# Supplementary material
Source: PubMed Central journal article supplement (PMC8277122)
Supplement: NIHMS1710572-supplement-Supplementary_Material.pdf [file NIHMS1710572-supplement-Supplementary_Material.pdf]

## **Supplementary Information for**

### **KDM4 Orchestrates Epigenomic Remodeling of Senescent Cells and Potentiates the Senescence-Associated Secretory Phenotype**

Boyi Zhang, Qilai Long, Shanshan Wu, Qixia Xu, Shuling Song, Liu Han, Min Qian,  
Xiaohui Ren, Hanxin Liu, Jing Jiang, Jianming Guo, Xiaoling Zhang, Xing Chang,  
Qiang Fu, Eric W-F Lam, Judith Campisi, James L. Kirkland, and Yu Sun

## Supplementary Methods

### Reagents, plasmids and antibodies.

The pLenti-Puro, pLVX-IRES-Puro and pLKO.1-Puro plasmids were purchased from Addgene. Lentiviral vector pLKO.1-Puro was used to clone small hairpin RNAs (shRNAs): KDM4A shRNA1 (target sequence: GCACCGAGTTTGTCTTGAAAT); KDM4A shRNA2 (target sequence: TTCGAGAGTTCCGCAAGATAG); KDM4A shRNA3 (target sequence: TAGTGAAAGGACGAGCCATTT); KDM4B shRNA1 (target sequence: GCGGCAGACGTATGATGACAT); KDM4B shRNA2 (target sequence: GCGGCATAAGATGACCCTCAT); KDM4B shRNA3 (target sequence: GATGACCTTGAACGCAAATAC). KDM4A and SUV39H1 cDNAs were cloned to pLenti-Puro to generate expression constructs, while KDM4B and HA-SETD2-M cDNAs were cloned to pLVX-IRES-Puro respectively.

Antibodies relevant to this article were from commercial suppliers and used for immunoblotting, immunofluorescence staining, ChIP-seq, ChIP-PCR or immunohistochemistry at optimized concentrations (details listed in Supplementary Table 10).

### *In vitro* cell treatments and senescence appraisal.

Stromal cells were grown until 60%-80% confluent (CTRL) and treated with bleomycin (50 µg/ml, BLEO, MedChemExpress, cat. no. HY-17565), mitoxantrone (1 µM, MIT, Selleck, cat. no. S2485), doxorubicin (2 µM, DOXO, MedChemExpress, cat. no. HY-15142), cisplatin (10 µM, CIS, MedChemExpress, cat. no. HY-17565), carboplatin (20 µM, CARB, MedChemExpress, cat. no. HY-17393), satraplatin (20 µM, SAT, MedChemExpress, cat. no. HY-17576), docetaxel (100 nM, DTX, TOCRIS, cat. no. 4056), paclitaxel (100 nM, PTX, MedChemExpress, cat. no. HY-B0015), vincristine (50 nM, VCR, Selleck, cat. no. S1241) for 12 h. After treatment, the cells were rinsed twice with PBS and allowed to stay for 7-10 d in media.

Oncogenic HRAS<sup>G12V</sup>-transduced cells were selected by puromycin for 3 d and allowed to stay for 7-10 d in media. Alternatively, the cells were allowed to passage consecutively for replicative exhaustion. SA- $\beta$ -Gal staining assay was performed with a commercial kit (Beyotime) to examine cellular senescence. For cell cycle arrest, a single pulse of BrdU (10  $\mu$ M, Yeasen) was performed for 24 h and cells were subject to immunofluorescence staining with an anti-BrdU antibody (1:400 dilution, Cell Signaling, cat no. 5292) before counterstained with DAPI and assessed by fluorescence microscopy. Alternatively, cells were exposed to ML324 (20  $\mu$ M, MedChemExpress, cat. no. HY-12725), Bay 11-7082 (2  $\mu$ M, Selleckchem, cat. no., S2913) or Chaetocin (10 nM, Selleckchem, cat. no. S8068), either alone or alongside other agents for specific assays.

DNA-damage extent was evaluated by immunostaining for  $\gamma$ H2AX (primary dilution 1:500) or p53-BP1 (primary dilution 1:500) foci by following a 4-category counting strategy as formerly reported <sup>1</sup>. Random fields were chosen to show DDR foci, and quantified using CellProfiler (<http://www.cellprofiler.org>). For clonogenic assays, cells were seeded at  $1 \times 10^3$  cells/dish in 10mm dishes for 24 h before treated with chemicals. Cells were fixed with 2% paraformaldehyde 7-10 d post treatment, gently washed with PBS and stained instantly with 10% crystal violet prepared in 50% methanol. Excess dye was removed with PBS, with plates photographed. Colony formation were evaluated by quantifying the number of single colonies per dish.

### **Quantitative RT-PCR.**

Quantitative RT-PCR (qRT-PCR) was performed after RNA extraction using TRIzol (Thermo Fisher). RNA expression was determined with Universal SYBR Green Two-step kit (Yeasen) on a QuantStudio 7 Real-Time PCR System (Thermo). For normalization of human gene expression, *RPL13A* was used as an internal control, and the fold change was calculated using the  $2^{-\Delta\Delta C(t)}$  method for all analyses (primer sequences listed in Supplementary Table 11).

### **Immunoblotting and immunofluorescence.**

Proteins were separated using NuPAGE 4 to 12% Bis-Tris gels and transferred onto nitrocellulose membranes (Life Technologies). The blots were blocked with 5% nonfat dry milk at room temperature for 1 h and incubated overnight at 4°C with desired primary antibodies at concentration per the manufacturer's protocol, followed by incubation with horseradish peroxidase-conjugated secondary antibodies (Santa Cruz) at room temperature for 1 h. The membrane blots were developed with enhanced chemiluminescence (ECL) detection reagent (Millipore) per the manufacturer's protocol and detected through chemiluminescence using ImageQuant LAS 400 Phospho-Imager (GE Healthcare). As a standard protein marker, we used Thermo Fisher Scientific PageRuler Plus Prestained Protein Ladder (no. 26619).

For immunofluorescence staining, cells were cultured in dishes and pre-seeded for at least 24 h on coverslips. Upon brief washing, cells were fixed with 4% paraformaldehyde in PBS for 8 min, blocked with 5% normal goat serum (NGS, Thermo Fisher) for 30 min and incubated with primary antibodies diluted in PBS containing 5% NGS for 2 h at room temperature. Alexa Fluor 488 or 594-conjugated secondary antibodies (Invitrogen, 1:400) were used. Nuclei were stained with Hoechst 33342, with slides mounted with Vectashield medium. Fluorescence imaging was performed on a fluorescence microscope (Nikon Eclipse Ti S). Captured images were analyzed and processed with the Nikon DS-Ri2 fluorescence workstation and processed with NIS-Elements F4.30.01. Alternatively, a confocal microscope (Zeiss LSM 780) was applied to acquire confocal images (antibodies used for this study listed in Supplementary Table 10).

### **Chromatin fractionation and nuclear protein extraction.**

To assess the levels of KDM4 family members at the chromatin-bound fraction, CTRL and BLEO-treated PSC27 cells were cross-linked with 1% formaldehyde for 5 min and quenched with 0.125 M glycine; then, cells were washed thrice



with 1 × PBS, and incubated with buffer A (10 mM HEPES, pH 7.9, 10 mM KCl, 1.5 mM MgCl<sub>2</sub>, 10% glycerol, 0.34 M Sucrose, 1 mM DTT, 0.1% Triton, PMSF, and protease inhibitor mixture) for 10 min at 4 °C. The cell lysates were centrifuged at 1,500 × g for 5 min at 4 °C, with supernatants removed. Pellets were resuspended in buffer B (3 mM EDTA, 0.2 mM EGTA, 1 mM DTT, PMSF, and protease inhibitor mixture) and incubated on ice for 10 min before centrifugation at 1,700 × g for 5 min at 4 °C. To prepare the chromatin-bound fraction, the pellets were incubated for 30 min at 37 °C with buffer A containing 1 mM CaCl<sub>2</sub> and 0.6 unit of MNase and centrifuged at 20,000 × g for 10 min at 4 °C, and the supernatant was collected and subjected to immunoblot analysis. For nuclear protein preparation, a Minute™ Cytoplasmic and Nuclear Extraction Kit (Invent Biotechnologies, Inc. # sc-003) was used by following the manufacturer' procedure.

#### **Stromal cell clonogenic assay.**

PSC27 cells were trypsinized and counted with a hemocytometer. Two milliliters of DMEM full medium containing 500 cells were plated in each well of the six-well plates. The cells were maintained at 37 °C for 7 d to allow colony formation before stained with 0.5% crystal violet (Sigma-Aldrich) in absolute methanol. Colonies per well were counted and numbers were recorded from 3 independent experiments.

#### **Cancer cell phenotype appraisal.**

Epithelial cell proliferation was determined following the MTT procedure (Promega). Migration and invasion were assessed in culture using Transwells (Cultrex 24-well Cell Migration Assay plates) containing a porous (8 μm pore size) membrane uncoated (for the migration assay) or coated (for the invasion assay) with a 0.5 × solution of basement membrane extract and the indicated CM in the bottom portion of the well. After 24 h, migrating or invading cells on the bottom side of the porous membranes were stained and quantified by

absorbance as recommended by the supplier.

### **Histology and immunohistochemistry.**

Mouse tissue specimens were fixed overnight in 10% neutral-buffered formalin and processed for paraffin embedding. Standard staining with hematoxylin/eosin was performed on sections of 5-8  $\mu\text{m}$  thickness processed from each specimen block. For immunohistochemistry, tissue sections were deparaffinized and incubated in citrate buffer at 95 °C for 40 min for antigen retrieval before incubated with the indicated antibodies (for instance, anti-cleaved Caspase 3, 1:1000) overnight at 4 °C. After 3 washes with PBS, tissue sections were incubated with biotinylated anti-mouse IgG (1:200 dilution, Vector Laboratories) for 1 h at room temperature then washed thrice, after which streptavidin-horseradish peroxidase conjugates (Vector Laboratories, CA, USA) were added and the slides incubated for 45 min. DAB solution (Vector Laboratories) was then added and the slides were counterstained with haematoxylin.

### **SILAC sample preparation.**

PSC27 cells were grown to 80% confluence in high glucose (4.5 g/L) DMEM media (with glutamine and sodium pyruvate) containing 10% FBS and 1% penicillin/streptomycin at 37 °C with 95% air and 5% CO<sub>2</sub>. Cells were either labeled with “heavy isotopic lysine” (<sup>13</sup>C-lysine) or “light isotopic lysine” (<sup>12</sup>C-lysine/arginine) using a SILAC protein quantitation kit (Pierce, Thermo) according to manufacturer’s instructions. Briefly, cells in the control group were labeled with L-<sup>13</sup>C<sub>6</sub>-Lysine/L-<sup>13</sup>C<sub>6</sub><sup>15</sup>N<sub>4</sub>-Arginine as “heavy” class, while those in the experimental group were labeled with L-Lysine/L-Arginine as “light” class. In each case, cells were cultured for more than 6 generations before being harvested. At least 1 passage prior to the experiment, incorporation efficiency of the heavy labeled amino acids into proteins was assessed in a pilot experiment, where a small aliquot of intracellular protein was lysed, reduced,

alkylated, and trypsin digested and subjected to mass spectrometric (MS) analysis as described below. Heavy label incorporation into proteins from control (non-senescent) cells was assessed as > 99%.

For the proteomics, 24 h before harvesting, plated cells (approximately  $5 \times 10^8$  in fifteen 150 cm<sup>2</sup> flasks) were washed thrice with fresh FBS-free medium for 10 min at 37°C each. The cells were then incubated in FBS-free medium (12 ml per flask) for 24 h at 37°C. At the end of the culture period, cells showed no evidence of apoptosis. Samples were prepared for MS analysis including removal of phenol red dye by buffer exchange with 50 mM Tris-Cl (pH8.0) (5 washing steps using spin columns at 5000 × g). Samples were denatured with 6M urea, reduced with 20mM DTT (30 min at 37°C), alkylated with 50 mM iodoacetamide (30 min at RT), and digested overnight at 37°C with 1:50 enzyme:substrate ratio (wt/wt) of sequencing grade trypsin (Promega, Madison, WI) as described<sup>2</sup>. Following digestion, samples were acidified with formic acid and desalted using HLB Oasis SPE cartridges (Waters, Milford, MA). Protein/peptide recovery was not specifically assessed, however, the above sample preparation and digestion protocol was thoroughly assessed for reproducibility during previous optimization and reproducibility studies. Hydrophilic Interaction Liquid Chromatography (HILIC) peptide fractionation was performed on a Waters 1525 HPLC system equipped with a 4.6 × 25 mm TSK gel Amide-80 HR 5 mm column (Tosoh Bioscience, South San Francisco, CA). Samples were loaded in 80% solvent B (98% acetonitrile, 0.1% TFA) and eluted with the following gradient: 80% B for 5 min followed by 80% B to 60% B in 40 min, 0% B in 5 min at 0.5 ml/min. Solvent A consisted of 98% HPLC grade water and 0.1% TFA collecting nine fractions.

### **Mass spectrometry.**

Samples were analyzed by reverse-phase HPLC-ESI-MS/MS using an

Eksigent Ultra Plus nano-LC 2D HPLC system (Dublin, CA) connected to a quadrupole time-of-flight TripleTOF 5600 (QqTOF) mass spectrometer (SCIEX). Typically, mass resolution for MS1 scans and corresponding precursor ions was ~35,000 (TripleTOF 5600), while resolution for MS/MS scans and resulting fragmentations (MRM-HR transitions) was ~15,000 ('high sensitivity' product ion scan mode)<sup>3</sup>. Briefly, after injection, peptide mixtures were transferred onto the analytical C18-nanocapillary HPLC column (C18 Acclaim PepMap100, 75 mm I.D. × 15 cm, 3 mm particle size, 100Å pore size, Dionex, Sunnyvale, CA) and eluted at a flow rate of 300 nl/min using stepwise gradients from 5% to 80% solvent B with total runtimes, including mobile phase equilibration, of 90 min. Solvent mobile phase A was 2% acetonitrile/98% of 0.1% formic acid (v/v) in water, and mobile phase B was 98% acetonitrile/2% of 0.1% formic acid (v/v) in water. Data acquisition was performed in data dependent acquisition (DDA) mode on the TripleTOF 5600 to obtain MS/MS spectra for the 30 most abundant precursor ions (50 msec per MS/MS) following each survey MS1 scan (250 msec), yielding a total cycle time of 1.8 s as described<sup>3,4</sup>.

### **Bioinformatics database searches and SILAC quantification.**

MS data were searched using the database search engine ProteinPilot (SCIEX Beta 4.5, revision 1656) with the Paragon algorithm (4.5.0.0, 1654). The search parameters were set as follows: trypsin digestion, cysteine alkylation set to iodoacetamide, SILAC Quantification (Lys-6, Arg-6, no bias correction), and Homo sapiens as species. Trypsin specificity was assumed as C-terminal cleavage at lysine and arginine. Processing parameters were set to "Biological modification" and a thorough ID search effort was used. During the search, Protein Pilot performs an automatic mass recalibration of the datasets based on highly confident peptide spectra. Specifically, a first search iteration was done to select high confidence peptide identifications to recalibrate both the MS and MS/MS data, which was subsequently automatically re-searched. During the iterative steps of re-searching the data, the search parameters were less

stringent, e.g., allowing for additional 'missed cleavages' (with typically not more than 2).

All data files were searched using the SwissProt (2014-01, released January 22, 2014), with a total of 40,464 human 'reviewed' protein sequences searched. A cut-off peptide confidence value of 99 was chosen, and a minimum of 2 identified peptides per protein was required. The Protein Pilot false discovery rate (FDR) analysis tool, the Proteomics System Performance Evaluation Pipeline (PSPEP algorithm) provided a global FDR of 1% and a local FDR at 1% in all cases. For protein quantification comparing samples of senescent (light) *versus* presenescent (heavy) cells a Protein Pilot significance threshold of < 0.05 was required (all database search results and details for peptide identifications and protein quantification are provided in Supplementary Tables 1-3).

### **RNA-seq and data profiling.**

Total RNA samples were obtained from stromal cells. Sample quality was validated by Bioanalyzer 2100 (Agilent), and RNA was subjected to sequencing by Illumina HiSeq X10 with gene expression levels quantified by the software package RSEM (<https://deweylab.github.io/RSEM/>). Briefly, rRNAs in the RNA samples were eliminated using the RiboMinus Eukaryote kit (Qiagen, Valencia, CA, USA), and strand-specific RNA-seq libraries were constructed using the TruSeq Stranded Total RNA preparation kits (Illumina, San Diego, CA, USA) according to the manufacturer's instructions before deep sequencing.

Paired-end transcriptomic reads were mapped to the reference genome (GRCh38/hg38) with reference annotation from Gencode v27 using the Bowtie tool. Duplicate reads were identified using the picard tools (1.98) script mark duplicates (<https://github.com/broadinstitute/picard>) and only non-duplicate reads were retained. Reference splice junctions were provided by a reference transcriptome (Ensembl build 73). FPKM values were calculated using Cufflinks, with differential gene expression called by the Cuffdiff maximum-likelihood

estimate function. Genes of significantly changed expression were defined by a false discovery rate (FDR)-corrected  $P$  value  $< 0.05$ . Only ensembl genes 73 of status “known” and biotype “coding” were used for downstream analysis.

Reads were trimmed using Trim Galore (v0.3.0) ([http://www.bioinformatics.babraham.ac.uk/projects/trim\\_galore/](http://www.bioinformatics.babraham.ac.uk/projects/trim_galore/)) and quality assessed using FastQC (v0.10.0) (<http://www.bioinformatics.bbsrc.ac.uk/projects/fastqc/>). Differentially expressed genes were subsequently analyzed for enrichment of biological themes using the DAVID bioinformatics platform (<https://david.ncifcrf.gov/>), the Ingenuity Pathways Analysis (IPA) program (<http://www.ingenuity.com/index.html>). Raw data were preliminarily analyzed on the free online platform of Majorbio I-Sanger Cloud Platform ([www.i-sanger.com](http://www.i-sanger.com)), and subsequently deposited in the NCBI Gene Expression Omnibus (GEO) database under the accession code GSE128282.

### ***Venn diagrams***

Venn diagrams and associated empirical  $P$ -values were generated using the USeq (v7.1.2) tool IntersectLists<sup>3</sup>. The  $t$ -value used was 22,008, as the total number of genes of status “known” and biotype “coding” in ensembl genes 73. The number of iterations used was 1,000.

### ***RNA-seq heatmaps***

For each gene, the FPKM value was calculated based on aligned reads, using Cufflinks. Z-scores were generated from FPKMs. Hierarchical clustering was performed using the R package heatmap.2 and the `distfun = “pearson”` and `hclustfun = “average”`.

### ***Protein–protein interaction network***

Protein-protein interaction (PPI) analysis was performed with STRING 3.0. The specific proteins meeting the criteria, were imported to NetworkAnalyst (<http://www.networkanalyst.ca>). A minimum interaction network was chosen for further hub and module analysis.

### **Gene set enrichment analysis (GSEA) of RNA-seq data.**

For each differential expression analysis comparison, genes were ranked using “wald statistics” obtained from DESeq2 and GSEA was performed on these ranked lists on all curated gene sets available in MSigDB (<http://software.broadinstitute.org/gsea/msigdb>). DESeq2 independent filtering is based on mean of normalized read counts and filters out genes with very low expression level. The SASP and GSEA signatures were derived as described before <sup>5</sup>.

### **ChIP-seq and ChIP-PCR.**

ChIP experiments were performed as described previously <sup>6</sup> and ChIP-seq libraries were generated using NEBNext Ultra II DNA library preparation kit for Illumina according to the manufacturer’s protocol. Briefly, stromal cells were grown to ~80% confluence before crosslinked in 1% formaldehyde for 10 min at room temperature. Crosslinking was quenched by addition of glycine to a final concentration of 0.15 M for 5 min at room temperature, with crosslinked cells washed with ice-cold PBS, supernatant discarded, pellets flash-frozen in liquid nitrogen and stored at -80 °C. For each sample, 20 million fixed cells were lysed to prepare nuclear extracts. After chromatin shearing by sonication, lysates were incubated overnight at 4°C with protein A Dynabeads (Invitrogen) coupled with 5 µg of antibody. After immunoprecipitation, beads were recovered using a magnet and washed, with DNA eluted, cross-links reverted at 65°C for 4 hours then purified with Qiagen Kit. DNA was quantitated using the Qubit dsDNA HS assay and a Qubit 3.0 Fluorimeter (Invitrogen). For ChIP-seq, 5 ng of purified ChIP DNA were used to generate the sequencing library using the NEBNext ChIP-seq Library Prep Master Mix Set using modified Illumina TruSeq adaptors, and sequenced with Illumina Nova Seq 6000.

ChIP-seq data analyses were performed by DIATRE Biotechnology (Shanghai, China). Adapter sequences of ChIP-seq raw reads are removed by using cutadapt (<https://doi.org/10.14806/ej.17.1.200>). Trimmed reads are

aligned by bowtie2 using default parameters to human genome (hg38). The samtools <sup>7</sup> and picard (<http://broadinstitute.github.io/picard>) were used to sort and remove duplicated reads to avoid PCR bias from the sequencing process. Each group of libraries after the above pre-processing is down-sampled (without replacement) to a fixed number of reads. Peak calling (identification of regions of ChIP-seq enrichment over background) was performed using MACS2 with parameters of “-extsize=146-nomodel”, while the sonicated input served as a control and an initial threshold q-value of 0.01 was used as cutoff. The “broad peak” option is on when identifying binding regions of H3K9me3 and H3K36me3. Visualization of read count data was performed by converting raw bam files to bigwig files using IGV tools <sup>8</sup>. BETA or ChIP seeker was used to analyze expression data and binding data. Basic characteristics and QC of ChIP-seq libraries are available in Supplementary Tables 12-15.

Chromosomal positions were annotated according to the RefSeq database. In our annotation, a TSS region was defined as  $\pm 1$  kb relative to the TSS. For density plots, we generated bigwig files allowing only one read per chromosomal position, eliminating potential spurious spikes. Each remaining read was extended from its 5' end to a total length of 250 bases. Each bigwig file was also scaled to TPM (tags per million) based on the number of unique read positions. For density plots, the regions of  $\pm 5$  kb for all annotated TSSs were divided into 100 equal-sized bins. All peaks with FDR greater than 5% were excluded from further analysis, with uniquely mapped reads used to generate the genome-wide intensity profiles. HOMER was employed to annotate peaks, to calculate overlaps between different peak files, and for motif searches. The genomic features (promoter, TSS, TES, exon, intron, 5' UTR, 3' UTR, and intergenic regions) were defined and calculated using Refseq and HOMER.

For ChIP-PCR,  $10^7$  cells were used per immunoprecipitation. The protein-chromatin complexes were purified by immunoaffinity captured by magnetic beads (Thermo Fisher Scientific), with the enriched DNA subjected to qPCR.



Briefly, immunoprecipitated chromatin complexes were eluted by DTT containing elution Buffer (10 mM DTT, 0.2% SDS in 1 × TE buffer) for 30 min at 37°C and then were further diluted 20-fold in a dilution buffer (10 mM Tris–HCl, pH8.0, 1 mM EDTA, 0.5 M EGTA, 100 mM NaCl, 1% Triton X-100 and protease inhibitor cocktail (Roche)), with DNA in the IP quantified by qPCR assays. The antibody used in ChIP-PCR was anti-KDM4A (abcam, # ab24545), with primers designed to amplify distal promoter regions (within -4kb TSS) of SASP hallmark factors or specified genes (sequences listed in Supplementary Table 16).

## References

1. Sun, Y. *et al.* Treatment-induced damage to the tumor microenvironment promotes prostate cancer therapy resistance through WNT16B. *Nat Med* **18**, 1359-1368 (2012).
2. Keshishian, H., Addona, T., Burgess, M., Kuhn, E. & Carr, S.A. Quantitative, multiplexed assays for low abundance proteins in plasma by targeted mass spectrometry and stable isotope dilution. *Molecular & cellular proteomics : MCP* **6**, 2212-2229 (2007).
3. Schilling, B. *et al.* Platform-independent and label-free quantitation of proteomic data using MS1 extracted ion chromatograms in skyline: application to protein acetylation and phosphorylation. *Molecular & cellular proteomics : MCP* **11**, 202-214 (2012).
4. Kuhn, M.L. *et al.* Structural, kinetic and proteomic characterization of acetyl phosphate-dependent bacterial protein acetylation. *PLoS one* **9**, e94816 (2014).
5. Zhang, B.Y. *et al.* The senescence-associated secretory phenotype is potentiated by feedforward regulatory mechanisms involving Zscan4 and TAK1. *Nat Commun* **9**, 1723 (2018).
6. Hinohara, K. *et al.* KDM5 Histone Demethylase Activity Links Cellular Transcriptomic Heterogeneity to Therapeutic Resistance. *Cancer cell* **34**, 939-953 e939 (2018).
7. Li, H. *et al.* The Sequence Alignment/Map format and SAMtools. *Bioinformatics* **25**, 2078-2079 (2009).
8. Robinson, J.T., Thorvaldsdottir, H., Wenger, A.M., Zehir, A. & Mesirov, J.P. Variant Review with the Integrative Genomics Viewer. *Cancer research* **77**, e31-e34 (2017).

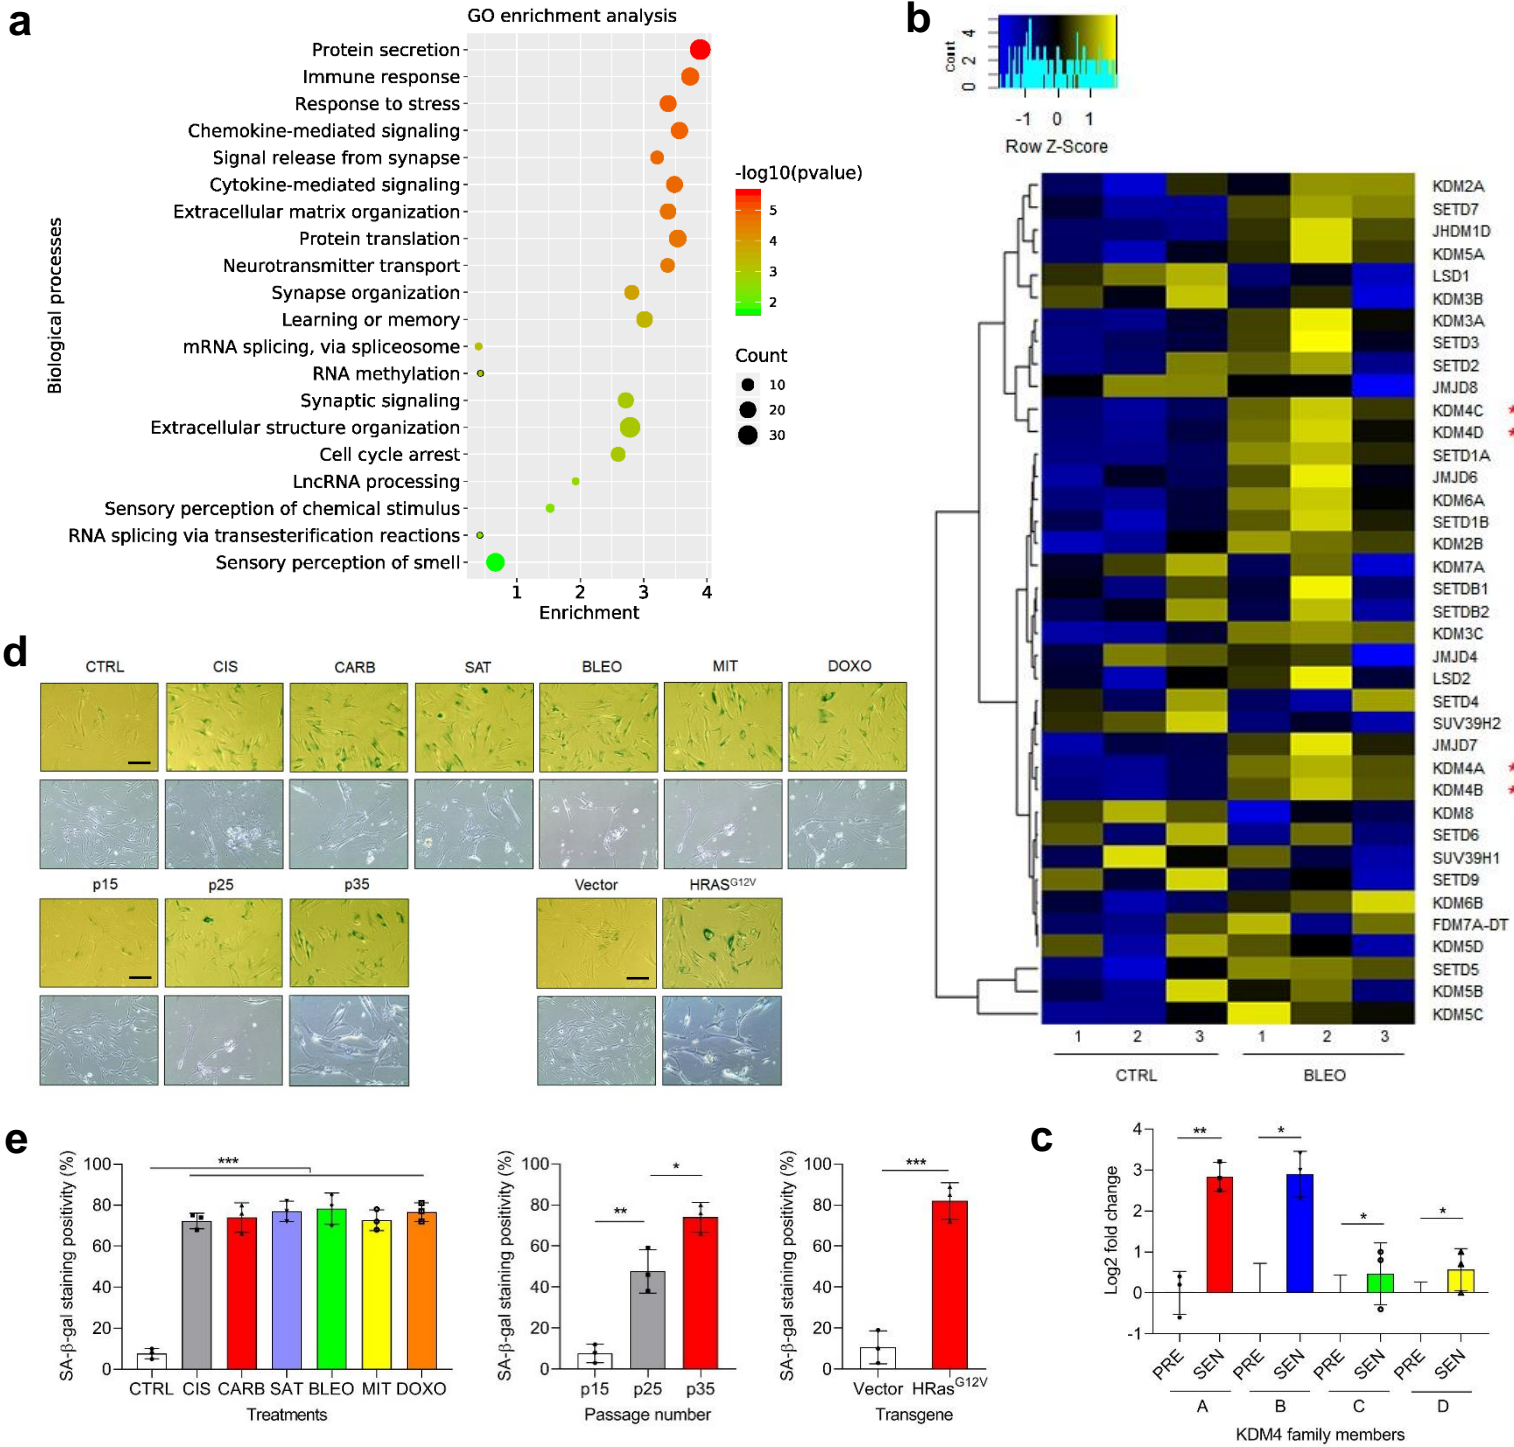

**Supplementary Fig. 1. Expression of KDM4 family is significantly upregulated in senescent cells in parallel to SASP development.** **a**, GO enrichment profiling of upregulated genes in PSC27 cells upon genotoxicity (bleomycin)-induced senescence. **b**, Heatmap displaying genes correlated with histone methylation and significantly upregulated in senescent cells. CTRL, control. BLEO, bleomycin. Genes are listed by their expression fold change in CTRL *versus* BLEO cells. **c**, Comparative transcript assay of KDM4 subfamily members (A/B/C/D) in presenescent (PRE) *versus* senescent (SEN) stromal cells. Signals were normalized to the PRE samples *per* gene. **d**, Representative SA- $\beta$ -Gal staining images of PSC27 cells upon therapy-induced senescence (TIS), replicative senescence (RS) or oncogene-induced senescence (OIS). Scale bars, 20  $\mu$ m. **e**, Comparative statistics of SA- $\beta$ -Gal staining-based quantification of senescent PSC27 cells. Data organized for cases of TIS, RS or OIS. Data in all bar plots are shown as mean  $\pm$  SD and representative of 3 biological replicates. **c** and **e**, *P* values were determined by two-sided unpaired *t*-test, and adjusted for multiple comparisons. Data in **d** are representative of 3 biological replicates.  $\wedge$ , *P* > 0.05. \*, *P* < 0.05. \*\*, *P* < 0.01.

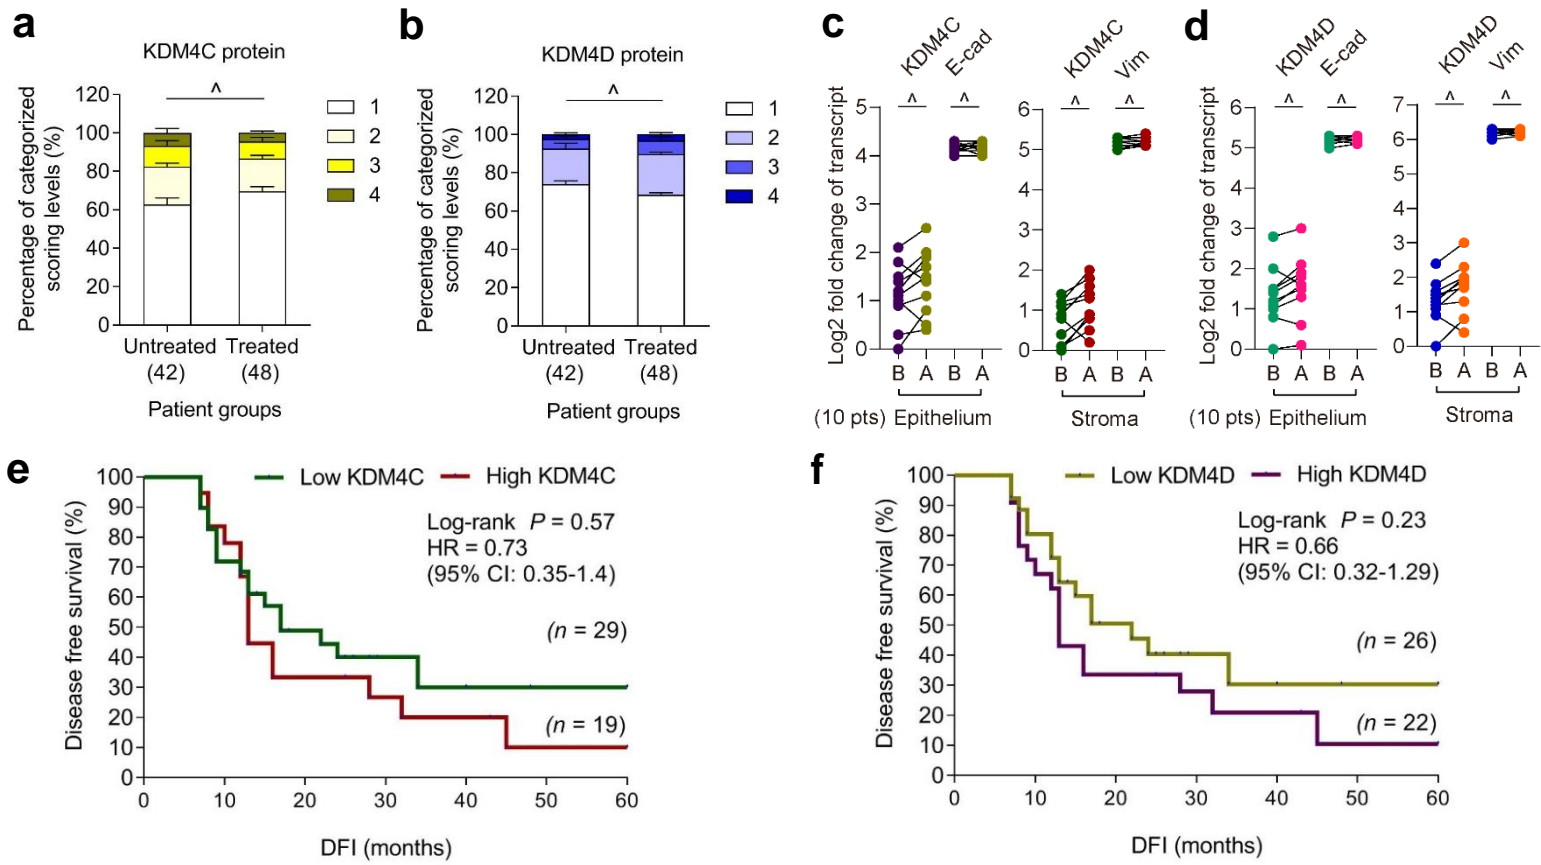

**Supplementary Fig. 2. *In vivo* expression of KDM4C/D in human prostate cancer patients and corresponding clinical relevance.** **a**, Pathological assessment of stromal KDM4C expression in PCa samples (42 untreated *versus* 48 treated). In each group, patients were pathologically assigned into 4 categories *per* IHC staining intensity of KDM4C in stroma. 1, negative; 2, weak; 3, moderate; 4, strong expression. **b**, Pathological assessment of stromal KDM4D expression in PCa samples (42 untreated *versus* 48 treated). In each group, patients were pathologically assigned into 4 categories *per* IHC staining intensity of KDM4D in tumor stroma. 1, negative; 2, weak; 3, moderate; 4, strong expression. **c**, Comparative analysis of KDM4C expression. Data were organized for epithelial and stromal cells, respectively, after laser capture microdissection (LCM) of either cell lineage followed by quantitative analysis. Each dot represents an individual patient, with the data of “before” and “after” connected to allow direct profiling of KDM4C expression in the same individual patient. Data were normalized to the lowest value of KDM4C *per* cell lineage. **d**, Comparative analysis of KDM4D expression in a strategy similar to that described for (**c**) panel. **e**, Kaplan-Meier analysis of PCa patients. Disease-free survival (DFS) stratified according to KDM4C expression (low, average score < 2, dark green line, n = 29; high, average score ≥ 2, dark red line, n = 19). DFS represents the length of period from the date of PCa diagnosis to the point of first disease relapse. Survival curves generated according to the Kaplan-Meier method, with *P* value calculated using a two-sided log-rank (Mantel-Cox) test. **f**, Kaplan-Meier analysis of PCa patients. DFS stratified according to KDM4D expression (low, average score < 2, Kelly line, n = 26; high, average score ≥ 2, purple line, n = 22). Survival curves generated according to the Kaplan–Meier method as described for (**e**) panel. Data in all bar plots are shown as mean ± SD and representative of 3 biological replicates. **a** and **b**, *P* values were determined by two-way ANOVA with Bonferroni’s post-hoc test. **c** and **d**, *P* values were determined by two-sided unpaired *t*-test. ^, *P* > 0.05.

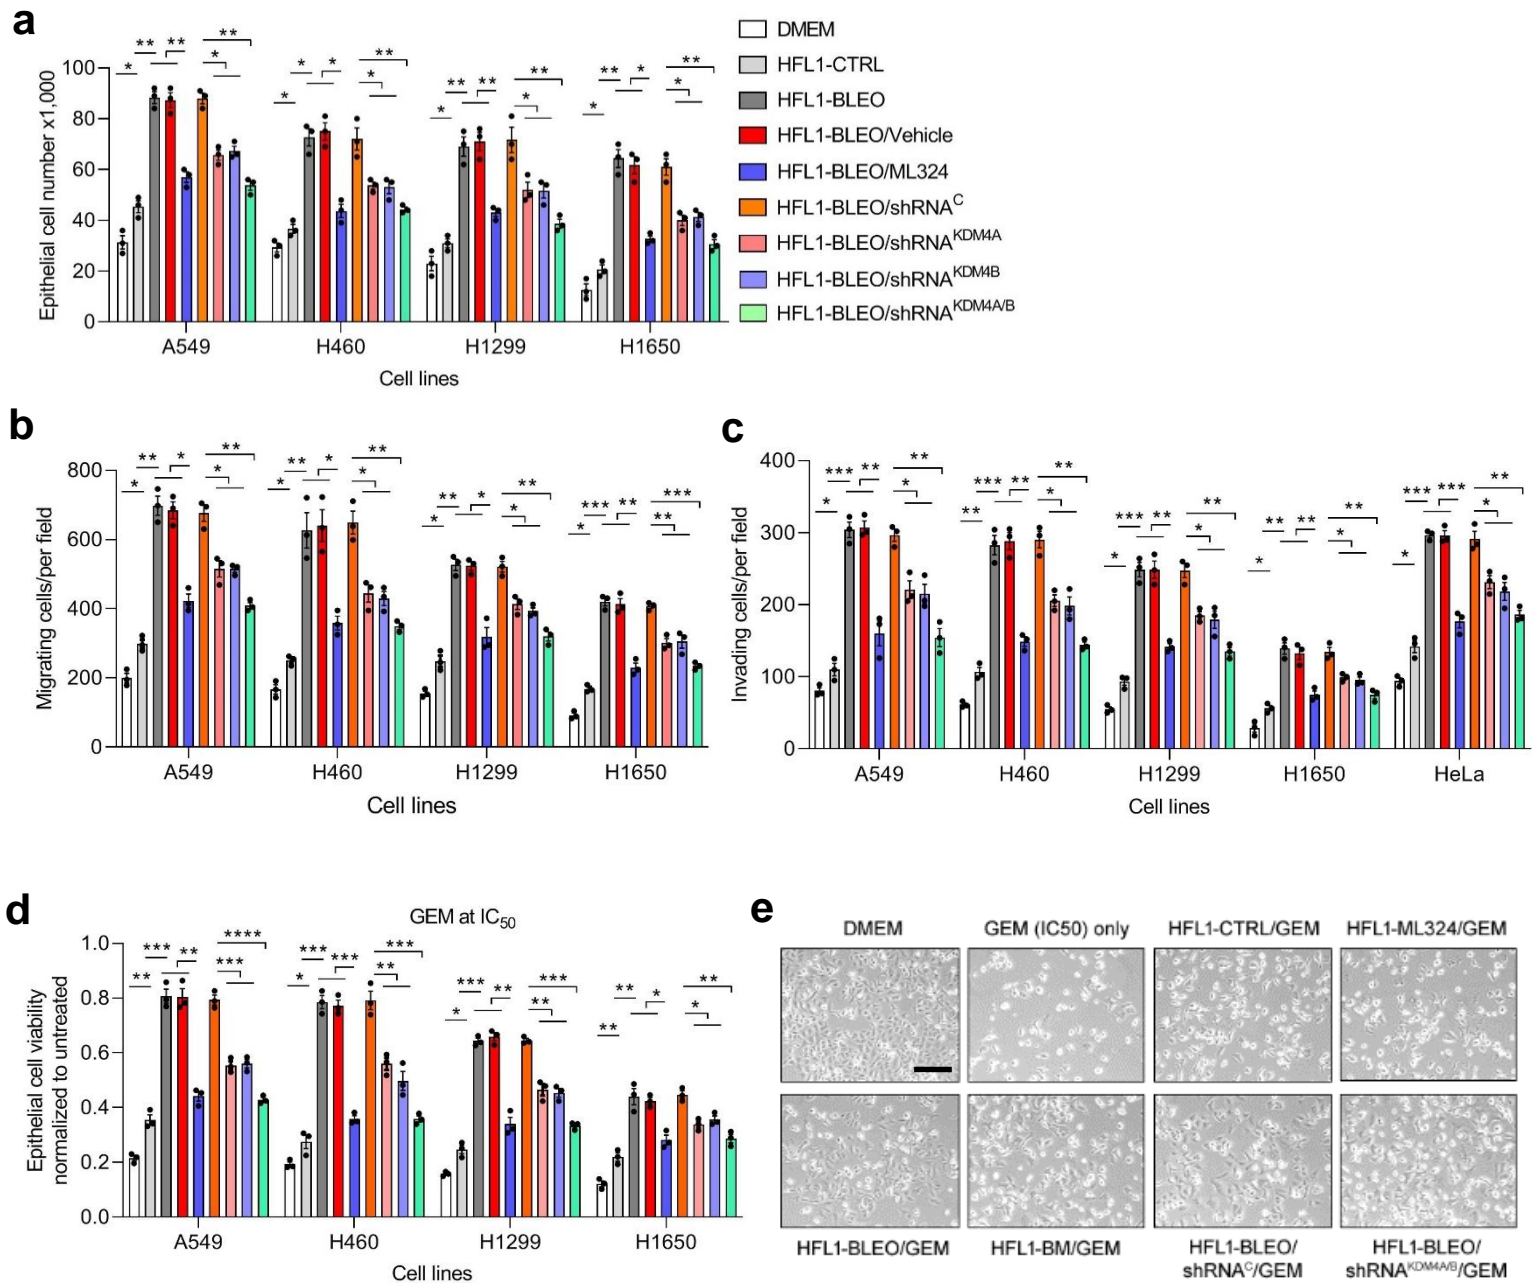

**Supplementary Fig. 3. Targeting KDM4 restrains lung cancer malignancy conferred by senescent fibroblasts.**

**a**, Measurement of *in vitro* proliferation of human lung cancer (LCa) cells after exposure to the conditioned media (CM) of lung fibroblasts (HFL1) treated by BLEO, ML324 or both, or transduced with individual shRNAs to deplete KDM4A/B. DMEM, routine media for LCa cell culture supplemented with 10% FBS. **b**, Assessment of *in vitro* migration of LCa cells after exposure to the CM of lung fibroblasts treated as described in **(a)**. **c**, Evaluation of *in vitro* invasion of LCa cells after exposure to the CM of lung fibroblasts treated as described for **(a)** panel. **d**, Chemoresistance of LCa cells to the chemotherapeutic agent gemcitabine (GEM) provided at the predetermined IC50 value of individual LCa cell lines upon culture with the CM described for **(a)** panel. **e**, Representative images of A549 cells upon treatment with the CM as described in **(a)**. BM, BLEO/ML324. Scale bar, 200  $\mu$ m. Data are shown as mean  $\pm$  SD and representative of 3 independent experiments. **a-d**, *P* values were determined by two-sided unpaired *t*-test, and adjusted for multiple comparisons. Data in **e** are representative of 3 biological replicates.  $\wedge$ ,  $P > 0.05$ . \*,  $P < 0.05$ . \*\*,  $P < 0.01$ . \*\*\*  $P < 0.001$ . \*\*\*\*  $P < 0.0001$ .

**a**

| Sample        | Peak distribution and number |      |            |        |      |            |        |        |       |
|---------------|------------------------------|------|------------|--------|------|------------|--------|--------|-------|
|               | Promoter-TSS                 | TES  | Intergenic | Intron | Exon | Non-coding | 5' UTR | 3' UTR | Total |
| CTRL-H3K9me3  | 128                          | 220  | 36661      | 12212  | 319  | 147        | 5      | 132    | 49824 |
| CTRL-H3K36me3 | 474                          | 2141 | 5783       | 58751  | 3936 | 1013       | 93     | 2520   | 74711 |
| BLEO-H3K9me3  | 70                           | 112  | 14454      | 3686   | 266  | 80         | 7      | 101    | 18776 |
| BLEO-H3K36me3 | 278                          | 1173 | 2102       | 29929  | 2735 | 388        | 42     | 1523   | 38170 |
| BM-H3K9me3    | 328                          | 278  | 30645      | 12011  | 444  | 215        | 25     | 198    | 44144 |
| BM-H3K36me3   | 541                          | 2197 | 4157       | 65694  | 3719 | 1017       | 84     | 2526   | 79935 |

**b**

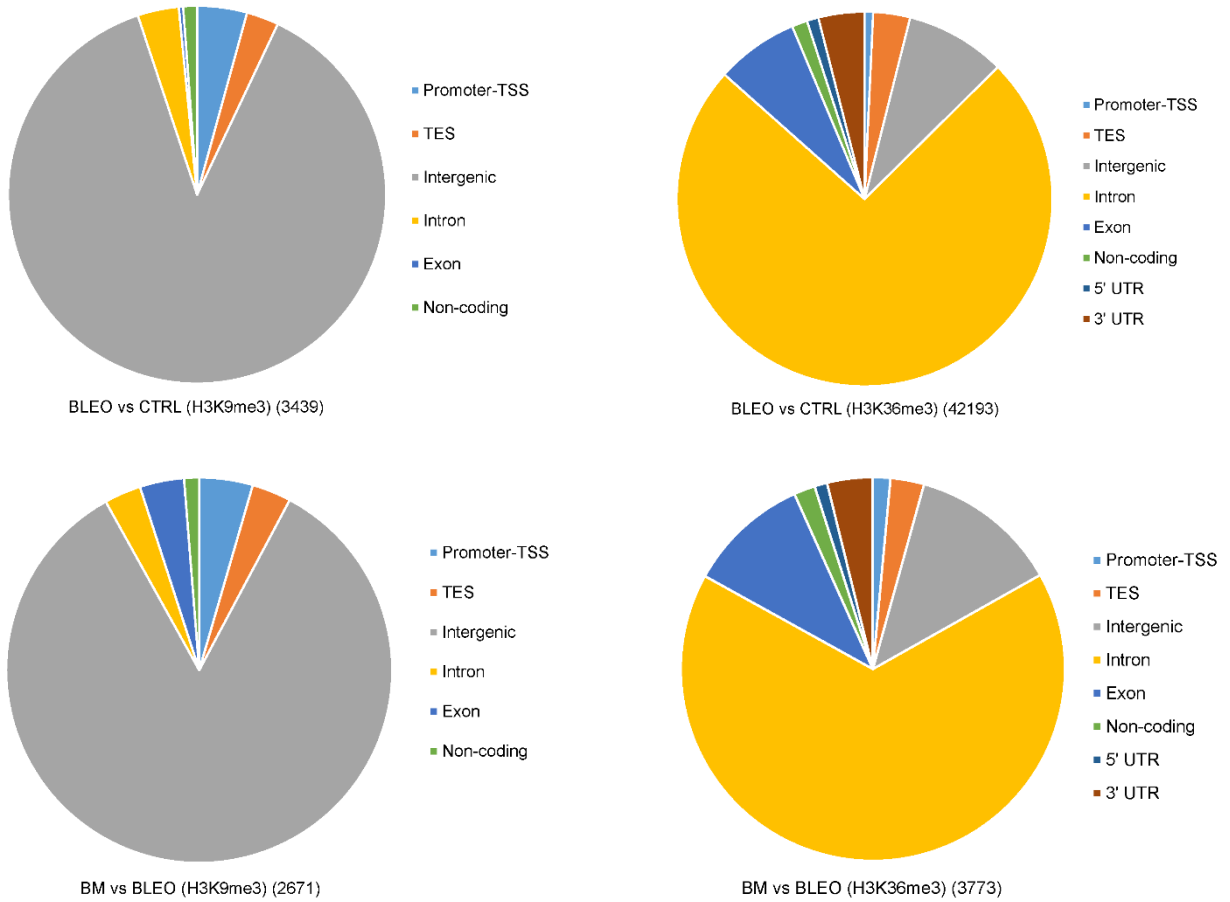

**c**

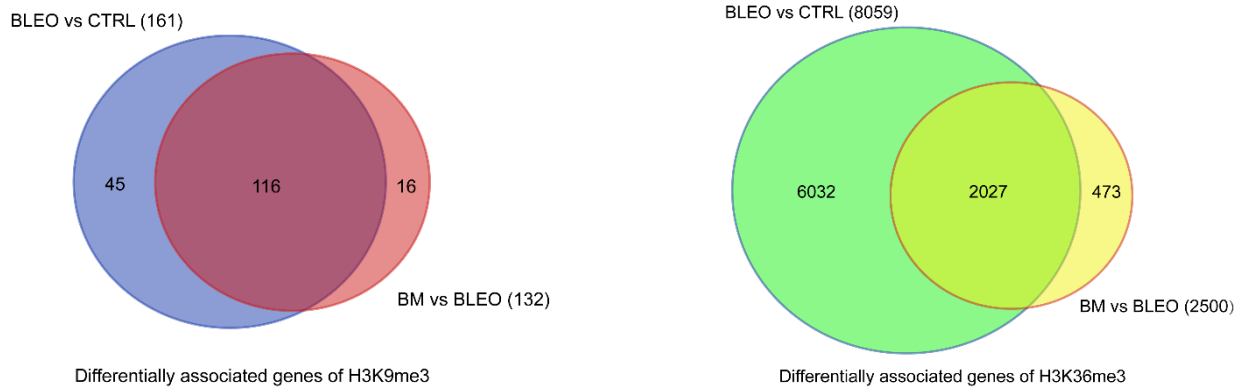



**Supplementary Fig. 4. ChIP-seq mapping of H3K9me3 and H3K36me3 in human stromal cells (PSC27).** **a**, Summary statistics of H3K9me3- and H3K36me3-specific peaks and their distribution across human genome. TSS, transcription start site. TES, transcription end site. BM, BLEO/ML324 co-treatment. **b**, Pie diagrams showing the distribution of differentially mapped H3K9me3 and H3K36me3 peaks between experimental conditions. BLEO vs CTRL, differential peaks of BLEO in contrast to those of CTRL. BM vs BLEO, differential peaks of BM in contrast to those of BLEO. The number of net peaks are indicated *per* comparative analysis. **c**, Venn diagrams displaying the number of genes that have regulatory regions containing binding sites for H3K9me3 or H3K36me3, and differentially mapped between conditions. Left, H3K9me3-associated genes down in 'BLEO vs CTRL' but up in 'BM vs BLEO'. Right, H3K36me3-associated genes up in 'BLEO vs CTRL' but down in 'BM vs BLEO'. The number of genes are shown *per* case.

**a**

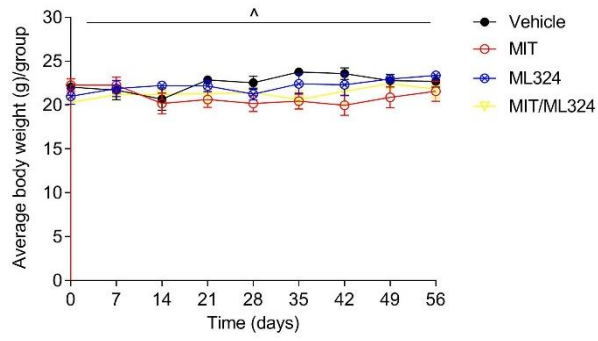

**c**

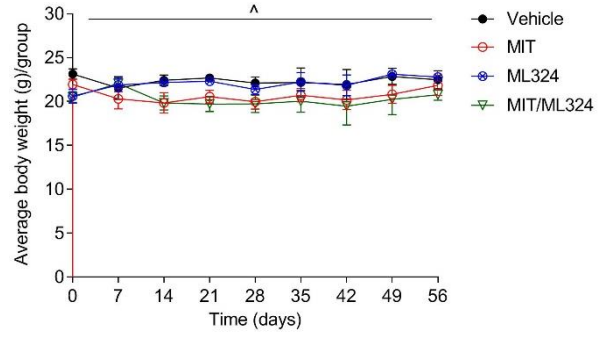

**b**

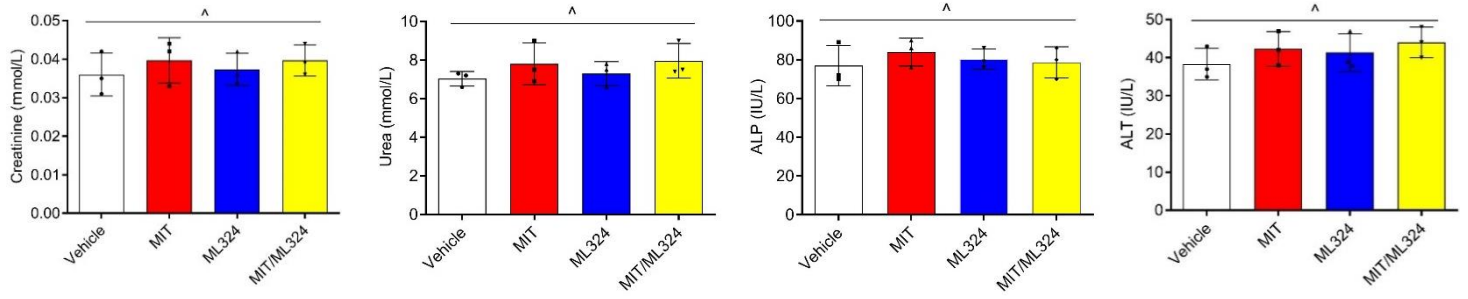

**d**

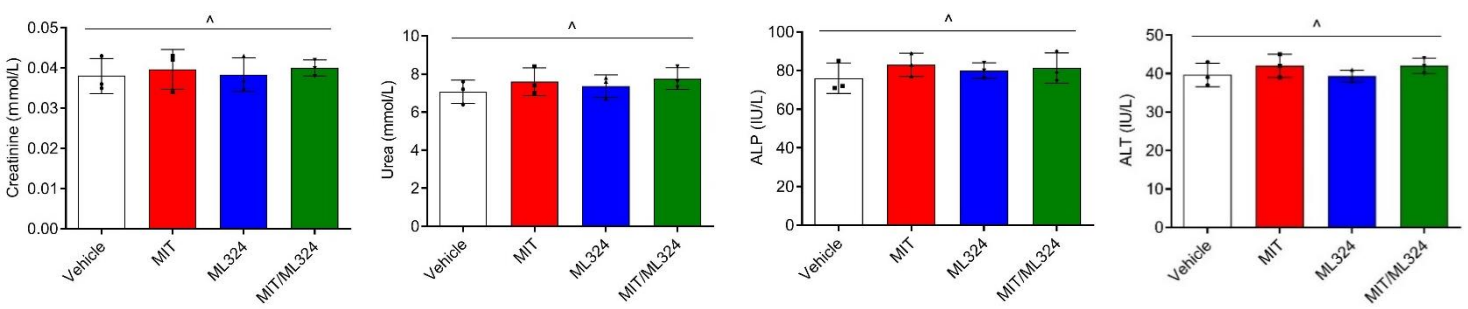

**e**

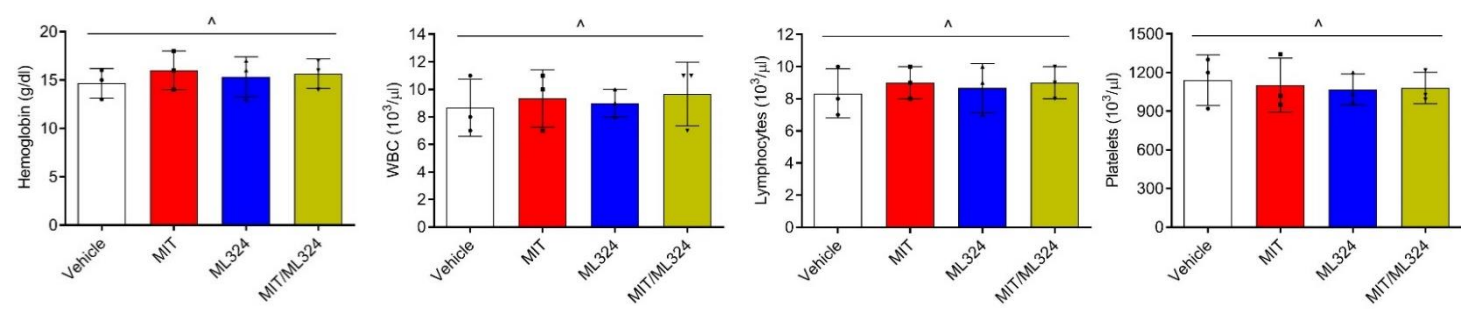

**Supplementary Fig. 5. Pathophysiological evaluation of treatment effects on body weight and functional integrity of key organs.** **a**, Mouse body weight determination performed on a weekly basis for immunodeficient mice. **b**, Serum measurement of creatinine, urea, alkaline phosphatase (ALP), and alanine aminotransferase (ALT) with terminal bleeds (cardiac punctures) taken at the end of therapeutic regimens. **c**, Mouse body weight determination performed on a weekly basis for immunocompetent mice (C57BL/6 strain). **d**, Serum measurement of creatinine, urea, alkaline phosphatase (ALP), and alanine aminotransferase (ALT) with terminal bleeds (cardiac punctures) taken at the end of therapeutic regimens for immunocompetent mice. **e**, Routine analysis of peripheral blood. The circulating levels of hemoglobin, white blood cells, lymphocytes and platelets at the end of each therapeutic regimen were assessed for C57BL/6 mice. Data are shown as mean  $\pm$  SD and representative of 3 independent experiments. MIT, mitoxantrone. WBC, white blood count. For all pathophysiological assays,  $n = 3$  per treatment arm. **a-e**,  $P$  values were determined by two-sided unpaired  $t$ -test, and adjusted for multiple comparisons.  $\wedge$ ,  $P > 0.05$ .

**a**

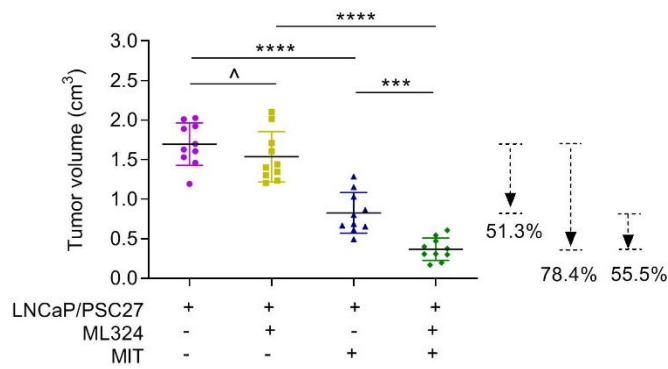

**b**

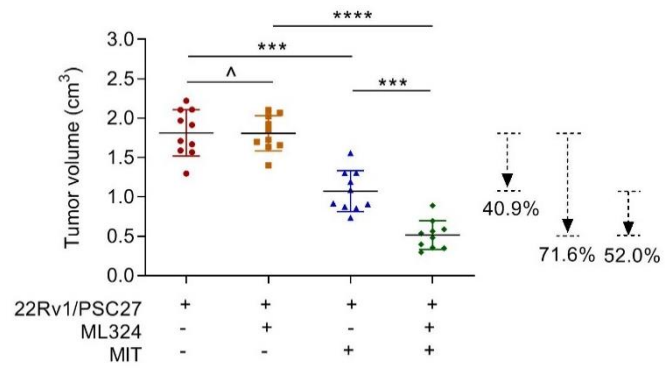

**c**

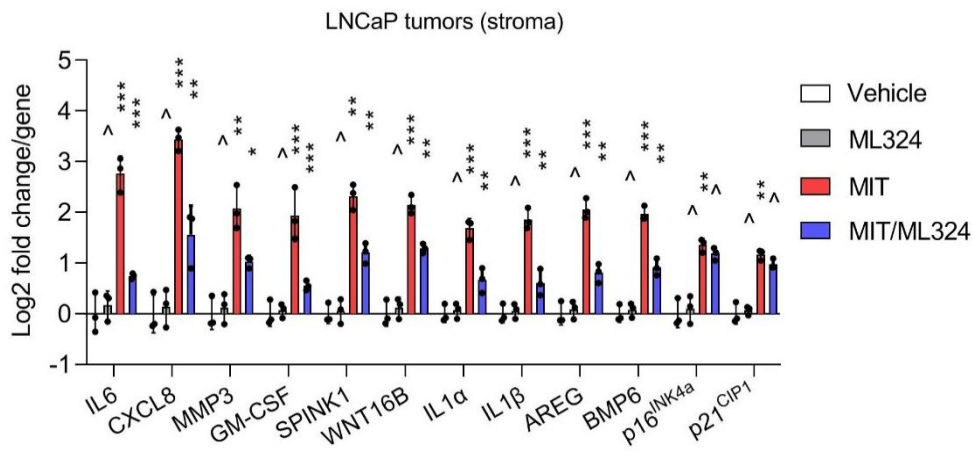

**d**

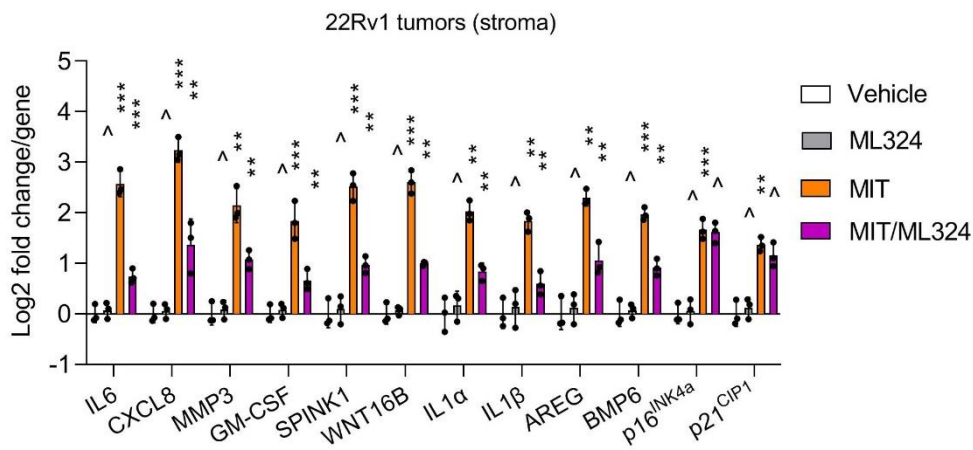

**e**

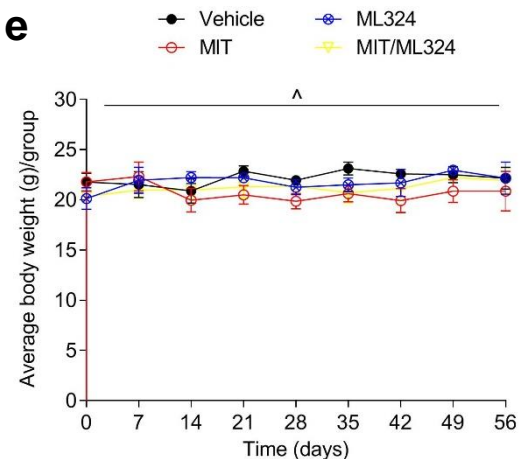

**f**

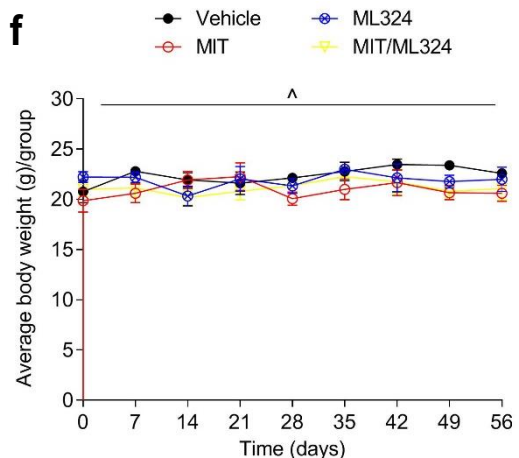

**g**

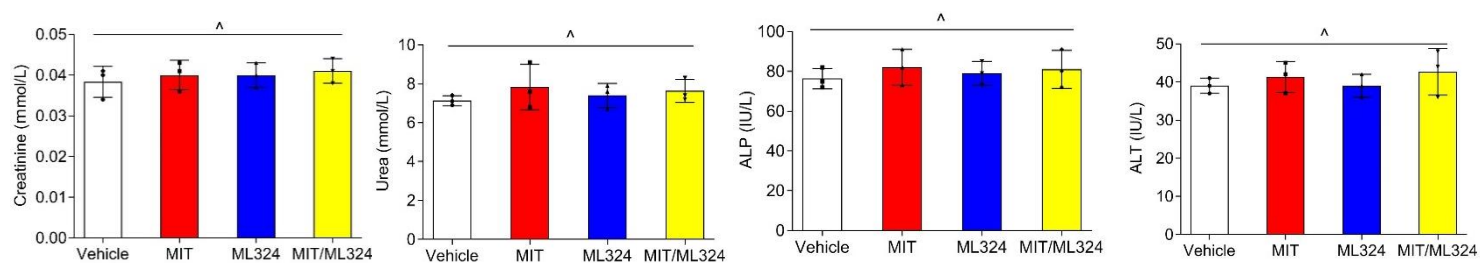

**h**

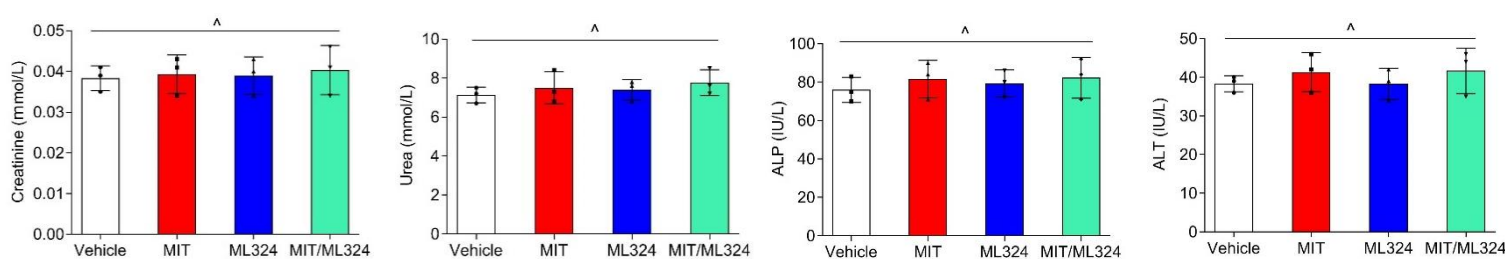

**Supplementary Fig. 6. Tumor measurement, *in vivo* SASP expression, and pathophysiological assessment of animals bearing LNCaP/PSC27 or 22Rv1/PSC27 tumors.** **a**, Comparison of tumor sizes at the end of preclinical treatment. Mice were implanted with androgen receptor (AR)-positive and hormone responsive LNCaP cells that were combined with PSC27 stromal cells, and experienced MIT and/or ML324-involving regimens. **b**, Similar comparison as described in **(a)**, except that 22Rv1 cells were applied as an AR-positive and hormone-refractory PCa line for tumor xenografting. **c**, Quantitative transcript assay of SASP factors and senescence markers expressed in experimental LNCaP/PSC27 mice as described in **(a)**. **d**, Quantitative transcript assay of SASP factors and senescence markers expressed in experimental 22Rv1/PSC27 mice as described in **(b)**. **e**, Body weight measurement of LNCaP/PSC27 mice as described in **(a)**. **f**, Body weight measurement of 22Rv1/PSC27 mice as described in **(b)**. **g**, Serum measurement of creatinine, urea, alkaline phosphatase (ALP), and alanine aminotransferase (ALT) with terminal bleeds (cardiac punctures) taken at the end of therapeutic regimens for LNCaP/PSC27 animals. **h**, Serum analysis of creatinine, urea, alkaline phosphatase (ALP), and alanine aminotransferase (ALT) with terminal bleeds (cardiac punctures) taken at the end of therapeutic regimens for 22Rv1/PSC27 animals. Data are shown as mean  $\pm$  SD and representative of 3 independent experiments. MIT, mitoxantrone. WBC, white blood count. For assays of **(a)**, **(b)**, **(e)** and **(f)**,  $n = 10$  per treatment arm. For tests of **(c)**, **(d)**, **(g)** and **(h)**,  $n = 3$  per group. **a-h**,  $P$  values were determined by two-sided unpaired  $t$ -test, and adjusted for multiple comparisons.  $\wedge$ ,  $P > 0.05$ . \*,  $P < 0.05$ . \*\*,  $P < 0.01$ . \*\*\*  $P < 0.001$ . \*\*\*\*  $P < 0.0001$ .

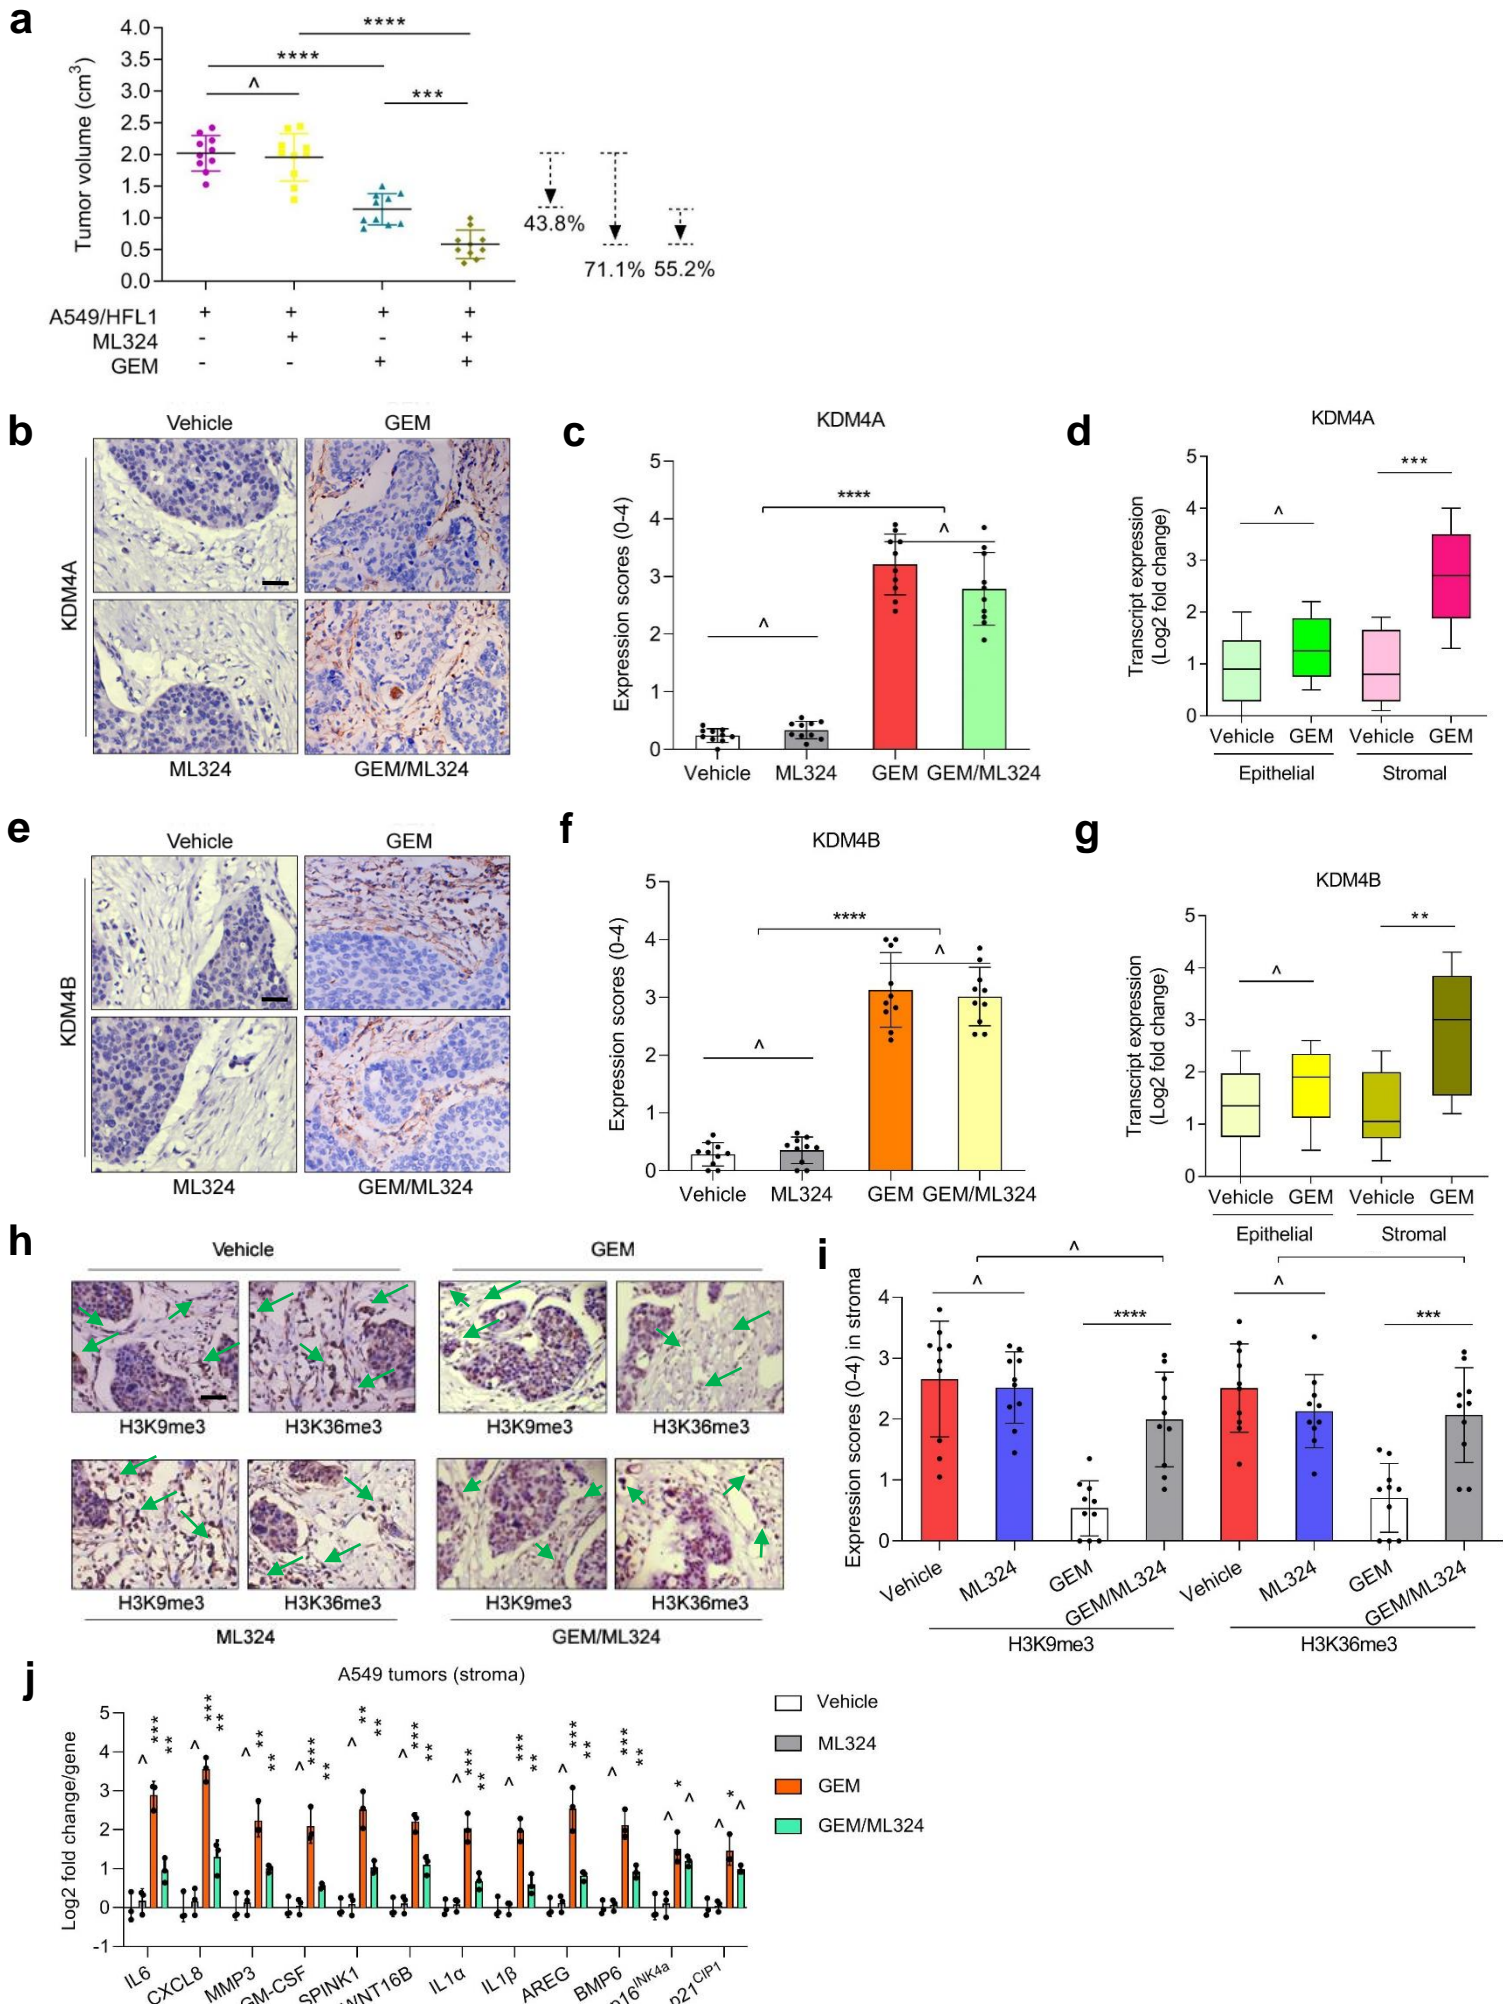



**Supplementary Fig. 7. Tumor measurement, *in vivo* expression of KDM4A/B, H3K9me3/H3K36me3 and the SASP in animals bearing A549/HFL1 tumors.** **a**, Comparison of tumor sizes at the end of preclinical treatment. Mice were implanted with human lung adenocarcinoma cells (A549) that were combined with HFL1 lung fibroblasts, and experienced gemcitabine (GEM) and/or ML324-mediated regimens. **b**, Pathological examination of KDM4A in lung tumors by IHC staining after mouse dissection. Scale bar, 50  $\mu$ m. **c**, Pathological scoring (in the range of 1-4, averaged from 3 independent readings/animal) of KDM4A expressed in fibroblasts isolated from mouse tumors via LCM. **d**, Comparative analysis of KDM4A expressed in epithelial cancer cells *versus* fibroblasts in tumor foci of animals experiencing different treatments. Cells were acquired from LCM-mediated isolation post tissue process. Signals normalized to the lowest value of cancer epithelial vehicle group. Median, 25th and 75th percentiles, with Turkey whisperm indicated in box-and-whisker plots. **e**, Pathological examination of KDM4B in lung tumors by IHC staining after mouse dissection. Scale bar, 50  $\mu$ m. **f**, Pathological scoring (in the range of 1-4, averaged from 3 independent readings/animal) of KDM4B expressed in fibroblasts isolated from mouse tumors via LCM. **g**, Comparative analysis of KDM4B expressed in epithelial cancer cells and fibroblasts in tumor foci. Cells were acquired from LCM-mediated isolation post tissue process. Signals normalized to the lowest value of cancer epithelial vehicle group. Median, 25th and 75th percentiles, with Turkey whisperm indicated in box-and-whisker plots. **h**, Pathological examination of H3K9me3 and H3K36me3 in lung tumors by IHC staining after mouse dissection. Scale bar, 100  $\mu$ m. Green arrows, representative stromal cells. **i**, Comparative statistics of H3K9me3 and H3K36me3 pathological scores (in a range of 1-4, averaged from 3 independent readings/animal) in lung tumors. **j**, Quantitative transcript assay of SASP factors and senescence markers expressed in experimental A549/HFL1 mice that experienced treatments as described in (**a**). Data are shown as mean  $\pm$  SD and representative of 3 independent experiments. **a**, **c**, **d**, **f**, **g**, **i**, **j**, *P* values were determined by two-sided unpaired *t*-test, and adjusted for multiple comparisons. Data in **b**, **e**, **h** are representative of 3 biological replicates.  $\wedge$ , *P* > 0.05. \*, *P* < 0.05. \*\*, *P* < 0.01. \*\*\* *P* < 0.001. \*\*\*\* *P* < 0.0001. N = 10/group.

**a**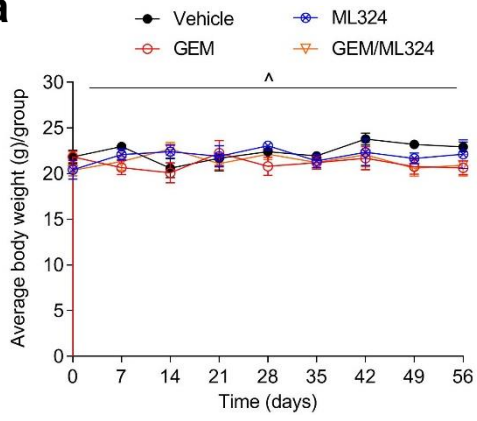**b**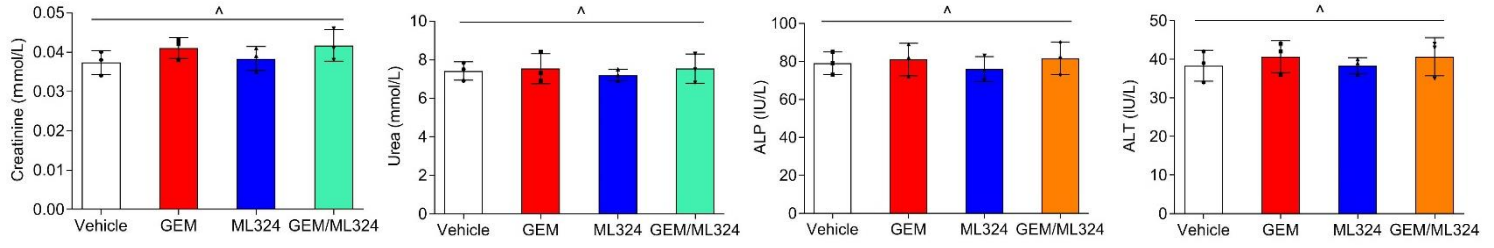



**Supplementary Fig. 8. Pathophysiological evaluation of treatment effects on body weight and functional integrity of key organs of A549/HFL1 mice. Related to Fig. 7.** a, Mouse body weight determination performed on a weekly basis for immunodeficient mice carrying A549/HFL1 tumors. b, Serum measurement of creatinine, urea, alkaline phosphatase (ALP), and alanine aminotransferase (ALT) with terminal bleeds (cardiac punctures) taken at the end of therapeutic regimens for A549/HFL1 animals. Data are shown as mean  $\pm$  SD and representative of 3 independent experiments. GEM, gemcitabine. For all assays, n = 3 per treatment arm. **a-b**, *P* values were determined by two-sided unpaired *t*-test, and adjusted for multiple comparisons. <sup>^</sup>, *P* > 0.05.

## Supplementary Information

**Supplementary Table 1. Mass spectrometric profiling of senescent cell proteomics.**

| <b>A. MS/MS spectrum database search analysis summary</b> |                   |          |                 |                     |                       |
|-----------------------------------------------------------|-------------------|----------|-----------------|---------------------|-----------------------|
| Total spectrums                                           | Matched spectrums | Peptides | Unique peptides | Identified proteins | Quantifiable proteins |
| 16495                                                     | 7694 (46.6%)      | 4110     | 3803            | 732                 | 447                   |

  

| <b>B. Differentially expressed protein summary<br/>(Filtered with threshold value of expression fold change and <i>P</i> value &lt; 0.05)</b> |                |                  |                  |                  |                |
|-----------------------------------------------------------------------------------------------------------------------------------------------|----------------|------------------|------------------|------------------|----------------|
| Compare group                                                                                                                                 | Regulated type | fold change >1.2 | fold change >1.3 | fold change >1.5 | fold change >2 |
| SEN/CTRL                                                                                                                                      | up-regulated   | 218              | 194              | 156              | 87             |
|                                                                                                                                               | down-regulated | 125              | 106              | 79               | 29             |

Supplementary Information

Supplementary Table 2. Intracellular proteins identified by mass spectrometry.

| Protein accession | Gene name | MW [kDa] | Score  | Coverage [%] | #Peptides | #PSMs | #Unique peptide | CTRL     | SEN      | SEN/CTRL Ratio | Subcellular localization | KEGG KO No. | KOG category | KOG NO. | KOG description                                                                     |
|-------------------|-----------|----------|--------|--------------|-----------|-------|-----------------|----------|----------|----------------|--------------------------|-------------|--------------|---------|-------------------------------------------------------------------------------------|
| P04179            | SOD2      | 24.75    | 39.431 | 31.1         | 5         | 8     | 5               | 8451300  | 3.25E+08 | 13.124         | mitochondria             | K04564      | P            | KOG0876 | Manganese superoxide dismutase                                                      |
| P53007            | SLC25A1   | 34.012   | 17.126 | 11.6         | 3         | 3     | 3               | 6521900  | 1.06E+08 | 7.788          | plasma membrane          | K15100      | C            | KOG0756 | Mitochondrial tricarboxylate/dicarboxylate carrier proteins                         |
| P24844            | MYL9      | 19.827   | 38.661 | 56.4         | 11        | 30    | 3               | 19644000 | 7.47E+08 | 7.272          | mitochondria             | K12755      | Z            | KOG0031 | Myosin regulatory light chain, EF-Hand protein superfamily                          |
| O00479            | HMGN4     | 9.5388   | 13.977 | 16.7         | 2         | 3     | 2               | 54708000 | 2.29E+08 | 5.207          | nucleus                  | K11302      |              |         |                                                                                     |
| O00159            | MYO1C     | 121.68   | 293.12 | 42.2         | 34        | 43    | 34              | 2.29E+08 | 3.93E+09 | 4.574          | cytoplasm                | K10356      | Z            | KOG0164 | Myosin class I heavy chain                                                          |
| Q9H4G4            | GLIPR2    | 17.218   | 20.284 | 37           | 3         | 3     | 3               | 22738000 | 1.3E+08  | 4.032          | cytoplasm                |             | S            | KOG3017 | Defense-related protein containing SCP domain                                       |
| P25705            | ATP5F1A   | 59.75    | 152.64 | 38           | 15        | 19    | 15              | 1.33E+08 | 1.5E+09  | 3.877          | mitochondria             | K02132      | C            | KOG1353 | F0F1-type ATP synthase, alpha subunit                                               |
| P80723            | BASP1     | 22.693   | 88.605 | 75.3         | 11        | 15    | 11              | 1.93E+08 | 1.47E+09 | 3.766          | nucleus                  | K17272      |              |         |                                                                                     |
| P08582            | MELTF     | 80.214   | 138.98 | 40.4         | 16        | 22    | 16              | 54881000 | 1.22E+09 | 3.725          | extracellular            | K06569      |              |         |                                                                                     |
| Q8NBQ5            | HSD17B11  | 32.935   | 93.938 | 45           | 10        | 14    | 10              | 57261000 | 5.51E+08 | 3.637          | endoplasmic reticulum    |             | Q            | KOG1201 | Hydroxysteroid 17-beta dehydrogenase 11                                             |
| P48047            | ATP5O     | 23.277   | 22.969 | 17.4         | 3         | 4     | 3               | 19552000 | 1.1E+08  | 3.591          | mitochondria             | K02137      | C            | KOG1662 | Mitochondrial F1F0-ATP synthase, subunit OSCP/ATP5                                  |
| P21589            | NT5E      | 63.367   | 103.23 | 38.7         | 14        | 19    | 14              | 99343000 | 8.05E+08 | 3.55           | peroxisome               | K19970      | F            | KOG4419 | 5' nucleotidase                                                                     |
| P27824            | CANX      | 67.567   | 24.663 | 12.3         | 4         | 5     | 4               | 15641000 | 1.22E+08 | 3.534          | endoplasmic reticulum    | K08054      | O            | KOG0675 | Calnexin                                                                            |
| P02545            | LMNA      | 74.139   | 176.93 | 45.2         | 20        | 23    | 20              | 88713000 | 9.26E+08 | 3.529          | nucleus                  | K12641      | DY           | KOG0977 | Nuclear envelope protein lamin, intermediate filament superfamily                   |
| P52926            | HMGA2     | 11.832   | 31.678 | 40.4         | 3         | 5     | 3               | 16460000 | 1.07E+08 | 3.524          | nucleus                  | K09283      |              |         |                                                                                     |
| Q56VL3            | OCIAD2    | 16.953   | 36.745 | 43.5         | 5         | 5     | 5               | 19218000 | 2.44E+08 | 3.498          | extracellular            |             |              |         |                                                                                     |
| P06576            | ATP5F1B   | 56.559   | 248.4  | 68.8         | 22        | 33    | 22              | 4.87E+08 | 4.34E+09 | 3.378          | mitochondria             | K02133      | C            | KOG1350 | F0F1-type ATP synthase, beta subunit                                                |
| P30838            | ALDH3A1   | 50.394   | 58.004 | 24.3         | 7         | 10    | 7               | 1.01E+08 | 3.29E+08 | 3.296          | mitochondria             | K00129      | C            | KOG2456 | Aldehyde dehydrogenase                                                              |
| P56385            | ATP5ME    | 7.9331   | 23.651 | 52.2         | 4         | 4     | 4               | 9839500  | 1.13E+08 | 3.254          | mitochondria             | K02129      | C            | KOG4326 | Mitochondrial F1F0-ATP synthase, subunit e                                          |
| Q96N66            | MBOAT7    | 52.764   | 28.204 | 10.8         | 3         | 3     | 3               | 12169000 | 1.16E+08 | 3.244          | plasma membrane          | K13516      | S            | KOG2706 | Predicted membrane protein                                                          |
| P09493            | TPM1      | 32.708   | 323.31 | 53.2         | 27        | 37    | 9               | 9.32E+08 | 9.19E+09 | 3.19           | cytoplasm                | K10373      |              |         |                                                                                     |
| P09525            | ANXA4     | 35.882   | 72.36  | 28.8         | 7         | 7     | 7               | 54065000 | 4.89E+08 | 3.18           | cytoplasm                | K17093      | U            | KOG0819 | Annexin                                                                             |
| P47755            | CAPZA2    | 32.949   | 35.751 | 30.4         | 5         | 6     | 4               | 40361000 | 2.26E+08 | 3.176          | cytoplasm                | K10364      | Z            | KOG0836 | F-actin capping protein, alpha subunit                                              |
| P07858            | CTSB      | 37.821   | 45.797 | 25.1         | 5         | 6     | 5               | 16233000 | 1.97E+08 | 3.153          | extracellular            | K01363      | O            | KOG1543 | Cysteine proteinase Cathepsin L                                                     |
| P67936            | TPM4      | 28.521   | 119.29 | 66.1         | 21        | 19    | 10              | 1.74E+08 | 1.72E+09 | 3.068          | cytoplasm                | K10375      |              |         |                                                                                     |
| P04792            | HSPB1     | 22.782   | 56.634 | 57.6         | 8         | 12    | 8               | 76335000 | 7.93E+08 | 3.047          | nucleus                  | K04455      | O            | KOG3591 | Alpha crystallins                                                                   |
| Q16795            | NDUFA9    | 42.509   | 31.695 | 17           | 5         | 5     | 5               | 18465000 | 1.28E+08 | 3.003          | mitochondria             | K03953      | C            | KOG2865 | NADH:ubiquinone oxidoreductase, NDUFA9/39kDa subunit                                |
| Q9UM54            | MYO6      | 149.69   | 116.21 | 20.4         | 15        | 18    | 15              | 36694000 | 8.46E+08 | 2.984          | cytoplasm                | K10358      | Z            | KOG0163 | Myosin class VI heavy chain                                                         |
| P60903            | S100A10   | 11.203   | 17.953 | 35.1         | 2         | 5     | 2               | 61356000 | 5.37E+08 | 2.952          | cytoplasm                | K17274      |              |         |                                                                                     |
| Q9Y608            | LRRFIP2   | 82.17    | 18.271 | 6.8          | 2         | 3     | 2               | 10794000 | 1.41E+08 | 2.924          | nucleus                  |             | R            | KOG2010 | Double stranded RNA binding protein                                                 |
| Q6NZI2            | CAVIN1    | 43.476   | 68.981 | 24.4         | 6         | 8     | 6               | 20151000 | 1.7E+08  | 2.922          | nucleus                  | K19387      |              |         |                                                                                     |
| P06753            | TPM3      | 32.95    | 77.878 | 46.3         | 24        | 28    | 7               | 1.5E+08  | 1.41E+09 | 2.875          | cytoplasm                | K09290      | Z            | KOG1003 | Actin filament-coating protein tropomyosin                                          |
| Q9Y4I1            | MYO5A     | 215.4    | 149    | 15           | 19        | 22    | 19              | 86320000 | 7.27E+08 | 2.853          | cytoplasm                | K10357      | Z            | KOG0161 | Myosin class II heavy chain                                                         |
| Q9P0K7            | RAI14     | 110.04   | 323.31 | 50.3         | 34        | 45    | 34              | 3.51E+08 | 2.35E+09 | 2.767          | nucleus                  |             |              |         |                                                                                     |
| P39656            | DDOST     | 50.8     | 46.385 | 20.6         | 6         | 6     | 6               | 24268000 | 2.9E+08  | 2.724          | plasma membrane          | K12670      | O            | KOG2754 | Oligosaccharyltransferase, beta subunit                                             |
| P56134            | ATP5J2    | 10.918   | 16.065 | 25.5         | 2         | 2     | 2               | 9911200  | 1.17E+08 | 2.709          | cytoplasm                | K02130      | C            | KOG4092 | Mitochondrial F1F0-ATP synthase, subunit f                                          |
| Q14257            | RCN2      | 36.876   | 11.758 | 11           | 2         | 2     | 2               | 10436000 | 44429000 | 2.703          | extracellular            |             | TU           | KOG4223 | Reticulocalbin, calumenin, DNA supercoiling factor, and related                     |
| Q15165            | PON2      | 39.38    | 42.55  | 35           | 5         | 5     | 5               | 12239000 | 1.7E+08  | 2.7            | extracellular            | K01045      |              |         | Ca <sup>2+</sup> -binding proteins of the CREC family (EF-Hand protein superfamily) |
| P13987            | CD59      | 14.177   | 38.046 | 25.8         | 5         | 7     | 5               | 31798000 | 2.08E+08 | 2.678          | extracellular            | K04008      |              |         |                                                                                     |
| P51608            | MECP2     | 52.44    | 67.069 | 24.7         | 9         | 10    | 9               | 40833000 | 3.08E+08 | 2.665          | nucleus                  | K11588      | KB           | KOG4161 | Methyl-CpG binding transcription regulators                                         |
| P23141            | CES1      | 62.52    | 35.558 | 12.3         | 5         | 7     | 5               | 13822000 | 1.78E+08 | 2.661          | extracellular            | K01044      | R            | KOG1516 | Carboxylesterase and related proteins                                               |
| Q6WCQ1            | MPRIP     | 116.53   | 323.31 | 40.7         | 32        | 40    | 32              | 5.72E+08 | 2.44E+09 | 2.643          | nucleus                  |             | Z            | KOG4807 | F-actin binding protein, regulates actin cytoskeletal organization                  |
| P36957            | DLST      | 48.755   | 39.504 | 18.1         | 5         | 5     | 5               | 20952000 | 1.17E+08 | 2.621          | mitochondria             | K00658      | C            | KOG0559 | Dihydrolipoamide succinyltransferase (2-oxoglutarate dehydrogenase, E2 subunit)     |
| P04843            | RPN1      | 68.569   | 41.954 | 14.7         | 6         | 6     | 6               | 18973000 | 1.15E+08 | 2.613          | endoplasmic reticulum    | K12666      | O            | KOG2291 | Oligosaccharyltransferase, alpha subunit (ribophorin I)                             |
| P10301            | RRAS      | 23.48    | 29.383 | 28.4         | 4         | 4     | 4               | 16909000 | 1.31E+08 | 2.584          | nucleus                  | K07829      | R            | KOG0395 | Ras-related GTPase                                                                  |

|        |          |        |        |      |    |     |    |          |          |       |                       |        |    |         |                                                                                  |
|--------|----------|--------|--------|------|----|-----|----|----------|----------|-------|-----------------------|--------|----|---------|----------------------------------------------------------------------------------|
| P18206 | VCL      | 123.8  | 32.739 | 8.9  | 5  | 5   | 5  | 11979000 | 1.14E+08 | 2.561 | cytoplasm             | K05700 | W  | KOG3681 | Alpha-catenin                                                                    |
| P11233 | RALA     | 23.567 | 28.725 | 25.2 | 4  | 4   | 4  | 6799500  | 87280000 | 2.553 | cytoplasm             | K07834 | R  | KOG0395 | Ras-related GTPase                                                               |
| Q13045 | FLII     | 144.75 | 32.266 | 5.1  | 5  | 5   | 5  | 12253000 | 86182000 | 2.544 | cytoplasm             |        | Z  | KOG0444 | Cytoskeletal regulator Flightless-I (contains leucine-rich and gelsolin repeats) |
| O60506 | SYNCRIP  | 69.602 | 53.512 | 22.2 | 8  | 9   | 6  | 82070000 | 2.82E+08 | 2.535 | nucleus               | K13160 | A  | KOG0117 | Heterogeneous nuclear ribonucleoprotein R (RRM superfamily)                      |
| P21333 | FLNA     | 280.74 | 323.31 | 36.4 | 56 | 75  | 54 | 7.97E+08 | 4.37E+09 | 2.534 | cytoplasm             | K04437 | Z  | KOG0518 | Actin-binding cytoskeleton protein, filamin                                      |
| O75368 | SH3BGRL  | 12.774 | 47.672 | 60.5 | 5  | 7   | 5  | 44555000 | 2.6E+08  | 2.512 | mitochondria          |        | S  | KOG4023 | Uncharacterized conserved protein                                                |
| P09936 | UCHL1    | 24.824 | 47.314 | 32.3 | 4  | 5   | 4  | 37857000 | 2.45E+08 | 2.473 | cytoplasm             | K05611 | O  | KOG1415 | Ubiquitin C-terminal hydrolase UCHL1                                             |
| Q9P0M6 | H2AFY2   | 40.058 | 92.939 | 52.2 | 13 | 16  | 11 | 75946000 | 3.21E+08 | 2.443 | mitochondria          | K11251 | BK | KOG2633 | Hismacro and SEC14 domain-containing proteins                                    |
| Q9H9B4 | SFXN1    | 35.619 | 7.1511 | 12.1 | 2  | 3   | 1  | 13476000 | 49510000 | 2.398 | cytoplasm             |        | R  | KOG3767 | Sideroflexin                                                                     |
| O15231 | ZNF185   | 73.525 | 33.738 | 10.4 | 5  | 5   | 5  | 15110000 | 1.46E+08 | 2.389 | cytoplasm,nucleus     |        |    |         |                                                                                  |
| O00151 | PDLIM1   | 36.071 | 53.529 | 46.5 | 7  | 7   | 7  | 4.29E+08 | 2.26E+08 | 2.379 | cytoplasm             |        | TZ | KOG1703 | Adaptor protein Enigma and related PDZ-LIM proteins                              |
| P21980 | TGM2     | 77.328 | 35.084 | 13.4 | 5  | 5   | 5  | 18150000 | 91747000 | 2.352 | cytoplasm             | K05625 |    |         |                                                                                  |
| O75947 | ATP5H    | 18.491 | 25.399 | 37.3 | 4  | 5   | 4  | 20152000 | 2.08E+08 | 2.344 | cytoplasm             | K02138 | C  | KOG3366 | Mitochondrial F1F0-ATP synthase, subunit d/ATP7                                  |
| P46821 | MAP1B    | 270.63 | 20.901 | 1.7  | 3  | 3   | 3  | 10930000 | 62882000 | 2.328 | nucleus               | K10429 | Z  | KOG3592 | Microtubule-associated proteins                                                  |
| P42330 | AKR1C3   | 36.853 | 71.259 | 45.8 | 9  | 9   | 6  | 42453000 | 2.33E+08 | 2.322 | cytoplasm             | K04119 | R  | KOG1577 | Aldo/keto reductase family proteins                                              |
| P63000 | RAC1     | 21.45  | 29.252 | 25   | 4  | 7   | 4  | 38019000 | 2.81E+08 | 2.303 | cytoplasm             | K04392 |    |         |                                                                                  |
| O43795 | MYO1B    | 131.98 | 299.66 | 36.4 | 32 | 46  | 32 | 3.26E+09 | 3.91E+09 | 2.3   | cytoplasm             | K10356 | Z  | KOG0164 | Myosin class I heavy chain                                                       |
| O75369 | FLNB     | 278.16 | 153.87 | 14.3 | 23 | 23  | 21 | 1.7E+08  | 4.45E+08 | 2.289 | cytoplasm,nucleus     | K04437 | Z  | KOG0518 | Actin-binding cytoskeleton protein, filamin                                      |
| Q13838 | DDX39B   | 48.991 | 61.277 | 29.9 | 9  | 11  | 9  | 57869000 | 4.2E+08  | 2.279 | cytoplasm,nucleus     | K12812 | A  | KOG0329 | ATP-dependent RNA helicase                                                       |
| P27105 | STOM     | 31.73  | 85.013 | 42   | 7  | 11  | 7  | 1.52E+08 | 1.17E+09 | 2.268 | cytoplasm             | K17286 | C  | KOG2621 | Prohibitins and stomatins of the PID superfamily                                 |
| P04899 | GNAI2    | 40.45  | 54.268 | 27.6 | 7  | 8   | 4  | 99363000 | 4.2E+08  | 2.261 | cytoplasm             | K04630 | DT | KOG0082 | G-protein alpha subunit (small G protein superfamily)                            |
| Q9BWM7 | SFXN3    | 35.503 | 19.391 | 12.8 | 3  | 3   | 2  | 23716000 | 1.33E+08 | 2.253 | cytoplasm             |        | R  | KOG3767 | Sideroflexin                                                                     |
| Q16881 | TXNRD1   | 70.905 | 19.137 | 5.9  | 2  | 2   | 2  | 12954000 | 70308000 | 2.238 | cytoplasm             | K22182 | O  | KOG4716 | Thioredoxin reductase                                                            |
| P14923 | JUP      | 81.744 | 56.36  | 17.7 | 7  | 8   | 7  | 33753000 | 2.4E+08  | 2.229 | cytoplasm             | K10056 | TZ | KOG4203 | Armadillo/beta-Catenin/plakoglobin                                               |
| P14866 | HNRNPL   | 64.132 | 73.749 | 28.5 | 8  | 9   | 8  | 72239000 | 4.14E+08 | 2.2   | nucleus               | K13159 | A  | KOG1456 | Heterogeneous nuclear ribonucleoprotein L (contains RRM repeats)                 |
| P62873 | GNB1     | 37.377 | 68.028 | 32.9 | 7  | 9   | 4  | 51229000 | 3.13E+08 | 2.189 | cytoplasm             | K04536 | R  | KOG0286 | G-protein beta subunit                                                           |
| O75489 | NDUFS3   | 30.241 | 50.015 | 31.1 | 6  | 6   | 6  | 27136000 | 90619000 | 2.178 | mitochondria          | K03936 | C  | KOG1713 | NADH-ubiquinone oxidoreductase, NDUFS3/30 kDa subunit                            |
| P15121 | AKR1B1   | 35.853 | 96.443 | 55.1 | 11 | 15  | 11 | 2.89E+08 | 1.63E+09 | 2.175 | cytoplasm             | K00011 | R  | KOG1577 | Aldo/keto reductase family proteins                                              |
| Q9UBI6 | GNG12    | 8.0061 | 21.612 | 56.9 | 3  | 3   | 3  | 52453000 | 3.5E+08  | 2.155 | nucleus               | K04347 | T  | KOG4119 | G protein gamma subunit                                                          |
| P10620 | MGST1    | 17.598 | 38.185 | 20   | 4  | 6   | 4  | 68874000 | 4.38E+08 | 2.145 | cytoplasm,nucleus     | K00799 |    |         |                                                                                  |
| P35580 | MYH10    | 229    | 323.31 | 38.8 | 72 | 109 | 40 | 8.41E+08 | 5.69E+09 | 2.132 | cytoplasm             | K10352 | Z  | KOG0161 | Myosin class II heavy chain                                                      |
| P37802 | TAGLN2   | 22.391 | 71.639 | 52.3 | 9  | 10  | 9  | 1.18E+08 | 6.42E+08 | 2.127 | cytoplasm,nucleus     | K20526 | Z  | KOG2046 | Calponin                                                                         |
| P40199 | CEACAM6  | 37.194 | 17.137 | 5.8  | 2  | 3   | 2  | 12938000 | 40194000 | 2.11  | extracellular         | K06499 |    |         |                                                                                  |
| Q09666 | AHNAK    | 629.09 | 120.14 | 12.9 | 18 | 21  | 18 | 2.08E+08 | 6.63E+08 | 2.109 | nucleus               |        |    |         |                                                                                  |
| Q13813 | SPTAN1   | 284.54 | 62.961 | 5.4  | 7  | 7   | 7  | 46211000 | 1.39E+08 | 2.081 | nucleus               | K06114 | Z  | KOG0035 | Ca <sup>2+</sup> -binding actin-bundling protein (actinin), alpha chain          |
| Q6NUK1 | SLC25A24 | 53.354 | 37.688 | 16.4 | 6  | 6   | 6  | 26640000 | 1.54E+08 | 2.06  | cytoplasm             | K14684 | F  | KOG0036 | Predicted mitochondrial carrier protein                                          |
| P26038 | MSN      | 67.819 | 32.027 | 10.2 | 5  | 5   | 5  | 13531000 | 1.09E+08 | 2.052 | cytoplasm             | K05763 | R  | KOG3529 | Radixin, moesin and related proteins of the ERM family                           |
| P51970 | NDUFA8   | 20.105 | 24.495 | 30.2 | 3  | 4   | 3  | 70760000 | 1.43E+08 | 2.052 | extracellular         | K03952 | C  | KOG3458 | NADH:ubiquinone oxidoreductase, NDUFA8/PGIV/19 kDa subunit                       |
| Q9NYL9 | TMOD3    | 39.594 | 177.16 | 75   | 20 | 30  | 19 | 5.01E+08 | 3.33E+09 | 2.04  | cytoplasm             | K10370 | Z  | KOG3735 | Tropomodulin and leiomodulin                                                     |
| Q07065 | CKAP4    | 66.022 | 80.037 | 23.8 | 10 | 11  | 10 | 2.63E+08 | 3.76E+08 | 2.019 | plasma membrane       | K13999 |    |         |                                                                                  |
| Q969G5 | CAVIN3   | 27.701 | 14.168 | 7.7  | 2  | 2   | 2  | 9055800  | 40254000 | 2.011 | extracellular         |        |    |         |                                                                                  |
| O60675 | MAFK     | 17.523 | 21.419 | 24.4 | 3  | 3   | 3  | 23843000 | 97765000 | 2.009 | nucleus               | K09037 |    |         |                                                                                  |
| P0DMV9 | HSPA1B   | 70.051 | 66.554 | 27.3 | 10 | 14  | 6  | 1.27E+08 | 4.33E+08 | 1.996 | cytoplasm             | K03283 |    |         |                                                                                  |
| O43390 | HNRNPR   | 70.942 | 35.432 | 15.8 | 7  | 9   | 5  | 45012000 | 2.25E+08 | 1.992 | nucleus               | K13161 | A  | KOG0117 | Heterogeneous nuclear ribonucleoprotein R (RRM superfamily)                      |
| Q16719 | KYNU     | 52.351 | 38.241 | 19.1 | 6  | 8   | 6  | 34369000 | 1.44E+08 | 1.982 | cytoplasm             | K01556 | E  | KOG3846 | L-kynurenine hydrolase                                                           |
| P49411 | TUFM     | 49.541 | 32.492 | 15.5 | 5  | 5   | 5  | 14538000 | 1.06E+08 | 1.97  | mitochondria          | K02358 | J  | KOG0460 | Mitochondrial translation elongation factor Tu                                   |
| P14649 | MYL6B    | 22.764 | 42.857 | 49   | 7  | 11  | 5  | 57876000 | 2.48E+08 | 1.951 | cytoplasm             | K12751 | Z  | KOG0030 | Myosin essential light chain, EF-Hand protein superfamily                        |
| Q13435 | SF3B2    | 100.23 | 58.085 | 15.5 | 9  | 9   | 9  | 42298000 | 2.72E+08 | 1.944 | nucleus               | K12829 | A  | KOG2330 | Splicing factor 3b, subunit 2                                                    |
| Q9Y5S9 | RBM8A    | 19.889 | 12.701 | 33.3 | 2  | 2   | 2  | 9105600  | 84319000 | 1.944 | nucleus               | K12876 | R  | KOG0130 | RNA-binding protein RBM8/Tsunagi (RRM superfamily)                               |
| P07099 | EPHX1    | 52.948 | 15.98  | 8.4  | 2  | 2   | 2  | 20502000 | 1.22E+08 | 1.922 | endoplasmic reticulum | K01253 | R  | KOG2565 | Predicted hydrolases or acyltransferases (alpha/beta hydrolase superfamily)      |
| P11413 | G6PD     | 59.256 | 91.487 | 31.5 | 11 | 13  | 11 | 82504000 | 3.68E+08 | 1.909 | cytoplasm             | K00036 | G  | KOG0563 | Glucose-6-phosphate 1-dehydrogenase                                              |



|        |          |        |        |      |    |    |    |          |          |       |                        |        |    |         |                                                                               |
|--------|----------|--------|--------|------|----|----|----|----------|----------|-------|------------------------|--------|----|---------|-------------------------------------------------------------------------------|
| P38117 | ETFB     | 27.843 | 21.789 | 17.6 | 4  | 4  | 4  | 37310000 | 53308000 | 1.559 | cytoplasm              | K03521 | C  | KOG3180 | Electron transfer flavoprotein, beta subunit                                  |
| P52272 | HNRNPM   | 77.515 | 48.747 | 12.3 | 6  | 6  | 6  | 63160000 | 1.89E+08 | 1.556 | cytoplasm              | K12887 | A  | KOG4212 | RNA-binding protein hnRNP-M                                                   |
| Q06830 | PRDX1    | 22.11  | 85.37  | 60.3 | 10 | 12 | 10 | 3.35E+08 | 9.59E+08 | 1.555 | cytoplasm              | K13279 | O  | KOG0852 | Alkyl hydroperoxide reductase, thiol specific antioxidant and related enzymes |
| O15511 | ARPC5    | 16.32  | 21.356 | 43.7 | 3  | 5  | 3  | 63159000 | 2.99E+08 | 1.547 | cytoplasm              | K05754 | Z  | KOG3380 | Actin-related protein Arp2/3 complex, subunit ARPC5                           |
| P60981 | DSTN     | 18.506 | 11.586 | 17   | 2  | 3  | 2  | 27428000 | 88172000 | 1.54  | mitochondria           | K10363 | Z  | KOG1735 | Actin depolymerizing factor                                                   |
| P07355 | ANXA2    | 38.604 | 283.3  | 75.5 | 27 | 40 | 27 | 1.66E+09 | 9.76E+09 | 1.519 | cytoplasm              | K17092 | U  | KOG0819 | Annexin                                                                       |
| P62306 | SNRPF    | 9.7251 | 22.789 | 48.8 | 3  | 4  | 3  | 19331000 | 47349000 | 1.516 | cytoplasm              | K11098 | A  | KOG3482 | Small nuclear ribonucleoprotein (snRNP) SMF                                   |
| P05114 | HMGNI    | 10.659 | 30.051 | 45   | 4  | 4  | 4  | 5544900  | 12703000 | 1.515 | nucleus                | K11299 |    |         |                                                                               |
| Q96QD9 | FYTDD1   | 35.818 | 19.718 | 12.6 | 3  | 3  | 3  | 16487000 | 78063000 | 1.511 | mitochondria           |        |    |         |                                                                               |
| O60701 | UGDH     | 55.023 | 46.08  | 19.6 | 7  | 9  | 7  | 1.13E+08 | 2.81E+08 | 1.498 | cytoplasm              | K00012 | GT | KOG2666 | UDP-glucose/GDP-mannose dehydrogenase                                         |
| P63104 | YWHAZ    | 27.745 | 108.55 | 44.5 | 11 | 13 | 10 | 2.87E+08 | 1.1E+09  | 1.496 | cytoplasm              | K16197 | O  | KOG0841 | Multifunctional chaperone (14-3-3 family)                                     |
| P08574 | CYC1     | 35.422 | 13.149 | 8.6  | 2  | 2  | 2  | 13849000 | 41576000 | 1.474 | mitochondria           | K00413 | C  | KOG3052 | Cytochrome c1                                                                 |
| P09651 | HNRNPA1  | 38.746 | 127.64 | 34.7 | 11 | 17 | 11 | 2.72E+08 | 9.67E+08 | 1.47  | nucleus                | K12741 | R  | KOG0118 | FOG: RRM domain                                                               |
| Q8IY81 | FTSJ3    | 96.557 | 22.156 | 7.6  | 3  | 3  | 3  | 22601000 | 1.14E+08 | 1.469 | nucleus                | K14857 | AR | KOG1098 | Putative SAM-dependent rRNA methyltransferase SPB1                            |
| P07339 | CTSD     | 44.552 | 37.804 | 15   | 5  | 5  | 5  | 1.06E+08 | 2.59E+08 | 1.462 | extracellular          | K01379 | O  | KOG1339 | Aspartyl protease                                                             |
| P26641 | EEF1G    | 50.118 | 11.457 | 5.5  | 2  | 2  | 2  | 10197000 | 23763000 | 1.456 | cytoplasm              | K03233 | J  | KOG1627 | Translation elongation factor EF-1 gamma                                      |
| Q00839 | HNRNPU   | 90.583 | 107.12 | 26.5 | 14 | 15 | 14 | 2.3E+08  | 8.32E+08 | 1.456 | nucleus                | K12888 |    |         |                                                                               |
| P68371 | TUBB4B   | 49.83  | 135.95 | 44.5 | 14 | 23 | 2  | 4.94E+08 | 1.8E+09  | 1.453 | cytoplasm,nucleus      | K07375 | Z  | KOG1375 | Beta tubulin                                                                  |
| P18859 | ATP5J    | 12.587 | 19.801 | 44.4 | 3  | 3  | 3  | 24042000 | 94681000 | 1.45  | mitochondria           | K02131 | C  | KOG4634 | Mitochondrial F1F0-ATP synthase, subunit Cf6 (coupling factor 6)              |
| Q9ULV4 | CORO1C   | 53.248 | 45.91  | 20.9 | 6  | 7  | 6  | 1.12E+08 | 4.5E+08  | 1.443 | mitochondria           | K13886 | Z  | KOG0303 | Actin-binding protein Coronin, contains WD40 repeats                          |
| P61421 | ATP6V0D1 | 40.329 | 20.734 | 17.7 | 3  | 4  | 3  | 16904000 | 1.32E+08 | 1.438 | cytoskeleton           | K02146 | C  | KOG2957 | Vacuolar H+-ATPase V0 sector, subunit d                                       |
| P22695 | UQCRC2   | 48.442 | 105.97 | 34.4 | 11 | 14 | 11 | 1.46E+08 | 3.94E+08 | 1.434 | mitochondria           | K00415 | C  | KOG2583 | Ubiquinol cytochrome c reductase, subunit QCR2                                |
| P63096 | GNAI1    | 40.361 | 32.294 | 24.3 | 6  | 9  | 3  | 25292000 | 1.71E+08 | 1.434 | cytoplasm              | K04630 | DT | KOG0082 | G-protein alpha subunit (small G protein superfamily)                         |
| P40926 | MDH2     | 35.503 | 65.044 | 37.6 | 8  | 8  | 8  | 1.01E+08 | 3.26E+08 | 1.431 | mitochondria           | K00026 | C  | KOG1494 | NAD-dependent malate dehydrogenase                                            |
| Q9UJS0 | SLC25A13 | 74.175 | 43.396 | 12.4 | 6  | 7  | 6  | 36183000 | 1.48E+08 | 1.424 | cytoplasm              | K15105 | C  | KOG0751 | Mitochondrial aspartate/glutamate carrier protein Aralar/Citrin               |
| P0DP25 | CALM3    | 16.837 | 169.78 | 74.5 | 14 | 32 | 14 | 1.91E+09 | 9.01E+09 | 1.423 | cytoplasm,nucleus      | K02183 |    |         | (contains EF-hand Ca2+-binding domains)                                       |
| O95758 | PTBP3    | 59.689 | 43.225 | 17.6 | 7  | 7  | 4  | 13066000 | 84000000 | 1.419 | cytoskeleton           | K17844 | A  | KOG1190 | Polypyrimidine tract-binding protein                                          |
| P29401 | TKT      | 67.877 | 137.46 | 46.4 | 15 | 20 | 15 | 4.37E+08 | 1.27E+09 | 1.412 | cytoplasm              | K00615 | G  | KOG0523 | Transketolase                                                                 |
| Q15050 | RRS1     | 41.193 | 19.557 | 12.1 | 3  | 4  | 3  | 30183000 | 98726000 | 1.411 | nucleus                | K14852 | J  | KOG1765 | Regulator of ribosome synthesis                                               |
| P82979 | SARNP    | 23.671 | 38.586 | 22.4 | 4  | 4  | 4  | 1.22E+08 | 2E+08    | 1.409 | nucleus                | K18732 | D  | KOG4259 | Putative nucleic acid-binding protein Hcc-1/proliferation associated          |
| P05141 | SLC25A5  | 32.852 | 96.017 | 39.9 | 13 | 16 | 6  | 2.59E+08 | 8.99E+08 | 1.396 | cytoplasm              | K05863 | C  | KOG0749 | Mitochondrial ADP/ATP carrier proteins                                        |
| P62241 | RPS8     | 24.205 | 57.806 | 42.3 | 7  | 8  | 7  | 1.05E+08 | 2.9E+08  | 1.396 | nucleus                | K02995 | J  | KOG3283 | 40S ribosomal protein S8                                                      |
| P10599 | TXN      | 11.737 | 29.269 | 41   | 4  | 5  | 4  | 90494000 | 4.21E+08 | 1.38  | extracellular          | K03671 | O  | KOG0907 | Thioredoxin                                                                   |
| Q10588 | BST1     | 35.724 | 16.501 | 6.9  | 2  | 2  | 2  | 17279000 | 61227000 | 1.378 | extracellular          | K18152 |    |         |                                                                               |
| P08579 | SNRPB2   | 25.486 | 37.056 | 28   | 5  | 5  | 3  | 81171000 | 1.05E+08 | 1.377 | nucleus                | K11094 | A  | KOG4206 | Spliceosomal protein snRNP-U1A/U2B                                            |
| Q9Y4Z0 | LSM4     | 15.35  | 14.511 | 11.5 | 2  | 2  | 2  | 23048000 | 50035000 | 1.375 | cytoplasm,nucleus      | K12623 | A  | KOG3293 | Small nuclear ribonucleoprotein (snRNP)                                       |
| P16070 | CD44     | 81.537 | 27.406 | 5.1  | 3  | 3  | 3  | 65026000 | 1.7E+08  | 1.368 | extracellular,plasma r | K06256 |    |         |                                                                               |
| P37837 | TALDO1   | 37.54  | 11.011 | 7.4  | 2  | 2  | 2  | 10443000 | 34823000 | 1.367 | mitochondria           | K00616 | G  | KOG2772 | Transaldolase                                                                 |
| P62308 | SNRPG    | 8.496  | 13.777 | 25   | 2  | 2  | 2  | 27941000 | 78527000 | 1.355 | cytoplasm              | K11099 | A  | KOG1780 | Small Nuclear ribonucleoprotein G                                             |
| O95831 | AIFM1    | 66.9   | 20.785 | 8.8  | 3  | 3  | 3  | 11579000 | 46268000 | 1.338 | mitochondria           | K04727 | T  | KOG1346 | Programmed cell death 8 (apoptosis-inducing factor)                           |
| Q15365 | PCBP1    | 37.497 | 15.178 | 10.7 | 3  | 4  | 2  | 27243000 | 63739000 | 1.337 | cytoskeleton           | K12889 | AR | KOG2190 | PolyC-binding proteins alphaCP-1 and related KH domain proteins               |
| P15144 | ANPEP    | 109.54 | 22.262 | 7.1  | 3  | 3  | 3  | 27947000 | 82277000 | 1.328 | endoplasmic reticulum  | K11140 | EO | KOG1046 | Puromycin-sensitive aminopeptidase and related aminopeptidases                |
| Q9Y3Y2 | CHTOP    | 26.396 | 60.395 | 29.8 | 6  | 7  | 6  | 1.61E+08 | 4.72E+08 | 1.327 | mitochondria           |        |    |         |                                                                               |
| P12236 | SLC25A6  | 32.866 | 41.928 | 43.6 | 12 | 16 | 4  | 1.33E+08 | 4.68E+08 | 1.326 | cytoplasm              | K05863 | C  | KOG0749 | Mitochondrial ADP/ATP carrier proteins                                        |
| Q12965 | MYO1E    | 127.06 | 75.718 | 13.2 | 10 | 10 | 10 | 1.04E+08 | 3.35E+08 | 1.325 | cytoplasm              | K10356 | Z  | KOG0164 | Myosin class I heavy chain                                                    |
| P60953 | CDC42    | 21.258 | 33.308 | 34.6 | 4  | 4  | 4  | 44736000 | 2.53E+08 | 1.319 | cytoplasm              | K04393 | R  | KOG0393 | Ras-related small GTPase, Rho type                                            |
| P23284 | PPIB     | 23.742 | 59.35  | 34.3 | 7  | 10 | 7  | 99955000 | 3.67E+08 | 1.315 | extracellular          | K03768 | O  | KOG0880 | Peptidyl-prolyl cis-trans isomerase                                           |
| P83916 | CBX1     | 21.418 | 24.182 | 24.9 | 4  | 5  | 3  | 21373000 | 46752000 | 1.298 | nucleus                | K11585 |    |         |                                                                               |
| P05556 | ITGB1    | 88.414 | 51.146 | 15.3 | 7  | 8  | 7  | 82078000 | 2.87E+08 | 1.295 | extracellular          | K05719 | TW | KOG1226 | Integrin beta subunit (N-terminal portion of extracellular region)            |
| P00441 | SOD1     | 15.936 | 43.508 | 53.9 | 3  | 4  | 3  | 1.69E+08 | 6.67E+08 | 1.292 | cytoplasm              | K04565 | P  | KOG0441 | Cu2+/Zn2+ superoxide dismutase SOD1                                           |
| P11021 | HSPA5    | 72.332 | 100.64 | 29.8 | 13 | 14 | 13 | 1.41E+08 | 3.36E+08 | 1.291 | endoplasmic reticulum  | K09490 | O  | KOG0101 | Molecular chaperones HSP70/HSC70, HSP70 superfamily                           |

|        |          |        |        |      |    |    |    |          |          |       |                 |        |    |         |                                                                                   |
|--------|----------|--------|--------|------|----|----|----|----------|----------|-------|-----------------|--------|----|---------|-----------------------------------------------------------------------------------|
| P59998 | ARPC4    | 19.667 | 49.465 | 39.9 | 6  | 7  | 6  | 86038000 | 2.39E+08 | 1.286 | mitochondria    | K05755 | Z  | KOG1876 | Actin-related protein Arp2/3 complex, subunit ARPC4                               |
| P62820 | RAB1A    | 22.677 | 21.346 | 22.9 | 3  | 3  | 2  | 49001000 | 1.12E+08 | 1.285 | cytoplasm       | K07874 | TU | KOG0084 | GTPase Rab1/YPT1, small G protein superfamily                                     |
| P30043 | BLVRB    | 22.119 | 22.664 | 25.7 | 3  | 3  | 3  | 19638000 | 72070000 | 1.284 | cytoplasm       | K05901 |    |         |                                                                                   |
| P60174 | TPI1     | 30.791 | 82.503 | 48.3 | 9  | 12 | 9  | 2.63E+08 | 7.77E+08 | 1.284 | cytoplasm       | K01803 | G  | KOG1643 | Triosephosphate isomerase                                                         |
| P49755 | TMED10   | 24.976 | 17.095 | 11.9 | 2  | 3  | 2  | 65658000 | 1.34E+08 | 1.278 | extracellular   | K20352 | U  | KOG1691 | emp24/gp25L/p24 family of membrane trafficking proteins                           |
| Q04837 | SSBP1    | 17.259 | 32.785 | 32.4 | 3  | 4  | 3  | 36110000 | 1.42E+08 | 1.278 | nucleus         | K03111 | L  | KOG1653 | Single-stranded DNA-binding protein                                               |
| P27348 | YWHAQ    | 27.764 | 45.7   | 30.6 | 6  | 7  | 5  | 68082000 | 2.87E+08 | 1.277 | cytoplasm       | K16197 | O  | KOG0841 | Multifunctional chaperone (14-3-3 family)                                         |
| P20674 | COX5A    | 16.762 | 30.699 | 26   | 4  | 9  | 4  | 1.34E+08 | 4.27E+08 | 1.267 | mitochondria    | K02264 | C  | KOG4077 | Cytochrome c oxidase, subunit Va/COX6                                             |
| Q9NZI8 | IGF2BP1  | 63.48  | 34.163 | 10.6 | 4  | 5  | 3  | 46592000 | 1.15E+08 | 1.26  | cytoplasm       | K17391 | AR | KOG2193 | IGF-II mRNA-binding protein IMP, contains RRM and KH domains                      |
| O15145 | ARPC3    | 20.546 | 14.718 | 20.8 | 2  | 2  | 2  | 31039000 | 86242000 | 1.254 | cytoplasm       | K05756 | Z  | KOG3155 | Actin-related protein Arp2/3 complex, subunit ARPC3                               |
| Q99536 | VAT1     | 41.92  | 29.445 | 16   | 4  | 4  | 4  | 12017000 | 73587000 | 1.249 | cytoplasm       |        | CR | KOG1198 | Zinc-binding oxidoreductase                                                       |
| Q9Y3A2 | UTP11    | 30.446 | 15.097 | 13.4 | 2  | 2  | 2  | 19442000 | 60785000 | 1.249 | nucleus         | K14769 | S  | KOG3237 | Uncharacterized conserved protein                                                 |
| P04075 | ALDOA    | 39.42  | 82.281 | 47.8 | 10 | 13 | 8  | 1.99E+08 | 4.83E+08 | 1.239 | cytoplasm       | K01623 | G  | KOG1557 | Fructose-biphosphate aldolase                                                     |
| P04844 | RPN2     | 69.283 | 71.392 | 29   | 8  | 9  | 8  | 58636000 | 5.4E+08  | 1.234 | extracellular   | K12667 | O  | KOG2447 | Oligosaccharyltransferase, delta subunit (ribophorin II)                          |
| P22392 | NME2     | 17.298 | 48.122 | 48   | 5  | 7  | 3  | 74551000 | 1.54E+08 | 1.234 | cytoplasm       | K00940 | F  | KOG0888 | Nucleoside diphosphate kinase                                                     |
| P52907 | CAPZA1   | 32.922 | 50.431 | 28   | 5  | 6  | 4  | 73449000 | 3.38E+08 | 1.234 | cytoplasm       | K10364 | Z  | KOG0836 | F-actin capping protein, alpha subunit                                            |
| P61981 | YWHAG    | 28.302 | 49.691 | 42.9 | 8  | 10 | 6  | 72331000 | 5.13E+08 | 1.225 | cytoplasm       | K16198 | O  | KOG0841 | Multifunctional chaperone (14-3-3 family)                                         |
| Q15084 | PDIA6    | 48.121 | 24.755 | 14.1 | 3  | 3  | 3  | 12260000 | 38116000 | 1.225 | extracellular   | K09584 | O  | KOG0191 | Thioredoxin/protein disulfide isomerase                                           |
| P68363 | TUBA1B   | 50.151 | 175.57 | 62.7 | 19 | 29 | 0  | 8.13E+08 | 2.85E+09 | 1.221 | cytoskeleton    | K07374 | Z  | KOG1376 | Alpha tubulin                                                                     |
| P31943 | HNRNPH1  | 49.229 | 32.803 | 14.9 | 4  | 4  | 4  | 28193000 | 78899000 | 1.209 | nucleus         | K12898 | A  | KOG4211 | Splicing factor hnRNP-F and related RNA-binding proteins                          |
| P68032 | ACTC1    | 42.019 | 43.304 | 44.8 | 19 | 50 | 3  | 99415000 | 4.12E+08 | 1.194 | cytoskeleton    | K12314 | Z  | KOG0676 | Actin and related proteins                                                        |
| P38159 | RBMX     | 42.331 | 37.335 | 15.9 | 5  | 6  | 5  | 65070000 | 2.34E+08 | 1.182 | nucleus         | K12885 |    |         |                                                                                   |
| Q15428 | SF3A2    | 49.255 | 28.014 | 9.5  | 3  | 4  | 3  | 46945000 | 1.42E+08 | 1.175 | cytoplasm       | K12826 | A  | KOG0227 | Splicing factor 3a, subunit 2                                                     |
| Q14978 | NOLC1    | 73.602 | 81.159 | 15.5 | 10 | 18 | 10 | 5.2E+08  | 1.16E+09 | 1.173 | nucleus         |        | Y  | KOG2992 | Nucleolar GTPase/ATPase p130                                                      |
| P62937 | PPIA     | 18.012 | 86.457 | 58.2 | 9  | 14 | 9  | 3.04E+08 | 8.89E+08 | 1.169 | cytoplasm       | K03767 | O  | KOG0865 | Cyclophilin type peptidyl-prolyl cis-trans isomerase                              |
| O00567 | NOP56    | 66.049 | 77.556 | 26.1 | 10 | 12 | 10 | 89590000 | 2.55E+08 | 1.166 | nucleus         | K14564 | AJ | KOG2572 | Ribosome biogenesis protein - Nop58p/Nop5p                                        |
| P61604 | HSPE1    | 10.932 | 37.551 | 52   | 5  | 6  | 5  | 1.35E+08 | 3.03E+08 | 1.164 | mitochondria    | K04078 | O  | KOG1641 | Mitochondrial chaperonin                                                          |
| Q14764 | MVP      | 99.326 | 51.658 | 15.5 | 7  | 7  | 7  | 27365000 | 1.75E+08 | 1.16  | cytoplasm       | K17266 |    |         |                                                                                   |
| P07919 | UQCRH    | 10.739 | 23.867 | 19.8 | 1  | 3  | 1  | 46412000 | 82857000 | 1.159 | extracellular   | K00416 | C  | KOG4763 | Ubiquinol-cytochrome c reductase hinge protein                                    |
| Q9NX24 | NHP2     | 17.201 | 49.201 | 68.6 | 5  | 7  | 5  | 2.37E+08 | 8.13E+08 | 1.155 | cytoplasm       | K11129 | A  | KOG3167 | Box H/ACA snoRNP component, involved in ribosomal RNA pseudouridylation           |
| P62314 | SNRPD1   | 13.281 | 30.049 | 54.6 | 4  | 5  | 4  | 1.11E+08 | 2.86E+08 | 1.149 | nucleus         | K11087 | A  | KOG3428 | Small nuclear ribonucleoprotein SMD1 and related snRNPs                           |
| Q9Y6C9 | MTCH2    | 33.331 | 47.901 | 32   | 6  | 8  | 6  | 1.71E+08 | 6.16E+08 | 1.147 | extracellular   | K17885 | R  | KOG2745 | Mitochondrial carrier protein                                                     |
| P43243 | MATR3    | 94.622 | 55.917 | 12.9 | 6  | 6  | 6  | 1.63E+08 | 4.5E+08  | 1.144 | nucleus         | K13213 |    |         |                                                                                   |
| P38646 | HSPA9    | 73.68  | 131.03 | 29.5 | 15 | 16 | 15 | 2.34E+08 | 5.83E+08 | 1.136 | mitochondria    | K04043 | O  | KOG0102 | Molecular chaperones mortalin/PBP74/GRP75, HSP70 superfamily                      |
| P62316 | SNRPD2   | 13.527 | 51.649 | 67.8 | 8  | 8  | 8  | 1.03E+08 | 2.66E+08 | 1.136 | cytoplasm       | K11096 | A  | KOG3459 | Small nuclear ribonucleoprotein (snRNP) Sm core protein                           |
| P22626 | HNRNPA2B | 37.429 | 143.87 | 55.5 | 17 | 25 | 17 | 4.85E+08 | 1.54E+09 | 1.131 | nucleus         | K13158 | R  | KOG0118 | FOG: RRM domain                                                                   |
| P54289 | CACNA2D1 | 124.57 | 37.792 | 7.9  | 6  | 6  | 6  | 22916000 | 1.12E+08 | 1.121 | plasma membrane | K04859 | PT | KOG2353 | L-type voltage-dependent Ca <sup>2+</sup> channel, alpha2/delta subunit           |
| P62879 | GNB2     | 37.331 | 11.35  | 19.1 | 4  | 6  | 1  | 21775000 | 68770000 | 1.121 | cytoplasm       | K04537 | R  | KOG0286 | G-protein beta subunit                                                            |
| P53999 | SUB1     | 14.395 | 29.265 | 37   | 4  | 4  | 4  | 64254000 | 1.45E+08 | 1.12  | nucleus         |        | K  | KOG2712 | Transcriptional coactivator                                                       |
| P38919 | EIF4A3   | 46.871 | 33.937 | 18.2 | 5  | 5  | 4  | 57083000 | 1.68E+08 | 1.116 | nucleus         | K13025 | J  | KOG0327 | Translation initiation factor 4F, helicase subunit (eIF-4A) and related helicases |
| P31949 | S100A11  | 11.74  | 19.958 | 45.7 | 2  | 3  | 2  | 1.51E+08 | 8.2E+08  | 1.114 | cytoplasm       |        |    |         |                                                                                   |
| P22087 | FBL      | 33.784 | 157.07 | 58.6 | 14 | 28 | 13 | 1.68E+09 | 6.15E+09 | 1.109 | nucleus         | K14563 | A  | KOG1596 | Fibrillarin and related nucleolar RNA-binding proteins                            |
| O75955 | FLOT1    | 47.355 | 100.79 | 33.7 | 10 | 14 | 10 | 2.01E+08 | 4.76E+08 | 1.107 | cytoplasm       | K07192 | UZ | KOG2668 | Flotillins                                                                        |
| P62753 | RPS6     | 28.68  | 40.198 | 22.9 | 5  | 5  | 5  | 61555000 | 1.08E+08 | 1.107 | cytoplasm       | K02991 | J  | KOG1646 | 40S ribosomal protein S6                                                          |
| Q14254 | FLOT2    | 47.064 | 104.2  | 34.8 | 11 | 14 | 11 | 2.27E+08 | 6.18E+08 | 1.105 | cytoplasm       | K07192 | UZ | KOG2668 | Flotillins                                                                        |
| Q9NS69 | TOMM22   | 15.521 | 42.084 | 66.2 | 5  | 6  | 5  | 88148000 | 1.97E+08 | 1.096 | cytoplasm       | K17769 | U  | KOG4111 | Translocase of outer mitochondrial membrane complex, subunit TOM22                |
| Q5SSJ5 | HP1BP3   | 61.206 | 25.639 | 7.6  | 4  | 4  | 4  | 11907000 | 54544000 | 1.095 | nucleus         |        | B  | KOG4012 | Histone H1                                                                        |
| P04083 | ANXA1    | 38.714 | 175.13 | 60.4 | 17 | 24 | 17 | 6.82E+08 | 1.99E+09 | 1.091 | cytoplasm       | K17091 | U  | KOG0819 | Annexin                                                                           |
| P46087 | NOP2     | 89.301 | 23.223 | 4.7  | 3  | 4  | 3  | 26268000 | 59835000 | 1.09  | nucleus         | K14835 | A  | KOG1122 | tRNA and rRNA cytosine-C5-methylase (nucleolar protein NOL1/NOP2)                 |
| Q02543 | RPL18A   | 20.762 | 22.969 | 16.5 | 3  | 3  | 3  | 26262000 | 50653000 | 1.089 | nucleus         | K02882 | J  | KOG0829 | 60S ribosomal protein L18A                                                        |
| Q9H1E3 | NUCKS1   | 27.296 | 21.183 | 17.7 | 3  | 5  | 3  | 16198000 | 37669000 | 1.088 | nucleus         |        |    |         |                                                                                   |



|        |          |        |        |      |    |    |    |          |          |       |                       |        |    |         |                                                                                     |
|--------|----------|--------|--------|------|----|----|----|----------|----------|-------|-----------------------|--------|----|---------|-------------------------------------------------------------------------------------|
| P55769 | SNU13    | 14.173 | 78.825 | 68.8 | 9  | 12 | 9  | 5.35E+08 | 2.3E+09  | 1.084 | cytoplasm             | K12845 | AJ | KOG3387 | 60S ribosomal protein 15.5kD/SNU13, NHP2/L7A family                                 |
| P14406 | COX7A2   | 9.3959 | 16.479 | 27.7 | 2  | 2  | 2  | 67689000 | 2.08E+08 | 1.08  | mitochondria          | K02270 |    |         | (includes ribonuclease P subunit p38), involved in splicing                         |
| P10809 | HSPD1    | 61.054 | 116.04 | 33   | 15 | 18 | 15 | 3.57E+08 | 7.7E+08  | 1.077 | mitochondria          | K04077 | O  | KOG0356 | Mitochondrial chaperonin, Cpn60/Hsp60p                                              |
| P07195 | LDHB     | 36.638 | 75.239 | 38.6 | 10 | 13 | 9  | 2.05E+08 | 5.79E+08 | 1.076 | cytoplasm             | K00016 | C  | KOG1495 | Lactate dehydrogenase                                                               |
| P07437 | TUBB     | 49.67  | 42.713 | 41.2 | 13 | 21 | 3  | 1.08E+08 | 4.59E+08 | 1.072 | cytoplasm,nucleus     | K07375 | Z  | KOG1375 | Beta tubulin                                                                        |
| P14625 | HSP90B1  | 92.468 | 50.801 | 16.4 | 8  | 8  | 7  | 53330000 | 2.29E+08 | 1.07  | endoplasmic reticulum | K09487 | O  | KOG0020 | Endoplasmic reticulum glucose-regulated protein (GRP94/endoplasmic)                 |
| Q96AE4 | FUBP1    | 67.56  | 23.382 | 5.3  | 3  | 4  | 3  | 16929000 | 32690000 | 1.069 | cytoplasm             | K13210 | A  | KOG1676 | K-homology type RNA binding proteins                                                |
| Q12906 | ILF3     | 95.337 | 104.35 | 23.2 | 12 | 15 | 12 | 3.75E+08 | 9.15E+08 | 1.066 | nucleus               | K13090 | R  | KOG3792 | Transcription factor NFAT, subunit NF90                                             |
| P14854 | COX6B1   | 10.192 | 21.178 | 47.7 | 3  | 4  | 3  | 70423000 | 2.04E+08 | 1.058 | extracellular         | K02267 | C  | KOG3057 | Cytochrome c oxidase, subunit VIb/COX12                                             |
| Q05639 | EEF1A2   | 50.47  | 15.094 | 41   | 11 | 16 | 2  | 56349000 | 1.9E+08  | 1.048 | cytoplasm             | K03231 | J  | KOG0052 | Translation elongation factor EF-1 alpha/Tu                                         |
| P24534 | EEF1B2   | 24.763 | 12.633 | 22.2 | 2  | 2  | 2  | 15912000 | 39326000 | 1.046 | nucleus               | K03232 | K  | KOG1668 | Elongation factor 1 beta/delta chain                                                |
| P84090 | ERH      | 12.259 | 32.627 | 64.4 | 4  | 4  | 4  | 1.13E+08 | 3.98E+08 | 1.043 | cytoplasm             |        | R  | KOG1766 | Enhancer of rudimentary                                                             |
| P62826 | RAN      | 24.423 | 79.21  | 43.1 | 9  | 12 | 9  | 2.2E+08  | 6.14E+08 | 1.041 | cytoplasm             | K07936 | U  | KOG0096 | GTPase Ran/TC4/GSP1 (nuclear protein transport pathway), small G protein            |
| Q92522 | H1FX     | 22.487 | 5.5407 | 5.6  | 1  | 2  | 1  | 1.28E+08 | 2.47E+09 | 1.034 | nucleus               | K11275 | B  | KOG4012 | Histone H1                                                                          |
| P62258 | YWHAE    | 29.174 | 56.839 | 35.3 | 8  | 8  | 7  | 1.07E+08 | 3.27E+08 | 1.033 | cytoplasm             | K06630 | O  | KOG0841 | Multifunctional chaperone (14-3-3 family)                                           |
| P11142 | HSPA8    | 70.897 | 177.54 | 42.1 | 19 | 25 | 14 | 9.59E+08 | 1.8E+09  | 1.031 | cytoplasm             | K03283 | O  | KOG0101 | Molecular chaperones HSP70/HSC70, HSP70 superfamily                                 |
| Q9Y2R4 | DDX52    | 67.497 | 12.764 | 4.5  | 2  | 4  | 2  | 18669000 | 30965000 | 1.028 | nucleus               | K14779 | A  | KOG0344 | ATP-dependent RNA helicase                                                          |
| Q8N3V7 | SYNPO    | 99.462 | 22.52  | 5    | 3  | 3  | 3  | 20215000 | 43332000 | 1.024 | nucleus               | K21112 |    |         |                                                                                     |
| Q9BZE4 | GTPBP4   | 73.964 | 11.716 | 5.5  | 2  | 2  | 2  | 20259000 | 43118000 | 1.022 | cytoplasm             | K06943 | R  | KOG1490 | GTP-binding protein CRFG/NOG1 (ODN superfamily)                                     |
| P00338 | LDHA     | 36.688 | 87.39  | 58.7 | 12 | 13 | 11 | 2.07E+08 | 4.46E+08 | 1.014 | cytoplasm             | K00016 | C  | KOG1495 | Lactate dehydrogenase                                                               |
| Q969Q0 | RPL36AL  | 12.469 | 12.836 | 16   | 2  | 2  | 2  | 28577000 | 49748000 | 1.012 | extracellular         | K02929 | J  | KOG3464 | 60S ribosomal protein L44                                                           |
| P54727 | RAD23B   | 43.171 | 11.76  | 5.9  | 2  | 2  | 2  | 14483000 | 21159000 | 1.01  | cytoplasm             | K10839 | L  | KOG0011 | Nucleotide excision repair factor NEF2, RAD23 component                             |
| P67809 | YBX1     | 35.924 | 31.287 | 20.4 | 3  | 3  | 2  | 49915000 | 77928000 | 1.007 | nucleus               | K09276 | J  | KOG3070 | Predicted RNA-binding protein containing PIN domain                                 |
| P13073 | COX4I1   | 19.576 | 32.266 | 26   | 4  | 4  | 4  | 1.28E+08 | 3.7E+08  | 1.003 | mitochondria          | K02263 | C  | KOG4075 | Cytochrome c oxidase, subunit IV/COX5b                                              |
| Q96A72 | MAGOHB   | 17.276 | 23.805 | 29.7 | 3  | 4  | 3  | 94435000 | 87526000 |       | 1 cytoplasm           | K12877 | A  | KOG3392 | Exon-exon junction complex, Magoh component                                         |
| O14950 | MYL12B   | 19.779 | 5.634  | 83.7 | 15 | 51 | 1  | 1.73E+08 | 1.29E+09 | 0.999 | mitochondria          | K12757 | Z  | KOG0031 | Myosin regulatory light chain, EF-Hand protein superfamily                          |
| P46782 | RPS5     | 22.876 | 25.987 | 30.9 | 3  | 6  | 3  | 1.28E+08 | 3.48E+08 | 0.992 | cytoplasm             | K02989 | J  | KOG3291 | Ribosomal protein S7                                                                |
| Q15061 | WDR43    | 74.89  | 11.627 | 5.3  | 2  | 2  | 2  | 18118000 | 51542000 | 0.983 | cytoplasm             | K14546 | R  | KOG4547 | WD40 repeat-containing protein                                                      |
| P62701 | RPS4X    | 29.597 | 72.339 | 37.3 | 9  | 10 | 9  | 2.4E+08  | 4.93E+08 | 0.968 | cytoplasm             | K02987 | J  | KOG0378 | 40S ribosomal protein S4                                                            |
| P51858 | HDGF     | 26.788 | 101.39 | 51.2 | 10 | 14 | 10 | 6.04E+08 | 9.68E+08 | 0.962 | nucleus               | K16641 |    |         |                                                                                     |
| Q1KMD3 | HNRNPUL2 | 85.104 | 45.15  | 15.4 | 6  | 6  | 6  | 2.61E+09 | 1.86E+08 | 0.957 | nucleus               |        |    |         |                                                                                     |
| P36873 | PPP1CC   | 36.983 | 36.626 | 23.2 | 5  | 5  | 5  | 22655000 | 87564000 | 0.954 | cytoplasm             | K06269 |    |         |                                                                                     |
| O75569 | PRKRA    | 34.404 | 31.566 | 18.2 | 4  | 4  | 4  | 56338000 | 1.37E+08 | 0.953 | cytoplasm             |        | UK | KOG3732 | Staufen and related double-stranded-RNA-binding proteins                            |
| P08195 | SLC3A2   | 67.993 | 42.579 | 13.3 | 5  | 5  | 5  | 64992000 | 1.09E+08 | 0.951 | endoplasmic reticulum | K06519 | G  | KOG0471 | Alpha-amylase                                                                       |
| P14678 | SNRPB    | 24.61  | 49.941 | 21.7 | 7  | 9  | 7  | 1.55E+08 | 3.59E+08 | 0.95  | cytoplasm             | K11086 | K  | KOG3168 | U1 snRNP component                                                                  |
| P09382 | LGALS1   | 14.716 | 65.318 | 60.7 | 7  | 9  | 7  | 2.77E+08 | 9.05E+08 | 0.947 | extracellular         | K06830 | W  | KOG3587 | Galectin, galactose-binding lectin                                                  |
| P36578 | RPL4     | 47.697 | 49.215 | 20.6 | 6  | 7  | 6  | 2.33E+08 | 5.65E+08 | 0.944 | cytoplasm             | K02930 | A  | KOG1475 | Ribosomal protein RPL1/RPL2/RL4L4                                                   |
| P18669 | PGAM1    | 28.804 | 29.875 | 32.7 | 4  | 5  | 4  | 1.25E+08 | 2.47E+08 | 0.941 | cytoplasm             | K01834 | G  | KOG0235 | Phosphoglycerate mutase                                                             |
| P23528 | CFL1     | 18.502 | 92.828 | 71.1 | 11 | 16 | 8  | 6.03E+08 | 1.75E+09 | 0.941 | mitochondria          | K05765 | Z  | KOG1735 | Actin depolymerizing factor                                                         |
| P30050 | RPL12    | 17.818 | 56.55  | 49.7 | 6  | 6  | 6  | 1.31E+08 | 3.33E+08 | 0.935 | cytoplasm             | K02870 | J  | KOG0886 | 40S ribosomal protein S2                                                            |
| P62910 | RPL32    | 15.86  | 32.515 | 33.3 | 4  | 6  | 4  | 41599000 | 70131000 | 0.935 | cytoplasm             | K02912 | J  | KOG0878 | 60S ribosomal protein L32                                                           |
| P41208 | CETN2    | 19.738 | 15.793 | 17.4 | 2  | 3  | 2  | 22533000 | 47340000 | 0.933 | nucleus               | K10840 | ZD | KOG0028 | Ca <sup>2+</sup> -binding protein (centrin/caltractin), EF-Hand superfamily protein |
| Q99848 | EBNA1BP2 | 34.852 | 44.547 | 22.2 | 5  | 8  | 5  | 1.56E+08 | 3.33E+08 | 0.933 | nucleus               | K14823 | A  | KOG3080 | Nucleolar protein-like/EBNA1-binding protein                                        |
| Q9Y277 | VDAC3    | 30.658 | 84.84  | 45.2 | 9  | 13 | 9  | 1.88E+08 | 4.46E+08 | 0.933 | cytoplasm             | K15041 | P  | KOG3126 | Porin/voltage-dependent anion-selective channel protein                             |
| Q9NY12 | GAR1     | 22.348 | 39.287 | 27.2 | 6  | 7  | 6  | 2.28E+08 | 6.74E+08 | 0.93  | cytoplasm             | K11128 | J  | KOG3262 | H/ACA small nucleolar RNP component GAR1                                            |
| Q9UJZ1 | STOML2   | 38.534 | 79.115 | 37.1 | 8  | 12 | 8  | 1.66E+08 | 3.87E+08 | 0.93  | mitochondria          |        | C  | KOG2620 | Prohibitins and stomatins of the PID superfamily                                    |
| P62913 | RPL11    | 20.252 | 28.274 | 19.7 | 3  | 3  | 3  | 58378000 | 1.04E+08 | 0.924 | cytoplasm             | K02868 | J  | KOG0397 | 60S ribosomal protein L11                                                           |
| P18077 | RPL35A   | 12.538 | 12.206 | 14.5 | 2  | 2  | 2  | 30936000 | 45372000 | 0.921 | cytoplasm             | K02917 | J  | KOG0887 | 60S ribosomal protein L35A/L37                                                      |
| P27635 | RPL10    | 24.604 | 20.039 | 23.8 | 3  | 4  | 3  | 60694000 | 1.39E+08 | 0.92  | cytoplasm             | K02866 | J  | KOG0857 | 60s ribosomal protein L10                                                           |
| O43169 | CYB5B    | 16.332 | 16.541 | 23.3 | 1  | 2  | 1  | 69509000 | 2.15E+08 | 0.917 | peroxisome            |        | C  | KOG0537 | Cytochrome b5                                                                       |
| P11940 | PABPC1   | 70.67  | 15.494 | 6.3  | 2  | 2  | 2  | 24395000 | 44159000 | 0.917 | nucleus               | K13126 | AJ | KOG0123 | Polyadenylate-binding protein (RRM superfamily)                                     |



|        |          |        |        |      |     |     |     |          |          |       |                       |        |    |         |                                                                                |
|--------|----------|--------|--------|------|-----|-----|-----|----------|----------|-------|-----------------------|--------|----|---------|--------------------------------------------------------------------------------|
| O43707 | ACTN4    | 104.85 | 323.31 | 71.2 | 48  | 80  | 33  | 3.96E+09 | 1.17E+10 | 0.915 | cytoplasm             | K05699 | Z  | KOG0035 | Ca <sup>2+</sup> -binding actin-bundling protein (actinin), alpha chain        |
| P50395 | GDI2     | 50.663 | 15.426 | 4.5  | 2   | 3   | 2   | 53585000 | 88082000 | 0.913 | endoplasmic reticulum | K17255 | O  | KOG1439 | RAB proteins geranylgeranyltransferase component A (RAB escort protein)        |
| P52209 | PGD      | 53.139 | 31.17  | 13.7 | 5   | 6   | 5   | 53902000 | 1.39E+08 | 0.913 | cytoplasm,nucleus     | K00033 | G  | KOG2653 | 6-phosphogluconate dehydrogenase                                               |
| Q16891 | IMMT     | 83.677 | 211.6  | 43.3 | 24  | 32  | 24  | 8.46E+08 | 1.83E+09 | 0.903 | mitochondria          | K17785 | M  | KOG1854 | Mitochondrial inner membrane protein (mitofilin)                               |
| Q9Y512 | SAMM50   | 51.976 | 51.727 | 16.6 | 6   | 6   | 6   | 1.05E+08 | 1.59E+08 | 0.898 | cytoplasm             | K07277 | R  | KOG2602 | Predicted cell surface protein homologous to bacterial outer membrane proteins |
| P17676 | CEBPB    | 36.105 | 38.469 | 19.1 | 4   | 5   | 4   | 35107000 | 74370000 | 0.895 | nucleus               | K10048 |    |         |                                                                                |
| P62318 | SNRPD3   | 13.916 | 51.628 | 53.2 | 5   | 8   | 5   | 2.81E+08 | 6.62E+08 | 0.892 | cytoplasm             | K11088 | A  | KOG3172 | Small nuclear ribonucleoprotein Sm D3                                          |
| Q9NR30 | DDX21    | 87.343 | 11.949 | 4.2  | 2   | 2   | 2   | 17984000 | 41203000 | 0.888 | cytoplasm,nucleus     | K16911 | A  | KOG0331 | ATP-dependent RNA helicase                                                     |
| P13639 | EEF2     | 95.337 | 39.816 | 13.6 | 6   | 7   | 6   | 46310000 | 97633000 | 0.886 | cytoplasm             | K03234 | J  | KOG0469 | Elongation factor 2                                                            |
| P46783 | RPS10    | 18.898 | 48.493 | 38.2 | 5   | 10  | 5   | 2.29E+08 | 2.15E+09 | 0.886 | nucleus               | K02947 | J  | KOG3344 | 40s ribosomal protein s10                                                      |
| P18754 | RCC1     | 44.969 | 115.39 | 50.8 | 11  | 14  | 11  | 3.86E+08 | 8.69E+08 | 0.882 | nucleus               | K11493 |    |         |                                                                                |
| Q9NVP1 | DDX18    | 75.406 | 24.057 | 6.3  | 3   | 3   | 3   | 45458000 | 76925000 | 0.879 | nucleus               | K13179 | A  | KOG0342 | ATP-dependent RNA helicase pitchoune                                           |
| Q15287 | RNPS1    | 34.208 | 48.054 | 23.3 | 5   | 8   | 5   | 1.43E+08 | 3.32E+08 | 0.875 | nucleus               | K14325 | A  | KOG4209 | Splicing factor RNPS1, SR protein superfamily                                  |
| P25398 | RPS12    | 14.515 | 25.109 | 34.1 | 3   | 5   | 3   | 49025000 | 71815000 | 0.874 | cytoplasm             | K02951 | J  | KOG3406 | 40S ribosomal protein S12                                                      |
| P40429 | RPL13A   | 23.577 | 19.102 | 14.8 | 3   | 3   | 3   | 29247000 | 57904000 | 0.869 | cytoplasm             | K02872 | J  | KOG3204 | 60S ribosomal protein L13a                                                     |
| P14618 | PKM      | 57.936 | 294.48 | 72.5 | 27  | 40  | 27  | 1.68E+09 | 4.14E+09 | 0.867 | cytoplasm             | K00873 | G  | KOG2323 | Pyruvate kinase                                                                |
| P55072 | VCP      | 89.321 | 27.984 | 7.4  | 4   | 5   | 4   | 46812000 | 81607000 | 0.847 | cytoplasm,nucleus     | K13525 | O  | KOG0730 | AAA+-type ATPase                                                               |
| P06733 | ENO1     | 47.168 | 186.92 | 53.5 | 15  | 22  | 15  | 5.24E+08 | 1.22E+09 | 0.845 | cytoplasm             | K01689 | G  | KOG2670 | Enolase                                                                        |
| P07237 | P4HB     | 57.116 | 21.837 | 8.5  | 4   | 4   | 4   | 29359000 | 83374000 | 0.838 | extracellular         | K09580 | O  | KOG0190 | Protein disulfide isomerase (prolyl 4-hydroxylase beta subunit)                |
| O75367 | H2AFY    | 39.617 | 183.62 | 68.8 | 17  | 28  | 15  | 9.41E+08 | 2.56E+09 | 0.836 | mitochondria          | K11251 | BK | KOG2633 | Hismacro and SEC14 domain-containing proteins                                  |
| Q00688 | FKBP3    | 25.177 | 23.618 | 16.5 | 3   | 3   | 3   | 14188000 | 25173000 | 0.836 | cytoplasm             | K09570 | O  | KOG0544 | FKBP-type peptidyl-prolyl cis-trans isomerase                                  |
| P63261 | ACTG1    | 41.792 | 323.31 | 95.5 | 38  | 130 | 2   | 1.18E+10 | 6.32E+10 | 0.834 | cytoskeleton          | K05692 | Z  | KOG0676 | Actin and related proteins                                                     |
| P09972 | ALDOC    | 39.455 | 18.737 | 16.8 | 4   | 6   | 2   | 86404000 | 2.53E+08 | 0.832 | cytoplasm             | K01623 | G  | KOG1557 | Fructose-biphosphate aldolase                                                  |
| Q96C19 | EFHD2    | 26.697 | 84.193 | 43.3 | 11  | 12  | 11  | 3.51E+08 | 9.06E+08 | 0.829 | cytoplasm             |        | R  | KOG0041 | Predicted Ca <sup>2+</sup> -binding protein, EF-Hand protein superfamily       |
| P31930 | UQCRC1   | 52.645 | 37.454 | 12.5 | 4   | 5   | 4   | 82151000 | 3.28E+08 | 0.821 | mitochondria          | K00414 | O  | KOG0960 | Mitochondrial processing peptidase, beta subunit, and related enzymes          |
| P07900 | HSP90AA1 | 84.659 | 35.3   | 16   | 10  | 13  | 4   | 41650000 | 78295000 | 0.82  | cytoplasm             | K04079 | O  | KOG0020 | Endoplasmic reticulum glucose-regulated protein (GRP94/endoplasmic)            |
| Q6DKI1 | RPL7L1   | 28.661 | 38.509 | 31.3 | 6   | 6   | 6   | 1.08E+08 | 2.08E+08 | 0.815 | cytoplasm             |        | J  | KOG3184 | 60S ribosomal protein L7                                                       |
| P08238 | HSP90AB1 | 83.263 | 106.07 | 25   | 14  | 16  | 6   | 2.42E+08 | 3.57E+08 | 0.814 | cytoplasm             | K04079 | O  | KOG0020 | Endoplasmic reticulum glucose-regulated protein (GRP94/endoplasmic)            |
| Q99729 | HNRNPAB  | 36.224 | 22.316 | 12.7 | 3   | 4   | 3   | 61885000 | 99963000 | 0.812 | nucleus               | K13044 | R  | KOG0118 | FOG: RRM domain                                                                |
| P28331 | NDUFS1   | 79.467 | 36.535 | 13.6 | 5   | 5   | 5   | 42678000 | 1.37E+08 | 0.81  | mitochondria          | K03934 | C  | KOG2282 | NADH-ubiquinone oxidoreductase, NDUFS1/75 kDa subunit                          |
| Q15149 | PLEC     | 531.78 | 323.31 | 29.7 | 100 | 118 | 100 | 2.25E+09 | 4.12E+09 | 0.807 | cytoplasm,nucleus     | K10388 | J  | KOG3344 | 40s ribosomal protein s10                                                      |
| P56182 | RRP1     | 52.839 | 26.155 | 13.7 | 4   | 4   | 4   | 38706000 | 92684000 | 0.804 | nucleus               | K14849 | A  | KOG3911 | Nucleolar protein NOP52/RRP1                                                   |
| Q00059 | TFAM     | 29.096 | 66.881 | 30.9 | 8   | 13  | 8   | 5.17E+08 | 8.46E+08 | 0.798 | mitochondria          | K11830 | R  | KOG0381 | HMG box-containing protein                                                     |
| Q15427 | SF3B4    | 44.385 | 17.566 | 11.1 | 2   | 3   | 2   | 1.01E+08 | 2.84E+08 | 0.795 | nucleus               | K12831 | A  | KOG0131 | Splicing factor 3b, subunit 4                                                  |
| Q86V81 | ALYREF   | 26.888 | 108.35 | 49.4 | 11  | 15  | 11  | 6.28E+08 | 1.66E+09 | 0.792 | cytoplasm             | K12881 | A  | KOG0533 | RRM motif-containing protein                                                   |
| P45880 | VDAC2    | 31.566 | 142.4  | 60.9 | 14  | 22  | 14  | 5.72E+08 | 1.22E+09 | 0.788 | cytoplasm             | K15040 | P  | KOG3126 | Porin/voltage-dependent anion-selective channel protein                        |
| Q7Z406 | MYH14    | 227.87 | 37.842 | 8.1  | 16  | 26  | 5   | 1.67E+08 | 2E+09    | 0.788 | nucleus               | K10352 | Z  | KOG0161 | Myosin class II heavy chain                                                    |
| P05388 | RPLP0    | 34.273 | 26.453 | 20.8 | 4   | 4   | 4   | 68020000 | 1.36E+08 | 0.78  | cytoplasm,nucleus     | K02941 | J  | KOG0815 | 60S acidic ribosomal protein P0                                                |
| Q07021 | C1QBP    | 31.362 | 23.571 | 21.6 | 3   | 3   | 3   | 32473000 | 1.04E+08 | 0.778 | mitochondria          | K15414 | V  | KOG4024 | Complement component 1, Q subcomponent binding protein                         |
| P21796 | VDAC1    | 30.772 | 176.48 | 79.2 | 16  | 29  | 16  | 1.01E+09 | 2.48E+09 | 0.77  | cytoplasm             | K05862 | P  | KOG3126 | Porin/voltage-dependent anion-selective channel protein                        |
| P39023 | RPL3     | 46.108 | 18.71  | 14.4 | 3   | 3   | 3   | 39271000 | 1.08E+08 | 0.77  | cytoplasm             | K02925 | J  | KOG0746 | 60S ribosomal protein L3 and related proteins                                  |
| P60660 | MYL6     | 16.93  | 135.52 | 81.5 | 12  | 37  | 10  | 2.94E+09 | 1.82E+10 | 0.767 | cytoplasm             | K12751 | Z  | KOG0030 | Myosin essential light chain, EF-Hand protein superfamily                      |
| P15880 | RPS2     | 31.324 | 78.112 | 42.7 | 10  | 11  | 10  | 2.5E+08  | 4.63E+08 | 0.76  | cytoplasm             | K02981 | J  | KOG0877 | 40S ribosomal protein S2/30S ribosomal protein S5                              |
| P15559 | NQO1     | 30.867 | 38.08  | 22.6 | 4   | 6   | 4   | 1.7E+08  | 3.5E+08  | 0.759 | cytoplasm             | K00355 |    |         |                                                                                |
| P36542 | ATP5F1C  | 32.996 | 12.471 | 6    | 2   | 2   | 2   | 20420000 | 31931000 | 0.757 | mitochondria          | K02136 | C  | KOG1531 | F0F1-type ATP synthase, gamma subunit                                          |
| P62424 | RPL7A    | 29.995 | 84.3   | 37.6 | 10  | 11  | 10  | 2.38E+08 | 3.96E+08 | 0.757 | cytoplasm             | K02936 | J  | KOG3166 | 60S ribosomal protein L7A                                                      |
| P05204 | HMG2     | 9.3926 | 27.167 | 16.7 | 4   | 6   | 4   | 56696000 | 69429000 | 0.756 | nucleus               | K11300 |    |         |                                                                                |
| Q8TDN6 | BRX1     | 41.401 | 61.244 | 30.6 | 8   | 11  | 8   | 1.79E+08 | 4.4E+08  | 0.754 | nucleus               | K14820 | J  | KOG2971 | RNA-binding protein required for biogenesis of the ribosomal 60S subunit       |
| Q9Y2X3 | NOP58    | 59.578 | 122.37 | 36.1 | 13  | 18  | 13  | 3.39E+08 | 6.82E+08 | 0.753 | cytoplasm             | K14565 | AJ | KOG2572 | Ribosome biogenesis protein - Nop58p/Nop5p                                     |
| Q9Y221 | NIP7     | 20.462 | 22.283 | 29.4 | 3   | 3   | 3   | 46442000 | 69574000 | 0.752 | cytoplasm             | K07565 | J  | KOG3492 | Ribosome biogenesis protein NIP7                                               |
| P04406 | GAPDH    | 36.053 | 139.2  | 68.7 | 15  | 28  | 15  | 1.03E+09 | 2.3E+09  | 0.74  | cytoplasm             | K00134 | G  | KOG0657 | Glyceraldehyde 3-phosphate dehydrogenase                                       |

|        |         |        |        |      |    |    |    |          |          |       |                   |        |    |         |                                                                          |
|--------|---------|--------|--------|------|----|----|----|----------|----------|-------|-------------------|--------|----|---------|--------------------------------------------------------------------------|
| P61353 | RPL27   | 15.798 | 31.496 | 36   | 4  | 5  | 4  | 1.35E+08 | 2.7E+08  | 0.737 | mitochondria      | K02901 | J  | KOG3418 | 60S ribosomal protein L27                                                |
| O00422 | SAP18   | 17.561 | 71.412 | 62.1 | 9  | 12 | 9  | 3.05E+08 | 5.32E+08 | 0.722 | nucleus           | K14324 | K  | KOG3391 | Transcriptional co-repressor component                                   |
| P56537 | EIF6    | 26.599 | 27.552 | 17.1 | 2  | 3  | 2  | 72516000 | 1.24E+08 | 0.717 | cytoplasm,nucleus | K03264 | J  | KOG3185 | Translation initiation factor 6 (eIF-6)                                  |
| O76021 | RSL1D1  | 54.972 | 134.21 | 30   | 15 | 20 | 15 | 7.98E+08 | 1.65E+09 | 0.714 | nucleus           | K14775 | S  | KOG1685 | Uncharacterized conserved protein                                        |
| P23396 | RPS3    | 26.688 | 125.98 | 67.5 | 16 | 18 | 16 | 5.34E+08 | 9.96E+08 | 0.711 | cytoplasm         | K02985 | J  | KOG3181 | 40S ribosomal protein S3                                                 |
| Q5JTH9 | RRP12   | 143.7  | 23.91  | 3.9  | 4  | 4  | 4  | 34147000 | 37577000 | 0.71  | nucleus           | K14794 | S  | KOG1248 | Uncharacterized conserved protein                                        |
| Q15397 | PUM3    | 73.584 | 40.877 | 13.1 | 5  | 5  | 5  | 1.07E+08 | 2.28E+08 | 0.709 | nucleus           | K14844 | J  | KOG2050 | Puf family RNA-binding protein                                           |
| Q9BYG3 | NIFK    | 34.222 | 48.093 | 27.3 | 5  | 5  | 5  | 88678000 | 1.41E+08 | 0.708 | nucleus           | K14838 | R  | KOG4208 | Nucleolar RNA-binding protein NIFK                                       |
| P46779 | RPL28   | 15.747 | 17.872 | 18.2 | 3  | 3  | 3  | 22805000 | 45762000 | 0.701 | mitochondria      | K02903 | J  | KOG3412 | 60S ribosomal protein L28                                                |
| P06703 | S100A6  | 10.18  | 35.47  | 74.4 | 5  | 7  | 5  | 5.37E+08 | 1.11E+09 | 0.697 | cytoplasm         |        |    |         |                                                                          |
| P18621 | RPL17   | 21.397 | 25.202 | 23.9 | 3  | 5  | 3  | 95331000 | 1.43E+08 | 0.693 | cytoplasm         | K02880 | J  | KOG3353 | 60S ribosomal protein L22                                                |
| Q02878 | RPL6    | 32.728 | 81.771 | 37.2 | 11 | 16 | 11 | 2.96E+08 | 4.13E+08 | 0.693 | cytoplasm         | K02934 | J  | KOG1694 | 60s ribosomal protein L6                                                 |
| Q12905 | ILF2    | 43.062 | 174.06 | 65.6 | 17 | 25 | 17 | 1.44E+09 | 3.32E+09 | 0.689 | cytoplasm         | K13089 | K  | KOG3793 | Transcription factor NFAT, subunit NF45                                  |
| P62280 | RPS11   | 18.431 | 49.374 | 39.2 | 6  | 8  | 6  | 1.97E+08 | 3.53E+08 | 0.684 | cytoplasm         | K02949 | J  | KOG1728 | 40S ribosomal protein S11                                                |
| P62888 | RPL30   | 12.784 | 42.476 | 59.1 | 5  | 6  | 5  | 1.13E+08 | 1.62E+08 | 0.678 | cytoplasm         | K02908 | J  | KOG2988 | 60S ribosomal protein L30                                                |
| Q9UNX3 | RPL26L1 | 17.256 | 25.098 | 22.8 | 4  | 4  | 4  | 90882000 | 1.21E+08 | 0.674 | nucleus           | K02898 | J  | KOG3401 | 60S ribosomal protein L26                                                |
| P55209 | NAPIL1  | 45.374 | 21.934 | 11.8 | 3  | 3  | 3  | 61753000 | 64006000 | 0.67  | cytoplasm,nucleus | K11279 | BD | KOG1507 | Nucleosome assembly protein NAP-1                                        |
| P62906 | RPL10A  | 24.831 | 53.658 | 31.3 | 6  | 10 | 6  | 2.77E+08 | 4.28E+08 | 0.665 | cytoplasm,nucleus | K02865 | J  | KOG1570 | 60S ribosomal protein L10A                                               |
| Q9UKM9 | RALY    | 32.463 | 93.93  | 35.9 | 10 | 13 | 10 | 8.7E+08  | 1.77E+09 | 0.663 | nucleus           | K12895 | R  | KOG0118 | FOG: RRM domain                                                          |
| P12956 | XRCC6   | 69.842 | 12.043 | 3.3  | 2  | 2  | 2  | 17643000 | 19575000 | 0.661 | cytoplasm         | K10884 | L  | KOG2327 | DNA-binding subunit of a DNA-dependent protein kinase (Ku70 autoantigen) |
| P00403 | MT-CO2  | 25.565 | 38.93  | 36.1 | 6  | 6  | 6  | 1.62E+08 | 4.85E+08 | 0.657 | plasma membrane   | K02261 | C  | KOG4767 | Cytochrome c oxidase, subunit II, and related proteins                   |
| P62269 | RPS18   | 17.718 | 60.012 | 39.5 | 8  | 9  | 8  | 3.41E+08 | 6.87E+08 | 0.655 | cytoplasm         | K02964 | J  | KOG3311 | Ribosomal protein S18                                                    |
| P09661 | SNRPA1  | 28.415 | 59.861 | 25.5 | 5  | 9  | 5  | 91111000 | 2.69E+08 | 0.651 | cytoplasm,nucleus | K11092 | A  | KOG1644 | U2-associated snRNP A' protein                                           |
| P63167 | DYNLL1  | 10.366 | 21.284 | 37.1 | 2  | 4  | 1  | 61457000 | 1.12E+08 | 0.651 | cytoplasm         | K10418 | Z  | KOG3430 | Dynein light chain type 1                                                |
| Q9NR12 | PDLIM7  | 49.844 | 27.028 | 17.9 | 4  | 4  | 4  | 86490000 | 1.08E+08 | 0.649 | nucleus           |        | TZ | KOG1703 | Adaptor protein Enigma and related PDZ-LIM proteins                      |
| Q07020 | RPL18   | 21.634 | 36.453 | 25   | 4  | 4  | 4  | 1.55E+08 | 3.12E+08 | 0.646 | cytoplasm         | K02883 | J  | KOG1714 | 60s ribosomal protein L18                                                |
| Q9Y265 | RUVBL1  | 50.227 | 20.391 | 11.6 | 3  | 4  | 3  | 44830000 | 55353000 | 0.628 | cytoplasm         | K04499 | L  | KOG1942 | DNA helicase, TBP-interacting protein                                    |
| P18124 | RPL7    | 29.225 | 42.776 | 28.6 | 6  | 7  | 6  | 2.75E+08 | 3.73E+08 | 0.625 | cytoplasm         | K02937 | J  | KOG3184 | 60S ribosomal protein L7                                                 |
| P19105 | MYL12A  | 19.794 | 179.35 | 84.2 | 15 | 50 | 1  | 3.05E+09 | 2.09E+10 | 0.625 | mitochondria      | K12757 | Z  | KOG0031 | Myosin regulatory light chain, EF-Hand protein superfamily               |
| Q9UKD2 | MRTO4   | 27.56  | 12.488 | 9.6  | 2  | 3  | 2  | 57565000 | 74974000 | 0.623 | nucleus           | K14815 | A  | KOG0816 | Protein involved in mRNA turnover                                        |
| Q71UM5 | RPS27L  | 9.4771 | 6.5039 | 15.5 | 1  | 2  | 1  | 60770000 | 88218000 | 0.622 | extracellular     | K02978 | J  | KOG1779 | 40s ribosomal protein S27                                                |
| P63241 | EIF5A   | 16.832 | 57.264 | 51.3 | 6  | 8  | 6  | 1.28E+08 | 1.85E+08 | 0.621 | cytoplasm         | K03263 | J  | KOG3271 | Translation initiation factor 5A (eIF-5A)                                |
| O96008 | TOMM40  | 37.893 | 85.027 | 53.7 | 9  | 13 | 9  | 4.5E+08  | 7.87E+08 | 0.62  | nucleus           | K11518 | U  | KOG3296 | Translocase of outer mitochondrial membrane complex, subunit TOM40       |
| P06748 | NPM1    | 32.575 | 144.37 | 46.9 | 12 | 29 | 12 | 3.07E+09 | 5.91E+09 | 0.618 | nucleus           | K11276 |    |         |                                                                          |
| P31946 | YWHAB   | 28.082 | 22.27  | 22.8 | 4  | 4  | 2  | 57969000 | 57058000 | 0.618 | cytoplasm         | K16197 | O  | KOG0841 | Multifunctional chaperone (14-3-3 family)                                |
| P08708 | RPS17   | 15.55  | 24.623 | 40   | 3  | 6  | 3  | 2.92E+08 | 4.32E+08 | 0.615 | cytoplasm         | K02962 | J  | KOG0187 | 40S ribosomal protein S17                                                |
| P49207 | RPL34   | 13.293 | 12.89  | 12.8 | 2  | 2  | 2  | 44205000 | 58632000 | 0.614 | nucleus           | K02915 | J  | KOG1790 | 60s ribosomal protein L34                                                |
| P62841 | RPS15   | 17.04  | 38.447 | 55.2 | 4  | 8  | 4  | 3.17E+08 | 6.08E+08 | 0.612 | cytoplasm         | K02958 | J  | KOG0898 | 40S ribosomal protein S15                                                |
| P26447 | S100A4  | 11.728 | 12.93  | 18.8 | 2  | 2  | 2  | 93639000 | 1.8E+08  | 0.61  | extracellular     |        |    |         |                                                                          |
| P62277 | RPS13   | 17.222 | 51.239 | 39.1 | 7  | 9  | 7  | 5.5E+08  | 1.2E+09  | 0.604 | cytoplasm         | K02953 | J  | KOG0400 | 40S ribosomal protein S13                                                |
| Q9H7B2 | RPF2    | 35.582 | 42.586 | 21.9 | 6  | 8  | 6  | 1.4E+08  | 2.08E+08 | 0.603 | nucleus           | K14847 | J  | KOG3031 | Protein required for biogenesis of the ribosomal 60S subunit             |
| P62854 | RPS26   | 13.015 | 15.56  | 23.5 | 2  | 3  | 2  | 48127000 | 1E+08    | 0.602 | cytoplasm         |        | J  | KOG1768 | 40s ribosomal protein S26                                                |
| Q13765 | NACA    | 23.384 | 20.383 | 13   | 2  | 2  | 2  | 24197000 | 28341000 | 0.602 | cytoplasm         | K03626 | K  | KOG2239 | Transcription factor containing NAC and TS-N domains                     |
| P62829 | RPL23   | 14.865 | 44.385 | 40   | 5  | 6  | 5  | 2.54E+08 | 3.93E+08 | 0.599 | cytoplasm         | K02894 | J  | KOG0901 | 60S ribosomal protein L14/L17/L23                                        |
| P42766 | RPL35   | 14.551 | 25.603 | 26   | 3  | 4  | 3  | 1.54E+08 | 1.98E+08 | 0.598 | cytoplasm         | K02918 | J  | KOG3436 | 60S ribosomal protein L35                                                |
| P46781 | RPS9    | 22.591 | 44.901 | 26.8 | 7  | 8  | 7  | 1.33E+08 | 2.24E+08 | 0.593 | cytoplasm         | K02997 | J  | KOG3301 | Ribosomal protein S4                                                     |
| P39019 | RPS19   | 16.06  | 55.907 | 38.6 | 8  | 9  | 8  | 2.98E+08 | 5.26E+08 | 0.588 | cytoplasm         | K02966 | J  | KOG3411 | 40S ribosomal protein S19                                                |
| P83731 | RPL24   | 17.779 | 13.67  | 13.4 | 2  | 2  | 2  | 61961000 | 82579000 | 0.587 | cytoplasm         | K02896 | J  | KOG1722 | 60s ribosomal protein L24                                                |
| Q15366 | PCBP2   | 38.58  | 73.114 | 40.5 | 8  | 12 | 7  | 4.08E+08 | 6.04E+08 | 0.577 | cytoskeleton      | K13162 | AR | KOG2190 | PolyC-binding proteins alphaCP-1 and related KH domain proteins          |
| P19338 | NCL     | 76.613 | 125.15 | 22.4 | 12 | 18 | 12 | 7.46E+08 | 1.24E+09 | 0.574 | nucleus           | K11294 |    |         |                                                                          |
| Q14974 | KPNB1   | 97.169 | 12.635 | 2.7  | 2  | 2  | 2  | 24081000 | 32380000 | 0.574 | cytoplasm         | K14293 | YU | KOG1241 | Karyopherin (importin) beta 1                                            |

|        |           |        |        |      |    |    |    |          |          |       |                       |        |    |         |                                                                           |
|--------|-----------|--------|--------|------|----|----|----|----------|----------|-------|-----------------------|--------|----|---------|---------------------------------------------------------------------------|
| Q9H6F5 | CCDC86    | 40.235 | 22.937 | 14.7 | 4  | 4  | 4  | 42139000 | 52210000 | 0.574 | nucleus               | K14822 | R  | KOG4538 | Predicted coiled-coil protein                                             |
| P05387 | RPLP2     | 11.665 | 34.534 | 55.7 | 3  | 5  | 3  | 2.14E+08 | 3.2E+08  | 0.571 | mitochondria          | K02943 | J  | KOG3449 | 60S acidic ribosomal protein P2                                           |
| P84243 | H3F3A     | 15.328 | 26.518 | 61.8 | 12 | 32 | 2  | 2.33E+09 | 5.39E+09 | 0.567 | nucleus               | K11253 | B  | KOG1745 | Histones H3 and H4                                                        |
| O75475 | PSIP1     | 60.103 | 84.796 | 19.8 | 8  | 14 | 8  | 5.52E+08 | 7.73E+08 | 0.562 | nucleus               |        | K  | KOG1904 | Transcription coactivator                                                 |
| P62750 | RPL23A    | 17.695 | 52.689 | 43.6 | 7  | 8  | 7  | 5.71E+08 | 8.69E+08 | 0.56  | cytoplasm             | K02893 | J  | KOG1751 | 60s ribosomal protein L23                                                 |
| O75531 | BANF1     | 10.058 | 59.517 | 70.8 | 7  | 14 | 7  | 2.79E+09 | 5.27E+09 | 0.556 | extracellular         | K21870 | BL | KOG4233 | DNA-bridging protein BAF                                                  |
| P62861 | FAU       | 6.6478 | 13.507 | 18.6 | 2  | 2  | 2  | 83690000 | 1.29E+08 | 0.556 | nucleus               | K02983 | JO | KOG0009 | Ubiquitin-like/40S ribosomal S30 protein fusion                           |
| Q9Y3U8 | RPL36     | 12.254 | 21.984 | 21   | 3  | 3  | 3  | 1.07E+08 | 1.59E+08 | 0.556 | nucleus               | K02920 | J  | KOG3452 | 60S ribosomal protein L36                                                 |
| P05386 | RPLP1     | 11.514 | 13.495 | 51.8 | 2  | 2  | 2  | 1.49E+08 | 2.32E+08 | 0.549 | mitochondria          | K02942 | J  | KOG1762 | 60s acidic ribosomal protein P1                                           |
| O14880 | MGST3     | 16.516 | 60.521 | 53.3 | 6  | 8  | 6  | 2.27E+08 | 1.09E+09 | 0.533 | extracellular         | K00799 |    |         |                                                                           |
| P17096 | HMGA1     | 11.676 | 45.363 | 23.4 | 4  | 7  | 4  | 3.18E+08 | 6.19E+08 | 0.533 | nucleus               | K09282 |    |         |                                                                           |
| P46776 | RPL27A    | 16.561 | 26.317 | 22.3 | 4  | 4  | 4  | 1.45E+08 | 1.4E+08  | 0.528 | cytoplasm             | K02900 | J  | KOG1742 | 60s ribosomal protein L15/L27                                             |
| P68104 | EEF1A1    | 50.14  | 166.43 | 52.2 | 17 | 29 | 8  | 1.61E+09 | 2.65E+09 | 0.526 | cytoplasm             | K03231 | J  | KOG0052 | Translation elongation factor EF-1 alpha/Tu                               |
| P62899 | RPL31     | 14.463 | 21.781 | 24.8 | 3  | 4  | 3  | 3.06E+08 | 4.24E+08 | 0.518 | cytoplasm             | K02910 | J  | KOG0893 | 60S ribosomal protein L31                                                 |
| P61247 | RPS3A     | 29.945 | 61.179 | 34.5 | 8  | 10 | 8  | 2.94E+08 | 3.69E+08 | 0.511 | nucleus               | K02984 | J  | KOG1628 | 40S ribosomal protein S3A                                                 |
| P46778 | RPL21     | 18.565 | 15.276 | 16.2 | 2  | 2  | 2  | 66782000 | 69890000 | 0.504 | nucleus               | K02889 | J  | KOG1732 | 60S ribosomal protein L21                                                 |
| P62081 | RPS7      | 22.127 | 60.573 | 52.1 | 8  | 11 | 8  | 6.25E+08 | 9.42E+08 | 0.499 | cytoplasm             | K02993 | J  | KOG3320 | 40S ribosomal protein S7                                                  |
| Q92979 | EMG1      | 26.72  | 18.191 | 18   | 3  | 3  | 3  | 62994000 | 62197000 | 0.496 | nucleus               | K14568 |    |         |                                                                           |
| P45973 | CBX5      | 22.225 | 21.197 | 30.9 | 4  | 6  | 3  | 1.21E+08 | 99991000 | 0.48  | nucleus               | K11587 |    |         |                                                                           |
| P62266 | RPS23     | 15.807 | 21.79  | 27.3 | 3  | 3  | 3  | 1.02E+08 | 1.63E+08 | 0.478 | cytoplasm             | K02973 | J  | KOG1749 | 40S ribosomal protein S23                                                 |
| P62249 | RPS16     | 16.445 | 31.819 | 26.7 | 4  | 5  | 4  | 2.13E+08 | 3.16E+08 | 0.477 | cytoplasm             | K02960 | J  | KOG1753 | 40S ribosomal protein S16                                                 |
| P60866 | RPS20     | 13.373 | 24.91  | 22.7 | 3  | 6  | 3  | 4.49E+08 | 6.5E+08  | 0.471 | cytoplasm             | K02969 | J  | KOG0900 | 40S ribosomal protein S20                                                 |
| P62917 | RPL8      | 28.024 | 12.285 | 10.5 | 2  | 2  | 2  | 17638000 | 20150000 | 0.464 | cytoplasm             | K02938 | J  | KOG2309 | 60s ribosomal protein L2/L8                                               |
| P35268 | RPL22     | 14.787 | 23.328 | 30.5 | 2  | 2  | 2  | 2.33E+08 | 4.18E+08 | 0.459 | nucleus               | K02891 | J  | KOG3434 | 60S ribosomal protein L22                                                 |
| P62847 | RPS24     | 15.423 | 18.4   | 20.3 | 2  | 2  | 2  | 1.89E+08 | 3.15E+08 | 0.456 | cytoplasm             | K02974 | J  | KOG3424 | 40S ribosomal protein S24                                                 |
| P26373 | RPL13     | 24.261 | 22.164 | 11.4 | 2  | 3  | 2  | 1.42E+08 | 4.25E+08 | 0.446 | cytoplasm             | K02873 | J  | KOG3295 | 60S Ribosomal protein L13                                                 |
| P07910 | HNRNPC    | 33.67  | 153.89 | 50.7 | 17 | 34 | 17 | 3.5E+09  | 7.76E+09 | 0.441 | nucleus               | K12884 | R  | KOG0118 | FOG: RRM domain                                                           |
| P62979 | RPS27A    | 17.965 | 55.233 | 42.3 | 6  | 14 | 6  | 7.7E+08  | 1.55E+09 | 0.44  | extracellular         | K02977 | J  | KOG0004 | Ubiquitin/40S ribosomal protein S27a fusion                               |
| P62851 | RPS25     | 13.742 | 21.177 | 22.4 | 3  | 3  | 3  | 90047000 | 90490000 | 0.434 | nucleus               | K02975 | J  | KOG1767 | 40S ribosomal protein S25                                                 |
| P57053 | H2BFS     | 13.944 | 110.97 | 60.3 | 12 | 62 | 6  | 1.35E+10 | 1.44E+10 | 0.421 | nucleus               |        | B  | KOG1744 | Histone H2B                                                               |
| P26599 | PTBP1     | 57.221 | 220.5  | 64.2 | 21 | 33 | 18 | 2.72E+09 | 4.72E+09 | 0.411 | cytoplasm,nucleus     | K13218 | A  | KOG1190 | Polypyrimidine tract-binding protein                                      |
| P62805 | HIST1H4A  | 11.367 | 271.06 | 86.4 | 27 | 70 | 27 | 2.16E+10 | 2.32E+10 | 0.344 | nucleus               | K11254 | B  | KOG3467 | Histone H4                                                                |
| P35659 | DEK       | 42.674 | 16.472 | 6.7  | 2  | 2  | 2  | 70443000 | 47831000 | 0.331 | nucleus               | K17046 | B  | KOG2266 | Chromatin-associated protein Dek and related proteins                     |
| Q13185 | CBX3      | 20.811 | 43.747 | 45.9 | 5  | 6  | 3  | 4.77E+08 | 6.11E+08 | 0.331 | nucleus               | K11586 | B  | KOG1911 | Heterochromatin-associated protein HP1 and related CHROMO domain proteins |
| P09429 | HMGB1     | 24.893 | 53.2   | 39.1 | 7  | 8  | 5  | 3.32E+08 | 1.89E+08 | 0.297 | nucleus               | K10802 | R  | KOG0381 | HMG box-containing protein                                                |
| Q71DI3 | HIST2H3A  | 15.388 | 114.43 | 72.1 | 14 | 39 | 3  | 2.17E+10 | 2.3E+10  | 0.276 | nucleus               | K11253 | B  | KOG1745 | Histones H3 and H4                                                        |
| P62244 | RPS15A    | 14.839 | 23.841 | 29.2 | 4  | 4  | 4  | 1.77E+08 | 2.36E+08 | 0.264 | cytoplasm             | K02957 | J  | KOG1754 | 40S ribosomal protein S15/S22                                             |
| O15347 | HMGB3     | 22.98  | 14.08  | 14.5 | 2  | 3  | 2  | 1.31E+08 | 56663000 | 0.242 | nucleus               | K11296 | R  | KOG0381 | HMG box-containing protein                                                |
| P68431 | HIST1H3A  | 15.404 | 34.78  | 72.1 | 14 | 36 | 3  | 6.68E+09 | 6.98E+09 | 0.225 | nucleus               | K11253 | B  | KOG1745 | Histones H3 and H4                                                        |
| Q71UI9 | H2AFV     | 13.509 | 50.682 | 53.9 | 6  | 16 | 4  | 2.26E+09 | 6.77E+09 | 0.201 | nucleus               | K11251 | B  | KOG1757 | Histone 2A                                                                |
| Q16777 | HIST2H2AC | 13.988 | 87.492 | 58.1 | 8  | 37 | 1  | 5.48E+09 | 6.18E+09 | 0.17  | nucleus               | K11251 | B  | KOG1756 | Histone 2A                                                                |
| P16401 | HIST1H1B  | 22.58  | 45.529 | 25.2 | 7  | 19 | 6  | 4.31E+08 | 2.27E+08 | 0.168 | nucleus               | K11275 | B  | KOG4012 | Histone H1                                                                |
| P68366 | TUBA4A    | 49.924 | 20.498 | 54   | 17 | 28 | 3  | 3.6E+08  | 1.84E+08 | 0.165 | cytoskeleton          | K07374 | Z  | KOG1376 | Alpha tubulin                                                             |
| Q16778 | HIST2H2BE | 13.92  | 25.117 | 54.8 | 9  | 55 | 1  | 2.35E+09 | 2.8E+09  | 0.15  | nucleus               | K11252 | B  | KOG1744 | Histone H2B                                                               |
| P16403 | HIST1H1C  | 21.364 | 70.975 | 28.6 | 9  | 22 | 8  | 2.44E+09 | 1.11E+09 | 0.107 | nucleus               | K11275 | B  | KOG4012 | Histone H1                                                                |
| A6NHQ2 | FBLL1     | 34.803 | 13.4   | 6.9  | 3  | 5  | 2  | 1.28E+08 | 4.59E+08 |       | nucleus               | K14563 |    |         |                                                                           |
| A6NMZ7 | COL6A6    | 247.17 | 5.6244 | 0.3  | 1  | 2  | 1  | 8863100  | 32431000 |       | endoplasmic reticulum | K06238 | W  | KOG3544 | Collagens (type IV and type XIII), and related proteins                   |
| O00299 | CLIC1     | 26.922 | 6.2216 | 9.1  | 1  | 1  | 1  | 0        | 14455000 |       | cytoplasm             | K05021 |    |         |                                                                           |
| O00425 | IGF2BP3   | 63.704 | 5.7634 | 4.7  | 2  | 2  | 1  | 7740500  | 25114000 |       | cytoplasm             | K13197 | AR | KOG2193 | IGF-II mRNA-binding protein IMP, contains RRM and KH domains              |
| O00764 | PDXK      | 35.102 | 7.3517 | 6.7  | 1  | 1  | 1  | 0        | 15943000 |       | cytoplasm             | K00868 | H  | KOG2599 | Pyridoxal/pyridoxine/pyridoxamine kinase                                  |
| O14548 | COX7A2L   | 12.615 | 7.4336 | 11.4 | 1  | 1  | 1  | 26040000 | 8935100  |       | cytoplasm             | K02270 |    |         |                                                                           |

|        |          |        |        |      |    |   |   |          |          |                       |        |     |                                                                                   |
|--------|----------|--------|--------|------|----|---|---|----------|----------|-----------------------|--------|-----|-----------------------------------------------------------------------------------|
| O14561 | NDUFAB1  | 17.417 | 6.665  | 9.6  | 1  | 1 | 1 | 19076000 | 42846000 | mitochondria          | K03955 | CIQ | KOG1748 Acyl carrier protein/NADH-ubiquinone oxidoreductase                       |
| O14949 | UQCRQ    | 9.9062 | 19.184 | 24.4 | 2  | 2 | 2 | 16497000 | 33371000 | mitochondria          | K00418 | C   | KOG4116 Ubiquinol cytochrome c reductase, subunit QCR8                            |
| O14974 | PPP1R12A | 115.28 | 18.455 | 3.5  | 2  | 3 | 2 | 1496200  | 40535000 | nucleus               | K06270 | OT  | KOG0505 Myosin phosphatase, regulatory subunit                                    |
| O14979 | HNRNPDL  | 46.437 | 9.3153 | 5.7  | 2  | 2 | 1 | 7332800  | 26663000 | nucleus               | K13044 |     |                                                                                   |
| O15143 | ARPC1B   | 40.949 | 6.4187 | 2.7  | 1  | 1 | 1 | 0        | 6607200  | cytoplasm             | K05757 | Z   | KOG1523 Actin-related protein Arp2/3 complex, subunit ARPC1/p41-ARC               |
| O15144 | ARPC2    | 34.333 | 5.7582 | 3.7  | 1  | 1 | 1 | 0        | 8704700  | cytoplasm             | K05758 | Z   | KOG2826 Actin-related protein Arp2/3 complex, subunit ARPC2                       |
| O15514 | POLR2D   | 16.311 | 8.7078 | 14.1 | 1  | 1 | 1 | 8240600  | 41519000 | cytoplasm             | K03012 | K   | KOG2351 RNA polymerase II, fourth largest subunit                                 |
| O15523 | DDX3Y    | 73.153 | 8.749  | 2.6  | 1  | 1 | 1 | 0        | 8379300  | nucleus               | K17642 | A   | KOG0335 ATP-dependent RNA helicase                                                |
| O43143 | DHX15    | 90.932 | 5.6074 | 1.5  | 1  | 1 | 1 | 0        | 15867000 | nucleus               | K12820 | A   | KOG0925 mRNA splicing factor ATP-dependent RNA helicase                           |
| O43159 | RRP8     | 50.714 | 9.3315 | 3.5  | 1  | 1 | 1 | 0        | 0        | nucleus               | K14850 | A   | KOG3045 Predicted RNA methylase involved in rRNA processing                       |
| O43504 | LAMTOR5  | 9.6138 | 14.13  | 15.4 | 1  | 1 | 1 | 0        | 15379000 | cytoskeleton          | K16344 |     |                                                                                   |
| O43570 | CA12     | 39.45  | 15.077 | 9.9  | 2  | 2 | 2 | 5477700  | 56606000 | extracellular         | K01672 | R   | KOG0382 Carbonic anhydrase                                                        |
| O43678 | NDUFA2   | 10.921 | 5.7938 | 21.2 | 1  | 1 | 1 | 5403700  | 13281000 | mitochondria          | K03946 | C   | KOG3446 NADH:ubiquinone oxidoreductase NDUFA2/B8 subunit                          |
| O43852 | CALU     | 37.106 | 6.8954 | 6    | 1  | 1 | 1 | 3746800  | 14911000 | extracellular         |        | TU  | KOG4223 Reticulocalbin, calumenin, DNA supercoiling factor                        |
| O60664 | PLIN3    | 47.074 | 10.538 | 3.7  | 1  | 1 | 1 | 17069000 | 26341000 | cytoplasm             | K20287 |     | of the CREC family (EF-Hand protein superfamily)                                  |
| O60784 | TOM1     | 53.818 | 6.8881 | 3.5  | 1  | 1 | 1 | 0        | 24041000 | cytoplasm             |        | U   | KOG1087 Cytosolic sorting protein GGA2/TOM1                                       |
| O60828 | PQBP1    | 30.472 | 12.519 | 13.2 | 2  | 2 | 2 | 0        | 28920000 | nucleus               | K12865 | K   | KOG3427 Polyglutamine tract-binding protein PQBP-1                                |
| O75251 | NDUFS7   | 23.563 | 11.116 | 6.6  | 1  | 1 | 1 | 6197300  | 23206000 | mitochondria          | K03940 | C   | KOG1687 NADH-ubiquinone oxidoreductase, NUFS7/PSST/20 kDa subunit                 |
| O75306 | NDUFS2   | 52.545 | 5.6926 | 1.5  | 1  | 1 | 1 | 0        | 4280500  | mitochondria          | K03935 | C   | KOG2870 NADH:ubiquinone oxidoreductase, NDUFS2/49 kDa subunit                     |
| O75396 | SEC22B   | 24.593 | 7.6914 | 6.5  | 1  | 1 | 1 | 3243400  | 24880000 | endoplasmic reticulum | K08517 |     |                                                                                   |
| O75431 | MTX2     | 29.763 | 11.571 | 8.4  | 1  | 2 | 1 | 52956000 | 1.37E+08 | cytoplasm             | K17776 | MU  | KOG3027 Mitochondrial outer membrane protein Metaxin 2, Metaxin 1-binding protein |
| O75533 | SF3B1    | 145.83 | 17.897 | 2.4  | 2  | 2 | 2 | 7789400  | 37550000 | plasma membrane       | K12828 | A   | KOG0213 Splicing factor 3b, subunit 1                                             |
| O75683 | SURF6    | 41.45  | 5.4869 | 1.9  | 1  | 1 | 1 | 0        | 0        | nucleus               |        | S   | KOG2885 Uncharacterized conserved protein                                         |
| O75874 | IDH1     | 46.659 | 12.158 | 4.8  | 2  | 2 | 2 | 4102100  | 36785000 | cytoplasm             | K00031 | C   | KOG1526 NADP-dependent isocitrate dehydrogenase                                   |
| O75880 | SCO1     | 33.814 | 6.1446 | 5.3  | 1  | 1 | 1 | 9553500  | 40285000 | mitochondria          | K07152 | C   | KOG2792 Putative cytochrome C oxidase assembly protein                            |
| O75940 | SMNDC1   | 26.711 | 15.222 | 13   | 2  | 3 | 2 | 6937200  | 22542000 | nucleus               | K12839 | A   | KOG3026 Splicing factor SPF30                                                     |
| O94826 | TOMM70   | 67.454 | 12.805 | 5.8  | 2  | 2 | 2 | 10158000 | 64091000 | endoplasmic reticulum | K17768 | U   | KOG0547 Translocase of outer mitochondrial membrane complex, subunit TOM70/TOM72  |
| O94889 | KLHL18   | 63.638 | 5.5906 | 1.2  | 1  | 1 | 1 | 20703000 | 2E+08    | nucleus               | K10455 | TR  | KOG4441 Proteins containing BTB/POZ and Kelch domains                             |
| O94973 | AP2A2    | 103.96 | 11.892 | 2.6  | 2  | 2 | 1 | 2567400  | 12611000 | cytoplasm             | K11824 | U   | KOG1077 Vesicle coat complex AP-2, alpha subunit                                  |
| O95182 | NDUFA7   | 12.551 | 6.7433 | 15.9 | 1  | 1 | 1 | 13278000 | 41743000 | mitochondria          | K03951 | C   | KOG4630 NADH:ubiquinone oxidoreductase, NDUFA7/B14.5A subunit                     |
| O95425 | SVIL     | 247.74 | 34.27  | 3.4  | 4  | 4 | 4 | 3083000  | 66999000 | nucleus               | K10369 | Z   | KOG0445 Actin regulatory protein supervillin (gelsolin/villin family)             |
| O95613 | PCNT     | 378.03 | -2     | 0.4  | 1  | 1 | 1 | 0        | 0        | nucleus               | K16481 |     |                                                                                   |
| O95782 | AP2A1    | 107.54 | 6.3704 | 3.9  | 2  | 2 | 1 | 3958200  | 38005000 | cytoplasm             | K11824 | U   | KOG1077 Vesicle coat complex AP-2, alpha subunit                                  |
| O95793 | STAU1    | 63.182 | 11.882 | 4.5  | 2  | 2 | 2 | 12110000 | 23381000 | nucleus               | K17597 | UK  | KOG3732 Staufen and related double-stranded-RNA-binding proteins                  |
| O95816 | BAG2     | 23.772 | 5.4999 | 10.4 | 1  | 1 | 1 | 3141000  | 13503000 | cytoplasm             | K09556 | O   | KOG3633 BAG family molecular chaperone regulator 2                                |
| P00387 | CYB5R3   | 34.234 | 17.366 | 14.3 | 3  | 3 | 3 | 0        | 49408000 | extracellular         | K00326 | HC  | KOG0534 NADH-cytochrome b-5 reductase                                             |
| P00450 | CP       | 122.2  | 5.9239 | 1.6  | 1  | 1 | 1 | 0        | 17352000 | endoplasmic reticulum | K13624 | Q   | KOG1263 Multicopper oxidases                                                      |
| P01116 | KRAS     | 21.656 | 7.7576 | 13.2 | 1  | 1 | 1 | 15914000 | 39660000 | cytoplasm             | K07827 | R   | KOG0395 Ras-related GTPase                                                        |
| P02792 | FTL      | 20.019 | 9.622  | 9.1  | 1  | 1 | 1 | 16635000 | 15554000 | cytoplasm             | K13625 |     |                                                                                   |
| P02794 | FTH1     | 21.225 | 6.2798 | 8.2  | 1  | 1 | 1 | 7740200  | 10069000 | cytoplasm             | K00522 | P   | KOG2332 Ferritin                                                                  |
| P04080 | CSTB     | 11.139 | 9.9269 | 21.4 | 1  | 2 | 1 | 0        | 14073000 | cytoplasm             | K13907 |     |                                                                                   |
| P04156 | PRNP     | 27.661 | 9.9192 | 4.7  | 1  | 1 | 1 | 11905000 | 38649000 | extracellular         | K05634 |     |                                                                                   |
| P04259 | KRT6B    | 60.066 | 12.221 | 13.1 | 10 | 0 | 0 | 0        | 77065000 | nucleus               | K07605 |     |                                                                                   |
| P04632 | CAPNS1   | 28.315 | 32.99  | 19.4 | 3  | 3 | 3 | 11330000 | 70495000 | cytoplasm             | K08583 | T   | KOG0037 Ca <sup>2+</sup> -binding protein, EF-Hand protein superfamily            |
| P05976 | MYL1     | 21.145 | 20.768 | 8.2  | 2  | 7 | 2 | 0        | 0        | cytoplasm             | K05738 | Z   | KOG0030 Myosin essential light chain, EF-Hand protein superfamily                 |
| P06454 | PTMA     | 12.203 | 6.9758 | 12.6 | 1  | 1 | 1 | 9756100  | 8035600  | cytoplasm             | K13784 |     |                                                                                   |
| P07948 | LYN      | 58.573 | 5.4748 | 4.3  | 2  | 2 | 1 | 0        | 0        | cytoplasm,nucleus     | K05854 | T   | KOG0197 Tyrosine kinases                                                          |
| P08865 | RPSA     | 32.854 | 26.808 | 23.1 | 3  | 3 | 3 | 8428400  | 42520000 | cytoplasm             | K02998 | J   | KOG0830 40S ribosomal protein SA (P40)/Laminin receptor 1                         |
| P09622 | DLD      | 54.177 | 7.496  | 3.7  | 1  | 1 | 1 | 6189300  | 44160000 | mitochondria          | K00382 | C   | KOG1335 Dihydrolipoamide dehydrogenase                                            |
| P0DP13 | CENPVL2  | 29.887 | 6.8835 | 2.9  | 1  | 1 | 1 | 9927200  | 40970000 | mitochondria          |        |     |                                                                                   |
| P10515 | DLAT     | 68.996 | 5.861  | 2.6  | 1  | 1 | 1 | 0        | 0        | mitochondria          | K00627 | C   | KOG0557 Dihydrolipoamide acetyltransferase                                        |

|        |          |        |        |      |   |    |   |          |          |                       |        |   |                                                                                       |
|--------|----------|--------|--------|------|---|----|---|----------|----------|-----------------------|--------|---|---------------------------------------------------------------------------------------|
| P11217 | PYGM     | 97.091 | 11.054 | 3.4  | 2 | 2  | 2 | 3901300  | 32647000 | cytoplasm             | K00688 | G | KOG2099 Glycogen phosphorylase                                                        |
| P12235 | SLC25A4  | 33.064 | 6.7433 | 31.9 | 8 | 10 | 1 | 2799000  | 15242000 | mitochondria          | K05863 | C | KOG0749 Mitochondrial ADP/ATP carrier proteins                                        |
| P12931 | SRC      | 59.834 | 13.226 | 5.2  | 2 | 2  | 1 | 6490200  | 57499000 | cytoplasm             | K05704 | T | KOG0197 Tyrosine kinases                                                              |
| P13010 | XRCC5    | 82.704 | 9.5646 | 2.2  | 1 | 1  | 1 | 18904000 | 23683000 | cytoplasm             | K10885 | L | KOG2326 DNA-binding subunit of a DNA-dependent protein kinase (Ku80 autoantigen)      |
| P13473 | LAMP2    | 44.96  | 17.701 | 4.9  | 2 | 2  | 2 | 5613100  | 53356000 | extracellular         | K06528 |   |                                                                                       |
| P14174 | MIF      | 12.476 | 6.4327 | 7.8  | 1 | 1  | 1 | 9031500  | 1.17E+08 | cytoplasm,nucleus     | K07253 | V | KOG1759 Macrophage migration inhibitory factor                                        |
| P14550 | AKR1A1   | 36.573 | 7.7634 | 3.1  | 1 | 1  | 1 | 12381000 | 88726000 | cytoplasm             | K00002 | R | KOG1577 Aldo/keto reductase family proteins                                           |
| P15531 | NME1     | 17.149 | 7.425  | 31.6 | 3 | 3  | 1 | 18359000 | 39178000 | cytoplasm             | K00940 | F | KOG0888 Nucleoside diphosphate kinase                                                 |
| P15954 | COX7C    | 7.2454 | 6.3913 | 27   | 1 | 1  | 1 | 23051000 | 63299000 | mitochondria          | K02272 | C | KOG4527 Cytochrome c oxidase, subunit VIIc/COX8                                       |
| P16104 | H2AFX    | 15.144 | 7.5736 | 52.4 | 6 | 19 | 0 | 0        | 0        | nucleus               | K11251 | B | KOG1756 Histone 2A                                                                    |
| P16989 | YBX3     | 40.089 | 13.295 | 9.7  | 2 | 2  | 1 | 13092000 | 17262000 | nucleus               | K06099 | J | KOG3070 Predicted RNA-binding protein containing PIN domain                           |
| P17066 | HSPA6    | 71.027 | 9.0598 | 11.7 | 6 | 9  | 1 | 47196000 | 1.16E+08 | cytoplasm             | K03283 | O | KOG0101 Molecular chaperones HSP70/HSC70, HSP70 superfamily                           |
| P17480 | UBTF     | 89.405 | 14.708 | 4.1  | 2 | 3  | 2 | 19316000 | 28691000 | nucleus               | K09273 | R | KOG0381 HMG box-containing protein                                                    |
| P17844 | DDX5     | 69.147 | 7.0362 | 2    | 1 | 1  | 1 | 3239200  | 8602000  | nucleus               | K12823 | A | KOG0331 ATP-dependent RNA helicase                                                    |
| P17931 | LGALS3   | 26.152 | 6.1018 | 6    | 1 | 1  | 1 | 0        | 0        | cytoplasm,nucleus     | K06831 | W | KOG3587 Galectin, galactose-binding lectin                                            |
| P18085 | ARF4     | 20.511 | 33.278 | 16.7 | 2 | 2  | 1 | 14266000 | 67340000 | cytoplasm             | K07939 | U | KOG0070 GTP-binding ADP-ribosylation factor Arf1                                      |
| P19404 | NDUFV2   | 27.391 | 6.2706 | 5.2  | 1 | 1  | 1 | 7539100  | 27798000 | mitochondria          | K03943 | C | KOG3196 NADH:ubiquinone oxidoreductase, NDUFV2/24 kD subunit                          |
| P19525 | EIF2AK2  | 62.094 | 6.3859 | 2.2  | 1 | 1  | 1 | 0        | 19915000 | cytoplasm             | K16195 | J | KOG1033 eIF-2alpha kinase PEK/EIF2AK3                                                 |
| P21291 | CSRP1    | 20.567 | 16.763 | 16.6 | 2 | 2  | 2 | 0        | 20787000 | nucleus               | K09377 |   |                                                                                       |
| P23497 | SP100    | 100.42 | 6.9185 | 2.2  | 2 | 2  | 1 | 0        | 5457100  | nucleus               | K15413 | O | KOG2177 Predicted E3 ubiquitin ligase                                                 |
| P24539 | ATP5F1   | 28.908 | 7.529  | 4.7  | 1 | 1  | 1 | 2932800  | 20836000 | mitochondria          | K02127 |   |                                                                                       |
| P25787 | PSMA2    | 25.898 | 7.4953 | 6    | 1 | 2  | 1 | 6262800  | 12291000 | cytoplasm             | K02726 | O | KOG0181 20S proteasome, regulatory subunit alpha type PSMA2/PRE8                      |
| P27449 | ATP6V0C  | 15.736 | 5.8043 | 11.6 | 1 | 1  | 1 | 7629700  | 28872000 | plasma membrane       | K02155 | C | KOG0232 Vacuolar H+-ATPase V0 sector, subunits c/c'                                   |
| P27816 | MAP4     | 121    | 17.429 | 6.5  | 3 | 3  | 3 | 6617700  | 45590000 | nucleus               | K10431 |   |                                                                                       |
| P28066 | PSMA5    | 26.411 | 6.9936 | 5    | 1 | 1  | 1 | 8327000  | 11158000 | cytoplasm             | K02729 | O | KOG0176 20S proteasome, regulatory subunit alpha type PSMA5/PUP2                      |
| P28289 | TMOD1    | 40.569 | 18.487 | 15   | 4 | 4  | 3 | 12675000 | 63133000 | cytoplasm             | K10370 | Z | KOG3735 Tropomodulin and leiomodulin                                                  |
| P29692 | EEF1D    | 31.121 | 19.271 | 8.5  | 1 | 1  | 1 | 8186300  | 21900000 | cytoplasm             | K15410 | K | KOG1668 Elongation factor 1 beta/delta chain                                          |
| P29966 | MARCKS   | 31.554 | 5.5636 | 5.4  | 1 | 1  | 1 | 1372200  | 6158400  | nucleus               | K12561 |   |                                                                                       |
| P30041 | PRDX6    | 25.035 | 10.178 | 7.6  | 1 | 2  | 1 | 0        | 42061000 | mitochondria          | K11188 | O | KOG0854 Alkyl hydroperoxide reductase, thiol specific antioxidant and related enzymes |
| P30048 | PRDX3    | 27.692 | 9.6957 | 5.5  | 1 | 1  | 1 | 5081600  | 17652000 | mitochondria          | K20011 | O | KOG0852 Alkyl hydroperoxide reductase, thiol specific antioxidant and related enzymes |
| P30049 | ATP5F1D  | 17.49  | 6.259  | 8.3  | 1 | 1  | 1 | 1980600  | 34064000 | mitochondria          | K02134 | C | KOG1758 Mitochondrial F1F0-ATP synthase, subunit delta/ATP16                          |
| P30086 | PEBP1    | 21.057 | 11.763 | 27.8 | 2 | 2  | 2 | 1853800  | 29433000 | cytoplasm             |        | R | KOG3346 Phosphatidylethanolamine binding protein                                      |
| P30153 | PPP2R1A  | 65.308 | 18.219 | 7    | 3 | 3  | 3 | 12909000 | 22634000 | cytoplasm             | K03456 | T | KOG0211 Protein phosphatase 2A regulatory subunit A and related proteins              |
| P31689 | DNAJA1   | 44.868 | 6.1034 | 6.3  | 1 | 1  | 1 | 0        | 11114000 | cytoplasm             | K09502 | O | KOG0712 Molecular chaperone (DnaJ superfamily)                                        |
| P31942 | HNRNPH3  | 36.926 | 6.3913 | 4    | 1 | 1  | 1 | 3575000  | 10546000 | cytoplasm             | K12898 | A | KOG4211 Splicing factor hnRNP-F and related RNA-binding proteins                      |
| P31947 | SFN      | 27.774 | 12.352 | 20.6 | 3 | 3  | 2 | 9397600  | 40503000 | cytoplasm,nucleus     | K06644 | O | KOG0841 Multifunctional chaperone (14-3-3 family)                                     |
| P32969 | RPL9     | 21.863 | 17.691 | 38.5 | 3 | 3  | 3 | 10233000 | 40700000 | cytoplasm             | K02940 | J | KOG3255 60S ribosomal protein L9                                                      |
| P34932 | HSPA4    | 94.33  | 14.049 | 3.9  | 2 | 2  | 2 | 7851300  | 32912000 | cytoplasm             | K09489 | O | KOG0103 Molecular chaperones HSP105/HSP110/SSE1, HSP70 superfamily                    |
| P35221 | CTNNA1   | 100.07 | 5.5057 | 1.4  | 1 | 1  | 1 | 4134500  | 11142000 | nucleus               | K05691 | W | KOG3681 Alpha-catenin                                                                 |
| P35754 | GLRX     | 11.776 | 10.667 | 39.6 | 2 | 2  | 2 | 0        | 47555000 | cytoplasm             | K03676 | O | KOG1752 Glutaredoxin and related proteins                                             |
| P36543 | ATP6V1E1 | 26.145 | 7.1745 | 6.2  | 1 | 1  | 1 | 0        | 0        | cytoplasm             | K02150 | C | KOG1664 Vacuolar H+-ATPase V1 sector, subunit E                                       |
| P37108 | SRP14    | 14.57  | 14.274 | 10.3 | 1 | 1  | 1 | 80715000 | 96060000 | cytoplasm             | K03104 | U | KOG1761 Signal recognition particle, subunit Srp14                                    |
| P40261 | NNMT     | 29.574 | 6.7658 | 7.2  | 1 | 1  | 1 | 48815000 | 58823000 | cytoplasm             | K00541 |   |                                                                                       |
| P40925 | MDH1     | 36.426 | 10.518 | 5.1  | 1 | 1  | 1 | 4149900  | 19134000 | cytoplasm             | K00025 | C | KOG1496 Malate dehydrogenase                                                          |
| P40939 | HADHA    | 82.999 | 8.1466 | 2.8  | 1 | 1  | 1 | 0        | 8626500  | mitochondria          | K07515 | I | KOG1683 Hydroxyacyl-CoA dehydrogenase/enoyl-CoA hydratase                             |
| P41223 | BUD31    | 17     | 5.9224 | 5.6  | 1 | 1  | 1 | 0        | 15367000 | extracellular         | K12873 | K | KOG3404 G10 protein/predicted nuclear transcription regulator                         |
| P42167 | TMPO     | 50.67  | 9.4494 | 2.6  | 1 | 1  | 1 | 10621000 | 9145500  | cytoplasm             |        |   |                                                                                       |
| P42704 | LRPPRC   | 157.9  | 18.324 | 2.4  | 3 | 3  | 3 | 7661400  | 18666000 | mitochondria          | K17964 | A | KOG4318 Bicoid mRNA stability factor                                                  |
| P43307 | SSR1     | 32.235 | 9.1812 | 5.2  | 1 | 1  | 1 | 31455000 | 71071000 | endoplasmic reticulum | K13249 | U | KOG1631 Translocon-associated complex TRAP, alpha subunit                             |
| P46777 | RPL5     | 34.362 | 11.266 | 10.4 | 2 | 2  | 2 | 88553    | 32137000 | nucleus               | K02932 | J | KOG0875 60S ribosomal protein L5                                                      |
| P47914 | RPL29    | 17.752 | 9.2572 | 9.4  | 1 | 1  | 1 | 62899000 | 83623000 | nucleus               | K02905 | J | KOG3504 60S ribosomal protein L29                                                     |

|        |         |        |        |      |    |     |   |          |          |                       |        |    |         |                                                                             |
|--------|---------|--------|--------|------|----|-----|---|----------|----------|-----------------------|--------|----|---------|-----------------------------------------------------------------------------|
| P49458 | SRP9    | 10.112 | 9.0865 | 12.8 | 1  | 1   | 1 | 28588000 | 28095000 | cytoplasm             | K03109 | U  | KOG3465 | Signal recognition particle, subunit Srp9                                   |
| P49821 | NDUFV1  | 50.817 | 12.5   | 4.7  | 2  | 3   | 2 | 5127600  | 17039000 | mitochondria          | K03942 | C  | KOG2658 | NADH:ubiquinone oxidoreductase, NDUFV1/51kDa subunit                        |
| P50238 | CRIP1   | 8.5328 | 5.7614 | 36.4 | 1  | 1   | 1 | 3685900  | 22691000 | nucleus               |        | TZ | KOG1700 | Regulatory protein MLP and related LIM proteins                             |
| P50914 | RPL14   | 23.432 | 15.847 | 10.2 | 2  | 2   | 2 | 13057000 | 44241000 | mitochondria          | K02875 | J  | KOG3421 | 60S ribosomal protein L14                                                   |
| P50990 | CCT8    | 59.62  | 5.5967 | 2.2  | 1  | 1   | 1 | 7544000  | 8919100  | cytoplasm             | K09500 | O  | KOG0362 | Chaperonin complex component, TCP-1 theta subunit (CCT8)                    |
| P51148 | RAB5C   | 23.482 | 5.5558 | 6.5  | 1  | 1   | 1 | 0        | 32160000 | cytoplasm             | K07889 | U  | KOG0092 | GTPase Rab5/YPT51 and related small G protein superfamily GTPases           |
| P51571 | SSR4    | 18.998 | 8.4155 | 6.4  | 1  | 1   | 1 | 5025600  | 23569000 | plasma membrane       | K04571 | U  | KOG4088 | Translocon-associated complex TRAP, delta subunit                           |
| P51572 | BCAP31  | 27.991 | 13.625 | 7.3  | 2  | 2   | 2 | 5162900  | 26827000 | endoplasmic reticulum | K14009 | V  | KOG1962 | B-cell receptor-associated protein and related proteins                     |
| P52292 | KPNA2   | 57.861 | 7.8933 | 2.8  | 1  | 1   | 1 | 6840100  | 11673000 | cytoplasm,nucleus     | K15043 | U  | KOG0166 | Karyopherin (importin) alpha                                                |
| P52597 | HNRNPF  | 45.671 | 12.146 | 15.7 | 2  | 2   | 2 | 5163300  | 61309000 | cytoplasm             | K12898 | A  | KOG4211 | Splicing factor hnRNP-F and related RNA-binding proteins                    |
| P52815 | MRPL12  | 21.348 | 11.69  | 11.6 | 2  | 2   | 2 | 0        | 0        | mitochondria          | K02935 | J  | KOG1715 | Mitochondrial/chloroplast ribosomal protein L12                             |
| P53396 | ACLY    | 120.84 | 5.6466 | 1.3  | 1  | 1   | 1 | 0        | 0        | cytoplasm             | K01648 | C  | KOG1254 | ATP-citrate lyase                                                           |
| P53567 | CEBPG   | 16.408 | 6.3625 | 20.7 | 1  | 1   | 1 | 0        | 0        | nucleus               | K10049 |    |         |                                                                             |
| P54652 | HSPA2   | 70.02  | 7.8145 | 12.5 | 6  | 6   | 1 | 11149000 | 18344000 | cytoplasm             | K03283 | O  | KOG0101 | Molecular chaperones HSP70/HSC70, HSP70 superfamily                         |
| P54855 | UGT2B15 | 61.036 | 6.1825 | 1.3  | 1  | 1   | 1 | 67849000 | 2.55E+08 | peroxisome            | K00699 | GC | KOG1192 | UDP-glucuronosyl and UDP-glucosyl transferase                               |
| P55084 | HADHB   | 51.294 | 5.9778 | 5.5  | 1  | 1   | 1 | 0        | 67202000 | nucleus               | K07509 | I  | KOG1392 | Acetyl-CoA acetyltransferase                                                |
| P60228 | EIF3E   | 52.22  | 6.771  | 2.9  | 1  | 1   | 1 | 0        | 0        | cytoplasm             | K03250 | J  | KOG2758 | Translation initiation factor 3, subunit e (eIF-3e)                         |
| P60602 | ROMO1   | 8.1828 | 11.904 | 21.5 | 1  | 1   | 1 | 13480000 | 33517000 | extracellular         |        | S  | KOG4096 | Uncharacterized conserved protein                                           |
| P60709 | ACTB    | 41.736 | 15.56  | 95.5 | 37 | 129 | 1 | 0        | 0        | cytoskeleton          | K05692 | Z  | KOG0676 | Actin and related proteins                                                  |
| P61026 | RAB10   | 22.541 | 8.4155 | 11   | 2  | 2   | 1 | 11795000 | 36198000 | cytoplasm             | K07903 | TU | KOG0078 | GTP-binding protein SEC4, small G protein superfamily                       |
| P61225 | RAP2B   | 20.504 | 6.0578 | 6.6  | 1  | 1   | 1 | 0        | 11994000 | cytoplasm             | K07838 | R  | KOG0395 | Ras-related GTPase                                                          |
| P61513 | RPL37A  | 10.275 | 7.9589 | 19.6 | 1  | 1   | 1 | 12424000 | 13074000 | extracellular         | K02921 | J  | KOG0402 | 60S ribosomal protein L37                                                   |
| P61586 | RHOA    | 21.768 | 5.5395 | 6.2  | 1  | 1   | 1 | 2490000  | 6892600  | cytoplasm             | K04513 | R  | KOG0393 | Ras-related small GTPase, Rho type                                          |
| P62263 | RPS14   | 16.273 | 12.951 | 13.9 | 2  | 2   | 2 | 8468600  | 13448000 | cytoplasm             | K02955 | J  | KOG0407 | 40S ribosomal protein S14                                                   |
| P62273 | RPS29   | 6.6767 | 5.4488 | 14.3 | 1  | 1   | 1 | 9848100  | 21171000 | extracellular         | K02980 | J  | KOG3506 | 40S ribosomal protein S29                                                   |
| P62304 | SNRPE   | 10.803 | 14.313 | 40.2 | 2  | 2   | 2 | 1.16E+08 | 2.77E+08 | mitochondria          | K11097 | A  | KOG1774 | Small nuclear ribonucleoprotein E                                           |
| P62328 | TMSB4X  | 5.0526 | 5.7749 | 31.8 | 1  | 1   | 1 | 6968900  | 29006000 | nucleus               | K05764 | N  | KOG4794 | Thymosin beta                                                               |
| P62834 | RAP1A   | 20.987 | 6.8051 | 5.4  | 1  | 1   | 1 | 2849400  | 18419000 | cytoplasm             | K04353 | R  | KOG0395 | Ras-related GTPase                                                          |
| P62857 | RPS28   | 7.8409 | 9.8793 | 17.4 | 1  | 2   | 1 | 34313000 | 69242000 | mitochondria          | K02979 | J  | KOG3502 | 40S ribosomal protein S28                                                   |
| P62942 | FKBP1A  | 11.951 | 14.963 | 28.7 | 2  | 2   | 2 | 2785200  | 32668000 | cytoplasm             | K09568 | O  | KOG0544 | FKBP-type peptidyl-prolyl cis-trans isomerase                               |
| P62995 | TRA2B   | 33.665 | 6.9499 | 5.6  | 1  | 1   | 1 | 5514300  | 13524000 | nucleus               | K12897 |    |         |                                                                             |
| P63092 | GNAS    | 45.664 | 10.791 | 9.4  | 3  | 3   | 2 | 2889400  | 21121000 | cytoplasm             | K04632 | T  | KOG0099 | G protein subunit Galphas, small G protein superfamily                      |
| P63173 | RPL38   | 8.2178 | 12.651 | 18.6 | 1  | 1   | 1 | 61710000 | 88103000 | nucleus               | K02923 | J  | KOG3499 | 60S ribosomal protein L38                                                   |
| P63313 | TMSB10  | 5.0256 | 8.543  | 31.8 | 1  | 1   | 1 | 61494000 | 1.11E+08 | cytoplasm             | K13785 | N  | KOG4794 | Thymosin beta                                                               |
| P67812 | SEC11A  | 20.625 | 9.0012 | 6.7  | 1  | 1   | 1 | 0        | 0        | cytoplasm             | K13280 | U  | KOG3342 | Signal peptidase I                                                          |
| P78417 | GSTO1   | 27.566 | 5.8036 | 3.3  | 1  | 1   | 1 | 0        | 0        | cytoplasm             | K00799 | O  | KOG0406 | Glutathione S-transferase                                                   |
| P84077 | ARF1    | 20.697 | 7.3522 | 21   | 2  | 2   | 1 | 0        | 17636000 | cytoplasm             | K07937 | U  | KOG0070 | GTP-binding ADP-ribosylation factor Arf1                                    |
| P84098 | RPL19   | 23.466 | 11.447 | 8.7  | 1  | 1   | 1 | 0        | 0        | cytoplasm             | K02885 | J  | KOG1696 | 60s ribosomal protein L19                                                   |
| P84103 | SRSF3   | 19.329 | 6.3039 | 12.8 | 1  | 1   | 1 | 0        | 28029000 | nucleus               | K12892 | A  | KOG0107 | Alternative splicing factor SRp20/9G8 (RRM superfamily)                     |
| P98187 | CYP4F8  | 59.994 | 5.7738 | 1.5  | 1  | 1   | 1 | 0        | 0        | plasma membrane       | K17728 |    |         |                                                                             |
| Q01082 | SPTBN1  | 274.61 | 34.147 | 2.8  | 5  | 5   | 5 | 5241600  | 27824000 | cytoplasm             | K06115 | Z  | KOG0035 | Ca2+-binding actin-bundling protein (actinin), alpha chain                  |
| Q01469 | FABP5   | 15.164 | 22.266 | 25.9 | 2  | 2   | 2 | 1.89E+08 | 77514000 | extracellular         | K08754 | I  | KOG4015 | Fatty acid-binding protein FABP                                             |
| Q01518 | CAP1    | 51.901 | 5.6686 | 2.7  | 1  | 2   | 1 | 0        | 0        | cytoplasm             | K17261 | ZT | KOG2675 | Adenylate cyclase-associated protein (CAP/Srv2p)                            |
| Q01995 | TAGLN   | 22.611 | 19.333 | 17.4 | 3  | 3   | 3 | 1352200  | 87694000 | cytoplasm             | K20526 | Z  | KOG2046 | Calponin                                                                    |
| Q03701 | CEBPZ   | 120.97 | 5.7113 | 2.1  | 1  | 1   | 1 | 0        | 0        | nucleus               | K14832 | JK | KOG2038 | CAATT-binding transcription factor/60S ribosomal subunit biogenesis protein |
| Q05682 | CALD1   | 93.23  | 6.7682 | 2.3  | 1  | 1   | 1 | 5371700  | 40718000 | nucleus               | K12327 |    |         |                                                                             |
| Q06323 | PSME1   | 28.723 | 18.841 | 12   | 3  | 3   | 3 | 7276200  | 54218000 | nucleus               | K06696 | O  | KOG4470 | Proteasome activator subunit                                                |
| Q07666 | KHDRBS1 | 48.227 | 5.9412 | 6.5  | 1  | 1   | 1 | 15118000 | 80492000 | cytoplasm             | K13198 | A  | KOG1588 | RNA-binding protein Sam68 and related KH domain proteins                    |
| Q08211 | DHX9    | 140.96 | 13.825 | 2.8  | 2  | 2   | 2 | 8517900  | 69707000 | nucleus               | K13184 | A  | KOG0920 | ATP-dependent RNA helicase A                                                |
| Q12797 | ASPH    | 85.862 | 8.0841 | 2.4  | 1  | 1   | 1 | 9173100  | 22070000 | plasma membrane       | K00476 | O  | KOG3696 | Aspartyl beta-hydroxylase                                                   |
| Q12860 | CNTN1   | 113.32 | 11.369 | 2.8  | 2  | 2   | 2 | 0        | 10733000 | plasma membrane       | K06759 | T  | KOG3513 | Neural cell adhesion molecule L1                                            |

|        |           |        |        |      |    |    |   |          |          |                   |        |     |         |                                                                           |
|--------|-----------|--------|--------|------|----|----|---|----------|----------|-------------------|--------|-----|---------|---------------------------------------------------------------------------|
| Q13011 | ECH1      | 35.816 | 7.2928 | 6.7  | 1  | 1  | 1 | 0        | 32763000 | mitochondria      | K12663 | I   | KOG1681 | Enoyl-CoA isomerase                                                       |
| Q13423 | NNT       | 113.89 | 23.343 | 5.9  | 4  | 4  | 4 | 0        | 52574000 | plasma membrane   | K00323 |     |         |                                                                           |
| Q13478 | IL18R1    | 62.303 | 6.4925 | 1.3  | 1  | 1  | 1 | 7134500  | 28674000 | peroxisome        | K05173 |     |         |                                                                           |
| Q13492 | PICALM    | 70.754 | 12.388 | 8.1  | 2  | 2  | 2 | 7122700  | 63954000 | nucleus           | K20044 | TU  | KOG0251 | Clathrin assembly protein AP180 and related proteins, contain ENTH domain |
| Q13601 | KRR1      | 43.664 | 14.695 | 7.3  | 1  | 1  | 1 | 3981300  | 17204000 | nucleus           | K06961 | JD  | KOG2874 | rRNA processing protein                                                   |
| Q13617 | CUL2      | 86.982 | 5.8013 | 1.2  | 1  | 1  | 1 | 34062000 | 2.99E+08 | cytoplasm         | K03870 | O   | KOG2284 | E3 ubiquitin ligase, Cullin 2 component                                   |
| Q13895 | BYSL      | 49.601 | 5.7002 | 3    | 1  | 1  | 1 | 0        | 0        | cytoplasm         | K14797 | W   | KOG3871 | Cell adhesion complex protein bystin                                      |
| Q14126 | DSG2      | 122.29 | 9.9498 | 2.1  | 1  | 1  | 1 | 6665900  | 26805000 | plasma membrane   | K07597 | S   | KOG3594 | FOG: Cadherin repeats                                                     |
| Q14573 | ITPR3     | 304.1  | 11.896 | 1.2  | 2  | 2  | 2 | 5187700  | 30066000 | plasma membrane   | K04960 | T   | KOG3533 | Inositol 1,4,5-trisphosphate receptor                                     |
| Q14847 | LASP1     | 29.717 | 6.2428 | 5    | 1  | 1  | 1 | 24887000 | 51365000 | nucleus           |        | Z   | KOG1702 | Nebulin repeat protein                                                    |
| Q14914 | PTGR1     | 35.869 | 11.436 | 7    | 1  | 1  | 1 | 10108000 | 43854000 | cytoplasm         | K13948 | R   | KOG1196 | Predicted NAD-dependent oxidoreductase                                    |
| Q15005 | SPCS2     | 25.003 | 10.968 | 8.4  | 1  | 1  | 1 | 4438600  | 38679000 | plasma membrane   | K12947 | U   | KOG4072 | Signal peptidase complex, subunit SPC25                                   |
| Q15019 | SEPT2     | 41.487 | 5.4982 | 6.4  | 1  | 1  | 1 | 0        | 0        | cytoplasm         | K16942 | DZU | KOG2655 | Septin family protein (P-loop GTPase)                                     |
| Q15181 | PPA1      | 32.66  | 5.8487 | 5.5  | 1  | 1  | 1 | 4432800  | 23881000 | cytoplasm         | K01507 | C   | KOG1626 | Inorganic pyrophosphatase/Nucleosome remodeling factor, subunit NURF38    |
| Q15363 | TMED2     | 22.761 | 18.166 | 24.9 | 3  | 3  | 3 | 0        | 1.37E+08 | extracellular     | K20347 | U   | KOG1692 | Putative cargo transport protein EMP24 (p24 protein family)               |
| Q15388 | TOMM20    | 16.298 | 9.0043 | 13.8 | 1  | 1  | 1 | 11250000 | 30756000 | extracellular     | K17770 | U   | KOG4056 | Translocase of outer mitochondrial membrane complex, subunit TOM20        |
| Q15637 | SF1       | 68.329 | 5.8963 | 3.3  | 1  | 1  | 1 | 17632000 | 15211000 | nucleus           | K13095 | A   | KOG0119 | Splicing factor 1/branch point binding protein (RRM superfamily)          |
| Q15836 | VAMP3     | 11.309 | 8.0807 | 24   | 1  | 1  | 1 | 3027900  | 14594000 | plasma membrane   | K13505 | U   | KOG0860 | Synaptobrevin/VAMP-like protein                                           |
| Q16352 | INA       | 55.39  | 17.4   | 6    | 3  | 3  | 2 | 6064500  | 41792000 | nucleus           | K07608 |     |         |                                                                           |
| Q16555 | DPYSL2    | 62.293 | 8.5422 | 3.5  | 1  | 1  | 1 | 9338300  | 37294000 | cytoplasm,nucleus | K07528 | F   | KOG2584 | Dihydroorotase and related enzymes                                        |
| Q3ZCM7 | TUBB8     | 49.775 | 6.568  | 18.5 | 6  | 9  | 1 | 28679000 | 70993000 | cytoplasm         | K07375 | Z   | KOG1375 | Beta tubulin                                                              |
| Q53GQ0 | HSD17B12  | 34.324 | 6.6243 | 4.8  | 1  | 1  | 1 | 0        | 27252000 | cytoplasm         | K10251 | I   | KOG1014 | 17 beta-hydroxysteroid dehydrogenase type 3, HSD17B3                      |
| Q58FF8 | HSP90AB2P | 44.348 | 9.9593 | 12.1 | 4  | 5  | 1 | 7454500  | 24015000 | cytoplasm         | K04079 |     |         |                                                                           |
| Q5GLZ8 | HERC4     | 118.56 | 5.9429 | 1.1  | 1  | 1  | 1 | 0        | 0        | nucleus           | K10615 | O   | KOG0941 | E3 ubiquitin protein ligase                                               |
| Q5M775 | SPECC1    | 118.58 | 7.8801 | 1.2  | 1  | 1  | 1 | 0        | 51071000 | nucleus           |        | R   | KOG4678 | FOG: Calponin homology domain                                             |
| Q5RI15 | COX20     | 13.291 | 9.5323 | 19.5 | 1  | 1  | 1 | 0        | 24102000 | cytoplasm         | K18184 |     |         |                                                                           |
| Q5T2N8 | ATAD3C    | 46.379 | 6.2077 | 3.4  | 1  | 1  | 1 | 3982500  | 17031000 | cytoplasm         |        | O   | KOG0742 | AAA+-type ATPase                                                          |
| Q5TGY3 | AHDC1     | 168.35 | -2     | 0.4  | 1  | 1  | 1 | 0        | 0        | nucleus           | K22592 |     |         |                                                                           |
| Q5TGZ0 | MINOS1    | 8.8081 | 5.5134 | 41   | 1  | 1  | 1 | 0        | 0        | mitochondria      | K17784 | S   | KOG4604 | Uncharacterized conserved protein                                         |
| Q5UIP0 | RIF1      | 274.46 | 5.6115 | 0.3  | 1  | 1  | 1 | 0        | 0        | cytoplasm         | K11138 |     |         |                                                                           |
| Q6PIJ6 | FBXO38    | 133.94 | 5.5397 | 0.8  | 1  | 1  | 1 | 31275000 | 36486000 | nucleus           | K10313 |     |         |                                                                           |
| Q6R327 | RICTOR    | 192.22 | -2     | 0.6  | 1  | 1  | 1 | 0        | 0        | nucleus           | K08267 | D   | KOG3694 | Protein required for meiosis                                              |
| Q6UW68 | TMEM205   | 21.198 | 14.074 | 6.9  | 1  | 1  | 1 | 6643700  | 31303000 | extracellular     |        | S   | KOG2886 | Uncharacterized conserved protein                                         |
| Q71U36 | TUBA1A    | 50.135 | 12.117 | 59.9 | 18 | 28 | 1 | 0        | 0        | cytoskeleton      | K07374 | Z   | KOG1376 | Alpha tubulin                                                             |
| Q7Z434 | MAVS      | 56.527 | 5.6769 | 4.3  | 1  | 1  | 1 | 0        | 0        | cytoplasm         | K12648 |     |         |                                                                           |
| Q7Z6B0 | CCDC91    | 49.971 | 6.3999 | 2    | 1  | 1  | 1 | 0        | 0        | cytoplasm         |        |     |         |                                                                           |
| Q7Z6I8 | C5orf24   | 20.132 | 6.5904 | 11.2 | 1  | 1  | 1 | 12990000 | 20774000 | nucleus           |        |     |         |                                                                           |
| Q7Z7K0 | CMC1      | 12.49  | 6.0891 | 9.4  | 1  | 1  | 1 | 3305100  | 16535000 | extracellular     | K18171 | S   | KOG4624 | Uncharacterized conserved protein                                         |
| Q86U42 | PABPN1    | 32.749 | 8.1029 | 9.2  | 1  | 1  | 1 | 0        | 36300000 | nucleus           | K14396 | A   | KOG4209 | Splicing factor RNPS1, SR protein superfamily                             |
| Q86VV8 | RTTN      | 248.63 | 6.4476 | 0.3  | 1  | 1  | 1 | 0        | 0        | plasma membrane   | K16484 |     |         |                                                                           |
| Q86XN8 | MEX3D     | 64.882 | 6.1853 | 1.1  | 1  | 1  | 1 | 23343000 | 29115000 | cytoplasm,nucleus | K15686 | R   | KOG2113 | Predicted RNA binding protein, contains KH domain                         |
| Q86Y39 | NDUFA11   | 14.852 | 7.763  | 10.6 | 1  | 1  | 1 | 5290400  | 25968000 | mitochondria      | K03956 |     |         |                                                                           |
| Q8IUE6 | HIST2H2AB | 13.995 | 6.7166 | 57.7 | 5  | 11 | 1 | 2.01E+08 | 1.68E+08 | nucleus           | K11251 | B   | KOG1756 | Histone 2A                                                                |
| Q8IVF2 | AHNAK2    | 616.62 | 13.338 | 5.2  | 2  | 2  | 2 | 1453600  | 76244000 | nucleus           |        |     |         |                                                                           |
| Q8N257 | HIST3H2BB | 13.908 | 6.2488 | 50.8 | 8  | 53 | 1 | 6876600  | 5978800  | nucleus           | K11252 | B   | KOG1744 | Histone H2B                                                               |
| Q8N283 | ANKRD35   | 109.96 | 6.71   | 0.8  | 1  | 1  | 1 | 4123600  | 39366000 | mitochondria      |        |     |         |                                                                           |
| Q8N2U0 | TMEM256   | 11.741 | 8.4805 | 24.8 | 1  | 1  | 1 | 11093000 | 56113000 | mitochondria      |        | S   | KOG3472 | Predicted small membrane protein                                          |
| Q8N3E9 | PLCD3     | 89.257 | 10.162 | 2.9  | 1  | 1  | 1 | 5049500  | 31490000 | mitochondria      | K05857 | T   | KOG0169 | Phosphoinositide-specific phospholipase C                                 |
| Q8N4H5 | TOMM5     | 6.0352 | 6.8738 | 19.6 | 1  | 1  | 1 | 8737100  | 14948000 | cytoplasm         | K17773 |     |         |                                                                           |
| Q8N8Y2 | ATP6V0D2  | 40.426 | 11.358 | 5.1  | 1  | 1  | 1 | 3995900  | 19494000 | cytoplasm         | K02146 | C   | KOG2957 | Vacuolar H+-ATPase V0 sector, subunit d                                   |
| Q8NAV1 | PRPF38A   | 37.476 | 5.7403 | 3.8  | 1  | 1  | 1 | 0        | 13461000 | nucleus           | K12849 | S   | KOG2889 | Predicted PRP38-like splicing factor                                      |



|        |           |        |        |      |    |    |   |          |          |                        |        |     |         |                                                                             |
|--------|-----------|--------|--------|------|----|----|---|----------|----------|------------------------|--------|-----|---------|-----------------------------------------------------------------------------|
| Q8ND76 | CCNY      | 39.336 | 5.8103 | 4.4  | 1  | 1  | 1 | 0        | 16965000 | nucleus                |        | R   | KOG1675 | Predicted cyclin                                                            |
| Q8NE86 | MCU       | 39.866 | 10.867 | 5.4  | 1  | 1  | 1 | 13576000 | 45060000 | mitochondria           | K20858 | R   | KOG2966 | Uncharacterized conserved protein                                           |
| Q8WTT2 | NOC3L     | 92.547 | 13.589 | 4.4  | 2  | 2  | 2 | 9971800  | 40562000 | nucleus                | K14834 | JU  | KOG2153 | Protein involved in the nuclear export of pre-ribosomes                     |
| Q8WWI1 | LMO7      | 192.69 | 9.0215 | 0.8  | 1  | 1  | 1 | 21694000 | 9338000  | nucleus                | K06084 | TZR | KOG1704 | FOG: LIM domain                                                             |
| Q8WXE9 | STON2     | 101.16 | 7.198  | 1    | 1  | 1  | 1 | 17216000 | 1.33E+08 | plasma membrane        | K20067 | U   | KOG2677 | Stoned B synaptic vesicle biogenesis protein                                |
| Q8WZ42 | TTN       | 3816   | 5.516  | 0    | 1  | 1  | 1 | 0        | 24624000 |                        | K12567 | Z   | KOG0613 | Projectin/twitchin and related proteins                                     |
| Q92614 | MYO18A    | 233.11 | 17.6   | 1.9  | 2  | 2  | 2 | 2518800  | 29474000 | nucleus                | K10362 | Z   | KOG0161 | Myosin class II heavy chain                                                 |
| Q96A26 | FAM162A   | 17.342 | 6.5455 | 13   | 1  | 1  | 1 | 0        | 15158000 | plasma membrane        |        |     |         |                                                                             |
| Q96AG4 | LRRC59    | 34.93  | 5.876  | 3.9  | 1  | 2  | 1 | 21430000 | 24854000 | cytoplasm,peroxisome   |        | S   | KOG0473 | Leucine-rich repeat protein                                                 |
| Q96AY2 | EME1      | 63.251 | 5.5701 | 1.6  | 1  | 1  | 1 | 0        | 2.56E+08 | nucleus                | K10882 |     |         |                                                                             |
| Q96B49 | TOMM6     | 8.0019 | 7.1713 | 18.9 | 1  | 1  | 1 | 0        | 0        | cytoplasm,nucleus      | K17772 |     |         |                                                                             |
| Q96CS3 | FAF2      | 52.623 | 16.557 | 10.1 | 2  | 2  | 2 | 9925200  | 53915000 | cytoplasm              | K18726 | T   | KOG1363 | Predicted regulator of the ubiquitin pathway (contains UAS and UBX domains) |
| Q96CW1 | AP2M1     | 49.654 | 5.7793 | 3.7  | 1  | 1  | 1 | 0        | 6015300  | cytoplasm              | K11826 | U   | KOG0937 | Adaptor complexes medium subunit family                                     |
| Q96DI7 | SNRNP40   | 39.31  | 17.086 | 8.4  | 1  | 1  | 1 | 5436800  | 39994000 | nucleus                | K12857 | A   | KOG0265 | U5 snRNP-specific protein-like factor and related proteins                  |
| Q96EU6 | RRP36     | 29.823 | 5.5604 | 5.8  | 1  | 1  | 1 | 0        | 0        | nucleus                | K14795 | S   | KOG3190 | Uncharacterized conserved protein                                           |
| Q96FJ2 | DYNLL2    | 10.35  | 7.7422 | 37.1 | 2  | 3  | 1 | 0        | 18194000 | cytoplasm              | K10418 | Z   | KOG3430 | Dynein light chain type 1                                                   |
| Q96IX5 | USMG5     | 6.4575 | 7.9504 | 25.9 | 1  | 1  | 1 | 8224600  | 38931000 | cytoplasm              | K18194 |     |         |                                                                             |
| Q96LW4 | PRIMPOL   | 64.411 | 5.5479 | 2.1  | 1  | 1  | 1 | 0        | 0        | cytoplasm,nucleus      | K22761 |     |         |                                                                             |
| Q96S97 | MYADM     | 35.273 | 11.327 | 7.1  | 1  | 1  | 1 | 23897000 | 94638000 | plasma membrane        |        | V   | KOG4788 | Members of chemokine-like factor super family and related proteins          |
| Q96ST3 | SIN3A     | 145.17 | 5.6198 | 1    | 1  | 1  | 1 | 0        | 0        | nucleus                | K11644 | B   | KOG4204 | Histone deacetylase complex, SIN3 component                                 |
| Q99439 | CNN2      | 33.697 | 7.0667 | 5.2  | 1  | 1  | 1 | 0        | 0        | cytoplasm              |        | Z   | KOG2046 | Calponin                                                                    |
| Q99497 | PARK7     | 19.891 | 6.1061 | 13.8 | 1  | 1  | 1 | 0        | 0        | cytoplasm              | K05687 | RV  | KOG2764 | Putative transcriptional regulator DJ-1                                     |
| Q99640 | PKMYT1    | 54.521 | 5.6913 | 1.8  | 1  | 1  | 1 | 1.94E+09 | 2.39E+09 | nucleus                | K06633 | D   | KOG0601 | Cyclin-dependent kinase WEE1                                                |
| Q99878 | HIST1H2AJ | 13.936 | 10.603 | 58.6 | 8  | 37 | 0 | 0        | 0        | nucleus                | K11251 | B   | KOG1756 | Histone 2A                                                                  |
| Q9BPU6 | DPYSL5    | 61.421 | 6.1601 | 1.2  | 1  | 2  | 1 | 6.27E+08 | 7.39E+08 | cytoplasm              | K07529 | F   | KOG2584 | Dihydroorotase and related enzymes                                          |
| Q9BQE3 | TUBA1C    | 49.895 | 11.763 | 56.3 | 17 | 24 | 1 | 40820000 | 65044000 | cytoskeleton           | K07374 | Z   | KOG1376 | Alpha tubulin                                                               |
| Q9BRT6 | LLPH      | 15.225 | 7.468  | 12.4 | 1  | 1  | 1 | 11444000 | 11424000 | nucleus                |        | S   | KOG4811 | Uncharacterized conserved protein                                           |
| Q9BTV4 | TMEM43    | 44.875 | 19.897 | 7.5  | 3  | 3  | 3 | 2836700  | 16768000 | plasma membrane        |        |     |         |                                                                             |
| Q9BUF5 | TUBB6     | 49.857 | 6.74   | 16.4 | 7  | 10 | 1 | 0        | 6710500  | cytoplasm,nucleus      | K07375 | Z   | KOG1375 | Beta tubulin                                                                |
| Q9BVA1 | TUBB2B    | 49.953 | 7.6727 | 29.2 | 10 | 17 | 1 | 6663000  | 21205000 | cytoplasm              | K07375 | Z   | KOG1375 | Beta tubulin                                                                |
| Q9BVI4 | NOC4L     | 58.467 | 6.9148 | 4.1  | 1  | 1  | 1 | 16125000 | 24721000 | cytoplasm              | K14771 | J   | KOG2154 | Predicted nucleolar protein involved in ribosome biogenesis                 |
| Q9BVJ6 | UTP14A    | 87.977 | 10.913 | 3    | 2  | 2  | 2 | 0        | 0        | nucleus                | K14567 | S   | KOG2172 | Uncharacterized conserved protein                                           |
| Q9BVK6 | TMED9     | 27.277 | 19.201 | 8.9  | 2  | 2  | 2 | 4324000  | 23939000 | peroxisome             | K20346 | U   | KOG1690 | emp24/gp25L/p24 family of membrane trafficking proteins                     |
| Q9BW72 | HIGD2A    | 11.528 | 9.03   | 23.6 | 1  | 1  | 1 | 21147000 | 63616000 | cytoplasm,mitochondria |        | R   | KOG4431 | Uncharacterized protein, induced by hypoxia                                 |
| Q9BWJ5 | SF3B5     | 10.135 | 11.428 | 27.9 | 2  | 2  | 2 | 3381200  | 16432000 | extracellular          | K12832 | S   | KOG3485 | Uncharacterized conserved protein                                           |
| Q9BXY0 | MAK16     | 35.368 | 5.7458 | 6.3  | 1  | 1  | 1 | 4782900  | 17969000 | nucleus                | K14831 | A   | KOG3064 | RNA-binding nuclear protein (MAK16) containing a distinct C4 Zn-finger      |
| Q9BZI7 | UPF3B     | 57.761 | -2     | 1.9  | 1  | 1  | 1 | 0        | 0        | cytoplasm,nucleus      | K14328 | A   | KOG1295 | Nonsense-mediated decay protein Upf3                                        |
| Q9BZZ5 | API5      | 59.004 | 19.212 | 3.4  | 1  | 1  | 1 | 19785000 | 58117000 | cytoplasm              |        | T   | KOG2213 | Apoptosis inhibitor 5/fibroblast growth factor 2-interacting factor 2       |
| Q9C002 | NMES1     | 9.6172 | 13.611 | 32.5 | 2  | 2  | 2 | 0        | 0        | extracellular          |        |     |         |                                                                             |
| Q9C005 | DPY30     | 11.25  | 17.119 | 36.4 | 2  | 2  | 2 | 32286000 | 80674000 | cytoplasm              | K14965 | K   | KOG4109 | Histone H3 (Lys4) methyltransferase complex, subunit CPS25/DPY-30           |
| Q9H061 | TMEM126A  | 21.527 | 5.5456 | 10.3 | 1  | 1  | 1 | 3464600  | 17546000 | cytoplasm              | K18157 |     |         |                                                                             |
| Q9H307 | PNN       | 81.627 | 8.5561 | 2.4  | 1  | 1  | 1 | 4483000  | 26169000 | nucleus                | K13114 | Z   | KOG3756 | Pinin (desmosome-associated protein)                                        |
| Q9H8H0 | NOL11     | 81.123 | 7.5053 | 1.9  | 1  | 1  | 1 | 10165000 | 34734000 | cytoplasm              |        |     |         |                                                                             |
| Q9HAW7 | UGT1A7    | 59.818 | 5.8913 | 2.3  | 1  | 1  | 1 | 0        | 0        | plasma membrane        | K00699 | GC  | KOG1192 | UDP-glucuronosyl and UDP-glucosyl transferase                               |
| Q9HBG6 | IFT122    | 141.82 | 10.434 | 1.5  | 2  | 2  | 2 | 26461000 | 2507200  | cytoplasm              | K19656 | R   | KOG1538 | Uncharacterized conserved protein WDR10, contains WD40 repeats              |
| Q9HDC9 | APMAP     | 46.48  | 6.7424 | 6.5  | 1  | 1  | 1 | 11600000 | 44347000 | plasma membrane        | K21407 | R   | KOG1520 | Predicted alkaloid synthase/Surface mucin Hemomucin                         |
| Q9NPE3 | NOP10     | 7.7059 | 12.458 | 20.3 | 1  | 1  | 1 | 44365000 | 1.7E+08  | cytoplasm              | K11130 | A   | KOG3503 | H/ACA snoRNP complex, subunit NOP10                                         |
| Q9NPG4 | PCDH12    | 128.99 | 5.6904 | 0.8  | 1  | 1  | 1 | 37543000 | 0        | endoplasmic reticulum  | K16499 | S   | KOG3594 | FOG: Cadherin repeats                                                       |
| Q9NQC3 | RTN4      | 129.93 | 11.755 | 4.9  | 2  | 2  | 2 | 2.46E+08 | 2.87E+08 | plasma membrane        | K20720 | U   | KOG1792 | Reticulon                                                                   |
| Q9NQG5 | RPRD1B    | 36.899 | 12.844 | 7.4  | 2  | 2  | 2 | 4327400  | 14111000 | nucleus                | K15559 | A   | KOG2669 | Regulator of nuclear mRNA                                                   |
| Q9NSI2 | FAM207A   | 25.456 | 5.9571 | 6.1  | 1  | 1  | 1 | 0        | 0        | nucleus                |        |     |         |                                                                             |



|        |          |        |        |      |   |   |   |          |          |                       |        |    |                                                                                     |
|--------|----------|--------|--------|------|---|---|---|----------|----------|-----------------------|--------|----|-------------------------------------------------------------------------------------|
| Q9NX40 | OCIAD1   | 27.626 | 12.761 | 18.8 | 2 | 2 | 2 | 7684700  | 47680000 | nucleus               |        |    |                                                                                     |
| Q9NY93 | DDX56    | 61.589 | 9.3496 | 2.7  | 1 | 1 | 1 | 7122800  | 11793000 | nucleus               | K14810 | A  | KOG0346 RNA helicase                                                                |
| Q9NZ45 | CISD1    | 12.199 | 5.9327 | 12   | 1 | 1 | 1 | 0        | 14742000 | extracellular         |        | R  | KOG3461 CDGSH-type Zn-finger containing protein                                     |
| Q9NZN4 | EHD2     | 61.161 | 20.895 | 10.3 | 3 | 3 | 3 | 5540300  | 80564000 | cytoplasm             | K12469 | TU | KOG1954 Endocytosis/signaling protein EHD1                                          |
| Q9P035 | HACD3    | 43.159 | 6.1709 | 6.1  | 1 | 1 | 1 | 3325100  | 47841000 | cytoplasm             | K10703 | R  | KOG3187 Protein tyrosine phosphatase-like protein PTPLA (contains Pro)              |
| Q9P0J0 | NDUFA13  | 16.698 | 18.473 | 16   | 2 | 2 | 2 | 7295600  | 37105000 | cytoplasm             | K11353 | CD | KOG3300 NADH:ubiquinone oxidoreductase, B16.6 subunit/cell death-regulatory protein |
| Q9P2E9 | RRBP1    | 152.45 | 5.6389 | 1.2  | 1 | 1 | 1 | 0        | 0        | endoplasmic reticulum | K14000 |    |                                                                                     |
| Q9UBD6 | RHCG     | 53.178 | 23.575 | 9.2  | 2 | 3 | 2 | 3858700  | 70541000 | plasma membrane       | K06580 | UR | KOG3796 Ammonium transporter RHBG                                                   |
| Q9UDW1 | UQCR10   | 7.3084 | 7.2677 | 27   | 1 | 1 | 1 | 4543400  | 12839000 | mitochondria          | K00419 | C  | KOG3494 Ubiquinol cytochrome c oxidoreductase, subunit QCR9                         |
| Q9UJC5 | SH3BGRL2 | 12.326 | 5.5437 | 12.1 | 1 | 1 | 1 | 0        | 21047000 | cytoplasm             |        | S  | KOG4023 Uncharacterized conserved protein                                           |
| Q9UM00 | TMCO1    | 21.175 | 8.3169 | 8    | 1 | 1 | 1 | 7150400  | 45256000 | extracellular         | K21891 | S  | KOG3312 Predicted membrane protein                                                  |
| Q9UMY1 | NOL7     | 29.426 | 6.7256 | 5.4  | 1 | 1 | 1 | 15385000 | 21291000 | nucleus               |        |    |                                                                                     |
| Q9UQ80 | PA2G4    | 43.786 | 6.1233 | 5.8  | 1 | 1 | 1 | 11917000 | 13548000 | nucleus               |        | R  | KOG2776 Metallopeptidase                                                            |
| Q9Y224 | RTRAF    | 28.068 | 14.607 | 13.9 | 2 | 2 | 2 | 18730000 | 57139000 | cytoplasm             | K15433 | R  | KOG4380 Carnitine deficiency associated protein                                     |
| Q9Y241 | HIGD1A   | 10.143 | 7.1218 | 19.4 | 1 | 1 | 1 | 0        | 15337000 | cytoplasm             |        | R  | KOG4431 Uncharacterized protein, induced by hypoxia                                 |
| Q9Y281 | CFL2     | 18.736 | 10.625 | 39.2 | 5 | 8 | 2 | 7478900  | 33080000 | mitochondria          | K05765 | Z  | KOG1735 Actin depolymerizing factor                                                 |
| Q9Y295 | DRG1     | 40.542 | 5.5475 | 3    | 1 | 1 | 1 | 0        | 0        | cytoplasm             |        | T  | KOG1487 GTP-binding protein DRG1 (ODN superfamily)                                  |
| Q9Y333 | LSM2     | 10.834 | 13.51  | 28.4 | 2 | 3 | 2 | 14493000 | 76749000 | cytoplasm             | K12621 | A  | KOG3448 Predicted snRNP core protein                                                |
| Q9Y3B3 | TMED7    | 25.171 | 7.7208 | 5.8  | 1 | 1 | 1 | 0        | 18200000 | mitochondria          | K20349 | U  | KOG1693 emp24/gp25L/p24 family of membrane trafficking proteins                     |
| Q9Y3B4 | SF3B6    | 14.585 | 5.5693 | 11.2 | 1 | 1 | 1 | 14344000 | 36025000 | nucleus               | K12833 | R  | KOG0114 Predicted RNA-binding protein (RRM superfamily)                             |
| Q9Y3B9 | RRP15    | 31.484 | 5.5586 | 3.9  | 1 | 1 | 1 | 0        | 0        | nucleus               |        | S  | KOG2974 Uncharacterized conserved protein                                           |
| Q9Y3C1 | NOP16    | 21.188 | 6.2276 | 3.9  | 1 | 1 | 1 | 8380600  | 12981000 | nucleus               |        | S  | KOG4706 Uncharacterized conserved protein                                           |
| Q9Y3T9 | NOC2L    | 84.918 | 8.1003 | 2.1  | 1 | 1 | 1 | 2564200  | 15010000 | nucleus               | K14833 | J  | KOG2256 Predicted protein involved in nuclear export of pre-ribosomes               |
| Q9Y5J1 | UTP18    | 62.003 | 6.0631 | 3.1  | 1 | 1 | 1 | 0        | 11635000 | nucleus               | K14553 | R  | KOG2055 WD40 repeat protein                                                         |

Supplementary Information

Supplementary Table 3. A representative list of proteins subject to remarkable methylation or demethylation in senescent cells.

**A. Differentially modified sites summary (Filtered with threshold value of expression fold change, dimethylation)**

| Compare group | Regulated type | Fold change >1.2 | Fold change >1.3 | Fold change >1.5 | Fold change >2 |
|---------------|----------------|------------------|------------------|------------------|----------------|
| SEN/CTRL      | up-regulated   | (0)              | (0)              | (0)              | (0)            |
|               | down-regulated | 1 (1)            | 1 (1)            | 1 (1)            | (0)            |

| Protein accession | Position  | Amino acid | Protein description | Gene name | Localization probability | PEP       | Score | Modified sequence         | Charge | Mass error (ppm) | MS/MS Count | CTRL    | SEN      | SEN/CTRL Ratio |
|-------------------|-----------|------------|---------------------|-----------|--------------------------|-----------|-------|---------------------------|--------|------------------|-------------|---------|----------|----------------|
| Q71DI3            | <b>36</b> | <b>K</b>   | <b>Histone H3.2</b> | HIST2H3A  | 0.837398                 | 0.0267953 | 64.22 | KSAPATGGVK(0.837)K(0.16:4 |        | -2.4441          | 1           | 5175500 | 15592000 | <b>0.554</b>   |

**B. Differentially modified sites summary (Filtered with threshold value of expression fold change, trimethylation)**

| Compare group | Regulated type | Fold change >1.2 | Fold change >1.3 | Fold change >1.5 | Fold change >2 |
|---------------|----------------|------------------|------------------|------------------|----------------|
| BLEO/CTRL     | up-regulated   | 1 (1)            | 1 (1)            | 1 (1)            | (0)            |
|               | down-regulated | 3 (2)            | 3 (2)            | 2 (2)            | (0)            |

| Protein accession | Position  | Amino acid | Protein description                                 | Gene name | Localization probability | PEP       | Score | Modified sequence      | Charge | Mass error (ppm) | MS/MS Count | CTRL     | SEN      | SEN/CTRL Ratio |
|-------------------|-----------|------------|-----------------------------------------------------|-----------|--------------------------|-----------|-------|------------------------|--------|------------------|-------------|----------|----------|----------------|
| P05141            | 52        | K          | ADP/ATP translocase 2                               | SLC25A5   | 1                        | 0.001817  | 129   | QYK(1)GIIDCVVR         | 2      | -0.78278         | 2           | 42366000 | 1.75E+08 | 1.66           |
| P0DP25            | 116       | K          | Calmodulin-3                                        | CALM3     | 1                        | 4.783E-18 | 231.9 | HVMTNLGEK(1)LTDEEVDEI3 |        | -0.4112          | 11          | 1.54E+09 | 7.47E+09 | 0.863          |
| P68104            | 318       | K          | Elongation factor 1-alpha 1                         | EEF1A1    | 1                        | 0.0643065 | 63.82 | NVSVK(1)DVR            | 2      | -0.84943         | 1           | 36018000 | 46913000 | 0.526          |
| P68104            | 79        | K          | Elongation factor 1-alpha 1                         | EEF1A1    | 1                        | 8.348E-07 | 141   | GITIDISLWK(1)FETSK     | 3      | -0.05163         | 2           | 46087000 | 54182000 | 0.701          |
| Q71DI3            | <b>27</b> | <b>K</b>   | <b>Histone H3.2</b>                                 | HIST2H3A  | 0.999996                 | 0.0267953 | 64.22 | K(1)SAPATGGVKKPHR      | 4      | -2.4441          | 1           | 5175500  | 15592000 | <b>0.554</b>   |
| Q9HBG6            | 711       | K          | Intraflagellar transport protein 122 homolog IFT122 |           | 1                        | 0.0500242 | 78.52 | FHEAAK(1)LYK           | 2      | 0.015077         | 1           | 0        | 1.32E+08 |                |

## Supplementary Information

**Supplementary Table 4. A representative list of human genes associated with ChIP-seq identified H3K9me3 peaks differentially mapped between experimental conditions of stromal cells.**

| Category name                                               | Number of peaks | Gene names (as output elements)                                                                                                                                                                                                                                                                                                                                                                                                                                                                                                                                                                                                                                                                                                                                                                                                                                                                                                     |
|-------------------------------------------------------------|-----------------|-------------------------------------------------------------------------------------------------------------------------------------------------------------------------------------------------------------------------------------------------------------------------------------------------------------------------------------------------------------------------------------------------------------------------------------------------------------------------------------------------------------------------------------------------------------------------------------------------------------------------------------------------------------------------------------------------------------------------------------------------------------------------------------------------------------------------------------------------------------------------------------------------------------------------------------|
| Overlapping between 'BLEO vs CTRL down' and 'BM vs BLEO up' | 116             | FAM230E OR11H12 ROCK1 MMP1 POTEA USP17L20 TPTE MIR6724-1 ART1 CHEK2P2 MMP3 FAM230F CXCL8 FRG2 IL7 RNA28SN3 LSP1P5 LOC390705 KCNE1B ACTR3BP2 MIR6724-3 MTRNR2L9 RNA28SN5 EPHA3 MIR10396A ZXDA NID1 FRG1DP MMP10 DEFB115 SFRP2 MIR4477A PROS1 SPINK1 ASNRP1 MMP12 LOC650226 AREG RNA5-8SN5 HCN1 LOC101929512 HAVCR1P1 CWH43 LINC00960 MMP8 LOC105379477 EMB EMBP1 CCNYL3 CCT8L2 ROCK1P1 FAM230C FRG1FP ZNF733P MIR5195 OTOAP1 OR11H1 ALG10B ZNF716 REXO1L2P LOC102724904 ACTR3BP5 LINC00999 ZNF707 MMEL1 FRG2B BAGE OR4C46 PLCH2 RNU2-1 LINC02218 LOC284240 CXCL1 LOC102723769 LOC100132249 LOC646813 MIR6724-2 ANKRD26P1 ACTN2 LSP1P4 SPIN4 IZUMO1R FRG1CP SLC6A10P RHOA LOC644669 BMS1P14 FRG1EP WNT16 ALG10 LOC102724159 FRG1BP USP17L6P SPRY3 DUX4 RNA5-8SN4 SNHG27 LOC100506585 MTRNR2L1 H3.Y GYG2P1 TEKT4P2 ANKRD30BP2 IL1B BMS1P22 LINC01667 LINC02167 FRG2EP RNA45SN3 MIR663AHG CSF2 MIR4477B DCUN1D4 MIR9901 ARHGEF18 ZNF565 |
| Unique to 'BLEO vs CTRL down'                               | 45              | LOC101929572 LOC102724843 CDKN2A-DT DOCK1 LOC102724580 RNA5S2 LOC112267871 SNORD164 LOC105369266 LOC100133920 RNA5S11 LINC01945 TTC34 LOC100134317 DHX32 USP17L24 ACAP2 UNCX FAM90A7P FAM72C RN7SL1 CDKN1A NKX1-1 USP17L15 FANK1 MIR4273 RNA5S16 RNA5S6 ZNF717 BAGE2 ZNF875 HGH1 ELOA3 MLLT10P1 MIR6724-4 RNA5S4 ZNF561 LOC286083 ABR MIR3648-1 DLEC1 FRG1HP DUSP5P1 C7orf33 SPATA31A5                                                                                                                                                                                                                                                                                                                                                                                                                                                                                                                                              |
| Unique to 'BM vs BLEO up'                                   | 16              | USP17L28 FRG1JP BAGE3 RNA28SN2 RNA28SN1 RNA5-8SN3 RNA5S14 MIR3648-2 SNAR-C3 ELOA3D                                                                                                                                                                                                                                                                                                                                                                                                                                                                                                                                                                                                                                                                                                                                                                                                                                                  |

|  |  |                                                        |
|--|--|--------------------------------------------------------|
|  |  | RNA5S3 SPATA31A7 USP17L11 UBBP4 LINC01163<br>LINC01596 |
|--|--|--------------------------------------------------------|

## Supplementary Information

**Supplementary Table 5. A representative list of human genes associated with ChIP-seq identified H3K36me3 peaks differentially mapped between experimental conditions of stromal cells.**

| Category name                                               | Number of peaks | Gene names (as output elements)                                                                                                                                                                                                                                                                                                                                                                                                                                                                                                                                                                                                                                                                                                                                                                                                                                                                                                                                                                                                                                                                                                                                                                                                                                                                                                                                                                                                                                                                                                                                                                                                                                                                                                                                                                                                                                                                                                                                                                                                                                                                                                                |
|-------------------------------------------------------------|-----------------|------------------------------------------------------------------------------------------------------------------------------------------------------------------------------------------------------------------------------------------------------------------------------------------------------------------------------------------------------------------------------------------------------------------------------------------------------------------------------------------------------------------------------------------------------------------------------------------------------------------------------------------------------------------------------------------------------------------------------------------------------------------------------------------------------------------------------------------------------------------------------------------------------------------------------------------------------------------------------------------------------------------------------------------------------------------------------------------------------------------------------------------------------------------------------------------------------------------------------------------------------------------------------------------------------------------------------------------------------------------------------------------------------------------------------------------------------------------------------------------------------------------------------------------------------------------------------------------------------------------------------------------------------------------------------------------------------------------------------------------------------------------------------------------------------------------------------------------------------------------------------------------------------------------------------------------------------------------------------------------------------------------------------------------------------------------------------------------------------------------------------------------------|
| Overlapping between 'BLEO vs CTRL up' and 'BM vs BLEO down' | 2027            | TRAF3IP2-AS1 ZNF799 OR2K2 LMAN1 MIR6886 CHRNA10 ZAR1L<br>PARN SOD2 MIER1 MIR4511 EVC SCYL3 NAT10 LINC02601 DHRS11<br>TAOK3 BAZ1B TERF2IP CD160 PHF20 COL1A1 RAB33B ZNF83<br>CEP350 MIR1228 SNORD98 VWA5A ABR LINC00597 POLR2B GPN2<br>GCC2 WBP4 KIAA0100 SETDB1 RUVBL1-AS1 PTP4A2 BDKRB1<br>SEC14L1 CHFR SF3B6 NIPSNAP3B ELAC2 GTF2IP20 RICTOR<br>ZNF687 COX7A2 KDM4B UBN2 LINC01450 WASHC5 MRM3 COMMD5<br>OSBP WASHC3 ZNF350 AHI1 EIF4A3 PRPF3 PXN-AS1 CAMSAP1<br>MIR6889 SNORA58B MIR628 EXOC1 TTC13 VRK2 FARSA-AS1<br>ZNF568 TTC3 TMEM248 ANKRD26 SCR1 PFN1P2 FAM161A PIGG<br>JAK2 RNU6-2 CASP1 LINC01619 RAB11FIP4 TALDO1 EHD2 YTHDC2<br>XXYLT1 NPIP5 SAFB2 MIR6868 CCAR2 CALCOCO2 ZNF551 HBQ1<br>GEMIN6 LINC-PINT BSDC1 MIR1182 ZNF480 LOC102723582 PROS1<br>PSMB8 ZBTB41 AHCTF1 PCNX2 WDR26 TOMM22 SOCS3 SOX15<br>EPN1 GAL RDH11 KIF1B SPHAR ALAS1 DUSP10 FBXO7 STH ZC3H14<br>SNORA68 ZNF287 ZFYVE9 HSD17B13 FBRS GRAMD1C GSR<br>SCGB1C2 SIGLEC15 HEATR5A MIR4498 CFAP36 GUSBP5 SLC35F5<br>EMB SRP14 LINC01587 MIR6780B UBN1 CTNNA1 MIR765 KRTCAP3<br>SPDYE10P C19orf18 ZNF16 RFT1 TACC1 ARL17B UBE2CP5 MDM2<br>GNAI1 VPS4B SLC25A4 CYB5B FARP2 ZFP36L1 GPR161 ZNF10<br>HOXB-AS1 LOC100506321 NEO1 TARS2 ZNF624 AGL SH3D21 DEGS1<br>TCTEX1D4 CMTR1 TXNRD1 FUT11 ABHD8 ZNF121 MTHFD1L SYT11<br>ZNF585A TARDBP LRP1-AS CHMP1A ZNF160 LRSAM1 ADAR DHX29<br>NSFL1C XRN1 SNX22 CROCCP2 SDC3 RPUSD2 MIR1226 ZSCAN31<br>RSPH10B ZNF559-ZNF177 MIR4430 POLR2J3 POU5F1P4 SNORD164<br>ZNF594 SLC41A1 LY6G5B ZMYM2 PCOTH MRPS21 ITCH GTF2H2C<br>MIR12119 PIK3R1 STAMPB MIR555 SNORA90 ELMOD3 OIP5-AS1<br>NEK9 ADNP BTD ZNF570 ZNF847P MIR6081 ACBD3-AS1 SORBS3<br>SNORD62A UBAP2 NBPF14 SBDSP1 C11orf65 MIR4714 HMGXB3 TPR<br>ZSCAN20 LOC105371998 MCPH1 ZNF57 CHCHD2 RHOBTB1 SLC4A4<br>SUMO1P3 AP2A2 DDX56 MRPS18B ZNF682 IL1R1 STIM2-AS1 NR1D1<br>ARID1A RPL23AP82 UQCRH SAV1 ZNF445 LOC154761 SNORA14B<br>LBR MIR1255B2 MMS19 KDM4A-AS1 ZNF485 MIR4785 LOC100289580<br>LOC101927018 SLTM NID1 KIF7 NBEAL1 SMARCC2 POLI ZNF248<br>IRF2BP2 ZNF230 C5orf24 RNF41 THOC5 MUSK LOC102724904<br>ZNF347 STRADB ARHGAP17 OR4C46 LOC646813 LINC00260 SMAD3 |

MIR597 YARS2 RMC1 ZNF669 CDK12 CHMP5 ZNF43 SKP1 ZBTB38  
FYCO1 RAPH1 MIR558 ZFP37 ZNF154 ACBD5 TIPARP VEGFA IPO8  
PHC3 TNFRSF11B EXO5 ZNF117 GPCPD1 PIGV EMBP1 DYNC1LI2  
RSKR ERMP1 SCD5 LSG1 CBR4 MIR7161 MIR574 CDR2 ZNF778  
SRP68 ARPC5 NPIP11 UBR5 ZNF20 ANXA6 SNORD13H PPHLN1  
CNTF STC1 STOM CPSF3 MIR548A3 GBAT2 ARPP19 BOLA2 RNF19B  
MPI SDHAP1 FAM229B ARMH3 TCTN1 MIR6766 MPZL1 SPIN4 VPS11  
MTCH1 CDC26 LAMTOR5-AS1 ZNF32-AS1 PPIB SCARNA11 GOLGA5  
ATP5MC2 IL6R-AS1 PYGO2 PPP1R10 TOM1 SLC26A11 RIOK3  
NSUN5P1 PPP1R12C MRPS26 PRICKLE2-AS3 NPIP3 UBE2B  
SNORD141B ARRDC4 TRAPPC10 SERPIND1 ZNF184 ZNF267 TXNIP  
ZNF260 SEC31A POLR2D HNRNPC FXR1 ZNF461 TH2LCRR  
PRPF40A RGS2 LOC101927604 IVNS1ABP MIR125B1 MIR6735  
ACTR3BP2 EPHA3 RBM12 MOV10 DEDD TMEM9 ZNF174 LEAP2  
SLU7 ANAPC11 UBR5-AS1 MIR6827 DNAJA2 PPIAP30 CCNL1 GDAP2  
MIR1231 ZNF491 COX6B1 LOC102723769 RNFT1 B3GNT4 SNX27  
DENND10 SLC16A6 HIBCH UTS2 DNMBP SEC24C LOC101929599  
RUSC1 DHX57 FAM177B ZNF226 ZNF773 APH1A COX18 TP53INP1  
MIR26A2 BAZ2A SECISBP2L DDX6 AP3M1 AKAP9 NGLY1 HLTF-AS1  
RBM22 TRIM38 CORIN TMCC1 SMG5 CYCSP52 NIT1 MIR3651  
FRG1CP DUT ZNF34 CDC73 GSTM3 EIF3L PMS2P5 NPIP13 RIT1  
RAB13 KIAA1614 MIR3162 TUBG2 PSMD1 CDC123 AMN ZNF700  
HAVCR1P1 TTC23L MIR6738 ZNF607 ZNF733P RAB11A SNX1  
MIR5191 MIR3175 ZFR MIR6852 MFSD4B TTC23 TRIM39-RPP21  
SMA4 OVCH1 MYPOP MIR6511B2 UCHL5 AIM2 SHC4 RARS ZFP69  
COX4I1 DTWD1 ARID4B SETX ZNF326 ZNF8-ERV3-1 IFT57  
LOC105379183 LMNA ZNF250 ZNF12 SNED1 ST7 PDHB MIR1343  
MIR4799 AP4E1 RASA3 PGD WAC ZNF816 MTMR11 SUOX STXBP3  
EIF3G UPK3BL1 SLC18B1 SUSD1 MIR553 PRUNE1 PRKAG1 MDM4  
NBPF15 ZNF200 LIMS3-LOC440895 CBR1 SNORD151 ZNF638  
VPS33A TFIP11 MIR3662 MIR4759 BTG3-AS1 SNORD13F MINDY1  
ZNF181 PIKFYVE PI4KB OAZ2 SNORA70G HSD11B2 CACTIN USE1  
CAND1 COL4A2-AS2 CDK11A COL9A2 PALLD GNAS MIR4757  
GOLGA3 BBS7 ZNF345 RTF1 WDR59 EVI2A INE1 TPI1 ZNF484 RIN2  
LOC100288069 HYOU1 ZNF25 ZSCAN16 STARD13 NPTN-IT1 SBNO2  
PSMD3 MPP4 PACC1 ZNF331 ZNF24 PIP4K2B EBPL MIR664A UQCC1  
RGL1 APPBP2 USP19 KDM5A ZNF467 MYOCOS CFAP298 NUP88  
DHX16 ARL2BP HSPA8 ABCC11 ZNF432 FUBP1 AAMDC NOTCH2NLC  
ZNF583 ATP1A1 ZNF805 IFI16 CLTCL1 ZNF891 SEC63 TOR1AIP1  
CEBPD SVEP1 GANAB C1orf198 BMP8A ZNF254 PSMC4 SGK1  
ZNF271P RARS2 LRBA NFKBIZ PPOX ZNF439 PLIN3 ATG7 HYPK  
MCFD2 TRPA1 FAM81B CBX1 SPIDR UBE2D3 MIR579 ZNF561  
RUNX1T1 EAF1 CTSK TRIM35 ZFP90 SLC30A7 S100B LINC01000  
ZNF565 NACA GLOD4 ZNF790 SPATA9 TEX10 TNFRSF19 HIF1A-AS2

DENND2A SCFD1 THEM4 NTPCR ZBED6 FAM91A1 CALM2 BNIPL  
GNA13 ARL8A NEK10 STAT1 PEX11B IRF2BPL PROCA1 BBX  
LOC100133331 FN3K EFEMP1 TRIP11 LOC101929479 KIAA1109  
LNX1-AS1 RAB24 GREM2 ZNF577 CCDC174 INPPL1 VPS35 ZNF563  
DTX2 RABIF DYRK3 RBM34 CDRT1 ZNF528 ZNF44 MTFR2 ZNF555  
SASH1 LOC100506076 ALG10B CDC14B ANGPT1 LSM14B HECTD1  
ELOA SNORA94 RPS6 TBCE TTC36 MAPK1 GADD45A MASC RNA  
DHX8 UBE3B SPDYE8P IKBKB LINC02167 TRIM66 ZNF132 USF3  
UBE2Q1-AS1 POLDIP2 VPS37A NISCH LRRC37B CCNT1 TNKS1BP1  
SNORA3B ZFYVE28 PIK3R2 AKR1B1 PSMB4 GSDMB PMPCB NID2  
ZNF616 EXTL2 CNIH4 POP1 RNF24 SETD1B ZNF606 SSR1 NFS1  
PDE4B ITFG1-AS1 ARFGAP3 KIF13A ADIPOR1 LOC100379224 DDX59  
DNTTIP2 TAF3 GOSR2 DSCR9 ZNF772 NR2C1 GLS IL4R KANK2 PEX5  
TM4SF1 EMILIN2 SDE2 RAD21-AS1 MAP4K3-DT CAT ACTR3BP5  
APH1B USP36 CTNND1 NUDCD3 NUP50-DT GUSBP9 PITRM1 USO1  
RUFY3 LDB1 ABCC1 LINC01341 FCER1G LOC101928000 TPST1  
EPAS1 TPH2 JDP2 MORF4L1 LINC00680 ELK3 TTLL5 FBXO28 INO80  
TMTC1 ERGIC2 CTTNBP2NL FSD1L NPIP12 MIR3189 BCAS3  
ZNF658B EDEM3 DBIL5P PURPL ZNF235 MIR4517 AOC2 LOC343052  
ZNF780A ZNF471 PPP3CB-AS1 NCKAP5-AS2 WAKMAR2 MIR548AR  
OCLM AGFG1 PWWP3A SEC23B SPTLC1 TMOD4 PHLDA3  
MIR181A1HG NUP214 SDCCAG8 NUP210L NR2F1 GPR3 RC3H1  
PRDX6 ILF2 ZNF500 ZNF506 AIDA PAIP2 ZNF879 LOC101928021  
ACAT1 FBN2 LOC101926943 ST3GAL1 MTRNR2L1 TEKT4P2  
SPATA31A5 MRPL24 TFCP2L1 FEM1B FOPNL TTYH3 LOC105371703  
H3F3AP4 ZNF665 ANGPTL7 ZFP69B SCARNA4 MEAK7 CDKL4 SWT1  
CDC25C RCOR3 CPSF7 ARID5B SPTAN1 ACTR1A SCARNA26A PPIG  
MYL6 POMZP3 ZNF441 ECM1 METTL15 TMEM165 KIAA1549L UHMK1  
PIM1 USP9X MIR103A2 NBPF20 CBLB UGDH-AS1 MYOF TMTC3  
LUC7L UNC13D SMAD7 MIR4448 RHBDD2 SDC4 FHL2 PSMB2 ITPKA  
PDPR DDX60 DOLPP1 EPRS DENND4B ZNF792 TTC39C ZNF234  
THOC1 INTS10 ZNF124 SPRED1 ZNF217 ZNF101 ACO1 RNVI1-19  
DDA1 LOC441666 RND3 ZNF599 RALGDS RNU4ATAC LOC400499  
MTOR-AS1 JCAD MIR1972-2 MSANTD1 TP53BP1 DDX46 CSNK1A1  
DIS3 SKIV2L ATF4 ZNF829 HEG1 SNORD159 SPATA7 CEP95 MAZ  
ANXA5 ZMAT3 PCNX1 MIR744 MIR6878 ETF1 MIR185 HSP90AA1  
MIR4721 KIAA1614-AS1 CCDC68 MIR6739 SLC25A25 GAPVD1  
ZNF140 SMIM4 ZNF701 TAF6 TUBB2A PRG4 MIR644A HERPUD1  
PXDC1 SRXN1 CPEB2 SCARNA28 CYP20A1 CCDC191 FGF7  
LOC102724995 FNBP4 LINC02478 YIPF1 JMY ZNF451 ZNF844  
ALDH3A1 SPG21 ZNF286A CLEC2L DENND3 LOC100506691 SSH1  
GNPNAT1 CCNG1 EPG5 PTH2R DDN GLUL NOTCH2NLA EPHX1  
MIR4502 ANKRD36BP1 ZNF14 DNPH1 CALCRL STAG3L1 MIR103B2  
TGOLN2 MIR181A1 C9orf131 ZNF528-AS1 NBPF11 ANPEP TRIP4 DST

CAB39 ZCCHC8 ARID4A CYP26B1 LOC100289333 YLPM1 RAVER2  
ZNF470 SMC5 SMN1 BACH1 EXOG LINC01347 RBBP5 PSMD13  
FAM227A PITPNM3 ZNF443 RBM5-AS1 NDUFS5 EYA4 ALG10 GAS8-  
AS1 CFHR3 SF3B4 ZNF222 COL10A1 WDR55 NBPF9 CACNA1C-AS2  
ELL2 RIPOR2 IGFBP4 HLX-AS1 ZNFX1 B3GALNT2 CLNS1A MIR378H  
DNER MALSU1 NRG1 ZNF557 ZNF658 LOC101927356 TNS2 GHSR  
MYBPHL FMN2 VDAC2 VHL SNORD8 SPART PLSCR3 TOP1  
KRTCAP2 DPY30 MIR4677 BTG2 ABCC6 LRRC41 C12orf66  
LOC101927151 C2orf49 ANAPC4 COX15 FBH1 SRPK1 ARL6IP1  
ATXN10 UFSP1 LHFPL2 ACTR8 ZNF510 ZNF623 PPP1R15B TXNDC8  
VGLL3 TRAF5 KLF3-AS1 MARF1 SRSF11 PXDN ZNF35 VIM-AS1  
COG1 IRS1 ZSCAN32 PCDH18 MIR3117 LOC100507346 KDM2A  
ZNF227 QRICH1 HP1BP3 XPC GMFB STAT5A SF3A3 PALM2-AKAP2  
SLC3A1 PIGF LOC100130111 YIPF2 PSMF1 NRF1 MICALL1 DUS4L  
CHEK2P2 STRIP1 CCT4 ZNF709 CHMP6 MRPL41 SCAMP3  
LOC101928809 ZNF137P ZNF649-AS1 SVIL MIR6839 MIR29B2 TCF21  
DLST ZNF419 TLK1 EIF3D MPC2 FBF1 EXOSC10-AS1 LAMTOR3  
POLR1A TNFRSF1A ISCU HBP1 DAGLB MCM10 CLK3 LOC105377621  
KDEL1 NT5E BEGAIN GK5 LOC653513 ACLY IL15RA HMBOX1  
MUC20 MSTO2P ZNF677 STX5 PGBD3 SUPT16H LOC100128108  
MIR6826 PCSK9 LOC728024 MIR21 KLHDC2 LOC729218 GCLC  
TWSG1 CTDP1 MIR6769B ELK4 ZNF846 SMURF2 ADAD1 PES1  
TRIM24 PABPN1 CC2D1B ZNF695 ABCD3 MSC-AS1 ZNF84 CITED2  
POLR3A ADGRE5 LOC105379477 RRN3P3 XPO6 ZDHHC7 ERCC4  
BLMH TXLNG FAM171B PRPH2 RPS10 PSMB7 SNORD90 MMP14  
LOC105374727 SLC10A6 APPL2 MIR599 CAPN2 FXD5 ZNF763  
EGFR-AS1 RPL15 APTR ABCB9 STAB1 ARMC9 ZNF211 MIR548AT  
PFDN1 MINPP1 PRPF8 RTRAF TMEM39B THBS1 ZNF433 SLC30A1  
ABCA11P SPATA18 MIR620 C16orf72 MIR4753 SNORA2B RBM5  
TUBGCP4 SNORA30 SSR2 SYF2 ARHGAP5 SNORD170 KTI12 PDHX  
ZNF720 POLR2A OGFOD1 MYLK-AS2 PDE4DIP NADK VCAN SYNE1-  
AS1 RNH1 PPP6R3 PGPEP1L PBXIP1 CCL26 ZNF550 ZNF567 FAT1  
FAM25E STAM2 LOC100130373 CACNG1 PDGFRA GTF2E2 SH3BP5-  
AS1 IZUMO1R AKAP8 HADHA SWI5 RPAP2 MIA3 CXCR6 TRIM46  
MIR6832 TIGD3 VIPAS39 ZNF404 ADSS LOC105370361 MIR4681  
ZNF2 NFKBIA PSMA6 CRTCL1 ZNF823 KCTD3 NXPE3 LINC00616  
FAM20C TSFM NBPF25P TTC33 MIR4723 LOC101928673 PRCC  
ZNF675 CALCOCO1 PMS2P9 UBR4 CTTN LINC00472 ARSJ MIR6514  
UQCRC2 HDLBP ACTR2 ZNF304 EIF2D ADAM30 SRGAP2-AS1 KANK1  
ZNF416 ZNF225 HECA RYK NCF1B ID3 CAPN3 TPD52L2 C19orf53  
TPP2 LAPTM4A ABL2 MIR4742 RGS3 OBSCN-AS1 ABHD4 YOD1 TBX5  
NAPG ZNF513 SLC66A3 MDH1 RPL7L1 KATNAL1 PAQR6 VCAN-AS1  
LOC644189 OSMR VWA8 LOC647070 ZNF175 SLC40A1 NCF2 HUS1B  
FAM133B NIPSNAP1 PI4K2A MED8 SNRPA C9orf163 ETS2 PRMT2



PRDX1 SGIP1 MIR4644 HIRA BAG1 AEBP2 NEAT1 RBMS2 ANTXR2  
ZNF765 MID1 MAPK9 TRIM37 PDCD7 GRSF1 ABCC4 ZFP36L2  
FRG1HP FTL ZNF595 PRPF4B CCNL2 CDC42SE1 ENDOV PMS2CL  
NAA20 GSN SMARCA5 FRMD6 SENP6 SLC1A2 STXBP5-AS1 SAMD9L  
MAN1C1 MIR1302-5 PDK2 NEK1 DUSP1 DDAH2 STX7 SLC45A2 MRC2  
SETD5 MYO18A MTSS2 ATM PRRC2C ZNF134 HHIPL2 TTC3-AS1  
TMEM183A TMEM106A FCHSD2 MIR6506 ZNF195 DHX34 CELF3  
NUMBL H2AFX SNORA77 GOSR1 RAB7B SPCS1 KDEL3 LRRC73  
IER3-AS1 TMED10P1 DYNLRB1 MAP4K5 EXOSC8 ARHGAP23  
MIR6736 MCL1 PRNP SNORD71 RSPH6A LOC613038 KRBA2 ZNF335  
CPT2 LIMS4 ATP5PF MVP ZC3H18 SF1 RNF213 NCKAP1 CLK1 XPR1  
ZNF333 DUSP11 LSP1P5 LOC101927989 KREMEN2 SNORA55  
LINC01072 CDK9 CD59 ARHGAP18 POMP AHSA1 TIMM9 ORC2  
CERS5 LOC100289561 SNORD15B PABPC1L UBE2C MIR3675  
GTPBP4 TEX35 NBPF10 HTT TRAPPC8 ZFC3H1 ZKSCAN8 LINC01355  
MRPS5 NEMF ZNF841 ERVFRD-1 PDZK1P1 SNORA70B KLHL12  
SF3B1 OR11H1 PSMA7 LINC00342 TUBG1 WASHC2A PPP4R3A  
MXD3 IKBKE RNVU1-15 FAM98C EP300-AS1 MIR6885 IBTK BIRC6-  
AS2 ST14 MLF2 NRADDP MIR6740 SUPT20H C1orf189 ZFP64 SOCS2  
TMEM242 LOC646471 MBIP COPB1 COQ8B SMG6 CIZ1 NFX1 MBD3  
LOC100505549 MMD POLR2J2 CDV3 TOR1AIP2 DAP RRM2B GNPAT  
WDR18 LOC100131315 CAMKK2 TBC1D2 ZNF77 EIF3K ZNF28 POP5  
PTP4A1 CARF LOC440300 ZNF613 SNORD13G ZNF490 BMS1P20  
SERPINC1 F3 ZNF37A ZNF266 MIEF2 APOA1 KPNB1 FOXO3 IFT20  
RFX7 SUPT7L CSF1R TMEM101 RBM43 DDX3X SESN2 HNRNPL  
EPB41L5 SH2D5 HDC OCA2 RPS6KC1 TNFRSF10D SMARCE1  
STK17B LINC01964 LOC105379331 PATL1 RANGAP1 KCNJ2 ZNF684  
TKT PMPCA C9orf78 GAS5 NCF1C NBPF12 GYS1 LOC100134317  
ASNSP1 MIR12114 HCN1 RNF14 BAK1 SPECC1L TMEM39A  
LRRC37A4P HMGN1 ZNF718 ABCC5-AS1 PCYT2 TSC22D1 CLCC1  
ACSL3 IMPDH2 INTS6 ZFP14 ZNF660-ZNF197 ALKBH2 SNORA100  
SLC27A3 CEP170 MSH6 HECTD2 PTK2 RNF217 USP3-AS1 PLIN2  
NFKB2 FZD9 ZNF75A ZNF605 MIR1278 CELF1 EDRF1 POGZ NBPF19  
ZZEF1 FRA10AC1 LTBP1 MIR6818 PSMC3IP RASSF5 ATF1 DYNC1H1  
RGPD5 FENDRR CDC6 ATP5PD VSIG10L ZNF320 BRD8 MIR5706  
SPG11 KCNJ13 COP1 KRT8P41 LACTB2 VAMP4 MIR6851 DDX24  
NEK6 C6orf62 SOWAHB GUSBP1 FTH1 WWC2-AS1 SNORD53B  
TIMM17A ZNF354C NSD1 LARGE2 GLDN MIR7-1 LRRC42 RBM26  
CYB561 ANTXR1 CRCP ZNF177 ZNF442 ZNF627 WIPI2 SVIL-AS1  
ZNF468 BAG3 LAMC1-AS1 PSMD2 PLEKHO2 BCAS2 APTX SNRPG  
ZNF514 ZKSCAN1 HSD17B7 ZNF354A SELENOS MDH2 BCL6  
ZNF780B MIR5187 C1orf131 ZNF223 BIRC2 SP9 MIR4304 MAVS  
RNU2-1 SEC23A-AS1 LOC375196 MIR320E ZIK1 ANGPTL1 FHOD3  
SRRM1 HMGCR IFT74 EI24 HERC1 DOCK1 IL19 CDC27 ZFP62 TTC19

GFPT1 FAM126A MRPS10 IP6K2 LINC00032 EIF2B4 LEO1 NIBAN2  
MIR6861 SNORD168 METTL14 SNORD133 SRSF7 MIR4758 RIPOR1  
TBCEL LOC100192426 AMFR SNORA59A DKK3 PDCL DMXL2  
SCARNA26B NAE1 SNORD23 LOC105377102 MEX3A ZNF268 MYLK  
ARL4D GPBAR1 SLC25A17 ARHGEF28 AGAP6 GTF3C2-AS1 PDLIM4  
NPIPA8 ZNF880 MIR711 ZNF426 LOC400710 PHF2 ACTL7A TMBIM6  
DNAJC21 PDE7A ARSG ZNF483 LMBR1L RALGPS2 LINC01926  
SLC35D1 PSMD4 ERLIN1 MRPL27 RBPMS-AS1 ZNF26 CDK11B SNF8  
STX10 ZNF143 TIPRL LOC100287049 STK19 IGF2BP2-AS1 TGIF1  
TP53 ZFAND5 RAPGEF2 PSMC5 ZNF564 SNORA86 ZNF782 GPR25  
ATP6V0A1 MIR1256 ZNF615 DNAH3 ALG5 S100PBP SNORD94  
TCTEX1D1 ZMAT2 DLC1 MXD1 NUAKE2 PMS2P3 MANBA ZNF671  
UBFD1 ELP2 MIR663AHG ZNF418 KLHL11 MIR2110 ORC4 GYG1  
ZNF91 GAPDH GPX1 PRPF40B SNAPC3 B4GALT5 TRMT1L VNN2  
CALM1 GPS2 RUFY2 HSPB9 TP53BP2 ZNF850 ZNF440 TMEM81 C9  
MRNIP RRN3 SLC5A11 MEF2D MYO1B ANKRA2 LINC01820 ZNF189  
C1R TICAM1 ZFP28 LOC284454 DOCK4-AS1 TRIM22 TSC22D1-AS1  
MRPS14 MRI1 TGM2 BASP1 ZNF202 MIR6769A ZNF197 ZNF274 ATF3  
UCHL1 APOL6 ZNF397 SYT2 DDX47 ATP8B2 DPP4 PSMC2 EXOC6B  
C5orf15 ARNT ZNF596 SEMA3A EIF4EBP3 ACBD6 YEATS2 JTB  
GMCL1 MGAT5 RAP1GAP MEF2A ZNF836 TBX2 COL21A1 RAI14  
CLP1 ZNF716 LOC114483834 BNIP2 CASC3 PPP2R1B TANC1  
LOC644669 ZNF527 TTBK2 NRAS ABHD15 FAM133CP LINC01465  
TRAPPC2B ACTR6 SNORA50A ZNF585B NBPF1 SLC2A8 SNRPE  
LRIG3 MTFMT PRKAB2 AFF4 RSRP1 SNX4 COPS2 ZNF221 PIP5K1A  
PRKAR1A ATG5 RAD52 ETV4 ZFP30 BMS1P14 RAB11FIP3 MIR4743  
GNG4 RGCC SLC6A13 KANSL1 CRIM1 ZNF546 GABARAPL1  
ANGPTL8 BMP4 POTEA AHSA2P RNF115 GBA PNRC1 TRIB1 CD46  
TYSND1 DEF6 SEC22B CDKL2 POLR3C FBN1 ZNF621 TBL2 ATP5ME  
TXLNA DIPK2B PRR1 STAG3L3 SNORD163 KPNA1 FAM149B1 CLTC  
SRP9 SMYD2 ZNF761 FRG1EP ECI2 CORO6 MED23 INTS3 ZNF558  
TRPM4 FAM227B NMRAL1 EEF1AKNMT GPR89B CLOCK LOC91370  
PSMA4 ROCK1 SCARNA3 ZNF45 ZNF610 ZNF329 ZDHHC18 VEZF1  
SPDYE11 LINC01555 ZNF394 EFCAB10 PPP1R12B SACS FOXO3B  
LAYN PLK2 PRMT5-AS1 OPTN SP100 GORAB-AS1 ZNF283 SBF2  
ZNF699 MBD6 C17orf64 RTTN STX12 ZNF322 PTGR1 ZNF69  
CCDC144CP HSPA5 ZKSCAN5 ACAT2 ZMYM4-AS1 MICB LINC01096  
PPIF CPNE3 ABCF3 CTSL FOXF1 PRPF18 TMCO1 PAPSS1 NBPF26  
EID3 FLJ31356 MIR194-1 ZNF569 MED28 ADSL BAP1 TMEM161A  
ERP44 ZNF180 NDUFAF5 LOC100128494 PA2G4 LOC100190986 RILP  
MIR29C SDHC B4GALT3 MAP1B ATAT1 GGNBP2 MIR6870 PRPF38A  
OXNAD1 RNF40 IFT81 LOC100289511 NT5C2 NUCB1-AS1 TSACC  
DNAJB12 SCAND2P MIR4273 ARFGEF1 NOLC1 TKFC MIR6894  
QSOX1 PKDCC FOXP1 RGMA SERINC1 PEX19 PSMD7 PPP1R3C

|                                                              |             |                                                                                                                                                                                                                                                                                                                                                                                                                                                                                                                                                                                                                                                                                                                                                                                                                                                                                                                                                                                                                                                                                                                                                                                                                                                                                                                                                                                                                                                                                                                                                                                                                                                                                                                                                                                                                                                                                                                                                                                                                                                                                                                                                                                                                                                                                                                                                                                                                                                                                                                                                                                                             |
|--------------------------------------------------------------|-------------|-------------------------------------------------------------------------------------------------------------------------------------------------------------------------------------------------------------------------------------------------------------------------------------------------------------------------------------------------------------------------------------------------------------------------------------------------------------------------------------------------------------------------------------------------------------------------------------------------------------------------------------------------------------------------------------------------------------------------------------------------------------------------------------------------------------------------------------------------------------------------------------------------------------------------------------------------------------------------------------------------------------------------------------------------------------------------------------------------------------------------------------------------------------------------------------------------------------------------------------------------------------------------------------------------------------------------------------------------------------------------------------------------------------------------------------------------------------------------------------------------------------------------------------------------------------------------------------------------------------------------------------------------------------------------------------------------------------------------------------------------------------------------------------------------------------------------------------------------------------------------------------------------------------------------------------------------------------------------------------------------------------------------------------------------------------------------------------------------------------------------------------------------------------------------------------------------------------------------------------------------------------------------------------------------------------------------------------------------------------------------------------------------------------------------------------------------------------------------------------------------------------------------------------------------------------------------------------------------------------|
|                                                              |             | <p>TTC17 C3orf35 ZNF736 ZNF791 LOC729867 CERS2 TXN MIR570HG<br/>         BECN1 ATP6V1D PTGS1 ADPGK-AS1 ZNF112 ZNF436 SNRNP27<br/>         LOC100132215 HGSNAT KIAA0754 VPS13C GCC2-AS1 TULP3<br/>         OTOAP1 ATP2A2 MIR3126 STRN UEVLD ZNF845 ZGPAT BAX NCOA4<br/>         SMARCAL1 PRMT7 DNAH5 PGPEP1 RNF6 ZNF383 S100A13 WDR66<br/>         RETREG1 DNAJC13 VPS13B LOC645513 DCLRE1C XPO5</p>                                                                                                                                                                                                                                                                                                                                                                                                                                                                                                                                                                                                                                                                                                                                                                                                                                                                                                                                                                                                                                                                                                                                                                                                                                                                                                                                                                                                                                                                                                                                                                                                                                                                                                                                                                                                                                                                                                                                                                                                                                                                                                                                                                                                         |
| <p>Unique to<br/>         'BLEO vs<br/>         CTRL up'</p> | <p>6032</p> | <p>MSRB1 FSTL1 CLMP AACS ELMO2 PNMA1 SLMAP FAM219A<br/>         SAMD4A TMEM216 ERCC5 APBB2 GARS-DT PDCL3 DECR1 SALL1<br/>         IRAK1 ESYT1 MIRLET7G CHD8 SUMO1 GP1BA TMC4 UQCR11<br/>         LINC01279 EP300 CRNKL1 RNVU1-14 DTNBP1 COPRS EFCAB9<br/>         CYTH1 CHD9 TOB2 INIP NINL MAP3K3 GRM2 CAPS OSBPL8 LONP1<br/>         SLC25A52 LOC102723566 CHD1 WDR34 LHB ADNP-AS1 MINAR2<br/>         STK25 SNORA80D MIR611 NOXO1 HIGD1B ABCD4 LOC105372383<br/>         MIR331 MIR6807 SLC25A46 GTPBP1 MIR6746 ZNF212 ACBD3 PRDM2<br/>         MIR630 PDCD4 CST7 NUP42 CIAO1 LTBP4 SIRT6 MIR3121 C2CD3<br/>         ZDHHC6 NEFH PGBD5 EXOSC7 RFXAP RNF4 EMC1 HDAC7 ALG2<br/>         GRB2 TPM3 FPGT GDF10 LOC102724843 LOC101927178 PLXNA1<br/>         PMF1 CRELD2 CD82 PMM1 GCLM INTS1 BIN3-IT1 LOC100287497<br/>         GMPPA OGFR-AS1 EMILIN1 THADA PIK3CB PRORP CDCA4 C9orf16<br/>         MIR11401 MTMR14 USP42 TMEM59 LOC729603 SNX6 DDX18<br/>         BORCS8-MEF2B TMEM104 POMT1 CAPN1 DDHD2 MRLN LAGE3<br/>         LOC101929464 UNC13B TTLL4 ZBED1 ANKRD49 METTL21A SARS<br/>         CACNB1 MAN2B1 OFD1 PDP1 AHCYL2 GPHB5 PEX16 HABP4<br/>         MIR548AU UFL1 RP9 TMEM11 LOC100129617 MIR5004 LOC400541<br/>         IPO13 PCCB UNG MIR6509 GSTP1 DCUN1D5 LTBR HDHD2 IGDCC3<br/>         ANKLE2 NBPF3 DOCK11 RPRD1B CHMP7 REM2 DNHD1 OVCA2<br/>         ASAH1 FKBP4 NADSYN1 OSGEP HK3 PSMD5 RSU1 E4F1 ACO2<br/>         RPS21 WAPL IFITM10 MIR5010 HDAC3 SNORA54 KRCC1 RPL13AP3<br/>         HUS1 UIMC1 GOT2 ZNF667 ACOT2 KIN ETFA SNORD65C AHRR<br/>         PDAP1 POLRMT MIA2 EIF4E2 NENF ZNF324 ENTPD7 CASC4<br/>         LOC100506083 TSTD3 AKIRIN1 RDX DNAJC9 ITSN1 EHP1L1 DCTN1<br/>         CAMK2B TNKS2 TMEM241 MRTO4 C1QBP NDUFB8 GRHL1 NDUFAF8<br/>         STOML3 R3HDM2 SLC2A10 TMED7 CENPL MIR2054 HCRTR1 VWCE<br/>         SNORA110 DDI2 GPATCH8 TANC2 ZNF511 ZMYM5 ZNF586<br/>         ADAMTS19-AS1 CPD TANK TEX53 PROSER3 DNAJB4 LIMD2<br/>         LOC101928371 TMEM189 SVOPL TACR2 NUP85 LOC100130744<br/>         GPR135 TM9SF4 ZNF264 RAB5A PRRT1 SUSD6 ABCG8 ICA1L<br/>         IFNAR1 TCTA LINC00680-GUSBP4 KMT5A SQLE MIR6129 GLIPR2<br/>         FAM49A PLRG1 SPG7 NUP133 ILF3-DT INPP5B PPID MIR3150A<br/>         UBE2J1 ELF1 LINC01291 ERMARD ICE1 LOC100506271 NCK2 OXA1L<br/>         LOC100506472 CLDN10 MIR4726 MEX3D KIAA0232 NFAT5 FBXO3<br/>         MSS51 GPR157 PEF1 FAM199X ZNF750 ALG9 MCM5 NOL4L BTBD10<br/>         BAIAP3 ANKRD40 LPP-AS1 SLC48A1 CDK16 HRAS ARSK CPNE9<br/>         NDUFAF1 PLAC8L1 TEKT2 MAP3K6 MIR943 SRRD SOCS4 PPP6R2</p> |

TBCCD1 LINC00622 VAT1 LOC105369781 KCTD2 SGSM3 SNORD41  
UNKL POP4 ZNF839 CCNA2 LOC285638 TMEM132A DACT3-AS1  
CGRRF1 ISCA1 RPAP1 GATD3A LOC101241902 NIPA2 MFSD14B  
SNORA115 SLC35A1 RAVER1 TSTD1 SNORA92 AUH SLC25A39  
EIF3H PLA2G10 MRPL37 LOC100996437 SNORA15B-2  
LOC105374952 PSMA5 RESF1 AMPD3 PIAS1 HMGXB4 RBMXL1  
CRTAP DDX50 LOC148696 TK2 STYXL1 TRIM16 A1BG-AS1 MIR6726  
GALNT10 MORC2-AS1 CCZ1B SNORD128 BANF1 HMBS FAM13A  
SLC25A24 MRPL22 SLC25A15 KLHDC1 TDP1 TCTN3 DNAJB11 GBA2  
NDUFB3 LINC02542 SPATA24 PTC2 USP38 CABP7 ITGA10 MAGEF1  
NDE1 MIR6752 SCARNA22 FH PTPN23 DGCR8 DNAJB13 PAQR7  
CCDC162P PDCD6 NRN1L PLBD2 SNORD61 UCKL1 MIR548S COX16  
RBM4B THAP4 LOC105370489 OCEL1 FBXO34 ALOX12 RB1CC1  
EIF4E TCHP IMPG2 SLC29A4 TRAF6 TELO2 PNPLA3 LOC102723885  
MIR4762 CD276 ANO4 CSNK1E NAPA-AS1 C6orf89 CCDC117  
RTN4IP1 USP15 CEND1 MIR6854 PTGER2 SCARNA18B LINC02057  
IFT172 ST7L CBX4 FOXN3 MIR6721 LCLAT1 MIR3164 LHX4-AS1  
RNF126 CEP63 CLIC4 DPM1 THUMP3 BIRC6 ELP6 POLR1B  
SH3PXD2B ATP13A2 TUT4 LINC00566 CAPNS1 SDF4 IPPK MIR4656  
GALR3 AKT2 ZDHHC3 MIR6761 NDRG1 SESN1 LINC02623 GBE1  
ZNF285 CLASP1 LOC102724404 PRKD2 OR2H2 PIK3IP1-AS1 DRICH1  
DZIP1 SEC22C RNF146 CCNB2 RORA-AS1 PCNP DNPEP SLX1B-  
SULT1A4 ERBB2 MIR4682 MXRA7 LAT NAP1L5 ZSWIM9 RBSN FCF1  
CFAP53 SMARCA4 SOHLH2 MRPL14 QRICH2 TMEM43 SLC22A13  
OAS2 SEC61G TRIM11 CAPN11 C1RL-AS1 TMEM50B ATXN7L3  
TBL1XR1 SZT2 ANKRD36 DPH7 NUDC PPP2R2A EIF3J SLC66A1  
BCAT2 MFN1 MIR1306 SNX11 ZNF865 CAMSAP2 ABCC5 HCFC2  
RBBP7 ABL1 NCOR1 MOCOS MIR4423 MIR3154 SLC16A4 UBE2H  
CCNE2 MBTD1 CWC22 USP33 NRDC FAM184A C15orf39 ERBIN  
MAP3K12 ARF5 PAAF1 BARHL1 SLC5A10 RAD50 IER5 SYNE1 MVK  
GUF1 LOC107985911 NUDT16L1 MED21 MIR4294 FBXL17 LINC01018  
LOC101927550 RNF111 ATP2B4 IST1 KIAA0895 CHST12 KANSL3  
RAB22A STAU1 DDX21 MIR5581 HADHB MTO1 PLXNB2 SLC15A3  
NUMB TNIP1 TM9SF2 PSKH1 LINC01743 TOX2 RHOG MED15  
LOC100128325 MTPN CCDC96 UNC50 SPATA6L SRPX BACH1-IT2  
ZFYVE16 LOC100287944 POLE MAPK11 TBC1D22A MIR6859-2 DET1  
FECH ZNF532 RAP2A TP53TG1 LAMTOR4 FBLN7 C16orf58 NOL7  
BRMS1L ASH2L ADAP2 ICAM3 TAF8 CABYR MIR190A ADAM8 BCL7B  
MAN2B2 ARL6IP4 CCDC157 CHP1 ZCCHC2 CLIP3 MAP4K2 ACAP2  
PRDM5 PPP4R2 DTD2 MIR3133 LINC02322 GUCD1 OACYLP  
CSNK1G2-AS1 LRRN4CL KIAA1586 SLC2A4RG MPHOSPH9 CLEC2D  
TENT4A IMPA1 SH3BP1 NPM3 B3GNTL1 ARPC5L ERMN MBP  
TANGO6 C20orf194 TNRC6C-AS1 MIR6770-1 ZMIZ2 MPEP1 C22orf39  
SEC24B-AS1 TCF20 KLHL20 STAG3L2 SRM MIR199A1 MPC1L SSH3

LDLRAD1 SARNP PER1 TIMM50 SELENON MIR4800 KLC2  
SMARCAD1 FNDC3B MICAL1 BLZF1 SUZ12P1 AREL1 PPP1R21  
MIR4701 MED26 DUS1L KDM2B USP50 ASF1A TOMM40 TUBGCP5  
RFFL MBOAT7 ERICH1 APBA3 ZNF689 PMS1 SLC25A51 ZNF814 TLE4  
TLK2 CLBA1 HSF5 TTC9B PSPC1 UPF2 TERF1 VIPR1-AS1 EFR3A  
SEC61A2 SFXN4 ZNF703 UCP3 MYL6B CDKN2AIPNL LOC283922  
BREA2 VAMP7 CKMT2 PLA2G12A SPRED2 N4BP2L1 RSF1 MIR6733  
C2orf88 LIN7C WDR83 MIR665 ANKRD13D KCNMB4 SNORA71C STX6  
KCNJ11 MIR6786 AATBC KRBA1 SLC45A1 IRF9 SYNM PTDSS2  
BMP2K NFU1 STT3A-AS1 SFXN5 SETD4 DYNLT3 FKBP11 BAIAP2-DT  
FLII KAZN GS1-124K5.11 CHPF CSNK2A1 MAP7D1 MIR6892  
TMEM208 TMOD3 LY96 EEA1 ADCK5 LMF1-AS1 KTN1 RELL2 ARL5A  
PHKB FAM92A CISD3 KMT2C YIPF3 MRTFB RGL4 XPO7 TRIM5  
MIR5693 MIR4771-2 SDHA ZNF17 ZNF251 ADAMTS7 ZNF280D RPP38  
RBMS1 SNORD108 HNRNPUL2-BSCCL2 DRG2 NLRC3 SAFB NSUN4  
MAPK8IP1 ANKZF1 SENP5 AFF3 COG7 FZR1 ANKRD37 SLC44A4  
MYCBP2-AS1 TBC1D19 UGCG ZAP70 MIR4315-2 NCKAP5-AS1 ORC3  
PTPRCAP IL12RB1 HIVEP1 HSPB6 ARV1 IER2 MIR26B COX5A MRPL4  
TRAF3IP2 RIDA LINC01963 RLBP1 APOBEC3D RENBP ATXN7L1  
TUBGCP3 ZNF783 MIR33A TFDLP2 CCDC12 MIR6754 LINC01816 UCN  
AMBRA1 CPSF4L ZNF764 USF2 LINC00384 SPATA5L1 RAD51B  
NDST1 PELP1 MSN SLC9A5 SERINC3 ATAD2B GAU1 GFRA4  
SLC39A14 RTL1 GPR137B NFATC4 TOP3B TMEM60 MIR933  
LOC102724009 SNORA5A FUBP3 ACACA MOB3C SCARNA9  
TMEM127 PLN MIR4485 LINC01127 SYNGR3 MIR3913-2 LNPEP  
MIR8053 FBXO22 MRV11 ALMS1-IT1 DDX27 ASB8 FAM192A CACNB3  
NEDD4 THAP11 MRPL19 NEK4 RBBP9 PRKAR2A MIR8085 PAFAH1B1  
OSTF1 FBLIM1 PLTP LGALS8-AS1 MINK1 SLC25A1 EZH2 PLEKHB1  
MRPL33 MIR3689C ARMC1 MIR127 HBEGF PI4KA MRPL12 GNPDA1  
LOC150776 REP15 MGAT1 CCDC137 MIER3 ZNF8 CKB INSC PSMB6  
PPP1R8 GOLPH3 UBLCP1 CCNI2 PIBF1 TTLL1 LOC613206 NKRF  
HSD17B11 TMEM35B SECISBP2 SPRTN GNG10 PIK3C3 DHDDS  
MRPL28 ANKRD28 SNRK-AS1 APBB1 COMMD7 SND1 ARHGAP45  
CHD3 BCAP31 SLC25A44 PP7080 ESYT3 GSN-AS1 WHAMMP2  
LINC00958 LOC101927051 ZNF81 EFTUD2 ZNF318 ZNF609 MED10  
EHMT2 NDUFAF6 LINC02603 COA5 WTIP HACE1 C3orf20 ATG4B  
SNU13 GPR22 WDR5B GRIN2C LOC100128079 DMPK POC5 LPXN  
IDNK RPS13 NPPA-AS1 FADS2 PDZD9 ATP2C1 RCC2 TMEM230  
AHCY CROT ALG12 THSD1 ZNF543 MIR548U BMERB1 TMEM8A  
NLGN2 ZNF566 PDRG1 SSR3 CC2D1A PPP4R3B STRADA PLAGL1  
LLGL1 RNF2 MTF1 ITGB7 DNAJC7 TM2D3 HUWE1 SMIM8 CD180  
MIR4479 FLOT2 MANSC4 ZDHHC4 MIR4729 ABCA8 ANKRD42  
NDUFS2 BTBD16 ZNF502 PEAK1 EPS8L1 ZNF816-ZNF321P MAPK14  
GTF2F2 NHP2 CLCN2 SATB2 SELENOH RRP36 RNF216P1 SLC25A13

ANKS1B FLJ45513 HIST1H2BN RAPGEF1 AKAP10 DLG4 RPAP3  
EFCAB14 PLEKHA3 TCP11L1 CWF19L1 GPKOW LOC100507547  
LINC02709 MIR2116 GGPS1 ST20-AS1 MAP2K2 LOC101929574  
SAMD8 MIR875 ANGEL1 CARS2 UNK SCD HCFC1-AS1 PHF19 TTC5  
MIR106B ZNF875 ZNF518A RBM14-RBM4 STAT3 PPP2R5C EP400P1  
SYNJ2 CAPG TPCN2 MBD4 ST3GAL6 TSSK3 MAD1L1 DDX52  
LOC101409256 INPP1 DENND4A PCNX4 NFKBID NDUFB5 TMEM214  
LOC100303749 ZBTB20-AS5 GATD1 N6AMT1 SIPA1L1 IER5L OXR1  
FBXW9 HK1 SLIRP WDR4 VPS33B NPIPA1 HEXB MRPL35 SNORA77B  
MIR6820 C5orf34 ARHGEF18 TRMT13 ITM2C EREG MIR30C2 SUMF2  
CENPA TMED5 CDH6 POLR3E AQR IPMK MINDY3 GRHL3 TBC1D26  
CCDC127 SFN RBL2 CSE1L ZBTB11-AS1 SCGB3A1 STYX ATG13  
CINP PPP1R26 PFKM SGMS1 NEXN-AS1 PRPSAP1 GRAMD4  
LINC01068 DNAJB6 ELP3 MIGA1 PELI1 PPT1 SLC35C2 KEAP1  
BCL2L13 GNB2 TMEM63B CCDC130 MIR626 LEMD3 LINC01988 CPQ  
PYM1 DMT1 SPAG4 LIX1 ATL3 KPNA5 TCAIM MIEF1 IFRD1 KCTD9  
WDFY1 ZBTB6 MIR3181 FBXL19 LINC01061 ERG28 GABPA CAMK2G  
HMGB2 POLB PTAR1 KIF3B PRICKLE2 REELD1 VPS8 LSS CLDN19  
UBAP1L SNORA22C CCDC142 RNF165 ZMYM3 CREBL2 SNORD125  
SCLY MIR6069 ZNF429 ENTPD5 LINC01312 PDIA5 SUCLG1 WDR47  
KCTD20 AGO1 IRF4 DDX19A MST1R PLCXD1 MOB3A GFM2 PHRF1  
ARHGEF11 ZNF529-AS1 PIK3R4 LINC01497 NDUFV3 ZDHHC11  
B3GALT4 TMBIM7P VPS26C LOC101927164 SCYL2 PILRB CC2D2A  
B3GNT8 LOC101927157 GPATCH1 P4HA3-AS1 SAP130 MIR1268A  
LNCTAM34A PMEL ATP6V1B2 GLRX3 HTR2B UVRAG ZNF512 NCS1  
SDAD1P1 ZNF619 ELP5 TOMM6 HGD C17orf58 SERPINE2 AARSD1  
MAPK6 LGMN USP31 NTMT1 MIR4636 UBE2R2 LINC00528 TATDN2  
SDCBP PYGL MIR6793 MTA3 LOC101928855 MIR6877 SOX5  
POGLUT2 SFT2D3 INA DGKI FAM136A RIN3 SCAANT1 YBEY  
MIR548H3 MED17 MED4-AS1 TPP1 RREB1 ZSCAN2 SP1 MIR1207  
TOX4 RNU6-7 TAF1 MYO15A RBM42 HCN2 ATP6V1E2 MIR4262  
NUP160 USP21 C5orf66-AS1 NAXD ORMDL2 SERPINB1 GGT7 TUT7  
GDPD3 PTPN21 MOK TBR1 IQGAP1 GTF2IRD2 CCDC82 PAFAH2  
NPEPL1 ZNF451-AS1 TUBB6 LATS1 SPOCK2 FGF2 ZSCAN25  
SNORA74B FLACC1 ING4 DPH2 VPS28 DIAPH1 ZNF71  
LOC101928120 TRAF4 C19orf12 OS9 SLC4A1AP COPS8 ADAM1A  
SIL1 MIR5588 ASB6 SNORD112 EFNB2 PCM1 TSG101 NOB1 ATRIP  
GTF3C4 LAMA5-AS1 IQSEC1 PIGN LOC100130548 BAG2 ANKRD2  
ISM2 SNRPN LOC102724804 GCFC2 COQ8A PLEC VWA7 NCAPD2  
DCP2 MRPL49 GLYR1 SMU1 MIR92B MIR6499 FAH MIR1301 UBE4B  
MIR3944 DNTTIP1 BTN3A3 PAX8 RASD1 IL21R-AS1 ALKAL2 LARP1B  
LYL1 EDEM1 SLC25A19 C19orf54 LOC100505658 6-Mar SERAC1  
NFATC2 SDF2 ANAPC5 NFATC2IP NOMO2 NKX2-4 CRYGS FBXW11  
TMEM201 ETAA1 MIR6741 AKT1S1 NOS1AP PRDX2 RPL13 TMX1

SAP30BP PRMT3 MEAF6 DOP1A SNORD14A TMEM92-AS1 KIF13B  
SLC39A3 XG SUGP2 C1orf226 ZNF626 ADAMTS13 ITFG1 C3orf18  
MIR324 WDR5 RANBP10 MYO7A PKN2-AS1 ACVR1B FAAP100  
TMEM128 ILVBL MIR562 MIR3620 IFNGR1 NOL9 MPP3 TGFBR2  
ORAI2 WWTR1 DDX60L CIB1 TSSK1B ZNF680 MDN1 CLDN20  
TNFAIP2 ADPRM LINC00668 ZNF575 KCTD7 MCM3AP MYO1F  
RNVU1-18 CLEC18A C7orf25 SETD7 RBM8A VANGL1 CHAF1B  
NDUFA3 CANX DESI2 LOC107985946 UGP2 ANKIB1 FRZB CATSPER2  
CUEDC1 STARD9 PPM1F RP9P ZFH3X3 NDUFA9 CTPS2 PGBD2  
AURKC SCRIB ORM2 MIR6071 CUX1 GPX3 UNC119 SNORD134 TBCK  
EIF2S2 CKAP5 ULK3 SNORA108 CNPPD1 GTF2IRD1 SNX24 MORC2  
LOC101928942 ZNF19 ZNF714 RSC1A1 HIST2H2BF AMT DSN1  
CIDECP1 GPRC5B RASL11A STRN4 KITLG SUMO4 DDR2 WWP2  
CTSH PAF1 TTC9C ZNF592 ZNF579 MIR6511A4 MIR6848 PPFIA4  
DCTD CNIH3 MAP4K4 GPRACR THSD4 FEZ2 DLAT CDC5L TBCD  
LINC01585 APLF PANK4 TTN-AS1 WNK1 RNU12 SPRYD3 MIR6784  
PPA1 POPDC3 GTF2IP12 GTF2H3 ATG16L1 PTH1R LOC112268124  
RFLNB NF2 KRBOX4 ZKSCAN7 CALHM2 POM121 PHYHD1 FBXO32  
MIR4803 SDCBP2 HOXB2 CRKL PARGP1-AGAP4 LOC101928324  
TMEM168 MPG ZNF133 DHX36 TNFAIP8L2 PHTF2 MIR12135 CHCHD4  
NDFIP1 APPL1 CUTA RAB43 IWS1 PTPN13 CDKAL1 GOLT1B NPC1  
ALDH9A1 ZNF600 MIR6788 ZNF678 PKD2L2 URM1 C2orf66 LRIG2  
MIR6773 MTERF2 VASH1-AS1 ATMIN STARD7-AS1 ZNF420 PAK2  
ATP2B1 EEF1G INCENP IGF2BP1 CDK10 FCHSD1 ZNRF1 UBE2J2  
PRR3 FBLN5 PUM1 KLHL24 CCDC88A RAB7A SGPP1 KANSL1-AS1  
SNORA36C SLC35B4 PMS2 ERVH48-1 LOC101929679 TRAPPC6B  
BIRC3 AMZ1 ZNHIT6 WDSUB1 H2AFY RAB2A CIPC DLG1 EIF2B5  
LOC101928595 CNTNAP1 APOL2 INPP5E HSPB1 U2SURP SLC7A6  
NUP155 NT5DC1 RBM15 AMZ2 MRPL10 ARAP1-AS2 TECTA TPRG1L  
GZMM LOC727896 PAIP1 TCF25 NDUFS1 ARRDC2 MIR15A  
LOC101926889 TOP3A FGFR1 MIR545 CERK GOT1 CASP6 SUSD2  
BET1L NOC4L FRY MIR6124 ATG2B FAM209A DAD1 HERC2  
SNORA11B LINC02618 PCGF3 ACTR10 LOC400553 TBL3 CPLX4  
COPS9 TMEM240 PDIA3 NECTIN2 DCP1A TMCO3 CES2 MIR624  
WNT8B ATP5MC1 SNORA119 ARHGAP39 SERPINB9 GLE1 DHRS7  
RAB30-DT RIPK4 LINC01983 GTF2H2 CCDC57 MIR151A GTF3C3  
ITGB1BP2 METTL2B ALDH18A1 PRICKLE2-AS2 TMEM191C DNAJC5  
ALDH2 ASAP1-IT1 MRAP PIN1 SNORD67 ATAD1 UBR3 PLEKHG7  
OTUD4 MFSD11 MIR4766 USP7 HMGN2P46 ASCC1 OTUD3 YME1L1  
RBMS3-AS1 TPCN1 TNFRSF10A ADI1 SCP2 SLC35D2 RWDD4 SH2B2  
SLC6A6 RAB35 LINC01081 PDZRN3 FKRP SDHAP2 PEX11G  
TMEM200A NIPBL GHRL EIF3M MICU1 PRRC2B BDH2 ZMAT5 SMAD9  
ACTC1 INO80D SNORD114-6 TMEM87B AFAP1L1 MIR6513 ENDOG  
WNT3 LOC105371925 ZNF549 ZBTB18 LOC103611081 NACAD

C12orf4 NTAN1 SNORD114-27 MOB4 SLC35A5 LEMD2 IGFBP7-AS1  
CD99 ZNF79 NOMO1 SLC10A4 OCRL MEG8 GLA DIDO1 PLA2R1  
PRRT1B COG3 CBFA2T2 NGDN SAC3D1 STK40 AGGF1 DPF2 CBARP  
TMED9 PJA2 SMG1P2 LOC101927243 CARS MIR6823 LINC01460  
MGST1 LOC100507144 RBM44 RHOBTB2 UTP14C RABEP2 MIR877  
KIAA0586 PERP MIR548AK MTR DHFR LOC100131496 PPP1R12A  
SPDYE5 ACTG1P20 ZNF7 SERTAD2 ZNF672 YWHAZ ANKRD52  
TMEM140 SCARNA8 PRPF39 USP4 MMP24-AS1-EDEM2 HPF1 PAX8-  
AS1 NUA1 RRAD MIR8077 NCOA3 SLC16A1-AS1 TDRD10 VSTM4  
SNORA5C BCKDK CTSB CMYA5 RILPL1 SIRT2 ZNF417 DIXDC1  
CHAMP1 KLHL10 MIR3160-1 GNRH1 SNORA38B MIR6732 ERCC1  
HARS CREBBP BVES PARK7 COQ5 NOP10 IFT43 RABGEF1  
MAP1LC3B MEMO1 DCLK2 NAPB SIGLEC16 ZNF827 LMAN2L DPP7  
DSE OSBPL3 MRPL20-AS1 SLC39A9 SENP8 MIR4292 IGFLR1 EPS15  
C19orf47 LOC103021295 MIR548O SMIM41 GNS FDFT1 PEX26  
CCDC90B LRP5 SLC25A34 ARFGEF2 MAP1A SSC5D NELFCD EME2  
TMEM69 TRAPPC5 ZNF362 MIR183 ANKRD17 ATXN7 IL21R ZNF781  
DNMT3A MIR1204 NCKAP5L AP2B1 LINC00324 SMCHD1 BMP2  
LRR19 CCNDBP1 SCCPDH KAT8 SRRT PDE4D EPHB3 TSPYL5  
MIR4779 FRS3 LINC00423 GXYLT2 UBE2K XYLT2 HIPK3 GAL3ST1  
TSPY26P DHCR7 CRAT FGFR4 CFLAR-AS1 LOC102724784 PIK3CD  
SLC7A11 MAIP1 FHL5 ENOPH1 FHAD1 SMIM23 ARPC1A MIR6803  
SPATA2 RUFY1 FRMD4A ORC5 TMEM259 MIR6796 ZC3H12C  
KIAA1841 GPR18 ACAA2 MIR4690 RNPC3 KLF9 TTC27 PYROXD1  
MIR5009 TMEM178A ZFAND6 EEF1AKMT1 RCC1 LINC01031 MIR670  
MIR8087 PARS2 INTS12 ZBTB4 B4GALT4 ZFPM2-AS1 CHD1L  
MIR7851 TRMT11 KIRREL3-AS2 TMEM62 POLR2M MRFAP1  
CASP8AP2 MIR6817 SNORA79 SERINC4 MIR4672 MICOS13 GHDC  
SMARCA1 ADGRF2 WEE1 SPAST PARP8 TEAD4 TMEM89 DTX4  
ARMC2 RPS15AP10 ZNF608 MIR335 SLC25A42 FKBP8 GALNT15  
POT1 USP40 CCT7 C3orf62 ZFX UCHL3 GSG1L CARHSP1 ARHGAP20  
CCDC102B HDDC2 SNORA37 SLA2 SDS NCOA5 SNORD175  
IRAK1BP1 GGT1 SNORD124 LINC02362 MIR6836 WDTC1 HAS3 TET2-  
AS1 C1S GLO1 WDR61 SIRT7 PKIG MIR3177 MKNK2 U2AF2 SEC16A  
CPLANE1 MIR3157 UTP25 TSSC4 COL11A2 AAR2 BPNT1 PLD2 PUM2  
PHC1 SYNE3 LDLRAP1 IL10RB-DT EMC2 MIR493 FLJ37453 TLN2  
ZNF493 MIR1236 ZNF717 SFXN1 CTNNBIP1 HMG2 NEUROD2  
BRPF1 ATP9A FNIP2 GJD4 RNF216 TMEM70 SBF1 KAT14 C1orf50  
MIR5697 USP46 MIR4797 STIM2 PKD1P6-NPIPP1 TMEM236 PLAT  
COPE IQCE HS1BP3-IT1 FBXW10 YRDC BLVRA MIR1273C KDF1  
BTN2A2 FRG1 NIPSNAP2 ADAMTS15 ARHGAP1 SPRY4-AS1 FCHO1  
PGAP1 FSCN1 ANKRD36C BNIP1 MIR6084 RELCH MIR6891 TYW5  
PLCD1 SRD5A1 NDUFV1 TASOR UFSP2 ZNF56 ATP1A1-AS1 ZNF142  
ANKHD1 LARS2-AS1 BRD7 RNU6ATAC DTYMK TAX1BP3 MARK2



OPA1-AS1 SLAIN2 AMMECR1L WDR77 HMG20A MIR6737 QTRT1  
FBXL22 AP1B1 DYNLL1 PLSCR1 LINC01507 PHACTR2 ZUP1  
SLC35E1 DENND6A MAPK8 DNAJC8 SRP54 GPR35 MIR147A ACVR1  
SCN1B JADE2 ASMTL TTI1 KIF1BP DNAJC27 LACC1 MTFP1 SART1  
GEMIN2 SEMA6D MAPK13 GSPT1 DPP9 GTF2B SLC43A2 NAIF1  
GUSB COPS3 MIR1294 EXTL3 LOC100652999 SUZ12 FBXW7-AS1  
ZNF415 CDK5RAP3 YTHDF2 GGCX TCEA1 ARPC4 C22orf24  
LOC100288123 KBTBD4 SMIM6 LOC103171574 FAM76A CSPG5 ZFP2  
FKBP15 BZW2 TST REPS1 DCPS PDXDC1 SRC SETD9 SNRNP35  
CRMP1 NUP107 OSBPL9 LOC100128653 CASTOR1 C12orf45 TCTE1  
C1orf54 TMEM14B GRINA WAC-AS1 CLIP4 SH3GL1P1 SMTN  
TMEM87A CYP17A1 GFER PCBD1 DDX1 SP3 C20orf203 PIR-FIGF  
TBC1D7 VPS54 TMEM262 DCAF10 SEC11A RPS2P32 LENG1  
SLC25A30-AS1 SMG7 SPAG8 PLPP3 LINC00412 PLGRKT VASP  
SNORA30B SYPL1 FIZ1 COA8 BUD13 RPS27L MIR4709 TGFBR3  
TATDN3 MED24 PPA2 MAP3K7 AKR1C1 MIPOL1 BAG4 CHURC1-  
FNTB MIR4646 ZNF746 AGAP3 ATXN1 CPOX TIRAP SPSB1 FAM219B  
PDZD11 OLFML3 ELAVL1 DNAJC17 TMEM120A BNIP3L MESD  
DCAKD GUK1 RASSF8 GS1-124K5.4 HINFP PTGR2 LAP3 IMPDH1  
PPIC ACP6 PRKACA TRPV3 ASXL1 MIR3179-3 IDH1 XRCC5 CSE1L-  
AS1 RAB1A LOC105371814 LMOD2 ZNF664-RFLNA NUDT4 VRK3  
FASTK FBXO38 SHLD2 LMF2 GDF1 NUP205 ACTA1 NHLH1 WRAP53  
SMIM32 RNF181 RBM15B COLGALT1 SBF2-AS1 AGLB5 TXNL4B  
SNRNP200 TOP2B RNF114 RAD54L2 LOC105373562 TSSK2 KCNIP2  
KLF13 ZFAND2A AP5S1 MED19 SREBF1 LRRC57 PWWP2B UBTF  
MIR4746 TMPRSS12 PHB HSDL2 WDYHV1 MIR3192 AKR1A1 MIR634  
POU2F1 ZNF350-AS1 TMEM184C C13orf46 LINC02210-CRHR1  
ENGASE SEC61B SNORD38C GALNT1 RSL1D1 ANKMY2 RBM25  
DHX58 ARCN1 PLEKHA5 MIR4305 MIR12127 KNCN SEC24A POLR2E  
PCCA-AS1 ZBTB25 MIR4748 MIR6874 EPHA8 LOC728554 GSTM2  
ETV1 TRAFD1 MTCH2 PEAR1 PGS1 PPP2R3A HAP1 KDSR PLAUR  
NME1 MESP2 ZKSCAN2 ANKS3 RBM28 DEPP1 SELENOT PCSK7  
ZNF883 PBX2 GIGYF1 CAAP1 HGS POLA2 ERCC6L2 TCOF1  
CCDC183-AS1 EVL GUSBP4 CFD ERC1 TRMT5 PPP1R7 SCO1 HTRA4  
LOC729968 MIR26A1 SPHK2 MIR4633 AGO3 LETMD1 CD3EAP  
TMEM63A FNBP1 S1PR3 ZNF224 CKAP4 MIR6843 PITPNM1 OAT  
MIR3658 DONSON SLC30A9 SLIT1-AS1 CCDC25 NBN CNTD2 MICU3  
FAN1 TAF5L TSTA3 RAC1 MED20 SQOR CHMP4A TOMM20 FBXL12  
DNAH14 TBC1D14 TC2N LOC100129534 MRPS35 BTLA SNORD116-  
19 DCK TIA1 KLF11 HOMER3 KLHDC4 TUG1 DPYSL2 IFT46 EXOC5  
LOC105378683 AFAP1-AS1 CHID1 ALPK3 LOC101929231 ACAD8  
MED29 MIR10525 GNAI2 METTL8 CAMK1 LINC00574 FGFBP3 SMPD4  
MIR6830 NOM1 PSMA3 FARSB ASCC3 ZYG11A ACYP2 LYRM1 GRK6  
LYSMD4 EPHA2 CRLS1 MIR6764 SNRNP70 MTHFR NEURL2 CALML4

RSL24D1 UBE2F LINC01424 DAP3 PHF3 RASL10B P3H1 GEMIN8  
DICER1 MIR8072 MIR320D1 MAPKAP1 HENMT1 MIR6799 CYFIP1  
UBQLN4 LOC91450 NPAS1 MIR8076 LOC102723439 MIR6775 LMLN  
SLC2A1-AS1 MGST3 MRGBP BDNF PRPF19 LDLRAD4 NDUFS8 TEFM  
SLC25A16 MIR6862-1 EIF2B3 RPA2 RBM4 SCARNA21B CSF1 MXD4  
SMARCB1 ULK1 ARID3A WDR43 MTHFSD LOC155060 POLM UHRF2  
CPLX1 CLPTM1 LINC00515 ZNHIT1 AMZ2P1 TMCO2 GPI AGPAT3  
TSEN15 CCHCR1 CELF6 RPS27A IGFALS PLCB3 NPAT COIL  
GPATCH2L TMEM217 SNORD148 TSC2 NRP2 MIR3115 GTF3A KRAS  
GPR151 ZRSR2 NECAP2 TMEM44 BBS10 PRDM4 HSPA4 DHX40 CZIB  
EVI5 GET4 IFT80 SPEM1 PSMG2 LSM10 MYBL2 GNB1L GPALPP1  
C12orf10 NAGA RPSA HSPA4L RASGEF1C CENPO KCTD5  
LOC105371506 C1orf21 HOXA3 DYM RAB21 FOXJ2 CPNE2 ZNF343  
PBRM1 FBXO33 SLC25A25-AS1 MIR6809 ZCCHC24 BICRAL RNF20  
TPBGL NR3C1 NEK7 DNALI1 KCCAT333 MIR5094 TMEM171 AGO4  
SERINC2 SLBP CCDC138 ANAPC7 MAGOH2P BNIP3 FES YJU2 NME6  
MIIP AP2M1 STAC2 SNAPC4 CDK6 NPRL3 TEAD2 VAPB ACKR4  
QPCTL LOC101927640 PRPF6 LINC02387 AKTIP FURIN HTT-AS  
MIR6511B1 SMIM12 MIR5582 SELENOF GMIP SELENOW PPP1R3B  
KIAA1107 CDC42BPG PHOX2A S100A14 CERS1 XRCC3 BTBD2  
SNORD172 ACRBP GPATCH4 MIR6871 TWF2 AP1M1 PRELID3B  
MIR593 CHUK MIR922 PDPK1 PEX7 RPS26 MIR7107 SPATA6 TBXAS1  
KXD1 ALDH1B1 ZC2HC1C PCYOX1 MIR937 CYTH2 FAM168B GPR45  
PARP6 REV1 GNA15 MIR4737 CHST14 GAMT DRAM1 TRMT44  
MIR939 FRAT2 GTSE1-DT HIRIP3 MPHOSPH8 GALM MTIF3 ATF5  
IQCG TULP4 TECPR2 SLC4A2 STK33 CYB5D2 SNUPN PKNOX1  
PFKFB3 NDUFV2-AS1 OSTM1 QRFP CLCN7 SELENOM MAP3K10  
PCDHGA9 AMDHD2 PDCD2L MTERF4 CRYBG3 LRRC14B MAN2A1  
SPECC1 MGC16025 COQ3 RRBP1 KLC3 MTMR10 MAT2B TJP1  
ERLEC1 LINC00689 PER2 SCARNA6 ARFGAP2 ZKSCAN4 PMS2P1  
CDRT3 FAM118A RETREG2 TBP LOC101927974 LINC00635  
LOC101929340 CXXC5 ADSSL1 ERCC3 TADA2A TFRC IPO5P1  
TMEM80 OCIAD1 AK2 LHPP BCOR MIR197 TYRO3 DYNC112 CCNC  
CCDC151 DHRS3 UBAP1 BHLHA15 ANKRD9 ZBED8 ZBTB20-AS1  
THAP3 VPS13D KMT5C CCDC62 SPIN1 OR5B21 RAET1E-AS1 FUZ  
ZNF813 SLC35G5 PVRIG2P RFXANK FAF2 ADA MIR1206 PDCD10  
ACADS DCTN6 MKRN2 C22orf31 GRAMD1A PSME4 TFG DGCR11  
ATF7IP CCDC8 MIR6880 TEF MRPL44 LIMK2 MIR3125 KCNJ14 UBE4A  
MIR1257 ICK SEL1L LOC101928123 MIR6865 MIR643 TRAPPC13  
PARP1 SIAH1 SAP30L-AS1 SH2D4A LOC101928659 BTF3L4 DDX55  
RPS15 MIR6772 GOLGA7 GCNA TGM1 RN7SK ZC3H13 WDR81 AP5Z1  
ENG MIR12122 WBP1L BRD9 GLUD1 OGT SNORD114-14 PHIP AARS2  
SLC11A2 DHX32 SCAPER MIR6770-3 STN1 SS18 SFRP5 PML AIRN  
ARL9 DPP3 PDE2A COMMD4 DAB2 RPL36 MIR548E AGBL3 ASPM

ZNF276 RBCK1 TLE1 THAP7-AS1 MGLL LINC01118 MLLT1 ANKRD39  
COPS5 TVP23B SCPEP1 LINC00200 MTG2 BPTF LINC00513  
LOC151484 DENR SENP2 JKAMP XPNPEP1 LOC100506730 MLLT6  
MIR1908 CDK5RAP1 ZNF571 NLRC5 SORBS1 LOC101928557 TBCA  
HTD2 C12orf43 SNAP23 CBL GP9 GPR4 FBXW5 RASGRF2-AS1  
MIR6075 MTURN GALK2 EVA1B STRA8 CEP97 FOXP4-AS1 UBA6  
DLK2 RAB3B REEP5 SRPK2 CACNA1A TCAF2 LOC401127 PLBD1-  
AS1 DOK3 PXDNL EMC4 ANKFY1 LOC101929439 LINC00852 RWDD1  
VHLL FIP1L1 LENEPEP GMDS-DT ENSA AMH ZNF526 MIR12117  
MIR6856 PPP2R1A CCKAR HNRNPM COL2A1 IFI30 AUNIP CIAO2A  
RASSF2 BFAR KLHL8 PPIL2 AIMP1 2-Mar DNAJC2 SLC27A4 PRKD1  
TNFAIP8 MICALCL ZNF674 HECTD3 LGALS9 ZNF561-AS1 SCARB2  
SCARNA21 MAPK3 USP34 MIR6750 APLP2 MICAL3 ADK ATP5PB  
GTPBP10 RANBP17 TIMMDC1 CRYZ SNORD103C SNORA74C-1  
CTBS ETS1 EDC4 MIR1238 TNIP2 SDHAF4 TRIM44 PARL SIDT2 GRN  
HSH2D TRIM32 SCAMP1 PTS BANP ADCY6 CYP51A1 NPR2 MIR3664  
CFAP410 LOC729291 ZFYVE26 SNX3 STOML2 FLNB-AS1 ZNF273  
MIR6801 NECAB3 UBE3D PYY2 TSC22D4 STK35 CCNH USP48 RRM1  
RUSC2 LOC114483833 RAD17 ZNF708 ARHGEF1 VN1R1 PCCA  
TSSK4 OSBPL11 PRKAR1B TCF3 FYTTD1 ZSWIM7 SERPINE1  
TMEM191A IRGQ MIR6815 PPP2R2D LOC643072 DTL ACTG2 LPAR6  
CREBRF FAM124B CTBP2 MIR4253 ZMYND11 MIR3619 CRTC3  
CDH23 LRRFIP2 INTS4 ZNF525 ZFYVE21 BEST2 ZNF93 C8orf76  
MEG3 ETFBKMT BCCIP TMEM219 DYRK1A PARD6G-AS1 SARDH  
ANGPTL2 HBS1L TMEM30A PDS5A CRK BRPF3 LINC01975  
CEP295NL DDX23 ETV5 SLC39A11 LY6E MIR4673 MIR629 MAD2L1BP  
CORO7 LOC100506551 PLPP5 TYRO3P PPP2R3C COX11 CUL4A  
NDUF4P1 CDC42BPB RIMS2 FAM217B SART3 TARP UPP1  
PITPNA-AS1 ZNHIT3 SNRPD3 FDXR PRKAB1 KIF20A YAP1 ITPKC  
RPUSD4 SNRPB MIR4639 MIF MICALL2 TIMM21 TCEA3 SPATA13  
CEP152 F2RL3 LOC101927539 NUDT5 LOC107985939 UBP1 RBM27  
ZNF282 ZNF788P PRDM15 STPG4 CERCAM NAA25 SUPT6H GSK3A  
PI16 CEMIP2 LOC105370941 ADAM20 SBK2 GPR89A ZNF30  
TRPC4AP LAMA4 ZZZ3 NDUFA10 NUDT15 CEPT1 CCDC92 ETNK1  
TEX30 MFSD14A EPS15L1 UBR7 CYB561A3 BCAT1 EBLN2  
LOC100505795 MED22 TMSB4X CHAC2 ETRF1 ZNF398 LRCH3  
CAPN7 GEM THAP6 TM6SF2 FAM72C RANBP2 LIG3 IRAK4 ECI1  
KDM3A RETSAT CAST DDX41 SLC4A11 UBE2D2 PGM3 GABARAPL2  
MARVELD2 TAOK1 EXOC3-AS1 SLC38A7 OGDHL GIT2 MIR4457  
HSPG2 SMG9 ATP6V0E1 SLC52A2 SLC17A8 SUCLA2 NANS ANO6  
SCNM1 TNRC17 AMD1 GGA2 TRIB2 CCDC115 TTC1 HIPK1 ATP8B1  
STX4 SEC22A LMBR1 TMA7 MMP23A LANCL1 FGF23 SNX21 PCNT  
MIR3713 NPHP3-AS1 BET1 SNX17 RPRML ZNF622 GHRH SMCR8  
RPS6KB1 DNAJC19 POLR3B LINC01534 ELOA-AS1 SHISA5 RNF169

PLPBP KCNMA1 CMTR2 LINC02080 ATF6B NDUFS6 TUT1 VPS4A  
MIR6876 GFOD2 UBXN7-AS1 ZNF646 ZAR1 RAB1B NTRK1 HOMEZ  
ANGPTL5 UBAC1 TRIB3 COL4A5 ERV3-1 CCDC97 CAPNS2 THRAP3  
LYAR PHYHIP COPS7A RNF185 SLC12A8 C4orf3 SSBP3-AS1 ZFYVE1  
MRPL1 PTC3 SNX33 SNORA46 LEP IRAIN MAPKAPK2 ECH1  
NMNAT1 LINC01848 DIP2A ITGA3 SLC26A10 LUZP1 EFN1 TIGAR  
EIF4G3 ATP5MG A2M PHLDB3 NOL8 LOC100129917 RELT ROCK2  
CCDC66 FOXK2 EED ATL2 DGUOK FGGY RBM17 SUPT4H1 MIR1181  
RAGEF6 EGOT STARD5 MIR6859-3 MFF NOA1 FAM98A SLFN12  
STAU2 EXOC3 RAD23B NCOR2 CHRAC1 MFSD8 PODN SSU72 TIAL1  
TM4SF4 AP3M2 USP14 APOE DSTN FBXO31 NR2E3 C9orf139 ING5  
LINC02022 ORM1 HIKESHI EDRF1-AS1 CCAR1 CCDC43 PRR19  
KLHL36 ADH5 MIR1225 SHBG MIR1291 CDIPT TOR3A PREP MIR4782  
COPS4 MAP3K13 TONSL EIF1AX FOXD4L1 BCL2 RNF166 ZNF239  
ZNF284 TNXB TOMM34 LOC107984265 ADAM32 XRN2 RSRC1  
LOC100506544 POLR2J4 PSMD11 ALAD MIR6845 CDC42BPA CNOT1  
CEP120 LUC7L2 SPTBN1 LOC102723360 LSM4 CDC42EP3 SAMM50  
MFN2 LINC02035 NUCB1 MTX1 ATR DDX49 BRK1 THAP1 DOHH  
MYO5C CROCCP3 ZNF552 LDHAL6A MIR6762 ZSWIM8-AS1 PI4KAP1  
AGT GLIS2 VPS25 CHRN2 COL7A1 TM6SF1 COX10 DNAJA3 GLG1  
EPHA4 MUTYH ZNF70 CMTM3 GPATCH2 FAM234A NQO2 ZBTB20  
RPU3 NEU1 UBE2L6 LINC00557 TSN LZTFL1 KLHL7 ALDH1L2  
MIR3199-1 NFYA LOC105371855 PBLD PTGER1 ACTR5 HEATR5B  
TRMT6 IL17C SMAD5-AS1 ZFX4-AS1 ATP6V1C1 RTCB COQ10B  
PDZRN3-AS1 NFE2L2 SH3PXD2A MRPS24 JADE1 SKAP2 TRAF7  
HS1BP3 PARG DYRK4 CHRM4 JPX DENND5B-AS1 MIR604 GGN  
RTEL1 C20orf173 BRD4 VMP1 TOMM20L MTMR6 MTG1 TNRC18  
PRR36 LDLRAD2 CARD9 SLC4A5 FBXO46 NDRG2 CELF5 CYP2T1P  
SNORD152 MIRLET7F2 NECAB2 RGS20 MIR554 UPK3B MTMR12  
RELL1 KLHL21 LOC101929154 FAM177A1 RER1 RPN1 GSDME KLF2  
PMVK FAM160B1 SNRPC KCTD13 MIR571 KLHL28 IRF7 FAM193A  
FBXL20 NAB2 LRP5L MIR1909 SLC38A9 SHH SH2B1 EIF2S1 RFNG  
TARSL2 TERF2 LINC02133 ZBTB8OS LINC02585 MIR6080 XIAP  
GPR62 GPS1 BDP1 RPS29 ATP6V0A2 MKLN1 KIAA0319L NAA60  
LGALS4 SDHD LOC105379176 NF1 IMPAD1 TAOK2 HCFC1R1  
PPFIBP1 LYPD3 BCL7A MAP4K3 RMDN3 CBS ATP5PO KIAA0753  
LOC440700 METTL21EP FAM71A CLIP2 NCSTN PARP4 FOXRED1  
SLC35B1 NOTCH2 SULF2 CEP164 ADD1 ZNF136 FAM180B TRPC1  
VIRMA RRAGC MIR762 NUB1 OR11H12 MAB21L2 DGKQ CSNK2A2  
HERC3 ZBTB47 ZNF681 CUL3 PODXL FAM160A2 GPX2 KMT2B  
MIR6776 RABAC1 YPEL1 FBXL5 METTL16 MEF2B KAT5 LOC652276  
LOC100506990 PARVB ELL LOC220729 CDS2 GOLGA6L9 EEF2K  
MAN2C1 NSUN5 CEP72 SNRNP48 ZNF18 BNC2-AS1 DECR2 MUS81  
PHYH C22orf23 IL10RB OTUB2 VWA3A CHPF2 ALPK1 FGF22 ZFP1

CEMP1 E2F7 LIN7B VCP THEMIS2 ICAM2 FAS-AS1 RALB SNORD62B  
PDXP KIF9-AS1 VPS37B MIR3940 PANK3 SMIM1 SFXN3 CEP104  
NCOA6 PPP4R1 MAN1A2 MIR4441 UPF1 LOC643802 ZSWIM4 CDC40  
GTPBP2 SETD3 LOC91548 MIR548O2 ACOX3 CD109 CCER2  
GOLGA8J TP53I3 TOR1A SLC22A20P GPBP1 TRPV1 ADAMTS12  
AVL9 MIR6855 FER1L6 WFS1 TBC1D16 ZDHHC17 PPARD KDM4A  
URB2 SNORA98 YBX1 PHAX STK24 SPEG AAAS CFAP70 MTF2  
PARVG FIG4 MIR4512 IGHMBP2 LOC100499489 DCTN4 CCSER2  
KCNH3 EIF2AK2 AP1S3 PAM MIR641 GDPD4 SNORA40B ZNF114  
KMT2D WDR70 MIR590 RINT1 FAM8A1 C7orf50 GPR21 UNC119B  
C5orf64 FNDC9 RAD23A PLA2G12B HAUS1 MIR34A LOC101927322  
LOC101930421 PPP5C MIR222 GHITM SCAMP4 SP110 KIAA0513  
MIER2 SH3BP2 AGRN DHH CEP290 CNPY3 TFB1M CNTNAP3P2  
GOLGB1 NFKBIL1 UQCR10 C5orf51 API5 ZNF790-AS1 DCAF13P3  
LOC100287036 ADHFE1 PTBP3 NELFA NAGLU MYSM1  
LOC100286925 SH3YL1 TMEM38A HDHD3 RAB2B DHRS12  
WHAMMP1 ZC3H8 FBXO9 MIR3128 TNPO1 MRPL13 METTL6 RAB6A  
SOD1 PAPOLG CDK13 CHML OC90 MSRB2 ZNF317 NR4A1 ZSCAN21  
TRAPPC11 PRC1 RMDN1 MELTF MIR941-3 RASA2 SRGAP2B  
OSBPL7 MIR4484 DBI LOC100507599 LPIN2 PDP2 UFD1 DIABLO  
RPS6KA4 TGFBRAP1 BBS4 MPHOSPH6 RGS11 MIR6806 CLPTM1L  
LOC100129484 ATP6V0C SGTA TTC39B NUDT19 PLEKHB2 CASP16P  
ELAC1 SCARNA1 D2HGDH CCDC17 HM13 TCERG1 SMIM26 RPRD1A  
KLF5 UBL5 LOC100129034 C7orf61 CPEB4 MIR339 PLEKHG5  
EIF4ENIF1 CCDC9B MIR936 TNFRSF21 KLHL18 CRIP2 MYDGF  
MPLKIP CCDC136 HERC2P9 CABIN1 SNORD89 HIST1H2AC UVSSA  
CDK7 CRELD1 SNCG DRD4 GDF11 GCN1 ARL5C WDR27 CDAN1  
LOC100335030 TGS1 MCM4 TOMM70 IFT88 CEP192 GUSBP11 ID2  
SLC24A1 ATXN1L DNM1P41 PWP1 DNAH10 METAP2 GNG11  
TBC1D32 ZBED4 CLCN3 GPAM ESYT2 INTS13 TENT2 ZER1 INTS2  
SEC14L2 TAPT1-AS1 LINC01940 LOC153910 PHEX CCZ1 MECOM  
MIR4642 POLH CAMTA2 FILIP1L SNAPC2 L3HYPDH DGKA SGSH  
LOC105372273 GALT ZMYM4 MIR7111 STK32B TMEM243 ATP6AP2  
TPT1-AS1 SLC35C1 NEURL4 RSPRY1 LOC100130449 HERC5 THAP9-  
AS1 TM9SF3 DDHD1 SHPK MAFG BICD2 C14orf119 ALKBH5 MIR1537  
SHANK2 JUP ARHGAP27P1-BPTFP1-KPNA2P3 TMEM41A KBTBD2  
MYL9 PDIA6 CDC23 NBL1 MARCKSL1 ZNF496 NCK1 CUL7 EIF2B1  
CTRL RNF10 JMJD8 NCBP3 LINC01798 MIR627 ZNF37BP SBSPON  
TBRG1 SV2A TAF1C CIAPIN1 MIR4728 ZNF668 ADAT1 ANXA2P1  
RPP21 MLKL ZNF737 KLHL5 CRYL1 SPACA9 MVB12A MRPL58 DLG5  
PLEKHF1 LOC101928140 HDAC10 ZFYVE27 SND1-IT1 RNMT PROX2  
BOLA3 SEMA3F TMEM135 SNORD91B IGBP1P1 MAPKBP1 GNB1  
UBE2V1 DMWD POLD1 LCAT U2AF1L5 ARHGEF25 POM121C  
CDRT15P1 SKIL TMED6 LRRC27 RAB10 TSTD2 ZBTB7B ST3GAL5

DHRS1 TSSK6 CNOT3 TYW1 ZNF821 GAK SFT2D2 GRAMD2B  
C16orf70 CPT1A FCSK ZNF433-AS1 SNORA16B JMJD7-PLA2G4B  
MLH1 EFCAB8 AMPD2 IFNAR2 CYB5A NRBF2 FBXO6 ITGAE PCNX3  
MCM3AP-AS1 ANKDD1B MIR6126 IFRD2 DOCK7 DNAJB14 MAP1S  
TTC4 NOXRED1 NDUFS3 WDR3 MAGED1 CRAMP1 HSD17B14  
MIR10399 ALG1 TBC1D23 SAMD4B HEXA USP39 ATXN2L MAP2K3  
OMG SCAP ZNF486 NARS SMAP2 CWF19L2 PEBP1 RMND1 GMEB1  
AKT3 LOC340512 GEMIN5 LTBP3 AMHR2 UTP15 EEF2KMT MYBBP1A  
PHF11 MIR4435-2 NDEL1 AGPAT4-IT1 USP8 MBD1 C1orf162 RBM48  
ARFGAP1 ZBTB40 LYPLAL1 ALPL CHST3 TRIM62 OXCT2P1 BTAF1  
TFAP2E SNORD145 MAEA RNPEPL1 CPSF2 PSD3 ISCA2 GBX1 GNB3  
SNORA63C CEP295 DBNL ARHGEF10L BCL2L12 DNASE1 LINC02106  
ZNF554 TNIK SLC22A18AS LYRM4-AS1 QARS IRS4 MACF1 TGFB2  
PRDM14 MNAT1 TMEM160 ZDHHC2 LZTR1 POLR1C KANSL2 TRIO  
RAB42 NUBP2 TM9SF1 ZNF473 IQCK GPR107 SNORD116-25 RECQL  
AP1G1 CTNBL1 SMARCC1 FOXQ1 NAXE LINC02033 SLC37A3  
POLG2 CD4 TSL AGAP5 SDHB TSPAN3 SMARCA5-AS1 FBXW8  
C8orf58 MYO3B USP20 DERA L3MBTL2 MCRS1 PLIN4 ECPAS ZFP3  
PHKG2 DDX19B EXT2 ZSCAN30 DOLK MIR6834 PTPN12 CRYZL1  
CRY2 DIP2C LAMP1 LINC02424 RXRA ALKBH1 MIR4650-2 SCARNA10  
ABITRAM FAM13A-AS1 SNIP1 MSL3 LINC01772 MIR3925 MAML2  
SPAG16 MIR98 ARHGEF12 NFATC1 B3GNT9 SCYL1 CTDSPL2  
HMOX2 YIPF4 DGKH PLCG1 ANKRD10 SLC16A7 EMC1-AS1 DSTNP2  
MIR370 ITGB4 DCBLD2 MIR635 RBM33 YTHDF3 TMEM150B  
LOC152048 THYN1 OTOR UBE2I TBC1D5 ANGPTL3 HRH4 FLYWCH1  
MYO6 GLRX2 RBM24 AKIRIN2 RBM23 FAS PRKCI SLC15A4 N4BP2L2-  
IT2 SOD3 ZNF574 LOC100288175 ALDH4A1 TRNAU1AP COPA  
ALKAL1 MIR4653 SKP2 SYNC PARVA MIR6840 ATP11A-AS1  
LOC112268140 RNF34 COA6 CD36 LOC101927278 PRKG2 LRRC37A2  
ARF4 DCAF12 MBTPS1 MIR215 FANCL ZNF692 SH3GLB1 XRCC6  
SUPT5H KCTD18 C12orf76 SOS2 LOC102723824 LOC403312  
LINC01032 LARS ZBTB2 TRAF3 LETM1 GALNT5 PLXNB1 USP10  
MIR6742 WDR75 TEX261 MIR4749 FGD4 CLDN2 NSMCE1-DT  
ZMYND8 PDXK TAP1 HCG17 NACC2 ZNF382 INTS8 COX17 ITGA1  
ARHGAP33 TMCC2 TCF12 HAL EMG1 B4GALT4-AS1 MIR640  
COLGALT2 VPS36 MYNN ITGA8 DCLRE1B PRKCD MIR619 NDUFB4  
GRIK4 NPIPA7 TRIM65 TP53INP2 MYO10 PUS1 LINC02693 PEX1  
BCL9L RBM19 PITRM1-AS1 MEIS1-AS2 LOC107984974 POGK RIPK2  
ZNF540 LRRC43 MIR3130-2 DYRK2 PIK3C2A MIR6780A LINC01725  
ARNTL2 ASAP3 TERB1 MRPS18A ASPH EARS2 PGBD1 PITPNA  
LOC105371046 SLC25A22 PRR14L DYNLL2 FABP3 MYBPC3 TRPV2  
SIM1 SNORC CDADC1 KIAA1217 LOC101927727 MORC3 MIR6853  
TBC1D2B CCDC32 ALG13 ZBED5-AS1 MPV17L2 ZBTB45 ANK2  
AKR7A2 PRC1-AS1 VEGFC LINC00092 KIRREL1-IT1 SRBD1 DBT

LINC01530 INVS MIR32 RFX1 P4HTM LGALS3BP HPS3 SMIM7  
MRFAP1L1 MIR761 ARHGEF3 CSNK1G2 CD27 NPM2 RWDD3 HELZ2  
COX20 CMC1 CACUL1 NR1H2 OCIAD1-AS1 DCAF1 SLC25A29 SPHK1  
TRIM26 CA5BP1 GID4 ZNF578 RUVBL1 APAF1 MYH11 MIR3911  
SNORA14A IFNGR2 NDUFA4 TBC1D20 MIR6079 MIR451B INSM2  
SHPRH SNORA105B BCAR1 RABGAP1 RNF187 GBP2 CTBP1-AS  
SNORD149 MIR3918 C1orf52 CDC42 GRK2 RPL19P12 LRPPRC  
NDUFAF7 LOC440434 POMGNT1 SNX2 CLEC18B RBX1 GRHPR  
NKX6-3 ANKRD54 TSNAX CENPBD1 ZBTB7A SEMA7A EDF1 LTN1  
ZNF818P GTF2H4 AXDND1 PARP2 WDR60 TMEM75 LINC01191  
MTREX MDM1 CD9 ALDH7A1 EIF3F CASP7 LENG8 EDEM2 DHX37  
CRYGN AATF MCRIP1 LOC100130283 LOC441242 SMAD4 SLC35B3  
RRP1B STAT6 GNL1 CCDC40 THOP1 PER3 LINC02365 TRIAP1  
ARMC10 SNORD13C VARS2 PTPA NFIC ITPR2 SUN2 COX4I2 CCNT2  
MED16 PLOD3 MIR602 ELMOD2 SHC3 DYNC2H1 DRG1 SRP19  
MFSD1 LRP10 PUS7L ATG16L2 SEPT5-GP1BB MIR1262 VPS35L  
GPHA2 TSPAN5 EHBP1 ATAD3A OSGIN2 ADCY10 LOC101928943  
SRSF4 TLE5 ASGR1 CXorf38 FBXL2 BRD1 LPAR2 FBXO44 MCCC2  
SNX7 IVD HEATR1 NAA35 SPRED3 ZMYM1 PSTPIP2 PMF1-BGLAP  
LYPD1 SUGT1P3 BCAS4 ISY1 MIR4315-1 NNT-AS1 CUL1 LY6G5C  
CNEP1R1 CXCR5 MIR6787 FLNC-AS1 HSD3B7 VDR PODNL1 SMIM24  
ZNF213 MIR1913 MIR6888 DLL3 CREB3L2 MFSD2B FASLG WASHC4  
MIR589 NUDT2 CD37 LINC02349 MIR330 MRPL18 BBS2 PGAM5  
FBXO21 LOC101928008 CCDC154 CLSTN1 CHCHD3 LMAN2  
R3HCC1L DFFA COQ6 ZNF337-AS1 PRPF4 RPS6KA2-IT1 MIR1227  
RCCD1 WDR11 NT5C3A EZH1 MRPL32 EXOSC1 ERP29 CACNB4  
NUDT9 STX17 SH3BP5L GMPPB BMPR2 MIR548K EAPP NME2 GCC1  
FRMD8 SNORD113-7 SNORA70H MIR6804 CNIH2 CUL5 HACD3 FPGS  
ANAPC2 GAL3ST2 SLX4 DERPC AIFM2 PALB2 MIR12124 BCORL1  
LOC101929577 BRAT1 CDK2AP1 TFDP1 LOC101928063 DHPS  
NODAL HCCS DENND1B MIR6753 LHX3 SNORA7B MIR23B NDST2  
CIC CCDC18-AS1 METTL22 PIH1D2 SAMD14 PPME1 MIR4684 TNPO3  
DCUN1D1 DAB2IP CYB5R1 KDM4C MIR600 TPGS2 RAB3D DCUN1D4  
MIR548AQ SDC1 ATP6V1H MUL1 NUP58 MYCBP2 TDRD12 WIP1  
ENTPD4 MIR7109 CYP27A1 XPO1 RPS18P9 ZNF777 SLC7A9 FADS3  
LOC642361 PAMR1 MED1 ABCB10 MIR133A1HG PCAT4 IDI1 ZDHHC5  
SACM1L MIR6730 CAPRIN2 SNORD92 MIR4658 TMEM260 NAV1  
LOC389906 TTF1 GET1 LINC02236 PLAGL2 HMGCL ZNF256 MSI2  
MRTFA ACAA1 FAM32A ANK1 PRSS23 MMUT ATP4B SPATA20  
PSMB5 MTRNR2L3 KIAA1191 USB1 GPN1 MON2 MIR2909 FAM185A  
RABEP1 CDK5R1 MIR4777 DBN1 ACAD10 TSEN34 SMIM14  
LOC100506679 TNFRSF11A SEMA4G OXER1 SLFNL1 KMT2A PKN1  
SPON2 FDX2 AFMID ACSF3 ARL3 MLLT10 SURF6 BPHL MTCL1  
C2CD2 COX5B WDR97 EIF2AK4 RRP12 CYREN MRS2 NDUFB2-AS1

DPP8 IL7R OTUD7B ANKRD12 RAB12 DDX51 AZIN2 ACVR2B ZNF517  
SUFU DNASE1L2 PPP2R5D C9orf24 TIMM44 ROM1 UBA5 FBXO4  
MLH3 DNAJB5 MIR3190 TMOD1 CD320 MRPL21 ANGEL2 TLR9  
GPR137 MARK4 CTU1 AMOTL1 CLEC16A SMG1P1 SYNJ1 NIT2  
SERPINB10 TCF7L2 ZNF431 CACYBP TCTN2 JAK1 TYW1B GALNT11  
QSER1 ULK2 PIGO SLC35E3 CSRP2 ZMIZ1 DDX58 AKT1 ZNF462  
CDC34 MTRF1 MCM6 MFSD13A USP22 PLEKHA4 LOC100130172  
PTCD1 MIR10397 SUDS3 PHETA1 SLC25A12 POLR2C SNORD116-6  
ANKRD27 HPX TCP11L2 CLEC4A PRR12 CPSF4 C11orf98 MAP2K1  
HPS5 GTF3C6 UBR2 SREK1 PPIE VOPP1 LOC101927189 PIGW SAE1  
BUD23 MIR7114 SAMD9 AKR1C3 RNF19A YKT6 UBE2V2 ASB7  
MIR6866 DERL1 FBXL18 RABL2A ACTN1-AS1 KCTD21 LOC100506100  
GTF3C1 CTSZ FICD SNORA12 NR1I2 VTI1B PRICKLE1 WNT5B LARS2  
BRD3OS SLC25A38 DCTN2 PSEN1 URAHP ZNF324B CARMIL2 OLA1  
CSRNP2 HSP90AB4P SSBP1 ZNF341 YTHDC1 EOGT SHKBP1  
AGMAT NAGK STK38 QTRT2 ADD3-AS1 TOMM7 TREX1 VTA1 TRIM15  
SNORD121A SNORD126 KIF3C MIR30C1 RPL26L1 TRHDE-AS1 NDC1  
ECD TMF1 PNPO TDP2 P3H3 SCML4 LOC101928445 SELENBP1  
TMED4 MROH1 TTC38 ATG14 TRAF3IP1 B3GAT3 ARHGAP27 PISD  
NSUN5P2 TRAP1 USP1 MRPL53 RNF44 EMSY PINK1-AS DPYSL3  
TTC7B C1orf146 INSYN2A GPC1 MIGA2 SLC51A APP TOB1  
PRKAR2A-AS1 TINCR NDUFB9 NADK2 WDR63 RNGTH CEP250 IFT52  
GOLT1A PDHA1 PDF TESMIN LINC02168 ANKRD36B RNF38 AHDC1  
ZNF205-AS1 GLTP HERPUD2 CSPG4 HSD17B2 FAM214A ATP5MF-  
PTCD1 LOC107984036 ADCY7 SNORD103B ATP13A1 DCAF5 DAZAP1  
PRKRA MITF NEPRO DHX35 ZNF131 MIR7110 TRIM33 SP140L  
IZUMO4 TNRC18P1 FBXO42 ABALON MIR4505 PAPOLA LINC00665  
NDUFAB1 ZNF852 MRPL45 COX6C MSMP NSMCE2 TTC37 GPR143  
ZNF576 CASTOR2 MIR12131 ANP32E MIR6890 ZNF182 SPPL2B  
MIR1914 BLOC1S2 ARHGAP21 MIR6133 HOOK3 ITM2B GINS1 UTRN  
MIR6792 MIR576 CLTA SMC3 ZNF702P GAREM2 OGDH ASB13 GSS  
PWARSN RHOC EPHX3 ZNF32-AS3 UTS2B ALDH3A2 LINC02574  
DDB2 SPTSSA MKNK1 DYSF BMT2 MTRNR2L4 MTRR C1orf174 PPIL4  
YTHDF1 LMAN1L MIR7106 TRUB2 ZNF280C QDPR PPP2R3B ZNF598  
BOP1 FRMD6-AS1 POLR1E TMEM98 ATP2C2-AS1 C1orf216  
SLC38A10 EP400 BTN3A1 THAP12 NDUFA8 NOP9 SORT1 DPP9-AS1  
5-Mar YWHAQ PPM1K ROPN1L-AS1 ENOSF1 TMEM120B LINC01804  
IFT140 DENND1A TEX43 FAM76B QPRT NUP37 CDS1 RAB3A  
LINC02068 ZNF41 ADAM19 FLJ42627 ABRAXAS2 PNLDC1 WDR19  
LDHB BAMBI RAB5B MRPS12 CRIPT MMP24OS DEPDC5 MAPRE1  
NDUFA2 TRIP12 PLD6 KIAA0355 ABI2 ATAD3B TMEM14C FGFR3  
TMEM33 ANKRD61 BBS1 PLD1 NDUFC1 NBR1 AKNA HPS4 HMGB3P1  
MAFA CEL DHX15 PICALM CNOT6 MARK3 TCF4 MIR340 TLE2 ASAH2  
TBC1D9B PNPLA6 MIR4326 LINC01704 AP3B1 MIR182 SYTL1 GGA1



MIR5006 RARA-AS1 TAB1 C5orf47 PCDHGC5 PRRX1 ASTE1 ACSF2  
IL1RL2 MED18 ECE1 SNN FAM189B YIPF6 PSMD6-AS2 GABBR1  
SNORA49 TIAF1 LSM3 FMN1 ZFP41 SNORA70D SSRP1 SEPTIN7  
ASXL2 SPCS3 MIR1244-1 TP53I13 MIR3909 A2M-AS1 ZFPM2 GC  
C14orf178 CSR1 BOD1 USP12-AS1 COG4 C12orf65 NFRKB DDX39A  
LOC102724927 TM4SF20 LOC105379194 HAGH LOC101927839  
FBLL1 BRCC3 FYN CNDP2 YPEL5 AGO2 NKX1-1 CFAP44 DSTYK  
DUSP14 SNX13 MIR614 CSPP1 UBALD1 MIR3657 BRSK1 SPAG9  
MARVELD3 HASPIN RAD54B MED25 EIF2B2 WNT5A MIR6729  
AURKAP1 MIR645 WBP11 CTNNB1 LOC100130357 GALNT2  
TMEM185B DND1 STK3 FAM78A ANO10 SNORA101B VEZT CCNK  
IMPACT WNK4 SLC7A6OS USP35 DKK4 SGK2 PRKDC ZCCHC10  
PDCD6IP MIR6756 USP18 ATXN2 RRAS IPO5 PIGBOS1 MIR6849  
KCTD17 GIGYF2 CHMP3 DNA2 SIK2 GPRC5D-AS1 PTPN14 BMS1  
NFATC3 FAM53A PLPP2 LRIG1 FASTKD2 PRSS27 KCNMB3 WDPC  
LOC101927572 POFUT2 PCBD2 MIR4469 TRUB1 PITPNM2 ZXDC  
TGFB1 SLC31A2 MIR1229 APEX1 CEP68 SCARF2 VPS53 WASHC2C  
UBE2L3 ATP6V1E1 MIR4685 C3orf70 ASB1 MCTP2 ASAP1-IT2  
LOC101929372 PTPN9 LOC644285 UCK1 RUNDC1 FAM120AOS  
SDHAF1 PWWP2A LOC102724050 MIR6829 SMG1 ZNF710-AS1  
C1orf220 RPL23AP64 PIP5K1C LOC100288254 TSPAN14 NAA40 PDK4  
NNMT ZNF74 RHBDL1 SNX29 LRRC39 EFCAB14-AS1 HYAL2  
TBC1D10A ERGIC3 TARBP1 LOC101927809 CWC25 NR2F2 CTTNBP2  
ZBTB24 PRDM1 CCDC47 SMAP1 BIN1 ALS2 PPP1CA NME9  
MIRLET7A1 MIR3616 PTDSS1 ECT2 MIR5585 DOCK6 GLCCI1 CCR4  
COX6A1 B3GALT2 CCDC74A MIR12126 SNAP29 HDAC2-AS2  
CCDC167 WDR45B CNTROB ZNF548 INSL6 INPP5F MYBL1 INPP5K  
COPB2 CTR9 MIR4730 UBR1 PTTG1IP ZNF767P COPS6 VAC14  
SOGA1 PSMD9 KDM5B BPGM HMOX1 FAM207A PRR13 TRPM7  
FEM1C SERPINB8 FCF1P2 TMED3 SMAD2 TMEM68 NXN PPIH  
FAM200A ZMYND19 EIF5B FAM53B-AS1 ASL TFAM RALGAPB  
TBC1D22A-AS1 PARP12 GTF2H1 FLCN NAMPT SSBP3 GDNF STK36  
TEP1 LOC105371414 KIDINS220 CA4 THEM5 PLCB4 MPHOSPH10  
G3BP2 PYGB TSC1 NARF OARD1 UTP18 DDX31 NHLRC2 ZNF430  
TNRC6A GTF2A2 RCHY1 EID1 ZC3HC1 SCARNA9L ATG2A SPOP  
ICMT PTPRF POLL ZNF808 TYK2 MUC6 DNAJB7 GPAT4 MIR1249  
RRP1 NUTM2A SNORD13E LBX2 MTMR4 SNX9 NECAP1 TTC39A  
POLR2F MCM7 TRIM52 PRPF31 MRPL55 CLCN1 RIOK2  
LOC100506606 STX18 DCBLD1 METTL2A EML6 NAT2 TTC8 CLSTN3  
FAM138B PSMG1 CENPS-CORT ZNF408 MIR3179-4 BOD1L1 BLCAP  
XIST ANKRD60 GNE ZNF501 ZNF213-AS1 COPG2 IARS PAPP-AS1  
CD163L1 TRPV4 SLC25A11 ESS2 OSBPL1A MED13 MIR4254 ESCO1  
F2R RFC1 LOXL1-AS1 ARMH2 BMP1 SNRNP25 NFE2L1 MRPS31 INE2  
MIR4256 ZCCHC17 SLC25A20 RSNB1 PPP1R9B FER RGL2 ARPC1B

C2CD2L SNRK UTP6 LOC101927478 TMEM74B SOCS1 IL17RA ST5  
LOC729683 BTN2A3P CLPX NPLOC4 RB1 C4orf51 ANKLE1 MPV17  
LYSMD3 COL16A1 COA7 GLRX SAA1 TP53I11 FBXW7 MIR30E VASN  
GOLGA6L4 RBFOX2 LOC101929140 MICU2 PHF8 DNAJB2 RABEPK  
H2AFV OAZ3 PHTF1 NKPD1 MAN1B1 LRRC20 MIR580 ZNF106  
OSBPL2 SNORD99 LHFPL5 PRMT9 GLI2 SCO2 C1QTNF12 NAV3  
MAP1LC3A MNT PLEKHD1 ZNF560 OTUB1 ADGRF3 SNORA80A  
SNORA74C-2 TMEM115 PRPSAP2 GDE1 ZNF438 MX1 LOXL4 PAXBP1  
SETD1A MIR6883 RELB NLRP1 FAM71F2 LAMB2 FNTA SUCO  
GTPBP6 ZNF512B SLFNL1-AS1 DYNC2LI1 ADAMTSL5 MIR671  
MRPS15 KDM1B CNOT8 GORASP2 ADAM17 LINC00467 ZC3H4  
RPL37A NDRG4 PIAS4 FAM118B CFLAR HAPLN3 WDR48 TOR4A  
ACACB FAM210B MIR6749 TRAK1 LINC01487 SNAR-E CUTC  
SNORD153 PREPL ABCB6 MRPS25 RABGAP1L HSBP1L1 MAPK8IP3  
SCARNA7 ETFB CERT1 LINC02308 ERI3 PCTP CD164 HDGFL2  
FDPSP2 HAX1 NSG1 RBAK-RBAKDN TPRKB HIST1H2BD COQ4  
C5orf22 RNF8 LARP4 SIAE CWC15 ZMPSTE24 ZNF503-AS2 PSMB3  
DEDD2 ASMT DNM1L CPT1C MTIF2 MPRIP TXN2 TOLLIP TEX29  
TRAPPC3 IDE SCMH1 ELMO3 GPR68 ARMC5 TLCD5 ATP8B5P  
R3HDM1 MKRN1 ANXA7 HACD4 APC PGAM2 WFDC1 ZNF233  
RRP7BP COMMD9 GNA12 ZASP LIMK1 MIR1277 MMP19 AKAP11  
GLB1 MCMBP PKD1P4-NPIPA8 PROSER2-AS1 CNOT11 MOCS2  
CCDC7 CYBRD1 ME1 MGRN1 TMEM88 TECPR1 MRPL30 C8orf33  
RCC1L CKM MAP3K11 SCAF4 CLASRP MIR6795 SIVA1 MSANTD4  
DIP2A-IT1 RALBP1 ATP5IF1 ZCWPW2 KAT7 GATC PIM2 SLC17A5  
INSIG1 CPLANE2 SYNGR1 UPK3BL2 REEP2 TMEM256 REPIN1  
PDE4A VPS45 PPM1D GINS2 LINC01039 VGLL4 SPC24 GNPTG  
BRWD1 ZFAT APC2 PPIP5K1 GOLPH3L UBOX5-AS1 SYAP1 ZBTB17  
PVR LTA4H MIR6802 LOC105373031 IFIT3 GNRH2 PGK1 DERL3 RLF  
PLOD1 NAT14 KHNYN NPDC1 GPAA1 HMCES TEX264 LTV1 NBAS  
TBCB CNPY2 C11orf42 CD81-AS1 PANX1 RCBTB1 CYBA SOS1  
KMT2E PTEN AFF1 RNF216-IT1 SETD2 ROGDI RPS14P3 UGGT1  
GCSHP3 MIR6716 TMEM204 FAM151B SNORA9B ZBTB34 NDUFA6  
HMG20B MIR6816 SNORD53 NOSIP TRIM23 ARL1 SSH2 CDK5RAP2  
PRAM1 EIF3B AK3 FLVCR1 COX14 LYRM2 PHLPP2 EPN2-AS1 AMBP  
ZNF219 H1FOO SLC25A26 SMIM3 TCAF1 ARHGEF7 SLC23A2  
SCARNA20 TBK1 PKD2 STX2 MIR6824 NR1H3 PAN3-AS1 MPPE1  
SLC44A2 ZNF704 CLCN6 DISC2 SH3GL1P2 LOC339666 MAN2A2  
GABPB2 PTPN11 ZACN C7orf26 MIR378J FTO-IT1 WDR54 PLK1  
KIAA1958 DPRXP4 MIR6857 GTF2IRD1P1 ZDHHC16 RFTN1  
LOC100133315 TAPBPL LOC100506071 GUSBP3 ZNF148 CNOT4  
APEH GGA3 ZNF749 PCYT1A BRMS1 LOC728392 TAF1B CASP10 ALK  
DACT3 PCMT1 VAMP1 EVC2 SLC66A2 GON4L RIC1 AFG3L2  
TMEM222 TGFBR3L MIR10394 GSTA4 LOC105376114 ADIG

MIR320B2 LSM14A BTRC USP49 TRIM3 ABCA1 REST EDC3 BMS1P2-AGAP9 MRPL47 SNORA36B LINC00294 C2orf27A COPG1 C3AR1 TWF1 MACO1 SEC31B HSD17B4 BDKRB2 CIAO3 PCGF6 LOC400627 RNF215 PACRGL TAF2 KATNA1 EBLN3P DHX33 P4HA2-AS1 LINC01719 MROH8 FKBP14 SFSWAP REC8 APMAP CASP8 PRKD3 CFH WASH8P DHX30 ZNF707 ARGFXP2 LINC01946 MAU2 SNORD13I ERAP1 ITSN2 CCNG2 MIR6751 ODR4 PSPN WDR88 MIR219B MIR6859-1 CNN3 JAG1 MMAB PAPP A RHOA LINC01572 DCTN3 ANKS6 C15orf62 AKR1C2 C11orf58 SUN1 NUDT18 RPL13P5 EHD4-AS1 CTXN1 FBXW2 OGG1 HDAC9 ZDHHC24 ZNF410 ZW10 C12orf29 SCAND1 VILL MPND MPC1 LOC105373100 HECTD4 PPP3CC TAMM41 GOLGA1 ZBTB43 VAPA MEA1 C4orf36 PIK3R3 USPL1 CDPF1 BRF1 PFN2 SHANK2-AS3 COG2 MIR4266 TARS TRAPPC2L ZNF92 ARHGAP28 MTOR FAM222B NR2C2AP MIR6770-2 INGX C17orf75 RCOR2 FBXW4 DELE1 LEPROT TXNRD2 TNFRSF4 KSR1 C17orf107 SS18L2 RAB11B-AS1 POU5F2 VPS39 ZNF236 MORF4L2 MRRF TAF1A-AS1 MARVELD1 INF2 SUB1 ZNF281 TIMM23B-AGAP6 ANKRD46 MIR2467 PRORS1P KCNE5 TIMM10B SYNRG MIR12121 USP30-AS1 GATAD1 LINC01729 SNRPD1 NUDT6 NEU3 NCAPG2 ITGAV MIR6798 TMEM191B RBBP4 ZRANB1 AVPI1 SGTB SLC38A8 C1orf122 GM2A C11orf95 CD2AP STARD3NL MIR6873 ISY1-RAB43 MIR6844 CTBP1 MYLK4 XRR1 ADAL MIR548F3 TMEM9B DNAJA1 MAP6D1 CWC27 ARG1 ASCC2 BABAM1 CYB561D2 MYO5A MIR1224 MEGF8 LOC102724951 TBKBP1 CAMLG PNPLA1 SZRD1 HERC2P11 PDS5B LOC644135 DHTKD1 SEPTIN9 SH3GLB2 KDM8 NOC2L SCAI MFSD10 SUGP1 WDR49 SIN3A NSD3 SLC12A9 MC1R TXNL1 RNF168 ISG20L2 CCNYL1 ESD PRDX5 MED6 TXNDC5 LINC02150 SNORA68B CIR1 SNORA47 WRAP73 DQX1 SEPTIN2 DNAJC18 NELFB GID8 ANO7 MIR7112 LOC105375713 MIR544B EPC1 LOC101927557 COX19 SNORD116-28 THRSP ASMTL-AS1 C1QTNF9 GOPC ILF3 PNPLA8 SNX14 ATG101 SP2-AS1 RPS6KB2 TADA1 ADRM1 MCEE DCAF16 LOC284009 SLC35E2B ZFP82 CEP89 AIMP2 LOC100129148 MIR133A1 TMEM184B ADPRHL1 DIS3L2 ZNF292 SENP3-EIF4A1 ARNTL DROSHA PUS10 SNTB2 FUT10 LOC100505915 TMEM41B C16orf86 M6PR ZNF521 MIR6837 EIF2AK3 COL13A1 RPRD2 CHMP4B ALKBH4 CCDC93 ERVW-1 AGAP2-AS1 GMEB2 YEATS2-AS1 KDM3B PDCD2 CHAC1 RPF2 MTPAP ZNF192P1 C1orf109 LINC02626 ISYNA1 SZT2-AS1 TMEM14EP IDH3A LSM7 LRRC47 LAMP5 ACSS2 COPS7B BAG6 GZF1 MIR4312 RIN1 SPINDOC MLX NSUN2 TPTEP2-CSNK1E ASB16-AS1 RILPL2 KIFC3 LOC101928020 TAGLN PTPRK MIR8075 STK11IP TAX1BP1 LETM2 TMBIM4 SAP30L UHRF1BP1L ST3GAL2 GIT1 MOXD1 SMYD4 ODF2 SLC25A47 DENND5A NUP98 PTPRS TRABD CLDN15 ITGB1BP1 BRAP SOCS7 RRP8 RFC2 ZYG11B PPARA VCPKMT PIAS2 MIR621 TRAPPC12 TBC1D13 PSMG3 EIF1B TG

GRASP ACAD9 MIR4467 TFB2M LIME1 MAP2K5 SNORD135 ZNF229  
NPEPPS DDRGK1 MIR3654 DNMT1 EPB41L2 ARF4-AS1 BRIP1 WIPF2  
PPM1B MMP21 AAMP ATRAID CFAP126 DGUOK-AS1 SNORD116-26  
NAT9 ZC3H12D DMBT1 SLC35D3 MXI1 EIF4A1 MIR3179-2 SPTLC2  
ZDHHC9 IL3RA ANKRD13C KMT5B SYMPK CLINT1 MRPL39 TEX22  
LOC100128361 ATP5MGL HPCAL1 HOMER1 PLA2G15 ITPA CNTRL  
SAP18 FNDC5 SERPINB6 ALDH8A1 TSHZ3 MIR4700 RALA H6PD CAD  
DOCK10 XPA IGDC4 ZBTB9 MGME1 IRF5 R3HCC1 GNMT RPAIN  
TMEM245 ARL14EP RPA1 ACTR1B PPP4R1L RAB29 FNDC3A ESF1  
LAMTOR1 MRPL2 RDH12 CELP SNORA118 METRNL IAH1 ZNF346  
SLC30A10 VPS18 GEMIN7 UBA52 RIPK1 CSAD ANKRD50 MIR6808  
EIF2A LHX6 CRBN ATPAF1 NCBP1 PLA2G4F C20orf144 FGFR1OP2  
SLC9A1 SUGT1P4-STRA6LP NEXN TTI2 PAFAH1B2 LOC101929162  
UBAP2L TVP23C-CDRT4 MIR6862-2 TMEM138 TMEM131 SH2B3  
SCRN3 WDFY3-AS2 KIF1C TOGARAM1 MIR499B ELF2 AP3D1  
PTCHD4 NIPAL3 LOC100505715 DDX54 MMP17 ZNF84-DT JPT2  
MIR1284 PTPRA HYKK BOK-AS1 RIPOR3 GOLIM4 HSF1 UBXN1  
HIF1AN TMEM249 NCKIPSD POLR2H VLDLR-AS1 LMLN-AS1 NFKBIB  
COX7A1 1-Mar NEDD8 MIR548BC POLR3H COL4A2-AS1 BRD7P3  
MIR4665 THUMPD2 CALM3 C6orf136 XKR8 MPDZ GBF1 MIR6505  
EIF2AK1 SNORA2C TXNDC11 SPATA5 NVL LINC02332 LTO1 NUP54  
ANKRD40CL PLPPR2 VCAM1 CUL9 PTAFR SMTNL1 PLEKHH3  
PDCD11 DTX2P1-UPK3BP1-PMS2P11 TM7SF3 CYTH3 PLEKHA8  
MLEC KLC1 TBC1D10B MIR6800 NCBP2-AS1 C21orf59-TCP10L  
ATP6V1FNB ZNF337 SNAP47 LINC00367 GXYLT1 FERMT1 DLD  
KIAA2013 PPFIA1 AMY2B CUL2 DENND4C PKM GCG MRPL45P2  
LOC651337 IARS2 RGS10 LOC388242 CHERP PRR35 MIR3160-2  
SYT17 NOP14-AS1 SGSM2 MLNR POFUT1 KLHL17 TMEM179B TJP2  
LINC00265 LOC105370802 PAPLN ARF3 EFCAB13 MIR4640 TM2D1  
SLC5A2 ELP1 SELENOO SNORA11F TTC21B-AS1 MRPL16 RHBDD3  
LCMT1-AS2 LPCAT3 ABLIM3 C2orf42 LINC01433 CALHM6 LTC4S  
EEF1AKMT2 PSMC3 SMARCA2 CABLES1 TUBGCP6 SPATA33 BRF2  
BLOC1S6 STAC3 TM4SF19-TCTEX1D2 CLUAP1 HRAT5 FANCE GMPS  
SPAG7 NPS TACO1 SYNPO SNRNP40 UBE3C PDSS2 MIR1285-1  
DCTN5 HKDC1 PSME3 PHF10 MIR1307 NME3 CHN1 MIR1205 LARP4B  
EMILIN3 GATAD2B RTF2 UAP1 MIR4722 ATIC ADAM15 ATOH7  
PRSS53 SCAF11 DLEU1 ZMYM6 KBTBD11-OT1 C20orf204 PXX FLNA  
MIR6744 LRPAP1 G6PC3 RAB5IF LRRC14 METTL21C GORASP1  
FCHO2 NDUFS7 FBXW4P1 ABCB8 SCARNA5 LOC102724034 SRF  
C2orf74 SIN3B TRIM8 SEMA3C LOC606724 MIR7108 FBXO10 PDGFC  
CLIP1-AS1 PEPD PHF21A CNST ERCC2 SMIM18 TRMU CCDC9  
LINC00940 HCLS1 MIR1972-1 CSF2 SLC2A11 GRIP2 RAB8A PCIF1  
PIK3IP1 SLC39A6 SNRPD2 LINC01806 AQP7

|                                                |            |                                                                                                                                                                                                                                                                                                                                                                                                                                                                                                                                                                                                                                                                                                                                                                                                                                                                                                                                                                                                                                                                                                                                                                                                                                                                                                                                                                                                                                                                                                                                                                                                                                                                                                                                                                                                                                                                                                                                                                                                                                                                                                                                                                                                                                                                                                                                                                                                                                                                                                                                                                                                                                                                      |
|------------------------------------------------|------------|----------------------------------------------------------------------------------------------------------------------------------------------------------------------------------------------------------------------------------------------------------------------------------------------------------------------------------------------------------------------------------------------------------------------------------------------------------------------------------------------------------------------------------------------------------------------------------------------------------------------------------------------------------------------------------------------------------------------------------------------------------------------------------------------------------------------------------------------------------------------------------------------------------------------------------------------------------------------------------------------------------------------------------------------------------------------------------------------------------------------------------------------------------------------------------------------------------------------------------------------------------------------------------------------------------------------------------------------------------------------------------------------------------------------------------------------------------------------------------------------------------------------------------------------------------------------------------------------------------------------------------------------------------------------------------------------------------------------------------------------------------------------------------------------------------------------------------------------------------------------------------------------------------------------------------------------------------------------------------------------------------------------------------------------------------------------------------------------------------------------------------------------------------------------------------------------------------------------------------------------------------------------------------------------------------------------------------------------------------------------------------------------------------------------------------------------------------------------------------------------------------------------------------------------------------------------------------------------------------------------------------------------------------------------|
| <p>Unique to<br/>'BM vs<br/>BLEO<br/>down'</p> | <p>473</p> | <p>MMP2 BRIX1 TMSB10 CCNI SMYD3 EIF1 RASA4B TAF12 MIR7705<br/> FUS BTF3 MIR637 SNORD14D LINC00475 OSER1 PAWR NCF1<br/> ZNF614 GRPEL2 HSCB MIR4750 LINC00641 WSB1 SNORA63B ZNF3<br/> GRID1 ANXA2 C4B SNORD72 HNRNPH1 PPP1R15A LINC01554 AXL<br/> SPDYE18 WASH7P MFGE8 EPC2 SNX18 LOC100506282 ERFE<br/> LGALS3 TAGLN3 SSB SLC3A2 MIR22 FRG1JP RPL35A PTRH2<br/> SNORA33 TPM1-AS CAV2 RPL31 KDEL2 AGL2 EIF3CL HLA-C<br/> SNORD79 SNORA73B FBXO39 THUMPD3-AS1 LBH RPS16 ZBTB46<br/> RBAK LINC01054 SMAD6 MAP4 SNORD83A MEX3B SFPQ INTU IDI2-<br/> AS1 SNORD156 SNORA40 MIR181B1 SLC12A2 KLF6 COL6A2 HLA-A<br/> LDHA ZSCAN29 CAP1 TMED2 RPL6 NUP50 RPL36AL DUSP6 ZNF460<br/> MIR6859-4 SLC25A6 RPL18 CDKN2AIP SNORD68 NR2F1-AS1<br/> LRRC59 DRAP1 SNORD10 OGA SNORA65 LINC01578 LINC01426<br/> INHBA-AS1 TRPS1 RNU1-3 CDKL1 GARS ACTN4 COX7A2L UBB<br/> KPNA2 TRA2B MYL12A HNRNPR LOC646652 PHLDA1 PHF1 FN1<br/> ZFP36 ITGB1 TUBA1A MST1P2 MIR6743 CNOT7 DMTF1 XPOT CWH43<br/> RPS24 RPL24 ARID2 TNRC6B LOC100506142 RPLP0 HNRNPA2B1<br/> SDHAF2 TSC22D2 LINC02283 RPL34 STAR TUBA1C SNORA64<br/> RNPS1 ANKRD13A CCN1 SNORA31 BRD2 TPM2 MIR6779 ADM<br/> MARK2P9 NAT1 ACTG1 SRRM2 LOC101928461 HNRNPA1 MIR29A<br/> PHF23 SMNDC1 LINC01184 JPT1 DNAJB1 SULT1A4 SNORD59B<br/> YWHAE SLC2A3 KIF5B SMLR1 LPGAT1-AS1 FLNC LRRC66 CDC37L1<br/> CCN2 WARS LPCAT2 MIR6515 AP5M1 TTC32 MIDN LINC01767<br/> PGM5P2 ATP5F1A CSNK1D MIR6759 ALDOA PSMC1 CCNO NIP7<br/> SERPINH1 PNRC2 GPR37 TPM4 UGDH ADAMTS1 SNORD173 ZNF302<br/> CALU RHOB MIR4482 SIX4 SNORD36C MIR10393 TTLL3 WTAP<br/> SNORA28 ILKAP HNRNPA3 PDZK1 MIR5047 HSD17B8 YBX3 MIR6797<br/> BCL3 SNORD12 ZNF385A TGFBI ZBTB49 CLDN18 SNORD63<br/> LINC01004 CD44 RPL19 SNORD37 SMG1P6 TUBB SNORA19 SNX19<br/> ZNF655 AHNAK HP09053 AHR RBBP6 MAGOHB SOX9 SNORD35B<br/> SNORD11 SET CLMAT3 AGER MICA KCNV2 SNORD114-10 MIR6895<br/> ERH MYC GASAL1 SRSF3 SNORD96A GRAMD2A SEC61A1 MIR3129<br/> ASH1L-AS1 MIR3605 ZNF544 PDE5A CMAS RPL9 DDX11L2 NABP1<br/> DDX17 SNORD82 CBX3 FRG1FP TMEM50A CFDP1 HMGCS1 DCN<br/> SUCLG2 ACTN1 SNORA71B COL1A2 LOC101929130 HMGB1 SEC24D<br/> NUFIP2 MTA2 RNU6-1 IRF1 ZSCAN5A PDLIM7 MXRA8 CSTF3<br/> A3GALT2 CCT2 RNF145 SNRPF SNORD111 RUNX1 SEPTIN7P2<br/> SNORD69 EIF2S3 RIF1 UQCRB SNORD14B SNORA53 SLC38A2 IL34<br/> MIR4804 NDFIP2-AS1 SLC4A7 MTNR1A PSME1 SLC7A2 OPN1SW<br/> ZNF155 SNX29P2 KLF7 TAF13 MIR6819 LIX1L-AS1 HNRNPD<br/> NECTIN3 PLAG1 MIR6747 SNORA66 SNORD97 PCBP2-OT1 PIP4P2<br/> TM2D2 IL6ST SETDB2 MIR6501 RELA MIR1244-4 GDI2 XBP1<br/> ADAMTSL4-AS1 ACTB MAP3K20-AS1 BSCL2 C19orf24 HIPK2 ABCA7<br/> ZC3H10 COL6A3 SLFN5 SPDYE2 GP5 STC2 LPAR1 SNORA22B</p> |
|------------------------------------------------|------------|----------------------------------------------------------------------------------------------------------------------------------------------------------------------------------------------------------------------------------------------------------------------------------------------------------------------------------------------------------------------------------------------------------------------------------------------------------------------------------------------------------------------------------------------------------------------------------------------------------------------------------------------------------------------------------------------------------------------------------------------------------------------------------------------------------------------------------------------------------------------------------------------------------------------------------------------------------------------------------------------------------------------------------------------------------------------------------------------------------------------------------------------------------------------------------------------------------------------------------------------------------------------------------------------------------------------------------------------------------------------------------------------------------------------------------------------------------------------------------------------------------------------------------------------------------------------------------------------------------------------------------------------------------------------------------------------------------------------------------------------------------------------------------------------------------------------------------------------------------------------------------------------------------------------------------------------------------------------------------------------------------------------------------------------------------------------------------------------------------------------------------------------------------------------------------------------------------------------------------------------------------------------------------------------------------------------------------------------------------------------------------------------------------------------------------------------------------------------------------------------------------------------------------------------------------------------------------------------------------------------------------------------------------------------|

|  |                                                                                                                                                                                                                                                                                                                                                                                                                                                                                                                                                                                                                                                                                                                                                                                                                                                                                                                                                                                                          |
|--|----------------------------------------------------------------------------------------------------------------------------------------------------------------------------------------------------------------------------------------------------------------------------------------------------------------------------------------------------------------------------------------------------------------------------------------------------------------------------------------------------------------------------------------------------------------------------------------------------------------------------------------------------------------------------------------------------------------------------------------------------------------------------------------------------------------------------------------------------------------------------------------------------------------------------------------------------------------------------------------------------------|
|  | SERBP1 JUN PNN POLR3D MLLT10P1 SNORD33 UBC ATP5MC3<br>BTN2A1 ZSCAN9 ARF6 RPL35 SNORA21B RPLP1 MIR4647 TMEM99<br>TRAM1 SNORD66 GPD1 NPM1 CCT8 TAF10 H3F3B ARPC3 AHCYL1<br>CDH24 GPATCH11 NET1 SURF4 RPL17 PRKACB MIR4426 ELL3<br>NUFIP1 SAMD5 MIR6875 RPH3A NAP1L1 DUSP12 EXT1 TMCO1-AS1<br>MYL12B PRAG1 ROMO1 ZNF691 MAML1 NAAA CFL1 NOP53 GBP1<br>SULT1A3 TRA2A DDX10 RDH14 SEC62 SBDS SNORD117 GTF2I<br>TUBB4B MRPL42 ECT2L ZNF207 MIR4668 LINC01001 SNORD42A<br>RPS9 MIR198 HGF RNF25 PLAU ANXA1 SQSTM1 SEPTIN11 HLA-E<br>SWAP70 ATP13A3 SNORD1A RPS4X SLC1A5 SNORD30 VTRNA2-1<br>TUBA1B MIR2355 LIMA1 LOC100505502 BMS1P4-AGAP5 BZW1<br>MIR3606 MIR6728 SNORA27 SNORD73A MIR12128 HNRNPUL1<br>LOC100287467 PPIA S100A6 ABHD17C S100A11 LAMC1 RAN<br>PHLDB1 PHF5A SERTAD3 ARHGAP9 LAMB1 JMJD6 SNORD119<br>SMARCD2 ZNF23 ARRDC3 SNORD38D TRABD2A SRSF1 MICAL2<br>WASIR1 ZNF584 GTDC1 SNORD18C ST6GALNAC6 STAT2 EWSR1<br>RPS7 CNP WASH3P ZNF330 KLF10 DCP1B RPS14 SNAI2 ZNF562<br>MAT2A USP3 RPS27 CTSC |
|--|----------------------------------------------------------------------------------------------------------------------------------------------------------------------------------------------------------------------------------------------------------------------------------------------------------------------------------------------------------------------------------------------------------------------------------------------------------------------------------------------------------------------------------------------------------------------------------------------------------------------------------------------------------------------------------------------------------------------------------------------------------------------------------------------------------------------------------------------------------------------------------------------------------------------------------------------------------------------------------------------------------|

Supplementary Information

Supplementary Table 6. Genome-wide profiling of differential peaks between proliferating and senescent cells (ChIP-seq for H3K9me3).

| geneID        | baseMea  | log2Fold | lfcSE     | stat     | pvalue   | padj     | Chr   | Start    | End      | Strai | Peak | Focus | Annotati       | Detailed          | Distance | Nearest F | Entrez ID | Nearest L          | Nearest F    | Nearest E  | Gene      | Nar           | Gene Ali  | Gene Des          | Gene Type          |
|---------------|----------|----------|-----------|----------|----------|----------|-------|----------|----------|-------|------|-------|----------------|-------------------|----------|-----------|-----------|--------------------|--------------|------------|-----------|---------------|-----------|-------------------|--------------------|
| chr13-182     | 227.8114 | -2.42336 | 0.203217  | -11.925  | 8.77E-33 | 3.00E-29 | chr13 | 18211746 | 18212407 | +     | 0    | NA    | intron (HSATI) | Sat               | 16779    | NR_027278 | 26080     | Hs.448582          | NR_027278    | ENSG000004 | FAM230C   | LINC00281     | family    | wincRNA           |                    |
| chr21-792     | 1231.017 | -1.52941 | 0.143729  | -10.6409 | 1.92E-26 | 3.29E-23 | chr21 | 7926271  | 7926544  | +     | 0    | NA    | Intergeni      | (ATGCATTC)        | -96775   | NM_001365 | 1.03E+08  | NM_001333          | ENSG000004   | KCNE1B     | -         | -             | potassium | protein-coding    |                    |
| chr16-345     | 603.1495 | -1.61484 | 0.15471   | -10.4378 | 1.67E-25 | 1.90E-22 | chr16 | 34592589 | 34596135 | +     | 0    | NA    | Intergeni      | (ATGCATTC)        | -212882  | NR_158155 | 1.03E+08  | Hs.69271CNR_158158 | CCNYL3       | -          | -         | -             | -         | cyclin Y          | pseudo             |
| chr3-9347     | 22612.98 | -1.24721 | 0.125957  | -9.90185 | 4.09E-23 | 3.50E-20 | chr3  | 93470428 | 93470734 | +     | 0    | NA    | Intergeni      | SAR Satel         | 503500   | NM_001314 | 5627      | Hs.64016           | NM_000313    | ENSG000004 | PROS1     | PROS PS21     | protein   | Sprotein-coding   |                    |
| chr16-463     | 2232.028 | -1.22852 | 0.128709  | -9.54497 | 1.36E-21 | 9.33E-19 | chr16 | 46394225 | 46395185 | +     | 0    | NA    | Intergeni      | Intergeni         | 174392   | NR_026556 | 124149    | Hs.97414           | NM_001004299 | ANKRD26P1  | -         | -             | ankyrin   | rpseudo           |                    |
| chr4-739C     | 101.9806 | -1.23316 | 0.275132  | -9.18423 | 1.64E-21 | 3.73E-18 | chr4  | 73906089 | 73906784 | +     | 0    | NA    | Intergeni      | LIP3A LIP         | 37043    | NM_001511 | 2919      | Hs.789             | NM_001511    | ENSG000004 | CXCL1     | FSP GRO1      | C-X-C     | motprotein-coding |                    |
| chr16-345     | 1126.969 | -1.26028 | 0.134457  | -9.37314 | 7.04E-21 | 4.02E-18 | chr16 | 34581388 | 34583833 | +     | 0    | NA    | Intergeni      | Intergeni         | -201130  | NR_158155 | 1.03E+08  | Hs.69271CNR_158158 | CCNYL3       | -          | -         | -             | -         | cyclin Y          | pseudo             |
| chr16-463     | 1488.808 | -1.21876 | 0.13058   | -9.33342 | 1.03E-20 | 5.02E-18 | chr16 | 46385254 | 46391433 | +     | 0    | NA    | Intergeni      | Intergeni         | 180754   | NR_026556 | 124149    | Hs.97414           | NM_001004299 | ANKRD26P1  | -         | -             | ankyrin   | rpseudo           |                    |
| chr1-1431     | 597.6095 | -1.34679 | 0.148916  | -9.04399 | 1.51E-19 | 6.47E-17 | chr1  | 1431519  | 1431519  | +     | 0    | NA    | Intergeni      | Intergeni         | 228599   | NR_027354 | 645166    | Hs.744182          | NR_027354    | LSP1P5     | -         | -             | LSP1      | psetpseudo        |                    |
| chr16-345     | 1040.462 | -1.20918 | 0.134867  | -8.96572 | 3.08E-19 | 1.17E-16 | chr16 | 34576184 | 34576656 | +     | 0    | NA    | Intergeni      | (AATGGAC)         | -194940  | NR_158155 | 1.03E+08  | Hs.69271CNR_158158 | CCNYL3       | -          | -         | -             | -         | cyclin Y          | pseudo             |
| chr4-74597144 | 7455     | -1.27643 | 0.269065  | -6.99583 | 3.27E-17 | 4.49E-15 | chr4  | 74597145 | 74598143 | +     | 0    | NA    | Intergeni      | THE1B-int         | 152508   | NM_001657 | 374       | Hs.270832          | NM_001657    | ENSG000004 | AREG      | AR AREGB      | amphireg  | protein-coding    |                    |
| chr16-463     | 1910.513 | -1.32509 | 0.157651  | -8.40519 | 4.27E-17 | 1.46E-14 | chr16 | 46398315 | 46401608 | +     | 0    | NA    | Intergeni      | Intergeni         | 169136   | NR_026556 | 124149    | Hs.97414           | NM_001004299 | ANKRD26P1  | -         | -             | ankyrin   | rpseudo           |                    |
| chr1-1432     | 673.684  | -1.21507 | 0.144887  | -8.38637 | 5.01E-17 | 1.56E-14 | chr1  | 1432008  | 1432008  | +     | 0    | NA    | Intergeni      | Intergeni         | 220709   | NR_027354 | 645166    | Hs.744182          | NR_027354    | LSP1P5     | -         | -             | LSP1      | psetpseudo        |                    |
| chr22-187     | 102.7861 | -2.35172 | 0.285252  | -8.24436 | 1.66E-16 | 4.74E-14 | chr22 | 18730441 | 18730694 | +     | 0    | NA    | Intergeni      | AluSc8 SI         | -3347    | NR_136561 | 642643    | NR_136561          | ENSG000004   | FAM230E    | LINC01662 | family        | wincRNA   |                   |                    |
| chr4-497      | 1159.323 | -1.15338 | 0.142329  | -8.10364 | 5.33E-16 | 1.41E-13 | chr4  | 49709331 | 49711815 | +     | 0    | NA    | Intergeni      | SAR Satel         | 723931   | NM_00128E | 80157     | Hs.479703          | NM_025087    | ENSG000004 | CWH43     | CWH43-C Fcell | wall      | protein-coding    |                    |
| chr10-133     | 502.6286 | -1.22932 | 0.152712  | -8.0499  | 8.29E-16 | 2.03E-13 | chr10 | 1330000  | 1330000  | +     | 0    | NA    | Intergeni      | BSR Beta          | -61888   | NM_00108C | 441581    | Hs.690471          | NM_00108C    | ENSG000004 | FRG2B     | -             | -         | FSHD              | regiprotein-coding |
| chr22-188     | 76.47112 | -2.50137 | 0.314582  | -7.95142 | 1.84E-15 | 4.21E-13 | chr22 | 18896187 | 18896559 | +     | 0    | NA    | Intergeni      | AluSc8 SI         | -1942    | NR_136571 | 1.01E+08  | Hs.631668          | NR_136571    | FAM230F    | LINC01662 | family        | wincRNA   |                   |                    |
| chr4-7461     | 97.86165 | -1.65222 | 0.282437  | -6.18557 | 7.86E-15 | 7.29E-13 | chr4  | 74616713 | 74616924 | +     | 0    | NA    | Intergeni      | AluY6 SI          | 171682   | NM_001657 | 374       | Hs.270832          | NM_001657    | ENSG000004 | AREG      | AR AREGB      | amphireg  | protein-coding    |                    |
| chr1-1432     | 1022.495 | -1.04798 | 0.138802  | -7.55019 | 4.35E-14 | 9.31E-12 | chr1  | 1432008  | 1432008  | +     | 0    | NA    | Intergeni      | Intergeni         | 205027   | NR_027354 | 645166    | Hs.744182          | NR_027354    | LSP1P5     | -         | -             | LSP1      | psetpseudo        |                    |
| chr1-1251     | 3170.92  | -0.97622 | 0.130246  | -7.4952  | 6.62E-14 | 1.33E-11 | chr1  | 1251000  | 1251000  | +     | 0    | NA    | Intergeni      | Intergeni         | 3662018  | NR_00395E | 647121    | Hs.697682          | NR_00395E    | ENSG000004 | EMBP1     | -             | -         | embigin           | rpseudo            |
| chr5-495      | 313.0752 | -1.30045 | 0.174025  | -7.47277 | 7.85E-14 | 1.49E-11 | chr5  | 49599496 | 49603043 | +     | 0    | NA    | Intergeni      | (TGGAA)n          | 840019   | NM_19844E | 133418    | Hs.561411          | NM_19844E    | ENSG000004 | EMB       | GP70          | embigin   | protein-coding    |                    |
| chr1-1432     | 807.1749 | -1.10926 | 0.14857   | -7.46625 | 8.25E-14 | 1.49E-11 | chr1  | 1432008  | 1432008  | +     | 0    | NA    | Intergeni      | Intergeni         | 190845   | NR_027354 | 645166    | Hs.744182          | NR_027354    | LSP1P5     | -         | -             | LSP1      | psetpseudo        |                    |
| chr16-345     | 421.4881 | -1.1773  | 0.158978  | -7.40547 | 1.31E-13 | 2.24E-11 | chr16 | 34571575 | 34574186 | +     | 0    | NA    | Intergeni      | (GAATG)n          | -191400  | NR_158155 | 1.03E+08  | Hs.69271CNR_158158 | CCNYL3       | -          | -         | -             | -         | cyclin Y          | pseudo             |
| chr1-1432     | 710.6941 | -1.05878 | 0.143971  | -7.35417 | 1.92E-13 | 3.13E-11 | chr1  | 1432008  | 1432008  | +     | 0    | NA    | Intergeni      | Intergeni         | 172643   | NR_027354 | 645166    | Hs.744182          | NR_027354    | LSP1P5     | -         | -             | LSP1      | psetpseudo        |                    |
| chr18-103     | 672.0041 | -1.05243 | 0.147814  | -7.11999 | 1.08E-12 | 1.38E-10 | chr18 | 1030000  | 111007   | +     | 0    | NA    | Intergeni      | promoter-promoter | -181     | NR_03377C | 727758    | Hs.585842          | NR_03377C    | ENSG000004 | ROCK1P1   | ROCK1P        | Rho       | assoc             | protein-coding     |
| chr22-126     | 256.5703 | -1.29617 | 0.182934  | -7.08544 | 1.39E-12 | 2.06E-10 | chr22 | 12691987 | 12692697 | +     | 0    | NA    | Intergeni      | BSR Beta          | 794936   | NR_110761 | 1.03E+08  | Hs.65292E          | NR_110761    | LOC102722  | -         | -             | uncharact | ncRNA             |                    |
| chr1-1432     | 677.3255 | -1.01271 | 0.143639  | -7.05036 | 1.78E-12 | 2.55E-10 | chr1  | 1432008  | 1432008  | +     | 0    | NA    | Intergeni      | Intergeni         | 168326   | NR_027354 | 645166    | Hs.744182          | NR_027354    | LSP1P5     | -         | -             | LSP1      | psetpseudo        |                    |
| chr4-744      | 35.38616 | -2.42017 | 0.414143  | -6.97563 | 1.90E-12 | 4.55E-10 | chr4  | 74498802 | 74499010 | +     | 0    | NA    | Intergeni      | LIM2 LINE         | 53770    | NM_001657 | 374       | Hs.270832          | NM_001657    | ENSG000004 | AREG      | AR AREGB      | amphireg  | protein-coding    |                    |
| chr21-842     | 103.687  | -1.79766 | 0.258068  | -6.96584 | 3.26E-12 | 4.47E-10 | chr21 | 8420098  | 8421999  | +     | 0    | NA    | Intergeni      | Intergeni         | -11482   | NR_12871E | 1.04E+08  | NR_12871E          | ENSG000004   | MIR6724-2  | hsa-mir-6 | microRNA      | ncRNA     |                   |                    |
| chr1-1432     | 620.0777 | -1.01644 | 0.147537  | -6.88943 | 5.60E-12 | 7.38E-10 | chr1  | 1432008  | 1432008  | +     | 0    | NA    | Intergeni      | Intergeni         | 175343   | NR_027354 | 645166    | Hs.744182          | NR_027354    | LSP1P5     | -         | -             | LSP1      | psetpseudo        |                    |
| chr4-1901     | 504.1323 | -1.04921 | 0.152753  | -6.87679 | 6.12E-12 | 7.52E-10 | chr4  | 1901000  | 1901000  | +     | 0    | NA    | Intergeni      | (BSR Beta)        | 4904     | NR_137167 | 1E+08     | Hs.728745          | NM_00120E    | ENSG000004 | DUX4      | DUX4L         | double    | hcprotein-coding  |                    |
| chr19-745     | 93.07395 | -1.84056 | 0.267669  | -6.87626 | 6.14E-12 | 7.52E-10 | chr19 | 7450655  | 7451110  | +     | 0    | NA    | Intergeni      | (intron)          | 11194    | NM_00113C | 23370     | Hs.465761          | NM_01531E    | ENSG000004 | ARHGFE18  | P114-Rho      | Rho/Rac   | gprotein-coding   |                    |
| chr14-495     | 71.36606 | -0.94801 | 0.1464575 | -6.71922 | 1.83E-11 | 2.16E-09 | chr14 | 49586559 | 49586837 | +     | 0    | NA    | Intergeni      | promoter-promoter | 118      | NR_00271E | 6029      | NR_00271E          | ENSG000004   | CN75L1     | 7L1a 7SL  | RNA           | comp      | ncRNA             |                    |
| chr16-345     | 474.8951 | -1.0646  | 0.160309  | -6.64092 | 3.12E-11 | 3.56E-09 | chr16 | 34584692 | 34588632 | +     | 0    | NA    | Intergeni      | Intergeni         | -205182  | NR_158155 | 1.03E+08  | Hs.69271CNR_158158 | CCNYL3       | -          | -         | -             | -         | cyclin Y          | pseudo             |
| chrY-113C     | 178.6599 | -1.34674 | 0.204912  | -6.57227 | 4.96E-11 | 5.48E-09 | chrY  | 11308792 | 11309745 | +     | 0    | NA    | Intergeni      | BSR Beta          | 1112322  | NR_033667 | 352887    | Hs.546221          | NR_033667    | ENSG000004 | GYG2P1    | GYG2P         | glycogen  | pseudo            |                    |
| chr21-841     | 86.847   | -1.77608 | 0.274038  | -6.48114 | 9.10E-11 | 9.75E-09 | chr21 | 8417703  | 8418926  | +     | 0    | NA    | Intergeni      | Intergeni         | -14216   | NR_12871E | 1.04E+08  | NR_12871E          | ENSG000004   | MIR6724-2  | hsa-mir-6 | microRNA      | ncRNA     |                   |                    |
| chr7-1581     | 29.59405 | -3.86084 | 0.597263  | -6.46423 | 1.02E-10 | 1.06E-08 | chr7  | 1581000  | 1581000  | +     | 0    | NA    | Intergeni      | (intron)          | 293551   | NR_03896E | 1.01E+08  | Hs.66126E          | NR_03896E    | LOC10050E  | -         | -             | uncharact | ncRNA             |                    |
| chr10-388     | 123.6202 | -1.4721  | 0.234121  | -6.28778 | 3.22E-10 | 3.25E-08 | chr10 | 38814069 | 38814273 | +     | 0    | NA    | Intergeni      | (TTCCA)n          | 117575   | NR_04500C | 399746    | Hs.742607          | NR_045000    | ACTR3BP5   | FKSG74    | ACTR3B        | ps        | pseudo            |                    |
| chr4-1901     | 294.6036 | -1.11777 | 0.179157  | -6.22232 | 4.90E-10 | 4.80E-08 | chr4  | 1901000  | 1901000  | +     | 0    | NA    | Intergeni      | (BSR Beta)        | 7358     | NR_137167 | 1E+08     | Hs.728745          | NM_00120E    | ENSG000004 | DUX4      | DUX4L         | double    | hcprotein-coding  |                    |
| chr1-1432     | 412.6005 | -1.12477 | 0.179445  | -6.20119 | 5.60E-10 | 5.33E-08 | chr1  | 1432008  | 1432008  | +     | 0    | NA    | Intergeni      | Intergeni         | 183664   | NR_027354 | 645166    | Hs.744182          | NR_027354    | LSP1P5     | -         | -             | LSP1      | psetpseudo        |                    |
| chr21-838     | 95.94166 | -1.61222 | 0.262226  | -6.14822 | 7.84E-10 | 7.26E-08 | chr21 | 8388083  | 8391544  | +     | 0    | NA    | Intergeni      | non-codir         | 778      | NR_146151 | 1.1E+08   | NR_146151          | RNA45SN3     | -          | -         | RNA,          | 45S       | rRNA              |                    |
| chr1-1432     | 219.2181 | -1.21601 | 0.199889  | -6.08342 | 1.18E-09 | 1.06E-07 | chr1  | 1432008  | 1432008  | +     | 0    | NA    | Intergeni      | Intergeni         | 236316   | NR_027354 | 645166    | Hs.744182          | NR_027354    | LSP1P5     | -         | -             | LSP1      | psetpseudo        |                    |
| chr21-841     | 98.1     |          |           |          |          |          |       |          |          |       |      |       |                |                   |          |           |           |                    |              |            |           |               |           |                   |                    |



|                    |          |          |          |          |          |       |          |            |      |                     |                    |                               |                             |           |                           |
|--------------------|----------|----------|----------|----------|----------|-------|----------|------------|------|---------------------|--------------------|-------------------------------|-----------------------------|-----------|---------------------------|
| chr4-4925 64.01477 | -1.19455 | 0.300648 | -3.97325 | 7.09E-05 | 0.00227  | chr4  | 49295581 | 49297505 + | 0 NA | Intergeni (GAAG)n S | 309901 NM_00128E   | 80157 Hs. 479703NM_025087     | ENSG00000CWH43              | CWH43-C   | Fcell wallprotein-coding  |
| chr10-418 45.55059 | -1.37738 | 0.350991 | -3.92426 | 8.70E-05 | 0.00276  | chr10 | 41858236 | 41860105 + | 0 NA | Intergeni (ATGGA)n  | 508875 NR_02438C   | 441666 Hs. 255725NR_02438C    | ENSG00000CLOC44166E-        |           | zinc fingpseudo           |
| chr22-126 45.98197 | -1.41137 | 0.360929 | -3.91038 | 9.22E-05 | 0.002896 | chr22 | 12693713 | 12693966 + | 0 NA | IntergeniCpG        | 796433 NR_110761   | 1.03E+08 Hs. 65292ENR_110761  | LOC102722-                  |           | uncharactncRNA            |
| chr10-133 33.24204 | -1.61292 | 0.414828 | -3.88816 | 0.000101 | 0.003146 | chr10 | 1.34E+08 | 1.34E+08 + | 0 NA | IntergeniCpG        | -126725 NM_00108C  | 441581 Hs. 690471NM_00108C    | ENSG00000FRG2B              | -         | FSHD regiprotein-coding   |
| chr21-106 47.03399 | -1.34274 | 0.345538 | -3.88595 | 0.000102 | 0.003146 | chr21 | 10692087 | 10693085 + | 0 NA | Intergeni (TTCCA)n  | 171072 NM_19926C   | 7179 Hs. 12298ENM_19925E      | ENSG00000TPT                | CT44 PTEN | transmemprotein-coding    |
| chr21-932 25.83842 | -1.83108 | 0.473456 | -3.86747 | 0.00011  | 0.003364 | chr21 | 9324988  | 9325365 +  | 0 NA | IntergeniCpG        | -195415 NR_038327  | 1E+08 Hs. 487562NM_17494E     | ENSG00000TEKT4P2            | MAFIPL TE | tektin 4 pseudo           |
| chr10-406 320.9418 | -0.65192 | 0.170309 | -3.82783 | 0.000129 | 0.003919 | chr10 | 40593342 | 40593686 + | 0 NA | IntergeniALR/Alphe  | 1774531 NR_02438C  | 441666 Hs. 255725NR_02438C    | ENSG00000CLOC44166E-        |           | zinc fingpseudo           |
| chr1-2366 89.63159 | -0.99674 | 0.260536 | -3.82572 | 0.00013  | 0.003919 | chr1  | 2.36E+08 | 2.36E+08 + | 0 NA | IntergeniLITR10A L  | -32161 NR_002508   | 4811 Hs. 356624NM_002508      | ENSG00000CNID1              | NID       | nidogen lprotein-coding   |
| chr21-825 56.66185 | -1.20476 | 0.316883 | -3.80191 | 0.000144 | 0.004278 | chr21 | 8253472  | 8260776 +  | 0 NA | TTS (NR_ITTS (NR_   | 343 NR_14612C      | 1.1E+08 Hs. NR_146120         | RNA5-8SN4RN5-8S1 FRNA, 5.8S | rRNA      |                           |
| chr21-122 42.62947 | -1.37965 | 0.364327 | -3.78684 | 0.000153 | 0.004506 | chr1  | 12036276 | 12036506 + | 0 NA | IntergeniALR/Alphe  | -1001775 NR_02691E | 149992 Hs. 55864ENM_153773    | ANKRD30BF                   | C21orf99  | ankyrin rpseudo           |
| chr1-1235 449.9485 | -0.58834 | 0.15613  | -3.76826 | 0.000164 | 0.004766 | chr1  | 1.24E+08 | 1.24E+08 + | 0 NA | IntergeniALR/Alphe  | 2407212 NR_00395E  | 647121 Hs. 69768ENR_00395E    | ENSG00000EMB1P1             | -         | embigin rpseudo           |
| chr9-429 22.20424  | -1.91983 | 0.509499 | -3.76808 | 0.000165 | 0.004766 | chr9  | 42900239 | 42900554 + | 0 NA | IntergeniIntergeni  | 111996 NR_131213   | 1.06E+08 Hs. NR_131213        | XLOC_007E-                  |           | uncharactncRNA            |
| chr13-176 69.80037 | -1.112   | 0.295234 | -3.76651 | 0.000166 | 0.004766 | chr13 | 17950249 | 17950597 + | 0 NA | IntergeniALR/Alphe  | -244874 NR_02727E  | 26080 Hs. 44858ENR_02727E     | ENSG00000FAM230C            | LINC00281 | family wincRNA            |
| chr17-233 1001.062 | -0.52158 | 0.138561 | -3.76428 | 0.000167 | 0.004769 | chr17 | 23302163 | 23301667 + | 0 NA | IntergeniALR/Alphe  | 493334 NM_00119C   | 1E+08 Hs. 74018ENM_00119C     | ENSG00000CMTRNR2L1          | HN1       | MT-RNR2 lprotein-coding   |
| chr7-5637 35.94944 | -1.48587 | 0.396156 | -3.75071 | 0.000176 | 0.004993 | chr7  | 56370528 | 56374724 + | 0 NA | IntergeniIntergeni  | 75749 NR_02942C    | 650226 Hs. 448401NR_029420    | LOC65022E-                  |           | ankyrin rpseudo           |
| chr1-228E 22.723   | -1.8865  | 0.503303 | -3.74824 | 0.000178 | 0.005001 | chr1  | 2.29E+08 | 2.29E+08 + | 0 NA | promoter-promoter-  | -277 NR_02337E     | 1E+08 Hs. NR_02337E           | ENSG00000RNA5S16            | RN5S16    | RNA, 5S rRNA              |
| chr4-4963 33.43406 | -1.52301 | 0.40852  | -3.72812 | 0.000193 | 0.005373 | chr4  | 49651362 | 49653432 + | 0 NA | Intergeni (GAATG)n  | 665755 NM_00128E   | 80157 Hs. 479703NM_025087     | ENSG00000CWH43              | CWH43-C   | Fcell wallprotein-coding  |
| chr20-310 53.724   | -1.2075  | 0.324095 | -3.72577 | 0.000195 | 0.00538  | chr20 | 31051831 | 31069369 + | 0 NA | Intergeni (GAAT)n   | -197064 NM_001037  | 245929 Hs. 580793NM_001037    | ENSG00000DEFB115            | DEFB-15   | defensin protein-coding   |
| chr4-493 33.94226  | -1.49804 | 0.404442 | -3.70396 | 0.000212 | 0.005818 | chr4  | 49303452 | 49304069 + | 0 NA | IntergeniIntergeni  | 317118 NM_00128E   | 80157 Hs. 479703NM_025087     | ENSG00000CWH43              | CWH43-C   | Fcell wallprotein-coding  |
| chr14-177 183.8708 | -0.75382 | 0.203884 | -3.69729 | 0.000218 | 0.005925 | chr14 | 17292720 | 17293026 + | 0 NA | IntergeniALR/Alphe  | -1308244 NM_00101E | 440153 Hs. 53488ENM_00101E    | ENSG00000COR11H12           | -         | olfactoryprotein-coding   |
| chr22-102 21.73442 | -1.87763 | 0.513214 | -3.65857 | 0.000254 | 0.006842 | chr22 | 10729225 | 10729256 + | 0 NA | Intergeni (TCCATTC  | 232149 NR_13232C   | 1.03E+08 Hs. NR_132320        | FRG1FP                      | -         | FSHD regiprotein-coding   |
| chr22-116 60.30936 | -1.18666 | 0.306264 | -3.65261 | 0.00026  | 0.006948 | chr22 | 11697905 | 11700168 + | 0 NA | IntergeniMER5A DN   | -198370 NR_110761  | 1.03E+08 Hs. 65292ENR_110761  | LOC102722-                  |           | uncharactncRNA            |
| chr10-418 34.70703 | -1.452   | 0.398251 | -3.64593 | 0.000266 | 0.007076 | chr10 | 41877707 | 41877984 + | 0 NA | Intergeni (ATGGA)n  | 490200 NR_02438C   | 441666 Hs. 255725NR_02438C    | ENSG00000CLOC44166E-        |           | zinc fingpseudo           |
| chrY-1131 57.67989 | -1.12304 | 0.312531 | -3.59337 | 0.000326 | 0.008603 | chrY  | 11316867 | 11321091 + | 0 NA | IntergeniBSR/Beta   | 1102611 NR_033667  | 352887 Hs. 546221NR_033667    | ENSG00000GYG2P              | GYG2P     | glycogenin pseudo         |
| chr10-405 398.1717 | -0.5897  | 0.164556 | -3.58355 | 0.000339 | 0.008864 | chr10 | 40980947 | 40981362 + | 0 NA | IntergeniALR/Alphe  | 1386891 NR_02438C  | 441666 Hs. 255725NR_02438C    | ENSG00000CLOC44166E-        |           | zinc fingpseudo           |
| chr10-418 49.37627 | -1.19438 | 0.335123 | -3.564   | 0.000365 | 0.00948  | chr10 | 41861599 | 41861892 + | 0 NA | Intergeni (ATG)n    | 506300 NR_02438C   | 441666 Hs. 255725NR_02438C    | ENSG00000CLOC44166E-        |           | zinc fingpseudo           |
| chr2-105 26.19522  | -1.64527 | 0.463154 | -3.55231 | 0.000382 | 0.009833 | chr2  | 10936135 | 10936593 + | 0 NA | IntergeniAluJo S    | 25165 NR_13232C    | 1.03E+08 Hs. NR_132320        | FRG1FP                      | -         | FSHD regiprotein-coding   |
| chr10-418 33.30435 | -1.41821 | 0.405203 | -3.49999 | 0.000465 | 0.011896 | chr10 | 41898663 | 41900578 + | 0 NA | Intergeni (AATGG)n  | 468425 NR_02438C   | 441666 Hs. 255725NR_02438C    | ENSG00000CLOC44166E-        |           | zinc fingpseudo           |
| chr10-132 26.93271 | -1.58471 | 0.453364 | -3.49546 | 0.000473 | 0.011954 | chr10 | 1.34E+08 | 1.34E+08 + | 0 NA | IntergeniCpG        | -40706 NM_00108C   | 441581 Hs. 690471NM_00108C    | ENSG00000FRG2B              | -         | FSHD regiprotein-coding   |
| chr10-418 51.1034  | -1.15144 | 0.329478 | -3.49474 | 0.000475 | 0.011954 | chr10 | 41845577 | 41846553 + | 0 NA | IntergeniIntergeni  | 521980 NR_02438C   | 441666 Hs. 255725NR_02438C    | ENSG00000CLOC44166E-        |           | zinc fingpseudo           |
| chr4-493 32.06976  | -1.43394 | 0.412401 | -3.47705 | 0.000507 | 0.012678 | chr4  | 49306056 | 49309600 + | 0 NA | IntergeniIntergeni  | 321186 NM_00128E   | 80157 Hs. 479703NM_025087     | ENSG00000CWH43              | CWH43-C   | Fcell wallprotein-coding  |
| chr21-12 38.42528  | -1.31348 | 0.379401 | -3.46198 | 0.000536 | 0.013312 | chr21 | 12066830 | 12067106 + | 0 NA | IntergeniALR/Alphe  | -971198 NR_02691E  | 149992 Hs. 55864ENM_153773    | ANKRD30BF                   | C21orf99  | ankyrin rpseudo           |
| chr4-4914 40.37566 | -1.27379 | 0.368259 | -3.45896 | 0.000542 | 0.013366 | chr4  | 49143929 | 49144773 + | 0 NA | Intergeni (TCCAT)n  | 157709 NR_00128E   | 80157 Hs. 479703NM_025087     | ENSG00000CWH43              | CWH43-C   | Fcell wallprotein-coding  |
| chr17-231 748.6793 | -0.50117 | 0.145189 | -3.45185 | 0.000557 | 0.013624 | chr17 | 23190216 | 23190599 + | 0 NA | IntergeniALR/Alphe  | 667296 NM_00119C   | 1E+08 Hs. 74018ENM_00119C     | ENSG00000CMTRNR2L1          | HN1       | MT-RNR2 lprotein-coding   |
| chr22-165 50.39314 | -1.14632 | 0.332543 | -3.44715 | 0.000567 | 0.013766 | chr22 | 16352695 | 16352954 + | 0 NA | Intergeni (GGAAT)n  | 239986 NR_01440E   | 150160 Hs. 128342NM_01440E    | ENSG00000CCT8L2             | CESK1     | chaperonin protein-coding |
| chr13-164 75.2502  | -0.96694 | 0.282327 | -3.4249  | 0.000615 | 0.014839 | chr13 | 16499326 | 16499635 + | 0 NA | IntergeniALR/Alphe  | -1695817 NR_02727E | 26080 Hs. 44858ENR_02727E     | ENSG00000FAM230C            | LINC00281 | family wincRNA            |
| chr21-881 16.97588 | -1.99783 | 0.584345 | -3.41893 | 0.000629 | 0.01497  | chr21 | 8814228  | 8814581 +  | 0 NA | IntergeniGSATII Se  | -172595 NR_037421  | 1.01E+08 Hs. NR_037421        | ENSG00000MIR3648-1          | MIR3648   | microRNA ncRNA            |
| chr4-4932 52.76493 | -1.11004 | 0.324695 | -3.41871 | 0.000629 | 0.01497  | chr4  | 49326006 | 49327442 + | 0 NA | IntergeniLIPAI10 L  | 340082 NM_00128E   | 80157 Hs. 479703NM_025087     | ENSG00000CWH43              | CWH43-C   | Fcell wallprotein-coding  |
| chr20-310 49.90556 | -1.13824 | 0.334005 | -3.40785 | 0.000655 | 0.01547  | chr20 | 31070765 | 31075914 + | 0 NA | Intergeni (GGAAT)n  | -184325 NM_001037  | 245929 Hs. 580793NM_001037    | ENSG00000DEFB115            | DEFB-15   | defensin protein-coding   |
| chr21-896 47.50432 | -1.16757 | 0.343895 | -3.39514 | 0.000686 | 0.016096 | chr21 | 8986973  | 8988653 +  | 0 NA | TTS (NR_CTTS (NR_C  | 196 NR_16210E      | 1.13E+08 Hs. NR_162105        | MIR10396F-                  |           | microRNA ncRNA            |
| chr1-228E 20.46645 | -1.77461 | 0.523131 | -3.39228 | 0.000693 | 0.016155 | chr1  | 2.29E+08 | 2.29E+08 + | 0 NA | TTS (NR_CTTS (NR_C  | 575 NR_02336E      | 1E+08 Hs. NR_02336E           | ENSG00000RNA5S4             | RN5S4     | RNA, 5S rRNA              |
| chr17-267 30.98879 | -1.41663 | 0.41887  | -3.38202 | 0.00072  | 0.016559 | chr17 | 26797006 | 26799208 + | 0 NA | IntergeniIntergeni  | 291777 NR_13567E   | 1.05E+08 Hs. 64991ENR_135673  | LOC105371-                  |           | uncharactncRNA            |
| chr1-228E 22.24987 | -1.68836 | 0.499252 | -3.38178 | 0.00072  | 0.016559 | chr1  | 2.29E+08 | 2.29E+08 + | 0 NA | TTS (NR_CTTS (NR_C  | 796 NR_02336E      | 1E+08 Hs. NR_02336E           | ENSG00000RNA5S6             | RN5S6     | RNA, 5S rRNA              |
| chr1-228E 20.96909 | -1.73411 | 0.51499  | -3.36726 | 0.000759 | 0.01734  | chr1  | 2.29E+08 | 2.29E+08 + | 0 NA | IntergeniCpG        | -3604 NR_03796E    | 58480 Hs. 647774NM_02120E     | ENSG00000CRHOU              | ARHU CDC4 | ras homolprotein-coding   |
| chr6-5964 168.2998 | -0.69591 | 0.207273 | -3.35747 | 0.000789 | 0.017774 | chr6  | 59640040 | 59640423 + | 0 NA | IntergeniALR/Alphe  | -1678785 NR_13299E | 1.07E+08 Hs. 56153ENR_125727  | ENSG00000LINC0068C-         |           | long intencRNA            |
| chr13-171 44.19967 | -1.20452 | 0.358832 | -3.35677 | 0.000789 | 0.017774 | chr13 | 17119617 | 17119840 + | 0 NA | IntergeniALR/Alphe  | -1075569 NR_02727E | 26080 Hs. 44858ENR_02727E     | ENSG00000FAM230C            | LINC00281 | family wincRNA            |
| chr4-491 37.51407  | -1.2755  | 0.380748 | -3.34998 | 0.000808 | 0.018097 | chr4  | 49152261 | 49156344 + | 0 NA | Intergeni (TCCAT)n  | 167660 NM_00128E   | 80157 Hs. 479703NM_025087     | ENSG00000CWH43              | CWH43-C   | Fcell wallprotein-coding  |
| chr10-385 38.55994 | -1.25343 | 0.375962 | -3.33394 | 0.000856 | 0.019049 | chr10 | 38526837 | 38529774 + | 0 NA | IntergeniIntergeni  | 100159 NR_024497   | 399744 Hs. 497951NM_001013665 | LINC0099E-                  |           | long intencRNA            |
| chr4-4911 33.45018 | -1.33558 | 0.402294 | -3.31992 | 0.0009   | 0.019903 | chr4  | 49112262 | 49113662 + | 0 NA | Intergeni (TCCAT)n  | 162320 NM_00128E   | 80157 Hs. 479703NM_025087     | ENSG00000CWH43              | CWH43-C   | Fcell wallprotein-coding  |
| chr5-487 466.7656  | -0.51509 | 0.155488 | -3.31271 | 0.000924 | 0.020291 | chr5  | 48732007 | 48732479 + | 0 NA | IntergeniALR/Alphe  | 1709445 NM_19844E  | 133418 Hs. 561411NM_19844E    | ENSG00000EMB                | GP70      | embigin protein-coding    |
| chr19-265 491.9488 | -0.50739 | 0.153392 | -3.30783 | 0.00094  | 0.02046  | chr19 | 26331538 | 26331990 + | 0 NA | IntergeniALR/Alphe  | -1461667 NR_14673E | 1.02E+08 Hs. 567934NR_110687  | ENSG00000CLOC101927-        |           | uncharactncRNA            |
| chr21-111 35.35721 | -1.32152 | 0.399633 | -3.30684 | 0.000944 | 0.02046  |       |          |            |      |                     |                    |                               |                             |           |                           |



|                    |          |          |          |          |          |       |          |          |   |      |                    |           |           |          |           |            |            |            |                                  |                         |                         |
|--------------------|----------|----------|----------|----------|----------|-------|----------|----------|---|------|--------------------|-----------|-----------|----------|-----------|------------|------------|------------|----------------------------------|-------------------------|-------------------------|
| chr19-362 16.67251 | -1.66343 | 0.570657 | -2.91493 | 0.003558 | 0.052993 | chr19 | 36268738 | 36278848 | + | 0 NA | IntergeniSST1 Sate | -27865    | NM_00136E | 147929   | Hs.59633E | NM_152477  | ENSG00000  | ZNF565     | -                                | zinc_fingprotein-coding |                         |
| chr9-435 25.79997  | -1.32583 | 0.455441 | -2.9111  | 0.003602 | 0.053416 | chr9  | 43509542 | 43509888 | + | 0 NA | IntergeniALR Alphe | 383549    | NR_160666 | 1.03E+08 | NR_160669 | LOC102724- |            |            |                                  | methylenepseudo         |                         |
| chr2-161 29.68072  | -1.22766 | 0.422029 | -2.90896 | 0.003626 | 0.053551 | chr2  | 1.61E+08 | 1.61E+08 | + | 0 NA | IntergeniIntergeni | -25972    | NR_110592 | 1.02E+08 | Hs.66648E | NR_110593  | LOC101925- |            |                                  | uncharactncRNA          |                         |
| chr10-41 26.41948  | -1.30099 | 0.447745 | -2.90566 | 0.003665 | 0.053887 | chr10 | 41784567 | 41876859 | + | 0 NA | Intergeni(ATGGA)n  | 492332    | NR_02438C | 441666   | Hs.25572E | NR_02438C  | ENSG00000  | LOC44166E- |                                  |                         | zinc_fingpseudo         |
| chr9-4351 32.96925 | -1.1656  | 0.401595 | -2.90244 | 0.003703 | 0.054212 | chr9  | 43511915 | 43512232 | + | 0 NA | IntergeniALR Alphe | 385907    | NR_160666 | 1.03E+08 | NR_160669 | LOC102724- |            |            |                                  | methylenepseudo         |                         |
| chr14-16 26.82694  | -1.28748 | 0.444474 | -2.89663 | 0.003772 | 0.05499  | chr14 | 16888632 | 16888984 | + | 0 NA | IntergeniALR Alphe | -1712309  | NM_001013 | 440153   | Hs.53488C | NM_001013  | ENSG00000  | COR11H12   | -                                |                         | olfactoryprotein-coding |
| chr13-18 67.62166  | -0.8588  | 0.297032 | -2.89128 | 0.003837 | 0.055699 | chr13 | 18002268 | 18002536 | + | 0 NA | IntergeniALR Alphe | -192895   | NR_02727E | 26080    | Hs.44858E | NR_02727E  | ENSG00000  | FAM230C    | LINC00281                        | family_wincRNA          |                         |
| chr19-362 17.17514 | -1.61907 | 0.560514 | -2.88855 | 0.00387  | 0.055946 | chr19 | 36279928 | 36286502 | + | 0 NA | IntergeniSST1 Sate | -28128    | NR_02938E | 1E+08    | Hs.46655C | NR_02938E  | LOC100134- |            |                                  |                         | uncharactncRNA          |
| chr5-479 159.2965  | -0.608   | 0.210807 | -2.88417 | 0.003925 | 0.056493 | chr5  | 47907355 | 47907619 | + | 0 NA | IntergeniALR Alphe | -2211107  | NM_021072 | 348980   | Hs.35317E | NM_021072  | ENSG00000  | HCN1       | BCNG-1 BChyperpolaprotein-coding |                         |                         |
| chr5-496 180.1123  | -0.59529 | 0.206568 | -2.88181 | 0.003954 | 0.056511 | chr5  | 49625442 | 49627096 | + | 0 NA | IntergeniALR Alphe | 815019    | NM_19844E | 133418   | Hs.561411 | NM_19844E  | ENSG00000  | EMB        | GP70                             | embigin_protein-coding  |                         |
| chr13-16 57.9298   | -0.89914 | 0.312045 | -2.88143 | 0.003959 | 0.056511 | chr13 | 16607704 | 16608088 | + | 0 NA | IntergeniALR Alphe | -1587401  | NR_02727E | 26080    | Hs.44858E | NR_02727E  | ENSG00000  | FAM230C    | LINC00281                        | family_wincRNA          |                         |
| chr19-264 54.22713 | -0.92653 | 0.322225 | -2.87542 | 0.004035 | 0.057359 | chr19 | 26412824 | 26413045 | + | 0 NA | IntergeniALR Alphe | -1380497  | NR_146733 | 1.02E+08 | Hs.567934 | NR_110687  | ENSG00000  | LOC101927- |                                  |                         | uncharactncRNA          |
| chr10-42 41.7833   | -1.03021 | 0.358773 | -2.87147 | 0.004086 | 0.057841 | chr10 | 42104468 | 42105022 | + | 0 NA | IntergeniIntergeni | 263300    | NR_02438C | 441666   | Hs.25572E | NR_02438C  | ENSG00000  | LOC44166E- |                                  |                         | zinc_fingpseudo         |
| chr22-13 59.52734  | -0.90347 | 0.315372 | -2.86478 | 0.004173 | 0.058765 | chr22 | 13863488 | 13863747 | + | 0 NA | IntergeniALR Alphe | -1664542  | NM_00100E | 81061    | Hs.55470E | NM_00100E  | ENSG00000  | COR11H1    | OR11H12 Colfactoryprotein-coding |                         |                         |
| chr19-26 95.97198  | -0.71891 | 0.251078 | -2.86329 | 0.004193 | 0.058765 | chr19 | 26097581 | 26097873 | + | 0 NA | IntergeniALR Alphe | -1695704  | NR_146733 | 1.02E+08 | Hs.567934 | NR_110687  | ENSG00000  | LOC101927- |                                  |                         | uncharactncRNA          |
| chr10-41 28.87529  | -1.22586 | 0.42824  | -2.86255 | 0.004202 | 0.058765 | chr10 | 41854079 | 41857383 | + | 0 NA | IntergeniIntergeni | 512314    | NR_02438C | 441666   | Hs.25572E | NR_02438C  | ENSG00000  | LOC44166E- |                                  |                         | zinc_fingpseudo         |
| chrY-568 23.28845  | -1.40476 | 0.492079 | -2.85475 | 0.004307 | 0.059984 | chrY  | 56842214 | 56842455 | + | 0 NA | IntergeniBSR Beta  | -11921    | NM_00584C | 10251    | Hs.381912 | NM_00584C  | ENSG00000  | SPRY3      | spry-3                           | sprouty_Fprotein-coding |                         |
| chr10-40 227.0854  | -0.53057 | 0.186169 | -2.84993 | 0.004373 | 0.060654 | chr10 | 40892033 | 40892746 | + | 0 NA | IntergeniALR Alphe | 1475656   | NR_02438C | 441666   | Hs.25572E | NR_02438C  | ENSG00000  | LOC44166E- |                                  |                         | zinc_fingpseudo         |
| chr1-121 213.1768  | -0.55061 | 0.193445 | -2.84631 | 0.004423 | 0.0611   | chr1  | 1.22E+08 | 1.22E+08 | + | 0 NA | IntergeniALR Alphe | 248539    | NR_00395E | 647121   | Hs.69768E | NR_00395E  | ENSG00000  | EMB1P      | -                                | embigin_pseudo          |                         |
| chr21-75 16.39419  | -1.63102 | 0.573489 | -2.84403 | 0.004455 | 0.061291 | chr21 | 7931792  | 7932803  | + | 0 NA | Intergeni(ATTCAT   | -102665   | NM_00136E | 1.03E+08 | NM_00133C | ENSG00000  | KCNE1B     | -          |                                  | potassiumprotein-coding |                         |
| chr19-29 61.58127  | -0.88605 | 0.312075 | -2.83923 | 0.004522 | 0.061864 | chr19 | 25339247 | 25339455 | + | 0 NA | IntergeniALR Alphe | -1175904  | NR_00360E | 1E+08    | Hs.149312 | NR_00360E  | ENSG00000  | HAVCR1P1   | -                                | hepatitispseudo         |                         |
| chr22-14 62.29264  | -0.88894 | 0.31317  | -2.83852 | 0.004532 | 0.061864 | chr22 | 14355616 | 14355877 | + | 0 NA | IntergeniALR Alphe | -1172413  | NM_00100E | 81061    | Hs.55470E | NM_00100E  | ENSG00000  | COR11H1    | OR11H12 Colfactoryprotein-coding |                         |                         |
| chr10-40 32.64753  | -1.14585 | 0.403863 | -2.83723 | 0.004551 | 0.061867 | chr10 | 40024602 | 40024927 | + | 0 NA | IntergeniALR Alphe | 1328168   | NR_04500C | 399746   | Hs.742607 | NR_045000  | ACTR3BP5   | FKSG74     | ACTR3B                           | pspseudo                |                         |
| chr21-11 22.90441  | -1.37035 | 0.485155 | -2.82456 | 0.004735 | 0.064089 | chr21 | 11537490 | 11537775 | + | 0 NA | IntergeniALR Alphe | 1016118   | NR_19926C | 7179     | Hs.12298E | NM_19925E  | ENSG00000  | TPTE       | CT44 PTEN                        | transmemprotein-coding  |                         |
| chr17-26 16.98363  | -1.59366 | 0.564673 | -2.82228 | 0.004768 | 0.064089 | chr17 | 26947666 | 26947976 | + | 0 NA | IntergeniMER5A L   | 141420    | NR_13567E | 1.05E+08 | Hs.64991E | NR_135673  | LOC105371- |            |                                  | uncharactncRNA          |                         |
| chr21-11 47.21149  | -0.95561 | 0.338609 | -2.82216 | 0.00477  | 0.064089 | chr21 | 11499681 | 11499932 | + | 0 NA | IntergeniALR Alphe | 978292    | NR_19926C | 7179     | Hs.12298E | NM_19925E  | ENSG00000  | TPTE       | CT44 PTEN                        | transmemprotein-coding  |                         |
| chr21-12 20.93901  | -1.42202 | 0.5042   | -2.82034 | 0.004797 | 0.064166 | chr21 | 12801182 | 12801512 | + | 0 NA | IntergeniALR Alphe | -22801182 | NR_02691E | 149992   | Hs.55864E | NM_153773  | ANKRD30B   | C21orf99   | ankyrin_pseudo                   |                         |                         |
| chr4-13 17.1379    | -1.68422 | 0.597396 | -2.81927 | 0.004813 | 0.064166 | chr4  | 1.32E+08 | 1.32E+08 | + | 0 NA | IntergeniCpG       | -13960    | NR_12588E | 1.02E+08 | Hs.507924 | NR_125883  | SNHG27     | -          |                                  | small_nucncRNA          |                         |
| chr13-17 35.27973  | -1.10143 | 0.391421 | -2.81394 | 0.004894 | 0.064986 | chr13 | 17079667 | 17080696 | + | 0 NA | IntergeniALR Alphe | -1115116  | NR_02727E | 26080    | Hs.44858E | NR_02727E  | ENSG00000  | FAM230C    | LINC00281                        | family_wincRNA          |                         |
| chr14-18 70.49211  | -0.79774 | 0.284066 | -2.80828 | 0.004981 | 0.065883 | chr14 | 18072507 | 18072967 | + | 0 NA | IntergeniALR Alphe | -528410   | NM_001013 | 440153   | Hs.53488C | NM_001013  | ENSG00000  | COR11H12   | -                                | olfactoryprotein-coding |                         |
| chr21-91 19.74782  | -1.45075 | 0.51767  | -2.80245 | 0.005072 | 0.066579 | chr21 | 9109383  | 9110148  | + | 0 NA | intron (AluSx1) S  | 19996     | NR_03832E | 1E+08    | Hs.48756E | NM_17494E  | ENSG00000  | TEKT4P2    | MAFIPL Tektin 4_pseudo           |                         |                         |
| chr4-496 36.22268  | -1.07491 | 0.383564 | -2.80242 | 0.005072 | 0.066579 | chr4  | 49637971 | 49638186 | + | 0 NA | Intergeni(GAATG)n  | 615436    | NM_00128E | 80157    | Hs.47970E | NM_02508E  | ENSG00000  | CWH43      | CWH43-C Fcell                    | wallprotein-coding      |                         |
| chr21-11 33.38502  | -1.11451 | 0.398887 | -2.79404 | 0.005205 | 0.067716 | chr21 | 1100437  | 11004626 | + | 0 NA | IntergeniALR Alphe | 1100437   | NM_19926C | 7179     | Hs.12298E | NM_19925E  | ENSG00000  | TPTE       | CT44 PTEN                        | transmemprotein-coding  |                         |
| chr10-13 15.63495  | -1.64593 | 0.589244 | -2.79328 | 0.005218 | 0.067716 | chr10 | 1.34E+08 | 1.34E+08 | + | 0 NA | IntergeniCpG       | -50567    | NM_00108C | 441581   | Hs.690471 | NM_00108C  | ENSG00000  | FRG2B      | -                                | FSHD                    | regiprotein-coding      |
| chr21-88 18.61235  | -1.5084  | 0.540014 | -2.79326 | 0.005218 | 0.067716 | chr21 | 8815569  | 8815818  | + | 0 NA | IntergeniTAR1 Sate | -171306   | NR_037421 | 1.01E+08 | NR_037421 | ENSG00000  | MIR3648    | -MIR3648   | hmicroRNA                        | ncRNA                   |                         |
| chr14-16 52.63131  | -0.90228 | 0.323386 | -2.79009 | 0.005269 | 0.068123 | chr14 | 16898852 | 16899735 | + | 0 NA | IntergeniALR Alphe | -170824   | NM_001013 | 440153   | Hs.53488C | NM_001013  | ENSG00000  | COR11H12   | -                                | olfactoryprotein-coding |                         |
| chr19-36 15.59155  | -1.64254 | 0.589286 | -2.78734 | 0.005314 | 0.06823  | chr19 | 36287580 | 36291565 | + | 0 NA | IntergeniSST1 Sate | -21771    | NR_02938E | 1E+08    | Hs.46655C | NR_02938E  | LOC100134- |            |                                  | uncharactncRNA          |                         |
| chr22-13 17.9427   | -1.51681 | 0.544217 | -2.78715 | 0.005317 | 0.06823  | chr22 | 13905821 | 13906059 | + | 0 NA | IntergeniALR Alphe | -1622219  | NM_00100E | 81061    | Hs.55470E | NM_00100E  | ENSG00000  | COR11H1    | OR11H12 Colfactoryprotein-coding |                         |                         |
| chr1-12 4 39.1622  | -1.024   | 0.369214 | -2.77344 | 0.005547 | 0.070906 | chr1  | 1.24E+08 | 1.24E+08 | + | 0 NA | IntergeniALR Alphe | 2872660   | NR_00395E | 647121   | Hs.69768E | NR_00395E  | ENSG00000  | EMB1P      | -                                | embigin_pseudo          |                         |
| chr22-12 20.20705  | -1.4178  | 0.511667 | -2.77094 | 0.005589 | 0.071188 | chr22 | 12171048 | 12172275 | + | 0 NA | IntergeniACR01 Sat | 274255    | NR_110761 | 1.03E+08 | Hs.65292E | NR_110761  | LOC10272E- |            |                                  | uncharactncRNA          |                         |
| chr10-41 23.4655   | -1.30978 | 0.47346  | -2.76664 | 0.005668 | 0.07192  | chr10 | 41903057 | 41907879 | + | 0 NA | Intergeni(AATGG)n  | 462577    | NR_02438C | 441666   | Hs.25572E | NR_02438C  | ENSG00000  | LOC44166E- |                                  |                         | zinc_fingpseudo         |
| chr4-190 20.70689  | -1.39354 | 0.504288 | -2.76338 | 0.005721 | 0.072321 | chr4  | 1.9E+08  | 1.9E+08  | + | 0 NA | IntergeniCpG       | 6284      | NM_00129E | 1E+08    | Hs.47824E | NM_00129E  | ENSG00000  | DUX4       | DUX4L                            | double_hcprotein-coding |                         |
| chr21-92 36.94126  | -1.04538 | 0.379619 | -2.75375 | 0.005892 | 0.074208 | chr21 | 9255137  | 9260549  | + | 0 NA | IntergeniMER5A DN  | -128082   | NR_03832E | 1E+08    | Hs.48756E | NM_17494E  | ENSG00000  | TEKT4P2    | MAFIPL Tektin 4_pseudo           |                         |                         |
| chr19-27 227.2699  | -0.56218 | 0.204411 | -2.75023 | 0.005955 | 0.074735 | chr19 | 27183517 | 27183747 | + | 0 NA | IntergeniALR Alphe | -609799   | NR_146733 | 1.02E+08 | Hs.567934 | NR_110687  | ENSG00000  | LOC101927- |                                  |                         | uncharactncRNA          |
| chr22-11 21.29633  | -1.37164 | 0.498959 | -2.74901 | 0.005978 | 0.074742 | chr22 | 11895531 | 11897831 | + | 0 NA | promoter-promoter- | -725      | NR_110761 | 1.03E+08 | Hs.65292E | NR_110761  | LOC10272E- |            |                                  | uncharactncRNA          |                         |
| chr21-79 16.7081   | -1.55602 | 0.566772 | -2.7454  | 0.006044 | 0.075293 | chr21 | 7915922  | 7917997  | + | 0 NA | Intergeni(ATTCAT   | -87327    | NM_00136E | 1.03E+08 | NM_00133C | ENSG00000  | KCNE1B     | -          |                                  | potassiumprotein-coding |                         |
| chr21-11 47.44803  | -0.94875 | 0.345825 | -2.74345 | 0.006068 | 0.075467 |       |          |          |   |      |                    |           |           |          |           |            |            |            |                                  |                         |                         |

|                    |          |          |          |          |          |       |          |          |   |   |    |                    |          |           |          |                     |                     |            |                         |                    |                |
|--------------------|----------|----------|----------|----------|----------|-------|----------|----------|---|---|----|--------------------|----------|-----------|----------|---------------------|---------------------|------------|-------------------------|--------------------|----------------|
| chr13-172.61.93852 | -0.76593 | 0.302883 | -2.52879 | 0.011446 | 0.110997 | chr13 | 17258381 | 17258636 | + | 0 | NA | IntergeniALR/Alphe | -936789  | NR_027278 | 26080    | Hs.448582NR_027278  | ENSG00000FAM230C    | LINC00281  | family                  | wincRNA            |                |
| chr1-1231.155.2765 | -0.54415 | 0.215246 | -2.52803 | 0.01147  | 0.110997 | chr1  | 1.23E+08 | 1.23E+08 | + | 0 | NA | IntergeniALR/Alphe | 1582448  | NR_003955 | 647121   | Hs.697682NR_003955  | ENSG00000EMB1       | -          | embigin                 | fpseudo            |                |
| chr5-4886.123.263  | -0.59153 | 0.234135 | -2.52645 | 0.011522 | 0.110997 | chr5  | 48860473 | 48860835 | + | 0 | NA | IntergeniALR/Alphe | 1580634  | NM_198445 | 133418   | Hs.561411NM_198445  | ENSG00000CMB        | GP70       | embigin                 | protein-coding     |                |
| chr22-16.20.37736  | -0.27996 | 0.506694 | -2.52609 | 0.011534 | 0.110997 | chr22 | 16315702 | 16315901 | + | 0 | NA | IntergeniIntergeni | 277009   | NM_014406 | 150160   | Hs.128342NM_014406  | ENSG00000CCT8L2     | CESK1      | chaperonin              | protein-coding     |                |
| chr19-265.21.34698 | -1.25218 | 0.496236 | -2.52335 | 0.011624 | 0.110992 | chr19 | 26519327 | 26519546 | + | 0 | NA | IntergeniALR/Alphe | -1273995 | NR_146733 | 1.02E+08 | Hs.567934NR_110687  | ENSG00000LOC101927- | -          | uncharactncRNA          |                    |                |
| chr19-271.35.07828 | -0.98562 | 0.390636 | -2.52311 | 0.011632 | 0.110992 | chr19 | 27178394 | 27178608 | + | 0 | NA | IntergeniALR/Alphe | -614930  | NR_146733 | 1.02E+08 | Hs.567934NR_110687  | ENSG00000LOC101927- | -          | uncharactncRNA          |                    |                |
| chr21-10.15.78356  | -1.45303 | 0.57595  | -2.52284 | 0.011641 | 0.110992 | chr21 | 10388640 | 10388839 | + | 0 | NA | IntergeniAluSg7 S1 | -24781   | NM_001187 | 574      | Hs.545785NM_001187  | BAGE                | BAGE1 CT2B | melanin                 | protein-coding     |                |
| chr4-491.21.8524   | -1.2261  | 0.486767 | -2.51887 | 0.011773 | 0.110992 | chr4  | 49135908 | 49137930 | + | 0 | NA | Intergeni(TCCAT)n  | 150277   | NM_00128E | 80157    | Hs.479703NM_025087  | ENSG00000CWH43      | CWH43-C F  | cell                    | wall               | protein-coding |
| chr9-435.24.02157  | -1.18146 | 0.469089 | -2.51862 | 0.011781 | 0.111514 | chr9  | 43562303 | 43562611 | + | 0 | NA | IntergeniALR/Alphe | 436291   | NR_16066E | 1.03E+08 | NR_160669           | LOC102724-          | -          | methylencpseudo         |                    |                |
| chr1-124.43.8041   | -0.46314 | 0.183939 | -2.51791 | 0.011805 | 0.111514 | chr1  | 1.24E+08 | 1.24E+08 | + | 0 | NA | IntergeniALR/Alphe | 2790644  | NR_003955 | 647121   | Hs.697682NR_003955  | ENSG00000EMB1       | -          | embigin                 | fpseudo            |                |
| chr1-124.43.88458  | -0.88624 | 0.35211  | -2.51694 | 0.011838 | 0.111514 | chr1  | 1.25E+08 | 1.25E+08 | + | 0 | NA | IntergeniALR/Alphe | 3142981  | NR_003955 | 647121   | Hs.697682NR_003955  | ENSG00000EMB1       | -          | embigin                 | fpseudo            |                |
| chr13-16.24.77129  | -1.16575 | 0.463215 | -2.51664 | 0.011848 | 0.111514 | chr13 | 16672847 | 16673127 | + | 0 | NA | IntergeniALR/Alphe | -1522310 | NR_027278 | 26080    | Hs.448582NR_027278  | ENSG00000FAM230C    | LINC00281  | family                  | wincRNA            |                |
| chr21-104.15.78635 | -1.44752 | 0.575659 | -2.51454 | 0.011919 | 0.111663 | chr21 | 10453016 | 10424825 | + | 0 | NA | intron (AluY SINE  | 10388    | NM_18248E | 85319    | Hs.545785NM_18248E  | BAGE2               | CT2.2      | BAGE                    | famiprotein-coding |                |
| chr5-485.138.9615  | -0.56382 | 0.22245  | -2.51424 | 0.011929 | 0.111663 | chr5  | 48529166 | 48590520 | + | 0 | NA | IntergeniALR/Alphe | 1851320  | NM_19844E | 133418   | Hs.561411NM_19844E  | ENSG00000EMB        | GP70       | embigin                 | protein-coding     |                |
| chr5-476.224.1711  | -0.47946 | 0.190817 | -2.51264 | 0.011983 | 0.111865 | chr5  | 47648570 | 47648811 | + | 0 | NA | IntergeniALR/Alphe | -1952310 | NM_02107E | 348980   | Hs.35317E NM_02107E | ENSG00000HCN1       | BCNG-1 B   | hyperpolaprotein-coding |                    |                |
| chr22-147.55.88976 | -0.79051 | 0.314969 | -2.50982 | 0.012079 | 0.112399 | chr22 | 14745789 | 14746123 | + | 0 | NA | IntergeniALR/Alphe | -782203  | NM_00100E | 81061    | Hs.55470E NM_00100E | ENSG00000OR11H1     | OR11H12 C  | olfactory               | protein-coding     |                |
| chr1-127.139.1094  | -0.54624 | 0.21777  | -2.50833 | 0.01213  | 0.112399 | chr1  | 1.24E+08 | 1.24E+08 | + | 0 | NA | IntergeniALR/Alphe | 2264899  | NR_003955 | 647121   | Hs.697682NR_003955  | ENSG00000EMB1       | -          | embigin                 | fpseudo            |                |
| chr17-268.1048.386 | -0.39567 | 0.157757 | -2.50808 | 0.012139 | 0.112399 | chr17 | 26880902 | 26885958 | + | 0 | NA | IntergeniALR/Alphe | 205811   | NR_13567E | 1.05E+08 | Hs.64991E NR_13567E | LOC105371-          | -          | uncharactncRNA          |                    |                |
| chr13-17.24.59768  | -1.15648 | 0.461894 | -2.50378 | 0.012288 | 0.113444 | chr13 | 17981163 | 17981571 | + | 0 | NA | IntergeniALR/Alphe | -213930  | NR_027278 | 26080    | Hs.448582NR_027278  | ENSG00000FAM230C    | LINC00281  | family                  | wincRNA            |                |
| chr21-91.25.75485  | -1.13118 | 0.451948 | -2.5029  | 0.012318 | 0.113444 | chr21 | 9167848  | 9168578  | + | 0 | NA | IntergeniIntergeni | -38452   | NR_038327 | 1E+08    | Hs.487562NM_17494E  | ENSG00000TEKT4P2    | MAFIPL T   | tektin                  | 4                  | pseudo         |
| chr10-41.27.20539  | -1.09988 | 0.441017 | -2.49396 | 0.012633 | 0.115968 | chr10 | 41901705 | 41902012 | + | 0 | NA | Intergeni(AATGG)n  | 466187   | NR_02438C | 441666   | Hs.25572E NR_02438C | ENSG00000LOC44166E- | -          | zinc                    | finger             |                |
| chr20-27.43.19602  | -0.87685 | 0.351817 | -2.49234 | 0.012691 | 0.115968 | chr20 | 27054504 | 27055659 | + | 0 | NA | IntergeniALR/Alphe | -845848  | NR_04009E | 284801   | Hs.37069E NR_04009E | ENSG00000MIR663AHC  | MIR663A    | lncRNA                  |                    |                |
| chr17-247.334.8753 | -0.41538 | 0.166667 | -2.49225 | 0.012693 | 0.115968 | chr17 | 24740194 | 24740464 | + | 0 | NA | IntergeniALR/Alphe | 2217218  | NM_00119C | 1E+08    | Hs.74018E NM_00119C | ENSG00000MTRNR2L1   | HN1        | MT-RNR2                 | lprotein-coding    |                |
| chr6-593.90.08121  | -0.63984 | 0.25714  | -2.4883  | 0.012836 | 0.116955 | chr6  | 59385445 | 59386412 | + | 0 | NA | IntergeniALR/Alphe | -1424482 | NR_13299E | 1.07E+08 | Hs.56153E NR_12572E | ENSG00000LINC0068C- | -          | long                    | intencRNA          |                |
| chr14-16.28.29366  | -1.08404 | 0.436266 | -2.48481 | 0.012962 | 0.117795 | chr14 | 16982284 | 16982946 | + | 0 | NA | IntergeniALR/Alphe | -1618502 | NM_00101E | 440153   | Hs.53488E NM_00101E | ENSG00000OR11H12    | OR11H12 C  | olfactory               | protein-coding     |                |
| chr9-434.16.80495  | -1.39248 | 0.56107  | -2.48183 | 0.013071 | 0.118468 | chr9  | 43495809 | 43496223 | + | 0 | NA | IntergeniALR/Alphe | 369850   | NR_16066E | 1.03E+08 | NR_160669           | LOC102724-          | -          | methylencpseudo         |                    |                |
| chr21-11.50.69147  | -0.81166 | 0.327252 | -2.48024 | 0.013129 | 0.118567 | chr21 | 11641143 | 11642052 | + | 0 | NA | IntergeniALR/Alphe | 1120083  | NM_19926C | 7179     | Hs.12298E NM_19925E | ENSG00000TPTE       | CT44 PTEN  | transmem                | protein-coding     |                |
| chr21-124.41.57683 | -0.89442 | 0.360762 | -2.47925 | 0.013166 | 0.118567 | chr21 | 12404628 | 12404945 | + | 0 | NA | IntergeniALR/Alphe | -633380  | NR_02691E | 149992   | Hs.55864E NM_153773 | ANKRD30BF           | C21orf99   | ankyrin                 | fpseudo            |                |
| chr14-17.37.44612  | -0.92849 | 0.374584 | -2.47871 | 0.013186 | 0.118567 | chr14 | 17241846 | 17242129 | + | 0 | NA | IntergeniALR/Alphe | -1359130 | NM_00101E | 440153   | Hs.53488E NM_00101E | ENSG00000OR11H12    | OR11H12 C  | olfactory               | protein-coding     |                |
| chr10-38.20.05007  | -1.25726 | 0.507606 | -2.47683 | 0.013255 | 0.118882 | chr10 | 39918348 | 39921148 | + | 0 | NA | Intergeni(GAATG)n  | 223152   | NR_04500C | 349746   | Hs.742607NR_045000  | ACTR3BP5            | FKSG74     | ACTR3B                  | pspseudo           |                |
| chr4-492.38.44859  | -0.91545 | 0.369998 | -2.4742  | 0.013353 | 0.119149 | chr4  | 49286447 | 49287455 | + | 0 | NA | IntergeniIntergeni | 300309   | NM_00128E | 80157    | Hs.47970E NM_025087 | ENSG00000CWH43      | CWH43-C F  | cell                    | wall               | protein-coding |
| chr21-11.22.92834  | -1.18154 | 0.477713 | -2.47332 | 0.013386 | 0.119149 | chr21 | 11373327 | 11373542 | + | 0 | NA | IntergeniALR/Alphe | 851920   | NM_19926C | 7179     | Hs.12298E NM_19925E | ENSG00000TPTE       | CT44 PTEN  | transmem                | protein-coding     |                |
| chr5-488.143.6209  | -0.53686 | 0.217068 | -2.47324 | 0.01339  | 0.119149 | chr5  | 48840395 | 48840679 | + | 0 | NA | IntergeniALR/Alphe | 1600751  | NM_19844E | 133418   | Hs.561411NM_19844E  | ENSG00000EMB        | GP70       | embigin                 | protein-coding     |                |
| chr14-17.29.84495  | -1.04767 | 0.42399  | -2.47097 | 0.013475 | 0.119597 | chr14 | 17097306 | 17097521 | + | 0 | NA | IntergeniALR/Alphe | -1503704 | NM_00101E | 440153   | Hs.53488E NM_00101E | ENSG00000OR11H12    | OR11H12 C  | olfactory               | protein-coding     |                |
| chr22-14.42.25987  | -0.93332 | 0.378357 | -2.46677 | 0.013634 | 0.119812 | chr22 | 14174790 | 14175005 | + | 0 | NA | IntergeniALR/Alphe | -1353262 | NM_00100E | 81061    | Hs.55470E NM_00100E | ENSG00000OR11H1     | OR11H12 C  | olfactory               | protein-coding     |                |
| chr21-12.56.11408  | -0.77159 | 0.314253 | -2.46676 | 0.013634 | 0.119812 | chr21 | 12879543 | 12879870 | + | 0 | NA | IntergeniALR/Alphe | -1584600 | NR_02691E | 149992   | Hs.55864E NM_153773 | ANKRD30BF           | C21orf99   | ankyrin                 | fpseudo            |                |
| chr13-16.47.96632  | -0.86298 | 0.349846 | -2.46675 | 0.013634 | 0.119812 | chr13 | 16736413 | 16736664 | + | 0 | NA | IntergeniALR/Alphe | -1458759 | NR_027278 | 26080    | Hs.448582NR_027278  | ENSG00000FAM230C    | LINC00281  | family                  | wincRNA            |                |
| chr21-88.20.52542  | -1.24065 | 0.502971 | -2.46664 | 0.013639 | 0.119812 | chr21 | 8876436  | 8878232  | + | 0 | NA | IntergeniAluSg2 S1 | -109665  | NR_037421 | 1.01E+08 | NR_037421           | ENSG00000MIR3648-1  | MIR3648    | microRNA                | ncRNA              |                |
| chr1-1237.81.56717 | -0.65728 | 0.266776 | -2.46381 | 0.013747 | 0.120442 | chr1  | 1.24E+08 | 1.24E+08 | + | 0 | NA | IntergeniALR/Alphe | 2271259  | NR_003955 | 647121   | Hs.697682NR_003955  | ENSG00000EMB1       | -          | embigin                 | fpseudo            |                |
| chr21-98.17.21798  | -1.35809 | 0.551414 | -2.46292 | 0.013781 | 0.120442 | chr21 | 9818829  | 9821819  | + | 0 | NA | intron (SST1 Sate  | 737      | NR_038377 | 441058   | Hs.13053E NR_038377 | LINC01667-          | -          | long                    | intencRNA          |                |
| chr14-16.21.09594  | -1.21798 | 0.495131 | -2.45991 | 0.013897 | 0.121151 | chr14 | 16961410 | 16961803 | + | 0 | NA | IntergeniALR/Alphe | -1639511 | NM_00101E | 440153   | Hs.53488E NM_00101E | ENSG00000OR11H12    | OR11H12 C  | olfactory               | protein-coding     |                |
| chr10-41.25.36245  | -1.10903 | 0.451132 | -2.45833 | 0.013958 | 0.121374 | chr10 | 41885191 | 41886626 | + | 0 | NA | Intergeni(ATGGA)n  | 482137   | NR_02438C | 441666   | Hs.25572E NR_02438C | ENSG00000LOC44166E- | -          | zinc                    | finger             |                |
| chr13-17.32.10925  | -0.98841 | 0.402832 | -2.45365 | 0.014142 | 0.122393 | chr13 | 17304012 | 17305676 | + | 0 | NA | IntergeniALR/Alphe | -890453  | NR_027278 | 26080    | Hs.448582NR_027278  | ENSG00000FAM230C    | LINC00281  | family                  | wincRNA            |                |
| chr9-434.24.28371  | -1.14904 | 0.468397 | -2.45313 | 0.014162 | 0.122393 | chr9  | 43488105 | 43488308 | + | 0 | NA | IntergeniALR/Alphe | 362040   | NR_16066E | 1.03E+08 | NR_160669           | LOC102724-          | -          | methylencpseudo         |                    |                |
| chr21-11.25.8415   | -1.10146 | 0.449118 | -2.45249 | 0.014187 | 0.122393 | chr21 | 11505322 | 11505800 | + | 0 | NA | IntergeniALR/Alphe | 983937   | NM_19926C | 7179     | Hs.12298E NM_19925E | ENSG00000TPTE       | CT44 PTEN  | transmem                | protein-coding     |                |
| chrY-112.25.84059  | -1.09591 | 0.447    | -2.4517  | 0.014218 | 0.122393 | chrY  | 11297479 | 11297696 | + | 0 | NA | Intergeni(ATTC)n   | 1124003  | NR_033667 | 352887   | Hs.546221NR_033667  | ENSG00000GYG2P1     | GYG2P      | glycoenipseudo          |                    |                |
|                    |          |          |          |          |          |       |          |          |   |   |    |                    |          |           |          |                     |                     |            |                         |                    |                |



|                     |          |          |          |          |          |       |          |          |   |      |                    |                     |                              |                     |           |                          |
|---------------------|----------|----------|----------|----------|----------|-------|----------|----------|---|------|--------------------|---------------------|------------------------------|---------------------|-----------|--------------------------|
| chr14-181 53.43836  | -0.74438 | 0.322269 | -2.30981 | 0.020899 | 0.150246 | chr14 | 18137208 | 18137572 | + | 0 NA | IntergeniALR/Alphe | -463727 NM_001013   | 440153 Hs. 53488CNM_001013   | ENSG00000COR11H12   | -         | olfactoryprotein-coding  |
| chr19-265 134.3893  | -0.51151 | 0.221485 | -2.30945 | 0.020919 | 0.150246 | chr19 | 26528930 | 26529948 | + | 0 NA | IntergeniALR/Alphe | -1263992 NR_146732  | 1.02E+08 Hs. 567934NR_110687 | ENSG00000LOC101927- | -         | uncharacterncRNA         |
| chr4-494f 17.18568  | -1.26317 | 0.547628 | -2.30662 | 0.021076 | 0.151058 | chr4  | 49489903 | 49492553 | + | 0 NA | IntergeniL1MA5 LI  | 504586 NM_00128f    | 80157 Hs. 479703NM_025087    | ENSG00000CWH43      | CWH43-C F | cell wallprotein-coding  |
| chr1-123f 63.62119  | -0.68611 | 0.298149 | -2.30125 | 0.021378 | 0.152902 | chr1  | 1.24E+08 | 1.24E+08 | + | 0 NA | IntergeniALR/Alphe | 2372290 NR_00395f   | 647121 Hs. 697682NR_00395f   | ENSG00000EMB1P      | -         | embigin fpseudo          |
| chr14-17f 27.22238  | -0.99922 | 0.435575 | -2.29402 | 0.02179  | 0.155523 | chr14 | 17236303 | 17237784 | + | 0 NA | IntergeniALR/Alphe | -1364700 NR_001013  | 440153 Hs. 53488CNM_001013   | ENSG00000COR11H12   | -         | olfactoryprotein-coding  |
| chr21-104 17.71281  | -1.23231 | 0.537543 | -2.29249 | 0.021877 | 0.155825 | chr21 | 10467639 | 10468213 | + | 0 NA | intron (MIR SINE   | -53588 NM_19925f    | 7179 Hs. 12298fNM_19925f     | ENSG00000TPTE       | CT44 PTEN | transmemt protein-coding |
| chr13-17f 38.92561  | -0.85763 | 0.374491 | -2.29013 | 0.022014 | 0.156473 | chr13 | 17330020 | 17330328 | + | 0 NA | IntergeniALR/Alphe | -865123 NR_02727f   | 26080 Hs. 44858fNR_02727f    | ENSG00000FAM230C    | LINC00281 | family wincRNA           |
| chr8-4584 58.2186   | -0.70695 | 0.308917 | -2.28849 | 0.022109 | 0.156823 | chr8  | 45840477 | 45840759 | + | 0 NA | IntergeniALR/Alphe | 775203 NR_146077    | 389652 NR_146077             | ENSG00000ASNSP1     | ASNSL1    | asparagipseudo           |
| chr22-107 18.21265  | -1.21118 | 0.530098 | -2.28482 | 0.022323 | 0.158017 | chr22 | 10736306 | 10739779 | + | 0 NA | IntergeniL2 LINE I | 223487 NR_13232C    | 1.03E+08 NR_132320           | FRG1FP              | -         | FSHD regipseudo          |
| chr21-11f 22.97341  | -1.08443 | 0.475831 | -2.27902 | 0.022666 | 0.16011  | chr21 | 11528066 | 11528737 | + | 0 NA | IntergeniALR/Alphe | 1006884 NM_19926C   | 7179 Hs. 12298fNM_19925f     | ENSG00000TPTE       | CT44 PTEN | transmemt protein-coding |
| chr22-11f 36.64403  | -0.86924 | 0.381772 | -2.27685 | 0.022795 | 0.160694 | chr22 | 11898762 | 11899230 | + | 0 NA | intron (intron (   | 1590 NR_110761      | 1.03E+08 Hs. 65292fNR_110761 | LOC10272f-          | -         | uncharacterncRNA         |
| chr5-489f 138.1332  | -0.50082 | 0.22042  | -2.27211 | 0.02308  | 0.162363 | chr5  | 48929400 | 48930438 | + | 0 NA | IntergeniALR/Alphe | 1511369 NM_19844f   | 133418 Hs. 561411NM_19844f   | ENSG00000EMB        | GP70      | embigin protein-coding   |
| chr13-16f 27.22937  | -0.99287 | 0.439469 | -2.25926 | 0.023867 | 0.162711 | chr13 | 16859959 | 16860687 | + | 0 NA | IntergeniALR/Alphe | -1334974 NR_02727f  | 26080 Hs. 44858fNR_02727f    | ENSG00000FAM230C    | LINC00281 | family wincRNA           |
| chr20-274 61.97188  | -0.67998 | 0.30099  | -2.25914 | 0.023875 | 0.162721 | chr20 | 27425468 | 27426193 | + | 0 NA | IntergeniALR/Alphe | 1176835 NR_13231f   | 1E+08 Hs. 529357NR_13231f    | ENSG00000FRG1CP     | -         | FSHD regipseudo          |
| chr21-91f 23.1092   | -1.08463 | 0.481007 | -2.25491 | 0.024139 | 0.168777 | chr21 | 9128188  | 9128456  | + | 0 NA | intron (MLTIH LTF  | 1439 NR_03832f      | 1E+08 Hs. 487562NM_17494f    | ENSG00000TEKT4P2    | MAFIPL T  | tektin 4 pseudo          |
| chr21-12f 26.48625  | -0.99092 | 0.440143 | -2.25136 | 0.024363 | 0.169691 | chr21 | 12095898 | 12097528 | + | 0 NA | IntergeniALR/Alphe | -941453 NR_02691f   | 149992 Hs. 55864fNM_153773   | ANKRD30BF           | C21orf99  | ankyrin rpseudo          |
| chr17-26f 19.19621  | -1.1623  | 0.516288 | -2.25126 | 0.024369 | 0.169691 | chr17 | 26936136 | 26940956 | + | 0 NA | Intergeni(GAATG)n  | 140563 NR_13567f    | 1.05E+08 Hs. 64991fNR_135673 | LOC105371-          | -         | uncharacterncRNA         |
| chr22-14f 19.62537  | -1.14925 | 0.512096 | -2.24421 | 0.024819 | 0.171621 | chr22 | 14376663 | 14380022 | + | 0 NA | IntergeniALR/Alphe | -1149927 NM_00100f  | 81061 Hs. 55470fNM_00100f    | ENSG00000COR11H1    | OR11H12 C | olfactoryprotein-coding  |
| chr22-13f 19.62258  | -1.15363 | 0.514082 | -2.24406 | 0.024828 | 0.171621 | chr22 | 13323846 | 13324518 | + | 0 NA | IntergeniALR/Alphe | 1426776 NR_110761   | 1.03E+08 Hs. 65292fNR_110761 | LOC10272f-          | -         | uncharacterncRNA         |
| chr9-440f 19.17451  | -1.16082 | 0.517638 | -2.24253 | 0.024927 | 0.171621 | chr9  | 44028506 | 44028793 | + | 0 NA | IntergeniALR/Alphe | 902483 NR_16066f    | 1.03E+08 NR_160669           | LOC102724-          | -         | methylenepseudo          |
| chr21-93f 20.69573  | -1.11287 | 0.496477 | -2.24154 | 0.024991 | 0.171621 | chr21 | 9370768  | 9376997  | + | 0 NA | IntergeniIntergeni | 169148 NR_135512    | 1.05E+08 Hs. 46232fNR_135512 | LOC105372-          | -         | nuclear rpseudo          |
| chr21-91f 16.42923  | -1.2544  | 0.559616 | -2.24153 | 0.024992 | 0.171621 | chr21 | 9111026  | 9114970  | + | 0 NA | intron (LIMB2 LI   | 16763 NR_03832f     | 1E+08 Hs. 487562NM_17494f    | ENSG00000TEKT4P2    | MAFIPL T  | tektin 4 pseudo          |
| chr20-28f 48.66426  | -0.74914 | 0.334221 | -2.24146 | 0.024996 | 0.171621 | chr20 | 28077682 | 28077914 | + | 0 NA | IntergeniALR/Alphe | 524867 NR_13231f    | 1E+08 Hs. 529357NR_13231f    | ENSG00000FRG1CP     | -         | FSHD regipseudo          |
| chr20-28f 51.17184  | -0.73327 | 0.327141 | -2.24145 | 0.024997 | 0.171621 | chr20 | 28022754 | 28023142 | + | 0 NA | IntergeniALR/Alphe | 579717 NR_13231f    | 1E+08 Hs. 529357NR_13231f    | ENSG00000FRG1CP     | -         | FSHD regipseudo          |
| chr5-484f 65.71182  | -0.65161 | 0.291114 | -2.23834 | 0.025199 | 0.172661 | chr5  | 48449574 | 48449824 | + | 0 NA | IntergeniALR/Alphe | 1991589 NM_19844f   | 133418 Hs. 561411NM_19844f   | ENSG00000EMB        | GP70      | embigin protein-coding   |
| chr22-14f 44.96276  | -0.7859  | 0.351249 | -2.23744 | 0.025258 | 0.17272  | chr22 | 14941654 | 14942053 | + | 0 NA | IntergeniALR/Alphe | -586306 NM_00100f   | 81061 Hs. 55470fNM_00100f    | ENSG00000COR11H1    | OR11H12 C | olfactoryprotein-coding  |
| chr4-504f 33.17353  | -0.89283 | 0.399591 | -2.23436 | 0.025459 | 0.173467 | chr4  | 50472252 | 50472624 | + | 0 NA | IntergeniALR/Alphe | -1370562 NM_001511f | 23142 Hs. 60538fNM_001511f   | ENSG00000DCUN1D4    | -         | defectiveprotein-coding  |
| chr18-20f 20.64675  | -1.11841 | 0.500558 | -2.23423 | 0.025468 | 0.173467 | chr18 | 20732904 | 20733200 | + | 0 NA | IntergeniALR/Alphe | 378761 NM_00540f    | 6093 Hs. 306307NM_00540f     | ENSG00000ROCK1      | P160ROCK  | Rho assocprotein-coding  |
| chr13-17f 18.05516  | -1.20993 | 0.541817 | -2.2331  | 0.025543 | 0.173628 | chr13 | 17492058 | 17492303 | + | 0 NA | IntergeniALR/Alphe | -703117 NR_02727f   | 26080 Hs. 44858fNR_02727f    | ENSG00000FAM230C    | LINC00281 | family wincRNA           |
| chr21-11f 21.17108  | -1.1008  | 0.493137 | -2.23224 | 0.025599 | 0.173668 | chr21 | 11516807 | 11517437 | + | 0 NA | IntergeniALR/Alphe | 995608 NR_19926C    | 7179 Hs. 12298fNM_19925f     | ENSG00000TPTE       | CT44 PTEN | transmemt protein-coding |
| chr6-589f 174.7492  | -0.44766 | 0.200775 | -2.22965 | 0.025771 | 0.173942 | chr6  | 58924121 | 58925151 | + | 0 NA | IntergeniALR/Alphe | -963190 NR_13299f   | 1.07E+08 Hs. 56153fNR_12572f | ENSG00000LINC0068C- | -         | long intencRNA           |
| chr9-435f 20.24487  | -1.12284 | 0.503744 | -2.229   | 0.025814 | 0.173942 | chr9  | 43521822 | 43522199 | + | 0 NA | IntergeniALR/Alphe | 395844 NR_16066f    | 1.03E+08 NR_160669           | LOC102724-          | -         | methylenepseudo          |
| chr22-107f 21.71991 | -1.0815  | 0.4852   | -2.22897 | 0.025816 | 0.173942 | chr22 | 10753451 | 10754566 | + | 0 NA | IntergeniIntergeni | 207576 NR_13232C    | 1.03E+08 NR_132320           | FRG1FP              | -         | FSHD regipseudo          |
| chr15-18f 16.88567  | -1.22761 | 0.55089  | -2.22842 | 0.025852 | 0.173942 | chr15 | 18540956 | 18541260 | + | 0 NA | IntergeniALR/Alphe | -1741636 NR_03883f  | 646096 Hs. 44878fNR_03883f   | ENSG00000CHEK2P2    | -         | checkpoirpseudo          |
| chr5-485f 29.95011  | -0.92417 | 0.414924 | -2.22734 | 0.025925 | 0.173942 | chr5  | 48529008 | 48529213 | + | 0 NA | IntergeniALR/Alphe | 1912178 NM_19844f   | 133418 Hs. 561411NM_19844f   | ENSG00000EMB        | GP70      | embigin protein-coding   |
| chr19-25f 149.2027  | -0.49798 | 0.223675 | -2.22634 | 0.025991 | 0.173942 | chr19 | 25506889 | 25507124 | + | 0 NA | IntergeniALR/Alphe | -1343559 NR_00360f  | 1E+08 Hs. 149312NR_00360f    | ENSG00000HAVCR1P1   | -         | hepatitispseudo          |
| chr14-18f 40.66897  | -0.80865 | 0.363229 | -2.22629 | 0.025995 | 0.173942 | chr14 | 18007663 | 18007927 | + | 0 NA | IntergeniALR/Alphe | -593322 NM_00101f   | 440153 Hs. 53488CNM_00101f   | ENSG00000COR11H12   | -         | olfactoryprotein-coding  |
| chr10-41f 16.88846  | -1.22258 | 0.549678 | -2.22418 | 0.026137 | 0.17407  | chr10 | 44870822 | 44871330 | + | 0 NA | Intergeni(ATGGA)n  | 499591 NR_02438f    | 441666 Hs. 25572fNR_02438f   | ENSG00000LOC44166f- | -         | zinc fingpseudo          |
| chr14-16f 25.84504  | -0.66535 | 0.299377 | -2.22425 | 0.026215 | 0.17407  | chr14 | 16611108 | 16613420 | + | 0 NA | IntergeniALR/Alphe | -1989897 NM_00101f  | 440153 Hs. 53488CNM_00101f   | ENSG00000COR11H12   | -         | olfactoryprotein-coding  |
| chr21-114f 61.65574 | -0.66535 | 0.299377 | -2.22425 | 0.026253 | 0.17407  | chr21 | 11472272 | 11472662 | + | 0 NA | IntergeniALR/Alphe | 950953 NM_19926C    | 7179 Hs. 12298fNM_19925f     | ENSG00000TPTE       | CT44 PTEN | transmemt protein-coding |
| chr22-14f 22.2254   | -1.06442 | 0.479156 | -2.22145 | 0.02632  | 0.17407  | chr22 | 14948496 | 14948970 | + | 0 NA | IntergeniALR/Alphe | -579426 NM_00100f   | 81061 Hs. 55470fNM_00100f    | ENSG00000COR11H1    | OR11H12 C | olfactoryprotein-coding  |
| chr10-41f 35.88757  | -0.85739 | 0.385982 | -2.22131 | 0.02633  | 0.17407  | chr10 | 11410176 | 11410395 | + | 0 NA | IntergeniALR/Alphe | -1241076 NR_02438f  | 441666 Hs. 25572fNR_02438f   | ENSG00000LOC44166f- | -         | zinc fingpseudo          |
| chr22-13f 29.04281  | -0.93666 | 0.421762 | -2.22083 | 0.026362 | 0.17407  | chr22 | 13373646 | 13373936 | + | 0 NA | IntergeniALR/Alphe | 1476385 NR_110761   | 1.03E+08 Hs. 65292fNR_110761 | LOC10272f-          | -         | uncharacterncRNA         |
| chr14-18f 21.70099  | -1.0763  | 0.484662 | -2.22072 | 0.02637  | 0.17407  | chr14 | 18141181 | 18141766 | + | 0 NA | IntergeniALR/Alphe | -459644 NM_00101f   | 440153 Hs. 53488CNM_00101f   | ENSG00000COR11H12   | -         | olfactoryprotein-coding  |
| chr22-14f 17.41     | -1.20241 | 0.541643 | -2.21993 | 0.026423 | 0.174089 | chr22 | 14983930 | 14984689 | + | 0 NA | IntergeniALR/Alphe | -543850 NM_00100f   | 81061 Hs. 55470fNM_00100f    | ENSG00000COR11H1    | OR11H12 C | olfactoryprotein-coding  |
| chr5-479f 78.57587  | -0.59906 | 0.270239 | -2.21679 | 0.026637 | 0.175162 | chr5  | 47961076 | 47984100 | + | 0 NA | IntergeniALR/Alphe | -2286208 NM_02107f  | 348980 Hs. 35317fNM_02107f   | ENSG00000HCN1       | BCNG-1 B  | hyperpoleprotein-coding  |
| chr10-41f 35.70559  | -0.85777 | 0.387168 | -2.2155  | 0.026726 | 0.175248 | chr10 | 41502836 | 41503108 | + | 0 NA | IntergeniALR/Alphe | 865073 NR_02438f    | 441666 Hs. 25572fNR_02438f   | ENSG00000LOC44166f- | -         | zinc fingpseudo          |
| chr19-26f 147.3858  | -0.47258 | 0.213346 | -2.21511 | 0.026753 | 0.175248 | chr19 | 26439881 | 26440183 | + | 0 NA | IntergeniALR/Alphe | -1353399 NR_146732  | 1.02E+08 Hs. 567934NR_110687 | ENSG00000LOC101927- | -         | uncharacterncRNA         |
| chr8-120f 16.99696  | -1.23088 | 0.555958 | -2.21398 | 0.02683  | 0.175419 | chr8  | 12606347 | 12606872 | + | 0 NA | intron (intron (   | 96148 NR_11194f     | 286083 Hs. 382131NR_03389f   | ENSG00000LOC28608f- | -         | uncharacterncRNA         |
| chr21-12f 32.43598  | -0.88387 | 0.399917 | -2.21013 | 0.027096 | 0.176401 | chr21 | 12168528 | 12170203 | + | 0 NA | IntergeniALR/Alphe | -868801 NR_02691f   | 149992 Hs. 55864fNM_153773   | ANKRD30BF           | C21orf99  | ankyrin rpseudo          |
| chr14-16f 21.10877  | -1.09275 | 0.494547 | -2       |          |          |       |          |          |   |      |                    |                     |                              |                     |           |                          |

|           |          |          |          |          |          |          |       |          |          |   |   |    |                    |          |           |          |                    |                      |                 |                          |                         |
|-----------|----------|----------|----------|----------|----------|----------|-------|----------|----------|---|---|----|--------------------|----------|-----------|----------|--------------------|----------------------|-----------------|--------------------------|-------------------------|
| chr7-5875 | 239.5871 | -0.38882 | 0.183538 | -2.11848 | 0.034134 | 0.194285 | chr7  | 58797682 | 58798052 | + | 0 | NA | IntergeniALR/Alphe | 1347690  | NM_001155 | 441234   | Hs.533121NM_001155 | ENSG000003ZNF716     | -               | zinc_fingprotein-coding  |                         |
| chr20-266 | 26.9293  | -0.92789 | 0.438056 | -2.11819 | 0.034159 | 0.194285 | chr20 | 26682528 | 26683157 | + | 0 | NA | IntergeniALR/Alphe | -473609  | NR_040095 | 284801   | Hs.370695NR_040095 | ENSG000003MIR663AHC  | -               | MIR663A lncRNA           |                         |
| chr13-165 | 23.81338 | -0.98499 | 0.465035 | -2.1181  | 0.034167 | 0.194285 | chr13 | 16563719 | 16563999 | + | 0 | NA | IntergeniALR/Alphe | -1631438 | NR_027278 | 26080    | Hs.448582NR_027278 | ENSG000003FAM230C    | LINC00281       | family_wincRNA           |                         |
| chr19-166 | 66.1282  | -0.62074 | 0.293089 | -2.11793 | 0.034181 | 0.194285 | chr19 | 26049087 | 26049338 | + | 0 | NA | IntergeniALR/Alphe | -1744219 | NR_146733 | 1.02E+08 | Hs.567934NR_110687 | ENSG000003LOC101927- |                 | uncharactncRNA           |                         |
| chr14-174 | 24.31322 | -0.97516 | 0.460518 | -2.11753 | 0.034215 | 0.194285 | chr14 | 17709765 | 17709966 | + | 0 | NA | IntergeniALR/Alphe | -891252  | NM_001013 | 440153   | Hs.534888NM_001013 | ENSG000003OR11H12    | -               | olfactoryprotein-coding  |                         |
| chr21-104 | 18.63679 | -1.10404 | 0.521491 | -2.11709 | 0.034252 | 0.194285 | chr21 | 10429411 | 10432892 | + | 0 | NA | intron (AluSq2)S1  | 17619    | NM_182482 | 85319    | Hs.545785NM_182482 | BAGE2                | CT2.2           | BAGE_famiprotein-coding  |                         |
| chr21-114 | 42.39555 | -0.75118 | 0.355143 | -2.11515 | 0.034417 | 0.194899 | chr21 | 11493506 | 11493852 | + | 0 | NA | IntergeniALR/Alphe | 972165   | NM_199266 | 7179     | Hs.122988NM_199265 | ENSG000003TPTE       | CT44 PTEN       | transmemtprotein-coding  |                         |
| chr1-1236 | 26.91318 | -0.92052 | 0.435454 | -2.11393 | 0.034522 | 0.195167 | chr1  | 1.24E+08 | 1.24E+08 | + | 0 | NA | IntergeniALR/Alphe | 2292340  | NR_003955 | 647121   | Hs.697682NR_003955 | ENSG000003EMBP1      | -               | embigin_pseudo           |                         |
| chr13-171 | 38.39124 | -0.77903 | 0.369094 | -2.11066 | 0.034801 | 0.196216 | chr13 | 17173198 | 17174274 | + | 0 | NA | IntergeniALR/Alphe | -1021561 | NR_027278 | 26080    | Hs.448582NR_027278 | ENSG000003FAM230C    | LINC00281       | family_wincRNA           |                         |
| chr22-145 | 43.40918 | -0.73617 | 0.348824 | -2.11043 | 0.034822 | 0.196216 | chr22 | 14392811 | 14393034 | + | 0 | NA | IntergeniALR/Alphe | -1135237 | NM_001005 | 81061    | Hs.554706NM_001005 | ENSG000003OR11H1     | OR11H12         | Colfactoryprotein-coding |                         |
| chr1-1245 | 71.02922 | -0.59304 | 0.281459 | -2.10702 | 0.035116 | 0.197059 | chr1  | 1.25E+08 | 1.25E+08 | + | 0 | NA | IntergeniALR/Alphe | 2995393  | NR_003955 | 647121   | Hs.697682NR_003955 | ENSG000003EMBP1      | -               | embigin_pseudo           |                         |
| chr13-178 | 19.03756 | -1.1202  | 0.531656 | -2.107   | 0.035118 | 0.197059 | chr13 | 17855578 | 17856028 | + | 0 | NA | IntergeniALR/Alphe | -339494  | NR_027278 | 26080    | Hs.448582NR_027278 | ENSG000003FAM230C    | LINC00281       | family_wincRNA           |                         |
| chr3-924  | 23.84841 | -0.9985  | 0.474011 | -2.10649 | 0.035162 | 0.197059 | chr3  | 92448223 | 92448696 | + | 0 | NA | IntergeniALR/Alphe | 1525622  | NM_001314 | 5627     | Hs.64016           | NM_000313            | ENSG000003PROS1 | PROS PS21                | protein_Sprotein-coding |
| chr3-915  | 33.66495 | -0.86341 | 0.409968 | -2.10603 | 0.035202 | 0.197059 | chr3  | 91552654 | 91553217 | + | 0 | NA | IntergeniALR/Alphe | 1242146  | NM_001314 | 5627     | Hs.64016           | NM_000313            | ENSG000003PROS1 | PROS PS21                | protein_Sprotein-coding |
| chr14-18  | 30.8496  | -0.86244 | 0.409693 | -2.10508 | 0.035285 | 0.197202 | chr14 | 18049613 | 18050998 | + | 0 | NA | IntergeniALR/Alphe | -550812  | NM_001013 | 440153   | Hs.534888NM_001013 | ENSG000003OR11H12    | -               | olfactoryprotein-coding  |                         |
| chr13-164 | 39.85294 | -0.76369 | 0.36294  | -2.10418 | 0.035363 | 0.197319 | chr13 | 16485731 | 16487008 | + | 0 | NA | IntergeniALR/Alphe | -1708928 | NR_027278 | 26080    | Hs.448582NR_027278 | ENSG000003FAM230C    | LINC00281       | family_wincRNA           |                         |
| chr14-16  | 18.54719 | -1.10252 | 0.524831 | -2.10071 | 0.035667 | 0.198182 | chr14 | 16699638 | 16699884 | + | 0 | NA | IntergeniALR/Alphe | -1901356 | NM_001013 | 440153   | Hs.534888NM_001013 | ENSG000003OR11H12    | -               | olfactoryprotein-coding  |                         |
| chr5-488  | 36.36738 | -0.79455 | 0.378262 | -2.10053 | 0.035682 | 0.198182 | chr5  | 48867704 | 48868028 | + | 0 | NA | IntergeniALR/Alphe | 1573422  | NM_198445 | 133418   | Hs.561411NM_198445 | ENSG000003EMB        | GP70            | embigin_protein-coding   |                         |
| chr22-141 | 27.29615 | -0.91695 | 0.436556 | -2.10043 | 0.035691 | 0.198182 | chr22 | 14117129 | 14118594 | + | 0 | NA | IntergeniALR/Alphe | -1410298 | NM_001005 | 81061    | Hs.554706NM_001005 | ENSG000003OR11H1     | OR11H12         | Colfactoryprotein-coding |                         |
| chr22-136 | 18.6991  | -1.11336 | 0.530467 | -2.09883 | 0.035832 | 0.198262 | chr19 | 25072928 | 25073166 | + | 0 | NA | IntergeniALR/Alphe | -909600  | NR_003603 | 1E+08    | Hs.149312NR_003603 | ENSG000003HAVCRIP1   | -               | hepatitis_pseudo         |                         |
| chr22-134 | 43.84392 | -0.73164 | 0.34865  | -2.09949 | 0.035862 | 0.198262 | chr22 | 13650829 | 13651070 | + | 0 | NA | IntergeniALR/Alphe | 1753543  | NR_110761 | 1.03E+08 | Hs.652929NR_110761 | LOC102722-           |                 | uncharactncRNA           |                         |
| chr13-176 | 30.32248 | -0.87276 | 0.415938 | -2.09829 | 0.035879 | 0.198262 | chr13 | 17659737 | 17660072 | + | 0 | NA | IntergeniALR/Alphe | -535393  | NR_027278 | 26080    | Hs.448582NR_027278 | ENSG000003FAM230C    | LINC00281       | family_wincRNA           |                         |
| chr12-365 | 25.8456  | -0.93616 | 0.446656 | -2.09594 | 0.036088 | 0.199094 | chr12 | 36335879 | 36336119 | + | 0 | NA | IntergeniALR/Alphe | -1980775 | NM_001308 | 144245   | Hs.259305NM_001013 | ENSG000003ALG10      | ALG10 KCFALG10  | alpprotein-coding        |                         |
| chr16-367 | 17.99837 | -1.12591 | 0.537984 | -2.09283 | 0.036364 | 0.200296 | chr16 | 36909729 | 36909965 | + | 0 | NA | IntergeniALR/Alphe | 1163295  | NR_003398 | 400533   | Hs.499133NR_003398 | ENSG000003LINC02167- |                 | long_intencRNA           |                         |
| chr13-165 | 20.59554 | -1.03786 | 0.496208 | -2.09157 | 0.036477 | 0.200594 | chr13 | 16513501 | 16516676 | + | 0 | NA | IntergeniALR/Alphe | -1680209 | NR_027278 | 26080    | Hs.448582NR_027278 | ENSG000003FAM230C    | LINC00281       | family_wincRNA           |                         |
| chr13-172 | 35.00364 | -0.80662 | 0.38646  | -2.08721 | 0.036869 | 0.202427 | chr13 | 17202265 | 17202571 | + | 0 | NA | IntergeniALR/Alphe | -992879  | NR_027278 | 26080    | Hs.448582NR_027278 | ENSG000003FAM230C    | LINC00281       | family_wincRNA           |                         |
| chr22-118 | 20.70963 | -1.03665 | 0.497751 | -2.08267 | 0.037281 | 0.20406  | chr22 | 11883134 | 11884175 | + | 0 | NA | IntergeniIntergeni | -13751   | NR_110761 | 1.03E+08 | Hs.652929NR_110761 | LOC102722-           |                 | uncharactncRNA           |                         |
| chr19-265 | 83.35003 | -0.55237 | 0.265226 | -2.08262 | 0.037286 | 0.20406  | chr19 | 26951168 | 26951397 | + | 0 | NA | IntergeniALR/Alphe | -842149  | NR_146733 | 1.02E+08 | Hs.567934NR_110687 | ENSG000003LOC101927- |                 | uncharactncRNA           |                         |
| chr2-898  | 15.85368 | -1.17518 | 0.565143 | -2.07943 | 0.037578 | 0.204644 | chr2  | 89832331 | 89834070 | + | 0 | NA | Intergeni(ATTC)Cn  | -195296  | NR_136323 | 1.02E+08 | Hs.578075NR_136329 | LOC101927-           |                 | lysine_mepseudo          |                         |
| chr21-93  | 22.12234 | -0.99509 | 0.478583 | -2.07925 | 0.037594 | 0.204644 | chr21 | 9363212  | 9369930  | + | 0 | NA | IntergeniIntergeni | -176459  | NR_135512 | 1.05E+08 | Hs.462323NR_135512 | LOC105375-           |                 | nuclear_ipseudo          |                         |
| chr10-401 | 134.2779 | -0.45663 | 0.219646 | -2.07892 | 0.037625 | 0.204644 | chr10 | 40135042 | 40135926 | + | 0 | NA | IntergeniALR/Alphe | 1438888  | NR_045000 | 399746   | Hs.742607NR_045000 | ACTR3BP5             | FKSG74          | ACTR3B                   | ppseudo                 |
| chr20-274 | 15.8264  | -1.18416 | 0.569674 | -2.07866 | 0.037649 | 0.204644 | chr20 | 27421924 | 27422179 | + | 0 | NA | IntergeniALR/Alphe | 1180614  | NR_132315 | 1E+08    | Hs.529357NR_132315 | ENSG000003FRG1CP     | -               | FSHD                     | regipseudo              |
| chr21-122 | 53.16117 | -0.66566 | 0.320279 | -2.0782  | 0.037691 | 0.204644 | chr21 | 12245149 | 12245414 | + | 0 | NA | IntergeniALR/Alphe | -1792885 | NR_02691E | 149992   | Hs.558645NM_153773 | ANKRD30BF            | C21orf99        | ankyrin_ipseudo          |                         |
| chr22-14  | 21.57631 | -1.00772 | 0.485071 | -2.07748 | 0.037758 | 0.20468  | chr22 | 14009075 | 14009812 | + | 0 | NA | IntergeniALR/Alphe | -1518716 | NM_001005 | 81061    | Hs.554706NM_001005 | ENSG000003OR11H1     | OR11H12         | Colfactoryprotein-coding |                         |
| chr1-1241 | 135.483  | -0.45788 | 0.22065  | -2.07514 | 0.037974 | 0.205526 | chr1  | 1.24E+08 | 1.24E+08 | + | 0 | NA | IntergeniALR/Alphe | 2604873  | NR_003955 | 647121   | Hs.697682NR_003955 | ENSG000003EMBP1      | -               | embigin_ipseudo          |                         |
| chr8-8578 | 16.33182 | -1.15203 | 0.5563   | -2.07089 | 0.038369 | 0.207127 | chr8  | 85789728 | 85795306 | + | 0 | NA | IntergeniIntergeni | -1149    | NR_003594 | 1E+08    | Hs.535055NR_003594 | REX01L2P             | -               | REX01                    | likpseudo               |
| chr12-355 | 16.35074 | -1.15895 | 0.559702 | -2.07066 | 0.03839  | 0.207127 | chr12 | 35503210 | 35503799 | + | 0 | NA | IntergeniALR/Alphe | 1481008  | NM_032834 | 84920    | Hs.102971NM_032834 | ENSG000003ALG10      | ALG10A DIALG10  | alpprotein-coding        |                         |
| chr5-4917 | 37.97045 | -0.77359 | 0.373966 | -2.06861 | 0.038583 | 0.207259 | chr5  | 49173292 | 49173501 | + | 0 | NA | IntergeniALR/Alphe | 1267892  | NM_198445 | 133418   | Hs.561411NM_198445 | ENSG000003EMB        | GP70            | embigin_protein-coding   |                         |
| chr22-141 | 23.17101 | -0.96914 | 0.468519 | -2.06852 | 0.038592 | 0.207259 | chr22 | 14172209 | 14172480 | + | 0 | NA | IntergeniALR/Alphe | -1157515 | NM_001005 | 81061    | Hs.554706NM_001005 | ENSG000003OR11H1     | OR11H12         | Colfactoryprotein-coding |                         |
| chr14-173 | 21.5791  | -1.00384 | 0.485449 | -2.06786 | 0.038653 | 0.207259 | chr14 | 17379948 | 17380930 | + | 0 | NA | IntergeniALR/Alphe | -1220678 | NM_001013 | 440153   | Hs.534888NM_001013 | ENSG000003OR11H12    | -               | olfactoryprotein-coding  |                         |
| chr7-580  | 23.64915 | -0.95812 | 0.46335  | -2.06782 | 0.038657 | 0.207259 | chr7  | 58067483 | 58067724 | + | 0 | NA | IntergeniIntergeni | 617426   | NM_001155 | 441234   | Hs.533121NM_001155 | ENSG000003ZNF716     | -               | zinc_fingprotein-coding  |                         |
| chr1-1235 | 118.7895 | -0.48748 | 0.236253 | -2.0634  | 0.039075 | 0.209019 | chr1  | 1.24E+08 | 1.24E+08 | + | 0 | NA | IntergeniALR/Alphe | 2429015  | NR_003955 | 647121   | Hs.697682NR_003955 | ENSG000003EMBP1      | -               | embigin_ipseudo          |                         |
| chr13-165 | 25.15146 | -0.92799 | 0.450112 | -2.06169 | 0.039237 | 0.209019 | chr13 | 16930416 | 16930780 | + | 0 | NA | IntergeniALR/Alphe | -1264699 | NR_027278 | 26080    | Hs.448582NR_027278 | ENSG000003FAM230C    | LINC00281       | family_wincRNA           |                         |
| chr10-418 | 24.19239 | -0.95125 | 0.461546 | -2.061   | 0.039303 | 0.209019 | chr10 | 41843480 | 41844321 | + | 0 | NA | IntergeniIntergeni | 521415   | NR_02438C | 441666   | Hs.255725NR_02438C | ENSG000003LOC441666- |                 | zinc_fingpseudo          |                         |
| chr17-265 | 71.06039 | -0.58684 | 0.284814 | -2.06044 | 0.039357 | 0.209019 | chr17 | 26398434 | 26398681 | + | 0 | NA | IntergeniALR/Alphe | 690684   | NR_135673 | 1.05E+08 | Hs.649918NR_135673 | LOC105371-           |                 | uncharactncRNA           |                         |
| chr22-141 | 25.60511 | -0.92086 | 0.447001 | -2.06008 | 0.03939  | 0.209019 | chr22 | 14146208 | 14146635 | + | 0 | NA | IntergeniALR/Alphe | -1381738 | NM_001005 | 81061    | Hs.554706NM_001005 | ENSG000003OR11H1     | OR11H12         | Colfactoryprotein-coding |                         |
| chr5-494  | 249.8001 | -0.38695 | 0.187847 | -2.0599  | 0.039408 | 0.209019 | chr5  | 49423219 | 49423481 | + | 0 | NA | IntergeniALR/Alphe | 1017938  | NM_198445 | 133418   | Hs.561411NM_198445 | ENSG000003EMB        | GP70            | embigin_protein-coding   |                         |
| chr21-115 | 15.78858 | -1.16989 | 0.568124 | -2.05922 | 0.039473 | 0.209019 | chr21 | 11500999 | 11501215 | + | 0 | NA | IntergeniALR/Alphe | 979593   | NM_199266 | 7179     | Hs.122988NM_199265 | ENSG000003TPTE       | CT44 PTEN       | transmemtprotein-coding  |                         |
| chr22-145 | 54.31945 | -0.65974 | 0.320441 | -2.05885 | 0.039508 | 0.209019 | chr22 | 14520915 | 14521648 | + | 0 | NA | IntergeniALR/Alphe | -1006878 | NM_001005 | 81061    | Hs.554706NM_001005 | ENSG000003OR11H1     | OR11H12         | Colfactoryprotein-coding |                         |
| chr1-1241 | 26.15394 | -0.90887 | 0.441707 | -2.05763 | 0.039626 | 0.209019 | chr1  | 1.24E+08 | 1.24E+08 | + | 0 | NA | IntergeniALR/Alphe | 2669980  | NR_003955 | 647121   |                    |                      |                 |                          |                         |



|                    |          |          |          |          |          |       |          |          |   |   |    |                      |          |           |          |                    |                     |           |                         |
|--------------------|----------|----------|----------|----------|----------|-------|----------|----------|---|---|----|----------------------|----------|-----------|----------|--------------------|---------------------|-----------|-------------------------|
| chrY-5684 33.32487 | -0.78491 | 0.393518 | -1.99459 | 0.046088 | 0.218486 | chrY  | 56845355 | 56845583 | + | 0 | NA | IntergeniBSR/Beta    | -108786  | NM_00584C | 10251    | Hs.381912NM_00584C | ENSG00000SPRY3      | spry-3    | sprouty Fprotein-coding |
| chr6-5875 56.79751 | -0.62257 | 0.31216  | -1.99441 | 0.046108 | 0.218486 | chr6  | 58791973 | 58793794 | + | 0 | NA | IntergeniALR/Alphe   | -831437  | NR_132995 | 1.07E+08 | Hs.561535NR_125727 | ENSG00000LINC0068C- |           | long intencRNA          |
| chr6-5908 34.33014 | -0.77241 | 0.38759  | -1.99285 | 0.046278 | 0.218542 | chr6  | 59082994 | 59083312 | + | 0 | NA | IntergeniALR/Alphe   | -121707  | NR_132995 | 1.07E+08 | Hs.561535NR_125727 | ENSG00000LINC0068C- |           | long intencRNA          |
| chr20-275 25.87562 | -0.88479 | 0.443992 | -1.99228 | 0.046284 | 0.218542 | chr20 | 27943250 | 27943667 | + | 0 | NA | IntergeniALR/Alphe   | 659207   | NR_13231E | 1E+08    | Hs.529357NR_13231E | ENSG00000FRG1CP     |           | FSHD regipseudo         |
| chr22-135 21.2301  | -0.9791  | 0.491383 | -1.99255 | 0.046311 | 0.218542 | chr22 | 16798333 | 16798966 | + | 0 | NA | IntergeniALR/Alphe   | 16798333 | NR_110761 | 1.03E+08 | Hs.652929NR_110761 | ENSG00000LOC102722- |           | uncharactcrRNA          |
| chr1-123 27.32895  | -0.86554 | 0.43542  | -1.98783 | 0.046831 | 0.22069  | chr1  | 1.24E+08 | 1.24E+08 | + | 0 | NA | IntergeniALR/Alphe   | 2160206  | NR_00395E | 647121   | Hs.697682NR_00395E | ENSG00000EMBPI      |           | embigin fpseudo         |
| chr18-157 27.92676 | -0.85148 | 0.429598 | -1.98205 | 0.047474 | 0.22298  | chr18 | 15779200 | 15779533 | + | 0 | NA | IntergeniALR/Alphe   | -453447  | NR_027417 | 644669   | Hs.579474NR_027417 | ENSG00000LOC64466E- |           | ankyrin rpseudo         |
| chr13-18 20.92177  | -1.01393 | 0.511697 | -1.9815  | 0.047535 | 0.22298  | chr13 | 18013269 | 18013468 | + | 0 | NA | IntergeniALR/Alphe   | -181929  | NR_027278 | 26080    | Hs.448582NR_027278 | ENSG00000FAM230C    | LINC00281 | family wincRNA          |
| chr22-107 24.26201 | -0.90848 | 0.458488 | -1.98148 | 0.047538 | 0.22298  | chr22 | 10731200 | 10731758 | + | 0 | NA | IntergeniAluS26 S1   | 230050   | NR_13232C | 1.03E+08 | NR_132320          | FRG1FP              |           | FSHD regipseudo         |
| chr5-4795 53.81737 | -0.62975 | 0.317954 | -1.98064 | 0.047631 | 0.22298  | chr5  | 47952841 | 47953439 | + | 0 | NA | IntergeniALR/Alphe   | -2256760 | NM_021072 | 348980   | Hs.353176NM_021072 | ENSG00000HCN1       | BCNG-1 B  | hyperpoleprotein-coding |
| chr14-17 27.76927  | -0.85    | 0.429178 | -1.98053 | 0.047644 | 0.22298  | chr14 | 17523753 | 17526511 | + | 0 | NA | IntergeniALR/Alphe   | -1075985 | NM_001012 | 440153   | Hs.53488CNM_001012 | ENSG00000OR11H12    |           | olfactoryprotein-coding |
| chr1-124 71.70774  | -0.55744 | 0.281648 | -1.9792  | 0.047794 | 0.22298  | chr1  | 1.24E+08 | 1.24E+08 | + | 0 | NA | IntergeniALR/Alphe   | 2486277  | NR_00395E | 647121   | Hs.697682NR_00395E | ENSG00000EMBPI      |           | embigin fpseudo         |
| chr10-404 109.6909 | -0.47539 | 0.240236 | -1.97884 | 0.047834 | 0.22298  | chr10 | 40412639 | 40414674 | + | 0 | NA | IntergeniALR/Alphe   | 1717060  | NR_045000 | 399746   | Hs.742607NR_045000 | ACTR3BP5            | FKSG74    | ACTR3B pspseudo         |
| chr9-412 16.50995  | -1.093   | 0.552349 | -1.97881 | 0.047837 | 0.22298  | chr9  | 41243497 | 41243696 | + | 0 | NA | IntergeniMER103C I   | -9761    | NR_03968E | 1.01E+08 | NR_03968E          | ENSG00000MIR4477B   |           | microRNA ncRNA          |
| chr4-494 17.05319  | -1.07861 | 0.54538  | -1.97773 | 0.04796  | 0.223247 | chr4  | 49493662 | 49495077 | + | 0 | NA | IntergeniLIMB8 L1N   | 507727   | NM_00128E | 80157    | Hs.479703NM_025087 | ENSG00000CWH43      | CWH43-C F | cell wallprotein-coding |
| chr10-385 15.96112 | -1.11897 | 0.566173 | -1.97637 | 0.048112 | 0.223421 | chr10 | 38911736 | 38913293 | + | 0 | NA | Intergeni(GAGTG)n    | 215918   | NR_045000 | 399746   | Hs.742607NR_045000 | ACTR3BP5            | FKSG74    | ACTR3B pspseudo         |
| chrY-121 22.42013  | -0.94576 | 0.478907 | -1.97484 | 0.048286 | 0.223421 | chrY  | 11283847 | 11284474 | + | 0 | NA | IntergeniLIPA4 L1N   | 1137430  | NR_033667 | 532887   | Hs.546221NR_033667 | ENSG00000GYG2P1     | GYG2P     | glycogenin pseudo       |
| chr20-29 17.00979  | -1.07258 | 0.545441 | -1.97465 | 0.048308 | 0.223421 | chr20 | 29121882 | 29123726 | + | 0 | NA | IntergeniIntergeni   | 42414    | NR_13231E | 1.03E+08 | NR_132316          | FRG1DP              |           | FSHD regipseudo         |
| chr13-17 30.75498  | -0.80871 | 0.409565 | -1.97456 | 0.048318 | 0.223421 | chr13 | 17827645 | 17828325 | + | 0 | NA | IntergeniALR/Alphe   | -367312  | NR_027278 | 26080    | Hs.448582NR_027278 | ENSG00000FAM230C    | LINC00281 | family wincRNA          |
| chr22-137 43.59562 | -0.68741 | 0.348141 | -1.97452 | 0.048323 | 0.223421 | chr22 | 13727052 | 13727418 | + | 0 | NA | IntergeniALR/Alphe   | -1800924 | NM_00100E | 81061    | Hs.554706NM_00100E | ENSG00000OR11H1     | OR11H12 C | olfactoryprotein-coding |
| chr6-5974 43.04958 | -0.68976 | 0.34959  | -1.97305 | 0.04849  | 0.223892 | chr6  | 59747781 | 59748798 | + | 0 | NA | IntergeniALR/Alphe   | -1786843 | NR_132995 | 1.07E+08 | Hs.561535NR_125727 | ENSG00000LINC0068C- |           | long intencRNA          |
| chr14-17 28.77453  | -0.83269 | 0.422526 | -1.97073 | 0.048755 | 0.224518 | chr14 | 17209945 | 17210203 | + | 0 | NA | IntergeniALR/Alphe   | -1391043 | NM_001012 | 440153   | Hs.53488CNM_001012 | ENSG00000OR11H12    |           | olfactoryprotein-coding |
| chrY-5684 17.53412 | -1.0555  | 0.535595 | -1.97071 | 0.048757 | 0.224518 | chrY  | 56846906 | 56849346 | + | 0 | NA | IntergeniBSR/Beta    | -106129  | NM_00584C | 10251    | Hs.381912NM_00584C | ENSG00000SPRY3      | spry-3    | sprouty Fprotein-coding |
| chr4-5034 17.01258 | -1.07037 | 0.543985 | -1.96765 | 0.049108 | 0.22583  | chr4  | 50348853 | 50349436 | + | 0 | NA | IntergeniALR/Alphe   | 1362507  | NM_00128E | 80157    | Hs.479703NM_025087 | ENSG00000CWH43      | CWH43-C F | cell wallprotein-coding |
| chr1-122 98.24792  | -0.4904  | 0.249315 | -1.96699 | 0.049184 | 0.225876 | chr1  | 1.23E+08 | 1.23E+08 | + | 0 | NA | IntergeniALR/Alphe   | 1126278  | NR_00395E | 647121   | Hs.697682NR_00395E | ENSG00000EMBPI      |           | embigin fpseudo         |
| chr14-18 23.33301  | -0.92206 | 0.46896  | -1.96618 | 0.049278 | 0.226005 | chr14 | 18075407 | 18075871 | + | 0 | NA | IntergeniALR/Alphe   | -525478  | NM_001012 | 440153   | Hs.53488CNM_001012 | ENSG00000OR11H12    |           | olfactoryprotein-coding |
| chr22-14 18.84777  | -1.03658 | 0.527609 | -1.96468 | 0.049452 | 0.226499 | chr22 | 14452605 | 14442928 | + | 0 | NA | IntergeniALR/Alphe   | -1085393 | NM_00100E | 81061    | Hs.554706NM_00100E | ENSG00000OR11H1     | OR11H12 C | olfactoryprotein-coding |
| chr1-121 86.91067  | -0.51254 | 0.260982 | -1.96387 | 0.049545 | 0.226624 | chr1  | 1.22E+08 | 1.22E+08 | + | 0 | NA | IntergeniALR/Alphe   | 231292   | NR_00395E | 647121   | Hs.697682NR_00395E | ENSG00000EMBPI      |           | embigin fpseudo         |
| chr21-11 22.18917  | -0.95152 | 0.484768 | -1.96284 | 0.049664 | 0.226867 | chr21 | 11247493 | 11247764 | + | 0 | NA | IntergeniLIPA4 L1N   | 726114   | NM_19926C | 7179     | Hs.122988NM_19925E | ENSG00000TPTE       | CT44 PTEN | transmem protein-coding |
| chrY-5687 18.53659 | -1.02085 | 0.520814 | -1.96012 | 0.049982 | 0.228015 | chrY  | 56876321 | 56880471 | + | 0 | NA | IntergeniMT1E1A I    | -75874   | NM_00584C | 10251    | Hs.381912NM_00584C | ENSG00000SPRY3      | spry-3    | sprouty Fprotein-coding |
| chr5-483 39.58573  | -0.71204 | 0.363608 | -1.95826 | 0.0502   | 0.228408 | chr5  | 48304649 | 48304918 | + | 0 | NA | IntergeniALR/Alphe   | 2136505  | NM_19844E | 133418   | Hs.561411NM_19844E | ENSG00000EMB        | GP70      | embigin protein-coding  |
| chr1-124 54.00113  | -0.63106 | 0.322259 | -1.95824 | 0.050202 | 0.228408 | chr1  | 1.24E+08 | 1.24E+08 | + | 0 | NA | IntergeniALR/Alphe   | 2918763  | NR_00395E | 647121   | Hs.697682NR_00395E | ENSG00000EMBPI      |           | embigin fpseudo         |
| chr6-584 100.3648  | -0.48281 | 0.246692 | -1.95715 | 0.050329 | 0.228685 | chr6  | 58450057 | 58450907 | + | 0 | NA | IntergeniALR/Alphe   | -489036  | NR_132995 | 1.07E+08 | Hs.561535NR_125727 | ENSG00000LINC0068C- |           | long intencRNA          |
| chr21-11 17.5614   | -1.04761 | 0.536051 | -1.95431 | 0.050665 | 0.229262 | chr21 | 11187952 | 11188312 | + | 0 | NA | IntergeniALR/Alphe   | 666618   | NM_19926C | 7179     | Hs.122988NM_19925E | ENSG00000TPTE       | CT44 PTEN | transmem protein-coding |
| chr9-628 16.93911  | -1.08035 | 0.552812 | -1.95427 | 0.050669 | 0.229262 | chr9  | 62833530 | 62833816 | + | 0 | NA | TTS (NR_1TTS) (NR_1) | 4673     | NR_135128 | 1E+08    | Hs.536982NR_135128 | LOC100132-          |           | uncharactcrRNA          |
| chr19-24 84.9575   | -0.51169 | 0.261868 | -1.95399 | 0.050702 | 0.229262 | chr19 | 24891472 | 24891808 | + | 0 | NA | IntergeniALR/Alphe   | -728193  | NR_003602 | 440153   | Hs.53488CNM_001012 | ENSG00000HAVCR1P1   |           | hepatitis pseudo        |
| chr14-17 52.64129  | -0.62834 | 0.321596 | -1.95381 | 0.050724 | 0.229262 | chr14 | 17640155 | 17640866 | + | 0 | NA | IntergeniALR/Alphe   | -960607  | NM_001012 | 440153   | Hs.53488CNM_001012 | ENSG00000OR11H12    |           | olfactoryprotein-coding |
| chr14-17 19.51458  | -0.9928  | 0.50884  | -1.95111 | 0.051045 | 0.230106 | chr14 | 17183616 | 17185169 | + | 0 | NA | IntergeniALR/Alphe   | -416725  | NM_001012 | 440153   | Hs.53488CNM_001012 | ENSG00000OR11H12    |           | olfactoryprotein-coding |
| chr21-91 19.51458  | -0.9928  | 0.50884  | -1.95111 | 0.051045 | 0.230106 | chr21 | 9130908  | 9131420  | + | 0 | NA | IntergeniMER66A L1   | -14203   | NR_038327 | 284801   | Hs.370695NR_04009E | ENSG00000MIR663AHC- |           | MIR663A lncRNA          |
| chr20-26 104.6813  | -0.47576 | 0.244066 | -1.94933 | 0.051257 | 0.230528 | chr20 | 26601669 | 26608003 | + | 0 | NA | IntergeniALR/Alphe   | -395603  | NR_04009E | 647121   | Hs.697682NR_00395E | ENSG00000EMBPI      |           | embigin fpseudo         |
| chr21-11 20.03891  | -0.97787 | 0.50168  | -1.94919 | 0.051273 | 0.230528 | chr21 | 11563639 | 11564968 | + | 0 | NA | IntergeniALR/Alphe   | 1042654  | NM_19926C | 7179     | Hs.122988NM_19925E | ENSG00000TPTE       | CT44 PTEN | transmem protein-coding |
| chr18-18 50.10086  | -0.64553 | 0.330859 | -1.94804 | 0.05141  | 0.230561 | chr18 | 18084962 | 18085268 | + | 0 | NA | IntergeniALR/Alphe   | -2759196 | NR_027417 | 644669   | Hs.579474NR_027417 | ENSG00000LOC64466E- |           | ankyrin rpseudo         |
| chr22-137 46.45391 | -0.66512 | 0.341499 | -1.94765 | 0.051456 | 0.230561 | chr22 | 13739462 | 13739750 | + | 0 | NA | IntergeniALR/Alphe   | -1788553 | NM_00100E | 81061    | Hs.554706NM_00100E | ENSG00000OR11H1     | OR11H12 C | olfactoryprotein-coding |
| chr5-496 113.7347  | -0.47028 | 0.241487 | -1.94744 | 0.051482 | 0.230561 | chr5  | 49609993 | 49610315 | + | 0 | NA | IntergeniALR/Alphe   | 831134   | NM_19844E | 133418   | Hs.561411NM_19844E | ENSG00000EMB        | GP70      | embigin protein-coding  |
| chr22-14 24.42787  | -0.89959 | 0.462116 | -1.94667 | 0.051575 | 0.230673 | chr22 | 14939638 | 14939982 | + | 0 | NA | IntergeniALR/Alphe   | -588349  | NM_00100E | 81061    | Hs.554706NM_00100E | ENSG00000OR11H1     | OR11H12 C | olfactoryprotein-coding |
| chr1-124 76.20687  | -0.53318 | 0.274039 | -1.94563 | 0.051699 | 0.230926 | chr1  | 1.25E+08 | 1.25E+08 | + | 0 | NA | IntergeniALR/Alphe   | 3062382  | NR_00395E | 647121   | Hs.697682NR_00395E | ENSG00000EMBPI      |           | embigin fpseudo         |
| chr21-12 17.49351  | -1.04749 | 0.538713 | -1.94442 | 0.051845 | 0.231276 | chr21 | 12304128 | 12304402 | + | 0 | NA | IntergeniALR/Alphe   | -733901  | NR_02691E | 149992   | Hs.558645NM_153773 | ANKRD30BF           | C21orf99  | ankyrin rpseudo         |
| chr5-492 58.16465  | -0.60581 | 0.31187  | -1.      |          |          |       |          |          |   |   |    |                      |          |           |          |                    |                     |           |                         |

|           |          |          |          |          |          |          |       |          |          |   |   |    |                    |          |           |          |                    |                     |                 |                         |                         |
|-----------|----------|----------|----------|----------|----------|----------|-------|----------|----------|---|---|----|--------------------|----------|-----------|----------|--------------------|---------------------|-----------------|-------------------------|-------------------------|
| chr14-165 | 18.69302 | -0.97021 | 0.519092 | -1.86905 | 0.061616 | 0.249486 | chr14 | 16577842 | 16578052 | + | 0 | NA | IntergeniALR/Alphe | -2023170 | NM_001013 | 440153   | Hs.53488CNM_001013 | ENSG00000COR11H12   | -               | olfactoryprotein-coding |                         |
| chr21-918 | 20.76028 | -0.92591 | 0.495507 | -1.86862 | 0.061676 | 0.249486 | chr21 | 9185036  | 9185285  | + | 0 | NA | IntergeniLIP4 LII  | -55399   | NR_038327 | 1E+08    | Hs.487562NM_174948 | ENSG00000TEKT4P2    | MAFIPL Tf       | tektin 4 pseudo         |                         |
| chr13-165 | 15.66669 | -1.06882 | 0.572038 | -1.86844 | 0.061701 | 0.249486 | chr13 | 16938603 | 16938804 | + | 0 | NA | IntergeniALR/Alphe | -1256594 | NR_027278 | 26080    | Hs.448582NR_027278 | ENSG00000FAM230C    | LINC00281       | family wincRNA          |                         |
| chr9-437  | 21.76554 | -0.8992  | 0.481355 | -1.86807 | 0.061752 | 0.249486 | chr9  | 43767179 | 43767781 | + | 0 | NA | IntergeniALR/Alphe | 641314   | NR_160666 | 1.03E+08 | NR_160669          | LOC102724-          |                 | methylenepseudo         |                         |
| chr21-126 | 30.67091 | -0.76709 | 0.410976 | -1.86651 | 0.061971 | 0.249516 | chr21 | 12692224 | 12692900 | + | 0 | NA | IntergeniALR/Alphe | 249516   | NR_02691E | 149992   | Hs.558645NM_153773 | ANKRD30BF           | C21orf99        | ankyrin ipseudo         |                         |
| chr20-276 | 21.79003 | -0.89674 | 0.480688 | -1.86552 | 0.062108 | 0.249516 | chr20 | 27688376 | 27688907 | + | 0 | NA | IntergeniALR/Alphe | 914024   | NR_13231E | 1E+08    | Hs.529357NR_13231E | ENSG00000FRG1CP     | -               | FSHD regipseudo         |                         |
| chr17-255 | 45.15023 | -0.29423 | 0.157781 | -1.8648  | 0.062209 | 0.249516 | chr17 | 25389805 | 25390063 | + | 0 | NA | IntergeniALR/Alphe | 1699307  | NR_13567E | 1.05E+08 | Hs.649918NR_135673 | LOC105371-          |                 | uncharactncRNA          |                         |
| chr22-135 | 20.21982 | -0.92914 | 0.498281 | -1.8647  | 0.062224 | 0.249516 | chr22 | 13516597 | 13519725 | + | 0 | NA | IntergeniALR/Alphe | 1620755  | NR_110761 | 1.03E+08 | Hs.652929NR_110761 | LOC102722-          |                 | uncharactncRNA          |                         |
| chr21-128 | 20.32833 | -0.93637 | 0.502176 | -1.86463 | 0.062233 | 0.249516 | chr21 | 12877811 | 12878085 | + | 0 | NA | IntergeniALR/Alphe | -160218  | NR_02691E | 149992   | Hs.558645NM_153773 | ANKRD30BF           | C21orf99        | ankyrin ipseudo         |                         |
| chr1-124  | 64.61194 | -0.54755 | 0.293688 | -1.86438 | 0.062269 | 0.249516 | chr1  | 1.24E+08 | 1.24E+08 | + | 0 | NA | IntergeniALR/Alphe | 2964628  | NR_00395E | 647121   | Hs.697682NR_00395E | ENSG00000EMB1P      | -               | embigin ipseudo         |                         |
| chr20-274 | 17.69333 | -0.96561 | 0.534592 | -1.86407 | 0.062313 | 0.249516 | chr20 | 27406136 | 27407637 | + | 0 | NA | IntergeniALR/Alphe | 1195779  | NR_13231E | 1E+08    | Hs.529357NR_13231E | ENSG00000FRG1CP     | -               | FSHD regipseudo         |                         |
| chr13-175 | 31.65447 | -0.75319 | 0.404193 | -1.86344 | 0.0624   | 0.249516 | chr13 | 17927311 | 17928745 | + | 0 | NA | IntergeniALR/Alphe | -267269  | NR_027278 | 26080    | Hs.448582NR_027278 | ENSG00000FAM230C    | LINC00281       | family wincRNA          |                         |
| chr7-601  | 21.72213 | -0.89652 | 0.481145 | -1.86333 | 0.06242  | 0.249516 | chr7  | 60106584 | 60106948 | + | 0 | NA | IntergeniALR/Alphe | 16016584 | NR_00115E | 441234   | Hs.533121NM_00115E | ENSG00000ZNF716     | -               | zinc fingprotein-coding |                         |
| chr5-4754 | 152.5734 | -0.3916  | 0.210227 | -1.86277 | 0.062495 | 0.249516 | chr5  | 47541711 | 47547678 | + | 0 | NA | IntergeniALR/Alphe | -851164  | NM_02107E | 348980   | Hs.353176NM_02107E | ENSG00000HCN1       | BCNG-1 B        | hyperpolprotein-coding  |                         |
| chr21-122 | 28.19062 | -0.79267 | 0.425733 | -1.86189 | 0.062619 | 0.249516 | chr21 | 12266066 | 12268779 | + | 0 | NA | IntergeniALR/Alphe | -770744  | NR_02691E | 149992   | Hs.558645NM_153773 | ANKRD30BF           | C21orf99        | ankyrin ipseudo         |                         |
| chr11-51  | 22.72461 | -0.87606 | 0.470667 | -1.86132 | 0.062699 | 0.249516 | chr11 | 51575722 | 51576079 | + | 0 | NA | IntergeniALR/Alphe | 1166753  | NR_024504 | 646813   | Hs.684175NR_024504 | LOC64681-           |                 | DExH-box pseudo         |                         |
| chr5-484  | 23.7215  | -0.86447 | 0.464582 | -1.86075 | 0.062779 | 0.249516 | chr5  | 48485068 | 48485425 | + | 0 | NA | IntergeniALR/Alphe | 1956042  | NM_19844E | 133418   | Hs.561411NM_19844E | ENSG00000EMB        | GP70            | embigin protein-coding  |                         |
| chr19-251 | 117.0684 | -0.43875 | 0.235798 | -1.86069 | 0.062788 | 0.249516 | chr19 | 25143539 | 25143786 | + | 0 | NA | IntergeniALR/Alphe | -980215  | NR_00360E | 1E+08    | Hs.149312NR_00360E | ENSG00000HAVCR1P1   | -               | hepatitispsudo          |                         |
| chr9-4384 | 23.72708 | -0.85741 | 0.460914 | -1.86023 | 0.062852 | 0.249516 | chr9  | 43844690 | 43845140 | + | 0 | NA | IntergeniALR/Alphe | 718749   | NR_160666 | 1.03E+08 | NR_160669          | LOC102724-          |                 | methylenepseudo         |                         |
| chr8-858  | 20.76864 | -0.91387 | 0.491873 | -1.85794 | 0.063178 | 0.250369 | chr8  | 85807267 | 85808792 | + | 0 | NA | IntergeniMLT1F1 L  | -4468    | NR_003594 | 1E+08    | Hs.535055NR_003594 | REXO112P            | -               | REXO1 likpseudo         |                         |
| chr20-271 | 23.75157 | -0.85517 | 0.460428 | -1.85733 | 0.063265 | 0.250369 | chr20 | 27137540 | 27139324 | + | 0 | NA | IntergeniALR/Alphe | -929199  | NR_04009E | 284801   | Hs.370695NR_04009E | ENSG00000MIR663AHC  | -               | MIR663A lncRNA          |                         |
| chr21-915 | 18.31005 | -0.97715 | 0.526149 | -1.85717 | 0.063286 | 0.250369 | chr21 | 9134860  | 9135862  | + | 0 | NA | IntergeniLIMA3 LII | -5600    | NR_038327 | 1E+08    | Hs.487562NM_174948 | ENSG00000TEKT4P2    | MAFIPL Tf       | tektin 4 pseudo         |                         |
| chr14-174 | 24.22971 | -0.84697 | 0.456237 | -1.85644 | 0.063391 | 0.250495 | chr14 | 17473467 | 17475180 | + | 0 | NA | IntergeniALR/Alphe | -1126794 | NM_001013 | 440153   | Hs.53488CNM_001013 | ENSG00000COR11H12   | -               | olfactoryprotein-coding |                         |
| chr19-265 | 80.41826 | -0.49587 | 0.267196 | -1.85582 | 0.063479 | 0.250552 | chr19 | 26504013 | 26504551 | + | 0 | NA | IntergeniALR/Alphe | -1289149 | NR_14673E | 1.02E+08 | Hs.567934NR_110687 | ENSG00000LOC101927- |                 | uncharactncRNA          |                         |
| chr13-175 | 41.9063  | -0.65732 | 0.354418 | -1.85464 | 0.063647 | 0.250786 | chr13 | 17389762 | 17389987 | + | 0 | NA | IntergeniALR/Alphe | -805423  | NR_027278 | 26080    | Hs.448582NR_027278 | ENSG00000FAM230C    | LINC00281       | family wincRNA          |                         |
| chr21-122 | 23.68089 | -0.85843 | 0.462918 | -1.85438 | 0.063685 | 0.250786 | chr21 | 12215718 | 12217633 | + | 0 | NA | IntergeniALR/Alphe | -821491  | NR_02691E | 149992   | Hs.558645NM_153773 | ANKRD30BF           | C21orf99        | ankyrin ipseudo         |                         |
| chr15-194 | 20.83654 | -0.91406 | 0.493244 | -1.85316 | 0.06386  | 0.251186 | chr15 | 19471999 | 19472261 | + | 0 | NA | IntergeniALR/Alphe | -810614  | NR_03883E | 646096   | Hs.448785NR_03883E | ENSG00000CHEK2P2    | -               | checkpoirpseudo         |                         |
| chr21-121 | 22.20306 | -0.88287 | 0.476853 | -1.85145 | 0.064104 | 0.25126  | chr21 | 12106183 | 12108626 | + | 0 | NA | IntergeniALR/Alphe | -930762  | NR_02691E | 149992   | Hs.558645NM_153773 | ANKRD30BF           | C21orf99        | ankyrin ipseudo         |                         |
| chr21-104 | 18.3178  | -1.00228 | 0.541374 | -1.85137 | 0.064116 | 0.25126  | chr21 | 10459729 | 10460002 | + | 0 | NA | intron (AluX) SIN  | 46333    | NM_18248E | 85319    | Hs.545785NM_18248E | BAGE2               | CT2.2           | BAGE famiprotein-coding |                         |
| chrY-568  | 22.29545 | -0.8007  | 0.475742 | -1.8512  | 0.06414  | 0.25126  | chrY  | 56855301 | 56856401 | + | 0 | NA | IntergeniIntergeni | -98404   | NM_00584C | 10251    | Hs.381912NM_00584C | ENSG00000SPRY3      | spry-3          | sprouty fprotein-coding |                         |
| chr20-266 | 25.78101 | -0.82049 | 0.443272 | -1.85099 | 0.064172 | 0.25126  | chr20 | 26616967 | 26617987 | + | 0 | NA | IntergeniALR/Alphe | -408244  | NR_04009E | 284801   | Hs.370695NR_04009E | ENSG00000MIR663AHC  | -               | MIR663A lncRNA          |                         |
| chr1-124  | 98.67546 | -0.46682 | 0.252409 | -1.84946 | 0.064392 | 0.251683 | chr1  | 1.24E+08 | 1.24E+08 | + | 0 | NA | IntergeniALR/Alphe | 2565372  | NR_00395E | 647121   | Hs.697682NR_00395E | ENSG00000EMB1P      | -               | embigin ipseudo         |                         |
| chr3-908  | 27.37291 | -0.80226 | 0.433837 | -1.84922 | 0.064427 | 0.251683 | chr3  | 90835915 | 90836119 | + | 0 | NA | IntergeniALR/Alphe | 1728396  | NM_00523E | 2042     | Hs.123642NM_00523E | ENSG00000EPAH3      | EK4 ETK E       | EPHF receptor-coding    |                         |
| chr17-251 | 77.7682  | -0.50231 | 0.272016 | -1.84663 | 0.064801 | 0.252857 | chr17 | 25101213 | 25101447 | + | 0 | NA | IntergeniALR/Alphe | 1987911  | NR_13567E | 1.05E+08 | Hs.649918NR_135673 | LOC105371-          |                 | uncharactncRNA          |                         |
| chr21-122 | 26.16676 | -0.8154  | 0.442012 | -1.84474 | 0.065076 | 0.25364  | chr21 | 12058674 | 12059558 | + | 0 | NA | IntergeniALR/Alphe | -979050  | NR_02691E | 149992   | Hs.558645NM_153773 | ANKRD30BF           | C21orf99        | ankyrin ipseudo         |                         |
| chr13-175 | 29.63062 | -0.77038 | 0.41887  | -1.83918 | 0.065888 | 0.256514 | chr13 | 17383417 | 17383830 | + | 0 | NA | IntergeniALR/Alphe | -811674  | NR_027278 | 26080    | Hs.448582NR_027278 | ENSG00000FAM230C    | LINC00281       | family wincRNA          |                         |
| chr1-1235 | 37.75115 | -0.69268 | 0.377399 | -1.83539 | 0.066448 | 0.258017 | chr1  | 1.24E+08 | 1.24E+08 | + | 0 | NA | IntergeniALR/Alphe | 1997057  | NR_00395E | 647121   | Hs.697682NR_00395E | ENSG00000EMB1P      | -               | embigin ipseudo         |                         |
| chr21-122 | 30.13325 | -0.76351 | 0.416073 | -1.83504 | 0.066499 | 0.258017 | chr21 | 12247978 | 12248388 | + | 0 | NA | IntergeniALR/Alphe | -789893  | NR_02691E | 149992   | Hs.558645NM_153773 | ANKRD30BF           | C21orf99        | ankyrin ipseudo         |                         |
| chr7-5936 | 169.2198 | -0.37825 | 0.206174 | -1.8346  | 0.066565 | 0.258017 | chr7  | 59364544 | 59364859 | + | 0 | NA | IntergeniALR/Alphe | 1914524  | NM_00115E | 441234   | Hs.533121NM_00115E | ENSG00000ZNF716     | -               | zinc fingprotein-coding |                         |
| chr18-184 | 17.64993 | -0.99316 | 0.541465 | -1.8342  | 0.066624 | 0.258017 | chr18 | 18437833 | 18438129 | + | 0 | NA | IntergeniALR/Alphe | 2673832  | NM_00540E | 6093     | Hs.306307NM_00540E | ENSG00000ROCK1      | P160ROCK        | Rho assocprotein-coding |                         |
| chr1-124  | 38.92338 | -0.67233 | 0.366628 | -1.83382 | 0.06668  | 0.258017 | chr1  | 1.25E+08 | 1.25E+08 | + | 0 | NA | IntergeniALR/Alphe | 3100324  | NR_00395E | 647121   | Hs.697682NR_00395E | ENSG00000EMB1P      | -               | embigin ipseudo         |                         |
| chr21-122 | 52.2572  | -0.59115 | 0.322412 | -1.83352 | 0.066726 | 0.258017 | chr21 | 12803177 | 12803466 | + | 0 | NA | IntergeniALR/Alphe | -238485  | NR_02691E | 149992   | Hs.558645NM_153773 | ANKRD30BF           | C21orf99        | ankyrin ipseudo         |                         |
| chr5-494  | 76.9327  | -0.49791 | 0.271991 | -1.8306  | 0.067161 | 0.259405 | chr5  | 49437287 | 49437564 | + | 0 | NA | IntergeniALR/Alphe | 1003863  | NM_19844E | 133418   | Hs.561411NM_19844E | ENSG00000EMB        | GP70            | embigin protein-coding  |                         |
| chr1-124  | 34.42977 | -0.7067  | 0.386734 | -1.82736 | 0.067645 | 0.260607 | chr1  | 1.25E+08 | 1.25E+08 | + | 0 | NA | IntergeniALR/Alphe | 3007698  | NR_00395E | 647121   | Hs.697682NR_00395E | ENSG00000EMB1P      | -               | embigin ipseudo         |                         |
| chr22-145 | 15.47518 | -1.03742 | 0.567899 | -1.82677 | 0.067734 | 0.260607 | chr22 | 14950830 | 14952358 | + | 0 | NA | IntergeniALR/Alphe | -576565  | NR_00100E | 81061    | Hs.55470E          | NM_00100E           | ENSG00000OR11H1 | OR11H12 C               | olfactoryprotein-coding |
| chr10-141 | 37.44276 | -0.68118 | 0.37294  | -1.82651 | 0.067773 | 0.260607 | chr10 | 41283017 | 41283360 | + | 0 | NA | IntergeniALR/Alphe | -1084857 | NR_02438E | 441666   | Hs.255725NR_02438E | ENSG00000LOC44166E  | -               | zinc fingpseudo         |                         |
| chr1-124  | 91.52733 | -0.47431 | 0.25975  | -1.82602 | 0.067847 | 0.260607 | chr1  | 1.25E+08 | 1.25E+08 | + | 0 | NA | IntergeniALR/Alphe | 3026720  | NR_00395E | 647121   | Hs.697682NR_00395E | ENSG00000EMB1P      | -               | embigin ipseudo         |                         |
| chr8-442  | 14.99146 | -1.06876 | 0.585308 | -1.82599 | 0.067852 | 0.260607 | chr8  | 44250250 | 44250528 | + | 0 | NA | IntergeniALR/Alphe | 957947   | NM_00100E | 34044    | Hs.531575NM_00100E | ENSG00000PTEA       | A26A1 CT1       | POTE ankyprotein-coding |                         |
| chr9-437  | 15.49409 | -1.04471 | 0.572491 | -1.82484 | 0.068025 | 0.260977 | chr9  | 43734271 | 43734921 | + | 0 | NA | IntergeniALR/Alphe | 68430    | NR_160666 | 1.03E+08 | NR_160669          | LOC102724-          |                 | methylenepseudo         |                         |
| chr5-485  | 81.98461 | -0.48655 | 0.266869 | -1.82318 | 0.068276 | 0.26113  | chr5  | 48596168 | 48596446 | + | 0 | NA | IntergeniALR/Alphe | 1844981  | NM_19844E | 133418   | Hs.561411NM_19844E | ENSG00000EMB        | GP70            | embigin protein-coding  |                         |
| chr1-1235 | 59.57788 | -0.55539 | 0.30464  | -1.82311 | 0.068287 | 0.26113  | chr1  | 1.24E+08 | 1.24E+08 | + | 0 |    |                    |          |           |          |                    |                     |                 |                         |                         |



|                    |          |          |          |          |          |       |          |          |   |   |    |                    |          |           |          |                    |                     |                 |                          |                         |
|--------------------|----------|----------|----------|----------|----------|-------|----------|----------|---|---|----|--------------------|----------|-----------|----------|--------------------|---------------------|-----------------|--------------------------|-------------------------|
| chr10-40c 32.62186 | -0.70158 | 0.397706 | -1.76407 | 0.07772  | 0.275071 | chr10 | 40601150 | 40601645 | + | 0 | NA | IntergeniALR/Alphe | 1766648  | NR_02438C | 441666   | Hs.255725NR_02438C | ENSG0000CLOC441666- | -               | zinc_fingpseudo          |                         |
| chr7-6031 64.18166 | -0.51746 | 0.293506 | -1.76302 | 0.077897 | 0.275411 | chr7  | 60310640 | 60312035 | + | 0 | NA | IntergeniALR/Alphe | 2861160  | NM_00115E | 441234   | Hs.533121NM_00115E | ENSG0000CZNF716     | -               | zinc_fingprotein-coding  |                         |
| chr20-27c 32.60016 | -0.70064 | 0.397868 | -1.76099 | 0.078241 | 0.276344 | chr20 | 27091205 | 27092210 | + | 0 | NA | IntergeniALR/Alphe | -882474  | NR_04009E | 284801   | Hs.370695NR_04009E | ENSG0000CMIR663AHC- | -               | MIR663A lncRNA           |                         |
| chr5-487c 76.06226 | -0.51471 | 0.292566 | -1.7593  | 0.078526 | 0.277066 | chr5  | 48759336 | 48759542 | + | 0 | NA | IntergeniALR/Alphe | 1681849  | NM_19844E | 133418   | Hs.561411NM_19844E | ENSG0000CEMB        | GP70            | embigin protein-coding   |                         |
| chr20-27c 52.70026 | -0.56443 | 0.321347 | -1.75646 | 0.079011 | 0.278365 | chr20 | 27975181 | 27976055 | + | 0 | NA | IntergeniALR/Alphe | 627047   | NR_13231E | 1E+08    | Hs.529357NR_13231E | ENSG0000CFRG1CP     | -               | FSHD regipseudo          |                         |
| chr5-482c 132.062  | -0.39178 | 0.223086 | -1.75618 | 0.079057 | 0.278365 | chr5  | 48272813 | 48273035 | + | 0 | NA | IntergeniALR/Alphe | 2168364  | NM_19844E | 133418   | Hs.561411NM_19844E | ENSG0000CEMB        | GP70            | embigin protein-coding   |                         |
| chr9-638c 22.15013 | -0.85643 | 0.488391 | -1.75358 | 0.079502 | 0.279444 | chr9  | 63830352 | 63830595 | + | 0 | NA | IntergeniIntergeni | -10819   | NR_03968E | 1.01E+08 | NR_03968E          | ENSG0000CMIR4477A   | -               | microRNA ncRNA           |                         |
| chr20-27c 39.33915 | -0.63858 | 0.364271 | -1.75305 | 0.079594 | 0.279444 | chr20 | 27514264 | 27515536 | + | 0 | NA | IntergeniALR/Alphe | 1087765  | NR_13231E | 1E+08    | Hs.529357NR_13231E | ENSG0000CFRG1CP     | -               | FSHD regipseudo          |                         |
| chr12-35c 16.46432 | -0.98248 | 0.560468 | -1.75297 | 0.079608 | 0.279444 | chr12 | 35302829 | 35303213 | + | 0 | NA | IntergeniALR/Alphe | 1280525  | NM_03283A | 84920    | Hs.102971NM_03283A | ENSG0000CALG10      | ALG10A DI       | ALG10 alprotein-coding   |                         |
| chr10-40c 62.19173 | -0.50263 | 0.300776 | -1.7498  | 0.080152 | 0.281067 | chr10 | 40973814 | 40974124 | + | 0 | NA | IntergeniALR/Alphe | 1394076  | NR_02438C | 441666   | Hs.255725NR_02438C | ENSG0000CLOC441666- | -               | zinc_fingpseudo          |                         |
| chr1-124c 39.0119  | -0.65084 | 0.372078 | -1.74921 | 0.080255 | 0.281138 | chr1  | 1.24E+08 | 1.24E+08 | + | 0 | NA | IntergeniALR/Alphe | 2542846  | NR_00395E | 647121   | Hs.697682NR_00395E | ENSG0000CEMBP1      | -               | embigin fpseudo          |                         |
| chr20-28c 34.82947 | -0.69221 | 0.39604  | -1.74782 | 0.080495 | 0.281693 | chr20 | 28091190 | 28091526 | + | 0 | NA | IntergeniALR/Alphe | 511307   | NR_13231E | 1E+08    | Hs.529357NR_13231E | ENSG0000CFRG1CP     | -               | FSHD regipseudo          |                         |
| chr20-27c 28.63646 | -0.7358  | 0.421743 | -1.74466 | 0.081044 | 0.283324 | chr20 | 27539269 | 27542138 | + | 0 | NA | IntergeniALR/Alphe | 1061962  | NR_13231E | 1E+08    | Hs.529357NR_13231E | ENSG0000CFRG1CP     | -               | FSHD regipseudo          |                         |
| chr9-437c 32.02684 | -0.70839 | 0.406373 | -1.74321 | 0.081297 | 0.283795 | chr9  | 43777409 | 43777956 | + | 0 | NA | IntergeniALR/Alphe | 651516   | NR_160669 | 1.03E+08 | NR_160669          | LOC102724-          | -               | methylenepseudo          |                         |
| chr5-476c 77.22389 | -0.4901  | 0.281205 | -1.74284 | 0.081361 | 0.283795 | chr5  | 47671646 | 47671878 | + | 0 | NA | IntergeniALR/Alphe | -1975382 | NM_02107E | 348980   | Hs.35317eNM_02107E | ENSG0000HCN1        | BCNG-1 B        | hyperpoleprotein-coding  |                         |
| chr22-14c 15.15067 | -0.99942 | 0.573689 | -1.74209 | 0.081492 | 0.283795 | chr2  | 14003031 | 14030862 | + | 0 | NA | IntergeniALR/Alphe | -1497713 | NM_00100E | 81061    | Hs.55470eNM_00100E | ENSG0000COR11H1     | OR11H12 C       | olfactoryprotein-coding  |                         |
| chr7-592c 74.75688 | -0.48099 | 0.276118 | -1.74199 | 0.08151  | 0.283795 | chr7  | 59251595 | 59251979 | + | 0 | NA | IntergeniALR/Alphe | 1801610  | NM_00115E | 441234   | Hs.533121NM_00115E | ENSG0000CZNF716     | -               | zinc_fingprotein-coding  |                         |
| chr11-53c 119.0882 | -0.40946 | 0.235251 | -1.74052 | 0.081767 | 0.284102 | chr11 | 53204993 | 53205270 | + | 0 | NA | IntergeniALR/Alphe | 1398867  | NM_00100A | 119749   | Hs.553564NM_00100A | ENSG0000COR4C46     | -               | olfactoryprotein-coding  |                         |
| chr20-26c 27.17755 | -0.75273 | 0.432507 | -1.74039 | 0.081791 | 0.284102 | chr20 | 26865858 | 26867743 | + | 0 | NA | IntergeniALR/Alphe | -657567  | NR_04009E | 284801   | Hs.370695NR_04009E | ENSG0000CMIR663AHC- | -               | MIR663A lncRNA           |                         |
| chr22-14c 27.63399 | -0.74642 | 0.42896  | -1.74007 | 0.081847 | 0.284102 | chr22 | 14404561 | 14407328 | + | 0 | NA | IntergeniALR/Alphe | -122215  | NM_00100E | 81061    | Hs.55470eNM_00100E | ENSG0000COR11H1     | OR11H12 C       | olfactoryprotein-coding  |                         |
| chr19-26c 27.19925 | -0.75386 | 0.433413 | -1.73936 | 0.081972 | 0.28419  | chr19 | 26084678 | 26084976 | + | 0 | NA | IntergeniALR/Alphe | -7078604 | NR_146733 | 1.02E+08 | Hs.567934NR_146733 | ENSG0000CLOC101927- | -               | uncharactncRNA           |                         |
| chr9-434c 28.59027 | -0.7366  | 0.423624 | -1.7388  | 0.08207  | 0.28419  | chr9  | 43465699 | 43466367 | + | 0 | NA | IntergeniALR/Alphe | 339867   | NR_160666 | 1.03E+08 | NR_160669          | LOC102724-          | -               | methylenepseudo          |                         |
| chr22-12c 15.65051 | -0.98359 | 0.56579  | -1.73844 | 0.082133 | 0.28419  | chr22 | 12559228 | 12559535 | + | 0 | NA | IntergeniMLTID LTF | 661975   | NR_110761 | 1.03E+08 | Hs.65292eNR_110761 | LOC102722-          | -               | uncharactncRNA           |                         |
| chr21-12c 15.12618 | -1.00307 | 0.577128 | -1.73804 | 0.082204 | 0.28419  | chr21 | 12972007 | 12971029 | + | 0 | NA | IntergeniALR/Alphe | -767638  | NR_02691E | 149992   | Hs.55864eNM_153773 | ANKRD30BF C21orf99  | ankyrin rpseudo |                          |                         |
| chr5-487c 56.51088 | -0.53828 | 0.309811 | -1.73746 | 0.082306 | 0.284255 | chr5  | 48791286 | 48792197 | + | 0 | NA | IntergeniALR/Alphe | 1649547  | NM_19844E | 133418   | Hs.561411NM_19844E | ENSG0000CEMB        | GP70            | embigin protein-coding   |                         |
| chr14-17c 15.15346 | -0.99398 | 0.57258  | -1.73597 | 0.082569 | 0.284877 | chr14 | 17469800 | 17472362 | + | 0 | NA | IntergeniALR/Alphe | -1130036 | NM_00101E | 440153   | Hs.53488eNM_00101E | ENSG0000COR11H12    | -               | olfactoryprotein-coding  |                         |
| chr22-11c 15.67779 | -0.97487 | 0.562648 | -1.73264 | 0.08316  | 0.285529 | chr22 | 11935389 | 11935651 | + | 0 | NA | intron (intron)    | 38559    | NR_110761 | 1.03E+08 | Hs.65292eNR_110761 | LOC102722-          | -               | uncharactncRNA           |                         |
| chr21-11c 25.72143 | -0.76845 | 0.443574 | -1.73241 | 0.0832   | 0.285529 | chr21 | 11943773 | 11945248 | + | 0 | NA | IntergeniALR/Alphe | -1093656 | NR_02691E | 149992   | Hs.55864eNM_153773 | ANKRD30BF C21orf99  | ankyrin rpseudo |                          |                         |
| chr22-14c 27.11244 | -0.7494  | 0.432709 | -1.73187 | 0.083297 | 0.285529 | chr22 | 14416192 | 14418179 | + | 0 | NA | IntergeniALR/Alphe | -1110664 | NM_00100E | 81061    | Hs.55470eNM_00100E | ENSG0000COR11H1     | OR11H12 C       | olfactoryprotein-coding  |                         |
| chr19-26c 70.64792 | -0.48859 | 0.282247 | -1.73107 | 0.08344  | 0.285529 | chr19 | 26410342 | 26411379 | + | 0 | NA | IntergeniALR/Alphe | -1382602 | NR_146733 | 1.02E+08 | Hs.567934NR_146733 | ENSG0000CLOC101927- | -               | uncharactncRNA           |                         |
| chr22-13c 19.85749 | -0.88784 | 0.513085 | -1.7304  | 0.083559 | 0.285529 | chr22 | 13386009 | 13386244 | + | 0 | NA | IntergeniALR/Alphe | 1488720  | NR_110761 | 1.03E+08 | Hs.65292eNR_110761 | LOC102722-          | -               | uncharactncRNA           |                         |
| chr5-484c 27.76698 | -0.75011 | 0.433509 | -1.73032 | 0.083573 | 0.285529 | chr5  | 48432744 | 48433024 | + | 0 | NA | IntergeniALR/Alphe | 2008415  | NM_19844E | 133418   | Hs.561411NM_19844E | ENSG0000CEMB        | GP70            | embigin protein-coding   |                         |
| chr21-11c 15.17795 | -0.99043 | 0.572461 | -1.73012 | 0.083609 | 0.285529 | chr21 | 11915885 | 11915912 | + | 0 | NA | IntergeniALR/Alphe | -1111177 | NR_02691E | 149992   | Hs.55864eNM_153773 | ANKRD30BF C21orf99  | ankyrin rpseudo |                          |                         |
| chr22-14c 15.17795 | -0.99043 | 0.572461 | -1.73012 | 0.083609 | 0.285529 | chr22 | 14237520 | 14238209 | + | 0 | NA | IntergeniALR/Alphe | -1290295 | NM_00100E | 81061    | Hs.55470eNM_00100E | ENSG0000COR11H1     | OR11H12 C       | olfactoryprotein-coding  |                         |
| chr21-79c 17.67995 | -0.91731 | 0.530622 | -1.72875 | 0.083854 | 0.285529 | chr21 | 7982709  | 79893245 | + | 0 | NA | IntergeniALR/Alphe | -153345  | NM_00136E | 1.03E+08 | NM_00133E          | ENSG0000KCNE1B      | -               | potassium protein-coding |                         |
| chr18-15c 15.10727 | -0.99568 | 0.57604  | -1.7285  | 0.083899 | 0.285529 | chr18 | 15689059 | 15690133 | + | 0 | NA | IntergeniALR/Alphe | 346677   | NR_027417 | 644669   | Hs.579474NR_027417 | ENSG0000CLOC64466E- | -               | ankyrin rpseudo          |                         |
| chr22-13c 25.24329 | -0.77453 | 0.44819  | -1.72812 | 0.083967 | 0.285529 | chr22 | 13496768 | 13497424 | + | 0 | NA | IntergeniALR/Alphe | 1599690  | NR_110761 | 1.03E+08 | Hs.65292eNR_110761 | LOC102722-          | -               | uncharactncRNA           |                         |
| chr22-13c 24.12394 | -0.79247 | 0.459018 | -1.72644 | 0.084268 | 0.285529 | chr22 | 13637866 | 13638442 | + | 0 | NA | IntergeniALR/Alphe | 1740748  | NR_110761 | 1.03E+08 | Hs.65292eNR_110761 | LOC102722-          | -               | uncharactncRNA           |                         |
| chr3-19c 16.68026  | -0.9418  | 0.545576 | -1.72625 | 0.084303 | 0.285529 | chr3  | 91987861 | 91988216 | + | 0 | NA | IntergeniALR/Alphe | 1986044  | NM_00131A | 5627     | Hs.64016           | NM_00031E           | ENSG0000CPRO1   | PRO1 PS21                | protein fprotein-coding |
| chr20-27c 22.71401 | -0.812   | 0.470669 | -1.72521 | 0.08449  | 0.285529 | chr20 | 27533374 | 27533614 | + | 0 | NA | IntergeniALR/Alphe | 1069171  | NR_13231E | 1E+08    | Hs.529357NR_13231E | ENSG0000CFRG1CP     | -               | FSHD regipseudo          |                         |
| chr22-15c 17.70444 | -0.9143  | 0.530084 | -1.72482 | 0.084559 | 0.285529 | chr22 | 15021994 | 15022633 | + | 0 | NA | IntergeniALR/Alphe | -505846  | NM_00100E | 81061    | Hs.55470eNM_00100E | ENSG0000COR11H1     | OR11H12 C       | olfactoryprotein-coding  |                         |
| chr5-488c 20.16024 | -0.86182 | 0.499888 | -1.72403 | 0.084703 | 0.285529 | chr5  | 48861644 | 48861965 | + | 0 | NA | IntergeniALR/Alphe | 1579484  | NM_19844E | 133418   | Hs.561411NM_19844E | ENSG0000CEMB        | GP70            | embigin protein-coding   |                         |
| chr14-16c 16.60958 | -0.94652 | 0.549302 | -1.72314 | 0.084863 | 0.285529 | chr14 | 16821092 | 16822416 | + | 0 | NA | IntergeniALR/Alphe | -1779363 | NM_00101E | 440153   | Hs.53488eNM_00101E | ENSG0000COR11H12    | -               | olfactoryprotein-coding  |                         |
| chr10-40c 42.13335 | -0.61133 | 0.354781 | -1.72312 | 0.084866 | 0.285529 | chr10 | 40594513 | 40596731 | + | 0 | NA | IntergeniALR/Alphe | 1772423  | NR_02438C | 441666   | Hs.255725NR_02438C | ENSG0000CLOC441666- | -               | zinc_fingpseudo          |                         |
| chr13-17c 16.18042 | -0.95525 | 0.55446  | -1.72284 | 0.084917 | 0.285529 | chr13 | 17408988 | 17409414 | + | 0 | NA | IntergeniALR/Alphe | -782608  | NR_02727E | 26080    | Hs.448582NR_02727E | ENSG0000FAM230C     | LINC00281       | family wincRNA           |                         |
| chr21-88c 19.22845 | -0.88013 | 0.510939 | -1.72258 | 0.084965 | 0.285529 | chr21 | 8833564  | 8834663  | + | 0 | NA | IntergeniLIMC4a LJ | -152886  | NR_037421 | 1.01E+08 | NR_037421          | ENSG0000CMIR3648-   | IMR3648 E       | microRNA ncRNA           |                         |
| chr22-13c 17.20459 | -0.92607 | 0.537716 | -1.72223 | 0.085027 | 0.285529 | chr22 | 13701894 | 13703219 | + | 0 | NA | IntergeniALR/Alphe | 1805150  | NR_110761 | 1.03E+08 | Hs.65292eNR_110761 | LOC102722-          | -               | uncharactncRNA           |                         |
| chr6-596c 18.13638 | -0.90296 | 0.524343 | -1.72209 | 0.085053 | 0.285529 | chr6  | 59683252 | 59683754 | + | 0 | NA | IntergeniALR/Alphe | -1722057 | NR_13299E | 1.07E+08 | Hs.56153eNR_13299E | ENSG0000CLOC10068C- | -               | long intencRNA           |                         |
| chr22-12c 18.70691 | -0.88837 | 0.515983 | -1.7217  | 0.085123 | 0.285529 | chr22 | 12868316 | 12872660 | + | 0 | NA | IntergeniIntergeni | 973082   | NR_110761 | 1.03E+08 | Hs.65292eNR_110761 | LOC102722-          | -               | uncharactncRNA           |                         |
| chr17-26c 101.6333 | -0.42273 | 0.245542 | -1.72163 | 0.085137 | 0.285529 | chr17 | 26468498 | 26468746 | + | 0 | NA | IntergeniALR/Alphe | 620619   | NR_13567E | 1.05E+08 | Hs.64991eNR_135673 | LOC105371-          | -               | uncharactncRNA           |                         |
| chr21-10c 22.12178 | -0.82069 | 0.476924 | -1.72079 | 0.085289 | 0.285529 | chr21 | 12845730 | 12846119 | + | 0 | NA | IntergeniALR/Alphe | -192244  | NR_02691E | 149992   | Hs.55864eNM_153773 | ANKRD30BF C21orf99  | ankyrin rpseudo |                          |                         |
| chr10-40c 34.82942 | -0.66227 |          |          |          |          |       |          |          |   |   |    |                    |          |           |          |                    |                     |                 |                          |                         |

|                    |          |          |          |          |          |       |          |          |   |      |                       |                    |                              |                    |                 |                          |
|--------------------|----------|----------|----------|----------|----------|-------|----------|----------|---|------|-----------------------|--------------------|------------------------------|--------------------|-----------------|--------------------------|
| chr13-171 25.88064 | -0.73218 | 0.440951 | -1.66045 | 0.096824 | 0.303734 | chr13 | 17114028 | 17115564 | + | 0 NA | IntergeniALR/Alphe    | -1080501 NR_027278 | 26080 Hs. 448582NR_027278    | ENSG00000FAM230C   | LINC00281       | family wincRNA           |
| chr10-405 64.08984 | -0.49095 | 0.295839 | -1.65952 | 0.097012 | 0.303734 | chr10 | 40923972 | 40925120 | + | 0 NA | IntergeniALR/Alphe    | 1443499 NR_02438C  | 441666 Hs. 255725NR_02438C   | ENSG00000LOC441666 | -               | zinc fingpseudo          |
| chr5-483 36.59834  | -0.64066 | 0.38653  | -1.65745 | 0.097428 | 0.303734 | chr5  | 48321979 | 48322219 | + | 0 NA | IntergeniALR/Alphe    | 2119189 NM_19844E  | 133418 Hs. 561411NM_19844E   | ENSG00000EMB       | GP70            | embigin protein-coding   |
| chr15-17 25.3563   | -0.73832 | 0.445515 | -1.65724 | 0.097471 | 0.303734 | chr15 | 17093382 | 17093632 | + | 0 NA | IntergeniALR/Alphe    | -3189237 NR_03883E | 646096 Hs. 448785NR_03883E   | ENSG00000CHEK2P2   | -               | checkpoirpseudo          |
| chr1-1226 55.48944 | -0.51937 | 0.313429 | -1.65706 | 0.097507 | 0.303734 | chr1  | 1639663  | 1639695E | + | 0 NA | IntergeniALR/Alphe    | 1639663 NR_00395E  | 647121 Hs. 697682NR_00395E   | ENSG00000EMB1      | -               | embigin fpseudo          |
| chr1-124 33.59761  | -0.64586 | 0.390147 | -1.65544 | 0.097835 | 0.303734 | chr1  | 1.25E+08 | 1.25E+08 | + | 0 NA | IntergeniALR/Alphe    | 2993717 NR_00395E  | 647121 Hs. 697682NR_00395E   | ENSG00000EMB1      | -               | embigin fpseudo          |
| chr20-284 22.84594 | -0.77621 | 0.468907 | -1.65536 | 0.097851 | 0.303734 | chr20 | 28417539 | 28417949 | + | 0 NA | IntergeniALR/Alphe    | 184921 NR_13231E   | 1E+08 Hs. 529357NR_13231E    | ENSG00000FRG1CP    | -               | FSHD regipseudo          |
| chr20-276 22.87043 | -0.77392 | 0.467599 | -1.65509 | 0.097907 | 0.303734 | chr20 | 27658635 | 27659718 | + | 0 NA | IntergeniALR/Alphe    | 943489 NR_13231E   | 1E+08 Hs. 529357NR_13231E    | ENSG00000FRG1CP    | -               | FSHD regipseudo          |
| chr8-8564 15.89653 | -0.92687 | 0.560354 | -1.65408 | 0.098111 | 0.303734 | chr8  | 85645401 | 85649011 | + | 0 NA | Intergeni Intergeni   | 8470 NR_003594     | 1E+08 Hs. 535055NR_003594    | REXO1L2P           | -               | REXO1 likpseudo          |
| chr20-275 24.83197 | -0.74473 | 0.450581 | -1.65282 | 0.098368 | 0.303734 | chr20 | 27537881 | 27538227 | + | 0 NA | IntergeniALR/Alphe    | 1064561 NR_13231E  | 1E+08 Hs. 529357NR_13231E    | ENSG00000FRG1CP    | -               | FSHD regipseudo          |
| chr3-9184 33.14117 | -0.64951 | 0.392976 | -1.65258 | 0.098371 | 0.303734 | chr3  | 91846693 | 91847208 | + | 0 NA | IntergeniALR/Alphe    | 1212731 NM_001314  | 5627 Hs. 64016 NM_00031E     | ENSG00000PROS1     | PROS PS21       | protein Sprotein-coding  |
| chr13-17 22.82145  | -0.77854 | 0.471047 | -1.65278 | 0.098375 | 0.303734 | chr13 | 17029104 | 17029907 | + | 0 NA | IntergeniALR/Alphe    | -1165792 NR_027278 | 26080 Hs. 448582NR_027278    | ENSG00000FAM230C   | LINC00281       | family wincRNA           |
| chr17-251 101.4624 | -0.40937 | 0.247743 | -1.65241 | 0.098452 | 0.303734 | chr17 | 25139805 | 25140052 | + | 0 NA | IntergeniALR/Alphe    | 1949313 NR_135673  | 1.05E+08 Hs. 649918NR_135673 | LOC105371          | -               | uncharactncRNA           |
| chr19-267 69.52076 | -0.46927 | 0.284143 | -1.65153 | 0.09863  | 0.303734 | chr19 | 26754027 | 26754268 | + | 0 NA | IntergeniALR/Alphe    | -1039284 NR_14673E | 1.02E+08 Hs. 567934NR_110687 | ENSG00000LOC101927 | -               | uncharactncRNA           |
| chr19-254 27.96301 | -0.73063 | 0.442516 | -1.65109 | 0.098721 | 0.303734 | chr19 | 25496035 | 25496273 | + | 0 NA | IntergeniALR/Alphe    | -1332707 NR_00360E | 1E+08 Hs. 149312NR_00360E    | ENSG00000HAVCRIP1  | -               | hepatitispseudo          |
| chr7-5917 15.39947 | -0.9351  | 0.566566 | -1.65047 | 0.098848 | 0.303734 | chr7  | 59172526 | 59172973 | + | 0 NA | IntergeniALR/Alphe    | 1722572 NM_00115E  | 441234 Hs. 533121NM_00115E   | ENSG00000ZNF716    | -               | zinc fingprotein-coding  |
| chr3-758 16.37746  | -0.90738 | 0.549861 | -1.6502  | 0.098902 | 0.303734 | chr3  | 75859662 | 75860574 | + | 0 NA | Intergeni Intergeni   | -74569 NR_00129C   | 1E+08 Hs. 556877NM_00112E    | ENSG00000ZNF717    | OB1 X17         | zinc fingprotein-coding  |
| chr10-41 22.37059  | -0.77955 | 0.472411 | -1.65016 | 0.09891  | 0.303734 | chr10 | 41537733 | 41538078 | + | 0 NA | IntergeniALR/Alphe    | 830140 NR_02438C   | 441666 Hs. 255725NR_02438C   | ENSG00000LOC441666 | -               | zinc fingpseudo          |
| chr4-4957 19.88471 | -0.82602 | 0.500623 | -1.64998 | 0.098947 | 0.303734 | chr4  | 49572377 | 49578989 | + | 0 NA | IntergeniMSTA-int1    | 589041 NM_00128E   | 80157 Hs. 479702NM_02508E    | ENSG00000CWH43     | CWH43-C         | cell wallprotein-coding  |
| chr20-296 20.36285 | -0.81705 | 0.495215 | -1.64988 | 0.098968 | 0.303734 | chr20 | 29873133 | 29882324 | + | 0 NA | Intergeni Intergeni   | -2656 NR_03968E    | 1.01E+08 NR_03968E           | ENSG00000MIR4477B  | -               | microRNA ncRNA           |
| chr19-265 71.91035 | -0.47166 | 0.286066 | -1.64878 | 0.099192 | 0.303734 | chr19 | 26358831 | 26359037 | + | 0 NA | IntergeniALR/Alphe    | -1434497 NR_14673E | 1.02E+08 Hs. 567934NR_110687 | ENSG00000LOC101927 | -               | uncharactncRNA           |
| chr21-117 20.38735 | -0.81447 | 0.49399  | -1.64875 | 0.099198 | 0.303734 | chr21 | 11703771 | 11703970 | + | 0 NA | IntergeniALR/Alphe    | 1182356 NM_19926C  | 7179 Hs. 122986NM_19925E     | ENSG00000TPTE      | CT44 PTEN       | transmem protein-coding  |
| chr5-493 92.925    | -0.4234  | 0.256808 | -1.6487  | 0.099208 | 0.303734 | chr5  | 49351635 | 49351914 | + | 0 NA | IntergeniALR/Alphe    | 1089514 NM_19844E  | 133418 Hs. 561411NM_19844E   | ENSG00000EMB       | GP70            | embigin protein-coding   |
| chr8-857 21.34363  | -0.79793 | 0.484022 | -1.64854 | 0.099242 | 0.303734 | chr8  | 85772118 | 85778993 | + | 0 NA | non-codiri non-codiri | 538 NR_003594      | 1E+08 Hs. 535055NR_003594    | REXO1L2P           | -               | REXO1 likpseudo          |
| chr21-12 15.87761  | -0.91988 | 0.558016 | -1.64848 | 0.099255 | 0.303734 | chr21 | 12015277 | 12017193 | + | 0 NA | IntergeniALR/Alphe    | -1021931 NR_02691E | 149992 Hs. 558645NM_153773   | ANKRD30BF C21orf99 | ankyrin rpseudo |                          |
| chr22-128 17.92596 | -0.86842 | 0.527128 | -1.64746 | 0.099463 | 0.303734 | chr22 | 12873492 | 12878924 | + | 0 NA | IntergeniLIP4 LID     | 978802 NR_110761   | 1.03E+08 Hs. 652929NR_110761 | LOC10272E          | -               | uncharactncRNA           |
| chr9-4351 19.90921 | -0.82338 | 0.499825 | -1.64734 | 0.099489 | 0.303734 | chr9  | 43516621 | 43516925 | + | 0 NA | IntergeniALR/Alphe    | 390167 NR_16066E   | 1.03E+08 NR_16066E           | LOC10272E          | -               | methylencpseudo          |
| chr20-285 19.35759 | -0.84098 | 0.510516 | -1.64732 | 0.099492 | 0.303734 | chr20 | 28330403 | 28331249 | + | 0 NA | IntergeniALR/Alphe    | 271839 NR_13231E   | 1E+08 Hs. 529357NR_13231E    | ENSG00000FRG1CP    | -               | FSHD regipseudo          |
| chr21-884 18.3824  | -0.85566 | 0.519482 | -1.64713 | 0.099531 | 0.303734 | chr21 | 8849453  | 8850376  | + | 0 NA | Intergeni Intergeni   | -137085 NR_037421  | 1.01E+08 NR_037421           | ENSG00000MIR3648   | MIR3648         | microRNA ncRNA           |
| chr13-17 32.51888  | -0.65941 | 0.400349 | -1.6471  | 0.099538 | 0.303734 | chr13 | 17359794 | 17360299 | + | 0 NA | IntergeniALR/Alphe    | -835251 NR_027278  | 26080 Hs. 448582NR_027278    | ENSG00000FAM230C   | LINC00281       | family wincRNA           |
| chr22-14 20.83431  | -0.83103 | 0.504634 | -1.64679 | 0.099601 | 0.303734 | chr22 | 14590484 | 14590768 | + | 0 NA | IntergeniALR/Alphe    | -937533 NM_00100E  | 81061 Hs. 554706NM_00100E    | ENSG00000OR11H1    | OR11H12         | Colfactoryprotein-coding |
| chr13-17 19.83852  | -0.8272  | 0.502391 | -1.64653 | 0.099654 | 0.303734 | chr13 | 17654342 | 17657039 | + | 0 NA | IntergeniALR/Alphe    | -539607 NR_027278  | 26080 Hs. 448582NR_027278    | ENSG00000FAM230C   | LINC00281       | family wincRNA           |
| chr21-927 15.92381 | -0.91835 | 0.557905 | -1.64606 | 0.099751 | 0.303734 | chr21 | 9275740  | 9276951  | + | 0 NA | Intergeni Intergeni   | -146584 NR_03832E  | 1E+08 Hs. 487562NM_17494E    | ENSG00000TEKT4P2   | MAFIPL T        | tektin 4 pseudo          |
| chr21-91 19.43107  | -0.83277 | 0.506301 | -1.6448  | 0.10001  | 0.303734 | chr21 | 9186026  | 9190432  | + | 0 NA | IntergeniLIP4 LID     | -58468 NR_03832E   | 1E+08 Hs. 487562NM_17494E    | ENSG00000TEKT4P2   | MAFIPL T        | tektin 4 pseudo          |
| chrY-568 19.43107  | -0.83277 | 0.506301 | -1.6448  | 0.10001  | 0.303734 | chrY  | 56868600 | 56875371 | + | 0 NA | Intergeni Intergeni   | -82270 NR_00584C   | 10251 Hs. 381912NM_00584C    | ENSG00000SPRY3     | spry-3          | sprouty fprotein-coding  |
| chr21-10 18.88503  | -0.84235 | 0.512463 | -1.64372 | 0.100234 | 0.303734 | chr21 | 10368104 | 10368958 | + | 0 NA | Intergeni Intergeni   | -44989 NM_001187   | 574 Hs. 545785NM_001187      | BAGE               | BAGE1 CTE2B     | melaninprotein-coding    |
| chr13-17 17.35823  | -0.8783  | 0.534435 | -1.64341 | 0.100297 | 0.303734 | chr13 | 17392507 | 17393993 | + | 0 NA | IntergeniALR/Alphe    | -802047 NR_027278  | 26080 Hs. 448582NR_027278    | ENSG00000FAM230C   | LINC00281       | family wincRNA           |
| chr20-27 18.83326  | -0.8524  | 0.518692 | -1.64336 | 0.100308 | 0.303734 | chr20 | 27099228 | 27102270 | + | 0 NA | IntergeniALR/Alphe    | -891516 NR_04009E  | 284801 Hs. 370695NR_04009E   | ENSG00000MIR663AH  | MIR663A         | lncRNA                   |
| chr20-27 19.36317  | -0.83245 | 0.506554 | -1.64336 | 0.100309 | 0.303734 | chr20 | 27389969 | 27392240 | + | 0 NA | IntergeniALR/Alphe    | -1721071 NM_00101E | 440153 Hs. 534888NM_00101E   | ENSG00000OR11H12   | -               | olfactoryprotein-coding  |
| chr4-5904 18.3607  | -0.85407 | 0.519884 | -1.64282 | 0.100421 | 0.303734 | chr4  | 59041222 | 59042642 | + | 0 NA | IntergeniALR/Alphe    | -1080468 NR_13299E | 1.07E+08 Hs. 561535NR_125727 | ENSG00000LINC0068C | -               | long intencRNA           |
| chr5-484 46.92089  | -0.55542 | 0.338091 | -1.64281 | 0.100423 | 0.303734 | chr5  | 48445423 | 48454422 | + | 0 NA | IntergeniALR/Alphe    | -1089696 NM_19844E | 133418 Hs. 561411NM_19844E   | ENSG00000EMB       | GP70            | embigin protein-coding   |
| chr20-277 32.79223 | -0.66325 | 0.403865 | -1.64226 | 0.100536 | 0.303734 | chr20 | 27779784 | 27780072 | + | 0 NA | IntergeniALR/Alphe    | 822737 NR_13231E   | 1E+08 Hs. 529357NR_13231E    | ENSG00000FRG1CP    | -               | FSHD regipseudo          |
| chr14-16 21.29464  | -0.80295 | 0.488988 | -1.64206 | 0.100578 | 0.303734 | chr14 | 16515439 | 16515800 | + | 0 NA | IntergeniALR/Alphe    | -2085498 NM_00101E | 440153 Hs. 534888NM_00101E   | ENSG00000OR11H12   | -               | olfactoryprotein-coding  |
| chr12-35 19.97431  | -0.82788 | 0.504484 | -1.64104 | 0.100789 | 0.303734 | chr12 | 35315739 | 35316190 | + | 0 NA | IntergeniALR/Alphe    | 1293468 NM_032834  | 84920 Hs. 102971NM_032834    | ENSG00000ALG10     | ALG10A DIALG10  | alprotein-coding         |
| chr6-586 23.32966  | -0.76247 | 0.464766 | -1.64054 | 0.100893 | 0.303734 | chr6  | 58690312 | 58691148 | + | 0 NA | IntergeniALR/Alphe    | -729284 NR_13299E  | 1.07E+08 Hs. 561535NR_125727 | ENSG00000LINC0068C | -               | long intencRNA           |
| chr1-123 20.91447  | -0.80099 | 0.488302 | -1.64036 | 0.10093  | 0.303734 | chr1  | 1.23E+08 | 1.23E+08 | + | 0 NA | IntergeniALR/Alphe    | 1769817 NR_00395E  | 647121 Hs. 697682NR_00395E   | ENSG00000EMB1      | -               | embigin fpseudo          |
| chr20-268 23.8078  | -0.75618 | 0.461225 | -1.63951 | 0.101107 | 0.303734 | chr20 | 26848548 | 26848774 | + | 0 NA | IntergeniALR/Alphe    | -639428 NR_04009E  | 284801 Hs. 370695NR_04009E   | ENSG00000MIR663AH  | MIR663A         | lncRNA                   |
| chr20-268 19.8658  | -0.82043 | 0.500462 | -1.63934 | 0.101142 | 0.303734 | chr20 | 26892280 | 26893265 | + | 0 NA | IntergeniALR/Alphe    | -683539 NR_04009E  | 284801 Hs. 370695NR_04009E   | ENSG00000MIR663AH  | MIR663A         | lncRNA                   |
| chr5-488 63.48529  | -0.48389 | 0.295207 | -1.63915 | 0.101182 | 0.303734 | chr5  | 48850687 | 48851635 | + | 0 NA | IntergeniALR/Alphe    | 1590127 NM_19844E  | 133418 Hs. 561411NM_19844E   | ENSG00000EMB       | GP70            | embigin protein-coding   |
| chr10-41 35.61092  | -0.62757 | 0.383187 | -1.63775 | 0.101473 | 0.303734 | chr10 | 41295912 | 41296133 | + | 0 NA | IntergeniALR/Alphe    | 1072023 NR_02438C  | 441666 Hs. 255725NR_02438C   | ENSG00000LOC441666 | -               | zinc fingpseudo          |
| chr7-5954 45.68736 | -0.56101 | 0.342564 | -        |          |          |       |          |          |   |      |                       |                    |                              |                    |                 |                          |



|            |          |          |          |          |          |          |       |          |          |   |   |    |                    |          |           |          |           |           |                     |           |            |                |                |                 |
|------------|----------|----------|----------|----------|----------|----------|-------|----------|----------|---|---|----|--------------------|----------|-----------|----------|-----------|-----------|---------------------|-----------|------------|----------------|----------------|-----------------|
| chr10-414  | 29.99686 | -0.67724 | 0.429912 | -1.57529 | 0.115189 | 0.320691 | chr10 | 41481944 | 41482143 | + | 0 | NA | IntergeniALR/Alphe | 886002   | NR_02438C | 441666   | Hs.255725 | NR_02438C | ENSG0000C.LOC441666 | -         | zinc       | fingerpseud    |                |                 |
| chr16-368  | 20.08175 | -0.78951 | 0.501224 | -1.57517 | 0.115216 | 0.320691 | chr16 | 36858852 | 36859102 | + | 0 | NA | IntergeniALR/Alphe | 112425   | NR_03398E | 400533   | Hs.499135 | NR_03398E | ENSG0000C.LINC02167 | -         | long       | intencRNA      |                |                 |
| chr20-268  | 20.06005 | -0.78801 | 0.500416 | -1.57471 | 0.115324 | 0.320691 | chr20 | 26849707 | 26851918 | + | 0 | NA | IntergeniALR/Alphe | -641579  | NR_04009E | 284801   | Hs.370695 | NR_04009E | ENSG0000C.MIR663AHC | -         | MIR663A    | lncRNA         |                |                 |
| chr10-121  | 19.6281  | -0.79515 | 0.505609 | -1.57434 | 0.11541  | 0.320691 | chr10 | 1.26E+08 | 1.26E+08 | + | 0 | NA | intron (N          | 8851     | NM_00136E | 92565    | Hs.352591 | NM_14523E | ENSG0000C.FANK1     | HSD13     |            | fibronect      | protein-coding |                 |
| chr5-49084 | 20.54098 | -0.77609 | 0.493355 | -1.57308 | 0.1157   | 0.320691 | chr5  | 49117822 | 49118084 | + | 0 | NA | IntergeniALR/Alphe | 1323335  | NM_19844E | 133418   | Hs.561411 | NM_19844E | ENSG0000C.EMB       | GP70      |            | embigin        | protein-coding |                 |
| chr22-148  | 21.9971  | -0.75624 | 0.480754 | -1.57303 | 0.115713 | 0.320691 | chr22 | 14850201 | 14850442 | + | 0 | NA | IntergeniALR/Alphe | -677838  | NM_00100E | 81061    | Hs.55470E | NM_00100E | ENSG0000C.COR1IH1   | OR11H12   |            | Colfatory      | protein-coding |                 |
| chr22-144  | 29.80925 | -0.64834 | 0.412355 | -1.57228 | 0.115885 | 0.320691 | chr22 | 14362795 | 14363344 | + | 0 | NA | IntergeniALR/Alphe | -116590  | NM_00100E | 81061    | Hs.55470E | NM_00100E | ENSG0000C.COR1IH1   | OR11H12   |            | Colfatory      | protein-coding |                 |
| chr1-1228  | 37.05366 | -0.58619 | 0.373017 | -1.57148 | 0.116071 | 0.320691 | chr1  | 1.23E+08 | 1.23E+08 | + | 0 | NA | IntergeniALR/Alphe | 1282941  | NR_00395E | 647121   | Hs.697682 | NR_00395E | ENSG0000C.EMB1P1    | -         | embigin    | pseudo         |                |                 |
| chr5-4918  | 19.07928 | -0.80788 | 0.514109 | -1.57142 | 0.116084 | 0.320691 | chr5  | 49186256 | 49186517 | + | 0 | NA | IntergeniALR/Alphe | 1254902  | NM_19844E | 133418   | Hs.561411 | NM_19844E | ENSG0000C.EMB       | GP70      |            | embigin        | protein-coding |                 |
| chr13-179  | 60.919   | -0.78946 | 0.502636 | -1.57063 | 0.116267 | 0.320691 | chr13 | 17231269 | 17233559 | + | 0 | NA | IntergeniALR/Alphe | -962283  | NR_02727E | 26080    | Hs.448582 | NR_02727E | ENSG0000C.FAM230C   | LINC00281 | family     | wincRNA        |                |                 |
| chr21-122  | 20.58996 | -0.77103 | 0.491027 | -1.57024 | 0.116358 | 0.320691 | chr21 | 12274782 | 12276093 | + | 0 | NA | IntergeniALR/Alphe | -762729  | NR_02691E | 149992   | Hs.55864E | NM_153773 | ANKRD30BF.C21orf99  | ankryn    | rpseudo    |                |                |                 |
| chr18-155  | 15.09667 | -0.89768 | 0.571735 | -1.5701  | 0.116392 | 0.320691 | chr18 | 15512512 | 15517435 | + | 0 | NA | IntergeniALR/Alphe | -189054  | NR_02741E | 644669   | Hs.579474 | NR_02741E | ENSG0000C.LOC64466E | -         | ankryn     | rpseudo        |                |                 |
| chr9-440   | 15.09667 | -0.89768 | 0.571735 | -1.5701  | 0.116392 | 0.320691 | chr9  | 44023347 | 44026039 | + | 0 | NA | IntergeniALR/Alphe | 898527   | NR_16066E | 1.03E+08 | NR_160669 | LOC102724 | -                   | methylene | pseudo     |                |                |                 |
| chr20-274  | 21.99989 | -0.75247 | 0.47927  | -1.57003 | 0.116407 | 0.320691 | chr20 | 27484652 | 27487833 | + | 0 | NA | IntergeniALR/Alphe | 1116395  | NR_13231E | 1E+08    | Hs.529357 | NR_13231E | ENSG0000C.FRGC1P    | -         | FSHD       | regipseudo     |                |                 |
| chr19-265  | 55.02139 | -0.49831 | 0.31744  | -1.56976 | 0.11647  | 0.320691 | chr19 | 26390793 | 26391708 | + | 0 | NA | IntergeniALR/Alphe | -1402181 | NR_146733 | 1.02E+08 | Hs.567934 | NR_110687 | ENSG0000C.LOC101927 | -         | uncharact  | ncRNA          |                |                 |
| chr5-4762  | 23.12203 | -0.73129 | 0.465895 | -1.56965 | 0.116496 | 0.320691 | chr5  | 47690718 | 47690982 | + | 0 | NA | IntergeniALR/Alphe | -1994470 | NM_02107E | 348980   | Hs.35317E | NM_02107E | ENSG0000C.HCN1      | BCNG-1    |            | BC             | hyperpole      | protein-coding  |
| chr21-122  | 24.93104 | -0.72531 | 0.462104 | -1.56959 | 0.116511 | 0.320691 | chr21 | 12273736 | 12273942 | + | 0 | NA | IntergeniALR/Alphe | -764327  | NR_02691E | 149992   | Hs.55864E | NM_153773 | ANKRD30BF.C21orf99  | ankryn    | rpseudo    |                |                |                 |
| chr1-2367  | 21.57073 | -0.75434 | 0.480887 | -1.56865 | 0.11673  | 0.320691 | chr1  | 2.37E+08 | 2.37E+08 | + | 0 | NA | intron (N          | 27429    | NM_00127E | 88       | Hs.49817E | NM_00110E | ENSG0000C.ACTN2     | CMD1AA    |            | C              | actinin        | aprotein-coding |
| chr22-145  | 17.10161 | -0.84333 | 0.537629 | -1.56861 | 0.116739 | 0.320691 | chr22 | 14535855 | 14536750 | + | 0 | NA | IntergeniALR/Alphe | -991857  | NM_00100E | 81061    | Hs.55470E | NM_00100E | ENSG0000C.COR1IH1   | OR11H12   |            | Colfatory      | protein-coding |                 |
| chr20-265  | 16.09914 | -0.86874 | 0.553831 | -1.56861 | 0.116739 | 0.320691 | chr20 | 26904891 | 26906112 | + | 0 | NA | IntergeniALR/Alphe | -696268  | NR_04009E | 284801   | Hs.370695 | NR_04009E | ENSG0000C.MIR663AHC | -         | MIR663A    | lncRNA         |                |                 |
| chr17-245  | 20.04114 | -0.78242 | 0.498811 | -1.56857 | 0.116747 | 0.320691 | chr17 | 24921274 | 24921533 | + | 0 | NA | IntergeniALR/Alphe | 2167838  | NR_135673 | 1.05E+08 | Hs.56491E | NR_135673 | LOC105371           | -         | uncharact  | ncRNA          |                |                 |
| chr21-104  | 15.621   | -0.88197 | 0.562322 | -1.56844 | 0.116779 | 0.320691 | chr21 | 10447517 | 10448766 | + | 0 | NA | intron (N          | 34609    | NM_18248E | 85319    | Hs.54578E | NM_18248E | BAGE2               | CT2.2     | 2          | BAGE           | fami           | protein-coding  |
| chr3-9218  | 15.57481 | -0.8835  | 0.563417 | -1.5681  | 0.116857 | 0.320691 | chr3  | 92184253 | 92194667 | + | 0 | NA | IntergeniALR/Alphe | 1789621  | NM_001314 | 5627     | Hs.64016  | NM_00031E | ENSG0000C.PROS1     | PROS PS21 | protein    | S              | protein-coding |                 |
| chr20-275  | 19.13105 | -0.79805 | 0.509029 | -1.56779 | 0.11693  | 0.320691 | chr20 | 27989115 | 27991056 | + | 0 | NA | IntergeniALR/Alphe | 612600   | NR_13231E | 1E+08    | Hs.529357 | NR_13231E | ENSG0000C.FRGC1P    | -         | FSHD       | regipseudo     |                |                 |
| chr13-167  | 24.0566  | -0.71892 | 0.45857  | -1.56773 | 0.116943 | 0.320691 | chr13 | 16779623 | 16779842 | + | 0 | NA | IntergeniALR/Alphe | -1415565 | NR_02727E | 26080    | Hs.448582 | NR_02727E | ENSG0000C.FAM230C   | LINC00281 | family     | wincRNA        |                |                 |
| chr20-276  | 16.57728 | -0.85635 | 0.546255 | -1.56767 | 0.116958 | 0.320691 | chr20 | 27591933 | 27593508 | + | 0 | NA | IntergeniALR/Alphe | 1009945  | NR_13231E | 1E+08    | Hs.529357 | NR_13231E | ENSG0000C.FRGC1P    | -         | FSHD       | regipseudo     |                |                 |
| chr9-6062  | 17.12052 | -0.84991 | 0.542185 | -1.56757 | 0.116981 | 0.320691 | chr9  | 60623190 | 60625999 | + | 0 | NA | IntergeniALR/Alphe | -2896233 | NM_00111E | 727905   | Hs.645497 | NM_00111E | ENSG0000C.SPATA31A  | FAM75A5   | SPATA31    | s              | protein-coding |                 |
| chr9-4398  | 22.98066 | -0.73769 | 0.470662 | -1.56735 | 0.117033 | 0.320691 | chr9  | 43981511 | 43981991 | + | 0 | NA | IntergeniALR/Alphe | 855585   | NR_16066E | 1.03E+08 | NR_160669 | LOC102724 | -                   | methylene | pseudo     |                |                |                 |
| chr20-288  | 20.54377 | -0.77211 | 0.492733 | -1.567   | 0.117116 | 0.320691 | chr20 | 28876175 | 28877139 | + | 0 | NA | IntergeniALR/Alphe | -203733  | NR_13231E | 1.03E+08 | NR_132316 | FRG1DP    | -                   | FSHD      | regipseudo |                |                |                 |
| chr21-114  | 20.54377 | -0.77211 | 0.492733 | -1.567   | 0.117116 | 0.320691 | chr21 | 11472981 | 11473951 | + | 0 | NA | IntergeniALR/Alphe | 917232   | NM_19926E | 7179     | Hs.12298E | NM_19925E | ENSG0000C.TPTE      | CT44      |            | PTEN           | transmem       | protein-coding  |
| chr20-271  | 20.51928 | -0.77465 | 0.494378 | -1.56692 | 0.117133 | 0.320691 | chr20 | 27104308 | 27107213 | + | 0 | NA | IntergeniALR/Alphe | -896527  | NR_04009E | 284801   | Hs.370695 | NR_04009E | ENSG0000C.MIR663AHC | -         | MIR663A    | lncRNA         |                |                 |
| chr10-412  | 30.31467 | -0.64094 | 0.49095  | -1.56689 | 0.11714  | 0.320691 | chr10 | 41250085 | 41250665 | + | 0 | NA | IntergeniALR/Alphe | 1117670  | NR_02438C | 441666   | Hs.255725 | NR_02438C | ENSG0000C.LOC441666 | -         | zinc       | fingerpseud    |                |                 |
| chr19-265  | 56.33499 | -0.48629 | 0.310457 | -1.56636 | 0.117264 | 0.320691 | chr19 | 26572432 | 26573801 | + | 0 | NA | IntergeniALR/Alphe | -1220315 | NR_146733 | 1.02E+08 | Hs.567934 | NR_110687 | ENSG0000C.LOC101927 | -         | uncharact  | ncRNA          |                |                 |
| chr22-120  | 18.12858 | -0.81795 | 0.52244  | -1.56564 | 0.117432 | 0.320691 | chr22 | 12048847 | 12049289 | + | 0 | NA | IntergeniL3 LINE(C | 151662   | NR_110761 | 1.03E+08 | Hs.65292E | NR_110761 | LOC10272E           | -         | uncharact  | ncRNA          |                |                 |
| chr22-141  | 18.12858 | -0.81795 | 0.52244  | -1.56564 | 0.117432 | 0.320691 | chr22 | 14169500 | 14170799 | + | 0 | NA | IntergeniALR/Alphe | -1358010 | NM_00100E | 81061    | Hs.55470E | NM_00100E | ENSG0000C.COR1IH1   | OR11H12   |            | Colfatory      | protein-coding |                 |
| chr21-127  | 16.60177 | -0.85319 | 0.544968 | -1.56557 | 0.117449 | 0.320691 | chr21 | 12747617 | 12748120 | + | 0 | NA | IntergeniALR/Alphe | -290271  | NR_02691E | 149992   | Hs.55864E | NM_153773 | ANKRD30BF.C21orf99  | ankryn    | rpseudo    |                |                |                 |
| chr20-275  | 18.53603 | -0.81239 | 0.518946 | -1.56546 | 0.117474 | 0.320691 | chr20 | 27932864 | 27934346 | + | 0 | NA | IntergeniALR/Alphe | 669060   | NR_13231E | 1E+08    | Hs.529357 | NR_13231E | ENSG0000C.FRGC1P    | -         | FSHD       | regipseudo     |                |                 |
| chr9-4428  | 18.53603 | -0.81239 | 0.518946 | -1.56546 | 0.117474 | 0.320691 | chr9  | 44292218 | 44292667 | + | 0 | NA | IntergeniALR/Alphe | 1166276  | NR_16066E | 1.03E+08 | NR_160669 | LOC102724 | -                   | methylene | pseudo     |                |                |                 |
| chr22-148  | 19.03866 | -0.80043 | 0.511517 | -1.56481 | 0.117628 | 0.320691 | chr22 | 14863795 | 14865314 | + | 0 | NA | IntergeniALR/Alphe | -663605  | NM_00100E | 81061    | Hs.55470E | NM_00100E | ENSG0000C.COR1IH1   | OR11H12   |            | Colfatory      | protein-coding |                 |
| chr20-278  | 18.0334  | -0.82506 | 0.527286 | -1.56473 | 0.117646 | 0.320691 | chr20 | 27840066 | 27843246 | + | 0 | NA | IntergeniALR/Alphe | 761009   | NR_13231E | 1E+08    | Hs.529357 | NR_13231E | ENSG0000C.FRGC1P    | -         | FSHD       | regipseudo     |                |                 |
| chr22-148  | 16.12363 | -0.86549 | 0.553141 | -1.56468 | 0.117659 | 0.320691 | chr22 | 14884859 | 14889386 | + | 0 | NA | IntergeniALR/Alphe | -639237  | NM_00100E | 81061    | Hs.55470E | NM_00100E | ENSG0000C.COR1IH1   | OR11H12   |            | Colfatory      | protein-coding |                 |
| chr14-177  | 29.26321 | -0.6511  | 0.416231 | -1.56428 | 0.117751 | 0.320691 | chr14 | 17777773 | 17793281 | + | 0 | NA | IntergeniALR/Alphe | -822590  | NM_00101E | 440153   | Hs.53488E | NM_00101E | ENSG0000C.COR1IH12  | -         | olfactory  | protein-coding |                |                 |
| chr10-412  | 19.55463 | -0.80351 | 0.513888 | -1.56359 | 0.117915 | 0.320691 | chr10 | 41278530 | 41278819 | + | 0 | NA | IntergeniALR/Alphe | 1089371  | NR_02438C | 441666   | Hs.255725 | NR_02438C | ENSG0000C.LOC441666 | -         | zinc       | fingerpseud    |                |                 |
| chr21-114  | 15.55311 | -0.88165 | 0.564049 | -1.56307 | 0.118036 | 0.320691 | chr21 | 11450003 | 11450297 | + | 0 | NA | IntergeniALR/Alphe | 928636   | NM_19926E | 7179     | Hs.12298E | NM_19925E | ENSG0000C.TPTE      | CT44      |            | PTEN           | transmem       | protein-coding  |
| chr14-18   | 15.09946 | -0.89229 | 0.517101 | -1.56265 | 0.118134 | 0.320691 | chr14 | 18062304 | 18063213 | + | 0 | NA | IntergeniALR/Alphe | -538359  | NM_00101E | 440153   | Hs.53488E | NM_00101E | ENSG0000C.COR1IH12  | -         | olfactory  | protein-coding |                |                 |
| chr5-4865  | 35.59196 | -0.59499 | 0.380769 | -1.56261 | 0.118144 | 0.320691 | chr5  | 48696127 | 48696344 | + | 0 | NA | IntergeniALR/Alphe | 1745053  | NM_19844E | 133418   | Hs.561411 | NM_19844E | ENSG0000C.EMB       | GP70      |            | embigin        | protein-coding |                 |
| chr6-586E  | 19.51123 | -0.80036 | 0.512221 | -1.56252 | 0.118165 | 0.320691 | chr6  | 58662243 | 58665899 | + | 0 | NA | IntergeniALR/Alphe | -702470  | NR_13299E | 1.07E+08 | Hs.56153E | NR_12572E | ENSG0000C.LINC0068C | -         | long       | intencRNA      |                |                 |
| chr22-128  | 17.65044 | -0.82813 | 0.530124 | -1.56215 | 0.118252 | 0.320691 | chr22 | 12881981 | 12884494 | + | 0 | NA | IntergeniALR/Alphe | 985831   | NR_110761 | 1.03E+08 | Hs.65292E | NR_110761 | LOC10272E           | -         | uncharact  | ncRNA          |                |                 |

|                    |          |          |          |          |          |       |          |          |   |      |                     |                    |                               |                     |                 |                          |
|--------------------|----------|----------|----------|----------|----------|-------|----------|----------|---|------|---------------------|--------------------|-------------------------------|---------------------|-----------------|--------------------------|
| chr20-267 22.36278 | -0.71174 | 0.472358 | -1.50677 | 0.131869 | 0.337541 | chr20 | 26718733 | 26719245 | + | 0 NA | IntergeniALR/Alphe  | -509756 NR_04009E  | 284801 Hs. 370695NR_04009E    | ENSG00000MIR663AHC- | MIR663A lncRNA  |                          |
| chr10-405 20.7842  | -0.74055 | 0.491598 | -1.50641 | 0.131961 | 0.337541 | chr10 | 40966719 | 40967697 | + | 0 NA | IntergeniALR/Alphe  | 1400837 NR_02438C  | 441666 Hs. 255725NR_02438C    | ENSG00000LOC441666- | zinc fingpseudo |                          |
| chr21-917 21.33582 | -0.72676 | 0.482462 | -1.50635 | 0.131978 | 0.337541 | chr21 | 9170867  | 9171997  | + | 0 NA | Intergeni Intergeni | -41671 NR_038327   | 1E+08 Hs. 487562NM_17494E     | ENSG00000TEK74P2    | MAFIPL TE       | tektin 4 pseudo          |
| chr10-402 48.84729 | -0.5013  | 0.33283  | -1.50618 | 0.132021 | 0.337541 | chr10 | 40267010 | 40269017 | + | 0 NA | IntergeniALR/Alphe  | 1571420 NR_045000  | 399746 Hs. 742607NR_045000    | ACTR3BP5 FKSG74     | ACTR3B          | pspseudo                 |
| chr21-121 33.38891 | -0.5978  | 0.397301 | -1.50568 | 0.132148 | 0.337614 | chr21 | 12199547 | 12199866 | + | 0 NA | IntergeniALR/Alphe  | 838960 NR_02691E   | 149992 Hs. 558645NM_153773    | ANKRD30BF C21orf99  | ankyrin rpsudo  | uncharactncRNA           |
| chr19-265 30.58517 | -0.61387 | 0.408129 | -1.5041  | 0.132555 | 0.337827 | chr19 | 26531815 | 26532040 | + | 0 NA | IntergeniALR/Alphe  | -1261504 NR_146733 | 1.02E+08 Hs. 567934NR_110687  | ENSG00000LOC101927- | uncharactncRNA  |                          |
| chr13-172 23.44547 | -0.71967 | 0.478843 | -1.50293 | 0.132857 | 0.337827 | chr13 | 17296206 | 17296588 | + | 0 NA | IntergeniALR/Alphe  | -898900 NR_02727E  | 26080 Hs. 448582NR_02727E     | ENSG00000FAM230C    | LINC00281       | family wincRNA           |
| chr19-265 70.5566  | -0.4257  | 0.283337 | -1.50245 | 0.132998 | 0.337827 | chr19 | 26919480 | 26920402 | + | 0 NA | IntergeniALR/Alphe  | -873490 NR_146733  | 1.02E+08 Hs. 567934NR_110687  | ENSG00000LOC101927- | uncharactncRNA  |                          |
| chr20-268 21.81675 | -0.71701 | 0.47732  | -1.50216 | 0.133055 | 0.337827 | chr20 | 26832769 | 26834323 | + | 0 NA | IntergeniALR/Alphe  | -624313 NR_04009E  | 284801 Hs. 370695NR_04009E    | ENSG00000MIR663AHC- | MIR663A lncRNA  |                          |
| chr3-2697 21.72157 | -0.72274 | 0.481181 | -1.50201 | 0.133096 | 0.337827 | chr1  | 2697006  | 26978939 | + | 0 NA | intron (n intron (n | -64435 NR_033467   | 79258 Hs. 591452NM_033467     | ENSG00000MMEL1      | MMEL2 NEF       | membrane protein-coding  |
| chr21-122 21.72157 | -0.72274 | 0.481181 | -1.50201 | 0.133096 | 0.337827 | chr21 | 12009315 | 12010639 | + | 0 NA | IntergeniALR/Alphe  | -1028189 NR_02691E | 149992 Hs. 558645NM_153773    | ANKRD30BF C21orf99  | ankyrin rpsudo  |                          |
| chr17-237 28.48227 | -0.63278 | 0.421625 | -1.50082 | 0.133403 | 0.337827 | chr17 | 23733642 | 23733865 | + | 0 NA | IntergeniALR/Alphe  | 1210642 NM_00119C  | 1E+08 Hs. 740182NM_00119C     | ENSG00000MTRNR2L1   | HN1             | MT-RNR2 lprotein-coding  |
| chr10-412 20.83598 | -0.73164 | 0.487852 | -1.49971 | 0.133689 | 0.337827 | chr10 | 41046158 | 41046373 | + | 0 NA | IntergeniALR/Alphe  | 1321780 NR_02438C  | 441666 Hs. 255725NR_02438C    | ENSG00000LOC441666- | zinc fingpseudo |                          |
| chr21-121 19.80901 | -0.74886 | 0.499732 | -1.49851 | 0.134    | 0.337827 | chr21 | 12725267 | 12726745 | + | 0 NA | IntergeniALR/Alphe  | -312160 NR_02691E  | 149992 Hs. 558645NM_153773    | ANKRD30BF C21orf99  | ankyrin rpsudo  |                          |
| chr22-142 18.80375 | -0.76956 | 0.514239 | -1.49651 | 0.134522 | 0.337827 | chr22 | 14234351 | 14236688 | + | 0 NA | IntergeniALR/Alphe  | -1292640 NM_00100E | 81061 Hs. 554706NM_00100E     | ENSG00000COR11H1    | OR11H12 Col     | factoryprotein-coding    |
| chr7-5807 18.80375 | -0.76956 | 0.514239 | -1.49651 | 0.134522 | 0.337827 | chr7  | 58071938 | 58072207 | + | 0 NA | Intergeni Intergeni | -821895 NM_00115E  | 441234 Hs. 533121NM_00115E    | ENSG00000ZNF716     | -               | zinc fingprotein-coding  |
| chr22-142 19.20648 | -0.63919 | 0.427195 | -1.49625 | 0.134588 | 0.337827 | chr22 | 14662843 | 14663124 | + | 0 NA | IntergeniALR/Alphe  | -865176 NM_00100E  | 81061 Hs. 554706NM_00100E     | ENSG00000COR11H1    | OR11H12 Col     | factoryprotein-coding    |
| chr14-172 19.73833 | -0.75261 | 0.503576 | -1.49453 | 0.135038 | 0.337827 | chr14 | 17226564 | 17227753 | + | 0 NA | IntergeniALR/Alphe  | -1373959 NM_00101E | 440153 Hs. 534888NM_00101E    | ENSG00000COR11H12   | -               | olfactoryprotein-coding  |
| chr10-415 19.78731 | -0.74736 | 0.500072 | -1.49445 | 0.135044 | 0.337827 | chr10 | 41529680 | 41532258 | + | 0 NA | IntergeniALR/Alphe  | 837076 NR_02438C   | 441666 Hs. 255725NR_02438C    | ENSG00000LOC441666- | zinc fingpseudo |                          |
| chr13-175 18.32561 | -0.77794 | 0.52071  | -1.49401 | 0.135174 | 0.337827 | chr13 | 17532823 | 17533695 | + | 0 NA | IntergeniALR/Alphe  | -662038 NR_02727E  | 26080 Hs. 448582NR_02727E     | ENSG00000FAM230C    | LINC00281       | family wincRNA           |
| chr20-267 27.5232  | -0.64182 | 0.42965  | -1.49382 | 0.135223 | 0.337827 | chr20 | 26841191 | 26842064 | + | 0 NA | IntergeniALR/Alphe  | -632394 NR_04009E  | 284801 Hs. 370695NR_04009E    | ENSG00000MIR663AHC- | MIR663A lncRNA  |                          |
| chr1-125 18.80654  | -0.76522 | 0.512394 | -1.49343 | 0.135326 | 0.337827 | chr1  | 1.25E+08 | 1.25E+08 | + | 0 NA | Intergeni Intergeni | 3562341 NR_00395E  | 647121 Hs. 697682NR_00395E    | ENSG00000EMB1P1     | -               | embigin rpsudo           |
| chr10-402 18.80654 | -0.76522 | 0.512394 | -1.49343 | 0.135326 | 0.337827 | chr10 | 40216834 | 40218898 | + | 0 NA | IntergeniALR/Alphe  | 1521270 NR_045000  | 399746 Hs. 742607NR_045000    | ACTR3BP5 FKSG74     | ACTR3B          | pspseudo                 |
| chr3-757 18.80654  | -0.76522 | 0.512394 | -1.49343 | 0.135326 | 0.337827 | chr3  | 75709189 | 75713774 | + | 0 NA | IntergeniMER101-ir  | -26799 NR_03623E   | 1E+08 Hs. 530638NM_001511E    | ENSG00000MIR4273    | -               | microRNA ncRNA           |
| chr20-288 18.30391 | -0.77632 | 0.519853 | -1.49334 | 0.135348 | 0.337827 | chr20 | 28366453 | 28367444 | + | 0 NA | IntergeniALR/Alphe  | 235717 NR_13231E   | 1E+08 Hs. 529357NR_13231E     | ENSG00000FRG1CP     | -               | FSHD regipseudo          |
| chr4-932 18.30391  | -0.77632 | 0.519853 | -1.49334 | 0.135348 | 0.337827 | chr4  | 9323055  | 9325890  | + | 0 NA | promoter-promoter-  | -693 NM_00124E     | 728369 Hs. 55381CNM_00124E    | ENSG00000USP17L24   | USP17L25        | ubiquitinprotein-coding  |
| chr22-134 23.0625  | -0.71953 | 0.481896 | -1.49312 | 0.135407 | 0.337827 | chr22 | 13473303 | 13473577 | + | 0 NA | IntergeniALR/Alphe  | 1576034 NM_110761  | 1.03E+08 Hs. 652929NR_110761  | LOC102722-          | uncharactncRNA  |                          |
| chr13-166 18.84715 | -0.77281 | 0.517601 | -1.49306 | 0.135421 | 0.337827 | chr13 | 16652247 | 16652833 | + | 0 NA | IntergeniALR/Alphe  | -1542757 NR_02727E | 26080 Hs. 448582NR_02727E     | ENSG00000FAM230C    | LINC00281       | family wincRNA           |
| chr20-266 29.1113  | -0.6435  | 0.431143 | -1.49254 | 0.135558 | 0.337827 | chr20 | 26626943 | 26627201 | + | 0 NA | IntergeniALR/Alphe  | -417839 NR_04009E  | 284801 Hs. 370695NR_04009E    | ENSG00000MIR663AHC- | MIR663A lncRNA  |                          |
| chr21-122 19.30917 | -0.74732 | 0.50574  | -1.49232 | 0.135616 | 0.337827 | chr21 | 12257025 | 12258186 | + | 0 NA | IntergeniALR/Alphe  | -870561 NR_02691E  | 149992 Hs. 558645NM_153773    | ANKRD30BF C21orf99  | ankyrin rpsudo  |                          |
| chr5-493 37.64761  | -0.55941 | 0.375122 | -1.49127 | 0.135891 | 0.337827 | chr5  | 49358787 | 49359042 | + | 0 NA | IntergeniALR/Alphe  | 1082374 NM_19844E  | 133418 Hs. 561411NM_19844E    | ENSG00000EMB        | GP70            | embigin protein-coding   |
| chr21-107 17.82577 | -0.78514 | 0.526594 | -1.49098 | 0.135967 | 0.337827 | chr21 | 10767387 | 10773121 | + | 0 NA | IntergeniLIP3 LID   | 248740 NM_19926C   | 7179 Hs. 122988NM_19926E      | ENSG00000TPTE       | CT44 PTEN       | transmemt protein-coding |
| chr14-177 18.28221 | -0.7747  | 0.519853 | -1.49024 | 0.136162 | 0.337827 | chr14 | 17787628 | 17788239 | + | 0 NA | IntergeniALR/Alphe  | -831384 NM_00101E  | 440153 Hs. 534888NM_00101E    | ENSG00000COR11H12   | -               | olfactoryprotein-coding  |
| chr20-275 19.71384 | -0.75531 | 0.50689  | -1.49009 | 0.1362   | 0.337827 | chr20 | 27517493 | 27520725 | + | 0 NA | IntergeniALR/Alphe  | 1083556 NR_13231E  | 1E+08 Hs. 529357NR_13231E     | ENSG00000FRG1CP     | -               | FSHD regipseudo          |
| chr20-267 17.32314 | -0.7975  | 0.535218 | -1.49004 | 0.136214 | 0.337827 | chr20 | 26706877 | 26707607 | + | 0 NA | IntergeniALR/Alphe  | -498009 NR_04009E  | 284801 Hs. 370695NR_04009E    | ENSG00000MIR663AHC- | MIR663A lncRNA  |                          |
| chr6-5946 19.23849 | -0.75855 | 0.509175 | -1.48977 | 0.136286 | 0.337827 | chr6  | 59461858 | 59462542 | + | 0 NA | IntergeniALR/Alphe  | -1500754 NR_13299E | 1.07E+08 Hs. 561535NR_125727  | ENSG00000LINC0068C- | long intencRNA  |                          |
| chr19-268 62.68431 | -0.44243 | 0.296981 | -1.48976 | 0.136287 | 0.337827 | chr19 | 26889035 | 26889359 | + | 0 NA | IntergeniALR/Alphe  | -904234 NR_146733  | 1.02E+08 Hs. 567934NR_110687  | ENSG00000LOC101927- | uncharactncRNA  |                          |
| chr5-4926 62.18057 | -0.44617 | 0.299601 | -1.48921 | 0.136431 | 0.337827 | chr5  | 49289538 | 49289853 | + | 0 NA | IntergeniALR/Alphe  | 1151593 NM_19844E  | 133418 Hs. 561411NM_19844E    | ENSG00000EMB        | GP70            | embigin protein-coding   |
| chr4-5075 18.25493 | -0.78211 | 0.525203 | -1.48916 | 0.136446 | 0.337827 | chr4  | 50792074 | 50790653 | + | 0 NA | IntergeniALR/Alphe  | -1052537 NM_01511E | 23142 Hs. 605388NM_01511E     | ENSG00000DCUN1D4    | -               | defectiveprotein-coding  |
| chr10-404 34.17817 | -0.57646 | 0.387473 | -1.48775 | 0.136817 | 0.337827 | chr10 | 40097742 | 40099433 | + | 0 NA | IntergeniALR/Alphe  | 1401991 NR_045000  | 399746 Hs. 742607NR_045000    | ACTR3BP5 FKSG74     | ACTR3B          | pspseudo                 |
| chr20-276 17.75509 | -0.78938 | 0.530609 | -1.48768 | 0.136835 | 0.337827 | chr20 | 27630457 | 27633777 | + | 0 NA | IntergeniALR/Alphe  | 970598 NR_13231E   | 1E+08 Hs. 529357NR_13231E     | ENSG00000FRG1CP     | -               | FSHD regipseudo          |
| chr5-4803 68.41308 | -0.42585 | 0.286266 | -1.48759 | 0.136859 | 0.337827 | chr5  | 48031598 | 48031840 | + | 0 NA | IntergeniALR/Alphe  | -2335339 NM_02107E | 348980 Hs. 353176NM_02107E    | ENSG00000HCN1       | BCNG-1 B        | hyperpoleprotein-coding  |
| chr22-143 17.32035 | -0.80232 | 0.539417 | -1.48739 | 0.136911 | 0.337827 | chr22 | 14357689 | 14358968 | + | 0 NA | IntergeniALR/Alphe  | -1169831 NM_00100E | 81061 Hs. 554706NM_00100E     | ENSG00000COR11H1    | OR11H12 Col     | factoryprotein-coding    |
| chr20-298 16.32067 | -0.81953 | 0.551128 | -1.487   | 0.137014 | 0.337827 | chr20 | 29824024 | 29824473 | + | 0 NA | IntergeniLIM2 LID   | -56136 NR_03968E   | 1.01E+08 Hs. NR_03968E        | ENSG00000MIR4477B   | -               | microRNA ncRNA           |
| chr21-127 17.85026 | -0.78224 | 0.526151 | -1.48672 | 0.137088 | 0.337827 | chr21 | 12727955 | 12728275 | + | 0 NA | IntergeniALR/Alphe  | -310051 NR_02691E  | 149992 Hs. 558645NM_153773    | ANKRD30BF C21orf99  | ankyrin rpsudo  |                          |
| chr9-434 19.33366  | -0.75206 | 0.505948 | -1.48644 | 0.137162 | 0.337827 | chr9  | 43431280 | 43431866 | + | 0 NA | IntergeniALR/Alphe  | 330407 NR_16066E   | 1.03E+08 Hs. NR_16066E        | LOC102724-          | methylenepseudo |                          |
| chr9-4356 16.29617 | -0.82279 | 0.553818 | -1.48568 | 0.137365 | 0.337827 | chr9  | 43583488 | 43584384 | + | 0 NA | IntergeniALR/Alphe  | 457770 NR_16066E   | 1.03E+08 Hs. NR_16066E        | LOC102724-          | methylenepseudo |                          |
| chr7-5971 17.75788 | -0.78475 | 0.528246 | -1.48558 | 0.137391 | 0.337827 | chr7  | 59711039 | 59713467 | + | 0 NA | IntergeniALR/Alphe  | 2262076 NM_00115E  | 441234 Hs. 533121NM_00115E    | ENSG00000ZNF716     | -               | zinc fingprotein-coding  |
| chr14-174 16.8016  | -0.80399 | 0.541223 | -1.48551 | 0.137408 | 0.337827 | chr14 | 17476913 | 17478166 | + | 0 NA | IntergeniALR/Alphe  | -1123578 NM_00101E | 440153 Hs. 534888NM_00101E    | ENSG00000COR11H12   | -               | olfactoryprotein-coding  |
| chr22-135 15.79633 | -0.83237 | 0.560327 | -1.4855  | 0.137411 | 0.337827 | chr22 | 13997607 | 13998096 | + | 0 NA | IntergeniALR/Alphe  | -1530308 NM_00100E | 81061 Hs. 554706NM_00100E     | ENSG00000COR11H1    | OR11H12 Col     | factoryprotein-coding    |
| chr20-292 18.35289 | -0.77068 | 0.519067 | -1.48474 | 0.137612 | 0.337827 | chr20 | 92925729 | 92925964 | + | 0 NA | IntergeniALR/Alphe  | 984713 NR_02771A   | 440888 Hs. 730235NM_00103241E | ACTR3BP2 FKSG73     | ACTR3B          | pspseudo                 |
| chr20-267 18.26051 | -0.7731  | 0.520713 | -1.48469 | 0.137627 | 0.337827 | chr20 | 26722837 | 26723594 | + | 0 NA | IntergeniALR/Alphe  | -513982 NR_04009E  | 284801 Hs. 370695NR_04009E    | ENSG00000MIR663AHC- | MIR663A lncRNA  |                          |
| chr5-4792 34.31675 | -0.57475 | 0.387211 | -1.48433 | 0.137722 | 0.337827 | chr5  | 47921050 | 47921376 | + | 0 NA | IntergeniALR/Alphe  | -2224833 NM_02107E | 348980 Hs. 353176NM_02107E    | ENSG00000HCN1       | BCNG-1 B        | hyperpoleprotein-coding  |
| chr4-5068 15.29649 | -0.84263 | 0.567716 | -1.48425 | 0.137742 | 0.337827 | chr4  | 50684948 | 50685472 | + | 0 NA | IntergeniALR/Alphe  | -1157790 NM_01511E | 23142 Hs. 605388NM_01511E     | ENSG00000DCUN1D4    |                 |                          |



|           |          |          |          |          |          |          |       |          |          |   |   |    |                    |          |           |          |                    |                      |                         |                          |                         |
|-----------|----------|----------|----------|----------|----------|----------|-------|----------|----------|---|---|----|--------------------|----------|-----------|----------|--------------------|----------------------|-------------------------|--------------------------|-------------------------|
| chr7-5914 | 27.76921 | -0.6139  | 0.428411 | -1.43298 | 0.151864 | 0.356359 | chr7  | 59148624 | 59149858 | + | 0 | NA | IntergeniALR/Alphe | 1699064  | NM_001155 | 441234   | Hs.533121NM_001155 | ENSG000003ZNF716     | -                       | zinc_fingprotein-coding  |                         |
| chr20-268 | 22.97564 | -0.66866 | 0.467101 | -1.4315  | 0.152286 | 0.357055 | chr20 | 26859852 | 26860072 | + | 0 | NA | IntergeniALR/Alphe | -650729  | NR_040095 | 284801   | Hs.370695NR_040095 | ENSG000003MIR663AHC  | -                       | MIR663A lncRNA           |                         |
| chr20-272 | 20.98961 | -0.69532 | 0.485913 | -1.43096 | 0.152441 | 0.357055 | chr20 | 27254886 | 27256914 | + | 0 | NA | IntergeniALR/Alphe | -1046667 | NR_040095 | 284801   | Hs.370695NR_040095 | ENSG000003MIR663AHC  | -                       | MIR663A lncRNA           |                         |
| chr20-282 | 37.65034 | -0.52978 | 0.370255 | -1.43085 | 0.152473 | 0.357055 | chr20 | 28270356 | 28271464 | + | 0 | NA | IntergeniALR/Alphe | 331755   | NR_132315 | 1E+08    | Hs.529357NR_132315 | ENSG000003FRG1CP     | -                       | FSHD regipseudo          |                         |
| chr1-1241 | 35.47843 | -0.54633 | 0.382429 | -1.42857 | 0.153129 | 0.358347 | chr1  | 1.24E+08 | 1.24E+08 | + | 0 | NA | IntergeniALR/Alphe | 2654403  | NR_003955 | 647121   | Hs.697682NR_003955 | ENSG000003EMB1P      | -                       | embigin fpseudo          |                         |
| chr8-4552 | 20.51147 | -0.70094 | 0.490896 | -1.42788 | 0.153326 | 0.358564 | chr8  | 45526878 | 45528428 | + | 0 | NA | IntergeniALR/Alphe | 1089990  | NR_146077 | 389652   | NR_146077          | ENSG000003ASNSP1     | ASNSL1                  | asparagirpseuso          |                         |
| chr17-262 | 132.4283 | -0.31765 | 0.222729 | -1.42615 | 0.153824 | 0.359026 | chr17 | 26299343 | 26299599 | + | 0 | NA | IntergeniALR/Alphe | 789770   | NR_135677 | 1.05E+08 | Hs.649915NR_135673 | LOC105371-           | uncharactcRNA           |                          |                         |
| chr8-4586 | 23.40759 | -0.66519 | 0.466536 | -1.42615 | 0.153925 | 0.359026 | chr8  | 45866419 | 45866767 | + | 0 | NA | IntergeniALR/Alphe | 751050   | NR_146077 | 389652   | NR_146077          | ENSG000003ASNSP1     | ASNSL1                  | asparagirpseuso          |                         |
| chr6-5944 | 20.05503 | -0.70834 | 0.496865 | -1.42561 | 0.153981 | 0.359026 | chr6  | 59446091 | 59447443 | + | 0 | NA | IntergeniALR/Alphe | -1485321 | NR_132995 | 1.07E+08 | Hs.561535NR_125727 | ENSG000003LINC0068C  | -                       | long_intencRNA           |                         |
| chr14-18C | 42.21853 | -0.50854 | 0.356733 | -1.42555 | 0.153999 | 0.359026 | chr14 | 18060858 | 18061280 | + | 0 | NA | IntergeniALR/Alphe | -540048  | NM_001013 | 440153   | Hs.53488CNM_001013 | ENSG000003COR11H12   | -                       | olfactoryprotein-coding  |                         |
| chr19-265 | 77.98196 | -0.39385 | 0.276398 | -1.42494 | 0.154174 | 0.359026 | chr19 | 26986841 | 26987080 | + | 0 | NA | IntergeniALR/Alphe | -806471  | NR_146733 | 1.02E+08 | Hs.567934NR_110687 | ENSG000003LOC101927- | uncharactcRNA           |                          |                         |
| chr5-4897 | 58.61769 | -0.43592 | 0.305953 | -1.42478 | 0.154219 | 0.359026 | chr5  | 48972894 | 48974315 | + | 0 | NA | IntergeniALR/Alphe | 1467684  | NM_198445 | 133418   | Hs.561411NM_198445 | ENSG000003EMB        | GP70                    | embigin protein-coding   |                         |
| chr10-414 | 29.1686  | -0.59579 | 0.418244 | -1.42445 | 0.154303 | 0.359026 | chr10 | 41410236 | 41410349 | + | 0 | NA | IntergeniALR/Alphe | 993778   | NR_02438C | 441666   | Hs.255725NR_02438C | ENSG000003LOC441666- | zinc_fingpseuso         |                          |                         |
| chr7-6008 | 21.47054 | -0.6862  | 0.481781 | -1.42429 | 0.154363 | 0.359026 | chr7  | 60081468 | 60081755 | + | 0 | NA | IntergeniALR/Alphe | 2631400  | NM_001155 | 441234   | Hs.533121NM_001155 | ENSG000003ZNF716     | -                       | zinc_fingprotein-coding  |                         |
| chr19-266 | 109.4176 | -0.34704 | 0.243739 | -1.42338 | 0.154503 | 0.359111 | chr19 | 26643030 | 26643252 | + | 0 | NA | IntergeniALR/Alphe | -1150290 | NR_146733 | 1.02E+08 | Hs.567934NR_110687 | ENSG000003LOC101927- | uncharactcRNA           |                          |                         |
| chr22-136 | 19.5307  | -0.71566 | 0.502851 | -1.42321 | 0.154676 | 0.359268 | chr22 | 13655316 | 13655946 | + | 0 | NA | IntergeniALR/Alphe | 1758225  | NR_110761 | 1.03E+08 | Hs.652925NR_110761 | LOC102722-           | uncharactcRNA           |                          |                         |
| chr22-145 | 19.509   | -0.71413 | 0.502818 | -1.42026 | 0.155531 | 0.360931 | chr22 | 14395521 | 14396628 | + | 0 | NA | IntergeniALR/Alphe | -1132085 | NM_001005 | 81061    | Hs.554705NM_001005 | ENSG000003COR11H1    | OR11H12                 | Colfactoryprotein-coding |                         |
| chr19-256 | 64.42321 | -0.42533 | 0.29832  | -1.41971 | 0.155692 | 0.360931 | chr19 | 25631101 | 25631362 | + | 0 | NA | IntergeniALR/Alphe | -1467784 | NR_003603 | 1E+08    | Hs.149312NR_003603 | ENSG000003HAVCR1P1   | -                       | hepatitispsseudo         |                         |
| chr21-117 | 27.18257 | -0.6109  | 0.430318 | -1.41965 | 0.155708 | 0.360931 | chr21 | 11724600 | 11725232 | + | 0 | NA | IntergeniALR/Alphe | 1203402  | NM_19926C | 7179     | Hs.122986NM_199255 | ENSG000003TPTE       | CT44 PTEN               | transmemprotein-coding   |                         |
| chr9-445  | 23.33412 | -0.6719  | 0.473533 | -1.41891 | 0.155924 | 0.361044 | chr9  | 44593968 | 44594286 | + | 0 | NA | IntergeniALR/Alphe | 1467961  | NR_160665 | 1.03E+08 | NR_160669          | LOC102724-           | methylenepseuso         |                          |                         |
| chr21-936 | 19.55519 | -0.71305 | 0.502586 | -1.41876 | 0.155968 | 0.361044 | chr21 | 9360015  | 9361765  | + | 0 | NA | IntergeniCER SateI | -182140  | NR_135512 | 1.05E+08 | Hs.462322NR_135512 | LOC105375-           | nuclear rpseuso         |                          |                         |
| chr19-248 | 32.92187 | -0.55819 | 0.393653 | -1.41799 | 0.156195 | 0.361101 | chr19 | 24848165 | 24848381 | + | 0 | NA | IntergeniALR/Alphe | -684826  | NR_003603 | 1E+08    | Hs.149312NR_003603 | ENSG000003HAVCR1P1   | -                       | hepatitispsseudo         |                         |
| chr9-435  | 19.59859 | -0.71612 | 0.505038 | -1.41796 | 0.156203 | 0.361101 | chr9  | 43531239 | 43531541 | + | 0 | NA | IntergeniALR/Alphe | 405224   | NR_160665 | 1.03E+08 | NR_160669          | LOC102724-           | methylenepseuso         |                          |                         |
| chr21-905 | 18.52822 | -0.73039 | 0.515743 | -1.41619 | 0.156272 | 0.362052 | chr21 | 9098429  | 9101252  | + | 0 | NA | intron (CER SateI) | 29921    | NR_03832E | 1E+08    | Hs.487562NM_174948 | ENSG000003TEKT4P2    | MAFIPL TE               | tektin 4 pseuso          |                         |
| chr20-275 | 19.43831 | -0.71789 | 0.507116 | -1.41563 | 0.156885 | 0.362108 | chr20 | 27919335 | 27919594 | + | 0 | NA | IntergeniALR/Alphe | 683201   | NR_132315 | 1E+08    | Hs.529357NR_132315 | ENSG000003FRG1CP     | -                       | FSHD regipseudo          |                         |
| chr20-284 | 18.98466 | -0.72182 | 0.509985 | -1.41539 | 0.156956 | 0.362108 | chr20 | 28458853 | 28459070 | + | 0 | NA | IntergeniALR/Alphe | 143704   | NR_132315 | 1E+08    | Hs.529357NR_132315 | ENSG000003FRG1CP     | -                       | FSHD regipseudo          |                         |
| chr19-266 | 18.02559 | -0.74063 | 0.523551 | -1.41463 | 0.157176 | 0.362108 | chr19 | 26666497 | 26667668 | + | 0 | NA | IntergeniALR/Alphe | -1126349 | NR_146733 | 1.02E+08 | Hs.567934NR_110687 | ENSG000003LOC101927- | uncharactcRNA           |                          |                         |
| chr10-415 | 18.48203 | -0.73156 | 0.517168 | -1.41454 | 0.157203 | 0.362108 | chr10 | 41581166 | 41584614 | + | 0 | NA | IntergeniALR/Alphe | 785155   | NR_02438C | 441666   | Hs.255725NR_02438C | ENSG000003LOC441666- | zinc_fingpseuso         |                          |                         |
| chr13-166 | 18.50652 | -0.72879 | 0.515741 | -1.41309 | 0.15763  | 0.362421 | chr13 | 16699070 | 16700145 | + | 0 | NA | IntergeniALR/Alphe | -1495690 | NR_02727E | 26080    | Hs.448582NR_02727E | ENSG000003FAM230C    | LINC00281               | family_wincRNA           |                         |
| chr22-136 | 18.93568 | -0.7273  | 0.514801 | -1.41277 | 0.157722 | 0.362421 | chr22 | 13675960 | 13676290 | + | 0 | NA | IntergeniALR/Alphe | 1778719  | NR_110761 | 1.03E+08 | Hs.652925NR_110761 | LOC102722-           | uncharactcRNA           |                          |                         |
| chr10-414 | 31.77414 | -0.57609 | 0.407776 | -1.41276 | 0.157727 | 0.362421 | chr10 | 41418100 | 41418388 | + | 0 | NA | IntergeniALR/Alphe | 949801   | NR_02438C | 441666   | Hs.255725NR_02438C | ENSG000003LOC441666- | zinc_fingpseuso         |                          |                         |
| chr19-261 | 32.44373 | -0.55961 | 0.396149 | -1.41262 | 0.157768 | 0.362421 | chr19 | 26180855 | 26181058 | + | 0 | NA | IntergeniALR/Alphe | -1612475 | NR_146733 | 1.02E+08 | Hs.567934NR_110687 | ENSG000003LOC101927- | uncharactcRNA           |                          |                         |
| chr14-18C | 20.52201 | -0.71911 | 0.509138 | -1.41224 | 0.157832 | 0.362421 | chr14 | 18005414 | 18005786 | + | 0 | NA | IntergeniALR/Alphe | -595517  | NM_001013 | 440153   | Hs.53488CNM_001013 | ENSG000003COR11H12   | -                       | olfactoryprotein-coding  |                         |
| chr22-115 | 18.05008 | -0.73779 | 0.522593 | -1.41178 | 0.158014 | 0.362513 | chr22 | 11914667 | 11922207 | + | 0 | NA | intron (MSTA-int   | 21031    | NR_110761 | 1.03E+08 | Hs.652925NR_110761 | LOC102722-           | uncharactcRNA           |                          |                         |
| chr19-261 | 20.53875 | -0.6945  | 0.492103 | -1.41129 | 0.158159 | 0.362513 | chr19 | 26162022 | 26162250 | + | 0 | NA | IntergeniALR/Alphe | -1631295 | NR_146733 | 1.02E+08 | Hs.567934NR_110687 | ENSG000003LOC101927- | uncharactcRNA           |                          |                         |
| chr6-5956 | 17.54745 | -0.74854 | 0.530665 | -1.41107 | 0.158371 | 0.362513 | chr6  | 59584744 | 59585038 | + | 0 | NA | IntergeniALR/Alphe | -1623445 | NR_132995 | 1.07E+08 | Hs.561535NR_125727 | ENSG000003LINC0068C  | -                       | long_intencRNA           |                         |
| chr1-1241 | 35.82078 | -0.54439 | 0.385941 | -1.41055 | 0.158378 | 0.362513 | chr1  | 1.24E+08 | 1.24E+08 | + | 0 | NA | IntergeniALR/Alphe | 2607370  | NR_003955 | 647121   | Hs.697682NR_003955 | ENSG000003EMB1P      | -                       | embigin fpseudo          |                         |
| chr14-175 | 17.52575 | -0.74684 | 0.529777 | -1.40973 | 0.158619 | 0.362513 | chr14 | 17947453 | 17945128 | + | 0 | NA | IntergeniALR/Alphe | -626177  | NM_001013 | 440153   | Hs.53488CNM_001013 | ENSG000003COR11H12   | -                       | olfactoryprotein-coding  |                         |
| chr13-175 | 18.46033 | -0.72995 | 0.518026 | -1.40911 | 0.158804 | 0.362513 | chr13 | 17947921 | 17949276 | + | 0 | NA | IntergeniALR/Alphe | -246669  | NR_02727E | 26080    | Hs.448582NR_02727E | ENSG000003FAM230C    | LINC00281               | family_wincRNA           |                         |
| chr21-127 | 18.96296 | -0.72026 | 0.511211 | -1.40893 | 0.158857 | 0.362513 | chr21 | 12720190 | 12720497 | + | 0 | NA | IntergeniALR/Alphe | -317823  | NR_02691E | 149992   | Hs.558645NM_153773 | ANKRD30BF C21orf99   | ankyrin rpseuso         |                          |                         |
| chr3-920  | 32.04403 | -0.5729  | 0.406862 | -1.40811 | 0.159099 | 0.362513 | chr3  | 92035956 | 92036287 | + | 0 | NA | IntergeniALR/Alphe | 1937690  | NM_001314 | 5627     | Hs.64016           | NM_000313            | ENSG000003PROS1         | PROS PS21                | protein Sprotein-coding |
| chr12-356 | 28.73944 | -0.59446 | 0.422258 | -1.40782 | 0.159185 | 0.362513 | chr12 | 35998324 | 35999126 | + | 0 | NA | IntergeniALR/Alphe | 1976229  | NM_03283A | 84920    | Hs.102971NM_03283A | ENSG000003ALG10      | ALG10A DIALG10          | al protein-coding        |                         |
| chr5-475  | 36.05564 | -0.53309 | 0.379097 | -1.4062  | 0.159664 | 0.362513 | chr5  | 47593939 | 47595076 | + | 0 | NA | IntergeniALR/Alphe | -1898127 | NM_021072 | 348980   | Hs.353176NM_021072 | ENSG000003HCN1       | BCNG-1 BCHyperpole      | protein-coding           |                         |
| chr22-113 | 17.06652 | -0.76177 | 0.542084 | -1.40526 | 0.159945 | 0.362513 | chr22 | 11357217 | 11357428 | + | 0 | NA | IntergeniIntergeni | -395793  | NR_13232C | 1.03E+08 | NR_132320          | FRG1FP               | -                       | FSHD regipseudo          |                         |
| chr10-40C | 29.24207 | -0.59048 | 0.420301 | -1.40489 | 0.160054 | 0.362513 | chr10 | 40001878 | 40002158 | + | 0 | NA | IntergeniALR/Alphe | 1305422  | NR_045000 | 399746   | Hs.742607NR_045000 | ACTR3BP5             | FKSG74                  | ACTR3B pspseudo          |                         |
| chr18-47C | 16.54498 | -0.76714 | 0.546056 | -1.40487 | 0.160059 | 0.362513 | chr18 | 47025261 | 47026562 | + | 0 | NA | intron (intron (   | -1748    | NM_145653 | 162699   | Hs.515381NM_145653 | ENSG000003ELOA3      | ELOA3A Hselongin        | l protein-coding         |                         |
| chr21-52  | 16.54498 | -0.76714 | 0.546056 | -1.40487 | 0.160059 | 0.362513 | chr21 | 5235605  | 5238454  | + | 0 | NA | IntergeniTHE1C-int | -82371   | NR_160695 | 1.03E+08 | Hs.449076NM_001368 | ENSG000003LOC102724- | periodic protein-coding |                          |                         |
| chr13-174 | 20.51705 | -0.69301 | 0.493541 | -1.40415 | 0.160273 | 0.362513 | chr13 | 17410264 | 17411521 | + | 0 | NA | IntergeniALR/Alphe | -784405  | NR_02727E | 26080    | Hs.448582NR_02727E | ENSG000003FAM230C    | LINC00281               | family_wincRNA           |                         |
| chr1-1247 | 172.0962 | -0.28529 | 0.203273 | -1.40349 | 0.160472 | 0.362513 | chr1  | 1.25E+08 | 1.25E+08 | + | 0 | NA | IntergeniALR/Alphe | 3238599  | NR_003955 | 647121   | Hs.697682NR_003955 | ENSG000003EMB1P      | -                       | embigin fpseudo          |                         |
| chr20-284 | 25.19932 | -0.62515 | 0.445469 | -1.40336 | 0.160509 | 0.362513 | chr20 | 28461197 | 28461398 | + | 0 | NA | IntergeniALR/Alphe | 141368   | NR_132315 | 1E+08    | Hs.529357NR_132315 | ENSG000003FRG1CP     | -                       | FSHD regipseudo          |                         |
| chr8-445  | 18.50931 | -0.72443 | 0.516245 | -1.40326 | 0.160539 | 0        |       |          |          |   |   |    |                    |          |           |          |                    |                      |                         |                          |                         |

|           |          |          |          |          |          |          |       |          |          |   |      |                     |         |           |          |                    |             |                   |                |                         |                         |
|-----------|----------|----------|----------|----------|----------|----------|-------|----------|----------|---|------|---------------------|---------|-----------|----------|--------------------|-------------|-------------------|----------------|-------------------------|-------------------------|
| chr5-4836 | 19.9738  | -0.69392 | 0.507494 | -1.36734 | 0.17152  | 0.37121  | chr5  | 48361010 | 48361343 | + | 0 NA | IntergeniALR/Alphe  | 2080112 | NM_19844E | 133418   | Hs.561411NM_19844E | ENSG00000   | EMB               | GP70           | embigin protein-coding  |                         |
| chr22-135 | 22.1702  | -0.64797 | 0.47409  | -1.36677 | 0.171698 | 0.371362 | chr22 | 13566779 | 13567041 | + | 0 NA | IntergeniALR/Alphe  | 1669504 | NR_110761 | 1.03E+08 | Hs.65292E          | NR_110761   | LOC102722         | -              | uncharactericrNA        |                         |
| chr11-526 | 41.44595 | -0.48747 | 0.356787 | -1.36627 | 0.171854 | 0.371466 | chr11 | 52690104 | 52690478 | + | 0 NA | IntergeniALR/Alphe  | 1913707 | NM_001004 | 119749   | Hs.553564NM_001004 | ENSG00000   | OR4C46            | -              | olfactoryprotein-coding |                         |
| chr1-124  | 31.18302 | -0.57072 | 0.418239 | -1.36457 | 0.172389 | 0.372283 | chr1  | 1.24E+08 | 1.24E+08 | + | 0 NA | IntergeniALR/Alphe  | 2687997 | NR_00395E | 647121   | Hs.697682NR_00395E | ENSG00000   | EMB1P             | -              | embigin fpseudo         |                         |
| chr18-19C | 21.23562 | -0.65797 | 0.482485 | -1.36372 | 0.172656 | 0.372283 | chr18 | 19025255 | 19025516 | + | 0 NA | IntergeniALR/Alphe  | 2086428 | NM_00540E | 6093     | Hs.306307NM_00540E | ENSG00000   | ROCK1             | P16G0RCK       | Rho assocprotein-coding |                         |
| chr21-11f | 21.23562 | -0.65797 | 0.482485 | -1.36372 | 0.172656 | 0.372283 | chr21 | 11602814 | 11603047 | + | 0 NA | IntergeniALR/Alphe  | 1081416 | NM_19926C | 7179     | Hs.12298E          | NR_19925E   | ENSG00000         | TPTE           | CT44 PTEN               | transmemtprotein-coding |
| chr20-27f | 17.91988 | -0.7277  | 0.533653 | -1.36363 | 0.172684 | 0.372283 | chr20 | 27610883 | 27611265 | + | 0 NA | IntergeniALR/Alphe  | 991591  | NR_13231E | 1E+08    | Hs.529357NR_13231E | ENSG00000   | FRG1CP            | -              | FSHD regipseudo         |                         |
| chr12-35f | 36.82878 | -0.50935 | 0.373665 | -1.36313 | 0.172842 | 0.372283 | chr12 | 35597039 | 35598194 | + | 0 NA | IntergeniALR/Alphe  | 1575120 | NM_032834 | 84920    | Hs.102971NM_032834 | ENSG00000   | ALG10             | ALG10A DIALG10 | alIprotein-coding       |                         |
| chr20-27f | 20.7302  | -0.66899 | 0.490825 | -1.36299 | 0.172884 | 0.372283 | chr20 | 27257976 | 27259977 | + | 0 NA | IntergeniALR/Alphe  | 1049743 | NR_04009E | 284801   | Hs.37069E          | NR_04009E   | ENSG00000         | MIR663AHC      | -                       | MIR663A lncRNA          |
| chr20-284 | 19.44947 | -0.70085 | 0.515411 | -1.3598  | 0.173894 | 0.374222 | chr20 | 28471884 | 28472172 | + | 0 NA | IntergeniALR/Alphe  | 130637  | NR_13231E | 1E+08    | Hs.529357NR_13231E | ENSG00000   | FRG1CP            | -              | FSHD regipseudo         |                         |
| chr11-537 | 46.35143 | -0.46047 | 0.338963 | -1.35847 | 0.174315 | 0.374892 | chr11 | 53700305 | 53700620 | + | 0 NA | IntergeniALR/Alphe  | 903536  | NM_001004 | 119749   | Hs.553564NM_001004 | ENSG00000   | OR4C46            | -              | olfactoryprotein-coding |                         |
| chr7-589f | 21.20277 | -0.67232 | 0.495303 | -1.35738 | 0.17466  | 0.375359 | chr7  | 58939023 | 58939427 | + | 0 NA | IntergeniALR/Alphe  | 1489048 | NM_00115E | 441234   | Hs.533121NM_00115E | ENSG00000   | ZNF716            | -              | zinc fingprotein-coding |                         |
| chr5-4927 | 48.36196 | -0.45636 | 0.336274 | -1.35709 | 0.174751 | 0.375359 | chr5  | 49275640 | 49275847 | + | 0 NA | IntergeniALR/Alphe  | 1165545 | NM_19844E | 133418   | Hs.561411NM_19844E | ENSG00000   | EMB               | GP70           | embigin protein-coding  |                         |
| chr10-40  | 20.25485 | -0.66998 | 0.494138 | -1.35585 | 0.175146 | 0.375971 | chr10 | 40829612 | 40831838 | + | 0 NA | IntergeniALR/Alphe  | 957320  | NR_02438C | 441666   | Hs.25572E          | NR_02438C   | ENSG00000         | LOC44166E      | -                       | zinc fingpseudo         |
| chr5-4924 | 54.13523 | -0.43156 | 0.318672 | -1.35423 | 0.175661 | 0.376564 | chr5  | 49243227 | 49244204 | + | 0 NA | IntergeniALR/Alphe  | 1197573 | NM_19844E | 133418   | Hs.561411NM_19844E | ENSG00000   | EMB               | GP70           | embigin protein-coding  |                         |
| chr19-26f | 49.05605 | -0.44643 | 0.329659 | -1.35422 | 0.175668 | 0.376564 | chr19 | 26807954 | 26808214 | + | 0 NA | IntergeniALR/Alphe  | 985347  | NR_146732 | 1.02E+08 | Hs.567934NR_110687 | ENSG00000   | LOC101927         | -              | uncharactericrNA        |                         |
| chr20-27f | 21.69485 | -0.64843 | 0.478991 | -1.35375 | 0.175817 | 0.376564 | chr20 | 27847634 | 27847967 | + | 0 NA | IntergeniALR/Alphe  | 754865  | NR_13231E | 1E+08    | Hs.529357NR_13231E | ENSG00000   | FRG1CP            | -              | FSHD regipseudo         |                         |
| chr1-124  | 42.98391 | -0.47807 | 0.35318  | -1.35361 | 0.175862 | 0.376564 | chr1  | 1.24E+08 | 1.24E+08 | + | 0 NA | IntergeniALR/Alphe  | 2892521 | NR_00395E | 647121   | Hs.697682NR_00395E | ENSG00000   | EMB1P             | -              | embigin fpseudo         |                         |
| chr15-19C | 20.27934 | -0.66748 | 0.493943 | -1.35133 | 0.176588 | 0.377779 | chr15 | 19640129 | 19641451 | + | 0 NA | IntergeniALR/Alphe  | 641954  | NR_03883E | 646096   | Hs.44878E          | NR_03883E   | ENSG00000         | CHEK2P2        | -                       | checkpoirpseudo         |
| chr1-124  | 54.25211 | -0.42995 | 0.318277 | -1.35087 | 0.176738 | 0.377779 | chr1  | 1.24E+08 | 1.24E+08 | + | 0 NA | IntergeniALR/Alphe  | 2580966 | NR_00395E | 647121   | Hs.697682NR_00395E | ENSG00000   | EMB1P             | -              | embigin fpseudo         |                         |
| chr1-122f | 43.7214  | -0.46793 | 0.346407 | -1.3508  | 0.17676  | 0.377779 | chr1  | 1.23E+08 | 1.23E+08 | + | 0 NA | IntergeniALR/Alphe  | 1360881 | NR_00395E | 647121   | Hs.697682NR_00395E | ENSG00000   | EMB1P             | -              | embigin fpseudo         |                         |
| chr5-476f | 31.51863 | -0.54815 | 0.406259 | -1.34926 | 0.177253 | 0.378169 | chr5  | 47694563 | 47697120 | + | 0 NA | IntergeniALR/Alphe  | 1999461 | NM_021072 | 348980   | Hs.35317E          | NM_021072   | ENSG00000         | HCN1           | BCNG-1 BChyperpole      | protein-coding          |
| chr20-27f | 19.70882 | -0.67468 | 0.500204 | -1.3488  | 0.177401 | 0.378169 | chr20 | 27250959 | 27251191 | + | 0 NA | IntergeniALR/Alphe  | 1042197 | NR_04009E | 284801   | Hs.37069E          | NR_04009E   | ENSG00000         | MIR663AHC      | -                       | MIR663A lncRNA          |
| chr5-4901 | 25.8745  | -0.59637 | 0.442204 | -1.34863 | 0.177456 | 0.378169 | chr5  | 49010782 | 49011102 | + | 0 NA | IntergeniALR/Alphe  | 1430341 | NM_19844E | 133418   | Hs.561411NM_19844E | ENSG00000   | EMB               | GP70           | embigin protein-coding  |                         |
| chr20-26f | 19.75501 | -0.67364 | 0.499532 | -1.34853 | 0.177487 | 0.378169 | chr20 | 26994114 | 26998377 | + | 0 NA | IntergeniALR/Alphe  | 787012  | NR_04009E | 284801   | Hs.37069E          | NR_04009E   | ENSG00000         | MIR663AHC      | -                       | MIR663A lncRNA          |
| chr17-26f | 84.50941 | -0.36036 | 0.267225 | -1.34851 | 0.177494 | 0.378169 | chr17 | 26098077 | 26098327 | + | 0 NA | IntergeniALR/Alphe  | 991039  | NR_135673 | 1.05E+08 | Hs.64991E          | NR_135673   | LOC105371         | -              | uncharactericrNA        |                         |
| chr19-254 | 31.24417 | -0.55607 | 0.408771 | -1.34713 | 0.177938 | 0.378433 | chr19 | 25400559 | 25400789 | + | 0 NA | IntergeniALR/Alphe  | 1237227 | NR_00360E | 1E+08    | Hs.149312NR_00360E | ENSG00000   | HAVCR1P1          | -              | hepatitispseudo         |                         |
| chr21-12f | 26.40441 | -0.58699 | 0.435768 | -1.34703 | 0.177971 | 0.378433 | chr21 | 12571974 | 12572998 | + | 0 NA | IntergeniALR/Alphe  | 465680  | NR_02691E | 149992   | Hs.55864E          | NM_153773   | ANKRD30B C21orf99 | -              | ankyrin rpseudo         |                         |
| chr19-251 | 37.26631 | -0.50483 | 0.374815 | -1.34687 | 0.178022 | 0.378433 | chr19 | 25182688 | 25184148 | + | 0 NA | IntergeniALR/Alphe  | 1019971 | NR_00360E | 1E+08    | Hs.149312NR_00360E | ENSG00000   | HAVCR1P1          | -              | hepatitispseudo         |                         |
| chr20-26f | 31.13845 | -0.54288 | 0.4032   | -1.34644 | 0.178162 | 0.378433 | chr20 | 26589322 | 26589556 | + | 0 NA | IntergeniALR/Alphe  | 380206  | NR_04009E | 284801   | Hs.37069E          | NR_04009E   | ENSG00000         | MIR663AHC      | -                       | MIR663A lncRNA          |
| chr5-488f | 19.20619 | -0.68276 | 0.507095 | -1.34641 | 0.17817  | 0.378433 | chr5  | 48872041 | 48872256 | + | 0 NA | IntergeniALR/Alphe  | 1569140 | NM_19844E | 133418   | Hs.561411NM_19844E | ENSG00000   | EMB               | GP70           | embigin protein-coding  |                         |
| chr10-411 | 34.83996 | -0.51852 | 0.385257 | -1.34559 | 0.178335 | 0.378549 | chr10 | 41187878 | 41188619 | + | 0 NA | IntergeniALR/Alphe  | 1179797 | NR_02438C | 441666   | Hs.25572E          | NR_02438C   | ENSG00000         | LOC44166E      | -                       | zinc fingpseudo         |
| chr11-53f | 35.31252 | -0.52668 | 0.388454 | -1.34549 | 0.178452 | 0.378549 | chr11 | 53620742 | 53621085 | + | 0 NA | IntergeniALR/Alphe  | 983085  | NM_001004 | 119749   | Hs.553564NM_001004 | ENSG00000   | OR4C46            | -              | olfactoryprotein-coding |                         |
| chr20-28C | 19.23068 | -0.68012 | 0.505831 | -1.34456 | 0.178769 | 0.37889  | chr20 | 28049227 | 28050735 | + | 0 NA | IntergeniALR/Alphe  | 552684  | NR_13231E | 1E+08    | Hs.529357NR_13231E | ENSG00000   | FRG1CP            | -              | FSHD regipseudo         |                         |
| chr22-141 | 19.66263 | -0.67574 | 0.502642 | -1.34437 | 0.178828 | 0.37889  | chr22 | 14107384 | 14108579 | + | 0 NA | IntergeniALR/Alphe  | 1420178 | NM_00100E | 81061    | Hs.55470E          | NM_00100E   | ENSG00000         | COR11H1        | OR11H12 Col             | factoryprotein-coding   |
| chr8-450f | 36.26105 | -0.50868 | 0.378536 | -1.34382 | 0.179006 | 0.379005 | chr8  | 45039184 | 45039618 | + | 0 NA | IntergeniALR/Alphe  | 1578242 | NR_146077 | 389652   | NR_146077          | ENSG00000   | ASNSP1            | ASNSL1         | asparagirpseudo         |                         |
| chr20-271 | 30.63582 | -0.54576 | 0.406244 | -1.34343 | 0.179133 | 0.379005 | chr20 | 27116910 | 27118097 | + | 0 NA | IntergeniALR/Alphe  | 908270  | NR_04009E | 284801   | Hs.37069E          | NR_04009E   | ENSG00000         | MIR663AHC      | -                       | MIR663A lncRNA          |
| chr16-342 | 21.52789 | -0.66921 | 0.498261 | -1.34309 | 0.179244 | 0.379005 | chr16 | 34276979 | 34277178 | + | 0 NA | IntergeniALR/Alphe  | 104402  | NR_15815E | 1.03E+08 | Hs.69271C          | NR_15815E   | CCNYL3            | -              | cyclin Y pseudo         |                         |
| chr20-30f | 20.28213 | -0.6635  | 0.49423  | -1.34249 | 0.179439 | 0.379005 | chr20 | 30384149 | 30384595 | + | 0 NA | IntergeniALR/Alphe  | 7208    | NR_145491 | 284802   | Hs.37069E          | NR_04009E   | ENSG00000         | FRG1BP         | C20orf80 F              | SHD regipseudo          |
| chr5-500C | 19.18449 | -0.6812  | 0.507488 | -1.3423  | 0.1795   | 0.379005 | chr5  | 50004449 | 50004742 | + | 0 NA | IntergeniALR/Alphe  | 436693  | NM_19844E | 133418   | Hs.561411NM_19844E | ENSG00000   | EMB               | GP70           | embigin protein-coding  |                         |
| chr19-26f | 25.37076 | -0.61073 | 0.455084 | -1.34201 | 0.179592 | 0.379005 | chr19 | 26999135 | 26999354 | + | 0 NA | IntergeniALR/Alphe  | 794817  | NR_146732 | 1.02E+08 | Hs.567934NR_110687 | ENSG00000   | LOC101927         | -              | uncharactericrNA        |                         |
| chr13-17f | 18.51768 | -0.7107  | 0.529659 | -1.34181 | 0.179657 | 0.379005 | chr13 | 17587372 | 17587704 | + | 0 NA | IntergeniALR/Alphe  | 667759  | NR_02727E | 26080    | Hs.44858E          | NR_02727E   | ENSG00000         | FAM230C        | LINC00281               | family wincRNA          |
| chr20-26f | 25.97246 | -0.58857 | 0.438799 | -1.34132 | 0.179816 | 0.379107 | chr20 | 26873075 | 26875553 | + | 0 NA | IntergeniALR/Alphe  | 665081  | NR_04009E | 284801   | Hs.37069E          | NR_04009E   | ENSG00000         | MIR663AHC      | -                       | MIR663A lncRNA          |
| chr7-5971 | 17.71161 | -0.67059 | 0.500257 | -1.3405  | 0.180084 | 0.379382 | chr7  | 59718394 | 59718606 | + | 0 NA | IntergeniALR/Alphe  | 2268233 | NM_00115E | 441234   | Hs.533121NM_00115E | ENSG00000   | ZNF716            | -              | zinc fingprotein-coding |                         |
| chr20-27f | 18.72247 | -0.69743 | 0.520374 | -1.34024 | 0.180168 | 0.379382 | chr20 | 27713326 | 27714682 | + | 0 NA | IntergeniALR/Alphe  | 886631  | NR_13231E | 1E+08    | Hs.529357NR_13231E | ENSG00000   | FRG1CP            | -              | FSHD regipseudo         |                         |
| chr20-27f | 18.70635 | -0.68696 | 0.512917 | -1.33932 | 0.180465 | 0.37944  | chr20 | 27749039 | 27752947 | + | 0 NA | IntergeniALR/Alphe  | 851672  | NR_13231E | 1E+08    | Hs.529357NR_13231E | ENSG00000   | FRG1CP            | -              | FSHD regipseudo         |                         |
| chr4-936f | 18.75254 | -0.68586 | 0.512094 | -1.33932 | 0.180467 | 0.37944  | chr4  | 9368140  | 9368966  | + | 0 NA | non-codir non-codir | 679     | NR_02727E | 391622   | Hs.72265E          | NR_02727E   | ENSG00000         | USP17L6P       | DUBA USP1               | ubiquitirpseudo         |
| chr7-604f | 18.22542 | -0.69749 | 0.520851 | -1.33913 | 0.180528 | 0.37944  | chr7  | 60437651 | 60439204 | + | 0 NA | IntergeniALR/Alphe  | 2865629 | NR_00395E | 643955   | Hs.58330E          | NR_00395E   | ENSG00000         | ZNF733P        | ZNF733                  | zinc fingpseudo         |
| chr3-925f | 18.65737 | -0.69247 | 0.517763 | -1.33743 | 0.181081 | 0.380371 | chr3  | 92589103 | 92590819 | + | 0 NA | IntergeniALR/Alphe  | 1384120 | NM_001314 | 5627     | Hs.64016           | NM_00031E   | ENSG00000         | PROS1          | PROS PS21               | protein Sprotein-coding |
| chr17-25f | 52.85941 | -0.42812 | 0.320246 | -1.33684 | 0.181274 | 0.380434 | chr17 | 25769639 | 25769856 | + | 0 NA | IntergeniALR/Alphe  | 1319494 | NR_135673 | 1.05E+08 | Hs.64991E          | NR_135673</ |                   |                |                         |                         |



|                    |          |          |          |          |          |       |          |          |   |      |                    |                    |                               |                     |                                   |                         |
|--------------------|----------|----------|----------|----------|----------|-------|----------|----------|---|------|--------------------|--------------------|-------------------------------|---------------------|-----------------------------------|-------------------------|
| chr15-184 15.74791 | -0.72697 | 0.557177 | -1.30474 | 0.191982 | 0.385318 | chr15 | 18414891 | 18416291 | + | 0 NA | IntergeniALR/Alphe | -1867153 NR_03883E | 646096 Hs. 448785NR_03883E    | ENSG00000CHEK2P2    | -                                 | checkpoirpseudo         |
| chr10-405 39.77104 | -0.47658 | 0.365272 | -1.30473 | 0.191984 | 0.385318 | chr10 | 40598530 | 40599669 | + | 0 NA | IntergeniALR/Alphe | 1768946 NR_02438C  | 441666 Hs. 255725NR_02438C    | ENSG00000LOC44166E  | -                                 | zinc fingpseudo         |
| chr21-122 16.68249 | -0.70944 | 0.543889 | -1.30438 | 0.192103 | 0.385333 | chr21 | 12263187 | 12264263 | + | 0 NA | IntergeniALR/Alphe | -774441 NR_02691E  | 149992 Hs. 558645NR_153773    | ANKRD30BFC21orf99   | ankyrin rpseudo                   |                         |
| chr19-265 36.15913 | -0.4943  | 0.3791   | -1.30389 | 0.192272 | 0.385438 | chr19 | 26578832 | 26579081 | + | 0 NA | IntergeniALR/Alphe | -1214475 NR_146733 | 1.02E+08 Hs. 567934NR_110687  | ENSG00000LOC101927- | uncharactncRNA                    |                         |
| chr20-281 27.55214 | -0.56497 | 0.433456 | -1.30304 | 0.192437 | 0.385438 | chr20 | 28127151 | 28127706 | + | 0 NA | IntergeniALR/Alphe | 4752737 NR_13231E  | 1E+08 Hs. 529357NR_13231E     | ENSG00000FRG1CP     | -                                 | FSHD regipseudo         |
| chr19-252 31.78914 | -0.52311 | 0.401393 | -1.30324 | 0.192494 | 0.385438 | chr19 | 25294053 | 25296620 | + | 0 NA | IntergeniALR/Alphe | -1131889 NR_00360E | 1E+08 Hs. 149312NR_00360E     | ENSG00000HAVCR1P1   | -                                 | hepatitispseudo         |
| chr5-4917 32.05022 | -0.54492 | 0.418419 | -1.30234 | 0.192801 | 0.385826 | chr5  | 49177635 | 49177835 | + | 0 NA | IntergeniALR/Alphe | 1263553 NR_19844E  | 133418 Hs. 561411NR_19844E    | ENSG00000EMB        | GP70                              | embigin protein-coding  |
| chr5-4775 27.21537 | -0.56149 | 0.43147  | -1.30135 | 0.19314  | 0.386121 | chr5  | 47735165 | 47736048 | + | 0 NA | IntergeniALR/Alphe | -2039226 NR_02107E | 348980 Hs. 353176NR_02107E    | ENSG00000CHCN1      | BCNG-1 BChyperpoleprotein-coding  |                         |
| chr10-402 22.44071 | -0.6111  | 0.469721 | -1.30099 | 0.19326  | 0.386121 | chr10 | 40284697 | 40285334 | + | 0 NA | IntergeniALR/Alphe | 1588419 NR_04500C  | 399746 Hs. 742607NR_045000    | ACTR3BP5 FKS74      | ACTR3B pspseudo                   |                         |
| chr17-258 48.61745 | -0.43233 | 0.33234  | -1.30086 | 0.193306 | 0.386121 | chr17 | 25828576 | 25827997 | + | 0 NA | IntergeniALR/Alphe | 1260554 NR_13567E  | 1.05E+08 Hs. 649918NR_13567E  | LOC105371-          | uncharactncRNA                    |                         |
| chr20-277 29.19309 | -0.54378 | 0.418106 | -1.30059 | 0.193399 | 0.386121 | chr20 | 27056659 | 27056907 | + | 0 NA | IntergeniALR/Alphe | -847550 NR_04009E  | 284801 Hs. 370695NR_04009E    | ENSG00000MIR663AHC- | MIR663A lncRNA                    |                         |
| chr1-1242 36.50706 | -0.48865 | 0.375986 | -1.29964 | 0.193723 | 0.38622  | chr1  | 1.24E+08 | 1.24E+08 | + | 0 NA | IntergeniALR/Alphe | 2731896 NR_00395E  | 647121 Hs. 697682NR_00395E    | ENSG00000EMBP1      | -                                 | embigin fpseudo         |
| chr9-4462 21.93808 | -0.61669 | 0.474676 | -1.29918 | 0.193883 | 0.38622  | chr9  | 44625226 | 44653006 | + | 0 NA | IntergeniALR/Alphe | 1526000 NR_16066E  | 1.03E+08 NR_160669            | LOC102724-          | methylenepseudo                   |                         |
| chr13-174 23.16213 | -0.62328 | 0.479759 | -1.29914 | 0.193895 | 0.38622  | chr13 | 17474907 | 1745122  | + | 0 NA | IntergeniALR/Alphe | -702283 NR_02727E  | 26080 Hs. 448582NR_02727E     | ENSG00000FAM230C    | LINC00281family wincRNA           |                         |
| chr5-4786 73.46047 | -0.36003 | 0.277129 | -1.29913 | 0.193899 | 0.38622  | chr5  | 47863888 | 47865016 | + | 0 NA | IntergeniALR/Alphe | -2168072 NR_02107E | 348980 Hs. 353176NR_02107E    | ENSG00000CHCN1      | BCNG-1 BChyperpoleprotein-coding  |                         |
| chr20-265 15.65553 | -0.72966 | 0.562017 | -1.29829 | 0.194187 | 0.386331 | chr20 | 26956340 | 26956605 | + | 0 NA | IntergeniALR/Alphe | -747239 NR_04009E  | 284801 Hs. 370695NR_04009E    | ENSG00000MIR663AHC- | MIR663A lncRNA                    |                         |
| chr20-268 16.75317 | -0.70513 | 0.543245 | -1.298   | 0.194286 | 0.386331 | chr20 | 26815500 | 26816097 | + | 0 NA | IntergeniALR/Alphe | -606565 NR_04009E  | 284801 Hs. 370695NR_04009E    | ENSG00000MIR663AHC- | MIR663A lncRNA                    |                         |
| chr5-4904 32.79998 | -0.51333 | 0.3955   | -1.29792 | 0.194314 | 0.386331 | chr5  | 49041539 | 49041747 | + | 0 NA | IntergeniALR/Alphe | 1339645 NR_19844E  | 133418 Hs. 561411NR_19844E    | ENSG00000EMB        | GP70                              | embigin protein-coding  |
| chr10-41E 21.41096 | -0.62489 | 0.48155  | -1.29765 | 0.194406 | 0.386331 | chr10 | 41574567 | 41577274 | + | 0 NA | IntergeniALR/Alphe | 792125 NR_02438C   | 441666 Hs. 255725NR_02438C    | ENSG00000LOC44166E- | zinc fingpseudo                   |                         |
| chr21-103 16.6363  | -0.71068 | 0.548185 | -1.29643 | 0.194828 | 0.386524 | chr21 | 10336840 | 10337084 | + | 0 NA | IntergeniALuY SINE | -76558 NR_001187   | 574 Hs. 545785NR_001187       | BAGE                | BAGE1 CT2B melanonprotein-coding  |                         |
| chr3-909C 21.43545 | -0.62253 | 0.480202 | -1.2964  | 0.194839 | 0.386524 | chr3  | 90909531 | 90909800 | + | 0 NA | IntergeniALR/Alphe | 1802044 NR_00523E  | 2042 Hs. 123642NR_00523E      | ENSG00000EPAH3      | EK4 ETK EFPH                      | receptprotein-coding    |
| chr10-414 27.56051 | -0.55595 | 0.428846 | -1.29639 | 0.194842 | 0.386524 | chr10 | 41438905 | 41440486 | + | 0 NA | IntergeniALR/Alphe | 928350 NR_02438C   | 441666 Hs. 255725NR_02438C    | ENSG00000LOC44166E- | zinc fingpseudo                   |                         |
| chr20-267 46.18831 | -0.4407  | 0.340068 | -1.29591 | 0.195008 | 0.386591 | chr20 | 26784806 | 26785701 | + | 0 NA | IntergeniALR/Alphe | -575705 NR_04009E  | 284801 Hs. 370695NR_04009E    | ENSG00000MIR663AHC- | MIR663A lncRNA                    |                         |
| chr10-404 35.59419 | -0.49107 | 0.379053 | -1.29552 | 0.195139 | 0.386591 | chr10 | 40465789 | 40467720 | + | 0 NA | IntergeniALR/Alphe | 1770158 NR_04500C  | 399746 Hs. 742607NR_045000    | ACTR3BP5 FKS74      | ACTR3B pspseudo                   |                         |
| chr1-1227 47.29433 | -0.43302 | 0.334509 | -1.29449 | 0.195497 | 0.386591 | chr1  | 1.23E+08 | 1.23E+08 | + | 0 NA | IntergeniALR/Alphe | 1258780 NR_00395E  | 647121 Hs. 697682NR_00395E    | ENSG00000EMBP1      | -                                 | embigin fpseudo         |
| chr19-261 17.13893 | -0.70052 | 0.514344 | -1.29404 | 0.195651 | 0.386591 | chr19 | 26139615 | 26139819 | + | 0 NA | IntergeniALR/Alphe | -1653714 NR_146733 | 1.02E+08 Hs. 567934NR_110687  | ENSG00000LOC101927- | uncharactncRNA                    |                         |
| chr10-41E 20.93003 | -0.63258 | 0.489025 | -1.29355 | 0.195821 | 0.386591 | chr10 | 41840858 | 41841708 | + | 0 NA | IntergeniALR/Alphe | 526762 NR_02438C   | 441666 Hs. 255725NR_02438C    | ENSG00000LOC44166E- | zinc fingpseudo                   |                         |
| chr4-498E 19.21735 | -0.6657  | 0.514646 | -1.29351 | 0.195836 | 0.386591 | chr4  | 49860100 | 49860489 | + | 0 NA | IntergeniALR/Alphe | 873652 NR_00128E   | 80157 Hs. 479703NR_025087     | ENSG00000CWH43      | CWH43-C Fcell wallprotein-coding  |                         |
| chr17-257 24.56532 | -0.59056 | 0.456886 | -1.29343 | 0.195864 | 0.386591 | chr17 | 25796406 | 25796639 | + | 0 NA | IntergeniALR/Alphe | 1292719 NR_13567E  | 1.05E+08 Hs. 649918NR_13567E  | LOC105371-          | uncharactncRNA                    |                         |
| chr13-171 21.45994 | -0.6202  | 0.479685 | -1.29293 | 0.196037 | 0.386591 | chr13 | 17144723 | 17146236 | + | 0 NA | IntergeniALR/Alphe | -1049923 NR_02727E | 26080 Hs. 448582NR_02727E     | ENSG00000FAM230C    | LINC00281family wincRNA           |                         |
| chr5-476C 38.74966 | -0.47424 | 0.366827 | -1.29282 | 0.196073 | 0.386591 | chr5  | 47607622 | 47608338 | + | 0 NA | IntergeniALR/Alphe | -1911600 NR_02107E | 348980 Hs. 353176NR_02107E    | ENSG00000CHCN1      | BCNG-1 BChyperpoleprotein-coding  |                         |
| chr10-41E 26.67213 | -0.55975 | 0.433007 | -1.29227 | 0.196114 | 0.386591 | chr10 | 41533473 | 41534497 | + | 0 NA | IntergeniALR/Alphe | 834060 NR_02438C   | 441666 Hs. 255725NR_02438C    | ENSG00000LOC44166E- | zinc fingpseudo                   |                         |
| chr19-217 17.40492 | -0.71226 | 0.550992 | -1.29227 | 0.196116 | 0.386591 | chr19 | 25178729 | 25179170 | + | 0 NA | IntergeniALR/Alphe | -1015502 NR_00360E | 1E+08 Hs. 149312NR_00360E     | ENSG00000HAVCR1P1   | -                                 | hepatitispseudo         |
| chr5-482C 27.22095 | -0.5555  | 0.429831 | -1.29237 | 0.196229 | 0.386591 | chr5  | 48203296 | 48203870 | + | 0 NA | IntergeniALR/Alphe | 2237705 NR_19844E  | 133418 Hs. 561411NR_19844E    | ENSG00000EMB        | GP70                              | embigin protein-coding  |
| chr1-1236 27.15306 | -0.55505 | 0.429617 | -1.29198 | 0.196365 | 0.386637 | chr1  | 1.24E+08 | 1.24E+08 | + | 0 NA | IntergeniALR/Alphe | 2364351 NR_00395E  | 647121 Hs. 697682NR_00395E    | ENSG00000EMBP1      | -                                 | embigin fpseudo         |
| chr19-262 45.09514 | -0.44399 | 0.343924 | -1.29096 | 0.196718 | 0.387108 | chr19 | 26266562 | 26266806 | + | 0 NA | IntergeniALR/Alphe | -1526747 NR_146733 | 1.02E+08 Hs. 567934NR_110687  | ENSG00000LOC101927- | uncharactncRNA                    |                         |
| chr20-274 20.95731 | -0.62626 | 0.485365 | -1.29029 | 0.196949 | 0.38725  | chr20 | 27478082 | 27479647 | + | 0 NA | IntergeniALR/Alphe | 1123801 NR_13231E  | 1E+08 Hs. 529357NR_13231E     | ENSG00000FRG1CP     | -                                 | FSHD regipseudo         |
| chr11-52E 21.00071 | -0.62919 | 0.487708 | -1.2901  | 0.197016 | 0.38725  | chr11 | 52839833 | 52840936 | + | 0 NA | IntergeniALR/Alphe | 1763614 NR_001004  | 119749 Hs. 553564NR_001004    | ENSG00000OR4C46     | -                                 | olfactoryprotein-coding |
| chr1-122E 21.43824 | -0.61878 | 0.479968 | -1.28921 | 0.197324 | 0.387591 | chr1  | 1.23E+08 | 1.23E+08 | + | 0 NA | IntergeniALR/Alphe | 1301836 NR_00395E  | 647121 Hs. 697682NR_00395E    | ENSG00000EMBP1      | -                                 | embigin fpseudo         |
| chr2-929E 22.94613 | -0.6022  | 0.467205 | -1.28895 | 0.197416 | 0.387591 | chr2  | 92920834 | 92921111 | + | 0 NA | IntergeniALR/Alphe | 979839 NR_027714   | 440888 Hs. 730235NR_001032412 | ACTR3BP2 FKS73      | ACTR3B pspseudo                   |                         |
| chr20-264 43.29336 | -0.46107 | 0.358509 | -1.28609 | 0.198411 | 0.388906 | chr20 | 26484555 | 26484799 | + | 0 NA | IntergeniALR/Alphe | -275444 NR_04009E  | 284801 Hs. 370695NR_04009E    | ENSG00000MIR663AHC- | MIR663A lncRNA                    |                         |
| chr3-918S 35.09434 | -0.49052 | 0.381507 | -1.28573 | 0.198536 | 0.388906 | chr3  | 91835551 | 91835900 | + | 0 NA | IntergeniALR/Alphe | 2138356 NR_001314  | 5627 Hs. 64016 NR_000315      | ENSG00000PROS1      | PROS1 PS21protein Sprotein-coding |                         |
| chr10-402 30.30574 | -0.52923 | 0.411708 | -1.28545 | 0.198636 | 0.388906 | chr10 | 40213435 | 40213647 | + | 0 NA | IntergeniALR/Alphe | 1516945 NR_04500C  | 399746 Hs. 742607NR_045000    | ACTR3BP5 FKS74      | ACTR3B pspseudo                   |                         |
| chr19-267 68.60676 | -0.36666 | 0.285328 | -1.28504 | 0.198777 | 0.388906 | chr19 | 26781782 | 26782860 | + | 0 NA | IntergeniALR/Alphe | -1011110 NR_146733 | 1.02E+08 Hs. 567934NR_110687  | ENSG00000LOC101927- | uncharactncRNA                    |                         |
| chr1-122S 30.37921 | -0.52421 | 0.40798  | -1.28489 | 0.198829 | 0.388906 | chr1  | 1.23E+08 | 1.23E+08 | + | 0 NA | IntergeniALR/Alphe | 1394132 NR_00395E  | 647121 Hs. 697682NR_00395E    | ENSG00000EMBP1      | -                                 | embigin fpseudo         |
| chr20-28E 20.43298 | -0.63115 | 0.491262 | -1.28475 | 0.19888  | 0.388906 | chr20 | 28829808 | 28834993 | + | 0 NA | IntergeniALR/Alphe | -229735 NR_13231E  | 1E+08 Hs. 529357NR_13231E     | ENSG00000FRG1CP     | -                                 | FSHD regipseudo         |
| chr22-13E 20.43298 | -0.63115 | 0.491262 | -1.28475 | 0.19888  | 0.388906 | chr22 | 13396334 | 13396596 | + | 0 NA | IntergeniALR/Alphe | 1499059 NR_110761  | 1.03E+08 Hs. 65292E NR_110761 | LOC10272E-          | uncharactncRNA                    |                         |
| chr10-401 34.95298 | -0.49443 | 0.385297 | -1.28325 | 0.199406 | 0.389407 | chr10 | 40100244 | 40100614 | + | 0 NA | IntergeniALR/Alphe | 1403833 NR_04500C  | 399746 Hs. 742607NR_045000    | ACTR3BP5 FKS74      | ACTR3B pspseudo                   |                         |
| chr9-435A 20.50087 | -0.63167 | 0.492228 | -1.28315 | 0.199438 | 0.389407 | chr9  | 43545964 | 43547355 | + | 0 NA | IntergeniALR/Alphe | 420493 NR_16066E   | 1.03E+08 NR_160669            | LOC102724-          | methylenepseudo                   |                         |
| chr14-16E 15.27256 | -0.73027 | 0.569172 | -1.28304 | 0.199477 | 0.389407 | chr14 | 16869339 | 16869551 | + | 0 NA | IntergeniALR/Alphe | -1731672 NR_00101E | 440153 Hs. 53488C NR_00101E   | ENSG00000OR11H12    | -                                 | olfactoryprotein-coding |
| chr14-17E 20.91391 | -0.62337 | 0.485981 | -1.2827  | 0.199597 | 0.389418 | chr14 | 17267006 | 17268338 | + | 0 NA | IntergeniALR/Alphe | -1333445 NR_00101E | 440153 Hs. 53488              |                     |                                   |                         |

|                    |          |          |          |          |          |       |          |          |   |      |                    |                    |                              |                     |                 |                         |
|--------------------|----------|----------|----------|----------|----------|-------|----------|----------|---|------|--------------------|--------------------|------------------------------|---------------------|-----------------|-------------------------|
| chr20-277 23.09697 | -0.57445 | 0.464496 | -1.23673 | 0.216189 | 0.404479 | chr20 | 27712619 | 27714581 | + | 0 NA | IntergeniALR/Alphe | 889065 NR_13231E   | 1E+08 Hs. 529357NR_13231E    | ENSG0000CFRG1CP     | -               | FSHD regipseudo         |
| chr19-256 116.4038 | -0.29475 | 0.238364 | -1.23655 | 0.216253 | 0.404479 | chr19 | 25601050 | 25601304 | + | 0 NA | IntergeniALR/Alphe | -1437730 NR_00360E | 1E+08 Hs. 149312NR_00360E    | ENSG0000CHAVCR1P1   | -               | hepatitispseudo         |
| chr6-589C 16.90402 | -0.66533 | 0.538301 | -1.23598 | 0.216467 | 0.404479 | chr6  | 58906421 | 58908599 | + | 0 NA | IntergeniALR/Alphe | -946064 NR_13299E  | 1.07E+08 Hs. 561535NR_125727 | ENSG0000CLINCO068C  | -               | long intencRNA          |
| chr1-124 31.01098  | -0.50076 | 0.405223 | -1.23577 | 0.216545 | 0.404479 | chr1  | 1.24E+08 | 1.24E+08 | + | 0 NA | IntergeniALR/Alphe | 2927380 NR_00395E  | 647121 Hs. 697682NR_00395E   | ENSG0000EMB1P       | -               | embigin ppsseudo        |
| chr22-142 16.37689 | -0.67756 | 0.548669 | -1.23492 | 0.216864 | 0.404479 | chr22 | 14295354 | 14295504 | + | 0 NA | IntergeniALR/Alphe | -1229680 NR_00100E | 81061 Hs. 554706NR_00100E    | ENSG0000COR1IH1     | OR11H12 Col     | factoryprotein-coding   |
| chr20-281 16.40139 | -0.67447 | 0.546246 | -1.23474 | 0.216928 | 0.404479 | chr20 | 28170803 | 28172989 | + | 0 NA | IntergeniALR/Alphe | 430769 NR_13231E   | 1E+08 Hs. 529357NR_13231E    | ENSG0000CFRG1CP     | -               | FSHD regipseudo         |
| chr19-266 46.85184 | -0.42418 | 0.343551 | -1.23468 | 0.216951 | 0.404479 | chr19 | 26875132 | 26875365 | + | 0 NA | IntergeniALR/Alphe | -918183 NR_14673E  | 1.02E+08 Hs. 567934NR_110687 | ENSG0000CLOC101927- | -               | uncharactncRNA          |
| chr20-267 26.93705 | -0.53613 | 0.434242 | -1.23462 | 0.216977 | 0.404479 | chr20 | 26724437 | 26725594 | + | 0 NA | IntergeniALR/Alphe | -515782 NR_04009E  | 284801 Hs. 370695NR_04009E   | ENSG0000MIR663AH    | -               | MIR663A lncRNA          |
| chr20-276 15.94495 | -0.6829  | 0.553192 | -1.23447 | 0.217026 | 0.404479 | chr20 | 27600678 | 27602183 | + | 0 NA | IntergeniALR/Alphe | 1001235 NR_13231E  | 1E+08 Hs. 529357NR_13231E    | ENSG0000CFRG1CP     | -               | FSHD regipseudo         |
| chr7-591C 26.11276 | -0.55032 | 0.4458   | -1.23446 | 0.21703  | 0.404479 | chr7  | 59130196 | 59130407 | + | 0 NA | IntergeniALR/Alphe | 1680214 NR_00115E  | 441234 Hs. 533121NR_00115E   | ENSG0000CZNF716     | -               | zinc fingprotein-coding |
| chr19-257 22.59434 | -0.57904 | 0.469153 | -1.23424 | 0.217115 | 0.404479 | chr19 | 25735783 | 25737545 | + | 0 NA | IntergeniALR/Alphe | -1573217 NR_00360E | 1E+08 Hs. 149312NR_00360E    | ENSG0000CHAVCR1P1   | -               | hepatitispseudo         |
| chr20-275 18.52599 | -0.64029 | 0.519047 | -1.23359 | 0.217356 | 0.404518 | chr20 | 27983835 | 27984144 | + | 0 NA | IntergeniALR/Alphe | 618676 NR_13231E   | 1E+08 Hs. 529357NR_13231E    | ENSG0000CFRG1CP     | -               | FSHD regipseudo         |
| chr10-401 16.9964  | -0.66294 | 0.537425 | -1.23355 | 0.217372 | 0.404518 | chr10 | 40141928 | 40142351 | + | 0 NA | IntergeniALR/Alphe | 1445543 NR_04500C  | 399746 Hs. 742607NR_04500C   | ACTR3BP5 FKSG74     | ACTR3B ppsseudo |                         |
| chr20-265 23.23555 | -0.57198 | 0.463902 | -1.23298 | 0.217584 | 0.404693 | chr20 | 26585738 | 26586006 | + | 0 NA | IntergeniALR/Alphe | -376639 NR_04009E  | 284801 Hs. 370695NR_04009E   | ENSG0000MIR663AH    | -               | MIR663A lncRNA          |
| chr19-255 34.79154 | -0.47192 | 0.382913 | -1.23244 | 0.217786 | 0.404848 | chr19 | 25512451 | 25514293 | + | 0 NA | IntergeniALR/Alphe | -1349925 NR_00360E | 1E+08 Hs. 149312NR_00360E    | ENSG0000CHAVCR1P1   | -               | hepatitispseudo         |
| chr21-107 21.65697 | -0.58938 | 0.478589 | -1.23149 | 0.21814  | 0.404859 | chr21 | 10760977 | 10763429 | + | 0 NA | IntergeniALR/Alphe | 240689 NR_19926C   | 7179 Hs. 122988NR_19926E     | ENSG0000CTPT        | CT44 PTEN       | transmemprotein-coding  |
| chr21-104 15.99114 | -0.68163 | 0.553574 | -1.23132 | 0.218205 | 0.404859 | chr21 | 10463461 | 10466048 | + | 0 NA | IntergeniALR/Alphe | 51222 NR_18248E    | 85319 Hs. 545785NR_18248E    | BAGE2               | CT2             | BAGE famiprotein-coding |
| chr5-481 15.99114  | -0.68163 | 0.553574 | -1.23132 | 0.218205 | 0.404859 | chr5  | 48185528 | 48186711 | + | 0 NA | IntergeniALR/Alphe | 1255169 NR_19844E  | 133418 Hs. 561411NR_19844E   | ENSG0000EMB         | GP70            | embigin protein-coding  |
| chr12-366 15.87426 | -0.68744 | 0.55849  | -1.23088 | 0.218366 | 0.404859 | chr12 | 36626864 | 36627206 | + | 0 NA | IntergeniALR/Alphe | -1689739 NR_00130E | 144245 Hs. 259305NR_00101E   | ENSG0000ALG10B      | ALG10 KCF       | ALG10 alpprotein-coding |
| chr18-154 15.92325 | -0.68104 | 0.55331  | -1.23084 | 0.218383 | 0.404859 | chr18 | 15488524 | 15493689 | + | 0 NA | IntergeniALR/Alphe | -165187 NR_02741E  | 644669 Hs. 579474NR_02741E   | ENSG0000CLOC64466E  | -               | ankyrin rpsseudo        |
| chr22-156 16.9747  | -0.66117 | 0.537494 | -1.2301  | 0.218659 | 0.404946 | chr22 | 15034168 | 15034716 | + | 0 NA | IntergeniALR/Alphe | 493717 NR_00100E   | 81061 Hs. 554706NR_00100E    | ENSG0000COR1IH1     | OR11H12 Col     | factoryprotein-coding   |
| chr20-285 15.96944 | -0.67976 | 0.552611 | -1.23008 | 0.218666 | 0.404946 | chr20 | 28868610 | 28873492 | + | 0 NA | IntergeniALR/Alphe | -209339 NR_13231E  | 1.03E+08 Hs. NR_132316       | FRG1DP              | -               | FSHD regipseudo         |
| chr9-446 21.63527  | -0.58796 | 0.478158 | -1.22963 | 0.218836 | 0.404958 | chr9  | 44621005 | 44621252 | + | 0 NA | IntergeniALR/Alphe | 1494962 NR_16066E  | 1.03E+08 Hs. NR_160669       | LOC102724-          | -               | methylenepseudo         |
| chr5-485 34.23714  | -0.47882 | 0.389464 | -1.22943 | 0.218909 | 0.404958 | chr5  | 48504932 | 48506174 | + | 0 NA | IntergeniALR/Alphe | 1935735 NR_19844E  | 133418 Hs. 561411NR_19844E   | ENSG0000EMB         | GP70            | embigin protein-coding  |
| chr20-276 15.42061 | -0.69129 | 0.562584 | -1.22878 | 0.219154 | 0.405069 | chr20 | 27604681 | 27607727 | + | 0 NA | IntergeniALR/Alphe | 996461 NR_13231E   | 1E+08 Hs. 529357NR_13231E    | ENSG0000CFRG1CP     | -               | FSHD regipseudo         |
| chr10-408 15.39612 | -0.6946  | 0.565341 | -1.22864 | 0.219205 | 0.405069 | chr10 | 40870173 | 40871118 | + | 0 NA | IntergeniALR/Alphe | 1497400 NR_02438C  | 441666 Hs. 255725NR_02438C   | ENSG0000CLOC44166E  | -               | zinc fingpseudo         |
| chr20-282 22.54815 | -0.57991 | 0.472301 | -1.22783 | 0.219511 | 0.405414 | chr20 | 28034414 | 28035463 | + | 0 NA | IntergeniALR/Alphe | 567727 NR_13231E   | 1E+08 Hs. 529357NR_13231E    | ENSG0000CFRG1CP     | -               | FSHD regipseudo         |
| chr11-534 22.64332 | -0.57464 | 0.468337 | -1.22699 | 0.219826 | 0.405725 | chr11 | 53435098 | 53435303 | + | 0 NA | IntergeniALR/Alphe | 1168798 NR_00100A  | 119749 Hs. 553564NR_00100A   | ENSG0000ORAC46      | -               | olfactoryprotein-coding |
| chr18-158 16.00726 | -0.69397 | 0.565696 | -1.22675 | 0.219916 | 0.405725 | chr18 | 15888389 | 15888792 | + | 0 NA | IntergeniALR/Alphe | -562671 NR_02741E  | 644669 Hs. 579474NR_02741E   | ENSG0000CLOC64466E  | -               | ankyrin rpsseudo        |
| chr20-280 21.61357 | -0.58655 | 0.47844  | -1.22595 | 0.220216 | 0.405869 | chr20 | 28006703 | 28006966 | + | 0 NA | IntergeniALR/Alphe | 595831 NR_13231E   | 1E+08 Hs. 529357NR_13231E    | ENSG0000CFRG1CP     | -               | FSHD regipseudo         |
| chr20-275 15.4451  | -0.68804 | 0.561242 | -1.22591 | 0.220231 | 0.405869 | chr20 | 27965609 | 27968361 | + | 0 NA | IntergeniALR/Alphe | 635680 NR_13231E   | 1E+08 Hs. 529357NR_13231E    | ENSG0000CFRG1CP     | -               | FSHD regipseudo         |
| chr6-592 21.15434  | -0.59466 | 0.485228 | -1.22553 | 0.220375 | 0.405917 | chr6  | 59270485 | 59271059 | + | 0 NA | IntergeniALR/Alphe | -1309326 NR_13299E | 1.07E+08 Hs. 561535NR_125727 | ENSG0000CLINCO068C  | -               | long intencRNA          |
| chr10-406 26.30143 | -0.53527 | 0.436925 | -1.22508 | 0.220545 | 0.406012 | chr10 | 40643315 | 40645650 | + | 0 NA | IntergeniALR/Alphe | 17236315 NR_02438C | 441666 Hs. 255725NR_02438C   | ENSG0000CLOC44166E  | -               | zinc fingpseudo         |
| chr20-276 22.18689 | -0.57848 | 0.472408 | -1.22454 | 0.220748 | 0.406116 | chr20 | 27644318 | 27645464 | + | 0 NA | IntergeniALR/Alphe | 957774 NR_13231E   | 1E+08 Hs. 529357NR_13231E    | ENSG0000CFRG1CP     | -               | FSHD regipseudo         |
| chr4-923 15.39891  | -0.68937 | 0.563299 | -1.22381 | 0.221023 | 0.406116 | chr4  | 9233648  | 9237494  | + | 0 NA | IntergeniALR/Alphe | 1186 NR_00125E     | 1E+08 Hs. 528621NR_00125E    | ENSG0000CUSP17L15   | -               | ubiquitinprotein-coding |
| chr6-585 92.31051  | -0.32724 | 0.267405 | -1.22377 | 0.221039 | 0.406116 | chr6  | 58560738 | 58560981 | + | 0 NA | IntergeniALR/Alphe | -599413 NR_13299E  | 1.07E+08 Hs. 561535NR_125727 | ENSG0000CLINCO068C  | -               | long intencRNA          |
| chr19-276 15.37442 | -0.69267 | 0.566062 | -1.22367 | 0.221076 | 0.406116 | chr19 | 27000422 | 27000627 | + | 0 NA | IntergeniALR/Alphe | -792907 NR_14673E  | 1.02E+08 Hs. 567934NR_110687 | ENSG0000CLOC101927- | -               | uncharactncRNA          |
| chr20-277 21.15713 | -0.59082 | 0.483067 | -1.22307 | 0.221303 | 0.40627  | chr20 | 27583937 | 27585889 | + | 0 NA | IntergeniALR/Alphe | 1017753 NR_13231E  | 1E+08 Hs. 529357NR_13231E    | ENSG0000CFRG1CP     | -               | FSHD regipseudo         |
| chr7-587 21.74936  | -0.58763 | 0.480639 | -1.22259 | 0.221483 | 0.40627  | chr7  | 58730505 | 58730839 | + | 0 NA | IntergeniALR/Alphe | 1280495 NR_00115E  | 441234 Hs. 533121NR_00115E   | ENSG0000CZNF716     | -               | zinc fingprotein-coding |
| chr21-801 26.89923 | -0.52775 | 0.431722 | -1.22243 | 0.221545 | 0.40627  | chr21 | 8019335  | 8020688  | + | 0 NA | IntergeniALR/Alphe | -177609 NR_03895E  | 1.01E+08 Hs. 426704NR_03895E | LOC100507-          | -               | uncharactncRNA          |
| chr19-266 53.78122 | -0.39084 | 0.319782 | -1.22219 | 0.221634 | 0.40627  | chr19 | 26842726 | 26843706 | + | 0 NA | IntergeniALR/Alphe | -950200 NR_14673E  | 1.02E+08 Hs. 567934NR_110687 | ENSG0000CLOC101927- | -               | uncharactncRNA          |
| chr20-265 21.11094 | -0.59175 | 0.484361 | -1.2217  | 0.22182  | 0.406393 | chr20 | 26914824 | 26918005 | + | 0 NA | IntergeniALR/Alphe | -707181 NR_04009E  | 284801 Hs. 370695NR_04009E   | ENSG0000MIR663AH    | -               | MIR663A lncRNA          |
| chr13-175 15.92603 | -0.67602 | 0.553933 | -1.22204 | 0.222314 | 0.406862 | chr13 | 17592511 | 17593034 | + | 0 NA | IntergeniALR/Alphe | -602525 NR_02727E  | 26080 Hs. 448582NR_02727E    | ENSG0000FAM230C     | LINC00281       | family wincRNA          |
| chr20-268 15.92603 | -0.67602 | 0.553933 | -1.22204 | 0.222314 | 0.406862 | chr20 | 26804671 | 26807420 | + | 0 NA | IntergeniALR/Alphe | -596812 NR_04009E  | 284801 Hs. 370695NR_04009E   | ENSG0000MIR663AH    | -               | MIR663A lncRNA          |
| chr19-255 21.18162 | -0.58848 | 0.482546 | -1.21952 | 0.222645 | 0.406875 | chr19 | 25274916 | 25276192 | + | 0 NA | IntergeniALR/Alphe | -1112107 NR_00360E | 1E+08 Hs. 149312NR_00360E    | ENSG0000CHAVCR1P1   | -               | hepatitispseudo         |
| chr1-125 59.23942  | -0.37243 | 0.30541  | -1.21943 | 0.222682 | 0.406875 | chr1  | 1.23E+08 | 1.23E+08 | + | 0 NA | IntergeniALR/Alphe | 1414770 NR_00395E  | 647121 Hs. 697682NR_00395E   | ENSG0000EMB1P       | -               | embigin ppsseudo        |
| chr12-372 22.52645 | -0.57854 | 0.47461  | -1.21897 | 0.222855 | 0.406875 | chr12 | 37266624 | 37266892 | + | 0 NA | IntergeniALR/Alphe | -1050016 NR_00130E | 144245 Hs. 259305NR_00101E   | ENSG0000ALG10B      | ALG10 KCF       | ALG10 alpprotein-coding |
| chr10-403 33.6911  | -0.47859 | 0.392636 | -1.2189  | 0.222881 | 0.406875 | chr10 | 40391847 | 40393491 | + | 0 NA | IntergeniALR/Alphe | 1696073 NR_04500C  | 399746 Hs. 742607NR_04500C   | ACTR3BP5 FKSG74     | ACTR3B ppsseudo |                         |
| chr19-264 16.42867 | -0.66553 | 0.546864 | -1.21881 | 0.222914 | 0.406875 | chr19 | 26483377 | 26483903 | + | 0 NA | IntergeniALR/Alphe | -1309326 NR_13299E | 1.07E+08 Hs. 567934NR_110687 | ENSG0000CLOC101927- | -               | uncharactncRNA          |
| chr20-265 21.61636 | -0.58283 | 0.478557 | -1.21789 | 0.223265 | 0.407132 | chr20 | 26582324 | 26584207 | + | 0 NA | IntergeniALR/Alphe | -374032 NR_04009E  | 284801 Hs. 370695NR_04009E   | ENSG0000MIR663AH    | -               | MIR663A lncRNA          |
| chr14-175 15.85535 | -0.68047 | 0.5      |          |          |          |       |          |          |   |      |                    |                    |                              |                     |                 |                         |





|           |          |          |          |          |          |          |       |          |          |   |   |    |                       |         |           |          |             |           |            |            |                 |                         |                 |
|-----------|----------|----------|----------|----------|----------|----------|-------|----------|----------|---|---|----|-----------------------|---------|-----------|----------|-------------|-----------|------------|------------|-----------------|-------------------------|-----------------|
| chr22-13  | 16.26722 | -0.61979 | 0.556653 | -1.11343 | 0.265523 | 0.438293 | chr22 | 13326379 | 13326853 | + | 0 | NA | IntergeniALR/Alphe    | 1429210 | NR_110761 | 1.03E+08 | Hs.65292E   | NR_110761 | LOC102723- |            | uncharactncRNA  |                         |                 |
| chr19-26  | 38.4068  | -0.40887 | 0.367266 | -1.11329 | 0.265586 | 0.438293 | chr19 | 26352889 | 26353692 | + | 0 | NA | IntergeniALR/Alphe    | 1440141 | NR_146732 | 1.02E+08 | Hs.567934NR | 110687    | ENSG0000C  | LOC101927- |                 | uncharactncRNA          |                 |
| chr22-10  | 15.675   | -0.62541 | 0.562136 | -1.11257 | 0.265895 | 0.438592 | chr22 | 10696200 | 10696539 | + | 0 | NA | IntergeniL2 LINE I    | 265160  | NR_13232C | 1.03E+08 |             | NR_132320 | FRG1FP     | -          |                 | FSHD regipseudo         |                 |
| chr13-167 | 17.85254 | -0.62767 | 0.56432  | -1.11226 | 0.266028 | 0.438601 | chr13 | 16767717 | 16767927 | + | 0 | NA | IntergeniALR/Alphe    | 1427475 | NR_02727E | 26808    | Hs.44858    | NR_02727E | ENSG0000C  | FAM230C    | LINC00281       | family wincRNA          |                 |
| chr5-486  | 19.42548 | -0.55982 | 0.503503 | -1.11185 | 0.266204 | 0.438679 | chr5  | 48653815 | 48655259 | + | 0 | NA | IntergeniALR/Alphe    | 1786751 | NR_19844E | 133418   | Hs.561411NR | 19844E    | ENSG0000C  | EMB        | GP70            | embigin protein-coding  |                 |
| chr5-4981 | 24.0904  | 0.521645 | 0.469524 | 1.111007 | 0.266565 | 0.439064 | chr5  | 49811174 | 49811405 | + | 0 | NA | IntergeniALR/Alphe    | 629999  | NR_19844E | 133418   | Hs.561411NR | 19844E    | ENSG0000C  | EMB        | GP70            | embigin protein-coding  |                 |
| chr1-1231 | 34.14531 | -0.42963 | 0.386887 | -1.11053 | 0.266771 | 0.439077 | chr1  | 1.23E+08 | 1.23E+08 | + | 0 | NA | IntergeniALR/Alphe    | 1588807 | NR_00395E | 647121   | Hs.697682NR | 00395E    | ENSG0000C  | EMB1       | -               | embigin fpseudo         |                 |
| chr3-9121 | 19.35759 | -0.5592  | 0.50361  | -1.11039 | 0.266883 | 0.439077 | chr3  | 91213803 | 91214234 | + | 0 | NA | IntergeniALR/Alphe    | 1206397 | NR_00523E | 2042     | Hs.123642NR | 00523E    | ENSG0000C  | EPHA3      | EK4 ETK E EPH   | recepprotein-coding     |                 |
| chr5-492  | 50.89899 | -0.36102 | 0.32532  | -1.10974 | 0.267111 | 0.439328 | chr5  | 49208430 | 49208716 | + | 0 | NA | IntergeniALR/Alphe    | 1232715 | NR_19844E | 133418   | Hs.561411NR | 19844E    | ENSG0000C  | EMB        | GP70            | embigin protein-coding  |                 |
| chr7-6001 | 18.39573 | -0.57295 | 0.516723 | -1.10881 | 0.267513 | 0.439779 | chr7  | 60013344 | 60013980 | + | 0 | NA | IntergeniALR/Alphe    | 2563485 | NR_00115E | 441234   | Hs.533121NR | 00115E    | ENSG0000C  | ZNF716     | -               | zinc fingprotein-coding |                 |
| chr20-26  | 18.85496 | -0.56428 | 0.509378 | -1.10778 | 0.267956 | 0.440085 | chr20 | 26538057 | 26540701 | + | 0 | NA | IntergeniALR/Alphe    | 330146  | NR_04009E | 284801   | Hs.370695NR | 04009E    | ENSG0000C  | MIR663AHC  | -               | MIR663A lncRNA          |                 |
| chr20-27  | 18.85496 | -0.56428 | 0.509378 | -1.10778 | 0.267956 | 0.440085 | chr20 | 27865478 | 27865702 | + | 0 | NA | IntergeniALR/Alphe    | 737075  | NR_13231E | 1E+08    | Hs.529357NR | 13231E    | ENSG0000C  | FRG1CP     | -               | FSHD regipseudo         |                 |
| chr1-122  | 30.81562 | -0.45836 | 0.413935 | -1.10732 | 0.268155 | 0.440201 | chr1  | 1.23E+08 | 1.23E+08 | + | 0 | NA | IntergeniALR/Alphe    | 1311253 | NR_00395E | 647121   | Hs.697682NR | 00395E    | ENSG0000C  | EMB1       | -               | embigin fpseudo         |                 |
| chr5-494  | 49.70896 | -0.36228 | 0.327256 | -1.10702 | 0.268286 | 0.440205 | chr5  | 49464927 | 49466069 | + | 0 | NA | IntergeniALR/Alphe    | 975790  | NR_19844E | 133418   | Hs.561411NR | 19844E    | ENSG0000C  | EMB        | GP70            | embigin protein-coding  |                 |
| chr20-267 | 16.63407 | -0.61075 | 0.552046 | -1.10633 | 0.268582 | 0.440315 | chr20 | 26779108 | 26779529 | + | 0 | NA | IntergeniALR/Alphe    | 570085  | NR_04009E | 284801   | Hs.370695NR | 04009E    | ENSG0000C  | MIR663AHC  | -               | MIR663A lncRNA          |                 |
| chr17-25  | 49.22803 | -0.36293 | 0.32807  | -1.10627 | 0.268661 | 0.440315 | chr17 | 25082611 | 25082851 | + | 0 | NA | IntergeniALR/Alphe    | 2006510 | NR_135673 | 1.05E+08 | Hs.649918NR | 135673    | LOC105371- |            | uncharactncRNA  |                         |                 |
| chr19-257 | 44.48172 | -0.38151 | 0.345187 | -1.10522 | 0.269066 | 0.440851 | chr19 | 25733804 | 25734023 | + | 0 | NA | IntergeniALR/Alphe    | 1570466 | NR_00360E | 1E+08    | Hs.149312NR | 00360E    | ENSG0000C  | HAVCR1P1   | -               | hepatitispsseudo        |                 |
| chr1-1217 | 34.24048 | -0.42626 | 0.385962 | -1.10441 | 0.269415 | 0.441212 | chr1  | 1.22E+08 | 1.22E+08 | + | 0 | NA | IntergeniALR/Alphe    | 226991  | NR_00395E | 647121   | Hs.697682NR | 00395E    | ENSG0000C  | EMB1       | -               | embigin fpseudo         |                 |
| chr21-83  | 57.70592 | -0.34218 | 0.309998 | -1.10382 | 0.269673 | 0.441272 | chr21 | 8385781  | 8387075  | + | 0 | NA | intron (intron (delta | -1934   | NR_12871E | 1.04E+08 |             | NR_12871E | ENSG0000C  | MIR6724-   | hsa-mir-        | microRNA ncRNA          |                 |
| chr1-123  | 19.38208 | -0.56665 | 0.504334 | -1.10373 | 0.269709 | 0.441272 | chr1  | 1.23E+08 | 1.23E+08 | + | 0 | NA | IntergeniALR/Alphe    | 1706296 | NR_00395E | 647121   | Hs.697682NR | 00395E    | ENSG0000C  | EMB1       | -               | embigin fpseudo         |                 |
| chr7-608  | 26.77455 | -0.4759  | 0.431821 | -1.10208 | 0.270428 | 0.442076 | chr7  | 60803527 | 60803803 | + | 0 | NA | IntergeniALR/Alphe    | 2506391 | NR_00395E | 643955   | Hs.583308NR | 00395E    | ENSG0000C  | ZNF733P    | ZNF733          | zinc fingpseudo         |                 |
| chr5-490  | 19.26521 | -0.56111 | 0.509256 | -1.10182 | 0.270538 | 0.442076 | chr5  | 49032207 | 49032931 | + | 0 | NA | IntergeniALR/Alphe    | 1408719 | NR_19844E | 133418   | Hs.561411NR | 19844E    | ENSG0000C  | EMB        | GP70            | embigin protein-coding  |                 |
| chr11-534 | 18.83326 | -0.56265 | 0.51071  | -1.10171 | 0.270588 | 0.442076 | chr11 | 53454475 | 53455701 | + | 0 | NA | IntergeniALR/Alphe    | 1148910 | NR_001004 | 119749   | Hs.553564NR | 001004    | ENSG0000C  | OR4C46     | -               | olfactoryprotein-coding |                 |
| chr19-25  | 26.29362 | -0.47194 | 0.435372 | -1.10054 | 0.271097 | 0.442698 | chr19 | 25802797 | 25803357 | + | 0 | NA | IntergeniALR/Alphe    | 1639630 | NR_00360E | 1E+08    | Hs.149312NR | 00360E    | ENSG0000C  | HAVCR1P1   | -               | hepatitispsseudo        |                 |
| chr6-5934 | 17.8497  | -0.57527 | 0.523134 | -1.09966 | 0.271482 | 0.443114 | chr6  | 59342733 | 59345761 | + | 0 | NA | IntergeniALR/Alphe    | 1382801 | NR_13299E | 1.07E+08 | Hs.561535NR | 125727    | ENSG0000C  | LINC0068C  | -               | long intencRNA          |                 |
| chr5-478  | 33.21073 | -0.42952 | 0.390872 | -1.09886 | 0.271827 | 0.443467 | chr5  | 47855246 | 47857101 | + | 0 | NA | IntergeniALR/Alphe    | 2159794 | NR_02107E | 348980   | Hs.35317E   | NR_02107E | ENSG0000C  | HCN1       | BCNG-1 B        | hyperpolprotein-coding  |                 |
| chr5-480  | 26.27192 | -0.47795 | 0.435505 | -1.09746 | 0.272439 | 0.444228 | chr5  | 48068271 | 48068578 | + | 0 | NA | IntergeniALR/Alphe    | 2372044 | NR_02107E | 348980   | Hs.35317E   | NR_02107E | ENSG0000C  | HCN1       | BCNG-1 B        | hyperpolprotein-coding  |                 |
| chr17-22  | 79.76978 | -0.30043 | 0.273811 | -1.0972  | 0.272553 | 0.444228 | chr17 | 22976497 | 22977768 | + | 0 | NA | IntergeniALR/Alphe    | 454021  | NR_00119C | 1E+08    | Hs.740185NR | 00119C    | ENSG0000C  | MTRNR2L1   | HN1             | MT-RNR2                 | lprotein-coding |
| chr5-490  | 36.39627 | -0.4112  | 0.375058 | -1.09638 | 0.272914 | 0.444406 | chr5  | 49055825 | 49058084 | + | 0 | NA | IntergeniALR/Alphe    | 1384434 | NR_19844E | 133418   | Hs.561411NR | 19844E    | ENSG0000C  | EMB        | GP70            | embigin protein-coding  |                 |
| chr5-484  | 22.12731 | -0.51961 | 0.473951 | -1.09633 | 0.272934 | 0.444406 | chr5  | 48483143 | 48483579 | + | 0 | NA | IntergeniALR/Alphe    | 1957924 | NR_19844E | 133418   | Hs.561411NR | 19844E    | ENSG0000C  | EMB        | GP70            | embigin protein-coding  |                 |
| chr5-493  | 18.85775 | -0.56004 | 0.510952 | -1.09606 | 0.273052 | 0.444406 | chr5  | 49381192 | 49381512 | + | 0 | NA | IntergeniALR/Alphe    | 1059936 | NR_19844E | 133418   | Hs.561411NR | 19844E    | ENSG0000C  | EMB        | GP70            | embigin protein-coding  |                 |
| chr6-5907 | 17.36877 | -0.58302 | 0.532215 | -1.09546 | 0.273314 | 0.444621 | chr6  | 59070324 | 59071091 | + | 0 | NA | IntergeniALR/Alphe    | 1109261 | NR_13299E | 1.07E+08 | Hs.561535NR | 125727    | ENSG0000C  | LINC0068C  | -               | long intencRNA          |                 |
| chr19-261 | 42.76735 | -0.38285 | 0.349825 | -1.0944  | 0.27378  | 0.445169 | chr19 | 26120147 | 26120524 | + | 0 | NA | IntergeniALR/Alphe    | 1673096 | NR_146733 | 1.02E+08 | Hs.567934NR | 110687    | ENSG0000C  | LOC101927- |                 | uncharactncRNA          |                 |
| chr20-27  | 17.85249 | -0.57082 | 0.522804 | -1.09184 | 0.274904 | 0.446479 | chr20 | 27354139 | 27356616 | + | 0 | NA | IntergeniALR/Alphe    | 1146144 | NR_04009E | 284801   | Hs.370695NR | 04009E    | ENSG0000C  | MIR663AHC  | -               | MIR663A lncRNA          |                 |
| chr20-28  | 17.85249 | -0.57082 | 0.522804 | -1.09184 | 0.274904 | 0.446479 | chr20 | 28820977 | 28821467 | + | 0 | NA | IntergeniALR/Alphe    | 218557  | NR_13231E | 1E+08    | Hs.529357NR | 13231E    | ENSG0000C  | FRG1CP     | -               | FSHD regipseudo         |                 |
| chr19-25  | 33.16733 | -0.42758 | 0.391675 | -1.09167 | 0.274977 | 0.446479 | chr19 | 25087989 | 25090286 | + | 0 | NA | IntergeniALR/Alphe    | 925699  | NR_00360E | 1E+08    | Hs.149312NR | 00360E    | ENSG0000C  | HAVCR1P1   | -               | hepatitispsseudo        |                 |
| chr10-41  | 19.24351 | -0.55948 | 0.512771 | -1.09109 | 0.275232 | 0.446515 | chr10 | 41373034 | 41373346 | + | 0 | NA | IntergeniALR/Alphe    | 994855  | NR_02438C | 441666   | Hs.255725NR | 02438C    | ENSG0000C  | LOC44166E  | -               | zinc fingpseudo         |                 |
| chr5-491  | 64.57567 | -0.31897 | 0.292373 | -1.09095 | 0.275294 | 0.446515 | chr5  | 49182237 | 49183369 | + | 0 | NA | IntergeniALR/Alphe    | 1258485 | NR_19844E | 133418   | Hs.561411NR | 19844E    | ENSG0000C  | EMB        | GP70            | embigin protein-coding  |                 |
| chr20-27  | 17.32537 | -0.5795  | 0.531354 | -1.09061 | 0.275446 | 0.446515 | chr20 | 27827668 | 27829743 | + | 0 | NA | IntergeniALR/Alphe    | 773960  | NR_13231E | 1E+08    | Hs.529357NR | 13231E    | ENSG0000C  | FRG1CP     | -               | FSHD regipseudo         |                 |
| chr1-1241 | 21.55678 | -0.52251 | 0.479176 | -1.09044 | 0.27552  | 0.446515 | chr1  | 1.24E+08 | 1.24E+08 | + | 0 | NA | IntergeniALR/Alphe    | 2583125 | NR_00395E | 647121   | Hs.697682NR | 00395E    | ENSG0000C  | EMB1       | -               | embigin fpseudo         |                 |
| chr21-11  | 15.22135 | -0.62716 | 0.575889 | -1.08902 | 0.276144 | 0.447314 | chr21 | 11904755 | 11904848 | + | 0 | NA | IntergeniALR/Alphe    | 1133455 | NR_02691E | 149992   | Hs.55864E   | NR_153773 | ANKRD30BF  | C21orf99   | ankyrin fpseudo |                         |                 |
| chr11-51  | 86.81098 | -0.28222 | 0.259414 | -1.08792 | 0.276632 | 0.447825 | chr11 | 51097822 | 51098096 | + | 0 | NA | IntergeniALR/Alphe    | 688812  | NR_024504 | 646813   | Hs.684175NR | 024504    | LOC646813- |            | DEXH-box pseudo |                         |                 |
| chr5-492  | 35.87194 | -0.41092 | 0.377884 | -1.08742 | 0.276851 | 0.447825 | chr5  | 49260323 | 49261153 | + | 0 | NA | IntergeniALR/Alphe    | 1180550 | NR_19844E | 133418   | Hs.561411NR | 19844E    | ENSG0000C  | EMB        | GP70            | embigin protein-coding  |                 |
| chr2-9341 | 26.66046 | -0.47601 | 0.437747 | -1.08742 | 0.276851 | 0.447825 | chr2  | 93414411 | 93414616 | + | 0 | NA | IntergeniALR/Alphe    | 73906   | NR_146105 | 728034   | Hs.561411NR | 146105    | BMS1P14    | -          | BMS1 psetpseudo |                         |                 |
| chr5-489  | 26.15393 | -0.48952 | 0.450581 | -1.08642 | 0.277293 | 0.448255 | chr5  | 48962019 | 48962232 | + | 0 | NA | IntergeniALR/Alphe    | 1479163 | NR_19844E | 133418   | Hs.561411NR | 19844E    | ENSG0000C  | EMB        | GP70            | embigin protein-coding  |                 |
| chr10-404 | 21.55957 | -0.51879 | 0.477876 | -1.08562 | 0.277646 | 0.448255 | chr10 | 40476464 | 40478829 | + | 0 | NA | IntergeniALR/Alphe    | 1781050 | NR_04500C | 339746   | Hs.742607NR | 045000    | ACTR3BP5   | FKSG74     | ACTR3B          | pspseudo                |                 |
| chr20-27  | 22.0405  | -0.51398 | 0.473647 | -1.08516 | 0.27785  | 0.448255 | chr20 | 27212045 | 27212885 | + | 0 | NA | IntergeniALR/Alphe    | 1003232 | NR_04009E | 284801   | Hs.370695NR | 04009E    | ENSG0000C  | MIR663AHC  | -               | MIR663A lncRNA          |                 |
| chr6-596  | 17.30366 | -0.57775 | 0.532417 | -1.08515 | 0.277855 | 0.448255 | chr6  | 59686391 | 59686595 | + | 0 | NA | IntergeniALR/Alphe    | 1725974 | NR_13299E | 1.07E+08 | Hs.561535NR | 125727    | ENSG0000C  | LINC0068C  | -               | long intencRNA          |                 |
| chr1-124  | 35.94262 | -0.40909 | 0.377705 | -1.0849  | 0.277966 | 0.448255 | chr1  | 1.24E+08 | 1.24E+08 | + | 0 | NA | IntergeniALR/Alphe    | 2979795 | NR_00395E | 647121   | Hs.697682NR |           |            |            |                 |                         |                 |



|           |          |          |          |          |          |          |       |          |          |   |   |    |                    |          |           |          |           |                 |                     |                |                      |                         |                    |
|-----------|----------|----------|----------|----------|----------|----------|-------|----------|----------|---|---|----|--------------------|----------|-----------|----------|-----------|-----------------|---------------------|----------------|----------------------|-------------------------|--------------------|
| chr10-406 | 30.2061  | -0.42496 | 0.408228 | -1.04097 | 0.297887 | 0.464314 | chr10 | 40673460 | 40673667 | + | 0 | NA | IntergeniALR/Alphe | 1694482  | NR_02438C | 441666   | Hs.255725 | NR_02438C       | ENSG0000C.LOC441666 | -              | zinc                 | fingerpseud             |                    |
| chr13-17  | 20.15243 | -0.51629 | 0.496183 | -1.04053 | 0.298094 | 0.464412 | chr13 | 17315416 | 17315692 | + | 0 | NA | IntergeniALR/Alphe | -879743  | NR_027278 | 26080    | Hs.44858  | NR_027278       | ENSG0000C.FAM230C   | LINC00281      | family               | wincRNA                 |                    |
| chr10-408 | 22.82976 | -0.48484 | 0.466073 | -1.04025 | 0.298221 | 0.464412 | chr10 | 40833171 | 40834292 | + | 0 | NA | IntergeniALR/Alphe | 1534314  | NR_02438C | 441666   | Hs.255725 | NR_02438C       | ENSG0000C.LOC441666 | -              | zinc                 | fingerpseud             |                    |
| chr1-123  | 34.76096 | -0.40511 | 0.39046  | -1.03751 | 0.299499 | 0.466189 | chr1  | 1.23E+08 | 1.23E+08 | + | 0 | NA | IntergeniALR/Alphe | 1578717  | NR_00395E | 647121   | Hs.697682 | NR_00395E       | ENSG0000C.EMB1      | -              | embigin              | fpseudo                 |                    |
| chr10-407 | 18.62005 | -0.50857 | 0.513302 | -1.03243 | 0.301027 | 0.468278 | chr10 | 40763185 | 40764350 | + | 0 | NA | IntergeniALR/Alphe | 1604278  | NR_02438C | 441666   | Hs.255725 | NR_02438C       | ENSG0000C.LOC441666 | -              | zinc                 | fingerpseud             |                    |
| chr1-123  | 32.93521 | -0.40551 | 0.392247 | -1.03381 | 0.301225 | 0.468278 | chr1  | 1.23E+08 | 1.23E+08 | + | 0 | NA | IntergeniALR/Alphe | 1531111  | NR_00395E | 647121   | Hs.697682 | NR_00395E       | ENSG0000C.EMB1      | -              | embigin              | fpseudo                 |                    |
| chr1-124  | 27.2211  | -0.47905 | 0.46343  | -1.03371 | 0.30127  | 0.468278 | chr1  | 1.25E+08 | 1.25E+08 | + | 0 | NA | IntergeniALR/Alphe | 3232285  | NR_00395E | 647121   | Hs.697682 | NR_00395E       | ENSG0000C.EMB1      | -              | embigin              | fpseudo                 |                    |
| chr20-265 | 17.33652 | -0.56069 | 0.542569 | -1.03339 | 0.30142  | 0.468278 | chr20 | 26935661 | 26935885 | + | 0 | NA | IntergeniALR/Alphe | -726540  | NR_04009E | 284801   | Hs.370695 | NR_04009E       | ENSG0000C.MIR663AHC | -              | MIR663A              | lncRNA                  |                    |
| chr1-124  | 18.55215 | -0.53019 | 0.513171 | -1.03317 | 0.301524 | 0.468278 | chr1  | 1.24E+08 | 1.24E+08 | + | 0 | NA | IntergeniALR/Alphe | 2511304  | NR_00395E | 647121   | Hs.697682 | NR_00395E       | ENSG0000C.EMB1      | -              | embigin              | fpseudo                 |                    |
| chr6-602  | 19.48283 | -0.54118 | 0.524351 | -1.03209 | 0.30203  | 0.468683 | chr6  | 60234132 | 60234340 | + | 0 | NA | IntergeniALR/Alphe | -1339894 | NR_00119C | 1E+08    | Hs.       | 1190706         | MTRNR2L9            | HN9            | MT-RNR2              | lprotein-coding         |                    |
| chr2-9401 | 22.76466 | -0.48703 | 0.465809 | -1.03203 | 0.302059 | 0.468683 | chr2  | 94011196 | 94011422 | + | 0 | NA | IntergeniALR/Alphe | 197110   | NR_146105 | 728034   | NR.146105 | BMS1P14         | -                   | BMS1           | pseudoprotein-coding |                         |                    |
| chr4-4984 | 16.28507 | -0.5739  | 0.556295 | -1.03165 | 0.302236 | 0.468747 | chr4  | 49841247 | 49841696 | + | 0 | NA | IntergeniALR/Alphe | 854829   | NR_00128E | 80157    | Hs.479702 | NR_025087       | ENSG0000C.CWH43     | CWH43-C        | Cell                 | wallprotein-coding      |                    |
| chr1-125  | 18.57664 | -0.52757 | 0.512439 | -1.02953 | 0.30323  | 0.469862 | chr1  | 1.23E+08 | 1.23E+08 | + | 0 | NA | IntergeniALR/Alphe | 1388345  | NR_00395E | 647121   | Hs.697682 | NR_00395E       | ENSG0000C.EMB1      | -              | embigin              | fpseudo                 |                    |
| chr20-266 | 18.57664 | -0.52757 | 0.512439 | -1.02953 | 0.30323  | 0.469862 | chr20 | 26922289 | 26924253 | + | 0 | NA | IntergeniALR/Alphe | -714328  | NR_04009E | 284801   | Hs.370695 | NR_04009E       | ENSG0000C.MIR663AHC | -              | MIR663A              | lncRNA                  |                    |
| chr1-244  | 16.47256 | 0.571272 | 0.556181 | 1.027134 | 0.304358 | 0.47137  | chr1  | 2440413  | 2440671  | + | 0 | NA | IntergeniCpG       | -26909   | NR_00130E | 9651     | Hs.17015E | NR_014638       | ENSG0000C.PLCH2     | PLC-L4         | PL                   | phospholiprotein-coding |                    |
| chr5-4795 | 55.61579 | -0.31955 | 0.311186 | -1.02688 | 0.304478 | 0.47137  | chr5  | 47924481 | 47924712 | + | 0 | NA | IntergeniALR/Alphe | -2228216 | NR_02107E | 348980   | Hs.35317E | NR_02107E       | ENSG0000C.HCN1      | BCNG-1         | BC                   | hyperpolprotein-coding  |                    |
| chr1-127  | 31.88096 | -0.40976 | 0.399559 | -1.02554 | 0.305108 | 0.472132 | chr1  | 1.23E+08 | 1.23E+08 | + | 0 | NA | IntergeniALR/Alphe | 1370751  | NR_00395E | 647121   | Hs.697682 | NR_00395E       | ENSG0000C.EMB1      | -              | embigin              | fpseudo                 |                    |
| chr19-27  | 53.00078 | -0.32621 | 0.31825  | -1.025   | 0.305364 | 0.472166 | chr19 | 27020554 | 27020787 | + | 0 | NA | IntergeniALR/Alphe | -772761  | NR_14673E | 1.02E+08 | Hs.567934 | NR_110687       | ENSG0000C.LOC101927 | -              | uncharactncRNA       |                         |                    |
| chr5-4904 | 31.21694 | -0.41777 | 0.407646 | -1.02484 | 0.305436 | 0.472166 | chr5  | 49042810 | 49043746 | + | 0 | NA | IntergeniALR/Alphe | 1398010  | NR_19844E | 133418   | Hs.561411 | NR_19844E       | ENSG0000C.EMB       | GP70           | embigin              | protein-coding          |                    |
| chr18-205 | 25.42029 | -0.45528 | 0.444667 | -1.02388 | 0.305894 | 0.472166 | chr18 | 20920232 | 20923103 | + | 0 | NA | IntergeniALR/Alphe | 190146   | NR_00540E | 6093     | Hs.306307 | NR_00540E       | ENSG0000C.ROCK1     | P160ROCK       | Rho                  | assocprotein-coding     |                    |
| chr19-27  | 53.00078 | -0.40524 | 0.393162 | -1.02385 | 0.305906 | 0.472166 | chr19 | 27069326 | 27069544 | + | 0 | NA | IntergeniALR/Alphe | -723996  | NR_14673E | 1.02E+08 | Hs.567934 | NR_110687       | ENSG0000C.LOC101927 | -              | uncharactncRNA       |                         |                    |
| chr12-372 | 21.7811  | -0.4873  | 0.475985 | -1.02377 | 0.305944 | 0.472166 | chr12 | 37235338 | 37236302 | + | 0 | NA | IntergeniALR/Alphe | -1080954 | NR_00130E | 144245   | Hs.25930E | NR_00101E       | ENSG0000C.ALG10B    | ALG10          | KCF                  | ALG10                   | alprotein-coding   |
| chr8-4417 | 22.16685 | -0.4885  | 0.477228 | -1.02362 | 0.306013 | 0.472166 | chr8  | 44174599 | 44175592 | + | 0 | NA | IntergeniALR/Alphe | 882653   | NR_00100E | 340441   | Hs.53157E | NR_00100E       | ENSG0000C.POTE      | A26A1          | CT1                  | POTE                    | ankyprotein-coding |
| chr8-456  | 18.00333 | -0.53571 | 0.523435 | -1.02345 | 0.306095 | 0.472166 | chr8  | 45639961 | 45640835 | + | 0 | NA | IntergeniALR/Alphe | 977245   | NR_146077 | 389652   | NR.146077 | ENSG0000C.ASNP1 | ASNSL1              | asparagipseudo |                      |                         |                    |
| chr10-402 | 21.7349  | -0.48812 | 0.477482 | -1.02228 | 0.306647 | 0.472592 | chr10 | 40246748 | 40248460 | + | 0 | NA | IntergeniALR/Alphe | 1551008  | NR_04500C | 399746   | Hs.742607 | NR_045000       | ACTR3BP5            | FKSG74         | ACTR3B               | pspseudo                |                    |
| chr10-403 | 21.7349  | -0.48812 | 0.477482 | -1.02228 | 0.306647 | 0.472592 | chr10 | 40396648 | 40397790 | + | 0 | NA | IntergeniALR/Alphe | 40396648 | NR_04500C | 399746   | Hs.742607 | NR_045000       | ACTR3BP5            | FKSG74         | ACTR3B               | pspseudo                |                    |
| chr10-411 | 36.55827 | -0.38617 | 0.377966 | -1.02169 | 0.306926 | 0.47281  | chr10 | 41143920 | 41144303 | + | 0 | NA | IntergeniALR/Alphe | 1220634  | NR_02438C | 441666   | Hs.255725 | NR_02438C       | ENSG0000C.LOC441666 | -              | zinc                 | fingerpseud             |                    |
| chr3-918  | 32.56836 | -0.40708 | 0.398821 | -1.0207  | 0.307396 | 0.473321 | chr3  | 91865256 | 91865540 | + | 0 | NA | IntergeniALR/Alphe | 2108683  | NR_001314 | 5627     | Hs.64016  | NR_00031E       | ENSG0000C.PROS1     | PROS1          | PS21                 | protein                 | protein-coding     |
| chr5-4897 | 35.17669 | -0.40063 | 0.392961 | -1.01953 | 0.307953 | 0.473756 | chr5  | 48979351 | 48979602 | + | 0 | NA | IntergeniALR/Alphe | 1461812  | NR_19844E | 133418   | Hs.561411 | NR_19844E       | ENSG0000C.EMB       | GP70           | embigin              | protein-coding          |                    |
| chr9-4098 | 17.5224  | -0.54227 | 0.53189  | -1.01952 | 0.307955 | 0.473756 | chr9  | 40982447 | 40983912 | + | 0 | NA | IntergeniLIMAG LID | -9082    | NR_15673C | 1E+08    | Hs.       | 15673C          | FRG1H               | -              | FSHD                 | regipseudo              |                    |
| chr1-122  | 60.00084 | -0.30687 | 0.301194 | -1.01886 | 0.308269 | 0.474026 | chr1  | 1.23E+08 | 1.23E+08 | + | 0 | NA | IntergeniALR/Alphe | 1052348  | NR_00395E | 647121   | Hs.697682 | NR_00395E       | ENSG0000C.EMB1      | -              | embigin              | fpseudo                 |                    |
| chr20-287 | 17.57138 | -0.5366  | 0.526907 | -1.0184  | 0.308486 | 0.474147 | chr20 | 28780595 | 28787216 | + | 0 | NA | IntergeniALR/Alphe | -181240  | NR_13231E | 1E+08    | Hs.529357 | NR_13231E       | ENSG0000C.FRGL1CP   | -              | FSHD                 | regipseudo              |                    |
| chr5-495  | 22.26482 | -0.47966 | 0.471197 | -1.01796 | 0.308696 | 0.474257 | chr5  | 49567719 | 49569712 | + | 0 | NA | IntergeniALR/Alphe | 872543   | NR_19844E | 133418   | Hs.561411 | NR_19844E       | ENSG0000C.EMB       | GP70           | embigin              | protein-coding          |                    |
| chr1-124  | 18.00612 | -0.53128 | 0.52256  | -1.01668 | 0.309305 | 0.474852 | chr1  | 1.24E+08 | 1.24E+08 | + | 0 | NA | IntergeniALR/Alphe | 2938015  | NR_00395E | 647121   | Hs.697682 | NR_00395E       | ENSG0000C.EMB1      | -              | embigin              | fpseudo                 |                    |
| chr20-287 | 29.0694  | 0.426568 | 0.419683 | 1.016403 | 0.309437 | 0.474852 | chr20 | 28534153 | 28534745 | + | 0 | NA | IntergeniALR/Alphe | 68216    | NR_13231E | 1E+08    | Hs.529357 | NR_13231E       | ENSG0000C.FRGL1CP   | -              | FSHD                 | regipseudo              |                    |
| chr21-127 | 21.25119 | -0.49636 | 0.488427 | -1.01624 | 0.309516 | 0.474852 | chr21 | 12711699 | 12711929 | + | 0 | NA | IntergeniALR/Alphe | -326352  | NR_02691E | 149992   | Hs.55864E | NR_153773       | ANKRD30B            | C21orf99       | ankyrin              | fpseudo                 |                    |
| chr11-51  | 17.63928 | -0.53734 | 0.528888 | -1.01598 | 0.309638 | 0.474852 | chr11 | 51925566 | 51926266 | + | 0 | NA | IntergeniALR/Alphe | 1516769  | NR_024504 | 646813   | Hs.68417E | NR_024504       | LOC64681E           | -              | DEXH-box             | pseudo                  |                    |
| chr5-4791 | 34.59115 | -0.38922 | 0.383954 | -1.01372 | 0.310714 | 0.476289 | chr5  | 47912908 | 47914813 | + | 0 | NA | IntergeniALR/Alphe | -2217480 | NR_02107E | 348980   | Hs.35317E | NR_02107E       | ENSG0000C.HCN1      | BCNG-1         | BC                   | hyperpolprotein-coding  |                    |
| chr1-122  | 30.39366 | -0.41993 | 0.414474 | -1.01317 | 0.310977 | 0.476363 | chr1  | 1.23E+08 | 1.23E+08 | + | 0 | NA | IntergeniALR/Alphe | 1476114  | NR_00395E | 647121   | Hs.697682 | NR_00395E       | ENSG0000C.EMB1      | -              | embigin              | fpseudo                 |                    |
| chr19-24  | 22.67506 | -0.4787  | 0.472552 | -1.013   | 0.311059 | 0.476363 | chr19 | 24976648 | 24978063 | + | 0 | NA | IntergeniALR/Alphe | -813908  | NR_00360E | 1E+08    | Hs.149312 | NR_00360E       | ENSG0000C.HAVCR1P1  | -              | hepatitis            | pseudo                  |                    |
| chr13-16  | 19.10656 | -0.51659 | 0.510086 | -1.01275 | 0.31118  | 0.476363 | chr13 | 16366093 | 16366324 | + | 0 | NA | IntergeniALR/Alphe | -1659899 | NR_027278 | 26080    | Hs.44858  | NR_027278       | ENSG0000C.FAM230C   | LINC00281      | family               | wincRNA                 |                    |
| chr14-17  | 17.09045 | -0.54336 | 0.536942 | -1.01196 | 0.311558 | 0.476531 | chr14 | 17362088 | 17362349 | + | 0 | NA | IntergeniALR/Alphe | -1238899 | NR_00101E | 440153   | Hs.53488C | NR_00101E       | ENSG0000C.ORI1H1    | ORI1H1         | Col                  | factoryprotein-coding   |                    |
| chr20-284 | 29.06506 | -0.42588 | 0.420852 | -1.01194 | 0.311567 | 0.476531 | chr20 | 28473938 | 28474450 | + | 0 | NA | IntergeniALR/Alphe | 128471   | NR_13231E | 1E+08    | Hs.529357 | NR_13231E       | ENSG0000C.FRGL1CP   | -              | FSHD                 | regipseudo              |                    |
| chr9-605  | 40.4596  | -0.36308 | 0.358923 | -1.01159 | 0.311733 | 0.476572 | chr9  | 60591243 | 60591488 | + | 0 | NA | IntergeniALR/Alphe | -323042  | NR_00111E | 727905   | Hs.645497 | NR_00111E       | ENSG0000C.SPATA31A  | FAM75A5        | SPATA31              | sprotein-coding         |                    |
| chr11-534 | 70.49088 | -0.28529 | 0.282106 | -1.01128 | 0.311883 | 0.476589 | chr11 | 53456744 | 53456998 | + | 0 | NA | IntergeniALR/Alphe | 1147127  | NR_001004 | 119749   | Hs.553564 | NR_001004       | ENSG0000C.ORAC46    | -              | olfactory            | protein-coding          |                    |
| chr5-472  | 17.11494 | -0.54047 | 0.535448 | -1.00938 | 0.312793 | 0.477369 | chr5  | 47292625 | 47297963 | + | 0 | NA | IntergeniALR/Alphe | -1600749 | NR_02107E | 348980   | Hs.35317E | NR_02107E       | ENSG0000C.HCN1      | BCNG-1         | BC                   | hyperpolprotein-coding  |                    |
| chr6-5964 | 17.6554  | -0.54878 | 0.54377  | -1.00921 | 0.312872 | 0.477369 | chr6  | 59648794 | 59649186 | + | 0 | NA | IntergeniALR/Alphe | -1687544 | NR_13299E | 1.07E+08 | Hs.56153E | NR_125727       | ENSG0000C.LINC0068C | -              | long                 | intencRNA               |                    |
| chr1-124  | 34.80604 | -0.40949 | 0.405817 | -1.00904 | 0.312955 | 0.477369 | chr1  | 1.24E+08 | 1.24E+08 | + | 0 | NA | IntergeniALR/Alphe | 2973183  | NR_00395E | 647121   | Hs.697682 | NR_00395E       | ENSG0000C.EMB1      | -              | embigin              | fpseudo                 |                    |
| chr19-251 | 21.78668 | -0.47998 | 0.475751 | -1.0089  | 0.313024 | 0.477369 | chr19 | 25192098 | 25194107 | + | 0 | NA |                    |          |           |          |           |                 |                     |                |                      |                         |                    |

|           |          |          |          |          |          |          |       |          |          |   |   |    |                             |          |           |          |                       |           |            |         |                            |
|-----------|----------|----------|----------|----------|----------|----------|-------|----------|----------|---|---|----|-----------------------------|----------|-----------|----------|-----------------------|-----------|------------|---------|----------------------------|
| chr5-4828 | 23.4916  | -0.44621 | 0.495511 | -0.97106 | 0.331516 | 0.489313 | chr5  | 48280249 | 48280723 | + | 0 | NA | IntergeniALR/Alphe          | 2160802  | NM_198444 | 133418   | Hs.561411NM_198444    | ENSG00000 | EMB        | GP70    | emigin protein-coding      |
| chr1-1234 | 51.89537 | -0.3172  | 0.326735 | -0.97082 | 0.331636 | 0.489313 | chr1  | 1.23E+08 | 1.23E+08 | + | 0 | NA | IntergeniALR/Alphe          | 1949633  | NR_003955 | 647121   | Hs.697682NR_003955    | ENSG00000 | EMB        | GP70    | emigin protein-coding      |
| chr19-265 | 20.143   | -0.4869  | 0.501881 | -0.97014 | 0.331976 | 0.489393 | chr19 | 26980787 | 26980999 | + | 0 | NA | IntergeniALR/Alphe          | -812538  | NR_146733 | 1.02E+08 | Hs.567934NR_110687    | ENSG00000 | LOC101927- |         | uncharactncRNA             |
| chr17-263 | 84.95413 | -0.2619  | 0.269956 | -0.97014 | 0.331976 | 0.489393 | chr17 | 26328659 | 26328911 | + | 0 | NA | IntergeniALR/Alphe          | 760456   | NR_135673 | 1.05E+08 | Hs.649918NR_135673    | ENSG00000 | LOC105371- |         | uncharactncRNA             |
| chr6-5866 | 15.0666  | -0.54866 | 0.566437 | -0.96861 | 0.33274  | 0.490308 | chr6  | 58685069 | 58685926 | + | 0 | NA | IntergeniALR/Alphe          | 58685069 | NR_132995 | 1.07E+08 | Hs.561535NR_125727    | ENSG00000 | LINC00681- |         | long intencRNA             |
| chr1-1245 | 16.14254 | -0.53329 | 0.5514   | -0.96716 | 0.333462 | 0.490973 | chr1  | 1.25E+08 | 1.25E+08 | + | 0 | NA | IntergeniALR/Alphe          | 2988616  | NR_003955 | 647121   | Hs.697682NR_003955    | ENSG00000 | EMB        | GP70    | emigin protein-coding      |
| chr11-516 | 26.11253 | -0.42386 | 0.438384 | -0.96686 | 0.333615 | 0.490973 | chr11 | 51800188 | 51800415 | + | 0 | NA | IntergeniALR/Alphe          | 1391154  | NR_024504 | 646813   | Hs.684175NR_024504    | ENSG00000 | LOC646813- |         | DEXH-box pseudo            |
| chr20-266 | 15.11279 | -0.54745 | 0.566225 | -0.96668 | 0.333644 | 0.490973 | chr20 | 26696172 | 26698193 | + | 0 | NA | IntergeniALR/Alphe          | -487949  | NR_040095 | 284801   | Hs.370695NR_040095    | ENSG00000 | MIR663AHC- |         | MIR663A lncRNA             |
| chr19-252 | 19.34699 | -0.48685 | 0.503689 | -0.96656 | 0.333764 | 0.490973 | chr19 | 25299835 | 25300693 | + | 0 | NA | IntergeniALR/Alphe          | -1136817 | NR_003603 | 1E+08    | Hs.149312NR_003603    | ENSG00000 | HAVCR1P1   |         | hepatitispseudo            |
| chr19-271 | 37.49559 | -0.35802 | 0.370916 | -0.96524 | 0.334426 | 0.491735 | chr19 | 27138456 | 27140712 | + | 0 | NA | IntergeniALR/Alphe          | -653847  | NR_146733 | 1.02E+08 | Hs.567934NR_110687    | ENSG00000 | LOC101927- |         | uncharactncRNA             |
| chr10-395 | 18.75198 | -0.49183 | 0.51077  | -0.96293 | 0.335584 | 0.493226 | chr10 | 39936594 | 39937584 | + | 0 | NA | IntergeniALR/Alphe          | 29936594 | NR_003955 | 399746   | Hs.742607NR_045000    | ENSG00000 | ACTR3BP5   | FKSG74  | ACTR3B pspseudo            |
| chr16-377 | 28.39262 | -0.40757 | 0.423538 | -0.96229 | 0.335904 | 0.493485 | chr16 | 37749960 | 37750295 | + | 0 | NA | IntergeniALR/Alphe          | 2003575  | NR_033985 | 400533   | Hs.499135NR_033985    | ENSG00000 | LINC02167- |         | long intencRNA             |
| chr7-5953 | 38.24708 | -0.36427 | 0.378997 | -0.96114 | 0.33648  | 0.49412  | chr7  | 59538057 | 59538324 | + | 0 | NA | IntergeniALR/Alphe          | 2088013  | NR_001155 | 441234   | Hs.533121NM_001155    | ENSG00000 | ZNF716     |         | zinc fingprotein-coding    |
| chr5-1752 | 34.35624 | -0.3702  | 0.385635 | -0.95999 | 0.337062 | 0.494762 | chr5  | 17525188 | 17527945 | + | 0 | NA | IntergeniIntergeni          | 82556    | NR_13427C | 1.03E+08 | NR_13427C             | ENSG00000 | LINC02218- |         | long intencRNA             |
| chr17-236 | 47.81698 | -0.32074 | 0.334309 | -0.95942 | 0.337349 | 0.494971 | chr17 | 23696720 | 23696930 | + | 0 | NA | IntergeniALR/Alphe          | 1173714  | NR_00119C | 1E+08    | Hs.740185NM_00119C    | ENSG00000 | MTRNR2L1   | HN1     | MT-RNR2 lprotein-coding    |
| chr22-137 | 23.49439 | -0.44276 | 0.461798 | -0.95878 | 0.337669 | 0.495129 | chr22 | 13741327 | 13741546 | + | 0 | NA | IntergeniALR/Alphe          | -1786723 | NR_001005 | 81061    | Hs.554706NM_001005    | ENSG00000 | OR11H1     | OR11H12 | Colfactoryprotein-coding   |
| chr5-4913 | 37.56906 | -0.35413 | 0.369412 | -0.95863 | 0.337746 | 0.495129 | chr5  | 49197568 | 49197861 | + | 0 | NA | IntergeniALR/Alphe          | 1243574  | NR_198444 | 133418   | Hs.561411NM_198444    | ENSG00000 | EMB        | GP70    | emigin protein-coding      |
| chr1-1233 | 18.31724 | -0.49594 | 0.518362 | -0.95675 | 0.338696 | 0.49631  | chr1  | 1.23E+08 | 1.23E+08 | + | 0 | NA | IntergeniALR/Alphe          | 1741699  | NR_003955 | 647121   | Hs.697682NR_003955    | ENSG00000 | EMB        | GP70    | emigin protein-coding      |
| chr17-255 | 18.80096 | -0.48669 | 0.509402 | -0.95542 | 0.339367 | 0.49708  | chr17 | 25963986 | 25964529 | + | 0 | NA | IntergeniALR/Alphe          | 1124984  | NR_135673 | 1.05E+08 | Hs.649918NR_135673    | ENSG00000 | LOC105371- |         | uncharactncRNA             |
| chr10-406 | 34.42692 | -0.36833 | 0.38589  | -0.9545  | 0.339832 | 0.497165 | chr10 | 40609163 | 40609464 | + | 0 | NA | IntergeniALR/Alphe          | 1758732  | NR_02438C | 441666   | Hs.255725NR_02438C    | ENSG00000 | LOC441666- |         | zinc fingpseudo            |
| chr1-1247 | 21.98371 | -0.4515  | 0.473046 | -0.95444 | 0.33986  | 0.497165 | chr1  | 1.25E+08 | 1.25E+08 | + | 0 | NA | IntergeniALR/Alphe          | 3211559  | NR_003955 | 647121   | Hs.697682NR_003955    | ENSG00000 | EMB        | GP70    | emigin protein-coding      |
| chr8-4405 | 21.98371 | -0.4515  | 0.473046 | -0.95444 | 0.33986  | 0.497165 | chr8  | 44056069 | 44057021 | + | 0 | NA | IntergeniALR/Alphe          | 764103   | NR_001002 | 340441   | Hs.531575NM_001002    | ENSG00000 | POTEA      | A26A1   | CTIPOTE ankyprotein-coding |
| chr19-265 | 15.6644  | -0.53541 | 0.561352 | -0.9538  | 0.340187 | 0.497431 | chr19 | 26538547 | 26539620 | + | 0 | NA | IntergeniALR/Alphe          | -1254348 | NR_146733 | 1.02E+08 | Hs.567934NR_110687    | ENSG00000 | LOC101927- |         | uncharactncRNA             |
| chr15-186 | 18.19758 | -0.50535 | 0.530279 | -0.95298 | 0.340598 | 0.49782  | chr15 | 18668862 | 18669455 | + | 0 | NA | IntergeniALR/Alphe          | -1613586 | NR_03883C | 646096   | Hs.448785NR_03883C    | ENSG00000 | CHEK2P2    |         | checkpoirpseudo            |
| chr1-1237 | 19.2357  | -0.4829  | 0.506966 | -0.95253 | 0.34083  | 0.497947 | chr1  | 1.24E+08 | 1.24E+08 | + | 0 | NA | IntergeniALR/Alphe          | 2213547  | NR_003955 | 647121   | Hs.697682NR_003955    | ENSG00000 | EMB        | GP70    | emigin protein-coding      |
| chr10-414 | 34.70138 | -0.36828 | 0.387048 | -0.9515  | 0.34135  | 0.498473 | chr10 | 41466548 | 41466900 | + | 0 | NA | IntergeniALR/Alphe          | 901321   | NR_02438C | 441666   | Hs.255725NR_02438C    | ENSG00000 | LOC441666- |         | zinc fingpseudo            |
| chr10-408 | 22.48913 | -0.44612 | 0.469015 | -0.95118 | 0.341511 | 0.498473 | chr10 | 40822031 | 40822542 | + | 0 | NA | IntergeniALR/Alphe          | 1545759  | NR_02438C | 441666   | Hs.255725NR_02438C    | ENSG00000 | LOC441666- |         | zinc fingpseudo            |
| chr19-245 | 28.88191 | -0.39735 | 0.417845 | -0.95096 | 0.341627 | 0.498473 | chr19 | 24959239 | 24960235 | + | 0 | NA | IntergeniALR/Alphe          | -796290  | NR_003603 | 1E+08    | Hs.149312NR_003603    | ENSG00000 | HAVCR1P1   |         | hepatitispseudo            |
| chr2-9302 | 22.53532 | -0.44537 | 0.468741 | -0.95014 | 0.342042 | 0.498866 | chr2  | 93025965 | 93026265 | + | 0 | NA | IntergeniALR/Alphe          | 1084982  | NR_027714 | 440888   | Hs.730235NM_001032412 | ENSG00000 | ACTR3BP2   | FKSG73  | ACTR3B pspseudo            |
| chr12-357 | 18.73307 | -0.48595 | 0.512402 | -0.94839 | 0.342933 | 0.499543 | chr12 | 33786055 | 35786498 | + | 0 | NA | IntergeniALR/Alphe          | 1763780  | NR_032834 | 84920    | Hs.102971NM_032834    | ENSG00000 | ALG10      | ALG10A  | DIALG10 alprotein-coding   |
| chr14-171 | 17.79291 | -0.49776 | 0.525241 | -0.94768 | 0.343292 | 0.500263 | chr14 | 17128289 | 17128995 | + | 0 | NA | IntergeniALR/Alphe          | -1472475 | NR_001013 | 440153   | Hs.534888NM_001013    | ENSG00000 | OR11H12    |         | olfactoryprotein-coding    |
| chr10-395 | 21.52727 | -0.45262 | 0.478266 | -0.94638 | 0.343953 | 0.501013 | chr10 | 39599775 | 39990787 | + | 0 | NA | IntergeniALR/Alphe          | 1293685  | NR_045000 | 399746   | Hs.742607NR_045000    | ENSG00000 | ACTR3BP5   | FKSG74  | ACTR3B pspseudo            |
| chr19-256 | 27.6173  | -0.4135  | 0.437108 | -0.946   | 0.344148 | 0.501024 | chr19 | 26605006 | 26605224 | + | 0 | NA | IntergeniALR/Alphe          | -1441668 | NR_003603 | 1E+08    | Hs.149312NR_003603    | ENSG00000 | HAVCR1P1   |         | hepatitispseudo            |
| chr19-264 | 18.27663 | -0.48821 | 0.516324 | -0.94556 | 0.344375 | 0.501024 | chr19 | 26489812 | 26491742 | + | 0 | NA | IntergeniALR/Alphe          | -1302654 | NR_146733 | 1.02E+08 | Hs.567934NR_110687    | ENSG00000 | LOC101927- |         | uncharactncRNA             |
| chr5-4946 | 43.78265 | -0.33327 | 0.35248  | -0.94551 | 0.344399 | 0.501024 | chr5  | 49467892 | 49468145 | + | 0 | NA | IntergeniALR/Alphe          | 973270   | NR_198444 | 133418   | Hs.561411NM_198444    | ENSG00000 | EMB        | GP70    | emigin protein-coding      |
| chr10-407 | 45.69405 | -0.32099 | 0.339681 | -0.94497 | 0.344675 | 0.501213 | chr10 | 40736163 | 40736461 | + | 0 | NA | IntergeniALR/Alphe          | 1631732  | NR_02438C | 441666   | Hs.255725NR_02438C    | ENSG00000 | LOC441666- |         | zinc fingpseudo            |
| chr5-4998 | 33.85919 | -0.36546 | 0.387179 | -0.94389 | 0.345224 | 0.501476 | chr5  | 49989733 | 49990011 | + | 0 | NA | IntergeniALR/Alphe          | 451416   | NR_198444 | 133418   | Hs.561411NM_198444    | ENSG00000 | EMB        | GP70    | emigin protein-coding      |
| chr1-1217 | 24.71821 | -0.42262 | 0.44776  | -0.94385 | 0.345247 | 0.501476 | chr1  | 1.22E+08 | 1.22E+08 | + | 0 | NA | IntergeniALR/Alphe          | 2045572  | NR_003955 | 647121   | Hs.697682NR_003955    | ENSG00000 | EMB        | GP70    | emigin protein-coding      |
| chr17-235 | 15.96056 | -0.53265 | 0.564526 | -0.94353 | 0.345407 | 0.501476 | chr17 | 23523166 | 23523369 | + | 0 | NA | IntergeniALR/Alphe          | 100156   | NR_00119C | 1E+08    | Hs.740185NM_00119C    | ENSG00000 | MTRNR2L1   | HN1     | MT-RNR2 lprotein-coding    |
| chr5-4901 | 27.94454 | -0.39897 | 0.422879 | -0.94347 | 0.345442 | 0.501476 | chr5  | 49012955 | 49013196 | + | 0 | NA | IntergeniALR/Alphe          | 1428213  | NR_198444 | 133418   | Hs.561411NM_198444    | ENSG00000 | EMB        | GP70    | emigin protein-coding      |
| chr1-1224 | 15.11837 | -0.53692 | 0.569438 | -0.94289 | 0.345736 | 0.501691 | chr1  | 1.22E+08 | 1.22E+08 | + | 0 | NA | IntergeniALR/Alphe          | 881023   | NR_003955 | 647121   | Hs.697682NR_003955    | ENSG00000 | EMB        | GP70    | emigin protein-coding      |
| chr21-822 | 57.95619 | -0.29505 | 0.313352 | -0.9416  | 0.346399 | 0.502439 | chr21 | 8202682  | 82023996 | + | 0 | NA | Intergeni intron (LIMC4 L1) | -1976    | NR_10678  | 1.02E+08 | NR_10678              | ENSG00000 | MIR6724-1  | MIR6724 | lmiRNA ncRNA               |
| chr1-1241 | 18.84994 | -0.48151 | 0.511794 | -0.94082 | 0.346795 | 0.502597 | chr1  | 1.24E+08 | 1.24E+08 | + | 0 | NA | IntergeniALR/Alphe          | 2612578  | NR_003955 | 647121   | Hs.697682NR_003955    | ENSG00000 | EMB        | GP70    | emigin protein-coding      |
| chr5-4927 | 20.74638 | -0.47032 | 0.499908 | -0.94081 | 0.346801 | 0.502597 | chr5  | 49277240 | 49277443 | + | 0 | NA | IntergeniALR/Alphe          | 1163947  | NR_198444 | 133418   | Hs.561411NM_198444    | ENSG00000 | EMB        | GP70    | emigin protein-coding      |
| chr5-4932 | 36.52039 | -0.35199 | 0.374443 | -0.94003 | 0.347203 | 0.502611 | chr5  | 49324904 | 49326221 | + | 0 | NA | IntergeniALR/Alphe          | 1115726  | NR_198444 | 133418   | Hs.561411NM_198444    | ENSG00000 | EMB        | GP70    | emigin protein-coding      |
| chr5-4888 | 18.30112 | -0.48557 | 0.516563 | -0.94001 | 0.347213 | 0.502611 | chr5  | 48805625 | 48806140 | + | 0 | NA | IntergeniALR/Alphe          | 1635406  | NR_198444 | 133418   | Hs.561411NM_198444    | ENSG00000 | EMB        | GP70    | emigin protein-coding      |
| chr11-516 | 18.71136 | -0.48427 | 0.515212 | -0.93994 | 0.347251 | 0.502611 | chr11 | 51619036 | 51619259 | + | 0 | NA | IntergeniALR/Alphe          | 1210000  | NR_024504 | 646813   | Hs.684175NR_024504    | ENSG00000 | LOC646813- |         | DEXH-box pseudo            |
| chr11-515 | 57.07079 | -0.29238 | 0.311267 | -0.93933 | 0.347563 | 0.502851 | chr11 | 51387664 | 51387991 | + | 0 | NA | IntergeniALR/Alphe          | 978680   | NR_024504 | 646813   | Hs.684175NR_024504    | ENSG00000 | LOC646813- |         | DEXH-box pseudo            |
| chr7-6147 | 19.29028 | -0.50153 | 0.534475 | -0.93836 | 0.34806  | 0.503358 | chr7  | 61409848 | 61410802 | + | 0 | NA | IntergeniALR/Alphe          | 1893731  | NR_003955 | 643955   | Hs.583308NR_003955    | ENSG00000 | ZNF733P    | ZNF733  | zinc fingpseudo            |
| chr5-4774 | 27.90114 | -0.39668 |          |          |          |          |       |          |          |   |   |    |                             |          |           |          |                       |           |            |         |                            |



|           |          |          |          |          |          |          |       |          |          |   |   |    |                    |          |           |          |           |             |            |            |           |           |                 |                |                |                |        |        |
|-----------|----------|----------|----------|----------|----------|----------|-------|----------|----------|---|---|----|--------------------|----------|-----------|----------|-----------|-------------|------------|------------|-----------|-----------|-----------------|----------------|----------------|----------------|--------|--------|
| chr20-27  | 18.99799 | -0.45359 | 0.507057 | -0.89455 | 0.371028 | 0.519691 | chr20 | 27010125 | 27012140 | + | 0 | NA | IntergeniALR/Alphe | -801899  | NR_040095 | 284801   | Hs.370695 | NR_040095   | ENSG00000  | MIR663AHC- | MIR663A   | lncRNA    |                 |                |                |                |        |        |
| chr17-244 | 15.72286 | -0.49813 | 0.556863 | -0.89454 | 0.371035 | 0.519691 | chr17 | 24416819 | 24417018 | + | 0 | NA | IntergeniALR/Alphe | 1893807  | NM_00119C | 1E+08    | Hs.74018E | NM_00119C   | ENSG00000  | MTRNR2L1   | HN1       | MT-RNR2   | lprotein-coding |                |                |                |        |        |
| chr17-252 | 15.72286 | -0.49813 | 0.556863 | -0.89454 | 0.371035 | 0.519691 | chr17 | 25211314 | 25211808 | + | 0 | NA | IntergeniALR/Alphe | 1877680  | NR_135673 | 1.05E+08 | Hs.64991E | NR_135673   | LOC105371- |            |           |           | uncharactncRNA  |                |                |                |        |        |
| chr1-1247 | 36.76641 | -0.33332 | 0.372958 | -0.89372 | 0.371472 | 0.520091 | chr1  | 1.25E+08 | 1.25E+08 | + | 0 | NA | IntergeniALR/Alphe | 3222246  | NR_00395E | 647121   | Hs.697682 | NR_00395E   | ENSG00000  | EMBPI      | -         |           | embigin         | fpseudo        |                |                |        |        |
| chr1-1247 | 15.79354 | -0.49398 | 0.553313 | -0.89276 | 0.371986 | 0.520598 | chr1  | 1.25E+08 | 1.25E+08 | + | 0 | NA | IntergeniALR/Alphe | 3184691  | NR_00395E | 647121   | Hs.697682 | NR_00395E   | ENSG00000  | EMBPI      | -         |           | embigin         | fpseudo        |                |                |        |        |
| chr11-512 | 15.32874 | -0.51279 | 0.574722 | -0.89224 | 0.372262 | 0.520771 | chr11 | 51234761 | 51235677 | + | 0 | NA | IntergeniALR/Alphe | 826072   | NR_024504 | 646813   | Hs.68417E | NR_024504   | LOC646813- |            |           |           | DEXH-box        | pseudo         |                |                |        |        |
| chr1-1245 | 53.88029 | -0.28642 | 0.3213   | -0.89144 | 0.372695 | 0.521164 | chr1  | 1.25E+08 | 1.25E+08 | + | 0 | NA | IntergeniALR/Alphe | 3167800  | NR_00395E | 647121   | Hs.697682 | NR_00395E   | ENSG00000  | EMBPI      | -         |           | embigin         | fpseudo        |                |                |        |        |
| chr2-945  | 15.31261 | -0.50003 | 0.562175 | -0.88946 | 0.373755 | 0.522282 | chr2  | 94501867 | 94502562 | + | 0 | NA | IntergeniALR/Alphe | 84969    | NR_02444E | 1E+08    | Hs.645502 | NR_02444E   | ENSG00000  | LOC101033- |           |           |                 | methylene      | pseudo         |                |        |        |
| chr20-265 | 18.90561 | -0.45543 | 0.512075 | -0.88938 | 0.373799 | 0.522282 | chr20 | 26557541 | 26559101 | + | 0 | NA | IntergeniALR/Alphe | -349088  | NR_040095 | 284801   | Hs.370695 | NR_040095   | ENSG00000  | MIR663AHC- | MIR663A   | lncRNA    |                 |                |                |                |        |        |
| chr1-1215 | 51.37768 | -0.28998 | 0.326312 | -0.88866 | 0.374184 | 0.522607 | chr1  | 1.22E+08 | 1.22E+08 | + | 0 | NA | IntergeniALR/Alphe | 256140   | NR_00395E | 647121   | Hs.697682 | NR_00395E   | ENSG00000  | EMBPI      | -         |           | embigin         | fpseudo        |                |                |        |        |
| chr22-113 | 30.82728 | -0.35896 | 0.404293 | -0.88788 | 0.374608 | 0.522986 | chr22 | 11365760 | 11371503 | + | 0 | NA | IntergeniALR/Alphe | -408602  | NR_13232E | 1.03E+08 | NR_132320 | FRG1FP      |            |            |           |           | FSHD            | regipseudo     |                |                |        |        |
| chr1-1233 | 26.92874 | -0.38687 | 0.436019 | -0.88728 | 0.37493  | 0.523222 | chr1  | 1.23E+08 | 1.23E+08 | + | 0 | NA | IntergeniALR/Alphe | 1878537  | NR_00395E | 647121   | Hs.697682 | NR_00395E   | ENSG00000  | EMBPI      | -         |           | embigin         | fpseudo        |                |                |        |        |
| chr21-107 | 15.29091 | -0.49803 | 0.561755 | -0.88657 | 0.375311 | 0.523541 | chr21 | 10782326 | 10793392 | + | 0 | NA | IntergeniALR/Alphe | 266345   | NM_19926E | 7179     | Hs.12298E | NM_19925E   | ENSG00000  | TPTE       | CT44 PTEN | transmem  | protein-coding  |                |                |                |        |        |
| chr8-458  | 18.49536 | -0.45587 | 0.514563 | -0.88593 | 0.375653 | 0.523804 | chr8  | 45835192 | 45835535 | + | 0 | NA | IntergeniALR/Alphe | 782280   | NR_146077 | 389652   | NR_146077 | ENSG00000   | ASNSP1     | ASNSL1     | asparagir | pseudo    |                 |                |                |                |        |        |
| chr21-911 | 15.24472 | -0.49918 | 0.563754 | -0.88546 | 0.37591  | 0.52395  | chr21 | 9118416  | 9119046  | + | 0 | NA | IntergeniALR/Alphe | 11030    | NR_03832E | 1E+08    | Hs.487562 | NM_17494E   | ENSG00000  | TEKT4P2    | MAFIPL TE | tektin    | 4               | pseudo         |                |                |        |        |
| chr13-171 | 17.71447 | -0.4769  | 0.539212 | -0.88445 | 0.376456 | 0.524497 | chr13 | 17147317 | 17147694 | + | 0 | NA | IntergeniALR/Alphe | -1047792 | NR_02727E | 26080    | Hs.44858E | NR_02727E   | ENSG00000  | FAM230C    | LINC00281 | family    | wincRNA         |                |                |                |        |        |
| chr20-284 | 19.5741  | -0.44403 | 0.502509 | -0.88362 | 0.376899 | 0.524525 | chr20 | 28402493 | 28402701 | + | 0 | NA | IntergeniALR/Alphe | 200068   | NR_13231E | 1E+08    | Hs.529357 | NR_13231E   | ENSG00000  | FRG1CP     |           |           |                 | FSHD           | regipseudo     |                |        |        |
| chr22-114 | 21.6809  | -0.42124 | 0.476871 | -0.88334 | 0.37705  | 0.524525 | chr22 | 11466744 | 11493678 | + | 0 | NA | IntergeniTiger1 I  | -417195  | NR_110761 | 1.03E+08 | Hs.65292E | NR_110761   | LOC10272E- |            |           |           |                 | uncharactncRNA |                |                |        |        |
| chr22-152 | 21.6809  | -0.42124 | 0.476871 | -0.88334 | 0.37705  | 0.524525 | chr22 | 15054057 | 15054297 | + | 0 | NA | IntergeniALR/Alphe | -473982  | NM_00100E | 81061    | Hs.55470E | NM_00100E   | ENSG00000  | OR11H1     | OR11H12 C | olfactory | protein-coding  |                |                |                |        |        |
| chr11-527 | 16.25277 | -0.48628 | 0.550665 | -0.88308 | 0.377194 | 0.524525 | chr11 | 52772891 | 52773111 | + | 0 | NA | IntergeniALR/Alphe | 1830997  | NM_001004 | 119749   | Hs.553564 | NM_001004   | ENSG00000  | OR4C46     |           |           |                 |                | olfactory      | protein-coding |        |        |
| chr20-298 | 46.63694 | -0.29627 | 0.335533 | -0.88299 | 0.377242 | 0.524525 | chr20 | 29884986 | 29886222 | + | 0 | NA | IntergeniALR/Alphe | -5141    | NR_03968E | 1.01E+08 | NR_03968E | ENSG00000   | MTR4477A   |            |           |           |                 | microRNA       | ncRNA          |                |        |        |
| chr19-255 | 95.48595 | -0.22648 | 0.257169 | -0.88066 | 0.378503 | 0.526066 | chr19 | 25316739 | 25316983 | + | 0 | NA | IntergeniALR/Alphe | -1153414 | NR_00360E | 1E+08    | Hs.14931E | NR_00360E   | ENSG00000  | HAVCR1P1   |           |           |                 |                | hepatitis      | pseudo         |        |        |
| chr20-276 | 18.49815 | -0.45159 | 0.512965 | -0.88034 | 0.378673 | 0.526088 | chr20 | 27603384 | 27603668 | + | 0 | NA | IntergeniALR/Alphe | 999139   | NR_13231E | 1E+08    | Hs.529357 | NR_13231E   | ENSG00000  | FRG1CP     |           |           |                 |                | FSHD           | regipseudo     |        |        |
| chr20-265 | 21.6592  | -0.41979 | 0.477192 | -0.87971 | 0.379015 | 0.526272 | chr20 | 26551030 | 26551655 | + | 0 | NA | IntergeniALR/Alphe | -342109  | NR_04009E | 284801   | Hs.370695 | NR_04009E   | ENSG00000  | MIR663AHC- | MIR663A   | lncRNA    |                 |                |                |                |        |        |
| chr19-265 | 31.74573 | -0.35508 | 0.40379  | -0.87937 | 0.379201 | 0.526272 | chr19 | 26965786 | 26967996 | + | 0 | NA | IntergeniALR/Alphe | -826540  | NR_14673E | 1.02E+08 | Hs.567934 | NR_110687   | ENSG00000  | LOC101927- |           |           |                 |                | uncharactncRNA |                |        |        |
| chr11-532 | 27.50205 | -0.38393 | 0.436652 | -0.87925 | 0.379266 | 0.526272 | chr11 | 53099267 | 53099525 | + | 0 | NA | IntergeniALR/Alphe | 1504602  | NM_001004 | 119749   | Hs.553564 | NM_001004   | ENSG00000  | OR4C46     |           |           |                 |                | olfactory      | protein-coding |        |        |
| chr1-1236 | 28.12546 | -0.3707  | 0.422081 | -0.87826 | 0.379801 | 0.526445 | chr1  | 1.24E+08 | 1.24E+08 | + | 0 | NA | IntergeniALR/Alphe | 2116354  | NR_00395E | 647121   | Hs.697682 | NR_00395E   | ENSG00000  | EMBPI      | -         |           | embigin         | fpseudo        |                |                |        |        |
| chr2-934  | 18.54435 | -0.45068 | 0.513181 | -0.87821 | 0.37983  | 0.526445 | chr2  | 93432421 | 93432801 | + | 0 | NA | IntergeniALR/Alphe | 775808   | NR_14610E | 728034   | NR_146105 | BMS1P14     |            |            |           |           | BMS1            | pset           | pseudo         |                |        |        |
| chr19-271 | 56.945   | -0.27117 | 0.308793 | -0.87817 | 0.379851 | 0.526445 | chr19 | 27187513 | 27187794 | + | 0 | NA | IntergeniALR/Alphe | -605778  | NR_14673E | 1.02E+08 | Hs.567934 | NR_110687   | ENSG00000  | LOC101927- |           |           |                 |                | uncharactncRNA |                |        |        |
| chr8-857  | 15.84252 | -0.48784 | 0.555993 | -0.87742 | 0.380261 | 0.526798 | chr8  | 85788548 | 85788747 | + | 0 | NA | IntergeniLIPAS LID | 2721     | NR_003594 | 1E+08    | Hs.53505E | NR_003594   | REX0112P   |            |           |           |                 | REX01          | lik            | pseudo         |        |        |
| chr1-1245 | 23.83558 | -0.40775 | 0.464917 | -0.87703 | 0.380471 | 0.526876 | chr1  | 1.25E+08 | 1.25E+08 | + | 0 | NA | IntergeniALR/Alphe | 3074632  | NR_00395E | 647121   | Hs.697682 | NR_00395E   | ENSG00000  | EMBPI      | -         |           | embigin         | fpseudo        |                |                |        |        |
| chr19-252 | 21.6375  | -0.41834 | 0.478275 | -0.87469 | 0.381741 | 0.528422 | chr19 | 25694265 | 25694501 | + | 0 | NA | IntergeniALR/Alphe | -1530936 | NR_00360E | 1E+08    | Hs.14931E | NR_00360E   | ENSG00000  | HAVCR1P1   |           |           |                 |                | hepatitis      | pseudo         |        |        |
| chr19-257 | 24.3883  | -0.39417 | 0.450935 | -0.87412 | 0.382052 | 0.528639 | chr19 | 25766146 | 25766379 | + | 0 | NA | IntergeniALR/Alphe | -602815  | NR_00360E | 1E+08    | Hs.14931E | NR_00360E   | ENSG00000  | HAVCR1P1   |           |           |                 |                | hepatitis      | pseudo         |        |        |
| chr7-604  | 18.91119 | -0.44699 | 0.512661 | -0.87191 | 0.383257 | 0.529942 | chr7  | 60421222 | 60421497 | + | 0 | NA | IntergeniALR/Alphe | 2882697  | NR_00395E | 643955   | Hs.58330E | NR_00395E   | ENSG00000  | ZNF733P    | ZNF733    |           |                 |                |                | zinc           | finger | pseudo |
| chr17-23  | 80.89192 | -0.23554 | 0.270169 | -0.87183 | 0.383303 | 0.529942 | chr17 | 23255947 | 23256199 | + | 0 | NA | IntergeniALR/Alphe | 732962   | NM_00119C | 1E+08    | Hs.74018E | NM_00119C   | ENSG00000  | MTRNR2L1   | HN1       | MT-RNR2   | lprotein-coding |                |                |                |        |        |
| chr10-404 | 30.41982 | -0.35514 | 0.407546 | -0.87141 | 0.383532 | 0.530045 | chr10 | 40408276 | 40409172 | + | 0 | NA | IntergeniALR/Alphe | 1712128  | NR_04500C | 399746   | Hs.742607 | NR_04500C   | ACTR3BP5   | FKSG74     |           |           |                 |                | ACTR3B         | ps             | pseudo |        |
| chr11-512 | 21.24896 | -0.41943 | 0.481626 | -0.87087 | 0.383827 | 0.530238 | chr11 | 51951183 | 51951777 | + | 0 | NA | IntergeniALR/Alphe | 1542333  | NR_024504 | 646813   | Hs.68417E | NR_024504   | LOC646813- |            |           |           |                 | DEXH-box       | pseudo         |                |        |        |
| chr1-1226 | 96.51565 | -0.21735 | 0.249853 | -0.86992 | 0.384345 | 0.530734 | chr1  | 1.23E+08 | 1.23E+08 | + | 0 | NA | IntergeniALR/Alphe | 1392312  | NR_00395E | 647121   | Hs.697682 | NR_00395E   | ENSG00000  | EMBPI      | -         |           | embigin         | fpseudo        |                |                |        |        |
| chr1-1235 | 15.272   | -0.49086 | 0.564702 | -0.86923 | 0.384721 | 0.530832 | chr1  | 1.24E+08 | 1.24E+08 | + | 0 | NA | IntergeniALR/Alphe | 2388316  | NR_00395E | 647121   | Hs.697682 | NR_00395E   | ENSG00000  | EMBPI      | -         |           | embigin         | fpseudo        |                |                |        |        |
| chr12-357 | 15.272   | -0.49086 | 0.564702 | -0.86923 | 0.384721 | 0.530832 | chr12 | 35721680 | 35722161 | + | 0 | NA | IntergeniALR/Alphe | 1699424  | NM_032834 | 84920    | Hs.102971 | NM_032834   | ENSG00000  | ALG10      | ALG10A DI | ALG10     | al              | protein-coding |                |                |        |        |
| chr19-267 | 18.02001 | -0.4512  | 0.519525 | -0.86849 | 0.385125 | 0.531175 | chr19 | 26778873 | 26779725 | + | 0 | NA | IntergeniALR/Alphe | -1014312 | NR_14673E | 1.02E+08 | Hs.567934 | NR_110687   | ENSG00000  | LOC101927- |           |           |                 |                | uncharactncRNA |                |        |        |
| chr5-481  | 43.26663 | -0.3012  | 0.349416 | -0.86745 | 0.385694 | 0.531746 | chr5  | 48138016 | 48138016 | + | 0 | NA | IntergeniALR/Alphe | 2303575  | NM_19844E | 133418   | Hs.561411 | NM_19844E   | ENSG00000  | EMB        | GP70      |           |                 |                | embigin        | protein-coding |        |        |
| chr2-926  | 25.35295 | -0.38744 | 0.447208 | -0.86635 | 0.386299 | 0.532365 | chr2  | 92677643 | 92678079 | + | 0 | NA | IntergeniALR/Alphe | 376728   | NR_027714 | 440888   | Hs.73023E | NM_01032412 | ACTR3BP2   | FKSG73     |           |           |                 |                | ACTR3B         | ps             | pseudo |        |
| chr19-258 | 18.47924 | -0.44563 | 0.514716 | -0.86578 | 0.386611 | 0.532581 | chr19 | 25849171 | 25850610 | + | 0 | NA | IntergeniALR/Alphe | -1686443 | NR_00360E | 1E+08    | Hs.14931E | NR_00360E   | ENSG00000  | HAVCR1P1   |           |           |                 |                | hepatitis      | pseudo         |        |        |
| chr1-1225 | 17.99831 | -0.44948 | 0.519583 | -0.86509 | 0.386992 | 0.532698 | chr1  | 1.23E+08 | 1.23E+08 | + | 0 | NA | IntergeniALR/Alphe | 994655   | NR_00395E | 647121   | Hs.697682 | NR_00395E   | ENSG00000  | EMBPI      | -         |           | embigin         | fpseudo        |                |                |        |        |
| chr19-266 | 40.65441 | -0.30864 | 0.356884 | -0.86482 | 0.387135 | 0.532698 | chr19 | 26008797 | 26009053 | + | 0 | NA | IntergeniALR/Alphe | -1784506 | NR_14673E | 1.02E+08 | Hs.567934 | NR_110687   | ENSG00000  | LOC101927- |           |           |                 |                | uncharactncRNA |                |        |        |
| chr1-1243 | 18.06621 | -0.45027 | 0.520683 | -0.86478 | 0.387162 | 0.532698 | chr1  | 1.24E+08 | 1.24E+08 | + | 0 | NA | IntergeniALR/Alphe | 2854765  | NR_00395E | 647121   | Hs.       |             |            |            |           |           |                 |                |                |                |        |        |

|            |          |          |          |          |          |          |       |          |          |   |   |      |                    |          |           |          |                       |                    |                                  |                         |
|------------|----------|----------|----------|----------|----------|----------|-------|----------|----------|---|---|------|--------------------|----------|-----------|----------|-----------------------|--------------------|----------------------------------|-------------------------|
| chr19-252  | 16.49879 | -0.44238 | 0.54452  | -0.81242 | 0.416552 | 0.555943 | chr19 | 25272374 | 25273031 | + | 0 | NA   | IntergeniALR/Alphe | -1109255 | NR_003602 | 1E+08    | Hs.149312NR_003602    | ENSG00000HACVCR1P1 | -                                | hepatitispsseudo        |
| chr1-1245  | 33.21575 | -0.31806 | 0.39203  | -0.81133 | 0.417177 | 0.556373 | chr1  | 1.25E+08 | 1.25E+08 | + | 0 | NA   | IntergeniALR/Alphe | 3042347  | NR_003955 | 647121   | Hs.697682NR_003955    | ENSG00000EMBMP1    | -                                | embigin ipseudo         |
| chr12-345  | 19.2034  | -0.40902 | 0.504542 | -0.81068 | 0.417547 | 0.556373 | chr12 | 34952200 | 34954363 | + | 0 | NA   | IntergeniALR/Alphe | 930785   | NM_032834 | 84920    | Hs.102971NM_032834    | ENSG00000CALG10    | ALG10A DIALG10                   | al protein-coding       |
| chr11-514  | 18.74417 | -0.41342 | 0.5102   | -0.81031 | 0.417763 | 0.556373 | chr11 | 51424567 | 51425380 | + | 0 | NA   | IntergeniALR/Alphe | 1015826  | NR_024504 | 646813   | Hs.684175NR_024504    | LOC646813          | -                                | DEXH-box pseudo         |
| chr1-1235  | 15.49074 | -0.45216 | 0.558113 | -0.81016 | 0.417848 | 0.556373 | chr1  | 1.23E+08 | 1.23E+08 | + | 0 | NA   | IntergeniALR/Alphe | 1815473  | NR_003955 | 647121   | Hs.697682NR_003955    | ENSG00000EMBMP1    | -                                | embigin ipseudo         |
| chr10-415  | 15.49074 | -0.45216 | 0.558113 | -0.81016 | 0.417848 | 0.556373 | chr10 | 41563244 | 41566698 | + | 0 | NA   | IntergeniALR/Alphe | 803074   | NR_02438C | 441666   | Hs.255725NR_02438C    | ENSG00000LOC441666 | -                                | zinc fingpseudo         |
| chr13-162  | 15.49074 | -0.45216 | 0.558113 | -0.81016 | 0.417848 | 0.556373 | chr13 | 16250294 | 16253530 | + | 0 | NA   | IntergeniALR/Alphe | -1943385 | NR_027278 | 26080    | Hs.448582NR_027278    | ENSG00000FAM230C   | LINC00281                        | family wincRNA          |
| chr1-1225  | 15.44454 | -0.45325 | 0.560665 | -0.80845 | 0.418834 | 0.55719  | chr1  | 1.23E+08 | 1.23E+08 | + | 0 | NA   | IntergeniALR/Alphe | 1072922  | NR_003955 | 647121   | Hs.697682NR_003955    | ENSG00000EMBMP1    | -                                | embigin ipseudo         |
| chr8-443   | 15.44454 | -0.45325 | 0.560665 | -0.80845 | 0.418834 | 0.55719  | chr8  | 44337474 | 44338946 | + | 0 | NA   | IntergeniALR/Alphe | 1045768  | NM_001002 | 340441   | Hs.531575NM_001002    | ENSG00000POTEA     | A26A1 CT1POTE                    | ankypotein-coding       |
| chr2-9305  | 16.61287 | -0.44216 | 0.547295 | -0.80779 | 0.419146 | 0.55719  | chr2  | 93091154 | 93091381 | + | 0 | NA   | IntergeniALR/Alphe | 117152   | NR_146105 | 728034   | NR_146105             | BMS1P14            | -                                | BMS1 psepseudo          |
| chr5-4905  | 22.41343 | -0.3801  | 0.470574 | -0.80773 | 0.419244 | 0.55719  | chr5  | 49030698 | 49031399 | + | 0 | NA   | IntergeniALR/Alphe | 1410204  | NM_198445 | 133418   | Hs.561411NM_198445    | ENSG00000EMB       | GP70                             | embigin protein-coding  |
| chr19-266  | 24.1723  | -0.37195 | 0.460521 | -0.80768 | 0.419275 | 0.55719  | chr19 | 26682633 | 26682832 | + | 0 | NA   | IntergeniALR/Alphe | -1110699 | NR_146733 | 1.02E+08 | Hs.567934NR_110687    | ENSG00000LOC101927 | -                                | uncharactncRNA          |
| chr4-5046  | 15.99616 | -0.44468 | 0.551029 | -0.80701 | 0.419662 | 0.557489 | chr4  | 50466450 | 50466823 | + | 0 | NA   | IntergeniALR/Alphe | -1376644 | NM_015115 | 23142    | Hs.605388NM_015115    | ENSG00000DCUN1D4   | -                                | defectiveprotein-coding |
| chr5-4933  | 35.42052 | -0.3067  | 0.380615 | -0.80581 | 0.420353 | 0.557925 | chr5  | 49304347 | 49305347 | + | 0 | NA   | IntergeniALR/Alphe | 1363641  | NM_198444 | 133418   | Hs.561411NM_198444    | ENSG00000EMB       | GP70                             | embigin protein-coding  |
| chr21-725  | 15.46903 | -0.45017 | 0.558914 | -0.80544 | 0.420564 | 0.557925 | chr21 | 7291506  | 7292108  | + | 0 | NA   | IntergeniALR/Alphe | -138830  | NM_001322 | 1.03E+08 | Hs.743984NM_001322    | LOC102724          | -                                | uncharactprotein-coding |
| chr17-228  | 15.51523 | -0.4491  | 0.557619 | -0.80539 | 0.420596 | 0.557925 | chr17 | 22863386 | 22864343 | + | 0 | NA   | IntergeniALR/Alphe | 340753   | NM_00119C | 1E+08    | Hs.740185NM_00119C    | ENSG00000MTRNR2L1  | HN1                              | MT-RNR2 lprotein-coding |
| chr5-4921  | 39.32074 | -0.29563 | 0.367286 | -0.80489 | 0.420882 | 0.557925 | chr5  | 49218769 | 49219303 | + | 0 | NA   | IntergeniALR/Alphe | 1222403  | NM_198444 | 133418   | Hs.561411NM_198444    | ENSG00000EMB       | GP70                             | embigin protein-coding  |
| chr1-1245  | 73.95802 | -0.22878 | 0.284352 | -0.80456 | 0.421071 | 0.557925 | chr1  | 1.25E+08 | 1.25E+08 | + | 0 | NA   | IntergeniALR/Alphe | 3394913  | NR_003955 | 647121   | Hs.697682NR_003955    | ENSG00000EMBMP1    | -                                | embigin ipseudo         |
| chr1-1225  | 19.1817  | -0.40737 | 0.506383 | -0.80446 | 0.42113  | 0.557925 | chr1  | 1.23E+08 | 1.23E+08 | + | 0 | NA   | IntergeniALR/Alphe | 1078346  | NR_003955 | 647121   | Hs.697682NR_003955    | ENSG00000EMBMP1    | -                                | embigin ipseudo         |
| chr19-250  | 19.1817  | -0.40737 | 0.506383 | -0.80446 | 0.42113  | 0.557925 | chr19 | 25069251 | 25069463 | + | 0 | NA   | IntergeniALR/Alphe | -905910  | NR_003602 | 1E+08    | Hs.149312NR_003602    | ENSG00000HACVCR1P1 | -                                | hepatitispsseudo        |
| chr5-4901  | 16.28563 | -0.46669 | 0.580365 | -0.80413 | 0.421324 | 0.557966 | chr5  | 49014486 | 49014703 | + | 0 | NA   | IntergeniALR/Alphe | 1426694  | NM_198445 | 133418   | Hs.561411NM_198445    | ENSG00000EMB       | GP70                             | embigin protein-coding  |
| chr4-5065  | 15.03151 | -0.45909 | 0.571198 | -0.80373 | 0.421553 | 0.558053 | chr4  | 50653424 | 50653690 | + | 0 | NA   | IntergeniALR/Alphe | -1189443 | NM_015115 | 23142    | Hs.605388NM_015115    | ENSG00000DCUN1D4   | -                                | defectiveprotein-coding |
| chr19-252  | 21.40538 | -0.38433 | 0.478652 | -0.80295 | 0.422005 | 0.558436 | chr19 | 25225896 | 25226959 | + | 0 | NA   | IntergeniALR/Alphe | -1062980 | NR_003602 | 1E+08    | Hs.149312NR_003602    | ENSG00000HACVCR1P1 | -                                | hepatitispsseudo        |
| chr5-4735  | 27.27662 | -0.3437  | 0.429169 | -0.80086 | 0.423215 | 0.559821 | chr5  | 47359728 | 47360728 | + | 0 | NA   | IntergeniALR/Alphe | -1663848 | NM_021072 | 348980   | Hs.353176NM_021072    | ENSG00000HCN1      | BCNG-1 BChyperpolaprotein-coding |                         |
| chr17-253  | 34.43417 | -0.30827 | 0.385085 | -0.80051 | 0.423413 | 0.559866 | chr17 | 25359989 | 25360417 | + | 0 | NA   | IntergeniALR/Alphe | 1729038  | NR_135673 | 1.05E+08 | Hs.649918NR_135673    | LOC105371          | -                                | uncharactncRNA          |
| chr21-122  | 15.0343  | -0.45378 | 0.567327 | -0.79944 | 0.424036 | 0.560377 | chr21 | 12226050 | 12226794 | + | 0 | NA   | IntergeniALR/Alphe | -811744  | NR_02691E | 149992   | Hs.558645NM_153773    | ANKRD30BFC21orf99  | ankyrin ipseudo                  |                         |
| chr21-104  | 18.81485 | -0.41001 | 0.513032 | -0.79919 | 0.424181 | 0.560377 | chr21 | 10457795 | 10458386 | + | 0 | NA   | IntergeniALR/Alphe | 44558    | NM_182482 | 85319    | Hs.545785NM_182482    | BAGE2              | CT2.2                            | BAGE famiprotein-coding |
| chr9-6382  | 18.17365 | -0.41379 | 0.517886 | -0.799   | 0.42429  | 0.560377 | chr9  | 63828119 | 63828793 | + | 0 | NA   | IntergeniIntergeni | -8802    | NR_039688 | 1.01E+08 | NR_039688             | ENSG00000MIR4477A  | -                                | microRNA ncRNA          |
| chr11-523  | 33.42501 | -0.31475 | 0.394532 | -0.79777 | 0.425002 | 0.561101 | chr11 | 52323112 | 52323363 | + | 0 | NA   | IntergeniALR/Alphe | 1914090  | NR_024504 | 646813   | Hs.684175NR_024504    | LOC646813          | -                                | DEXH-box pseudo         |
| chr19-245  | 15.0126  | -0.45172 | 0.566568 | -0.7973  | 0.425279 | 0.56125  | chr19 | 24922027 | 24925960 | + | 0 | NA   | IntergeniALR/Alphe | -760546  | NR_003602 | 1E+08    | Hs.149312NR_003602    | ENSG00000HACVCR1P1 | -                                | hepatitispsseudo        |
| chr5-1755  | 31.65609 | -0.32137 | 0.403269 | -0.7969  | 0.425506 | 0.561322 | chr5  | 17595475 | 17596280 | + | 0 | NA   | IntergeniCharlie2e | 59761    | NM_001355 | 391769   | NM_001355             | ENSG00000CH3.Y     | -                                | histone cprotein-coding |
| chr19-246  | 26.31086 | -0.35591 | 0.446763 | -0.79664 | 0.425661 | 0.561322 | chr19 | 24642615 | 24642885 | + | 0 | NA   | IntergeniALR/Alphe | -479303  | NR_003602 | 1E+08    | Hs.149312NR_003602    | ENSG00000HACVCR1P1 | -                                | hepatitispsseudo        |
| chr7-6035  | 36.61445 | -0.29923 | 0.375846 | -0.79616 | 0.425938 | 0.561471 | chr7  | 60350305 | 60350581 | + | 0 | NA   | IntergeniALR/Alphe | 2900276  | NM_001155 | 441234   | Hs.533121NM_001155    | ENSG00000ZNF716    | -                                | zinc fingprotein-coding |
| chr11-518  | 18.19814 | -0.41118 | 0.516712 | -0.79577 | 0.426167 | 0.561556 | chr11 | 51809660 | 51810920 | + | 0 | NA   | IntergeniALR/Alphe | 1401143  | NR_024504 | 646813   | Hs.684175NR_024504    | LOC646813          | -                                | DEXH-box pseudo         |
| chr10-405  | 17.73612 | -0.42049 | 0.530009 | -0.79324 | 0.427638 | 0.563125 | chr10 | 40377877 | 40379220 | + | 0 | NA   | IntergeniALR/Alphe | 1681952  | NR_045000 | 399746   | Hs.742607NR_045000    | ACTR3BP5           | FKSG74                           | ACTR3B pspseudo         |
| chr8-4532  | 20.94894 | -0.38393 | 0.484056 | -0.79316 | 0.427686 | 0.563125 | chr8  | 45327990 | 45329357 | + | 0 | NA   | IntergeniALR/Alphe | 2288290  | NR_146077 | 389652   | NR_146077             | ENSG00000ASNSP1    | ASNSL1                           | asparagipseudo          |
| chr1-1238  | 30.97037 | -0.32616 | 0.41157  | -0.79249 | 0.428076 | 0.563386 | chr1  | 1.24E+08 | 1.24E+08 | + | 0 | NA   | IntergeniALR/Alphe | 2371184  | NR_003955 | 647121   | Hs.697682NR_003955    | ENSG00000EMBMP1    | -                                | embigin ipseudo         |
| chr8-4574  | 17.69272 | -0.41682 | 0.526122 | -0.79225 | 0.428213 | 0.563386 | chr8  | 45747859 | 45748224 | + | 0 | NA   | IntergeniALR/Alphe | 869602   | NR_146077 | 389652   | NR_146077             | ENSG00000ASNSP1    | ASNSL1                           | asparagipseudo          |
| chr2-9233  | 15.03709 | -0.44856 | 0.566654 | -0.7916  | 0.428594 | 0.563367 | chr2  | 92339878 | 92330566 | + | 0 | NA   | IntergeniALR/Alphe | 3980989  | NR_027714 | 440888   | Hs.730235NM_001032412 | ACTR3BP2           | FKSG73                           | ACTR3B pspseudo         |
| chr5-4896  | 29.59826 | -0.32549 | 0.412335 | -0.78937 | 0.429895 | 0.565165 | chr5  | 48960928 | 48961191 | + | 0 | NA   | IntergeniALR/Alphe | 1480229  | NM_198444 | 133418   | Hs.561411NM_198444    | ENSG00000EMB       | GP70                             | embigin protein-coding  |
| chr20-275  | 29.02485 | -0.32691 | 0.415556 | -0.78669 | 0.431466 | 0.567012 | chr20 | 27654057 | 27654612 | + | 0 | NA   | IntergeniALR/Alphe | 948331   | NR_13231E | 1E+08    | Hs.529357NR_13231E    | ENSG00000FRG1C     | -                                | F5HD regipseudo         |
| chr19-1255 | 50.44087 | -0.25495 | 0.324943 | -0.78461 | 0.432683 | 0.568378 | chr19 | 25929996 | 25930244 | + | 0 | NA   | IntergeniALR/Alphe | -766673  | NR_003602 | 1E+08    | Hs.149312NR_003602    | ENSG00000HACVCR1P1 | -                                | hepatitispsseudo        |
| chr1-1225  | 23.10473 | -0.36429 | 0.464447 | -0.78435 | 0.432837 | 0.568378 | chr1  | 1.23E+08 | 1.23E+08 | + | 0 | NA   | IntergeniALR/Alphe | 1410581  | NR_003955 | 647121   | Hs.697682NR_003955    | ENSG00000EMBMP1    | -                                | embigin ipseudo         |
| chr19-246  | 29.04944 | -0.32528 | 0.415308 | -0.78322 | 0.433496 | 0.568958 | chr19 | 24605343 | 24605546 | + | 0 | NA   | IntergeniALR/Alphe | -441997  | NR_003602 | 1E+08    | Hs.149312NR_003602    | ENSG00000HACVCR1P1 | -                                | hepatitispsseudo        |
| chr10-411  | 21.45715 | -0.37619 | 0.480428 | -0.78303 | 0.43361  | 0.568958 | chr10 | 41131045 | 41131285 | + | 0 | NA   | IntergeniALR/Alphe | 1268980  | NR_02438C | 441666   | Hs.255725NR_02438C    | ENSG00000LOC441666 | -                                | zinc fingpseudo         |
| chr5-4862  | 23.61294 | -0.35764 | 0.457327 | -0.78201 | 0.434207 | 0.569523 | chr5  | 48603204 | 48605281 | + | 0 | NA   | IntergeniALR/Alphe | 1837046  | NM_198444 | 133418   | Hs.561411NM_198444    | ENSG00000EMB       | GP70                             | embigin protein-coding  |
| chr10-415  | 17.76619 | -0.40877 | 0.523847 | -0.78031 | 0.435206 | 0.570204 | chr10 | 41586835 | 41587134 | + | 0 | NA   | IntergeniALR/Alphe | 781061   | NR_02438C | 441666   | Hs.255725NR_02438C    | ENSG00000LOC441666 | -                                | zinc fingpseudo         |
| chr19-265  | 54.1797  | -0.25351 | 0.324879 | -0.78031 | 0.435206 | 0.570204 | chr19 | 26505417 | 26505643 | + | 0 | NA   | IntergeniALR/Alphe | -1287901 | NR_146733 | 1.02E+08 | Hs.567934NR_110687    | ENSG00000LOC101927 | -                                | uncharactncRNA          |
| chr1-1225  | 23.10752 | -0.36802 | 0.462418 | -0.78028 | 0.435225 | 0.570204 | chr1  | 1.23E+08 | 1.23E+08 | + | 0 | NA   | IntergeniALR/Alphe | 1417205  | NR_003955 | 647121   | Hs.697682NR_003955    | ENSG00000EMBMP1    | -                                | embigin ipseudo         |
| chr16-365  | 17.69829 | -0.40791 | 0.523768 | -0.77881 | 0.436093 | 0.571122 | chr16 | 36907498 | 36908263 | + | 0 | NA   | IntergeniALR/Alphe | 1161328  | NR_03398E | 400533   | Hs.499135NR_03398E    | ENSG00000LINC02167 | -                                | long intncRNA           |
| chr5-485   | 18.75254 | -0.40065 | 0.515299 | -0.77751 | 0.436855 | 0.571487 | chr5  | 48500661 | 48501011 | + | 0 | NA</ |                    |          |           |          |                       |                    |                                  |                         |



|           |          |          |          |          |          |          |       |            |          |   |   |    |                     |          |           |          |                       |           |           |                 |                         |
|-----------|----------|----------|----------|----------|----------|----------|-------|------------|----------|---|---|----|---------------------|----------|-----------|----------|-----------------------|-----------|-----------|-----------------|-------------------------|
| chr2-9243 | 15.66607 | -0.41076 | 0.557099 | -0.73732 | 0.460928 | 0.586841 | chr2  | 92432640   | 92433299 | + | 0 | NA | IntergeniALR/Alphe  | 491836   | NR_027714 | 440888   | Hs.730235NM_001032412 | ACTR3BP2  | FKSG73    | ACTR3B          | pspseudo                |
| chr11-535 | 31.58044 | -0.3066  | 0.415861 | -0.73727 | 0.460955 | 0.586841 | chr11 | 53951923   | 53952123 | + | 0 | NA | IntergeniALR/Alphe  | 651975   | NM_001004 | 119749   | Hs.553564NM_001004    | ENSG0000C | OR4C46    | -               | olfactoryprotein-coding |
| chr7-5895 | 16.26387 | -0.40268 | 0.54637  | -0.73701 | 0.461114 | 0.586841 | chr7  | 58956269   | 58956796 | + | 0 | NA | IntergeniALR/Alphe  | 1506355  | NM_001155 | 441234   | Hs.533121NM_001155    | ENSG0000C | ZNF716    | -               | zinc fingprotein-coding |
| chr5-4735 | 18.90059 | -0.37379 | 0.507581 | -0.73641 | 0.461482 | 0.587092 | chr5  | 47397705   | 47397904 | + | 0 | NA | IntergeniALR/Alphe  | -1701427 | NM_021072 | 348980   | Hs.353176NM_021072    | ENSG0000C | HCHN1     | BCNG-1 BCh      | hyperpolprotein-coding  |
| chr6-5946 | 16.02733 | -0.41796 | 0.570191 | -0.73301 | 0.463555 | 0.589503 | chr6  | 59404658   | 59405254 | + | 0 | NA | IntergeniALR/Alphe  | -1443510 | NR_132992 | 1.07E+08 | Hs.561535NR_125727    | ENSG0000C | LINC0068C | -               | long intencRNA          |
| chr7-6055 | 16.14979 | -0.40271 | 0.550025 | -0.73216 | 0.464071 | 0.589898 | chr7  | 60559487   | 60560146 | + | 0 | NA | IntergeniALR/Alphe  | 2744240  | NR_003952 | 643955   | Hs.583308NR_003952    | ENSG0000C | ZNF733P   | ZNF733          | zinc fingpseudo         |
| chr11-526 | 26.51737 | -0.31701 | 0.4334   | -0.73146 | 0.4645   | 0.589898 | chr11 | 52071729   | 52072652 | + | 0 | NA | IntergeniALR/Alphe  | 1663043  | NR_024504 | 646813   | Hs.684175NR_024504    | LOC646813 | -         | DEfH-box pseudo |                         |
| chr19-256 | 21.72208 | -0.34932 | 0.477615 | -0.73138 | 0.464545 | 0.589898 | chr19 | 25613373   | 25613583 | + | 0 | NA | IntergeniALR/Alphe  | -1443510 | NR_003602 | 1E+08    | Hs.149312NR_003602    | ENSG0000C | HAVCR1P1  | -               | hepatitispseudo         |
| chr1-1235 | 24.36158 | -0.32961 | 0.450677 | -0.73138 | 0.464549 | 0.589898 | chr1  | 1.24E+08   | 1.24E+08 | + | 0 | NA | IntergeniALR/Alphe  | 2032161  | NR_003952 | 647121   | Hs.697682NR_003952    | ENSG0000C | EMBP1     | -               | embigin fpseudo         |
| chr20-271 | 15.71505 | -0.40473 | 0.553828 | -0.73079 | 0.464909 | 0.590136 | chr20 | 27122885   | 27123784 | + | 0 | NA | IntergeniALR/Alphe  | -914101  | NR_040095 | 284801   | Hs.370695NR_040095    | ENSG0000C | MIR663AHC | -               | MIR663A lncRNA          |
| chr17-233 | 20.68015 | -0.37674 | 0.516082 | -0.72999 | 0.465395 | 0.590331 | chr17 | 23207571   | 23207826 | + | 0 | NA | IntergeniALR/Alphe  | 684587   | NM_00119C | 1E+08    | Hs.740185NM_00119C    | ENSG0000C | MTRNR2L1  | HN1             | MT-RNR2 lprotein-coding |
| chr5-481  | 21.14876 | -0.3518  | 0.481934 | -0.72997 | 0.465407 | 0.590331 | chr5  | 48132228   | 48132427 | + | 0 | NA | IntergeniALR/Alphe  | 2308961  | NM_198445 | 133418   | Hs.561411NM_198445    | ENSG0000C | EMB       | GP70            | embigin protein-coding  |
| chr5-4768 | 15.80465 | -0.40772 | 0.55893  | -0.72946 | 0.465721 | 0.59043  | chr5  | 47683032   | 47683379 | + | 0 | NA | IntergeniALR/Alphe  | -1986825 | NR_021072 | 348980   | Hs.353176NM_021072    | ENSG0000C | HCHN1     | BCNG-1 BCh      | hyperpolprotein-coding  |
| chr19-265 | 18.48756 | -0.37649 | 0.516251 | -0.72928 | 0.46583  | 0.59043  | chr19 | 26861861   | 26863256 | + | 0 | NA | IntergeniALR/Alphe  | -930873  | NM_146732 | 1.02E+08 | Hs.567934NR_110687    | ENSG0000C | LOC101927 | -               | uncharactncRNA          |
| chr5-4925 | 27.04728 | -0.31326 | 0.4304   | -0.72784 | 0.466713 | 0.591331 | chr5  | 49252151   | 49252758 | + | 0 | NA | IntergeniALR/Alphe  | 1188834  | NM_198445 | 133418   | Hs.561411NM_198445    | ENSG0000C | EMB       | GP70            | embigin protein-coding  |
| chr5-4714 | 21.17325 | -0.34957 | 0.481539 | -0.72595 | 0.46787  | 0.592578 | chr5  | 47140632   | 47140896 | + | 0 | NA | IntergeniALR/Alphe  | -1444384 | NM_021072 | 348980   | Hs.353176NM_021072    | ENSG0000C | HCHN1     | BCNG-1 BCh      | hyperpolprotein-coding  |
| chr19-252 | 66.66413 | -0.21017 | 0.289719 | -0.72542 | 0.468197 | 0.592773 | chr19 | 25271153   | 25271389 | + | 0 | NA | IntergeniALR/Alphe  | -1075824 | NR_003602 | 1E+08    | Hs.149312NR_003602    | ENSG0000C | HAVCR1P1  | -               | hepatitispseudo         |
| chr12-372 | 23.30455 | -0.33543 | 0.463297 | -0.724   | 0.469065 | 0.593652 | chr12 | 37259970   | 37261633 | + | 0 | NA | IntergeniALR/Alphe  | -1107973 | NM_001308 | 144245   | Hs.259305NM_001011    | ENSG0000C | ALG10B    | ALG10 KCF       | ALG10 alprotein-coding  |
| chr5-485  | 31.81698 | -0.29893 | 0.413267 | -0.72333 | 0.469478 | 0.593955 | chr5  | 48507078   | 48507309 | + | 0 | NA | IntergeniALR/Alphe  | 1934095  | NM_198445 | 133418   | Hs.561411NM_198445    | ENSG0000C | EMB       | GP70            | embigin protein-coding  |
| chr19-96  | 15.14174 | -0.41008 | 0.567896 | -0.7221  | 0.470235 | 0.594693 | chr19 | 9608205    | 9615695  | + | 0 | NA | intron (AluSx SIN)  | 9282     | NM_00133C | 93134    | Hs.720081NM_152285    | ENSG0000C | ZNF561    | -               | zinc fingprotein-coding |
| chr20-265 | 24.36437 | -0.32633 | 0.452264 | -0.72156 | 0.470568 | 0.594895 | chr20 | 26964000   | 26964240 | + | 0 | NA | IntergeniALR/Alphe  | -754887  | NR_040095 | 284801   | Hs.370695NR_040095    | ENSG0000C | MIR663AHC | -               | MIR663A lncRNA          |
| chr19-265 | 18.46864 | -0.3705  | 0.513701 | -0.72124 | 0.470763 | 0.594923 | chr19 | 26955410   | 26955635 | + | 0 | NA | IntergeniALR/Alphe  | -837544  | NR_146732 | 1.02E+08 | Hs.567934NR_110687    | ENSG0000C | LOC101927 | -               | uncharactncRNA          |
| chr19-255 | 15.16623 | -0.40692 | 0.564859 | -0.72039 | 0.471284 | 0.595142 | chr19 | 25962793   | 25965809 | + | 0 | NA | IntergeniALR/Alphe  | -1800854 | NR_003602 | 1E+08    | Hs.149312NR_003602    | ENSG0000C | HAVCR1P1  | -               | hepatitispseudo         |
| chr5-4711 | 15.16623 | -0.40692 | 0.564859 | -0.72039 | 0.471284 | 0.595142 | chr5  | 47113907   | 47115974 | + | 0 | NA | IntergeniALR/Alphe  | -1418559 | NM_021072 | 348980   | Hs.353176NM_021072    | ENSG0000C | HCHN1     | BCNG-1 BCh      | hyperpolprotein-coding  |
| chr10-405 | 20.68954 | -0.35458 | 0.492681 | -0.7197  | 0.471709 | 0.595336 | chr10 | 40934550   | 40936374 | + | 0 | NA | IntergeniALR/Alphe  | 1432583  | NR_02438C | 441666   | Hs.255725NR_02438C    | ENSG0000C | LOC441666 | -               | zinc fingpseudo         |
| chr5-489  | 18.88168 | -0.36791 | 0.511284 | -0.71958 | 0.471785 | 0.595336 | chr5  | 48937500   | 48937725 | + | 0 | NA | IntergeniALR/Alphe  | 1503676  | NM_198445 | 133418   | Hs.561411NM_198445    | ENSG0000C | EMB       | GP70            | embigin protein-coding  |
| chr5-4761 | 20.62443 | -0.34983 | 0.487582 | -0.71748 | 0.473079 | 0.596372 | chr5  | 47611037   | 47612273 | + | 0 | NA | IntergeniALR/Alphe  | -1915275 | NM_021072 | 348980   | Hs.353176NM_021072    | ENSG0000C | HCHN1     | BCNG-1 BCh      | hyperpolprotein-coding  |
| chr15-195 | 17.89533 | -0.374   | 0.52147  | -0.71721 | 0.473244 | 0.596372 | chr15 | 19336497   | 19336924 | + | 0 | NA | IntergeniALR/Alphe  | -946034  | NR_03883E | 646096   | Hs.448785NR_03883E    | ENSG0000C | CHEK2P2   | -               | checkpoirpseudo         |
| chr1-124  | 15.19072 | -0.40382 | 0.56311  | -0.71712 | 0.473303 | 0.596372 | chr1  | 1.24E+08   | 1.24E+08 | + | 0 | NA | IntergeniALR/Alphe  | 2706514  | NR_003952 | 647121   | Hs.697682NR_003952    | ENSG0000C | EMBP1     | -               | embigin fpseudo         |
| chr7-5864 | 15.19072 | -0.40382 | 0.56311  | -0.71712 | 0.473303 | 0.596372 | chr7  | 58640826   | 58641867 | + | 0 | NA | IntergeniALR/Alphe  | 1191169  | NM_001155 | 441234   | Hs.533121NM_001155    | ENSG0000C | ZNF716    | -               | zinc fingprotein-coding |
| chr3-910  | 17.94152 | -0.37313 | 0.520719 | -0.71657 | 0.473637 | 0.59642  | chr3  | 91022140   | 91022382 | + | 0 | NA | IntergeniALR/Alphe  | 1914640  | NM_005233 | 2042     | Hs.123642NM_005233    | ENSG0000C | EPHA3     | EK4 ETK EPEH    | receptprotein-coding    |
| chr5-175  | 15.23691 | -0.40277 | 0.56239  | -0.71618 | 0.473883 | 0.59642  | chr5  | 17528573   | 17530394 | + | 0 | NA | Intergeni Intergeni | 85473    | NR_134272 | 1.03E+08 | Hs.134272             | ENSG0000C | LINC02215 | -               | long intencRNA          |
| chr2-122  | 15.62546 | -0.40175 | 0.561012 | -0.71611 | 0.473925 | 0.59642  | chr2  | 12024447   | 12024944 | + | 0 | NA | IntergeniLIP4 LID   | 137789   | NR_110761 | 1.03E+08 | Hs.652925NR_110761    | LOC102722 | -         | uncharactncRNA  |                         |
| chr1-1241 | 28.21951 | -0.30195 | 0.421763 | -0.71593 | 0.474037 | 0.59642  | chr1  | 1.24E+08   | 1.24E+08 | + | 0 | NA | IntergeniALR/Alphe  | 2636015  | NR_003952 | 647121   | Hs.697682NR_003952    | ENSG0000C | EMBP1     | -               | embigin fpseudo         |
| chr5-495  | 24.8236  | -0.3244  | 0.453574 | -0.71522 | 0.474475 | 0.596544 | chr5  | 49560537   | 49560740 | + | 0 | NA | IntergeniALR/Alphe  | 880650   | NM_198445 | 133418   | Hs.561411NM_198445    | ENSG0000C | EMB       | GP70            | embigin protein-coding  |
| chr17-24  | 15.14453 | -0.40488 | 0.566371 | -0.71486 | 0.474695 | 0.596544 | chr17 | 24502813   | 24503194 | + | 0 | NA | IntergeniALR/Alphe  | 1559452  | NM_00119C | 1E+08    | Hs.740185NM_00119C    | ENSG0000C | MTRNR2L1  | HN1             | MT-RNR2 lprotein-coding |
| chr19-256 | 20.60273 | -0.34829 | 0.487564 | -0.71434 | 0.475014 | 0.596544 | chr19 | 25665974   | 25666574 | + | 0 | NA | IntergeniALR/Alphe  | -1502827 | NR_003602 | 1E+08    | Hs.149312NR_003602    | ENSG0000C | HAVCR1P1  | -               | hepatitispseudo         |
| chr19-252 | 28.60806 | -0.30302 | 0.424267 | -0.71422 | 0.475089 | 0.596544 | chr19 | 25235725   | 25235936 | + | 0 | NA | IntergeniALR/Alphe  | -1072383 | NR_003602 | 1E+08    | Hs.149312NR_003602    | ENSG0000C | HAVCR1P1  | -               | hepatitispseudo         |
| chr11-533 | 23.35632 | -0.32793 | 0.459225 | -0.7141  | 0.475166 | 0.596544 | chr11 | 53306319   | 53307889 | + | 0 | NA | IntergeniALR/Alphe  | 1296894  | NM_001004 | 119749   | Hs.553564NM_001004    | ENSG0000C | OR4C46    | -               | olfactoryprotein-coding |
| chr18-168 | 17.91982 | -0.37138 | 0.520288 | -0.71379 | 0.475355 | 0.596544 | chr18 | 16858707   | 16859131 | + | 0 | NA | IntergeniALR/Alphe  | -1533000 | NR_027417 | 644669   | Hs.579474NR_027417    | ENSG0000C | LOC644669 | -               | ankyrin ipseudo         |
| chr5-500  | 17.91982 | -0.37138 | 0.520288 | -0.71379 | 0.475355 | 0.596544 | chr5  | 50053482   | 50053723 | + | 0 | NA | IntergeniALR/Alphe  | 367686   | NM_198445 | 133418   | Hs.561411NM_198445    | ENSG0000C | EMB       | GP70            | embigin protein-coding  |
| chr21-111 | 17.98771 | -0.37228 | 0.521943 | -0.71326 | 0.475687 | 0.596686 | chr21 | 11117295   | 11118199 | + | 0 | NA | IntergeniALR/Alphe  | 518263   | NR_13231E | 7179     | Hs.122988NM_199255    | ENSG0000C | TPT       | CT44 PTEN       | transmem protein-coding |
| chr20-28  | 17.87363 | -0.37225 | 0.522055 | -0.71305 | 0.475816 | 0.596686 | chr20 | 28084296   | 28084508 | + | 0 | NA | IntergeniALR/Alphe  | 518263   | NR_13231E | 7179     | Hs.122988NM_199255    | ENSG0000C | TPT       | CT44 PTEN       | transmem protein-coding |
| chr19-252 | 28.19781 | -0.3008  | 0.422145 | -0.71255 | 0.476125 | 0.596855 | chr19 | 25085848   | 25086059 | + | 0 | NA | IntergeniALR/Alphe  | -922506  | NR_003602 | 1E+08    | Hs.149312NR_003602    | ENSG0000C | HAVCR1P1  | -               | hepatitispseudo         |
| chr2-927  | 15.16902 | -0.40177 | 0.564614 | -0.71158 | 0.476723 | 0.597386 | chr2  | 92730380   | 92731263 | + | 0 | NA | IntergeniALR/Alphe  | 785688   | NR_027714 | 440888   | Hs.730235NM_001032412 | ACTR3BP2  | FKSG73    | ACTR3B          | pspseudo                |
| chr7-5892 | 23.33462 | -0.32656 | 0.459492 | -0.7107  | 0.477269 | 0.597852 | chr7  | 58924761   | 59785203 | + | 0 | NA | IntergeniALR/Alphe  | 1475107  | NM_001155 | 441234   | Hs.533121NM_001155    | ENSG0000C | ZNF716    | -               | zinc fingprotein-coding |
| chr19-255 | 81.97009 | -0.19253 | 0.271199 | -0.70992 | 0.477751 | 0.598236 | chr19 | 25933316   | 25933548 | + | 0 | NA | IntergeniALR/Alphe  | -1769985 | NR_003602 | 1E+08    | Hs.149312NR_003602    | ENSG0000C | HAVCR1P1  | -               | hepatitispseudo         |
| chr2-924  | 17.89812 | -0.36963 | 0.520871 | -0.70963 | 0.477932 | 0.598245 | chr2  | 92473048   | 92474841 | + | 0 | NA | IntergeniALR/Alphe  | 5224118  | NR_027714 | 440888   | Hs.730235NM_001032412 | ACTR3BP2  | FKSG73    | ACTR3B          | pspseudo                |
| chr1-1237 | 17.94431 | -0.36877 | 0.520064 | -0.70908 | 0.478277 | 0.598457 | chr1  | 1.24E+08   | 1.24E+08 | + | 0 | NA | IntergeniALR/Alphe  | 2340426  | NR_003952 | 647121   | Hs.697682NR_003952    | ENSG0000C | EMBP1     | -               | embigin fpseudo         |
| chr21-127 | 17.4144  | -0.37597 | 0.530645 | -0.70851 | 0.478626 | 0.598675 | chr21 | 12758727</ |          |   |   |    |                     |          |           |          |                       |           |           |                 |                         |





|           |          |          |          |          |          |          |       |          |          |   |    |                    |                    |           |           |                    |                       |            |            |                |                         |                        |
|-----------|----------|----------|----------|----------|----------|----------|-------|----------|----------|---|----|--------------------|--------------------|-----------|-----------|--------------------|-----------------------|------------|------------|----------------|-------------------------|------------------------|
| chr1-1234 | 20.50533 | -0.27499 | 0.489339 | -0.56196 | 0.574146 | 0.669968 | chr1  | 1.23E+08 | 1.23E+08 | 0 | NA | IntergeniALR/Alphe | 1924961            | NR_00395E | 647121    | Hs.697682NR_00395E | ENSG00000             | EMBP1      | -          | embigin        | fpseudo                 |                        |
| chr19-262 | 22.75629 | -0.26089 | 0.464806 | -0.56129 | 0.574602 | 0.670271 | chr19 | 26202697 | 26204858 | + | 0  | NA                 | IntergeniALR/Alphe | -1589654  | NR_146733 | 1.02E+08           | Hs.567934NR_110687    | ENSG00000  | LOC101927- | -              | uncharactncRNA          |                        |
| chr19-268 | 27.57886 | -0.24101 | 0.429874 | -0.56064 | 0.575041 | 0.670555 | chr19 | 26856341 | 26856551 | + | 0  | NA                 | IntergeniALR/Alphe | -936985   | NR_146733 | 1.02E+08           | Hs.567934NR_110687    | ENSG00000  | LOC101927- | -              | uncharactncRNA          |                        |
| chr11-542 | 15.63935 | -0.31043 | 0.55494  | -0.55939 | 0.575894 | 0.671321 | chr11 | 54221939 | 54223088 | + | 0  | NA                 | IntergeniALR/Alphe | 381485    | NM_001004 | 1.197949           | Hs.553564NM_001004    | ENSG00000  | OR4C46     | -              | olfactoryprotein-coding |                        |
| chr15-192 | 20.13569 | -0.27045 | 0.498476 | -0.55866 | 0.576437 | 0.671725 | chr15 | 19226162 | 19226420 | + | 0  | NA                 | IntergeniALR/Alphe | -1056453  | NR_03883E | 646969             | Hs.448785NR_03883E    | ENSG00000  | CHEK2P2    | -              | checkpoirpseudo         |                        |
| chr17-234 | 16.50882 | -0.31152 | 0.558097 | -0.55817 | 0.576725 | 0.671833 | chr17 | 23453743 | 23453942 | + | 0  | NA                 | IntergeniALR/Alphe | 930731    | NM_00119C | 1E+08              | Hs.740185NM_00119C    | ENSG00000  | MTRNR2L1   | HN1            | MT-RNR2                 | lprotein-coding        |
| chr17-246 | 17.86582 | -0.29057 | 0.520951 | -0.55776 | 0.577006 | 0.671931 | chr17 | 24660607 | 24660822 | + | 0  | NA                 | IntergeniALR/Alphe | 21376003  | NM_00119C | 1E+08              | Hs.740185NM_00119C    | ENSG00000  | MTRNR2L1   | HN1            | MT-RNR2                 | lprotein-coding        |
| chr12-352 | 15.15563 | -0.31571 | 0.566631 | -0.55717 | 0.577413 | 0.672177 | chr12 | 35204680 | 35204971 | + | 0  | NA                 | IntergeniALR/Alphe | 11823299  | NM_032834 | 84920              | Hs.102971NM_032834    | ENSG00000  | ALG10      | ALG10A         | DIALG10                 | alprotein-coding       |
| chr2-923E | 16.71808 | -0.30525 | 0.549429 | -0.55558 | 0.578496 | 0.672421 | chr2  | 92395819 | 92396249 | + | 0  | NA                 | IntergeniALR/Alphe | 454901    | NR_02771A | 440888             | Hs.730235NM_001032412 | ACTR3BP2   | FKSG73     | ACTR3B         | pspseudo                |                        |
| chr2-923E | 26.36044 | -0.24984 | 0.449784 | -0.55548 | 0.578569 | 0.672421 | chr2  | 93003783 | 93004042 | + | 0  | NA                 | IntergeniALR/Alphe | 1062779   | NR_02771A | 440888             | Hs.730235NM_001032412 | ACTR3BP2   | FKSG73     | ACTR3B         | pspseudo                |                        |
| chr1-1228 | 20.0244  | -0.27424 | 0.493956 | -0.5552  | 0.578761 | 0.672421 | chr1  | 1.23E+08 | 1.23E+08 | + | 0  | NA                 | IntergeniALR/Alphe | 1375644   | NR_00395E | 647121             | Hs.697682NR_00395E    | ENSG00000  | EMBP1      | -              | embigin                 | fpseudo                |
| chr11-517 | 20.0244  | -0.27424 | 0.493956 | -0.5552  | 0.578761 | 0.672421 | chr11 | 51793531 | 51793774 | + | 0  | NA                 | IntergeniALR/Alphe | 1384505   | NR_024504 | 646813             | Hs.684175NR_024504    | LOC646813- | -          | DEXH-box       | pseudo                  |                        |
| chr10-411 | 15.13393 | -0.31358 | 0.564873 | -0.55514 | 0.5788   | 0.672421 | chr10 | 41176766 | 41178267 | + | 0  | NA                 | IntergeniALR/Alphe | 1190529   | NR_02438C | 441666             | Hs.255725NR_02438C    | ENSG00000  | LOC441666- | -              | zinc                    | finfpseudo             |
| chr8-857E | 15.13393 | -0.31358 | 0.564873 | -0.55514 | 0.5788   | 0.672421 | chr8  | 85726990 | 85728015 | + | 0  | NA                 | IntergeniALR/Alphe | -8796     | NR_003594 | 1E+08              | Hs.535055NR_003594    | REXO1L2P   | -          | REXO1          | likpseudo               |                        |
| chr18-204 | 15.18012 | -0.31264 | 0.56557  | -0.55279 | 0.58041  | 0.674062 | chr18 | 20492194 | 20492530 | + | 0  | NA                 | IntergeniALR/Alphe | 619451    | NM_00540E | 6093               | Hs.306307NM_00540E    | ENSG00000  | ROCK1      | P160ROCK       | Rho                     | asokprotein-coding     |
| chr14-164 | 15.11223 | -0.31149 | 0.564454 | -0.55184 | 0.581057 | 0.674492 | chr14 | 16498939 | 16499154 | + | 0  | NA                 | IntergeniALR/Alphe | -2102071  | NM_001013 | 440153             | Hs.53488CNR_001013    | ENSG00000  | OR11H12    | -              | olfactoryprotein-coding |                        |
| chr1-1244 | 48.2901  | -0.18252 | 0.330856 | -0.55167 | 0.581173 | 0.674492 | chr1  | 1.24E+08 | 1.24E+08 | + | 0  | NA                 | IntergeniALR/Alphe | 2883509   | NR_00395E | 647121             | Hs.697682NR_00395E    | ENSG00000  | EMBP1      | -              | embigin                 | fpseudo                |
| chr1-1247 | 20.66839 | -0.27065 | 0.490939 | -0.55129 | 0.581435 | 0.674557 | chr1  | 1.25E+08 | 1.25E+08 | + | 0  | NA                 | IntergeniALR/Alphe | 3264701   | NR_00395E | 647121             | Hs.697682NR_00395E    | ENSG00000  | EMBP1      | -              | embigin                 | fpseudo                |
| chr17-266 | 37.16271 | -0.20553 | 0.373005 | -0.55102 | 0.581623 | 0.674557 | chr17 | 26624945 | 26626420 | + | 0  | NA                 | IntergeniALR/Alphe | 463559    | NR_135673 | 1.05E+08           | Hs.649918NR_135673    | LOC105371- | -          | uncharactncRNA |                         |                        |
| chr20-284 | 22.25366 | -0.25846 | 0.469636 | -0.55035 | 0.582079 | 0.674772 | chr20 | 28433074 | 28433359 | + | 0  | NA                 | IntergeniALR/Alphe | 169449    | NR_13231E | 1E+08              | Hs.529357NR_13231E    | ENSG00000  | FRG1C1P    | -              | FSHD                    | regipseudo             |
| chr11-52E | 25.56165 | -0.24479 | 0.445183 | -0.54987 | 0.582409 | 0.674772 | chr11 | 52327339 | 52327935 | + | 0  | NA                 | IntergeniALR/Alphe | 1918490   | NR_024504 | 646813             | Hs.684175NR_024504    | LOC646813- | -          | DEXH-box       | pseudo                  |                        |
| chr5-487E | 22.20746 | -0.25909 | 0.471301 | -0.54973 | 0.582502 | 0.674772 | chr5  | 48784845 | 48786749 | + | 0  | NA                 | IntergeniALR/Alphe | 1655491   | NM_19844E | 133418             | Hs.561411NM_19844E    | ENSG00000  | EMB        | GP70           | embigin                 | protein-coding         |
| chr11-51E | 17.82242 | -0.287   | 0.522193 | -0.5496  | 0.582597 | 0.674772 | chr11 | 51948668 | 51950096 | + | 0  | NA                 | IntergeniALR/Alphe | 1540235   | NR_024504 | 646813             | Hs.684175NR_024504    | LOC646813- | -          | DEXH-box       | pseudo                  |                        |
| chr20-264 | 24.36604 | -0.24858 | 0.45401  | -0.54753 | 0.584014 | 0.676186 | chr20 | 26486370 | 26486743 | + | 0  | NA                 | IntergeniALR/Alphe | 26486370  | NR_04009E | 284801             | Hs.370695NR_04009E    | ENSG00000  | MIR663AHC- | -              | MIR663A                 | lncRNA                 |
| chr1-121E | 17.2953  | -0.28727 | 0.53003  | -0.54199 | 0.587827 | 0.679895 | chr1  | 1.22E+08 | 1.22E+08 | + | 0  | NA                 | IntergeniALR/Alphe | 281724    | NR_00395E | 647121             | Hs.697682NR_00395E    | ENSG00000  | EMBP1      | -              | embigin                 | fpseudo                |
| chr7-604E | 15.16121 | -0.30542 | 0.563535 | -0.54197 | 0.587842 | 0.679895 | chr7  | 60486328 | 60486977 | + | 0  | NA                 | IntergeniALR/Alphe | 2817404   | NR_00395E | 643955             | Hs.583308NR_00395E    | ENSG00000  | ZNF733P    | ZNF733         | zinc                    | finfpseudo             |
| chr19-268 | 19.47557 | -0.27256 | 0.503152 | -0.54171 | 0.588016 | 0.679895 | chr19 | 26823520 | 26823730 | + | 0  | NA                 | IntergeniALR/Alphe | -969806   | NR_146733 | 1.02E+08           | Hs.567934NR_110687    | ENSG00000  | LOC101927- | -              | uncharactncRNA          |                        |
| chr2-927E | 19.47557 | -0.27256 | 0.503152 | -0.54171 | 0.588016 | 0.679895 | chr2  | 92726049 | 92726388 | + | 0  | NA                 | IntergeniALR/Alphe | 785085    | NR_02771A | 440888             | Hs.730235NM_001032412 | ACTR3BP2   | FKSG73     | ACTR3B         | pspseudo                |                        |
| chr2-926E | 21.72723 | -0.25742 | 0.475443 | -0.54143 | 0.58821  | 0.679895 | chr2  | 92665533 | 92666448 | + | 0  | NA                 | IntergeniALR/Alphe | 724767    | NR_02771A | 440888             | Hs.730235NM_001032412 | ACTR3BP2   | FKSG73     | ACTR3B         | pspseudo                |                        |
| chr11-51E | 26.20676 | -0.23252 | 0.435949 | -0.53963 | 0.589449 | 0.68106  | chr11 | 51310637 | 51310951 | + | 0  | NA                 | IntergeniALR/Alphe | 9101647   | NR_024504 | 646813             | Hs.684175NR_024504    | LOC646813- | -          | DEXH-box       | pseudo                  |                        |
| chr1-1224 | 19.95929 | -0.26939 | 0.499436 | -0.53939 | 0.589616 | 0.68106  | chr1  | 1.22E+08 | 1.22E+08 | + | 0  | NA                 | IntergeniALR/Alphe | 918021    | NR_00395E | 647121             | Hs.697682NR_00395E    | ENSG00000  | EMBP1      | -              | embigin                 | fpseudo                |
| chr14-192 | 15.2074  | -0.30445 | 0.56528  | -0.53858 | 0.590176 | 0.681477 | chr14 | 19264915 | 19265143 | + | 0  | NA                 | IntergeniALR/Alphe | -36675    | NR_13391E | 1.06E+08           | Hs.643607NR_13391E    | ENSG00000  | BMS1P22    | -              | BMS1                    | psetpseudo             |
| chr8-459E | 21.79722 | -0.2553  | 0.474794 | -0.5377  | 0.590783 | 0.681949 | chr8  | 45927307 | 45929522 | + | 0  | NA                 | IntergeniALR/Alphe | 689014    | NR_146077 | 389652             | NR_146077             | ENSG00000  | ASNSP1     | ASNSL1         | asparagipseudo          |                        |
| chr2-926E | 19.45387 | -0.27092 | 0.504595 | -0.5369  | 0.591335 | 0.682355 | chr2  | 92602076 | 92603750 | + | 0  | NA                 | IntergeniALR/Alphe | 661780    | NR_02771A | 440888             | Hs.730235NM_001032412 | ACTR3BP2   | FKSG73     | ACTR3B         | pspseudo                |                        |
| chr5-474E | 19.52456 | -0.26781 | 0.499747 | -0.53589 | 0.592033 | 0.682931 | chr5  | 47411073 | 47411306 | + | 0  | NA                 | IntergeniALR/Alphe | -171484   | NR_021072 | 348980             | Hs.353176NM_021072    | ENSG00000  | HCN1       | BCNG-1         | BC                      | hyperpolprotein-coding |
| chr9-638E | 19.01635 | -0.2735  | 0.511459 | -0.53475 | 0.592822 | 0.683604 | chr9  | 63816703 | 68319606 | + | 0  | NA                 | non-codir          | -1420     | NR_03968E | 1.01E+08           | NR_03968E             | ENSG00000  | MIR4477B   | -              | microRNA                | ncRNA                  |
| chr5-488E | 15.64493 | -0.30029 | 0.561844 | -0.53447 | 0.593015 | 0.683604 | chr5  | 48873895 | 48874728 | + | 0  | NA                 | IntergeniALR/Alphe | 1566977   | NM_19844E | 133418             | Hs.561411NM_19844E    | ENSG00000  | EMB        | GP70           | embigin                 | protein-coding         |
| chr2-927E | 21.68313 | -0.25509 | 0.477882 | -0.53378 | 0.593491 | 0.683919 | chr2  | 92727679 | 92728159 | + | 0  | NA                 | IntergeniALR/Alphe | 786786    | NR_02771A | 440888             | Hs.730235NM_001032412 | ACTR3BP2   | FKSG73     | ACTR3B         | pspseudo                |                        |
| chr20-30E | 17.34428 | -0.28196 | 0.528594 | -0.53342 | 0.59374  | 0.683919 | chr20 | 30818122 | 30820036 | + | 0  | NA                 | IntergeniALR/Alphe | -415617   | NR_04511E | 140678             | Hs.653095NR_04511E    | MLL1T10P1  | MLL1T10L   | MLL1T10        | pspseudo                |                        |
| chr2-931E | 21.82171 | -0.25318 | 0.474826 | -0.53321 | 0.593887 | 0.683919 | chr2  | 93119510 | 93120232 | + | 0  | NA                 | IntergeniALR/Alphe | 1088548   | NR_14610E | 728034             | NR_14610E             | BMSIP14    | -          | BMS1           | psetpseudo              |                        |
| chr5-484E | 20.05447 | -0.26408 | 0.496516 | -0.53187 | 0.594818 | 0.684761 | chr5  | 48460664 | 48460663 | + | 0  | NA                 | IntergeniALR/Alphe | 2035025   | NM_19844E | 133418             | Hs.561411NM_19844E    | ENSG00000  | EMB        | GP70           | embigin                 | protein-coding         |
| chr21-127 | 15.11781 | -0.3012  | 0.566715 | -0.53148 | 0.595088 | 0.684841 | chr21 | 12778233 | 12778455 | + | 0  | NA                 | IntergeniALR/Alphe | -259822   | NR_02691E | 149992             | Hs.55864ENM_153773    | ANKRD30BF  | C21orf99   | ankryrin       | fpseudo                 |                        |
| chr1-1234 | 26.18784 | -0.23098 | 0.435364 | -0.53055 | 0.595729 | 0.685191 | chr1  | 1.23E+08 | 1.23E+08 | + | 0  | NA                 | IntergeniALR/Alphe | 1914031   | NR_00395E | 647121             | Hs.697682NR_00395E    | ENSG00000  | EMBP1      | -              | embigin                 | fpseudo                |
| chr19-251 | 19.59524 | -0.26475 | 0.499098 | -0.53046 | 0.595792 | 0.685191 | chr19 | 25123792 | 25124733 | + | 0  | NA                 | IntergeniALR/Alphe | -960815   | NR_00360E | 1E+08              | Hs.149312NR_00360E    | ENSG00000  | HAVCR1P1   | -              | hepatitis               | pseudo                 |
| chr5-474E | 16.79266 | -0.28483 | 0.538082 | -0.52934 | 0.596573 | 0.685858 | chr5  | 47480931 | 47481357 | + | 0  | NA                 | IntergeniALR/Alphe | -1784764  | NR_021072 | 348980             | Hs.353176NM_021072    | ENSG00000  | HCN1       | BCNG-1         | BC                      | hyperpolprotein-coding |
| chr1-1237 | 23.93688 | -0.24207 | 0.454761 | -0.52834 | 0.597266 | 0.686425 | chr1  | 1.24E+08 | 1.24E+08 | + | 0  | NA                 | IntergeniALR/Alphe | 2279215   | NR_00395E | 647121             | Hs.697682NR_00395E    | ENSG00000  | EMBP1      | -              | embigin                 | fpseudo                |
| chr2-926E | 17.36877 | -0.2793  | 0.529324 | -0.52766 | 0.597734 | 0.686583 | chr2  | 92689875 | 92690188 | + | 0  | NA                 | IntergeniALR/Alphe | 748898    | NR_02771A | 440888             | Hs.730235NM_001032412 | ACTR3BP2   | FKSG73     | ACTR3B         | pspseudo                |                        |
| chr20-294 | 20.84204 | 0.258728 | 0.490243 | 0.527561 | 0.597804 | 0.686583 | chr20 | 29448473 | 29449975 | + | 0  | NA                 | intron             | 707       | NR_134504 | 1.05E+08           | Hs.70227CNR_134504    | LOC105377- | -          | uncharactncRNA |                         |                        |
| chr2-929E | 19.04363 | -0.26683 | 0.506088 | -0.52724 | 0.598025 | 0.686606 | chr2  | 92943419 | 92933539 | + | 0  | NA                 | IntergeniALR/Alphe | 994110    | NR_02771A | 440888             | Hs.730235NM_001032412 | ACTR3BP2   | FKSG73     | ACTR3B         | pspseudo                |                        |
| chr1-124E | 19.57354 | -0.26311 | 0.49959  | -0.526   |          |          |       |          |          |   |    |                    |                    |           |           |                    |                       |            |            |                |                         |                        |

|           |          |          |          |          |          |          |       |          |          |   |   |    |                    |          |           |          |                    |              |            |          |          |                      |                         |
|-----------|----------|----------|----------|----------|----------|----------|-------|----------|----------|---|---|----|--------------------|----------|-----------|----------|--------------------|--------------|------------|----------|----------|----------------------|-------------------------|
| chr5-4884 | 21.45101 | -0.21954 | 0.478064 | -0.45922 | 0.646074 | 0.723586 | chr5  | 48847443 | 48847675 | + | 0 | NA | IntergeniALR/Alphe | 1593729  | NM_19844E | 133418   | Hs.561411NM_19844E | ENSG00000    | EMB        | GP70     | embigin  | protein-coding       |                         |
| chr2-9238 | 21.26173 | 0.220934 | 0.42889  | 0.457524 | 0.647294 | 0.724716 | chr2  | 92387034 | 92387631 | + | 0 | NA | IntergeniALR/Alphe | 446199   | NR_027714 | 440888   | Hs.73023E          | NM_001032412 | ACTR3BP2   | FKSG73   | ACTR3B   | pspsseudo            |                         |
| chr19-266 | 51.82235 | -0.14784 | 0.323781 | -0.4566  | 0.647955 | 0.725169 | chr19 | 26024094 | 26024311 | + | 0 | NA | IntergeniALR/Alphe | -1769229 | NR_146733 | 1.02E+08 | Hs.567934NR_110687 | ENSG00000    | LOC101927- |          |          | uncharactncRNA       |                         |
| chr7-586  | 17.06317 | -0.24297 | 0.532395 | -0.45637 | 0.648123 | 0.725169 | chr7  | 58632312 | 58635947 | + | 0 | NA | IntergeniALR/Alphe | 1183952  | NM_00115E | 441234   | Hs.533121NM_00115E | ENSG00000    | ZNF716     | -        |          | zinc                 | fingerprotein-coding    |
| chr2-9367 | 29.81923 | -0.18674 | 0.410062 | -0.45538 | 0.648832 | 0.725601 | chr2  | 93672523 | 93672946 | + | 0 | NA | IntergeniALR/Alphe | 5368835  | NR_146105 | 728034   | NR_146105          | ENSG00000    | BMS1P14    | -        |          | BMS1                 | pseupseudo              |
| chr2-922  | 16.97079 | -0.24459 | 0.537258 | -0.45525 | 0.648932 | 0.725601 | chr2  | 92231925 | 92233925 | + | 0 | NA | IntergeniALR/Alphe | 291792   | NR_027714 | 440888   | Hs.73023E          | NM_001032412 | ACTR3BP2   | FKSG73   | ACTR3B   | pspsseudo            |                         |
| chr11-52  | 25.38241 | -0.20037 | 0.442137 | -0.45319 | 0.650414 | 0.727021 | chr11 | 52320619 | 52321209 | + | 0 | NA | IntergeniALR/Alphe | 1911767  | NR_024504 | 646813   | Hs.684175NR_024504 | ENSG00000    | LOC64681E  | -        |          | DEXH-box             | pseudo                  |
| chr19-27  | 17.08766 | -0.24031 | 0.532158 | -0.45157 | 0.651578 | 0.728084 | chr19 | 27095943 | 27097148 | + | 0 | NA | IntergeniALR/Alphe | -6968886 | NR_146732 | 1.02E+08 | Hs.567934NR_110687 | ENSG00000    | LOC101927- |          |          | uncharactncRNA       |                         |
| chr1-124  | 21.49999 | -0.21529 | 0.477441 | -0.45092 | 0.652045 | 0.728369 | chr1  | 1.24E+08 | 1.24E+08 | + | 0 | NA | IntergeniALR/Alphe | 2829172  | NR_00395E | 647121   | Hs.697682NR_00395E | ENSG00000    | EMBMP1     | -        |          | embigin              | fpseudo                 |
| chr1-122  | 24.79514 | 0.201017 | 0.450075 | 0.446629 | 0.655143 | 0.73159  | chr1  | 1.23E+08 | 1.23E+08 | + | 0 | NA | IntergeniALR/Alphe | 1009361  | NR_00395E | 647121   | Hs.697682NR_00395E | ENSG00000    | EMBMP1     | -        |          | embigin              | fpseudo                 |
| chr11-524 | 30.96975 | -0.18038 | 0.405433 | -0.4449  | 0.656393 | 0.732747 | chr11 | 52492890 | 52493168 | + | 0 | NA | IntergeniALR/Alphe | 2083882  | NR_024504 | 646813   | Hs.684175NR_024504 | ENSG00000    | LOC64681E  | -        |          | DEXH-box             | pseudo                  |
| chr2-922  | 23.24832 | -0.20392 | 0.461021 | -0.44231 | 0.658264 | 0.73413  | chr2  | 92253871 | 92254831 | + | 0 | NA | IntergeniALR/Alphe | 313218   | NR_027714 | 440888   | Hs.73023E          | NM_001032412 | ACTR3BP2   | FKSG73   | ACTR3B   | pspsseudo            |                         |
| chr2-34   | 17.09045 | -0.23576 | 0.53303  | -0.4423  | 0.658274 | 0.73413  | chr2  | 34946695 | 34946988 | + | 0 | NA | IntergeniALR/Alphe | 924345   | NM_032834 | 84920    | Hs.102971NM_032834 | ENSG00000    | ALG10      | ALG10A   | DIALG10  | alprprotein-coding   |                         |
| chr5-487  | 17.09045 | -0.23576 | 0.53303  | -0.4423  | 0.658274 | 0.73413  | chr5  | 48957535 | 48958003 | + | 0 | NA | IntergeniALR/Alphe | 1465611  | NM_19844E | 133418   | Hs.561411NM_19844E | ENSG00000    | EMB        | GP70     | embigin  | protein-coding       |                         |
| chr5-494  | 30.90354 | -0.18254 | 0.413531 | -0.44141 | 0.658914 | 0.734605 | chr5  | 49469821 | 49470050 | + | 0 | NA | IntergeniALR/Alphe | 971353   | NM_19844E | 133418   | Hs.561411NM_19844E | ENSG00000    | EMB        | GP70     | embigin  | protein-coding       |                         |
| chr5-483  | 21.86962 | -0.21306 | 0.48678  | -0.43768 | 0.661617 | 0.737378 | chr5  | 48325069 | 48325315 | + | 0 | NA | IntergeniALR/Alphe | 2116096  | NM_19844E | 133418   | Hs.561411NM_19844E | ENSG00000    | EMB        | GP70     | embigin  | protein-coding       |                         |
| chrX-623  | 30.55672 | -0.17921 | 0.411523 | -0.43549 | 0.663207 | 0.738909 | chrX  | 62362395 | 62362960 | + | 0 | NA | IntergeniALR/Alphe | 98655    | NM_00101E | 139886   | Hs.612782NM_00101E | ENSG00000    | SPIN4      | TDRD28   | spindlin | protein-coding       |                         |
| chr11-521 | 18.38119 | -0.22577 | 0.520459 | -0.43378 | 0.664445 | 0.739502 | chr11 | 52183468 | 52183708 | + | 0 | NA | IntergeniALR/Alphe | 1774441  | NR_024504 | 646813   | Hs.684175NR_024504 | ENSG00000    | LOC64681E  | -        |          | DEXH-box             | pseudo                  |
| chr2-925  | 20.51364 | -0.21326 | 0.491637 | -0.43377 | 0.664458 | 0.739502 | chr2  | 92533572 | 92534498 | + | 0 | NA | IntergeniALR/Alphe | 592902   | NR_027714 | 440888   | Hs.73023E          | NM_001032412 | ACTR3BP2   | FKSG73   | ACTR3B   | pspsseudo            |                         |
| chrX-594  | 38.23753 | -0.1615  | 0.372455 | -0.43362 | 0.664567 | 0.739502 | chrX  | 59488012 | 59489036 | + | 0 | NA | IntergeniALR/Alphe | -1577891 | NM_00715E | 7789     | Hs.550094NM_00715E | ENSG00000    | ZXDA       | ZNF896   | zinc     | fingerprotein-coding |                         |
| chrX-6207 | 18.70021 | -0.22189 | 0.511775 | -0.43357 | 0.664602 | 0.739502 | chrX  | 62074740 | 62075452 | + | 0 | NA | IntergeniALR/Alphe | 1276236  | NM_00101E | 139886   | Hs.612782NM_00101E | ENSG00000    | SPIN4      | TDRD28   | spindlin | protein-coding       |                         |
| chr17-25  | 16.00893 | -0.24098 | 0.556441 | -0.43307 | 0.664961 | 0.739661 | chr17 | 25375417 | 25375617 | + | 0 | NA | IntergeniALR/Alphe | 1713724  | NR_135673 | 1.05E+08 | Hs.649918NR_135673 | ENSG00000    | LOC105371- |          |          | uncharactncRNA       |                         |
| chr5-467  | 22.94216 | 0.200851 | 0.4654   | 0.431566 | 0.666057 | 0.740464 | chr5  | 46721258 | 46721593 | + | 0 | NA | IntergeniALR/Alphe | -1025045 | NM_02107E | 348980   | Hs.35317E          | NM_02107E    | ENSG00000  | HCN1     | BCNG-1   | BC                   | hyperpolaprotein-coding |
| chr10-40  | 29.2053  | -0.18065 | 0.418662 | -0.43149 | 0.666115 | 0.740464 | chr10 | 40315195 | 40315534 | + | 0 | NA | IntergeniALR/Alphe | 1618768  | NR_04500C | 399746   | Hs.742607NR_04500C | ENSG00000    | ACTR3BP5   | FKSG74   | ACTR3B   | pspsseudo            |                         |
| chr5-4801 | 17.13943 | -0.2303  | 0.537414 | -0.42854 | 0.66826  | 0.742608 | chr5  | 48013865 | 48014073 | + | 0 | NA | IntergeniALR/Alphe | -2317589 | NM_02107E | 348980   | Hs.35317E          | NM_02107E    | ENSG00000  | HCN1     | BCNG-1   | BC                   | hyperpolaprotein-coding |
| chr11-51  | 24.33095 | -0.19408 | 0.453664 | -0.4278  | 0.668797 | 0.742963 | chr11 | 51284263 | 51285088 | + | 0 | NA | IntergeniALR/Alphe | 875528   | NR_024504 | 646813   | Hs.684175NR_024504 | ENSG00000    | LOC64681E  | -        |          | DEXH-box             | pseudo                  |
| chr1-1218 | 26.60919 | -0.1841  | 0.432278 | -0.42589 | 0.670189 | 0.744268 | chr1  | 1.22E+08 | 1.22E+08 | + | 0 | NA | IntergeniALR/Alphe | 340944   | NR_00395E | 647121   | Hs.697682NR_00395E | ENSG00000    | EMBMP1     | -        |          | embigin              | fpseudo                 |
| chr5-478  | 20.56262 | -0.20877 | 0.490881 | -0.42531 | 0.670613 | 0.744498 | chr5  | 47891967 | 47892176 | + | 0 | NA | IntergeniALR/Alphe | -2195691 | NM_02107E | 348980   | Hs.35317E          | NM_02107E    | ENSG00000  | HCN1     | BCNG-1   | BC                   | hyperpolaprotein-coding |
| chr1-122  | 16.03621 | -0.23309 | 0.549312 | -0.42433 | 0.671328 | 0.74505  | chr1  | 1.22E+08 | 1.22E+08 | + | 0 | NA | IntergeniALR/Alphe | 744801   | NR_00395E | 647121   | Hs.697682NR_00395E | ENSG00000    | EMBMP1     | -        |          | embigin              | fpseudo                 |
| chr2-926  | 18.24377 | -0.21714 | 0.515798 | -0.42097 | 0.673774 | 0.747335 | chr2  | 92622879 | 92625785 | + | 0 | NA | IntergeniALR/Alphe | 683199   | NR_027714 | 440888   | Hs.73023E          | NM_001032412 | ACTR3BP2   | FKSG73   | ACTR3B   | pspsseudo            |                         |
| chr1-124  | 19.96482 | -0.21006 | 0.499077 | -0.42091 | 0.673823 | 0.747335 | chr1  | 1.25E+08 | 1.25E+08 | + | 0 | NA | IntergeniALR/Alphe | 3343248  | NR_00395E | 647121   | Hs.697682NR_00395E | ENSG00000    | EMBMP1     | -        |          | embigin              | fpseudo                 |
| chrX-624  | 54.54592 | -0.13651 | 0.324699 | -0.42008 | 0.674429 | 0.747765 | chrX  | 62471948 | 62473142 | + | 0 | NA | IntergeniALR/Alphe | 878787   | NM_00101E | 139886   | Hs.612782NM_00101E | ENSG00000    | SPIN4      | TDRD28   | spindlin | protein-coding       |                         |
| chr5-495  | 25.39356 | -0.18678 | 0.447634 | -0.41955 | 0.674817 | 0.747953 | chr5  | 49553310 | 49553674 | + | 0 | NA | IntergeniALR/Alphe | 887796   | NM_19844E | 133418   | Hs.561411NM_19844E | ENSG00000    | EMB        | GP70     | embigin  | protein-coding       |                         |
| chr1-124  | 34.45308 | -0.1607  | 0.383964 | -0.41853 | 0.675562 | 0.748537 | chr1  | 1.25E+08 | 1.25E+08 | + | 0 | NA | IntergeniALR/Alphe | 3200768  | NR_00395E | 647121   | Hs.697682NR_00395E | ENSG00000    | EMBMP1     | -        |          | embigin              | fpseudo                 |
| chr5-465  | 29.92277 | -0.17493 | 0.418372 | -0.41812 | 0.675859 | 0.748624 | chr5  | 46524164 | 46524408 | + | 0 | NA | IntergeniALR/Alphe | -827906  | NM_02107E | 348980   | Hs.35317E          | NM_02107E    | ENSG00000  | HCN1     | BCNG-1   | BC                   | hyperpolaprotein-coding |
| chr2-927  | 18.33615 | -0.21571 | 0.516384 | -0.41774 | 0.67614  | 0.748693 | chr2  | 92755302 | 92756056 | + | 0 | NA | IntergeniALR/Alphe | 814546   | NR_027714 | 440888   | Hs.73023E          | NM_001032412 | ACTR3BP2   | FKSG73   | ACTR3B   | pspsseudo            |                         |
| chr2-933  | 16.039   | -0.22826 | 0.548137 | -0.41643 | 0.677097 | 0.749511 | chr2  | 93346297 | 93348275 | + | 0 | NA | IntergeniALR/Alphe | 861133   | NR_146105 | 728034   | NR_146105          | ENSG00000    | BMS1P14    | -        |          | BMS1                 | pseupseudo              |
| chr17-24  | 15.1684  | 0.238033 | 0.573516 | 0.415041 | 0.678112 | 0.750391 | chr17 | 24821226 | 24821427 | + | 0 | NA | IntergeniALR/Alphe | 2267913  | NR_135673 | 1.05E+08 | Hs.649918NR_135673 | ENSG00000    | LOC105371- |          |          | uncharactncRNA       |                         |
| chr17-23  | 20.47582 | -0.2024  | 0.489139 | -0.41379 | 0.679031 | 0.750898 | chr17 | 23632413 | 23632635 | + | 0 | NA | IntergeniALR/Alphe | 1109413  | NM_00119C | 1E+08    | Hs.74018E          | NM_00119C    | ENSG00000  | MTRNR2L1 | HN1      | MT-RNR2              | lprotein-coding         |
| chr5-500  | 27.16577 | 0.178564 | 0.431742 | 0.413591 | 0.679174 | 0.750898 | chr5  | 50031670 | 50031890 | + | 0 | NA | IntergeniALR/Alphe | 409508   | NM_19844E | 133418   | Hs.561411NM_19844E | ENSG00000    | EMB        | GP70     | embigin  | protein-coding       |                         |
| chr5-499  | 23.92071 | -0.18938 | 0.457972 | -0.41352 | 0.679227 | 0.750898 | chr5  | 49975993 | 49976456 | + | 0 | NA | IntergeniALR/Alphe | 465064   | NM_19844E | 133418   | Hs.561411NM_19844E | ENSG00000    | EMB        | GP70     | embigin  | protein-coding       |                         |
| chr2-932  | 27.71533 | -0.17767 | 0.43033  | -0.41286 | 0.679707 | 0.751186 | chr2  | 93286111 | 93286606 | + | 0 | NA | IntergeniALR/Alphe | 93286111 | 93286606  | 728034   | NR_146105          | ENSG00000    | BMS1P14    | -        |          | BMS1                 | pseupseudo              |
| chr1-124  | 28.29242 | -0.1732  | 0.420392 | -0.41201 | 0.680335 | 0.751637 | chr1  | 1.25E+08 | 1.25E+08 | + | 0 | NA | IntergeniALR/Alphe | 3386895  | NR_00395E | 647121   | Hs.697682NR_00395E | ENSG00000    | EMBMP1     | -        |          | embigin              | fpseudo                 |
| chr19-26  | 18.29275 | -0.21218 | 0.515521 | -0.41158 | 0.680649 | 0.751695 | chr19 | 26675488 | 26677143 | + | 0 | NA | IntergeniALR/Alphe | -1117116 | NM_04573E | 1.02E+08 | Hs.567934NR_110687 | ENSG00000    | LOC101927- |          |          | uncharactncRNA       |                         |
| chr18-19  | 23.9669  | -0.18888 | 0.45918  | -0.41134 | 0.680826 | 0.751695 | chr18 | 19426410 | 19426749 | + | 0 | NA | IntergeniALR/Alphe | 1685234  | NM_00540E | 6093     | Hs.306307NM_00540E | ENSG00000    | ROCK1      | P160ROCK | Rho      | assocprotein-coding  |                         |
| chr19-27  | 17.787   | -0.17256 | 0.424678 | -0.40634 | 0.684491 | 0.755304 | chr19 | 27152820 | 27153185 | + | 0 | NA | IntergeniALR/Alphe | -640429  | NR_146732 | 1.02E+08 | Hs.567934NR_110687 | ENSG00000    | LOC101927- |          |          | uncharactncRNA       |                         |
| chr17-24  | 42.01981 | -0.14769 | 0.363515 | -0.40628 | 0.684536 | 0.755304 | chr17 | 24062456 | 24062699 | + | 0 | NA | IntergeniALR/Alphe | 1539466  | NM_00119C | 1E+08    | Hs.74018E          | NM_00119C    | ENSG00000  | MTRNR2L1 | HN1      | MT-RNR2              | lprotein-coding         |
| chr19-27  | 34.21258 | 0.157916 | 0.389093 | 0.405857 | 0.684847 | 0.755405 | chr19 | 27125210 | 27125436 | + | 0 | NA | IntergeniALR/Alphe | -668108  | NR_146733 | 1.02E+08 | Hs.567934NR_110687 | ENSG00000    | LOC101927- |          |          | uncharactncRNA       |                         |
| chr11-    |          |          |          |          |          |          |       |          |          |   |   |    |                    |          |           |          |                    |              |            |          |          |                      |                         |



|           |          |          |            |          |          |          |       |          |          |   |   |    |                    |          |           |          |                       |                      |               |           |                      |                      |
|-----------|----------|----------|------------|----------|----------|----------|-------|----------|----------|---|---|----|--------------------|----------|-----------|----------|-----------------------|----------------------|---------------|-----------|----------------------|----------------------|
| chr2-9258 | 28.75438 | -0.13592 | 0.420957   | -0.32289 | 0.746775 | 0.803966 | chr2  | 92588763 | 92589501 | + | 0 | NA | IntergeniALR/Alphe | 647999   | NR_027714 | 440888   | Hs.730235NM_001032412 | ACTR3BP2             | FKSG73        | ACTR3B    | pspseudo             |                      |
| chr11-51f | 27.03054 | -0.1388  | 0.430331   | -0.32254 | 0.747041 | 0.803966 | chr11 | 51547851 | 51548070 | + | 0 | NA | IntergeniALR/Alphe | 1138813  | NR_024504 | 646813   | Hs.684175NR_024504    | LOC646813            | -             | DEXH-box  | pseudo               |                      |
| chr20-28f | 18.40571 | 0.16621  | 0.515637   | 0.322339 | 0.747196 | 0.803966 | chr20 | 28552122 | 28554482 | + | 0 | NA | IntergeniALR/Alphe | 49363    | NR_13231f | 1E+08    | Hs.529357NR_13231f    | ENSG00000FRG1CP      | -             | FSHD      | regipseudo           |                      |
| chrX-599f | 15.73898 | -0.17827 | 0.553546   | -0.32205 | 0.747411 | 0.803966 | chrX  | 59928180 | 59929689 | + | 0 | NA | IntergeniALR/Alphe | -2018301 | NM_00715e | 7789     | Hs.550094NM_00715e    | ENSG00000CXDA        | ZNF896        | -         | zinc                 | fingerprotein-coding |
| chr21-79f | 17.46282 | -0.16939 | 0.52732    | -0.32122 | 0.748042 | 0.804392 | chr21 | 7956171  | 79969566 | + | 0 | NA | IntergeniALR/Alphe | -133236  | NM_00136e | 1.03E+08 | NM_00133C             | ENSG00000KCNE1B      | -             | potassium | protein-coding       |                      |
| chr1-124f | 16.26889 | -0.1765  | 0.55013    | -0.32084 | 0.748334 | 0.804454 | chr1  | 1.25E+08 | 1.25E+08 | + | 0 | NA | IntergeniALR/Alphe | 3336534  | NR_00395f | 647121   | Hs.697682NR_00395f    | ENSG00000EMB1P       | -             | embigin   | fpseudo              |                      |
| chr1-124f | 16.91646 | -0.13848 | 0.437395   | -0.31924 | 0.749548 | 0.805505 | chr1  | 1.25E+08 | 1.25E+08 | + | 0 | NA | IntergeniALR/Alphe | 3290571  | NR_00395f | 647121   | Hs.697682NR_00395f    | ENSG00000EMB1P       | -             | embigin   | fpseudo              |                      |
| chr8-448f | 15.20907 | -0.1801  | 0.567159   | -0.31755 | 0.750824 | 0.806624 | chr8  | 44887108 | 44887375 | + | 0 | NA | IntergeniALR/Alphe | 1594799  | NM_001002 | 340441   | Hs.531575NM_001002    | ENSG00000POTEA       | A26A1 CT1POTE | an        | kyprotein-coding     |                      |
| chr1-124f | 16.80831 | 0.106729 | 0.33657    | 0.317108 | 0.751162 | 0.806734 | chr1  | 1.25E+08 | 1.25E+08 | + | 0 | NA | IntergeniALR/Alphe | 3367860  | NR_00395f | 647121   | Hs.697682NR_00395f    | ENSG00000EMB1P       | -             | embigin   | fpseudo              |                      |
| chr11-53f | 19.71936 | -0.1572  | 0.497665   | -0.31588 | 0.752091 | 0.807478 | chr11 | 53519613 | 53519917 | + | 0 | NA | IntergeniALR/Alphe | 1084233  | NM_001004 | 119749   | Hs.553564NM_001004    | ENSG00000OR4C46      | -             | olfactory | protein-coding       |                      |
| chr7-587f | 17.53335 | -0.16612 | 0.52706    | -0.31519 | 0.752619 | 0.807793 | chr7  | 58783892 | 58784334 | + | 0 | NA | IntergeniALR/Alphe | 1333936  | NM_00115e | 441234   | Hs.533121NM_00115e    | ENSG00000CZNF716     | -             | zinc      | fingerprotein-coding |                      |
| chr2-923f | 19.09707 | -0.15941 | 0.508898   | -0.31325 | 0.754092 | 0.809119 | chr2  | 92367835 | 92369326 | + | 0 | NA | IntergeniALR/Alphe | 427447   | NR_027714 | 440888   | Hs.730235NM_001032412 | ACTR3BP2             | FKSG73        | ACTR3B    | pspseudo             |                      |
| chr7-597f | 16.9574  | -0.16823 | 0.540257   | -0.31139 | 0.755504 | 0.810381 | chr7  | 59726595 | 59727021 | + | 0 | NA | IntergeniALR/Alphe | 2276631  | NM_00115e | 441234   | Hs.533121NM_00115e    | ENSG00000CZNF716     | -             | zinc      | fingerprotein-coding |                      |
| chr11-51f | 26.60305 | 0.134611 | 0.434173   | 0.31004  | 0.756531 | 0.811228 | chr11 | 51264609 | 51264866 | + | 0 | NA | IntergeniALR/Alphe | 855590   | NR_024504 | 646813   | Hs.684175NR_024504    | LOC646813            | -             | DEXH-box  | pseudo               |                      |
| chr11-94f | 19.48834 | 0.156411 | 0.507032   | 0.308483 | 0.757715 | 0.812244 | chr11 | 94233618 | 94237470 | + | 0 | NA | IntergeniLIPA2 L1N | -70093   | NM_00119e | 390243   | Hs.553758NM_00108C    | ENSG00000IZUM01R     | FOLR4 FolI    | IZUM01    | reprotein-coding     |                      |
| chr1-123f | 15.72007 | -0.17122 | 0.559061   | -0.30626 | 0.75941  | 0.813806 | chr1  | 1.24E+08 | 1.24E+08 | + | 0 | NA | IntergeniALR/Alphe | 2196956  | NR_00395f | 647121   | Hs.697682NR_00395f    | ENSG00000EMB1P       | -             | embigin   | fpseudo              |                      |
| chr19-26f | 15.81245 | -0.1697  | 0.555742   | -0.30536 | 0.760094 | 0.814254 | chr19 | 26912931 | 26913508 | + | 0 | NA | IntergeniALR/Alphe | -880212  | NR_146733 | 1.02E+08 | Hs.567934NR_110687    | ENSG00000CLOC101927- | -             | uncharact | ncRNA                |                      |
| chr11-52f | 16.96109 | -0.16353 | 0.536011   | -0.30508 | 0.760303 | 0.814254 | chr11 | 52821308 | 52821780 | + | 0 | NA | IntergeniALR/Alphe | 1782454  | NM_001004 | 119749   | Hs.553564NM_001004    | ENSG00000OR4C46      | -             | olfactory | protein-coding       |                      |
| chr10-41f | 20.89438 | -0.14706 | 0.484295   | -0.30366 | 0.761385 | 0.815157 | chr10 | 41553296 | 41553751 | + | 0 | NA | IntergeniALR/Alphe | 814522   | NR_02438C | 441666   | Hs.255725NR_02438C    | ENSG00000CLOC44166e- | -             | zinc      | fingerpsudo          |                      |
| chr2-924f | 16.93849 | -0.16159 | 0.535583   | -0.30171 | 0.76287  | 0.816492 | chr2  | 92429171 | 92431455 | + | 0 | NA | IntergeniALR/Alphe | 489180   | NR_027714 | 440888   | Hs.730235NM_001032412 | ACTR3BP2             | FKSG73        | ACTR3B    | pspseudo             |                      |
| chr7-25f  | 16.44143 | 0.168259 | 0.558303   | 0.301376 | 0.763128 | 0.816513 | chr7  | 25257831 | 25258060 | + | 0 | NA | IntergeniALR/Alphe | 1831296  | NR_135673 | 1.05E+08 | Hs.64991fNR_135673    | LOC105371-           | -             | uncharact | ncRNA                |                      |
| chr12-36f | 15.74456 | -0.16832 | 0.559802   | -0.30067 | 0.763666 | 0.816834 | chr12 | 36000128 | 36000740 | + | 0 | NA | IntergeniALR/Alphe | 1977938  | NM_032834 | 84920    | Hs.102971NM_032834    | ENSG00000ALG10       | ALG10A DI     | ALG10     | al protein-coding    |                      |
| chr10-40f | 15.37493 | -0.1696  | 0.566051   | -0.29962 | 0.764463 | 0.817432 | chr10 | 40926465 | 40926722 | + | 0 | NA | IntergeniALR/Alphe | 1441452  | NR_02438C | 441666   | Hs.255725NR_02438C    | ENSG00000CLOC44166e- | -             | zinc      | fingerpsudo          |                      |
| chr20-28f | 16.96298 | -0.15894 | 0.533953   | -0.29767 | 0.765953 | 0.818769 | chr20 | 28930371 | 28930482 | + | 0 | NA | IntergeniALR/Alphe | 298669   | NR_13231f | 1E+08    | Hs.529357NR_13231f    | ENSG00000FRG1CP      | -             | FSHD      | regipseudo           |                      |
| chr19-25f | 15.28533 | -0.16617 | 0.561415   | -0.29598 | 0.767244 | 0.819734 | chr19 | 25960505 | 25960837 | + | 0 | NA | IntergeniALR/Alphe | -1797224 | NR_00360f | 1E+08    | Hs.149312NR_00360f    | ENSG00000HAVCR1P1    | -             | hepatitis | pspseudo             |                      |
| chr7-60f  | 15.19295 | -0.16773 | 0.566934   | -0.29586 | 0.767334 | 0.819734 | chr7  | 60400908 | 60401460 | + | 0 | NA | IntergeniALR/Alphe | 2902872  | NR_00395f | 643955   | Hs.583308NR_00395f    | ENSG00000CZNF733P    | ZNF733        | -         | zinc                 | fingerpsudo          |
| chr14-10f | 20.45685 | -0.14673 | 0.497746   | -0.29479 | 0.768158 | 0.820358 | chr14 | 1.07E+08 | 1.07E+08 | + | 0 | NA | IntergeniIntergeni | 98598    | NR_049827 | 1.01E+08 | NR_049827             | ENSG00000M1R5195     | -             | microRNA  | ncRNA                |                      |
| chr19-25f | 15.33152 | -0.16535 | 0.562423   | -0.294   | 0.768756 | 0.820741 | chr19 | 25042546 | 25042923 | + | 0 | NA | IntergeniALR/Alphe | -879287  | NR_00360f | 1E+08    | Hs.149312NR_00360f    | ENSG00000HAVCR1P1    | -             | hepatitis | pspseudo             |                      |
| chrX-590f | 21.81836 | 0.139968 | 0.476966   | 0.293455 | 0.769175 | 0.820932 | chrX  | 59050923 | 59051317 | + | 0 | NA | IntergeniALR/Alphe | -1140487 | NM_00715e | 7789     | Hs.550094NM_00715e    | ENSG00000CXDA        | ZNF896        | -         | zinc                 | fingerprotein-coding |
| chr2-926f | 16.89509 | -0.15775 | 0.538324   | -0.29304 | 0.769494 | 0.821018 | chr2  | 92614929 | 92615386 | + | 0 | NA | IntergeniALR/Alphe | 674024   | NR_027714 | 440888   | Hs.730235NM_001032412 | ACTR3BP2             | FKSG73        | ACTR3B    | pspseudo             |                      |
| chr1-124f | 22.04769 | -0.13665 | 0.47579    | -0.28721 | 0.773951 | 0.825516 | chr1  | 1.25E+08 | 1.25E+08 | + | 0 | NA | IntergeniALR/Alphe | 3407694  | NR_00395f | 647121   | Hs.697682NR_00395f    | ENSG00000EMB1P       | -             | embigin   | fpseudo              |                      |
| chr2-929f | 20.37004 | -0.14003 | 0.490408   | -0.28553 | 0.77524  | 0.826213 | chr2  | 92994226 | 92995894 | + | 0 | NA | IntergeniALR/Alphe | 1053927  | NR_027714 | 440888   | Hs.730235NM_001032412 | ACTR3BP2             | FKSG73        | ACTR3B    | pspseudo             |                      |
| chr1-124f | 20.32385 | -0.14063 | 0.492682   | -0.28544 | 0.775305 | 0.826213 | chr1  | 1.25E+08 | 1.25E+08 | + | 0 | NA | IntergeniALR/Alphe | 3415162  | NR_00395f | 647121   | Hs.697682NR_00395f    | ENSG00000EMB1P       | -             | embigin   | fpseudo              |                      |
| chrX-600f | 65.06546 | -0.08358 | 0.293043   | -0.28521 | 0.775487 | 0.826213 | chrX  | 60082937 | 60083380 | + | 0 | NA | IntergeniALR/Alphe | -2172525 | NM_00715e | 7789     | Hs.550094NM_00715e    | ENSG00000CXDA        | ZNF896        | -         | zinc                 | fingerprotein-coding |
| chr19-26f | 17.58917 | 0.151033 | 0.529758   | 0.285908 | 0.775569 | 0.826213 | chr19 | 26003948 | 26004172 | + | 0 | NA | IntergeniALR/Alphe | -1789371 | NR_146733 | 1.02E+08 | Hs.567934NR_110687    | ENSG00000CLOC101927- | -             | uncharact | ncRNA                |                      |
| chr11-54f | 29.5264  | 0.118284 | 0.415759   | 0.284501 | 0.776026 | 0.826297 | chr11 | 54132879 | 54133109 | + | 0 | NA | IntergeniALR/Alphe | 471004   | NM_001004 | 119749   | Hs.553564NM_001004    | ENSG00000OR4C46      | -             | olfactory | protein-coding       |                      |
| chr1-123f | 47.57258 | -0.09657 | 0.339596   | -0.28436 | 0.776131 | 0.826297 | chr1  | 1.24E+08 | 1.24E+08 | + | 0 | NA | IntergeniALR/Alphe | 2099651  | NR_00395f | 647121   | Hs.697682NR_00395f    | ENSG00000EMB1P       | -             | embigin   | fpseudo              |                      |
| chr7-613f | 20.39454 | -0.13782 | 0.489345   | -0.28165 | 0.778214 | 0.828199 | chr7  | 61378493 | 61379469 | + | 0 | NA | IntergeniALR/Alphe | 1925075  | NR_00395f | 643955   | Hs.583308NR_00395f    | ENSG00000CZNF733P    | ZNF733        | -         | zinc                 | fingerpsudo          |
| chr18-18f | 18.73859 | -0.14351 | 0.509987   | -0.2814  | 0.778401 | 0.828199 | chr18 | 18533091 | 18533449 | + | 0 | NA | IntergeniALR/Alphe | 2578593  | NM_00540e | 6093     | Hs.306307NR_00540e    | ENSG00000ROCK1       | P16OROCK      | -         | Rho                  | assocprotein-coding  |
| chr1-124f | 61.36113 | -0.08542 | 0.304982   | -0.28007 | 0.779427 | 0.828883 | chr1  | 1.24E+08 | 1.24E+08 | + | 0 | NA | IntergeniALR/Alphe | 2948036  | NR_00395f | 647121   | Hs.697682NR_00395f    | ENSG00000EMB1P       | -             | embigin   | fpseudo              |                      |
| chrX-612f | 25.91678 | -0.12359 | 0.441489   | -0.27993 | 0.779528 | 0.828883 | chrX  | 61282489 | 61282799 | + | 0 | NA | IntergeniALR/Alphe | 2068688  | NM_001012 | 139886   | Hs.612782NM_001012    | ENSG00000SP1N4       | TDR28         | -         | spindlin             | protein-coding       |
| chrX-585f | 22.9416  | 0.126531 | 0.468406   | 0.270131 | 0.780706 | 0.836382 | chrX  | 58545094 | 58555512 | + | 0 | NA | IntergeniALR/Alphe | -637600  | NM_00715e | 7789     | Hs.550094NM_00715e    | ENSG00000CXDA        | ZNF896        | -         | zinc                 | fingerprotein-coding |
| chr11-52f | 22.07776 | -0.12747 | 0.472013   | -0.27006 | 0.78711  | 0.836382 | chr11 | 52815040 | 52815527 | + | 0 | NA | IntergeniALR/Alphe | 1788715  | NM_001004 | 119749   | Hs.553564NM_001004    | ENSG00000OR4C46      | -             | olfactory | protein-coding       |                      |
| chr1-124f | 16.55552 | -0.14644 | 0.542752   | -0.2698  | 0.787312 | 0.836382 | chr1  | 1.25E+08 | 1.25E+08 | + | 0 | NA | IntergeniALR/Alphe | 3197910  | NR_00395f | 647121   | Hs.697682NR_00395f    | ENSG00000EMB1P       | -             | embigin   | fpseudo              |                      |
| chr2-928f | 25.38965 | -0.12064 | 0.447825   | -0.26939 | 0.787629 | 0.836459 | chr2  | 92829616 | 92830994 | + | 0 | NA | IntergeniALR/Alphe | 889172   | NR_027714 | 440888   | Hs.730235NM_001032412 | ACTR3BP2             | FKSG73        | ACTR3B    | pspseudo             |                      |
| chr5-484f | 18.8977  | -0.13798 | 0.516337   | -0.26722 | 0.789299 | 0.837973 | chr5  | 48418744 | 48418979 | + | 0 | NA | IntergeniALR/Alphe | 2022427  | NM_19844f | 133418   | Hs.561411NM_19844f    | ENSG00000EMB         | GP70          | -         | embigin              | protein-coding       |
| chr2-930f | 21.45547 | -0.12887 | 0.487395   | -0.2644  | 0.791472 | 0.839856 | chr2  | 93050067 | 93050876 | + | 0 | NA | IntergeniALR/Alphe | 1109338  | NR_027714 | 440888   | Hs.730235NM_001032412 | ACTR3BP2             | FKSG73        | ACTR3B    | pspseudo             |                      |
| chr19-26f | 23.96467 | -0.12133 | 0.459745   | -0.2639  | 0.791858 | 0.839856 | chr19 | 26443785 | 26444012 | + | 0 | NA | IntergeniALR/Alphe | -1349533 | NR_146733 | 1.02E+08 | Hs.567934NR_110687    | ENSG00000CLOC101927- | -             | uncharact | ncRNA                |                      |
| chr22-13f | 16.41973 | -0.14389 | 0.545601   | -0.26373 | 0.791987 | 0.839856 | chr22 | 13245088 | 13245442 | + | 0 | NA | IntergeniALR/Alphe | 1347859  | NR_110761 | 1.03E+08 | Hs.65292fNR_110761    | LOC1021927-          | -             | uncharact | ncRNA                |                      |
| chr20-28f | 29.33773 | 0.109776 | 0.416376</ |          |          |          |       |          |          |   |   |    |                    |          |           |          |                       |                      |               |           |                      |                      |

|            |          |          |          |          |          |          |       |          |          |   |      |                    |          |           |          |                        |                     |                |                            |
|------------|----------|----------|----------|----------|----------|----------|-------|----------|----------|---|------|--------------------|----------|-----------|----------|------------------------|---------------------|----------------|----------------------------|
| chr17-26c  | 16.2121  | -0.09246 | 0.547225 | -0.16896 | 0.865826 | 0.897381 | chr17 | 26076962 | 26077872 | + | 0 NA | IntergeniALR/Alphe | 1011824  | NR_135673 | 1.05E+08 | Hs. 649918NR_135673    | LOC105371-          | uncharactncRNA |                            |
| chrX-618c  | 15.57419 | 0.094345 | 0.558897 | 0.168807 | 0.865949 | 0.897381 | chrX  | 61821708 | 61822772 | + | 0 NA | IntergeniALR/Alphe | 1529092  | NM_001012 | 139886   | Hs. 612782NM_001012    | ENSG00000CPIN4      | TDRD28         | spindlin protein-coding    |
| chr2-937f  | 15.528   | 0.093825 | 0.558459 | 0.168007 | 0.866578 | 0.897761 | chr2  | 93752978 | 93753370 | + | 0 NA | IntergeniALR/Alphe | 455245   | NR_146108 | 728034   | NR_146105              | BMS1P14             | -              | BMS1 psepseudo             |
| chrX-5867  | 25.90339 | -0.0736  | 0.440496 | -0.16709 | 0.867297 | 0.897918 | chrX  | 58674237 | 58674469 | + | 0 NA | IntergeniALR/Alphe | -763720  | NM_007156 | 7789     | Hs. 550094NM_007156    | ENSG00000CXDA       | ZNF896         | zinc fingprotein-coding    |
| chr6-595f  | 17.43052 | -0.08853 | 0.529911 | -0.16707 | 0.867314 | 0.897918 | chr6  | 59505624 | 59505862 | + | 0 NA | IntergeniALR/Alphe | -1544297 | NR_132995 | 1.07E+08 | Hs. 561535NR_132995    | ENSG00000LINC0068C  | -              | long intencRNA             |
| chrX-602f  | 21.2779  | -0.07994 | 0.481904 | -0.16589 | 0.86824  | 0.897918 | chrX  | 60282652 | 60283683 | + | 0 NA | IntergeniALR/Alphe | -2372534 | NM_007156 | 7789     | Hs. 550094NM_007156    | ENSG00000CXDA       | ZNF896         | zinc fingprotein-coding    |
| chr1-123c  | 18.48141 | 0.085047 | 0.514334 | 0.165354 | 0.868665 | 0.897918 | chr1  | 1.23E+08 | 1.23E+08 | + | 0 NA | IntergeniALR/Alphe | 1832223  | NR_00395f | 647121   | Hs. 697682NR_00395f    | ENSG00000EMB1P      | -              | embigin fpseudo            |
| chr20-28f  | 18.48141 | 0.085047 | 0.514334 | 0.165354 | 0.868665 | 0.897918 | chr20 | 28521783 | 28521774 | + | 0 NA | IntergeniALR/Alphe | 78187    | NR_13231f | 1E+08    | Hs. 529357NR_13231f    | ENSG00000FRG1CP     | -              | FSHD regipseudo            |
| chr3-9117  | 19.55127 | -0.08317 | 0.503057 | -0.16532 | 0.86869  | 0.897918 | chr3  | 91177444 | 91177958 | + | 0 NA | IntergeniALR/Alphe | 2070080  | NM_00523c | 2042     | Hs. 123642NM_00523c    | ENSG00000EPAH3      | EK4 ETK E      | EPH receptorprotein-coding |
| chr1-123c  | 18.48141 | 0.085047 | 0.514334 | 0.165354 | 0.868665 | 0.897918 | chr1  | 1.24E+08 | 1.24E+08 | + | 0 NA | IntergeniALR/Alphe | 2146108  | NR_00395f | 647121   | Hs. 697682NR_00395f    | ENSG00000EMB1P      | -              | embigin fpseudo            |
| chrX-624c  | 30.46098 | -0.06895 | 0.418069 | -0.16492 | 0.869004 | 0.897918 | chrX  | 62462860 | 62463979 | + | 0 NA | IntergeniALR/Alphe | 887913   | NM_001012 | 139886   | Hs. 612782NM_001012    | ENSG00000CPIN4      | TDRD28         | spindlin protein-coding    |
| chr2-9234  | 17.36263 | -0.08725 | 0.529351 | -0.16482 | 0.869089 | 0.897918 | chr2  | 92349336 | 92350186 | + | 0 NA | IntergeniALR/Alphe | 408628   | NR_027714 | 440888   | Hs. 730235NM_001032412 | ACTR3BP2            | FKSG73         | ACTR3B pspseudo            |
| chr19-26f  | 40.07769 | 0.059065 | 0.360264 | 0.163949 | 0.869771 | 0.898353 | chr19 | 26818302 | 26818513 | + | 0 NA | IntergeniALR/Alphe | -975024  | NR_14673c | 1.02E+08 | Hs. 567934NR_14673c    | ENSG00000LOC101927- | -              | uncharactncRNA             |
| chr5-466f  | 15.77457 | -0.08999 | 0.557723 | -0.16135 | 0.87182  | 0.900198 | chr5  | 46671863 | 46672182 | + | 0 NA | IntergeniALR/Alphe | -975642  | NM_021072 | 348980   | Hs. 353176NM_021072    | ENSG00000HCN1       | BCNG-1 B       | hyperpolaprotein-coding    |
| chr5-4744  | 17.34093 | -0.08535 | 0.530104 | -0.161   | 0.872095 | 0.90021  | chr5  | 47443011 | 47443295 | + | 0 NA | IntergeniALR/Alphe | -1746773 | NM_021072 | 348980   | Hs. 353176NM_021072    | ENSG00000HCN1       | BCNG-1 B       | hyperpolaprotein-coding    |
| chr19-261f | 37.44376 | -0.05828 | 0.373368 | -0.15661 | 0.875952 | 0.903528 | chr19 | 26118342 | 26118546 | + | 0 NA | IntergeniALR/Alphe | -1674987 | NR_14673c | 1.02E+08 | Hs. 567934NR_14673c    | ENSG00000LOC101927- | -              | uncharactncRNA             |
| chr11-52c  | 15.68498 | -0.08647 | 0.554181 | -0.15604 | 0.876003 | 0.903528 | chr11 | 52362936 | 52363178 | + | 0 NA | IntergeniALR/Alphe | 1953910  | NR_024504 | 646813   | Hs. 684175NR_024504    | LOC646813-          | -              | DEH-box pseudo             |
| chr1-124c  | 19.13824 | -0.07866 | 0.50451  | -0.15591 | 0.8761   | 0.903528 | chr1  | 1.25E+08 | 1.25E+08 | + | 0 NA | IntergeniALR/Alphe | 2987258  | NR_00395f | 647121   | Hs. 697682NR_00395f    | ENSG00000EMB1P      | -              | embigin fpseudo            |
| chr17-22f  | 18.58384 | -0.07995 | 0.5179   | -0.15437 | 0.877316 | 0.90451  | chr17 | 22869445 | 22869741 | + | 0 NA | IntergeniALR/Alphe | 346482   | NM_00119C | 1E+08    | Hs. 740185NM_00119C    | ENSG00000MTRNR2L1   | HN1            | MT-RNR2 lprotein-coding    |
| chr19-25c  | 17.34372 | -0.0809  | 0.530572 | -0.15247 | 0.878817 | 0.905784 | chr19 | 25391904 | 25392256 | + | 0 NA | IntergeniALR/Alphe | -1228633 | NR_00360c | 1E+08    | Hs. 149312NR_00360c    | ENSG00000HAVCR1P1   | -              | hepatitispseudo            |
| chr9-606f  | 16.8817  | -0.08093 | 0.531915 | -0.15013 | 0.880665 | 0.907417 | chr9  | 60602817 | 60603293 | + | 0 NA | IntergeniALR/Alphe | -311352  | NM_00111c | 727905   | Hs. 645497NM_00111c    | ENSG00000SPATA31A   | FAM75A5        | SPATA31 sprotein-coding    |
| chrX-615c  | 27.63839 | -0.06316 | 0.425538 | -0.14843 | 0.882004 | 0.908522 | chrX  | 61538233 | 61539410 | + | 0 NA | IntergeniALR/Alphe | 1812511  | NM_001012 | 139886   | Hs. 612782NM_001012    | ENSG00000CPIN4      | TDRD28         | spindlin protein-coding    |
| chr5-484c  | 16.60952 | 0.078397 | 0.549475 | 0.142676 | 0.886546 | 0.912927 | chr5  | 48404425 | 48404641 | + | 0 NA | IntergeniALR/Alphe | 2036755  | NM_19844f | 133418   | Hs. 561411NM_19844f    | ENSG00000EMB        | GP70           | embigin protein-coding     |
| chr1-124c  | 15.1167  | -0.08081 | 0.56782  | -0.14232 | 0.88683  | 0.912944 | chr1  | 1.25E+08 | 1.25E+08 | + | 0 NA | IntergeniALR/Alphe | 3374869  | NR_00395f | 647121   | Hs. 697682NR_00395f    | ENSG00000EMB1P      | -              | embigin fpseudo            |
| chr22-124  | 15.15786 | -0.08006 | 0.564267 | -0.14188 | 0.887175 | 0.913025 | chr22 | 12489037 | 12490680 | + | 0 NA | IntergeniALR/Alphe | 592452   | NR_110761 | 1.03E+08 | Hs. 652929NR_110761    | LOC10272c-          | -              | uncharactncRNA             |
| chrX-592c  | 25.40634 | -0.06163 | 0.44257  | -0.13925 | 0.889255 | 0.914891 | chrX  | 59239676 | 59241388 | + | 0 NA | IntergeniALR/Alphe | -1329599 | NM_007156 | 7789     | Hs. 550094NM_007156    | ENSG00000CXDA       | ZNF896         | zinc fingprotein-coding    |
| chrX-6144  | 18.91336 | 0.070366 | 0.5089   | 0.138271 | 0.890026 | 0.91541  | chrX  | 61444891 | 61446426 | + | 0 NA | IntergeniALR/Alphe | 1905674  | NM_001012 | 139886   | Hs. 612782NM_001012    | ENSG00000CPIN4      | TDRD28         | spindlin protein-coding    |
| chr1-168f  | 15.13616 | -0.07789 | 0.565298 | -0.13779 | 0.890407 | 0.915526 | chr1  | 16865910 | 16866658 | + | 0 NA | IntergeniLIPAS L1I | -5942    | NR_160657 | 1.12E+08 | NR_160657              | LOC112267-          | -              | uncharactncRNA             |
| chr1-124c  | 15.18235 | -0.07717 | 0.562854 | -0.13711 | 0.890947 | 0.915672 | chr1  | 1.25E+08 | 1.25E+08 | + | 0 NA | IntergeniALR/Alphe | 3383866  | NR_00395f | 647121   | Hs. 697682NR_00395f    | ENSG00000EMB1P      | -              | embigin fpseudo            |
| chrX-624c  | 27.20365 | -0.05843 | 0.428273 | -0.13643 | 0.891482 | 0.915672 | chrX  | 62469769 | 62470908 | + | 0 NA | IntergeniALR/Alphe | 880996   | NM_001012 | 139886   | Hs. 612782NM_001012    | ENSG00000CPIN4      | TDRD28         | spindlin protein-coding    |
| chr1-123c  | 71.64028 | -0.03855 | 0.282827 | -0.13631 | 0.891578 | 0.915672 | chr1  | 1.24E+08 | 1.24E+08 | + | 0 NA | IntergeniALR/Alphe | 2030595  | NR_00395f | 647121   | Hs. 697682NR_00395f    | ENSG00000EMB1P      | -              | embigin fpseudo            |
| chr7-602f  | 18.52152 | -0.07027 | 0.515842 | -0.13622 | 0.891649 | 0.915672 | chr7  | 60273892 | 60274200 | + | 0 NA | IntergeniALR/Alphe | 2823869  | NM_00115f | 441234   | Hs. 533121NM_00115f    | ENSG00000ZNF716     | -              | zinc fingprotein-coding    |
| chr2-939c  | 17.71385 | 0.071367 | 0.525066 | 0.135919 | 0.891885 | 0.915672 | chr2  | 93935328 | 93935523 | + | 0 NA | IntergeniALR/Alphe | 2729699  | NR_146105 | 728034   | NR_146105              | BMS1P14             | -              | BMS1 psepseudo             |
| chr19-25d  | 22.3288  | 0.063017 | 0.474418 | 0.13283  | 0.894328 | 0.917905 | chr19 | 25436960 | 25437336 | + | 0 NA | IntergeniALR/Alphe | -1273701 | NR_00360c | 1E+08    | Hs. 149312NR_00360c    | ENSG00000HAVCR1P1   | -              | hepatitispseudo            |
| chr5-494f  | 17.44168 | -0.07064 | 0.533492 | -0.1324  | 0.894666 | 0.917977 | chr5  | 49405855 | 49406138 | + | 0 NA | IntergeniALR/Alphe | 1035292  | NM_19844f | 133418   | Hs. 561411NM_19844f    | ENSG00000EMB        | GP70           | embigin protein-coding     |
| chrX-611c  | 21.8178  | 0.062144 | 0.477368 | 0.130181 | 0.896424 | 0.919485 | chrX  | 61120291 | 61121922 | + | 0 NA | IntergeniALR/Alphe | 2230226  | NM_001012 | 139886   | Hs. 612782NM_001012    | ENSG00000CPIN4      | TDRD28         | spindlin protein-coding    |
| chr19-25c  | 26.43274 | 0.056634 | 0.436092 | 0.129866 | 0.896672 | 0.919485 | chr19 | 25304519 | 25304791 | + | 0 NA | IntergeniALR/Alphe | -1141208 | NR_00360c | 1E+08    | Hs. 149312NR_00360c    | ENSG00000HAVCR1P1   | -              | hepatitispseudo            |
| chrX-606c  | 20.29713 | -0.06362 | 0.49128  | -0.12949 | 0.89697  | 0.919515 | chrX  | 60691088 | 60692269 | + | 0 NA | IntergeniALR/Alphe | 2659564  | NM_001012 | 139886   | Hs. 612782NM_001012    | ENSG00000CPIN4      | TDRD28         | spindlin protein-coding    |
| chr20-28f  | 17.75726 | 0.067532 | 0.523494 | 0.129003 | 0.897356 | 0.919635 | chr20 | 28530792 | 28533213 | + | 0 NA | IntergeniALR/Alphe | 70663    | NR_13231f | 1E+08    | Hs. 529357NR_13231f    | ENSG00000FRG1CP     | -              | FSHD regipseudo            |
| chr1-1247  | 38.65665 | 0.045296 | 0.365816 | 0.123823 | 0.901455 | 0.923561 | chr1  | 1.25E+08 | 1.25E+08 | + | 0 NA | IntergeniALR/Alphe | 3279729  | NR_00395f | 647121   | Hs. 697682NR_00395f    | ENSG00000EMB1P      | -              | embigin fpseudo            |
| chr5-477c  | 23.22327 | -0.05594 | 0.461139 | -0.12131 | 0.903445 | 0.925322 | chr5  | 47713357 | 47718109 | + | 0 NA | IntergeniALR/Alphe | -2035203 | NM_021072 | 348980   | Hs. 353176NM_021072    | ENSG00000HCN1       | BCNG-1 B       | hyperpolaprotein-coding    |
| chr5-491f  | 19.8379  | -0.0593  | 0.496687 | -0.1194  | 0.904959 | 0.926522 | chr5  | 49192139 | 49192355 | + | 0 NA | IntergeniALR/Alphe | 1249041  | NM_19844f | 133418   | Hs. 561411NM_19844f    | ENSG00000EMB        | GP70           | embigin protein-coding     |
| chrX-624c  | 16.40635 | -0.06471 | 0.54353  | -0.11906 | 0.905228 | 0.926522 | chrX  | 62497812 | 62500437 | + | 0 NA | IntergeniALR/Alphe | 852208   | NM_001012 | 139886   | Hs. 612782NM_001012    | ENSG00000CPIN4      | TDRD28         | spindlin protein-coding    |
| chr5-467f  | 19.46219 | 0.059526 | 0.501031 | 0.118807 | 0.905428 | 0.926522 | chr5  | 46730498 | 46732360 | + | 0 NA | IntergeniALR/Alphe | -1035049 | NM_021072 | 348980   | Hs. 353176NM_021072    | ENSG00000HCN1       | BCNG-1 B       | hyperpolaprotein-coding    |
| chr1-122c  | 15.23412 | -0.06631 | 0.566071 | -0.11715 | 0.906743 | 0.927591 | chr1  | 1.23E+08 | 1.23E+08 | + | 0 NA | IntergeniALR/Alphe | 1336743  | NR_00395f | 647121   | Hs. 697682NR_00395f    | ENSG00000EMB1P      | -              | embigin fpseudo            |
| chr19-24f  | 17.15555 | 0.061288 | 0.54147  | 0.113188 | 0.909881 | 0.930406 | chr19 | 24625227 | 24625497 | + | 0 NA | IntergeniALR/Alphe | -461915  | NR_00360c | 1E+08    | Hs. 149312NR_00360c    | ENSG00000HAVCR1P1   | -              | hepatitispseudo            |
| chr19-247  | 27.90053 | -0.04807 | 0.4254   | -0.11299 | 0.910038 | 0.930406 | chr19 | 24765071 | 24765344 | + | 0 NA | IntergeniALR/Alphe | -601760  | NR_00360c | 1E+08    | Hs. 149312NR_00360c    | ENSG00000HAVCR1P1   | -              | hepatitispseudo            |
| chr20-28f  | 18.23    |          |          |          |          |          |       |          |          |   |      |                    |          |           |          |                        |                     |                |                            |



Supplementary Information

Supplementary Table 7. Genome-wide profiling of differential peaks between proliferating and bleomycin-induced senescent cells (ChIP-seq for H3K36me3).

| geneID    | baseMea  | log2Fold | lfcSE    | stat     | pvalue   | padj     | Chr   | Start    | End      | Stran | Peak | Focus | Annotati             | Detailed | Distance  | Nearest  | F         | Entrez   | ID        | Nearest   | L         | Nearest  | F      | Nearest  | E              | Gene           | Nar | Gene | Ali | Gene | De | Gene | Type |  |  |  |
|-----------|----------|----------|----------|----------|----------|----------|-------|----------|----------|-------|------|-------|----------------------|----------|-----------|----------|-----------|----------|-----------|-----------|-----------|----------|--------|----------|----------------|----------------|-----|------|-----|------|----|------|------|--|--|--|
| chr5-464  | 56.27501 | 1.540953 | 0.386873 | 3.983093 | 6.80E-05 | 0.981636 | chr5  | 46434582 | 46434946 | +     | 0    | NA    | IntergeniALR/Alp     | -738384  | NM_021072 | 348980   | Hs.       | 353176   | NR_021072 | ENS00000  | HCN1      | BCNG-1   | [BC    | hyperpol | protein-coding |                |     |      |     |      |    |      |      |  |  |  |
| chr3-441  | 5.836925 | -5.97783 | 1.66186  | -3.59707 | 0.000322 | 0.981636 | chr3  | 44815289 | 44815596 | +     | 0    | NA    | intron (NM)T1K L     | -46444   | NR_03029C | 693149   | NR_03029C | ENS00000 | MIR564    | MIRN564   | [mi       | croRNA   | ncRNA  |          |                |                |     |      |     |      |    |      |      |  |  |  |
| chr1-214  | 6.888664 | -5.39213 | 1.756285 | -3.07019 | 0.002139 | 0.981636 | chr1  | 2.15E+08 | 2.15E+08 | +     | 0    | NA    | intron (C)Pg         | 5361     | NM_016343 | 1063     | Hs.       | 497741   | NR_016343 | ENS00000  | CENPF     | CENF     | [C     | IL1      | centromer      | protein-coding |     |      |     |      |    |      |      |  |  |  |
| chr5-467  | 19.5447  | 1.78688  | 0.592184 | 3.017442 | 0.002549 | 0.981636 | chr5  | 46731825 | 46732204 | +     | 0    | NA    | IntergeniALR/Alp     | -1035634 | NM_021072 | 348980   | Hs.       | 353176   | NR_021072 | ENS00000  | HCN1      | BCNG-1   | [BC    | hyperpol | protein-coding |                |     |      |     |      |    |      |      |  |  |  |
| chr4-739  | 8.432759 | -2.80103 | 0.946173 | -2.99067 | 0.002567 | 0.981636 | chr4  | 73906089 | 73906784 | +     | 0    | NA    | IntergeniLIPA3 L     | 37043    | NM_001511 | 2919     | Hs.       | 789      | NR_001511 | ENS00000  | CXCL1     | FSP GR01 | [C-X-C | mot      | protein-coding |                |     |      |     |      |    |      |      |  |  |  |
| chr12-286 | 3.641203 | -5.29767 | 1.776977 | -2.98128 | 0.00287  | 0.981636 | chr12 | 2861178  | 2861741  | +     | 0    | NA    | intron (N)IME3G L    | -4420    | NM_00136E | 1.02E+08 | Hs.       | 63462E   | NR_00136E | ENS00000  | TEX52     |          |        |          |                |                |     |      |     |      |    |      |      |  |  |  |
| chr17-266 | 773.7942 | 0.720193 | 0.242394 | 2.971167 | 0.002967 | 0.981636 | chr17 | 26603798 | 26604053 | +     | 0    | NA    | IntergeniALR/Alp     | 485316   | NR_135673 | 1.05E+08 | Hs.       | 64991E   | NR_135673 | LOC105371 |           |          |        |          |                |                |     |      |     |      |    |      |      |  |  |  |
| chr20-28  | 18.53599 | 1.793789 | 0.607525 | 2.952618 | 0.003151 | 0.981636 | chr20 | 28517445 | 28519255 | +     | 0    | NA    | IntergeniALR/Alp     | 84315    | NR_13231E | 1E+08    | Hs.       | 529357   | NR_13231E | ENS00000  | FRG1CP    |          |        |          |                |                |     |      |     |      |    |      |      |  |  |  |
| chr20-28  | 16.98956 | 1.865205 | 0.634361 | 2.94029  | 0.003279 | 0.981636 | chr20 | 28523377 | 28524675 | +     | 0    | NA    | IntergeniALR/Alp     | 78639    | NR_13231E | 1E+08    | Hs.       | 529357   | NR_13231E | ENS00000  | FRG1CP    |          |        |          |                |                |     |      |     |      |    |      |      |  |  |  |
| chr4-745  | 8.315302 | -2.47978 | 0.939137 | -2.61084 | 0.003717 | 0.981636 | chr4  | 74597145 | 74598143 | +     | 0    | NA    | IntergeniTHE1B-int   | 152508   | NM_001657 | 374      | Hs.       | 27083E   | NR_001657 | ENS00000  | CAREG     | AR AREGB | [am    | phireg   | protein-coding |                |     |      |     |      |    |      |      |  |  |  |
| chr10-12  | 3.393741 | -5.19658 | 1.801836 | -2.88404 | 0.003926 | 0.981636 | chr10 | 1.28E+08 | 1.28E+08 | +     | 0    | NA    | exon (NM)exon (NM)   | 14612    | NM_002417 | 4288     | Hs.       | 80976    | NR_002417 | ENS00000  | MKI67     | KIA MI6  | [mar   | ker      | of             | protein-coding |     |      |     |      |    |      |      |  |  |  |
| chr19-36  | 12.93097 | 2.107527 | 0.736323 | 2.86223  | 0.004207 | 0.981636 | chr19 | 36288833 | 36289139 | +     | 0    | NA    | IntergeniSST1 S      | -22357   | NR_02938E | 1E+08    | Hs.       | 46655C   | NR_02938E | LOC100134 |           |          |        |          |                |                |     |      |     |      |    |      |      |  |  |  |
| chr5-492  | 37.7132  | 1.284362 | 0.454933 | 2.823188 | 0.004755 | 0.981636 | chr5  | 49203138 | 49203392 | +     | 0    | NA    | IntergeniALR/Alp     | 1238023  | NM_19844E | 133418   | Hs.       | 561411   | NR_19844E | ENS00000  | EMB       | GP70     |        |          |                |                |     |      |     |      |    |      |      |  |  |  |
| chr20-28  | 35.18259 | 1.282136 | 0.454411 | 2.821533 | 0.004779 | 0.981636 | chr20 | 28643737 | 28644855 | +     | 0    | NA    | IntergeniALR/Alp     | -41631   | NR_13231E | 1E+08    | Hs.       | 529357   | NR_13231E | ENS00000  | FRG1CP    |          |        |          |                |                |     |      |     |      |    |      |      |  |  |  |
| chr4-746  | 6.013237 | -2.7512  | 1.148472 | -2.42768 | 0.005196 | 0.981636 | chr4  | 74616713 | 74616924 | +     | 0    | NA    | IntergeniAluYg6 S    | 176182   | NM_001657 | 374      | Hs.       | 27083E   | NR_001657 | ENS00000  | CAREG     | AR AREGB | [am    | phireg   | protein-coding |                |     |      |     |      |    |      |      |  |  |  |
| chr19-36  | 13.55283 | 2.012879 | 0.723684 | 2.781433 | 0.005412 | 0.981636 | chr19 | 36273945 | 36274230 | +     | 0    | NA    | IntergeniSST1 S      | -28159   | NR_00136E | 147929   | Hs.       | 59633E   | NR_00136E | ENS00000  | ZNF565    |          |        |          |                |                |     |      |     |      |    |      |      |  |  |  |
| chr1-462  | 3.146279 | -5.08785 | 1.832379 | -2.77663 | 0.005492 | 0.981636 | chr1  | 46250430 | 46250881 | +     | 0    | NA    | intron (N)intron (N) | 2892     | NM_00357E | 8438     | Hs.       | 642042   | NR_00357E | ENS00000  | RAD54L    | HR54 RAD | [RAD   | 54       | lik            | protein-coding |     |      |     |      |    |      |      |  |  |  |
| chr17-82  | 3.146279 | -5.08785 | 1.832379 | -2.77663 | 0.005492 | 0.981636 | chr17 | 8203263  | 8203952  | +     | 0    | NA    | IntergeniAluSx S     | 618      | NR_132731 | 9212     | Hs.       | 44265E   | NR_004217 | ENS00000  | AURKB     | ATK2 ATM | [aur   | ora      | k              | protein-coding |     |      |     |      |    |      |      |  |  |  |
| chr3-908  | 18.79917 | 1.708134 | 0.617911 | 2.76468  | 0.005703 | 0.981636 | chr3  | 9086855  | 90869676 | +     | 0    | NA    | IntergeniALR/Alp     | 1761504  | NM_182644 | 2042     | Hs.       | 123642   | NR_00523E | ENS00000  | EPHA3     | EK4 ETK  | [E     | PH       | recep          | protein-coding |     |      |     |      |    |      |      |  |  |  |
| chr19-36  | 13.22928 | 1.974391 | 0.718478 | 2.748018 | 0.005996 | 0.981636 | chr19 | 36305538 | 36306094 | +     | 0    | NA    | IntergeniIntergeni   | -5527    | NR_02938E | 1E+08    | Hs.       | 46655C   | NR_02938E | LOC100134 |           |          |        |          |                |                |     |      |     |      |    |      |      |  |  |  |
| chr20-38  | 2.914534 | -4.97635 | 1.846932 | -2.69439 | 0.007052 | 0.981636 | chr20 | 38943012 | 38943485 | +     | 0    | NA    | intron (N)AluSx S    | 16831    | NR_03091E | 81610    | Hs.       | 726442   | NR_03091E | ENS00000  | FAM83D    | C20orf12 | [fam   | ily      | w              | protein-coding |     |      |     |      |    |      |      |  |  |  |
| chr19-18  | 7.529523 | 2.749781 | 1.021015 | 2.693185 | 0.007077 | 0.981636 | chr19 | 18386706 | 18386963 | +     | 0    | NA    | TTS (NR_C)TTS (NR_C) | 272      | NR_03615E | 1E+08    | Hs.       | 03615E   | NR_03615E | ENS00000  | MIR3189   | mir-3189 | [mi    | croRNA   | ncRNA          |                |     |      |     |      |    |      |      |  |  |  |
| chr19-36  | 10.69956 | 2.163039 | 0.81901  | 2.641042 | 0.008265 | 0.981636 | chr19 | 36294349 | 36294924 | +     | 0    | NA    | IntergeniSST1 S      | -16707   | NR_02938E | 1E+08    | Hs.       | 46655C   | NR_02938E | LOC100134 |           |          |        |          |                |                |     |      |     |      |    |      |      |  |  |  |
| chr9-36   | 8.324024 | -2.48178 | 0.946173 | -2.62297 | 0.008717 | 0.981636 | chr9  | 36653166 | 36653493 | +     | 0    | NA    | intron (N)AluJo S    | 80434    | NM_014791 | 9833     | Hs.       | 18433E   | NR_014791 | ENS00000  | MELK      | HPK38    |        |          |                |                |     |      |     |      |    |      |      |  |  |  |
| chr4-746  | 5.234628 | -2.08902 | 0.856385 | -2.62073 | 0.008743 | 0.981636 | chr4  | 74498802 | 74499010 | +     | 0    | NA    | IntergeniLIME2 L     | 53770    | NM_001657 | 374      | Hs.       | 27083E   | NR_001657 | ENS00000  | CAREG     | AR AREGB | [am    | phireg   | protein-coding |                |     |      |     |      |    |      |      |  |  |  |
| chr21-25  | 7.589682 | -2.69283 | 1.027551 | -2.62063 | 0.008777 | 0.981636 | chr21 | 25972664 | 25973000 | +     | 0    | NA    | intron (N)IMEc L     | 167558   | NM_00113E | 351      | Hs.       | 43498C   | NR_00048E | ENS00000  | APP       | AAA ABET | [am    | yl       | oid            | protein-coding |     |      |     |      |    |      |      |  |  |  |
| chr7-955  | 7.264681 | 2.691055 | 1.029079 | 2.615014 | 0.008922 | 0.981636 | chr7  | 95592568 | 95595189 | +     | 0    | NA    | intron (N)intron (N) | 2638     | NM_00261E | 5166     | Hs.       | 8364     | NR_00261E | ENS00000  | PDK4      |          |        |          |                |                |     |      |     |      |    |      |      |  |  |  |
| chr19-36  | 5.802375 | 3.439154 | 1.316238 | 2.612866 | 0.008979 | 0.981636 | chr19 | 36626461 | 36626843 | +     | 0    | NA    | exon (NM)exon (NM)   | 21339    | NM_03282E | 84911    | Hs.       | 631591   | NR_03282E | ENS00000  | ZNF382    | KS1      |        |          |                |                |     |      |     |      |    |      |      |  |  |  |
| chr4-103  | 5.846263 | -3.40899 | 1.304734 | -2.61278 | 0.008981 | 0.981636 | chr4  | 1.03E+08 | 1.03E+08 | +     | 0    | NA    | exon (NM)exon (NM)   | -33991   | NM_02013E | 56898    | Hs.       | 12469E   | NR_02013E | ENS00000  | BDH2      | DHRS6 EF | [3-h   | ydrox    | y              | protein-coding |     |      |     |      |    |      |      |  |  |  |
| chr7-588  | 21.73201 | 4.38733  | 0.552591 | 2.603612 | 0.009225 | 0.981636 | chr7  | 58893059 | 58893259 | +     | 0    | NA    | IntergeniALR/Alp     | 1442982  | NM_00115E | 441234   | Hs.       | 533121   | NR_00115E | ENS00000  | ZNF716    |          |        |          |                |                |     |      |     |      |    |      |      |  |  |  |
| chr17-78  | 5.094355 | -4.27535 | 1.6729   | -2.55565 | 0.010599 | 0.981636 | chr17 | 78217917 | 78218199 | +     | 0    | NA    | intron (N)AluJo S    | 3795     | NM_00101E | 332      | Hs.       | 74487E   | NR_00116E | ENS00000  | BTRC5     | API4 EPR | [bac   | ulo      | vir            | protein-coding |     |      |     |      |    |      |      |  |  |  |
| chr1-197  | 7.350078 | -2.63875 | 1.033828 | -2.55241 | 0.010698 | 0.981636 | chr1  | 1.2E+08  | 1.2E+08  | +     | 0    | NA    | exon (NM)exon (NM)   | 14927    | NM_00662E | 26227    | Hs.       | 48729E   | NR_00662E | ENS00000  | PHGDH     |          |        |          |                |                |     |      |     |      |    |      |      |  |  |  |
| chr19-36  | 4.690022 | 2.183611 | 0.861275 | 2.535322 | 0.011234 | 0.981636 | chr19 | 36270412 | 36272955 | +     | 0    | NA    | IntergeniSST1 S      | -25755   | NR_00136E | 147929   | Hs.       | 59633E   | NR_00136E | ENS00000  | ZNF565    |          |        |          |                |                |     |      |     |      |    |      |      |  |  |  |
| chr10-40  | 173.637  | 0.709559 | 0.285612 | 2.484347 | 0.012979 | 0.981636 | chr10 | 40593352 | 40593438 | +     | 0    | NA    | IntergeniALR/Alp     | 1774566  | NR_02438C | 441666   | Hs.       | 25572E   | NR_02438C | ENS00000  | LOC44166E |          |        |          |                |                |     |      |     |      |    |      |      |  |  |  |
| chr19-36  | 9.973448 | 2.040305 | 0.821388 | 2.483973 | 0.012993 | 0.981636 | chr19 | 36299211 | 36301092 | +     | 0    | NA    | IntergeniCpG         | -11192   | NR_02938E | 1E+08    | Hs.       | 46655C   | NR_02938E | LOC100134 |           |          |        |          |                |                |     |      |     |      |    |      |      |  |  |  |
| chr5-138  | 4.701862 | 4.204168 | 1.705862 |          |          |          |       |          |          |       |      |       |                      |          |           |          |           |          |           |           |           |          |        |          |                |                |     |      |     |      |    |      |      |  |  |  |

|                    |          |          |          |          |          |       |          |          |        |                    |          |           |          |           |                   |                       |                    |                          |                |
|--------------------|----------|----------|----------|----------|----------|-------|----------|----------|--------|--------------------|----------|-----------|----------|-----------|-------------------|-----------------------|--------------------|--------------------------|----------------|
| chr15-805.4.410491 | -2.9281  | 1.394136 | -2.10029 | 0.035703 | 0.981636 | chr15 | 80933495 | 80934129 | + 0 NA | intron (NMIR SINE  | 56007    | NR_12632E | 23184    | Hs.57845C | NR_015154         | ENSG000000MESD        | BOCA MESL          | mesoderm protein-coding  |                |
| chr5-4961.179.2379 | 0.614564 | 0.292931 | 2.097981 | 0.035907 | 0.981636 | chr5  | 49616438 | 49617194 | + 0 NA | IntergeniALR/Alph  | 824472   | NR_19844E | 133418   | Hs.561411 | NR_19844E         | ENSG000000EMB         | GP70               | embigin protein-coding   |                |
| chr10-408.20.6046  | 1.171331 | 0.558458 | 2.09744  | 0.035955 | 0.981636 | chr10 | 40806076 | 40806313 | + 0 NA | IntergeniALR/Alph  | 1561851  | NR_02438C | 441666   | Hs.25572E | NR_02438C         | ENSG000000CLOC44166C- |                    | zinc fingpseudo          |                |
| chr10-402.38.19696 | 0.92218  | 0.440596 | 2.093209 | 0.036347 | 0.981636 | chr10 | 40267076 | 40268087 | + 0 NA | IntergeniALR/Alph  | 1570985  | NR_04500C | 399746   | Hs.742607 | NR_045000         | ACTR3BP5              | FKSG74             | ACTR3B pspseudo          |                |
| chr16-846.7.591162 | -1.99474 | 0.95306  | -2.09299 | 0.03635  | 0.981636 | chr16 | 84615586 | 84615924 | + 0 NA | intron (Nintron (N | 2323     | NR_02114E | 23406    | Hs.28909E | NR_02114E         | ENSG000000COTL1       | CLP                | coactosin protein-coding |                |
| chr19-436.4.238745 | 2.938944 | 1.406556 | 2.089461 | 0.036666 | 0.981636 | chr19 | 43875108 | 43875569 | + 0 NA | intron (Nintron (N | 4798     | NR_00103E | 342908   | Hs.76561  | NR_00103E         | ENSG000000ZNF404      |                    | zinc fingprotein-coding  |                |
| chr6-4796.4.238745 | 2.938944 | 1.406556 | 2.089461 | 0.036666 | 0.981636 | chr6  | 47989216 | 47990117 | + 0 NA | intron (NTH1A-int  | 79023    | NR_00101E | 442213   | Hs.65940E | NR_20749E         | ENSG000000PTCHD4      | G6orf138           | patched protein-coding   |                |
| chr1-1245.14.27016 | 1.40362  | 0.673417 | 2.084325 | 0.037131 | 0.981636 | chr1  | 12588001 | 1.25E+08 | + 0 NA | IntergeniALR/Alph  | 3406518  | NR_00395E | 647121   | Hs.69768E | NR_00395E         | ENSG000000EMBP1       |                    | embigin psseudo          |                |
| chr2-739.7.357566  | -1.95207 | 0.937843 | -2.08145 | 0.037393 | 0.981636 | chr2  | 73907971 | 73912171 | + 0 NA | intron (NAluSx1 SI | -16755   | NR_13489E | 1716     | Hs.46902E | NR_00192E         | ENSG000000CDGUOK      | MTDPS3 NC          | deoxyguar protein-coding |                |
| chr8-1332.6.63894  | -2.08572 | 1.003234 | -2.079   | 0.037617 | 0.981636 | chr8  | 1.33E+08 | 1.33E+08 | + 0 NA | intron (Nintron (N | 25933    | NR_00113E | 10397    | Hs.372914 | NR_00609E         | ENSG000000NDRG1       | CAP43 CM1-         | nuclyc dowprotein-coding |                |
| chr4-2684.7.349708 | -1.95067 | 0.938723 | -2.078   | 0.037709 | 0.981636 | chr4  | 2684380  | 2684579  | + 0 NA | intron (NLMEd LIN  | 59047    | NR_04633E | 8603     | Hs.652364 | NR_003704         | ENSG000000FAM193A     | C4orf8 RE          | familyp wiprotein-coding |                |
| chr12-108.8.820242 | -1.75691 | 0.847451 | -2.07317 | 0.038157 | 0.981636 | chr12 | 1.09E+08 | 1.09E+08 | + 0 NA | intron (Nintron (N | 26146    | NR_039717 | 1.01E+08 | NR_039717 | ENSG000000CIR4496 |                       |                    | microRNA ncRNA           |                |
| chr8-143.6.615366  | -2.07106 | 1.006381 | -2.06787 | 0.038653 | 0.981636 | chr8  | 1.44E+08 | 1.44E+08 | + 0 NA | IntergeniIntergeni | 27535    | NR_20138E | 5339     | Hs.43424E | NR_00044E         | ENSG000000PLEC        | EBS1 EBSv          | plectin protein-coding   |                |
| chr7-5925.62.4047  | 0.787932 | 0.377467 | 2.065693 | 0.038857 | 0.981636 | chr7  | 59292394 | 59292611 | + 0 NA | IntergeniALR/Alph  | 1842325  | NR_00115E | 441234   | Hs.533121 | NR_00115E         | ENSG000000ZNF716      |                    | zinc fingprotein-coding  |                |
| chr19-264.75.15622 | 0.725538 | 0.351299 | 2.065302 | 0.038894 | 0.981636 | chr19 | 26460000 | 26460272 | + 0 NA | IntergeniALR/Alph  | -133295  | NR_14673E | 1.02E+08 | Hs.567934 | NR_110687         | ENSG000000LOC101927-  |                    | uncharactncRNA           |                |
| chr14-886.6.582085 | -2.09053 | 1.012931 | -2.06384 | 0.039033 | 0.981636 | chr14 | 88538470 | 88538669 | + 0 NA | intron (Nintron (N | 16438    | NR_00703E | 11099    | Hs.43704C | NR_00703E         | ENSG000000PTNP21      | PTPD1 PTF          | protein tprotein-coding  |                |
| chr6-5956.50.04129 | 0.822985 | 0.399562 | 2.059716 | 0.039426 | 0.981636 | chr6  | 59586841 | 59587042 | + 0 NA | IntergeniALR/Alph  | -1625495 | NR_132994 | 1.07E+08 | Hs.56153E | NR_125727         | ENSG000000CLNCO068C-  |                    | long intencRNA           |                |
| chr1-2013.4.442553 | -3.64925 | 1.772274 | -2.05908 | 0.039487 | 0.981636 | chr1  | 2.02E+08 | 2.02E+08 | + 0 NA | intron (Nintron (N | 1498     | NR_00119E | 1465     | Hs.10808E | NR_00407E         | ENSG000000CSRP1       | CRP CRP1           | cysteine protein-coding  |                |
| chr7-3641.3.393556 | -3.65484 | 1.77675  | -2.05704 | 0.039683 | 0.981636 | chr7  | 36419496 | 36420375 | + 0 NA | intron (Nintron (N | -29578   | NR_00110C | 23366    | Hs.6224   | NR_015314         | ENSG000000KIAA0895    |                    | KIAA0895 protein-coding  |                |
| chr18-241.6.419492 | 2.103774 | 1.023135 | 2.056203 | 0.039763 | 0.981636 | chr18 | 24146467 | 24146749 | + 0 NA | intron (NLMEd LIN  | 7124     | NR_138644 | 26256    | Hs.51198E | NR_01218E         | ENSG000000CABYR       | CABYR Ca           | calcium tprotein-coding  |                |
| chr17-236.330.4404 | 0.542952 | 0.264229 | 2.054852 | 0.039893 | 0.981636 | chr17 | 23016338 | 23016540 | + 0 NA | IntergeniALR/Alph  | 493328   | NR_00119C | 1E+08    | Hs.74018E | NR_00119C         | ENSG000000MTRNR2L1    | HNI                | MT-RNR2 lprotein-coding  |                |
| chr17-618.4.161179 | -2.86055 | 1.392121 | -2.05482 | 0.039897 | 0.981636 | chr17 | 61845152 | 61846160 | + 0 NA | intron (NCharlieL  | 17903    | NR_03204E | 83990    | Hs.12890E | NR_03204E         | ENSG000000BRIP1       | BACH1 FAN          | BRCA1 intrprotein-coding |                |
| chr2-3056.6.607508 | -2.0794  | 1.012061 | -2.05462 | 0.039916 | 0.981636 | chr2  | 30569159 | 30569358 | + 0 NA | intron (Nintron (N | 122012   | NR_00130A | 253558   | Hs.46804E | NR_182551         | ENSG000000LCLAT1      | IAGPAT8 A          | lysocardiprotein-coding  |                |
| chr6-152.6.607508  | -2.0794  | 1.012061 | -2.05462 | 0.039916 | 0.981636 | chr6  | 152E+08  | 1.52E+08 | + 0 NA | intron (Nintron (N | 10909    | NR_012177 | 26271    | Hs.52050E | NR_012177         | ENSG000000FBX05       | EM11 FBX           | F-box prcprotein-coding  |                |
| chr12-454.3.41898  | -3.64118 | 1.772982 | -2.05371 | 0.040004 | 0.981636 | chr12 | 4544342  | 45442740 | + 0 NA | intron (NLM7 LIN   | 5901     | NR_00113C | 10635    | Hs.73069E | NR_00647E         | ENSG000000RAD51AP1    | PIR51              | RAD51 assprotein-coding  |                |
| chr15-413.3.41898  | -3.64118 | 1.772982 | -2.05371 | 0.040004 | 0.981636 | chr15 | 41347185 | 41347845 | + 0 NA | intron (Nintron (N | 14604    | NR_01635E | 51203    | Hs.61509E | NR_01635E         | ENSG000000NUSAP1      | ANKT BMO           | cellular protein-coding  |                |
| chr18-795.4.145464 | -2.85599 | 1.396053 | -2.04576 | 0.04078  | 0.981636 | chr18 | 79900796 | 79901362 | + 0 NA | IntergeniIntergeni | 37411    | NR_01228E | 26251    | Hs.24790E | NR_01228E         | ENSG000000KCNG2       | KCNF2 KVC          | potassium protein-coding |                |
| chr22-463.3.385698 | -3.65224 | 1.785918 | -2.04502 | 0.040853 | 0.981636 | chr22 | 46316880 | 46317311 | + 0 NA | intron (NAluSx1 SI | -18306   | NR_104241 | 55687    | Hs.439524 | NR_01800E         | ENSG000000TRMU        | L3CAL3 MT          | tRNA 5-mcprotein-coding  |                |
| chr1-2116.3.411122 | -3.63821 | 1.782005 | -2.04164 | 0.041188 | 0.981636 | chr1  | 2.12E+08 | 2.12E+08 | + 0 NA | intron (Nintron (N | 4538     | NR_002497 | 4751     | Hs.15370E | NR_002497         | ENSG000000CNEK2       | HSK21 NF           | NEM1a relprotein-coding  |                |
| chr2-1756.7.326134 | -1.94633 | 0.953714 | -2.04079 | 0.041272 | 0.981636 | chr2  | 1.76E+08 | 1.76E+08 | + 0 NA | intron (NLP1A3 LIN | 38639    | NR_03065E | 80856    | Hs.209561 | NR_03065E         | ENSG000000LNPK        | KIAA1715 lunapark, | protein-coding           |                |
| chr7-364E.4.137606 | -2.85364 | 1.403819 | -2.03277 | 0.042076 | 0.981636 | chr7  | 36452347 | 36454460 | + 0 NA | 3' UTR (N3' UTR (N | -63046   | NR_00110C | 23366    | Hs.6224   | NR_015314         | ENSG000000KIAA0895    |                    | KIAA0895 protein-coding  |                |
| chr7-158.4.137606  | -2.85364 | 1.403819 | -2.03277 | 0.042076 | 0.981636 | chr7  | 1.59E+08 | 1.59E+08 | + 0 NA | intron (NAluY SINE | 44938    | NR_01776E | 54892    | Hs.18616  | NR_01776E         | ENSG000000NCAPG2      | 3KS CAP-           | non-SMC cprotein-coding  |                |
| chr14-556.6.548803 | -2.10072 | 1.035961 | -2.0278  | 0.042581 | 0.981636 | chr14 | 55631694 | 55631897 | + 0 NA | intron (Nintron (N | 51588    | NR_00107E | 3895     | Hs.509414 | NR_00498E         | ENSG000000KTN1        | CG1 KNT            | kinectin protein-coding  |                |
| chr10-408.168.482  | 0.618197 | 0.305386 | 2.024314 | 0.042938 | 0.981636 | chr10 | 40892151 | 40892527 | + 0 NA | IntergeniALR/Alph  | 1475706  | NR_02438C | 441666   | Hs.25572E | NR_02438C         | ENSG000000CLOC44166C- |                    | zinc fingpseudo          |                |
| chr1-6847.4.871947 | -2.45966 | 1.217932 | -2.01954 | 0.043431 | 0.981636 | chr1  | 68479629 | 68479901 | + 0 NA | intron (NAluJr SIN | -16911   | NR_110671 | 1.02E+08 | Hs.38285E | NR_110671         | ENSG000000DEPDC1-AS-  |                    | DEPDC1 arncRNA           |                |
| chr15-805.4.410491 | -2.9281  | 1.394136 | -2.10029 | 0.035703 | 0.981636 | chr15 | 80805796 | 80806551 | + 0 NA | intron (NCharlie2E | 26803    | NR_00129E | 57214    | Hs.45908E | NR_01868E         | ENSG000000CEMIP       | CCSP1 HYE          | cell migrprotein-coding  |                |
| chr15-406.4.178745 | -2.83775 | 1.405379 | -2.01921 | 0.043465 | 0.981636 | chr15 | 40621023 | 40621625 | + 0 NA | exon (NM exon (NM  | 27075    | NR_14450E | 57082    | Hs.18185E | NR_14450E         | ENSG000000CNKL1       | AF15Q14 C          | kinetoch protein-coding  |                |
| chr3-1006.4.178745 | -2.83775 | 1.405379 | -2.01921 | 0.043465 | 0.981636 | chr3  | 10068230 | 10068803 | + 0 NA | intron (NLM3A3 LIN | 39739    | NR_17347E | 115795   | Hs.19041E | NR_17347E         | ENSG000000FANCD20S    | C3orf24            | FANCD2 pprotein-coding   |                |
| chr15-402.4.905229 | -2.44603 | 1.211975 | -2.01822 | 0.043568 | 0.981636 | chr15 | 40108699 | 40109574 | + 0 NA | intron (Nintron (N | -8292    | NR_00112E | 1.07E+08 | Hs.73237E | NR_00112E         | ENSG000000BUB1B-PAK   | PAK-5 PAK          | BUB1B-PAK protein-coding |                |
| chr11-748.4.129748 | -2.85122 | 1.41607  | -2.01348 | 0.044065 | 0.981636 | chr11 | 74838783 | 74839035 | + 0 NA | 3' UTR (N3' UTR (N | 90060    | NR_00109E | 254225   | Hs.37014E | NR_00109E         | ENSG000000CRNF169     |                    | ring fingprotein-coding  |                |
| chr10-114.7.744073 | 1.831101 | 0.90977  | 2.012708 | 0.044145 | 0.981636 | chr10 | 1.14E+08 | 1.14E+08 | + 0 NA | intron (NAluSg SIN | 31750    | NR_031747 | 1E+08    | NR_031747 | ENSG000000MIR2110 |                       |                    | hsa-mir-2                | microRNA ncRNA |
| chr20-317.4.170087 | -2.83521 | 1.409446 | -2.01158 | 0.044264 | 0.981636 | chr20 | 31772407 | 31772929 | + 0 NA | intron (NLM1E4C LI | 33378    | NR_01211E | 22974    | Hs.24458C | NR_01211E         | ENSG000000TPX2        | C20orf1 C          | TPX2 micrprotein-coding  |                |
| chr12-506.5.639571 | -2.20102 | 1.094948 | -2.01016 | 0.044414 | 0.981636 | chr12 | 50631387 | 50631669 | + 0 NA | intron (NAluS6 SI  | 126543   | NR_17360E | 57609    | Hs.50551E | NR_02084E         | ENSG000000DIP2B       |                    | disco intrprotein-coding |                |
| chr1-1481.7.18693  | 1.96479  | 0.97808  | 2.008825 | 0.044556 | 0.981636 | chr1  | 1.48E+08 | 1.48E+08 | + 0 NA | intron (NAluSx1 SI | 9549     | NR_001101 | 200030   | Hs.72158E | NR_18337E         | ENSG000000NBPF11      | NBPF24             | NBPF memprotein-coding   |                |
| chr9-1347.4.864009 | -2.45774 | 1.224606 | -2.00696 | 0.044754 | 0.981636 | chr9  | 1.35E+08 | 1.35E+08 | + 0 NA | intron (Nintron (N | -53848   | NR_13804E | 414316   | Hs.571561 | NR_13804E         | ENSG000000COL5A1-AS-  | C9orf104 G         | COL5A1 arncRNA           |                |
| chrX-4912.4.743191 | 2.4552   | 1.22456  | 2.004965 | 0.044967 | 0.981636 | chrX  | 49120465 | 49120966 | + 0 NA | intron (NAluSx SIN | 3020     | NR_01569E | 27238    | Hs.50366E | NR_01569E         | ENSG000000GPKW0       | GPAT5 G            | 6-patch protein-coding   |                |
| chr9-128.5.487056  | 2.213379 | 1.104267 | 2.004387 | 0.045029 | 0.981636 | chr9  | 1.28E+08 | 1.28E+08 | + 0 NA | 3' UTR (N3' UTR (N | 4367     | NR_19795E | 203245   | Hs.37360E | NR_19795E         | ENSG000000NAIF1       | C9orf90 t          | nuclear pprotein-coding  |                |
| chr10-74.5.606289  | -2.21233 | 1.105061 | -2.002   | 0        |          |       |          |          |        |                    |          |           |          |           |                   |                       |                    |                          |                |



|                      |          |          |          |          |          |       |                 |                   |      |                     |                    |                              |                     |               |                                      |
|----------------------|----------|----------|----------|----------|----------|-------|-----------------|-------------------|------|---------------------|--------------------|------------------------------|---------------------|---------------|--------------------------------------|
| chr5-4908 14. 71608  | 1.2342   | 0.642964 | 1.919547 | 0.054915 | 0.981636 | chr5  | 49088837        | 49089492 +        | 0 NA | IntergeniALR/Alpha  | 1352124 NM_198444  | 133418 Hs. 561411NM_198444   | ENSG000000CEMB      | GP70          | emigin protein-coding                |
| chr2-2675 4. 657768  | -2.35714 | 1.229029 | -1.91789 | 0.055125 | 0.981636 | chr2  | 26790705        | 26792687 +        | 0 NA | intron (Nintron (N  | 5640 NM_001805     | 1058 Hs. 1594 NM_001805      | ENSG000000CENPA     | CENP-A C      | centromere protein-coding            |
| chr8-9504 4. 657768  | -2.35714 | 1.229029 | -1.91789 | 0.055125 | 0.981636 | chr8  | 95045645        | 95045900 +        | 0 NA | intron (Nintron (N  | 20783 NR_148913    | 137682 Hs. 435500NM_152414   | ENSG000000NDUFAP6   | C8orf38 N     | NADH:ubiquinone protein-coding       |
| chr8-417 6. 717801   | 1.849174 | 0.965073 | 1.916098 | 0.055353 | 0.981636 | chr8  | 41707497        | 41707701 +        | 0 NA | intron (Nintron (N  | 42325 NM_02048C    | 286 Hs. 654438NM_000037      | ENSG000000ANK1      | ANK1 SPH1     | ankyrin 1 protein-coding             |
| chr12-105 5. 399967  | -2.12396 | 1.109148 | -1.91495 | 0.055499 | 0.981636 | chr12 | 1.057078        | 1.057081 +        | 0 NA | IntergeniALR/Alpha  | 42466 NM_00114F    | 387882 Hs. 368983NM_207377   | ENSG000000C12orf75  | AGK3 OCC      | chromosome protein-coding            |
| chr19-564 7. 502805  | 1.758828 | 0.918838 | 1.914186 | 0.055596 | 0.981636 | chr19 | 56460915        | 56461342 +        | 0 NA | intron (NMIR SINE   | 16217 NM_001321    | 63934 Hs. 67660NM_022103     | ENSG000000ZNF667    | MIPU1         | zinc finger protein-coding           |
| chr2-3202 7. 502805  | 1.758828 | 0.918838 | 1.914186 | 0.055596 | 0.981636 | chr2  | 32024460        | 32024737 +        | 0 NA | intron (NLM3C3A LI  | -13599 NR_126034   | 51072 Hs. 444966NM_015955    | ENSG000000MEMO1     | C2orf4 C      | mediator protein-coding              |
| chr11-665 5. 991502  | 1.974324 | 1.03206  | 1.912993 | 0.055749 | 0.981636 | chr11 | 66535964        | 66536516 +        | 0 NA | 3' UTR (N3' UTR (N  | 9808 NM_20734C     | 254359 Hs. 209587NM_20734C   | ENSG000000ZDHH24    | -             | zinc finger protein-coding           |
| chr10-404 50. 79542  | 0.7396   | 0.38665  | 1.912842 | 0.055768 | 0.981636 | chr10 | 40412688        | 40414995 +        | 0 NA | IntergeniALR/Alpha  | 1717245 NR_04500C  | 399746 Hs. 742607NR_045000   | ACTR3BP5            | FKSG74        | ACTR3B ps_pseudo                     |
| chr3-2146 4. 384251  | -2.12024 | 1.109116 | -1.91164 | 0.055922 | 0.981636 | chr3  | 2.15E+08        | 2.15E+08 +        | 0 NA | exon (NM exon (NM   | 54016 NM_016343    | 1063 Hs. 497741NM_016343     | ENSG000000CENPF     | CENF CILL     | centromere protein-coding            |
| chr10-408 13. 94476  | 1.354961 | 0.709003 | 1.911078 | 0.055995 | 0.981636 | chr10 | 40898298        | 40898519 +        | 0 NA | IntergeniALR/Alpha  | 1469637 NR_02438C  | 441666 Hs. 255725NR_02438C   | ENSG000000LOC441666 | -             | zinc finger pseudo                   |
| chr19-105 5. 99936   | 1.970665 | 1.031772 | 1.909982 | 0.056136 | 0.981636 | chr19 | 1056868         | 1060029 +         | 0 NA | intron (N3b LINE    | -7511 NM_00125E    | 23526 Hs. 465521NM_012292    | ENSG000000ARHGAP45  | HA-1 HLA-Rho  | GTPase protein-coding                |
| chr19-40C 5. 99936   | 1.970665 | 1.031772 | 1.909982 | 0.056136 | 0.981636 | chr19 | 40034687        | 40035214 +        | 0 NA | exon (NM exon (NM   | 21281 NM_00100E    | 163131 Hs. 101135NM_00100E   | ENSG000000ZNF780B   | ZNF779        | zinc finger protein-coding           |
| chr2-1555 5. 99936   | 1.970665 | 1.031772 | 1.909982 | 0.056136 | 0.981636 | chr2  | 15552908        | 15553233 +        | 0 NA | intron (NAluSc SIN  | 8264 NM_01590E     | 51594 Hs. 407155NM_01590E    | ENSG000000CNBAS     | ILF52 NAC     | neuroblastin protein-coding          |
| chr3-1836 5. 99936   | 1.970665 | 1.031772 | 1.909982 | 0.056136 | 0.981636 | chr3  | 1.84E+08        | 1.84E+08 +        | 0 NA | intron (NAluSp SIN  | -24991 NM_001351   | 55689 Hs. 632575NM_018023    | ENSG000000YEATS2    | -             | YEATS domain protein-coding          |
| chr8-2332 5. 366686  | -2.13551 | 1.118168 | -1.90983 | 0.056155 | 0.981636 | chr8  | 23324274        | 23325985 +        | 0 NA | intron (NAluJb SIN  | -10844 NR_038322   | 1.01E+08 Hs. 661133NR_038322 | ENSG000000LOC100507 | -             | uncharacterized ncRNA                |
| chr5-6718 8. 170399  | 1.675699 | 0.877712 | 1.909247 | 0.05623  | 0.981636 | chr5  | 67142994        | 67143302 +        | 0 NA | intron (NFMAM_C SI  | 53651 NM_00558E    | 4064 Hs. 87205 NM_00558E     | ENSG000000CD180     | LY64 Ly7c     | CD180 mol protein-coding             |
| chr10-404 41. 71549  | 0.78331  | 0.410351 | 1.908877 | 0.056278 | 0.981636 | chr10 | 40587921        | 40588148 +        | 0 NA | IntergeniALR/Alpha  | 178011 NR_02438C   | 441666 Hs. 255725NR_02438C   | ENSG000000LOC441666 | -             | zinc finger pseudo                   |
| chr5-1215 6. 862643  | -1.82497 | 0.957442 | -1.90609 | 0.056639 | 0.981636 | chr5  | 1.22E+08        | 1.22E+08 +        | 0 NA | intron (NLIAP7 LIN  | 2913 NM_15254E     | 153443 Hs. 107622NM_15254E   | ENSG000000SRFBP1    | BUD22 P4      | serum response protein-coding        |
| chr5-4945 85. 83963  | 0.69468  | 0.364496 | 1.905864 | 0.056668 | 0.981636 | chr5  | 49492298        | 49492628 +        | 0 NA | IntergeniALR/Alpha  | 948825 NM_19844F   | 133418 Hs. 561411NM_19844F   | ENSG000000CEMB      | GP70          | emigin protein-coding                |
| chr5-3347 6. 837219  | -1.83492 | 0.963356 | -1.90471 | 0.056817 | 0.981636 | chr5  | 33470230        | 33470502 +        | 0 NA | IntergeniIntergeni  | 29590 NR_04767E    | 6897 Hs. 481866NM_15229F     | ENSG000000TARS      | ThrRS         | threonyl-tRNA protein-coding         |
| chr20-505 5. 966078  | 1.968861 | 1.03477  | 1.902704 | 0.057079 | 0.981636 | chr20 | 5096548         | 5097333 +         | 0 NA | intron (Nintron (N  | 16136 NM_00100E    | 29058 Hs. 472024NM_01414F    | ENSG000000TMEM230   | C2orf30 C     | transmembrane protein-coding         |
| chr19-564 6. 725659  | 1.845095 | 0.970441 | 1.90213  | 0.057154 | 0.981636 | chr19 | 56441478        | 56444947 +        | 0 NA | intron (NLMIB7 LIN  | 34133 NM_001321    | 63934 Hs. 67660NM_022103     | ENSG000000ZNF667    | MIPU1         | zinc finger protein-coding           |
| chr3-1704 5. 376393  | -2.11834 | 1.113709 | -1.90206 | 0.057163 | 0.981636 | chr3  | 1.7E+08         | 1.7E+08 +         | 0 NA | intron (Nintron (N  | 3313 NR_10688E     | 1.02E+08 Hs. 10688E          | ENSG000000MIR6828   | hsa-mir-6828  | microRNA ncRNA                       |
| chr6-334 4. 616628   | -2.36919 | 1.246821 | -1.90018 | 0.057409 | 0.981636 | chr6  | 33406024        | 33406324 +        | 0 NA | intron (Nintron (N  | -4840 NM_02416E    | 5252 Hs. 166204NM_00263E     | ENSG000000PHF1      | MTF2L2 PC     | HD finger protein-coding             |
| chr16-145 5. 222213  | 2.127513 | 1.206882 | 1.898408 | 0.057642 | 0.981636 | chr16 | 1457033         | 1457396 +         | 0 NA | intron (Nintron (N  | -12740 NM_00114E   | 645811 Hs. 355232NM_00114E   | ENSG000000CCDC154   | C16orf29      | coiled-coil protein-coding           |
| chr16-302 6. 102877  | -1.95442 | 1.029643 | -1.89816 | 0.057676 | 0.981636 | chr16 | 3021770         | 3022334 +         | 0 NA | TTS (NM_C TTS (NM_C | 1684 NM_01663E     | 51330 Hs. 355899NM_01663E    | ENSG000000TNFRSF12  | CD266 FN1     | TNFR protein-coding                  |
| chr8-1332 6. 136159  | -1.94473 | 1.024803 | -1.89766 | 0.057741 | 0.981636 | chr8  | 1.33E+08        | 1.33E+08 +        | 0 NA | intron (NMER5A DNA  | 24136 NM_08083E    | 8840 Hs. 492974NM_00388E     | ENSG000000CCN4      | WISP1 WIS     | cellular protein-coding              |
| chr6-1392 6. 829361  | -1.83345 | 0.966763 | -1.89648 | 0.057896 | 0.981636 | chr6  | 1.39E+08        | 1.39E+08 +        | 0 NA | exon (NM exon (NM   | 14020 NM_02124E    | 58527 Hs. 600861NM_02124E    | ENSG000000ABRACL    | C6orf115 ABRA | C-terminus protein-coding            |
| chr1-1928 13. 98978  | 2.12472  | 0.657959 | 1.89635  | 0.057914 | 0.981636 | chr1  | 1.93E+08        | 1.93E+08 +        | 0 NA | intron (Nintron (N  | 1827 NM_00292E     | 5997 Hs. 78944 NM_00292E     | ENSG000000RGS2      | GOSR          | regulator protein-coding             |
| chr5-7925 6. 684519  | 1.847389 | 0.975542 | 1.893705 | 0.058264 | 0.981636 | chr5  | 79290640        | 79290900 +        | 0 NA | intron (NAluSg7 SI  | 54639 NM_15240E    | 133746 Hs. 482606NM_15240E   | ENSG000000JMY       | WHAMM2 WJ     | junction protein-coding              |
| chr19-444 6. 101228  | -1.97126 | 1.041129 | -1.89338 | 0.058307 | 0.981636 | chr19 | 44676444        | 44676643 +        | 0 NA | intron (Nintron (N  | 5091 NM_02021E     | 56971 Hs. 416922NM_02021E    | ENSG000000CEACAM19  | CEACAM19      | carcinoembryonic protein-coding      |
| chr17-404 4. 642052  | -2.3525  | 1.244004 | -1.89107 | 0.058615 | 0.981636 | chr17 | 40404772        | 40407422 +        | 0 NA | intron (NAluSg2 SI  | 11799 NM_001067    | 7153 Hs. 15634NM_001067      | ENSG000000TOP2A     | TOP2 TP2A     | DNA topoisomerase protein-coding     |
| chr6-1445 5. 425391  | -2.1104  | 1.116557 | -1.89009 | 0.058745 | 0.981636 | chr6  | 1.45E+08        | 1.45E+08 +        | 0 NA | intron (Nintron (N  | 126067 NR_13277E   | 1.07E+08 Hs. 13277E          | SNORA98             | -             | small nucleolar RNA                  |
| chr9-5465 11. 425391 | -2.1104  | 1.116557 | -1.89009 | 0.058745 | 0.981636 | chr9  | 5462599         | 5463108 +         | 0 NA | exon (NM exon (NM   | 12311 NM_001314    | 29126 Hs. 521989NM_01414F    | ENSG000000CD274     | B7-H B7H1     | CD274 mol protein-coding             |
| chr7-1375 5. 107578  | -1.40387 | 0.743834 | -1.88734 | 0.059114 | 0.981636 | chr7  | 1.38E+08        | 1.38E+08 +        | 0 NA | intron (NLIAP8 LIN  | 6471 NM_00131E     | 64764 Hs. 490275NM_194071    | ENSG000000CREB3L2   | BBF2H7        | cAMP response protein-coding         |
| chr11-28C 5. 368536  | -2.1164  | 1.121588 | -1.88697 | 0.059164 | 0.981636 | chr11 | 28087724        | 28089555 +        | 0 NA | exon (NM exon (NM   | 19517 NM_03121E    | 81930 Hs. 301052NM_03121E    | ENSG000000KIF18A    | MS-KIF18A     | kinesin I protein-coding             |
| chr2-1527 5. 368536  | -2.1164  | 1.121588 | -1.88697 | 0.059164 | 0.981636 | chr2  | 1.53E+08        | 1.53E+08 +        | 0 NA | intron (NHERV1P OI  | 11316 NM_00136E    | 55660 Hs. 64358NM_01789E     | ENSG000000PRP40A    | FBP-11 F      | pre-mRNA processing protein-coding   |
| chr5-1294 8. 317461  | -1.64711 | 0.873047 | -1.88662 | 0.059211 | 0.981636 | chr5  | 1.29E+08        | 1.29E+08 +        | 0 NA | intron (NAluSx1 SI  | -8283 NR_12574F    | 1.04E+08 Hs. 628635NR_12574F | ENSG000000ADAMTS19  | -             | ADAMTS19 ncRNA                       |
| chr20-317 5. 343112  | -2.13019 | 1.13249  | -1.88098 | 0.059974 | 0.981636 | chr20 | 31779835        | 31780153 +        | 0 NA | intron (N2b LINE    | -39381 NM_03311E   | 85366 Hs. 86092 NM_03311E    | ENSG000000MYLK2     | KMLC MLC      | myosin I protein-coding              |
| chr9-3805 5. 343112  | -2.13019 | 1.13249  | -1.88098 | 0.059974 | 0.981636 | chr9  | 38055980        | 38055980 +        | 0 NA | intron (Nintron (N  | 9533 NM_00302E     | 6461 Hs. 521482NM_00302E     | ENSG000000SHB       | BA3J10.2      | SH2 domain protein-coding            |
| chr16-884 6. 007218  | 1.96681  | 1.046087 | 1.880159 | 0.060086 | 0.981636 | chr16 | 884159          | 885094 +          | 0 NA | intron (NLMIEc LIN  | -36407 NR_11094E   | 1.02E+08 Hs. 737087NR_11094E | ENSG000000LMF1-AS1  | LA136-36E     | LMF1 antinuclear RNA                 |
| chr19-574 5. 230071  | 2.12304  | 1.12942  | 1.879761 | 0.060141 | 0.981636 | chr19 | 57452347        | 57452546 +        | 0 NA | IntergeniMST LTR    | 4293 NM_02063E     | 57191 Hs. 677422NM_02063E    | ENSG000000VNIR1     | VNIR1 VN      | von Willebrand factor protein-coding |
| chr17-281 7. 12952   | -1.86211 | 0.991981 | -1.87716 | 0.060496 | 0.981636 | chr17 | 28101275        | 28101474 +        | 0 NA | intron (NLMIE1 LIN  | 58697 NM_016231    | 51701 Hs. 208755NM_016231    | ENSG000000NLK       | -             | nemo like protein-coding             |
| chr1-1745 8. 758974  | 1.57614  | 0.83999  | 1.876379 | 0.060603 | 0.981636 | chr1  | 50710 NM_00136E | 50710 NM_00136E + | 0 NA | intron (NLMIA6 LIN  | 50710 NM_00136E    | 9910 Hs. 585375NM_014857     | ENSG000000RABGAP1L  | HHL TB        | IC1 RAB GTPase protein-coding        |
| chr6-5936 55. 08224  | 0.725062 | 0.386781 | 1.874605 | 0.060847 | 0.981636 | chr6  | 59383276        | 59383494 +        | 0 NA | IntergeniALR/Alpha  | -1421939 NR_132994 | 1.07E+08 Hs. 561535NR_125727 | ENSG000000LINC0068C | -             | long intergenic RNA                  |
| chr1-1228 11. 956447 | 1.326251 | 0.707629 | 1.874217 | 0.060901 | 0.981636 | chr1  | 1.23E+08        | 1.23E+08 +        | 0 NA | IntergeniALR/Alpha  | 133121 NR_00395E   | 647121 Hs. 697682NR_00395E   | ENSG000000EMBPI     | -             | emigin ps_pseudo                     |
| chr11-117 9. 554399  | -1.494   | 0.797534 | -1.87328 | 0.06103  | 0.981636 | chr11 | 1.17E+08        | 1.17E+08 +        | 0 NA | 3' UTR (N3' UTR (N  | -5104 NR_04521E    | 1.01E+08 Hs. 732365NR_04521E | ENSG000000LOC100652 | -             | uncharacterized ncRNA                |
| chr10-40C 8. 99379   | 0.834661 | 0.446167 | 1.870737 | 0.061381 | 0.981636 | chr10 | 40019658        | 40020581 +        | 0 NA | IntergeniALR/Alpha  | 1323523 NR_04500C  | 399746 Hs. 742607NR_045000   | ACTR3BP5            | FKSG74        | ACTR3B ps_pseudo                     |
| chr1-1628 7. 991535  | 1.636747 | 0.875458 | 1.869589 | 0.061541 | 0.981636 | chr1  | 1.63E+08        | 1.63E+08 +        | 0 NA | intron (Nintron (N  | 10578 NM_016371    | 51478 Hs. 492922NM_016371    | ENSG000000HSD17B7   | PRAP SDR      | hydroxysteroid protein-coding        |
| chr18-764 7. 991535  | 1.6367   |          |          |          |          |       |                 |                   |      |                     |                    |                              |                     |               |                                      |

|           |          |          |          |          |          |          |       |          |          |   |    |                     |          |           |          |                    |                    |                   |                          |                |                |                |                |
|-----------|----------|----------|----------|----------|----------|----------|-------|----------|----------|---|----|---------------------|----------|-----------|----------|--------------------|--------------------|-------------------|--------------------------|----------------|----------------|----------------|----------------|
| chr1-1967 | 9.271277 | 1.479612 | 0.81799  | 1.80884  | 0.070476 | 0.981636 | chr1  | 1.97E+08 | 1.97E+08 | 0 | NA | intron (THE1C-int   | -35692   | NM_021023 | 10878    | Hs.709217NM_021023 | ENSG00000CFHR3     | CFHL3 DOW         | complemer protein-coding |                |                |                |                |
| chr1-2418 | 4.377024 | -2.277   | 1.260254 | -1.80677 | 0.070797 | 0.981636 | chr1  | 2.42E+08 | 2.42E+08 | 0 | NA | intron (NLTR12C LI  | 6053     | NM_006027 | 9156     | Hs.498244NM_003688 | ENSG00000EX01      | HEX1 hEx          | exonucleo protein-coding |                |                |                |                |
| chr2-112  | 4.377024 | -2.277   | 1.260254 | -1.80677 | 0.070797 | 0.981636 | chr2  | 1.12E+08 | 1.12E+08 | 0 | NA | intron (NAluSp SIN  | 21797    | NM_024953 | 80018    | Hs.530941NM_024953 | ENSG00000NAA25     | C12orf30 N(alpha) | protein-coding           |                |                |                |                |
| chr2-7385 | 5.896555 | -1.87138 | 1.035836 | -1.80664 | 0.070819 | 0.981636 | chr2  | 73899178 | 73904633 | 0 | NA | intron (Nintron (N  | 8897     | NM_001199 | 72       | Hs.516105NM_001616 | ENSG00000ACTG2     | ACT ACT3          | actin gα protein-coding  |                |                |                |                |
| chr15-412 | 5.111366 | -2.05049 | 1.136616 | -1.80403 | 0.071226 | 0.981636 | chr15 | 14345606 | 14346736 | 0 | NA | intron (NL2 LINE I  | 12960    | NM_001635 | 51203    | Hs.615092NM_016355 | ENSG00000NUSAP1    | ANKT BMO2         | nucleolar protein-coding |                |                |                |                |
| chr15-694 | 5.111366 | -2.05049 | 1.136616 | -1.80403 | 0.071226 | 0.981636 | chr15 | 69438121 | 69438854 | 0 | NA | intron (Nintron (N  | -14331   | NM_001003 | 6176     | Hs.356502NM_001003 | ENSG00000CRPLP1    | LP1 P1 RF         | ribosomal protein-coding |                |                |                |                |
| chr1-771C | 4.264354 | 2.268934 | 1.258642 | 1.802684 | 0.071438 | 0.981636 | chr1  | 7710111  | 771579   | 0 | NA | intron (Nintron (N  | 7939     | NR_033908 | 1E+08    | Hs.527521NR_033908 | LOC100288          |                   | uncharactercna           |                |                |                |                |
| chr10-681 | 6.519222 | -1.75534 | 0.97418  | -1.80187 | 0.071566 | 0.981636 | chr10 | 68002688 | 68003162 | 0 | NA | intron (NLIMA3 LIN  | 7958     | NR_131184 | 1E+08    | Hs. NR_131184      | POU5F1P5           | Oct4-pg5          | POU class pseudo         |                |                |                |                |
| chr15-892 | 6.607323 | -1.75534 | 0.97418  | -1.80187 | 0.071566 | 0.981636 | chr15 | 89248846 | 89250381 | 0 | NA | intron (NAluJb SIN  | 5634     | NM_018193 | 55215    | Hs.513122NM_018193 | ENSG00000FANCI     | KIAA1794          | FA comple                | protein-coding |                |                |                |
| chr10-377 | 4.982795 | 2.042757 | 1.134187 | 1.801076 | 0.071691 | 0.981636 | chr10 | 37747025 | 37971146 | 0 | NA | intron (NL2a LINE   | 5045     | NR_138066 | 219749   | Hs.499422NM_145011 | ENSG00000ZNF25     | KOX19 Zfz         | zinc fing                | protein-coding |                |                |                |
| chr19-374 | 4.982795 | 2.042757 | 1.134187 | 1.801076 | 0.071691 | 0.981636 | chr19 | 37474646 | 37749901 | 0 | NA | intron (NAluY SINE  | -28012   | NM_032685 | 84775    | Hs.116622NM_032685 | ENSG00000ZNF607    |                   |                          | zinc fing      | protein-coding |                |                |
| chr5-3782 | 4.982795 | 2.042757 | 1.134187 | 1.801076 | 0.071691 | 0.981636 | chr5  | 37822987 | 37824795 | 0 | NA | intron (Nintron (N  | 10931    | NM_001278 | 2668     | Hs.248114NM_000514 | ENSG00000GDNF      | ATF ATF1 glial    | cell                     | protein-coding |                |                |                |
| chr6-2614 | 4.982795 | 2.042757 | 1.134187 | 1.801076 | 0.071691 | 0.981636 | chr6  | 26137347 | 26139842 | 0 | NA | Intergeni LIME4b LI | 14449    | NM_003512 | 8334     | Hs.484952NM_003512 | ENSG00000HIST1H2AC | H2A H1 H2         | histone c                | protein-coding |                |                |                |
| chr9-379  | 6.5819   | -1.76561 | 0.980348 | -1.801   | 0.071702 | 0.981636 | chr9  | 37991654 | 37991853 | 0 | NA | intron (Nintron (N  | 77474    | NM_030302 | 6461     | Hs.521482NM_030302 | ENSG00000SHB       | ba3J10.2          | SH2                      | domai          | protein-coding |                |                |
| chr11-345 | 6.648463 | -1.74834 | 0.971952 | -1.79879 | 0.072051 | 0.981636 | chr11 | 34944680 | 34944933 | 0 | NA | intron (NLIMEi LIN  | 2969     | NR_039833 | 1.01E+08 | NR_039833          | ENSG00000MIR1343   |                   |                          | microRNA       | ncRNA          |                |                |
| chr10-176 | 5.855416 | -1.87949 | 1.045408 | -1.79786 | 0.0722   | 0.981636 | chr10 | 17612604 | 17612831 | 0 | NA | intron (NAluY SINE  | 4657     | NM_014241 | 9200     | Hs.114062NM_014241 | ENSG00000HACD1     | CAP PTPLA         | 3-hydroxy                | protein-coding |                |                |                |
| chr1-214C | 4.402448 | -2.25994 | 1.25735  | -1.79738 | 0.072275 | 0.981636 | chr1  | 2.15E+08 | 2.15E+08 | 0 | NA | 3' UTR (N3' UTR (N  | 61002    | NM_016343 | 1063     | Hs.497741NM_016343 | ENSG00000CCENPF    | CENF CILL         | centromer                | protein-coding |                |                |                |
| chr17-404 | 4.402448 | -2.25994 | 1.25735  | -1.79738 | 0.072275 | 0.981636 | chr17 | 40397611 | 40401221 | 0 | NA | intron (NAluJb SIN  | 18480    | NM_001067 | 7153     | Hs.156342NM_001067 | ENSG00000TOP2A     | TOP2 TP2          | DNA topoi                | protein-coding |                |                |                |
| chr17-404 | 4.402448 | -2.25994 | 1.25735  | -1.79738 | 0.072275 | 0.981636 | chr17 | 40402179 | 40403015 | 0 | NA | intron (NL2a LINE   | 15299    | NM_001067 | 7153     | Hs.156342NM_001067 | ENSG00000TOP2A     | TOP2 TP2          | DNA topoi                | protein-coding |                |                |                |
| chr1-1965 | 5.701236 | 1.887575 | 1.050773 | 1.796368 | 0.072436 | 0.981636 | chr1  | 19625455 | 19625748 | 0 | NA | 3' UTR (N3' UTR (N  | -17628   | NM_182744 | 4681     | Hs.654502NM_005383 | ENSG00000CNBL1     | D1S1733E NBL1     | DA                       | protein-coding |                |                |                |
| chr1-2355 | 5.701236 | 1.887575 | 1.050773 | 1.796368 | 0.072436 | 0.981636 | chr1  | 2.36E+08 | 2.36E+08 | 0 | NA | intron (NChap1_Man  | -45269   | NM_001098 | 2786     | Hs.159711NM_004488 | ENSG00000GNG4      |                   |                          | G              | protein-coding |                |                |
| chr8-8654 | 9.161725 | 1.466446 | 0.817351 | 1.794145 | 0.07279  | 0.981636 | chr8  | 86544904 | 86545385 | 0 | NA | intron (NMER70C LI  | 30709    | NM_003905 | 8895     | Hs.191215NM_003905 | ENSG00000CPNE3     | CPN3 PRO1         | copine 3                 | protein-coding |                |                |                |
| chr4-9427 | 9.306937 | -1.44283 | 0.804567 | -1.7933  | 0.072925 | 0.981636 | chr4  | 94275780 | 94276037 | 0 | NA | intron (NAluY SINE  | 22599    | NM_001254 | 56916    | Hs.410402NM_020155 | ENSG00000SMARCAD1  | ADERM BAS         | SWI/SNF-1                | protein-coding |                |                |                |
| chr14-705 | 4.23893  | 2.261471 | 1.261248 | 1.793043 | 0.072966 | 0.981636 | chr14 | 70520346 | 70521207 | 0 | NA | Intergeni Tigger1 I | 14228    | NM_003814 | 8748     | Hs.177984NM_003814 | ENSG00000ADAM20    |                   |                          | ADAM           | meta           | protein-coding |                |
| chr19-524 | 4.23893  | 2.261471 | 1.261248 | 1.793043 | 0.072966 | 0.981636 | chr19 | 52468433 | 52469429 | 0 | NA | intron (NMLT2B3 LI  | 15378    | NM_001095 | 147660   | Hs.157287NM_152472 | ENSG00000ZNF578    |                   |                          | zinc           | fing           | protein-coding |                |
| chr10-40  | 23.62776 | 0.950094 | 0.529967 | 1.792743 | 0.073014 | 0.981636 | chr10 | 40367454 | 40368623 | 0 | NA | Intergeni ALR Alpha | 1671442  | NR_045000 | 399746   | Hs.742607NR_045000 | ACTR3BP5           | FKSG74            | ACTR3B                   | ps             | pseudo         |                |                |
| chr19-105 | 5.016076 | 2.044747 | 1.141308 | 1.791582 | 0.0732   | 0.981636 | chr19 | 10545456 | 10560038 | 0 | NA | exon (NM exon (NM   | -10667   | NM_001258 | 23256    | Hs.465521NM_012292 | ENSG00000ARHGAP45  | HA-1 HLA          | Rho                      | GT             | Pas            | protein-coding |                |
| chr4-1031 | 3.675964 | -2.62305 | 1.464154 | -1.79151 | 0.073211 | 0.981636 | chr4  | 1.03E+08 | 1.03E+08 | 0 | NA | intron (NL2c LINE   | -9898    | NM_020135 | 56898    | Hs.124692NM_020135 | ENSG00000BDH2      | DHR56 EF          | 3-hydroxy                | protein-coding |                |                |                |
| chr5-8107 | 7.300526 | -1.67692 | 0.936219 | -1.79117 | 0.073266 | 0.981636 | chr5  | 81070686 | 81070913 | 0 | NA | intron (Nintron (N  | -109892  | NR_105015 | 1.03E+08 | Hs.737155NR_105015 | ENSG00000RASGRF2-1 |                   |                          | RASGRF2        | ε              | ncRNA          |                |
| chr7-5927 | 8.494131 | 1.517431 | 0.847798 | 1.78985  | 0.073478 | 0.981636 | chr7  | 59274995 | 59275528 | 0 | NA | Intergeni ALR Alpha | 1825084  | NM_001155 | 441234   | Hs.533121NM_001155 | ENSG00000ZNF716    |                   |                          | zinc           | fing           | protein-coding |                |
| chr3-1235 | 5.880839 | -1.8677  | 1.04446  | -1.7882  | 0.073744 | 0.981636 | chr3  | 1.24E+08 | 1.24E+08 | 0 | NA | intron (NHAL1b LI   | 21676    | NM_001366 | 64770    | Hs.645022NM_022757 | ENSG00000CCDC14    |                   |                          | coiled-c       | protein-coding |                |                |
| chr2-1217 | 6.564334 | -1.77801 | 0.994443 | -1.78795 | 0.073784 | 0.981636 | chr2  | 1.22E+08 | 1.22E+08 | 0 | NA | intron (Nintron (N  | 2859     | NM_004622 | 7247     | Hs.75066           | NM_004622          | ENSG00000TSN      | BCLF-1 C                 | transl         | in             | protein-coding |                |
| chr17-682 | 6.957371 | 2.036221 | 1.139893 | 1.786326 | 0.074046 | 0.981636 | chr17 | 68227184 | 68227732 | 0 | NA | intron (NMLT1D LTF  | -20116   | NM_001346 | 51321    | Hs.293566          | NM_016627          | ENSG00000AMZ2     |                          |                | archaeal       | ys             | protein-coding |
| chr2-365  | 6.599465 | -1.75368 | 0.981816 | -1.78616 | 0.074073 | 0.981636 | chr2  | 36507731 | 36507930 | 0 | NA | intron (Nintron (N  | 90338    | NM_001042 | 9637     | Hs.258563NM_005102 | ENSG00000FEZ2      | HUM3CL            | fascicul                 | ε              | protein-coding |                |                |
| chr15-326 | 6.574042 | -1.76411 | 0.988074 | -1.78541 | 0.074195 | 0.981636 | chr15 | 32625149 | 32626377 | 0 | NA | intron (Nintron (N  | 10259    | NM_001286 | 9824     | Hs.591133NM_014783 | ENSG00000ARHGAP11  | 11                | GAP (1-12                | Rho            | GT             | Pas            | protein-coding |
| chr6-616  | 6.519522 | 1.779739 | 0.997801 | 1.783301 | 0.074537 | 0.981636 | chr6  | 26132458 | 26132815 | 0 | NA | Intergeni AluSx4 SI | 8491     | NM_003512 | 8334     | Hs.484952NM_003512 | ENSG00000HIST1H2AC | H2A H1 H2         | histone c                | protein-coding |                |                |                |
| chr15-477 | 4.990653 | 2.038206 | 1.143282 | 1.782767 | 0.074624 | 0.981636 | chr15 | 47764022 | 47765974 | 0 | NA | exon (NM exon (NM   | 46509    | NM_153615 | 80031    | Hs.511265NM_020855 | ENSG00000SEMA6D    |                   |                          | semaphori      | protein-coding |                |                |
| chr6-1497 | 5.847558 | -1.87776 | 1.054409 | -1.78086 | 0.074935 | 0.981636 | chr6  | 1.5E+08  | 1.5E+08  | 0 | NA | intron (NAluSg SIN  | 33628    | NM_001366 | 5110     | Hs.279257NM_005383 | ENSG00000PCMT1     | P1MT              |                          | protein-l      | protein-coding |                |                |
| chr12-585 | 5.121074 | -2.03254 | 1.143105 | -1.77808 | 0.07539  | 0.981636 | chr12 | 58868014 | 58868405 | 0 | NA | Intergeni Intergeni | 51337    | NM_001136 | 121227   | Hs.253737NM_153377 | ENSG00000LRIG3     | LIG3              |                          | leucine        | in             | protein-coding |                |
| chr2-1355 | 5.121074 | -2.03254 | 1.143105 | -1.77808 | 0.07539  | 0.981636 | chr2  | 1.36E+08 | 1.36E+08 | 0 | NA | intron (NLIMA2 LIN  | -13673   | NR_110200 | 1.02E+08 | Hs.602175NR_110195 | ENSG00000DARS-AS1  |                   |                          | DARS           | ant            | ncRNA          |                |
| chr15-58  | 9.365642 | -1.4304  | 0.804486 | -1.77803 | 0.075399 | 0.981636 | chr15 | 58654692 | 58654974 | 0 | NA | intron (NLIMA2 LIN  | 38774    | NR_073415 | 664618   | Hs.670224NM_002927 | HSP90ABF HSP90b    |                   |                          | heat           | shoc           | pseudo         |                |
| chr7-4507 | 7.245821 | 1.688798 | 0.950904 | 1.775992 | 0.075734 | 0.981636 | chr7  | 45072720 | 45072979 | 0 | NA | intron (Nintron (N  | 16095    | NM_001146 | 23148    | Hs.96633           | NM_001146          | ENSG00000NACAD    |                          |                | NAC            | alphan         | protein-coding |
| chr8-4317 | 7.709127 | 1.566054 | 0.882196 | 1.775176 | 0.075869 | 0.981636 | chr8  | 43177116 | 43177530 | 0 | NA | intron (NAluY SINE  | 36859    | NM_152415 | 138050   | Hs.600384NM_152415 | ENSG00000HGSNAT    | HGNAT MPS         | heparan-ε                | protein-coding |                |                |                |
| chr5-478  | 139.0327 | 0.506707 | 0.285495 | 1.774835 | 0.075925 | 0.981636 | chr5  | 47864769 | 47864981 | 0 | NA | Intergeni ALR Alpha | -2168495 | NM_021072 | 348980   | Hs.353176NM_021072 | ENSG00000HCN1      | BCNG-1 BC         | hyperpol                 | ε              | protein-coding |                |                |
| chr17-565 | 7.742409 | 1.567868 | 0.884348 | 1.772908 | 0.076244 | 0.981636 | chr17 | 56941715 | 56941955 | 0 | NA | intron (Nintron (N  | 19215    | NM_004645 | 8161     | Hs.532795NM_004645 | ENSG00000COIL      | CLN80 p8C         | coilin                   | protein-coding |                |                |                |
| chr2-1732 | 8.062141 | -1.58812 | 0.896322 | -1.77182 | 0.076424 | 0.981636 | chr2  | 1.73E+08 | 1.73E+08 | 0 | NA | intron (NAluSx SIN  | 74591    | NR_033882 | 339751   | Hs.570085NR_033882 | ENSG00000MAP3K20-1 | MLK7-AS1          | MAP3K20                  | ε              | ncRNA          |                |                |
| chr8-4255 | 5.872982 | -1.86573 | 1.053458 | -1.77106 | 0.076551 | 0.981636 | chr8  | 42532310 | 42532652 | 0 | NA | intron (Nintron (N  | -8667    | NM_001135 | 114926   | Hs.655322NM_138433 | ENSG00000SMIM19    | C8orf40           |                          | small          | in             | protein-coding |                |
| chr6-839  | 5.921979 | -1.85912 | 1.049836 | -1.77087 | 0.076583 | 0.981636 | chr6  | 83934671 | 83935202 | 0 | NA | intron (Nintron (N  | 75247    | NM_016233 | 51167    | Hs.5741            | NM_016233          | ENSG00000CCYB5R4  | NCB50R ct                | cytochro       | protein-coding |                |                |
| chr4-267  | 8.613735 | -1.47865 | 0.836267 | -1.76815 | 0.077037 | 0.981636 | chr4  | 26735694 | 26735981 | 0 | NA | intron (NLIPA2 LIN  | 124407   | NR_134675 | 1.05E+08 | Hs.548855NR_134673 | STIM2-AS1          |                   |                          | STIM2          | ant            | ncRNA          |                |
| chr4-1135 | 6.624889 | -1.7431  | 0.987095 | -1.76589 | 0.077415 | 0.9816   |       |          |          |   |    |                     |          |           |          |                    |                    |                   |                          |                |                |                |                |



|                    |          |          |          |          |          |       |          |          |   |      |                     |                   |                               |                    |                                    |
|--------------------|----------|----------|----------|----------|----------|-------|----------|----------|---|------|---------------------|-------------------|-------------------------------|--------------------|------------------------------------|
| chr17-417 5.495099 | 1.80979  | 1.058738 | 1.709385 | 0.08738  | 0.981636 | chr17 | 41769422 | 41771610 | + | 0 NA | intron (Nintron (N  | 15579 NM_001352   | 3728 Hs. 514174NM_00223C      | ENSG00000CJUP      | CTNNG DP2 junction protein-coding  |
| chr5-487 22.43233  | 0.905459 | 0.529751 | 1.709217 | 0.087411 | 0.981636 | chr5  | 48785857 | 48786704 | + | 0 NA | IntergeniALR/Alph   | 1655008 NM_198445 | 133418 Hs. 561411NM_198445    | ENSG00000EMB       | GP70 embigin protein-coding        |
| chr3-532 6.188116  | 1.698572 | 0.994013 | 1.708802 | 0.087488 | 0.981636 | chr3  | 53251108 | 53251491 | + | 0 NA | intron (Nintron (N  | 4723 NM_001064    | 7086 Hs. 89643 NM_001064      | ENSG00000CKT       | HEL-S-48 transketcprotein-coding   |
| chr17-417 4.973087 | 2.025941 | 1.185604 | 1.708783 | 0.087491 | 0.981636 | chr17 | 41755718 | 41756125 | + | 0 NA | intron (Nintron (N  | -21275 NM_001079  | 9001 Hs. 158303NM_00394C      | ENSG00000HAP1      | HAP2 HPE huntingtin protein-coding |
| chr2-1106 4.137421 | -2.17849 | 1.275642 | -1.70776 | 0.087681 | 0.981636 | chr2  | 1.11E+08 | 1.11E+08 | + | 0 NA | intron (Nintron (N  | 4662 NR_132975    | 1.07E+08 NR_132975            | SNORD132           | small nucsnoRNA                    |
| chr11-124 5.615812 | -1.80227 | 1.055605 | -1.70734 | 0.087759 | 0.981636 | chr11 | 1.25E+08 | 1.25E+08 | + | 0 NA | intron (NAluS6 SI   | 4551 NM_001312    | 79684 Hs. 146079NM_02463I     | ENSG00000MSANTD2   | C11orf61 Myb/SANT protein-coding   |
| chr2-364 5.615812  | -1.80227 | 1.055605 | -1.70734 | 0.087759 | 0.981636 | chr2  | 36454282 | 36454546 | + | 0 NA | intron (Nintron (N  | 98636 NM_016441   | 51232 Hs. 699247NM_01644I     | ENSG00000CRIMI     | CRIM-1 5E cysteine protein-coding  |
| chr2-2018 5.615812 | -1.80227 | 1.055605 | -1.70734 | 0.087759 | 0.981636 | chr2  | 2.02E+08 | 2.02E+08 | + | 0 NA | intron (Nintron (N  | 20476 NM_001261   | 65061 Hs. 348711NM_13915E     | ENSG00000CDK15     | ALS2CR7 Fyclin deprotein-coding    |
| chr5-176 5.615812  | -1.80227 | 1.055605 | -1.70734 | 0.087759 | 0.981636 | chr5  | 1.76E+08 | 1.76E+08 | + | 0 NA | TTS (NM_TTS (NM_I   | -1582 NM_00125E   | 51491 Hs. 696282NM_01639I     | ENSG00000CNO16     | HSPC111 FNOP16 nucprotein-coding   |
| chr8-6161 5.615812 | -1.80227 | 1.055605 | -1.70734 | 0.087759 | 0.981636 | chr8  | 61612440 | 61613003 | + | 0 NA | intron (NLM4a LI    | 77659 NM_001164   | 444 Hs. 332422NM_00431E       | ENSG00000ASPH      | AAH BAH Caspartat protein-coding   |
| chr5-134 5.649094  | -1.79223 | 1.049905 | -1.70704 | 0.087815 | 0.981636 | chr5  | 1.35E+08 | 1.35E+08 | + | 0 NA | intron (NLMBA LI    | 23654 NM_17801I   | 347732 Hs. 631804NM_17801E    | ENSG00000CATSPER3  | CACR carotid cprotein-coding       |
| chr10-10 8.196007  | 1.454459 | 0.852246 | 1.706618 | 0.087893 | 0.981636 | chr10 | 1.02E+08 | 1.02E+08 | + | 0 NA | intron (Nintron (N  | 2887 NM_001322    | 4791 Hs. 73090 NM_00250E      | ENSG00000CNFKB2    | CVID10 H2 nuclear fprotein-coding  |
| chr1-1231 36.12926 | 0.756761 | 0.443899 | 1.704806 | 0.088231 | 0.981636 | chr1  | 1.23E+08 | 1.23E+08 | + | 0 NA | IntergeniALR/Alph   | 1588203 NR_00395E | 647121 Hs. 697682NR_00395E    | ENSG00000EMB1      | embigin fpseudo                    |
| chr7-3061 9.62623  | -1.33891 | 0.785531 | -1.70446 | 0.088295 | 0.981636 | chr7  | 30614287 | 30615066 | + | 0 NA | intron (NAluYh3 SI  | 19798 NM_002047   | 2617 Hs. 404321NM_002047      | ENSG00000GARS      | CMT2D DSM glycy1-tfprotein-coding  |
| chr19-19 6.401001  | -1.67684 | 0.983996 | -1.70411 | 0.088361 | 0.981636 | chr19 | 19907795 | 19908024 | + | 0 NA | intron (Nintron (N  | 6963 NM_03121E    | 81931 Hs. 301059NM_03121E     | ENSG00000ZNF93     | HPF34 HTF zinc fingprotein-coding  |
| chr7-593 10.83821  | 1.285295 | 0.754306 | 1.703943 | 0.088392 | 0.981636 | chr7  | 59321009 | 59321546 | + | 0 NA | IntergeniALR/Alph   | 1871000 NM_00115E | 441234 Hs. 533121NM_00115E    | ENSG00000ZNF716    | zinc fingprotein-coding            |
| chr7-116 9.051618  | -1.38859 | 0.815781 | -1.70216 | 0.088725 | 0.981636 | chr7  | 1.17E+08 | 1.17E+08 | + | 0 NA | intron (Nintron (N  | 510 NM_00117E     | 857 Hs. 74034 NM_00175E       | ENSG00000CAV1      | BSC13 GLI caveolin protein-coding  |
| chr7-448 6.898698  | -1.94791 | 1.144485 | -1.702   | 0.088756 | 0.981636 | chr7  | 44882763 | 44883448 | + | 0 NA | 3' UTR (N3' UTR (N  | -1305 NR_039801   | 1.01E+08 NR_039801            | ENSG00000MIR4657   | mir-4657 microRNA ncRNA            |
| chr16-88 5.598246  | -1.81641 | 1.067311 | -1.70186 | 0.088782 | 0.981636 | chr16 | 8887427  | 8887626  | + | 0 NA | Intergeni (GT)n LIN | -18514 NM_00127E  | 23589 Hs. 632184NM_01431E     | ENSG00000CARHSP1   | CRHSP-24 calcium rprotein-coding   |
| chrX-774 5.598246  | -1.81641 | 1.067311 | -1.70186 | 0.088782 | 0.981636 | chrX  | 77645607 | 77646029 | + | 0 NA | intron (NLM4c LI    | 140398 NM_13827E  | 546 Hs. 533521NM_00048E       | ENSG00000CATR      | JMS MRX52 ATR chrprotein-coding    |
| chr17-64 6.359862  | -1.68387 | 0.993536 | -1.70168 | 0.088815 | 0.981636 | chr17 | 64652637 | 64652836 | + | 0 NA | intron (NAluSx1 SI  | 9571 NM_002273E   | 64750 Hs. 515011NM_002273E    | ENSG00000SMURF2    | SMAD specprotein-coding            |
| chr8-664 5.461817  | 1.807573 | 1.062437 | 1.701346 | 0.088878 | 0.981636 | chr8  | 66448695 | 66449303 | + | 0 NA | intron (Nintron (N  | 16495 NM_14465E   | 137872 Hs. 720022NM_14465E    | ENSG00000ADHFE1    | ADH8 HMF1 alcohol cprotein-coding  |
| chr20-62 9.477599  | 1.341688 | 0.78871  | 1.701116 | 0.088921 | 0.981636 | chr20 | 62339742 | 62340049 | + | 0 NA | intron (Nintron (N  | -7338 NR_03991E   | 1.01E+08 NR_03991E            | ENSG00000MIR4758   | microRNA ncRNA                     |
| chr19-48 6.898698  | 1.621269 | 0.953865 | 1.699683 | 0.089191 | 0.981636 | chr19 | 48626257 | 48626501 | + | 0 NA | intron (Nintron (N  | 1350 NM_001204    | 56848 Hs. 528006NM_02012E     | ENSG00000SPHK2     | SK 2 SK-2 sphingosiprotein-coding  |
| chr8-9494 4.743376 | 1.952667 | 1.149667 | 1.698464 | 0.08942  | 0.981636 | chr8  | 94945630 | 94946551 | + | 0 NA | intron (NLM4e LI    | 3288 NM_00113E    | 94241 Hs. 492261NM_03328E     | ENSG00000TP53INP1  | SIP TP53E tumor prprotein-coding   |
| chr19-93 5.469675  | 1.803713 | 1.062125 | 1.698211 | 0.089468 | 0.981636 | chr19 | 9357696  | 9357941  | + | 0 NA | intron (Nintron (N  | -5195 NM_00345E   | 7730 Hs. 728944NM_00345I      | ENSG00000ZNF177    | PIGX zinc fngprotein-coding        |
| chr12-11 7.520556  | 1.513211 | 0.891139 | 1.698063 | 0.089496 | 0.981636 | chr12 | 1.1E+08  | 1.1E+08  | + | 0 NA | intron (NAluSx1 SI  | 49770 NM_17066E   | 488 Hs. 506755NM_00168I       | ENSG00000ATP2A2    | ATP2B DAF ATPase sprotein-coding   |
| chr10-89 5.641236  | -1.7903  | 1.054622 | -1.69757 | 0.089589 | 0.981636 | chr10 | 89760956 | 89763466 | + | 0 NA | intron (NMLT1H1 LI  | 60621 NM_001284   | 9585 Hs. 240 NM_01619E        | ENSG00000KIF20B    | CT90 KRMF kinesin fprotein-coding  |
| chr1-117 4.86309   | -1.96223 | 1.156323 | -1.69696 | 0.089705 | 0.981636 | chr1  | 1.17E+08 | 1.17E+08 | + | 0 NA | intron (Nintron (N  | -6977 NR_03064E   | 1E+08 NR_03064E               | ENSG00000MIR942    | MIRN942 microRNA ncRNA             |
| chr1-205 5.504807  | 1.82376  | 1.075099 | 1.696364 | 0.089817 | 0.981636 | chr1  | 2.05E+08 | 2.05E+08 | + | 0 NA | intron (Nintron (N  | 12700 NM_001331   | 9911 Hs. 6360 NM_01485E       | ENSG00000TMCC2     | HUCEP11 transment protein-coding   |
| chr12-95 6.393143  | -1.67506 | 0.988017 | -1.69537 | 0.090005 | 0.981636 | chr12 | 95775500 | 95775857 | + | 0 NA | intron (NLM4a LI    | 14517 NM_00132E   | 59277 Hs. 201034NM_02122E     | ENSG00000CNTN4     | PRO3091 netrin 4 protein-coding    |
| chr19-24 38.77165  | 0.72194  | 0.426006 | 1.694669 | 0.090138 | 0.981636 | chr19 | 24893005 | 24893298 | + | 0 NA | IntergeniALR/Alph   | -729704 NR_00360E | 1E+08 Hs. 149312NR_00360E     | ENSG00000HAVCRIP1  | hepatitis fpseudo                  |
| chr7-70 7.053064   | -1.61212 | 0.951632 | -1.69406 | 0.090254 | 0.981636 | chr7  | 1.04E+08 | 1.04E+08 | + | 0 NA | intron (NAluJo SIN  | 12427 NM_00255E   | 5001 Hs. 432948NM_00255E      | ENSG00000COC5      | ORC5L ORC origin rprotein-coding   |
| chr14-10 7.512698  | 1.515929 | 0.895159 | 1.693475 | 0.090365 | 0.981636 | chr14 | 1E+08    | 1E+08    | + | 0 NA | exon (NM_exon (NM   | 13606 NM_00135E   | 123096 Hs. 578109NM_15233E    | ENSG00000SLC25A29  | C14orf69 solute cprotein-coding    |
| chr19-26 10.73377  | 1.254869 | 0.741154 | 1.692887 | 0.090477 | 0.981636 | chr19 | 26938609 | 26939623 | + | 0 NA | IntergeniALR/Alph   | -854315 NR_14673E | 1.02E+08 Hs. 567934NR_110687  | ENSG00000LOC101927 | uncharactncRNA                     |
| chr3-123 4.930468  | -1.93785 | 1.145201 | -1.69215 | 0.090618 | 0.981636 | chr3  | 1.24E+08 | 1.24E+08 | + | 0 NA | intron (NFLAM_A SI  | 28517 NM_00132E   | 201562 Hs. 705488NM_19840E    | ENSG00000HACD2     | PTPLB 3-hydroxyprotein-coding      |
| chr5-15 7.024935   | 2.165878 | 1.280023 | 1.692061 | 0.090634 | 0.981636 | chr5  | 1.57E+08 | 1.57E+08 | + | 0 NA | intron (Nintron (N  | 21577 NM_00100I   | 408263 Hs. 437066NM_00100I    | ENSG00000FNDC9     | C5orf40 fibronectprotein-coding    |
| chr11-62 8.170584  | 1.450115 | 0.857082 | 1.691921 | 0.090661 | 0.981636 | chr11 | 62677167 | 62677666 | + | 0 NA | intron (Nintron (N  | 1657 NM_00128E    | 51035 Hs. 35129E NM_01585E    | ENSG00000UBXN1     | 2B28 SARX UBX domaiprotein-coding  |
| chr19-36 8.170584  | 1.450115 | 0.857082 | 1.691921 | 0.090661 | 0.981636 | chr19 | 36359663 | 36360256 | + | 0 NA | intron (NLM5 LINE   | 19242 NM_020917   | 57677 Hs. 35524 NM_020917     | ENSG00000ZFP14     | ZNF531 ZFP14 xzprotein-coding      |
| chr1-151 5.479383  | 1.817628 | 1.075059 | 1.690724 | 0.090889 | 0.981636 | chr1  | 1.51E+08 | 1.51E+08 | + | 0 NA | intron (Nintron (N  | 13217 NR_13013E   | 58497 Hs. 78524 NM_02122E     | ENSG00000PRUNE1    | DRES-17 lprune excprotein-coding   |
| chr19-36 6.922273  | 1.612024 | 0.953699 | 1.690286 | 0.090973 | 0.981636 | chr19 | 36615931 | 36616363 | + | 0 NA | intron (NAluJr SIN  | 10834 NM_03282E   | 84911 Hs. 631591NM_03282E     | ENSG00000ZNF382    | KS1 zinc fingprotein-coding        |
| chr2-423 9.04376   | -1.3874  | 0.820954 | -1.68998 | 0.091031 | 0.981636 | chr2  | 42320134 | 42320392 | + | 0 NA | intron (NFLAM_C SI  | 39775 NR_13494E   | 9167 Hs. 33963E NM_00471E     | ENSG00000COX7A2L   | COX7AR CC cytochroprotein-coding   |
| chr19-19 7.006402  | 1.623867 | 0.961043 | 1.689693 | 0.091087 | 0.981636 | chr19 | 1987070  | 1987293  | + | 0 NA | exon (NM_exon (NM   | 28533 NM_017797   | 55643 Hs. 46554E NM_017797    | ENSG00000BTBD2     | BTB domaiprotein-coding            |
| chr1-230 6.162692  | 1.692962 | 1.002995 | 1.687906 | 0.091429 | 0.981636 | chr1  | 2.3E+08  | 2.3E+08  | + | 0 NA | intron (Nintron (N  | 179044 NM_00448I  | 2590 Hs. 743964NM_00448I      | ENSG00000GALNT2    | GalNAc-T2 polypept protein-coding  |
| chr19-32 7.528414  | 1.510556 | 0.895171 | 1.68745  | 0.091517 | 0.981636 | chr19 | 32639005 | 32639464 | + | 0 NA | intron (Nintron (N  | -30765 NR_14571E  | 1.1E+08 NR_14571E             | ENSG00000SNORA68B  | small nucsnoRNA                    |
| chr19-36 7.528414  | 1.510556 | 0.895171 | 1.68745  | 0.091517 | 0.981636 | chr19 | 36862773 | 36864054 | + | 0 NA | intron (NERVL-E ir  | 11762 NM_00124E   | 25850 Hs. 362324NM_00341E     | ENSG00000ZNF345    | HZF10 zinc fngprotein-coding       |
| chr10-10 4.92261   | -1.93569 | 1.147114 | -1.68744 | 0.091518 | 0.981636 | chr10 | 1.02E+08 | 1.02E+08 | + | 0 NA | IntergeniAluSx1 SI  | 17096 NM_00389E   | 8861 Hs. 45441E NM_00389E     | ENSG00000LDB1      | CLIM-2 CLIM domaiprotein-coding    |
| chr19-78 4.717952  | 1.945781 | 1.153801 | 1.686409 | 0.091717 | 0.981636 | chr19 | 7858623  | 7859453  | + | 0 NA | intron (NAluSx SIN  | 15352 NM_00119C   | 80164 Hs. 28854CNM_00108E     | ENSG00000PRR36     | proline rprotein-coding            |
| chr11-27 3.999511  | 2.17916  | 1.280524 | 1.685181 | 0.091954 | 0.981636 | chr11 | 27541270 | 27542402 | + | 0 NA | intron (NLM9A LI    | -17005 NR_107054  | 1.02E+08 NR_107054            | ENSG00000MIR8087   | hsa-mir-5microRNA ncRNA            |
| chr17-50 6.254679  | 1.702463 | 1.010535 | 1.684714 | 0.092044 | 0.981636 | chr17 | 50115680 | 50115942 | + | 0 NA | intron (Nintron (N  | 14349 NM_17492C   | 201191 Hs. 567766NM_17492C    | ENSG00000SAMD14    | sterile eprotein-coding            |
| chr1-73 7.46185    | 1.506628 | 0.844394 | 1.684524 | 0.092081 | 0.981636 | chr1  | 2.31E+08 | 2.31E+08 | + | 0 NA | intron (NLM4e LI    | 45221 NR_110681   | 1.02E+08 Hs. 63892E NR_110681 | ENSG00000LOC101927 | uncharactncRNA                     |
| chr13-29 8.366273  | -1.42133 |          |          |          |          |       |          |          |   |      |                     |                   |                               |                    |                                    |

|                     |           |          |           |          |          |       |          |           |   |    |                     |          |           |          |           |           |           |           |                 |                              |                          |                         |
|---------------------|-----------|----------|-----------|----------|----------|-------|----------|-----------|---|----|---------------------|----------|-----------|----------|-----------|-----------|-----------|-----------|-----------------|------------------------------|--------------------------|-------------------------|
| chr2-189f.6.733702  | 1.55403   | 0.950794 | 1.634456  | 0.102163 | 0.981636 | chr2  | 1.9E+08  | 1.9E+08   | 0 | NA | intron (Nintron (N  | 6539     | NM_01458E | 30061    | Hs.64300E | NM_01458E | ENSG00000 | SLC40A1   | FPN1 HFE4       | solute cation protein-coding |                          |                         |
| chr1-149c.6.01711   | 1.643254  | 1.005864 | 1.633674  | 0.102327 | 0.981636 | chr1  | 1.49E+08 | 1.49E+08  | 0 | NA | 3' UTR (N3' UTR (N  | 49952    | NM_001277 | 400818   | Hs.44508C | NM_001037 | ENSG00000 | NBP9      | AE01            | NBP9 mem protein-coding      |                          |                         |
| chr2-134f.6.143832  | -1.61575  | 0.989568 | -1.63279  | 0.102514 | 0.981636 | chr2  | 1.35E+08 | 1.35E+08  | 0 | NA | intron (NAluJb SIN  | 24453    | NM_001241 | 905      | Hs.74411E | NM_001241 | ENSG00000 | CCNT2     | CYCT2           | cyclin T2 protein-coding     |                          |                         |
| chr1-108f.6.118408  | -1.62629  | 0.996023 | -1.63278  | 0.102515 | 0.981636 | chr1  | 1.09E+08 | 1.09E+08  | 0 | NA | 3' UTR (N3' UTR (N  | 9432     | NM_00134E | 55119    | Hs.342307 | NM_018061 | ENSG00000 | PRPF38B   | NET1            | pre-mRNA protein-coding      |                          |                         |
| chr19-52f.7.982012  | 1.399349  | 0.857618 | 1.631668  | 0.102749 | 0.981636 | chr19 | 52150911 | 52512607  | 0 | NA | exon (NM exon (NM   | -15897   | NM_001321 | 388558   | Hs.729294 | NM_00103E | ENSG00000 | ZNF808    |                 | zinc finger protein-coding   |                          |                         |
| chr2-203f.7.982012  | 1.399349  | 0.857618 | 1.631668  | 0.102749 | 0.981636 | chr2  | 2.03E+08 | 2.03E+08  | 0 | NA | intron (Nintron (N  | -108131  | NM_17753E | 57404    | Hs.44606E | NM_020674 | ENSG00000 | CYP20A1   | CYP-M           | cytochrome protein-coding    |                          |                         |
| chr5-494f.5.18549   | 0.632789  | 0.387885 | 1.631384  | 0.102809 | 0.981636 | chr5  | 49465510 | 49466309  | 0 | NA | IntergeniALR/Alpha  | 975514   | NM_19844E | 133418   | Hs.561411 | NM_19844E | ENSG00000 | EMB       | GP70            | emigin protein-coding        |                          |                         |
| chr8-852f.6.135974  | -1.617403 | 0.989496 | -1.631164 | 0.102857 | 0.981636 | chr8  | 85213831 | 85213831  | 0 | NA | TTS (NM_C TTS (NM_C | 6665     | NR_120681 | 401466   | Hs.44307E | NM_00109E | ENSG00000 | CRB1S     | C8orf59         | ribosomal protein-coding     |                          |                         |
| chr1-702f.6.11055   | -1.62455  | 0.995953 | -1.63115  | 0.102859 | 0.981636 | chr1  | 70225689 | 70225943  | 0 | NA | intron (Nintron (N  | 4436     | NM_00135E | 9295     | Hs.47969E | NM_00476E | ENSG00000 | SRSP11    | NET2 SFRS       | serine ar protein-coding     |                          |                         |
| chr1-227f.7.816629  | 1.603181  | 0.83409  | 1.6309    | 0.102911 | 0.981636 | chr1  | 1.28E+08 | 1.28E+08  | 0 | NA | 3' UTR (N3' UTR (N  | -2762    | NM_00132E | 116841   | Hs.325081 | NM_05305E | ENSG00000 | SNAP47    | Clorf142        | synaptos protein-coding      |                          |                         |
| chr1-124f.54.80824  | 0.631841  | 0.387515 | 1.630495  | 0.102997 | 0.981636 | chr1  | 1.25E+08 | 1.25E+08  | 0 | NA | IntergeniALR/Alpha  | 3215871  | NR_00395E | 647121   | Hs.69768E | NR_00395E | ENSG00000 | EMB1P     |                 | emigin pseudo                |                          |                         |
| chr1-155f.4.784516  | 1.949815  | 1.196512 | 1.629583  | 0.10319  | 0.981636 | chr1  | 1.55E+08 | 1.55E+08  | 0 | NA | exon (NM exon (NM   | 2867     | NR_030281 | 693235   | NR_030281 | ENSG00000 | MIR92B    | MIRN92B   | microRNA ncRNA  |                              |                          |                         |
| chr19-36f.5.974121  | 1.628467  | 0.999345 | 1.629535  | 0.1032   | 0.981636 | chr19 | 21765    | NM_00136E | 0 | NA | IntergeniAluSj SIN  | 164312   | HS.412517 | 15260E   | ENSG00000 | ZNF567    |           |           |                 | zinc finger protein-coding   |                          |                         |
| chr20-60f.6.821318  | -1.54712  | 0.950595 | -1.62752  | 0.103626 | 0.981636 | chr20 | 6034450  | 6034728   | 0 | NA | intron (Nintron (N  | 19471    | NM_152611 | 164312   | HS.412517 | 15261E    | ENSG00000 | LRRN4     | C20orf75        | leucine r protein-coding     |                          |                         |
| chr2-112f.7.179191  | -2.41025  | 1.481887 | -1.62647  | 0.103849 | 0.981636 | chr2  | 1.13E+08 | 1.13E+08  | 0 | NA | intron (Nintron (N  | 20576    | NM_001304 | 150468   | HS.43425E | NM_15251E | ENSG00000 | CKAP2L    |                 |                              | cytoskel protein-coding  |                         |
| chr6-437f.6.102692  | -1.62286  | 0.998837 | -1.62475  | 0.104217 | 0.981636 | chr6  | 43772255 | 43772666  | 0 | NA | intron (Nintron (N  | 492      | NM_001287 | 7422     | HS.73793  | NM_00337E | ENSG00000 | VEGFA     | MVCD1 VEF       | vascular protein-coding      |                          |                         |
| chr14-10f.6.007403  | 1.630718  | 1.003764 | 1.624603  | 0.104247 | 0.981636 | chr14 | 1.03E+08 | 1.03E+08  | 0 | NA | intron (NMIRb SINE  | 7728     | NM_006291 | 7127     | HS.525607 | NM_006291 | ENSG00000 | TNFAIP2   | B94 ELOC3       | TNF alpha protein-coding     |                          |                         |
| chr1-252f.7.434577  | 1.488718  | 0.91645  | 1.624439  | 0.104282 | 0.981636 | chr1  | 25262846 | 25263045  | 0 | NA | intron (NMLT2B3 LI  | 4980     | NR_135777 | 57035    | HS.25941E | NM_02031E | ENSG00000 | SRSP1     | Clorf60C        | arginine protein-coding      |                          |                         |
| chr1-550f.5.966263  | 1.631867  | 1.005529 | 1.622894  | 0.104612 | 0.981636 | chr1  | 55087814 | 55088152  | 0 | NA | intron (NLT2b LINE  | 47761    | NR_110451 | 255738   | HS.18844  | NM_17493E | ENSG00000 | PCSK9     | FH3 HCHO1       | proprate protein-coding      |                          |                         |
| chr3-184f.5.966263  | 1.631867  | 1.005529 | 1.622894  | 0.104612 | 0.981636 | chr3  | 1.84E+08 | 1.84E+08  | 0 | NA | intron (Nintron (N  | 5617     | NM_003907 | 8893     | HS.283551 | NM_003907 | ENSG00000 | EIF2B5    | CACH CLE        | eukaryoti protein-coding     |                          |                         |
| chr11-86f.6.708278  | 1.5488    | 0.954692 | 1.622304  | 0.104738 | 0.981636 | chr11 | 8623947  | 8624909   | 0 | NA | exon (NM exon (NM   | -30200   | NM_00128E | 65975    | HS.50183E | NM_03090E | ENSG00000 | STK33     |                 |                              | serine/t protein-coding  |                         |
| chr10-404f.32.87888 | 0.799561  | 0.492973 | 1.621916  | 0.104821 | 0.981636 | chr10 | 40462784 | 40463063  | 0 | NA | IntergeniALR/Alpha  | 1766327  | NR_04500C | 399746   | HS.742607 | NR_045000 | ACTR3BP5  | FKSG74    | ACTR3B          | ps pseudo                    |                          |                         |
| chr14-30f.6.838884  | -1.53598  | 0.948125 | -1.62002  | 0.105228 | 0.981636 | chr14 | 30680776 | 30681209  | 0 | NA | intron (NAluSv6 SI  | 58673    | NM_01610E | 23256    | HS.36916E | NM_01610E | ENSG00000 | SCFD1     | C14orf16C       | secl fami protein-coding     |                          |                         |
| chr7-102f.6.838884  | -1.53598  | 0.948125 | -1.62002  | 0.105228 | 0.981636 | chr7  | 1.03E+08 | 1.03E+08  | 0 | NA | intron (NAluSx SIN  | 2642     | NM_03295E | 246721   | HS.61025E | NM_03295E | ENSG00000 | POLR2J2   | HRPB11B FRNA    | polyn protein-coding         |                          |                         |
| chr13-11f.9.238181  | 1.289096  | 0.795786 | 1.619904  | 0.105253 | 0.981636 | chr13 | 1.13E+08 | 1.13E+08  | 0 | NA | intron (Nintron (N  | -4013    | NR_10704E | 1.02E+08 | NR_10704E | ENSG00000 | MIR8075   |           |                 |                              | hsa-mir-ε microRNA ncRNA |                         |
| chr16-19f.5.384066  | -1.72259  | 1.063731 | -1.61930  | 0.105364 | 0.981636 | chr16 | 69002932 | 69003441  | 0 | NA | intron (NHERV35 I   | -102467  | NM_00119E | 3038     | HS.59206E | NM_00532E | ENSG00000 | HAS3      |                 |                              |                          | hyaluron protein-coding |
| chr18-17f.10.48649  | 1.209311  | 0.747367 | 1.618095  | 0.105642 | 0.981636 | chr18 | 10755628 | 10756081  | 0 | NA | IntergeniALR/Alpha  | -1729935 | NR_027417 | 644669   | HS.579474 | NR_027417 | ENSG00000 | LOC64466E |                 |                              |                          | ankyrin r pseudo        |
| chr12-98f.7.530237  | -1.4999   | 0.927085 | -1.61787  | 0.105691 | 0.981636 | chr12 | 9856952  | 9857167   | 0 | NA | intron (NLT2c LINE  | 12800    | NM_005127 | 9976     | HS.85201  | NM_005127 | ENSG00000 | CLEC2B    | A1CL CLEC       | C-type I protein-coding      |                          |                         |
| chr1-214f.3.171333  | -2.40717  | 1.488649 | -1.61701  | 0.105875 | 0.981636 | chr1  | 2.15E+08 | 2.15E+08  | 0 | NA | intron (Nintron (N  | 19442    | NM_01634E | 1063     | HS.497741 | NM_01634E | ENSG00000 | CENPF     | CENF CILI       | centromer protein-coding     |                          |                         |
| chr15-89f.3.171333  | -2.40717  | 1.488649 | -1.61701  | 0.105875 | 0.981636 | chr15 | 89594806 | 89597651  | 0 | NA | intron (NLM5 LINE   | 20641    | NM_00130E | 90381    | HS.44170E | NM_15225E | ENSG00000 | TICRR     | C15orf42 TOPBP1 | r protein-coding             |                          |                         |
| chr1-856f.8.878577  | -1.32328  | 0.818435 | -1.61684  | 0.105912 | 0.981636 | chr1  | 85653059 | 85653491  | 0 | NA | 3' UTR (N3' UTR (N  | 55158    | NM_00117C | 54680    | HS.5111   | NM_01795E | ENSG00000 | ZNHIT6    | BCD1 Clor       | zinc finger protein-coding   |                          |                         |
| chr13-32f.5.981979  | 1.625018  | 1.005193 | 1.616623  | 0.10596  | 0.981636 | chr13 | 32671213 | 32674133  | 0 | NA | intron (NMLT1C LIT  | 135539   | NM_023037 | 10129    | HS.50766E | NM_023037 | ENSG00000 | FRY       | 13CDNA73 FRY    | micro protein-coding         |                          |                         |
| chr19-13f.5.981979  | 1.625018  | 1.005193 | 1.616623  | 0.10596  | 0.981636 | chr19 | 13969844 | 13970056  | 0 | NA | intron (Nintron (N  | -16558   | NM_00114E | 79883    | HS.44849E | NM_02482E | ENSG00000 | PODNL1    | SLRR5B          | podocan r protein-coding     |                          |                         |
| chr19-36f.5.981979  | 1.625018  | 1.005193 | 1.616623  | 0.10596  | 0.981636 | chr19 | 36809977 | 36811092  | 0 | NA | intron (Nintron (N  | 12971    | NR_04002E | 284408   | HS.57001E | NR_04002E | ENSG00000 | ZNF790-AS |                 |                              |                          | ZNF790 ar ncRNA         |
| chr9-987f.5.981979  | 1.625018  | 1.005193 | 1.616623  | 0.10596  | 0.981636 | chr9  | 98772749 | 98773144  | 0 | NA | intron (NLT2c LINE  | 23609    | NM_173551 | 203286   | HS.40689E | NM_173551 | ENSG00000 | ANKS6     | ANKRD14         | ankyrin r protein-coding     |                          |                         |
| chr19-12f.9.212757  | 1.285202  | 0.796187 | 1.614196  | 0.106485 | 0.981636 | chr19 | 12763201 | 12763738  | 0 | NA | intron (Nintron (N  | 11678    | NM_01768E | 54381    | HS.43561E | NM_01768E | ENSG00000 | BEST2     | VMD2L1          | bestrophin protein-coding    |                          |                         |
| chr3-132f.6.094834  | -1.6212   | 1.004778 | -1.61349  | 0.106639 | 0.981636 | chr3  | 1.33E+08 | 1.33E+08  | 0 | NA | TTS (NM_C TTS (NM_C | 19023    | NM_001321 | 79876    | HS.170737 | NM_02481E | ENSG00000 | CUBA5     | EIEE44 SC       | ubiquitin r protein-coding   |                          |                         |
| chr11-28f.6.120258  | -1.6105   | 0.998214 | -1.61339  | 0.106661 | 0.981636 | chr11 | 28062023 | 28061887  | 0 | NA | intron (NME68 LIT   | 4260     | NR_030341 | 693195   | NR_030341 | ENSG00000 | MIR610    | MIRN610   | microRNA ncRNA  |                              |                          |                         |
| chr10-14f.6.929021  | -1.52491  | 0.945194 | -1.61333  | 0.106673 | 0.981636 | chr10 | 14533985 | 14534695  | 0 | NA | intron (Nintron (N  | -1626    | NM_00132C | 83641    | HS.44631E | NM_03145E | ENSG00000 | FAM107B   | C10orf45        | family w protein-coding      |                          |                         |
| chr12-50f.6.169256  | -1.60515  | 0.994952 | -1.6133   | 0.10668  | 0.981636 | chr12 | 50461612 | 50461866  | 0 | NA | TTS (NM_C TTS (NM_C | 5168     | NR_13275E | 1.07E+08 | NR_13275E | SNORD133  |           |           |                 |                              | ZL142 ZL4                | small nucsnoRNA         |
| chr11-64f.5.376208  | -1.72068  | 1.067166 | -1.61238  | 0.10688  | 0.981636 | chr11 | 64762505 | 64763414  | 0 | NA | Intergeni Intergeni | -824     | NM_001164 | 5837     | HS.154084 | NM_00560E | ENSG00000 | PYGM      |                 |                              |                          | glycogen protein-coding |
| chr17-77f.5.376208  | -1.72068  | 1.067166 | -1.61238  | 0.10688  | 0.981636 | chr17 | 77405653 | 77406105  | 0 | NA | intron (Nintron (N  | 2024     | NM_00129E | 10801    | HS.44093E | NM_00664E | ENSG00000 | SEPTIN9   | AF17q25 SEPTIN9 | protein-coding               |                          |                         |
| chr2-365f.5.376208  | -1.72068  | 1.067166 | -1.61238  | 0.10688  | 0.981636 | chr2  | 36553431 | 36553842  | 0 | NA | intron (Nintron (N  | 44532    | NM_00104E | 9637     | HS.25856E | NM_00510E | ENSG00000 | FEZ2      | HUM3CL          | fascicul protein-coding      |                          |                         |
| chr3-187f.5.376208  | -1.72068  | 1.067166 | -1.61238  | 0.10688  | 0.981636 | chr3  | 1.87E+08 | 1.87E+08  | 0 | NA | intron (NLT2a LINE  | -15091   | NR_135551 | 1.02E+08 | NR_135551 | ENSG00000 | LOC10192E |           |                 |                              | uncharact ncRNA          |                         |
| chr8-254f.5.376208  | -1.72068  | 1.067166 | -1.61238  | 0.10688  | 0.981636 | chr8  | 25483899 | 25485067  | 0 | NA | intron (NLM5 LINE   | 25250    | NM_15256E | 157313   | HS.33366  | NM_15256E | ENSG00000 | CDC42     | PPP1R81 Fcell   | divi protein-coding          |                          |                         |
| chr12-98f.6.161398  | -1.60342  | 0.994881 | -1.61167  | 0.107034 | 0.981636 | chr12 | 9855176  | 9855633   | 0 | NA | intron (Nintron (N  | 14455    | NM_005127 |          |           |           |           |           |                 |                              |                          |                         |



|                     |          |          |          |          |          |       |          |          |   |      |                     |                    |                                  |                                   |                                    |
|---------------------|----------|----------|----------|----------|----------|-------|----------|----------|---|------|---------------------|--------------------|----------------------------------|-----------------------------------|------------------------------------|
| chr2-4756 5.393774  | -1.7064  | 1.073191 | -1.59002 | 0.11183  | 0.981636 | chr2  | 45388192 | 45388391 | + | 0 NA | TTS (NM_C/TTS (NM_C | -133520 NR_033831  | 400952 Hs. 468368 NR_033831      | ENSG000001LINC01121UNQ6975        | long intencRNA                     |
| chr3-1604 5.393774  | -1.7064  | 1.073191 | -1.59002 | 0.11183  | 0.981636 | chr3  | 1.6E+08  | 1.6E+08  | + | 0 NA | intron (Nintron (N  | 8184 NR_029525     | 406951 NR_029525                 | ENSG000001MIR16-2                 | MIRN16-2 microRNA ncRNA            |
| chr7-1301 5.393774  | -1.7064  | 1.073191 | -1.59002 | 0.11183  | 0.981636 | chr7  | 1.3E+08  | 1.3E+08  | + | 0 NA | TTS (NM_C/TTS (NM_C | 22994 NR_149034    | 1E+08 Hs. 105944 NR_149034       | ENSG000001CLOC100128-             | uncharactncRNA                     |
| chr1-152 7.238148   | 1.436319 | 0.903668 | 1.589433 | 0.119663 | 0.981636 | chr1  | 152219   | 1523222  | + | 0 NA | intron (NCPg-113    | 10490 NM_001177    | 55210 Hs. 23413 NM_018188        | ENSG000001ATAD3                   | HAYOS ATPase fε protein-coding     |
| chr9-1108 8.110954  | -1.36024 | 0.855831 | -1.58938 | 0.11974  | 0.981636 | chr9  | 1.11E+08 | 1.11E+08 | + | 0 NA | intron (NAluY SINE  | 147624 NM_001351   | 1902 Hs. 126667 NM_001401        | ENSG000001LPAR1                   | EDG2 GPR2 lysophosf protein-coding |
| chr15-307 3.204615  | -2.38579 | 1.50179  | -1.58863 | 0.112144 | 0.981636 | chr15 | 30755863 | 30756600 | + | 0 NA | intron (Nintron (N  | -61805 NR_072991   | 390561 Hs. 72129 NR_072991       | HERC2P10                          | hect domε pseudo                   |
| chr13-95 8.911859   | -1.31719 | 0.829229 | -1.58845 | 0.112184 | 0.981636 | chr13 | 95061382 | 95061581 | + | 0 NA | intron (Nintron (N  | 101440 NR_047487   | 1.01E+08 Hs. 48706 NR_047487     | ENSG000001LINC00557-              | long intencRNA                     |
| chr6-5875 116.4778  | 0.518456 | 0.326422 | 1.588299 | 0.112219 | 0.981636 | chr6  | 58793454 | 58793676 | + | 0 NA | IntergeniALR/Alphe  | -832119 NR_132994  | 1.07E+08 Hs. 561535 NR_125727    | ENSG000001LINC00687-              | long intencRNA                     |
| chr10-88 4.641867   | -1.85335 | 1.167053 | -1.58806 | 0.112273 | 0.981636 | chr10 | 88928240 | 88929609 | + | 0 NA | IntergeniIntergeni  | -3760 NR_125373    | 1E+08 NR_125373                  | ENSG000001ACTA2-AS1UC001kfo ACTA2 | antncRNA                           |
| chr5-388 4.641867   | -1.85335 | 1.167053 | -1.58806 | 0.112273 | 0.981636 | chr5  | 38838907 | 38839289 | + | 0 NA | intron (NLMER1 LIN  | 6731 NR_109951     | 1.02E+08 Hs. 546623 NR_109951    | OSMR-AS1                          | CTD-2127 OSMR antncRNA             |
| chr9-553 4.641867   | -1.85335 | 1.167053 | -1.58806 | 0.112273 | 0.981636 | chr9  | 5535098  | 5535799  | + | 0 NA | intron (NLMER112 DN | 24913 NM_025235    | 80380 Hs. 532275 NM_025235       | ENSG000001PDCD1L G2               | B7DC Btdc program protein-coding   |
| chr2-233 3.889959   | -2.07027 | 1.304317 | -1.58724 | 0.112458 | 0.981636 | chr2  | 2.34E+08 | 2.34E+08 | + | 0 NA | intron (Nintron (N  | 6894 NM_01841C     | 55355 Hs. 532968 NM_01841C       | ENSG000001HJURP                   | FAKTS URI Holliday protein-coding  |
| chr4-8405 5.196975  | 1.716393 | 1.081496 | 1.587054 | 0.1125   | 0.981636 | chr4  | 8409273  | 8409472  | + | 0 NA | intron (Nintron (N  | 31351 NM_003501    | 8310 Hs. 479122 NM_003501        | ENSG000001ACOX3                   | acyl-CoA protein-coding            |
| chr5-45 6.41867     | -1.85335 | 1.167053 | -1.58806 | 0.112273 | 0.981636 | chr5  | 47450769 | 47451138 | + | 0 NA | IntergeniALR/Alphe  | -1754573 NM_021072 | 348980 Hs. 353172 NM_021072      | ENSG000001HCN1                    | BCNG-1 BC hyperpolε protein-coding |
| chr13-75 4.683006   | -1.84317 | 1.162939 | -1.58493 | 0.112983 | 0.981636 | chr13 | 75691825 | 75693003 | + | 0 NA | intron (NAluJr SIN  | 56084 NM_00130E    | 4008 Hs. 207631 NM_00535E        | ENSG000001LM07                    | FBX20 FBX LIM domai protein-coding |
| chr6-972 4.683006   | -1.84317 | 1.162939 | -1.58493 | 0.112983 | 0.981636 | chr6  | 97268070 | 97268765 | + | 0 NA | intron (NAluYf1 SI  | 14799 NM_00135C    | 253714 Hs. 444292 NM_19846E      | ENSG000001MMS22L                  | G6orf167 MMS22 lik protein-coding  |
| chr8-12 4.683006    | -1.84317 | 1.162939 | -1.58493 | 0.112983 | 0.981636 | chr8  | 1.23E+08 | 1.23E+08 | + | 0 NA | intron (Nintron (N  | -8094 NR_03038E    | 693130 NR_03038E                 | ENSG000001MIR548D1                | MIRN548D1 microRNA ncRNA           |
| chr19-36 8.486458   | 1.312155 | 0.82792  | 1.584881 | 0.112993 | 0.981636 | chr19 | 36995858 | 36998082 | + | 0 NA | exon (NM exon (NM   | 80638 NM_001204    | 734900 Hs. 404222 NM_19853E      | ENSG000001ZNF568                  | ZFP568 zinc fing protein-coding    |
| chr12-117 5.931132  | 1.613317 | 1.018076 | 1.584672 | 0.113041 | 0.981636 | chr12 | 1.17E+08 | 1.17E+08 | + | 0 NA | intron (NAluSz SIN  | 33297 NM_015002    | 23014 Hs. 74037E NM_015002       | ENSG000001FBX021                  | FBX21 F-box prc protein-coding     |
| chr2-157 5.204833   | 1.712409 | 1.081169 | 1.583849 | 0.113228 | 0.981636 | chr2  | 1.57E+08 | 1.57E+08 | + | 0 NA | intron (Nintron (N  | 3598 NM_00132E     | 11227 Hs. 269027 NM_01456E       | ENSG000001GALNT5                  | GALNAC-Tε polypepti protein-coding |
| chr1-171 10.42594   | 1.195103 | 0.755044 | 1.582826 | 0.113461 | 0.981636 | chr1  | 1.72E+08 | 1.72E+08 | + | 0 NA | 3' UTR (N3' UTR (N  | 37871 NR_003704    | 8674 Hs. 6651 NM_00376E          | ENSG000001VAMP4                   | VAMP-4 Vvesicle ε protein-coding   |
| chr21-63 10.06051   | -1.2207  | 0.771365 | -1.58251 | 0.113533 | 0.981636 | chr21 | 6331889  | 6333916  | + | 0 NA | IntergeniAluSc SIN  | -65566 NM_001322   | 1.03E+08 Hs. 743984 NM_001322044 | LOC102724-                        | uncharact protein-coding           |
| chr19-397 7.357196  | -1.42117 | 0.898125 | -1.58237 | 0.113565 | 0.981636 | chr19 | 3973073  | 3973708  | + | 0 NA | IntergeniAluSx1 SI  | -2291 NM_00134E    | 1613 Hs. 631844 NM_00134E        | ENSG000001DAPK3                   | DLK ZIP Zdeath ass protein-coding  |
| chr11-94 10.51007   | 1.20382  | 0.76114  | 1.581601 | 0.113741 | 0.981636 | chr11 | 94235881 | 94237578 | + | 0 NA | IntergeniL1P2 LIN   | -68908 NM_00119E   | 390243 Hs. 55375E NM_00108C      | ENSG000001IZUMO1R                 | FOLR4 FolIZUMO1 re protein-coding  |
| chr19-47 5.989837   | 1.621239 | 1.02514  | 1.581481 | 0.113768 | 0.981636 | chr19 | 47488426 | 47488834 | + | 0 NA | intron (Nintron (N  | 4348 NR_03845E     | 1.01E+08 Hs. 65732E NR_03845E    | ENSG000001NAPA-AS1                | NAPA antncRNA                      |
| chr12-504 7.374762  | -1.41125 | 0.892731 | -1.58082 | 0.113919 | 0.981636 | chr12 | 50416496 | 50416844 | + | 0 NA | intron (NAluJb SIN  | 15260 NM_00135E    | 113251 Hs. 26613 NM_05287E       | ENSG000001CLARP4                  | PP1296 La ribon protein-coding     |
| chr11-8507 4.478534 | 1.849233 | 1.169944 | 1.580616 | 0.113966 | 0.981636 | chr11 | 85074850 | 85075112 | + | 0 NA | intron (NLa2 LINE   | 12657 NM_14517E    | 126820 Hs. 97933 NM_14517E       | ENSG000001WDR63                   | DIC3 NYD-WD repeat protein-coding  |
| chr17-57 4.478534   | 1.849233 | 1.169944 | 1.580616 | 0.113966 | 0.981636 | chr17 | 57310649 | 57311380 | + | 0 NA | intron (NMLRb SINE  | 53995 NM_170721    | 124540 Hs. 658922 NM_13896E      | ENSG000001MSI2                    | MSI2H musashi f protein-coding     |
| chr17-27 6.716136   | 1.545183 | 0.977624 | 1.580549 | 0.113981 | 0.981636 | chr17 | 27594905 | 27595126 | + | 0 NA | intron (Nintron (N  | -36173 NM_00230E   | 3965 Hs. 81337 NM_00230E         | ENSG000001GLALS9                  | HUAT Lgal galactin protein-coding  |
| chr2-885 9.253897   | 1.284799 | 0.812889 | 1.580534 | 0.113985 | 0.981636 | chr2  | 88585240 | 88586032 | + | 0 NA | intron (NLa2-3_Crp  | 32993 NM_00131E    | 9451 Hs. 59158E NM_00483E        | ENSG000001EIF2AK3                 | PEK PERK eukaryoti protein-coding  |
| chr3-142 7.212724   | 1.431451 | 0.905859 | 1.580213 | 0.114058 | 0.981636 | chr3  | 1.42E+08 | 1.42E+08 | + | 0 NA | intron (Nintron (N  | 18014 NM_00128E    | 54464 Hs. 43510E NM_019001       | ENSG000001CXRN1                   | 1-Sep 5'-3' exc protein-coding     |
| chr8-143 7.212724   | 1.431451 | 0.905859 | 1.580213 | 0.114058 | 0.981636 | chr8  | 1.43E+08 | 1.43E+08 | + | 0 NA | intron (NMSTA-int   | -18487 NM_20158E   | 389692 NM_20158E                 | ENSG000001MAFA                    | INSDM RTF maf Z1P protein-coding   |
| chr8-94 7.38262     | -1.41273 | 0.894032 | -1.58017 | 0.114067 | 0.981636 | chr8  | 94769786 | 94770110 | + | 0 NA | intron (NAluSz SIN  | 50048 NM_181787    | 286148 Hs. 56782E NM_181787      | ENSG000001DPY19L4                 | PAP-1 PGI pyrogluta protein-coding |
| chr19-197 5.263538  | 1.721195 | 1.089482 | 1.579829 | 0.114146 | 0.981636 | chr19 | 19703805 | 19704852 | + | 0 NA | IntergeniAluSz SIN  | 28784 NM_02103C    | 7561 Hs. 65993E NM_02103C        | ENSG000001ZNF14                   | GIOT-4 KC zinc fing protein-coding |
| chr8-123 8.107254   | -1.38428 | 0.876394 | -1.57952 | 0.114217 | 0.981636 | chr8  | 1.23E+08 | 1.23E+08 | + | 0 NA | intron (NAluS6 SI   | -12992 NR_03038E   | 693130 NR_03038E                 | ENSG000001MIR548D1                | MIRN548D1 microRNA ncRNA           |
| chr19-18 4.4961     | 1.861309 | 1.178634 | 1.579209 | 0.114288 | 0.981636 | chr19 | 18353281 | 18353709 | + | 0 NA | intron (NAluJb SIN  | 12897 NM_00132E    | 54858 Hs. 13177E NM_01771E       | ENSG000001PGPEP1                  | PAP-1 PGI pyrogluta protein-coding |
| chr20-28 10.9988    | 1.152018 | 0.729793 | 1.578555 | 0.114438 | 0.981636 | chr20 | 28525634 | 28526317 | + | 0 NA | IntergeniALR/Alphe  | 76690 NR_13231E    | 1E+08 Hs. 529357 NR_13231E       | ENSG000001FRG1CP                  | FSHD regipseudo                    |
| chr11-439 7.365054  | -1.42272 | 0.901826 | -1.57776 | 0.114656 | 0.981636 | chr11 | 43929915 | 43930341 | + | 0 NA | intron (Nintron (N  | -3192 NM_05709E    | 9048 Hs. 632404 NM_00397E        | ENSG000001ARTN                    | ART ENOV artemin protein-coding    |
| chr10-141 65.69286  | 0.596608 | 0.377846 | 1.57754  | 0.11467  | 0.981636 | chr10 | 1124957  | 1125502  | + | 0 NA | IntergeniALR/Alphe  | 1242816 NR_02438C  | 441666 Hs. 25572E NR_02438C      | ENSG000001LOC44166E-              | zinc fing pseudo                   |
| chr11-12 7.366904   | -1.40976 | 0.893781 | -1.5773  | 0.114727 | 0.981636 | chr11 | 1.22E+08 | 1.22E+08 | + | 0 NA | intron (Nintron (N  | -9693 NR_13718E    | 399959 Hs. 44098 NR_02443C       | ENSG000001MIR100HG                | AGD1 lincmir-100-lncRNA            |
| chr16-28 7.366904   | -1.40976 | 0.893781 | -1.5773  | 0.114727 | 0.981636 | chr16 | 28721979 | 28722178 | + | 0 NA | intron (Nintron (N  | -2174 NR_10705E    | 1.02E+08 Hs. 51403E NM_00447E    | ENSG000001MIR6862-2               | hsa-mir-ε microRNA ncRNA           |
| chr14-61 6.137824   | -1.59764 | 1.012922 | -1.57726 | 0.114736 | 0.981636 | chr14 | 61749638 | 61750155 | + | 0 NA | promoter-promoter-  | -807 NR_04540E     | 1.01E+08 Hs. 59721E NR_04540E    | HIF1A-AS2-3                       | aHIF-1 HIF1A antncRNA              |
| chr3-123 6.137824   | -1.59764 | 1.012922 | -1.57726 | 0.114736 | 0.981636 | chr3  | 1.24E+08 | 1.24E+08 | + | 0 NA | intron (Nintron (N  | 10250 NM_00136E    | 64770 Hs. 64502E NM_02275E       | ENSG000001CCDC14                  | - coiled-cp protein-coding         |
| chr6-57 6.137824    | -1.59764 | 1.012922 | -1.57726 | 0.114736 | 0.981636 | chr6  | 57187074 | 57181208 | + | 0 NA | intron (NLMIE5 LIN  | 8665 NM_00428E     | 9532 Hs. 74504E NM_00428E        | ENSG000001BAG2                    | BAG-2 d4BCL2 assc protein-coding   |
| chr2-297 8.494316   | 1.309894 | 0.831059 | 1.576175 | 0.114986 | 0.981636 | chr2  | 29792564 | 29793287 | + | 0 NA | intron (NAluJb SIN  | 25606 NM_01338E    | 29796 Hs. 28429E NM_01338E       | ENSG000001UCRQ10                  | HSPC0501 Fubiquinol protein-coding |
| chr6-896 7.390478   | -1.41241 | 0.89771  | -1.57535 | 0.115175 | 0.981636 | chr6  | 89684808 | 89685007 | + | 0 NA | exon (NM exon (NM   | -46160 NM_02046E   | 57226 Hs. 17727E NM_02046E       | ENSG000001LYRM2                   | DJ12208.εLYR motif protein-coding  |
| chr1-123 123.0855   | 0.478808 | 0.304177 | 1.574112 | 0.115462 | 0.981636 | chr1  | 1.24E+08 | 1.24E+08 | + | 0 NA | IntergeniALR/Alphe  | 1991822 NR_00395E  | 647121 Hs. 69768E NR_00395E      | ENSG000001EMBP1                   | - embigin f pseudo                 |
| chr1-157 3.752235   | 2.052116 | 1.304131 | 1.57355  | 0.115592 | 0.981636 | chr1  | 1.57E+08 | 1.57E+08 | + | 0 NA | intron (NLMIB7 LIN  | 22387 NM_014784    | 9826 Hs. 516954 NM_014784        | ENSG000001CARHGF11                | GTRAP48 FRho guaniprotein-coding   |
| chr17-28 5.89785    | 1.610917 | 1.02397  | 1.573207 | 0.115671 | 0.981636 | chr17 | 28884584 | 28884809 | + | 0 NA | intron (Nintron (N  | 13037 NM_00447E    | 2319 Hs. 51403E NM_00447E        | ENSG000001FLOT2                   | ECS-1 ECS Flotillir protein-coding |
| chr10-14 12.17869   | 1.088909 | 0.692383 | 1.572698 | 0.115789 | 0.981636 | chr10 | 41380177 | 41380376 | + | 0 NA | IntergeniALR/Alphe  | 987769 NR_02438C   | 441666 Hs. 25572E NR_02438C      | ENSG000001LOC44166E-              | zinc fing pseudo                   |
| chr19-41 4.511815   | 1.851799 | 1.177498 | 1.572655 | 0.115799 | 0.981636 | chr19 | 1460788  | 1461577  | + | 0 NA | intron (Nintron (N  | 8194 NM_00135E     | 1029                             |                                   |                                    |

|                    |          |          |          |          |          |       |           |          |   |   |    |                    |         |           |        |                    |                    |                   |                 |                         |                         |                |                |                |
|--------------------|----------|----------|----------|----------|----------|-------|-----------|----------|---|---|----|--------------------|---------|-----------|--------|--------------------|--------------------|-------------------|-----------------|-------------------------|-------------------------|----------------|----------------|----------------|
| chr10-40f.24.53054 | 0.833078 | 0.540727 | 1.540662 | 0.123399 | 0.981636 | chr10 | 40595496  | 40596559 | + | 0 | NA | IntergeniALR/Alph  | 1772018 | NR_02438C | 441666 | Hs.25572ENR_02438C | ENSG000004C0441666 | -                 | zinc fingpseudo |                         |                         |                |                |                |
| chr17-73f.6.581715 | -1.47754 | 0.959124 | -1.54051 | 0.123436 | 0.981636 | chr17 | 73238148  | 73238362 | + | 0 | NA | intron (intron)    | 5594    | NR_11010F | 55028  | Hs.12929           | NM_017941          | ENSG00000C170rF80 | HLC-8 MITC      | chromosomprotein-coding |                         |                |                |                |
| chr16-25f.7.709312 | 1.335282 | 0.867362 | 1.539476 | 0.123688 | 0.981636 | chr16 | 2566414   | 2566670  | + | 0 | NA | intron (intron)    | 28521   | NM_001261 | 5170   | Hs.459691          | NM_00261E          | ENSG00000C        | PDPK1           | PDPK3-phospho           | protein-coding          |                |                |                |
| chrX-103f.9.27532  | -1.25164 | 0.813493 | -1.5386  | 0.123902 | 0.981636 | chrX  | 1.04E+08  | 1.04E+08 | + | 0 | NA | exon (NM exon)     | 10491   | NM_01228E | 9643   | Hs.326387          | NM_01228E          | ENSG00000C        | MORFL2          | MORFL2 MF               | mortalityprotein-coding |                |                |                |
| chr1-145f.10.46708 | 1.19458  | 0.776407 | 1.538601 | 0.123902 | 0.981636 | chr1  | 1.45E+08  | 1.45E+08 | + | 0 | NA | intron (intron)    | 4389    | NM_00127E | 1E+08  | Hs.44508C          | NM_00127E          | ENSG00000C        | NBP20           | NBP2                    | mentprotein-coding      |                |                |                |
| chr1-147f.6.632562 | -1.45837 | 0.948434 | -1.53766 | 0.124132 | 0.981636 | chr1  | 1.47E+08  | 1.47E+08 | + | 0 | NA | intron (AluJr SIN  | 47742   | NM_00134E | 9557   | Hs.191164          | NM_00428A          | ENSG00000C        | CHD1L           | ALC1 CHD1               | chromodon               | protein-coding |                |                |
| chr2-47f.6.632562  | -1.45837 | 0.948434 | -1.53766 | 0.124132 | 0.981636 | chr2  | 1.4715781 | 47416989 | + | 0 | NA | exon (NM exon)     | 13318   | NM_00125E | 4436   | Hs.59765E          | NM_000251          | ENSG00000C        | MSH2            | COCA1 FCC               | mutS                    | homc           | protein-coding |                |
| chr9-110f.6.632562 | -1.45837 | 0.948434 | -1.53766 | 0.124132 | 0.981636 | chr9  | 111E+08   | 1.11E+08 | + | 0 | NA | intron (AluSz SIN  | 121467  | NM_001351 | 1902   | Hs.126667          | NM_001401          | ENSG00000C        | LPAR1           | EDG2 GPR2               | Lysophosf               | protein-coding |                |                |
| chr1-148f.7.71717  | 1.332801 | 0.867411 | 1.536528 | 0.124409 | 0.981636 | chr1  | 1.49E+08  | 1.49E+08 | + | 0 | NA | intron (AluSx SIN  | 5598    | NR_03718E | 653513 | Hs.632434          | NR_03718E          | LOC65351E         | -               | phosphodipe             | pseudo                  |                |                |                |
| chr1-236f.7.71717  | 1.332801 | 0.867411 | 1.536528 | 0.124409 | 0.981636 | chr1  | 2.37E+08  | 2.37E+08 | + | 0 | NA | intron (intron)    | 16500   | NR_01807E | 55127  | Hs.708114          | NM_01807E          | ENSG00000C        | HEATR1          | BAP28 UTF               | HEAT                    | repe           | protein-coding |                |
| chr3-197f.7.71717  | 1.332801 | 0.867411 | 1.536528 | 0.124409 | 0.981636 | chr3  | 1.98E+08  | 1.98E+08 | + | 0 | NA | intron (intron)    | 22076   | NM_03322E | 89782  | Hs.51854C          | NM_03302E          | ENSG00000C        | LMLN            | GP63 INV                | leishman                | protein-coding |                |                |
| chr10-11f.6.435578 | 1.47473  | 0.959975 | 1.536218 | 0.124485 | 0.981636 | chr10 | 1131133   | 1131676  | + | 0 | NA | 3' UTR (3' UTR)    | -28364  | NR_01537E | 399706 | Hs.721191          | NM_00101C          | ENSG00000C        | LINC0020C       | C10orf13E               | long                    | intencRNA      |                |                |
| chr6-301f.6.435578 | 1.47473  | 0.959975 | 1.536218 | 0.124485 | 0.981636 | chr6  | 30185523  | 30185722 | + | 0 | NA | 3' UTR (3' UTR)    | 22076   | NM_03322E | 89870  | Hs.59178E          | NM_03322E          | ENSG00000C        | TRIM15          | RNF93 ZNF               | tripartit               | protein-coding |                |                |
| chr11-88f.4.600727 | -1.86428 | 1.213578 | -1.53619 | 0.124492 | 0.981636 | chr11 | 88288155  | 88288354 | + | 0 | NA | IntergeniLIMA4 LI  | 49482   | NM_14817I | 1075   | Hs.12806E          | NM_001814          | ENSG00000C        | CTSC            | CPPI DPP-               | cathepsin               | protein-coding |                |                |
| chr10-49f.5.760126 | 1.554611 | 1.012033 | 1.536127 | 0.124507 | 0.981636 | chr10 | 49475788  | 49476646 | + | 0 | NA | exon (NM exon)     | 48064   | NM_17075E | 267004 | Hs.49063           | NM_17075E          | ENSG00000C        | PGBD3           | -                       | piggyBac                | protein-coding |                |                |
| chr20-27f.18.10871 | 0.893563 | 0.581838 | 1.535759 | 0.124597 | 0.981636 | chr20 | 27966984  | 27967183 | + | 0 | NA | IntergeniALR/Alph  | 635582  | NR_13231E | 1E+08  | Hs.529357          | NR_13231E          | ENSG00000C        | FRG1CP          | -                       | FSHD                    | regipseudo     |                |                |
| chr20-27f.32.22904 | 0.753299 | 0.490697 | 1.535161 | 0.124744 | 0.981636 | chr20 | 17811246  | 27811523 | + | 0 | NA | IntergeniALR/Alph  | 791281  | NR_13231E | 1E+08  | Hs.529357          | NR_13231E          | ENSG00000C        | FRG1CP          | -                       | FSHD                    | regipseudo     |                |                |
| chr4-105f.6.59928  | -1.46622 | 0.95559  | -1.53436 | 0.12494  | 0.981636 | chr4  | 2.06E+08  | 1.06E+08 | + | 0 | NA | intron (NLIP4S LIN | 20736   | NM_001031 | 79807  | Hs.16142E          | NM_024751          | ENSG00000C        | GSTCD           | -                       | glutathio               | protein-coding |                |                |
| chr8-307f.6.59928  | -1.46622 | 0.95559  | -1.53436 | 0.12494  | 0.981636 | chr8  | 30798567  | 30799040 | + | 0 | NA | intron (intron)    | 14015   | NM_00100E | 5516   | Hs.49144C          | NM_00415E          | ENSG00000C        | PPP2CB          | PP2beta                 | protein                 | protein-coding |                |                |
| chr5-151f.6.589976 | -1.27037 | 0.828403 | -1.53351 | 0.125149 | 0.981636 | chr5  | 1.52E+08  | 1.52E+08 | + | 0 | NA | intron (MIR3 SINE  | 2590    | NM_00130E | 6678   | Hs.11177E          | NM_00311E          | ENSG00000C        | SPARC           | BM-40 O1                | secreted                | protein-coding |                |                |
| chr15-80f.5.904228 | -1.53866 | 0.103368 | -1.5335  | 0.125153 | 0.981636 | chr15 | 80817583  | 80819594 | + | 0 | NA | intron (intron)    | 23485   | NR_03039E | 693132 | NR_03039E          | ENSG00000C         | MIR549A           | MIR549 MI       | microRNA                | ncRNA                   |                |                |                |
| chr1-156f.5.734702 | 1.548667 | 1.011905 | 1.530447 | 0.125906 | 0.981636 | chr1  | 1.57E+08  | 1.57E+08 | + | 0 | NA | intron (intron)    | -35133  | NR_030527 | 768220 | NR_030527          | ENSG00000C         | MIR765            | MIRN765         | mi                      | microRNA                | ncRNA          |                |                |
| chr1-232f.5.734702 | 1.548667 | 1.011905 | 1.530447 | 0.125906 | 0.981636 | chr1  | 2.33E+08  | 2.33E+08 | + | 0 | NA | intron (intron)    | 26181   | NR_138027 | 84284  | Hs.64271E          | NM_03232A          | ENSG00000C        | NTPCR           | C1orf57                 | leucosic                | protein-coding |                |                |
| chr11-66f.5.734702 | 1.548667 | 1.011905 | 1.530447 | 0.125906 | 0.981636 | chr11 | 66241403  | 66242245 | + | 0 | NA | intron (intron)    | -15470  | NM_001134 | 64837  | Hs.28079E          | NM_02282E          | ENSG00000C        | KLC2            | -                       | kinesin                 | I              | protein-coding |                |
| chr18-54f.5.734702 | 1.548667 | 1.011905 | 1.530447 | 0.125906 | 0.981636 | chr18 | 54909856  | 54910155 | + | 0 | NA | intron (MERS2D LI  | 48043   | NM_00114E | 80323  | Hs.12079C          | NM_02521A          | ENSG00000C        | CCDC68          | SE57-1                  | coiled-cc               | protein-coding |                |                |
| chr2-259f.5.734702 | 1.548667 | 1.011905 | 1.530447 | 0.125906 | 0.981636 | chr2  | 25946555  | 25947153 | + | 0 | NA | intron (AluSz SIN  | 35643   | NM_00225A | 3797   | Hs.21611           | NM_00225A          | ENSG00000C        | KIF3C           | -                       | kinesin                 | I              | protein-coding |                |
| chr12-66f.5.888512 | -1.53504 | 1.00325  | -1.53006 | 0.126001 | 0.981636 | chr12 | 66165962  | 66166161 | + | 0 | NA | intron (NLIM3 LINE | 4011    | NM_00128E | 51643  | Hs.505934          | NM_01605E          | ENSG00000C        | TMBIM4          | CG1-119                 | transmem                | protein-coding |                |                |
| chr14-55f.5.888512 | -1.53504 | 1.00325  | -1.53006 | 0.126001 | 0.981636 | chr14 | 55313567  | 55313817 | + | 0 | NA | intron (THEID LTF  | 41538   | NM_152231 | 55030  | Hs.52534E          | NM_01794E          | ENSG00000C        | FBX034          | CG1-301                 | FF-box                  | prc            | protein-coding |                |
| chr19-39f.5.888512 | -1.53504 | 1.00325  | -1.53006 | 0.126001 | 0.981636 | chr19 | 39366551  | 39366895 | + | 0 | NA | intron (intron)    | 24314   | NM_00130E | 55095  | Hs.61233E          | NM_01802E          | ENSG00000C        | SAMD4B          | SMGB Sma                | sterile                 | protein-coding |                |                |
| chr1-124f.13.96288 | 1.005914 | 0.657693 | 1.529457 | 0.126151 | 0.981636 | chr1  | 1.25E+08  | 1.25E+08 | + | 0 | NA | IntergeniALR/Alph  | 3084509 | NR_00395E | 647121 | Hs.69768E          | NR_00395E          | ENSG00000C        | EMBP1           | -                       | embin                   | pseudo         |                |                |
| chr1-150f.11.49353 | 1.095612 | 0.716753 | 1.528577 | 0.126369 | 0.981636 | chr1  | 1.5E+08   | 1.5E+08  | + | 0 | NA | exon (NM exon)     | -15673  | NM_001271 | 80222  | Hs.288974          | NM_02515C          | ENSG00000C        | TARS2           | COXP21                  | threonyl-               | protein-coding |                |                |
| chr1-122f.7.801299 | 1.344144 | 0.879572 | 1.528179 | 0.126468 | 0.981636 | chr1  | 1.22E+08  | 1.22E+08 | + | 0 | NA | IntergeniALR/Alph  | 968809  | NR_00395E | 647121 | Hs.69768E          | NR_00395E          | ENSG00000C        | EMBP1           | -                       | embin                   | pseudo         |                |                |
| chr5-488f.68.72361 | 0.535947 | 0.350835 | 1.527633 | 0.126604 | 0.981636 | chr5  | 48860545  | 48860791 | + | 0 | NA | IntergeniALR/Alph  | 1580620 | NM_19844E | 133418 | Hs.561411          | NM_19844E          | ENSG00000C        | EMB             | GP70                    | embin                   | protein-coding |                |                |
| chr11-10f.9.834772 | -1.18249 | 0.774118 | -1.52753 | 0.126629 | 0.981636 | chr11 | 10589641  | 10590078 | + | 0 | NA | intron (intron)    | -21194  | NM_006691 | 10894  | Hs.65533E          | NM_006691          | ENSG00000C        | LYVE1           | CRSBP-1                 | lymphatic               | protein-coding |                |                |
| chr2-112f.7.750452 | 1.334872 | 0.873934 | 1.527428 | 0.126655 | 0.981636 | chr2  | 1.12E+08  | 1.12E+08 | + | 0 | NA | intron (intron)    | 54874   | NM_005054 | 84220  | Hs.46963C          | NM_005054          | ENSG00000C        | RGPD5           | BS-63                   | B5E                     | RANBP2         | 1              | protein-coding |
| chr20-33f.8.623258 | -1.26459 | 0.82793  | -1.52741 | 0.12666  | 0.981636 | chr20 | 33767468  | 33767719 | + | 0 | NA | intron (Tigger1 I  | 24926   | NM_01640E | 51654  | Hs.45837E          | NM_01608E          | ENSG00000C        | CDK5RAP1        | C20orf34                | CDK5                    | regu           | protein-coding |                |
| chr1-462f.2.179822 | -2.9561  | 1.936578 | -1.52646 | 0.126896 | 0.981636 | chr1  | 46265471  | 46266303 | + | 0 | NA | intron (MIRb SINE  | 18124   | NM_00357E | 8438   | Hs.64204E          | NM_00357E          | ENSG00000C        | RAD54L          | HR54                    | RAD54                   | lik            | protein-coding |                |
| chr1-124f.125.4758 | 0.448112 | 0.293705 | 1.525722 | 0.127079 | 0.981636 | chr1  | 1.24E+08  | 1.24E+08 | + | 0 | NA | IntergeniALR/Alph  | 2790635 | NR_00395E | 647121 | Hs.69768E          | NR_00395E          | ENSG00000C        | EMBP1           | -                       | embin                   | pseudo         |                |                |
| chr5-479f.22.11682 | 0.807174 | 0.52906  | 1.525676 | 0.127091 | 0.981636 | chr5  | 47912961  | 47914327 | + | 0 | NA | IntergeniALR/Alph  | -221764 | NM_02107E | 348980 | Hs.35317E          | NM_02107E          | ENSG00000C        | HCN1            | BCNG-1                  | BC                      | hyperpol       | protein-coding |                |
| chr11-34f.7.368754 | -1.39629 | 0.915874 | -1.52454 | 0.127374 | 0.981636 | chr11 | 34057825  | 34058024 | + | 0 | NA | intron (AluSq2 SI  | 6193    | NM_00589E | 4076   | Hs.47181E          | NM_00589E          | ENSG00000C        | CAPRIN1         | GPIAP1                  | GF                      | cell           | cycl           | protein-coding |
| chr12-93f.10.56496 | -1.15076 | 0.754916 | -1.52436 | 0.127419 | 0.981636 | chr12 | 93490996  | 93491195 | + | 0 | NA | intron (AluSz SIN  | 23581   | NR_03816E | 28977  | Hs.19957E          | NM_01405E          | ENSG00000C        | RPL27           | HSPC204                 | mitochon                | protein-coding |                |                |
| chr2-231f.5.726844 | 1.55215  | 1.018272 | 1.524298 | 0.127434 | 0.981636 | chr2  | 2.32E+08  | 2.32E+08 | + | 0 | NA | intron (LIME3D LI  | 13009   | NM_00128E | 64708  | Hs.335061          | NM_02273C          | ENSG00000C        | COP57B          | CG1-301                 | SMG                     | COP9           | sig            | protein-coding |
| chr3-184f.5.767984 | 1.551154 | 1.01804  | 1.523667 | 0.127592 | 0.981636 | chr3  | 1.84E+08  | 1.84E+08 | + | 0 | NA | intron (intron)    | 3470    | NM_001171 | 1181   | Hs.436847          | NM_00436E          | ENSG00000C        | CLCN2           | C1C-2                   | CL                      | chloride       | protein-coding |                |
| chr17-57f.9.80334  | -1.17781 | 0.773406 | -1.52289 | 0.127787 | 0.981636 | chr17 | 57997584  | 57998158 | + | 0 | NA | IntergeniIntergeni | 9375    | NM_00107E | 6426   | Hs.68714           |                    |                   |                 |                         |                         |                |                |                |



|                     |          |          |          |          |          |       |          |          |   |   |    |                    |         |           |          |           |              |           |         |              |           |          |                |                |                |                |
|---------------------|----------|----------|----------|----------|----------|-------|----------|----------|---|---|----|--------------------|---------|-----------|----------|-----------|--------------|-----------|---------|--------------|-----------|----------|----------------|----------------|----------------|----------------|
| chrX-41f 7.863492   | -1.2979  | 0.867112 | -1.49681 | 0.134442 | 0.981636 | chrX  | 41350482 | 41350707 | + | 0 | NA | TTS (NM_C          | 16428   | NM_001363 | 1654     | Hs.72856  | NM_00135     | ENS       | G0000   | DDX3X        | CAP-Rf    | DEAD-box | protein-coding |                |                |                |
| chr22-41f 6.418012  | 1.465715 | 0.979571 | 1.496282 | 0.13458  | 0.981636 | chr22 | 41882548 | 41882860 | + | 0 | NA | intron (AluSj SIN  | -18240  | NR_029507 | 4077039  | NR_029507 | ENS          | G0000     | MIR33A  | MIR33        | MI        | microRNA | ncRNA          |                |                |                |
| chr9-114f 6.418012  | 1.465715 | 0.979571 | 1.496282 | 0.13458  | 0.981636 | chr9  | 1.15E+08 | 1.15E+08 | + | 0 | NA | exon (NM_exon      | 14557   | NM_001354 | 1.05E+08 | Hs.14736  | NM_001354    | ENS       | G0000   | TEX53        |           | testis   | expression     |                |                |                |
| chr19-17f 3.666071  | -1.9613  | 1.310797 | -1.49627 | 0.134584 | 0.981636 | chr19 | 17066684 | 17067411 | + | 0 | NA | intron (AluSj SIN  | 8405    | NM_033417 | 93323    | Hs.40408  | NM_033417    | ENS       | G0000   | HAUS8        | DGT4      | HICE     | HAUS           | augm           | protein-coding |                |
| chr1-426f 4.410121  | -1.75702 | 1.174586 | -1.49586 | 0.134689 | 0.981636 | chr1  | 42675312 | 42675684 | + | 0 | NA | intron (AluSj SIN  | -6920   | NM_004555 | 4904     | Hs.47358  | NM_004555    | ENS       | G0000   | YBX1         | BP-8      | CBCF-    | Y-box          | bir            | protein-coding |                |
| chr1-214f 4.410121  | -1.75702 | 1.174586 | -1.49586 | 0.134689 | 0.981636 | chr1  | 2.15E+08 | 2.15E+08 | + | 0 | NA | intron (AluSj SIN  | 16441   | NM_016343 | 1063     | Hs.49774  | NM_016343    | ENS       | G0000   | CENPF        | CENF      | CILL     | centromer      | protein-coding |                |                |
| chr12-64f 4.410121  | -1.75702 | 1.174586 | -1.49586 | 0.134689 | 0.981636 | chr12 | 64615259 | 64616199 | + | 0 | NA | intron (AluSj SIN  | 5234    | NM_178166 | 283349   | Hs.64360  | NM_178166    | ENS       | G0000   | RASSF3       | RASSF5    | FAN      | assoc          | protein-coding |                |                |
| chr17-61f 4.410121  | -1.75702 | 1.174586 | -1.49586 | 0.134689 | 0.981636 | chr17 | 61768931 | 61770098 | + | 0 | NA | intron (AluSj SIN  | 94045   | NM_032042 | 83990    | Hs.12890  | NM_032042    | ENS       | G0000   | BRIP1        | BACH1     | FAN      | BRCA1          | in             | protein-coding |                |
| chr1-235f 6.957589  | 1.368769 | 0.915155 | 1.495669 | 0.13474  | 0.981636 | chr1  | 2.35E+08 | 2.35E+08 | + | 0 | NA | intron (AluSp SIN  | -57750  | NR_039908 | 1.01E+08 | NR_039908 | ENS          | G0000     | MIR4753 | mir-4753     |           |          | microRNA       | ncRNA          |                |                |
| chr10-40f 3.13119   | 0.701881 | 0.469553 | 1.494787 | 0.13497  | 0.981636 | chr10 | 40598964 | 40599627 | + | 0 | NA | Intergeni          | 1768750 | NR_02438C | 441666   | Hs.25572  | NR_02438C    | ENS       | G0000   | LOC441666    |           |          | zinc           | finger         | pseudo         |                |
| chr19-52f 7.67418   | 1.320775 | 0.88367  | 1.494647 | 0.135007 | 0.981636 | chr19 | 5207543  | 5207849  | + | 0 | NA | intron (AluSj SIN  | 133116  | NM_130854 | 5802     | Hs.74492  | NM_02285C    | ENS       | G0000   | PTPRS        | PTPSIGMA  |          | protein        | protein-coding |                |                |
| chr1-382f 4.990838  | 1.62872  | 1.090568 | 1.49346  | 0.135317 | 0.981636 | chr1  | 3828979  | 3829334  | + | 0 | NA | intron (AluSj SIN  | 28055   | NM_014704 | 9731     | Hs.13308  | NM_014704    | ENS       | G0000   | CPEP104      | CFAP256   |          | centrosom      | protein-coding |                |                |
| chr16-15f 4.990838  | 1.62872  | 1.090568 | 1.49346  | 0.135317 | 0.981636 | chr16 | 1557202  | 1558082  | + | 0 | NA | intron (AluSj SIN  | -22885  | NR_13517E | 1.05E+08 | Hs.66332  | NR_13517E    | ENS       | G0000   | LOC105371    |           |          | uncharact      | ncRNA          |                |                |
| chr8-949f 4.990838  | 1.62872  | 1.090568 | 1.49346  | 0.135317 | 0.981636 | chr8  | 94942211 | 94944383 | + | 0 | NA | intron (AluJo SIN  | 6081    | NM_001135 | 94241    | Hs.49226  | NM_001135    | ENS       | G0000   | TP53INP1     | SIP       | TP53I    | umcor          | protein-coding |                |                |
| chrX-129f 4.990838  | 1.62872  | 1.090568 | 1.49346  | 0.135317 | 0.981636 | chrX  | 1.3E+08  | 1.3E+08  | + | 0 | NA | intron (AluSj SIN  | 18826   | NM_001587 | 4952     | Hs.12635  | NM_00027E    | ENS       | G0000   | OCRL         | INPP5F    |          | LC             | OCRL           | inos           | protein-coding |
| chr7-116f 4.433695  | -1.76407 | 1.181385 | -1.49322 | 0.13538  | 0.981636 | chr7  | 1.17E+08 | 1.17E+08 | + | 0 | NA | TTS (NM_C          | 9229    | NM_00120E | 858      | Hs.21233  | NR_00123E    | ENS       | G0000   | CAV2         | CAV       |          | caveolin       | protein-coding |                |                |
| chr18-48f 2.221616  | 1.248557 | 0.836356 | 1.492854 | 0.135475 | 0.981636 | chr18 | 48718711 | 48719456 | + | 0 | NA | intron (ML3 LINE C | 48483   | NR_039897 | 1.01E+08 | NR_039897 | ENS          | G0000     | MIR4743 |              |           | microRNA | ncRNA          |                |                |                |
| chr11-201f 5.154171 | -1.61957 | 1.085066 | -1.4926  | 0.135541 | 0.981636 | chr11 | 20100414 | 20101419 | + | 0 | NA | intron (AluSj SIN  | -51613  | NR_046672 | 1.01E+08 | Hs.55791  | NR_046672    | ENS       | G0000   | NAV2-AS2     |           |          | NAV2           | antinc         | RNA            |                |
| chr7-143f 5.154171  | -1.61957 | 1.085066 | -1.4926  | 0.135541 | 0.981636 | chr7  | 1.43E+08 | 1.43E+08 | + | 0 | NA | intron (AluSj SIN  | 2364    | NR_106952 | 1.02E+08 | NR_106952 | ENS          | G0000     | MIR6892 | hsa-mir-6892 |           |          | microRNA       | ncRNA          |                |                |
| chr13-11f 7.394178  | -1.38688 | 0.929309 | -1.49238 | 0.135599 | 0.981636 | chr13 | 1.1E+08  | 1.1E+08  | + | 0 | NA | intron (AluY SINE  | 71708   | NM_00184E | 1282     | Hs.17441  | NM_00184E    | ENS       | G0000   | COL4A1       | BSVD      |          | BSVI           | collagen       | protein-coding |                |
| chr4-802f 7.394178  | -1.38688 | 0.929309 | -1.49238 | 0.135599 | 0.981636 | chr4  | 80275627 | 80275866 | + | 0 | NA | intron (AluSj SIN  | 7301    | NM_001291 | 2250     | Hs.37055  | NM_004464    | ENS       | G0000   | PGF5         | HBGF-5    |          | Sn             | fibroblas      | protein-coding |                |
| chr1-172f 4.384697  | -1.77203 | 1.18741  | -1.49235 | 0.135607 | 0.981636 | chr1  | 1.72E+08 | 1.72E+08 | + | 0 | NA | non-codir          | -2643   | NR_029627 | 406996   | NR_029627 | ENS          | G0000     | MIR214  | MIRN214      |           |          | microRNA       | ncRNA          |                |                |
| chr8-132f 7.109735  | -1.35343 | 0.907083 | -1.49207 | 0.135681 | 0.981636 | chr8  | 1.33E+08 | 1.33E+08 | + | 0 | NA | intron (AluSj SIN  | 15599   | NM_01601E | 51105    | Hs.30436  | NR_01601E    | ENS       | G0000   | PHF20L1      | CGI-72    |          | TL             | PHD            | finger         | protein-coding |
| chr17-59f 7.732886  | 1.327472 | 0.890474 | 1.490748 | 0.136028 | 0.981636 | chr17 | 59292023 | 59292024 | + | 0 | NA | intron (AluSx1 SI  | 27014   | NR_16146E | 6198     | Hs.46364  | NR_003161    | ENS       | G0000   | RPS6KB1      | PS6K      |          | SR6            | ribosomal      | protein-coding |                |
| chr3-101f 7.732886  | 1.327472 | 0.890474 | 1.490748 | 0.136028 | 0.981636 | chr3  | 1.02E+08 | 1.02E+08 | + | 0 | NA | exon (NM_exon      | -6368   | NM_00100E | 64332    | Hs.31971  | NM_03141E    | ENS       | G0000   | NFKB1Z       | IKBZ      |          | INAF           | NFKB           | inh            | protein-coding |
| chr16-46f 3.658213  | -1.95859 | 1.313926 | -1.49064 | 0.136057 | 0.981636 | chr16 | 46589953 | 46591522 | + | 0 | NA | intron (MLIPA5 LIN | -21640  | NR_02655E | 124149   | Hs.97414  | NM_001004299 | ANKRD26P1 |         |              | ankryn    | r        | pseudo         |                |                |                |
| chr3-448f 3.658213  | -1.95859 | 1.313926 | -1.49064 | 0.136057 | 0.981636 | chr3  | 44853426 | 44854978 | + | 0 | NA | TTS (NM_C          | 7686    | NR_03029C | 693149   | NR_03029C | ENS          | G0000     | MIR564  | MIRN564      |           |          | microRNA       | ncRNA          |                |                |
| chr9-107f 3.658213  | -1.95859 | 1.313926 | -1.49064 | 0.136057 | 0.981636 | chr9  | 1.07E+08 | 1.07E+08 | + | 0 | NA | Intergeni          | 51624   | NM_001244 | 5887     | Hs.52164  | NR_002874    | ENS       | G0000   | RAD23B       | HHR23B    |          | HHR            | RAD23          | hon            | protein-coding |
| chr10-13f 7.101877  | -1.35188 | 0.906964 | -1.49055 | 0.13608  | 0.981636 | chr10 | 1.3E+08  | 1.3E+08  | + | 0 | NA | intron (AluJb SIN  | 35496   | NM_001321 | 10539    | Hs.42644  | NM_006541    | ENS       | G0000   | GLRX3        | GLRX4     |          | GRX            | glutared       | protein-coding |                |
| chr6-130f 7.101877  | -1.35188 | 0.906964 | -1.49055 | 0.13608  | 0.981636 | chr6  | 1.31E+08 | 1.31E+08 | + | 0 | NA | intron (AluSx SIN  | 30302   | NM_00119E | 1.01E+08 | Hs.38871  | NM_00119E    | ENS       | G0000   | SMLR1        |           |          | small          | le             | protein-coding |                |
| chr2-201f 5.775842  | 1.547492 | 1.038552 | 1.490048 | 0.136212 | 0.981636 | chr2  | 2.01E+08 | 2.01E+08 | + | 0 | NA | intron (AluSj SIN  | 13422   | NR_11062C | 130540   | Hs.10794  | NR_13916E    | ENS       | G0000   | FLACC1       | ALS2CR12  |          |                | flagellum      | protein-coding |                |
| chr14-73f 7.804787  | -1.31226 | 0.880871 | -1.48973 | 0.136294 | 0.981636 | chr14 | 73316447 | 73316652 | + | 0 | NA | intron (AluSj SIN  | -70548  | NR_13524E | 1.02E+08 | Hs.66059  | NR_13524E    | LOC10192E |         |              |           |          | uncharact      | ncRNA          |                |                |
| chr9-922f 6.973305  | 1.363225 | 0.915148 | 1.489623 | 0.136323 | 0.981636 | chr9  | 92290796 | 92290393 | + | 0 | NA | intron (MLMB7 LIN  | 2313    | NR_037424 | 1.01E+08 | NR_037424 | ENS          | G0000     | MIR3651 | mir-3651     |           |          | microRNA       | ncRNA          |                |                |
| chr1-235f 6.973305  | 1.363225 | 0.915148 | 1.489623 | 0.136323 | 0.981636 | chr1  | 2.36E+08 | 2.36E+08 | + | 0 | NA | intron (AluSj SIN  | -66741  | NR_00109E | 2786     | Hs.15971  | NM_00448E    | ENS       | G0000   | CNG4         |           |          | G              | protein        | protein-coding |                |
| chr19-124f 6.973305 | 1.363225 | 0.915148 | 1.489623 | 0.136323 | 0.981636 | chr19 | 12458423 | 12458962 | + | 0 | NA | Intergeni          | -17671  | NM_00581E | 10224    | Hs.63689  | NR_00581E    | ENS       | G0000   | ZNF443       | ZK1       |          |                | zinc           | finger         | protein-coding |
| chr8-919f 6.973305  | 1.363225 | 0.915148 | 1.489623 | 0.136323 | 0.981636 | chr8  | 91970184 | 91970618 | + | 0 | NA | intron (AluSj SIN  | 47279   | NM_17563E | 862      | Hs.36843  | NR_00434E    | ENS       | G0000   | RUNX1T1      | AML1-MTG8 |          | RUNX1          | par            | protein-coding |                |
| chr9-116f 6.973305  | 1.363225 | 0.915148 | 1.489623 | 0.136323 | 0.981636 | chr9  | 1.16E+08 | 1.16E+08 | + | 0 | NA | intron (ML2b LINE  | 45893   | NR_103711 | 493913   | Hs.72883  | NR_103711    | ENS       | G0000   | PAPPA-AS1    | DIPAS     |          | NCF            | PAPPA          | ant            | ncRNA          |
| chr9-115f 7.135158  | -1.34488 | 0.902893 | -1.48952 | 0.136351 | 0.981636 | chr9  | 1.15E+08 | 1.15E+08 | + | 0 | NA | intron (AluSj SIN  | 4210    | NM_00216E | 3371     | Hs.14325  | NM_00216E    | ENS       | G0000   | TNC          | 150-225   |          |                | Tenascin       | protein-coding |                |
| chr11-55f 10.68111  | 1.094253 | 0.735138 | 1.488868 | 0.136522 | 0.981636 | chr11 | 53416348 | 53416621 | + | 0 | NA | Intergeni          | 1187514 | NM_001004 | 119749   | Hs.55356  | NM_001004    | ENS       | G0000   | COR4C4       |           |          | o              | factory        | protein-coding |                |
| chr1-185f 8.254898  | 1.250639 | 0.840011 | 1.488837 | 0.13653  | 0.981636 | chr1  | 1.85E+08 | 1.85E+08 | + | 0 | NA | intron (MLIMA6 LIN | 65886   | NM_01767E | 54823    | Hs.13418  | NR_01767E    | ENS       | G0000   | SWT1         | Clorf26   |          |                | SWT1           | RNA            | protein-coding |
| chr1-155f 9.452361  | 1.607116 | 0.780036 | 1.488028 | 0.136744 | 0.981636 | chr1  | 1.56E+08 | 1.56E+08 | + | 0 | NA | exon (NM_exon      | -32019  | NR_132767 | 1.07E+08 | NR_132767 | SCARNA26E    |           |         |              |           | small    | Ca             | ncRNA          |                |                |
| chr2-21f 7.1273     | 1.34333  | 0.902773 | -1.48801 | 0.13675  | 0.981636 | chr22 | 19601272 | 21961538 | + | 0 | NA | intron (AluSj SIN  | -8557   | NM_014634 | 9647     | Hs.11272  | NR_014634    | ENS       | G0000   | PPM1F        | CAMKP     |          | Ca             | protein        | protein-coding |                |
| chr17-63f 6.940024  | 1.360938 | 0.914741 | 1.487786 | 0.136807 | 0.981636 | chr17 | 63738492 | 63738766 | + | 0 | NA | intron (AluSx3 SI  | 3170    | NM_00100E | 92335    | Hs.51440  | NR_15333E    | ENS       | G0000   | STRADA       | LYK5      |          | NY             | -ESTE20        | rel            | protein-coding |
| chr3-567f 6.940024  | 1.360938 | 0.914741 | 1.487786 | 0.136807 | 0.981636 | chr3  | 56736988 | 56737247 | + | 0 | NA | intron (AluSj SIN  | 38600   | NM_00112E | 50650    | Hs.47640  | NR_01955E    | ENS       | G0000   | ARHGFE3      | GEF3      |          | STA3           | Rho            | guanin         | protein-coding |
| chr6-432f 6.940024  | 1.360938 | 0.914741 | 1.487786 | 0.136807 | 0.981636 | chr6  | 43216546 | 43217457 | + | 0 | NA | intron (AluSj SIN  | 12480   | NM_199184 | 10591    | Hs.10975  | NR_00644E    | ENS       | G0000   | CNDP1H       | C6orf108  |          |                | 2'             | -deoxy         | protein-coding |
| chr10-145f 5.821949 | -1.55403 | 1.044645 | -1.48762 | 0.136852 | 0.981636 | chr10 | 14576375 | 14576695 | + | 0 | NA | intron (AluSg SIN  | -4160   | NM_00128E | 83641    | Hs.44631  | NR_003145E   | ENS       | G0000   | FAM107B      | C10orf45  |          |                | family         | wi             | protein-coding |
| chr3-314f 5.821949  | -1.55403 | 1.044645 | -1.48762 | 0.136852 | 0.981636 | chr3  | 3146781  | 3146980  | + |   |    |                    |         |           |          |           |              |           |         |              |           |          |                |                |                |                |

|                     |          |          |          |          |          |       |          |          |   |    |                    |                   |                             |                     |                     |                                     |                             |
|---------------------|----------|----------|----------|----------|----------|-------|----------|----------|---|----|--------------------|-------------------|-----------------------------|---------------------|---------------------|-------------------------------------|-----------------------------|
| chr2-594 8. 237332  | 1.243863 | 0.849378 | 1.464439 | 0.143074 | 0.981636 | chr2  | 1.9E+08  | 1.9E+08  | 0 | NA | intron (Nintron (N | 16321 NM_01458E   | 30061 Hs. 643000ENM_01458E  | ENSG00000SLC40A1    | FPN1 HFE4           | solute cation protein-coding        |                             |
| chr1-2675 6. 683409 | -1.43748 | 0.98169  | -1.4643  | 0.143113 | 0.981636 | chr1  | 26756055 | 26756502 | 0 | NA | intron (NAluSx SIN | -31685 NM_017837  | 55650 Hs. 259600ENM_017837  | ENSG00000PIGV       | GPI-MT-II           | phosphatidylinositol protein-coding |                             |
| chr9-1364 8. 178626 | 1.237393 | 0.845386 | 1.463701 | 0.143276 | 0.981636 | chr9  | 1.36E+08 | 1.36E+08 | 0 | NA | intron (Nintron (N | 9231 NM_00131E    | 56623 Hs. 120999ENM_01989E  | ENSG00000INPP5E     | CORS1 CPI           | inositol protein-coding             |                             |
| chr18-58 6. 383251  | -1.39802 | 0.955266 | -1.46348 | 0.143335 | 0.981636 | chr18 | 58557093 | 58558106 | 0 | NA | intron (NLM1C1 LIN | -43021 NR_13296E  | 1.07E+08                    | SNORA108            |                     | small nucleolar RNA                 |                             |
| chr7-105 6. 383251  | -1.39802 | 0.955266 | -1.46348 | 0.143335 | 0.981636 | chr7  | 58557093 | 58558106 | 0 | NA | intron (Nintron (N | 6102 NM_00131E    | 54517 Hs. 520619ENM_01904E  | ENSG00000PUS1       | IDDABS              | pseudouridine protein-coding        |                             |
| chr17-74 6. 247006  | 1.410145 | 0.963639 | 1.463355 | 0.14337  | 0.981636 | chr17 | 74868404 | 74870193 | 0 | NA | promoter-promoter- | -545 NM_00125E    | 2232 Hs. 69745 NM_00411E    | ENSG00000CFDXR      | ADR ADXR            | ferredoxin protein-coding           |                             |
| chr13-45 11. 87086  | 1.034782 | 0.707238 | 1.463132 | 0.143431 | 0.981636 | chr13 | 45530396 | 45530395 | 0 | NA | intron (Nintron (N | 65556 NM_031431   | 83548 Hs. 50794ENM_031431   | ENSG00000COG3       | SEC34               | component protein-coding            |                             |
| chr18-87 8. 373946  | -1.21609 | 0.831728 | -1.46213 | 0.143706 | 0.981636 | chr18 | 8796366  | 8797230  | 0 | NA | intron (Nintron (N | 79417 NM_01521E   | 23255 Hs. 70792ENM_01521E   | ENSG00000MCTCL1     | CCDC165             | microtubule protein-coding          |                             |
| chr20-264 24. 84149 | 0.747364 | 0.511241 | 1.461863 | 0.143779 | 0.981636 | chr20 | 26468721 | 26469385 | 0 | NA | IntergeniALR/Alph  | -259820 NR_04009E | 284801 Hs. 370699ENM_04009E | ENSG00000MIR663AHC  | MIR663A             | lincRNA                             |                             |
| chr14-39 6. 375393  | -1.39631 | 0.955178 | -1.46183 | 0.143788 | 0.981636 | chr14 | 39124559 | 39124758 | 0 | NA | intron (NAluSx SIN | 10374 NM_00361E   | 8487 Hs. 652307NM_00361E    | ENSG00000GEM12      | SIP1 SIP1em         | nucleic acid protein-coding         |                             |
| chr15-494 6. 375393 | -1.39631 | 0.955178 | -1.46183 | 0.143788 | 0.981636 | chr15 | 49487944 | 49488396 | 0 | NA | 3' UTR (N3' UTR (N | 64928 NM_00200E   | 2252 Hs. 56726ENM_00200E    | ENSG00000FG7        | B CYP-S1            | peptidyl protein-coding             |                             |
| chr3-490 6. 375393  | -1.39631 | 0.955178 | -1.46183 | 0.143788 | 0.981636 | chr3  | 49086231 | 49086627 | 0 | NA | intron (NAluY SINE | 7203 NM_00132E    | 54870 Hs. 29738ENM_01773E   | ENSG00000QRICH1     | AB-DIP VF           | glutamine protein-coding            |                             |
| chr11-51 20. 20092  | 0.812947 | 0.562632 | 1.461524 | 0.143872 | 0.981636 | chr11 | 51912546 | 51912766 | 0 | NA | IntergeniALR/Alph  | 1503509 NR_024504 | 646813 Hs. 684179NR_024504  | LOC64681E           |                     | DEH-hom pseudo                      |                             |
| chr7-189 6. 922458  | 1.352871 | 0.957552 | 1.461375 | 0.143912 | 0.981636 | chr7  | 5914051  | 5914362  | 0 | NA | intron (NAluJr SIN | 15473 NM_01562E   | 51622 Hs. 53000ENM_01562E   | ENSG00000CCZ1       | C7orf28A CCZ1       | home protein-coding                 |                             |
| chr15-80 6. 391109  | -1.39976 | 0.958311 | -1.46065 | 0.144112 | 0.981636 | chr15 | 80871550 | 80874331 | 0 | NA | intron (NMLT1J LTF | -30867 NR_03039E  | 693132                      | ENSG00000MIR549A    | MIR549              | microRNA                            |                             |
| chr20-35 12. 45944  | 1.002293 | 0.686301 | 1.460429 | 0.144172 | 0.981636 | chr20 | 35502322 | 35502521 | 0 | NA | exon (NM exon (NM  | 27231 NR_02693E   | 140873 Hs. 15868ENM_08082E  | ENSG00000C20orf17E  | dJ47704.4           | chromosome protein-coding           |                             |
| chr11-19 4. 427687  | -1.73923 | 1.191009 | -1.4603  | 0.144209 | 0.981636 | chr11 | 19887682 | 19887946 | 0 | NA | intron (Nintron (N | -127731 NR_03984E | 1.01E+08                    | NR_03984E           | ENSG00000MIR4694    |                                     | microRNA                    |
| chr15-30 4. 427687  | -1.73923 | 1.191009 | -1.4603  | 0.144209 | 0.981636 | chr15 | 30646245 | 30646874 | 0 | NA | intron (NAluYe5 SI | 444 NR_03825E     | 1E+08                       | Hs. 66895ENM_03825E | ENSG00000LOC100208E |                                     | OTU deubiquitination pseudo |
| chr7-158 2. 916014  | -2.26385 | 1.550486 | -1.46009 | 0.144266 | 0.981636 | chr7  | 1.59E+08 | 1.59E+08 | 0 | NA | intron (Nintron (N | 55046 NR_04989E   | 1.01E+08                    | NR_04989E           | ENSG00000MIR5707    |                                     | microRNA                    |
| chr19-25 17. 19384  | 0.863099 | 0.591191 | 1.459933 | 0.144309 | 0.981636 | chr19 | 25021130 | 25021580 | 0 | NA | IntergeniALR/Alph  | -857908 NR_00360E | 1E+08                       | Hs. 149312NR_00360E | ENSG00000HACVCRIP1  |                                     | hepatitis pseudo            |
| chr10-92 6. 358223  | -1.21339 | 0.831418 | -1.45943 | 0.144447 | 0.981636 | chr10 | 92691184 | 92693071 | 0 | NA | intron (Nintron (N | 2172 NM_00272E    | 3087 Hs. 118651NM_00272E    | ENSG00000HHX        | HEX HMHP1           | hematopoietic protein-coding        |                             |
| chr12-12 5. 179594  | -1.60623 | 1.100906 | -1.45901 | 0.144563 | 0.981636 | chr12 | 1.21E+08 | 1.21E+08 | 0 | NA | intron (NAluSx1 SI | 9591 NM_032314    | 84274 Hs. 17250 NM_032314   | ENSG00000COQ5       |                     | coenzyme protein-coding             |                             |
| chr3-119 6. 179594  | -1.60623 | 1.100906 | -1.45901 | 0.144563 | 0.981636 | chr3  | 1.19E+08 | 1.19E+08 | 0 | NA | intron (NLTR12D LI | -14981 NR_04674E  | 1.01E+08                    | Hs. 607097NR_04674E | ENSG00000ARHGAP31-  |                                     | ARHGAP31 ncRNA              |
| chr15-64 6. 213725  | 1.407644 | 0.965094 | 1.458556 | 0.144687 | 0.981636 | chr15 | 64195685 | 64196092 | 0 | NA | intron (Nintron (N | -32733 NM_00094E  | 5479 Hs. 434937NM_00094E    | ENSG00000PP1B       | B CYP-S1            | peptidyl protein-coding             |                             |
| chr9-116 6. 213725  | 1.407644 | 0.965094 | 1.458556 | 0.144687 | 0.981636 | chr9  | 1.16E+08 | 1.16E+08 | 0 | NA | intron (Nintron (N | 97033 NR_103711   | 493913 Hs. 728832NR_103711  | ENSG00000PAPPA-AS1  | DIPAS NCF           | PAPPA lincRNA                       |                             |
| chrX-48 6. 213725   | 1.407644 | 0.965094 | 1.458556 | 0.144687 | 0.981636 | chrX  | 48933820 | 48934992 | 0 | NA | intron (Nintron (N | -15382 NM_00687E  | 11040 Hs. 72714ENM_00687E   | ENSG00000PIM2       |                     | Pim-2 precursor protein-coding      |                             |
| chr13-24 7. 103726  | -1.33855 | 0.91803  | -1.45807 | 0.144822 | 0.981636 | chr13 | 24499251 | 24499774 | 0 | NA | intron (Nintron (N | 13266 NM_006437   | 143 Hs. 744855NM_006437     | ENSG00000PARP4      | ADPRTL1 Apol        | ADP-protein-coding                  |                             |
| chr13-33 6. 642497  | -1.95326 | 1.339774 | -1.4579  | 0.144868 | 0.981636 | chr13 | 33834887 | 33836410 | 0 | NA | intron (Nintron (N | 17499 NM_00291E   | 5983 Hs. 115474NM_00291E    | ENSG00000RFC3       | RFC38               | replicator protein-coding           |                             |
| chr20-31 7. 642497  | -1.95326 | 1.339774 | -1.4579  | 0.144868 | 0.981636 | chr20 | 31743951 | 31745072 | 0 | NA | intron (Nintron (N | 5221 NM_01211E    | 22974 Hs. 24458ENM_01211E   | ENSG00000TPX2       | C20orf1 CTPX2       | micro protein-coding                |                             |
| chr3-12 6. 642497   | -1.95326 | 1.339774 | -1.4579  | 0.144868 | 0.981636 | chr3  | 1.28E+08 | 1.28E+08 | 0 | NA | intron (Nintron (N | 36631 NM_00728E   | 11343 Hs. 27703ENM_00728E   | ENSG00000MGLL       | HU-K5 HU            | monoclonal protein-coding           |                             |
| chr1-18 6. 10946    | 0.992363 | 0.680753 | 1.457743 | 0.144911 | 0.981636 | chr1  | 1.86E+08 | 1.86E+08 | 0 | NA | intron (Nintron (N | 28107 NM_00329E   | 7175 Hs. 27964ENM_00329E    | ENSG00000TPR        |                     | translocase protein-coding          |                             |
| chr20-50 8. 324949  | -1.21919 | 0.837243 | -1.4562  | 0.145338 | 0.981636 | chr20 | 50150549 | 50150978 | 0 | NA | intron (NAluSx1 SI | 2960 NM_19912E    | 387521 Hs. 74483ENM_19912E  | ENSG00000TMEM189    | KUA                 | transmembrane protein-coding        |                             |
| chr6-31 6. 211908   | 1.239398 | 0.851186 | 1.456084 | 0.145369 | 0.981636 | chr6  | 31505897 | 31506131 | 0 | NA | intron (Nintron (N | 7869 NM_00128E    | 4277 Hs. 73144ENM_005931    | ENSG00000M1CB       | PERB1.2             | MHC class protein-coding            |                             |
| chr13-27 6. 367535  | -1.39461 | 0.958051 | -1.45567 | 0.145483 | 0.981636 | chr13 | 27114803 | 27115041 | 0 | NA | intron (NAluJr SIN | -10611 NR_046547  | 1.01E+08                    | Hs. 524922NR_046547 | USP12-AS1-          |                                     | USP12 lincRNA               |
| chr2-39 6. 367535   | -1.39461 | 0.958051 | -1.45567 | 0.145483 | 0.981636 | chr2  | 39321207 | 39321933 | 0 | NA | intron (NLTR5_Hs L | -77587 NR_144521  | 344387 Hs. 403201NM_00100E  | ENSG00000CDKL4      |                     | cyclin dependent protein-coding     |                             |
| chr3-47 6. 367535   | -1.39461 | 0.958051 | -1.45567 | 0.145483 | 0.981636 | chr3  | 47621236 | 47621435 | 0 | NA | intron (NLM1P17 LI | 40359 NR_145791   | 1.1E+08                     | NR_145791           | SNORD146            |                                     | small nucleolar RNA         |
| chr3-14 6. 367535   | -1.39461 | 0.958051 | -1.45567 | 0.145483 | 0.981636 | chr3  | 1.46E+08 | 1.46E+08 | 0 | NA | intron (NTHE1B LTF | 13941 NM_00112E   | 57088 Hs. 47786ENM_02035E   | ENSG00000PLSCR4     | TRA1                | phospholipase protein-coding        |                             |
| chr5-38 6. 367535   | -1.39461 | 0.958051 | -1.45567 | 0.145483 | 0.981636 | chr5  | 38927438 | 38925673 | 0 | NA | exon (NM exon (NM  | 79193 NM_00132E   | 9180 Hs. 12066ENM_00399E    | ENSG00000OSMR       | IL-31R              | beccanostatin protein-coding        |                             |
| chr6-18 6. 367535   | -1.39461 | 0.958051 | -1.45567 | 0.145483 | 0.981636 | chr6  | 18223556 | 18226034 | 0 | NA | TTS (NM_TTS (NM_I  | 39735 NM_001134   | 7913 Hs. 48481ENM_00347E    | ENSG00000DEK        | D6S231E             | DEK prototypic protein-coding       |                             |
| chr1-15 6. 221583   | 1.404546 | 0.965012 | 1.45547  | 0.145539 | 0.981636 | chr1  | 1.58E+08 | 1.58E+08 | 0 | NA | intron (N2a LINE   | 29355 NR_145471   | 1.01E+08                    | Hs. 66465ENM_145471 | KIRREL1-KIRREL-1    | KIRREL1 lincRNA                     |                             |
| chr17-17 6. 221583  | 1.404546 | 0.965012 | 1.45547  | 0.145539 | 0.981636 | chr17 | 17132817 | 17132266 | 0 | NA | intron (Nintron (N | 73292 NR_17883E   | 201164 Hs. 72907ENM_17883E  | ENSG00000PLD6       | SIC                 | phospholipase protein-coding        |                             |
| chr8-94 6. 221583   | 1.404546 | 0.965012 | 1.45547  | 0.145539 | 0.981636 | chr8  | 94925442 | 94926423 | 0 | NA | TTS (NM_TTS (NM_C  | 23446 NM_00113E   | 91424 Hs. 492261NM_03328E   | ENSG00000TP53INP1   | ZUP TP53            | tumor protein-coding                |                             |
| chr9-20 6. 221583   | 1.404546 | 0.965012 | 1.45547  | 0.145539 | 0.981636 | chr9  | 2086822  | 2087021  | 0 | NA | exon (NM exon (NM  | 64976 NM_00128E   | 6595 Hs. 29899ENM_00307E    | ENSG00000SMARCA2    | BAF190 BFSWI SNF    | r protein-coding                    |                             |
| chr9-54 0 6. 213691 | 1.73784  | 1.194264 | 1.455156 | 0.145626 | 0.981636 | chr9  | 5408338  | 5408797  | 0 | NA | intron (NTHE1D-int | 29358 NM_01846E   | 55848 Hs. 584424NM_01846E   | ENSG00000PLGRKT     | AD025               | C9c plasminogen protein-coding      |                             |
| chr12-6 6. 365685   | -1.40964 | 0.96899  | -1.45475 | 0.145738 | 0.981636 | chr12 | 65456764 | 65457508 | 0 | NA | intron (Nintron (N | 100175 NR_13503E  | 1.05E+08                    | Hs. 738044NR_13503E | ENSG00000LOC10536E  |                                     | uncharacterized RNA         |
| chr12-28 6. 365685  | -1.40964 | 0.96899  | -1.45475 | 0.145738 | 0.981636 | chr12 | 28401523 | 28401779 | 0 | NA | intron (NTHE1C LTF | -210913 NR_14501E | 729291 Hs. 12927ENM_14893E  | LOC729291-          |                     | uncharacterized RNA                 |                             |
| chr10-31 6. 408674  | -1.38845 | 0.955    | -1.45388 | 0.14598  | 0.981636 | chr10 | 3120805  | 3121445  | 0 | NA | intron (Nintron (N | 12979 NR_13275E   | 1.07E+08                    | NR_13275E           | SNORD142            | SNORA85                             | small nucleolar RNA         |
| chr3-7 6. 408674    | -1.38845 | 0.955    | -1.45388 | 0.14598  | 0.981636 | chr3  | 72922448 | 72923056 | 0 | NA | intron (Nintron (N | 34706 NM_00108E   | 727936 Hs. 71027ENM_00108E  | ENSG00000GXLYT2     | GLT8D4              | glucosylase protein-coding          |                             |
| chr5-7 6. 408674    | -1.38845 | 0.955    | -1.45388 | 0.14598  | 0.981636 | chr5  | 78089125 | 78089450 | 0 | NA | intron (Nintron (N | 131040 NR_10501E  | 1.02E+08                    | Hs. 25289ENM_10501E | LOC10192E-          |                                     | uncharacterized RNA         |
| chr19-20 6. 4359274 | -1.78913 | 1.230604 | -1.45386 | 0.145985 | 0.981636 | chr19 | 20935071 | 20935908 | 0 | NA | intron (NLM3a LIN  | 12236 NR_04583E   | 7639 Hs. 37138 NM_00342E    | ENSG00000ZNF85      | HPF4 HTF1           | zinc finger protein-coding          |                             |



|           |          |          |          |          |          |          |       |          |          |   |   |    |                    |                   |                                |                     |                                     |
|-----------|----------|----------|----------|----------|----------|----------|-------|----------|----------|---|---|----|--------------------|-------------------|--------------------------------|---------------------|-------------------------------------|
| chr5-3594 | 8.24519  | 1.241268 | 0.867439 | 1.430957 | 0.152443 | 0.981636 | chr5  | 359456   | 359888   | + | 0 | NA | intron (Nintron (N | 55496 NM_020731   | 57491 Hs. 50823 NM_020731      | ENSG000004AHRH      | AHH AHRH aryl-hydriprotein-coding   |
| chrX-6245 | 11.72528 | 1.004899 | 0.702441 | 1.430581 | 0.15255  | 0.981636 | chrX  | 62499326 | 62499605 | + | 0 | NA | IntergeniALR/Alpha | 851867 NM_001012  | 139886 Hs. 612782 NM_001012    | ENSG000004SPIN4     | TDRD28 spindlin protein-coding      |
| chr10-395 | 35.34092 | 0.660611 | 0.461889 | 1.430238 | 0.152649 | 0.981636 | chr10 | 39983438 | 39983710 | + | 0 | NA | IntergeniALR/Alpha | 1286978 NR_045000 | 399746 Hs. 742607 NR_045000    | ACTR3BP5            | FKSG74 ACTR3B pspseudo              |
| chr15-822 | 7.588757 | -1.25306 | 0.876538 | -1.42955 | 0.152845 | 0.981636 | chr15 | 82226710 | 82227188 | + | 0 | NA | intron (NL2-3_Crp) | 35579 NM_001322   | 79631 Hs. 459114 NM_024588     | ENSG000004EFL1      | EFTUD1 F elongaticprotein-coding    |
| chr7-1587 | 7.606323 | -1.24367 | 0.870402 | -1.42881 | 0.153058 | 0.981636 | chr7  | 1.59E+08 | 1.59E+08 | + | 0 | NA | intron (NLIMB3 LIN | 38361 NM_020728   | 57488 Hs. 490796 NM_020728     | ENSG000004ESY2      | CHR2SYT E xtended protein-coding    |
| chr9-2716 | 6.434098 | -1.37854 | 0.965158 | -1.4283  | 0.153206 | 0.981636 | chr9  | 27187159 | 27187500 | + | 0 | NA | intron (Nintron (N | 78188 NM_000455   | 7010 Hs. 89640 NM_000455       | ENSG000004CTEY      | CD202B G TEK recep protein-coding   |
| chr6-1305 | 5.915786 | -1.50545 | 1.054982 | -1.42699 | 0.153584 | 0.981636 | chr6  | 1.31E+08 | 1.31E+08 | + | 0 | NA | intron (NALuX LI   | 27725 NM_001195   | 1.01E+08 Hs. 388715 NM_001195  | ENSG000004SMLR1     | - small let protein-coding          |
| chr17-395 | 5.495284 | 1.464155 | 1.02612  | 1.426885 | 0.153613 | 0.981636 | chr17 | 39339443 | 39339765 | + | 0 | NA | intron (NLIMC4a LI | 42204 NR_162098   | 1.14E+08 NR_162098             | MIR548BC            | - microRNA ncRNA                    |
| chr19-524 | 5.495284 | 1.464155 | 1.02612  | 1.426885 | 0.153613 | 0.981636 | chr19 | 52462494 | 52463902 | + | 0 | NA | intron (NHERVK4-i  | 9645 NM_001095    | 147660 Hs. 157287 NM_152472    | ENSG000004ZNF578    | - zinc fing protein-coding          |
| chr8-1864 | 5.495284 | 1.464155 | 1.02612  | 1.426885 | 0.153613 | 0.981636 | chr8  | 18648856 | 18649717 | + | 0 | NA | intron (NMSTA-int) | 159581 NM_206905  | 23362 Hs. 434255 NM_015311     | ENSG000004PSD3      | EFA6D E F pleckstrin protein-coding |
| chr19-174 | 8.127779 | 1.228139 | 0.860923 | 1.426538 | 0.153713 | 0.981636 | chr19 | 17423738 | 17424084 | + | 0 | NA | intron (Nintron (N | 3864 NM_138401    | 93343 Hs. 515243 NM_138401     | ENSG000004MVB12A    | CFBP FAM multivesiprotein-coding    |
| chr11-134 | 5.130597 | -1.61229 | 1.13063  | -1.42601 | 0.153865 | 0.981636 | chr11 | 1.34E+08 | 1.34E+08 | + | 0 | NA | intron (Nintron (N | -15326 NR_145790  | 1.1E+08 NR_145790              | SNORD153            | - small nucsnRNA                    |
| chr3-9782 | 6.615627 | -1.4625  | 1.026056 | -1.42536 | 0.154054 | 0.981636 | chr3  | 9782147  | 9782352  | + | 0 | NA | TTS (NM_TTS (NM_1  | -10246 NM_001024  | 10093 Hs. 323342 NM_005715     | ENSG000004ARPC4     | ARC20 P2 actin rel protein-coding   |
| chr5-3238 | 9.814898 | -1.15873 | 0.813328 | -1.42468 | 0.15425  | 0.981636 | chr5  | 32386056 | 32386342 | + | 0 | NA | intron (NMIR SINE) | 8276 NR_030305    | 693164 NR_030305               | ENSG000004MIR579    | MIRN579 microRNA ncRNA              |
| chr1-1495 | 5.641051 | -1.45147 | 1.018976 | -1.42444 | 0.154318 | 0.981636 | chr1  | 14957085 | 14957526 | + | 0 | NA | intron (Nintron (N | 11386 NM_001017   | 23254 Hs. 368822 NM_015205     | ENSG000004KAZN      | KAZ kazrin, f protein-coding        |
| chr1-7864 | 5.641051 | -1.45147 | 1.018976 | -1.42444 | 0.154318 | 0.981636 | chr1  | 78641676 | 78642609 | + | 0 | NA | 3' UTR (N3' UTR (N | -7647 NR_135640   | 10561 Hs. 82316 NM_006417      | ENSG000004IF144     | MTAP44 TI interferc protein-coding  |
| chr1-154  | 5.641051 | -1.45147 | 1.018976 | -1.42444 | 0.154318 | 0.981636 | chr1  | 1.55E+08 | 1.55E+08 | + | 0 | NA | intron (Nintron (N | 2986 NR_036212    | 1E+08 NR_036212                | ENSG000004MIR4258   | - microRNA ncRNA                    |
| chr11-205 | 5.641051 | -1.45147 | 1.018976 | -1.42444 | 0.154318 | 0.981636 | chr11 | 20097797 | 20098294 | + | 0 | NA | intron (Nintron (N | -48742 NR_046672  | 1.01E+08 Hs. 557915 NM_046672  | ENSG000004NAV2-AS2  | - NAV2 anticnRNA                    |
| chr15-515 | 5.641051 | -1.45147 | 1.018976 | -1.42444 | 0.154318 | 0.981636 | chr15 | 51930672 | 51930871 | + | 0 | NA | IntergeniIntergeni | -6651 NR_109775   | 1E+08 Hs. 664788 NR_109775     | LOC100422           | - LEO1 homc pseudo                  |
| chr2-3317 | 5.641051 | -1.45147 | 1.018976 | -1.42444 | 0.154318 | 0.981636 | chr2  | 33177753 | 33178200 | + | 0 | NA | intron (Nintron (N | 43379 NM_001166   | 4052 Hs. 619315 NM_000627      | ENSG000004LTBP1     | - latent tr protein-coding          |
| chr4-9905 | 5.641051 | -1.45147 | 1.018976 | -1.42444 | 0.154318 | 0.981636 | chr4  | 99057556 | 99057906 | + | 0 | NA | intron (Nintron (N | 31057 NM_000671   | 128 Hs. 78989 NM_000671        | ENSG000004ADH5      | ADH-3 AD alcohol protein-coding     |
| chr6-2046 | 5.641051 | -1.45147 | 1.018976 | -1.42444 | 0.154318 | 0.981636 | chr6  | 20463983 | 20464603 | + | 0 | NA | intron (NMER2-int  | 60614 NM_001243   | 1871 Hs. 269405 NM_001945      | ENSG000004E2F3      | E2F-3 E2F trans protein-coding      |
| chr6-151  | 5.641051 | -1.45147 | 1.018976 | -1.42444 | 0.154318 | 0.981636 | chr6  | 1.51E+08 | 1.51E+08 | + | 0 | NA | intron (NMSTB LTR  | 25297 NM_001355   | 25902 Hs. 591343 NM_015440     | ENSG000004MTHFD1L   | FTHFSDC1 methyleneprotein-coding    |
| chrX-2196 | 5.641051 | -1.45147 | 1.018976 | -1.42444 | 0.154318 | 0.981636 | chrX  | 12967290 | 12967574 | + | 0 | NA | intron (Nintron (N | 26723 NM_004595   | 6611 Hs. 724874 NM_004595      | ENSG000004SMS       | MRSR SPM spermine protein-coding    |
| chr1-2438 | 7.426904 | 1.25819  | 0.883368 | 1.42431  | 0.154357 | 0.981636 | chr1  | 2.44E+08 | 2.44E+08 | + | 0 | NA | intron (NLIPA10 LI | 20435 NM_181690   | 10000 Hs. 498292 NM_005465     | ENSG000004AKT3      | MPPH MPP AKT serir protein-coding   |
| chr20-284 | 88.26594 | 0.453982 | 0.31875  | 1.424257 | 0.154372 | 0.981636 | chr20 | 28494794 | 28498050 | + | 0 | NA | IntergeniALR/Alpha | 106243 NR_132315  | 1E+08 Hs. 529357 NR_132315     | ENSG000004FRG1CP    | - FSHD rep pseudo                   |
| chr2-7391 | 7.639604 | -1.23733 | 0.8695   | -1.42304 | 0.154725 | 0.981636 | chr2  | 73912994 | 73920395 | + | 0 | NA | exon (NM_exon (NM_ | -10132 NR_134895  | 1716 Hs. 469022 NM_001925      | ENSG000004DGUOK     | MTDPS3 NC deoxyguar protein-coding  |
| chr5-4962 | 128.5629 | 0.415534 | 0.292075 | 1.422695 | 0.154825 | 0.981636 | chr5  | 49625564 | 49627067 | + | 0 | NA | IntergeniALR/Alpha | 814973 NM_198445  | 133418 Hs. 561141 NM_198445    | ENSG000004EMB       | GP70 embigin protein-coding         |
| chr11-133 | 7.460186 | 1.260424 | 0.886037 | 1.422541 | 0.154869 | 0.981636 | chr11 | 13369641 | 13369935 | + | 0 | NA | intron (Nintron (N | 70491 NM_001297   | 84280 Hs. 332382 NM_032320     | ENSG000004BTBD10    | GMRP-1 GN BTB domai protein-coding  |
| chr16-195 | 7.460186 | 1.260424 | 0.886037 | 1.422541 | 0.154869 | 0.981636 | chr16 | 19577048 | 19577247 | + | 0 | NA | intron (NMSTB1 LTR | 21444 NM_001365   | 57020 Hs. 654964 NM_020314     | ENSG000004VPS35L    | C16orf62 VPS35 enc protein-coding   |
| chr17-637 | 7.460186 | 1.260424 | 0.886037 | 1.422541 | 0.154869 | 0.981636 | chr17 | 63713164 | 63713568 | + | 0 | NA | intron (Nintron (N | 13028 NR_046273   | 729683 Hs. 534931 NR_046273    | LOC729683           | - uncharactncRNA                    |
| chr7-5996 | 15.98526 | 0.904777 | 0.635898 | 1.422362 | 0.154921 | 0.981636 | chr7  | 59908457 | 59908731 | + | 0 | NA | IntergeniALR/Alpha | 2458417 NM_001155 | 441234 Hs. 533121 NM_001155    | ENSG000004ZNF716    | - zinc fing protein-coding          |
| chr1-1246 | 33.84719 | 0.647218 | 0.455181 | 1.421892 | 0.155058 | 0.981636 | chr1  | 1.25E+08 | 1.25E+08 | + | 0 | NA | IntergeniALR/Alpha | 3167475 NR_003955 | 641234 Hs. 697682 NR_003955    | ENSG000004EMB1P     | - embigin f pseudo                  |
| chr3-1231 | 10.76538 | 1.094239 | 0.769983 | 1.421121 | 0.155282 | 0.981636 | chr3  | 1.23E+08 | 1.23E+08 | + | 0 | NA | IntergeniIntergeni | 3023 NR_106960    | 1.02E+08 NR_106960             | ENSG000004MIR7110   | hsa-mir-7 microRNA ncRNA            |
| chr19-187 | 5.487426 | 1.467733 | 1.032838 | 1.421609 | 0.155297 | 0.981636 | chr19 | 18342870 | 18344069 | + | 0 | NA | intron (NMIR SINE  | 2871 NM_001322    | 54858 Hs. 131775 NM_017712     | ENSG000004PGPEP1    | PAP-1 PG pyroglyt protein-coding    |
| chr10-506 | 6.418382 | -1.37498 | 0.968    | -1.42043 | 0.155481 | 0.981636 | chr10 | 50746266 | 50746465 | + | 0 | NA | intron (NLIMA8 LIN | 6429 NM_001321    | 653308 Hs. 659820 NM_001075    | ENSG000004ASAH2B    | ASAH2 ASN-acylsp protein-coding     |
| chr5-9887 | 6.418382 | -1.37498 | 0.968    | -1.42043 | 0.155481 | 0.981636 | chr5  | 98871874 | 98872313 | + | 0 | NA | exon (NM_exon (NM_ | 54441 NM_001270   | 1105 Hs. 643465 NM_001270      | ENSG000004CHD1      | CHD-1 PII chromodon protein-coding  |
| chr7-6657 | 6.418382 | -1.37498 | 0.968    | -1.42043 | 0.155481 | 0.981636 | chr7  | 66571346 | 66571545 | + | 0 | NA | intron (NMIR3 SINE | 20962 NR_111974   | 493754 Hs. 732405 NR_002933    | ENSG000004GS1-124E1 | - RAB guanipseudo                   |
| chr16-485 | 6.377243 | -1.38127 | 0.972954 | -1.41967 | 0.155705 | 0.981636 | chr16 | 48594413 | 48594636 | + | 0 | NA | intron (NLIMC4a LI | 15656 NM_153025   | 9683 Hs. 511835 NM_153025      | ENSG000004NBP1      | - NEDD4 bi protein-coding           |
| chr5-144  | 6.377243 | -1.38127 | 0.972954 | -1.41967 | 0.155705 | 0.981636 | chr5  | 14434373 | 14434796 | + | 0 | NA | intron (NLIMC4a LI | -29399 NR_145815  | 1.1E+08 NR_145815              | SNORD170            | - small nucsnRNA                    |
| chr6-8722 | 7.631746 | -1.23585 | 0.87055  | -1.41962 | 0.155719 | 0.981636 | chr6  | 87220695 | 87220989 | + | 0 | NA | intron (Nintron (N | 65277 NM_015021   | 23036 Hs. 444800 NM_015021     | ENSG000004ZNF292    | Nbla00365 zinc fing protein-coding  |
| chr9-107  | 7.631746 | -1.23585 | 0.87055  | -1.41962 | 0.155719 | 0.981636 | chr9  | 1.07E+08 | 1.07E+08 | + | 0 | NA | IntergeniL3 LINE C | 53994 NM_001244   | 5887 Hs. 521640 NM_02874       | ENSG000004RAD23B    | HHR23B HF RAD23 hon protein-coding  |
| chr10-74  | 7.573041 | -1.25017 | 0.881096 | -1.41888 | 0.155933 | 0.981636 | chr10 | 74015241 | 74015842 | + | 0 | NA | intron (NALuS SIN  | 17425 NM_003373   | 7414 Hs. 643895 NM_003373      | ENSG000004CVL       | CMD1W CMF vinculin protein-coding   |
| chr2-1277 | 7.573041 | -1.25017 | 0.881096 | -1.41888 | 0.155933 | 0.981636 | chr2  | 1.28E+08 | 1.28E+08 | + | 0 | NA | TTS (NM_TTS (NM_C  | 40751 NM_018383   | 55339 Hs. 554831 NM_018383     | ENSG000004WDR33     | NET14 WDC WD repeat protein-coding  |
| chr1-8508 | 5.46986  | 1.457874 | 1.027958 | 1.418222 | 0.156126 | 0.981636 | chr1  | 85081436 | 85083456 | + | 0 | NA | intron (Nintron (N | 20119 NM_145172   | 126820 Hs. 97933 NM_145172     | ENSG000004WDR63     | DIC3 NYD- WD repeat protein-coding  |
| chr19-122 | 5.46986  | 1.457874 | 1.027958 | 1.418222 | 0.156126 | 0.981636 | chr19 | 12207998 | 12209709 | + | 0 | NA | IntergeniIntergeni | 13838 NR_104175   | 1E+08 Hs. 662620 NR_104175     | LOC100285           | - uncharactncRNA                    |
| chr7-1497 | 5.46986  | 1.457874 | 1.027958 | 1.418222 | 0.156126 | 0.981636 | chr7  | 1.5E+08  | 1.5E+08  | + | 0 | NA | intron (NMIR SINE  | 8361 NM_001290    | 84626 Hs. 299560 NM_032534     | ENSG000004KRBA1     | - KRAB-A d protein-coding           |
| chr22-431 | 8.852968 | -1.14004 | 0.805679 | -1.415   | 0.157067 | 0.981636 | chr22 | 43161236 | 43161476 | + | 0 | NA | intron (Nintron (N | 9421 NM_001255    | 706 Hs. 202 NM_000714          | ENSG000004TSPO      | BPBS BZRF transloc protein-coding   |
| chr2-929  | 17.66316 | 0.834004 | 0.589453 | 1.414878 | 0.157104 | 0.981636 | chr2  | 92934828 | 92935157 | + | 0 | NA | IntergeniALR/Alpha | 993859 NR_027714  | 440888 Hs. 730235 NM_001032412 | ACTR3BP2            | FKSG73 ACTR3B pspseudo              |
| chr1-2282 | 5.503142 | 1.460606 | 1.03246  | 1.414685 | 0.157161 | 0.981636 | chr1  | 2.28E+08 | 2.28E+08 | + | 0 | NA | intron (Nintron (N | -70335 NR_073154  | 574407 Hs. 650035 NM_001025    | ENSG000004OBSCN-AS1 | C1orf145 OBSCN anticnRNA            |
| chr4-281  | 5.503142 | 1.460606 | 1.03246  | 1.414685 | 0.157161 | 0.981636 | chr4  | 2821434  | 2821938  | + | 0 | NA | intron (NALuJb SIN | 2872 NM_003023    | 6452 Hs. 167675 NM_003023      | ENSG000004SH3BP2    | 3BP-2 3BP SH3 domai protein-coding  |
| chr17-315 | 5.607769 | -1.46066 | 1.033249 | -1.41366 | 0.157462 | 0.981636 | chr17 | 31591189 | 31591511 | + | 0 | NA | IntergeniHALLME LI | 15939 NR_029855   | 1E+08 NR_029855                | ENSG000004MIR365B   | MIR365-2 microRNA ncRNA             |
| chr18-51  | 5.607769 | -1.46066 | 1.033249 | -1.41366 | 0.157462 | 0.981636 | chr18 | 51086476 | 51086757 | + | 0 | NA | IntergeniLIMD1 LIN | 56403 NM_005355   | 4089 Hs. 75862 NM_005355       | ENSG000004SMAD4     | DPC4 JIP SMAD fami protein-coding   |

|                    |          |          |          |          |          |       |          |          |   |     |    |                     |          |           |          |                                                                        |                                            |                 |
|--------------------|----------|----------|----------|----------|----------|-------|----------|----------|---|-----|----|---------------------|----------|-----------|----------|------------------------------------------------------------------------|--------------------------------------------|-----------------|
| chr20-60: 4.922425 | -1.52942 | 1.094359 | -1.39755 | 0.162249 | 0.981636 | chr20 | 6032876  | 6033549  | + | 0   | NA | intron (AluS2) SI   | 20848    | NM_152611 | 164312   | Hs.14913:NM_152611:ENS00000CLRRN4                                      | C20orf75 leucine rprotein-coding           |                 |
| chr20-58: 4.922425 | -1.52942 | 1.094359 | -1.39755 | 0.162249 | 0.981636 | chr20 | 5852898  | 5853166  | + | 0   | NA | intron (L1MB1) LIN  | -14903   | NM_15336C | 164284   | Hs.11928:NM_15336C:ENS00000APCDL1L                                     | - APC down-protein-coding                  |                 |
| chr3-180: 4.922425 | -1.52942 | 1.094359 | -1.39755 | 0.162249 | 0.981636 | chr3  | 1.81E+08 | 1.81E+08 | + | 0   | NA | TTS (NM_C TTS (NM_C | 16145    | NM_001042 | 151613   | Hs.43213:NM_001042:ENS00000TTC14                                       | DRDL5813 tetratric protein-coding          |                 |
| chr8-233: 4.922425 | -1.52942 | 1.094359 | -1.39755 | 0.162249 | 0.981636 | chr8  | 23334285 | 23334615 | + | 0   | NA | intron (N intron (N | -1758    | NR_038322 | 1.01E+08 | Hs.66113:NR_038322:ENS00000LOC100507-                                  | uncharactncRNA                             |                 |
| chr9-115: 4.922425 | -1.52942 | 1.094359 | -1.39755 | 0.162249 | 0.981636 | chr9  | 1.53E+08 | 1.15E+08 | + | 0   | NA | intron (N intron (N | 57228    | NM_00216C | 3371     | Hs.14325:NM_00216C:ENS00000TNC                                         | 150-225 tenascin protein-coding            |                 |
| chr1-150: 7.956774 | 1.182053 | 0.845938 | 1.397327 | 0.162315 | 0.981636 | chr1  | 1.51E+08 | 1.51E+08 | + | 0   | NA | intron (N intron (N | -3035    | NM_022664 | 1893     | Hs.81071:NM_00442:ENS00000CECM1                                        | URBWD extracell protein-coding             |                 |
| chr15-23: 7.956774 | 1.182053 | 0.845938 | 1.397327 | 0.162315 | 0.981636 | chr15 | 23311286 | 23311783 | + | 0   | NA | intron (N intron (N | 189      | NR_145475 | 1.01E+08 | NR_145479                                                              | HERC2P11                                   | hect dom pseudo |
| chr18-17: 7.956774 | 1.182053 | 0.845938 | 1.397327 | 0.162315 | 0.981636 | chr18 | 17240247 | 17240454 | + | 0   | NA | IntergeniALR Alpha  | -1914431 | NR_027417 | 644669   | Hs.579474:NR_027417:ENS00000LOC644669-                                 | ankyrin rpseudo                            |                 |
| chr7-106: 7.956774 | 1.182053 | 0.845938 | 1.397327 | 0.162315 | 0.981636 | chr7  | 1.06E+08 | 1.06E+08 | + | 0   | NA | intron (N intron (N | 15932    | NM_00574E | 10135    | Hs.48961:NM_00574E:ENS00000CNAMPT                                      | 11100350 nicotinan protein-coding          |                 |
| chr9-104: 7.956774 | 1.182053 | 0.845938 | 1.397327 | 0.162315 | 0.981636 | chr9  | 1.05E+08 | 1.05E+08 | + | 0   | NA | intron (AluSc) SIN  | 27539    | NR_13076C | 55335    | Hs.4929294:NM_01837:ENS00000NIPSNAP3EFP944                             | NIPSNAP3 protein-coding                    |                 |
| chr1-113: 5.599911 | -1.45884 | 1.044484 | -1.39671 | 0.162501 | 0.981636 | chr1  | 1.14E+08 | 1.14E+08 | + | 0   | NA | exon (NM exon (NM   | 85808    | NM_00660E | 10745    | Hs.655824:NM_00660E:ENS00000PHTF1                                      | PHTF putative protein-coding               |                 |
| chr20-32: 5.599911 | -1.45884 | 1.044484 | -1.39671 | 0.162501 | 0.981636 | chr20 | 32701946 | 32702264 | + | 0   | NA | TTS (NM_C TTS (NM_C | -28164   | NM_182584 | 284805   | Hs.353262:NM_182584:ENS00000C20orf20-                                  | mitochondrion protein-coding               |                 |
| chr8-12: 5.599911  | -1.45884 | 1.044484 | -1.39671 | 0.162501 | 0.981636 | chr8  | 1.25E+08 | 1.23E+08 | + | 0   | NA | exon (NM exon (NM   | -11115   | NR_030382 | 693130   | NR_030382:ENS00000MIR5482D-                                            | MIR5482D microRNA ncRNA                    |                 |
| chr19-25: 12.21216 | 0.960881 | 0.688102 | 1.396422 | 0.162587 | 0.981636 | chr19 | 25693106 | 25693327 | + | 0   | NA | IntergeniALR Alpha  | -1529769 | NR_003603 | 1E+08    | Hs.14931:NR_003603:ENS00000HACVCR1P1                                   | hepatitis rpseudo                          |                 |
| chr11-13: 5.582346 | -1.47256 | 1.055282 | -1.39542 | 0.162891 | 0.981636 | chr11 | 1.31E+08 | 1.31E+08 | + | 0   | NA | IntergeniAlu Jo SIN | -3993    | NR_125382 | 1.04E+08 | Hs.43030:NR_125382:ENS00000LOC103611-                                  | uncharactncRNA                             |                 |
| chr14-50: 5.625335 | -1.44746 | 1.037347 | -1.39535 | 0.162911 | 0.981636 | chr14 | 50356190 | 50356529 | + | 0   | NA | intron (N intron (N | 40522    | NM_00419E | 8814     | Hs.280881:NM_00419E:ENS00000CDKL1                                      | KKIALRE F cyclin d protein-coding          |                 |
| chr1-31: 6.733887  | 1.291579 | 0.925637 | 1.395341 | 0.162913 | 0.981636 | chr1  | 31364806 | 31365427 | + | 0   | NA | TTS (NM_C TTS (NM_C | 7960     | NM_00410E | 2170     | Hs.576372:NM_00410E:ENS00000FABP3                                      | FABP11 H-fatty aciprotein-coding           |                 |
| chr1-20: 6.733887  | 1.291579 | 0.925637 | 1.395341 | 0.162913 | 0.981636 | chr1  | 2.08E+08 | 2.08E+08 | + | 0   | NA | intron (N intron (N | -5228    | NR_026817 | 148696   | Hs.125511:NM_01039568                                                  | LOC14869E-                                 | uncharactncRNA  |
| chr8-43: 6.733887  | 1.291579 | 0.925637 | 1.395341 | 0.162913 | 0.981636 | chr8  | 43170476 | 43171175 | + | 0   | NA | intron (N intron (N | 30361    | NM_15241E | 138050   | Hs.600384:NM_15241E:ENS00000HGSNAT                                     | HGNAT MPS heparan-ε protein-coding         |                 |
| chr12-16: 6.887697 | -1.27369 | 0.912944 | -1.39514 | 0.162973 | 0.981636 | chr12 | 1632139  | 1632476  | + | 0   | NA | intron (ML2c LINE   | 3076     | NM_03264E | 81029    | Hs.306051:NM_03077:ENS00000WNT5B                                       | - Wnt fami protein-coding                  |                 |
| chr7-16: 6.887697  | -1.27369 | 0.912944 | -1.39514 | 0.162973 | 0.981636 | chr7  | 16316773 | 16164038 | + | 0   | NA | intron (N LMB7 LIN  | -10709   | NR_145787 | 1.1E+08  | NR_145787                                                              | SNORD163                                   | small nucsnRNA  |
| chr19-10: 6.887697 | -1.27369 | 0.912944 | -1.39514 | 0.162973 | 0.981636 | chr19 | 10390379 | 10390665 | + | 0   | NA | TTS (NM_C TTS (NM_C | -9950    | NM_003331 | 7297     | Hs.75516:NM_003331:ENS00000TYK2                                        | TYK2 JTK tyrosine protein-coding           |                 |
| chr7-100: 6.887697 | -1.27369 | 0.912944 | -1.39514 | 0.162973 | 0.981636 | chr7  | 1.01E+08 | 1.01E+08 | + | 0   | NA | 3' UTR (N3' UTR (N  | -23673   | NM_00136E | 56996    | Hs.521087:NM_02024:ENS00000SLC12A9                                     | SLC12A9 CIP1 solute c protein-coding       |                 |
| chr8-13: 6.887697  | -1.27369 | 0.912944 | -1.39514 | 0.162973 | 0.981636 | chr8  | 1.33E+08 | 1.33E+08 | + | 0   | NA | non-codirnon-codir  | 37071    | NM_08083E | 8840     | Hs.4929294:NM_003882:ENS00000CCN4                                      | CCN4 WISP1 WISC cellular protein-coding    |                 |
| chr13-36: 6.700605 | 1.289113 | 0.924008 | 1.395132 | 0.162976 | 0.981636 | chr13 | 36247146 | 36247618 | + | 0   | NA | intron (N Tiger1 E  | -32767   | NM_00128E | 54937    | Hs.12451:NM_01782:ENS00000SOHLH2                                       | SOHLH2 SP1 spermatog protein-coding        |                 |
| chr17-64: 6.700605 | 1.289113 | 0.924008 | 1.395132 | 0.162976 | 0.981636 | chr17 | 64046008 | 64046291 | + | 0   | NA | intron (N intron (N | -25515   | NM_00109E | 3384     | Hs.43146:NM_00087:ENS00000ICAM2                                        | ICAM2 CD102 intercell protein-coding       |                 |
| chr2-27: 6.948916  | 1.184375 | 0.849012 | 1.395003 | 0.163015 | 0.981636 | chr2  | 27695842 | 27696148 | + | 0   | NA | IntergeniIntergeni  | 19737    | NR_13520C | 1E+08    | Hs.51587:NR_13520C:ENS00000LINC0146C-                                  | long intencRNA                             |                 |
| chr8-105: 7.582749 | -1.23921 | 0.888431 | -1.39483 | 0.163067 | 0.981636 | chr8  | 1.05E+08 | 1.05E+08 | + | 0   | NA | intron (N intron (N | 174168   | NM_00136E | 23414    | Hs.43100:NM_01208:ENS00000ZFPM2                                        | ZFPM2 DIH3 FOG2 zinc fing protein-coding   |                 |
| chr6-5: 6.895555   | -1.2753  | 0.914423 | -1.39465 | 0.163123 | 0.981636 | chr6  | 52529350 | 52530927 | + | 0   | NA | intron (N MER53 DNA | 46922    | NM_01228E | 9697     | Hs.520182:NM_01228E:ENS00000TRAM2                                      | TRAM2 - transloc protein-coding            |                 |
| chr20-28: 6.895555 | -1.4382  | 1.032043 | -1.39355 | 0.163454 | 0.981636 | chr20 | 28118593 | 28118792 | + | 0   | NA | IntergeniALR Alpha  | 483973   | NR_13231E | 1E+08    | Hs.529357:NR_13231E:ENS00000FRGLCP                                     | - FSHD regpseudo                           |                 |
| chr8-13: 6.586817  | -1.4382  | 1.032043 | -1.39355 | 0.163454 | 0.981636 | chr8  | 1.33E+08 | 1.33E+08 | + | 0   | NA | intron (N intron (N | 30676    | NM_00113E | 10397    | Hs.372914:NM_00609:ENS00000CNRG1                                       | CNRG1 CAP43 CMN-myc down protein-coding    |                 |
| chr9-11: 5.658617  | -1.4382  | 1.032043 | -1.39355 | 0.163454 | 0.981636 | chr9  | 1.11E+08 | 1.11E+08 | + | 0   | NA | intron (N intron (N | 26374    | NM_001351 | 1902     | Hs.126667:NM_001401:ENS00000LPAR1                                      | LPAR1 EDG2 GPR2 lysophosph protein-coding  |                 |
| chr5-490: 10.01366 | 1.0987   | 0.789227 | 1.392122 | 0.163886 | 0.981636 | chr5  | 49096248 | 49096467 | + | 0   | NA | IntergeniALR Alpha  | 1344931  | NM_19844E | 133418   | Hs.561411:NM_19844E:ENS00000EMB                                        | EMB GP70 embigin protein-coding            |                 |
| chr6-27: 4.522294  | 1.447825 | 1.040173 | 1.391908 | 0.16395  | 0.981636 | chr6  | 27845387 | 27845772 | + | 0   | NA | IntergeniIntergeni  | 6917     | NM_00352C | 8341     | Hs.53436:NM_00352C:ENS00000HIST1H2B H2B/d H2E histone c protein-coding |                                            |                 |
| chr6-4: 4.522294   | 1.447825 | 1.040173 | 1.391908 | 0.16395  | 0.981636 | chr6  | 41566731 | 41567015 | + | 0   | NA | intron (N intron (N | -18252   | NR_12641E | 1.01E+08 | Hs.57109:NR_12641E:ENS00000POXP4-AS1-                                  | POXP4 antncRNA                             |                 |
| chr4-76: 6.879839  | -1.27207 | 0.914199 | -1.39145 | 0.164088 | 0.981636 | chr4  | 762179   | 762657   | + | 0   | NA | intron (N intron (N | 19475    | NR_036511 | 1E+08    | Hs.73175:NR_036511:ENS00000LOC10012E-                                  | uncharactncRNA                             |                 |
| chr5-43: 6.879839  | -1.27207 | 0.914199 | -1.39145 | 0.164088 | 0.981636 | chr5  | 43135517 | 43135718 | + | 0   | NA | intron (AluS2) SIN  | 14052    | NM_00133C | 7690     | Hs.535804:NM_00343:ENS00000ZNF131                                      | ZNF131 ZBTB35 p/zinc fing protein-coding   |                 |
| chr6-7: 6.879839   | -1.27207 | 0.914199 | -1.39145 | 0.164088 | 0.981636 | chr6  | 75147248 | 75156865 | + | 0   | NA | intron (N intron (N | -23274   | NR_14578E | 1.1E+08  | NR_145788                                                              | SNORD156                                   | small nucsnRNA  |
| chr7-23: 6.879839  | -1.27207 | 0.914199 | -1.39145 | 0.164088 | 0.981636 | chr7  | 23330673 | 23331642 | + | 0   | NA | intron (N intron (N | 31818    | NM_13844E | 115416   | Hs.87385:NM_13844E:ENS00000MALSU1                                      | C7orf30 mi to micro protein-coding         |                 |
| chr19-23: 9.195376 | 1.099966 | 0.79092  | 1.390742 | 0.164304 | 0.981636 | chr19 | 23344503 | 23345218 | + | 0   | NA | IntergeniMER48 LTF  | 50611    | NM_00343C | 7644     | Hs.58834:NM_00343C:ENS00000ZNF91                                       | ZNF91 HPF7 HTF1 zinc fing protein-coding   |                 |
| chr12-54: 4.914567 | -1.52717 | 1.098625 | -1.39008 | 0.164506 | 0.981636 | chr12 | 54414594 | 54415017 | + | 0   | NA | intron (AluU) SINE  | 4461     | NM_00220E | 3678     | Hs.505654:NM_00220E:ENS00000ITGA5                                      | ITGA5 CD49E FN1 integrin protein-coding    |                 |
| chr1-54: 7.964632  | 1.179709 | 0.849184 | 1.389225 | 0.164764 | 0.981636 | chr1  | 1.54E+08 | 1.54E+08 | + | 0   | NA | exon (NM exon (NM   | -22870   | NR_14785E | 1.02E+08 | Hs.61708:NR_14785E:ENS00000IL6R-AS1-                                   | IL6R antncRNA                              |                 |
| chr1-16: 7.964632  | 1.179709 | 0.849184 | 1.389225 | 0.164764 | 0.981636 | chr1  | 1.63E+08 | 1.63E+08 | + | 0   | NA | intron (N intron (N | 14526    | NM_016371 | 51478    | Hs.49292:NM_016371:ENS00000HSD17B7                                     | HSD17B7 PRAP SDR2 hydroxyst protein-coding |                 |
| chr1-18: 7.964632  | 1.179709 | 0.849184 | 1.389225 | 0.164764 | 0.981636 | chr1  | 1.85E+08 | 1.85E+08 | + | 0   | NA | intron (N intron (N | 17643    | NM_00131E | 80267    | Hs.523811:NM_025191:ENS00000EDEM3                                      | EDEM3 Clorf22 ER degrad protein-coding     |                 |
| chr1-19: 7.964632  | -1.13485 | 0.817018 | -1.38901 | 0.164829 | 0.981636 | chr1  | 19730217 | 19730571 | + | 0   | NA | intron (N MLT1 LTF  | 65519    | NM_000871 | 3362     | Hs.22180:NM_000871:ENS00000CHTR6                                       | CHTR6 5-HT6 5-β hydroxy protein-coding     |                 |
| chr10-49: 8.821537 | -1.13485 | 0.817018 | -1.38901 | 0.164829 | 0.981636 | chr10 | 49947371 | 49947755 | + | 0   | NA | intron (AluSx1) SI  | 5510     | NR_15865E | 1.13E+08 | NR_158654                                                              | TMM23B-β                                   | TMM23B-β ncRNA  |
| chr1-16: 8.81285   | -1.53783 | 1.108346 | -1.3875  | 0.165289 | 0.981636 | chr1  | 1.63E+08 | 1.63E+08 | + | 0   | NA | intron (N LIMEc LIN | 9729     | NM_145697 | 83540    | Hs.65195:NM_03142:ENS00000NUF2                                         | NUF2 CDCA1 CT1NUP2 com protein-coding      |                 |
| chr11-8: 8.81285   | -1.53783 | 1.108346 | -1.3875  | 0.165289 | 0.981636 | chr11 | 86253034 | 86253286 | + | 0   | NA | intron (N intron (N | 8407     | NM_003797 | 8726     | Hs.50351:NM_003797:ENS00000CEED                                        | CEED COG15 HEF embryonic protein-coding    |                 |
| chr12-9: 8.81285   | -1.53783 | 1.108346 | -1.3875  | 0.165289 | 0.981636 | chr12 | 95665125 | 95665538 | + | 0   | NA | intron (N intron (N | 16076    | NR_07722E | 1E+08    | Hs.676211:NR_07722E:ENS00000PGAM1P5                                    | PGAM1P5 - phosphog pseudo                  |                 |
| chr20-56: 4.881285 | -1.53783 | 1.108346 | -1.3875  | 0.165289 | 0.981636 | chr20 | 56372061 | 56373505 | + | 0   | NA | intron (N intron (N | 13809    | NM_080821 | 116151   | Hs.14373:NM_080821:ENS00000FAM210B                                     | FAM210B 5A3 C20orf family wiprotein-coding |                 |
| chr15-90: 9.279505 | 1.110032 | 0.800275 | 1.387062 | 0.165423 | 0.981636 | chr15 | 90911401 | 90911602 | + | 0   | NA | non-codirnon-codir  | 7311     | NR_135504 | 4122     | Hs.11645:NM_00612:ENS00000MAN2A2                                       | MAN2A2 MANA2X mannosi d protein-coding     |                 |
| chr2-32: 9.279505  | 1.110032 | 0.800275 | 1.387062 | 0.165423 | 0.981636 | chr2  | 32282411 | 32282615 | + | 0   | NA | intron (AluUx4) SI  | 4609     | NM_03231E | 84272    | Hs.468099:NM_03231E:ENS00000YIPF4                                      | YIPF4 FinGER4 Yip1 dom protein-coding      |                 |
| chr16-70: 7.93135  | 1.17748  | 0.849088 | 1.386758 | 0.165515 | 0.981636 | chr16 | 70463586 | 70464263 | + | 0</ |    |                     |          |           |          |                                                                        |                                            |                 |



|                    |           |          |           |          |          |       |                 |                          |               |                                   |                     |                   |                              |                    |                                     |                                     |                    |
|--------------------|-----------|----------|-----------|----------|----------|-------|-----------------|--------------------------|---------------|-----------------------------------|---------------------|-------------------|------------------------------|--------------------|-------------------------------------|-------------------------------------|--------------------|
| chr17-821.6.741745 | 1.288605  | 0.939427 | 1.371693  | 0.170159 | 0.981636 | chr17 | 82170931        | 82171733                 | +             | 0 NA                              | intron (Nintron (N  | 41510 NM_001316   | 284001 Hs. 631724NM_152677   | ENSG00000CCDC57    | -                                   | coiled-coil protein-coding          |                    |
| chr15-896.6.864123 | -1.26874  | 0.925178 | -1.37135  | 0.170267 | 0.981636 | chr15 | 89637136        | 89637579                 | +             | 0 NA                              | intron (NLIAPA3 LIN | 18110 NM_198525   | 374654 Hs. 513134NM_198525   | ENSG00000KIF7      | -                                   | ACLS AGBB kinesin protein-coding    |                    |
| chr3-114.6.864123  | -1.26874  | 0.925178 | -1.37135  | 0.170267 | 0.981636 | chr3  | 1.14E+08        | 1.14E+08                 | +             | 0 NA                              | intron (Nintron (N  | 12009 NM_024638   | 79691 Hs. 477162NM_024638    | ENSG00000QTRT2     | -                                   | QTRTD1 queuine t protein-coding     |                    |
| chr5-1135.6.864123 | -1.26874  | 0.925178 | -1.37135  | 0.170267 | 0.981636 | chr5  | 1.14E+08        | 1.14E+08                 | +             | 0 NA                              | exon (NM exon (NM   | 65967 NM_001346   | 64848 Hs. 231942NM_022828    | ENSG00000YTHDC2    | -                                   | CAHL HYTH YTH domain protein-coding |                    |
| chr6-8765.6.864123 | -1.26874  | 0.925178 | -1.37135  | 0.170267 | 0.981636 | chr6  | 87696527        | 87696919                 | +             | 0 NA                              | intron (Nintron (N  | 5510 NM_018064    | 55122 Hs. 485915NM_018064    | ENSG00000AKIRIN2   | -                                   | G6orf166 akirin 2 protein-coding    |                    |
| chr16-277.6.683039 | 1.280833  | 0.934116 | 1.371172  | 0.170321 | 0.981636 | chr16 | 27727583        | 27727878                 | +             | 0 NA                              | intron (NLMC5a LI   | -8701 NR_147898   | 1E+08 Hs. 610277NR_147898    | LOC100128          | -                                   | uncharactericnRNA                   |                    |
| chr19-161.6.683039 | 1.280833  | 0.934116 | 1.371172  | 0.170321 | 0.981636 | chr19 | 1612443         | 1613146                  | +             | 0 NA                              | intron (Nintron (N  | -7332 NM_00683C   | 10975 Hs. 8372               | ENSG00000UQCR11    | 0710008DC ubiquinol protein-coding  |                                     |                    |
| chrX-7135.6.683039 | 1.280833  | 0.934116 | 1.371172  | 0.170321 | 0.981636 | chrX  | 71389943        | 71391024                 | +             | 0 NA                              | intron (Nintron (N  | 24126 NR_104387   | 6872 Hs. 158566NM_004600     | ENSG00000TAF1      | BA2R CCG1TATA-box protein-coding    |                                     |                    |
| chr8-1177.6.067779 | -1.16728  | 0.851484 | -1.37087  | 0.170414 | 0.981636 | chr8  | 1.18E+08        | 1.18E+08                 | +             | 0 NA                              | Intergeni LIPREC2 I | 144007 NR_145799  | 1.1E+08                      | NR_145799          | SNORD168                            | -                                   | small nucleosnoRNA |
| chr9-9595.0.963850 | 0.995961  | 0.727405 | 1.369198  | 0.170937 | 0.981636 | chr9  | 95958301        | 95959278                 | +             | 0 NA                              | intron (NLIAPA3 LIN | 63022 NR_024125   | 1.0E+08 Hs. 43431CNR_024125  | ENSG00000LINC00092 | NCRNA0009                           | long intencnRNA                     |                    |
| chr14-754.8.110769 | -1.15121  | 0.841142 | -1.36863  | 0.171116 | 0.981636 | chr14 | 75443137        | 75443336                 | +             | 0 NA                              | intron (Nintron (N  | 11102 NM_001135   | 122953 Hs. 196482NM_130466   | ENSG00000JDP2      | JUNDM2                              | Jun dimer protein-coding            |                    |
| chr6-7512.8.110769 | -1.15121  | 0.841142 | -1.36863  | 0.171116 | 0.981636 | chr6  | 75121737        | 75130595                 | +             | 0 NA                              | intron (Nintron (N  | 2616 NR_145788    | 1.1E+08                      | NR_145788          | SNORD156                            | -                                   | small nucleosnoRNA |
| chrX-3057.8.110769 | -1.15121  | 0.841142 | -1.36863  | 0.171116 | 0.981636 | chrX  | 305759          | 307264                   | +             | 0 NA                              | intron (Nintron (N  | 12308 NM_012227   | 8225 Hs. 437145NM_012227     | ENSG00000GTPBP6    | PGPL                                | GTP bindi protein-coding            |                    |
| chr1-1494.12.61918 | 0.92203   | 0.674145 | 1.367703  | 0.171405 | 0.981636 | chr1  | 1.49E+08        | 1.49E+08                 | +             | 0 NA                              | intron (Nintron (N  | 3711 NM_001351    | 1.01E+08 Hs. 44508CNR_001351 | ENSG00000NBPF19    | -                                   | NBPF memt protein-coding            |                    |
| chr17-618.6.897404 | -1.26157  | 0.92249  | -1.36757  | 0.171445 | 0.981636 | chr17 | 61820732        | 61820936                 | +             | 0 NA                              | intron (NAluSz SIN  | 42725 NM_032043   | 83990 Hs. 128903NM_032043    | ENSG00000BRIP1     | BACHI FANBRCA1 intr protein-coding  |                                     |                    |
| chr2-2245.6.897404 | -1.26157  | 0.92249  | -1.36757  | 0.171445 | 0.981636 | chr2  | 2.25E+08        | 2.25E+08                 | +             | 0 NA                              | intron (N Tiger2a   | 56835 NM_001257   | 8452 Hs. 372288NM_00359C     | ENSG00000CUL3      | CUL-3 PH1 cullin 3 protein-coding   |                                     |                    |
| chr17-422.9.725246 | 1.048146  | 0.766459 | 1.367518  | 0.171463 | 0.981636 | chr17 | 42614592        | 42616045                 | +             | 0 NA                              | TTS (NM_TTS (NM_C   | 5635 NM_00107C    | 7283 Hs. 279665NM_00107C     | ENSG00000TUBG1     | CDCMB4 Gc tubulin 3 protein-coding  |                                     |                    |
| chr4-185.9.793659  | 1.061704  | 0.776395 | 1.367479  | 0.171475 | 0.981636 | chr4  | 1.85E+08        | 1.85E+08                 | +             | 0 NA                              | exon (NM exon (NM   | 19595 NM_001151   | 291 Hs. 246505NM_001151      | ENSG00000SLC25A4   | AAC1 ANT solute c protein-coding    |                                     |                    |
| chr10-404.19.15893 | 0.771612  | 0.564909 | 1.365905  | 0.171969 | 0.981636 | chr10 | 40466158        | 40467631                 | +             | 0 NA                              | Intergeni ALR Alpha | 1770298 NR_04500C | 399746 Hs. 742607NR_04500C   | ACTR3BP5           | FKSG74                              | ACTR3B ps pseudo                    |                    |
| chr10-705.5.99973  | 1.333724  | 0.97756  | 1.36434   | 0.172461 | 0.981636 | chr10 | 70884825        | 70885309                 | +             | 0 NA                              | intron (Nintron (N  | 2814 NM_001285    | 5092 Hs. 3192                | NM_000281          | ENSG00000PCBD1                      | DCOH PCBE pterin-4 protein-coding   |                    |
| chr2-727.5.99973   | 1.333724  | 0.97756  | 1.36434   | 0.172461 | 0.981636 | chr2  | 72760822        | 72762009                 | +             | 0 NA                              | intron (Nintron (N  | 64618 NM_001321   | 23233 Hs. 303454NM_01518C    | ENSG00000EXOC6B    | SEC15B SE exocyst protein-coding    |                                     |                    |
| chr19-125.7.913784 | 1.170409  | 0.858045 | 1.364042  | 0.172554 | 0.981636 | chr19 | 12517669        | 12518106                 | +             | 0 NA                              | Intergeni Intergeni | -33071 NM_152601  | 163051 Hs. 631622NM_152601   | ENSG00000ZNF709    | -                                   | zinc fing protein-coding            |                    |
| chr1-2804.6.135789 | -1.31921  | 0.967146 | -1.36403  | 0.172559 | 0.981636 | chr1  | 28000413        | 28001568                 | +             | 0 NA                              | intron (NAluJb SIN  | 41528 NM_018055   | 55113 Hs. 55024              | NM_018055          | ENSG00000XKR8                       | XRG8 hXkr XK relate protein-coding  |                    |
| chr8-222.6.135789  | -1.31921  | 0.967146 | -1.36403  | 0.172559 | 0.981636 | chr8  | 22246584        | 22246908                 | +             | 0 NA                              | intron (Nintron (N  | 1634 NM_001722    | 661 Hs. 148352NM_001722      | ENSG00000POLR3D    | BN51T RPC RNA polyn protein-coding  |                                     |                    |
| chr12-567.8.077487 | -1.15707  | 0.848413 | -1.3638   | 0.172629 | 0.981636 | chr12 | 56719171        | 56719407                 | +             | 0 NA                              | exon (NM exon (NM   | 6010 NM_005594    | 4666 Hs. 505735NM_005594     | ENSG00000NACA      | HSD48 NAC nascent f protein-coding  |                                     |                    |
| chr19-101.6.143647 | -1.32102  | 0.968828 | -1.36352  | 0.172718 | 0.981636 | chr19 | 10167863        | 10168979                 | +             | 0 NA                              | intron (Nintron (N  | 26532 NM_001318   | 1786 Hs. 202672NM_001318     | ENSG00000DNMT1     | ADCAN AIDNA methyl protein-coding   |                                     |                    |
| chr4-8395.7.417196 | 1.247338  | 0.915149 | 1.362989  | 0.172886 | 0.981636 | chr4  | 83961128        | 8399474                  | +             | 0 NA                              | intron (Nintron (N  | 41424 NM_003501   | 8310 Hs. 479122NM_003501     | ENSG00000ACOX3     | -                                   | acyl-CoA protein-coding             |                    |
| chr11-117.4.203799 | -1.63813  | 1.202667 | -1.36208  | 0.173173 | 0.981636 | chr11 | 1.17E+08        | 1.17E+08                 | +             | 0 NA                              | intron (Nintron (N  | 1228 NM_003188    | 6876 Hs. 410977NM_003188     | ENSG00000TAGLN     | SM22 SM22 transgelin protein-coding |                                     |                    |
| chr1-1501.9.349556 | -1.046308 | 0.782609 | -1.36194  | 0.173215 | 0.981636 | chr1  | 1.5E+08         | 1.5E+08                  | +             | 0 NA                              | promoter-promoter-  | -618 NR_135098    | 1.05E+08 Hs. 599366NR_135098 | LOC105371          | -                                   | uncharactericnRNA                   |                    |
| chr1-2356.9.699822 | -1.065307 | 0.766827 | -1.361857 | 0.173243 | 0.981636 | chr1  | 2.36E+08        | 2.36E+08                 | +             | 0 NA                              | intron (NHERVPI0F   | -20154 NM_001098  | 2786 Hs. 159711NM_004488     | ENSG00000GNG4      | -                                   | G protein binding                   |                    |
| chr10-395.46.18847 | 0.544894  | 0.400116 | 1.361842  | 0.173248 | 0.981636 | chr10 | 39986368        | 39987336                 | +             | 0 NA                              | Intergeni ALR Alpha | 1290256 NR_04500C | 399746 Hs. 742607NR_04500C   | ACTR3BP5           | FKSG74                              | ACTR3B ps pseudo                    |                    |
| chr5-9554.8.872384 | -1.12112  | 0.823389 | -1.36159  | 0.173329 | 0.981636 | chr5  | 95548626        | 95549008                 | +             | 0 NA                              | intron (Nintron (N  | 6188 NM_014638    | 9652 Hs. 482868NM_014638     | ENSG00000TTC37     | KIAA0372 tetraatric protein-coding  |                                     |                    |
| chr1-8888.3.410752 | -1.83169  | 1.345441 | -1.3614   | 0.173387 | 0.981636 | chr1  | 88802725        | 88803057                 | +             | 0 NA                              | intron (Nintron (N  | 88676 NM_001514   | 2959 Hs. 481852NM_001514     | ENSG00000GTF2B     | TF2B TFII general protein-coding    |                                     |                    |
| chr11-102.4.692714 | 1.522148  | 1.118205 | 1.361242  | 0.173437 | 0.981636 | chr11 | 1.02E+08        | 1.02E+08                 | +             | 0 NA                              | intron (NAluSg SIN  | 25645 NM_001195   | 10413 Hs. 503692NM_006100    | ENSG00000YAP1      | COB1 YAP Yes assoc protein-coding   |                                     |                    |
| chr5-113.4.692714  | 1.522148  | 1.118205 | 1.361242  | 0.173437 | 0.981636 | chr5  | 1.13E+08        | 1.13E+08                 | +             | 0 NA                              | intron (Nintron (N  | 67774 NM_152624   | 167227 Hs. 443875NM_152624   | ENSG00000DCP2      | NUD20 decapping protein-coding      |                                     |                    |
| chr1-3172.6.007588 | 1.330572  | 0.977471 | 1.36124   | 0.173438 | 0.981636 | chr1  | 31727062        | 31728236                 | +             | 0 NA                              | intron (NMR SINE    | -23632 NM_001856  | 1307 Hs. 368921NM_001856     | ENSG00000COL16A1   | 447AA FPII collagen protein-coding  |                                     |                    |
| chr10-308.4.154801 | -1.64601  | 1.209725 | -1.36065  | 0.173625 | 0.981636 | chr10 | 3086532         | 3087509                  | +             | 0 NA                              | intron (NAluSz SIN  | -17589 NM_001323  | 5214 Hs. 26010               | NM_002627          | ENSG00000PFKP                       | ATP-PFK f phosphofr protein-coding  |                    |
| chr9-129.8.151925  | 1.118656  | 0.822664 | 1.360128  | 0.173789 | 0.981636 | chr9  | 1.29E+08        | 1.29E+08                 | +             | 0 NA                              | intron (NAluSx SIN  | 19984 NM_003280   | 84895 Hs. 632692NM_03280C    | ENSG00000MIGA2     | C9orf54 Fmi toguar protein-coding   |                                     |                    |
| chr12-96.6.127931  | -1.31743  | 0.968676 | -1.36003  | 0.17382  | 0.981636 | chr12 | 96312255        | 96312516                 | +             | 0 NA                              | intron (Nintron (N  | 56887 NM_001303   | 2004 Hs. 46523               | NM_00523C          | ENSG00000ELK3                       | ERP NET SET trans protein-coding    |                    |
| chr4-763.6.127931  | -1.31743  | 0.968676 | -1.36003  | 0.17382  | 0.981636 | chr4  | 76309845        | 76310640                 | +             | 0 NA                              | 3' UTR (3' UTR (N   | 4216 NM_003943    | 8987 Hs. 109599NM_003943     | ENSG00000STBD1     | GENEX34 starch bi protein-coding    |                                     |                    |
| chr6-7511.6.127931 | -1.31743  | 0.968676 | -1.36003  | 0.17382  | 0.981636 | chr6  | 75111596        | 75114071                 | +             | 0 NA                              | intron (Nintron (N  | 15949 NR_145788   | 1.1E+08                      | NR_145788          | SNORD156                            | -                                   | small nucleosnoRNA |
| chr8-1335.6.127931 | -1.31743  | 0.968676 | -1.36003  | 0.17382  | 0.981636 | chr8  | 17900 NM_080838 | 8840 Hs. 492974NM_080838 | ENSG00000CCN4 | WISPI WIS cellular protein-coding |                     |                   |                              |                    |                                     |                                     |                    |
| chr2-5532.8.102911 | -1.14977  | 0.845502 | -1.35987  | 0.173872 | 0.981636 | chr2  | 55322215        | 55322488                 | +             | 0 NA                              | intron (N2a LINE    | 40032 NR_027258   | 344405 Hs. 445292NM_00108C   | ENSG00000PRORSD1P  | NCRNA0011                           | prolyl-tf pseudo                    |                    |
| chr15-735.8.14405  | -1.14536  | 0.84246  | -1.35954  | 0.173976 | 0.981636 | chr15 | 73917896        | 73918359                 | +             | 0 NA                              | non-codir-non-codir | -8335 NM_005576   | 4016 Hs. 65436               | NM_005576          | ENSG00000LOXL1                      | LOL LOXL llysl oxiprotein-coding    |                    |
| chr2-2745.8.494501 | 1.114301  | 0.819744 | 1.359328  | 0.174043 | 0.981636 | chr2  | 27439615        | 27440117                 | +             | 0 NA                              | exon (NM exon (NM   | -2500 NM_001168   | 200634 Hs. 59509             | NM_17385C          | ENSG00000KRTCAP3                    | KCP3 keratinoc protein-coding       |                    |
| chr11-645.7.255898 | 1.207364  | 0.888286 | 1.359207  | 0.174081 | 0.981636 | chr11 | 649380          | 649983                   | +             | 0 NA                              | intron (NAluSz SIN  | 12412 NM_000797   | 1815 Hs. 599922              | NM_000797          | ENSG00000DRD4                       | D4DR dopamine protein-coding        |                    |
| chr14-496.2.684268 | -2.11658  | 1.557647 | -1.35883  | 0.174201 | 0.981636 | chr14 | 49612203        | 49613537                 | +             | 0 NA                              | intron (Nintron (N  | 7756 NM_001001    | 6166 Hs. 444745NM_001001     | ENSG00000RPL36AL   | RPL36A ribosomal protein-coding     |                                     |                    |
| chr19-365.5.974306 | 1.327844  | 0.977375 | 1.358582  | 0.174279 | 0.981636 | chr19 | 36978787        | 36979637                 | +             | 0 NA                              | intron (NAluSp SIN  | 62908 NM_001204   | 374900 Hs. 404222NM_198535   | ENSG00000ZNF568    | ZFP568 zinc fing protein-coding     |                                     |                    |
| chr3-754.5.974306  | 1.327844  | 0.977375 | 1.358582  | 0.174279 | 0.981636 | chr3  | 75748969        | 75750477                 | +             | 0 NA                              | intron (N CER Sate1 | 11443 NR_036238   | 1E+08                        | NR_036238          | ENSG00000MIR4273                    | microRNA ncRNA                      |                    |
| chr9-1365.4.129378 | -1.66184  | 1.223575 | -1.35819  | 0.174404 | 0.981636 | chr9  | 1.36E+08        | 1.36E+08                 | +             | 0 NA                              | intron (Nintron (N  | -5932 NM_001145   | 26086 Hs. 23937CNR_015597    | ENSG00000GPSM1     | AGS3                                | G protein binding                   |                    |
| chr5-1067.6.281322 | 1.212429  | 0.89281  | 1.357992  | 0.174466 | 0.981636 | chr5  | 10686966        | 10687423                 | +             | 0 NA                              | intron (N Tiger1 I  | 74040 NM_004394   | 1611 Hs. 7                   |                    |                                     |                                     |                    |



|                    |          |          |          |          |          |       |          |          |   |   |    |                     |          |            |          |           |                       |                      |                          |                                 |                |
|--------------------|----------|----------|----------|----------|----------|-------|----------|----------|---|---|----|---------------------|----------|------------|----------|-----------|-----------------------|----------------------|--------------------------|---------------------------------|----------------|
| chr20-321.9.367122 | -1.05834 | 0.788118 | -1.34287 | 0.179314 | 0.981636 | chr20 | 32138883 | 32139123 | + | 0 | NA | intron (Nintron (N  | 29275    | NM_001363  | 9777     | Hs.654666 | NM_014742             | ENSG000002TM9SF4     | dJ836N17                 | transmembrane protein-coding    |                |
| chr7-8735.4.865569 | -1.53342 | 1.142299 | -1.3424  | 0.179466 | 0.981636 | chr7  | 87336151 | 87336427 | + | 0 | NA | intron (Nintron (N  | 9203     | NR_015381  | 11257    | Hs.274325 | NM_007233             | ENSG000002TP53TG1    | LINC00099                | TP53 target RNA                 |                |
| chrX-135.4.865569  | -1.53342 | 1.142299 | -1.3424  | 0.179466 | 0.981636 | chrX  | 1.35E+08 | 1.35E+08 | + | 0 | NA | IntergeniLTR16A2 I  | 6632     | NM_001078  | 8933     | Hs.522788 | NM_003928             | ENSG000002RTL8C      | CXX1 FAM1retrotransposon | protein-coding                  |                |
| chr2-1275.9.682257 | 1.038512 | 0.773712 | 1.342246 | 0.179516 | 0.981636 | chr2  | 1.28E+08 | 1.28E+08 | + | 0 | NA | intron (Nintron (N  | 37748    | NM_001141  | 75959    | Hs.32995  | NM_024545             | ENSG000002SAP130     | -                        | Sin3A associated protein-coding |                |
| chr1-377.2.658844  | -2.14374 | 1.597187 | -1.3422  | 0.179532 | 0.981636 | chr1  | 37709410 | 37710252 | + | 0 | NA | TTS (NM_C TTS (NM_C | 17315    | NM_081110  | 55143    | Hs.524571 | NM_018101             | ENSG000002CDC48      | BOR BOR cell             | dividing protein-coding         |                |
| chr10-145.6.145497 | -1.30579 | 0.973191 | -1.34176 | 0.179673 | 0.981636 | chr10 | 14541170 | 14543234 | + | 0 | NA | intron (NAluS SIN   | -3660    | NM_00132C  | 83641    | Hs.446315 | NM_031455             | ENSG000002FAM107B    | C10orf45 family          | wiprotein-coding                |                |
| chr12-795.6.145497 | -1.30579 | 0.973191 | -1.34176 | 0.179673 | 0.981636 | chr12 | 79562649 | 79562949 | + | 0 | NA | IntergeniLTR12C LI  | 127781   | NM_001354  | 5074     | Hs.64313C | NM_002585             | ENSG000002PAWR       | PAR4 Par-pro-apopt       | protein-coding                  |                |
| chr15-225.6.145497 | -1.30579 | 0.973191 | -1.34176 | 0.179673 | 0.981636 | chr15 | 22555243 | 22555442 | + | 0 | NA | intron (Nintron (N  | 60464    | NM_001367  | 8924     | Hs.43489C | NM_004667             | ENSG000002HERC2      | D15F37S1 HECT            | and protein-coding              |                |
| chr3-8751.6.145497 | -1.30579 | 0.973191 | -1.34176 | 0.179673 | 0.981636 | chr3  | 8751669  | 8753082  | + | 0 | NA | 3' UTR (N3' UTR (N  | 16356    | NM_001354  | 5021     | Hs.2820   | NM_000915             | ENSG000002COXR       | OT-R                     | oxytocin protein-coding         |                |
| chr6-8546.6.145497 | -1.30579 | 0.973191 | -1.34176 | 0.179673 | 0.981636 | chr6  | 85468890 | 85470268 | + | 0 | NA | intron (N2a LINE    | 19496    | NM_00252E  | 4907     | Hs.153952 | NM_00252E             | ENSG000002NT5E       | CALJA CD75               | protein-coding                  |                |
| chr7-1054.6.145497 | -1.30579 | 0.973191 | -1.34176 | 0.179673 | 0.981636 | chr7  | 10546889 | 10546889 | + | 0 | NA | intron (Nintron (N  | 22153    | NM_00131E  | 54517    | Hs.520615 | NM_019042             | ENSG000002PUS7       | IDDAB3                   | pseudouridine protein-coding    |                |
| chr2-1902.7.197193 | 1.199967 | 0.895023 | 1.34071  | 0.180015 | 0.981636 | chr2  | 1.9E+08  | 1.9E+08  | + | 0 | NA | intron (Nintron (N  | 68443    | NM_014362  | 26275    | Hs.65668E | NM_014362             | ENSG000002HIBCH      | HIBYLCOAF-3              | hydroxy protein-coding          |                |
| chr3-1701.7.374577 | -1.17882 | 0.879345 | -1.34056 | 0.180063 | 0.981636 | chr3  | 1.7E+08  | 1.7E+08  | + | 0 | NA | intron (NAluSx1 SI  | 15959    | NM_024947  | 80012    | Hs.529592 | NM_024947             | ENSG000002PHC3       | EDR3 HPH2                | polyhomeoprotein-coding         |                |
| chr7-4465.6.677031 | 1.297941 | 0.968937 | 1.339551 | 0.180391 | 0.981636 | chr7  | 44650188 | 44650408 | + | 0 | NA | intron (Nintron (N  | 43671    | NM_001003  | 4967     | Hs.488181 | NM_002541             | ENSG000002CGDH       | AKG8H Elk                | oxoglutarate protein-coding     |                |
| chr12-245.11.841   | -0.96167 | 0.717987 | -1.3394  | 0.18044  | 0.981636 | chr12 | 24828914 | 24829135 | + | 0 | NA | intron (N(AAAT)n S  | 73198    | NM_00117E  | 586      | Hs.43899E | NM_005504             | ENSG000002BCAT1      | BCATC BC1                | branched protein-coding         |                |
| chr6-5916.270.4006 | 0.356235 | 0.265994 | 1.339258 | 0.180487 | 0.981636 | chr6  | 59163123 | 59163348 | + | 0 | NA | IntergeniALR Alpha  | -1201789 | NR_132994  | 1.07E+08 | Hs.56153E | NR_125727             | ENSG000002LINC0068C  | -                        | long intencRNA                  |                |
| chr19-233.3.974273 | 1.625694 | 1.214002 | 1.33912  | 0.180532 | 0.981636 | chr19 | 23341176 | 23342005 | + | 0 | NA | IntergeniLIM3 LINE  | 53881    | NM_00343C  | 7644     | Hs.58834  | NM_00343C             | ENSG000002ZNF9F      | HPF7 HTF1                | zinc finger protein-coding      |                |
| chr1-9324.7.366719 | -1.17729 | 0.879214 | -1.33902 | 0.180564 | 0.981636 | chr1  | 93241758 | 93243663 | + | 0 | NA | intron (NTHEIB-int  | 61994    | NM_001130C | 343099   | Hs.48287E | NM_20688E             | ENSG000002CCDC18     | NY-SAR-4                 | coiled-coil protein-coding      |                |
| chr10-111.7.366719 | -1.17729 | 0.879214 | -1.33902 | 0.180564 | 0.981636 | chr10 | 1.14E+08 | 1.14E+08 | + | 0 | NA | intron (NLM4c LIN   | 6464     | NM_198514  | 374354   | Hs.369924 | NM_198514             | ENSG000002NHLRC2     | FINCA                    | NHL repeat protein-coding       |                |
| chr15-807.7.366719 | -1.17729 | 0.879214 | -1.33902 | 0.180564 | 0.981636 | chr15 | 80790022 | 80796271 | + | 0 | NA | intron (Nintron (N  | 13776    | NM_00129E  | 57214    | Hs.45908E | NM_01868E             | ENSG000002CEMIP      | CCSP1 HYE                | cell migr protein-coding        |                |
| chr3-1944.7.366719 | -1.17729 | 0.879214 | -1.33902 | 0.180564 | 0.981636 | chr3  | 1.94E+08 | 1.94E+08 | + | 0 | NA | intron (Nintron (N  | 8986     | NM_001367  | 79752    | Hs.52960E | NM_024524             | ENSG000002ATP13A3    | AFURS1                   | ATPase 1                        | protein-coding |
| chr1-2256.7.246191 | 1.197221 | 0.894147 | 1.338954 | 0.180586 | 0.981636 | chr1  | 2.26E+08 | 2.26E+08 | + | 0 | NA | intron (N2a LINE    | 27755    | NM_01469E  | 9725     | Hs.119387 | NM_01469E             | ENSG000002TMEM63A    | KIAA0792                 | transmembrane protein-coding    |                |
| chr10-125.7.246191 | 1.197221 | 0.894147 | 1.338954 | 0.180586 | 0.981636 | chr10 | 1.26E+08 | 1.26E+08 | + | 0 | NA | intron (NMIRb SINE  | -18336   | NM_147191  | 118856   | Hs.314141 | NM_147191             | ENSG000002MMP21      | HTX7 MMP-                | matrix metalloproteinase        |                |
| chr16-156.7.246191 | 1.197221 | 0.894147 | 1.338954 | 0.180586 | 0.981636 | chr16 | 15599400 | 15599865 | + | 0 | NA | intron (Nintron (N  | 11463    | NR_106761  | 1.02E+08 | NR_106761 | ENSG000002MIR6506     | hsa-mir-61           | microRNA ncRNA           |                                 |                |
| chr20-317.4.146943 | -1.64328 | 1.22779  | -1.3384  | 0.180765 | 0.981636 | chr20 | 31793377 | 31794532 | + | 0 | NA | exon (NM exon (NM   | -25421   | NM_03311E  | 85366    | Hs.86092  | NM_03311E             | ENSG000002MYLK2      | KMLC MLC                 | myosin liprotein-coding         |                |
| chr10-877.6.112215 | -1.31384 | 0.981765 | -1.33824 | 0.180817 | 0.981636 | chr10 | 87747869 | 87748317 | + | 0 | NA | TTS (NM_C TTS (NM_C | 70138    | NM_001321  | 84896    | Hs.43594E | NM_03281C             | ENSG000002ATAD1      | AFDC1 FNF                | ATPase f                        | protein-coding |
| chr11-781.6.112215 | -1.31384 | 0.981765 | -1.33824 | 0.180817 | 0.981636 | chr11 | 78103382 | 78103748 | + | 0 | NA | intron (NAluSp SIN  | -23703   | NM_001203  | 1.01E+08 | Hs.40786C | NM_001203             | ENSG000002NDUFC2-KC- | -                        | NDUFC2-kc                       | protein-coding |
| chr3-1967.7.382435 | -1.18037 | 0.882034 | -1.33823 | 0.18082  | 0.981636 | chr3  | 1.97E+08 | 1.97E+08 | + | 0 | NA | 3' UTR (N3' UTR (N  | -36252   | NM_00130E  | 205564   | Hs.24077C | NM_15269E             | ENSG000002SEN5P      | -                        | SUMO spec protein-coding        |                |
| chr6-2644.7.382435 | -1.18037 | 0.882034 | -1.33823 | 0.18082  | 0.981636 | chr6  | 26443655 | 26444015 | + | 0 | NA | intron (Nintron (N  | 3331     | NM_006994  | 10384    | Hs.167741 | NM_006994             | ENSG000002BTN3A3     | BTf3 BTN2                | butyrophilin protein-coding     |                |
| chr1-2354.7.179627 | 1.192361 | 0.891328 | 1.337735 | 0.180983 | 0.981636 | chr1  | 2.35E+08 | 2.35E+08 | + | 0 | NA | 3' UTR (N3' UTR (N  | 40043    | NM_15249C  | 148789   | Hs.49814E | NM_15249C             | ENSG000002B3GALNT2   | B3GALNac-beta-1,3-       | protein-coding                  |                |
| chr8-1278.7.179627 | 1.192361 | 0.891328 | 1.337735 | 0.180983 | 0.981636 | chr8  | 1.28E+08 | 1.28E+08 | + | 0 | NA | intron (NAluJo SIN  | 8057     | NR_03160E  | 1E+08    | NR_03160E | ENSG000002MIR1204     | hsa-mir-1            | microRNA ncRNA           |                                 |                |
| chr16-296.4.032978 | 1.637518 | 1.22419  | 1.337633 | 0.181016 | 0.981636 | chr16 | 29682401 | 29683195 | + | 0 | NA | intron (NLM5C LIN   | 3618     | NR_13453E  | 23475    | Hs.513484 | NM_01429E             | ENSG000002QPRT       | HEL-5-90r                | quinoline protein-coding        |                |
| chr11-691.8.103399 | 1.103399 | 0.824926 | 1.337574 | 0.181035 | 0.981636 | chr11 | 69068089 | 69068164 | + | 0 | NA | intron (Nintron (N  | -14811   | NR_036122  | 1E+08    | NR_036122 | ENSG000002MIR3164     | -                    | microRNA ncRNA           |                                 |                |
| chr17-765.9.185669 | 1.091394 | 0.815988 | 1.337512 | 0.181055 | 0.981636 | chr17 | 76347693 | 76347989 | + | 0 | NA | intron (N2 LINE I   | 6075     | NM_00276E  | 5635     | Hs.77498  | NM_00276E             | ENSG000002PRPSAP1    | PAP39                    | phosphoriprotein-coding         |                |
| chr1-2251.5.990022 | 1.321434 | 0.988009 | 1.337472 | 0.181069 | 0.981636 | chr1  | 2.25E+08 | 2.25E+08 | + | 0 | NA | intron (NLM1A4 LIN  | 239218   | NM_00114E  | 127602   | Hs.133977 | NM_00137E             | ENSG000002DNAH14     | Clorf67 dynein           | alpha protein-coding            |                |
| chr19-125.5.990022 | 1.321434 | 0.988009 | 1.337472 | 0.181069 | 0.981636 | chr19 | 12224566 | 12225093 | + | 0 | NA | IntergeniLTR19A LI  | 29814    | NR_10417E  | 1E+08    | Hs.66260E | NR_104179             | LOC10028E-           | -                        | uncharacterized RNA             |                |
| chr7-1492.5.990022 | 1.321434 | 0.988009 | 1.337472 | 0.181069 | 0.981636 | chr7  | 1.49E+08 | 1.49E+08 | + | 0 | NA | intron (Nintron (N  | -6903    | NR_03657E  | 155060   | Hs.490512 | NR_015357             | ENSG000002LOC15506C- | -                        | AT894139 pseudo                 |                |
| chr17-374.6.922282 | -1.25217 | 0.936266 | -1.33741 | 0.18109  | 0.981636 | chr17 | 31794538 | 31794720 | + | 0 | NA | intron (NAluS6 SI   | 12364    | NM_00148E  | 6871     | Hs.50066E | NM_00148E             | ENSG000002TADA2A     | ADA2 ADA2                | transcriptase protein-coding    |                |
| chr2-4357.6.922282 | -1.25217 | 0.936266 | -1.33741 | 0.18109  | 0.981636 | chr2  | 43570345 | 43570544 | + | 0 | NA | exon (NM exon (NM   | 25530    | NM_00108E  | 63892    | Hs.369592 | NM_00206E             | ENSG000002THADA      | ARMC13 G1THADA           | arm protein-coding              |                |
| chr8-1184.7.341295 | -1.18532 | 0.886539 | -1.33702 | 0.181216 | 0.981636 | chr8  | 11840352 | 11841040 | + | 0 | NA | IntergeniIntergeni  | 27391    | NM_00190E  | 1508     | Hs.52089E | NM_00190E             | ENSG000002CTSB       | APPS CPSE                | cathepsin protein-coding        |                |
| chr12-702.4.180225 | -1.62994 | 1.219622 | -1.33643 | 0.181409 | 0.981636 | chr12 | 70285023 | 70285203 | + | 0 | NA | intron (Nintron (N  | 41457    | NM_00119E  | 4848     | Hs.13335C | NM_01451E             | ENSG000002CNOT2      | CDC36 HSF                | CCKR4-NOT                       | protein-coding |
| chr7-809.4.180225  | -1.62994 | 1.219622 | -1.33643 | 0.181409 | 0.981636 | chr7  | 80911285 | 80912761 | + | 0 | NA | intron (Nintron (N  | 7028     | NM_00637E  | 10512    | Hs.26910E | NM_00637E             | ENSG000002SEMA3C     | SEMAE Semaphorin         | protein-coding                  |                |
| chr1-1494.5.941024 | 1.325128 | 0.991682 | 1.336242 | 0.18147  | 0.981636 | chr1  | 1.49E+08 | 1.49E+08 | + | 0 | NA | intron (Nintron (N  | 22818    | NM_001364  | 1.01E+08 | NM_001364 | ENSG000002NOTCH2NL2C- | N2N NOTCH            | notch 2 protein-coding   |                                 |                |
| chr16-524.5.941024 | 1.325128 | 0.991682 | 1.336242 | 0.18147  | 0.981636 | chr16 | 57458496 | 57458717 | + | 0 | NA | intron (Nintron (N  | -4073    | NM_03294C  | 5432     | Hs.79402  | NM_002694             | ENSG000002POLR2C     | RPB3 RPB3                | RNA polymerase protein-coding   |                |
| chr2-9237.16.10101 | 0.811921 | 0.608081 | 1.335218 | 0.181805 | 0.981636 | chr2  | 92374494 | 92374819 | + | 0 | NA | IntergeniALR Alpha  | 433523   | NR_027714  | 440888   | Hs.73023E | NM_001032412          | ACTR3BP2             | FKSG73                   | ACTR3B                          | ps pseudo      |
| chr7-1396.8.061771 | -1.15429 | 0.864537 | -1.33516 | 0.181825 | 0.981636 | chr7  |          |          |   |   |    |                     |          |            |          |           |                       |                      |                          |                                 |                |

|                     |          |          |          |          |          |       |          |          |   |      |                     |                    |          |            |                    |                     |              |                                              |                                |                                           |
|---------------------|----------|----------|----------|----------|----------|-------|----------|----------|---|------|---------------------|--------------------|----------|------------|--------------------|---------------------|--------------|----------------------------------------------|--------------------------------|-------------------------------------------|
| chr19-517.8.564367  | -1.08463 | 0.822258 | -1.31909 | 0.187138 | 0.981636 | chr19 | 51701858 | 51702599 | + | 0 NA | intron (Nintron (N  | -8772 NR_10810C    | 1.02E+08 | Hs. 64018E | NR_10810C          | ENSG000003PACA6P    | -            | LINC01125                                    | SPACA6P                        | ncRNA                                     |
| chr19-287.7.162062  | 1.18464  | 0.898102 | 1.319049 | 0.187153 | 0.981636 | chr19 | 2808862  | 2809297  | + | 0 NA | intron (Nintron (N  | -10789 NM_001102   | 115196   | Hs. 30704E | NR_15230E          | ENSG000003ZNF554    | -            |                                              |                                | zinc finger protein-coding                |
| chr1-251.5.255865   | 1.374347 | 1.042665 | 1.31811  | 0.187467 | 0.981636 | chr1  | 2513376  | 2514276  | + | 0 NA | intron (Nintron (N  | 12770 NM_01821E    | 55229    | Hs. 26156  | NM_01821E          | ENSG000003PANK4     | -            |                                              |                                | panthothenic acid synthase protein-coding |
| chr1-2124.5.255865  | 1.374347 | 1.042665 | 1.31811  | 0.187467 | 0.981636 | chr1  | 12770    | 12770    | + | 0 NA | intron (N2 LINE N   | 11787 NM_01334E    | 29937    | Hs. 461787 | NM_01334E          | ENSG000003NENF      | VAMP-2 SCF1  | neudesin                                     | protein-coding                 |                                           |
| chr1-1717.11.94732  | 0.913451 | 0.693046 | 1.318023 | 0.187496 | 0.981636 | chr1  | 1.72E+08 | 1.72E+08 | + | 0 NA | intron (NAluSz SIN  | 5883 NR_033704     | 8674     | Hs. 6651   | NM_00376E          | ENSG000003VAMP4     | VAMP-4 VAV   | vesicle protein-coding                       |                                |                                           |
| chr6-5956.109.3849  | 0.427096 | 0.324061 | 1.317951 | 0.18752  | 0.981636 | chr6  | 59566217 | 59566459 | + | 0 NA | IntergeniALR/Alpha  | -1604892 NR_132994 | 1.07E+08 | Hs. 56153E | NR_12572E          | ENSG000003LINC0068C |              |                                              | long intencRNA                 |                                           |
| chr17-401.0.27083   | 0.998654 | 0.758023 | 1.317446 | 0.187689 | 0.981636 | chr17 | 4014871  | 40149092 | + | 0 NA | intron (NAluSz6 S1  | 8399 NM_00735E     | 22794    | Hs. 743287 | NM_00735E          | ENSG000003CAS3      | BTZ MLN51    | CASC3                                        | exc protein-coding             |                                           |
| chr11-1119.9.869718 | -1.00374 | 0.762193 | -1.31691 | 0.187869 | 0.981636 | chr11 | 1.12E+08 | 1.12E+08 | + | 0 NA | intron (Nintron (N  | 15066 NM_00125E    | 143903   | Hs. 503831 | NM_17883E          | ENSG000003LAYN      |              |                                              | laylin protein-coding          |                                           |
| chr19-1316.0.078934 | -1.32238 | 1.005278 | -1.31544 | 0.188362 | 0.981636 | chr19 | 13107771 | 13108017 | + | 0 NA | intron (Nintron (N  | -5036 NM_00558E    | 4066     | Hs. 46446  | NM_00558E          | ENSG000003LYL1      | bHLHa18      | LYL1                                         | basiprotein-coding             |                                           |
| chr1-2075.7.376427  | -1.16618 | 0.886828 | -1.315   | 0.188508 | 0.981636 | chr1  | 12025842 | 12025508 | + | 0 NA | intron (NAluSc8 S1  | -20508 NM_001103   | 400745   | Hs. 591522 | NM_001103          | ENSG000003SH2D5     |              |                                              | SH2 domain protein-coding      |                                           |
| chr12-1272.7.376427 | -1.16618 | 0.886828 | -1.315   | 0.188508 | 0.981636 | chr12 | 1.22E+08 | 1.22E+08 | + | 0 NA | intron (Nintron (N  | -31962 NR_04538E   | 1.01E+08 | Hs. 62425E | NR_04538E          | ENSG000003CLIP1-AS1 |              |                                              | CLIP1 antncRNA                 |                                           |
| chr14-954.7.376427  | -1.16618 | 0.886828 | -1.315   | 0.188508 | 0.981636 | chr14 | 95438694 | 95439146 | + | 0 NA | intron (Nintron (N  | 36915 NM_00136E    | 161176   | Hs. 41502  | NM_02463E          | ENSG000003SYNE3     | C14orf13E    | spectrin                                     | protein-coding                 |                                           |
| chr4-1456.7.29472   | 1.199583 | 0.912329 | 1.314859 | 0.188557 | 0.981636 | chr4  | 1.46E+08 | 1.46E+08 | + | 0 NA | exon (NM exon (NM   | 36517 NM_17883E    | 152485   | Hs. 13391E | NM_17883E          | ENSG000003ZNF827    |              |                                              | zinc finger protein-coding     |                                           |
| chr11-466.8.97481   | 1.044929 | 0.795073 | 1.314257 | 0.18876  | 0.981636 | chr11 | 46665302 | 46665799 | + | 0 NA | intron (Nintron (N  | 35069 NM_00430E    | 392      | Hs. 13886C | NM_00430E          | ENSG000003ARHGAP1   | CDC42GAP Rho | GTPase                                       | protein-coding                 |                                           |
| chr19-636.5.393589  | -1.36278 | 1.037459 | -1.31357 | 0.18899  | 0.981636 | chr19 | 630536   | 630735   | + | 0 NA | intron (Nintron (N  | 2902 NM_00503E     | 5442     | Hs. 25411E | NM_00503E          | ENSG000003POLRMT    | APOLMT MRNA  | polynprotein-coding                          |                                |                                           |
| chr19-125.5.393589  | -1.36278 | 1.037459 | -1.31357 | 0.18899  | 0.981636 | chr19 | 12286883 | 12287408 | + | 0 NA | intron (Nintron (N  | 7467 NM_00135E     | 51710    | Hs. 296731 | NM_01626E          | ENSG000003ZNF44     | GIOT-2 KC    | zinc finger protein-coding                   |                                |                                           |
| chr3-1604.5.393589  | -1.36278 | 1.037459 | -1.31357 | 0.18899  | 0.981636 | chr3  | 1.6E+08  | 1.6E+08  | + | 0 NA | intron (Nintron (N  | 12886 NR_02952E    | 406951   | NR_02952E  | ENSG000003MIR16-2  | MIRN16-2 microRNA   | ncRNA        |                                              |                                |                                           |
| chr3-1604.5.393589  | -1.36278 | 1.037459 | -1.31357 | 0.18899  | 0.981636 | chr3  | 1.6E+08  | 1.6E+08  | + | 0 NA | intron (Nintron (N  | 16589 NR_02952E    | 406951   | NR_02952E  | ENSG000003MIR16-2  | MIRN16-2 microRNA   | ncRNA        |                                              |                                |                                           |
| chr4-1031.5.393589  | -1.36278 | 1.037459 | -1.31357 | 0.18899  | 0.981636 | chr4  | 1.03E+08 | 1.03E+08 | + | 0 NA | intron (Nintron (N  | 28236 NM_00128E    | 1062     | Hs. 75573  | NM_00181E          | ENSG000003CENPE     | CENP-E KI    | centromere protein-coding                    |                                |                                           |
| chr7-551E.5.393589  | -1.36278 | 1.037459 | -1.31357 | 0.18899  | 0.981636 | chr7  | 55185174 | 55185698 | + | 0 NA | intron (Nintron (N  | 3513 NR_047551     | 1.01E+08 | Hs. 72048E | NR_047551          | ENSG000003CEGRF-AS1 |              |                                              | EGFR antncRNA                  |                                           |
| chr7-400.5.393589   | -1.36278 | 1.037459 | -1.31357 | 0.18899  | 0.981636 | chr7  | 1.4E+08  | 1.4E+08  | + | 0 NA | TTS (NM_C TTS (NM_C | 39940 NM_02275E    | 64761    | Hs. 12646  | NM_02275E          | ENSG000003PARP12    | ARTD12 MS    | poly(ADP-ribosyl) transferase protein-coding |                                |                                           |
| chr8-641E.5.393589  | -1.36278 | 1.037459 | -1.31357 | 0.18899  | 0.981636 | chr8  | 6416339  | 6416538  | + | 0 NA | intron (Nintron (N  | 9285 NM_00132E     | 79648    | Hs. 593807 | NM_02459E          | ENSG000003MCPH1     | BRIT1 MC1    | microcephalin protein-coding                 |                                |                                           |
| chr8-144E.5.248007  | 1.378034 | 0.949619 | 1.31289  | 0.18922  | 0.981636 | chr8  | 1.45E+08 | 1.45E+08 | + | 0 NA | intron (NAluJb SIN  | 668 NM_00130E      | 80728    | Hs. 14898E | NM_02525E          | ENSG000003ARHGAP39  | CrGAP Vil    | Rho GTPase                                   | protein-coding                 |                                           |
| chr16-577.2.54048   | 1.194469 | 0.910564 | 1.311791 | 0.189591 | 0.981636 | chr16 | 5779556  | 5779788  | + | 0 NA | intron (Nintron (N  | 7345 NM_00113C     | 3801     | Hs. 23131  | NM_00555E          | ENSG000003KIFC3     |              |                                              | kinesin f protein-coding       |                                           |
| chr10-608.5.230441  | 1.367702 | 1.042666 | 1.311743 | 0.189607 | 0.981636 | chr10 | 60883060 | 60883629 | + | 0 NA | intron (Nintron (N  | 60841 NM_00135C    | 9886     | Hs. 737374 | NM_01483E          | ENSG000003RHOBTB1   |              |                                              | Rho related protein-coding     |                                           |
| chr16-196.5.230441  | 1.367702 | 1.042666 | 1.311743 | 0.189607 | 0.981636 | chr16 | 19871240 | 19872158 | + | 0 NA | intron (Nintron (N  | 13149 NM_01623E    | 51704    | Hs. 14868E | NM_01623E          | ENSG000003GPRC5B    | RAIG-2 RfG   | protein protein-coding                       |                                |                                           |
| chr19-366.5.230441  | 1.367702 | 1.042666 | 1.311743 | 0.189607 | 0.981636 | chr19 | 36345974 | 36347227 | + | 0 NA | intron (Nintron (N  | -14882 NR_03827E   | 1.01E+08 | Hs. 59515E | NR_03827E          | ENSG000003LINC0066E |              |                                              | long intencRNA                 |                                           |
| chr22-418.5.230441  | 1.367702 | 1.042666 | 1.311743 | 0.189607 | 0.981636 | chr22 | 41873835 | 41875875 | + | 0 NA | intron (Nintron (N  | -26089 NR_029507   | 407039   | NR_029507  | ENSG000003MIR33A   | MIR33 MI            | microRNA     | ncRNA                                        |                                |                                           |
| chr3-141E.5.230441  | 1.367702 | 1.042666 | 1.311743 | 0.189607 | 0.981636 | chr3  | 1.42E+08 | 1.42E+08 | + | 0 NA | intron (Nintron (N  | 6967 NR_13619E     | 646730   | Hs. 570677 | NR_13619E          | ENSG000003LINC0261E |              |                                              | long intencRNA                 |                                           |
| chr10-68.9.384688   | -1.0504  | 0.80079  | -1.31171 | 0.189619 | 0.981636 | chr10 | 68067149 | 68067364 | + | 0 NA | TTS (NM_C TTS (NM_C | 8027 NM_00127E     | 26091    | Hs. 51891  | NM_015601          | ENSG000003HERC4     |              |                                              | HECT and protein-coding        |                                           |
| chr5-466E.3.255832  | 1.782972 | 1.359443 | 1.311546 | 0.189673 | 0.981636 | chr5  | 46665392 | 46666191 | + | 0 NA | IntergeniALR/Alpha  | -969411 NM_02107E  | 348980   | Hs. 35317E | NM_02107E          | ENSG000003HCN1      | BCNG-1 Bc    | hyperpolarized protein-coding                |                                |                                           |
| chr2-390E.5.898035  | 1.309796 | 0.998889 | 1.311253 | 0.189772 | 0.981636 | chr2  | 39054512 | 39054719 | + | 0 NA | exon (NM exon (NM   | 65848 NM_00563E    | 6654     | Hs. 70989E | NM_00563E          | ENSG000003SOS1      | GF1 G6F1     | SOS Ras/Fra                                  | protein-coding                 |                                           |
| chr16-156.5.939175  | 1.309278 | 0.998615 | 1.311094 | 0.189826 | 0.981636 | chr16 | 1561709  | 1561319  | + | 0 NA | intron (Nintron (N  | -18103 NR_13517E   | 1.05E+08 | Hs. 66332E | NR_13517E          | ENSG000003LOC105371 |              |                                              | uncharacterized protein-coding |                                           |
| chr5-115E.7.343145  | -1.17266 | 0.894559 | -1.31088 | 0.189897 | 0.981636 | chr5  | 1.16E+08 | 1.16E+08 | + | 0 NA | exon (NM exon (NM   | -21331 NR_10987E   | 1.02E+08 | Hs. 74534E | NR_10987E          | ENSG000003LOC101927 |              |                                              | uncharacterized ncRNA          |                                           |
| chr5-493E.56.21002  | 0.50863  | 0.388023 | 1.310822 | 0.189918 | 0.981636 | chr5  | 49368045 | 49368499 | + | 0 NA | IntergeniALR/Alpha  | 1073016 NM_19844E  | 133418   | Hs. 561411 | NM_19844E          | ENSG000003EMB       | GP70         | emigin                                       | protein-coding                 |                                           |
| chr1-212E.7.260344  | 1.128995 | 0.861294 | 1.310812 | 0.189921 | 0.981636 | chr1  | 2.12E+08 | 2.12E+08 | + | 0 NA | intron (NMER5A DNA  | 30023 NM_01825E    | 55248    | Hs. 44538E | NM_01825E          | ENSG000003PACC1     | Clorf75 Fro  | topon acron protein-coding                   |                                |                                           |
| chr17-161E.8.615215 | -1.0711  | 0.817319 | -1.3105  | 0.190025 | 0.981636 | chr17 | 16146274 | 16146589 | + | 0 NA | exon (NM exon (NM   | 6765 NR_14578E     | 1.1E+08  | NR_14578E  | ENSG000003SNORD163 |                     |              | small nucleolar RNA                          |                                |                                           |
| chr8-899E.8.615215  | -1.0711  | 0.817319 | -1.3105  | 0.190025 | 0.981636 | chr8  | 89977405 | 89977701 | + | 0 NA | intron (Nintron (N  | 7118 NM_00248E     | 4683     | Hs. 49220E | NM_00248E          | ENSG000003NBN       | AT-V1 AT     | nibrin                                       | protein-coding                 |                                           |
| chr12-77E.6.129781  | -1.30177 | 0.993597 | -1.31016 | 0.190141 | 0.981636 | chr12 | 77945851 | 77946199 | + | 0 NA | intron (Nintron (N  | 115131 NM_01490E   | 89795    | Hs. 655301 | NM_01490E          | ENSG000003NAV3      | POMF1 L1     | neuron                                       | protein-coding                 |                                           |
| chr5-129E.6.129781  | -1.30177 | 0.993597 | -1.31016 | 0.190141 | 0.981636 | chr5  | 1.3E+08  | 1.3E+08  | + | 0 NA | intron (Nintron (N  | -102597 NR_12574E  | 1.04E+08 | Hs. 62863E | NR_12574E          | ENSG000003ADAMTS19  |              |                                              | ADAMTS19 ncRNA                 |                                           |
| chr1-206E.11.45859  | 0.474769 | 0.723593 | 1.309921 | 0.19026  | 0.981636 | chr1  | 2.06E+08 | 2.06E+08 | + | 0 NA | intron (N2c LINE N  | -49130 NM_01400E   | 9641     | Hs. 32104E | NM_01400E          | ENSG000003IKBKE     | IKK-E IKK    | inhibitor protein-coding                     |                                |                                           |
| chr5-112E.13.64923  | 0.853434 | 0.651613 | 1.309785 | 0.190289 | 0.981636 | chr5  | 71204016 | 71204433 | + | 0 NA | intron (Nintron (N  | 3907 NR_02702E     | 728411   | Hs. 88181  | NM_207331          | ENSG000003GUSP1     |              |                                              | GUSB pseudo                    |                                           |
| chr10-40E.15.45884  | 0.810488 | 0.618828 | 1.309714 | 0.190293 | 0.981636 | chr10 | 40835250 | 40835639 | + | 0 NA | IntergeniALR/Alpha  | 1532601 NR_02438E  | 441666   | Hs. 25572E | NR_02438E          | ENSG000003LOC44166E |              |                                              | zinc finger pseudo             |                                           |
| chr3-1551.4.641866  | 1.506869 | 1.15058  | 1.309661 | 0.19031  | 0.981636 | chr3  | 1.55E+08 | 1.55E+08 | + | 0 NA | intron (N2 LINE L   | -71203 NR_12539E   | 1.02E+08 | Hs. 12141E | NR_12539E          | ENSG000003LINC01487 |              |                                              | long intencRNA                 |                                           |
| chr15-484.8.581933  | -1.07649 | 0.822148 | -1.30936 | 0.190413 | 0.981636 | chr15 | 48494896 | 48495130 | + | 0 NA | intron (Nintron (N  | 150775 NM_00013E   | 2200     | Hs. 59113E | NM_00013E          | ENSG000003FBN1      | ACM1C D      | EC fibriillin                                | protein-coding                 |                                           |
| chr20-59E.7.417566  | -1.1621  | 0.886938 | -1.30924 | 0.190454 | 0.981636 | chr20 | 59034163 | 59034630 | + | 0 NA | 3' UTR (N3' UTR (N  | -2061 NM_00688E    | 514      | Hs. 17753E | NM_00688E          | ENSG000003ATP5F1E   | ATP5E ATF    | ATP synth                                    | protein-coding                 |                                           |
| chr17-31E.7.317721  | -1.1809  | 0.902058 | -1.30912 | 0.190493 | 0.981636 | chr17 | 31939780 | 31939979 | + | 0 NA | intron (Nintron (N  | 2872 NM_01535E     | 23512    | Hs. 46273E | NM_01535E          | ENSG000003SUZ12     | CHEY9 JJA    | SUZ12                                        |                                |                                           |



|           |          |          |          |          |          |          |       |          |          |   |   |    |                     |         |           |          |                    |                    |                    |                  |                  |                |                |
|-----------|----------|----------|----------|----------|----------|----------|-------|----------|----------|---|---|----|---------------------|---------|-----------|----------|--------------------|--------------------|--------------------|------------------|------------------|----------------|----------------|
| chr9-6751 | 6.461186 | 1.213481 | 0.934493 | 1.298545 | 0.1941   | 0.981636 | chr9  | 37524074 | 37525032 | + | 0 | NA | intron (NL2b LINE   | 38605   | NM_02249C | 64425    | Hs.591087NM_02249C | ENSG00000POLR1E    | PAF53 PRF          | RNA polyn        | protein-coding   |                |                |
| chr9-1287 | 6.461186 | 1.213481 | 0.934493 | 1.298545 | 0.1941   | 0.981636 | chr9  | 1.29E+08 | 1.29E+08 | + | 0 | NA | intron (intron (N   | 20121   | NM_00633F | 10444    | Hs.14795C          | 00633F             | ENSG00000ZER1      | C9orf60 Zygy-11  | reprotein-coding |                |                |
| chr9-1354 | 6.461186 | 1.213481 | 0.934493 | 1.298545 | 0.1941   | 0.981636 | chr9  | 1.35E+08 | 1.35E+08 | + | 0 | NA | TTS (NM_C TTS (NM_C | 9060    | NM_01481I | 9858     | Hs.53326C          | 01481I             | ENSG00000PPP1R26   | KIAA0649 protein | protein-coding   |                |                |
| chr15-808 | 6.461893 | -1.2005  | 0.924504 | -1.29853 | 0.194105 | 0.981636 | chr15 | 80882296 | 80883096 | + | 0 | NA | intron (intron (N   | -40623  | NR_03039F | 693132   | NR_03039F          | ENSG00000MIR549A   | MIR549 Mimicr      | ncRNA            |                  |                |                |
| chr12-295 | 7.691931 | 1.112358 | 0.856869 | 1.298165 | 0.194231 | 0.981636 | chr12 | 29342929 | 29343229 | + | 0 | NA | intron (intron (N   | -25231  | NR_10386E | 1.01E+08 | Hs.298851NR_10386E | ENSG00000LOC10050E |                    | uncharacterncRNA |                  |                |                |
| chr2-2025 | 7.691931 | 1.112358 | 0.856869 | 1.298165 | 0.194231 | 0.981636 | chr2  | 2.03E+08 | 2.03E+08 | + | 0 | NA | intron (NLIPB LINE  | 11101   | NM_00135E | 79800    | Hs.444982NM_024744 | ENSG00000CCARF     | ALS2CR8 AL         | calcium          | protein-coding   |                |                |
| chr6-3731 | 7.691931 | 1.112358 | 0.856869 | 1.298165 | 0.194231 | 0.981636 | chr6  | 37312743 | 37314679 | + | 0 | NA | intron (intron (N   | -40272  | NM_18307F | 9025     | Hs.485278NM_00395E | ENSG00000RN8F      | hRN8               | ring             | protein-coding   |                |                |
| chr12-125 | 8.930534 | 1.038714 | 0.800348 | 1.297828 | 0.194347 | 0.981636 | chr12 | 1.22E+08 | 1.22E+08 | + | 0 | NA | intron (NL2a LINE   | -18263  | NR_135044 | 1.01E+08 | Hs.53633E          | NR_135044          | ENSG00000LOC10050E |                  | uncharacterncRNA |                |                |
| chr1-6694 | 4.657397 | -1.44379 | 1.112831 | -1.2974  | 0.194494 | 0.981636 | chr1  | 66942710 | 66943288 | + | 0 | NA | intron (intron (N   | 12743   | NM_001077 | 57708    | Hs.605432NM_02094E | ENSG00000MIER1     | ER1 MI-EFMIER1     | tra              | protein-coding   |                |                |
| chr11-311 | 4.657397 | -1.44379 | 1.112831 | -1.2974  | 0.194494 | 0.981636 | chr1  | 3112735  | 3113690  | + | 0 | NA | intron (MER4-int    | 52098   | NM_001144 | 114879   | Hs.436166NM_02089E | ENSG00000OSBPL5    | OBPH1 ORF          | sterol           | protein-coding   |                |                |
| chr15-805 | 4.657397 | -1.44379 | 1.112831 | -1.2974  | 0.194494 | 0.981636 | chr15 | 80914933 | 80916276 | + | 0 | NA | intron (LTR85b LI   | -73531  | NR_03039F | 693132   | NR_03039F          | ENSG00000MIR549A   | MIR549 Mimicr      | ncRNA            |                  |                |                |
| chr17-597 | 4.657397 | -1.44379 | 1.112831 | -1.2974  | 0.194494 | 0.981636 | chr17 | 59704123 | 59705108 | + | 0 | NA | intron (NL2b LINE   | 2983    | NM_016077 | 51651    | Hs.12677           | NM_016077          | ENSG00000PTRH2     | BIT1 CFAF        | peptidyl-        | protein-coding |                |
| chr4-7705 | 4.657397 | -1.44379 | 1.112831 | -1.2974  | 0.194494 | 0.981636 | chr4  | 77050100 | 77050925 | + | 0 | NA | intron (intron (N   | 24398   | NM_00134E | 10983    | Hs.518827NM_00683E | ENSG00000CCNI      | CCNI1 CYC          | cyclin I         | protein-coding   |                |                |
| chr7-6749 | 4.657397 | -1.44379 | 1.112831 | -1.2974  | 0.194494 | 0.981636 | chr7  | 64917106 | 64917881 | + | 0 | NA | intron (intron (N   | 14251   | NM_02114E | 10793    | Hs.520889NM_02114E | ENSG00000ZNF273    | HZF9               | zinc             | protein-coding   |                |                |
| chr3-9081 | 6.494468 | 1.216154 | 0.937541 | 1.297174 | 0.194571 | 0.981636 | chr3  | 90811765 | 90812886 | + | 0 | NA | IntergeniALR/Alpha  | 1704704 | NM_182644 | 2042     | Hs.123642NM_00523E | ENSG00000EPHA3     | EK4 ETK E          | EPH              | recep            | protein-coding |                |
| chr4-6601 | 6.494468 | 1.216154 | 0.937541 | 1.297174 | 0.194571 | 0.981636 | chr4  | 6601980  | 6603256  | + | 0 | NA | intron (intron (N   | 27429   | NM_015274 | 23324    | Hs.188464NM_015274 | ENSG00000MAN2B2    |                    | mannoside        | protein-coding   |                |                |
| chr9-1165 | 6.494468 | 1.216154 | 0.937541 | 1.297174 | 0.194571 | 0.981636 | chr9  | 1.16E+08 | 1.16E+08 | + | 0 | NA | intron (intron (N   | 36499   | NR_103711 | 493913   | Hs.728832NR_103711 | ENSG00000PAPPA-AS1 | DIPAS NCF          | PAPPA            | antncRNA         |                |                |
| chr1-124  | 3.15539  | 0.582805 | 0.49321  | 1.297081 | 0.194603 | 0.981636 | chr1  | 1.24E+08 | 1.24E+08 | + | 0 | NA | IntergeniALR/Alpha  | 2486311 | NR_00395E | 647121   | Hs.697682NR_00395E | ENSG00000EMB1      |                    | emigin           | pseudo           |                |                |
| chr1-8906 | 6.640235 | -1.19881 | 0.924401 | -1.29685 | 0.194682 | 0.981636 | chr1  | 89061175 | 89063060 | + | 0 | NA | intron (NLIMB3 LI   | 3091    | NM_02020E | 2633     | Hs.62661           | NM_02020E          | ENSG00000GBP1      |                  | guanylate        | protein-coding |                |
| chr17-955 | 6.640235 | -1.19881 | 0.924401 | -1.29685 | 0.194682 | 0.981636 | chr17 | 955924   | 956394   | + | 0 | NA | intron (intron (N   | 23617   | NM_02246E | 64359    | Hs.527989NM_02246E | ENSG00000CNXN      | NRX TRG-4          | nucleoc          | protein-coding   |                |                |
| chr19-235 | 6.640235 | -1.19881 | 0.924401 | -1.29685 | 0.194682 | 0.981636 | chr19 | 23392042 | 23393448 | + | 0 | NA | intron (ALuSg SI    | 2726    | NM_00343C | 7644     | Hs.58834           | NM_00343C          | ENSG00000ZNF91     | HPF7 HTF1        | zinc             | protein-coding |                |
| chr6-1105 | 6.640235 | -1.19881 | 0.924401 | -1.29685 | 0.194682 | 0.981636 | chr6  | 1.11E+08 | 1.11E+08 | + | 0 | NA | intron (ALuSx SI    | 16873   | NM_032194 | 84154    | Hs.37226E          | NM_032194          | ENSG00000RPF2      | BXDC1 ba         | ribosome         | protein-coding |                |
| chr9-1105 | 6.640235 | -1.19881 | 0.924401 | -1.29685 | 0.194682 | 0.981636 | chr9  | 1.1E+08  | 1.1E+08  | + | 0 | NA | intron (intron (N   | 17521   | NM_00113E | 445815   | Hs.591098NM_00720E | ENSG00000PALM2-AK  | AKAP-2 AK          | PALM2-AK         | protein-coding   |                |                |
| chr9-1101 | 4.662555 | -1.44612 | 1.115133 | -1.29681 | 0.194696 | 0.981636 | chr9  | 1.15E+08 | 1.15E+08 | + | 0 | NA | intron (intron (N   | 53910   | NM_00216C | 3371     | Hs.14325E          | NM_00216C          | ENSG00000TNC       | 150-225 T        | enascin          | protein-coding |                |
| chr3-1797 | 4.883135 | -1.5167  | 1.169756 | -1.2966  | 0.194769 | 0.981636 | chr3  | 1.8E+08  | 1.8E+08  | + | 0 | NA | intron (intron (N   | 102007  | NM_00394C | 8975     | Hs.175322NM_00394C | ENSG00000CUSP13    | ISOT3 I            | scubiquitin      | protein-coding   |                |                |
| chr12-194 | 7.684073 | 1.114709 | 0.860011 | 1.296157 | 0.194921 | 0.981636 | chr12 | 19465785 | 19465984 | + | 0 | NA | intron (ALuSx SI    | 25285   | NM_001267 | 121536   | Hs.126497NM_15320E | ENSG00000AEBP2     |                    | AE               | bindir           | protein-coding |                |
| chr15-654 | 6.453328 | 1.216331 | 0.938918 | 1.29546  | 0.195162 | 0.981636 | chr15 | 65556818 | 65557239 | + | 0 | NA | intron (NLIMC3 LI   | 26565   | NM_01639E | 51945    | Hs.51297E          | NM_01639E          | ENSG00000HCB3      | B-IND1 BI        | 3-hydroxy        | protein-coding |                |
| chr20-385 | 6.453328 | 1.216331 | 0.938918 | 1.29546  | 0.195162 | 0.981636 | chr20 | 38566372 | 38566933 | + | 0 | NA | intron (intron (N   | -14545  | NR_130907 | 149685   | Hs.36802E          | NM_17490E          | ENSG00000ADIG      | SMAF1            | adipogeni        | protein-coding |                |
| chr1-1562 | 10.25327 | 0.993074 | 0.76663  | 1.295376 | 0.195191 | 0.981636 | chr1  | 1.56E+08 | 1.56E+08 | + | 0 | NA | exon (NM exon (NM   | -2637   | NM_00119E | 11243    | Hs.53047E          | NM_00722I          | ENSG00000PMF1      |                  | polymine         | protein-coding |                |
| chr4-1275 | 7.292298 | -1.1896  | 0.918552 | -1.29508 | 0.195291 | 0.981636 | chr4  | 1.28E+08 | 1.28E+08 | + | 0 | NA | 3' UTR (3' UTR (N   | 39357   | NM_00119C | 10733    | Hs.17205E          | NM_014264          | ENSG00000PLK4      | MCCR2 SA         | poly             | like           | protein-coding |
| chr1-1975 | 5.419013 | -1.35132 | 1.04355  | -1.29493 | 0.195346 | 0.981636 | chr1  | 19795092 | 19795954 | + | 0 | NA | intron (intron (N   | 3826    | NM_00134E | 255104   | Hs.46672E          | NM_18171E          | ENSG00000TMC04     |                  | transmem         | protein-coding |                |
| chr1-150  | 5.419013 | -1.35132 | 1.04355  | -1.29493 | 0.195346 | 0.981636 | chr1  | 1.5E+08  | 1.5E+08  | + | 0 | NA | intron (ALuSx5 SI   | 2174    | NM_00127E | 11311    | Hs.44375E          | NM_00725E          | ENSG00000VPS45     | HI H1VPS4        | vacuolar         | protein-coding |                |
| chr19-125 | 5.419013 | -1.35132 | 1.04355  | -1.29493 | 0.195346 | 0.981636 | chr19 | 12632513 | 12632887 | + | 0 | NA | 3' UTR (3' UTR (N   | 2780    | NM_15335E | 163049   | Hs.72077E          | NM_15335E          | ENSG00000ZNF791    |                  | zinc             | protein-coding |                |
| chr3-1387 | 5.419013 | -1.35132 | 1.04355  | -1.29493 | 0.195346 | 0.981636 | chr3  | 1.39E+08 | 1.39E+08 | + | 0 | NA | intron (intron (N   | -3559   | NM_00125E | 5291     | Hs.23981E          | NM_00621E          | ENSG00000CIK3CB    | P110BETA         | phosphati        | protein-coding |                |
| chr8-478  | 5.419013 | -1.35132 | 1.04355  | -1.29493 | 0.195346 | 0.981636 | chr8  | 47837742 | 47838572 | + | 0 | NA | intron (intron (N   | -99993  | NM_00519E | 1052     | Hs.44082E          | NM_00519E          | ENSG00000CEBPD     | C/EBP-delta      | CCAAT            | en             | protein-coding |
| chr6-1324 | 5.19716  | 1.364632 | 1.053948 | 1.294781 | 0.195396 | 0.981636 | chr6  | 1.32E+08 | 1.32E+08 | + | 0 | NA | intron (THE1B LTF   | 19520   | NM_00132E | 8417     | Hs.59314E          | NM_00356E          | ENSG00000STX7      |                  | syntxin          | protein-coding |                |
| chr18-752 | 6.606953 | -1.20597 | 0.931709 | -1.29437 | 0.195539 | 0.981636 | chr18 | 75201839 | 75202038 | + | 0 | NA | exon (NM exon (NM   | 3575    | NM_00130E | 284273   | Hs.46543E          | NM_17590E          | ENSG00000ZADH2     | PRG-3            | zinc             | bin            | protein-coding |
| chr2-112  | 6.606953 | -1.20597 | 0.931709 | -1.29437 | 0.195539 | 0.981636 | chr2  | 1.13E+08 | 1.13E+08 | + | 0 | NA | intron (intron (N   | -22931  | NM_001137 | 84172    | Hs.745127NM_019014 | ENSG00000POLR1B    | HPA135 RF          | RNA polyn        | protein-coding   |                |                |
| chr15-494 | 9.838287 | -0.99882 | 0.772168 | -1.29533 | 0.195828 | 0.981636 | chr15 | 49485488 | 49485966 | + | 0 | NA | 3' UTR (3' UTR (N   | 62485   | NM_00200E | 2252     | Hs.56726E          | NM_00200E          | ENSG00000FGF7      | HBFG-7 K         | fibroblast       | protein-coding |                |
| chr20-622 | 7.203201 | 1.184109 | 0.915545 | 1.293338 | 0.195894 | 0.981636 | chr20 | 62272190 | 62273445 | + | 0 | NA | intron (ALuJr SI    | -30079  | NM_17557E | 11047    | Hs.90107           | NM_00700E          | ENSG00000ADRM1     | ARM-1 AR         | adhesion         | protein-coding |                |
| chr5-559E | 12.7519  | -0.876   | 0.677668 | -1.29267 | 0.196124 | 0.981636 | chr5  | 55962763 | 55963594 | + | 0 | NA | intron (intron (N   | 31830   | NM_175767 | 3572     | Hs.53208E          | NM_002184          | ENSG00000IL6ST     | CD130 CD         | 130              | interleuk      | protein-coding |
| chr1-112E | 4.64954  | -1.4415  | 1.115234 | -1.29255 | 0.196166 | 0.981636 | chr1  | 1.13E+08 | 1.13E+08 | + | 0 | NA | intron (LJM4 LINE   | 41172   | NM_024494 | 7482     | Hs.25857E          | NM_00418E          | ENSG00000WNT2B     | WNT13            | Wnt              | family         | protein-coding |
| chr10-684 | 4.64954  | -1.4415  | 1.115234 | -1.29255 | 0.196166 | 0.981636 | chr10 | 68464357 | 68465154 | + | 0 | NA | intron (ALuSp SI    | 7218    | NM_00108C | 1763     | Hs.53244E          | NM_00108C          | ENSG00000DNA2      | DNA2L hd         | hDNA             | repl           | protein-coding |
| chr16-374 | 4.64954  | -1.4415  | 1.115234 | -1.29255 | 0.196166 | 0.981636 | chr16 | 3749818  | 3750399  | + | 0 | NA | intron (ALuJb SI    | -32584  | NM_01629E | 10131    | Hs.30345           | NM_01629E          | ENSG00000TRAP1     | HSP 75 HS        | TNF              | recep          | protein-coding |
| chr18-471 | 4.64954  | -1.4415  | 1.115234 | -1.29255 | 0.196166 | 0.981636 | chr18 | 47136460 | 47137106 | + | 0 | NA | intron (intron (N   | 13717   | NM_00131E | 84064    | Hs.465041NM_032124 | ENSG00000HDHD2     | HSP 70 HSP         | 70               | recep            | protein-coding |                |
| chr8-170E | 4.64954  | -1.4415  | 1.115234 | -1.29255 | 0.196166 | 0.981636 | chr8  | 17086790 | 17087450 | + | 0 | NA | intron (intron (N   | 59882   | NR_14623C | 286097   | Hs.460359NM_18172E | ENSG00000MICU3     | EFHA2              | mitochond        | protein-coding   |                |                |
| chr9-135E | 6.071076 | -1.32076 | 1.021977 | -1.29236 | 0.196233 | 0.981636 | chr9  | 1.36E+08 | 1.36E+08 | + | 0 | NA | intron (intron (N   | 91910   | NM_015447 | 157922   | Hs.52249E          | NM_015447          | ENSG00000CAMSAP1   |                  | calmodul         | protein-coding |                |
| chr6-124E | 8.963816 | 1.040801 | 0.805547 | 1.292042 | 0.196343 | 0.981636 | chr6  | 1.25E+08 | 1.25E+08 | + | 0 | NA | intron (intron (N   | -33257  | NR_136734 | 154214   | Hs.12876           | NM_15255E          | ENSG00000CRNF27    | G6orf172         | ring             | protein-coding |                |
| chr9-104E | 8.963816 | 1.040801 | 0.805547 | 1.292042 | 0.196343 | 0.981636 | chr9  | 1.05E+08 | 1.05E+08 | + | 0 | NA | intron (MTRb SINE   |         |           |          |                    |                    |                    |                  |                  |                |                |

|                     |          |          |          |          |          |          |          |          |   |    |                     |                      |           |            |           |           |                  |                    |                         |                           |
|---------------------|----------|----------|----------|----------|----------|----------|----------|----------|---|----|---------------------|----------------------|-----------|------------|-----------|-----------|------------------|--------------------|-------------------------|---------------------------|
| chr3-138C.7.837883  | -1.09359 | 0.855143 | -1.27883 | 0.200955 | 0.981636 | chr3     | 1.38E+08 | 1.38E+08 | + | 0  | NA                  | intron (N)LP1B LIN   | 37165     | NM_00117C  | 199221    | Hs.35140C | NM_17354C        | ENSG00000CDZIP1L   | DZIP2 PKI DAZ           | interprotein-coding       |
| chr5-496C.215.915   | 0.339047 | 0.265125 | 1.278818 | 0.200961 | 0.981636 | chr5     | 49630809 | 49632109 | + | 0  | NA                  | IntergeniALR Alpha   | 809829    | NM_198445  | 133418    | Hs.561411 | NM_198445        | ENSG00000EMB       | GP70                    | emigin protein-coding     |
| chr1-551F.5.377873  | -1.35844 | 1.062601 | -1.27841 | 0.201105 | 0.981636 | chr1     | 55160000 | 55160244 | + | 0  | NA                  | intron (N)intron (N) | 55242     | NM_01530C  | 23358     | Hs.47700E | NM_01530C        | ENSG00000CASP24    | -                       | ubiquitin protein-coding  |
| chr12-104F.5.377873 | -1.35844 | 1.062601 | -1.27841 | 0.201105 | 0.981636 | chr12    | 1.04E+08 | 1.04E+08 | + | 0  | NA                  | intron (N)HAL LINE   | 26106     | NM_01332C  | 29915     | Hs.50655E | NM_01332C        | ENSG00000HCFC2     | HCF-2 HCF               | cell protein-coding       |
| chr15-74F.5.377873  | -1.35844 | 1.062601 | -1.27841 | 0.201105 | 0.981636 | chr15    | 74638594 | 74638870 | + | 0  | NA                  | intron (N)L2c LINE   | 23738     | NM_001113C | 1198      | Hs.51179C | NM_001129C       | ENSG00000CLK3      | PHCLK3 PE CDC           | like protein-coding       |
| chr3-131C.5.377873  | -1.35844 | 1.062601 | -1.27841 | 0.201105 | 0.981636 | chr3     | 1.31E+08 | 1.31E+08 | + | 0  | NA                  | intron (N)intron (N) | 16246     | NM_01406E  | 28990     | Hs.10087E | NM_01406E        | ENSG00000ASTE1     | HT001                   | asteroid protein-coding   |
| chr7-152F.5.377873  | -1.35844 | 1.062601 | -1.27841 | 0.201105 | 0.981636 | chr7     | 1.52E+08 | 1.52E+08 | + | 0  | NA                  | intron (N)AluS6 SI   | 141929    | NM_17060E  | 58508     | Hs.64712C | NM_02123C        | ENSG00000KMT2C     | HALR KLEF               | lysine m protein-coding   |
| chr1-1504I.10.67358 | 0.939861 | 0.735669 | 1.277559 | 0.201405 | 0.981636 | chr1     | 1.5E+08  | 1.5E+08  | + | 0  | NA                  | exon (NM)exon (NM)   | 29872     | NM_001271  | 80222     | Hs.288974 | NM_02515C        | ENSG00000TARS2     | CXPD21 T                | threonyl- protein-coding  |
| chr9-999F.10.67358  | 0.939861 | 0.735669 | 1.277559 | 0.201405 | 0.981636 | chr9     | 99952192 | 99952546 | + | 0  | NA                  | intron (N)LP1A3 LIN  | 45715     | NM_01791E  | 55014     | Hs.704031 | NM_01791E        | ENSG00000CSTX17    | -                       | syntaxin protein-coding   |
| chr21-41F.5.171736  | 1.357816 | 1.062875 | 1.277493 | 0.201428 | 0.981636 | chr21    | 41809882 | 41810448 | + | 0  | NA                  | non-codiron-codir    | -43113    | NM_02063E  | 54101     | Hs.51731C | NM_02063E        | ENSG00000RIPK4     | ANKK2 ANK               | receptor protein-coding   |
| chr16-167I.9.444688 | 0.993344 | 0.777749 | 1.277203 | 0.201531 | 0.981636 | chr16    | 1670773  | 16710220 | + | 0  | NA                  | intron (N)intron (N) | -7383     | NM_14457C  | 90861     | Hs.513261 | NM_14457C        | ENSG00000JPT2      | C16orf34 Jupit          | r protein-coding          |
| chr12-105F.6.443621 | 1.204961 | 0.943546 | 1.277056 | 0.201583 | 0.981636 | chr12    | 1.1E+08  | 1.1E+08  | + | 0  | NA                  | intron (N)MIRb SINE  | 22319     | NM_01643C  | 51228     | Hs.38125E | NM_01643C        | ENSG00000GLTP      | -                       | glycolipin protein-coding |
| chr17-60F.6.443621  | 1.204961 | 0.943546 | 1.277056 | 0.201583 | 0.981636 | chr17    | 60690000 | 60691272 | + | 0  | NA                  | intron (N)LM1B2 LIN  | 12785     | NM_00132C  | 54828     | Hs.65502E | NM_01767E        | ENSG00000BCAS3     | GAOB1 MA                | BCAS3 mic protein-coding  |
| chr19-162F.6.443621 | 1.204961 | 0.943546 | 1.277056 | 0.201583 | 0.981636 | chr19    | 1622032  | 1622231  | + | 0  | NA                  | exon (NM)exon (NM)   | -16669    | NM_00683C  | 10975     | Hs.8372   | NM_00683C        | ENSG00000UCR11     | 071008DC                | ubiquinol protein-coding  |
| chr7-152I.4.52841   | -0.80815 | 0.633091 | -1.27651 | 0.201774 | 0.981636 | chr7     | 1.52E+08 | 1.52E+08 | + | 0  | NA                  | exon (NM)exon (NM)   | 59141     | NM_00135C  | 55193     | Hs.18992C | NM_01816E        | ENSG00000PBRM1     | BAF180 PF               | polybrom protein-coding   |
| chr3-526E.9.051247  | -1.02125 | 0.800287 | -1.27611 | 0.201918 | 0.981636 | chr3     | 52626259 | 52626657 | + | 0  | NA                  | intron (N)intron (N) | -12       | NR_029501  | 40718     | Hs.029501 | ENSG00000MIR27A  | hsa-mir-27A        | microRNA ncRNA          |                           |
| chr19-13F.13.58978  | -0.85888 | 0.673267 | -1.27569 | 0.202066 | 0.981636 | chr19    | 13836372 | 13836687 | + | 0  | NA                  | promoter-promoter    | 9067      | NR_10678E  | 1072E+08  | NR_10678E | ENSG00000MIR6728 | hsa-mir-6728       | microRNA ncRNA          |                           |
| chr1-885F.6.657801  | -1.18815 | 0.93159  | -1.2754  | 0.202166 | 0.981636 | chr1     | 8857258  | 8857789  | + | 0  | NA                  | IntergeniMERS5 DNA   | 1443476   | NR_02438C  | 441666    | Hs.25572E | NR_02438C        | ENSG00000LOC44166E | -                       | zinc fing pseudo          |
| chr10-40E.27.92521  | 0.622803 | 0.488365 | 1.275283 | 0.202209 | 0.981636 | chr10    | 40924037 | 40925101 | + | 0  | NA                  | IntergeniALR Alpha   | 3757      | NM_03243C  | 84446     | Hs.182081 | NM_03243C        | ENSG00000CBRSK1    | hSAD1                   | BR serine protein-coding  |
| chr19-55F.5.947033  | 1.205323 | 1.02376  | 1.275029 | 0.202299 | 0.981636 | chr19    | 55287631 | 55287878 | + | 0  | NA                  | intron (N)intron (N) | 11205     | NM_00104C  | 222962    | Hs.4302   | NM_15324E        | ENSG00000SLC29A4   | ENT4 PMA1               | solute c protein-coding   |
| chr7-529F.6.502326  | 1.213175 | 0.95163  | 1.274838 | 0.202367 | 0.981636 | chr7     | 5293633  | 5294663  | + | 0  | NA                  | intron (N)AluJr SIN  | 11259     | NM_00117C  | 192111    | Hs.10255E | NM_13857E        | ENSG00000PGAM5     | BXLBV68                 | PGAM fam protein-coding   |
| chr12-13F.7.863307  | -1.08622 | 0.852179 | -1.27464 | 0.202436 | 0.981636 | chr12    | 1.33E+08 | 1.33E+08 | + | 0  | NA                  | 3' UTR (N)3' UTR (N) | -25472    | NM_00226E  | 3837      | Hs.53279E | NM_00226E        | ENSG00000KPMB1     | IMB1 IPO1               | karyopher protein-coding  |
| chr17-47F.7.863307  | -1.08622 | 0.852179 | -1.27464 | 0.202436 | 0.981636 | chr17    | 47623882 | 47625012 | + | 0  | NA                  | IntergeniAluSx SIN   | 13189     | NM_00111E  | 10801     | Hs.44093C | NM_00664C        | ENSG00000SEPTIN9   | AF17q25 S               | septin 9 protein-coding   |
| chr17-77F.6.689636  | -1.06106 | 0.832983 | -1.27381 | 0.202731 | 0.981636 | chr17    | 77488255 | 77488609 | + | 0  | NA                  | intron (N)intron (N) | 15258     | NM_17385A  | 254428    | Hs.20274  | NM_17385A        | ENSG00000SLC41A1   | MgtE                    | solute c protein-coding   |
| chr1-2057I.9.493685 | 0.991636 | 0.778784 | 1.273314 | 0.202907 | 0.981636 | chr1     | 2.06E+08 | 2.06E+08 | + | 0  | NA                  | exon (NM)exon (NM)   | 27583     | NM_02477E  | 79830     | Hs.47124E | NM_02477E        | ENSG00000ZMYM1     | MYM                     | zinc fing protein-coding  |
| chr1-351F.7.81246   | -1.10117 | 0.864925 | -1.27314 | 0.20297  | 0.981636 | chr1     | 35106854 | 35107082 | + | 0  | NA                  | intron (N)AluY SINE  | -19689    | NM_00598E  | 6615      | Hs.48029  | NM_00598E        | ENSG00000SNA11     | SLUGH2 S                | snail fam protein-coding  |
| chr20-49F.9.902597  | -1.09355 | 0.859001 | -1.27305 | 0.203001 | 0.981636 | chr20    | 49963143 | 49963439 | + | 0  | NA                  | IntergeniAluY SINE   | 14507     | NM_00104C  | 51752     | Hs.666524 | NM_01644E        | ENSG00000CERAP1    | A-LAP AL                | endoplasm protein-coding  |
| chr5-967F.4.667105  | -1.42598 | 1.121325 | -1.27169 | 0.203484 | 0.981636 | chr5     | 96792940 | 96793937 | + | 0  | NA                  | exon (NM)exon (NM)   | -42749    | NR_02989E  | 442893    | NR_02989E | ENSG00000MIR151A | MIR151 MI          | microRNA ncRNA          |                           |
| chr8-140F.6.667105  | -1.42598 | 1.121325 | -1.27169 | 0.203484 | 0.981636 | chr8     | 1.41E+08 | 1.41E+08 | + | 0  | NA                  | intron (N)AluS6 SI   | 8347      | NM_032637  | 6502      | Hs.23348  | NM_00598E        | ENSG00000SKP2      | FBL1 FBX1               | S-phase k protein-coding  |
| chr5-361F.7.327429  | -1.12694 | 0.919674 | -1.27156 | 0.203531 | 0.981636 | chr5     | 36160321 | 36160595 | + | 0  | NA                  | intron (N)L2c LINE   | 16866     | NR_13296E  | 192217    | Hs.472491 | NR_13296E        | ENSG00000CXCT2P1   | CXCT2P                  | 3-oxoacid pseudo          |
| chr1-395F.7.650792  | 1.112275 | 0.874905 | 1.27131  | 0.203618 | 0.981636 | chr1     | 39531557 | 39531907 | + | 0  | NA                  | intron (N)intron (N) | 35907     | NR_104387  | 6872      | Hs.15856C | NM_00460C        | ENSG00000TAF1      | BA2R CCG1               | TATA-box protein-coding   |
| chrX-714F.5.189302  | 1.368411 | 1.076498 | 1.271169 | 0.203668 | 0.981636 | chrX     | 71401994 | 71402534 | + | 0  | NA                  | intron (N)AluS6 SI   | 15420     | NM_00135E  | 10587     | Hs.44343C | NM_00644C        | ENSG00000TXNRD2    | GCCD5 SEL               | thioredox protein-coding  |
| chr22-19F.5.187452  | 1.350351 | 1.062462 | 1.203741 | 0.981636 | chr22    | 19116875 | 19117392 | +        | 0 | NA | intron (N)LM14 LINE | 1994                 | NM_001001 | 861        | Hs.149261 | NM_00175A | ENSG00000CRUX1   | AML1 AML1          | RUNX fam protein-coding |                           |
| chr21-34F.7.912304  | -1.08325 | 0.85246  | -1.27074 | 0.203822 | 0.981636 | chr21    | 34886445 | 34886966 | + | 0  | NA                  | intron (N)CpG        | 33023     | NR_03370A  | 8674      | Hs.6651   | NM_00376E        | ENSG00000VAMP4     | VAMP-4 V                | vesicle e protein-coding  |
| chr1-1717I.11.19559 | 0.905328 | 0.712828 | 1.270051 | 0.204067 | 0.981636 | chr1     | 1.72E+08 | 1.72E+08 | + | 0  | NA                  | intron (N)intron (N) | -19466    | NR_03961E  | 1.01E+08  | NR_03961E | ENSG00000MIR4423 | MIR-4423           | microRNA ncRNA          |                           |
| chr1-851I.4.504142  | 1.433575 | 1.128766 | 1.270037 | 0.204071 | 0.981636 | chr1     | 85113587 | 85115070 | + | 0  | NA                  | intron (N)LM1E1 LIN  | 31495827  | 31496618   | 117583    | Hs.65738E | NM_05717E        | ENSG00000PARD3B    | ALS2 PBR19              | par-3 fan protein-coding  |
| chr10-314F.6.591238 | -1.20268 | 0.947035 | -1.26994 | 0.204107 | 0.981636 | chr10    | 2.05E+08 | 2.05E+08 | + | 0  | NA                  | intron (N)intron (N) | 21782     | NM_00130E  | 26896     | Hs.387804 | NM_00256E        | ENSG00000PABPC1    | PAB1 PABF               | poly(A) t protein-coding  |
| chr2-2047F.6.591238 | -1.20268 | 0.947035 | -1.26994 | 0.204107 | 0.981636 | chr2     | 1.01E+08 | 1.01E+08 | + | 0  | NA                  | intron (N)MERE1E LI  | 8033      | NM_01763E  | 54795     | Hs.467101 | NM_01763E        | ENSG00000TRPM4     | LTrpC4 PF               | transient protein-coding  |
| chr8-949F.9.468262  | 0.987644 | 0.77823  | 1.269901 | 0.204409 | 0.981636 | chr8     | 94932124 | 94941324 | + | 0  | NA                  | intron (N)intron (N) | 12654     | NM_00113E  | 94241     | Hs.492261 | NM_03328E        | ENSG00000TP53INP1  | SIP1 TP53               | tumor p protein-coding    |
| chr11-66F.7.641084  | 1.102644 | 0.869228 | 1.268533 | 0.204608 | 0.981636 | chr11    | 66238920 | 66239126 | + | 0  | NA                  | intron (N)intron (N) | -18271    | NM_001134  | 64837     | Hs.28079E | NM_02282E        | ENSG00000KLC2      | -                       | kinesin l protein-coding  |
| chr17-57F.7.641084  | 1.102644 | 0.869228 | 1.268533 | 0.204608 | 0.981636 | chr17    | 57300557 | 57300801 | + | 0  | NA                  | intron (N)THE1B LTF  | 43660     | NM_170721  | 124540    | Hs.65892E | NM_13896E        | ENSG00000CMS12     | MSI2H                   | musashi f protein-coding  |
| chr22-29F.7.641084  | 1.102644 | 0.869228 | 1.268533 | 0.204608 | 0.981636 | chr22    | 29678271 | 29678490 | + | 0  | NA                  | intron (N)intron (N) | -41623    | NM_182527  | 164633    | Hs.64360E | NM_182527        | ENSG00000CABP7     | CALN2                   | calcium t protein-coding  |
| chr15-68F.8.280506  | 1.057039 | 0.833682 | 1.267917 | 0.204828 | 0.981636 | chr15    | 68092311 | 68092810 | + | 0  | NA                  | intron (N)MLT1A0 LI  | 37984     | NM_00132C  | 8554      | Hs.16245E | NM_01616E        | ENSG00000PIAS1     | DDXB1 GE                | protein-coding            |
| chr5-179F.8.280506  | 1.057039 | 0.833682 | 1.267917 | 0.204828 | 0.981636 | chr5     | 1.79E+08 | 1.79E+08 | + | 0  | NA                  | 3' UTR (N)3' UTR (N) | 22548     | NM_014594  | 30832     | Hs.27232E | NM_014594        | ENSG00000ZNF354C   | KID3                    | zinc fing protein-coding  |
| chr3-157F.9.094237  | -1.00726 | 0.794822 | -1.26728 | 0.205056 | 0.981636 | chr3     | 15733172 | 15733385 | + | 0  | NA                  | intron (N)intron (N) | 23269     | NM_00119E  | 23243     | Hs.33523E | NM_01519E        | ENSG00000ANKRD28   | PITK PPP1               | ankyrin l protein-coding  |
| chr1-538F.6.476902  | 1.207519 | 0.953019 | 1.267046 | 0.205139 | 0.981636 | chr1     | 53854263 | 53855136 |   |    |                     |                      |           |            |           |           |                  |                    |                         |                           |



|                    |          |          |          |          |          |       |          |          |   |      |                     |                   |                              |                     |                                      |
|--------------------|----------|----------|----------|----------|----------|-------|----------|----------|---|------|---------------------|-------------------|------------------------------|---------------------|--------------------------------------|
| chr3-4841 5.768169 | 1.246327 | 0.993386 | 1.254626 | 0.209615 | 0.981636 | chr3  | 48411578 | 48412477 | + | 0 NA | intron (Nintron (N  | 17436 NM_002673   | 5364 Hs. 476209NM_002673     | ENSG00000PLXNB1     | PLEXIN-B1plexin B1protein-coding     |
| chr14-31:8.237517  | 1.045772 | 0.833789 | 1.25424  | 0.209755 | 0.981636 | chr14 | 31307462 | 31307904 | + | 0 NA | intron (Nintron (N  | -99890 NM_015382  | 25831 Hs. 708017NM_015382    | ENSG00000HECTD1     | EULR HECT domain protein-coding      |
| chr1-227:5.734887  | 1.243329 | 0.991421 | 1.254088 | 0.20981  | 0.981636 | chr1  | 2.28E+08 | 2.28E+08 | + | 0 NA | 3' UTR (N3' UTR (N  | 36432 NR_036753   | 401983 Hs. 681816NR_036753   | ZNF847P             | gml27 zinc finger pseudo             |
| chr2-426:6.965632  | 1.12576  | 0.897714 | 1.25403  | 0.209831 | 0.981636 | chr2  | 42682719 | 42683597 | + | 0 NA | intron (Nintron (N  | 81103 NM_148962   | 165140 Hs. 168439NM_148962   | ENSG00000CXER1      | GPCR GPR10xoeicos protein-coding     |
| chr4-324:6.965632  | 1.12576  | 0.897714 | 1.25403  | 0.209831 | 0.981636 | chr4  | 3240088  | 3240451  | + | 0 NA | 3' UTR (N3' UTR (N  | -4100 NM_00133C   | 345222 Hs. 442291NM_001012   | ENSG00000MSANTD1    | Corf444 Myb/SANT protein-coding      |
| chr5-149:6.965632  | 1.12576  | 0.897714 | 1.25403  | 0.209831 | 0.981636 | chr5  | 1.5E+08  | 1.5E+08  | + | 0 NA | intron (NLINE2z/LI  | 9608 NM_001271    | 1452 Hs. 529862NM_001892     | ENSG00000CCSNK1A1   | CK1 CK1a casein k protein-coding     |
| chr8-518:6.965632  | 1.12576  | 0.897714 | 1.25403  | 0.209831 | 0.981636 | chr8  | 51831102 | 51831319 | + | 0 NA | intron (NAluSz SIN  | -21765 NM_144651  | 137902 Hs. 444882NM_144651   | ENSG00000PDXNL      | PMR1 PM1peroxidase protein-coding    |
| chr20-266:64.62055 | 0.448571 | 0.357773 | 1.253786 | 0.20992  | 0.981636 | chr20 | 26605426 | 26607869 | + | 0 NA | IntergeniALR/Alph   | -397414 NR_04009E | ENSG00000MIR663AHC           | MIR663A lncRNA      |                                      |
| chr1-112:5.880469  | -1.23399 | 0.984257 | -1.25373 | 0.20994  | 0.981636 | chr1  | 1.13E+08 | 1.13E+08 | + | 0 NA | TTS (NM_TTS (NM_I   | 32529 NM_024494   | 7482 Hs. 258577NM_00418E     | ENSG00000WNT2B      | WNT13 Wnt family protein-coding      |
| chr10-14:5.880469  | -1.23399 | 0.984257 | -1.25373 | 0.20994  | 0.981636 | chr10 | 14551100 | 14552394 | + | 0 NA | intron (Nintron (N  | -3110 NM_00132C   | 83641 Hs. 446311NM_03145E    | ENSG00000FAM107B    | C10orf45 family wiprotein-coding     |
| chr17-45:5.880469  | -1.23399 | 0.984257 | -1.25373 | 0.20994  | 0.981636 | chr17 | 45281501 | 45282497 | + | 0 NA | intron (Nintron (N  | -19905 NM_00132C  | 124783 Hs. 412711NM_15234E   | ENSG00000SPATA32    | AEP2 C17c spermatog protein-coding   |
| chr19-914:5.880469 | -1.23399 | 0.984257 | -1.25373 | 0.20994  | 0.981636 | chr19 | 9142010  | 9142541  | + | 0 NA | intron (Nintron (N  | 1878 NR_10243E    | 57693 Hs. 465822NM_02093E    | ENSG00000ZNF317     | zinc finger protein-coding           |
| chr2-875:5.880469  | -1.23399 | 0.984257 | -1.25373 | 0.20994  | 0.981636 | chr2  | 87526558 | 87527310 | + | 0 NA | Intergeni Intergeni | 56984 NR_14646C   | 112597 Hs. 652166NR_02420A   | ENSG00000CYTOR      | C2orf59 lyctoskelcRNA                |
| chr2-1731:5.880469 | -1.23399 | 0.984257 | -1.25373 | 0.20994  | 0.981636 | chr2  | 1.73E+08 | 1.73E+08 | + | 0 NA | intron (Nintron (N  | 87219 NM_00136E   | 51776 Hs. 444511NM_01665E    | ENSG00000MAP3K20    | AZK CNM6 mitogen- protein-coding     |
| chr2-199:5.880469  | -1.23399 | 0.984257 | -1.25373 | 0.20994  | 0.981636 | chr2  | 2E+08    | 2E+08    | + | 0 NA | intron (Nintron (N  | -12129 NM_00136E  | 79568 Hs. 154494NM_02452C    | ENSG00000MAIP1      | C2orf47 matrix A protein-coding      |
| chr20-49:5.880469  | -1.23399 | 0.984257 | -1.25373 | 0.20994  | 0.981636 | chr20 | 49267003 | 49268038 | + | 0 NA | intron (Nintron (N  | 10537 NM_02103E   | 51769 Hs. 371794NM_02103E    | ENSG00000ZNF1       | zinc finger protein-coding           |
| chr4-119:5.880469  | -1.23399 | 0.984257 | -1.25373 | 0.20994  | 0.981636 | chr4  | 1.19E+08 | 1.19E+08 | + | 0 NA | intron (NHAL1 LINE  | 9340 NM_001371396 |                              |                     |                                      |
| chr5-491:11.21131  | 0.902138 | 0.720013 | 1.252947 | 0.210225 | 0.981636 | chr5  | 49134512 | 49136221 | + | 0 NA | IntergeniALR/Alph   | 1305922 NM_19844E | 133418 Hs. 561411NM_19844E   | ENSG00000EMB        | GP70 embigin protein-coding          |
| chr11-124:5.921609 | -1.22783 | 0.980526 | -1.25222 | 0.210491 | 0.981636 | chr11 | 12484936 | 12486262 | + | 0 NA | intron (NLMC3 LIN   | 108028 NM_01822E  | 55742 Hs. 432914NM_01822E    | ENSG00000PARVA      | CH-ILKBP parvin al protein-coding    |
| chr15-80:5.921609  | -1.22783 | 0.980526 | -1.25222 | 0.210491 | 0.981636 | chr15 | 80802077 | 80804203 | + | 0 NA | intron (Nintron (N  | 23770 NM_00129E   | 57214 Hs. 459085NM_01868E    | ENSG00000CEMIP      | CCSP1 HYE cell migr protein-coding   |
| chr19-12:5.921609  | -1.22783 | 0.980526 | -1.25222 | 0.210491 | 0.981636 | chr19 | 12699211 | 12699744 | + | 0 NA | 3' UTR (N3' UTR (N  | -2846 NM_032301   | 84261 Hs. 515154NM_032301    | ENSG00000FBXW9      | Fbw9 MEC-F-box anc protein-coding    |
| chr2-745:5.921609  | -1.22783 | 0.980526 | -1.25222 | 0.210491 | 0.981636 | chr2  | 74546958 | 74547986 | + | 0 NA | intron (NLS LINE C  | -1548 NM_001197   | 1796 Hs. 103854NM_001381     | ENSG00000DOK1       | P62DOK p docking p protein-coding    |
| chr3-102:5.921609  | -1.22783 | 0.980526 | -1.25222 | 0.210491 | 0.981636 | chr3  | 10252671 | 10252870 | + | 0 NA | intron (NAluJo SIN  | 4311 NM_01476C    | 9797 Hs. 475401NM_01476C     | ENSG00000TATDN2     | TatD DNase protein-coding            |
| chr4-267:5.921609  | -1.22783 | 0.980526 | -1.25222 | 0.210491 | 0.981636 | chr4  | 26777407 | 26778034 | + | 0 NA | IntergeniALuSz6 SI  | 82524 NR_13467E   | 1.05E+08 Hs. 548856NR_134673 | STIM2-AS1           | STIM2 antncRNA                       |
| chr8-122:5.921609  | -1.22783 | 0.980526 | -1.25222 | 0.210491 | 0.981636 | chr8  | 12209487 | 12210892 | + | 0 NA | Intergeni Intergeni | -16056 NR_14887E  | 65333 Hs. 458413NM_001137    | ENSG00000FAM86B2    | family wiprotein-coding              |
| chr9-33:5.921609   | -1.22783 | 0.980526 | -1.25222 | 0.210491 | 0.981636 | chr9  | 33127081 | 33127522 | + | 0 NA | intron (Nintron (N  | 18609 NR_162131   | 1.13E+08 NR_162131           | MIR12117            | microRNA ncRNA                       |
| chr1-149:8.170954  | 1.04112  | 0.831681 | 1.251826 | 0.210633 | 0.981636 | chr1  | 1.5E+08  | 1.5E+08  | + | 0 NA | intron (Nintron (N  | -2466 NM_00585C   | 10262 Hs. 516166NM_00585C    | ENSG00000SF3B4      | AFD1 Hsh4splicing protein-coding     |
| chr2-13:8.170954   | 1.04112  | 0.831681 | 1.251826 | 0.210633 | 0.981636 | chr2  | 1.32E+08 | 1.32E+08 | + | 0 NA | intron (Nintron (N  | 16029 NR_00329C   | 347918 Hs. 122115NM_18261E   | ENSG00000EP400P1    | EP400NL EP400 psc pseudo             |
| chr3-988:8.170954  | 1.04112  | 0.831681 | 1.251826 | 0.210633 | 0.981636 | chr3  | 98800689 | 98801240 | + | 0 NA | intron (Nintron (N  | 37657 NM_00132E   | 10402 Hs. 148711NM_00610C    | ENSG00000ST3GAL6    | SIAT10 ST13 beta- protein-coding     |
| chr19-57:7.740929  | 1.109612 | 0.88688  | 1.25114  | 0.210883 | 0.981636 | chr19 | 57879690 | 57879889 | + | 0 NA | intron (NLS LINE L  | 9248 NM_001144    | 730051 Hs. 634148NM_001144   | ENSG00000ZNF814     | zinc finger protein-coding           |
| chr1-155:6.97349   | 1.123167 | 0.89775  | 1.25109  | 0.210902 | 0.981636 | chr1  | 1.55E+08 | 1.55E+08 | + | 0 NA | intron (Nintron (N  | 8648 NM_00125E    | 51043 Hs. 729275NM_00125E    | ENSG00000ZBTB7B     | CKROX THF zinc finger protein-coding |
| chr1-168:6.97349   | 1.123167 | 0.89775  | 1.25109  | 0.210902 | 0.981636 | chr1  | 1.68E+08 | 1.68E+08 | + | 0 NA | intron (Nintron (N  | 14623 NR_03170Z   | 1E+08 NR_03170Z              | ENSG00000MIR1255B   | MIR1255B-microRNA ncRNA              |
| chr13-98:6.97349   | 1.123167 | 0.89775  | 1.25109  | 0.210902 | 0.981636 | chr13 | 98385392 | 98385771 | + | 0 NA | intron (Nintron (N  | 136544 NM_00357E  | 8428 Hs. 508514NM_00357E     | ENSG00000STK24      | HEL-S-95 serine/t protein-coding     |
| chr16-47:6.97349   | 1.123167 | 0.89775  | 1.25109  | 0.210902 | 0.981636 | chr16 | 47688973 | 47689473 | + | 0 NA | intron (Nintron (N  | -169358 NR_11065C | 1.02E+08 Hs. 589404NR_11065C | ENSG00000CLINC0213C | long intncRNA                        |
| chr18-20:6.97349   | 1.123167 | 0.89775  | 1.25109  | 0.210902 | 0.981636 | chr18 | 20972945 | 20973521 | + | 0 NA | intron (NLSa LINE   | 138530 NM_00540E  | 6193 Hs. 306307NM_00540E     | ENSG00000ROCK1      | P160ROCK Rho assoc protein-coding    |
| chr19-20:6.97349   | 1.123167 | 0.89775  | 1.25109  | 0.210902 | 0.981636 | chr19 | 20027064 | 20021640 | + | 0 NA | intron (NMER30 DNA  | 18103 NM_001077   | 9120 Hs. 306296NR_03319E     | ENSG00000ZNF682     | BC39498 zinc finger protein-coding   |
| chr19-564:6.97349  | 1.123167 | 0.89775  | 1.25109  | 0.210902 | 0.981636 | chr19 | 56445847 | 56446388 | + | 0 NA | intron (NMER33 DNA  | 31228 NM_001321   | 63934 Hs. 676605NM_02210E    | ENSG00000ZNF667     | MIPU1 zinc finger protein-coding     |
| chr9-116:6.97349   | 1.123167 | 0.89775  | 1.25109  | 0.210902 | 0.981636 | chr9  | 1.16E+08 | 1.16E+08 | + | 0 NA | intron (N(GAAA)n S  | 58946 NM_002581   | 5069 Hs. 643596NM_002581     | ENSG00000PAPPA      | ASBAB27 pappalysiprotein-coding      |
| chr1-1851:5.742745 | 1.240117 | 0.991321 | 1.250974 | 0.210944 | 0.981636 | chr1  | 1.85E+08 | 1.85E+08 | + | 0 NA | intron (NLP1A7 LIN  | 40672 NM_01767E   | 54823 Hs. 134188NM_01767E    | ENSG00000SWT1       | Corf26 ESWT1 RNA protein-coding      |
| chr16-164:5.742745 | 1.240117 | 0.991321 | 1.250974 | 0.210944 | 0.981636 | chr16 | 1643760  | 1645278  | + | 0 NA | intron (Nintron (N  | 29879 NM_02082E   | 57585 Hs. 603676NM_02082E    | ENSG00000CRAMP1     | CRAMP1L cramped c protein-coding     |
| chr16-29:5.742745  | 1.240117 | 0.991321 | 1.250974 | 0.210944 | 0.981636 | chr16 | 29684589 | 29685060 | + | 0 NA | intron (Nintron (N  | 5644 NR_13453E    | 23475 Hs. 513484NM_01429E    | ENSG00000QPRT       | HEL-S-90 quinoline protein-coding    |
| chr16-47:5.742745  | 1.240117 | 0.991321 | 1.250974 | 0.210944 | 0.981636 | chr16 | 47599067 | 47591966 | + | 0 NA | intron (NLS2c LINE  | 130135 NM_001031  | 5257 Hs. 78060 NM_00029E     | ENSG00000PHK6       | phosphory protein-coding             |
| chr22-49:5.742745  | 1.240117 | 0.991321 | 1.250974 | 0.210944 | 0.981636 | chr22 | 49866839 | 49867653 | + | 0 NA | intron (NLM4 LINE   | 13402 NM_01483E   | 9889 Hs. 475205NM_01483E     | ENSG00000ZBED4      | zinc finger protein-coding           |
| chr4-866:5.742745  | 1.240117 | 0.991321 | 1.250974 | 0.210944 | 0.981636 | chr4  | 86650231 | 86651194 | + | 0 NA | intron (NLM4A LIN   | 56397 NM_00626A   | 5783 Hs. 436142NM_00626A     | ENSG00000PTPN13     | FAP-1 PNF protein t protein-coding   |
| chr7-643:5.742745  | 1.240117 | 0.991321 | 1.250974 | 0.210944 | 0.981636 | chr7  | 64330804 | 64332128 | + | 0 NA | intron (NLM1 LINE   | 17505 NM_00117C   | 728927 Hs. 386162NM_00117C   | ENSG00000ZNF736     | zinc finger protein-coding           |
| chr3-114:6.642085  | -1.18434 | 0.946919 | -1.25073 | 0.211032 | 0.981636 | chr3  | 1.14E+08 | 1.14E+08 | + | 0 NA | intron (NLM1E3G LI  | 19167 NM_02463E   | 79691 Hs. 477162NM_02463E    | ENSG00000QTRT2      | QTRTD1 queuine t protein-coding      |
| chr9-108:6.642085  | -1.18434 | 0.946919 | -1.25073 | 0.211032 | 0.981636 | chr9  | 1.09E+08 | 1.09E+08 | + | 0 NA | intron (NKangalla L | 12207 NM_006687   | 10881 Hs. 12353C             | ENSG00000ACTL7A     | actin lik protein-coding             |
| chr1-173:5.913751  | -1.22595 | 0.980461 | -1.25038 | 0.211162 | 0.981636 | chr1  | 1.74E+08 | 1.74E+08 | + | 0 NA | intron (NLP1A6 LIN  | 6574 NM_001171    | 91687 Hs. 531856NM_03331E    | ENSG00000CCENPL     | C1orf155 centromer protein-coding    |
| chr11-12:5.913751  | -1.22595 | 0.980461 | -1.25038 | 0.211162 | 0.981636 | chr11 | 1.28E+08 | 1.28E+08 | + | 0 NA | 3' UTR (N3' UTR (N  | 62318 NM_00523E   | 2113 Hs. 369438NM_00523E     | ENSG00000ETS1       | ETS-1 EWS ETS protc protein-coding   |
| chr12-46:5.913751  | -1.22595 | 0.980461 | -1.25038 | 0.211162 | 0.981636 | chr12 | 46211975 | 46212489 | + | 0 NA | intron (Nintron (N  | 54284 NM_00127E   | 81539 Hs. 53377C             | ENSG00000SLC38A1    | ATA1 NAT2 solute c protein-coding    |
| chr12-96:5.913751  | -1.22595 | 0.980461 | -1.25038 | 0.211162 | 0.981636 | chr12 | 96273138 | 96273387 | + | 0 NA | IntergeniALuSx SIN  | 17764 NM_00130E   | 2004 Hs. 46523 NM_00523C     | ENSG00000CELK3      | ERP NET ETS trans protein-coding     |
| chr12-13:5.913751  | -1.22595 | 0.980461 | -1.25038 | 0.211162 | 0.981636 | chr12 | 1.33E+08 | 1.33E+08 | + |      |                     |                   |                              |                     |                                      |

|                    |          |          |          |          |          |       |          |          |   |      |                     |                   |                               |                        |                     |                              |                |
|--------------------|----------|----------|----------|----------|----------|-------|----------|----------|---|------|---------------------|-------------------|-------------------------------|------------------------|---------------------|------------------------------|----------------|
| chr3-1411 6.948067 | 1.117926 | 0.90039  | 1.241602 | 0.214384 | 0.981636 | chr3  | 14112352 | 14113341 | + | 0 NA | 3' UTR (N3' UTR (N  | 12024 NM_001098   | 131474 Hs. 51781ENM_14463ENS  | ENSG000004CHCHD4       | MIA40 TIM           | coiled-coiled protein-coding |                |
| chr6-264 6.948067  | 1.117926 | 0.90039  | 1.241602 | 0.214384 | 0.981636 | chr6  | 26430379 | 26430790 | + | 0 NA | TTS (NR_C TTS (NR_C | 9193 NR_027795    | 54718 Hs. 729655ENM_02401ENS  | ENSG000004BTN2A3P      | BTN2.3 BTB          | butyrophilic pseudo          |                |
| chr5-1284 8.365903 | -1.01983 | 0.821621 | -1.24124 | 0.214518 | 0.981636 | chr5  | 1.28E+08 | 1.28E+08 | + | 0 NA | intron (NMIRB SINE  | 130942 NM_001995  | 2201 Hs. 519294NM_001995ENS   | ENSG000004FBN2         | CCA DA9 E           | fibriin protein-coding       |                |
| chr12-10 9.563551  | -0.95918 | 0.727871 | -1.24106 | 0.214583 | 0.981636 | chr12 | 1.04E+08 | 1.04E+08 | + | 0 NA | TTS (NM_C TTS (NM_C | 211330 NM_003211  | 6996 Hs. 584809NM_003211ENS   | ENSG000004TDG          | hTDG                | thymine I protein-coding     |                |
| chr5-4892 59.41868 | 0.45026  | 0.362862 | 1.240856 | 0.214659 | 0.981636 | chr5  | 48929424 | 48930402 | + | 0 NA | IntergeniALR/Alpha  | 1511375 NM_198445 | 133418 Hs. 561411NM_198445ENS | ENSG000004EMB          | GP70                | thymine I protein-coding     |                |
| chr6-751 7.117407  | -1.11921 | 0.902499 | -1.24012 | 0.21493  | 0.981636 | chr6  | 75105487 | 75107064 | + | 0 NA | intron (Nintron (N  | 22507 NR_145788   | 1.1E+08                       | SNORD156               | -                   | small nucsnoRNA              |                |
| chr6-158 8.332622  | -1.02528 | 0.826811 | -1.24004 | 0.214961 | 0.981636 | chr6  | 1.59E+08 | 1.59E+08 | + | 0 NA | intron (Nintron (N  | 4556 NM_001291    | 6993 Hs. 445999NM_00651ENS    | ENSG000004DYNLT1       | CW-1 TCT            | dynein I protein-coding      |                |
| chr6-354 9.588975  | -0.95328 | 0.768866 | -1.23985 | 0.215032 | 0.981636 | chr6  | 35468561 | 35473568 | + | 0 NA | TTS (NM_C TTS (NM_C | 556 NR_106961     | 1.02E+08                      | NR_106961ENS           | ENSG000004MIR7111   | hsa-mir-7                    | microRNA ncRNA |
| chr6-419 8.358045  | -1.01844 | 0.821461 | -1.23979 | 0.215053 | 0.981636 | chr6  | 41924526 | 41924937 | + | 0 NA | intron (N2b LINE    | 3232 NM_004055    | 705 Hs. 106888NM_004055ENS    | ENSG000004BYSL         | BYSTIN E            | rbystin I protein-coding     |                |
| chr19-27 24.81644  | 0.626768 | 0.505571 | 1.239724 | 0.215078 | 0.981636 | chr19 | 27008326 | 27009103 | + | 0 NA | IntergeniALR/Alpha  | -784717 NR_146735 | 1.02E+08                      | Hs. 567934NR_110687ENS | ENSG000004LOC101927 | -                            | uncharactercna |
| chr15-805 8.373761 | -1.02123 | 0.824019 | -1.23933 | 0.215224 | 0.981636 | chr15 | 80024123 | 80926037 | + | 0 NA | intron (Nintron (N  | 64739 NR_126325   | 23184 Hs. 578455NM_015154ENS  | ENSG000004MESD         | BOCA MES            | mesoderm protein-coding      |                |
| chr5-132 8.373761  | -1.02123 | 0.824019 | -1.23933 | 0.215224 | 0.981636 | chr5  | 1.32E+08 | 1.32E+08 | + | 0 NA | intron (Nintron (N  | 13689 NR_106888   | 1.02E+08                      | NR_106888ENS           | ENSG000004MIR6830   | hsa-mir-6                    | microRNA ncRNA |
| chr17-29 9.947284  | 0.936547 | 0.755863 | 1.239043 | 0.21533  | 0.981636 | chr17 | 29632044 | 29632644 | + | 0 NA | exon (NM exon (NM   | -10921 NM_032854  | 84940 Hs. 143045NM_032854ENS  | ENSG000004COR06        | -                   | coronin f protein-coding     |                |
| chr4-754 5.847188  | -1.24241 | 1.002867 | -1.23886 | 0.215397 | 0.981636 | chr4  | 81745839 | 81746338 | + | 0 NA | intron (Nintron (N  | 162811 NM_001263  | 1040 Hs. 654895NM_001263ENS   | ENSG000004CDS1         | CDS 1               | CDP-diacyl protein-coding    |                |
| chr1-1247 19.12583 | 0.692645 | 0.55947  | 1.238038 | 0.215702 | 0.981636 | chr1  | 1.25E+08 | 1.25E+08 | + | 0 NA | IntergeniALR/Alpha  | 3187382 NR_003955 | 647121 Hs. 697682NR_003955ENS | ENSG000004EMBP1        | -                   | emigin f pseudo              |                |
| chr12-10 5.776027  | 1.243107 | 1.004408 | 1.237651 | 0.215846 | 0.981636 | chr12 | 1.06E+08 | 1.06E+08 | + | 0 NA | intron (Nintron (N  | 16824 NM_001288   | 255394 Hs. 696047NM_152777ENS | ENSG000004TCP11L2      | -                   | t-complex protein-coding     |                |
| chr2-48 5.776027   | 1.243107 | 1.004408 | 1.237651 | 0.215846 | 0.981636 | chr2  | 48478073 | 48478490 | + | 0 NA | intron (NMLTIC LTF  | 37512 NM_001193   | 129285 Hs. 654615NM_152994ENS | ENSG000004PPP1R21      | CCDC128 K           | protein I protein-coding     |                |
| chr16-28 8.186669  | 1.036636 | 0.837685 | 1.237502 | 0.215901 | 0.981636 | chr16 | 28391588 | 28391862 | + | 0 NA | promoter-promoter-  | -674 NR_106922    | 1.02E+08                      | NR_106922ENS           | ENSG000004MIR6862   | hsa-mir-6                    | microRNA ncRNA |
| chr7-752 8.186669  | 1.036636 | 0.837685 | 1.237502 | 0.215901 | 0.981636 | chr7  | 752242   | 752458   | + | 0 NA | intron (NCPG        | -24674 NM_001164  | 5575 Hs. 520851NM_002733ENS   | ENSG000004PRKAR1B      | PRKAR1              | protein I protein-coding     |                |
| chr19-181 6.981348 | 1.12051  | 0.905469 | 1.237492 | 0.215904 | 0.981636 | chr19 | 18127899 | 18129444 | + | 0 NA | intron (Nintron (N  | -24919 NR_162071  | 5296 Hs. 371344NM_005027ENS   | ENSG000004PIK3R2       | MPPH MPPI           | phosphoin protein-coding     |                |
| chr19-18 6.981348  | 1.12051  | 0.905469 | 1.237492 | 0.215904 | 0.981636 | chr19 | 18877024 | 18877255 | + | 0 NA | TTS (NM_C TTS (NM_C | 19492 NM_001492   | 2657 Hs. 412355NM_001492ENS   | ENSG000004GDF1         | CERS1 CHI           | growth di protein-coding     |                |
| chr22-31 6.981348  | 1.12051  | 0.905469 | 1.237492 | 0.215904 | 0.981636 | chr22 | 31267809 | 31269463 | + | 0 NA | intron (Nintron (N  | 20252 NM_016733   | 3985 Hs. 474599NM_005566ENS   | ENSG000004LIMK2        | -                   | LIM domain protein-coding    |                |
| chr1-205 6.932351  | 1.123142 | 0.908025 | 1.236907 | 0.216122 | 0.981636 | chr1  | 2.36E+08 | 2.36E+08 | + | 0 NA | intron (Nintron (N  | -92454 NM_001098  | 2786 Hs. 159711NM_004488ENS   | ENSG000004CNG4         | -                   | G protein-coding             |                |
| chr3-102 6.932351  | 1.123142 | 0.908025 | 1.236907 | 0.216122 | 0.981636 | chr3  | 10239150 | 10239430 | + | 0 NA | intron (N2 LINE L   | -9169 NM_014766   | 9797 Hs. 475401NM_014766ENS   | ENSG000004TADN2        | -                   | TadD NAs protein-coding      |                |
| chr9-1104 7.914154 | -1.07101 | 0.865995 | -1.23673 | 0.216186 | 0.981636 | chr9  | 1.1E+08  | 1.1E+08  | + | 0 NA | intron (NLMES3Cz L  | -86625 NM_001286  | 255220 Hs. 147064NM_001000ENS | ENSG000004TXNDC8       | SPTRX-3 S           | thioedox protein-coding      |                |
| chr19-211 7.152539 | -1.09966 | 0.889271 | -1.23658 | 0.216241 | 0.981636 | chr19 | 21185479 | 21186240 | + | 0 NA | 3' UTR (N3' UTR (N  | 43819 NM_133475   | 170959 Hs. 156255NM_133475ENS | ENSG000004ZNF431       | -                   | zinc fing protein-coding     |                |
| chr7-17 8.270798   | 1.048069 | 0.847759 | 1.236282 | 0.216354 | 0.981636 | chr7  | 74119684 | 74120517 | + | 0 NA | intron (NMLTID LTF  | 26883 NM_001204   | 3984 Hs. 647035NM_002314ENS   | ENSG000004LIMK1        | LIMK LIML           | domain protein-coding        |                |
| chr8-254 3.171148  | -1.6957  | 1.371769 | -1.23614 | 0.216407 | 0.981636 | chr8  | 25463936 | 25465963 | + | 0 NA | intron (Nintron (N  | 5716 NM_152562    | 157313 Hs. 33366 NM_152562ENS | ENSG000004CDA2         | PPP1R81 F           | cell divi protein-coding     |                |
| chr17-61 6.510184  | 1.209883 | 0.979003 | 1.235832 | 0.216521 | 0.981636 | chr17 | 61920131 | 61920347 | + | 0 NA | intron (NAluSq10 S  | 7743 NM_020748    | 57508 Hs. 279644NM_020748ENS  | ENSG000004INTS2        | INT2 KIAI           | integratc protein-coding     |                |
| chr17-37 12.1174   | -0.85702 | 0.693616 | -1.23558 | 0.216613 | 0.981636 | chr17 | 37557619 | 37557942 | + | 0 NA | intron (NAluJr SIN  | 5163 NM_080555    | 11276 Hs. 594647NM_007247ENS  | ENSG000004SYNRG        | APIGBP1 S           | ynnergim protein-coding      |                |
| chr22-41 5.701606  | 1.240391 | 1.004445 | 1.234902 | 0.216867 | 0.981636 | chr22 | 41877473 | 41878504 | + | 0 NA | exon (NM exon (NM   | -22956 NR_029507  | 407039                        | NR_029507ENS           | ENSG000004MIR33A    | MIR33 MI                     | microRNA ncRNA |
| chr3-515 5.701606  | 1.240391 | 1.004445 | 1.234902 | 0.216867 | 0.981636 | chr3  | 51565559 | 51567008 | + | 0 NA | intron (NAluSp SIN  | 15194 NM_001322   | 23132 Hs. 105399NM_015100ENS  | ENSG000004RAD54L2      | ARIP4 HSF           | RAD54 l1 protein-coding      |                |
| chr1-851 7.111399  | -1.1045  | 0.894471 | -1.23481 | 0.216902 | 0.981636 | chr1  | 85186330 | 85186641 | + | 0 NA | intron (NLIAP3 LIN  | 14531 NM_032184   | 84144 Hs. 533855NM_032184ENS  | ENSG000004SYDE2        | -                   | synase c protein-coding      |                |
| chr11-281 7.111399 | -1.1045  | 0.894471 | -1.23481 | 0.216902 | 0.981636 | chr11 | 28112308 | 28112591 | + | 0 NA | intron (Nintron (N  | 4061 NM_152636    | 196074 Hs. 243322NM_152636ENS | ENSG000004METTL15      | METT5D1             | methyltrc protein-coding     |                |
| chr5-3884 7.111399 | -1.1045  | 0.894471 | -1.23481 | 0.216902 | 0.981636 | chr5  | 38848197 | 38849772 | + | 0 NA | intron (NLMES3G LI  | 3072 NM_001322    | 9180 Hs. 120655NM_003999ENS   | ENSG000004OSMR         | IL-31R              | beoncostat1 protein-coding   |                |
| chr2-75 8.356195   | -1.02962 | 0.8341   | -1.23441 | 0.21705  | 0.981636 | chr2  | 75492977 | 75493259 | + | 0 NA | 3' UTR (N3' UTR (N  | -30950 NR_110281  | 1.02E+08                      | Hs. 671111NR_110281ENS | ENSG000004LOC101927 | -                            | uncharactercna |
| chr19-134 5.750603 | 1.236833 | 1.002318 | 1.233972 | 0.217213 | 0.981636 | chr19 | 13451545 | 13451944 | + | 0 NA | intron (NMLT1J2 LI  | 54716 NM_001127   | 773 Hs. 501632NM_000068ENS    | ENSG000004CACNA1A      | APCA BI C           | alcium v protein-coding      |                |
| chr19-16 5.750603  | 1.236833 | 1.002318 | 1.233972 | 0.217213 | 0.981636 | chr19 | 16680519 | 16681135 | + | 0 NA | intron (Nintron (N  | 19688 NM_024074   | 79041 Hs. 436068NM_024074ENS  | ENSG000004TMEM38A      | TRIC-A T            | transcript protein-coding    |                |
| chr20-62 5.750603  | 1.236833 | 1.002318 | 1.233972 | 0.217213 | 0.981636 | chr20 | 62327165 | 62328905 | + | 0 NA | intron (Nintron (N  | 4522 NR_039915    | 1.01E+08                      | NR_039915ENS           | ENSG000004MIR4758   | -                            | microRNA ncRNA |
| chr5-694 10.43102  | -0.94474 | 0.765851 | -1.23359 | 0.217357 | 0.981636 | chr5  | 69415090 | 69415355 | + | 0 NA | TTS (NM_C TTS (NM_C | 106 NM_001038     | 153562 Hs. 657687NM_144724ENS | ENSG000004MARVELD2     | DFNB49 MA           | MARVEL dc protein-coding     |                |
| chr1-130 7.085976  | -1.11271 | 0.902017 | -1.23359 | 0.217358 | 0.981636 | chr1  | 1309913  | 1310112  | + | 0 NA | intron (Nintron (N  | 1415 NM_153339    | 126789 Hs. 400655NM_153339ENS | ENSG000004PUSL1        | -                   | pseudour1 protein-coding     |                |
| chr12-10 7.085976  | -1.11271 | 0.902017 | -1.23359 | 0.217358 | 0.981636 | chr12 | 1.09E+08 | 1.09E+08 | + | 0 NA | intron (Nintron (N  | 13146 NM_001276   | 23603 Hs. 330384NM_014327ENS  | ENSG000004COR10C       | HCRN4               | coronin I protein-coding     |                |
| chr12-111 8.245375 | 1.04347  | 0.846065 | 1.233322 | 0.217456 | 0.981636 | chr12 | 1.12E+08 | 1.12E+08 | + | 0 NA | exon (NM exon (NM   | -22059 NM_000699  | 217 Hs. 604551NM_000699ENS    | ENSG000004ALDH2        | ALDH-E2 A           | aldehyde protein-coding      |                |
| chr1-703 7.144681  | -1.09804 | 0.890523 | -1.23303 | 0.217564 | 0.981636 | chr1  | 70322616 | 70322942 | + | 0 NA | intron (NAluSp SIN  | 31943 NM_030816   | 81573 Hs. 744989NM_030816ENS  | ENSG000004ANKRD13C     | dJ67H15.            | ankyrin I protein-coding     |                |
| chr12-121 7.144681 | -1.09804 | 0.890523 | -1.23303 | 0.217564 | 0.981636 | chr12 | 1.21E+08 | 1.21E+08 | + | 0 NA | 3' UTR (N3' UTR (N  | 30772 NM_00127C   | 10645 Hs. 297343NM_006544ENS  | ENSG000004CAMK2        | CAMKK CAM           | calcium/c protein-coding     |                |
| chr19-19 7.144681  | -1.09804 | 0.890523 | -1.23303 | 0.217564 | 0.981636 | chr19 | 19022036 | 19022631 | + | 0 NA | intron (Nintron (N  | 11184 NR_147913   | 10147 Hs. 77876 NM_014884ENS  | ENSG000004SUGP2        | SFRS14 S            | SRP and protein-coding       |                |
| chr20-39 7.144681  | -1.09804 | 0.890523 | -1.23303 | 0.217564 | 0.981636 | chr20 | 3921619  | 3921831  | + | 0 NA | intron (NAluSz SIN  | -4162 NR_031722   | 1E+08                         | NR_031722ENS           | ENSG000004MIR103B2  | MIR103-2                     | microRNA ncRNA |
| chr10-40 17.71234  | 0.747912 | 0.606598 | 1.232962 | 0.21759  | 0.981636 | chr10 | 40476615 | 40477209 | + | 0 NA | IntergeniALR/Alpha  | 1780316 NR_045000 | 399746 Hs. 742607NR_045000    | ACTR3BP5               | FKSG74              | ACTR3B ps pseudo             |                |
| chr10-87 5.898035  | -1.22199 | 0.991107 | -1.23295 | 0.217594 | 0.981636 | chr10 | 87520816 | 87521279 | + | 0 NA | exon (NM exon (NM   | 13214 NM_001178   | 9562 Hs. 121269NM_004897ENS   | ENSG000004M1NPP1       | HIPER1 M            | multiple protein-coding      |                |
| chr18-70 5.898035  | -1.22199 | 0.991107 | -1.23295 | 0.217594 | 0.981636 | chr18 | 70104566 | 70104779 | + | 0 NA | intron (NLIAP8A LI  | 101015 NM_001318  | 25914 Hs. 654809NM_173633ENS  | ENSG000004RTTN         | MSSP                | rotatin protein-coding       |                |
| chr2-189 5.898035  | -1.22199 | 0.991107 | -1.23295 | 0.217594 | 0.981636 | chr2  | 1.9E+08  | 1.9E+08  | + | 0 NA | TTS (NM_C TTS (NM_C | -5082 NM_144708   | 150709 Hs. 60772 NM_144708ENS | ENSG000004ANKAR        | -                   | ankyrin f protein-coding     |                |
| chr22-45 5.898035  | -1.22199 | 0.991107 | -1.23295 | 0.217594 | 0.981636 | chr22 | 45699029 | 45699438 | + | 0 NA | intron (Nintron (N  | 19347 NM_013236   | 25814 Hs. 475122NM_013236ENS  | ENSG000004ATXN10       | E46L HUM            | ataxin I protein-coding      |                |
| chr3-283 5.898035  | -1.22199 | 0.991107 | -1.23295 | 0.217594 | 0.981636 | chr3  | 28353066 | 28353354 | + | 0 NA | intron (NCharlie2E  | 4061 NM_001324    | 152098 Hs. 510633NM_001040ENS | ENSG000004ZCWFW2       | ZCW2                | zinc fing protein-coding     |                |
| chr4-47 5.898035   | -1.22199 | 0.991107 | -1.23295 | 0.217594 | 0.981636 |       |          |          |   |      |                     |                   |                               |                        |                     |                              |                |



|                    |          |          |           |          |          |       |           |          |   |      |                     |                            |                              |                     |                                  |                               |
|--------------------|----------|----------|-----------|----------|----------|-------|-----------|----------|---|------|---------------------|----------------------------|------------------------------|---------------------|----------------------------------|-------------------------------|
| chr17-197 11.72361 | 0.864689 | 0.70837  | 1.220675  | 0.222209 | 0.981636 | chr17 | 19796132  | 19797296 | + | 0 NA | intron (NLTR22C0 I  | -48416 NM_000691           | 218 Hs. 531682NM_000691      | ENSG000004ALDH3A1   | ALDH3 ALI                        | aldehyde protein-coding       |
| chr12-105 5.144278 | -1.28624 | 1.053743 | -1.220664 | 0.222224 | 0.981636 | chr12 | 1.05E+08  | 1.05E+08 | + | 0 NA | intron (Nintron (N  | 387882 Hs. 368936NM_207377 | ENSG000004C12orf75           | AGD3 OCC            | -chromosom protein-coding        |                               |
| chr8-4241 5.144278 | -1.28624 | 1.053743 | -1.220664 | 0.222224 | 0.981636 | chr8  | 42418391  | 42418740 | + | 0 NA | intron (NAluSz SIN  | 26685 NM_005662            | 7419 Hs. 699301NM_005662     | ENSG000004VDAC3     | HD-VDAC3 voltage c               | protein-coding                |
| chr8-1234 5.144278 | -1.28624 | 1.053743 | -1.220664 | 0.222224 | 0.981636 | chr8  | 1.23E+08  | 1.23E+08 | + | 0 NA | intron (Nintron (N  | 20622 NM_018024            | 55093 Hs. 18029 NM_018024    | ENSG000004WDYHV1    | C8orf32                          | WDYHV motprotein-coding       |
| chr21-29 5.931317  | -1.21362 | 0.994648 | -1.220115 | 0.222408 | 0.981636 | chr21 | 429043974 | 29044726 | + | 0 NA | intron (NLMC5 LIN   | 19682 NM_006447            | 10600 Hs. 99819 NM_006447    | ENSG000004USP16     | UBP-MUB                          | ubiquitin protein-coding      |
| chr6-289 5.931317  | -1.21362 | 0.994648 | -1.220115 | 0.222408 | 0.981636 | chr6  | 28908334  | 28908785 | + | 0 NA | intron (Nintron (N  | 12029 NR_104117            | 414760 Hs. 211006NR_104117   | ENSG000004HCG14     | dJ111M5.4HLA                     | complncRNA                    |
| chr8-589 5.931317  | -1.21362 | 0.994648 | -1.220115 | 0.222408 | 0.981636 | chr8  | 58938007  | 58938948 | + | 0 NA | intron (NLM3 LINE C | 180670 NM_014722           | 9760 Hs. 491806NM_014722     | ENSG000004TOX       | TOX1                             | thymocyte protein-coding      |
| chr13-421 8.120106 | 1.031803 | 0.845694 | 1.220666  | 0.22244  | 0.981636 | chr13 | 42159969  | 42160168 | + | 0 NA | exon (NM exon (NM   | 22010 NM_001204            | 160851 Hs. 630383NM_152911   | ENSG000004DGKH      | DGKeta                           | diacylglycerol protein-coding |
| chr12-121 8.683257 | 0.981202 | 0.804367 | 1.219844  | 0.222524 | 0.981636 | chr12 | 1.22E+08  | 1.22E+08 | + | 0 NA | intron (NAluY SINE  | 12003 NM_00108C            | 144404 Hs. 644504NM_00108C   | ENSG000004TMEM120B  | -                                | transmemt protein-coding      |
| chr19-366 8.683257 | 0.981202 | 0.804367 | 1.219844  | 0.222524 | 0.981636 | chr19 | 368761307 | 36878331 | + | 0 NA | exon (NM exon (NM   | 25598 NM_001242            | 25850 Hs. 362324NM_003411    | ENSG000004ZNF345    | HZF10                            | zinc fing protein-coding      |
| chr2-1311 8.683257 | 0.981202 | 0.804367 | 1.219844  | 0.222524 | 0.981636 | chr2  | 1.31E+08  | 1.31E+08 | + | 0 NA | intron (NHALb LIN   | 23428 NM_00130C            | 55041 Hs. 469944NM_017951    | ENSG000004PLEKH2    | EV22                             | pleckstrin protein-coding     |
| chr3-433 8.683257  | 0.981202 | 0.804367 | 1.219844  | 0.222524 | 0.981636 | chr3  | 43303771  | 43304609 | + | 0 NA | intron (Nintron (N  | 17650 NM_017711            | 54861 Hs. 476052NM_017711    | ENSG000004SNRR      | HSNFRK                           | SNF relat protein-coding      |
| chr1-1541 5.13642  | -1.28409 | 1.05374  | -1.2186   | 0.222995 | 0.981636 | chr1  | 1.54E+08  | 1.54E+08 | + | 0 NA | promoter-promoter-  | -734 NM_001278             | 7170 Hs. 535581NM_152263     | ENSG000004TPM3      | CAPM1 CFI                        | tropomyosin protein-coding    |
| chr4-705 5.13642   | -1.28409 | 1.05374  | -1.2186   | 0.222995 | 0.981636 | chr4  | 7059111   | 7059516  | + | 0 NA | 3' UTR (N3' UTR (N  | 8751 NM_02519E             | 80273 Hs. 443723NM_02519E    | ENSG000004GRPEL1    | GrpE HMGCGrpE                    | like protein-coding           |
| chr18-318 5.169701 | -1.27477 | 1.046208 | -1.21847  | 0.223045 | 0.981636 | chr18 | 31898006  | 31898500 | + | 0 NA | intron (NMER2 DNA   | 44875 NM_014931            | 22878 Hs. 202001NM_014931    | ENSG000004TRAPPC8   | GSGL HsT2                        | traffickiprotein-coding       |
| chr7-8402 5.169701 | -1.27477 | 1.046208 | -1.21847  | 0.223045 | 0.981636 | chr7  | 84024203  | 84024524 | + | 0 NA | intron (NAluSz6 SI  | 170516 NM_00608C           | 10371 Hs. 252451NM_00608C    | ENSG000004SEMA3A    | COLL1 HHI                        | semaphoriprotein-coding       |
| chr5-129 5.962749  | -1.22109 | 1.002229 | -1.21838  | 0.22308  | 0.981636 | chr5  | 1.3E+08   | 1.3E+08  | + | 0 NA | intron (NAluSc SIN  | -137202 NR_125744          | 1.04E+08 Hs. 628631NR_125744 | ENSG000004ADAMTS19- | ADAMTS19                         | ncRNA                         |
| chr1-264 5.962749  | -1.22109 | 1.002229 | -1.21838  | 0.22308  | 0.981636 | chr1  | 26453392  | 26454014 | + | 0 NA | intron (NAluJb SIN  | 13834 NR_125952            | 1.02E+08 Hs. 663251NR_125952 | LOC101928-          | -                                | uncharactncRNA                |
| chr12-22 8.367753  | -1.0088  | 0.828255 | -1.21798  | 0.223233 | 0.981636 | chr12 | 22531035  | 22532033 | + | 0 NA | intron (Nintron (N  | 12663 NM_00128C            | 9847 Hs. 271014NM_014802     | ENSG000004C2CD5     | CDP138 KIC2                      | calcit protein-coding         |
| chr12-76 8.367753  | -1.0088  | 0.828255 | -1.21798  | 0.223233 | 0.981636 | chr12 | 76073112  | 76073813 | + | 0 NA | intron (Nintron (N  | 11223 NM_00130C            | 4673 Hs. 524599NM_004537     | ENSG000004NAP1L1    | NAP1 NAP1                        | nucleoson protein-coding      |
| chr11-65 6.924493  | 1.125873 | 0.924726 | 1.21752   | 0.223406 | 0.981636 | chr11 | 65282887  | 65283150 | + | 0 NA | intron (NAluJr4 SI  | 21056 NM_002688            | 23649 Hs. 201897NM_002688    | ENSG000004POLA2     | -                                | DNA polyn protein-coding      |
| chr16-22 6.924493  | 1.125873 | 0.924726 | 1.21752   | 0.223406 | 0.981636 | chr16 | 22371134  | 22371550 | + | 0 NA | intron (Nintron (N  | 3277 NM_001802             | 1039 Hs. 513433NM_001802     | ENSG000004CDR2      | CDR62 Yo                         | cerebell protein-coding       |
| chr18-54 5.890177  | -1.21986 | 1.002323 | -1.21704  | 0.22359  | 0.981636 | chr18 | 54283204  | 54283751 | + | 0 NA | intron (NMIR SINE   | 13903 NM_001351            | 11201 Hs. 438533NM_007191    | ENSG000004POLI      | RAD30B RADNA                     | polyn protein-coding          |
| chr19-101 5.161843 | -1.27264 | 1.046202 | -1.21644  | 0.223817 | 0.981636 | chr19 | 10127739  | 10128541 | + | 0 NA | IntergeniAluSz SIN  | -8244 NM_00375E            | 8666 Hs. 529051NM_00375E     | ENSG000004EIF3G     | EIF3-P42 eukaryotiprotein-coding |                               |
| chr3-105 5.161843  | -1.27264 | 1.046202 | -1.21644  | 0.223817 | 0.981636 | chr3  | 1.06E+08  | 1.06E+08 | + | 0 NA | intron (N(AT)n Sin  | 192314 NM_001627           | 214 Hs. 591293NM_001627      | ENSG000004ALCAM     | CD166 MEM                        | activatc protein-coding       |
| chr4-127 5.161843  | -1.27264 | 1.046202 | -1.21644  | 0.223817 | 0.981636 | chr4  | 1272905   | 1272910  | + | 0 NA | exon (NM exon (NM   | 7026 NM_006342             | 10460 Hs. 104011NM_006342    | ENSG000004TACC3     | ERIC-1 EF                        | transforn protein-coding      |
| chr7-121 5.161843  | -1.27264 | 1.046202 | -1.21644  | 0.223817 | 0.981636 | chr7  | 1.21E+08  | 1.21E+08 | + | 0 NA | intron (Nintron (N  | -157955 NM_016087          | 51384 Hs. 272371NM_016087    | ENSG000004WNT16     | -                                | Wnt fami protein-coding       |
| chr9-167 5.161843  | -1.27264 | 1.046202 | -1.21644  | 0.223817 | 0.981636 | chr9  | 16775541  | 16776125 | + | 0 NA | intron (Nintron (N  | 49019 NR_151723            | 1.11E+08 Hs. 609211NR_151723 | ENSG000004BNC2-AS1  | BNC2                             | antncRNA                      |
| chr19-507 7.50336  | 1.053994 | 0.866459 | 1.216438  | 0.223818 | 0.981636 | chr19 | 5078508   | 5079548  | + | 0 NA | intron (Nintron (N  | 109915 NM_00137C           | 23030 Hs. 654811NM_015011    | ENSG000004KDM4B     | JMJD2B TI                        | lysine d protein-coding       |
| chr3-5674 7.528784 | 1.058997 | 0.87103  | 1.215798  | 0.224062 | 0.981636 | chr3  | 56749086  | 56750490 | + | 0 NA | intron (Nintron (N  | 25929 NM_00112E            | 50650 Hs. 474002NM_019551    | ENSG000004ARHGEF3   | GEF3 STA3                        | Rho guaniprotein-coding       |
| chr1-168 3.734854  | 1.504004 | 1.237169 | 1.215682  | 0.224106 | 0.981636 | chr1  | 1682612   | 1683551  | + | 0 NA | intron (NAluXs1 SI  | 9714 NM_00111C             | 728661 Hs. 655251NM_00111C   | ENSG000004SLC35E2B  | SLC35E2                          | solute c protein-coding       |
| chr7-6071 3.734854 | 1.504004 | 1.237169 | 1.215682  | 0.224106 | 0.981636 | chr7  | 60712859  | 60713751 | + | 0 NA | IntergeniALR/Alph   | 2590751 NR_00395E          | 643955 Hs. 583301NR_00395E   | ENSG000004ZNF73P    | ZNF733                           | zinc fing pseudo              |
| chr2-9721 8.309048 | -1.02122 | 0.840138 | -1.21554  | 0.224159 | 0.981636 | chr2  | 97219642  | 97219814 | + | 0 NA | intron (NAluSp SIN  | -58976 NR_103732           | 1.01E+08 Hs. 732611NR_103732 | LOC100505C-         | -                                | uncharactncRNA                |
| chr17-404 10.45173 | 0.894378 | 0.735813 | 1.215496  | 0.224177 | 0.981636 | chr17 | 40443944  | 40457865 | + | 0 NA | intron (Nintron (N  | 7454 NM_001552             | 3487 Hs. 462999NM_001552     | ENSG000004IGFBP4    | BP-4 HT21                        | insulin l protein-coding      |
| chr5-2747 10.45173 | 0.894378 | 0.735813 | 1.215496  | 0.224177 | 0.981636 | chr5  | 27473395  | 27479165 | + | 0 NA | intron (NMER61-int  | 3988 NR_03884F             | 643401 Hs. 533211NR_03884F   | ENSG000004PURPL     | LINC01021 p53                    | upregncRNA                    |
| chr6-751 9.663396  | -0.94507 | 0.777714 | -1.21519  | 0.224293 | 0.981636 | chr6  | 75163156  | 75164257 | + | 0 NA | intron (Nintron (N  | -34924 NR_145788           | 1.1E+08 NR_145788            | SNORD156            | -                                | small ncsoRNA                 |
| chr6-108 8.334471  | -1.01424 | 0.834686 | -1.21511  | 0.224324 | 0.981636 | chr6  | 1.08E+08  | 1.08E+08 | + | 0 NA | intron (NLIPA8 LIN  | 15806 NM_00130C            | 8724 Hs. 12102 NM_003791     | ENSG000004CSNX3     | Grd19 MCC                        | sorting r protein-coding      |
| chr6-144 8.334471  | -1.01424 | 0.834686 | -1.21511  | 0.224324 | 0.981636 | chr6  | 1.44E+08  | 1.44E+08 | + | 0 NA | intron (NLIPA11 LI  | 56455 NM_132778            | 1.07E+08 NR_132778           | SNORA98             | -                                | small ncsoRNA                 |
| chr17-824 6.930501 | 1.109805 | 0.913965 | 1.214275  | 0.224643 | 0.981636 | chr17 | 82485425  | 82486630 | + | 0 NA | intron (Nintron (N  | 27286 NM_01233C            | 26502 Hs. 256521NM_01233C    | ENSG000004NARF      | TOP2                             | nuclear r protein-coding      |
| chr17-61 8.408893  | -1.00474 | 0.827862 | -1.21365  | 0.224881 | 0.981636 | chr17 | 61993882  | 61994099 | + | 0 NA | intron (Nintron (N  | -66008 NM_00133C           | 57508 Hs. 279641NM_020741    | ENSG000004INTS2     | INT2 KIA1                        | integratc protein-coding      |
| chr19-41 8.408893  | -1.00474 | 0.827862 | -1.21365  | 0.224881 | 0.981636 | chr19 | 41224327  | 41225297 | + | 0 NA | intron (Nintron (N  | -1943 NM_00127E            | 558 Hs. 590977NM_001691      | ENSG000004AXL       | ARK JTK11 AXL                    | recep protein-coding          |
| chr6-157 42.86859  | 0.495293 | 0.4082   | 1.213359  | 0.224993 | 0.981636 | chr6  | 1.57E+08  | 1.57E+08 | + | 0 NA | intron (Nintron (N  | 13170 NM_018452            | 729515 Hs. 157211NM_018452   | ENSG000004TMEM242   | BM033 C6c                        | transmemt protein-coding      |
| chr11-66 8.691115  | 0.979139 | 0.80703  | 1.213263  | 0.225029 | 0.981636 | chr11 | 66537335  | 66537565 | + | 0 NA | 3' UTR (N3' UTR (N  | 8598 NM_20734C             | 254359 Hs. 209587NM_20734C   | ENSG000004ZDHHC24   | -                                | zinc fing protein-coding      |
| chr17-48 8.691115  | 0.979139 | 0.80703  | 1.213263  | 0.225029 | 0.981636 | chr17 | 48056509  | 48058156 | + | 0 NA | 3' UTR (N3' UTR (N  | 8973 NM_003204             | 4779 Hs. 514284NM_003204     | ENSG000004NFEZL1    | LCR-F1 NFC                       | nuclear l protein-coding      |
| chr6-159 8.691115  | 0.979139 | 0.80703  | 1.213263  | 0.225029 | 0.981636 | chr6  | 1.6E+08   | 1.6E+08  | + | 0 NA | 3' UTR (N3' UTR (N  | 1251 NM_001024             | 6648 Hs. 457041NM_000631     | ENSG000004SOD2      | IPO-B IPC                        | superoxid protein-coding      |
| chr7-139 8.691115  | 0.979139 | 0.80703  | 1.213263  | 0.225029 | 0.981636 | chr7  | 1.4E+08   | 1.4E+08  | + | 0 NA | intron (Nintron (N  | 43440 NM_00136E            | 6916 Hs. 520757NM_001061     | ENSG000004TBXAS1    | BDPLT14 C                        | thromboxe protein-coding      |
| chr16-307 7.477936 | 1.049052 | 0.864673 | 1.213236  | 0.22504  | 0.981636 | chr16 | 30751699  | 30757289 | + | 0 NA | TTS (NM_C TTS (NM_C | -4868 NM_001207            | 9810 Hs. 65238 NM_014771     | ENSG000004RNF40     | BRE1B RBF                        | ring fing protein-coding      |
| chr18-797 7.477936 | 1.049052 | 0.864673 | 1.213236  | 0.22504  | 0.981636 | chr18 | 79717515  | 79717908 | + | 0 NA | intron (Nintron (N  | 36281 NM_001202            | 9150 Hs. 465491NM_004711     | ENSG000004CTDP1     | CCFDN FCF                        | CTD phosph protein-coding     |
| chr4-8884 7.477936 | 1.049052 | 0.864673 | 1.213236  | 0.22504  | 0.981636 | chr4  | 88850     | 89231    | + | 0 NA | TTS (NM_C TTS (NM_C | -35436 NR_11052E           | 255403 Hs. 636631NM_001031   | ENSG000004ZNF718    | -                                | zinc fing protein-coding      |
| chr7-2774 7.477936 | 1.049052 | 0.864673 | 1.213236  | 0.22504  | 0.981636 | chr7  | 27749343  | 27749813 | + | 0 NA | intron (NTiger15e   | 9483 NM                    |                              |                     |                                  |                               |

|           |          |          |          |          |          |          |       |          |          |   |   |    |                    |          |           |          |           |                   |                     |                     |                                      |                          |
|-----------|----------|----------|----------|----------|----------|----------|-------|----------|----------|---|---|----|--------------------|----------|-----------|----------|-----------|-------------------|---------------------|---------------------|--------------------------------------|--------------------------|
| chr4-5542 | 10.10914 | -0.89967 | 0.748796 | -1.20149 | 0.229559 | 0.981636 | chr4  | 55420365 | 55421735 | + | 0 | NA | intron (AluSx SIN  | 25093    | NM_018475 | 55858    | Hs.479766 | NM_018475         | ENSG000002TMEM165   | CDG2K FT2           | transmem protein-coding              |                          |
| chr12-163 | 8.253233 | 1.040979 | 0.866455 | 1.201423 | 0.229587 | 0.981636 | chr12 | 1632712  | 1633219  | + | 0 | NA | intron (intron (N  | 3734     | NM_032642 | 81029    | Hs.306051 | NM_030777         | ENSG000002WNT5B     | -                   | Wnt fam1 protein-coding              |                          |
| chr2-6919 | 9.624107 | -0.93875 | 0.781572 | -1.20111 | 0.229711 | 0.981636 | chr2  | 69194621 | 69194863 | + | 0 | NA | intron (AluSz SIN  | 91060    | NR_036073 | 1E+08    | NR_036073 | ENSG000002MIR3126 | mir-3126            | microRNA ncRNA      |                                      |                          |
| chr11-301 | 3.70943  | 1.494846 | 1.244816 | 1.200857 | 0.229807 | 0.981636 | chr11 | 1.02E+08 | 1.02E+08 | + | 0 | NA | intron (intron (N  | -34547   | NM_178127 | 253935   | Hs.318373 | NM_178127         | ENSG000002ANGPTL5   | -                   | angiopoietin protein-coding          |                          |
| chr9-341C | 7.46222  | 1.053966 | 0.878007 | 1.200457 | 0.229981 | 0.981636 | chr9  | 34109158 | 34109793 | + | 0 | NA | intron (intron (N  | 17223    | NM_015397 | 25853    | Hs.49375C | NM_015397         | ENSG000002DCAF12    | CT102 K1A DDB1      | and protein-coding                   |                          |
| chr10-414 | 13.94569 | 0.781436 | 0.651146 | 1.200093 | 0.230103 | 0.981636 | chr10 | 41438956 | 41440503 | + | 0 | NA | IntergeniALR/Alph  | 928316   | NR_02438C | 441666   | Hs.25572E | NR_02438C         | ENSG000002LOC441666 | -                   | zinc fing pseudo                     |                          |
| chr1-779C | 4.676813 | -1.40578 | 1.171477 | -1.20001 | 0.230136 | 0.981636 | chr1  | 77903520 | 77904158 | + | 0 | NA | intron (AluJb SIN  | -14300   | NR_103535 | 374987   | Hs.632414 | NM_19934E         | ENSG000002NEXN-AS1  | C1orf118            | NEXN anticnRNA                       |                          |
| chr22-38E | 3.742712 | 1.498738 | 1.248988 | 1.199962 | 0.230154 | 0.981636 | chr22 | 38635703 | 38636592 | + | 0 | NA | intron (intron (N  | 20245    | NM_00101E | 646851   | Hs.542707 | NM_00101E         | ENSG000002FAM227A   | -                   | family wiprotein-coding              |                          |
| chr3-6907 | 10.11699 | -0.90085 | 0.750746 | -1.19994 | 0.230162 | 0.981636 | chr3  | 69070773 | 69070972 | + | 0 | NA | intron (AluJo SIN  | 9493     | NM_19819E | 9039     | Hs.15432C | NM_00396E         | ENSG000002CUBA3     | NAE2 UBE1           | ubiquitin protein-coding             |                          |
| chr1-178E | 10.43416 | 0.888988 | 0.740888 | 1.198995 | 0.23018  | 0.981636 | chr1  | 1.79E+08 | 1.79E+08 | + | 0 | NA | intron (L1PA2 LIN  | -26125   | NM_00467E | 9068     | Hs.591474 | NM_00467E         | ENSG000002ANGPTL1   | ANG3 ANGF           | angiopoietin protein-coding          |                          |
| chr14-67E | 5.120704 | -1.27995 | 1.066983 | -1.1996  | 0.230296 | 0.981636 | chr14 | 67279329 | 67280477 | + | 0 | NA | intron (intron (N  | 38468    | NM_00125E | 64398    | Hs.65231E | NM_02247E         | ENSG000002MPP5      | PALS1               | membrane protein-coding              |                          |
| chr2-174E | 5.120704 | -1.27995 | 1.066983 | -1.1996  | 0.230296 | 0.981636 | chr2  | 1.74E+08 | 1.74E+08 | + | 0 | NA | intron (MER30 DNA  | 7710     | NM_00488E | 9541     | Hs.632531 | NM_00488E         | ENSG000002CIR1      | CIR                 | corepress protein-coding             |                          |
| chr2-177E | 10.04257 | -0.90847 | 0.757319 | -1.19958 | 0.230301 | 0.981636 | chr2  | 1.77E+08 | 1.77E+08 | + | 0 | NA | non-codiron-codir  | 9675     | NR_13847C | 220988   | Hs.51653E | NM_19424E         | ENSG000002HNRNP3    | 2610510D1           | heterolog protein-coding             |                          |
| chr17-35E | 8.844925 | -0.95791 | 0.798709 | -1.19932 | 0.230404 | 0.981636 | chr17 | 35138852 | 35139201 | + | 0 | NA | intron (AluJo SIN  | 3225     | NM_00101A | 54475    | Hs.85570  | NM_01809E         | ENSG000002SNLE1     | NLE                 | notogless protein-coding             |                          |
| chr18-58E | 8.844925 | -0.95791 | 0.798709 | -1.19932 | 0.230404 | 0.981636 | chr18 | 58573947 | 58575813 | + | 0 | NA | intron (intron (N  | -25740   | NR_13296E | 1.07E+08 | NR_13296E | SNORA108          | -                   | small nucsnRNA      |                                      |                          |
| chr2-1114 | 8.844925 | -0.95791 | 0.798709 | -1.19932 | 0.230404 | 0.981636 | chr2  | 1.11E+08 | 1.11E+08 | + | 0 | NA | intron (intron (N  | 2426     | NR_13616E | 541471   | Hs.56080E | NM_01539E         | ENSG000002MIR4435   | -                   | AGD2 LINMIR4435                      | zncRNA                   |
| chr15-711 | 8.852783 | -0.95295 | 0.79993  | -1.19917 | 0.230464 | 0.981636 | chr15 | 71154967 | 71155746 | + | 0 | NA | intron (MSTA LTR   | 13907    | NM_02481E | 79875    | Hs.387057 | NM_02481E         | ENSG000002THSD4     | ADAMTSL- $\epsilon$ | thrombospondin protein-coding        |                          |
| chr10-49E | 7.460371 | 1.041707 | 0.868989 | 1.198758 | 0.230622 | 0.981636 | chr10 | 4966920  | 4973715  | + | 0 | NA | intron (L1MC4 LIN  | 6902     | NM_00135E | 1645     | Hs.46026C | NM_00135E         | ENSG000002AKR1C1    | 2-ALPHA-H           | aldo-ketoprotein-coding              |                          |
| chr11-64E | 7.460371 | 1.041707 | 0.868989 | 1.198758 | 0.230622 | 0.981636 | chr11 | 6456486  | 6458557  | + | 0 | NA | intron (intron (N  | 16420    | NM_03327E | 10612    | Hs.59199E | NM_00645E         | ENSG000002TRIM3     | BERP HAC1           | tripartite protein-coding            |                          |
| chr16-897 | 7.460371 | 1.041707 | 0.868989 | 1.198758 | 0.230622 | 0.981636 | chr16 | 89726752 | 89727062 | + | 0 | NA | intron (AluSg SIN  | 5370     | NM_00111E | 92822    | Hs.290154 | NM_15228E         | ENSG000002ZNF276    | CENP-7              | Cfzinc fing protein-coding           |                          |
| chr2-743C | 7.460371 | 1.041707 | 0.868989 | 1.198758 | 0.230622 | 0.981636 | chr2  | 74331067 | 74331366 | + | 0 | NA | intron (intron (N  | 12229    | NM_13347E | 57835    | Hs.59409E | NM_02119E         | ENSG000002SLCA45    | NBC4 NBCe           | solute c protein-coding              |                          |
| chr3-115E | 7.460371 | 1.041707 | 0.868989 | 1.198758 | 0.230622 | 0.981636 | chr3  | 11562645 | 11563527 | + | 0 | NA | intron (intron (N  | 5712     | NM_00112E | 9686     | Hs.74038E | NM_01466E         | ENSG000002VGLL4     | VGL-4               | vestigial protein-coding             |                          |
| chr9-129E | 7.460371 | 1.041707 | 0.868989 | 1.198758 | 0.230622 | 0.981636 | chr9  | 1.3E+08  | 1.3E+08  | + | 0 | NA | intron (AluSc8 SI  | -7076    | NR_106914 | 1.02E+08 | NR_106914 | ENSG000002MIR6855 | hsa-mir- $\epsilon$ | microRNA ncRNA      |                                      |                          |
| chr1-156E | 8.698973 | 0.976983 | 0.814997 | 1.198757 | 0.230622 | 0.981636 | chr1  | 1.56E+08 | 1.56E+08 | + | 0 | NA | exon (NM exon (NM  | 5450     | NM_00109E | 92312    | Hs.59149E | NM_00109E         | ENSG000002MEX3A     | MEX-3A FR           | mex-3 RN <sup>4</sup> protein-coding |                          |
| chr12-34E | 8.698973 | 0.976983 | 0.814997 | 1.198757 | 0.230622 | 0.981636 | chr12 | 34928803 | 34929002 | + | 0 | NA | IntergeniALR/Alph  | 906406   | NM_03283A | 84920    | Hs.102971 | NM_03283A         | ENSG000002ALG10     | ALG10A DIALG10      | al protein-coding                    |                          |
| chr16-47E | 8.698973 | 0.976983 | 0.814997 | 1.198757 | 0.230622 | 0.981636 | chr16 | 47550434 | 47550871 | + | 0 | NA | intron (L1PRE2 I   | 89351    | NM_00103I | 5257     | Hs.78060  | NM_00029E         | ENSG000002PHKB      | -                   | phosphoryl protein-coding            |                          |
| chr5-53E  | 8.698973 | 0.976983 | 0.814997 | 1.198757 | 0.230622 | 0.981636 | chr5  | 47353625 | 47354378 | + | 0 | NA | IntergeniALR/Alph  | -1657621 | NM_02107E | 348980   | Hs.35317E | NM_02107E         | ENSG000002HCN1      | BCNG-1 B            | hyperpol protein-coding              |                          |
| chr11-10C | 6.42118  | 0.980919 | 0.818515 | 1.198412 | 0.230757 | 0.981636 | chr11 | 10079794 | 10080116 | + | 0 | NA | intron (L1M2 LINE  | 214252   | NM_03096E | 81846    | Hs.57725E | NM_03096E         | ENSG000002SFB2      | CMT4B2 DFSET        | bindi protein-coding                 |                          |
| chr19-53E | 5.187267 | -1.26111 | 1.052363 | -1.19836 | 0.230777 | 0.981636 | chr19 | 53559080 | 53559558 | + | 0 | NA | intron (AC)n Sin   | 4012     | NM_00107E | 55422    | Hs.185674 | NM_01855E         | ENSG000002ZNF331    | RITA ZNF $\epsilon$ | zinc fing protein-coding             |                          |
| chr5-969E | 5.187267 | -1.26111 | 1.052363 | -1.19836 | 0.230777 | 0.981636 | chr5  | 96902315 | 96902758 | + | 0 | NA | intron (intron (N  | 26597    | NR_13763E | 64167    | Hs.48291C | NM_02235E         | ENSG000002ERAP2     | 64167               | ERAP2                                | endoplasm protein-coding |
| chr9-278E | 5.187267 | -1.26111 | 1.052363 | -1.19836 | 0.230777 | 0.981636 | chr9  | 2789174  | 2790028  | + | 0 | NA | IntergeniIntergeni | 54494    | NM_01487E | 9933     | Hs.49330E | NM_01487E         | ENSG000002PUM3      | HA-8 HLA            | pumilio f protein-coding             |                          |
| chr12-72E | 6.400631 | -1.12162 | 0.936016 | -1.19829 | 0.230803 | 0.981636 | chr12 | 78042689 | 78043559 | + | 0 | NA | intron (L1PA7 LIN  | 212230   | NM_01490E | 89795    | Hs.655301 | NM_01490E         | ENSG000002NAV3      | POMF1L1 S           | neurone protein-coding               |                          |
| chr15-28E | 6.400631 | -1.12162 | 0.936016 | -1.19829 | 0.230803 | 0.981636 | chr15 | 22668038 | 22669313 | + | 0 | NA | intron (AluSx SIN  | 3936     | NR_00352I | 339005   | Hs.51267C | NR_00352I         | WHAMMP3             | WHAMML1 W           | was prote pseudo                     |                          |
| chr3-127E | 6.400631 | -1.12162 | 0.936016 | -1.19829 | 0.230803 | 0.981636 | chr3  | 1.28E+08 | 1.28E+08 | + | 0 | NA | intron (L2a LINE   | 20676    | NM_17202E | 80325    | Hs.10781E | NM_03254E         | ENSG000002ABTB1     | BPOZ BTB $\epsilon$ | ankyrin f protein-coding             |                          |
| chr4-779E | 6.400631 | -1.12162 | 0.936016 | -1.19829 | 0.230803 | 0.981636 | chr4  | 77924792 | 77926172 | + | 0 | NA | intron (AluYh3 SI  | 62652    | NM_00202E | 65008    | Hs.53201E | NM_02023E         | ENSG000002MRPL1     | SMEC2 L1M           | mitochon protein-coding              |                          |
| chr5-131E | 6.400631 | -1.12162 | 0.936016 | -1.19829 | 0.230803 | 0.981636 | chr5  | 1.31E+08 | 1.31E+08 | + | 0 | NA | intron (L1PA5 LIN  | 80423    | NM_00103E | 56990    | Hs.50882E | NM_02024E         | ENSG000002CDC425E2  | SPEC2               | CDC42 sm $\epsilon$ protein-coding   |                          |
| chr7-755E | 6.400631 | -1.12162 | 0.936016 | -1.19829 | 0.230803 | 0.981636 | chr7  | 75590864 | 75591063 | + | 0 | NA | intron (intron (N  | -62840   | NR_02805E | 5387     | Hs.659871 | NM_00539E         | ENSG000002PMS2P3    | PMS2L3 P            | PMS1 homc pseudo                     |                          |
| chr9-122E | 6.400631 | -1.12162 | 0.936016 | -1.19829 | 0.230803 | 0.981636 | chr9  | 1.23E+08 | 1.23E+08 | + | 0 | NA | intron (intron (N  | -43727   | NM_00529A | 2844     | Hs.72203E | NM_00529A         | ENSG000002GPR21     | -                   | G protein protein-coding             |                          |
| chr16-29E | 6.36735  | -1.12884 | 0.942078 | -1.19824 | 0.230823 | 0.981636 | chr16 | 29557832 | 29558327 | + | 0 | NA | intron (intron (N  | 37013    | NR_13530E | 440354   | Hs.55270C | NR_00247E         | SMGIP2              | -                   | SMG1 pset pseudo                     |                          |
| chr7-124E | 6.36735  | -1.12884 | 0.942078 | -1.19824 | 0.230823 | 0.981636 | chr7  | 1.25E+08 | 1.25E+08 | + | 0 | NA | intron (intron (N  | -34432   | NM_00102A | 154872   | Hs.44416E | NM_00102A         | ENSG000002C7orf77   | -                   | chromoson protein-coding             |                          |
| chr1-786E | 6.408489 | -1.12339 | 0.937722 | -1.198   | 0.230919 | 0.981636 | chr1  | 78658834 | 78659261 | + | 0 | NA | intron (L2a LINE   | 9216     | NM_00641E | 10561    | Hs.8231E  | NM_00641E         | ENSG000002IF14E     | MTAP44 T            | interfer protein-coding              |                          |
| chr13-41E | 6.408489 | -1.12339 | 0.937722 | -1.198   | 0.230919 | 0.981636 | chr13 | 41364271 | 41364731 | + | 0 | NA | intron (intron (N  | -52463   | NM_00135A | 9617     | Hs.38217E | NM_00429A         | ENSG000002MTRF1     | MRF1 MTF            | mitochon protein-coding              |                          |
| chr15-80E | 6.408489 | -1.12339 | 0.937722 | -1.198   | 0.230919 | 0.981636 | chr15 | 80812865 | 80816462 | + | 0 | NA | intron (L2c LINE   | 27410    | NR_03039E | 693132   | NR_03039E | ENSG000002MIR549A | MIR549 M            | microRNA ncRNA      |                                      |                          |
| chr9-115E | 6.408489 | -1.12339 | 0.937722 | -1.198   | 0.230919 | 0.981636 | chr9  | 1.15E+08 | 1.15E+08 | + | 0 | NA | exon (NM exon (NM  | 75911    | NM_00216E | 3371     | Hs.14325C | NM_00216E         | ENSG000002TNC       | 150-225 E           | tenascin protein-coding              |                          |
| chr11-791 | 6.221768 | 1.133621 | 0.946419 | 1.197801 | 0.230995 | 0.981636 | chr11 | 791938   | 792143   | + | 0 | NA | exon (NM exon (NM  | -1950    | NM_01656A | 51286    | Hs.73211E | NM_01656A         | ENSG000002CEND1     | BM88                | cell cycl protein-coding             |                          |
| chr13-324 | 6.221768 | 1.133621 | 0.946419 | 1.197801 | 0.230995 | 0.981636 | chr13 | 32456919 | 32457971 | + | 0 | NA | intron (L1MA4A LI  | -29315   | NM_00128E | 90634    | Hs.73211E | NM_05281E         | ENSG000002N4BP2L1   | CG108               | NEDD4                                | bir protein-coding       |
| chr17-657 | 6.221768 | 1.133621 | 0.946419 | 1.197801 | 0.230995 | 0.981636 | chr17 | 657341   | 657765   | + | 0 | NA | intron (intron (N  | 57286    | NM_00112E | 55275    | Hs.46181E | NM_01828E         | ENSG000002VPS53     | HCCS1 PCF           | VPS53 sub protein-coding             |                          |
| chr19-23E | 6.221768 | 1.133621 | 0.946419 | 1.197801 | 0.230995 | 0.981636 | chr19 | 2348010  | 2349870  | + | 0 | NA | intron (CpG        | 20256    | NM_15298E | 56928    | Hs.74402E | NM_15298E         | ENSG000002SPPL2B    | IMP-4 IMF           | signal p protein-coding              |                          |
| chr19-104 | 6.221768 | 1.133621 | 0.946419 | 1.197801 | 0.230995 | 0.981636 | chr19 | 10641856 | 10643705 | + | 0 | NA | intron (intron (N  | 11092    | NR_02433E | 14727    |           |                   |                     |                     |                                      |                          |



|            |          |          |          |          |          |          |       |          |          |   |   |    |                      |                                            |                                               |                            |                               |
|------------|----------|----------|----------|----------|----------|----------|-------|----------|----------|---|---|----|----------------------|--------------------------------------------|-----------------------------------------------|----------------------------|-------------------------------|
| chr14-92c  | 4.965599 | 1.26439  | 1.062075 | 1.19049  | 0.233854 | 0.981636 | chr14 | 92066989 | 92068732 | + | 0 | NA | intron (N)LMIDa LIN  | -27801 NM_001321                           | 9321 Hs. 63233cENM_00423cENSG00000TRIP11      | ACG1A CEV                  | thyroid f protein-coding      |
| chr2-999f  | 4.965599 | 1.26439  | 1.062075 | 1.19049  | 0.233854 | 0.981636 | chr2  | 9995679  | 9996496  | + | 0 | NA | intron (N)intron (N) | 44394 NM_198182                            | 29841 Hs. 41849cENM_19818cENSG00000GRHL1      | LBP32 MGF                  | grainyhead protein-coding     |
| chr14-10f  | 6.359492 | -1.1271  | 0.946924 | -1.19028 | 0.233938 | 0.981636 | chr14 | 1.04E+08 | 1.04E+08 | + | 0 | NA | IntergeniAluS6 SI    | 13159 NM_00182c                            | 1152 Hs. 173724NM_00182cENSG00000CKBK         | B-CK BCK                   | creatine protein-coding       |
| chr5-406f  | 6.359492 | -1.1271  | 0.946924 | -1.19028 | 0.233938 | 0.981636 | chr5  | 40692524 | 40693290 | + | 0 | NA | 3' UTR (N)3' UTR (N) | 12992 NM_00095f                            | 5734 Hs. 19924fENM_00095fENSG00000PTGER4      | EP4 EP4R                   | prostaglandin protein-coding  |
| chr5-753f  | 6.359492 | -1.1271  | 0.946924 | -1.19028 | 0.233938 | 0.981636 | chr5  | 75374759 | 75375497 | + | 0 | NA | intron (N)intron (N) | 37908 NM_00085f                            | 3156 Hs. 62809cENM_00085fENSG00000MGCCR       | LDLcCQ3                    | 3-hydroxy protein-coding      |
| chr9-132f  | 6.359492 | -1.1271  | 0.946924 | -1.19028 | 0.233938 | 0.981636 | chr9  | 1.32E+08 | 1.32E+08 | + | 0 | NA | intron (N)L2a LINE   | 63896 NM_00135f                            | 23064 Hs. 460317NM_01504cENSG00000CSETX       | ALS4 AOA2                  | senataxir protein-coding      |
| chr19-20f  | 6.341926 | -1.13823 | 0.956407 | -1.19011 | 0.234005 | 0.981636 | chr19 | 20655936 | 20651135 | + | 0 | NA | intron (N)AluSg4 SI  | 10536 NM_00107f                            | 19777 Hs. 657001NM_145297ENSG00000ZNF626      | -                          | zinc finger protein-coding    |
| chr3-198f  | 8.783102 | 0.987974 | 0.83061  | 1.189457 | 0.23426  | 0.981636 | chr3  | 1.98E+08 | 1.98E+08 | + | 0 | NA | intron (N)intron (N) | 35376 NR_04666e                            | 1.01E+08 Hs. 63716cNR_04666cENSG00000LMLN-AS1 | -                          | LMLN antincRNA                |
| chr3-134d  | 10.08556 | -0.89609 | 0.753547 | -1.18917 | 0.234373 | 0.981636 | chr3  | 1.34E+08 | 1.34E+08 | + | 0 | NA | intron (N)LIMA4A LI  | 9582 NM_00135c                             | 80254 Hs. 443301NM_02518cENSG00000CCEP63      | SCKL6                      | centrosome protein-coding     |
| chr5-358f  | 10.08556 | -0.89609 | 0.753547 | -1.18917 | 0.234373 | 0.981636 | chr5  | 35864208 | 35865690 | + | 0 | NA | intron (N)LIME2 LIN  | 8058 NM_00218f                             | 3575 Hs. 591742NM_00218fENSG00000IL7R         | CD127 CDW                  | interleukin protein-coding    |
| chr1-206f  | 6.229626 | 1.130703 | 0.950897 | 1.189091 | 0.234404 | 0.981636 | chr1  | 20638142 | 20638693 | + | 0 | NA | intron (N)AluJb SIN  | 4738 NR_10673z                             | ENSG00000MIR6084                              | hsa-mir-6084               | microRNA ncRNA                |
| chr1-206a  | 6.229626 | 1.130703 | 0.950897 | 1.189091 | 0.234404 | 0.981636 | chr1  | 2.06E+08 | 2.06E+08 | + | 0 | NA | intron (N)intron (N) | -54199 NM_01400z                           | 9641 Hs. 32104cENM_01400zENSG00000IKBKE       | IKK-E IKK                  | inhibitor protein-coding      |
| chr1-246f  | 6.229626 | 1.130703 | 0.950897 | 1.189091 | 0.234404 | 0.981636 | chr1  | 2.47E+08 | 2.47E+08 | + | 0 | NA | intron (N)intron (N) | 16633 NM_01544f                            | 25909 Hs. 300887NM_01544fENSG00000AHCTF1      | ELYS MS1AT                 | hook protein-coding           |
| chr17-41f  | 6.229626 | 1.130703 | 0.950897 | 1.189091 | 0.234404 | 0.981636 | chr17 | 41760601 | 41767979 | + | 0 | NA | intron (N)AluSx1 SI  | 21805 NM_00135z                            | 3728 Hs. 514174NM_00223cENSG00000JUP          | CTNNG DP2                  | junction protein-coding       |
| chr17-47f  | 6.229626 | 1.130703 | 0.950897 | 1.189091 | 0.234404 | 0.981636 | chr17 | 47807180 | 47808305 | + | 0 | NA | 3' UTR (N)3' UTR (N) | 14052 NM_14579f                            | 114881 Hs. 46332cNM_017731ENSG00000OSBPL7     | ORP7                       | oxysterol protein-coding      |
| chr22-35f  | 6.229626 | 1.130703 | 0.950897 | 1.189091 | 0.234404 | 0.981636 | chr22 | 35317440 | 35320613 | + | 0 | NA | intron (N)intron (N) | -16614 NR_037471                           | 1.01E+08 NR_037471ENSG00000MIR3909            | mir-3909                   | microRNA ncRNA                |
| chr22-46f  | 6.229626 | 1.130703 | 0.950897 | 1.189091 | 0.234404 | 0.981636 | chr22 | 46666622 | 46668656 | + | 0 | NA | intron (N)intron (N) | 47253 NM_015124                            | 23151 Hs. 47515cNM_015124ENSG00000GRAMD4      | DAD                        | GRAM domain protein-coding    |
| chr5-134f  | 6.229626 | 1.130703 | 0.950897 | 1.189091 | 0.234404 | 0.981636 | chr5  | 1.65E+08 | 1.35E+08 | + | 0 | NA | exon (NM)exon (NM)   | 11966 NM_01528f                            | 23338 Hs. 73215cNM_01528fENSG00000JADE2       | JADE2 PF                   | jade family protein-coding    |
| chr8-143f  | 6.229626 | 1.130703 | 0.950897 | 1.189091 | 0.234404 | 0.981636 | chr8  | 1.44E+08 | 1.44E+08 | + | 0 | NA | intron (N)intron (N) | 17070 NR_03063z                            | ENSG00000MIR937                               | MIRN937                    | lmiRNA ncRNA                  |
| chr15-72f  | 7.493652 | 1.044203 | 0.878346 | 1.18883  | 0.234507 | 0.981636 | chr15 | 72356034 | 72356538 | + | 0 | NA | intron (N)intron (N) | 19728 NM_00131f                            | 3073 Hs. 60447cENM_00052cENSG00000CHEXA       | TSD                        | hexosaminidase protein-coding |
| chr20-50f  | 4.93652  | 1.044203 | 0.878346 | 1.18883  | 0.234507 | 0.981636 | chr20 | 50831342 | 50831675 | + | 0 | NA | intron (N)MER102c I  | 36614 NM_19879f                            | 55653 Hs. 38117cNM_01784cENSG00000BCASA       | CNOL                       | breast cancer protein-coding  |
| chr11-60f  | 6.938359 | 1.106722 | 0.930936 | 1.188826 | 0.234508 | 0.981636 | chr11 | 60941556 | 60941755 | + | 0 | NA | intron (N)intron (N) | 10521 NM_01658z                            | 51296 Hs. 23785cNM_01658zENSG00000SLC15A3     | OCTP PHT2                  | solute carrier protein-coding |
| chr11-88c  | 4.998881 | 1.26775  | 1.066395 | 1.188818 | 0.234511 | 0.981636 | chr11 | 886615   | 887497   | + | 0 | NA | intron (N)AluJb SIN  | 23754 NM_00114z                            | 66005 Hs. 14446cENM_023947ENSG00000CHHID1     | GL008 SI                   | chitinase protein-coding      |
| chr14-73f  | 4.998881 | 1.26775  | 1.066395 | 1.188818 | 0.234511 | 0.981636 | chr14 | 73967145 | 73968081 | + | 0 | NA | intron (N)AluS6 SI   | 17311 NM_18247f                            | 51004 Hs. 13155cNM_18247cENSG00000COQ6        | CG1-10 CC                  | coenzyme protein-coding       |
| chr9-343f  | 4.998881 | 1.26775  | 1.066395 | 1.188818 | 0.234511 | 0.981636 | chr9  | 34397601 | 34398339 | + | 0 | NA | promoter-promoter-   | -160 NM_03259f                             | 84688 Hs. 50334 NM_03259cENSG00000C9orf24     | CBE1 NYD                   | chromosome protein-coding     |
| chr9-137f  | 4.998881 | 1.26775  | 1.066395 | 1.188818 | 0.234511 | 0.981636 | chr9  | 1.37E+08 | 1.37E+08 | + | 0 | NA | intron (N)intron (N) | -12862 NM_20751f                           | 401563 Hs. 52250cENM_20751f                   | C9orf139                   | chromosome protein-coding     |
| chr2-324f  | 10.1267  | -0.89294 | 0.751156 | -1.18875 | 0.234537 | 0.981636 | chr2  | 32494188 | 32494427 | + | 0 | NA | intron (N)AluS5 SI   | -3784 NR_03028f                            | 693143 NR_03028fENSG00000MIR558               | MIRN558                    | lmiRNA ncRNA                  |
| chr17-63f  | 8.757679 | 0.98355  | 0.827778 | 1.188179 | 0.234763 | 0.981636 | chr17 | 63010574 | 63010773 | + | 0 | NA | intron (N)MER21C LI  | 44438 NM_02518f                            | 26115 Hs. 41088cNM_01562cENSG00000TANC2       | ROLSA rol                  | tetratric protein-coding      |
| chr1-229f  | 9.195561 | 0.928505 | 0.7816   | 1.187955 | 0.234851 | 0.981636 | chr1  | 2.3E+08  | 2.3E+08  | + | 0 | NA | intron (N)AluSx3 SI  | 5332 NM_01823z                             | 55746 Hs. 12457cNM_01823cENSG00000NUP133      | GAMOS8 NF                  | nucleoporin protein-coding    |
| chr14-90f  | 9.195561 | 0.928505 | 0.7816   | 1.187955 | 0.234851 | 0.981636 | chr14 | 90769435 | 90769736 | + | 0 | NA | intron (N)AluJo SIN  | 46832 NM_00132z                            | 145567 Hs. 655697NM_00101cENSG00000TTC7B      | TTCTL1 CT                  | tetratric protein-coding      |
| chr6-319f  | 9.195561 | 0.928505 | 0.7816   | 1.187955 | 0.234851 | 0.981636 | chr6  | 31969067 | 31969266 | + | 0 | NA | TTS (NM)TTS (NM)C    | -2009 NR_02671f                            | 8859 Hs. 654371NM_004197ENSG00000CSTK19       | D6S60 D6S                  | serine/t protein-coding       |
| chr1-150f  | 7.434947 | 1.036693 | 0.872777 | 1.187809 | 0.234908 | 0.981636 | chr1  | 1.51E+08 | 1.51E+08 | + | 0 | NA | intron (N)intron (N) | 8786 NM_00116z                             | 55793 Hs. 74395cNM_01837fENSG00000MINDY1      | PAM63A MI                  | MINDY lysine protein-coding   |
| chr16-161f | 7.434947 | 1.036693 | 0.872777 | 1.187809 | 0.234908 | 0.981636 | chr16 | 16164682 | 16165735 | + | 0 | NA | intron (N)AluJr SIN  | 58263 NM_00107f                            | 368 Hs. 44218cNM_001171ENSG00000ABC6          | ABC34 ARA                  | ATP binding protein-coding    |
| chr4-321f  | 7.434947 | 1.036693 | 0.872777 | 1.187809 | 0.234908 | 0.981636 | chr4  | 3217908  | 3218595  | + | 0 | NA | intron (N)intron (N) | -26118 NM_00133z                           | 345222 Hs. 442291NM_00101zENSG00000MSANTD1    | C4orf44                    | Myb/SANT protein-coding       |
| chr11-62f  | 6.196344 | 1.127792 | 0.949579 | 1.187675 | 0.234961 | 0.981636 | chr11 | 62782434 | 62782743 | + | 0 | NA | intron (N)Charlie1f  | -4814 NM_00136z                            | 373495 Hs. 381134NM_199337ENSG00000TMEM1795   | -                          | transmembrane protein-coding  |
| chr11-10f  | 6.196344 | 1.127792 | 0.949579 | 1.187675 | 0.234961 | 0.981636 | chr11 | 1.08E+08 | 1.08E+08 | + | 0 | NA | intron (N)MLT1f LTF  | 116105 NM_00133z                           | 160140 Hs. 65318cNM_152587ENSG00000C11orf6B   | -                          | chromosome protein-coding     |
| chr14-10f  | 6.196344 | 1.127792 | 0.949579 | 1.187675 | 0.234961 | 0.981636 | chr14 | 1.01E+08 | 1.01E+08 | + | 0 | NA | intron (N)intron (N) | -4705 NR_02986z                            | 442915 NR_02986zENSG00000MIR370               | MIRN370                    | lmiRNA ncRNA                  |
| chr2-218f  | 6.196344 | 1.127792 | 0.949579 | 1.187675 | 0.234961 | 0.981636 | chr2  | 2.19E+08 | 2.19E+08 | + | 0 | NA | intron (N)AluSp SIN  | -10854 NM_01464z                           | 9654 Hs. 47140cENM_01464zENSG00000TTL4        | -                          | tubulin protein-coding        |
| chr22-27f  | 6.196344 | 1.127792 | 0.949579 | 1.187675 | 0.234961 | 0.981636 | chr22 | 27982465 | 27983427 | + | 0 | NA | exon (NM)exon (NM)   | -62424 NR_03616z                           | ENSG00000MIR3199                              | mir-3199                   | microRNA ncRNA                |
| chr3-113f  | 6.196344 | 1.127792 | 0.949579 | 1.187675 | 0.234961 | 0.981636 | chr3  | 1.14E+08 | 1.14E+08 | + | 0 | NA | intron (N)intron (N) | 19412 NM_00100z                            | 205717 Hs. 63257cNM_00100zENSG00000USF3       | KIAA2018                   | upstream protein-coding       |
| chr3-123f  | 6.196344 | 1.127792 | 0.949579 | 1.187675 | 0.234961 | 0.981636 | chr3  | 1.23E+08 | 1.23E+08 | + | 0 | NA | intron (N)intron (N) | -43477 NR_10696z                           | 1.02E+08 NR_10696zENSG00000MIR7110            | hsa-mir-7110               | microRNA ncRNA                |
| chr19-94f  | 5.144463 | 1.330753 | 1.120913 | 1.187205 | 0.235147 | 0.981636 | chr19 | 9468869  | 9469113  | + | 0 | NA | intron (N)AluSx4 SI  | 147741 Hs. 63161cENM_15247cENSG00000ZNF560 | -                                             | zinc finger protein-coding |                               |
| chr11-94f  | 6.384915 | -1.11804 | 0.942202 | -1.18662 | 0.235377 | 0.981636 | chr11 | 94813839 | 94814745 | + | 0 | NA | intron (N)intron (N) | 45936 NM_00130f                            | 154810 Hs. 503594NM_130847ENSG00000AMOTL1     | JEAP                       | angiomin protein-coding       |
| chr2-101f  | 6.384915 | -1.11804 | 0.942202 | -1.18662 | 0.235377 | 0.981636 | chr2  | 1.01E+08 | 1.01E+08 | + | 0 | NA | intron (N)L1P3 LIN   | 14001 NM_00099z                            | 6160 Hs. 46947cNM_00099zENSG00000RPL31        | L31                        | ribosomal protein-coding      |
| chr2-173f  | 6.384915 | -1.11804 | 0.942202 | -1.18662 | 0.235377 | 0.981636 | chr2  | 1.73E+08 | 1.73E+08 | + | 0 | NA | exon (NM)exon (NM)   | 15322 NR_03388z                            | 339751 Hs. 57008cNR_03388zENSG00000MAP3K20    | MLK7-AS1                   | RAP3K20 εncRNA                |
| chr3-111f  | 6.384915 | -1.11804 | 0.942202 | -1.18662 | 0.235377 | 0.981636 | chr3  | 11161946 | 11162547 | + | 0 | NA | intron (N)LTR79 LTF  | 7753 NM_00109f                             | 3269 Hs. 1570 NM_000861ENSG00000HRH1          | HR1-R HR1                  | histamine protein-coding      |
| chr4-139f  | 6.384915 | -1.11804 | 0.942202 | -1.18662 | 0.235377 | 0.981636 | chr4  | 1.39E+08 | 1.39E+08 | + | 0 | NA | IntergeniIntergeni   | 31741 NM_01211f                            | 25819 Hs. 63984cNM_01211fENSG00000NOCT        | CCR4L CCF                  | nocturnin protein-coding      |
| chr17-60f  | 7.179846 | 0.932328 | 0.785856 | 1.186386 | 0.23547  | 0.981636 | chr17 | 60624608 | 60624910 | + | 0 | NA | intron (N)AluSp SIN  | 24576 NM_00362z                            | 8493 Hs. 28607cNM_00362cENSG00000PPM1D        | IDDDG PF                   | protein f protein-coding      |
| chr14-73f  | 6.23703  | -1.01974 | 0.859706 | -1.18615 | 0.235565 | 0.981636 | chr14 | 73450688 | 73450946 | + | 0 | NA | intron (N)intron (N) | 7763 NM_00100z                             | 8650 Hs. 52544cNM_00374cENSG00000NUMB         | C14orf41 NUMB              | end protein-coding            |
| chr16-29f  | 7.623703 | -1.01974 | 0.859706 | -1.18615 | 0.235565 | 0.981636 | chr16 | 29286675 | 29288148 | + | 0 | NA | IntergeniIntergeni   | -14876 NR_00293z                           | 440352 Hs. 65814cNR_00293z                    | SNX29P2                    | sorting rpsudo                |
| chr2-247f  | 7.623703 | -1.01974 | 0.859706 | -1.18615 | 0.235565 | 0.981636 | chr2  | 24798751 | 24802720 | + | 0 | NA | intron (N)L1PA4 LIN  | 7310 NM_00119f                             | 79172 Hs. 73156cENM_02432cENSG00000CCENP0     | CENP-0 IC                  | centromere protein-coding     |
| chr2-365f  | 7.623703 | -1.01974 | 0.859706 | -1.18615 | 0.235565 | 0.981636 | chr2  | 36588922 | 36589525 | + | 0 | NA | intron (N)L2c LINE   | 8945 NM_00104z                             | 9637 Hs. 22585cENM_00510zENSG00000FE22        | HMB3CL                     | fasciculin protein-coding     |
| chr3-123f  | 7.623703 | -1.01974 | 0.859706 | -1.18615 | 0.235565 | 0.981636 | chr3  | 12382629 | 12383395 | + | 0 | NA | intron (N)MIR3 SINE  | 31510 NM_0158                              |                                               |                            |                               |

|                     |          |          |          |          |          |       |           |           |   |   |    |                    |          |              |          |                     |                    |                     |            |                |                |
|---------------------|----------|----------|----------|----------|----------|-------|-----------|-----------|---|---|----|--------------------|----------|--------------|----------|---------------------|--------------------|---------------------|------------|----------------|----------------|
| chr3-9088.6.007806  | 0.990106 | 0.840651 | 1.177784 | 0.238883 | 0.981636 | chr3  | 90888721  | 908889568 | + | 0 | NA | IntergeniALR/Alpha | 1781523  | NM_182644    | 2042     | Hs.123642NM_005233  | ENSG00000EPAH3     | EK4 ETK E EPH       | recep      | protein-coding |                |
| chr7-645f.4.425652  | -1.34077 | 1.138571 | -1.17759 | 0.238961 | 0.981636 | chr7  | 64557362  | 64558099  | + | 0 | NA | intron (NAluSz SIN | 5341     | NM_17855f    | 340252   | Hs.52088fNM_17855f  | ENSG00000ZNF680    | -                   | zinc fing  | protein-coding |                |
| chr19-44f.11.02274  | 0.860348 | 0.730645 | 1.177519 | 0.238988 | 0.981636 | chr19 | 44273424  | 44274715  | + | 0 | NA | exon (NM_exon (NM  | 14155    | NM_18175f    | 353355   | Hs.466891NM_18175f  | ENSG00000ZNF233    | -                   | zinc fing  | protein-coding |                |
| chr1-117f.7.615845  | -1.01818 | 0.864775 | -1.17739 | 0.239041 | 0.981636 | chr1  | 1.17fE+08 | 1.17fE+08 | + | 0 | NA | intron (Nintron (N | 16507    | NM_003594    | 8458     | Hs.32333            | ENSG00000TTF2      | HuF2 ZGRF           | transcrip  | protein-coding |                |
| chr14-147f.7.615845 | -1.01818 | 0.864775 | -1.17739 | 0.239041 | 0.981636 | chr14 | 73083914  | 73084238  | + | 0 | NA | intron (NAluSx SIN | 25542    | NM_02123f    | 58517    | Hs.53110fNM_02123f  | ENSG00000RBM25     | NET52 REI           | RNA bindi  | protein-coding |                |
| chr3-150f.7.615845  | -1.01818 | 0.864775 | -1.17739 | 0.239041 | 0.981636 | chr3  | 1.51E+08  | 1.51E+08  | + | 0 | NA | intron (Nintron (N | 17025    | NM_03202f    | 83939    | Hs.65578fNM_03202f  | ENSG00000EIF2A     | CDAO2 EIF           | eukaryoti  | protein-coding |                |
| chr4-802f.7.615845  | -1.01818 | 0.864775 | -1.17739 | 0.239041 | 0.981636 | chr4  | 80286497  | 80292204  | + | 0 | NA | 3' UTR (N3' UTR (N | 21085    | NM_001291    | 2250     | Hs.37055            | ENSG00000PGF5      | HBGf-5 Sn           | fibroblas  | protein-coding |                |
| chr6-875f.7.615845  | -1.01818 | 0.864775 | -1.17739 | 0.239041 | 0.981636 | chr6  | 87506137  | 87506520  | + | 0 | NA | intron (Nintron (N | 33354    | NM_00641f    | 10550    | Hs.42771fNM_00641f  | ENSG00000SLC35A1   | CGD2f CMF           | solute ce  | protein-coding |                |
| chr8-9107.7.672701  | -1.01681 | 0.863622 | -1.17738 | 0.239045 | 0.981636 | chr8  | 91073785  | 91074560  | + | 0 | NA | intron (NMIRb SINE | 3828     | NM_00128f    | 51633    | Hs.30532            | ENSG00000OTUD6B    | CGI-77 DU           | OTU doma   | protein-coding |                |
| chr2-223f.7.982382  | 0.985379 | 0.837625 | 1.176396 | 0.239436 | 0.981636 | chr2  | 2.24fE+08 | 2.24fE+08 | + | 0 | NA | intron (Nintron (N | 26509    | NM_002291f   | 65080    | Hs.20355fNM_002291f | ENSG00000MRPL44    | COXP16 L            | mitochon   | protein-coding |                |
| chr1-207f.8.846775  | -0.94753 | 0.805677 | -1.17607 | 0.239567 | 0.981636 | chr1  | 20754531  | 20755470  | + | 0 | NA | intron (NLIMB7 LIN | -22297   | NM_00110f    | 400745   | Hs.59152fNM_00110f  | ENSG00000SH2D5     | -                   | SH2 doma   | protein-coding |                |
| chr11-781.4.940175  | 1.257208 | 1.069415 | 1.175604 | 0.239753 | 0.981636 | chr11 | 78193290  | 78194083  | + | 0 | NA | intron (Nintron (N | 4767     | NM_02079f    | 57558    | Hs.53124fNM_02079f  | ENSG00000CUSP35    | -                   | ubiquiti   | protein-coding |                |
| chr14-102.4.940175  | 1.257208 | 1.069415 | 1.175604 | 0.239753 | 0.981636 | chr14 | 1.02fE+08 | 1.02fE+08 | + | 0 | NA | intron (NL2a LINE  | 54529    | NM_01484f    | 9895     | Hs.19566fNM_01484f  | ENSG00000TECPR2    | KIAA0329            | tectonin   | protein-coding |                |
| chr1-1237.182.2106  | 0.343188 | 0.2921   | 1.174902 | 0.240034 | 0.981636 | chr1  | 1.24fE+08 | 1.24fE+08 | + | 0 | NA | IntergeniALR/Alpha | 2264529  | NR_00395f    | 647121   | Hs.69768fNR_00395f  | ENSG00000EMBP1     | -                   | embigin    | psudo          |                |
| chr19-26f.15.64575  | 0.738361 | 0.628532 | 1.174738 | 0.240099 | 0.981636 | chr19 | 26519309  | 26519508  | + | 0 | NA | IntergeniALR/Alpha | -1274023 | NR_14673f    | 1.02E+08 | Hs.567934NR_110687  | ENSG00000LOC101927 | -                   | uncharact  | ncRNA          |                |
| chr11-12f.6.377058  | -1.11618 | 0.950651 | -1.17412 | 0.240347 | 0.981636 | chr11 | 12879195  | 12879476  | + | 0 | NA | intron (Nintron (N | 110213   | NR_038904    | 1.01E+08 | Hs.15340fNR_038904  | ENSG00000LINC0095f | BLACAT2             | long       | intcncRNA      |                |
| chr13-110f.6.377058 | -1.11618 | 0.950651 | -1.17412 | 0.240347 | 0.981636 | chr13 | 1.1E+08   | 1.1E+08   | + | 0 | NA | intron (Nintron (N | 15339    | NM_00184f    | 1282     | Hs.17441            | ENSG00000COL4A1    | BSVD BSV            | collagen   | protein-coding |                |
| chr14-104f.6.377058 | -1.11618 | 0.950651 | -1.17412 | 0.240347 | 0.981636 | chr14 | 1.05E+08  | 1.05E+08  | + | 0 | NA | 3' UTR (N3' UTR (N | -4577    | NM_15232f    | 122622   | Hs.59232fNM_15232f  | ENSG00000ADSSL1    | Adss1 MP            | adenylos   | protein-coding |                |
| chr22-42f.6.377058  | -1.11618 | 0.950651 | -1.17412 | 0.240347 | 0.981636 | chr22 | 42088919  | 42089623  | + | 0 | NA | intron (Nintron (N | 1501     | NM_00249f    | 4700     | Hs.27441fNM_00249f  | ENSG00000NDUFA6    | B14 CI-B            | INDAH:u    | bic            | protein-coding |
| chr5-435f.6.377058  | -1.11618 | 0.950651 | -1.17412 | 0.240347 | 0.981636 | chr5  | 43554898  | 43555155  | + | 0 | NA | intron (NLIME3A LI | 2051     | NM_00645f    | 10605    | Hs.48203fNM_00645f  | ENSG00000PAIP1     | -                   | poly(A)    | t              | protein-coding |
| chr10-132.6.262907  | 1.13355  | 0.965548 | 1.173996 | 0.240397 | 0.981636 | chr10 | 1.32fE+08 | 1.32fE+08 | + | 0 | NA | exon (NM_exon (NM  | 8257     | NM_00109f    | 170394   | Hs.52775fNM_13849f  | ENSG00000PWWP2B    | PWWP2 bA            | A4PWWP     | lome           | protein-coding |
| chr9-130f.6.262907  | 1.13355  | 0.965548 | 1.173996 | 0.240397 | 0.981636 | chr9  | 1.31E+08  | 1.31E+08  | + | 0 | NA | TTS (NM_TTS (NM_C  | 12424    | NR_10691f    | 1.02E+08 | NR_10691f           | ENSG00000MIR6856   | hsa-mir- $\epsilon$ | microRNA   | ncRNA          |                |
| chr12-98f.7.99024   | 0.98317  | 0.837734 | 1.173607 | 0.240552 | 0.981636 | chr12 | 98661001  | 98661244  | + | 0 | NA | intron (NAluY SINE | 15822    | NM_18186f    | 317      | Hs.55256fNM_00116f  | ENSG00000CAPAF1    | APAF-1 C            | apoptotic  | protein-coding |                |
| chr17-82f.7.99024   | 0.98317  | 0.837734 | 1.173607 | 0.240552 | 0.981636 | chr17 | 82083461  | 82089842  | + | 0 | NA | intron (Nintron (N | 3489     | NR_13275f    | 1.07E+08 | NR_13275f           | SNORD134           | ZL12                | small      | nucsnRNA       |                |
| chr2-219f.7.99024   | 0.98317  | 0.837734 | 1.173607 | 0.240552 | 0.981636 | chr2  | 2.19fE+08 | 2.19fE+08 | + | 0 | NA | exon (NM_exon (NM  | 5053     | NM_01808f    | 55139    | Hs.43764fNM_01808f  | ENSG00000ANKZF1    | Vms1 ZNF            | 7ankyrin   | protein-coding |                |
| chr16-74f.6.17092   | 1.121859 | 0.956589 | 1.17277  | 0.240888 | 0.981636 | chr16 | 74928794  | 74929091  | + | 0 | NA | intron (NLIMA3 LIN | 56181    | NM_03058f    | 79726    | Hs.28095fNM_03058f  | ENSG00000WDR59     | CDW12 FP            | RD         | repeat         | protein-coding |
| chr20-62f.6.17092   | 1.121859 | 0.956589 | 1.17277  | 0.240888 | 0.981636 | chr20 | 62306458  | 62307049  | + | 0 | NA | intron (Nintron (N | 3756     | NM_00700f    | 11047    | Hs.90107            | ENSG00000ADRM1     | ARM-1 AR            | adhesion   | protein-coding |                |
| chr6-335f.6.17092   | 1.121859 | 0.956589 | 1.17277  | 0.240888 | 0.981636 | chr6  | 33572702  | 33573155  | + | 0 | NA | 3' UTR (N3' UTR (N | 7348     | NM_00118f    | 578      | Hs.48513fNM_00118f  | ENSG00000BAK1      | BAK BAK-1           | ECL2       | ant            | protein-coding |
| chr7-149f.6.17092   | 1.121859 | 0.956589 | 1.17277  | 0.240888 | 0.981636 | chr7  | 1.5E+08   | 1.5E+08   | + | 0 | NA | non-codiron-codir  | -51511   | NM_15255f    | 155061   | Hs.24643            | ENSG00000ZNF746    | PARIS               | zinc       | fing           | protein-coding |
| chr1-148f.18.89427  | 0.661711 | 0.564335 | 1.172551 | 0.240976 | 0.981636 | chr1  | 1.49fE+08 | 1.49fE+08 | + | 0 | NA | intron (Nintron (N | 37900    | NM_01538f    | 25832    | Hs.53467fNM_01538f  | ENSG00000NBPF14    | DJ328E19            | NBPF       | mem            | protein-coding |
| chr17-384.9.575109  | -0.94063 | 0.802759 | -1.17175 | 0.241299 | 0.981636 | chr17 | 38471609  | 38471852  | + | 0 | NA | intron (Nintron (N | 43266    | NM_00119f    | 57636    | Hs.37444fNM_02087f  | ENSG00000ARHGAP23  | -                   | Rho        | GTPas          | protein-coding |
| chr10-10f.7.956959  | 0.980691 | 0.837164 | 1.171444 | 0.24142  | 0.981636 | chr10 | 1.03E+08  | 1.03E+08  | + | 0 | NA | intron (NAluSx SI  | 34037    | NM_03272f    | 9118     | Hs.50091fNM_03272f  | ENSG00000INA       | NEF5 NF- $\epsilon$ | interne    | protein-coding |                |
| chr9-122f.7.956959  | 0.980691 | 0.837164 | 1.171444 | 0.24142  | 0.981636 | chr9  | 1.23E+08  | 1.23E+08  | + | 0 | NA | IntergeniLIM4c LIN | -4247    | NM_01219f    | 23637    | Hs.27134fNM_01219f  | ENSG00000RABGAP1   | CAGPCNA             | TRAB       | GTPas          | protein-coding |
| chr9-1274.7.956959  | 0.980691 | 0.837164 | 1.171444 | 0.24142  | 0.981636 | chr9  | 1.27E+08  | 1.27E+08  | + | 0 | NA | intron (NAluY SINE | 33210    | NM_00100f    | 90678    | Hs.49518fNM_13836f  | ENSG00000LRSAM1    | CMT2P RIF           | leucine    | protein-coding |                |
| chr3-566f.6.410339  | -1.10888 | 0.946758 | -1.17124 | 0.241502 | 0.981636 | chr3  | 56627966  | 56628165  | + | 0 | NA | intron (Nintron (N | 35981    | NM_015224    | 23272    | Hs.11687fNM_015224  | ENSG00000TASOR     | C3orf63 F           | transcrip  | protein-coding |                |
| chr6-272f.6.410339  | -1.10888 | 0.946758 | -1.17124 | 0.241502 | 0.981636 | chr6  | 22723161  | 22723360  | + | 0 | NA | IntergeniMLT1H2-ir | -5336    | NR_13461f    | 1.05E+08 | Hs.48488fNR_13461f  | LOC105374          | -                   | uncharact  | ncRNA          |                |
| chr9-100f.6.410339  | -1.10888 | 0.946758 | -1.17124 | 0.241502 | 0.981636 | chr9  | 1E+08     | 1E+08     | + | 0 | NA | intron (Nintron (N | 39772    | NM_00116f    | 54881    | Hs.49464fNM_01774f  | ENSG00000CTEX10    | Ipi1 ba2C           | testis     | es             | protein-coding |
| chrX-742f.6.410339  | -1.10888 | 0.946758 | -1.17124 | 0.241502 | 0.981636 | chrX  | 74269300  | 74269565  | + | 0 | NA | intron (Nintron (N | 17777    | NR_03025f    | 664614   | NR_03025f           | ENSG00000MIR545    | MIRN545  $\mu$      | microRNA   | ncRNA          |                |
| chr12-12f.6.997064  | 1.114477 | 0.951679 | 1.171064 | 0.241573 | 0.981636 | chr12 | 1.23E+08  | 1.23E+08  | + | 0 | NA | exon (NM_exon (NM  | 6433     | NM_00124f    | 23457    | Hs.51195fNM_01962f  | ENSG00000ABCB9     | EST12254ATP         | bindi      | protein-coding |                |
| chr17-471.6.912935  | 1.101027 | 0.940236 | 1.171012 | 0.241594 | 0.981636 | chr17 | 47163903  | 47164102  | + | 0 | NA | intron (NAluSq2 SI | 25293    | NM_00125f    | 996      | Hs.46329fNM_00125f  | ENSG00000CDC27     | ANAPC3 A            | F cell     | divi           | protein-coding |
| chr11-68f.7.442805  | 1.034083 | 0.883191 | 1.170849 | 0.24166  | 0.981636 | chr11 | 68907383  | 68907582  | + | 0 | NA | intron (Nintron (N | 3631     | NM_00218f    | 3508     | Hs.50304fNM_00218f  | ENSG00000IGHMBP2   | CATF1 CM            | immunogl   | protein-coding |                |
| chr21-46f.7.442805  | 1.034083 | 0.883191 | 1.170849 | 0.24166  | 0.981636 | chr21 | 46560699  | 46561194  | + | 0 | NA | intron (Nintron (N | 44136    | NM_00627f    | 6285     | Hs.42218fNM_00627f  | ENSG00000CS100B    | NEF S100            | S100       | calc           | protein-coding |
| chr7-1521.7.442805  | 1.034083 | 0.883191 | 1.170849 | 0.24166  | 0.981636 | chr7  | 1.52E+08  | 1.52E+08  | + | 0 | NA | intron (Nintron (N | 26106    | NM_001371474 | 80084    | NR_03408f           | 1E+08              | Hs.73266fNR_03408f  | CCDC18-AS- | CCDC18         | arncRNA        |
| chr1-932f.4.402078  | -1.33334 | 1.138824 | -1.1708  | 0.241679 | 0.981636 | chr1  | 93265173  | 93266282  | + | 0 | NA | intron (NLIPA5 LIN | 24469    | NM_00662f    | 26227    | Hs.48729fNM_00662f  | ENSG00000PHGDH     | 3-PGDH 3F           | phosphog   | protein-coding |                |
| chr12-26f.4.402078  | -1.33334 | 1.138824 | -1.1708  | 0.241679 | 0.981636 | chr12 | 26916371  | 26917230  | + | 0 | NA | intron (Nintron (N | 2181     | NM_01816f    | 55726    | Hs.50530fNM_01816f  | ENSG00000INTS13    | ASUN C1c2           | integrac   | protein-coding |                |
| chr17-301.4.402078  | -1.33334 | 1.138824 | -1.1708  | 0.241679 |          |       |           |           |   |   |    |                    |          |              |          |                     |                    |                     |            |                |                |



|                    |           |          |           |          |          |       |          |          |   |   |    |                    |          |                    |          |                     |               |            |            |                                       |                                      |                |
|--------------------|-----------|----------|-----------|----------|----------|-------|----------|----------|---|---|----|--------------------|----------|--------------------|----------|---------------------|---------------|------------|------------|---------------------------------------|--------------------------------------|----------------|
| chr4-7612.6.402481 | -1.10688  | 0.955117 | -1.15889  | 0.2465   | 0.981636 | chr4  | 76123945 | 76124548 | + | 0 | NA | intron (NLIMEj LIN | 24151    | NR_017426          | 53371    | Hs.43043ENM_017426  | ENSG000005    | UNC5P4     | -          | nucleoporin protein-coding            |                                      |                |
| chr4-8807.6.751637 | -1.055844 | 0.911216 | -1.15872  | 0.24657  | 0.981636 | chr4  | 88074880 | 88075672 | + | 0 | NA | intron (Nintron (N | 67641    | NR_156488          | 5311     | Hs.181272ENM_000297 | ENSG000005    | PKD2       | -          | APK2 PC2 polycystin protein-coding    |                                      |                |
| chr1-1544.13.21939 | 0.770392  | 0.665015 | -1.158459 | 0.246677 | 0.981636 | chr1  | 1.54E+08 | 1.54E+08 | + | 0 | NA | intron (NMLT1H1 LI | -29633   | NR_147855          | 1.02E+08 | Hs.61708ENR_147855  | ENSG000005    | IL6R-AS1   | -          | IL6R anticRNA                         |                                      |                |
| chr17-756.6.21206  | 0.121632  | 0.968737 | -1.15783  | 0.246933 | 0.981636 | chr17 | 75820387 | 75821921 | + | 0 | NA | intron (Nintron (N | 23928    | NM_199242          | 201294   | Hs.41045            | ENM_199242    | ENSG000005 | UNC13D     | -                                     | FHL3 HLH3 unc-13 hc protein-coding   |                |
| chr19-574.6.21206  | 0.121632  | 0.968737 | -1.15783  | 0.246933 | 0.981636 | chr19 | 57469837 | 57472042 | + | 0 | NA | 3' UTR (N3' UTR (N | 7527     | NM_001144          | 4001270  | Hs.38881CNM_001024  | ENSG000005    | ZNF772     | -          | zinc finger protein-coding            |                                      |                |
| chr22-204.6.21206  | 0.121632  | 0.968737 | -1.15783  | 0.246933 | 0.981636 | chr22 | 20464434 | 20465430 | + | 0 | NA | exon (NM_exon (NM_ | -27107   | NM_182895          | 91179    | Hs.474251NM_153334  | ENSG000005    | SCARF2     | -          | NSR1 SREC scavenger protein-coding    |                                      |                |
| chr1-1602.7.972674 | 0.976235  | 0.843211 | -1.157759 | 0.246962 | 0.981636 | chr1  | 1.6E+08  | 1.6E+08  | + | 0 | NA | intron (Nintron (N | -18308   | NR_123722          | 729867   | Hs.674191NR_123722  | ENSG000005    | LOC729867  | -          | uncharacterized protein-coding        |                                      |                |
| chr1-2235.7.972674 | 0.976235  | 0.843211 | -1.157759 | 0.246962 | 0.981636 | chr1  | 2.24E+08 | 2.24E+08 | + | 0 | NA | intron (NMLRb SINE | 19267    | NR_132119          | 441124   | Hs.52058ENR_132119  | ENSG000005    | GTF2IP20   | -          | general tpsudo                        |                                      |                |
| chr17-291.7.972674 | 0.976235  | 0.843211 | -1.157759 | 0.246962 | 0.981636 | chr17 | 29113094 | 29113323 | + | 0 | NA | intron (Nintron (N | 27181    | NM_001346          | 399687   | Hs.46259CNM_078471  | ENSG000005    | MYO18A     | -          | MAJN MYSF myosin XI protein-coding    |                                      |                |
| chr19-436.7.972674 | 0.976235  | 0.843211 | -1.157759 | 0.246962 | 0.981636 | chr19 | 43872412 | 43874032 | + | 0 | NA | exon (NM_exon (NM_ | 6914     | NM_001033          | 342908   | Hs.674191NR_123722  | ENSG000005    | ZNF404     | -          | zinc finger protein-coding            |                                      |                |
| chr1-2235.7.972674 | 0.976235  | 0.843211 | -1.157759 | 0.246962 | 0.981636 | chr1  | 2.24E+08 | 2.24E+08 | + | 0 | NA | intron (NMLRb SINE | 19267    | NR_132119          | 441124   | Hs.52058ENR_132119  | ENSG000005    | GTF2IP20   | -          | general tpsudo                        |                                      |                |
| chr22-395.9.349371 | -0.8973   | 0.775338 | -1.1573   | 0.247152 | 0.981636 | chr22 | 39529655 | 39530437 | + | 0 | NA | intron (Nintron (N | 2702     | NR_130151          | 91582    | Hs.52693ENM_194326  | ENSG000005    | RPS19BP1   | -          | AROS S19E ribosomal protein-coding    |                                      |                |
| chr14-775.6.3692   | -1.11245  | 0.962813 | -1.15728  | 0.247157 | 0.981636 | chr14 | 77552082 | 77552361 | + | 0 | NA | exon (NM_exon (NM_ | -53405   | NM_199296          | 145501   | Hs.29742            | ENM_182505    | ENSG000005 | ISM2       | -                                     | TAIL1 HIS1 thimazin 2 protein-coding |                |
| chr12-106.4.39422  | -1.33089  | 1.150085 | -1.15721  | 0.247188 | 0.981636 | chr12 | 1.07E+08 | 1.07E+08 | + | 0 | NA | intron (Nintron (N | -9443    | NR_040246          | 14029    | NR_037433           | 1.01E+08      | NR_037433  | ENSG000005 | MIR3657                               | -                                    | microRNA ncRNA |
| chr12-112.4.39422  | -1.33089  | 1.150085 | -1.15721  | 0.247188 | 0.981636 | chr12 | 1.12E+08 | 1.12E+08 | + | 0 | NA | intron (Nintron (N | -52050   | NM_001024          | 2643     | Hs.86724            | NM_000161     | ENSG000005 | GCHI1      | -                                     | DYT14 DYT1 GTP cyclc protein-coding  |                |
| chr14-545.4.39422  | -1.33089  | 1.150085 | -1.15721  | 0.247188 | 0.981636 | chr14 | 54954637 | 54955116 | + | 0 | NA | exon (NAluSp SIN   | 6726     | NM_024032          | 78995    | Hs.43705ENM_024032  | ENSG000005    | CC1orf53   | -          | chromosom protein-coding              |                                      |                |
| chr17-441.4.39422  | -1.33089  | 1.150085 | -1.15721  | 0.247188 | 0.981636 | chr17 | 44148533 | 44148779 | + | 0 | NA | exon (NM_exon (NM_ | 29262    | NM_001292          | 54946    | Hs.64022ENM_019022  | ENSG000005    | PRMT7      | -          | SBIDDS protein protein-coding         |                                      |                |
| chr16-685.11.40977 | 0.815207  | 0.704644 | -1.156906 | 0.247311 | 0.981636 | chr16 | 68338970 | 68341783 | + | 0 | NA | intron (NLIME4b LI | 9561     | NM_014955          | 51603    | Hs.49470ENM_014955  | ENSG000005    | EEF1AKNM1  | -          | 5630401D2eEFL1 lys protein-coding     |                                      |                |
| chr1-1717.9.707865 | 0.881775  | 0.762487 | -1.156445 | 0.247499 | 0.981636 | chr1  | 1.72E+08 | 1.72E+08 | + | 0 | NA | intron (Nintron (N | 455      | NR_137195          | 399959   | Hs.44098            | NR_024432     | ENSG000005 | MIR100HG   | -                                     | AGD1 lincmir-100-1ncRNA              |                |
| chr11-125.5.648724 | -1.14941  | 0.994519 | -1.15574  | 0.247787 | 0.981636 | chr11 | 1.22E+08 | 1.22E+08 | + | 0 | NA | non-codinn-codir   | 11936    | NM_002097          | 2971     | Hs.445977NM_002097  | ENSG000005    | GTF3A      | -          | AP2 TFIIIf general tprotein-coding    |                                      |                |
| chr13-274.5.648724 | -1.14941  | 0.994519 | -1.15574  | 0.247787 | 0.981636 | chr13 | 27436079 | 27437032 | + | 0 | NA | TTS (NM_CTS (NM_C  | 16599    | NM_001164          | 444      | Hs.332422NM_004318  | ENSG000005    | ASPH       | -          | AAH BAH Caspartate protein-coding     |                                      |                |
| chr8-6152.5.648724 | -1.14941  | 0.994519 | -1.15574  | 0.247787 | 0.981636 | chr8  | 61523389 | 61524315 | + | 0 | NA | intron (NAluJr SIN | -59798   | NM_004176          | 6720     | Hs.59212ENM_004176  | ENSG000005    | SREBF1     | -          | SREBP1 bf sterol r protein-coding     |                                      |                |
| chr17-178.6.726214 | 0.150363  | 0.909279 | -1.15516  | 0.248025 | 0.981636 | chr17 | 17896203 | 17897415 | + | 0 | NA | intron (NTigger15a | -24002   | NM_001142          | 84514    | Hs.38039            | NM_032484     | ENSG000005 | GHDC       | -                                     | D11LGP1 LGH3 domai protein-coding    |                |
| chr17-425.6.726214 | 0.150363  | 0.909279 | -1.15516  | 0.248025 | 0.981636 | chr17 | 42818075 | 42818917 | + | 0 | NA | intron (Nintron (N | 40016    | NM_031407          | 10075    | Hs.13690ENM_031407  | ENSG000005    | HUWE1      | -          | ARF-BP1 FHECT, UB1 protein-coding     |                                      |                |
| chrX-5364.6.726214 | 0.150363  | 0.909279 | -1.15516  | 0.248025 | 0.981636 | chrX  | 53646375 | 53647032 | + | 0 | NA | intron (Nintron (N | -1227    | NM_001288          | 255403   | Hs.63663ENM_001035  | ENSG000005    | ZNF718     | -          | zinc finger protein-coding            |                                      |                |
| chr4-1266.9.306382 | -0.91073  | 0.788539 | -1.15495  | 0.24811  | 0.981636 | chr4  | 126668   | 127120   | + | 0 | NA | intron (NAluSc5 SI | 1222498  | NR_003955          | 647121   | Hs.69768ENR_003955  | ENSG000005    | EMBP1      | -          | emigin ppsudo                         |                                      |                |
| chr1-1227.89.12074 | 0.375943  | 0.325592 | -1.154643 | 0.248237 | 0.981636 | chr1  | 1.23E+08 | 1.23E+08 | + | 0 | NA | IntergeniAlR/Alph  | 13189    | NM_001127          | 51324    | Hs.24245ENM_016633  | ENSG000005    | SPG21      | -          | ABHD21 ACSPG21 abt protein-coding     |                                      |                |
| chr15-645.11.41763 | 0.813692  | 0.704847 | -1.154424 | 0.248327 | 0.981636 | chr15 | 64976169 | 64976393 | + | 0 | NA | intron (NAluS2 SIN | 9610     | NM_033278          | 10612    | Hs.59199ENM_006455  | ENSG000005    | TRIM3      | -          | BERP HAC1 tripartit protein-coding    |                                      |                |
| chr11-647.9.666276 | 0.881418  | 0.763556 | -1.153436 | 0.248353 | 0.981636 | chr11 | 66613703 | 66649599 | + | 0 | NA | intron (NL2c LINE  | 32465    | NM_001522          | 2975     | Hs.37171ENM_001522  | ENSG000005    | GTF3C1     | -          | TFIIIC TFIIIf general tprotein-coding |                                      |                |
| chr16-276.7.476086 | 0.103642  | 0.898375 | -1.153466 | 0.248359 | 0.981636 | chr16 | 27657307 | 27517594 | + | 0 | NA | intron (Nintron (N | -1589467 | NR_146735          | 1.02E+08 | Hs.567934NR_106875  | ENSG000005    | LOC101927  | -          | uncharacterized protein-coding        |                                      |                |
| chr19-262.65.82624 | 0.407636  | 0.353437 | -1.153348 | 0.248768 | 0.981636 | chr19 | 26203861 | 26204067 | + | 0 | NA | IntergeniAlR/Alph  | 10744    | NM_152498          | 148789   | Hs.49814ENM_152498  | ENSG000005    | B3GALNT2   | -          | B3GAlNAc-beta-1,3- protein-coding     |                                      |                |
| chr1-2354.11.45091 | 0.815777  | 0.702225 | -1.153208 | 0.248825 | 0.981636 | chr1  | 2.35E+08 | 2.35E+08 | + | 0 | NA | intron (NAluSx1 SI | 13773    | NM_175767          | 3572     | Hs.53208ENM_002184  | ENSG000005    | IL6ST      | -          | CD130 CDW interl leuk protein-coding  |                                      |                |
| chr5-5598.9.341514 | -0.89602  | 0.777137 | -1.15298  | 0.248918 | 0.981636 | chr5  | 55980018 | 55982363 | + | 0 | NA | intron (Nintron (N | 78857    | NM_001145          | 222234   | Hs.20254ENM_147194  | ENSG000005    | FAM185A    | -          | family wiprotein-coding               |                                      |                |
| chr7-1028.9.341514 | -0.89602  | 0.777137 | -1.15298  | 0.248918 | 0.981636 | chr7  | 1.03E+08 | 1.03E+08 | + | 0 | NA | intron (NAluP4 LIN | 3534     | NR_026903          | 201283   | Hs.396447NM_153035  | ENSG000005    | AMZP21     | -          | archaelys pseudo                      |                                      |                |
| chr17-645.9.11432  | 0.917809  | 0.796035 | -1.152976 | 0.24892  | 0.981636 | chr17 | 64971890 | 64972212 | + | 0 | NA | intron (NAluJb SIN | 2385     | NM_001344          | 1603     | Hs.82890            | NM_001344     | ENSG000005 | DAD1       | -                                     | OST2 defender protein-coding         |                |
| chr14-225.6.145497 | 0.115742  | 0.967839 | -1.152818 | 0.248985 | 0.981636 | chr14 | 22587639 | 22587040 | + | 0 | NA | intron (Nintron (N | 6190     | NM_001317          | 51657    | Hs.11615            | NM_016085     | ENSG000005 | STYXL1     | -                                     | DUSP24 MS serine/t protein-coding    |                |
| chr7-7602.6.145497 | 0.115742  | 0.967839 | -1.152818 | 0.248985 | 0.981636 | chr7  | 76024183 | 76024485 | + | 0 | NA | intron (NTigger19f | 23858    | NM_001318          | 23268    | Hs.500771NM_015221  | ENSG000005    | DNMBP      | -          | ARHGFB3 dynamn l protein-coding       |                                      |                |
| chr10-996.5.6233   | -1.15976  | 1.006228 | -1.15258  | 0.249081 | 0.981636 | chr10 | 99889986 | 99890483 | + | 0 | NA | intron (Nintron (N | 63045    | NM_001277          | 400818   | Hs.450078NM_001037  | ENSG000005    | BNP9F      | -          | AEO1 NBPF memt protein-coding         |                                      |                |
| chr1-149.6.734072  | 0.104729  | 0.909309 | -1.152225 | 0.249229 | 0.981636 | chr1  | 1.49E+08 | 1.49E+08 | + | 0 | NA | intron (Nintron (N | -77517   | NM_014002          | 9641     | Hs.32104ENM_014002  | ENSG000005    | IKBKE      | -          | IKK-E IKK inhibitor protein-coding    |                                      |                |
| chr1-2062.6.734072 | 0.104729  | 0.909309 | -1.152225 | 0.249229 | 0.981636 | chr1  | 2.06E+08 | 2.06E+08 | + | 0 | NA | intron (Nintron (N | 84791    | HS.52393ENM_032705 | 220002   | ENM_22546           | 1.1ENSG000005 | CYB561A3   | -          | Cyorf93 l cytochron protein-coding    |                                      |                |
| chr1-211.6.734072  | 0.104729  | 0.909309 | -1.152225 | 0.249229 | 0.981636 | chr1  | 2.11E+08 | 2.11E+08 | + | 0 | NA | intron (NMLTIN2 LI | 9806     | NR_026761          | 145226   | Hs.415322ENM_152444 | ENSG000005    | RDH12      | -          | LCAI3 RP retinol c protein-coding     |                                      |                |
| chr11-615.6.734072 | 0.104729  | 0.909309 | -1.152225 | 0.249229 | 0.981636 | chr11 | 61552126 | 61554288 | + | 0 | NA | 3' UTR (N3' UTR (N | 4107     | NM_001161          | 8482     | Hs.24640            | NM_003612     | ENSG000005 | SEMA7A     | -                                     | CD108 CDW semaphorin protein-coding  |                |
| chr14-677.6.734072 | 0.104729  | 0.909309 | -1.152225 | 0.249229 | 0.981636 | chr14 | 67750964 | 67753240 | + | 0 | NA | intron (Nintron (N | 50216    | NM_152444          | 57448    | Hs.150107NM_016252  | ENSG000005    | BLRC6      | -          | ADOLLON Ebaculovir protein-coding     |                                      |                |
| chr15-744.6.734072 | 0.104729  | 0.909309 | -1.152225 | 0.249229 | 0.981636 | chr15 | 74445335 | 74449279 | + | 0 | NA | intron (Nintron (N | 1578     | NM_016252          | 9448     | Hs.70101ENM_004834  | ENSG000005    | MAP4K4     | -          | FLH21957 mitogen-ε protein-coding     |                                      |                |
| chr2-3235.6.734072 | 0.104729  | 0.909309 | -1.152225 | 0.249229 | 0.981636 | chr2  | 32358443 | 32358270 | + | 0 | NA | intron (NTHEID LTF | 25458    | NM_145687          | 169834   | Hs.192877NM_001101  | ENSG000005    | ZNF883     | -          |                                       |                                      |                |



|            |          |          |          |          |          |          |       |          |          |   |   |    |                     |         |           |          |            |                      |                      |                    |                                 |
|------------|----------|----------|----------|----------|----------|----------|-------|----------|----------|---|---|----|---------------------|---------|-----------|----------|------------|----------------------|----------------------|--------------------|---------------------------------|
| chr18-88c  | 7.898253 | 0.973442 | 0.849819 | 1.145471 | 0.252014 | 0.981636 | chr18 | 8807001  | 8807219  | + | 0 | NA | intron (Nintron (N  | 89729   | NM_01521C | 23255    | Hs. 70792C | 01521C               | ENSG000000MTC1       | CCDC165            | [K]microtubul protein-coding    |
| chr5-1111  | 10.59001 | -0.84587 | 0.738539 | -1.14532 | 0.252075 | 0.981636 | chr5  | 1.11E+08 | 1.11E+08 | + | 0 | NA | intron (Nintron (N  | 8673    | NM_139281 | 134430   | Hs. 533237 | NM_139281            | ENSG000000WDR36      | GLC1G              | TA-WD repeat protein-coding     |
| chr1-363f  | 5.495469 | 1.153512 | 1.007457 | 1.144975 | 0.25222  | 0.981636 | chr1  | 3635633  | 3636737  | + | 0 | NA | intron (Nintron (N  | 11170   | NM_182752 | 127262   | Hs. 20529  | NM_182752            | ENSG000000TPRG1L     | FAM79A             | h-tumor prc protein-coding      |
| chr11-10f  | 5.495469 | 1.153512 | 1.007457 | 1.144975 | 0.25222  | 0.981636 | chr11 | 1.08E+08 | 1.08E+08 | + | 0 | NA | exon (NM exon (NM   | 17396   | NM_00001E | 38       | Hs. 23237E | NM_00001E            | ENSG000000ACAT1      | ACAT               | [MAT] acetyl-Cc protein-coding  |
| chr1-465f  | 6.708648 | 1.042258 | 0.910606 | 1.144576 | 0.252385 | 0.981636 | chr1  | 4658259  | 46583489 | + | 0 | NA | intron (Nintron (N  | 21394   | NM_19897f | 8569     | Hs. 371594 | NM_003684            | ENSG000000MKNK1      | MNK1               | MAPK intc protein-coding        |
| chr1-156f  | 6.708648 | 1.042258 | 0.910606 | 1.144576 | 0.252385 | 0.981636 | chr1  | 1.56E+08 | 1.56E+08 | + | 0 | NA | exon (NM exon (NM   | 11598   | NM_020131 | 56893    | Hs. 28373E | NM_020131            | ENSG000000CUBQLN4    | A1U                | [Alu] ubi quilir protein-coding |
| chr10-29f  | 6.708648 | 1.042258 | 0.910606 | 1.144576 | 0.252385 | 0.981636 | chr10 | 29674993 | 29677333 | + | 0 | NA | intron (Nintron (N  | 41192   | NM_021738 | 6840     | Hs. 49290E | NM_003174            | ENSG000000SVIL       | -                  | supervill protein-coding        |
| chr12-35f  | 6.708648 | 1.042258 | 0.910606 | 1.144576 | 0.252385 | 0.981636 | chr12 | 35845251 | 35845608 | + | 0 | NA | Intergeni ALR/Alph  | 1822933 | NM_032834 | 84920    | Hs. 109971 | NM_032834            | ENSG000000ALG10      | ALG10              | [DIALG10] alr protein-coding    |
| chr16-507f | 6.708648 | 1.042258 | 0.910606 | 1.144576 | 0.252385 | 0.981636 | chr16 | 5075525  | 5076479  | + | 0 | NA | intron (NMLTIK LTF  | 3754    | NM_00133C | 56052    | Hs. 59208E | NM_01910E            | ENSG000000ALG1       | CDG1K              | [HM] ALG1 chit protein-coding   |
| chr16-16f  | 6.708648 | 1.042258 | 0.910606 | 1.144576 | 0.252385 | 0.981636 | chr16 | 16258283 | 16258758 | + | 0 | NA | intron (NML2 LINE L | 25925   | NM_173614 | 283820   | Hs. 460141 | NM_173614            | ENSG000000NOMO2      | NOMO2              | PM5 NODAL mcr protein-coding    |
| chr19-181f | 6.708648 | 1.042258 | 0.910606 | 1.144576 | 0.252385 | 0.981636 | chr19 | 18123390 | 18125267 | + | 0 | NA | exon (NM exon (NM   | 25512   | NM_00129C | 3594     | Hs. 567294 | NM_00553E            | ENSG000000IL12RB1    | CD212              | [IL- inter] leuk protein-coding |
| chr19-181f | 6.708648 | 1.042258 | 0.910606 | 1.144576 | 0.252385 | 0.981636 | chr19 | 18135676 | 18137970 | + | 0 | NA | intron (NAluSx1 SI  | 16340   | NR_162071 | 5296     | Hs. 371344 | NM_005027            | ENSG000000PIK3R2     | MPPH               | [MPP] phosphoir protein-coding  |
| chr2-995f  | 6.708648 | 1.042258 | 0.910606 | 1.144576 | 0.252385 | 0.981636 | chr2  | 99550474 | 99552472 | + | 0 | NA | 3' UTR (N3' UTR (N  | 61456   | NR_135652 | 51455    | Hs. 443077 | NM_01631E            | ENSG000000REV1       | AIBP80             | [RE] REV1 DNA protein-coding    |
| chr2-20f   | 6.708648 | 1.042258 | 0.910606 | 1.144576 | 0.252385 | 0.981636 | chr2  | 20054996 | 20056006 | + | 0 | NA | intron (Nintron (N  | 22462   | NR_02970E | 406961   | NR_02970E  | ENSG000000MIR185     | MIRN185              | [m] microRNA ncRNA |                                 |
| chr4-840f  | 6.708648 | 1.042258 | 0.910606 | 1.144576 | 0.252385 | 0.981636 | chr4  | 840530   | 8406465  | + | 0 | NA | intron (Nintron (N  | 34976   | NM_003501 | 8310     | Hs. 479122 | NM_003501            | ENSG000000ACO3       | -                  | acyl-CoA protein-coding         |
| chr5-142f  | 6.708648 | 1.042258 | 0.910606 | 1.144576 | 0.252385 | 0.981636 | chr5  | 1.42E+08 | 1.42E+08 | + | 0 | NA | exon (NM exon (NM   | 6790    | NM_005471 | 10007    | Hs. 63385E | NM_005471            | ENSG000000GNPDA1     | GNP1               | [GNP] glucosam protein-coding   |
| chr6-158f  | 6.435763 | -1.09917 | 0.961113 | -1.14364 | 0.252772 | 0.981636 | chr6  | 1.58E+08 | 1.58E+08 | + | 0 | NA | intron (NLI PA7 LN  | 12090   | NM_20711E | 404672   | Hs. 356224 | NM_20711E            | ENSG000000GTF2H5     | C6orf175           | [general] t protein-coding      |
| chr1-244f  | 6.767353 | 1.050572 | 0.919123 | 1.143016 | 0.253032 | 0.981636 | chr1  | 2.24E+08 | 2.24E+08 | + | 0 | NA | intron (Nintron (N  | 1210    | NM_02516C | 80232    | Hs. 49787E | NM_02516C            | ENSG000000WDR26      | CDW2               | [G1D7W] repeat protein-coding   |
| chr2-197f  | 6.186636 | 1.115502 | 0.97597  | 1.142967 | 0.253052 | 0.981636 | chr2  | 19719920 | 19720591 | + | 0 | NA | intron (NCPg-1875E  | 1786    | NR_03761E | 1.01E+08 | Hs. 28374E | NR_03761E            | ENSG000000SEPT5-GP1  | GP1B1B             | [GP1SEPT5-GP1] ncRNA            |
| chr10-86f  | 5.633008 | -1.14544 | 1.002252 | -1.14287 | 0.253093 | 0.981636 | chr10 | 86930622 | 86931264 | + | 0 | NA | Intergeni Intergeni | 24844   | NM_00133C | 6623     | Hs. 34947C | NM_003087            | ENSG000000CSNCG      | BCSG1              | [SR] synrho protein-coding      |
| chr11-46f  | 5.633008 | -1.14544 | 1.002252 | -1.14287 | 0.253093 | 0.981636 | chr11 | 46677261 | 46677400 | + | 0 | NA | 3' UTR (N3' UTR (N  | 23259   | NM_00430E | 392      | Hs. 13886C | NM_00430E            | ENSG000000ARHGAP1    | CDC42GAP           | [Rho] GTPas protein-coding      |
| chr11-12f  | 5.633008 | -1.14544 | 1.002252 | -1.14287 | 0.253093 | 0.981636 | chr11 | 1.23E+08 | 1.23E+08 | + | 0 | NA | intron (NAluJb SIN  | 24750   | NM_006597 | 3312     | Hs. 180414 | NM_006597            | ENSG000000HSPA8      | HEL-33             | [HE] heat shoc protein-coding   |
| chr12-10f  | 5.633008 | -1.14544 | 1.002252 | -1.14287 | 0.253093 | 0.981636 | chr12 | 1.05E+08 | 1.05E+08 | + | 0 | NA | intron (NMSTB1 LTF  | 7991    | NM_00114E | 387882   | Hs. 36893E | NM_20737E            | ENSG000000C12orf75   | AGD3               | [OCC-] chromoson protein-coding |
| chr15-39f  | 5.633008 | -1.14544 | 1.002252 | -1.14287 | 0.253093 | 0.981636 | chr15 | 39998768 | 40000119 | + | 0 | NA | intron (Nintron (N  | 39738   | NM_003134 | 6727     | Hs. 53373E | NM_003134            | ENSG000000SRP14      | ALURBP             | signal r protein-coding         |
| chr17-21f  | 5.633008 | -1.14544 | 1.002252 | -1.14287 | 0.253093 | 0.981636 | chr17 | 21544950 | 21545340 | + | 0 | NA | intron (NMSTB1 LTF  | 6533    | NR_160801 | 339263   | Hs. 51401E | NM_00111E            | ENSG000000LINC0269E  | C17orf51           | [long] intc ncRNA               |
| chr2-132f  | 5.633008 | -1.14544 | 1.002252 | -1.14287 | 0.253093 | 0.981636 | chr2  | 1.33E+08 | 1.33E+08 | + | 0 | NA | intron (NHAL1 LINE  | 77536   | NR_13557E | 1.02E+08 | Hs. 680114 | NR_13557E            | ENSG000000NCKAP5-AS- | NCKAP5             | arncRNA                         |
| chr3-160f  | 5.633008 | -1.14544 | 1.002252 | -1.14287 | 0.253093 | 0.981636 | chr3  | 1.6E+08  | 1.6E+08  | + | 0 | NA | TTS (NM_CTS (NM_C   | 13886   | NM_173084 | 286827   | Hs. 212957 | NM_173084            | ENSG000000TRIM59     | IFT80L             | [MF] tripartit protein-coding   |
| chr6-429f  | 5.633008 | -1.14544 | 1.002252 | -1.14287 | 0.253093 | 0.981636 | chr6  | 42976648 | 42977065 | + | 0 | NA | intron (N2c LINE    | 2325    | NR_13300E | 5190     | Hs. 65642E | NM_000287            | ENSG000000PEX6       | HMLR2              | [PAF] peroxisom protein-coding  |
| chr7-148f  | 5.633008 | -1.14544 | 1.002252 | -1.14287 | 0.253093 | 0.981636 | chr7  | 1.49E+08 | 1.49E+08 | + | 0 | NA | intron (Nintron (N  | 78838   | NM_00137C | 8454     | Hs. 14680E | NM_00359E            | ENSG000000CUL1       | -                  | cullin 1 protein-coding         |
| chr1-156f  | 4.450663 | 1.031204 | 0.902299 | 1.142862 | 0.253096 | 0.981636 | chr1  | 1.57E+08 | 1.57E+08 | + | 0 | NA | intron (NMIR3 SINE  | 25078   | NR_030527 | 768220   | NR_030527  | ENSG000000MIR765     | MIRN765              | [t] microRNA ncRNA |                                 |
| chr9-104f  | 4.2393   | 1.314289 | 1.150341 | 1.142522 | 0.253237 | 0.981636 | chr9  | 1.05E+08 | 1.05E+08 | + | 0 | NA | intron (Nintron (N  | 30073   | NM_00550E | 19       | Hs. 659274 | NM_00550E            | ENSG000000ABCA1      | ABC-1              | [ABCATP] bindi protein-coding   |
| chr1-214f  | 8.143865 | -0.94817 | 0.830233 | -1.14205 | 0.253433 | 0.981636 | chr1  | 2.14E+08 | 2.14E+08 | + | 0 | NA | intron (Nintron (N  | 38317   | NM_020197 | 56950    | Hs. 66170  | NM_020197            | ENSG000000SMYD2      | HSKM-B             | [K] SET and I protein-coding    |
| chr14-60f  | 6.394623 | -1.10475 | 0.967351 | -1.14203 | 0.253441 | 0.981636 | chr14 | 60983328 | 60984069 | + | 0 | NA | intron (Nintron (N  | 2008    | NM_00135C | 57570    | Hs. 38015E | NM_02081C            | ENSG000000TRMT5      | COXP226            | [tRNA] met protein-coding       |
| chr1-320f  | 8.077302 | -0.9591  | 0.839885 | -1.14194 | 0.253479 | 0.981636 | chr1  | 32030855 | 32031439 | + | 0 | NA | intron (NAluJo SIN  | 17279   | NM_001271 | 10657    | Hs. 44589E | NM_00655E            | ENSG000000KHDRBS1    | Sam68              | [p62K] RNA bi protein-coding    |
| chr14-50f  | 0.77302  | -0.9591  | 0.839885 | -1.14194 | 0.253479 | 0.981636 | chr14 | 50442395 | 50442662 | + | 0 | NA | intron (NLMJC4 LIN  | 45230   | NM_001367 | 8814     | Hs. 280881 | NM_00419E            | ENSG000000CDKL1      | KKTLAR             | [F] cyclin d protein-coding     |
| chr11-93f  | 8.151723 | -0.9496  | 0.831585 | -1.14192 | 0.253489 | 0.981636 | chr11 | 93702931 | 93703524 | + | 0 | NA | intron (NAluSx1 SI  | 18287   | NR_00256E | 619383   | Hs. 66066E | NR_00256E            | ENSG000000SCARN9A    | Z32                | [mgU2-SUMO] small Cc ncRNA      |
| chr17-54f  | 8.151723 | -0.9496  | 0.831585 | -1.14192 | 0.253489 | 0.981636 | chr17 | 5448042  | 5448287  | + | 0 | NA | intron (NAluSx SIN  | 9009    | NM_00121E | 708      | Hs. 55586E | NM_00121E            | ENSG000000C1QB       | COXP33             | [C] complemer protein-coding    |
| chr2-222f  | 8.151723 | -0.9496  | 0.831585 | -1.14192 | 0.253489 | 0.981636 | chr2  | 2.23E+08 | 2.23E+08 | + | 0 | NA | intron (Nintron (N  | 9343    | NR_130154 | 10056    | Hs. 47145E | NM_005687            | ENSG000000FARSB      | FARSLB             | [FF] phenylal pseudo            |
| chr10-40f  | 5.503327 | 1.150232 | 1.007347 | 1.141843 | 0.253519 | 0.981636 | chr10 | 40171908 | 40172571 | + | 0 | NA | Intergeni ALR/Alph  | 165580  | NR_02438C | 441666   | NR_02438C  | ENSG000000LOC441666- | -                    | zinc fing pseudo   |                                 |
| chr16-207f | 5.503327 | 1.150232 | 1.007347 | 1.141843 | 0.253519 | 0.981636 | chr16 | 2074842  | 2075530  | + | 0 | NA | intron (NAluSx1 SI  | 15098   | NR_03064E | 1E+08    | NR_03064E  | ENSG000000MIR1225    | MIRN1225             | microRNA ncRNA     |                                 |
| chr4-139f  | 5.503327 | 1.150232 | 1.007347 | 1.141843 | 0.253519 | 0.981636 | chr4  | 1391481  | 1393125  | + | 0 | NA | Intergeni L1M4 LINE | 14139   | NM_00129C | 54729    | Hs. 52639E | NM_00129C            | ENSG000000NKX1-1     | HSP-153            | [NKK1] homec protein-coding     |
| chr1-449f  | 6.871796 | -1.03122 | 0.903252 | -1.14168 | 0.253589 | 0.981636 | chr1  | 44971506 | 44971999 | + | 0 | NA | intron (NAluSg SIN  | 14843   | NM_02036E | 8891     | Hs. 53354E | NM_02036E            | ENSG000000EIF2B3     | EIF2B3             | [E] Eukaryot protein-coding     |
| chr1-842f  | 6.871796 | -1.03122 | 0.903252 | -1.14168 | 0.253589 | 0.981636 | chr1  | 84239468 | 84240268 | + | 0 | NA | Intergeni Intergeni | 58236   | NM_00124E | 5567     | Hs. 48732E | NM_002731            | ENSG000000PRKACB     | PKA                | C-beta protein-coding           |
| chr1-844f  | 6.871796 | -1.03122 | 0.903252 | -1.14168 | 0.253589 | 0.981636 | chr1  | 84485117 | 84485920 | + | 0 | NA | intron (NTiger4b    | 6252    | NM_02506E | 80135    | Hs. 48120E | NM_02506E            | ENSG000000RPF1       | BXDC5              | ribosome protein-coding         |
| chr15-80f  | 6.871796 | -1.03122 | 0.903252 | -1.14168 | 0.253589 | 0.981636 | chr15 | 80781494 | 80782761 | + | 0 | NA | intron (Nintron (N  | 2757    | NM_00129E | 57214    | Hs. 45908E | NM_01868E            | ENSG000000CEMP1      | CCSP1              | [HYE] cell migr protein-coding  |
| chr16-88f  | 6.871796 | -1.03122 | 0.903252 | -1.14168 | 0.253589 | 0.981636 | chr16 | 88399883 | 88400082 | + | 0 | NA | Intergeni MIR SINE  | 27489   | NM_001367 | 84627    | Hs. 54925  | NM_001127            | ENSG000000ZNF469     | BCS1               | [BCS1] zinc fing protein-coding |
| chr17-75f  | 6.871796 | -1.03122 | 0.903252 | -1.14168 | 0.253589 | 0.981636 | chr17 | 75220833 | 75221850 | + | 0 | NA | intron (NAluS6 SI   | 15662   | NM_024844 | 79902    | Hs. 362817 | NM_024844            | ENSG000000NUP85      | FRONT1             | [NF] nucleopor protein-coding   |
| chr2-106f  | 6.871796 | -1.03122 | 0.903252 | -1.14168 | 0.253589 | 0.981636 | chr2  | 10605802 | 10606714 | + | 0 | NA | intron (NMIR SINE   | 83707   | NM_024894 | 79954    | Hs. 222494 | NM_024894            | ENSG000000NOL10      | PQB5               | nucleolar protein-coding        |
| chr5-536f  | 6.871796 | -1.03122 | 0.903252 | -1.14168 | 0.253589 | 0.981636 | chr5  | 53683    |          |   |   |    |                     |         |           |          |            |                      |                      |                    |                                 |

|           |          |          |          |          |          |          |       |          |          |   |   |    |                     |         |           |          |           |                    |                     |                    |                             |
|-----------|----------|----------|----------|----------|----------|----------|-------|----------|----------|---|---|----|---------------------|---------|-----------|----------|-----------|--------------------|---------------------|--------------------|-----------------------------|
| chr20-635 | 11.05932 | -0.81279 | 0.717084 | -1.13347 | 0.257019 | 0.981636 | chr20 | 63522180 | 63523939 | + | 0 | NA | TTS (NM_C TTS (NM_C | 2294    | NM_024299 | 79144    | Hs.79625  | NM_024299          | ENSG000000PPDPF     | C20orf145          | pancreatic protein-coding   |
| chr19-245 | 28.04944 | 0.538294 | 0.475113 | 1.13298  | 0.257222 | 0.981636 | chr19 | 24976712 | 24977057 | + | 0 | NA | IntergeniALR Alpha  | -813437 | NR_003603 | 1E+08    | Hs.149312 | NR_003603          | ENSG000000HAVCR1P1  | -                  | hepatitis pseudo            |
| chr13-505 | 5.658432 | -1.13519 | 1.002056 | -1.13286 | 0.257271 | 0.981636 | chr13 | 50013618 | 50014093 | + | 0 | NA | 3' UTR (A3' UTR (A  | -1589   | NM_173605 | 283518   | Hs.660161 | NM_173605          | ENSG000000KCNRG     | DLTET              | potassium protein-coding    |
| chr2-3315 | 5.658432 | -1.13519 | 1.002056 | -1.13286 | 0.257271 | 0.981636 | chr2  | 31976556 | 31982777 | + | 0 | NA | intron (Nintron (N  | 63369   | NM_001166 | 4052     | Hs.619319 | NM_000627          | ENSG000000LTBP1     | -                  | latent t protein-coding     |
| chr2-1795 | 5.658432 | -1.13519 | 1.002056 | -1.13286 | 0.257271 | 0.981636 | chr2  | 1.8E+08  | 1.8E+08  | + | 0 | NA | intron (NAlu Jo SIN | 30258   | NM_020944 | 57703    | Hs.311363 | NM_020944          | ENSG000000CWC22     | EIF4GL NC          | C22 s plprotein-coding      |
| chr3-1235 | 5.658432 | -1.13519 | 1.002056 | -1.13286 | 0.257271 | 0.981636 | chr3  | 1.24E+08 | 1.24E+08 | + | 0 | NA | intron (N(A)n Simp  | 420     | NM_053031 | 4638     | Hs.477375 | NM_005965          | ENSG000000MYLK      | AAT7 KRP           | myosin I protein-coding     |
| chr3-1574 | 5.658432 | -1.13519 | 1.002056 | -1.13286 | 0.257271 | 0.981636 | chr3  | 1.57E+08 | 1.57E+08 | + | 0 | NA | intron (Nintron (N  | 3577    | NM_002852 | 5806     | Hs.591288 | NM_002852          | ENSG000000PTX3      | TNFAIP5 T          | tenaxin protein-coding      |
| chr7-8175 | 5.658432 | -1.13519 | 1.002056 | -1.13286 | 0.257271 | 0.981636 | chr7  | 81732363 | 81733575 | + | 0 | NA | intron (Nintron (N  | 37058   | NM_001010 | 3082     | Hs.396533 | NM_000601          | ENSG000000HGF       | DFNB39 F           | hepatocyt protein-coding    |
| chr8-6155 | 5.658432 | -1.13519 | 1.002056 | -1.13286 | 0.257271 | 0.981636 | chr8  | 61586765 | 61587878 | + | 0 | NA | intron (Nintron (N  | 102490  | NM_001164 | 444      | Hs.332422 | NM_004315          | ENSG000000ASPH      | AAH BAH C          | aspartate protein-coding    |
| chr8-9096 | 5.658432 | -1.13519 | 1.002056 | -1.13286 | 0.257271 | 0.981636 | chr8  | 90969935 | 90970828 | + | 0 | NA | intron (Nintron (N  | 14696   | NM_001362 | 1E+08    | Hs.733266 | NM_001199          | ENSG000000C8orf88   | -                  | chromosom protein-coding    |
| chr8-1304 | 5.658432 | -1.13519 | 1.002056 | -1.13286 | 0.257271 | 0.981636 | chr8  | 1.3E+08  | 1.3E+08  | + | 0 | NA | intron (Nintron (N  | 21059   | NM_001362 | 50807    | Hs.655552 | NM_018482          | ENSG000000ASAP1     | AMAP1 CEN          | ArfGAP wiprotein-coding     |
| chr1-5197 | 6.683224 | 1.036722 | 0.915211 | 1.132768 | 0.257312 | 0.981636 | chr1  | 51976762 | 51977090 | + | 0 | NA | exon (NM_exon (NM   | 13774   | NM_002867 | 5865     | Hs.123072 | NM_002867          | ENSG000000CRAB3B    | -                  | RAB3B, me protein-coding    |
| chr15-25  | 6.683224 | 1.036722 | 0.915211 | 1.132768 | 0.257312 | 0.981636 | chr15 | 25086629 | 25087532 | + | 0 | NA | promoter-promoter-  | 554     | NR_001293 | 727708   | NR_001293 | ENSG000000SNORD116 | HBII-85             | -1 small nucsnoRNA |                             |
| chr19-135 | 6.683224 | 1.036722 | 0.915211 | 1.132768 | 0.257312 | 0.981636 | chr19 | 35023453 | 35024152 | + | 0 | NA | intron (NMLTIK LTF  | -6668   | NM_001037 | 6324     | Hs.436645 | NM_001037          | ENSG000000SCN1B     | ATFB13 BF          | sodium vcprotein-coding     |
| chr3-4741 | 6.683224 | 1.036722 | 0.915211 | 1.132768 | 0.257312 | 0.981636 | chr3  | 47416228 | 47416548 | + | 0 | NA | intron (Nintron (N  | 35367   | NM_001304 | 25930    | Hs.25524  | NM_015466          | ENSG000000PTPN23    | HD-PTP HE          | protein tyrosine-coding     |
| chr5-4897 | 35.31809 | 0.497793 | 0.43955  | 1.132507 | 0.257422 | 0.981636 | chr5  | 48973351 | 48974271 | + | 0 | NA | IntergeniALR Alpha  | 1467477 | NM_198445 | 133418   | Hs.561411 | NM_198445          | ENSG000000EMB       | GP70               | emigin protein-coding       |
| chr11-708 | 6.897219 | -1.02302 | 0.903337 | -1.13249 | 0.25743  | 0.981636 | chr11 | 70807055 | 70807265 | + | 0 | NA | exon (NM_exon (NM   | -55630  | NR_073535 | 220070   | Hs.326766 | NM_145305          | ENSG000000SHANK2-AS | C11orf76           | SHANK2 arncRNA              |
| chr11-857 | 6.897219 | -1.02302 | 0.903337 | -1.13249 | 0.25743  | 0.981636 | chr11 | 85706325 | 85708154 | + | 0 | NA | intron (NMRB SINE   | 11855   | NM_001362 | 54843    | Hs.369523 | NM_003237          | ENSG000000SYTL2     | CHR115YT           | synaptot protein-coding     |
| chr12-112 | 6.897219 | -1.02302 | 0.903337 | -1.13249 | 0.25743  | 0.981636 | chr12 | 1.12E+08 | 1.12E+08 | + | 0 | NA | exon (NM_exon (NM   | -22594  | NR_037433 | 1.01E+08 | NR_037433 | ENSG000000MIR3657  | -                   | microRNA ncRNA     |                             |
| chr2-364  | 6.897219 | -1.02302 | 0.903337 | -1.13249 | 0.25743  | 0.981636 | chr2  | 36463007 | 36463428 | + | 0 | NA | intron (Nintron (N  | 107439  | NM_016441 | 51232    | Hs.699247 | NM_016441          | ENSG000000CRIM1     | CRIM-1 SE          | cysteine protein-coding     |
| chr2-1896 | 6.897219 | -1.02302 | 0.903337 | -1.13249 | 0.25743  | 0.981636 | chr2  | 1.9E+08  | 1.9E+08  | + | 0 | NA | intron (NMLTIAO LI  | 33969   | NM_001321 | 5378     | Hs.111745 | NM_000534          | ENSG000000PMS1      | HNPC3 MI           | PMS1 homc protein-coding    |
| chr2-2296 | 6.897219 | -1.02302 | 0.903337 | -1.13249 | 0.25743  | 0.981636 | chr2  | 2.3E+08  | 2.3E+08  | + | 0 | NA | intron (NAlu Jr4 SI | 44868   | NM_001345 | 9320     | Hs.572642 | NM_004235          | ENSG000000TRIP12    | MRD49 TRI          | thyroid t protein-coding    |
| chr20-137 | 6.897219 | -1.02302 | 0.903337 | -1.13249 | 0.25743  | 0.981636 | chr20 | 13798590 | 13799079 | + | 0 | NA | intron (N L2c LINE  | 13806   | NR_147982 | 79133    | Hs.472165 | NM_024120          | ENSG000000NDUFAF5   | C20orf7 V          | NADH:ubiq protein-coding    |
| chr4-7103 | 6.897219 | -1.02302 | 0.903337 | -1.13249 | 0.25743  | 0.981636 | chr4  | 71039074 | 71039350 | + | 0 | NA | IntergeniAlu Jr SIN | 45563   | NM_000788 | 1633     | Hs.709    | NM_000788          | ENSG000000DCK       | -                  | deoxycytiprotein-coding     |
| chr5-1686 | 6.897219 | -1.02302 | 0.903337 | -1.13249 | 0.25743  | 0.981636 | chr5  | 16866983 | 16867499 | + | 0 | NA | intron (Nintron (N  | 69047   | NM_012334 | 4651     | Hs.481720 | NM_012334          | ENSG000000MYO10     | -                  | myosin X protein-coding     |
| chr5-7818 | 6.897219 | -1.02302 | 0.903337 | -1.13249 | 0.25743  | 0.981636 | chr5  | 78180905 | 78181375 | + | 0 | NA | intron (Nintron (N  | 113558  | NM_001271 | 8546     | Hs.532091 | NM_003664          | ENSG000000AP3B1     | ADTB3 AD1          | adaptor t protein-coding    |
| chr8-6656 | 6.897219 | -1.02302 | 0.903337 | -1.13249 | 0.25743  | 0.981636 | chr8  | 66568904 | 66569584 | + | 0 | NA | intron (N LIPA13 LI | 43974   | NM_001080 | 4603     | Hs.445898 | NM_001080          | ENSG000000MYBL1     | A-MYB AMY          | MYB protc protein-coding    |
| chr3-1111 | 8.361745 | -0.9947  | 0.878425 | -1.13237 | 0.25748  | 0.981636 | chr3  | 1.11E+08 | 1.11E+08 | + | 0 | NA | exon (NM_exon (NM   | 50387   | NM_001243 | 25945    | Hs.293917 | NM_015480          | ENSG000000NECTIN3   | CD113 CD           | wnectin cp protein-coding   |
| chr12-163 | 8.128149 | -0.94522 | 0.834735 | -1.13236 | 0.257483 | 0.981636 | chr12 | 1636734  | 16372921 | + | 0 | NA | intron (NAlu Jr SIN | 7782    | NM_032642 | 81029    | Hs.306051 | NM_030775          | ENSG000000WNT57     | -                  | Wnt familprotein-coding     |
| chr12-861 | 8.128149 | -0.94522 | 0.834735 | -1.13236 | 0.257483 | 0.981636 | chr12 | 88195313 | 88195751 | + | 0 | NA | exon (NM_exon (NM   | 53225   | NM_001366 | 160418   | Hs.331268 | NM_181785          | ENSG000000TMT3      | LIS8 SMI           | transment protein-coding    |
| chr19-494 | 8.128149 | -0.94522 | 0.834735 | -1.13236 | 0.257483 | 0.981636 | chr19 | 4948075  | 4948565  | + | 0 | NA | intron (Nintron (N  | 15633   | NR_039902 | 1.01E+08 | NR_039902 | ENSG000000MIR4747  | mir-4747            | microRNA ncRNA     |                             |
| chr5-3888 | 8.128149 | -0.94522 | 0.834735 | -1.13236 | 0.257483 | 0.981636 | chr5  | 38851238 | 38852209 | + | 0 | NA | intron (N THE1B LTF | 5711    | NM_001322 | 9180     | Hs.120655 | NM_003990          | ENSG000000OSMR      | IL-31R             | -beconostat iprotein-coding |
| chr6-7508 | 8.128149 | -0.94522 | 0.834735 | -1.13236 | 0.257483 | 0.981636 | chr6  | 75083791 | 75086007 | + | 0 | NA | 3' UTR (N3' UTR (N  | 43883   | NR_145788 | 1.1E+08  | NR_145788 | ENSG000000SNORD156 | -                   | small nucsnoRNA    |                             |
| chr1-2628 | 6.863938 | -1.02954 | 0.909233 | -1.13232 | 0.257501 | 0.981636 | chr1  | 26281025 | 26281541 | + | 0 | NA | TTS (NM_C TTS (NM_C | 1197    | NM_031285 | 83442    | Hs.109051 | NM_031285          | ENSG000000SH3BGRL3  | HEL-S-297          | SH3 domaiprotein-coding     |
| chr18-125 | 6.863938 | -1.02954 | 0.909233 | -1.13232 | 0.257501 | 0.981636 | chr18 | 12598229 | 12599156 | + | 0 | NA | intron (N LIMB4 LIN | 10681   | NM_001013 | 81929    | Hs.301045 | NM_031210          | ENSG000000SEHL1     | SEC13L SE          | SEHL1 like protein-coding   |
| chr8-6155 | 6.863938 | -1.02954 | 0.909233 | -1.13232 | 0.257501 | 0.981636 | chr8  | 61650592 | 61651736 | + | 0 | NA | intron (Nintron (N  | 38647   | NM_001164 | 444      | Hs.332422 | NM_004315          | ENSG000000ASPH      | AAH BAH C          | aspartate protein-coding    |
| chr8-9372 | 6.863938 | -1.02954 | 0.909233 | -1.13232 | 0.257501 | 0.981636 | chr8  | 93729945 | 93731092 | + | 0 | NA | non-codiron-codir   | -9593   | NR_027255 | 55472    | Hs.192788 | NM_018605          | ENSG000000RBM12B-AS | C8orf39 F          | FRBM12B arncRNA             |
| chr1-1742 | 8.47712  | 0.921446 | 0.813838 | 1.132223 | 0.257541 | 0.981636 | chr1  | 1.74E+08 | 1.74E+08 | + | 0 | NA | intron (N LTR12 LTF | 6277    | NM_001366 | 9910     | Hs.585375 | NM_014857          | ENSG000000RABGAP1L  | HHL TBC1I          | RAB GTPas protein-coding    |
| chr1-2064 | 8.47712  | 0.921446 | 0.813838 | 1.132223 | 0.257541 | 0.981636 | chr1  | 2.06E+08 | 2.06E+08 | + | 0 | NA | 3' UTR (N3' UTR (N  | -14947  | NM_014002 | 9641     | Hs.321045 | NM_014002          | ENSG000000IKKBE     | IKK-E IKK          | inhibitor protein-coding    |
| chr3-3355 | 8.47712  | 0.921446 | 0.813838 | 1.132223 | 0.257541 | 0.981636 | chr3  | 33531288 | 33532129 | + | 0 | NA | intron (NAlu Sp SIN | -91303  | NM_014517 | 7342     | Hs.729120 | NM_014517          | ENSG000000CUBP1     | LBP-1B L           | upstream protein-coding     |
| chr7-1567 | 8.47712  | 0.921446 | 0.813838 | 1.132223 | 0.257541 | 0.981636 | chr7  | 1567011  | 1567523  | + | 0 | NA | TTS (NM_C TTS (NM_C | 2765    | NM_032302 | 84262    | Hs.446311 | NM_032302          | ENSG000000PSMG3     | C7orf48 F          | proteasom protein-coding    |
| chr9-1311 | 8.47712  | 0.921446 | 0.813838 | 1.132223 | 0.257541 | 0.981636 | chr9  | 1.31E+08 | 1.31E+08 | + | 0 | NA | exon (NM_exon (NM   | -26244  | NM_001315 | 8021     | Hs.654533 | NM_005058          | ENSG000000NUP214    | CAIN CAN           | nucleopor protein-coding    |
| chr1-9988 | 8.443839 | 0.919041 | 0.811845 | 1.132041 | 0.257617 | 0.981636 | chr1  | 99885341 | 99885743 | + | 0 | NA | intron (N MERIA DNA | 34567   | NM_000645 | 178      | Hs.904    | NM_000025          | ENSG000000CAGL      | GDE                | amyo-alf protein-coding     |
| chr13-111 | 8.443839 | 0.919041 | 0.811845 | 1.132041 | 0.257617 | 0.981636 | chr13 | 1.11E+08 | 1.11E+08 | + | 0 | NA | intron (N CpG       | 13936   | NM_001354 | 8874     | Hs.508735 | NM_003895          | ENSG000000ARHGFE7   | BETA-PIX           | Rho guaniprotein-coding     |
| chr17-182 | 8.443839 | 0.919041 | 0.811845 | 1.132041 | 0.257617 | 0.981636 | chr17 | 1804145  | 1804588  | + | 0 | NA | intron (NAlu Sx SIN | 25536   | NM_052925 | 114826   | Hs.514602 | NM_052925          | ENSG000000SMYD4     | ZMYND21            | SET and W protein-coding    |
| chr19-424 | 8.443839 | 0.919041 | 0.811845 | 1.132041 | 0.257617 | 0.981636 | chr19 | 42224254 | 42224463 | + | 0 | NA | intron (Nintron (N  | 4042    | NM_133444 | 116115   | Hs.137282 | NM_133444          | ENSG000000ZNF526    | -                  | zinc fingprotein-coding     |
| chr4-5587 | 8.443839 | 0.919041 | 0.811845 | 1.132041 | 0.257617 | 0.981636 | chr4  | 55877962 | 55878901 | + | 0 | NA | intron (Nintron (N  | 24781   | NM_018261 | 55763    | Hs.269665 | NM_018261          | ENSG000000EXOC1     | BM-102 S           | exocyst c protein-coding    |
| chr15-484 | 4.213876 | 1.306036 | 1.153753 | 1.131989 | 0.257639 | 0.981636 | chr15 | 48843099 | 48841642 | + | 0 | NA | intron (Nintron (N  | -29951  | NM_001194 | 22995    | Hs.443005 | NM_014985          | ENSG000000CEP152    | MCPH4 MC           | centrosom protein-coding    |
| chr21-418 | 4.213876 | 1.306036 | 1.153753 | 1.131989 | 0.257639 | 0.981636 | chr21 | 41813601 | 41814993 | + | 0 | NA | intron (Nintron (N  | -47245  | NM_020635 | 54101    | Hs.517310 |                    |                     |                    |                             |



|                    |          |          |          |          |          |       |          |          |   |      |                    |                   |                            |                     |                   |                              |                                      |
|--------------------|----------|----------|----------|----------|----------|-------|----------|----------|---|------|--------------------|-------------------|----------------------------|---------------------|-------------------|------------------------------|--------------------------------------|
| chr7-7662 6.685074 | 1.050371 | 0.935387 | 1.22927  | 0.261469 | 0.981636 | chr7  | 76622320 | 76622597 | + | 0 NA | intron (AluSg4 SI  | 4845 NM_152992    | 22932 Hs. 488877NM_01223C  | ENS00000POMZP3      | POM-ZP3 FPM121    | ar protein-coding            |                                      |
| chr20-41C 9.810828 | -0.85587 | 0.762291 | -1.12275 | 0.261542 | 0.981636 | chr20 | 41084832 | 41086569 | + | 0 NA | intron (L1ME3G LI  | -51843 NM_182811  | 5335 Hs. 268177NM_00266C   | ENS00000PLCG1       | NCKAP3 PI         | phospholipase protein-coding |                                      |
| chr2-7454 8.120291 | -0.94368 | 0.840715 | -1.12247 | 0.261663 | 0.981636 | chr2  | 74543513 | 74544395 | + | 0 NA | intron (intron (   | -5066 NM_001197   | 1796 Hs. 103854NM_00138I   | ENS00000COK1        | P62DOK pf         | docking protein-coding       |                                      |
| chr7-1301 8.120291 | -0.94368 | 0.840715 | -1.12247 | 0.261663 | 0.981636 | chr7  | 1.3E+08  | 1.3E+08  | + | 0 NA | intron (AluJb SIN  | 25538 NM_003284   | 84928 Hs. 26724E           | ENS00000TMEM209     | NET31             | transmembrane protein-coding |                                      |
| chr1-1142 8.161431 | -0.93968 | 0.837415 | -1.12212 | 0.261812 | 0.981636 | chr1  | 1.14E+08 | 1.14E+08 | + | 0 NA | 3' UTR (3' UTR (   | 114929 NM_03302C  | 51592 Hs. 26837            | NM_01590C           | ENS00000TRIM33    | ECTO PTC7                    | tripartite protein-coding            |
| chr7-1344 8.510402 | 0.923863 | 0.823592 | 1.121747 | 0.26197  | 0.981636 | chr7  | 1.34E+08 | 1.34E+08 | + | 0 NA | intron (intron (   | 2509 NM_00162E    | 231 Hs. 52121E             | NM_00162E           | ENS00000AKR1B1    | ADR ALDR1                    | aldo-ketose reductase protein-coding |
| chr2-1271 11.00062 | -0.82197 | 0.823592 | -1.12145 | 0.262096 | 0.981636 | chr2  | 1.28E+08 | 1.28E+08 | + | 0 NA | intron (intron (   | 21879 NM_01796E   | 55677 Hs. 46987E           | NM_01796E           | ENS00000TWS1      |                              | interacts protein-coding             |
| chr4-3927 7.896403 | 0.961699 | 0.857796 | 1.121127 | 0.262234 | 0.981636 | chr4  | 39273399 | 39273860 | + | 0 NA | intron (MER68 LTF  | 91100 NM_025132   | 57728 Hs. 43848E           | NM_025132           | ENS00000WDR19     | ATD5 CED4WD                  | repeat protein-coding                |
| chr9-1282 7.896403 | 0.961699 | 0.857796 | 1.121127 | 0.262234 | 0.981636 | chr9  | 1.28E+08 | 1.28E+08 | + | 0 NA | intron (LTR13A LI  | 3653 NM_00104C    | 375757 Hs. 259594NM_00104C | ENS00000SWI5        | C9orf119 SWI5     | homeobox protein-coding      |                                      |
| chr11-352 9.828394 | -0.84897 | 0.757327 | -1.12101 | 0.262284 | 0.981636 | chr11 | 35203368 | 35211480 | + | 0 NA | intron (intron (   | 145794 NR_145794  | 1.1E+08                    | NR_145794           | SNORD164          |                              | small nucleolar RNA                  |
| chr10-406 17.67924 | 0.662811 | 0.591413 | 1.120725 | 0.262405 | 0.981636 | chr10 | 40643502 | 40644673 | + | 0 NA | IntergeniALR Alphe | 1723958 NR_02438C | 441666 Hs. 25572E          | NR_02438C           | ENS00000LOC441666 |                              | zinc finger pseudo                   |
| chr8-1312 6.938359 | -1.01802 | 0.908434 | -1.12063 | 0.262445 | 0.981636 | chr8  | 13128428 | 13128856 | + | 0 NA | intron (AluY SINE  | 4647 NM_006094    | 10395 Hs. 13429E           | NM_006094           | ENS00000DLC1      | ARHGAP7 F                    | DLC1 Rho protein-coding              |
| chr4-1031 6.86765  | -1.10245 | 0.984179 | -1.12018 | 0.262639 | 0.981636 | chr4  | 1.03E+08 | 1.03E+08 | + | 0 NA | intron (L2a LINE   | -48895 NM_02013E  | 56898 Hs. 12469E           | NM_02013E           | ENS00000BDH2      | DHRS6 EFA3                   | hydroxyprotein-coding                |
| chr1-2562 6.691082 | 1.033917 | 0.923152 | 1.119986 | 0.26272  | 0.981636 | chr1  | 22506262 | 22507232 | + | 0 NA | intron (intron (   | 54896 NM_00133C   | 9923 Hs. 41896E            | NM_01487C           | ENS00000ZBT40     | ZNF923                       | zinc finger protein-coding           |
| chr22-466 6.691082 | 1.033917 | 0.923152 | 1.119986 | 0.26272  | 0.981636 | chr22 | 46673387 | 46674946 | + | 0 NA | intron (intron (   | 53780 NM_015124   | 23151 Hs. 47515E           | NM_015124           | ENS00000GRAMD4    | DIP                          | GRAM domain protein-coding           |
| chr7-9036 6.691082 | 1.033917 | 0.923152 | 1.119986 | 0.26272  | 0.981636 | chr7  | 90361349 | 90361874 | + | 0 NA | intron (L1P46 LIN  | 14895 NM_033107   | 85865 Hs. 593547NM_033107  | ENS00000GTPBP10     | ObgH2 UGCGTP      | bindin protein-coding        |                                      |
| chr1-1564 10.19475 | 0.836231 | 0.74672  | 1.119873 | 0.262768 | 0.981636 | chr1  | 1.56E+08 | 1.56E+08 | + | 0 NA | exon (NM_exon (NM_ | 10939 NM_001271   | 4209 Hs. 314327NM_00592C   | ENS00000MEF2D       |                   | myocyte protein-coding       |                                      |
| chr1-2202 10.19475 | 0.836231 | 0.74672  | 1.119873 | 0.262768 | 0.981636 | chr1  | 2.2E+08  | 2.2E+08  | + | 0 NA | intron (THE1C-int  | 17487 NR_001587   | 6791 Hs. 65484E            | NR_001587           | AURKAP1           | AURKAPS1                     | aurora kinase pseudo                 |
| chr1-2325 10.19475 | 0.836231 | 0.74672  | 1.119873 | 0.262768 | 0.981636 | chr1  | 2.33E+08 | 2.33E+08 | + | 0 NA | intron (L2a LINE   | 6897 NR_138027    | 84284 Hs. 64271E           | NM_032324           | ENS00000NTPCR     | Clorf57                      | nucleoside protein-coding            |
| chr3-4334 10.19475 | 0.836231 | 0.74672  | 1.119873 | 0.262768 | 0.981636 | chr3  | 43343550 | 43343749 | + | 0 NA | intron (intron (   | 8131 NR_046757    | 1.01E+08                   | Hs. 600984NR_046757 | SNRK-AS1          |                              | SNRK anticRNA                        |
| chr19-104 6.649943 | 1.033756 | 0.923303 | 1.119628 | 0.262872 | 0.981636 | chr19 | 10464100 | 10464546 | + | 0 NA | intron (AluSg SIN  | 11831 NM_006202   | 5141 Hs. 89901             | NR_006202           | ENS00000PE4A      | DPPE2 PDF                    | phosphodiesterase protein-coding     |
| chr19-151 6.649943 | 1.033756 | 0.923303 | 1.119628 | 0.262872 | 0.981636 | chr19 | 15186229 | 15186847 | + | 0 NA | intron (AluSx1 SI  | -7188 NR_10685E   | 1.02E+08                   | NR_10685E           | ENS00000MIR6795   | hsa-mir-ε                    | microRNA ncRNA                       |
| chr21-366 6.649943 | 1.033756 | 0.923303 | 1.119628 | 0.262872 | 0.981636 | chr21 | 36050308 | 36050560 | + | 0 NA | intron (intron (   | 9930 NM_001007    | 54093 Hs. 60620C           | NM_01743E           | ENS00000CSETD4    | C21orf18 SET                 | domain protein-coding                |
| chr4-8386 6.649943 | 1.033756 | 0.923303 | 1.119628 | 0.262872 | 0.981636 | chr4  | 8386958  | 8387346  | + | 0 NA | intron (intron (   | 53571 NM_003501   | 8310 Hs. 47912E            | NM_003501           | ENS00000ACOX3     |                              | acyl-CoA protein-coding              |
| chr5-1394 6.649943 | 1.033756 | 0.923303 | 1.119628 | 0.262872 | 0.981636 | chr5  | 1.39E+08 | 1.39E+08 | + | 0 NA | intron (AluJr SIN  | 5019 NM_15268E    | 202052 Hs. 483537NM_15268E | ENS00000DNAJ18      |                   | DnaJ heat protein-coding     |                                      |
| chr1-2916 5.650574 | -1.133   | 1.012198 | -1.11935 | 0.262991 | 0.981636 | chr1  | 29164283 | 29165238 | + | 0 NA | intron (intron (   | 17140 NM_00562E   | 6429 Hs. 46997C            | NM_00562E           | ENS00000SRSP4     | SFRS4 SRF                    | serine arginine protein-coding       |
| chr1-180C 5.650574 | -1.133   | 1.012198 | -1.11935 | 0.262991 | 0.981636 | chr1  | 1.8E+08  | 1.8E+08  | + | 0 NA | intron (intron (   | -67409 NM_001004  | 5768 Hs. 71917E            | NM_00282E           | ENS00000QSOX1     | Q6 QSCN6                     | quiescin protein-coding              |
| chr13-445 5.650574 | -1.133   | 1.012198 | -1.11935 | 0.262991 | 0.981636 | chr13 | 44960018 | 44960236 | + | 0 NA | intron (AluSg SIN  | 29344 NM_01234E   | 26747 Hs. 52500E           | NM_01234E           | ENS00000NUFIP1    | NUFIP baE                    | nuclear protein-coding               |
| chr13-11 5.650574  | -1.133   | 1.012198 | -1.11935 | 0.262991 | 0.981636 | chr13 | 1.1E+08  | 1.1E+08  | + | 0 NA | intron (THE1B LTF  | -5449 NR_10704C   | 1.02E+08                   | NR_10704C           | ENS00000MIR8073   | hsa-mir-ε                    | microRNA ncRNA                       |
| chr19-192 5.650574 | -1.133   | 1.012198 | -1.11935 | 0.262991 | 0.981636 | chr19 | 1922607  | 1922806  | + | 0 NA | intron (intron (   | 17307 NM_00132E   | 113178 Hs. 14498E          | NM_079834           | ENS00000SCAMP     | SCAMP-4                      | secretory protein-coding             |
| chr3-129 5.650574  | -1.133   | 1.012198 | -1.11935 | 0.262991 | 0.981636 | chr3  | 1.29E+08 | 1.29E+08 | + | 0 NA | intron (intron (   | 9955 NR_00299E    | 677797 Hs. 71139E          | NR_00299E           | ENS00000SNORA7B   | ACA7B                        | small nucleolar RNA                  |
| chr5-1507 5.650574 | -1.133   | 1.012198 | -1.11935 | 0.262991 | 0.981636 | chr5  | 1.51E+08 | 1.51E+08 | + | 0 NA | intron (AluSx SIN  | 7913 NM_032947    | 85027 Hs. 29444            | NM_032947           | ENS00000SMIM3     | C5orf62                      | small intron protein-coding          |
| chr9-122 5.650574  | -1.133   | 1.012198 | -1.11935 | 0.262991 | 0.981636 | chr9  | 1.23E+08 | 1.23E+08 | + | 0 NA | intron (L2c LINE   | 36718 NM_012197   | 23637 Hs. 271341NM_012197  | ENS00000RABGAP1     | CAPGCNA TRAB      | GTPase protein-coding        |                                      |
| chr1-439 5.485761  | 1.140275 | 1.01873  | 1.11931  | 0.263008 | 0.981636 | chr1  | 43962536 | 43963553 | + | 0 NA | intron (intron (   | -6966 NM_00131E   | 1802 Hs. 63239E            | NM_001384           | ENS00000DPH2      | DPH2L2                       | diphthamide protein-coding           |
| chr1-2302 5.485761 | 1.140275 | 1.01873  | 1.11931  | 0.263008 | 0.981636 | chr1  | 2.3E+08  | 2.3E+08  | + | 0 NA | intron (AluSx1 SI  | 170155 NM_00125E  | 79605 Hs. 52046E           | NM_024554           | ENS00000PGDB5     |                              | piggyBac protein-coding              |
| chr14-10C 5.485761 | 1.140275 | 1.01873  | 1.11931  | 0.263008 | 0.981636 | chr14 | 1E+08    | 1E+08    | + | 0 NA | 3' UTR (3' UTR (   | 14035 NR_10682E   | 1.02E+08                   | NR_10682E           | ENS00000MIR6764   | hsa-mir-ε                    | microRNA ncRNA                       |
| chr20-28 5.485761  | 1.140275 | 1.01873  | 1.11931  | 0.263008 | 0.981636 | chr20 | 28315580 | 28316224 | + | 0 NA | IntergeniALR Alphe | 286763 NR_13231E  | 1E+08                      | Hs. 529357NR_13231E | ENS00000FRG1CP    |                              | FSHD repeat pseudo                   |
| chr22-302 5.485761 | 1.140275 | 1.01873  | 1.11931  | 0.263008 | 0.981636 | chr22 | 30283187 | 30286572 | + | 0 NA | TTS (NM_C          | 4748 NM_001037    | 652968 Hs. 44495E          | NM_001037           | ENS00000CASTOR1   | GATSL3                       | cytosolic protein-coding             |
| chr22-43 5.485761  | 1.140275 | 1.01873  | 1.11931  | 0.263008 | 0.981636 | chr22 | 43932842 | 43934858 | + | 0 NA | intron (intron (   | 10045 NM_02522E   | 80339 Hs. 65480C           | NM_02522E           | ENS00000PNPLA3    | ADPN C22c                    | patatin protein-coding               |
| chr14-601 6.85608  | -1.02783 | 0.918541 | -1.11898 | 0.263149 | 0.981636 | chr14 | 60130403 | 60130844 | + | 0 NA | intron (MLT1A LTF  | 34775 NM_01602E   | 51635 Hs. 59719            | NM_01602E           | ENS00000DHR57     | CGI-86 SE                    | dehydrogenase protein-coding         |
| chr5-623 6.85608   | -1.02783 | 0.918541 | -1.11898 | 0.263149 | 0.981636 | chr5  | 62392330 | 62394271 | + | 0 NA | intron (FLAM_A SI  | 10605 NM_00134E   | 27292 Hs. 73166E           | NM_01447E           | ENS00000DITM1     | DIM1 DITM1                   | rRNA protein-coding                  |
| chr10-87 5.691173  | -1.12675 | 1.007125 | -1.11878 | 0.263234 | 0.981636 | chr10 | 87804794 | 87805522 | + | 0 NA | intron (intron (   | 13048 NM_001321   | 84896 Hs. 43594E           | NM_03281C           | ENS00000ATAD1     | AFCDC1 FNF                   | ATPase protein-coding                |
| chr15-654 6.830656 | -1.03634 | 0.926393 | -1.11868 | 0.263275 | 0.981636 | chr15 | 65478419 | 65478659 | + | 0 NA | intron (AluSx SIN  | 38735 NM_19796C   | 54878 Hs. 45860E           | NM_01774E           | ENS00000DPPP8     | DP8 DPRP                     | dipeptidyl protein-coding            |
| chr2-179 6.830656  | -1.03634 | 0.926393 | -1.11868 | 0.263275 | 0.981636 | chr2  | 1.8E+08  | 1.8E+08  | + | 0 NA | intron (MER44A DN  | 21542 NM_02094E   | 57703 Hs. 31136E           | NM_02094E           | ENS00000CWC22     | E1F4GL NCWC22                | spl protein-coding                   |
| chr6-117 6.830656  | -1.03634 | 0.926393 | -1.11868 | 0.263275 | 0.981636 | chr6  | 1.18E+08 | 1.18E+08 | + | 0 NA | intron (LTR28B LI  | 19336 NM_001017   | 57120 Hs. 19153E           | NM_02039E           | ENS00000GOPC      | CAL FIG1                     | golgi associated protein-coding      |
| chr1-151 8.484978  | 0.919341 | 0.821882 | 1.118581 | 0.263319 | 0.981636 | chr1  | 1.51E+08 | 1.51E+08 | + | 0 NA | exon (NM_exon (NM_ | 6883 NM_00125E    | 8991 Hs. 63246E            | NM_003944           | ENS00000SELENBP1  | EHHM70 HEL                   | selenium protein-coding              |
| chr10-324 8.484978 | 0.919341 | 0.821882 | 1.118581 | 0.263319 | 0.981636 | chr10 | 32487655 | 32488363 | + | 0 NA | intron (L1P44 LIN  | 41869 NR_109827   | 79741 Hs. 585464NM_02468E  | ENS00000CCDC7       | BIOT2 Bic         | coiled-coil protein-coding   |                                      |
| chr12-10 8.484978  | 0.919341 | 0.821882 | 1.118581 | 0.263319 | 0.981636 | chr12 | 1.09E+08 | 1.09E+08 | + | 0 NA | intron (AluSc SIN  | 5138 NM_001161    | 54434 Hs. 19976E           | NM_018984           | ENS00000CSSH1     | SSH1L                        | slingshot protein-coding             |
| chr9-669 8.484978  | 0.919341 | 0.821882 | 1.118581 | 0.263319 | 0.981636 | chr9  | 66911917 | 66917414 | + | 0 NA | intron (L1MB7 LIN  | 11304 NR_13425E   | 26149 Hs. 52214E           | NM_03316C           | ENS00000ZNF658    |                              | zinc finger protein-coding           |
| chr15-491 11.04361 | -0.8106  | 0.724744 | -1.11846 | 0.26337  | 0.981636 | chr15 |          |          |   |      |                    |                   |                            |                     |                   |                              |                                      |



|            |          |          |          |          |          |          |       |          |          |   |   |    |           |            |                    |                  |           |            |                    |                                   |                                     |                          |                                   |                          |                  |
|------------|----------|----------|----------|----------|----------|----------|-------|----------|----------|---|---|----|-----------|------------|--------------------|------------------|-----------|------------|--------------------|-----------------------------------|-------------------------------------|--------------------------|-----------------------------------|--------------------------|------------------|
| chr5-135c  | 4.896816 | -1.18584 | 1.070859 | -1.10737 | 0.268133 | 0.981636 | chr5  | 1.35E+08 | 1.35E+08 | + | 0 | NA | Intergeni | Intergeni  | -7125 NR_161235    | 1.01E+08         | NR_161235 | C5orf66    | -                  | chromosomncRNA                    |                                     |                          |                                   |                          |                  |
| chr5-1494  | 4.896816 | -1.18584 | 1.070859 | -1.10737 | 0.268133 | 0.981636 | chr5  | 1.49E+08 | 1.49E+08 | + | 0 | NA | intron    | (intron)   | (N                 | 3955 NR_105056   | 728264    | Hs. 519666 | NR_027180          | CARMN                             | CARMEN MI cardiac nncRNA            |                          |                                   |                          |                  |
| chr7-140c  | 4.896816 | -1.18584 | 1.070859 | -1.10737 | 0.268133 | 0.981636 | chr7  | 1.4E+08  | 1.4E+08  | + | 0 | NA | intron    | (intron)   | (N                 | 21817 NM_02275c  | 64761     | Hs. 12646  | NM_02275c          | ENSG000003PARP12                  | ARTD12 MS poly (ADP- protein-coding |                          |                                   |                          |                  |
| chr7-140c  | 4.896816 | -1.18584 | 1.070859 | -1.10737 | 0.268133 | 0.981636 | chr7  | 1.4E+08  | 1.4E+08  | + | 0 | NA | intron    | (intron)   | (N                 | 17982 NM_02275c  | 64761     | Hs. 12646  | NM_02275c          | ENSG000003PARP12                  | ARTD12 MS poly (ADP- protein-coding |                          |                                   |                          |                  |
| chr8-130c  | 4.896816 | -1.18584 | 1.070859 | -1.10737 | 0.268133 | 0.981636 | chr8  | 1.3E+08  | 1.3E+08  | + | 0 | NA | intron    | (intron)   | (N                 | -23590 NR_00276c | 29065     | Hs. 63931  | NR_00276c          | ASAP1-IT1 ASAP1 intrncRNA         |                                     |                          |                                   |                          |                  |
| chr16-22c  | 9.894957 | -0.84022 | 0.75876  | -1.10736 | 0.268138 | 0.981636 | chr16 | 22341282 | 22341668 | + | 0 | NA | Intergeni | AluSx SIN  | 33144 NM_00180c    | 1039             | Hs. 51343 | CNM_00180c | ENSG000003CCR2     | CCR2 Yo cerebellar protein-coding |                                     |                          |                                   |                          |                  |
| chr21-26c  | 4.904674 | -1.18817 | 1.073236 | -1.10709 | 0.268255 | 0.981636 | chr21 | 26928679 | 26929224 | + | 0 | NA | intron    | (intron)   | (N                 | -25010 NR_03991c | 1.01E+08  | NR_03991c  | ENSG000003MIR4759  | -                                 | microRNA ncRNA                      |                          |                                   |                          |                  |
| chr17-43c  | 10.75004 | 0.807802 | 0.729743 | 1.106967 | 0.268308 | 0.981636 | chr17 | 43399941 | 43400986 | + | 0 | NA | 3' UTR    | (3' UTR)   | (N                 | 1470 NM_001661   | 379       | Hs. 18315  | NR_001661          | ENSG000003ARL4D                   | ARF4 ARI ADP ribosom protein-coding |                          |                                   |                          |                  |
| chr14-761c | 8.630745 | -0.89085 | 0.804973 | -1.10669 | 0.26843  | 0.981636 | chr14 | 76180777 | 76182070 | + | 0 | NA | intron    | (intron)   | (N                 | 27069 NR_110314  | 55668     | Hs. 41023  | 1NM_01792c         | ENSG000003PATCH2L                 | C14orf118 G-patch c protein-coding  |                          |                                   |                          |                  |
| chr19-124  | 10.69133 | 0.802097 | 0.724857 | 1.106559 | 0.268484 | 0.981636 | chr19 | 12463898 | 12468080 | + | 0 | NA | intron    | (intron)   | (N                 | 18822 NM_152601  | 16305     | Hs. 63162  | 2NM_152601         | ENSG000003ZNF709                  | -                                   | zinc fing protein-coding |                                   |                          |                  |
| chr1-149c  | 12.44224 | 0.751638 | 0.679306 | 1.106478 | 0.26852  | 0.981636 | chr1  | 1.49E+08 | 1.49E+08 | + | 0 | NA | intron    | (intron)   | (N                 | 19524 NM_001277  | 400818    | Hs. 44508  | CNM_001037         | ENSG000003NBPF9                   | AEO1                                | NBPF memt protein-coding |                                   |                          |                  |
| chr20-324  | 8.981566 | 0.87332  | 0.789562 | 1.106082 | 0.268691 | 0.981636 | chr20 | 32451768 | 32453319 | + | 0 | NA | intron    | (intron)   | (N                 | 30947 NM_001351  | 140688    | Hs. 51697  | ENM_08061c         | ENSG000003NOL4L                   | C20orf112 nucleolar protein-coding  |                          |                                   |                          |                  |
| chr19-25c  | 21.18106 | 0.626697 | 0.566897 | 1.105964 | 0.268742 | 0.981636 | chr19 | 25520214 | 25520844 | + | 0 | NA | Intergeni | ALR/Alpha  | -1357282 NR_00360c | 399746           | Hs. 14931 | 2NR_00360c | ENSG000003HAVCR1P1 | -                                 | hepatitis pseudo                    |                          |                                   |                          |                  |
| chr10-40c  | 10.2026  | 0.83444  | 0.754669 | 1.105705 | 0.268854 | 0.981636 | chr10 | 40081263 | 40082143 | + | 0 | NA | Intergeni | ALR/Alpha  | 1385102 NR_045000  | 441234           | Hs. 53312 | 1NM_00115c | ENSG000003ZNF716   | -                                 | zinc fing protein-coding            |                          |                                   |                          |                  |
| chr7-602c  | 10.2026  | 0.83444  | 0.754669 | 1.105705 | 0.268854 | 0.981636 | chr7  | 60234792 | 60235021 | + | 0 | NA | Intergeni | ALR/Alpha  | 2784729 NM_00115c  | 7750             | Hs. 50743 | 3NR_00345c | ENSG000003ZMY2     | FIM MYM Zinc fing protein-coding  |                                     |                          |                                   |                          |                  |
| chr13-20c  | 8.589606 | -0.8945  | 0.809016 | -1.10567 | 0.268871 | 0.981636 | chr13 | 20012393 | 20012592 | + | 0 | NA | intron    | (intron)   | (N                 | 52678 NR_14836c  | 26010     | Hs. 12032  | 2NM_01553c         | ENSG000003SPM2SL                  | DNAETP6 Spermatog protein-coding    |                          |                                   |                          |                  |
| chr2-20c   | 8.589606 | -0.8945  | 0.809016 | -1.10567 | 0.268871 | 0.981636 | chr2  | 2E+08    | 2E+08    | + | 0 | NA | intron    | (intron)   | (N                 | 22387 NM_00128c  | 28996     | Hs. 73141  | 7NM_02274c         | ENSG000003HIPK2                   | PROO593                             | homodome protein-coding  |                                   |                          |                  |
| chr7-1397  | 8.589606 | -0.8945  | 0.809016 | -1.10567 | 0.268871 | 0.981636 | chr7  | 1.4E+08  | 1.4E+08  | + | 0 | NA | intron    | (intron)   | (N                 | 69711 NM_00111c  | 147837    | Hs. 66351  | CNM_14527c         | ENSG000003ZNF563                  | -                                   | zinc fing protein-coding |                                   |                          |                  |
| chr19-12c  | 10.72462 | 0.804137 | 0.727367 | 1.105545 | 0.268924 | 0.981636 | chr19 | 12318576 | 12321684 | + | 0 | NA | intron    | (intron)   | (N                 | 13503 NM_14527c  | 64934     | Hs. 12560  | ENM_00101c         | ENSG000003C9orf152                | ba470J20                            | chromosom protein-coding |                                   |                          |                  |
| chr9-110c  | 8.622888 | -0.88948 | 0.804805 | -1.10521 | 0.269069 | 0.981636 | chr9  | 1.1E+08  | 1.1E+08  | + | 0 | NA | 3' UTR    | (3' UTR)   | (N                 | 36493 NM_00101c  | 401516    | Hs. 12560  | ENM_00101c         | ENSG000003MIR610                  | MIRN610 miRNA ncRNA                 |                          |                                   |                          |                  |
| chr11-28c  | 4.92224  | -1.17413 | 1.063048 | -1.1045  | 0.269378 | 0.981636 | chr11 | 28033618 | 28037048 | + | 0 | NA | intron    | (intron)   | (N                 | -21482 NR_030341 | 6814      | Hs. 64839  | 4NM_00141c         | ENSG000003EIF4B                   | EIF-4B PF eukaryot protein-coding   |                          |                                   |                          |                  |
| chr12-53c  | 4.92224  | -1.17413 | 1.063048 | -1.1045  | 0.269378 | 0.981636 | chr12 | 53012833 | 53013707 | + | 0 | NA | intron    | (intron)   | (N                 | 6814 NM_00133c   | 221143    | Hs. 26674  | NM_17492c          | ENSG000003EEF1AKMT1               | ESP13 N6 EEF1A lys protein-coding   |                          |                                   |                          |                  |
| chr13-207  | 4.92224  | -1.17413 | 1.063048 | -1.1045  | 0.269378 | 0.981636 | chr13 | 20794752 | 20795762 | + | 0 | NA | intron    | (intron)   | (N                 | -21296 NM_00131c | 10128     | Hs. 36808  | 4NM_13325c         | ENSG000003LRP3C                   | CLONE-23c                           | leucine i protein-coding |                                   |                          |                  |
| chr2-439c  | 4.92224  | -1.17413 | 1.063048 | -1.1045  | 0.269378 | 0.981636 | chr2  | 43969015 | 43969967 | + | 0 | NA | intron    | (intron)   | (N                 | 88042 NM_01461c  | 23200     | Hs. 47842  | 2NM_01461c         | ENSG000003ATP11B                  | ATP1F ATF ATPase p protein-coding   |                          |                                   |                          |                  |
| chr3-182c  | 4.92224  | -1.17413 | 1.063048 | -1.1045  | 0.269378 | 0.981636 | chr3  | 1.83E+08 | 1.83E+08 | + | 0 | NA | intron    | (intron)   | (N                 | 27981 NM_00134c  | 10983     | Hs. 51882  | 7NM_00683c         | ENSG000003CCNI                    | CCNI1 CYC cyclin I protein-coding   |                          |                                   |                          |                  |
| chr4-770c  | 4.92224  | -1.17413 | 1.063048 | -1.1045  | 0.269378 | 0.981636 | chr4  | 77046710 | 77047148 | + | 0 | NA | TTS       | (NM_C TTS) | (NM_C              | 27981 NM_00134c  | 3480      | Hs. 48734  | 1NM_00735c         | ENSG000003GNA12                   | NNX3 RMP G protein protein-coding   |                          |                                   |                          |                  |
| chr7-283c  | 4.92224  | -1.17413 | 1.063048 | -1.1045  | 0.269378 | 0.981636 | chr7  | 2893737  | 2841920  | + | 0 | NA | intron    | (intron)   | (N                 | 3480 NM_00735c   | 6482      | Hs. 37425  | 2NM_00303c         | ENSG000003ST3GAL1                 | Gal-1 Nac6S ST3 beta protein-coding |                          |                                   |                          |                  |
| chr8-133c  | 4.92224  | -1.17413 | 1.063048 | -1.1045  | 0.269378 | 0.981636 | chr8  | 1.34E+08 | 1.34E+08 | + | 0 | NA | intron    | (intron)   | (N                 | 56856 NM_00303c  | 9479      | Hs. 46307  | 4NM_00517c         | ENSG000003ATP6VOA1                | ATP6N1 AT ATPase H+ protein-coding  |                          |                                   |                          |                  |
| chr17-424  | 8.948285 | 0.870982 | 0.788873 | 1.104084 | 0.269557 | 0.981636 | chr17 | 42468194 | 42468521 | + | 0 | NA | intron    | (intron)   | (N                 | 10949 NM_00312c  | 6713      | Hs. 71465  | NR_00312c          | ENSG000003SQLE                    | -                                   | qualene protein-coding   |                                   |                          |                  |
| chr8-125c  | 8.948285 | 0.870982 | 0.788873 | 1.104084 | 0.269557 | 0.981636 | chr8  | 1.25E+08 | 1.25E+08 | + | 0 | NA | intron    | (intron)   | (N                 | 10949 NM_00312c  | 253827    | Hs. 33902  | 4NM_19808c         | ENSG000003MSRB3                   | DFNB74                              | methionin protein-coding |                                   |                          |                  |
| chr12-65c  | 9.914785 | -1.01269 | 0.91728  | -1.10401 | 0.269588 | 0.981636 | chr12 | 65309017 | 65309891 | + | 0 | NA | intron    | (intron)   | (N                 | 30467 NM_00119c  | 2821      | Hs. 46647  | 1NM_00017c         | ENSG000003GPI                     | AGN GPI glucose-C protein-coding    |                          |                                   |                          |                  |
| chr19-34c  | 6.914785 | -1.01269 | 0.91728  | -1.10401 | 0.269588 | 0.981636 | chr19 | 34320576 | 34321150 | + | 0 | NA | intron    | (intron)   | (N                 | -43877 NM_001184 | 407040    | NR_02961c  | ENSG000003MIR34A   | -                                 | microRNA ncRNA                      |                          |                                   |                          |                  |
| chr1-915c  | 6.665658 | 1.02816  | 0.931369 | 1.103924 | 0.269626 | 0.981636 | chr1  | 9157023  | 91571490 | + | 0 | NA | intron    | (intron)   | (N                 | -5479 NR_02961c  | 5817      | Hs. 17184  | 4NM_00650c         | ENSG000003PVR                     | CD155 HVE PVR cell protein-coding   |                          |                                   |                          |                  |
| chr19-44c  | 6.665658 | 1.02816  | 0.931369 | 1.103924 | 0.269626 | 0.981636 | chr19 | 44632046 | 44632245 | + | 0 | NA | intron    | (intron)   | (N                 | -11653 NM_00113c | 10056     | Hs. 47145  | 2NM_00568c         | ENSG000003FARSB                   | FARSLB PF phenylal protein-coding   |                          |                                   |                          |                  |
| chr2-222c  | 3.70118  | -1.39009 | 1.259308 | -1.10385 | 0.269656 | 0.981636 | chr2  | 2.23E+08 | 2.23E+08 | + | 0 | NA | intron    | (intron)   | (N                 | 65162 NR_130154  | 1056      | Hs. 47145  | 2NR_03993c         | ENSG000003MIR4777                 | -                                   | microRNA ncRNA           |                                   |                          |                  |
| chr2-231c  | 7.220952 | 0.970023 | 0.878957 | 1.103606 | 0.269764 | 0.981636 | chr2  | 2.31E+08 | 2.31E+08 | + | 0 | NA | intron    | (intron)   | (N                 | -69629 NR_03993c | 10141     | Hs. 17797  | 2NM_00575c         | ENSG000003LINC01587               | C4orf6 a c long intncRNA            |                          |                                   |                          |                  |
| chr4-557c  | 7.220952 | 0.970023 | 0.878957 | 1.103606 | 0.269764 | 0.981636 | chr4  | 5573642  | 5574272  | + | 0 | NA | intron    | (intron)   | (N                 | 48801 NR_126517  | 11163     | NR_13621c  | 1.05E+08           | 08                                | Hs. 64380                           | 1NR_13621c               | ENSG000003VCAN-AS1                | -                        | VCAN antincRNA   |
| chr5-8357  | 7.220952 | 0.970023 | 0.878957 | 1.103606 | 0.269764 | 0.981636 | chr5  | 83572794 | 83574161 | + | 0 | NA | intron    | (intron)   | (N                 | -11163 NR_13621c | 2878      | Hs. 38679  | 2NM_00208c         | ENSG000003GPX3                    | GPX-P GSE glutathic protein-coding  |                          |                                   |                          |                  |
| chr5-151c  | 7.220952 | 0.970023 | 0.878957 | 1.103606 | 0.269764 | 0.981636 | chr5  | 1.51E+08 | 1.51E+08 | + | 0 | NA | intron    | (intron)   | (N                 | 15230 NM_00132c  | 51622     | Hs. 53000  | CNM_01562c         | ENSG000003CCZ1                    | C7orf28A CCZ1 homc protein-coding   |                          |                                   |                          |                  |
| chr7-590c  | 7.220952 | 0.970023 | 0.878957 | 1.103606 | 0.269764 | 0.981636 | chr7  | 5906036  | 5907324  | + | 0 | NA | intron    | (intron)   | (N                 | 7947 NM_01562c   | 9819      | Hs. 72247  | 7NM_01477c         | ENSG000003TSC22D2                 | TILZ4a T TSC22 don protein-coding   |                          |                                   |                          |                  |
| chr3-1504  | 11.57163 | -0.7222  | 0.700087 | -1.10301 | 0.270024 | 0.981636 | chr3  | 1.5E+08  | 1.5E+08  | + | 0 | NA | intron    | (intron)   | (N                 | 4245 NM_00130c   | 23627     | NR_10672c  | 1.02E+08           | 08                                | NR_10672c                           | ENSG000003MIR6079        | -                                 | microRNA ncRNA           |                  |
| chr1-4381  | 4.888958 | -1.18359 | 1.07328  | -1.10278 | 0.270122 | 0.981636 | chr1  | 43814896 | 43815095 | + | 0 | NA | intron    | (intron)   | (N                 | -23627 NR_10672c | 24295     | NR_13872c  | 54879              | Hs. 20192                         | 1NM_01774c                          | ENSG000003ST7L           | -                                 | uncharacterncRNA         |                  |
| chr1-112c  | 4.888958 | -1.18359 | 1.07328  | -1.10278 | 0.270122 | 0.981636 | chr1  | 1.13E+08 | 1.13E+08 | + | 0 | NA | intron    | (intron)   | (N                 | 24295 NM_13872c  | 41831     | NR_11077c  | 1.02E+08           | 08                                | Hs. 43690                           | 2NR_11077c               | ENSG000003LOC101927               | -                        | uncharacterncRNA |
| chr18-107  | 4.888958 | -1.18359 | 1.07328  | -1.10278 | 0.270122 | 0.981636 | chr18 | 10703494 | 10704035 | + | 0 | NA | intron    | (intron)   | (N                 | 41831 NR_11077c  | 31376     | NR_00137c  | 5723               | Hs. 51265                         | 5NM_00457c                          | ENSG000003PSPH           | PSP PSPH phospho protein-coding   |                          |                  |
| chr7-561c  | 4.888958 | -1.18359 | 1.07328  | -1.10278 | 0.270122 | 0.981636 | chr7  | 56109338 | 56202099 | + | 0 | NA | intron    | (intron)   | (N                 | 31376 NM_00137c  | 374768    | Hs. 71059  | 9NM_19933c         | ENSG000003SPEM1                   | C17orf83                            | spermatoc protein-coding |                                   |                          |                  |
| chr17-741  | 8.400849 | 0.907834 | 0.823324 | 1.102645 | 0.270181 | 0.981636 | chr17 | 7414862  | 7415798  | + | 0 | NA | intron    | (intron)   | (N                 | -4994 NM_19933c  | 1300      | Hs. 52033  | 3NM_00049c         | ENSG000003COL10A1                 | -                                   | collagen protein-coding  |                                   |                          |                  |
| chr6-1161  | 8.400849 | 0.907834 | 0.823324 | 1.102645 | 0.270181 | 0.981636 | chr6  | 1.16E+08 | 1.16E+08 | + | 0 | NA | intron    | (intron)   | (N                 | 11277 NM_00049c  | 29563     | NR_00113c  | 5610               | Hs. 13143                         | 1NM_00275c                          | ENSG000003EIF2AK2        | EIF2AK1 F eukaryot protein-coding |                          |                  |
| chr2-3711  | 7.366534 | -0.95912 | 0.870051 | -1.10237 | 0.270302 | 0.981636 | chr2  | 37118060 | 37118459 | + | 0 | NA | intron    | (intron)   | (N                 | 29563 NM_00113c  | 39253     | NR_00128c  | 79745              | Hs. 12292                         | 7NM_02469c                          | ENSG000003CLIP4          | RNSL2                             | CAP-Gly c protein-coding |                  |
| chr2-291c  | 8.434131 | 0.910229 | 0.825758 | 1.102295 | 0.270334 | 0.981636 | chr2  | 291      |          |   |   |    |           |            |                    |                  |           |            |                    |                                   |                                     |                          |                                   |                          |                  |

|                     |          |          |          |          |          |       |          |          |   |      |                    |                   |                              |                      |                                     |
|---------------------|----------|----------|----------|----------|----------|-------|----------|----------|---|------|--------------------|-------------------|------------------------------|----------------------|-------------------------------------|
| chr19-407.6.007773  | 1.055163 | 0.96204  | 1.096798 | 0.27273  | 0.981636 | chr19 | 40711169 | 40711686 | + | 0 NA | intron (AluJo SIN  | 3692 NM_001142    | 79934 Hs. 130712NM_024876    | ENSG00000CQ8B        | ADCK4 NPF coenzyme protein-coding   |
| chr4-8454.6.007773  | 1.055163 | 0.96204  | 1.096798 | 0.27273  | 0.981636 | chr4  | 8454952  | 8455292  | + | 0 NA | intron (intron (N  | 14325 NM_00135C   | 152992 Hs. 566191NM_02495C   | ENSG00000TRMT44      | C4orf23 lncRNA methylprotein-coding |
| chr19-1015.6.675997 | -1.12215 | 1.023392 | -1.0965  | 0.272862 | 0.981636 | chr19 | 10130170 | 10130369 | + | 0 NA | IntergeniAluSx SIN | -10370 NM_00375E  | 8666 Hs. 529055NM_00375E     | ENSG00000EIF3G       | EIF3-P42 eukaryotiprotein-coding    |
| chr8-6711.6.69894   | 1.030843 | 0.940354 | 1.096229 | 0.272978 | 0.981636 | chr8  | 67112919 | 67113250 | + | 0 NA | intron (AluSc8 SI  | 29236 NM_001291   | 79848 Hs. 370147NM_02479C    | ENSG00000CSPPI       | CSPPI JBTSCentrosomeprotein-coding  |
| chr1-2431.12.93097  | 0.728425 | 0.664775 | 1.095747 | 0.273189 | 0.981636 | chr1  | 2431008  | 2.43E+08 | + | 0 NA | exon (NM exon (NM  | 63908 NM_01481E   | 9859 Hs. 533636NM_01481E     | ENSG00000CEP170      | FAM68A KATcentrosomeprotein-coding  |
| chr17-486.6.161028  | -1.04005 | 0.949322 | -1.09558 | 0.273265 | 0.981636 | chr17 | 48911341 | 48912218 | + | 0 NA | intron (intron (N  | -2796 NR_135674   | 1.05E+08 Hs. 655254NR_135674 | ENSG00000CLOC105371  | uncharacteractncRNA                 |
| chr17-591.6.161028  | -1.04005 | 0.949322 | -1.09558 | 0.273265 | 0.981636 | chr17 | 59069887 | 59070226 | + | 0 NA | intron (MER5B DN   | 36824 NR_148347   | 4591 Hs. 579079NM_015294     | ENSG00000TRIM37      | MUL POB1 tripartitiprotein-coding   |
| chr17-241.10.67377  | 0.796386 | 0.727911 | 1.094687 | 0.273654 | 0.981636 | chr17 | 24188150 | 24188722 | + | 0 NA | IntergeniALR/Alph  | 1665325 NM_00119C | 1E+08 Hs. 740188NM_00119C    | ENSG00000MTRNR2L1    | HNI  MT-NR2L1 protein-coding        |
| chr17-378.8.957993  | 0.879303 | 0.803344 | 1.094554 | 0.273712 | 0.981636 | chr17 | 37553404 | 37553857 | + | 0 NA | exon (NM exon (NM  | 55788 NM_08055C   | 11276 Hs. 594647NM_007247    | ENSG00000CSYNRG      | AP1GBP1 Synergina protein-coding    |
| chr15-285.6.999915  | 1.058183 | 0.966838 | 1.094478 | 0.273746 | 0.981636 | chr15 | 28289789 | 28290549 | + | 0 NA | intron (NLTR80A LI | 36824 NR_148347   | 8924 Hs. 434899NM_004667     | ENSG00000HERC2       | D15F37S1 HECT and protein-coding    |
| chr17-541.10.67377  | 0.796386 | 0.727911 | 1.094687 | 0.273772 | 0.981636 | chr17 | 24188150 | 24188722 | + | 0 NA | IntergeniALR/Alph  | 1665325 NM_00119C | 1E+08 Hs. 740188NM_00119C    | ENSG00000MTRNR2L1    | HNI  MT-NR2L1 protein-coding        |
| chr17-378.8.957993  | 0.879303 | 0.803344 | 1.094554 | 0.273712 | 0.981636 | chr17 | 37553404 | 37553857 | + | 0 NA | exon (NM exon (NM  | 55788 NM_08055C   | 11276 Hs. 594647NM_007247    | ENSG00000CSYNRG      | AP1GBP1 Synergina protein-coding    |
| chr15-285.6.999915  | 1.058183 | 0.966838 | 1.094478 | 0.273746 | 0.981636 | chr15 | 28289789 | 28290549 | + | 0 NA | intron (NLTR80A LI | 36824 NR_148347   | 8924 Hs. 434899NM_004667     | ENSG00000HERC2       | D15F37S1 HECT and protein-coding    |
| chr11-464.7.195528  | 0.964815 | 0.881579 | 1.094417 | 0.273772 | 0.981636 | chr11 | 46407829 | 46409668 | + | 0 NA | intron (intron (N  | -17080 NM_00136E  | 1132 Hs. 248100NM_000741     | ENSG00000CHRM4       | HM4 MAR cholinergeprotein-coding    |
| chr16-1617.1.95528  | 0.964815 | 0.881579 | 1.094417 | 0.273772 | 0.981636 | chr16 | 16170463 | 16174408 | + | 0 NA | intron (G-rich Lc  | 51036 NM_00107E   | 368 Hs. 442182NM_001171      | ENSG00000ABC6C       | ABC34 ARFATP bindiprotein-coding    |
| chr16-227.7.195528  | 0.964815 | 0.881579 | 1.094417 | 0.273772 | 0.981636 | chr16 | 22308875 | 22310428 | + | 0 NA | intron (intron (N  | 50364 NM_00125E   | 55718 Hs. 460298NM_01811E    | ENSG00000POLR3E      | RPC5 SIN RNA polyprotein-coding     |
| chr17-183.7.195528  | 0.964815 | 0.881579 | 1.094417 | 0.273772 | 0.981636 | chr17 | 1879746  | 1880993  | + | 0 NA | intron (intron (N  | 12668 NM_001007   | 6117 Hs. 461922NM_00294E     | ENSG00000CPRA1       | HSSB MSTCreplicatiprotein-coding    |
| chr19-347.7.195528  | 0.964815 | 0.881579 | 1.094417 | 0.273772 | 0.981636 | chr19 | 34759536 | 34761559 | + | 0 NA | exon (NM exon (NM  | 12668 NM_001007   | 148103 Hs. 590961NM_001007   | ENSG00000ZNF599      | zinc fingprotein-coding             |
| chr19-365.7.195528  | 0.964815 | 0.881579 | 1.094417 | 0.273772 | 0.981636 | chr19 | 36980532 | 36980765 | + | 0 NA | intron (MCR77B LI  | 64316 NM_001204   | 374900 Hs. 404222NM_19853E   | ENSG00000ZNF568      | ZFP568 zinc fingprotein-coding      |
| chr19-527.7.195528  | 0.964815 | 0.881579 | 1.094417 | 0.273772 | 0.981636 | chr19 | 52390114 | 52390800 | + | 0 NA | intron (intron (N  | 7300 NR_12534E    | 1.03E+08 Hs. 188688NR_12534E | ENSG00000ZNF528-AS-  | ZNF528 arncRNA                      |
| chr4-1476.7.195528  | 0.964815 | 0.881579 | 1.094417 | 0.273772 | 0.981636 | chr4  | 1.48E+08 | 1.48E+08 | + | 0 NA | intron (AluJb SIN  | 4826 NM_138364    | 90826 Hs. 591692NM_138364    | ENSG00000PRMT9       | PRMT10 protein eprotein-coding      |
| chr9-1337.7.195528  | 0.964815 | 0.881579 | 1.094417 | 0.273772 | 0.981636 | chr9  | 1.33E+08 | 1.33E+08 | + | 0 NA | intron (intron (N  | -7696 NR_106937   | 1.02E+08 NR_106937           | ENSG00000MIR6877     | hsa-mir-6microRNA ncRNA             |
| chr1-7795.7.3841    | -0.95002 | 0.868218 | -1.09422 | 0.273858 | 0.981636 | chr1  | 77934995 | 77940286 | + | 0 NA | intron (AluSx1 SI  | 41432 NR_13015E   | 8880 Hs. 567388NM_00390C     | ENSG00000FUBP1       | FBP FUBP far upstrprotein-coding    |
| chr14-582.7.3841    | -0.95002 | 0.868218 | -1.09422 | 0.273858 | 0.981636 | chr14 | 58247843 | 58249899 | + | 0 NA | intron (AluSx SIN  | 4028 NM_00278E    | 5684 Hs. 558799NM_00278E     | ENSG00000PSMA3       | H8 P5C3 proteasoneprotein-coding    |
| chr17-496.7.3841    | -0.95002 | 0.868218 | -1.09422 | 0.273858 | 0.981636 | chr17 | 4969821  | 4970252  | + | 0 NA | promoter-promoter- | 114 NR_10692E     | 1.02E+08 NR_10692E           | ENSG00000MIR6865     | hsa-mir-6microRNA ncRNA             |
| chr2-1891.7.3841    | -0.95002 | 0.868218 | -1.09422 | 0.273858 | 0.981636 | chr2  | 1.89E+08 | 1.89E+08 | + | 0 NA | intron (intron (N  | -15534 NR_03607E  | 1E+08 NR_03607E              | ENSG00000MIR3129     | mir-3129 microRNA ncRNA             |
| chr3-1505.7.3841    | -0.95002 | 0.868218 | -1.09422 | 0.273858 | 0.981636 | chr3  | 1.51E+08 | 1.51E+08 | + | 0 NA | intron (intron (N  | 25890 NM_03202E   | 83939 Hs. 655782NM_03202E    | ENSG00000EIF2A       | CDAO2 EIFeukaryotiprotein-coding    |
| chr4-9445.7.3841    | -0.95002 | 0.868218 | -1.09422 | 0.273858 | 0.981636 | chr4  | 94456071 | 94456980 | + | 0 NA | exon (NM exon (NM  | 4583 NM_00125E    | 10611 Hs. 480311NM_006457    | ENSG00000PDLIM5      | ENH ENH1 PDZ and Iprotein-coding    |
| chr8-1244.7.3841    | -0.95002 | 0.868218 | -1.09422 | 0.273858 | 0.981636 | chr8  | 1.24E+08 | 1.24E+08 | + | 0 NA | exon (NM exon (NM  | 12496 NM_00721E   | 11236 Hs. 744151NM_00721E    | ENSG00000RNF139      | HRCAL RCFring fingprotein-coding    |
| chrX-1558.7.3841    | -0.95002 | 0.868218 | -1.09422 | 0.273858 | 0.981636 | chrX  | 1.56E+08 | 1.56E+08 | + | 0 NA | intron (NL2b LINE  | 8745 NM_00118E    | 6845 Hs. 241161NM_00563E     | ENSG00000VAMP7       | SYB1 TI-vesicle eprotein-coding     |
| chr3-474C.8.57019   | -0.91383 | 0.835303 | -1.09401 | 0.273949 | 0.981636 | chr3  | 47408468 | 47409172 | + | 0 NA | exon (NM exon (NM  | 27799 NM_001304   | 25930 Hs. 25524 NM_01546E    | ENSG00000PTPN23      | HD-PTP HE protein tprotein-coding   |
| chrX-1436.10.11062  | 0.826338 | 0.755339 | 1.093996 | 0.273957 | 0.981636 | chrX  | 1436589  | 1437217  | + | 0 NA | intron (MLT1B LTF  | 16006 NM_00117E   | 8623 Hs. 533514NM_00419E     | ENSG00000ASMTL1      | ASMTLX AS acetylser protein-coding  |
| chr1-270C.6.15317   | -1.03819 | 0.94924  | -1.09371 | 0.274082 | 0.981636 | chr1  | 27000060 | 27001170 | + | 0 NA | 3' UTR (3' UTR (N  | 6923 NM_00101E    | 388610 Hs. 355744NM_00101E   | ENSG00000TRNP1       | Clorf225 TMF1 regprotein-coding     |
| chr10-156.6.15317   | -1.03819 | 0.94924  | -1.09371 | 0.274082 | 0.981636 | chr10 | 15659712 | 15660170 | + | 0 NA | intron (MLT1C LTF  | 59981 NM_00363E   | 8516 Hs. 171311NM_00363E     | ENSG00000ITGAS       | integrin protein-coding             |
| chr12-274.6.15317   | -1.03819 | 0.94924  | -1.09371 | 0.274082 | 0.981636 | chr12 | 27401647 | 27405387 | + | 0 NA | exon (NM exon (NM  | 43117 NR_10997E   | 1.02E+08 Hs. 434262NR_10997E | ENSG00000ARNTL2-AS-  | ARNTL2 arncRNA                      |
| chr12-462.6.15317   | -1.03819 | 0.94924  | -1.09371 | 0.274082 | 0.981636 | chr12 | 46222764 | 46224720 | + | 0 NA | intron (intron (N  | 42774 NR_00127E   | 81539 Hs. 53377C             | ENSG00000SLC38A1     | ATA1 NAT2solute eprotein-coding     |
| chr13-727.6.15317   | -1.03819 | 0.94924  | -1.09371 | 0.274082 | 0.981636 | chr13 | 72743614 | 72744538 | + | 0 NA | intron (intron (N  | 16153 NM_00128E   | 79866 Hs. 643464NM_02480E    | ENSG00000CBORA       | C13orf34 BORA aurcprotein-coding    |
| chr15-627.6.15317   | -1.03819 | 0.94924  | -1.09371 | 0.274082 | 0.981636 | chr15 | 62766673 | 62766949 | + | 0 NA | intron (intron (N  | -57146 NR_02979E  | 406965 NR_02979E             | ENSG00000MIR190A     | MIR190 MimicroRNA ncRNA             |
| chr17-318.6.15317   | -1.03819 | 0.94924  | -1.09371 | 0.274082 | 0.981636 | chr17 | 31855753 | 31856656 | + | 0 NA | intron (AluSx SIN  | 2758 NM_00133C    | 55352 Hs. 46272E             | ENSG00000COPRS       | C17orf79 coordinatprotein-coding    |
| chr18-471.6.15317   | -1.03819 | 0.94924  | -1.09371 | 0.274082 | 0.981636 | chr18 | 47112188 | 47112876 | + | 0 NA | intron (intron (N  | 37968 NM_00131E   | 84064 Hs. 465041NM_032124    | ENSG00000CHDHD2      | 3110052NChaloacid protein-coding    |
| chr19-492.6.15317   | -1.03819 | 0.94924  | -1.09371 | 0.274082 | 0.981636 | chr19 | 4929487  | 4933361  | + | 0 NA | intron (AluSx1 SI  | -1263 NR_03990E   | 1.01E+08 NR_03990E           | ENSG00000MIR4747     | mir-4747 microRNA ncRNA             |
| chr2-4897.6.15317   | -1.03819 | 0.94924  | -1.09371 | 0.274082 | 0.981636 | chr2  | 84977224 | 84978004 | + | 0 NA | intron (AluJb SIN  | 6452 NM_02012E    | 56888 Hs. 65496E             | ENSG00000KCMF1       | DEBT91 Fipotassiumprotein-coding    |
| chr2-201C.6.15317   | -1.03819 | 0.94924  | -1.09371 | 0.274082 | 0.981636 | chr2  | 2.01E+08 | 2.01E+08 | + | 0 NA | intron (intron (N  | 41474 NM_00132I   | 285172 Hs. 24701 NM_17382E   | ENSG00000FAM126B     | HYCC2 family wiprotein-coding       |
| chr21-461.6.15317   | -1.03819 | 0.94924  | -1.09371 | 0.274082 | 0.981636 | chr21 | 46106404 | 46109652 | + | 0 NA | intron (intron (N  | 9909 NM_05817E    | 1292 Hs. 40206E              | ENSG00000CCL6A2      | BTHLM1 PFcollagen protein-coding    |
| chr5-7766.6.15317   | -1.03819 | 0.94924  | -1.09371 | 0.274082 | 0.981636 | chr5  | 77689798 | 77690685 | + | 0 NA | TTS (NM_TTS (NM_C  | -51544 NR_02310E  | 23440 Hs. 202247NM_03210E    | ENSG00000COTP        | orthopediprotein-coding             |
| chr8-2336.6.15317   | -1.03819 | 0.94924  | -1.09371 | 0.274082 | 0.981636 | chr8  | 23362046 | 23365198 | + | 0 NA | non-codiron-codir  | 27414 NR_03832E   | 1.01E+08 Hs. 661133NR_03832E | ENSG00000CLOC100507- | uncharacteractncRNA                 |
| chr8-1233.6.15317   | -1.03819 | 0.94924  | -1.09371 | 0.274082 | 0.981636 | chr8  | 1.23E+08 | 1.23E+08 | + | 0 NA | intron (AluSx SIN  | -2647 NR_03751E   | 1.01E+08 NR_03751E           | ENSG00000MIR548A1    | microRNA ncRNA                      |
| chr9-3107.6.15317   | -1.03819 | 0.94924  | -1.09371 | 0.274082 | 0.981636 | chr9  | 36078734 | 36079821 | + | 0 NA | intron (intron (N  | 42364 NM_00131E   | 8434 Hs. 38891E              | ENSG00000CRECK       | ST15 reversiorprotein-coding        |
| chr9-1168.6.15317   | -1.03819 | 0.94924  | -1.09371 | 0.274082 | 0.981636 | chr9  | 1.11E+08 | 1.11E+08 | + | 0 NA | IntergeniIntergeni | 141956 NM_00136E  | 4593 Hs. 52165E              | ENSG00000MUSK        | CMS9 FADSmuscle asprotein-coding    |
| chr1-1602.8.930719  | 0.864782 | 0.790735 | 1.093644 | 0.274111 | 0.981636 | chr1  | 1.6E+08  | 1.6E+08  | + | 0 NA | intron (AluSc SIN  | -7187 NR_14761E   | 1E+08 Hs. 65764E             | ENSG00000CLOC100287- | uncharacteractncRNA                 |
| chr1-2078.8.930719  | 0.864782 | 0.790735 | 1.093644 | 0.274111 | 0.981636 | chr1  | 2.08E+08 | 2.08E+08 | + | 0 NA | intron (intron (N  | -1927 NR_02951E   | 407025 NR_02951E             | ENSG00000MIR29B2     | MIRN29B2 microRNA ncRNA             |
| chr13-405.8.930719  | 0.864782 | 0.790735 | 1.093644 | 0.274111 |          |       |          |          |   |      |                    |                   |                              |                      |                                     |



|           |          |          |          |          |          |          |       |          |          |   |   |    |                     |        |           |          |                       |                    |                   |                           |                       |                        |                |
|-----------|----------|----------|----------|----------|----------|----------|-------|----------|----------|---|---|----|---------------------|--------|-----------|----------|-----------------------|--------------------|-------------------|---------------------------|-----------------------|------------------------|----------------|
| chr10-145 | 6.145312 | -1.03631 | 0.952558 | -1.08793 | 0.276628 | 0.981636 | chr10 | 14525373 | 14528790 | + | 0 | NA | intron (AluY SINE   | 5633   | NM_00132C | 83641    | Hs.44631ENM_031455    | ENSG00000CFAM107B  | C10orf45          | family wiprotein-coding   |                       |                        |                |
| chr10-146 | 6.145312 | -1.03631 | 0.952558 | -1.08793 | 0.276628 | 0.981636 | chr10 | 14596716 | 14599100 | + | 0 | NA | intron (AluSz SIN   | 6493   | NM_001282 | 83641    | Hs.44631ENM_031455    | ENSG00000CFAM107B  | C10orf45          | family wiprotein-coding   |                       |                        |                |
| chr12-502 | 6.145312 | -1.03631 | 0.952558 | -1.08793 | 0.276628 | 0.981636 | chr12 | 50210335 | 50213242 | + | 0 | NA | intron (AC)n Sin    | -10255 | NM_001243 | 51474    | Hs.52541ENM_016357    | ENSG00000CLIM1A1   | EPLIN LDLIM       | domain protein-coding     |                       |                        |                |
| chr13-476 | 6.145312 | -1.03631 | 0.952558 | -1.08793 | 0.276628 | 0.981636 | chr13 | 47956907 | 47962339 | + | 0 | NA | intron (LOR1-int)   | -27392 | NR_047492 | 1.01E+08 | Hs.66097ENR_047492    | ENSG00000LINC00562 | long intncRNA     |                           |                       |                        |                |
| chr13-111 | 6.145312 | -1.03631 | 0.952558 | -1.08793 | 0.276628 | 0.981636 | chr13 | 1.1E+08  | 1.1E+08  | + | 0 | NA | intron (intron (N   | 43768  | NM_001267 | 1.01E+08 | Hs.64003ENM_001267044 | COL4A2-AS-         | COL4A2            | ar protein-coding         |                       |                        |                |
| chr14-527 | 6.145312 | -1.03631 | 0.952558 | -1.08793 | 0.276628 | 0.981636 | chr14 | 52779866 | 52782586 | + | 0 | NA | intron (intron (N   | 10381  | NM_198066 | 64841    | Hs.47802ENM_198066    | ENSG00000GNPNAT1   | GNAI1 GNP         | glucosamin protein-coding |                       |                        |                |
| chr14-106 | 6.145312 | -1.03631 | 0.952558 | -1.08793 | 0.276628 | 0.981636 | chr14 | 1.01E+08 | 1.01E+08 | + | 0 | NA | promoter-promoter-  | -635   | NR_003233 | 767565   | NR_003233             | ENSG00000SNORD113- | 14q(1-5)          | small ncnRNA              |                       |                        |                |
| chr17-625 | 6.145312 | -1.03631 | 0.952558 | -1.08793 | 0.276628 | 0.981636 | chr17 | 62568586 | 62569081 | + | 0 | NA | intron (AluSx SI    | -58837 | NR_006035 | 9902     | Hs.7835               | NM_006035          | ENSG00000MRC2     | CD280                     | CLF                   | mannose protein-coding |                |
| chr2-331  | 6.145312 | -1.03631 | 0.952558 | -1.08793 | 0.276628 | 0.981636 | chr2  | 33155131 | 33156388 | + | 0 | NA | intron (intron (N   | 21162  | NM_001166 | 4052     | Hs.61931ENM_000627    | ENSG00000CLTBP1    |                   | latent tr protein-coding  |                       |                        |                |
| chr2-132  | 6.145312 | -1.03631 | 0.952558 | -1.08793 | 0.276628 | 0.981636 | chr2  | 1.33E+08 | 1.33E+08 | + | 0 | NA | intron (intron (N   | 11614  | NM_001321 | 116372   | Hs.43239ENM_144586    | ENSG00000LYPD1     | LYPDC1 PF         | LY6 PLAUF                 | protein-coding        |                        |                |
| chr2-1527 | 6.145312 | -1.03631 | 0.952558 | -1.08793 | 0.276628 | 0.981636 | chr2  | 1.53E+08 | 1.53E+08 | + | 0 | NA | intron (HERV1 IOF   | 15600  | NM_001365 | 55660    | Hs.64358CNM_017892    | ENSG00000PRPF40A   |                   | FBP-11 FF                 | pre-mRNA              | protein-coding         |                |
| chr3-1116 | 6.145312 | -1.03631 | 0.952558 | -1.08793 | 0.276628 | 0.981636 | chr3  | 11166757 | 11167770 | + | 0 | NA | intron (intron (N   | 12770  | NM_001098 | 3269     | Hs.1570               | NM_000861          | ENSG00000CHRH1    | H1-R H1R                  | histamine             | protein-coding         |                |
| chr3-502  | 6.145312 | -1.03631 | 0.952558 | -1.08793 | 0.276628 | 0.981636 | chr3  | 50239950 | 50240469 | + | 0 | NA | intron (intron (N   | 3905   | NM_001282 | 2771     | Hs.77269              | NM_002070          | ENSG00000GNAI2    | GIP GNAI2                 | G                     | protein-coding         |                |
| chr3-1586 | 6.145312 | -1.03631 | 0.952558 | -1.08793 | 0.276628 | 0.981636 | chr3  | 1.59E+08 | 1.59E+08 | + | 0 | NA | intron (intron (N   | 14042  | NM_020165 | 56925    | Hs.478067             | NM_020165          | ENSG00000CLXN     | ECI TCI                   | unchar protein-coding |                        |                |
| chr4-1196 | 6.145312 | -1.03631 | 0.952558 | -1.08793 | 0.276628 | 0.981636 | chr4  | 1196736  | 1197590  | + | 0 | NA | non-codiron-codir   | 11799  | NR_024565 | 1E+08    | Hs.302962             | NR_024569          | LOC100130         |                           | uncharactncRNA        |                        |                |
| chr7-1346 | 6.145312 | -1.03631 | 0.952558 | -1.08793 | 0.276628 | 0.981636 | chr7  | 1.35E+08 | 1.35E+08 | + | 0 | NA | intron (intron (N   | 39191  | NM_033144 | 800      | Hs.490203             | NM_004342          | ENSG00000CALD1    | CDM H-CAI                 | caldesmon             | protein-coding         |                |
| chr9-981  | 6.145312 | -1.03631 | 0.952558 | -1.08793 | 0.276628 | 0.981636 | chr9  | 98116097 | 98116381 | + | 0 | NA | intron (AluSz SIN   | 2983   | NM_014788 | 9830     | Hs.575631             | NM_014788          | ENSG00000TRIM14   |                           | tripartit             | protein-coding         |                |
| chr1-1212 | 6.22881  | 0.967492 | 0.889466 | 1.087722 | 0.276718 | 0.981636 | chr1  | 11203865 | 11204695 | + | 0 | NA | intron (intron (N   | 14925  | NM_021146 | 10218    | Hs.14653ENM_021146    | ENSG00000ANGPTL7   | AngX CDT          | angiopoie                 | protein-coding        |                        |                |
| chr1-1565 | 6.22881  | 0.967492 | 0.889466 | 1.087722 | 0.276718 | 0.981636 | chr1  | 1.57E+08 | 1.57E+08 | + | 0 | NA | intron (intron (N   | -33194 | NR_030527 | 768220   | NR_030527             | ENSG00000MIR765    | MIRN765           | l                         | microRNA              | ncRNA                  |                |
| chr15-655 | 6.22881  | 0.967492 | 0.889466 | 1.087722 | 0.276718 | 0.981636 | chr15 | 65911387 | 65911809 | + | 0 | NA | intron (AluSc SIN   | 42107  | NM_001206 | 8766     | Hs.321541             | NM_004665          | ENSG00000CRAB1A   | YL8                       | RAB11A                | n                      | protein-coding |
| chr19-425 | 6.22881  | 0.967492 | 0.889466 | 1.087722 | 0.276718 | 0.981636 | chr19 | 42336611 | 42337141 | + | 0 | NA | exon (NM exon (NM   | 11241  | NM_001271 | 1954     | Hs.13248ENM_001411    | ENSG00000MEGF8     | C19orf49          | l                         | multiple              | protein-coding         |                |
| chr22-502 | 6.22881  | 0.967492 | 0.889466 | 1.087722 | 0.276718 | 0.981636 | chr22 | 50247665 | 50248016 | + | 0 | NA | intron (intron (N   | -2817  | NM_020461 | 85378    | Hs.336431             | NM_020461          | ENSG00000TUBGCP6  | GCP-6 GCF                 | tubulin               | protein-coding         |                |
| chr1-666  | 7.142807 | -0.69594 | 0.640046 | -1.08733 | 0.276892 | 0.981636 | chr1  | 66630170 | 66630425 | + | 0 | NA | intron (intron (N   | 1857   | NR_030606 | 1E+08    | NR_030606             | ENSG00000MIR3117   | mir-3117          | microRNA                  | ncRNA                 |                        |                |
| chr1-466  | 7.142807 | -0.69594 | 0.640046 | -1.08733 | 0.276892 | 0.981636 | chr1  | 46608473 | 46608684 | + | 0 | NA | 3' UTR (3' UTR (N   | -4310  | NR_024176 | 8569     | Hs.371594             | NM_003684          | ENSG00000MKNK1    | MNK1                      | MAPK                  | inte                   | protein-coding |
| chr1-7797 | 7.376242 | -0.94841 | 0.872264 | -1.08733 | 0.276906 | 0.981636 | chr1  | 77973972 | 77975269 | + | 0 | NA | intron (intron (N   | 4452   | NR_130152 | 8880     | Hs.56738CNM_003902    | ENSG00000FUBP1     | FBP FUBP          | far                       | upstr                 | protein-coding         |                |
| chr12-647 | 7.376242 | -0.94841 | 0.872264 | -1.08733 | 0.276906 | 0.981636 | chr12 | 64075157 | 64075812 | + | 0 | NA | intron (MER9a2 LI   | 146812 | NM_00130C | 144577   | Hs.444671             | NM_15244C          | ENSG00000C12orf66 |                           | chromoson             | protein-coding         |                |
| chr12-797 | 7.376242 | -0.94841 | 0.872264 | -1.08733 | 0.276906 | 0.981636 | chr12 | 79789813 | 79791470 | + | 0 | NA | intron (intron (N   | -99544 | NM_001354 | 5074     | Hs.64313CNM_002582    | ENSG00000PAWR      | PAR4 Par          | pro-apopt                 | protein-coding        |                        |                |
| chr12-112 | 7.376242 | -0.94841 | 0.872264 | -1.08733 | 0.276906 | 0.981636 | chr12 | 1.12E+08 | 1.12E+08 | + | 0 | NA | intron (AluSg SIN   | 23725  | NM_024953 | 80018    | Hs.530941             | NM_024953          | ENSG00000NAA25    | C12orf30                  | N(alpha)              | protein-coding         |                |
| chr16-868 | 7.376242 | -0.94841 | 0.872264 | -1.08733 | 0.276906 | 0.981636 | chr16 | 88390284 | 88390518 | + | 0 | NA | IntergeniIntergeni  | -37070 | NM_001367 | 84627    | Hs.54925              | NM_001127          | ENSG00000ZNF469   | BKAS BCSI                 | zinc                  | finger                 | protein-coding |
| chr9-1367 | 7.376242 | -0.94841 | 0.872264 | -1.08733 | 0.276906 | 0.981636 | chr9  | 1.37E+08 | 1.37E+08 | + | 0 | NA | intron (MER4E LTF   | -2308  | NR_024588 | 1E+08    | Hs.734812             | NR_024588          | ENSG00000CCDC183  | KIAA1984                  | CCDC183               | ancRNA                 |                |
| chr10-10C | 8.57389  | -0.89176 | 0.820198 | -1.08726 | 0.276924 | 0.981636 | chr10 | 1E+08    | 1E+08    | + | 0 | NA | intron (intron (N   | 7626   | NM_001278 | 1147     | Hs.19899ENM_001278    | ENSG00000CHUK      | IKKBA IKK         | component                 | protein-coding        |                        |                |
| chr14-10  | 10.35641 | -0.8039  | 0.739423 | -1.0872  | 0.276949 | 0.981636 | chr14 | 1.01E+08 | 1.01E+08 | + | 0 | NA | TTS (NR_C TTS (NR_C | 159    | NR_029863 | 442915   | NR_029863             | ENSG00000MIR370    | MIRN370           | l                         | microRNA              | ncRNA                  |                |
| chr18-957 | 10.35641 | -0.8039  | 0.739423 | -1.0872  | 0.276949 | 0.981636 | chr18 | 9577334  | 9577533  | + | 0 | NA | intron (AluJb SIN   | 37126  | NR_052003 | 9989     | Hs.74323ENM_005134    | ENSG00000PPP4R1    | MEG1 PP4          | protein                   | protein-coding        |                        |                |
| chr17-497 | 10.3407  | -0.80155 | 0.737271 | -1.08718 | 0.276957 | 0.981636 | chr17 | 49705433 | 49705762 | + | 0 | NA | intron (intron (N   | 2367   | NM_001278 | 10237    | Hs.15407ENM_005827    | ENSG00000SLC35B1   | UGTREL1           | solute                    | protein-coding        |                        |                |
| chr9-1307 | 10.3407  | -0.80155 | 0.737271 | -1.08718 | 0.276957 | 0.981636 | chr9  | 1.31E+08 | 1.31E+08 | + | 0 | NA | non-codiron-codir   | -9749  | NM_007313 | 25       | Hs.43104ENM_005157    | ENSG00000ABL1      | ABL CHDS          | ABL                       | protc                 | protein-coding         |                |
| chr8-4802 | 6.176744 | -1.0438  | 0.960108 | -1.08717 | 0.276963 | 0.981636 | chr8  | 48021473 | 48022160 | + | 0 | NA | intron (AluSx SIN   | 13385  | NM_00335C | 7336     | Hs.49169ENM_00335C    | ENSG00000UBE2V2    | BDVIT1 DE         | ubiquitir                 | protein-coding        |                        |                |
| chr1-2242 | 7.154389 | 0.964451 | 0.887177 | 1.087101 | 0.276992 | 0.981636 | chr1  | 2.24E+08 | 2.24E+08 | + | 0 | NA | intron (intron (N   | 16467  | NR_110668 | 1.02E+08 | Hs.71012ENR_110668    | ENSG00000LOC101927 |                   | uncharactncRNA            |                       |                        |                |
| chr12-102 | 4.947664 | -1.16236 | 1.069371 | -1.08696 | 0.277056 | 0.981636 | chr12 | 1.02E+08 | 1.02E+08 | + | 0 | NA | intron (intron (N   | 10622  | NM_016052 | 51019    | Hs.405692             | NM_016052          | ENSG00000WASHC3   | CCDC53                    | C                     | WASH                   | protein-coding |
| chr2-112  | 4.947664 | -1.16236 | 1.069371 | -1.08696 | 0.277056 | 0.981636 | chr2  | 1.13E+08 | 1.13E+08 | + | 0 | NA | 3' UTR (3' UTR (N   | -7906  | NM_001304 | 84269    | Hs.375707             | NM_03230C          | ENSG00000CHCHD5   | CDorf9                    | C                     | coiled-co              | protein-coding |
| chr2-2332 | 4.947664 | -1.16236 | 1.069371 | -1.08696 | 0.277056 | 0.981636 | chr2  | 2.33E+08 | 2.33E+08 | + | 0 | NA | promoter-promoter-  | -257   | NR_00300C | 677772   | Hs.689637             | NR_00300C          | ENSG00000SCARNA6  | U88                       | small                 | Ca                     | ncRNA          |
| chr5-1691 | 10.30557 | -0.81471 | 0.749735 | -1.08666 | 0.277185 | 0.981636 | chr5  | 16915355 | 16915877 | + | 0 | NA | intron (intron (N   | 20672  | NM_012334 | 4651     | Hs.48172CNM_012334    | ENSG00000MYO10     |                   | myosin X                  | protein-coding        |                        |                |
| chr1-1247 | 28.95601 | 0.54905  | 0.505494 | 1.086165 | 0.277406 | 0.981636 | chr1  | 1.25E+08 | 1.25E+08 | + | 0 | NA | IntergeniALR/Alphe  | 321421 | NR_00395E | 647121   | Hs.697682             | NR_00395E          | ENSG00000EMB1P1   |                           | embigin               | psudo                  |                |
| chr8-3346 | 5.401632 | 1.123252 | 1.034475 | 1.085818 | 0.277559 | 0.981636 | chr8  | 33460034 | 33460233 | + | 0 | NA | intron (AluSx1 SI   | 13013  | NM_032664 | 84750    | Hs.45871ENM_032664    | ENSG00000FUT10     | FUCTX             | fucosyltr                 | protein-coding        |                        |                |
| chr1-1465 | 10.62477 | 0.797986 | 0.735517 | 1.084932 | 0.277952 | 0.981636 | chr1  | 1.47E+08 | 1.47E+08 | + | 0 | NA | exon (NM exon (NM   | 37208  | NM_001278 | 149013   | Hs.666981             | NM_001278          | ENSG00000NBPF12   | COAS1 K1                  | NBPF                  | memt                   | protein-coding |
| chr1-1695 | 8.938577 | 0.862796 | 0.795529 | 1.084557 | 0.278118 | 0.981636 | chr1  | 1.69E+08 | 1.69E+08 | + | 0 | NA | intron (PABL_A-ir   | 22961  | NM_00132C | 8548     | Hs.13074ENM_003666    | ENSG00000BLZF1     | COLG1N            | 4E                        | basic                 | let                    | protein-coding |
| chr15-748 | 8.938577 | 0.862796 | 0.795529 | 1.084557 | 0.278118 | 0.981636 | chr15 | 74892770 | 74893215 | + | 0 | NA | intron (intron (N   | 2950   | NM_002433 | 4351     | Hs.75694              | NM_002433          | ENSG00000MPL1     | GDLB PMI                  | mannose               | protein-coding         |                |
| chr17-288 | 8.938577 | 0.862796 | 0.795529 | 1.084557 | 0.278118 | 0.981636 | chr17 | 28833097 | 28833757 | + | 0 | NA | intron (intron (N   | 11731  | NM_001321 | 9703     | Hs.151761             | NM_01468C          | ENSG00000KIAA0100 | BCOX BCOX                 | KIAA0100              | protein-coding         |                |
| chr19-21F | 8.938577 | 0.862796 | 0.795529 | 1.084557 | 0.278118 | 0.981636 | chr19 | 21528543 | 21537791 | + | 0 | NA | intron (L1M3 LINE   | 27565  | NM_00134E | 353088   | Hs.572567             | NM_001001          | ENSG00000ZNF429   |                           | zinc                  | finger                 | protein-coding |
| chr1-1656 | 5.956925 | 1.042914 | 0.96166  | 1.084493 | 0.278146 | 0.981636 | chr1  | 1.66E+08 | 1.66E+08 | + | 0 | NA | intron (MTR SINE    | 17623  | NM_004528 | 4259     | Hs.191734             |                    |                   |                           |                       |                        |                |



|                    |          |          |          |          |          |       |          |          |   |      |                     |                   |          |           |                     |                    |                              |       |
|--------------------|----------|----------|----------|----------|----------|-------|----------|----------|---|------|---------------------|-------------------|----------|-----------|---------------------|--------------------|------------------------------|-------|
| chr22-28 7.203386  | 0.962205 | 0.892133 | 1.078544 | 0.280791 | 0.981636 | chr22 | 28061478 | 28061740 | + | 0 NA | intron (NLIPI1 LINE | -140997 NR_036166 | 1E+08    | NR_036166 | ENSG000002MIR3199-1 | mir-3199           | microRNA                     | ncRNA |
| chr9-127 7.203386  | 0.962205 | 0.892133 | 1.078544 | 0.280791 | 0.981636 | chr9  | 1.28E+08 | 1.28E+08 | + | 0 NA | promoter-promoter-  | -83 NR_037473     | 1.01E+08 | NR_037473 | ENSG000002MIR3911   | mir-3911           | microRNA                     | ncRNA |
| chr22-20 4.743746  | 1.172159 | 1.086905 | 1.078437 | 0.280839 | 0.981636 | chr22 | 20040490 | 20041353 | + | 0 NA | intron (Nintron (N  | 7782 NR_029706    | 406961   | NR_029706 | ENSG000002MIR185    | MIRN185            | microRNA                     | ncRNA |
| chr14-451 4.873242 | -1.17922 | 1.093537 | -1.07835 | 0.280877 | 0.981636 | chr14 | 45112263 | 45112915 | + | 0 NA | intron (Nintron (N  | 1714 NR_003691    | 1E+08    | NR_003691 | ENSG000002SNORD127  | small nucleosRNA   |                              |       |
| chr17-161 4.873242 | -1.17922 | 1.093537 | -1.07835 | 0.280877 | 0.981636 | chr17 | 16346686 | 16347560 | + | 0 NA | intron (NAluJb SIN  | 6346 NR_181716    | 201161   | NR_181716 | ENSG000002CENPV     | 3110013HC          | transmembrane protein-coding |       |
| chr20-944 7.776245 | 0.920254 | 0.853448 | 1.078277 | 0.28091  | 0.981636 | chr20 | 9447118  | 9447476  | + | 0 NA | intron (NMLT1H LTF  | -67061 NM_001199  | 24141    | NR_012261 | ENSG000002CLAMP5    | BAD-LAMP           | lysosomal protein-coding     |       |
| chr2-545 7.317536  | -0.96229 | 0.892641 | -1.07802 | 0.281203 | 0.981636 | chr2  | 54535911 | 54536110 | + | 0 NA | intron (NAluSq2 SI  | 6788 NR_002225    | 56969    | NR_002225 | ENSG000002RPL23A3   | RPL23A_9           | ribosomal pseudo             |       |
| chr14-305 6.137454 | -1.03438 | 0.959725 | -1.07779 | 0.281126 | 0.981636 | chr14 | 30562612 | 30563045 | + | 0 NA | intron (NLTR13 LSI  | 3670 NM_017766    | 55632    | NR_017766 | ENSG000002G2E3      | KIAA1333 G2/M      | phospho protein-coding       |       |
| chr15-671 6.137454 | -1.03438 | 0.959725 | -1.07779 | 0.281126 | 0.981636 | chr15 | 67124031 | 67124623 | + | 0 NA | intron (Nintron (N  | -1389 NM_001145   | 4088     | NR_001145 | ENSG000002SMAD3     | HSPC193 SMAD       | famiprotein-coding           |       |
| chr17-171 6.137454 | -1.03438 | 0.959725 | -1.07779 | 0.281126 | 0.981636 | chr17 | 17102328 | 17102539 | + | 0 NA | intron (Nintron (N  | 59673 NM_201274   | 23164    | NR_201274 | ENSG000002MPRIP     | M-RIP MRImyosin p  | protein-coding               |       |
| chr2-939 6.137454  | -1.03438 | 0.959725 | -1.07779 | 0.281126 | 0.981636 | chr2  | 9390947  | 9392312  | + | 0 NA | intron (NAluSx1 SI  | 30962 NM_001315   | 9270     | NR_001315 | ENSG000002ITGB1BP1  | ICAP-1A Integrin   | protein-coding               |       |
| chr22-357 6.137454 | -1.03438 | 0.959725 | -1.07779 | 0.281126 | 0.981636 | chr22 | 35761065 | 35761814 | + | 0 NA | exon (NM exon (NM   | 43567 NM_030642   | 80831    | NR_030642 | ENSG000002APOL5     | APOL-V AF apolipop | protein-coding               |       |
| chr6-158 6.137454  | -1.03438 | 0.959725 | -1.07779 | 0.281126 | 0.981636 | chr6  | 1.58E+08 | 1.58E+08 | + | 0 NA | intron (Nintron (N  | 1732 NM_001178    | 8871     | NR_001178 | ENSG000002SYNJ2     | INPP5H             | synapto protein-coding       |       |
| chr7-101 6.137454  | -1.03438 | 0.959725 | -1.07779 | 0.281126 | 0.981636 | chr7  | 1.01E+08 | 1.01E+08 | + | 0 NA | IntergeniAluJb SIN  | -4203 NM_016066   | 51024    | NR_016066 | ENSG000002F1S1      | CGI-135 Fission,   | protein-coding               |       |
| chr8-106 6.137454  | -1.03438 | 0.959725 | -1.07779 | 0.281126 | 0.981636 | chr8  | 1.07E+08 | 1.07E+08 | + | 0 NA | 3' UTR (N3' UTR (N  | 18645 NM_139166   | 137735   | NR_139166 | ENSG000002ABRA      | STARS              | actin b protein-coding       |       |
| chr9-111 6.137454  | -1.03438 | 0.959725 | -1.07779 | 0.281126 | 0.981636 | chr9  | 1.11E+08 | 1.11E+08 | + | 0 NA | intron (Nintron (N  | 3298 NM_001351    | 1902     | NR_001351 | ENSG000002LPAR1     | EDG2 GPR2          | lysophospho protein-coding   |       |
| chr4-867 12.05851  | -0.73971 | 0.68635  | -1.07774 | 0.28115  | 0.981636 | chr4  | 86786860 | 86787106 | + | 0 NA | intron (NAluSz SIN  | 62401 NM_197966   | 345274   | NR_197966 | ENSG000002SLC10A6   | SOAT               | solute c protein-coding      |       |
| chr1-183 7.71754   | 0.912639 | 0.846907 | 1.077614 | 0.281206 | 0.981636 | chr1  | 1.84E+08 | 1.84E+08 | + | 0 NA | intron (NAluJr4 SI  | -62093 NM_001297  | 23179    | NR_001297 | ENSG000002RGL1      | RGL                | ran guaprotein-coding        |       |
| chr17-70 7.71754   | 0.912639 | 0.846907 | 1.077614 | 0.281206 | 0.981636 | chr17 | 7002040  | 7002662  | + | 0 NA | intron (Nintron (N  | 6302 NM_000697    | 239      | NR_000697 | ENSG000002ALOX12    | 12-LOX 12          | arachidon protein-coding     |       |
| chr20-33 7.71754   | 0.912639 | 0.846907 | 1.077614 | 0.281206 | 0.981636 | chr20 | 33644523 | 33645908 | + | 0 NA | 3' UTR (N3' UTR (N  | -17112 NM_080825  | 128864   | NR_080825 | ENSG000002C2orf144  | dJ63M2.6           | chromoson protein-coding     |       |
| chr19-211 9.460589 | 0.826628 | 0.767674 | 1.076795 | 0.281572 | 0.981636 | chr19 | 21116945 | 21117831 | + | 0 NA | exon (NM exon (NM   | -24652 NM_001319  | 170959   | NR_001319 | ENSG000002ZNF431    | -                  | zinc fing protein-coding     |       |
| chr2-262 9.460589  | 0.826628 | 0.767674 | 1.076795 | 0.281572 | 0.981636 | chr2  | 26281056 | 26281307 | + | 0 NA | intron (NLS LINE C  | 36242 NM_001281   | 3032     | NR_001281 | ENSG000002HADHB     | ECHB MSTF          | hydroxyac protein-coding     |       |
| chr10-73 7.368384  | -0.94676 | 0.879249 | -1.07678 | 0.281579 | 0.981636 | chr10 | 73034489 | 73034841 | + | 0 NA | intron (NAluJb SIN  | 62309 NM_000917   | 5033     | NR_000917 | ENSG000002P4HA1     | P4HA               | prolyl 4- protein-coding     |       |
| chr14-34 7.368384  | -0.94676 | 0.879249 | -1.07678 | 0.281579 | 0.981636 | chr14 | 34712282 | 34713415 | + | 0 NA | non-codiron-codir   | 966 NM_021914     | 1073     | NR_021914 | ENSG000002CFL2      | NEM7               | cofilin 2 protein-coding     |       |
| chr14-50 7.368384  | -0.94676 | 0.879249 | -1.07678 | 0.281579 | 0.981636 | chr14 | 50448128 | 50448533 | + | 0 NA | intron (Nintron (N  | -51034 NM_001367  | 8814     | NR_001367 | ENSG000002CDKL1     | KKIALRE F cyclin d | protein-coding               |       |
| chr14-95 7.368384  | -0.94676 | 0.879249 | -1.07678 | 0.281579 | 0.981636 | chr14 | 95090587 | 95091013 | + | 0 NA | intron (Nintron (N  | 42703 NM_001199   | 23405    | NR_001199 | ENSG000002DICER1    | DCR1 Dicer         | 1, protein-coding            |       |
| chr2-113 7.368384  | -0.94676 | 0.879249 | -1.07678 | 0.281579 | 0.981636 | chr2  | 11318983 | 11319315 | + | 0 NA | intron (NLIPI5 LIN  | 25487 NM_00485C   | 9475     | NR_00485C | ENSG000002ROCK2     | ROCK-1 II          | Rho assoc protein-coding     |       |
| chr21-74 7.368384  | -0.94676 | 0.879249 | -1.07678 | 0.281579 | 0.981636 | chr21 | 74350117 | 74352566 | + | 0 NA | intron (Nintron (N  | 4499 NM_001322    | 1.03E+08 | NR_001322 | ENSG000002LOC102724 | -                  | uncharact protein-coding     |       |
| chr22-23 7.368384  | -0.94676 | 0.879249 | -1.07678 | 0.281579 | 0.981636 | chr22 | 23813091 | 23813527 | + | 0 NA | intron (NLMID2 LIN  | 25697 NM_001135   | 91319    | NR_001135 | ENSG000002CDERL3    | C2orf14 derlin 3   | protein-coding               |       |
| chr2-24 7.368384   | -0.94676 | 0.879249 | -1.07678 | 0.281579 | 0.981636 | chr2  | 24057389 | 24057614 | + | 0 NA | intron (NHAL LINE   | 46131 NM_001199   | 23523    | NR_001199 | ENSG000002CABIN1    | CABIN1 KB-ε        | calcineur protein-coding     |       |
| chr8-133 7.368384  | -0.94676 | 0.879249 | -1.07678 | 0.281579 | 0.981636 | chr8  | 1.34E+08 | 1.34E+08 | + | 0 NA | intron (Nintron (N  | 45684 NM_003033   | 6482     | NR_003033 | ENSG000002ST3GAL1   | Gal-NAc6S ST3      | beta- protein-coding         |       |
| chr9-839 7.368384  | -0.94676 | 0.879249 | -1.07678 | 0.281579 | 0.981636 | chr9  | 83969689 | 83968133 | + | 0 NA | TTS (NM_C TTS (NM_C | 2306 NR_029606    | 407043   | NR_029606 | ENSG000002MIR7-1    | MIRN7-1            | microRNA                     | ncRNA |
| chr22-501 5.403482 | 1.140294 | 1.059166 | 1.076596 | 0.281661 | 0.981636 | chr22 | 50198135 | 50198507 | + | 0 NA | intron (NCpG-1933C  | -2690 NM_031454   | 83642    | NR_031454 | ENSG000002SELENO    | SELO               | selenopr protein-coding      |       |
| chr1-243 5.964783  | 1.039917 | 0.966394 | 1.076079 | 0.281892 | 0.981636 | chr1  | 24357926 | 24358617 | + | 0 NA | 3' UTR (N3' UTR (N  | 35231 NM_02118C   | 57822    | NR_02118C | ENSG000002GRHL3     | SOM TFCP2          | grainyhe protein-coding      |       |
| chr1-987 5.964783  | 1.039917 | 0.966394 | 1.076079 | 0.281892 | 0.981636 | chr1  | 98727554 | 98728051 | + | 0 NA | intron (NLIPIA10 LI | 66081 NM_001364   | 51375    | NR_001364 | ENSG000002SNX7      | -                  | sorting r protein-coding     |       |
| chr1-123 5.964783  | 1.039917 | 0.966394 | 1.076079 | 0.281892 | 0.981636 | chr1  | 1.23E+08 | 1.23E+08 | + | 0 NA | IntergeniAluJb SIN  | 1786487 NR_003955 | 647121   | NR_003955 | ENSG000002EMBP1     | -                  | embigin pseudo               |       |
| chr1-248 5.964783  | 1.039917 | 0.966394 | 1.076079 | 0.281892 | 0.981636 | chr1  | 2.49E+08 | 2.49E+08 | + | 0 NA | intron (Nintron (N  | 9847 NM_001017    | 267002   | NR_001017 | ENSG000002CPGBD2    | -                  | piggyBac protein-coding      |       |
| chr10-10 5.964783  | 1.039917 | 0.966394 | 1.076079 | 0.281892 | 0.981636 | chr10 | 1.04E+08 | 1.04E+08 | + | 0 NA | 3' UTR (N3' UTR (N  | -26700 NM_014631  | 9644     | NR_014631 | ENSG000002SH3PXD2A  | FISH SH3           | SH3 and F protein-coding     |       |
| chr10-12 5.964783  | 1.039917 | 0.966394 | 1.076079 | 0.281892 | 0.981636 | chr10 | 1.26E+08 | 1.26E+08 | + | 0 NA | intron (Nintron (N  | 8432 NR_120633    | 1.02E+08 | NR_120633 | ENSG000002EDRF1-AS1 | EDRF1              | antncRNA                     |       |
| chr16-69 5.964783  | 1.039917 | 0.966394 | 1.076079 | 0.281892 | 0.981636 | chr16 | 69872306 | 69872525 | + | 0 NA | intron (NAluY SINE  | 33678 NM_00127C   | 11060    | NR_00127C | ENSG000002WWP2      | AIP2 Wwp2          | WW domain protein-coding     |       |
| chr17-82 5.964783  | 1.039917 | 0.966394 | 1.076079 | 0.281892 | 0.981636 | chr17 | 82429144 | 82480036 | + | 0 NA | intron (Nintron (N  | 20849 NM_01233C   | 26502    | NR_01233C | ENSG000002NARF      | IOP2               | nuclear r protein-coding     |       |
| chr19-36 5.964783  | 1.039917 | 0.966394 | 1.076079 | 0.281892 | 0.981636 | chr19 | 36991943 | 36992166 | + | 0 NA | exon (NM exon (NM   | 75422 NM_001204   | 374900   | NR_001204 | ENSG000002ZNF568    | FZF568             | zinc fing protein-coding     |       |
| chr19-41 5.964783  | 1.039917 | 0.966394 | 1.076079 | 0.281892 | 0.981636 | chr19 | 41418889 | 41420786 | + | 0 NA | intron (NAluSq2 SI  | 8893 NM_19854C    | 374907   | NR_19854C | ENSG000002B3GNT8    | B3GALT7 EUDP-GlcN  | protein-coding               |       |
| chr20-62 5.964783  | 1.039917 | 0.966394 | 1.076079 | 0.281892 | 0.981636 | chr20 | 62009932 | 62003833 | + | 0 NA | intron (Nintron (N  | -48720 NR_031658  | 1E+08    | NR_031658 | ENSG000002MIR1257   | MIRN1257           | microRNA                     | ncRNA |
| chr3-44 5.964783   | 1.039917 | 0.966394 | 1.076079 | 0.281892 | 0.981636 | chr3  | 44716449 | 44718784 | + | 0 NA | intron (NAluSp SIN  | 4956 NM_001134    | 91392    | NR_001134 | ENSG000002ZNF502    | -                  | zinc fing protein-coding     |       |
| chr5-374 5.964783  | 1.039917 | 0.966394 | 1.076079 | 0.281892 | 0.981636 | chr5  | 37444808 | 37445325 | + | 0 NA | intron (NMER1B DNA  | 65748 NM_00134E   | 55100    | NR_00134E | ENSG000002WDR70     | -                  | WD repeat protein-coding     |       |
| chr9-35 5.964783   | 1.039917 | 0.966394 | 1.076079 | 0.281892 | 0.981636 | chr9  | 35390188 | 35390851 | + | 0 NA | intron (Nintron (N  | -16236 NR_11032C  | 158381   | NR_11032C | ENSG000002ATP8B5P   | FetA               | ATPase p pseudo              |       |
| chr9-10 5.964783   | 1.039917 | 0.966394 | 1.076079 | 0.281892 | 0.981636 | chr9  | 1.05E+08 | 1.05E+08 | + | 0 NA | intron (NLS LINE    | 75979 NR_13076C   | 55335    | NR_13076C | ENSG000002NIPSNAP3E | FP944 NIP          | nipsnap r protein-coding     |       |
| chr9-124 8.681593  | -0.87777 | 0.816226 | -1.0754  | 0.282198 | 0.981636 | chr9  | 12002690 | 12003671 | + | 0 NA | intron (NAluSx4 SI  | 15563 NR_134927   | 1.02E+08 | NR_134927 | ENSG000002ZNF433-AC | ZNF433             | arcnRNA                      |       |
| chr1-889 4.898666  |          |          |          |          |          |       |          |          |   |      |                     |                   |          |           |                     |                    |                              |       |

|            |          |          |          |          |          |          |       |          |          |   |   |    |                      |                  |                               |                    |            |                           |                |
|------------|----------|----------|----------|----------|----------|----------|-------|----------|----------|---|---|----|----------------------|------------------|-------------------------------|--------------------|------------|---------------------------|----------------|
| chr2-1178  | 7.699974 | 0.90551  | 0.847949 | 1.067883 | 0.285573 | 0.981636 | chr2  | 1.18E+08 | 1.18E+08 | + | 0 | NA | intron (Nintron (N   | -6851 NR_158150  | 1.08E+08                      | NR_158150          | LOC10798E- |                           | uncharactncRNA |
| chr2-24    | 7.699974 | 0.90551  | 0.847949 | 1.067883 | 0.285573 | 0.981636 | chr22 | 24354567 | 24354865 | + | 0 | NA | intron (NAluSc SIN   | 12608 NM_001254  | 23384 Hs. 474384NM_015330     | ENSG00000SPECCIL   | CYTA5 GBE  | sperm antprotein-coding   |                |
| chr8-327   | 7.699974 | 0.90551  | 0.847949 | 1.067883 | 0.285573 | 0.981636 | chr8  | 32759252 | 32761593 | + | 0 | NA | 3' UTR (N3' UTR (N   | 38587 NM_001322  | 3084 Hs. 453951NM_00449E      | ENSG00000CNRG1     | ARIA GGF   | neureguliprotein-coding   |                |
| chr9-9594  | 7.699974 | 0.90551  | 0.847949 | 1.067883 | 0.285573 | 0.981636 | chr9  | 95945090 | 95945302 | + | 0 | NA | intron (NMER1 C LI   | 69188 NM_00101C  | 375748 Hs. 432364NM_020207    | ENSG00000ERC6L2    | BMP25 C9c  | ERCC exciprotein-coding   |                |
| chr3-1574  | 6.104172 | -1.04185 | 0.975923 | -1.06755 | 0.285724 | 0.981636 | chr3  | 15740000 | 1.57E+08 | + | 0 | NA | intron (NLIPA16 LI   | 13811 NM_001167  | 79674 Hs. 658046NM_024621     | ENSG00000VEPH1     | MELT VEPF  | ventricularprotein-coding |                |
| chr5-1461  | 6.104172 | -1.04185 | 0.975923 | -1.06755 | 0.285724 | 0.981636 | chr5  | 1.46E+08 | 1.46E+08 | + | 0 | NA | intron (Nintron (N   | -32107 NM_00102E | 153770 Hs. 162366NM_00102E    | ENSG00000PLAC8L1   |            | PLAC8 ltkprotein-coding   |                |
| chr19-117  | 7.335102 | -0.95284 | 0.892587 | -1.06751 | 0.285744 | 0.981636 | chr19 | 11731070 | 11731310 | + | 0 | NA | intron (NAluSp SIN   | 7756 NM_00108C   | 55552 Hs. 142169NM_017507     | ENSG00000ZNF82F    | HSZFP36    | zinc fingprotein-coding   |                |
| chrX-1236  | 8.163281 | -0.92705 | 0.868602 | -1.06729 | 0.285843 | 0.981636 | chrX  | 1.24E+08 | 1.24E+08 | + | 0 | NA | intron (NLIPA5 LIN   | 69123 NM_001081  | 57187 Hs. 149991NM_02044E     | ENSG00000THOC2     | CXorf3 MF  | THO compprotein-coding    |                |
| chr3-1111  | 11.65576 | -0.75882 | 0.711    | -1.06726 | 0.285854 | 0.981636 | chr3  | 1.11E+08 | 1.11E+08 | + | 0 | NA | intron (Nintron (N   | 47305 NM_00124E  | 25945 Hs. 293917NM_01548C     | ENSG00000NECTIN3   | CD113 CD   | wnectin cplprotein-coding |                |
| chr10-72   | 9.074636 | -0.85412 | 0.800457 | -1.06704 | 0.285953 | 0.981636 | chr10 | 72337920 | 72338229 | + | 0 | NA | intron (Nintron (N   | 16795 NM_001002  | 54788 Hs. 50001E:NM_01762E    | ENSG00000DNAJB12   | DJ10       | DnaJ heatprotein-coding   |                |
| chr16-31C  | 7.684258 | 0.910006 | 0.85366  | 1.066005 | 0.286422 | 0.981636 | chr16 | 15057913 | 13058188 | + | 0 | NA | IntergeniAluSx SIN   | 7037 NM_00117E   | 79759 Hs. 10292E:NM_02470E    | ENSG00000ZNF668    |            | zinc fingprotein-coding   |                |
| chr2-971E  | 7.684258 | 0.910006 | 0.85366  | 1.066005 | 0.286422 | 0.981636 | chr2  | 97191142 | 97191413 | + | 0 | NA | intron (NMER5A1 DN   | 78124 NM_001354  | 375248 Hs. 541894NM_19855E    | ENSG00000ANKRD36   | UNQ2430    | ankyrin rprotein-coding   |                |
| chr2-21E   | 7.684258 | 0.910006 | 0.85366  | 1.066005 | 0.286422 | 0.981636 | chr2  | 21693194 | 21693677 | + | 0 | NA | intron (Nintron (N   | 27423 NM_14817E  | 23759 Hs. 438587NM_014337     | ENSG00000PPIL2     | CYC4 CYP   | peptidyl protein-coding   |                |
| chr10-27C  | 7.177962 | 0.956814 | 0.897966 | 1.065535 | 0.286634 | 0.981636 | chr10 | 27046014 | 27046269 | + | 0 | NA | intron (NLI LINE I   | 54537 NM_00125E  | 22852 Hs. 361041NM_01491E     | ENSG00000ANKRD26   | THC2 hA1A  | ankyrin i protein-coding  |                |
| chr9-3524  | 7.177962 | 0.956814 | 0.897966 | 1.065535 | 0.286634 | 0.981636 | chr9  | 35245789 | 35246170 | + | 0 | NA | intron (NLIPA5 LIN   | 83970 NM_00133C  | 10497 Hs. 493791NM_006377     | ENSG00000UNC13B    | MUNC13 U   | unc-13 hcprotein-coding   |                |
| chr9-129E  | 7.177962 | 0.956814 | 0.897966 | 1.065535 | 0.286634 | 0.981636 | chr9  | 1.3E+08  | 1.3E+08  | + | 0 | NA | intron (NAluJb SIN   | 2341 NM_01652C   | 51759 Hs. 27842E:NM_01652C    | ENSG00000C9orf78   | CSU2 HCA   | metastasinprotein-coding  |                |
| chr2-425E  | 9.443023 | 0.820729 | 0.770398 | 1.065331 | 0.286726 | 0.981636 | chr2  | 42581868 | 42582367 | + | 0 | NA | intron (NAluY SINE   | 13485 NM_00133C  | 57504 Hs. 43451E:NM_02074E    | ENSG00000CMTA3     |            | metastasinprotein-coding  |                |
| chr12-10E  | 5.998065 | 1.043    | 0.979374 | 1.064966 | 0.286891 | 0.981636 | chr12 | 10214570 | 10215123 | + | 0 | NA | intron (Nintron (N   | 1969 NM_001341E  | 23710 Hs. 52425E:NM_03141E    | ENSG00000GABARAPL1 | APG8-LIKE  | GABA typeprotein-coding   |                |
| chr2-8537  | 5.998065 | 1.043    | 0.979374 | 1.064966 | 0.286891 | 0.981636 | chr2  | 85377198 | 85377530 | + | 0 | NA | non-codirnon-codir   | 22595 NM_00113E  | 84173 Hs. 26999C:NM_03221E    | ENSG00000ELMOD3    | DFNB88 LS  | ELMO domeprotein-coding   |                |
| chr4-5654  | 5.998065 | 1.043    | 0.979374 | 1.064966 | 0.286891 | 0.981636 | chr4  | 5654576  | 5654964  | + | 0 | NA | intron (Nintron (N   | 53378 NM_147127  | 132884 Hs. 87306 NM_147127    | ENSG00000CEVC2     | LBN WAD    | EvC cilie protein-coding  |                |
| chr11-711  | 4.734038 | 1.156917 | 1.086599 | 1.064714 | 0.287005 | 0.981636 | chr11 | 71107498 | 71108397 | + | 0 | NA | intron (Nintron (N   | 116849 NM_01230E | 22941 Hs. 26872E:NM_01230E    | ENSG00000SHANK2    | AUTS17 CS  | SH3 and nprotein-coding   |                |
| chr21-514  | 4.734038 | 1.156917 | 1.086599 | 1.064714 | 0.287005 | 0.981636 | chr21 | 5140369  | 5141020  | + | 0 | NA | intron (Nintron (N   | -12254 NR_13522C | 8209 Hs. 41348E:NM_00464E     | ENSG00000GATD3A    | C21orf33   | glutamine protein-coding  |                |
| chr19-12E  | 7.733256 | 0.908145 | 0.853033 | 1.064606 | 0.287054 | 0.981636 | chr19 | 12655285 | 12655895 | + | 0 | NA | intron (NMIRc SINE   | 11152 NM_00052E  | 4125 Hs. 35676E:NM_00052E     | ENSG00000MAN2B1    | LAMAN MAN  | mannosid e protein-coding |                |
| chr22-29E  | 7.733256 | 0.908145 | 0.853033 | 1.064606 | 0.287054 | 0.981636 | chr22 | 29350818 | 29352636 | + | 0 | NA | exon (NM exon (NM    | -18469 NR_00368E | 1E+08 NR_00368E               | ENSG00000SNORD125  |            | small nucsnoRNA           |                |
| chr4-152E  | 6.626369 | 1.041864 | 0.979135 | 1.064066 | 0.287299 | 0.981636 | chr4  | 152269   | 152468   | + | 0 | NA | intron (NLTR5E Hs I  | 24247 NM_00128E  | 255403 Hs. 63663E:NM_00103E   | ENSG00000ZNF718    |            | zinc fingprotein-coding   |                |
| chr2-218E  | 9.143049 | -0.83437 | 0.784312 | -1.06383 | 0.287407 | 0.981636 | chr2  | 2.19E+08 | 2.19E+08 | + | 0 | NA | intron (NAluJr SIN   | 11256 NM_02093E  | 57695 Hs. 16606E:NM_02093E    | ENSG00000CASP37    |            | ubiquitin protein-coding  |                |
| chr20-19E  | 9.143049 | -0.83437 | 0.784312 | -1.06383 | 0.287407 | 0.981636 | chr20 | 19990146 | 19990467 | + | 0 | NA | exon (NM exon (NM    | -26984 NR_18152E | 51126 Hs. 36878E:NM_01610C    | ENSG00000NAA20     | NAT3 NAT   | (alpha)-protein-coding    |                |
| chr3-1494  | 9.143049 | -0.83437 | 0.784312 | -1.06383 | 0.287407 | 0.981636 | chr3  | 14944508 | 14945443 | + | 0 | NA | non-codirnon-codir   | 2530 NR_046254   | 1.01E+08 Hs. 517821NR_046251  | ENSG00000FGD5-AS1  |            | FGD5 antncRNA             |                |
| chr4-6861  | 9.143049 | -0.83437 | 0.784312 | -1.06383 | 0.287407 | 0.981636 | chr4  | 6861571  | 6862519  | + | 0 | NA | exon (NM exon (NM    | -47399 NM_00111E | 57533 Hs. 518611NM_02077E     | ENSG00000TBC1D14   |            | TBC1 domeprotein-coding   |                |
| chr2-216E  | 7.393807 | -0.93901 | 0.882827 | -1.06364 | 0.287491 | 0.981636 | chr2  | 2.16E+08 | 2.16E+08 | + | 0 | NA | intron (Nintron (N   | 7105 NM_021141   | 7520 Hs. 38873E:NM_021141     | ENSG00000XRCC5     | KARP-1 K   | X-ray reprotein-coding    |                |
| chr2-1731  | 9.094052 | -0.83641 | 0.786482 | -1.06348 | 0.287564 | 0.981636 | chr2  | 1.73E+08 | 1.73E+08 | + | 0 | NA | intron (NAluSp SIN   | 64618 NM_01665E  | 51776 Hs. 444451NM_01665E     | ENSG00000MAP3K20   | AZK CNM6   | mitogen- e protein-coding |                |
| chr1-227E  | 5.93936  | 1.033655 | 0.972158 | 1.063258 | 0.287665 | 0.981636 | chr1  | 2.28E+08 | 2.28E+08 | + | 0 | NA | IntergeniLIPB1 LIN   | -30943 NR_10230C | 339500 Hs. 30323 NM_03275E    | ENSG00000ZNF678    |            | zinc fingprotein-coding   |                |
| chr1-243E  | 5.93936  | 1.033655 | 0.972158 | 1.063258 | 0.287665 | 0.981636 | chr1  | 2.44E+08 | 2.44E+08 | + | 0 | NA | intron (Nintron (N   | 198043 NM_18169C | 10000 Hs. 49829E:NM_00546E    | ENSG00000AKT3      | MPPH MPPE  | AKT serir protein-coding  |                |
| chr11-12E  | 5.93936  | 1.033655 | 0.972158 | 1.063258 | 0.287665 | 0.981636 | chr11 | 1.3E+08  | 1.3E+08  | + | 0 | NA | intron (NLI LINE I   | 27646 NM_00616E  | 4798 Hs. 53053E:NM_00616E     | ENSG00000CFRKB     | IN080G     | nuclear fprotein-coding   |                |
| chr17-501  | 5.93936  | 1.033655 | 0.972158 | 1.063258 | 0.287665 | 0.981636 | chr17 | 50109167 | 50109736 | + | 0 | NA | TTS (NM_C            | 13756 NM_00119E  | 5164 Hs. 25666E:NM_00261E     | ENSG00000PDK2      | PDHK2 PDK  | pyruvate protein-coding   |                |
| chr22-50E  | 5.93936  | 1.033655 | 0.972158 | 1.063258 | 0.287665 | 0.981636 | chr22 | 50305080 | 50305376 | + | 0 | NA | intron (Nintron (N   | 2418 NM_012401   | 23654 Hs. 3989 NM_012401      | ENSG00000PLXNB2    | NM1 Nblac  | plexin B e protein-coding |                |
| chr4-396C  | 5.93936  | 1.033655 | 0.972158 | 1.063258 | 0.287665 | 0.981636 | chr4  | 39602170 | 39602696 | + | 0 | NA | intron (NAluSx1 SI   | 24688 NM_001317  | 201895 Hs. 20595E:NM_17492E   | ENSG00000CSMIM4    | C4orf34    | small intprotein-coding   |                |
| chr4-1194  | 5.93936  | 1.033655 | 0.972158 | 1.063258 | 0.287665 | 0.981636 | chr4  | 1.19E+08 | 1.19E+08 | + | 0 | NA | IntergeniIntergeni   | 6278 NR_13511E   | 1.02E+08 Hs. 655864NR_13511E  | ENSG00000GTF2P12   |            | general tpsudo            |                |
| chr6-133E  | 5.93936  | 1.033655 | 0.972158 | 1.063258 | 0.287665 | 0.981636 | chr6  | 13321344 | 13322445 | + | 0 | NA | intron (Nintron (N   | 6643 NM_00131E   | 51256 Hs. 48467E:NM_01649E    | ENSG00000TBC1D7    | MGCPH PIC  | TBC1 domeprotein-coding   |                |
| chr6-1121  | 5.93936  | 1.033655 | 0.972158 | 1.063258 | 0.287665 | 0.981636 | chr6  | 1.12E+08 | 1.12E+08 | + | 0 | NA | intron (NLI2c LINE I | -55252 NR_12119E | 1.02E+08 Hs. 510007NR_12119E  | LOC101927-         |            | uncharactncRNA            |                |
| chr12-687  | 6.129596 | -1.03238 | 0.971117 | -1.06309 | 0.287741 | 0.981636 | chr12 | 68703950 | 68704264 | + | 0 | NA | intron (Nintron (N   | 17129 NM_020401  | 57122 Hs. 524574NM_020401     | ENSG00000NUP107    | NPHS1 N    | ucleoporprotein-coding    |                |
| chr12-95E  | 6.129596 | -1.03238 | 0.971117 | -1.06309 | 0.287741 | 0.981636 | chr12 | 95509964 | 95509934 | + | 0 | NA | intron (Nintron (N   | 35662 NM_001317  | 10988 Hs. 44498E:NM_00683E    | ENSG00000MPTAP2    | MAP2 MNPF  | methionyl protein-coding  |                |
| chr3-142E  | 6.129596 | -1.03238 | 0.971117 | -1.06309 | 0.287741 | 0.981636 | chr3  | 1.43E+08 | 1.43E+08 | + | 0 | NA | intron (NAluYh3 SI   | 64242 NM_001184  | 545 Hs. 271791NM_001184       | ENSG00000ATR       | FCTCS FRF  | ATR serir protein-coding  |                |
| chr5-728E  | 6.129596 | -1.03238 | 0.971117 | -1.06309 | 0.287741 | 0.981636 | chr5  | 72851916 | 72852418 | + | 0 | NA | intron (Nintron (N   | 4028 NM_001364   | 3842 Hs. 48249E:NM_00227E     | ENSG00000TNPO1     | IPO2 KPNE  | transportprotein-coding   |                |
| chr15-22E  | 6.162878 | -1.02499 | 0.964396 | -1.06284 | 0.287856 | 0.981636 | chr15 | 22970365 | 22970667 | + | 0 | NA | intron (NLMIEc LIN   | 9852 NM_001324   | 23191 Hs. 26704 NM_01460E     | ENSG00000CYFIP1    | P140SRA-1  | cytoplasm protein-coding  |                |
| chr12-135E | 6.162878 | -1.02499 | 0.964396 | -1.06284 | 0.287856 | 0.981636 | chr12 | 2.36E+08 | 2.36E+08 | + | 0 | NA | intron (Nintron (N   | -2181 NR_11020C  | 1.02E+08 Hs. 60217E:NR_11019E | ENSG00000DARS-AS1  |            | DARS antncRNA             |                |
| chr3-133E  | 6.162878 | -1.02499 | 0.964396 | -1.06284 | 0.287856 | 0.981636 | chr3  | 1.34E+08 | 1.34E+08 | + | 0 | NA | intron (NAluJr4 SI   | 26500 NM_00136E  | 11073 Hs. 59337E:NM_00702E    | ENSG00000TOPBP1    | Dpb11 TOF  | DNA topoi protein-coding  |                |
| chr4-802E  | 6.162878 | -1.02499 | 0.964396 | -1.06284 | 0.287856 | 0.981636 | chr4  | 80269741 | 80270829 | + | 0 | NA | intron (Nintron (N   | 2020 NM_001291   | 2250 Hs. 37055 NM_00446E      | ENSG00000CGF5      | HBBF-5 S   | n fibroblasprotein-coding |                |
| chr8-133E  | 6.162878 | -1.02499 | 0.964396 | -1.06284 | 0.287856 | 0.981636 | chr8  | 1.33E+08 | 1.33E+08 | + | 0 | NA | intron (Nintron (N   | 3446 NM_00113E   | 10397 Hs. 372914NM_00609E     | ENSG00000NDRG1     | CAP43 Cn   | myc dowprotein-coding     |                |
| chr9-545E  | 6.162878 | -1.02499 | 0.964396 | -1.06284 | 0.287856 | 0.981636 | chr9  | 5457046  | 5457365  | + | 0 | NA | exon (NM exon (NM    | 6663 NM_001314   | 29126 Hs. 52198E:NM_01414E    | ENSG00000CD274     | B7-H B7H   | CD274 molprotein-coding   |                |
| chr9-116E  | 6.162878 | -1.02499 | 0.964396 | -1.06284 | 0.287856 | 0.981636 | chr9  | 1.12E+08 | 1.12E+08 | + | 0 | NA | intron (NHERVK11-i   | 18055 NM_03230E  | 84263 Hs. 59486 NM_03230E     | ENSG00000CHSD12    | C9orf99 S  | hydroxyst protein-coding  |                |
| chr16-26E  | 4.700757 | 1.153154 | 1.085154 | 1.062663 | 0.287935 | 0.981636 | chr16 | 262      |          |   |   |    |                      |                  |                               |                    |            |                           |                |



|                     |          |          |          |          |          |       |          |           |   |   |    |                      |                   |                                                 |                                            |
|---------------------|----------|----------|----------|----------|----------|-------|----------|-----------|---|---|----|----------------------|-------------------|-------------------------------------------------|--------------------------------------------|
| chr4-5066 4.162474  | -1.21903 | 1.157793 | -1.05289 | 0.292389 | 0.981636 | chr4  | 5066587  | 5067206   | + | 0 | NA | intron (NL2b LINE)   | 15416 NM_001306   | 55351 Hs.133062NM_018401ENSG000003TK32B         | HSA25083 serine/threonine protein-coding   |
| chr4-8901 4.162474  | -1.21903 | 1.157793 | -1.05289 | 0.292389 | 0.981636 | chr4  | 89015360 | 89016825  | + | 0 | NA | intron (NTiger3b)    | 41093 NM_014888   | 10144 Hs.97270 NM_014888 ENSG000003FAM13A       | ARHGAP48 family wiprotein-coding           |
| chr7-9785 4.162474  | -1.21903 | 1.157793 | -1.05289 | 0.292389 | 0.981636 | chr7  | 97851834 | 97852803  | + | 0 | NA | exon (NM_exon NM)    | 19847 NM_133436   | 440 Hs.489207NM_001677 ENSG000003ASNS           | ASNSD TS1asparagin protein-coding          |
| chr12-72f 6.204017  | -1.01927 | 0.968194 | -1.05275 | 0.292454 | 0.981636 | chr12 | 72636537 | 72636841  | + | 0 | NA | intron (NL1PA3 LIN)  | -363180 NR_026836 | 283392 Hs.363603NM_001022 ENSG000003TRHDE-AS1   | TRHDE antncRNA                             |
| chr20-37c 6.204017  | -1.01927 | 0.968194 | -1.05275 | 0.292454 | 0.981636 | chr20 | 20317073 | 20321819  | + | 0 | NA | intron (NALuJb SIN)  | 64051 NM_001322   | 5933 Hs.207745NM_002899 ENSG000003RBL1          | CP107 PRE RB transcrpotein-coding          |
| chr1-231c 7.211244  | 0.959344 | 0.911532 | 1.052452 | 0.292592 | 0.981636 | chr1  | 2.31E+08 | 2.31E+08  | + | 0 | NA | IntergeniIntergeni   | 4442 NR_031599    | 1E+08 NR_031599 ENSG000003MIR1182               | MIRN1182 microRNA ncRNA                    |
| chr11-40f 7.211244  | 0.959344 | 0.911532 | 1.052452 | 0.292592 | 0.981636 | chr11 | 40826114 | 40837875  | + | 0 | NA | intron (Nintron (N)) | -11486 NM_001318  | 6240 Hs.445705NM_001033 ENSG000003RRM1          | R1 R1R1 Fribonucle protein-coding          |
| chr14-23z 7.211244  | 0.959344 | 0.911532 | 1.052452 | 0.292592 | 0.981636 | chr14 | 23276381 | 23277189  | + | 0 | NA | exon (NM_exon NM)    | 9347 NM_020834    | 57594 Hs.632323NM_020834 ENSG000003HOMEZ        | KIAA1443 homeobox protein-coding           |
| chr15-28c 6.486795  | 0.970773 | 0.922496 | 1.052333 | 0.292647 | 0.981636 | chr15 | 28654288 | 28655693  | + | 0 | NA | intron (NALuSx3 SI)  | 548 NR_036443     | 440248 Hs.531505NM_199044 ENSG000003HERC2P9     | HERC2P9 hect domain pseudo                 |
| chr15-32f 6.486795  | 0.970773 | 0.922496 | 1.052333 | 0.292647 | 0.981636 | chr15 | 32725516 | 32726040  | + | 0 | NA | intron (NL1PA7 LIN)  | -6913 NR_109767   | 1E+08 Hs.610545NR_109767 ENSG000003LOC100131    | LOC100131 uncharacterized ncRNA            |
| chr2-470c 6.486795  | 0.970773 | 0.922496 | 1.052333 | 0.292647 | 0.981636 | chr2  | 47021901 | 47022275  | + | 0 | NA | intron (Nintron (N)) | -80483 NM_001171  | 90411 Hs.662152NM_139275 ENSG000003MCFD2        | F5F8D F5F multiple protein-coding          |
| chr18-541f 7.427089 | -0.93277 | 0.886476 | -1.05223 | 0.292696 | 0.981636 | chr18 | 54162898 | 54163184  | + | 0 | NA | intron (NALuSx4 SI)  | 59371 NR_002970   | 677819 Hs.655869NR_002970 ENSG000003SNORA37     | ACA37 small nucleolar RNA                  |
| chr10-95z 7.863122  | -0.88567 | 0.841731 | -1.05222 | 0.292707 | 0.981636 | chr10 | 95233154 | 95235818  | + | 0 | NA | IntergeniAluJr SIN   | 40286 NM_207321   | 142827 Hs.134225NM_207321 ENSG000003ACSM6       | C10orf12 acyl-CoA protein-coding           |
| chr12-11f 7.863122  | -0.88567 | 0.841731 | -1.05222 | 0.292707 | 0.981636 | chr12 | 1.18E+08 | 1.18E+08  | + | 0 | NA | intron (Nintron (N)) | -5572 NM_001346   | 51347 Hs.644422NM_016281 ENSG000003TAKO3        | DPK JIK WTAO kinase protein-coding         |
| chr13-11f 7.863122  | -0.88567 | 0.841731 | -1.05222 | 0.292707 | 0.981636 | chr13 | 1.14E+08 | 1.14E+08  | + | 0 | NA | intron (Nintron (N)) | 12134 NM_000820   | 2621 Hs.646344NM_000820 ENSG000003GAS6          | AXLLG AXS growth ar protein-coding         |
| chr17-281f 7.863122 | -0.88567 | 0.841731 | -1.05222 | 0.292707 | 0.981636 | chr17 | 28174668 | 28175279  | + | 0 | NA | intron (Nintron (N)) | -51590 NR_003064  | 23615 Hs.157195NM_021093 ENSG000003PYY2         | PYY2 peptide lpsudo                        |
| chr2-746f 7.863122  | -0.88567 | 0.841731 | -1.05222 | 0.292707 | 0.981636 | chr2  | 74890293 | 74891517  | + | 0 | NA | exon (NM_exon NM)    | -18226 NR_125792  | 1.03E+08 Hs.708645NR_125792 ENSG000003LINC01291 | LINC01291 long intencRNA                   |
| chr2-218f 7.863122  | -0.88567 | 0.841731 | -1.05222 | 0.292707 | 0.981636 | chr2  | 2.17E+08 | 2.17E+08  | + | 0 | NA | intron (Nintron (N)) | 2937 NM_000599    | 3488 Hs.607212NM_000599 ENSG000003IGFBP5        | IGFBP5 insulin lprotein-coding             |
| chr4-249f 7.863122  | -0.88567 | 0.841731 | -1.05222 | 0.292707 | 0.981636 | chr4  | 2493975  | 2494777   | + | 0 | NA | intron (NALuY SINE)  | 24923 NM_001188   | 6047 Hs.66394 NM_002938 ENSG000003RNF4          | RNF4 RING fing protein-coding              |
| chr8-304f 7.863122  | -0.88567 | 0.841731 | -1.05222 | 0.292707 | 0.981636 | chr8  | 30486487 | 30487244  | + | 0 | NA | intron (Nintron (N)) | -10146 NR_046205  | 1E+08 Hs.126815NR_046205 ENSG000003RBPMS-AS1    | RBPMS antncRNA                             |
| chr15-434 9.965035  | 0.788793 | 0.749676 | 1.052179 | 0.292718 | 0.981636 | chr15 | 43430597 | 43432738  | + | 0 | NA | intron (Nintron (N)) | 60566 NM_001288   | 27229 Hs.584887NM_014444 ENSG000003TUBGCP4      | TUBGCP4 GCP-4 tubulin g protein-coding     |
| chr19-43z 7.820133  | -0.90151 | 0.856916 | -1.05204 | 0.292782 | 0.981636 | chr19 | 43989575 | 43990431  | + | 0 | NA | intron (Nintron (N)) | 5815 NM_198088    | 7711 Hs.279567NM_003444 ENSG000003ZNF155        | ZNF155 pH2-96 zinc fing protein-coding     |
| chr4-410z 5.89822   | 1.033317 | 0.982322 | 1.051912 | 0.29284  | 0.981636 | chr4  | 41024379 | 41024917  | + | 0 | NA | intron (NLTR76 LTF)  | -167456 NM_001166 | 323 Hs.479602NM_004307 ENSG000003APBB2          | APBB2 FE65L FE65 amyloid t protein-coding  |
| chr1-148z 13.93801  | 0.675843 | 0.642595 | 1.051741 | 0.292918 | 0.981636 | chr1  | 1.49E+08 | 1.49E+08  | + | 0 | NA | intron (Nintron (N)) | 27011 NM_001350   | 9659 Hs.584841NM_014644 ENSG000003PDEAD1P       | PDEAD1P CMY2 MMCP phosphodiprotein-coding  |
| chr19-34f 6.520077  | 0.973872 | 0.926352 | 1.051298 | 0.293122 | 0.981636 | chr19 | 34938794 | 34939555  | + | 0 | NA | intron (NCTCC N)     | 12271 NR_024018   | 90075 Hs.657402NM_194322 ENSG000003ZNF30        | ZNF30 KOX28 zinc fing protein-coding       |
| chr5-482 16.15408   | 0.63851  | 0.607592 | 1.050886 | 0.293311 | 0.981636 | chr5  | 48241487 | 48242221  | + | 0 | NA | IntergeniAlu/Alph    | 2199434 NM_198444 | 133418 Hs.561411NM_198444 ENSG000003CEMB        | CEMB GP70 embigin protein-coding           |
| chr12-24f 7.904262  | -0.88173 | 0.839776 | -1.04996 | 0.293736 | 0.981636 | chr12 | 41843300 | 418424158 | + | 0 | NA | intron (NALuSx1 SI)  | 60478 NM_001178   | 586 Hs.438992NM_005504 ENSG000003BCAT1          | BCAT1 BC1 branched protein-coding          |
| chr5-9554 7.904262  | -0.88173 | 0.839776 | -1.04996 | 0.293736 | 0.981636 | chr5  | 95545546 | 95546009  | + | 0 | NA | intron (NL2a LINE)   | 9228 NM_014635    | 9652 Hs.482866NM_014635 ENSG000003TTC37         | TTC37 KIAA0372 tetraatric protein-coding   |
| chr5-129f 7.904262  | -0.88173 | 0.839776 | -1.04996 | 0.293736 | 0.981636 | chr5  | 1.3E+08  | 1.3E+08   | + | 0 | NA | intron (NMLT1A LTF)  | -76122 NM_001257  | 1E+08 Hs.582534NM_001257 ENSG000003MINAR2       | MINAR2 KIAA1024 membrane protein-coding    |
| chr13-197 9.37464   | 0.861102 | 0.777491 | 1.04966  | 0.293875 | 0.981636 | chr13 | 19732569 | 19732839  | + | 0 | NA | intron (NALuSx SIN)  | 50241 NM_001354   | 55269 Hs.213198NM_001042 ENSG000003PSPC1        | PSPC1 paraspel protein-coding              |
| chr1-255f 6.494653  | 0.968094 | 0.922519 | 1.049402 | 0.293993 | 0.981636 | chr1  | 25558665 | 25560084  | + | 0 | NA | intron (Nintron (N)) | 15789 NM_015627   | 26119 Hs.590911NM_015627 ENSG000003DLRAP1       | DLRAP1 ARH ARH1 low densiprotein-coding    |
| chr1-211f 6.494653  | 0.968094 | 0.922519 | 1.049402 | 0.293993 | 0.981636 | chr1  | 2.11E+08 | 2.11E+08  | + | 0 | NA | intron (NHAL1 LINE)  | 12114 NR_026761   | 84791 Hs.523932NM_032705                        | LINC00467 p29-197 long intencRNA           |
| chr16-884 6.494653  | 0.968094 | 0.922519 | 1.049402 | 0.293993 | 0.981636 | chr16 | 88655100 | 88656205  | + | 0 | NA | intron (NCPg-10162)  | -4599 NM_000101   | 1535 Hs.513803NM_000101 ENSG000003CYBA          | CYBA C12-Phoenix cytochron protein-coding  |
| chrX-143z 6.494653  | 0.968094 | 0.922519 | 1.049402 | 0.293993 | 0.981636 | chrX  | 1432050  | 1432681   | + | 0 | NA | exon (NM_exon NM)    | 20544 NM_001172   | 8623 Hs.533514NM_004192 ENSG000003ASMTL         | ASMTL AS acetylser protein-coding          |
| chr18-23z 7.103541  | 0.953155 | 0.909128 | 1.048824 | 0.294259 | 0.981636 | chr18 | 23297621 | 23297967  | + | 0 | NA | non-codirnon-codir   | 140167 NM_032933  | 85019 Hs.137562NM_032933 ENSG000003TMEM241      | TMEM241 C18orf45 transmem protein-coding   |
| chr15-42z 6.614262  | -0.96417 | 0.919534 | -1.04854 | 0.294391 | 0.981636 | chr15 | 42963914 | 42964915  | + | 0 | NA | intron (NALuSp SIN)  | -43636 NM_173500  | 146057 Hs.646511NM_173500 ENSG000003TTBK2       | TTBK2 KIAA11 TTE tubul protein-coding      |
| chr17-47z 7.896404  | -0.88023 | 0.839624 | -1.04836 | 0.294471 | 0.981636 | chr17 | 47588479 | 47589335  | + | 0 | NA | intron (Nintron (N)) | 57799 NM_006310   | 9520 Hs.443837NM_006310 ENSG000003NPEPPS        | NPEPPS AAP-S MAP1aminopept protein-coding  |
| chr3-157f 7.896404  | -0.88023 | 0.839624 | -1.04836 | 0.294471 | 0.981636 | chr3  | 15700591 | 15701071  | + | 0 | NA | intron (Nintron (N)) | -3460 NR_036088   | 1E+08 NR_036088 ENSG000003MIR3134               | MIR3134 microRNA ncRNA                     |
| chr8-9987 7.912119  | -0.88222 | 0.842503 | -1.04832 | 0.29449  | 0.981636 | chr8  | 99875069 | 99875455  | + | 0 | NA | intron (Nintron (N)) | 18445 NM_004374   | 1345 Hs.351875NM_004374 ENSG000003COX6C         | COX6C cytochron protein-coding             |
| chr16-15z 6.64005   | -0.95575 | 0.911713 | -1.0483  | 0.294499 | 0.981636 | chr16 | 15664652 | 15664947  | + | 0 | NA | exon (NM_exon NM)    | 14554 NM_017668   | 54820 Hs.655377NM_017668 ENSG000003NDE1         | NDE1 HOM-TES-ε nudE neur protein-coding    |
| chr17-45z 6.64005   | -0.95575 | 0.911713 | -1.0483  | 0.294499 | 0.981636 | chr17 | 45278916 | 45280043  | + | 0 | NA | intron (NALuSx8 SI)  | -17385 NM_152343  | 124783 Hs.412711NM_152343 ENSG000003SPATA32     | SPATA32 AEP2 C17C spermatog protein-coding |
| chr18-19z 6.64005   | -0.95575 | 0.911713 | -1.0483  | 0.294499 | 0.981636 | chr18 | 198043   | 200242    | + | 0 | NA | intron (Nintron (N)) | 40585 NM_005151   | 9097 Hs.464411NM_005151 ENSG000003USP14         | USP14 TGT ubiquitn protein-coding          |
| chr22-41z 6.64005   | -0.95575 | 0.911713 | -1.0483  | 0.294499 | 0.981636 | chr22 | 41676238 | 41676841  | + | 0 | NA | intron (Nintron (N)) | 12328 NM_001005   | 4809 Hs.182255NM_005005 ENSG000003SNU13         | SNU13 15.5K FA-small nuc protein-coding    |
| chrX-464z 6.64005   | -0.95575 | 0.911713 | -1.0483  | 0.294499 | 0.981636 | chrX  | 46467114 | 46469753  | + | 0 | NA | intron (NALuSx6 SI)  | 21136 NM_001123   | 55634 Hs.632800NM_017777 ENSG000003KRBOX4       | KRBOX4 ZNF673 KRAB box protein-coding      |
| chr2-460z 6.15502   | -1.02281 | 0.975697 | -1.04829 | 0.294507 | 0.981636 | chr2  | 46007605 | 46007804  | + | 0 | NA | intron (Nintron (N)) | -289703 NM_001432 | 2034 Hs.468411NM_001432 ENSG000003EPAS1         | EPAS1 BAGY4 HIF endothel protein-coding    |
| chr6-571z 6.15502   | -1.02281 | 0.975697 | -1.04829 | 0.294507 | 0.981636 | chr6  | 57193232 | 57193464  | + | 0 | NA | intron (NL4_B Mam)   | 21022 NM_004282   | 9532 Hs.745044NM_004282 ENSG000003BAG2          | BAG2-2 dJ4BCL2 asc protein-coding          |
| chr2-190z 4.965229  | -1.14718 | 1.094373 | -1.04826 | 0.29452  | 0.981636 | chr2  | 1.91E+08 | 1.91E+08  | + | 0 | NA | intron (Nintron (N)) | 11763 NM_001321   | 4664 Hs.107474NM_005966 ENSG000003NAB1          | NAB1 NGF1-A biprotein-coding               |
| chr13-11z 6.647908  | -0.95751 | 0.913441 | -1.04825 | 0.294524 | 0.981636 | chr13 | 1.13E+08 | 1.13E+08  | + | 0 | NA | intron (NLIMEf LIN)  | -18523 NM_001278  | 8451 Hs.339735NM_003585 ENSG000003CUL4A         | CUL4A cullin 4 protein-coding              |
| chr6-144z 6.647908  | -0.95751 | 0.913441 | -1.04825 | 0.294524 | 0.981636 | chr6  | 1.44E+08 | 1.44E+08  | + | 0 | NA | intron (Nintron (N)) | 16497 NR_132778   | 1.07E+08 NR_132778                              | SNORA98 small nucsnRNA                     |
| chr19-26z 21.92511  | 0.574227 | 0.548394 | 1.048019 | 0.29463  | 0.981636 | chr19 | 26903950 | 26904752  | + | 0 | NA | IntergeniALR/Alph    | -889080 NR_146733 | 1.02E+08 Hs.567934NR_110687 ENSG000003LOC101927 | LOC101927 uncharacterized ncRNA            |
| chr1-31C 8.255268   | 0.863368 |          |          |          |          |       |          |           |   |   |    |                      |                   |                                                 |                                            |



|                    |          |          |          |          |          |       |          |          |   |    |                     |                  |                             |                    |                  |                             |                |
|--------------------|----------|----------|----------|----------|----------|-------|----------|----------|---|----|---------------------|------------------|-----------------------------|--------------------|------------------|-----------------------------|----------------|
| chr12-112 7.855264 | -0.88416 | 0.846807 | -1.04411 | 0.296436 | 0.981636 | chr12 | 1.12E+08 | 1.12E+08 | 0 | NA | TTS (NM_C TTS (NM_C | 10911 NM_006817  | 10961 Hs. 75841 NM_006817   | ENSG000002CERP29   | C12orf8          | Fendoplasn protein-coding   |                |
| chr13-111 7.855264 | -0.88416 | 0.846807 | -1.04411 | 0.296436 | 0.981636 | chr13 | 1.1E+08  | 1.1E+08  | 0 | NA | intron (NL2c LINE   | 3334 NM_00184E   | 1282 Hs. 17441 NM_00184E    | ENSG00000COL4A1    | BSDV BSVI        | collagen protein-coding     |                |
| chr4-119 7.855264  | -0.88416 | 0.846807 | -1.04411 | 0.296436 | 0.981636 | chr4  | 1.2E+08  | 1.2E+08  | 0 | NA | intron (NTigger12c  | 82862 NM_03343C  | 8654 Hs. 647971 NM_00108E   | ENSG00000PDE5A     | CGB-PDE C        | phosphodi protein-coding    |                |
| chr8-103 7.855264  | -0.88416 | 0.846807 | -1.04411 | 0.296436 | 0.981636 | chr8  | 1.03E+08 | 1.03E+08 | 0 | NA | intron (NL2b LINE   | 4653 NM_001164   | 8323 Hs. 59186E NM_00350E   | ENSG00000FZD6      | Fz-6 FZ6         | frizzled protein-coding     |                |
| chr2-653 7.855264  | -1.05956 | 0.814887 | -1.04402 | 0.296476 | 0.981636 | chr2  | 65330967 | 65331856 | 0 | NA | intron (Nintron (N  | 35367 NM_00112E  | 200734 Hs. 59332 NM_181784  | ENSG00000SPRED2    | SP-2             | sprouty protein-coding      |                |
| chr4-475 5.416978  | -1.05956 | 0.814887 | -1.04402 | 0.296476 | 0.981636 | chr4  | 47580228 | 47581114 | 0 | NA | intron (NL3 LINE C  | -71998 NR_10702C | 1.02E+08                    | NR_10702C          | ENSG00000MIR8053 | hsa-mir-ε                   | microRNA ncRNA |
| chr4-767 5.416978  | -1.05956 | 0.814887 | -1.04402 | 0.296476 | 0.981636 | chr4  | 76766053 | 76766695 | 0 | NA | intron (NMIRc SINE  | 131770 NM_00102E | 345079 Hs. 25729E NM_00102E | ENSG00000SOWAIB    | ANKRD56          | sonodow protein-coding      |                |
| chr11-65 5.947218  | 1.030332 | 0.98708  | 1.043818 | 0.29657  | 0.981636 | chr11 | 65584811 | 65585273 | 0 | NA | exon (NM exon (NM   | 8989 NM_00109E   | 254102 Hs. 502867 NM_00109E | ENSG00000EHP1L1    | -                | EH domain protein-coding    |                |
| chr9-121 5.947218  | 1.030332 | 0.98708  | 1.043818 | 0.29657  | 0.981636 | chr9  | 1.22E+08 | 1.22E+08 | 0 | NA | intron (Nintron (N  | 21579 NM_13870E  | 153090 Hs. 52237E NM_03255E | ENSG00000DAB2IP    | AF9Q34 A         | IDAB2 intε protein-coding   |                |
| chr9-131 5.947218  | 1.030332 | 0.98708  | 1.043818 | 0.29657  | 0.981636 | chr9  | 1.32E+08 | 1.32E+08 | 0 | NA | intron (N (ATTATAT) | 36919 NM_00136E  | 642515 Hs. NM_00136E        | ENSG00000PRRT1B    | DSPD2 IF         | Iproline protein-coding     |                |
| chr17-80 8.895588  | 0.851713 | 0.815994 | 1.043774 | 0.29659  | 0.981636 | chr17 | 80009927 | 80010388 | 0 | NA | intron (Nintron (N  | 25715 NM_01902C  | 125058 Hs. 36981E NM_01902C | ENSG00000TBC1D16   | -                | TBC1 dome protein-coding    |                |
| chr10-11 7.888546  | -0.8787  | 0.84205  | -1.04352 | 0.296706 | 0.981636 | chr10 | 1.2E+08  | 1.2E+08  | 0 | NA | TTS (NM_C TTS (NM_C | 24363 NR_13666E  | 7073 Hs. 50120E NM_00325E   | ENSG00000TIAL1     | TCBP TIA         | TIAI cytc protein-coding    |                |
| chr2-200 7.888546  | -0.8787  | 0.84205  | -1.04352 | 0.296706 | 0.981636 | chr2  | 2E+08    | 2E+08    | 0 | NA | intron (NL2c LINE   | 59213 NM_00132E  | 130535 Hs. 60577E NM_15238E | ENSG00000KCTD18    | 6530404F         | Ipotassium protein-coding   |                |
| chr22-31 7.888546  | -0.8787  | 0.84205  | -1.04352 | 0.296706 | 0.981636 | chr22 | 31740131 | 31740405 | 0 | NA | intron (NAluSg SIN  | 9838 NM_17356E   | 253143 Hs. 43890E NM_17356E | ENSG00000PRL14L    | C22orf30         | proline i protein-coding    |                |
| chr3-12 7.888546   | -0.8787  | 0.84205  | -1.04352 | 0.296706 | 0.981636 | chr3  | 1.28E+08 | 1.28E+08 | 0 | NA | intron (Nintron (N  | 49407 NM_17202E  | 80325 Hs. 10781E NM_03254E  | ENSG00000ABTB1     | BPOZ BTBε        | ankyrin i protein-coding    |                |
| chr3-194 7.888546  | -0.8787  | 0.84205  | -1.04352 | 0.296706 | 0.981636 | chr3  | 1.94E+08 | 1.94E+08 | 0 | NA | intron (NLIME3Cz L  | 25561 NM_02452A  | 79572 Hs. 52960E NM_02452A  | ENSG00000ATP13A3   | AFURS1           | ATPase Iε protein-coding    |                |
| chr2-390 10.00617  | 0.789328 | 0.756407 | 1.043523 | 0.296706 | 0.981636 | chr2  | 39032667 | 39032931 | 0 | NA | intron (NAluSx SIN  | -72455 NR_02838E | 37519E Hs. 65903E NR_02838E | ENSG00000LOC37519E | -                | uncharactcRNA               |                |
| chr1-212 6.469229  | 0.962353 | 0.922232 | 1.043504 | 0.296715 | 0.981636 | chr1  | 2.13E+08 | 2.13E+08 | 0 | NA | intron (NAluSx SIN  | 13625 NM_00104E  | 128387 Hs. 53053E NM_00104E | ENSG00000CTADN3    | -                | TatD DNase protein-coding   |                |
| chr10-68 6.469229  | 0.962353 | 0.922232 | 1.043504 | 0.296715 | 0.981636 | chr10 | 68199577 | 68200262 | 0 | NA | intron (NL2b LINE   | 32194 NM_14517E  | 220202 Hs. 17539E NM_14517E | ENSG00000ATOH7     | Math5 NCF        | atonal bε protein-coding    |                |
| chr11-86 6.469229  | 0.962353 | 0.922232 | 1.043504 | 0.296715 | 0.981636 | chr11 | 86321282 | 86321574 | 0 | NA | intron (NLIME1 LIN  | 19188 NM_00132E  | 51501 Hs. 28332E NM_01640E  | ENSG00000CHIKESHI  | C11orf73         | heat shoc protein-coding    |                |
| chr12-12 6.469229  | 0.962353 | 0.922232 | 1.043504 | 0.296715 | 0.981636 | chr12 | 1.23E+08 | 1.23E+08 | 0 | NA | Intergeni Intergeni | -26915 NM_00130C | 57605 Hs. 27275E NM_02084E  | ENSG00000PITPM2    | NIR-7 NIF        | phosphat i protein-coding   |                |
| chr15-67 6.469229  | 0.962353 | 0.922232 | 1.043504 | 0.296715 | 0.981636 | chr15 | 67586812 | 67588402 | 0 | NA | intron (NL3 LINE C  | 38513 NM_00120E  | 5607 Hs. 11419E NM_00275E   | ENSG00000MAP2K5    | HsT17454         | mitogen-ε protein-coding    |                |
| chr16-14 6.469229  | 0.962353 | 0.922232 | 1.043504 | 0.296715 | 0.981636 | chr16 | 14581379 | 14582881 | 0 | NA | intron (Nintron (N  | 48130 NM_00258E  | 5073 Hs. 25319E NM_00258E   | ENSG00000PARN      | DAN DKCBε        | poly (A)-s protein-coding   |                |
| chr9-104 6.469229  | 0.962353 | 0.922232 | 1.043504 | 0.296715 | 0.981636 | chr9  | 1.05E+08 | 1.05E+08 | 0 | NA | intron (Nintron (N  | 68158 NR_13076E  | 55335 Hs. 42929E NM_01837E  | ENSG00000NIPSNAP3E | FP944 NIF        | nipnasε protein-coding      |                |
| chr9-11 6.469229   | 0.962353 | 0.922232 | 1.043504 | 0.296715 | 0.981636 | chr9  | 1.16E+08 | 1.16E+08 | 0 | NA | intron (Nintron (N  | 118422 NM_00258I | 5069 Hs. 64359E NM_00258I   | ENSG00000PAPPA     | ASBAP2 E         | pappalys i protein-coding   |                |
| chr3-450 7.919977  | -0.8847  | 0.847873 | -1.04343 | 0.29675  | 0.981636 | chr3  | 45070652 | 45071133 | 0 | NA | Intergeni L2a LINE  | 40799 NM_00130E  | 7123 Hs. 47609E NM_00327E   | ENSG00000CLEC3B    | TN TNA           | C-type iε protein-coding    |                |
| chr2-223 7.649127  | 0.895255 | 0.858396 | 1.043253 | 0.296831 | 0.981636 | chr2  | 2.40E+08 | 2.40E+08 | 0 | NA | intron (Nintron (N  | 29902 NM_02291E  | 65080 Hs. 20355E NM_02291E  | ENSG00000MRPL44    | CXXPD16 L        | mitochon protein-coding     |                |
| chr3-113 6.681374  | 1.021231 | 0.979502 | 1.042602 | 0.297133 | 0.981636 | chr3  | 1.13E+08 | 1.13E+08 | 0 | NA | intron (NSVA_C Ret  | -17204 NM_01833E | 55779 Hs. 58493E NM_01833E  | ENSG00000CFAP44    | SPGF20 W         | cilia anc protein-coding    |                |
| chr1-12 5.375838   | -1.06587 | 1.022603 | -1.04231 | 0.297268 | 0.981636 | chr1  | 42937051 | 42937967 | 0 | NA | intron (Nintron (N  | 21359 NM_00651E  | 6513 Hs. 473721 NM_00651E   | ENSG00000SLC2A1    | CSE DYT17        | solute εε protein-coding    |                |
| chr10-12 5.375838  | -1.06587 | 1.022603 | -1.04231 | 0.297268 | 0.981636 | chr10 | 17437    | 17437    | 0 | NA | intron (NMIRb SINE  | 17437 NM_018117  | 55717 Hs. 14444E NM_018117  | ENSG00000WDR11     | BRWD2 DR         | WD repeat protein-coding    |                |
| chr12-12 5.375838  | -1.06587 | 1.022603 | -1.04231 | 0.297268 | 0.981636 | chr12 | 1.23E+08 | 1.23E+08 | 0 | NA | TTS (NM_C TTS (NM_C | 2771 NM_00127E   | 51329 Hs. 103561 NM_01663E  | ENSG00000CARL6IP4  | SFRS20 S         | FADP ribos protein-coding   |                |
| chr2-232 5.375838  | -1.06587 | 1.022603 | -1.04231 | 0.297268 | 0.981636 | chr2  | 2.32E+08 | 2.32E+08 | 0 | NA | intron (N MamRep137 | 64141 NR_046477  | 129563 Hs. 73223E NM_15238E | ENSG00000DIS3L2    | FAM6A PIR        | DIS3 like protein-coding    |                |
| chr22-17 5.375838  | -1.06587 | 1.022603 | -1.04231 | 0.297268 | 0.981636 | chr22 | 17821170 | 17821628 | 0 | NA | intron (Nintron (N  | 44109 NR_10371E  | 200298 Hs. 51739E NR_10371E | ENSG00000LINC0052E | C22orf37         | long intncRNA               |                |
| chr10-13 9.484163  | 0.821056 | 0.787741 | 1.042293 | 0.297276 | 0.981636 | chr10 | 13631036 | 13631557 | 0 | NA | TTS (NM_C TTS (NM_C | 44331 NM_00367E  | 8559 Hs. 66064E NM_00367E   | ENSG00000PRPF18    | PRP18 h          | Prpre-mRNA protein-coding   |                |
| chr13-39 9.484163  | 0.821056 | 0.787741 | 1.042293 | 0.297276 | 0.981636 | chr13 | 39014124 | 39014433 | 0 | NA | exon (NM exon (NM   | -23419 NM_001144 | 161003 Hs. 32779E NM_14528E | ENSG00000STOML3    | Epb7.21 S        | stomatoin protein-coding    |                |
| chr11-17 4.187898  | -1.20524 | 1.156444 | -1.04219 | 0.297323 | 0.981636 | chr11 | 17309211 | 17309967 | 0 | NA | exon (NM exon (NM   | 32619 NM_00135E  | 4925 Hs. 65459E NM_00501E   | ENSG00000NUCB2     | HEL-S-10ε        | nucleobir protein-coding    |                |
| chr12-31 4.187898  | -1.20524 | 1.156444 | -1.04219 | 0.297323 | 0.981636 | chr12 | 31097041 | 31097808 | 0 | NA | intron (NAluSc8 SI  | 23564 NM_00125E  | 1663 Hs. 44396E NM_00439E   | ENSG00000CDDX11    | CHL1 CHL         | FDEAD/H-εc protein-coding   |                |
| chr2-18 4.187898   | -1.20524 | 1.156444 | -1.04219 | 0.297323 | 0.981636 | chr2  | 1.9E+08  | 1.9E+08  | 0 | NA | intron (NMERS DNA   | 90882 NM_00132E  | 5378 Hs. 11174E NM_00053A   | ENSG00000PMS1      | HNPPC3 M         | PMS1 homc protein-coding    |                |
| chr21-46 4.187898  | -1.20524 | 1.156444 | -1.04219 | 0.297323 | 0.981636 | chr21 | 46310314 | 46311324 | 0 | NA | intron (Nintron (N  | 7401 NM_00128E   | 54058 Hs. 23657E NM_05818E  | ENSG00000C21orf58  | -                | chromoson protein-coding    |                |
| chr22-40 4.187898  | -1.20524 | 1.156444 | -1.04219 | 0.297323 | 0.981636 | chr22 | 40919641 | 40920135 | 0 | NA | intron (NLIME2 LIN  | -31490 NM_01424E | 9978 Hs. 47494E NM_01424E   | ENSG00000CRBX1     | BA554C12.        | ring-box protein-coding     |                |
| chr7-97 4.187898   | -1.20524 | 1.156444 | -1.04219 | 0.297323 | 0.981636 | chr7  | 97856224 | 97857361 | 0 | NA | exon (NM exon (NM   | 15373 NM_13343E  | 440 Hs. 48920E NM_00167E    | ENSG00000ASNS      | ASNSD TS         | asparag i protein-coding    |                |
| chr11-28 4.154616  | -1.21641 | 1.167273 | -1.0421  | 0.297367 | 0.981636 | chr11 | 28067643 | 28069841 | 0 | NA | intron (Nintron (N  | 11927 NR_030341  | 693195 NR_030341            | ENSG00000MIR610    | MIRN610          | microRNA ncRNA              |                |
| chr2-22 4.154616   | -1.21641 | 1.167273 | -1.0421  | 0.297367 | 0.981636 | chr2  | 2.25E+08 | 2.25E+08 | 0 | NA | intron (Nintron (N  | 132880 NM_00129C | 55619 Hs. 46578 NM_01468E   | ENSG00000DOCK10    | DRIP2 N          | bl dedicator protein-coding |                |
| chr5-98 4.154616   | -1.21641 | 1.167273 | -1.0421  | 0.297367 | 0.981636 | chr5  | 98882705 | 98884535 | 0 | NA | intron (NLIPB1 LIN  | 42914 NM_00127E  | 1105 Hs. 64346E NM_00127E   | ENSG00000CHD1      | CHD-1 PII        | chromodon protein-coding    |                |
| chr10-30 9.980751  | 0.785379 | 0.753833 | 1.041847 | 0.297482 | 0.981636 | chr10 | 30022347 | 30022873 | 0 | NA | intron (Nintron (N  | 36976 NM_00135C  | 57608 Hs. 53395E NM_02084E  | ENSG00000JCAD      | KIAA1462         | junctionε protein-coding    |                |
| chr1-58 7.14.30619 | -0.66101 | 0.634472 | -1.04183 | 0.297489 | 0.981636 | chr1  | 58781095 | 58783117 | 0 | NA | exon (NM exon (NM   | 1941 NM_00222E   | 3725 Hs. 69668E NM_00222E   | ENSG00000JUN       | AP-1 AP1         | Jun protc protein-coding    |                |
| chr21-31 7.419231  | -0.9309  | 0.893584 | -1.04176 | 0.297521 | 0.981636 | chr21 | 31702921 | 31703313 | 0 | NA | intron (Nintron (N  | 29001 NM_00114E  | 57466 Hs. 17255 NM_02070E   | ENSG00000SCAF4     | SFRS15 S         | FRS-relate protein-coding   |                |
| chr22-41 8.20442   | 0.85405  | 0.820272 | 1.041179 | 0.297792 | 0.981636 | chr22 | 41884897 | 41888130 | 0 | NA | intron (NLIME3 LIN  | -14431 NR_029507 | 407039 NR_029507            | ENSG00000MIR33A    | MIR33 MI         | microRNA ncRNA              |                |
| chr5-37 8.20442    | 0.85405  | 0.820272 | 1.041179 | 0.297792 | 0.981636 | chr5  | 37446188 | 37447009 | 0 | NA | intron (NLIPA5 LIN  | 67280 NM_00134E  | 551100 Hs. 21369E NM_01803A | ENSG00000WDR70     | WD               | repeat protein-coding       |                |
| chr8-10 8.20442    | 0.85405  | 0.820272 | 1.041179 | 0.297792 | 0.981636 | chr8  | 1.06E+08 | 1.06E+08 | 0 | NA | intron (NMSTB-int   | 72397 NR_125797  | 1.03E+08 H                  |                    |                  |                             |                |

|                    |          |          |          |          |          |       |           |          |      |                     |                   |                            |                      |                                      |                             |
|--------------------|----------|----------|----------|----------|----------|-------|-----------|----------|------|---------------------|-------------------|----------------------------|----------------------|--------------------------------------|-----------------------------|
| chr3-1701 5.434544 | -1.0471  | 1.010165 | -1.03656 | 0.29994  | 0.981636 | chr3  | 1.7E+08   | 1.7E+08  | 0 NA | intron (Nintron (N  | 57461 NM_024947   | 80012 Hs. 529592NM_024947  | ENSG000003CASS3      | EDR3 HPH2 polyhomec protein-coding   |                             |
| chr9-7032 5.434544 | -1.0471  | 1.010165 | -1.03656 | 0.29994  | 0.981636 | chr9  | 70325714  | 70327613 | 0 NA | intron (NLM5 LIN    | 67685 NM_01511C   | 23137 Hs. 534189NM_01511C  | ENSG000003SMC5       | SMC5L1 structure protein-coding      |                             |
| chr13-274 6.435948 | 0.959271 | 0.925482 | 1.036509 | 0.299965 | 0.981636 | chr13 | 27441335  | 27441608 | 0 NA | intron (Nintron (N  | 8718 NM_001166    | 219402 Hs. 534582NM_152912 | ENSG000003MTIF3      | IF3mt mitochondon protein-coding     |                             |
| chr16-286 6.435948 | 0.959271 | 0.925482 | 1.036509 | 0.299965 | 0.981636 | chr16 | 28662364  | 28662897 | 0 NA | intron (NHERV LI    | 4047 NR_039742    | 1.01E+08                   | NR_039742            | ENSG000003MIR4517                    | mir-4517 microRNA ncRNA     |
| chr19-96 6.435948  | 0.959271 | 0.925482 | 1.036509 | 0.299965 | 0.981636 | chr19 | 9636019   | 9636787  | 0 NA | IntergeniHERV1B-int | 15071 NR_122038   | 284385 Hs. 651747NM_001242 | ENSG000003ZNF561-AS1 | C19orf82 ZNF561 arncRNA              |                             |
| chr19-121 6.435948 | 0.959271 | 0.925482 | 1.036509 | 0.299965 | 0.981636 | chr19 | 12175420  | 12175677 | 0 NA | intron (NLM1C LIN   | 12452 NM_003437   | 7695 Hs. 479874NM_003437   | ENSG000003ZNF136     | pH2-20 zinc fing protein-coding      |                             |
| chr9-129 6.435948  | 0.959271 | 0.925482 | 1.036509 | 0.299965 | 0.981636 | chr9  | 1.29E+08  | 1.29E+08 | 0 NA | intron (Nintron (N  | 14137 NR_163192   | 56904 Hs. 460238NM_020144  | ENSG000003SH3GLB2    | PP6569 PF SH3 domain protein-coding  |                             |
| chr7-8395 5.367981 | -1.06383 | 1.026971 | -1.03589 | 0.300255 | 0.981636 | chr7  | 83959733  | 83959932 | 0 NA | 3' UTR (N3' UTR (N  | 234957 NM_00608C  | 10371 Hs. 252451NM_00608C  | ENSG000003SEMA3A     | COLL11 HHI semaphorin protein-coding |                             |
| chr10-396 66.78385 | 0.393906 | 0.380396 | 1.035514 | 0.300429 | 0.981636 | chr10 | 39967518  | 39968398 | 0 NA | IntergeniALR/Alpha  | 1271362 NR_04500C | 399746 Hs. 742607NR_045000 | ACTR3BP5             | FKSG74 ACTR3B ps pseudo              |                             |
| chr11-96 6.657616  | -0.9457  | 0.91329  | -1.03549 | 0.300441 | 0.981636 | chr11 | 96383076  | 96384206 | 0 NA | intron (Nintron (N  | 6175 NM_001363    | 79780 Hs. 525088NM_014144  | ENSG000003CCDC82     | HSPC048 coiled-co protein-coding     |                             |
| chr16-503 6.657616 | -0.9457  | 0.91329  | -1.03549 | 0.300441 | 0.981636 | chr16 | 50325031  | 50325855 | 0 NA | intron (Nintron (N  | 32827 NR_106822   | 1.02E+08                   | NR_106822            | ENSG000003MIR6771                    | hsa-mir-6771 microRNA ncRNA |
| chr17-664 6.657616 | -0.9457  | 0.91329  | -1.03549 | 0.300441 | 0.981636 | chr17 | 6642832   | 6644630  | 0 NA | 3' UTR (N3' UTR (N  | 2671 NM_032731    | 84817 Hs. 408233NM_032731  | ENSG000003TXNDC17    | TRP14 TXN thioredox protein-coding   |                             |
| chr2-8747 6.657616 | -0.9457  | 0.91329  | -1.03549 | 0.300441 | 0.981636 | chr2  | 87478599  | 87481682 | 0 NA | intron (Nintron (N  | 10190 NR_146466   | 112597 Hs. 652166NR_024204 | ENSG000003CYTOR      | C2orf59 L cytoskelncRNA              |                             |
| chr20-564 6.657616 | -0.9457  | 0.91329  | -1.03549 | 0.300441 | 0.981636 | chr20 | 56415570  | 56415973 | 0 NA | intron (Nintron (N  | 3577 NM_001164    | 57091 Hs. 473144NM_020354  | ENSG000003CASC4      | C2orf32 Cas scaff protein-coding     |                             |
| chr22-41 6.657616  | -0.9457  | 0.91329  | -1.03549 | 0.300441 | 0.981636 | chr22 | 41512436  | 41512888 | 0 NA | intron (Nintron (N  | 31808 NM_001018   | 171568 Hs. 712617NM_138333 | ENSG000003POLR3H     | RPC22.9 F RNA polyn protein-coding   |                             |
| chr4-1691 6.657616 | -0.9457  | 0.91329  | -1.03549 | 0.300441 | 0.981636 | chr4  | 1.69E+08  | 1.69E+08 | 0 NA | intron (Nintron (N  | -110536 NM_032783 | 848669 Hs. 659311NM_032783 | ENSG000003CBRA4      | SDR45C1 carbonyl protein-coding      |                             |
| chr8-382 6.657616  | -0.9457  | 0.91329  | -1.03549 | 0.300441 | 0.981636 | chr8  | 38306933  | 38307356 | 0 NA | intron (N(AAAT)n S  | -37912 NM_001354  | 84513 Hs. 567619NM_032483  | ENSG000003PLPP5      | DPPL1 HTF phospholiprotein-coding    |                             |
| chr1-112 7.880688  | -0.87712 | 0.847127 | -1.0354  | 0.300482 | 0.981636 | chr1  | 1.13E+08  | 1.13E+08 | 0 NA | intron (NAluSc8 SI  | 44123 NM_138727   | 54879 Hs. 201921NM_017744  | ENSG000003STL7       | FAM4B ST7 suppressin protein-coding  |                             |
| chr12-121 7.880688 | -0.87712 | 0.847127 | -1.0354  | 0.300482 | 0.981636 | chr12 | 1.21E+08  | 1.21E+08 | 0 NA | TTS (NM_C TTS (NM_C | 19665 NR_106957   | 1.02E+08                   | NR_106957            | ENSG000003MIR7107                    | hsa-mir-7107 microRNA ncRNA |
| chr13-44 6.68119   | -0.95093 | 0.918535 | -1.03527 | 0.300545 | 0.981636 | chr13 | 44545344  | 44545776 | 0 NA | intron (Nintron (N  | -30336 NR_038381  | 641467 Hs. 624196NR_038381 | ENSG000003TSC22D1-1  | TSC22D1 ncRNA                        |                             |
| chr16-65 6.68119   | -0.95093 | 0.918535 | -1.03527 | 0.300545 | 0.981636 | chr16 | 65113862  | 65114886 | 0 NA | intron (NMTB SINE   | 7689 NM_001797    | 1009 Hs. 116471NM_001797   | ENSG000003CDH11      | CAD11 CDF cadherin protein-coding    |                             |
| chr16-16 8.212278  | 0.85196  | 0.822991 | 1.0352   | 0.300576 | 0.981636 | chr16 | 1639775   | 1640766  | 0 NA | intron (NLM1E LIN   | 25630 NM_02082E   | 57585 Hs. 603676NM_02082E  | ENSG000003CRAMP1     | CRAMP1L C cramped c protein-coding   |                             |
| chr16-19 8.212278  | 0.85196  | 0.822991 | 1.0352   | 0.300576 | 0.981636 | chr16 | 23629658  | 23630022 | 0 NA | exon (NM exon (NM   | 11517 NM_02467E   | 79728 Hs. 444664NM_02467E  | ENSG000003PALB2      | FANCN PNC partner e protein-coding   |                             |
| chr19-237 8.212278 | 0.85196  | 0.822991 | 1.0352   | 0.300576 | 0.981636 | chr19 | 19729174  | 19730979 | 0 NA | intron (NAluSx SIN  | 3036 NM_02103C    | 7561 Hs. 659932NM_02103C   | ENSG000003ZNF14      | GIOT-4 KC zinc fing protein-coding   |                             |
| chr2-3881 8.212278 | 0.85196  | 0.822991 | 1.0352   | 0.300576 | 0.981636 | chr2  | 38810683  | 38811603 | 0 NA | intron (Nintron (N  | 32933 NM_02477E   | 79833 Hs. 143818NM_02477E  | ENSG000003GEM16      | - gem nucle protein-coding           |                             |
| chr2-238 8.212278  | 0.85196  | 0.822991 | 1.0352   | 0.300576 | 0.981636 | chr2  | 2.38E+08  | 2.38E+08 | 0 NA | intron (NAluJb SIN  | 35884 NM_001133   | 26136 Hs. 631899NM_01565C  | ENSG000003TRAF3IP1   | IFT54 MIF TRAF3 int protein-coding   |                             |
| chr22-378 8.212278 | 0.85196  | 0.822991 | 1.0352   | 0.300576 | 0.981636 | chr22 | 37837970  | 37838471 | 0 NA | intron (NAluV SINE  | 5868 NM_001363    | 129138 Hs. 135255NM_138797 | ENSG000003ANKRD54    | LIATF ankyrin i protein-coding       |                             |
| chr3-185 8.212278  | 0.85196  | 0.822991 | 1.0352   | 0.300576 | 0.981636 | chr3  | 1.86E+08  | 1.86E+08 | 0 NA | intron (Nintron (N  | -20917 NR_12632E  | 646600 Hs. 647945NR_027317 | ENSG000003IGFBP2-1   | C3orf65 IGF2BP2 ncRNA                |                             |
| chr6-443 8.212278  | 0.85196  | 0.822991 | 1.0352   | 0.300576 | 0.981636 | chr6  | 44305177  | 44305909 | 0 NA | intron (Nintron (N  | 7804 NM_02074E    | 57505 Hs. 158381NM_02074E  | ENSG000003AARS2      | AARSL COA alanyl-tE protein-coding   |                             |
| chr6-1211 8.212278 | 0.85196  | 0.822991 | 1.0352   | 0.300576 | 0.981636 | chr6  | 21.21E+08 | 1.21E+08 | 0 NA | intron (Nintron (N  | 208994 NM_15273C  | 221322 Hs. 121396NM_15273C | ENSG000003TBC1D32    | BROMI C6c TBC1 dome protein-coding   |                             |
| chr7-745 8.212278  | 0.85196  | 0.822991 | 1.0352   | 0.300576 | 0.981636 | chr7  | 74539005  | 74540271 | 0 NA | intron (NAluSx SIN  | -56330 NR_162111  | 1.13E+08                   | NR_162111            | MIR10525                             | - microRNA ncRNA            |
| chr8-100 8.212278  | 0.85196  | 0.822991 | 1.0352   | 0.300576 | 0.981636 | chr8  | 1.01E+08  | 1.01E+08 | 0 NA | 3' UTR (N3' UTR (N  | 37299 NR_00127C   | 157567 Hs. 530199NM_198401 | ENSG000003ANKRD46    | ANK-S GEM ankyrin i protein-coding   |                             |
| chr9-127 8.212278  | 0.85196  | 0.822991 | 1.0352   | 0.300576 | 0.981636 | chr9  | 1.27E+08  | 1.27E+08 | 0 NA | intron (NAluSx SIN  | 7594 NM_00100E    | 90678 Hs. 495188NM_138361  | ENSG000003LRSAM1     | CM2P2 RIF leucine i protein-coding   |                             |
| chr10-414 15.20019 | 0.666307 | 0.64395  | 1.034718 | 0.3008   | 0.981636 | chr10 | 41494385  | 41495161 | 0 NA | IntergeniALR/Alpha  | 873272 NR_02438C  | 441666 Hs. 255722NR_02438C | ENSG000003LOC441666  | - zinc fing pseudo                   |                             |
| chr1-565 5.426686  | -1.04499 | 1.010135 | -1.03451 | 0.300898 | 0.981636 | chr1  | 56564585  | 56567578 | 0 NA | intron (Nintron (N  | 13432 NM_00371E   | 8613 Hs. 405156NM_00371E   | ENSG000003PLPP3      | Dri42 LPF phospholiprotein-coding    |                             |
| chr1-100 5.426686  | -1.04499 | 1.010135 | -1.03451 | 0.300898 | 0.981636 | chr1  | 1E+08     | 1E+08    | 0 NA | intron (NAluSx3 SI  | -25972 NM_03305E  | 64645 Hs. 124156NM_03305E  | ENSG000003MFS14A     | HIAT1 major fac protein-coding       |                             |
| chr11-167 5.426686 | -1.04499 | 1.010135 | -1.03451 | 0.300898 | 0.981636 | chr11 | 16757283  | 16758289 | 0 NA | 3' UTR (N3' UTR (N  | 19139 NM_014267   | 10944 Hs. 368222NM_014267  | ENSG000003C11orf58   | IMAGE145C chromoson protein-coding   |                             |
| chr13-32 5.426686  | -1.04499 | 1.010135 | -1.03451 | 0.300898 | 0.981636 | chr13 | 32682962  | 32685007 | 0 NA | exon (NM exon (NM   | 97535 NM_015032   | 23047 Hs. 744901NM_015032  | ENSG000003PDS5B      | APRN ASE PDS5 cohe protein-coding    |                             |
| chr2-2024 5.426686 | -1.04499 | 1.010135 | -1.03451 | 0.300898 | 0.981636 | chr2  | 20249905  | 20250747 | 0 NA | 3' UTR (N3' UTR (N  | -24893 NM_00100E  | 6382 Hs. 224607NM_002997   | ENSG000003SDC1       | C13orf35 syndecan protein-coding     |                             |
| chr2-5821 5.426686 | -1.04499 | 1.010135 | -1.03451 | 0.300898 | 0.981636 | chr2  | 58211016  | 58211922 | 0 NA | intron (NTHE1B-int  | 29911 NR_156742   | 55120 Hs. 631899NM_01806E  | ENSG000003FANCL      | FAAP43 PFA comple protein-coding     |                             |
| chr2-144 5.426686  | -1.04499 | 1.010135 | -1.03451 | 0.300898 | 0.981636 | chr2  | 1.44E+08  | 1.44E+08 | 0 NA | intron (Nintron (N  | -57274 NM_001354  | 79712 Hs. 44780 NM_02465E  | ENSG000003GTDCl      | Hmat-Xa nglycosyl protein-coding     |                             |
| chr2-2016 5.426686 | -1.04499 | 1.010135 | -1.03451 | 0.300898 | 0.981636 | chr2  | 2.02E+08  | 2.02E+08 | 0 NA | intron (Nintron (N  | -10040 NM_00116E  | 151254 Hs. 335788NM_15252E | ENSG000003C2DC6      | ALS2CR11 C2 calci protein-coding     |                             |
| chr3-481 5.426686  | -1.04499 | 1.010135 | -1.03451 | 0.300898 | 0.981636 | chr3  | 48180186  | 48182473 | 0 NA | intron (NLM1E3 LIN  | 7088 NM_00178E    | 993 Hs. 437705NM_00178E    | ENSG000003CDC25A     | CDC25A2 cell divi protein-coding     |                             |
| chr4-159 5.426686  | -1.04499 | 1.010135 | -1.03451 | 0.300898 | 0.981636 | chr4  | 1.59E+08  | 1.59E+08 | 0 NA | intron (Nintron (N  | 12904 NM_001351   | 9693 Hs. 744884NM_014247   | ENSG000003RAPGEF2    | CNrasGEF WPC guanin protein-coding   |                             |
| chr4-183 5.426686  | -1.04499 | 1.010135 | -1.03451 | 0.300898 | 0.981636 | chr4  | 1.83E+08  | 1.83E+08 | 0 NA | intron (Nintron (N  | 30940 NR_12647E   | 1.02E+08                   | Hs. 57071NR_12647E   | ENSG000003WWC2-AS1                   | RWC2 antincRNA              |
| chr5-810 5.426686  | -1.04499 | 1.010135 | -1.03451 | 0.300898 | 0.981636 | chr5  | 81063364  | 81064400 | 0 NA | intron (NHALIME LI  | -102975 NR_10501E | 1.03E+08                   | Hs. 737156NR_10501E  | ENSG000003RASGRF2-1                  | RASGRF2 ncRNA               |
| chr5-969 5.426686  | -1.04499 | 1.010135 | -1.03451 | 0.300898 | 0.981636 | chr5  | 96903757  | 96904733 | 0 NA | intron (Nintron (N  | 28306 NR_137637   | 64167 Hs. 482911NM_02235C  | ENSG000003ERAP2      | L-RAP LR1 endoplasm protein-coding   |                             |
| chr9-8601 5.426686 | -1.04499 | 1.010135 | -1.03451 | 0.300898 | 0.981636 | chr9  | 86019419  | 86020171 | 0 NA | intron (NLM1E4b LI  | 78276 NM_001321   | 60560 Hs. 436099NM_02192E  | ENSG000003NAA35      | EGAP MAK1N(alpha)- protein-coding    |                             |
| chr9-9807 5.426686 | -1.04499 | 1.010135 | -1.03451 | 0.300898 | 0.981636 | chr9  | 98079050  | 98079708 | 0 NA | intron (Nintron (N  | 22647 NM_01894E   | 54187 Hs. 522311NM_01894E  | ENSG000003NANS       | HEL-S-10CN-acetyl protein-coding     |                             |
| chr19-144 7.821982 | -0.88979 | 0.860348 | -1.03422 | 0.301031 | 0.981636 | chr19 | 14403035  | 14403234 | 0 NA | intron (NAluSx SIN  | 16207 NM_005804   | 10212 Hs. 311606NM_005804  | ENSG000003DDX39A     | BAT1 BAT1DEXD-box protein-coding     |                             |
| chr20-36 7.821982  | -0.88979 | 0.860348 | -1.03422 | 0.301031 | 0.981636 | chr20 | 36912119  | 36912318 | 0 NA | intron (Nintron (N  | 36080 NM_08062E   | 140711 Hs. 472633NM_08062E | ENSG000003TLDC2      | C2orf11E TBC/LysM- protein-coding    |                             |
| chr10-49 6.683191  | 1.141302 | 1.103749 | 1.034023 | 0.301125 | 0.981636 | chr10 | 49516143  | 49516731 | 0 NA | exon (NM exon (NM   | 7844 NM_17075E    | 267004 Hs. 49063 NM_17075E | ENSG                 |                                      |                             |



|                     |          |          |          |          |          |       |                 |          |   |      |                     |                    |                   |                      |                          |                            |                        |
|---------------------|----------|----------|----------|----------|----------|-------|-----------------|----------|---|------|---------------------|--------------------|-------------------|----------------------|--------------------------|----------------------------|------------------------|
| chr17-416 7.913969  | -0.87155 | 0.84828  | -1.02744 | 0.304215 | 0.981636 | chr17 | 41806783        | 41807020 | + | 0 NA | intron (Nintron (N  | 5048 NM_006455     | 10609 Hs. 446459  | ENSG000003P3H4       | LEPREL4 N                | prolyl 3-protein-coding    |                        |
| chr8-1178 7.913969  | -0.87155 | 0.84828  | -1.02744 | 0.304215 | 0.981636 | chr8  | 1.18E+08        | 1.18E+08 | + | 0 NA | intron (Nintron (N  | 96127 NR_145799    | 1.1E+08           | NR_145799            | SNORD168                 | small nucsnRNA             |                        |
| chr15-443 3.677444  | -1.37819 | 1.342062 | -1.02692 | 0.304457 | 0.981636 | chr15 | 44380785        | 44381064 | + | 0 NA | exon (NM_exon (NM_  | -46705 NM_01639E   | 51496 Hs. 497967  | ENSG000003CTD5PL2    | HSPC058 E                | CTD small protein-coding   |                        |
| chr1-2401 8.186854  | 0.847279 | 0.825086 | 1.026898 | 0.304468 | 0.981636 | chr1  | 2.4E+08         | 2.4E+08  | + | 0 NA | intron (Nintron (N  | 67840 NM_02006E    | 56715 Hs. 24889   | ENSG000003FM2E       | -                        | formin 2 protein-coding    |                        |
| chr15-416 8.186854  | 0.847279 | 0.825086 | 1.026898 | 0.304468 | 0.981636 | chr15 | 41536496        | 41537009 | + | 0 NA | intron (NMIR SINE   | 7505 NM_01554C     | 26015 Hs. 37104E  | ENSG000003RPA1P      | -                        | RNA polynprotein-coding    |                        |
| chr17-119 8.186854  | 0.847279 | 0.825086 | 1.026898 | 0.304468 | 0.981636 | chr17 | 11977213        | 11979457 | + | 0 NA | exon (NM_exon (NM_  | 19037 NM_14468C    | 7566 Hs. 37047E   | ENSG000003ZNF18      | HDSG1 K0                 | zinc fing protein-coding   |                        |
| chr6-3088 8.186854  | 0.847279 | 0.825086 | 1.026898 | 0.304468 | 0.981636 | chr6  | 30894668        | 30898594 | + | 0 NA | exon (NM_exon (NM_  | 5748 NR_03978E     | 1.01E+08          | NR_03978E            | ENSG000003MIR4640        | -                          | microRNA ncRNA         |
| chr11-201 5.385546  | -1.0511  | 1.023657 | -1.02681 | 0.304508 | 0.981636 | chr11 | 20119888        | 20119649 | + | 0 NA | 3' UTR (N3' UTR (N  | 41157 NM_00102E    | 120237            | NR_00102E            | ENSG000003DBX1           | -                          | developiprotein-coding |
| chr11-128 5.385546  | -1.0511  | 1.023657 | -1.02681 | 0.304508 | 0.981636 | chr11 | 1.28E+08        | 1.28E+08 | + | 0 NA | intron (Nintron (N  | 58211 NM_00523E    | 2113 Hs. 36943E   | ENSG000003ETS1       | ETS-1 EWS                | ETS protc protein-coding   |                        |
| chr13-106 5.385546  | -1.0511  | 1.023657 | -1.02681 | 0.304508 | 0.981636 | chr13 | 1.07E+08        | 1.07E+08 | + | 0 NA | TTS (NM_C TTS (NM_C | -6378 NM_00409E    | 1948 Hs. 14923E   | ENSG000003EFN2E      | EPLG5 HT                 | ephrin B2 protein-coding   |                        |
| chr17-774 5.385546  | -1.0511  | 1.023657 | -1.02681 | 0.304508 | 0.981636 | chr17 | 77411378        | 77411617 | + | 0 NA | intron (NAluS4 SI   | 6420 NM_00129E     | 10801 Hs. 44093E  | ENSG000003SEPTIN9    | AF17q25 A                | septin 9 protein-coding    |                        |
| chr2-173 5.385546   | -1.0511  | 1.023657 | -1.02681 | 0.304508 | 0.981636 | chr2  | 1.73E+08        | 1.73E+08 | + | 0 NA | intron (Nintron (N  | 7097 NM_01665E     | 51776 Hs. 444451  | ENSG000003MAP3K20    | AZK CNM6                 | mitogen-ε protein-coding   |                        |
| chr2-2274 5.385546  | -1.0511  | 1.023657 | -1.02681 | 0.304508 | 0.981636 | chr2  | 20998 NM_00113E | 2.27E+08 | + | 0 NA | intron (NLM1B LI    | 3267 Hs. 35296E    | ENSG000003AGFG1   | HRB IAB              | FarfGAP wiprotein-coding |                            |                        |
| chr20-205 5.385546  | -1.0511  | 1.023657 | -1.02681 | 0.304508 | 0.981636 | chr20 | 36907584        | 36907810 | + | 0 NA | intron (NAluSg4 LI  | 31559 NM_00129E    | 140711 Hs. 47263E | ENSG000003TLD2C      | C20orf11E                | TBC/LysM protein-coding    |                        |
| chr22-181 5.385546  | -1.0511  | 1.023657 | -1.02681 | 0.304508 | 0.981636 | chr22 | 18158065        | 18158414 | + | 0 NA | intron (NAluSg4 SI  | 8069 NM_017414     | 11274 Hs. 38260   | ENSG000003USP18      | ISG43 PTC                | ubiquitin protein-coding   |                        |
| chr4-1223 5.385546  | -1.0511  | 1.023657 | -1.02681 | 0.304508 | 0.981636 | chr4  | 1.22E+08        | 1.22E+08 | + | 0 NA | intron (Nintron (N  | -68917 NM_13924E   | 132612 Hs. 518957 | ENSG000003ADAD1      | Tenr                     | adenosine protein-coding   |                        |
| chr5-3587 5.385546  | -1.0511  | 1.023657 | -1.02681 | 0.304508 | 0.981636 | chr5  | 35874616        | 35877737 | + | 0 NA | exon (NM_exon (NM_  | 19285 NM_00218E    | 3575 Hs. 59174E   | ENSG000003IL7R       | CD127 CDW                | interleuk protein-coding   |                        |
| chr6-2475 5.385546  | -1.0511  | 1.023657 | -1.02681 | 0.304508 | 0.981636 | chr6  | 24785934        | 24787288 | + | 0 NA | TTS (NM_C TTS (NM_C | 11198 NM_001251    | 51053 Hs. 23489E  | ENSG000003GMNN       | Gem MGOR                 | geminin I protein-coding   |                        |
| chr7-1347 5.385546  | -1.0511  | 1.023657 | -1.02681 | 0.304508 | 0.981636 | chr7  | 1.35E+08        | 1.35E+08 | + | 0 NA | intron (Nintron (N  | 1587 NM_03313E     | 800 Hs. 49020E    | ENSG000003CALD1      | CDM H-CA                 | caldesmor protein-coding   |                        |
| chr8-1331 5.385546  | -1.0511  | 1.023657 | -1.02681 | 0.304508 | 0.981636 | chr8  | 1.33E+08        | 1.33E+08 | + | 0 NA | intron (Nintron (N  | 2356 NM_08083E     | 8840 Hs. 492974   | ENSG000003CCN4       | WISPI WIS                | cellular protein-coding    |                        |
| chrX-1415 5.385546  | -1.0511  | 1.023657 | -1.02681 | 0.304508 | 0.981636 | chrX  | 1415059         | 1415524  | + | 0 NA | non-codiron-codir   | 14760 NR_02671C    | 80161 Hs. 52185E  | ENSG000003ASMTL-AS1  | ASMTL-AS1                | cellular antncRNA          |                        |
| chrX-1015 5.385546  | -1.0511  | 1.023657 | -1.02681 | 0.304508 | 0.981636 | chrX  | 1.01E+08        | 1.01E+08 | + | 0 NA | intron (NLM1A LI    | 2149 NM_00119E     | 1.01E+08          | Hs. 43248E           | ENSG000003RPL36A-HN      | RPL36A-HN                  | protein-coding         |
| chr19-498 11.34774  | -0.72599 | 0.707094 | -1.02673 | 0.30455  | 0.981636 | chr19 | 49805909        | 49806109 | + | 0 NA | TTS (NM_C TTS (NM_C | 7283 NR_03326E     | 80199 Hs. 28880E  | ENSG000003CFUZ       | CPLANE3 F                | fuzzy plε protein-coding   |                        |
| chr5-5594 11.34774  | -0.72599 | 0.707094 | -1.02673 | 0.30455  | 0.981636 | chr5  | 55940822        | 55942726 | + | 0 NA | non-codiron-codir   | 53189 NM_175767    | 3572 Hs. 53208E   | ENSG000003IL6ST      | CDL30 CDW                | interleuk protein-coding   |                        |
| chr18-123 11.33202  | -0.72381 | 0.705099 | -1.02653 | 0.304641 | 0.981636 | chr18 | 12309583        | 12320977 | + | 0 NA | intron (NLM1E4a LI  | 7039 NM_00130E     | 84617 Hs. 193491  | ENSG000003TUBB6      | FPVPEP H                 | tubulin t protein-coding   |                        |
| chr2-691 11.33202   | -0.72381 | 0.705099 | -1.02653 | 0.304641 | 0.981636 | chr2  | 69152670        | 69153351 | + | 0 NA | intron (Nintron (N  | 49328 NR_03607E    | 1E+08             | NR_03607E            | ENSG000003MIR3126        | mir-3126                   | microRNA ncRNA         |
| chr14-105 9.921794  | 1.023739 | 0.997389 | 1.026419 | 0.304694 | 0.981636 | chr14 | 1.05E+08        | 1.05E+08 | + | 0 NA | intron (Nintron (N  | 28256 NM_14568E    | 2972 Hs. 424484   | ENSG000003BRF1       | BRF1 BRF-1               | BRF1 RNA protein-coding    |                        |
| chr12-502 6.616476  | -0.95047 | 0.926376 | -1.02601 | 0.304886 | 0.981636 | chr12 | 50208095        | 50208318 | + | 0 NA | intron (NAluSx3 SI  | -6673 NM_00124E    | 51474 Hs. 52541E  | ENSG000003LMA1A      | EPLIN LDI                | LIM domain protein-coding  |                        |
| chr2-8647 6.616476  | -0.95047 | 0.926376 | -1.02601 | 0.304886 | 0.981636 | chr2  | 86478268        | 86479068 | + | 0 NA | exon (NM_exon (NM_  | 37207 NM_00114E    | 55818 Hs. 55742E  | ENSG000003KDM3A      | JHDM2A JF                | lysine deprotein-coding    |                        |
| chr3-186 6.616476   | -0.95047 | 0.926376 | -1.02601 | 0.304886 | 0.981636 | chr3  | 1.88E+08        | 1.88E+08 | + | 0 NA | intron (Nintron (N  | -5133 NM_001167    | 4026 Hs. 52722E   | ENSG000003LPP        | -                        | LIM domain protein-coding  |                        |
| chr4-1187 6.616476  | -0.95047 | 0.926376 | -1.02601 | 0.304886 | 0.981636 | chr4  | 1.19E+08        | 1.19E+08 | + | 0 NA | intron (Nintron (N  | 64263 NM_01482E    | 9871 Hs. 189641   | ENSG000003SEC24D     | CLCRP2                   | SEC24 hom protein-coding   |                        |
| chr8-1802 6.616476  | -0.95047 | 0.926376 | -1.02601 | 0.304886 | 0.981636 | chr8  | 18021502        | 18021298 | + | 0 NA | intron (NMER57A-ir  | 61481 NM_00136E    | 427 Hs. 52741E    | ENSG000003ASAHI      | ATC ADCase               | N-acetyl sp protein-coding |                        |
| chr12-111 10.109599 | -0.74751 | 0.729074 | -1.02529 | 0.305227 | 0.981636 | chr12 | 1.1E+08         | 1.1E+08  | + | 0 NA | intron (Nintron (N  | 37091 NM_17066E    | 488 Hs. 55765E    | ENSG000003ATP2A2     | ATP2B2 DAF               | ATPase sp protein-coding   |                        |
| chr8-6156 5.360123  | -1.06184 | 1.035987 | -1.02496 | 0.305383 | 0.981636 | chr8  | 61564231        | 61565168 | + | 0 NA | intron (Nintron (N  | 125112 NM_001164   | 444 Hs. 33242E    | ENSG000003ASPH       | AAH BAH                  | Caspartate protein-coding  |                        |
| chr19-206 29.65707  | 0.509013 | 0.496841 | 1.024499 | 0.3056   | 0.981636 | chr19 | 26079823        | 26080137 | + | 0 NA | IntergeniALR Alpha  | -1713451 NR_14673E | 1.02E+08          | Hs. 567934           | ENSG000003LOC101927-     | uncharactncRNA             |                        |
| chr10-405 29.17805  | 0.517456 | 0.505104 | 1.024455 | 0.30562  | 0.981636 | chr10 | 40975909        | 40976161 | + | 0 NA | IntergeniALR Alpha  | 1392010 NR_02438C  | 441666 Hs. 25572E | ENSG000003LOC44166E- | zinc fingpseudo          |                            |                        |
| chr11-126 6.445655  | 0.970656 | 0.947493 | 1.024446 | 0.305625 | 0.981636 | chr11 | 1.26E+08        | 1.26E+08 | + | 0 NA | TTS (NM_C TTS (NM_C | -10093 NM_00135E   | 28960 Hs. 50424E  | ENSG000003DCPS       | ARS DCS1                 | decapping protein-coding   |                        |
| chr1-123 40.46533   | 0.421614 | 0.411731 | 1.024002 | 0.305834 | 0.981636 | chr1  | 1.23E+08        | 1.23E+08 | + | 0 NA | IntergeniALR Alpha  | 1539401 NR_00395E  | 647121 Hs. 69768E | ENSG000003EMBP1      | -                        | embin g ppsudo             |                        |
| chr10-136 6.088456  | -1.03808 | 1.013757 | -1.024   | 0.305837 | 0.981636 | chr10 | 13342259        | 13342513 | + | 0 NA | intron (NAluSx SIN  | 5907 NM_012247     | 22929 Hs. 124027  | ENSG000003SEPHS1     | SELD SPS                 | selenophc protein-coding   |                        |
| chr1-1114 5.238484  | 1.047355 | 1.023788 | 1.02302  | 0.306299 | 0.981636 | chr1  | 1.11E+08        | 1.11E+08 | + | 0 NA | IntergeniL2c LINE   | -3864 NM_00130C    | 128346 Hs. 28801E | ENSG000003C1orf162   | -                        | chromoson protein-coding   |                        |
| chr1-122 5.238484   | 1.047355 | 1.023788 | 1.02302  | 0.306299 | 0.981636 | chr1  | 1.23E+08        | 1.23E+08 | + | 0 NA | IntergeniALR Alpha  | 1235972 NR_00395E  | 647121 Hs. 69768E | ENSG000003EMBP1      | -                        | embin g ppsudo             |                        |
| chr12-127 5.238484  | 1.047355 | 1.023788 | 1.02302  | 0.306299 | 0.981636 | chr12 | 1.21E+08        | 1.21E+08 | + | 0 NA | 3' UTR (N3' UTR (N  | 39121 NM_000017    | 35 Hs. 50707E     | ENSG000003ACADS      | ACAD3 SC                 | acyl-CoA protein-coding    |                        |
| chr20-515 5.238484  | 1.047355 | 1.023788 | 1.02302  | 0.306299 | 0.981636 | chr20 | 51598744        | 51600517 | + | 0 NA | 3' UTR (N3' UTR (N  | -36791 NM_00113E   | 4773 Hs. 74414E   | ENSG000003NFATC2     | NFAT1 NF                 | nuclear f protein-coding   |                        |
| chr9-104 5.238484   | 1.047355 | 1.023788 | 1.02302  | 0.306299 | 0.981636 | chr9  | 1.05E+08        | 1.05E+08 | + | 0 NA | intron (Nintron (N  | 73153 NM_00550E    | 19 Hs. 659274     | ENSG000003ABCA1      | ABC-1 ABC                | ATP bindiprotein-coding    |                        |
| chr12-106 5.980499  | 1.033138 | 1.009982 | 1.022928 | 0.306342 | 0.981636 | chr12 | 1.06E+08        | 1.06E+08 | + | 0 NA | exon (NM_exon (NM_  | 18842 NM_00128E    | 255394 Hs. 696047 | ENSG000003TCP11L2    | -                        | t-complex protein-coding   |                        |
| chr9-133 5.980499   | 1.033138 | 1.009982 | 1.022928 | 0.306342 | 0.981636 | chr9  | 1.33E+08        | 1.33E+08 | + | 0 NA | intron (Nintron (N  | -4776 NM_001807    | 1056 Hs. 53325E   | ENSG000003CEL        | BAL BSDL                 | carboxyl protein-coding    |                        |
| chr11-464 8.220136  | 0.849805 | 0.831142 | 1.022454 | 0.306566 | 0.981636 | chr11 | 46434547        | 46434926 | + | 0 NA | intron (Nintron (N  | -17071 NR_03611E   | 1E+08             | NR_03611E            | ENSG000003MIR3160-       | mir-3160                   | microRNA ncRNA         |
| chr9-976 8.220136   | 0.849805 | 0.831142 | 1.022454 | 0.306566 | 0.981636 | chr9  | 97600852        | 97601517 | + | 0 NA | 3' UTR (N3' UTR (N  | 32184 NM_13924E    | 158427 Hs. 72323E | ENSG000003TSTD2      | C9orf97                  | thiosulfε protein-coding   |                        |
| chr4-2636 6.180443  | -1.01267 | 0.990526 | -1.02235 | 0.306614 | 0.981636 | chr4  | 2636386         | 2636993  | + | 0 NA | intron (NCharliel   | 11257 NR_04633E    | 8603 Hs. 652364   | ENSG000003FAM193A    | C4orf8 RE                | famil y wiprotein-coding   |                        |
| chr14-61 9.655353   | -0.78422 | 0.767087 | -1.02234 | 0.306622 | 0.981636 | chr14 | 61060879        | 61061251 | + | 0 NA | intron (NLIHS LINE  | -79375 NM_00135E   | 57570 Hs. 38015E  | ENSG000003TRMT5      | COXP26 K                 | tRNA metl protein-coding   |                        |
| chr22-192 7.774395  | 0.908351 | 0.888557 | 1.022277 | 0.30665  | 0.981636 | chr22 | 19222653        | 19222948 | + | 0 NA | exon (NM_exon (NM_  | -43937 NR_04629E   | 6576 Hs. 111024   | ENSG000003SLC25A1    | CMS23 CTF                | solute cε protein-coding   |                        |
| chr1                |          |          |          |          |          |       |                 |          |   |      |                     |                    |                   |                      |                          |                            |                        |



|                    |          |          |          |          |          |       |          |          |   |   |    |                    |          |           |          |           |                    |                     |            |                 |                               |                       |
|--------------------|----------|----------|----------|----------|----------|-------|----------|----------|---|---|----|--------------------|----------|-----------|----------|-----------|--------------------|---------------------|------------|-----------------|-------------------------------|-----------------------|
| chr19-472.8.742148 | 0.811464 | 0.799103 | 0.015468 | 0.309883 | 0.981636 | chr19 | 47260529 | 47261640 | + | 0 | NA | intron (Nintron (N | 4559     | NM_015603 | 26093    | Hs.227782 | NM_015603          | ENSG000000CCDC9     | -          |                 | coiled-coiled protein-coding  |                       |
| chr3-3164.8.742148 | 0.811464 | 0.799103 | 0.015468 | 0.309883 | 0.981636 | chr3  | 3164210  | 3165443  | + | 0 | NA | intron (Nintron (N | 14891    | NM_016302 | 51185    | Hs.18925  | NM_016302          | ENSG000000CRBN      | MRT2       | MRT2            | cerebrin protein-coding       |                       |
| chr18-765.7.024523 | 0.907908 | 0.894079 | 0.015468 | 0.309883 | 0.981636 | chr18 | 76900966 | 76901530 | + | 0 | NA | intron (Nintron (N | 77088    | NM_007345 | 7776     | Hs.719137 | NM_007345          | ENSG000000ZNF236    | ZNF236A    | ZNF236          | zinc finger protein-coding    |                       |
| chr7-8026.6.510369 | 0.962584 | 0.947933 | 0.015468 | 0.309888 | 0.981636 | chr7  | 8026350  | 8027942  | + | 0 | NA | intron (Nintron (N | 58350    | NM_138422 | 113263   | Hs.13167  | NM_138422          | ENSG000000GLCC11    | FAM117C    | GLUCO           | glucocorticoid protein-coding |                       |
| chr1-1784.6.999099 | 0.90242  | 0.888815 | 0.015307 | 0.30996  | 0.981636 | chr1  | 1784085  | 1784177  | + | 0 | NA | 3' UTR (N3' UTR (N | -39354   | NM_001117 | 84066    | Hs.534501 | NM_001117          | ENSG000000TEX35     | Clorf49    | TESTIS          | testis e protein-coding       |                       |
| chr1-2131.6.999099 | 0.90242  | 0.888815 | 0.015307 | 0.30996  | 0.981636 | chr1  | 2131085  | 2131177  | + | 0 | NA | intron (Nintron (N | 62053    | NM_012424 | 26750    | Hs.59141  | NM_012424          | ENSG000000RPS6K1    | RPK118     | RPS6K1          | ribosomal protein-coding      |                       |
| chr15-634.8.161431 | 0.842527 | 0.829844 | 0.015283 | 0.309971 | 0.981636 | chr15 | 63676511 | 63676750 | + | 0 | NA | intron (Nintron (N | -75803   | NR_034088 | 1E+08    | Hs.63116  | NR_034088          | ENSG000000USP3-AS1  | -          | USP3            | antincRNA                     |                       |
| chr22-506.8.161431 | 0.842527 | 0.829844 | 0.015283 | 0.309971 | 0.981636 | chr22 | 50465479 | 50467867 | + | 0 | NA | exon (NM exon (NM  | 8362     | NM_002972 | 6305     | Hs.589924 | NM_002972          | ENSG000000SBF1      | CMT4B3     | DESET           | bindiprotein-coding           |                       |
| chr18-492.8.726432 | 0.815431 | 0.803483 | 0.01487  | 0.310168 | 0.981636 | chr18 | 49257907 | 49258374 | + | 0 | NA | intron (Nintron (N | 202505   | NM_001353 | 54808    | Hs.16299  | NM_001353          | ENSG000000CDYM      | DMC1       | SMC             | dymeclin protein-coding       |                       |
| chr18-162.146.6285 | 0.286875 | 0.282685 | 0.01487  | 0.310119 | 0.981636 | chr18 | 16265918 | 16266195 | + | 0 | NA | IntergeniALR/Alpha | -940137  | NR_027417 | 644669   | Hs.579474 | NR_027417          | ENSG000000LOC644669 | -          |                 | ankyrin r pseudo              |                       |
| chr1-149.8.708866  | 0.808974 | 0.797233 | 0.014726 | 0.310236 | 0.981636 | chr1  | 1.49E+08 | 1.49E+08 | + | 0 | NA | exon (NM exon (NM  | 52902    | NM_001353 | 9659     | Hs.584841 | NM_001353          | ENSG000000PDE4DIP   | CMYA2      | MM              | phosphodi protein-coding      |                       |
| chr12-111.8.708866 | 0.808974 | 0.797233 | 0.014726 | 0.310236 | 0.981636 | chr12 | 1.12E+08 | 1.12E+08 | + | 0 | NA | intron (Nintron (N | 39613    | NM_025247 | 80724    | Hs.331141 | NM_025247          | ENSG000000ACAD10    | -          | acyl-CoA        | protein-coding                |                       |
| chr8-473.8.708866  | 0.808974 | 0.797233 | 0.014726 | 0.310236 | 0.981636 | chr8  | 47313540 | 47313742 | + | 0 | NA | intron (Nintron (N | 52703    | NM_001088 | 23514    | Hs.38105  | NM_001088          | ENSG000000SPIDR     | KIAA0146   | scalloid        | protein-coding                |                       |
| chr15-417.6.991241 | 0.904924 | 0.892134 | 0.014336 | 0.310422 | 0.981636 | chr15 | 41766340 | 41766926 | + | 0 | NA | exon (NM exon (NM  | -7851    | NM_001265 | 23005    | Hs.513661 | NM_001265          | ENSG000000MAPKB1    | JNKBP1     | Jmi             | protein-coding                |                       |
| chr15-714.6.991241 | 0.904924 | 0.892134 | 0.014336 | 0.310422 | 0.981636 | chr15 | 71400590 | 71401899 | + | 0 | NA | intron (Nintron (N | -145992  | NM_001288 | 79875    | Hs.387057 | NM_001288          | ENSG000000THSD4     | ADAMTSL-1  | thrombos        | protein-coding                |                       |
| chr19-266.10.43435 | 0.744069 | 0.733615 | 0.014251 | 0.310463 | 0.981636 | chr19 | 26033642 | 26033865 | + | 0 | NA | IntergeniALR/Alpha | -1759678 | NR_146733 | 1.02E+08 | Hs.567934 | NR_146733          | ENSG000000LOC101927 | -          |                 | uncharactericnRNA             |                       |
| chr17-408.8.194712 | 0.845067 | 0.833265 | 0.014163 | 0.310505 | 0.981636 | chr17 | 40029333 | 40029835 | + | 0 | NA | intron (Nintron (N | -1969    | NR_102365 | 1.01E+08 | NR_102365 | ENSG000000SNORD124 | -                   |            | small nucsnoRNA |                               |                       |
| chr19-101.8.194712 | 0.845067 | 0.833265 | 0.014163 | 0.310505 | 0.981636 | chr19 | 10158509 | 10158794 | + | 0 | NA | intron (Nintron (N | 36332    | NM_001318 | 1786     | Hs.20267  | NM_001318          | ENSG000000DNMT1     | ADCADN     | AIDNA           | methylprotein-coding          |                       |
| chr7-149.8.194712  | 0.845067 | 0.833265 | 0.014163 | 0.310505 | 0.981636 | chr7  | 1.49E+08 | 1.49E+08 | + | 0 | NA | intron (Nintron (N | 4697     | NR_163909 |          |           |                    |                     |            |                 |                               |                       |
| chr10-100.5.213061 | 0.104038 | 0.102613 | 0.013843 | 0.310658 | 0.981636 | chr10 | 1E+08    | 1E+08    | + | 0 | NA | intron (Nintron (N | 26422    | NM_003393 | 7479     | Hs.421281 | NM_003393          | ENSG000000WNT8B     | -          |                 | Wnt                           | family protein-coding |
| chr11-862.5.213061 | 0.104038 | 0.102613 | 0.013843 | 0.310658 | 0.981636 | chr11 | 8622154  | 8622843  | + | 0 | NA | intron (Nintron (N | -28270   | NM_001288 | 65975    | Hs.50183  | NM_001288          | ENSG000000STK33     | -          |                 | serine/t protein-coding       |                       |
| chr12-115.5.213061 | 0.104038 | 0.102613 | 0.013843 | 0.310658 | 0.981636 | chr12 | 1.13E+08 | 1.13E+08 | + | 0 | NA | intron (Nintron (N | 7826     | NM_001143 | 53373    | Hs.52476  | NM_001143          | ENSG000000TPCN1     | TPC1       | two pore        | protein-coding                |                       |
| chr16-216.5.213061 | 0.104038 | 0.102613 | 0.013843 | 0.310658 | 0.981636 | chr16 | 2167271  | 2168444  | + | 0 | NA | intron (Nintron (N | 12075    | NM_032271 | 84231    | Hs.71363  | NM_032271          | ENSG000000TRAF7     | CAFDADD    | FTN             | recept protein-coding         |                       |
| chr17-147.5.213061 | 0.104038 | 0.102613 | 0.013843 | 0.310658 | 0.981636 | chr17 | 47817028 | 47818869 | + | 0 | NA | intron (Nintron (N | 3846     | NM_145798 | 114881   | Hs.64332  | NM_145798          | ENSG000000OSBP17    | ORP7       | oxysterol       | protein-coding                |                       |
| chr4-2335.5.213061 | 0.104038 | 0.102613 | 0.013843 | 0.310658 | 0.981636 | chr4  | 2335325  | 2335930  | + | 0 | NA | intron (Nintron (N | 29187    | NM_001172 | 57732    | Hs.292025 | NM_001172          | ENSG000000ZFVYE28   | LST2       | LYST            | zinc finger protein-coding    |                       |
| chr5-1574.5.213061 | 0.104038 | 0.102613 | 0.013843 | 0.310658 | 0.981636 | chr5  | 1.57E+08 | 1.57E+08 | + | 0 | NA | 3' UTR (N3' UTR (N | -20778   | NR_136205 | 1.03E+08 | Hs.57088  | NR_136205          | ENSG000000LOC102724 | -          |                 | uncharactericnRNA             |                       |
| chr7-5865.5.213061 | 0.104038 | 0.102613 | 0.013843 | 0.310658 | 0.981636 | chr7  | 58698599 | 58700039 | + | 0 | NA | IntergeniALR/Alpha | 1249142  | NM_001155 | 441234   | Hs.533121 | NM_001155          | ENSG000000ZNF716    | -          |                 | zinc finger protein-coding    |                       |
| chr9-8906.5.213061 | 0.104038 | 0.102613 | 0.013843 | 0.310658 | 0.981636 | chr9  | 89063911 | 89065374 | + | 0 | NA | intron (Nintron (N | 73174    | NM_005226 | 1903     | Hs.58511  | NM_005226          | ENSG000000LIPR3     | EDG-3      | EDC             | sphingosin protein-coding     |                       |
| chr9-1365.5.213061 | 0.104038 | 0.102613 | 0.013843 | 0.310658 | 0.981636 | chr9  | 1.37E+08 | 1.37E+08 | + | 0 | NA | intron (Nintron (N | 20896    | NR_039697 | 255130   | NR_039697 | ENSG000000MIR4479  | -                   |            | microRNA ncRNA  |                               |                       |
| chr4-571C.7.788701 | -0.8959  | 0.883703 | -0.0138  | 0.310677 | 0.981636 | chr4  | 57100892 | 57101289 | + | 0 | NA | intron (Nintron (N | -8672    | NR_034081 | 401941   | Hs.691061 | NR_034081          | ENSG000000IGFBP7-AS | -          |                 | IGFBP7                        | arnRNA                |
| chr14-347.4.213322 | -1.19067 | 1.17482  | -0.01349 | 0.310826 | 0.981636 | chr14 | 34754092 | 34754714 | + | 0 | NA | intron (Nintron (N | -39580   | NR_028130 | 1073     | Hs.180141 | NR_028130          | ENSG000000CFL2      | NEM7       | cofilin 2       | protein-coding                |                       |
| chr7-1286.10.49305 | 0.749991 | 0.740289 | 0.013101 | 0.31101  | 0.981636 | chr7  | 1.29E+08 | 1.29E+08 | + | 0 | NA | non-codiron-codir  | 11297    | NR_024368 | 402483   | Hs.72235  | NR_024368          | ENSG000000LINC0100C | -          |                 | long intncRNA                 |                       |
| chr2-1448.8.375426 | -0.82458 | 0.814083 | -0.01289 | 0.311112 | 0.981636 | chr2  | 1.44E+08 | 1.44E+08 | + | 0 | NA | intron (Nintron (N | -72688   | NR_040248 | 1E+08    | Hs.56078  | NR_040248          | ENSG000000ZEB2-AS1  | ZEB2-AS1   | ZEB2            | antincRNA                     |                       |
| chr3-7097.8.375426 | -0.82458 | 0.814083 | -0.01289 | 0.311112 | 0.981636 | chr3  | 70974539 | 70975097 | + | 0 | NA | intron (Nintron (N | 90106    | NM_001345 | 27086    | Hs.59368  | NM_001345          | ENSG000000FOX1P     | 12CC4      | HSF             | forkhead protein-coding       |                       |
| chr4-1688.8.375426 | -0.82458 | 0.814083 | -0.01289 | 0.311112 | 0.981636 | chr4  | 1.69E+08 | 1.69E+08 | + | 0 | NA | intron (Nintron (N | 37260    | NM_001367 | 23022    | Hs.15122  | NM_001367          | ENSG000000PALLD     | CG1-151    | CALLADIN        | protein-coding                |                       |
| chr7-1435.8.375426 | -0.82458 | 0.814083 | -0.01289 | 0.311112 | 0.981636 | chr7  | 1.43E+08 | 1.43E+08 | + | 0 | NA | intron (Nintron (N | 12778    | NM_001224 | 835      | Hs.36898  | NM_001224          | ENSG000000CASP2     | CASP-2     | C               | caspase 2 protein-coding      |                       |
| chr12-911.9.59064  | -0.78349 | 0.773672 | -0.01269 | 0.311209 | 0.981636 | chr12 | 91176600 | 91177914 | + | 0 | NA | intron (Nintron (N | 1389     | NM_133505 | 1634     | Hs.15631  | NM_133505          | ENSG000000CDN       | CSCD       | DSPC            | decorin protein-coding        |                       |
| chr19-941.12.68184 | 0.678375 | 0.669936 | 0.012596 | 0.311253 | 0.981636 | chr19 | 9412168  | 9420477  | + | 0 | NA | intron (Nintron (N | 19251    | NM_001370 | 10781    | Hs.65618  | NM_001370          | ENSG000000ZNF266    | HZF1       | zinc finger     | protein-coding                |                       |
| chr9-265.8.381434  | -0.83694 | 0.826682 | -0.0124  | 0.311345 | 0.981636 | chr9  | 2652451  | 2653203  | + | 0 | NA | exon (NM exon (NM  | 30454    | NR_015375 | 401491   | Hs.41604  | NR_015375          | ENSG000000VLDLR-AS1 | linc-VLDLR | VLDLR           | antincRNA                     |                       |
| chr1-1921.8.716724 | 0.807028 | 0.797384 | 0.012095 | 0.311493 | 0.981636 | chr1  | 19218421 | 19219423 | + | 0 | NA | 3' UTR (N3' UTR (N | 8536     | NR_135115 | 1.02E+08 | Hs.660534 | NR_135115          | ENSG000000EMC1-AS1  | -          |                 | EMC1                          | antincRNA             |
| chr1-2191.8.716724 | 0.807028 | 0.797384 | 0.012095 | 0.311493 | 0.981636 | chr1  | 2.19E+08 | 2.19E+08 | + | 0 | NA | intron (Nintron (N | 5411     | NM_001320 | 127018   | Hs.65761  | NM_001320          | ENSG000000LYPLAL1   | Q96AV0     | lysofos         | protein-coding                |                       |
| chr11-11.8.716724  | 0.807028 | 0.797384 | 0.012095 | 0.311493 | 0.981636 | chr11 | 1.14E+08 | 1.14E+08 | + | 0 | NA | intron (Nintron (N | 18101    | NM_004724 | 9183     | Hs.50388  | NM_004724          | ENSG000000ZWI10     | HZW10      | KNI             | zinc protein-coding           |                       |
| chr19-365.8.716724 | 0.807028 | 0.797384 | 0.012095 | 0.311493 | 0.981636 | chr19 | 36943280 | 36951074 | + | 0 | NA | intron (Nintron (N | 30845    | NM_001204 | 374900   | Hs.40422  | NM_001204          | ENSG000000ZNF568    | ZFP568     | zinc finger     | protein-coding                |                       |
| chr20-558.8.716724 | 0.807028 | 0.797384 | 0.012095 | 0.311493 | 0.981636 | chr20 | 5591449  | 5594859  | + | 0 | NA | intron (Nintron (N | 17852    | NM_019593 | 56261    | Hs.63635  | NM_019593          | ENSG000000GPCPD1    | E103       | GDEF            | glycerol protein-coding       |                       |
| chr10-146.8.342144 | -0.82963 | 0.819726 | -0.01209 | 0.311497 | 0.981636 | chr10 | 14600394 | 14601159 | + | 0 | NA | intron (Nintron (N | 3629     | NM_001282 | 83641    | H         |                    |                     |            |                 |                               |                       |

|           |          |          |          |          |          |          |       |          |          |        |                     |                    |                              |                      |                                       |                                   |
|-----------|----------|----------|----------|----------|----------|----------|-------|----------|----------|--------|---------------------|--------------------|------------------------------|----------------------|---------------------------------------|-----------------------------------|
| chr2-1615 | 6.948252 | 0.891605 | 0.888095 | 1.003952 | 0.315402 | 0.981636 | chr2  | 1.62E+08 | 1.62E+08 | 0 NA   | intron (Nintron (N  | 74002 NM_001935    | 1803 Hs. 368912NM_001935     | ENSG000004DPP4       | ADABP ADC dipeptidylprotein-coding    |                                   |
| chr3-1842 | 6.948252 | 0.891605 | 0.888095 | 1.003952 | 0.315402 | 0.981636 | chr3  | 1.84E+08 | 1.84E+08 | 0 NA   | non-codiron-codir   | 2565 NR_03041C     | 1E+08                        | NR_03041C            | ENSG000004MIR1224                     | MIRN1224 microRNA ncRNA           |
| chr7-1295 | 6.948252 | 0.891605 | 0.888095 | 1.003952 | 0.315402 | 0.981636 | chr7  | 1.3E+08  | 1.3E+08  | 0 NA   | intron (NAluSp SIN  | 22774 NM_003344    | 7328 Hs. 643545NM_003344     | ENSG000004UBE2H      | E2-20K Gubiquitin protein-coding      |                                   |
| chr9-116  | 6.948252 | 0.891605 | 0.888095 | 1.003952 | 0.315402 | 0.981636 | chr9  | 1.16E+08 | 1.16E+08 | 0 NA   | intron (Nintron (N  | 54260 NR_103711    | 493913 Hs. 728832NR_103711   | ENSG000004PAPA-AS1   | DIPAS NCF PAPA antncRNA               |                                   |
| chr13-786 | 6.948252 | 0.891605 | 0.888095 | 1.003952 | 0.315402 | 0.981636 | chr13 | 1.16E+08 | 1.16E+08 | 0 NA   | intron (NAluXs1 SI  | 18571 NM_024544    | 79596 Hs. 567575NM_024544    | ENSG000004OBI1       | C13orf7 FORC ubiq protein-coding      |                                   |
| chr2-1935 | 6.948252 | 0.891605 | 0.888095 | 1.003952 | 0.315402 | 0.981636 | chr2  | 1.16E+08 | 1.16E+08 | 0 NA   | intron (NCpG        | 1779 NM_14526C     | 130497 Hs. 123933NM_14526C   | ENSG000004OSR1       | ODD odd-skip protein-coding           |                                   |
| chr6-2814 | 6.948252 | 0.891605 | 0.888095 | 1.003952 | 0.315402 | 0.981636 | chr6  | 1.16E+08 | 1.16E+08 | 0 NA   | 5' UTR (N5' UTR (N  | 2193 NM_001278     | 7745 Hs. 57679NM_006298      | ENSG000004ZKSCAN8    | L105-1 ZNF zinc finger protein-coding |                                   |
| chr10-111 | 6.948252 | 0.891605 | 0.888095 | 1.003952 | 0.315402 | 0.981636 | chr10 | 1.16E+08 | 1.16E+08 | 0 NA   | intron (Nintron (N  | -48862 NR_015376   | 399706 Hs. 721191NM_00101C   | ENSG000004LINC00200C | CDorf135 long intncRNA                |                                   |
| chr12-296 | 6.948252 | 0.891605 | 0.888095 | 1.003952 | 0.315402 | 0.981636 | chr12 | 1.16E+08 | 1.16E+08 | 0 NA   | intron (Nintron (N  | -101112 NM_001355  | 341350 Hs. 674585NM_183378   | ENSG000004OVCH1      | OVCH ovochymas protein-coding         |                                   |
| chr12-577 | 6.948252 | 0.891605 | 0.888095 | 1.003952 | 0.315402 | 0.981636 | chr12 | 1.16E+08 | 1.16E+08 | 0 NA   | intron (NLINE LINE  | 3171 NM_015433     | 25895 Hs. 63272C             | ENSG000004EEFLAKMT7  | FAM119B EEFLA lys protein-coding      |                                   |
| chr14-594 | 6.948252 | 0.891605 | 0.888095 | 1.003952 | 0.315402 | 0.981636 | chr14 | 1.16E+08 | 1.16E+08 | 0 NA   | IntergeniLIMb LIN   | 6980 NM_022571     | 64582 Hs. 647575NM_022571    | ENSG000004GPR135     | HUMNP11Y2G protein-coding             |                                   |
| chr17-784 | 6.948252 | 0.891605 | 0.888095 | 1.003952 | 0.315402 | 0.981636 | chr17 | 1.16E+08 | 1.16E+08 | 0 NA   | intron (Nintron (N  | 34310 NR_110601    | 9489 Hs. 654671NM_024415     | ENSG000004PGS1       | phosphatidylprotein-coding            |                                   |
| chr19-975 | 6.948252 | 0.891605 | 0.888095 | 1.003952 | 0.315402 | 0.981636 | chr19 | 1.16E+08 | 1.16E+08 | 0 NA   | TTS (NM_C TTS (NM_C | 12037 NM_001077    | 162993 Hs. 665717NM_001077   | ENSG000004ZNF846     | zinc finger protein-coding            |                                   |
| chr2-202  | 6.948252 | 0.891605 | 0.888095 | 1.003952 | 0.315402 | 0.981636 | chr2  | 1.16E+08 | 1.16E+08 | 0 NA   | TTS (NR_C TTS (NR_C | 118 NR_003058      | 692110                       | NR_003058            | ENSG000004SNORD70                     | HBI1-234 small nucsnoRNA          |
| chr21-414 | 6.948252 | 0.891605 | 0.888095 | 1.003952 | 0.315402 | 0.981636 | chr21 | 1.16E+08 | 1.16E+08 | 0 NA   | intron (NMER21C LI  | 17678 NM_001282    | 4599 Hs. 517307NM_002462     | ENSG000004CMX1       | IFI-78K IMX dynam protein-coding      |                                   |
| chr5-1714 | 6.948252 | 0.891605 | 0.888095 | 1.003952 | 0.315402 | 0.981636 | chr5  | 1.16E+08 | 1.16E+08 | 0 NA   | IntergeniIntergeni  | -6331 NM_003862    | 8817 Hs. 87191 NM_003862     | ENSG000004PGF18      | PGF-18 Zf fibroblast protein-coding   |                                   |
| chr6-4108 | 6.948252 | 0.891605 | 0.888095 | 1.003952 | 0.315402 | 0.981636 | chr6  | 1.16E+08 | 1.16E+08 | 0 NA   | intron (Nintron (N  | 11752 NM_001325    | 221443 Hs. 227457NM_145065   | ENSG000004OARD1      | C6orf130 O-acyl-AI protein-coding     |                                   |
| chr7-1508 | 6.948252 | 0.891605 | 0.888095 | 1.003952 | 0.315402 | 0.981636 | chr7  | 1.16E+08 | 1.16E+08 | 0 NA   | non-codiron-codir   | 18178 NR_022447    | 1E+08 Hs. 586358NR_022447    | ENSG000004PAX11-AS   | PAX1105 PAX11 arncRNA                 |                                   |
| chr12-425 | 6.948252 | 0.891605 | 0.888095 | 1.003952 | 0.315402 | 0.981636 | chr12 | 1.16E+08 | 1.16E+08 | 0 NA   | intron (Nintron (N  | 28314 NM_00113C    | 84318 Hs. 631656NM_032355    | ENSG000004CCDC77     | coiled-co protein-coding              |                                   |
| chr19-324 | 6.948252 | 0.891605 | 0.888095 | 1.003952 | 0.315402 | 0.981636 | chr19 | 1.16E+08 | 1.16E+08 | 0 NA   | intron (NMER52C LI  | 2329 NM_03281E     | 84902 Hs. 599703NM_03281E    | ENSG000004CEP89      | CCDC123 Centron protein-coding        |                                   |
| chr1-125  | 6.948252 | 0.891605 | 0.888095 | 1.003952 | 0.315402 | 0.981636 | chr1  | 1.16E+08 | 1.16E+08 | 0 NA   | intron (NMIRb SINE  | 6687 NM_018252     | 55248 Hs. 445388NM_018252    | ENSG000004PACC1      | CRorf75 Proton ac protein-coding      |                                   |
| chr14-226 | 6.948252 | 0.891605 | 0.888095 | 1.003952 | 0.315402 | 0.981636 | chr14 | 1.16E+08 | 1.16E+08 | 0 NA   | intron (Nintron (N  | 11723 NM_02206C    | 63874 Hs. 445665NM_02206C    | ENSG000004ABHD4      | ABH4 abhydrolase protein-coding       |                                   |
| chr7-526  | 6.948252 | 0.891605 | 0.888095 | 1.003952 | 0.315402 | 0.981636 | chr7  | 1.16E+08 | 1.16E+08 | 0 NA   | intron (NCpG        | 14019 NM_001035    | 26100 Hs. 122363NM_01561C    | ENSG000004WIP12      | ATG18B AtWD repeat protein-coding     |                                   |
| chr19-100 | 6.948252 | 0.891605 | 0.888095 | 1.003952 | 0.315402 | 0.981636 | chr19 | 1.16E+08 | 1.16E+08 | 0 NA   | intron (NAluXs1 SI  | 19471 NM_00451E    | 3609 Hs. 465888NM_00451E     | ENSG000004ILF3       | CBTF DRBF interleaf protein-coding    |                                   |
| chr10-124 | 6.948252 | 0.891605 | 0.888095 | 1.003952 | 0.315402 | 0.981636 | chr10 | 1.16E+08 | 1.16E+08 | 0 NA   | intron (NAluJb SIN  | 16181 NM_001363    | 1488 Hs. 501345NM_001325     | ENSG000004CTBP2      | C-terminal protein-coding             |                                   |
| chr16-186 | 6.948252 | 0.891605 | 0.888095 | 1.003952 | 0.315402 | 0.981636 | chr16 | 1.16E+08 | 1.16E+08 | 0 NA   | intron (Nintron (N  | -61693 NM_015161   | 23204 Hs. 634882NM_015161    | ENSG000004ARL61P1    | AIP1 ARL6 ADP ribos protein-coding    |                                   |
| chr6-1768 | 6.948252 | 0.891605 | 0.888095 | 1.003952 | 0.315402 | 0.981636 | chr6  | 1.16E+08 | 1.16E+08 | 0 NA   | intron (Nintron (N  | -40998 NR_13461E   | 1.05E+08 Hs. 718703NR_13461E | ENSG000004LOC105374  | uncharactncRNA                        |                                   |
| chr17-362 | 6.948252 | 0.891605 | 0.888095 | 1.003952 | 0.315402 | 0.981636 | chr17 | 1.16E+08 | 1.16E+08 | 0 NA   | intron (NAluY SINE  | -11088 NM_080704   | 7442 Hs. 579217NM_018727     | ENSG000004TRPV1      | VR1 transient protein-coding          |                                   |
| chr19-365 | 6.948252 | 0.891605 | 0.888095 | 1.003952 | 0.315402 | 0.981636 | chr19 | 1.16E+08 | 1.16E+08 | 0 NA   | intron (Nintron (N  | 9510 NM_00130C     | 23396 Hs. 282177NM_012395    | ENSG000004PIP5K1C    | LCCS3 PIF phosphatidyl protein-coding |                                   |
| chr2-218  | 6.948252 | 0.891605 | 0.888095 | 1.003952 | 0.315402 | 0.981636 | chr2  | 1.16E+08 | 1.16E+08 | 0 NA   | intron (Nintron (N  | 20108 NR_106867    | 1.02E+08                     | NR_106867            | ENSG000004MIR6809                     | hsa-mir-6809 microRNA ncRNA       |
| chr16-295 | 6.948252 | 0.891605 | 0.888095 | 1.003952 | 0.315402 | 0.981636 | chr16 | 1.16E+08 | 1.16E+08 | 0 NA   | IntergeniIntergeni  | 33806 NM_00131C    | 728888 Hs. 720282NM_00131C   | ENSG000004NPIP1      | NPIP nuclear protein-coding           |                                   |
| chr7-1041 | 6.948252 | 0.891605 | 0.888095 | 1.003952 | 0.315402 | 0.981636 | chr7  | 1.16E+08 | 1.16E+08 | 0 NA   | intron (NMSTb LTR   | 10078 NM_002555    | 5001 Hs. 432945NM_002555     | ENSG000004ORC5       | ORC5 ORC origin protein-coding        |                                   |
| chr7-1484 | 6.948252 | 0.891605 | 0.888095 | 1.003952 | 0.315402 | 0.981636 | chr7  | 1.16E+08 | 1.16E+08 | 0 NA   | intron (NLINE LINE  | 75798 NM_00137C    | 8454 Hs. 146806NM_003592     | ENSG000004CULL1      | cullin 1 protein-coding               |                                   |
| chr14-556 | 6.948252 | 0.891605 | 0.888095 | 1.003952 | 0.315402 | 0.981636 | chr14 | 1.16E+08 | 1.16E+08 | 0 NA   | exon (NM_exon (NM   | 70148 NM_00107E    | 3895 Hs. 509414NM_004985     | ENSG000004CTN1       | CG1 KNT1 kinesin protein-coding       |                                   |
| chr6-1305 | 6.948252 | 0.891605 | 0.888095 | 1.003952 | 0.315402 | 0.981636 | chr6  | 1.16E+08 | 1.16E+08 | 0 NA   | intron (Nintron (N  | 69778 NM_00135C    | 2037 Hs. 486477NM_001431     | ENSG000004EPB41L2    | 4.1-G 4.1 erythrocy protein-coding    |                                   |
| chr5-4951 | 6.948252 | 0.891605 | 0.888095 | 1.003952 | 0.315402 | 0.981636 | chr5  | 1.16E+08 | 1.16E+08 | 0 NA   | IntergeniALR Alphe  | 92805 NM_198445    | 133418 Hs. 561411NM_198445   | ENSG000004EMB        | GP70 embigin protein-coding           |                                   |
| chr19-271 | 6.948252 | 0.891605 | 0.888095 | 1.003952 | 0.315402 | 0.981636 | chr19 | 1.16E+08 | 1.16E+08 | 0 NA   | IntergeniALR Alphe  | -646558 NR_14673E  | 1.02E+08 Hs. 567934NR_10687  | ENSG000004LOC101927  | uncharactncRNA                        |                                   |
| chr14-815 | 6.948252 | 0.891605 | 0.888095 | 1.003952 | 0.315402 | 0.981636 | chr14 | 1.16E+08 | 1.16E+08 | 0 NA   | intron (NLTR12 LTR  | 20525 NM_00506E    | 6400 Hs. 18130C              | ENSG000004SELLL      | Hrd3 PRO1SELLL ade protein-coding     |                                   |
| chr3-4767 | 6.948252 | 0.891605 | 0.888095 | 1.003952 | 0.315402 | 0.981636 | chr3  | 1.16E+08 | 1.16E+08 | 0 NA   | intron (Nintron (N  | -10982 NR_145791   | 1.1E+08                      | NR_145791            | SNORD146                              | small nucsnoRNA                   |
| chr2-2308 | 6.948252 | 0.891605 | 0.888095 | 1.003952 | 0.315402 | 0.981636 | chr2  | 1.16E+08 | 1.16E+08 | 0 NA   | intron (NLIPA6 LIN  | -59298 NM_001287   | 81618 Hs. 111577NM_030925    | ENSG000004ITM2C      | BRI3 BRIC integral protein-coding     |                                   |
| chr19-258 | 6.948252 | 0.891605 | 0.888095 | 1.003952 | 0.315402 | 0.981636 | chr19 | 1.16E+08 | 1.16E+08 | 0 NA   | IntergeniALR Alphe  | -1675038 NR_003603 | 1E+08 Hs. 149312NR_003603    | ENSG000004HAVCR1P1   | hepatitis pseudo                      |                                   |
| chr7-3996 | 6.948252 | 0.891605 | 0.888095 | 1.003952 | 0.315402 | 0.981636 | chr7  | 1.16E+08 | 1.16E+08 | 0 NA   | intron (NLIPA4 LIN  | 11793 NM_031267    | 8621 Hs. 233552NM_003715     | ENSG000004CDK13      | CDCL2 CDC cyclin de protein-coding    |                                   |
| chr10-795 | 6.948252 | 0.891605 | 0.888095 | 1.003952 | 0.315402 | 0.981636 | chr10 | 1.16E+08 | 1.16E+08 | 0 NA   | intron (Nintron (N  | -37473 NM_005725   | 10105 Hs. 381072NM_005725    | ENSG000004PPIF       | CYP3 CyP peptidyl protein-coding      |                                   |
| chr13-927 | 6.948252 | 0.891605 | 0.888095 | 1.003952 | 0.315402 | 0.981636 | chr13 | 1.16E+08 | 1.16E+08 | 0 NA   | IntergeniLIPA5 LIN  | 22022 NM_001071    | 440145 Hs. 28465             | NR_001071            | ENSG000004CMT1                        | C13orf37 mitotic s protein-coding |
| chr19-551 | 6.948252 | 0.891605 | 0.888095 | 1.003952 | 0.315402 | 0.981636 | chr19 | 1.16E+08 | 1.16E+08 | 0 NA   | intron (NAluJr SIN  | 24621 NR_145733    | 1.1E+08                      | NR_145733            | SNORD13G                              | small nucsnoRNA                   |
| chr19-924 | 6.948252 | 0.891605 | 0.888095 | 1.003952 | 0.315402 | 0.981636 | chr19 | 1.16E+08 | 1.16E+08 | 0 NA   | intron (NLINE LINE  | 3424 NM_014222     | 5518 Hs. 467192NM_014222     | ENSG000004PPP2R1A    | MRD36 PP2 protein protein-coding      |                                   |
| chr2-2035 | 6.948252 | 0.891605 | 0.888095 | 1.003952 | 0.315402 | 0.981636 | chr2  | 1.16E+08 | 1.16E+08 | 0 NA   | intron (Nintron (N  | 27812 NM_001282    | 10152 Hs. 471155NM_005755    | ENSG000004ABI2       | ABI-2 ABI1 inter protein-coding       |                                   |
| chr20-147 | 6.948252 | 0.891605 | 0.888095 | 1.003952 | 0.315402 | 0.981636 | chr20 | 1.16E+08 | 1.16E+08 | 0 NA   | intron (Nintron (N  | 3662 NM_018835     | 55968 Hs. 12865              | ENSG000004NSFL1C     | P47 UBX1 NSFL1 cof protein-coding     |                                   |
| chr7-6176 | 6.948252 | 0.891605 | 0.888095 | 1.003952 | 0.315402 | 0.981636 | chr7  | 1.16E+08 | 1.16E+08 | 0 NA   | intron (Nintron (N  | -5177 NM_001367    | 9265 Hs. 487475NM_004227     | ENSG000004CYTH3      | ARNO3 GRF cytohesin protein-coding    |                                   |
| chr9-6477 | 6.948252 | 0.891605 | 0.888095 | 1.003952 | 0.315402 | 0.981636 | chr9  | 1.16E+08 | 1.16E+08 | 0 NA   | non-codiron-codir   | 64608 NM_15289E    | 115426 Hs. 493401NM_15289E   | ENSG000004UHRF2      | NIRF RNFI ubiquitin protein-coding    |                                   |
| chr19-161 | 6.948252 | 0.891605 | 0.888095 | 1.003952 | 0.315402 | 0.981636 | chr19 | 1.16E+08 | 1.16E+08 | 0 NA   | 3' UTR (N3' UTR (N  | -6075 NM_00683C    | 10975 Hs. 8372               | ENSG000004UCR11      | 0710008DC ubiquinol protein-coding    |                                   |
| chr1-175  | 6.948252 | 0.891605 | 0.888095 | 1.003952 | 0.315402 | 0.981636 | chr1  | 1.16E+08 | 1.16E+08 | 0 NA   | IntergeniIntergeni  | -3249 NM_172071    | 149041 Hs. 30258             | NR_172071            | ENSG000004RC3H1                       | RNF198 RCR3 ing protein-coding    |
| chr1-3176 | 6.948252 | 0.891605 | 0.888095 | 1.003952 | 0.315402 | 0.981636 | chr1  | 1.16E+08 | 1.16E+08 | 0 NA   | exon (NM_exon (NM   | 2193 NR_03621E     | 1E+08                        | NR_03621E            | ENSG000004MIR4254                     | microRNA ncRNA                    |
| chr15-896 | 6.948252 | 0.891605 | 0.888095 | 1.003952 | 0.315402 | 0.981636 | chr15 | 1.16E+08 | 1.16E+08 | 0 NA   | intron (NSVA_F Ret  | 16530 NR_049807    | 1.01E+08                     | NR_049807            | ENSG000004MIR5009                     | microRNA ncRNA                    |
| chr19-964 | 6.948252 | 0.891605 | 0.888095 | 1.003952 | 0.315402 | 0.981636 | chr19 | 1.16E+08 | 1.16E+08 | 0 NA</ |                     |                    |                              |                      |                                       |                                   |







|           |          |          |          |          |          |          |       |          |          |   |    |                      |         |           |          |           |                  |                    |                 |                                |
|-----------|----------|----------|----------|----------|----------|----------|-------|----------|----------|---|----|----------------------|---------|-----------|----------|-----------|------------------|--------------------|-----------------|--------------------------------|
| chr6-1675 | 8.434131 | -0.81278 | 0.824416 | -0.98588 | 0.32419  | 0.981636 | chr6  | 1.68E+08 | 1.68E+08 | 0 | NA | intron (N)Tigger3b   | 32271   | NM_001125 | 1E+08    | Hs.448055 | ENM_001129895    | HGC6.3             | -               | uncharacterized protein-coding |
| chr10-10C | 6.434098 | 0.944578 | 0.958313 | 0.985667 | 0.324297 | 0.981636 | chr10 | 1E+08    | 1E+08    | 0 | NA | intron (N)CRI_Mam L  | 12630   | NM_001303 | 55280    | Hs.215502 | ENM_018294       | ENSG00000CWF19L1   | C19L1 SCA CWF19 | lik protein-coding             |
| chr11-10F | 5.768354 | 0.965656 | 0.98008  | 0.985282 | 0.324486 | 0.981636 | chr11 | 1.08E+08 | 1.08E+08 | 0 | NA | intron (N)AluJo SIN  | 39624   | NM_001321 | 4863     | Hs.171061 | ENM_002519       | ENSG00000CNPAT     | E14 E14 Nuclear | protein-coding                 |
| chr11-70C | 3.428132 | -1.26727 | 1.286309 | -0.9852  | 0.324527 | 0.981636 | chr11 | 76363672 | 76364528 | 0 | NA | intron (N)intron (N) | 16665   | NM_130898 | 5612     | Hs.50331  | ENM_00470F       | ENSG00000CTHAP12   | DAP4 P52 THAP   | dom protein-coding             |
| chr15-407 | 3.428132 | -1.26727 | 1.286309 | -0.9852  | 0.324527 | 0.981636 | chr15 | 40700830 | 40702727 | 0 | NA | intron (N)AluSc SIN  | 6604    | NM_001164 | 5888     | Hs.63170  | ENM_00287F       | ENSG00000CRAD51    | BRCC5 FAN RAD51 | rec protein-coding             |
| chr16-23C | 3.428132 | -1.26727 | 1.286309 | -0.9852  | 0.324527 | 0.981636 | chr16 | 23515085 | 23515961 | 0 | NA | IntergeniAluSx SIN   | -5029   | NM_015044 | 23062    | Hs.46033  | ENM_015044       | ENSG00000CGGA2     | VEAR            | golgi ass protein-coding       |
| chr2-113C | 3.428132 | -1.26727 | 1.286309 | -0.9852  | 0.324527 | 0.981636 | chr2  | 1.13E+08 | 1.13E+08 | 0 | NA | intron (N)intron (N) | 7430    | NR_015377 | 654433   | Hs.65666  | CNR_015377       | ENSG00000CPAX8-AS1 | PAX8            | antincRNA                      |
| chr1-729E | 8.836883 | -0.78306 | 0.794827 | -0.9852  | 0.324527 | 0.981636 | chr1  | 729663   | 729936   | 0 | NA | non-codiron-codir    | 552     | NR_028327 | 1E+08    | Hs.728864 | NR_028327        | LOC100133          | -               | uncharacterized                |
| chr1-947I | 8.836883 | -0.78306 | 0.794827 | -0.9852  | 0.324527 | 0.981636 | chr1  | 947169   | 947523   | 0 | NA | intron (N)intron (N) | 11910   | NM_015658 | 26155    | Hs.405987 | ENM_015658       | ENSG00000CNO2L     | NET15 NET10C2   | like protein-coding            |
| chr10-17C | 7.12878  | -0.87337 | 0.886724 | -0.98495 | 0.324651 | 0.981636 | chr10 | 73999734 | 74002274 | 0 | NA | intron (N)intron (N) | 2874    | NM_003373 | 7414     | Hs.64389  | ENM_003373       | ENSG00000CVCL      | CMD1W CMF       | vinculin protein-coding        |
| chr4-74E  | 7.12878  | -0.87337 | 0.886724 | -0.98495 | 0.324651 | 0.981636 | chr4  | 1942048  | 1944174  | 0 | NA | TTS (NM_C)TTS (NM_C) | -31525  | NR_003004 | 677770   | Hs.676951 | NR_003004        | ENSG00000SCARNA22  | ACA11           | small CajncRNA                 |
| chr4-533A | 7.12878  | -0.87337 | 0.886724 | -0.98495 | 0.324651 | 0.981636 | chr4  | 53345180 | 53346029 | 0 | NA | intron (N)LIPA6 LIN  | 20457   | NM_15254C | 152579   | Hs.302287 | ENM_15254C       | ENSG00000SCFD2     | STXPB1L1        | secl fami protein-coding       |
| chr16-294 | 11.86189 | -0.6828  | 0.693289 | -0.98487 | 0.324686 | 0.981636 | chr16 | 29431987 | 29432773 | 0 | NA | intron (N)AluJb SIN  | 14646   | NR_135312 | 1E+08    | Hs.55270  | CNR_135312       | ENSG00000CSMG1P6   | SMG1            | psedu                          |
| chr20-26  | 11.86189 | -0.6828  | 0.693289 | -0.98487 | 0.324686 | 0.981636 | chr20 | 26949100 | 26949802 | 0 | NA | IntergeniALR/Alphe   | -74023  | NR_04009E | 284801   | Hs.37069  | NR_04009E        | ENSG00000CMR663AHC | MIR663A         | lncRNA                         |
| chr6-3737 | 5.195495 | 1.029606 | 1.045429 | 0.984865 | 0.324691 | 0.981636 | chr6  | 37377892 | 37378282 | 0 | NA | intron (N)AluSx SIN  | 24104   | NR_046399 | 9025     | Hs.48527  | ENM_00395E       | ENSG00000CRNF8     | hRNF8           | ring fing protein-coding       |
| chr7-128E | 5.195495 | 1.029606 | 1.045429 | 0.984865 | 0.324691 | 0.981636 | chr7  | 1.29E+08 | 1.29E+08 | 0 | NA | intron (N)intron (N) | 16065   | NM_001367 | 64753    | Hs.52117  | ENM_00274E       | ENSG00000CCDC136   | NAG6            | coiled-cc protein-coding       |
| chr9-350E | 5.195495 | 1.029606 | 1.045429 | 0.984865 | 0.324691 | 0.981636 | chr9  | 35090368 | 35090923 | 0 | NA | exon (NM)exon (NM)   | 5904    | NM_001201 | 84720    | Hs.52209  | ENM_003263       | ENSG00000CPIGO     | HPMRS2          | phosphatiprotein-coding        |
| chr1-429E | 5.905708 | -0.94966 | 0.964391 | -0.98472 | 0.32476  | 0.981636 | chr1  | 42951770 | 42958101 | 0 | NA | intron (N)intron (N) | 3933    | NM_00651E | 6513     | Hs.47372  | ENM_00651E       | ENSG00000SCLC2A1   | CSE DYT17       | solute c protein-coding        |
| chr1-932E | 5.905708 | -0.94966 | 0.964391 | -0.98472 | 0.32476  | 0.981636 | chr1  | 93260309 | 93261653 | 0 | NA | intron (N)LIP47 LI   | 80265   | NM_00130C | 343099   | Hs.48287  | ENM_20688E       | ENSG00000CCDC18    | NY-SAR-41       | coiled-cc protein-coding       |
| chr1-181C | 5.905708 | -0.94966 | 0.964391 | -0.98472 | 0.32476  | 0.981636 | chr1  | 1.81E+08 | 1.81E+08 | 0 | NA | intron (N)LTR12C LI  | 13152   | NM_001531 | 3140     | Hs.13500  | ENM_001531       | ENSG00000CMR1      | HALMS           | major his protein-coding       |
| chr12-25E | 5.905708 | -0.94966 | 0.964391 | -0.98472 | 0.32476  | 0.981636 | chr12 | 56417607 | 56418296 | 0 | NA | exon (NM)exon (NM)   | 31475   | NM_00133C | 8914     | Hs.118631 | ENM_00392C       | ENSG00000CTIMELESS | TIM1 TIM1       | timeless protein-coding        |
| chr13-44E | 5.905708 | -0.94966 | 0.964391 | -0.98472 | 0.32476  | 0.981636 | chr13 | 44941774 | 44943063 | 0 | NA | intron (N)intron (N) | 47053   | NM_01234E | 26747    | Hs.52500  | ENM_01234E       | ENSG00000CNF1P1    | NUF1P baE       | nuclear f protein-coding       |
| chr14-21E | 5.905708 | -0.94966 | 0.964391 | -0.98472 | 0.32476  | 0.981636 | chr14 | 21219508 | 21220447 | 0 | NA | intron (N)L2a LINE   | -13077  | NR_03897I | 283624   | Hs.52521  | CNR_03897C       | ENSG00000CLNCO0641 | -               | long intencRNA                 |
| chr16-28E | 5.905708 | -0.94966 | 0.964391 | -0.98472 | 0.32476  | 0.981636 | chr16 | 28729421 | 28730191 | 0 | NA | intron (N)AluJb SIN  | 5554    | NR_106922 | 1E+08    | Hs.106922 | ENSG00000CMR6862 | hsa-mir-6          | microRNA ncRNA  |                                |
| chr17-16E | 5.905708 | -0.94966 | 0.964391 | -0.98472 | 0.32476  | 0.981636 | chr17 | 16648648 | 16649365 | 0 | NA | intron (N)intron (N) | 4844    | NM_020787 | 57547    | Hs.12807  | ENM_020787       | ENSG00000CZNF624   | -               | zinc fing protein-coding       |
| chr17-44E | 5.905708 | -0.94966 | 0.964391 | -0.98472 | 0.32476  | 0.981636 | chr17 | 44938013 | 44939018 | 0 | NA | intron (N)LIM5 LINE  | -3834   | NR_106841 | 1.02E+08 | NR_106841 | ENSG00000CMR6783 | hsa-mir-6          | microRNA ncRNA  |                                |
| chr22-45E | 5.905708 | -0.94966 | 0.964391 | -0.98472 | 0.32476  | 0.981636 | chr22 | 45600748 | 45601854 | 0 | NA | TTS (NM_C)TTS (NM_C) | 4346    | NR_131244 | 1.01E+08 | Hs.51769  | NR_131244        | ENSG00000CLNCO158E | TCONS_00C       | long intencRNA                 |
| chr3-108I | 5.905708 | -0.94966 | 0.964391 | -0.98472 | 0.32476  | 0.981636 | chr3  | 1.08E+08 | 1.08E+08 | 0 | NA | intron (N)LIMA4 LI   | 27092   | NM_01801C | 55081    | Hs.41219  | ENM_01801C       | ENSG00000CIFT57    | ESRRBL1 E       | intraflag protein-coding       |
| chr4-185A | 5.905708 | -0.94966 | 0.964391 | -0.98472 | 0.32476  | 0.981636 | chr4  | 1.85E+08 | 1.85E+08 | 0 | NA | non-codiron-codir    | 11126   | NM_18172E | 353322   | Hs.508154 | ENM_18172E       | ENSG00000CANRDR37  | Lrp2bp          | ankyrin r protein-coding       |
| chr5-358E | 5.905708 | -0.94966 | 0.964391 | -0.98472 | 0.32476  | 0.981636 | chr5  | 35861199 | 35861398 | 0 | NA | intron (N)intron (N) | 4407    | NM_00218E | 3575     | Hs.59174  | ENM_00218E       | ENSG00000CIL7R     | CD127 CDW       | interleuk protein-coding       |
| chr5-358E | 5.905708 | -0.94966 | 0.964391 | -0.98472 | 0.32476  | 0.981636 | chr5  | 35871349 | 35871741 | 0 | NA | intron (N)intron (N) | 14654   | NM_00218E | 3575     | Hs.59174  | ENM_00218E       | ENSG00000CIL7R     | CD127 CDW       | interleuk protein-coding       |
| chr5-714E | 5.905708 | -0.94966 | 0.964391 | -0.98472 | 0.32476  | 0.981636 | chr5  | 71479388 | 71480139 | 0 | NA | intron (N)AluYk2 SI  | 24112   | NM_01842E | 55814    | Hs.25827  | ENM_01842E       | ENSG00000BDP1      | DFNB112 F       | B double protein-coding        |
| chr5-715E | 5.905708 | -0.94966 | 0.964391 | -0.98472 | 0.32476  | 0.981636 | chr5  | 71567758 | 71567957 | 0 | NA | TTS (NM_C)TTS (NM_C) | -19483  | NR_002132 | 64087    | Hs.60478  | ENM_002132       | ENSG00000CMCC2     | MCCB            | mythlcr protein-coding         |
| chr6-10E  | 5.905708 | -0.94966 | 0.964391 | -0.98472 | 0.32476  | 0.981636 | chr6  | 1.08E+08 | 1.08E+08 | 0 | NA | intron (N)intron (N) | 46326   | NM_00130C | 8724     | Hs.12102  | ENM_00379E       | ENSG00000CSNX3     | Grd19 MC        | sorting r protein-coding       |
| chr7-124E | 5.905708 | -0.94966 | 0.964391 | -0.98472 | 0.32476  | 0.981636 | chr7  | 1.25E+08 | 1.25E+08 | 0 | NA | 3' UTR (N)3' UTR (N) | 20453   | NM_005302 | 2861     | Hs.406094 | ENM_005302       | ENSG00000GPR37     | EDNRBL P        | g protein-coding               |
| chr8-588E | 5.905708 | -0.94966 | 0.964391 | -0.98472 | 0.32476  | 0.981636 | chr8  | 58836100 | 58838959 | 0 | NA | intron (N)intron (N) | -177676 | NR_00358C | 8439     | Hs.37200  | ENM_00358C       | ENSG00000CSMAF     | FAN GRAM        | neutral s protein-coding       |
| chr9-553E | 5.905708 | -0.94966 | 0.964391 | -0.98472 | 0.32476  | 0.981636 | chr9  | 5536678  | 5537792  | 0 | NA | intron (N)Charlie2t  | 26704   | NM_02523E | 80380    | Hs.53227  | ENM_02523E       | ENSG00000PCDC1L62  | B7DC Btdc       | programme protein-coding       |
| chr9-860I | 5.905708 | -0.94966 | 0.964391 | -0.98472 | 0.32476  | 0.981636 | chr9  | 86010849 | 86011048 | 0 | NA | intron (N)A-rich LC  | 69419   | NM_001321 | 65660    | Hs.43069  | ENM_02192C       | ENSG00000CNA35     | EGAP MAK1N      | (alpha)-protein-coding         |
| chr14-761 | 10.15194 | -0.73698 | 0.748535 | -0.98456 | 0.324842 | 0.981636 | chr14 | 76154207 | 76155363 | 0 | NA | exon (NM)exon (NM)   | 431     | NR_110314 | 55668    | Hs.41203  | ENM_01792E       | ENSG00000CPATCH2L  | C14orf11E       | G-patch protein-coding         |
| chr10-80C | 6.674778 | -1.06596 | 1.082794 | -0.98446 | 0.324892 | 0.981636 | chr10 | 806063   | 807376   | 0 | NA | TTS (NM_C)TTS (NM_C) | -117051 | NR_014974 | 22982    | Hs.432397 | ENM_014974       | ENSG00000CIP2C     | KIAA0934        | disco int protein-coding       |
| chr11-11I | 6.674778 | -1.06596 | 1.082794 | -0.98446 | 0.324892 | 0.981636 | chr11 | 1.12E+08 | 1.12E+08 | 0 | NA | intron (N)intron (N) | 49592   | NM_00271E | 5519     | Hs.26912  | ENM_00271E       | ENSG00000PPP2R1B   | PP2A-A          | bet protein-coding             |
| chr12-11I | 6.674778 | -1.06596 | 1.082794 | -0.98446 | 0.324892 | 0.981636 | chr12 | 1.12E+08 | 1.12E+08 | 0 | NA | intron (N)L2a LINE   | -77484  | NR_001347 | 22895    | Hs.21239  | ENM_001347       | ENSG00000CRP3A     | -               | rabphilin protein-coding       |
| chr12-12C | 6.674778 | -1.06596 | 1.082794 | -0.98446 | 0.324892 | 0.981636 | chr12 | 1.23E+08 | 1.23E+08 | 0 | NA | intron (N)AluSg SIN  | 70291   | NM_01470E | 9735     | Hs.30055  | ENM_01470E       | ENSG00000CNKTC1    | ROD             | kinetoch protein-coding        |
| chr15-44E | 6.674778 | -1.06596 | 1.082794 | -0.98446 | 0.324892 | 0.981636 | chr15 | 44507588 | 44509150 | 0 | NA | intron (N)AluJb SIN  | 28531   | NR_03417I | 645212   | Hs.594287 | NR_03417I        | EIF3J-DT           | EIF3J-AS1 EIF3J | divncRNA                       |
| chr3-455E | 6.674778 | -1.06596 | 1.082794 | -0.98446 | 0.324892 | 0.981636 | chr3  | 45598765 | 45599887 | 0 | NA | intron (N)LIMB5 LIN  | 4575    | NM_01424C | 8994     | Hs.19337  | CNR_01424C       | ENSG00000CLMD1     | -               | LIM domain protein-coding      |
| chr3-1597 | 6.674778 | -1.06596 | 1.082794 | -0.98446 | 0.324892 | 0.981636 | chr3  | 1.6E+08  | 1.6E+08  | 0 | NA | intron (N)AluY SINE  | 13435   | NR_12166E | 1.01E+08 | Hs.60147  | ENM_12166E       | IQCJ-SCH1          | IQCJ-SCH1       | ncRNA                          |
| chr9-980E | 6.674778 | -1.06596 | 1.082794 | -0.98446 | 0.324892 | 0.981636 | chr9  | 98081862 | 98082707 | 0 | NA | intron (N)intron (N) | 25552   | NM_01894E | 54187    | Hs.52231  | CNR_01894E       | ENSG00000CNANS     | HEL-S-10C       | N-acetyl r protein-coding      |
| chr5-489A | 29.06267 | 0.466636 | 0.474026 | 0.98441  | 0.324914 | 0.981636 | chr5  | 48949810 | 48951019 | 0 | NA | IntergeniALR/Alphe   | 1490874 | NM_19844E | 133418   | Hs.56141  | ENM_19844E       | ENSG00000CEMB      | GP70            | embin protein-coding           |
| chr19-384 | 8.870164 | -0.77834 | 0.790816 | -0.98422 | 0.325007 | 0.981636 | chr19 | 3408394  | 3408704  | 0 | NA | intron (N)AluJr SIN  | 41966   | NM_00124E | 4782     | Hs.170131 | ENM_00559E       | ENSG00000CNFC      | CTF CTF5        | nuclear protein-coding         |
| chr2-216I | 8.870164 | -0.77834 | 0.790816 | -0.98422 | 0.325007 | 0.981636 | chr2  | 2.16E+08 | 2.16E+08 | 0 | NA | intron (N)L3 LINE C  | 24593   | NM_021141 | 7520     | Hs.38873  | ENM_021141       | ENSG00000CXRC5     | KARP-1 KAX      | ray re protein-coding          |
|           |          |          |          |          |          |          |       |          |          |   |    |                      |         |           |          |           |                  |                    |                 |                                |





|                    |          |          |          |          |          |       |          |          |   |    |                    |                  |                               |                    |                 |                         |                |                |
|--------------------|----------|----------|----------|----------|----------|-------|----------|----------|---|----|--------------------|------------------|-------------------------------|--------------------|-----------------|-------------------------|----------------|----------------|
| chrX-154:10.60554  | -0.70577 | 0.726504 | -0.97146 | 0.331318 | 0.981636 | chrX  | 1.54E+08 | 1.54E+08 | 0 | NA | promoter-promoter- | -658 NR_000011   | 26778 Hs. 534404NR_000011     | ENSG000003SNORA70  | DXS648E fsmall  | nucsnRNA                |                |                |
| chr10-73:6.938544  | 0.880917 | 0.906917 | 0.971331 | 0.331383 | 0.981636 | chr10 | 73392230 | 73392541 | 0 | NA | intron (NLP1A5 LIN | 21673 NM_001156  | 310 Hs. 631827NM_001156       | ENSG000003ANXA7    | ANX7 SNR anexin | protein-coding          |                |                |
| chr11-62:8.84659   | -0.77423 | 0.797085 | -0.97132 | 0.331386 | 0.981636 | chr11 | 62515135 | 62515908 | 0 | NA | TTS (NM_TTS (NM_C  | 30143 NM_001346  | 79026 Hs. 502755NM_00162C     | ENSG000003AHNAK    | AHNAKRS1 FAHNAK | nucprotein-coding       |                |                |
| chr2-2267:8.84659  | -0.77423 | 0.797085 | -0.97132 | 0.331386 | 0.981636 | chr2  | 2.27E+08 | 2.27E+08 | 0 | NA | intron (Nintron (N | 30338 NM_005544  | 3667 Hs. 471505NM_005544      | ENSG000003IRS1     | HIRS-1          | insulin                 | protein-coding |                |
| chr6-1051:7.44484  | 0.83838  | 0.863451 | 0.970964 | 0.331566 | 0.981636 | chr6  | 1.05E+08 | 1.05E+08 | 0 | NA | intron (Nintron (N | 20888 NM_147147  | 11149 Hs. 22166CNC_00707      | ENSG000003BVES     | CARIC HEB       | lucod vesprotein-coding |                |                |
| chr9-137:7.44484   | 0.83838  | 0.863451 | 0.970964 | 0.331566 | 0.981636 | chr9  | 1.38E+08 | 1.38E+08 | 0 | NA | 3' UTR (N3' UTR (N | -3264 NR_030333  | 693187 NR_030333              | ENSG000003MIR602   | MIRN602 f       | microRNA ncRNA          |                |                |
| chr19-131:8.607171 | 0.790921 | 0.814951 | 0.970513 | 0.331791 | 0.981636 | chr19 | 13138489 | 13138711 | 0 | NA | 3' UTR (N3' UTR (N | 11775 NM_001271  | 8677 Hs. 43812 NM_00376       | ENSG000003STX10    | SYN10 hsy       | synsytaxin              | protein-coding |                |
| chr1-3206:5.931132 | -0.94027 | 0.969064 | -0.97029 | 0.331902 | 0.981636 | chr1  | 32064231 | 32065420 | 0 | NA | IntergeniAluSz6 SI | 7206 NM_001316   | 55116 Hs. 25544 NM_01805      | ENSG000003TMEM39B  | -               | transmem protein-coding |                |                |
| chr12-28:5.931132  | -0.94027 | 0.969064 | -0.97029 | 0.331902 | 0.981636 | chr12 | 2886524  | 2887078  | 0 | NA | intron (Nintron (N | -4090 NM_003324  | 7289 Hs. 65533NM_003324       | ENSG000003TULP3    | TUBL3           | TUB like                | protein-coding |                |
| chr16-71:5.931132  | -0.94027 | 0.969064 | -0.97029 | 0.331902 | 0.981636 | chr16 | 71802501 | 71802926 | 0 | NA | intron (NAluXs1 SI | 6121 NM_00103C   | 164 Hs. 461255NM_00112        | ENSG000003AP1G1    | ADTG CLAF       | adaptor                 | protein-coding |                |
| chr19-38:5.931132  | -0.94027 | 0.969064 | -0.97029 | 0.331902 | 0.981636 | chr19 | 38393146 | 38393657 | 0 | NA | intron (NAluXs1 SI | 3109 NR_073032   | 399473 Hs. 196011NM_00103     | ENSG000003SPRED3   | Eve-3 spr       | sprouty                 | protein-coding |                |
| chr3-274:5.931132  | -0.94027 | 0.969064 | -0.97029 | 0.331902 | 0.981636 | chr3  | 27408553 | 27408937 | 0 | NA | intron (Nintron (N | -39285 NM_152534 | 152110 Hs. 506115NM_152534    | ENSG000003CNEK10   | -               | NIMA                    | rel            | protein-coding |
| chr3-3704:5.931132 | -0.94027 | 0.969064 | -0.97029 | 0.331902 | 0.981636 | chr3  | 37040956 | 37041462 | 0 | NA | intron (Nintron (N | 47859 NM_00125E  | 4292 Hs. 190536NM_00024       | ENSG000003MLH1     | COCA2 FCC       | mtc                     | protein-coding |                |
| chr3-729:5.931132  | -0.94027 | 0.969064 | -0.97029 | 0.331902 | 0.981636 | chr3  | 72909669 | 72910011 | 0 | NA | intron (Nintron (N | 21794 NM_00108C  | 727936 Hs. 710275NM_00108     | ENSG000003GXYLT2   | GLT8D4          | glucoside               | protein-coding |                |
| chr5-946:5.931132  | -0.94027 | 0.969064 | -0.97029 | 0.331902 | 0.981636 | chr5  | 94654910 | 94656717 | 0 | NA | intron (NLM2b LIN  | 37144 NM_03229C  | 84250 Hs. 657315NM_03229      | ENSG000003SLF1     | ANKRD32 E       | SMC5-SMC6               | protein-coding |                |
| chr5-1264:5.931132 | -0.94027 | 0.969064 | -0.97029 | 0.331902 | 0.981636 | chr5  | 1.26E+08 | 1.26E+08 | 0 | NA | intron (NLM8B LIN  | 7086 NM_001345   | 65983 Hs. 363555NM_02392      | ENSG000003GRAMD2B  | GRAMD3 NS       | gram dom                | protein-coding |                |
| chr7-729:5.931132  | -0.94027 | 0.969064 | -0.97029 | 0.331902 | 0.981636 | chr7  | 72987991 | 72988682 | 0 | NA | IntergeniAluSz LIN | 17607 NR_04058E  | 442578 Hs. 63231CNC_001013739 | STAG3L3            | STAG3L1 S       | stromal                 | pseudo         |                |
| chr15-49:5.864569  | -0.95513 | 0.985445 | -0.96923 | 0.332429 | 0.981636 | chr15 | 49124125 | 49124419 | 0 | NA | 3' UTR (N3' UTR (N | 31327 NM_00114Z  | 9318 Hs. 369614NM_00423       | ENSG000003COPS2    | ALIEN CSN       | COP9                    | sig            | protein-coding |
| chr3-638:5.864569  | -0.95513 | 0.985445 | -0.96923 | 0.332429 | 0.981636 | chr3  | 63834679 | 63834908 | 0 | NA | intron (Nintron (N | 15494 NM_00135E  | 132200 Hs. 506386NM_00135     | ENSG000003CORF49   | -               | chromosom               | protein-coding |                |
| chr3-1727:5.864569 | -0.95513 | 0.985445 | -0.96923 | 0.332429 | 0.981636 | chr3  | 1.73E+08 | 1.73E+08 | 0 | NA | intron (NAluJr SIN | 33246 NM_00134E  | 1894 Hs. 518295NM_01809       | ENSG000003ECT2     | ARHGFEF31       | epitheli                | protein-coding |                |
| chr6-247:5.864569  | -0.95513 | 0.985445 | -0.96923 | 0.332429 | 0.981636 | chr6  | 24783462 | 24784903 | 0 | NA | intron (Nintron (N | 8769 NM_001251   | 51053 Hs. 234895NM_01589      | ENSG000003GMN      | MIR60R3         | geminin                 | protein-coding |                |
| chr15-64:4.633639  | -1.07325 | 1.107821 | -0.96879 | 0.332648 | 0.981636 | chr15 | 64820868 | 64821455 | 0 | NA | intron (Nintron (N | 4486 NM_025045   | 80119 Hs. 11216CNC_02504      | ENSG000003PIF1     | C15orf20 PIF1   | 5'                      | protein-coding |                |
| chr20-54:4.633639  | -1.07325 | 1.107821 | -0.96879 | 0.332648 | 0.981636 | chr20 | 58393798 | 58394615 | 0 | NA | intron (Nintron (N | 4977 NR_036633   | 9217 Hs. 182625NM_00473       | ENSG000003VAPB     | ALS8 VAMF       | VAMP                    | assoc          | protein-coding |
| chr17-767:11.77961 | -0.68762 | 0.709783 | -0.96878 | 0.332657 | 0.981636 | chr17 | 76735468 | 76736170 | 0 | NA | promoter-promoter- | 729 NR_03036E    | 693221 NR_03036E              | ENSG000003MIR636   | MIRN636 f       | microRNA ncRNA          |                |                |
| chr1-2377:5.725365 | 0.949639 | 0.98034  | 0.968684 | 0.332703 | 0.981636 | chr1  | 23770542 | 23772019 | 0 | NA | intron (NAluJb SIN | 7017 NR_03828C   | 1.01E+08 Hs. 592545NR_03828   | ENSG000003ELOA-AS1 | TCEB3-AS1       | ELOA                    | antncRNA       |                |
| chr1-317:5.725365  | 0.949639 | 0.98034  | 0.968684 | 0.332703 | 0.981636 | chr1  | 31729934 | 31732657 | 0 | NA | exon (NM_exon (NM  | -27278 NM_00185E | 1307 Hs. 368921NM_00185       | ENSG000003COL16A1  | 447AA FP1       | collagen                | protein-coding |                |
| chr1-2042:5.725365 | 0.949639 | 0.98034  | 0.968684 | 0.332703 | 0.981636 | chr1  | 2.04E+08 | 2.04E+08 | 0 | NA | intron (NHERVL-int | -24233 NM_198447 | 127845 Hs. 532401NM_19844     | ENSG000003GOLTI1A  | CGI-141 C       | golgi                   | protein-coding |                |
| chr1-246:5.725365  | 0.949639 | 0.98034  | 0.968684 | 0.332703 | 0.981636 | chr1  | 2.47E+08 | 2.47E+08 | 0 | NA | intron (Nintron (N | 77587 NM_15260E  | 163882 Hs. 368355NM_15260     | ENSG000003CNST     | Clorf71 f       | consort                 | protein-coding |                |
| chr10-90:5.725365  | 0.949639 | 0.98034  | 0.968684 | 0.332703 | 0.981636 | chr10 | 97366513 | 97369761 | 0 | NA | intron (NAluSz SIN | 33203 NM_01517E  | 23223 Hs. 434251NM_01517      | ENSG000003RRP12    | KIAA0690        | ribosomal               | protein-coding |                |
| chr15-97:5.725365  | 0.949639 | 0.98034  | 0.968684 | 0.332703 | 0.981636 | chr15 | 90906257 | 90907057 | 0 | NA | intron (Nintron (N | 2467 NR_135504   | 4122 Hs. 116455NM_00961       | ENSG000003MAN2A2   | MANA2X          | mannosid                | protein-coding |                |
| chr16-48:5.725365  | 0.949639 | 0.98034  | 0.968684 | 0.332703 | 0.981636 | chr16 | 4886293  | 4886895  | 0 | NA | intron (Nintron (N | 38214 NM_00128E  | 29855 Hs. 440215NM_01693      | ENSG000003CUBN1    | VT VT4          | ubinucl                 | protein-coding |                |
| chr16-28:5.725365  | 0.949639 | 0.98034  | 0.968684 | 0.332703 | 0.981636 | chr16 | 28908511 | 28909407 | 0 | NA | intron (Nintron (N | 16279 NM_02481E  | 79874 Hs. 555975NM_02481      | ENSG000003RABEP2   | FRA             | rabatin                 | protein-coding |                |
| chr17-76:5.725365  | 0.949639 | 0.98034  | 0.968684 | 0.332703 | 0.981636 | chr17 | 76310972 | 76311781 | 0 | NA | 3' UTR (N3' UTR (N | -3696 NM_023134  | 84074 Hs. 252735NM_03213      | ENSG000003QRICH2   | SPGF35          | glutamin                | protein-coding |                |
| chr20-62:5.725365  | 0.949639 | 0.98034  | 0.968684 | 0.332703 | 0.981636 | chr20 | 62329743 | 62333961 | 0 | NA | TTS (NR_TTS (NR_C  | 705 NR_03991E    | 1.01E+08 NR_03991E            | ENSG000003MIR4758  | -               | microRNA ncRNA          |                |                |
| chr22-23:5.725365  | 0.949639 | 0.98034  | 0.968684 | 0.332703 | 0.981636 | chr22 | 23668853 | 23870169 | 0 | NA | intron (NAluJb SIN | 11636 NM_001024  | 66035 Hs. 66191CNC_03080      | ENSG000003SLC2A11  | GLUT10 G        | solute c                | protein-coding |                |
| chr3-75:5.725365   | 0.949639 | 0.98034  | 0.968684 | 0.332703 | 0.981636 | chr3  | 75760107 | 75764857 | 0 | NA | intron (NLM2B LIN  | 22520 NM_001324  | 1.0E+08 Hs. 556877NM_00112    | ENSG000003ZNF17    | OB1 X17 z       | inc                     | protein-coding |                |
| chr4-3021:5.725365 | 0.949639 | 0.98034  | 0.968684 | 0.332703 | 0.981636 | chr4  | 3021531  | 3021888  | 0 | NA | intron (Nintron (N | 52805 NR_045414  | 1.01E+08 Hs. 575112NR_045414  | HTT-AS             | HTT-AS1 H       | TTT                     | antisncRNA     |                |
| chr5-671:5.725365  | 0.949639 | 0.98034  | 0.968684 | 0.332703 | 0.981636 | chr5  | 67154424 | 67155777 | 0 | NA | intron (Nintron (N | 41699 NM_00558E  | 4064 Hs. 87205 NM_00558       | ENSG000003CD180    | LY64 L          | Y7CD180                 | mol            | protein-coding |
| chr5-176:5.725365  | 0.949639 | 0.98034  | 0.968684 | 0.332703 | 0.981636 | chr5  | 1.77E+08 | 1.77E+08 | 0 | NA | intron (Nintron (N | 23742 NM_01629C  | 51720 Hs. 116455NM_01629      | ENSG000003UIMC1    | RAP80 X2        | f                       | ubiquit        | protein-coding |
| chr6-311:5.725365  | 0.949639 | 0.98034  | 0.968684 | 0.332703 | 0.981636 | chr6  | 31154613 | 31155415 | 0 | NA | intron (Nintron (N | 2775 NM_00110E   | 54535 Hs. 485075NM_01905      | ENSG000003CCHCR1   | C6orf18 f       | coiled-c                | protein-coding |                |
| chr9-104:5.725365  | 0.949639 | 0.98034  | 0.968684 | 0.332703 | 0.981636 | chr9  | 1.05E+08 | 1.05E+08 | 0 | NA | intron (Nintron (N | 42451 NM_00550E  | 19 Hs. 692974NM_00550         | ENSG000003ABCA1    | A1C ABC         | ATP                     | bindi          | protein-coding |
| chr10-14:10.62911  | -0.70927 | 0.732423 | -0.96838 | 0.332853 | 0.981636 | chr10 | 14519819 | 14521837 | 0 | NA | 3' UTR (N3' UTR (N | 11886 NM_00132C  | 83641 Hs. 446315NM_03145      | ENSG000003FAM107B  | ABC-1 ABC       | ATP                     | bindi          | protein-coding |
| chr3-195:9.211462  | 0.759384 | 0.784292 | 0.968242 | 0.332924 | 0.981636 | chr3  | 1.96E+08 | 1.96E+08 | 0 | NA | IntergeniLTR16C LI | 31365 NR_003264  | 255812 Hs. 566872NR_00326     | ENSG000003SDHAP1   | SDHAL1 S        | uccinat                 | pseudo         |                |
| chr2-613:14.19518  | 0.616397 | 0.636622 | 0.96823  | 0.332929 | 0.981636 | chr2  | 61306391 | 61307161 | 0 | NA | intron (NLP1A5 LIN | 110601 NR_003707 | 1E+08 Hs. 675825NR_00370      | ENSG000003SNORA702 | -               | small                   | nucsnRNA       |                |
| chr19-181:7.493837 | 0.83665  | 0.864179 | 0.968144 | 0.332972 | 0.981636 | chr19 | 18130532 | 18134840 | 0 | NA | intron (Nintron (N | -20477 NR_162071 | 5296 Hs. 371344NM_00502       | ENSG000003PIK3R2   | MPPP MPPI       | phospho                 | protein-coding |                |
| chr19-57:7.493837  | 0.83665  | 0.864179 | 0.968144 | 0.332972 | 0.981636 | chr19 | 57512068 | 57517333 | 0 | NA | 3' UTR (N3' UTR (N | -12355 NM_153263 | 256051 Hs. 744285NM_15326     | ENSG000003ZNF549   | -               | zinc                    | protein-coding |                |
| chr2-105:7.493837  | 0.83665  | 0.864179 | 0.968144 | 0.332972 | 0.981636 | chr2  | 1.05E+08 | 1.05E+08 | 0 | NA | intron (NLMC5a LI  | 31789 NR_13732E  | 9392 Hs. 44635CNC_00425       | ENSG000003TGFBAP1  | TRAP-1 T        | TF                      | transfor       | protein-coding |
| chr12-911:10.59768 | -0.7046  | 0.728072 | -0.96776 | 0.333166 | 0.981636 | chr12 | 91144657 | 91159398 | 0 | NA | intron (Nintron (N | 26619 NM_13350E  | 1634 Hs. 156315NM_00192       | ENSG000003CCDCN    | CSD DSPC        | degrin                  | protein-coding |                |
| chr1-841:8.410557  | -0.80809 | 0.83502  | -0.96774 | 0.333172 | 0.981636 | chr1  | 8410304  | 8410572  | 0 | NA |                    |                  |                               |                    |                 |                         |                |                |



|                    |          |          |          |          |          |       |                 |                 |   |      |                     |                   |                              |                    |                   |                              |                          |
|--------------------|----------|----------|----------|----------|----------|-------|-----------------|-----------------|---|------|---------------------|-------------------|------------------------------|--------------------|-------------------|------------------------------|--------------------------|
| chr12-297 5.923274 | -0.93816 | 0.974951 | -0.96226 | 0.335917 | 0.981636 | chr12 | 29775488        | 29776274        | + | 0 NA | intron (NMER21C LI  | 8061 NM_001367    | 83857 Hs. 401954NM_03192C    | ENSG00000TMTCT1    | ARG99 OLF         | transmembrane protein-coding |                          |
| chr20-384 5.923274 | -0.93816 | 0.974951 | -0.96226 | 0.335917 | 0.981636 | chr20 | 38418447        | 38419588        | + | 0 NA | Intergeni Intergeni | 6313 NR_00291C    | 26776 Hs. 40087ENR_00291C    | ENSG00000SNORA71B  | RNU7B U7small     | nucsnRNA                     |                          |
| chr6-1366 5.923274 | -0.93816 | 0.974951 | -0.96226 | 0.335917 | 0.981636 | chr6  | 1.37E+08        | 1.37E+08        | + | 0 NA | intron (AluS6 SI    | 35736 NR_12585E   | 1.02E+08 Hs. 66651ENR_12585E | LOC10192E-         |                   | uncharacterized RNA          |                          |
| chr4-3195 7.419416 | 0.83323  | 0.866055 | 0.962098 | 0.336    | 0.981636 | chr4  | 3199785         | 3200010         | + | 0 NA | exon (NM exon (NM   | -44472 NM_00133C  | 345222 Hs. 442291NM_00101E   | ENSG00000MSANTD1   | C4orf44           | Myb/SANT protein-coding      |                          |
| chr11-300 8.921011 | -0.76613 | 0.79641  | -0.96198 | 0.33606  | 0.981636 | chr11 | 3000240         | 3000439         | + | 0 NA | TTS (NM_CTS (NM_C   | -8010 NM_00136E   | 4676 Hs. 731784NM_00596E     | ENSG00000NAP1L4    | NAP1L4 b          | nucleoson protein-coding     |                          |
| chr8-8978 7.598095 | -0.8231  | 0.855684 | -0.96192 | 0.336092 | 0.981636 | chr8  | 89780168        | 89780509        | + | 0 NA | intron (intron (N   | 22522 NM_00382I   | 8767 Hs. 103755NM_00382I     | ENSG00000CRIPK2    | CARD3 CAF         | receptor protein-coding      |                          |
| chr10-125 5.962564 | -0.94797 | 0.98551  | -0.96191 | 0.336097 | 0.981636 | chr10 | 12020963        | 12021964        | + | 0 NA | intron (AluJo SIN   | 21346 NM_01554Z   | 26019 Hs. 370688NM_01554Z    | ENSG00000UPP2      | HUPP2 REN         | UPP2 reg protein-coding      |                          |
| chr13-757 10.64668 | -0.70302 | 0.730984 | -0.96174 | 0.336178 | 0.981636 | chr13 | 75796768        | 75797598        | + | 0 NA | intron (intron (N   | 36522 NM_01584Z   | 4008 Hs. 207631NM_00535E     | ENSG00000LM07      | FBX20 FBLIM       | domain protein-coding        |                          |
| chr2-2764 10.64668 | -0.70302 | 0.730984 | -0.96174 | 0.336178 | 0.981636 | chr2  | 27645000        | 27645342        | + | 0 NA | intron (AluJr4 SI   | 16121 NM_00726E   | 11321 Hs. 18259 NM_00726E    | ENSG00000CPN1      | ATPBD1A GPN       | loop protein-coding          |                          |
| chr7-9904 10.64668 | -0.70302 | 0.730984 | -0.96174 | 0.336178 | 0.981636 | chr7  | 99041235        | 99041924        | + | 0 NA | intron (intron (N   | 28614 NR_110102   | 1.02E+08 Hs. 63666E          | NR_110102          | LOC101927-        |                              | uncharacterized RNA      |
| chr3-1572 8.838732 | -0.77282 | 0.803867 | -0.96138 | 0.336359 | 0.981636 | chr3  | 15723543        | 15724269        | + | 0 NA | intron (intron (N   | -26535 NR_03608E  | 1E+08 NR_03608E              | ENSG00000MIR3134   |                   | microRNA ncRNA               |                          |
| chr22-402 9.152757 | 0.752698 | 0.783392 | 0.960819 | 0.336643 | 0.981636 | chr22 | 40286285        | 40287076        | + | 0 NA | intron (intron (N   | -59820 NM_00136E  | 158 Hs. 75527 NM_00002E      | ENSG00000ADSL      | AMPS ASAS         | adenylost protein-coding     |                          |
| chr2-2398 8.656169 | 0.789274 | 0.821716 | 0.960519 | 0.336794 | 0.981636 | chr2  | 23983253        | 23983953        | + | 0 NA | intron (intron (N   | -26482 NM_00134E  | 388931 Hs. 407482NM_00108C   | ENSG00000MPSD2B    |                   | major fac protein-coding     |                          |
| chr1-9675 7.647092 | -0.82072 | 0.854651 | -0.9603  | 0.336903 | 0.981636 | chr1  | 96755599        | 96757069        | + | 0 NA | intron (AluSp SIN   | 33696 NR_12535E   | 58155 Hs. 596061NM_02119C    | ENSG00000PTPB2     | PTBP1 brf         | polyrribin protein-coding    |                          |
| chr10-615 7.647092 | -0.82072 | 0.854651 | -0.9603  | 0.336903 | 0.981636 | chr10 | 61924264        | 61925093        | + | 0 NA | intron (intron (N   | 22979 NM_03219E   | 84159 Hs. 535297NM_03219E    | ENSG00000ARID5B    | DESRT MRF         | AT-rich protein-coding       |                          |
| chr3-1218 7.647092 | -0.82072 | 0.854651 | -0.9603  | 0.336903 | 0.981636 | chr3  | 1.22E+08        | 1.22E+08        | + | 0 NA | intron (intron (N   | 17480 NM_00102Z   | 9657 Hs. 60411C              | NR_00102Z          | ENSG00000IQCB1    | NHPH5 PTG                    | IQ motif protein-coding  |
| chr8-1404 7.647092 | -0.82072 | 0.854651 | -0.9603  | 0.336903 | 0.981636 | chr8  | 1.41E+08        | 1.41E+08        | + | 0 NA | intron (intron (N   | -84763 NR_02989E  | 442893 NR_02989E             | ENSG00000MIR151A   | MIR151 MI         | microRNA ncRNA               |                          |
| chr1-1971 4.692344 | -1.05132 | 1.094789 | -0.96029 | 0.336908 | 0.981636 | chr1  | 1.97E+08        | 1.97E+08        | + | 0 NA | intron (Tiger1 I    | 30839 NM_01813C   | 259266 Hs. 121028NM_01813E   | ENSG00000ASPM      | ASP Calmt         | abnormal protein-coding      |                          |
| chr12-952 4.692344 | -1.05132 | 1.094789 | -0.96029 | 0.336908 | 0.981636 | chr12 | 95272574        | 95273004        | + | 0 NA | intron (AluJb SIN   | -35631 NR_02989E  | 442903 NR_02989E             | ENSG00000MIR331    | MIRN331 hm        | microRNA ncRNA               |                          |
| chr17-644 4.692344 | -1.05132 | 1.094789 | -0.96029 | 0.336908 | 0.981636 | chr17 | 64485910        | 64486287        | + | 0 NA | intron (intron (N   | 10966 NM_00721E   | 11232 Hs. 43700E             | NR_00721E          | ENSG00000POLG2    | HP55 MTPC                    | DNA polyn protein-coding |
| chr2-189 4.692344  | -1.05132 | 1.094789 | -0.96029 | 0.336908 | 0.981636 | chr2  | 1.9E+08         | 1.9E+08         | + | 0 NA | non-codnon-codir    | 93004 NM_00132I   | 5378 Hs. 11174E              | NR_00053A          | ENSG00000PMS1     | HNPC3 PMS1                   | homc protein-coding      |
| chr2-6122 7.146346 | -0.86368 | 0.89967  | -0.95999 | 0.337058 | 0.981636 | chr2  | 61226204        | 61226335        | + | 0 NA | intron (Tiger1 7c   | 48761 NR_15221I   | 130872 Hs. 65560E            | NR_15239E          | ENSG00000AHS2A2P  | AHA1 AHS                     | activator pseudo         |
| chr6-1113 7.146346 | -0.86368 | 0.89967  | -0.95999 | 0.337058 | 0.981636 | chr6  | 1.11E+08        | 1.11E+08        | + | 0 NA | intron (intron (N   | 75511 NR_15336E   | 91749 Hs. 40057E             | NR_15336E          | ENSG00000MFS4B    | KIAA1919 major               | fac protein-coding       |
| chr8-1235 7.146346 | -0.86368 | 0.89967  | -0.95999 | 0.337058 | 0.981636 | chr8  | 1.23E+08        | 1.23E+08        | + | 0 NA | intron (AluY SINE   | -9951 NR_03751E   | 1.01E+08 NR_03751E           | ENSG00000MIR548A1A |                   | microRNA ncRNA               |                          |
| chr1-9308 7.623518 | -0.81599 | 0.850027 | -0.95995 | 0.337078 | 0.981636 | chr1  | 93084830        | 93085271        | + | 0 NA | intron (intron (N   | 5767 NM_00735E    | 22823 Hs. 31016 NM_00735E    | ENSG00000MTF2      | M96 PCL2 metal    | res protein-coding           |                          |
| chr12-45 7.623518  | -0.81599 | 0.850027 | -0.95995 | 0.337078 | 0.981636 | chr12 | 45961752        | 45964004        | + | 0 NA | intron (LIMEd LIN   | 27698 NM_00471E   | 9169 Hs. 210367NM_00471E     | ENSG00000SCAF11    | CASP11 SFR        | relate protein-coding        |                          |
| chr12-105 7.623518 | -0.81599 | 0.850027 | -0.95995 | 0.337078 | 0.981636 | chr12 | 1.05E+08        | 1.05E+08        | + | 0 NA | non-codnon-codir    | 37875 NM_15231E   | 121053 Hs. 29556E            | NR_15231E          | ENSG00000C12orf45 |                              | chromoson protein-coding |
| chr16-158 7.623518 | -0.81599 | 0.850027 | -0.95995 | 0.337078 | 0.981636 | chr16 | 15872350        | 15873342        | + | 0 NA | intron (intron (N   | 15757 NM_00130A   | 123811 Hs. 51417E            | NR_14460C          | ENSG00000FOPNL    | C16orf63 FGFR10P             | protein-coding           |
| chr17-371 7.623518 | -0.81599 | 0.850027 | -0.95995 | 0.337078 | 0.981636 | chr17 | 37120732        | 37120972        | + | 0 NA | intron (intron (N   | 87107 NR_03605E   | 1E+08 NR_03605E              | ENSG00000MIR2909   |                   | microRNA ncRNA               |                          |
| chr18-587 7.623518 | -0.81599 | 0.850027 | -0.95995 | 0.337078 | 0.981636 | chr18 | 58522362        | 58524763        | + | 0 NA | intron (LIP43 LIN   | -27410 NR_03989E  | 1.01E+08 NR_03989E           | ENSG00000MIR3591   |                   | microRNA ncRNA               |                          |
| chr3-1962 7.623518 | -0.81599 | 0.850027 | -0.95995 | 0.337078 | 0.981636 | chr3  | 1.96E+08        | 1.96E+08        | + | 0 NA | intron (intron (N   | 17995 NM_00131Z   | 5130 Hs. 135997NM_005017     | ENSG00000PCYT1A    | CCTA CTI          | Cphosphate protein-coding    |                          |
| chr6-5301 7.623518 | -0.81599 | 0.850027 | -0.95995 | 0.337078 | 0.981636 | chr6  | 53013558        | 53013863        | + | 0 NA | exon (NM exon (NM   | 18090 NR_00144E   | 125050 NR_00144E             | ENSG00000CRN7SK    | 7SK               | RNA ncsnRNA                  |                          |
| chr8-131E 7.623518 | -0.81599 | 0.850027 | -0.95995 | 0.337078 | 0.981636 | chr8  | 13153509        | 13153817        | + | 0 NA | intron (LTR12C LI   | -20724 NM_00134E  | 10395 Hs. 13429E             | NR_00609A          | ENSG00000DLCL1    | HNCGAP7 E                    | DLCL1 Rho protein-coding |
| chr9-218E 7.623518 | -0.81599 | 0.850027 | -0.95995 | 0.337078 | 0.981636 | chr9  | 21834326        | 21834662        | + | 0 NA | intron (MLTID LTF   | 31858 NM_00245I   | 4507 Hs. 19326E              | NR_00245I          | ENSG00000MTAP     | BDMF DMSF                    | methylthiprotein-coding  |
| chr9-136E 7.623518 | -0.81599 | 0.850027 | -0.95995 | 0.337078 | 0.981636 | chr9  | 1.36E+08        | 1.36E+08        | + | 0 NA | intron (intron (N   | 2225 NM_00120C    | 26086 Hs. 23937C             | NR_015597          | ENSG00000GSPM1    | AGS3                         | G protein protein-coding |
| chr1-123E 9.70805  | 0.726209 | 0.756552 | 0.959893 | 0.337109 | 0.981636 | chr1  | 1.24E+08        | 1.24E+08        | + | 0 NA | Intergeni ALR/Alphe | 2443198 NR_00395E | 647121 Hs. 69768E            | NR_00395E          | ENSG00000EMBP1    |                              | embin pseudo             |
| chr1-1717 9.70805  | 0.726209 | 0.756552 | 0.959893 | 0.337109 | 0.981636 | chr1  | 1.72E+08        | 1.72E+08        | + | 0 NA | intron (AluJb SIN   | 27335 NR_03370A   | 8674 Hs. 6651 NM_00376E      | ENSG00000CVAMP4    | VAMP-4 V          | vesicle protein-coding       |                          |
| chr6-9054 9.70805  | 0.726209 | 0.756552 | 0.959893 | 0.337109 | 0.981636 | chr6  | 90545789        | 90546081        | + | 0 NA | intron (MLTIJ LTF   | 41137 NM_00318E   | 6885 Hs. 59483E              | NR_00318E          | ENSG00000MAP3K7   | CSCP FMD2                    | mitogen protein-coding   |
| chr22-317 7.436982 | 0.840788 | 0.87605  | 0.959749 | 0.337182 | 0.981636 | chr22 | 52364 NM_00136E | 52364 NM_00136E | + | 0 NA | intron (intron (N   | 52364 NM_00136E   | 9681 Hs. 435022NM_01466E     | ENSG00000DEPDC5    | DEP. 5 F          | DEP domain protein-coding    |                          |
| chr5-108E 7.436982 | 0.840788 | 0.87605  | 0.959749 | 0.337182 | 0.981636 | chr5  | 1.08E+08        | 1.08E+08        | + | 0 NA | intron (LIM4 LINE   | 9504 NM_00116E    | 64839 Hs. 65722E             | NR_02282A          | ENSG00000FBXL17   | FBXO13 F                     | box anc protein-coding   |
| chr17-505 10.53112 | -0.71249 | 0.742481 | -0.95961 | 0.337253 | 0.981636 | chr17 | 56910732        | 56910942        | + | 0 NA | intron (intron (N   | 3212 NM_00508E    | 7706 Hs. 52995E              | NR_00508E          | ENSG00000TRIM25   | EFP RNFI4                    | tripartit protein-coding |
| chrX-246 9.270168  | 0.766903 | 0.799108 | 0.958685 | 0.337718 | 0.981636 | chrX  | 2407107         | 2407483         | + | 0 NA | intron (LTR22C0 I   | 93244 NM_00117I   | 9189 Hs. 13145E              | NR_00472E          | ENSG00000ZBED1    | ALTE DREF                    | zinc fing protein-coding |
| chr7-9962 6.971825 | 0.883672 | 0.921942 | 0.95849  | 0.337816 | 0.981636 | chr7  | 99628248        | 99628734        | + | 0 NA | intron (intron (N   | 11545 NM_00135C   | 221785 Hs. 446297NM_14511E   | ENSG00000ZSCAN25   | ZNF498            | zinc fing protein-coding     |                          |
| chr11-78E 5.699941 | 0.943075 | 0.984545 | 0.957879 | 0.338124 | 0.981636 | chr11 | 78220837        | 78221369        | + | 0 NA | intron (intron (N   | 32184 NM_02079E   | 57558 Hs. 53124E             | NR_02079E          | ENSG00000USP35    |                              | ubiquitin protein-coding |
| chr11-125 5.699941 | 0.943075 | 0.984545 | 0.957879 | 0.338124 | 0.981636 | chr11 | 1.25E+08        | 1.25E+08        | + | 0 NA | 3' UTR (3' UTR (N   | -50457 NM_00130I  | 403312 Hs. 450611NM_20345E   | LOC040331E-        |                   | putative protein-coding      |                          |
| chr12-50E 5.699941 | 0.943075 | 0.984545 | 0.957879 | 0.338124 | 0.981636 | chr12 | 50120934        | 50121226        | + | 0 NA | Intergeni Intergeni | 9294 NM_001257    | 84987 Hs. 38864E             | NR_03290I          | ENSG00000COX14    | C12orf62 cyto                | chron protein-coding     |
| chr15-41E 5.699941 | 0.943075 | 0.984545 | 0.957879 | 0.338124 | 0.981636 | chr15 | 41573727        | 41575133        | + | 0 NA | intron (MIR SINE    | 14458 NM_00133C   | 7301 Hs. 38128E              | NR_00629E          | ENSG00000TYR03    | BYK Dtk E                    | TYR03 prc protein-coding |
| chr16-16E 5.699941 | 0.943075 | 0.984545 | 0.957879 | 0.338124 | 0.981636 | chr16 | 16260311        | 16260827        | + | 0 NA | intron (intron (N   | 62627 NM_00107E   | 368 Hs. 44218E               | NR_00117I          | ENSG00000ABC6C    | ABC34 AR                     | ATP brd protein-coding   |
| chr16-56E 5.699941 | 0.943075 | 0.984545 | 0.957879 | 0.338124 | 0.981636 | chr16 | 56362339        | 56363247        | + | 0 NA | 3' UTR (3' UTR (N   | 62196 NM_00132Z   | 267 Hs. 295137NM_00114E      | ENSG00000AMFR      | GP78 HNF4         | autocrine protein-coding     |                          |
| chr17-78E 5.699941 | 0.943075 | 0.984545 | 0.957879 | 0.338124 | 0.981636 | chr17 | 78707604        | 78707896        | + | 0 NA | intron (AluSc SIN   | 9                 |                              |                    |                   |                              |                          |

|                     |          |          |          |          |          |       |          |          |   |   |    |                    |         |            |          |                    |                     |                                                  |                                       |
|---------------------|----------|----------|----------|----------|----------|-------|----------|----------|---|---|----|--------------------|---------|------------|----------|--------------------|---------------------|--------------------------------------------------|---------------------------------------|
| chr17-405.7.648942  | -0.80894 | 0.850331 | -0.95133 | 0.341438 | 0.981636 | chr17 | 4099458  | 4099657  | + | 0 | NA | intron (AluSq2 S)  | 43473   | NM_015113  | 23140    | Hs.277624NM_015113 | ENSG000002ZEF1      | ZZZA                                             | zinc finger protein-coding            |
| chr19-245.7.648942  | -0.80894 | 0.850331 | -0.95133 | 0.341438 | 0.981636 | chr19 | 2430652  | 2431029  | + | 0 | NA | 3' UTR (N3' UTR (N | -3254   | NM_012458  | 26517    | Hs.75056           | NM_012458           | ENSG000002TIMM13                                 | TIMM13 TIM translocase protein-coding |
| chr19-101.7.648942  | -0.80894 | 0.850331 | -0.95133 | 0.341438 | 0.981636 | chr19 | 10171216 | 10173350 | + | 0 | NA | intron (AluSx1 S)  | 22670   | NM_001318  | 1786     | Hs.202672NM_001318 | ENSG000002DNMT1     | ADCADN AIDNA methyltransferase protein-coding    |                                       |
| chr2-1731.7.648942  | -0.80894 | 0.850331 | -0.95133 | 0.341438 | 0.981636 | chr2  | 1.73E+08 | 1.73E+08 | + | 0 | NA | intron (NLIP47 L)  | 98517   | NM_016652  | 51776    | Hs.444451NM_016652 | ENSG000002MAP3K20   | AZK CNM6 mitogen-activated protein kinase-coding |                                       |
| chr2-1865.7.648942  | -0.80894 | 0.850331 | -0.95133 | 0.341438 | 0.981636 | chr2  | 1.87E+08 | 1.87E+08 | + | 0 | NA | intron (AluS5 S)   | 14683   | NM_018471  | 55854    | Hs.74118CNC_018471 | ENSG000002ZC3H15    | HT010 LEF zinc finger protein-coding             |                                       |
| chr3-445.7.648942   | -0.80894 | 0.850331 | -0.95133 | 0.341438 | 0.981636 | chr3  | 44506727 | 44506926 | + | 0 | NA | intron (AluSx S)   | 3791    | NM_001287  | 285346   | Hs.648974NM_001287 | ENSG000002ZNF852    | zinc finger protein-coding                       |                                       |
| chr3-1111.7.648942  | -0.80894 | 0.850331 | -0.95133 | 0.341438 | 0.981636 | chr3  | 1.11E+08 | 1.11E+08 | + | 0 | NA | intron (MER68 LTF) | 23020   | NM_001242  | 25945    | Hs.293917NM_001242 | ENSG000002NECTIN3   | CDN13 CDNectin cell protein-coding               |                                       |
| chr5-3466.7.648942  | -0.80894 | 0.850331 | -0.95133 | 0.341438 | 0.981636 | chr5  | 34661077 | 34661276 | + | 0 | NA | intron (Tigger4 )  | 4685    | NM_001145  | 26064    | Hs.43140CNC_015577 | ENSG000002RAI14     | NR016 RAR retinoic acid protein-coding           |                                       |
| chr7-1305.7.648942  | -0.80894 | 0.850331 | -0.95133 | 0.341438 | 0.981636 | chr7  | 1.31E+08 | 1.31E+08 | + | 0 | NA | intron (intron (N  | 6691    | NR_110472  | 378805   | Hs.150556NM_001088 | ENSG000002LINC-PIN1 | LincRNA-F long intracncRNA                       |                                       |
| chr7-1348.7.648942  | -0.80894 | 0.850331 | -0.95133 | 0.341438 | 0.981636 | chr7  | 1.31E+08 | 1.31E+08 | + | 0 | NA | intron (intron (N  | 26434   | NM_033138  | 800      | Hs.490203NM_004342 | ENSG000002CALD1     | CDM H-CAL caldesmon protein-coding               |                                       |
| chr9-6458.7.648942  | -0.80894 | 0.850331 | -0.95133 | 0.341438 | 0.981636 | chr9  | 6458471  | 6458810  | + | 0 | NA | intron (NLIP47 L)  | 45441   | NM_152896  | 115426   | Hs.493401NM_152896 | ENSG000002UHRF7     | NIRF RNFI ubiquitin protein-coding               |                                       |
| chr14-688.8.805451  | -0.7777  | 0.817535 | -0.95127 | 0.341467 | 0.981636 | chr14 | 68976727 | 68977278 | + | 0 | NA | intron (intron (N  | 2300    | NM_001102  | 87       | Hs.235755NM_001102 | ENSG000002ACTN1     | BDPLT15 actinin epsilon protein-coding           |                                       |
| chr1-3814.7.409708  | 0.823462 | 0.865918 | 0.95097  | 0.34162  | 0.981636 | chr1  | 3814520  | 3815284  | + | 0 | NA | 3' UTR (N3' UTR (N | -18404  | NM_02071C  | 57470    | Hs.268488NM_02071C | ENSG000002RNF57     | FAD104 PF fibronectin protein-coding             |                                       |
| chr14-202.7.409708  | 0.823462 | 0.865918 | 0.95097  | 0.34162  | 0.981636 | chr14 | 20289342 | 20289773 | + | 0 | NA | 3' UTR (N3' UTR (N | 16394   | NM_028376  | 91875    | Hs.98553           | NM_138376           | ENSG000002TTC5                                   | Strap tetraatric protein-coding       |
| chr6-3648.7.409708  | 0.823462 | 0.865918 | 0.95097  | 0.34162  | 0.981636 | chr6  | 36485025 | 36485245 | + | 0 | NA | intron (intron (N  | 42135   | NM_173562  | 222658   | Hs.188757NM_173562 | ENSG000002KCTD20    | C6orf69 cortactin protein-coding                 |                                       |
| chr7-1117.7.409708  | 0.823462 | 0.865918 | 0.95097  | 0.34162  | 0.981636 | chr7  | 1.12E+08 | 1.12E+08 | + | 0 | NA | exon (NM exon (NM  | -79793  | NR_103800  | 1.01E+08 | Hs.677512NR_103800 | ENSG000002DOCK4-AS1 | DOCK4 antncRNA                                   |                                       |
| chr9-8607.7.409708  | 0.823462 | 0.865918 | 0.95097  | 0.34162  | 0.981636 | chr9  | 86007462 | 86007882 | + | 0 | NA | intron (intron (N  | 66143   | NM_001321  | 60560    | Hs.436098NM_021925 | ENSG000002NAA35     | EGAP MAK1N(alpha)-protein-coding                 |                                       |
| chr9-1312.7.409708  | 0.823462 | 0.865918 | 0.95097  | 0.34162  | 0.981636 | chr9  | 1.31E+08 | 1.31E+08 | + | 0 | NA | intron (NMIR SINE) | 13159   | NM_001318  | 8021     | Hs.65453CNC_005088 | ENSG000002NUP214    | CAN CAN nucleoporin protein-coding               |                                       |
| chr1-2251.7.990425  | 0.79081  | 0.831651 | 0.950892 | 0.341659 | 0.981636 | chr1  | 22517338 | 22518190 | + | 0 | NA | intron (intron (N  | -45725  | NM_001006  | 2046     | Hs.283613NM_020526 | ENSG000002EPH8A     | EELK EK3 EPH receptor protein-coding             |                                       |
| chr2-1317.7.990425  | 0.79081  | 0.831651 | 0.950892 | 0.341659 | 0.981636 | chr2  | 1.32E+08 | 1.32E+08 | + | 0 | NA | intron (NLIPA5 L)  | 20196   | NR_149014  | 29798    | Hs.635289NM_013310 | C2orf27A            | C2orf27 chromosome protein-coding                |                                       |
| chr19-524.7.990425  | 0.79081  | 0.831651 | 0.950892 | 0.34171  | 0.981636 | chr19 | 52465390 | 52466360 | + | 0 | NA | intron (HERVK4-i   | 12322   | NM_001099  | 147660   | Hs.157287NM_152472 | ENSG000002ZNF578    | zinc finger protein-coding                       |                                       |
| chr2-2308.7.990425  | 0.79081  | 0.831651 | 0.950892 | 0.34171  | 0.981636 | chr2  | 2.31E+08 | 2.31E+08 | + | 0 | NA | 3' UTR (N3' UTR (N | -7415   | NR_038238  | 151484   | Hs.559309NR_038238 | ENSG000002LOC151484 | uncharacterized ncRNA                            |                                       |
| chr22-352.7.990425  | 0.79081  | 0.831651 | 0.950892 | 0.34171  | 0.981636 | chr22 | 35337362 | 35339063 | + | 0 | NA | intron (intron (N  | -1413   | NR_106717  | 1.02E+08 | NR_106717          | ENSG000002MIR6069   | hsa-mir-610 microRNA ncRNA                       |                                       |
| chr3-1722.7.990425  | 0.79081  | 0.831651 | 0.950892 | 0.34171  | 0.981636 | chr3  | 1.72E+08 | 1.72E+08 | + | 0 | NA | intron (intron (N  | 191873  | NM_001133  | 64778    | Hs.744888NM_022763 | ENSG000002FND3B     | FAD104 PF fibronectin protein-coding             |                                       |
| chr7-2314.7.990425  | 0.79081  | 0.831651 | 0.950892 | 0.34171  | 0.981636 | chr7  | 23145525 | 23146445 | + | 0 | NA | intron (AluJo S)   | -36063  | NM_00137C  | 11097    | Hs.408241NM_007342 | ENSG000002NUP42     | CG1 NLP-1 nucleoporin protein-coding             |                                       |
| chr9-1377.7.990425  | 0.79081  | 0.831651 | 0.950892 | 0.34171  | 0.981636 | chr9  | 1.38E+08 | 1.38E+08 | + | 0 | NA | intron (intron (N  | -10312  | NR_147508  | 651337   | Hs.603195NR_147508 | ENSG000002LOC651337 | uncharacterized ncRNA                            |                                       |
| chr1-2436.7.982567  | 0.79254  | 0.83415  | 0.950613 | 0.341801 | 0.981636 | chr1  | 2.44E+08 | 2.44E+08 | + | 0 | NA | intron (NLIMEg L)  | 195604  | NM_181696  | 10000    | Hs.498292NM_005466 | ENSG000002AKT3      | MPPH MPPF AKT serine protein-coding              |                                       |
| chr3-1975.4.478904  | 1.052944 | 1.107677 | 0.950588 | 0.341814 | 0.981636 | chr3  | 1.98E+08 | 1.98E+08 | + | 0 | NA | intron (Tigger9a ) | 37464   | NR_02678E  | 89782    | Hs.51854CNC_033025 | ENSG000002LMLN      | GP63 INV leishman protein-coding                 |                                       |
| chr1-1195.7.564813  | -0.82901 | 0.872113 | -0.95058 | 0.341819 | 0.981636 | chr1  | 1.2E+08  | 1.2E+08  | + | 0 | NA | exon (NM exon (NM  | -45041  | NM_002179A | 11085    | Hs.283011NM_02179A | ENSG000002ADAM30    | svf4 ADAM metalloprotein-coding                  |                                       |
| chr5-167.7.564813   | -0.82901 | 0.872113 | -0.95058 | 0.341819 | 0.981636 | chr5  | 16737928 | 16738144 | + | 0 | NA | intron (intron (N  | -120978 | NM_001034  | 54463    | Hs.481704NM_01900C | ENSG000002RETREG1   | SM134B J reticulon protein-coding                |                                       |
| chr18-688.5.666659  | 0.939514 | 0.988427 | 0.950514 | 0.341851 | 0.981636 | chr18 | 68879175 | 68879760 | + | 0 | NA | intron (LTR12C L)  | 81387   | NM_024781  | 79839    | Hs.280781NM_024781 | ENSG000002CCDC102B  | ACYL1 AN coiled-coiled protein-coding            |                                       |
| chr20-635.5.666659  | 0.939514 | 0.988427 | 0.950514 | 0.341851 | 0.981636 | chr20 | 63589168 | 63589619 | + | 0 | NA | 3' UTR (N3' UTR (N | -15154  | NM_001037  | 85441    | Hs.51718CNC_033405 | ENSG000002HELZ2     | PDIP1 PF helicase protein-coding                 |                                       |
| chr7-1005.5.666659  | 0.939514 | 0.988427 | 0.950514 | 0.341851 | 0.981636 | chr7  | 1E+08    | 1E+08    | + | 0 | NA | TTS (NR_1TTS (NR_1 | 1833    | NR_103728  | 1.02E+08 | Hs.521072NR_103728 | PVRIG2P             | poliovirus pseudo                                |                                       |
| chr9-8164.5.666659  | 0.939514 | 0.988427 | 0.950514 | 0.341851 | 0.981636 | chr9  | 81642916 | 81643480 | + | 0 | NA | intron (NLIMA9 L)  | 46337   | NM_001303  | 7088     | Hs.19732CNC_005077 | ENSG000002CTLE1     | ESG ESG1 TLE family protein-coding               |                                       |
| chr3-1278.9.341329  | -0.73348 | 0.771705 | -0.95046 | 0.341877 | 0.981636 | chr3  | 1.28E+08 | 1.28E+08 | + | 0 | NA | intron (MER91A D)  | 7108    | NM_007283  | 11343    | Hs.277033NM_007283 | ENSG000002MGLL      | HU-K5 HU homologous protein-coding               |                                       |
| chr13-984.5.915416  | -0.93592 | 0.985152 | -0.95002 | 0.3421   | 0.981636 | chr13 | 98407029 | 98407228 | + | 0 | NA | intron (intron (N  | 114997  | NM_003576  | 8428     | Hs.508514NM_003576 | ENSG000002STK24     | HEL-S-95 serine/threonine protein-coding         |                                       |
| chr3-1085.5.915416  | -0.93592 | 0.985152 | -0.95002 | 0.3421   | 0.981636 | chr3  | 1.09E+08 | 1.09E+08 | + | 0 | NA | intron (NLIME3A L) | 15001   | NM_02089C  | 57650    | Hs.591308NM_02089C | ENSG000002CIP2A     | KIAA1524 cell proliferation protein-coding       |                                       |
| chr6-1078.5.915416  | -0.93592 | 0.985152 | -0.95002 | 0.3421   | 0.981636 | chr6  | 1.08E+08 | 1.08E+08 | + | 0 | NA | intron (AluS6 S)   | 59995   | NM_007214  | 11231    | Hs.26904           | NM_007214           | ENSG000002SEC63                                  | DNAJC23 ESE63 homoprotein-coding      |
| chr17-701.11.93798  | 0.655271 | 0.689863 | 0.949856 | 0.342185 | 0.981636 | chr17 | 70177082 | 70177731 | + | 0 | NA | 3' UTR (N3' UTR (N | 6671    | NM_000891  | 3759     | Hs.1547            | NM_000891           | ENSG000002KCNJ2                                  | ATFB9 HHE potassium protein-coding    |
| chr19-576.11.93798  | 0.655271 | 0.689863 | 0.949856 | 0.342185 | 0.981636 | chr19 | 57699959 | 57705128 | + | 0 | NA | exon (NM exon (NM  | 6661    | NR_110974  | 7710     | Hs.646377NM_003444 | ENSG000002ZNF154    | pH2-92 zinc finger protein-coding                |                                       |
| chr15-1105.10.62726 | -0.71822 | 0.756322 | -0.94962 | 0.342303 | 0.981636 | chr15 | 40954963 | 40955695 | + | 0 | NA | intron (intron (N  | 1858    | NM_001142  | 79094    | Hs.155566NM_024111 | ENSG000002CHAC1     | ChaC glutathione protein-coding                  |                                       |
| chr9-404.8.897438   | -0.71822 | 0.756322 | -0.94962 | 0.342303 | 0.981636 | chr9  | 1.1E+08  | 1.1E+08  | + | 0 | NA | intron (AluJb S)   | -90949  | NM_00128E  | 255220   | Hs.147064NM_00100C | ENSG000002TXND8     | SPTRX-3 3-thioredoxin protein-coding             |                                       |
| chr3-1325.5.658801  | 0.942521 | 0.993456 | 0.94873  | 0.342758 | 0.981636 | chr3  | 1.33E+08 | 1.33E+08 | + | 0 | NA | intron (intron (N  | -21307  | NM_016557  | 51554    | Hs.310512NM_016557 | ENSG000002ACKR4     | CC-CR-1 atypical protein-coding                  |                                       |
| chr11-648.8.830874  | -0.77138 | 0.813233 | -0.94854 | 0.342856 | 0.981636 | chr11 | 64857673 | 64857889 | + | 0 | NA | intron (intron (N  | -13128  | NM_017522  | 55561    | Hs.29359CNC_017522 | ENSG000002CDC42BPG  | DMPK2 HSM CDC42 binding protein-coding           |                                       |
| chr14-451.9.382468  | -0.7304  | 0.770504 | -0.94795 | 0.343155 | 0.981636 | chr14 | 45105801 | 45106319 | + | 0 | NA | intron (AluSx S)   | -4795   | NR_003691  | 1E+08    | Hs.712501NR_003691 | ENSG000002SNORD127  | small nucleolar RNA                              |                                       |
| chr15-635.9.382468  | -0.7304  | 0.770504 | -0.94795 | 0.343155 | 0.981636 | chr15 | 63559902 | 63560220 | + | 0 | NA | intron (intron (N  | -37326  | NM_001367  | 283807   | Hs.631162NM_203377 | ENSG000002FBXL22    | Fb122 F-box ankyrin protein-coding               |                                       |
| chr5-624.5.831287   | -0.96328 | 1.016183 | -0.94793 | 0.343163 | 0.981636 | chr5  | 62400905 | 62401442 | + | 0 | NA | intron (LTR33 LTF) | 2732    | NM_00134E  | 27292    | Hs.731666NM_014477 | ENSG000002DITM1     | DITM1 DITM1 rRNA protein-coding                  |                                       |
| chr5-1342.4.684486  | -1.04855 | 1.106171 | -0.94791 | 0.343173 | 0.981636 | chr5  | 1.34E    |          |   |   |    |                    |         |            |          |                    |                     |                                                  |                                       |



chr6-1305 6.392588 -0.87241 0.924615 -0.94354 0.345407 0.981636 chr6 1.31E+08 1.31E+08 + 0 NA intron (NLIPA7|LIN 60267 NM\_00135C 2037 Hs. 48647C|NM\_001431|ENSG00000CEPB41L2 4.1-G|4.1erythrocyprotein-coding

chr8-1932 6.392588 -0.87241 0.924615 -0.94354 0.345407 0.981636 chr8 19320215 19320804 + 0 NA intron (NALuJr|SIN 6533 NM\_001174 63898 Hs. 30320E|NM\_022071|ENSG00000SH2D4A PPP1R38|SSH2 domainprotein-coding

chr8-4782 6.392588 -0.87241 0.924615 -0.94354 0.345407 0.981636 chr8 47822837 47824189 + 0 NA intron (NMSTB|LTR| 85349 NM\_00519E 1052 Hs. 44082E|NM\_00519E|ENSG00000CEBPD C/EBP-de|CCAAT enfprotein-coding

chr9-1347 6.392588 -0.87241 0.924615 -0.94354 0.345407 0.981636 chr9 1.35E+08 1.35E+08 + 0 NA intron (NTTS (NTTS ( 66484 NR\_039691 1.01E+08 NR\_039691|ENSG00000MIR3689C - microRNA ncRNA

chrX-7426 6.392588 -0.87241 0.924615 -0.94354 0.345407 0.981636 chrX 74284411 74289393 + 0 NA TTS (NR\_03025E 664614 NR\_03025E|ENSG00000MIR545 MIRN545|microRNA ncRNA

chr10-973 4.461338 1.040914 1.103414 0.943357 0.345498 0.981636 chr10 97359016 97360155 + 0 NA intron (Nintron (N -24856 NM\_01208E 23401 Hs. 14072C|NM\_01208E|ENSG00000FRAT2 FRAT-2 FRAT regt protein-coding

chr11-714 4.461338 1.040914 1.103414 0.943357 0.345498 0.981636 chr11 71436928 71438408 + 0 NA intron (Nintron (N 10725 NM\_00116E 1717 Hs. 503134|NM\_00136E|ENSG00000DHC7 FLOS 7-dehydroprotein-coding

chr7-1436 4.461338 1.040914 1.103414 0.943357 0.345498 0.981636 chr7 144E+08 1.44E+08 + 0 NA intron (Nintron (N -17779 NM\_00136E 285966 Hs. 17367E|NM\_00136E|ENSG00000TCAF2 SMI15C|FTRPM8 cheprotein-coding

chr9-6567 10.60739 -0.69701 0.738993 -0.94318 0.345587 0.981636 chr9 65679431 65680308 + 0 NA intron (Nintron (N 3941 NM\_00136E 220869 Hs. 35595C|NM\_001024|ENSG00000CBWD5 CBWD3|DC|COBW dome protein-coding

chr18-132 7.117366 -1.35605 1.437871 -0.9431 0.345632 0.981636 chr18 13707101 13707711 + 0 NA intron (NMER57-int 19152 NM\_15235E 125228 Hs. 13034 NM\_15235E|ENSG00000FAM210A C18orf19|family wiprotein-coding

chr11-468 11.00829 -0.68743 0.729286 -0.94261 0.345881 0.981636 chr11 46815937 46816254 + 0 NA intron (NMER1B|DNA 30185 NM\_00100E 7979 Hs. 20125E|NM\_01475E|ENSG00000CKAP5 CHTG0|MSF cytoskelcprotein-coding

chr1-2128 6.255234 0.883771 0.937582 0.942607 0.345882 0.981636 chr1 2.13E+08 2.13E+08 + 0 NA 3' UTR (N3' UTR (N 37382 NM\_01405E 28982 Hs. 7055 NM\_01405E|ENSG00000FLVCR1 AXPC1|FLVfeline lprotein-coding

chr19-282 6.255234 0.883771 0.937582 0.942607 0.345882 0.981636 chr19 2826583 2829322 + 0 NA intron (THE1B|LTF 8084 NM\_00110E 115196 Hs. 30704E|NM\_15230E|ENSG00000ZNF554 - zinc fingprotein-coding

chr1-4025 5.674517 0.936347 0.993362 0.942604 0.345883 0.981636 chr1 40294196 40294564 + 0 NA TTS (NM\_CTT (NM\_C 22906 NM\_00185E 1298 Hs. 41801E|NM\_00185E|ENSG00000COL9A2 DJ39G22.4|collagen protein-coding

chr8-4314 5.674517 0.936347 0.993362 0.942604 0.345883 0.981636 chr8 43147507 43148058 + 0 NA intron (NLIPA16|LI 7318 NM\_15241E 138050 Hs. 600384|NM\_15241E|ENSG00000HGSNAT HGNAT|MPS heparan-eprotein-coding

chr13-102 3.445698 -1.24561 1.32169 -0.94244 0.345968 0.981636 chr13 1.03E+08 1.03E+08 + 0 NA intron (Nintron (N 31504 NM\_00101C 196541 Hs. 50862E|NM\_00101C|ENSG00000METTL21C C13orf39 methyltrprotein-coding

chr1-1565 7.972859 0.783853 0.832553 0.941505 0.346446 0.981636 chr1 1.57E+08 1.57E+08 + 0 NA intron (Nintron (N -48503 NR\_030527 768220 NR\_030527|ENSG00000CMIR765 MIRN765|microRNA ncRNA

chr10-245 7.972859 0.783853 0.832553 0.941505 0.346446 0.981636 chr10 24532028 24534314 + 0 NA exon (NM exon (NM 66640 NM\_00128E 56243 Hs. 44588E|NM\_01959C|ENSG00000K1AA1217 ET14|SKT K1AA1217 protein-coding

chr12-665 7.972859 0.783853 0.832553 0.941505 0.346446 0.981636 chr12 6650185 6652955 + 0 NA intron (NALuSzl|SIN 4138 NM\_03248E 84519 Hs. 12323E|NM\_03248E|ENSG00000ACRBP CT23|OY-lactosin lprotein-coding

chr17-44 7.972859 0.783853 0.832553 0.941505 0.346446 0.981636 chr17 44082561 44083740 + 0 NA intron (NALuJb|SIN 12239 NR\_02858E 92579 Hs. 29400E|NM\_13838E|ENSG00000G6PC3 SCN4|UGRF glucose-tprotein-coding

chr19-111 7.972859 0.783853 0.832553 0.941505 0.346446 0.981636 chr19 11975210 11979715 + 0 NA intron (Nintron (N 10155 NR\_13493C 1.02E+08 Hs. 63164E|NR\_13492E|ENSG00000ZNF433-AS- C ZNF433 arncRNA

chr19-518 7.972859 0.783853 0.832553 0.941505 0.346446 0.981636 chr19 51874615 51880937 + 0 NA intron (NLIMB3|LIN 10160 NM\_00113E 84765 Hs. 72301E|NM\_03267E|ENSG00000ZNF577 - zinc fingprotein-coding

chr6-3728 7.972859 0.783853 0.832553 0.941505 0.346446 0.981636 chr6 37289823 37294760 + 0 NA intron (Nintron (N -34138 NM\_00128E 221468 Hs. 520101|NM\_14531E|ENSG00000TMEM217 C6orf128|transmemt protein-coding

chr11-517 7.117366 0.821039 0.872104 0.941447 0.346476 0.981636 chr11 1341526 NR\_024504 646813 Hs. 68417E|NR\_024504 L0C64681E DEXH-box pseudo

chr16-675 7.117366 0.821039 0.872104 0.941447 0.346476 0.981636 chr16 67908854 67909673 + 0 NA exon (NM exon (NM 16009 NM\_00674E 5681 Hs. 51368E|NM\_00674E|ENSG00000PSKH1 - protein sprotein-coding

chr2-4397 7.556595 -0.82736 0.87926 -0.9412 0.346604 0.981636 chr2 43991965 43992331 + 0 NA intron (NL2b|LINE| 3841 NM\_13325E 10128 Hs. 368084|NM\_13325E|ENSG00000LRPPRC CLONE-23E|leucine rprotein-coding

chr1-2597 6.221953 0.880436 0.935532 0.941107 0.34665 0.981636 chr1 25975194 25975227 + 0 NA intron (NL2a|LINE| 22303 NM\_000437 5051 Hs. 47708E|NM\_000437|ENSG00000PFAH2 HSD-PLA2 platelet protein-coding

chr1-2357 6.221953 0.880436 0.935532 0.941107 0.34665 0.981636 chr1 2.36E+08 2.36E+08 + 0 NA intron (NMSTL|LTR| 56260 NR\_03171E 1E+08 NR\_03171E|ENSG00000MIR1537 MIRN1537|microRNA ncRNA

chr17-395 6.221953 0.880436 0.935532 0.941107 0.34665 0.981636 chr17 39556552 39557424 + 0 NA Intergeni Intergeni 50932 NM\_00616E 4761 Hs. 322431|NM\_00616E|ENSG00000NEUROD2 EIEE72|N neuronal protein-coding

chr17-606 6.221953 0.880436 0.935532 0.941107 0.34665 0.981636 chr17 60649632 60655806 + 0 NA intron (Nintron (N -27632 NM\_00109E 54828 Hs. 65502E|NM\_01767E|ENSG00000BCAS3 GAOB1|MAFBCAS3 micprotein-coding

chr20-558 6.221953 0.880436 0.935532 0.941107 0.34665 0.981636 chr20 5588610 5589082 + 0 NA intron (NALuSzl|SIN 22160 NM\_01959E 56261 Hs. 63635E|NM\_01959E|ENSG00000GPCPD1 EDI3|GDEglyceropl protein-coding

chr3-1691 6.221953 0.880436 0.935532 0.941107 0.34665 0.981636 chr3 1.69E+08 1.69E+08 + 0 NA intron (Nintron (N 25182 NM\_00136E 2122 Hs. 65639E|NM\_004991|ENSG00000MECOM AML1-EV1-MDS1 and protein-coding

chr3-1702 6.221953 0.880436 0.935532 0.941107 0.34665 0.981636 chr3 1.7E+08 1.7E+08 + 0 NA intron (NALuSxl|SI 20327 NM\_00274C 5584 Hs. 47199E|NM\_00274C|ENSG00000PRKCI DXS1179E|protein lprotein-coding

chr4-7154 6.221953 0.880436 0.935532 0.941107 0.34665 0.981636 chr4 71546848 71547863 + 0 NA intron (Nintron (N 208302 NM\_00375E 8671 Hs. 5462 NM\_00375E|ENSG00000SLC4A4 HNBC1|KNE solute cprotein-coding

chr7-1398 6.221953 0.880436 0.935532 0.941107 0.34665 0.981636 chr7 1.4E+08 1.4E+08 + 0 NA intron (NALuJr|SIN 18721 NM\_00136E 6916 Hs. 520757|NM\_001061|ENSG00000TBXAS1 BDPLT14|C thromboxe protein-coding

chr7-1395 6.221953 0.880436 0.935532 0.941107 0.34665 0.981636 chr7 1.4E+08 1.4E+08 + 0 NA intron (Nintron (N 116234 NM\_00136E 6916 Hs. 520757|NM\_001061|ENSG00000TBXAS1 BDPLT14|C thromboxe protein-coding

chr22-214 10.2125 0.694792 0.738679 0.940588 0.346916 0.981636 chr22 21477511 21477946 + 0 NA intron (Nintron (N 10558 NM\_001207 645426 Hs. 376511|NM\_001207|ENSG00000TMEM191C - transmemt protein-coding

chr11-464 4.45348 1.0448 1.111023 0.940394 0.347015 0.981636 chr11 46441362 46442167 + 0 NA intron (NL3b|LINE| -10043 NR\_03611E 1E+08 NR\_03611E|ENSG00000MIR3160-Zmir-3160-microRNA ncRNA

chr16-896 4.45348 1.0448 1.111023 0.940394 0.347015 0.981636 chr16 89663889 89664674 + 0 NA intron (Nintron (N 6248 NR\_07351E 124045 Hs. 655171|NM\_15302E|ENSG00000SPATA33 C16orf55 spermatogprotein-coding

chr3-3737 4.45348 1.0448 1.111023 0.940394 0.347015 0.981636 chr3 37373590 37374317 + 0 NA IntergeniMER83B-ir -12316 NM\_178344 339883 Hs. 47594E|NM\_17833E|ENSG00000C3orf35 APRG1 chromosome protein-coding

chr7-9894 8.938577 -0.75831 0.80645 -0.9403 0.347062 0.981636 chr7 98942607 98942918 + 0 NA intron (Nintron (N 61065 NR\_132754 1.07E+08 NR\_132754 SCARNA28 ZL1 small Ca ncRNA

chr1-1628 7.939578 0.78112 0.830712 0.940302 0.347063 0.981636 chr1 47687 NM\_00618E 4921 Hs. 275757|NM\_00618E|ENSG00000DDR2 M1G20a|N1 discoidl protein-coding

chr11-332 7.939578 0.78112 0.830712 0.940302 0.347063 0.981636 chr11 33297803 33298493 + 0 NA intron (NTiger1|I 39817 NM\_00127E 10114 Hs. 20191E|NM\_005734|ENSG00000CHIPK3 DYRK6|FIS homeodome protein-coding

chr15-506 7.939578 0.78112 0.830712 0.940302 0.347063 0.981636 chr15 50607697 50607988 + 0 NA intron (NALuSx|SIN -61176 NM\_203494 373509 Hs. 67775E|NM\_203494|ENSG00000USP50 - ubiquitin protein-coding

chr16-155 7.939578 0.78112 0.830712 0.940302 0.347063 0.981636 chr16 15046981 15047659 + 0 NA intron (NL2a|LINE| 8754 NM\_173474 123803 Hs. 59204E|NM\_173474|ENSG00000CNTAN1 PNAAL|PNAI-N-termin protein-coding

chr17-305 7.939578 0.78112 0.830712 0.940302 0.347063 0.981636 chr17 30997005 30999971 + 0 NA intron (NLIMA5A|LI -9796 NM\_00135C 1.08E+08 Hs. 558901|NM\_001350575 L0C107984 - uncharacter protein-coding

chr19-965 7.939578 0.78112 0.830712 0.940302 0.347063 0.981636 chr19 9631900 9633684 + 0 NA intron (NHERV10|E 11310 NR\_12203E 284385 Hs. 651747|NM\_00124E|ENSG00000ZNF561-AS1 C19orf82 ZNF561 arncRNA

chr2-724 7.939578 0.78112 0.830712 0.940302 0.347063 0.981636 chr2 72460747 72465534 + 0 NA intron (NLIMD|LINE -315278 NM\_001277 56603 Hs. 91546 NM\_01988E|ENSG00000CYP26B1 CYP26A2|F cytochrom protein-coding

chr20-555 7.939578 0.78112 0.830712 0.940302 0.347063 0.981636 chr20 55594941 5604503 + 0 NA intron (Nintron (N 11011 NM\_01959E 56261 Hs. 63635E|NM\_01959E|ENSG00000GPCPD1 EDI3|GDEglyceropl protein-coding

chr6-1368 7.939578 0.78112 0.830712 0.940302 0.347063 0.981636 chr6 1.37E+08 1.37E+08 + 0 NA intron (NLIMC4|LIN 48542 NM\_00100E 340146 Hs. 36970E|NM\_00100E|ENSG00000SLC35D3 FRCL1 solute cprotein-coding

chr19-937 6.239518 0.88937 0.945853 0.940283 0.347072 0.981636 chr19 9371808 9372385 + 0 NA intron (NLIMEd|LIN -4220 NM\_00117E 7730 Hs. 728944|NM\_003451|ENSG00000ZNF177 PIGX zinc fingprotein-coding

chr11-108 8.394842 -0.80445 0.855572 -0.94025 0.347092 0.981636 chr11 1.01E+08 1.01E+08 + 0 NA intron (Nintron (N 28202 NR\_145747 1.1E+08 NR\_145747 SNORD131 - small nucsoRNA

chr2-9265 9.723766 0.722698 0.768651 0.940216 0.347107 0.981636 chr2 92654989 92655622 + 0 NA IntergeniALR|Alphe 714172 NR\_027714 440888 Hs. 73023E|NM\_001032412 ACTR3BP2 FKS673 ACTR3B ps pseudo

chr6-7367 7.93172 0.933228 0.833212 0.94001 0.347212 0.981636 chr6 73630586 73630879 + 0 NA intron (Nintron (N 23260 NM\_012434 26503 Hs. 59742E|NM\_012434|ENSG00000SLC17A5 AST|ISSD|solute cprotein-coding

chr1-3325 7.707799 0.789757 0.999736 0.939999 0.347218 0.981636 chr1 33276844 33277579 + 0 NA intron (Nintron (N 7518 NM\_00137C 149076 Hs. 74335E|NM\_15249E|ENSG00000ZNF362 RN|lin-2E zinc fingprotein-coding

chr11-725 7.707799 0.939751 0.999736 0.939999 0.347218 0.981636 chr11 72690043 72691299 + 0 NA intron (NALuJr|SIN -9803 NR\_14678C 1.01E+08 Hs. 50316E|NR\_14678C|ENSG00000ARAP1-AS2- ARAP1 antncRNA

chr1-1785 11.94584 0.653299 0.695646 0.939888 0.347275 0.981636 chr1 1.79E+08 1.79E+08 + 0 NA 3' UTR (N3' UTR (N -45494 NM\_00467E 9068 Hs. 591474|NM\_00467E|ENSG00000ANGPTL1 ANG3|ANGF angiopoie protein-coding

chr11-115 9.358894 -0.72646 0.773127 -0.93964 0.347403 0.981636 chr11 11942379 11943255 + 0 NA exon (NM exon (NM 65822 NM\_00101E 21722 Hs. 62925E|NM\_01325E|ENSG00000DKK3 REIC|RIG dickkopf protein-coding

chr17-47 9.358894 -0.72646 0.773127 -0.93964 0.347403 0.981636 chr17 47051266 47051503 + 0 NA Intergeni Intergeni -72131 NM\_20340C 388394 Hs. 36799E|NM\_20340C|ENSG00000RPRML - reprimol protein-coding

chr2-3259 9.358894 -0.72646 0.773127 -0.93964 0.347403 0.981636 chr2 32586451 32586974 + 0 NA intron (NALuJb|SIN -11894 NR\_12579E 1.04E+08 Hs. 66609E|NR\_12579E|ENSG00000BIRC6-AS2|linc-birc6BIRC6 antncRNA

chr2-1731 9.358894 -0.72646 0.773127 -0.93964 0.347403 0.981636 chr2 1.73E+08 1.73E+08 + 0 NA intron (Nintron (N 83198 NR\_03388E 339751 Hs. 57008E|NR\_03388E|ENSG00000MAP3K20-MLK7-AS1 MAP3K20 ncRNA

chr3-2738 9.358894 -0.72646 0.773127 -0.93964 0.347403 0.981636 chr3 27388892 27391047 + 0 NA non-codir non-codir -20509 NM\_152534 152110 Hs. 50611E|NM\_152534|ENSG00000CNEK10 - NIMA relcprotein-coding

chr11-882 8.36156 -0.80975 0.861838 -0.93956 0.347442 0.981636 chr11 88294332 88294545 + 0 NA exon (NM exon (NM 43298 NM\_14817C 1075 Hs. 12806E|NM\_001814|ENSG00000CTSC CPPI|DPP-cathepsir protein-coding

chr11-12 7.690802 -0.80489 0.856914 -0.93929 0.347582 0.981636 chr11 12500137 12500719 + 0 NA intron (Nintron (N 122857 NM\_01822E 55742 Hs. 432914|NM\_01822E|ENSG00000PARVA CH-ILKBP|parv in protein-coding

chr2-100 7.682224 -0.80334 0.855374 -0.93917 0.347642 0.981636 chr2 1E+08 1E+08 + 0 NA intron (N(GTGGTG)T 88863 NM\_00102E 3899 Hs. 444414|NM\_00228E|ENSG00000CAFF3 LAF4|MLL1AF4/FMR2 protein-coding

chr1-112 6.359307 -0.87915 0.936128 -0.93913 0.347662 0.981636 chr1 1.13E+08 1.13E+08 + 0 NA intron (Nintron (N 50814 NM\_138727 54879 Hs. 201921|NM\_017744|ENSG00000STL7 FAM4B|ST7 suppressir protein-coding

chr16-110 6.359307 -0.87915 0.936128 -0.93913 0.347662 0.981636 chr16 1.05E+08 1.05E+08 + 0 NA intron (NHUERS-P1- 5631 NM\_03330E 837 Hs. 13837E|NM\_00122E|ENSG00000CASPA ICE|RE1|Icaspase 4 protein-coding

chr17-182 6.359307 -0.87915 0.936128 -0.93913 0.347662 0.981636 chr17 11044514 11045075 + 0 NA intron (NALuSp|SIN 100230 NM\_01522E 23274 Hs. 35490 NM\_01522E|ENSG00000CLEC16A Gop-1|KIAC-type lprotein-coding

chr17-182 6.359307 -0.87915 0.936128 -0.93913 0.347662 0.981636 chr17 18265959 18266182 + 0 NA TTS (NM\_ITTS (NM\_3) 4956 NM\_14888E 125170 Hs. 65555E|NM\_13916E|ENSG00000MIEF2 MID49|SMC1 tochoch protein-coding

chr2-384 6.359307 -0.87915 0.936128 -0.93913 0.347662 0.981636 chr2 38479911 38481321 + 0 NA intron (NLIMYh3|SI 12520 NM\_00685E 11015 Hs. 74507E|NM\_00685E|ENSG00000KDELER3 EDYD2L3|KDEL endc protein-coding

chr9-6501 6.359307 -0.87915 0.936128 -0.93913 0.347662 0.981636 chr9 6501065 6501309 + 0 NA intron (Nintron (N 87988 NM\_15289E 115426 Hs. 493401|NM\_15289E|ENSG00000UHRF2 NIRP|RNF1ubiquitir protein-coding

chr9-2152 6.359307 -0.87915 0.936128 -0.93913 0.347662 0.981636 chr9 21527685 21528510 + 0 NA intron (NLIPA13|LI -15912 NR\_02950E 407035 NR\_02950E|ENSG00000MIR31 MIRN31|hsmicroRNA ncRNA

chrX-7426 6.359307 -0.87915 0.936128 -0.93913 0.347662 0.981636 chrX 74261848 74262184 + 0 NA intron (NALuJo|SIN 25193 NR\_03025E 664614 NR\_03025E|ENSG00000MIR545 MIRN545|microRNA ncRNA

chr1-2772 6.229811 0.877714 0.935546 0.938183 0.34815 0.981636 chr1 27728357 27728997 + 0 NA intron (Nintron (N 2716 NM\_00114E 199870 Hs. 46935E|NM\_15266E|ENSG00000FAM76A - family wiprotein-coding

chr1-2077 6.229811 0.877714 0.935546 0.938183 0.34815 0.981636 chr1 2.08E+08 2.08E+08 + 0 NA intron (NMER44B|DI 10306 NR\_02983E 407026 NR\_02983E|ENSG00000MIR29C MIRN29C|hsmicroRNA ncRNA

chr10-116 6.229811 0.877714 0.935546 0.938183 0.34815 0.981636 chr10 1.11E+08 1.11E+08 + 0 NA intron (N(TAT)n|SI 12891 NM\_01445E 27250 Hs. 71149C|NM\_01445E|ENSG00000PCDC4 H731 programme protein-coding

chr11-764 6.229811 0.877714 0.935546 0.938183 0.34815 0.981636 chr11 76480346 76481002 + 0 NA intron (NLIP3|LINE 35649 NM\_02019E 56946 Hs. 35258E|NM\_02019E|ENSG00000EMSY C1orf303|EMSY trar protein-coding

chr11-116 6.229811 0.877714 0.935546 0.938183 0.34815 0.981636 chr11 1.17E+08 1.17E+08 + 0 NA intron (NMLT1D|LTF -86961 NM\_00003E 335 Hs. 93194 NM\_00003E|ENSG00000APOA1 apo(a) apolipoprotein-coding

chr15-727 6.229811 0.877714 0.935546 0.938183 0.34815 0.981636 chr15 30365 NM\_03302E 585 Hs. 208681|NM



|            |          |          |          |          |          |          |       |          |          |   |   |    |                     |        |           |          |                    |            |            |           |                                       |                                   |
|------------|----------|----------|----------|----------|----------|----------|-------|----------|----------|---|---|----|---------------------|--------|-----------|----------|--------------------|------------|------------|-----------|---------------------------------------|-----------------------------------|
| chr6-1965  | 6.42587  | -0.86583 | 0.924751 | -0.93628 | 0.349129 | 0.981636 | chr6  | 99502439 | 99503064 | + | 0 | NA | intron (NMSTA LTR)  | 12625  | NM_00134E | 85015    | Hs.14341CNM_03292E | ENSG00000C | USP45      | -         | ubiquitin protein-coding              |                                   |
| chr9-9795  | 6.42587  | -0.86583 | 0.924751 | -0.93628 | 0.349129 | 0.981636 | chr9  | 97994884 | 97996539 | + | 0 | NA | intron (NAIuSx6 SI) | 12370  | NM_006401 | 10541    | Hs.730654NM_006401 | ENSG00000C | ANP32B     | -         | APRIL PIH acidic n protein-coding     |                                   |
| chr9-113   | 3.998032 | 1.169493 | 1.249286 | 0.93613  | 0.349206 | 0.981636 | chr9  | 1.13E+08 | 1.13E+08 | + | 0 | NA | intron (NL2a LINE)  | 4581   | NM_00128E | 7539     | Hs.15040E          | ENSG00000C | ZFP37      | -         | ZNF906 zfZFP37 zir protein-coding     |                                   |
| chr12-111  | 12.40914 | 0.630715 | 0.673768 | 0.9361   | 0.349222 | 0.981636 | chr12 | 1.13E+08 | 1.13E+08 | + | 0 | NA | intron (Nintron)    | 7817   | NM_001111 | 79039    | Hs.506861NM_02407E | ENSG00000C | DDX54      | -         | DP97 DEAD-box protein-coding          |                                   |
| chr19-12   | 12.40914 | 0.630715 | 0.673768 | 0.9361   | 0.349222 | 0.981636 | chr19 | 12012592 | 12021254 | + | 0 | NA | intron (NAIuSx3 SI) | 18818  | NM_00130E | 163059   | Hs.66777E          | ENSG00000C | ZNF433     | -         | zinc finger protein-coding            |                                   |
| chr13-48   | 10.18707 | 0.690911 | 0.738076 | 0.936097 | 0.349223 | 0.981636 | chr13 | 48395174 | 48395413 | + | 0 | NA | intron (NLIPA7 LIN) | 17820  | NM_00116E | 10161    | Hs.123464NM_00576E | ENSG00000C | CLPAR6     | -         | ARWH1 HYF lysophosph protein-coding   |                                   |
| chr7-661F  | 8.930719 | -0.75684 | 0.808561 | -0.93604 | 0.349254 | 0.981636 | chr7  | 66153465 | 66153896 | + | 0 | NA | non-codiron-codir   | 38833  | NM_01447E | 27297    | Hs.300684NM_01447E | ENSG00000C | CRCP       | -         | CGRP-RCP CGRP receptor protein-coding |                                   |
| chr9-135E  | 8.930719 | -0.75684 | 0.808561 | -0.93604 | 0.349254 | 0.981636 | chr9  | 1.36E+08 | 1.36E+08 | + | 0 | NA | TTS (NM TTS (NM_C   | -25258 | NM_01544E | 157922   | Hs.52249E          | ENSG00000C | CAMSAP1    | -         | calmodulin protein-coding             |                                   |
| chr11-65C  | 6.214095 | 0.883233 | 0.943655 | 0.93597  | 0.349288 | 0.981636 | chr11 | 65034769 | 65036247 | + | 0 | NA | intron (Nintron)    | -5425  | NR_16002E | 29901    | Hs.23642           | NM_01329E  | ENSG00000C | SAC3D1    | -                                     | HSU79266 SAC3 dome protein-coding |
| chr11-68T  | 6.214095 | 0.883233 | 0.943655 | 0.93597  | 0.349288 | 0.981636 | chr11 | 68796170 | 68796720 | + | 0 | NA | intron (NAIuSq2 SI) | -44925 | NM_00103E | 9633     | Hs.145932NM_00492E | ENSG00000C | TESMIN     | -         | CXCD2 CMT10 testis e protein-coding   |                                   |
| chr4-420T  | 6.674366 | -0.80173 | 0.856621 | -0.93593 | 0.349311 | 0.981636 | chr4  | 42025350 | 42025801 | + | 0 | NA | intron (Nintron)    | 35045  | NM_00634E | 10463    | Hs.479634NM_00634E | ENSG00000C | SLC30A9    | -         | BILAPES Csolute e protein-coding      |                                   |
| chr6-135A  | 6.674366 | -0.80173 | 0.856621 | -0.93593 | 0.349311 | 0.981636 | chr6  | 1.35E+08 | 1.35E+08 | + | 0 | NA | intron (Nintron)    | 4728   | NM_001134 | 54806    | Hs.386684NM_01765E | ENSG00000C | AHI1       | -         | AHI-1 JBIAbelson l protein-coding     |                                   |
| chr2-861C  | 6.633226 | -0.80563 | 0.861371 | -0.93529 | 0.349637 | 0.981636 | chr2  | 86102018 | 86102392 | + | 0 | NA | intron (NLIMB3 LIN) | 3681   | NM_01542E | 25885    | Hs.53181E          | ENSG00000C | POLR1A     | -         | A190 AFDCRNA poly protein-coding      |                                   |
| chr1-146E  | 6.947436 | 0.778992 | 0.833466 | 0.934641 | 0.349974 | 0.981636 | chr1  | 1.47E+08 | 1.47E+08 | + | 0 | NA | intron (Nintron)    | 13432  | NM_00127E | 149013   | Hs.666981NM_00127E | ENSG00000C | BNP1F2     | -         | COA1 K1/NBPFF mem protein-coding      |                                   |
| chr1-156E  | 6.947436 | 0.778992 | 0.833466 | 0.934641 | 0.349974 | 0.981636 | chr1  | 1.57E+08 | 1.57E+08 | + | 0 | NA | intron (NLIMB7 LIN) | -39607 | NR_03052E | 768220   | NR_03052E          | ENSG00000C | MIR765     | -         | MIRN765 l microRNA ncRNA              |                                   |
| chr1-168E  | 6.947436 | 0.778992 | 0.833466 | 0.934641 | 0.349974 | 0.981636 | chr1  | 1.68E+08 | 1.68E+08 | + | 0 | NA | intron (Nintron)    | 6517   | NR_19934E | 375035   | Hs.64543E          | ENSG00000C | SFT2D2     | -         | UNQ512 DJSF12 dome protein-coding     |                                   |
| chr12-11T  | 6.947436 | 0.778992 | 0.833466 | 0.934641 | 0.349974 | 0.981636 | chr12 | 1.12E+08 | 1.12E+08 | + | 0 | NA | intron (NAIuSx SIN) | -40770 | NR_106921 | 1.02E+08 | NR_106921          | ENSG00000C | MIR6861    | -         | hsa-mir-6861 dome protein-coding      |                                   |
| chr13-11C  | 6.947436 | 0.778992 | 0.833466 | 0.934641 | 0.349974 | 0.981636 | chr13 | 1.11E+08 | 1.11E+08 | + | 0 | NA | intron (Nintron)    | 20572  | NM_01821C | 55739    | Hs.408324NM_01821C | ENSG00000C | NAXD       | -         | CARRD LPC2(N)HX protein-coding        |                                   |
| chr15-40T  | 6.947436 | 0.778992 | 0.833466 | 0.934641 | 0.349974 | 0.981636 | chr15 | 40749355 | 40749554 | + | 0 | NA | intron (NAIuJr SIN) | 5800   | NM_01814E | 55177    | Hs.511067NM_01814E | ENSG00000C | RMDN3      | -         | FAM82A2 regulator protein-coding      |                                   |
| chr16-66E  | 6.947436 | 0.778992 | 0.833466 | 0.934641 | 0.349974 | 0.981636 | chr16 | 66809022 | 66810873 | + | 0 | NA | intron (Nintron)    | -8327  | NM_00113E | 283847   | Hs.37650E          | ENSG00000C | TERB1      | -         | CCDC79 telomere protein-coding        |                                   |
| chr16-66E  | 6.947436 | 0.778992 | 0.833466 | 0.934641 | 0.349974 | 0.981636 | chr16 | 66943136 | 66943466 | + | 0 | NA | exon (NM exon (NM   | 7785   | NM_00136E | 8824     | Hs.28297E          | ENSG00000C | CES2       | -         | CE-2 CES2 carboxylc protein-coding    |                                   |
| chr17-29E  | 6.947436 | 0.778992 | 0.833466 | 0.934641 | 0.349974 | 0.981636 | chr17 | 29576577 | 29577650 | + | 0 | NA | intron (Nintron)    | 8412   | NM_00134E | 90313    | Hs.51405E          | ENSG00000C | TP53I13    | -         | DSCP1 tumor prc protein-coding        |                                   |
| chr18-54E  | 6.947436 | 0.778992 | 0.833466 | 0.934641 | 0.349974 | 0.981636 | chr18 | 54936511 | 54944085 | + | 0 | NA | intron (NL2 LINE I  | 17750  | NM_00114E | 80323    | Hs.12079E          | ENSG00000C | CCDC68     | -         | SE57-1 coiled-c protein-coding        |                                   |
| chr19-41E  | 6.947436 | 0.778992 | 0.833466 | 0.934641 | 0.349974 | 0.981636 | chr19 | 41897986 | 41899048 | + | 0 | NA | exon (NM exon (NM   | 14074  | NM_19900E | 9138     | Hs.63153E          | ENSG00000C | ARHGEF1    | -         | GEP1 IMD6 Rho guaniprotein-coding     |                                   |
| chr21-33T  | 6.947436 | 0.778992 | 0.833466 | 0.934641 | 0.349974 | 0.981636 | chr21 | 33794585 | 33794951 | + | 0 | NA | intron (Nintron)    | 121036 | NM_00169E | 539      | Hs.40914E          | ENSG00000C | ATP5P0     | -         | ATP50 ATF ATP synt protein-coding     |                                   |
| chr5-326T  | 6.947436 | 0.778992 | 0.833466 | 0.934641 | 0.349974 | 0.981636 | chr5  | 32262592 | 32263741 | + | 0 | NA | exon (NM exon (NM   | 49773  | NM_00104E | 54545    | Hs.48183E          | ENSG00000C | MTMR12     | -         | 3-PAP PIF myotubulc protein-coding    |                                   |
| chr6-106E  | 6.947436 | 0.778992 | 0.833466 | 0.934641 | 0.349974 | 0.981636 | chr6  | 1.06E+08 | 1.06E+08 | + | 0 | NA | exon (NM exon (NM   | 6010   | NM_18290E | 639      | Hs.43602E          | ENSG00000C | PRDM1      | -         | BLIMP1 PFYPR/SET d protein-coding     |                                   |
| chr7-75E   | 6.947436 | 0.778992 | 0.833466 | 0.934641 | 0.349974 | 0.981636 | chr7  | 75553266 | 75555312 | + | 0 | NA | intron (Nintron)    | -26166 | NR_02805E | 5387     | Hs.659871NM_00539E | ENSG00000C | PMS2P3     | -         | PMS2L3 PWMS1 homc pseudo              |                                   |
| chr11-14E  | 6.433728 | -0.86764 | 0.928407 | -0.93455 | 0.350022 | 0.981636 | chr11 | 14503809 | 14504307 | + | 0 | NA | TTS (NM TTS (NM_I   | -4163  | NR_001144 | 1315     | Hs.33927E          | ENSG00000C | COPB1      | -         | COPB coator protein-coding            |                                   |
| chr19-49E  | 6.433728 | -0.86764 | 0.928407 | -0.93455 | 0.350022 | 0.981636 | chr19 | 4942743  | 4943483  | + | 0 | NA | intron (NAIuSx3 SI) | 10426  | NR_03990E | 1.01E+08 | NR_03990E          | ENSG00000C | MIR4747    | -         | miR-4747 microRNA ncRNA               |                                   |
| chr2-157E  | 6.433728 | -0.86764 | 0.928407 | -0.93455 | 0.350022 | 0.981636 | chr2  | 1.57E+08 | 1.57E+08 | + | 0 | NA | intron (N75K RNA F  | 26972  | NM_001304 | 57471    | Hs.443894NM_02071E | ENSG00000C | CERNM      | -         | JN KIAA11ermin protein-coding         |                                   |
| chr1-131E  | 6.418012 | -0.86399 | 0.924654 | -0.93439 | 0.350103 | 0.981636 | chr1  | 1316094  | 1317900  | + | 0 | NA | intron (NAIuJr SIN) | -4431  | NR_10678E | 1.02E+08 | NR_10678E          | ENSG00000C | MIR6727    | -         | hsa-mir-6727 microRNA ncRNA           |                                   |
| chr1-108E  | 6.418012 | -0.86399 | 0.924654 | -0.93439 | 0.350103 | 0.981636 | chr1  | 1.08E+08 | 1.08E+08 | + | 0 | NA | TTS (NM TTS (NM_2   | 58813  | NM_21365E | 29957    | Hs.65687E          | ENSG00000C | SLC25A24   | -         | hpa1 SCAM solute e protein-coding     |                                   |
| chr11-12E  | 6.418012 | -0.86399 | 0.924654 | -0.93439 | 0.350103 | 0.981636 | chr11 | 1.2E+08  | 1.2E+08  | + | 0 | NA | intron (Nintron)    | 45530  | NM_001301 | 23365    | Hs.24598           | NM_01531E  | ENSG00000C | CARHGEF12 | -                                     | LARG PRO2 Rho guaniprotein-coding |
| chr13-75E  | 6.418012 | -0.86399 | 0.924654 | -0.93439 | 0.350103 | 0.981636 | chr13 | 75798498 | 75799770 | + | 0 | NA | intron (NL4_C_Mam)  | 38473  | NM_01584E | 4008     | Hs.207631NM_00535E | ENSG00000C | LM07       | -         | FBX20 FBX LIM doma protein-coding     |                                   |
| chr15-58E  | 6.418012 | -0.86399 | 0.924654 | -0.93439 | 0.350103 | 0.981636 | chr15 | 58833316 | 58834209 | + | 0 | NA | intron (NLTR5_Hs I  | 62460  | NM_00104C | 54629    | Hs.59112E          | ENSG00000C | MINDY2     | -         | FAM63B MINDY lys protein-coding       |                                   |
| chr16-70E  | 6.418012 | -0.86399 | 0.924654 | -0.93439 | 0.350103 | 0.981636 | chr16 | 70527915 | 70528607 | + | 0 | NA | intron (NAIuSz SIN) | -1238  | NR_03742E | 1E+08    | NR_03742E          | ENSG00000C | SNORD111E  | -         | MIR3647 small nucsnoRNA               |                                   |
| chr2-36E   | 6.418012 | -0.86399 | 0.924654 | -0.93439 | 0.350103 | 0.981636 | chr2  | 36550000 | 36566734 | + | 0 | NA | intron (NMER20 DNA  | 32284  | NM_00104E | 9637     | Hs.25856E          | ENSG00000C | FEZ2       | -         | HUM3CL fasciculc protein-coding       |                                   |
| chr20-50E  | 6.418012 | -0.86399 | 0.924654 | -0.93439 | 0.350103 | 0.981636 | chr20 | 50687008 | 50687239 | + | 0 | NA | intron (Nintron)    | 4421   | NR_11089E | 140876   | Hs.37257E          | ENSG00000C | RIPOR3     | -         | C20orf17E RIPOR fan protein-coding    |                                   |
| chr4-420E  | 6.418012 | -0.86399 | 0.924654 | -0.93439 | 0.350103 | 0.981636 | chr4  | 42055404 | 42056345 | + | 0 | NA | intron (Nintron)    | 65344  | NM_00634E | 10463    | Hs.479634NM_00634E | ENSG00000C | SLC30A9    | -         | BILAPES Csolute e protein-coding      |                                   |
| chr4-139E  | 6.418012 | -0.86399 | 0.924654 | -0.93439 | 0.350103 | 0.981636 | chr4  | 1.39E+08 | 1.39E+08 | + | 0 | NA | intron (NAIuMl SI)  | 24388  | NM_01211E | 25819    | Hs.63984E          | ENSG00000C | NOCT       | -         | CCR4L CCFnocturn protein-coding       |                                   |
| chr4-147E  | 6.418012 | -0.86399 | 0.924654 | -0.93439 | 0.350103 | 0.981636 | chr4  | 1.48E+08 | 1.48E+08 | + | 0 | NA | intron (NLIMC1 LIN) | 120842 | NR_03996E | 1.01E+08 | NR_03996E          | ENSG00000C | MIR4799    | -         | miRNA ncRNA                           |                                   |
| chr5-146E  | 6.418012 | -0.86399 | 0.924654 | -0.93439 | 0.350103 | 0.981636 | chr5  | 1.46E+08 | 1.46E+08 | + | 0 | NA | 3' UTR (N3' UTR (N  | -7718  | NR_00102E | 153770   | Hs.16236E          | ENSG00000C | PLACL8L1   | -         | PLAC8 lll protein-coding              |                                   |
| chr6-714E  | 6.418012 | -0.86399 | 0.924654 | -0.93439 | 0.350103 | 0.981636 | chr6  | 71410004 | 71410273 | + | 0 | NA | non-codiron-codir   | -6517  | NR_029504 | 407029   | NR_029504          | ENSG00000C | MIR30A     | -         | MIRN30A mi microRNA ncRNA             |                                   |
| chr7-6014E | 6.418012 | -0.86399 | 0.924654 | -0.93439 | 0.350103 | 0.981636 | chr7  | 6014974  | 6015578  | + | 0 | NA | exon (NM exon (NM   | -1601  | NR_145771 | 1.1E+08  | NR_145771          | ENSG00000C | SNORA80D   | -         | small nucsnoRNA                       |                                   |
| chr1-217E  | 6.698343 | 0.718576 | 0.769134 | 0.934267 | 0.350166 | 0.981636 | chr1  | 2.18E+08 | 2.18E+08 | + | 0 | NA | exon (NM exon (NM   | 10857  | NM_001297 | 55105    | Hs.36234E          | ENSG00000C | PATCH2     | -         | CT110 GPAG-patch protein-coding       |                                   |
| chr12-48T  | 6.698343 | 0.718576 | 0.769134 | 0.934267 | 0.350166 | 0.981636 | chr12 | 48770156 | 48774021 | + | 0 | NA | promoter-promoter-  | -51    | NR_03985E | 1.01E+08 | NR_03985E          | ENSG00000C | MIR4701    | -         | miRNA ncRNA                           |                                   |
| chr21-371T | 6.698343 | 0.718576 | 0.769134 | 0.934267 | 0.350166 | 0.981636 | chr21 | 37121291 | 37121490 | + | 0 | NA | intron (Nintron)    | 38443  | NM_00331E | 7267     | Hs.368214NM_00331E | ENSG00000C | CTC3       | -         | DCRR1 RNf tetraic protein-coding      |                                   |
| chr21-464T | 6.698343 | 0.718576 | 0.769134 | 0.934267 | 0.350166 | 0.981636 | chr21 | 46402422 | 46403087 | + | 0 | NA | intron (Nintron)    | -56137 | NM_20689E | 23181    | Hs.18958E          | ENSG00000C | DIP2A      | -         | C21orf10E disco intr protein-coding   |                                   |
| chr19-25E  | 6.230593 | 1.213545 | 1.299362 | 0.933954 | 0.350327 | 0.981636 | chr19 | 25814    |          |   |   |    |                     |        |           |          |                    |            |            |           |                                       |                                   |

|                    |          |          |          |          |          |       |           |          |   |      |                       |                    |                          |                     |                   |                                     |                             |
|--------------------|----------|----------|----------|----------|----------|-------|-----------|----------|---|------|-----------------------|--------------------|--------------------------|---------------------|-------------------|-------------------------------------|-----------------------------|
| chr8-4286 6.204387 | 0.871655 | 0.937242 | 0.930022 | 0.35236  | 0.981636 | chr8  | 42863119  | 42864280 | + | 0 NA | intron (AluSc SIN     | -20368 NM_199003   | 55145 Hs. 7432 NM_01810f | ENSG000003THAP1     | DYT6              | THAP domain protein-coding          |                             |
| chr17-427 7.906296 | 0.778343 | 0.836943 | 0.929984 | 0.352379 | 0.981636 | chr17 | 42778798  | 42779351 | + | 0 NA | 3' UTR (N3' UTR (N    | -1536 NM_001321    | 65266 Hs. 10544f         | ENSG000003WNK4      | PHA2B PRKWNK      | lysine protein-coding               |                             |
| chr20-27 7.980717  | 0.781698 | 0.840805 | 0.929702 | 0.352526 | 0.981636 | chr20 | 27366030  | 27366962 | + | 0 NA | IntergeniALR/Alpha    | -1157263 NR_04009f | 284801 Hs. 37069f        | ENSG000003MIR663AHC | MIR663A           | lncRNA                              |                             |
| chr4-723 7.980717  | 0.781698 | 0.840805 | 0.929702 | 0.352526 | 0.981636 | chr4  | 722559    | 722558   | + | 0 NA | intron (Nintron (N    | 16626 NM_001317    | 10336 Hs. 14430f         | ENSG000003PCGF3     | DONG1 RNFL        | polycomb protein-coding             |                             |
| chr17-184 7.666508 | -0.80005 | 0.860701 | -0.92953 | 0.352615 | 0.981636 | chr17 | 1843027   | 1843424  | + | 0 NA | intron (Nintron (N    | 13220 NM_00135f    | 6117 Hs. 46192f          | ENSG000003RPA1      | HSSB MSGC         | replicator protein-coding           |                             |
| chr6-117 7.666508  | -0.80005 | 0.860701 | -0.92953 | 0.352615 | 0.981636 | chr6  | 1.18E+08  | 1.18E+08 | + | 0 NA | intron (LIME4b LI     | 58545 NM_00136f    | 285761 Hs. 658304        | ENSG000003DCBLD1    | dJ94G16.1         | discoidin protein-coding            |                             |
| chr18-508 6.441586 | -0.86945 | 0.935771 | -0.92913 | 0.352823 | 0.981636 | chr18 | 58548503  | 58548921 | + | 0 NA | intron (Nintron (N    | -51908 NR_13296f   | 1.07E+08                 | NR_13296f           | SNORA108          | small nucleolar RNA                 |                             |
| chr1-4008 8.118257 | -0.76616 | 0.82461  | -0.92912 | 0.352827 | 0.981636 | chr1  | 40087853  | 40088374 | + | 0 NA | intron (Nintron (N    | 9139 NM_001142     | 5538 Hs. 3873            | NR_00031f           | ENSG000003PPT1    | CLN1 INCL                           | lamitoy protein-coding      |
| chr11-102 8.118257 | -0.76616 | 0.82461  | -0.92912 | 0.352827 | 0.981636 | chr11 | 1.02E+08  | 1.02E+08 | + | 0 NA | TTS (NM_C TTS (NM_C   | 48637 NM_00125f    | 329 Hs. 69623f           | ENSG000003BIRC2     | API1 HIAF         | baculovirus protein-coding          |                             |
| chr5-967 8.118257  | -0.76616 | 0.82461  | -0.92912 | 0.352827 | 0.981636 | chr5  | 96730580  | 96731989 | + | 0 NA | intron (Nintron (N    | -12318 NR_14024f   | 831 Hs. 43618f           | ENSG000003CAST      | BS-17 PL7         | calpastatin protein-coding          |                             |
| chr5-109 8.118257  | -0.76616 | 0.82461  | -0.92912 | 0.352827 | 0.981636 | chr5  | -0.92E+08 | 1.09E+08 | + | 0 NA | intron (Nintron (N    | -40444 NR_10498f   | 285638 Hs. 532104        | ENSG000003LOC28563f |                   | uncharacterized ncRNA               |                             |
| chr8-1407 8.922861 | -0.75529 | 0.813007 | -0.92901 | 0.352884 | 0.981636 | chr8  | 1.41E+08  | 1.41E+08 | + | 0 NA | promoter-promoter-    | 23 NR_02989f       | 442893                   | NR_02989f           | ENSG000003MIR151A | MIR151                              | microRNA ncRNA              |
| chr1-236 6.376873  | -0.86871 | 0.935112 | -0.929   | 0.352891 | 0.981636 | chr1  | 2.36E+08  | 2.36E+08 | + | 0 NA | intron (AluXs1 SI     | 42715 NM_00250f    | 4811 Hs. 356624          | ENSG000003NID1      | NID               | nidogen 1 protein-coding            |                             |
| chr11-104 6.376873 | -0.86871 | 0.935112 | -0.929   | 0.352891 | 0.981636 | chr11 | 1.05E+08  | 1.05E+08 | + | 0 NA | intron (L2a LINE      | 25024 NM_03330f    | 837 Hs. 13837f           | ENSG000003CASP4     | ICE (rel)         | caspace 4 protein-coding            |                             |
| chr12-48 6.376873  | -0.86871 | 0.935112 | -0.929   | 0.352891 | 0.981636 | chr12 | 48045333  | 48045560 | + | 0 NA | intron (Nintron (N    | -40970 NM_03315f   | 1280 Hs. 40818f          | ENSG000003COL2A1    | ANFH AOM          | collagen protein-coding             |                             |
| chr13-467 6.376873 | -0.86871 | 0.935112 | -0.929   | 0.352891 | 0.981636 | chr13 | 46780263  | 46781980 | + | 0 NA | intron (Nintron (N    | 16040 NM_00198f    | 2098 Hs. 43249f          | ENSG000003ESD       | FGH               | esterase protein-coding             |                             |
| chr13-49 6.376873  | -0.86871 | 0.935112 | -0.929   | 0.352891 | 0.981636 | chr13 | 49914173  | 49914761 | + | 0 NA | non-coding-non-coding | 21873 NM_02045f    | 57213 Hs. 44235          | ENSG000003SPRYD7    | C13orf1 CSRY      | domain protein-coding               |                             |
| chr15-67 6.376873  | -0.86871 | 0.935112 | -0.929   | 0.352891 | 0.981636 | chr15 | 67079020  | 67079616 | + | 0 NA | intron (Nintron (N    | 13716 NM_00590f    | 4088 Hs. 72798f          | ENSG000003SMAD3     | HSPC193 SMAD      | fam protein-coding                  |                             |
| chr2-6111 6.376873 | -0.86871 | 0.935112 | -0.929   | 0.352891 | 0.981636 | chr2  | 61118875  | 61119438 | + | 0 NA | intron (Nintron (N    | 25819 NR_03649f    | 339803 Hs. 25243f        | ENSG000003LOC33980f |                   | uncharacterized ncRNA               |                             |
| chr2-210 6.376873  | -0.86871 | 0.935112 | -0.929   | 0.352891 | 0.981636 | chr2  | 2.1E+08   | 2.1E+08  | + | 0 NA | intron (Nintron (N    | 6028 NM_00131f     | 6120 Hs. 28226f          | ENSG000003CRPE      | RPE2-1            | ribulose protein-coding             |                             |
| chr2-217 6.376873  | -0.86871 | 0.935112 | -0.929   | 0.352891 | 0.981636 | chr2  | 2.17E+08  | 2.17E+08 | + | 0 NA | intron (THE1B-int     | 108260 NR_13364f   | 1.05E+08                 | NR_13364f           | DIRC3-AS1         | DIRC3                               | antncRNA                    |
| chr2-224 6.376873  | -0.86871 | 0.935112 | -0.929   | 0.352891 | 0.981636 | chr2  | 2.25E+08  | 2.25E+08 | + | 0 NA | intron (AluSz SIN     | 17013 NM_00129f    | 55619 Hs. 46578          | ENSG000003DOCK10    | DRIP2 Nbl         | dedicator protein-coding            |                             |
| chr6-107 6.376873  | -0.86871 | 0.935112 | -0.929   | 0.352891 | 0.981636 | chr6  | 1.08E+08  | 1.08E+08 | + | 0 NA | 3' UTR (N3' UTR (N    | -46765 NM_00128f   | 256380 Hs. 48610f        | ENSG000003SCML4     | dJ47M23.1         | Scm polycomb protein-coding         |                             |
| chr1-4294 6.410154 | -0.8621  | 0.928118 | -0.92887 | 0.352958 | 0.981636 | chr1  | 42942245  | 42943547 | + | 0 NA | intron (MIRc SINE     | 15972 NM_00651f    | 6513 Hs. 47372f          | ENSG000003SLC2A1    | BSE DYTT1         | solute carrier protein-coding       |                             |
| chr12-705 6.410154 | -0.8621  | 0.928118 | -0.92887 | 0.352958 | 0.981636 | chr12 | 7098469   | 7099218  | + | 0 NA | intron (LIMB7 LIN     | -6398 NM_00173f    | 715 Hs. 52422f           | ENSG000003CIR       | EDSPD1            | complement protein-coding           |                             |
| chr17-37 6.410154  | -0.8621  | 0.928118 | -0.92887 | 0.352958 | 0.981636 | chr17 | 37613573  | 37614602 | + | 0 NA | TTS (NR_C TTS (NR_C   | 952 NR_10674f      | 1.02E+08                 | NR_10674f           | ENSG000003MIR378J | hsa-mir-5                           | microRNA ncRNA              |
| chr2-3931 6.410154 | -0.8621  | 0.928118 | -0.92887 | 0.352958 | 0.981636 | chr2  | 39318949  | 39319389 | + | 0 NA | intron (Nintron (N    | -75186 NR_14452f   | 344387 Hs. 40320f        | ENSG000003CDKL4     |                   | cyclin dependent protein-coding     |                             |
| chr2-199 6.410154  | -0.8621  | 0.928118 | -0.92887 | 0.352958 | 0.981636 | chr2  | 2E+08     | 2E+08    | + | 0 NA | non-coding-non-coding | 18770 NM_15368f    | 205327 Hs. 15449f        | ENSG000003C2orf69   |                   | chromosome protein-coding           |                             |
| chr8-263 6.410154  | -0.8621  | 0.928118 | -0.92887 | 0.352958 | 0.981636 | chr8  | 26397282  | 26397576 | + | 0 NA | intron (LIPA2 LIN     | 7016 NM_00133f     | 665 Hs. 13122f           | ENSG000003BNIP3L    | BNIP3a NBCL2      | integrin protein-coding             |                             |
| chr11-18 8.092833  | -0.77287 | 0.83227  | -0.92863 | 0.353079 | 0.981636 | chr11 | 18352950  | 18353232 | + | 0 NA | intron (AluSq2 SI     | 30524 NM_00531f    | 2965 Hs. 57720f          | ENSG000003GTF2H1    | BTf2 P62          | general protein-coding              |                             |
| chr7-550 4.717768  | -1.03811 | 1.118204 | -0.92837 | 0.353213 | 0.981636 | chr7  | 55083076  | 55083545 | + | 0 NA | intron (Nintron (N    | -26529 NM_00134f   | 1956 Hs. 48829f          | ENSG000003EGFR      | ERBB ERBE         | epidermal protein-coding            |                             |
| chr1-203 6.668509  | 0.955119 | 1.029471 | 0.928165 | 0.353322 | 0.981636 | chr1  | 2.04E+08  | 2.04E+08 | + | 0 NA | intron (AluJb SIN     | -41286 NR_00301f   | 677843 Hs. 67613f        | ENSG000003SNORA77   | ACA63 SNC         | small nucleolar RNA                 |                             |
| chr12-105 8.126114 | -0.76768 | 0.827352 | -0.92788 | 0.353469 | 0.981636 | chr12 | 1.09E+08  | 1.09E+08 | + | 0 NA | TTS (NM_C TTS (NM_C   | 29190 NR_13389f    | 339803 Hs. 25243f        | ENSG000003LOC33980f |                   | uncharacterized ncRNA               |                             |
| chr1-153 6.188671  | 0.877133 | 0.945379 | 0.927811 | 0.353506 | 0.981636 | chr1  | 1.54E+08  | 1.54E+08 | + | 0 NA | 3' UTR (N3' UTR (N    | 14125 NR_12656f    | 343052 Hs. 51653f        | ENSG000003LOC34305f |                   | immunoglobulin pseudo               |                             |
| chr16-864 6.188671 | 0.877133 | 0.945379 | 0.927811 | 0.353506 | 0.981636 | chr16 | 8646318   | 8646891  | + | 0 NA | non-coding-non-coding | 24906 NR_13460f    | 79091 Hs. 30638f         | ENSG000003METTL22   | C16orf68          | methyltransferase protein-coding    |                             |
| chr3-120 6.188671  | 0.877133 | 0.945379 | 0.927811 | 0.353506 | 0.981636 | chr3  | 1.2E+08   | 1.2E+08  | + | 0 NA | intron (Nintron (N    | 4835 NM_00708f     | 11167 Hs. 26951f         | ENSG000003PSTL1     | FRP FSL1          | follicle-stimulating protein-coding |                             |
| chr4-533 6.188671  | 0.877133 | 0.945379 | 0.927811 | 0.353506 | 0.981636 | chr4  | 533062    | 533443   | + | 0 NA | intron (Nintron (N    | 34042 NM_00112f    | 54872 Hs. 7099           | NR_01773f           | ENSG000003PIGG    | GP17 LAS2                           | phosphatidyl protein-coding |
| chr10-934 3.922871 | -1.09485 | 1.180089 | -0.92777 | 0.353526 | 0.981636 | chr10 | 93473394  | 93474002 | + | 0 NA | intron (Nintron (N    | 8636 NM_01345f     | 26509 Hs. 60208f         | ENSG000003MYOF      | FERL13            | myoferlin protein-coding            |                             |
| chr2-177 3.922871  | -1.09485 | 1.180089 | -0.92777 | 0.353526 | 0.981636 | chr2  | 1.8E+08   | 1.78E+08 | + | 0 NA | intron (LIPA16 LI     | 36751 NM_15251f    | 150737 Hs. 44765f        | ENSG000003TTC30B    | IFT70 IFT         | tetralin protein-coding             |                             |
| chr3-815 3.922871  | -1.09485 | 1.180089 | -0.92777 | 0.353526 | 0.981636 | chr3  | 81525640  | 81526561 | + | 0 NA | intron (LIPA4 LIN     | 235545 NM_00015f   | 2632 Hs. 43606f          | ENSG000003GBE1      | APBD GBE1         | 1,4-alpha protein-coding            |                             |
| chr3-1381 3.922871 | -1.09485 | 1.180089 | -0.92777 | 0.353526 | 0.981636 | chr3  | 1.38E+08  | 1.38E+08 | + | 0 NA | intron (AluSq2 SI     | 5490 NM_00126f     | 25852 Hs. 74486f         | ENSG000003ARMC8     | GID5 HSPC         | armadillo protein-coding            |                             |
| chr6-144 3.922871  | -1.09485 | 1.180089 | -0.92777 | 0.353526 | 0.981636 | chr6  | 1.45E+08  | 1.45E+08 | + | 0 NA | intron (Nintron (N    | 146679 NR_13277f   | 1.07E+08                 | NR_13277f           | SNORA98           | small nucleolar RNA                 |                             |
| chr1-2344 4.435914 | 1.032655 | 1.113063 | 0.92776  | 0.353532 | 0.981636 | chr1  | 2.34E+08  | 2.34E+08 | + | 0 NA | intron (MER102b I     | 50700 NM_00564f    | 6894 Hs. 49811f          | ENSG000003TARBP1    | TRM3 TRMT         | TAR (HIV-1) protein-coding          |                             |
| chr7-154 5.177374  | -0.96146 | 1.036579 | -0.92753 | 0.353649 | 0.981636 | chr7  | 1.55E+08  | 1.55E+08 | + | 0 NA | intron (Nintron (N    | 33160 NR_02447f    | 1E+08                    | ENSG000003PAX1P1-AS | PAX1P1OS          | PAX1P1                              | lncRNA                      |
| chr1-183 5.153801  | -0.95467 | 1.029258 | -0.92753 | 0.353651 | 0.981636 | chr1  | 1.84E+08  | 1.84E+08 | + | 0 NA | 3' UTR (N3' UTR (N    | 9013 NM_00571f     | 10092 Hs. 51860f         | ENSG000003ARPC5     | ARPC16d J         | lactin receptor protein-coding      |                             |
| chr11-78 5.153801  | -0.95467 | 1.029258 | -0.92753 | 0.353651 | 0.981636 | chr11 | 78067752  | 78068718 | + | 0 NA | TTS (NM_C TTS (NM_C   | 4374 NM_00325f     | 7069 Hs. 59196f          | ENSG000003TRHP5     | LRPG1 Lp          | thyroid protein-coding              |                             |
| chr14-911 5.153801 | -0.95467 | 1.029258 | -0.92753 | 0.353651 | 0.981636 | chr14 | 91187898  | 91188657 | + | 0 NA | intron (MLT1J1 LI     | 56427 NM_00117f    | 8111 Hs. 8882            | NR_00348f           | ENSG000003GPR68   | A12A6 GPF                           | G protein-coding            |
| chr15-41 5.153801  | -0.95467 | 1.029258 | -0.92753 | 0.353651 | 0.981636 | chr15 | 41899103  | 41901091 | + | 0 NA | 3' UTR (N3' UTR (N    | -6044 NM_01664f    | 51332 Hs. 70981f         | ENSG000003SPTBN5    | BSPECV H          | spectrin protein-coding             |                             |
| chr16-33 5.153801  | -0.95467 | 1.029258 | -0.92753 | 0.353651 | 0.981636 | chr16 | 3302702   | 3303634  | + | 0 NA | intron (Nintron (N    | -2238 NM_15302f    | 7627 Hs. 51329f          | ENSG000003ZNF75A    |                   | zinc finger protein-coding          |                             |
| chr2-724 5.153801  | -0.95467 | 1.029258 | -0.92753 | 0.353651 | 0.981636 | chr2  | 72495491  | 72495996 | + | 0 NA | intron (LIME1 LIN     | 330290 NM_00132f   | 23233 Hs. 30345f         | ENSG000003EXOC6B    | SEC15B SE         | exocyst protein-coding              |                             |
| chr2-216 5.153801  | -0.95467 | 1.029258 | -0.92753 | 0.353651 | 0.981636 | chr2  | 2.16E+08  | 2.16E+08 | + | 0 NA | intron (Nintron (N    | -27693 NM_00099f   | 6168 Hs. 43370f          | ENSG000003RPL37A    | L37A              | ribosomal protein-coding            |                             |
| chr2-365 5.153801  | -0.95467 | 1.029258 | -0.92753 | 0.353651 |          |       |           |          |   |      |                       |                    |                          |                     |                   |                                     |                             |



|                    |          |          |           |          |          |       |          |           |      |                    |                  |                     |                              |           |          |                    |                  |           |                                       |
|--------------------|----------|----------|-----------|----------|----------|-------|----------|-----------|------|--------------------|------------------|---------------------|------------------------------|-----------|----------|--------------------|------------------|-----------|---------------------------------------|
| chr5-4881 37.78014 | 0.391905 | 0.425003 | 0.922123  | 0.356464 | 0.981636 | chr5  | 48810888 | 48811807  | +    | 0                  | NA               | IntergeniALR/Alpha  | 1629941                      | NM_198444 | 133418   | Hs.561411NM_198444 | ENSG000000000000 | GP70      | emigin protein-coding                 |
| chr1-2237 8.135822 | -0.75813 | 0.822231 | -0.92204  | 0.356509 | 0.981636 | chr1  | 2.24E+08 | 2.24E+08  | +    | 0                  | NA               | intron (NLIMC3 LIN  | 10225                        | NM_001748 | 824      | Hs.350899NM_001748 | ENSG000000000000 | CANP2     | CAN calpain 2 protein-coding          |
| chr11-865 8.135822 | -0.75813 | 0.822231 | -0.92204  | 0.356509 | 0.981636 | chr11 | 86339010 | 86340873  | +    | 0                  | NA               | intron (NLIPA6 LIN  | -34795                       | NM_021827 | 60494    | Hs.144913NM_021827 | ENSG000000000000 | -         | coiled-cc protein-coding              |
| chr17-29 8.135822  | -0.75813 | 0.822231 | -0.92204  | 0.356509 | 0.981636 | chr17 | 29080058 | 29080257  | +    | 0                  | NA               | intron (NCPG        | -4548                        | NM_00474C | 9220     | Hs.462599NM_00474C | ENSG000000000000 | MAJN      | MAJN SPR2 TGFbeta1-inc protein-coding |
| chr5-5597 8.135822 | -0.75813 | 0.822231 | -0.92204  | 0.356509 | 0.981636 | chr5  | 55972338 | 55972461  | +    | 0                  | NA               | intron (NMIR SINE   | 20064                        | NM_175767 | 3572     | Hs.532082NM_002184 | ENSG000000000000 | CD130     | CD130 CDW interluc protein-coding     |
| chr6-7517 8.135822 | -0.75813 | 0.822231 | -0.92204  | 0.356509 | 0.981636 | chr6  | 75175799 | 75184148  | +    | 0                  | NA               | intron (NLIMB3 LIN  | 26080                        | NM_08064E | 1303     | Hs.101302NM_00437C | ENSG000000000000 | BA209D8   | BA209D8 collagen protein-coding       |
| chr8-2775 5.19494  | -0.94858 | 1.028833 | -0.922    | 0.35653  | 0.981636 | chr8  | 27756365 | 27757002  | +    | 0                  | NA               | intron (Nintron (N  | 15957                        | NR_15643Z | 55246    | Hs.445512NM_01824C | ENSG000000000000 | -         | coiled-cc protein-coding              |
| chr2-9361 5.187082 | -0.94637 | 1.026442 | -0.92199  | 0.356533 | 0.981636 | chr2  | 9361958  | 9363398   | +    | 0                  | NA               | intron (NAluJo SIN  | 59913                        | NM_00131E | 9270     | Hs.467662NM_00476C | ENSG000000000000 | ICAP-1A   | ICAP-1A integin protein-coding        |
| chr2-3302 5.187082 | -0.94637 | 1.026442 | -0.92199  | 0.356533 | 0.981636 | chr2  | 33026782 | 33027767  | +    | 0                  | NA               | intron (NLIMA9 LIN  | 80321                        | NM_20694E | 4052     | Hs.619313NM_000627 | ENSG000000000000 | -         | latent tr protein-coding              |
| chr2-3324 5.187082 | -0.94637 | 1.026442 | -0.92199  | 0.356533 | 0.981636 | chr2  | 33246904 | 33247657  | +    | 0                  | NA               | intron (NMIRb SINE  | 112683                       | NM_00116E | 4052     | Hs.619313NM_000627 | ENSG000000000000 | -         | latent tr protein-coding              |
| chr22-45 5.187082  | -0.94637 | 1.026442 | -0.92199  | 0.356533 | 0.981636 | chr22 | 45541110 | 4555836   | +    | 0                  | NA               | intron (Nintron (N  | 50774                        | NR_131244 | 1.01E+08 | Hs.517692NR_131244 | ENSG000000000000 | LINC01589 | TCONS_00C long intncrRNA              |
| chr19-291 12.91359 | 0.609947 | 0.661596 | 0.921933  | 0.356563 | 0.981636 | chr19 | 2915647  | 2918752   | +    | 0                  | NA               | exon (NM exon (NM   | 10091                        | NM_00131E | 126295   | Hs.591373NM_17348C | ENSG000000000000 | ZNF424    | zinc fing protein-coding              |
| chr8-5378 4.643346 | -1.05547 | 1.145119 | -0.92171  | 0.356678 | 0.981636 | chr8  | 53788006 | 53788205  | +    | 0                  | NA               | intron (Nintron (N  | 54937                        | NM_21362C | 51606    | Hs.491737NM_015941 | ENSG000000000000 | CGI-11    | MS ATPase H+ protein-coding           |
| chr1-6261 9.802785 | -0.70141 | 0.761114 | -0.92156  | 0.356759 | 0.981636 | chr1  | 62618090 | 62618477  | +    | 0                  | NA               | intron (Nintron (N  | 20763                        | NM_01449E | 27329    | Hs.209153NM_01449E | ENSG000000000000 | ANG-5     | ANG anagapoi protein-coding           |
| chr5-934 9.802785  | -0.70141 | 0.761114 | -0.92156  | 0.356759 | 0.981636 | chr5  | 93490666 | 93490865  | +    | 0                  | NA               | intron (N (GGT)n SI | 80578                        | NR_10982E | 441094   | Hs.457407NR_01536E | ENSG000000000000 | NR2F1     | NR2F1 antncrRNA                       |
| chr5-129 9.86149   | -0.69174 | 0.750767 | -0.92137  | 0.356856 | 0.981636 | chr5  | 1.3E+08  | 1.3E+08   | +    | 0                  | NA               | intron (NMER58A DN  | -11496                       | NM_001257 | 1E+08    | Hs.582534NM_001257 | ENSG000000000000 | KIAA1024  | membrane protein-coding               |
| chr6-100 9.86149   | -0.69174 | 0.750767 | -0.92137  | 0.356856 | 0.981636 | chr6  | 1.01E+08 | 1.01E+08  | +    | 0                  | NA               | intron (NLIPA3 LIN  | -12270                       | NM_00506E | 6492     | Hs.520293NM_00506E | ENSG000000000000 | bHLHe14   | SI bHLH protein-coding                |
| chr18-801 9.425457 | -0.7175  | 0.778797 | -0.92129  | 0.356899 | 0.981636 | chr18 | 80133301 | 80133500  | +    | 0                  | NA               | intron (Nintron (N  | -14524                       | NR_02833E | 1E+08    | Hs.352620NM_00114E | ENSG000000000000 | PARD6     | PARD6 arncrRNA                        |
| chr6-158 9.37646   | -0.71928 | 0.780934 | -0.92104  | 0.357027 | 0.981636 | chr6  | 1.58E+08 | 1.58E+08  | +    | 0                  | NA               | intron (Nintron (N  | 3410                         | NM_00117E | 8871     | Hs.434494NM_00389E | ENSG000000000000 | INPP5H    | synaptoje protein-coding              |
| chr7-777 9.37646   | -0.71928 | 0.780934 | -0.92104  | 0.357027 | 0.981636 | chr7  | 7774310  | 7774603   | +    | 0                  | NA               | intron (NAluSx3 SI  | 23978                        | NM_03293E | 85025    | Hs.19025NM_03293E  | ENSG000000000000 | C7orf35   | transmem protein-coding               |
| chr1-241 7.65865   | -0.79826 | 0.867745 | -0.920986 | 0.357058 | 0.981636 | chr1  | 77744682 | 77744972  | +    | 0                  | NA               | intron (NAluJr SIN  | 15025                        | NM_20162E | 23032    | Hs.480597NM_015017 | ENSG000000000000 | VDU1      | inquitir protein-coding               |
| chr15-727 6.171105 | 0.86827  | 0.942761 | 0.920986  | 0.357058 | 0.981636 | chr15 | 72731508 | 72732863  | +    | 0                  | NA               | intron (Nintron (N  | 45978                        | NM_03302E | 585      | Hs.208681NM_03302E | ENSG000000000000 | -         | Bardet-Bi protein-coding              |
| chr2-220 6.171105  | 0.86827  | 0.942761 | 0.920986  | 0.357058 | 0.981636 | chr2  | 2.24E+08 | 2.24E+08  | +    | 0                  | NA               | intron (NAluSz6 SI  | 18487                        | NM_02083C | 57590    | Hs.368355NM_02083C | ENSG000000000000 | WDFY1     | FENS-1 FEWD repeat protein-coding     |
| chr22-203 6.171105 | 0.86827  | 0.942761 | 0.920986  | 0.357058 | 0.981636 | chr22 | 20044179 | 20044299  | +    | 0                  | NA               | intron (Nintron (N  | 10600                        | NR_02970E | 406961   | NR_02970E          | ENSG000000000000 | MIR185    | nmicroRNA ncRNA                       |
| chr7-879 2.701649  | -1.34751 | 1.463629 | -0.92066  | 0.357228 | 0.981636 | chr7  | 87907020 | 87907871  | +    | 0                  | NA               | exon (NM exon (NM   | -26698                       | NM_021721 | 53616    | Hs.25639E          | ENSG000000000000 | ADAM22    | ADAM 22 ADAM meta protein-coding      |
| chr2-332 12.42504  | -0.64138 | 0.696953 | -0.92027  | 0.357432 | 0.981636 | chr2  | 33286580 | 33287018  | +    | 0                  | NA               | intron (NLIPA4 LIN  | -131717                      | NR_03062E | 1.01E+08 | NR_03062E          | ENSG000000000000 | MIR4430   | microRNA ncRNA                        |
| chr1-241 7.65865   | -0.79826 | 0.867745 | -0.91993  | 0.35761  | 0.981636 | chr1  | 318      | NM_00014E | 2271 | Hs.592429NM_00014E | ENSG000000000000 | FMRD                | HLRC fumarate protein-coding |           |          |                    |                  |           |                                       |
| chr15-57 7.65865   | -0.79826 | 0.867745 | -0.91993  | 0.35761  | 0.981636 | chr15 | 57276691 | 57277020  | +    | 0                  | NA               | intron (NAluSx SIN  | 1802                         | NR_14574E | 1.1E+08  | NR_14574E          | ENSG000000000000 | SNORD13D  | small nucsnRNA                        |
| chr12-12 8.477305  | 0.742187 | 0.806824 | 0.919887  | 0.357632 | 0.981636 | chr12 | 1.21E+08 | 1.21E+08  | +    | 0                  | NA               | intron (Nintron (N  | 42018                        | NM_000017 | 35       | Hs.50707E          | ENSG000000000000 | ACADS     | ACAD3 SCF acyl-CoA protein-coding     |
| chr17-46 8.477305  | 0.742187 | 0.806824 | 0.919887  | 0.357632 | 0.981636 | chr17 | 46351699 | 46352805  | +    | 0                  | NA               | intron (NAluSp SIN  | 9535                         | NM_00136E | 1.01E+08 | Hs.559255NM_00103E | ENSG000000000000 | ARL17B    | ARL17 ARI Arab protein-coding         |
| chr8-9451 8.477305 | 0.742187 | 0.806824 | 0.919887  | 0.357632 | 0.981636 | chr8  | 94518591 | 94519415  | +    | 0                  | NA               | exon (NM exon (NM   | 34466                        | NM_01549E | 25962    | Hs.202233NM_01549E | ENSG000000000000 | VIKRA     | KIAA1429 vir like protein-coding      |
| chr18-58 8.46159   | 0.746177 | 0.811263 | 0.919773  | 0.357691 | 0.981636 | chr18 | 58895854 | 58898989  | +    | 0                  | NA               | intron (Nintron (N  | 33842                        | NM_00135E | 55205    | Hs.529022NM_018181 | ENSG000000000000 | ZNF532    | zinc fing protein-coding              |
| chr11-894 3.915013 | -1.09203 | 1.18731  | -0.91975  | 0.357705 | 0.981636 | chr11 | 8949626  | 8950508   | +    | 0                  | NA               | intron (Nintron (N  | -7034                        | NM_02064E | 56676    | Hs.501852NM_02064E | ENSG000000000000 | ASCL3     | HASH3 SG chaete- protein-coding       |
| chr3-123 3.915013  | -1.09203 | 1.18731  | -0.91975  | 0.357705 | 0.981636 | chr3  | 1.24E+08 | 1.24E+08  | +    | 0                  | NA               | intron (NLIM5 LINE  | 12963                        | NM_05302E | 4638     | Hs.47737E          | ENSG000000000000 | MYLK      | AAT7 KRP myosin 1 protein-coding      |
| chr4-183 3.915013  | -1.09203 | 1.18731  | -0.91975  | 0.357705 | 0.981636 | chr4  | 1.83E+08 | 1.83E+08  | +    | 0                  | NA               | intron (NLIM5 LINE  | 28002                        | NM_001111 | 53842    | Hs.33317E          | ENSG000000000000 | CLDN22    | CLDN21 claudin 2 protein-coding       |
| chr6-182 3.915013  | -1.09203 | 1.18731  | -0.91975  | 0.357705 | 0.981636 | chr6  | 18238301 | 18241172  | +    | 0                  | NA               | intron (NTigger15e  | 24794                        | NM_001134 | 7913     | Hs.48481E          | ENSG000000000000 | DEK       | prot protein-coding                   |
| chr6-163 3.915013  | -1.09203 | 1.18731  | -0.91975  | 0.357705 | 0.981636 | chr6  | 1.64E+08 | 1.64E+08  | +    | 0                  | NA               | 3' UTR (N3' UTR (N  | 101688                       | NR_13462C | 1.03E+08 | Hs.73818E          | NR_134620        | LOC102724 | uncharactncrRNA                       |
| chr8-617 3.915013  | -1.09203 | 1.18731  | -0.91975  | 0.357705 | 0.981636 | chr8  | 61709518 | 61711713  | +    | 0                  | NA               | intron (Nintron (N  | 3977                         | NM_001164 | 444      | Hs.332422NM_00431E | ENSG000000000000 | ASPH      | AAH BAH casparate protein-coding      |
| chrX-738 3.915013  | -1.09203 | 1.18731  | -0.91975  | 0.357705 | 0.981636 | chrX  | 73832883 | 73833504  | +    | 0                  | NA               | intron (Nintron (N  | 19560                        | NR_001564 | 7503     | Hs.529901NR_001564 | ENSG000000000000 | XIST      | DXS1089 X inactive ncRNA              |
| chr19-44 12.92145  | 0.608666 | 0.661819 | 0.919686  | 0.357737 | 0.981636 | chr19 | 44027742 | 44033536  | +    | 0                  | NA               | intron (NMER77B LI  | 5260                         | NM_00112E | 7673     | Hs.27984C          | ENSG000000000000 | ZNF222    | zinc fing protein-coding              |
| chr19-37 6.402296  | -0.86014 | 0.935304 | -0.91963  | 0.357764 | 0.981636 | chr19 | 37350394 | 37350719  | +    | 0                  | NA               | intron (NLIMD2 LIN  | 15907                        | NM_00132E | 284459   | Hs.64024E          | ENSG000000000000 | ZNF875    | HKR1 zinc fing protein-coding         |
| chr21-17 6.402296  | -0.86014 | 0.935304 | -0.91963  | 0.357764 | 0.981636 | chr21 | 17108280 | 17111420  | +    | 0                  | NA               | intron (Nintron (N  | 8506                         | NM_00110C | 54149    | Hs.239811NM_017447 | ENSG000000000000 | C21orf91  | C21orf14 chromosom protein-coding     |
| chr3-477 6.402296  | -0.86014 | 0.935304 | -0.91963  | 0.357764 | 0.981636 | chr3  | 47726918 | 47727136  | +    | 0                  | NA               | intron (NAluSx SIN  | 54866                        | NM_003074 | 6599     | Hs.47617E          | ENSG000000000000 | SMARCC1   | BAF155 CF SWI/SNF i protein-coding    |
| chr3-108 6.402296  | -0.86014 | 0.935304 | -0.91963  | 0.357764 | 0.981636 | chr3  | 1.08E+08 | 1.08E+08  | +    | 0                  | NA               | intron (Nintron (N  | 23069                        | NM_001777 | 961      | Hs.446414NM_001777 | ENSG000000000000 | CD47      | IAP MERG CD47 mole protein-coding     |
| chr4-8294 6.402296 | -0.86014 | 0.935304 | -0.91963  | 0.357764 | 0.981636 | chr4  | 82944963 | 82945352  | +    | 0                  | NA               | intron (Nintron (N  | -44241                       | NR_034077 | 1E+08    | Hs.72891E          | ENSG000000000000 | THAP9-AS1 | THAP9 antncrRNA                       |
| chr4-8804 6.402296 | -0.86014 | 0.935304 | -0.91963  | 0.357764 | 0.981636 | chr4  | 88047418 | 88047617  | +    | 0                  | NA               | intron (NAluJo SIN  | 39882                        | NR_15648E | 5311     | Hs.18127E          | ENSG000000000000 | PKD2      | APKD2 PC2 polycyst protein-coding     |
| chr4-159 6.402296  | -0.86014 | 0.935304 | -0.91963  | 0.357764 | 0.981636 | chr4  | 1.59E+08 | 1.59E+08  | +    | 0                  | NA               | in                  |                              |           |          |                    |                  |           |                                       |



|           |          |          |          |          |          |          |       |          |          |   |   |    |                     |                  |          |            |                    |                                     |
|-----------|----------|----------|----------|----------|----------|----------|-------|----------|----------|---|---|----|---------------------|------------------|----------|------------|--------------------|-------------------------------------|
| chr17-48  | 7.88873  | 0.771257 | 0.841093 | 0.916969 | 0.359159 | 0.981636 | chr17 | 4890647  | 4891128  | + | 0 | NA | intron (Nintron (N  | -8649 NM_001144  | 1E+08    | Hs.57924   | ENSG000001C7orf107 | chromosonprotein-coding             |
| chr20-315 | 7.88873  | 0.771257 | 0.841093 | 0.916969 | 0.359159 | 0.981636 | chr20 | 31945731 | 31946423 | + | 0 | NA | intron (Nintron (N  | 5969 NM_03081E   | 81572    | Hs.43575E  | ENSG00000PDRG1     | C20orf12E p53 and Iprotein-coding   |
| chr12-101 | 3.948294 | -1.08071 | 1.178632 | -0.91692 | 0.359184 | 0.981636 | chr12 | 1.01E+08 | 1.01E+08 | + | 0 | NA | exon (NM_exon (NM   | 41477 NM_01450E  | 27340    | Hs.29573E  | ENSG00000UTP20     | 1A6/DRIM UTP20 smε protein-coding   |
| chr2-175  | 3.948294 | -1.08071 | 1.178632 | -0.91692 | 0.359184 | 0.981636 | chr2  | 1.76E+08 | 1.76E+08 | + | 0 | NA | intron (Nintron (N  | 65178 NM_03065E  | 80856    | Hs.209561E | ENSG00000LNPK      | K1AA1715 lunapark, protein-coding   |
| chr20-37  | 3.948294 | -1.08071 | 1.178632 | -0.91692 | 0.359184 | 0.981636 | chr20 | 37035042 | 37036082 | + | 0 | NA | intron (Nintron (N  | 60435 NM_00132E  | 5933     | Hs.20774E  | ENSG00000RBL1      | CPI07 PRE RB transcrprotein-coding  |
| chr3-141  | 3.948294 | -1.08071 | 1.178632 | -0.91692 | 0.359184 | 0.981636 | chr3  | 1.42E+08 | 1.42E+08 | + | 0 | NA | intron (N(AT)n Sin  | 33680 NM_00130E  | 5922     | Hs.98445   | ENSG00000CRASA2    | GAP1M RAS p21 fprotein-coding       |
| chr5-807  | 3.948294 | -1.08071 | 1.178632 | -0.91692 | 0.359184 | 0.981636 | chr5  | 80729208 | 80729765 | + | 0 | NA | intron (Nintron (N  | -74503 NM_000791 | 1719     | Hs.592364E | ENSG00000DHR       | DHFRP1 Dy dihydrofrc protein-coding |
| chr6-1754 | 3.948294 | -1.08071 | 1.178632 | -0.91692 | 0.359184 | 0.981636 | chr6  | 17547802 | 17549461 | + | 0 | NA | intron (N(LIME3Cz L | -37366 NR_110855 | 1.02E+08 | Hs.62287E  | ENSG00000LOC10192E | uncharactncRNA                      |
| chr12-62  | 7.880873 | 0.773372 | 0.843632 | 0.916718 | 0.359291 | 0.981636 | chr12 | 6233315  | 6233777  | + | 0 | NA | intron (Nintron (N  | 33146 NM_00176E  | 928      | Hs.11428E  | ENSG00000CCD9      | BTCC-1 DFCD9 molecprotein-coding    |
| chr9-598  | 10.68366 | 0.664315 | 0.72496  | 0.916346 | 0.359485 | 0.981636 | chr9  | 5982467  | 5982756  | + | 0 | NA | intron (NMSTC LTR   | -25215 NM_039811 | 1.01E+08 | NR_039811  | ENSG00000MIR4665   | mir-4665 microRNA ncRNA             |
| chr5-4947 | 40.69938 | 0.394087 | 0.430122 | 0.916221 | 0.359551 | 0.981636 | chr5  | 49479027 | 49479228 | + | 0 | NA | IntergeniALR/Alphe  | 962161 NM_19844E | 133418   | Hs.561411E | ENSG00000EMB       | GP70 embigin protein-coding         |
| chr16-43  | 9.845775 | -0.68923 | 0.752367 | -0.91608 | 0.359623 | 0.981636 | chr16 | 4301766  | 4301980  | + | 0 | NA | IntergeniAluSc8 SI  | -12888 NM_00131E | 84662    | Hs.592087E | ENSG00000GLIS2     | NKL NHPH7GLIS fami protein-coding   |
| chr19-76  | 8.039423 | 0.789434 | 0.862024 | 0.915791 | 0.359776 | 0.981636 | chr19 | 7622252  | 7622568  | + | 0 | NA | exon (NM_exon (NM   | 4971 NR_10685E   | 1.02E+08 | NR_10685E  | ENSG00000MIR6792   | hsa-mir-ε microRNA ncRNA            |
| chr3-1461 | 6.369015 | -0.86681 | 0.946522 | -0.91579 | 0.359777 | 0.981636 | chr3  | 1.46E+08 | 1.46E+08 | + | 0 | NA | intron (N(LIPAS LIN | -43057 NR_146297 | 1.1E+08  | NR_146297  | ENSG00000LNC5RRLR  | lncRNA-ε lncRNA scncRNA             |
| chr3-172  | 6.369015 | -0.86681 | 0.946522 | -0.91579 | 0.359777 | 0.981636 | chr3  | 1.73E+08 | 1.73E+08 | + | 0 | NA | intron (Nintron (N  | 54656 NM_00134E  | 1894     | Hs.51829E  | ENSG00000ECT2      | ARHGFE31 epitheliε protein-coding   |
| chr15-98  | 6.163247 | 0.870983 | 0.951134 | 0.915731 | 0.359808 | 0.981636 | chr15 | 98834324 | 98834540 | + | 0 | NA | intron (Nintron (N  | 50006 NR_039864  | 1.01E+08 | NR_039864  | ENSG00000MIR4714   | uncharactncRNA                      |
| chr17-63  | 6.163247 | 0.870983 | 0.951134 | 0.915731 | 0.359808 | 0.981636 | chr17 | 63086494 | 63086750 | + | 0 | NA | intron (N(LIMCa LIN | 120404 NM_02518E | 26115    | Hs.41088E  | ENSG00000TANC2     | ROLSA rol tetraatric protein-coding |
| chr22-21  | 6.163247 | 0.870983 | 0.951134 | 0.915731 | 0.359808 | 0.981636 | chr22 | 21691658 | 21691866 | + | 0 | NA | intron (Nintron (N  | 25750 NM_14817E  | 23759    | Hs.438587E | ENSG00000PPL12     | CYC4 CYPε peptidyl protein-coding   |
| chr1-171  | 10.69938 | 0.661195 | 0.722154 | 0.915587 | 0.359884 | 0.981636 | chr1  | 1.72E+08 | 1.72E+08 | + | 0 | NA | exon (NM_exon (NM   | 47006 NM_01517E  | 23215    | Hs.494641E | ENSG00000PRRC2C    | BAT2-iso proline i protein-coding   |
| chr19-121 | 10.69938 | 0.661195 | 0.722154 | 0.915587 | 0.359884 | 0.981636 | chr19 | 12179842 | 12193133 | + | 0 | NA | intron (Nintron (N  | -8528 NR_10417E  | 1E+08    | Hs.66260E  | ENSG00000LOC10028E | uncharactncRNA                      |
| chr1-233  | 8.094683 | -0.76172 | 0.831958 | -0.91557 | 0.359892 | 0.981636 | chr1  | 2.33E+08 | 2.33E+08 | + | 0 | NA | intron (N(L2b LINE  | 43598 NM_00132E  | 80003    | Hs.37060E  | ENSG00000PCNX2     | PCNXL2 pecanex 2 protein-coding     |
| chr16-21  | 8.094683 | -0.76172 | 0.831958 | -0.91557 | 0.359892 | 0.981636 | chr16 | 2152522  | 2154467  | + | 0 | NA | 3' UTR (N3' UTR (N  | 1611 NR_00273E   | 26788    | NR_00273E  | ENSG00000SNORD60   | RNU60 U6C small nucsnRNA            |
| chr17-14  | 8.094683 | -0.76172 | 0.831958 | -0.91557 | 0.359892 | 0.981636 | chr17 | 1461950  | 1462219  | + | 0 | NA | IntergeniAluSx4 SI  | -5852 NM_00520E  | 1398     | Hs.46189E  | ENSG00000CCRK      | CRK1I p3ε CRK protc protein-coding  |
| chr3-532  | 8.094683 | -0.76172 | 0.831958 | -0.91557 | 0.359892 | 0.981636 | chr3  | 53244093 | 53244292 | + | 0 | NA | intron (Nintron (N  | 11830 NM_001064  | 7086     | Hs.89643   | ENSG00000TKT       | HML-5-48 transketc protein-coding   |
| chr3-150  | 8.094683 | -0.76172 | 0.831958 | -0.91557 | 0.359892 | 0.981636 | chr3  | 1.51E+08 | 1.51E+08 | + | 0 | NA | intron (NAluJb SIN  | -27159 NM_01627E | 51714    | Hs.36905E  | ENSG00000SELENOT   | SELT selenoprc protein-coding       |
| chr1-1457 | 10.17736 | 0.683668 | 0.746897 | 0.915344 | 0.360011 | 0.981636 | chr1  | 1.46E+08 | 1.46E+08 | + | 0 | NA | intron (N(SVA_D Ret | 48279 NR_10384E  | 11126    | Hs.488237E | ENSG00000CD160     | BY55 NK1 CD160 mol protein-coding   |
| chr2-190  | 8.069259 | -0.76847 | 0.839695 | -0.91518 | 0.360097 | 0.981636 | chr2  | 1.91E+08 | 1.91E+08 | + | 0 | NA | intron (Nintron (N  | 9758 NM_01490E   | 2744     | Hs.11644E  | ENSG00000GLS       | AAD20 CAS glutaminε protein-coding  |
| chrX-103  | 8.069259 | -0.76847 | 0.839695 | -0.91518 | 0.360097 | 0.981636 | chrX  | 1.03E+08 | 1.03E+08 | + | 0 | NA | exon (NM_exon (NM   | 1338 NM_00100E   | 51186    | Hs.533287E | ENSG00000TCEAL9    | WBP5 WEXε transcrip protein-coding  |
| chr5-1057 | 3.889589 | -1.10683 | 1.209545 | -0.91508 | 0.360149 | 0.981636 | chr5  | 10573999 | 10574509 | + | 0 | NA | intron (Nintron (N  | 10184 NM_001164  | 651746   | Hs.26039   | ENSG00000ANKRD33B  | - ankryn i protein-coding           |
| chr22-23  | 8.013999 | 0.784418 | 0.857254 | 0.915035 | 0.360173 | 0.981636 | chr22 | 23261397 | 23262176 | + | 0 | NA | promoter-promoter-  | -981 NR_03340E   | 26226    | Hs.72958E  | ENSG00000FBXW4P1   | FBW3 FBXW f-box anc pseudo          |
| chr1-268  | 10.28692 | 0.697832 | 0.762711 | 0.914937 | 0.360225 | 0.981636 | chr1  | 26888041 | 26888405 | + | 0 | NA | intron (Nintron (N  | 2060 NM_01806E   | 54707    | Hs.14333   | ENSG00000GPN2      | ATPBD1B GPN-loop protein-coding     |
| chr10-73  | 8.451882 | 0.737582 | 0.806312 | 0.91476  | 0.360318 | 0.981636 | chr10 | 73174276 | 73182877 | + | 0 | NA | intron (Nintron (N  | 10682 NM_17334E  | 317662   | Hs.408577E | ENSG00000FAM149B1  | K1AA0974 family wiprotein-coding    |
| chr12-507 | 8.451882 | 0.737582 | 0.806312 | 0.91476  | 0.360318 | 0.981636 | chr12 | 50704568 | 50704982 | + | 0 | NA | intron (NAluSx SIN  | -59326 NM_005171 | 466      | Hs.64856E  | ENSG00000ATF1      | EWS-ATF1 activat i protein-coding   |
| chr13-11  | 8.451882 | 0.737582 | 0.806312 | 0.91476  | 0.360318 | 0.981636 | chr13 | 1.13E+08 | 1.13E+08 | + | 0 | NA | 3' UTR (N3' UTR (N  | 1164 NR_10704E   | 1.02E+08 | NR_10704E  | ENSG00000MIR8075   | hsa-mir-ε microRNA ncRNA            |
| chr16-27  | 8.451882 | 0.737582 | 0.806312 | 0.91476  | 0.360318 | 0.981636 | chr16 | 2707447  | 2708801  | + | 0 | NA | 3' UTR (N3' UTR (N  | 12100 NM_00131E  | 83886    | Hs.33287E  | ENSG00000PRSS27    | CAPH2 MPN serine i protein-coding   |
| chr22-207 | 8.451882 | 0.737582 | 0.806312 | 0.91476  | 0.360318 | 0.981636 | chr22 | 20763583 | 20765397 | + | 0 | NA | intron (Nintron (N  | -9623 NM_00018E  | 3053     | Hs.47427E  | ENSG00000SERPIND1  | D22S673 ε serpin fε protein-coding  |
| chr5-735  | 8.451882 | 0.737582 | 0.806312 | 0.91476  | 0.360318 | 0.981636 | chr5  | 73559086 | 73562778 | + | 0 | NA | intron (N(LIMA7 LIN | 4707 NM_02303E   | 57763    | Hs.239154E | ENSG00000ANKRA2    | ANKRA ankryn i protein-coding       |
| chr6-108  | 8.451882 | 0.737582 | 0.806312 | 0.91476  | 0.360318 | 0.981636 | chr6  | 1.09E+08 | 1.09E+08 | + | 0 | NA | intron (Nintron (N  | 16278 NM_00119E  | 27244    | Hs.59133E  | ENSG00000SESNI     | PA26 SES1ε sertrin i protein-coding |
| chr8-730  | 8.436166 | 0.741541 | 0.810752 | 0.914634 | 0.360384 | 0.981636 | chr8  | 73055672 | 73055910 | + | 0 | NA | IntergeniLIP6 LIN   | 37381 NR_15322E  | 157689   | Hs.43904E  | ENSG00000SBSPON    | C8orf84 somatomec protein-coding    |
| chr9-682  | 11.55573 | -0.64133 | 0.701303 | -0.91449 | 0.360459 | 0.981636 | chr9  | 68259448 | 68259728 | + | 0 | NA | intron (NAluSz SIN  | 17643 NM_20145E  | 445571   | Hs.645337E | ENSG00000CBWD3     | ba561023. COBW domε protein-coding  |
| chr1-149  | 12.92931 | 0.607376 | 0.664413 | 0.914155 | 0.360636 | 0.981636 | chr1  | 1.49E+08 | 1.49E+08 | + | 0 | NA | intron (Nintron (N  | 25476 NM_001277  | 400818   | Hs.44508E  | ENSG00000NBPF9     | AE01 NBPF memε protein-coding       |
| chr18-29  | 9.284473 | -0.73422 | 0.803446 | -0.91384 | 0.360801 | 0.981636 | chr18 | 2936563  | 2936796  | + | 0 | NA | intron (NAluJb SIN  | 9944 NR_02665E   | 727896   | Hs.67312E  | ENSG00000LOC72789E | - cysteine pseudo                   |
| chr12-76  | 9.812493 | -0.6934  | 0.759456 | -0.91302 | 0.36123  | 0.981636 | chr12 | 76856528 | 76857576 | + | 0 | NA | IntergeniMLT1G3 LI  | 21967 NM_001321  | 1466     | Hs.530904E | ENSG00000CSR2P     | CRP2 LMOε cysteine protein-coding   |
| chr15-64  | 7.92987  | 0.7718   | 0.845508 | 0.912823 | 0.361335 | 0.981636 | chr15 | 64863407 | 64863633 | + | 0 | NA | intron (N(TG)n Sin  | 21605 NM_025201  | 80301    | Hs.709337E | ENSG00000PLEKH02   | PLEKH01 Fpleckstr i protein-coding  |
| chr15-65  | 7.92987  | 0.7718   | 0.845508 | 0.912823 | 0.361335 | 0.981636 | chr15 | 65667535 | 65668222 | + | 0 | NA | intron (Nintron (N  | 24999 NM_001254  | 9187     | Hs.17309E  | ENSG00000SLC24A1   | CSNB21 Fshleckstr cε protein-coding |
| chr10-50  | 9.894772 | -0.68761 | 0.753496 | -0.91256 | 0.361473 | 0.981636 | chr10 | 50095447 | 50095676 | + | 0 | NA | intron (Nintron (N  | 27607 NM_00100E  | 387680   | Hs.36528E  | ENSG00000WASHC2A   | PMA21A Fε WASH comε protein-coding  |
| chr10-10  | 10.6661  | 0.659013 | 0.722264 | 0.912426 | 0.361544 | 0.981636 | chr10 | 1.03E+08 | 1.03E+08 | + | 0 | NA | intron (Nintron (N  | 17915 NM_01497E  | 22984    | Hs.23949E  | ENSG00000PDCD11    | ALG-4 ALC programε protein-coding   |
| chr19-12  | 10.6661  | 0.659013 | 0.722264 | 0.912426 | 0.361544 | 0.981636 | chr19 | 12349425 | 12354224 | + | 0 | NA | intron (Nintron (N  | 13859 NM_030824  | 79973    | Hs.25319E  | ENSG00000ZNF442    | - zinc fing protein-coding          |
| chr16-70  | 8.169104 | -0.75304 | 0.825389 | -0.91234 | 0.36159  | 0.981636 | chr16 | 70028698 | 70029000 | + | 0 | NA | intron (NAluSx SIN  | -1497 NR_03626E  | 1E+08    | NR_03626E  | ENSG00000MIR1972-2 | microRNA ncRNA                      |
| chr3-1421 | 8.169104 | -0.75304 | 0.825389 | -0.91234 | 0.36159  | 0.981636 | chr3  | 1.42E+08 | 1.42E+08 | + | 0 | NA | intron (Nintron (N  | 26885 NM_00103E  | 256356   | Hs.135904E | ENSG00000CGK5      | - glycerolε protein-coding          |
| chr5-957  | 9.879056 | -0.68512 | 0.751131 | -0.91212 | 0.361706 | 0.981636 | chr5  | 95755614 | 95756539 | + | 0 | NA | intron (N(LIMB3 LIN | -23974 NM_00134E | 83890    | Hs.50499   | ENSG00000SPATA9    | NYD-SP16 spermatogε protein-coding  |
| chr5-141  | 9.879056 | -0.68512 | 0.751131 | -0.91212 | 0.361706 | 0.981636 | chr5  | 1.41E+08 | 1.41E+08 | + | 0 | NA | TTS (NM_C TTS (NM_C | 3284 NM_00564E   | 6879     | Hs.43883E  | ENSG00000TAF7      | TAF2F TAF TATA-box protein-coding   |
| chr19-217 | 6.435578 | -0.85338 | 0.93627  | -0.91147 | 0.362049 | 0.981636 | chr19 | 21758570 | 21759304 | + | 0 | NA | intron (Nintron (N  | 8192 NR_02452E   | 641367   | Hs.68012E  | ENSG00000LOC64136E | cyclin Y pseudo                     |
| chr16-37  | 7.896588 | 0.769053 | 0.843887 | 0.911323 | 0.362125 | 0.981636 | chr16 | 375861   | 3762     |   |   |    |                     |                  |          |            |                    |                                     |

|            |          |          |          |          |          |          |       |          |          |        |           |           |                    |                            |                     |            |              |            |                               |                            |                      |
|------------|----------|----------|----------|----------|----------|----------|-------|----------|----------|--------|-----------|-----------|--------------------|----------------------------|---------------------|------------|--------------|------------|-------------------------------|----------------------------|----------------------|
| chr7-7697  | 6.91931  | -0.79236 | 0.873754 | -0.90684 | 0.364489 | 0.981636 | chr7  | 76972579 | 76972819 | + 0 NA | Intergeni | Intergeni | -8123 NR_023388    | 441263 Hs. 675888NR_023388 | ENS000000           | DTX2P1-UF  | PMS2L11      | DTX2P1-UF  | pseudo                        |                            |                      |
| chr1-4395  | 8.45974  | 0.735585 | 0.811201 | 0.906785 | 0.36452  | 0.981636 | chr1  | 43956343 | 43957113 | + 0 NA | intron (N | intron (N | 9778 NM_014652     | 9670 Hs. 158497NM_014652   | ENS000000           | IPO13      | IMP13        | KAF        | importin protein-coding       |                            |                      |
| chr11-944  | 8.45974  | 0.735585 | 0.811201 | 0.906785 | 0.36452  | 0.981636 | chr11 | 94497129 | 94498438 | + 0 NA | intron (N | intron (N | 3799 NM_017704     | 54851 Hs. 29052 NM_017704  | ENS000000           | CANKRD49   | FGIF         | GBIF       | ankyrin r protein-coding      |                            |                      |
| chr14-507  | 8.45974  | 0.735585 | 0.811201 | 0.906785 | 0.36452  | 0.981636 | chr14 | 50728891 | 50729768 | + 0 NA | intron (N | FAM SINE  | -61023 NR_020181E  | 60485 Hs. 642842NM_020181E | ENS000000           | SAV1       | SAV          | W45        | salvador protein-coding       |                            |                      |
| chr22-355  | 8.45974  | 0.735585 | 0.811201 | 0.906785 | 0.36452  | 0.981636 | chr22 | 35523426 | 35528162 | + 0 NA | intron (N | FAM SINE  | -98426 NR_037471   | 1.01E+08                   | NR_037471           | ENS000000  | MIR3909      | miR-3909   | microRNA ncRNA                |                            |                      |
| chr3-524E  | 8.45974  | 0.735585 | 0.811201 | 0.906785 | 0.36452  | 0.981636 | chr3  | 52489385 | 52490078 | + 0 NA | intron (N | intron (N | -5607 NM_01513E    | 23166 Hs. 301989NM_01513E  | ENS000000           | STAB1      | miR-CLEVER-1 | stabilin   | protein-coding                |                            |                      |
| chr5-476E  | 8.45974  | 0.735585 | 0.811201 | 0.906785 | 0.36452  | 0.981636 | chr5  | 47631951 | 47633692 | + 0 NA | Intergeni | ALR Alpha | -1936441 NM_021072 | 348980 Hs. 353177NM_021072 | ENS000000           | HCN1       | BCNG-1       | BC         | hyperpolarized protein-coding |                            |                      |
| chr1-434E  | 8.426458 | 0.73296  | 0.808376 | 0.906706 | 0.364562 | 0.981636 | chr1  | 43450883 | 43451211 | + 0 NA | TTS (NM_C | TTS (NM_C | -2403 NR_046744    | 1.01E+08                   | Hs. 619768NR_046744 | ENS000000  | SZT2-AS1     | SZT2       | antincRNA                     |                            |                      |
| chr10-742  | 8.426458 | 0.73296  | 0.808376 | 0.906706 | 0.364562 | 0.981636 | chr10 | 74242943 | 74243319 | + 0 NA | intron (N | LTR28B L1 | 66368 NM_00136E    | 132 Hs. 656588NM_00136E    | ENS000000           | CADK       | AK           | adenosine  | protein-coding                |                            |                      |
| chr11-45E  | 8.426458 | 0.73296  | 0.808376 | 0.906706 | 0.364562 | 0.981636 | chr11 | 45947482 | 45949078 | + 0 NA | intron (N | intron (N | 25624 NM_00130E    | 120071 Hs. 86543 NM_15231E | ENS000000           | LARGE2     | GYLLTLB1     | FLARIGE    | xlprotein-coding              |                            |                      |
| chr12-56E  | 8.426458 | 0.73296  | 0.808376 | 0.906706 | 0.364562 | 0.981636 | chr12 | 56034404 | 56035335 | + 0 NA | exon (NM  | exon (NM  | -7049 NM_00102E    | 6231 Hs. 447562NM_00102E   | ENS000000           | RPS26      | DBA10        | S2E        | ribosomal protein-coding      |                            |                      |
| chr19-12E  | 8.426458 | 0.73296  | 0.808376 | 0.906706 | 0.364562 | 0.981636 | chr19 | 12605014 | 12605548 | + 0 NA | intron (N | AluJr SIN | 5532 NM_020714     | 57474 Hs. 655866NM_020714  | ENS000000           | ZNF490     |              |            | zinc finger protein-coding    |                            |                      |
| chr20-34E  | 8.426458 | 0.73296  | 0.808376 | 0.906706 | 0.364562 | 0.981636 | chr20 | 34500228 | 34501614 | + 0 NA | intron (N | L1M2 LINE | -15463 NM_00131E   | 83658 Hs. 59392NM_01418E   | ENS000000           | DYNLRB1    | BITH         | BLP        | dynein I1 protein-coding      |                            |                      |
| chr12-56E  | 8.426458 | 0.73296  | 0.808376 | 0.906706 | 0.364562 | 0.981636 | chr12 | 56034404 | 56035335 | + 0 NA | exon (NM  | exon (NM  | 11505 NM_01673E    | 3985 Hs. 474596NM_00556E   | ENS000000           | L1MK2      |              |            | LIM domain protein-coding     |                            |                      |
| chr19-12E  | 8.426458 | 0.73296  | 0.808376 | 0.906706 | 0.364562 | 0.981636 | chr19 | 12605014 | 12605548 | + 0 NA | intron (N | AluJr SIN | 5532 NM_020714     | 57474 Hs. 655866NM_020714  | ENS000000           | ZNF490     |              |            | zinc finger protein-coding    |                            |                      |
| chr20-34E  | 8.426458 | 0.73296  | 0.808376 | 0.906706 | 0.364562 | 0.981636 | chr20 | 34500228 | 34501614 | + 0 NA | intron (N | L1M2 LINE | -15463 NM_00131E   | 83658 Hs. 59392NM_01418E   | ENS000000           | DYNLRB1    | BITH         | BLP        | dynein I1 protein-coding      |                            |                      |
| chr12-56E  | 8.426458 | 0.73296  | 0.808376 | 0.906706 | 0.364562 | 0.981636 | chr12 | 56034404 | 56035335 | + 0 NA | exon (NM  | exon (NM  | 11505 NM_01673E    | 3985 Hs. 474596NM_00556E   | ENS000000           | L1MK2      |              |            | LIM domain protein-coding     |                            |                      |
| chr8-737E  | 8.426458 | 0.73296  | 0.808376 | 0.906706 | 0.364562 | 0.981636 | chr8  | 73737080 | 73737596 | + 0 NA | intron (N | AluSp SIN | 9502 NM_001164     | 27067 Hs. 561815NM_01439E  | ENS000000           | STAU2      | 39K2         | 39K3       | staufen c protein-coding      |                            |                      |
| chr9-999E  | 8.426458 | 0.73296  | 0.808376 | 0.906706 | 0.364562 | 0.981636 | chr9  | 99922547 | 99922917 | + 0 NA | intron (N | intron (N | 16078 NM_01791E    | 55014 Hs. 704031NM_01791E  | ENS000000           | STX17      |              |            | syntactin protein-coding      |                            |                      |
| chr8-103E  | 6.394438 | -0.85808 | 0.946559 | -0.90652 | 0.36466  | 0.981636 | chr8  | 1.03E+08 | 1.03E+08 | + 0 NA | intron (N | intron (N | 6864 NM_01542E     | 25879 Hs. 532265NM_01542E  | ENS000000           | CCAF13     | GM83         | HSPC       | DDB1 and protein-coding       |                            |                      |
| chr13-11E  | 6.153388 | -0.75001 | 0.827654 | -0.90618 | 0.364838 | 0.981636 | chr13 | 1.14E+08 | 1.14E+08 | + 0 NA | intron (N | intron (N | 5214 NM_00082C     | 2621 Hs. 646346NM_00082C   | ENS000000           | GAS6       | AXLLG        | AXS        | growth ar protein-coding      |                            |                      |
| chr19-39E  | 6.153388 | -0.75001 | 0.827654 | -0.90618 | 0.364838 | 0.981636 | chr19 | 3955850  | 3956436  | + 0 NA | Intergeni | Intergeni | 5369 NR_030367     | 693222                     | NR_030367           | ENS000000  | MIR637       | MIRN637    | microRNA ncRNA                |                            |                      |
| chr4-802E  | 6.153388 | -0.75001 | 0.827654 | -0.90618 | 0.364838 | 0.981636 | chr4  | 80268090 | 80268929 | + 0 NA | 5' UTR (N | 5' UTR (N | 244 NM_001291      | 2250 Hs. 37055 NM_00446E   | ENS000000           | CGF5       | HBGF-5       | Sn         | fibroblasts protein-coding    |                            |                      |
| chr3-186E  | 7.61751  | -0.80201 | 0.885298 | -0.90592 | 0.364978 | 0.981636 | chr3  | 1.87E+08 | 1.87E+08 | + 0 NA | intron (N | AluSx SIN | -6059 NM_017541    | 1427 Hs. 376209NM_017541   | ENS000000           | CRYGS      | CRYG8        | CTF        | crystallin protein-coding     |                            |                      |
| chr7-154E  | 7.61751  | -0.80201 | 0.885298 | -0.90592 | 0.364978 | 0.981636 | chr7  | 1.55E+08 | 1.55E+08 | + 0 NA | TTS (NR_C | TTS (NR_C | 21226 NR_02447E    | 1E+08                      | Hs. 586358NR_02447E | ENS000000  | PAXIPI-AS    | PAXIPI10S  | PAXIPI                        | arcncRNA                   |                      |
| chr4-569E  | 3.907155 | -1.08917 | 1.202454 | -0.90579 | 0.365048 | 0.981636 | chr4  | 56960533 | 56961112 | + 0 NA | Intergeni | AluSc SIN | 16784 NM_03231E    | 84273 Hs. 8715 NM_03231E   | ENS000000           | NOA1       | C4orf14      | Wnitric    | ox protein-coding             |                            |                      |
| chr6-147E  | 3.907155 | -1.08917 | 1.202454 | -0.90579 | 0.365048 | 0.981636 | chr6  | 1.47E+08 | 1.47E+08 | + 0 NA | intron (N | L1MCI LIN | -15357 NR_03411E   | 729178 Hs. 557608NR_03411E | STXPB5-AS-          | STXPB5     | AS-          | arcncRNA   |                               |                            |                      |
| chr14-351E | 6.138085 | -0.95016 | 1.049345 | -0.90548 | 0.365212 | 0.981636 | chr14 | 35169140 | 35169572 | + 0 NA | intron (N | L1MEF LIN | 46804 NM_00125E    | 9692 Hs. 458487NM_01467E   | ENS000000           | PRORP      | K1AA0391     |            | protein-coding                |                            |                      |
| chr2-240E  | 5.138085 | -0.95016 | 1.049345 | -0.90548 | 0.365212 | 0.981636 | chr2  | 2.41E+08 | 2.41E+08 | + 0 NA | intron (N | LORI-int  | 13513 NM_01655E    | 51281 Hs. 656615NM_01655E  | ENS000000           | CANKMY1    | ZMYND13      |            | ankyrin r protein-coding      |                            |                      |
| chr5-695E  | 5.138085 | -0.95016 | 1.049345 | -0.90548 | 0.365212 | 0.981636 | chr5  | 69589953 | 69591203 | + 0 NA | intron (N | intron (N | 30333 NM_00109E    | 728340 Hs. 191356NM_00109E | ENS000000           | GTF2P2C    | GTF2P2C      | ZTGT2H2    | F protein-coding              |                            |                      |
| chr11-13E  | 6.086825 | -0.76023 | 0.839853 | -0.90519 | 0.365365 | 0.981636 | chr11 | 1.34E+08 | 1.34E+08 | + 0 NA | intron (N | AluJb SIN | 33838 NM_015261    | 23310 Hs. 438555NM_015261  | ENS000000           | CAPFD3     | CAP-D3       | C          | non-SMC c protein-coding      |                            |                      |
| chr2-191E  | 6.086825 | -0.76023 | 0.839853 | -0.90519 | 0.365365 | 0.981636 | chr2  | 1.92E+08 | 1.92E+08 | + 0 NA | non-codir | non-codir | -1682 NR_131917    | 1.06E+08                   | Hs. 104972NR_131917 | LOC105747- |              |            |                               | uncharacterncRNA           |                      |
| chr16-53E  | 5.095095 | -0.97512 | 1.077295 | -0.90515 | 0.365384 | 0.981636 | chr16 | 53443915 | 53444274 | + 0 NA | intron (N | AluSq2 SI | 8475 NM_00132E     | 5934 Hs. 513605NM_005611   | ENS000000           | RBL2       | P130         | Rb2        | RB                            | transcript protein-coding  |                      |
| chr5-131E  | 5.095095 | -0.97512 | 1.077295 | -0.90515 | 0.365384 | 0.981636 | chr5  | 1.31E+08 | 1.31E+08 | + 0 NA | 3' UTR (N | 3' UTR (N | 129607 NM_00103E   | 56990 Hs. 508825NM_02024E  | ENS000000           | CDC42SE2   | SPEC2        |            | CDC42                         | sm protein-coding          |                      |
| chr12-13E  | 4.999066 | 0.94409  | 1.043056 | 0.905119 | 0.365403 | 0.981636 | chr12 | 1.33E+08 | 1.33E+08 | + 0 NA | 3' UTR (N | 3' UTR (N | 34210 NM_18323E    | 1E+08                      | Hs. 29698 NM_18323E | ENS000000  | ZNF605       |            |                               | zinc finger protein-coding |                      |
| chr17-50E  | 4.999066 | 0.94409  | 1.043056 | 0.905119 | 0.365403 | 0.981636 | chr17 | 50461462 | 50463407 | + 0 NA | exon (NM  | exon (NM  | -5895 NR_11023E    | 80202 Hs. 288955NM_02514E  | ENS000000           | ACSF2      | ACSMW        | AV         | acyl-CoA                      | protein-coding             |                      |
| chr7-112E  | 4.999066 | 0.94409  | 1.043056 | 0.905119 | 0.365403 | 0.981636 | chr7  | 1126382  | 1127009  | + 0 NA | intron (N | AluSz SIN | 11552 NM_00131E    | 84310 Hs. 653255NM_03235E  | ENS000000           | C7orf50    | YCRO16W      |            | chromosom                     | protein-coding             |                      |
| chr10-45E  | 6.887327 | -0.80903 | 0.893875 | -0.90508 | 0.365422 | 0.981636 | chr10 | 45761483 | 45762034 | + 0 NA | intron (N | intron (N | 34492 NM_001367    | 253725 Hs. 365286NM_01526E | ENS000000           | WASHC2C    | FAM21A1      | FA         | WASH                          | com protein-coding         |                      |
| chr4-253E  | 6.887327 | -0.80903 | 0.893875 | -0.90508 | 0.365422 | 0.981636 | chr4  | 25315291 | 25316108 | + 0 NA | intron (N | L1MB4 LIN | 2925 NM_00131E     | 29063 Hs. 27894E           | ENS000000           | ZCHC4      | FSPC052      | Z          | zinc finger protein-coding    |                            |                      |
| chr9-950E  | 6.887327 | -0.80903 | 0.893875 | -0.90508 | 0.365422 | 0.981636 | chr9  | 95026616 | 95027093 | + 0 NA | intron (N | intron (N | -38496 NR_10672E   | 1.02E+08                   | NR_10672E           | ENS000000  | MIR6081      | hsa-mir-6  | microRNA ncRNA                |                            |                      |
| chrX-701E  | 6.887327 | -0.80903 | 0.893875 | -0.90508 | 0.365422 | 0.981636 | chrX  | 70151876 | 70152869 | + 0 NA | intron (N | L1MEF LIN | 18437 NM_00137E    | 3476 Hs. 496267NM_00155E   | ENS000000           | IGBP1      | ALPHA-4      | I          | immunogl                      | protein-coding             |                      |
| chr6-149E  | 5.112661 | -0.96214 | 1.062188 | -0.90496 | 0.365487 | 0.981636 | chr6  | 1.5E+08  | 1.5E+08  | + 0 NA | intron (N | L1ME3F LI | -30208 NM_001204   | 11104 Hs. 45017E           | NM_007044           | ENS000000  | KATNAL1      |            |                               | katanin                    | protein-coding       |
| chr1-100E  | 6.879469 | -0.80727 | 0.892128 | -0.90488 | 0.365527 | 0.981636 | chr1  | 1.01E+08 | 1.01E+08 | + 0 NA | intron (N | AluJb SIN | 16499 NM_001144    | 148867 Hs. 53390E          | NM_13349E           | ENS000000  | SLC30A7      | ZNT7       | ZnT                           | solute c protein-coding    |                      |
| chr12-28E  | 6.879469 | -0.80727 | 0.892128 | -0.90488 | 0.365527 | 0.981636 | chr12 | 2803548  | 2803923  | + 0 NA | 3' UTR (N | 3' UTR (N | 8765 NM_002014     | 2288 Hs. 52418E            | NM_002014           | ENS000000  | FKBP4        | FKBP51     | FK                            | FKBP                       | prol protein-coding  |
| chr12-76E  | 6.879469 | -0.80727 | 0.892128 | -0.90488 | 0.365527 | 0.981636 | chr12 | 76043080 | 76044753 | + 0 NA | TTS (NM_C | TTS (NM_C | -12140 NM_00735E   | 22822 Hs. 62088E           | NM_00735E           | ENS000000  | PHLDA1       | IT1B11     | I                             | pleckstrin                 | protein-coding       |
| chr15-81E  | 6.879469 | -0.80727 | 0.892128 | -0.90488 | 0.365527 | 0.981636 | chr15 | 81002987 | 81004040 | + 0 NA | 3' UTR (N | 3' UTR (N | 2590 NM_02256E     | 59274 Hs. 513071NM_02256E  | ENS000000           | TLNRD1     | MESDC1       |            | talin                         | ro protein-coding          |                      |
| chr19-45E  | 6.879469 | -0.80727 | 0.892128 | -0.90488 | 0.365527 | 0.981636 | chr19 | 45084572 | 45085524 | + 0 NA | TTS (NR_C | TTS (NR_C | 5343 NR_134887     | 1.05E+08                   | Hs. 66269E          | NR_134887  | ENS000000    | GEM1NT-AS- | GEM1NT                        | arcncRNA                   |                      |
| chr2-111E  | 6.879469 | -0.80727 | 0.892128 | -0.90488 | 0.365527 | 0.981636 | chr2  | 1.11E+08 | 1.11E+08 | + 0 NA | intron (N | intron (N | 1699 NR_03963E     | 1.01E+08                   | NR_03963E           | ENS000000  | MIR4435-2    | mir-4435   | microRNA ncRNA                |                            |                      |
| chr2-237E  | 6.879469 | -0.80727 | 0.892128 | -0.90488 | 0.365527 | 0.981636 | chr2  | 2.38E+08 | 2.38E+08 | + 0 NA | intron (N | intron (N | 18242 NM_001137    | 9208 Hs. 47177E            | NR_00473E           | ENS000000  | RFRFP1       | FLAP-1     | FL                            | LRR                        | bindi protein-coding |
| chr4-147E  | 6.879469 | -0.80727 | 0.892128 | -0.90488 | 0.365527 | 0.981636 | chr4  | 1.48E+08 | 1.48E+08 | + 0 NA | intron (N | LTR12 LTF | 67699 NR_03996E    | 1.01E+08                   | NR_03996E           | ENS000000  | MIR4799      |            |                               | microRNA ncRNA             |                      |
| chr4-147E  | 6.879469 | -0.80727 | 0.892128 | -0.      |          |          |       |          |          |        |           |           |                    |                            |                     |            |              |            |                               |                            |                      |



|            |          |          |          |          |          |          |       |          |          |   |   |    |                     |         |            |          |           |                     |                       |                |                             |
|------------|----------|----------|----------|----------|----------|----------|-------|----------|----------|---|---|----|---------------------|---------|------------|----------|-----------|---------------------|-----------------------|----------------|-----------------------------|
| chr5-7748  | 6.91275  | -0.80127 | 0.890641 | -0.89966 | 0.368302 | 0.981636 | chr5  | 77487866 | 77488687 | + | 0 | NA | intron (Nintron (N  | 4040    | NM_01826E  | 55255    | Hs.482572 | NM_01826E           | ENSG000000WDR41       | MSTP048        | WD repeatprotein-coding     |
| chr6-7884  | 6.91275  | -0.80127 | 0.890641 | -0.89966 | 0.368302 | 0.981636 | chr6  | 7884689  | 7885597  | + | 0 | NA | intron (Nintron (N  | 24934   | NM_001114F | 81567    | Hs.150837 | NM_02208E           | ENSG000000TXND5       | ENDOPDI1       | E thioredoxinprotein-coding |
| chr7-6507  | 6.91275  | -0.80127 | 0.890641 | -0.89966 | 0.368302 | 0.981636 | chr7  | 65071632 | 65073054 | + | 0 | NA | intron (Nintron (N  | 1805    | NR_14571E  | 1.1E+08  | NR_14571E | ENSG000000SNORA15B- |                       | small nucsnRNA |                             |
| chr9-3364  | 6.91275  | -0.80127 | 0.890641 | -0.89966 | 0.368302 | 0.981636 | chr9  | 33940727 | 33941523 | + | 0 | NA | intron (Nintron (N  | -6750   | NR_10237C  | 1.01E+08 | NR_10237C | ENSG000000SNORD121E |                       | small nucsnRNA |                             |
| chr11-8678 | 6.112248 | -0.75531 | 0.837588 | -0.89962 | 0.368322 | 0.981636 | chr11 | 86027518 | 86162764 | + | 0 | NA | intron (NAluJr SIN  | 41443   | NM_00716E  | 8301     | Hs.16389E | NM_00716E           | ENSG000000PICALM      | CALM CLTF      | phosphatidprotein-coding    |
| chr1-1514  | 7.904446 | 0.766701 | 0.852266 | 0.899603 | 0.368332 | 0.981636 | chr1  | 1.51E+08 | 1.51E+08 | + | 0 | NA | intron (NAluJb SIN  | 3389    | NM_207171  | 23126    | Hs.48987E | NM_01510C           | ENSG000000POGZ        | MRD37 WHS      | pogo trar protein-coding    |
| chr19-1576 | 6.16813  | 0.540514 | 0.600847 | 0.899587 | 0.36834  | 0.981636 | chr19 | 57975854 | 57989843 | + | 0 | NA | intron (NAluJr4 S1  | -8314   | NM_152474  | 147685   | Hs.13420E | NM_152474           | ENSG000000C19orf18    |                | chromosomprotein-coding     |
| chr11-175  | 6.904892 | -0.79955 | 0.8889   | -0.89948 | 0.368398 | 0.981636 | chr11 | 17304972 | 17305789 | + | 0 | NA | intron (NLM5 LINE   | 28410   | NM_00135E  | 4925     | Hs.65459E | NM_00501E           | ENSG000000NUCB2       | HEL-S-10E      | nucleobir protein-coding    |
| chr11-122  | 6.904892 | -0.79955 | 0.8889   | -0.89948 | 0.368398 | 0.981636 | chr11 | 1.23E+08 | 1.23E+08 | + | 0 | NA | 3' UTR (N3' UTR (N  | -28447  | NM_019604  | 56253    | Hs.15952E | NM_019604           | ENSG000000CCTAM       | CD355          | cytotoxicprotein-coding     |
| chr15-806  | 6.904892 | -0.79955 | 0.8889   | -0.89948 | 0.368398 | 0.981636 | chr15 | 80852846 | 80853610 | + | 0 | NA | intron (NMLT10 LTF  | -11155  | NR_00303E  | 693132   | NR_03039E | ENSG000000MIR549A   | MIR549                | miRNA ncRNA    |                             |
| chr16-532  | 6.904892 | -0.79955 | 0.8889   | -0.89948 | 0.368398 | 0.981636 | chr16 | 53222013 | 53222417 | + | 0 | NA | intron (NAluSq2 S1  | 13764   | NM_00135E  | 80205    | Hs.59159  | NR_01528E           | ENSG000000CHD9        | AD013 CHE      | chromodnonprotein-coding    |
| chr17-816  | 6.904892 | -0.79955 | 0.8889   | -0.89948 | 0.368398 | 0.981636 | chr17 | 81862286 | 81863284 | + | 0 | NA | IntergeniAluSx SIN  | -2250   | NM_00091E  | 5034     | Hs.46433E | NM_00091E           | ENSG000000CP4HB       | CLCRP1 DS      | prolyl 4-protein-coding     |
| chr19-195  | 6.904892 | -0.79955 | 0.8889   | -0.89948 | 0.368398 | 0.981636 | chr19 | 19915541 | 19920539 | + | 0 | NA | intron (NLP1A5 LIN  | 17094   | NM_03121E  | 81931    | Hs.30105E | NM_03121E           | ENSG000000ZNF93       | HPF34 HTF      | zinc fingprotein-coding     |
| chr3-1544  | 6.904892 | -0.79955 | 0.8889   | -0.89948 | 0.368398 | 0.981636 | chr3  | 15442675 | 15443002 | + | 0 | NA | TTS (NM_C TTS (NM_C | 15240   | NM_03308E  | 85403    | Hs.71673E | NM_03308E           | ENSG000000EAF1        |                | ELL assocprotein-coding     |
| chr4-1223  | 6.904892 | -0.79955 | 0.8889   | -0.89948 | 0.368398 | 0.981636 | chr4  | 1.22E+08 | 1.22E+08 | + | 0 | NA | intron (Nintron (N  | -50557  | NM_13924E  | 132612   | Hs.51895E | NM_13924E           | ENSG000000ADAD1       | Tenr           | adenosineprotein-coding     |
| chr4-1511  | 6.904892 | -0.79955 | 0.8889   | -0.89948 | 0.368398 | 0.981636 | chr4  | 1.51E+08 | 1.51E+08 | + | 0 | NA | intron (Nintron (N  | 22249   | NR_000007  | 8944     | NR_000007 | ENSG000000SNORD73A  | RNU73 RNU             | small nucsnRNA |                             |
| chr6-3746  | 6.904892 | -0.79955 | 0.8889   | -0.89948 | 0.368398 | 0.981636 | chr6  | 37465357 | 37466816 | + | 0 | NA | intron (NLM5E LIN   | 32865   | NM_01505C  | 23070    | Hs.52010E | NM_01505C           | ENSG000000CMCR1       | FTS JDS2 K1    | cap nucsnRNA                |
| chr7-840   | 6.904892 | -0.79955 | 0.8889   | -0.89948 | 0.368398 | 0.981636 | chr7  | 84066704 | 84067618 | + | 0 | NA | intron (NLP1A2 LIN  | 127628  | NM_00608C  | 10371    | Hs.252451 | NM_00608C           | ENSG000000SEMA3A      | COLL1 HHI      | semaphorinprotein-coding    |
| chr7-1076  | 6.904892 | -0.79955 | 0.8889   | -0.89948 | 0.368398 | 0.981636 | chr7  | 1.08E+08 | 1.08E+08 | + | 0 | NA | intron (NLM1A4 LIN  | 20735   | NM_00010E  | 1738     | Hs.131711 | NM_00010E           | ENSG000000DLD         | DLDD DLDF      | dihydroliprotein-coding     |
| chr8-2332  | 6.904892 | -0.79955 | 0.8889   | -0.89948 | 0.368398 | 0.981636 | chr8  | 23320350 | 23323902 | + | 0 | NA | intron (Nintron (N  | -14082  | NR_03832E  | 1.01E+08 | Hs.66113C | NR_03832E           | ENSG000000CLOC100507- |                | uncharactncRNA              |
| chr9-3242  | 6.904892 | -0.79955 | 0.8889   | -0.89948 | 0.368398 | 0.981636 | chr9  | 32420615 | 32425387 | + | 0 | NA | intron (Nintron (N  | 38358   | NM_00136E  | 48       | Hs.56722E | NM_00219E           | ENSG000000AC01        | ACONS HEL      | aconitaseprotein-coding     |
| chr19-124  | 11.20382 | 0.635748 | 0.706931 | 0.899308 | 0.368489 | 0.981636 | chr19 | 12428903 | 12432003 | + | 0 | NA | exon (NM exon (NM   | 10568   | NM_00581E  | 10224    | Hs.63689E | NM_00581E           | ENSG000000ZNF443      | ZK1            | zinc fingprotein-coding     |
| chr1-1251  | 6.220103 | 0.86578  | 0.963219 | 0.89884  | 0.368738 | 0.981636 | chr1  | 12576803 | 12577677 | + | 0 | NA | intron (Nintron (N  | 1783    | NR_10678E  | 1.02E+08 | NR_10678E | ENSG000000MIR6730   | hsa-mir-ε             | microRNA ncRNA |                             |
| chr12-126  | 6.220103 | 0.86578  | 0.963219 | 0.89884  | 0.368738 | 0.981636 | chr12 | 1.21E+08 | 1.21E+08 | + | 0 | NA | exon (NM exon (NM   | 29975   | NM_00127C  | 10645    | Hs.29734E | NM_00654E           | ENSG000000CAMK2C      | CAMK2          | CaM calcium/cprotein-coding |
| chr15-313  | 6.220103 | 0.86578  | 0.963219 | 0.89884  | 0.368738 | 0.981636 | chr15 | 31380937 | 31381564 | + | 0 | NA | intron (NMLT1D LTF  | 54415   | NM_00130E  | 51621    | Hs.37644E | NM_01599E           | ENSG000000KLF13       | BTEB3 FKI      | Kruppel lprotein-coding     |
| chr1-1235  | 8.434316 | 0.730925 | 0.813281 | 0.898736 | 0.368793 | 0.981636 | chr1  | 1.24E+08 | 1.24E+08 | + | 0 | NA | IntergeniAluR/Alpha | 2395909 | NR_00395E  | 647211   | Hs.69768E | NR_00395E           | ENSG000000EMBPI1      |                | embigin pseudo              |
| chr19-140  | 8.434316 | 0.730925 | 0.813281 | 0.898736 | 0.368793 | 0.981636 | chr19 | 40369893 | 40370927 | + | 0 | NA | TTS (NR_1 TTS (NR_1 | 564     | NR_10685E  | 1.02E+08 | NR_10685E | ENSG000000MIR6796   | hsa-mir-ε             | microRNA ncRNA |                             |
| chr7-1288  | 8.434316 | 0.730925 | 0.813281 | 0.898736 | 0.368793 | 0.981636 | chr7  | 1.29E+08 | 1.29E+08 | + | 0 | NA | intron (Nintron (N  | 13642   | NM_001367  | 64753    | Hs.52117E | NM_02274E           | ENSG000000CCDC136     | NAG6           | coiled-ccprotein-coding     |
| chr16-743  | 8.14553  | -0.74841 | 0.83274  | -0.89873 | 0.368797 | 0.981636 | chr16 | 74339017 | 74339216 | + | 0 | NA | intron (NAluSp SIN  | 29139   | NR_02695C  | 283922   | Hs.55872E | NR_02695C           | ENSG000000LOC283922   |                | pyruvate pseudo             |
| chr15-632  | 11.23895 | 0.646147 | 0.719077 | 0.898577 | 0.368878 | 0.981636 | chr15 | 63303213 | 63303514 | + | 0 | NA | intron (NLM1E3A LI  | 25758   | NM_031301  | 83464    | Hs.51170E | NM_031301           | ENSG000000APH1B       | APH-1B PF      | aph-1 honprotein-coding     |
| chr15-523  | 10.71509 | 0.658052 | 0.732353 | 0.898545 | 0.368895 | 0.981636 | chr15 | 52374406 | 52375792 | + | 0 | NA | intron (NAluJr SIN  | -79295  | NR_01872E  | 55930    | Hs.48703E | NM_01872E           | ENSG000000MY05C       |                | myosin Vprotein-coding      |
| chr3-1953  | 8.973894 | 0.707334 | 0.787327 | 0.8984   | 0.368972 | 0.981636 | chr3  | 1.95E+08 | 1.95E+08 | + | 0 | NA | intron (NAluV SINE  | 10123   | NM_152531  | 152002   | Hs.478741 | NM_152531           | ENSG000000XXYL11      | C3orf21        | lysidine protein-coding     |
| chr1-3785  | 8.493021 | 0.733104 | 0.821746 | 0.898333 | 0.369008 | 0.981636 | chr1  | 3785673  | 3787053  | + | 0 | NA | intron (NAluSz SIN  | -30135  | NM_02071C  | 57470    | Hs.26848E | NM_02071C           | ENSG000000LRR4C7      |                | leucine rprotein-coding     |
| chr10-207  | 8.393176 | 0.730265 | 0.812947 | 0.898293 | 0.369029 | 0.981636 | chr10 | 207384   | 207995   | + | 0 | NA | intron (NLP1A3 LIN  | 27695   | NM_00120E  | 10771    | Hs.29226E | NM_00662E           | ENSG000000ZMYND11     | BRAM1 BS       | zinc fingprotein-coding     |
| chr4-159   | 8.393176 | 0.730265 | 0.812947 | 0.898293 | 0.369029 | 0.981636 | chr4  | 1.59E+08 | 1.59E+08 | + | 0 | NA | intron (NAluSx4 S1  | 56225   | NM_001351  | 9693     | Hs.74488E | NM_01424E           | ENSG000000RAGPEF2     | CNrasGEF Rap   | guaniprotein-coding         |
| chr18-585  | 8.981751 | 0.705455 | 0.785376 | 0.898243 | 0.369056 | 0.981636 | chr18 | 58979233 | 58980157 | + | 0 | NA | intron (Nintron (N  | -55984  | NR_024021  | 390858   | Hs.71628E | NR_024021           | OACVLP2               |                | o-acetyl pseudo             |
| chr10-101  | 4.973642 | 0.936658 | 1.043134 | 0.897927 | 0.369225 | 0.981636 | chr10 | 1.02E+08 | 1.02E+08 | + | 0 | NA | intron (Nintron (N  | 35640   | NM_02203E  | 6468     | Hs.50082E | NM_02203E           | ENSG000000FBXW4       | DAC FBW4 F     | box ancprotein-coding       |
| chr17-17   | 4.973642 | 0.936658 | 1.043134 | 0.897927 | 0.369225 | 0.981636 | chr17 | 1732838  | 1734023  | + | 0 | NA | intron (NMIR SINE   | 8599    | NM_00116E  | 124997   | Hs.23457E | NM_15234E           | ENSG000000WDR81       | CAMRQ2 HY      | WD repeatprotein-coding     |
| chr2-142   | 4.973642 | 0.936658 | 1.043134 | 0.897927 | 0.369225 | 0.981636 | chr2  | 1.48E+08 | 1.48E+08 | + | 0 | NA | intron (NHERVL18-1  | -23212  | NM_18174E  | 5000     | Hs.55836E | NM_00255E           | ENSG000000ORC4        | ORC4 ORC       | origin rprotein-coding      |
| chr2-2322  | 4.973642 | 0.936658 | 1.043134 | 0.897927 | 0.369225 | 0.981636 | chr2  | 2.32E+08 | 2.32E+08 | + | 0 | NA | intron (Nintron (N  | 91786   | NR_03028E  | 693147   | NR_03028E | ENSG000000MIR562    | MIRN562 f             | microRNA ncRNA |                             |
| chr10-406  | 19.15579 | 0.530922 | 0.591938 | 0.896922 | 0.369761 | 0.981636 | chr10 | 40683400 | 40683650 | + | 0 | NA | IntergeniAluR/Alpha | 1684520 | NR_02438C  | 441666   | Hs.25572E | NR_02438C           | ENSG000000LOC441666-  |                | zinc fingpseudo             |
| chr5-7835  | 5.204648 | -0.93315 | 1.040427 | -0.89689 | 0.369777 | 0.981636 | chr5  | 78357492 | 78358151 | + | 0 | NA | TTS (NR_1 TTS (NR_1 | 2866    | NR_105014  | 728769   | Hs.58619E | NR_105014           | ENSG000000SCAMP11A6E- |                | SCAMP1 arncRNA              |
| chr5-1313  | 5.204648 | -0.93315 | 1.040427 | -0.89689 | 0.369777 | 0.981636 | chr5  | 1.31E+08 | 1.31E+08 | + | 0 | NA | intron (Nintron (N  | 126018  | NM_00103E  | 56990    | Hs.50882E | NM_02024E           | ENSG000000CDC42SE2    | SPEC2          | CDC42 smεprotein-coding     |
| chr9-1107  | 9.753788 | -0.70366 | 0.784759 | -0.89665 | 0.369904 | 0.981636 | chr9  | 1.11E+08 | 1.11E+08 | + | 0 | NA | intron (Nintron (N  | 89084   | NM_001351  | 1902     | Hs.12666E | NM_001401           | ENSG000000LPAR1       | EDG2 GPR       | ε lysophosphprotein-coding  |
| chr12-718  | 6.05137  | -0.72114 | 0.80435  | -0.89655 | 0.369961 | 0.981636 | chr12 | 71771993 | 71772375 | + | 0 | NA | intron (NMLT1H LTF  | 17321   | NM_01499E  | 23011    | Hs.52459E | NM_01499E           | ENSG000000RAB21       |                | RAB21, mεprotein-coding     |
| chr5-1110  | 10.31509 | -0.66211 | 0.73856  | -0.89649 | 0.36999  | 0.981636 | chr5  | 1.11E+08 | 1.11E+08 | + | 0 | NA | non-codiron-codir   | 3763    | NM_138551  | 85480    | Hs.38987E | NM_03303E           | ENSG000000TSLP        |                | thymic stprotein-coding     |
| chr11-463  | 8.597279 | -0.71969 | 0.802975 | -0.89628 | 0.370103 | 0.981636 | chr11 | 46321623 | 46322773 | + | 0 | NA | TTS (NM_C TTS (NM_C | -10728  | NM_20153E  | 8525     | Hs.502461 | NM_00364E           | ENSG000000DGKZ        | DAGK5 DAC      | diacylglyprotein-coding     |
| chr11-123  | 8.597279 | -0.71969 | 0.802975 | -0.89628 | 0.370103 | 0.981636 | chr11 | 1.2E+08  | 1.2E+08  | + | 0 | NA | intron (Nintron (N  | 42717   | NM_001301  | 23365    | Hs.24598  | NM_01531E           | ENSG000000ARHGEF12    | ARG PRO2       | Rho guaniprotein-coding     |
| chr1-1024  | 6.716691 | 0.809181 | 0.902912 | 0.89619  | 0.370151 | 0.981636 | chr1  | 1034912  | 1035579  | + | 0 | NA | intron (Nintron (N  | 1252    | NM_001364  | 375790   | Hs.273331 | NM_01985E           | ENSG000000AGRN        | LAGRN CMS      | agrin protein-coding        |
| chr1-17    |          |          |          |          |          |          |       |          |          |   |   |    |                     |         |            |          |           |                     |                       |                |                             |



|           |          |          |          |          |          |          |       |          |          |   |    |                    |                    |           |           |                    |                      |                     |                                            |                                      |                               |                   |           |                            |
|-----------|----------|----------|----------|----------|----------|----------|-------|----------|----------|---|----|--------------------|--------------------|-----------|-----------|--------------------|----------------------|---------------------|--------------------------------------------|--------------------------------------|-------------------------------|-------------------|-----------|----------------------------|
| chr7-1571 | 6.863753 | -0.80384 | 0.898466 | -0.89468 | 0.370958 | 0.981636 | chr7  | 1.57E+08 | 1.57E+08 | 0 | NA | intron (Nintron (N | 31945              | NM_014671 | 9690      | Hs.118351NM_014671 | ENSG000003CUBE3C     | HECTH2              | ubiquitin protein-coding                   |                                      |                               |                   |           |                            |
| chr8-1033 | 6.863753 | -0.80384 | 0.898466 | -0.89468 | 0.370958 | 0.981636 | chr8  | 1.03E+08 | 1.03E+08 | 0 | NA | intron (HAL LINE   | 6844               | NR_145795 | 1.1E+08   | NR_145795          | SNORD173             | -                   | small nucleolar RNA                        |                                      |                               |                   |           |                            |
| chr9-2186 | 6.863753 | -0.80384 | 0.898466 | -0.89468 | 0.370958 | 0.981636 | chr9  | 21862022 | 21862548 | + | 0  | NA                 | 3' UTR (N3' UTR (N | 59649     | NM_002451 | 4507               | Hs.193266NM_002451   | ENSG000003MTAP      | BDMF DMSF methyltransferase protein-coding |                                      |                               |                   |           |                            |
| chr1-155  | 8.956328 | 0.70106  | 0.783638 | 0.894622 | 0.370989 | 0.981636 | chr1  | 1.55E+08 | 1.55E+08 | + | 0  | NA                 | intron (Nintron (N | -1161     | NR_030282 | 693140             | NR_030282            | ENSG000003MIR555    | Hsnr555 microRNA ncRNA                     |                                      |                               |                   |           |                            |
| chr17-427 | 8.956328 | 0.70106  | 0.783638 | 0.894622 | 0.370989 | 0.981636 | chr17 | 42716303 | 42718633 | + | 0  | NA                 | intron (Nintron (N | -9317     | NR_106838 | 1.02E+08           | NR_106838            | ENSG000003MIR6780A  | hsa-mir-6780a microRNA ncRNA               |                                      |                               |                   |           |                            |
| chr17-64  | 8.956328 | 0.70106  | 0.783638 | 0.894622 | 0.370989 | 0.981636 | chr17 | 64068710 | 64071231 | + | 0  | NA                 | intron (MLT1H LTF  | -49336    | NM_001095 | 3384               | Hs.431466NM_000872   | ENSG000003ICAM2     | CD102                                      | intercellular protein-coding         |                               |                   |           |                            |
| chr2-1098 | 8.956328 | 0.70106  | 0.783638 | 0.894622 | 0.370989 | 0.981636 | chr2  | 1.1E+08  | 1.1E+08  | + | 0  | NA                 | intron (NLIME1 LIN | -46840    | NR_038099 | 1E+08              | Hs.535619NM_001202   | ENSG000003LIMS4     | LIMS3L                                     | LIM zinc finger protein-coding       |                               |                   |           |                            |
| chr7-1587 | 8.956328 | 0.70106  | 0.783638 | 0.894622 | 0.370989 | 0.981636 | chr7  | 1.59E+08 | 1.59E+08 | + | 0  | NA                 | intron (Nintron (N | -32507    | NR_104054 | 54892              | Hs.18616             | NR_017766           | ENSG000003NCAPG3                           | K3S CAP-Conn-SMC                     | protein-coding                |                   |           |                            |
| chr2-1113 | 8.579713 | -0.72754 | 0.813692 | -0.89413 | 0.371254 | 0.981636 | chr2  | 1.11E+08 | 1.11E+08 | + | 0  | NA                 | intron (MLT1H LI   | -43387    | NR_039634 | 1.01E+08           | NR_039634            | ENSG000003MIR4435-1 | mir-4435                                   | microRNA ncRNA                       |                               |                   |           |                            |
| chr6-332  | 8.579713 | -0.72754 | 0.813692 | -0.89413 | 0.371254 | 0.981636 | chr6  | 33257244 | 33257476 | + | 0  | NA                 | intron (NLIME1 LIN | 7824      | NR_044997 | 414765             | Hs.675862NR_044997   | ENSG000003HCG25     | d1J033B1 HLA                               | compncRNA                            |                               |                   |           |                            |
| chr4-1228 | 6.693117 | 0.816772 | 0.913517 | 0.894097 | 0.37127  | 0.981636 | chr4  | 1.23E+08 | 1.23E+08 | + | 0  | NA                 | intron (NLTR8A LTF | 8464      | NM_001361 | 2247               | Hs.284244NM_002006   | ENSG000003PGF2      | BFGF FGF                                   | fibroblast protein-coding            |                               |                   |           |                            |
| chr6-1192 | 6.693117 | 0.816772 | 0.913517 | 0.894097 | 0.37127  | 0.981636 | chr6  | 1.19E+08 | 1.19E+08 | + | 0  | NA                 | intron (NTiger3b   | -53558    | NM_001288 | 79632              | Hs.443788NM_024581   | ENSG000003FAM184A   | C6orf60                                    | family wiprotein-coding              |                               |                   |           |                            |
| chr9-344  | 4.45163  | 1.023933 | 1.145232 | 0.894084 | 0.371277 | 0.981636 | chr9  | 34438113 | 34438647 | + | 0  | NA                 | intron (NLTR12C LI | 203259    | NM_147202 | 203259             | Hs.493771NM_147202   | ENSG000003FAM219A   | C9orf25                                    | family wiprotein-coding              |                               |                   |           |                            |
| chr17-295 | 10.30723 | -0.66091 | 0.739302 | -0.89397 | 0.371339 | 0.981636 | chr17 | 29262010 | 29262353 | + | 0  | NA                 | 3' UTR (N3' UTR (N | 15324     | NM_005208 | 1411               | Hs.46275             | NM_005208           | ENSG000003CRYBA1                           | CRYB1 CTF                            | crystallin protein-coding     |                   |           |                            |
| chr12-781 | 8.571855 | -0.72606 | 0.812304 | -0.89383 | 0.371411 | 0.981636 | chr12 | 78140036 | 78140255 | + | 0  | NA                 | intron (Nintron (N | 219601    | NR_135021 | 1.05E+08           | Hs.156899NR_135021   | ENSG000003LINC02424 | -                                          | long intencRNA                       |                               |                   |           |                            |
| chr1-8495 | 4.957926 | 0.943581 | 1.055658 | 0.893832 | 0.371412 | 0.981636 | chr1  | 8499674  | 8500648  | + | 0  | NA                 | intron (N(AAC)n SI | -5248     | NR_132752 | 1.07E+08           | NR_132752            | SNORD128            | ZL43                                       | small nucleolar RNA                  |                               |                   |           |                            |
| chr10-68  | 8.63056  | -0.71496 | 0.800094 | -0.89359 | 0.371541 | 0.981636 | chr10 | 68055462 | 68056607 | + | 0  | NA                 | intron (NALuSx SIN | 19249     | NM_001278 | 26091              | Hs.51891             | NM_015601           | ENSG000003CHERCA                           | -                                    | HECT and protein-coding       |                   |           |                            |
| chr16-30  | 8.63056  | -0.71496 | 0.800094 | -0.89359 | 0.371541 | 0.981636 | chr16 | 30059650 | 30060244 | + | 0  | NA                 | intron (NMIRb SINE | -4332     | NM_184043 | 226                | Hs.513499NM_000034   | ENSG000003ALDOA     | ALDA GSDI                                  | aldolase, protein-coding             |                               |                   |           |                            |
| chr17-285 | 8.63056  | -0.71496 | 0.800094 | -0.89359 | 0.371541 | 0.981636 | chr17 | 28583214 | 28583945 | + | 0  | NA                 | exon (NM exon (NM  | -6684     | NM_005166 | 230                | Hs.155247NM_005166   | ENSG000003ALDOC     | ALDC                                       | aldolase, protein-coding             |                               |                   |           |                            |
| chr12-661 | 10.28967 | -0.66745 | 0.747079 | -0.89341 | 0.371636 | 0.981636 | chr12 | 66136735 | 66136934 | + | 0  | NA                 | TTS (NM_TTS (NM_C  | 6083      | NR_125724 | 1.04E+08           | Hs.504822NR_125724   | ENSG000003LLPH-DT   | LLPH-AS1                                   | LLPH divncRNA                        |                               |                   |           |                            |
| chr1-8393 | 8.622703 | -0.71353 | 0.798725 | -0.89334 | 0.371674 | 0.981636 | chr1  | 83937464 | 83937710 | + | 0  | NA                 | intron (NTiger3a   | 1645      | NM_00135C | 79739              | Hs.445826NM_024688   | ENSG000003TLL7      | -                                          | tubulin protein-coding               |                               |                   |           |                            |
| chr11-657 | 8.622703 | -0.71353 | 0.798725 | -0.89334 | 0.371674 | 0.981636 | chr11 | 65718545 | 65718752 | + | 0  | NA                 | exon (NM exon (NM  | 2290      | NM_032193 | 84153              | Hs.718438NM_032193   | ENSG000003RNA5E2C   | AGS3 AYP1                                  | ribonucleoprotein-coding             |                               |                   |           |                            |
| chr13-48  | 8.622703 | -0.71353 | 0.798725 | -0.89334 | 0.371674 | 0.981636 | chr13 | 48381385 | 48381924 | + | 0  | NA                 | intron (Nintron (N | 31459     | NM_001162 | 10161              | Hs.123464NM_005767   | ENSG000003LPAR6     | ARWH1 HYF                                  | lysophosphatidase protein-coding     |                               |                   |           |                            |
| chr17-281 | 8.622703 | -0.71353 | 0.798725 | -0.89334 | 0.371674 | 0.981636 | chr17 | 28134734 | 28135024 | + | 0  | NA                 | intron (Nintron (N | -91495    | NR_003064 | 23615              | Hs.157199NM_021093   | ENSG000003PYY2      | -                                          | peptide lyase                        |                               |                   |           |                            |
| chr1-2065 | 8.989609 | 0.70362  | 0.787658 | 0.893307 | 0.371693 | 0.981636 | chr1  | 2.07E+08 | 2.07E+08 | + | 0  | NA                 | intron (Nintron (N | 16764     | NM_006893 | 1939               | Hs.497581NM_006893   | ENSG000003EIF2D     | HCA56 LGI                                  | eukaryotic protein-coding            |                               |                   |           |                            |
| chr6-3357 | 8.989609 | 0.70362  | 0.787658 | 0.893307 | 0.371693 | 0.981636 | chr6  | 33574406 | 33577720 | + | 0  | NA                 | intron (NALuSp SIN | 4213      | NM_001188 | 578                | Hs.485139NM_001188   | ENSG000003BAK1      | BAK BAK-1 BCL2                             | antiapoptotic protein-coding         |                               |                   |           |                            |
| chr1-112  | 8.18667  | -0.74473 | 0.833713 | -0.89327 | 0.371715 | 0.981636 | chr1  | 1.13E+08 | 1.13E+08 | + | 0  | NA                 | intron (Nintron (N | 7023      | NM_001042 | 389                | Hs.502656NM_001042   | ENSG000003RHOC      | ARH9 RHOC                                  | Ras homolog protein-coding           |                               |                   |           |                            |
| chr4-169  | 8.18667  | -0.74473 | 0.833713 | -0.89327 | 0.371715 | 0.981636 | chr4  | 1.69E+08 | 1.69E+08 | + | 0  | NA                 | intron (Nintron (N | 4798      | NM_032783 | 84869              | Hs.659311NM_032783   | ENSG000003CBR4      | SDR45C1                                    | cardenolide protein-coding           |                               |                   |           |                            |
| chr11-863 | 8.467598 | 0.733507 | 0.821236 | 0.893175 | 0.371763 | 0.981636 | chr11 | 8635605  | 8636503  | + | 0  | NA                 | intron (NLTR8A LTF | 22782     | NM_014818 | 9866               | Hs.130833NM_014818   | ENSG000003TRIM66    | CTlorf29                                   | tripartite protein-coding            |                               |                   |           |                            |
| chr11-117 | 8.467598 | 0.733507 | 0.821236 | 0.893175 | 0.371763 | 0.981636 | chr11 | 1.17E+08 | 1.17E+08 | + | 0  | NA                 | intron (Nintron (N | 9689      | NM_00104C | 51092              | Hs.712144NM_015996   | ENSG000003SIDT2     | CGI-40                                     | SID1                                 | transcript protein-coding     |                   |           |                            |
| chr14-104 | 8.467598 | 0.733507 | 0.821236 | 0.893175 | 0.371763 | 0.981636 | chr14 | 1.05E+08 | 1.05E+08 | + | 0  | NA                 | intron (Nintron (N | 12956     | NR_162135 | 1.13E+08           | NR_162135            | MIR12121            | -                                          | microRNA ncRNA                       |                               |                   |           |                            |
| chr5-656  | 8.467598 | 0.733507 | 0.821236 | 0.893175 | 0.371763 | 0.981636 | chr5  | 65687714 | 65688004 | + | 0  | NA                 | intron (NALuSx SIN | 34250     | NM_019072 | 54557              | Hs.482301NM_019072   | ENSG000003SGTB      | SGT2                                       | small gtprotein-coding               |                               |                   |           |                            |
| chr15-891 | 8.638329 | -0.81185 | 0.909038 | -0.89309 | 0.371808 | 0.981636 | chr15 | 89179106 | 89179305 | + | 0  | NA                 | intron (Nintron (N | 42374     | NM_00032E | 6017               | Hs.1933              | NM_00032E           | ENSG000003RLBP1                            | CRALBP                               | retinaldehyde protein-coding  |                   |           |                            |
| chr18-541 | 6.838329 | -0.81185 | 0.909038 | -0.89309 | 0.371808 | 0.981636 | chr18 | 54182384 | 54182583 | + | 0  | NA                 | intron (NL2c LINE  | 39929     | NR_00297C | 677819             | Hs.655869NR_00297C   | ENSG000003SNORA37   | ACA37                                      | small nucleolar RNA                  |                               |                   |           |                            |
| chr1-1244 | 24.91684 | 0.45302  | 0.509873 | 0.892971 | 0.371873 | 0.981636 | chr1  | 1.24E+08 | 1.24E+08 | + | 0  | NA                 | IntergeniALR/Alpha | 291865    | NR_003955 | 647121             | Hs.697688NR_003955   | ENSG000003EMBP1     | 23203                                      | Hs.98041                             | NM_01534E                     | ENSG000003ZFVYE26 | FYVE-CEN1 | zinc finger protein-coding |
| chr14-705 | 6.683409 | 0.805992 | 0.902633 | 0.892934 | 0.371892 | 0.981636 | chr14 | 70562379 | 70562664 | + | 0  | NA                 | IntergeniMSTA-int  | -27517    | NM_003814 | 8748               | Hs.177984NM_003814   | ENSG000003ADAM20    | -                                          | ADAM metallopeptidase protein-coding |                               |                   |           |                            |
| chr19-796 | 6.683409 | 0.805992 | 0.902633 | 0.892934 | 0.371892 | 0.981636 | chr19 | 7966537  | 7967002  | + | 0  | NA                 | intron (NALuJr SIN | -23103    | NM_006351 | 10469              | Hs.465784NM_006351   | ENSG000003TIMM44    | TIMM44                                     | translocase protein-coding           |                               |                   |           |                            |
| chr3-9833 | 6.683409 | 0.805992 | 0.902633 | 0.892934 | 0.371892 | 0.981636 | chr3  | 9833244  | 9833691  | + | 0  | NA                 | intron (Nintron (N | 10541     | NM_001351 | 285367             | Hs.33719             | NM_17365E           | ENSG000003RPSD3                            | -                                    | RNA splicing protein-coding   |                   |           |                            |
| chr8-1334 | 6.683409 | 0.805992 | 0.902633 | 0.892934 | 0.371892 | 0.981636 | chr8  | 1.33E+08 | 1.33E+08 | + | 0  | NA                 | intron (Nintron (N | 100001    | NM_003033 | 6482               | Hs.374257NM_003033   | ENSG000003ST3GAL1   | Gal-Nac6S                                  | ST3 beta protein-coding              |                               |                   |           |                            |
| chr9-127  | 6.683409 | 0.805992 | 0.902633 | 0.892934 | 0.371892 | 0.981636 | chr9  | 1.28E+08 | 1.28E+08 | + | 0  | NA                 | intron (Nintron (N | 35349     | NM_002283 | 64855              | Hs.522401NM_002283   | ENSG000003NIBAN2    | C9orf88                                    | Fniban apcprotein-coding             |                               |                   |           |                            |
| chr9-129  | 6.683409 | 0.805992 | 0.902633 | 0.892934 | 0.371892 | 0.981636 | chr9  | 1.29E+08 | 1.29E+08 | + | 0  | NA                 | intron (Nintron (N | 11320     | NM_03280E | 84895              | Hs.632693NM_03280E   | ENSG000003MIGAE2    | C9orf54                                    | Fmitoguanine protein-coding          |                               |                   |           |                            |
| chr17-441 | 11.67129 | -0.63285 | 0.708757 | -0.89291 | 0.371908 | 0.981636 | chr17 | 44197036 | 44197235 | + | 0  | NA                 | intron (Nintron (N | 1026      | NM_00109E | 56970              | Hs.512651NM_02021E   | ENSG000003ATXN7L3   | -                                          | ataxin 7 protein-coding              |                               |                   |           |                            |
| chr2-927  | 16.17598 | 0.539477 | 0.604441 | 0.892522 | 0.372113 | 0.981636 | chr2  | 92780060 | 92780372 | + | 0  | NA                 | IntergeniALR/Alpha | 839083    | NR_027714 | 440888             | Hs.730233NM_010324I2 | ACTR3BP2            | FKSG73                                     | ACTR3B                               | psseudo                       |                   |           |                            |
| chr1-2294 | 9.04057  | 0.712617 | 0.798483 | 0.892464 | 0.372144 | 0.981636 | chr1  | 2.29E+08 | 2.29E+08 | + | 0  | NA                 | intron (Nintron (N | 18762     | NM_01823C | 55746              | Hs.12457             | NM_01823C           | ENSG000003NUP133                           | GAMOS8                               | NF nucleoporin protein-coding |                   |           |                            |
| chr1-376  | 6.75551  | 0.808482 | 0.906035 | 0.89233  | 0.372216 | 0.981636 | chr1  | 37683414 | 37683801 | + | 0  | NA                 | intron (Nintron (N | 6922      | NM_00135C | 54955              | Hs.272672NM_01785C   | ENSG000003Crf109    | -                                          | chromosom protein-coding             |                               |                   |           |                            |
| chr16-286 | 6.75551  | 0.808482 | 0.906035 | 0.89233  | 0.372216 | 0.981636 | chr16 | 28837579 | 28838052 | + | 0  | NA                 | TTS (NM_TTS (NM_1  | 6192      | NR_039872 | 1.01E+08           | NR_039872            | ENSG000003MIR4721   | -                                          | microRNA ncRNA                       |                               |                   |           |                            |
| chr21-42  | 6.75551  | 0.808482 | 0.906035 | 0.89233  | 0.372216 | 0.981636 | chr21 | 42854987 | 42856070 | + | 0  | NA                 | intron (Nintron (N | 23747     | NM_00126E | 10785              | Hs.248819NM_01866E   | ENSG000003WDR4      | GAMOS6                                     | M1WD                                 | repeat protein-coding         |                   |           |                            |
| chr5-794  | 6.75551  | 0.808482 | 0.906035 | 0.89233  | 0.372216 | 0.981636 | chr5  | 79491177 | 79490664 | + | 0  | NA                 | intron (NALuSx SIN | 104446    | NM_001277 | 9456               | Hs.591761NM_00427E   | ENSG000003HOMER1    | HOMER HOM                                  | homeo sapien protein-coding          |                               |                   |           |                            |
| chr9-101  | 6.75551  | 0.808482 | 0.906035 | 0.89233  | 0.372216 | 0.981636 | chr9  | 1.02E+08 | 1.02E+08 | + | 0  | NA                 | intron (Nintron (N | 20634     | NM_019592 | 56254              | Hs.729088NM_019592   | ENSG000003RNF20     | BRE1 BRE1                                  | ring finger protein-coding           |                               |                   |           |                            |
| chr2-849  | 16.04924 | -0.5359  | 0.60082  | -0.89194 | 0.372424 | 0.981636 | chr2  | 84906074 | 84907327 | + | 0  | NA                 | TTS (NM_TTS (NM_C  | 1044      | NR_02110C | 9                  |                      |                     |                                            |                                      |                               |                   |           |                            |



|           |          |          |          |          |          |          |       |          |          |   |    |                   |                     |           |           |           |                     |                      |                      |                           |                              |                   |
|-----------|----------|----------|----------|----------|----------|----------|-------|----------|----------|---|----|-------------------|---------------------|-----------|-----------|-----------|---------------------|----------------------|----------------------|---------------------------|------------------------------|-------------------|
| chr2-2195 | 6.691267 | 0.803445 | 0.906155 | 0.886653 | 0.375266 | 0.981636 | chr2  | 2.2E+08  | 2.2E+08  | 0 | NA | intron (NL2c LINE | 4948                | NM_205847 | 29926     | Hs. 27059 | NM_013333           | ENSG000006MPPA       | AAMR                 | GDP-mannan-protein-coding |                              |                   |
| chr20-256 | 6.691267 | 0.803445 | 0.906155 | 0.886653 | 0.375266 | 0.981636 | chr20 | 25644067 | 25645800 | + | 0  | NA                | intron (NLIM3 LINE  | 20708     | NR_126467 | 1.03E+08  | Hs. 633621NR_126467 | ENSG000002ZNF337-AS- | -                    | ZNF337                    | arcncRNA                     |                   |
| chr20-325 | 6.691267 | 0.803445 | 0.906155 | 0.886653 | 0.375266 | 0.981636 | chr20 | 32309560 | 32310611 | + | 0  | NA                | exon (NM_exon (NM_  | 32434     | NM_004798 | 9371      | Hs. 369677          | CNM_004798           | ENSG000002KIF3B      | FLA8 HHO                  | kinesin fprotein-coding      |                   |
| chr21-334 | 6.691267 | 0.803445 | 0.906155 | 0.886653 | 0.375266 | 0.981636 | chr21 | 33817277 | 33818067 | + | 0  | NA                | intron (NL2c LINE   | 98132     | NM_001697 | 539       | Hs. 40914           | CNM_001697           | ENSG000002ATP50      | ATP50 ATF                 | ATP syntt protein-coding     |                   |
| chr21-454 | 6.691267 | 0.803445 | 0.906155 | 0.886653 | 0.375266 | 0.981636 | chr21 | 45474815 | 45475040 | + | 0  | NA                | intron (NCpG        | -3339     | NR_106877 | 1.02E+08  | NR_106877           | ENSG000002MIR6815    | hsa-mir-6815         | microRNA ncRNA            |                              |                   |
| chr21-464 | 6.691267 | 0.803445 | 0.906155 | 0.886653 | 0.375266 | 0.981636 | chr21 | 46430646 | 46432425 | + | 0  | NA                | exon (NM_exon (NM_  | -27356    | NM_206891 | 23181     | Hs. 189588          | NM_015151            | ENSG000002CIP2A      | C21orf106                 | disco intprotein-coding      |                   |
| chr22-236 | 6.691267 | 0.803445 | 0.906155 | 0.886653 | 0.375266 | 0.981636 | chr22 | 23659537 | 23659870 | + | 0  | NA                | intron (Nintron (N  | -27382    | NM_016448 | 51233     | Hs. 517466          | NM_016448            | ENSG000002DRICH1     | C22orf43                  | aspartate-protein-coding     |                   |
| chr3-4582 | 6.691267 | 0.803445 | 0.906155 | 0.886653 | 0.375266 | 0.981636 | chr3  | 45833756 | 45834355 | + | 0  | NA                | intron (Nintron (N  | 8064      | NM_020347 | 54585     | Hs. 30824           | NM_020347            | ENSG000002LZTF1      | BBS17                     | leucine zprotein-coding      |                   |
| chr19-575 | 13.94606 | 0.569538 | 0.642689 | 0.886179 | 0.375521 | 0.981636 | chr19 | 57571173 | 57577622 | + | 0  | NA                | intron (NMER74B LI  | 4514      | NM_017878 | 55659     | Hs. 247711          | NM_017878            | ENSG000002ZNF416     | -                         | zinc fingprotein-coding      |                   |
| chr11-74  | 4.948218 | 0.929151 | 1.048616 | 0.886073 | 0.375578 | 0.981636 | chr11 | 77117253 | 77118118 | + | 0  | NA                | intron (NLMR SINE   | -10311    | NM_001127 | 4647      | Hs. 370421          | NM_000266            | ENSG000002MY07A      | DFNA11                    | DF myosin Vprotein-coding    |                   |
| chr16-84  | 4.948218 | 0.929151 | 1.048616 | 0.886073 | 0.375578 | 0.981636 | chr16 | 84071671 | 84072885 | + | 0  | NA                | intron (NLIMB7 LIN  | -30121    | NM_00108C | 146167    | NM_00108C           | ENSG000002SLC38A8    | FVH2                 | solute cprotein-coding    |                              |                   |
| chr19-388 | 4.948218 | 0.929151 | 1.048616 | 0.886073 | 0.375578 | 0.981636 | chr19 | 38890083 | 38891353 | + | 0  | NA                | intron (NAluSx SIN  | 3437      | NR_034148 | 22933     | Hs. 466698          | NM_012237            | ENSG000002SIRT2      | SIRT2 SIRT                | zirtuin 2protein-coding      |                   |
| chr6-1116 | 4.948218 | 0.929151 | 1.048616 | 0.886073 | 0.375578 | 0.981636 | chr6  | 1.12E+08 | 1.12E+08 | + | 0  | NA                | intron (NL2b LINE   | -66419    | NM_001164 | 10758     | Hs. 561514          | NM_14720C            | ENSG000002TRAF3IP2   | ACT1 C6or                 | TRAF3 intprotein-coding      |                   |
| chr5-4954 | 37.00299 | 0.378213 | 0.426852 | 0.886052 | 0.375589 | 0.981636 | chr5  | 49545495 | 49547490 | + | 0  | NA                | IntergeniALR/Alphe  | 894795    | NM_198445 | 133418    | Hs. 561411          | NM_198445            | ENSG000002EMBP       | GP70                      | embin protein-coding         |                   |
| chr19-325 | 8.556139 | -0.72327 | 0.816865 | -0.88543 | 0.375926 | 0.981636 | chr19 | 32382532 | 32383467 | + | 0  | NA                | exon (NM_exon (NM_  | 22540     | NR_046201 | 400684    | Hs. 438768          | NR_046201            | ENSG000002LOC400684  | -                         | uncharactncRNA               |                   |
| chr10-10C | 8.648126 | -0.70742 | 0.799177 | -0.88519 | 0.376054 | 0.981636 | chr10 | 1.01E+08 | 1.01E+08 | + | 0  | NA                | intron (NAluSx3 SI  | 24897     | NM_001138 | 55719     | Hs. 447458          | NM_018121            | ENSG000002SLF2       | C10orf6                   | F5MC5-SMC6 protein-coding    |                   |
| chr12-48  | 6.648126 | -0.70742 | 0.799177 | -0.88519 | 0.376054 | 0.981636 | chr12 | 48656711 | 48657412 | + | 0  | NA                | promoter-promoter-  | -279      | NR_002958 | 677793    | Hs. 689722          | NR_002958            | ENSG000002SNORA2A    | ACA2A                     | small nucsnoRNA              |                   |
| chr13-75  | 6.648126 | -0.70742 | 0.799177 | -0.88519 | 0.376054 | 0.981636 | chr13 | 75583741 | 75584313 | + | 0  | NA                | intron (NLIME6 LIN  | 34277     | NM_006002 | 7347      | Hs. 162241          | NM_006002            | ENSG000002UCHL3      | UCH-L3                    | ubiquitin protein-coding     |                   |
| chr16-881 | 6.648126 | -0.70742 | 0.799177 | -0.88519 | 0.376054 | 0.981636 | chr16 | 8818097  | 8819098  | + | 0  | NA                | intron (Nintron (N  | 20758     | NM_000303 | 5373      | Hs. 625732          | NM_000303            | ENSG000002PMM2       | CDG1 CDG1                 | phosphom protein-coding      |                   |
| chr2-993  | 6.648126 | -0.70742 | 0.799177 | -0.88519 | 0.376054 | 0.981636 | chr2  | 99398511 | 99400443 | + | 0  | NA                | TTS (NM_C TTS (NM_C | 62088     | NM_015904 | 9669      | Hs. 158688          | NM_015904            | ENSG000002EIF5B      | IF2                       | eukaryoti protein-coding     |                   |
| chr6-8317 | 6.648126 | -0.70742 | 0.799177 | -0.88519 | 0.376054 | 0.981636 | chr6  | 83177811 | 83179551 | + | 0  | NA                | intron (Nintron (N  | 14599     | NM_001199 | 5238      | Hs. 661666          | NM_015599            | ENSG000002PGM3       | AGM1 IMD2                 | phosphog protein-coding      |                   |
| chr22-208 | 8.442174 | 0.728778 | 0.823346 | 0.885142 | 0.37608  | 0.981636 | chr22 | 20816567 | 20817696 | + | 0  | NA                | intron (Nintron (N  | 41680     | NM_058004 | 5297      | Hs. 529438          | NM_002658            | ENSG000002PI4KA      | PI4K-ALPF                 | phosphatiprotein-coding      |                   |
| chr6-1121 | 8.442174 | 0.728778 | 0.823346 | 0.885142 | 0.37608  | 0.981636 | chr6  | 1.12E+08 | 1.12E+08 | + | 0  | NA                | intron (Nintron (N  | 25121     | NM_001033 | 619208    | Hs. 59134C          | NM_001033            | ENSG000002FAM229B    | C6orf225                  | family wiprotein-coding      |                   |
| chr21-912 | 10.66425 | 0.650473 | 0.734893 | 0.885078 | 0.376115 | 0.981636 | chr21 | 9126152  | 9126861  | + | 0  | NA                | intron (NLTR6A LTF  | 3255      | NR_038328 | 1E+08     | Hs. 487562          | NM_17494E            | ENSG000002TEKT4P2    | MAFN12                    | TEktin 4 pseudo              |                   |
| chr11-831 | 8.606987 | -0.71069 | 0.803203 | -0.88482 | 0.376251 | 0.981636 | chr11 | 83164492 | 83171529 | + | 0  | NA                | intron (Nintron (N  | 10879     | NM_001348 | 51585     | Hs. 128958          | NM_015888            | ENSG000002PCF11      | -                         | PCF11                        | clcprotein-coding |
| chr13-45  | 8.606987 | -0.71069 | 0.803203 | -0.88482 | 0.376251 | 0.981636 | chr13 | 45028584 | 45028847 | + | 0  | NA                | 3' UTR (N3' UTR (N  | 39177     | NM_018558 | 55425     | Hs. 731811          | NM_018558            | ENSG000002GPALPP1    | AD029                     | KI GPALPP                    | mcprotein-coding  |
| chr17-63  | 8.606987 | -0.71069 | 0.803203 | -0.88482 | 0.376251 | 0.981636 | chr17 | 63361334 | 63361677 | + | 0  | NA                | intron (NMERS2A LI  | 78762     | NM_001338 | 1534      | Hs. 355264          | NM_001918            | ENSG000002CYB561     | CYB561A1                  | cytochom protein-coding      |                   |
| chr3-3851 | 8.606987 | -0.71069 | 0.803203 | -0.88482 | 0.376251 | 0.981636 | chr3  | 38515451 | 38515828 | + | 0  | NA                | intron (Nintron (N  | 19299     | NR_134938 | 9941      | Hs. 517897          | NM_005107            | ENSG000002EXOQ       | ENDOGL1                   | Exo/endor protein-coding     |                   |
| chr5-511  | 8.606987 | -0.71069 | 0.803203 | -0.88482 | 0.376251 | 0.981636 | chr5  | 1.11E+08 | 1.11E+08 | + | 0  | NA                | intron (NMSTC LTR   | 21817     | NM_139281 | 134340    | Hs. 533237          | NM_139281            | ENSG000002WDR36      | GLTG1                     | TA-WD repeat protein-coding  |                   |
| chr7-4823 | 8.606987 | -0.71069 | 0.803203 | -0.88482 | 0.376251 | 0.981636 | chr7  | 45743796 | 45748235 | + | 0  | NA                | intron (Nintron (N  | 23003     | NR_024271 | 641977    | Hs. 723477          | NR_024271            | ENSG000002SEPTIN7P2  | SEPTIN7                   | SE septin 7 pseudo           |                   |
| chr9-1114 | 8.606987 | -0.71069 | 0.803203 | -0.88482 | 0.376251 | 0.981636 | chr9  | 1.11E+08 | 1.11E+08 | + | 0  | NA                | intron (Nintron (N  | 62362     | NM_001364 | 23392     | Hs. 368258          | NM_00108C            | ENSG000002ECPAS      | ECM29                     | KI Ecm29                     | prcprotein-coding |
| chr6-374  | 6.461002 | -0.84403 | 0.953958 | -0.88477 | 0.376281 | 0.981636 | chr6  | 37458151 | 37458544 | + | 0  | NA                | intron (NAluSx SIN  | 25125     | NM_015058 | 23070     | Hs. 520102          | NM_015058            | ENSG000002CMTR1      | FTSJ22                    | KI cp methyl protein-coding  |                   |
| chr1-2201 | 3.899297 | -1.08622 | 1.22792  | -0.8846  | 0.376371 | 0.981636 | chr1  | 2.2E+08  | 2.2E+08  | + | 0  | NA                | intron (Nintron (N  | -5117     | NR_029711 | 406969    | NR_029711           | ENSG000002MIR194-1   | MIRN194-1            | microRNA ncRNA            |                              |                   |
| chr6-309  | 3.899297 | -1.08622 | 1.22792  | -0.8846  | 0.376371 | 0.981636 | chr6  | 3098302  | 3098762  | + | 0  | NA                | intron (NLIM5 LINE  | -19844    | NR_026648 | 670       | Hs. 10136           | NM_004332            | ENSG000002BPHL       | BPH-RP                    | MC biphenyl protein-coding   |                   |
| chr1-9871 | 6.667693 | 0.811005 | 0.916816 | 0.884589 | 0.376379 | 0.981636 | chr1  | 98711818 | 98712259 | + | 0  | NA                | intron (NTigger1 E  | 50316     | NM_001364 | 51375     | Hs. 197018          | NM_015978            | ENSG000002SNX7       | -                         | sorting rprotein-coding      |                   |
| chr16-68  | 6.667693 | 0.811005 | 0.916816 | 0.884589 | 0.376379 | 0.981636 | chr16 | 68060804 | 68061039 | + | 0  | NA                | intron (Nintron (N  | -24449    | NM_173163 | 4775      | Hs. 436858          | NM_004558            | ENSG000002NFATC3     | NF-AT4c                   | N nuclear fprotein-coding    |                   |
| chr16-69  | 6.855895 | -0.80212 | 0.906816 | -0.88455 | 0.3764   | 0.981636 | chr16 | 69575438 | 69575713 | + | 0  | NA                | intron (NAluJb SIN  | 9609      | NM_138713 | 10725     | Hs. 371987          | NM_006598            | ENSG000002NFAT5      | NF-AT5                    | N nuclear fprotein-coding    |                   |
| chr4-139  | 6.855895 | -0.80212 | 0.906816 | -0.88455 | 0.3764   | 0.981636 | chr4  | 1.4E+08  | 1.4E+08  | + | 0  | NA                | intron (NTigger3a   | 29550     | NM_001308 | 80854     | Hs. 480792          | NM_03064E            | ENSG000002SETD7      | DMK7                      | SET7SET domai protein-coding |                   |
| chr7-436  | 6.855895 | -0.80212 | 0.906816 | -0.88455 | 0.3764   | 0.981636 | chr7  | 43603118 | 43603589 | + | 0  | NA                | intron (Nintron (N  | 20245     | NM_004768 | 9263      | Hs. 709488          | NM_004768            | ENSG000002STK17A     | KRAT1                     | serine/t protein-coding      |                   |
| chr1-3841 | 4.9815   | 0.933113 | 1.05523  | 0.884275 | 0.376548 | 0.981636 | chr1  | 3841264  | 3842153  | + | 0  | NA                | intron (Nintron (N  | 15503     | NM_014704 | 9731      | Hs. 133088          | NM_014704            | ENSG000002CEP104     | CFAP256                   | C centrosom protein-coding   |                   |
| chr15-74  | 4.9815   | 0.933113 | 1.05523  | 0.884275 | 0.376548 | 0.981636 | chr15 | 74633839 | 74634257 | + | 0  | NA                | intron (NMIR3 SINE  | 19054     | NM_001138 | 1198      | Hs. 51179C          | NM_001298            | ENSG000002CLK3       | PHCLK3                    | PF CDC like protein-coding   |                   |
| chr3-1291 | 4.9815   | 0.933113 | 1.05523  | 0.884275 | 0.376548 | 0.981636 | chr3  | 12919866 | 12920740 | + | 0  | NA                | intron (Nintron (N  | -35092    | NR_136188 | 1.05E+08  | Hs. 561178          | NR_136188            | ENSG000002LINC02022- | -                         | long intncRNA                |                   |
| chr7-1177 | 6.710683 | 0.825445 | 0.933523 | 0.884226 | 0.376574 | 0.981636 | chr7  | 1.18E+08 | 1.18E+08 | + | 0  | NA                | intron (Nintron (N  | 115741    | NM_001363 | 83992     | Hs. 592288          | NM_033427            | ENSG000002CTTNBP2    | C7orf8                    | C Cortactin protein-coding   |                   |
| chr12-106 | 5.648539 | -0.869   | 0.983147 | -0.88389 | 0.376753 | 0.981636 | chr12 | 1.06E+08 | 1.06E+08 | + | 0  | NA                | TTS (NM_C TTS (NM_C | 10352     | NM_006828 | 10970     | Hs. 74368           | NM_006828            | ENSG000002CKAP4      | CLIMP-63                  | cytoskele protein-coding     |                   |
| chr12-11  | 5.648539 | -0.869   | 0.983147 | -0.88389 | 0.376753 | 0.981636 | chr12 | 1.13E+08 | 1.13E+08 | + | 0  | NA                | intron (Nintron (N  | 30487     | NM_001032 | 4939      | Hs. 414332          | NM_002538            | ENSG000002OAS2       | -                         | 2'-5'-oliprotein-coding      |                   |
| chr2-232  | 5.648539 | -0.869   | 0.983147 | -0.88389 | 0.376753 | 0.981636 | chr2  | 2.33E+08 | 2.33E+08 | + | 0  | NA                | intron (NAluJo SIN  | -24263    | NM_001172 | 3769      | Hs. 467338          | NM_002242            | ENSG000002KCNJ13     | KIR1.4                    | K potassium protein-coding   |                   |
| chr6-117  | 5.648539 | -0.869   | 0.983147 | -0.88389 | 0.376753 | 0.981636 | chr6  | 1.18E+08 | 1.18E+08 | + | 0  | NA                | intron (Nintron (N  | 29169     | NM_138455 | 116150    | Hs. 289008          | NM_138455            | ENSG000002NUS1       | C6orf68                   | CNUS1 dehyprotein-coding     |                   |
| chr17-75  | 6.922458 | -0.79002 | 0.894001 | -0.88369 | 0.376866 | 0.981636 | chr17 | 75228912 | 75229360 | + | 0  | NA                | intron (Nintron (N  | 23457     | NM_024844 | 79902     | Hs. 362817          | NM_024844            | ENSG000002NUP85      | FRONT1                    | NF nucleopor protein-coding  |                   |
| chr20-38  | 6.922458 | -0.79002 | 0.894001 | -0.88369 | 0.376866 | 0.981636 | chr20 | 389356   | 389609   | + | 0  | NA                |                     |           |           |           |                     |                      |                      |                           |                              |                   |

|                    |          |          |          |          |          |       |          |          |   |   |    |                     |                   |          |           |                  |                     |                |           |                  |                |
|--------------------|----------|----------|----------|----------|----------|-------|----------|----------|---|---|----|---------------------|-------------------|----------|-----------|------------------|---------------------|----------------|-----------|------------------|----------------|
| chr14-10C.5.673962 | -0.85952 | 0.97805  | -0.87881 | 0.379506 | 0.981636 | chr14 | 1.01E+08 | 1.01E+08 | + | 0 | NA | non-codiron-codir   | -2343 NR_03052E   | 768222   | NR_03052E | ENSG00000MIR770  | MIRN770 l           | microRNA       | ncRNA     |                  |                |
| chr17-394.5.673962 | -0.85952 | 0.97805  | -0.87881 | 0.379506 | 0.981636 | chr17 | 39477761 | 39478734 | + | 0 | NA | intron (Alu)Sx SIN  | 16761 NM_01508E   | 51755    | Hs.34502E | NR_01508E        | ENSG00000CDK12      | CRK7 CRKf      | cyclin    | deprotein-coding |                |
| chr2-3721.5.673962 | -0.85952 | 0.97805  | -0.87881 | 0.379506 | 0.981636 | chr2  | 37219715 | 37220187 | + | 0 | NA | intron (Nintron (N  | 11645 NM_00576C   | 10153    | Hs.13540E | NR_00576C        | ENSG00000CEBPZ      | CBF CBF2 CCAAT | enl       | protein-coding   |                |
| chr5-140F.5.673962 | -0.85952 | 0.97805  | -0.87881 | 0.379506 | 0.981636 | chr5  | 1.41E+08 | 1.41E+08 | + | 0 | NA | TTS (NM_C TTS (NM_C | 1742 NM_00373Z    | 8637     | Hs.594084 | NR_00373Z        | ENSG00000EIF4EBP3   | 4E-BP3 4E      | eukaryot  | protein-coding   |                |
| chr6-7567.5.673962 | -0.85952 | 0.97805  | -0.87881 | 0.379506 | 0.981636 | chr6  | 75671810 | 75672459 | + | 0 | NA | intron (Nintron (N  | 70254 NM_015571   | 26054    | Hs.485784 | NR_015571        | ENSG00000SEN6P      | SSP1 SUSF      | smo       | protein-coding   |                |
| chr6-133F.5.673962 | -0.85952 | 0.97805  | -0.87881 | 0.379506 | 0.981636 | chr6  | 1.34E+08 | 1.34E+08 | + | 0 | NA | 3' UTR (N3' UTR (N  | 287469 NM_001301  | 2070     | Hs.59668C | NR_001301        | ENSG00000CEYA4      | CMD1J DFNEYA   | trans     | protein-coding   |                |
| chr6-144F.5.673962 | -0.85952 | 0.97805  | -0.87881 | 0.379506 | 0.981636 | chr6  | 1.45E+08 | 1.45E+08 | + | 0 | NA | intron (Nintron (N  | 166716 NR_132777  | 1.07E+08 | NR_132777 | SNORA98          | small               | nucsnRNA       |           |                  |                |
| chrX-154F.5.673962 | -0.85952 | 0.97805  | -0.87881 | 0.379506 | 0.981636 | chrX  | 1.54E+08 | 1.54E+08 | + | 0 | NA | intron (Nintron (N  | 6275 NM_00111C    | 2316     | Hs.195464 | NR_00111C        | ENSG00000FLNA       | ABP-280 A      | filamin   | protein-coding   |                |
| chr1-230E.13.95391 | 0.568345 | 0.647155 | 0.87822  | 0.379824 | 0.981636 | chr1  | 2.31E+08 | 2.31E+08 | + | 0 | NA | intron (Nintron (N  | 2026 NM_00113E    | 84886    | Hs.520494 | NR_03280C        | ENSG00000C1orf198   |                | chromosom | protein-coding   |                |
| chr20-51F.5.615257 | -0.8768  | 0.998511 | -0.8781  | 0.379888 | 0.981636 | chr20 | 5195254  | 5195698  | + | 0 | NA | 3' UTR (N3' UTR (N  | 68468 NM_00381E   | 8760     | Hs.126857 | NR_00381E        | ENSG00000CDS2       |                | CDP-diacy | protein-coding   |                |
| chr1-154F.11.6907  | 0.607712 | 0.692647 | 0.877376 | 0.380282 | 0.981636 | chr1  | 1.54E+08 | 1.54E+08 | + | 0 | NA | intron (Alu)Jr SIN  | 3605 NM_001367    | 57198    | Hs.45370C | NR_02045E        | ENSG00000ATP8B2     | ATP1D          | ATPase    | protein-coding   |                |
| chr19-18F.7.246561 | 0.763684 | 0.870694 | 0.877098 | 0.380434 | 0.981636 | chr19 | 18568522 | 18569221 | + | 0 | NA | 3' UTR (N3' UTR (N  | -2859 NM_001321   | 7311     | Hs.5308   | NR_00333E        | ENSG00000CUBA52     | CEP52 HU       | ubiquitin | protein-coding   |                |
| chr10-984.6.9146   | -0.78817 | 0.89883  | -0.87689 | 0.380547 | 0.981636 | chr10 | 98402018 | 98403070 | + | 0 | NA | intron (Nintron (N  | -7237 NR_03161E   | 1E+08    | NR_03161E | ENSG00000MIR1287 | MIRN1287 micro      | RNA            | ncRNA     |                  |                |
| chr10-11F.6.9146   | -0.78817 | 0.89883  | -0.87689 | 0.380547 | 0.981636 | chr10 | 1.19E+08 | 1.19E+08 | + | 0 | NA | intron (Nintron (N  | 61139 NR_03982E   | 1.01E+08 | NR_03982E | ENSG00000MIR4681 |                     | microRNA       | ncRNA     |                  |                |
| chr13-491.6.9146   | -0.78817 | 0.89883  | -0.87689 | 0.380547 | 0.981636 | chr13 | 49115394 | 49116856 | + | 0 | NA | intron (N2b LINE    | 5808 NM_01492Z    | 22862    | Hs.50801C | NR_01492Z        | ENSG00000FNDC3A     | FNDC3 HUC      | fibronect | protein-coding   |                |
| chr13-11F.6.9146   | -0.78817 | 0.89883  | -0.87689 | 0.380547 | 0.981636 | chr13 | 1.14E+08 | 1.14E+08 | + | 0 | NA | exon (NM exon (NM   | 29626 NM_00134E   | 55002    | Hs.31759E | NR_01790E        | ENSG00000TMC03      | C13orf11       | transment | protein-coding   |                |
| chr17-164.6.9146   | -0.78817 | 0.89883  | -0.87689 | 0.380547 | 0.981636 | chr17 | 16432813 | 16433367 | + | 0 | NA | intron (NAluSq2 SI  | -5897 NR_04502E   | 125144   | Hs.368934 | NR_15235E        | ENSG00000CENMG29    | C17orf45 small | nucncRNA  |                  |                |
| chr20-37F.6.9146   | -0.78817 | 0.89883  | -0.87689 | 0.380547 | 0.981636 | chr20 | 37059386 | 37060665 | + | 0 | NA | intron (Alu)Sp SIN  | 35972 NM_00132Z   | 5933     | Hs.20774E | NR_00289E        | ENSG00000RBL1       | CP107 PRE      | RB        | transc           | protein-coding |
| chr16-23F.9.486197 | 0.672854 | 0.767374 | 0.876827 | 0.38058  | 0.981636 | chr16 | 23620633 | 23621287 | + | 0 | NA | intron (NAluSzl SIN | 20397 NM_02467E   | 79728    | Hs.444664 | NR_02467E        | ENSG00000PALB2      | FANCN PNC      | partner   | protein-coding   |                |
| chr22-21F.9.486197 | 0.672854 | 0.767374 | 0.876827 | 0.38058  | 0.981636 | chr22 | 31845147 | 31845634 | + | 0 | NA | intron (Nintron (N  | 91367 NM_00136E   | 9681     | Hs.43502E | NR_01466E        | ENSG00000DEPDC5     | DEP.5 FFE      | DEP       | doma             | protein-coding |
| chr1-279F.5.666104 | -0.85744 | 0.977999 | -0.87673 | 0.380631 | 0.981636 | chr1  | 27901215 | 27902155 | + | 0 | NA | intron (Alu)Jr SIN  | 12709 NM_00294E   | 6118     | Hs.79411  | NR_00294E        | ENSG00000CPA2       | REPA2 RP-      | replicat  | protein-coding   |                |
| chr10-49F.5.666104 | -0.85744 | 0.977999 | -0.87673 | 0.380631 | 0.981636 | chr10 | 49960604 | 49962265 | + | 0 | NA | intron (Nintron (N  | 7222 NR_14577E    | 1.1E+08  | NR_14577E | SNORA74C-        | small               | nucsnRNA       |           |                  |                |
| chr10-67F.5.666104 | -0.85744 | 0.977999 | -0.87673 | 0.380631 | 0.981636 | chr10 | 67959668 | 67961066 | + | 0 | NA | intron (Nintron (N  | 50516 NR_131184   | 1E+08    | NR_131184 | POU5F1P5         | Oct4-pg5            | POU            | class     | pseudo           |                |
| chr10-68F.5.666104 | -0.85744 | 0.977999 | -0.87673 | 0.380631 | 0.981636 | chr10 | 68682949 | 68683771 | + | 0 | NA | intron (NAlu)S SINE | -37879 NR_018237  | 55749    | Hs.49853  | NR_018237        | ENSG00000CCAR1      |                | cell      | div              | protein-coding |
| chr11-17F.5.666104 | -0.85744 | 0.977999 | -0.87673 | 0.380631 | 0.981636 | chr11 | 17311500 | 17312769 | + | 0 | NA | intron (Nintron (N  | 35164 NM_00135E   | 4925     | Hs.65459E | NR_00501E        | ENSG00000NCUB2      | HEL-S-10E      | nucleobir | protein-coding   |                |
| chr12-781.5.666104 | -0.85744 | 0.977999 | -0.87673 | 0.380631 | 0.981636 | chr12 | 78148996 | 78149949 | + | 0 | NA | intron (Nintron (N  | 210274 NR_135021  | 1.05E+08 | Hs.15689E | NR_135021        | ENSG00000LINC02424- |                | long      | intencRNA        |                |
| chr12-95F.5.666104 | -0.85744 | 0.977999 | -0.87673 | 0.380631 | 0.981636 | chr12 | 95027179 | 95029383 | + | 0 | NA | intron (NLM87 LIN   | -24568 NM_00125E  | 55967    | Hs.506374 | NR_01883E        | ENSG00000NDUFA12    | B17.2 DAF      | NADH      | ubiquitin        | protein-coding |
| chr13-11F.5.666104 | -0.85744 | 0.977999 | -0.87673 | 0.380631 | 0.981636 | chr13 | 1.1E+08  | 1.1E+08  | + | 0 | NA | exon (NM exon (NM   | 5895 NM_001267    | 1E+08    | Hs.64003E | NR_001267044     | COL4A2-AS-          | COL4A2         | ar        | protein-coding   |                |
| chr19-52F.5.666104 | -0.85744 | 0.977999 | -0.87673 | 0.380631 | 0.981636 | chr19 | 52771920 | 52772398 | + | 0 | NA | intron (NAlu)Sp SIN | 14632 NM_001321   | 162966   | Hs.69684E | NR_19845E        | ENSG00000ZNF600     | KRE-ZNF1       | zinc      | finger           | protein-coding |
| chr2-182F.5.666104 | -0.85744 | 0.977999 | -0.87673 | 0.380631 | 0.981636 | chr2  | 82378    | 82378    | + | 0 | NA | intron (Nintron (N  | -72273 NM_00146E  | 2487     | Hs.12845E | NR_00146E        | ENSG00000FRZB       | FRF FRITZ      | frizzled  | protein-coding   |                |
| chr20-50F.5.666104 | -0.85744 | 0.977999 | -0.87673 | 0.380631 | 0.981636 | chr20 | 50682304 | 50684053 | + | 0 | NA | intron (Nintron (N  | 8364 NR_11089C    | 140876   | Hs.37257E | NR_08082E        | ENSG00000CRIPOR3    | C20orf17E      | RIPOR     | fan              | protein-coding |
| chr5-369F.5.666104 | -0.85744 | 0.977999 | -0.87673 | 0.380631 | 0.981636 | chr5  | 36961672 | 36962730 | + | 0 | NA | exon (NM exon (NM   | 8332 NM_015384    | 25836    | Hs.481927 | NR_015384        | ENSG00000NIPBL      | CDL3 CDL3N     | NIPBL     | col              | protein-coding |
| chr7-143F.5.666104 | -0.85744 | 0.977999 | -0.87673 | 0.380631 | 0.981636 | chr7  | 1.43E+08 | 1.43E+08 | + | 0 | NA | TTS (NR_C TTS (NR_C | 7439 NR_10695E    | 1.02E+08 | NR_10695E | ENSG00000MIR6892 | hsa-mir-6           | microRNA       | ncRNA     |                  |                |
| chr9-115F.5.666104 | -0.85744 | 0.977999 | -0.87673 | 0.380631 | 0.981636 | chr9  | 1.15E+08 | 1.15E+08 | + | 0 | NA | intron (N2a LINE    | 9148 NM_00216C    | 3371     | Hs.14325C | NR_00216C        | ENSG00000CTNC       | 150-225 I      | tenascin  | protein-coding   |                |
| chr1-378F.8.63241  | -0.70453 | 0.803657 | -0.87666 | 0.380674 | 0.981636 | chr1  | 37855340 | 37855539 | + | 0 | NA | intron (N3 LINE C   | 4153 NM_00595E    | 4520     | Hs.471991 | NR_00595E        | ENSG00000MTF1       | MTF-1 ZRF      | metal     | reg              | protein-coding |
| chr11-10F.8.63241  | -0.70453 | 0.803657 | -0.87666 | 0.380674 | 0.981636 | chr11 | 103550   | 103550   | + | 0 | NA | intron (Nintron (N  | 12941 NM_001377   | 79659    | Hs.503721 | NR_001377        | ENSG00000DYNC2H1    | ATD3 DHC1      | dynein    | cy               | protein-coding |
| chr12-46F.8.63241  | -0.70453 | 0.803657 | -0.87666 | 0.380674 | 0.981636 | chr12 | 46204829 | 46207575 | + | 0 | NA | intron (Nintron (N  | 60314 NM_00127E   | 81539    | Hs.53377C | NR_030674        | ENSG00000SLC38A1    | ATA1 NAT       | z         | solute           | protein-coding |
| chr13-77F.8.63241  | -0.70453 | 0.803657 | -0.87666 | 0.380674 | 0.981636 | chr13 | 77009340 | 77010770 | + | 0 | NA | intron (NLM1P7 LIN  | 17104 NM_01215E   | 26224    | Hs.508284 | NR_01215E        | ENSG00000FBXL3      | FBL3 FBL2      | FB        | anc              | protein-coding |
| chr13-77F.8.63241  | -0.70453 | 0.803657 | -0.87666 | 0.380674 | 0.981636 | chr13 | 77087138 | 77087800 | + | 0 | NA | intron (Nintron (N  | 11956 NR_04671E   | 1.01E+08 | Hs.56928E | NR_04671E        | ENSG00000MYCBP2-AS- |                | MYCBP2    | ar               | ncRNA          |
| chr19-83F.8.63241  | -0.70453 | 0.803657 | -0.87666 | 0.380674 | 0.981636 | chr19 | 8322480  | 8324480  | + | 0 | NA | TTS (NM_C TTS (NM_C | 1984 NM_001031    | 6234     | Hs.153177 | NR_001031        | ENSG00000CRPS28     | DBA15 S2E      | ribosomal | protein-coding   |                |
| chr2-234F.8.63241  | -0.70453 | 0.803657 | -0.87666 | 0.380674 | 0.981636 | chr2  | 2.35E+08 | 2.35E+08 | + | 0 | NA | intron (NLM2B LI    | 5887 NM_001371302 |          |           |                  |                     |                |           |                  |                |
| chr5-1674.8.63241  | -0.70453 | 0.803657 | -0.87666 | 0.380674 | 0.981636 | chr5  | 16747574 | 16747803 | + | 0 | NA | intron (NAlu)Sc8 SI | -130630 NM_001034 | 54463    | Hs.481704 | NR_01900C        | ENSG00000RETREG1    | FAMI34B J      | reticulop | protein-coding   |                |
| chr5-529F.8.63241  | -0.70453 | 0.803657 | -0.87666 | 0.380674 | 0.981636 | chr5  | 52927805 | 52928114 | + | 0 | NA | intron (NMLT1A LI   | -61393 NM_00220E  | 3673     | Hs.482077 | NR_00220E        | ENSG00000ITGA2      | BR CD49B       | integrin  | protein-coding   |                |
| chr2-173F.5.15565  | -0.93658 | 1.068369 | -0.87665 | 0.380678 | 0.981636 | chr2  | 1.73E+08 | 1.73E+08 | + | 0 | NA | intron (NMLT1L LTF  | 17998 NR_03388E   | 33975    | Hs.57008E | NR_03388E        | ENSG00000MAP3K20-   | MLK7-AS1       | MAP3K20   | anc              | ncRNA          |
| chr14-311.8.599129 | -0.70295 | 0.809177 | -0.87651 | 0.380756 | 0.981636 | chr14 | 31155596 | 31157393 | + | 0 | NA | intron (NAlu)Sx SIN | 51299 NM_01538E   | 25831    | Hs.708017 | NR_01538E        | ENSG00000HECTD1     | EULR           | HECT      | doma             | protein-coding |
| chr5-4841.5.62855  | -0.54688 | 0.624139 | 0.876216 | 0.380913 | 0.981636 | chr5  | 48414003 | 48414324 | + | 0 | NA | IntergeniALR/Alph   | 2027125 NR_19844E | 133418   | Hs.641411 | NR_19844E        | ENSG00000EMB        | GP70           | emigin    | protein-coding   |                |
| chr1-2484.5.632823 | -0.86487 | 0.987393 | -0.87591 | 0.381079 | 0.981636 | chr1  | 24844735 | 24845660 | + | 0 | NA | TTS (NM_C TTS (NM_C | 74219 NR_10678E   | 1.02E+08 | NR_10678E | ENSG00000MIR6731 | hsa-mir-6           | microRNA       | ncRNA     |                  |                |
| chr1-5181.5.632823 | -0.86487 | 0.987393 | -0.87591 | 0.381079 | 0.981636 | chr1  | 51817010 | 51817822 | + | 0 | NA | intron (Nintron (N  | 18986 NR_03158E   | 1E+08    | NR_03158E | ENSG00000MIR761  | hsa-mir-7           | microRNA       | ncRNA     |                  |                |
| chr10-11F.5.632823 | -0.86487 | 0.987393 | -0.87591 | 0.381079 | 0.981636 | chr10 | 51856728 | 51857233 | + | 0 | NA | intron (Nintron (N  | 52808 NM_00119E   | 8028     | Hs.30385  | NR_004641        | ENSG00000MLLT10     | AF10           | MLLT10    | hip              | protein-coding |
| chr10-721.5.632823 | -0.86487 | 0.987393 | -0.87591 | 0.381079 | 0.981636 | chr10 | 72183519 | 72184341 | + | 0 | NA | intron (NAlu)Sx SIN | 32026 NM_00136E   | 51008    | Hs.500007 | NR_01594E        | ENSG00000ASCC1      | ASCLP50 c      | activat   |                  |                |



|           |          |          |          |          |          |          |       |          |          |   |   |    |                     |        |           |          |           |                     |   |               |                     |                |                |
|-----------|----------|----------|----------|----------|----------|----------|-------|----------|----------|---|---|----|---------------------|--------|-----------|----------|-----------|---------------------|---|---------------|---------------------|----------------|----------------|
| chr4-1541 | 4.956076 | 0.925478 | 1.060822 | 0.872416 | 0.382982 | 0.981636 | chr4  | 154195   | 155969   | + | 0 | NA | intron (THE1B-int   | 26961  | NM_001288 | 255403   | Hs.63663  | ENSG000002ZNF718    | - | zinc          | finger              | protein-coding |                |
| chr5-1731 | 4.956076 | 0.925478 | 1.060822 | 0.872416 | 0.382982 | 0.981636 | chr5  | 1.73E+08 | 1.73E+08 | + | 0 | NA | intron (intron (N   | 18486  | NM_01398C | 662      | Hs.14572  | ENSG000002BNIP1     | - | NIP1 SEC2     | BCL2                | int            | protein-coding |
| chr2-3684 | 7.205421 | 0.762973 | 0.874584 | 0.872384 | 0.382999 | 0.981636 | chr2  | 36848746 | 36849807 | + | 0 | NA | 3' UTR (3' UTR (N   | 117260 | NM_003162 | 6801     | Hs.12748  | ENSG000002CSTRN     | - | PPP2R6A S     | triatin             | protein-coding |                |
| chr3-1555 | 5.607399 | -0.87478 | 1.002903 | -0.87225 | 0.383072 | 0.981636 | chr3  | 1.56E+08 | 1.56E+08 | + | 0 | NA | intron (AluSj SIN   | 41160  | NM_003875 | 8833     | Hs.59131  | ENSG000002GMPS      | - | GATD7         | guanine             | n              | protein-coding |
| chr9-1308 | 5.607399 | -0.87478 | 1.002903 | -0.87225 | 0.383072 | 0.981636 | chr9  | 1.31E+08 | 1.31E+08 | + | 0 | NA | intron (intron (N   | 29747  | NM_198188 | 347148   | Hs.66070  | ENSG000002QRFP      | - | 26RFa P51     | pyru                | glut           | protein-coding |
| chr12-935 | 9.468632 | 0.66688  | 0.76474  | 0.872035 | 0.383189 | 0.981636 | chr12 | 93574941 | 93575817 | + | 0 | NA | 3' UTR (3' UTR (N   | 2704   | NM_00127C | 8835     | Hs.48557  | ENSG000002SCS2      | - | CIS2 Cis1     | suppres             | protein-coding |                |
| chr16-288 | 4.686832 | 0.66688  | 0.76474  | 0.872035 | 0.383189 | 0.981636 | chr16 | 28842590 | 28844775 | + | 0 | NA | TTS (NR_C TTS (NR_C | 325    | NR_039872 | 1.01E+08 | NR_039872 | ENSG000002MIR4721   | - | microRNA      | ncRNA               |                |                |
| chr11-118 | 8.681408 | -0.7026  | 0.80573  | -0.87201 | 0.383205 | 0.981636 | chr11 | 1.1E+08  | 1.1E+08  | + | 0 | NA | intron (L1PA16 LI   | 7774   | NM_004105 | 2230     | Hs.744    | ENSG000002FDX1      | - | ADX FDX1      | ferredoxin          | protein-coding |                |
| chr8-945  | 8.681408 | -0.7026  | 0.80573  | -0.87201 | 0.383205 | 0.981636 | chr8  | 94533649 | 94534153 | + | 0 | NA | intron (AluSz SIN   | 19568  | NM_01549E | 25962    | Hs.20223  | ENSG000002VIRMA     | - | KIAA1429 vir  | like                | protein-coding |                |
| chr2-1114 | 6.412004 | -0.84665 | 0.971035 | -0.87191 | 0.383259 | 0.981636 | chr2  | 1.11E+08 | 1.11E+08 | + | 0 | NA | intron (intron (N   | 20348  | NR_136166 | 541471   | Hs.56080  | ENSG000002MIR4435   | - | AGD2 LIN      | MIR4435             | znc            | RNA            |
| chr5-1764 | 6.412004 | -0.84665 | 0.971035 | -0.87191 | 0.383259 | 0.981636 | chr5  | 1.76E+08 | 1.76E+08 | + | 0 | NA | intron (intron (N   | 30728  | NM_014613 | 23197    | Hs.48424  | ENSG000002FAF2      | - | ETEA UBX1     | Fas                 | assoc          | protein-coding |
| chr19-345 | 8.67355  | -0.7012  | 0.804352 | -0.87176 | 0.383341 | 0.981636 | chr19 | 34371531 | 34371730 | + | 0 | NA | intron (AluSx3 SI   | 6434   | NM_00132E | 2821     | Hs.46647  | ENSG000002GPI       | - | AMF GNP1      | glucose- $\epsilon$ | protein-coding |                |
| chr6-1664 | 8.67355  | -0.7012  | 0.804352 | -0.87176 | 0.383341 | 0.981636 | chr6  | 1.66E+08 | 1.66E+08 | + | 0 | NA | intron (MER34A LI   | 35470  | NR_040679 | 1.01E+08 | Hs.57659  | ENSG000002RPS6KA2-1 | - | RPS6KA2       | inc                 | RNA            |                |
| chr9-1254 | 8.67355  | -0.7012  | 0.804352 | -0.87176 | 0.383341 | 0.981636 | chr9  | 1.25E+08 | 1.25E+08 | + | 0 | NA | intron (AluSz SIN   | -76756 | NM_002077 | 2800     | Hs.59504  | ENSG000002GOLGA1    | - | golgin-97     | golgin              | Al             | protein-coding |
| chr1-2038 | 11.69856 | 0.606302 | 0.695606 | 0.871617 | 0.383418 | 0.981636 | chr1  | 2.04E+08 | 2.04E+08 | + | 0 | NA | intron (intron (N   | 8176   | NM_001174 | 1E+08    | NM_001174 | ENSG000002ZBED6     | - | MGR           | zinc                | finger         | protein-coding |
| chr19-374 | 11.69856 | 0.606302 | 0.695606 | 0.871617 | 0.383418 | 0.981636 | chr19 | 37474322 | 37485331 | + | 0 | NA | intron (L1MED LIN   | 10255  | NM_001321 | 148268   | Hs.12696  | ENSG000002ZNF570    | - | zinc          | finger              | protein-coding |                |
| chr9-1110 | 10.30908 | -0.65214 | 0.748374 | -0.8714  | 0.383533 | 0.981636 | chr9  | 1.11E+08 | 1.11E+08 | + | 0 | NA | intron (L1PA7 LI    | 11893  | NM_001351 | 1902     | Hs.12666  | ENSG000002CLPAR1    | - | EDG2 GPR2     | lyso                | phos           | protein-coding |
| chr1-1757 | 5.658247 | -0.85534 | 0.982257 | -0.87079 | 0.383866 | 0.981636 | chr1  | 75758164 | 75758727 | + | 0 | NA | intron (MER21B LI   | -13432 | NR_13074E | 1744     | Hs.52545  | ENSG000002DLSTP1    | - | DLSTP         | dihydro             | lip            | pseudo         |
| chr10-794 | 5.658247 | -0.85534 | 0.982257 | -0.87079 | 0.383866 | 0.981636 | chr10 | 79427915 | 79428742 | + | 0 | NA | intron (L1MB3 LI    | 17296  | NM_153367 | 219654   | Hs.52308  | ENSG000002ZCHC24    | - | C10orf56 zinc | finger              | protein-coding |                |
| chr10-945 | 5.658247 | -0.85534 | 0.982257 | -0.87079 | 0.383866 | 0.981636 | chr10 | 94340948 | 94342431 | + | 0 | NA | exon (NM exon (NM   | 21250  | NM_022451 | 64318    | Hs.74899  | ENSG000002NOC3L     | - | AD24 C10      | NOC3                | like           | protein-coding |
| chr10-995 | 5.658247 | -0.85534 | 0.982257 | -0.87079 | 0.383866 | 0.981636 | chr10 | 99677844 | 99678454 | + | 0 | NA | intron (L1ME3E LI   | 18520  | NM_00134E | 57089    | Hs.28326  | ENSG000002ENTPD7    | - | LALP1         | ectonuc             | le             | protein-coding |
| chr12-684 | 5.658247 | -0.85534 | 0.982257 | -0.87079 | 0.383866 | 0.981636 | chr12 | 6841165  | 6841736  | + | 0 | NA | intron (intron (N   | 525    | NM_00207E | 2784     | Hs.63165  | ENSG000002GNB3      | - | CSNB1H        | G                   | proteir        | protein-coding |
| chr12-645 | 5.658247 | -0.85534 | 0.982257 | -0.87079 | 0.383866 | 0.981636 | chr12 | 64064333 | 64066875 | + | 0 | NA | intron (AluJr SIN   | 156692 | NM_00130C | 144577   | Hs.44467  | ENSG000002C12orf66  | - | chromoson     | protein-coding      |                |                |
| chr13-274 | 5.658247 | -0.85534 | 0.982257 | -0.87079 | 0.383866 | 0.981636 | chr13 | 27433681 | 27434009 | + | 0 | NA | intron (intron (N   | 9226   | NM_002097 | 2971     | Hs.44597  | ENSG000002GTF3A     | - | AP2 TFII      | l                   | general        | protein-coding |
| chr13-101 | 5.658247 | -0.85534 | 0.982257 | -0.87079 | 0.383866 | 0.981636 | chr13 | 1.01E+08 | 1.01E+08 | + | 0 | NA | intron (intron (N   | 7599   | NM_001271 | 9358     | Hs.69655  | ENSG000002ITGBL1    | - | OSCP TIEE     | integrin            | protein-coding |                |
| chr13-115 | 5.658247 | -0.85534 | 0.982257 | -0.87079 | 0.383866 | 0.981636 | chr13 | 1.14E+08 | 1.14E+08 | + | 0 | NA | intron (intron (N   | 7937   | NM_007111 | 7027     | Hs.79353  | ENSG000002TFDP1     | - | DILC DP1      | transcri            | pt             | protein-coding |
| chr13-115 | 5.658247 | -0.85534 | 0.982257 | -0.87079 | 0.383866 | 0.981636 | chr13 | 1.14E+08 | 1.14E+08 | + | 0 | NA | intron (intron (N   | 11647  | NM_00136E | 1.01E+08 | Hs.70426  | ENSG000002C13orf46  | - | chromoson     | protein-coding      |                |                |
| chr13-115 | 5.658247 | -0.85534 | 0.982257 | -0.87079 | 0.383866 | 0.981636 | chr13 | 1.14E+08 | 1.14E+08 | + | 0 | NA | intron (intron (N   | 6918   | NM_00136E | 1.01E+08 | Hs.70426  | ENSG000002C13orf46  | - | chromoson     | protein-coding      |                |                |
| chr14-528 | 5.658247 | -0.85534 | 0.982257 | -0.87079 | 0.383866 | 0.981636 | chr14 | 52886355 | 52887234 | + | 0 | NA | intron (intron (N   | 64256  | NM_00683Z | 10979    | Hs.50934  | ENSG000002FERMT2    | - | KIND2 MIC     | fermitin            | protein-coding |                |
| chr15-48  | 5.658247 | -0.85534 | 0.982257 | -0.87079 | 0.383866 | 0.981636 | chr15 | 48732046 | 48732853 | + | 0 | NA | IntergeniL1PA8A LI  | 78620  | NM_01498E | 22995    | Hs.44300  | ENSG000002CEP152    | - | MCPH4 MCF     | centrosom           | protein-coding |                |
| chr15-808 | 5.658247 | -0.85534 | 0.982257 | -0.87079 | 0.383866 | 0.981636 | chr15 | 80840952 | 80842953 | + | 0 | NA | TTS (NR_C TTS (NR_C | 121    | NR_03039E | 693132   | NR_03039E | ENSG000002MIR549A   | - | MIR549        | Mi                  | microRNA       | ncRNA          |
| chr2-155  | 5.658247 | -0.85534 | 0.982257 | -0.87079 | 0.383866 | 0.981636 | chr2  | 15552228 | 15552632 | + | 0 | NA | intron (Tigger2a    | 8904   | NM_01590E | 51594    | Hs.46775  | ENSG000002NBAS      | - | L1P52 NAC     | neurine             | like           | protein-coding |
| chr2-155  | 5.658247 | -0.85534 | 0.982257 | -0.87079 | 0.383866 | 0.981636 | chr2  | 1.9E+08  | 1.9E+08  | + | 0 | NA | intron (AluJr4 SI   | 5833   | NM_00136E | 27148    | Hs.47140  | ENSG000002STK36     | - | FU            | serine/t            | protein-coding |                |
| chr3-481  | 5.658247 | -0.85534 | 0.982257 | -0.87079 | 0.383866 | 0.981636 | chr3  | 48166512 | 48168452 | + | 0 | NA | intron (intron (N   | 20935  | NM_00178E | 993      | Hs.43770  | ENSG000002CDC25A    | - | CDC25A2       | cell                | divi           | protein-coding |
| chr3-136  | 5.658247 | -0.85534 | 0.982257 | -0.87079 | 0.383866 | 0.981636 | chr3  | 1.36E+08 | 1.36E+08 | + | 0 | NA | intron (L1MC4 LI    | 72552  | NM_00053Z | 5096     | Hs.63788  | ENSG000002PCCB      | - | propionyl     | protein-coding      |                |                |
| chr3-146  | 5.658247 | -0.85534 | 0.982257 | -0.87079 | 0.383866 | 0.981636 | chr3  | 1.46E+08 | 1.46E+08 | + | 0 | NA | intron (intron (N   | -34828 | NR_146297 | 1.1E+08  | NR_146297 | ENSG000002LNCsRLR   | - | lncRNA-SF     | lncRNA              | sc             | ncRNA          |
| chr4-156  | 5.658247 | -0.85534 | 0.982257 | -0.87079 | 0.383866 | 0.981636 | chr4  | 15684910 | 15685280 | + | 0 | NA | intron (Tigger9a    | 3268   | NM_00114E | 285550   | Hs.39998  | ENSG000002FAM200B   | - | C4orf53       | family              | wi             | protein-coding |
| chr4-564  | 5.658247 | -0.85534 | 0.982257 | -0.87079 | 0.383866 | 0.981636 | chr4  | 56458636 | 56463101 | + | 0 | NA | 3' UTR (3' UTR (N   | -6749  | NR_001267 | 6731     | Hs.23782  | ENSG000002SRP72     | - | BMMF BMS      | signal              | re             | protein-coding |
| chr4-823  | 5.658247 | -0.85534 | 0.982257 | -0.87079 | 0.383866 | 0.981636 | chr4  | 82367020 | 82370919 | + | 0 | NA | intron (intron (N   | 5022   | NM_03137C | 3184     | Hs.48007  | ENSG000002HNRNPD    | - | AUF1 AUF1     | heterog             | er             | protein-coding |
| chr4-1451 | 5.658247 | -0.85534 | 0.982257 | -0.87079 | 0.383866 | 0.981636 | chr4  | 1.45E+08 | 1.45E+08 | + | 0 | NA | intron (intron (N   | -21130 | NM_00125E | 10393    | Hs.48087  | ENSG000002ANAPC10   | - | APC10 DOC     | anaphase            | protein-coding |                |
| chr4-186  | 5.658247 | -0.85534 | 0.982257 | -0.87079 | 0.383866 | 0.981636 | chr4  | 1.87E+08 | 1.87E+08 | + | 0 | NA | intron (intron (N   | 6151   | NM_00524E | 2195     | Hs.48137  | ENSG000002FAT1      | - | CDHF7 CDF     | FAT1                | atyp           | protein-coding |
| chr7-6731 | 5.658247 | -0.85534 | 0.982257 | -0.87079 | 0.383866 | 0.981636 | chr7  | 67312490 | 67314316 | + | 0 | NA | intron (Tigger1 E   | 10765  | NR_04058E | 64940    | Hs.63201  | ENSG000002STAG3L4   | - | STAG3L4P      | stromal             | p              | pseudo         |
| chr7-127  | 5.658247 | -0.85534 | 0.982257 | -0.87079 | 0.383866 | 0.981636 | chr7  | 1.27E+08 | 1.27E+08 | + | 0 | NA | intron (intron (N   | 6877   | NM_176814 | 168850   | Hs.15900  | ENSG000002ZNF800    | - | -             | zinc                | finger         | protein-coding |
| chr8-2544 | 5.658247 | -0.85534 | 0.982257 | -0.87079 | 0.383866 | 0.981636 | chr8  | 25442181 | 25443929 | + | 0 | NA | intron (HAL1M8 LI   | 15378  | NM_017634 | 54793    | Hs.72071  | ENSG000002KCTD9     | - | BTBD27        | potassi             | um             | protein-coding |
| chr8-103  | 5.658247 | -0.85534 | 0.982257 | -0.87079 | 0.383866 | 0.981636 | chr8  | 1.03E+08 | 1.03E+08 | + | 0 | NA | intron (MIRb SINE   | 4223   | NR_14579E | 1.1E+08  | NR_14579E | SNORD173            | - | small         | nuc                 | snoRNA         |                |
| chr8-103  | 5.658247 | -0.85534 | 0.982257 | -0.87079 | 0.383866 | 0.981636 | chr8  | 1.03E+08 | 1.03E+08 | + | 0 | NA | intron (intron (N   | 27252  | NM_01542C | 25879    | Hs.53226  | ENSG000002DCAF13    | - | GM83 HSPC     | DBB1                | and            | protein-coding |
| chr8-133  | 5.658247 | -0.85534 | 0.982257 | -0.87079 | 0.383866 | 0.981636 | chr8  | 1.33E+08 | 1.33E+08 | + | 0 | NA | intron (intron (N   | 27552  | NM_001161 | 10397    | Hs.37291  | ENSG000002NDRG1     | - | CAP43 CM1     | N-myc               | do             | protein-coding |
| chr9-100  | 5.658247 | -0.85534 | 0.982257 | -0.87079 | 0.383866 | 0.981636 | chr9  | 1E+08    | 1E+08    | + | 0 | NA | intron (L1MED LI    | 19677  | NM_001161 | 54881    | Hs.49464  | ENSG000002TEX10     | - | Ipi1 ba2C     | testis              | ex             | protein-coding |
| chr7-640  | 5.658247 | -0.85816 | 0.66978  | -0.87067 | 0.383935 | 0.981636 | chr7  | 6402782  | 6403031  | + | 0 | NA | 3' UTR (3' UTR (N   | 28379  | NM_00690E | 5879     | Hs.41381  | ENSG000002RAC1      | - | MIG5 MRD4     | Rac                 | ex             | protein-coding |
| chr17-291 | 10.6721  | 0.648666 |          |          |          |          |       |          |          |   |   |    |                     |        |           |          |           |                     |   |               |                     |                |                |

|                    |          |          |          |          |          |       |          |          |   |   |    |                     |                  |                            |                    |                     |                                     |                          |
|--------------------|----------|----------|----------|----------|----------|-------|----------|----------|---|---|----|---------------------|------------------|----------------------------|--------------------|---------------------|-------------------------------------|--------------------------|
| chr19-541 7.195713 | 0.752972 | 0.869904 | 0.865581 | 0.38672  | 0.981636 | chr19 | 54148404 | 54151277 | + | 0 | NA | intron (Nintron (N  | 9881 NM_024316   | 79165 Hs. 590974NM_024316  | ENSG000001LENG1    | -                   | leukocyte protein-coding            |                          |
| chr2-3208 7.195713 | 0.752972 | 0.869904 | 0.865581 | 0.38672  | 0.981636 | chr2  | 32089702 | 32090411 | + | 0 | NA | intron (NAlu SINE   | 26445 NM_199436  | 6683 Hs. 468091NM_014946   | ENSG000001SPAST    | -                   | ADPSP FSF spastin protein-coding    |                          |
| chr2-5554 7.195713 | 0.752972 | 0.869904 | 0.865581 | 0.38672  | 0.981636 | chr2  | 55545309 | 55546118 | + | 0 | NA | TTS (NM_C TTS (NM_C | 26118 NM_080667  | 112942 Hs. 26420ENM_080667 | ENSG000001CFAP36   | -                   | BARTL1 CC cilia anc protein-coding  |                          |
| chr20-93 7.195713  | 0.752972 | 0.869904 | 0.865581 | 0.38672  | 0.981636 | chr20 | 9391440  | 9392073  | + | 0 | NA | intron (NLR T6 C L  | 83956 NM_000993  | 5332 Hs. 472101NM_000993   | ENSG000001PLCB4    | -                   | ARCND2 P phospholip protein-coding  |                          |
| chr22-312 7.195713 | 0.752972 | 0.869904 | 0.865581 | 0.38672  | 0.981636 | chr22 | 31281155 | 31290028 | + | 0 | NA | intron (NMR 3 SINE  | 6897 NM_052888   | 113791 Hs. 26670 NM_052888 | ENSG000001PIK3IP1  | -                   | HGNL7 TrIF phospho protein-coding   |                          |
| chr22-404 7.195713 | 0.752972 | 0.869904 | 0.865581 | 0.38672  | 0.981636 | chr22 | 40422415 | 40424184 | + | 0 | NA | intron (Nintron (N  | 40141 NM_001282  | 57591 Hs. 65468ENM_020831  | ENSG000001MRFTA    | -                   | BSAC MAL myocardir protein-coding   |                          |
| chr3-9651 7.195713 | 0.752972 | 0.869904 | 0.865581 | 0.38672  | 0.981636 | chr3  | 9651901  | 9654654  | + | 0 | NA | intron (Nintron (N  | 3772 NM_022486   | 64419 Hs. 475382NM_022486  | ENSG000001MTRM14   | -                   | C3orf29 myotubul protein-coding     |                          |
| chr4-8672 7.195713 | 0.752972 | 0.869904 | 0.865581 | 0.38672  | 0.981636 | chr4  | 86723280 | 86723541 | + | 0 | NA | intron (NMR B DNA   | 125974 NM_197966 | 345274 Hs. 45299ENM_197966 | ENSG000001SLC10A6  | -                   | SOAT myotubul protein-coding        |                          |
| chr6-472 7.195713  | 0.752972 | 0.869904 | 0.865581 | 0.38672  | 0.981636 | chr6  | 47231831 | 47233070 | + | 0 | NA | 3' UTR (N3' UTR (N  | 77455 NM_014452  | 27242 Hs. 443577NM_014452  | ENSG000001TNFRSF21 | -                   | BM-018 TNF recepr protein-coding    |                          |
| chr7-7546 7.195713 | 0.752972 | 0.869904 | 0.865581 | 0.38672  | 0.981636 | chr7  | 754617   | 755194   | + | 0 | NA | intron (NCPg-2525E  | -27229 NM_001164 | 5575 Hs. 520851NM_00273E   | ENSG000001PKRARI1B | -                   | PRKARI protein h protein-coding     |                          |
| chr7-1346 7.195713 | 0.752972 | 0.869904 | 0.865581 | 0.38672  | 0.981636 | chr7  | 135E+08  | 1.35E+08 | + | 0 | NA | TTS (NM_C TTS (NM_C | 33166 NM_0011724 | 669 Hs. 19836ENM_0011724   | ENSG000001BPGM     | -                   | DDGM ECY1bisphosp protein-coding    |                          |
| chr9-1245 7.195713 | 0.752972 | 0.869904 | 0.865581 | 0.38672  | 0.981636 | chr9  | 1.25E+08 | 1.25E+08 | + | 0 | NA | intron (Nintron (N  | -53410 NM_002077 | 2800 Hs. 59504 NM_002077   | ENSG000001GOLGA1   | -                   | golgin-97 golgin A1 protein-coding  |                          |
| chr9-1276 7.195713 | 0.752972 | 0.869904 | 0.865581 | 0.38672  | 0.981636 | chr9  | 1.28E+08 | 1.28E+08 | + | 0 | NA | intron (Nintron (N  | 13628 NR_037473  | 1.01E+08                   | NR_037473          | ENSG000001MIR3911   | -                                   | mir-3911 microRNA ncRNA  |
| chr9-1367 7.195713 | 0.752972 | 0.869904 | 0.865581 | 0.38672  | 0.981636 | chr9  | 1.37E+08 | 1.37E+08 | + | 0 | NA | intron (Nintron (N  | 11684 NR_039822  | 1.01E+08                   | NR_039822          | ENSG000001MIR4673   | -                                   | mir-4673 microRNA ncRNA  |
| chr1-1294 9.109583 | -0.6741  | 0.778906 | -0.86544 | 0.386798 | 0.981636 | chr1  | 1294036  | 1294787  | + | 0 | NA | exon (NM exon (NM   | 1759 NR_106784   | 1.02E+08                   | NR_106784          | ENSG000001MIR6726   | -                                   | hsa-mir-6 microRNA ncRNA |
| chr14-607 9.109583 | -0.6741  | 0.778906 | -0.86544 | 0.386798 | 0.981636 | chr14 | 60713461 | 60714819 | + | 0 | NA | exon (NM exon (NM   | 10211 NM_01742C  | 51804 Hs. 97849 NM_01742C  | ENSG000001SIX4     | -                   | AREC3 SIX home protein-coding       |                          |
| chr14-736 9.109583 | -0.6741  | 0.778906 | -0.86544 | 0.386798 | 0.981636 | chr14 | 73900514 | 73900891 | + | 0 | NA | intron (N Kanga2_a  | 13843 NR_040251  | 57862 Hs. 27086ENM_02118E  | ENSG000001ZNF410   | -                   | APA-1 AP2 zinc fing protein-coding  |                          |
| chr1-1504 9.47649  | 0.665142 | 0.768788 | 0.865183 | 0.386938 | 0.981636 | chr1  | 1.5E+08  | 1.5E+08  | + | 0 | NA | intron (NMR B SINE  | 1696 NR_106938   | 1.02E+08                   | NR_106938          | ENSG000001MIR6878   | -                                   | hsa-mir-6 microRNA ncRNA |
| chr1-2143 9.47649  | 0.665142 | 0.768788 | 0.865183 | 0.386938 | 0.981636 | chr1  | 2.14E+08 | 2.14E+08 | + | 0 | NA | 3' UTR (N3' UTR (N  | 76113 NM_020197  | 56950 Hs. 66170 NM_020197  | ENSG000001SMYD2    | -                   | HSKM-8 KMS2 and h protein-coding    |                          |
| chr19-407 9.47649  | 0.665142 | 0.768788 | 0.865183 | 0.386938 | 0.981636 | chr19 | 40729572 | 40731161 | + | 0 | NA | intron (Nintron (N  | 13254 NM_025194  | 80271 Hs. 51541ENM_025194  | ENSG000001ITPKC    | -                   | IP3-3KCl inositol protein-coding    |                          |
| chr4-4785 9.47649  | 0.665142 | 0.768788 | 0.865183 | 0.386938 | 0.981636 | chr4  | 47859250 | 47897827 | + | 0 | NA | TTS (NR_ITTS (NR_1  | -16689 NR_125879 | 1.02E+08                   | NR_125879          | ENSG000001LOC101927 | -                                   | uncharacterncRNA         |
| chr5-1416 7.179997 | 0.757588 | 0.875823 | 0.865002 | 0.387038 | 0.981636 | chr5  | 1.42E+08 | 1.42E+08 | + | 0 | NA | intron (Nintron (N  | 4356 NR_149167   | 8841 Hs. 519632NM_00388E   | ENSG000001HDAC3    | -                   | HD3 KDAC histone c protein-coding   |                          |
| chr6-8335 7.179997 | 0.757588 | 0.875823 | 0.865002 | 0.387038 | 0.981636 | chr6  | 83359736 | 83360926 | + | 0 | NA | intron (NHERV L-int | 70720 NM_00239E  | 4199 Hs. 21160 NM_00239E   | ENSG000001CEME1    | -                   | HUMNDME kmalic enz protein-coding   |                          |
| chr7-1333 7.179997 | 0.757588 | 0.875823 | 0.865002 | 0.387038 | 0.981636 | chr7  | 1.33E+08 | 1.33E+08 | + | 0 | NA | intron (Nintron (N  | 15864 NR_10674E  | 1.02E+08                   | NR_10674E          | ENSG000001MIR6133   | -                                   | hsa-mir-6 microRNA ncRNA |
| chr1-4121 5.699386 | -0.85    | 0.982786 | -0.86489 | 0.3871   | 0.981636 | chr1  | 41219263 | 41220220 | + | 0 | NA | intron (NAluSx S    | 22565 NM_00135C  | 22955 Hs. 571874NM_01223E  | ENSG000001SCMH1    | -                   | Scm13 Scm polyc protein-coding      |                          |
| chr5-113 5.699386  | -0.85    | 0.982786 | -0.86489 | 0.3871   | 0.981636 | chr5  | 1.13E+08 | 1.13E+08 | + | 0 | NA | 3' UTR (N3' UTR (N  | 48687 NM_152624  | 167227 Hs. 44387ENM_152624 | ENSG000001DCP2     | -                   | NUDT20 decapping protein-coding     |                          |
| chr8-381 5.699386  | -0.85    | 0.982786 | -0.86489 | 0.3871   | 0.981636 | chr8  | 38138272 | 38139218 | + | 0 | NA | intron (Nintron (N  | 12207 NM_00034E  | 6770 Hs. 52153ENM_00034E   | ENSG000001STAR     | -                   | STARD1 steroidog protein-coding     |                          |
| chr1-1675 11.63986 | 0.600766 | 0.694699 | 0.864787 | 0.387156 | 0.981636 | chr1  | 1.68E+08 | 1.68E+08 | + | 0 | NA | intron (NAluSx S    | -16737 NM_001143 | 25874 Hs. 51776ENM_01541E  | ENSG000001MPC2     | -                   | BRP44 SLC mitochonc protein-coding  |                          |
| chr18-68 7.399631  | -0.74604 | 0.862734 | -0.86474 | 0.387179 | 0.981636 | chr18 | 68685593 | 68686281 | + | 0 | NA | intron (N L2b LINE  | 29171 NM_00135C  | 54495 Hs. 440534NM_01902E  | ENSG000001TMX3     | -                   | PDAI3 T thioredo protein-coding     |                          |
| chr20-199 7.399631 | -0.74604 | 0.862734 | -0.86474 | 0.387179 | 0.981636 | chr20 | 19940941 | 19941566 | + | 0 | NA | intron (N L2b LINE  | 51687 NM_01899E  | 54453 Hs. 472277NM_01899E  | ENSG000001RIN2     | -                   | MCA3 RSSAS and h protein-coding     |                          |
| chr4-1505 7.399631 | -0.74604 | 0.862734 | -0.86474 | 0.387179 | 0.981636 | chr4  | 1.51E+08 | 1.51E+08 | + | 0 | NA | intron (N LIMB2 LIN | 103200 NM_00119E | 987 Hs. 48093ENM_00672E    | ENSG000001LRBA     | -                   | BGL CDC4L LPS resp protein-coding   |                          |
| chr6-3214 9.552761 | 0.678075 | 0.784234 | 0.864633 | 0.38724  | 0.981636 | chr6  | 32148675 | 32149185 | + | 0 | NA | 3' UTR (N3' UTR (N  | 3009 NM_030651   | 80863 Hs. 549204NM_030651  | ENSG000001PRRT1    | -                   | C6orf31 L proline i protein-coding  |                          |
| chr6-4357 9.117441 | -0.67548 | 0.81336  | -0.86451 | 0.387305 | 0.981636 | chr6  | 43578145 | 43578344 | + | 0 | NA | intron (NAluSg2 S   | 2059 NM_001291   | 5429 Hs. 655467NM_00650E   | ENSG000001POLH     | -                   | RAD30 RAL DNA poly protein-coding   |                          |
| chr1-183 8.921196  | 0.688392 | 0.796349 | 0.864435 | 0.387349 | 0.981636 | chr1  | 1.84E+08 | 1.84E+08 | + | 0 | NA | intron (Nintron (N  | 102118 NM_001297 | 23179 Hs. 49714ENM_01514E  | ENSG000001CRL1     | -                   | RGL ral guaniprotein-coding         |                          |
| chr5-1375 8.921196 | 0.688392 | 0.796349 | 0.864435 | 0.387349 | 0.981636 | chr5  | 13793937 | 13793967 | + | 0 | NA | exon (NM exon (NM   | 150933 NM_00136E | 1767 Hs. 21236ENM_00136E   | ENSG000001DNAH5    | -                   | CILD3 DN dynein ax protein-coding   |                          |
| chr10-94 7.383915  | -0.74275 | 0.859455 | -0.86421 | 0.387471 | 0.981636 | chr10 | 94333498 | 94334521 | + | 0 | NA | 3' UTR (N3' UTR (N  | 28930 NM_022451  | 64318 Hs. 74899 NM_022451  | ENSG000001NOC3L    | -                   | AD24 C10c NOC3 like protein-coding  |                          |
| chr10-127 7.383915 | -0.74275 | 0.859455 | -0.86421 | 0.387471 | 0.981636 | chr10 | 1.27E+08 | 1.27E+08 | + | 0 | NA | intron (N MLT1 L T  | 141215 NM_00103E | 642938 Hs. 61388ENM_00103E | ENSG000001INSYN2A  | -                   | C10orf141 inhibitor protein-coding  |                          |
| chr12-502 7.383915 | -0.74275 | 0.859455 | -0.86421 | 0.387471 | 0.981636 | chr12 | 50230078 | 50230358 | + | 0 | NA | intron (NAluSx S    | 3994 NR_03162E   | 1E+08                      | NR_03162E          | ENSG000001MIR1293   | -                                   | MIRN1293 microRNA ncRNA  |
| chr16-314 7.383915 | -0.74275 | 0.859455 | -0.86421 | 0.387471 | 0.981636 | chr16 | 31473328 | 31473535 | + | 0 | NA | intron (NCPg-9530   | 3226 NM_0015927  | 7041 Hs. 51353CNM_015927   | ENSG000001TGFB11   | -                   | ARA55 HIC transforn protein-coding  |                          |
| chr17-372 7.383915 | -0.74275 | 0.859455 | -0.86421 | 0.387471 | 0.981636 | chr17 | 37237428 | 37237708 | + | 0 | NA | intron (N LIME3D LI | -7233 NR_13277E  | 1.07E+08                   | SNORA90            | -                   | small nucsnRNA                      |                          |
| chr3-227 7.383915  | -0.74275 | 0.859455 | -0.86421 | 0.387471 | 0.981636 | chr3  | 1.23E+08 | 1.23E+08 | + | 0 | NA | intron (N LIME5 LIN | 24426 NM_0017554 | 54625 Hs. 51820ENM_017554  | ENSG000001PARP14   | -                   | ARTD8 BAL poly (ADP- protein-coding |                          |
| chr4-149 7.383915  | -0.74275 | 0.859455 | -0.86421 | 0.387471 | 0.981636 | chr4  | 24909908 | 24910190 | + | 0 | NA | intron (N MLT1C L T | -2929 NM_00113C  | 91050 Hs. 52153ENM_17346E  | ENSG000001CCDC149  | -                   | coiled-c protein-coding             |                          |
| chr5-804 7.383915  | -0.74275 | 0.859455 | -0.86421 | 0.387471 | 0.981636 | chr5  | 80428091 | 80428449 | + | 0 | NA | intron (N LIPA5 LIN | 20206 NM_00110E  | 9765 Hs. 48266CNM_01473E   | ENSG000001ZFYE16   | -                   | PPP1R69 zinc fing protein-coding    |                          |
| chr5-1158 7.383915 | -0.74275 | 0.859455 | -0.86421 | 0.387471 | 0.981636 | chr5  | 1.16E+08 | 1.16E+08 | + | 0 | NA | non-codir non-codir | 11901 NM_004707  | 9140 Hs. 26448ENM_004707   | ENSG000001ATG12    | -                   | APG12 APC autophagy protein-coding  |                          |
| chr5-1591 7.383915 | -0.74275 | 0.859455 | -0.86421 | 0.387471 | 0.981636 | chr5  | 1.59E+08 | 1.59E+08 | + | 0 | NA | intron (N LIME3F LI | 41025 NM_00119E  | 153830 Hs. 34930ENM_14472E | ENSG000001CRNF145  | -                   | ring fing protein-coding            |                          |
| chr6-7505 7.383915 | -0.74275 | 0.859455 | -0.86421 | 0.387471 | 0.981636 | chr6  | 75099963 | 75102730 | + | 0 | NA | intron (Nintron (N  | 27436 NR_145788  | 1.1E+08                    | NR_145788          | ENSG000001SNORD156  | -                                   | small nucsnRNA           |
| chr7-1276 7.383915 | -0.74275 | 0.859455 | -0.86421 | 0.387471 | 0.981636 | chr7  | 1.28E+08 | 1.28E+08 | + | 0 | NA | intron (Nintron (N  | 5613 NM_01439C   | 27044 Hs. 12252ENM_01439C  | ENSG000001SND1     | -                   | TDRD11 T staphyloc protein-coding   |                          |
| chr1-1565 7.228995 | 0.756006 | 0.874875 | 0.864131 | 0.387516 | 0.981636 | chr1  | 1.57E+08 | 1.57E+08 | + | 0 | NA | intron (Nintron (N  | -26886 NR_030527 | 768220                     | NR_030527          | ENSG000001MIR765    | -                                   | MIRN765 microRNA ncRNA   |
| chr1-2357 7.228995 | 0.756006 |          |          |          |          |       |          |          |   |   |    |                     |                  |                            |                    |                     |                                     |                          |



|                    |           |          |           |          |          |       |           |           |   |   |    |                     |                   |                               |                     |                |                            |
|--------------------|-----------|----------|-----------|----------|----------|-------|-----------|-----------|---|---|----|---------------------|-------------------|-------------------------------|---------------------|----------------|----------------------------|
| chr14-685.5.650389 | -0.85318  | 0.991087 | -0.86086  | 0.389317 | 0.981636 | chr14 | 68933813  | 68934559  | + | 0 | NA | intron (intron (N   | 45116 NM_001102   | 87 Hs. 235755NM_001102        | ENSG000000ACTN1     | BDPLT15        | actinin 1 protein-coding   |
| chr15-636.5.650389 | -0.85318  | 0.991087 | -0.86086  | 0.389317 | 0.981636 | chr15 | 63613856  | 63614372  | + | 0 | NA | intron (intron (N   | -13287 NR_03408C  | 1E+08 Hs. 631163NR_03408C     | ENSG000000USP3-AS1  | -              | USP3 antincRNA             |
| chr2-1874.5.650389 | -0.85318  | 0.991087 | -0.86086  | 0.389317 | 0.981636 | chr2  | 1.87E+08  | 1.87E+08  | + | 0 | NA | intron (intron (N   | -33038 NM_001271  | 10203 Hs. 470882NM_005795     | ENSG000000CALCRL    | CGRPR CRI      | calcitonin protein-coding  |
| chr21-262.5.650389 | -0.85318  | 0.991087 | -0.86086  | 0.389317 | 0.981636 | chr21 | 46292550  | 46293264  | + | 0 | NA | TTS (NM_C           | 6565 NM_001314    | 54059 Hs. 474066NM_058181     | ENSG000000YBIE      | C21orf57       | ybeY meta protein-coding   |
| chr22-296.5.650389 | -0.85318  | 0.991087 | -0.86086  | 0.389317 | 0.981636 | chr22 | 29327813  | 29328209  | + | 0 | NA | 3' UTR (3' UTR (N   | 5307 NR_00368E    | 1E+08 Hs. NR_00368E           | ENSG000000SNORD125  | -              | small ncsnoRNA             |
| chr3-1277.5.650389 | -0.85318  | 0.991087 | -0.86086  | 0.389317 | 0.981636 | chr3  | 1.28E+08  | 1.28E+08  | + | 0 | NA | intron (intron (N   | 26052 NM_007283   | 11343 Hs. 277035NM_007283     | ENSG000000MGLL      | HU-K5 HUK      | monoglyc protein-coding    |
| chr3-1286.5.650389 | -0.85318  | 0.991087 | -0.86086  | 0.389317 | 0.981636 | chr3  | 1.29E+08  | 1.29E+08  | + | 0 | NA | intron (intron (N   | 9751 NM_00295C    | 6184 Hs. 518244NM_00295C      | ENSG000000RPN1      | OST1 RBPI      | ribophorin protein-coding  |
| chr4-8805.5.650389 | -0.85318  | 0.991087 | -0.86086  | 0.389317 | 0.981636 | chr4  | 88053015  | 88053449  | + | 0 | NA | intron (MER3 DNA    | 45597 NR_15648E   | 5311 Hs. 181272NM_000297      | ENSG000000PKD2      | APKD2 PC2      | polycystin protein-coding  |
| chr8-2337.5.650389 | -0.85318  | 0.991087 | -0.86086  | 0.389317 | 0.981636 | chr8  | 23374323  | 23375418  | + | 0 | NA | intron (LIPA5 LIN   | 29250 NM_00231E   | 4017 Hs. 626637NM_00231E      | ENSG000000CLOXL2    | LOR LOR2 lysyl | oxiprotein-coding          |
| chr6-111C.4.920268 | -0.661966 | 0.769356 | -0.860146 | 0.38956  | 0.981636 | chr6  | 1.11E+08  | 1.11E+08  | + | 0 | NA | intron (ALuSx1 SI   | 21405 NM_032194   | 84154 Hs. 372262NM_032194     | ENSG000000RPF2      | BXDC1 ba3      | ribosome protein-coding    |
| chr1-1542.9.451066 | -0.660924 | 0.768214 | -0.860338 | 0.389603 | 0.981636 | chr1  | 1.54E+08  | 1.54E+08  | + | 0 | NA | exon (NM exon (NM   | -1130 NM_00101C   | 388701 Hs. 104967NM_00101C    | ENSG000000C1orf189  | -              | chromosome protein-coding  |
| chr12-123.9.451066 | -0.660924 | 0.768214 | -0.860338 | 0.389603 | 0.981636 | chr12 | 1.23E+08  | 1.23E+08  | + | 0 | NA | intron (intron (N   | 1247 NR_036187    | 1E+08 Hs. NR_036187           | ENSG000000MIR4304   | -              | microRNA ncRNA             |
| chr19-252.9.451066 | -0.660924 | 0.768214 | -0.860338 | 0.389603 | 0.981636 | chr19 | 25299806  | 25300554  | + | 0 | NA | IntergeniALR Alpha  | -136733 NR_00360C | 1E+08 Hs. 149312NR_00360C     | ENSG000000HAVCR1P1  | -              | hepatitis pseudo           |
| chr3-1134.9.451066 | -0.660924 | 0.768214 | -0.860338 | 0.389603 | 0.981636 | chr3  | 1.13E+08  | 1.13E+08  | + | 0 | NA | intron (THE1 LTF    | 5802 NR_107043    | 1.02E+08 Hs. NR_107043        | ENSG000000MIR8076   | hsa-mir-5      | microRNA ncRNA             |
| chr5-179C.9.451066 | -0.660924 | 0.768214 | -0.860338 | 0.389603 | 0.981636 | chr5  | 1.79E+08  | 1.79E+08  | + | 0 | NA | intron (NLIME4a LI  | 6361 NM_001355    | 345462 Hs. 445744NM_001133    | ENSG000000ZNF879    | DKFZp686E      | zinc finger protein-coding |
| chr9-351C.9.451066 | -0.660924 | 0.768214 | -0.860338 | 0.389603 | 0.981636 | chr9  | 35105035  | 35107484  | + | 0 | NA | non-codirnon-codir  | -3063 NM_001287   | 30968 Hs. 3439 NM_013442      | ENSG000000STOML2    | HSPC108 Sst    | tomatin protein-coding     |
| chr9-927.9.451066  | -0.660924 | 0.768214 | -0.860338 | 0.389603 | 0.981636 | chr9  | 92253524  | 92253389  | + | 0 | NA | intron (intron (N   | 38861 NR_037424   | 1.01E+08 Hs. NR_037424        | ENSG000000MIR3651   | mir-3651       | microRNA ncRNA             |
| chr11-972.16.18187 | -0.584716 | 0.679875 | -0.860035 | 0.38977  | 0.981636 | chr11 | 975370    | 975718    | + | 0 | NA | intron (CPg         | 49674 NM_01230E   | 161 Hs. 19121 NM_01230E       | ENSG000000AP2A2     | ADTAP Ct       | adaptor protein-coding     |
| chr2-1275.9.093867 | -0.67139  | 0.780794 | -0.85988  | 0.389853 | 0.981636 | chr2  | 1.28E+08  | 1.28E+08  | + | 0 | NA | intron (THE1B LTF   | 63484 NM_00114E   | 79595 Hs. 32995 NM_02454E     | ENSG000000SAP130    | -              | Sin3A ass protein-coding   |
| chr4-9832.9.093867 | -0.67139  | 0.780794 | -0.85988  | 0.389853 | 0.981636 | chr4  | 98320618  | 98320817  | + | 0 | NA | intron (NLIPA2 LIN  | 59333 NM_02115E   | 5910 Hs. 132855NM_02115E      | ENSG000000CRAP1GDS1 | GDS1 Smg       | Crp1 GTPase protein-coding |
| chr5-141F.9.093867 | -0.67139  | 0.780794 | -0.85988  | 0.389853 | 0.981636 | chr5  | 14157879  | 14158563  | + | 0 | NA | intron (ALuSx1 SI   | 14879 NM_00711E   | 7204 Hs. 130031NM_00711E      | ENSG000000TRIO      | ARHGEP23 trio  | Rho protein-coding         |
| chr22-45E.9.135006 | -0.66835  | 0.777309 | -0.85983  | 0.389885 | 0.981636 | chr22 | 45556911  | 45560828  | + | 0 | NA | TTS (NM_C           | 46778 NR_131244   | 1.01E+08 Hs. 517692NR_131244  | ENSG000000LINC0158E | TCOXS_OOC      | long intencRNA             |
| chr5-873C.9.135006 | -0.66835  | 0.777309 | -0.85983  | 0.389885 | 0.981636 | chr5  | 87304674  | 87304600  | + | 0 | NA | intron (NLIPA13 LI  | 18061 NR_13092E   | 644285 Hs. 709255NR_13092E    | LOC64428E           | -              | uncharactercncRNA          |
| chr7-839C.9.135006 | -0.66835  | 0.777309 | -0.85983  | 0.389885 | 0.981636 | chr7  | 839001    | 839200    | + | 0 | NA | intron (intron (N   | -2274 NM_001367   | 23353 Hs. 438072NM_025154     | ENSG000000SUN1      | UNC84A         | Sad1 protein-coding        |
| chr9-279C.9.135006 | -0.66835  | 0.777309 | -0.85983  | 0.389885 | 0.981636 | chr9  | 2790902   | 2792190   | + | 0 | NA | IntergeniLTRB LTF   | 52549 NM_01487E   | 9933 Hs. 493305NM_01487E      | ENSG000000PUM3      | HA-8 HLA-      | pumilio f protein-coding   |
| chr1-230C.9.417784 | -0.658476 | 0.765838 | -0.859812 | 0.389893 | 0.981636 | chr1  | 23059471  | 23059690  | + | 0 | NA | intron (intron (N   | 15275 NR_036057   | 1E+08 Hs. NR_036057           | ENSG000000MIR3115   | mir-3115       | microRNA ncRNA             |
| chr1-226E.9.417784 | -0.658476 | 0.765838 | -0.859812 | 0.389893 | 0.981636 | chr1  | 2262678   | 22626E+08 | + | 0 | NA | intron (intron (N   | 28407 NM_00161E   | 142 Hs. 177766NM_00161E       | ENSG000000PARP1     | ADPRT ADF      | poly (ADP- protein-coding  |
| chr1-229E.9.417784 | -0.658476 | 0.765838 | -0.859812 | 0.389893 | 0.981636 | chr1  | 22929E+08 | 229E+08   | + | 0 | NA | promoter-promoter-  | -617 NM_006542    | 10638 Hs. 296166NM_006542     | ENSG000000SPHAR     | -              | S-phase r protein-coding   |
| chr17-80E.9.417784 | -0.658476 | 0.765838 | -0.859812 | 0.389893 | 0.981636 | chr17 | 80995959  | 80997843  | + | 0 | NA | intron (N FLAM_A SI | 5060 NM_024591    | 79643 Hs. 514566NM_024591     | ENSG000000CHMP6     | VPS20          | charged n protein-coding   |
| chr4-533E.9.417784 | -0.658476 | 0.765838 | -0.859812 | 0.389893 | 0.981636 | chr4  | 53383311  | 53383808  | + | 0 | NA | intron (ALuSx1 SI   | 5906 NM_001134    | 81608 Hs. 555105NM_030917     | ENSG000000FIP1L1    | FIP1 Rhe       | factor r protein-coding    |
| chr1-1717.12.20301 | -0.58537  | 0.680973 | -0.859608 | 0.390005 | 0.981636 | chr1  | 1.72E+08  | 1.72E+08  | + | 0 | NA | intron (intron (N   | 5500 NM_01495E    | 51603 Hs. 494705NM_01495E     | ENSG000000EEF1AKNM1 | 5630401D2e     | EF1A lys protein-coding    |
| chr2-1192.3.196387 | -1.11993  | 1.30305  | -0.85947  | 0.390083 | 0.981636 | chr2  | 1.19E+08  | 1.19E+08  | + | 0 | NA | intron (MER113A I   | -13188 NR_046721  | 1.01E+08 Hs. 704682NR_046721  | ENSG000000STAP3-AC  | -              | STAP3 arncRNA              |
| chr9-692E.3.196387 | -1.11993  | 1.30305  | -0.85947  | 0.390083 | 0.981636 | chr9  | 69235003  | 69235693  | + | 0 | NA | intron (ALu SINE    | 30193 NR_00136E   | 9414 Hs. 50382 NR_004817      | ENSG000000TJP2      | C9DUPq21.2     | tight jur protein-coding   |
| chr10-10C.7.376057 | -0.74112  | 0.862318 | -0.85945  | 0.390094 | 0.981636 | chr10 | 1.01E+08  | 1.01E+08  | + | 0 | NA | intron (intron (N   | -11640 NM_01789E  | 57715 Hs. 591922NM_01789E     | ENSG000000SEMA4G    | -              | semaphorin protein-coding  |
| chr11-754.7.376057 | -0.74112  | 0.862318 | -0.85945  | 0.390094 | 0.981636 | chr11 | 75407264  | 75408768  | + | 0 | NA | intron (intron (N   | 3554 NR_00002E    | 114599 Hs. 689089NR_00002E    | ENSG000000SNORD15B  | RNU15B U1      | small ncsnoRNA             |
| chr12-46E.7.376057 | -0.74112  | 0.862318 | -0.85945  | 0.390094 | 0.981636 | chr12 | 46513545  | 46516068  | + | 0 | NA | intron (NLIPA14 LI  | 131199 NR_125381  | 1E+08 Hs. 525922NR_125377     | LOC100208E          | -              | uncharactercncRNA          |
| chr18-28C.7.376057 | -0.74112  | 0.862318 | -0.85945  | 0.390094 | 0.981636 | chr18 | 2800427   | 2800980   | + | 0 | NA | intron (intron (N   | -46303 NM_03204E  | 84034 Hs. 532815NM_03204E     | ENSG000000CEMLIN2   | EMILIN-2 e     | elastin n protein-coding   |
| chr2-874E.7.376057 | -0.74112  | 0.862318 | -0.85945  | 0.390094 | 0.981636 | chr2  | 87469091  | 87470457  | + | 0 | NA | promoter-promoter-  | -176 NR_14646C    | 112597 Hs. 165216NR_024204    | ENSG000000CYTOR     | C2orf59 D      | cytoskelcncRNA             |
| chr3-998E.7.376057 | -0.74112  | 0.862318 | -0.85945  | 0.390094 | 0.981636 | chr3  | 99852897  | 99856408  | + | 0 | NA | intron (MER20 DNA   | 21521 NM_00137C   | 11259 Hs. 104672NM_01489C     | ENSG000000FILIP1L   | DOC-1 DOC      | filament f protein-coding  |
| chr3-1017.7.376057 | -0.74112  | 0.862318 | -0.85945  | 0.390094 | 0.981636 | chr3  | 1.02E+08  | 1.02E+08  | + | 0 | NA | intron (NLIPA7 LIN  | 10812 NM_02454E   | 79598 Hs. 444135NM_02454E     | ENSG000000CEP97     | 2810403BC      | centrosome protein-coding  |
| chr3-1204.7.376057 | -0.74112  | 0.862318 | -0.85945  | 0.390094 | 0.981636 | chr3  | 1.2E+08   | 1.2E+08   | + | 0 | NA | intron (intron (N   | 16308 NM_00708E   | 11167 Hs. 269512NM_00708E     | ENSG000000PSTL1     | FRP FSL1       | foolistat protein-coding   |
| chr7-116E.7.376057 | -0.74112  | 0.862318 | -0.85945  | 0.390094 | 0.981636 | chr7  | 1.17E+08  | 1.17E+08  | + | 0 | NA | intron (ALuJo SIN   | 28916 NM_00117E   | 857 Hs. 74034 NM_00117E       | ENSG000000CAV1      | BSC3L CGI      | collagen protein-coding    |
| chr19-121.12.16973 | -0.583368 | 0.678823 | -0.85938  | 0.390131 | 0.981636 | chr19 | 12110494  | 12113448  | + | 0 | NA | exon (NM exon (NM   | 19674 NM_00134E   | 388507 Hs. 127475NM_001004314 | ZNF788P             | ZNF788         | zinc finger protein-coding |
| chr5-495E.12.16973 | -0.583368 | 0.678823 | -0.85938  | 0.390131 | 0.981636 | chr5  | 49535216  | 49537790  | + | 0 | NA | IntergeniALR Alpha  | 904785 NM_19844E  | 133418 Hs. 561411NM_19844E    | ENSG000000EMB       | GN70           | emigin protein-coding      |
| chr1-1444.11.64771 | -0.599318 | 0.697667 | -0.859032 | 0.390323 | 0.981636 | chr1  | 1.44E+08  | 1.44E+08  | + | 0 | NA | exon (NM exon (NM   | 15256 NR_10407E   | 1.02E+08 Hs. NR_10407E        | ENSG000000RNVU1-15  | RNU1-121 RNA,  | varisnRNA                  |
| chr14-737.9.142864 | -0.6697   | 0.779735 | -0.85888  | 0.390405 | 0.981636 | chr14 | 73718809  | 73723324  | + | 0 | NA | intron (NMIR SINE   | -6882 NM_00602E   | 9240 Hs. 194705NR_00602E      | ENSG000000PNMA1     | MA1            | PNMA famiprotein-coding    |
| chr7-928E.9.142864 | -0.6697   | 0.779735 | -0.85888  | 0.390405 | 0.981636 | chr7  | 92832644  | 92833526  | + | 0 | NA | intron (CPg         | 874 NM_00125E     | 1021 Hs. 119882NM_00125E      | ENSG000000CDK6      | MCPI12 PI      | cyclin d protein-coding    |
| chr19-38E.8.954478 | -0.69086  | 0.80479  | -0.858435 | 0.390652 | 0.981636 | chr19 | 38888369  | 38889509  | + | 0 | NA | intron (intron (N   | 5446 NR_03414E    | 22933 Hs. 466695NM_012237     | ENSG000000SIRT2     | SIR2 SIR2      | sirtuin 2 protein-coding   |
| chr21-39E.5.25209  | -0.75586  | 0.880621 | -0.85832  | 0.390714 | 0.981636 | chr21 | 39213791  | 39232318  | + | 0 | NA | intron (intron (N   |                   |                               |                     |                |                            |



|                    |          |          |          |          |          |       |          |          |        |                     |                   |                              |                      |                    |                           |                          |
|--------------------|----------|----------|----------|----------|----------|-------|----------|----------|--------|---------------------|-------------------|------------------------------|----------------------|--------------------|---------------------------|--------------------------|
| chr11-573.7.409338 | -0.73563 | 0.859743 | -0.85564 | 0.392198 | 0.981636 | chr11 | 57318773 | 57319392 | + 0 NA | intron (AluY SINE   | 5870 NM_03339E    | 85456 Hs. 53073CNM_03339E    | ENSG000002TKNS1BP1   | TAB182             | tankyrase protein-coding  |                          |
| chr12-781.7.409338 | -0.73563 | 0.859743 | -0.85564 | 0.392198 | 0.981636 | chr12 | 78178360 | 78178993 | + 0 NA | intron (intron (N   | 181070 NR_135021  | 1.05E+08 Hs. 15689ENR_135021 | ENSG000002LINC02424- |                    | long intncRNA             |                          |
| chr13-102.7.409338 | -0.73563 | 0.859743 | -0.85564 | 0.392198 | 0.981636 | chr13 | 1.03E+08 | 1.03E+08 | + 0 NA | intron (MER31B LI   | 15941 NM_001204   | 1.01E+08 Hs. 25842ENM_001204 | ENSG000002BIVM-ERCC  | ERCC5-202BIVM-ERCC | protein-coding            |                          |
| chr13-106.7.409338 | -0.73563 | 0.859743 | -0.85564 | 0.392198 | 0.981636 | chr13 | 1.1E+08  | 1.1E+08  | + 0 NA | exon (NM exon (N    | 3058 NM_00374E    | 8660 Hs. 442344NM_00374E     | ENSG000002IRS2       | IRS-2              | insulin 1 protein-coding  |                          |
| chr14-50E.7.409338 | -0.73563 | 0.859743 | -0.85564 | 0.392198 | 0.981636 | chr14 | 50648584 | 50648982 | + 0 NA | intron (AluY SINE   | 19523 NM_02181E   | 60485 Hs. 64282ENM_02181E    | ENSG000002SAV1       | SAV WW45           | salvador protein-coding   |                          |
| chr15-712.7.409338 | -0.73563 | 0.859743 | -0.85564 | 0.392198 | 0.981636 | chr15 | 71256719 | 71261142 | + 0 NA | intron (AluSp SIN   | -69871 NR_12034E  | 1.02E+08 Hs. 68047ENR_12034E | THSD4-AS1-           | THSD4              | antncRNA                  |                          |
| chr16-54E.7.409338 | -0.73563 | 0.859743 | -0.85564 | 0.392198 | 0.981636 | chr16 | 549907   | 550106   | + 0 NA | intron (intron (N   | 6729 NR_036137    | 1E+08 NR_036137              | ENSG000002MIR3176    | mir-3176           | microRNA ncRNA            |                          |
| chr20-17E.7.409338 | -0.73563 | 0.859743 | -0.85564 | 0.392198 | 0.981636 | chr20 | 17667918 | 17669556 | + 0 NA | intron (L1MED LIN   | 13505 NM_00136E   | 6238 Hs. 47221ENM_004587     | ENSG000002RRBP1      | ES/130 E           | ribosome protein-coding   |                          |
| chr4-100E.7.409338 | -0.73563 | 0.859743 | -0.85564 | 0.392198 | 0.981636 | chr4  | 10095562 | 10095840 | + 0 NA | intron (intron (N   | -17009 NR_03609C  | 1E+08 NR_03609C              | ENSG000002MIR3138    | mir-3138           | microRNA ncRNA            |                          |
| chr6-162E.7.409338 | -0.73563 | 0.859743 | -0.85564 | 0.392198 | 0.981636 | chr6  | 16247663 | 16247930 | + 0 NA | intron (NMIR SINE   | 9209 NM_006877    | 2766 Hs. 484741NM_006877     | ENSG000002GMPR1      | GMPR1 G            | guanosine protein-coding  |                          |
| chr6-130E.7.409338 | -0.73563 | 0.859743 | -0.85564 | 0.392198 | 0.981636 | chr6  | 1.31E+08 | 1.31E+08 | + 0 NA | TTS (NM_C TTS (NM_C | 11640 NM_00119E   | 1.01E+08 Hs. 38871ENM_00119E | ENSG000002SMLR1      |                    | small leu protein-coding  |                          |
| chr8-118E.7.409338 | -0.73563 | 0.859743 | -0.85564 | 0.392198 | 0.981636 | chr8  | 1.18E+08 | 1.18E+08 | + 0 NA | intron (NL3 LINE C  | 38808 NM_000127   | 2131 Hs. 49261ENM_000127     | ENSG000002EXT1       | EXT L              | GCRR protein-coding       |                          |
| chr10-40E.9.998501 | 0.624024 | 0.750635 | 0.855332 | 0.392367 | 0.981636 | chr10 | 40837518 | 40837916 | + 0 NA | IntergeniALR Alpha  | 1530298 NR_02438C | 441666 Hs. 25572ENR_02438C   | ENSG000002LOC44166E  |                    | zinc fingpseudo           |                          |
| chr14-52E.9.133157 | -0.67836 | 0.793196 | -0.85522 | 0.392429 | 0.981636 | chr14 | 52874279 | 52875179 | + 0 NA | intron (AluJr SIN   | 71626 NM_00683E   | 10979 Hs. 50934ENM_00683E    | ENSG000002FERMT2     | KIND2 MIC          | fermitin protein-coding   |                          |
| chr10-87E.10.86252 | -0.61468 | 0.718983 | -0.85494 | 0.392587 | 0.981636 | chr10 | 87800473 | 87803977 | + 0 NA | intron (NMER4-int   | 16006 NM_001321   | 84896 Hs. 43594ENM_03281C    | ENSG000002ATAD1      | AFDC1 FNF          | ATPase f2 protein-coding  |                          |
| chr12-13E.10.86252 | -0.61468 | 0.718983 | -0.85494 | 0.392587 | 0.981636 | chr12 | 1.33E+08 | 1.33E+08 | + 0 NA | intron (AluSp SIN   | -17364 NM_015114  | 23141 Hs. 65462ENM_015114    | ENSG000002ANKLE2     | KIAA0692           | ankyrin 1 protein-coding  |                          |
| chr9-110E.10.86252 | -0.61468 | 0.718983 | -0.85494 | 0.392587 | 0.981636 | chr9  | 1.11E+08 | 1.11E+08 | + 0 NA | 3' UTR (N3' UTR (N  | 145883 NM_00136E  | 4593 Hs. 52165ENM_00559E     | ENSG000002MUSK       | CMS9 FADS          | muscle as protein-coding  |                          |
| chr1-94E.7.170289  | 0.747555 | 0.874437 | 0.854899 | 0.392607 | 0.981636 | chr1  | 946308   | 947052   | + 0 NA | intron (intron (N   | 12576 NM_01565E   | 26155 Hs. 405987NM_01565E    | ENSG000002NOC2L      | CMT15 NEI          | NOC2 like protein-coding  |                          |
| chr10-10E.7.170289 | 0.747555 | 0.874437 | 0.854899 | 0.392607 | 0.981636 | chr10 | 1093973  | 1094655  | + 0 NA | intron (NMER58A DN  | -37610 NR_13430C  | 3422 Hs. 28365ENM_00450E     | ENSG000002IDI1       | IPPI IPPI          | isoprenyl protein-coding  |                          |
| chr2-262E.7.170289 | 0.747555 | 0.874437 | 0.854899 | 0.392607 | 0.981636 | chr2  | 96252531 | 96253875 | + 0 NA | 3' UTR (N3' UTR (N  | 12794 NM_00119E   | 55654 Hs. 16430ENM_01784E    | ENSG000002MEM127     |                    | transmem protein-coding   |                          |
| chr22-20E.7.170289 | 0.747555 | 0.874437 | 0.854899 | 0.392607 | 0.981636 | chr22 | 20036690 | 20037116 | + 0 NA | non-codir-non-codir | 3764 NR_02970E    | 406961 NR_02970E             | ENSG000002MIR185     | MIRN185 n          | microRNA ncRNA            |                          |
| chr6-387E.7.170289 | 0.747555 | 0.874437 | 0.854899 | 0.392607 | 0.981636 | chr6  | 38700219 | 38700482 | + 0 NA | intron (intron (N   | 2795 NM_00670E    | 2739 Hs. 26884ENM_00670E     | ENSG000002GLO1       | GLOD1 GLY          | glyoxalase protein-coding |                          |
| chr9-136E.7.170289 | 0.747555 | 0.874437 | 0.854899 | 0.392607 | 0.981636 | chr9  | 1.37E+08 | 1.37E+08 | + 0 NA | 3' UTR (N3' UTR (N  | 18662 NM_01899E   | 54461 Hs. 522507NM_01899E    | ENSG000002FBXW5      | Fbxw5              | F-box anc protein-coding  |                          |
| chr1-465E.5.452664 | 0.849467 | 0.993824 | 0.854746 | 0.392692 | 0.981636 | chr1  | 46561197 | 46567963 | + 0 NA | intron (AluSp SIN   | -12923 NM_00132E  | 148930 Hs. 350764NM_18251E   | ENSG000002KNCN       | Kino L5            | kinociliar protein-coding |                          |
| chr1-234E.5.452664 | 0.849467 | 0.993824 | 0.854746 | 0.392692 | 0.981636 | chr1  | 2.34E+08 | 2.34E+08 | + 0 NA | intron (L1MEF LIN   | 38976 NM_00564E   | 6894 Hs. 49811ENM_00564E     | ENSG000002TARBP1     | TRM3 TRM1          | TAR (HIV- protein-coding  |                          |
| chr11-64E.5.452664 | 0.849467 | 0.993824 | 0.854746 | 0.392692 | 0.981636 | chr11 | 6459466  | 6461361  | + 0 NA | intron (intron (N   | 13528 NM_03327E   | 10612 Hs. 59199ENM_00645E    | ENSG000002TRIM3      | BERP HAC1          | tripartit protein-coding  |                          |
| chr12-11E.5.452664 | 0.849467 | 0.993824 | 0.854746 | 0.392692 | 0.981636 | chr12 | 1.12E+08 | 1.12E+08 | + 0 NA | intron (intron (N   | -92762 NR_106921  | 1.02E+08 NR_106921           | ENSG000002MIR6861    | HSA miR            | microRNA ncRNA            |                          |
| chr12-12E.5.452664 | 0.849467 | 0.993824 | 0.854746 | 0.392692 | 0.981636 | chr12 | 1.21E+08 | 1.21E+08 | + 0 NA | intron (AluSq2 SI   | 9979 NM_001037    | 8655 Hs. 5120 NR_00374E      | ENSG000002YNLL1      | DLCL1 DLCC         | dynein 1 protein-coding   |                          |
| chr13-11E.5.452664 | 0.849467 | 0.993824 | 0.854746 | 0.392692 | 0.981636 | chr13 | 1.13E+08 | 1.13E+08 | + 0 NA | intron (AluJb SIN   | 6734 NM_19916E    | 113622 Hs. 98669 NM_13843C   | ENSG000002ADPRHL1    | ARH2               | ADP-ribos protein-coding  |                          |
| chr15-30E.5.452664 | 0.849467 | 0.993824 | 0.854746 | 0.392692 | 0.981636 | chr15 | 30475640 | 30476364 | + 0 NA | intron (AluSp SIN   | 2019 NR_03665E    | 11E+08 Hs. 56262ENR_036650   | WHAMMP1              | WHDC1P1            | W5 protepseudo            |                          |
| chr18-12E.5.452664 | 0.849467 | 0.993824 | 0.854746 | 0.392692 | 0.981636 | chr18 | 12449032 | 12449527 | + 0 NA | 3' UTR (N3' UTR (N  | 16505 NR_136514   | 1.05E+08 Hs. 51528ENR_136514 | LOC105371-           |                    | uncharactncRNA            |                          |
| chr19-29E.5.452664 | 0.849467 | 0.993824 | 0.854746 | 0.392692 | 0.981636 | chr19 | 29706945 | 29707325 | + 0 NA | intron (AluSx6 SI   | 7913 NM_00128E    | 83636 Hs. 529094NM_03144E    | ENSG000002C19orf12   | MPAN NBI           | chromosome protein-coding |                          |
| chr4-561E.5.452664 | 0.849467 | 0.993824 | 0.854746 | 0.392692 | 0.981636 | chr4  | 5610592  | 5611124  | + 0 NA | intron (intron (N   | 85752 NR_126517   | 10141 Hs. 17792ENM_00575E    | ENSG000002LINC01587  | CAForf6 a          | long intncRNA             |                          |
| chr6-829E.5.452664 | 0.849467 | 0.993824 | 0.854746 | 0.392692 | 0.981636 | chr6  | 82930624 | 82932149 | + 0 NA | intron (THE1C-int   | 134455 NM_00135C  | 90025 Hs. 14860ENM_19892C    | ENSG000002CUBE3D     | C6orf157 u         | ubiquitin protein-coding  |                          |
| chr7-745E.5.452664 | 0.849467 | 0.993824 | 0.854746 | 0.392692 | 0.981636 | chr7  | 74510846 | 74512868 | + 0 NA | intron (intron (N   | 57951 NM_01632E   | 9569 Hs. 64705ENM_00568E     | ENSG000002GTF21RD1   | BEN CREAM          | GTF2I rep protein-coding  |                          |
| chr1-221E.9.96522  | 0.639663 | 0.748441 | 0.854623 | 0.39276  | 0.981636 | chr1  | 2.22E+08 | 2.22E+08 | + 0 NA | intron (intron (N   | 4929 NR_11193E    | 11221 Hs. 49782ENM_00720E    | ENSG000002DUSP10     | MKP-5 MKF          | dual spec protein-coding  |                          |
| chr19-10E.6.616846 | 0.799175 | 0.935131 | 0.854613 | 0.392765 | 0.981636 | chr19 | 10454948 | 10455151 | + 0 NA | intron (intron (N   | 2117 NM_00620E    | 5141 Hs. 89901 NM_00620E     | ENSG000002PDE4A      | DPDE2 PDF          | phosphodi protein-coding  |                          |
| chr19-50E.7.154574 | 0.752167 | 0.880397 | 0.85435  | 0.392911 | 0.981636 | chr19 | 50382025 | 50382266 | + 0 NA | exon (NM exon (N    | -2178 NM_00125E   | 5424 Hs. 27941ENM_00269E     | ENSG000002POLD1      | CDC2 CRCS          | DNA polyn protein-coding  |                          |
| chr4-269E.7.342775 | -0.74675 | 0.874114 | -0.85429 | 0.392945 | 0.981636 | chr4  | 26920401 | 26921025 | + 0 NA | intron (intron (N   | 59887 NM_02086C   | 57620 Hs. 74495ENM_02086C    | ENSG000002STIM2      |                    | stromal protein-coding    |                          |
| chr1-123E.42.13848 | 0.349653 | 0.409303 | 0.854266 | 0.392958 | 0.981636 | chr1  | 1.24E+08 | 1.24E+08 | + 0 NA | IntergeniALR Alpha  | 2016633 NR_00395E | 647121 Hs. 69768ENR_00395E   | ENSG000002EMBPI1     |                    | embigin fpseudo           |                          |
| chr15-40E.9.119291 | -0.66563 | 0.779192 | -0.85426 | 0.392961 | 0.981636 | chr15 | 49131275 | 49131682 | + 0 NA | intron (intron (N   | 24121 NM_00114E   | 9318 Hs. 369614NM_00423E     | ENSG000002COP5E      | ALIEN CSN          | COP9 sigr protein-coding  |                          |
| chr4-109E.9.119291 | -0.66563 | 0.779192 | -0.85426 | 0.392961 | 0.981636 | chr4  | 10072403 | 10075574 | + 0 NA | TTS (NM_C TTS (NM_C | 4704 NR_03609C    | ENSG000002MIR3138            | 1E+08 NR_03609C      | ENSG000002MIR3138  | ALIEN CSN                 | COP9 sigr protein-coding |
| chr4-113E.9.119291 | -0.66563 | 0.779192 | -0.85426 | 0.392961 | 0.981636 | chr4  | 1.14E+08 | 1.14E+08 | + 0 NA | 3' UTR (N3' UTR (N  | 77839 NM_00135A   | 79642 Hs. 22895 NM_02459C    | ENSG000002CARSJ      | ASJ                | arylsulf protein-coding   |                          |
| chr1-166E.14.91196 | 0.531373 | 0.622083 | 0.854183 | 0.393004 | 0.981636 | chr1  | 16603810 | 16604399 | + 0 NA | intron (intron (N   | 9501 NM_01794C    | 55672 Hs. 467587NM_01794C    | ENSG000002NBPF1      | AB13 AB14          | NBPF memt protein-coding  |                          |
| chr16-39E.9.973078 | 0.637966 | 0.746877 | 0.854177 | 0.393007 | 0.981636 | chr16 | 3965992  | 3966681  | + 0 NA | exon (NM exon (N    | -15892 NR_120311  | 1.03E+08 Hs. 36473ENR_120311 | ENSG000002LOC102724- |                    | uncharactncRNA            |                          |
| chr11-15E.5.444806 | 0.852527 | 0.998892 | 0.853473 | 0.393397 | 0.981636 | chr11 | 15232763 | 15233814 | + 0 NA | intron (intron (N   | 84186 NM_00127E   | 387755 Hs. 591997NM_00103E   | ENSG000002INSC       |                    | INSC spir protein-coding  |                          |
| chr19-54E.5.444806 | 0.852527 | 0.998892 | 0.853473 | 0.393397 | 0.981636 | chr19 | 54175674 | 54177473 | + 0 NA | intron (NMER20 DN   | -3413 NM_00114E   | 147798 Hs. 35512ENM_14468E   | ENSG000002TMC4       |                    | transmem protein-coding   |                          |
| chr6-897E.5.444806 | 0.852527 | 0.998892 | 0.853473 | 0.393397 | 0.981636 | chr6  | 89770478 | 89771746 | + 0 NA | intron (NLTR35B LI  | 48682 NM_014611   | 23195 Hs. 52994ENM_014611    | ENSG000002MDM1       | Real               | midasin 1 protein-coding  |                          |
| chr7-140E.5.444806 | 0.852527 | 0.998892 | 0.853473 | 0.393397 | 0.981636 | chr7  | 1.4E+08  | 1.4E+08  | + 0 NA | intron (L1ME4b LI   | 44790 NM_00136E   | 84255 Hs. 446021NM_03229E    | ENSG000002SLC37A3    |                    | solute c protein-coding   |                          |
| chr3-152E.6.840179 | -0.79859 | 0.935709 | -0.85346 | 0.393406 | 0.981636 | chr3  | 15224519 | 15224733 | + 0 NA | intron (L1ME4a LI   | 18380 NM_01429E   | 23473 Hs. 595234NM_01429E    | ENSG000002CAPN7      | CALPAINT           | calpain 7 protein-coding  |                          |
| chr3-12E.9.086009  | -0.67004 | 0.785167 | -0.85338 | 0.39345  | 0.981636 | chr3  | 1.25E+08 | 1.25E+08 |        |                     |                   |                              |                      |                    |                           |                          |

|                    |          |          |          |          |          |       |          |          |   |      |                      |                  |                              |                     |                |                                        |                                    |
|--------------------|----------|----------|----------|----------|----------|-------|----------|----------|---|------|----------------------|------------------|------------------------------|---------------------|----------------|----------------------------------------|------------------------------------|
| chr16-317 5.460522 | 0.846349 | 0.998774 | 0.847388 | 0.396779 | 0.981636 | chr16 | 31750939 | 31752384 | + | 0 NA | intron (NLIP4 LINE)  | 38432 NM_00113C  | 124411 Hs. 528822cNM_001004  | ENSG000002ZNF720    | -              | zinc finger protein-coding             |                                    |
| chr16-68: 5.460522 | 0.846349 | 0.998774 | 0.847388 | 0.396779 | 0.981636 | chr16 | 68322001 | 68322350 | + | 0 NA | intron (Nintron (N   | 11061 NM_00129C  | 54946 Hs. 64022cNM_01902c    | ENSG000002PRM77     | -              | SBIDDS protein-coding                  |                                    |
| chr19-12: 5.460522 | 0.846349 | 0.998774 | 0.847388 | 0.396779 | 0.981636 | chr19 | 12236540 | 12237500 | + | 0 NA | IntergeniMER57E3 I   | 42005 NR_10417E  | 1E+08 Hs. 66260cNR_104179    | LOC10028c           | -              | uncharacterized RNA                    |                                    |
| chr19-35: 5.460522 | 0.846349 | 0.998774 | 0.847388 | 0.396779 | 0.981636 | chr19 | 35941859 | 35942455 | + | 0 NA | intron (NALuYm S I   | -4958 NR_13652E  | 1.05E+08 Hs. 64159cNR_136525 | LOC10537c           | -              | uncharacterized RNA                    |                                    |
| chr21-46: 5.460522 | 0.846349 | 0.998774 | 0.847388 | 0.396779 | 0.981636 | chr21 | 46208062 | 46211257 | + | 0 NA | intron (Nintron (N   | -15500 NR_147580 | 1.1E+08 NR_147580            | SNORD159            | -              | small nucleolar RNA                    |                                    |
| chr3-379: 5.460522 | 0.846349 | 0.998774 | 0.847388 | 0.396779 | 0.981636 | chr3  | 37980554 | 37983258 | + | 0 NA | 3' UTR (N3' UTR (N   | -11681 NM_01587c | 50853 Hs. 10366cNM_01587c    | ENSG000002CIVL      | -              | villin liprotein-coding                |                                    |
| chr5-8147 11.31427 | -0.59921 | 0.70732  | -0.84716 | 0.396906 | 0.981636 | chr5  | 81473208 | 81473738 | + | 0 NA | intron (NLIP4 LINE)  | -79354 NM_130767 | 134526 Hs. 59175cNM_130767   | ENSG000002ACOT12    | -              | CACH-1 Caelyl-CoA protein-coding       |                                    |
| chr12-301 6.932166 | -0.77789 | 0.918265 | -0.84713 | 0.396924 | 0.981636 | chr12 | 301829   | 3021300  | + | 0 NA | intron (NLIP4 LINE)  | -39106 NM_00119C | 6540 Hs. 50439cNM_01661c     | ENSG000002SLC6A13   | -              | GAT-2 GAI solute c protein-coding      |                                    |
| chr4-118: 6.932166 | -0.77789 | 0.918265 | -0.84713 | 0.396924 | 0.981636 | chr4  | 1.19E+08 | 1.19E+08 | + | 0 NA | intron (NL2c LINE )  | 8903 NM_01482c   | 9871 Hs. 189641cNM_01482c    | ENSG000002SEC24D    | -              | CLCRP2 SEC24 hom protein-coding        |                                    |
| chr20-38: 7.735291 | 0.724064 | 0.854743 | 0.847112 | 0.396932 | 0.981636 | chr20 | 38063902 | 38064539 | + | 0 NA | intron (Nintron (N   | 30474 NM_02121E  | 58490 Hs. 27883cNM_02121E    | ENSG000002RPRD1B    | -              | C20orf77 regulator protein-coding      |                                    |
| chr9-1364 4.897371 | 0.913331 | 1.078433 | 0.846906 | 0.397047 | 0.981636 | chr9  | 1.36E+08 | 1.36E+08 | + | 0 NA | intron (Nintron (N   | -2675 NM_152571  | 158055 Hs. 21261cNM_152571   | C9orf163            | -              | chromosome protein-coding              |                                    |
| chr15-307 5.675812 | -0.84343 | 0.995921 | -0.84689 | 0.397059 | 0.981636 | chr15 | 30730979 | 30731367 | + | 0 NA | intron (Nintron (N   | 72456 NR_03825E  | 1E+08 Hs. 66895cNR_03825E    | ENSG000002LOC10028E | -              | OTU deubiquitinase                     |                                    |
| chr16-24: 5.675812 | -0.84343 | 0.995921 | -0.84689 | 0.397059 | 0.981636 | chr16 | 2446257  | 2447188  | + | 0 NA | intron (Nintron (N   | 1330 NR_10682E   | 1.02E+08 NR_10682E           | ENSG000002MIR6767   | -              | hsa-mir-61 microRNA ncRNA              |                                    |
| chr4-880 5.675812  | -0.84343 | 0.995921 | -0.84689 | 0.397059 | 0.981636 | chr4  | 88063355 | 88063833 | + | 0 NA | intron (Nintron (N   | 55958 NR_15648E  | 5311 Hs. 18127cNM_000297     | ENSG000002PKD2      | -              | APKD2 PC2 polycystin protein-coding    |                                    |
| chr7-560: 5.675812 | -0.84343 | 0.995921 | -0.84689 | 0.397059 | 0.981636 | chr7  | 56027849 | 56028347 | + | 0 NA | intron (Nintron (N   | 23346 NM_00137C  | 5723 Hs. 51265cNM_004577     | ENSG000002PSPH      | -              | PSP PSPH phosphoprotein-coding         |                                    |
| chr17-75: 5.642531 | -0.85093 | 1.005244 | -0.84649 | 0.39728  | 0.981636 | chr17 | 75680686 | 75680885 | + | 0 NA | intron (NALuYb S I   | 13447 NM_01326C  | 29115 Hs. 65508cNM_01326C    | ENSG000002SAP30BP   | -              | HCGNG HITSAP30 bir protein-coding      |                                    |
| chr5-873: 5.642531 | -0.85093 | 1.005244 | -0.84649 | 0.39728  | 0.981636 | chr5  | 87370504 | 87371207 | + | 0 NA | intron (Nintron (N   | 42049 NM_00119E  | 902 Hs. 292524cNM_00123E     | ENSG000002CCNH      | -              | CAK CyclH cyclin H protein-coding      |                                    |
| chr7-121: 4.468456 | -0.94187 | 1.112785 | -0.8464  | 0.397327 | 0.981636 | chr7  | 1.21E+08 | 1.21E+08 | + | 0 NA | intron (Nintron (N   | 82165 NM_00110E  | 79974 Hs. 18965cNM_02491E    | ENSG000002CPED1     | -              | C7orf58 cadherin protein-coding        |                                    |
| chr18-12: 4.460598 | -0.93931 | 1.109807 | -0.84638 | 0.397343 | 0.981636 | chr18 | 12971346 | 12972088 | + | 0 NA | intron (NL2c LINE )  | -19645 NM_03214E | 55125 Hs. 100914cNM_01806E   | ENSG000002CEP192    | -              | PPP1R62 centrosome protein-coding      |                                    |
| chr4-787: 4.460598 | -0.93931 | 1.109807 | -0.84638 | 0.397343 | 0.981636 | chr4  | 78794730 | 78795369 | + | 0 NA | intron (Nintron (N   | 18671 NM_19898E  | 55589 Hs. 146551cNM_01759E   | ENSG000002BMP2K     | -              | BIKE HRI BMP2 indt protein-coding      |                                    |
| chr9-137: 4.460598 | -0.93931 | 1.109807 | -0.84638 | 0.397343 | 0.981636 | chr9  | 1.38E+08 | 1.38E+08 | + | 0 NA | intron (Nintron (N   | 35176 NR_14750E  | 651337 Hs. 60319cNR_14750E   | ENSG000002LOC651337 | -              | uncharacterized RNA                    |                                    |
| chr1-855: 21.97981 | -0.44344 | 0.523942 | -0.84636 | 0.397355 | 0.981636 | chr1  | 85581111 | 85583536 | + | 0 NA | intron (Nintron (N   | 1562 NM_001554   | 3491 Hs. 8867                | NR_001554           | ENSG000002CCN1 | -                                      | CYR61 GIC cellular protein-coding  |
| chr1-185: 9.955512 | 0.632293 | 0.747175 | 0.846245 | 0.397416 | 0.981636 | chr1  | 1.85E+08 | 1.85E+08 | + | 0 NA | intron (NLIM7 LINE ) | 22105 NM_030934  | 81627 Hs. 10714cNM_030934    | ENSG000002TRMT1L    | -              | Clorf25 tRNA met protein-coding        |                                    |
| chr1-207: 9.955512 | 0.632293 | 0.747175 | 0.846245 | 0.397416 | 0.981636 | chr20 | 2.08E+08 | 2.08E+08 | + | 0 NA | intron (Nintron (N   | 9579 NM_17235E   | 4179 Hs. 51403cNM_00238E     | ENSG000002CD46      | -              | AHUS2 MCFC46 mole protein-coding       |                                    |
| chr19-52: 9.955512 | 0.632293 | 0.747175 | 0.846245 | 0.397416 | 0.981636 | chr19 | 52156855 | 52165237 | + | 0 NA | intron (NMIR SINE )  | 10575 NM_00110E  | 162962 Hs. 631584cNM_00110E  | ENSG000002ZNF836    | -              | zinc finger protein-coding             |                                    |
| chr8-102: 9.955512 | 0.632293 | 0.747175 | 0.846245 | 0.397416 | 0.981636 | chr8  | 1.02E+08 | 1.02E+08 | + | 0 NA | intron (Nintron (N   | 14226 NM_00117E  | 51034 Hs. 51259cNM_01571E    | ENSG000002RRM2B     | -              | MTDPS8A ribonucleic protein-coding     |                                    |
| chr16-30: 9.955512 | -0.56623 | 0.66913  | -0.84622 | 0.397431 | 0.981636 | chr20 | 30288275 | 30288614 | + | 0 NA | intron (NALuJo S I   | -40031 NM_001321 | 60387 Hs. 58573cNM_001321    | ENSG000002NPIP13    | -              | nuclear i protein-coding               |                                    |
| chr1-235: 12.67417 | 0.564203 | 0.666745 | 0.846205 | 0.397438 | 0.981636 | chr1  | 23557487 | 23559335 | + | 0 NA | 3' UTR (N3' UTR (N   | 1090 NM_002167   | 3399 Hs. 76884               | NR_002167           | ENSG000002ID3  | -                                      | HEIR-1 hb inhibitor protein-coding |
| chr16-34: 12.67417 | 0.564203 | 0.666745 | 0.846205 | 0.397438 | 0.981636 | chr16 | 3403837  | 3409864  | + | 0 NA | TTS (NM_C TTS (NM_C  | 5635 NM_001347   | 7727 Hs. 155204cNM_00345E    | ENSG000002ZNF174    | -              | ZSCAN8 zinc finger protein-coding      |                                    |
| chr7-64: 12.67417  | 0.564203 | 0.666745 | 0.846205 | 0.397438 | 0.981636 | chr7  | 6445609  | 6448584  | + | 0 NA | intron (NALuSj S I   | 2263 NM_13917E   | 221955 Hs. 48749cNM_13917E   | ENSG000002DAGLB     | -              | DAGLBETA diacylglycerol protein-coding |                                    |
| chr1-114: 7.178147 | 0.745127 | 0.880686 | 0.846076 | 0.39751  | 0.981636 | chr1  | 11146406 | 11146951 | + | 0 NA | exon (NM_exon (NM_   | 2780 NR_04660C   | 1.01E+08 Hs. 67913cNR_04660C | ENSG000002MTOR-AS1  | -              | MTOR anticRNA                          |                                    |
| chr1-204: 7.178147 | 0.745127 | 0.880686 | 0.846076 | 0.39751  | 0.981636 | chr1  | 20644185 | 20644700 | + | 0 NA | intron (Nintron (N   | 7751 NR_046507   | 1.01E+08 Hs. 71025cNR_046507 | ENSG000002PINK1-AS  | -              | NAPINK1 PINK1 anticRNA                 |                                    |
| chr11-66: 7.178147 | 0.745127 | 0.880686 | 0.846076 | 0.39751  | 0.981636 | chr11 | 64281228 | 64282717 | + | 0 NA | intron (NALuSc S I   | -2367 NM_00117C  | 56834 Hs. 52376cNM_02015E    | ENSG000002GPR137    | -              | CL1orf4 C protein-coding               |                                    |
| chr11-69: 7.178147 | 0.745127 | 0.880686 | 0.846076 | 0.39751  | 0.981636 | chr11 | 69055436 | 69055635 | + | 0 NA | intron (Nintron (N   | 6603 NM_13907E   | 219931 Hs. 131851cNM_13907E  | ENSG000002TPCN2     | -              | SHEP10 Tf two pore protein-coding      |                                    |
| chr11-13: 7.178147 | 0.745127 | 0.880686 | 0.846076 | 0.39751  | 0.981636 | chr11 | 1.3E+08  | 1.3E+08  | + | 0 NA | TTS (NM_C TTS (NM_C  | -14686 NM_02197E | 6768 Hs. 50431cNM_02197E     | ENSG000002ST14      | -              | ARCT11 H suppressin protein-coding     |                                    |
| chr14-10: 7.178147 | 0.745127 | 0.880686 | 0.846076 | 0.39751  | 0.981636 | chr14 | 1.05E+08 | 1.05E+08 | + | 0 NA | intron (Nintron (N   | 21823 NM_14568E  | 2972 Hs. 424484cNM_00151E    | ENSG000002BRF1      | -              | BRF1 BRF1 RNA protein-coding           |                                    |
| chr2-208: 7.178147 | 0.745127 | 0.880686 | 0.846076 | 0.39751  | 0.981636 | chr2  | 2.08E+08 | 2.08E+08 | + | 0 NA | intron (NALuJr4 S I  | 6540 NM_00128E   | 3417 Hs. 59342cNM_00589E     | ENSG000002IDH1      | -              | HEL-216 E isocitrat protein-coding     |                                    |
| chr3-488: 7.178147 | 0.745127 | 0.880686 | 0.846076 | 0.39751  | 0.981636 | chr3  | 48858593 | 48859385 | + | 0 NA | intron (Nintron (N   | 11052 NR_10999E  | 1.01E+08 Hs. 63425cNR_10999E | ENSG000002PRKAR2A-1 | -              | PRKAR2A ncRNA                          |                                    |
| chr8-143: 7.178147 | 0.745127 | 0.880686 | 0.846076 | 0.39751  | 0.981636 | chr8  | 1.44E+08 | 1.44E+08 | + | 0 NA | 3' UTR (N3' UTR (N   | 2390 NR_106904   | 1.02E+08 NR_106904           | ENSG000002MIR6845   | -              | hsa-mir-61 microRNA ncRNA              |                                    |
| chr22-40: 12.11888 | 0.576649 | 0.682286 | 0.845172 | 0.398015 | 0.981636 | chr22 | 40300708 | 40301607 | + | 0 NA | exon (NM_exon (NM_   | -45343 NM_00136E | 158 Hs. 75527                | NR_00002E           | ENSG000002ADSL | -                                      | AMPS ASAs adenylost protein-coding |
| chr22-22: 11.33184 | -0.59343 | 0.702455 | -0.84479 | 0.398226 | 0.981636 | chr22 | 37676457 | 37676804 | + | 0 NA | intron (NL2b LINE )  | 2534 NM_00230E   | 3956 Hs. 445351cNM_00230E    | ENSG000002LGLS1     | -              | GALL GB galactin protein-coding        |                                    |
| chr5-37: 11.33184  | -0.59343 | 0.702455 | -0.84479 | 0.398226 | 0.981636 | chr5  | 73767183 | 73767964 | + | 0 NA | intron (THE1B-int    | -46153 NM_001244 | 64283 Hs. 482521cNM_00108E   | ENSG000002ARHGFE28  | -              | RGNEF RIF Rho guaniprotein-coding      |                                    |
| chr1-179: 9.92223  | 0.629923 | 0.745685 | 0.844757 | 0.398246 | 0.981636 | chr1  | 1.8E+08  | 1.8E+08  | + | 0 NA | intron (Nintron (N   | 19305 NM_00134E  | 163590 Hs. 571797cNM_022347  | ENSG000002TOR1AIP2  | -              | IFRG15 Ll torsin 1 protein-coding      |                                    |
| chr2-443: 9.92223  | 0.629923 | 0.745685 | 0.844757 | 0.398246 | 0.981636 | chr2  | 44310032 | 44315241 | + | 0 NA | exon (NM_exon (NM_   | 37156 NM_000341  | 6519 Hs. 11291cNM_000341     | ENSG000002SLC3A1    | -              | ATRI CSN solute c protein-coding       |                                    |
| chr1-146: 7.733441 | 0.712339 | 0.843414 | 0.84459  | 0.39834  | 0.981636 | chr1  | 1.47E+08 | 1.47E+08 | + | 0 NA | intron (NLTR5_Hs I   | 10133 NM_00127E  | 149013 Hs. 666981cNM_00127E  | ENSG000002CNBP12    | -              | COAS1 KI ANBP mem protein-coding       |                                    |
| chr15-77: 7.733441 | 0.712339 | 0.843414 | 0.84459  | 0.39834  | 0.981636 | chr15 | 7798716  | 77999244 | + | 0 NA | intron (Nintron (N   | -4755 NR_02699E  | 91450 Hs. 40676cNR_02699E    | LOC91450            | -              | uncharacterized RNA                    |                                    |
| chr16-15: 7.733441 | 0.712339 | 0.843414 | 0.84459  | 0.39834  | 0.981636 | chr16 | 15616662 | 15617835 | + | 0 NA | intron (Nintron (N   | -6153 NR_106761  | 1.02E+08 NR_106761           | ENSG000002MIR6506   | -              | hsa-mir-61 microRNA ncRNA              |                                    |
| chr19-62: 7.733441 | 0.712339 | 0.843414 | 0.84459  | 0.39834  | 0.981636 | chr19 | 628517   | 628890   | + | 0 NA | intron (NLIM4 LINE ) | 4834 NM_00503E   | 5442 Hs. 25411cNM_00503E     | ENSG000002POLRMT    | -              | APOLMT MTRNA poly protein-coding       |                                    |
| chr22-50: 7.733441 | 0.712339 | 0.843414 | 0.84459  | 0.39834  | 0.981636 | chr22 | 50453649 | 50457157 | + | 0 NA | exon (NM_exon (NM_   | 19632 NM_00297E  | 6305 Hs. 589924cNM_00297E    | ENSG000002SBF1      | -              | CMT4B3 DE SET bindi protein-coding     |                                    |
| chr9-134: 7.733441 | 0.712339 | 0.843414 | 0.84459  | 0.39834  | 0.981636 | chr9  | 1.33E+08 | 1.       |   |      |                      |                  |                              |                     |                |                                        |                                    |



|                     |          |          |          |          |          |       |          |          |        |                    |                   |                            |                     |                            |                               |                                  |           |
|---------------------|----------|----------|----------|----------|----------|-------|----------|----------|--------|--------------------|-------------------|----------------------------|---------------------|----------------------------|-------------------------------|----------------------------------|-----------|
| chr14-347 6. 127561 | -0.79458 | 0.945886 | -0.84004 | 0.400884 | 0.981636 | chr14 | 34775474 | 34776839 | + 0 NA | exon (NM exon (NM  | -61333 NR_02813C  | 1073 Hs. 180141NM_021914   | ENSG00000CFL2       | NEM7                       | cofilin 2 protein-coding      |                                  |           |
| chr15-487 6. 127561 | -0.79458 | 0.945886 | -0.84004 | 0.400884 | 0.981636 | chr15 | 48741061 | 48741612 | + 0 NA | intron (HALIME LI  | 69733 NM_01498E   | 22995 Hs. 44300FNM_01498E  | ENSG00000CEP152     | MCPH4 MCFC                 | centrosome protein-coding     |                                  |           |
| chr16-184 6. 127561 | -0.79458 | 0.945886 | -0.84004 | 0.400884 | 0.981636 | chr16 | 18499090 | 18499484 | + 0 NA | TTS (NM_TTS (NM_I  | -4711 NR_03614E   | 1E+08                      | NR_03614E           | ENSG00000CIR3179           | microRNA ncRNA                |                                  |           |
| chr3-9484 6. 127561 | -0.79458 | 0.945886 | -0.84004 | 0.400884 | 0.981636 | chr3  | 9484254  | 9485202  | + 0 NA | IntergeniLMC2 LI   | 69094 NM_19856E   | 375323 Hs. 56782E          | NR_19856E           | ENSG00000LHFP4             | GARLH4                        | LHFP4 ltr protein-coding         |           |
| chr1-9444 15. 42426 | 0.51635  | 0.614785 | 0.839887 | 0.400972 | 0.981636 | chr1  | 94449174 | 94450846 | + 0 NA | intron (HERVC2 IR  | 31621 NM_00285E   | 5825 Hs. 70057E            | NR_00285E           | ENSG00000ABCDC3            | ABC43 CBATP                   | bindi protein-coding             |           |
| chr19-27C 15. 42426 | 0.51635  | 0.614785 | 0.839887 | 0.400972 | 0.981636 | chr19 | 27076526 | 27077680 | + 0 NA | IntergeniALR Alpha | -716328 NR_14673E | 1.02E+08                   | Hs. 567934NR_110687 | ENSG00000CLOC101927        | uncharacterized ncRNA         |                                  |           |
| chr5-4932 28. 87428 | 0.399333 | 0.475563 | 0.839707 | 0.401073 | 0.981636 | chr5  | 49325611 | 49326176 | + 0 NA | IntergeniALR Alpha | 1115395 NM_19844E | 133418 Hs. 561411NM_19844E | ENSG00000EMB        | GP70                       | emgbin protein-coding         |                                  |           |
| chr8-3875 5. 716952 | -0.83786 | 0.997836 | -0.83968 | 0.401088 | 0.981636 | chr8  | 38794685 | 38795441 | + 0 NA | intron (intron (N  | 6957 NM_00135E    | 6867 Hs. 27924E            | NR_00628E           | ENSG00000TACC1             | GA55                          | transform protein-coding         |           |
| chr9-703C 11. 36512 | -0.58995 | 0.70267  | -0.83959 | 0.40114  | 0.981636 | chr9  | 70301421 | 70302922 | + 0 NA | intron (AluSx SIN  | 43193 NM_01511C   | 23137 Hs. 53418E           | NR_01511C           | ENSG00000CMC5              | SMC5L1                        | structural protein-coding        |           |
| chr1-1234 18. 59652 | 0.471842 | 0.562018 | 0.83955  | 0.401161 | 0.981636 | chr1  | 1.23E+08 | 1.23E+08 | + 0 NA | IntergeniALR Alpha | 1904312 NR_00395E | 647121 Hs. 69768E          | NR_00395E           | ENSG00000EMB51             | emgbin ltr pseudo             |                                  |           |
| chr4-398 6. 370864  | -0.85099 | 1.013966 | -0.83927 | 0.401318 | 0.981636 | chr4  | 39886377 | 39886576 | + 0 NA | intron (AluSp SIN  | 91435 NM_00110C   | 23244 Hs. 331431NM_01520C  | ENSG00000PDS5A      | PIG54 SCC                  | PDS5 cohesin protein-coding   |                                  |           |
| chr3-1237 11. 35726 | -0.58884 | 0.701628 | -0.83925 | 0.40133  | 0.981636 | chr3  | 1.24E+08 | 1.24E+08 | + 0 NA | intron (intron (N  | 43925 NR_04662E   | 1.01E+08                   | Hs. 66731E          | NR_04662E                  | ENSG00000MYLK-AS2             | MYLK                             | antincRNA |
| chr1-123 7. 708017  | 0.707269 | 0.842964 | 0.839026 | 0.401454 | 0.981636 | chr1  | 12318148 | 12318579 | + 0 NA | intron (intron (N  | 88333 NM_01537E   | 55187 Hs. 439381NM_01537E  | ENSG00000VPS13D     | SCAR4                      | vacuolar protein-coding       |                                  |           |
| chr1-1924 7. 708017 | 0.707269 | 0.842964 | 0.839026 | 0.401454 | 0.981636 | chr1  | 19241935 | 19241879 | + 0 NA | intron (intron (N  | 8148 NM_001271    | 23065 Hs. 43920C           | NR_015047           | ENSG00000EMC1              | CAV1PMR BER                   | membrane protein-coding          |           |
| chr1-1565 7. 708017 | 0.707269 | 0.842964 | 0.839026 | 0.401454 | 0.981636 | chr1  | 1.57E+08 | 1.57E+08 | + 0 NA | intron (AluJr SIN  | -14311 NR_030527  | 768220                     | NR_030527           | ENSG00000CIR765            | MIRN765 f                     | microRNA ncRNA                   |           |
| chr1-1656 7. 708017 | 0.707269 | 0.842964 | 0.839026 | 0.401454 | 0.981636 | chr1  | 1.66E+08 | 1.66E+08 | + 0 NA | intron (intron (N  | 21749 NM_00452E   | 4259 Hs. 191734NM_00452E   | ENSG00000MGST3      | GST-III                    | microsome protein-coding      |                                  |           |
| chr1-183 7. 708017  | 0.707269 | 0.842964 | 0.839026 | 0.401454 | 0.981636 | chr1  | 1.84E+08 | 1.84E+08 | + 0 NA | intron (LIMD3 LIN  | 94405 NM_001297   | 23179 Hs. 49714E           | NR_01514E           | ENSG00000CRL1              | RGL                           | racal guanine protein-coding     |           |
| chr10-11 7. 708017  | 0.707269 | 0.842964 | 0.839026 | 0.401454 | 0.981636 | chr10 | 1.13E+08 | 1.13E+08 | + 0 NA | intron (intron (N  | 23963 NM_00134E   | 6934 Hs. 59399E            | NR_03075E           | ENSG00000CF7L2             | TCF-4 TCF                     | transcription protein-coding     |           |
| chr11-714 7. 708017 | 0.707269 | 0.842964 | 0.839026 | 0.401454 | 0.981636 | chr11 | 71482874 | 71486899 | + 0 NA | intron (N (AGTGTG  | 11383 NR_10681E   | 1.02E+08                   | NR_10681E           | ENSG00000MIR6754           | hsa-mir-6                     | microRNA ncRNA                   |           |
| chr12-122 7. 708017 | 0.707269 | 0.842964 | 0.839026 | 0.401454 | 0.981636 | chr12 | 1.22E+08 | 1.22E+08 | + 0 NA | 3' UTR (N3' UTR (N | -4274 NM_019887   | 56616 Hs. 169611NM_019887  | ENSG00000DIABLO     | DFNA64 S                   | diablo 1 protein-coding       |                                  |           |
| chr14-677 7. 708017 | 0.707269 | 0.842964 | 0.839026 | 0.401454 | 0.981636 | chr14 | 67788126 | 67790794 | + 0 NA | exon (NM exon (NM  | 21730 NM_01534E   | 23503 Hs. 98041            | NR_01534E           | ENSG00000ZFVY26            | FYVE-CEN1                     | zinc finger protein-coding       |           |
| chr15-52E 7. 708017 | 0.707269 | 0.842964 | 0.839026 | 0.401454 | 0.981636 | chr15 | 52609217 | 52612108 | + 0 NA | intron (intron (N  | -41216 NM_00130E  | 10776 Hs. 51290E           | NR_00662E           | ENSG00000ARPP19            | ARPP-16 A                     | cAMP regulated protein-coding    |           |
| chr15-72 7. 708017  | 0.707269 | 0.842964 | 0.839026 | 0.401454 | 0.981636 | chr15 | 72241068 | 72241470 | + 0 NA | TTS (NR_TTS (NR_I  | -9645 NM_00120E   | 5315 Hs. 53477E            | NR_00265E           | ENSG00000CPKM              | CTHBP HEL                     | pyruvate protein-coding          |           |
| chr16-864 7. 708017 | 0.707269 | 0.842964 | 0.839026 | 0.401454 | 0.981636 | chr16 | 8641854  | 8645685  | + 0 NA | intron (AluSx SIN  | 22071 NR_13460E   | 79091 Hs. 30638E           | NR_02410E           | ENSG00000METTL22           | C16orf68                      | methyltransferase protein-coding |           |
| chr17-121 7. 708017 | 0.707269 | 0.842964 | 0.839026 | 0.401454 | 0.981636 | chr17 | 12118287 | 12118486 | + 0 NA | intron (Tigger4 I  | 36487 NR_03061E   | 1E+08                      | NR_03061E           | ENSG00000CIR744            | MIRN744 f                     | microRNA ncRNA                   |           |
| chr17-182 7. 708017 | 0.707269 | 0.842964 | 0.839026 | 0.401454 | 0.981636 | chr17 | 18263175 | 18265562 | + 0 NA | exon (NM exon (NM  | 3258 NM_14888E    | 125170 Hs. 65555E          | NR_13916E           | ENSG00000MIEF2             | MID49 SMC                     | mitochondrial protein-coding     |           |
| chr17-29C 7. 708017 | 0.707269 | 0.842964 | 0.839026 | 0.401454 | 0.981636 | chr17 | 29085785 | 29089594 | + 0 NA | exon (NM exon (NM  | -16760 NM_00474C  | 9220 Hs. 46259E            | NR_00474C           | ENSG00000TIAF1             | MAJN SPR2                     | TGFBI-nc protein-coding          |           |
| chr19-237 7. 708017 | 0.707269 | 0.842964 | 0.839026 | 0.401454 | 0.981636 | chr19 | 23744153 | 23744755 | + 0 NA | exon (NM exon (NM  | 14437 NM_13828E   | 148213 Hs. 39995E          | NR_13828E           | ENSG00000ZNF681            | zinc finger protein-coding    |                                  |           |
| chr19-40 7. 708017  | 0.707269 | 0.842964 | 0.839026 | 0.401454 | 0.981636 | chr19 | 40321902 | 40326795 | + 0 NA | intron (intron (N  | 24049 NR_04620E   | 126526 Hs. 631557NM_17883C | ENSG00000C19orf47   | chromosom protein-coding   |                               |                                  |           |
| chr2-702 7. 708017  | 0.707269 | 0.842964 | 0.839026 | 0.401454 | 0.981636 | chr2  | 70264858 | 70267778 | + 0 NA | intron (MLT1D LTF  | 8181 NM_016297    | 51449 Hs. 56750E           | NR_016297           | ENSG00000PCYOX1            | PCL1                          | prenylation protein-coding       |           |
| chr2-1137 7. 708017 | 0.707269 | 0.842964 | 0.839026 | 0.401454 | 0.981636 | chr2  | 1.14E+08 | 1.14E+08 | + 0 NA | intron (THE1D LTF  | -5699 NR_03994E   | 1.01E+08                   | NR_03994E           | ENSG00000CIR4782           | microRNA ncRNA                |                                  |           |
| chr2-504 7. 708017  | 0.707269 | 0.842964 | 0.839026 | 0.401454 | 0.981636 | chr2  | 50458534 | 50464586 | + 0 NA | exon (NM exon (NM  | 13475 NM_00297E   | 6305 Hs. 58992E            | NR_00297E           | ENSG00000SBF1              | CMT4B3 DEF                    | SET domain protein-coding        |           |
| chr3-1965 7. 708017 | 0.707269 | 0.842964 | 0.839026 | 0.401454 | 0.981636 | chr3  | 1.97E+08 | 1.97E+08 | + 0 NA | 3' UTR (N3' UTR (N | -8536 NR_04663C   | 1.01E+08                   | Hs. 591671NR_04663C | NCBP2-AS1                  | NCBP2                         | antincRNA                        |           |
| chr4-323 7. 708017  | 0.707269 | 0.842964 | 0.839026 | 0.401454 | 0.981636 | chr4  | 3235435  | 3236486  | + 0 NA | intron (intron (N  | -8409 NM_00133C   | 345222 Hs. 442291NM_00101E | ENSG00000CMSANTD1   | C4orf44                    | Myb/SANT protein-coding       |                                  |           |
| chr6-352E 7. 708017 | 0.707269 | 0.842964 | 0.839026 | 0.401454 | 0.981636 | chr6  | 35289275 | 35293597 | + 0 NA | intron (intron (N  | -6382 NM_022047   | 50619 Hs. 15476            | NR_022047           | ENSG00000DEF6              | I6P SLAT DEF6                 | guar protein-coding              |           |
| chr6-441 7. 708017  | 0.707269 | 0.842964 | 0.839026 | 0.401454 | 0.981636 | chr6  | 44134734 | 44150081 | + 0 NA | intron (AluSx4 SI  | 14853 NM_01842E   | 55362 Hs. 41447E           | NR_01842E           | ENSG00000TMEM63B           | Gor110                        | transmembrane protein-coding     |           |
| chr6-832 7. 708017  | 0.707269 | 0.842964 | 0.839026 | 0.401454 | 0.981636 | chr6  | 83292543 | 83292917 | + 0 NA | intron (LIPA7 LIN  | -98830 NM_00119E  | 5238 Hs. 66166E            | NR_01559E           | ENSG00000PGM3              | AGM1 IMD2                     | phosphoglycoprotein-coding       |           |
| chr7-259E 7. 708017 | 0.707269 | 0.842964 | 0.839026 | 0.401454 | 0.981636 | chr7  | 2598280  | 2599647  | + 0 NA | intron (intron (N  | -33023 NM_02525E  | 80727 Hs. 44089E           | NR_02525E           | ENSG00000TTYH3             | twinty 2 protein-coding       |                                  |           |
| chr7-1392 7. 708017 | 0.707269 | 0.842964 | 0.839026 | 0.401454 | 0.981636 | chr7  | 1.39E+08 | 1.39E+08 | + 0 NA | intron (AluSx SIN  | 28821 NM_17356E   | 254048 Hs. 15345E          | NR_17356E           | ENSG00000UBN2              | ubiquitin-like protein-coding |                                  |           |
| chr9-7171 7. 708017 | 0.707269 | 0.842964 | 0.839026 | 0.401454 | 0.981636 | chr9  | 71710937 | 71712754 | + 0 NA | intron (intron (N  | 56668 NM_00113E   | 23670 Hs. 49414E           | NR_01339E           | ENSG00000CEMP2             | TMEM2                         | cell migration protein-coding    |           |
| chr9-9271 7. 708017 | 0.707269 | 0.842964 | 0.839026 | 0.401454 | 0.981636 | chr9  | 92715877 | 92716076 | + 0 NA | intron (intron (N  | -45845 NM_002275E | 64768 Hs. 45989E           | NR_02275E           | ENSG00000IPPK              | C9orf12 L                     | inositol protein-coding          |           |
| chr9-9101 7. 708017 | 0.707269 | 0.842964 | 0.839026 | 0.401454 | 0.981636 | chr9  | 1.1E+08  | 1.1E+08  | + 0 NA | intron (MIRb SINE  | -23457 NM_00113E  | 445815 Hs. 59190E          | NR_00720E           | ENSG00000PALM2-AK1         | AKAP-2 AK                     | PALM2-AK1 protein-coding         |           |
| chr9-127E 7. 708017 | 0.707269 | 0.842964 | 0.839026 | 0.401454 | 0.981636 | chr9  | 1.28E+08 | 1.28E+08 | + 0 NA | intron (intron (N  | 36969 NR_03747E   | 1.01E+08                   | NR_03747E           | ENSG00000CIR3911           | mir-3911                      | microRNA ncRNA                   |           |
| chr17-821 7. 684443 | 0.713747 | 0.850822 | 0.838891 | 0.401531 | 0.981636 | chr17 | 82197738 | 82198223 | + 0 NA | intron (MLT2B1 LI  | 14862 NM_00131E   | 284001 Hs. 631724NM_15267E | ENSG00000CCDC57     | coiled-coil protein-coding |                               |                                  |           |
| chr19-374 7. 684443 | 0.713747 | 0.850822 | 0.838891 | 0.401531 | 0.981636 | chr19 | 37444229 | 37444633 | + 0 NA | intron (LIME3 LI   | 22978 NM_00133C   | 148266 Hs. 51184E          | NR_15248E           | ENSG00000ZNF569            | ZAP1 ZNF                      | zinc finger protein-coding       |           |
| chr20-33 7. 684443  | 0.713747 | 0.850822 | 0.838891 | 0.401531 | 0.981636 | chr20 | 33091429 | 33091623 | + 0 NA | intron (MERC3 DNA  | 10187 NM_01640E   | 51654 Hs. 43595E           | NR_01608E           | ENSG00000CDK5RAP1          | C20orf34 CDK5                 | regulatory protein-coding        |           |
| chr17-637 9. 103575 | -0.66281 | 0.790329 | -0.83865 | 0.401667 | 0.981636 | chr17 | 63776664 | 63777016 | + 0 NA | intron (MIR SINE   | 2651 NM_00737E    | 11325 Hs. 70201C           | NR_00737E           | ENSG00000DDX42             | DDX42P RF                     | DEAD-box protein-coding          |           |
| chr21-451 9. 103575 | -0.66281 | 0.790329 | -0.83865 | 0.401667 | 0.981636 | chr21 | 45185158 | 45189974 | + 0 NA | intron (LIME3Cz I  | 35036 NM_00134E   | 104 Hs. 47401E             | NR_00111E           | ENSG00000ADARB1            | ADAR2 DRP                     | adenosine protein-coding         |           |
| chr1-1121 8. 934234 | 1.065201 | 1.270318 | 0.83851  | 0.401733 | 0.981636 | chr1  | 11216088 | 11216425 | + 0 NA | intron (intron (N  | 26901 NM_02114E   | 10218 Hs. 14655E           | NR_02114E           | ENSG00000ANGPTL7           | AngX CDTc                     | angiopoietin protein-coding      |           |
| chr10-115 6. 160843 | -0.78785 | 0.939572 | -0.83852 | 0.401741 | 0.981636 | chr10 | 1.2E+08  | 1.2E+08  | + 0 NA | intron (intron (N  | 5631 NM_004281    | 9531 Hs. 52330             |                     |                            |                               |                                  |           |



|                    |           |          |          |          |          |       |          |          |                    |                    |                   |                     |                 |                    |            |                                |                 |          |                           |
|--------------------|-----------|----------|----------|----------|----------|-------|----------|----------|--------------------|--------------------|-------------------|---------------------|-----------------|--------------------|------------|--------------------------------|-----------------|----------|---------------------------|
| chr7-1006 6.145127 | -0.78396  | 0.939407 | -0.83453 | 0.403981 | 0.981636 | chr6  | 1.01E+08 | 0 NA     | intron (Nintron (N | -191851 NM_005066  | 6492 Hs. 5202929  | NR_005066           | ENSG00000CSIM1  | bHLHe14            | SIM        | bHLH protein-coding            |                 |          |                           |
| chr7-9256 6.145127 | -0.78396  | 0.939407 | -0.83453 | 0.403981 | 0.981636 | chr7  | 92561056 | 92562314 | 0 NA               | non-codiron-codir  | 28364 NM_001288   | 257415 Hs. 18564    | NR_152789       | ENSG00000FAM133B   | -          | family wiprotein-coding        |                 |          |                           |
| chr7-1006 6.145127 | -0.78396  | 0.939407 | -0.83453 | 0.403981 | 0.981636 | chr7  | 1E+08    | 1E+08    | 0 NA               | non-codiron-codir  | -12142 NM_001362  | 7589 Hs. 632294     | NR_145914       | ENSG00000ZSCAN21   | NY-REN-21  | zinc fingprotein-coding        |                 |          |                           |
| chr7-1276 6.145127 | -0.78396  | 0.939407 | -0.83453 | 0.403981 | 0.981636 | chr7  | 1.28E+08 | 1.28E+08 | 0 NA               | intron (Nintron (N | -20448 NR_027333  | 27099 Hs. 657377    | NR_014411       | ENSG00000SND1-TT1  | C7orf54    | SNB1 intrncRNA                 |                 |          |                           |
| chr8-6727 6.145127 | -0.78396  | 0.939407 | -0.83453 | 0.403981 | 0.981636 | chr8  | 67275642 | 67276049 | 0 NA               | intron (Nintron (N | 67936 NM_006421   | 10565 Hs. 656902    | NR_006421       | ENSG00000ARFGEF1   | ARFGEF1    | EADP ribotncRNA                |                 |          |                           |
| chr8-9486 6.145127 | -0.78396  | 0.939407 | -0.83453 | 0.403981 | 0.981636 | chr8  | 94882115 | 94883329 | 0 NA               | TTS (NM_C          | 12532 NM_057745   | 9134 Hs. 521695     | NR_004702       | ENSG00000CCNE2     | CYCE2      | cyclin E2 protein-coding       |                 |          |                           |
| chr9-1096 6.145127 | -0.78396  | 0.939407 | -0.83453 | 0.403981 | 0.981636 | chr9  | 1.09E+08 | 1.09E+08 | 0 NA               | intron (Nintron (N | 3516 NR_029506    | 407036              | NR_029506       | ENSG00000MIR32     | MIRN32     | hsimicroRNA ncRNA              |                 |          |                           |
| chrX-7226 6.145127 | -0.78396  | 0.939407 | -0.83453 | 0.403981 | 0.981636 | chrX  | 72267793 | 72269571 | 0 NA               | Intergeni          | 8566 NM_001007    | 6191 Hs. 118076     | NR_001007       | ENSG00000RPS43     | CCG2       | DXS ribosomal protein-coding   |                 |          |                           |
| chr7-1495 10.52837 | 0.619974  | 0.743028 | 0.834388 | 0.404062 | 0.981636 | chr7  | 1.5E+08  | 1.5E+08  | 0 NA               | non-codiron-codir  | -51057 NM_152557  | 155061 Hs. 24643    | NR_152557       | ENSG00000ZNF746    | PARIS      | zinc fingprotein-coding        |                 |          |                           |
| chr14-104 5.435099 | 0.839297  | 1.006061 | 0.83424  | 0.404146 | 0.981636 | chr14 | 1.05E+08 | 1.05E+08 | 0 NA               | intron (Nintron (N | 6212 NM_001364    | 122616 Hs. 27183    | NR_174891       | ENSG00000CLBA1     | C14orf79   | clathrin protein-coding        |                 |          |                           |
| chr16-151 5.435099 | 0.839297  | 1.006061 | 0.83424  | 0.404146 | 0.981636 | chr16 | 15135300 | 15136187 | 0 NA               | non-codiron-codir  | 1216 NR_123721    | 1.05E+08 Hs. 634612 | NR_123721       | ENSG00000PKD1P6-NF | -          | PKD1P6-NF pseudo               |                 |          |                           |
| chr19-20C 5.435099 | 0.839297  | 1.006061 | 0.83424  | 0.404146 | 0.981636 | chr19 | 20009718 | 20012660 | 0 NA               | intron (N          | 28066 NM_001077   | 91120 Hs. 306299    | NR_033196       | ENSG00000ZNF682    | BC39498    | zinc fingprotein-coding        |                 |          |                           |
| chr2-2637 5.435099 | 0.839297  | 1.006061 | 0.83424  | 0.404146 | 0.981636 | chr2  | 26371812 | 26372232 | 0 NA               | intron (N          | -25233 NM_001321  | 165082 Hs. 631878   | NR_153836       | ENSG00000ADGRF3    | APR113     | PCadhesion protein-coding      |                 |          |                           |
| chr5-3225 5.435099 | 0.839297  | 1.006061 | 0.83424  | 0.404146 | 0.981636 | chr5  | 32254242 | 32254466 | 0 NA               | intron (N          | 55855 NM_001040   | 54545 Hs. 481838    | NR_019061       | ENSG00000MTMR12    | 3-PAP      | PIF myotubul protein-coding    |                 |          |                           |
| chr6-4285 5.435099 | 0.839297  | 1.006061 | 0.83424  | 0.404146 | 0.981636 | chr6  | 42858365 | 42861347 | 0 NA               | intron (N          | -19760 NR_134562  | 285855 Hs. 520133   | NR_198488       | ENSG00000RPL7L1    | dJ475N16   | ribosomal protein-coding       |                 |          |                           |
| chr19-494 13.5541  | -0.53969  | 0.647074 | -0.83405 | 0.404255 | 0.981636 | chr19 | 49488328 | 49493075 | 0 NA               | promoter-promoter- | 84 NR_00002C      | 26818               | NR_00002C       | ENSG00000SNORD33   | RNU33      | U3c small nucsnRNA             |                 |          |                           |
| chr14-917 7.845371 | -0.70186  | 0.841526 | -0.83403 | 0.404265 | 0.981636 | chr14 | 91867841 | 91868184 | 0 NA               | promoter-promoter- | -476 NM_001128    | 123036 Hs. 510262   | NR_152332       | ENSG00000CTC2N     | C14orf47   | tandem C2 protein-coding       |                 |          |                           |
| chr2-333 7.845371  | -0.70186  | 0.841526 | -0.83403 | 0.404265 | 0.981636 | chr2  | 33339691 | 33340012 | 0 NA               | intron (N          | -78665 NR_039628  | 1.01E+08            | NR_039628       | ENSG00000MIR4430   | -          | microRNA ncRNA                 |                 |          |                           |
| chr3-5662 7.845371 | -0.70186  | 0.841526 | -0.83403 | 0.404265 | 0.981636 | chr3  | 56626267 | 56626760 | 0 NA               | intron (N          | 37533 NM_015224   | 23272 Hs. 116877    | NR_015224       | ENSG00000TASOR     | C3orf63    | F transcriptin protein-coding  |                 |          |                           |
| chr12-534 7.878653 | -0.69665  | 0.835287 | -0.83402 | 0.404269 | 0.981636 | chr12 | 53063064 | 53064243 | 0 NA               | intron (N          | 5359 NR_10681E    | 1.02E+08            | NR_10681E       | ENSG00000MIR6757   | hsa-mir-6  | microRNA ncRNA                 |                 |          |                           |
| chr17-774 7.878653 | -0.69665  | 0.835287 | -0.83402 | 0.404269 | 0.981636 | chr17 | 77499000 | 77500777 | 0 NA               | 3' UTR (3' UTR (N  | 24645 NM_001113   | 10801 Hs. 440932    | NR_00664C       | ENSG00000SEPTIN9   | AF17q25    | septin 9 protein-coding        |                 |          |                           |
| chr2-1825 7.878653 | -0.69665  | 0.835287 | -0.83402 | 0.404269 | 0.981636 | chr2  | 1.83E+08 | 1.83E+08 | 0 NA               | intron (N          | -67634 NM_001463  | 2487 Hs. 128455     | NR_001463       | ENSG00000FRZB      | FRE        | FRT17 frizzled protein-coding  |                 |          |                           |
| chr7-272C 7.878653 | -0.69665  | 0.835287 | -0.83402 | 0.404269 | 0.981636 | chr7  | 2726957  | 2727293  | 0 NA               | TTS (NM_C          | 36015 NM_001282   | 2768 Hs. 487341     | NR_007353       | ENSG00000GNA12     | NNX3       | RMP G protein-coding           |                 |          |                           |
| chr15-494 10.4521  | 0.608079  | 0.729152 | 0.833954 | 0.404307 | 0.981636 | chr15 | 49423717 | 49427471 | 0 NA               | intron (N          | 2352 NM_002009    | 2252 Hs. 567268     | NR_002009       | ENSG00000FGF7      | HBGF-7     | KC fibroblas protein-coding    |                 |          |                           |
| chr21-332 10.4521  | 0.608079  | 0.729152 | 0.833954 | 0.404307 | 0.981636 | chr21 | 33278398 | 33280364 | 0 NA               | intron (N          | 13014 NM_000628   | 3588 Hs. 654593     | NR_000628       | ENSG00000LL10RB    | CDW210B    | C interleuk protein-coding     |                 |          |                           |
| chr9-3944 10.4521  | 0.608079  | 0.729152 | 0.833954 | 0.404307 | 0.981636 | chr9  | 39447415 | 39448087 | 0 NA               | intron (N          | 16775 NR_003528   | 401509 Hs. 449445   | NR_001032297    | ZNF658B            | -          | zinc fingpseudo                |                 |          |                           |
| chr1-1558 12.66446 | -0.583775 | 0.66966  | 0.833818 | 0.404384 | 0.981636 | chr1  | 1.56E+08 | 1.56E+08 | 0 NA               | exon (NM exon (NM  | 3786 NM_032292    | 54856 Hs. 656361    | NR_032292       | ENSG00000GON4L     | GON-4      | GON gon-4 lik protein-coding   |                 |          |                           |
| chr1-252C 7.741299 | 0.710184  | 0.851775 | 0.833769 | 0.404411 | 0.981636 | chr1  | 2520663  | 2521632  | 0 NA               | exon (NM exon (NM  | 5449 NM_01821E    | 55229 Hs. 26156     | NR_01821E       | ENSG00000PANK4     | -          | panthoether protein-coding     |                 |          |                           |
| chr1-151 7.741299  | 0.710184  | 0.851775 | 0.833769 | 0.404411 | 0.981636 | chr1  | 1.52E+08 | 1.52E+08 | 0 NA               | 3' UTR (3' UTR (N  | -20449 NM_182578  | 284488 Hs. 132648   | NR_182578       | ENSG00000THEM5     | ACOT15     | thioester protein-coding       |                 |          |                           |
| chr2-1592 7.741299 | 0.710184  | 0.851775 | 0.833769 | 0.404411 | 0.981636 | chr2  | 1.59E+08 | 1.59E+08 | 0 NA               | intron (N          | 28163 NR_10694E   | 1.02E+08            | NR_10694E       | ENSG00000MIR6888   | hsa-mir-6  | microRNA ncRNA                 |                 |          |                           |
| chr8-144 7.741299  | 0.710184  | 0.851775 | 0.833769 | 0.404411 | 0.981636 | chr8  | 1.44E+08 | 1.44E+08 | 0 NA               | intron (N          | 6811 NM_174922    | 203054 Hs. 283374   | NR_174922       | ENSG00000ADCK5     | -          | aarF dom protein-coding        |                 |          |                           |
| chr1-9362 5.709094 | -0.83559  | 1.002217 | -0.83374 | 0.404429 | 0.981636 | chr1  | 93621924 | 93622322 | 0 NA               | intron (N          | -8026 NM_001261   | 8412 Hs. 36958      | NR_003567       | ENSG00000BCAR3     | AND-34     | NSBCAR3 ad protein-coding      |                 |          |                           |
| chr1-1102 7.870795 | -0.69508  | 0.833747 | -0.83368 | 0.404462 | 0.981636 | chr1  | 11024270 | 11025297 | 0 NA               | 3' UTR (3' UTR (N  | 12386 NM_007375   | 23435 Hs. 300624    | NR_007375       | ENSG00000TARDBP    | ALD10      | TDNF DNA t protein-coding      |                 |          |                           |
| chr12-297 7.870795 | -0.69508  | 0.833747 | -0.83368 | 0.404462 | 0.981636 | chr12 | 29765778 | 29766811 | 0 NA               | intron (N          | 17648 NM_001367   | 83857 Hs. 401954    | NR_03192C       | ENSG00000TMTCT1    | ARG99      | OLF transmemt protein-coding   |                 |          |                           |
| chr12-462 7.870795 | -0.69508  | 0.833747 | -0.83368 | 0.404462 | 0.981636 | chr12 | 46253360 | 46255205 | 0 NA               | intron (N          | 12234 NR_0010278  | 81539 Hs. 53377C    | NR_030674       | ENSG00000SLC38A1   | ATA1       | NAT2 solute c protein-coding   |                 |          |                           |
| chr12-112 7.870795 | -0.69508  | 0.833747 | -0.83368 | 0.404462 | 0.981636 | chr12 | 1.12E+08 | 1.12E+08 | 0 NA               | intron (N          | -17071 NR_03743C  | 1.01E+08            | NR_03743C       | ENSG00000MIR3657   | -          | microRNA ncRNA                 |                 |          |                           |
| chr14-505 7.870795 | -0.69508  | 0.833747 | -0.83368 | 0.404462 | 0.981636 | chr14 | 50502841 | 50504492 | 0 NA               | intron (N          | 28903 NM_198794   | 11183 Hs. 130491    | NR_00657E       | ENSG00000MAP4K5    | GCKR       | KHS mitogen- protein-coding    |                 |          |                           |
| chr17-281 7.870795 | -0.69508  | 0.833747 | -0.83368 | 0.404462 | 0.981636 | chr17 | 28195500 | 28198318 | 0 NA               | TTS (NM_C          | -29453 NR_003064  | 23615 Hs. 15719E    | NR_021093       | ENSG00000PY2       | -          | peptide lypseudo               |                 |          |                           |
| chr19-344 7.870795 | -0.69508  | 0.833747 | -0.83368 | 0.404462 | 0.981636 | chr19 | 3425520  | 3427370  | 0 NA               | intron (N          | 5480 Hs. 130714   | NR_00113E           | ENSG00000SMIM24 | 284422             | Hs. 150714 | NR_00113E                      | ENSG00000SMIM24 | C19orf77 | small intrnprotein-coding |
| chr19-111 7.870795 | -0.69508  | 0.833747 | -0.83368 | 0.404462 | 0.981636 | chr19 | 11062375 | 11062574 | 0 NA               | TTS (NM_C          | -26888 NM_000527  | 3949 Hs. 21328E     | NR_000527       | ENSG00000CLDLR     | FH         | FHC LI low densiprotein-coding |                 |          |                           |
| chr19-577 7.870795 | -0.69508  | 0.833747 | -0.83368 | 0.404462 | 0.981636 | chr19 | 57771048 | 57772507 | 0 NA               | intron (N          | 2101 NM_017652    | 54807 Hs. 625133    | NR_017652       | ENSG00000ZNF586    | -          | zinc fingprotein-coding        |                 |          |                           |
| chr5-143 7.870795  | -0.69508  | 0.833747 | -0.83368 | 0.404462 | 0.981636 | chr5  | 14350059 | 14350742 | 0 NA               | intron (N          | -113883 NR_14581E | 1.01E+08            | NR_14581E       | ENSG00000SNORD170  | -          | small nucsnRNA                 |                 |          |                           |
| chr5-144 7.870795  | -0.69508  | 0.833747 | -0.83368 | 0.404462 | 0.981636 | chr5  | 14435733 | 14436761 | 0 NA               | intron (N          | -27736 NR_14581E  | 1.1E+08             | NR_14581E       | SNORD170           | -          | small nucsnRNA                 |                 |          |                           |
| chr5-141 7.870795  | -0.69508  | 0.833747 | -0.83368 | 0.404462 | 0.981636 | chr5  | 1.42E+08 | 1.42E+08 | 0 NA               | Intergeni          | 13722 NM_005471   | 10007 Hs. 633855    | NR_005471       | ENSG00000GNPDA1    | GNP1       | GNP1 glucosamin protein-coding |                 |          |                           |
| chr8-1197 7.870795 | -0.69508  | 0.833747 | -0.83368 | 0.404462 | 0.981636 | chr8  | 1.2E+08  | 1.2E+08  | 0 NA               | intron (N          | 41842 NM_003184   | 6873 Hs. 122752     | NR_003184       | ENSG00000CTAF2     | CIF150     | MF TATA-box protein-coding     |                 |          |                           |
| chr7-9195 4.905229 | 0.909329  | 1.090947 | 0.833522 | 0.40455  | 0.981636 | chr7  | 91996197 | 91996396 | 0 NA               | intron (N          | 55421 NM_005751   | 10142 Hs. 651221    | NR_005751       | ENSG00000AKAP9     | AKAP-9     | AK A-kinase protein-coding     |                 |          |                           |
| chr1-1197 4.411601 | -0.94357  | 1.132488 | -0.83318 | 0.404741 | 0.981636 | chr1  | 1.2E+08  | 1.2E+08  | 0 NA               | intron (N          | 22673 NM_006622   | 26227 Hs. 48729E    | NR_006622       | ENSG00000PHGDH     | 3-PGDH     | 3F phosphog protein-coding     |                 |          |                           |
| chr15-74C 4.411601 | -0.94357  | 1.132488 | -0.83318 | 0.404741 | 0.981636 | chr15 | 74041203 | 74041961 | 0 NA               | intron (N          | 40968 NM_001038   | 342096 Hs. 54640E   | NR_001038       | ENSG00000GOLGA6A   | GLP        | GOLGA6 golgin A protein-coding |                 |          |                           |
| chrX-1014 4.411601 | -0.94357  | 1.132488 | -0.83318 | 0.404741 | 0.981636 | chrX  | 10141731 | 10142322 | 0 NA               | 3' UTR (3' UTR (N  | -14919 NM_001256  | 1183 Hs. 495674     | NR_00183C       | ENSG00000CLCN4     | CLC4       | C10C-chloride protein-coding   |                 |          |                           |
| chr1-3931 9.629745 | -0.63483  | 0.762173 | -0.83293 | 0.404886 | 0.981636 | chr1  | 39313897 | 39314385 | 0 NA               | intron (N          | -94932 NM_015038  | 643314 Hs. 65876C   | NR_015038       | ENSG00000KIAA0754  | -          | KIAA0754 protein-coding        |                 |          |                           |
| chr10-69 6.629745  | -0.63483  | 0.762173 | -0.83293 | 0.404886 | 0.981636 | chr10 | 69384636 | 69386587 | 0 NA               | intron (N          | 31307 NM_001057   | 6865 Hs. 88372      | NR_001057       | ENSG00000TACR2     | NKR2       | NKN2 tachykinin protein-coding |                 |          |                           |
| chr5-736 5.667954  | -0.84096  | 1.009982 | -0.83265 | 0.405044 | 0.981636 | chr5  | 73681190 | 73681787 | 0 NA               | intron (N          | 55330 NM_00108C   | 64283 Hs. 482521    | NR_00108C       | ENSG00000ARHGEF28  | RGNEF      | RIF Rho guaniprotein-coding    |                 |          |                           |
| chr1-2262 6.152724 | 0.739504  | 0.8888   | 0.832025 | 0.405395 | 0.981636 | chr1  | 2.26E+08 | 2.26E+08 | 0 NA               | intron (N          | 37455 NM_00161E   | 142 Hs. 17776E      | NR_00161E       | ENSG00000PARP1     | ADPRT      | ADP poly (ADP- protein-coding  |                 |          |                           |
| chr15-65 7.152724  | 0.739504  | 0.8888   | 0.832025 | 0.405395 | 0.981636 | chr15 | 65906902 | 65908271 | 0 NA               | intron (N          | 38095 NR_00120E   | 8766 Hs. 321541     | NR_004663       | ENSG00000RAB11A    | YL8        | RAB11A, n protein-coding       |                 |          |                           |
| chr6-170 7.152724  | 0.739504  | 0.8888   | 0.832025 | 0.405395 | 0.981636 | chr6  | 1.7E+08  | 1.7E+08  | 0 NA               | intron (N          | 2812              |                     |                 |                    |            |                                |                 |          |                           |

|                    |          |          |          |          |          |       |          |          |        |                    |                   |                              |                     |                    |                           |                |
|--------------------|----------|----------|----------|----------|----------|-------|----------|----------|--------|--------------------|-------------------|------------------------------|---------------------|--------------------|---------------------------|----------------|
| chr14-21:6.178408  | -0.77735 | 0.937706 | -0.82899 | 0.407112 | 0.981636 | chr14 | 21371719 | 21372974 | + 0 NA | intron (Nintron (N | 11673 NM_007192   | 11198 Hs. 213724NM_007192    | ENSG000003UPT16H    | CDC68 FACSP16      | honprotein-coding         |                |
| chr15-50:6.178408  | -0.77735 | 0.937706 | -0.82899 | 0.407112 | 0.981636 | chr15 | 50617005 | 50618105 | + 0 NA | intron (Nintron (N | 69242 NR_149154   | 54822 Hs. 512894NM_017672    | ENSG000003TRPM7     | ALSPDC CF          | transientprotein-coding   |                |
| chr15-74:6.178408  | -0.77735 | 0.937706 | -0.82899 | 0.407112 | 0.981636 | chr15 | 74029446 | 74031076 | + 0 NA | intron (Nintron (N | 35545 NM_033244   | 5371 Hs. 526464NM_002675     | ENSG000003PML       | MYL PP867          | promyelocprotein-coding   |                |
| chr19-211:6.178408 | -0.77735 | 0.937706 | -0.82899 | 0.407112 | 0.981636 | chr19 | 21143982 | 21144907 | + 0 NA | intron (NAluS2 S1  | 2404 NM_133473    | 170959 Hs. 156256NM_133473   | ENSG000003ZNF431    | -                  | zinc fingprotein-coding   |                |
| chr3-580:6.178408  | -0.77735 | 0.937706 | -0.82899 | 0.407112 | 0.981636 | chr3  | 58094325 | 58095234 | + 0 NA | intron (Nintron (N | 58094325          | 1.05E+08 Hs. 613914NR_135534 | ENSG000003FLNB-AS1  | -                  | FLNB antncRNA             |                |
| chr3-130:6.178408  | -0.77735 | 0.937706 | -0.82899 | 0.407112 | 0.981636 | chr3  | 1.31E+08 | 1.31E+08 | + 0 NA | intron (Nintron (N | 48199 NM_001001   | 27032 Hs. 584884NM_014382    | ENSG000003ATP2C1    | ATP2C1A EATPase    | seprotein-coding          |                |
| chr4-182:6.178408  | -0.77735 | 0.937706 | -0.82899 | 0.407112 | 0.981636 | chr4  | 1.83E+08 | 1.83E+08 | + 0 NA | IntergeniIntergeni | 31414 NM_001351   | 1635 Hs. 183856NM_001921     | ENSG000003DCTD      | -                  | dCMP deacprotein-coding   |                |
| chr16-50:3.213952  | -1.09836 | 1.324941 | -0.82898 | 0.407113 | 0.981636 | chr16 | 50028656 | 50029469 | + 0 NA | intron (Nintron (N | 3856 NR_104042    | 255919 Hs. 591134 NM_153261  | ENSG000003CNEP1R1   | C16orf69 CTD       | neulprotein-coding        |                |
| chr9-366:3.213952  | -1.09836 | 1.324941 | -0.82898 | 0.407113 | 0.981636 | chr9  | 36639409 | 36640042 | + 0 NA | intron (Nintron (N | 66830 NM_014791   | 9833 Hs. 184336NM_014791     | ENSG000003MELK      | HPK38              | maternal protein-coding   |                |
| chr1-155:10.54594  | 0.625872 | 0.754994 | 0.828976 | 0.407118 | 0.981636 | chr1  | 1.56E+08 | 1.56E+08 | + 0 NA | intron (NAluSp SIN | -1595 NR_024117   | 1E+08 Hs. 656361NR_024117    | MSTO2P              | MSTO2              | misato fepseudo           |                |
| chr3-9157:53.32945 | 0.323654 | 0.390539 | 0.828739 | 0.407252 | 0.981636 | chr3  | 91572763 | 91572986 | + 0 NA | IntergeniALR/Alpha | 2401207 NM_001314 | 5627 Hs. 64016 NM_000315     | ENSG000003PROS1     | PROS PS21          | protein fepseudo-coding   |                |
| chr6-227:9.996652  | 0.633008 | 0.763842 | 0.828716 | 0.407265 | 0.981636 | chr6  | 2272196  | 2272691  | + 0 NA | intron (Nintron (N | 26690 NR_046225   | 1.01E+08 Hs. 188825NR_046229 | GMDS-DT             | GMDS-AS1           | GMDS divncRNA             |                |
| chr2-205:8.255453  | 0.681152 | 0.822054 | 0.828597 | 0.407333 | 0.981636 | chr2  | 2.01E+08 | 2.01E+08 | + 0 NA | intron (NAluS2 SIN | 22937 NR_03391E   | 4999 Hs. 444877NM_00619C     | ENSG000003ORC2      | ORC2L              | origin reprotein-coding   |                |
| chr11-40:5.990392  | 0.787749 | 0.950756 | 0.82855  | 0.407359 | 0.981636 | chr11 | 45952761 | 45953541 | + 0 NA | intron (NCharlie2E | 30495 NM_00130C   | 120071 Hs. 86543 NM_152312   | ENSG000003LARGE2    | ORCLTL L1          | FLARGE2 xylprotein-coding |                |
| chr16-84:5.990392  | 0.787749 | 0.950756 | 0.82855  | 0.407359 | 0.981636 | chr16 | 84180099 | 84181721 | + 0 NA | 5' UTR (N5' UTR (N | 6147 NM_00567E    | 9013 Hs. 153022NM_00567E     | ENSG000003TAF1C     | MGC:3997E          | TATA-box protein-coding   |                |
| chr17-291:5.990392 | 0.787749 | 0.950756 | 0.82855  | 0.407359 | 0.981636 | chr17 | 29101615 | 29101958 | + 0 NA | intron (Nintron (N | -26177 NM_00474C  | 9220 Hs. 46259C              | ENSG000003TAF1A     | MAJN SPR2          | TGFB1-incprotein-coding   |                |
| chr17-80:5.990392  | 0.787749 | 0.950756 | 0.82855  | 0.407359 | 0.981636 | chr17 | 80249015 | 80250313 | + 0 NA | intron (NAluSx1 S1 | -11188 NM_00125E  | 57674 Hs. 195642NM_020914    | ENSG000003CRNF213   | AL017 Cl17         | ring fingprotein-coding   |                |
| chr19-57:5.990392  | 0.787749 | 0.950756 | 0.82855  | 0.407359 | 0.981636 | chr19 | 57790669 | 57791404 | + 0 NA | IntergeniIntergeni | 21374 NM_017652   | 54807 Hs. 625133NM_017652    | ENSG000003ZNF586    | -                  | zinc fingprotein-coding   |                |
| chr20-26:5.990392  | 0.787749 | 0.950756 | 0.82855  | 0.407359 | 0.981636 | chr20 | 26517932 | 26518917 | + 0 NA | IntergeniALR/Alpha | -309191 NR_04009E | 284801 Hs. 370699NR_04009E   | ENSG000003MIR663AHC | -                  | MIR663A lncRNA            |                |
| chr4-886:5.990392  | 0.787749 | 0.950756 | 0.82855  | 0.407359 | 0.981636 | chr4  | 88655661 | 88656494 | + 0 NA | 3' UTR (N3' UTR (N | 41752 NM_153757   | 266812 Hs. 12554 NM_153757   | ENSG000003NAP1L5    | DRLM               | nucleosonprotein-coding   |                |
| chr7-1117:5.990392 | 0.787749 | 0.950756 | 0.82855  | 0.407359 | 0.981636 | chr7  | 1.12E+08 | 1.12E+08 | + 0 NA | intron (NHUERS-P3- | -11503 NR_10380E  | 1.01E+08 Hs. 67751NR_10380E  | ENSG000003DOCK4-AS1 | DOCK4              | antncRNA                  |                |
| chr20-501:13.19433 | 0.54408  | 0.656783 | 0.828401 | 0.407443 | 0.981636 | chr20 | 50192051 | 50194646 | + 0 NA | TTS (NM_C          | -1279 NR_12573E   | 1.02E+08 Hs. 442486NR_12573E | ENSG000003CEBPB-AS1 | -                  | CEBPB antncRNA            |                |
| chr15-101:9.128998 | -0.65688 | 0.792977 | -0.82837 | 0.407462 | 0.981636 | chr15 | 1.02E+08 | 1.02E+08 | + 0 NA | intron (NLINE I    | 10933 NM_152334   | 132833 Hs. 657166NM_152334   | ENSG000003TARSL2    | -                  | threonyl-protein-coding   |                |
| chr13-321:7.419046 | -0.72481 | 0.875001 | -0.82835 | 0.407471 | 0.981636 | chr13 | 32180544 | 32180775 | + 0 NA | intron (Nintron (N | 131295 NM_00113E  | 646799 Hs. 569254NM_00113E   | ENSG000003ZARIL2    | Z3CXXC7 Z          | zygote arprotein-coding   |                |
| chr6-897:7.419046  | -0.72481 | 0.875001 | -0.82835 | 0.407471 | 0.981636 | chr6  | 89753932 | 89754134 | + 0 NA | intron (Nintron (N | 65761 NM_014611   | 23195 Hs. 52994E             | ENSG000003MDN1      | Real               | midasin fprotein-coding   |                |
| chr9-1101:7.419046 | -0.72481 | 0.875001 | -0.82835 | 0.407471 | 0.981636 | chr9  | 1.1E+08  | 1.1E+08  | + 0 NA | intron (NFLAM_C S1 | 24241 NM_00113E   | 445815 Hs. 59190E            | ENSG000003PALM2-AK1 | AKAP-2 AK          | PAK2-AK1 protein-coding   |                |
| chr5-485:18.11565  | 0.479151 | 0.57852  | 0.828236 | 0.407537 | 0.981636 | chr5  | 48505107 | 48506150 | + 0 NA | IntergeniALR/Alpha | 1935705 NM_19844E | 133418 Hs. 561411NM_19844E   | ENSG000003EMB       | GP70               | embin protein-coding      |                |
| chr1-272:7.715875  | 0.705059 | 0.851326 | 0.82819  | 0.407563 | 0.981636 | chr1  | 27287654 | 27288167 | + 0 NA | intron (Nintron (N | -34235 NM_03212E  | 84065 Hs. 469171NM_03212E    | ENSG000003TMEM222   | Clorf160           | transmem protein-coding   |                |
| chr1-2057:7.715875 | 0.705059 | 0.851326 | 0.82819  | 0.407563 | 0.981636 | chr1  | 2.06E+08 | 2.06E+08 | + 0 NA | intron (NLM2 LIN   | -18617 NM_00113E  | 8934 Hs. 11532E              | ENSG000003RAB29     | RAB7L RAE          | RAB29, meprotein-coding   |                |
| chr11-65:7.715875  | 0.705059 | 0.851326 | 0.82819  | 0.407563 | 0.981636 | chr11 | 65624434 | 65626705 | + 0 NA | intron (Nintron (N | 9257 NM_03222E    | 399909 Hs. 380801NM_03222E   | ENSG000003PCNX3     | PCNXL3             | pecanex fprotein-coding   |                |
| chr16-87:7.715875  | 0.705059 | 0.851326 | 0.82819  | 0.407563 | 0.981636 | chr16 | 87343203 | 87343699 | + 0 NA | intron (Nintron (N | 25942 NR_13518C   | 1.02E+08 Hs. 66745NR_13518C  | ENSG000003LOC10192E | -                  | uncharactncRNA            |                |
| chr17-71:7.715875  | 0.705059 | 0.851326 | 0.82819  | 0.407563 | 0.981636 | chr17 | 7191964  | 7197771  | + 0 NA | intron (NAluYc SIN | 10320 NM_001321   | 1742 Hs. 46392E              | ENSG000003DLG4      | PSD95 SAF          | discs larprotein-coding   |                |
| chr19-55:7.715875  | 0.705059 | 0.851326 | 0.82819  | 0.407563 | 0.981636 | chr19 | 55500357 | 55501739 | + 0 NA | exon (NM_exon (NM  | 12612 NM_001144   | 284927 Hs. 554182NM_182571   | ENSG000003SCSD      | S5D-SRRE           | scavengerprotein-coding   |                |
| chr2-217:7.715875  | 0.705059 | 0.851326 | 0.82819  | 0.407563 | 0.981636 | chr2  | 2.18E+08 | 2.18E+08 | + 0 NA | intron (Nintron (N | 4866 NR_106867    | 1.02E+08                     | NR_106867           | ENSG000003MIR6809  | hsa-mir-6                 | microRNA ncRNA |
| chr2-22:7.715875   | 0.705059 | 0.851326 | 0.82819  | 0.407563 | 0.981636 | chr2  | 22291032 | 22292142 | + 0 NA | IntergeniG-rich Lc | -6511 NR_02729E   | 96610 Hs. 449601NM_08092E    | BMS1P20             | IGL IGLV BMS1      | psetpseudo                |                |
| chr3-1291:7.715875 | 0.705059 | 0.851326 | 0.82819  | 0.407563 | 0.981636 | chr3  | 1.29E+08 | 1.29E+08 | + 0 NA | intron (NAluS2 S1  | 9125 NM_020701    | 57461 Hs. 512661NM_020701    | ENSG000003ISY1      | FSAP33             | ISY1 spliprotein-coding   |                |
| chr1-1114:7.896219 | -0.68846 | 0.831482 | -0.82799 | 0.407677 | 0.981636 | chr1  | 11144064 | 11144382 | + 0 NA | intron (NMER5B DNA | 325 NR_04660C     | 1.01E+08 Hs. 679133NR_04660C | ENSG000003MTOR-AS1  | -                  | MTOR antncRNA             |                |
| chr10-32:7.896219  | -0.68846 | 0.831482 | -0.82799 | 0.407677 | 0.981636 | chr10 | 32697553 | 32898646 | + 0 NA | IntergeniIntergeni | 3373 NR_13276E    | 1.07E+08                     | NR_13276E           | SNORA86            | -                         | small nucsnRNA |
| chr11-10:7.896219  | -0.68846 | 0.831482 | -0.82799 | 0.407677 | 0.981636 | chr11 | 10208291 | 10604055 | + 0 NA | intron (NMER1B DNA | -34808 NR_006691  | 10894 Hs. 655332NM_006691    | ENSG000003LYVE1     | CRSBP-1 E          | lymphatic protein-coding  |                |
| chr16-30:7.896219  | -0.68846 | 0.831482 | -0.82799 | 0.407677 | 0.981636 | chr16 | 30263116 | 30263591 | + 0 NA | IntergeniAluS2 SIN | -14940 NM_001321  | 613037 Hs. 58573E            | ENSG000003NPIP3     | -                  | nuclear fprotein-coding   |                |
| chr2-1331:7.896219 | -0.68846 | 0.831482 | -0.82799 | 0.407677 | 0.981636 | chr2  | 1.33E+08 | 1.33E+08 | + 0 NA | intron (NAluS8 S1  | -163901 NR_110294 | 1.02E+08 Hs. 661917NR_110294 | ENSG000003NCKAP5-AS | -                  | NCKAP5 arncRNA            |                |
| chr2-22:7.896219   | -0.68846 | 0.831482 | -0.82799 | 0.407677 | 0.981636 | chr2  | 35812752 | 35814253 | + 0 NA | intron (Nintron (N | 26962 NM_00134E   | 23543 Hs. 628299NM_01430E    | ENSG000003RBF0X2    | FOX2 Fox-          | N bndiprotein-coding      |                |
| chr4-1134:7.896219 | -0.68846 | 0.831482 | -0.82799 | 0.407677 | 0.981636 | chr4  | 1.13E+08 | 1.13E+08 | + 0 NA | intron (NLIPA2 LIN | 201915 NM_001354  | 287 Hs. 620557NM_00114E      | ENSG000003ANK2      | ANK-2 LQ           | ankyrin f2protein-coding  |                |
| chr5-883:7.896219  | -0.68846 | 0.831482 | -0.82799 | 0.407677 | 0.981636 | chr5  | 883067   | 883887   | + 0 NA | intron (Nintron (N | 9045 NR_13429E    | 65980 Hs. 44927E             | ENSG000003BRD9      | LAVS3040 bromodome | protein-coding            |                |
| chr6-565:7.896219  | -0.68846 | 0.831482 | -0.82799 | 0.407677 | 0.981636 | chr6  | 5658757  | 56589670 | + 0 NA | intron (Nintron (N | 54067 NM_01554E   | 667 Hs. 60491E               | ENSG000003COST      | BP240 BP4          | dystonin protein-coding   |                |
| chr9-981:7.896219  | -0.68846 | 0.831482 | -0.82799 | 0.407677 | 0.981636 | chr9  | 98199442 | 98200236 | + 0 NA | intron (NLINE I    | -7202 NM_05282E   | 7464 Hs. 113094NM_00338E     | ENSG000003CORA2A    | CLIP1NB I          | cononin f2protein-coding  |                |
| chr3-425:5.634673  | -0.84854 | 1.02536  | -0.82756 | 0.407922 | 0.981636 | chr3  | 42551412 | 42551611 | + 0 NA | 3' UTR (N3' UTR (N | -18905 NR_046654  | 1.01E+08 Hs. 600642NR_046654 | VIPR1-AS1           | -                  | VIPR1 antncRNA            |                |
| chr1-180:8.230029  | 0.676266 | 0.817387 | 0.827351 | 0.408038 | 0.981636 | chr1  | 1.81E+08 | 1.81E+08 | + 0 NA | intron (NLIPA7 LIN | -79747 NM_02095E  | 57710 Hs. 73481E             | ENSG000003KIAA1614  | -                  | KIAA1614 protein-coding   |                |
| chr3-1224:8.230029 | 0.676266 | 0.817387 | 0.827351 | 0.408038 | 0.981636 | chr3  | 1.22E+08 | 1.22E+08 | + 0 NA | intron (NAluY6 S1  | 22941 NR_02669E   | 3836 Hs. 16100E              | ENSG000003KPN1A     | IPOA5 NP1          | karyopher protein-coding  |                |
| chr6-5794:8.230029 | 0.676266 | 0.817387 | 0.827351 | 0.408038 | 0.981636 | chr6  | 57946512 | 57947300 | + 0 NA | non-codirnon-codir | -9977 NR_13299E   | 375513 Hs. 56153E            | ENSG000003GUSBP4    | G6orf216 GUSB      | psetpseudo                |                |
| chr1-1794:6.137269 | -0.78202 | 0.945243 | -0.82732 | 0.408054 | 0.981636 | chr1  | 77949861 | 77950851 | + 0 NA | intron (NAluJb SIN | 28716 NR_13015E   | 8880 Hs. 56738C              | ENSG000003FUBP1     | FBP FUBP           | far upstr protein-coding  |                |



|           |          |          |          |          |          |          |       |          |          |   |   |    |                    |          |            |           |            |            |           |             |                           |         |                                          |                             |         |
|-----------|----------|----------|----------|----------|----------|----------|-------|----------|----------|---|---|----|--------------------|----------|------------|-----------|------------|------------|-----------|-------------|---------------------------|---------|------------------------------------------|-----------------------------|---------|
| chr4-397  | 7.855079 | -0.69199 | 0.839025 | -0.82476 | 0.409507 | 0.981636 | chr4  | 39702433 | 39702988 | + | 0 | NA | intron (Nintron (N | 4574     | NM_001111  | 3093      | Hs. 50308  | NM_005333  | ENSG00000 | UBE2K       | E2-25K                    | H       | ubiquitin protein-coding                 |                             |         |
| chr7-134  | 7.855079 | -0.69199 | 0.839025 | -0.82476 | 0.409507 | 0.981636 | chr7  | 1.35E+08 | 1.35E+08 | + | 0 | NA | intron (Nintron (N | -43677   | NR_160299  | 340351    | Hs. 64861  | ENM_178563 | ENSG00000 | AGBL3       | CCP3                      | ATP/GTP | protein-coding                           |                             |         |
| chr9-127  | 7.855079 | -0.69199 | 0.839025 | -0.82476 | 0.409507 | 0.981636 | chr9  | 1.28E+08 | 1.28E+08 | + | 0 | NA | intron (Nintron (N | 15749    | NM_022833  | 64855     | Hs. 522401 | NM_022833  | ENSG00000 | CNIBAN2     | C9orf88                   | F       | ribonucleoprotein-coding                 |                             |         |
| chrX-710  | 7.855079 | -0.69199 | 0.839025 | -0.82476 | 0.409507 | 0.981636 | chrX  | 7105456  | 7105655  | + | 0 | NA | intron (Nintron (N | -41735   | NM_00132C  | 412       | Hs. 522578 | NM_000351  | ENSG00000 | STS         | ARSC                      | ARSC    | steroid                                  | protein-coding              |         |
| chr20-275 | 26.58565 | 0.40018  | 0.485607 | 0.824573 | 0.409614 | 0.981636 | chr20 | 27350665 | 27351284 | + | 0 | NA | IntergeniALR/Alpha | -1141741 | NR_04009E  | 284801    | Hs. 370699 | NM_04009E  | ENSG00000 | MIR663AHC   | MIR663A                   | lincRNA |                                          |                             |         |
| chr4-7794 | 7.641454 | 0.701324 | 0.850946 | 0.82417  | 0.409843 | 0.981636 | chr4  | 77945470 | 77945875 | + | 0 | NA | intron (MER11A LI  | 82842    | NM_02023E  | 65008     | Hs. 53201  | NM_02023E  | ENSG00000 | MRPL1       | BM022                     | L       | mitochondrial protein-coding             |                             |         |
| chr2-2267 | 9.631595 | -0.6255  | 0.758983 | -0.82413 | 0.409863 | 0.981636 | chr2  | 2.27E+08 | 2.27E+08 | + | 0 | NA | exon (NM exon (NM  | 1189     | NM_005544  | 3667      | Hs. 47150E | NM_005544  | ENSG00000 | TRS1        | HIRS-1                    | I       | insulin protein-coding                   |                             |         |
| chr1-1844 | 8.204605 | 0.671452 | 0.815514 | 0.823348 | 0.41031  | 0.981636 | chr1  | 1.84E+08 | 1.84E+08 | + | 0 | NA | intron (Nintron (N | 90232    | NM_03080E  | 81563     | Hs. 49715E | NM_03080E  | ENSG00000 | C1orf21     | PIG13                     | C       | chromosome protein-coding                |                             |         |
| chr1-2242 | 8.204605 | 0.671452 | 0.815514 | 0.823348 | 0.41031  | 0.981636 | chr1  | 2.24E+08 | 2.24E+08 | + | 0 | NA | intron (AluJb SIN  | 10517    | NR_11066E  | 1.02E+08  | Hs. 71012E | NR_11066E  | ENSG00000 | LOC101927-  |                           |         | uncharacterized ncRNA                    |                             |         |
| chr11-98  | 8.204605 | 0.671452 | 0.815514 | 0.823348 | 0.41031  | 0.981636 | chr11 | 985231   | 985289   | + | 0 | NA | exon (NM exon (NM  | 51143    | NM_005961  | 4588      | Hs. 52843E | NM_005961  | ENSG00000 | MUC6        | MUC-6                     | M       | mucin 6, protein-coding                  |                             |         |
| chr6-3731 | 8.204605 | 0.671452 | 0.815514 | 0.823348 | 0.41031  | 0.981636 | chr6  | 37316749 | 37319033 | + | 0 | NA | intron (L2a LINE   | -36092   | NM_18307E  | 9025      | Hs. 48527E | NM_00395E  | ENSG00000 | CNRF8       | hRNF8                     | R       | ring finger protein-coding               |                             |         |
| chr7-299  | 8.204605 | 0.671452 | 0.815514 | 0.823348 | 0.41031  | 0.981636 | chr7  | 29954357 | 29955658 | + | 0 | NA | intron (LIMB8 LIN  | 34794    | NM_01476E  | 9805      | Hs. 52074  | CNM_01476E | ENSG00000 | SCRN1       | SES1                      | S       | secretory protein-coding                 |                             |         |
| chr9-1047 | 8.204605 | 0.671452 | 0.815514 | 0.823348 | 0.41031  | 0.981636 | chr9  | 1.05E+08 | 1.05E+08 | + | 0 | NA | intron (AluSc SIN  | 20673    | NR_13076E  | 55335     | Hs. 429294 | NM_01837E  | ENSG00000 | NIPSNAP3E   | PP944                     | NIP     | nipsnap 3 protein-coding                 |                             |         |
| chr16-48  | 7.119442 | 0.736246 | 0.894436 | 0.82314  | 0.410428 | 0.981636 | chr16 | 4869147  | 4869367  | + | 0 | NA | intron (Nintron (N | 20877    | NR_00128E  | 29855     | Hs. 44021  | NM_01693E  | ENSG00000 | UBN1        | VT VT4                    | V       | ubiquitin protein-coding                 |                             |         |
| chr1-1557 | 10.40125 | 0.600362 | 0.729899 | 0.822528 | 0.410777 | 0.981636 | chr1  | 1.56E+08 | 1.56E+08 | + | 0 | NA | intron (AluJr4 SI  | -9838    | NR_132767  | 1.07E+08  |            | NR_132767  |           | SCARNA26E   |                           |         |                                          | small Ca <sub>v</sub> ncRNA |         |
| chr3-4912 | 10.40125 | 0.600362 | 0.729899 | 0.822528 | 0.410777 | 0.981636 | chr3  | 49124291 | 49125309 | + | 0 | NA | exon (NM exon (NM  | -3862    | NM_001351  | 10869     | Hs. 25559E | NM_006677  | ENSG00000 | USP19       | ZMYND9                    | Z       | ubiquitin protein-coding                 |                             |         |
| chr19-271 | 25.6179  | 0.412214 | 0.50138  | 0.822159 | 0.410987 | 0.981636 | chr19 | 27156007 | 27157002 | + | 0 | NA | IntergeniALR/Alpha | -636297  | NR_14673E  | 1.02E+08  | Hs. 567934 | NR_110687  | ENSG00000 | LOC1019127- |                           |         | uncharacterized ncRNA                    |                             |         |
| chr1-429  | 5.964968 | 0.78136  | 0.950562 | 0.821998 | 0.411078 | 0.981636 | chr1  | 42982490 | 42981967 | + | 0 | NA | intron (Nintron (N | 22049    | NR_033967  | 440584    | Hs. 26092E | NR_033967  | ENSG00000 | SLC2A1-AC   |                           |         |                                          | SLC2A1                      | arncRNA |
| chr1-1844 | 5.964968 | 0.78136  | 0.950562 | 0.821998 | 0.411078 | 0.981636 | chr1  | 1.84E+08 | 1.84E+08 | + | 0 | NA | intron (Nintron (N | 85544    | NM_03080E  | 81563     | Hs. 49715E | NM_03080E  | ENSG00000 | C1orf21     | PIG13                     | C       | chromosome protein-coding                |                             |         |
| chr1-2191 | 5.964968 | 0.78136  | 0.950562 | 0.821998 | 0.411078 | 0.981636 | chr1  | 2.19E+08 | 2.19E+08 | + | 0 | NA | intron (Nintron (N | 7951     | NM_00130C  | 127018    | Hs. 657617 | NM_138794  | ENSG00000 | LYPLAL1     | Q96AV0                    | L       | lysophosphatidyl protein-coding          |                             |         |
| chr12-47  | 5.964968 | 0.78136  | 0.950562 | 0.821998 | 0.411078 | 0.981636 | chr12 | 4790265  | 4791045  | + | 0 | NA | intron (Nintron (N | 17417    | NM_01784E  | 55652     | Hs. 438867 | NM_01784E  | ENSG00000 | SLC48A1     | H8G-1                     | HRC     | solute carrier protein-coding            |                             |         |
| chr12-12  | 5.964968 | 0.78136  | 0.950562 | 0.821998 | 0.411078 | 0.981636 | chr12 | 1.24E+08 | 1.24E+08 | + | 0 | NA | intron (Nintron (N | 10179    | NM_00131E  | 353116    | Hs. 53031E | NM_178314  | ENSG00000 | RILPL1      | GOSPFL                    | R       | Rab interprotein-coding                  |                             |         |
| chr12-13  | 5.964968 | 0.78136  | 0.950562 | 0.821998 | 0.411078 | 0.981636 | chr12 | 1.33E+08 | 1.33E+08 | + | 0 | NA | 3' UTR (N3' UTR (N | -20093   | NM_00130C  | 7699      | Hs. 18155E | NM_00344E  | ENSG00000 | ZNF140      | pHZ-39                    | Z       | zinc finger protein-coding               |                             |         |
| chr13-20  | 5.964968 | 0.78136  | 0.950562 | 0.821998 | 0.411078 | 0.981636 | chr13 | 20511192 | 20512449 | + | 0 | NA | intron (Nintron (N | 51084    | Hs. 37070E | NM_015974 | ENSG00000  | CRYL1      | GDH HEL3C | C           | crystallin protein-coding |         |                                          |                             |         |
| chr15-52  | 5.964968 | 0.78136  | 0.950562 | 0.821998 | 0.411078 | 0.981636 | chr15 | 52668999 | 52672365 | + | 0 | NA | intron (Nintron (N | 7952     | NM_01960C  | 56204     | Hs. 15238E | NM_01960C  | ENSG00000 | FAM214A     | KIAA1370                  | F       | family wiprotein-coding                  |                             |         |
| chr16-18  | 5.964968 | 0.78136  | 0.950562 | 0.821998 | 0.411078 | 0.981636 | chr16 | 1807418  | 1810757  | + | 0 | NA | TTS (NM_C          | -14179   | NR_02738E  | 3483      | Hs. 839    | NM_00497E  | ENSG00000 | IGFALS      | ACLSLD                    | A       | insulin I protein-coding                 |                             |         |
| chr16-68  | 5.964968 | 0.78136  | 0.950562 | 0.821998 | 0.411078 | 0.981636 | chr16 | 68352411 | 68354822 | + | 0 | NA | intron (Nintron (N | 42502    | NM_00129C  | 54946     | Hs. 64022E | NM_01902E  | ENSG00000 | PRMT7       | SBIDS                     | S       | protein arginine-coding                  |                             |         |
| chr17-80  | 5.964968 | 0.78136  | 0.950562 | 0.821998 | 0.411078 | 0.981636 | chr17 | 80951045 | 80952102 | + | 0 | NA | intron (Nintron (N | 19640    | NR_14896E  | 400627    | Hs. 591201 | NR_14896E  | ENSG00000 | LOC400627-  |                           |         |                                          | uncharacterized ncRNA       |         |
| chr19-29  | 5.964968 | 0.78136  | 0.950562 | 0.821998 | 0.411078 | 0.981636 | chr19 | 29674558 | 29675634 | + | 0 | NA | 3' UTR (N3' UTR (N | 9635     | NM_02431C  | 79156     | Hs. 46638E | NM_02431C  | ENSG00000 | PLEKHF1     | APPD                      | L       | LAPF complex protein-coding              |                             |         |
| chr19-49  | 5.964968 | 0.78136  | 0.950562 | 0.821998 | 0.411078 | 0.981636 | chr19 | 49176125 | 49179543 | + | 0 | NA | intron (MIRb SINE  | 20042    | NM_01763E  | 54795     | Hs. 467101 | NM_01763E  | ENSG00000 | TRPM4       | L1TrpC4                   | P       | transient receptor protein-coding        |                             |         |
| chr19-54  | 5.964968 | 0.78136  | 0.950562 | 0.821998 | 0.411078 | 0.981636 | chr19 | 54120704 | 54121723 | + | 0 | NA | intron (AluSj SIN  | 5459     | NM_01562E  | 26121     | Hs. 51559E | NM_01562E  | ENSG00000 | PRPF31      | NY-BR-99                  | P       | pre-mRNA protein-coding                  |                             |         |
| chr2-238  | 5.964968 | 0.78136  | 0.950562 | 0.821998 | 0.411078 | 0.981636 | chr2  | 2.38E+08 | 2.38E+08 | + | 0 | NA | intron (Nintron (N | 12514    | NM_0022817 | 8864      | Hs. 58756  | NM_003894  | ENSG00000 | PER2        | FASPS                     | F       | fast period 2 protein-coding             |                             |         |
| chr20-24  | 5.964968 | 0.78136  | 0.950562 | 0.821998 | 0.411078 | 0.981636 | chr20 | 24963242 | 24964331 | + | 0 | NA | 3' UTR (N3' UTR (N | 14517    | NM_00365C  | 8530      | Hs. 14321E | NM_00365C  | ENSG00000 | CST7        | CMAP                      | C       | cystatin protein-coding                  |                             |         |
| chr20-33  | 5.964968 | 0.78136  | 0.950562 | 0.821998 | 0.411078 | 0.981636 | chr20 | 33629838 | 33631463 | + | 0 | NA | intron (Nintron (N | -31677   | NM_08082E  | 128864    | Hs. 324104 | NM_08082E  | ENSG00000 | C2orf144    | dJ63M2.6                  | C       | chromosome protein-coding                |                             |         |
| chr22-29  | 5.964968 | 0.78136  | 0.950562 | 0.821998 | 0.411078 | 0.981636 | chr22 | 29795297 | 29795766 | + | 0 | NA | intron (Nintron (N | 28117    | NM_013387  | 29796     | Hs. 28429E | NM_013387  | ENSG00000 | UQCRL0      | HSPC051                   | F       | ubiquitin protein-coding                 |                             |         |
| chr3-144  | 5.964968 | 0.78136  | 0.950562 | 0.821998 | 0.411078 | 0.981636 | chr3  | 14443542 | 14444385 | + | 0 | NA | intron (Nintron (N | 41357    | NM_001134  | 6533      | Hs. 52948E | NM_00304E  | ENSG00000 | SLC6A6      | TAU6                      | T       | solute carrier protein-coding            |                             |         |
| chr3-44   | 5.964968 | 0.78136  | 0.950562 | 0.821998 | 0.411078 | 0.981636 | chr3  | 44932136 | 44933633 | + | 0 | NA | intron (Nintron (N | 43290    | NM_00134E  | 51304     | Hs. 61430  | NM_01659E  | ENSG00000 | ZDHH3       | DHHC-3                    | D       | zinc finger protein-coding               |                             |         |
| chr3-48   | 5.964968 | 0.78136  | 0.950562 | 0.821998 | 0.411078 | 0.981636 | chr3  | 48538342 | 48540444 | + | 0 | NA | intron (Nintron (N | 10628    | NR_106881  | 1.02E+08  |            | NR_106881  | ENSG00000 | MIR6823     | hsa-mir-6823              | M       | microRNA ncRNA                           |                             |         |
| chr3-48   | 5.964968 | 0.78136  | 0.950562 | 0.821998 | 0.411078 | 0.981636 | chr3  | 48746021 | 48746220 | + | 0 | NA | TTS (NM_C          | -28842   | NM_00114E  | 51447     | Hs. 59598E | NM_016291  | ENSG00000 | IP6K2       | IHPK2                     | I       | inositol protein-coding                  |                             |         |
| chr3-53   | 5.964968 | 0.78136  | 0.950562 | 0.821998 | 0.411078 | 0.981636 | chr3  | 53245323 | 53248378 | + | 0 | NA | intron (AluSp SIN  | 9172     | NM_001064  | 7086      | Hs. 89643  | NM_001064  | ENSG00000 | TKT         | HEL-S-48                  | T       | transketolase protein-coding             |                             |         |
| chr4-87   | 5.964968 | 0.78136  | 0.950562 | 0.821998 | 0.411078 | 0.981636 | chr4  | 874952   | 882414   | + | 0 | NA | intron (LIMEc LIN  | -52554   | NM_006651  | 10815     | Hs. 47893E | NM_006651  | ENSG00000 | CPLX1       | CPX-1                     | C       | complexin protein-coding                 |                             |         |
| chr5-34   | 5.964968 | 0.78136  | 0.950562 | 0.821998 | 0.411078 | 0.981636 | chr5  | 348021   | 348999   | + | 0 | NA | intron (LIMEl LIN  | 44334    | NM_020731  | 57491     | Hs. 80E23  | NM_020731  | ENSG00000 | AHRR        | AHH AHR                   | A       | aryl hydrocarbon receptor protein-coding |                             |         |
| chr7-14   | 5.964968 | 0.78136  | 0.950562 | 0.821998 | 0.411078 | 0.981636 | chr7  | 1479924  | 1481288  | + | 0 | NA | intron (Nintron (N | -21136   | NM_182924  | 79778     | Hs. 376617 | NM_02472E  | ENSG00000 | MICAL2      | JRAB                      | J       | MICAL like protein-coding                |                             |         |
| chr7-22   | 5.964968 | 0.78136  | 0.950562 | 0.821998 | 0.411078 | 0.981636 | chr7  | 2212483  | 2213336  | + | 0 | NA | intron (Nintron (N | 20036    | NM_001304  | 8379      | Hs. 65483E | NM_00355E  | ENSG00000 | MADL1       | MAD1                      | P       | mitotic 1 protein-coding                 |                             |         |
| chr7-23   | 5.964968 | 0.78136  | 0.950562 | 0.821998 | 0.411078 | 0.981636 | chr7  | 23128732 | 23129892 | + | 0 | NA | intron (Nintron (N | 22651    | NM_01884E  | 55975     | Hs. 654817 | NM_01884E  | ENSG00000 | KLHL7       | CISS3                     | K       | kelch like protein-coding                |                             |         |
| chr9-13   | 5.964968 | 0.78136  | 0.950562 | 0.821998 | 0.411078 | 0.981636 | chr9  | 1.35E+08 | 1.35E+08 | + | 0 | NA | exon (NM exon (NM  | 5913     | NM_014811  | 9858      | Hs. 53326E | NM_014811  | ENSG00000 | PPP1R26     | KIAA0649                  | P       | protein phosphatase 1 protein-coding     |                             |         |
| chr19-47  | 7.468044 | -0.72234 | 0.879375 | -0.82142 | 0.411405 | 0.981636 | chr19 | 47153749 | 47154219 | + | 0 | NA | intron (AluSj SIN  | 23149    | NM_00114E  | 10055     | Hs. 51550E | NM_00550C  | ENSG00000 | SAE1        | AOS1                      | H       | HSPC SUMO1 act protein-coding            |                             |         |
| chr1-17   | 10.44239 | 0.601083 | 0.732172 | 0.820959 |          |          |       |          |          |   |   |    |                    |          |            |           |            |            |           |             |                           |         |                                          |                             |         |



|                    |          |          |          |          |          |       |          |          |      |                     |                    |                              |                 |                 |                         |                         |                       |                |
|--------------------|----------|----------|----------|----------|----------|-------|----------|----------|------|---------------------|--------------------|------------------------------|-----------------|-----------------|-------------------------|-------------------------|-----------------------|----------------|
| chrX-1295 7.377907 | -0.72851 | 0.890912 | -0.81772 | 0.41352  | 0.981636 | chrX  | 1.3E+08  | 1.3E+08  | 0 NA | intron (AluSz SIN   | 13874 NM_006649    | 10813 Hs. 458598NM_006649    | ENSG00000000000 | UTP14A          | NYCO16 SI               | UTP14A                  | snprotein-coding      |                |
| chr8-9375 9.514184 | -0.64536 | 0.789434 | -0.8175  | 0.413642 | 0.981636 | chr8  | 93738505 | 93738742 | 0 NA | intron (AluJb SIN   | -1488 NR_027255    | 55472 Hs. 192788NM_018608    | ENSG00000000000 | RBM12B-AS1      | CSorF39 FRBM12B         | arncRNA                 |                       |                |
| chr1-6815 8.245745 | 0.672292 | 0.822481 | 0.817395 | 0.413703 | 0.981636 | chr1  | 68153062 | 68153850 | 0 NA | intron (intron (    | 30154 NR_031664    | 1E+08                        | NR_031664       | ENSG00000000000 | MIRN1262                | microRNA ncRNA          |                       |                |
| chr10-457 8.245745 | 0.672292 | 0.822481 | 0.817395 | 0.413703 | 0.981636 | chr10 | 45776050 | 45776729 | 0 NA | intron (intron (    | 40935 NM_001351    | 643479 Hs. 522900NM_001351   | FAM25E          | FAM25E          | family wiprotein-coding |                         |                       |                |
| chr10-875 8.245745 | 0.672292 | 0.822481 | 0.817395 | 0.413703 | 0.981636 | chr10 | 87530518 | 87530938 | 0 NA | intron (L1P45 LIN   | 22895 NM_001178    | 95672 Hs. 121262NM_004897    | ENSG00000000000 | M1NP1           | H1PERI MI               | miuiprotein-coding      |                       |                |
| chr1-5475 7.411188 | -0.72288 | 0.884372 | -0.81739 | 0.413705 | 0.981636 | chr1  | 54733160 | 54733588 | 0 NA | intron (AluJb SIN   | 17513 NM_004623    | 7268 Hs. 412482NM_004623     | ENSG00000000000 | CTTC4           | CNS1                    | tetratricprotein-coding |                       |                |
| chr12-246 7.411188 | -0.72288 | 0.884372 | -0.81739 | 0.413705 | 0.981636 | chr12 | 24892350 | 24892757 | 0 NA | intron (intron (    | 9669 NM_001178     | 586 Hs. 438993NM_005504      | ENSG00000000000 | BCAT1           | BCATC BC1               | branched protein-coding |                       |                |
| chr17-666 7.9295   | -0.68334 | 0.836041 | -0.81735 | 0.413729 | 0.981636 | chr17 | 66641862 | 66642416 | 0 NA | intron (AluY SINE   | -144933 NR_030364  | 693219                       | NR_030364       | ENSG00000000000 | MIR634                  | tmicroRNA ncRNA         |                       |                |
| chr10-406 26.09692 | 0.404693 | 0.495166 | 0.817288 | 0.413764 | 0.981636 | chr10 | 40633542 | 40633977 | 0 NA | IntergeniALR/Alpha  | 1734286 NR_02438C  | 441666 Hs. 255725NR_02438C   | ENSG00000000000 | LOC441666       |                         | zinc fingpseudo         |                       |                |
| chr2-1327 11.35911 | -0.58075 | 0.710727 | -0.81712 | 0.413861 | 0.981636 | chr2  | 1.33E+08 | 1.33E+08 | 0 NA | intron (intron (    | -101919 NM_001077  | 116372 Hs. 432395NM_14458E   | ENSG00000000000 | LYPD1           | LYPDC1 PF               | LYF/PLAUF               | protein-coding        |                |
| chr14-954 4.221919 | 0.919094 | 1.124831 | 0.817095 | 0.413874 | 0.981636 | chr14 | 95411797 | 95411874 | 0 NA | 3' UTR (3' UTR (    | 58300 NM_001363    | 161176 Hs. 41502 NM_024653   | ENSG00000000000 | SYNE3           | C14orf135               | spectrin protein-coding |                       |                |
| chr7-1474 4.221919 | 0.919094 | 1.124831 | 0.817095 | 0.413874 | 0.981636 | chr7  | 1474716  | 1475647  | 0 NA | intron (AluJb SIN   | -15711 NM_182924   | 79778 Hs. 376617NM_024723    | ENSG00000000000 | MICAL2          | JRAB MIC MICAL          | 11k                     | protein-coding        |                |
| chr1-5275 7.921642 | -0.6818  | 0.834499 | -0.81702 | 0.413917 | 0.981636 | chr1  | 52797566 | 52798005 | 0 NA | intron (AluY SINE   | -44975 NM_001307   | 440590 Hs. 658455NM_001004   | ENSG00000000000 | ZYG11A          | ZYG11                   | zyg-11                  | protein-coding        |                |
| chr13-215 7.921642 | -0.6818  | 0.834499 | -0.81702 | 0.413917 | 0.981636 | chr13 | 21509487 | 21509737 | 0 NA | intron (MLT1H LTF   | -05242 NM_00128E   | 253832 Hs. 564611NM_153251   | ENSG00000000000 | ZDHHC20         | 4933421L1L              | zinc fingprotein-coding |                       |                |
| chr16-882 7.921642 | -0.6818  | 0.834499 | -0.81702 | 0.413917 | 0.981636 | chr16 | 8829879  | 8830345  | 0 NA | intron (HERV351-i   | -19357 NR_14790E   | 1E+08 Hs. 735515NR_14790E    | LOC10013C       |                 |                         | uncharactercRNA         |                       |                |
| chr2-1357 7.921642 | -0.6818  | 0.834499 | -0.81702 | 0.413917 | 0.981636 | chr2  | 1.36E+08 | 1.36E+08 | 0 NA | intron (LA_C_Mam    | -20880 NR_16347E   | 1.08E+08 Hs. 591242NM_001365 | 239             | LOC10798E       |                         | uncharactercRNA         |                       |                |
| chr3-7145 7.921642 | -0.6818  | 0.834499 | -0.81702 | 0.413917 | 0.981636 | chr3  | 71490831 | 71491416 | 0 NA | intron (AluXs1 SI   | 50966 NR_031697    | 1E+08                        | NR_031697       | ENSG00000000000 | MIRN1284                | tmicroRNA ncRNA         |                       |                |
| chr7-5338 7.921642 | -0.6818  | 0.834499 | -0.81702 | 0.413917 | 0.981636 | chr7  | 5338957  | 5340151  | 0 NA | intron (T(G)n Sin   | 56611 NM_00104C    | 222962 Hs. 4302 NM_153247    | ENSG00000000000 | SLC29A4         | ENT4 PMA1               | solute cprotein-coding  |                       |                |
| chr9-1347 7.921642 | -0.6818  | 0.834499 | -0.81702 | 0.413917 | 0.981636 | chr9  | 1.35E+08 | 1.35E+08 | 0 NA | intron (intron (    | 75797 NR_039691    | 1.01E+08                     | NR_039691       | ENSG00000000000 | MIR3689C                |                         | microRNA ncRNA        |                |
| chrX-1685 7.921642 | -0.6818  | 0.834499 | -0.81702 | 0.413917 | 0.981636 | chrX  | 16855503 | 16855736 | 0 NA | intron (intron (    | 14244 NM_00119E    | 5931 Hs. 495755NM_002893     | ENSG00000000000 | RBBP7           | RbAp46                  | RB                      | bindir protein-coding |                |
| chr9-1217 7.749157 | 0.707935 | 0.866561 | 0.816947 | 0.413958 | 0.981636 | chr9  | 1.22E+08 | 1.22E+08 | 0 NA | intron (intron (    | 33137 NM_13870E    | 153090 Hs. 522378NM_032552   | ENSG00000000000 | DAB2IP          | AF9Q34 A1               | DAB2                    | intcprotein-coding    |                |
| chr7-1056 7.160582 | 0.736781 | 0.902001 | 0.81683  | 0.414026 | 0.981636 | chr7  | 1.06E+08 | 1.06E+08 | 0 NA | intron (intron (    | -34640 NM_00135E   | 1E+08 Hs. 719432NM_00135E    | ENSG00000000000 | EFCAB10         |                         | EF-hand                 | cprotein-coding       |                |
| chr7-6728 4.437024 | -0.93064 | 1.139428 | -0.81676 | 0.414063 | 0.981636 | chr7  | 67286899 | 67287098 | 0 NA | TTS (NR_C TTS (NR_C | 15444 NR_046297    | 5382 Hs. 712714NR_022007     | ENSG00000000000 | PMS2P4          | PMS2L4 P                | PMS1                    | homc                  | pseudo         |
| chr8-9865 7.821797 | -0.69732 | 0.853923 | -0.81661 | 0.41415  | 0.981636 | chr8  | 98699589 | 98699794 | 0 NA | intron (L1P43 LIN   | 125980 NM_00125E   | 6788 Hs. 492333NM_006281     | ENSG00000000000 | STK3            | KRS1 MS12               | serine/t                | protein-coding        |                |
| chr1-2276 10.9644  | 0.583202 | 0.71418  | 0.816604 | 0.414155 | 0.981636 | chr1  | 2.28E+08 | 2.28E+08 | 0 NA | exon (NM exon (NM   | 43215 NR_036753    | 401983 Hs. 681815NR_036753   | ZNF847P         |                 | gml27                   | zinc fingpseudo         |                       |                |
| chr1-123 8.179182  | 0.666655 | 0.816398 | 0.816581 | 0.414168 | 0.981636 | chr1  | 12308691 | 12309003 | 0 NA | intron (AluXs SIN   | 78817 NM_01537E    | 55187 Hs. 439381NM_01537E    | ENSG00000000000 | VPS13D          | SCAR4                   | vacuolar                | protein-coding        |                |
| chr13-102 8.179182 | 0.666655 | 0.816398 | 0.816581 | 0.414168 | 0.981636 | chr13 | 1.03E+08 | 1.03E+08 | 0 NA | intron (AluXs SIN   | 26239 NM_003291    | 7174 Hs. 432424NM_003291     | ENSG00000000000 | PPP2            | PPP2                    | tripeptic               | protein-coding        |                |
| chr17-405 8.179182 | 0.666655 | 0.816398 | 0.816581 | 0.414168 | 0.981636 | chr17 | 4054940  | 4055139  | 0 NA | intron (L2c LINE    | 77936 NR_146884    | 1.05E+08 Hs. 579235NR_146884 | LINC0197E       |                 |                         | long intcncRNA          |                       |                |
| chr19-111 8.179182 | 0.666655 | 0.816398 | 0.816581 | 0.414168 | 0.981636 | chr19 | 11359546 | 11360145 | 0 NA | exon (NM exon (NM   | 4413 NM_00117E     | 64748 Hs. 6846 NM_022737     | ENSG00000000000 | PLPPR2          | LPPR2 PRC               | phospholip              | protein-coding        |                |
| chr2-8621 8.179182 | 0.666655 | 0.816398 | 0.816581 | 0.414168 | 0.981636 | chr2  | 86210861 | 86211060 | 0 NA | 3' UTR (3' UTR (    | 11503 NM_016622    | 51318 Hs. 434335NM_016622    | ENSG00000000000 | MRPL35          | L35mt MR1               | mitochonc               | protein-coding        |                |
| chr20-582 8.179182 | 0.666655 | 0.816398 | 0.816581 | 0.414168 | 0.981636 | chr20 | 58246857 | 58248462 | 0 NA | intron (intron (    | -19006 NM_001304   | 140731 Hs. 266571NM_080674   | ENSG00000000000 | ANKRD60         | C20orf86                | ankyrin r               | protein-coding        |                |
| chr4-3578 8.179182 | 0.666655 | 0.816398 | 0.816581 | 0.414168 | 0.981636 | chr4  | 357885   | 360025   | 0 NA | 3' UTR (3' UTR (    | 8798 NR_030297     | 693156                       | NR_030297       | ENSG00000000000 | MIR571                  | tmicroRNA ncRNA         |                       |                |
| chr5-1802 8.179182 | 0.666655 | 0.816398 | 0.816581 | 0.414168 | 0.981636 | chr5  | 1.8E+08  | 1.8E+08  | 0 NA | intron (L1M3B LI    | 6815 NM_00130E     | 5601 Hs. 484371NM_002752     | ENSG00000000000 | MAPK9           | JNK-55 J                | mitogen-e               | protein-coding        |                |
| chr9-1215 8.179182 | 0.666655 | 0.816398 | 0.816581 | 0.414168 | 0.981636 | chr9  | 1.21E+08 | 1.21E+08 | 0 NA | intron (HAL1 LINE   | 11587 NM_198194    | 2040 Hs. 253903NM_00409E     | ENSG00000000000 | STOM            | BND7 EPB7               | stomatin                | protein-coding        |                |
| chr1-214 6.129411  | -0.78004 | 0.955542 | -0.81633 | 0.41431  | 0.981636 | chr1  | 21447344 | 21446737 | 0 NA | intron (L1M2C LI    | 7353 NM_00125E     | 84224 Hs. 325422NM_032264    | ENSG00000000000 | NBPF3           | AE2                     | NBPF                    | meat                  | protein-coding |
| chr19-577 6.129411 | -0.78004 | 0.955542 | -0.81633 | 0.41431  | 0.981636 | chr19 | 57761071 | 57761200 | 0 NA | IntergeniALR/Alpha  | -8482 NM_001204    | 54807 Hs. 625133NM_017652    | ENSG00000000000 | ZNF586          |                         | zinc fingprotein-coding |                       |                |
| chr2-1514 6.129411 | -0.78004 | 0.955542 | -0.81633 | 0.41431  | 0.981636 | chr2  | 1.51E+08 | 1.51E+08 | 0 NA | intron (intron (    | 21972 NM_001177    | 55183 Hs. 536537NM_018151    | ENSG00000000000 | CRIF1           |                         | replicatiprotein-coding |                       |                |
| chr2-202 6.129411  | -0.78004 | 0.955542 | -0.81633 | 0.41431  | 0.981636 | chr2  | 2.02E+08 | 2.02E+08 | 0 NA | IntergeniIntergeni  | 13842 NR_003031    | 692058                       | NR_003031       | ENSG00000000000 | SNORD11                 | HB11-95                 | small nucsnRNA        |                |
| chr6-1582 6.129411 | -0.78004 | 0.955542 | -0.81633 | 0.41431  | 0.981636 | chr6  | 1.58E+08 | 1.58E+08 | 0 NA | intron (intron (    | 73874 NM_00117E    | 8871 Hs. 434494NM_00389E     | ENSG00000000000 | SYNJ2           | INPF5H                  | synaptoe                | protein-coding        |                |
| chr11-654 7.847221 | -0.69045 | 0.846022 | -0.81611 | 0.414437 | 0.981636 | chr11 | 65436819 | 65438182 | 0 NA | non-codirnon-codir  | -6958 NR_030343    | 693197                       | NR_030343       | ENSG00000000000 | MIR612                  | tmicroRNA ncRNA         |                       |                |
| chr2-5557 7.847221 | -0.69045 | 0.846022 | -0.81611 | 0.414437 | 0.981636 | chr2  | 55570500 | 55577153 | 0 NA | intron (AluSc8 SI   | 41021 NM_001122    | 57223 Hs. 516182NM_020463    | ENSG00000000000 | PPP4R3B         | CNLF2 PP4               | phospholip              | protein-coding        |                |
| chr4-159 7.847221  | -0.69045 | 0.846022 | -0.81611 | 0.414437 | 0.981636 | chr4  | 1.59E+08 | 1.59E+08 | 0 NA | intron (L1P64 LIN   | 37424 NM_001351    | 9693 Hs. 744884NM_014247     | ENSG00000000000 | RAPGEF2         | FRAS GEP                | Rap                     | guaniprotein-coding   |                |
| chr9-137 7.847221  | -0.69045 | 0.846022 | -0.81611 | 0.414437 | 0.981636 | chr9  | 1.38E+08 | 1.38E+08 | 0 NA | intron (L1R13 LTF   | 7694 NM_032477     | 64975 Hs. 44017 NM_032477    | ENSG00000000000 | MRPL41          | BMRP MRP-               | mitochonc               | protein-coding        |                |
| chr18-492 10.97411 | 0.590072 | 0.723221 | 0.815894 | 0.414561 | 0.981636 | chr18 | 49281673 | 49281891 | 0 NA | intron (L1P44 LIN   | 178663 NM_00135E   | 54808 Hs. 162996NM_017652    | ENSG00000000000 | DYM             | DMC SMC                 | dymeclin                | protein-coding        |                |
| chr17-408 9.672734 | -0.62259 | 0.763775 | -0.81515 | 0.414986 | 0.981636 | chr17 | 40817345 | 40818159 | 0 NA | TTS (NM_C TTS (NM_C | -1393 NR_160887    | 147184 Hs. 353163NM_145274   | ENSG00000000000 | TMEM99          |                         | transmemncRNA           |                       |                |
| chr11-124 7.452328 | -0.71889 | 0.882166 | -0.81491 | 0.415124 | 0.981636 | chr11 | 1.24E+08 | 1.24E+08 | 0 NA | intron (AluSg SIN   | 11132 NM_00113C    | 4013 Hs. 152944NM_014622     | ENSG00000000000 | VWA5A           | BCSC-1 B                | von Wille               | protein-coding        |                |
| chr19-255 27.3591  | 0.411485 | 0.505111 | 0.814643 | 0.415277 | 0.981636 | chr19 | 25552364 | 25552870 | 0 NA | IntergeniALR/Alpha  | -1389170 NR_003603 | 1E+08 Hs. 149312NR_003603    | ENSG00000000000 | HAVCR1P1        |                         | hepatitis               | pseudo                |                |
| chr16-88 5.931687  | 0.777711 | 0.954675 | 0.814634 | 0.415282 | 0.981636 | chr16 | 88606413 | 88606923 | 0 NA | intron (AluJo SIN   | -31904 NM_01327E   | 27189 Hs. 278911NM_01327E    | ENSG00000000000 | IL17C           | CX2 IL-17               | interleu                | protein-coding        |                |
| chr17-600 5.931687 | 0.777711 | 0.954675 | 0.814634 | 0.415282 | 0.981636 | chr17 | 60043221 |          |      |                     |                    |                              |                 |                 |                         |                         |                       |                |

|                    |          |          |          |          |          |       |            |           |   |   |    |                    |         |           |          |                    |                     |                 |             |                      |                |                |
|--------------------|----------|----------|----------|----------|----------|-------|------------|-----------|---|---|----|--------------------|---------|-----------|----------|--------------------|---------------------|-----------------|-------------|----------------------|----------------|----------------|
| chr19-458.5.939545 | 0.774921 | 0.954679 | 0.811708 | 0.416959 | 0.981636 | chr19 | 45895765   | 45896738  | + | 0 | NA | intron (AluSx SIN  | 6362    | NM_001012 | 339344   | Hs.51547ENM_001012 | ENSG000005MPOP      | P42pop          | Myb         | relatprotein-coding  |                |                |
| chr20-585.5.939545 | 0.774921 | 0.954679 | 0.811708 | 0.416959 | 0.981636 | chr20 | 58998810   | 59000152  | + | 0 | NA | intron (intron (N  | 7773    | NM_001336 | 1522     | Hs.25254ENM_001336 | ENSG000005CTS       | CTSX            | cathepsin   | protein-coding       |                |                |
| chr22-317.5.939545 | 0.774921 | 0.954679 | 0.811708 | 0.416959 | 0.981636 | chr22 | 31776425   | 31778888  | + | 0 | NA | intron (intron (N  | 23633   | NM_001366 | 9681     | Hs.435022NM_014662 | ENSG000005DEPDC5    | DEP.5           | FFDEP       | domainprotein-coding |                |                |
| chr5-1735.5.939545 | 0.774921 | 0.954679 | 0.811708 | 0.416959 | 0.981636 | chr5  | 1.74E+08   | 1.74E+08  | + | 0 | NA | intron (intron (N  | 18783   | NM_001308 | 80315    | Hs.12712ENM_030627 | ENSG000005CPEBA     | CPBE-BP4        | cytochrome  | protein-coding       |                |                |
| chr7-7504.5.939545 | 0.774921 | 0.954679 | 0.811708 | 0.416959 | 0.981636 | chr7  | 75043822   | 75044287  | + | 0 | NA | intron (intron (N  | 29748   | NM_001362 | 81554    | Hs.52962ENM_030798 | ENSG000005RCC1L     | WBCSCR16        | RCC1        | likeprotein-coding   |                |                |
| chr7-1395.5.939545 | 0.774921 | 0.954679 | 0.811708 | 0.416959 | 0.981636 | chr7  | 1.4E+08    | 1.4E+08   | + | 0 | NA | intron (intron (N  | 107074  | NM_001366 | 6916     | Hs.520757NM_001061 | ENSG000005TBXAS1    | BDPLT14         | thromboxane | protein-coding       |                |                |
| chr9-1132.5.939545 | 0.774921 | 0.954679 | 0.811708 | 0.416959 | 0.981636 | chr9  | 1.13E+08   | 1.13E+08  | + | 0 | NA | intron (MLT2A2 L1  | 10620   | NM_015258 | 23307    | Hs.522351NM_015258 | ENSG000005FKBP15    | FKBP133         | FKBP        | protein-coding       |                |                |
| chr9-1315.5.939545 | 0.774921 | 0.954679 | 0.811708 | 0.416959 | 0.981636 | chr9  | 1.32E+08   | 1.32E+08  | + | 0 | NA | intron (intron (N  | 4725    | NM_031432 | 83547    | Hs.9597            | NM_031432           | ENSG000005UCK1  | URK1        | uridine              | protein-coding |                |
| chr9-1365.5.939545 | 0.774921 | 0.954679 | 0.811708 | 0.416959 | 0.981636 | chr9  | 1.36E+08   | 1.36E+08  | + | 0 | NA | intron (intron (N  | -7741   | NM_052813 | 64170    | Hs.694071NM_052813 | ENSG000005CARD9     | CANDF2          | h caspase   | protein-coding       |                |                |
| chr8-3046.0.106763 | -0.60498 | 0.745454 | -0.81155 | 0.417047 | 0.981636 | chr8  | 30465386   | 30465782  | + | 0 | NA | intron (AluSx1 S1  | -80183  | NR_046205 | 1E+08    | Hs.12681ENR_046205 | ENSG000005RBPMS-AS1 | RBPMS           | antncRNA    |                      |                |                |
| chr1-4051.4.914197 | -0.84886 | 1.046034 | -0.81155 | 0.417076 | 0.981636 | chr1  | 40510008   | 40512757  | + | 0 | NA | intron (intron (N  | 2663    | NM_001346 | 64789    | Hs.59584           | NM_022774           | ENSG000005EXO5  | Clorf176    | exonucle             | protein-coding |                |
| chr1-1693.4.914197 | -0.84886 | 1.046034 | -0.81155 | 0.417076 | 0.981636 | chr1  | 1.69E+08   | 1.69E+08  | + | 0 | NA | intron (intron (N  | 15933   | NM_001320 | 8548     | Hs.13074ENM_003666 | ENSG000005BLZF1     | GOLGIN-4        | basic       | protein-coding       |                |                |
| chr11-83.4.914197  | -0.84886 | 1.046034 | -0.81155 | 0.417076 | 0.981636 | chr11 | 83074824   | 83075553  | + | 0 | NA | Intergeni (GGAGA)n | 3122    | NR_038903 | 1.01E+08 | Hs.50342ENR_038903 | ENSG000005RAB30-DT  | RAB30-AS1       | RAB30       | divncRNA             |                |                |
| chr12-248.4.914197 | -0.84886 | 1.046034 | -0.81155 | 0.417076 | 0.981636 | chr12 | 24869267   | 24870967  | + | 0 | NA | intron (intron (N  | 32105   | NM_001178 | 586      | Hs.43899ENM_005504 | ENSG000005CBAT1     | BCATC           | BC1         | branched             | protein-coding |                |
| chr13-195.4.914197 | -0.84886 | 1.046034 | -0.81155 | 0.417076 | 0.981636 | chr13 | 19972510   | 19973190  | + | 0 | NA | intron (intron (N  | 13036   | NR_148365 | 7750     | Hs.50743ENM_003455 | ENSG000005ZMYM2     | FIM             | MYM         | finger               | protein-coding |                |
| chr14-994.4.914197 | -0.84886 | 1.046034 | -0.81155 | 0.417076 | 0.981636 | chr14 | 99455290   | 99456249  | + | 0 | NA | intron (MER20 DN   | 25090   | NM_199122 | 84193    | Hs.510407NM_032233 | ENSG000005SETD3     | C1orf154        | SET         | domain               | protein-coding |                |
| chr2-1281.4.914197 | -0.84886 | 1.046034 | -0.81155 | 0.417076 | 0.981636 | chr2  | 11810115   | 11810983  | + | 0 | NA | 3' UTR (A3' UTR (N | 25081   | NM_001282 | 130814   | Hs.27441ENM_152391 | ENSG000005CLC66A3   | C2orf22         | F           | solute               | protein-coding |                |
| chr2-2185.4.914197 | -0.84886 | 1.046034 | -0.81155 | 0.417076 | 0.981636 | chr2  | 2.19E+08   | 2.19E+08  | + | 0 | NA | intron (intron (N  | 52643   | NR_027671 | 56886    | Hs.74330ENM_020120 | ENSG000005UGGT1     | HUGT1           | UGC         | UDP-gluc             | protein-coding |                |
| chr3-3821.4.914197 | -0.84886 | 1.046034 | -0.81155 | 0.417076 | 0.981636 | chr3  | 32509      | NM_020935 | + | 0 | NA | intron (AluY SIN   | 32509   | NM_020935 | 57695    | Hs.16606ENM_020935 | ENSG000005USP37     | -               | ubiquitin   | protein-coding       |                |                |
| chr3-1965.4.914197 | -0.84886 | 1.046034 | -0.81155 | 0.417076 | 0.981636 | chr3  | 1.98216812 | 38218295  | + | 0 | NA | intron (AluS6 S1   | -48259  | NM_004256 | 9390     | Hs.225941NM_004256 | ENSG000005SLC22A13  | OAT10           | OC          | solute               | protein-coding |                |
| chr6-2054.4.914197 | -0.84886 | 1.046034 | -0.81155 | 0.417076 | 0.981636 | chr6  | 20545887   | 20546764  | + | 0 | NA | intron (NLIP3 LINE | -30244  | NR_046633 | 1.01E+08 | Hs.591671NR_046630 | NCBP2-AS1           | NCBP2           | antncRNA    |                      |                |                |
| chr7-9948.4.914197 | -0.84886 | 1.046034 | -0.81155 | 0.417076 | 0.981636 | chr7  | 99481345   | 99483614  | + | 0 | NA | intron (intron (N  | 11868   | NM_017774 | 54901    | Hs.657604NM_017774 | ENSG000005CDKAL1    | -               | CDK5        | regu                 | protein-coding |                |
| chr7-1305.4.914197 | -0.84886 | 1.046034 | -0.81155 | 0.417076 | 0.981636 | chr7  | 1.31E+08   | 1.31E+08  | + | 0 | NA | TTS (NR_1TTS (NR_1 | 9587    | NM_001351 | 285989   | Hs.440384NM_213605 | ENSG000005ZNF789    | -               | zinc        | finger               | protein-coding |                |
| chrX-1014.4.914197 | -0.84886 | 1.046034 | -0.81155 | 0.417076 | 0.981636 | chrX  | 1.01E+08   | 1.01E+08  | + | 0 | NA | intron (intron (N  | 62628   | NR_109780 | 1.01E+08 | Hs.63501ENR_109780 | LINC00515           | -               | long        | intncRNA             |                |                |
| chr19-101.7.796374 | -0.70453 | 0.868204 | -0.81148 | 0.41709  | 0.981636 | chr19 | 10169950   | 10170378  | + | 0 | NA | exon (NM exon (NM  | 3860    | NM_019597 | 3188     | Hs.43248ENM_019597 | ENSG000005HNRNP2    | FTP3            | HNRF        | heterog              | protein-coding |                |
| chr22-305.7.723733 | 0.702718 | 0.866117 | 0.811343 | 0.417169 | 0.981636 | chr22 | 30583081   | 30585063  | + | 0 | NA | intron (AluSx1 S1  | 24789   | NM_001318 | 1786     | Hs.202672NM_001318 | ENSG000005DNMT1     | ADCADN          | A1DNA       | methyl               | protein-coding |                |
| chr6-431.7.723733  | 0.702718 | 0.866117 | 0.811343 | 0.417169 | 0.981636 | chr6  | 43139135   | 43139934  | + | 0 | NA | intron (intron (N  | 7838    | NM_001243 | 23481    | Hs.51754ENM_014305 | ENSG000005NPT7      | NPT7            | pes         | protein-coding       |                |                |
| chr7-4387.7.723733 | 0.702718 | 0.866117 | 0.811343 | 0.417169 | 0.981636 | chr7  | 43804052   | 43804370  | + | 0 | NA | intron (AluSx SIN  | -31735  | NM_003131 | 6722     | Hs.52014ENM_003131 | ENSG000005SRF       | MCM1            | serum       | res                  | protein-coding |                |
| chr5-1687.10.10091 | -0.60103 | 0.740913 | -0.81122 | 0.417252 | 0.981636 | chr5  | 16872796   | 16876985  | + | 0 | NA | intron (THEIA1 LTF | 45531   | NM_000712 | 644      | Hs.48814ENM_000712 | ENSG000005BLVRA     | BLVR            | BVR         | biliverdin           | protein-coding |                |
| chr2-2312.10.45025 | 0.599462 | 0.739013 | 0.811166 | 0.417271 | 0.981636 | chr2  | 2.31E+08   | 2.31E+08  | + | 0 | NA | intron (intron (N  | 61398   | NM_012334 | 4651     | Hs.48172ENM_012334 | ENSG000005MYO10     | -               | myosin      | X                    | protein-coding |                |
| chr12-504.10.10877 | -0.60229 | 0.743092 | -0.81052 | 0.417641 | 0.981636 | chr12 | 50463264   | 50464849  | + | 0 | NA | intron (NMSTA-int  | 37493   | NM_001352 | 80210    | Hs.162411NM_025135 | ENSG000005ARMC9     | ARM             | JBTS        | armadill             | protein-coding |                |
| chr15-735.10.10877 | -0.60229 | 0.743092 | -0.81052 | 0.417641 | 0.981636 | chr15 | 73919240   | 73920089  | + | 0 | NA | intron (intron (N  | 7485    | NR_132753 | 1.07E+08 | NR_132753          | SNORD133            | L102            | ZLA         | small                | nuc            | snoRNA         |
| chr6-1385.10.10877 | -0.60229 | 0.743092 | -0.81052 | 0.417641 | 0.981636 | chr6  | 1.39E+08   | 1.39E+08  | + | 0 | NA | TTS (NM_TTS (NM_C  | 85102   | NM_001128 | 85021    | Hs.33460ENM_031922 | ENSG000005CREP5     | NBIA7           | RAL         | BLBP1                | as             | protein-coding |
| chr1-9227.7.872645 | -0.6837  | 0.843718 | -0.81034 | 0.417747 | 0.981636 | chr1  | 92284980   | 92286113  | + | 0 | NA | intron (NLIP6 L1   | 13441   | NM_053274 | 11146    | Hs.49105           | NR_007070           | ENSG000005GLMN  | FAP         | FAP4                 | glomulin       | protein-coding |
| chr15-777.7.872645 | -0.6837  | 0.843718 | -0.81034 | 0.417747 | 0.981636 | chr15 | 7751241    | 7751588   | + | 0 | NA | intron (AluSg2 S1  | 19695   | NM_001168 | 10099    | Hs.74486ENM_005724 | ENSG000005TSPAN3    | TM4-A           | TM4         | transp               | protein-coding |                |
| chr22-408.7.872645 | -0.6837  | 0.843718 | -0.81034 | 0.417747 | 0.981636 | chr22 | 40828874   | 40829112  | + | 0 | NA | intron (intron (N  | -9594   | NM_001282 | 10478    | Hs.47493ENM_006358 | ENSG000005SLC25A17  | PMP34           | solute      | protein-coding       |                |                |
| chr3-1414.7.872645 | -0.6837  | 0.843718 | -0.81034 | 0.417747 | 0.981636 | chr3  | 1.41E+08   | 1.41E+08  | + | 0 | NA | intron (intron (N  | 5724    | NM_001355 | 253461   | Hs.518301NM_152535 | ENSG000005ZBTB38    | CIBZ            | PPP1        | zinc                 | finger         | protein-coding |
| chr9-1657.7.872645 | -0.6837  | 0.843718 | -0.81034 | 0.417747 | 0.981636 | chr9  | 16551737   | 16551940  | + | 0 | NA | intron (intron (N  | -174976 | NR_151723 | 1.11E+08 | Hs.60921ENR_151723 | ENSG000005BNC2-AS1  | -               | BNC2        | antncRNA             |                |                |
| chr14-775.5.923829 | 0.78048  | 0.963193 | 0.810305 | 0.417765 | 0.981636 | chr14 | 77534869   | 77535095  | + | 0 | NA | intron (AluSp SIN  | -36166  | NM_199299 | 145501   | Hs.29742           | NM_182505           | ENSG000005ISM2  | TAIL1       | THS                  | isthmin        | protein-coding |
| chr16-125.5.923829 | 0.78048  | 0.963193 | 0.810305 | 0.417765 | 0.981636 | chr16 | 12084101   | 12084412  | + | 0 | NA | intron (AluSg4 S1  | 107525  | NM_032167 | 92017    | Hs.458401NM_032167 | ENSG000005SNX29     | A-388D4         | Isort       | ing                  | protein-coding |                |
| chr3-1635.5.923829 | 0.78048  | 0.963193 | 0.810305 | 0.417765 | 0.981636 | chr3  | 16351062   | 16351397  | + | 0 | NA | 3' UTR (A3' UTR (N | 86017   | NM_001352 | 92106    | Hs.65544ENM_001352 | ENSG000005OXNAD1    | -               | oxidore     | protein-coding       |                |                |
| chr8-6162.10.09305 | -0.59978 | 0.740717 | -0.80973 | 0.418094 | 0.981636 | chr8  | 61639585   | 61643762  | + | 0 | NA | intron (intron (N  | 48138   | NM_001164 | 444      | Hs.332422NM_004318 | ENSG000005ASPH      | AAH             | BAH         | oxaspartate          | protein-coding |                |
| chrX-4455.6.219548 | -0.77233 | 0.954049 | -0.80953 | 0.418212 | 0.981636 | chrX  | 44535706   | 44536560  | + | 0 | NA | intron (AluSg4 S1  | 6726    | NM_173794 | 139341   | Hs.7549            | NM_173794           | ENSG000005FUND1 | -           | FUN14                | don            | protein-coding |
| chr12-117.6.589572 | 0.778455 | 0.961668 | 0.809484 | 0.418237 | 0.981636 | chr12 | 1.14E+08   | 1.14E+08  | + | 0 | NA | intron (intron (N  | 20707   | NM_016196 | 9904     | Hs.7482            | NM_016196           | ENSG000005RBM19 | Mrd1        | RNA                  | bind           | protein-coding |
| chr16-115.7.61603  | 0.696045 | 0.859971 | 0.809382 | 0.418295 | 0.981636 | chr16 | 11724719   | 11724932  | + | 0 | NA | intron (AluSx3 S1  | 18032   | NM_001303 | 51061    | Hs.313847NM_015914 | ENSG000005TXND11    | EFP1            | thioredo    | protein-coding       |                |                |
| chr17-500.7.61603  | 0.6960   |          |          |          |          |       |            |           |   |   |    |                    |         |           |          |                    |                     |                 |             |                      |                |                |



|           |          |          |          |          |          |          |       |           |           |   |   |    |                     |                   |                              |                     |                    |                           |
|-----------|----------|----------|----------|----------|----------|----------|-------|-----------|-----------|---|---|----|---------------------|-------------------|------------------------------|---------------------|--------------------|---------------------------|
| chr7-2996 | 8.357675 | -0.6534  | 0.812208 | -0.80448 | 0.421122 | 0.981636 | chr7  | 29965280  | 29965627  | + | 0 | NA | intron (Nintron (N  | 2438 NM_014766    | 9805 Hs. 52074CNM_014766     | ENSG000003SCRN1     | SES1               | secernin protein-coding   |
| chr1-3974 | 8.161616 | 0.659811 | 0.820232 | 0.804421 | 0.421154 | 0.981636 | chr1  | 39741593  | 39741966  | + | 0 | NA | intron (Nintron (N  | 2934 NR_036543    | 10450 Hs. 52469CNM_006112    | ENSG000003PPIE      | CYP-33 C           | peptidyl protein-coding   |
| chr13-302 | 8.161616 | 0.659811 | 0.820232 | 0.804421 | 0.421154 | 0.981636 | chr13 | 30224739  | 30225639  | + | 0 | NA | intron (NMLT2F LTF  | -72115 NR_138041  | 1.02E+08 Hs. 63987ENR_138041 | LINC00384           | -                  | long intencRNA            |
| chr20-411 | 8.161616 | 0.659811 | 0.820232 | 0.804421 | 0.421154 | 0.981636 | chr20 | 41164800  | 41165490  | + | 0 | NA | intron (Nintron (N  | -3876 NR_106931   | 1.02E+08 Hs. NR_106931       | ENSG000003MIR6871   | hsa-mir-6          | microRNA ncRNA            |
| chr3-1701 | 8.161616 | 0.659811 | 0.820232 | 0.804421 | 0.421154 | 0.981636 | chr3  | 1.7E+08   | 1.7E+08   | + | 0 | NA | intron (NAluJb SIN  | 22795 NM_024947   | 80012 Hs. 525952NM_024947    | ENSG000003PHC3      | EDR3 HPHE          | polyhome protein-coding   |
| chr5-9716 | 8.161616 | 0.659811 | 0.820232 | 0.804421 | 0.421154 | 0.981636 | chr5  | 97163841  | 97164498  | + | 0 | NA | intron (NAluJo SIN  | 19078 NM_001155   | 55781 Hs. 27021 NM_01834     | ENSG000003CROK2     | RIO2               | RIO kinase protein-coding |
| chr7-5624 | 8.161616 | 0.659811 | 0.820232 | 0.804421 | 0.421154 | 0.981636 | chr7  | 5624119   | 56245409  | + | 0 | NA | intron (Nintron (N  | 31518 NM_003038   | 6624 Hs. 11840CNM_003038     | ENSG000003FSCN1     | FAN1 HSM           | fascin acprotein-coding   |
| chr1-2405 | 10.42483 | 0.59553  | 0.740395 | 0.80434  | 0.4212   | 0.981636 | chr1  | 2.4E+08   | 2.4E+08   | + | 0 | NA | intron (NAluSx3 SI  | 254432 NM_022465  | 64388 Hs. 98206 NM_022465    | ENSG000003GREM2     | CKTSF1B2 gremlin   | protein-coding            |
| chr10-315 | 10.11847 | -0.59466 | 0.739557 | -0.80408 | 0.421351 | 0.981636 | chr10 | 31518422  | 31521659  | + | 0 | NA | intron (Nintron (N  | -120285 NM_001368 | 1.01E+08 Hs. 730227NM_001368 | 169 LOC100505       | -                  | putative protein-coding   |
| chr11-128 | 10.11847 | -0.59466 | 0.739557 | -0.80408 | 0.421351 | 0.981636 | chr11 | 1.28E+08  | 1.28E+08  | + | 0 | NA | Intergeni Intergeni | 64937 NM_005238   | 2113 Hs. 369432NM_005238     | ENSG000003ETS1      | ETS-1 EWS          | ETS protc protein-coding  |
| chr13-115 | 10.11847 | -0.59466 | 0.739557 | -0.80408 | 0.421351 | 0.981636 | chr13 | 1.14E+08  | 1.14E+08  | + | 0 | NA | intron (NAluYc SIN  | 12450 NR_044995   | 650669 Hs. 369201NM_01039799 | GAS6-AS1            | -                  | GAS6 antincRNA            |
| chr19-520 | 10.11847 | -0.59466 | 0.739557 | -0.80408 | 0.421351 | 0.981636 | chr19 | 52090856  | 52093443  | + | 0 | NA | intron (NLIAMA9 LIN | 2122 NM_001352    | 284371 Hs. 665751NM_001133   | ENSG000003ZNF841    | -                  | zinc fing protein-coding  |
| chr3-1238 | 10.11847 | -0.59466 | 0.739557 | -0.80408 | 0.421351 | 0.981636 | chr3  | 1.24E+08  | 1.24E+08  | + | 0 | NA | intron (NLIIME1 LIN | 9972 NM_05302E    | 4638 Hs. 47737ENM_00596      | ENSG000003MYLK      | AAT7 KRP           | myosin I protein-coding   |
| chr22-495 | 4.196496 | 0.910283 | 0.132283 | 0.803936 | 0.421434 | 0.981636 | chr22 | 49908041  | 49908692  | + | 0 | NA | intron (NAluSc5 SI  | 10072 NM_02401E   | 79087 Hs. 526711NM_02410E    | ENSG000003ALG12     | CDG1G ECM          | ALG1 protein-coding       |
| chr2-2334 | 4.947479 | -0.84049 | 1.045518 | -0.80389 | 0.421458 | 0.981636 | chr2  | 2.33E+08  | 2.33E+08  | + | 0 | NA | intron (Nintron (N  | 62204 NM_00364E   | 8527 Hs. 47167ENM_00364E     | ENSG000003DGKD      | DGKdelta diacylgly | protein-coding            |
| chr20-344 | 4.947479 | -0.84049 | 1.045518 | -0.80389 | 0.421458 | 0.981636 | chr20 | 34404385  | 34404909  | + | 0 | NA | intron (NAluSq2 SI  | 41374 NM_001324   | 83737 Hs. 632227NM_03148E    | ENSG000003ITCH      | ADMPD AIF          | itchy E3 protein-coding   |
| chr20-365 | 4.947479 | -0.84049 | 1.045518 | -0.80389 | 0.421458 | 0.981636 | chr20 | 36937709  | 36938388  | + | 0 | NA | intron (NAluJb SIN  | 13660 NM_00136E   | 25939 Hs. 580681NM_01547E    | ENSG000003SAMHD1    | CHBL2 DCISAM       | and I protein-coding      |
| chr3-119  | 4.947479 | -0.84049 | 1.045518 | -0.80389 | 0.421458 | 0.981636 | chr3  | 1.19E+08  | 1.19E+08  | + | 0 | NA | intron (Nintron (N  | 69975 NR_07350E   | 55254 Hs. 594171NM_01826E    | ENSG000003TMEM39A   | -                  | transmem protein-coding   |
| chr3-1725 | 4.947479 | -0.84049 | 1.045518 | -0.80389 | 0.421458 | 0.981636 | chr3  | 1.72E+08  | 1.72E+08  | + | 0 | NA | intron (Nintron (N  | 175294 NM_00113E  | 64778 Hs. 744888NM_02276E    | ENSG000003FND3C3B   | FAD104 PF          | fibronect protein-coding  |
| chr15-101 | 6.096129 | -0.78707 | 0.979109 | -0.80386 | 0.421478 | 0.981636 | chr15 | 1.01E+08  | 1.01E+08  | + | 0 | NA | TTS (NM_C TTS (NM_C | 77205 NM_01491E   | 22856 Hs. 110488NM_01491E    | ENSG000003CHSY1     | CHSY CSS1          | chondroit protein-coding  |
| chr8-389  | 6.096129 | -0.78707 | 0.979109 | -0.80386 | 0.421478 | 0.981636 | chr8  | 9831113   | 9831351   | + | 0 | NA | intron (NAluSx SIN  | 29886 NM_02162E   | 59339 Hs. 36912E2NM_02162E   | ENSG000003PLEKHA2   | TAPP2              | pleckstr protein-coding   |
| chr12-692 | 11.84599 | -0.55651 | 0.692835 | -0.80323 | 0.421842 | 0.981636 | chr12 | 69261760  | 69263049  | + | 0 | NA | exon (NM exon (NM   | 10814 NR_03169E   | 1E+08 Hs. NR_03169E          | ENSG000003MIR1279   | MIRN1279 microRNA  | ncRNA                     |
| chr3-514  | 7.40333  | -0.72081 | 0.897572 | -0.80306 | 0.421938 | 0.981636 | chr3  | 51430907  | 51431106  | + | 0 | NA | intron (NAluJb SIN  | 39721 NM_01328E   | 29890 Hs. 11873ENM_01328E    | ENSG000003RBM15B    | HUMAGCGB RNA       | bindi protein-coding      |
| chr1-435  | 7.698309 | 0.69745  | 0.868755 | 0.802816 | 0.422081 | 0.981636 | chr1  | 43592683  | 43593294  | + | 0 | NA | intron (Nintron (N  | -57161 NM_01466E  | 9682 Hs. 15598ENM_01466E     | ENSG000003KDM4A     | JHDM3A JM          | lysine de protein-coding  |
| chr16-301 | 7.698309 | 0.69745  | 0.868755 | 0.802816 | 0.422081 | 0.981636 | chr16 | 30115400  | 30116034  | + | 0 | NA | intron (Nintron (N  | -2180 NM_024307   | 79153 Hs. 28901ENM_024307    | ENSG000003GDPD3     | GDE7               | glycerol protein-coding   |
| chr9-104  | 7.698309 | 0.69745  | 0.868755 | 0.802816 | 0.422081 | 0.981636 | chr9  | 1.05E+08  | 1.05E+08  | + | 0 | NA | intron (Nintron (N  | 42477 NR_13076E   | 55335 Hs. 429294NM_01837E    | ENSG000003NIPSNAP3E | FP944 NIF          | napsnap I protein-coding  |
| chr2-3327 | 8.349817 | -0.65192 | 0.812041 | -0.80281 | 0.422082 | 0.981636 | chr2  | 33273616  | 33275561  | + | 0 | NA | intron (NLI3 LINE C | 139991 NM_00116E  | 4052 Hs. 61931ENM_00062E     | ENSG000003LTBP1     | -                  | latent tr protein-coding  |
| chr3-113  | 8.349817 | -0.65192 | 0.812041 | -0.80281 | 0.422082 | 0.981636 | chr3  | 1.13E+08  | 1.13E+08  | + | 0 | NA | TTS (NM_C TTS (NM_C | 11947 NM_01417C   | 29083 Hs. 12749E9NM_01417C   | ENSG000003GTPBP8    | HSPC135            | GTP bindi protein-coding  |
| chr1-112  | 8.709051 | 0.63894  | 0.79488  | 0.802755 | 0.422116 | 0.981636 | chr1  | 1.13E+08  | 1.13E+08  | + | 0 | NA | intron (NLIIMB7 LIN | 29710 NM_138727   | 54879 Hs. 201921NM_01774E    | ENSG000003STL7      | FAM4B ST7          | suppressi protein-coding  |
| chr11-708 | 6.512404 | 0.741736 | 0.924253 | 0.802525 | 0.422249 | 0.981636 | chr11 | 70888922  | 70889729  | + | 0 | NA | intron (NMLT1C LTF  | -16957 NR_037437  | 1.01E+08 Hs. NR_037437       | ENSG000003MIR3664   | mir-3664           | microRNA ncRNA            |
| chr1-282  | 8.716909 | 0.636208 | 0.792905 | 0.802376 | 0.422336 | 0.981636 | chr1  | 28238004  | 28238559  | + | 0 | NA | TTS (NM_C TTS (NM_C | 2157 NM_17819C    | 93974 Hs. 744914NM_016311    | ENSG000003ATP5IF1   | ATP1 ATP1ATP       | syntf protein-coding      |
| chr1-150  | 8.716909 | 0.636208 | 0.792905 | 0.802376 | 0.422336 | 0.981636 | chr1  | 1.5E+08   | 1.5E+08   | + | 0 | NA | intron (Nintron (N  | 2761 NM_018997    | 57402 Hs. 40588CNM_018997    | ENSG000003MRP52     | MDSO16 MF          | mitochon protein-coding   |
| chr1-153  | 8.716909 | 0.636208 | 0.792905 | 0.802376 | 0.422336 | 0.981636 | chr1  | 1.54E+08  | 1.54E+08  | + | 0 | NA | intron (NAluSx1 SI  | -4930 NM_02067E   | 57402 Hs. 28899E9NM_02067E   | ENSG000003S100A14   | 84284 S1           | S100 calc protein-coding  |
| chr4-714  | 8.716909 | 0.636208 | 0.792905 | 0.802376 | 0.422336 | 0.981636 | chr4  | 71408295  | 71410444  | + | 0 | NA | intron (NTHE1A-int  | 70316 NM_00375E   | 8671 Hs. 5462 NM_00375E      | ENSG000003SLC4A4    | HNBC1 KNE          | solute c protein-coding   |
| chr6-3147 | 8.716909 | 0.636208 | 0.792905 | 0.802376 | 0.422336 | 0.981636 | chr6  | 3147282   | 3148397   | + | 0 | NA | intron (NMLT2B4 LI  | 9705 NM_00131C    | 7280 Hs. 65454E3NM_00106E    | ENSG000003TUBB2A    | CDCBMS TU          | tubulin t protein-coding  |
| chr22-429 | 9.187704 | -0.64598 | 0.805131 | -0.80233 | 0.422365 | 0.981636 | chr22 | 428212750 | 428212988 | + | 0 | NA | intron (NLI3 LINE C | 44404 NM_01457C   | 26286 Hs. 68522E2NM_01457C   | ENSG000003ARFGAP3   | ARFGAP1            | ARF ribos protein-coding  |
| chr18-63  | 10.05191 | -0.60253 | 0.751087 | -0.80222 | 0.422427 | 0.981636 | chr18 | 63340674  | 63340959  | + | 0 | NA | intron (Nintron (N  | -21436 NM_000657  | 596 Hs. 15074ENM_00065E      | ENSG000003BCL2      | Bcl-2 PPF          | BCL2 apof protein-coding  |
| chr15-297 | 6.639865 | -0.72581 | 0.904854 | -0.80213 | 0.422477 | 0.981636 | chr15 | 29767662  | 29768310  | + | 0 | NA | intron (Nintron (N  | 53078 NM_00135E   | 7082 Hs. 74399CNM_00325E     | ENSG000003TJP1      | ZO-1               | tight jur protein-coding  |
| chr8-301  | 6.639865 | -0.72581 | 0.904854 | -0.80213 | 0.422477 | 0.981636 | chr8  | 30105065  | 30106480  | + | 0 | NA | intron (Nintron (N  | 10314 NM_00112E   | 23484 Hs. 14658ENM_01534E    | ENSG000003LEPROTL1  | HSPC112 V          | leptin r protein-coding   |
| chr8-129  | 4.955336 | -0.84283 | 1.050898 | -0.80201 | 0.42255  | 0.981636 | chr8  | 1.3E+08   | 1.3E+08   | + | 0 | NA | intron (Nintron (N  | -57214 NM_03141E  | 56169 Hs. 133244NM_03141E    | ENSG000003GSDMC     | MLZE               | gasdermir protein-coding  |
| chr5-109  | 4.955336 | -0.84283 | 1.050898 | -0.80201 | 0.42255  | 0.981636 | chr5  | 1.09E+08  | 1.09E+08  | + | 0 | NA | intron (Nintron (N  | -12781 NR_14904C  | 285638 Hs. 532104NR_14904C   | ENSG000003LOC28563E | -                  | uncharacterncRNA          |
| chr1-1657 | 17.3912  | 0.464039 | 0.578829 | 0.801686 | 0.422735 | 0.981636 | chr1  | 16576305  | 16577088  | + | 0 | NA | intron (Nintron (N  | 27882 NR_03744E   | 1.01E+08 Hs. NR_03744E       | ENSG000003MIR3675   | -                  | microRNA ncRNA            |
| chr1-285  | 4.939621 | -0.8381  | 1.045534 | -0.8016  | 0.422782 | 0.981636 | chr1  | 28534678  | 28535413  | + | 0 | NA | intron (Nintron (N  | 16819 NM_00104E   | 1104 Hs. 46972E2NM_00126E    | ENSG000003RCC1      | CHC1 RCC1          | regulator protein-coding  |
| chr10-35  | 4.939621 | -0.8381  | 1.045534 | -0.8016  | 0.422782 | 0.981636 | chr10 | 35013004  | 35014341  | + | 0 | NA | intron (Nintron (N  | 60611 NM_00119E   | 8453 Hs. 82919 NM_003591     | ENSG000003CUL2      | -                  | cullin 2 protein-coding   |
| chr10-12  | 4.939621 | -0.8381  | 1.045534 | -0.8016  | 0.422782 | 0.981636 | chr10 | 1.26E+08  | 1.26E+08  | + | 0 | NA | intron (Nintron (N  | 25178 NM_07846E   | 56647 Hs. 37029E2NM_01656E   | ENSG000003BCC1P     | TOK-1 TOB          | BRCA2 anc protein-coding  |
| chr11-651 | 4.939621 | -0.8381  | 1.045534 | -0.8016  | 0.422782 | 0.981636 | chr11 | 65116165  | 65116861  | + | 0 | NA | TTS (NM_C TTS (NM_C | 1188 NM_01420E    | 741 Hs. 12102E2NM_01420E     | ENSG000003ZNHT2     | Clorf5 F           | zinc fing protein-coding  |
| chr12-27  | 4.939621 | -0.8381  | 1.045534 | -0.8016  | 0.422782 | 0.981636 | chr12 | 27745053  | 27745787  | + | 0 | NA | intron (Nintron (N  | 26162 NM_00114E   | 1E+08 Hs. NM_00114E          | ENSG000003MANS4     | -                  | MANS4 don protein-coding  |
| chr15-52  | 4.939621 | -0.8381  | 1.045534 | -0.8016  | 0.422782 | 0.981636 | chr15 | 52033191  | 52034079  | + | 0 | NA | intron (NLIIMEF LIN | 14716 NM_00274E   | 5597 Hs. 411847NM_00274E     | ENSG000003MAPK6     | ERK3 HsT           | mitogen-ε protein-coding  |
| chr16-70  | 4.939621 | -0.8381  | 1.045534 | -0.8016  | 0.422782 | 0.981636 | chr16 | 70239963  | 70241020  | + | 0 | NA | Intergeni AluJb SIN | 11449 NM_05821E   | 118460 Hs. 66063ENM_005821E  | ENSG000003EXOSC6    | EAP4 MTRE          | exosome c protein-coding  |
| chr17-83  | 4.939621 | -0.8381  | 1.045534 | -0.8016  | 0.422782 | 0.981636 | chr17 | 83045928  | 83047208  | + | 0 | NA | intron (NLIIMB5 LIN | 5202 NR_13546E    | 146712 Hs. 607824NM_00100E   | ENSG000003B3GNTL1   | 3-Gn-T8 E          | UDDP-GlcN protein-coding  |
| chr19-217 | 4.939621 | -0.8381  | 1.045534 | -0.8016  | 0.422782 | 0.981636 | chr19 | 21764449  | 21765569  | + | 0 | NA | intron (Nintron (N  | 2570 NM_00135E    | 163227 Hs. 365142NM_173531   | ENSG000003ZNF100    | -                  | zinc fing protein-coding  |
| chr19-37  | 4.939621 | -0.8381  | 1.045534 | -0.8016  | 0.422782 | 0.981636 | chr19 | 3         |           |   |   |    |                     |                   |                              |                     |                    |                           |



|                    |          |          |          |          |          |       |          |          |   |      |                     |                  |                            |                     |                           |                                      |                                |
|--------------------|----------|----------|----------|----------|----------|-------|----------|----------|---|------|---------------------|------------------|----------------------------|---------------------|---------------------------|--------------------------------------|--------------------------------|
| chr11-282 5.915971 | 0.683348 | 0.981369 | 0.79822  | 0.424743 | 0.981636 | chr11 | 28216910 | 28217363 | + | 0 NA | intron (NLIPA5 LIN  | 108748 NM_152636 | 196074 Hs. 243326NM_152636 | ENSG000003METTL15   | METT5D1                   | methyltransferase protein-coding     |                                |
| chr1-2066 8.724767 | 0.634347 | 0.795204 | 0.797715 | 0.425036 | 0.981636 | chr1  | 2.07E+08 | 2.07E+08 | + | 0 NA | intron (intron (N   | 7486 NM_001004   | 8444 Hs. 164267NM_003582   | ENSG000003DYRK3     | DYRK5                     | RE dual specific protein-coding      |                                |
| chr17-392 8.724767 | 0.634347 | 0.795204 | 0.797715 | 0.425036 | 0.981636 | chr17 | 39298435 | 39298801 | + | 0 NA | intron (NAluJr SIN  | 1218 NR_162098   | 1.14E+08                   | NR_162098           | MIR548BC                  | microRNA ncRNA                       |                                |
| chr19-105 8.724767 | 0.634347 | 0.795204 | 0.797715 | 0.425036 | 0.981636 | chr19 | 10907705 | 10909842 | + | 0 NA | intron (NMTIRb SINE | 20316 NM_024025  | 78992 Hs. 164026NM_024025  | ENSG000003YIPF2     | FinGER2                   | Yip1 domain protein-coding           |                                |
| chr2-3246 8.724767 | 0.634347 | 0.795204 | 0.797715 | 0.425036 | 0.981636 | chr2  | 32462757 | 32463429 | + | 0 NA | intron (intron (N   | -69066 NR_030285 | 69343 Hs. 164026NM_024025  | ENSG000003MIR558    | MIRN558                   | microRNA ncRNA                       |                                |
| chr3-1958 8.724767 | 0.634347 | 0.795204 | 0.797715 | 0.425036 | 0.981636 | chr3  | 1.96E+08 | 1.96E+08 | + | 0 NA | intron (intron (N   | -1454 NR_106887  | 1.02E+08                   | NR_106887           | ENSG000003MIR6829         | hsa-mir-6829                         | microRNA ncRNA                 |
| chr12-326 5.914121 | 0.768329 | 0.963379 | 0.797535 | 0.42514  | 0.981636 | chr12 | 32611275 | 32611947 | + | 0 NA | intron (intron (N   | -67589 NM_00133C | 10059 Hs. 556299NM_005699  | ENSG000003DNM1L     | DLM1                      | DRP1 domain protein-coding           |                                |
| chr2-2178 5.914121 | 0.768329 | 0.963379 | 0.797535 | 0.42514  | 0.981636 | chr2  | 1.28E+08 | 2.18E+08 | + | 0 NA | exon (NM exon (NM   | 15033 NR_145792  | 1.1E+08                    | NR_145792           | SNORA115                  | small nucleolar RNA                  |                                |
| chr20-322 5.914121 | 0.768329 | 0.963379 | 0.797535 | 0.42514  | 0.981636 | chr20 | 32219553 | 32219752 | + | 0 NA | intron (NAluY SINE  | 11772 NM_015352  | 23509 Hs. 472409NM_015352  | ENSG000003POFUT1    | DDD2                      | FUT1 protein (protein-coding         |                                |
| chr7-5435 5.914121 | 0.768329 | 0.963379 | 0.797535 | 0.42514  | 0.981636 | chr7  | 5435701  | 5435929  | + | 0 NA | IntergeniIntergeni  | -6888 NM_001354  | 1E+08                      | Hs. 147507NM_001354 | 8886                      | LOC100122                            | uncharacterized protein-coding |
| chr1-1507 8.683628 | 0.633517 | 0.794348 | 0.797531 | 0.425142 | 0.981636 | chr1  | 1.51E+08 | 1.51E+08 | + | 0 NA | exon (NM exon (NM   | 9047 NM_000396   | 1513 Hs. 632466NM_000396   | ENSG000003CTS       | CTS02                     | CTS cathepsin protein-coding         |                                |
| chr1-1513 8.683628 | 0.633517 | 0.794348 | 0.797531 | 0.425142 | 0.981636 | chr1  | 1.51E+08 | 1.51E+08 | + | 0 NA | exon (NM exon (NM   | -3142 NR_131972  | 1.02E+08                   | Hs. 634042NR_131972 | GBAT2                     | glioblastin protein-coding           |                                |
| chr1-1613 8.683628 | 0.633517 | 0.794348 | 0.797531 | 0.425142 | 0.981636 | chr1  | 1.61E+08 | 1.61E+08 | + | 0 NA | intron (intron (N   | 20663 NM_001013  | 257177 Hs. 534593NM_001013 | ENSG000003CFAP126   | Clorf192                  | cilia and protein-coding             |                                |
| chr11-15 8.683628  | 0.633517 | 0.794348 | 0.797531 | 0.425142 | 0.981636 | chr11 | 51308315 | 51309505 | + | 0 NA | IntergeniALR/Alphe  | 899763 NR_024504 | 646813 Hs. 684175NR_024504 | LOC646813           | DEXH-box pseudo           |                                      |                                |
| chr12-452 8.683628 | 0.633517 | 0.794348 | 0.797531 | 0.425142 | 0.981636 | chr12 | 4523561  | 4523827  | + | 0 NA | intron (NLIPA5 LIN  | 14775 NM_020374  | 57102 Hs. 302977NM_020374  | ENSG000003C12orf4   | chromosome protein-coding |                                      |                                |
| chr6-302 8.683628  | 0.633517 | 0.794348 | 0.797531 | 0.425142 | 0.981636 | chr6  | 30200624 | 30200827 | + | 0 NA | intron (NMTIRb SINE | 12681 NM_001242  | 7726 Hs. 485041NM_003444   | ENSG000003TRIM26    | AFP                       | RNF99 tripartite protein-coding      |                                |
| chr15-907 6.939208 | -0.67331 | 0.844315 | -0.79747 | 0.425181 | 0.981636 | chr15 | 90614548 | 90614761 | + | 0 NA | intron (intron (N   | -45580 NR_120371 | 1.02E+08                   | Hs. 615346NR_120371 | ENSG000003LINC01585       | long intronic RNA                    |                                |
| chr1-2200 10.45811 | 0.597767 | 0.74961  | 0.797438 | 0.425197 | 0.981636 | chr1  | 2.2E+08  | 2.2E+08  | + | 0 NA | 3' UTR (3' UTR (N   | -12168 NM_004444 | 2058 Hs. 497788NM_004444   | ENSG000003EPRS      | EARS                      | GLUF glutamyl protein-coding         |                                |
| chr1-3538 8.691485 | 0.631646 | 0.792372 | 0.797158 | 0.425359 | 0.981636 | chr1  | 35381441 | 35381992 | + | 0 NA | exon (NM exon (NM   | -15639 NR_046655 | 1.01E+08                   | Hs. 585397NR_046655 | ENSG000003ZMYM4-AS1       | ZMYM4                                | antncRNA                       |
| chr1-1507 8.691485 | 0.631646 | 0.792372 | 0.797158 | 0.425359 | 0.981636 | chr1  | 1.55E+08 | 1.55E+08 | + | 0 NA | intron (intron (N   | 3648 NM_198883   | 4580 Hs. 490874NM_002455   | ENSG000003MTX1      | MTX                       | MTXN metaxin 1 protein-coding        |                                |
| chr1-1707 8.691485 | 0.631646 | 0.792372 | 0.797158 | 0.425359 | 0.981636 | chr1  | 1.71E+08 | 1.71E+08 | + | 0 NA | intron (intron (N   | 56468 NM_006902  | 5396 Hs. 283413NM_006902   | ENSG000003PRR1      | AGOTC                     | PHC related protein-coding           |                                |
| chr1-1796 8.691485 | 0.631646 | 0.792372 | 0.797158 | 0.425359 | 0.981636 | chr1  | 1.8E+08  | 1.8E+08  | + | 0 NA | promoter-promoter-  | -702 NM_001345   | 163590 Hs. 571797NM_022347 | ENSG000003TOR1AIP2  | IFRG15                    | LIU torsin 1 protein-coding          |                                |
| chr19-119 8.691485 | 0.631646 | 0.792372 | 0.797158 | 0.425359 | 0.981636 | chr19 | 11250222 | 11252421 | + | 0 NA | intron (intron (N   | 11203 NM_020812  | 57572 Hs. 591002NM_020812  | ENSG000003DOCK6     | AOS2                      | ZIR1 dedicator protein-coding        |                                |
| chr19-112 8.691485 | 0.631646 | 0.792372 | 0.797158 | 0.425359 | 0.981636 | chr19 | 19632527 | 19635368 | + | 0 NA | exon (NM exon (NM   | -5727 NM_00472C  | 9170 Hs. 122577NM_00472C   | ENSG000003LPAR2     | EDG-4                     | EDC lysophospholipase protein-coding |                                |
| chr2-6981 8.691485 | 0.631646 | 0.792372 | 0.797158 | 0.425359 | 0.981636 | chr2  | 69819297 | 69822388 | + | 0 NA | intron (intron (N   | -8818 NM_178435  | 64395 Hs. 293971NM_178435  | ENSG000003GMCL1     | BTD13                     | GC germ cell protein-coding          |                                |
| chr2-154 8.691485  | 0.631646 | 0.792372 | 0.797158 | 0.425359 | 0.981636 | chr2  | 1.34E+08 | 1.34E+08 | + | 0 NA | exon (NM exon (NM   | 194752 NM_00241C | 4249 Hs. 4988 NM_00241C    | ENSG000003MGAT5     | GNT-V                     | GNT1 alpha-1, epsilon protein-coding |                                |
| chr20-556 8.691485 | 0.631646 | 0.792372 | 0.797158 | 0.425359 | 0.981636 | chr20 | 5560600  | 5581177  | + | 0 NA | intron (intron (N   | 40388 NM_019593  | 56261 Hs. 636355NM_019593  | ENSG000003GPCPD1    | ED13                      | GDEE glycerol protein-coding         |                                |
| chr4-1361 8.691485 | 0.631646 | 0.792372 | 0.797158 | 0.425359 | 0.981636 | chr4  | 13612726 | 13616012 | + | 0 NA | exon (NM exon (NM   | 13356 NM_148894  | 259282 Hs. 744933NM_148894 | ENSG000003BOD1L1    | BOD1L                     | FAM biont protein-coding             |                                |
| chr5-3131 8.691485 | 0.631646 | 0.792372 | 0.797158 | 0.425359 | 0.981636 | chr5  | 31312397 | 31313916 | + | 0 NA | intron (intron (N   | 119470 NM_004932 | 1004 Hs. 124777NM_004932   | ENSG000003CDH6      | CAD6                      | KCAI cadherin protein-coding         |                                |
| chr10-457 8.169474 | 0.657727 | 0.825206 | 0.797045 | 0.425425 | 0.981636 | chr10 | 45793618 | 45793817 | + | 0 NA | TTS (NR_TTS (NR_1   | 23607 NM_001351  | 643479 Hs. 522909NM_001351 | 23434               | FAM25E                    | FAM25 family wiprotein-coding        |                                |
| chr10-92 8.169474  | 0.657727 | 0.825206 | 0.797045 | 0.425425 | 0.981636 | chr10 | 92014657 | 92015058 | + | 0 NA | intron (NTiger3a    | 91087 NM_003972  | 9044 Hs. 500522NM_003972   | ENSG000003BTAF1     | MOT1                      | TAF(B-TFIID 1 protein-coding         |                                |
| chr11-111 8.169474 | 0.657727 | 0.825206 | 0.797045 | 0.425425 | 0.981636 | chr11 | 1.12E+08 | 1.12E+08 | + | 0 NA | intron (intron (N   | 62793 NM_00271E  | 5519 Hs. 269128NM_00271E   | ENSG000003PPP2R1B   | PP2A                      | Abet protein protein-coding          |                                |
| chr20-635 8.169474 | 0.657727 | 0.825206 | 0.797045 | 0.425425 | 0.981636 | chr20 | 63531323 | 63534175 | + | 0 NA | 3' UTR (3' UTR (N   | 8294 NR_031735   | 1E+08                      | NR_031735           | ENSG000003MIR1914         | MIRN1914                             | microRNA ncRNA                 |
| chr14-495 6.469414 | 0.727033 | 0.91223  | 0.796984 | 0.42546  | 0.981636 | chr14 | 49576768 | 49577784 | + | 0 NA | 3' UTR (3' UTR (N   | 9104 NM_00103C   | 6235 Hs. 156367NM_00103C   | ENSG000003RPS29     | DBA13                     | S29 ribosomal protein-coding         |                                |
| chr16-234 6.469414 | 0.727033 | 0.91223  | 0.796984 | 0.42546  | 0.981636 | chr16 | 23484271 | 23488049 | + | 0 NA | intron (intron (N   | 24334 NM_015044  | 23062 Hs. 460333NM_015044  | ENSG000003GGA2      | VEAR                      | golgi ass protein-coding             |                                |
| chr2-2164 6.469414 | 0.727033 | 0.91223  | 0.796984 | 0.42546  | 0.981636 | chr2  | 2.16E+08 | 2.16E+08 | + | 0 NA | intron (intron (N   | -30487 NM_00099E | 6168 Hs. 437011NM_00099E   | ENSG000003RPL37A    | L37A                      | ribosomal protein-coding             |                                |
| chr20-385 6.469414 | 0.727033 | 0.91223  | 0.796984 | 0.42546  | 0.981636 | chr20 | 38568281 | 38569178 | + | 0 NA | intron (intron (N   | -12468 NR_130907 | 149685 Hs. 368028NM_174900 | ENSG000003ADIG      | SMAF1                     | adipogenin protein-coding            |                                |
| chr22-312 6.469414 | 0.727033 | 0.91223  | 0.796984 | 0.42546  | 0.981636 | chr22 | 31814484 | 31815467 | + | 0 NA | intron (intron (N   | 60952 NM_00136E  | 9681 Hs. 435022NM_014662   | ENSG000003DEPDC5    | DEP.5                     | FFDEP domain protein-coding          |                                |
| chr5-1501 6.469414 | 0.727033 | 0.91223  | 0.796984 | 0.42546  | 0.981636 | chr5  | 1.5E+08  | 1.5E+08  | + | 0 NA | intron (NL2a LINE   | -20801 NM_005211 | 1436 Hs. 586211NM_005211   | ENSG000003CSF1R     | C-FMS                     | CD1 colony st protein-coding         |                                |
| chr7-1495 6.469414 | 0.727033 | 0.91223  | 0.796984 | 0.42546  | 0.981636 | chr7  | 1.5E+08  | 1.5E+08  | + | 0 NA | intron (MLT2D LTF   | 36156 NR_02778E  | 79970 Hs. 520785NM_02491C  | ENSG000003ZNF767P   | ZNF767                    | zinc finger pseudo                   |                                |
| chr8-8655 6.469414 | 0.727033 | 0.91223  | 0.796984 | 0.42546  | 0.981636 | chr8  | 86530942 | 86531544 | + | 0 NA | intron (intron (N   | 16808 NM_00390E  | 8895 Hs. 191215NM_00390E   | ENSG000003CPNE3     | CPN3                      | PRO1 copine 3 protein-coding         |                                |
| chr15-328 6.52812  | 0.736586 | 0.924362 | 0.796859 | 0.425533 | 0.981636 | chr15 | 32893207 | 32893880 | + | 0 NA | intron (intron (N   | 174631 NM_001103 | 342184 Hs. 657645NM_001103 | ENSG000003FNM1      | FNM1                      | LDL formin 1 protein-coding          |                                |
| chr14-705 11.45128 | 0.557009 | 0.699043 | 0.796817 | 0.425557 | 0.981636 | chr14 | 70978015 | 70978840 | + | 0 NA | exon (NM exon (NM   | 70968 NM_00130E  | 22990 Hs. 446555NM_014982  | ENSG000003PCNX1     | PCNX1                     | PCNX1 pectanex 1 protein-coding      |                                |
| chr20-356 6.461556 | 0.729583 | 0.915822 | 0.796643 | 0.425658 | 0.981636 | chr20 | 35939637 | 35940072 | + | 0 NA | intron (intron (N   | 14772 NM_00336C  | 51282 Hs. 584905NM_016555  | ENSG000003SCAND1    | RAC1                      | SDP1 domain protein-coding           |                                |
| chr5-3942 6.461556 | 0.729583 | 0.915822 | 0.796643 | 0.425658 | 0.981636 | chr5  | 39421426 | 39424017 | + | 0 NA | intron (intron (N   | 2259 NM_001343   | 1601 Hs. 696631NM_001343   | ENSG000003DAB2      | DOC2                      | DOC2AB domain protein-coding         |                                |
| chrX-1356 6.461556 | 0.729583 | 0.915822 | 0.796643 | 0.425658 | 0.981636 | chrX  | 13581166 | 1359420  | + | 0 NA | intron (intron (N   | 22008 NM_002183  | 3563 Hs. 632793NM_002183   | ENSG000003IL3RA     | CD123                     | IL3 interleukin protein-coding       |                                |
| chr1-4627 6.665289 | -0.71796 | 0.901544 | -0.79637 | 0.425818 | 0.981636 | chr1  | 46278211 | 46278775 | + | 0 NA | TTS (NM_TTS (NM_C   | 24873 NM_00636E  | 10489 Hs. 144941NM_00636E  | ENSG000003LRRC41    | MUF1                      | PP77 leucine protein-coding          |                                |
| chr10-583 6.665289 | -0.71796 | 0.901544 | -0.79637 | 0.425818 | 0.981636 | chr10 | 58388660 | 58389109 | + | 0 NA | intron (intron (N   | 3474 NM_003201   | 7019 Hs. 594255NM_003201   | ENSG000003TFAM      | NTPC-15                   | transcript protein-coding            |                                |
| chr16-836 6.665289 | -0.71796 | 0.901544 | -0.79637 | 0.425818 | 0.981636 | chr16 | 83811389 | 83813497 | + | 0 NA | 3' UTR (3' UTR (N   | 4465 NM_001537   | 3281 Hs. 250899NM_001537   | ENSG000003HSBP1     | PP3A-A                    | 13 heat shock protein-coding         |                                |
| chr16-895 6.665289 | -0.71796 | 0.901544 | -0.79637 | 0.425818 | 0.981636 | chr16 | 89909002 | 89911486 | + | 0 NA | intron (intron (N   | -7635 NM_00238E  | 4157 Hs. 51382             |                     |                           |                                      |                                |

|                    |           |          |           |          |          |       |                 |                 |   |   |    |                    |                          |                              |                     |                         |                            |                |                |
|--------------------|-----------|----------|-----------|----------|----------|-------|-----------------|-----------------|---|---|----|--------------------|--------------------------|------------------------------|---------------------|-------------------------|----------------------------|----------------|----------------|
| chr15-626 6.657431 | -0.71614  | 0.901432 | -0.79445  | 0.426932 | 0.981636 | chr15 | 62649959        | 62654326        | + | 0 | NA | intron (Nintron (N | 4831 NM_01505E           | 83660 Hs. 56943ENR_01505E    | ENSG00000CLTN2      | ILWEQ                   | talin 2 protein-coding     |                |                |
| chr17-376 6.657431 | -0.71614  | 0.901432 | -0.79445  | 0.426932 | 0.981636 | chr17 | 37510207        | 37514700        | + | 0 | NA | exon (NM exon (NM  | 22562 NM_00702E          | 11072 Hs. 91448 NM_00702E    | ENSG00000DUSP14     | MKP-1 MKF dual spec     | protein-coding             |                |                |
| chr19-144 6.657431 | -0.71614  | 0.901432 | -0.79445  | 0.426932 | 0.981636 | chr19 | 14400150        | 14401764        | + | 0 | NA | intron (NAluJb SIN | 18384 NM_00580A          | 10212 Hs. 31160ENR_00580A    | ENSG00000CDDX39A    | BAT1 BAT1DExD-box       | protein-coding             |                |                |
| chr19-236 6.657431 | -0.71614  | 0.901432 | -0.79445  | 0.426932 | 0.981636 | chr19 | 23238619        | 23239320        | + | 0 | NA | intron (Nintron (N | 11425 NM_00135E          | 440519 Hs. 675811NM_00135E   | ENSG00000ZNF724     | ZNF724P                 | zinc finger protein-coding |                |                |
| chr19-406 6.657431 | -0.71614  | 0.901432 | -0.79445  | 0.426932 | 0.981636 | chr19 | 40616135        | 40616235        | + | 0 | NA | intron (NAluSz SIN | 15316 NM_00104E          | 8425 Hs. 466766NM_00357E     | ENSG00000LTBP4      | ARCL1C L1latent t       | protein-coding             |                |                |
| chr2-8746 6.657431 | -0.71614  | 0.901432 | -0.79445  | 0.426932 | 0.981636 | chr2  | 87466339        | 87468172        | + | 0 | NA | intron (Nintron (N | -2695 NR_14646C          | 112597 Hs. 65216ENR_02420A   | ENSG00000CCYTOR     | C2orf59 l               | cytoskeleton RNA           |                |                |
| chr2-1276 6.657431 | -0.71614  | 0.901432 | -0.79445  | 0.426932 | 0.981636 | chr2  | 1.27E+08        | 1.27E+08        | + | 0 | NA | intron (NMIR SINE  | 36121 NM_00130C          | 2071 Hs. 469872NM_00012E     | ENSG00000ERCC3      | BTf2 GTfE               | ERCC exciprotein-coding    |                |                |
| chr2-1332 6.657431 | -0.71614  | 0.901432 | -0.79445  | 0.426932 | 0.981636 | chr2  | 1.33E+08        | 1.33E+08        | + | 0 | NA | intron (NLM5 LINE  | 11677 NR_110294          | 1.02E+08 Hs. 661917NR_110294 | ENSG00000NCKAP5-AS- | NCKAP5                  | arcncRNA                   |                |                |
| chr2-2016 6.657431 | -0.71614  | 0.901432 | -0.79445  | 0.426932 | 0.981636 | chr2  | 2.02E+08        | 2.02E+08        | + | 0 | NA | intron (Nintron (N | 9639 NM_15238E           | 65062 Hs. 12319 NM_15238E    | ENSG00000TMEM237    | ALS2CR4 J               | transmemt protein-coding   |                |                |
| chr2-232 6.657431  | -0.71614  | 0.901432 | -0.79445  | 0.426932 | 0.981636 | chr22 | 30841 NM_00247E | 30841 NM_00247E | + | 0 | NA | intron (NL2b LINE  | 4627 Hs. 474751NM_00247E | ENSG00000MYH9                | BDPLT6 DF           | myosin h protein-coding |                            |                |                |
| chr2-466 6.657431  | -0.71614  | 0.901432 | -0.79445  | 0.426932 | 0.981636 | chr22 | 46088899        | 46091162        | + | 0 | NA | intron (Nintron (N | -1014 NR_03741E          | 1.01E+08 NR_03741E           | ENSG00000MIR3619    | NCKAP5                  | arcncRNA                   |                |                |
| chr4-1393 6.657431 | -0.71614  | 0.901432 | -0.79445  | 0.426932 | 0.981636 | chr4  | 1.39E+08        | 1.39E+08        | + | 0 | NA | intron (Nintron (N | -73703 NM_001184         | 4717 Hs. 84549 NM_00249A     | ENSG00000NDUF1C     | KFYI                    | NADH:ubiq                  | protein-coding |                |
| chr4-1854 6.657431 | -0.71614  | 0.901432 | -0.79445  | 0.426932 | 0.981636 | chr4  | 1.85E+08        | 1.85E+08        | + | 0 | NA | intron (Nintron (N | 6409 NM_18172E           | 353322 Hs. 508154NM_18172E   | ENSG00000ANKRD37    | Lrp2bp                  | ankyrin r                  | protein-coding |                |
| chr5-7826 6.657431 | -0.71614  | 0.901432 | -0.79445  | 0.426932 | 0.981636 | chr5  | 78264375        | 78265943        | + | 0 | NA | intron (NAluJr SIN | 29539 NM_00127I          | 8546 Hs. 532091NM_00366A     | ENSG00000CAP3B1     | ADTB3 AD1               | adaptor l                  | protein-coding |                |
| chr6-8547 6.657431 | -0.71614  | 0.901432 | -0.79445  | 0.426932 | 0.981636 | chr6  | 85471886        | 85478321        | + | 0 | NA | intron (Nintron (N | 25020 NM_00252E          | 4907 Hs. 153952NM_00252E     | ENSG00000CNT5E      | CALJA CD75              | -nuclec                    | protein-coding |                |
| chr6-1334 6.657431 | -0.71614  | 0.901432 | -0.79445  | 0.426932 | 0.981636 | chr6  | 1.33E+08        | 1.33E+08        | + | 0 | NA | intron (Nintron (N | 215862 NM_00130I         | 2070 Hs. 596688NM_00410C     | ENSG00000EYA4       | CMDJ1 JFN               | EYA trans                  | protein-coding |                |
| chr7-668 6.657431  | -0.71614  | 0.901432 | -0.79445  | 0.426932 | 0.981636 | chr7  | 66802323        | 66803532        | + | 0 | NA | intron (NA-rich Lc | 41899 NR_00393A          | 729156 Hs. 70987ENR_00393A   | ENSG00000GTF2IRD1F- | GTF2I                   | repseude                   |                |                |
| chr8-615 6.657431  | -0.71614  | 0.901432 | -0.79445  | 0.426932 | 0.981636 | chr8  | 61558928        | 61561898        | + | 0 | NA | intron (NA-rich Lc | 129398 NM_001164         | 444 Hs. 332422NM_00431E      | ENSG00000ASPH       | AAH BAH                 | Caspate                    | protein-coding |                |
| chr8-7696 6.657431 | -0.71614  | 0.901432 | -0.79445  | 0.426932 | 0.981636 | chr8  | 76982048        | 76983705        | + | 0 | NA | 3' UTR (N3' UTR (N | -16026 NR_13046C         | 1E+08 NR_13046C              | ENSG00000MIR3149    |                         | microRNA                   | ncRNA          |                |
| chr8-1301 6.657431 | -0.71614  | 0.901432 | -0.79445  | 0.426932 | 0.981636 | chr8  | 1.3E+08         | 1.3E+08         | + | 0 | NA | intron (NAluJb SIN | -86043 NR_04538E         | 1.01E+08 Hs. 10601ENR_04538E | ENSG00000ASAP1-IT2- | ASAP1                   | intncRNA                   |                |                |
| chr9-982 6.657431  | -0.71614  | 0.901432 | -0.79445  | 0.426932 | 0.981636 | chr9  | 98204909        | 98205698        | + | 0 | NA | intron (Nintron (N | 8248 NM_001267           | 55357 Hs. 37101ENR_01842I    | ENSG00000TBC1D2     | PARIS-1 F               | TBC1                       | protein-coding |                |
| chr9-1096 6.657431 | -0.71614  | 0.901432 | -0.79445  | 0.426932 | 0.981636 | chr9  | 1.09E+08        | 1.09E+08        | + | 0 | NA | intron (NAluSx SIN | 13489 NR_02950E          | 407036 NR_02950E             | ENSG00000MIR32      | MIRN32 hs               | microRNA                   | ncRNA          |                |
| chr1-2846 4.898481 | -0.84408  | 1.062733 | -0.79426  | 0.427046 | 0.981636 | chr1  | 28464178        | 28464720        | + | 0 | NA | intron (NAluJo SIN | 26299 NM_02392E          | 65979 Hs. 225641NM_02392E    | ENSG00000PHACTR4    | PPP1R124                | phosfat                    | protein-coding |                |
| chr12-572 4.898481 | -0.84408  | 1.062733 | -0.79426  | 0.427046 | 0.981636 | chr12 | 57325679        | 57325660        | + | 0 | NA | intron (Nigger1 I  | 13398 NM_00135I          | 22864 Hs. 44367E             | ENSG00000R3HDM2     | CAG6 PRO1R3H            | doma                       | protein-coding |                |
| chr12-654 4.898481 | -0.84408  | 1.062733 | -0.79426  | 0.427046 | 0.981636 | chr12 | 65841923        | 65842766        | + | 0 | NA | intron (NMIR SINE  | -15370 NR_02682E         | 204010 Hs. 55868ENR_02682E   | ENSG00000RPSAP52    | RPSA_17                 | ribosoma                   | pseudo         |                |
| chr14-693 4.898481 | -0.84408  | 1.062733 | -0.79426  | 0.427046 | 0.981636 | chr14 | 69375299        | 69377584        | + | 0 | NA | IntergeniLTR87 LTF | 21543 NM_00445E          | 2079 Hs. 509791NM_00445E     | ENSG00000CERH       | DROER                   | ERH                        | mRNA           | protein-coding |
| chr2-1995 4.898481 | -0.84408  | 1.062733 | -0.79426  | 0.427046 | 0.981636 | chr2  | 19952929        | 19952508        | + | 0 | NA | intron (NMIRb SINE | -9277 NM_00136E          | 79568 Hs. 154494NM_02452C    | ENSG00000MAIP1      | C2orf47                 | matrix A                   | protein-coding |                |
| chr2-2185 4.898481 | -0.84408  | 1.062733 | -0.79426  | 0.427046 | 0.981636 | chr2  | 2.19E+08        | 2.19E+08        | + | 0 | NA | intron (Nintron (N | 6473 NM_02093E           | 57695 Hs. 166066NM_02093E    | ENSG00000CUSP37     |                         | ubiquiti                   | protein-coding |                |
| chr3-1081 4.898481 | -0.84408  | 1.062733 | -0.79426  | 0.427046 | 0.981636 | chr3  | 1.08E+08        | 1.08E+08        | + | 0 | NA | intron (Nintron (N | 40021 NR_11002E          | 1.02E+08 Hs. 57065E          | NR_11002E           | ENSG00000LINC0121E-     |                            | long           | intncRNA       |
| chr3-1794 4.898481 | -0.84408  | 1.062733 | -0.79426  | 0.427046 | 0.981636 | chr3  | 1.8E+08         | 1.8E+08         | + | 0 | NA | intron (NAluSx1 SI | 15301 NM_00430I          | 86 Hs. 435322NM_00430I       | ENSG00000ACTL6A     | ACTL6 ARF               | actin                      | lik            | protein-coding |
| chr4-1684 4.898481 | -0.84408  | 1.062733 | -0.79426  | 0.427046 | 0.981636 | chr4  | 1.68E+08        | 1.68E+08        | + | 0 | NA | intron (NAluJb SIN | 23436 NM_00129I          | 91351 Hs. 535011NM_00101E    | ENSG00000CDDX60L    |                         | DEXD/H-bc                  | protein-coding |                |
| chrX-7394 4.898481 | -0.84408  | 1.062733 | -0.79426  | 0.427046 | 0.981636 | chrX  | 73949842        | 73950644        | + | 0 | NA | intron (NLM5B LIN  | 5918 NR_02458E           | 554203 Hs. 64831ENR_02458E   | ENSG00000JPX        | DCBALD06 JPX            | transc                     | ncRNA          |                |
| chr1-3294 8.202755 | -0.660484 | 0.831652 | -0.794183 | 0.427089 | 0.981636 | chr1  | 32944378        | 32944683        | + | 0 | NA | intron (Nintron (N | 20574 NM_001127          | 127544 Hs. 591504NM_15334I   | ENSG00000RNF19B     | IBRD03 NR               | ring                       | protein-coding |                |
| chr15-898 8.202755 | -0.660484 | 0.831652 | -0.794183 | 0.427089 | 0.981636 | chr15 | 89868855        | 89869242        | + | 0 | NA | intron (NSVA F Ret | 14982 NR_049807          | 1.01E+08 NR_049807           | ENSG00000MIR5009    |                         | microRNA                   | ncRNA          |                |
| chr19-105 8.202755 | -0.660484 | 0.831652 | -0.794183 | 0.427089 | 0.981636 | chr19 | 10376503        | 10377219        | + | 0 | NA | intron (NAluSz SIN | 3711 NM_00333I           | 7297 Hs. 75516 NM_00333I     | ENSG00000TYK2       | IMD35 JF                | tyrosine                   | protein-coding |                |
| chr19-258 8.202755 | -0.660484 | 0.831652 | -0.794183 | 0.427089 | 0.981636 | chr19 | 25848034        | 25850213        | + | 0 | NA | IntergeniALR/Alpha | -1685676 NR_00360E       | 1E+08 Hs. 149312NR_00360E    | ENSG00000HACR1P1    |                         | hepatitis                  | pseudo         |                |
| chr19-403 8.202755 | -0.660484 | 0.831652 | -0.794183 | 0.427089 | 0.981636 | chr19 | 40374331        | 40375229        | + | 0 | NA | intron (Nintron (N | 4934 NR_106854           | 1.02E+08 NR_106854           | ENSG00000MIR6796    | hsa-mir-                | microRNA                   | ncRNA          |                |
| chr6-4304 8.202755 | -0.660484 | 0.831652 | -0.794183 | 0.427089 | 0.981636 | chr6  | 43043923        | 43045784        | + | 0 | NA | exon (NM exon (NM  | 9092 NM_00116E           | 9820 Hs. 52013ENR_01478C     | ENSG00000CUL7       | 3M1 CUL-                | 7-cullin 7                 | protein-coding |                |
| chr19-514 5.980684 | -0.775488 | 0.977133 | -0.793636 | 0.427407 | 0.981636 | chr19 | 51426208        | 51426800        | + | 0 | NA | intron (NCpG       | 173241 NM_001137C        | 23030 Hs. 65481ENR_01501E    | ENSG00000KDM4B      | JMJ2B2 TI               | lysine                     | de             | protein-coding |
| chr7-2591 5.980684 | -0.775488 | 0.977133 | -0.793636 | 0.427407 | 0.981636 | chr7  | 2591669         | 2594569         | + | 0 | NA | exon (NM exon (NM  | 34140 NM_15255E          | 23288 Hs. 520627NM_15255E    | ENSG00000IQCE       | 1700028P                | IQ motif                   | protein-coding |                |
| chr1-1714 8.675777 | -0.63543  | 0.800744 | -0.79355  | 0.427458 | 0.981636 | chr1  | 1.71E+08        | 1.71E+08        | + | 0 | NA | intron (NAluSg SIN | 4632 NM_01517E           | 2261 Hs. 494611NM_01517E     | ENSG00000PRRC2C     | BAT2-iso                | proline                    | r              | protein-coding |
| chr6-5657 8.408523 | -0.64099  | 0.808331 | -0.79297  | 0.427793 | 0.981636 | chr6  | 56578281        | 56578652        | + | 0 | NA | intron (Nintron (N | 64423 NM_00103I          | 6675 Hs. 60491ENR_00117E     | ENSG00000CST        | BP20 BP                 | dystonin                   | protein-coding |                |
| chr1-1122 8.699343 | -0.629772 | 0.794671 | -0.792493 | 0.428073 | 0.981636 | chr1  | 11228694        | 11232997        | + | 0 | NA | intron (Nintron (N | 31706 NM_00495E          | 2475 Hs. 338207NM_00495E     | ENSG00000MTOR       | FRAP FRAF               | mechanist                  | protein-coding |                |
| chr1-2688 8.699343 | -0.629772 | 0.794671 | -0.792493 | 0.428073 | 0.981636 | chr1  | 26883256        | 26883619        | + | 0 | NA | intron (NMIRb SINE | 7679 NM_03228E           | 84243 Hs. 52371ENR_03228E    | ENSG00000ZDHH18     | DHHC-18 Z               | zinc                       | finger         | protein-coding |
| chr1-1204 8.699343 | -0.629772 | 0.794671 | -0.792493 | 0.428073 | 0.981636 | chr1  | 1.2E+08         | 1.2E+08         | + | 0 | NA | intron (Nintron (N | -69414 NR_00324E         | 767846 Hs. 65718ENR_00324E   | ENSG00000PFN1P2     | CHRC152 P               | profilin                   | pseudo         |                |
| chr1-168 8.699343  | -0.629772 | 0.794671 | -0.792493 | 0.428073 | 0.981636 | chr1  | 1.68E+08        | 1.68E+08        | + | 0 | NA | intron (NMER58A DN | 65187 NM_001267          | 23432 Hs. 27180ENR_00736E    | ENSG00000GPR161     | RE2                     | G                          | protein        | protein-coding |
| chr1-2128 8.699343 | -0.629772 | 0.794671 | -0.792493 | 0.428073 | 0.981636 | chr1  | 2.13E+08        | 2.13E+08        | + | 0 | NA | intron (Nintron (N | 15484 NM_01405E          | 28982 Hs. 7055 NM_01405E     | ENSG00000FLVCR1     | AXPC1 FLV               | feline                     | l              | protein-coding |
| chr1-2294 8.699343 | -0.629772 | 0.794671 | -0.792493 | 0.428073 | 0.981636 | chr1  | 2.29E+08        | 2.29E+08        | + | 0 | NA | intron (NLTR33 LTF |                          |                              |                     |                         |                            |                |                |



|                     |          |          |          |          |          |       |           |           |   |    |                      |                   |                     |                   |                    |            |                          |                |                |
|---------------------|----------|----------|----------|----------|----------|-------|-----------|-----------|---|----|----------------------|-------------------|---------------------|-------------------|--------------------|------------|--------------------------|----------------|----------------|
| chr8-125c.666062    | 0.627071 | 0.79441  | 0.789355 | 0.429905 | 0.981636 | chr8  | 1.25E+08  | 1.25E+08  | 0 | NA | intron (AluSp SIN    | 40015 NM_01484E   | 9897 Hs. 27004E     | ENSG00000WASHC5   | KIAA0196 WASH      | comp       | protein-coding           |                |                |
| chr1-197c.3.675409  | -0.95585 | 1.210944 | -0.78934 | 0.429914 | 0.981636 | chr1  | 1.9750777 | 1.9752311 | + | NA | intron (AluJb SIN    | 47805 NM_001345   | 255104 Hs. 46672E   | ENSG00000TMC04    | -                  | -          | transment protein-coding |                |                |
| chr10-167c.675409   | -0.95585 | 1.210944 | -0.78934 | 0.429914 | 0.981636 | chr10 | 16752880  | 16753834  | + | NA | intron (intron (N    | 64067 NM_01242E   | 6251 Hs. 524161NM   | 01242E            | ENSG00000CRS1U     | RSP-1      | Ras suppr                | protein-coding |                |
| chr10-27c.675409    | -0.95585 | 1.210944 | -0.78934 | 0.429914 | 0.981636 | chr10 | 107540290 | 27540666  | + | NA | non-codiron-codir    | 36174 NR_04617E   | 22931 Hs. 406799NM  | 02125E            | ENSG00000RAB18     | RAB18L11   | RAB18, me                | protein-coding |                |
| chr12-102c.675409   | -0.95585 | 1.210944 | -0.78934 | 0.429914 | 0.981636 | chr12 | 2.02E+08  | 1.02E+08  | + | NA | intron (Mam SINE1    | 51019 Hs. 40569E  | ENSG00000WASHC3     | CCDC53            | CCWASH             | comp       | protein-coding           |                |                |
| chr13-11c.675409    | -0.95585 | 1.210944 | -0.78934 | 0.429914 | 0.981636 | chr13 | 1.11E+08  | 1.11E+08  | + | NA | intron (LIMC5 LIN    | 41512 NM_01821C   | 55739 Hs. 408324NM  | 01821C            | ENSG00000CNAXD     | CARKD LP:  | NAD(P)HX                 | protein-coding |                |
| chr3-138c.675409    | -0.95585 | 1.210944 | -0.78934 | 0.429914 | 0.981636 | chr3  | 1.38E+08  | 1.38E+08  | + | NA | intron (NMIRb SINE   | 58737 NM_001345   | 347736 Hs. 660992NM | 17813C            | ENSG00000NME9      | NP23-H9    | TNME NM23                | protein-coding |                |
| chr1-971c.6.443991  | 0.721061 | 0.913875 | 0.789015 | 0.430103 | 0.981636 | chr1  | 9715644   | 9716107   | + | NA | exon (NM exon (NM    | 24408 NM_00135C   | 5293 Hs. 518451NM   | 00502E            | ENSG00000PIK3CD    | AMDS IMD1  | phosphatiprotein-coding  |                |                |
| chr1-103c.6.443991  | 0.721061 | 0.913875 | 0.789015 | 0.430103 | 0.981636 | chr1  | 10364898  | 10367965  | + | NA | intron (intron (N    | -32633 NM_001304  | 5226 Hs. 464071NM   | 00263I            | ENSG00000CPGD      | 6PGD       | phosphogl                | protein-coding |                |
| chr1-212c.6.443991  | 0.721061 | 0.913875 | 0.789015 | 0.430103 | 0.981636 | chr1  | 2.12E+08  | 2.12E+08  | + | NA | intron (NLIM4a LIN   | 17753 NM_01825E   | 55248 Hs. 44538E    | ENSG00000PACC1    | Clorf75            | Fproton ac | protein-coding           |                |                |
| chr1-247c.6.443991  | 0.721061 | 0.913875 | 0.789015 | 0.430103 | 0.981636 | chr1  | 2.47E+08  | 2.47E+08  | + | NA | intron (MLT1B LTF    | 28855 NM_00132E   | 84838 Hs. 168677NM  | 03275E            | ENSG00000ZNF496    | N1ZP1 ZFF  | zinc fing                | protein-coding |                |
| chr12-66c.6.443991  | 0.721061 | 0.913875 | 0.789015 | 0.430103 | 0.981636 | chr12 | 6656909   | 6658483   | + | NA | intron (AluSg SIN    | 5423 NM_001127    | 51147 Hs. 52421C    | ENSG00000ING4     | my036 p2E          | inhibitor  | protein-coding           |                |                |
| chr12-101c.6.443991 | 0.721061 | 0.913875 | 0.789015 | 0.430103 | 0.981636 | chr12 | 1.01E+08  | 1.01E+08  | + | NA | intron (NLIP47 LIN   | -76150 NR_04983E  | 1.01E+08            | NR_04983E         | ENSG00000MIR5484Q  | -          | microRNA                 | ncRNA          |                |
| chr13-100c.6.443991 | 0.721061 | 0.913875 | 0.789015 | 0.430103 | 0.981636 | chr13 | 1E+08     | 1E+08     | + | NA | intron (MER61 int    | 72840 NR_04768E   | 1.01E+08            | Hs. 662554NR      | 04768E             | PCCA-AS1   | -                        | PCCA           | anticrRNA      |
| chr14-34c.6.443991  | 0.721061 | 0.913875 | 0.789015 | 0.430103 | 0.981636 | chr14 | 34956122  | 34957480  | + | NA | intron (AluSq2 SI    | 16879 NR_002937   | 280655 Hs. 639271NR | 002937            | IGBP1P1            | C14orf19   | immunogl                 | pseudo         |                |
| chr15-991c.6.443991 | 0.721061 | 0.913875 | 0.789015 | 0.430103 | 0.981636 | chr15 | 99151149  | 99151805  | + | NA | intron (intron (N    | 46397 NM_01528E   | 23336 Hs. 20710E    | ENSG00000SYNM     | DMN SYN            | synemin    | protein-coding           |                |                |
| chr16-311c.6.443991 | 0.721061 | 0.913875 | 0.789015 | 0.430103 | 0.981636 | chr16 | 3119755   | 3120973   | + | NA | 3' UTR (N3' UTR (N   | -4766 NR_02416E   | 81854 Hs. 66949C    | NR_02416E         | ZNF205-AS-         | ZNF205     | arnRNA                   |                |                |
| chr17-27c.6.443991  | 0.721061 | 0.913875 | 0.789015 | 0.430103 | 0.981636 | chr17 | 27591457  | 27594099  | + | NA | intron (intron (N    | -38410 NM_00230E  | 3965 Hs. 81337      | NR_00230E         | ENSG00000LIGALS9   | HUAT L     | LGALectin                | protein-coding |                |
| chr17-454c.6.443991 | 0.721061 | 0.913875 | 0.789015 | 0.430103 | 0.981636 | chr17 | 45477088  | 45479358  | + | NA | intron (intron (N    | -2788 NR_03619E   | 1E+08               | NR_03619E         | ENSG00000MIR4315-  | -          | microRNA                 | ncRNA          |                |
| chr17-70c.6.443991  | 0.721061 | 0.913875 | 0.789015 | 0.430103 | 0.981636 | chr17 | 60683816  | 60685444  | + | NA | intron (intron (N    | 6779 NM_00132C    | 54828 Hs. 65502E    | ENSG00000BCAS3    | GAOB1 MA:          | BCAS3      | mic                      | protein-coding |                |
| chr17-66c.6.443991  | 0.721061 | 0.913875 | 0.789015 | 0.430103 | 0.981636 | chr17 | 77336840  | 77337984  | + | NA | intron (NLIMEf LIN   | 17897 NM_00664C   | 10801 Hs. 44093E    | ENSG00000SEPTIN9  | AF17q25            | septin     | 9                        | protein-coding |                |
| chr17-805c.6.443991 | 0.721061 | 0.913875 | 0.789015 | 0.430103 | 0.981636 | chr17 | 80998684  | 80999906  | + | NA | 3' UTR (N3' UTR (N   | 7454 NM_02459I    | 79643 Hs. 51456C    | ENSG00000CHMP6    | VPS20              | charged    | n                        | protein-coding |                |
| chr19-12c.6.443991  | 0.721061 | 0.913875 | 0.789015 | 0.430103 | 0.981636 | chr19 | 12043210  | 12045078  | + | NA | exon (NM exon (NM    | -8403 NM_00108E   | 163059 Hs. 66777E   | ENSG00000ZNF433   | -                  | zinc fing  | protein-coding           |                |                |
| chr19-422c.6.443991 | 0.721061 | 0.913875 | 0.789015 | 0.430103 | 0.981636 | chr19 | 37108181  | 37117044  | + | NA | intron (HERYK int    | 34179 NM_00132E   | 147923 Hs. 44499E   | ENSG00000ZNF420   | APAK               | zinc fing  | protein-coding           |                |                |
| chr22-17c.6.443991  | 0.721061 | 0.913875 | 0.789015 | 0.430103 | 0.981636 | chr22 | 17863954  | 17864450  | + | NA | 3' UTR (N3' UTR (N   | 42684 NM_00112E   | 57553 Hs. 528024NM  | 01524I            | ENSG00000MICAL3    | MICAL-3    | microtub                 | protein-coding |                |
| chr3-9937c.6.443991 | 0.721061 | 0.913875 | 0.789015 | 0.430103 | 0.981636 | chr3  | 9937154   | 9938176   | + | NA | exon (NM exon (NM    | 3831 NM_01551E    | 78987 Hs. 9383      | NR_01551E         | ENSG00000CRELD1    | AVSD2 C1F  | cysteine                 | protein-coding |                |
| chr6-422c.6.443991  | 0.721061 | 0.913875 | 0.789015 | 0.430103 | 0.981636 | chr6  | 42299799  | 42300537  | + | NA | intron (NL3 LINE C   | -82307 NM_01814I  | 55173 Hs. 380887NM  | 01814I            | ENSG00000MRP50     | MRP-S10    | Fmitochon                | protein-coding |                |
| chr7-5504c.6.443991 | 0.721061 | 0.913875 | 0.789015 | 0.430103 | 0.981636 | chr7  | 5504083   | 5505778   | + | NA | intron (AluY SINE    | 8879 NM_00136E    | 80028 Hs. 623974NM  | 02496E            | ENSG00000FBXL18    | Fb118      | F-box                    | anc            | protein-coding |
| chr7-121c.6.443991  | 0.721061 | 0.913875 | 0.789015 | 0.430103 | 0.981636 | chr7  | 1.21E+08  | 1.21E+08  | + | NA | intron (NMSTA LTR    | -135991 NR_01608E | 51384 Hs. 27237E    | ENSG00000WNT16    | -                  | Wnt        | family                   | protein-coding |                |
| chr13-951c.6.432625 | 0.632467 | 0.801934 | 0.788677 | 0.430301 | 0.981636 | chr13 | 95219672  | 95219911  | + | NA | intron (AluJo SIN    | 9447 NR_14573E    | 1.1E+08             | NR_14573E         | SNORD13G           | -          | small                    | nucsnRNA       |                |
| chr16-46c.6.432625  | 0.632467 | 0.801934 | 0.788677 | 0.430301 | 0.981636 | chr16 | 4699830   | 4700756   | + | NA | intron (AluSx3 SI    | 6575 NM_00137C    | 84309 Hs. 51331E    | ENSG00000NUDT16L1 | SDOS TIR:          | nudix      | hyc                      | protein-coding |                |
| chr16-11c.6.432625  | 0.632467 | 0.801934 | 0.788677 | 0.430301 | 0.981636 | chr16 | 1125236   | 11272442  | + | NA | intron (NLIMEc LIN   | 81775 NM_01522E   | 23274 Hs. 35490     | ENSG00000CLEC16A  | Gop-1 K1A          | C-type     | l                        | protein-coding |                |
| chr9-126c.6.432625  | 0.632467 | 0.801934 | 0.788677 | 0.430301 | 0.981636 | chr9  | 1.27E+08  | 1.27E+08  | + | NA | intron (Tigger L     | 15326 NM_01400E   | 23099 Hs. 355581NM  | 01400E            | ENSG00000ZBTB43    | ZBTB22B z  | zinc fing                | protein-coding |                |
| chr1-310c.6.436133  | 0.723591 | 0.917478 | 0.788674 | 0.430303 | 0.981636 | chr1  | 31055147  | 31055916  | + | NA | intron (MamRTE L     | 10186 NM_00102C   | 9698 Hs. 281707NM   | 01467E            | ENSG00000PUM1      | HSPUM PUM  | pumilio                  | f              | protein-coding |
| chr1-1851c.6.436133 | 0.723591 | 0.917478 | 0.788674 | 0.430303 | 0.981636 | chr1  | 1.85E+08  | 1.85E+08  | + | NA | intron (NLIMC5 LIN   | 13926 NM_03093A   | 81627 Hs. 10714E    | ENSG00000TRMT1L   | Clorf25            | trna       | met                      | protein-coding |                |
| chr12-881c.6.436133 | 0.723591 | 0.917478 | 0.788674 | 0.430303 | 0.981636 | chr12 | 88129030  | 88129777  | + | NA | intron (intron (N    | 12813 NM_025114   | 80184 Hs. 150444NM  | 025114            | ENSG00000CEP290    | 3H11Ag E   | chromatin                | protein-coding |                |
| chr2-170c.6.436133  | 0.723591 | 0.917478 | 0.788674 | 0.430303 | 0.981636 | chr2  | 1.7E+08   | 1.7E+08   | + | NA | intron (NLIME3 LIN   | -107721 NR_04568E | 140469 Hs. 67190C   | ENSG00000MYO3B    | -                  | myosin     | II                       | protein-coding |                |
| chr3-3714c.6.436133 | 0.723591 | 0.917478 | 0.788674 | 0.430303 | 0.981636 | chr3  | 3714737   | 37147939  | + | NA | intron (intron (N    | 26919 NM_00630E   | 9209 Hs. 74052E     | ENSG00000LRRFP2   | HUF1-2             | LRR        | bindip                   | protein-coding |                |
| chr3-1224c.6.436133 | 0.723591 | 0.917478 | 0.788674 | 0.430303 | 0.981636 | chr3  | 1.22E+08  | 1.22E+08  | + | NA | intron (intron (N    | 8244 NM_01906E    | 54554 Hs. 56751E    | ENSG00000WDR5B    | -                  | WD         | repeat                   | protein-coding |                |
| chr4-420c.6.436133  | 0.723591 | 0.917478 | 0.788674 | 0.430303 | 0.981636 | chr4  | 42062818  | 42064206  | + | NA | intron (LTR78 LTF    | 72982 NM_00634E   | 10463 Hs. 479634NM  | 00634E            | ENSG00000SLC30A9   | BILAPES    | colute                   | protein-coding |                |
| chr9-231c.6.436133  | 0.723591 | 0.917478 | 0.788674 | 0.430303 | 0.981636 | chr9  | 23196188  | 23197141  | + | NA | intron (LOR1b LTF    | 28438 NM_00384A   | 8797 Hs. 213467NM   | 00384A            | ENSG00000TNFRSF10A | AP02 CD2E  | TNF                      | rece           | protein-coding |
| chr9-1907c.6.436133 | 0.723591 | 0.917478 | 0.788674 | 0.430303 | 0.981636 | chr9  | 19075185  | 19076086  | + | NA | intron (NLIMB5 LIN   | -11849 NR_00300E  | 677776 Hs. 68963E   | ENSG00000SCARN8A  | U92                | small      | Ca_                      | ncRNA          |                |
| chr10-68c.6.359525  | -0.64273 | 0.815192 | -0.78843 | 0.430443 | 0.981636 | chr10 | 68068757  | 68073161  | + | NA | intron (intron (N    | 4324 NM_00127E    | 26091 Hs. 51891     | NR_01560I         | ENSG00000CHERC4    | -          | HECT                     | and            | protein-coding |
| chr16-85c.6.359525  | -0.64273 | 0.815192 | -0.78843 | 0.430443 | 0.981636 | chr16 | 85435     | 85930     | + | NA | TTS (NM_C            | 7457 NM_00101E    | 4350 Hs. 45959E     | ENSG00000MCPG     | AAG ADP            | C-N-methyl | l                        | protein-coding |                |
| chr2-179c.6.359525  | -0.64273 | 0.815192 | -0.78843 | 0.430443 | 0.981636 | chr2  | 1.8E+08   | 1.8E+08   | + | NA | intron (HelitronE    | 23490 NM_02094E   | 57703 Hs. 31136E    | ENSG00000CWC22    | E1F4A              | NC         | C22                      | spl            | protein-coding |
| chr20-21c.6.359525  | -0.64273 | 0.815192 | -0.78843 | 0.430443 | 0.981636 | chr20 | 21332627  | 21334382  | + | NA | intron (intron (N    | 30006 NM_001317   | 22803 Hs. 25593E    | ENSG00000XRN2     | -                  | 5'-3'      | exc                      | protein-coding |                |
| chr6-405c.6.359525  | -0.64273 | 0.815192 | -0.78843 | 0.430443 | 0.981636 | chr6  | 4056927   | 4058306   | + | NA | intron (intron (N    | 21521 NM_17356E   | 222826 Hs. 65734E   | ENSG00000FAM217A  | C6orf146           | general    | wip                      | protein-coding |                |
| chr6-110c.6.359525  | -0.64273 | 0.815192 | -0.78843 | 0.430443 | 0.981636 | chr6  | 1.11E+08  | 1.11E+08  | + | NA | TTS (NM_C            | 9450 NM_13840E    | 112495 Hs. 41852C   | ENSG00000GTF3C6   | C6orf51            | general    | t                        | protein-coding |                |
| chr6-133c.6.359525  | -0.64273 | 0.815192 | -0.78843 | 0.430443 | 0.981636 | chr6  | 1.34E+08  | 1.34E+08  | + | NA | intron (NLIP47 LIN</ |                   |                     |                   |                    |            |                          |                |                |



|           |          |          |          |          |          |          |       |          |          |   |   |    |                    |          |           |          |           |                    |            |                 |                     |                |
|-----------|----------|----------|----------|----------|----------|----------|-------|----------|----------|---|---|----|--------------------|----------|-----------|----------|-----------|--------------------|------------|-----------------|---------------------|----------------|
| chr11-618 | 6.451849 | 0.718493 | 0.917582 | 0.783029 | 0.43361  | 0.981636 | chr11 | 61807835 | 61810759 | + | 0 | NA | intron (Nintron (N | 5943     | NR_031725 | 1E+08    | NR_031725 | ENSG00000MIR1908   | MIRN1908   | microRNA        | ncRNA               |                |
| chr11-714 | 6.451849 | 0.718493 | 0.917582 | 0.783029 | 0.43361  | 0.981636 | chr11 | 71472734 | 71477086 | + | 0 | NA | intron (NLTR53 LTF | 1407     | NR_106812 | 1.02E+08 | NR_106812 | ENSG00000MIR6754   | hsa-mir-61 | microRNA        | ncRNA               |                |
| chr11-13C | 6.451849 | 0.718493 | 0.917582 | 0.783029 | 0.43361  | 0.981636 | chr11 | 1.3E+08  | 1.3E+08  | + | 0 | NA | intron (Nintron (N | -22457   | NM_021978 | 6768     | Hs.50431  | ENSG00000CT14      | ARCT11     | H1 suppressor   | protein-coding      |                |
| chr12-43C | 6.451849 | 0.718493 | 0.917582 | 0.783029 | 0.43361  | 0.981636 | chr12 | 4324551  | 4325234  | + | 0 | NA | intron (Nintron (N | 3679     | NM_020375 | 57103    | Hs.50454  | ENSG00000TIGAR     | C12orf5    | FTP53           | ind protein-coding  |                |
| chr12-10C | 6.451849 | 0.718493 | 0.917582 | 0.783029 | 0.43361  | 0.981636 | chr12 | 1E+08    | 1E+08    | + | 0 | NA | intron (Nintron (N | -39503   | NM_001145 | 246123   | Hs.116871 | ENSG00000SLC17A8   | DFNA25     | VC solute c     | protein-coding      |                |
| chr12-124 | 6.451849 | 0.718493 | 0.917582 | 0.783029 | 0.43361  | 0.981636 | chr12 | 1.25E+08 | 1.25E+08 | + | 0 | NA | intron (Nintron (N | 20434    | NM_032656 | 57647    | Hs.107382 | ENSG00000DXH37     | DDX37      | DhrDEAH-box     | protein-coding      |                |
| chr13-46C | 6.451849 | 0.718493 | 0.917582 | 0.783029 | 0.43361  | 0.981636 | chr13 | 46000195 | 46001179 | + | 0 | NA | intron (NTigger1 E | 52059    | NM_00133C | 23091    | Hs.136102 | ENSG00000ZC3H13    | KIAA0853   | zinc finger     | protein-coding      |                |
| chr13-77C | 6.451849 | 0.718493 | 0.917582 | 0.783029 | 0.43361  | 0.981636 | chr13 | 77099840 | 77099813 | + | 0 | NA | intron (Nintron (N | 23607    | NR_046716 | 1.01E+08 | Hs.56928  | ENSG00000MYPB2-AS  | MYPB2      | arncRNA         |                     |                |
| chr16-82C | 6.451849 | 0.718493 | 0.917582 | 0.783029 | 0.43361  | 0.981636 | chr16 | 82094178 | 82096459 | + | 0 | NA | intron (Nintron (N | 60065    | NM_002153 | 3294     | Hs.16279  | ENSG00000HSD17B2   | EDH17B2    | F hydroxyst     | protein-coding      |                |
| chr16-85C | 6.451849 | 0.718493 | 0.917582 | 0.783029 | 0.43361  | 0.981636 | chr16 | 85079699 | 85078962 | + | 0 | NA | intron (Nintron (N | 14753    | NM_00128E | 9764     | Hs.30165  | ENSG00000KIAA0513  | KIAA0513   | protein-coding  |                     |                |
| chr19-374 | 6.451849 | 0.718493 | 0.917582 | 0.783029 | 0.43361  | 0.981636 | chr19 | 37438564 | 37439598 | + | 0 | NA | intron (NAluSq SIN | 28363    | NM_00133C | 148266   | Hs.51184  | ENSG00000ZNF569    | ZNF569     | ZNF zinc        | protein-coding      |                |
| chr2-273C | 6.451849 | 0.718493 | 0.917582 | 0.783029 | 0.43361  | 0.981636 | chr2  | 27326094 | 27327622 | + | 0 | NA | exon (NM exon (NM  | -3761    | NM_002437 | 4358     | Hs.75659  | ENSG00000MYPV17    | CMT2E      | MI mitochond    | protein-coding      |                |
| chr2-427C | 6.451849 | 0.718493 | 0.917582 | 0.783029 | 0.43361  | 0.981636 | chr2  | 42703397 | 42704321 | + | 0 | NA | intron (NAluSc8 S  | 60402    | NM_148962 | 165140   | Hs.16843  | ENSG00000OXER1     | GPCR       | GPR1 oxoecis    | protein-coding      |                |
| chr2-196C | 6.451849 | 0.718493 | 0.917582 | 0.783029 | 0.43361  | 0.981636 | chr2  | 1.97E+08 | 1.97E+08 | + | 0 | NA | intron (NLMIME3B L | 8507     | NM_001321 | 80055    | Hs.22998  | ENSG00000PGAP1     | Bst1       | ISFP post-GPI   | protein-coding      |                |
| chr2-219C | 6.451849 | 0.718493 | 0.917582 | 0.783029 | 0.43361  | 0.981636 | chr2  | 2.2E+08  | 2.2E+08  | + | 0 | NA | intron (Nintron (N | 7994     | NM_052902 | 114790   | Hs.22410  | ENSG00000STK111P   | LIP1       | LKB1 serine/tl  | protein-coding      |                |
| chr20-34C | 6.451849 | 0.718493 | 0.917582 | 0.783029 | 0.43361  | 0.981636 | chr20 | 34851312 | 34851995 | + | 0 | NA | intron (Nintron (N | -17191   | NR_002165 | 128872   | Hs.55862  | ENSG00000HMG3P1    | HMG4L      | HMC high        | mobipseudo          |                |
| chr22-31C | 6.451849 | 0.718493 | 0.917582 | 0.783029 | 0.43361  | 0.981636 | chr22 | 31265331 | 31266584 | + | 0 | NA | intron (NAluSg SIN | 16573    | NM_016733 | 3985     | Hs.47459  | ENSG00000CLIMK2    |            | LIM domain      | protein-coding      |                |
| chr3-195C | 6.451849 | 0.718493 | 0.917582 | 0.783029 | 0.43361  | 0.981636 | chr3  | 1.96E+08 | 1.96E+08 | + | 0 | NA | exon (NM exon (NM  | -7356    | NR_134939 | 1.02E+08 | Hs.55175  | ENSG00000LINC01983 |            | long intencRNA  |                     |                |
| chr4-408C | 6.451849 | 0.718493 | 0.917582 | 0.783029 | 0.43361  | 0.981636 | chr4  | 40821788 | 40823048 | + | 0 | NA | intron (Nintron (N | 34737    | NM_00116E | 323      | Hs.47960  | ENSG00000APB2      | FEF5L      | FEF amyloid t   | protein-coding      |                |
| chr6-1421 | 6.451849 | 0.718493 | 0.917582 | 0.783029 | 0.43361  | 0.981636 | chr6  | 1.42E+08 | 1.42E+08 | + | 0 | NA | intron (NMSTB-int  | 27289    | NM_016485 | 51534    | Hs.431367 | ENSG00000CVTA1     | C6orf55    | l vesicle t     | protein-coding      |                |
| chr7-7451 | 6.451849 | 0.718493 | 0.917582 | 0.783029 | 0.43361  | 0.981636 | chr7  | 74513677 | 74516410 | + | 0 | NA | intron (NAluSx1 S  | 61137    | NM_01632E | 9569     | Hs.64705  | ENSG00000GTF21RD1  | BEN        | CREAM GTP2I     | reprotein-coding    |                |
| chr8-1181 | 6.451849 | 0.718493 | 0.917582 | 0.783029 | 0.43361  | 0.981636 | chr8  | 11811437 | 11812583 | + | 0 | NA | intron (NMamSINE1  | 2866     | NM_001287 | 2222     | Hs.59329  | ENSG00000FDFT1     | DGPT       | ERCC farnesyl-  | protein-coding      |                |
| chr8-287C | 6.451849 | 0.718493 | 0.917582 | 0.783029 | 0.43361  | 0.981636 | chr8  | 28738325 | 28738715 | + | 0 | NA | intron (NMER33 DN  | 37019    | NR_07346E | 2137     | Hs.49135  | ENSG00000EXTL3     | BOTV       | EXT1 exostosyl  | protein-coding      |                |
| chr9-1377 | 6.451849 | 0.718493 | 0.917582 | 0.783029 | 0.43361  | 0.981636 | chr9  | 1.38E+08 | 1.38E+08 | + | 0 | NA | intron (NLMIM2 L   | 67704    | NR_14750E | 651337   | Hs.60319  | ENSG00000LOC651337 |            | uncharactcRNA   |                     |                |
| chr3-184C | 10.17718 | -0.58548 | 0.748021 | -0.7827  | 0.433802 | 0.981636 | chr3  | 1.84E+08 | 1.84E+08 | + | 0 | NA | intron (NAluJb SIN | 2266     | NM_00127E | 5437     | Hs.43257  | ENSG00000POLR2H    | RPABC3     | RF RNA          | polynprotein-coding |                |
| chr1-1708 | 9.213497 | 0.608566 | 0.777535 | 0.782866 | 0.433812 | 0.981636 | chr1  | 77864048 | 77864310 | + | 0 | NA | intron (NAluSq2 S  | -24336   | NM_144573 | 91624    | Hs.61238  | ENSG00000CNEXN     | CMH20      | NEI nexilin     | F protein-coding    |                |
| chr2-160C | 8.326243 | -0.64757 | 0.827462 | -0.7826  | 0.433864 | 0.981636 | chr2  | 1.6E+08  | 1.6E+08  | + | 0 | NA | TTS (NM_CTS (NM_C  | 137      | NR_10377E | 1.01E+08 | Hs.10377  | ENSG00000LINC0247E |            | long intencRNA  |                     |                |
| chr1-3167 | 6.682854 | -0.70826 | 0.905061 | -0.78255 | 0.433891 | 0.981636 | chr1  | 31676630 | 31677192 | + | 0 | NA | intron (Nintron (N | 27106    | NM_00185E | 1307     | Hs.36892  | ENSG00000COL16A1   | 447AA      | FP1 collagen    | protein-coding      |                |
| chr13-951 | 6.682854 | -0.70826 | 0.905061 | -0.78255 | 0.433891 | 0.981636 | chr13 | 95180211 | 95180578 | + | 0 | NA | intron (NAluSq2 S  | -29950   | NR_145733 | 1.1E+08  | NR_145733 | SNORD13G           |            | small nucsnoRNA |                     |                |
| chr18-35C | 6.682854 | -0.70826 | 0.905061 | -0.78255 | 0.433891 | 0.981636 | chr18 | 35341732 | 35341931 | + | 0 | NA | intron (NAluJo SIN | 2589     | NM_00130E | 7572     | Hs.51480  | ENSG00000ZNF24     | KOX17      | RSC zinc        | protein-coding      |                |
| chr20-58C | 6.682854 | -0.70826 | 0.905061 | -0.78255 | 0.433891 | 0.981636 | chr20 | 58663225 | 58664109 | + | 0 | NA | intron (Nintron (N | 12384    | NM_001134 | 8675     | Hs.30791  | ENSG00000CSTX16    | SYN16      | syntaxin        | protein-coding      |                |
| chr4-8494 | 6.682854 | -0.70826 | 0.905061 | -0.78255 | 0.433891 | 0.981636 | chr4  | 84941011 | 84941830 | + | 0 | NA | intron (NLMIM5 L   | -21496   | NR_152774 | 404201   | Hs.46730  | ENSG00000WDFY3-AS2 | C4orf12    | WDFY3           | antcncRNA           |                |
| chr4-139C | 6.682854 | -0.70826 | 0.905061 | -0.78255 | 0.433891 | 0.981636 | chr4  | 1.49E+08 | 1.49E+08 | + | 0 | NA | intron (Nintron (N | 21474    | NM_001354 | 287      | Hs.62057  | ENSG00000ANK2      | ANK2       | -LQ1 tankyrin   | protein-coding      |                |
| chr5-7151 | 6.682854 | -0.70826 | 0.905061 | -0.78255 | 0.433891 | 0.981636 | chr5  | 1.39E+08 | 1.39E+08 | + | 0 | NA | intron (Nintron (N | -68651   | NM_001184 | 4717     | Hs.84549  | ENSG00000NDUF1     | KFY1       | NADH:ubiq       | protein-coding      |                |
| chr5-1791 | 6.682854 | -0.70826 | 0.905061 | -0.78255 | 0.433891 | 0.981636 | chr5  | 17151940 | 17152102 | + | 0 | NA | intron (NLMIM4 L   | 64578    | NM_01842E | 55814    | Hs.25827  | ENSG00000BDP1      | KDNB112    | F B double      | protein-coding      |                |
| chr9-380C | 6.682854 | -0.70826 | 0.905061 | -0.78255 | 0.433891 | 0.981636 | chr9  | 1.99E+08 | 1.99E+08 | + | 0 | NA | intron (Nintron (N | 118947   | NM_014594 | 30832    | Hs.27232  | ENSG00000ZNF354C   | IDF3       | zinc            | protein-coding      |                |
| chrX-1667 | 6.682854 | -0.70826 | 0.905061 | -0.78255 | 0.433891 | 0.981636 | chrX  | 38060785 | 38061506 | + | 0 | NA | intron (NAluJb SIN | 8082     | NM_00302E | 6461     | Hs.52148  | ENSG00000CSHB      | ba3J10.2   | SH2             | domaiprotein-coding |                |
| chr6-333C | 6.113695 | -0.77585 | 0.991487 | -0.78251 | 0.433915 | 0.981636 | chr6  | 33308759 | 33309342 | + | 0 | NA | intron (Nintron (N | 3348     | NM_001011 | 6399     | Hs.59223  | ENSG00000TRAPP2C   | MIP2A      | SEE trafficki   | protein-coding      |                |
| chr16-67C | 6.428275 | 0.726177 | 0.928427 | 0.782158 | 0.434122 | 0.981636 | chr16 | 67828452 | 67828911 | + | 0 | NA | TTS (NM_CTS (NM_C  | 20090    | NM_004057 | 7395     | Hs.639    | ENSG00000S100G     | CABP       | CABF S100       | calcprotein-coding  |                |
| chr18-23C | 6.428275 | 0.726177 | 0.928427 | 0.782158 | 0.434122 | 0.981636 | chr18 | 23205684 | 23206517 | + | 0 | NA | intron (NMLTIC L   | 50275    | NM_13837E | 91768    | Hs.11108  | ENSG00000CABLES1   | CABL1      | CAF Cdk5        | and                 | protein-coding |
| chr19-136 | 6.428275 | 0.726177 | 0.928427 | 0.782158 | 0.434122 | 0.981636 | chr19 | 1388881  | 1389853  | + | 0 | NA | intron (Nintron (N | 5460     | NM_00136E | 374291   | Hs.21194  | ENSG00000NDUF57    | CI-20      | CI-NADH:ubiq    | protein-coding      |                |
| chr15-61C | 9.229213 | 0.604988 | 0.77398  | 0.781658 | 0.434416 | 0.981636 | chr15 | 61964292 | 61964969 | + | 0 | NA | intron (Nintron (N | 95817    | NM_017684 | 54832    | Hs.51166  | ENSG00000VPS13C    | PARK23     | vacuolar        | protein-coding      |                |
| chr1-6637 | 10.5975  | -0.56562 | 0.723663 | -0.78161 | 0.434446 | 0.981636 | chr1  | 66372196 | 66374081 | + | 0 | NA | 3' UTR (N3' UTR (N | 18603    | NM_001297 | 5142     | Hs.19807  | ENSG00000PDE4B     | DPDE4      | PDE phosphodi   | protein-coding      |                |
| chr8-3901 | 10.5975  | -0.56562 | 0.723663 | -0.78161 | 0.434446 | 0.981636 | chr8  | 39011835 | 39013962 | + | 0 | NA | intron (NLMIP5 L   | 5787     | NR_14598E | 1.1E+08  | NR_145733 | ENSG00000SNORD38D  |            | small nucsnoRNA |                     |                |
| chr1-1561 | 11.92245 | 0.535758 | 0.685529 | 0.781524 | 0.434494 | 0.981636 | chr1  | 1.56E+08 | 1.56E+08 | + | 0 | NA | 3' UTR (N3' UTR (N | -15982   | NM_00314E | 6746     | Hs.74564  | ENSG00000SSR2      | HSD25      | TLA signal      | protein-coding      |                |
| chr19-264 | 11.92245 | 0.535758 | 0.685529 | 0.781524 | 0.434494 | 0.981636 | chr19 | 26437272 | 26438043 | + | 0 | NA | IntergeniALR/Alph  | -1355774 | NR_146733 | 1.02E+08 | Hs.56793  | ENSG00000LOC101927 |            | uncharactcRNA   |                     |                |
| chr16-894 | 8.30082  | -0.65412 | 0.837091 | -0.78142 | 0.434557 | 0.981636 | chr16 | 89498784 | 89499010 | + | 0 | NA | IntergeniL2a L     | -8336    | NR_04583E | 29123    | Hs.33500  | ENSG00000ANKRD11   | ANCO-1     | AN ankyrin      | r protein-coding    |                |
| chr7-134C | 10.16932 | -0.58422 | 0.747825 | -0.78123 | 0.434666 | 0.981636 | chr7  | 1.35E+08 | 1.35E+08 | + | 0 | NA | intron (N(TCTT)n S | 42321    | NM_03313E | 800      | Hs.49020  | ENSG00000CALD1     | CDM        | H-CAL           | caldesmor           | protein-coding |
| chr12-437 | 6.471264 | 0.741369 | 0.949052 | 0.781168 | 0.434704 | 0.981636 | chr12 | 43784418 | 43784796 | + | 0 | NA | intron (Nintron (N | 21710    | NM_00124E | 5756     | Hs.18907  | ENSG00000TWF1      | A6 PTK9    | twinfilin       | protein-coding      |                |
| chr1-2147 | 6.641715 | -0.71242 | 0.91204  | -0.78113 | 0.434727 | 0.981636 | chr1  | 21475286 | 21475607 | + | 0 | NA | intron (NLMIP2 L   | -33538   | NM_00136E | 249      | Hs.75431  | ENSG00000ALPL      | AF-TNAP    | alkaline        | protein-coding      |                |
| chr11-58C | 6.641715 | -0.71242 | 0.91204  | -0.78113 | 0.434727 | 0.981636 | chr11 | 58623824 | 58624647 | + | 0 |    |                    |          |           |          |           |                    |            |                 |                     |                |

|            |          |          |          |          |          |          |       |          |          |   |   |    |                       |                   |                            |                     |                    |                           |                           |
|------------|----------|----------|----------|----------|----------|----------|-------|----------|----------|---|---|----|-----------------------|-------------------|----------------------------|---------------------|--------------------|---------------------------|---------------------------|
| chr17-38c  | 6.410709 | 0.717538 | 0.92313  | 0.777287 | 0.436989 | 0.981636 | chr17 | 38399447 | 38400431 | + | 0 | NA | 3' UTR (N3' UTR (N    | -28525 NM_001199  | 57636 Hs. 37444cNM_02087c  | ENSG00000CARHGAP23  | -                  | Rho                       | GTPase protein-coding     |
| chr2-117c  | 6.410709 | 0.717538 | 0.92313  | 0.777287 | 0.436989 | 0.981636 | chr2  | 11788919 | 11789475 | + | 0 | NA | intron (Nintron (N    | 21753 NR_036071   | 1E+08                      | NR_036071           | ENSG00000MIR548S   | -                         | microRNA ncRNA            |
| chr2-177c  | 10.12032 | -0.58555 | 0.753412 | -0.77719 | 0.437044 | 0.981636 | chr2  | 1.77E+08 | 1.77E+08 | + | 0 | NA | non-coding non-coding | 8036 NR_13847c    | 220988 Hs. 51653cNM_194247 | ENSG00000HNRNP3     | 2610510D1          | hetero protein-coding     |                           |
| chr2-332c  | 10.58964 | -0.56442 | 0.726275 | -0.77714 | 0.437075 | 0.981636 | chr2  | 33262804 | 33267122 | + | 0 | NA | intron (NMLT2B1 LI    | 130366 NM_001166  | 4052 Hs. 61931cNM_000627   | ENSG00000LTBP1      | -                  | latent t protein-coding   |                           |
| chr3-197c  | 10.58964 | -0.56442 | 0.726275 | -0.77714 | 0.437075 | 0.981636 | chr3  | 1.97E+08 | 1.97E+08 | + | 0 | NA | intron (NMLT1A1 LI    | 12601 NR_03996c   | 1.01E+08                   | NR_03996c           | ENSG00000MIR4797   | -                         | microRNA ncRNA            |
| chr1-1247  | 11.93816 | 0.533042 | 0.685965 | 0.777069 | 0.437118 | 0.981636 | chr1  | 1.25E+08 | 1.25E+08 | + | 0 | NA | IntergeniALR/Alpha    | 3248669 NR_00395c | 647121 Hs. 69768cNR_00395c | ENSG00000CEMBP1     | -                  | embigin p pseudo          |                           |
| chr15-40c  | 10.63078 | -0.56195 | 0.723546 | -0.77666 | 0.437357 | 0.981636 | chr15 | 40009936 | 40001841 | + | 0 | NA | intron (NCharlie4c    | 37793 NM_003134   | 6127 Hs. 53373cNM_003134   | ENSG00000SRP14      | ALURBP             | signal r protein-coding   |                           |
| chr20-19c  | 10.63078 | -0.56195 | 0.723546 | -0.77666 | 0.437357 | 0.981636 | chr20 | 19965756 | 19965955 | + | 0 | NA | intron (NAluX1 SI     | -51435 NM_18152c  | 5726 Hs. 36878cNM_01610c   | ENSG00000NAA20      | NAT3 NAT3N(alpha)  | protein-coding            |                           |
| chr2-100c  | 10.08704 | -0.58947 | 0.759191 | -0.77644 | 0.437488 | 0.981636 | chr2  | 1E+08    | 1E+08    | + | 0 | NA | intron (NLM14 LINE    | 17664 NM_00102c   | 3899 Hs. 44441cNM_00228c   | ENSG00000CAFF3      | LAF4 MLL1AF4/FMR2  | protein-coding            |                           |
| chr16-47c  | 8.210613 | 0.658192 | 0.847948 | 0.776217 | 0.437621 | 0.981636 | chr16 | 47505408 | 47505250 | + | 0 | NA | intron (NLSU-rRNA     | 43953 NM_001031   | 5257 Hs. 78060cNM_00029c   | ENSG00000PKHB       | -                  | phosphory protein-coding  |                           |
| chr1-986c  | 4.734223 | 0.824827 | 1.062985 | 0.775954 | 0.437776 | 0.981636 | chr1  | 98690008 | 9870385  | + | 0 | NA | intron (Nintron (N    | 40573 NM_02024c   | 56998 Hs. 46375cNM_02024c  | ENSG00000CTNNBP1    | ICAT               | catenin t protein-coding  |                           |
| chr16-397c | 4.734223 | 0.824827 | 1.062985 | 0.775954 | 0.437776 | 0.981636 | chr16 | 3978509  | 3979481  | + | 0 | NA | intron (NAluSc SIN    | -28551 NR_120311  | 1.03E+08                   | Hs. 36473cNR_120311 | ENSG00000LOC102724 | -                         | uncharacter ncRNA         |
| chr19-50c  | 4.734223 | 0.824827 | 1.062985 | 0.775954 | 0.437776 | 0.981636 | chr19 | 5052049  | 5052840  | + | 0 | NA | intron (Nintron (N    | 83331 NM_00137c   | 23030 Hs. 65481cNM_01501c  | ENSG00000KDM4B      | JMJD2B T           | lysine d protein-coding   |                           |
| chr2-478c  | 4.734223 | 0.824827 | 1.062985 | 0.775954 | 0.437776 | 0.981636 | chr2  | 47829654 | 47830442 | + | 0 | NA | intron (Nintron (N    | 46093 NM_001281   | 2956 Hs. 44505cNM_00017c   | ENSG00000MSH6       | GTBP GTME          | mtS homc protein-coding   |                           |
| chr2-933c  | 4.734223 | 0.824827 | 1.062985 | 0.775954 | 0.437776 | 0.981636 | chr2  | 93340659 | 93342363 | + | 0 | NA | IntergeniALR/Alpha    | 866908 NR_14610c  | 728034                     | NR_14610c           | BMS1P14            | -                         | BMS1 p set pseudo         |
| chr21-33c  | 4.734223 | 0.824827 | 1.062985 | 0.775954 | 0.437776 | 0.981636 | chr21 | 33253679 | 33254969 | + | 0 | NA | intron (NMER4D1 LI    | 11936 NR_038974   | 1E+08                      | Hs. 70979cNR_038974 | IL10RB-D1          | IFNAR2-AS                 | IL10RB dincRNA            |
| chr4-526c  | 4.734223 | 0.824827 | 1.062985 | 0.775954 | 0.437776 | 0.981636 | chr4  | 526506   | 528764   | + | 0 | NA | intron (Nintron (N    | 28425 NM_001127   | 54872 Hs. 7099             | NM_01773c           | ENSG00000PIGG      | GP17 LAS2                 | phosphatid protein-coding |
| chr1-1541  | 6.1724   | -0.75969 | 0.97923  | -0.7758  | 0.437865 | 0.981636 | chr1  | 1541106  | 1541383  | + | 0 | NA | promoter-promoter-    | -620 NM_001114    | 339453 Hs. 66865cNM_001114 | ENSG00000TMM240     | CLorf70 S          | transmem protein-coding   |                           |
| chr12-92c  | 8.681778 | 0.623205 | 0.803466 | 0.775646 | 0.437958 | 0.981636 | chr12 | 92895779 | 92896244 | + | 0 | NA | intron (NAluSc SIN    | 33284 NM_00356c   | 8411 Hs. 56736cNM_00356c   | ENSG00000EEA1       | MST105 MS          | early enc protein-coding  |                           |
| chr22-19c  | 8.681778 | 0.623205 | 0.803466 | 0.775646 | 0.437958 | 0.981636 | chr22 | 19913416 | 19915564 | + | 0 | NA | intron (NLM8B LIN     | 18063 NM_00135c   | 10587 Hs. 44343cNM_00644c  | ENSG00000TXNRD2     | GCCD5 SEI          | thioredo protein-coding   |                           |
| chr15-39c  | 6.608433 | -0.71857 | 0.926675 | -0.77543 | 0.438087 | 0.981636 | chr15 | 39959784 | 39959987 | + | 0 | NA | intron (NAluU SINE    | 25770 NM_00101c   | 440275 Hs. 65667cNM_00101c | ENSG00000EIF2AK4    | GCN2 PVOL          | eukaryot protein-coding   |                           |
| chr3-491c  | 6.608433 | -0.71857 | 0.926675 | -0.77543 | 0.438087 | 0.981636 | chr3  | 49108274 | 49108552 | + | 0 | NA | TTS (NM_C             | -3656 NM_00127c   | 5859 Hs. 79322             | NM_00505c           | ENSG00000QARS      | GLNRS MSC                 | glutamin protein-coding   |
| chr3-62c   | 6.608433 | -0.71857 | 0.926675 | -0.77543 | 0.438087 | 0.981636 | chr3  | 69087251 | 69087450 | + | 0 | NA | intron (Nintron (N    | 2413 NM_006407    | 10550 Hs. 51806cNM_006407  | ENSG00000CARL6IP5   | DERP11 G           | ADP ribos protein-coding  |                           |
| chr10-49c  | 9.237071 | 0.603241 | 0.778067 | 0.775307 | 0.438158 | 0.981636 | chr10 | 42520355 | 42521911 | + | 0 | NA | intron (Nintron (N    | 31737 NR_026777   | 1E+08                      | Hs. 27806cNR_026777 | ENSG00000ZNF37BP   | KOXY21 ZNF                | zinc fng pseudo           |
| chr2-426c  | 9.237071 | 0.603241 | 0.778067 | 0.775307 | 0.438158 | 0.981636 | chr2  | 42643723 | 42646854 | + | 0 | NA | intron (NAluSz SIN    | 76656 NM_00133c   | 57504 Hs. 43541cNM_02074c  | ENSG00000MTA3       | -                  | metastasis protein-coding |                           |
| chr3-183c  | 9.237071 | 0.603241 | 0.778067 | 0.775307 | 0.438158 | 0.981636 | chr3  | 1.84E+08 | 1.84E+08 | + | 0 | NA | intron (Nintron (N    | 58563 NR_03965c   | 1.01E+08                   | NR_03965c           | ENSG00000MIR4448   | -                         | microRNA ncRNA            |
| chr6-154c  | 6.58301  | -0.72687 | 0.937657 | -0.77519 | 0.438225 | 0.981636 | chr6  | 1.51E+08 | 1.51E+08 | + | 0 | NA | 3' UTR (N3' UTR (N    | -13446 NM_020861  | 57621 Hs. 52007cNM_020861  | ENSG00000ZBTB2      | ZNF437             | -                         | zinc fng protein-coding   |
| chr1-144c  | 8.869979 | -0.61074 | 0.788039 | -0.77501 | 0.438331 | 0.981636 | chr1  | 1.44E+08 | 1.44E+08 | + | 0 | NA | intron (NLM1Ec LIN    | 6984 NR_027354    | 645166 Hs. 74418cNR_027354 | LSP1P5              | -                  | LSP1 p set pseudo         |                           |
| chr17-30c  | 8.869979 | -0.61074 | 0.788039 | -0.77501 | 0.438331 | 0.981636 | chr17 | 30764901 | 30765249 | + | 0 | NA | intron (NAluSp SIN    | 55467 NR_14439c   | 440423 Hs. 62888cNR_024187 | SUZ12P1             | SUZ12              | p set pseudo              |                           |
| chr2-188c  | 8.869979 | -0.61074 | 0.788039 | -0.77501 | 0.438331 | 0.981636 | chr2  | 1.88E+08 | 1.88E+08 | + | 0 | NA | intron (NTHE1B-int    | 87914 NR_030287   | 693146                     | NR_030287           | ENSG00000MIR561    | MIRN561 t                 | microRNA ncRNA            |
| chr11-65c  | 8.862121 | -0.60932 | 0.786663 | -0.77457 | 0.438596 | 0.981636 | chr11 | 65434443 | 65436017 | + | 0 | NA | non-coding non-coding | -9228 NR_03034c   | 693197                     | NR_03034c           | ENSG00000MIR612    | MIRN612 t                 | microRNA ncRNA            |
| chr16-33c  | 8.862121 | -0.60932 | 0.786663 | -0.77457 | 0.438596 | 0.981636 | chr16 | 3398409  | 3399205  | + | 0 | NA | intron (Nintron (N    | 2197 NM_001284    | 54925 Hs. 59207cNM_01781c  | ENSG00000ZSCAN32    | HCCS-5 Zn          | zinc fng protein-coding   |                           |
| chr2-134c  | 8.862121 | -0.60932 | 0.786663 | -0.77457 | 0.438596 | 0.981636 | chr2  | 1.34E+08 | 1.34E+08 | + | 0 | NA | intron (Nintron (N    | 169055 NM_00241c  | 4249 Hs. 4988              | NM_00241c           | ENSG00000MGAT5     | GCN2 PVOL                 | eukaryot protein-coding   |
| chr22-27c  | 8.862121 | -0.60932 | 0.786663 | -0.77457 | 0.438596 | 0.981636 | chr22 | 27908474 | 27911226 | + | 0 | NA | intron (NAluJo SIN    | 9364 NM_001284    | 23760 Hs. 70532cNM_01239c  | ENSG00000PITPNB     | PI-TP-beta         | phosphatid protein-coding |                           |
| chr7-840c  | 8.862121 | -0.60932 | 0.786663 | -0.77457 | 0.438596 | 0.981636 | chr7  | 84004777 | 84006094 | + | 0 | NA | exon (NM exon (NM     | 189354 NM_00608c  | 10371 Hs. 25245cNM_00608c  | ENSG00000SEMA3A     | COLL1 HHH          | semaphor protein-coding   |                           |
| chr9-271c  | 8.862121 | -0.60932 | 0.786663 | -0.77457 | 0.438596 | 0.981636 | chr9  | 27168571 | 27170978 | + | 0 | NA | intron (Nintron (N    | 60633 NM_00045c   | 7010 Hs. 89640             | NM_00045c           | ENSG00000CTEK      | CD202B GLTEK              | recep protein-coding      |
| chr9-134c  | 8.862121 | -0.60932 | 0.786663 | -0.77457 | 0.438596 | 0.981636 | chr9  | 1.35E+08 | 1.35E+08 | + | 0 | NA | intron (Nintron (N    | 87182 NR_039691   | 1.01E+08                   | NR_039691           | ENSG00000MIR3689C  | -                         | microRNA ncRNA            |
| chr1-186c  | 8.648496 | 0.620507 | 0.801417 | 0.774623 | 0.438775 | 0.981636 | chr1  | 1.86E+08 | 1.86E+08 | + | 0 | NA | intron (Nintron (N    | 31445 NM_001127   | 10216 Hs. 64772cNM_005807  | ENSG00000PRG4       | CACP HAPC          | proteogly protein-coding  |                           |
| chr21-44c  | 9.170508 | 0.598027 | 0.772678 | 0.773967 | 0.43895  | 0.981636 | chr21 | 44854138 | 44859297 | + | 0 | NA | intron (Nintron (N    | 18658 NM_00433c   | 754 Hs. 44101cNM_00433c    | ENSG00000PTTG1P1    | C1orf11 CTTG1      | intron protein-coding     |                           |
| chr3-459c  | 9.170508 | 0.598027 | 0.772678 | 0.773967 | 0.43895  | 0.981636 | chr3  | 45979303 | 45980593 | + | 0 | NA | intron (Nintron (N    | 15876 NM_02451c   | 79443 Hs. 20022cNM_02451c  | ENSG00000FYCO1      | CATC2 CTFF         | YVE and protein-coding    |                           |
| chr8-1441  | 9.170508 | 0.598027 | 0.772678 | 0.773967 | 0.43895  | 0.981636 | chr8  | 1.44E+08 | 1.44E+08 | + | 0 | NA | promoter-promoter-    | -902 NM_00131c    | 340390 Hs. 98723           | NM_03252c           | ENSG00000WDR97     | KIAA1875                  | WD repeat protein-coding  |
| chr11-52c  | 24.69977 | 0.388646 | 0.502233 | 0.773835 | 0.439028 | 0.981636 | chr11 | 52320907 | 52321152 | + | 0 | NA | IntergeniALR/Alpha    | 1911882 NR_024504 | 646813 Hs. 68417cNR_024504 | LOC646811           | -                  | DEXH-box pseudo           |                           |
| chr12-277  | 8.82884  | -0.61383 | 0.793708 | -0.77337 | 0.439305 | 0.981636 | chr12 | 27791730 | 27793381 | + | 0 | NA | intron (NAluSx SIN    | 12322 NM_02078c   | 57542 Hs. 50510cNM_02078c  | ENSG00000KLHL42     | Ctb9 KLHE          | kelch lik protein-coding  |                           |
| chr11-524  | 4.718507 | 0.831948 | 1.075884 | 0.773269 | 0.439363 | 0.981636 | chr11 | 52414247 | 52415191 | + | 0 | NA | IntergeniALR/Alpha    | 2005572 NR_024504 | 646813 Hs. 68417cNR_024504 | LOC646811           | -                  | DEXH-box pseudo           |                           |
| chr10-10c  | 6.991426 | 0.689096 | 0.891251 | 0.773179 | 0.439416 | 0.981636 | chr10 | 1E+08    | 1E+08    | + | 0 | NA | intron (Nintron (N    | -12640 NR_002954  | 677800 Hs. 66216cNR_002954 | ENSG00000SNORA12    | U108               | small nucsnoRNA           |                           |
| chr5-157c  | 6.991426 | 0.689096 | 0.891251 | 0.773179 | 0.439416 | 0.981636 | chr5  | 1.57E+08 | 1.57E+08 | + | 0 | NA | intron (Nintron (N    | -21666 NR_13620c  | 1.03E+08                   | Hs. 57088cNR_13620c | LOC102724          | -                         | uncharacter ncRNA         |
| chr9-686c  | 7.007142 | 0.684285 | 0.885215 | 0.773015 | 0.439513 | 0.981636 | chr9  | 6863467  | 6864087  | + | 0 | NA | intron (NAluU SINE    | 106427 NR_130707  | 23081 Hs. 70942cNM_015061  | ENSG00000KDM4C      | GASC1 JHE          | lysine d protein-coding   |                           |
| chr15-407  | 7.882353 | -0.67315 | 0.870827 | -0.773   | 0.439522 | 0.981636 | chr15 | 40744605 | 40744861 | + | 0 | NA | intron (Nintron (N    | 10521 NM_01814c   | 55177 Hs. 51106cNM_01814c  | ENSG00000RMDN3      | FAM82A2 F          | regulator protein-coding  |                           |
| chr1-168c  | 6.97386  | 0.680961 | 0.881216 | 0.772752 | 0.439669 | 0.981636 | chr1  | 61350681 | 61350945 | + | 0 | NA | promoter-promoter-    | 68 NR_026844      | 84832 Hs. 53706cNR_026844  | ENSG00000ANKRD36B   | ANKRD26 lankyrin   | pseudo                    |                           |
| chr11-61c  | 6.97386  | 0.680961 | 0.881216 | 0.772752 | 0.439669 | 0.981636 | chr11 | 97690602 | 97692634 | + | 0 | NA | intron (NAluSj SIN    | 6501 NM_001161    | 220002 Hs. 22546           | NM_15361c           | ENSG00000CYB561A3  | CYBASC3 c                 | cytochron protein-coding  |
| chr11-95c  | 6.97386  | 0.680961 | 0.881216 | 0.772752 | 0.439669 | 0.981636 | chr11 | 97690602 | 97692634 | + | 0 | NA | intron (NAluSj SIN    | 5791 NR_149094    | 7507 Hs. 65436cNM_00038c   | ENSG00000XPA        | XPI XPAC           | XPA, DNA protein-coding   |                           |
| chr11-97c  | 11.91274 | 0.529593 | 0.68614  | 0.771844 | 0.440207 | 0.981636 | chr19 | 95835166 | 95835397 | + | 0 |    |                       |                   |                            |                     |                    |                           |                           |



|           |          |          |          |          |          |          |       |          |          |   |   |    |                     |        |           |          |           |           |           |           |            |                               |                         |        |
|-----------|----------|----------|----------|----------|----------|----------|-------|----------|----------|---|---|----|---------------------|--------|-----------|----------|-----------|-----------|-----------|-----------|------------|-------------------------------|-------------------------|--------|
| chr4-504  | 8.887545 | -0.60352 | 0.785035 | -0.76878 | 0.442022 | 0.981636 | chr14 | 50433034 | 50441371 | + | 0 | NA | intron (Nintron (N  | -39904 | NR_001367 | 8814     | Hs.280881 | NR_00419  | ENSG00000 | CDKL1     | KKIALRE F  | cyclin d                      | protein-coding          |        |
| chr2-5496 | 8.887545 | -0.60352 | 0.785035 | -0.76878 | 0.442022 | 0.981636 | chr2  | 54969731 | 54974557 | + | 0 | NA | TTS (NM_TTS (NM_1   | 38128  | NR_007008 | 57142    | Hs.63785  | NR_00700  | ENSG00000 | RTN4      | ASY NI22C  | reticular protein-coding      | AS                      |        |
| chr4-1126 | 8.887545 | -0.60352 | 0.785035 | -0.76878 | 0.442022 | 0.981636 | chr4  | 1.13E+08 | 1.13E+08 | + | 0 | NA | intron (NAluSp SIN  | -3577  | NR_146092 | 1.1E+08  | Hs.64297  | NR_14609  | ENSG00000 | MIR302CHC | -          | mir-302/2                     | ncRNA                   |        |
| chr20-504 | 4.916047 | -0.83027 | 1.080571 | -0.76836 | 0.442271 | 0.981636 | chr20 | 5945674  | 5945873  | + | 0 | NA | intron (Nintron (N  | 4760   | NR_015939 | 51605    | Hs.12879  | NR_01593  | ENSG00000 | TRMT6     | CGI-09 GC  | RNA methyl protein-coding     | CGI-09                  |        |
| chr11-305 | 7.118887 | -0.67288 | 0.876008 | -0.76806 | 0.442453 | 0.981636 | chr11 | 3097590  | 3097919  | + | 0 | NA | intron (NLMed LIN   | -40331 | NR_001194 | 833      | Hs.27487  | NR_00175  | ENSG00000 | CARS      | CARS1 CYS  | cysteine ly protein-coding    | CARS1                   |        |
| chr12-248 | 7.118887 | -0.67288 | 0.876008 | -0.76806 | 0.442453 | 0.981636 | chr12 | 24815914 | 24817763 | + | 0 | NA | 3' UTR (N3' UTR (N  | 85384  | NR_001178 | 586      | Hs.43899  | NR_00550  | ENSG00000 | BCAT1     | BCATC BC1  | branched protein-coding       | BCATC                   |        |
| chr15-447 | 7.118887 | -0.67288 | 0.876008 | -0.76806 | 0.442453 | 0.981636 | chr15 | 44539286 | 44541282 | + | 0 | NA | intron (NAluSz SIN  | 3137   | NR_003758 | 8669     | Hs.40405  | NR_00375  | ENSG00000 | E1F3J     | E1F3S1 E   | eukaryot protein-coding       | E1F3S1                  |        |
| chr2-207  | 7.118887 | -0.67288 | 0.876008 | -0.76806 | 0.442453 | 0.981636 | chr2  | 2.07E+08 | 2.07E+08 | + | 0 | NA | intron (Nintron (N  | 23528  | NR_036227 | 1E+08    | NR_03622  | ENSG00000 | MIR2355   | -         | mir-2355   | microRNA                      | ncRNA                   |        |
| chr5-1591 | 7.118887 | -0.67288 | 0.876008 | -0.76806 | 0.442453 | 0.981636 | chr5  | 1.59E+08 | 1.59E+08 | + | 0 | NA | intron (Nintron (N  | 19728  | NR_001199 | 153830   | Hs.34930  | NR_14472  | ENSG00000 | CRNF145   | -          | ring finger protein-coding    | CRNF145                 |        |
| chr6-158  | 7.118887 | -0.67288 | 0.876008 | -0.76806 | 0.442453 | 0.981636 | chr6  | 1.58E+08 | 1.58E+08 | + | 0 | NA | intron (Nintron (N  | 62597  | NR_001178 | 8871     | Hs.43449  | NR_00389  | ENSG00000 | SYNJ2     | INPP5F     | synapto protein-coding        | INPP5F                  |        |
| chr8-479  | 7.118887 | -0.67288 | 0.876008 | -0.76806 | 0.442453 | 0.981636 | chr8  | 47902559 | 47904735 | + | 0 | NA | intron (Nintron (N  | 56489  | NR_001081 | 5591     | Hs.49168  | NR_00690  | ENSG00000 | PRKDC     | DNA-PKC I  | protein-coding                | DNA-PKC                 |        |
| chr8-1198 | 7.118887 | -0.67288 | 0.876008 | -0.76806 | 0.442453 | 0.981636 | chr8  | 1.2E+08  | 1.2E+08  | + | 0 | NA | intron (NTHE1B-int  | 7538   | NR_003184 | 6873     | Hs.12275  | NR_00318  | ENSG00000 | TAF2      | CIF150 M   | TATA-box protein-coding       | CIF150                  |        |
| chr3-123  | 10.11247 | -0.58411 | 0.761561 | -0.767   | 0.443084 | 0.981636 | chr3  | 1.24E+08 | 1.24E+08 | + | 0 | NA | intron (Nintron (N  | -14554 | NR_153032 | 4638     | Hs.47737  | NR_00596  | ENSG00000 | MYLK      | AAR7 KR    | myosin I protein-coding       | AAR7                    |        |
| chr6-734  | 8.343809 | -0.63963 | 0.833988 | -0.76695 | 0.443112 | 0.981636 | chr6  | 73425058 | 73425267 | + | 0 | NA | 3' UTR (N3' UTR (N  | 27135  | NR_138441 | 115004   | Hs.65840  | NR_13844  | ENSG00000 | CGAS      | CAAT7 F150 | cyclic G protein-coding       | CAAT7                   |        |
| chr1-120  | 6.948437 | 0.675349 | 0.880851 | 0.766701 | 0.443259 | 0.981636 | chr1  | 12009475 | 12012038 | + | 0 | NA | intron (NMIRb SINE  | -8742  | NR_021933 | 60672    | Hs.8595   | NR_02193  | ENSG00000 | MIIP      | IIP45      | migrator protein-coding       | IIP45                   |        |
| chr1-286  | 6.948437 | 0.675349 | 0.880851 | 0.766701 | 0.443259 | 0.981636 | chr1  | 28603759 | 28608093 | + | 0 | NA | intron (NAluSq2 SI  | 13431  | NR_001199 | 115273   | Hs.65232  | NR_15230  | ENSG00000 | RAB42     | -          | RAB42                         | protein-coding          | RAB42  |
| chr1-313  | 6.948437 | 0.675349 | 0.880851 | 0.766701 | 0.443259 | 0.981636 | chr1  | 31316662 | 31317245 | + | 0 | NA | intron (Nintron (N  | 19971  | NR_016505 | 51538    | Hs.52409  | NR_01650  | ENSG00000 | ZCCHC17   | HSPC251 F  | zinc finger protein-coding    | HSPC251                 |        |
| chr1-110  | 6.948437 | 0.675349 | 0.880851 | 0.766701 | 0.443259 | 0.981636 | chr1  | 1.1E+08  | 1.1E+08  | + | 0 | NA | exon (NM exon (NM   | 12084  | NR_001201 | 9122     | Hs.35130  | NR_00469  | ENSG00000 | SLC16A4   | MCT4 MCT   | solute carrier protein-coding | MCT4                    |        |
| chr1-217  | 6.948437 | 0.675349 | 0.880851 | 0.766701 | 0.443259 | 0.981636 | chr1  | 2.18E+08 | 2.18E+08 | + | 0 | NA | intron (NAluSq2 SI  | 117951 | NR_001297 | 55105    | Hs.36234  | NR_01804  | ENSG00000 | GPATCH2   | CT110 G    | PAG-patch protein-coding      | GPATCH2                 |        |
| chr1-229  | 6.948437 | 0.675349 | 0.880851 | 0.766701 | 0.443259 | 0.981636 | chr1  | 2.29E+08 | 2.29E+08 | + | 0 | NA | intron (NAluSx SIN  | 24800  | NR_018232 | 55746    | Hs.12457  | NR_01823  | ENSG00000 | CNUP133   | GAMOS8 N   | neucleoporin-coding           | GAMOS8                  |        |
| chr14-754 | 6.948437 | 0.675349 | 0.880851 | 0.766701 | 0.443259 | 0.981636 | chr14 | 75036503 | 75036733 | + | 0 | NA | intron (NAluSx1 SI  | 14849  | NR_014381 | 27030    | Hs.43665  | NR_01438  | ENSG00000 | MLH3      | HNPCC7     | mutL                          | hom protein-coding      | HNPCC7 |
| chr16-234 | 6.948437 | 0.675349 | 0.880851 | 0.766701 | 0.443259 | 0.981636 | chr16 | 23443899 | 23444911 | + | 0 | NA | intron (Nintron (N  | 8784   | NR_153603 | 91949    | Hs.18580  | NR_15360  | ENSG00000 | COG7      | CDG2E      | component protein-coding      | COG7                    |        |
| chr2-690  | 6.948437 | 0.675349 | 0.880851 | 0.766701 | 0.443259 | 0.981636 | chr2  | 69058191 | 69061093 | + | 0 | NA | intron (NTiger1 I   | -4490  | NR_036073 | 1E+08    | NR_03607  | ENSG00000 | MIR3126   | -         | mir-3126   | microRNA                      | ncRNA                   |        |
| chr7-231  | 6.948437 | 0.675349 | 0.880851 | 0.766701 | 0.443259 | 0.981636 | chr7  | 23125379 | 23125939 | + | 0 | NA | intron (Nintron (N  | 18998  | NR_01884  | 55975    | Hs.65481  | NR_01884  | ENSG00000 | KLHL7     | CISS3 KLF  | kelch like protein-coding     | CISS3                   |        |
| chr8-97   | 6.948437 | 0.675349 | 0.880851 | 0.766701 | 0.443259 | 0.981636 | chr8  | 9776824  | 9777885  | + | 0 | NA | 3' UTR (N3' UTR (N  | 35682  | NR_030327 | 693182   | NR_03032  | ENSG00000 | MIR597    | -         | mir-597    | microRNA                      | ncRNA                   |        |
| chr1-841  | 8.846405 | -0.60652 | 0.791133 | -0.76665 | 0.443289 | 0.981636 | chr1  | 8418091  | 8418789  | + | 0 | NA | intron (Nintron (N  | 5392   | NR_001042 | 473      | Hs.46304  | NR_01210  | ENSG00000 | RCERE     | ARG ARP    | arginine protein-coding       | ARG                     |        |
| chr3-470  | 11.06681 | -0.54264 | 0.712517 | -0.76664 | 0.443295 | 0.981636 | chr3  | 47056733 | 47057403 | + | 0 | NA | exon (NM exon (NM   | 45526  | NR_02404  | 1E+08    | NR_02152  | NR_02404  | ENSG00000 | NRADDP    | -          | neurotroph pseudo             | NRADDP                  |        |
| chr5-326  | 7.101322 | -0.6823  | 0.890549 | -0.76616 | 0.443584 | 0.981636 | chr5  | 32600833 | 32601307 | + | 0 | NA | exon (NM exon (NM   | 15513  | NR_006711 | 10923    | Hs.22964  | NR_00671  | ENSG00000 | SUB1      | P15 PC41   | rSUB1 reg protein-coding      | P15                     |        |
| chr19-10  | 7.134603 | -0.67646 | 0.882933 | -0.76615 | 0.443584 | 0.981636 | chr19 | 10321013 | 10321337 | + | 0 | NA | intron (Nintron (N  | -5126  | NR_001031 | 112812   | Hs.65486  | NR_08066  | ENSG00000 | FDX2      | FDX1L ME   | ferredoxin protein-coding     | FDX1L                   |        |
| chr1-8507 | 4.7088   | 0.816842 | 1.066192 | 0.76613  | 0.443599 | 0.981636 | chr1  | 85076114 | 85076888 | + | 0 | NA | intron (NTHE1B LTF  | 126820 | NR_059933 | 126820   | Hs.97933  | NR_14517  | ENSG00000 | WDR63     | DIC3 NYD   | WD repeat protein-coding      | DIC3                    |        |
| chr14-10  | 4.7088   | 0.816842 | 1.066192 | 0.76613  | 0.443599 | 0.981636 | chr14 | 1.05E+08 | 1.05E+08 | + | 0 | NA | intron (Nintron (N  | -15190 | NR_001199 | 647310   | Hs.72949  | NR_00119  | ENSG00000 | TEX22     | -          | testis ex protein-coding      | TEX22                   |        |
| chr15-73  | 4.7088   | 0.816842 | 1.066192 | 0.76613  | 0.443599 | 0.981636 | chr15 | 73250134 | 73251170 | + | 0 | NA | intron (NLMC4 LIN   | -49258 | NR_162148 | 1.13E+08 | NR_16214  | NR_16214  | ENSG00000 | MIR12135  | -          | mir-12135                     | microRNA                | ncRNA  |
| chr17-19  | 4.7088   | 0.816842 | 1.066192 | 0.76613  | 0.443599 | 0.981636 | chr17 | 19799756 | 19801895 | + | 0 | NA | intron (Nintron (N  | -52527 | NR_000691 | 218      | Hs.53168  | NR_00069  | ENSG00000 | ALDH3A1   | ALDH3      | AL                            | aldehyde protein-coding | ALDH3  |
| chr18-231 | 4.7088   | 0.816842 | 1.066192 | 0.76613  | 0.443599 | 0.981636 | chr18 | 23181821 | 23183312 | + | 0 | NA | intron (NMER5B DNA  | 26741  | NR_138375 | 91768    | Hs.11108  | NR_13837  | ENSG00000 | CABLES1   | CABL1 CAE  | Cdk5 and protein-coding       | CABL1                   |        |
| chr18-62  | 4.7088   | 0.816842 | 1.066192 | 0.76613  | 0.443599 | 0.981636 | chr18 | 62300775 | 62301182 | + | 0 | NA | intron (NLC2 LINE   | -24309 | NR_001272 | 8792     | Hs.20404  | NR_00383  | ENSG00000 | TNFRSF11  | CD265 FEC  | TNF receptor protein-coding   | TNFRSF11                |        |
| chr19-19  | 4.7088   | 0.816842 | 1.066192 | 0.76613  | 0.443599 | 0.981636 | chr19 | 19883318 | 19884573 | + | 0 | NA | intron (NAluSp SIN  | -17001 | NR_031218 | 81931    | Hs.30105  | NR_03121  | ENSG00000 | ZNF93     | HPF34 HTF  | zinc finger protein-coding    | HPF34                   |        |
| chr2-238  | 4.7088   | 0.816842 | 1.066192 | 0.76613  | 0.443599 | 0.981636 | chr2  | 2.38E+08 | 2.38E+08 | + | 0 | NA | IntergeniLIMDa LIN  | 42269  | NR_00104  | 51665    | Hs.51678  | NR_01611  | ENSG00000 | CASB1     | ASB-1      | ankyrin I protein-coding      | ASB-1                   |        |
| chr2-52   | 4.7088   | 0.816842 | 1.066192 | 0.76613  | 0.443599 | 0.981636 | chr2  | 50253620 | 50254191 | + | 0 | NA | intron (Nintron (N  | -2640  | NR_032019 | 83933    | Hs.26593  | NR_03201  | ENSG00000 | HDAC10    | HD10       | histone c protein-coding      | HD10                    |        |
| chr14-507 | 7.849071 | -0.67838 | 0.885587 | -0.76602 | 0.443661 | 0.981636 | chr14 | 52769295 | 52769511 | + | 0 | NA | intron (Nintron (N  | 22204  | NR_19806  | 64841    | Hs.47802  | NR_19806  | ENSG00000 | GPNPAT1   | GNA1 GNP   | glucosamin protein-coding     | GNA1                    |        |
| chr10-67  | 8.879687 | -0.60211 | 0.786052 | -0.766   | 0.443679 | 0.981636 | chr10 | 67989771 | 67996986 | + | 0 | NA | intron (NFAM SINE   | 17505  | NR_131184 | 1E+08    | NR_13118  | NR_13118  | ENSG00000 | POU5F1P5  | Oct4-pg5   | POU class pseudo              | POU5F1P5                |        |
| chr10-10  | 8.879687 | -0.60211 | 0.786052 | -0.766   | 0.443679 | 0.981636 | chr10 | 87164091 | 87164523 | + | 0 | NA | intron (NAluJb SIN  | -61141 | NR_001099 | 728118   | Hs.71056  | NR_00109  | ENSG00000 | NTM2A     | FAM22A     | NUT                           | famil protein-coding    | FAM22A |
| chr11-85  | 8.879687 | -0.60211 | 0.786052 | -0.766   | 0.443679 | 0.981636 | chr11 | 65894117 | 65897246 | + | 0 | NA | intron (Nintron (N  | 4707   | NR_00130  | 8061     | Hs.28356  | NR_00543  | ENSG00000 | FOSL1     | FRA FRA1   | FOS like protein-coding       | FOSL1                   |        |
| chr12-69  | 8.879687 | -0.60211 | 0.786052 | -0.766   | 0.443679 | 0.981636 | chr12 | 6939265  | 6940999  | + | 0 | NA | intron (NAluSc SIN  | -3306  | NR_001301 | 113246   | Hs.40591  | NR_13842  | ENSG00000 | C12orf57  | C10 GRCC1  | chromosome protein-coding     | C12orf57                |        |
| chr15-57  | 8.879687 | -0.60211 | 0.786052 | -0.766   | 0.443679 | 0.981636 | chr15 | 57231394 | 57235778 | + | 0 | NA | intron (NAluS6 SI   | 14156  | NR_001306 | 6938     | Hs.51150  | NR_00320  | ENSG00000 | TCF12     | CRS3 HEB   | transcrip protein-coding      | CRS3                    |        |
| chr15-71  | 8.879687 | -0.60211 | 0.786052 | -0.766   | 0.443679 | 0.981636 | chr15 | 71858238 | 71858576 | + | 0 | NA | intron (NLIPIA5 LIN | 47853  | NR_01424  | 10002    | Hs.18735  | NR_01424  | ENSG00000 | NR2E3     | ESCS PNR   | nuclear I protein-coding      | NR2E3                   |        |
| chr2-171  | 8.879687 | -0.60211 | 0.786052 | -0.766   | 0.443679 | 0.981636 | chr2  | 1.72E+08 | 1.72E+08 | + | 0 | NA | intron (Nintron (N  | 3575   | NR_00132  | 1781     | Hs.54675  | NR_00137  | ENSG00000 | DYNC1I2   | DIC74 DNC  | dynein cy protein-coding      | DYNC1I2                 |        |
| chr2-174  | 8.879687 | -0.60211 | 0.786052 | -0.766   | 0.443679 | 0.981636 | chr2  | 1.75E+08 | 1.75E+08 | + | 0 | NA | TTS (NM_TTS (NM_C   | -34896 | NR_001039 | 1134     | Hs.43447  | NR_00007  | ENSG00000 | CHRNA1    | ACHRA AC   | cholinergic protein-coding    | CHRNA1                  |        |
| chr3-425  |          |          |          |          |          |          |       |          |          |   |   |    |                     |        |           |          |           |           |           |           |            |                               |                         |        |



|                    |          |          |          |          |          |       |          |           |   |   |    |                     |         |           |          |                    |                     |                       |                           |                         |
|--------------------|----------|----------|----------|----------|----------|-------|----------|-----------|---|---|----|---------------------|---------|-----------|----------|--------------------|---------------------|-----------------------|---------------------------|-------------------------|
| chr7-1665 6.434359 | -0.7611  | 0.99618  | -0.76402 | 0.444854 | 0.981636 | chr7  | 16634603 | 16635347  | + | 0 | NA | intron (NLIMEc LIN  | 10779   | NM_02031E | 57037    | Hs.15737ENM_02031E | ENSG00000ANKMY2     | ZMYND20               | ankyrin1 protein-coding   |                         |
| chr1-8496 6.956295 | 0.673017 | 0.880938 | 0.763977 | 0.444881 | 0.981636 | chr1  | 8496666  | 8497158   | + | 0 | NA | intron (NLIPA8 LIN  | -1999   | NR_132752 | 1.07E+08 | NR_132752          | SNORD128            | ZLY43                 | small nucsnoRNA           |                         |
| chr1-1457 6.956295 | 0.673017 | 0.880938 | 0.763977 | 0.444881 | 0.981636 | chr1  | 1.46E+08 | 1.46E+08  | + | 0 | NA | intron (NSVA_C Ret  | 44659   | NR_10384E | 1.1126   | Hs.488237NM_00705E | ENSG00000CD160      | BY55 NK1 CD160        | molprotein-coding         |                         |
| chr1-1504 6.956295 | 0.673017 | 0.880938 | 0.763977 | 0.444881 | 0.981636 | chr1  | 1.5E+08  | 1.51E+08  | + | 0 | NA | intron (NALuSx SIN  | 7227    | NR_10693E | 1.02E+08 | NR_10693E          | ENSG00000MIR6878    | hsa-mir-εmicroRNA     | ncRNA                     |                         |
| chr1-1786 6.956295 | 0.673017 | 0.880938 | 0.763977 | 0.444881 | 0.981636 | chr1  | 1.79E+08 | 1.79E+08  | + | 0 | NA | intron (NALuJb SIN  | 56450   | NM_00467E | 9068     | Hs.591474NM_00467E | ENSG00000ANGPTL1    | ANG3 mir-angiopoietin | protein-coding            |                         |
| chr1-213C 6.956295 | 0.673017 | 0.880938 | 0.763977 | 0.444881 | 0.981636 | chr1  | 2.13E+08 | 2.13E+08  | + | 0 | NA | intron (NALuJb SIN  | 29449   | NM_012424 | 26750    | Hs.59141ENM_012424 | ENSG00000CRPS6KC1   | RPK118 RS             | ribosomal protein-coding  |                         |
| chr1-222C 6.956295 | 0.673017 | 0.880938 | 0.763977 | 0.444881 | 0.981636 | chr1  | 2.23E+08 | 2.23E+08  | + | 0 | NA | intron (Nintron (N  | 19831   | NM_022831 | 64853    | Hs.15662ENM_022831 | ENSG00000AIDA       | Clorf80               | axin intcprotein-coding   |                         |
| chr1-225E 6.956295 | 0.673017 | 0.880938 | 0.763977 | 0.444881 | 0.981636 | chr1  | 2.26E+08 | 2.26E+08  | + | 0 | NA | intron (Nintron (N  | 25823   | NM_01469E | 9725     | Hs.119387NM_01469E | ENSG00000TMEM63A    | KIAA0792              | transment protein-coding  |                         |
| chr1-229E 6.956295 | 0.673017 | 0.880938 | 0.763977 | 0.444881 | 0.981636 | chr1  | 2.3E+08  | 2.3E+08   | + | 0 | NA | intron (Nintron (N  | 20049   | NM_01208E | 23456    | Hs.17614           | NM_01208E           | ENSG00000ABC10        | EST20237 ATP              | bindiprotein-coding     |
| chr10-124 6.956295 | 0.673017 | 0.880938 | 0.763977 | 0.444881 | 0.981636 | chr10 | 1.25E+08 | 1.25E+08  | + | 0 | NA | exon (NM exon (NM   | -21985  | NR_12063C | 1.02E+08 | Hs.43744ENR_120630 | FAM53B-AS-          | FAM53B                | arncRNA                   |                         |
| chr10-125 6.956295 | 0.673017 | 0.880938 | 0.763977 | 0.444881 | 0.981636 | chr10 | 1.26E+08 | 1.26E+08  | + | 0 | NA | intron (N (TTTTTC)r | 14998   | NM_01818C | 55760    | Hs.370292NM_01818C | ENSG00000DHX32      | DDX32 DHL             | DEAH-box protein-coding   |                         |
| chr11-64E 6.956295 | 0.673017 | 0.880938 | 0.763977 | 0.444881 | 0.981636 | chr11 | 6454170  | 6455653   | + | 0 | NA | intron (Nintron (N  | -13924  | NM_00061E | 3263     | Hs.42648ENM_00061E | ENSG00000CHPX       | HX                    | hemopexin protein-coding  |                         |
| chr13-19C 6.956295 | 0.673017 | 0.880938 | 0.763977 | 0.444881 | 0.981636 | chr13 | 19649611 | 19651423  | + | 0 | NA | intron (Nintron (N  | 16858   | NM_01752E | 54737    | Hs.269654NM_01752E | ENSG00000MPHOSPH8   | HSPMP8 TWM            | phase protein-coding      |                         |
| chr14-96E 6.956295 | 0.673017 | 0.880938 | 0.763977 | 0.444881 | 0.981636 | chr14 | 96215242 | 96216140  | + | 0 | NA | intron (Nintron (N  | 10893   | NM_00062E | 624      | Hs.654542NM_00062E | ENSG00000BKDKR2     | B2R BK-2 bradykinin   | protein-coding            |                         |
| chr14-101 6.956295 | 0.673017 | 0.880938 | 0.763977 | 0.444881 | 0.981636 | chr14 | 1.02E+08 | 1.02E+08  | + | 0 | NA | intron (Nintron (N  | 3689    | NM_00135E | 5527     | Hs.368264NM_00271E | ENSG00000PPP2R5C    | B56G B56E             | protein protein-coding    |                         |
| chr15-28E 6.956295 | 0.673017 | 0.880938 | 0.763977 | 0.444881 | 0.981636 | chr15 | 28667377 | 28670244  | + | 0 | NA | intron (Nintron (N  | 14368   | NR_03644E | 440248   | Hs.53150ENM_19904E | ENSG00000HERC2P9    | -                     | hect dom pseudo           |                         |
| chr16-29E 6.956295 | 0.673017 | 0.880938 | 0.763977 | 0.444881 | 0.981636 | chr16 | 2932489  | 2935452   | + | 0 | NA | exon (NM exon (NM   | 21991   | NM_00130E | 84256    | Hs.655321NM_02091E | ENSG00000FLYWCH1    | -                     | FLYWCH-typ protein-coding |                         |
| chr17-18C 6.956295 | 0.673017 | 0.880938 | 0.763977 | 0.444881 | 0.981636 | chr17 | 18045199 | 18048198  | + | 0 | NA | intron (NALuS2 SI   | 7290    | NM_02405E | 79018    | Hs.187422NM_02405E | ENSG00000GTD4       | C1orf80               | GID complprotein-coding   |                         |
| chr17-18E 6.956295 | 0.673017 | 0.880938 | 0.763977 | 0.444881 | 0.981636 | chr17 | 18928841 | 18931759  | + | 0 | NA | intron (NALuY SIN   | -20376  | NM_00128E | 125206   | Hs.46241ENM_152351 | ENSG00000SLCSA10    | SGLT-5 SC             | solute cprotein-coding    |                         |
| chr17-427 6.956295 | 0.673017 | 0.880938 | 0.763977 | 0.444881 | 0.981636 | chr17 | 42724608 | 42725320  | + | 0 | NA | intron (NALuSc SIN  | -16913  | NR_10683E | 1.02E+08 | NR_10683E          | ENSG00000MIR6780A   | hsa-mir-εmicroRNA     | ncRNA                     |                         |
| chr17-427 6.956295 | 0.673017 | 0.880938 | 0.763977 | 0.444881 | 0.981636 | chr17 | 42726547 | 42730824  | + | 0 | NA | intron (NALuY SIN   | 16305   | NM_001321 | 2145     | Hs.19466ENM_001991 | ENSG00000EZHI       | KMT6B                 | enhancer protein-coding   |                         |
| chr19-11E 6.956295 | 0.673017 | 0.880938 | 0.763977 | 0.444881 | 0.981636 | chr19 | 11936221 | 11936638  | + | 0 | NA | intron (NLIPA6 LIN  | 11322   | NM_14456E | 90592    | Hs.52848ENM_14456E | ENSG00000ZNF700     | -                     | zinc fingprotein-coding   |                         |
| chr19-36E 6.956295 | 0.673017 | 0.880938 | 0.763977 | 0.444881 | 0.981636 | chr19 | 36560836 | 36562407  | + | 0 | NA | intron (NMLTIA1-ir  | -11449  | NR_11070E | 1.02E+08 | Hs.51537ENR_11070E | ENSG00000ZNF529-AS- | -                     | ZNF529                    | arncRNA                 |
| chr19-46E 6.956295 | 0.673017 | 0.880938 | 0.763977 | 0.444881 | 0.981636 | chr19 | 46705950 | 46710986  | + | 0 | NA | TTS (NR_C TTS (NR_C | 886     | NR_03615E | 1E+08    | NR_03615E          | ENSG00000MIR320E    | mir-320e              | microRNA                  | ncRNA                   |
| chr19-47E 6.956295 | 0.673017 | 0.880938 | 0.763977 | 0.444881 | 0.981636 | chr19 | 47673710 | 47675259  | + | 0 | NA | intron (NMLTIF1 LI  | -38938  | NM_014601 | 30846    | Hs.74496ENM_014601 | ENSG00000EHD2       | PAST2                 | EH domain protein-coding  |                         |
| chr20-35E 6.956295 | 0.673017 | 0.880938 | 0.763977 | 0.444881 | 0.981636 | chr20 | 35927422 | 35933064  | + | 0 | NA | intron (NL2a LINE   | 24383   | NM_03363C | 51282    | Hs.58490ENM_01655E | ENSG00000SCAND1     | RAV1 SDP1             | SCAN dom protein-coding   |                         |
| chr22-37E 6.956295 | 0.673017 | 0.880938 | 0.763977 | 0.444881 | 0.981636 | chr22 | 37399227 | 373943209 | + | 0 | NA | 3' UTR (N3' UTR (N  | 12383   | NM_032561 | 84645    | Hs.51761ENM_032561 | ENSG00000C22orf23   | EVG1 dJ1C             | chromoson protein-coding  |                         |
| chr22-39E 6.956295 | 0.673017 | 0.880938 | 0.763977 | 0.444881 | 0.981636 | chr22 | 39418694 | 39424988  | + | 0 | NA | exon (NM exon (NM   | -10319  | NR_04053E | 1.01E+08 | Hs.72908ENR_040535 | LOC10050E-          | -                     | uncharactncRNA            |                         |
| chr3-316E 6.956295 | 0.673017 | 0.880938 | 0.763977 | 0.444881 | 0.981636 | chr3  | 36833475 | 36833923  | + | 0 | NA | exon (NM exon (NM   | -11199  | NR_147141 | 1.05E+08 | Hs.33386ENR_147141 | ENSG00000LINC0203E- | -                     | long intcncRNA            |                         |
| chr3-114E 6.956295 | 0.673017 | 0.880938 | 0.763977 | 0.444881 | 0.981636 | chr3  | 1.14E+08 | 1.14E+08  | + | 0 | NA | exon (NM exon (NM   | -1010   | NR_03899E | 1E+08    | Hs.122417NR_03899E | ENSG00000ZBTB20-AS- | -                     | ZBTB20                    | arncRNA                 |
| chr3-128E 6.956295 | 0.673017 | 0.880938 | 0.763977 | 0.444881 | 0.981636 | chr3  | 1.29E+08 | 1.29E+08  | + | 0 | NA | intron (Nintron (N  | 31279   | NM_01404E | 28976    | Hs.56748ENM_01404E | ENSG00000ACAD9      | MC1DN20 Nacyl-CoA     | protein-coding            |                         |
| chr3-129E 6.956295 | 0.673017 | 0.880938 | 0.763977 | 0.444881 | 0.981636 | chr3  | 1.73E+08 | 1.73E+08  | + | 0 | NA | intron (NLIME1 LIN  | 42116   | NM_00134E | 1894     | Hs.51829ENM_01809E | ENSG00000ECT2       | ARHGEP31              | epitheli protein-coding   |                         |
| chr5-127E 6.956295 | 0.673017 | 0.880938 | 0.763977 | 0.444881 | 0.981636 | chr5  | 1.3E+08  | 1.3E+08   | + | 0 | NA | intron (Nintron (N  | -82709  | NM_012574 | 1.04E+08 | Hs.62863ENR_12574E | ENSG00000ADAMTS19-  | -                     | ADAMTS19                  | ncRNA                   |
| chr5-134E 6.956295 | 0.673017 | 0.880938 | 0.763977 | 0.444881 | 0.981636 | chr5  | 1.35E+08 | 1.35E+08  | + | 0 | NA | intron (NMIRc SINE  | 16996   | NM_032151 | 84105    | Hs.710014NM_032151 | ENSG00000PCBD2      | DCOH2 DCC             | pterin-4 protein-coding   |                         |
| chr7-166E 6.956295 | 0.673017 | 0.880938 | 0.763977 | 0.444881 | 0.981636 | chr7  | 16623507 | 16624989  | + | 0 | NA | intron (Nintron (N  | 21506   | NM_002031 | 57037    | Hs.15737ENM_02031E | ENSG00000ANKMY2     | ZMYND20               | ankyrin1 protein-coding   |                         |
| chr7-101E 6.956295 | 0.673017 | 0.880938 | 0.763977 | 0.444881 | 0.981636 | chr7  | 1.01E+08 | 1.01E+08  | + | 0 | NA | TTS (NM_C TTS (NM_C | 6544    | NM_00634E | 10467    | Hs.21107ENM_00634E | ENSG00000ZNH1T      | CG11 ZNF              | zinc fingprotein-coding   |                         |
| chr7-138E 6.956295 | 0.673017 | 0.880938 | 0.763977 | 0.444881 | 0.981636 | chr7  | 1.39E+08 | 1.39E+08  | + | 0 | NA | intron (NTigger3a   | 91978   | NM_01590E | 8805     | Hs.490287NM_00385E | ENSG00000TRIM24     | PTC6 RNFE             | tripartit protein-coding  |                         |
| chr7-149E 6.956295 | 0.673017 | 0.880938 | 0.763977 | 0.444881 | 0.981636 | chr7  | 1.49E+08 | 1.49E+08  | + | 0 | NA | intron (Nintron (N  | 17213   | NR_16390E | -        | -                  | -                   | -                     | -                         | -                       |
| chr7-149E 6.956295 | 0.673017 | 0.880938 | 0.763977 | 0.444881 | 0.981636 | chr7  | 1.49E+08 | 1.49E+08  | + | 0 | NA | intron (Nintron (N  | 11362   | NM_015694 | 27153    | Hs.38512           | NM_015694           | ENSG00000ZNF777       | -                         | zinc fingprotein-coding |
| chr9-130C 6.956295 | 0.673017 | 0.880938 | 0.763977 | 0.444881 | 0.981636 | chr9  | 1.3E+08  | 1.3E+08   | + | 0 | NA | intron (NALuSz SIN  | 27386   | NM_02096C | 57720    | Hs.512461NM_02096C | ENSG00000GPR107     | GCDRP LUSG            | protein protein-coding    |                         |
| chr1-2261 9.137226 | 0.595398 | 0.779479 | 0.763841 | 0.444962 | 0.981636 | chr1  | 2.26E+08 | 2.26E+08  | + | 0 | NA | intron (NALuJb SIN  | 13820   | NM_00227E | 64746    | Hs.520207NM_0227E  | ENSG00000ACBD3      | GCP60 GOC             | acyl-CoA protein-coding   |                         |
| chr10-155E 4.26501 | -0.75891 | 0.993771 | -0.76367 | 0.445067 | 0.981636 | chr10 | 45945522 | 45946672  | + | 0 | NA | exon (NM exon (NM   | 23441   | NM_00130C | 120071   | Hs.862543NM_15231E | ENSG00000LARGE2     | GLYTL1B FLARGE        | acyl protein-coding       |                         |
| chr10-22E 5.426501 | -0.75891 | 0.993771 | -0.76367 | 0.445067 | 0.981636 | chr10 | 22572341 | 22573188  | + | 0 | NA | intron (NL2a LINE   | -134835 | NR_03653E | 1E+08    | Hs.7444            | NR_03653E           | LOC10049E-            | -                         | uncharactncRNA          |
| chr10-63E 5.426501 | -0.75891 | 0.993771 | -0.76367 | 0.445067 | 0.981636 | chr10 | 63598262 | 63599631  | + | 0 | NA | intron (NALuJr4 SI  | -77056  | NM_00131E | 221037   | Hs.41341ENM_004241 | ENSG00000JMJD1C     | KDM3C TRI             | jumonji cprotein-coding   |                         |
| chr10-86E 5.426501 | -0.75891 | 0.993771 | -0.76367 | 0.445067 | 0.981636 | chr10 | 86463342 | 86463852  | + | 0 | NA | intron (NTigger3 I  | 58187   | NM_00131E | 23063    | Hs.20309ENM_01504E | ENSG00000WAPL       | F0E KIAAC             | WAPL cohe protein-coding  |                         |
| chr13-39E 5.426501 | -0.75891 | 0.993771 | -0.76367 | 0.445067 | 0.981636 | chr13 | 39027389 | 39028584  | + | 0 | NA | intron (Nintron (N  | 10089   | NM_17071E | 80209    | Hs.31852ENM_02513E | ENSG00000PROSER1    | C1orf323              | proline ε protein-coding  |                         |
| chr15-74E 5.426501 | -0.75891 | 0.993771 | -0.76367 | 0.445067 | 0.981636 | chr15 | 74868475 | 74869044  | + | 0 | NA | intron (NALuS6 SI   | 4608    | NM_00132C | 10066    | Hs.458917NM_00569E | ENSG00000SCAMP2     | -                     | secretory protein-coding  |                         |
| chr17-75E 5.426501 | -0.75891 | 0.993771 | -0.76367 | 0.445067 | 0.981636 | chr17 | 75897656 | 75898454  | + | 0 | NA | TTS (NM_C TTS (NM_C | -1104   | NM_00125E | 20192    | Hs.18982ENM_17354E | ENSG00000TRIM65     | 4732463G1             | tripartit protein-coding  |                         |
| chr19-21E 5.426501 | -0.75891 | 0.993771 | -0.76367 | 0.445067 | 0.981636 | chr19 | 21166373 | 21169219  | + | 0 | NA | intron (Nintron (N  | 25757   | NM_13347E | 170959   | Hs.15625ENM_13347E | ENSG00000ZNF431     | -                     | zinc fingprotein-coding   |                         |
| chr19-21E 5.426501 | -0.75891 | 0.993771 | -0.76367 | 0.445067 | 0.981636 | chr19 | 21736516 | 21737474  | + | 0 | NA | intron (NLIPA10 LI  | -13749  | NR_02452E | 641367   | Hs.68012ENR_02452E | ENSG00000LOC64136E- | -                     | cyclin Y pseudo           |                         |
| chr19-44E 5.426501 | -0.75891 | 0.993771 | -0.76367 | 0.445067 | 0.981636 | chr19 | 44272525 | 442       |   |   |    |                     |         |           |          |                    |                     |                       |                           |                         |

|                    |          |          |          |          |          |       |          |          |        |                     |                  |          |           |                     |                                   |                                      |
|--------------------|----------|----------|----------|----------|----------|-------|----------|----------|--------|---------------------|------------------|----------|-----------|---------------------|-----------------------------------|--------------------------------------|
| chr11-345 5.418643 | -0.7567  | 0.996118 | -0.75965 | 0.447465 | 0.981636 | chr11 | 34974197 | 34974894 | + 0 NA | intron (NLM1B3 LIN  | 32708 NR_039836  | 1.01E+08 | NR_039836 | ENSG000003MIR1343   | -                                 | microRNA ncRNA                       |
| chr11-937 5.418643 | -0.7567  | 0.996118 | -0.75965 | 0.447465 | 0.981636 | chr11 | 93723671 | 93725468 | + 0 NA | intron (NALuS6 SI   | 3055 NR_002566   | 619383   | Hs.660666 | NR_002566           | ENSG000003SCARNA9                 | Z32 mgU2- small CajncRNA             |
| chr11-122 5.418643 | -0.7567  | 0.996118 | -0.75965 | 0.447465 | 0.981636 | chr11 | 1.22E+08 | 1.22E+08 | + 0 NA | intron (NCRI-3_Crc  | -12351 NM_001001 | 414899   | Hs.686105 | NR_001001           | ENSG000003BLID                    | BRCC2 BH3-like protein-coding        |
| chr11-124 5.418643 | -0.7567  | 0.996118 | -0.75965 | 0.447465 | 0.981636 | chr11 | 1.26E+08 | 1.26E+08 | + 0 NA | intron (Nintron (N  | 13941 NM_003139  | 6734     | Hs.368376 | NR_003139           | ENSG000003SRPA                    | DP SRPR SRRP receptor protein-coding |
| chr11-134 5.418643 | -0.7567  | 0.996118 | -0.75965 | 0.447465 | 0.981636 | chr11 | 1.34E+08 | 1.34E+08 | + 0 NA | exon (NM_exon (NM   | 31718 NM_015261  | 23310    | Hs.438555 | NR_015261           | ENSG000003NCAPD3                  | CAP-D3 Cano-SMC protein-coding       |
| chr12-637 5.418643 | -0.7567  | 0.996118 | -0.75965 | 0.447465 | 0.981636 | chr12 | 63782132 | 63783014 | + 0 NA | intron (NMLTID-int  | 2447 NM_001278   | 10329    | Hs.216388 | NR_014254           | ENSG000003CRXYLT1                 | HP10481 ribitol protein-coding       |
| chr12-64 5.418643  | -0.7567  | 0.996118 | -0.75965 | 0.447465 | 0.981636 | chr12 | 64044904 | 64045739 | + 0 NA | intron (Nintron (N  | 176975 NM_001300 | 144577   | Hs.444671 | NR_152440           | ENSG000003C12orf66                | - chromosom protein-coding           |
| chr12-111 5.418643 | -0.7567  | 0.996118 | -0.75965 | 0.447465 | 0.981636 | chr12 | 1.1E+08  | 1.1E+08  | + 0 NA | exon (NM_exon (NM   | 16272 NM_013300  | 29902    | Hs.436618 | NR_013300           | ENSG000003FAM216A                 | C12orf24 family wiprotein-coding     |
| chr15-435 5.418643 | -0.7567  | 0.996118 | -0.75965 | 0.447465 | 0.981636 | chr15 | 43050068 | 43050702 | + 0 NA | intron (NLIPA13 LI  | 55653 NM_174916  | 197131   | Hs.591121 | NR_174916           | ENSG000003CUBR1                   | JBS ubiquitin protein-coding         |
| chr15-587 5.418643 | -0.7567  | 0.996118 | -0.75965 | 0.447465 | 0.981636 | chr15 | 58778791 | 58779479 | + 0 NA | intron (NFLAM_C SI  | 7833 NR_001040   | 54629    | Hs.591122 | NR_019092           | ENSG000003MINDY2                  | FAM63B MINDY lysprotein-coding       |
| chr16-292 5.418643 | -0.7567  | 0.996118 | -0.75965 | 0.447465 | 0.981636 | chr16 | 29214471 | 29215885 | + 0 NA | Intergeni AluY SINE | -87109 NR_002935 | 440352   | Hs.658145 | NR_002939           | SNX29P2                           | RUND2C2 sorting rpsudo               |
| chr16-564 5.418643 | -0.7567  | 0.996118 | -0.75965 | 0.447465 | 0.981636 | chr16 | 56445080 | 56445596 | + 0 NA | intron (NLIMA2 LIN  | 5994 NM_007006   | 11051    | Hs.528834 | NR_007006           | ENSG000003NUDT21                  | CFIM25 CFnudix hycprotein-coding     |
| chr17-632 5.418643 | -0.7567  | 0.996118 | -0.75965 | 0.447465 | 0.981636 | chr17 | 63286992 | 63287681 | + 0 NA | intron (NLIMEc LIN  | 152931 NM_001330 | 1534     | Hs.355264 | NR_001915           | ENSG000003CYB561                  | CYB561A1 cytochrom protein-coding    |
| chr2-8758 5.418643 | -0.7567  | 0.996118 | -0.75965 | 0.447465 | 0.981636 | chr2  | 87580035 | 87590979 | + 0 NA | Intergeni LIME2z LI | -41248 NR_039634 | 1.01E+08 | NR_039634 | ENSG000003MIR4435-1 | mir-4435-microRNA ncRNA           |                                      |
| chr2-1611 5.418643 | -0.7567  | 0.996118 | -0.75965 | 0.447465 | 0.981636 | chr2  | 1.61E+08 | 1.61E+08 | + 0 NA | intron (NLIPA2 LI   | 25350 NM_001199  | 10010    | Hs.132257 | NR_004180           | ENSG000003TANK                    | I-TRAF ITRAF famiprotein-coding      |
| chr2-1975 5.418643 | -0.7567  | 0.996118 | -0.75965 | 0.447465 | 0.981636 | chr2  | 1.98E+08 | 1.98E+08 | + 0 NA | Intergeni LIPA6 LI  | 46415 NM_001204  | 25843    | Hs.633165 | NR_015387           | ENSG000003MOB4                    | 2C40 CGI-MOB famil protein-coding    |
| chr20-365 5.418643 | -0.7567  | 0.996118 | -0.75965 | 0.447465 | 0.981636 | chr20 | 36897129 | 36897840 | + 0 NA | intron (Nintron (N  | 21346 NM_080628  | 140711   | Hs.472633 | NR_080628           | ENSG000003TLD2C                   | C20orf11E TBC/LysM protein-coding    |
| chr3-476 5.418643  | -0.7567  | 0.996118 | -0.75965 | 0.447465 | 0.981636 | chr3  | 47657908 | 47659275 | + 0 NA | intron (NLM1B7 LIN  | 3103 NR_145791   | 1.1E+08  | NR_145791 | SNORD146            | - small nucsnRNA                  |                                      |
| chr3-1112 5.418643 | -0.7567  | 0.996118 | -0.75965 | 0.447465 | 0.981636 | chr3  | 1.11E+08 | 1.11E+08 | + 0 NA | Intergeni Intergeni | 131483 NM_001242 | 25945    | Hs.293917 | NR_015480           | ENSG000003NECTIN3                 | CD113 CDWnectin cprotein-coding      |
| chr3-1247 5.418643 | -0.7567  | 0.996118 | -0.75965 | 0.447465 | 0.981636 | chr3  | 1.25E+08 | 1.25E+08 | + 0 NA | intron (Nintron (N  | 41192 NR_036088  | 1E+08    | NR_036088 | ENSG000003MIR544B   | - microRNA ncRNA                  |                                      |
| chr3-149 5.418643  | -0.7567  | 0.996118 | -0.75965 | 0.447465 | 0.981636 | chr3  | 1.49E+08 | 1.49E+08 | + 0 NA | intron (NALuY SINE  | 41477 NM_004130  | 2992     | Hs.477892 | NR_004130           | ENSG000003GYG1                    | GSD15 GYCglycogeniprotein-coding     |
| chr4-554 5.418643  | -0.7567  | 0.996118 | -0.75965 | 0.447465 | 0.981636 | chr4  | 55434230 | 55435682 | + 0 NA | 3' UTR (N3' UTR (N  | 38999 NM_018475  | 55858    | Hs.479766 | NR_018475           | ENSG000003TMEM165                 | CDG2K FT2 transment protein-coding   |
| chr4-9421 5.418643 | -0.7567  | 0.996118 | -0.75965 | 0.447465 | 0.981636 | chr4  | 94217682 | 94218529 | + 0 NA | intron (Nintron (N  | 10021 NR_045644  | 56916    | Hs.410406 | NR_020155           | ENSG000003SMARCAD1                | ADERM BAS SWI/SNF-1 protein-coding   |
| chr5-5542 5.418643 | -0.7567  | 0.996118 | -0.75965 | 0.447465 | 0.981636 | chr5  | 55428096 | 55429262 | + 0 NA | intron (Nintron (N  | 80247 NR_049866  | 1.01E+08 | NR_049866 | ENSG000003MIR5687   | - microRNA ncRNA                  |                                      |
| chr7-2315 5.418643 | -0.7567  | 0.996118 | -0.75965 | 0.447465 | 0.981636 | chr7  | 23198289 | 23198961 | + 0 NA | intron (Nintron (N  | 16577 NM_001370  | 11097    | Hs.408241 | NR_007342           | ENSG000003NUP42                   | CG1 NLP-1nucleopor protein-coding    |
| chr7-1276 5.418643 | -0.7567  | 0.996118 | -0.75965 | 0.447465 | 0.981636 | chr7  | 1.28E+08 | 1.28E+08 | + 0 NA | intron (Nl2b LINE   | 38129 NM_014390  | 27044    | Hs.122522 | NR_014390           | ENSG000003SND1                    | TDRD11 Tt staphyloc protein-coding   |
| chr7-139 5.418643  | -0.7567  | 0.996118 | -0.75965 | 0.447465 | 0.981636 | chr7  | 1.4E+08  | 1.4E+08  | + 0 NA | 3' UTR (N3' UTR (N  | 41172 NM_001080  | 154790   | Hs.57806  | NR_001080           | ENSG000003CLEC2L                  | - C-type lprotein-coding             |
| chr9-9742 5.418643 | -0.7567  | 0.996118 | -0.75965 | 0.447465 | 0.981636 | chr9  | 97429475 | 97430427 | + 0 NA | intron (NLIME4c LI  | 17855 NM_014290  | 23424    | Hs.193842 | NR_014290           | ENSG000003TDRD7                   | CATC4 PCI tudor don protein-coding   |
| chr9-1047 5.418643 | -0.7567  | 0.996118 | -0.75965 | 0.447465 | 0.981636 | chr9  | 1.05E+08 | 1.05E+08 | + 0 NA | intron (Nintron (N  | -6623 NR_130755  | 55335    | Hs.429294 | NR_018375           | ENSG000003NIPSNAP3E               | FP944 NIP nipsnap l protein-coding   |
| chrX-1005 5.418643 | -0.7567  | 0.996118 | -0.75965 | 0.447465 | 0.981636 | chrX  | 10091159 | 10091944 | + 0 NA | intron (NMLT1C LTF  | -65394 NM_001255 | 1183     | Hs.495694 | NR_001830           | ENSG000003CLCN4                   | CCN10 Cl chloride protein-coding     |
| chr18-242 6.434283 | 0.709595 | 0.934381 | 0.759428 | 0.447597 | 0.981636 | chr18 | 24235686 | 24236562 | + 0 NA | intron (NMLT1D LTF  | 36108 NM_018030  | 114876   | Hs.370722 | NR_018030           | ENSG000003OSBPL1A                 | ORP-1 ORF oxysterol protein-coding   |
| chr19-15 6.434283  | 0.709595 | 0.934381 | 0.759428 | 0.447597 | 0.981636 | chr19 | 1555619  | 1556081  | + 0 NA | exon (NM_exon (NM   | 12208 NM_203304  | 399664   | Hs.436495 | NR_203304           | ENSG000003MEX3D                   | MEX-3D Mex-3 RN protein-coding       |
| chr19-75 6.434283  | 0.709595 | 0.934381 | 0.759428 | 0.447597 | 0.981636 | chr19 | 7562047  | 7562060  | + 0 NA | exon (NM_exon (NM   | 25336 NM_001166  | 10908    | Hs.631863 | NR_006702           | ENSG000003PNPLA                   | BNHS LNMSPatatin l protein-coding    |
| chr22-43 6.434283  | 0.709595 | 0.934381 | 0.759428 | 0.447597 | 0.981636 | chr22 | 43929885 | 43930359 | + 0 NA | intron (Nintron (N  | 6317 NM_025225   | 80339    | Hs.654800 | NR_025225           | ENSG000003PNPLA3                  | ADPN C22cpatatin l protein-coding    |
| chr7-994 6.434283  | 0.709595 | 0.934381 | 0.759428 | 0.447597 | 0.981636 | chr7  | 99456442 | 99456963 | + 0 NA | 3' UTR (N3' UTR (N  | 9460 NM_001198   | 1.01E+08 | NR_001198 | ENSG000003ATP5MF-P1 | ATP5J2-2 ATP5MF-P1 protein-coding |                                      |
| chrX-168 6.434283  | 0.709595 | 0.934381 | 0.759428 | 0.447597 | 0.981636 | chrX  | 16820963 | 16821651 | + 0 NA | intron (NALuS6 SI   | 34841 NM_018360  | 55787    | Hs.555961 | NR_018360           | ENSG000003TXLNG                   | Xorf15 E taxilin g protein-coding    |
| chr11-106 8.920826 | -0.59908 | 0.789037 | -0.75926 | 0.447698 | 0.981636 | chr11 | 10612072 | 10618159 | + 0 NA | intron (NLIPA5 LIN  | 37186 NM_001098  | 10335    | Hs.501895 | NR_130388           | ENSG000003MRV11                   | IRAG JAWI murine rprotein-coding     |
| chr5-143 8.920826  | -0.59908 | 0.789037 | -0.75926 | 0.447698 | 0.981636 | chr5  | 1.43E+08 | 1.43E+08 | + 0 NA | exon (NM_exon (NM   | 3328 NM_001364   | 2908     | Hs.122927 | NR_000175           | ENSG000003NR3C1                   | GCRC GCR1 nuclear l protein-coding   |
| chr19-38 8.920826  | -0.59908 | 0.789037 | -0.75926 | 0.447698 | 0.981636 | chr19 | 38825491 | 38825995 | + 0 NA | intron (NHERV9NC-i  | 6051 NM_001398   | 1891     | Hs.196176 | NR_001398           | ENSG000003ECH1                    | HCCCL enoyl-CoA protein-coding       |
| chr17-548 8.920826 | -0.60511 | 0.797107 | -0.75914 | 0.447769 | 0.981636 | chr17 | 5488272  | 5490040  | + 0 NA | exon (NM_exon (NM   | 2263 NM_024035   | 79003    | Hs.267194 | NR_024035           | ENSG000003MIS12                   | 2510025 FMCIS12 kir protein-coding   |
| chr4-311 8.920826  | -0.69807 | 0.919622 | -0.75909 | 0.447800 | 0.981636 | chr4  | 31135644 | 31136507 | + 0 NA | intron (Nintron (N  | 71718 NM_015382  | 25831    | Hs.708017 | NR_015382           | ENSG000003HECTD1                  | EULIR HECT dom protein-coding        |
| chr19-148 8.920826 | -0.69807 | 0.919622 | -0.75909 | 0.447800 | 0.981636 | chr19 | 14825491 | 14825995 | + 0 NA | intron (Nintron (N  | -6694 NM_001105  | 221545   | Hs.159122 | NR_145025           | ENSG000003C6orf136                | - chromosom protein-coding           |
| chr10-10 8.920826  | -0.66959 | 0.882419 | -0.75871 | 0.448024 | 0.981636 | chr10 | 1E+08    | 1E+08    | + 0 NA | intron (Nintron (N  | 12082 NM_001347  | 10613    | Hs.150087 | NR_006455           | ENSG000003ERLIN1                  | C10orf69 ER lipid protein-coding     |
| chr12-12 8.920826  | -0.66959 | 0.882419 | -0.75871 | 0.448024 | 0.981636 | chr12 | 1.22E+08 | 1.22E+08 | + 0 NA | intron (NALuSx SIN  | -57289 NR_045382 | 1.01E+08 | NR_045382 | CLIP1-AS1           | CLIP1 antncRNA                    |                                      |
| chr19-101 8.920826 | -0.66959 | 0.882419 | -0.75871 | 0.448024 | 0.981636 | chr19 | 10156042 | 10157794 | + 0 NA | intron (Nintron (N  | -37019 NR_003755 | 8666     | Hs.529055 | NR_003755           | ENSG000003EIF3G                   | EIF3-P42 eukaryot protein-coding     |
| chr2-690 8.920826  | -0.66959 | 0.882419 | -0.75871 | 0.448024 | 0.981636 | chr2  | 69066166 | 69066430 | + 0 NA | intron (NALuSp SIN  | -37384 NR_036073 | 1E+08    | NR_036073 | ENSG000003MIR3126   | mif-3126 microRNA ncRNA           |                                      |
| chr4-770 8.920826  | -0.66959 | 0.882419 | -0.75871 | 0.448024 | 0.981636 | chr4  | 77053365 | 77053803 | + 0 NA | intron (Nintron (N  | 21326 NM_001348  | 10983    | Hs.518827 | NR_006835           | ENSG000003CCN1                    | CCN1 CYC cyclin I protein-coding     |
| chr5-168 8.920826  | -0.66959 | 0.882419 | -0.75871 | 0.448024 | 0.981636 | chr5  | 16829266 | 16829554 | + 0 NA | intron (Nintron (N  | 106878 NM_012334 | 4651     | Hs.481722 | NR_012334           | ENSG000003MYO10                   | - myosin X protein-coding            |
| chr9-154 8.920826  | -0.66959 | 0.882419 | -0.75871 | 0.448024 | 0.981636 | chr9  | 15466241 | 15466669 | + 0 NA | non-codirnon-codir  | 43579 NR_161442  | 6619     | Hs.546299 | NR_003084           | ENSG000003SNAPC3                  | PTFbeta S small nuc protein-coding   |
| chr2-301 9.716093  | 0.572945 | 0.755244 | 0.758622 | 0.448079 | 0.981636 | chr2  | 30156661 | 30158340 | + 0 NA | intron (NMamRep60E  | 10493 NM_016061  | 51646    | Hs.515890 | NR_016061           | ENSG000003YPEL5                   | CGI-127 yippee l protein-coding      |
|                    |          |          |          |          |          |       |          |          |        |                     |                  |          |           |                     |                                   |                                      |



|           |          |          |          |          |          |          |       |          |          |   |   |    |                     |                  |                              |                      |                                                           |                                                         |
|-----------|----------|----------|----------|----------|----------|----------|-------|----------|----------|---|---|----|---------------------|------------------|------------------------------|----------------------|-----------------------------------------------------------|---------------------------------------------------------|
| chr22-215 | 6.964152 | 0.670642 | 0.887225 | 0.755888 | 0.449717 | 0.981636 | chr22 | 21973407 | 21975159 | + | 0 | NA | intron (Nintron (N  | 8504 NM_001345   | 8940 Hs. 436401NM_003935     | ENSG000003TOP3B      | TOP3B1                                                    | DNA topoisomerase protein-coding                        |
| chr4-106  | 6.964152 | 0.670642 | 0.887225 | 0.755888 | 0.449717 | 0.981636 | chr4  | 1.06E+08 | 1.06E+08 | + | 0 | NA | intron (NLR12C L1   | -69225 NR_125928 | 1.02E+08 Hs. 631131NR_125928 | ENSG000001LOC101925  | -                                                         | uncharactericRNA                                        |
| chr6-529  | 6.964152 | 0.670642 | 0.887225 | 0.755888 | 0.449717 | 0.981636 | chr6  | 52982787 | 52983873 | + | 0 | NA | intron (Nintron (N  | 11954 NM_001512  | 2941 Hs. 485557NM_001512     | ENSG000003GSTA4      | GSTA4-4 Cglutathione S-transferase gamma 4 protein-coding |                                                         |
| chr7-143  | 6.964152 | 0.670642 | 0.887225 | 0.755888 | 0.449717 | 0.981636 | chr7  | 1435577  | 1438658  | + | 0 | NA | intron (Nintron (N  | 22353 NM_182924  | 79778 Hs. 376617NM_024722    | ENSG000003MICALL2    | JRAB MICACICAL1 lik protein-coding                        |                                                         |
| chr9-133  | 6.964152 | 0.670642 | 0.887225 | 0.755888 | 0.449717 | 0.981636 | chr9  | 1.33E+08 | 1.33E+08 | + | 0 | NA | intron (Nintron (N  | 2821 NR_106937   | 1.02E+08                     | NR_106937            | ENSG000003MIR6877                                         | hsa-mir-6877 microRNA ncRNA                             |
| chr4-714  | 5.359938 | -0.77435 | 1.024736 | -0.75566 | 0.449855 | 0.981636 | chr4  | 71455515 | 71455755 | + | 0 | NA | intron (Nintron (N  | 116582 NM_003755 | 8671 Hs. 5462                | NR_003755            | ENSG000003SLC44A                                          | HNBC1 KNE solute carrier protein-coding                 |
| chr2-372  | 9.667096 | 0.573802 | 0.759489 | 0.755511 | 0.449942 | 0.981636 | chr2  | 37247553 | 37249272 | + | 0 | NA | non-codiron-codir   | 16754 NR_146408  | 55471 Hs. 433466NM_018607    | ENSG000003NDUFAF7    | C2orf56 NADH:ubiquinone oxidoreductase 7 protein-coding   |                                                         |
| chr11-47  | 7.128595 | -0.66216 | 0.876506 | -0.75545 | 0.44998  | 0.981636 | chr11 | 47370327 | 47370783 | + | 0 | NA | intron (Nintron (N  | -35490 NR_120566 | 1.02E+08 Hs. 664956NR_120566 | ENSG000003LOC101925  | -                                                         | uncharactericRNA                                        |
| chr15-38  | 7.128595 | -0.66216 | 0.876506 | -0.75545 | 0.44998  | 0.981636 | chr15 | 38323089 | 38323525 | + | 0 | NA | intron (Nintron (N  | 70471 NM_152594  | 161742 Hs. 525781NM_152594   | ENSG000003SPRED1     | LGSS NFLS sprouty 1 protein-coding                        |                                                         |
| chr17-70  | 7.128595 | -0.66216 | 0.876506 | -0.75545 | 0.44998  | 0.981636 | chr17 | 7003159  | 7003851  | + | 0 | NA | intron (NAluJo SIN  | 7456 NM_000697   | 239 Hs. 654431NM_000697      | ENSG000003ALOX12     | 12-LOX 12arachidonic acid oxidase protein-coding          |                                                         |
| chr2-664  | 7.128595 | -0.66216 | 0.876506 | -0.75545 | 0.44998  | 0.981636 | chr2  | 66466320 | 66466556 | + | 0 | NA | intron (Nintron (N  | -26108 NR_046622 | 1.01E+08 Hs. 734696NR_046622 | ENSG000003MEI51-AS2  | MEI51-AS1 MEI51 antncRNA                                  |                                                         |
| chr2-202  | 7.128595 | -0.66216 | 0.876506 | -0.75545 | 0.44998  | 0.981636 | chr2  | 2.02E+08 | 2.02E+08 | + | 0 | NA | promoter-promoter-  | -345 NR_003031   | 692058                       | NR_003031            | ENSG000003SNORD11                                         | HBII1-95 small nucleolar RNA                            |
| chr4-101  | 7.128595 | -0.66216 | 0.876506 | -0.75545 | 0.44998  | 0.981636 | chr4  | 1.01E+08 | 1.01E+08 | + | 0 | NA | intron (Nintron (N  | 195626 NR_107033 | 1.02E+08                     | NR_107033            | ENSG000003MIR8066                                         | hsa-mir-8066 microRNA ncRNA                             |
| chr4-13   | 7.128595 | -0.66216 | 0.876506 | -0.75545 | 0.44998  | 0.981636 | chr4  | 1.39E+08 | 1.39E+08 | + | 0 | NA | intron (Nintron (N  | -57088 NM_001184 | 4717 Hs. 84549               | NR_002494            | ENSG000003NDUFC1                                          | KFYI NADH:ubiquinone oxidoreductase 1 protein-coding    |
| chr7-139  | 7.128595 | -0.66216 | 0.876506 | -0.75545 | 0.44998  | 0.981636 | chr7  | 1.39E+08 | 1.39E+08 | + | 0 | NA | intron (Nintron (N  | 1930 NM_080660   | 92092 Hs. 512833NM_080660    | ENSG000003ZC3HAV1L   | C7orf39 zinc finger protein-coding                        |                                                         |
| chr1-243  | 6.915155 | 0.672046 | 0.890172 | 0.754962 | 0.450271 | 0.981636 | chr1  | 2.44E+08 | 2.44E+08 | + | 0 | NA | intron (Nintron (N  | 165255 NR_039824 | 1.01E+08                     | NR_039824            | ENSG000003MIR4677                                         | mir-4677 microRNA ncRNA                                 |
| chr10-10  | 6.915155 | 0.672046 | 0.890172 | 0.754962 | 0.450271 | 0.981636 | chr10 | 1.02E+08 | 1.02E+08 | + | 0 | NA | intron (Nintron (N  | 47066 NM_024541  | 79591 Hs. 16004              | NR_024541            | ENSG000003ARMH3                                           | C10orf76 armadillo protein-coding                       |
| chr14-35  | 6.915155 | 0.672046 | 0.890172 | 0.754962 | 0.450271 | 0.981636 | chr14 | 35611650 | 35612695 | + | 0 | NA | intron (NAluJo SIN  | 78008 NM_032594  | 84684 Hs. 62813              | NR_032594            | ENSG000003INSM2                                           | IA-6 IAG INSM trar protein-coding                       |
| chr19-57  | 6.915155 | 0.672046 | 0.890172 | 0.754962 | 0.450271 | 0.981636 | chr19 | 57883074 | 57883667 | + | 0 | NA | intron (NAluYe6 S1  | 5667 NM_001144   | 730051 Hs. 634142NM_001144   | ENSG000003ZNF814     | -                                                         | zinc finger protein-coding                              |
| chr21-37  | 6.915155 | 0.672046 | 0.890172 | 0.754962 | 0.450271 | 0.981636 | chr21 | 37182858 | 37184292 | + | 0 | NA | intron (NMLT1H LTF  | 10349 NR_046651  | 1.01E+08 Hs. 570411NR_046651 | ENSG000003TTC3-AS1   | -                                                         | TTC3 antncRNA                                           |
| chr3-129  | 6.915155 | 0.672046 | 0.890172 | 0.754962 | 0.450271 | 0.981636 | chr3  | 12922033 | 12922232 | + | 0 | NA | exon (NM exon (NM   | -36921 NR_136188 | 1.05E+08 Hs. 561179NR_136188 | ENSG000003LINC02022  | -                                                         | long intncRNA                                           |
| chr3-196  | 6.915155 | 0.672046 | 0.890172 | 0.754962 | 0.450271 | 0.981636 | chr3  | 1.97E+08 | 1.97E+08 | + | 0 | NA | intron (N(TG)n Sin  | -63402 NM_001308 | 205564 Hs. 240777NM_152699   | ENSG000003SEN5       | -                                                         | SUMO spec protein-coding                                |
| chr5-138  | 6.915155 | 0.672046 | 0.890172 | 0.754962 | 0.450271 | 0.981636 | chr5  | 1.38E+08 | 1.38E+08 | + | 0 | NA | intron (NHUERS-P3-  | -31223 NR_073445 | 51308 Hs. 416099NM_016606    | ENSG000003REEP2      | C5orf19 Sreceptor protein-coding                          |                                                         |
| chr8-287  | 6.915155 | 0.672046 | 0.890172 | 0.754962 | 0.450271 | 0.981636 | chr8  | 28737581 | 28738052 | + | 0 | NA | intron (Nintron (N  | 36315 NR_073469  | 2137 Hs. 491354NM_001440     | ENSG000003EXTL3      | BOTV EXTL3 exostosin protein-coding                       |                                                         |
| chr3-102  | 4.186788 | 0.891943 | 1.181489 | 0.754931 | 0.45029  | 0.981636 | chr3  | 10286207 | 10286797 | + | 0 | NA | TTS (NR_C TTS (NR_C | 2083 NR_026825   | 84657 Hs. 302131NM_001035    | ENSG000003LINC00852  | C3orf42 C long intncRNA                                   |                                                         |
| chr19-43  | 4.675518 | 0.812244 | 1.075926 | 0.754925 | 0.450294 | 0.981636 | chr19 | 43477982 | 43479039 | + | 0 | NA | intron (NMR1b SINE  | -12902 NM_014400 | 227076 Hs. 631594NM_014400   | ENSG000003LYPD3      | C4.4A LY6/PLAUF protein-coding                            |                                                         |
| chr9-357  | 4.675518 | 0.812244 | 1.075926 | 0.754925 | 0.450294 | 0.981636 | chr9  | 35754474 | 35755231 | + | 0 | NA | promoter-promoter-  | -576 NM_001044   | 692094 Hs. 571601NM_001044   | ENSG000003MSPM       | PSPM                                                      | microsemin protein-coding                               |
| chr1-116  | 6.930871 | 0.667371 | 0.884125 | 0.754839 | 0.450346 | 0.981636 | chr1  | 11659105 | 11661095 | + | 0 | NA | intron (NMER3 DNA   | -4100 NM_018438  | 26270 Hs. 464415NM_018438    | ENSG000003FBX06      | FBG2 FBX2 F-box protein-coding                            |                                                         |
| chr1-333  | 6.930871 | 0.667371 | 0.884125 | 0.754839 | 0.450346 | 0.981636 | chr1  | 33354534 | 33355204 | + | 0 | NA | exon (NM exon (NM   | 4517 NR_125978   | 1.02E+08 Hs. 568627NR_125978 | ENSG000003LOC101925  | -                                                         | uncharactericRNA                                        |
| chr1-439  | 6.930871 | 0.667371 | 0.884125 | 0.754839 | 0.450346 | 0.981636 | chr1  | 43960186 | 43960990 | + | 0 | NA | intron (Nintron (N  | -9422 NM_001315  | 1802 Hs. 632369NM_001384     | ENSG000003DPH2       | DPH2L2                                                    | diphthamide protein-coding                              |
| chr1-157  | 6.930871 | 0.667371 | 0.884125 | 0.754839 | 0.450346 | 0.981636 | chr1  | 1.56E+08 | 1.56E+08 | + | 0 | NA | intron (Nintron (N  | -7614 NR_132767  | 1.07E+08                     | NR_132767            | SCARNA26E                                                 | small Cajal box RNA                                     |
| chr1-164  | 6.930871 | 0.667371 | 0.884125 | 0.754839 | 0.450346 | 0.981636 | chr1  | 1.65E+08 | 1.65E+08 | + | 0 | NA | intron (Nintron (N  | -25533 NR_038072 | 1.01E+08 Hs. 661035NR_038072 | ENSG000003LOC100505E | -                                                         | uncharactericRNA                                        |
| chr1-225  | 6.930871 | 0.667371 | 0.884125 | 0.754839 | 0.450346 | 0.981636 | chr1  | 2.26E+08 | 2.26E+08 | + | 0 | NA | exon (NM exon (NM   | 21228 NM_014698  | 9725 Hs. 119387NM_014698     | ENSG000003TMEM63A    | KIAA0792 transmembrane protein-coding                     |                                                         |
| chr15-32  | 6.930871 | 0.667371 | 0.884125 | 0.754839 | 0.450346 | 0.981636 | chr15 | 32798722 | 32798921 | + | 0 | NA | exon (NM exon (NM   | -79956 NR_109767 | 1E+08 Hs. 610545NR_109767    | ENSG000003LOC100131  | -                                                         | uncharactericRNA                                        |
| chr16-22  | 6.930871 | 0.667371 | 0.884125 | 0.754839 | 0.450346 | 0.981636 | chr16 | 22260128 | 22261555 | + | 0 | NA | intron (Nintron (N  | -36534 NM_001258 | 55718 Hs. 460298NM_018115    | ENSG000003POLR3E     | RPC5 SIN RNA polymerase protein-coding                    |                                                         |
| chr16-85  | 6.930871 | 0.667371 | 0.884125 | 0.754839 | 0.450346 | 0.981636 | chr16 | 85778163 | 85778637 | + | 0 | NA | TTS (NM_C TTS (NM_C | -14015 NR_001195 | 1.02E+08 Hs. 662217NR_135195 | ENSG000003LOC101925  | -                                                         | uncharactericRNA                                        |
| chr17-50  | 6.930871 | 0.667371 | 0.884125 | 0.754839 | 0.450346 | 0.981636 | chr17 | 50105536 | 50106206 | + | 0 | NA | intron (Nintron (N  | 10176 NM_001195  | 5164 Hs. 256667NM_002611     | ENSG000003CPDK2      | PDHK2 PK pyruvate dehydrogenase kinase 2 protein-coding   |                                                         |
| chr19-15  | 6.930871 | 0.667371 | 0.884125 | 0.754839 | 0.450346 | 0.981636 | chr19 | 1505654  | 1506219  | + | 0 | NA | 3' UTR (N3' UTR (N  | 7083 NM_001367   | 339366 Hs. 371674NM_213604   | ENSG000003ADAMTSL5   | THSD6                                                     | ADAMTSL5 protein-coding                                 |
| chr2-685  | 6.930871 | 0.667371 | 0.884125 | 0.754839 | 0.450346 | 0.981636 | chr2  | 68508823 | 68509216 | + | 0 | NA | intron (N(LIP45 LIN | 41434 NM_173545  | 200558 Hs. 173545            | NR_173545            | ENSG000003APL                                             | APLF C2orf42 apoptosis-inducing factor 1 protein-coding |
| chr2-121  | 6.930871 | 0.667371 | 0.884125 | 0.754839 | 0.450346 | 0.981636 | chr2  | 1.21E+08 | 1.21E+08 | + | 0 | NA | intron (Nintron (N  | -86447 NR_023343 | 1E+08 Hs. 689635NR_023343    | ENSG000003RNU4ATAC   | MOPD1 RFWRNA, U4atsnRNA                                   |                                                         |
| chr20-34  | 6.930871 | 0.667371 | 0.884125 | 0.754839 | 0.450346 | 0.981636 | chr20 | 34292017 | 34292756 | + | 0 | NA | exon (NM exon (NM   | 10604 NM_001322  | 191 Hs. 388004NM_000687      | ENSG000003AHCY       | SAHH adof adenosyl protein-coding                         |                                                         |
| chr20-41  | 6.930871 | 0.667371 | 0.884125 | 0.754839 | 0.450346 | 0.981636 | chr20 | 41443157 | 41444133 | + | 0 | NA | intron (Nintron (N  | -76827 NM_052846 | 90187 Hs. 726525NM_052846    | ENSG000003EMILIN3    | C2orf13 elastin protein-coding                            |                                                         |
| chr22-37  | 6.930871 | 0.667371 | 0.884125 | 0.754839 | 0.450346 | 0.981636 | chr22 | 37373275 | 37373640 | + | 0 | NA | exon (NM exon (NM   | -18618 NR_110515 | 1.01E+08 Hs. 220555NR_110515 | ENSG000003LOC100505E | -                                                         | uncharactericRNA                                        |
| chr3-49   | 6.930871 | 0.667371 | 0.884125 | 0.754839 | 0.450346 | 0.981636 | chr3  | 49680644 | 49682256 | + | 0 | NA | intron (Nintron (N  | 7099 NM_001640   | 327 Hs. 517966NM_001640      | ENSG000003APEH       | AARE ACPF acylaminic protein-coding                       |                                                         |
| chr4-168  | 6.930871 | 0.667371 | 0.884125 | 0.754839 | 0.450346 | 0.981636 | chr4  | 1.69E+08 | 1.69E+08 | + | 0 | NA | Intergeni(L2b LINE  | 23701 NM_032783  | 84869 Hs. 659311NM_032783    | ENSG000003CBR4       | SDR45C1 dibenzoyl protein-coding                          |                                                         |
| chr5-13   | 6.930871 | 0.667371 | 0.884125 | 0.754839 | 0.450346 | 0.981636 | chr5  | 13863141 | 13866308 | + | 0 | NA | intron (Nintron (N  | 79756 NM_001386  | 1767 Hs. 212368NM_001386     | ENSG000003DNAH5      | C1LD3 DN <sup>2</sup> dynein alpha protein-coding         |                                                         |
| chr6-11   | 6.930871 | 0.667371 | 0.884125 | 0.754839 | 0.450346 | 0.981636 | chr6  | 1.12E+08 | 1.12E+08 | + | 0 | NA | intron (Nintron (N  | 70787 NM_001033  | 619208 Hs. 591340NM_001033   | ENSG000003FAM229B    | C6orf225 family wiprotein-coding                          |                                                         |
| chr7-14   | 6.930871 | 0.667371 | 0.884125 | 0.754839 | 0.450346 | 0.981636 | chr7  | 1.4E+08  | 1.4E+08  | + | 0 | NA | non-codiron-codir   | 47078 NM_001363  | 84255 Hs. 446021NM_032295    | ENSG000003SLC37A3    | -                                                         | solute carrier protein-coding                           |
| chr7-149  | 6.930871 | 0.667371 | 0.884125 | 0.754839 | 0.450346 | 0.981636 | chr7  | 1.5E+08  | 1.5E+08  | + | 0 | NA | intron (Nintron (N  | -52861 NR_152557 | 155061 Hs. 24643             | NR_152557            | ENSG000003ZNF746                                          | PARIS zinc finger protein-coding                        |
| chr8-47   | 6.930871 | 0.667371 | 0.884125 | 0.754839 | 0.450346 | 0.981636 | chr8  | 47280500 | 47280800 | + | 0 | NA | intron (NAluSx SIN  | 19712 NM_001080  | 23514 Hs. 381055NM_001080    | ENSG000003SPIDR      | KIAA0146 scaffold protein-coding                          |                                                         |
| chr9-33   | 6.930871 | 0.667371 | 0.884125 | 0.754839 | 0.450346 | 0.981636 | chr9  | 33133091 | 33133200 | + | 0 | NA | intron (Nintron (N  | 24768 NR_162131  | 1.13E+08                     | NR_162131            | MIR12117                                                  | microRNA ncRNA                                          |
| chrX-40   | 6.930871 | 0.667371 | 0.884125 | 0.754839 | 0.450346 | 0.981636 | chrX  | 40631171 | 40632829 | + | 0 | NA | intron (NAluS6 S1   | 8019 NM_001195</ |                              |                      |                                                           |                                                         |



|                    |          |          |          |          |          |       |          |          |   |   |    |                      |                   |                               |                     |                     |                           |
|--------------------|----------|----------|----------|----------|----------|-------|----------|----------|---|---|----|----------------------|-------------------|-------------------------------|---------------------|---------------------|---------------------------|
| chr6-1175 5.410785 | -0.75444 | 1.003388 | -0.75189 | 0.452117 | 0.981636 | chr6  | 1.18E+08 | 1.18E+08 | + | 0 | NA | intron (Nintron (N   | 57218 NM_001017   | 57120 Hs. 191535NM_020399     | ENSG00000G0PC       | CAL FIG C golgi ass | protein-coding            |
| chr6-1334 5.410785 | -0.75444 | 1.003388 | -0.75189 | 0.452117 | 0.981636 | chr6  | 1.33E+08 | 1.33E+08 | + | 0 | NA | intron (Nintron (N   | 233718 NM_001301  | 2070 Hs. 596688NM_004100      | ENSG00000EY4A       | CMD1J DFN EYA       | transprotein-coding       |
| chr8-7865 5.410785 | -0.75444 | 1.003388 | -0.75189 | 0.452117 | 0.981636 | chr8  | 78681779 | 78683490 | + | 0 | NA | intron (NTHE1B LTF   | 16545 NR_156423   | 51101 Hs. 271878NM_016010     | ENSG00000CZ2HC1A    | C8orf70 C zinc fing | protein-coding            |
| chr8-1255 5.410785 | -0.75444 | 1.003388 | -0.75189 | 0.452117 | 0.981636 | chr8  | 1.25E+08 | 1.25E+08 | + | 0 | NA | intron (Nintron (N   | 33236 NM_003125   | 6713 Hs. 71465 NM_003125      | ENSG00000SQLE       | -                   | squalene protein-coding   |
| chr9-8597 5.410785 | -0.75444 | 1.003388 | -0.75189 | 0.452117 | 0.981636 | chr9  | 85976288 | 85976645 | + | 0 | NA | intron (Nintron (N   | 34937 NM_001321   | 60560 Hs. 436098NM_021925     | ENSG00000NAA35      | EGAP MAK1N alpha-   | protein-coding            |
| chr9-1225 5.410785 | -0.75444 | 1.003388 | -0.75189 | 0.452117 | 0.981636 | chr9  | 1.23E+08 | 1.23E+08 | + | 0 | NA | IntergeniL2 LINE I   | -2753 NM_012197   | 23637 Hs. 271341NM_012197     | ENSG00000CRABGAP1   | GAPCENA TRAB        | GTPas protein-coding      |
| chr6-1006 9.127518 | 0.587397 | 0.78148  | 0.751647 | 0.452263 | 0.981636 | chr6  | 1.01E+08 | 1.01E+08 | + | 0 | NA | intron (NMLTL LTF    | -181128 NM_005066 | 6492 Hs. 520293NM_005066      | ENSG00000S1M1       | bHLHe14 SIM         | bHLH protein-coding       |
| chr14-102 8.664212 | 0.616306 | 0.819952 | 0.751637 | 0.45227  | 0.981636 | chr14 | 1.02E+08 | 1.02E+08 | + | 0 | NA | intron (NAluJo SIN   | 14297 NM_014844   | 9895 Hs. 195667NM_014844      | ENSG00000TECPR2     | KIAA0329 t          | ectonin protein-coding    |
| chr19-581 12.39962 | 0.507668 | 0.675578 | 0.751457 | 0.452377 | 0.981636 | chr19 | 58127035 | 58143891 | + | 0 | NA | intron (NAluSq2 SI   | 15326 NM_024620   | 79673 Hs. 458377NM_024620     | ENSG00000ZNF329     | -                   | zinc fing protein-coding  |
| chr16-884 6.467564 | 0.712873 | 0.948879 | 0.751279 | 0.452485 | 0.981636 | chr16 | 88069705 | 88070107 | + | 0 | NA | intron (NTigger2 I   | 31079 NR_12031C   | 400553 Hs. 592071NR_12031C    | ENSG00000LOC400553  | -                   | uncharactcrRNA            |
| chr18-124 6.467564 | 0.712873 | 0.948879 | 0.751279 | 0.452485 | 0.981636 | chr18 | 12432315 | 12433324 | + | 0 | NA | promoter-promoter-   | 45 NR_136514      | 1.05E+08 Hs. 515283NR_136514  | LOC105371           | -                   | uncharactcrRNA            |
| chr3-1971 6.467564 | 0.712873 | 0.948879 | 0.751279 | 0.452485 | 0.981636 | chr3  | 1.97E+08 | 1.97E+08 | + | 0 | NA | intron (NLM4c LIN    | 28701 NM_001366   | 1739 Hs. 292545NM_004087      | ENSG00000CDLGI      | DLGH1 SAF           | discs lar protein-coding  |
| chr3-1805 8.897253 | -0.59479 | 0.792131 | -0.75088 | 0.452727 | 0.981636 | chr3  | 1.81E+08 | 1.81E+08 | + | 0 | NA | intron (Nintron (N   | 20829 NM_00119C   | 131118 Hs. 230601NM_145261    | ENSG00000DNAJ19     | PAM18 TIM           | DnaJ heat protein-coding  |
| chr4-744 8.897253  | -0.59479 | 0.792131 | -0.75088 | 0.452727 | 0.981636 | chr4  | 74475    | 744863   | + | 0 | NA | intron (NCpG         | 37129 NR_036511   | 1E+08 Hs. 731755NR_036511     | ENSG00000LOC100129  | -                   | uncharactcrRNA            |
| chr5-6617 8.897253 | -0.59479 | 0.792131 | -0.75088 | 0.452727 | 0.981636 | chr5  | 6617510  | 6617974  | + | 0 | NA | intron (Nintron (N   | 15302 NR_037947   | 54888 Hs. 481522NM_017755     | ENSG00000NSUN2      | MISU MRT            | E NOP2/Sun protein-coding |
| chr11-115 6.692562 | -0.69597 | 0.926906 | -0.75086 | 0.452739 | 0.981636 | chr11 | 11929971 | 11930729 | + | 0 | NA | intron (NMER58A DN   | 78289 NM_00101E   | 27122 Hs. 292155NM_013255     | ENSG00000DKK3       | REIC RIG            | dickkopf protein-coding   |
| chr6-152 6.692562  | -0.69597 | 0.926906 | -0.75086 | 0.452739 | 0.981636 | chr6  | 1.52E+08 | 1.52E+08 | + | 0 | NA | exon (NM exon (NM    | -25654 NR_120501  | 1.01E+08 Hs. 571203NR_120501  | SYNE1-AS1           | SYNE1               | antncRNA                  |
| chr11-125 9.723951 | 0.571276 | 0.760837 | 0.750853 | 0.452741 | 0.981636 | chr11 | 1.3E+08  | 1.3E+08  | + | 0 | NA | exon (NM exon (NM    | 23282 NM_00616E   | 4798 Hs. 530535NM_00616E      | ENSG00000FRFRK      | INO80G              | nuclear f protein-coding  |
| chr2-9255 9.723951 | 0.571276 | 0.760837 | 0.750853 | 0.452741 | 0.981636 | chr2  | 92533517 | 92534424 | + | 0 | NA | IntergeniALR Alpha   | 592837 NR_027714  | 440888 Hs. 730235NM_001032412 | ACTR3BP2            | FKSG73              | ACTR3B ps                 |
| chr9-1296 9.723951 | 0.571276 | 0.760837 | 0.750853 | 0.452741 | 0.981636 | chr9  | 1.3E+08  | 1.3E+08  | + | 0 | NA | intron (NMER5A1 DN   | 5769 NM_000113    | 1861 Hs. 534312NM_000113      | ENSG00000TORIA      | DQ2 DYT1            | torsin f protein-coding   |
| chr1-2008 12.35848 | 0.506423 | 0.675257 | 0.75074  | 0.452809 | 0.981636 | chr1  | 2.01E+08 | 2.01E+08 | + | 0 | NA | exon (NM exon (NM    | -23758 NM_00529E  | 2841 Hs. 534312NM_00529E      | ENSG00000GPR25      | -                   | G protein protein-coding  |
| chr1-2265 9.657388 | 0.56627  | 0.754349 | 0.750673 | 0.452849 | 0.981636 | chr1  | 2.26E+08 | 2.26E+08 | + | 0 | NA | intron (NMER33 DNA   | 32350 NM_00161E   | 142 Hs. 177766NM_00161E       | ENSG00000PARP1      | ADPRT ADF           | poly (ADP- protein-coding |
| chr15-55 5.459782  | -0.75139 | 1.001004 | -0.75064 | 0.452872 | 0.981636 | chr15 | 55949751 | 55950759 | + | 0 | NA | intron (Nintron (N   | -33124 NM_001284  | 4734 Hs. 1565 NM_006154       | ENSG00000CNEDD4     | NEDD4-1 FNEDD4      | E3 protein-coding         |
| chr3-1324 5.459782 | -0.75139 | 1.001004 | -0.75064 | 0.452872 | 0.981636 | chr3  | 1.32E+08 | 1.32E+08 | + | 0 | NA | intron (Nintron (N   | 70280 NM_00132E   | 23317 Hs. 12707 NM_015268     | ENSG00000DNAJ13     | PARK21 RM           | DnaJ heat protein-coding  |
| chr12-297 9.349001 | -0.577   | 0.768815 | -0.7505  | 0.452952 | 0.981636 | chr12 | 29704054 | 29705174 | + | 0 | NA | intron (N L3 LINE C  | 79328 NM_001367   | 83857 Hs. 401954NM_031920     | ENSG00000TMTCI      | ARG99 OLF           | transmemt protein-coding  |
| chr10-924 8.581933 | 0.614667 | 0.819204 | 0.750322 | 0.453061 | 0.981636 | chr10 | 92463455 | 92463797 | + | 0 | NA | intron (Nintron (N   | 34140 NM_001322   | 3416 Hs. 500545NM_004965      | ENSG00000IDE        | INSULYSIN           | insulin c protein-coding  |
| chr1-4101 5.451925 | -0.74922 | 0.998575 | -0.75029 | 0.453081 | 0.981636 | chr1  | 41016603 | 41017224 | + | 0 | NA | non-codiron-codir    | 2323 NR_03786E    | 1.01E+08 Hs. 660055NR_03786E  | ENSG00000SLFNL1-AS- | SLFNL1              | arncRNA                   |
| chr13-115 5.451925 | -0.74922 | 0.998575 | -0.75029 | 0.453081 | 0.981636 | chr13 | 1.14E+08 | 1.14E+08 | + | 0 | NA | intron (Nintron (N   | 15015 NM_007111   | 7027 Hs. 79353 NM_007111      | ENSG00000TFDP1      | DILC DP1 transcrip  | protein-coding            |
| chr2-161 5.451925  | -0.74922 | 0.998575 | -0.75029 | 0.453081 | 0.981636 | chr2  | 1.61E+08 | 1.61E+08 | + | 0 | NA | intron (N L2c LINE I | -15478 NR_110163  | 1.01E+08 Hs. 660925NR_110163  | ENSG00000LINC0180E- | -                   | long intncRNA             |
| chr20-455 5.451925 | -0.74922 | 0.998575 | -0.75029 | 0.453081 | 0.981636 | chr20 | 45368354 | 45368770 | + | 0 | NA | 3' UTR (N3' UTR (N   | 5393 NR_00318E    | 677557 Hs. 730645NR_00318E    | ENSG00000SYS1-DBN1  | C20orf166           | SYS1-DBN1                 |
| chr22-462 5.451925 | -0.74922 | 0.998575 | -0.75029 | 0.453081 | 0.981636 | chr22 | 46208347 | 46209214 | + | 0 | NA | intron (N LIMA7 LIN  | 41513 NM_207327   | 150383 Hs. 103111NM_207327    | ENSG00000CDPF1      | C22orf40            | cysteine protein-coding   |
| chr5-554 5.451925  | -0.74922 | 0.998575 | -0.75029 | 0.453081 | 0.981636 | chr5  | 55405503 | 55406085 | + | 0 | NA | intron (Nintron (N   | 97805 NM_01536C   | 23517 Hs. 274531NM_01536C     | ENSG00000MTRFX      | Dob1 KIA            | Mtr4 exos protein-coding  |
| chr6-8317 5.451925 | -0.74922 | 0.998575 | -0.75029 | 0.453081 | 0.981636 | chr6  | 83179880 | 83176814 | + | 0 | NA | intron (NMER58A DN   | 16868 NM_00119E   | 5238 Hs. 661665NM_015595      | ENSG00000PGM3       | AGM1 LMD2           | phosphog protein-coding   |
| chr8-3105 5.451925 | -0.74922 | 0.998575 | -0.75029 | 0.453081 | 0.981636 | chr8  | 31090150 | 31091150 | + | 0 | NA | intron (Nintron (N   | -57294 NM_00101E  | 29942 Hs. 373778NM_013357     | ENSG00000PURG       | PURG-A PL           | purine r protein-coding   |
| chr5-4957 18.36311 | 0.432949 | 0.577065 | 0.75026  | 0.453098 | 0.981636 | chr5  | 49573966 | 49579432 | + | 0 | NA | IntergeniALR Alpha   | 866839 NM_19844E  | 133418 Hs. 561411NM_19844E    | ENSG00000EMB        | GP70                | emigin protein-coding     |
| chr16-295 11.14308 | -0.53228 | 0.709936 | -0.74975 | 0.453403 | 0.981636 | chr16 | 29521019 | 29521242 | + | 0 | NA | IntergeniLTR7B LTF   | -12526 NM_00135E  | 440353 NM_001355400           | NPIPB12             | -                   | nuclein protein-coding    |
| chr6-158 7.095314  | -0.66784 | 0.890785 | -0.74972 | 0.453425 | 0.981636 | chr6  | 1.59E+08 | 1.59E+08 | + | 0 | NA | 3' UTR (N3' UTR (N   | 11246 NM_001291   | 6993 Hs. 445995NM_006515      | ENSG00000DYNLT1     | CW-1 TCTF           | dynein l protein-coding   |
| chr11-87 7.478306  | 0.641414 | 0.855586 | 0.749678 | 0.453449 | 0.981636 | chr11 | 87043179 | 87043645 | + | 0 | NA | intron (Nintron (N   | 5478 NM_00116E    | 65084 Hs. 188591NM_02291E     | ENSG00000KMT135     | PMP52               | transmemt protein-coding  |
| chr20-181 7.478306 | 0.641414 | 0.855586 | 0.749678 | 0.453449 | 0.981636 | chr20 | 18179817 | 18180365 | + | 0 | NA | intron (NTHE1A-int   | 35098 NR_028402   | 57325 Hs. 488051NM_02053E     | ENSG00000KAT14      | ATAC2 CRF           | lyase ac protein-coding   |
| chr6-494 7.478306  | 0.641414 | 0.855586 | 0.749678 | 0.453449 | 0.981636 | chr6  | 49438794 | 49440207 | + | 0 | NA | intron (NHERVL-int   | 23753 NM_00025E   | 4594 Hs. 485527NM_00025E      | ENSG00000MMUT       | MCM MUT             | methylmal protein-coding  |
| chr17-757 18.27131 | -0.4244  | 0.566239 | -0.7495  | 0.453556 | 0.981636 | chr17 | 7577547  | 75779341 | + | 0 | NA | 3' UTR (N3' UTR (N   | 1335 NM_005324    | 3021 Hs. 180877NM_005324      | ENSG00000H3F3B      | H3.3B               | H3 histor protein-coding  |
| chr19-105 7.486164 | 0.639214 | 0.853005 | 0.749368 | 0.453636 | 0.981636 | chr19 | 10550413 | 10551145 | + | 0 | NA | intron (NAluY SINE   | -1343 NR_031603   | 1E+08 NR_031603               | ENSG00000MIR1238    | MIRN1238            | microRNA ncRNA            |
| chr2-240 7.486164  | 0.639214 | 0.853005 | 0.749368 | 0.453636 | 0.981636 | chr2  | 2.4E+08  | 2.4E+08  | + | 0 | NA | exon (NM exon (NM    | 10553 NR_136157   | 4705 Hs. 277677NM_004544      | ENSG00000NDUFA10    | CI-42KD C           | NADH:ubiq protein-coding  |
| chr1-8393 8.830689 | -0.60368 | 0.805773 | -0.7492  | 0.453739 | 0.981636 | chr1  | 8393050  | 8393498  | + | 0 | NA | intron (Nintron (N   | 30558 NM_00104C   | 473 Hs. 463041NM_012102       | ENSG00000RERE       | ARG ARP             | arginine- protein-coding  |
| chr17-437 8.830689 | -0.60368 | 0.805773 | -0.7492  | 0.453739 | 0.981636 | chr17 | 43776645 | 43777570 | + | 0 | NA | intron (NAluSq2 SI   | 1870 NM_00409C    | 1845 Hs. 181045NM_00409C      | ENSG00000DUSP3      | VHR                 | dual spec protein-coding  |
| chr16-305 4.94147  | -0.81851 | 1.092624 | -0.74912 | 0.453782 | 0.981636 | chr16 | 30928715 | 30929000 | + | 0 | NA | intron (Nintron (N   | 4282 NM_00109E    | 54620 Hs. 152145NM_01908E     | ENSG00000FBXL19     | CXXC11 FE           | F-box an protein-coding   |
| chr19-507 4.94147  | -0.81851 | 1.092624 | -0.74912 | 0.453782 | 0.981636 | chr19 | 5071876  | 5072075  | + | 0 | NA | intron (Nintron (N   | 102862 NM_00137C  | 23030 Hs. 654815NM_01501E     | ENSG00000KDM4B      | JMJD2B TT           | lysine de protein-coding  |
| chr16-845 11.86975 | 0.521158 | 0.695711 | 0.749101 | 0.453796 | 0.981636 | chr16 | 84990165 | 84990420 | + | 0 | NA | intron (Nintron (N   | 21243 NM_00114E   | 55625 Hs. 461615NM_01774C     | ENSG00000ZDIHC7     | DHHC7 SEF           | zinc fing protein-coding  |
| chr3-1235 9.341143 | -0.57565 | 0.768628 | -0.74893 | 0.453901 | 0.981636 | chr3  | 1.24E+08 | 1.24E+08 | + | 0 | NA | intron (Nintron (N   | 6                 |                               |                     |                     |                           |

|                    |          |          |           |          |          |       |          |          |   |   |    |                     |                   |                               |                      |                                     |
|--------------------|----------|----------|-----------|----------|----------|-------|----------|----------|---|---|----|---------------------|-------------------|-------------------------------|----------------------|-------------------------------------|
| chr14-746 5.238669 | 0.753046 | 1.010211 | 0.745434  | 0.456009 | 0.981636 | chr14 | 74687434 | 74688410 | + | 0 | NA | intron (NLMC5a LI   | 25158 NM_001039   | 9870 Hs. 497417NM_014821      | ENSG000004AREL1      | FIEL1 KI apoptosis protein-coding   |
| chr17-195 5.238669 | 0.753046 | 1.010211 | 0.745434  | 0.456009 | 0.981636 | chr17 | 19913118 | 19914194 | + | 0 | NA | intron (Nintron (N  | -45720 NM_014688  | 9706 Hs. 168762NM_014688      | ENSG000004ULK2       | ATG1B Unc-51 liprotein-coding       |
| chr6-1334 5.238669 | 0.753046 | 1.010211 | 0.745434  | 0.456009 | 0.981636 | chr6  | 1.33E+08 | 1.33E+08 | + | 0 | NA | intron (Nintron (N  | 240525 NM_001301  | 2070 Hs. 596688NM_00410C      | ENSG000004CEYA4      | CMD1J DFNEYA transprotein-coding    |
| chrX-1567 5.238669 | 0.753046 | 1.010211 | 0.745434  | 0.456009 | 0.981636 | chrX  | 15678773 | 15679370 | + | 0 | NA | intron (NMLT2D LTF  | 3579 NR_160542    | 340591 Hs. 732244NM_026551    | ENSG000004CA5BP1     | CAB7L CAE carbonic pseudo           |
| chr5-4836 10.22054 | 0.549667 | 0.737436 | 0.745376  | 0.456044 | 0.981636 | chr5  | 48364399 | 48365273 | + | 0 | NA | IntergeniALR/Alphe  | 20764524          | 561411NM_198444               | ENSG000004EMB        | CP50 embigin protein-coding         |
| chr7-7347 10.22054 | 0.549667 | 0.737436 | 0.745376  | 0.456044 | 0.981636 | chr7  | 73476716 | 73478288 | + | 0 | NA | exon (NM_exon (NM   | 43724 NM_003508   | 8326 Hs. 647029NM_003508      | ENSG000004CFZD9      | CD349 FZI frizzled protein-coding   |
| chr12-716 6.897589 | 0.663985 | 0.890944 | 0.745261  | 0.456114 | 0.981636 | chr12 | 71907869 | 71908697 | + | 0 | NA | intron (Nintron (N  | -30562 NM_173355  | 121278 Hs. 736577NM_173355    | ENSG000004TPH2       | ADHD7 NTF tryptophan protein-coding |
| chr9-1291 6.897589 | 0.663985 | 0.890944 | 0.745261  | 0.456114 | 0.981636 | chr9  | 1.29E+08 | 1.29E+08 | + | 0 | NA | intron (N2b LINE    | 3144 NM_004003    | 1384 Hs. 12068 NM_000758      | ENSG000004CRAT       | CD7 CAT1 carnitine protein-coding   |
| chr1-1174 7.452883 | 0.636086 | 0.853541 | 0.745232  | 0.456131 | 0.981636 | chr1  | 1.17E+08 | 1.17E+08 | + | 0 | NA | intron (Nintron (N  | 57760 NM_006699   | 10905 Hs. 435938NM_006699     | ENSG000004MANIA2     | MAN1B mannosidase protein-coding    |
| chr11-681 7.452883 | 0.636086 | 0.853541 | 0.745232  | 0.456131 | 0.981636 | chr11 | 68184249 | 68184692 | + | 0 | NA | intron (Nintron (N  | 28826 NM_001366   | 51111 Hs. 63212CNM_016028     | ENSG000004KMT5B      | CI8-85 CC lysine meprotein-coding   |
| chr2-702 7.452883  | 0.636086 | 0.853541 | 0.745232  | 0.456131 | 0.981636 | chr2  | 70262850 | 70263995 | + | 0 | NA | intron (N2a LINE    | 5285 NM_016297    | 51449 Hs. 567502NM_016297     | ENSG000004PCYOX1     | PCL1 prenylcys protein-coding       |
| chr22-412 7.452883 | 0.636086 | 0.853541 | 0.745232  | 0.456131 | 0.981636 | chr22 | 41210146 | 41211239 | + | 0 | NA | intron (NAluSx1 SI  | 5380 NM_031488    | 83746 Hs. 517641NM_031488     | ENSG000004L3MBTL2    | H-1(3) mbtL3MBTL2 hiprotein-coding  |
| chr4-3924 7.452883 | 0.636086 | 0.853541 | 0.745232  | 0.456131 | 0.981636 | chr4  | 39246784 | 39247332 | + | 0 | NA | intron (NLIpA4 LIN  | 64529 NM_025132   | 57728 Hs. 438482NM_025132     | ENSG000004WDR19      | ATD5 CED4D repeat protein-coding    |
| chr4-8807 7.452883 | 0.636086 | 0.853541 | 0.745232  | 0.456131 | 0.981636 | chr4  | 88071660 | 88072707 | + | 0 | NA | intron (NLIuJb SIN  | 64548 NR_156488   | 5311 Hs. 181272NM_000297      | ENSG000004PKD2       | APKD2 PC2 polycystiprotein-coding   |
| chr5-1325 9.333286 | -0.57432 | 0.770695 | -0.74519  | 0.456155 | 0.981636 | chr5  | 1.33E+08 | 1.33E+08 | + | 0 | NA | intron (NLIpA5 LIN  | 27184 NM_005732   | 10111 Hs. 633509NM_005732     | ENSG000004RAD50      | NBSLD RAI RAD50 dot protein-coding  |
| chr1-3284 11.12737 | -0.52995 | 0.711292 | -0.74505  | 0.456239 | 0.981636 | chr1  | 32845725 | 32847059 | + | 0 | NA | intron (NLMIE1 LIN  | 21079 NR_135106   | 64766 Hs. 440888NM_022755     | ENSG000004S100BP     | S100BPBP S100P b2 protein-coding    |
| chr11-958 9.366567 | -0.57015 | 0.765287 | -0.74502  | 0.456259 | 0.981636 | chr11 | 9587756  | 9589384  | + | 0 | NA | exon (NM_exon (NM   | 13883 NM_001143   | 7465 Hs. 249441NM_00339C      | ENSG000004WEE1       | WEE1A WEE1E G2 cprotein-coding      |
| chr12-686 9.366567 | -0.57015 | 0.765287 | -0.74502  | 0.456259 | 0.981636 | chr12 | 6869181  | 6871177  | + | 0 | NA | TTS (NM_C TTS (NM_C | 2065 NM_001258    | 7167 Hs. 524219NM_00036E      | ENSG000004TP11       | HEL-5-49 triosephc protein-coding   |
| chr19-206 9.366567 | -0.57015 | 0.765287 | -0.74502  | 0.456259 | 0.981636 | chr19 | 20656961 | 20658414 | + | 0 | NA | intron (NAluSp SIN  | 3884 NM_001076    | 199777 Hs. 657001NM_145297    | ENSG000004ZNF626     | - zinc fingprotein-coding           |
| chr2-1361 9.366567 | -0.57015 | 0.765287 | -0.74502  | 0.456259 | 0.981636 | chr2  | 1.33E+08 | 1.33E+08 | + | 0 | NA | intron (NAluSq2 SI  | -112071 NR_110294 | 1.02E+08 Hs. 661917NR_110294  | ENSG000004NCKAP5-AS- | NCKAP5 arn crNA                     |
| chr3-1461 9.366567 | -0.57015 | 0.765287 | -0.74502  | 0.456259 | 0.981636 | chr3  | 1.46E+08 | 1.46E+08 | + | 0 | NA | intron (NLIpA4 LIN  | 40673 NM_182943   | 5352 Hs. 477866NM_00093E      | ENSG000004PLOD2      | BRK52 LH2 procollag protein-coding  |
| chr4-5702 9.366567 | -0.57015 | 0.765287 | -0.74502  | 0.456259 | 0.981636 | chr4  | 57028623 | 57033861 | + | 0 | NA | TTS (NM_C TTS (NM_C | 52346 NM_000938   | 5431 Hs. 602757NM_000938      | ENSG000004POLR2B     | POL2R2B RF RNA polynprotein-coding  |
| chr4-823 9.366567  | -0.57015 | 0.765287 | -0.74502  | 0.456259 | 0.981636 | chr4  | 82353830 | 82359650 | + | 0 | NA | intron (Nintron (N  | 17521 NM_03137C   | 3184 Hs. 480072NM_00213E      | ENSG000004HNRNP      | AUF1 AUF1 heterog protein-coding    |
| chr4-1025 9.366567 | -0.57015 | 0.765287 | -0.74502  | 0.456259 | 0.981636 | chr4  | 1.03E+08 | 1.03E+08 | + | 0 | NA | intron (NAluYc SIN  | 96549 NM_005908   | 4126 Hs. 480411NM_00590E      | ENSG000004MANBA      | MANB1 mannosidase protein-coding    |
| chr8-3908 9.366567 | -0.57015 | 0.765287 | -0.74502  | 0.456259 | 0.981636 | chr8  | 39086892 | 39087988 | + | 0 | NA | intron (NLMIE4c LI  | -20089 NM_001313  | 203102 Hs. 52154E NM_145004   | ENSG000004ADAM32     | ADAM ADAM metc protein-coding       |
| chr9-3608 9.366567 | -0.57015 | 0.765287 | -0.74502  | 0.456259 | 0.981636 | chr9  | 36089291 | 36087517 | + | 0 | NA | 3' UTR (N3' UTR (N  | 48306 NM_001316   | 8434 Hs. 388918NM_021111      | ENSG000004RECK       | ST15 reversio protein-coding        |
| chr19-284 16.15075 | -0.44753 | 0.601013 | -0.74498  | 0.456273 | 0.981636 | chr19 | 2849857  | 28495724 | + | 0 | NA | exon (NM_exon (NM   | 11815 NM_152791   | 148254 Hs. 47712 NM_152791    | ENSG000004ZNF555     | - zinc fingprotein-coding           |
| chr9-3785 8.94625  | -0.59309 | 0.79609  | -0.745    | 0.456273 | 0.981636 | chr9  | 37824998 | 37825762 | + | 0 | NA | intron (NLIpA13 LI  | 24583 NM_02434E   | 79269 Hs. 118394NM_02434E     | ENSG000004CAF10      | WDR32 DBD1 and protein-coding       |
| chr1-1232 7.460741 | 0.633911 | 0.850963 | 0.744934  | 0.456312 | 0.981636 | chr1  | 12333506 | 12334737 | + | 0 | NA | intron (Nintron (N  | 104091 NM_01537E  | 55187 Hs. 439381NM_01537E     | ENSG000004VPS13D     | SCAR4 vacuolar protein-coding       |
| chr1-3925 7.460741 | 0.633911 | 0.850963 | 0.744934  | 0.456312 | 0.981636 | chr1  | 39254387 | 39256619 | + | 0 | NA | intron (Nintron (N  | -153570 NM_015038 | 643314 Hs. 658766NM_01503E    | ENSG000004KIAA0754   | - KIAA0754 protein-coding           |
| chr11-354 7.460741 | 0.633911 | 0.850963 | 0.744934  | 0.456312 | 0.981636 | chr11 | 35434010 | 35440909 | + | 0 | NA | intron (Nintron (N  | -17401 NM_00119E  | 6506 Hs. 50233E NM_004171     | ENSG000004SLC1A2     | EAA2T EIF solute c protein-coding   |
| chr13-492 7.460741 | 0.633911 | 0.850963 | 0.744934  | 0.456312 | 0.981636 | chr13 | 49259263 | 49261593 | + | 0 | NA | intron (NMLT1J2 LI  | 12503 NM_030911   | 81602 Hs. 38822C NM_030911    | ENSG000004CDADC1     | NYD-SP15 cytidine protein-coding    |
| chr15-495 7.460741 | 0.633911 | 0.850963 | 0.744934  | 0.456312 | 0.981636 | chr15 | 49319030 | 49321442 | + | 0 | NA | intron (Nintron (N  | -103006 NM_00200E | 2252 Hs. 56726E NM_00200E     | ENSG000004PGF7       | PHZ-7 KC fibroblas protein-coding   |
| chr17-767 7.460741 | 0.633911 | 0.850963 | 0.744934  | 0.456312 | 0.981636 | chr17 | 76754334 | 76755142 | + | 0 | NA | intron (Nintron (N  | 17237 NM_024311   | 79157 Hs. 73965 NM_024311     | ENSG000004MFSD11     | ET major fac protein-coding         |
| chr18-461 7.460741 | 0.633911 | 0.850963 | 0.744934  | 0.456312 | 0.981636 | chr18 | 46002722 | 46003297 | + | 0 | NA | intron (NLMIMD LI   | -35680 NM_020964  | 57724 Hs. 51484E NM_020964    | ENSG000004EPG5       | HEEW1 KI ectopic f protein-coding   |
| chr19-121 7.460741 | 0.633911 | 0.850963 | 0.744934  | 0.456312 | 0.981636 | chr19 | 12172201 | 12174119 | + | 0 | NA | intron (NMERSA LI   | 10064 NM_003437   | 7695 Hs. 479874NM_003437      | ENSG000004ZNF136     | pH2-20 zinc fing protein-coding     |
| chr19-435 7.460741 | 0.633911 | 0.850963 | 0.744934  | 0.456312 | 0.981636 | chr19 | 43598698 | 43599883 | + | 0 | NA | 3' UTR (N3' UTR (N  | 2695 NM_00114E    | 79177 Hs. 11110 NM_024327     | ENSG000004ZNF576     | - zinc fing protein-coding          |
| chr20-176 7.460741 | 0.633911 | 0.850963 | 0.744934  | 0.456312 | 0.981636 | chr20 | 17600981 | 17601524 | + | 0 | NA | intron (Nintron (N  | 31177 NM_00687C   | 11034 Hs. 304192NM_00687C     | ENSG000004DSTN       | ACTDP ADF destrin, protein-coding   |
| chr22-467 7.460741 | 0.633911 | 0.850963 | 0.744934  | 0.456312 | 0.981636 | chr22 | 46694281 | 46701966 | + | 0 | NA | intron (NMERSA DNA  | 40129 NM_00276E   | 64781 Hs. 20066E NM_02276E    | ENSG000004CERK       | LK4 dA59E ceramide protein-coding   |
| chr6-248 7.460741  | 0.633911 | 0.850963 | 0.744934  | 0.456312 | 0.981636 | chr6  | 24806990 | 24811087 | + | 0 | NA | intron (NAluS2 SIN  | -10121 NM_00128E  | 1.02E+08 Hs. 63513E NM_00128E | ENSG000004ARMH2      | C6orf229 armadillc protein-coding   |
| chr9-193 7.460741  | 0.633911 | 0.850963 | 0.744934  | 0.456312 | 0.981636 | chr9  | 19352720 | 19353646 | + | 0 | NA | intron (Nintron (N  | 27053 NM_00101C   | 6194 Hs. 48087E NM_00101C     | ENSG000004RPS6       | S6 ribosomal protein-coding         |
| chr1-1225 18.3044  | 0.429098 | 0.576285 | -0.744592 | 0.456518 | 0.981636 | chr1  | 1.23E+08 | 1.23E+08 | + | 0 | NA | IntergeniALR/Alphe  | 1006006 NR_00395E | 647121 Hs. 69768E NR_00395E   | ENSG000004EMB1P      | - embigin pseudo                    |
| chr17-481 6.408859 | 0.703192 | 0.944482 | 0.744527  | 0.456558 | 0.981636 | chr17 | 48115465 | 48115789 | + | 0 | NA | intron (Nintron (N  | 8042 NM_01332E    | 29916 Hs. 15827 NM_01332E     | ENSG000004SNX11      | - sorting r protein-coding          |
| chr3-485 6.408859  | 0.703192 | 0.944482 | 0.744527  | 0.456558 | 0.981636 | chr3  | 48500082 | 48500561 | + | 0 | NA | intron (Nintron (N  | 3729 NM_00127E    | 51246 Hs. 41457E NM_01647E    | ENSG000004SHISA5     | SCOTIN shisa fan protein-coding     |
| chr8-377 6.408859  | 0.703192 | 0.944482 | 0.744527  | 0.456558 | 0.981636 | chr8  | 3775281  | 37775480 | + | 0 | NA | exon (NM_exon (NM   | 12735 NM_00134E   | 11212 Hs. 30479E NM_00719E    | ENSG000004PLPBP      | EPVB6D PF pibic protein-coding      |
| chr10-102 7.494022 | 0.637065 | 0.855823 | 0.744389  | 0.456641 | 0.981636 | chr10 | 1.02E+08 | 1.02E+08 | + | 0 | NA | intron (Nintron (N  | 19812 NM_02478E   | 79847 Hs. 30906E NM_02478E    | ENSG000004MPSD13A    | CTP107 f7 major fac protein-coding  |
| chr13-416 7.494022 | 0.637065 | 0.855823 | 0.744389  | 0.456641 | 0.981636 | chr13 | 41683609 | 41684076 | + | 0 | NA | intron (N2c LINE    | -15444 NR_04980C  | 1.01E+08 NR_04980C            | ENSG000004MIR5006    | - microRNA ncRNA                    |
| chr14-735 7.494022 | 0.637065 | 0.855823 | 0.744389  | 0.456641 | 0.981636 | chr14 | 73955301 | 73956220 | + | 0 | NA | intron (Nintron (N  | 5461 NM_18247E    | 51004 Hs. 13155E NM_18247E    | ENSG000004COQ6       | CGI-10 CC coenzyme protein-coding   |
| chr7-102 7.494022  | 0.637065 | 0.855823 | 0.744389  | 0.456641 | 0.981636 | chr7  | 1.02E+08 | 1.02E+08 | + | 0 | NA | exon (NM_exon (NM   | -83421 NM_02097E  | 10603 Hs. 48944E NM_02097E    | ENSG000004SH2B2      | APS SH2B adap protein-coding        |
| chr9-124 7.494022  | 0.63706  |          |           |          |          |       |          |          |   |   |    |                     |                   |                               |                      |                                     |



|                    |           |          |           |          |          |       |          |          |   |      |                     |                    |                            |                      |                      |                            |                           |          |
|--------------------|-----------|----------|-----------|----------|----------|-------|----------|----------|---|------|---------------------|--------------------|----------------------------|----------------------|----------------------|----------------------------|---------------------------|----------|
| chr15-204 9.300004 | -0.57867  | 0.782584 | -0.73944  | 0.459642 | 0.981636 | chr15 | 20453763 | 20453996 | + | 0 NA | non-codirnon-codir  | -13392 NR_036444   | 440248 Hs. 531509NM_199044 | ENSG000003HERC2P9    | -                    | hct domε pseudo            |                           |          |
| chr11-102 9.325428 | -0.57299  | 0.77507  | -0.73928  | 0.459737 | 0.981636 | chr11 | 1.02E+08 | 1.02E+08 | + | 0 NA | intron (Alu)S2 SI   | -101944 NM_001116E | 330 Hs. 127799NM_00116E    | ENSG000003BTRC3      | AIP1 AP12            | baculovir protein-coding   |                           |          |
| chr4-122 9.325428  | -0.57299  | 0.77507  | -0.73928  | 0.459737 | 0.981636 | chr4  | 1.22E+08 | 1.22E+08 | + | 0 NA | intron (intron)     | -47278 NM_139243   | 132612 Hs. 518957NM_139243 | ENSG000003CADAD1     | Tenr                 | adenosine protein-coding   |                           |          |
| chr18-927 7.1873   | -0.64924  | 0.878409 | -0.73911  | 0.459838 | 0.981636 | chr18 | 92717750 | 92722100 | + | 0 NA | intron (intron)     | -62781 NM_02064E   | 57045 Hs. 514688NM_02064E  | ENSG000003TWSG1      | TSG                  | torked ε protein-coding    |                           |          |
| chr7-4727 7.1873   | -0.64924  | 0.878409 | -0.73911  | 0.459838 | 0.981636 | chr7  | 4727900  | 4728193  | + | 0 NA | intron (intron)     | -45751 NM_001037   | 221937 Hs. 487393NM_001037 | ENSG000003FOXK1      | FOXK1L               | forkhead protein-coding    |                           |          |
| chr7-649E 7.1873   | -0.64924  | 0.878409 | -0.73911  | 0.459838 | 0.981636 | chr7  | 64991995 | 64992598 | + | 0 NA | exon (NM_exon)      | -1260 NM_01585E    | 51351 Hs. 250699NM_01585E  | ENSG000003ZNF117     | H-p1k HPF            | zinc fing protein-coding   |                           |          |
| chr2-4631 11.53012 | -0.51975  | 0.703243 | -0.73908  | 0.459857 | 0.981636 | chr2  | 46317137 | 46317813 | + | 0 NA | intron (Tigger1) E  | 20068 NM_00143C    | 2034 Hs. 468411NM_00143C   | ENSG000003EPAS1      | ECYT4 HIF            | endothelin protein-coding  |                           |          |
| chr1-2434 9.086379 | -0.58636  | 0.793384 | -0.739061 | 0.45987  | 0.981636 | chr1  | 46317137 | 46317813 | + | 0 NA | intron (MLTB) SINE  | 80846 NR_039824    | 1.01E+08                   | NR_039824            | ENSG000003MIR4677    | mir-4677                   | microRNA ncRNA            |          |
| chr5-172E 8.101061 | -0.639657 | 0.865654 | -0.73893  | 0.45995  | 0.981636 | chr5  | 1.73E+08 | 1.73E+08 | + | 0 NA | intron (MLT1L) LTF  | 9243 NM_001317     | 51121 Hs. 546399NM_01609E  | ENSG000003RPL26L1    | RPL26P1              | ribosomal protein-coding   |                           |          |
| chr13-491 9.399849 | -0.56603  | 0.766015 | -0.73893  | 0.459951 | 0.981636 | chr13 | 49148285 | 49149259 | + | 0 NA | intron (L1M2) LINE  | 38455 NM_01492E    | 22862 Hs. 508011NM_01492E  | ENSG000003FNDC3A     | FNDC3 HUC            | fibronectin protein-coding |                           |          |
| chr15-61E 9.616248 | -0.565364 | 0.765139 | -0.738904 | 0.459965 | 0.981636 | chr15 | 61961609 | 61961838 | + | 0 NA | exon (NM_exon)      | 98724 NM_017684    | 54832 Hs. 51166E           | NR_017684            | ENSG000003VPS13C     | PARK23                     | vacuolar protein-coding   |          |
| chr11-72E 5.246527 | -0.749937 | 1.01509  | -0.738789 | 0.460035 | 0.981636 | chr11 | 72888844 | 72888947 | + | 0 NA | intron (intron)     | 74934 NM_00131E    | 89849 Hs. 65318E           | NR_03338E            | ENSG000003ATG16L2    | ATG16B WI                  | autophagy protein-coding  |          |
| chr19-26E 5.246527 | -0.749937 | 1.01509  | -0.738789 | 0.460035 | 0.981636 | chr19 | 26600854 | 26602304 | + | 0 NA | IntergeniALR Alpha  | -1191852 NR_14673E | 1.02E+08                   | Hs. 567934NR_110687  | ENSG000003LOC101927- | uncharactncRNA             |                           |          |
| chr10-71 9.673104  | -0.562846 | 0.761915 | -0.738726 | 0.460073 | 0.981636 | chr10 | 73156164 | 73156479 | + | 0 NA | exon (NM_exon)      | 11687 NM_00726E    | 11319 Hs. 63182E           | NR_00726E            | ENSG000003CECD       | GCR2 HSG1                  | ecdysone protein-coding   |          |
| chr10-11 5.436209  | -0.74458  | 1.008264 | -0.73848  | 0.460225 | 0.981636 | chr10 | 1.14E+08 | 1.14E+08 | + | 0 NA | intron (intron)     | 49217 NM_198514    | 374354 Hs. 369924NM_198514 | ENSG000003NHLRC2     | FINCA                | NHL repeat protein-coding  |                           |          |
| chr14-34E 5.436209 | -0.74458  | 1.008264 | -0.73848  | 0.460225 | 0.981636 | chr14 | 34843991 | 34844323 | + | 0 NA | intron (AluY) SINE  | -30034 NR_16077E   | 1.12E+08                   | Hs. 50914CNR_16077E  | LOC11226E            | uncharactncRNA             |                           |          |
| chr3-447 5.436209  | -0.74458  | 1.008264 | -0.73848  | 0.460225 | 0.981636 | chr3  | 44748514 | 44748993 | + | 0 NA | TTS (NM_CTTT)       | 12866 NM_00132C    | 57456 Hs. 74495E           | NR_02069E            | ENSG000003KIAA1143   | -                          | KIAA1143 protein-coding   |          |
| chr8-230 5.436209  | -0.74458  | 1.008264 | -0.73848  | 0.460225 | 0.981636 | chr8  | 230037   | 230689   | + | 0 NA | intron (intron)     | -1774 NM_001287    | 169270 Hs. 59138E          | NR_17353E            | ENSG000003ZNF596     | -                          | zinc fing protein-coding  |          |
| chr8-897E 5.436209 | -0.74458  | 1.008264 | -0.73848  | 0.460225 | 0.981636 | chr8  | 89788116 | 89788828 | + | 0 NA | intron (L2b) LINE   | 30656 NM_003821    | 8767 Hs. 10375E            | NR_003821            | ENSG000003R1PK2      | CARD3 CAF                  | receptor protein-coding   |          |
| chr8-1301 5.436209 | -0.74458  | 1.008264 | -0.73848  | 0.460225 | 0.981636 | chr8  | 1.3E+08  | 1.3E+08  | + | 0 NA | intron (intron)     | -67916 NR_04538E   | 1.01E+08                   | Hs. 10601E           | NR_04538E            | ENSG000003ASAP1-IT2        | ASAP1                     | intncRNA |
| chr1-328E 9.407707 | -0.56736  | 0.768446 | -0.73832  | 0.46032  | 0.981636 | chr1  | 32855995 | 32856340 | + | 0 NA | non-codirnon-codir  | 14646 NM_001171    | 252995 Hs. 524234NM_15375E | ENSG000003FNDC5      | FRCP2 iri            | fibronectin protein-coding |                           |          |
| chr10-87 9.407707  | -0.56736  | 0.768446 | -0.73832  | 0.46032  | 0.981636 | chr10 | 87745103 | 87745947 | + | 0 NA | intron (intron)     | 72706 NM_001321    | 84896 Hs. 43594E           | NR_03281E            | ENSG000003ATAD1      | AFDC1 FNF                  | ATPase ε protein-coding   |          |
| chr4-174E 9.407707 | -0.56736  | 0.768446 | -0.73832  | 0.46032  | 0.981636 | chr4  | 17491891 | 17492199 | + | 0 NA | intron (MLT1A) LI   | 20045 NM_00032C    | 5860 Hs. 75438             | NR_00032C            | ENSG000003QDPR       | DHPR HDHF                  | quinoid ε protein-coding  |          |
| chr1-921E 5.213246 | -0.745739 | 1.010211 | -0.738201 | 0.460392 | 0.981636 | chr1  | 92159073 | 92160213 | + | 0 NA | IntergeniL1MB1 LI   | 92159073           | 21554 Hs. 015237           | ENSG000003KIAA1107-  | -                    | KIAA1107 protein-coding    |                           |          |
| chr10-29E 5.213246 | -0.745739 | 1.010211 | -0.738201 | 0.460392 | 0.981636 | chr10 | 29666797 | 29667362 | + | 0 NA | intron (L1ME1) LI   | -32108 NM_02173E   | 6840 Hs. 49920E            | NR_003174            | ENSG000003SVIL       | -                          | supervill protein-coding  |          |
| chr10-71 5.213246  | -0.745739 | 1.010211 | -0.738201 | 0.460392 | 0.981636 | chr10 | 72101332 | 72103496 | + | 0 NA | intron (intron)     | -13382 NM_001134   | 9806 Hs. 52300E            | NR_014767            | ENSG000003SPOCK2     | testican-SPARC             | (os) protein-coding       |          |
| chr10-121 5.213246 | -0.745739 | 1.010211 | -0.738201 | 0.460392 | 0.981636 | chr10 | 1.32E+08 | 1.32E+08 | + | 0 NA | intron (intron)     | 37771 NM_001291    | 55844 Hs. 38037E           | NR_018461            | ENSG000003PPP2R2D    | B55D B55E                  | protein ε protein-coding  |          |
| chr11-664 5.213246 | -0.745739 | 1.010211 | -0.738201 | 0.460392 | 0.981636 | chr11 | 66491579 | 66493805 | + | 0 NA | intron (intron)     | 12258 NM_13044E    | 10072 Hs. 502914NM_00570C  | ENSG000003DPP3       | DPP11I               | dipeptidyl protein-coding  |                           |          |
| chr12-10E 5.213246 | -0.745739 | 1.010211 | -0.738201 | 0.460392 | 0.981636 | chr12 | 1.1E+08  | 1.1E+08  | + | 0 NA | intron (NLIPA3) LI  | 9881 NM_000431     | 4598 Hs. 130607NM_000431   | ENSG000003MVK        | LRBP MK              | lyveal on protein-coding   |                           |          |
| chr19-13 5.213246  | -0.745739 | 1.010211 | -0.738201 | 0.460392 | 0.981636 | chr19 | 13089904 | 13087610 | + | 0 NA | intron (intron)     | 15601 NM_00558E    | 4066 Hs. 46446             | NR_00558E            | ENSG000003LYL1       | bHLHa18                    | LYL1 basiprotein-coding   |          |
| chr20-11E 5.213246 | -0.745739 | 1.010211 | -0.738201 | 0.460392 | 0.981636 | chr20 | 1168215  | 1169689  | + | 0 NA | 3' UTR (3' UTR)     | 15521 NM_018354    | 55321 Hs. 516834NM_018354  | ENSG000003TMEM74B    | C20orf46             | transmem protein-coding    |                           |          |
| chr3-196 5.213246  | -0.745739 | 1.010211 | -0.738201 | 0.460392 | 0.981636 | chr3  | 1.96E+08 | 1.96E+08 | + | 0 NA | intron (Alu)S2 SI   | -12901 NM_005017   | 5130 Hs. 135997NM_005017   | ENSG000003PCYT1A     | CCTA CTC             | phosphatε protein-coding   |                           |          |
| chr7-396 5.213246  | -0.745739 | 1.010211 | -0.738201 | 0.460392 | 0.981636 | chr7  | 39635046 | 39635820 | + | 0 NA | intron (L1MB7) LI   | 11861 NM_00540E    | 5898 Hs. 6906              | NR_00540E            | ENSG000003RALA       | RAL                        | RAS like protein-coding   |          |
| chr7-149E 5.213246 | -0.745739 | 1.010211 | -0.738201 | 0.460392 | 0.981636 | chr7  | 1.5E+08  | 1.5E+08  | + | 0 NA | intron (intron)     | 31988 NR_02778E    | 79970 Hs. 52078E           | NR_02491E            | ENSG000003ZNF767P    | ZNF767                     | zinc fing pseudo          |          |
| chr10-11 10.16183  | -0.543256 | 0.736019 | -0.7381   | 0.460454 | 0.981636 | chr10 | 1.2E+08  | 1.2E+08  | + | 0 NA | 3' UTR (3' UTR)     | 26029 NM_004281    | 9531 Hs. 52330E            | NR_004281            | ENSG000003BAG3       | BAG-3 BTS                  | BCL2 assoc protein-coding |          |
| chr2-395 10.16183  | -0.543256 | 0.736019 | -0.7381   | 0.460454 | 0.981636 | chr2  | 39518556 | 39522629 | + | 0 NA | intron (L1MC4a) LI  | 39518556           | 39522629                   | ENSG000003MAP4K3-D1- | MAP4K3               | dincRNA                    |                           |          |
| chr1-218E 7.427459 | -0.630782 | 0.854735 | -0.737985 | 0.460524 | 0.981636 | chr1  | 21866723 | 21866936 | + | 0 NA | intron (intron)     | 54564 NM_00101E    | 401944 Hs. 74515E          | NR_00101E            | ENSG000003DLRAD2     | -                          | low densiprotein-coding   |          |
| chr2-22E 7.427459  | -0.630782 | 0.854735 | -0.737985 | 0.460524 | 0.981636 | chr2  | 42576136 | 42577782 | + | 0 NA | intron (intron)     | 5152 NR_002184     | 91695 Hs. 534041NR_002184  | ENSG000003RRP7BP     | RRP7B dJ2            | ribosomal pseudo           |                           |          |
| chr5-50E 7.427459  | -0.630782 | 0.854735 | -0.737985 | 0.460524 | 0.981636 | chr5  | 20091353 | 20091758 | + | 0 NA | IntergeniL1TR41 LTF | 42042 NM_001297    | 6606 Hs. 53575E            | NR_000344            | ENSG000003SMN1       | BCD541 GE                  | survival protein-coding   |          |
| chr7-106E 7.427459 | -0.630782 | 0.854735 | -0.737985 | 0.460524 | 0.981636 | chr7  | 1.06E+08 | 1.06E+08 | + | 0 NA | IntergeniAluS2 SI   | 23489 NM_18271E    | 6856 Hs. 80919             | NR_006754            | ENSG000003SYPL1      | H-SP1 SYF                  | synaptopl protein-coding  |          |
| chr9-127 7.427459  | -0.630782 | 0.854735 | -0.737985 | 0.460524 | 0.981636 | chr9  | 1.28E+08 | 1.28E+08 | + | 0 NA | intron (intron)     | -1626 NR_03981E    | 1.01E+08                   | NR_03981E            | ENSG000003MIR4672    | -                          | microRNA ncRNA            |          |
| chr9-128 7.427459  | -0.630782 | 0.854735 | -0.737985 | 0.460524 | 0.981636 | chr9  | 1.29E+08 | 1.29E+08 | + | 0 NA | exon (NM_exon)      | 15636 NR_04624C    | 1.01E+08                   | Hs. 62946            | NR_04624C            | ENSG000003LOC10050E        | uncharactncRNA            |          |
| chr1-2201 9.102095 | -0.582791 | 0.789751 | -0.737942 | 0.46055  | 0.981636 | chr1  | 2.2E+08  | 2.2E+08  | + | 0 NA | intron (Alu)S4 SIN  | -40442 NR_029711   | 406969                     | NR_029711            | ENSG000003MIR194-1   | MIRN194-1                  | microRNA ncRNA            |          |
| chr10-14E 7.605768 | -0.62882  | 0.852253 | -0.73784  | 0.460614 | 0.981636 | chr10 | 14509034 | 14509596 | + | 0 NA | IntergeniIntergeni  | 23399 NM_00132C    | 83641 Hs. 44631E           | NR_03145E            | ENSG000003FAM107B    | C10orf45                   | family wiprotein-coding   |          |
| chr5-156 7.605768  | -0.62882  | 0.852253 | -0.73784  | 0.460614 | 0.981636 | chr5  | 1.55E+08 | 1.55E+08 | + | 0 NA | intron (Alu)S2 SI   | 33034 NM_01546E    | 25929 Hs. 483921NM_01546E  | ENSG000003GEMIN5     | GEMIN-5              | gen nucle protein-coding   |                           |          |
| chr9-134 7.605768  | -0.62882  | 0.852253 | -0.73784  | 0.460614 | 0.981636 | chr9  | 1.36E+08 | 1.36E+08 | + | 0 NA | intron (intron)     | -8811 NM_00114E    | 26086 Hs. 23937E           | NR_015597            | ENSG000003GSPM1      | AGS3                       | G protein protein-coding  |          |
| chr10-271 7.146161 | -0.653    | 0.885082 | -0.73779  | 0.460643 | 0.981636 | chr10 | 27164076 | 27164434 | + | 0 NA | intron (Alu)Jr SIN  | 9431 NM_00117E     | 84930 Hs. 27690E           | NR_032844            | ENSG000003MASTL      | GREATWALL                  | microtub protein-coding   |          |
| chr15-857 7.146161 | -0.653    | 0.885082 | -0.73779  | 0.460643 | 0.981636 | chr15 | 85723672 | 85723912 | + | 0 NA | intron (intron)     | 34933 NR_12036E    | 1.02E+08                   | Hs. 51311E           | NR_12036E            | LOC10192E-                 | uncharactncRNA            |          |
| chr17-61 7.146161  | -0.653    | 0.885082 | -0.73779  | 0.460643 | 0.981636 | chr17 | 61917468 | 61917721 | + | 0 NA | intron (NLIPA16) LI | 10388 NM_02074E    | 57508 Hs. 27964E           | NR_02074E            | ENSG000003INTS2      | INT2 KIA                   | integract protein-coding  |          |
| chr19-101 7.146161 | -0.653    | 0.885082 | -0.73779  | 0.460643 | 0.981636 |       |          |          |   |      |                     |                    |                            |                      |                      |                            |                           |          |



|           |          |          |          |          |          |          |       |          |          |   |   |    |                     |                   |                                                |                        |                                |                 |
|-----------|----------|----------|----------|----------|----------|----------|-------|----------|----------|---|---|----|---------------------|-------------------|------------------------------------------------|------------------------|--------------------------------|-----------------|
| chr12-705 | 7.50188  | 0.634909 | 0.864299 | 0.734594 | 0.462587 | 0.981636 | chr12 | 7099616  | 7100559  | + | 0 | NA | intron (NMER102b I  | -7642 NM_001733   | 715 Hs. 524224NM_001733:ENSG00000C1R           | EDSPD1                 | complemer protein-coding       |                 |
| chr19-402 | 7.50188  | 0.634909 | 0.864299 | 0.734594 | 0.462587 | 0.981636 | chr19 | 4024411  | 4025288  | + | 0 | NA | intron (NAIuS SIN   | 17113 NM_015897   | 51588 Hs. 105775NM_015897:ENSG00000PIA54       | PIAS-gamm              | protein-coding                 |                 |
| chr19-11C | 7.50188  | 0.634909 | 0.864299 | 0.734594 | 0.462587 | 0.981636 | chr19 | 11019407 | 11020115 | + | 0 | NA | intron (Nintron (N  | 35609 NM_001128   | 6597 Hs. 327527NM_003072:ENSG00000CMARCA4      | BAF190 BA SWI/SNF      | protein-coding                 |                 |
| chr7-7504 | 7.50188  | 0.634909 | 0.864299 | 0.734594 | 0.462587 | 0.981636 | chr7  | 75042296 | 75043020 | + | 0 | NA | 3' UTR (N3' UTR (N  | 31144 NM_001363   | 81554 Hs. 529622NM_030798:ENSG00000RCC1L       | WBSRC16                | RCC1 like protein-coding       |                 |
| chr1-1002 | 6.913305 | 0.659108 | 0.897402 | 0.734463 | 0.462667 | 0.981636 | chr1  | 1E+08    | 1E+08    | + | 0 | NA | promoter-promoter-  | -416 NR_030275    | 693138 NR_030275:ENSG00000MIR553               | MIRN5533               | microRNA ncRNA                 |                 |
| chr10-115 | 6.913305 | 0.659108 | 0.897402 | 0.734463 | 0.462667 | 0.981636 | chr10 | 1.14E+08 | 1.14E+08 | + | 0 | NA | 3' UTR (N3' UTR (N  | 20306 NM_001267   | 840 Hs. 9216 NM_001227:ENSG00000CASP7          | CASP-7 C               | caspase 7 protein-coding       |                 |
| chr21-332 | 6.913305 | 0.659108 | 0.897402 | 0.734463 | 0.462667 | 0.981636 | chr21 | 33251834 | 33252243 | + | 0 | NA | intron (NAIuSx S    | 14222 NR_038974   | 1E+08 Hs. 709799NR_038974                      | IL10RB-D1              | IFNAR2-AS IL10RB dincRNA       |                 |
| chr4-6296 | 6.913305 | 0.659108 | 0.897402 | 0.734463 | 0.462667 | 0.981636 | chr4  | 6290702  | 6292254  | + | 0 | NA | intron (Nintron (N  | 21628 NM_001145   | 7466 Hs. 518602NM_006006:ENSG00000WFS1         | CTRCT41                | WU framing protein-coding      |                 |
| chr15-718 | 7.112879 | -0.65859 | 0.896997 | -0.73422 | 0.462815 | 0.981636 | chr15 | 71817522 | 71817766 | + | 0 | NA | exon (NM exon (NM   | 7090 NM_014245    | 10002 Hs. 187354NM_014245:ENSG00000CNR2E3      | ESCS PNR nuclear       | protein-coding                 |                 |
| chr10-112 | 4.195571 | -0.82746 | 1.127334 | -0.734   | 0.462949 | 0.981636 | chr10 | 1.14E+08 | 1.14E+08 | + | 0 | NA | intron (N(GTAT)n S  | 7457 NM_001227    | 840 Hs. 9216 NM_001227:ENSG00000CASP7          | CASP-7 C               | caspase 7 protein-coding       |                 |
| chr17-287 | 4.195571 | -0.82746 | 1.127334 | -0.734   | 0.462949 | 0.981636 | chr17 | 28756344 | 28757217 | + | 0 | NA | 3' UTR (N3' UTR (N  | 12769 NM_004295   | 9618 Hs. 8375 NM_004295:ENSG00000CTRAF4        | CART1 MLN TNF receptor | protein-coding                 |                 |
| chr11-625 | 11.58097 | -0.51079 | 0.696169 | -0.73371 | 0.463126 | 0.981636 | chr11 | 62557634 | 62560473 | + | 0 | NA | TTS (NM_C TTS (NM_C | 1253 NR_037427    | 1.01E+08 NR_037427:ENSG00000CIR3654            | -                      | microRNA ncRNA                 |                 |
| chr11-962 | 9.384133 | -0.56332 | 0.767886 | -0.7336  | 0.463193 | 0.981636 | chr11 | 96364183 | 96364730 | + | 0 | NA | intron (Nintron (N  | -21261 NM_032427  | 84441 Hs. 428214NM_032427:ENSG00000MAML2       | MAM-3 MAW              | termin protein-coding          |                 |
| chr12-625 | 9.384133 | -0.56332 | 0.767886 | -0.7336  | 0.463193 | 0.981636 | chr12 | 62303069 | 62306016 | + | 0 | NA | TTS (NM_C TTS (NM_C | 44138 NR_147088   | 9958 Hs. 434951NM_006313:ENSG00000CUSP15       | UNPH-2 UN              | ubiquitin protein-coding       |                 |
| chr3-1414 | 9.384133 | -0.56332 | 0.767886 | -0.7336  | 0.463193 | 0.981636 | chr3  | 1.41E+08 | 1.41E+08 | + | 0 | NA | intron (Nintron (N  | 4050 NM_001355    | 253461 Hs. 518301NM_152533:ENSG00000ZBTB38     | CIBZ PPP1zinc          | finger protein-coding          |                 |
| chr3-1501 | 7.419601 | 0.632979 | 0.862972 | 0.733488 | 0.463261 | 0.981636 | chr3  | 15014270 | 15015204 | + | 0 | NA | intron (NLIMB3 LIN  | 50578 NM_002249   | 64432 Hs. 657764NM_022497:ENSG00000MRP525      | MRP-S25 Fmi            | topon protein-coding           |                 |
| chr15-286 | 10.74255 | 0.534127 | 0.728218 | 0.733471 | 0.463271 | 0.981636 | chr15 | 28636754 | 28637006 | + | 0 | NA | Intergeni Intergeni | -17562 NR_036443  | 440248 Hs. 531505NM_199045:ENSG00000CHERC2P9   | -                      | hect dom pseudo                |                 |
| chr17-147 | 7.588202 | -0.63785 | 0.869809 | -0.73332 | 0.463362 | 0.981636 | chr17 | 1452427  | 1452698  | + | 0 | NA | intron (NAIuSx S    | 3670 NM_016822    | 1398 Hs. 461896NM_005206:ENSG00000CRK          | CRK11 p38 CRK          | protc protein-coding           |                 |
| chr5-1434 | 11.15279 | -0.52517 | 0.716457 | -0.73301 | 0.463555 | 0.981636 | chr5  | 14343503 | 14344520 | + | 0 | NA | intron (Nintron (N  | -119972 NR_145815 | 1.1E+08 NR_145815                              | SNORD170               | -                              | small nucsnoRNA |
| chr12-987 | 7.179443 | -0.64739 | 0.883244 | -0.73297 | 0.463577 | 0.981636 | chr12 | 98723752 | 98724106 | + | 0 | NA | intron (Nintron (N  | 78299 NM_181868   | 317 Hs. 552567NM_001166:ENSG00000CAPAF1        | APAF-1 C               | apoptotic protein-coding       |                 |
| chr13-951 | 7.179443 | -0.64739 | 0.883244 | -0.73297 | 0.463577 | 0.981636 | chr13 | 95118407 | 95118467 | + | 0 | NA | intron (Nintron (N  | -92191 NR_145733  | 1.1E+08 NR_145733                              | SNORD13G               | -                              | small nucsnoRNA |
| chr19-488 | 7.179443 | -0.64739 | 0.883244 | -0.73297 | 0.463577 | 0.981636 | chr19 | 48847688 | 48847962 | + | 0 | NA | intron (Nintron (N  | -11334 NM_016246  | 51171 Hs. 18788 NM_016246:ENSG00000HSD17B14    | DHR510 SE              | hydroxyst protein-coding       |                 |
| chr21-415 | 7.179443 | -0.64739 | 0.883244 | -0.73297 | 0.463577 | 0.981636 | chr21 | 41917935 | 41918204 | + | 0 | NA | intron (Nintron (N  | 8634 NM_19905C    | 25966 Hs. 473894NM_01550C:ENSG00000C2CD2       | C21orf25 C2            | calcit protein-coding          |                 |
| chr1-3628 | 6.946587 | 0.662339 | 0.903704 | 0.732916 | 0.46361  | 0.981636 | chr1  | 3628707  | 3629890  | + | 0 | NA | 3' UTR (N3' UTR (N  | 4283 NM_182752    | 127262 Hs. 20529 NM_182752:ENSG00000TPRG1L     | FAM79A b               | tumor prc protein-coding       |                 |
| chr12-714 | 6.946587 | 0.662339 | 0.903704 | 0.732916 | 0.46361  | 0.981636 | chr12 | 7149197  | 7151501  | + | 0 | NA | intron (Nintron (N  | 19978 NM_014718   | 9746 Hs. 535378NM_014718:ENSG00000CLSTN3       | CDHR14 CS              | calynter protein-coding        |                 |
| chr4-2508 | 6.946587 | 0.662339 | 0.903704 | 0.732916 | 0.46361  | 0.981636 | chr4  | 2508693  | 2508982  | + | 0 | NA | intron (NAIuSp SIN  | -26583 NM_001366  | 8603 Hs. 652364NM_003704:ENSG00000FAM193A      | C4orf38 RF             | family wiprotein-coding        |                 |
| chr1-1216 | 7.443175 | 0.626435 | 0.85497  | 0.732699 | 0.463742 | 0.981636 | chr1  | 1216164  | 1218798  | + | 0 | NA | 3' UTR (N3' UTR (N  | -3328 NM_003327   | 7293 Hs. 12978CNM_003327:ENSG00000TNFRSF4      | A3orf35 CD1TNF         | recep protein-coding           |                 |
| chr1-7836 | 7.443175 | 0.626435 | 0.85497  | 0.732699 | 0.463742 | 0.981636 | chr1  | 7836425  | 7839082  | + | 0 | NA | intron (Nintron (N  | 15312 NM_00678E   | 10911 Hs. 715862NM_00678E:ENSG00000UTS2        | PRO1068 turo           | tsinr protein-coding           |                 |
| chr1-1814 | 7.443175 | 0.626435 | 0.85497  | 0.732699 | 0.463742 | 0.981636 | chr1  | 1.61E+08 | 1.61E+08 | + | 0 | NA | intron (NMIRb SINE  | 2801 NM_00377E    | 8703 Hs. 321231NM_00377E:ENSG00000B4GALT3      | beta4GAL-beta-1,4-     | protein-coding                 |                 |
| chr1-1604 | 7.443175 | 0.626435 | 0.85497  | 0.732699 | 0.463742 | 0.981636 | chr1  | 1.8E+08  | 1.8E+08  | + | 0 | NA | intron (NLIPA14 L   | -23890 NR_036067  | NR_036067:ENSG00000MIR3121                     | mir-3121               | microRNA ncRNA                 |                 |
| chr10-92C | 7.443175 | 0.626435 | 0.85497  | 0.732699 | 0.463742 | 0.981636 | chr10 | 92032193 | 92033243 | + | 0 | NA | Intergeni Intergeni | 108948 NM_003972  | 9044 Hs. 500526NM_003972:ENSG00000BTAF1        | MOT1 TAF               | (B-TFIID) protein-coding       |                 |
| chr11-647 | 7.443175 | 0.626435 | 0.85497  | 0.732699 | 0.463742 | 0.981636 | chr11 | 647630   | 648533   | + | 0 | NA | intron (Nintron (N  | 10812 NM_000797   | 1815 Hs. 99922 NM_000797:ENSG00000DRD4         | D4DR                   | dopamine protein-coding        |                 |
| chr12-105 | 7.443175 | 0.626435 | 0.85497  | 0.732699 | 0.463742 | 0.981636 | chr12 | 1.1E+08  | 1.1E+08  | + | 0 | NA | intron (Nintron (N  | 5279 NM_03230C    | 84260 Hs. 410924NM_03230C:ENSG00000TCHP        | Tpms                   | trichople protein-coding       |                 |
| chr14-677 | 7.443175 | 0.626435 | 0.85497  | 0.732699 | 0.463742 | 0.981636 | chr14 | 67771203 | 67781748 | + | 0 | NA | intron (NMER58A DN  | 40115 NM_01534E   | 23503 Hs. 98041 NM_01534E:ENSG00000ZFVYE26     | FVYE-CEN1zinc          | finger protein-coding          |                 |
| chr14-735 | 7.443175 | 0.626435 | 0.85497  | 0.732699 | 0.463742 | 0.981636 | chr14 | 73984928 | 73987574 | + | 0 | NA | intron (Nintron (N  | 33037 NM_001321   | 957 Hs. 655077NM_00124E:ENSG00000ENTPD5        | CD39L4 N               | ectonucle protein-coding       |                 |
| chr14-915 | 7.443175 | 0.626435 | 0.85497  | 0.732699 | 0.463742 | 0.981636 | chr14 | 91936280 | 91938155 | + | 0 | NA | intron (Nintron (N  | 10485 NM_00632E   | 10516 Hs. 33270E NM_00632E:ENSG00000FBLN5      | ADCL2 ARC              | fibulin 5 protein-coding       |                 |
| chr16-222 | 7.443175 | 0.626435 | 0.85497  | 0.732699 | 0.463742 | 0.981636 | chr16 | 22256911 | 22259312 | + | 0 | NA | intron (Nintron (N  | -39264 NM_00125E  | 55718 Hs. 46029E NM_01811E:ENSG00000POLR3E     | RPC5 SIN               | RNA polyn protein-coding       |                 |
| chr17-397 | 7.443175 | 0.626435 | 0.85497  | 0.732699 | 0.463742 | 0.981636 | chr17 | 39714148 | 39718141 | + | 0 | NA | intron (Nintron (N  | -10351 NR_039881  | 1.01E+08 NR_039881:ENSG00000MIR4728            | -                      | microRNA ncRNA                 |                 |
| chr17-507 | 7.443175 | 0.626435 | 0.85497  | 0.732699 | 0.463742 | 0.981636 | chr17 | 50352403 | 50355357 | + | 0 | NA | exon (NM exon (NM   | 7754 NR_11001C    | 64132 Hs. 46341E NM_022167:ENSG00000XYLT2      | PXYLT2 SC              | xlyosltr protein-coding        |                 |
| chr17-82C | 7.443175 | 0.626435 | 0.85497  | 0.732699 | 0.463742 | 0.981636 | chr17 | 82078495 | 82082596 | + | 0 | NA | exon (NM exon (NM   | 9595 NR_132755    | 1.07E+08 NR_132755                             | SNORD134               | -                              | small nucsnoRNA |
| chr19-147 | 7.443175 | 0.626435 | 0.85497  | 0.732699 | 0.463742 | 0.981636 | chr19 | 14095898 | 14107672 | + | 0 | NA | intron (NAIuSp SIN  | 6605 NM_001304    | 5566 Hs. 63163C NM_00273C:ENSG00000PRKACA      | PACA PPN               | protein k protein-coding       |                 |
| chr19-374 | 7.443175 | 0.626435 | 0.85497  | 0.732699 | 0.463742 | 0.981636 | chr19 | 37419618 | 37427849 | + | 0 | NA | intron (NLIME4B L   | 43711 NM_00133C   | 148266 Hs. 51184E NM_15248A:ENSG00000ZNF569    | ZNF569                 | ZNF zinc finger protein-coding |                 |
| chr19-394 | 7.443175 | 0.626435 | 0.85497  | 0.732699 | 0.463742 | 0.981636 | chr19 | 39451684 | 39453984 | + | 0 | NA | intron (NAIuSx SIN  | 7186 NM_00316E    | 6829 Hs. 631604NM_00316E:ENSG00000SUPT5H       | SPT5 SPT5              | SPT5 homc protein-coding       |                 |
| chr2-5552 | 7.443175 | 0.626435 | 0.85497  | 0.732699 | 0.463742 | 0.981636 | chr2  | 55523679 | 55527384 | + | 0 | NA | intron (Nintron (N  | 5936 NM_080667    | 112942 Hs. 26420E NM_080667:ENSG00000CFAP36    | BARTL1 CC              | ilicilia ancp protein-coding   |                 |
| chr20-11E | 7.443175 | 0.626435 | 0.85497  | 0.732699 | 0.463742 | 0.981636 | chr20 | 1163206  | 1166234  | + | 0 | NA | intron (Nintron (N  | 19753 NM_018354   | 55321 Hs. 516834NM_018354:ENSG00000TMEM74B     | C20orf46               | transment protein-coding       |                 |
| chr21-462 | 7.443175 | 0.626435 | 0.85497  | 0.732699 | 0.463742 | 0.981636 | chr21 | 46249050 | 46250090 | + | 0 | NA | intron (Nintron (N  | 20339 NR_11056E   | 114044 Hs. 65509E NR_00277E:ENSG00000MCM3AP-AS | C21orf85 MCM3AP        | ancRNA                         |                 |
| chr3-1291 | 7.443175 | 0.626435 | 0.85497  | 0.732699 | 0.463742 | 0.981636 | chr3  | 1.29E+08 | 1.29E+08 | + | 0 | NA | exon (NM exon (NM   | -14989 NM_001204  | 339122 Hs. 381132NM_19849C:ENSG00000RAB43      | RAB11B RAB43,          | nc protein-coding              |                 |
| chr4-107E | 7.443175 | 0.626435 | 0.85497  | 0.732699 | 0.463742 | 0.981636 | chr4  | 1.08E+08 | 1.08E+08 | + | 0 | NA | intron (Nintron (N  | 26764 NM_005443   | 9061 Hs. 36861C NM_005443:ENSG00000PAPSS1      | ATPSK1 P3'             | -phosp protein-coding          |                 |
| chr7-1404 | 7.443175 | 0.626435 | 0.85497  | 0.732699 | 0.463742 | 0.981636 | chr7  | 1.4E+08  | 1.4E+08  | + | 0 | NA | intron (NAIu SINE   | 10222 NM_01344E   | 23608 Hs. 74488C NM_01344E:ENSG00000MKRN1      | RNF61                  | makorin 1 protein-coding       |                 |
| chr9-457E | 7.443175 | 0.626435 | 0.85497  | 0.732699 | 0.463742 | 0.981636 | chr9  | 4576268  | 4577298  | + | 0 | NA | intron (Nintron (N  | 85440 NR_14844E   | 55064 Hs. 17961E NM_01798E:ENSG00000SPAT6L     | C9orf68 t              | spermatog protein-coding       |                 |
| chr9-893  | 7.443175 | 0.626435 | 0.85497  | 0.732699 | 0.463742 | 0.981636 | chr9  | 89338989 | 89339630 | + | 0 | NA | intron (Nintron (N  | 20458 NM_00128E   | 79048 Hs. 59804 NM_024077:ENSG00000SECS1BP2    | SBP2                   | SECS1 bir protein-coding       |                 |
| chr14-55C | 10.75041 | 0.532582 | 0.72692  | 0.732655 | 0.463769 | 0.981636 | chr14 | 55035226 | 55035425 | + | 0 | NA | intron (NTiger10    | 8089 NM_080867    | 122809 Hs. 744302NM_080867:ENSG00000SOC5A      | SOC5                   | suppress protein-coding        |                 |
| chr1-162E | 10.26168 | 0.550606 | 0.751599 | 0.732579 | 0.463815 | 0.981636 | chr1  | 1.63E+08 | 1.63E+08 | + |   |    |                     |                   |                                                |                        |                                |                 |

|           |          |          |          |          |          |          |       |          |          |   |      |                       |        |           |          |                       |                    |                                  |                                                  |
|-----------|----------|----------|----------|----------|----------|----------|-------|----------|----------|---|------|-----------------------|--------|-----------|----------|-----------------------|--------------------|----------------------------------|--------------------------------------------------|
| chr19-117 | 17.13421 | 0.425306 | 0.582804 | 0.729758 | 0.465538 | 0.981636 | chr19 | 11776444 | 11783195 | + | 0 NA | intron (AluJb SIN     | 12819  | NM_152355 | 126068   | Hs.675132NM_152355    | ENSG000002CNF441   | -                                | zinc finger protein-coding                       |
| chr1-1008 | 9.64768  | 0.558557 | 0.765896 | 0.729285 | 0.465827 | 0.981636 | chr1  | 1.01E+08 | 1.01E+08 | + | 0 NA | intron (intron (N     | 17397  | NM_001003 | 2135     | Hs.357637NM_001003    | ENSG000002EXTL2    | -                                | EXTR2 exostosin protein-coding                   |
| chr12-827 | 9.64768  | 0.558557 | 0.765896 | 0.729285 | 0.465827 | 0.981636 | chr12 | 827425   | 827698   | + | 0 NA | intron (AluSz SIN     | 74638  | NM_213655 | 65125    | Hs.744906NM_014822    | ENSG000002WNK1     | -                                | HSAN2 HSA WNK lysin protein-coding               |
| chr15-636 | 7.99061  | 0.605006 | 0.829606 | 0.729269 | 0.465837 | 0.981636 | chr15 | 63631761 | 63633871 | + | 0 NA | intron (intron (N     | -31989 | NR_034088 | 1E+08    | Hs.631162NR_034088    | ENSG000002USP3-AS1 | -                                | USP3 antinucRNA                                  |
| chr16-468 | 7.99061  | 0.605006 | 0.829606 | 0.729269 | 0.465837 | 0.981636 | chr16 | 4681505  | 4681861  | + | 0 NA | exon (NM exon (NM     | 10365  | NM_106827 | 1.02E+08 | NR_106827             | ENSG000002MIR6769A | -                                | hsa-mir-6769 microRNA ncRNA                      |
| chr3-1946 | 7.99061  | 0.605006 | 0.829606 | 0.729269 | 0.465837 | 0.981636 | chr3  | 1.95E+08 | 1.95E+08 | + | 0 NA | intron (L2a LINE      | 5269   | NM_138399 | 93109    | Hs.478722NM_138399    | ENSG000002MEM44    | -                                | transmembrane protein-coding                     |
| chr1-1111 | 10.69956 | 0.524801 | 0.719709 | 0.729184 | 0.465889 | 0.981636 | chr1  | 1.11E+08 | 1.11E+08 | + | 0 NA | intron (intron (N     | 8067   | NR_138483 | 10390    | Hs.363572NM_006099    | ENSG000002CEPT1    | -                                | choline esterase protein-coding                  |
| chr12-125 | 5.880099 | -0.70063 | 0.961159 | -0.72895 | 0.466034 | 0.981636 | chr12 | 1.24E+08 | 1.24E+08 | + | 0 NA | intron (AluSx SIN     | 18044  | NM_012462 | 23545    | Hs.25786 NM_012462    | ENSG000002ATP6VOA2 | A2 ARCL AATPase H protein-coding |                                                  |
| chr14-751 | 5.880099 | -0.70063 | 0.961159 | -0.72895 | 0.466034 | 0.981636 | chr14 | 75119771 | 75120368 | + | 0 NA | intron (intron (N     | 6979   | NM_001325 | 91754    | Hs.7200 NM_033116     | ENSG000002CNEK9    | -                                | APUG LCCS NIMA release protein-coding            |
| chr17-315 | 5.880099 | -0.70063 | 0.961159 | -0.72895 | 0.466034 | 0.981636 | chr17 | 61970726 | 61971349 | + | 0 NA | intron (AluJb SIN     | -43055 | NM_001332 | 57508    | Hs.279646NM_020748    | ENSG000002INTS2    | -                                | INT2 KIAA integrator protein-coding              |
| chr19-681 | 5.880099 | -0.70063 | 0.961159 | -0.72895 | 0.466034 | 0.981636 | chr19 | 38154250 | 38154654 | + | 0 NA | intron (AluSq2 SI     | -8644  | NR_145800 | 1.1E+08  | NR_145800             | SNORD152           | -                                | small nucleolar RNA                              |
| chr19-508 | 5.880099 | -0.70063 | 0.961159 | -0.72895 | 0.466034 | 0.981636 | chr19 | 50801383 | 50802098 | + | 0 NA | TTS (NR_C TTS (NR_C   | 681    | NR_003066 | 692204   | NR_003066             | ENSG000002SNORD88C | -                                | HBIT-180C small nucleolar RNA                    |
| chr5-171  | 5.880099 | -0.70063 | 0.961159 | -0.72895 | 0.466034 | 0.981636 | chr5  | 1.71E+08 | 1.71E+08 | + | 0 NA | intron (MER41 int     | 193261 | NM_022897 | 64901    | Hs.410811NM_022897    | ENSG000002RANBP17  | -                                | RAN binding protein-coding                       |
| chr6-1498 | 5.880099 | -0.70063 | 0.961159 | -0.72895 | 0.466034 | 0.981636 | chr6  | 1.5E+08  | 1.5E+08  | + | 0 NA | intron (AluJr4 SI     | 55257  | NM_001360 | 5110     | Hs.279257NM_005389    | ENSG000002PCMT1    | -                                | PIMT protein-ligase protein-coding               |
| chr10-962 | 7.648757 | -0.61362 | 0.84188  | -0.72887 | 0.466082 | 0.981636 | chr10 | 96543416 | 96544783 | + | 0 NA | exon (NM exon (NM     | -30173 | NM_012465 | 7093     | Hs.154299NM_012465    | ENSG000002TLL2     | -                                | toll-like receptor protein-coding                |
| chr11-276 | 7.648757 | -0.61362 | 0.84188  | -0.72887 | 0.466082 | 0.981636 | chr11 | 27661600 | 27662136 | + | 0 NA | intron (intron (N     | -2219  | NM_001143 | 627      | Hs.502182NM_001143    | ENSG000002BDNF     | -                                | ANON2 BUB brain derived protein-coding           |
| chr12-477 | 7.648757 | -0.61362 | 0.84188  | -0.72887 | 0.466082 | 0.981636 | chr12 | 47695907 | 47696544 | + | 0 NA | intron (intron (N     | 9805   | NM_024604 | 79657    | Hs.437855NM_024604    | ENSG000002CRPAP3   | -                                | Tah1 hSpa RNA polymerase protein-coding          |
| chr15-576 | 7.648757 | -0.61362 | 0.84188  | -0.72887 | 0.466082 | 0.981636 | chr15 | 57281450 | 57284460 | + | 0 NA | intron (intron (N     | -4298  | NR_145748 | 1.1E+08  | NR_145748             | ENSG000002SNORD13D | -                                | small nucleolar RNA                              |
| chr2-372  | 7.648757 | -0.61362 | 0.84188  | -0.72887 | 0.466082 | 0.981636 | chr2  | 37208867 | 37214562 | + | 0 NA | intron (intron (N     | 15218  | NM_001322 | 1.01E+08 | Hs.666956NM_001322    | ENSG000002CEBPZOS  | -                                | CEBPZ-AS1 CEBPZ opf protein-coding               |
| chr2-556  | 7.648757 | -0.61362 | 0.84188  | -0.72887 | 0.466082 | 0.981636 | chr2  | 55654056 | 55654426 | + | 0 NA | intron (AluSx4 SI     | -36619 | NM_020465 | 57223    | Hs.516182NM_020465    | ENSG000002PPP4R3B  | -                                | FLFL2 PP4 protein tyrosine kinase protein-coding |
| chr2-652  | 7.648757 | -0.61362 | 0.84188  | -0.72887 | 0.466082 | 0.981636 | chr2  | 65268043 | 65272884 | + | 0 NA | 3' UTR (3' UTR (N     | 42768  | NM_001100 | 10097    | Hs.643727NM_005722    | ENSG000002ACTR2    | -                                | ARP2 actin regulator protein-coding              |
| chr2-2377 | 7.648757 | -0.61362 | 0.84188  | -0.72887 | 0.466082 | 0.981636 | chr2  | 2.38E+08 | 2.38E+08 | + | 0 NA | intron (intron (N     | -39758 | NM_001080 | 375316   | Hs.607266NM_198855    | ENSG000002RBM44    | -                                | RNA binding protein-coding                       |
| chr21-293 | 7.648757 | -0.61362 | 0.84188  | -0.72887 | 0.466082 | 0.981636 | chr21 | 29362211 | 29363408 | + | 0 NA | TTS (NR_C TTS (NR_C   | -9692  | NR_046564 | 1.01E+08 | Hs.326404NR_046564    | BACH1-IT2          | -                                | BACH1 intron ncRNA                               |
| chr3-5261 | 7.648757 | -0.61362 | 0.84188  | -0.72887 | 0.466082 | 0.981636 | chr3  | 52615418 | 52617271 | + | 0 NA | intron (intron (N     | 69255  | NM_001350 | 55193    | Hs.189922NM_018166    | ENSG000002PBRM1    | -                                | BAF180 PF polycomb protein-coding                |
| chr4-754  | 7.648757 | -0.61362 | 0.84188  | -0.72887 | 0.466082 | 0.981636 | chr4  | 75498470 | 75500742 | + | 0 NA | intron (L1MA4 LIN     | 9690   | NR_103725 | 25898    | Hs.48297 NM_015436    | ENSG000002RCHY1    | -                                | ARNIP CH ring finger protein-coding              |
| chr5-278  | 7.648757 | -0.61362 | 0.84188  | -0.72887 | 0.466082 | 0.981636 | chr5  | 72879069 | 72880228 | + | 0 NA | TTS (NR_C TTS (NR_C   | 1057   | NR_039966 | 1.01E+08 | NR_039966             | ENSG000002MIR4804  | -                                | microRNA ncRNA                                   |
| chr5-1518 | 7.648757 | -0.61362 | 0.84188  | -0.72887 | 0.466082 | 0.981636 | chr5  | 1.52E+08 | 1.52E+08 | + | 0 NA | intron (AluSx3 SI     | -31127 | NR_132345 | 1.01E+08 | Hs.587054NM_001278082 | LOC100652          | -                                | uncharacterized ncRNA                            |
| chr5-177  | 7.648757 | -0.61362 | 0.84188  | -0.72887 | 0.466082 | 0.981636 | chr5  | 1.78E+08 | 1.78E+08 | + | 0 NA | intron (intron (N     | -18284 | NM_016222 | 51428    | Hs.484288NM_016222    | ENSG000002DDX41    | -                                | ABS MLP PF DEAD-box protein-coding               |
| chr6-875  | 7.648757 | -0.61362 | 0.84188  | -0.72887 | 0.466082 | 0.981636 | chr6  | 87567371 | 87568670 | + | 0 NA | intron (AluSc8 SI     | 21967  | NM_020322 | 57038    | Hs.485911NM_020322    | ENSG000002RARS2    | -                                | ArgRS DAL arginyl-tRNA-protein-coding            |
| chr6-1444 | 7.648757 | -0.61362 | 0.84188  | -0.72887 | 0.466082 | 0.981636 | chr6  | 14447631 | 14448408 | + | 0 NA | intron (AluSx SIN     | 83780  | NR_132778 | 1.07E+08 | NR_132778             | SNORA98            | -                                | small nucleolar RNA                              |
| chr6-151  | 7.648757 | -0.61362 | 0.84188  | -0.72887 | 0.466082 | 0.981636 | chr6  | 1.51E+08 | 1.51E+08 | + | 0 NA | exon (NM exon (NM     | 23936  | NM_001370 | 9590     | Hs.371242NM_005100    | ENSG000002AKAP12   | -                                | AKAP250 SA-kinase protein-coding                 |
| chr14-30  | 5.913381 | -0.69385 | 0.952681 | -0.72831 | 0.466422 | 0.981636 | chr14 | 30597702 | 30598273 | + | 0 NA | intron (intron (N     | -20630 | NR_151723 | 1.05E+08 | Hs.603989NR_151723    | ENSG000002G2E3-AS1 | -                                | CAT1647 G2E3 antinucRNA                          |
| chr14-905 | 5.913381 | -0.69385 | 0.952681 | -0.72831 | 0.466422 | 0.981636 | chr14 | 90315645 | 90316744 | + | 0 NA | intron (intron (N     | 15747  | NM_001797 | 55051    | Hs.528131NM_001797    | ENSG000002NRDE2    | -                                | C14orf102 NRDE-2, r protein-coding               |
| chr17-366 | 5.913381 | -0.69385 | 0.952681 | -0.72831 | 0.466422 | 0.981636 | chr17 | 3661454  | 3662949  | + | 0 NA | TTS (NM_C TTS (NM_C   | 6377   | NM_014604 | 30851    | Hs.12956 NM_014604    | ENSG000002TAX1BP3  | -                                | TIP-1 TIF Tax1 binc protein-coding               |
| chr17-161 | 5.913381 | -0.69385 | 0.952681 | -0.72831 | 0.466422 | 0.981636 | chr17 | 16107593 | 16108129 | + | 0 NA | intron (AluY SINE     | 46235  | NR_145787 | 1.1E+08  | NR_145787             | SNORD163           | -                                | small nucleolar RNA                              |
| chr19-115 | 5.913381 | -0.69385 | 0.952681 | -0.72831 | 0.466422 | 0.981636 | chr19 | 11599367 | 11601208 | + | 0 NA | intron (AluY SINE     | 2804   | NM_145295 | 199692   | Hs.526666NM_145295    | ENSG000002ZNF627   | -                                | zinc finger protein-coding                       |
| chr19-525 | 5.913381 | -0.69385 | 0.952681 | -0.72831 | 0.466422 | 0.981636 | chr19 | 52592194 | 52595094 | + | 0 NA | Intergeni SVA_D Ret   | -3040  | NR_023311 | 7696     | Hs.373646NM_003438    | ZNF137P            | -                                | ZNF137 pf zinc finger pseudo                     |
| chr2-691  | 5.913381 | -0.69385 | 0.952681 | -0.72831 | 0.466422 | 0.981636 | chr2  | 69165530 | 69166717 | + | 0 NA | intron (NL4_A_Mam     | 62441  | NR_036073 | 1E+08    | NR_036073             | ENSG000002MIR3126  | -                                | mir-3126 microRNA ncRNA                          |
| chr2-1137 | 5.913381 | -0.69385 | 0.952681 | -0.72831 | 0.466422 | 0.981636 | chr2  | 1.14E+08 | 1.14E+08 | + | 0 NA | exon (NM exon (NM     | -1758  | NR_039944 | 1.01E+08 | NR_039944             | ENSG000002MIR4782  | -                                | microRNA ncRNA                                   |
| chr5-1474 | 5.913381 | -0.69385 | 0.952681 | -0.72831 | 0.466422 | 0.981636 | chr5  | 1.47E+08 | 1.47E+08 | + | 0 NA | intron (intron (N     | 52564  | NM_001387 | 1809     | Hs.519655NM_001387    | ENSG000002DPYSL3   | -                                | CRMP-4 CF dihydropyridine protein-coding         |
| chr8-132  | 5.913381 | -0.69385 | 0.952681 | -0.72831 | 0.466422 | 0.981636 | chr8  | 1.32E+08 | 1.32E+08 | + | 0 NA | non-coding-non-coding | 46657  | NM_001088 | 729330   | Hs.653174NM_001088    | ENSG000002OC90     | -                                | PLA2L otoconin protein-coding                    |
| chr8-140  | 5.913381 | -0.69385 | 0.952681 | -0.72831 | 0.466422 | 0.981636 | chr8  | 1.41E+08 | 1.41E+08 | + | 0 NA | intron (AluJr SIN     | 56431  | NM_001164 | 27161    | Hs.660189NM_001164    | ENSG000002AG02     | -                                | CASC7 EIF argonaute protein-coding               |
| chr1-193  | 7.402035 | 0.625434 | 0.859241 | 0.727891 | 0.466681 | 0.981636 | chr1  | 19382498 | 19382738 | + | 0 NA | intron (intron (N     | 70292  | NM_001040 | 54896    | Hs.647622NM_017766    | ENSG000002SLC66A1  | -                                | LAAT-1 L soluble cytochrome protein-coding       |
| chr17-161 | 7.402035 | 0.625434 | 0.859241 | 0.727891 | 0.466681 | 0.981636 | chr17 | 16198456 | 16198661 | + | 0 NA | intron (AluSp SIN     | -3919  | NM_001190 | 9611     | Hs.462322NM_006311    | ENSG000002NCOR1    | -                                | N-CoR N-C nuclear receptor protein-coding        |
| chr19-19  | 7.402035 | 0.625434 | 0.859241 | 0.727891 | 0.466681 | 0.981636 | chr19 | 19648989 | 19649819 | + | 0 NA | intron (intron (N     | -5747  | NM_016573 | 51291    | Hs.49427 NM_016573    | ENSG000002GMIP     | -                                | ARHGAP46 GEM interprotein-coding                 |
| chr3-566  | 7.402035 | 0.625434 | 0.859241 | 0.727891 | 0.466681 | 0.981636 | chr3  | 56638209 | 56639142 | + | 0 NA | intron (intron (N     | 25371  | NM_015224 | 23272    | Hs.116877NM_015224    | ENSG000002TASOR    | -                                | C3orf63 F transcriptase protein-coding           |
| chr7-924  | 7.402035 | 0.625434 | 0.859241 | 0.727891 | 0.466681 | 0.981636 | chr7  | 92490799 | 92491616 | + | 0 NA | intron (intron (N     | -13246 | NM_001133 | 30816    | NR_014590             | ENSG000002ERVW-1   | -                                | ENV ENVW endogenous protein-coding               |
| chr7-129  | 7.402035 | 0.625434 | 0.859241 | 0.727891 | 0.466681 | 0.981636 | chr7  | 1.3E+08  | 1.3E+08  | + | 0 NA | intron (FAM SINE      | 13785  | NM_003344 | 7328     | Hs.643546NM_003344    | ENSG000002CUBE2H   | -                                | E2-20K G tubiquitin protein-coding               |
| chr2-6124 | 11.57131 | -0.50966 | 0.700198 | -0.72787 | 0.466691 | 0.981636 | chr2  | 61240692 | 61241370 | + | 0 NA | intron (intron (N     | 63613  | NR_152211 | 130872   | Hs.655602NM_152392    | ENSG000002AHS2P    | -                                | AHA1 AHS activator pseudo                        |
| chr1-184  | 10.68385 | 0.527865 | 0.725344 | 0.72745  | 0.46677  | 0.981636 | chr1  | 1.85E+08 | 1.85E+08 | + | 0 NA | exon (NM exon (NM     | 48163  | NM_001315 | 80267    | Hs.523811NM_025191    | ENSG000002EDEM3    | -                                | Clorf22 ER degrad protein-coding                 |
| chr16-447 | 7.982752 | 0.60712  | 0.834334 | 0.72767  | 0.466816 | 0.981636 | chr16 | 47503077 | 47504058 | + | 0 NA | intron (AluSc SIN     | 42236  | NM_001031 | 5257     | Hs.78060 NM_000295    | ENSG000002PKHK     | -                                | phosphorylation protein-coding                   |
| chr11-43  | 7.409893 | 0.623274 | 0.85664  | 0.72758  | 0        |          |       |          |          |   |      |                       |        |           |          |                       |                    |                                  |                                                  |



|                    |           |          |          |          |          |       |                 |                  |           |                  |                     |                   |                        |                    |                          |                |                                       |
|--------------------|-----------|----------|----------|----------|----------|-------|-----------------|------------------|-----------|------------------|---------------------|-------------------|------------------------|--------------------|--------------------------|----------------|---------------------------------------|
| chr1-1514 7.957329 | 0.602018  | 0.830856 | 0.724576 | 0.468712 | 0.981636 | chr1  | 1.51E+08        | 1.51E+08         | +         | 0 NA             | intron (Nintron (N  | 950 NM_207171     | 23126 Hs. 489875       | NR_01510C          | ENSG000003POGZ           | MRD37 WHS      | pogo trar protein-coding              |
| chr16-507 7.957329 | 0.602018  | 0.830856 | 0.724576 | 0.468712 | 0.981636 | chr16 | 50783336        | 50784012         | +         | 0 NA             | intron (NAluSx SIN  | -22998 NR_146575  | 1.05E+08               | NR_146575          | ENSG000003LINC02166      | -              | long intncRNA                         |
| chr16-748 7.957329 | 0.602018  | 0.830856 | 0.724576 | 0.468712 | 0.981636 | chr16 | 74884433        | 74885047         | +         | 0 NA             | intron (Nl2c LINE   | 100383 NM_030581  | 79726 Hs. 280951       | NM_030581          | ENSG000003WDR59          | CDW12 FPF      | WD repeat protein-coding              |
| chr18-361 7.957329 | 0.602018  | 0.830856 | 0.724576 | 0.468712 | 0.981636 | chr18 | 36115938        | 36116710         | +         | 0 NA             | intron (NLMC4 LIN   | 13016 NM_012319   | 25800 Hs. 79136        | NM_012319          | ENSG000003SLC39A6        | LIV-1 ZIF      | solute c protein-coding               |
| chr1-1481 10.67414 | 0.520972  | 0.719081 | 0.724497 | 0.468761 | 0.981636 | chr1  | 1.48E+08        | 1.48E+08         | +         | 0 NA             | intron (Nl1P2 LINE  | 22359 NM_001101   | 20030 Hs. 721558       | NR_183372          | ENSG000003NBPF1          | NBPF24         | NBPF mem protein-coding               |
| chr1-1514 10.67414 | 0.520972  | 0.719081 | 0.724497 | 0.468761 | 0.981636 | chr1  | 1.51E+08        | 1.51E+08         | +         | 0 NA             | exon (NM exon (NM   | 7434 NM_002796    | 5692 Hs. 89545         | NM_002796          | ENSG000003PSMB4          | HN3 HsN3       | proteasome protein-coding             |
| chr1-1567 10.67414 | 0.520972  | 0.719081 | 0.724497 | 0.468761 | 0.981636 | chr1  | 1.57E+08        | 1.57E+08         | +         | 0 NA             | intron (Nintron (N  | -21465 NM_001007  | 4914 Hs. 406293        | NR_002525          | ENSG000003NTRK1          | MTC TRK        | neurotrophin protein-coding           |
| chr1-2226 10.67414 | 0.520972  | 0.719081 | 0.724497 | 0.468761 | 0.981636 | chr1  | 2.23E+08        | 2.23E+08         | +         | 0 NA             | intron (Nintron (N  | 8572 NM_001300    | 375056 Hs. 118474      | NR_198551          | ENSG000003MIA3           | ARNT D3C2MIA   | SH3 c protein-coding                  |
| chr1-2578 7.640899 | -0.61198  | 0.844727 | -0.72447 | 0.468774 | 0.981636 | chr1  | 25783379        | 25783902         | +         | 0 NA             | intron (Nintron (N  | -16553 NM_206926  | 57190 Hs. 32339        | NR_020451          | ENSG000003SELENON        | CFTD MDR5      | selenoprotein-coding                  |
| chr10-145 7.640899 | -0.61198  | 0.844727 | -0.72447 | 0.468774 | 0.981636 | chr10 | 45975421        | 45978514         | +         | 0 NA             | intron (NLMB8 LIN   | 4478 NM_006327    | 1E+08 Hs. 52430        | NR_006327          | ENSG000003TIMM23         | TIM23          | translocase protein-coding            |
| chr10-127 7.640899 | -0.61198  | 0.844727 | -0.72447 | 0.468774 | 0.981636 | chr10 | 69689 NM_001035 | 642938 Hs. 61388 | NR_001035 | ENSG000003INSY2A | 642938 Hs. 61388    | NR_001035         | ENSG000003INSY2A       | C10orf14           | inhibitor protein-coding |                |                                       |
| chr11-103 7.640899 | -0.61198  | 0.844727 | -0.72447 | 0.468774 | 0.981636 | chr11 | 1.03E+08        | 1.03E+08         | +         | 0 NA             | intron (Nintron (N  | 14685 NM_001318   | 84259 Hs. 50371        | NR_032299          | ENSG000003DCUN1D5        | SCCR05         | defective protein-coding              |
| chr11-106 7.640899 | -0.61198  | 0.844727 | -0.72447 | 0.468774 | 0.981636 | chr11 | 1.06E+08        | 1.06E+08         | +         | 0 NA             | intron (Nintron (N  | -2620 NM_001330   | 143879 Hs. 10194       | NR_152433          | ENSG000003KBTBD3         | BKLBH3         | kelch repeat protein-coding           |
| chr14-305 7.640899 | -0.61198  | 0.844727 | -0.72447 | 0.468774 | 0.981636 | chr14 | 30904142        | 30906837         | +         | 0 NA             | exon (NM exon (NM   | -15681 NR_038356  | 1.01E+08 Hs. 72919     | NR_038356          | ENSG000003LOC1005006     | -              | uncharacterized ncRNA                 |
| chr15-226 7.640899 | -0.61198  | 0.844727 | -0.72447 | 0.468774 | 0.981636 | chr15 | 22672168        | 22675652         | +         | 0 NA             | intron (NMLT1A LTF  | 9171 NR_003521    | 339005 Hs. 21267       | NR_003521          | WHAMMP3                  | WHAMML1 WAS    | proteasome pseudo                     |
| chr17-307 7.640899 | -0.61198  | 0.844727 | -0.72447 | 0.468774 | 0.981636 | chr17 | 30759357        | 30762019         | +         | 0 NA             | intron (Nintron (N  | 51080 NR_144399   | 440423 Hs. 62888       | NR_024187          | SUZ12P1                  | SUZ12P         | SUZ12 pseudo                          |
| chr18-363 7.640899 | -0.61198  | 0.844727 | -0.72447 | 0.468774 | 0.981636 | chr18 | 36227362        | 36228255         | +         | 0 NA             | intron (Nl1PA13 LI  | 40311 NM_017947   | 55034 Hs. 40502        | NR_017947          | ENSG000003MOCOS          | HMC5 MCS       | molybdenum protein-coding             |
| chr19-344 7.640899 | -0.61198  | 0.844727 | -0.72447 | 0.468774 | 0.981636 | chr19 | 34351867        | 34352091         | +         | 0 NA             | intron (NAluJr4 SI  | -12761 NM_001184  | 2821 Hs. 46647         | NR_000177          | ENSG000003GPI            | AMF GNP1       | glucose-6-phosphate protein-coding    |
| chr2-3858 7.640899 | -0.61198  | 0.844727 | -0.72447 | 0.468774 | 0.981636 | chr2  | 38580166        | 38581643         | +         | 0 NA             | intron (Nintron (N  | 22024 NM_138394   | 92906 Hs. 44549        | NR_138394          | ENSG000003HNRNPLL        | HNRNPLL SF     | heterogeneous protein-coding          |
| chr3-9965 7.640899 | -0.61198  | 0.844727 | -0.72447 | 0.468774 | 0.981636 | chr3  | 99691909        | 99692231         | +         | 0 NA             | intron (Nintron (N  | 53476 NM_003551   | 1295 Hs. 65454         | NR_001850          | ENSG000003COL8A1         | C3orf7         | collagen protein-coding               |
| chr3-1207 7.640899 | -0.61198  | 0.844727 | -0.72447 | 0.468774 | 0.981636 | chr3  | 1.21E+08        | 1.21E+08         | +         | 0 NA             | intron (Nl1PA3 LIN  | 4992 NM_005513    | 2960 Hs. 44527         | NR_005513          | ENSG000003GTF2E1         | FE TF2E1       | general transcription factor-coding   |
| chr3-1237 7.640899 | -0.61198  | 0.844727 | -0.72447 | 0.468774 | 0.981636 | chr3  | 1.24E+08        | 1.24E+08         | +         | 0 NA             | intron (NAluJo SIN  | 40390 NR_046625   | 1.01E+08 Hs. 66731     | NR_046625          | ENSG000003MYLK-AS2       | -              | MYLK antncRNA                         |
| chr3-1884 7.640899 | -0.61198  | 0.844727 | -0.72447 | 0.468774 | 0.981636 | chr3  | 1.88E+08        | 1.88E+08         | +         | 0 NA             | intron (Nl1PA7 LIN  | 123587 NR_046625  | 1.01E+08 Hs. 67499     | NR_046625          | ENSG000003LPP-AS1        | -              | LPP antisense ncRNA                   |
| chr5-3618 7.640899 | -0.61198  | 0.844727 | -0.72447 | 0.468774 | 0.981636 | chr5  | 36182555        | 36185248         | +         | 0 NA             | exon (NM exon (NM   | 31790 NM_032637   | 6502 Hs. 52348         | NR_005983          | ENSG000003SKP2           | FBL1 FBX1      | S-phase kinase protein-coding         |
| chr5-1135 7.640899 | -0.61198  | 0.844727 | -0.72447 | 0.468774 | 0.981636 | chr5  | 1.14E+08        | 1.14E+08         | +         | 0 NA             | intron (Nl1PA11 LI  | 59827 NM_001345   | 64848 Hs. 23194        | NR_022828          | ENSG000003YTHDC2         | CAHL HYTH      | YTH domain protein-coding             |
| chr7-1027 7.640899 | -0.61198  | 0.844727 | -0.72447 | 0.468774 | 0.981636 | chr7  | 1.03E+08        | 1.03E+08         | +         | 0 NA             | intron (Nl1PA4 LIN  | 32279 NM_001145   | 22234 Hs. 20254        | NR_147194          | ENSG000003FAM185A        | -              | family wiprotein-coding               |
| chr7-1212 7.640899 | -0.61198  | 0.844727 | -0.72447 | 0.468774 | 0.981636 | chr7  | 1.21E+08        | 1.21E+08         | +         | 0 NA             | intron (Nl2b LINE   | -56615 NM_016087  | 51384 Hs. 27237        | NR_016087          | ENSG000003WNT16          | -              | Wnt family protein-coding             |
| chr9-6015 7.640899 | -0.61198  | 0.844727 | -0.72447 | 0.468774 | 0.981636 | chr9  | 6013672         | 6014338          | +         | 0 NA             | exon (NM exon (NM   | 1619 NM_001243    | 26953 Hs. 16749        | NR_012411          | ENSG000003RANBP6         | -              | RAN binding protein-coding            |
| chr21-348 9.853447 | -0.54154  | 0.747598 | -0.72437 | 0.46884  | 0.981636 | chr21 | 34848183        | 34848687         | +         | 0 NA             | intron (Nintron (N  | 40264 NM_001001   | 861 Hs. 14926          | NR_001754          | ENSG000003RUNX1          | AML1 AML1      | RUNX family protein-coding            |
| chr5-9552 9.853447 | -0.54154  | 0.747598 | -0.72437 | 0.46884  | 0.981636 | chr5  | 95528149        | 95529686         | +         | 0 NA             | intron (Nintron (N  | 26088 NM_014638   | 9652 Hs. 48286         | NR_014638          | ENSG000003TTC37          | KIAA0372       | tetratricopeptide protein-coding      |
| chr8-131 9.853447  | -0.54154  | 0.747598 | -0.72437 | 0.46884  | 0.981636 | chr8  | 13105860        | 13108328         | +         | 0 NA             | intron (Nintron (N  | 9150 NM_001164    | 10395 Hs. 13429        | NR_006094          | ENSG000003DLCL1          | ARHGAP7 DLCL1  | Rho protein-coding                    |
| chr1-1565 4.179855 | -0.82183  | 1.134615 | -0.72432 | 0.468868 | 0.981636 | chr1  | 15695662        | 15695365         | +         | 0 NA             | intron (NAluJb SIN  | 11688 NM_015164   | 23207 Hs. 64677        | NR_015164          | ENSG000003PLEKHM2        | SKPIN          | pleckstrin protein-coding             |
| chr13-326 4.179855 | -0.82183  | 1.134615 | -0.72432 | 0.468868 | 0.981636 | chr13 | 32653155        | 32655455         | +         | 0 NA             | intron (Nintron (N  | 67858 NM_015032   | 23047 Hs. 74490        | NR_015032          | ENSG000003PDS5B          | ARLIP ASE      | PDS5 cohesin protein-coding           |
| chr16-435 4.179855 | -0.82183  | 1.134615 | -0.72432 | 0.468868 | 0.981636 | chr16 | 4396952         | 4397769          | +         | 0 NA             | intron (NAluSz SIN  | 18537 NM_001351   | 79585 Hs. 43795        | NR_024533          | ENSG000003COR07          | O61001 B1      | coronin 7 protein-coding              |
| chr17-355 4.179855 | -0.82183  | 1.134615 | -0.72432 | 0.468868 | 0.981636 | chr17 | 35354661        | 35355141         | +         | 0 NA             | intron (Nintron (N  | 18720 NM_001104   | 91607 Hs. 74505        | NR_152270          | ENSG000003SLFN11         | SLFN8/9        | schlafen protein-coding               |
| chr2-1774 4.179855 | -0.82183  | 1.134615 | -0.72432 | 0.468868 | 0.981636 | chr2  | 17729667        | 17773956         | +         | 0 NA             | intron (Nintron (N  | 19323 NM_001130   | 34854 Hs. 50499        | NR_017855          | ENSG000003GEN1           | Gen            | GEN1 Holliday junction protein-coding |
| chr2-3055 4.179855 | -0.82183  | 1.134615 | -0.72432 | 0.468868 | 0.981636 | chr2  | 30550844        | 30552750         | +         | 0 NA             | intron (NMLT1D LTF  | 104551 NM_001304  | 253558 Hs. 46804       | NR_182551          | ENSG000003CLAT1          | 1AGPAT8 A      | lysocardiolipin protein-coding        |
| chr2-281 4.179855  | -0.82183  | 1.134615 | -0.72432 | 0.468868 | 0.981636 | chr2  | 1.28E+08        | 1.28E+08         | +         | 0 NA             | intron (Nintron (N  | 73149 NR_0027671  | 56886 Hs. 74330        | NR_020120          | ENSG000003UGGT1          | HUGT1 UGR      | UDP-glucuronosyltransferase-coding    |
| chr20-635 4.179855 | -0.82183  | 1.134615 | -0.72432 | 0.468868 | 0.981636 | chr20 | 63505227        | 63509805         | +         | 0 NA             | intron (Nintron (N  | 671 NM_001199     | 54963 Hs. 50499        | NR_017855          | ENSG000003UCKL1          | UCKL1 URK      | uridine-5-phosphate protein-coding    |
| chr4-8481 4.179855 | -0.82183  | 1.134615 | -0.72432 | 0.468868 | 0.981636 | chr4  | 84816184        | 84817525         | +         | 0 NA             | intron (NMIRb SINE  | -148762 NR_152774 | 404201 Hs. 46730       | NR_205857          | ENSG000003WDFY3-AS2      | C4orf12 F      | WDFY3 antisense ncRNA                 |
| chr6-149 4.179855  | -0.82183  | 1.134615 | -0.72432 | 0.468868 | 0.981636 | chr6  | 1.5E+08         | 1.5E+08          | +         | 0 NA             | intron (Nintron (N  | -8246 NR_077247   | 645958 Hs. 63261       | NR_077247          | RPS18P9                  | RPS18          | ribosomal pseudo                      |
| chr6-1571 4.179855 | -0.82183  | 1.134615 | -0.72432 | 0.468868 | 0.981636 | chr6  | 1.57E+08        | 1.57E+08         | +         | 0 NA             | intron (Nintron (N  | 130987 NR_001363  | 57492 Hs. 29158        | NR_017511          | ENSG000003ARID1B         | GAG3-5 BAF     | AT-ribosome protein-coding            |
| chr8-3844 4.179855 | -0.82183  | 1.134615 | -0.72432 | 0.468868 | 0.981636 | chr8  | 38449759        | 38450575         | +         | 0 NA             | intron (Nintron (N  | 17557 NM_001174   | 2260 Hs. 26488         | NR_015850          | ENSG000003FGFR1          | BFGFR CD       | fibroblast growth factor-coding       |
| chr8-1233 4.179855 | -0.82183  | 1.134615 | -0.72432 | 0.468868 | 0.981636 | chr8  | 1.23E+08        | 1.23E+08         | +         | 0 NA             | intron (NAluJr4 SI  | -26126 NR_037511  | 1.01E+08 Hs. NR_037511 | ENSG000003MIR548A1 | -                        | microRNA ncRNA |                                       |
| chrX-1475 4.179855 | -0.82183  | 1.134615 | -0.72432 | 0.468868 | 0.981636 | chrX  | 1.48E+08        | 1.48E+08         | +         | 0 NA             | intron (NmamTip2 S  | 32095 NM_001185   | 2332 Hs. 10318         | NR_020204          | ENSG000003FMR1           | FMRP FRA       | fragile X protein-coding              |
| chr17-804 5.254385 | -0.746747 | 1.031022 | -0.72429 | 0.468895 | 0.981636 | chr17 | 80419551        | 80420085         | +         | 0 NA             | TTS (NR_TTS (NR_C   | 400 NR_039883     | 1.01E+08 Hs. NR_039883 | ENSG000003MIR4730  | -                        | microRNA ncRNA |                                       |
| chr2-2082 5.254385 | -0.746747 | 1.031022 | -0.72429 | 0.468895 | 0.981636 | chr2  | 2.08E+08        | 2.08E+08         | +         | 0 NA             | intron (NMIRb SINE  | 11920 NM_001282   | 3417 Hs. 59342         | NR_005899          | ENSG000003IDH1           | HEL-216 E      | isocitrate dehydrogenase-coding       |
| chr19-597 7.171585 | -0.64542  | 0.891607 | -0.72389 | 0.469136 | 0.981636 | chr19 | 57931652        | 57931851         | +         | 0 NA             | intron (NAluJr SINE | 3651 NM_001317    | 147686 Hs. 66072       | NR_133460          | ENSG000003ZNF418         | -              | zinc finger protein-coding            |
| chr4-190 7.171585  | -0.64542  | 0.891607 | -0.72389 | 0.469136 | 0.981636 | chr4  | 19              |                  |           |                  |                     |                   |                        |                    |                          |                |                                       |



|           |          |          |          |          |          |          |       |          |          |   |      |                     |                  |           |                        |                         |                                       |                                  |
|-----------|----------|----------|----------|----------|----------|----------|-------|----------|----------|---|------|---------------------|------------------|-----------|------------------------|-------------------------|---------------------------------------|----------------------------------|
| chr2-3333 | 5.897665 | -0.68976 | 0.956857 | -0.72086 | 0.470996 | 0.981636 | chr2  | 33335366 | 33336173 | + | 0 NA | intron (Nintron (N  | -82747 NR_039628 | 1.01E+08  | NR_039628              | ENSG00000MIR4430        | -                                     | microRNA ncRNA                   |
| chr2-1444 | 5.897665 | -0.68976 | 0.956857 | -0.72086 | 0.470996 | 0.981636 | chr2  | 1.44E+08 | 1.44E+08 | + | 0 NA | intron (NMIR SINE   | -86050 NM_001354 | 79712     | Hs. 44780              | NR_024656               | ENSG00000GTD1C1                       | Hmat-Xa nglycosyl protein-coding |
| chr2-171  | 5.897665 | -0.68976 | 0.956857 | -0.72086 | 0.470996 | 0.981636 | chr2  | 1.71E+08 | 1.71E+08 | + | 0 NA | intron (Nintron (N  | -12020 NM_001136 | 9874      | Hs. 744917NM_01229C    | ENSG00000CTLK1          | PKU-beta tousled lprotein-coding      |                                  |
| chr2-182  | 5.897665 | -0.68976 | 0.956857 | -0.72086 | 0.470996 | 0.981636 | chr2  | 1.83E+08 | 1.83E+08 | + | 0 NA | intron (Nintron (N  | 49063 NM_013436  | 10787     | Hs. 603732NM_01343C    | ENSG00000NCKAP1         | HEM2 NAP NCK assoc protein-coding     |                                  |
| chr21-29  | 5.897665 | -0.68976 | 0.956857 | -0.72086 | 0.470996 | 0.981636 | chr21 | 29037248 | 29040933 | + | 0 NA | exon (NM exon (NM   | 14422 NM_006447  | 10600     | Hs. 99819              | NR_006447               | ENSG00000USP16                        | UBP-MUB ubiquitin protein-coding |
| chr3-239  | 5.897665 | -0.68976 | 0.956857 | -0.72086 | 0.470996 | 0.981636 | chr3  | 23954880 | 23956083 | + | 0 NA | intron (Nintron (N  | 9360 NM_001145   | 9975      | Hs. 37288              | NR_00512C               | ENSG00000CNR1D2                       | BD73 EAR-nuclear rprotein-coding |
| chr4-564  | 5.897665 | -0.68976 | 0.956857 | -0.72086 | 0.470996 | 0.981636 | chr4  | 56450897 | 56454541 | + | 0 NA | intron (Nintron (N  | -14898 NM_001267 | 6731      | Hs. 237822NM_006947    | ENSG00000SRP72          | BMFF EMFS signal rprotein-coding      |                                  |
| chr4-942  | 5.897665 | -0.68976 | 0.956857 | -0.72086 | 0.470996 | 0.981636 | chr4  | 94285059 | 94286376 | + | 0 NA | intron (Nintron (N  | 32408 NM_001254  | 56916     | Hs. 414006NM_02015C    | ENSG00000SMARCAD1       | ADERM BAS SWI SNF-1 protein-coding    |                                  |
| chr4-105  | 5.897665 | -0.68976 | 0.956857 | -0.72086 | 0.470996 | 0.981636 | chr4  | 1.06E+08 | 1.06E+08 | + | 0 NA | intron (NAluSz SIN  | 16246 NM_020395  | 57117     | Hs. 480454NM_02039C    | ENSG00000INTS12         | INT12 PHF integrat protein-coding     |                                  |
| chr5-6917 | 5.897665 | -0.68976 | 0.956857 | -0.72086 | 0.470996 | 0.981636 | chr5  | 69172135 | 69178131 | + | 0 NA | intron (Nintron (N  | 7983 NM_031966   | 891       | Hs. 23960              | NR_031966               | ENSG00000CCNB1                        | CCNB cyclin B protein-coding     |
| chr5-874  | 5.897665 | -0.68976 | 0.956857 | -0.72086 | 0.470996 | 0.981636 | chr5  | 87402317 | 87403741 | + | 0 NA | intron (Nintron (N  | 9875 NM_001195   | 902       | Hs. 292524NM_00123C    | ENSG00000CCNH           | CAK CycH cyclin H protein-coding      |                                  |
| chr5-177  | 5.897665 | -0.68976 | 0.956857 | -0.72086 | 0.470996 | 0.981636 | chr5  | 1.77E+08 | 1.77E+08 | + | 0 NA | 3' UTR (N3' UTR (N  | 6626 NM_001031   | 53917     | Hs. 16258              | NR_130781               | ENSG00000CRAB24                       | - RAB24, m protein-coding        |
| chr6-333  | 5.897665 | -0.68976 | 0.956857 | -0.72086 | 0.470996 | 0.981636 | chr6  | 33300475 | 33301571 | + | 0 NA | 3' UTR (N3' UTR (N  | -1635 NM_001243  | 5863      | Hs. 509622NM_004761    | ENSG00000RGL2           | HKE1.5 KFR sol guanine protein-coding |                                  |
| chr8-645  | 5.897665 | -0.68976 | 0.956857 | -0.72086 | 0.470996 | 0.981636 | chr8  | 23544098 | 23544591 | + | 0 NA | intron (Nintron (N  | 15571 NM_001317  | 51312     | Hs. 596022NM_01661C    | ENSG00000SLC25A37       | HTO15 MF soluble c protein-coding     |                                  |
| chr9-6487 | 5.897665 | -0.68976 | 0.956857 | -0.72086 | 0.470996 | 0.981636 | chr9  | 6487996  | 6488507  | + | 0 NA | intron (NAluJb SIN  | 75052 NM_15289C  | 115426    | Hs. 493401NM_15289C    | ENSG00000UHRP2          | NIRP RNF ubiquitin protein-coding     |                                  |
| chrX-123  | 5.897665 | -0.68976 | 0.956857 | -0.72086 | 0.470996 | 0.981636 | chrX  | 1.24E+08 | 1.24E+08 | + | 0 NA | intron (NAluSj SIN  | 32227 NM_001167  | 331       | Hs. 356077NM_001167    | ENSG00000XIAP           | AP13 BIRC-X-linked protein-coding     |                                  |
| chr11-68  | 9.309712 | -0.57032 | 0.791247 | -0.72079 | 0.471041 | 0.981636 | chr11 | 68034257 | 68034599 | + | 0 NA | TTS (NR_C TTS (NR_C | 531 NR_03984C    | NR_03984C | ENSG00000MIR4691       | mir-4691 microRNA ncRNA |                                       |                                  |
| chr1-155  | 10.682   | 0.51947  | 0.720781 | 0.720704 | 0.471092 | 0.981636 | chr1  | 1.33E+08 | 1.33E+08 | + | 0 NA | intron (Nintron (N  | 3071 NR_024117   | 1E+08     | Hs. 656361NR_024117    | MSTO2P                  | MSTO2 misato f pseudo                 |                                  |
| chr1-155  | 10.682   | 0.51947  | 0.720781 | 0.720704 | 0.471092 | 0.981636 | chr1  | 1.56E+08 | 1.56E+08 | + | 0 NA | intron (Nintron (N  | 9510 NR_132762   | 1.07E+08  | NR_132762              | SCARNA26A               | - small CA ncRNA                      |                                  |
| chr1-2051 | 10.682   | 0.51947  | 0.720781 | 0.720704 | 0.471092 | 0.981636 | chr1  | 2.05E+08 | 2.05E+08 | + | 0 NA | intron (Nintron (N  | -36113 NM_001193 | 5929      | Hs. 519232NM_005057    | ENSG00000RBBP5          | RBQ3 SWD1RB bindir protein-coding     |                                  |
| chr12-132 | 10.682   | 0.51947  | 0.720781 | 0.720704 | 0.471092 | 0.981636 | chr12 | 1.33E+08 | 1.33E+08 | + | 0 NA | intron (NLA_A Mam   | 11449 NM_183238  | 1E+08     | Hs. 29698              | NR_183238               | ENSG00000ZNF605                       | 1E+08 Hs. 29698                  |
| chr19-44  | 10.682   | 0.51947  | 0.720781 | 0.720704 | 0.471092 | 0.981636 | chr19 | 44061063 | 44067853 | + | 0 NA | intron (Nintron (N  | -7701 NM_001037  | 342909    | Hs. 445395NM_001037    | ENSG00000ZNF284         | ZNF284L zinc fing protein-coding      |                                  |
| chr14-10  | 6.921163 | 0.656394 | 0.910775 | 0.720698 | 0.471095 | 0.981636 | chr14 | 1.03E+08 | 1.03E+08 | + | 0 NA | intron (Nintron (N  | 53701 NM_006035  | 9578      | Hs. 654634NM_00603C    | ENSG00000CDC42BPB       | MRCBK CDC42 bir protein-coding        |                                  |
| chr1-169  | 7.939763 | 0.594938 | 0.825666 | 0.720555 | 0.471183 | 0.981636 | chr1  | 1.7E+08  | 1.7E+08  | + | 0 NA | intron (Nintron (N  | 24636 NM_020423  | 57147     | Hs. 435566NM_02042C    | ENSG00000SCYL3          | PACE-1 PASCY1 like protein-coding     |                                  |
| chr11-104 | 7.939763 | 0.594938 | 0.825666 | 0.720555 | 0.471183 | 0.981636 | chr11 | 10462144 | 10465204 | + | 0 NA | intron (Nintron (N  | 2543 NM_001172   | 272       | Hs. 501896NM_00048C    | ENSG00000AMPD3          | - adenosine protein-coding            |                                  |
| chr11-45  | 7.939763 | 0.594938 | 0.825666 | 0.720555 | 0.471183 | 0.981636 | chr11 | 45880622 | 45889091 | + | 0 NA | intron (Nintron (N  | -4845 NM_005456  | 9479      | Hs. 234245NM_00545C    | ENSG00000MAPK8IP1       | IB1 JIP-1 mitogen- protein-coding     |                                  |
| chr11-12  | 7.939763 | 0.594938 | 0.825666 | 0.720555 | 0.471183 | 0.981636 | chr11 | 1.3E+08  | 1.3E+08  | + | 0 NA | intron (NLA_A Mam   | 17771 NM_00616E  | 4798      | Hs. 530525NM_00616C    | ENSG00000FRBK           | IN080G nuclear f protein-coding       |                                  |
| chr17-29  | 7.939763 | 0.594938 | 0.825666 | 0.720555 | 0.471183 | 0.981636 | chr17 | 29655288 | 29656108 | + | 0 NA | intron (Nintron (N  | -34275 NM_032854 | 84940     | Hs. 143045NM_03285C    | ENSG00000COR06          | - coronin f protein-coding            |                                  |
| chr18-70  | 7.939763 | 0.594938 | 0.825666 | 0.720555 | 0.471183 | 0.981636 | chr18 | 70102876 | 70103177 | + | 0 NA | intron (NSVA_A Ret  | 102661 NM_001318 | 25914     | Hs. 654809NM_17363C    | ENSG00000RTTN           | MSSP rotatin protein-coding           |                                  |
| chr19-39  | 7.939763 | 0.594938 | 0.825666 | 0.720555 | 0.471183 | 0.981636 | chr19 | 39369486 | 39370741 | + | 0 NA | exon (NM exon (NM   | 20993 NM_00125E  | 54623     | Hs. 466714NM_01908C    | ENSG00000PAF1           | PAF1 hom protein-coding               |                                  |
| chr6-30   | 7.939763 | 0.594938 | 0.825666 | 0.720555 | 0.471183 | 0.981636 | chr6  | 30329884 | 30331591 | + | 0 NA | intron (Nintron (N  | 1426 NM_001195   | 202658    | Hs. 413493NM_001195    | ENSG00000TRIM39-RF      | TRIM39R TRIM39-RF protein-coding      |                                  |
| chr6-37   | 7.939763 | 0.594938 | 0.825666 | 0.720555 | 0.471183 | 0.981636 | chr6  | 37473878 | 37475767 | + | 0 NA | intron (Nintron (N  | 25071 NM_138499  | 154647    | Hs. 284207NM_13849C    | ENSG00000CCDC167        | G6orf129 coiled-c protein-coding      |                                  |
| chr7-12   | 7.939763 | 0.594938 | 0.825666 | 0.720555 | 0.471183 | 0.981636 | chr7  | 1.29E+08 | 1.29E+08 | + | 0 NA | IntergeniAluSz SIN  | -30964 NR_024368 | 402483    | Hs. 722355NM_001039682 | LINC0100C               | long intcncRNA                        |                                  |
| chr1-16   | 5.19568  | 0.735154 | 1.020517 | 0.720374 | 0.471295 | 0.981636 | chr1  | 16393741 | 16394625 | + | 0 NA | intron (NCR1_Mam I  | 26941 NR_073501  | 26099     | Hs. 252967NM_001114    | ENSG00000CZRDI          | C1orf144 SUZ RNA t protein-coding     |                                  |
| chr1-19   | 5.19568  | 0.735154 | 1.020517 | 0.720374 | 0.471295 | 0.981636 | chr1  | 19324003 | 19324959 | + | 0 NA | intron (Nintron (N  | 12155 NM_00104C  | 54896     | Hs. 647622NM_01776C    | ENSG00000SLC66A1        | LAAT-1 L soluble c protein-coding     |                                  |
| chr1-22   | 5.19568  | 0.735154 | 1.020517 | 0.720374 | 0.471295 | 0.981636 | chr1  | 2.24E+08 | 2.24E+08 | + | 0 NA | intron (NAluSg SIN  | 17096 NR_031574  | 1E+08     | NR_031574              | ENSG00000MIR320B2       | MIR320B-2 microRNA ncRNA              |                                  |
| chr11-87  | 5.19568  | 0.735154 | 1.020517 | 0.720374 | 0.471295 | 0.981636 | chr11 | 8784601  | 8784800  | + | 0 NA | intron (NAluSx SIN  | 15922 NR_12059C  | 1.03E+08  | Hs. 613277NR_120590    | LOC102724               | - uncharact ncRNA                     |                                  |
| chr11-64  | 5.19568  | 0.735154 | 1.020517 | 0.720374 | 0.471295 | 0.981636 | chr11 | 64789456 | 64789955 | + | 0 NA | intron (Nintron (N  | -10882 NM_20199E | 7536      | Hs. 502825NM_00463C    | ENSG00000SF1            | BBP D115E splicing protein-coding     |                                  |
| chr11-7   | 5.19568  | 0.735154 | 1.020517 | 0.720374 | 0.471295 | 0.981636 | chr11 | 78218632 | 78219251 | + | 0 NA | 3' UTR (N3' UTR (N  | 30022 NM_02079E  | 5758      | Hs. 531245NM_02079C    | ENSG00000USP35          | - ubiquitin protein-coding            |                                  |
| chr12-11  | 5.19568  | 0.735154 | 1.020517 | 0.720374 | 0.471295 | 0.981636 | chr12 | 1.13E+08 | 1.13E+08 | + | 0 NA | intron (Nintron (N  | 16552 NM_00684C  | 10993     | Hs. 439022NM_00684C    | ENSG00000SDS            | SDH serine d protein-coding           |                                  |
| chr13-11  | 5.19568  | 0.735154 | 1.020517 | 0.720374 | 0.471295 | 0.981636 | chr13 | 1.13E+08 | 1.13E+08 | + | 0 NA | intron (Nintron (N  | 21836 NM_005561  | 3916      | Hs. 494415NM_005561    | ENSG00000LAMP1          | CDI07a L lysosomal protein-coding     |                                  |
| chr16-34  | 5.19568  | 0.735154 | 1.020517 | 0.720374 | 0.471295 | 0.981636 | chr16 | 3448033  | 3449144  | + | 0 NA | intron (Nintron (N  | 4908 NM_00108C   | 79903     | Hs. 513292NM_02484C    | ENSG00000NA60           | HAT4 NAT1N(alpha)- protein-coding     |                                  |
| chr19-56  | 5.19568  | 0.735154 | 1.020517 | 0.720374 | 0.471295 | 0.981636 | chr19 | 56605727 | 56606117 | + | 0 NA | intron (Nintron (N  | 10620 NM_00137C  | 58491     | Hs. 301431NM_02121C    | ENSG00000ZNF71          | EZF1T zinc fing protein-coding        |                                  |
| chr2-13   | 5.19568  | 0.735154 | 1.020517 | 0.720374 | 0.471295 | 0.981636 | chr2  | 1.32E+08 | 1.32E+08 | + | 0 NA | intron (Nintron (N  | -8186 NM_00125E  | 90557     | Hs. 351461NM_13877C    | ENSG00000CCDC74A        | - coiled-c protein-coding             |                                  |
| chr9-10   | 5.19568  | 0.735154 | 1.020517 | 0.720374 | 0.471295 | 0.981636 | chr9  | 1.05E+08 | 1.05E+08 | + | 0 NA | intron (Nintron (N  | 59697 NM_00550C  | 19        | Hs. 659274NM_00550C    | ENSG00000ABCA1          | ABC-1 ABCAT bindir protein-coding     |                                  |
| chr2-42   | 7.682039 | -0.6085  | 0.845067 | -0.72006 | 0.471488 | 0.981636 | chr2  | 42316247 | 42319282 | + | 0 NA | intron (Nintron (N  | 42274 NR_13494F  | 9167      | Hs. 339635NM_00471C    | ENSG00000COX7A2L        | COX7AR C cytochrome protein-coding    |                                  |
| chr2-61   | 7.682039 | -0.6085  | 0.845067 | -0.72006 | 0.471488 | 0.981636 | chr2  | 61280687 | 61282242 | + | 0 NA | intron (NAluSz6 SI  | 104046 NR_152211 | 130872    | Hs. 655602NM_15239C    | ENSG00000AHSAP2P        | AHA1 AHS activator pseudo             |                                  |
| chr22-42  | 7.682039 | -0.6085  | 0.845067 | -0.72006 | 0.471488 | 0.981636 | chr22 | 42578232 | 42580288 | + | 0 NA | intron (Nintron (N  | 2751 NR_002184   | 91695     | Hs. 534041NR_002184    | ENSG00000RRP7BP         | RRP7B dJ2 ribosomal pseudo            |                                  |
| chr3-51   | 7.682039 | -0.6085  | 0.845067 | -0.72006 | 0.471488 | 0.981636 | chr3  | 43569    | 43569    | + | 0 NA | intron (NLI PA4 LIN | 43569 NM_001171  | 9730      | Hs. 716622NM_01470C    | ENSG00000DCAF1          | RIP VPRB DBD1 and protein-coding      |                                  |

|                    |          |          |          |          |          |       |          |          |   |    |                     |                   |                              |                     |                    |                            |                |
|--------------------|----------|----------|----------|----------|----------|-------|----------|----------|---|----|---------------------|-------------------|------------------------------|---------------------|--------------------|----------------------------|----------------|
| chr9-1217.7.947621 | 0.592923 | 0.825806 | 0.717993 | 0.472761 | 0.981636 | chr9  | 1.22E+08 | 1.22E+08 | 0 | NA | intron (NLM5 LINE   | 24212 NM_138709   | 153090 Hs. 52237ENR_032552   | ENSG000003DAB2IP    | AF9Q34 AIDAB2      | intcprotein-coding         |                |
| chrX-3115.7.947621 | 0.592923 | 0.825806 | 0.717993 | 0.472761 | 0.981636 | chrX  | 311951   | 313009   | 0 | NA | intron (Nintron (N  | 6339 NM_012227    | 8225 Hs. 43714ENR_012227     | ENSG000003GTPBP6    | PGPL               | GTP bindi protein-coding   |                |
| chrX-4063.7.947621 | 0.592923 | 0.825806 | 0.717993 | 0.472761 | 0.981636 | chrX  | 40634116 | 40639680 | 0 | NA | intron (Nintron (N  | 10663 NM_14497C   | 159013 Hs. 495961NM_14497C   | ENSG000003CXorf38   | -                  | chromoson protein-coding   |                |
| chr7-1248.4.146573 | -0.81382 | 1.15874  | -0.71787 | 0.47284  | 0.981636 | chr7  | 1.25E+08 | 1.25E+08 | 0 | NA | intron (Nintron (N  | -60582 NM_001024  | 154872 Hs. 44416ENR_001024   | ENSG000003C7orf77   | -                  | chromoson protein-coding   |                |
| chr2-9855.10.64871 | 0.517138 | 0.720427 | 0.717821 | 0.472868 | 0.981636 | chr2  | 9855054  | 9851087  | 0 | NA | intron (Nintron (N  | 7321 NM_005688    | 9014 Hs. 58483ENR_005688     | ENSG000003TAF1B     | MGC:9349 TATA-box  | protein-coding             |                |
| chr9-1228.10.64871 | 0.517138 | 0.720427 | 0.717821 | 0.472868 | 0.981636 | chr9  | 1.23E+08 | 1.23E+08 | 0 | NA | 3' UTR (N3' UTR (N  | -18610 NM_005388  | 5082 Hs. 27174ENR_005388     | ENSG000003PDCL      | PhLP               | phosducin protein-coding   |                |
| chr21-437.9.655538 | 0.556662 | 0.775498 | 0.717812 | 0.472873 | 0.981636 | chr21 | 43724209 | 43724470 | 0 | NA | intron (Nintron (N  | 5210 NM_003681    | 8566 Hs. 284491NM_003681     | ENSG000003PDXK      | C2orf124 pyridoxal | protein-coding             |                |
| chr9-1208.9.655538 | 0.556662 | 0.775498 | 0.717812 | 0.472873 | 0.981636 | chr9  | 1.23E+08 | 1.23E+08 | 0 | NA | intron (Nintron (N  | 11104 NM_001325   | 26995 Hs. 63268ENR_001325    | ENSG000003TRUB2     | CLONE2492 Trub     | psen protein-coding        |                |
| chr11-978.8.580083 | 0.603325 | 0.840513 | 0.717805 | 0.472878 | 0.981636 | chr11 | 9787160  | 9787359  | 0 | NA | intron (Nintron (N  | -27726 NR_033972  | 440028 Hs. 677541NR_033972   | ENSG000003LINC02705 | -                  | long intcncRNA             |                |
| chr15-297.9.894587 | -0.53894 | 0.751022 | -0.71761 | 0.472999 | 0.981636 | chr15 | 29769460 | 29770360 | 0 | NA | intron (Ntigger 3b  | 50764 NM_001355   | 7082 Hs. 74399ENR_003257     | ENSG000003TJPI      | ZO-1               | tight jur protein-coding   |                |
| chr4-1688.9.894587 | -0.53894 | 0.751022 | -0.71761 | 0.472999 | 0.981636 | chr4  | 1.69E+08 | 1.69E+08 | 0 | NA | intron (Nintron (N  | 23370 NM_001367   | 23022 Hs. 15122ENR_016081    | ENSG000003PALLD     | CGI-151 C          | calladin, protein-coding   |                |
| chr13-454.7.633041 | -0.61031 | 0.850679 | -0.71744 | 0.473105 | 0.981636 | chr13 | 45483294 | 45484887 | 0 | NA | intron (Nintron (N  | 19151 NM_031431   | 83548 Hs. 50794ENR_031431    | ENSG000003COG3      | SEC34              | component protein-coding   |                |
| chr14-92.7.633041  | -0.61031 | 0.850679 | -0.71744 | 0.473105 | 0.981636 | chr14 | 92005118 | 92005614 | 0 | NA | exon (NM exon (NM   | 34693 NM_004235   | 9321 Hs. 63233ENR_004235     | ENSG000003TRIP11    | ACG1A CEV          | thyroid l protein-coding   |                |
| chr15-671.7.633041 | -0.61031 | 0.850679 | -0.71744 | 0.473105 | 0.981636 | chr15 | 67129020 | 67129924 | 0 | NA | intron (NMER44 DN   | 3756 NM_001145    | 4088 Hs. 72798ENR_005902     | ENSG000003SMAD3     | HSP193 F           | MSTF fami protein-coding   |                |
| chr16-898.7.633041 | -0.61031 | 0.850679 | -0.71744 | 0.473105 | 0.981636 | chr16 | 89895973 | 89896433 | 0 | NA | intron (Nintron (N  | -21676 NM_002388  | 4157 Hs. 51382ENR_002388     | ENSG000003CMCIR     | CMM5 MSH           | melanocor protein-coding   |                |
| chr3-1204.7.633041 | -0.61031 | 0.850679 | -0.71744 | 0.473105 | 0.981636 | chr3  | 1.2E+08  | 1.2E+08  | 0 | NA | intron (Nintron (N  | 12894 NM_007078   | 11167 Hs. 26951ENR_007078    | ENSG000003PSTL1     | FRP FSL1 F         | ollistat protein-coding    |                |
| chr9-958.7.633041  | -0.61031 | 0.850679 | -0.71744 | 0.473105 | 0.981636 | chr9  | 95892937 | 95892640 | 0 | NA | intron (NAluS SIN   | 16510 NM_00101C   | 375748 Hs. 432364NM_020207   | ENSG000003ERCC6L2   | BMP52 C9c          | ERCC exciprotein-coding    |                |
| chr3-1578.9.837732 | -0.53897 | 0.751437 | -0.71725 | 0.473218 | 0.981636 | chr3  | 15789973 | 15793965 | 0 | NA | intron (NLM1A LIN   | 6010 NM_001349    | 23243 Hs. 33523ENR_001519    | ENSG000003ANKRD28   | P1TK PPP           | lankyrin r protein-coding  |                |
| chr1-1568.5.930947 | -0.6831  | 0.952591 | -0.7171  | 0.473312 | 0.981636 | chr1  | 1.57E+08 | 1.57E+08 | 0 | NA | Intergeni Intergeni | -13577 NM_001007  | 4914 Hs. 40629ENR_002525     | ENSG000003NTRK1     | MTC TRK1 neurotro  | protein-coding             |                |
| chr1-240.5.930947  | -0.6831  | 0.952591 | -0.7171  | 0.473312 | 0.981636 | chr1  | 2.4E+08  | 2.4E+08  | 0 | NA | intron (Nintron (N  | 2524 NM_020066    | 56776 Hs. 24889 NM_020066    | ENSG000003FMN2      | -                  | formin 2 protein-coding    |                |
| chr10-685.9.930947 | -0.6831  | 0.952591 | -0.7171  | 0.473312 | 0.981636 | chr10 | 68921413 | 68923725 | 0 | NA | intron (NAluJo SIN  | 21254 NM_024045   | 79009 Hs. 522984NM_024045    | ENSG000003DDX50     | GU2 GUB F          | DEd-box protein-coding     |                |
| chr11-125.5.930947 | -0.6831  | 0.952591 | -0.7171  | 0.473312 | 0.981636 | chr11 | 1.26E+08 | 1.26E+08 | 0 | NA | intron (NAluJb SIN  | 8020 NM_001274    | 1111 Hs. 24529 NM_001274     | ENSG000003CHEK1     | CHK1               | checkpoir protein-coding   |                |
| chr12-128.5.930947 | -0.6831  | 0.952591 | -0.7171  | 0.473312 | 0.981636 | chr12 | 12831137 | 12832901 | 0 | NA | Intergeni Intergeni | 18673 NM_016355   | 51202 Hs. 71993ENR_016355    | ENSG000003DDX47     | E4-DBP H           | DEAD-box protein-coding    |                |
| chr14-547.5.930947 | -0.6831  | 0.952591 | -0.7171  | 0.473312 | 0.981636 | chr14 | 54791902 | 54792662 | 0 | NA | 3' UTR (N3' UTR (N  | 37449 NM_001161   | 23034 Hs. 98259 NM_015588    | ENSG000003SAMD4A    | SAMD4 SMP          | sterile ε protein-coding   |                |
| chr14-103.5.930947 | -0.6831  | 0.952591 | -0.7171  | 0.473312 | 0.981636 | chr14 | 1.04E+08 | 1.04E+08 | 0 | NA | Intergeni Intergeni | 11371 NM_001823   | 1152 Hs. 173724NM_001823     | ENSG000003CKB       | B-CK BCK c         | reatine protein-coding     |                |
| chr16-234.5.930947 | -0.6831  | 0.952591 | -0.7171  | 0.473312 | 0.981636 | chr16 | 23671294 | 23672709 | 0 | NA | non-codiron-codir   | -6888 NM_00503C   | 5347 Hs. 59204ENR_00503C     | ENSG000003PLK1      | PLK STPK           | polo like protein-coding   |                |
| chr17-37.5.930947  | -0.6831  | 0.952591 | -0.7171  | 0.473312 | 0.981636 | chr17 | 37443405 | 37444775 | 0 | NA | intron (NAluJo SIN  | 36865 NM_001488   | 6871 Hs. 50066ENR_001488     | ENSG000003TADA2A    | ADA2 ADA2          | transcrip protein-coding   |                |
| chr17-471.5.930947 | -0.6831  | 0.952591 | -0.7171  | 0.473312 | 0.981636 | chr17 | 47122702 | 47123554 | 0 | NA | intron (Nintron (N  | 60637 NM_001256   | 996 Hs. 46329ENR_001256      | ENSG000003CDC27     | ANAPC3 AF          | cell divi protein-coding   |                |
| chr17-60.5.930947  | -0.6831  | 0.952591 | -0.7171  | 0.473312 | 0.981636 | chr17 | 60371544 | 60332008 | 0 | NA | intron (NAluJb SIN  | 60351 NM_032582   | 84669 Hs. 13286ENR_032582    | ENSG000003USP32     | NY-REN-6           | ubiquitir protein-coding   |                |
| chr18-587.5.930947 | -0.6831  | 0.952591 | -0.7171  | 0.473312 | 0.981636 | chr18 | 58701913 | 58710744 | 0 | NA | intron (Nintron (N  | -38355 NM_001288  | 1.02E+08 Hs. 64487ENR_001289 | ENSG000003LOC101927 | -                  | uncharact protein-coding   |                |
| chr2-2784.5.930947 | -0.6831  | 0.952591 | -0.7171  | 0.473312 | 0.981636 | chr2  | 278475   | 279618   | 0 | NA | TTS (NR_C TTS (NR_C | 9045 NM_001002    | 285016 Hs. 355207NM_001002   | ENSG000003ALKAL2    | AUGA FAM           | 1ALK and l protein-coding  |                |
| chr2-6644.5.930947 | -0.6831  | 0.952591 | -0.7171  | 0.473312 | 0.981636 | chr2  | 66454024 | 66455492 | 0 | NA | intron (Nintron (N  | -14428 NR_046622  | 1.01E+08 Hs. 73469ENR_046622 | ENSG000003MEI51-AS2 | MEI51-AS1 MEI51    | atncRNA                    |                |
| chr2-1005.5.930947 | -0.6831  | 0.952591 | -0.7171  | 0.473312 | 0.981636 | chr2  | 1.05E+08 | 1.05E+08 | 0 | NA | intron (NAluS SIN   | 39527 NR_137325   | 9392 Hs. 44635ENR_004257     | ENSG000003TGFBRAP1  | TRAP-1 T           | TF transfn protein-coding  |                |
| chr2-1774.5.930947 | -0.6831  | 0.952591 | -0.7171  | 0.473312 | 0.981636 | chr2  | 1.77E+08 | 1.77E+08 | 0 | NA | intron (Nintron (N  | 50103 NM_003655   | 8540 Hs. 51654ENR_003655     | ENSG000003AGPS      | ADAP-S A           | E alkylglyc protein-coding |                |
| chr2-1814.5.930947 | -0.6831  | 0.952591 | -0.7171  | 0.473312 | 0.981636 | chr2  | 1.81E+08 | 1.81E+08 | 0 | NA | intron (NLa LINE    | 26744 NM_000888   | 3676 Hs. 72981 NM_000888     | ENSG000003ITGA4     | CD49D IA           | integrin protein-coding    |                |
| chr2-2004.5.930947 | -0.6831  | 0.952591 | -0.7171  | 0.473312 | 0.981636 | chr2  | 2E+08    | 2E+08    | 0 | NA | intron (Nintron (N  | 96446 NM_001321   | 130535 Hs. 60577ENR_001321   | ENSG000003CKTD18    | 6530404F1          | potassium protein-coding   |                |
| chr20-137.5.930947 | -0.6831  | 0.952591 | -0.7171  | 0.473312 | 0.981636 | chr20 | 13770292 | 13771779 | 0 | NA | intron (Nintron (N  | 13851 NM_016645   | 51575 Hs. 369284NM_016645    | ENSG000003ESF1      | ABTAP C2C          | ESF1 nucl protein-coding   |                |
| chr21-36.5.930947  | -0.6831  | 0.952591 | -0.7171  | 0.473312 | 0.981636 | chr21 | 36073569 | 36073987 | 0 | NA | TTS (NM_C TTS (NM_C | 3754 NM_001757    | 873 Hs. 88778 NM_001757      | ENSG000003CBR1      | CBR1 SDR2          | carbonyl protein-coding    |                |
| chr22-31.5.930947  | -0.6831  | 0.952591 | -0.7171  | 0.473312 | 0.981636 | chr22 | 31837444 | 31837805 | 0 | NA | intron (NAluJb SIN  | 83601 NM_001365   | 9681 Hs. 435022NM_014662     | ENSG000003DEPDC5    | DEP. 5 F           | DEP domain protein-coding  |                |
| chr3-1232.5.930947 | -0.6831  | 0.952591 | -0.7171  | 0.473312 | 0.981636 | chr3  | 1.23E+08 | 1.23E+08 | 0 | NA | intron (Nintron (N  | 45731 NM_01243C   | 26984 Hs. 477361NM_01243C    | ENSG000003SEC22A    | SEC22L2            | SEC22 hon protein-coding   |                |
| chr4-741.5.930947  | -0.6831  | 0.952591 | -0.7171  | 0.473312 | 0.981636 | chr4  | 76119369 | 76119602 | 0 | NA | intron (NAluJb SIN  | 28912 NM_017422   | 53371 Hs. 43043ENR_017422    | ENSG000003NUP54     | -                  | nucleoson protein-coding   |                |
| chr5-615.5.930947  | -0.6831  | 0.952591 | -0.7171  | 0.473312 | 0.981636 | chr5  | 61496439 | 61497096 | 0 | NA | intron (Nintron (N  | -140993 NR_161251 | 285668 Hs. 68386ENR_126525   | ENSG000003C5orf64   | -                  | chromoson ncRNA            |                |
| chr5-6601.5.930947 | -0.6831  | 0.952591 | -0.7171  | 0.473312 | 0.981636 | chr5  | 66012942 | 66015472 | 0 | NA | intron (Nintron (N  | -68634 NR_028474  | 1E+08 Hs. 60806ENR_028474    | LOC100305           | -                  | LSM3 homc pseudo           |                |
| chr5-7704.5.930947 | -0.6831  | 0.952591 | -0.7171  | 0.473312 | 0.981636 | chr5  | 77040501 | 77041786 | 0 | NA | intron (Nintron (N  | 10739 NM_018046   | 55109 Hs. 63484ENR_018046    | ENSG000003AGGF1     | GPATCT G           | F angiogeni protein-coding |                |
| chr6-154.5.930947  | -0.6831  | 0.952591 | -0.7171  | 0.473312 | 0.981636 | chr6  | 1.55E+08 | 1.55E+08 | 0 | NA | intron (NLM4 LINE   | -22604 NM_152405  | 134553 Hs. 70853ENR_152405   | ENSG000003C5orf24   | -                  | chromoson protein-coding   |                |
| chr6-1514.5.930947 | -0.6831  | 0.952591 | -0.7171  | 0.473312 | 0.981636 | chr6  | 1.51E+08 | 1.51E+08 | 0 | NA | intron (Nintron (N  | -20252 NM_020861  | 57621 Hs. 52007ENR_020861    | ENSG000003ZBTB2     | ZNF437             | zinc fing protein-coding   |                |
| chr7-105.5.930947  | -0.6831  | 0.952591 | -0.7171  | 0.473312 | 0.981636 | chr7  | 1.05E+08 | 1.05E+08 | 0 | NA | intron (Nintron (N  | 3316 NR_182692    | 6733 Hs. 285197NM_182691     | ENSG000003SRPK2     | SFRSK2             | SRSF prot protein-coding   |                |
| chr7-1368.5.930947 | -0.6831  | 0.952591 | -0.7171  | 0.473312 | 0.981636 | chr7  | 1.37E+08 | 1.37E+08 | 0 | NA | intron (NAluSx SIN  | -8585 NR_030165   | 574443                       | NR_030165           | ENSG000003MIR490   | MIRNA90 t                  | microRNA ncRNA |
| chr8-5855.5.930947 | -0.6831  | 0.952591 | -0.7171  | 0.473312 | 0.981636 | chr8  | 58598989 | 58599466 | 0 | NA | intron (Nintron (N  | 45921 NM_005622   | 6386 Hs. 200804NM_005622     | ENSG000003SDCBP     | MDA-9 MD           | syndecan protein-coding    |                |
| chr8-1301.5.930947 | -0.6831  | 0.952591 | -0.7171  | 0.473312 | 0.981636 | chr8  | 1.3E+08  | 1.3E+08  | 0 | NA | intron (Nintron (N  | -88148 NR_045388  | 1.01                         |                     |                    |                            |                |



|                    |          |          |          |          |          |       |          |          |   |   |    |                     |        |            |          |                      |                      |               |                            |
|--------------------|----------|----------|----------|----------|----------|-------|----------|----------|---|---|----|---------------------|--------|------------|----------|----------------------|----------------------|---------------|----------------------------|
| chr19-473.7.914339 | 0.589917 | 0.828181 | 0.712304 | 0.476277 | 0.981636 | chr19 | 47380419 | 47380987 | + | 0 | NA | intron (NMLT1K LTF  | 31388  | NM_014681  | 9704     | Hs.151706NM_014681   | ENSG000003DHX34      | DDX34 HRE     | DEH-box protein-coding     |
| chr21-332.7.914339 | 0.589917 | 0.828181 | 0.712304 | 0.476277 | 0.981636 | chr21 | 33276354 | 33277365 | + | 0 | NA | intron (NMLT1K LTF  | 10492  | NM_000628  | 3588     | Hs.654593NM_000628   | ENSG000003IL10RB     | CDW210B C     | interleukin protein-coding |
| chr22-497.7.914339 | 0.589917 | 0.828181 | 0.712304 | 0.476277 | 0.981636 | chr22 | 49787128 | 49788082 | + | 0 | NA | exon (NM_exon NM    | 36726  | NR_146334  | 23774    | Hs.127953NM_014577   | ENSG000003BRD1       | BRL BRPF1     | bromodomain protein-coding |
| chr5-1707.7.914339 | 0.589917 | 0.828181 | 0.712304 | 0.476277 | 0.981636 | chr5  | 1.8E+08  | 1.8E+08  | + | 0 | NA | intron (NALuSp SIN  | 19187  | NM_00104C  | 80230    | Hs.306766NM_025158   | ENSG000003RUFY1      | RAB1P4 ZF     | RUN and F protein-coding   |
| chr7-1476.7.914339 | 0.589917 | 0.828181 | 0.712304 | 0.476277 | 0.981636 | chr7  | 1.41E+08 | 1.41E+08 | + | 0 | NA | intron (NTiger4a    | -82458 | NR_024454  | 1E+08    | Hs.534141NR_024454   | ENSG000003NDUFB2-AS- | NDUFB2        | ancRNA                     |
| chr9-1281.7.914339 | 0.589917 | 0.828181 | 0.712304 | 0.476277 | 0.981636 | chr9  | 1.28E+08 | 1.28E+08 | + | 0 | NA | TTS (NM_C TTS (NM_C | 3652   | NM_024112  | 79095    | Hs.522412NM_024112   | ENSG000003C9orf16    | ESTO0098      | chromosom protein-coding   |
| chr12-101.4.171997 | -0.81887 | 1.149665 | -0.71227 | 0.4763   | 0.981636 | chr12 | 1.01E+08 | 1.01E+08 | + | 0 | NA | intron (Nintron (N  | 108959 | NM_00128E  | 121601   | Hs.58785 NM_17882E   | ENSG000003AN04       | TMEM16D       | anoctamin protein-coding   |
| chr18-215.4.171997 | -0.81887 | 1.149665 | -0.71227 | 0.4763   | 0.981636 | chr18 | 21564245 | 21564935 | + | 0 | NA | intron (NALu SINE   | 36114  | NM_052911  | 114799   | Hs.464733NM_052911   | ENSG000003ESCO1      | A9300141      | establis protein-coding    |
| chr2-1781.4.171997 | -0.81887 | 1.149665 | -0.71227 | 0.4763   | 0.981636 | chr2  | 1.78E+08 | 1.78E+08 | + | 0 | NA | intron (Nintron (N  | 7443   | NM_15294E  | 129831   | Hs.377257NM_15294E   | ENSG000003CRBM45     | DRB1 RB-1     | RNA bindi protein-coding   |
| chr21-464.4.171997 | -0.81887 | 1.149665 | -0.71227 | 0.4763   | 0.981636 | chr21 | 46443858 | 46444344 | + | 0 | NA | intron (Nintron (N  | -14790 | NM_206891  | 14790    | Hs.189588NM_015151   | ENSG000003DIP2A      | C21orf106     | disco intncRNA             |
| chr5-5781.4.171997 | -0.81887 | 1.149665 | -0.71227 | 0.4763   | 0.981636 | chr5  | 57819439 | 57820178 | + | 0 | NA | Intergeni LIMEc LIN | 79354  | NR_109900  | 1.02E+08 | Hs.63938E NR_109900  | ENSG000003LINC0222E- | long intncRNA |                            |
| chr6-1597.4.171997 | -0.81887 | 1.149665 | -0.71227 | 0.4763   | 0.981636 | chr6  | 1.6E+08  | 1.6E+08  | + | 0 | NA | intron (Nintron (N  | 3361   | NM_00127C  | 9589     | Hs.446091NM_00490E   | ENSG000003WTAP       | Mum2          | WT1 assoc protein-coding   |
| chr1-2397.5.889807 | -0.68768 | 0.965675 | -0.71213 | 0.476385 | 0.981636 | chr1  | 23976577 | 23977589 | + | 0 | NA | intron (Nintron (N  | 3244   | NM_001191  | 10772    | Hs.3530 NM_00662E    | ENSG000003SRSF1      | FUS1P1 FU     | serine ar protein-coding   |
| chr11-737.5.889807 | -0.68768 | 0.965675 | -0.71213 | 0.476385 | 0.981636 | chr11 | 73720523 | 73721174 | + | 0 | NA | exon (NM_exon NM    | 39245  | NM_001243  | 5870     | Hs.530222NM_00286E   | ENSG000003RAB6A      | RAB6          | RAB6, me protein-coding    |
| chr12-462.5.889807 | -0.68768 | 0.965675 | -0.71213 | 0.476385 | 0.981636 | chr12 | 46241211 | 46242056 | + | 0 | NA | intron (Nintron (N  | 24883  | NM_00127E  | 81539    | Hs.533777NM_030674   | ENSG000003SLC38A1    | ATA1 NAT2     | solute c protein-coding    |
| chr14-100.5.889807 | -0.68768 | 0.965675 | -0.71213 | 0.476385 | 0.981636 | chr14 | 1.01E+08 | 1.01E+08 | + | 0 | NA | promoter-promoter-  | -166   | NR_00321E  | 767603   | NR_00321E            | ENSG000003SNORD114-  | 14q (II-22    | small nucsnRNA             |
| chr17-493.5.889807 | -0.68768 | 0.965675 | -0.71213 | 0.476385 | 0.981636 | chr17 | 4935958  | 4936308  | + | 0 | NA | TTS (NM_C TTS (NM_C | 3856   | NM_00017E  | 2811     | Hs.1472 NM_00017E    | ENSG000003GP1B4      | BDPLT1 BL     | glycoprot protein-coding   |
| chr2-333.5.889807  | -0.68768 | 0.965675 | -0.71213 | 0.476385 | 0.981636 | chr2  | 33138400 | 33139328 | + | 0 | NA | intron (NALu SINE   | 4267   | NM_00116E  | 4052     | Hs.61931E NM_00062E  | ENSG000003LTBP1      | -             | latent tr protein-coding   |
| chr22-296.5.889807 | -0.68768 | 0.965675 | -0.71213 | 0.476385 | 0.981636 | chr22 | 29688193 | 29688459 | + | 0 | NA | intron (Nintron (N  | -31677 | NM_182527  | 164633   | Hs.64360E NM_182527  | ENSG000003CABP7      | CALN2         | calcium t protein-coding   |
| chr14-996.5.829252 | -0.72034 | 1.011542 | -0.71213 | 0.476387 | 0.981636 | chr14 | 99878733 | 99879067 | + | 0 | NA | intron (Nintron (N  | 85487  | NM_004434  | 2009     | Hs.12451 NM_004434   | ENSG000003EML1       | BH ELP79 EMAP | like protein-coding        |
| chr1-159.10.1267   | 0.531908 | 0.747015 | 0.712044 | 0.476438 | 0.981636 | chr1  | 1.59E+08 | 1.59E+08 | + | 0 | NA | intron (Nintron (N  | 27150  | NM_00120E  | 3428     | Hs.38025E NM_005531  | ENSG000003IF116      | IFNGIP1 IF    | interfer protein-coding    |
| chr1-1736.10.1267  | 0.531908 | 0.747015 | 0.712044 | 0.476438 | 0.981636 | chr1  | 1.74E+08 | 1.74E+08 | + | 0 | NA | 3' UTR (N3' UTR (N  | -7634  | NR_152521  | 60674    | Hs.53185E NR_00257E  | ENSG000003GAS5       | NCRNA000E     | growth ancRNA              |
| chr1-1703.5.717692 | 0.687783 | 0.96614  | 0.711887 | 0.476535 | 0.981636 | chr1  | 17037793 | 17038536 | + | 0 | NA | intron (NALuJo SIN  | 16006  | NM_00300C  | 6390     | Hs.465924NM_00300C   | ENSG000003SDHB       | CWS2 IP F     | succinate protein-coding   |
| chr10-112.5.717692 | 0.687783 | 0.96614  | 0.711887 | 0.476535 | 0.981636 | chr10 | 1.12E+08 | 1.12E+08 | + | 0 | NA | exon (NM_exon NM    | 15329  | NM_02091E  | 57678    | Hs.42586 NM_02091E   | ENSG000003GPAM       | GPAT GPA      | glycerol-protein-coding    |
| chr12-456.5.717692 | 0.687783 | 0.96614  | 0.711887 | 0.476535 | 0.981636 | chr12 | 45944745 | 45945659 | + | 0 | NA | intron (Nintron (N  | 45372  | NM_00471E  | 9169     | Hs.210367NM_00471E   | ENSG000003SCAF11     | CASP11 SF     | SR-related protein-coding  |
| chr17-821.5.717692 | 0.687783 | 0.96614  | 0.711887 | 0.476535 | 0.981636 | chr17 | 82183571 | 82184996 | + | 0 | NA | intron (N2b LINE    | 28559  | NM_00131E  | 284001   | Hs.631724NM_15267E   | ENSG000003CCDC57     | -             | coiled-c protein-coding    |
| chr19-556.5.717692 | 0.687783 | 0.96614  | 0.711887 | 0.476535 | 0.981636 | chr19 | 55688528 | 55690191 | + | 0 | NA | exon (NM_exon NM    | 12734  | NM_00113C  | 29924    | Hs.27995E NM_01333E  | ENSG000003EPN1       | -             | epsin I protein-coding     |
| chr3-4733.5.717692 | 0.687783 | 0.96614  | 0.711887 | 0.476535 | 0.981636 | chr3  | 47333575 | 47334367 | + | 0 | NA | intron (Nintron (N  | -47050 | NM_01546E  | 25930    | Hs.25524 NM_01546E   | ENSG000003PTPN23     | HD-PTP HE     | protein t protein-coding   |
| chr5-1492.5.717692 | 0.687783 | 0.96614  | 0.711887 | 0.476535 | 0.981636 | chr5  | 1.49E+08 | 1.49E+08 | + | 0 | NA | intron (Nintron (N  | -19467 | NM_100132E | 134265   | Hs.62930 NM_15240E   | ENSG000003AFAP111    | -             | actin fil protein-coding   |
| chr7-1734.5.717692 | 0.687783 | 0.96614  | 0.711887 | 0.476535 | 0.981636 | chr7  | 17342326 | 17343197 | + | 0 | NA | intron (Nintron (N  | -32156 | NR_11001E  | 1.03E+08 | Hs.55948E NR_110014  | KCCAT333             | -             | retin clncRNA              |
| chr7-2761.5.717692 | 0.687783 | 0.96614  | 0.711887 | 0.476535 | 0.981636 | chr7  | 27619325 | 27620551 | + | 0 | NA | intron (NLM2 LINE   | 3964   | NR_12212E  | 790953   | Hs.57133E NR_122122  | TSL                  | -             | testis-ancRNA              |
| chr15-484.7.163727 | -0.64332 | 0.903862 | -0.71174 | 0.476625 | 0.981636 | chr15 | 49463339 | 49466375 | + | 0 | NA | intron (N2 LINE I   | 40361  | NM_00200E  | 2252     | Hs.56726E NM_00200E  | ENSG000003PGF7       | HBGF-7 KC     | fibroblas protein-coding   |
| chr15-589.7.163727 | -0.64332 | 0.903862 | -0.71174 | 0.476625 | 0.981636 | chr15 | 58991370 | 58991884 | + | 0 | NA | intron (N2a LINE    | 3481   | NM_00127C  | 54778    | Hs.40442E NM_01761E  | ENSG000003RNF111     | hRNF111       | ring fing protein-coding   |
| chr2-5567.7.163727 | -0.64332 | 0.903862 | -0.71174 | 0.476625 | 0.981636 | chr2  | 55655676 | 55655909 | + | 0 | NA | intron (Nintron (N  | 38052  | NM_03310E  | 87178    | Hs.38873E NM_03310E  | ENSG000003PNPT1      | COXPDI3 P     | polyribor protein-coding   |
| chr3-1441.7.163727 | -0.64332 | 0.903862 | -0.71174 | 0.476625 | 0.981636 | chr3  | 14418659 | 14418959 | + | 0 | NA | intron (NMR SINE    | 16203  | NM_001134  | 6533     | Hs.52948E NM_00304E  | ENSG000003SLC6A6     | TAUT          | solute c protein-coding    |
| chr1-8466.5.923089 | -0.681   | 0.956834 | -0.71172 | 0.476638 | 0.981636 | chr1  | 84664999 | 84666099 | + | 0 | NA | intron (Nintron (N  | 24912  | NM_00116E  | 117178   | Hs.22587 NM_014021   | ENSG000003SSX2IP     | ADIP hMSC     | SSX fami protein-coding    |
| chr10-943.5.923089 | -0.681   | 0.956834 | -0.71172 | 0.476638 | 0.981636 | chr10 | 94343296 | 94346671 | + | 0 | NA | intron (NLM3Cz I    | 17956  | NM_022451  | 64318    | Hs.74899 NM_022451   | ENSG000003CNO3L      | AD24 C10c     | NOC3 like protein-coding   |
| chr10-994.5.923089 | -0.681   | 0.956834 | -0.71172 | 0.476638 | 0.981636 | chr10 | 99419397 | 99419815 | + | 0 | NA | intron (NMERSB DNA  | 11018  | NM_00207E  | 2805     | Hs.50075E NM_00207E  | ENSG000003GOT1       | AST1 AST      | glutamic protein-coding    |
| chr11-20.5.923089  | -0.681   | 0.956834 | -0.71172 | 0.476638 | 0.981636 | chr11 | 20093328 | 20093328 | + | 0 | NA | intron (Nintron (N  | -42768 | NR_04667E  | 1.01E+08 | Hs.55791E NR_04667E  | ENSG000003NAV2-AS2   | -             | NAV2 antncRNA              |
| chr12-106.5.923089 | -0.681   | 0.956834 | -0.71172 | 0.476638 | 0.981636 | chr12 | 10606055 | 10607979 | + | 0 | NA | intron (NLM4c LI    | 5961   | NM_00130C  | 55110    | Hs.10465E NM_01804E  | ENSG000003MAGOHB     | MGN2 mag      | mago homc protein-coding   |
| chr12-248.5.923089 | -0.681   | 0.956834 | -0.71172 | 0.476638 | 0.981636 | chr12 | 24825446 | 24826947 | + | 0 | NA | intron (NALuJb SIN  | 76026  | NM_00117E  | 586      | Hs.43899E NM_005504  | ENSG000003BCAT1      | BCATC BC      | branched protein-coding    |
| chr13-758.5.923089 | -0.681   | 0.956834 | -0.71172 | 0.476638 | 0.981636 | chr13 | 75809979 | 75809983 | + | 0 | NA | exon (NM_exon NM    | 47320  | NM_01584E  | 4008     | Hs.207631NM_00535E   | ENSG000003LCM7       | FBX20 FB      | LIM domain protein-coding  |
| chr15-588.5.923089 | -0.681   | 0.956834 | -0.71172 | 0.476638 | 0.981636 | chr15 | 58825585 | 58826578 | + | 0 | NA | intron (Nintron (N  | 54779  | NM_00104C  | 54629    | Hs.59112E NM_01909E  | ENSG000003MINDY2     | FAM63B        | MINDY lys protein-coding   |
| chr15-101.5.923089 | -0.681   | 0.956834 | -0.71172 | 0.476638 | 0.981636 | chr15 | 1.01E+08 | 1.01E+08 | + | 0 | NA | intron (NMSTA LTR   | 37278  | NM_01491E  | 22856    | Hs.11048E NM_01491E  | ENSG000003CHSY1      | CHSY CSS1     | chondroit protein-coding   |
| chr18-232.5.923089 | -0.681   | 0.956834 | -0.71172 | 0.476638 | 0.981636 | chr18 | 23247697 | 23248040 | + | 0 | NA | intron (Nintron (N  | 92043  | NM_13837E  | 91768    | Hs.11108 NM_13837E   | ENSG000003CABLES1    | CABL1 CAE     | Cdk5 and protein-coding    |
| chr2-6137.5.923089 | -0.681   | 0.956834 | -0.71172 | 0.476638 | 0.981636 | chr2  | 61379311 | 61379822 | + | 0 | NA | intron (NMER102b I  | 37811  | NR_0033707 | 1E+08    | Hs.67582E NR_0033707 | ENSG000003SNORA70B   | -             | small nucsnRNA             |
| chr2-1118.5.923089 | -0.681   | 0.956834 | -0.71172 | 0.476638 | 0.981636 | chr2  | 1.12E+08 | 1.12E+08 | + | 0 | NA | intron (Nintron (N  | 50180  | NM_02266E  |          |                      |                      |               |                            |

|           |           |          |          |          |          |          |       |          |          |   |      |                     |                   |                                |                      |                    |                       |                |                |
|-----------|-----------|----------|----------|----------|----------|----------|-------|----------|----------|---|------|---------------------|-------------------|--------------------------------|----------------------|--------------------|-----------------------|----------------|----------------|
| chr11-102 | 8.08479   | -0.58886 | 0.830756 | -0.70883 | 0.478433 | 0.981636 | chr11 | 1.02E+08 | 1.02E+08 | + | 0 NA | intron (NAluSp SIN  | 52312 NM_00119E   | 10413 Hs. 503692NM_00610f      | ENSG00000CYP1        | COB1 YAP Yes assoc | protein-coding        |                |                |
| chr15-586 | 8.08479   | -0.58886 | 0.830756 | -0.70883 | 0.478433 | 0.981636 | chr15 | 58657778 | 58658413 | + | 0 NA | intron (NLIMA2 LIN  | 35512 NR_07341E   | 664618 Hs. 670224NR_002927     | HSP90A HSP90B        | heat shock         | pseudo                |                |                |
| chr7-129  | 8.014184  | 0.598984 | 0.845048 | 0.708816 | 0.478438 | 0.981636 | chr7  | 1.3E+08  | 1.3E+08  | + | 0 NA | intron (Nintron (N  | 24124 NM_003344   | 7328 Hs. 643544NM_003344       | ENSG00000CUBE2H      | E2-20K Gubiquitin  | protein-coding        |                |                |
| chr2-939  | 2.923501  | -0.96618 | 1.36319  | -0.70876 | 0.478473 | 0.981636 | chr2  | 9399856  | 93999474 | + | 0 NA | intron (N (TCCTC N  | 23375 NM_00131E   | 9270 Hs. 467662NM_00476E       | ENSG00000ITGB1BP1    | ICAP-1A Integrin   | protein-coding        |                |                |
| chr21-415 | 12.14227  | -0.48476 | 0.683975 | -0.70874 | 0.478485 | 0.981636 | chr21 | 41995737 | 41995936 | + | 0 NA | intron (THE1B int   | -13558 NR_119384  | 150142 Hs. 143833NM_119384     | ENSG00000ZNF295-AS2  | Clorf121 ZNF295    | arncRNA               |                |                |
| chr14-35  | 5.709834  | 0.690678 | 0.974779 | 0.708548 | 0.478605 | 0.981636 | chr14 | 35072301 | 35073155 | + | 0 NA | intron (NTiger2 I   | -8353 NR_11041E   | 1.02E+08 Hs. 617135NR_11041E   | ENSG00000CLOC101927- |                    | uncharacterncRNA      |                |                |
| chr14-88  | 5.709834  | 0.690678 | 0.974779 | 0.708548 | 0.478605 | 0.981636 | chr14 | 88882722 | 88883366 | + | 0 NA | Intergeni THE1D-int | 58393 NM_00136E   | 123016 Hs. 303055NM_14459E     | ENSG00000CTTC8       | BBS8 RP51          | tetratric             | protein-coding |                |
| chr16-68  | 5.709834  | 0.690678 | 0.974779 | 0.708548 | 0.478605 | 0.981636 | chr16 | 68919209 | 68920167 | + | 0 NA | intron (Nintron (N  | 76157 NM_02456E   | 79613 Hs. 13526 NM_02456E      | ENSG00000TANG06      | TMC07              | transport             | protein-coding |                |
| chr17-78  | 5.709834  | 0.690678 | 0.974779 | 0.708548 | 0.478605 | 0.981636 | chr17 | 78100571 | 78101502 | + | 0 NA | intron (NAluSq2 SI  | 10763 NR_040071   | 1E+08 Hs. 635442NR_040071      | ENSG00000TNR6C-AS    | TMC6 Inc           | TNR6C                 | arncRNA        |                |
| chr19-19  | 3.444773  | 0.883329 | 1.246758 | 0.708501 | 0.478634 | 0.981636 | chr19 | 1946420  | 1947056  | + | 0 NA | intron (NAluY SINE  | 5566 NM_00131E    | 1455 Hs. 65190E NM_00131E      | ENSG00000CSNK1G2     | CK1g2              | casein                | protein-coding |                |
| chr7-116  | 9.920011  | -0.53371 | 0.753373 | -0.70843 | 0.478679 | 0.981636 | chr7  | 1.17E+08 | 1.17E+08 | + | 0 NA | intron (Nintron (N  | 1346 NM_00120E    | 858 Hs. 212332NM_00123E        | ENSG00000CAV2        | CAV                | caveolin              | protein-coding |                |
| chr6-128  | 1.393841  | -0.55475 | 0.783504 | -0.70803 | 0.478924 | 0.981636 | chr6  | 1.28E+08 | 1.28E+08 | + | 0 NA | intron (Nintron (N  | 156296 NR_12584E  | 1.02E+08 Hs. 65677E NR_125849  | LLOC10192E-          |                    | uncharacterncRNA      |                |                |
| chr15-25  | 7.458891  | 0.621741 | 0.878449 | 0.707771 | 0.479088 | 0.981636 | chr15 | 25103890 | 25104673 | + | 0 NA | promoter-promoter-  | -360 NR_003361    | ENSG00000SNORD116-             | HBI1-85-2            | small              | nucsnRNA              |                |                |
| chr15-48  | 7.625183  | -0.60857 | 0.859962 | -0.70768 | 0.479146 | 0.981636 | chr15 | 48423357 | 48424079 | + | 0 NA | intron (Nintron (N  | 91521 NM_00194E   | 1854 Hs. 527928NM_00194E       | ENSG00000CDUT        | dUTPase            | deoxyribonucleic acid | protein-coding |                |
| chr7-121  | 7.625183  | -0.60857 | 0.859962 | -0.70768 | 0.479146 | 0.981636 | chr7  | 1.21E+08 | 1.21E+08 | + | 0 NA | intron (Nintron (N  | 21933 NM_05716E   | 51384 Hs. 27237E NM_01608E     | ENSG00000WNT16       | -                  | Wnt                   | family         | protein-coding |
| chr12-437 | 11.15316  | 0.498499 | 0.704703 | 0.707388 | 0.479325 | 0.981636 | chr12 | 43796796 | 43796995 | + | 0 NA | intron (Nintron (N  | 9422 NM_00124E    | 5756 Hs. 18907E NM_00282E      | ENSG00000TWF1        | A6 PTK9            | twintin               | protein-coding |                |
| chr1-520  | 8.47749   | 0.568279 | 0.803424 | 0.707321 | 0.479367 | 0.981636 | chr1  | 52023638 | 52024718 | + | 0 NA | intron (NAluJb SIN  | 9632 NM_138417    | 112970 Hs. 47603E NM_138417    | ENSG00000CKTI12      | SBB181 TKCT112     | chr                   | protein-coding |                |
| chr1-168  | 8.47749   | 0.568279 | 0.803424 | 0.707321 | 0.479367 | 0.981636 | chr1  | 1.68E+08 | 1.68E+08 | + | 0 NA | intron (Nintron (N  | 24649 NR_03170E   | 1E+08 NR_03170E                | ENSG00000MIR1255B2   | MIR1255B           | microRNA              | ncRNA          |                |
| chr14-21  | 8.47749   | 0.568279 | 0.803424 | 0.707321 | 0.479367 | 0.981636 | chr14 | 21387433 | 21387632 | + | 0 NA | intron (NAluSp SIN  | -3513 NM_00719E   | 11198 Hs. 213724NM_00719E      | ENSG00000SUPT16H     | CDC68 FAC          | SPT16                 | hom            | protein-coding |
| chr17-4   | 8.47749   | 0.568279 | 0.803424 | 0.707321 | 0.479367 | 0.981636 | chr17 | 47477271 | 47479323 | + | 0 NA | intron (NMLT1A0 LI  | 14323 NR_033934   | 653479 Hs. 53727E NR_033934    | MRPL45P2             | -                  | mitochondrion         | pseudo         |                |
| chr19-26  | 14.37442  | 0.444556 | 0.628894 | 0.706886 | 0.479638 | 0.981636 | chr19 | 26675521 | 26676488 | + | 0 NA | Intergeni ALR Alpha | -117427 NR_14673E | 1.02E+08 Hs. 567934NR_110687   | ENSG00000CLOC101927- |                    | uncharacterncRNA      |                |                |
| chr5-113  | 9.896437  | -0.52987 | 0.749613 | -0.70686 | 0.479652 | 0.981636 | chr5  | 1.14E+08 | 1.14E+08 | + | 0 NA | intron (NLR22B1 I   | 17644 NM_00134E   | 64848 Hs. 23194E NM_02282E     | ENSG00000YTHDC2      | CAHL HYTH          | YTH                   | domain         | protein-coding |
| chr1-95   | 7.658465  | -0.60345 | 0.853747 | -0.70683 | 0.479675 | 0.981636 | chr1  | 95024834 | 95025555 | + | 0 NA | intron (NTiger1 I   | -36402 NR_13278E  | 1.02E+08 Hs. 73009E NR_13278E  | ENSG00000CLOC10192E- |                    | uncharacterncRNA      |                |                |
| chr15-65  | 7.658465  | -0.60345 | 0.853747 | -0.70683 | 0.479675 | 0.981636 | chr15 | 65023771 | 65024291 | + | 0 NA | intron (Nintron (N  | 5608 NM_13924E    | 123263 Hs. 53161E NM_13924E    | ENSG00000MTFM        | COXPDI5            | F                     | mitochondrion  | protein-coding |
| chr18-13  | 7.658465  | -0.60345 | 0.853747 | -0.70683 | 0.479675 | 0.981636 | chr18 | 13107914 | 13108510 | + | 0 NA | intron (NLIPA16 LI  | -110548 NM_18148E | 753 Hs. 697787NM_00433E        | ENSG00000LDLRAD4     | C18orf1            | low                   | density        | protein-coding |
| chr2-159  | 7.658465  | -0.60345 | 0.853747 | -0.70683 | 0.479675 | 0.981636 | chr2  | 1.6E+08  | 1.6E+08  | + | 0 NA | intron (Nintron (N  | 31168 NM_01488E   | 9936 Hs. 130014NM_01488E       | ENSG00000CD302       | B1MLEC CI          | CD302                 | mol            | protein-coding |
| chr4-168  | 7.658465  | -0.60345 | 0.853747 | -0.70683 | 0.479675 | 0.981636 | chr4  | 1.69E+08 | 1.69E+08 | + | 0 NA | Intergeni LM2c LIN  | 79350 NM_03278E   | 84869 Hs. 65931NM_03278E       | ENSG00000CBR4        | SDR45C1            | carboxyl              | protein-coding |                |
| chr8-14   | 7.658465  | -0.60345 | 0.853747 | -0.70683 | 0.479675 | 0.981636 | chr8  | 1.44E+08 | 1.44E+08 | + | 0 NA | TTS (NM_C TTS (NM_C | 1155 NR_10690E    | 1.02E+08 NR_10690E             | ENSG00000MIR6847     | hsa-mir-6          | microRNA              | ncRNA          |                |
| chr1-21   | 8.102356  | -0.58082 | 0.822392 | -0.70625 | 0.48003  | 0.981636 | chr1  | 2.13E+08 | 2.13E+08 | + | 0 NA | intron (NMSTA LTR   | -41589 NM_018664  | 55509 Hs. 62919 NM_018664      | ENSG00000BATF3       | JDP1 JUN           | basic                 | let            | protein-coding |
| chr10-87  | 8.102356  | -0.58082 | 0.822392 | -0.70625 | 0.48003  | 0.981636 | chr10 | 87957655 | 87958924 | + | 0 NA | intron (Nintron (N  | 94664 NM_000314   | 5728 Hs. 50046E NM_000314      | ENSG00000PTEN        | 10q23del1          | phosphate             | protein-coding |                |
| chr14-9   | 8.102356  | -0.58082 | 0.822392 | -0.70625 | 0.48003  | 0.981636 | chr14 | 92131146 | 92132111 | + | 0 NA | intron (NAluSj SIN  | 9659 NM_00132E    | 53981 Hs. 65763E NM_01743E     | ENSG00000CPSF2       | CPSF100            | cleavage              | protein-coding |                |
| chr4-18   | 8.102356  | -0.58082 | 0.822392 | -0.70625 | 0.48003  | 0.981636 | chr4  | 1.83E+08 | 1.83E+08 | + | 0 NA | 3' UTR (N3' UTR (N  | 3697 NM_001317    | 55602 Hs. 59250E NM_01763E     | ENSG00000CDKN2AIP    | CARG               | CDKN2A                | ir             | protein-coding |
| chr5-115  | 8.102356  | -0.58082 | 0.822392 | -0.70625 | 0.48003  | 0.981636 | chr5  | 1.15E+08 | 1.15E+08 | + | 0 NA | intron (Nintron (N  | -12331 NM_00502E  | 5229 Hs. 25400E NM_00502E      | ENSG00000PGT81       | BGG1 GGT1          | grip                  | protein-coding |                |
| chr2-23   | 11.076932 | -0.58732 | 0.831998 | -0.70592 | 0.480238 | 0.981636 | chr2  | 2.31E+08 | 2.31E+08 | + | 0 NA | intron (NAluJo SIN  | -29550 NM_000867  | 3357 Hs. 42164E NM_000867      | ENSG00000CHTR2B      | 5-HT (2B) 5        | -hydroxy              | protein-coding |                |
| chr16-16  | 5.203538  | 0.731678 | 1.036589 | 0.705851 | 0.480281 | 0.981636 | chr16 | 16188954 | 16189908 | + | 0 NA | intron (NAluXj SI   | 33995 NM_00107E   | 368 Hs. 44218E NM_001171       | ENSG00000ABCC6       | ABC34 ARAF         | bindi                 | protein-coding |                |
| chr6-16   | 5.203538  | 0.731678 | 1.036589 | 0.705851 | 0.480281 | 0.981636 | chr6  | 1.7E+08  | 1.7E+08  | + | 0 NA | non-codir-non-codir | 33914 NM_00135E   | 253769 Hs. 13190E NM_18255E    | ENSG00000WDR27       | -                  | WD                    | repeat         | protein-coding |
| chr9-39   | 5.203538  | 0.731678 | 1.036589 | 0.705851 | 0.480281 | 0.981636 | chr9  | 39456121 | 39456586 | + | 0 NA | intron (NMER2 DNA   | 8173 NR_00352E    | 401509 Hs. 44944E NM_001032297 | ZNF658B              | -                  | zinc                  | finger         | pseudo         |
| chr11-10  | 8.143495  | -0.57759 | 0.818322 | -0.70582 | 0.480297 | 0.981636 | chr11 | 1.02E+08 | 1.02E+08 | + | 0 NA | intron (Nintron (N  | 98925 NM_00119E   | 10413 Hs. 503692NM_00610E      | ENSG00000CYP1        | COB1 YAP Yes       | assoc                 | protein-coding |                |
| chr12-10  | 8.143495  | -0.57759 | 0.818322 | -0.70582 | 0.480297 | 0.981636 | chr12 | 1.05E+08 | 1.05E+08 | + | 0 NA | intron (NMLRb SINE  | 36204 NM_001034   | 160428 Hs. 42572 NM_001034     | ENSG00000ALDH1L2     | mtFBH              | aldehyde              | protein-coding |                |
| chr15-8   | 8.143495  | -0.57759 | 0.818322 | -0.70582 | 0.480297 | 0.981636 | chr15 | 80944416 | 80949706 | + | 0 NA | exon (NM_exon (NM   | 42758 NR_12632E   | 23184 Hs. 57845E NM_015154     | ENSG00000MESD        | BOCA MES           | mesoderm              | protein-coding |                |
| chr17-3   | 8.143495  | -0.57759 | 0.818322 | -0.70582 | 0.480297 | 0.981636 | chr17 | 38883031 | 38884343 | + | 0 NA | intron (NAluXj SIN  | 12309 NM_00614E   | 3927 Hs. 74115E NM_00614E      | ENSG00000LASP1       | Lasp-1 ML          | LIM and S             | protein-coding |                |
| chr19-4   | 8.143495  | -0.57759 | 0.818322 | -0.70582 | 0.480297 | 0.981636 | chr19 | 47788299 | 47788299 | + | 0 NA | intron (NAluJo SIN  | 29271 NM_014681   | 9704 Hs. 15170E NM_014681      | ENSG00000DHX34       | DDX34 HRE          | DEX-h                 | box            | protein-coding |
| chr7-5    | 8.143495  | -0.57759 | 0.818322 | -0.70582 | 0.480297 | 0.981636 | chr7  | 55169012 | 55169681 | + | 0 NA | TTS (NM_C TTS (NM_C | 19603 NR_047551   | 1.01E+08 Hs. 72048E NR_047551  | ENSG00000EGFR-AS1    | -                  | EGFR                  | antincRNA      |                |
| chr19-8   | 7.98876   | 0.59386  | 0.84154  | 0.705683 | 0.480386 | 0.981636 | chr19 | 899293   | 899701   | + | 0 NA | intron (Nintron (N  | 5828 NR_12573E    | 1.04E+08 NR_12573E             | ENSG00000RNU6-2      | U6-2               | RNA, U6               | snRNA          |                |
| chr2-4    | 7.98876   | 0.59386  | 0.84154  | 0.705683 | 0.480386 | 0.981636 | chr2  | 46159536 | 46160966 | + | 0 NA | intron (Nintron (N  | -137156 NM_00143E | 2034 Hs. 46841NM_00143E        | ENSG00000CEPAS1      | ECYT4 HIF          | endothelin            | protein-coding |                |
| chr19-8   | 11.1943   | 0.49932  | 0.707624 | 0.705629 | 0.480419 | 0.981636 | chr19 | 8809871  | 8821427  | + | 0 NA | intron (NAluJr SIN  | 6414 NM_001304    | 148156 Hs. 349444NM_014469E    | ENSG00000ZNF558      | -                  | zinc                  | finger         | protein-coding |
| chr9-1    | 11.1943   | 0.49932  | 0.707624 | 0.705629 | 0.480419 | 0.981636 | chr9  | 1.13E+08 | 1.13E+08 | + | 0 NA | intron (Nintron (N  | 9581 NM_00128E    | 7539 Hs. 15040E NM_00340E      | ENSG00000ZFP37       | ZNF906 zf          | ZFP37                 | zir            | protein-coding |
| chr11-4   | 5.453774  | -0.7314  | 1.036973 | -0.70533 | 0.480608 | 0.981636 | chr11 | 44108902 | 44109557 | + | 0 NA | exon (NM_exon (NM   | 13032 NM_000401   | 2132 Hs. 368404NM_000401       | ENSG00000EXT2        | SOTV SSM           | exostosin             | protein-coding |                |
| chr10-7   | 5.453774  | -0.7314  | 1.036973 | -0.70533 | 0.480641 | 0.981636 | chr10 | 70216038 | 70218884 | + | 0 NA | intron (NMLRc SINE  | 15968 NM_02112E   | 5464 Hs. 43740E NM_02112E      | ENSG00000PPA1        | HEL-5-6            | pyrophosph            | protein-coding |                |
| chr11-3   | 5.453774  | -0.7314  | 1.036973 | -0.70533 | 0.480641 | 0.981636 | chr11 | 34882896 | 34883095 | + | 0 NA | intron (Nintron (N  | -33135 NM_00116E  | 8050 Hs. 50231E NM_00347E      | ENSG00000PDHX        | DLDBP E3E          | pyruvate              | protein-coding |                |
| chr11-8   | 5.453774  | -0.7314  | 1.036973 | -0.70533 | 0.480641 | 0.981636 | chr11 | 88303207 | 88311003 | + | 0 NA | intron (Nintron (N  | 30631 NM_14817E   | 1075 Hs. 12806E NM_001814      | ENSG00000CTSC        | CPPI DPP           | cathepsin             | protein-coding |                |
| chr12-1   | 5.453774  | -0.7314  | 1.036973 | -0.70533 | 0.480641 | 0.981636 | chr12 | 21651813 | 21654675 | + | 0 NA | intron (NLMC4 LIN   | 4550 NM_001174    | 3945 Hs. 44614E NM_00230E      | ENSG00000LDHB        | HEL-5-28           | lactate               |                |                |



|                    |          |          |          |          |          |       |          |          |   |   |    |                      |         |           |          |                                        |                                      |                                    |
|--------------------|----------|----------|----------|----------|----------|-------|----------|----------|---|---|----|----------------------|---------|-----------|----------|----------------------------------------|--------------------------------------|------------------------------------|
| chr16-305.7.930055 | 0.585803 | 0.833335 | 0.702962 | 0.482079 | 0.981636 | chr16 | 30979749 | 30981627 | + | 0 | NA | intron (NCpG)        | -4519   | NM_001142 | 80270    | Hs.46061ENM_02519:ENSG00000CHSD3B7     | CBAS1 PFI hydroxy-c-protein-coding   |                                    |
| chr2-3202.7.930055 | 0.585803 | 0.833335 | 0.702962 | 0.482079 | 0.981636 | chr2  | 32028136 | 32029088 | + | 0 | NA | intron (NAuSc SIN)   | 11193   | NM_001321 | 84661    | Hs.51788NM_032574:ENSG00000DPY30       | Cps25 HDF pdy-30 hiprotein-coding    |                                    |
| chr5-180C.7.930055 | 0.585803 | 0.833335 | 0.702962 | 0.482079 | 0.981636 | chr5  | 1.8E+08  | 1.8E+08  | + | 0 | NA | intron (NLIMB7 LIN)  | -20730  | NR_02988E | 442908   | NR_02988E:ENSG00000CIR340              | MIRN340 l-microRNA ncRNA             |                                    |
| chr6-1164.7.930055 | 0.585803 | 0.833335 | 0.702962 | 0.482079 | 0.981636 | chr6  | 1.16E+08 | 1.16E+08 | + | 0 | NA | intron (NLIPA16 LI)  | -27594  | NM_00127E | 441168   | Hs.38122C:NM_00101C:ENSG00000CALHM6    | C6orf187 calcium I-protein-coding    |                                    |
| chr6-1697.7.930055 | 0.585803 | 0.833335 | 0.702962 | 0.482079 | 0.981636 | chr6  | 1.7E+08  | 1.7E+08  | + | 0 | NA | intron (NALuSg SIN)  | 6879    | NM_13332E | 55274    | Hs.43593:NM_01828E:ENSG00000PHF10      | BAF454 XAPH finger protein-coding    |                                    |
| chr7-130C.7.930055 | 0.585803 | 0.833335 | 0.702962 | 0.482079 | 0.981636 | chr7  | 1.3E+08  | 1.3E+08  | + | 0 | NA | intron (NALuY SINE)  | 10875   | NM_00136E | 51530    | Hs.194157:NM_01647E:ENSG00000CZ3HC1    | HSPC216 zinc finger protein-coding   |                                    |
| chr9-209C.7.930055 | 0.585803 | 0.833335 | 0.702962 | 0.482079 | 0.981636 | chr9  | 20990232 | 20990786 | + | 0 | NA | intron (Nintron (N)) | 41131   | NM_00101C | 401494   | Hs.71667E:NM_00101C:ENSG00000HACD4     | PTPLAD2 3-hydroxyprotein-coding      |                                    |
| chr1-229C.7.930055 | 0.585803 | 0.833335 | 0.702962 | 0.482079 | 0.981636 | chr1  | 2.3E+08  | 2.3E+08  | + | 0 | NA | intron (Nintron (N)) | 20394   | NR_11063C | 1.02E+08 | Hs.80208:NR_11063C:ENSG00000LOC101927  | LOC101927-1                          |                                    |
| chr2-922C.7.930055 | 0.585803 | 0.833335 | 0.702962 | 0.482079 | 0.981636 | chr2  | 92296775 | 92297631 | + | 0 | NA | IntergeniALR/Alpha   | 356070  | NR_027714 | 440888   | Hs.73023E:NM_001032412                 | ACTR3BP2 FKGSG73 ACTR3B ps-pseudo    |                                    |
| chr7-442C.7.930055 | 0.585803 | 0.833335 | 0.702962 | 0.482079 | 0.981636 | chr7  | 64523802 | 64524841 | + | 0 | NA | TTS (NM_CTS (NM_C))  | 38750   | NM_17855E | 340252   | Hs.52088E:NM_17855E:ENSG00000ZNF680    | - zinc finger protein-coding         |                                    |
| chr4-4427.11.71631 | 0.487262 | 0.693192 | 0.702924 | 0.482103 | 0.981636 | chr4  | 442772   | 442525   | + | 0 | NA | exon (NM exon (NM))  | 30197   | NR_002451 | 79963    | Hs.67749E:NM_02490E:ENSG00000ABCA11P   | ABCA11 ES ATP bindipseudo            |                                    |
| chr10-145.5.915231 | -0.6788  | 0.965813 | -0.70283 | 0.482165 | 0.981636 | chr10 | 14924649 | 14925133 | + | 0 | NA | intron (Nintron (N)) | 29205   | NM_00135C | 64421    | Hs.65593E:NM_02248E:ENSG00000DCLRE1C   | A-SCID DCDNA cross protein-coding    |                                    |
| chr11-614.5.915231 | -0.6788  | 0.965813 | -0.70283 | 0.482165 | 0.981636 | chr11 | 614960   | 615467   | + | 0 | NA | exon (NM exon (NM))  | 737     | NM_00402E | 3665     | Hs.16612C:NM_00157E:ENSG00000IRF7      | IMD39 IRF interferon protein-coding  |                                    |
| chr12-681.5.915231 | -0.6788  | 0.965813 | -0.70283 | 0.482165 | 0.981636 | chr12 | 6817395  | 6818067  | + | 0 | NA | intron (N (CA)n Sin) | -4090   | NM_01985E | 27239    | Hs.631654:NM_01444E:ENSG00000GPR162    | A-2 GRCA G protein protein-coding    |                                    |
| chr13-111.5.915231 | -0.6788  | 0.965813 | -0.70283 | 0.482165 | 0.981636 | chr13 | 1.13E+08 | 1.13E+08 | + | 0 | NA | intron (Nintron (N)) | -69039  | NR_046661 | 1.01E+08 | Hs.65869E:NR_046661:ENSG00000ATP11A-AS | ATP11A arn-cRNA                      |                                    |
| chr16-587.5.915231 | -0.6788  | 0.965813 | -0.70283 | 0.482165 | 0.981636 | chr16 | 58711504 | 58711703 | + | 0 | NA | intron (NMER102a LI) | 22713   | NM_00128C | 2806     | Hs.59947C:NM_00208C:ENSG00000GOT2      | KAT4 KAT glutamic-protein-coding     |                                    |
| chr17-35C.5.915231 | -0.6788  | 0.965813 | -0.70283 | 0.482165 | 0.981636 | chr17 | 35655305 | 35655790 | + | 0 | NA | intron (NLIME3 LI)   | 68225   | NM_00103C | 163      | Hs.51481E:NM_00128E:ENSG00000CAP2B1    | ADTB2 AP1 adaptor protein-coding     |                                    |
| chr20-36C.5.915231 | -0.6788  | 0.965813 | -0.70283 | 0.482165 | 0.981636 | chr20 | 36994981 | 36995762 | + | 0 | NA | TTS (NM_CTS (NM_C))  | -43528  | NM_015474 | 25939    | Hs.580681:NM_015474:ENSG00000SAMHD1    | CHBL2 DC15AM and I-protein-coding    |                                    |
| chr5-8394.5.915231 | -0.6788  | 0.965813 | -0.70283 | 0.482165 | 0.981636 | chr5  | 83943317 | 83943830 | + | 0 | NA | intron (Nintron (N)) | -222718 | NM_001884 | 1404     | Hs.2799                                | NM_001884:ENSG00000HAPLN1            | CRT1 CRT hyaluronan protein-coding |
| chr7-139C.5.915231 | -0.6788  | 0.965813 | -0.70283 | 0.482165 | 0.981636 | chr7  | 1.4E+08  | 1.4E+08  | + | 0 | NA | intron (Nintron (N)) | 89509   | NM_00111E | 28996    | Hs.731417:NM_02274C:ENSG00000CHIPK2    | SGO0593 homeodomain protein-coding   |                                    |
| chr13-252.7.699604 | -0.5999  | 0.85358  | -0.70281 | 0.482175 | 0.981636 | chr13 | 52662735 | 52663010 | + | 0 | NA | intron (Nintron (N)) | 10036   | NM_00132C | 10910    | Hs.28190E:NM_00670C:ENSG00000SUGT1     | SGT1 SGT1 home protein-coding        |                                    |
| chr6-265C.7.699604 | -0.5999  | 0.85358  | -0.70281 | 0.482175 | 0.981636 | chr6  | 26598992 | 26599220 | + | 0 | NA | 3' UTR (3' UTR (N))  | 2153    | NM_01337E | 29777    | Hs.25440E:NM_01337E:ENSG00000ABT1      | Esf2 HAB1 activator protein-coding   |                                    |
| chr2-104.10.33247  | -0.51454 | 0.732277 | -0.70265 | 0.482273 | 0.981636 | chr2  | 10643800 | 10644202 | + | 0 | NA | intron (NALuSz SIN)  | 45974   | NM_024894 | 79954    | Hs.222494:NM_024894:ENSG00000NOL10     | PQB55 nucleolar protein-coding       |                                    |
| chr1-2454.5.972086 | -0.67822 | 0.96566  | -0.70238 | 0.482442 | 0.981636 | chr1  | 2.4E+08  | 2.4E+08  | + | 0 | NA | IntergeniIntergeni   | 135915  | NM_02246E | 64388    | Hs.98206                               | NM_02246E:ENSG00000GREM2             | CKTSF1B2 gremlin 2 protein-coding  |
| chr1-176C.8.127779 | -0.57452 | 0.817997 | -0.70235 | 0.482464 | 0.981636 | chr1  | 1762083  | 1762305  | + | 0 | NA | intron (Nintron (N)) | -3552   | NM_00119E | 65220    | Hs.65479E:NM_02301E:ENSG00000NADK      | dJ28E3E.1 NAD kinase protein-coding  |                                    |
| chr1-4054.8.127779 | -0.57452 | 0.817997 | -0.70235 | 0.482464 | 0.981636 | chr1  | 40543193 | 40543899 | + | 0 | NA | intron (NALuY SINE)  | 11909   | NM_15237E | 127396   | Hs.524767:NM_15237E:ENSG00000ZNF684    | - zinc finger protein-coding         |                                    |
| chr10-151.8.127779 | -0.57452 | 0.817997 | -0.70235 | 0.482464 | 0.981636 | chr10 | 15117399 | 15120635 | + | 0 | NA | intron (NCharlie a)  | 21662   | NM_006414 | 10557    | Hs.94986                               | NM_006414:ENSG00000RPP38             | ribonucleoprotein-coding           |
| chr10-605.8.127779 | -0.57452 | 0.817997 | -0.70235 | 0.482464 | 0.981636 | chr10 | 60934863 | 60936414 | + | 0 | NA | intron (NMER63C DN)  | 8547    | NM_00135C | 9886     | Hs.737374:NM_01483E:ENSG00000RHOBTB1   | Rho relat protein-coding             |                                    |
| chr10-88C.8.127779 | -0.57452 | 0.817997 | -0.70235 | 0.482464 | 0.981636 | chr10 | 68015615 | 68017876 | + | 0 | NA | intron (Nintron (N)) | -5862   | NR_131184 | 1E+08    | NR_131184:POU5F1P5                     | Oct4-pg5 POU class-pseudo            |                                    |
| chr10-87C.8.127779 | -0.57452 | 0.817997 | -0.70235 | 0.482464 | 0.981636 | chr10 | 87047353 | 87049556 | + | 0 | NA | IntergeniNALuY SINE  | 28160   | NM_00114E | 643161   | Hs.72994E:NM_00114E:ENSG00000FAM25A    | bA96C23.E family wiprotein-coding    |                                    |
| chr11-65C.8.127779 | -0.57452 | 0.817997 | -0.70235 | 0.482464 | 0.981636 | chr11 | 65891229 | 65893153 | + | 0 | NA | TTS (NR_1TTS (NR_1)) | 1518    | NM_00684E | 11007    | Hs.66713                               | NM_00684E:ENSG00000CCDC85B           | DIPA coiled-cc protein-coding      |
| chr11-106.8.127779 | -0.57452 | 0.817997 | -0.70235 | 0.482464 | 0.981636 | chr11 | 1.06E+08 | 1.06E+08 | + | 0 | NA | intron (Nintron (N)) | -5038   | NM_00133C | 143879   | Hs.10194E:NM_15243E:ENSG00000KBTBD3    | BKLHD3 kelch repeat protein-coding   |                                    |
| chr13-98C.8.127779 | -0.57452 | 0.817997 | -0.70235 | 0.482464 | 0.981636 | chr13 | 98000853 | 98003698 | + | 0 | NA | intron (NALuYk2 SI)  | 48600   | NM_002271 | 3843     | Hs.1259E:NM_002271:ENSG00000IPO5       | IMB3 JNK importin protein-coding     |                                    |
| chr14-61C.8.127779 | -0.57452 | 0.817997 | -0.70235 | 0.482464 | 0.981636 | chr14 | 61004246 | 61006061 | + | 0 | NA | intron (NLIPA3 LIN)  | -23463  | NM_00135C | 57570    | Hs.38015E:NM_02081C:ENSG00000TRMT5     | COXP26 k-tRNA met protein-coding     |                                    |
| chr2-2114.8.127779 | -0.57452 | 0.817997 | -0.70235 | 0.482464 | 0.981636 | chr2  | 1.11E+08 | 1.11E+08 | + | 0 | NA | intron (NMLT1C LTF)  | 15092   | NR_13616E | 54147    | Hs.56080E:NR_01539E:ENSG00000MIR4435-2 | AGD2 LIN MIR4435-2 ncRNA             |                                    |
| chr2-237C.8.127779 | -0.57452 | 0.817997 | -0.70235 | 0.482464 | 0.981636 | chr2  | 2.38E+08 | 2.38E+08 | + | 0 | NA | TTS (NM_CTS (NM_C))  | -16738  | NM_00108C | 375316   | Hs.60726E:NM_19885E:ENSG00000RBM44     | - RNA bindi protein-coding           |                                    |
| chr20-37C.8.127779 | -0.57452 | 0.817997 | -0.70235 | 0.482464 | 0.981636 | chr20 | 37216129 | 37218291 | + | 0 | NA | intron (NALuJb SIN)  | -37662  | NM_21363E | 140699   | Hs.34912E:NM_15250E:ENSG00000CMROH8    | C20orf131 maestro protein-coding     |                                    |
| chr20-41C.8.127779 | -0.57452 | 0.817997 | -0.70235 | 0.482464 | 0.981636 | chr20 | 41078887 | 41082674 | + | 0 | NA | intron (Nintron (N)) | 51958   | NM_00328E | 7150     | Hs.47273C:NM_00328E:ENSG00000TOP1      | TOPI DNA topoi protein-coding        |                                    |
| chr21-34C.8.127779 | -0.57452 | 0.817997 | -0.70235 | 0.482464 | 0.981636 | chr21 | 34840724 | 34841351 | + | 0 | NA | intron (Nintron (N)) | 47662   | NM_001001 | 861      | Hs.149261:NM_001754:ENSG00000RUNK1     | AML1 AML1 RUNX family protein-coding |                                    |
| chr3-575C.8.127779 | -0.57452 | 0.817997 | -0.70235 | 0.482464 | 0.981636 | chr3  | 57559662 | 57560530 | + | 0 | NA | 3' UTR (3' UTR (N))  | 3822    | NM_00132E | 201626   | Hs.57299E:NM_17796E:ENSG00000PDE12     | 2'-PDE 2-phosphodi protein-coding    |                                    |
| chr3-122C.8.127779 | -0.57452 | 0.817997 | -0.70235 | 0.482464 | 0.981636 | chr3  | 1.23E+08 | 1.23E+08 | + | 0 | NA | intron (Nintron (N)) | 18601   | NM_00114E | 83666    | Hs.51820C:NM_03145E:ENSG00000PARP9     | ARTD9 BAL poly (ADP- protein-coding  |                                    |
| chr5-637C.8.127779 | -0.57452 | 0.817997 | -0.70235 | 0.482464 | 0.981636 | chr5  | 6375524  | 6376648  | + | 0 | NA | intron (Nintron (N)) | 2461    | NM_03228E | 84246    | Hs.13885                               | NM_03228E:ENSG00000MED10             | L61 NUT72 mediator protein-coding  |
| chr5-6604.8.127779 | -0.57452 | 0.817997 | -0.70235 | 0.482464 | 0.981636 | chr5  | 66046392 | 66046880 | + | 0 | NA | intron (Nintron (N)) | -97664  | NM_00132E | 140890   | Hs.49367                               | NM_13916E:ENSG00000SREK1             | SFRS12 SF splicing protein-coding  |
| chr5-1107.8.127779 | -0.57452 | 0.817997 | -0.70235 | 0.482464 | 0.981636 | chr5  | 1.11E+08 | 1.11E+08 | + | 0 | NA | intron (NLIPA17 LI)  | 9339    | NM_00130E | 91137    | Hs.75639                               | NM_13877E:ENSG00000SLC25A46          | HMSN6B solute c protein-coding     |
| chr5-1461.8.127779 | -0.57452 | 0.817997 | -0.70235 | 0.482464 | 0.981636 | chr5  | 1.46E+08 | 1.46E+08 | + | 0 | NA | intron (NMIRb SINE)  | -20116  | NM_00102E | 153770   | Hs.16236E:NM_00102E:ENSG00000PLAC8L1   | - PLAC8 lik protein-coding           |                                    |
| chr6-1437.8.127779 | -0.57452 | 0.817997 | -0.70235 | 0.482464 | 0.981636 | chr6  | 1.44E+08 | 1.44E+08 | + | 0 | NA | intron (Nintron (N)) | 76149   | NM_00110C | 9749     | Hs.102471:NM_014721:ENSG00000PHACTR2   | C6orf56 phosphatase protein-coding   |                                    |
| chr7-436C.8.127779 | -0.57452 | 0.817997 | -0.70235 | 0.482464 | 0.981636 | chr7  | 43624521 | 43626275 | + | 0 | NA | 3' UTR (3' UTR (N))  | 42290   | NM_00476E | 9263     | Hs.70948E:NM_00476E:ENSG00000STK17A    | DRAK1 serine/th protein-coding       |                                    |
| chr8-2337.8.127779 | -0.57452 | 0.817997 | -0.70235 | 0.482464 | 0.981636 | chr8  | 23378032 | 23378245 | + | 0 | NA | intron (NLIPA5 LIN)  | 25708   | NM_00231E | 4017     | Hs.626637:NM_00231E:ENSG00000CLOX2     | LOR LOR2 lysyl oxiprotein-coding     |                                    |
| chr8-103C.8.127779 | -0.      |          |          |          |          |       |          |          |   |   |    |                      |         |           |          |                                        |                                      |                                    |



|           |          |          |          |          |          |          |       |                 |                   |   |   |    |                       |                   |                                                |                                         |
|-----------|----------|----------|----------|----------|----------|----------|-------|-----------------|-------------------|---|---|----|-----------------------|-------------------|------------------------------------------------|-----------------------------------------|
| chr1-2254 | 8.459925 | 0.561627 | 0.803849 | 0.698672 | 0.484757 | 0.981636 | chr1  | 2.28E+08        | 2.28E+08          | + | 0 | NA | intron (AluSg SIN     | 5426 NM_00101C    | 149603 Hs.356377NM_00101C ENSG00000CRNF187     | RACO-1 P ring protein-coding            |
| chr1-2351 | 8.459925 | 0.561627 | 0.803849 | 0.698672 | 0.484757 | 0.981636 | chr1  | 2.35E+08        | 2.35E+08          | + | 0 | NA | intron (AluSg2 SI     | -13459 NM_01476E  | 9804 Hs.533192NM_01476E ENSG00000TOMM20        | MAS20 MOV translocase protein-coding    |
| chr10-114 | 8.459925 | 0.561627 | 0.803849 | 0.698672 | 0.484757 | 0.981636 | chr10 | 1.15E+08        | 1.15E+08          | + | 0 | NA | IntergeniAluSx1 SI    | -11910 NR_120677  | 1.03E+08 NR_120677 ENSG00000CLINCO262C-        | long intencRNA                          |
| chr11-681 | 8.459925 | 0.561627 | 0.803849 | 0.698672 | 0.484757 | 0.981636 | chr11 | 681838          | 689205            | + | 0 | NA | intron (AluSx SIN     | -10070 NM_001217E | 283232 Hs.448664NM_17494C ENSG00000TMEM80      | - transmem protein-coding               |
| chr11-651 | 8.459925 | 0.561627 | 0.803849 | 0.698672 | 0.484757 | 0.981636 | chr11 | 65394294        | 65398416          | + | 0 | NA | intron (intron (N     | 9718 NM_00130C    | 83786 Hs.578433NM_031904 ENSG00000FRMD8        | FKSG44 1 FERM domain protein-coding     |
| chr11-703 | 8.459925 | 0.561627 | 0.803849 | 0.698672 | 0.484757 | 0.981636 | chr11 | 70338571        | 70340018          | + | 0 | NA | exon (NM exon (NM     | 55339 NR_031624   | 1E+08 NR_031624 ENSG00000MIR548K               | MIRN548K microRNA ncRNA                 |
| chr16-84  | 8.459925 | 0.561627 | 0.803849 | 0.698672 | 0.484757 | 0.981636 | chr16 | 84066235        | 84069648          | + | 0 | NA | intron (intron (N     | -25784 NM_00108C  | 146167 Hs.00108C ENSG00000SLC38A8              | FVH2 solute carrier protein-coding      |
| chr18-12  | 8.459925 | 0.561627 | 0.803849 | 0.698672 | 0.484757 | 0.981636 | chr18 | 12340739        | 12344329          | + | 0 | NA | intron (LIME1 LIN     | 34293 NM_00130C   | 84617 Hs.193491NM_03252E ENSG00000TUBB6        | FPVEPD Hs tubulin beta protein-coding   |
| chr19-435 | 8.459925 | 0.561627 | 0.803849 | 0.698672 | 0.484757 | 0.981636 | chr19 | 43551922        | 43552393          | + | 0 | NA | exon (NM exon (NM     | 18969 NM_17494E   | 284346 Hs.213534NM_17494E ENSG00000ZNF575      | - zinc finger protein-coding            |
| chr19-444 | 8.459925 | 0.561627 | 0.803849 | 0.698672 | 0.484757 | 0.981636 | chr19 | 44441632        | 44443077          | + | 0 | NA | intron (intron (N     | 6118 NR_103551    | 7772 Hs.70934E ENSG00000ZNF229                 | - zinc finger protein-coding            |
| chr19-466 | 8.459925 | 0.561627 | 0.803849 | 0.698672 | 0.484757 | 0.981636 | chr19 | 46678087        | 46704533          | + | 0 | NA | intron (intron (N     | 18044 NR_036157   | 1E+08 NR_036157 ENSG00000MIR320E               | mir-320e microRNA ncRNA                 |
| chr20-325 | 8.459925 | 0.561627 | 0.803849 | 0.698672 | 0.484757 | 0.981636 | chr20 | 3254660         | 3256245           | + | 0 | NA | intron (intron (N     | -16262 NM_001174  | 83959 Hs.105607NM_032034 ENSG00000SLC4A11      | BTRI CDPI solute carrier protein-coding |
| chr3-1237 | 8.459925 | 0.561627 | 0.803849 | 0.698672 | 0.484757 | 0.981636 | chr3  | 1.24E+08        | 1.24E+08          | + | 0 | NA | intron (NL2a LINE     | 37403 NR_046625   | 1.01E+08 Hs.66731E NR_046625 ENSG00000MYLK-AS2 | - MYLK antincRNA                        |
| chr9-135  | 8.459925 | 0.561627 | 0.803849 | 0.698672 | 0.484757 | 0.981636 | chr9  | 1.36E+08        | 1.36E+08          | + | 0 | NA | intron (AluSx3 SI     | 24099 NM_016172   | 10422 Hs.9194 NM_016172 ENSG00000UBAC1         | GBDR1 KPCUBA domain protein-coding      |
| chr16-885 | 10.63901 | 0.510133 | 0.730288 | 0.698536 | 0.484842 | 0.981636 | chr16 | 88577508        | 88577735          | + | 0 | NA | exon (NM exon (NM     | 7218 NM_144604    | 124245 Hs.93670 NM_144604 ENSG00000ZC3H18      | NHN1 zinc finger protein-coding         |
| chr2-1125 | 10.63901 | 0.510133 | 0.730288 | 0.698536 | 0.484842 | 0.981636 | chr2  | 1.12E+08        | 1.12E+08          | + | 0 | NA | intron (AluJb SIN     | 35973 NM_005054   | 84220 Hs.46963C NM_005054 ENSG00000RGPD5       | BS-63 BSF RNBP2.1 protein-coding        |
| chr5-7234 | 10.63901 | 0.510133 | 0.730288 | 0.698536 | 0.484842 | 0.981636 | chr5  | 72343284        | 72343499          | + | 0 | NA | intron (intron (N     | 23018 NM_001284   | 79810 Hs.12690E NM_024754 ENSG00000CTCD2       | - pentatric protein-coding              |
| chr14-962 | 10.35789 | -0.50961 | 0.729636 | -0.69845 | 0.484895 | 0.981636 | chr14 | 96261339        | 96265537          | + | 0 | NA | intron (MER58A DN     | 7228 NM_00071C    | 623 Hs.52557E NM_00071C ENSG00000BDRKB1        | B1BKR B1F bradykinin protein-coding     |
| chr22-356 | 10.35789 | -0.50961 | 0.729636 | -0.69845 | 0.484895 | 0.981636 | chr22 | 35655252        | 35660329          | + | 0 | NA | intron (intron (N     | 9344 NM_030641    | 80830 Hs.25735E NM_030641 ENSG00000APOL6       | APOL-VII apolipoprotein-coding          |
| chr3-123  | 10.35789 | -0.50961 | 0.729636 | -0.69845 | 0.484895 | 0.981636 | chr3  | 1.24E+08        | 1.24E+08          | + | 0 | NA | intron (AluJo SIN     | 5601 NM_053031    | 4638 Hs.47737E NM_00596E ENSG00000MYLK         | AAT7 KRP myosin I protein-coding        |
| chr1-1195 | 7.691746 | -0.59818 | 0.856466 | -0.69842 | 0.484912 | 0.981636 | chr1  | 1.2E+08         | 1.2E+08           | + | 0 | NA | intron (intron (N     | -67670 NM_021794  | 11085 Hs.283011NM_021794 ENSG00000ADAM30       | svph4 ADAM metal protein-coding         |
| chr2-6077 | 7.691746 | -0.59818 | 0.856466 | -0.69842 | 0.484912 | 0.981636 | chr2  | 60778130        | 60778509          | + | 0 | NA | intron (N (ATTTT) n   | 22051 NM_022894   | 64895 Hs.387471NM_022894 ENSG00000PAPOLG       | - poly (A) protein-coding               |
| chr2-8746 | 12.61158 | -0.47108 | 0.674897 | -0.69801 | 0.485173 | 0.981636 | chr2  | 87460331        | 87460703          | + | 0 | NA | intron (intron (N     | 5090 NR_02420E    | 112597 Hs.65216E NR_02420E ENSG00000CYTOR      | C2orf59 l cytoskeleton ncRNA            |
| chr1-2205 | 8.168919 | -0.57133 | 0.818752 | -0.6978  | 0.485301 | 0.981636 | chr1  | 22096960        | 22099427          | + | 0 | NA | 3' UTR (N3' UTR (N    | 44904 NM_030761   | 54361 Hs.25766 NM_030761 ENSG00000WNT4         | SERKAL W Wnt family protein-coding      |
| chr2-3927 | 8.168919 | -0.57133 | 0.818752 | -0.6978  | 0.485301 | 0.981636 | chr2  | 39274337        | 39275353          | + | 0 | NA | intron (MIR SINE      | -30862 NR_144521  | 344387 Hs.403201NM_00100E ENSG00000CDKL4       | - cyclin dependent protein-coding       |
| chr2-112  | 8.168919 | -0.57133 | 0.818752 | -0.6978  | 0.485301 | 0.981636 | chr2  | 1.12E+08        | 1.12E+08          | + | 0 | NA | intron (intron (N     | 5216 NM_032824    | 84910 Hs.65629E NM_032824 ENSG00000TMEM87B     | - transmem protein-coding               |
| chr4-6641 | 8.168919 | -0.57133 | 0.818752 | -0.6978  | 0.485301 | 0.981636 | chr4  | 6641937         | 6643225           | + | 0 | NA | 3' UTR (N3' UTR (N    | 2490 NM_001272    | 93621 Hs.406594NM_03329E ENSG00000MRFP1        | PAM14 PGF Morf4 fan protein-coding      |
| chr1-1037 | 7.433467 | 0.61617  | 0.883048 | 0.697776 | 0.485317 | 0.981636 | chr1  | 10375018        | 10375596          | + | 0 | NA | exon (NM exon (NM     | -23757 NM_001304  | 5226 Hs.464071NM_002631 ENSG00000PGD           | 6PGD phosphoglycoprotein-coding         |
| chr17-456 | 7.433467 | 0.61617  | 0.883048 | 0.697776 | 0.485317 | 0.981636 | chr17 | 45630622        | 45630843          | + | 0 | NA | intron (AluS6 SI      | 8824 NM_00130C    | 1.05E+08 NM_00125E ENSG00000LINC0221C          | CRHR1-IT1 LINC0221C protein-coding      |
| chr3-4708 | 11.20216 | 0.497862 | 0.713157 | 0.697758 | 0.485329 | 0.981636 | chr3  | 47080221        | 47080981          | + | 0 | NA | intron (intron (N     | 69050 NR_02404E   | 1E+08 Hs.201522NR_02404E                       | NRADDP microRNA pseudo                  |
| chr1-1244 | 11.13559 | 0.493362 | 0.707076 | 0.69775  | 0.485334 | 0.981636 | chr1  | 1.24E+08        | 1.24E+08          | + | 0 | NA | IntergeniALR/Alph     | 2902300 NR_00395E | 647121 Hs.69768E NR_00395E ENSG00000EMBPI      | - embigin pseudo                        |
| chr1-7781 | 8.161061 | -0.5698  | 0.817208 | -0.69725 | 0.485643 | 0.981636 | chr1  | 7789731         | 77897830          | + | 0 | NA | intron (NLIP4 LIN     | -7741 NR_10353E   | 374987 Hs.632414NM_19934E ENSG00000NEXN-AS1    | Clorf118 NEXN antincRNA                 |
| chr1-1568 | 8.161061 | -0.5698  | 0.817208 | -0.69725 | 0.485643 | 0.981636 | chr1  | 1.56E+08        | 1.56E+08          | + | 0 | NA | intron (AluJb SIN     | 2856 NM_170707    | 4000 Hs.00557E NM_00557E ENSG00000LMNA         | CCDC1 CDE lamin A/C protein-coding      |
| chr10-74  | 8.161061 | -0.5698  | 0.817208 | -0.69725 | 0.485643 | 0.981636 | chr10 | 74016950        | 74017389          | + | 0 | NA | intron (AluYa5 SI     | 19053 NM_00337E   | 7414 Hs.64389E NM_00337E ENSG00000CVCL         | CMD1W CM vinculin protein-coding        |
| chr11-108 | 8.161061 | -0.5698  | 0.817208 | -0.69725 | 0.485643 | 0.981636 | chr11 | 1.09E+08        | 1.09E+08          | + | 0 | NA | intron (AluSx SIN     | 46417 NM_00439E   | 1662 Hs.591931NM_00439E ENSG00000DDX10         | Dbx4 HRH-DEAD-box protein-coding        |
| chr17-82  | 8.161061 | -0.5698  | 0.817208 | -0.69725 | 0.485643 | 0.981636 | chr17 | 82641421        | 82644364          | + | 0 | NA | intron (N (Charlie E  | 5552 NM_01961E    | 56270 Hs.132161NM_01961E ENSG00000WDR45B       | NEDSBA3 WWD repeat protein-coding       |
| chr2-2244 | 8.161061 | -0.5698  | 0.817208 | -0.69725 | 0.485643 | 0.981636 | chr2  | 2.24E+08        | 2.24E+08          | + | 0 | NA | intron (LIME1 LIN     | 74438 NM_001257   | 8452 Hs.37228E NM_00359C ENSG00000CUL3         | CUL-3 PH cullin 3 protein-coding        |
| chr5-9347 | 8.161061 | -0.5698  | 0.817208 | -0.69725 | 0.485643 | 0.981636 | chr5  | 93478937        | 93480256          | + | 0 | NA | intron (NLIME5 LI     | 91747 NR_10982E   | 441094 Hs.457407NR_01536E ENSG00000NR2F1-AS1   | NR2F1 antincRNA                         |
| chr6-176  | 8.161061 | -0.5698  | 0.817208 | -0.69725 | 0.485643 | 0.981636 | chr6  | 17631733        | 17632608          | + | 0 | NA | intron (N (MamRep 187 | 3216 NM_00095E    | 5732 Hs.2090 NM_00095E ENSG00000PTGER2         | EP2 prostaglandin protein-coding        |
| chr3-4771 | 7.650607 | -0.60161 | 0.863057 | -0.69706 | 0.485762 | 0.981636 | chr3  | 47714106        | 47714368          | + | 0 | NA | intron (AluSx SIN     | -52543 NR_145791  | 1.1E+08 NR_145791                              | SNORD146 - small nucleolar RNA          |
| chr8-1033 | 7.650607 | -0.60161 | 0.863057 | -0.69706 | 0.485762 | 0.981636 | chr8  | 18200 NR_14579E | 1.1E+08 NR_14579E | + | 0 | NA | intron (LIME4b LI     | -1365 NR_00307C   | 692205 Hs.65650E NR_00307C ENSG00000SNORD89    | HBIT-289 small nucleolar RNA            |
| chr2-1012 | 8.119921 | -0.57297 | 0.82202  | -0.69703 | 0.485785 | 0.981636 | chr2  | 50352104        | 50352303          | + | 0 | NA | intron (AluSx1 SI     | 8876 NM_001351    | 9701 Hs.44909E NM_01467E ENSG00000PPP6R2       | KIAA0685 protein protein-coding         |
| chr5-3615 | 8.119921 | -0.57297 | 0.82202  | -0.69703 | 0.485785 | 0.981636 | chr5  | 36154273        | 36155103          | + | 0 | NA | intron (AluJo SIN     | 2577 NM_032637    | 6502 Hs.23348 NM_00598E ENSG00000SKP2          | FBL1 FBX S-phase kinase protein-coding  |
| chr8-4794 | 8.119921 | -0.57297 | 0.82202  | -0.69703 | 0.485785 | 0.981636 | chr8  | 47949535        | 47950563          | + | 0 | NA | intron (AluSx2 SI     | 10087 NM_001081   | 5591 Hs.49168E NM_006904 ENSG00000PRKDC        | DNA-PKC I protein kinase protein-coding |
| chr1-3782 | 8.418785 | 0.56065  | 0.804395 | 0.696984 | 0.485813 | 0.981636 | chr1  | 37821588        | 37823431          | + | 0 | NA | exon (NM exon (NM     | -14301 NM_02464C  | 79693 Hs.301564NM_02464C ENSG00000YRDC         | DRIP3 IRI yrdc N6-t protein-coding      |
| chr1-1451 | 8.418785 | 0.56065  | 0.804395 | 0.696984 | 0.485813 | 0.981636 | chr1  | 1.46E+08        | 1.46E+08          | + | 0 | NA | non-codnon-codir      | -1338 NM_00130E   | 8515 Hs.158237NM_003637 ENSG00000ITGA10        | PRO827 integrin protein-coding          |
| chr1-1768 | 8.418785 | 0.56065  | 0.804395 | 0.696984 | 0.485813 | 0.981636 | chr1  | 1.76E+08        | 1.76E+08          | + | 0 | NA | intron (NLIMEF LI     | 48904 NM_001001   | 64326 Hs.523744NM_022457 ENSG00000COP1         | RFWD2 RFNF E3 ubiquitin-coding          |
| chr7-745  | 8.418785 | 0.56065  | 0.804395 | 0.696984 | 0.485813 | 0.981636 | chr7  | 74509826        | 74510031          | + | 0 | NA | intron (AluSc SIN     | 56022 NM_01632E   | 9569 Hs.64705E NM_00568E ENSG00000GTF2IRD1     | BEN CREAM GTF2I repeat protein-coding   |
| chr10-131 | 11.69875 | 0.482326 | 0.692282 | 0.696718 | 0.485979 | 0.981636 | chr10 | 13111207        | 13114424          | + | 0 | NA | intron (intron (N     | 12652 NM_00100E   | 10133 Hs.33270E NM_02198C ENSG00000COPTN       | ALS12 FIF optineurin protein-coding     |
| chr10-381 | 11.69875 | 0.482326 | 0.692282 | 0.696718 | 0.485979 | 0.981636 | chr10 | 38113072        | 38119262          | + | 0 | NA | TTS (NM_TTS (NM_C     | 21830 NM_001324   | 7587 Hs.29257E NM_003421 ENSG00000ZNF37A       | KOX21 ZNF zinc finger protein-coding    |
|           |          |          |          |          |          |          |       |                 |                   |   |   |    |                       |                   |                                                |                                         |



|           |           |          |          |          |          |          |       |          |          |   |   |    |                     |                  |          |                     |                     |                     |                              |                          |
|-----------|-----------|----------|----------|----------|----------|----------|-------|----------|----------|---|---|----|---------------------|------------------|----------|---------------------|---------------------|---------------------|------------------------------|--------------------------|
| chr3-4896 | 7.904631  | 0.580633 | 0.838989 | 0.692062 | 0.488898 | 0.981636 | chr3  | 48981441 | 48982128 | + | 0 | NA | intron (Nintron (N  | -8124 NM_17793E  | 54681    | Hs. 654944NM_01773E | ENSG0000CP4HTM      | EGLN4 HIF           | prolyl 4-protein-coding      |                          |
| chr11-591 | 8.434501  | 0.556857 | 0.804711 | 0.691996 | 0.48894  | 0.981636 | chr11 | 59182496 | 59182939 | + | 0 | NA | intron (Nintron (N  | 10585 NM_015177  | 23220    | Hs. 523696NM_015177 | ENSG000000DTX4      | RNF155              | deltex E protein-coding      |                          |
| chr17-738 | 8.434501  | 0.556857 | 0.804711 | 0.691996 | 0.48894  | 0.981636 | chr17 | 7389387  | 7392968  | + | 0 | NA | intron (Nintron (N  | 3348 NM_001201   | 57048    | Hs. 534591NM_02036E | ENSG000000PLSCR3    | -                   | phospholiprotein-coding      |                          |
| chr17-812 | 8.434501  | 0.556857 | 0.804711 | 0.691996 | 0.48894  | 0.981636 | chr17 | 81269150 | 81270215 | + | 0 | NA | intron (Nintron (N  | 25625 NM_001037  | 124565   | Hs. 352242NM_13857E | ENSG000000SLC38A10  | PP1744              | solute c protein-coding      |                          |
| chr2-4225 | 8.434501  | 0.556857 | 0.804711 | 0.691996 | 0.48894  | 0.981636 | chr2  | 42258678 | 42259109 | + | 0 | NA | intron (Nintron (N  | -88662 NR_110584 | 1.03E+08 | Hs. 63982E          | NR_110584           | LOC10272E           | uncharactercna               |                          |
| chr22-394 | 8.434501  | 0.556857 | 0.804711 | 0.691996 | 0.48894  | 0.981636 | chr22 | 39432176 | 39432438 | + | 0 | NA | TTS (NM_C           | 147 NR_04053E    | 1.01E+08 | Hs. 72908CN         | _040535             | LOC10050E           | uncharactercna               |                          |
| chr3-112  | 8.434501  | 0.556857 | 0.804711 | 0.691996 | 0.48894  | 0.981636 | chr3  | 1.13E+08 | 1.13E+08 | + | 0 | NA | intron (N2a LINE    | -13587 NM_00134F | 55032    | Hs. 23748CN         | _01794E             | ENSG000000SLC35A5   | -                            | solute c protein-coding  |
| chr3-1567 | 8.434501  | 0.556857 | 0.804711 | 0.691996 | 0.48894  | 0.981636 | chr3  | 1.57E+08 | 1.57E+08 | + | 0 | NA | intron (Nintron (N  | 26714 NM_001184  | 25976    | Hs. 74405CN         | _01550E             | ENSG000000TIPARP    | ARTD14 PATCD                 | ind protein-coding       |
| chr5-348  | 8.434501  | 0.556857 | 0.804711 | 0.691996 | 0.48894  | 0.981636 | chr5  | 34832644 | 34833175 | + | 0 | NA | TTS (NM_C           | -6255 NM_14472E  | 153657   | Hs. 435742NM_14472E | ENSG000000TTC23L    | MC25-1              | tetratric protein-coding     |                          |
| chr6-177  | 8.434501  | 0.556857 | 0.804711 | 0.691996 | 0.48894  | 0.981636 | chr6  | 17763191 | 17765253 | + | 0 | NA | exon (NM_exon (NM   | 57179 NR_13461E  | 1.05E+08 | Hs. 71801CN         | _13461E             | ENSG000000LOC105374 | -                            | uncharactercna           |
| chr6-4367 | 8.434501  | 0.556857 | 0.804711 | 0.691996 | 0.48894  | 0.981636 | chr6  | 43676858 | 43677425 | + | 0 | NA | intron (Nintron (N  | 10671 NM_01813E  | 55168    | Hs. 520145NM_01813E | ENSG000000MRPS18A   | HumanS18            | mitochondrion protein-coding |                          |
| chr8-307  | 8.434501  | 0.556857 | 0.804711 | 0.691996 | 0.48894  | 0.981636 | chr8  | 30701938 | 30709747 | + | 0 | NA | intron (Nintron (N  | 22004 NM_000637  | 2936     | Hs. 27151CN         | _000637             | ENSG000000GSR       | GR HEL-7E                    | glutathic protein-coding |
| chr9-920  | 8.434501  | 0.556857 | 0.804711 | 0.691996 | 0.48894  | 0.981636 | chr9  | 92054189 | 92055341 | + | 0 | NA | intron (NAluSc SIN  | 60648 NM_00641E  | 10558    | Hs. 90458           | NM_00641E           | ENSG000000SPTLC1    | HSAN1 HSN                    | serine p protein-coding  |
| chr9-116  | 8.434501  | 0.556857 | 0.804711 | 0.691996 | 0.48894  | 0.981636 | chr9  | 1.16E+08 | 1.16E+08 | + | 0 | NA | TTS (NR_C           | 3261 NR_103711   | 493913   | Hs. 728832NR_103711 | ENSG000000PAPPA-AS1 | DP1AS NCF           | PAPPA antncRNA               |                          |
| chr9-125  | 8.434501  | 0.556857 | 0.804711 | 0.691996 | 0.48894  | 0.981636 | chr9  | 1.25E+08 | 1.25E+08 | + | 0 | NA | intron (Nintron (N  | 6595 NM_001174   | 10244    | Hs. 19012           | NM_00583E           | ENSG000000CRABEPK   | RAB9P40 t                    | Rab9 effe protein-coding |
| chr13-51  | 10.57429  | 0.51378  | 0.742648 | 0.691821 | 0.48905  | 0.981636 | chr13 | 51387184 | 51382124 | + | 0 | NA | intron (NAluSq4 SI  | -33315 NR_04987E | 1.01E+08 | NR_04987E           | ENSG000000MIR5693   | -                   | microRNA ncRNA               |                          |
| chr1-150  | 7.937913  | 0.5836   | 0.843632 | 0.691771 | 0.489081 | 0.981636 | chr1  | 1.5E+08  | 1.5E+08  | + | 0 | NA | TTS (NR_C           | 2994 NR_14574E   | 1.1E+08  | NR_14574E           | SNORD13C            | -                   | small nucsnoRNA              |                          |
| chr11-66  | 7.937913  | 0.5836   | 0.843632 | 0.691771 | 0.489081 | 0.981636 | chr11 | 66341723 | 66341973 | + | 0 | NA | intron (N(TGTC)A r  | 3256 NM_001024   | 25855    | Hs. 10042e          | NM_01539E           | ENSG000000BRMS1     | BRMS1                        | tr protein-coding        |
| chr5-169  | 2.941067  | -0.94376 | 1.364786 | -0.69151 | 0.489248 | 0.981636 | chr5  | 1.7E+08  | 1.7E+08  | + | 0 | NA | intron (NMER1 3 DN  | 102118 NM_00134E | 1E+08    | Hs. 721917NM_00112E | ENSG000000INSYN2B   | C5orf57 F           | inhibitor protein-coding     |                          |
| chr16-294 | 7.683889  | -0.59634 | 0.862492 | -0.69142 | 0.489301 | 0.981636 | chr16 | 29430450 | 29431154 | + | 0 | NA | intron (Nintron (N  | 16224 NR_13531E  | 1E+08    | Hs. 55270CN         | _13531E             | ENSG000000SMG1P6    | -                            | SMG1 pset pseudo         |
| chr1-280  | 6.384545  | -0.63561 | 0.919361 | -0.69137 | 0.489336 | 0.981636 | chr1  | 28040821 | 28041020 | + | 0 | NA | intron (N2 LINE I   | 47690 NM_00128E  | 2140     | Hs. 185774NM_00119E | ENSG000000EYA3      | -                   | EMY trans protein-coding     |                          |
| chr1-565  | 6.384545  | -0.63561 | 0.919361 | -0.69137 | 0.489336 | 0.981636 | chr1  | 56545508 | 56547371 | + | 0 | NA | intron (Nintron (N  | 33124 NM_00371E  | 8613     | Hs. 40515E          | NM_00371E           | ENSG000000PLPP3     | Dri42 LPF                    | phospholiprotein-coding  |
| chr11-90  | 6.384545  | -0.63561 | 0.919361 | -0.69137 | 0.489336 | 0.981636 | chr11 | 90209578 | 90210893 | + | 0 | NA | intron (N2a LINE    | 12814 NM_012124  | 26973    | Hs. 22857           | NM_012124           | ENSG000000CHORDC1   | CHP1                         | cysteine protein-coding  |
| chr12-48  | 6.384545  | -0.63561 | 0.919361 | -0.69137 | 0.489336 | 0.981636 | chr12 | 48679954 | 48680912 | + | 0 | NA | intron (NAluJr4 SI  | 1805 NM_01782E   | 54934    | Hs. 50541E          | NM_01782E           | ENSG000000KANSL2    | C12orf41 KAT8                | reg protein-coding       |
| chr2-549  | 6.384545  | -0.63561 | 0.919361 | -0.69137 | 0.489336 | 0.981636 | chr2  | 54979263 | 54979665 | + | 0 | NA | intron (Nintron (N  | 30808 NM_00700E  | 57142    | Hs. 63785CN         | _00700E             | ENSG000000RTN4      | ASY N122C                    | reticulor protein-coding |
| chr2-128  | 6.384545  | -0.63561 | 0.919361 | -0.69137 | 0.489336 | 0.981636 | chr2  | 1.28E+08 | 1.28E+08 | + | 0 | NA | intron (Nintron (N  | 69732 NR_027671  | 56886    | Hs. 74330e          | NM_02012E           | ENSG000000UGGT1     | HUGT1 UGUDP                  | glucc protein-coding     |
| chr20-19  | 6.384545  | -0.63561 | 0.919361 | -0.69137 | 0.489336 | 0.981636 | chr20 | 19853247 | 19853857 | + | 0 | NA | IntergeniLIP45 LIN  | -32969 NM_00124E | 54453    | Hs. 47227CN         | _01899E             | ENSG000000RIN2      | MACS RASS                    | Ras and F protein-coding |
| chr20-49  | 6.384545  | -0.63561 | 0.919361 | -0.69137 | 0.489336 | 0.981636 | chr20 | 49245361 | 49246912 | + | 0 | NA | 3' UTR (N3' UTR (N  | 26841 NM_01789E  | 55661    | Hs. 65234           | NM_01789E           | ENSG000000DDX27     | DRS1 Drs1                    | DEAD-box protein-coding  |
| chr3-58   | 6.384545  | -0.63561 | 0.919361 | -0.69137 | 0.489336 | 0.981636 | chr3  | 58167113 | 58169255 | + | 0 | NA | intron (Nintron (N  | 2451 NR_135534   | 1.05E+08 | Hs. 613914NR_135534 | ENSG000000FLNB-AS1  | -                   | FLNB antncRNA                |                          |
| chr3-186  | 6.384545  | -0.63561 | 0.919361 | -0.69137 | 0.489336 | 0.981636 | chr3  | 1.87E+08 | 1.87E+08 | + | 0 | NA | intron (Nintron (N  | 12312 NM_01630E  | 51726    | Hs. 31719E          | NM_01630E           | ENSG000000DNAJB11   | ABBP-2 A                     | Flna heat protein-coding |
| chr4-47   | 6.384545  | -0.63561 | 0.919361 | -0.69137 | 0.489336 | 0.981636 | chr4  | 47453001 | 47453402 | + | 0 | NA | exon (NM_exon (NM   | 10501 NM_01784E  | 54951    | Hs. 23956           | NM_01784E           | ENSG000000COMM8     | -                            | COMM dome protein-coding |
| chr5-31   | 6.384545  | -0.63561 | 0.919361 | -0.69137 | 0.489336 | 0.981636 | chr5  | 31208696 | 31209108 | + | 0 | NA | intron (NMaamRTEI I | 15216 NM_00493E  | 1004     | Hs. 12477e          | NM_00493E           | ENSG000000CDH6      | CAD6 KCAL                    | cadherin protein-coding  |
| chr5-43   | 6.384545  | -0.63561 | 0.919361 | -0.69137 | 0.489336 | 0.981636 | chr5  | 43145150 | 43145517 | + | 0 | NA | intron (Nintron (N  | 23768 NM_00133C  | 7690     | Hs. 535804NM_00343E | ENSG000000ZNF131    | ZBTB35 p            | zinc fing protein-coding     |                          |
| chr5-17   | 6.384545  | -0.63561 | 0.919361 | -0.69137 | 0.489336 | 0.981636 | chr5  | 1.73E+08 | 1.73E+08 | + | 0 | NA | IntergeniMIRc SINE  | 15947 NR_00298E  | 67784    | Hs. 69272CN         | _00298E             | ENSG000000SNORA74B  | U19-2                        | small nucsnoRNA          |
| chr12-4   | 6.4917    | -0.74589 | 1.078962 | -0.69131 | 0.489373 | 0.981636 | chr12 | 4503996  | 4504599  | + | 0 | NA | intron (Nintron (N  | 34175 NM_020374  | 57102    | Hs. 302977NM_020374 | ENSG000000C12orf4   | -                   | chromosom protein-coding     |                          |
| chr14-49  | 10.38332  | -0.50471 | 0.730244 | -0.69115 | 0.489469 | 0.981636 | chr14 | 49583305 | 49584736 | + | 0 | NA | intron (Nintron (N  | 2482 NM_00103C   | 6235     | Hs. 51367NM_00103E  | ENSG000000RPS29     | -                   | chromosom protein-coding     |                          |
| chr7-7    | 10.38332  | -0.50471 | 0.730244 | -0.69115 | 0.489469 | 0.981636 | chr7  | 74181682 | 74181942 | + | 0 | NA | intron (NAluSq4 SI  | 7456 NM_03199E   | 7458     | Hs. 52094e          | NM_02217E           | ENSG000000EIF4H     | WBCSR1 W                     | eukaryoti protein-coding |
| chr1-9    | 6.5707984 | 0.675242 | 0.977032 | 0.691116 | 0.489492 | 0.981636 | chr1  | 91262337 | 91262963 | + | 0 | NA | intron (Nintron (N  | 22753 NM_00128E  | 9563     | Hs. 463511NM_00428E | ENSG000000H6PD      | CORTRD1 C           | hexose-6- protein-coding     |                          |
| chr11-6   | 5.707984  | 0.675242 | 0.977032 | 0.691116 | 0.489492 | 0.981636 | chr11 | 61785686 | 61786746 | + | 0 | NA | 3' UTR (N3' UTR (N  | 6345 NR_03034E   | 693196   | NR_03034E           | ENSG000000MIR611    | MIRN611 ch          | xros ncRNA                   |                          |
| chr11-6   | 5.707984  | 0.675242 | 0.977032 | 0.691116 | 0.489492 | 0.981636 | chr11 | 64897857 | 64898871 | + | 0 | NA | promoter-promoter-  | 73 NR_10680E     | 1.02E+08 | NR_10680E           | ENSG000000MIR6750   | hsa-mir-6           | microRNA ncRNA               |                          |
| chr11-6   | 5.707984  | 0.675242 | 0.977032 | 0.691116 | 0.489492 | 0.981636 | chr11 | 67495257 | 67496509 | + | 0 | NA | intron (Nintron (N  | 5638 NR_10681E   | 1.02E+08 | NR_10681E           | ENSG000000MIR6752   | hsa-mir-6           | microRNA ncRNA               |                          |
| chr11-6   | 5.707984  | 0.675242 | 0.977032 | 0.691116 | 0.489492 | 0.981636 | chr11 | 68410514 | 68412142 | + | 0 | NA | intron (Nintron (N  | -49424 NM_00135E | 55291    | Hs. 503022NM_01831E | ENSG000000PPP6R3    | Hsaorf23 p          | rotein protein-coding        |                          |
| chr12-4   | 5.707984  | 0.675242 | 0.977032 | 0.691116 | 0.489492 | 0.981636 | chr12 | 49655958 | 49657814 | + | 0 | NA | exon (NM_exon (NM   | 26342 NM_00136E  | 25766    | Hs. 706827NM_01227E | ENSG000000PRPF40B   | HYPIC               | pre-mRNA protein-coding      |                          |
| chr12-5   | 5.707984  | 0.675242 | 0.977032 | 0.691116 | 0.489492 | 0.981636 | chr12 | 52011436 | 52014955 | + | 0 | NA | intron (NAlu SINE   | 2703 NM_00127E   | 160622   | Hs. 407202NM_18171E | ENSG000000GRASP     | TAMALIN             | general i protein-coding     |                          |
| chr12-1   | 5.707984  | 0.675242 | 0.977032 | 0.691116 | 0.489492 | 0.981636 | chr12 | 1.25E+08 | 1.25E+08 | + | 0 | NA | intron (N2a LINE    | 18385 NM_03265E  | 57647    | Hs. 10738E          | NM_03265E           | ENSG000000DHX37     | DDX37 Dhr                    | DEAH-box protein-coding  |
| chr14-10  | 5.707984  | 0.675242 | 0.977032 | 0.691116 | 0.489492 | 0.981636 | chr14 | 1.05E+08 | 1.05E+08 | + | 0 | NA | intron (Nintron (N  | -18573 NR_07308E | 1397     | Hs. 53430e          | NM_00131E           | ENSG000000CRIP2     | CRIP1 CRP2                   | cysteine protein-coding  |
| chr15-5   | 5.707984  | 0.675242 | 0.977032 | 0.691116 | 0.489492 | 0.981636 | chr15 | 50974288 | 50975359 | + | 0 | NA | intron (NLIMB1 LIN  | 30694 NR_02764E  | 1E+08    | Hs. 73049E          | NR_02764E           | DCAF13P3            | -                            | DDB1 and pseudo          |
| chr15-7   | 5.707984  | 0.675242 | 0.977032 | 0.691116 | 0.489492 | 0.981636 | chr15 | 71846173 | 71847355 | + | 0 | NA | intron (Nintron (N  | 36210 NM_01424E  | 10002    | Hs. 187354NM_01424E | ENSG000000NR2E3     | ESCS PNR            | nuclear i protein-coding     |                          |
| chr20-1   | 5.707984  | 0.675242 | 0.977032 | 0.691116 | 0.489492 | 0.981636 | chr20 | 18569984 | 18570536 | + | 0 | NA | TTS (NM_C           | 2840 NM_00134F   | 388789   | Hs. 349092NM_00134E | ENSG000000SMIM26    | LINC0049E           | small intron protein-coding  |                          |
| chr20-5   | 5.707984  | 0.675242 | 0.977032 | 0.691116 | 0.489492 | 0.981636 | chr20 | 50199462 | 50199835 | + | 0 | NA | IntergeniMLT1 LITF  | -7579 NR_12573E  | 1.02E+08 | Hs. 44248e          | NR_12573E           | ENSG000000CEBPB-AS1 | -                            | CEBPB antncRNA           |
| chr22-4   | 5.707984  | 0.675242 | 0.977032 | 0.691116 | 0.489492 | 0.981636 | chr22 | 42870401 | 42871643 | + | 0 |    |                     |                  |          |                     |                     |                     |                              |                          |

|                    |          |          |          |          |          |       |          |          |   |      |                      |                   |                              |                    |            |                             |
|--------------------|----------|----------|----------|----------|----------|-------|----------|----------|---|------|----------------------|-------------------|------------------------------|--------------------|------------|-----------------------------|
| chr2-1874 6.417827 | -0.62956 | 0.913975 | -0.68881 | 0.49094  | 0.981636 | chr2  | 1.87E+08 | 1.87E+08 | + | 0 NA | intron (Nintron (N   | -19932 NM_001271  | 12023 Hs. 470882NM_005799    | ENSG00000CALCRL    | CGRPR CRI  | calcitriol protein-coding   |
| chr2-463 6.417827  | -0.62956 | 0.913975 | -0.68881 | 0.49094  | 0.981636 | chr22 | 46340430 | 46341082 | + | 0 NA | intron (NMIR3 SINE   | 5042 NM_001282    | 55687 Hs. 439524NM_018006    | ENSG00000TRMU      | LCAL3 MT   | LCAL3 5-mecp protein-coding |
| chr3-1025 6.417827 | -0.62956 | 0.913975 | -0.68881 | 0.49094  | 0.981636 | chr3  | 10298795 | 10301917 | + | 0 NA | TTS (NM_TTS (NM_1    | -7409 NM_001134   | 51738 Hs. 59008CNM_016362    | ENSG00000GHRL      | MTLPR      | ghrelin protein-coding      |
| chr3-108 6.417827  | -0.62956 | 0.913975 | -0.68881 | 0.49094  | 0.981636 | chr3  | 1.08E+08 | 1.08E+08 | + | 0 NA | intron (NLM2 LINE    | 13093 NM_001777   | 961 Hs. 446414NM_001777      | ENSG00000CD47      | IAP MER6   | CD47 mole protein-coding    |
| chr3-1605 6.417827 | -0.62956 | 0.913975 | -0.68881 | 0.49094  | 0.981636 | chr3  | 1.61E+08 | 1.61E+08 | + | 0 NA | intron (NAluJ SINE   | 4026 NR_003001    | 677767 Hs. 675955NR_003001   | ENSG00000SCARNA7   | U90        | small Ca <sub>v</sub> ncRNA |
| chr4-675 6.417827  | -0.62956 | 0.913975 | -0.68881 | 0.49094  | 0.981636 | chr4  | 67508434 | 67508824 | + | 0 NA | intron (NMIRb SINE   | 36874 NM_001812   | 1060 Hs. 479867NM_001812     | ENSG00000CENPC     | CENP-C CF  | centromere protein-coding   |
| chr4-1684 6.417827 | -0.62956 | 0.913975 | -0.68881 | 0.49094  | 0.981636 | chr4  | 1.68E+08 | 1.68E+08 | + | 0 NA | intron (NLI2A LINE   | 34824 NM_001291   | 91351 Hs. 535011NM_001291    | ENSG00000DDX60L    |            | DEXD/H-bc protein-coding    |
| chr4-1855 6.417827 | -0.62956 | 0.913975 | -0.68881 | 0.49094  | 0.981636 | chr4  | 1.85E+08 | 1.85E+08 | + | 0 NA | TTS (NM_TTS (NM_1    | 3448 NM_181726    | 353322 Hs. 508154NM_181726   | ENSG00000ANKRD37   | Lrp2bp     | ankyrin protein-coding      |
| chr5-7968 6.417827 | -0.62956 | 0.913975 | -0.68881 | 0.49094  | 0.981636 | chr5  | 79680698 | 79682413 | + | 0 NA | intron (Nintron (N   | -8281 NM_15361C   | 202333 Hs. 482622NM_15361C   | ENSG00000CMTA5     | C5orf10 S  | cardiomy protein-coding     |
| chr5-9352 6.417827 | -0.62956 | 0.913975 | -0.68881 | 0.49094  | 0.981636 | chr5  | 93525254 | 93527522 | + | 0 NA | intron (NLI2A LINE   | 44955 NR_109822   | 441094 Hs. 457407NR_109822   | ENSG00000NR2F1-AS1 | NR2F1      | antncRNA                    |
| chr5-1461 6.417827 | -0.62956 | 0.913975 | -0.68881 | 0.49094  | 0.981636 | chr5  | 1.46E+08 | 1.46E+08 | + | 0 NA | intron (Nintron (N   | 5563 NM_020117    | 51520 Hs. 432674NM_01646C    | ENSG00000LARS      | HSPC192 I  | lucyl-tf protein-coding     |
| chr5-1762 6.417827 | -0.62956 | 0.913975 | -0.68881 | 0.49094  | 0.981636 | chr5  | 1.76E+08 | 1.76E+08 | + | 0 NA | intron (Nintron (N   | 2790 NM_001317    | 51491 Hs. 696282NM_016391    | ENSG00000CNP16     | HSPC111 F  | NOP16 nuc protein-coding    |
| chr6-1005 6.417827 | -0.62956 | 0.913975 | -0.68881 | 0.49094  | 0.981636 | chr6  | 1.01E+08 | 1.01E+08 | + | 0 NA | intron (NLI2a LINE   | -133685 NM_005068 | 6492 Hs. 520292NM_005068     | ENSG00000SIM1      | bHLHe14    | SIM bHLH protein-coding     |
| chr6-1365 6.417827 | -0.62956 | 0.913975 | -0.68881 | 0.49094  | 0.981636 | chr6  | 1.37E+08 | 1.37E+08 | + | 0 NA | intron (NLI2b LINE   | -27537 NM_00398C  | 9053 Hs. 486549NM_00398C     | ENSG00000MAP7      | E-MAP-11E  | microtub protein-coding     |
| chr7-2993 6.417827 | -0.62956 | 0.913975 | -0.68881 | 0.49094  | 0.981636 | chr7  | 29933115 | 29934514 | + | 0 NA | intron (Nintron (N   | 55987 NM_014766   | 9805 Hs. 520744NM_014766     | ENSG00000SCRN1     | SES1       | secernin protein-coding     |
| chr7-423 6.417827  | -0.62956 | 0.913975 | -0.68881 | 0.49094  | 0.981636 | chr7  | 47323027 | 47324608 | + | 0 NA | intron (NLMda LINE   | 140986 NR_14581E  | 1.1E+08 NR_14581E            | SNORD151           |            | small nucsnoRNA             |
| chr7-171 6.417827  | -0.62956 | 0.913975 | -0.68881 | 0.49094  | 0.981636 | chr7  | 1.21E+08 | 1.21E+08 | + | 0 NA | intron (Nintron (N   | 76797 NM_001105   | 79774 Hs. 189652NM_024913    | ENSG00000CPED1     | C7orf58    | cadherin protein-coding     |
| chr7-135 6.417827  | -0.62956 | 0.913975 | -0.68881 | 0.49094  | 0.981636 | chr7  | 1.36E+08 | 1.36E+08 | + | 0 NA | intron (Nintron (N   | -23782 NM_00113C  | 647087 Hs. 200022NM_00113C   | ENSG00000STMP1     | C7orf73 F  | short tr protein-coding     |
| chr8-378 6.417827  | -0.62956 | 0.913975 | -0.68881 | 0.49094  | 0.981636 | chr8  | 37868833 | 37869545 | + | 0 NA | intron (NAluJb SINE  | -19328 NM_01831C  | 55290 Hs. 709301NM_01831C    | ENSG00000BRF2      | BRFU TF11  | BRF2 RNA protein-coding     |
| chr9-114 6.417827  | -0.62956 | 0.913975 | -0.68881 | 0.49094  | 0.981636 | chr9  | 1.14E+08 | 1.14E+08 | + | 0 NA | TTS (NR_TTS (NR_C    | 608 NR_03025E     | 619556 NR_03025E             | ENSG00000MIR455    | MIRN455 I  | microRNA ncRNA              |
| chr9-1092 6.417827 | -0.62956 | 0.913975 | -0.68881 | 0.49094  | 0.981636 | chrX  | 1.1E+08  | 1.1E+08  | + | 0 NA | intron (Nintron (N   | -48717 NM_012282  | 23630 Hs. 522752NM_012282    | ENSG00000CKNE5     | KCNE1      | potassium protein-coding    |
| chr1-279 6.674702  | 0.67127  | 0.975535 | 0.688105 | 0.491387 | 0.981636 | chr1  | 27964011 | 27965190 | + | 0 NA | intron (NLI2b LINE   | 5138 NM_01805E    | 55113 Hs. 55024 NM_01805E    | ENSG00000XKR8      | XRG8 HXK   | HK relate protein-coding    |
| chr2-121 6.674702  | 0.67127  | 0.975535 | 0.688105 | 0.491387 | 0.981636 | chr2  | 1.22E+08 | 1.22E+08 | + | 0 NA | intron (NAluY SINE   | 10223 NM_001142   | 23332 Hs. 469844NM_01528E    | ENSG00000CLASP1    | MAST1      | cytoplasm protein-coding    |
| chr20-324 6.674702 | 0.67127  | 0.975535 | 0.688105 | 0.491387 | 0.981636 | chr20 | 32462409 | 32462628 | + | 0 NA | intron (Nintron (N   | 20972 NM_001351   | 140688 Hs. 516978NM_08061E   | ENSG00000NOL4F     | C20orf12   | nucleolar protein-coding    |
| chr21-464 6.674702 | 0.67127  | 0.975535 | 0.688105 | 0.491387 | 0.981636 | chr21 | 46463816 | 46464321 | + | 0 NA | intron (Nintron (N   | 1597 NR_04640C    | 1.01E+08 Hs. 737163NR_04640C | ENSG00000DIP2A-IT1 | DIP2A      | intncRNA                    |
| chr16-251 8.956513 | 0.53752  | 0.781162 | 0.688103 | 0.491388 | 0.981636 | chr16 | 25166855 | 25167054 | + | 0 NA | intron (Nintron (N   | -17922 NR_03999E  | 1.01E+08 Hs. 657576NR_03999E | ENSG00000LCMT1-AS2 | LCMT1      | antncRNA                    |
| chr19-325 8.956513 | 0.53752  | 0.781162 | 0.688103 | 0.491388 | 0.981636 | chr19 | 32592591 | 32592821 | + | 0 NA | intron (NAluJr SINE  | 19252 NM_00108C   | 84902 Hs. 59970E             | ENSG00000CEP89     | CCDC123 C  | centromer protein-coding    |
| chr8-472 8.956513  | 0.53752  | 0.781162 | 0.688103 | 0.491388 | 0.981636 | chr8  | 47291283 | 47291861 | + | 0 NA | intron (NMIRb SINE   | 30634 NM_00108C   | 23514 Hs. 38105E             | ENSG00000SPIDR     | KIAA0146   | scaffold protein-coding     |
| chr16-89 10.61358  | 0.506117 | 0.73579  | 0.68755  | 0.491544 | 0.981636 | chr16 | 89906425 | 89907210 | + | 0 NA | intron (Nintron (N   | -11062 NM_00238E  | 4157 Hs. 51382E              | ENSG00000CMCIR     | CM55 MSH   | melanocor protein-coding    |
| chr12-297 10.37546 | -0.50346 | 0.732023 | -0.68776 | 0.491604 | 0.981636 | chr12 | 29757469 | 29758249 | + | 0 NA | intron (Nintron (N   | 29575469          | 29575469                     | ENSG00000TMT1C     | 25883 OLH  | transmem protein-coding     |
| chr5-102 10.37546  | -0.50346 | 0.732023 | -0.68776 | 0.491604 | 0.981636 | chr5  | 10262000 | 10264463 | + | 0 NA | exon (NM_exon (NM_   | 12694 NM_00130E   | 22948 Hs. 1600 NM_01207E     | ENSG00000CCT5      | CCT-epsil  | chaperon protein-coding     |
| chr11-68 7.863492  | 0.579581 | 0.842757 | 0.68772  | 0.491629 | 0.981636 | chr11 | 68526306 | 68526552 | + | 0 NA | intron (NAluJb SINE  | 65727 NM_00135E   | 55291 Hs. 503022NM_01831E    | ENSG00000PPP6R3    | C11orf23 P | protein protein-coding      |
| chr19-452 7.863492 | 0.579581 | 0.842757 | 0.68772  | 0.491629 | 0.981636 | chr19 | 45695619 | 45695916 | + | 0 NA | intron (Nintron (N   | 3101 NM_01765E    | 54814 Hs. 63155E             | ENSG00000QPCTL     | gQC        | glutamin protein-coding     |
| chr5-770 7.863492  | 0.579581 | 0.842757 | 0.68772  | 0.491629 | 0.981636 | chr5  | 77055755 | 77056345 | + | 0 NA | intron (NLMEL LINE   | 24521 NR_003014   | 677828 Hs. 69324E            | ENSG00000SNORA47   | HBI-115    | small nucsnoRNA             |
| chr12-26 5.940655  | -0.66965 | 0.974306 | -0.68731 | 0.491886 | 0.981636 | chr12 | 26931708 | 26931680 | + | 0 NA | intron (NAluSc8 SINE | 6602 NM_018164    | 55726 Hs. 505077NM_018164    | ENSG00000INTS13    | ASOD C12c  | integrat protein-coding     |
| chr16-71 5.940655  | -0.66965 | 0.974306 | -0.68731 | 0.491886 | 0.981636 | chr16 | 71665059 | 71665578 | + | 0 NA | intron (NAluSc8 SINE | 33383 NR_033337   | 51708 Hs. 72511E             | ENSG00000SNORA70D  | UT0D       | small nucsnoRNA             |
| chr2-388 5.940655  | -0.66965 | 0.974306 | -0.68731 | 0.491886 | 0.981636 | chr2  | 38850310 | 38851047 | + | 0 NA | intron (Nintron (N   | 25256 NM_19896E   | 90957 Hs. 46822E             | ENSG00000DXH57     | DDX57      | DEXH-box protein-coding     |
| chr20-25 5.940655  | -0.66965 | 0.974306 | -0.68731 | 0.491886 | 0.981636 | chr20 | 25427129 | 25427456 | + | 0 NA | intron (NAluSg2 SINE | 19607 NR_134574   | 9837 Hs. 658464NM_021067     | ENSG00000GINS1     | INM57 PSF  | GINS comp protein-coding    |
| chr19-404 8.401219 | 0.553967 | 0.806046 | 0.687265 | 0.491915 | 0.981636 | chr19 | 40036305 | 40037562 | + | 0 NA | exon (NM_exon (NM_   | 19701 NM_00100E   | 163131 Hs. 10113E            | ENSG00000ZNF780B   | ZNF779     | zinc finger protein-coding  |
| chr19-49 8.401219  | 0.553967 | 0.806046 | 0.687265 | 0.491915 | 0.981636 | chr19 | 49015445 | 49015682 | + | 0 NA | TTS (NM_TTS (NM_C    | 1527 NM_000894    | 3972 Hs. 154704NM_000894     | ENSG00000LHB       | CGB4 HH2   | luteinizer protein-coding   |
| chr1-129 6.222138  | 0.639656 | 0.930865 | 0.687163 | 0.49198  | 0.981636 | chr1  | 1293194  | 1293694  | + | 0 NA | 3' UTR (N3' UTR (N   | 2726 NR_106784    | 1.02E+08 NR_106784           | ENSG00000MIR6726   | hsa-mir-6  | microRNA ncRNA              |
| chr17-174 6.222138 | 0.639656 | 0.930865 | 0.687163 | 0.49198  | 0.981636 | chr17 | 17486573 | 17487390 | + | 0 NA | intron (NLTR12C LINE | 9414 NM_016084    | 51655 Hs. 25829 NM_016084    | ENSG00000CRASD1    | AGS1 LTXF  | ras relat protein-coding    |
| chr8-2631 6.222138 | 0.639656 | 0.930865 | 0.687163 | 0.49198  | 0.981636 | chr8  | 26316290 | 26316800 | + | 0 NA | intron (Nintron (N   | 23329 NM_001177   | 5520 Hs. 14633E              | ENSG00000PPP2R2A   | B55A B55   | protein protein-coding      |
| chr11-117 8.948655 | 0.539339 | 0.784931 | 0.687117 | 0.492009 | 0.981636 | chr11 | 1.17E+08 | 1.17E+08 | + | 0 NA | intron (Nintron (N   | 34331 NM_01495E   | 22897 Hs. 50400E             | ENSG00000CEP164    | NPHP15     | syntaxon protein-coding     |
| chr1-2774 6.229996 | 0.637048 | 0.927193 | 0.687072 | 0.492038 | 0.981636 | chr1  | 27749060 | 27750631 | + | 0 NA | intron (Nintron (N   | -23734 NM_177424  | 23673 Hs. 52385E             | ENSG00000CSTX12    | STX13 ST   | syntxin protein-coding      |
| chr12-10 6.229996  | 0.637048 | 0.927193 | 0.687072 | 0.492038 | 0.981636 | chr12 | 1.06E+08 | 1.06E+08 | + | 0 NA | intron (NIGger17a    | 70321 NM_01484C   | 9891 Hs. 52469E              | ENSG00000NUAK1     | ARK5       | NUAK fami protein-coding    |
| chr12-11 6.229996  | 0.637048 | 0.927193 | 0.687072 | 0.492038 | 0.981636 | chr12 | 1.1E+08  | 1.1E+08  | + | 0 NA | intron (NERV3-16A3   | 58020 NM_001347   | 28981 Hs. 52838E             | ENSG00000IFT81     | CDV-1 CDV  | intraflag protein-coding    |
| chr2-203 6.229996  | 0.637048 | 0.927193 | 0.687072 | 0.492038 | 0.981636 | chr2  | 1.62E+08 | 1.62E+08 | + | 0 NA | intron (Nintron (N   | 8590 NM_00193E    | 1803 Hs. 36891E              | ENSG00000DPP4      | ADABP ADC  | dipteryd protein-coding     |
| chr2-1621 6.229996 | 0.637048 | 0.927193 | 0.687072 | 0.492038 | 0.981636 | chr2  | 2.03E+08 | 2.03E+08 | + | 0 NA | intron (NAluS6 SINE  | -60155 NM_177538  | 57404 Hs. 44606E             | ENSG00000CYP20A1   | CYP-M      | cytochrome protein-coding   |
| chr20-34 6.229996  | 0.637048 | 0.927193 | 0.687072 | 0.492038 | 0.981636 | chr20 | 34287184 | 34288125 | + | 0 NA | intron (NAluS2 SINE  | 15336 NM_001322   | 191 Hs. 388004NM_000687      | ENSG00000AHCY      | SAHH ado   | adenosyl protein-coding     |
| chr22-17 6.229996  | 0.637048 | 0.927193 | 0.687072 | 0.492    |          |       |          |          |   |      |                      |                   |                              |                    |            |                             |



|           |          |          |          |          |          |          |       |          |          |   |   |    |                    |                   |                              |                     |                                         |
|-----------|----------|----------|----------|----------|----------|----------|-------|----------|----------|---|---|----|--------------------|-------------------|------------------------------|---------------------|-----------------------------------------|
| chr10-744 | 4.666735 | -0.7321  | 1.068789 | -0.68498 | 0.493353 | 0.981636 | chr10 | 74003791 | 74005843 | + | 0 | NA | intron (AluSx SIN  | 6701 NM_003373    | 7414 Hs. 643899NM_003373     | ENSG000000CVCL      | CMD1W CMF vinculin protein-coding       |
| chr11-204 | 4.666735 | -0.7321  | 1.068789 | -0.68498 | 0.493353 | 0.981636 | chr11 | 20408872 | 20409354 | + | 0 | NA | intron (intron (N  | 21397 NM_005788   | 10196 Hs. 152337NM_005788    | ENSG000000PRMT3     | HRMT1L3 protein εprotein-coding         |
| chr11-668 | 4.666735 | -0.7321  | 1.068789 | -0.68498 | 0.493353 | 0.981636 | chr11 | 66858494 | 66860345 | + | 0 | NA | intron (intron (N  | 2355 NM_001363    | 78999 Hs. 209979NM_024033    | ENSG000000LRFN4     | FIGLER6 S leucine rprotein-coding       |
| chr11-857 | 4.666735 | -0.7321  | 1.068789 | -0.68498 | 0.493353 | 0.981636 | chr11 | 85730724 | 85732429 | + | 0 | NA | intron (NLIP47 LIN | -12226 NM_001298  | 54843 Hs. 369522NM_032373    | ENSG000000SYTL2     | CHR115Y7 synaptotagmin protein-coding   |
| chr12-494 | 4.666735 | -0.7321  | 1.068789 | -0.68498 | 0.493353 | 0.981636 | chr12 | 49987603 | 49997331 | + | 0 | NA | intron (intron (N  | 19520 NM_001652   | 363 Hs. 54505 NM_001652      | ENSG000000AQP6      | AQP2L KII aquaporin protein-coding      |
| chr13-482 | 4.666735 | -0.7321  | 1.068789 | -0.68498 | 0.493353 | 0.981636 | chr13 | 48321411 | 48322194 | + | 0 | NA | intron (AluSq2 SI  | 18055 NM_000321   | 5925 Hs. 408522NM_000321     | ENSG000000CRB1      | OSRC PPP1R3B transcr protein-coding     |
| chr13-111 | 4.666735 | -0.7321  | 1.068789 | -0.68498 | 0.493353 | 0.981636 | chr13 | 1.11E+08 | 1.11E+08 | + | 0 | NA | intron (intron (N  | 16558 NM_001352   | 79587 Hs. 508722NM_024537    | ENSG000000CAR52     | COXP227 cysteinyln protein-coding       |
| chr17-124 | 4.666735 | -0.7321  | 1.068789 | -0.68498 | 0.493353 | 0.981636 | chr17 | 12081395 | 12082598 | + | 0 | NA | promoter-promoter- | 197 NR_030611     | NR_030611                    | ENSG000000MIR744    | MIRN744 microRNA ncRNA                  |
| chr17-424 | 4.666735 | -0.7321  | 1.068789 | -0.68498 | 0.493353 | 0.981636 | chr17 | 42008836 | 42009860 | + | 0 | NA | intron (intron (N  | 7817 NM_001144    | 7266 Hs. 500156NM_003311     | ENSG000000DNAJC7    | DJ11 DJC7DnaJ heatprotein-coding        |
| chr19-374 | 4.666735 | -0.7321  | 1.068789 | -0.68498 | 0.493353 | 0.981636 | chr19 | 37760133 | 37760593 | + | 0 | NA | intron (NLIM4a LI  | 19227 NM_001172   | 126231 Hs. 531262NM_152366   | ENSG000000ZNF573    | - zinc fing protein-coding              |
| chr19-521 | 4.666735 | -0.7321  | 1.068789 | -0.68498 | 0.493353 | 0.981636 | chr19 | 52195923 | 52198219 | + | 0 | NA | intron (Charlie4e  | -4125 NM_001136   | 5518 Hs. 467192NM_014222     | ENSG000000PPP2R1A   | MRD36 PP2 protein i protein-coding      |
| chr2-4042 | 4.666735 | -0.7321  | 1.068789 | -0.68498 | 0.493353 | 0.981636 | chr2  | 40428702 | 40430295 | + | 0 | NA | exon (NM exon (NM  | 806 NM_001112     | 6546 Hs. 31961 NM_021097     | ENSG000000SLC8A1    | NCX1 solute cεprotein-coding            |
| chr2-201C | 4.666735 | -0.7321  | 1.068789 | -0.68498 | 0.493353 | 0.981636 | chr2  | 2.01E+08 | 2.01E+08 | + | 0 | NA | IntergeniAluSx1 SI | 15208 NM_001257   | 4709 Hs. 109766NM_002491     | ENSG000000DNDFB3    | B12 CI-B1NADH:ubiquinone-protein-coding |
| chr2-224  | 4.666735 | -0.7321  | 1.068789 | -0.68498 | 0.493353 | 0.981636 | chr2  | 2.33E+08 | 2.33E+08 | + | 0 | NA | intron (intron (N  | -29380 NM_001172  | 3769 Hs. 467363NM_002242     | ENSG000000KCNJ1     | KIR1.4 K1potassium protein-coding       |
| chr22-328 | 4.666735 | -0.7321  | 1.068789 | -0.68498 | 0.493353 | 0.981636 | chr22 | 32808684 | 32810138 | + | 0 | NA | intron (intron (N  | 8595 NM_000362    | 7078 Hs. 644633NM_000362     | ENSG000000TIMP3     | HSMRK222 TIMP metεprotein-coding        |
| chr3-4862 | 4.666735 | -0.7321  | 1.068789 | -0.68498 | 0.493353 | 0.981636 | chr3  | 48622020 | 48622840 | + | 0 | NA | promoter-promoter- | -661 NM_001008    | 440955 Hs. 631922NM_001008   | ENSG000000TMEM89    | - transment protein-coding              |
| chr4-195  | 4.666735 | -0.7321  | 1.068789 | -0.68498 | 0.493353 | 0.981636 | chr4  | 1950317  | 1951374  | + | 0 | NA | intron (intron (N  | 23609 NR_003004   | 67770 Hs. 676951NM_003004    | ENSG000000SCARN22   | ACA11 small Ca_ncRNA                    |
| chr4-1682 | 4.666735 | -0.7321  | 1.068789 | -0.68498 | 0.493353 | 0.981636 | chr4  | 1.68E+08 | 1.68E+08 | + | 0 | NA | intron (intron (N  | 42036 NM_017631   | 55601 Hs. 591711NM_017631    | ENSG000000DDX60     | - Dexd/H-bcprotein-coding               |
| chr6-1547 | 4.666735 | -0.7321  | 1.068789 | -0.68498 | 0.493353 | 0.981636 | chr6  | 1.55E+08 | 1.55E+08 | + | 0 | NA | intron (AluS6 SI   | 45322 NM_00128E   | 22828 Hs. 591325NM_014892    | ENSG000000SCAF8     | RBM16 SR-relate protein-coding          |
| chr7-9234 | 4.666735 | -0.7321  | 1.068789 | -0.68498 | 0.493353 | 0.981636 | chr7  | 92386181 | 92387295 | + | 0 | NA | intron (intron (N  | 50576 NR_145992   | 1.05E+08 NM_001317           | ENSG000000TMB17P    | - transment pseudo                      |
| chr9-339  | 4.666735 | -0.7321  | 1.068789 | -0.68498 | 0.493353 | 0.981636 | chr9  | 33937152 | 33938296 | + | 0 | NA | intron (AluSq SIN  | -13349 NR_102377  | 1.01E+08 NR_102377           | ENSG000000SNORD121E | - small nucsnRNA                        |
| chr1-1135 | 6.376688 | -0.63372 | 0.925201 | -0.68496 | 0.493371 | 0.981636 | chr1  | 1.14E+08 | 1.14E+08 | + | 0 | NA | exon (NM exon (NM  | 6214 NM_001363    | 64858 Hs. 591412NM_022833    | ENSG000000DCLRE1B   | APOLLO SN DNA crossprotein-coding       |
| chr11-13C | 6.376688 | -0.63372 | 0.925201 | -0.68496 | 0.493371 | 0.981636 | chr11 | 1.31E+08 | 1.31E+08 | + | 0 | NA | intron (intron (N  | -19276 NR_125382  | 1.04E+08 Hs. 430303NR_125382 | ENSG000000LOC103611 | - uncharactncRNA                        |
| chr12-957 | 6.376688 | -0.63372 | 0.925201 | -0.68496 | 0.493371 | 0.981636 | chr12 | 95727723 | 95729069 | + | 0 | NA | intron (NLIMB7 LIN | 61799 NM_001325   | 59277 Hs. 201034NM_021222    | ENSG000000NTN4      | PRO3091 netrin 4 protein-coding         |
| chr12-101 | 6.376688 | -0.63372 | 0.925201 | -0.68496 | 0.493371 | 0.981636 | chr12 | 1.01E+08 | 1.01E+08 | + | 0 | NA | intron (AluSp SIN  | 11300 NM_014503   | 27340 Hs. 295732NM_014503    | ENSG000000UTP20     | IAG DRIM UTP20 smεprotein-coding        |
| chr19-471 | 6.376688 | -0.63372 | 0.925201 | -0.68496 | 0.493371 | 0.981636 | chr19 | 47146648 | 47148241 | + | 0 | NA | intron (AluJb SIN  | 16609 NM_001145   | 10055 Hs. 515500NM_005500    | ENSG000000SAE1      | AOS1 HSPC SUMO1 actεprotein-coding      |
| chr2-181  | 6.376688 | -0.63372 | 0.925201 | -0.68496 | 0.493371 | 0.981636 | chr2  | 1.82E+08 | 1.82E+08 | + | 0 | NA | intron (NL2c LINE  | 20479 NM_001287   | 6744 Hs. 196983NM_006751     | ENSG000000ITPRID2   | CS-1 CSI1 ITPR intεprotein-coding       |
| chr3-5264 | 6.376688 | -0.63372 | 0.925201 | -0.68496 | 0.493371 | 0.981636 | chr3  | 52646691 | 52647070 | + | 0 | NA | intron (NLIMB8 LIN | 38719 NM_00135C   | 55193 Hs. 189922NM_018161    | ENSG000000PBRM1     | BAF180 PE polybrom protein-coding       |
| chr3-1111 | 6.376688 | -0.63372 | 0.925201 | -0.68496 | 0.493371 | 0.981636 | chr3  | 1.11E+08 | 1.11E+08 | + | 0 | NA | intron (intron (N  | 93094 NM_001243   | 25945 Hs. 293917NM_015483    | ENSG000000NECTIN3   | CD113 CDWnectin cεprotein-coding        |
| chr4-5644 | 6.376688 | -0.63372 | 0.925201 | -0.68496 | 0.493371 | 0.981636 | chr4  | 56448300 | 56449528 | + | 0 | NA | intron (intron (N  | 12654 NM_001075   | 10606 Hs. 518774NM_006452    | ENSG000000PAICS     | ADE2 ADE2 phosphor i protein-coding     |
| chr4-102f | 8.597094 | -0.54896 | 0.801768 | -0.68469 | 0.493541 | 0.981636 | chr4  | 1.03E+08 | 1.03E+08 | + | 0 | NA | intron (intron (N  | -108939 NR_136202 | 1.05E+08 Hs. 15833 NR_136202 | LOC105377-          | - uncharactncRNA                        |
| chr2-206  | 8.526488 | 0.567512 | 0.829049 | 0.685433 | 0.493639 | 0.981636 | chr2  | 2.06E+08 | 2.06E+08 | + | 0 | NA | intron (THE1B-int  | 69801 NM_017755   | 54891 Hs. 445033NM_017755    | ENSG000000IN080D    | - IN080 conprotein-coding               |
| chr16-701 | 12.17777 | 0.463337 | 0.677607 | 0.683784 | 0.494111 | 0.981636 | chr16 | 1.54E+08 | 1.54E+08 | + | 0 | NA | 3' UTR (3' UTR (N  | 15922 NR_126007   | 400541 Hs. 461183NR_126007   | ENSG000000LOC400541 | - uncharactncRNA                        |
| chr19-581 | 12.17777 | 0.463337 | 0.677607 | 0.683784 | 0.494111 | 0.981636 | chr19 | 58184823 | 58214192 | + | 0 | NA | intron (AluSz SIN  | 16446 NM_133502   | 10782 Hs. 83761 NM_016324    | ENSG000000ZNF274    | HFB101 Z zinc fing protein-coding       |
| chr1-4344 | 8.442359 | 0.55489  | 0.811516 | 0.683769 | 0.494121 | 0.981636 | chr1  | 43446307 | 43449293 | + | 0 | NA | promoter-promoter- | -739 NR_106793    | 1.02E+08 NR_106793           | ENSG000000MIR6735   | hwa-mir-εmicroRNA ncRNA                 |
| chr1-1537 | 8.442359 | 0.55489  | 0.811516 | 0.683769 | 0.494121 | 0.981636 | chr1  | 1.54E+08 | 1.54E+08 | + | 0 | NA | intron (intron (N  | -2554 NR_14582E   | 11000 Hs. 438722NM_024333    | ENSG000000SLC27A3   | ACSVL3 Fεsolute cεprotein-coding        |
| chr12-121 | 8.442359 | 0.55489  | 0.811516 | 0.683769 | 0.494121 | 0.981636 | chr12 | 1.22E+08 | 1.22E+08 | + | 0 | NA | intron (intron (N  | 48714 NM_001178   | 144406 Hs. 709837NM_144668   | ENSG000000WDR66     | CFAP251 CWD repeatprotein-coding        |
| chr5-1484 | 8.442359 | 0.55489  | 0.811516 | 0.683769 | 0.494121 | 0.981636 | chr5  | 1.48E+08 | 1.48E+08 | + | 0 | NA | intron (intron (N  | 43999 NM_003079   | 81545 Hs. 483772NM_030792    | ENSG000000FBX038    | Fbx38 HMM F-box prcprotein-coding       |
| chr17-175 | 7.41265  | 0.679101 | 0.993189 | 0.683758 | 0.494128 | 0.981636 | chr17 | 17861401 | 17862354 | + | 0 | NA | intron (intron (N  | -24866 NM_00417E  | 6720 Hs. 592122NM_00417E     | ENSG000000SREBF1    | SREBF1 βsterol rεprotein-coding         |
| chr19-191 | 5.741265 | 0.679101 | 0.993189 | 0.683758 | 0.494128 | 0.981636 | chr19 | 19182193 | 19183039 | + | 0 | NA | non-codiron-codir  | 9536 NR_027308    | 4207 Hs. 153622NM_005911     | ENSG000000BORCS8-MF | LOC729991 BORCS8-MF protein-coding      |
| chr7-5205 | 5.741265 | 0.679101 | 0.993189 | 0.683758 | 0.494128 | 0.981636 | chr7  | 5205811  | 5206895  | + | 0 | NA | intron (intron (N  | -7916 NM_001033   | 26100 Hs. 122263NM_015611    | ENSG000000WIP12     | ATG18B AtWD repeatprotein-coding        |
| chr9-9808 | 5.874091 | -0.68331 | 0.999924 | -0.68336 | 0.494377 | 0.981636 | chr9  | 98084330 | 98084971 | + | 0 | NA | 3' UTR (3' UTR (N  | 27918 NM_001894   | 54187 Hs. 522331NM_018944    | ENSG000000CNANS     | HEL-S-10CN-acetyl r protein-coding      |
| chr17-374 | 10.83507 | -0.49373 | 0.722557 | -0.68331 | 0.494412 | 0.981636 | chr17 | 37440559 | 37440979 | + | 0 | NA | intron (intron (N  | 33544 NM_001488   | 6871 Hs. 500666NM_001488     | ENSG000000TADA2A    | ADA2 ADA2 transcriεprotein-coding       |
| chr8-2874 | 3.982501 | 0.785909 | 1.150301 | 0.683221 | 0.494467 | 0.981636 | chr8  | 28749794 | 28750587 | + | 0 | NA | intron (intron (N  | 48689 NR_07346E   | 2137 Hs. 491354NM_00144C     | ENSG000000EXTL3     | BOTV EXTL exostosin r protein-coding    |
| chr10-35  | 6.962303 | 0.656237 | 0.960565 | 0.683178 | 0.494495 | 0.981636 | chr10 | 35530098 | 35530348 | + | 0 | NA | exon (NM exon (NM  | -75118 NM_15336E  | 219770 Hs. 638922NM_15336E   | ENSG000000CGJD4     | CX40.1 gap junct protein-coding         |
| chr22-394 | 6.962303 | 0.656237 | 0.960565 | 0.683178 | 0.494495 | 0.981636 | chr22 | 39415602 | 39415805 | + | 0 | NA | intron (intron (N  | 15923 NM_00611E   | 10454 Hs. 507681NM_00611E    | ENSG000000TAB1      | 3'-Tab1 MTGF-beta protein-coding        |
| chr9-218  | 8.078782 | -0.57628 | 0.84364  | -0.68309 | 0.494551 | 0.981636 | chr9  | 21864619 | 21864900 | + | 0 | NA | 3' UTR (3' UTR (N  | 62123 NM_002451   | 4507 Hs. 193266NM_002451     | ENSG000000MTAP      | BDMF DMSF methylthi protein-coding      |
| chr1-218  | 8.409077 | 0.552034 | 0.808378 | 0.682891 | 0.494676 | 0.981636 | chr1  | 21883657 | 21886783 | + | 0 | NA | intron (intron (N  | 59290 NM_001291   | 3339 Hs. 562227NM_005521     | ENSG000000HSPG2     | HSPG PLC heparan sεprotein-coding       |
| chr11-77  | 8.409077 | 0.552034 | 0.808378 | 0.682891 | 0.494676 | 0.981636 | chr11 | 77696945 | 77697207 | + | 0 | NA | intron (MIR SINE   | -52970 NM_001311  | 1207 Hs. 430733NM_001291     | ENSG000000CLNS1A    | CLC1 CLNC chloride protein-coding       |
| chr16-56  | 8.409077 | 0.552034 | 0.808378 | 0.682891 | 0.494676 | 0.981636 | chr16 | 56500356 | 56503220 | + | 0 | NA | intron (intron (N  | 18236 NM_03188E   | 5883 Hs. 333733NM_03188E     | ENSG000000BBS2      | BBS RP74 Bardet-Bi protein-coding       |
| chr19-212 | 8.409077 | 0.552034 | 0.808378 | 0.682891 | 0.494676 | 0.981636 | chr19 | 2120708  | 2121811  | + | 0 | NA | exon (NM exon (NM  | 24344 NM_001035   | 113177 Hs. 424045NM_052871   | ENSG000000IZUM04    | C19orf36 IZUM0 fan protein-coding       |
| chr4-1697 | 8.409077 | 0.552034 | 0.808378 | 0.682891 | 0.494676 | 0.981636 | chr4  | 1.7E+08  | 1.7E+08  | + | 0 | NA | intron (intron (N  | 44522 NM_017867   | 54969 Hs. 406756NM_017867    | ENSG000000HPP1      | C4orf27 histone F protein-coding        |
| chr5-119  | 8.409077 | 0.552034 | 0.808378 | 0.682891 | 0.494676 | 0.981636 | chr5  | 1.2E+08  | 1.2E+08  | + | 0 | NA | intron (NLIM4      |                   |                              |                     |                                         |

|                                                                 |       |          |          |   |   |    |                     |        |           |          |                            |                              |           |                      |                                    |                            |
|-----------------------------------------------------------------|-------|----------|----------|---|---|----|---------------------|--------|-----------|----------|----------------------------|------------------------------|-----------|----------------------|------------------------------------|----------------------------|
| chr14-214.6.204572.0.630747.0.926949.0.680455.0.496216.0.981636 | chr14 | 21466394 | 21467431 | + | 0 | NA | intron (AluSx4 SI   | 9762   | NM_001163 | 84932    | Hs.22399                   | NM_03284 ENSG0000CRAB2B      | -         | RAB2B, mc            | protein-coding                     |                            |
| chr14-751.6.204572.0.630747.0.926949.0.680455.0.496216.0.981636 | chr14 | 75100662 | 75101122 | + | 0 | NA | intron (intron (N   | 26156  | NM_001325 | 91754    | Hs.7200                    | NM_03311 ENSG0000NEK9        | -         | APUG LCCSNIMA        | rel protein-coding                 |                            |
| chr14-921.6.204572.0.630747.0.926949.0.680455.0.496216.0.981636 | chr14 | 92129002 | 92129833 | + | 0 | NA | intron (NL2a LINE   | 7448   | NM_001322 | 53981    | Hs.657632                  | NM_017437 ENSG0000CPSF2      | -         | CPSF100              | cleavage protein-coding            |                            |
| chr14-102.6.204572.0.630747.0.926949.0.680455.0.496216.0.981636 | chr14 | 1.02E+08 | 1.02E+08 | + | 0 | NA | TTS (NM_CTS (NM_C   | 18908  | NM_03263C | 51550    | Hs.129634                  | NM_03263C ENSG0000CINP       | -         | CINP                 | cyclin d protein-coding            |                            |
| chr15-48.6.204572.0.630747.0.926949.0.680455.0.496216.0.981636  | chr15 | 48848156 | 48850076 | + | 0 | NA | intron (intron (N   | -29018 | NM_01433E | 23741    | Hs.255977                  | NM_01433E ENSG0000CED1       | -         | C15orf3 CEP300       | intron protein-coding              |                            |
| chr15-657.6.204572.0.630747.0.926949.0.680455.0.496216.0.981636 | chr15 | 65783885 | 65785051 | + | 0 | NA | intron (LIMC3 LIN   | 7825   | NM_00132C | 10260    | Hs.654567                  | NM_00584E ENSG0000CENND4A    | -         | ENND4A               | domain protein-coding              |                            |
| chr16-19.6.204572.0.630747.0.926949.0.680455.0.496216.0.981636  | chr16 | 19630509 | 19633436 | + | 0 | NA | intron (AluSx SIN   | 76269  | NM_00136E | 57020    | Hs.654964                  | NM_020314 ENSG0000CVPS35L    | -         | VP35                 | encl protein-coding                |                            |
| chr17-196.6.204572.0.630747.0.926949.0.680455.0.496216.0.981636 | chr17 | 19652696 | 19653845 | + | 0 | NA | intron (AluSx SIN   | 4519   | NM_001031 | 224      | Hs.49988E                  | NM_00038E ENSG0000ALDH3A2    | -         | ALDH10F FALDH        | aldehyde protein-coding            |                            |
| chr17-295.6.204572.0.630747.0.926949.0.680455.0.496216.0.981636 | chr17 | 29514151 | 29516265 | + | 0 | NA | intron (intron (N   | 51829  | NM_198147 | 116236   | Hs.10651                   | CNM_198147 ENSG0000CABHD15   | -         | ABHD15               | abhydrolase protein-coding         |                            |
| chr17-31.6.204572.0.630747.0.926949.0.680455.0.496216.0.981636  | chr17 | 31002256 | 31027603 | + | 0 | NA | IntergeniAluS       | -5855  | NM_00135C | 1.08E+08 | Hs.558901                  | NM_001350575                 | LOC107984 | -                    | LOC107984                          | uncharacter protein-coding |
| chr18-17.6.204572.0.630747.0.926949.0.680455.0.496216.0.981636  | chr18 | 172429   | 1727107  | + | 0 | NA | intron (Tigger L    | 14016  | NM_005151 | 9097     | Hs.64441                   | CNM_005151 ENSG0000CUSP14    | -         | CUSP14               | ubiquitin protein-coding           |                            |
| chr18-95.6.204572.0.630747.0.926949.0.680455.0.496216.0.981636  | chr18 | 9501853  | 9503265  | + | 0 | NA | intron (AluY SINE   | 27046  | NM_00678E | 10928    | Hs.52899                   | CNM_00678E ENSG0000CRALBP1   | -         | RALBP1               | bin protein-coding                 |                            |
| chr19-957.6.204572.0.630747.0.926949.0.680455.0.496216.0.981636 | chr19 | 9574280  | 9575305  | + | 0 | NA | intron (LTR OCL L   | 9712   | NM_00130E | 7675     | Hs.501537                  | NM_00100E ENSG0000CNZF121    | -         | ZNF121               | zinc finger protein-coding         |                            |
| chr19-164.6.204572.0.630747.0.926949.0.680455.0.496216.0.981636 | chr19 | 16420296 | 16422740 | + | 0 | NA | intron (intron (N   | 50452  | NM_00125E | 58513    | Hs.65463E                  | NM_02123E ENSG0000CEPS15L1   | -         | EPS15R               | epidermal protein-coding           |                            |
| chr2-2441.6.204572.0.630747.0.926949.0.680455.0.496216.0.981636 | chr2  | 244177   | 245170   | + | 0 | NA | intron (MIR SINE    | 11667  | NM_00128E | 26751    | Hs.515951                  | NM_015677 ENSG0000CSH3YL1    | -         | SH3YL1               | SH3 and protein-coding             |                            |
| chr2-174.6.204572.0.630747.0.926949.0.680455.0.496216.0.981636  | chr2  | 1.74E+08 | 1.74E+08 | + | 0 | NA | intron (THE1C-int   | 5866   | NM_00488E | 9541     | Hs.632531                  | NM_00488E ENSG0000CIR1       | -         | CIR                  | corepress protein-coding           |                            |
| chr20-114.6.204572.0.630747.0.926949.0.680455.0.496216.0.981636 | chr20 | 1145894  | 1147100  | + | 0 | NA | intron (intron (N   | 27895  | NM_00132E | 9491     | Hs.471917                  | NM_006814 ENSG0000CPSMF1     | -         | P131                 | proteasome protein-coding          |                            |
| chr21-392.6.204572.0.630747.0.926949.0.680455.0.496216.0.981636 | chr21 | 39273581 | 39276828 | + | 0 | NA | intron (intron (N   | 38428  | NM_01896E | 54014    | Hs.62713E                  | NM_01896E ENSG0000CBRDW1     | -         | BRDW1                | C21orf107 bromodome protein-coding |                            |
| chr22-232.6.204572.0.630747.0.926949.0.680455.0.496216.0.981636 | chr22 | 23292521 | 23294188 | + | 0 | NA | intron (MIR3 SINE   | 30587  | NR_03340E | 26226    | Hs.72958E                  | NR_03340E ENSG0000CFBXW4P1   | -         | FBXW4                | FBXW-box an pseudo                 |                            |
| chr22-504.6.204572.0.630747.0.926949.0.680455.0.496216.0.981636 | chr22 | 50449868 | 50451000 | + | 0 | NA | intron (AluSx1 SI   | 24601  | NM_00297E | 6305     | Hs.589924                  | NM_00297E ENSG0000CSBF1      | -         | SBF1                 | CMT4B3 DESET                       | bind protein-coding        |
| chr3-185.6.204572.0.630747.0.926949.0.680455.0.496216.0.981636  | chr3  | 1.85E+08 | 1.85E+08 | + | 0 | NA | intron (intron (N   | 152056 | NM_00102E | 285382   | Hs.24579E                  | NM_00102E ENSG0000C3orf70    | -         | C3orf70              | chromosome protein-coding          |                            |
| chr7-1491.6.204572.0.630747.0.926949.0.680455.0.496216.0.981636 | chr7  | 1491474  | 1492389  | + | 0 | NA | intron (LIMB8 LIN   | 12458  | NM_00108C | 26173    | Hs.53218E                  | NM_00108C ENSG0000CNTS1      | -         | INTS1                | INT1 NET2                          | integrat protein-coding    |
| chr7-1392.6.204572.0.630747.0.926949.0.680455.0.496216.0.981636 | chr7  | 1.39E+08 | 1.39E+08 | + | 0 | NA | intron (AluJr SIN   | 38693  | NM_17356E | 250408   | Hs.15345E                  | NM_17356E ENSG0000CUBN2      | -         | CUBN2                | ubiquitin protein-coding           |                            |
| chr8-423.6.204572.0.630747.0.926949.0.680455.0.496216.0.981636  | chr8  | 42302724 | 42310475 | + | 0 | NA | intron (intron (N   | -29620 | NM_00269C | 5423     | Hs.654484                  | NM_00269C ENSG0000CPOLB      | -         | POLB                 | DNA polyn protein-coding           |                            |
| chr8-1442.6.204572.0.630747.0.926949.0.680455.0.496216.0.981636 | chr8  | 1.44E+08 | 1.44E+08 | + | 0 | NA | TTS (NM_CTS (NM_C   | 48908  | NR_107057 | 1.02E+08 | NR_107057                  | ENSG0000CIR1712              | -         | MIR1712              | l-microRNA ncRNA                   |                            |
| chrX-474.6.204572.0.630747.0.926949.0.680455.0.496216.0.981636  | chrX  | 47451742 | 47454676 | + | 0 | NA | intron (AluJr SIN   | 14460  | NM_001324 | 7592     | Hs.496074                  | NM_00713C ENSG0000CZNF41     | -         | ZNF41                | zinc finger protein-coding         |                            |
| chr1-1182.8.938947.0.531216.0.780782.0.680364.0.496274.0.981636 | chr1  | 11828500 | 11830175 | + | 0 | NA | intron (intron (N   | -10982 | NR_03780E | 1E+08    | Hs.71001E                  | NR_03780E                    | NPPA-AS1  | NPPA                 | antincRNA                          |                            |
| chr1-1504.8.938947.0.531216.0.780782.0.680364.0.496274.0.981636 | chr1  | 1.5E+08  | 1.5E+08  | + | 0 | NA | intron (AluSp SIN   | -39914 | NM_001271 | 80222    | Hs.288974                  | NM_02515E ENSG0000CARS2      | -         | COXP211              | l-threonyl-protein-coding          |                            |
| chr1-1508.8.938947.0.531216.0.780782.0.680364.0.496274.0.981636 | chr1  | 1.58E+08 | 1.58E+08 | + | 0 | NA | intron (intron (N   | 53790  | NR_03394E | 642628   | Hs.50690E                  | NR_03394E ENSG0000CLINCO170A | -         | LINC0170A            | long intncRNA                      |                            |
| chr1-1602.8.938947.0.531216.0.780782.0.680364.0.496274.0.981636 | chr1  | 1.6E+08  | 1.6E+08  | + | 0 | NA | intron (intron (N   | -14523 | NR_12372E | 729867   | Hs.674191                  | NR_12372E ENSG0000CLOC29867  | -         | CLOC29867            | uncharactercna                     |                            |
| chr1-220C.8.938947.0.531216.0.780782.0.680364.0.496274.0.981636 | chr1  | 2.2E+08  | 2.2E+08  | + | 0 | NA | intron (AluS6 SI    | 36648  | NM_00444E | 2058     | Hs.49778E                  | NM_00444E ENSG0000CEPRS      | -         | CEPRS                | EARS GLUF                          | glutamyl-protein-coding    |
| chr10-274.8.938947.0.531216.0.780782.0.680364.0.496274.0.981636 | chr10 | 29485775 | 29494500 | + | 0 | NA | intron (intron (N   | 54959  | NR_03033E | 693189   | NR_03033E ENSG0000CMIR604  | -                            | MIR604    | l-microRNA ncRNA     |                                    |                            |
| chr10-395.8.938947.0.531216.0.780782.0.680364.0.496274.0.981636 | chr10 | 3951755  | 3957570  | + | 0 | NA | intron (intron (N   | 21253  | NR_13806E | 219749   | Hs.49942E                  | NM_145011 ENSG0000CNZF25     | -         | ZNF25                | zinc finger protein-coding         |                            |
| chr13-302.8.938947.0.531216.0.780782.0.680364.0.496274.0.981636 | chr13 | 30248735 | 30249898 | + | 0 | NA | intron (LIME3A LI   | 57695  | NM_001014 | 84056    | Hs.24359E                  | NM_03211E ENSG0000CKATNAL1   | -         | KATNAL1              | katanin c protein-coding           |                            |
| chr16-15.8.938947.0.531216.0.780782.0.680364.0.496274.0.981636  | chr16 | 15634971 | 15639100 | + | 0 | NA | intron (intron (N   | 6114   | NM_014647 | 9665     | Hs.173524                  | NM_014647 ENSG0000CMARF1     | -         | MARF1                | KIAA0430 meiosis                   | l-protein-coding           |
| chr17-48E.8.938947.0.531216.0.780782.0.680364.0.496274.0.981636 | chr17 | 48862442 | 48864897 | + | 0 | NA | 3' UTR (3' UTR (N   | -29118 | NM_00100E | 516      | Hs.80956                   | NM_00517E ENSG0000CATP5MC1   | -         | ATP5MC1              | ATP synth protein-coding           |                            |
| chr19-53E.8.938947.0.531216.0.780782.0.680364.0.496274.0.981636 | chr19 | 535361   | 539338   | + | 0 | NA | intron (intron (N   | 5589   | NM_00435E | 997      | Hs.514997                  | NM_00435E ENSG0000CCDC34     | -         | CDC34                | cell divi protein-coding           |                            |
| chr2-952.8.938947.0.531216.0.780782.0.680364.0.496274.0.981636  | chr2  | 95209501 | 95217792 | + | 0 | NA | IntergeniIntergeni  | 47862  | NM_001291 | 7549     | Hs.59091E                  | NM_02108E ENSG0000CNZF2      | -         | ZNF2                 | ZNF2 zinc                          | finger protein-coding      |
| chr2-218E.8.938947.0.531216.0.780782.0.680364.0.496274.0.981636 | chr2  | 2.18E+08 | 2.18E+08 | + | 0 | NA | intron (MIRB SINE   | 1866   | NR_10676E | 1.02E+08 | NR_10676E ENSG0000CMIR6513 | -                            | MIR6513   | mir-ε microRNA ncRNA |                                    |                            |
| chr20-35E.8.938947.0.531216.0.780782.0.680364.0.496274.0.981636 | chr20 | 35669782 | 35674147 | + | 0 | NA | intron (N (GTTTTT)r | -7064  | NM_00119E | 10137    | Hs.70018E                  | NM_006047 ENSG0000CRBM12     | -         | RBM12                | HRIHF20E RNA                       | bind protein-coding        |
| chr20-214.8.938947.0.531216.0.780782.0.680364.0.496274.0.981636 | chr20 | 41452073 | 41452600 | + | 0 | NA | intron (intron (N   | -85522 | NM_05284E | 90187    | Hs.7652E                   | NM_05284E ENSG0000CEMILIN3   | -         | EMILIN3              | C20orf13 elastin                   | n protein-coding           |
| chr22-41E.8.938947.0.531216.0.780782.0.680364.0.496274.0.981636 | chr22 | 24541436 | 24543493 | + | 0 | NA | non-codir non-codir | 12674  | NM_001284 | 8306     | Hs.72855                   | NM_031444 ENSG0000CUCD1      | -         | CUCD1                | C20orf13 guanylyl                  | protein-coding             |
| chr3-1841.8.938947.0.531216.0.780782.0.680364.0.496274.0.981636 | chr3  | 1.84E+08 | 1.84E+08 | + | 0 | NA | exon (NM exon (NM   | 2874   | NM_001351 | 55324    | Hs.36132E                  | NM_01835E ENSG0000CABC3F     | -         | ABC3F                | EST201864 ATP                      | bind protein-coding        |
| chr5-372E.8.938947.0.531216.0.780782.0.680364.0.496274.0.981636 | chr5  | 37223410 | 37223987 | + | 0 | NA | intron (intron (N   | -25348 | NR_13426E | 1.05E+08 | Hs.17099E                  | NR_13426E ENSG0000CLOC105374 | -         | CLOC105374           | uncharactercna                     |                            |
| chr7-138E.8.938947.0.531216.0.780782.0.680364.0.496274.0.981636 | chr7  | 1.39E+08 | 1.39E+08 | + | 0 | NA | intron (LTR4 LTR    | 96632  | NM_01590E | 8805     | Hs.490287                  | NM_00385E ENSG0000CTRIM24    | -         | TRIM24               | PTC6 RNFE                          | tripartit protein-coding   |
| chr8-102E.8.938947.0.531216.0.780782.0.680364.0.496274.0.981636 | chr8  | 1.02E+08 | 1.02E+08 | + | 0 | NA | intron (AluJb SIN   | 27716  | NM_00117E | 50484    | Hs.51259E                  | NM_01571E ENSG0000CRMB2B     | -         | MB2B                 | MTDPS8A ribonucle                  | protein-coding             |
| chr14-761.4.707875.0.72619.1.068123.0.67987.0.496586.0.981636   | chr14 | 76174753 | 76175640 | + | 0 | NA | 3' UTR (3' UTR (N   | 20842  | NR_110314 | 55668    | Hs.410231                  | NM_01792E ENSG0000CPATCH2L   | -         | PATCH2L              | C14orf11E G-patch                  | c protein-coding           |
| chr15-591.4.707875.0.72619.1.068123.0.67987.0.496586.0.981636   | chr15 | 59144058 | 59144631 | + | 0 | NA | intron (AluSx1 SI   | 26918  | NR_03175E | 1E+08    | NR_03175E ENSG0000CMIR2116 | -                            | MIR2116   | mir-2116             | microRNA ncRNA                     |                            |
| chr1-2064.8.972229.0.533971.0.785453.0.679825.0.496615.0.981636 | chr1  | 2.06E+08 | 2.06E+08 | + | 0 | NA | intron (MERSB DNA   | -15032 | NM_18266E | 83593    | Hs.49757E                  | NM_031437 ENSG0000CRASSF5    | -         | RASSF5               | Maxp1 NOF                          | RAS assoc protein-coding   |
| chr1-212E.8.972229.0.533971.0.785453.0.679825.0.496615.0.981636 | chr1  | 2.13E+08 | 2.13E+08 | + | 0 | NA | intron (AluY SINE   | 27371  |           |          |                            |                              |           |                      |                                    |                            |



|           |          |           |          |           |          |          |       |          |          |   |   |    |                     |          |           |          |                     |                      |                 |           |                |                |                |
|-----------|----------|-----------|----------|-----------|----------|----------|-------|----------|----------|---|---|----|---------------------|----------|-----------|----------|---------------------|----------------------|-----------------|-----------|----------------|----------------|----------------|
| chr17-756 | 4.658877 | -0.72955  | 1.078219 | -0.67662  | 0.498646 | 0.981636 | chr17 | 75684593 | 75685808 | + | 0 | NA | intron (Nintron (N  | 17862    | NM_01326C | 29115    | Hs. 65508ENM_01326C | ENSG000003AP30BP     | HCNGP HTF       | SAP30     | bir            | protein-coding |                |
| chr2-1696 | 4.658877 | -0.72955  | 1.078219 | -0.67662  | 0.498646 | 0.981636 | chr2  | 1.7E+08  | 1.7E+08  | + | 0 | NA | intron (Nintron (N  | 20414    | NM_024622 | 79675    | Hs. 52927ENM_024622 | ENSG000003FASTKD1    | -               | FAST      | kin            | protein-coding |                |
| chr21-436 | 7.441325 | -0.61336  | 0.906565 | -0.676575 | 0.498676 | 0.981636 | chr21 | 43672026 | 43672558 | + | 0 | NA | intron (Nintron (N  | 12732    | NM_01505E | 23076    | Hs. 56572ENM_01505E | ENSG000003RRP1B      | KIAA0179        | ribosomal | protein-coding |                |                |
| chr1-8906 | 8.647941 | -0.53711  | 0.794007 | -0.67646  | 0.498749 | 0.981636 | chr1  | 89051041 | 89060366 | + | 0 | NA | intron (Nintron (N  | 9505     | NM_00205E | 2633     | Hs. 62661           | NM_00205E            | ENSG000003GBP1  | -         | guanylate      | protein-coding |                |
| chr1-1501 | 8.647941 | -0.53711  | 0.794007 | -0.67646  | 0.498749 | 0.981636 | chr1  | 1.5E+08  | 1.5E+08  | + | 0 | NA | intron (Nintron (N  | -3494    | NR_135098 | 1.05E+08 | Hs. 59936ENR_135098 | LOC105371-           | -               | uncharact | ncRNA          |                |                |
| chr11-876 | 8.647941 | -0.53711  | 0.794007 | -0.67646  | 0.498749 | 0.981636 | chr11 | 8730218  | 8731285  | + | 0 | NA | exon (NM_exon (NM   | -38027   | NR_12059C | 1.03E+08 | Hs. 61327ENR_120590 | LOC102724-           | -               | uncharact | ncRNA          |                |                |
| chr12-952 | 8.647941 | -0.53711  | 0.794007 | -0.67646  | 0.498749 | 0.981636 | chr12 | 95255365 | 95256681 | + | 0 | NA | intron (Nintron (N  | 38216    | NM_01759E | 55591    | Hs. 24135           | NM_01759E            | ENSG000003VEZT  | VEZATIN   | vezatin        | protein-coding |                |
| chr13-758 | 8.647941 | -0.53711  | 0.794007 | -0.67646  | 0.498749 | 0.981636 | chr13 | 75848280 | 75853958 | + | 0 | NA | intron (NMLTIH2 LI  | -19919   | NM_001257 | 729420   | Hs. 58682ENM_001257 | 75995                | LM07DN          | LM07      | dowr           | protein-coding |                |
| chr13-110 | 8.647941 | -0.53711  | 0.794007 | -0.67646  | 0.498749 | 0.981636 | chr13 | 1.11E+08 | 1.11E+08 | + | 0 | NA | 3' UTR (N3' UTR (N  | -4675    | NR_04658E | 1.01E+08 | Hs. 50871ENR_04658E | ENSG000003COL4A2-AS- | -               | COL4A2    | ar             | ncRNA          |                |
| chr18-882 | 8.647941 | -0.53711  | 0.794007 | -0.67646  | 0.498749 | 0.981636 | chr18 | 8821551  | 8827398  | + | 0 | NA | intron (Nintron (N  | 107093   | NM_01521C | 23255    | Hs. 70792ENM_01521C | ENSG000003MTCL1      | CCDC165         | microtub  | protein-coding |                |                |
| chr19-108 | 8.647941 | -0.53711  | 0.794007 | -0.67646  | 0.498749 | 0.981636 | chr19 | 10832820 | 10833158 | + | 0 | NA | non-codiron-codir   | 2751     | NR_10401E | 11018    | Hs. 21146ENM_00685E | ENSG000003TMED1      | IL1RL1 LG       | transmem  | protein-coding |                |                |
| chr8-6058 | 8.647941 | -0.53711  | 0.794007 | -0.67646  | 0.498749 | 0.981636 | chr8  | 60584484 | 60586204 | + | 0 | NA | intron (NAluJb SIN  | 68357    | NM_00286E | 5862     | Hs. 369017NM_00286E | ENSG000003CRAB2A     | LHX RAB2        | RAB2A     | me             | protein-coding |                |
| chr9-1322 | 8.647941 | -0.53711  | 0.794007 | -0.67646  | 0.498749 | 0.981636 | chr9  | 1.32E+08 | 1.32E+08 | + | 0 | NA | intron (NMER104 DN  | 88574    | NM_00135E | 23064    | Hs. 460317NM_01504E | ENSG000003SETX       | ALS4 AOA2       | senataxir | protein-coding |                |                |
| chr22-222 | 6.343406 | -0.64018  | 0.946488 | -0.67637  | 0.498805 | 0.981636 | chr22 | 22288122 | 22288355 | + | 0 | NA | IntergeniFLAM_C SI  | -9860    | NR_02729E | 96610    | Hs. 449601NM_080926 | BMS1P20              | IGL IGLV BMS1   | pset      | pseudo         |                |                |
| chr19-267 | 15.38146 | -0.416563 | 0.615899 | -0.67635  | 0.498819 | 0.981636 | chr19 | 26785712 | 26786021 | + | 0 | NA | IntergeniALR/Alpha  | -1007565 | NR_14673E | 1.02E+08 | Hs. 567934NR_110687 | ENSG000003LOC101927- | -               | uncharact | ncRNA          |                |                |
| chr15-732 | 8.367938 | -0.550968 | 0.814677 | -0.676302 | 0.498849 | 0.981636 | chr15 | 73266753 | 73267243 | + | 0 | NA | intron (NAluY SINE  | -32912   | NR_16214E | 1.13E+08 | Hs. 16214E          | MIR12135             | -               | microRNA  | ncRNA          |                |                |
| chr14-211 | 8.655799 | -0.53857  | 0.796752 | -0.67596  | 0.499066 | 0.981636 | chr14 | 21073219 | 21073518 | + | 0 | NA | intron (Nintron (N  | -2496    | NM_00128E | 57447    | Hs. 52520ENM_01625C | ENSG000003NDRG2      | SYLD            | NDRG      | fami           | protein-coding |                |
| chr3-1118 | 8.655799 | -0.53857  | 0.796752 | -0.67596  | 0.499066 | 0.981636 | chr3  | 1.11E+08 | 1.11E+08 | + | 0 | NA | TTS (NM_C TTS (NM_C | 122444   | NM_00124C | 25445    | Hs. 293917NM_01548C | ENSG000003NECTIN3    | CD113 CDW       | nectin    | ce             | protein-coding |                |
| chr5-9356 | 8.655799 | -0.53857  | 0.796752 | -0.67596  | 0.499066 | 0.981636 | chr5  | 93561060 | 93563493 | + | 0 | NA | intron (Nintron (N  | 9067     | NR_10982E | 441094   | Hs. 457407NR_01536E | ENSG000003NR2F1-AS1  | NR2F1           | ant       | ncRNA          |                |                |
| chr8-134  | 8.655799 | -0.53857  | 0.796752 | -0.67596  | 0.499066 | 0.981636 | chr8  | 13499532 | 13499760 | + | 0 | NA | exon (NM_exon (NM   | 15205    | NM_18264E | 10395    | Hs. 13429ENM_00609E | ENSG000003DLC1       | ARHGAP7 DLC1    | Rho       | protein-coding |                |                |
| chr5-747  | 10.8706  | -0.48307  | 0.71477  | -0.67584  | 0.49914  | 0.981636 | chr5  | 74705251 | 74707566 | + | 0 | NA | intron (NLIAPA3 LIN | 21160    | NM_000521 | 3074     | Hs. 69293           | NM_000521            | ENSG000003HEXB  | ELC-1AS F | hexosamir      | protein-coding |                |
| chr6-152  | 7.945771 | -0.581223 | 0.860138 | -0.675733 | 0.49921  | 0.981636 | chr6  | 1.52E+08 | 1.52E+08 | + | 0 | NA | exon (NM_exon (NM   | -43671   | NR_120501 | 1.01E+08 | Hs. 57120ENR_120501 | SYNE1-AS1            | -               | SYNE1     | ant            | ncRNA          |                |
| chr1-2368 | 8.375796 | -0.549072 | 0.812643 | -0.675663 | 0.499255 | 0.981636 | chr1  | 2.37E+08 | 2.37E+08 | + | 0 | NA | intron (NTigger3a   | 43743    | NM_001291 | 4548     | Hs. 498187NM_00025E | ENSG000003MTR        | HMAG MS c       | 5-methylt | protein-coding |                |                |
| chr16-182 | 6.36883  | -0.63182  | 0.935345 | -0.67549  | 0.499365 | 0.981636 | chr16 | 1675501  | 1675894  | + | 0 | NA | 3' UTR (N3' UTR (N  | -2582    | NM_14457C | 90861    | Hs. 513261NM_14457C | ENSG000003JPT2       | C16orf34 J      | Jupiter   | n              | protein-coding |                |
| chr2-1541 | 6.36883  | -0.63182  | 0.935345 | -0.67549  | 0.499365 | 0.981636 | chr2  | 15410373 | 15410709 | + | 0 | NA | intron (Nintron (N  | 150793   | NM_01590E | 51594    | Hs. 46775ENM_01590E | ENSG000003NBAS       | ILF52 NAC       | neuroblas | protein-coding |                |                |
| chr9-1208 | 6.36883  | -0.63182  | 0.935345 | -0.67549  | 0.499365 | 0.981636 | chr9  | 1.21E+08 | 1.21E+08 | + | 0 | NA | TTS (NM_C TTS (NM_C | 22550    | NR_02744E | 1E+08    | Hs. 70681ENR_02744E | B3GNT10              | -               | UDP-GlcNA | pseudo         |                |                |
| chr16-676 | 6.188856 | -0.635983 | 0.941749 | -0.675322 | 0.499471 | 0.981636 | chr16 | 67684482 | 67685771 | + | 0 | NA | 3' UTR (N3' UTR (N  | 18312    | NM_00101E | 388284   | Hs. 63220ENM_00101E | ENSG000003C16orf86   | -               | chromoson | protein-coding |                |                |
| chr18-422 | 6.188856 | -0.635983 | 0.941749 | -0.675322 | 0.499471 | 0.981636 | chr18 | 42009684 | 42010710 | + | 0 | NA | intron (NTigger1 E  | 54963    | NM_002647 | 5289     | Hs. 464971NM_002647 | ENSG000003PIK3C3     | VPS34 Vps       | phosphat  | protein-coding |                |                |
| chr19-417 | 3.990359 | -0.781805 | 1.157774 | -0.675265 | 0.499507 | 0.981636 | chr19 | 4175329  | 4176159  | + | 0 | NA | exon (NM_exon (NM   | 6562     | NM_001321 | 51548    | Hs. 42375ENM_01653E | ENSG000003SIRT6      | SIRT6           | sirtuin   | f              | protein-coding |                |
| chr1-8855 | 10.8702  | -0.48189  | 0.713634 | -0.67526  | 0.49951  | 0.981636 | chr1  | 8859384  | 8877825  | + | 0 | NA | intron (NMARNA DNA  | -2014    | NR_10678E | 1.02E+08 | Hs. 10678E          | ENSG000003MIR6728    | hsa-mir-6       | microRNA  | ncRNA          |                |                |
| chr12-124 | 10.8702  | -0.48189  | 0.713634 | -0.67526  | 0.49951  | 0.981636 | chr12 | 1.24E+08 | 1.24E+08 | + | 0 | NA | 3' UTR (N3' UTR (N  | 12516    | NR_10694C | 1.02E+08 | Hs. 10694C          | ENSG000003MIR6880    | hsa-mir-6       | microRNA  | ncRNA          |                |                |
| chr1-1557 | 8.905665 | -0.528458 | 0.782625 | -0.675237 | 0.499525 | 0.981636 | chr1  | 1.56E+08 | 1.56E+08 | + | 0 | NA | intron (NMIR SINE   | 21506    | NM_033657 | 7818     | Hs. 51674ENM_00463E | ENSG000003DAP3       | DAP-3 MR        | death     | as             | protein-coding |                |
| chr22-292 | 8.905665 | -0.528458 | 0.782625 | -0.675237 | 0.499525 | 0.981636 | chr22 | 29279899 | 29280111 | + | 0 | NA | intron (Nintron (N  | -27499   | NR_10687E | 1.02E+08 | Hs. 10687E          | ENSG000003MIR6818    | hsa-mir-6       | microRNA  | ncRNA          |                |                |
| chr5-1772 | 8.905665 | -0.528458 | 0.782625 | -0.675237 | 0.499525 | 0.981636 | chr5  | 1.77E+08 | 1.77E+08 | + | 0 | NA | intron (Nintron (N  | 37598    | NM_001031 | 53917    | Hs. 16258           | NM_130781            | ENSG000003CRAB2 | -         | RAB24          | me             | protein-coding |
| chr19-106 | 5.715842 | -0.67208  | 0.995526 | -0.6751   | 0.499612 | 0.981636 | chr19 | 10913745 | 10914165 | + | 0 | NA | exon (NM_exon (NM   | 14684    | NM_02402E | 78992    | Hs. 16402ENM_02402E | ENSG000003YIPF2      | FinGer2         | Yip1      | dom            | protein-coding |                |
| chr22-386 | 5.715842 | -0.67208  | 0.995526 | -0.6751   | 0.499612 | 0.981636 | chr22 | 38618448 | 38619546 | + | 0 | NA | intron (Nintron (N  | 37395    | NM_00101E | 646851   | Hs. 542707NM_00101E | ENSG000003FAM227A    | -               | family    | wi             | protein-coding |                |
| chr1-351  | 4.692159 | -0.72107  | 1.068218 | -0.67502  | 0.499661 | 0.981636 | chr1  | 35102949 | 35103579 | + | 0 | NA | intron (NLMBS LIN   | 23879    | NM_02477E | 79830    | Hs. 47124ENM_02477E | ENSG000003ZMYM1      | MYM             | zinc      | fin            | protein-coding |                |
| chr1-4212 | 4.692159 | -0.72107  | 1.068218 | -0.67502  | 0.499661 | 0.981636 | chr1  | 4219782  | 42197297 | + | 0 | NA | intron (NLMBS LINE  | -32294   | NM_03355E | 2980     | Hs. 778             | NM_03355E            | ENSG000003GUC2A | GCAP-1 G  | uanyl          | at             | protein-coding |
| chr10-11  | 4.692159 | -0.72107  | 1.068218 | -0.67502  | 0.499661 | 0.981636 | chr10 | 1.14E+08 | 1.14E+08 | + | 0 | NA | intron (Nintron (N  | 4765     | NM_198514 | 374354   | Hs. 369924NM_198514 | ENSG000003NHLRC2     | FINCA           | NHL       | repe           | protein-coding |                |
| chr11-466 | 4.692159 | -0.72107  | 1.068218 | -0.67502  | 0.499661 | 0.981636 | chr11 | 46960062 | 46961295 | + | 0 | NA | intron (NAluSq SIN  | 23917    | NM_00100E | 79096    | Hs. 36829ENM_02411E | ENSG000003C11orf49   | -               | chromoson | protein-coding |                |                |
| chr12-112 | 4.692159 | -0.72107  | 1.068218 | -0.67502  | 0.499661 | 0.981636 | chr12 | 1.12E+08 | 1.12E+08 | + | 0 | NA | intron (Nintron (N  | 9032     | NM_02495E | 80018    | Hs. 530941NM_02495E | ENSG000003NAA25      | C12orf30 N      | (alpha)-  | protein-coding |                |                |
| chr19-314 | 4.692159 | -0.72107  | 1.068218 | -0.67502  | 0.499661 | 0.981636 | chr19 | 31458027 | 32460300 | + | 0 | NA | intron (Nintron (N  | 53038    | NM_20732E | 147991   | Hs. 194392NM_20732E | ENSG000003YIP19L3    | -               | dpy-19    | lip            | protein-coding |                |
| chr2-3512 | 4.692159 | -0.72107  | 1.068218 | -0.67502  | 0.499661 | 0.981636 | chr2  | 3512208  | 3512852  | + | 0 | NA | intron (NMSTA-int   | 5217     | NM_00130E | 55256    | Hs. 50277ENM_01826E | ENSG000003ADI1       | APL1 ARD        | acireduct | protein-coding |                |                |
| chr2-1756 | 4.692159 | -0.72107  | 1.068218 | -0.67502  | 0.499661 | 0.981636 | chr2  | 1.76E+08 | 1.76E+08 | + | 0 | NA | intron (NMER2 DNA   | 23998    | NM_03065E | 80856    | Hs. 209561NM_03065E | ENSG000003LNPK       | KIAA1715        | lunapark  | protein-coding |                |                |
| chr20-937 | 4.692159 | -0.72107  | 1.068218 | -0.67502  | 0.4      |          |       |          |          |   |   |    |                     |          |           |          |                     |                      |                 |           |                |                |                |



|                    |          |          |          |          |          |       |          |          |   |   |    |                     |                   |                                                  |                                                    |                          |
|--------------------|----------|----------|----------|----------|----------|-------|----------|----------|---|---|----|---------------------|-------------------|--------------------------------------------------|----------------------------------------------------|--------------------------|
| chr12-952.8.416935 | 0.550011 | 0.815215 | 0.674682 | 0.499878 | 0.981636 | chr12 | 95283571 | 95284346 | + | 0 | NA | intron (NL2) LINE I | -24462 NR_029899  | 442903                                           | NR_029899 ENSG000002MIR331                         | MIRN331 l microRNA ncRNA |
| chr2-1715.8.416935 | 0.550011 | 0.815215 | 0.674682 | 0.499878 | 0.981636 | chr2  | 1.72E+08 | 1.72E+08 | + | 0 | NA | 3' UTR (N3' UTR (N  | 32639 NM_001127   | 79901 Hs. 221941NM_024844 ENSG000002CYBRD1       | CYB561A2 cytochrome protein-coding                 |                          |
| chrX-2435.8.416935 | 0.550011 | 0.815215 | 0.674682 | 0.499878 | 0.981636 | chrX  | 2439684  | 2439962  | + | 0 | NA | intron (MER1A) DNA  | 60716 NM_001171   | 9189 Hs. 131452NM_004725 ENSG000002ZBED1         | ALTE DRE zinc finger protein-coding                |                          |
| chr3-4865.9.49424  | 0.517087 | 0.766561 | 0.674554 | 0.499959 | 0.981636 | chr3  | 48698857 | 48699933 | + | 0 | NA | intron (AluSp) SIN  | -13480 NM_016455  | 51517 Hs. 655006NM_016455 ENSG000002NCK1P5D      | AF3P21 DNCK1 interprotein-coding                   |                          |
| chr15-694.10.82906 | -0.48418 | 0.717826 | -0.67454 | 0.499985 | 0.981636 | chr15 | 69453643 | 69456659 | + | 0 | NA | intron (intron (N   | 2333 NM_213725    | 6176 Hs. 356502NM_001000 ENSG000002RPLP1         | LPI1 P1 RF ribosomal protein-coding                |                          |
| chr1-1657.8.946805 | 0.529419 | 0.784901 | 0.674504 | 0.499991 | 0.981636 | chr1  | 1.66E+08 | 1.66E+08 | + | 0 | NA | intron (AluJo) SIN  | 15118 NM_001366   | 54499 Hs. 31498 NM_019025 ENSG000002TCMO1        | HP10122 F transmembrane protein-coding             |                          |
| chr1-1864.8.946805 | 0.529419 | 0.784901 | 0.674504 | 0.499991 | 0.981636 | chr1  | 1.86E+08 | 1.86E+08 | + | 0 | NA | exon (NM exon (NM   | 5556 NM_022375    | 10896 Hs. 679232NM_022375 ENSG000002OCLM         | TISR oculomedial protein-coding                    |                          |
| chr1-2011.8.946805 | 0.529419 | 0.784901 | 0.674504 | 0.499991 | 0.981636 | chr1  | 2.01E+08 | 2.01E+08 | + | 0 | NA | intron (intron (N   | 8328 NM_001288    | 252839 Hs. 181444NM_016455 ENSG000002TMEM9       | DERM4 TME transmembrane protein-coding             |                          |
| chr11-354.8.946805 | 0.529419 | 0.784901 | 0.674504 | 0.499991 | 0.981636 | chr11 | 35430720 | 35433502 | + | 0 | NA | 3' UTR (N3' UTR (N  | -12053 NM_001195  | 6506 Hs. 502335NM_004171 ENSG000002SLC1A2        | EAA2T2 EIF solute carrier protein-coding           |                          |
| chr14-102.8.946805 | 0.529419 | 0.784901 | 0.674504 | 0.499991 | 0.981636 | chr14 | 1.03E+08 | 1.03E+08 | + | 0 | NA | intron (intron (N   | 35210 NM_030943   | 81693 Hs. 534494NM_030943 ENSG000002AMN          | PR1028 amionin alpha protein-coding                |                          |
| chr15-555.8.946805 | 0.529419 | 0.784901 | 0.674504 | 0.499991 | 0.981636 | chr15 | 5379770  | 5379969  | + | 0 | NA | intron (AluSq2) SI  | -6835 NR_030358   | 693213                                           | NR_030358 ENSG000002MIR628                         | MIRN628 l microRNA ncRNA |
| chr16-161.8.946805 | 0.529419 | 0.784901 | 0.674504 | 0.499991 | 0.981636 | chr16 | 16158382 | 16159526 | + | 0 | NA | intron (intron (N   | 64517 NM_001075   | 368 Hs. 442182NM_001171 ENSG000002ABCC6          | ABC34 ARF ATP binding protein-coding               |                          |
| chr16-678.8.946805 | 0.529419 | 0.784901 | 0.674504 | 0.499991 | 0.981636 | chr16 | 67876321 | 67881666 | + | 0 | NA | exon (NM exon (NM   | -5892 NM_198444   | 123904 Hs. 435464NM_198444 ENSG000002NRN1L       | MRC2246 neurotin protein-coding                    |                          |
| chr17-535.8.946805 | 0.529419 | 0.784901 | 0.674504 | 0.499991 | 0.981636 | chr17 | 5358619  | 5358866  | + | 0 | NA | intron (intron (N   | -60899 NM_001166  | 84268 Hs. 462085NM_032305 ENSG000002RPL1         | HRIP IRIP RPA interprotein-coding                  |                          |
| chr17-755.8.946805 | 0.529419 | 0.784901 | 0.674504 | 0.499991 | 0.981636 | chr17 | 75953173 | 75956541 | + | 0 | NA | intron (AluSg) SIN  | -16625 NM_001315  | 85302 Hs. 720065NM_001080 ENSG000002PBF1         | Alb FBF-1 Fas binding protein-coding               |                          |
| chr19-495.8.946805 | 0.529419 | 0.784901 | 0.674504 | 0.499991 | 0.981636 | chr19 | 49879684 | 49885819 | + | 0 | NA | intron (intron (N   | -4395 NM_001278   | 84335 Hs. 515542NM_032375 ENSG000002AKT1S1       | Lobe PRAS AKT1 subunit protein-coding              |                          |
| chr22-193.8.946805 | 0.529419 | 0.784901 | 0.674504 | 0.499991 | 0.981636 | chr22 | 19381527 | 19383820 | + | 0 | NA | intron (intron (N   | 49060 NM_003325   | 7290 Hs. 474205NM_003325 ENSG000002CHIRA         | DGCR1 TUF histone core protein-coding              |                          |
| chr22-215.8.946805 | 0.529419 | 0.784901 | 0.674504 | 0.499991 | 0.981636 | chr22 | 21932675 | 21933700 | + | 0 | NA | intron (intron (N   | -5050 NR_147622   | 1E+08 Hs. 659182NR_147622                        | LOC100208E-1                                       | uncharacterized ncRNA    |
| chr3-4867.8.946805 | 0.529419 | 0.784901 | 0.674504 | 0.499991 | 0.981636 | chr3  | 48671060 | 48672141 | + | 0 | NA | Intergeni Intergeni | 7832 NR_111921    | 1.03E+08 Hs. 663571NR_111921 ENSG000002LINC02258 | CELSR3-AS long intergenic ncRNA                    |                          |
| chr4-1181.8.946805 | 0.529419 | 0.784901 | 0.674504 | 0.499991 | 0.981636 | chr4  | 1.19E+08 | 1.19E+08 | + | 0 | NA | intron (intron (N   | -5835 NR_109983   | 729218 Hs. 448515NR_103825                       | LOC729218E-1                                       | uncharacterized pseudo   |
| chr15-591.8.646091 | -0.5476  | 0.812011 | -0.67437 | 0.500075 | 0.981636 | chr15 | 59194602 | 59195492 | + | 0 | NA | intron (intron (N   | 11796 NM_033195   | 92483 Hs. 307052NM_033195 ENSG000002LDHAL6B      | LDHB LD lactate dehydrogenase protein-coding       |                          |
| chr6-1697.8.646091 | -0.5476  | 0.812011 | -0.67437 | 0.500075 | 0.981636 | chr6  | 1.7E+08  | 1.7E+08  | + | 0 | NA | intron (THE1A) LTF  | 5529 NM_001278    | 55780 Hs. 47546 NM_018341 ENSG000002ERMARD       | G6orf70 FER membrane protein-coding                |                          |
| chr11-111.8.897807 | 0.530233 | 0.786407 | 0.674247 | 0.500154 | 0.981636 | chr11 | 1.12E+08 | 1.12E+08 | + | 0 | NA | intron (LIMA9) LIN  | 77502 NM_002716   | 5519 Hs. 269125NM_002716 ENSG000002PPP2R1B       | PP2A Abet protein-coding                           |                          |
| chr9-3305.11.15917 | 0.488747 | 0.725049 | 0.674089 | 0.500255 | 0.981636 | chr9  | 33052460 | 33052744 | + | 0 | NA | intron (intron (N   | 24072 NM_018222   | 55234 Hs. 655351NM_018222 ENSG000002SMU1         | BWD SMU-1 SMU1 DNA protein-coding                  |                          |
| chr22-245.5.899515 | -0.67398 | 0.999843 | -0.67408 | 0.500258 | 0.981636 | chr22 | 24576339 | 24576617 | + | 0 | NA | Intergeni AluSq2 SI | -7272 NM_013430   | 2678 Hs. 595805NM_005265 ENSG000002GGT1          | CD224 D22 gamma-glutamate protein-coding           |                          |
| chr5-1097.5.899515 | -0.67398 | 0.999843 | -0.67408 | 0.500258 | 0.981636 | chr5  | 1.8E+08  | 1.8E+08  | + | 0 | NA | intron (HAL1) LINE  | 16831 NM_014757   | 9794 Hs. 631951NM_014757 ENSG000002MAML1         | Mam-1 Man mastermind protein-coding                |                          |
| chr10-175.6.435393 | -0.61961 | 0.919622 | -0.67376 | 0.500461 | 0.981636 | chr10 | 1.03E+08 | 1.03E+08 | + | 0 | NA | intron (AluJb) SIN  | 25281 NM_015915   | 51063 Hs. 241545NM_015915 ENSG000002CALHM2       | FAM26B calcium protein-coding                      |                          |
| chr12-121.6.435393 | -0.61961 | 0.919622 | -0.67376 | 0.500461 | 0.981636 | chr12 | 12199951 | 12200577 | + | 0 | NA | intron (intron (N   | 66780 NM_002335   | 4040 Hs. 584775NM_002335 ENSG000002LRP6          | ADCAD2 SLDL receptor protein-coding                |                          |
| chr15-297.6.435393 | -0.61961 | 0.919622 | -0.67376 | 0.500461 | 0.981636 | chr15 | 29793155 | 29794947 | + | 0 | NA | intron (LIMA3) LIN  | 26624 NM_001355   | 7082 Hs. 743995NM_003257 ENSG000002TJP1          | ZO-1 tight junction protein-coding                 |                          |
| chr15-341.6.435393 | -0.61961 | 0.919622 | -0.67376 | 0.500461 | 0.981636 | chr15 | 34142185 | 34143207 | + | 0 | NA | intron (intron (N   | 40613 NM_152595   | 161779 Hs. 156317NM_152595 ENSG000002PGBD4       | - piggyback protein-coding                         |                          |
| chr2-2894.6.435393 | -0.61961 | 0.919622 | -0.67376 | 0.500461 | 0.981636 | chr2  | 28940205 | 28940721 | + | 0 | NA | intron (AluSp) SIN  | 12480 NR_145755   | 1.1E+08 NR_145755 ENSG000002SNORD53B             | - small nucleolar RNA                              |                          |
| chr2-131.6.435393  | -0.61961 | 0.919622 | -0.67376 | 0.500461 | 0.981636 | chr2  | 1.31E+08 | 1.31E+08 | + | 0 | NA | intron (MERS) DNA   | 6456 NM_001321    | 130074 Hs. 534675NM_001005 ENSG000002FAM168B     | MANI family wiprotein-coding                       |                          |
| chr20-436.6.435393 | -0.61961 | 0.919622 | -0.67376 | 0.500461 | 0.981636 | chr20 | 43621972 | 43623083 | + | 0 | NA | intron (AluY) SINE  | 31590 NM_001322   | 51098 Hs. 444332NM_016004 ENSG000002IFT52        | C20orf9 C intracellular protein-coding             |                          |
| chr4-1955.6.435393 | -0.61961 | 0.919622 | -0.67376 | 0.500461 | 0.981636 | chr4  | 1959230  | 1961352  | + | 0 | NA | intron (intron (N   | -14345 NR_003004  | 677770 Hs. 676951NR_003004 ENSG000002SCARNA22    | ACA11 small Ca <sup>2+</sup> ncRNA                 |                          |
| chr6-3217.6.435393 | -0.61961 | 0.919622 | -0.67376 | 0.500461 | 0.981636 | chr6  | 32171468 | 32171667 | + | 0 | NA | intron (intron (N   | -1451 NR_106775   | 1.02E+08 NR_106775 ENSG000002MIR6721             | hsa-mir-6721 microRNA ncRNA                        |                          |
| chr7-1732.6.435393 | -0.61961 | 0.919622 | -0.67376 | 0.500461 | 0.981636 | chr7  | 17323881 | 17324271 | + | 0 | NA | intron (intron (N   | 25649 NM_001621   | 196 Hs. 171185NM_001621 ENSG000002AHR            | RP85 bHLH aryl hydrocarbon receptor protein-coding |                          |
| chr8-9765.6.435393 | -0.61961 | 0.919622 | -0.67376 | 0.500461 | 0.981636 | chr8  | 97690121 | 97691565 | + | 0 | NA | intron (intron (N   | 46659 NM_001365   | 92140 Hs. 377155NM_178812 ENSG000002MTDH         | 3D3 AEG-1 metadherin protein-coding                |                          |
| chrX-5481.6.435393 | -0.61961 | 0.919622 | -0.67376 | 0.500461 | 0.981636 | chrX  | 54814015 | 54814444 | + | 0 | NA | promoter-promoter   | -139 NR_002955    | 677799 Hs. 679785NR_002955 ENSG000002SNORA11     | SNORA11 small nucleolar RNA                        |                          |
| chr19-551.9.00551  | 0.536785 | 0.796914 | 0.67358  | 0.500578 | 0.981636 | chr19 | 55101537 | 55101813 | + | 0 | NA | intron (intron (N   | 15962 NM_0017607  | 54776 Hs. 631575NM_017607 ENSG000002PPP1R2C      | AAVS1 LEN protein-coding                           |                          |
| chr17-823.9.460959 | 0.5144   | 0.763983 | 0.673313 | 0.500748 | 0.981636 | chr17 | 8231542  | 8232855  | + | 0 | NA | exon (NM exon (NM   | -8155 NR_026951   | 284029 Hs. 121692NM_173621 ENSG000002LINC00324   | C17orf44 long intergenic ncRNA                     |                          |
| chr3-5325.8.57352  | -0.54626 | 0.809109 | -0.67311 | 0.500875 | 0.981636 | chr3  | 53286519 | 53286758 | + | 0 | NA | 3' UTR (N3' UTR (N  | -30524 NR_047588  | 7086 Hs. 89643 NM_001064 ENSG000002TKT           | HEL-5-48 transketolase protein-coding              |                          |
| chr8-4455.42.96377 | 0.273628 | 0.406515 | 0.673107 | 0.500879 | 0.981636 | chr8  | 44594451 | 44594671 | + | 0 | NA | Intergeni ALR Alphe | 1302119 NM_001002 | 340441 Hs. 631575NM_001002 ENSG000002POTEA       | A26A1 CT1POTE ankyrin protein-coding               |                          |
| chr10-125.7.894554 | 0.939092 | 1.395454 | 0.672965 | 0.500969 | 0.981636 | chr10 | 1.26E+08 | 1.26E+08 | + | 0 | NA | intron (MER44B) DN  | 7042 NR_120633    | 1.02E+08 Hs. 634265NR_120633 ENSG000002EDRF1-AS1 | EDRF1 antinuclear RNA                              |                          |
| chr11-352.10.86234 | -0.4807  | 0.714359 | -0.67291 | 0.501004 | 0.981636 | chr11 | 35214779 | 35226617 | + | 0 | NA | intron (intron (N   | 57748 NR_145794   | 1.1E+08 NR_145794                                | SNORD164                                           | small nucleolar RNA      |
| chr15-605.10.86234 | -0.4807  | 0.714359 | -0.67291 | 0.501004 | 0.981636 | chr15 | 60394238 | 60397060 | + | 0 | NA | intron (intron (N   | 2337 NM_001002    | 302 Hs. 511605NM_004035 ENSG000002ANXA2          | ANX2 ANX annexin I protein-coding                  |                          |
| chr4-1187.10.86234 | -0.4807  | 0.714359 | -0.67291 | 0.501004 | 0.981636 | chr4  | 1.19E+08 | 1.19E+08 | + | 0 | NA | intron (LIPA6) LIN  | 53473 NM_014822   | 9871 Hs. 189641NM_014822 ENSG000002SEC24D        | CLCRP2 SEC24 homoprotein-coding                    |                          |
| chr7-7405.10.86234 | -0.4807  | 0.714359 | -0.67291 | 0.501004 | 0.981636 | chr7  | 74096057 | 74097911 | + | 0 | NA | intron (intron (N   | 3767 NM_001204    | 3984 Hs. 647035NM_002314 ENSG000002LIMK1         | LIMK LIM LIM domain protein-coding                 |                          |
| chr1-1657.8.913523 | 0.526673 | 0.782798 | 0.672809 | 0.501069 | 0.981636 | chr1  | 1.66E+08 | 1.66E+08 | + | 0 | NA | intron (AluJb) SIN  | 26518 NM_001366   | 54499 Hs. 31498 NM_019025 ENSG000002TCMO1        | HP10122 F transmembrane protein-coding             |                          |
| chr1-2355.8.913523 | 0.526673 | 0.782798 | 0.672809 | 0.501069 | 0.981636 | chr1  | 2.35E+08 | 2.35E+08 | + | 0 | NA | intron (AluJb) SIN  | -38178 NR_039905  | 1.01E+08 NR_039905 ENSG000002MIR4753             | mir-4753 microRNA ncRNA                            |                          |
| chr1-2367.8.913523 | 0.526673 | 0.782798 | 0.672809 | 0.501069 | 0.981636 | chr1  | 2.36E+08 | 2.36E+08 | + | 0 | NA | intron (intron (N   | 40517 NM_002505   | 4811 Hs. 356624NM_002505 ENSG000002NID1          | NID nidogen 1 protein-coding                       |                          |
| chr10-111.8.913523 | 0.526673 | 0.782798 | 0.672809 | 0.501069 | 0.981636 | chr10 | 1.2E+08  | 1        |   |   |    |                     |                   |                                                  |                                                    |                          |



chr16-207 6.394253 -0.62365 0.931869 -0.66925 0.503339 0.981636 chr16 20797457 20798004 + 0 NA TTS (NM\_CTTT (NM\_C 8742 NM\_001142 112479 Hs. 248437NM\_080665:ENSG000000CER12 EXOD1|ZGFER1|exor|protein-coding







|                     |          |          |          |          |          |       |          |          |   |    |                     |                  |                                                  |                                     |                           |
|---------------------|----------|----------|----------|----------|----------|-------|----------|----------|---|----|---------------------|------------------|--------------------------------------------------|-------------------------------------|---------------------------|
| chr5-148: 6.896849  | -0.58225 | 0.882455 | -0.6598  | 0.50938  | 0.981636 | chr5  | 1.48E+08 | 1.48E+08 | 0 | NA | intron (NLIME4c LI  | 11867 NM_030793  | 81545 Hs. 483772NM_030793:ENSG00000PFBX038       | Fbx38 HMF-box prcprotein-coding     |                           |
| chr5-157: 6.896849  | -0.58225 | 0.882455 | -0.6598  | 0.50938  | 0.981636 | chr5  | 1.58E+08 | 1.58E+08 | 0 | NA | intron (Nintron (N  | 56026 NM_014666  | 9685 Hs. 64400CNM_014666:ENSG00000CLINT1         | CLINT ENT clathrin protein-coding   |                           |
| chr5-157: 6.896849  | -0.58225 | 0.882455 | -0.6598  | 0.50938  | 0.981636 | chr5  | 1.58E+08 | 1.58E+08 | 0 | NA | intron (NAluSx1 SI  | 11701 NM_014666  | 9685 Hs. 64400CNM_014666:ENSG00000CLINT1         | CLINT ENT clathrin protein-coding   |                           |
| chr5-175: 6.896849  | -0.58225 | 0.882455 | -0.6598  | 0.50938  | 0.981636 | chr5  | 1.75E+08 | 1.75E+08 | 0 | NA | intron (NLIME3 LI   | 16458 NM_022754  | 94081 Hs. 36944CNM_022754:ENSG00000SFXX1         | SLC56A1 Siderofilin protein-coding  |                           |
| chr6-7401: 6.896849 | -0.58225 | 0.882455 | -0.6598  | 0.50938  | 0.981636 | chr6  | 7401914  | 7405437  | 0 | NA | intron (NMER104 DN  | 13456 NM_001346  | 83732 Hs. 437474NM_03148C:ENSG00000C10K1         | AD034 RICR10 kinaseprotein-coding   |                           |
| chr6-169: 6.896849  | -0.58225 | 0.882455 | -0.6598  | 0.50938  | 0.981636 | chr6  | 1.7E+08  | 1.7E+08  | 0 | NA | intron (NLIME3A LI  | 14563 NM_00135C  | 253769 Hs. 13190ENM_182552:ENSG00000WDR27        | -WD repeatprotein-coding            |                           |
| chr7-4574: 6.896849 | -0.58225 | 0.882455 | -0.6598  | 0.50938  | 0.981636 | chr7  | 45741146 | 45742368 | 0 | NA | intron (Nintron (N  | 27261 NR_024271  | 641977 Hs. 723477NR_024271:ENSG00000SEPTIN7P2    | SEPTIN3 SEPTIN7 pseudo              |                           |
| chr7-4736: 6.896849 | -0.58225 | 0.882455 | -0.6598  | 0.50938  | 0.981636 | chr7  | 47363452 | 47364620 | 0 | NA | intron (Nintron (N  | 100767 NR_145811 | 1.1E+08 NR_145813                                | SNORD151                            | small nucleosRNA          |
| chr7-120: 6.896849  | -0.58225 | 0.882455 | -0.6598  | 0.50938  | 0.981636 | chr7  | 1.21E+08 | 1.21E+08 | 0 | NA | intron (Nintron (N  | -14397 NM_024913 | 79974 Hs. 189652NM_024913:ENSG00000CCPEDI        | C7orf58                             | cadherin protein-coding   |
| chr8-232: 6.896849  | -0.58225 | 0.882455 | -0.6598  | 0.50938  | 0.981636 | chr8  | 23293884 | 23300326 | 0 | NA | TTS (NM_CTS (NM_C   | 8997 NM_001136   | 203069 Hs. 458644NM_001136:ENSG00000R3HCC1       | -R3H domaiprotein-coding            |                           |
| chr9-375: 6.896849  | -0.58225 | 0.882455 | -0.6598  | 0.50938  | 0.981636 | chr9  | 37583661 | 37586712 | 0 | NA | Intergeni LIMEH LI  | 7411 NM_001001   | 401505 Hs. 130774NM_001001:ENSG00000TOMM5        | C9orf105 translocprotein-coding     |                           |
| chr9-980: 6.896849  | -0.58225 | 0.882455 | -0.6598  | 0.50938  | 0.981636 | chr9  | 98007894 | 98009101 | 0 | NA | intron (NCharlie3   | 25156 NM_006401  | 10541 Hs. 730654NM_006401:ENSG00000ANP32B        | APRIL PH acidic m protein-coding    |                           |
| chr1-356: 9.10154   | -0.51225 | 0.776432 | -0.65975 | 0.509417 | 0.981636 | chr1  | 35602074 | 35603435 | 0 | NA | 3' UTR (N3' UTR (N  | 28783 NM_001199  | 5690 Hs. 471441NM_002794:ENSG00000PSMB2          | HC7-1                               | proteasomprotein-coding   |
| chr6-354: 9.10154   | -0.51225 | 0.776432 | -0.65975 | 0.509417 | 0.981636 | chr6  | 35424115 | 35425060 | 0 | NA | exon (NM exon (NM   | -27744 NM_021922 | 2178 Hs. 30200CNM_021922:ENSG00000FANCE          | FACE FAE FA complprotein-coding     |                           |
| chr8-2641: 11.67147 | 0.470783 | 0.713706 | 0.659631 | 0.509491 | 0.981636 | chr8  | 26413190 | 26413887 | 0 | NA | TTS (NM_CTS (NM_C   | 23125 NM_00133C  | 665 Hs. 131222NM_004331:ENSG00000BNIP3L          | BNIP3a NBCL2 inte protein-coding    |                           |
| chr4-800: 11.35708  | -0.46111 | 0.699339 | -0.65936 | 0.509667 | 0.981636 | chr4  | 80007583 | 80008230 | 0 | NA | intron (NMLT1D LTF  | 65323 NM_00128E  | 118429 Hs. 162966NM_058172:ENSG00000ANTXR2       | CMG-2 CMC ANTXR cel protein-coding  |                           |
| chr13-33: 6.70116   | 0.593097 | 0.899717 | 0.659203 | 0.509765 | 0.981636 | chr13 | 33232867 | 33233657 | 0 | NA | intron (NLTR28 LTF  | -27212 NM_00124E | 90627 Hs. 156551NM_052851:ENSG00000STARD13       | ARHGAP37 Star rel protein-coding    |                           |
| chr2-196: 6.70116   | 0.593097 | 0.899717 | 0.659203 | 0.509765 | 0.981636 | chr2  | 1.97E+08 | 1.97E+08 | 0 | NA | intron (NLIPA7 LIN  | -56796 NM_01236E | 410207 Hs. 245666NM_21360E:ENSG00000C2orf66      | L1DS6411 chromosomprotein-coding    |                           |
| chr1-323: 6.863568  | -0.58787 | 0.891893 | -0.65913 | 0.509814 | 0.981636 | chr1  | 32329668 | 32330005 | 0 | NA | intron (NL2c LINE   | 6397 NM_02300E   | 65108 Hs. 75061 NM_02300E:ENSG00000MARCKSL1      | F52 MACM MARCKS liprotein-coding    |                           |
| chr11-764: 6.863568 | -0.58787 | 0.891893 | -0.65913 | 0.509814 | 0.981636 | chr11 | 76452510 | 76453300 | 0 | NA | intron (NL3 LINE C  | 7930 NM_02019E   | 56946 Hs. 352588NM_02019E:ENSG00000CEMSY         | C11orf30 EMSY trarp protein-coding  |                           |
| chr12-58: 6.863568  | -0.58787 | 0.891893 | -0.65913 | 0.509814 | 0.981636 | chr12 | 58881930 | 58882696 | 0 | NA | intron (NMTRe SINE  | 37233 NM_001136  | 112227 Hs. 253732NM_153377:ENSG00000LRIG3        | LIG3                                | leucine iprotein-coding   |
| chr17-59: 6.334656  | 0.547786 | 0.83112  | 0.659094 | 0.509835 | 0.981636 | chr17 | 59056166 | 59056432 | 0 | NA | intron (NFLAM_A SI  | 50581 NR_148347  | 4591 Hs. 579075NM_015294:ENSG00000TRIM37         | MUL POBI tripartit protein-coding   |                           |
| chr13-143: 6.15503  | -0.55665 | 0.844939 | -0.6588  | 0.510022 | 0.981636 | chr13 | 1.43E+08 | 1.43E+08 | 0 | NA | intron (NLMIB3 LIN  | 25997 NM_00132C  | 23350 Hs. 596572NM_00108C:ENSG00000U2SURP        | SR140 fsA U2 snRNP protein-coding   |                           |
| chr10-42: 6.716876  | 0.588316 | 0.893596 | 0.65837  | 0.510301 | 0.981636 | chr10 | 42819884 | 42821254 | 0 | NA | exon (NM exon (NM   | 37771 NM_01475E  | 9790 Hs. 10848 NM_01475E:ENSG00000BMS1           | ACCBMS1 BMS1 rib protein-coding     |                           |
| chr15-65: 6.716876  | 0.588316 | 0.893596 | 0.65837  | 0.510301 | 0.981636 | chr15 | 65700560 | 65704088 | 0 | NA | exon (NM exon (NM   | -5388 NR_14575C  | 1.1E+08 NR_14575C                                | ENSG00000SNORD13E                   | -small nucleosRNA         |
| chr16-29: 6.716876  | 0.588316 | 0.893596 | 0.65837  | 0.510301 | 0.981636 | chr16 | 2920693  | 2923967  | 0 | NA | intron (Nintron (N  | 10351 NM_00130E  | 84756 Hs. 655321NM_020912:ENSG00000FLYWCH1       | -FLYWCH-typ protein-coding          |                           |
| chr17-79: 6.716876  | 0.588316 | 0.893596 | 0.65837  | 0.510301 | 0.981636 | chr17 | 7908366  | 7911927  | 0 | NA | intron (N(TCTT) n S | 677763 NR_00300C | 677763 NR_00300C                                 | SCARN21                             | ACA68 SCA small Ca ncRNA  |
| chr19-18: 6.716876  | 0.588316 | 0.893596 | 0.65837  | 0.510301 | 0.981636 | chr19 | 18361450 | 18362455 | 0 | NA | intron (NLIME3G LI  | 21354 NM_00132E  | 54858 Hs. 131776NM_017712:ENSG00000PGPEP1        | PAP-1 PG pyrog lut protein-coding   |                           |
| chr19-32: 6.716876  | 0.588316 | 0.893596 | 0.65837  | 0.510301 | 0.981636 | chr19 | 32893559 | 32894282 | 0 | NA | intron (NLM2 LINE   | -24153 NM_00124E | 11136 Hs. 743345NM_01427C:ENSG00000SLC7A9        | BAT1 CSN solute c protein-coding    |                           |
| chr2-117: 6.716876  | 0.588316 | 0.893596 | 0.65837  | 0.510301 | 0.981636 | chr2  | 11794718 | 11797683 | 0 | NA | intron (Nintron (N  | 28756 NR_036071  | 1E+08 NR_036071                                  | ENSG00000MIR548S                    | ncRNA                     |
| chr2-470: 6.716876  | 0.588316 | 0.893596 | 0.65837  | 0.510301 | 0.981636 | chr2  | 47012468 | 47013082 | 0 | NA | intron (Nintron (N  | -70920 NM_001171 | 90411 Hs. 662152NM_13927E:ENSG00000CMCFD2        | F5F8D F5F multiple protein-coding   |                           |
| chr21-46: 6.716876  | 0.588316 | 0.893596 | 0.65837  | 0.510301 | 0.981636 | chr21 | 46204584 | 46207145 | 0 | NA | exon (NM exon (NM   | -11705 NR_14578C | 1.1E+08 NR_145780                                | SNORD159                            | -small nucleosRNA         |
| chr21-46: 6.716876  | 0.588316 | 0.893596 | 0.65837  | 0.510301 | 0.981636 | chr21 | 46204584 | 46207145 | 0 | NA | intron (Nintron (N  | 44720 NM_00627E  | 6285 Hs. 422181NM_00627E:ENSG00000S100B          | NEF S100 S100 calc protein-coding   |                           |
| chr3-17: 6.716876   | 0.588316 | 0.893596 | 0.65837  | 0.510301 | 0.981636 | chr3  | 1.72E+08 | 1.72E+08 | 0 | NA | intron (Nintron (N  | 148672 NM_00266E | 5337 Hs. 382865NM_00266E:ENSG00000PLD1           | CVDD                                | phospholip protein-coding |
| chr3-17: 6.716876   | 0.588316 | 0.893596 | 0.65837  | 0.510301 | 0.981636 | chr3  | 1.72E+08 | 1.72E+08 | 0 | NA | intron (NLMIB7 LIN  | 86425 NM_00266E  | 5337 Hs. 382865NM_00266E:ENSG00000PLD1           | CVDD                                | phospholip protein-coding |
| chr3-19: 6.716876   | 0.588316 | 0.893596 | 0.65837  | 0.510301 | 0.981636 | chr3  | 1.98E+08 | 1.98E+08 | 0 | NA | intron (NMTRe SINE  | -1659 NR_030627  | 1E+08 NR_030627                                  | ENSG00000MIR922                     | MIRN922 microRNA ncRNA    |
| chr4-135: 6.716876  | 0.588316 | 0.893596 | 0.65837  | 0.510301 | 0.981636 | chr4  | 1356778  | 1358961  | 0 | NA | intron (Nintron (N  | 10313 NM_001317  | 57654 Hs. 380475NM_020894:ENSG00000UVSSA         | KIAA1530 UV stimul protein-coding   |                           |
| chr6-30: 6.716876   | 0.588316 | 0.893596 | 0.65837  | 0.510301 | 0.981636 | chr6  | 30640618 | 30641757 | 0 | NA | intron (NMTRe 19E   | -5946 NM_001109  | 221545 Hs. 591787NM_14502E:ENSG00000C6orf136     | -chromosom protein-coding           |                           |
| chr7-129: 6.716876  | 0.588316 | 0.893596 | 0.65837  | 0.510301 | 0.981636 | chr7  | 1.3E+08  | 1.3E+08  | 0 | NA | intron (NMER2 DNA   | 72772 NM_003344  | 7328 Hs. 643545NM_003344:ENSG00000UBEZH          | E2-20K G ubiquit it protein-coding  |                           |
| chr9-81: 6.716876   | 0.588316 | 0.893596 | 0.65837  | 0.510301 | 0.981636 | chr9  | 81650749 | 81651822 | 0 | NA | intron (Nintron (N  | 38250 NM_00130E  | 7088 Hs. 197322NM_005077:ENSG00000TLE1           | ESG ESG1 TLE famil protein-coding   |                           |
| chr1-180: 9.425827  | 0.50236  | 0.763193 | 0.658234 | 0.510388 | 0.981636 | chr1  | 1.81E+08 | 1.81E+08 | 0 | NA | intron (NMER33 DN   | -13366 NR_145481 | 1.03E+08 Hs. 665315NR_145481:ENSG00000KIAA1614-  | KIAA1614 ncRNA                      |                           |
| chr10-85: 9.425827  | 0.50236  | 0.763193 | 0.658234 | 0.510388 | 0.981636 | chr10 | 853484   | 855801   | 0 | NA | intron (NTigger1 E  | 77063 NR_001351  | 23185 Hs. 159066NM_01515E:ENSG00000LARP4B        | KIAA0217 La ribon protein-coding    |                           |
| chr10-12: 9.425827  | 0.50236  | 0.763193 | 0.658234 | 0.510388 | 0.981636 | chr10 | 1.26E+08 | 1.26E+08 | 0 | NA | intron (Nintron (N  | -2418 NR_12063E  | 1.02E+08 Hs. 63426E NR_12063E:ENSG00000EDRF1-AS1 | EDRF1 ant ncRNA                     |                           |
| chr12-4: 9.425827   | 0.50236  | 0.763193 | 0.658234 | 0.510388 | 0.981636 | chr12 | 49524896 | 49526185 | 0 | NA | intron (Nintron (N  | -13490 NM_001314 | 23416 Hs. 64064 NM_012284:ENSG00000KCNI3         | BEC1 ELK2 potassi um protein-coding |                           |
| chr12-7: 9.425827   | 0.50236  | 0.763193 | 0.658234 | 0.510388 | 0.981636 | chr12 | 1.23E+08 | 1.23E+08 | 0 | NA | intron (Nintron (N  | 43518 NR_10703E  | 1.02E+08 NR_10703E:ENSG00000MIR8072              | hsa-mir-8 microRNA ncRNA            |                           |
| chr16-12: 9.425827  | 0.50236  | 0.763193 | 0.658234 | 0.510388 | 0.981636 | chr16 | 74330669 | 74337015 | 0 | NA | intron (Nintron (N  | 34413 NR_02695E  | 283922 Hs. 558722NR_02695E:ENSG00000LOC283922    | pyruvate pseudo                     |                           |
| chr19-37: 9.425827  | 0.50236  | 0.763193 | 0.658234 | 0.510388 | 0.981636 | chr19 | 37696655 | 37700508 | 0 | NA | exon (NM exon (NM   | -6266 NM_15260E  | 163115 Hs. 722657NM_15260E:ENSG00000ZNF781       | -zinc fing protein-coding           |                           |
| chr2-230: 9.425827  | 0.50236  | 0.763193 | 0.658234 | 0.510388 | 0.981636 | chr2  | 2.3E+08  | 2.3E+08  | 0 | NA | intron (Nintron (N  | 11439 NM_00450E  | 3431 Hs. 14515CNM_00450E:ENSG00000CSP110         | IFI411 IFI5P110 nuc protein-coding  |                           |
| chr3-48: 9.425827   | 0.50236  | 0.763193 | 0.658234 | 0.510388 | 0.981636 | chr3  | 48585953 | 48593011 | 0 | NA | intron (Nintron (N  | 5678 NM_000094   | 1294 Hs. 47621E NM_000094:ENSG00000C6orf71       | EBB1 EBDC collagen protein-coding   |                           |
| chr5-31: 9.425827   | 0.50236  | 0.763193 | 0.658234 | 0.510388 | 0.981636 | chr5  | 31314527 | 31319257 | 0 | NA | intron (Nintron (N  | 123206 NM_00493E | 1004 Hs. 124776NM_00493E:ENSG00000CDH6           | CAD6 KCAL cadherin protein-coding   |                           |
| chr5-95: 9.425827   | 0.50236  | 0.763193 | 0.658234 | 0.510388 | 0.981636 | chr5  | 95917628 | 95919780 | 0 | NA | intron (Nintron (N  | 43147 NM_012081  | 22936 Hs. 192221NM_012081:ENSG00000CELL2         | MRCRAT1 elongat ic protein-coding   |                           |
| chr6-30: 9.425827   | 0.50236  | 0.763193 | 0.658234 | 0.510388 | 0.981636 | chr6  | 30624873 | 30625324 | 0 | NA | intron (Nintron (N  | -1776 NR_03382E  | 79969 Hs. 654798NM_02490E:ENSG00000ATAT1         | C6orf134 alpha tub protein-coding   |                           |
| chr8-67: 9.425827   | 0.50236  | 0.763193 | 0.658234 | 0.510388 | 0.981636 | chr8  | 67298238 | 67300006 | 0 | NA | intron (Nintron (N  | 44659 NM_006421  | 10565 Hs. 656902NM_006421:ENSG00000ARFGEF1       | ARFGEF1 EADP ribos protein-coding   |                           |
| chr9-13: 9.425827   | 0.50236  | 0.763193 | 0.658234 | 0.510388 | 0.981636 | chr9  | 1.31E+08 | 1.31E+08 | 0 | NA | exon (NM exon (NM   | 21997 NM_00131E  | 8021 Hs. 65453CNM_00508E:ENSG00000CNP214         | CAIN CAN nucleop rotein-coding      |                           |
| chr16-8: 6.716876   | 0.588316 | 0.893596 | 0.65821  | 0.510401 | 0.981636 | chr16 | 57788496 | 57788945 | 0 | NA | intron (Nintron (N  | -6351 NM_00131E  | 3801 Hs. 23131 NM_00555C:ENSG00000KIFC3          | -kinesin f protein-coding           |                           |
| chr20-3: 6.716876   | 0.588316 | 0.893596 | 0.65821  | 0.510401 | 0.981636 | chr20 | 36915094 | 3        |   |    |                     |                  |                                                  |                                     |                           |

|                    |          |          |          |          |          |       |          |          |   |      |                     |                  |                             |                   |                |                               |
|--------------------|----------|----------|----------|----------|----------|-------|----------|----------|---|------|---------------------|------------------|-----------------------------|-------------------|----------------|-------------------------------|
| chr17-295.6.888991 | -0.58045 | 0.885885 | -0.65522 | 0.512327 | 0.981636 | chr17 | 29573172 | 29573781 | + | 0 NA | TTS (NM_C TTS (NM_C | 4775 NM_001346   | 90313 Hs. 51405CNM_13834    | ENS00000TP53I13   | DSCP1          | tumor prcprotein-coding       |
| chr17-356.6.888991 | -0.58045 | 0.885885 | -0.65522 | 0.512327 | 0.981636 | chr17 | 35629851 | 35630051 | + | 0 NA | intron (N intron (N | 42629 NM_00103C  | 163 Hs. 51481ENM_00128      | ENS00000CAP2B1    | ADTB2          | AP1 adaptor rprotein-coding   |
| chr19-431.6.888991 | -0.58045 | 0.885885 | -0.65522 | 0.512327 | 0.981636 | chr19 | 4310620  | 4311046  | + | 0 NA | intron (N intron (N | 6235 NM_02433    | 79187 Hs. 28144 NM_02433    | ENS00000CFSD1     | GLFND          | MIF fibronect protein-coding  |
| chr2-138.6.888991  | -0.58045 | 0.885885 | -0.65522 | 0.512327 | 0.981636 | chr2  | 1.33E+08 | 1.33E+08 | + | 0 NA | intron (N LTR84a LI | -20653 NR_135572 | 1.02E+08 Hs. 680114NR_13557 | ENS00000NCKAP5-AS | NCKAP5         | arncRNA                       |
| chr2-212.6.888991  | -0.58045 | 0.885885 | -0.65522 | 0.512327 | 0.981636 | chr2  | 2.19E+08 | 2.19E+08 | + | 0 NA | intron (N intron (N | 143503 NM_00129C | 55619 Hs. 46578 NM_01468    | ENS00000DOCK10    | DRIP2          | Nbl dedicator protein-coding  |
| chr2-224.6.888991  | -0.58045 | 0.885885 | -0.65522 | 0.512327 | 0.981636 | chr2  | 44752906 | 46153768 | + | 0 NA | intron (N AluSq2 SI | 2542 NM_001362   | 5465 Hs. 10311CNM_00503     | ENS00000PPARA     | NR1C1          | PPPeroxin protein-coding      |
| chr3-4947.6.888991 | -0.58045 | 0.885885 | -0.65522 | 0.512327 | 0.981636 | chr3  | 49477306 | 49477991 | + | 0 NA | intron (N intron (N | 7516 NM_001177   | 1605 Hs. 76111 NM_00439     | ENS00000DAG1      | 156DAG         | AAcystrogly protein-coding    |
| chr5-1764.6.888991 | -0.58045 | 0.885885 | -0.65522 | 0.512327 | 0.981636 | chr5  | 1.76E+08 | 1.76E+08 | + | 0 NA | intron (N intron (N | 4790 NM_01461    | 23197 Hs. 484242NM_01461    | ENS00000CFAP2     | ETEA           | UBX1 Fas assoc protein-coding |
| chr6-149.6.888991  | -0.58045 | 0.885885 | -0.65522 | 0.512327 | 0.981636 | chr6  | 1.49E+08 | 1.49E+08 | + | 0 NA | intron (N intron (N | -14331 NM_001002 | 387802 Hs. 657168NM_00100   | ENS00000SUC0      | IDD55          | SMI small ubi protein-coding  |
| chr7-5312.6.888991 | -0.58045 | 0.885885 | -0.65522 | 0.512327 | 0.981636 | chr7  | 5312369  | 5312781  | + | 0 NA | exon (NM_exon (NM   | 29632 NM_00104C  | 222962 Hs. 4302 NM_15324    | ENS00000SLC29A4   | ENT4           | PM1 solute cprotein-coding    |
| chr7-8734.6.888991 | -0.58045 | 0.885885 | -0.65522 | 0.512327 | 0.981636 | chr7  | 87340568 | 87341315 | + | 0 NA | intron (N intron (N | 4551 NR_015381   | 11257 Hs. 27432ENM_00723    | ENS00000TP53TG1   | LINC0009       | TP53 targetncRNA              |
| chr7-1277.6.888991 | -0.58045 | 0.885885 | -0.65522 | 0.512327 | 0.981636 | chr7  | 1.28E+08 | 1.28E+08 | + | 0 NA | intron (N HAL1 LINE | 59537 NM_00149C  | 27044 Hs. 12252ENM_01439    | ENS00000SND1      | TDRD11         | Tustaphyloc protein-coding    |
| chr8-1302.6.888991 | -0.58045 | 0.885885 | -0.65522 | 0.512327 | 0.981636 | chr8  | 1.3E+08  | 1.3E+08  | + | 0 NA | intron (N MR1B SINE | 61535 NR_00276E  | 29065 Hs. 63931ENR_00276    | ENS00000ASAP1-IT1 | ASAP1-IT1      | ASAP1 intrncRNA               |
| chr9-1134.6.888991 | -0.58045 | 0.885885 | -0.65522 | 0.512327 | 0.981636 | chr9  | 1.13E+08 | 1.13E+08 | + | 0 NA | non-codirnon-codir  | 2609 NM_01744    | 54107 Hs. 10811ENM_01744    | ENS00000POLE3     | CHARAC17       | DNA polyn protein-coding      |
| chr9-125.6.888991  | -0.58045 | 0.885885 | -0.65522 | 0.512327 | 0.981636 | chr9  | 1.25E+08 | 1.25E+08 | + | 0 NA | intron (N THE1B LTF | 60397 NM_17369C  | 286205 Hs. 59504 NM_17369   | ENS00000SCAI      | C9orf126       | suppress protein-coding       |
| chr11-118.6.888991 | -0.52669 | 0.803931 | -0.65514 | 0.512379 | 0.981636 | chr11 | 1.19E+08 | 1.19E+08 | + | 0 NA | exon (NM_exon (NM   | 6950 NM_001144   | 23187 Hs. 54046ENM_01515    | ENS00000PHLDB1    | LL5a           | pleckstri protein-coding      |
| chr2-862.8.888991  | -0.52669 | 0.803931 | -0.65514 | 0.512379 | 0.981636 | chr2  | 86206122 | 86206342 | + | 0 NA | exon (NM_exon (NM   | 6775 NM_016622   | 51318 Hs. 43343ENM_01662    | ENS00000MRPL35    | L35mt          | MRF1 tochohc protein-coding   |
| chr13-114.11.34136 | -0.45883 | 0.700683 | -0.65483 | 0.512579 | 0.981636 | chr13 | 1.14E+08 | 1.14E+08 | + | 0 NA | intron (N CpG       | 18881 NM_00736E  | 22821 Hs. 59307ENM_00736    | ENS00000CRASA3    | GAP1IP4        | BFAS p21 rprotein-coding      |
| chr10-69.9.142679  | -0.50951 | 0.778221 | -0.65471 | 0.512651 | 0.981636 | chr10 | 69050598 | 69006254 | + | 0 NA | intron (N AluSg7 SI | 16873 NM_015634  | 26128 Hs. 27958CNM_01563    | ENS00000KIF1BP    | KBP            | KIAA1K1F1 binc protein-coding |
| chr12-53.9.142679  | -0.50951 | 0.778221 | -0.65471 | 0.512651 | 0.981636 | chr12 | 53053846 | 53054361 | + | 0 NA | intron (N intron (N | 335 NR_033854    | 283335 Hs. 65706CNR_03385   | ENS00000LOC28333  | uncharactncRNA |                               |
| chr2-2327.9.384688 | 0.501378 | 0.765858 | 0.654663 | 0.512685 | 0.981636 | chr2  | 2.33E+08 | 2.33E+08 | + | 0 NA | exon (NM_exon (NM   | -14789 NM_001172 | 3769 Hs. 46733ENM_00224     | ENS00000KCNJ13    | KIR1.4         | KIpotassium protein-coding    |
| chr1-7021.8.557804 | -0.54179 | 0.828013 | -0.65433 | 0.51291  | 0.981636 | chr1  | 70215671 | 70216097 | + | 0 NA | intron (N AluSp SIN | -5496 NM_00135C  | 9295 Hs. 47969ENM_00476     | ENS00000SRSP11    | NET2           | SFRS serine ar protein-coding |
| chr1-2042.6.194864 | 0.618978 | 0.946067 | 0.654265 | 0.512941 | 0.981636 | chr1  | 2.04E+08 | 2.04E+08 | + | 0 NA | intron (N intron (N | -52905 NM_198447 | 127845 Hs. 532401NM_19844   | ENS00000GOLTI1A   | CG1-141        | Cglogi tr protein-coding      |
| chr12-118.6.194864 | 0.618978 | 0.946067 | 0.654265 | 0.512941 | 0.981636 | chr12 | 1.18E+08 | 1.18E+08 | + | 0 NA | intron (N intron (N | 13312 NM_022491  | 64426 Hs. 41663CNM_02249    | ENS00000SUD53     | SAP45          | SDS SDS3 homc protein-coding  |
| chr20-332.6.194864 | 0.618978 | 0.946067 | 0.654265 | 0.512941 | 0.981636 | chr20 | 33384721 | 33386060 | + | 0 NA | intron (N MR1B SINE | 16129 NM_01640E  | 51654 Hs. 43595ENM_01608    | ENS00000CDK5RAP1  | C20orf34       | CDK5 regt protein-coding      |
| chr5-173.6.194864  | 0.618978 | 0.946067 | 0.654265 | 0.512941 | 0.981636 | chr5  | 1.72E+08 | 1.72E+08 | + | 0 NA | intron (N intron (N | -42443 NM_03364E | 23291 Hs. 48413ENM_01230    | ENS00000FBXW11    | BTRC2          | BTFF-box an protein-coding    |
| chr1-153.9.955697  | 0.486308 | 0.743712 | 0.653894 | 0.51318  | 0.981636 | chr1  | 1.54E+08 | 1.54E+08 | + | 0 NA | TTS (NM_C TTS (NM_C | 2551 NM_006694   | 10899 Hs. 6396 NM_00669     | ENS00000JTB       | HJTB           | HSPC jumping tprotein-coding  |
| chr1-248.9.955697  | 0.486308 | 0.743712 | 0.653894 | 0.51318  | 0.981636 | chr1  | 2.47E+08 | 2.47E+08 | + | 0 NA | intron (N AluSq4 SI | 69002 NR_015422  | 149134 Hs. 720494NM_207326  | LINC01341         | long intncRNA  |                               |
| chr14-226.9.955697 | 0.486308 | 0.743712 | 0.653894 | 0.51318  | 0.981636 | chr14 | 22840128 | 22847207 | + | 0 NA | intron (N intron (N | 7082 NM_00499E   | 4323 Hs. 2399 NM_00499      | ENS00000MMP14     | MMP-14         | MM matrix m protein-coding    |
| chr2-206.9.955697  | 0.486308 | 0.743712 | 0.653894 | 0.51318  | 0.981636 | chr2  | 2.06E+08 | 2.06E+08 | + | 0 NA | exon (NM_exon (NM   | 29778 NM_01775E  | 54891 Hs. 44503ENM_01775    | ENS00000IN080D    | IN080          | con protein-coding            |
| chr7-2994.9.955697 | 0.486308 | 0.743712 | 0.653894 | 0.51318  | 0.981636 | chr7  | 29942460 | 29944316 | + | 0 NA | intron (N intron (N | 46413 NM_01476E  | 9805 Hs. 52074CNM_01476     | ENS00000SCRNI     | SES1           | secernin protein-coding       |
| chr9-121.9.955697  | 0.486308 | 0.743712 | 0.653894 | 0.51318  | 0.981636 | chr9  | 2.11E+08 | 2.11E+08 | + | 0 NA | intron (N MR1A Am   | 4339 NM_0010177  | 2934 Hs. 52237ENM_00017     | ENS00000GSN       | AGEL           | AGEL gelsoin protein-coding   |
| chr11-77.9.955697  | 0.486308 | 0.743712 | 0.653894 | 0.51318  | 0.981636 | chr11 | 77853445 | 77857378 | + | 0 NA | intron (N AluY SINE | 14273 NM_00136E  | 28971 Hs. 74504CNM_02468    | ENS00000CAAMD     | C11orf67       | adipogene protein-coding      |
| chr6-147.9.955697  | 0.486308 | 0.743712 | 0.653894 | 0.51318  | 0.981636 | chr6  | 1.47E+08 | 1.47E+08 | + | 0 NA | intron (N LM2 LINE  | -92755 NR_03411E | 729178 Hs. 55760ENR_03411   | ENS00000STXBP5-AS | STXBP5         | arncRNA                       |
| chr8-263.9.955697  | 0.486308 | 0.743712 | 0.653894 | 0.51318  | 0.981636 | chr8  | 26308783 | 26309427 | + | 0 NA | intron (N AluJb SIN | 15890 NM_001177  | 5520 Hs. 14633ENM_00271     | ENS00000PPP2R2A   | B55A           | B55a protein-coding           |
| chr15-80.6.683594  | -0.71547 | 1.094583 | -0.65364 | 0.513342 | 0.981636 | chr15 | 80597717 | 80598083 | + | 0 NA | TTS (NM_C TTS (NM_C | 16797 NR_049837  | 1.01E+08 NR_04983           | ENS00000MIR5572   | microRNA       | ncRNA                         |
| chr9-136.6.683594  | 0.629139 | 0.962684 | 0.653252 | 0.513418 | 0.981636 | chr9  | 1.37E+08 | 1.37E+08 | + | 0 NA | intron (N intron (N | 28042 NM_01899E  | 54461 Hs. 522507ENM_01899   | ENS00000FBXW5     | Fbw5           | F-box an protein-coding       |
| chr7-106.8.683594  | -0.52517 | 0.803746 | -0.6534  | 0.513499 | 0.981636 | chr7  | 1.06E+08 | 1.06E+08 | + | 0 NA | Intergeni LINE      | 38064 NM_00574E  | 10135 Hs. 48961ENM_00574    | ENS00000NAMPT     | 11100350       | nicotinacn protein-coding     |
| chr12-50.6.683594  | 0.584774 | 0.895117 | 0.653293 | 0.513567 | 0.981636 | chr12 | 50674919 | 50676209 | + | 0 NA | intron (N L2c LINE  | -88537 NM_005171 | 466 Hs. 64856ENM_00517      | ENS00000ATF1      | EWS-ATF1       | activatir protein-coding      |
| chr12-55.6.683594  | 0.584774 | 0.895117 | 0.653293 | 0.513567 | 0.981636 | chr12 | 55901977 | 55903369 | + | 0 NA | intron (N AluXs1 SI | 24452 NM_001143  | 84305 Hs. 50568ENM_03234    | ENS00000PYM1      | PYM            | WIBG PYM homol protein-coding |
| chr14-64.6.683594  | 0.584774 | 0.895117 | 0.653293 | 0.513567 | 0.981636 | chr14 | 64498041 | 64498487 | + | 0 NA | promoter-promoter   | -272 NM_001354   | 7597 Hs. 654571NM_00697     | ENS00000ZBTB25    | C14orf51       | zinc fing protein-coding      |
| chr14-10.6.683594  | 0.584774 | 0.895117 | 0.653293 | 0.513567 | 0.981636 | chr14 | 1.03E+08 | 1.03E+08 | + | 0 NA | intron (N HAL1 LINE | 60093 NM_00603E  | 9578 Hs. 654634NM_00603     | ENS00000CDC42BPB  | MCRKB          | CDC42 bir protein-coding      |
| chr14-10.6.683594  | 0.584774 | 0.895117 | 0.653293 | 0.513567 | 0.981636 | chr14 | 1.03E+08 | 1.03E+08 | + | 0 NA | intron (N intron (N | 55079 NM_00603E  | 9578 Hs. 654634NM_00603     | ENS00000CDC42BPB  | MCRKB          | CDC42 bir protein-coding      |
| chr15-42.6.683594  | 0.584774 | 0.895117 | 0.653293 | 0.513567 | 0.981636 | chr15 | 42720011 | 42720614 | + | 0 NA | 3' UTR (N3' UTR (N  | 16816 NM_138477  | 146059 Hs. 59923ENM_13847   | ENS00000CDANI     | CDAI           | CDAI cadin l protein-coding   |
| chr17-19.6.683594  | 0.584774 | 0.895117 | 0.653293 | 0.513567 | 0.981636 | chr17 | 19925989 | 19927006 | + | 0 NA | intron (N LIMB7 LIN | 51331 NM_007202  | 11216 Hs. 613424NM_00720    | ENS00000AKAP10    | AKAP-10        | IA-kinase protein-coding      |
| chr17-64.6.683594  | 0.584774 | 0.895117 | 0.653293 | 0.513567 | 0.981636 | chr17 | 64053029 | 64053276 | + | 0 NA | intron (N intron (N | -32518 NM_00109E | 3384 Hs. 43146CNM_00087     | ENS00000ICAM2     | CD102          | intercell protein-coding      |
| chr19-79.6.683594  | 0.584774 | 0.895117 | 0.653293 | 0.513567 | 0.981636 | chr19 | 7939510  | 7941289  | + | 0 NA | intron (N intron (N | 3267 NM_006351   | 10469 Hs. 465784NM_00635    | ENS00000TIMM44    | TIM44          | transloc protein-coding       |
| chr19-44.6.683594  | 0.584774 | 0.895117 | 0.653293 | 0.513567 | 0.981636 | chr19 | 44324654 | 44325368 | + | 0 NA | Intergeni LMCC LIN  | -19986 NM_004234 | 9310 Hs. 613424NM_00423     | ENS00000ZNF235    | ANF270         | HZ zinc fing protein-coding   |
| chr2-17.6.683594   | 0.584774 | 0.895117 | 0.653293 | 0.513567 | 0.981636 | chr2  | 1.77E+08 | 1.77E+08 | + | 0 NA | intron (N intron (N | 1675 NM_00114E   | 4780 Hs. 74400ENM_00616     | ENS00000NFE2L2    | HEBP1          | IME nuclear f protein-coding  |
| chr2-186.6.683594  | 0.584774 | 0.895117 | 0.653293 | 0.513567 | 0.981636 | chr2  | 1.87E+08 | 1.87E+08 | + | 0 NA | intron (N L2b LINE  | 23387 NM_001144  | 3685 Hs. 43687ENM_00221     | ENS00000ITGAV     | CD51           | MSK integrin protein-coding   |
| chr20-4            |          |          |          |          |          |       |          |          |   |      |                     |                  |                             |                   |                |                               |



|                    |          |          |          |          |          |       |          |          |   |   |    |           |           |           |          |                    |           |           |                |                      |                |                |                |
|--------------------|----------|----------|----------|----------|----------|-------|----------|----------|---|---|----|-----------|-----------|-----------|----------|--------------------|-----------|-----------|----------------|----------------------|----------------|----------------|----------------|
| chr3-3147.6.922273 | -0.57493 | 0.882702 | -0.65133 | 0.514835 | 0.981636 | chr3  | 3147894  | 2150916  | + | 0 | NA | TTS (NM_C | 22465     | NR_15994C | 51095    | Hs.73272ENM_01600  | ENSG00000 | TRNT1     | CCA1 CGI-      | tRNA                 | nucl           | protein-coding |                |
| chr3-1506.6.922273 | -0.57493 | 0.882702 | -0.65133 | 0.514835 | 0.981636 | chr3  | 1.51E+08 | 1.51E+08 | + | 0 | NA | intron (N | -20158    | NR_016277 | 51714    | Hs.369052NM_016277 | ENSG00000 | SELENOT   | SELT           | selenoprotein-coding |                |                |                |
| chr3-196C.6.922273 | -0.57493 | 0.882702 | -0.65133 | 0.514835 | 0.981636 | chr3  | 1.96E+08 | 1.96E+08 | + | 0 | NA | intron (N | 13888     | NR_001128 | 7037     | Hs.52961ENM_003234 | ENSG00000 | TFRC      | CD71 IMD4      | transferrin          | protein-coding |                |                |
| chr4-1086.6.922273 | -0.57493 | 0.882702 | -0.65133 | 0.514835 | 0.981636 | chr4  | 1.09E+08 | 1.09E+08 | + | 0 | NA | Intergeni | 13609     | NR_001319 | 6164     | Hs.438227NM_000995 | ENSG00000 | RPL34     | L34            | ribosomal            | protein-coding |                |                |
| chr5-3701.6.922273 | -0.57493 | 0.882702 | -0.65133 | 0.514835 | 0.981636 | chr5  | 37015465 | 37017135 | + | 0 | NA | intron (N | 139531    | NR_015384 | 25836    | Hs.481927NM_015384 | ENSG00000 | NIPBL     | CDLS CDLS      | NIPBL                | col            | protein-coding |                |
| chr5-5686.6.922273 | -0.57493 | 0.882702 | -0.65133 | 0.514835 | 0.981636 | chr5  | 56885211 | 56886362 | + | 0 | NA | intron (N | -23474    | NR_136556 | 133383   | Hs.85950           | NR_153706 | ENSG00000 | SETD9          | C5orf35              | SET            | domain         | protein-coding |
| chr5-7156.6.922273 | -0.57493 | 0.882702 | -0.65133 | 0.514835 | 0.981636 | chr5  | 71558613 | 71560489 | + | 0 | NA | intron (N | -27789    | NR_022132 | 64087    | Hs.604789NM_022132 | ENSG00000 | MCCC2     | MCCB           | methylcr             | protein-coding |                |                |
| chr6-2645.6.922273 | -0.57493 | 0.882702 | -0.65133 | 0.514835 | 0.981636 | chr6  | 26431515 | 26433050 | + | 0 | NA | Intergeni | 26431515  | NR_001242 | 10384    | Hs.167741NM_006994 | ENSG00000 | BTN3A3    | BTF3 BTN3      | butyryl              | protein-coding |                |                |
| chr6-7564.6.922273 | -0.57493 | 0.882702 | -0.65133 | 0.514835 | 0.981636 | chr6  | 75640722 | 75642278 | + | 0 | NA | intron (N | 39620     | NR_015571 | 26054    | Hs.485784NM_015571 | ENSG00000 | SENP6     | SSP1 SUSF      | SUMO                 | spec           | protein-coding |                |
| chr7-5516.6.922273 | -0.57493 | 0.882702 | -0.65133 | 0.514835 | 0.981636 | chr7  | 55194129 | 55195508 | + | 0 | NA | intron (N | -5869     | NR_047551 | 1.01E+08 | Hs.720489NR_047551 | ENSG00000 | EGFR-AS1  | EGFR           | antincRNA            |                |                |                |
| chr7-7424.6.922273 | -0.57493 | 0.882702 | -0.65133 | 0.514835 | 0.981636 | chr7  | 74241463 | 74241824 | + | 0 | NA | intron (N | 12756     | NR_181471 | 5982     | Hs.647062NM_002914 | ENSG00000 | RFC2      | RFC40          | replicat             | protein-coding |                |                |
| chr8-4787.6.922273 | -0.57493 | 0.882702 | -0.65133 | 0.514835 | 0.981636 | chr8  | 47873450 | 47874825 | + | 0 | NA | intron (N | 85999     | NR_001081 | 5591     | Hs.491682NM_006904 | ENSG00000 | PRKDC     | DNA-PKC I      | protein              | protein-coding |                |                |
| chr8-6157.6.922273 | -0.57493 | 0.882702 | -0.65133 | 0.514835 | 0.981636 | chr8  | 61578226 | 61582279 | + | 0 | NA | intron (N | 109559    | NR_001164 | 444      | Hs.332422NM_004318 | ENSG00000 | ASPH      | AAH BAH        | Casp                 | protein-coding |                |                |
| chr8-1254.6.922273 | -0.57493 | 0.882702 | -0.65133 | 0.514835 | 0.981636 | chr8  | 1.25E+08 | 1.25E+08 | + | 0 | NA | intron (N | 17287     | NR_003126 | 6713     | Hs.71465           | NR_003126 | ENSG00000 | SQLE           | -                    | squalene       | protein-coding |                |
| chr9-3245.6.922273 | -0.57493 | 0.882702 | -0.65133 | 0.514835 | 0.981636 | chr9  | 32452084 | 32452463 | + | 0 | NA | 3' UTR (N | 67630     | NR_001362 | 48       | Hs.567222NM_002197 | ENSG00000 | AC01      | ACONS HEL      | aconitase            | protein-coding |                |                |
| chr3-103C.9.150537 | -0.51096 | 0.784529 | -0.65133 | 0.514855 | 0.981636 | chr3  | 10306356 | 10308838 | + | 0 | NA | intron (N | 13444     | NR_001136 | 6396     | Hs.166924NM_030675 | ENSG00000 | SEC13     | D3S1231E SEC13 | hnc                  | protein-coding |                |                |
| chr12-644.9.922415 | 0.483765 | 0.742913 | 0.651173 | 0.514935 | 0.981636 | chr12 | 64464289 | 64465752 | + | 0 | NA | intron (N | 12900     | NR_013254 | 29110    | Hs.505874NM_013254 | ENSG00000 | TBK1      | FTDALS4 ITANK  | hnc                  | protein-coding |                |                |
| chr12-122.9.922415 | 0.483765 | 0.742913 | 0.651173 | 0.514935 | 0.981636 | chr12 | 1.23E+08 | 1.23E+08 | + | 0 | NA | intron (N | 37573     | NR_107038 | 0.02E+08 | NR_107038          | ENSG00000 | MR18072   | hsa-mir-5      | microRNA             | ncRNA          |                |                |
| chr6-1304.9.922415 | 0.483765 | 0.742913 | 0.651173 | 0.514935 | 0.981636 | chr6  | 1.3E+08  | 1.3E+08  | + | 0 | NA | exon (NM  | 4591      | NR_052912 | 114801   | Hs.591341NM_052912 | ENSG00000 | TMEM200A  | K1AA1913       | transmem             | protein-coding |                |                |
| chr1-8469.9.492391 | 0.507658 | 0.77962  | 0.651161 | 0.514942 | 0.981636 | chr1  | 84657554 | 84659475 | + | 0 | NA | intron (N | -23494    | NR_027375 | 439927   | Hs.407054NM_001035 | ENSG00000 | LINC01555 | C1orf180       | long                 | intcncRNA      |                |                |
| chr1-3591.9.433685 | 0.500623 | 0.768836 | 0.651144 | 0.514953 | 0.981636 | chr1  | 35913585 | 35914401 | + | 0 | NA | exon (NM  | -17112    | NR_177422 | 192669   | Hs.657659NM_024852 | ENSG00000 | AG03      | E1P2C3         | argonaut             | protein-coding |                |                |
| chr10-718.9.433685 | 0.500623 | 0.768836 | 0.651144 | 0.514953 | 0.981636 | chr10 | 71817893 | 71821965 | + | 0 | NA | intron (N | 8046      | NR_001171 | 64072    | Hs.656032NM_022124 | ENSG00000 | CDH23     | CDHR23 P1      | cadherin             | protein-coding |                |                |
| chr1-1702.6.830286 | -0.59389 | 0.912164 | -0.65108 | 0.514993 | 0.981636 | chr1  | 1.73E+08 | 1.73E+08 | + | 0 | NA | intron (N | 40478     | NR_014285 | 51430    | Hs.204555NM_014285 | ENSG00000 | SUCO      | C1orf9 C1U     | SN                   | domain         | protein-coding |                |
| chr1-1821.6.724734 | 0.585932 | 0.899964 | 0.651061 | 0.515007 | 0.981636 | chr1  | 1.8E+08  | 1.8E+08  | + | 0 | NA | intron (N | 17215     | NR_002822 | 5768     | Hs.719176NM_002822 | ENSG00000 | CSOX1     | Q6 Q5CN6       | quiescin             | protein-coding |                |                |
| chr11-29C.6.724734 | 0.585932 | 0.899964 | 0.651061 | 0.515007 | 0.981636 | chr11 | 2905363  | 2906331  | + | 0 | NA | intron (N | -2272     | NR_001302 | 5003     | Hs.300076NM_007105 | ENSG00000 | SLC22A18A | BWR1B BWS      | solute               | carrier        | protein-coding |                |
| chr14-20C.6.724734 | 0.585932 | 0.899964 | 0.651061 | 0.515007 | 0.981636 | chr14 | 20395594 | 20396514 | + | 0 | NA | intron (N | 17447     | NR_007110 | 7011     | Hs.508833NM_007110 | ENSG00000 | TEP1      | TLP1 TP1       | telomeras            | protein-coding |                |                |
| chr17-37C.6.724734 | 0.585932 | 0.899964 | 0.651061 | 0.515007 | 0.981636 | chr17 | 37563643 | 37566121 | + | 0 | NA | intron (N | 44536     | NR_080555 | 11276    | Hs.594647NM_007247 | ENSG00000 | SYNRG     | API6BP1 S      | ynnerg               | protein-coding |                |                |
| chr18-46C.6.724734 | 0.585932 | 0.899964 | 0.651061 | 0.515007 | 0.981636 | chr18 | 46008140 | 46010869 | + | 0 | NA | intron (N | -42175    | NR_020964 | 57724    | Hs.514842NM_020964 | ENSG00000 | EPG5      | HEEW1 K1       | ectopic              | protein-coding |                |                |
| chr19-176.6.724734 | 0.585932 | 0.899964 | 0.651061 | 0.515007 | 0.981636 | chr19 | 2760684  | 2767705  | + | 0 | NA | intron (N | 19079     | NR_003021 | 6449     | Hs.203911NM_003021 | ENSG00000 | SGTA      | SGT alpha      | SM                   | glut           | protein-coding |                |
| chr19-29C.6.724734 | 0.585932 | 0.899964 | 0.651061 | 0.515007 | 0.981636 | chr19 | 19639435 | 19640204 | + | 0 | NA | intron (N | 3838      | NR_001288 | 51291    | Hs.49427           | NR_016575 | ENSG00000 | GMP1P          | ARHGAP46             | GEM            | inter          | protein-coding |
| chr19-49C.6.724734 | 0.585932 | 0.899964 | 0.651061 | 0.515007 | 0.981636 | chr19 | 49831179 | 49836241 | + | 0 | NA | intron (N | 1692      | NR_106855 | 1.02E+08 | NR_106855          | ENSG00000 | MIR6800   | hsa-mir-5      | microRNA             | ncRNA          |                |                |
| chr2-8756.6.724734 | 0.585932 | 0.899964 | 0.651061 | 0.515007 | 0.981636 | chr2  | 8758422  | 8759114  | + | 0 | NA | intron (N | 76712     | NR_002166 | 3398     | Hs.180915NM_002166 | ENSG00000 | ID2       | G1G8 ID2       | inhibitor            | protein-coding |                |                |
| chr2-182.6.724734  | 0.585932 | 0.899964 | 0.651061 | 0.515007 | 0.981636 | chr2  | 2.19E+08 | 2.19E+08 | + | 0 | NA | intron (N | 4197      | NR_001366 | 27148    | Hs.471404NM_015690 | ENSG00000 | STK36     | FU             | serine/thr           | protein-coding |                |                |
| chr2-240C.6.724734 | 0.585932 | 0.899964 | 0.651061 | 0.515007 | 0.981636 | chr2  | 2.4E+08  | 2.4E+08  | + | 0 | NA | intron (N | 18540     | NR_136157 | 4705     | Hs.277677NM_004544 | ENSG00000 | CNDUFA10  | CI-42KD C      | NADH:ubiq            | protein-coding |                |                |
| chr21-414.6.724734 | 0.585932 | 0.899964 | 0.651061 | 0.515007 | 0.981636 | chr21 | 41440976 | 41441902 | + | 0 | NA | intron (N | 9389      | NR_001282 | 4599     | Hs.517307NM_002462 | ENSG00000 | MX1       | IF1-78K IMX    | dynam                | protein-coding |                |                |
| chr22-37C.6.724734 | 0.585932 | 0.899964 | 0.651061 | 0.515007 | 0.981636 | chr22 | 37644956 | 37648191 | + | 0 | NA | intron (N | 6904      | NR_018957 | 23616    | Hs.601143NM_018957 | ENSG00000 | SH3BP1    | ARHGAP43       | SH3                  | doma           | protein-coding |                |
| chr22-38C.6.724734 | 0.585932 | 0.899964 | 0.651061 | 0.515007 | 0.981636 | chr22 | 38247083 | 38247814 | + | 0 | NA | intron (N | -22728    | NR_132774 | 1.07E+08 | NR_132774          | ENSG00000 | SNORA92   | -              | small                | nuc            | snoRNA         |                |
| chr5-176C.6.724734 | 0.585932 | 0.899964 | 0.651061 | 0.515007 | 0.981636 | chr5  | 1.77E+08 | 1.77E+08 | + | 0 | NA | intron (N | 7724      | NR_014901 | 22838    | Hs.434888NM_014901 | ENSG00000 | RNF44     | -              | ring                 | finger         | protein-coding |                |
| chr7-222C.6.724734 | 0.585932 | 0.899964 | 0.651061 | 0.515007 | 0.981636 | chr7  | 2225107  | 2227085  | + | 0 | NA | intron (N | 6849      | NR_001304 | 8379     | Hs.654832NM_003550 | ENSG00000 | MAD1L1    | MAD1 PIG5      | mitotic              | protein-coding |                |                |
| chr9-120C.6.724734 | 0.585932 | 0.899964 | 0.651061 | 0.515007 | 0.981636 | chr9  | 1.21E+08 | 1.21E+08 | + | 0 | NA | intron (N | -27844    | NR_001272 | 55755    | Hs.269566NM_018245 | ENSG00000 | CDK5RAP2  | C48 Cep21      | CDK5                 | reg            | protein-coding |                |
| chr10-141.13.15153 | 0.427261 | 0.656296 | 0.651018 | 0.515035 | 0.981636 | chr10 | 1.15E+08 | 1.15E+08 | + | 0 | NA | Intergeni | 415775889 | NR_024388 | 441666   | Hs.255725NR_024388 | ENSG00000 | LOC441666 | -              | zinc                 | finger         | pseudo         |                |
| chr5-136.11.37464  | -0.45552 | 0.699782 | -0.65095 | 0.515081 | 0.981636 | chr5  | 1.36E+08 | 1.36E+08 | + | 0 | NA | exon (NM  | 24863     | NR_030583 | 1E+08    | NR_030583          | ENSG00000 | VTRNA2-1  | CBL-3 CBL      | vault                | RNA            | ncRNA          |                |
| chr19-345.13.11039 | 0.426481 | 0.655302 | 0.650816 | 0.515165 | 0.981636 | chr19 | 34955650 | 34960508 | + | 0 | NA | exon (NM  | 6150      | NR_175872 | 126375   | Hs.50405           | NR_175872 | ENSG00000 | ZNF792         | -                    | zinc           | finger         | protein-coding |
| chr19-541.8.862676 | 0.517334 | 0.794926 | 0.650795 | 0.515179 | 0.981636 | chr19 | 54127854 | 54128067 | + | 0 | NA | intron (N | -9802     | NR_014515 | 4849     | Hs.343571NM_014515 | ENSG00000 | CNOT3     | LENG2 NOT      | CCR4-NOT             | protein-coding |                |                |
| chr1-5954.6.486947 | 0.707086 | 1.086702 | 0.650762 | 0.515258 | 0.981636 | chr1  | 59558366 | 59559049 | + | 0 | NA | intron (N | 43077     | NR_001278 | 55277    | Hs.444301NM_018291 | ENSG00000 | PCGY      | -              | FGGY                 | cart           | protein-coding |                |
| chr1-1594          |          |          |          |          |          |       |          |          |   |   |    |           |           |           |          |                    |           |           |                |                      |                |                |                |

|                     |          |          |          |          |          |       |          |          |   |      |                     |                    |                               |                        |                                      |
|---------------------|----------|----------|----------|----------|----------|-------|----------|----------|---|------|---------------------|--------------------|-------------------------------|------------------------|--------------------------------------|
| chr17-49c 9.160245  | -0.50257 | 0.774957 | -0.64851 | 0.516655 | 0.981636 | chr17 | 49036974 | 49037425 | + | 0 NA | intron (Nintron (N  | 39814 NM_00116C    | 10642 Hs. 14493cNM_00654c     | ENSG000001IGF2BP1      | CRD-BP CF insulin I protein-coding   |
| chr5-1341 9.160245  | -0.50257 | 0.774957 | -0.64851 | 0.516655 | 0.981636 | chr5  | 1.34E+08 | 1.34E+08 | + | 0 NA | intron (Nintron (N  | 14240 NM_170675    | 6500 Hs. 17162cNM_00693c      | ENSG00000SKP1          | EMC19 OCF5-phase I protein-coding    |
| chr5-487c 31.09488  | 0.302188 | 0.465999 | 0.648475 | 0.516678 | 0.981636 | chr5  | 48791310 | 48792133 | + | 0 NA | IntergeniALR/Alpha  | 1649567 NM_19844c  | 133418 Hs. 561411NM_19844c    | ENSG00000CEMB          | GP70 embigin protein-coding          |
| chr19-441 13.64812  | 0.41664  | 0.625227 | 0.64844  | 0.5167   | 0.981636 | chr19 | 44100561 | 44108688 | + | 0 NA | TTS (NR_C TTS (NR_C | 8559 NR_033341     | 1E+08 Hs. 58585cNR_033341     | ENSG00000LOC10037c     | uncharacterizedncRNA                 |
| chr17-565 4.709725  | -0.70676 | 1.089953 | -0.64844 | 0.516703 | 0.981636 | chr17 | 56909146 | 56909672 | + | 0 NA | intron (NAluJb SIN  | 4640 NM_005082     | 7706 Hs. 52895cNM_005082      | ENSG00000TRIM25        | EFP RNFI14 tripartite protein-coding |
| chr12-88c 9.111248  | -0.5039  | 0.777487 | -0.64812 | 0.516909 | 0.981636 | chr12 | 88087406 | 88087653 | + | 0 NA | intron (NAluY SINE  | 51993 NM_001005    | 91298 Hs. 59100cNM_001005     | ENSG00000C12orf29      | chromosom protein-coding             |
| chr3-1137 9.111248  | -0.5039  | 0.777487 | -0.64812 | 0.516909 | 0.981636 | chr3  | 1.14E+08 | 1.14E+08 | + | 0 NA | intron (Nintron (N  | 22875 NM_001308    | 80218 Hs. 37237cNM_02514c     | ENSG00000NAA50         | MAK3 NAT1N(alpha)-protein-coding     |
| chr8-1411 9.111248  | -0.5039  | 0.777487 | -0.64812 | 0.516909 | 0.981636 | chr8  | 1.41E+08 | 1.41E+08 | + | 0 NA | IntergeniMLT1C LTF  | 31050 NM_00108C    | 57210 Hs. 37249cNM_00108C     | ENSG00000SLC4544       | solute c protein-coding              |
| chr1-992c 6.881134  | -0.57863 | 0.89303  | -0.64793 | 0.517027 | 0.981636 | chr1  | 9928331  | 9928802  | + | 0 NA | 3' UTR (N3' UTR (N  | -14357 NM_001297   | 64802 Hs. 63376cNM_02278c     | ENSG00000NMNAT1        | LCA9 NMNp nicotinan protein-coding   |
| chr13-23c 6.881134  | -0.57863 | 0.89303  | -0.64793 | 0.517027 | 0.981636 | chr13 | 23522291 | 23523569 | + | 0 NA | intron (Nintron (N  | 22564 NM_001278    | 26278 Hs. 15949cNM_01436c     | ENSG00000SACS          | ARSACS DN saccin m protein-coding    |
| chr16-16c 6.881134  | -0.57863 | 0.89303  | -0.64793 | 0.517027 | 0.981636 | chr16 | 16242744 | 16243458 | + | 0 NA | intron (Nintron (N  | 10511 NM_173614    | 28320 Hs. 460141NM_173614     | ENSG00000NOM02         | NOM0 PM5 NODAL m protein-coding      |
| chr2-1114 6.881134  | -0.57863 | 0.89303  | -0.64793 | 0.517027 | 0.981636 | chr2  | 1.11E+08 | 1.11E+08 | + | 0 NA | intron (N L3 LINE C | 11337 NR_13616c    | 541471 Hs. 56080cNR_01539c    | ENSG00000MIR4435-2     | AGD2 LINCMIR4435-2ncRNA              |
| chr2-1514 6.881134  | -0.57863 | 0.89303  | -0.64793 | 0.517027 | 0.981636 | chr2  | 1.51E+08 | 1.51E+08 | + | 0 NA | 3' UTR (N3' UTR (N  | 65330 NM_001177    | 55183 Hs. 53653cNM_01815c     | ENSG00000RIF1          | replicat protein-coding              |
| chr20-35c 6.881134  | -0.57863 | 0.89303  | -0.64793 | 0.517027 | 0.981636 | chr20 | 35282291 | 35283186 | + | 0 NA | intron (NAluSp SIN  | 1979 NM_001267     | 3692 Hs. 70925cNM_02221c      | ENSG00000EIF6          | CAB EIF3a eukaryot protein-coding    |
| chr2-173c 9.152387  | -0.50118 | 0.773577 | -0.64788 | 0.517065 | 0.981636 | chr2  | 1.73E+08 | 1.73E+08 | + | 0 NA | intron (Nintron (N  | 77449 NR_033882    | 339751 Hs. 57008cNR_033882    | ENSG00000MAP3K20-1     | MLK7-AS1 MAP3K20 ncRNA               |
| chr5-873c 9.152387  | -0.50118 | 0.773577 | -0.64788 | 0.517065 | 0.981636 | chr5  | 87338270 | 87340066 | + | 0 NA | intron (Nintron (N  | -15540 NR_130925   | 644285 Hs. 70925cNR_130929    | LOC64428c              | uncharacterizedncRNA                 |
| chr6-1004 9.152387  | -0.50118 | 0.773577 | -0.64788 | 0.517065 | 0.981636 | chr6  | 1.01E+08 | 1.01E+08 | + | 0 NA | intron (Nintron (N  | 20893 NM_00682c    | 10973 Hs. 486031NM_00682c     | ENSG00000CASC3         | ASC1p200 activat protein-coding      |
| chr9-1114 9.152387  | -0.50118 | 0.773577 | -0.64788 | 0.517065 | 0.981636 | chr9  | 1.11E+08 | 1.11E+08 | + | 0 NA | intron (Nintron (N  | 72310 NM_001364    | 23392 Hs. 36825cNM_00108C     | ENSG00000CEPAS         | ECM29 K1 Ecm29 prc protein-coding    |
| chr20-38c 11.36679  | -0.45436 | 0.701336 | -0.64785 | 0.517082 | 0.981636 | chr20 | 38017325 | 38018812 | + | 0 NA | intron (N LIMEg LIN | 15388 NM_00130c    | 9675 Hs. 655481NM_01465c      | ENSG00000TTI1          | KIAA0406 TEL02 intr protein-coding   |
| chr15-904 8.683073  | -0.52215 | 0.805993 | -0.64783 | 0.517095 | 0.981636 | chr15 | 90466893 | 90467382 | + | 0 NA | intron (Nintron (N  | -62786 NM_02276c   | 64784 Hs. 56757cNM_02276c     | ENSG00000CRTC3         | TORC-3 TCREB regt protein-coding     |
| chr8-377c 6.683073  | -0.52215 | 0.805993 | -0.64783 | 0.517095 | 0.981636 | chr8  | 37754600 | 37755050 | + | 0 NA | 3' UTR (N3' UTR (N  | -6779 NR_003671    | 728024 Hs. 64713cNR_003671    | LOC728024              | chromosom pseudo                     |
| chr17-44c 8.903816  | 0.51821  | 0.799992 | 0.647769 | 0.517134 | 0.981636 | chr17 | 44351532 | 44351863 | + | 0 NA | exon (NM exon (NM   | 6611 NM_002087     | 2896 Hs. 51422cNM_002087      | ENSG00000GRN           | CLN11 GEF granulin protein-coding    |
| chr1-234c 9.466967  | 0.503237 | 0.777831 | 0.646976 | 0.517648 | 0.981636 | chr1  | 23436893 | 23437333 | + | 0 NA | intron (N CpG-648   | -12365 NM_00319c   | 6920 Hs. 446354NM_00319c      | ENSG00000TCEA3         | TFIIS TFI transcript protein-coding  |
| chr13-23c 6.686967  | 0.503237 | 0.777831 | 0.646976 | 0.517648 | 0.981636 | chr13 | 23883301 | 23885900 | + | 0 NA | intron (N MR SINE I | -4267 NM_001014    | 542767 Hs. 642624NM_001014442 | PCOTH                  | C1QTNF9B-Pro-X-Gly protein-coding    |
| chr19-11c 6.228146  | 0.622574 | 0.962459 | 0.646857 | 0.517724 | 0.981636 | chr19 | 11225815 | 11226523 | + | 0 NA | intron (N Charlie8  | -13450 NM_018687   | 55908 Hs. 534467NM_018687     | ENSG00000ANGPTL8       | C19orf80 angiopoic protein-coding    |
| chr1-1616 6.914415  | -0.57309 | 0.886132 | -0.64673 | 0.517808 | 0.981636 | chr1  | 1.62E+08 | 1.62E+08 | + | 0 NA | intron (N LIM5 LINE | 20072 NM_00734c    | 22926 Hs. 49274cNM_00734c     | ENSG00000ATF6          | AChM7 ATF activat protein-coding     |
| chr10-11c 6.914415  | -0.57309 | 0.886132 | -0.64673 | 0.517808 | 0.981636 | chr10 | 1.2E+08  | 1.2E+08  | + | 0 NA | intron (Nintron (N  | 16175 NM_024834    | 79892 Hs. 12424cNM_024834     | ENSG00000CMBP          | C10orf115 minichron protein-coding   |
| chr12-24c 6.914415  | -0.57309 | 0.886132 | -0.64673 | 0.517808 | 0.981636 | chr12 | 24860467 | 24860766 | + | 0 NA | intron (N MER41-int | 41606 NM_00117c    | 586 Hs. 43899cNM_005504       | ENSG00000BCAT1         | BCATC BC1 branched protein-coding    |
| chr12-69c 6.914415  | -0.57309 | 0.886132 | -0.64673 | 0.517808 | 0.981636 | chr12 | 69562337 | 69563097 | + | 0 NA | intron (N AluJo SIN | -22006 NR_03747c   | 201163 Hs. 51618cNR_03747c    | ENSG00000MIR3913-2     | mir-3913-microRNA ncRNA              |
| chr17-17c 6.914415  | -0.57309 | 0.886132 | -0.64673 | 0.517808 | 0.981636 | chr17 | 17245628 | 17246688 | + | 0 NA | TTS (NM_C TTS (NM_C | -8990 NM_14460c    | 201163 Hs. 31652 NM_14460c    | ENSG00000FLNC          | BHD DENN1 follicul protein-coding    |
| chr17-37c 6.914415  | -0.57309 | 0.886132 | -0.64673 | 0.517808 | 0.981636 | chr17 | 37528974 | 37529258 | + | 0 NA | intron (Nintron (N  | 39225 NM_00702c    | 11072 Hs. 91448 NM_00702c     | ENSG00000DUSP14        | MKP-L MKF dual spec protein-coding   |
| chr2-248c 6.914415  | -0.57309 | 0.886132 | -0.64673 | 0.517808 | 0.981636 | chr2  | 24820425 | 24820958 | + | 0 NA | non-codiron-codir   | 27266 NM_00119c    | 79172 Hs. 73156cNM_02432c     | ENSG00000CENP0         | CENP-0 1 centromer protein-coding    |
| chr2-3331c 6.914415 | -0.57309 | 0.886132 | -0.64673 | 0.517808 | 0.981636 | chr2  | 33317821 | 33319328 | + | 0 NA | intron (Nintron (N  | -99942 NR_03962c   | 1.01E+08 NR_03962c            | ENSG00000MIR4430       | microRNA ncRNA                       |
| chr2-5557 6.914415  | -0.57309 | 0.886132 | -0.64673 | 0.517808 | 0.981636 | chr2  | 55578540 | 55579484 | + | 0 NA | intron (N Tiger13c  | 38610 NM_00112c    | 57223 Hs. 51618cNM_02046c     | ENSG00000PPP4R3B       | FLFL2 PP4 protein f protein-coding   |
| chr20-467 6.914415  | -0.57309 | 0.886132 | -0.64673 | 0.517808 | 0.981636 | chr20 | 46728993 | 46730268 | + | 0 NA | intron (N AluYc3 S1 | 19981 NM_030777    | 81031 Hs. 305971NM_030777     | ENSG00000SLC2A10       | ATORS ATS solute c protein-coding    |
| chr22-314 6.914415  | -0.57309 | 0.886132 | -0.64673 | 0.517808 | 0.981636 | chr22 | 31446501 | 31447145 | + | 0 NA | intron (Nintron (N  | 42733 NM_001164    | 56478 Hs. 51755cNM_01984c     | ENSG00000EIF4ENIF14E-T | Clas eukaryot protein-coding         |
| chr3-1054 6.914415  | -0.57309 | 0.886132 | -0.64673 | 0.517808 | 0.981636 | chr3  | 1.05E+08 | 1.05E+08 | + | 0 NA | intron (N THE1C-int | 124460 NM_001627   | 214 Hs. 59129cNM_001627       | ENSG00000CALCAM        | CD166 MEV activatc protein-coding    |
| chr3-187c 6.914415  | -0.57309 | 0.886132 | -0.64673 | 0.517808 | 0.981636 | chr3  | 1.87E+08 | 1.87E+08 | + | 0 NA | intron (N MLT1H-int | -21709 NR_135551   | 1.02E+08 NR_135551            | ENSG00000LOC10192c     | uncharacterizedncRNA                 |
| chr4-564c 6.914415  | -0.57309 | 0.886132 | -0.64673 | 0.517808 | 0.981636 | chr4  | 56498667 | 56502995 | + | 0 NA | intron (Nintron (N  | -4378 NM_20691c    | 132946 Hs. 44444cNM_20691c    | ENSG00000ARL9          | ADP ribosom protein-coding           |
| chr5-5444 6.914415  | -0.57309 | 0.886132 | -0.64673 | 0.517808 | 0.981636 | chr5  | 5444264  | 5444928  | + | 0 NA | intron (Nintron (N  | 21919 NM_01532c    | 23379 Hs. 44929cNM_01532c     | ENSG00000ICE1          | KIAA0947 interactc protein-coding    |
| chr5-9357 6.914415  | -0.57309 | 0.886132 | -0.64673 | 0.517808 | 0.981636 | chr5  | 93570898 | 93573067 | + | 0 NA | promoter-promoter-  | -639 NR_10982c     | 441094 Hs. 457407NR_01536c    | ENSG00000NR2F1-AS1     | NR2F1 antncRNA                       |
| chr5-137c 6.914415  | -0.57309 | 0.886132 | -0.64673 | 0.517808 | 0.981636 | chr5  | 1.38E+08 | 1.38E+08 | + | 0 NA | TTS (NM_C TTS (NM_C | 47822 NM_01438c    | 27039 Hs. 716884NM_01438c     | ENSG00000PKD2L2        | TRPP5 polycyst protein-coding        |
| chr5-177c 6.914415  | -0.57309 | 0.886132 | -0.64673 | 0.517808 | 0.981636 | chr5  | 1.77E+08 | 1.77E+08 | + | 0 NA | intron (N MER50 LTF | 7020 NM_00130c     | 23567 Hs. 48425cNM_01227c     | ENSG00000ZNF346        | JAZ Zfp34 zinc fing protein-coding   |
| chr6-1324 6.914415  | -0.57309 | 0.886132 | -0.64673 | 0.517808 | 0.981636 | chr6  | 1.32E+08 | 1.32E+08 | + | 0 NA | intron (Nintron (N  | 43788 NM_00132c    | 8417 Hs. 59314cNM_00356c      | ENSG00000STX7          | syntaxin protein-coding              |
| chr6-1514 6.914415  | -0.57309 | 0.886132 | -0.64673 | 0.517808 | 0.981636 | chr6  | 1.51E+08 | 1.51E+08 | + | 0 NA | intron (Nintron (N  | 21942 NM_01790c    | 55005 Hs. 48683cNM_01790c     | ENSG00000CRMND1        | C6orf96 Crequired protein-coding     |
| chr7-154c 6.914415  | -0.57309 | 0.886132 | -0.64673 | 0.517808 | 0.981636 | chr7  | 1541898  | 1543222  | + | 0 NA | 3' UTR (N3' UTR (N  | -7680 NR_14903c    | 1E+08 Hs. 65698cNR_14903c     | LOC10012c              | uncharacterizedncRNA                 |
| chr7-248c 6.914415  | -0.57309 | 0.886132 | -0.64673 | 0.517808 | 0.981636 | chr7  | 24860184 | 24861486 | + | 0 NA | intron (N LIMD2 LIN | 31786 NR_104111    | 26031 Hs. 52025cNM_01555c     | ENSG00000OSBPL3        | ORP-3 ORF oxysterol protein-coding   |
| chr7-4751 6.914415  | -0.57309 | 0.886132 | -0.64673 | 0.517808 | 0.981636 | chr7  | 47511307 | 47512222 | + | 0 NA | intron (Nintron (N  | -46961 NR_14581c   | 1.1E+08 NR_14581c             | SNORD151               | small nucsnRNA                       |
| chr8-5897 6.914415  | -0.57309 | 0.886132 | -0.64673 | 0.517808 | 0.981636 | chr8  | 58976455 | 58977332 | + | 0 NA | intron (N Tiger1 I  | 142254 NM_01472c   | 9760 Hs. 49180cNM_01472c      | ENSG00000TOX           | TOX1 thymocyte protein-coding        |
| chrX-136c 6.914415  | -0.57309 | 0.886132 | -0.64673 | 0.517808 | 0.981636 | chrX  | 1.37E+08 | 1.37E+08 | + | 0 NA | intron (N AluY SINE | 7875 NR_00273c     | 26787 NR_00273c               | ENSG00000SNORD61       | HBI1-342 small nucsnRNA              |
| chr1-9454 14.08378  | -0.41027 | 0.634458 | -0.64665 | 0.517857 | 0.981636 | chr1  | 94529544 | 94541609 | + | 0 NA | intron (Nintron (N  | 6183 NM_00199c     | 2152 Hs. 62192 NM_00199c      | ENSG00000CF3           | CD142 TF coagulat protein-coding     |
| chr19-26c 37.3331   | 0.281166 | 0.434945 | 0.646441 | 0.517993 | 0.981636 | chr19 | 26919544 | 26920304 | + | 0 NA | IntergeniALR/Alpha  | -873057 NR_146733c | 1.02E+08 Hs. 567934NR_110687  | ENSG00000LOC101927     | uncharacterizedncRNA                 |
| chr10-14c 11.82639  | -0.44759 | 0.692973 | -0.6459  | 0.518344 | 0.981636 | chr10 | 14914586 | 14914785 | + | 0 NA | intron (N AluSx SIN | 35785 NM_02467c    | 79723 Hs. 55488cNM_02467c     | ENSG00000SUV39H2       | KMT1B suppressc protein-coding       |
| chr2-182c 9.077966  | -0.50811 | 0.786868 | -0.64573 | 0.518452 | 0.981636 | chr2  | 1.83E+08 | 1.83E+08 | + | 0 NA | intron (Nintron (N  | -60127 NM_00146c   | 2487 Hs. 12845cNM_00146c      | ENSG00000FRZB          | FRE FRITZ frizzled protein-coding    |
| chr2-552c 8.608652  | -0.52949 | 0.820025 | -0.6457  | 0.518471 | 0.981636 | chr2  | 55203584 | 55203907 | + | 0 NA | intron (N LIM43 LIN | -28158 NM_00113c   | 6233 Hs. 3116                 |                        |                                      |



|                    |          |          |          |          |          |       |          |          |   |      |                     |                  |            |                 |                    |                |                               |
|--------------------|----------|----------|----------|----------|----------|-------|----------|----------|---|------|---------------------|------------------|------------|-----------------|--------------------|----------------|-------------------------------|
| chr10-27 5.179039  | -0.65078 | 1.012227 | -0.64292 | 0.520276 | 0.981636 | chr10 | 27089513 | 27091883 | + | 0 NA | intron (Nintron (N  | 9800 NM_001256   | 22852 Hs.  | 361041NM_014911 | ENSG000000ANKRD26  | THC2 ba14      | ankyrin 1 protein-coding      |
| chr10-745 5.179039 | -0.65078 | 1.012227 | -0.64292 | 0.520276 | 0.981636 | chr10 | 74997381 | 74998545 | + | 0 NA | intron (NAluSx1 SI  | -23770 NR_145812 | 1.1E+08    | NR_145812       | SNORD172           | -              | small nucsnoRNA               |
| chr10-864 5.179039 | -0.65078 | 1.012227 | -0.64292 | 0.520276 | 0.981636 | chr10 | 86489084 | 86490050 | + | 0 NA | intron (NMER20 DNA  | 32217 NM_001318  | 23063 Hs.  | 203099NM_015044 | ENSG000000WAPL     | FOE KIAAC      | WAPL cohesin protein-coding   |
| chr10-134 5.179039 | -0.65078 | 1.012227 | -0.64292 | 0.520276 | 0.981636 | chr10 | 133E+08  | 1.33E+08 | + | 0 NA | intron (NCpG        | 10679 NM_001321  | 3632 Hs.   | 523366NM_005539 | ENSG000000INPP5A   | 5PTASE         | inositol protein-coding       |
| chr11-103 5.179039 | -0.65078 | 1.012227 | -0.64292 | 0.520276 | 0.981636 | chr11 | 10485845 | 10486453 | + | 0 NA | intron (NL3 LINE C  | 22177 NR_039705  | 1.01E+08   | NR_039705       | ENSG000000MIR4485  | mir-4485       | microRNA ncRNA                |
| chr13-451 5.179039 | -0.65078 | 1.012227 | -0.64292 | 0.520276 | 0.981636 | chr13 | 45175118 | 45176029 | + | 0 NA | intron (NLIMEg LIN  | 25472 NM_198404  | 386618 Hs. | 23406 NM_198404 | ENSG000000CKTD4    | ba321C24       | potassium protein-coding      |
| chr14-526 5.179039 | -0.65078 | 1.012227 | -0.64292 | 0.520276 | 0.981636 | chr14 | 52642926 | 52644553 | + | 0 NA | intron (Nintron (N  | 51819 NM_014584  | 30001 Hs.  | 525339NM_014584 | ENSG000000ER01A    | ER01-L EF      | endoplasmic protein-coding    |
| chr15-756 5.179039 | -0.65078 | 1.012227 | -0.64292 | 0.520276 | 0.981636 | chr15 | 75919045 | 75919939 | + | 0 NA | intron (NMIRb SINE  | 15614 NM_147188  | 26263 Hs.  | 591111NM_012170 | ENSG000000FBX022   | FBX22 FISF-box | prc protein-coding            |
| chr15-943 5.179039 | -0.65078 | 1.012227 | -0.64292 | 0.520276 | 0.981636 | chr15 | 94357289 | 94358306 | + | 0 NA | intron (Nintron (N  | 1867 NM_001155   | 55784 Hs.  | 33368 NM_018349 | ENSG000000MCTP2    | -              | multiple protein-coding       |
| chr16-507 5.179039 | -0.65078 | 1.012227 | -0.64292 | 0.520276 | 0.981636 | chr16 | 50744744 | 50746549 | + | 0 NA | intron (NAluJo SIN  | 3341 NR_130462   | 84306 Hs.  | 515344NM_032346 | ENSG000000PDCD2L   | -              | microRNA ncRNA                |
| chr19-344 5.179039 | -0.65078 | 1.012227 | -0.64292 | 0.520276 | 0.981636 | chr19 | 34414071 | 34414829 | + | 0 NA | intron (NAluSx1 SI  | 10051 NM_032346  | 1E+08      | NR_130462       | ENSG000000MIR3181  | -              | programme protein-coding      |
| chr2-5463 5.179039 | -0.65078 | 1.012227 | -0.64292 | 0.520276 | 0.981636 | chr2  | 54636762 | 54637882 | + | 0 NA | intron (Nintron (N  | 78928 NM_178313  | 6711 Hs.   | 503177NM_003128 | ENSG000000SPTBN1   | ELF HELIC      | spectrin protein-coding       |
| chr2-101 5.179039  | -0.65078 | 1.012227 | -0.64292 | 0.520276 | 0.981636 | chr2  | 1.01E+08 | 1.01E+08 | + | 0 NA | TTS (NM_C TTS (NM_C | 15520 NM_000993  | 6160 Hs.   | 469473NM_000993 | ENSG000000RPL31    | L31            | ribosomal protein-coding      |
| chr3-1242 5.179039 | -0.65078 | 1.012227 | -0.64292 | 0.520276 | 0.981636 | chr3  | 12428320 | 12429505 | + | 0 NA | intron (NMIR3 SINE  | -55520 NM_001145 | 80746 Hs.  | 335555NM_025266 | ENSG000000TSEN2    | PCH2B SEN      | tRNA spliprotein-coding       |
| chr3-9882 5.179039 | -0.65078 | 1.012227 | -0.64292 | 0.520276 | 0.981636 | chr3  | 98821207 | 98823144 | + | 0 NA | intron (Nintron (N  | 58868 NM_001323  | 10402 Hs.  | 148716NM_006100 | ENSG000000ST3GAL6  | SIAT10 S1T3    | beta protein-coding           |
| chr3-1721 5.179039 | -0.65078 | 1.012227 | -0.64292 | 0.520276 | 0.981636 | chr3  | 1.72E+08 | 1.72E+08 | + | 0 NA | intron (Nintron (N  | 96595 NM_001133  | 64778 Hs.  | 744888NM_022763 | ENSG000000FNDC3B   | FAD104 PF      | fibronectin protein-coding    |
| chr3-1997 5.179039 | -0.65078 | 1.012227 | -0.64292 | 0.520276 | 0.981636 | chr3  | 1.95E+08 | 1.95E+08 | + | 0 NA | 3' UTR (N3' UTR (N  | -7357 NM_152531  | 152002 Hs. | 478741NM_152531 | ENSG000000XXYL1T   | C3orf21        | xyloside protein-coding       |
| chr4-3997 5.179039 | -0.65078 | 1.012227 | -0.64292 | 0.520276 | 0.981636 | chr4  | 39971816 | 39972441 | + | 0 NA | intron (Nintron (N  | 5783 NM_001100   | 23244 Hs.  | 331431NM_015200 | ENSG000000PDS5A    | PI654 SCC      | PDS5 cohesin protein-coding   |
| chr4-4752 5.179039 | -0.65078 | 1.012227 | -0.64292 | 0.520276 | 0.981636 | chr4  | 47522756 | 47524709 | + | 0 NA | intron (Nintron (N  | 38138 NM_020453  | 57205 Hs.  | 437241NM_020453 | ENSG000000ATP10D   | ATPVD          | ATPase 10 protein-coding      |
| chr5-1683 5.179039 | -0.65078 | 1.012227 | -0.64292 | 0.520276 | 0.981636 | chr5  | 16836476 | 16837401 | + | 0 NA | intron (NLIMB7 LIN  | 99346 NM_012334  | 4651 Hs.   | 481722NM_012334 | ENSG000000MYO10    | 6              | myosin X protein-coding       |
| chr5-1117 5.179039 | -0.65078 | 1.012227 | -0.64292 | 0.520276 | 0.981636 | chr5  | 1.12E+08 | 1.12E+08 | + | 0 NA | 3' UTR (N3' UTR (N  | 26388 NM_001142  | 9315 Hs.   | 36053 NM_004477 | ENSG000000NREP     | C5orf13 Ine    | uronic protein-coding         |
| chr5-1514 5.179039 | -0.65078 | 1.012227 | -0.64292 | 0.520276 | 0.981636 | chr5  | 1.51E+08 | 1.51E+08 | + | 0 NA | intron (Nintron (N  | 30580 NM_001308  | 206358 Hs. | 269004NM_078483 | ENSG000000SLC36A1  | Dct1 LYAA      | solute carrier protein-coding |
| chr5-154 5.179039  | -0.65078 | 1.012227 | -0.64292 | 0.520276 | 0.981636 | chr5  | 1.54E+08 | 1.54E+08 | + | 0 NA | exon (NM exon (NM   | 12441 NM_001317  | 10827 Hs.  | 166551NM_018691 | ENSG000000FAM114A2 | 133K02 C3      | family wiprotein-coding       |
| chr7-2344 5.179039 | -0.65078 | 1.012227 | -0.64292 | 0.520276 | 0.981636 | chr7  | 23409481 | 23415093 | + | 0 NA | intron (N (TACTTAT) | 15841 NR_145734  | 1.1E+08    | NR_145734       | ENSG000000SNORD65C | -              | small nucsnoRNA               |
| chr7-4805 5.179039 | -0.65078 | 1.012227 | -0.64292 | 0.520276 | 0.981636 | chr7  | 48096012 | 48097346 | + | 0 NA | intron (Nintron (N  | 7414 NM_003364   | 7378 Hs.   | 488242NM_003364 | ENSG000000UPP1     | UDRPASE U      | ridine 1 protein-coding       |
| chr7-1487 5.179039 | -0.65078 | 1.012227 | -0.64292 | 0.520276 | 0.981636 | chr7  | 1.49E+08 | 1.49E+08 | + | 0 NA | intron (Nintron (N  | 84697 NM_001370  | 8454 Hs.   | 146806NM_003592 | ENSG000000CUL1     | -              | culin 1 protein-coding        |
| chr8-2655 5.179039 | -0.65078 | 1.012227 | -0.64292 | 0.520276 | 0.981636 | chr8  | 26594039 | 26595262 | + | 0 NA | intron (N (ATCT)n S | 16245 NM_001244  | 1808 Hs.   | 593187NM_001386 | ENSG000000DPYSL2   | CRMP-2 CF      | dihydropyridin protein-coding |
| chr8-4296 5.179039 | -0.65078 | 1.012227 | -0.64292 | 0.520276 | 0.981636 | chr8  | 42969451 | 42971490 | + | 0 NA | intron (NLIME3Cz L  | 73492 NM_032411  | 84376 Hs.  | 162852NM_032411 | ENSG000000H00K3    | HK3            | hook micr protein-coding      |
| chr8-6318 5.179039 | -0.65078 | 1.012227 | -0.64292 | 0.520276 | 0.981636 | chr8  | 63181601 | 63182192 | + | 0 NA | intron (Nintron (N  | 12893 NM_001277  | 253943 Hs. | 491861NM_152758 | ENSG000000YTHDF3   | -              | YTH N6-me                     |
| chr1-1225 9.408262 | 0.496207 | 0.771891 | 0.642846 | 0.520324 | 0.981636 | chr1  | 1.23E+08 | 1.23E+08 | + | 0 NA | IntergeniALR Alpha  | 998723 NR_003955 | 647121 Hs. | 697682NR_003955 | ENSG000000EMBP1    | -              | ethin pseude                  |
| chr1-1512 6.658171 | 0.578798 | 0.900669 | 0.642617 | 0.520473 | 0.981636 | chr1  | 1.51E+08 | 1.51E+08 | + | 0 NA | IntergeniIntergeni  | -8876 NM_001304  | 57592 Hs.  | 186755NM_020832 | ENSG000000ZNF687   | PDB6           | zinc fing protein-coding      |
| chr1-13 6.658171   | 0.578798 | 0.900669 | 0.642617 | 0.520473 | 0.981636 | chr1  | 1.3E+08  | 1.3E+08  | + | 0 NA | exon (NM exon (NM   | 24842 NM_139055  | 170689 Hs. | 534221NM_139055 | ENSG000000ADAMTS15 | -              | ADAM tetr protein-coding      |
| chr12-293 6.658171 | 0.578798 | 0.900669 | 0.642617 | 0.520473 | 0.981636 | chr12 | 2935992  | 2936324  | + | 0 NA | intron (NAluSx1 SI  | -23239 NM_003213 | 7004 Hs.   | 949855NM_003213 | ENSG000000TEAD4    | EFTR-2 RT      | TEA doma protein-coding       |
| chr14-932 6.658171 | 0.578798 | 0.900669 | 0.642617 | 0.520473 | 0.981636 | chr14 | 93247771 | 93248541 | + | 0 NA | intron (Nintron (N  | 40900 NM_175748  | 55148 Hs.  | 648806NM_175748 | ENSG000000CUBR7    | C14orf13C      | ubiquitin protein-coding      |
| chr7-9202 6.658171 | 0.578798 | 0.900669 | 0.642617 | 0.520473 | 0.981636 | chr7  | 92023539 | 92023974 | + | 0 NA | intron (NL2a LINE   | 82881 NM_005751  | 10142 Hs.  | 651221NM_005751 | ENSG000000AKAP9    | AKAP-9 AK      | -kinase protein-coding        |
| chr7-1556 6.658171 | 0.578798 | 0.900669 | 0.642617 | 0.520473 | 0.981636 | chr7  | 1.56E+08 | 1.56E+08 | + | 0 NA | intron (NAluSx1 SI  | 34421 NM_053043  | 155435 Hs. | 591815NM_053043 | ENSG000000RBM33    | PRR8           | RNA bindi protein-coding      |
| chr16-467 4.461523 | 0.698515 | 1.087004 | 0.642606 | 0.52048  | 0.981636 | chr16 | 4675979  | 4676562  | + | 0 NA | intron (Nintron (N  | 4952 NR_106827   | 1.02E+08   | NR_106827       | ENSG000000MIR6769A | hsa-mir-6      | microRNA ncRNA                |
| chr21-372 4.461523 | 0.698515 | 1.087004 | 0.642606 | 0.52048  | 0.981636 | chr21 | 37235379 | 37236151 | + | 0 NA | intron (Nintron (N  | 27262 NR_026716  | 257203 Hs. | 515155NM_148673 | ENSG000000DSCR9    | NCRNA0000      | Down syncncRNA                |
| chr4-2641 4.461523 | 0.698515 | 1.087004 | 0.642606 | 0.52048  | 0.981636 | chr4  | 26413259 | 26413992 | + | 0 NA | intron (Nintron (N  | 76859 NR_000730  | 886 Hs.    | 129 NM_000730   | ENSG000000CCKAR    | CCK-A CCK      | cholecyst protein-coding      |
| chr1-109 7.213464  | 0.556414 | 0.865933 | 0.64256  | 0.520509 | 0.981636 | chr1  | 1.09E+08 | 1.09E+08 | + | 0 NA | intron (NLIMEb LIN  | 25238 NM_001142  | 22911 Hs.  | 570055NM_014963 | ENSG000000WDR47    | -              | WD repeat protein-coding      |
| chr15-184 7.213464 | 0.556414 | 0.865933 | 0.64256  | 0.520509 | 0.981636 | chr15 | 18497649 | 18498173 | + | 0 NA | intron (Nintron (N  | 9109 NM_001127   | 51324 Hs.  | 242455NM_016630 | ENSG000000SPG21    | ABHD21 AC      | SPG21 abt protein-coding      |
| chr17-64 7.213464  | 0.556414 | 0.865933 | 0.64256  | 0.520509 | 0.981636 | chr17 | 6492420  | 6494043  | + | 0 NA | intron (Nintron (N  | 14439 NM_001355  | 6117 Hs.   | 461922NM_002949 | ENSG000000RPA1     | HBSB MSTC      | replicat protein-coding       |
| chr17-171 7.213464 | 0.556414 | 0.865933 | 0.64256  | 0.520509 | 0.981636 | chr17 | 17161860 | 17163079 | + | 0 NA | intron (Nintron (N  | 43864 NM_178833  | 201164 Hs. | 729075NM_178833 | ENSG000000PLD6     | ZUC            | phospholip protein-coding     |
| chr17-21 7.213464  | 0.556414 | 0.865933 | 0.64256  | 0.520509 | 0.981636 | chr17 | 21305987 | 21307201 | + | 0 NA | intron (NAluSx6 SI  | 18558 NM_002755  | 5606 Hs.   | 514012NM_002755 | ENSG000000MAP2K3   | MAPKK3 ME      | mitten protein-coding         |
| chr17-47 7.213464  | 0.556414 | 0.865933 | 0.64256  | 0.520509 | 0.981636 | chr17 | 47923058 | 47923542 | + | 0 NA | intron (Nintron (N  | 18104 NR_103855  | 1.01E+08   | NR_103855       | ENSG000000SP2-AS1  | -              | SP2 antiscRNA                 |
| chr20-554 7.213464 | 0.556414 | 0.865933 | 0.64256  | 0.520509 | 0.981636 | chr20 | 5940016  | 5941467  | + | 0 NA | intron (NAluJb SIN  | 9792 NM_015933   | 51605 Hs.  | 128791NM_015933 | ENSG000000TRMT6    | CGI-09 CG      | tRNA meti protein-coding      |
| chr2-175 3.402524  | -0.81776 | 1.27383  | -0.64197 | 0.520892 | 0.981636 | chr2  | 1.76E+08 | 1.76E+08 | + | 0 NA | intron (NAluSx1 SI  | 26379 NM_030653  | 80856 Hs.  | 209561NM_030653 | ENSG000000LNPK     | KIAA1715 I     | unapark, protein-coding       |
| chr2-1791 3.402524 | -0.81776 | 1.27383  | -0.64197 | 0.520892 | 0.981636 | chr2  | 1.79E+08 | 1.79E+08 | + | 0 NA | intron (Nintron (N  | -99045 NM_173648 | 285025 Hs. | 324341NM_173648 | ENSG000000CCDC141  | CAMD1          | coiled-ec protein-coding      |
| chr12-953 4.427947 | -0.80203 | 1.249343 | -0.64196 | 0.5209   | 0.981636 | chr12 | 95772241 | 95773422 | + | 0 NA | intron (NL2a LINE   | 17364 NM_001322  | 59277 Hs.  | 201034NM_021    |                    |                |                               |

|                     |          |          |          |          |          |       |          |          |   |   |    |                    |        |            |          |                    |                     |                  |                             |                          |
|---------------------|----------|----------|----------|----------|----------|-------|----------|----------|---|---|----|--------------------|--------|------------|----------|--------------------|---------------------|------------------|-----------------------------|--------------------------|
| chr8-558k 6.906557  | -0.57118 | 0.893277 | -0.63942 | 0.522552 | 0.981636 | chr8  | 55802523 | 55802836 | + | 0 | NA | intron (NLMC4 LIN  | 29233  | NM_001363  | 96764    | Hs.335066NM_024831 | ENSG000007TGS1      | NCOA6IP F        | trimethylprotein-coding     |                          |
| chr9-980k 6.906557  | -0.57118 | 0.893277 | -0.63942 | 0.522552 | 0.981636 | chr9  | 98098556 | 98099317 | + | 0 | NA | intron (NALuS26 SI | 20286  | NM_014788  | 9830     | Hs.575631NM_014788 | ENSG000007TRIM14    | -                | tripartitprotein-coding     |                          |
| chrX-5361k 6.906557 | -0.57118 | 0.893277 | -0.63942 | 0.522552 | 0.981636 | chrX  | 53613511 | 53613982 | + | 0 | NA | intron (N(AAC)n Si | -56472 | NR_029484  | 406889   | NR_029484          | ENSG000007MIRLET7F2 | LET7F2 M         | microRNA ncRNA              |                          |
| chr1-224k 14.16042  | 0.404539 | 0.632838 | 0.639247 | 0.522663 | 0.981636 | chr1  | 2.24E+08 | 2.24E+08 | + | 0 | NA | intron (Nintron (N | 14016  | NM_025166  | 80232    | Hs.497872NM_025166 | ENSG000007WDR26     | CDW2 G           | 1D7WD repeatprotein-coding  |                          |
| chr19-584k 14.16042 | 0.404539 | 0.632838 | 0.639247 | 0.522663 | 0.981636 | chr19 | 58431034 | 58438871 | + | 0 | NA | exon (NM exon (NM  | 5201   | NM_003433  | 7691     | Hs.156166NM_003433 | ENSG000007ZNF132    | pH2-12           | zinc fingerprotein-coding   |                          |
| chr1-150k 10.43472  | 0.463972 | 0.726012 | 0.639069 | 0.522778 | 0.981636 | chr1  | 1.5E+08  | 1.5E+08  | + | 0 | NA | TTS (NR_1TTS (NR_1 | -10046 | NM_001297  | 23248    | Hs.213666NM_015203 | ENSG000007CPRD2     | HSPC099 K        | regulatoryprotein-coding    |                          |
| chr1-155k 10.43472  | 0.463972 | 0.726012 | 0.639069 | 0.522778 | 0.981636 | chr1  | 1.55E+08 | 1.55E+08 | + | 0 | NA | intron (NMIRb SINE | 3713   | NR_030282  | 693140   | NR_030282          | ENSG000007MIR555    | MIRN555 H        | microRNA ncRNA              |                          |
| chr22-41k 6.732592  | 0.583452 | 0.913347 | 0.638806 | 0.522949 | 0.981636 | chr22 | 41870973 | 41872397 | + | 0 | NA | intron (NALuSx SIN | -29259 | NR_029507  | 407039   | NR_029507          | ENSG000007MIR33A    | MIRN33A M        | microRNA ncRNA              |                          |
| chr3-482k 6.732592  | 0.583452 | 0.913347 | 0.638806 | 0.522949 | 0.981636 | chr3  | 48297105 | 48298446 | + | 0 | NA | intron (NMLT1E2 LI | 3636   | NM_001308  | 10201    | Hs.465558NM_005793 | ENSG000007NME6      | IPIA-ALP         | NME/NM23 protein-coding     |                          |
| chr7-1301k 8.57537  | -0.53404 | 0.83602  | -0.63879 | 0.522957 | 0.981636 | chr7  | 1.3E+08  | 1.3E+08  | + | 0 | NA | intron (NALuJo SIN | -24072 | NR_149033  | 1E+08    | Hs.105944NR_149033 | ENSG000007LOC100128 | -                | uncharactericncRNA          |                          |
| chr2-166k 3.461229  | -0.79038 | 1.237482 | -0.6387  | 0.523018 | 0.981636 | chr2  | 1.66E+08 | 1.66E+08 | + | 0 | NA | intron (Nintron (N | 99253  | NM_001365  | 6335     | Hs.439145NM_002977 | ENSG000007SCN9A     | ETHA FEB         | sodium vcpprotein-coding    |                          |
| chr5-1404k 3.461229 | -0.79038 | 1.237482 | -0.6387  | 0.523018 | 0.981636 | chr5  | 1.4E+08  | 1.4E+08  | + | 0 | NA | intron (Nintron (N | 64013  | NM_017978  | 54882    | Hs.594084NM_017747 | ENSG000007ANKHD1    | MASK MAS         | ankyrin rprotein-coding     |                          |
| chr11-10k 6.947697  | -0.56745 | 0.889191 | -0.63817 | 0.523364 | 0.981636 | chr11 | 10578173 | 10578741 | + | 0 | NA | intron (Nintron (N | -9792  | NM_006691  | 10894    | Hs.655332NM_006691 | ENSG000007LYVE1     | CRSBP-1 F        | lymphaticprotein-coding     |                          |
| chr11-62k 6.947697  | -0.56745 | 0.889191 | -0.63817 | 0.523364 | 0.981636 | chr11 | 62649631 | 62649830 | + | 0 | NA | exon (NM exon (NM  | -3004  | NM_001278  | 23193    | Hs.595071NM_014611 | ENSG000007GANAB     | G2AN G1A         | glucosidaseprotein-coding   |                          |
| chr5-132k 6.947697  | -0.56745 | 0.889191 | -0.63817 | 0.523364 | 0.981636 | chr5  | 1.33E+08 | 1.33E+08 | + | 0 | NA | intron (NMLT1E2 LI | 15982  | NM_005732  | 10111    | Hs.633509NM_005732 | ENSG000007RAD50     | NBSLD RAI        | RAD50 dotprotein-coding     |                          |
| chr16-13k 5.698276  | 0.66109  | 1.035988 | 0.638126 | 0.523392 | 0.981636 | chr16 | 1399227  | 1399711  | + | 0 | NA | exon (NM exon (NM  | 15232  | NM_001193  | 64718    | Hs.643536NM_001037 | ENSG000007UNKL      | C16orf28 u       | unk like protein-coding     |                          |
| chr13-50k 0.044684  | -0.51254 | 0.803228 | -0.6381  | 0.523407 | 0.981636 | chr13 | 50047686 | 50047885 | + | 0 | NA | intron (NALuS2 SI  | 1276   | NR_029486  | 406950   | NR_029486          | ENSG000007MIR16-1   | MIRN16-1         | microRNA ncRNA              |                          |
| chr1-243k 11.86938  | -0.43787 | 0.686397 | -0.63793 | 0.523521 | 0.981636 | chr1  | 2.44E+08 | 2.44E+08 | + | 0 | NA | intron (NLMIB7 LIN | 216152 | NR_039824  | 1.01E+08 | NR_039824          | ENSG000007MIR4677   | mir-4677         | microRNA ncRNA              |                          |
| chr1-7781k 6.873276 | -0.57675 | 0.904237 | -0.63783 | 0.523584 | 0.981636 | chr1  | 77811306 | 77811789 | + | 0 | NA | intron (Nintron (N | 31742  | NM_001363  | 374986   | Hs.437755NM_198545 | ENSG000007MIGA1     | FAM73A           | mitochondrialprotein-coding |                          |
| chr16-69k 6.873276  | -0.57675 | 0.904237 | -0.63783 | 0.523584 | 0.981636 | chr16 | 69569063 | 69570768 | + | 0 | NA | intron (Nintron (N | 3949   | NM_138713  | 10725    | Hs.371987NM_006595 | ENSG000007NFAT5     | NF-AT5 N         | nuclear fprotein-coding     |                          |
| chr2-187k 6.873276  | -0.57675 | 0.904237 | -0.63783 | 0.523584 | 0.981636 | chr2  | 28113554 | 28123227 | + | 0 | NA | intron (NMLT1B LTF | 25083  | NM_001325  | 7035     | Hs.516578NM_006287 | ENSG000007TFP1      | EPI LACI         | tissue fprotein-coding      |                          |
| chr21-334k 6.873276 | -0.57675 | 0.904237 | -0.63783 | 0.523584 | 0.981636 | chr21 | 33430044 | 33430471 | + | 0 | NA | intron (Nintron (N | 27361  | NM_001325  | 3460     | Hs.634632NM_005534 | ENSG000007IFNGR2    | AF-1 IFG         | interfercprotein-coding     |                          |
| chr8-424k 6.873276  | -0.57675 | 0.904237 | -0.63783 | 0.523584 | 0.981636 | chr8  | 42462475 | 42464588 | + | 0 | NA | intron (Nintron (N | 36800  | NM_001257  | 6575     | Hs.653172NM_006745 | ENSG000007SLC20A2   | GLVR-2 G         | solute cprotein-coding      |                          |
| chr9-2811k 6.873276 | -0.57675 | 0.904237 | -0.63783 | 0.523584 | 0.981636 | chr9  | 32155    | 32155    | + | 0 | NA | intron (Nintron (N | 32155  | NM_014878  | 9933     | Hs.493095NM_014878 | ENSG000007PUM3      | HA-8 HLA         | pulmo fprotein-coding       |                          |
| chr7-143k 9.555138  | -0.49025 | 0.768815 | -0.63767 | 0.523686 | 0.981636 | chr7  | 1.43E+08 | 1.43E+08 | + | 0 | NA | intron (Nintron (N | 5286   | NM_001224  | 835      | Hs.368982NM_001224 | ENSG000007CASP2     | CASP-2 C         | caspase 2protein-coding     |                          |
| chr3-485k 7.358306  | -0.55013 | 0.862764 | -0.63764 | 0.523707 | 0.981636 | chr3  | 48564830 | 48565228 | + | 0 | NA | intron (Nintron (N | -1248  | NM_033199  | 90226    | Hs.631914NM_033199 | ENSG000007UCN2      | SRP UCN          | urocortin protein-coding    |                          |
| chr5-348k 7.358306  | -0.55013 | 0.862764 | -0.63764 | 0.523707 | 0.981636 | chr5  | 34833194 | 34834024 | + | 0 | NA | TTS (NM_CTS (NM_C  | -5555  | NM_144722  | 136527   | Hs.435742NM_144722 | ENSG000007TTC23L    | MC25-1           | tetratricprotein-coding     |                          |
| chr11-127k 7.22918  | 0.552017 | 0.866156 | 0.637319 | 0.523917 | 0.981636 | chr11 | 1276155  | 1277245  | + | 0 | NA | 3' UTR (3' UTR (N  | 20095  | NR_106802  | 1.02E+08 | NR_106802          | ENSG000007MIR6744   | hsa-mir-6        | microRNA ncRNA              |                          |
| chr11-58k 7.22918   | 0.552017 | 0.866156 | 0.637319 | 0.523917 | 0.981636 | chr11 | 58531851 | 58533039 | + | 0 | NA | intron (NLTR12C LI | -24340 | NM_001005  | 219968   | Hs.553647NM_001005 | ENSG000007OR5B21    | -                | olfactoryprotein-coding     |                          |
| chr13-36k 7.22918   | 0.552017 | 0.866156 | 0.637319 | 0.523917 | 0.981636 | chr13 | 36852989 | 36854138 | + | 0 | NA | exon (NM exon (NM  | 34361  | NM_000538  | 5994     | Hs.24422           | NR_000538           | ENSG000007RFXAP  | -                           | regulatorprotein-coding  |
| chr19-20k 7.22918   | 0.552017 | 0.866156 | 0.637319 | 0.523917 | 0.981636 | chr19 | 20659239 | 20659856 | + | 0 | NA | intron (NMER92B LI | 2024   | NM_001076  | 199777   | Hs.657001NM_145297 | ENSG000007ZNF626    | -                | zinc fingerprotein-coding   |                          |
| chr19-45k 7.22918   | 0.552017 | 0.866156 | 0.637319 | 0.523917 | 0.981636 | chr19 | 45287482 | 45293711 | + | 0 | NA | intron (Nintron (N | 32279  | NM_001824  | 1158     | Hs.334347NM_001824 | ENSG000007CKM       | CKMM CPK         | creatine protein-coding     |                          |
| chr20-48k 7.22918   | 0.552017 | 0.866156 | 0.637319 | 0.523917 | 0.981636 | chr20 | 485559   | 486057   | + | 0 | NA | intron (Nintron (N | -23275 | NM_144622  | 128637   | Hs.590876NM_144622 | ENSG000007TBC1D20   | C20orf4 C        | TBC1 domeprotein-coding     |                          |
| chr5-136k 7.22918   | 0.552017 | 0.866156 | 0.637319 | 0.523917 | 0.981636 | chr5  | 1.36E+08 | 1.36E+08 | + | 0 | NA | 3' UTR (3' UTR (N  | 14007  | NM_001355  | 389332   | Hs.127688NM_001355 | ENSG000007SMIM32    | -                | small intprotein-coding     |                          |
| chr6-352k 7.22918   | 0.552017 | 0.866156 | 0.637319 | 0.523917 | 0.981636 | chr6  | 35283470 | 35286685 | + | 0 | NA | intron (Nintron (N | -12741 | NM_0022047 | 50619    | Hs.15476           | NR_0022047          | ENSG000007DEF6   | IBP SLAT                    | DEP6 guarprotein-coding  |
| chr7-782k 7.22918   | 0.552017 | 0.866156 | 0.637319 | 0.523917 | 0.981636 | chr7  | 782334   | 783242   | + | 0 | NA | intron (NCPg       | -32769 | NM_001171  | 23535    | Hs.438072NM_025154 | ENSG000007SUNI      | UNC84A           | Sadl and protein-coding     |                          |
| chrX-411k 7.22918   | 0.552017 | 0.866156 | 0.637319 | 0.523917 | 0.981636 | chrX  | 41184487 | 41185477 | + | 0 | NA | intron (Nintron (N | -90757 | NR_135616  | 1.05E+08 | Hs.546119NR_135616 | ENSG000007LINC02601 | -                | long intncRNA               |                          |
| chrX-714k 7.22918   | 0.552017 | 0.866156 | 0.637319 | 0.523917 | 0.981636 | chrX  | 71407888 | 71408269 | + | 0 | NA | exon (NM exon (NM  | 41721  | NR_104387  | 6872     | Hs.158566NM_004605 | ENSG000007TAF1      | BA2R CCG         | TATA-box protein-coding     |                          |
| chr7-747k 11.86152  | -0.43677 | 0.68535  | -0.6373  | 0.52393  | 0.981636 | chr7  | 74751680 | 74756242 | + | 0 | NA | exon (NM exon (NM  | -20001 | NM_000265  | 653361   | Hs.647047NM_000265 | ENSG000007NCF1      | NCF1A NO         | nucleothriprotein-coding    |                          |
| chr1-331k 5.171181  | -0.6484  | 1.017602 | -0.63719 | 0.524003 | 0.981636 | chr1  | 33125156 | 33125955 | + | 0 | NA | IntergeniL2a LINE  | 43377  | NM_001301  | 113451   | Hs.101807NM_052998 | ENSG000007AZIN2     | ADC AZI2         | antizyme protein-coding     |                          |
| chr12-145k 5.171181 | -0.6484  | 1.017602 | -0.63719 | 0.524003 | 0.981636 | chr12 | 45392214 | 45393217 | + | 0 | NA | intron (NLIAP6 LIN | 10025  | NM_001142  | 196527   | Hs.505332NM_001022 | ENSG000007ANOG      | BDPLT7 S         | canactamir protein-coding   |                          |
| chr12-131k 5.171181 | -0.6484  | 1.017602 | -0.63719 | 0.524003 | 0.981636 | chr12 | 9.12E+08 | 9.12E+08 | + | 0 | NA | intron (NALuY SINE | 28615  | NM_004459  | 6433     | Hs.381871NM_004459 | ENSG000007SFSWAF    | SFR58 SW         | splicing protein-coding     |                          |
| chr13-49k 5.171181  | -0.6484  | 1.017602 | -0.63719 | 0.524003 | 0.981636 | chr13 | 49532104 | 49534223 | + | 0 | NA | non-codiron-codir  | 36107  | NM_001045  | 51131    | Hs.369033NM_001045 | ENSG000007PHF11     | APY BCAP         | PHD fingerprotein-coding    |                          |
| chr17-46k 5.171181  | -0.6484  | 1.017602 | -0.63719 | 0.524003 | 0.981636 | chr17 | 46041419 | 46042284 | + | 0 | NA | intron (Nintron (N | 42601  | NM_001007  | 246744   | Hs.661831NM_001007 | ENSG000007STH       | MAPTIT           | saitohin protein-coding     |                          |
| chr18-26k 5.171181  | -0.6484  | 1.017602 | -0.63719 | 0.524003 | 0.981636 | chr18 | 2692229  | 2693350  | + | 0 | NA | intron (NML2c LINE | 36992  | NM_015295  | 23347    | Hs.8118            | NR_015295           | ENSG000007SMCHD1 | BAMS FSH                    | structure protein-coding |
| chr2-260k 5.171181  | -0.6484  | 1.017602 | -0.63719 | 0.524003 | 0.981636 | chr2  | 26099881 | 26100771 | + | 0 | NA | intron (Nintron (N | 66242  | NM_016131  | 10890    | Hs.467966NM_016131 | ENSG000007RAB10     | -                | RAB10, meprotein-coding     |                          |
| chr2-757k 5.171181  | -0.6484  | 1.017602 | -0.63719 | 0.524003 | 0.981636 | chr2  | 75700783 | 75702635 | + | 0 | NA |                    |        |            |          |                    |                     |                  |                             |                          |



|                    |          |          |          |          |          |       |          |          |   |    |                    |                     |                   |                     |                     |                     |                          |                            |
|--------------------|----------|----------|----------|----------|----------|-------|----------|----------|---|----|--------------------|---------------------|-------------------|---------------------|---------------------|---------------------|--------------------------|----------------------------|
| chr4-152:7.195898  | 0.548652 | 0.862911 | 0.635815 | 0.524897 | 0.981636 | chr4  | 1.52E+08 | 1.52E+08 | 0 | NA | intron (Nintron (N | -14499 NR_104273    | 1.02E+08          | Hs. 712524NR_104273 | ENSG00000FBXW7-AS1  | DEAR DESF           | FBXW7                    | antncRNA                   |
| chr5-1805:7.195898 | 0.548652 | 0.862911 | 0.635815 | 0.524897 | 0.981636 | chr5  | 1.809209 | 1.809937 | + | NA | intron (Nintron (N | 8166 NM_004555      | 4726              | Hs. 408285NR_004555 | ENSG00000NDUFS6     | CI-13kA CNADH       | ubic protein-coding      |                            |
| chr5-7805:7.195898 | 0.548652 | 0.862911 | 0.635815 | 0.524897 | 0.981636 | chr5  | 78097728 | 78098045 | + | NA | intron (NSVA_D Ret | 139639 NR_105012    | 1.02E+08          | Hs. 252895NR_105012 | LOC101925           | -                   | uncharactncRNA           |                            |
| chr5-1684:7.195898 | 0.548652 | 0.862911 | 0.635815 | 0.524897 | 0.981636 | chr5  | 1.68E+08 | 1.69E+08 | 0 | NA | intron (Nintron (N | 13886 NM_002887     | 5917              | Hs. 654907NM_002887 | ENSG00000CARRS      | ArgRS DAL           | arginyl-t-protein-coding |                            |
| chr6-619:7.195898  | 0.548652 | 0.862911 | 0.635815 | 0.524897 | 0.981636 | chr6  | 41907890 | 41909572 | + | 0  | NA                 | intron (Nintron (N  | 12212 NM_001305   | 9477                | Hs. 278483NM_004277 | ENSG00000MED20      | PROG213 Smediator        | protein-coding             |
| chr6-5712:7.195898 | 0.548652 | 0.862911 | 0.635815 | 0.524897 | 0.981636 | chr6  | 57121863 | 57123181 | + | 0  | NA                 | intron (NLIPA17 LI  | 32334 NM_001031   | 26036               | Hs. 485628NM_015555 | ENSG00000ZNF451     | COASTER ezinc            | finfprotein-coding         |
| chr6-111:7.195898  | 0.548652 | 0.862911 | 0.635815 | 0.524897 | 0.981636 | chr6  | 1.11E+08 | 1.11E+08 | 0 | NA | intron (Nintron (N | 95401 NM_153366     | 91749             | Hs. 400572NM_153366 | ENSG00000MPSD4B     | KIAA1919 major      | fagprotein-coding        |                            |
| chr7-6496:7.195898 | 0.548652 | 0.862911 | 0.635815 | 0.524897 | 0.981636 | chr7  | 64983604 | 64988919 | + | 0  | NA                 | intron (NPRIMA4_L1  | 4775 NM_015852    | 51351               | Hs. 250699NM_015852 | ENSG00000ZNF117     | H-plk HPF                | zinc finfprotein-coding    |
| chr7-130C:7.195898 | 0.548652 | 0.862911 | 0.635815 | 0.524897 | 0.981636 | chr7  | 1.3E+08  | 1.3E+08  | + | 0  | NA                 | intron (NLM14 LINE  | 19514 NM_001363   | 51530               | Hs. 194157NM_016478 | ENSG00000ZC3HC1     | HSPC216 zinc             | finfprotein-coding         |
| chr8-3057:7.195898 | 0.548652 | 0.862911 | 0.635815 | 0.524897 | 0.981636 | chr8  | 30572374 | 30578993 | + | 0  | NA                 | TTS (NM_CTS (NM_C   | -60397 NR_001206  | 1.01E+08            | Hs. 659493NM_001206 | ENSG00000SMIM18     | -                        | small intronprotein-coding |
| chr8-672C:7.195898 | 0.548652 | 0.862911 | 0.635815 | 0.524897 | 0.981636 | chr8  | 67208242 | 67212471 | + | 0  | NA                 | intron (NALuJb SIN  | 126508 NM_001291  | 79848               | Hs. 370147NM_02479C | ENSG00000CSPP1      | CSPP JBTs                | centrosomprotein-coding    |
| chr9-9364:7.195898 | 0.548652 | 0.862911 | 0.635815 | 0.524897 | 0.981636 | chr9  | 93649530 | 93651811 | + | 0  | NA                 | intron (Nintron (N  | 55829 NR_049855   | 1.01E+08            | NR_049855           | ENSG00000MIR548AU   | -                        | microRNA ncRNA             |
| chr9-971C:7.195898 | 0.548652 | 0.862911 | 0.635815 | 0.524897 | 0.981636 | chr9  | 97196733 | 97198974 | + | 0  | NA                 | intron (Nintron (N  | -40573 NR_03652C  | 1E+08               | Hs. 435625NR_03652C | ENSG00000SUGTIP4-5  | -                        | SUGTIP4-5pseudo            |
| chr9-137C:7.195898 | 0.548652 | 0.862911 | 0.635815 | 0.524897 | 0.981636 | chr9  | 1.37E+08 | 1.37E+08 | + | 0  | NA                 | intron (Nintron (N  | 3926 NR_04572C    | 11253               | Hs. 279881NM_016215 | ENSG00000CMAN1B1    | ERMANN EF                | mannoside protein-coding   |
| chr6-319C:8.301375 | 0.54436  | 0.856435 | 0.635611 | 0.52503  | 0.981636 | chr6  | 31966869 | 31967523 | + | 0  | NA                 | intron (Nintron (N  | -3979 NR_026717   | 8859                | Hs. 654371NM_004197 | ENSG00000STK19      | D6S60 D6S                | serine/tl protein-coding   |
| chr1-149C:6.136159 | 0.608401 | 0.957267 | 0.635561 | 0.525063 | 0.981636 | chr1  | 1492423  | 1492622  | + | 0  | NA                 | intron (NALuXs1 SI  | 14673 NM_001317   | 83858               | Hs. 729021NM_031921 | ENSG00000ATAD3B     | AAA-T0B3 ATPase          | ε protein-coding           |
| chr15-59C:4.668585 | -0.71232 | 1.120815 | -0.63554 | 0.525079 | 0.981636 | chr15 | 59654859 | 59655058 | + | 0  | NA                 | intron (NTigger4a   | 2347 NM_00132C    | 2958                | Hs. 512934NM_004492 | ENSG00000GTF2A2     | HAT18745 general         | tprotein-coding            |
| chr14-67C:7.38373  | -0.54319 | 0.854732 | -0.63551 | 0.525098 | 0.981636 | chr14 | 67374536 | 67375263 | + | 0  | NA                 | intron (NFLAM_C4a   | 14571 NM_004094   | 1965                | Hs. 151777NM_004094 | ENSG00000EIF2S1     | EIF-2 EIF                | ekaryotiprotein-coding     |
| chr16-717:7.38373  | -0.54319 | 0.854732 | -0.63551 | 0.525098 | 0.981636 | chr16 | 71761149 | 71761957 | + | 0  | NA                 | exon (NM_exon (NM_  | -3066 NR_00305E   | 692111              | NR_00305E           | ENSG00000SNORD71    | HBII-239 small           | nucsnRNA                   |
| chr16-84C:7.38373  | -0.54319 | 0.854732 | -0.63551 | 0.525098 | 0.981636 | chr16 | 84609627 | 84610962 | + | 0  | NA                 | intron (NMLTIK LTF  | 7784 NM_02114E    | 23406               | Hs. 289092NM_02114E | ENSG00000COTL1      | CLP                      | coactosin protein-coding   |
| chr19-534:7.38373  | -0.54319 | 0.854732 | -0.63551 | 0.525098 | 0.981636 | chr19 | 53433928 | 53436861 | + | 0  | NA                 | intron (NALuSp SIN  | 3410 NM_00100E    | 38856               | Hs. 433293NM_00100E | ENSG00000ZNF761     | ZNF468                   | zinc finfprotein-coding    |
| chr2-202C:7.38373  | -0.54319 | 0.854732 | -0.63551 | 0.525098 | 0.981636 | chr2  | 20293838 | 20294532 | + | 0  | NA                 | intron (Nintron (N  | 33201 NM_00128E   | 23369               | Hs. 467824NM_015317 | ENSG00000PUM2       | PUMH2 PUM                | pumilio fprotein-coding    |
| chr3-154C:7.38373  | -0.54319 | 0.854732 | -0.63551 | 0.525098 | 0.981636 | chr3  | 1.54E+08 | 1.54E+08 | + | 0  | NA                 | intron (Nintron (N  | 41855 NM_02086E   | 170506              | Hs. 446277NM_02086E | ENSG00000DXH36      | DDX36 G4F                | DEAH-box protein-coding    |
| chr6-3747:7.38373  | -0.54319 | 0.854732 | -0.63551 | 0.525098 | 0.981636 | chr6  | 37472233 | 37472884 | + | 0  | NA                 | intron (Nintron (N  | 27335 NM_13849E   | 154467              | Hs. 284207NM_13849E | ENSG00000CCDC167    | C6orf129 coiled-c        | protein-coding             |
| chr9-115C:7.38373  | -0.54319 | 0.854732 | -0.63551 | 0.525098 | 0.981636 | chr9  | 1.15E+08 | 1.15E+08 | + | 0  | NA                 | intron (NMLRb SINE  | 77917 NM_00216C   | 3371                | Hs. 143255NM_00216C | ENSG00000TNC        | 150-225 T                | tenascin protein-coding    |
| chr9-1347:7.38373  | -0.54319 | 0.854732 | -0.63551 | 0.525098 | 0.981636 | chr9  | 1.35E+08 | 1.35E+08 | + | 0  | NA                 | intron (Nintron (N  | -78843 NR_13804E  | 414316              | Hs. 571561NR_13804E | ENSG00000COL5A1-AS  | C9orf104 COL5A1          | arncRNA                    |
| chr1-2227:10.44258 | 0.462462 | 0.727722 | 0.635493 | 0.525107 | 0.981636 | chr1  | 2.23E+08 | 2.23E+08 | + | 0  | NA                 | intron (Nintron (N  | -11913 NM_20746E  | 400823              | Hs. 697606NM_20746E | ENSG00000FAM177B    | -                        | family wiprotein-coding    |
| chr1-228:10.44258  | 0.462462 | 0.727722 | 0.635493 | 0.525107 | 0.981636 | chr1  | 2.28E+08 | 2.28E+08 | + | 0  | NA                 | TTS (NR_CTS (NR_C   | 1068 NR_03741E    | 1.01E+08            | NR_03741E           | ENSG00000MIR3620    | mir-3620                 | microRNA ncRNA             |
| chr16-66C:10.44258 | 0.462462 | 0.727722 | 0.635493 | 0.525107 | 0.981636 | chr16 | 66940469 | 66942489 | + | 0  | NA                 | intron (Nintron (N  | 5963 NM_00136E    | 8824                | Hs. 282975NM_00386E | ENSG00000CES2       | CE-2 CES2                | chromoxyle protein-coding  |
| chr19-127:11.85367 | -0.43567 | 0.68597  | -0.63511 | 0.525354 | 0.981636 | chr19 | 1271063  | 1272525  | + | 0  | NA                 | TTS (NM_CTS (NM_C   | -2371 NM_017914   | 55009               | Hs. 591383NM_017914 | ENSG00000C19orf24   | -                        | chromosomprotein-coding    |
| chr4-1194:11.85367 | -0.43567 | 0.68597  | -0.63511 | 0.525354 | 0.981636 | chr4  | 1.19E+08 | 1.2E+08  | + | 0  | NA                 | intron (Nintron (N  | 51890 NR_03763C   | 645513              | Hs. 677546NR_03763C | ENSG00000CLOC645513 | -                        | septin 7 pseudo            |
| chr6-318:11.85367  | -0.43567 | 0.68597  | -0.63511 | 0.525354 | 0.981636 | chr6  | 31836360 | 31841148 | + | 0  | NA                 | intron (NALuXs1 SI  | 1678 NR_00274E    | 26797               | NR_00274E           | ENSG00000SNORD52    | RNU52 U52                | small nucsnRNA             |
| chr1-111:9.605986  | -0.4795  | 0.755183 | -0.63494 | 0.525467 | 0.981636 | chr1  | 11132765 | 11133308 | + | 0  | NA                 | intron (Nintron (N  | -10862 NR_04660C  | 1.01E+08            | Hs. 679133NR_04660C | ENSG00000MTOR-AS1   | -                        | MTOR antncRNA              |
| chr10-13:9.605986  | -0.4795  | 0.755183 | -0.63494 | 0.525467 | 0.981636 | chr10 | 1.33E+08 | 1.33E+08 | + | 0  | NA                 | intron (NLMIMA4 LIN | 13094 NM_00101E   | 503542              | Hs. 64968 NM_00101E | ENSG00000CSPRN      | SHAD00 Sf                | shadow of protein-coding   |
| chr13-11:9.605986  | -0.4795  | 0.755183 | -0.63494 | 0.525467 | 0.981636 | chr13 | 1.13E+08 | 1.13E+08 | + | 0  | NA                 | intron (N (ACC)n Si | 22382 NM_00100E   | 8451                | Hs. 339782NM_00358E | ENSG00000CUL4A      | -                        | culin 4#protein-coding     |
| chr17-29C:9.605986 | -0.4795  | 0.755183 | -0.63494 | 0.525467 | 0.981636 | chr17 | 29266064 | 29267596 | + | 0  | NA                 | intron (Nintron (N  | 19973 NM_00520E   | 1411                | Hs. 46275 NM_00520E | ENSG00000CRYBA1     | CRYB1 CTF                | crystallin protein-coding  |
| chr4-266C:9.605986 | -0.4795  | 0.755183 | -0.63494 | 0.525467 | 0.981636 | chr4  | 26689519 | 26692235 | + | 0  | NA                 | intron (NTigger1 I  | 106793 NM_018317  | 55296               | Hs. 479403NM_018317 | ENSG00000TBC1D19    | -                        | TBC1 domε protein-coding   |
| chr5-1294:9.605986 | -0.4795  | 0.755183 | -0.63494 | 0.525467 | 0.981636 | chr5  | 1.29E+08 | 1.29E+08 | + | 0  | NA                 | intron (Nintron (N  | -18159 NR_125744E | 1.04E+08            | Hs. 628633NR_12574E | ENSG00000ADAMTS19-  | -                        | ADAMTS19 ncRNA             |
| chr6-856C:9.605986 | -0.4795  | 0.755183 | -0.63494 | 0.525467 | 0.981636 | chr6  | 85628110 | 85630635 | + | 0  | NA                 | intron (Nintron (N  | 12079 NM_00115E   | 10492               | Hs. 571177NM_00637E | ENSG00000SYNCRIP    | GRY-RBP C                | synaptotil protein-coding  |
| chr9-128C:9.605986 | -0.4795  | 0.755183 | -0.63494 | 0.525467 | 0.981636 | chr9  | 1.29E+08 | 1.29E+08 | + | 0  | NA                 | intron (Nintron (N  | 9830 NM_00136E    | 6709                | Hs. 372331NM_003127 | ENSG00000SPTAN1     | EIEE5 NE#                | spectrin protein-coding    |
| chr12-69C:7.350448 | -0.54845 | 0.864262 | -0.63458 | 0.525749 | 0.981636 | chr12 | 69564918 | 69565374 | + | 0  | NA                 | intron (NTigger3b   | -19577 NR_03747E  | 1.01E+08            | NR_03747E           | ENSG00000MIR3913-2  | mir-3913                 | microRNA ncRNA             |
| chr1-151E:7.350448 | -0.54667 | 0.861561 | -0.63451 | 0.525749 | 0.981636 | chr1  | 1.62E+08 | 1.52E+08 | + | 0  | NA                 | intron (Nintron (N  | 16491 NR_03028C   | 693139              | NR_03028C           | ENSG00000MIR554     | -                        | microRNA ncRNA             |
| chr15-944:7.399446 | -0.54667 | 0.861561 | -0.63451 | 0.525749 | 0.981636 | chr15 | 94444984 | 94445789 | + | 0  | NA                 | intron (Nintron (N  | 89456 NM_00115E   | 55784               | Hs. 33368 NM_01834E | ENSG00000MCTP2      | -                        | multiple protein-coding    |
| chr11-34C:9.572704 | -0.48347 | 0.762094 | -0.63439 | 0.525825 | 0.981636 | chr11 | 34881609 | 34881870 | + | 0  | NA                 | TTS (NM_CTS (NM_C   | -34391 NM_00116E  | 8050                | Hs. 502315NM_003477 | ENSG00000PDHX       | DLDB E3E                 | pyruvate protein-coding    |
| chr19-10C:9.605986 | -0.49416 | 0.779056 | -0.6343  | 0.525885 | 0.981636 | chr19 | 10671019 | 10672317 | + | 0  | NA                 | intron (Nintron (N  | 17322 NM_00111E   | 3609                | Hs. 465888NM_00451E | ENSG00000ILF3       | CBTF DRBF                | interleuk protein-coding   |
| chr4-397E:9.605986 | -0.49416 | 0.779056 | -0.6343  | 0.525885 | 0.981636 | chr4  | 39765374 | 39765613 | + | 0  | NA                 | intron (NALuJb SIN  | 67357 NM_001111   | 3093                | Hs. 50308 NM_00533E | ENSG00000UBE2K      | E2-25K HU                | ubiquitin protein-coding   |
| chr1-202E:5.1379   | -0.656   | 1.034368 | -0.6342  | 0.52595  | 0.981636 | chr1  | 2.03E+08 | 2.03E+08 | + | 0  | NA                 | 3' UTR (N3' UTR (N  | 9608 NM_002871    | 5877                | Hs. 90875 NM_002871 | ENSG00000RAB1F      | MSS4 RASC                | RAB interprotein-coding    |
| chr11-10E:5.1379   | -0.656   | 1.034368 | -0.6342  | 0.52595  | 0.981636 | chr11 | 1.08E+08 | 1.08E+08 | + | 0  | NA                 | intron (Nintron (N  | 37655 NM_00347E   | 8065                | Hs.                 |                     |                          |                            |

|                     |          |          |          |          |          |       |          |          |   |        |                     |                  |                   |                |                                  |                                    |                              |
|---------------------|----------|----------|----------|----------|----------|-------|----------|----------|---|--------|---------------------|------------------|-------------------|----------------|----------------------------------|------------------------------------|------------------------------|
| chr10-295 7.203756  | 0.546451 | 0.865756 | 0.631184 | 0.52792  | 0.981636 | chr10 | 29508338 | 29508905 | + | 0 NA   | intron (Nintron (N  | 36476 NR_030335  | 693189            | NR_030335      | ENSG000002MIR604                 | MIRN604 tmicroRNA ncRNA            |                              |
| chr11-354 7.203756  | 0.546451 | 0.865756 | 0.631184 | 0.52792  | 0.981636 | chr11 | 35428228 | 35429749 | + | 0 NA   | Intergeni MLT2F LTF | -8930 NM_0011195 | 6506 Hs. 502338   | NR_004171      | ENSG000002SLC1A2                 | EAAT2 E1E solute c protein-coding  |                              |
| chr11-472 7.203756  | 0.546451 | 0.865756 | 0.631184 | 0.52792  | 0.981636 | chr11 | 47221616 | 47223285 | + | 0 NA   | intron (NAluJr SIN  | 7508 NM_001300   | 1643 Hs. 700338   | ENSG000002DDB2 | DBB UV-I damage s protein-coding |                                    |                              |
| chr11-117 7.203756  | 0.546451 | 0.865756 | 0.631184 | 0.52792  | 0.981636 | chr11 | 1.17E+08 | 1.17E+08 | + | 0 NA   | intron (Nintron (N  | 65875 NM_014956  | 22897 Hs. 504009  | NR_014956      | ENSG000002CEP164                 | NPHP15 centrosome protein-coding   |                              |
| chr12-481 7.203756  | 0.546451 | 0.865756 | 0.631184 | 0.52792  | 0.981636 | chr12 | 48129290 | 48135554 | + | 0 NA   | promoter-promoter-  | -375 NR_106766   | 1.02E+08          | NR_106766      | ENSG000002MIR6505                | hsa-mir-61 microRNA ncRNA          |                              |
| chr12-101 7.203756  | 0.546451 | 0.865756 | 0.631184 | 0.52792  | 0.981636 | chr12 | 1.01E+08 | 1.01E+08 | + | 0 NA   | intron (NAluJr SIN  | -20976 NR_049838 | 1.01E+08          | NR_049838      | ENSG000002MIR548A                | microRNA ncRNA                     |                              |
| chr12-112 7.203756  | 0.546451 | 0.865756 | 0.631184 | 0.52792  | 0.981636 | chr12 | 1.12E+08 | 1.12E+08 | + | 0 NA   | exon (NM exon (NM   | -83672 NR_106921 | 1.02E+08          | NR_106921      | ENSG000002MIR6861                | hsa-mir-61 microRNA ncRNA          |                              |
| chr12-125 7.203756  | 0.546451 | 0.865756 | 0.631184 | 0.52792  | 0.981636 | chr12 | 1.22E+08 | 1.22E+08 | + | 0 NA   | 3' UTR (N3' UTR (N  | -25287 NM_152755 | 254050            | Hs. 374856     | NR_152755                        | ENSG000002LRR343                   | leucine r protein-coding     |
| chr12-125 7.203756  | 0.546451 | 0.865756 | 0.631184 | 0.52792  | 0.981636 | chr12 | 1.23E+08 | 1.23E+08 | + | 0 NA   | intron (NAluSc5 SI  | -21669 NR_036187 | 1E+08             | NR_036187      | ENSG000002MIR4304                | microRNA ncRNA                     |                              |
| chr14-742 7.203756  | 0.546451 | 0.865756 | 0.631184 | 0.52792  | 0.981636 | chr14 | 74268886 | 74292411 | + | 0 NA   | intron (Nintron (N  | 13286 NR_148467  | 5826 Hs. 94395    | NR_005056      | ENSG000002ABCD4                  | ABC4 EST1ATP bindi protein-coding  |                              |
| chr14-102 7.203756  | 0.546451 | 0.865756 | 0.631184 | 0.52792  | 0.981636 | chr14 | 1.02E+08 | 1.02E+08 | + | 0 NA   | TTS (NM_C TTS (NM_C | 43596 NM_001348  | 122416            | Hs. 432946     | NR_152326                        | ENSG000002ANKRD9                   | ankyrin r protein-coding     |
| chr15-407 7.203756  | 0.546451 | 0.865756 | 0.631184 | 0.52792  | 0.981636 | chr15 | 40771945 | 40779476 | + | 0 NA   | intron (Nintron (N  | 5730 NM_001130   | 643338            | Hs. 631715     | NR_001130                        | ENSG000002C15orf62                 | chromosome protein-coding    |
| chr15-725 7.203756  | 0.546451 | 0.865756 | 0.631184 | 0.52792  | 0.981636 | chr15 | 72344989 | 72350374 | + | 0 NA   | intron (Nintron (N  | -27524 NM_005284 | 60677 Hs. 348342  | NR_005284      | ENSG000002CELP6                  | BRUNOL6 CUGBP E protein-coding     |                              |
| chr17-692 7.203756  | 0.546451 | 0.865756 | 0.631184 | 0.52792  | 0.981636 | chr17 | 6998738  | 6999401  | + | 0 NA   | intron (Nintron (N  | 3020 NM_000697   | 239 Hs. 654431    | NR_000697      | ENSG000002ALOX12                 | L2-LOX L2arachid protein-coding    |                              |
| chr17-291 7.203756  | 0.546451 | 0.865756 | 0.631184 | 0.52792  | 0.981636 | chr17 | 29103488 | 29107392 | + | 0 NA   | intron (N L2c LINE  | -29831 NM_004740 | 9220 Hs. 462599   | NR_004740      | ENSG000002TIAF1                  | MAJN SPR2 TGFBI-inc protein-coding |                              |
| chr18-747 7.203756  | 0.546451 | 0.865756 | 0.631184 | 0.52792  | 0.981636 | chr18 | 74503643 | 74504231 | + | 0 NA   | intron (Nintron (N  | 4349 NM_001168   | 55748 Hs. 149188  | NR_018236      | ENSG000002CNDP2                  | CN2 CPGL carnosine protein-coding  |                              |
| chr18-797 7.203756  | 0.546451 | 0.865756 | 0.631184 | 0.52792  | 0.981636 | chr18 | 79753957 | 79755156 | + | 0 NA   | TTS (NM_C TTS (NM_C | 73127 NM_001205  | 9150 Hs. 465499   | NR_004715      | ENSG000002CTDP1                  | CCFDN PCFCTD phosph protein-coding |                              |
| chr18-797 7.203756  | 0.546451 | 0.865756 | 0.631184 | 0.52792  | 0.981636 | chr18 | 79940111 | 79943344 | + | 0 NA   | intron (Nintron (N  | 9926 NM_001146   | 80148 Hs. 288284  | NR_025078      | ENSG000002SLC66A2                | PQLC1 solute c protein-coding      |                              |
| chr19-125 7.203756  | 0.546451 | 0.865756 | 0.631184 | 0.52792  | 0.981636 | chr19 | 12542945 | 12546360 | + | 0 NA   | intron (NMERS4A LI  | 6830 NM_144976   | 163050            | Hs. 655615     | NR_144976                        | ENSG000002ZNF564                   | zinc finger protein-coding   |
| chr19-164 7.203756  | 0.546451 | 0.865756 | 0.631184 | 0.52792  | 0.981636 | chr19 | 16400729 | 16405558 | + | 0 NA   | intron (Nintron (N  | 68827 NM_001258  | 58513 Hs. 654635  | NR_021235      | ENSG000002EPL5L1                 | EPL5L1 epidermal protein-coding    |                              |
| chr19-187 7.203756  | 0.546451 | 0.865756 | 0.631184 | 0.52792  | 0.981636 | chr19 | 18531897 | 18533296 | + | 0 NA   | intron (Nintron (N  | -10526 NM_006532 | 8178 Hs. 515266   | NR_006532      | ENSG000002ELL                    | C19orf17 elongatic protein-coding  |                              |
| chr19-195 7.203756  | 0.546451 | 0.865756 | 0.631184 | 0.52792  | 0.981636 | chr19 | 19349051 | 19357516 | + | 0 NA   | intron (Nintron (N  | 32454 NM_015325  | 23383 Hs. 654935  | NR_015325      | ENSG000002MAU2                   | KIAA0892 MAU2 sist protein-coding  |                              |
| chr19-552 7.203756  | 0.546451 | 0.865756 | 0.631184 | 0.52792  | 0.981636 | chr19 | 55289061 | 55296588 | + | 0 NA   | intron (NAluSx SIN  | 8827 NM_032430   | 84446 Hs. 182081  | NR_032430      | ENSG000002BRSK1                  | hSAD1 BR serine protein-coding     |                              |
| chr2-2334 7.203756  | 0.546451 | 0.865756 | 0.631184 | 0.52792  | 0.981636 | chr2  | 2.33E+08 | 2.33E+08 | + | 0 NA   | intron (Nintron (N  | 81931 NM_018218  | 55230 Hs. 96513   | NR_018218      | ENSG000002USP40                  | ubiquitin protein-coding           |                              |
| chr2-176 7.203756   | 0.546451 | 0.865756 | 0.631184 | 0.52792  | 0.981636 | chr2  | 17621313 | 17622961 | + | 0 NA   | intron (Nintron (N  | 6612 NM_001696   | 529 Hs. 517338    | NR_001696      | ENSG000002ATP6V1E1               | ARCL2C ATATPase H protein-coding   |                              |
| chr2-205 7.203756   | 0.546451 | 0.865756 | 0.631184 | 0.52792  | 0.981636 | chr2  | 20999589 | 21000267 | + | 0 NA   | TTS (NM_C TTS (NM_C | -1399 NR_027055  | 439931            | Hs. 517433     | NR_027055                        | ENSG000002THAP7-AS1                | THAP7 antncRNA               |
| chr2-214 7.203756   | 0.546451 | 0.865756 | 0.631184 | 0.52792  | 0.981636 | chr2  | 21479992 | 21481966 | + | 0 NA   | intron (NAluSx1 SI  | 10479992         | 645426            | Hs. 376511     | NR_001207                        | ENSG000002TMEM191C                 | transmembrane protein-coding |
| chr2-305 7.203756   | 0.546451 | 0.865756 | 0.631184 | 0.52792  | 0.981636 | chr2  | 30575979 | 30581817 | + | 0 NA   | exon (NM exon (NM   | -4233 NM_001318  | 9514 Hs. 17958    | NR_004861      | ENSG000002GAL3ST1                | CST galactose protein-coding       |                              |
| chr2-434 7.203756   | 0.546451 | 0.865756 | 0.631184 | 0.52792  | 0.981636 | chr2  | 43980644 | 43986317 | + | 0 NA   | intron (Nintron (N  | -15731 NM_001003 | 29780 Hs. 475074  | NR_013327      | ENSG000002PARVB                  | CGI-56 parvin b protein-coding     |                              |
| chr2-505 7.203756   | 0.546451 | 0.865756 | 0.631184 | 0.52792  | 0.981636 | chr2  | 50436629 | 50442437 | + | 0 NA   | intron (Nintron (N  | 32091 NR_162128  | 1.13E+08          | NR_162128      | MIR12114                         | microRNA ncRNA                     |                              |
| chr3-1571 7.203756  | 0.546451 | 0.865756 | 0.631184 | 0.52792  | 0.981636 | chr3  | 1.57E+08 | 1.57E+08 | + | 0 NA   | Intergeni L2a LINE  | -25038 NM_020307 | 57018 Hs. 4859    | NR_020307      | ENSG000002CCNL1                  | ANI6A B cyclin L1 protein-coding   |                              |
| chr4-8607 7.203756  | 0.546451 | 0.865756 | 0.631184 | 0.52792  | 0.981636 | chr4  | 860744   | 864994   | + | 0 NA   | intron (N Tigger1 I | -36740 NM_006651 | 10815 Hs. 478933  | NR_006651      | ENSG000002CPLX1                  | CPX-1 CPX complex protein-coding   |                              |
| chr5-1387 7.203756  | 0.546451 | 0.865756 | 0.631184 | 0.52792  | 0.981636 | chr5  | 13875128 | 13876848 | + | 0 NA   | intron (Nintron (N  | 68492 NM_001366  | 1767 Hs. 212366   | NR_001366      | ENSG000002DNAH5                  | CILD3 DNA dynein a protein-coding  |                              |
| chr6-152 7.203756   | 0.546451 | 0.865756 | 0.631184 | 0.52792  | 0.981636 | chr6  | 1.52E+08 | 1.52E+08 | + | 0 NA   | intron (N L2b LINE  | -57657 NR_120501 | 1.01E+08          | Hs. 571205     | NR_120501                        | SYNE1-AS1                          | SYNE1 antncRNA               |
| chr7-670 7.203756   | 0.546451 | 0.865756 | 0.631184 | 0.52792  | 0.981636 | chr7  | 67009767 | 67012093 | + | 0 NA   | intron (Nintron (N  | 14097 NR_018264  | 55253 Hs. 520917  | NR_018264      | ENSG000002TYW1                   | RSADF1 TY tRNA-yW s protein-coding |                              |
| chr7-9895 7.203756  | 0.546451 | 0.865756 | 0.631184 | 0.52792  | 0.981636 | chr7  | 98993545 | 98995218 | + | 0 NA   | intron (Nintron (N  | -18784 NR_110102 | 1.02E+08          | Hs. 636663     | NR_110102                        | LOC101927                          | uncharacterized ncRNA        |
| chr9-9271 7.203756  | 0.546451 | 0.865756 | 0.631184 | 0.52792  | 0.981636 | chr9  | 92712895 | 92714129 | + | 0 NA   | 3' UTR (N3' UTR (N  | -43381 NM_022755 | 64768 Hs. 459898  | NR_022755      | ENSG000002IPPK                   | C9orf12 inositol- protein-coding   |                              |
| chr9-1365 7.203756  | 0.546451 | 0.865756 | 0.631184 | 0.52792  | 0.981636 | chr9  | 1.36E+08 | 1.36E+08 | + | 0 NA   | intron (Nintron (N  | 3381 NM_003088   | 6621 Hs. 113265   | NR_003088      | ENSG000002SNAPC4                 | P17Alfa small nuc protein-coding   |                              |
| chr12-511 6.707168  | 0.577379 | 0.915    | 0.631015 | 0.528031 | 0.981636 | chr12 | 51107638 | 51108495 | + | 0 NA   | intron (NAluSx3 SI  | -24470 NM_030805 | 81566 Hs. 524422  | NR_030805      | ENSG000002CSRNP2                 | C2orf2 cysteine protein-coding     |                              |
| chr15-768 6.707168  | 0.577379 | 0.915    | 0.631015 | 0.528031 | 0.981636 | chr15 | 76850480 | 76852454 | + | 0 NA   | intron (N LIPREC2 I | 10477 NM_001145  | 49855 Hs. 458988  | NR_020843      | ENSG000002SCAPER                 | IDDRP MS1S-phase c protein-coding  |                              |
| chr16-156 6.707168  | 0.577379 | 0.915    | 0.631015 | 0.528031 | 0.981636 | chr16 | 1582199  | 1582815  | + | 0 NA   | intron (N MLT1D LTF | 1980 NR_135176   | 1.05E+08          | Hs. 663322     | NR_135176                        | ENSG000002LOC105371                | uncharacterized ncRNA        |
| chr16-256 6.707168  | 0.577379 | 0.915    | 0.631015 | 0.528031 | 0.981636 | chr16 | 2596026  | 2597169  | + | 0 NA   | intron (Nintron (N  | -6787 NR_015441  | 652276 Hs. 720448 | NR_015441      | ENSG000002LOC652276              | potassium pseudo                   |                              |
| chr3-9677 6.707168  | 0.577379 | 0.915    | 0.631015 | 0.528031 | 0.981636 | chr3  | 9677682  | 9678832  | + | 0 NA   | intron (Nintron (N  | -25576 NM_153635 | 151835 Hs. 121333 | NR_153635      | ENSG000002CPNE9                  | copine f protein-coding            |                              |
| chr5-173 6.707168   | 0.577379 | 0.915    | 0.631015 | 0.528031 | 0.981636 | chr5  | 1.73E+08 | 1.73E+08 | + | 0 NA   | intron (Nintron (N  | 13961 NM_013988  | 662 Hs. 145722    | NR_001205      | ENSG000002BNIP1                  | NIP1 SEC2BCL2 inte protein-coding  |                              |
| chr19-231 3.453371  | -0.78681 | 1.247571 | -0.63067 | 0.528253 | 0.981636 | chr19 | 23219527 | 23220423 | + | 0 NA   | Intergeni Intergeni | 30419 NM_001355  | 440519 Hs. 675814 | NR_001355      | ENSG000002ZNF724                 | ZNF724F zinc finger protein-coding |                              |
| chr2-2375 3.453371  | -0.78681 | 1.247571 | -0.63067 | 0.528253 | 0.981636 | chr2  | 2.38E+08 | 2.38E+08 | + | 0 NA   | intron (NAluJb SIN  | 17381 NM_001278  | 140739 Hs. 471788 | NR_080678      | ENSG000002UBE2F                  | NCE2 ubiquitin protein-coding      |                              |
| chr1-2075 9.639267  | -0.47561 | 0.754169 | -0.63064 | 0.528273 | 0.981636 | chr1  | 2.07E+08 | 2.07E+08 | + | 0 NA   | intron (N LIMEg LIN | 11925 NR_125345  | 1604 Hs. 126517   | NR_000574      | ENSG000002CD55                   | CHAPLE CFCD55 mole protein-coding  |                              |
| chr14-525 9.639267  | -0.47561 | 0.754169 | -0.63064 | 0.528273 | 0.981636 | chr14 | 52946587 | 52948189 | + | 0 NA   | intron (NAluY SINE  | 3662 NM_006832   | 10979 Hs. 509342  | NR_006832      | ENSG000002FERMT2                 | KIND2 MIC fermitin protein-coding  |                              |
| chr19-1119 9.639267 | -0.47561 | 0.754169 | -0.63064 | 0.528273 | 0.981636 | chr19 | 11169428 | 11171303 | + | 0 NA   | intron (Nintron (N  | -14553 NM_001317 | 14784 Hs. 381225  | NR_182515      | ENSG000002SPC24                  | SPC24 con protein-coding           |                              |
| chr2-1698 9.639267  | -0.47561 | 0.754169 | -0.63064 | 0.528273 | 0.981636 | chr2  | 1.7E+08  | 1.7E+08  | + | 0 NA</ |                     |                  |                   |                |                                  |                                    |                              |



|            |          |          |          |          |          |          |       |          |          |   |   |    |                          |        |           |          |           |                     |                  |                            |
|------------|----------|----------|----------|----------|----------|----------|-------|----------|----------|---|---|----|--------------------------|--------|-----------|----------|-----------|---------------------|------------------|----------------------------|
| chr3-1944  | 9.63141  | -0.47428 | 0.753977 | -0.62904 | 0.529323 | 0.981636 | chr3  | 1.94E+08 | 1.94E+08 | + | 0 | NA | intron (N(TGTAATA)       | 8651   | NM_024524 | 79572    | Hs.529609 | ENSG000004ATP13A3   | AFURS1           | ATPase 1;protein-coding    |
| chr5-6911  | 9.63141  | -0.47428 | 0.753977 | -0.62904 | 0.529323 | 0.981636 | chr5  | 69115545 | 69117582 | + | 0 | NA | exon (NM_exon (NM_022902 | 22549  | NM_022902 | 64924    | Hs.63197  | ENSG000004SLC30A5   | ZNT5 ZNT1        | solute c;protein-coding    |
| chr5-179f  | 9.63141  | -0.47428 | 0.753977 | -0.62904 | 0.529323 | 0.981636 | chr5  | 1.8E+08  | 1.8E+08  | + | 0 | NA | intron (N(intron (N      | 9264   | NR_11056f | 1.02E+08 | Hs.66325  | ENSG000004LOC10192f | -                | uncharactercncRNA          |
| chr6-158f  | 9.63141  | -0.47428 | 0.753977 | -0.62904 | 0.529323 | 0.981636 | chr6  | 1.59E+08 | 1.59E+08 | + | 0 | NA | intron (N(LIPA5 LIN      | 4893   | NR_106981 | 1.02E+08 | NR_106981 | ENSG000004MIR7161   | hsa-mir-7        | miRNA ncRNA                |
| chr7-107f  | 9.63141  | -0.47428 | 0.753977 | -0.62904 | 0.529323 | 0.981636 | chr7  | 1.08E+08 | 1.08E+08 | + | 0 | NA | intron (N(intron (N      | 38815  | NM_00010f | 1738     | HS.13171  | ENSG000004DLD       | DLDD DLDF        | hydrolylprotein-coding     |
| chr8-381f  | 9.63141  | -0.47428 | 0.753977 | -0.62904 | 0.529323 | 0.981636 | chr8  | 38168109 | 38172497 | + | 0 | NA | intron (N(AluSx3 SI      | 6190   | NM_01446f | 27257    | Hs.42531  | ENSG000004CLSM1     | CASM YJL1LSM1    | homcprotein-coding         |
| chr20-43f  | 6.632747 | 0.572659 | 0.910553 | 0.628914 | 0.529405 | 0.981636 | chr20 | 43638058 | 43638430 | + | 0 | NA | intron (N(AluSg2 SI      | -28775 | NM_00127f | 4605     | HS.17971  | ENSG000004MYBL2     | B-MYB BMYB       | protcprotein-coding        |
| chr18-74f  | 7.237038 | 0.549811 | 0.874726 | 0.628552 | 0.529642 | 0.981636 | chr18 | 74260786 | 74263611 | + | 0 | NA | intron (N(AluSx SIN      | 29765  | NM_14892f | 1528     | HS.46541  | ENSG000004CYB5A     | CYB5 MCBE        | cytochornprotein-coding    |
| chr20-321f | 7.237038 | 0.549811 | 0.874726 | 0.628552 | 0.529642 | 0.981636 | chr20 | 32139502 | 32140668 | + | 0 | NA | intron (N(L2c LINE       | 30357  | NM_00136f | 9777     | HS.65466  | ENSG000004TM9SF4    | dJ836N17         | transmemtprotein-coding    |
| chr2-5564f | 7.424869 | -0.53979 | 0.859173 | -0.62827 | 0.529828 | 0.981636 | chr2  | 55642794 | 55643600 | + | 0 | NA | exon (NM_exon (NM_02046f | -25575 | NM_02046f | 57223    | HS.51618  | ENSG000004PPP4R3B   | FLFL2 PP4        | protein f;protein-coding   |
| chr7-121f  | 7.424869 | -0.53979 | 0.859173 | -0.62827 | 0.529828 | 0.981636 | chr7  | 1.21E+08 | 1.21E+08 | + | 0 | NA | intron (N(MER103C I      | 28118  | NM_05716f | 51384    | HS.27237  | ENSG000004WNT16     | -                | Wnt familtprotein-coding   |
| chr1-551f  | 5.163323 | -0.64594 | 1.028808 | -0.62786 | 0.530099 | 0.981636 | chr1  | 55151062 | 55152937 | + | 0 | NA | intron (N(intron (N      | 63365  | NM_01530f | 23358    | HS.47700  | ENSG000004USP24     | -                | ubiquitirprotein-coding    |
| chr15-75f  | 5.163323 | -0.64594 | 1.028808 | -0.62786 | 0.530099 | 0.981636 | chr15 | 75861494 | 75861915 | + | 0 | NA | intron (N(intron (N      | 17660  | NM_00114f | 92912    | HS.23033  | ENSG000004UBE2Q2    | -                | ubiquitirprotein-coding    |
| chr17-42f  | 5.163323 | -0.64594 | 1.028808 | -0.62786 | 0.530099 | 0.981636 | chr17 | 4222859  | 4223141  | + | 0 | NA | intron (N(intron (N      | 40748  | NM_00125f | 51479    | HS.69608  | ENSG000004ANKFY1    | ANKHZH B1ankyrin | lprotein-coding            |
| chr17-591f | 5.163323 | -0.64594 | 1.028808 | -0.62786 | 0.530099 | 0.981636 | chr17 | 59126351 | 59127543 | + | 0 | NA | intron (N(LIMB3 LIN      | 10925  | NR_030411 | 768216   | NR_030411 | ENSG000004MIR454    | MIRN454          | microRNA ncRNA             |
| chr2-702f  | 5.163323 | -0.64594 | 1.028808 | -0.62786 | 0.530099 | 0.981636 | chr2  | 70209088 | 70211020 | + | 0 | NA | non-codiron-codir        | -19035 | NR_14597f | 54980    | HS.72004  | ENSG000004C2orf42   | -                | chromosonprotein-coding    |
| chr7-137f  | 5.163323 | -0.64594 | 1.028808 | -0.62786 | 0.530099 | 0.981636 | chr7  | 1.38E+08 | 1.38E+08 | + | 0 | NA | intron (N(AluS6 SI       | 40532  | NM_00131f | 64764    | HS.49027  | ENSG000004CREB3L2   | BBF2H7           | cAMP res;pprotein-coding   |
| chr9-132f  | 5.163323 | -0.64594 | 1.028808 | -0.62786 | 0.530099 | 0.981636 | chr9  | 1.33E+08 | 1.33E+08 | + | 0 | NA | non-codiron-codir        | 20367  | NM_012204 | 9329     | HS.22027  | ENSG000004GTF3C4    | KAT12 TF3        | general tprotein-coding    |
| chr10-68f  | 9.887284 | 0.472169 | 0.752176 | 0.627738 | 0.530176 | 0.981636 | chr10 | 68375626 | 68375845 | + | 0 | NA | exon (N(Alu SINE         | 31454  | NM_017987 | 55680    | HS.65314  | ENSG000004RUFY2     | RAB1P4R ZRUN     | and fprotein-coding        |
| chr11-864f | 7.162617 | 0.545267 | 0.868686 | 0.627691 | 0.530206 | 0.981636 | chr11 | 8647905  | 8648927  | + | 0 | NA | exon (NM_exon (NM_01481f | 10420  | NM_01481f | 9866     | HS.13083  | ENSG000004TRIM66    | C1lorf29         | tripartitprotein-coding    |
| chr11-942f | 7.162617 | 0.545267 | 0.868686 | 0.627691 | 0.530206 | 0.981636 | chr11 | 94288980 | 94289476 | + | 0 | NA | Intergeni(LIMEf LIN      | -8470  | NM_01834f | 55784    | HS.33368  | ENSG000004MTCP2     | -                | multiple protein-coding    |
| chr3-1247f | 7.162617 | 0.545267 | 0.868686 | 0.627691 | 0.530206 | 0.981636 | chr3  | 1.25E+08 | 1.25E+08 | + | 0 | NA | 3' UTR (N3' UTR (N       | 30833  | NR_03608f | 1E+08    | NR_03608f | ENSG000004MIR544B   | -                | microRNA ncRNA             |
| chr5-134f  | 7.162617 | 0.545267 | 0.868686 | 0.627691 | 0.530206 | 0.981636 | chr5  | 1.35E+08 | 1.35E+08 | + | 0 | NA | intron (N(intron (N      | 18656  | NM_03215f | 84105    | HS.71001  | ENSG000004PCBD2     | DCOH2 DCC        | pterin-4 protein-coding    |
| chr9-127f  | 7.162617 | 0.545267 | 0.868686 | 0.627691 | 0.530206 | 0.981636 | chr9  | 1.28E+08 | 1.28E+08 | + | 0 | NA | intron (N(intron (N      | 20861  | NM_02283f | 64855    | HS.52240  | ENSG000004NIBAN2    | C9orf88 F        | niban apcprotein-coding    |
| chr12-68f  | 9.594428 | -0.49781 | 0.793169 | -0.62762 | 0.530252 | 0.981636 | chr12 | 6836305  | 6836589  | + | 0 | NA | intron (N(intron (N      | -4478  | NM_00129f | 2784     | HS.63165  | ENSG000004GNB3      | CSNB1H           | G proteirprotein-coding    |
| chr1-156f  | 7.170475 | 0.54308  | 0.866051 | 0.627076 | 0.530609 | 0.981636 | chr1  | 1.56E+08 | 1.56E+08 | + | 0 | NA | exon (NM_exon (NM_01465f | 6255   | NM_01465f | 9673     | HS.53237  | ENSG000004SLC25A44  | -                | solute c;protein-coding    |
| chr10-13f  | 7.170475 | 0.54308  | 0.866051 | 0.627076 | 0.530609 | 0.981636 | chr10 | 13616553 | 13617117 | + | 0 | NA | intron (N(intron (N      | 29870  | NM_00367f | 8559     | HS.66064  | ENSG000004PRPF18    | PRP18 hPr        | pre-mRNA protein-coding    |
| chr12-26f  | 7.170475 | 0.54308  | 0.866051 | 0.627076 | 0.530609 | 0.981636 | chr12 | 26977266 | 26978050 | + | 0 | NA | intron (N(AluS SIN       | 36726  | NM_016551 | 51768    | HS.43864  | ENSG000004TM7SF3    | -                | transmemtprotein-coding    |
| chr15-28f  | 7.170475 | 0.54308  | 0.866051 | 0.627076 | 0.530609 | 0.981636 | chr15 | 28211824 | 28213058 | + | 0 | NA | intron (N(intron (N      | 109711 | NM_00466f | 8924     | HS.43489  | ENSG000004HERC2     | D15F37S1         | HECT and protein-coding    |
| chr15-63f  | 7.170475 | 0.54308  | 0.866051 | 0.627076 | 0.530609 | 0.981636 | chr15 | 63161904 | 63161578 | + | 0 | NA | intron (N(intron (N      | -1464  | NR_03408f | 1E+08    | NR_03408f | ENSG000004USP3-AS1  | USP3             | antincRNA                  |
| chr15-91f  | 7.170475 | 0.54308  | 0.866051 | 0.627076 | 0.530609 | 0.981636 | chr15 | 91001051 | 91001991 | + | 0 | NA | intron (N(intron (N      | -6986  | NM_19941f | 9055     | HS.36640  | ENSG000004PRC1      | ASE1             | protein rprotein-coding    |
| chr19-14f  | 7.170475 | 0.54308  | 0.866051 | 0.627076 | 0.530609 | 0.981636 | chr19 | 14694890 | 14697243 | + | 0 | NA | intron (N(AluS6 SI       | 6018   | NM_00135f | 84449    | HS.51521  | ENSG000004ZNF333    | -                | zinc fingernprotein-coding |
| chr2-273f  | 7.170475 | 0.54308  | 0.866051 | 0.627076 | 0.530609 | 0.981636 | chr2  | 27333326 | 27337653 | + | 0 | NA | promoter-promoter-       | -53    | NR_03842f | 1.01E+08 | HS.66650  | ENSG000004GTF3C2-AS | GTF3C2           | ancRNA                     |
| chr3-5274f | 7.170475 | 0.54308  | 0.866051 | 0.627076 | 0.530609 | 0.981636 | chr3  | 52745281 | 52747083 | + | 0 | NA | exon (NM_exon (NM_00134f | 24758  | NM_00134f | 6787     | HS.63192  | ENSG000004CNEK4     | NRK2 STK2        | NIMA rel;pprotein-coding   |
| chr4-3557f | 7.170475 | 0.54308  | 0.866051 | 0.627076 | 0.530609 | 0.981636 | chr4  | 355788   | 356397   | + | 0 | NA | intron (N(AluSg4 SI      | 5935   | NR_03029f | 693156   | NR_03029f | ENSG000004MIR571    | MIRN571          | microRNA ncRNA             |
| chr4-657f  | 7.170475 | 0.54308  | 0.866051 | 0.627076 | 0.530609 | 0.981636 | chr4  | 6578626  | 6580884  | + | 0 | NA | intron (N(CCATCA)R       | 4566   | NM_015274 | 23324    | HS.18846  | ENSG000004MAN2B2    | -                | mannoside protein-coding   |
| chr6-155f  | 7.170475 | 0.54308  | 0.866051 | 0.627076 | 0.530609 | 0.981636 | chr6  | 15501024 | 15501947 | + | 0 | NA | intron (N(intron (N      | 161543 | NR_03644f | 84062    | HS.57114  | ENSG000004DTNBP1    | BLOC1S8 I        | dystrobre protein-coding   |
| chr6-431f  | 7.170475 | 0.54308  | 0.866051 | 0.627076 | 0.530609 | 0.981636 | chr6  | 43194838 | 43198914 | + | 0 | NA | intron (N(intron (N      | 14680  | NM_01508f | 23113    | HS.48543  | ENSG000004CUL9      | H7AP1 PAF        | cullin 9 protein-coding    |
| chr8-202f  | 7.170475 | 0.54308  | 0.866051 | 0.627076 | 0.530609 | 0.981636 | chr8  | 20224725 | 20226834 | + | 0 | NA | Intergeni(Intergeni      | 28398  | NM_00169f | 526      | HS.29591  | ENSG000004ATP6V1B2  | ATP6B1B2         | ATPase H;protein-coding    |
| chr9-136f  | 7.170475 | 0.54308  | 0.866051 | 0.627076 | 0.530609 | 0.981636 | chr9  | 1.37E+08 | 1.37E+08 | + | 0 | NA | exon (NM_exon (NM_03982f | 14297  | NR_03982f | 1.01E+08 | NR_03982f | ENSG000004MIR4673   | -                | microRNA ncRNA             |
| chr11-10f  | 7.317166 | -0.55412 | 0.883746 | -0.62702 | 0.530648 | 0.981636 | chr11 | 1.02E+08 | 1.02E+08 | + | 0 | NA | intron (N(AluS SIN       | 12525  | NM_00119f | 10413    | HS.50369  | ENSG000004YAP1      | COB1 YAP         | Yes assocprotein-coding    |
| chr10-68f  | 7.368014 | -0.53982 | 0.861001 | -0.62696 | 0.530683 | 0.981636 | chr10 | 68378631 | 68379391 | + | 0 | NA | intron (N(intron (N      | 28178  | NM_017987 | 55680    | HS.65314  | ENSG000004RUFY2     | RAB1P4R ZRUN     | and fprotein-coding        |
| chr10-96f  | 7.368014 | -0.53982 | 0.861001 | -0.62696 | 0.530683 | 0.981636 | chr10 | 96550489 | 96550725 | + | 0 | NA | intron (N(intron (N      | 36405  | NM_02012f | 56889    | HS.50067  | ENSG000004TM9SF3    | EP70-P-          | is transmemtprotein-coding |
| chr10-10f  | 7.368014 | -0.53982 | 0.861001 | -0.62696 | 0.530683 | 0.981636 | chr10 | 1.01E+08 | 1.01E+08 | + | 0 | NA | intron (N(intron (N      | 7602   | NM_01790f | 55662    | HS.50078  | ENSG000004HIF1AN    | FIH1             | hypoxia iprotein-coding    |
| chr11-12f  | 7.368014 | -0.53982 | 0.861001 | -0.62696 | 0.530683 | 0.981636 | chr11 | 1.26E+08 | 1.26E+08 | + | 0 | NA | intron (N(intron (N      | 4114   | NM_00127f | 3703     | HS.50423  | ENSG000004SIT3A     | ITM1 STT3        | STT3 oli;pprotein-coding   |
| chr2-177f  | 7.368014 | -0.53982 | 0.861001 | -0.62696 | 0.530683 | 0.981636 | chr2  | 17714380 | 17715033 | + | 0 | NA | intron (N(intron (N      | 39104  | NM_00114f | 79677    | HS.50272  | ENSG000004SMC6      | SMC-6 SMC        | structure;pprotein-coding  |
| chr2-739f  | 7.368014 | -0.53982 | 0.861001 | -0.62696 | 0.530683 | 0.981636 | chr2  | 73941899 | 73942374 | + | 0 | NA | intron (N(AluSx1 SI      | 15256  | NR_13489f | 1716     | HS.46902  | ENSG000004DGPUK     | MTDPS3 N         | C deoxyguar protein-coding |
| chr4-569f  | 7.368014 | -0.53982 | 0.861001 | -0.62696 | 0.530683 | 0.981636 | chr4  | 56989665 | 56989864 | + | 0 | NA | intron (N(intron (N      | 10868  | NM_00093f | 5431     | HS.60275  | ENSG000004POLR2B    | POLY2RB RF       | RNA polynprotein-coding    |
| chr6-8561f | 7.368014 | -0.53982 | 0.861001 | -0.62696 | 0.530683 | 0.981636 | chr6  | 85619643 | 85620083 | + | 0 | NA | intron (N(LIMC1 LIN      | 21588  | NM_00115f | 10492    | HS.57117  | ENSG000004SYNCRIP   | GRY-8BP          | synaptote;pprotein-coding  |
| chr8-419f  | 7.368014 | -0.53982 | 0.861001 | -0.62696 | 0.530683 | 0.981636 | chr8  | 41954567 | 41955314 | + | 0 | NA | intron (N(intron (N      | -58199 | NM_00114f | 286      | HS.65443  | ENSG000004ANK1      | ANK SPH1         | ankyrin lprotein-coding    |
| chr1-2410  | 10.94702 | 0.446048 | 0.711622 | 0.626804 | 0.530787 | 0.981636 | chr1  | 2.47E+08 | 2.47E+08 | + | 0 | NA | 3' UTR (N3' UTR (N       | 15507  | NM_00129f | 7678     | HS.42123  | ENSG000004ZNF124    | HZF-16 H         | zinc fingernprotein-coding |
|            |          |          |          |          |          |          |       |          |          |   |   |    |                          |        |           |          |           |                     |                  |                            |

|                    |          |          |          |          |          |       |          |          |   |   |    |                                        |                  |                              |                     |                                     |
|--------------------|----------|----------|----------|----------|----------|-------|----------|----------|---|---|----|----------------------------------------|------------------|------------------------------|---------------------|-------------------------------------|
| chr1-1627 7.178332 | 0.540846 | 0.868907 | 0.622444 | 0.53365  | 0.981636 | chr1  | 1.63E+08 | 1.63E+08 | + | 0 | NA | intron (N)LM5a LI                      | -27070 NM_001304 | 51478 Hs. 492925NM_016371    | ENSG000004HSD17B7   | PRAP SDR2 hydroxyst protein-coding  |
| chr1-1835 7.178332 | 0.540846 | 0.868907 | 0.622444 | 0.53365  | 0.981636 | chr1  | 1.84E+08 | 1.84E+08 | + | 0 | NA | intron (N)MIRc SINE                    | 115786 NM_001303 | 23127 Hs. 387999NM_015101    | ENSG000004COLGALT2  | C1orf17 collagen protein-coding     |
| chr10-996 7.178332 | 0.540846 | 0.868907 | 0.622444 | 0.53365  | 0.981636 | chr10 | 99685732 | 99686432 | + | 0 | NA | intron (N)intron (N)                   | 26453 NM_001345  | 57089 Hs. 28326 NM_020354    | ENSG000004CENTPD7   | LALP1 ectonucle protein-coding      |
| chr10-102 7.178332 | 0.540846 | 0.868907 | 0.622444 | 0.53365  | 0.981636 | chr10 | 1.03E+08 | 1.03E+08 | + | 0 | NA | intron (N)AluSg7 SI                    | 17008 NM_004311  | 403 Hs. 182215NM_004311      | ENSG000004ARL3      | ARL3 JBI ADP ribos protein-coding   |
| chr10-125 7.178332 | 0.540846 | 0.868907 | 0.622444 | 0.53365  | 0.981636 | chr10 | 1.26E+08 | 1.26E+08 | + | 0 | NA | intron (N)intron (N)                   | -4554 NR_039704  | 1.01E+08 NR_039704           | ENSG000004MIR4484   | mir-4484 microRNA ncRNA             |
| chr11-655 7.178332 | 0.540846 | 0.868907 | 0.622444 | 0.53365  | 0.981636 | chr11 | 65551964 | 65552598 | + | 0 | NA | exon (NM)exon (NM)                     | 5947 NM_021070   | 4054 Hs. 289015NM_021070     | ENSG000004TBP3      | DASS GPH latent tr protein-coding   |
| chr15-96 7.178332  | 0.540846 | 0.868907 | 0.622444 | 0.53365  | 0.981636 | chr15 | 96337278 | 96338438 | + | 0 | NA | 3' UTR (N)3' UTR (N)                   | 4093 NM_001145   | 7026 Hs. 347991NM_021000     | ENSG000004NR2F2     | HAT-1 ARF nuclear l protein-coding  |
| chr17-276 7.178332 | 0.540846 | 0.868907 | 0.622444 | 0.53365  | 0.981636 | chr17 | 10367596 | 10370072 | + | 0 | NA | intron (N)intron (N)                   | -19198 NM_002308 | 3965 Hs. 81337 NM_002308     | ENSG000004LGALS9    | ARUP L GAL galectin protein-coding  |
| chr17-584 7.178332 | 0.540846 | 0.868907 | 0.622444 | 0.53365  | 0.981636 | chr17 | 58488323 | 58488623 | + | 0 | NA | promoter-promoter-intron (N)intron (N) | -65 NM_001080    | 124535 Hs. 380061NM_001080   | ENSG000004HSF5      | HSF 5 HS1 heat shoc protein-coding  |
| chr17-76 7.178332  | 0.540846 | 0.868907 | 0.622444 | 0.53365  | 0.981636 | chr17 | 76084578 | 76086714 | + | 0 | NA | intron (N)intron (N)                   | 6464 NM_180999   | 353174 Hs. 714915NM_180999   | ENSG000004ZACN      | L2 L GIC2 zinc acti protein-coding  |
| chr19-105 7.178332 | 0.540846 | 0.868907 | 0.622444 | 0.53365  | 0.981636 | chr19 | 10367236 | 10370072 | + | 0 | NA | intron (N)MLT1 J2 LI                   | 1918 NM_003331   | 7297 Hs. 75516 NM_003331     | ENSG000004TYK2      | IMD35 JTK tyrosine protein-coding   |
| chr19-205 7.178332 | 0.540846 | 0.868907 | 0.622444 | 0.53365  | 0.981636 | chr19 | 20545279 | 20548280 | + | 0 | NA | intron (N)AluJr4 SI                    | 19002 NM_001155  | 1E+08 Hs. 515695NM_001155    | ENSG000004ZNF737    | ZNF102 zinc fing protein-coding     |
| chr19-357 7.178332 | 0.540846 | 0.868907 | 0.622444 | 0.53365  | 0.981636 | chr19 | 35753157 | 35754070 | + | 0 | NA | TTS (NM)TTS (NM)                       | 3416 NM_144617   | 126393 Hs. 534535NM_144617   | ENSG000004HSPB6     | HLL55 Hs heat shoc protein-coding   |
| chr19-367 7.178332 | 0.540846 | 0.868907 | 0.622444 | 0.53365  | 0.981636 | chr19 | 36024542 | 36028643 | + | 0 | NA | exon (NM)exon (NM)                     | 6043 NM_001195   | 25999 Hs. 466535NM_015525    | ENSG000004CLIP3     | CLIPR-59 CAP-Gly c protein-coding   |
| chr2-1591 7.178332 | 0.540846 | 0.868907 | 0.622444 | 0.53365  | 0.981636 | chr2  | 1.59E+08 | 1.59E+08 | + | 0 | NA | intron (N)intron (N)                   | 7690 NR_106945   | 1.02E+08 NR_106945           | ENSG000004MIR6888   | hsa-mir-618 microRNA ncRNA          |
| chr2-2178 7.178332 | 0.540846 | 0.868907 | 0.622444 | 0.53365  | 0.981636 | chr2  | 2.18E+08 | 2.18E+08 | + | 0 | NA | exon (NM)exon (NM)                     | 2752 NR_106867   | 1.02E+08 NR_106867           | ENSG000004MIR6809   | hsa-mir-618 microRNA ncRNA          |
| chr3-3305 7.178332 | 0.540846 | 0.868907 | 0.622444 | 0.53365  | 0.981636 | chr3  | 33033892 | 33034397 | + | 0 | NA | intron (N)intron (N)                   | 62688 NM_001075  | 2720 Hs. 443031NM_000404     | ENSG000004GLB1      | EBP ELNR1 galactosi protein-coding  |
| chr5-213 7.178332  | 0.540846 | 0.868907 | 0.622444 | 0.53365  | 0.981636 | chr5  | 213352   | 214202   | + | 0 | NA | intron (N)LM1D1 LIN                    | 4376 NM_145265   | 133957 Hs. 294145NM_145265   | ENSG000004CCDC127   | - coiled-cc protein-coding          |
| chr5-1195 7.178332 | 0.540846 | 0.868907 | 0.622444 | 0.53365  | 0.981636 | chr5  | 1.2E+08  | 1.2E+08  | + | 0 | NA | intron (N)intron (N)                   | 77540 NM_000414  | 3295 Hs. 406861NM_000414     | ENSG000004HSD17B4   | DBP MFE-2 hydroxyst protein-coding  |
| chr6-4301 7.178332 | 0.540846 | 0.868907 | 0.622444 | 0.53365  | 0.981636 | chr6  | 43010610 | 43012192 | + | 0 | NA | TTS (NM)TTS (NM)                       | 2545 NM_014623   | 4201 Hs. 278362NM_014623     | ENSG000004MEA1      | HYS MEA male-enhe protein-coding    |
| chr7-5708 7.178332 | 0.540846 | 0.868907 | 0.622444 | 0.53365  | 0.981636 | chr7  | 5709201  | 5709201  | + | 0 | NA | intron (N)intron (N)                   | 3160 NR_106934   | 1.02E+08 NR_106934           | ENSG000004MIR6874   | hsa-mir-618 microRNA ncRNA          |
| chr1-2735 7.211614 | 0.544183 | 0.874328 | 0.622402 | 0.533678 | 0.981636 | chr1  | 27334143 | 27335484 | + | 0 | NA | intron (N)intron (N)                   | -7209 NM_001193  | 84958 Hs. 469175NM_032872    | ENSG000004SYTL1     | JFC1 SLP1 synaptot protein-coding   |
| chr1-4665 7.211614 | 0.544183 | 0.874328 | 0.622402 | 0.533678 | 0.981636 | chr1  | 46657753 | 46658642 | + | 0 | NA | intron (N)intron (N)                   | 7681 NM_001255   | 64756 Hs. 100874NM_022745    | ENSG000004ATPAF1    | ATP11 ATF ATP syntl protein-coding  |
| chr1-2265 7.211614 | 0.544183 | 0.874328 | 0.622402 | 0.533678 | 0.981636 | chr1  | 2.26E+08 | 2.26E+08 | + | 0 | NA | intron (N)intron (N)                   | 39067 NM_001618  | 142 Hs. 177769NM_001618      | ENSG000004PARP1     | ADPRT ADP poly (ADP- protein-coding |
| chr14-776 7.211614 | 0.544183 | 0.874328 | 0.622402 | 0.533678 | 0.981636 | chr14 | 77672555 | 77674141 | + | 0 | NA | 3' UTR (N)3' UTR (N)                   | 34675 NM_006020  | 8846 Hs. 94542 NM_006020     | ENSG000004ALKBH1    | ABH ABH1 alkB homc protein-coding   |
| chr14-814 7.211614 | 0.544183 | 0.874328 | 0.622402 | 0.533678 | 0.981636 | chr14 | 81480680 | 81481145 | + | 0 | NA | intron (N)Charlie2a                    | -30755 NR_109995 | 1.01E+08 Hs. 116304NR_109995 | ENSG000004LINC02308 | - long intncRNA                     |
| chr17-487 7.211614 | 0.544183 | 0.874328 | 0.622402 | 0.533678 | 0.981636 | chr17 | 4892253  | 4893697  | + | 0 | NA | intron (N)intron (N)                   | -6561 NM_001145  | 1E+08 Hs. 579245NM_001145    | ENSG000004C17orf107 | - chromoson protein-coding          |
| chr2-1275 7.211614 | 0.544183 | 0.874328 | 0.622402 | 0.533678 | 0.981636 | chr2  | 12727463 | 12729589 | + | 0 | NA | intron (N)intron (N)                   | -8841 NR_036072  | 1E+08 NR_036072              | ENSG000004MIR3125   | mir-3125 microRNA ncRNA             |
| chr20-516 7.211614 | 0.544183 | 0.874328 | 0.622402 | 0.533678 | 0.981636 | chr20 | 51673310 | 51676674 | + | 0 | NA | intron (N)AluSx1 SI                    | 93398 NR_006045  | 10079 Hs. 649234NM_006045    | ENSG000004ATP9A     | ATPIIA ATPase pI protein-coding     |
| chr22-295 7.211614 | 0.544183 | 0.874328 | 0.622402 | 0.533678 | 0.981636 | chr22 | 29328241 | 29329218 | + | 0 | NA | 3' UTR (N)3' UTR (N)                   | 4529 NR_003688   | 1E+08 NR_003688              | ENSG000004SNORD125  | - small nucsnoRNA                   |
| chr22-376 7.211614 | 0.544183 | 0.874328 | 0.622402 | 0.533678 | 0.981636 | chr22 | 37650245 | 37653327 | + | 0 | NA | intron (N)intron (N)                   | 6591 NR_109952   | 1.02E+08 NR_109952           | ENSG000004LOC101927 | - uncharactncRNA                    |
| chr6-1571 7.211614 | 0.544183 | 0.874328 | 0.622402 | 0.533678 | 0.981636 | chr6  | 1.57E+08 | 1.57E+08 | + | 0 | NA | intron (N)intron (N)                   | 127311 NM_018452 | 729515 Hs. 157212NM_018452   | ENSG000004TMEM242   | BMO33 C6c transmant protein-coding  |
| chr9-1047 7.211614 | 0.544183 | 0.874328 | 0.622402 | 0.533678 | 0.981636 | chr9  | 1.05E+08 | 1.05E+08 | + | 0 | NA | intron (N)MIR SINE                     | 36183 NR_130760  | 55335 Hs. 579245NM_018375    | ENSG000004NIPSNAP3E | FP944 NIPSNAP3E protein-coding      |
| chr11-351 12.34055 | -0.4185  | 0.672637 | -0.62218 | 0.533824 | 0.981636 | chr11 | 35139548 | 35143564 | + | 0 | NA | intron (N)intron (N)                   | 2385 NM_001001   | 960 Hs. 502325NM_000610      | ENSG000004CD44      | CDW44 CSF CD44  mole protein-coding |
| chr12-911 12.34055 | -0.4185  | 0.672637 | -0.62218 | 0.533824 | 0.981636 | chr12 | 91160045 | 91176029 | + | 0 | NA | intron (N)AluSx8 SI                    | 10609 NM_133505  | 1634 Hs. 156315NM_001920     | ENSG000004CCN       | CCD1 DSPC decorin protein-coding    |
| chr15-633 12.34055 | -0.4185  | 0.672637 | -0.62218 | 0.533824 | 0.981636 | chr15 | 63056408 | 63069593 | + | 0 | NA | intron (N)intron (N)                   | -13613 NR_147233 | 1.11E+08 Hs. 602995NR_147233 | TPM1-AS             | TPM1-AS1 TPM1  antncRNA             |
| chr5-955 12.34055  | -0.4185  | 0.672637 | -0.62218 | 0.533824 | 0.981636 | chr5  | 95539343 | 95541849 | + | 0 | NA | intron (N)LM5 LINE                     | 14409 NM_014635  | 9652 Hs. 482868NM_014635     | ENSG000004TTC37     | KIAA0372 tetratric protein-coding   |
| chr1-1517 10.95488 | 0.444612 | 0.714635 | 0.622153 | 0.533842 | 0.981636 | chr1  | 1.52E+08 | 1.52E+08 | + | 0 | NA | intron (N)intron (N)                   | -1526 NM_001134  | 51686 Hs. 713785NM_016175    | ENSG000004OAZ3      | AZ3 OAZ-3 tornithine protein-coding |
| chr19-521 10.95488 | 0.444612 | 0.714635 | 0.622153 | 0.533842 | 0.981636 | chr19 | 5213910  | 5214603  | + | 0 | NA | intron (N)intron (N)                   | 126556 NM_130854 | 5802 Hs. 744925NM_002855     | ENSG000004PTPRS     | PTPS GMA  protein tr protein-coding |
| chr6-2836 10.95488 | 0.444612 | 0.714635 | 0.622153 | 0.533842 | 0.981636 | chr6  | 28364466 | 28366939 | + | 0 | NA | exon (NM)exon (NM)                     | -9431 NM_001135  | 64288 Hs. 656415NM_030895    | ENSG000004ZSCAN31   | ZNF20-Lp zinc fing protein-coding   |
| chr20-25 32.87025  | 0.310905 | 0.499734 | 0.622141 | 0.533849 | 0.981636 | chr20 | 27957889 | 27958096 | + | 0 | NA | IntergeniALR Alpha                     | 646473 NR_132315 | 1E+08 Hs. 529357NR_132315    | ENSG000004FRG1CP    | - FSHD regipseudo                   |
| chr1-1508 10.9216  | 0.442243 | 0.710982 | 0.622017 | 0.533931 | 0.981636 | chr1  | 1.51E+08 | 1.51E+08 | + | 0 | NA | intron (N)AluSx SI                     | -6389 NM_000396  | 1513 Hs. 632465NM_000396     | ENSG000004CTSK      | CTS02 CTS cathepsi protein-coding   |
| chr1-1567 10.9216  | 0.442243 | 0.710982 | 0.622017 | 0.533931 | 0.981636 | chr1  | 1.57E+08 | 1.57E+08 | + | 0 | NA | intron (N)intron (N)                   | -15523 NM_001007 | 4914 Hs. 406295NM_002525     | ENSG000004NTRK1     | MTC TRK lneurotro protein-coding    |
| chr1-1735 10.9216  | 0.442243 | 0.710982 | 0.622017 | 0.533931 | 0.981636 | chr1  | 1.74E+08 | 1.74E+08 | + | 0 | NA | intron (N)intron (N)                   | 13340 NM_001300  | 149041 Hs. 30258 NM_172071   | ENSG000004RC3H1     | RNF198 RC3 ring fing protein-coding |
| chr1-2066 10.9216  | 0.442243 | 0.710982 | 0.622017 | 0.533931 | 0.981636 | chr1  | 2.07E+08 | 2.07E+08 | + | 0 | NA | intron (N)intron (N)                   | 4376 NM_001004   | 8444 Hs. 164267NM_003582     | ENSG000004DYRK3     | DYRK5 REC dual spc protein-coding   |
| chr1-2236 10.9216  | 0.442243 | 0.710982 | 0.622017 | 0.533931 | 0.981636 | chr1  | 2.24E+08 | 2.24E+08 | + | 0 | NA | intron (N)intron (N)                   | 42362 NM_001031  | 7159 Hs. 523968NM_005425     | ENSG000004TP53BP2   | 53BP2 ASF  tumor prc protein-coding |
| chr1-2295 10.9216  | 0.442243 | 0.710982 | 0.622017 | 0.533931 | 0.981636 | chr1  | 2.3E+08  | 2.3E+08  | + | 0 | NA | exon (NM)exon (NM)                     | 31390 NM_014405  | 27097 Hs. 270621NM_014405    | ENSG000004TAF5L     | PAF65B TATA-box protein-coding      |
| chr12-133 10.9216  | 0.442243 | 0.710982 | 0.622017 | 0.533931 | 0.981636 | chr12 | 1.33E+08 | 1.33E+08 | + | 0 | NA | intron (N)intron (N)                   | 23749 NM_001255  | 7574 Hs. 489605NM_019591     | ENSG000004ZNF26     | HEL-179 zinc fing protein-coding    |
| chr17-186 10.9216  | 0.442243 | 0.710982 | 0.622017 | 0.533931 | 0.981636 | chr17 | 18667212 | 18674896 | + | 0 | NA | 3' UTR (N)3' UTR (N)                   | 11260 NM_001368  | 2310 Hs. 592125NM_001368     | 134 FOXO3B          | FKHRLP1 forkhead protein-coding     |
| chr2-2             |          |          |          |          |          |       |          |          |   |   |    |                                        |                  |                              |                     |                                     |



|                     |          |          |            |          |          |       |           |           |   |    |                     |         |              |          |                      |                     |                 |                                   |                                   |
|---------------------|----------|----------|------------|----------|----------|-------|-----------|-----------|---|----|---------------------|---------|--------------|----------|----------------------|---------------------|-----------------|-----------------------------------|-----------------------------------|
| chr1-2256 7. 708202 | 0.517387 | 0.836363 | 0.618615   | 0.53617  | 0.981636 | chr1  | 2.26E+08  | 2.26E+08  | 0 | NA | intron (Nintron (N  | 13657   | NM_01469E    | 9725     | Hs. 119387NM_01469E  | ENSG00000CTMEM63A   | KIAA0792        | transmembrane protein-coding      |                                   |
| chr11-703 7. 708202 | 0.517387 | 0.836363 | 0.618615   | 0.53617  | 0.981636 | chr11 | 70348459  | 70349778  | 0 | NA | intron (Nintron (N  | -49388  | NM_13856E    | 2017     | Hs. 596164NM_005231  | ENSG00000CTTN       | EMS1            | cortactin protein-coding          |                                   |
| chr12-194 7. 708202 | 0.517387 | 0.836363 | 0.618615   | 0.53617  | 0.981636 | chr12 | 19493881  | 19495843  | 0 | NA | intron (Nintron (N  | 54263   | NM_001267    | 121536   | Hs. 126497NM_153207  | ENSG00000CAEBP2     | -               | AE binding protein-coding         |                                   |
| chr12-266 7. 708202 | 0.517387 | 0.836363 | 0.618615   | 0.53617  | 0.981636 | chr12 | 26994076  | 26995806  | 0 | NA | intron (Nintron (N  | 19443   | NM_016551    | 51768    | Hs. 438864NM_016551  | ENSG00000TM7SF3     | -               | transmembrane protein-coding      |                                   |
| chr12-965 7. 708202 | 0.517387 | 0.836363 | 0.618615   | 0.53617  | 0.981636 | chr12 | 96007907  | 96013224  | 0 | NA | intron (N2b LINE    | -14200  | NM_00125E    | 3034     | Hs. 190783NM_00210E  | ENSG00000CAL        | HIS1 HSTD       | histidine protein-coding          |                                   |
| chr12-122 7. 708202 | 0.517387 | 0.836363 | 0.618615   | 0.53617  | 0.981636 | chr12 | 1.22E+08  | 1.22E+08  | 0 | NA | intron (NAluSq SI   | -32911  | NM_15275E    | 254050   | Hs. 374856NM_15275E  | ENSG00000LRR4C3     | -               | leucine protein-coding            |                                   |
| chr15-456 7. 708202 | 0.517387 | 0.836363 | 0.618615   | 0.53617  | 0.981636 | chr15 | 49304043  | 49305049  | 0 | NA | intron (NMLTII LITR | -118696 | NM_00200E    | 2252     | Hs. 56726E NM_00200E | ENSG00000PGF7       | HBGF-7 KC       | fibroblast protein-coding         |                                   |
| chr15-75E 7. 708202 | 0.517387 | 0.836363 | 0.618615   | 0.53617  | 0.981636 | chr15 | 75604659  | 75611208  | 0 | NA | intron (N2c LINE    | 17792   | NM_005701    | 10073    | Hs. 215777NM_005701  | ENSG00000SNUPN      | KPNBL RN        | snurportin protein-coding         |                                   |
| chr16-16E 7. 708202 | 0.517387 | 0.836363 | 0.618615   | 0.53617  | 0.981636 | chr16 | 1632491   | 1635392   | 0 | NA | intron (NAluSc SIN  | 19301   | NM_02082E    | 57585    | Hs. 603676NM_02082E  | ENSG00000CRAMP1     | CRAMP1L C       | cramped protein-coding            |                                   |
| chr16-75E 7. 708202 | 0.517387 | 0.836363 | 0.618615   | 0.53617  | 0.981636 | chr16 | 75567932  | 75571577  | 0 | NA | intron (Nintron (N  | 3375    | NM_00728E    | 11345    | Hs. 461379NM_00728E  | ENSG00000GABARAPL2  | ATG8 ATG8       | GABA type protein-coding          |                                   |
| chr16-75E 7. 708202 | 0.517387 | 0.836363 | 0.618615   | 0.53617  | 0.981636 | chr16 | 75577177  | 75579922  | 0 | NA | TTS (NM_C TTS (NM_C | 12170   | NM_00728E    | 11345    | Hs. 461379NM_00728E  | ENSG00000GABARAPL2  | ATG8 ATG8       | GABA type protein-coding          |                                   |
| chr17-297 7. 708202 | 0.517387 | 0.836363 | 0.618615   | 0.53617  | 0.981636 | chr17 | 29756735  | 29757119  | 0 | NA | intron (NAluSx3 SI  | 4505    | NM_00128E    | 85464    | Hs. 654754NM_03338E  | ENSG00000SSH2       | SSH-2 SSI       | slingshot protein-coding          |                                   |
| chr17-50E 7. 708202 | 0.517387 | 0.836363 | 0.618615   | 0.53617  | 0.981636 | chr17 | 50550412  | 50550914  | 0 | NA | intron (Nintron (N  | 3489    | NM_022827    | 64847    | Hs. 103147NM_022827  | ENSG00000SPATA20    | HEL-S-98        | spermatogonium protein-coding     |                                   |
| chr19-93E 7. 708202 | 0.517387 | 0.836363 | 0.618615   | 0.53617  | 0.981636 | chr19 | 9326329   | 9334282   | 0 | NA | intron (NLM3c LIN   | 5610    | NM_00120E    | 1.01E+08 | Hs. 728944NM_00117E  | ENSG00000ZNF559-5Z  | -               | ZNF559-Z protein-coding           |                                   |
| chr19-477 7. 708202 | 0.517387 | 0.836363 | 0.618615   | 0.53617  | 0.981636 | chr19 | 47781130  | 47785571  | 0 | NA | intron (NAluY SINE  | 4647    | NM_00300E    | 6415     | Hs. 63154E NM_00300E | ENSG00000SELENOV    | SEPW1 sel       | selenoprotein-coding              |                                   |
| chr20-351 7. 708202 | 0.517387 | 0.836363 | 0.618615   | 0.53617  | 0.981636 | chr20 | 35140281  | 35143277  | 0 | NA | intron (NMR8B DNA   | 5557    | NM_00114E    | 55741    | Hs. 720177NM_01821E  | ENSG00000EDEM2      | C20orf31 ER     | degrac protein-coding             |                                   |
| chr20-351 7. 708202 | 0.517387 | 0.836363 | 0.618615   | 0.53617  | 0.981636 | chr20 | 35493921  | 35500391  | 0 | NA | intron (Nintron (N  | 32496   | NR_02693E    | 140873   | Hs. 158688NM_08082E  | ENSG00000C20orf17E  | dJ4770.4        | chromosome protein-coding         |                                   |
| chr22-21E 7. 708202 | 0.517387 | 0.836363 | 0.618615   | 0.53617  | 0.981636 | chr22 | 21683169  | 21683603  | 0 | NA | intron (Nintron (N  | 17374   | NM_14817E    | 23759    | Hs. 438858NM_014337  | ENSG00000PPL12      | CYC4 CYP        | peptidyl protein-coding           |                                   |
| chr3-497E 7. 708202 | 0.517387 | 0.836363 | 0.618615   | 0.53617  | 0.981636 | chr3  | 49727016  | 49728415  | 0 | NA | intron (Nintron (N  | -3741   | NM_013334    | 29925    | Hs. 56748E NM_013334 | ENSG00000GMPBP      | LGMDR19 GDP     | mannan protein-coding             |                                   |
| chr3-134E 7. 708202 | 0.517387 | 0.836363 | 0.618615   | 0.53617  | 0.981636 | chr3  | 1.34E+08  | 1.34E+08  | 0 | NA | intron (Nintron (N  | 39922   | NM_00295E    | 6259     | Hs. 65456E NM_00295E | ENSG00000CRK        | D3S3195 J       | receptor protein-coding           |                                   |
| chr3-197E 7. 708202 | 0.517387 | 0.836363 | 0.618615   | 0.53617  | 0.981636 | chr3  | 1.98E+08  | 1.98E+08  | 0 | NA | intron (Nintron (N  | -8610   | NR_030627    | 1E+08    | NR_030627            | ENSG00000MIR922     | MIRN922         | microRNA ncRNA                    |                                   |
| chr4-785E 7. 708202 | 0.517387 | 0.836363 | 0.618615   | 0.53617  | 0.981636 | chr4  | 7852899   | 7855337   | 0 | NA | intron (Nintron (N  | 18190   | NM_001371090 | 22902    | Hs. 740904NM_014961  | ENSG00000CRUFY3     | RIPX SINCRN     | and I protein-coding              |                                   |
| chr4-707E 7. 708202 | 0.517387 | 0.836363 | 0.618615   | 0.53617  | 0.981636 | chr4  | 70782706  | 70785706  | 0 | NA | intron (NAluSx SIN  | 49796   | NM_00134E    | 373      | Hs. 792              | NM_00165E           | ENSG00000TRIM23 | ARD1 ARF1                         | tripartite protein-coding         |
| chr5-656E 7. 708202 | 0.517387 | 0.836363 | 0.618615   | 0.53617  | 0.981636 | chr5  | 65606159  | 65612785  | 0 | NA | intron (Nintron (N  | 14867   | NM_00165E    | 7726     | Hs. 485041NM_00344E  | ENSG00000TRIM26     | APP RNF9E       | tripartite protein-coding         |                                   |
| chr6-301E 7. 708202 | 0.517387 | 0.836363 | 0.618615   | 0.53617  | 0.981636 | chr6  | 30188646  | 30190477  | 0 | NA | intron (Nintron (N  | 23845   | NM_00124E    | -954     | NR_03978E            | ENSG00000MIR4640    | -               | microRNA ncRNA                    |                                   |
| chr6-308E 7. 708202 | 0.517387 | 0.836363 | 0.618615   | 0.53617  | 0.981636 | chr6  | 30889164  | 30890964  | 0 | NA | promoter-promoter-  | -38231  | NM_003131    | 6722     | Hs. 52014C NM_003131 | ENSG00000MIR640     | MCM1            | serum response protein-coding     |                                   |
| chr6-431E 7. 708202 | 0.517387 | 0.836363 | 0.618615   | 0.53617  | 0.981636 | chr6  | 43130930  | 43135146  | 0 | NA | intron (NMR3c SINE  | -11234  | NR_14903E    | 1E+08    | Hs. 105944NR_14903E  | ENSG00000LOC10012E  | -               | uncharacterized ncRNA             |                                   |
| chr7-1301 7. 708202 | 0.517387 | 0.836363 | 0.618615   | 0.53617  | 0.981636 | chr7  | 1.3E+08   | 1.3E+08   | 0 | NA | intron (Nintron (N  | -11618  | NR_12121E    | 1.02E+08 | Hs. 57163C NR_12121E | LINC01507           | XLOC_000E       | intcncRNA                         |                                   |
| chr9-137E 7. 708202 | 0.517387 | 0.836363 | 0.618615   | 0.53617  | 0.981636 | chr9  | 79705357  | 79711467  | 0 | NA | intron (N2a LINE    | -119    | NR_024514    | 11093    | Hs. 13143E NM_13902E | ENSG00000ADAMT53    | ADAM-TS1E       | ADAM meta protein-coding          |                                   |
| chr9-1334 7. 708202 | 0.517387 | 0.836363 | 0.618615   | 0.53617  | 0.981636 | chr9  | 1.33E+08  | 1.33E+08  | 0 | NA | promoter-promoter-  | -11733  | NM_00103E    | 1E+08    | Hs. 714127NM_00103E  | ENSG00000NBPF10     | AB6 AG1 NBPF    | membrane protein-coding           |                                   |
| chr1-1461 13. 65412 | 0.408664 | 0.660639 | 0.618589   | 0.536187 | 0.981636 | chr1  | 1.46E+08  | 1.46E+08  | 0 | NA | exon (NM_exon (NM   | 190879  | NR_135021    | 1.05E+08 | Hs. 15689E NR_135021 | ENSG00000LINC02424E | -               | long intcncRNA                    |                                   |
| chr12-181 10. 10072 | -0.4576  | 0.740301 | -0.61812   | 0.536493 | 0.981636 | chr12 | 78168630  | 78169105  | 0 | NA | intron (Nintron (N  | -14587  | NR_001304    | 51478    | Hs. 42929E NM_016371 | ENSG00000HSD17B7    | PRAP SDR5       | hydroxysteroid protein-coding     |                                   |
| chr1-627 10. 88832  | 0.439875 | 0.712105 | 0.617711   | 0.536766 | 0.981636 | chr1  | 61.63E+08 | 61.63E+08 | 0 | NA | intron (Nintron (N  | -5583   | NM_00132E    | 90338    | Hs. 655967NM_03328E  | ENSG00000ZNF160     | F11 HKR1E       | zinc finger protein-coding        |                                   |
| chr19-531 10. 88832 | 0.439875 | 0.712105 | 0.617711   | 0.536766 | 0.981636 | chr19 | 53108234  | 53109801  | 0 | NA | exon (NM_exon (NM   | 9002    | NM_014321    | 23594    | Hs. 49760            | NM_014321           | ENSG00000ORC6   | ORC6L                             | origin recognition protein-coding |
| chr16-46E 6. 694009 | -0.70004 | 1.133565 | -0.61755   | 0.536871 | 0.981636 | chr16 | 46698541  | 46698781  | 0 | NA | TTS (NM_C TTS (NM_C | 11855   | NM_001277    | 400818   | Hs. 44508C NM_001037 | ENSG00000NBPF9      | AEO1            | NBPF membrane protein-coding      |                                   |
| chr1-149 10. 92946  | 0.440791 | 0.713995 | 0.617359   | 0.536998 | 0.981636 | chr1  | 1.49E+08  | 1.49E+08  | 0 | NA | intron (Nintron (N  | 28062   | NM_03094E    | 81693    | Hs. 534494NM_03094E  | ENSG00000CAMN       | PRO1028E        | ammonium aspartate protein-coding |                                   |
| chr14-10E 7. 741484 | 0.520617 | 0.843487 | 0.61722    | 0.53709  | 0.981636 | chr14 | 1.03E+08  | 1.03E+08  | 0 | NA | intron (NAluSx SIN  | -9807   | NM_014634    | 9647     | Hs. 11272E NM_014634 | ENSG00000PPM1F      | CAMKP1 Ca       | protein-coding                    |                                   |
| chr22-21E 7. 741484 | 0.520617 | 0.843487 | 0.61722    | 0.53709  | 0.981636 | chr22 | 21962341  | 21962969  | 0 | NA | intron (Nintron (N  | 1734    | NM_001317    | 7264     | Hs. 40411E NM_00331E | ENSG00000TSTA3      | FX P35B1        | tissue specific protein-coding    |                                   |
| chr6-570E 12. 37383 | -0.41549 | 0.673538 | -0.61687   | 0.537319 | 0.981636 | chr6  | 57098364  | 57103021  | 0 | NA | exon (NM_exon (NM   | 10504   | NM_001031    | 26036    | Hs. 48562E NM_01555E | ENSG00000ZNF451     | COASTER c       | zinc finger protein-coding        |                                   |
| chr10-17E 6. 640496 | -0.60231 | 0.976685 | -0.61669   | 0.537438 | 0.981636 | chr10 | 17699209  | 17700307  | 0 | NA | intron (Nintron (N  | -52443  | NM_00109E    | 653657   | Hs. 56413E NM_00101E | ENSG00000TMEM236    | HSA-23A F       | transmembrane protein-coding      |                                   |
| chr11-68E 5. 640496 | -0.60231 | 0.976685 | -0.61669   | 0.537438 | 0.981636 | chr11 | 68064693  | 68065158  | 0 | NA | intron (Nintron (N  | 20131   | NR_106811    | 1.02E+08 | NR_106811            | ENSG00000MIR6753    | hsa-mir-6753    | microRNA ncRNA                    |                                   |
| chr12-297 5. 640496 | -0.60231 | 0.976685 | -0.61669   | 0.537438 | 0.981636 | chr12 | 29719947  | 29720740  | 0 | NA | intron (Nintron (N  | 63599   | NM_001367    | 83857    | Hs. 401954NM_03192E  | ENSG00000TMTC1      | ARG99 OLF       | transmembrane protein-coding      |                                   |
| chr13-11E 5. 640496 | -0.60231 | 0.976685 | -0.61669   | 0.537438 | 0.981636 | chr13 | 1.14E+08  | 1.14E+08  | 0 | NA | intron (Nintron (N  | 9185    | NM_00082E    | 2621     | Hs. 64634E NM_00082E | ENSG00000GAS6       | AXLL4 ACS       | mediator protein-coding           |                                   |
| chr2-320E 5. 640496 | -0.60231 | 0.976685 | -0.61669   | 0.537438 | 0.981636 | chr2  | 32025082  | 32025458  | 0 | NA | intron (NAluSg SIN  | -14262  | NR_126034    | 51072    | Hs. 44496E NM_01595E | ENSG00000MEMO1      | C2orf4 C        | growth factor protein-coding      |                                   |
| chr22-461 5. 640496 | -0.60231 | 0.976685 | -0.61669   | 0.537438 | 0.981636 | chr22 | 46104355  | 46105497  | 0 | NA | intron (Nintron (N  | -7823   | NR_02947E    | 406883   | NR_02947E            | ENSG00000MIRLET7A5  | LET7A3 MI       | microRNA ncRNA                    |                                   |
| chr4-1381 5. 640496 | -0.60231 | 0.976685 | -0.61669   | 0.537438 | 0.981636 | chr4  | 1.38E+08  | 1.38E+08  | 0 | NA | 3' UTR (3' UTR (N   | -36821  | NR_03786E    | 641365   | Hs. 43563C NR_03786E | ENSG00000LINC0061E  | -               | long intcncRNA                    |                                   |
| chr7-564 5. 640496  | -0.60231 | 0.976685 | -0.61669   | 0.537438 | 0.981636 | chr7  | 5607946   | 5608369   | 0 | NA | Intergenic CpG      | 15341   | NM_00308E    | 6624     | Hs. 11840C NM_00308E | ENSG00000FSCN1      | FANI HSN        | fast acroprotein-coding           |                                   |
| chr7-105E 5. 640496 | -0.60231 | 0.976685 | -0.61669</ |          |          |       |           |           |   |    |                     |         |              |          |                      |                     |                 |                                   |                                   |

|           |          |           |          |          |          |          |       |          |          |   |   |    |                    |         |           |          |                    |                   |                     |                   |                |                       |                |  |
|-----------|----------|-----------|----------|----------|----------|----------|-------|----------|----------|---|---|----|--------------------|---------|-----------|----------|--------------------|-------------------|---------------------|-------------------|----------------|-----------------------|----------------|--|
| chr11-684 | 7.18619  | 0.538504  | 0.877516 | 0.613669 | 0.539434 | 0.981636 | chr11 | 68438706 | 68439238 | + | 0 | NA | intron (Nintron (N | -21780  | NM_001352 | 55291    | Hs.503022NM_018312 | ENSG000003PPP6R3  | C11orf23 protein f  | protein-coding    |                |                       |                |  |
| chr11-115 | 7.18619  | 0.538504  | 0.877516 | 0.613669 | 0.539434 | 0.981636 | chr11 | 1.19E+08 | 1.19E+08 | + | 0 | NA | intron (NAluJb SIN | -6732   | NM_001243 | 25988    | Hs.504091NM_015517 | ENSG000003HINFP   | Hinf-P MIhistone f  | protein-coding    |                |                       |                |  |
| chr14-911 | 7.18619  | 0.538504  | 0.877516 | 0.613669 | 0.539434 | 0.981636 | chr14 | 91188944 | 91190849 | + | 0 | NA | intron (Nintron (N | 54808   | NM_001177 | 8111     | Hs.8882            | NM_003483         | ENSG000003GPR68     | A12A6 GPFg        | protein-coding |                       |                |  |
| chr16-716 | 7.18619  | 0.538504  | 0.877516 | 0.613669 | 0.539434 | 0.981636 | chr16 | 71668940 | 71669568 | + | 0 | NA | intron (Nintron (N | 29447   | NR_033337 | 11E+08   | Hs.725111          | NR_033337         | ENSG000003SNORA70D  | U70D              | small          | lncsnoRNA             |                |  |
| chr19-376 | 7.18619  | 0.538504  | 0.877516 | 0.613669 | 0.539434 | 0.981636 | chr19 | 37649560 | 37650054 | + | 0 | NA | intron (NAluJb SIN | 5658    | NM_00132C | 22835    | Hs.668737          | NM_014898         | ENSG000003ZFP30     | ZFP30             | zinc           | finger protein-coding |                |  |
| chr19-488 | 7.18619  | 0.538504  | 0.877516 | 0.613669 | 0.539434 | 0.981636 | chr19 | 48831007 | 48832835 | + | 0 | NA | intron (NAluSx1 SI | 4570    | NM_01624E | 51171    | Hs.18788           | NM_01624E         | ENSG000003HSD17B14  | DHRS10 SE         | hydroxyst      | protein-coding        |                |  |
| chrX-6573 | 7.18619  | 0.538504  | 0.877516 | 0.613669 | 0.539434 | 0.981636 | chrX  | 65735507 | 65736117 | + | 0 | NA | intron (NLa2 LINE  | 68158   | NM_002244 | 4478     | Hs.87752           | NM_002244         | ENSG000003MSN       | HEL70 IM          | moesin         | protein-coding        |                |  |
| chr1-5655 | 10.12615 | -0.45262  | 0.737625 | -0.61362 | 0.53947  | 0.981636 | chr1  | 56502994 | 56521594 | + | 0 | NA | intron (Nintron (N | 67269   | NM_00371E | 8613     | Hs.40515E          | NM_00371E         | ENSG000003PLP3      | Dri42 LPF         | phospholip     | protein-coding        |                |  |
| chr11-125 | 10.12615 | -0.45262  | 0.737625 | -0.61362 | 0.53947  | 0.981636 | chr11 | 12528243 | 12528873 | + | 0 | NA | 3' UTR (N3' UTR (N | -145863 | NM_021961 | 7003     | Hs.655331          | NM_021961         | ENSG000003TEAD1     | AA NTEF-1         | TEA domain     | protein-coding        |                |  |
| chr11-32  | 10.12615 | -0.45262  | 0.737625 | -0.61362 | 0.53947  | 0.981636 | chr11 | 32096809 | 32100823 | + | 0 | NA | intron (NMLTJ2 LI  | 7742    | NM_002901 | 5954     | Hs.97887           | NM_002901         | ENSG000003RCN1      | HE-S-84 reticuloc | protein-coding |                       |                |  |
| chr13-115 | 10.12615 | -0.45262  | 0.737625 | -0.61362 | 0.53947  | 0.981636 | chr13 | 1.14E+08 | 1.14E+08 | + | 0 | NA | intron (NMER102b I | 7374    | NR_04499E | 650669   | Hs.369201          | NM_01039799       | ENSG000003GAS6-AS1  | GAS6              | antincRNA      |                       |                |  |
| chr10-793 | 7.845186 | -0.51584  | 0.841304 | -0.61315 | 0.539778 | 0.981636 | chr10 | 79394008 | 79394219 | + | 0 | NA | intron (Nintron (N | 46644   | NM_00572E | 10105    | Hs.381072          | NM_00572E         | ENSG000003PPIF      | CYP3 CyP-         | peptidyl f     | protein-coding        |                |  |
| chr8-3047 | 7.845186 | -0.51584  | 0.841304 | -0.61315 | 0.539778 | 0.981636 | chr8  | 30477216 | 30477415 | + | 0 | NA | intron (NAluV SINE | -91914  | NR_04620E | 1E+08    | Hs.12681E          | NR_04620E         | ENSG000003RBPMS-AS1 | RBPMS             | antncRNA       |                       |                |  |
| chr19-262 | 7.270929 | 0.332076  | 0.541655 | 0.613076 | 0.539826 | 0.981636 | chr19 | 26918117 | 26918364 | + | 0 | NA | IntergeniALR Alphe | -875191 | NR_14673E | 1.02E+08 | Hs.567934          | NR_110687         | ENSG000003LOC101927 |                   | uncharacter    | ncRNA                 |                |  |
| chr20-323 | 6.715026 | 0.574561  | 0.937187 | 0.613069 | 0.539883 | 0.981636 | chr20 | 32318204 | 32318642 | + | 0 | NA | intron (NLMB8 LIN  | -39921  | NM_01533E | 171023   | Hs.37404E          | NM_01533E         | ENSG000003ASXL1     | BOPS MDS          | ASXL trar      | protein-coding        |                |  |
| chr1-842  | 5.632638 | -0.60016  | 0.979043 | -0.61301 | 0.539873 | 0.981636 | chr1  | 84207979 | 84208758 | + | 0 | NA | intron (Nintron (N | 26736   | NM_001242 | 5567     | Hs.48732E          | NM_002731         | ENSG000003PRKACB    | PKA C-beta        | protein-coding |                       |                |  |
| chr20-373 | 5.632638 | -0.60016  | 0.979043 | -0.61301 | 0.539873 | 0.981636 | chr20 | 37055040 | 37055661 | + | 0 | NA | intron (Nintron (N | 40647   | NM_00132E | 5933     | Hs.20774E          | NM_00289E         | ENSG000003CRL1      | CP107 PRE         | R trans        | protein-coding        |                |  |
| chr20-254 | 5.632638 | -0.60016  | 0.979043 | -0.61301 | 0.539873 | 0.981636 | chr22 | 25459101 | 25459581 | + | 0 | NA | intron (N(CT)n Sin | 3695    | NR_10687E | 1.02E+08 | NR_10687E          | ENSG000003MR6817  | hsa-mir-6           | microRNA          | ncRNA          |                       |                |  |
| chr3-1235 | 5.632638 | -0.60016  | 0.979043 | -0.61301 | 0.539873 | 0.981636 | chr3  | 1.24E+08 | 1.24E+08 | + | 0 | NA | intron (Nintron (N | 22745   | NM_05302E | 4638     | Hs.47737E          | NM_00596E         | ENSG000003MYLK      | AAT7 KRP myosin   | l              | protein-coding        |                |  |
| chr9-778  | 5.632638 | -0.60016  | 0.979043 | -0.61301 | 0.539873 | 0.981636 | chr9  | 77808929 | 77809296 | + | 0 | NA | intron (Nintron (N | -160790 | NM_00429E | 9630     | Hs.65779E          | NM_00429E         | ENSG000003GNA14     |                   | G              | protein-coding        |                |  |
| chr1-2625 | 5.665919 | -0.59333  | 0.967933 | -0.61298 | 0.539887 | 0.981636 | chr1  | 26257559 | 26258427 | + | 0 | NA | intron (Nintron (N | -11286  | NM_001281 | 64793    | Hs.63795           | NM_02277E         | ENSG000003CEP85     | CCDC21            | centrosom      | protein-coding        |                |  |
| chr10-285 | 5.665919 | -0.59333  | 0.967933 | -0.61298 | 0.539887 | 0.981636 | chr10 | 28596925 | 28598198 | + | 0 | NA | intron (Nintron (N | 64443   | NM_01662E | 51322    | Hs.743224          | NM_01662E         | ENSG000003WAC       | BM-016 DFW        | domain         | protein-coding        |                |  |
| chr10-685 | 5.665919 | -0.59333  | 0.967933 | -0.61298 | 0.539887 | 0.981636 | chr10 | 68500813 | 68501493 | + | 0 | NA | intron (NAluSx SIN | 17065   | NM_00132A | 8034     | Hs.18040E          | NM_152707         | ENSG000003SLC25A16  | D10S105E solute   | c              | protein-coding        |                |  |
| chr10-871 | 5.665919 | -0.59333  | 0.967933 | -0.61298 | 0.539887 | 0.981636 | chr10 | 87189776 | 87190743 | + | 0 | NA | intron (NAluSz SIN | -35189  | NM_00109E | 728118   | Hs.71056E          | NM_00109E         | ENSG000003NUTM2A    | FAM22A NUT        | cell           | protein-coding        |                |  |
| chr14-34  | 5.665919 | -0.59333  | 0.967933 | -0.61298 | 0.539887 | 0.981636 | chr14 | 34820320 | 34821159 | + | 0 | NA | intron (NLMC1 LIN  | -53452  | NR_16077E | 1.12E+08 | Hs.50914C          | NR_16077E         | LOC11226E           |                   | uncharacter    | ncRNA                 |                |  |
| chr14-884 | 5.665919 | -0.59333  | 0.967933 | -0.61298 | 0.539887 | 0.981636 | chr14 | 88466993 | 88468045 | + | 0 | NA | 3' UTR (N3' UTR (N | 81862   | NM_01841E | 55812    | Hs.52551E          | NM_01841E         | ENSG000003SPATA7    | HEL-S-29E         | spermatog      | protein-coding        |                |  |
| chr15-654 | 5.665919 | -0.59333  | 0.967933 | -0.61298 | 0.539887 | 0.981636 | chr14 | 65446727 | 65449752 | + | 0 | NA | intron (NAluJo SIN | -25292  | NM_02096E | 57722    | Hs.458607          | NM_02096E         | ENSG000003IGDCCA7   | DDM36 NOF         | immunog        | protein-coding        |                |  |
| chr17-376 | 5.665919 | -0.59333  | 0.967933 | -0.61298 | 0.539887 | 0.981636 | chr17 | 37615679 | 37616343 | + | 0 | NA | promoter-promoter- | -972    | NR_106744 | 1.02E+08 | NR_106744          | ENSG000003MIR378J | hsa-mir-2           | microRNA          | ncRNA          |                       |                |  |
| chr19-84  | 5.665919 | -0.59333  | 0.967933 | -0.61298 | 0.539887 | 0.981636 | chr19 | 8461911  | 8462732  | + | 0 | NA | intron (Nintron (N | 17346   | NM_03120E | 4670     | Hs.46580E          | NM_00596E         | ENSG000003HNRNPM    | CEAR HNR          | heterog        | protein-coding        |                |  |
| chr2-157  | 5.665919 | -0.59333  | 0.967933 | -0.61298 | 0.539887 | 0.981636 | chr2  | 1.58E+08 | 1.58E+08 | + | 0 | NA | intron (Nintron (N | 71115   | NM_001347 | 90       | Hs.47031E          | NM_00110E         | ENSG000003ACVR1     | ACTRI AC          | activin f      | protein-coding        |                |  |
| chr22-42  | 5.665919 | -0.59333  | 0.967933 | -0.61298 | 0.539887 | 0.981636 | chr22 | 42619355 | 42623839 | + | 0 | NA | intron (Nintron (N | 6352    | NR_02942E | 267010   | Hs.574857          | NR_02942E         | ENSG000003CRNU12    | RNU12-1 F         | RNA, U12       | snRNA                 |                |  |
| chr3-158  | 5.665919 | -0.59333  | 0.967933 | -0.61298 | 0.539887 | 0.981636 | chr3  | 1.59E+08 | 1.59E+08 | + | 0 | NA | intron (NLMC3 LIN  | 12144   | NM_00130E | 85476    | Hs.51835E          | NM_02499E         | ENSG000003GFM1      | COXPDI EFG        | elongat        | protein-coding        |                |  |
| chr4-5764 | 5.665919 | -0.59333  | 0.967933 | -0.61298 | 0.539887 | 0.981636 | chr4  | 5764612  | 5765208  | + | 0 | NA | intron (NLMC3 LIN  | 53709   | NM_00130E | 2121     | Hs.64869E          | NM_01455E         | ENSG000003MIR378J   | DWF-1 EVC         | EvC cilic      | protein-coding        |                |  |
| chr5-7874 | 5.665919 | -0.59333  | 0.967933 | -0.61298 | 0.539887 | 0.981636 | chr5  | 7874617  | 7876324  | + | 0 | NA | intron (Nintron (N | 6322    | NR_13448E | 4552     | Hs.481551          | NM_00245E         | ENSG000003MTRR      | MSR cbE           | 5-methyl       | protein-coding        |                |  |
| chr7-477  | 5.665919 | -0.59333  | 0.967933 | -0.61298 | 0.539887 | 0.981636 | chr7  | 4770916  | 4771928  | + | 0 | NA | TTS (NM_CTS (NM_C  | -4201   | NM_001364 | 9907     | Hs.55844E          | NM_01485E         | ENSG000003AP521     | KIAA0415 adaptor  | l              | protein-coding        |                |  |
| chr8-1705 | 5.665919 | -0.59333  | 0.967933 | -0.61298 | 0.539887 | 0.981636 | chr8  | 17037088 | 17038328 | + | 0 | NA | intron (NTHE1B-int | 10470   | NR_14623E | 286097   | Hs.403594          | NM_18172E         | ENSG000003M1CUC3    | EFHA2             | mitochon       | protein-coding        |                |  |
| chr9-1047 | 5.665919 | -0.59333  | 0.967933 | -0.61298 | 0.539887 | 0.981636 | chr9  | 1.05E+08 | 1.05E+08 | + | 0 | NA | intron (Nintron (N | 4766    | NM_01546E | 25934    | Hs.53027E          | NM_01546E         | ENSG000003NIPSNAP3  | HSPC299 nipsnap   | l              | protein-coding        |                |  |
| chr16-29  | 10.11829 | -0.45134  | 0.736379 | -0.61292 | 0.539931 | 0.981636 | chr16 | 29517052 | 29519969 | + | 0 | NA | IntergeniLIPA5 LI  | -12636  | NM_00135E | 440353   | NM_001355401       | NPIP1B2           |                     | nuclear           | l              | protein-coding        |                |  |
| chr19-362 | 10.11829 | -0.45134  | 0.736379 | -0.61292 | 0.539931 | 0.981636 | chr19 | 36220793 | 36221117 | + | 0 | NA | intron (NAluSx1 SI | -5871   | NM_00104E | 147929   | Hs.59633E          | NM_152477         | ENSG000003ZNF565    |                   | zinc           | finger                | protein-coding |  |
| chr2-1331 | 10.11829 | -0.45134  | 0.736379 | -0.61292 | 0.539931 | 0.981636 | chr2  | 1.33E+08 | 1.33E+08 | + | 0 | NA | intron (Nintron (N | -138114 | NR_110294 | 1.02E+08 | Hs.661917          | NR_110294         | ENSG000003NCKAP5-AS |                   | NCKAP5         | arcncRNA              |                |  |
| chr5-1747 | 10.11829 | -0.45134  | 0.736379 | -0.61292 | 0.539931 | 0.981636 | chr5  | 1.75E+08 | 1.75E+08 | + | 0 | NA | 3' UTR (N3' UTR (N | 5863    | NM_00136E | 4488     | Hs.89404           | NM_00244E         | ENSG000003MSX2      | CRS2 FPP ms       | home           | protein-coding        |                |  |
| chr8-125  | 10.11829 | -0.45134  | 0.736379 | -0.61292 | 0.539931 | 0.981636 | chr8  | 1.25E+08 | 1.25E+08 | + | 0 | NA | intron (NMER104 DN | 33554   | NM_01484E | 9897     | Hs.27004E          | NM_01484E         | ENSG000003WASHC5    | KIAA0196 WASH     | com            | protein-coding        |                |  |
| chr13-198 | 9.607836 | -0.47015  | 0.767117 | -0.61288 | 0.539953 | 0.981636 | chr13 | 19844549 | 19844853 | + | 0 | NA | intron (NAluSq SIN | 18935   | NM_00103E | 9205     | Hs.53098E          | NM_01424E         | ENSG000003ZMYM5     | HSPC050 zinc      | finger         | protein-coding        |                |  |
| chr19-46  | 9.607836 | -0.47015  | 0.767117 | -0.61288 | 0.539953 | 0.981636 | chr19 | 4695092  | 4696072  | + | 0 | NA | intron (Nintron (N | 16300   | NM_001242 | 1E+08    | Hs.67813E          | NM_001242901      | DPP9-AS1            | DPP9              | anti           | protein-coding        |                |  |
| chr7-261  | 9.607836 | -0.47015  | 0.767117 | -0.61288 | 0.539953 | 0.981636 | chr7  | 26198633 | 26199720 | + | 0 | NA | intron (Nintron (N | 1570    | NM_002137 | 3181     | Hs.487774          | NM_002137         | ENSG000003HNRNPA2B1 | HNRNPA2B1         | heterog        | protein-coding        |                |  |
| chrX-5338 | 7.129335 | -0.441757 | 0.884008 | 0.612841 | 0.539981 | 0.981636 | chrX  | 53382029 | 53382519 | + | 0 | NA | exon (NM exon (NM  | 23491   | NR_10691E | 1.02E+08 | NR_10691E          | ENSG000003MIR6857 | hsa-mir-6           | microRNA          | ncRNA          |                       |                |  |
| chr14-705 | 7.38558  | -0.53118  | 0.866883 | -0.61275 | 0.540043 | 0.981636 | chr14 | 70581014 | 70581314 | + | 0 | NA | IntergeniLIME3B LI | 19526   | NM_001284 | 10001    | Hs.49735E          | NM_00546E         | ENSG000003MED6      | ARC33 NY-         | mediator       | protein-coding        |                |  |
| chr17-19  | 7.38558  | -0.53118  | 0.866883 | -0.61275 | 0.540043 | 0.981636 | chr17 | 19927275 | 19927490 | + | 0 | NA |                    |         |           |          |                    |                   |                     |                   |                |                       |                |  |



|           |          |          |          |          |          |          |       |          |          |   |      |                     |                   |          |            |                   |                    |                                           |                         |
|-----------|----------|----------|----------|----------|----------|----------|-------|----------|----------|---|------|---------------------|-------------------|----------|------------|-------------------|--------------------|-------------------------------------------|-------------------------|
| chr14-321 | 11.4339  | 0.426072 | 0.697774 | 0.610615 | 0.541454 | 0.981636 | chr14 | 32153786 | 32156233 | + | 0 NA | 3' UTR (N3' UTR (N  | -47036 NR_104084  | 1.02E+08 | NR_104084  | ENSG0000CRNU6-7   | U6-7               | RNA, U6 ssnRNA                            |                         |
| chr13-102 | 7.862752 | -0.50763 | 0.83142  | -0.61056 | 0.541493 | 0.981636 | chr13 | 1.03E+08 | 1.03E+08 | + | 0 NA | exon (NM exon (NM   | 45470 NM_001010   | 196541   | Hs. 508623 | NR_001010         | ENSG00000METTL21C  | C13orf39 methyltransferase protein-coding |                         |
| chr15-731 | 7.862752 | -0.50763 | 0.83142  | -0.61056 | 0.541493 | 0.981636 | chr15 | 73179044 | 73179461 | + | 0 NA | intron (NLTR4 LTF   | -120658 NR_162148 | 1.13E+08 | NR_162148  | MIR12135          | -                  | microRNA ncRNA                            |                         |
| chr16-65  | 7.862752 | -0.50763 | 0.83142  | -0.61056 | 0.541493 | 0.981636 | chr16 | 65052748 | 65053478 | + | 0 NA | intron (Nintron (N  | 68951 NM_001797   | 1009     | Hs. 116471 | NR_001797         | ENSG00000CDH11     | CAD11 CDF cadherin protein-coding         |                         |
| chr2-8802 | 7.862752 | -0.50763 | 0.83142  | -0.61056 | 0.541493 | 0.981636 | chr2  | 88028735 | 88029477 | + | 0 NA | intron (Nintron (N  | 26522 NM_001304   | 5103     | Hs. 469254 | NR_001304         | ENSG00000KRC1      | CHBP2 lysine ribonucleoprotein-coding     |                         |
| chr21-25  | 7.862752 | -0.50763 | 0.83142  | -0.61056 | 0.541493 | 0.981636 | chr21 | 25945437 | 25946769 | + | 0 NA | intron (NLIM4 LINE  | 194287 NM_001136  | 351      | Hs. 43498  | NR_000484         | ENSG00000CAPP      | AAA ABET amyloid L protein-coding         |                         |
| chr9-1377 | 7.862752 | -0.50763 | 0.83142  | -0.61056 | 0.541493 | 0.981636 | chr9  | 1.38E+08 | 1.38E+08 | + | 0 NA | intron (Nintron (N  | 25770 NR_147508   | 651337   | Hs. 60319  | NR_147508         | ENSG00000LOC651337 | uncharacterized ncRNA                     |                         |
| chr14-73  | 7.418861 | -0.52606 | 0.861685 | -0.6105  | 0.541528 | 0.981636 | chr14 | 73296678 | 73297051 | + | 0 NA | intron (NALuSx SIN  | -50863 NR_135248  | 1.02E+08 | Hs. 66059  | NR_135248         | LOC101928          | uncharacterized ncRNA                     |                         |
| chr15-342 | 7.418861 | -0.52606 | 0.861685 | -0.6105  | 0.541528 | 0.981636 | chr15 | 34226601 | 34226856 | + | 0 NA | intron (NALuS2 SI   | 1712 NM_001286    | 51234    | Hs. 25090  | NR_016454         | ENSG00000CEMC4     | PIG17 TMERF2 membrane protein-coding      |                         |
| chr20-394 | 7.418861 | -0.52606 | 0.861685 | -0.6105  | 0.541528 | 0.981636 | chr20 | 394277   | 394966   | + | 0 NA | intron (NALuJo SIN  | 13278 NM_001301   | 57761    | Hs. 51682  | NR_021158         | ENSG00000TRIB3     | C20orf97 tribbles protein-coding          |                         |
| chr20-38  | 7.418861 | -0.52606 | 0.861685 | -0.6105  | 0.541528 | 0.981636 | chr20 | 38035214 | 38035545 | + | 0 NA | intron (Nintron (N  | 1633 NM_021211    | 58490    | Hs. 27883  | NR_021211         | ENSG00000RPRD1B    | C2orf27 regulatory protein-coding         |                         |
| chr3-1944 | 7.418861 | -0.52606 | 0.861685 | -0.6105  | 0.541528 | 0.981636 | chr3  | 1.94E+08 | 1.94E+08 | + | 0 NA | intron (NALuJb SIN  | 3681 NM_001367    | 79572    | Hs. 52960  | NR_024524         | ENSG00000ATP13A3   | AFURS1 ATPase 1 protein-coding            |                         |
| chr9-193  | 7.418861 | -0.52606 | 0.861685 | -0.6105  | 0.541528 | 0.981636 | chr9  | 19335991 | 19336997 | + | 0 NA | intron (Nintron (N  | 43742 NM_00101C   | 6194     | Hs. 40807  | NR_00101C         | ENSG00000RPS6      | S6 ribosomal protein-coding               |                         |
| chr12-156 | 10.11043 | -0.45006 | 0.737228 | -0.61048 | 0.541544 | 0.981636 | chr12 | 15894293 | 15897043 | + | 0 NA | intron (NALuJr SIN  | 13281 NM_001718   | 1171     | Hs. 74397  | NR_001718         | ENSG00000STRAP     | MAWD PT-1 serine/threonine protein-coding |                         |
| chr13-41  | 10.11043 | -0.45006 | 0.737228 | -0.61048 | 0.541544 | 0.981636 | chr13 | 41370780 | 41371127 | + | 0 NA | intron (NTiger2 I   | -58915 NM_001354  | 9617     | Hs. 38217  | NR_004294         | ENSG00000MTRF1     | MRF1 MTTF mitochondrion protein-coding    |                         |
| chr2-2374 | 10.11043 | -0.45006 | 0.737228 | -0.61048 | 0.541544 | 0.981636 | chr2  | 2.37E+08 | 2.37E+08 | + | 0 NA | intron (Nintron (N  | 2124 NM_057166    | 1293     | Hs. 23324  | NR_004366         | ENSG00000COL6A3    | BTHLM1 DY collagen protein-coding         |                         |
| chr5-1347 | 10.11043 | -0.45006 | 0.737228 | -0.61048 | 0.541544 | 0.981636 | chr5  | 1.35E+08 | 1.35E+08 | + | 0 NA | intron (NALuSg SIN  | 28011 NM_014825   | 9879     | Hs. 40654  | NR_014825         | ENSG00000CDDX46    | PRPF5 PRF DEAD-box protein-coding         |                         |
| chr7-305  | 10.11043 | -0.45006 | 0.737228 | -0.61048 | 0.541544 | 0.981636 | chr7  | 30598530 | 30613234 | + | 0 NA | intron (NLIM5 LIN   | 11004 NM_002047   | 2617     | Hs. 40432  | NR_002047         | ENSG00000GARS      | CMT2D DSM glycolytic protein-coding       |                         |
| chr8-3901 | 10.11043 | -0.45006 | 0.737228 | -0.61048 | 0.541544 | 0.981636 | chr8  | 39017148 | 39030672 | + | 0 NA | intron (NALuSx1 SI  | -5225 NR_145988   | 1.1E+08  | NR_145738  | ENSG00000SNORD38D | -                  | small nucleolar RNA                       |                         |
| chr21-428 | 8.230214 | 0.498928 | 0.817467 | 0.610334 | 0.541641 | 0.981636 | chr21 | 42871938 | 42872589 | + | 0 NA | intron (NALuS2 SI   | 7012 NM_001266    | 10785    | Hs. 24881  | NR_018665         | ENSG00000WDR4      | GAMOS6 MIWD repeat protein-coding         |                         |
| chr6-116  | 9.690115 | -0.465   | 0.762528 | -0.60982 | 0.541981 | 0.981636 | chr6  | 1.17E+08 | 1.17E+08 | + | 0 NA | intron (NLIP44 LIN  | 11768 NM_001366   | 3841     | Hs. 18297  | NR_002266         | ENSG00000KPN5A     | IPOA6 SRF karyopherin protein-coding      |                         |
| chr2-2027 | 4.981685 | 0.630691 | 1.034364 | 0.609738 | 0.542036 | 0.981636 | chr2  | 2.03E+08 | 2.03E+08 | + | 0 NA | intron (NALuV SINE  | 69434 NM_001288   | 130026   | Hs. 51662  | NR_138468         | ENSG00000ICAIL     | ALS2CR14 islet cell protein-coding        |                         |
| chr16-887 | 9.365272 | 0.485021 | 0.795532 | 0.609682 | 0.542072 | 0.981636 | chr16 | 88734209 | 88734675 | + | 0 NA | exon (NM exon (NM   | 3262 NR_103774    | 1E+08    | Hs. 43771  | NR_1027451        | LOC100288          | uncharacterized ncRNA                     |                         |
| chr6-714  | 9.365272 | 0.485021 | 0.795532 | 0.609682 | 0.542072 | 0.981636 | chr6  | 71416978 | 71417289 | + | 0 NA | intron (Nintron (N  | 3612 NR_121614    | 79940    | Hs. 36833  | NR_026807         | ENSG00000LINC00472 | G6orf155 long intcncRNA                   |                         |
| chr1-192  | 8.238072 | 0.496974 | 0.81543  | 0.609462 | 0.542218 | 0.981636 | chr1  | 1.93E+08 | 1.93E+08 | + | 0 NA | Intergeni Intergeni | -46388 NR_126003  | 1.03E+08 | Hs. 24348  | NR_126003         | LINC01032          | -                                         | long intcncRNA          |
| chr10-428 | 5.658062 | -0.59116 | 0.970259 | -0.60928 | 0.542336 | 0.981636 | chr10 | 42811797 | 42814465 | + | 0 NA | intron (NLIMDa LIN  | 30336 NM_014755   | 9790     | Hs. 10848  | NR_014755         | ENSG00000BMS1      | ACC BMS1 BMS1 ribc protein-coding         |                         |
| chr10-67  | 5.658062 | -0.59116 | 0.970259 | -0.60928 | 0.542336 | 0.981636 | chr10 | 67948243 | 67949608 | + | 0 NA | intron (NLIM4 LINE  | 57523 NM_001314   | 23411    | Hs. 36977  | NR_012238         | ENSG00000SIRT1     | SIRT2 SIRT2 sirtuin protein-coding        |                         |
| chr10-68  | 5.658062 | -0.59116 | 0.970259 | -0.60928 | 0.542336 | 0.981636 | chr10 | 68061451 | 68065702 | + | 0 NA | intron (Nintron (N  | 11707 NM_001278   | 26091    | Hs. 51891  | NR_015601         | ENSG00000HERC4     | -                                         | HECT and protein-coding |
| chr10-11  | 5.658062 | -0.59116 | 0.970259 | -0.60928 | 0.542336 | 0.981636 | chr10 | 1.11E+08 | 1.11E+08 | + | 0 NA | intron (NALuSg SIN  | 31469 NM_005444   | 9126     | Hs. 24485  | NR_005444         | ENSG00000SMC3      | BAM BMH C structure protein-coding        |                         |
| chr10-115 | 5.658062 | -0.59116 | 0.970259 | -0.60928 | 0.542336 | 0.981636 | chr10 | 1.2E+08  | 1.2E+08  | + | 0 NA | intron (NALuJb SIN  | 20352 NM_024834   | 79892    | Hs. 12424  | NR_024834         | ENSG00000MCMBP     | C10orf115 minichromosome protein-coding   |                         |
| chr11-34  | 5.658062 | -0.59116 | 0.970259 | -0.60928 | 0.542336 | 0.981636 | chr11 | 34932946 | 34934791 | + | 0 NA | intron (NLIMC5a LI  | -7969 NR_039831   | 1.01E+08 | NR_039831  | ENSG00000MIR1343  | -                  | microRNA ncRNA                            |                         |
| chr11-46  | 5.658062 | -0.59116 | 0.970259 | -0.60928 | 0.542336 | 0.981636 | chr11 | 46307043 | 46307608 | + | 0 NA | intron (NALuJo SIN  | -25601 NM_201532  | 8525     | Hs. 20426  | NR_003646         | ENSG00000DGK7      | DAGK5 DAC diacylglycerol protein-coding   |                         |
| chr11-11  | 5.658062 | -0.59116 | 0.970259 | -0.60928 | 0.542336 | 0.981636 | chr11 | 1.11E+08 | 1.11E+08 | + | 0 NA | intron (NLIM8 LIN   | 120831 NM_001258  | 57569    | Hs. 61306  | NR_020808         | ENSG00000ARHGAP20  | RARHGAP18 GTPase protein-coding           |                         |
| chr12-104 | 5.658062 | -0.59116 | 0.970259 | -0.60928 | 0.542336 | 0.981636 | chr12 | 1.04E+08 | 1.04E+08 | + | 0 NA | intron (NMER58 DN   | 9446 NM_01332C    | 29915    | Hs. 50655  | NR_01332C         | ENSG00000HCFC2     | HCF-2 HCF host cell protein-coding        |                         |
| chr13-114 | 5.658062 | -0.59116 | 0.970259 | -0.60928 | 0.542336 | 0.981636 | chr13 | 1.14E+08 | 1.14E+08 | + | 0 NA | Intergeni LIM4 LINE | 1795 NR_039724    | 1.01E+08 | NR_039724  | ENSG00000MIR4502  | -                  | microRNA ncRNA                            |                         |
| chr14-582 | 5.658062 | -0.59116 | 0.970259 | -0.60928 | 0.542336 | 0.981636 | chr14 | 58234325 | 58235100 | + | 0 NA | 3' UTR (N3' UTR (N  | -10093 NR_038122  | 5684     | Hs. 55879  | NR_038122         | ENSG00000PSMA3     | HCS PSC3 proteasome protein-coding        |                         |
| chr14-73  | 5.658062 | -0.59116 | 0.970259 | -0.60928 | 0.542336 | 0.981636 | chr14 | 73062351 | 73067194 | + | 0 NA | intron (Nintron (N  | 6238 NM_021235    | 58517    | Hs. 53110  | NR_021235         | ENSG00000CRBM25    | NET52 REI RNA binding protein-coding      |                         |
| chr14-10  | 5.658062 | -0.59116 | 0.970259 | -0.60928 | 0.542336 | 0.981636 | chr14 | 1.02E+08 | 1.02E+08 | + | 0 NA | intron (NALuSc SIN  | 36818 NM_014844   | 9895     | Hs. 19566  | NR_014844         | ENSG00000TECPR2    | KIAA0329 tectonin protein-coding          |                         |
| chr15-64  | 5.658062 | -0.59116 | 0.970259 | -0.60928 | 0.542336 | 0.981636 | chr15 | 64684903 | 64686312 | + | 0 NA | 3' UTR (N3' UTR (N  | 17674 NM_001301   | 4947     | Hs. 74492  | NR_002537         | ENSG00000CAZ2      | AZ2 ornithine protein-coding              |                         |
| chr15-654 | 5.658062 | -0.59116 | 0.970259 | -0.60928 | 0.542336 | 0.981636 | chr15 | 65461083 | 65462006 | + | 0 NA | intron (Nintron (N  | -38597 NR_020962  | 57722    | Hs. 45860  | NR_020962         | ENSG00000IGDCC4    | DDM36 NOF immunoglobulin protein-coding   |                         |
| chr15-71  | 5.658062 | -0.59116 | 0.970259 | -0.60928 | 0.542336 | 0.981636 | chr15 | 71163674 | 71165088 | + | 0 NA | intron (Nintron (N  | 22932 NM_024817   | 79875    | Hs. 38705  | NR_024817         | ENSG00000THSD4     | ADAMTSL-5 thrombospondin protein-coding   |                         |
| chr16-295 | 5.658062 | -0.59116 | 0.970259 | -0.60928 | 0.542336 | 0.981636 | chr16 | 29992928 | 29993945 | + | 0 NA | intron (Nintron (N  | 2181 NM_003605    | 8479     | Hs. 56737  | NR_003605         | ENSG00000CHIRP3    | -                                         | HIRA intcncRNA          |
| chr16-821 | 5.658062 | -0.59116 | 0.970259 | -0.60928 | 0.542336 | 0.981636 | chr16 | 82138313 | 82140911 | + | 0 NA | Intergeni LIP2 LIN  | 30612 NM_005792   | 10200    | Hs. 34440  | NR_005792         | ENSG00000MPHOSPH6  | MPP MPP-1M-phase protein-coding           |                         |
| chr17-74  | 5.658062 | -0.59116 | 0.970259 | -0.60928 | 0.542336 | 0.981636 | chr17 | 742956   | 748949   | + | 0 NA | exon (NM exon (NM   | 6312 NM_015721    | 50628    | Hs. 49962  | NR_015721         | ENSG00000GEM14     | HC56 HCAF gene nucleic protein-coding     |                         |
| chr17-38  | 5.658062 | -0.59116 | 0.970259 | -0.60928 | 0.542336 | 0.981636 | chr17 | 3833544  | 3834715  | + | 0 NA | intron (Nintron (N  | 12117 NM_001114   | 55421    | Hs. 12096  | NR_018553         | ENSG00000CNCBP3    | C17orf85 nuclear cap protein-coding       |                         |
| chr17-15  | 5.658062 | -0.59116 | 0.970259 | -0.60928 | 0.542336 | 0.981636 | chr17 | 15553267 | 15554461 | + | 0 NA | intron (Nintron (N  | 9619 NM_001204    | 51E+08   | Hs. 16459  | NR_001204         | ENSG00000TVP23C-CI | FAM18B2 TVP23C-CI protein-coding          |                         |
| chr2-2304 | 5.658062 | -0.59116 | 0.970259 | -0.60928 | 0.542336 | 0.981636 | chr2  | 2.3E+08  | 2.3E+08  | + | 0 NA | intron (Nintron (N  | 62477 NM_001206   | 6672     | Hs. 36905  | NR_003111         | ENSG00000SP100     | lysp100b SP100 nucleic protein-coding     |                         |
| chr22-45  | 5.658062 | -0.59116 | 0.970259 | -0.60928 | 0.542336 | 0.981636 | chr22 | 45525729 | 45526212 | + | 0 NA | intron (Nintron (N  | 23087 NM_001996   | 2192     | Hs. 24601  | NR_001996         | ENSG00000FBLN1     | FBLN FIBL fibulin 1 protein-coding        |                         |
| chr3-1207 | 5.65806  |          |          |          |          |          |       |          |          |   |      |                     |                   |          |            |                   |                    |                                           |                         |

|                    |           |          |           |          |          |       |          |          |   |      |                      |                  |          |                        |                     |                    |                            |                          |
|--------------------|-----------|----------|-----------|----------|----------|-------|----------|----------|---|------|----------------------|------------------|----------|------------------------|---------------------|--------------------|----------------------------|--------------------------|
| chr10-68c 7.888176 | -0.50126  | 0.826958 | -0.60615  | 0.544415 | 0.981636 | chr10 | 68009697 | 68014464 | + | 0 NA | intron (N)Tigger1 I  | -1197 NR_131184  | 1E+08    | NR_131184              | POU5F1P5            | Oct4-pg5           | POU class:pseudo           |                          |
| chr10-73c 7.888176 | -0.50126  | 0.826958 | -0.60615  | 0.544415 | 0.981636 | chr10 | 73045972 | 73057421 | + | 0 NA | intron (N)AluSq2 SI  | 45278 NM_000917  | 5033     | Hs. 500047NM_000917    | ENSG000004P4HA1     | P4HA               | prolyl 4-protein-coding    |                          |
| chr10-93c 7.888176 | -0.50126  | 0.826958 | -0.60615  | 0.544415 | 0.981636 | chr10 | 93385486 | 93389138 | + | 0 NA | intron (N)intron (N) | 95022 NM_013451  | 26509    | Hs. 60208cNM_013451    | ENSG00000CMYOF      | FER1L3             | myoferlin protein-coding   |                          |
| chr10-93c 7.888176 | -0.50126  | 0.826958 | -0.60615  | 0.544415 | 0.981636 | chr10 | 93393835 | 93400664 | + | 0 NA | exon (NM)exon (NM)   | 85085 NM_013451  | 26509    | Hs. 60208cNM_013451    | ENSG00000CMYOF      | FER1L3             | myoferlin protein-coding   |                          |
| chr10-12c 7.888176 | -0.50126  | 0.826958 | -0.60615  | 0.544415 | 0.981636 | chr10 | 1.26E+08 | 1.26E+08 | + | 0 NA | intron (N)Alu SINE   | -7828 NR_120633  | 1.02E+08 | Hs. 63426cNR_120633    | ENSG00000EDRF1-AS1  | EDRF1              | antncRNA                   |                          |
| chr11-474 7.888176 | -0.50126  | 0.826958 | -0.60615  | 0.544415 | 0.981636 | chr11 | 47410226 | 47418729 | + | 0 NA | intron (N)intron (N) | 5887 NM_001128   | 91252    | Hs. 523664NM_152264    | ENSG00000CLC39A13   | EDSSPD3 I          | solute c protein-coding    |                          |
| chr11-831 7.888176 | -0.50126  | 0.826958 | -0.60615  | 0.544415 | 0.981636 | chr11 | 83176299 | 83185075 | + | 0 NA | intron (N)intron (N) | 6797 NR_133914   | 1.07E+08 | Hs. 59534cNR_133914    | PCF11-AS1           | PCF11              | antncRNA                   |                          |
| chr13-11c 7.888176 | -0.50126  | 0.826958 | -0.60615  | 0.544415 | 0.981636 | chr13 | 1.1E+08  | 1.1E+08  | + | 0 NA | intron (N)intron (N) | 12241 NM_001267  | 1E+08    | Hs. 64003cNM_001267044 | COL4A2-AS1          | COL4A2             | aprotein-coding            |                          |
| chr15-558 7.888176 | -0.50126  | 0.826958 | -0.60615  | 0.544415 | 0.981636 | chr15 | 55858922 | 55863291 | + | 0 NA | intron (N)intron (N) | 56025 NM_001284  | 4734     | Hs. 1565 NM_006154     | ENSG00000CNEDD4     | NEDD4-1 FNEDD4     | E3 protein-coding          |                          |
| chr15-58c 7.888176 | -0.50126  | 0.826958 | -0.60615  | 0.544415 | 0.981636 | chr15 | 58640060 | 58643624 | + | 0 NA | intron (N)intron (N) | 51765 NR_07341c  | 664618   | Hs. 670224NR_002927    | HSP90AB4F           | HSP90Bd            | heat shockpseud            |                          |
| chr15-717 7.888176 | -0.50126  | 0.826958 | -0.60615  | 0.544415 | 0.981636 | chr15 | 71758184 | 71760643 | + | 0 NA | intron (N)MIRB SINE  | -51141 NM_01634c | 10002    | Hs. 187354NM_01424c    | ENSG00000CNR2E3     | ESCS PNR           | nuclear i protein-coding   |                          |
| chr15-101 7.888176 | -0.50126  | 0.826958 | -0.60615  | 0.544415 | 0.981636 | chr15 | 1.01E+08 | 1.01E+08 | + | 0 NA | exon (NM)exon (NM)   | 74134 NM_01491c  | 22856    | Hs. 11048cNM_01491c    | ENSG00000CHSY1      | CHSY CSS1          | chondroitin protein-coding |                          |
| chr16-84c 7.888176 | -0.50126  | 0.826958 | -0.60615  | 0.544415 | 0.981636 | chr16 | 84588048 | 84591503 | + | 0 NA | intron (N)intron (N) | 28303 NM_02114c  | 23406    | Hs. 28909cNM_02114c    | ENSG00000COTL1      | CLP                | coactosin protein-coding   |                          |
| chr17-61c 7.888176 | -0.50126  | 0.826958 | -0.60615  | 0.544415 | 0.981636 | chr17 | 61924146 | 61924829 | + | 0 NA | intron (N)intron (N) | 3495 NM_02074c   | 57508    | Hs. 27964cNM_02074c    | ENSG00000INTS2      | INT2 KIAI          | integrat protein-coding    |                          |
| chr2-5561 7.888176 | -0.50126  | 0.826958 | -0.60615  | 0.544415 | 0.981636 | chr2  | 55614505 | 55615197 | + | 0 NA | intron (N)intron (N) | 2771 NM_001122   | 57223    | Hs. 51618cNM_02046c    | ENSG00000PPP4R3B    | FLFL2 PP4          | intron f protein-coding    |                          |
| chr2-6507 7.888176 | -0.50126  | 0.826958 | -0.60615  | 0.544415 | 0.981636 | chr2  | 65071426 | 65072358 | + | 0 NA | exon (NM)exon (NM)   | 15476 NM_00131c  | 23177    | Hs. 70925cNM_015147    | ENSG00000CEP68      | KIAA0582           | centrosome protein-coding  |                          |
| chr2-218 7.888176  | -0.50126  | 0.826958 | -0.60615  | 0.544415 | 0.981636 | chr2  | 1.22E+08 | 1.22E+08 | + | 0 NA | intron (N)intron (N) | 5986 NM_03239c   | 84365    | Hs. 36784cNM_03239c    | ENSG00000CNIFK      | MKI671P N          | nucleolar protein-coding   |                          |
| chr2-1217 7.888176 | -0.50126  | 0.826958 | -0.60615  | 0.544415 | 0.981636 | chr2  | 2.19E+08 | 2.19E+08 | + | 0 NA | intron (N)AluSx3 SI  | 15445 NM_02093c  | 57695    | Hs. 16606cNM_02093c    | ENSG00000UCSP37     | -                  | ubiquitin protein-coding   |                          |
| chr2-218c 7.888176 | -0.50126  | 0.826958 | -0.60615  | 0.544415 | 0.981636 | chr2  | 2.19E+08 | 2.19E+08 | + | 0 NA | intron (N)intron (N) | 15686 NM_00127c  | 9125     | Hs. 14876cNM_005444    | ENSG00000CNOT9      | CAF40 CT1          | CCR4-NOT protein-coding    |                          |
| chr20-601 7.888176 | -0.50126  | 0.826958 | -0.60615  | 0.544415 | 0.981636 | chr20 | 6011087  | 6012932  | + | 0 NA | intron (N)intron (N) | 4760 NM_00132c   | 54675    | Hs. 74395cNM_01909c    | ENSG00000CRLS1      | C20orf15c          | cardiolin protein-coding   |                          |
| chr3-160c 7.888176 | -0.50126  | 0.826958 | -0.60615  | 0.544415 | 0.981636 | chr3  | 1.61E+08 | 1.61E+08 | + | 0 NA | intron (N)AluJb SIN  | -13969 NR_003001 | 67767    | Hs. 67595cNM_003001    | ENSG00000SCARNA7    | U90                | small Ca ncRNA             |                          |
| chr3-187c 7.888176 | -0.50126  | 0.826958 | -0.60615  | 0.544415 | 0.981636 | chr3  | 1.87E+08 | 1.87E+08 | + | 0 NA | intron (N)MER49 LTF  | -32659 NR_135551 | 1.02E+08 | NR_135551              | ENSG00000CLOC10192c | -                  | uncharacterncRNA           |                          |
| chr4-767 7.888176  | -0.50126  | 0.826958 | -0.60615  | 0.544415 | 0.981636 | chr4  | 76775010 | 76777141 | + | 0 NA | intron (N)LP1B LIN   | 122069 NR_00102c | 345079   | Hs. 25729cNM_00102c    | ENSG00000SOWAHB     | ANKRD56            | sonowd protein-coding      |                          |
| chr5-691c 7.888176 | -0.50126  | 0.826958 | -0.60615  | 0.544415 | 0.981636 | chr5  | 69127352 | 69129049 | + | 0 NA | intron (N)intron (N) | -32608 NR_14573c | 1.1E+08  | NR_14573c              | ENSG00000SNORA50    | -                  | small nucsnRNA             |                          |
| chr5-129c 7.888176 | -0.50126  | 0.826958 | -0.60615  | 0.544415 | 0.981636 | chr5  | 1.3E+08  | 1.3E+08  | + | 0 NA | intron (N)intron (N) | -68994 NR_12574c | 1.04E+08 | Hs. 62863cNR_12574c    | ENSG00000ADAMTS19   | -                  | ADAMTS19 ncRNA             |                          |
| chr7-474 7.888176  | -0.50126  | 0.826958 | -0.60615  | 0.544415 | 0.981636 | chr7  | 4747071  | 4749369  | + | 0 NA | intron (N)intron (N) | -27403 NM_001364 | 9907     | Hs. 55844cNM_01485c    | ENSG00000CAP521     | KIAA0415           | adaptor i protein-coding   |                          |
| chr7-662c 7.888176 | -0.50126  | 0.826958 | -0.60615  | 0.544415 | 0.981636 | chr7  | 66286902 | 66287203 | + | 0 NA | intron (N)LH5 LINE   | 81718 NM_00359c  | 8460     | Hs. 421194NM_00359c    | ENSG00000TPST1      | TANG013A           | tyrosin protein-coding     |                          |
| chr8-937c 7.888176 | -0.50126  | 0.826958 | -0.60615  | 0.544415 | 0.981636 | chr8  | 93722497 | 93725527 | + | 0 NA | intron (N)AluJr SIN  | -16099 NR_02725c | 55472    | Hs. 19278cNM_01860c    | ENSG00000RBM12B-AS  | 8orf39 FRBM12B     | ancRNA                     |                          |
| chr8-107c 7.888176 | -0.50126  | 0.826958 | -0.60615  | 0.544415 | 0.981636 | chr8  | 1.08E+08 | 1.08E+08 | + | 0 NA | intron (N)AluSz6 SI  | 36013 NM_00156c  | 3646     | Hs. 40559cNM_00156c    | ENSG00000EIF3E      | EIF3P4E            | eukaryot i protein-coding  |                          |
| chr1-168c 8.212648 | -0.491971 | 0.811952 | -0.605911 | 0.544574 | 0.981636 | chr1  | 1675869  | 1676960  | + | 0 NA | exon (NM)exon (NM)   | 16818 NM_00111c  | 728661   | Hs. 65525cNM_00111c    | ENSG00000SLC35E2B   | SLC35E2B           | solute c protein-coding    |                          |
| chr1-151c 8.212648 | -0.491971 | 0.811952 | -0.605911 | 0.544574 | 0.981636 | chr1  | 1.51E+08 | 1.51E+08 | + | 0 NA | exon (NM)exon (NM)   | 4169 NM_02083c   | 57592    | Hs. 18675cNM_02083c    | ENSG00000ZNF687     | PDB6               | zinc fing protein-coding   |                          |
| chr1-176c 8.212648 | -0.491971 | 0.811952 | -0.605911 | 0.544574 | 0.981636 | chr1  | 1.76E+08 | 1.76E+08 | + | 0 NA | intron (N)Tigger1 I  | 36460 NM_001001  | 64326    | Hs. 523744NM_02245c    | ENSG00000COP1       | RFWD2 RNF          | COP1 E3 protein-coding     |                          |
| chr1-180c 8.212648 | -0.491971 | 0.811952 | -0.605911 | 0.544574 | 0.981636 | chr1  | 1.8E+08  | 1.8E+08  | + | 0 NA | intron (N)Tigger1 I  | 26771 NR_03060c  | 1E+08    | NR_03060c              | ENSG00000MIR3121    | mir-3121           | microRNA ncRNA             |                          |
| chr1-209c 8.212648 | -0.491971 | 0.811952 | -0.605911 | 0.544574 | 0.981636 | chr1  | 2.1E+08  | 2.1E+08  | + | 0 NA | 3' UTR (N)3' UTR (N) | 24352 NM_01438c  | 27042    | Hs. 194754NM_01438c    | ENSG00000CUTP25     | C1orf107 UTP25     | sm protein-coding          |                          |
| chr11-74c 8.212648 | -0.491971 | 0.811952 | -0.605911 | 0.544574 | 0.981636 | chr11 | 74918543 | 74920097 | + | 0 NA | intron (N)LM5C LIN   | 29771 NM_00127c  | 143570   | Hs. 37014cNM_18296c    | ENSG00000XRR1A      | -                  | X-ray rac protein-coding   |                          |
| chr12-10c 8.212648 | -0.491971 | 0.811952 | -0.605911 | 0.544574 | 0.981636 | chr12 | 1.02E+08 | 1.02E+08 | + | 0 NA | intron (N)MER5A DN   | 18850 NM_01605c  | 51019    | Hs. 40569cNM_01605c    | ENSG00000WASHC3     | CCDC53 C           | WASH comp protein-coding   |                          |
| chr14-36c 8.212648 | -0.491971 | 0.811952 | -0.605911 | 0.544574 | 0.981636 | chr14 | 36310291 | 36312027 | + | 0 NA | intron (N)intron (N) | 9478 NM_00130c   | 51562    | Hs. 36864cNM_01658c    | ENSG00000CMBIP      | -                  | MAP3K12 t protein-coding   |                          |
| chr18-127 8.212648 | -0.491971 | 0.811952 | -0.605911 | 0.544574 | 0.981636 | chr18 | 12713854 | 12715813 | + | 0 NA | intron (N)AluSx SIN  | 11791 NM_02023c  | 56984    | Hs. 46465cNM_02023c    | ENSG00000PSMG2      | CLAST3 HC          | proteasom protein-coding   |                          |
| chr2-878c 8.212648 | -0.491971 | 0.811952 | -0.605911 | 0.544574 | 0.981636 | chr2  | 8785321  | 8786400  | + | 0 NA | exon (NM)exon (NM)   | 51752 NM_00134c  | 57498    | Hs. 9873               | NR_02073c           | ENSG00000KIDINS22C | ARMS SIN                   | kinase D protein-coding  |
| chr2-222c 8.212648 | -0.491971 | 0.811952 | -0.605911 | 0.544574 | 0.981636 | chr2  | 2.23E+08 | 2.23E+08 | + | 0 NA | intron (N)intron (N) | 72683 NM_001354  | 2181     | Hs. 65577cNM_00445c    | ENSG00000ACSL3      | ACS3 FACL          | acyl-CoA protein-coding    |                          |
| chr2-22c 8.212648  | -0.491971 | 0.811952 | -0.605911 | 0.544574 | 0.981636 | chr2  | 24544738 | 24548749 | + | 0 NA | non-codirnon-codir   | 7075 NM_001284   | 83606    | Hs. 9850               | NR_031444           | ENSG00000GUCD1     | C22orf13                   | guanyil protein-coding   |
| chr5-180c 8.212648 | -0.491971 | 0.811952 | -0.605911 | 0.544574 | 0.981636 | chr5  | 1.8E+08  | 1.8E+08  | + | 0 NA | intron (N)intron (N) | -31478 NR_17506c | 255246   | Hs. 19055cNM_17506c    | ENSG00000RASGEF1C   | -                  | RasGEF dc protein-coding   |                          |
| chr2-134c 10.14371 | -0.4464   | 0.736979 | -0.60571  | 0.544708 | 0.981636 | chr2  | 1.35E+08 | 1.35E+08 | + | 0 NA | intron (N)AluJb SIN  | 29305 NM_001241  | 905      | Hs. 74411cNM_001241    | ENSG00000CCNT2      | CYCT2              | cyclin T2 protein-coding   |                          |
| chr5-662c 10.14371 | -0.4464   | 0.736979 | -0.60571  | 0.544708 | 0.981636 | chr5  | 6620705  | 6626970  | + | 0 NA | intron (N)intron (N) | 9207 NR_03794c   | 54888    | Hs. 48152cNM_01775c    | ENSG00000NSUN2      | MISU MRTE          | NOP2/Sun protein-coding    |                          |
| chr1-157c 7.690636 | -0.510052 | 0.842578 | -0.605347 | 0.544949 | 0.981636 | chr1  | 15727940 | 15731488 | + | 0 NA | intron (N)intron (N) | 109524 NM_02019c | 56950    | Hs. 66170              | NR_02019c           | ENSG00000CSDYD2    | HSKM-B K                   | SET and p protein-coding |
| chr11-94c 7.690636 | -0.510052 | 0.842578 | -0.605347 | 0.544949 | 0.981636 | chr11 | 94864567 | 94867738 | + | 0 NA | exon (NM)exon (NM)   | 97796 NM_001301  | 154810   | Hs. 503594NM_130847    | ENSG00000AMOTL1     | JEAP               | angiomot i protein-coding  |                          |
| chr11-117 7.690636 | -0.510052 | 0.842578 | -0.605347 | 0.544949 | 0.981636 | chr11 | 1.17E+08 | 1.17E+08 | + | 0 NA | exon (NM)exon (NM)   | 2604 NM_00471c   | 9159     | Hs. 64861cNM_00471c    | ENSG00000CPCSK7     | LPC PC7 F          | prote i protein-coding     |                          |
| chr14-35c 7.690636 | -0.510052 | 0.842578 | -0.605347 | 0.544949 | 0.981636 | chr14 | 35644668 | 35645730 | + | 0 NA | intron (N)MLT1A0 LI  | 111035 NM_032594 | 84684    | Hs. 62813              | NR_032594           | ENSG00000INSM2     | IA-6 IA6 INS               | trapezoid protein-coding |
| chr16-10c 7.690636 | -0.510052 | 0.842578 | -0.605347 | 0.544949 | 0.981636 | chr16 | 108916   | 110627   | + | 0 NA | intron (N)LM4E4b LI  | 28902 NM_00107c  | 8131     | Hs. 19699              | NR_01207c           | ENSG00000NPRL3     | C16orf35 NPR3              | like protein-coding      |
| chr19-11c 7.690636 | -0.510052 | 0.842578 | -0.605347 | 0.544949 | 0.981636 | chr19 | 11002950 | 11005652 | + | 0 NA | intron (N)AluSx1 SI  | 20149 NM_001128  | 6597     | Hs. 32752cNM_00307c    | ENSG00000CMARCA4    | BAF190 B           | SWI1/SNF i protein-coding  |                          |
| chr19-184 7.690636 | -0.510052 | 0.842578 | -0.605347 | 0.544949 | 0.981636 | chr19 | 18443637 | 18447500 | + | 0 NA | intron (N)(G) Simp   | -7435 NR_045574  | 51477    | Hs. 40587cNM_01636c    | ENSG00000ISYNA1     | INO1 INOS          | inositol- protein-coding   |                          |
| chr19-184 7.690636 | -0.510052 | 0.842578 | -0.605347 | 0.544949 | 0.981636 | chr19 | 18455346 | 18459741 | + | 0 NA | intron (N)intron (N) | -19410 NR_045574 | 51477    | Hs. 40587cNM_01636c    | ENSG00000ISYNA1     | INO1 INOS          | inositol- protein-coding   |                          |
| chr2-131 7.690636  | -0.510052 | 0.842578 |           |          |          |       |          |          |   |      |                      |                  |          |                        |                     |                    |                            |                          |



|                     |          |          |          |          |          |       |          |          |   |    |                     |                   |                             |                      |                  |                           |                         |       |
|---------------------|----------|----------|----------|----------|----------|-------|----------|----------|---|----|---------------------|-------------------|-----------------------------|----------------------|------------------|---------------------------|-------------------------|-------|
| chr12-122.5.650204  | -0.58898 | 0.977503 | -0.60254 | 0.546817 | 0.981636 | chr12 | 1.23E+08 | 1.23E+08 | 0 | NA | intron (AluSz SIN   | 21920 NM_014708   | 9735 Hs. 300555NM_014708    | ENSG00000KNTC1       | ROD              | kinetochprotein-coding    |                         |       |
| chr16-474.5.650204  | -0.58898 | 0.977503 | -0.60254 | 0.546817 | 0.981636 | chr16 | 47456709 | 47456908 | 0 | NA | intron (intron (N   | 4255 NM_03079C    | 81533 Hs. 42217 NM_03079C   | ENSG00000ITFG1       | 2310047C2        | integrin protein-coding   |                         |       |
| chr17-486.5.650204  | -0.58898 | 0.977503 | -0.60254 | 0.546817 | 0.981636 | chr17 | 4861473  | 4861955  | 0 | NA | intron (AluSx SIN   | 28374 NM_170663   | 50488 Hs. 443417NM_01571C   | ENSG00000MINK1       | B55 MAP4#        | missshaper protein-coding |                         |       |
| chr17-644.5.650204  | -0.58898 | 0.977503 | -0.60254 | 0.546817 | 0.981636 | chr17 | 64483092 | 64484186 | 0 | NA | intron (intron (N   | 13415 NM_00721E   | 11232 Hs. 437009NM_00721E   | ENSG00000POLG2       | HP55             | MTPC DNA                  | polynprotein-coding     |       |
| chr19-341.5.650204  | -0.58898 | 0.977503 | -0.60254 | 0.546817 | 0.981636 | chr19 | 3419890  | 3420310  | 0 | NA | intron (AluJo SIN   | 53527 NM_00124E   | 4782 Hs. 170131NM_005597    | ENSG00000NFIC        | CTF CTF5         | nuclear fprotein-coding   |                         |       |
| chr2-6817.5.650204  | -0.58898 | 0.977503 | -0.60254 | 0.546817 | 0.981636 | chr2  | 68170192 | 68172000 | 0 | NA | intron (HALI LINE   | 13208 NM_020143   | 56902 Hs. 262855NM_020143   | ENSG00000CPN01       | KHRBP1 RF        | partner cprotein-coding   |                         |       |
| chr2-1117.5.650204  | -0.58898 | 0.977503 | -0.60254 | 0.546817 | 0.981636 | chr2  | 1.12E+08 | 1.12E+08 | 0 | NA | intron (Tigger4a    | -28419 NR_03992E  | 1.01E+08                    | NR_03992E            | ENSG00000MIR4771 | 2-AAA ABET7               | amyloid tprotein-coding |       |
| chr21-261.5.650204  | -0.58898 | 0.977503 | -0.60254 | 0.546817 | 0.981636 | chr21 | 26109505 | 26111557 | 0 | NA | intron (intron (N   | 29859 NM_00113E   | 351 Hs. 434988NM_000484     | ENSG00000APP         | MIRN944 f        | microRNA ncRNA            |                         |       |
| chr3-1895.5.650204  | -0.58898 | 0.977503 | -0.60254 | 0.546817 | 0.981636 | chr3  | 1.9E+08  | 1.9E+08  | 0 | NA | intron (intron (N   | 135542 NR_03064Z  | 1E+08                       | NR_03064Z            | ENSG00000MIR944  | MIRN944 f                 | microRNA ncRNA          |       |
| chr5-8105.5.650204  | -0.58898 | 0.977503 | -0.60254 | 0.546817 | 0.981636 | chr5  | 81053464 | 81054374 | 0 | NA | intron (NLIP45 LIN  | -93012 NR_10501E  | 1.03E+08                    | Hs. 737159NR_10501E  | ENSG00000RASGRF2 | -f                        | RASGRF2                 | ncRNA |
| chr6-4225.5.650204  | -0.58898 | 0.977503 | -0.60254 | 0.546817 | 0.981636 | chr6  | 42231117 | 42232263 | 0 | NA | intron (intron (N   | -13829 NR_018141  | 55173 Hs. 380887NM_018141   | ENSG00000MRP510      | MRP-510          | Fam120hcnr                | protein-coding          |       |
| chr7-1347.5.650204  | -0.58898 | 0.977503 | -0.60254 | 0.546817 | 0.981636 | chr7  | 1.35E+08 | 1.35E+08 | 0 | NA | intron (intron (N   | 14562 NM_03313E   | 800 Hs. 490203NM_00434Z     | ENSG00000CALD1       | CDM H-CAI        | caldesmon protein-coding  |                         |       |
| chr13-467.7.723918  | 0.513221 | 0.851781 | 0.602527 | 0.546823 | 0.981636 | chr13 | 46728315 | 46729905 | 0 | NA | intron (intron (N   | 68051 NM_001984   | 2098 Hs. 432491NM_001984    | ENSG00000ESD         | FGH              | esterase protein-coding   |                         |       |
| chr15-722.7.723918  | 0.513221 | 0.851781 | 0.602527 | 0.546823 | 0.981636 | chr15 | 72250100 | 72251163 | 0 | NA | non-codinn-codir    | -19277 NM_00120E  | 5315 Hs. 534777NM_002654    | ENSG00000PKM         | CTHBP HEL        | pyruvate protein-coding   |                         |       |
| chr20-495.7.723918  | 0.513221 | 0.851781 | 0.602527 | 0.546823 | 0.981636 | chr20 | 49904274 | 49905933 | 0 | NA | 3' UTR (3' UTR (N   | 8636 NM_00113E    | 9825 Hs. 48513 NM_00603E    | ENSG00000SPATA2      | PD1 PPP1F        | spermatogprotein-coding   |                         |       |
| chr4-8465.7.723918  | 0.513221 | 0.851781 | 0.602527 | 0.546823 | 0.981636 | chr4  | 84694276 | 84694637 | 0 | NA | intron (intron (N   | 111329 NM_00126E  | 1040 Hs. 654899NM_00126E    | ENSG00000CDS1        | CDS 1            | CDP-diacylprotein-coding  |                         |       |
| chr9-124.7.723918   | 0.513221 | 0.851781 | 0.602527 | 0.546823 | 0.981636 | chr9  | 1.25E+08 | 1.25E+08 | 0 | NA | intron (intron (N   | 29628 NM_00207E   | 2800 Hs. 59504 NM_00207E    | ENSG00000COLGA1      | golgin-97        | golgin Alprotein-coding   |                         |       |
| chr1-1807.7.411003  | -0.52418 | 0.869982 | -0.60251 | 0.546832 | 0.981636 | chr1  | 1.8E+08  | 1.8E+08  | 0 | NA | intron (intron (N   | -279796 NM_001004 | 5768 Hs. 719177NM_00282E    | ENSG00000QSOX1       | Q6 QSCN6         | quiescin protein-coding   |                         |       |
| chr10-572.7.411003  | -0.52418 | 0.869982 | -0.60251 | 0.546832 | 0.981636 | chr10 | 5723184  | 5724015  | 0 | NA | intron (intron (N   | 38761 NM_001321   | 54906 Hs. 610717NM_01778E   | ENSG00000TASOR2      | C10orf18         | transcrip protein-coding  |                         |       |
| chr2-4309.7.411003  | -0.52418 | 0.869982 | -0.60251 | 0.546832 | 0.981636 | chr2  | 43932928 | 43932572 | 0 | NA | intron (intron (N   | 62739 NM_13325E   | 10128 Hs. 368084NM_13325E   | ENSG00000LRPPRC      | CLONE-23E        | leucine rprotein-coding   |                         |       |
| chr2-2004.7.411003  | -0.52418 | 0.869982 | -0.60251 | 0.546832 | 0.981636 | chr2  | 2E+08    | 2E+08    | 0 | NA | intron (intron (N   | 61494 NM_001321   | 130535 Hs. 605777NM_152387  | ENSG00000KCTD18      | 6530404F         | potassium protein-coding  |                         |       |
| chr4-6728.7.411003  | -0.52418 | 0.869982 | -0.60251 | 0.546832 | 0.981636 | chr4  | 672814   | 673098   | 0 | NA | intron (AluSq SIN   | 1320 NR_03374Z    | 521 Hs. 85539 NM_00710C     | ENSG00000ATP5ME      | ATP5I ATF        | ATP synt protein-coding   |                         |       |
| chr17-356.6.689602  | 0.568204 | 0.94319  | 0.602428 | 0.54689  | 0.981636 | chr17 | 35020803 | 35021508 | 0 | NA | intron (A)n Simp    | 40643 NM_01397E   | 3980 Hs. 100299NM_002311    | ENSG00000CLIG3       | LIG2 LIG3        | DNA ligas protein-coding  |                         |       |
| chr13-111.7.160767  | 0.532695 | 0.884454 | 0.602287 | 0.546983 | 0.981636 | chr13 | 1.14E+08 | 1.14E+08 | 0 | NA | intron (intron (N   | 40053 NM_00134E   | 55002 Hs. 317593NM_01790E   | ENSG00000TMC03       | C13orf11         | transmem protein-coding   |                         |       |
| chr18-634.7.160767  | 0.532695 | 0.884454 | 0.602287 | 0.546983 | 0.981636 | chr18 | 63417358 | 63417642 | 0 | NA | intron (L2a LINE    | 4976 NM_00486E    | 9525 Hs. 126555NM_00486E    | ENSG00000VPS4B       | MIG1 SKD1        | vacuolar protein-coding   |                         |       |
| chr20-467.7.160767  | 0.532695 | 0.884454 | 0.602287 | 0.546983 | 0.981636 | chr20 | 46374358 | 46374998 | 0 | NA | intron (intron (N   | -10220 NM_001281  | 51006 Hs. 593344NM_01594E   | ENSG00000SLC35C2     | BA39402          | Isolute c protein-coding  |                         |       |
| chr5-1391.7.160767  | 0.532695 | 0.884454 | 0.602287 | 0.546983 | 0.981636 | chr5  | 1.39E+08 | 1.39E+08 | 0 | NA | intron (MIR SINE    | 78224 NM_001037   | 643074 Hs. 483521NM_022464  | ENSG00000SILL1       | BAP MSS1         | L SILL1                   | nuclprotein-coding      |       |
| chr6-2048.7.160767  | 0.532695 | 0.884454 | 0.602287 | 0.546983 | 0.981636 | chr6  | 20488668 | 20488981 | 0 | NA | intron (AluSc5 SI   | -45633 NM_017774  | 54901 Hs. 657604NM_017774   | ENSG00000CDKAL1      | -                | CDK5 reg protein-coding   |                         |       |
| chr11-745.7.377722  | -0.52932 | 0.879026 | -0.60216 | 0.547066 | 0.981636 | chr11 | 74952591 | 74953343 | 0 | NA | intron (intron (N   | 3701 NM_01475E    | 9789 Hs. 282702NM_01475E    | ENSG00000SPCS2       | -                | signal pprotein-coding    |                         |       |
| chr3-1341.7.377722  | -0.52932 | 0.879026 | -0.60216 | 0.547066 | 0.981636 | chr3  | 1.34E+08 | 1.34E+08 | 0 | NA | TTS (NM_C TTS (NM_C | 93899 NM_00295E   | 6259 Hs. 654562NM_00295E    | ENSG00000RYK         | D3S3195          | receptor protein-coding   |                         |       |
| chr6-822.7.377722   | -0.52932 | 0.879026 | -0.60216 | 0.547066 | 0.981636 | chr6  | 82204132 | 82204589 | 0 | NA | intron (intron (N   | 43384 NM_00130C   | 25998 Hs. 306422NM_01552E   | ENSG00000IBTK        | BTBD26 B1        | inhibitor protein-coding  |                         |       |
| chr1-1947.7.880318  | -0.49965 | 0.829793 | -0.60214 | 0.547078 | 0.981636 | chr1  | 19471351 | 19471686 | 0 | NA | intron (intron (N   | 12777 NM_00128E   | 832 Hs. 43276C NM_00493C    | ENSG00000CAPZB       | CAPB CAPF        | capping e protein-coding  |                         |       |
| chr10-121.7.880318  | -0.49965 | 0.829793 | -0.60214 | 0.547078 | 0.981636 | chr10 | 12163815 | 12164889 | 0 | NA | TTS (NM_C TTS (NM_C | 31539 NM_01414Z   | 11164 Hs. 555956NM_01414Z   | ENSG00000NUD15       | YSAL YSAL        | nudix hycprotein-coding   |                         |       |
| chr11-891.7.880318  | -0.49965 | 0.829793 | -0.60214 | 0.547078 | 0.981636 | chr11 | 8914812  | 8915862  | 0 | NA | intron (intron (N   | 4148 NM_00120E    | 56672 Hs. 13118C NM_02064Z  | ENSG00000CAKIP1      | BCA3 C11c        | A-kinase protein-coding   |                         |       |
| chr12-111.7.880318  | -0.49965 | 0.829793 | -0.60214 | 0.547078 | 0.981636 | chr12 | 1.12E+08 | 1.12E+08 | 0 | NA | intron (AluJb SIN   | 17428 NM_02495E   | 80018 Hs. 530941NM_02495E   | ENSG00000NAA25       | C12orf30 N       | (alpha)-protein-coding    |                         |       |
| chr15-1011.7.880318 | -0.49965 | 0.829793 | -0.60214 | 0.547078 | 0.981636 | chr15 | 1.01E+08 | 1.01E+08 | 0 | NA | intron (intron (N   | 18728 NM_01491E   | 22856 Hs. 110488NM_01491E   | ENSG00000CHS1Y       | CHS1Y CSS1       | chondroit protein-coding  |                         |       |
| chr17-295.7.880318  | -0.49965 | 0.829793 | -0.60214 | 0.547078 | 0.981636 | chr17 | 29505407 | 29505606 | 0 | NA | intron (AluSq2 SI   | 61531 NM_198147   | 116236 Hs. 106511NM_198147  | ENSG00000ABHD15      | -                | abhydrol e protein-coding |                         |       |
| chr19-211.7.880318  | -0.49965 | 0.829793 | -0.60214 | 0.547078 | 0.981636 | chr19 | 21052675 | 21053824 | 0 | NA | intron (intron (N   | -28898 NR_117087  | 148206 Hs. 72918E NM_18251E | ENSG00000ZNF714      | -                | zinc fingprotein-coding   |                         |       |
| chr19-554.7.880318  | -0.49965 | 0.829793 | -0.60214 | 0.547078 | 0.981636 | chr19 | 55405890 | 55406800 | 0 | NA | intron (intron (N   | 1443 NM_014501    | 27338 Hs. 39639E NM_014501  | ENSG00000UBE2S       | E2-EFP E2        | ubiquitin protein-coding  |                         |       |
| chr2-1681.7.880318  | -0.49965 | 0.829793 | -0.60214 | 0.547078 | 0.981636 | chr2  | 1681461  | 1683006  | 0 | NA | intron (intron (N   | 62282 NM_01229E   | 7837 Hs. 332197NM_01229E    | ENSG00000PXDN        | ASG7 COF         | peroxidase protein-coding |                         |       |
| chr2-1018.7.880318  | -0.49965 | 0.829793 | -0.60214 | 0.547078 | 0.981636 | chr2  | 1.02E+08 | 1.02E+08 | 0 | NA | intron (NL3 LINE    | -98385 NR_103791  | 1.01E+08                    | Hs. 51624E NR_103791 | LINC01127-       | long intncRNA             |                         |       |
| chr4-1417.7.880318  | -0.49965 | 0.829793 | -0.60214 | 0.547078 | 0.981636 | chr4  | 1.19E+08 | 1.19E+08 | 0 | NA | intron (MIRb SINE   | 59007 NM_020961   | 57721 Hs. 596872NM_020961   | ENSG00000METTL14     | hMETTL14         | methyltr protein-coding   |                         |       |
| chr5-143C.7.880318  | -0.49965 | 0.829793 | -0.60214 | 0.547078 | 0.981636 | chr5  | 14304025 | 14307627 | 0 | NA | intron (Tigger3a    | -158157 NR_14581E | 1.1E+08                     | NR_14581E            | SNORD170-        | small nucsnRNA            |                         |       |
| chr5-1093.7.880318  | -0.49965 | 0.829793 | -0.60214 | 0.547078 | 0.981636 | chr5  | 1.09E+08 | 1.09E+08 | 0 | NA | intron (AluJr SIN   | -28515 NR_14904C  | 285638 Hs. 532104NR_14904C  | ENSG00000LOC28563E   | -                | uncharactncRNA            |                         |       |
| chr8-2814.7.880318  | -0.49965 | 0.829793 | -0.60214 | 0.547078 | 0.981636 | chr8  | 28149071 | 28149669 | 0 | NA | intron (intron (N   | 2448 NM_00449E    | 3182 Hs. 591731NM_00449E    | ENSG00000HNRNPAB     | ABBP1 HNf        | heteroger protein-coding  |                         |       |
| chr8-1167.7.880318  | -0.49965 | 0.829793 | -0.60214 | 0.547078 | 0.981636 | chr8  | 1.17E+08 | 1.17E+08 | 0 | NA | intron (NLIMCa LIN  | 56231 NM_001284   | 55140 Hs. 49133E NM_018091  | ENSG00000ELP3        | KAT9             | elongator protein-coding  |                         |       |
| chr12-111.7.111769  | 0.533742 | 0.886499 | 0.602079 | 0.547122 | 0.981636 | chr12 | 1.12E+08 | 1.12E+08 | 0 | NA | 3' UTR (3' UTR (N   | 5707 NM_032334    | 84294 Hs. 86970 NM_032334   | ENSG00000UTP23       | C8orf53          | UTP23 sm protein-coding   |                         |       |
| chr12-112.7.623039  | 0.561086 | 0.931994 | 0.602028 | 0.547156 | 0.981636 | chr12 | 1.12E+08 | 1.12E+08 | 0 | NA | intron (AluJr SIN   | 93856 NM_00110E   | 283450 Hs. 53094E NM_17381E | ENSG00000HECTD4      | C12orf51 HECT    | dom protein-coding        |                         |       |
| chr10-101.7.657355  | 0.506838 | 0.841971 | 0.601966 | 0.547197 | 0.981636 | chr10 | 1.02E+08 | 1.02E+08 | 0 | NA | intron (NLIMB7 LIN  | 22302 NM_00203E   | 6311 Hs. 76253 NM_00297E    | ENSG00000ATXN2       | ATX2 SCA2        | ataxin 2 protein-coding   |                         |       |
| chr14-954.7.657355  | 0.506838 | 0.841971 | 0.601966 | 0.547197 | 0.981636 | chr14 | 95449583 | 95450116 | 0 | NA | intron (intron (N   | 25986             |                             |                      |                  |                           |                         |       |

|                     |          |          |          |         |          |       |          |          |   |   |    |                     |                  |          |                       |                      |            |                                 |
|---------------------|----------|----------|----------|---------|----------|-------|----------|----------|---|---|----|---------------------|------------------|----------|-----------------------|----------------------|------------|---------------------------------|
| chr16-274.8.187224  | 0.487013 | 0.811451 | 0.600175 | 0.54839 | 0.981636 | chr16 | 27479634 | 27489832 | + | 0 | NA | intron (Nintron (N  | -31340 NR_037158 | 283888   | Hs.66093ENR_037158    | ENSG000002IL21R-AS1- | IL21R      | antncRNA                        |
| chr17-43c.8.187224  | 0.487013 | 0.811451 | 0.600175 | 0.54839 | 0.981636 | chr17 | 43015244 | 43018627 | + | 0 | NA | intron (NAluSp SIN  | 5450 NM_006373   | 10493    | Hs.514199NM_006373    | ENSG000002VAT1       | VAT1       | vesicle protein-coding          |
| chr18-23f.8.187224  | 0.487013 | 0.811451 | 0.600175 | 0.54839 | 0.981636 | chr18 | 23536317 | 23544351 | + | 0 | NA | intron (Nintron (N  | 36823 NM_01332f  | 29919    | Hs.46477ENM_01332f    | ENSG000002CRM1       | C18orf8 E  | regulator protein-coding        |
| chr19-11f.8.187224  | 0.487013 | 0.811451 | 0.600175 | 0.54839 | 0.981636 | chr19 | 11940268 | 11942752 | + | 0 | NA | intron (NLTR12C LI  | 16403 NM_14456e  | 90592    | Hs.52848ENM_14456e    | ENSG000002ZNF700     | -          | zinc finger protein-coding      |
| chr19-15x.8.187224  | 0.487013 | 0.811451 | 0.600175 | 0.54839 | 0.981636 | chr19 | 15634387 | 15637054 | + | 0 | NA | intron (Nintron (N  | 11067 NM_00585f  | 10270    | Hs.59449ENM_00585f    | ENSG000002AKAF8      | AKAP 95 A  | kinase protein-coding           |
| chr19-35e.8.187224  | 0.487013 | 0.811451 | 0.600175 | 0.54839 | 0.981636 | chr19 | 35651026 | 35659491 | + | 0 | NA | intron (NAluSc8 SI  | 6935 NM_00186g   | 1340     | Hs.43166ENM_00186g    | ENSG000002COX6B1     | COX6B COX  | cytochrome protein-coding       |
| chr2-240f.8.187224  | 0.487013 | 0.811451 | 0.600175 | 0.54839 | 0.981636 | chr2  | 24066596 | 24068952 | + | 0 | NA | exon (NM exon (NM   | 8552 NM_01604f   | 51639    | Hs.17786ENM_01604f    | ENSG000002SF3B6      | CAF-110 F  | splicing protein-coding         |
| chr20-46f.8.187224  | 0.487013 | 0.811451 | 0.600175 | 0.54839 | 0.981636 | chr20 | 46064134 | 46065061 | + | 0 | NA | intron (Nintron (N  | 25365 NM_02096f  | 57727    | Hs.45499ENM_02096f    | ENSG000002NCOA5      | CIA ba46E  | nuclear protein-coding          |
| chr20-51f.8.187224  | 0.487013 | 0.811451 | 0.600175 | 0.54839 | 0.981636 | chr20 | 51668688 | 51670465 | + | 0 | NA | intron (Nintron (N  | 98814 NM_00604f  | 10079    | Hs.649234NM_00604f    | ENSG000002ATP9A      | ATP11A     | ATPase protein-coding           |
| chr21-43f.8.187224  | 0.487013 | 0.811451 | 0.600175 | 0.54839 | 0.981636 | chr21 | 43685124 | 43687148 | + | 0 | NA | intron (Nintron (N  | 26376 NM_01505e  | 23076    | Hs.56572ENM_01505e    | ENSG000002RRP1B      | KIAA0179 R | ribosomal protein-coding        |
| chr21-46f.8.187224  | 0.487013 | 0.811451 | 0.600175 | 0.54839 | 0.981636 | chr21 | 46580479 | 46583001 | + | 0 | NA | Intergeni LIP10 LI  | 23342 NM_00627f  | 6285     | Hs.422181NM_00627f    | ENSG000002S100B      | NEF S100 S | 100 cal protein-coding          |
| chr3-165f.8.187224  | 0.487013 | 0.811451 | 0.600175 | 0.54839 | 0.981636 | chr3  | 16500774 | 16501113 | + | 0 | NA | intron (Nintron (N  | 12756 NM_01515c  | 23180    | Hs.98910 NM_01515c    | ENSG000002CFTN1      | MIG2 PIB1  | raftlin, protein-coding         |
| chr4-707f.8.187224  | 0.487013 | 0.811451 | 0.600175 | 0.54839 | 0.981636 | chr4  | 70763128 | 70767030 | + | 0 | NA | intron (NAluS26 SI  | 30669 NM_00134f  | 22902    | Hs.740904NM_01496f    | ENSG000002RUFY3      | RIPX SIN   | RUN and F protein-coding        |
| chr5-553f.8.187224  | 0.487013 | 0.811451 | 0.600175 | 0.54839 | 0.981636 | chr5  | 31267187 | 31267035 | + | 0 | NA | intron (Nintron (N  | 74775 NM_00493f  | 1004     | Hs.12477ENM_00493f    | ENSG000002CDH6       | CAD6 KCAI  | cadherin protein-coding         |
| chr5-796f.8.187224  | 0.487013 | 0.811451 | 0.600175 | 0.54839 | 0.981636 | chr5  | 79661643 | 79662809 | + | 0 | NA | intron (NMER11C LI  | 66992 NM_01536c  | 23517    | Hs.274531NM_01536c    | ENSG000002MTREX      | Dob1 KIA   | Mtr4 exos protein-coding        |
| chr7-127f.8.187224  | 0.487013 | 0.811451 | 0.600175 | 0.54839 | 0.981636 | chr7  | 1.28E+08 | 1.28E+08 | + | 0 | NA | intron (NTigger1 E  | -27610 NM_15361c | 202333   | Hs.48262ENM_15361c    | ENSG000002CMYA5      | C5orf10 S  | cardiomyocyte protein-coding    |
| chr7-128f.8.187224  | 0.487013 | 0.811451 | 0.600175 | 0.54839 | 0.981636 | chr7  | 1.29E+08 | 1.29E+08 | + | 0 | NA | intron (Nintron (N  | 2350 NM_00166f   | 381      | Hs.65320ENM_00166f    | ENSG000002CARF5      | -          | ADP ribos protein-coding        |
| chr1-896f.5.683485  | -0.58229 | 0.970196 | -0.60017 | 0.54839 | 0.981636 | chr1  | 89687733 | 89688913 | + | 0 | NA | Intergeni MER6A DNA | -47982 NR_02436e | 402483   | Hs.72235ENM_001039682 | LINC0100c            | -          | long intncRNA                   |
| chr1-169f.5.683485  | -0.58229 | 0.970196 | -0.60017 | 0.54839 | 0.981636 | chr1  | 1.7E+08  | 1.7E+08  | + | 0 | NA | intron (NLa2 LINE   | 55203 NM_03227f  | 84230    | Hs.41283ENM_03227f    | ENSG000002LRRC8C     | AD158 FAL  | leucine protein-coding          |
| chr11-74f.5.683485  | -0.58229 | 0.970196 | -0.60017 | 0.54839 | 0.981636 | chr11 | 74881654 | 74883166 | + | 0 | NA | intron (NLIPIA16 LI | 43767 NM_00136f  | 55732    | Hs.443551NM_01818f    | ENSG000002C1orf112   | -          | chromosome protein-coding       |
| chr11-96f.5.683485  | -0.58229 | 0.970196 | -0.60017 | 0.54839 | 0.981636 | chr11 | 96372287 | 96373930 | + | 0 | NA | intron (NLIPIA2 LIN | 66681 NM_00127c  | 143570   | Hs.37014ENM_18296f    | ENSG000002XRRA1      | -          | X-ray rac protein-coding        |
| chr12-56f.5.683485  | -0.58229 | 0.970196 | -0.60017 | 0.54839 | 0.981636 | chr12 | 56303142 | 56304046 | + | 0 | NA | intron (Nintron (N  | 16708 NM_00136f  | 79780    | Hs.52508ENM_01414f    | ENSG000002CCDC82     | HSPC048    | coiled-co protein-coding        |
| chr14-10f.5.683485  | -0.58229 | 0.970196 | -0.60017 | 0.54839 | 0.981636 | chr14 | 1.03E+08 | 1.03E+08 | + | 0 | NA | Intergeni AluJo SIN | -3264 NM_00407f  | 1431     | Hs.74325ENM_00407f    | ENSG000002CCS        | -          | citrate protein-coding          |
| chr15-34f.5.683485  | -0.58229 | 0.970196 | -0.60017 | 0.54839 | 0.981636 | chr15 | 34361115 | 34362236 | + | 0 | NA | intron (Nintron (N  | 36279 NM_00182f  | 1152     | Hs.173724NM_00182f    | ENSG000002CKB        | B-CK BCK   | creatine protein-coding         |
| chr17-75f.5.683485  | -0.58229 | 0.970196 | -0.60017 | 0.54839 | 0.981636 | chr17 | 784452   | 784857   | + | 0 | NA | intron (Nintron (N  | 5521 NM_15361f   | 254531   | Hs.352614NM_15361f    | ENSG000002LPCAT4     | AGPAT7 AN  | lysochospholipid protein-coding |
| chr17-511f.5.683485 | -0.58229 | 0.970196 | -0.60017 | 0.54839 | 0.981636 | chr17 | 51182519 | 51183690 | + | 0 | NA | intron (Nintron (N  | 2301 NM_01814f   | 55178    | Hs.18272ENM_01814f    | ENSG000002MRM3       | RM1L1 RN   | mitochondrial protein-coding    |
| chr18-68f.5.683485  | -0.58229 | 0.970196 | -0.60017 | 0.54839 | 0.981636 | chr18 | 68690229 | 68691331 | + | 0 | NA | intron (Nintron (N  | 16382 NM_00101f  | 4831     | Hs.46345ENM_00251f    | ENSG000002NME2       | NDBK NDP   | NME2 protein-coding             |
| chr2-202f.5.683485  | -0.58229 | 0.970196 | -0.60017 | 0.54839 | 0.981636 | chr2  | 20261349 | 20263342 | + | 0 | NA | TTS (NM_C           | 24328 NM_00135c  | 5495     | Hs.440534NM_01902f    | ENSG000002TMX3       | PDIA13 T   | thioredoxin protein-coding      |
| chr2-327f.5.683485  | -0.58229 | 0.970196 | -0.60017 | 0.54839 | 0.981636 | chr2  | 32780492 | 32781247 | + | 0 | NA | intron (NTigger3b   | -36912 NM_00100f | 6382     | Hs.224607NM_00299f    | ENSG000002SDC1       | CD138 SDC  | syndecan protein-coding         |
| chr2-371f.5.683485  | -0.58229 | 0.970196 | -0.60017 | 0.54839 | 0.981636 | chr2  | 37127641 | 37129258 | + | 0 | NA | intron (NLIPIA2 LIN | -44564 NR_02709f | 285045   | Hs.43466ENM_02709f    | ENSG000002LINC0048e  | -          | long intncRNA                   |
| chr2-206f.5.683485  | -0.58229 | 0.970196 | -0.60017 | 0.54839 | 0.981636 | chr2  | 2.06E+08 | 2.06E+08 | + | 0 | NA | intron (Nintron (N  | 19373 NM_00113f  | 5610     | Hs.131431NM_00275f    | ENSG000002EIF2AK2    | EIF2AK1 E  | karyotic protein-coding         |
| chr2-207f.5.683485  | -0.58229 | 0.970196 | -0.60017 | 0.54839 | 0.981636 | chr2  | 2.08E+08 | 2.08E+08 | + | 0 | NA | intron (NLIPIA4 LI  | 80090 NM_01775f  | 54891    | Hs.44503ENM_01775f    | ENSG000002IN08D      | -          | IN08D con protein-coding        |
| chr20-13f.5.683485  | -0.58229 | 0.970196 | -0.60017 | 0.54839 | 0.981636 | chr20 | 1306212  | 1306583  | + | 0 | NA | 3' UTR (N3' UTR (N  | 7276 NM_01568f   | 27111    | Hs.65701ENM_01568f    | ENSG000002SDCBP2     | SITAC SIT  | syndecan protein-coding         |
| chr3-330f.5.683485  | -0.58229 | 0.970196 | -0.60017 | 0.54839 | 0.981636 | chr3  | 33090279 | 33091323 | + | 0 | NA | 3' UTR (N3' UTR (N  | 6031 NM_00107f   | 2720     | Hs.443031NM_00040f    | ENSG000002GLB1       | EBP ELN1   | galactosyl protein-coding       |
| chr3-457f.5.683485  | -0.58229 | 0.970196 | -0.60017 | 0.54839 | 0.981636 | chr3  | 45713397 | 45713267 | + | 0 | NA | intron (Nintron (N  | 24986 NM_00131f  | 22908    | Hs.15650ENM_01401f    | ENSG000002SACM1L     | SACT1      | SAC1 like protein-coding        |
| chr3-136f.5.683485  | -0.58229 | 0.970196 | -0.60017 | 0.54839 | 0.981636 | chr3  | 1.36E+08 | 1.36E+08 | + | 0 | NA | intron (Nintron (N  | 90090 NM_00053f  | 5096     | Hs.63788 NM_00053f    | ENSG000002PCCB       | -          | propionyl protein-coding        |
| chr3-179f.5.683485  | -0.58229 | 0.970196 | -0.60017 | 0.54839 | 0.981636 | chr3  | 1.8E+08  | 1.8E+08  | + | 0 | NA | intron (Nintron (N  | 18779 NM_00430f  | 86       | Hs.43523ENM_00430f    | ENSG000002ACTL6A     | ACTL6 ARF  | actin like protein-coding       |
| chr4-8911f.5.683485 | -0.58229 | 0.970196 | -0.60017 | 0.54839 | 0.981636 | chr4  | 89113771 | 89115516 | + | 0 | NA | 3' UTR (N3' UTR (N  | 1826 NM_14571f   | 166815   | Hs.58924 NM_14571f    | ENSG000002TIGD2      | HEL106     | tigger protein-coding           |
| chr5-384f.5.683485  | -0.58229 | 0.970196 | -0.60017 | 0.54839 | 0.981636 | chr5  | 38490724 | 38491391 | + | 0 | NA | intron (Nintron (N  | 45511 NM_18280f  | 133584   | Hs.20103 NM_15240f    | ENSG000002EGFLAM     | AGRINL ACE | EGF like, protein-coding        |
| chr5-796f.5.683485  | -0.58229 | 0.970196 | -0.60017 | 0.54839 | 0.981636 | chr5  | 79668947 | 79670312 | + | 0 | NA | intron (Nintron (N  | -20207 NM_15361c | 202333   | Hs.48262ENM_15361c    | ENSG000002CMYA5      | C5orf10 S  | cardiomyocyte protein-coding    |
| chr6-897f.5.683485  | -0.58229 | 0.970196 | -0.60017 | 0.54839 | 0.981636 | chr6  | 89701188 | 89701710 | + | 0 | NA | intron (Nintron (N  | -62702 NM_02046f | 57226    | Hs.17727ENM_02046f    | ENSG000002LYRM2      | DJ1 2208.  | LYR motif protein-coding        |
| chr6-155f.5.683485  | -0.58229 | 0.970196 | -0.60017 | 0.54839 | 0.981636 | chr6  | 1.55E+08 | 1.55E+08 | + | 0 | NA | intron (NLIPIA1 LI  | 9866 NM_01602c   | 51106    | Hs.27990ENM_01602c    | ENSG000002TFB1M      | CGI-75 C   | transcript protein-coding       |
| chr7-139f.5.683485  | -0.58229 | 0.970196 | -0.60017 | 0.54839 | 0.981636 | chr7  | 1.4E+08  | 1.4E+08  | + | 0 | NA | intron (Nintron (N  | 12273 NM_00111f  | 28996    | Hs.731417NM_02274f    | ENSG000002HIPK2      | PRO0593    | homeodomain protein-coding      |
| chr8-175f.5.683485  | -0.58229 | 0.970196 | -0.60017 | 0.54839 | 0.981636 | chr8  | 17564427 | 17565186 | + | 0 | NA | intron (NMER1B DNA  | -11627 NM_00620f | 5157     | Hs.45857ENM_00620f    | ENSG000002PDGFRL     | PDGRL PR   | platelet protein-coding         |
| chr9-121f.5.683485  | -0.58229 | 0.970196 | -0.60017 | 0.54839 | 0.981636 | chr9  | 1.21E+08 | 1.21E+08 | + | 0 | NA | intron (NMI13 SINE  | -3029 NM_00135f  | 2934     | Hs.552237ENM_00017f   | ENSG000002GSN        | ADF AGE    | gelatin protein-coding          |
| chr9-130f.5.683485  | -0.58229 | 0.970196 | -0.60017 | 0.54839 | 0.981636 | chr9  | 1.31E+08 | 1.31E+08 | + | 0 | NA | 3' UTR (N3' UTR (N  | 11259 NR_10691f  | 1.02E+08 | NR_10691f             | ENSG000002MIR6856    | hsa-mir-6  | microRNA ncRNA                  |
| chr1-666f.7.921457  | -0.49654 | 0.82753  | -0.60002 | 0.54849 | 0.981636 | chr1  | 66620385 | 66622766 | + | 0 | NA | intron (NLIPIA5 LI  | -6865 NR_03606f  | 1E+08    | NR_03606f             | ENSG000002MIR3117    | mir-3117   | microRNA ncRNA                  |
| chr14-617f.7.921457 | -0.49654 | 0.82753  | -0.60002 | 0.54849 | 0.981636 | chr14 | 61793010 | 61794934 | + | 0 | NA | intron (Nintron (N  | 81821 NR_        |          |                       |                      |            |                                 |



|           |           |          |          |          |            |          |       |          |          |   |   |    |                     |                  |                   |            |                   |                                  |                                  |
|-----------|-----------|----------|----------|----------|------------|----------|-------|----------|----------|---|---|----|---------------------|------------------|-------------------|------------|-------------------|----------------------------------|----------------------------------|
| chr5-7115 | 8.195082  | 0.485096 | 0.81379  | 0.596095 | 0.551112   | 0.981636 | chr5  | 71196754 | 71197681 | + | 0 | NA | intron (Nintron (N  | 10914 NR_02702E  | 728411 Hs. 88181  | NM_207331  | ENSG00000GUSBP1   | -                                | USB pset pseudo                  |
| chr6-3187 | 8.195082  | 0.485096 | 0.81379  | 0.596095 | 0.551112   | 0.981636 | chr6  | 31879457 | 31885454 | + | 0 | NA | intron (N-G-rich Lc | -3409 NM_001117E | 80736 Hs. 33535E  | NM_025257  | ENSG00000SLC44A4  | -                                | G6orf29 Csolute cεprotein-coding |
| chr7-4304 | 8.195082  | 0.485096 | 0.81379  | 0.596095 | 0.551112   | 0.981636 | chr6  | 43048208 | 43050287 | + | 0 | NA | intron (Nintron (N  | 4698 NM_00116E   | 9820 Hs. 52013E   | NM_01478C  | ENSG00000CUL7     | 3M1 CUL-7                        | cullin 7 protein-coding          |
| chr7-1665 | 8.195082  | 0.485096 | 0.81379  | 0.596095 | 0.551112   | 0.981636 | chr7  | 16695101 | 16697496 | + | 0 | NA | intron (Nintron (N  | 35084 NM_00136E  | 28969 Hs. 48763E  | NM_01403E  | ENSG00000BZW2     | HSPC028 Mbasic letprotein-coding |                                  |
| chr7-6663 | 8.195082  | 0.485096 | 0.81379  | 0.596095 | 0.551112   | 0.981636 | chr7  | 66638408 | 66641178 | + | 0 | NA | 3' UTR (N3' UTR (N  | 10912 NM_001167E | 154881 Hs. 546627 | NM_15303E  | ENSG00000KCTD7    | CLN14 EPW                        | potassium protein-coding         |
| chr7-745E | 8.195082  | 0.485096 | 0.81379  | 0.596095 | 0.551112   | 0.981636 | chr7  | 74594551 | 74596241 | + | 0 | NA | promoter-promoter-  | -572 NR_16211E   | 1.13E+08          | NR_16211E  | MIR10525          | -                                | microRNA ncRNA                   |
| chr9-127E | 8.195082  | 0.485096 | 0.81379  | 0.596095 | 0.551112   | 0.981636 | chr9  | 1.28E+08 | 1.28E+08 | + | 0 | NA | intron (Nintron (N  | 26753 NR_03747E  | 1.01E+08          | NR_03747E  | ENSG00000MIR3911  | mir-3911                         | microRNA ncRNA                   |
| chr9-131E | 8.195082  | 0.485096 | 0.81379  | 0.596095 | 0.551112   | 0.981636 | chr9  | 1.32E+08 | 1.32E+08 | + | 0 | NA | intron (Nintron (N  | 12951 NM_00135E  | 10585 Hs. 52244E  | NM_00717E  | ENSG00000POMT1    | LGM2K L                          | protein-coding                   |
| chr9-1364 | 8.195082  | 0.485096 | 0.81379  | 0.596095 | 0.551112   | 0.981636 | chr9  | 1.36E+08 | 1.36E+08 | + | 0 | NA | exon (NM_exon (NM_  | -7057 NM_01989E  | 56623 Hs. 12099E  | NM_01989E  | ENSG00000INPP5E   | CORS1 CPI                        | inositol protein-coding          |
| chr9-136E | 8.195082  | 0.485096 | 0.81379  | 0.596095 | 0.551112   | 0.981636 | chr9  | 1.36E+08 | 1.36E+08 | + | 0 | NA | intron (Nintron (N  | -15639 NM_01989E | 56623 Hs. 12099E  | NM_01989E  | ENSG00000INPP5E   | CORS1 CPI                        | inositol protein-coding          |
| chr11-11C | 7.87246   | -0.49803 | 0.835728 | -0.59592 | 0.551229   | 0.981636 | chr11 | 1.1E+08  | 1.1E+08  | + | 0 | NA | intron (NAluSx S S  | 33506 NM_00126C  | 5962 Hs. 263671   | NM_00290E  | ENSG00000CRDX     | DFNB24                           | radixin protein-coding           |
| chr12-77E | 7.87246   | -0.49803 | 0.835728 | -0.59592 | 0.551229   | 0.981636 | chr12 | 77989439 | 77991267 | + | 0 | NA | intron (N LOR1a LTF | 159459 NM_01490E | 89795 Hs. 655301  | NM_01490E  | ENSG00000CNAV3    | POMF1L1 S                        | neuron nεprotein-coding          |
| chr17-424 | 7.87246   | -0.49803 | 0.835728 | -0.59592 | 0.551229   | 0.981636 | chr17 | 42417939 | 42419090 | + | 0 | NA | intron (NAluSp S N  | 4742 NM_01223E   | 284119 Hs. 437191 | NM_01223E  | ENSG00000CAVIN1   | CAVIN CGL                        | caecolae protein-coding          |
| chr18-30C | 7.87246   | -0.49803 | 0.835728 | -0.59592 | 0.551229   | 0.981636 | chr18 | 30021667 | 3002235  | + | 0 | NA | intron (NLMC4 LIN   | 10496 NM_01464E  | 9663 Hs. 13234E   | NM_01464E  | ENSG00000LPIN2    | -                                | lipin 2 protein-coding           |
| chr2-323E | 7.87246   | -0.49803 | 0.835728 | -0.59592 | 0.551229   | 0.981636 | chr2  | 32380958 | 32381441 | + | 0 | NA | intron (Nintron (N  | 24171 NM_01625E  | 57448 Hs. 150107  | NM_01625E  | ENSG00000BTRC6    | APOLLON E                        | baculovir protein-coding         |
| chr5-151E | 7.87246   | -0.49803 | 0.835728 | -0.59592 | 0.551229   | 0.981636 | chr5  | 1.52E+08 | 1.52E+08 | + | 0 | NA | intron (Nintron (N  | 883 NM_00130E    | 6678 Hs. 11177E   | NM_00311E  | ENSG00000SPARC    | BM-40 O1                         | secreted protein-coding          |
| chr1-274  | 7.665213  | 0.504695 | 0.847057 | 0.595821 | 0.551295   | 0.981636 | chr1  | 2744281  | 27746696 | + | 0 | NA | intron (N L2c LINE  | 19527 NM_00114E  | 199870 Hs. 46935E | NM_15266E  | ENSG00000CFAM76A  | -                                | family wiprotein-coding          |
| chr10-694 | 7.665213  | 0.504695 | 0.847057 | 0.595821 | 0.551295   | 0.981636 | chr10 | 69401010 | 69402148 | + | 0 | NA | 3' UTR (N3' UTR (N  | 15339 NM_001057E | 6865 Hs. 8837E    | NM_001057E | ENSG00000TACR2    | NK2R NKN                         | tachykinin protein-coding        |
| chr13-41E | 7.665213  | 0.504695 | 0.847057 | 0.595821 | 0.551295   | 0.981636 | chr13 | 41816410 | 41816609 | + | 0 | NA | intron (Nintron (N  | 144576 NM_00100E | 23078 Hs. 36828E  | NM_01505E  | ENSG00000VWA8     | KIAA0564 v                       | von Wille protein-coding         |
| chr13-451 | 7.665213  | 0.504695 | 0.847057 | 0.595821 | 0.551295   | 0.981636 | chr13 | 45138449 | 45139067 | + | 0 | NA | intron (NAluSz S N  | 18248 NM_00412E  | 2963 Hs. 65458E   | NM_00412E  | ENSG00000GTF2F2   | BTF4 RAP                         | general tprotein-coding          |
| chr2-118E | 7.665213  | 0.504695 | 0.847057 | 0.595821 | 0.551295   | 0.981636 | chr2  | 11803323 | 11806328 | + | 0 | NA | intron (Nintron (N  | 32161 NR_03622E  | 1E+08             | NR_03622E  | ENSG00000MIR4262  | -                                | microRNA ncRNA                   |
| chr2-3904 | 7.665213  | 0.504695 | 0.847057 | 0.595821 | 0.551295   | 0.981636 | chr2  | 39049019 | 39049218 | + | 0 | NA | intron (NAluSx S N  | 71345 NM_00563E  | 6654 Hs. 70989E   | NM_00563E  | ENSG00000SOS1     | GF1 GGF1 S                       | Ras/Fprotein-coding              |
| chr5-138E | 7.665213  | 0.504695 | 0.847057 | 0.595821 | 0.551295   | 0.981636 | chr5  | 13837273 | 13837509 | + | 0 | NA | intron (N L2a LINE  | 107089 NM_00136E | 1767 Hs. 21236E   | NM_00136E  | ENSG00000DNAH5    | CILD3 DN                         | dynein aεprotein-coding          |
| chr3-158E | 8.742518  | 0.474386 | 0.796209 | 0.595806 | 0.551305   | 0.981636 | chr3  | 1.59E+08 | 1.59E+08 | + | 0 | NA | intron (N L3 LINE C | 7798 NM_02273E   | 64747 Hs. 58663E  | NM_02273E  | ENSG00000MPSD1    | SMAP4                            | major facprotein-coding          |
| chr11-95E | 5.214171  | -0.62507 | 1.049746 | -0.59545 | 0.551542   | 0.981636 | chr11 | 95806602 | 95806809 | + | 0 | NA | intron (N LIP45 LIN | 16207 NM_01467E  | 9702 Hs. 101014   | NM_01467E  | ENSG00000CEP57    | MVA2 PIG                         | centrosom protein-coding         |
| chr17-601 | 7.698494  | 0.50786  | 0.852967 | 0.595404 | 0.551573   | 0.981636 | chr17 | 60184206 | 60185572 | + | 0 | NA | intron (Nintron (N  | 34916 NM_000717E | 762 Hs. 89485     | NM_000717E | ENSG00000CCA4     | CAIV Car                         | 4carbonic protein-coding         |
| chr16-75E | 10.262089 | -0.43312 | 0.726765 | -0.59521 | 0.551706   | 0.981636 | chr16 | 75231772 | 75234877 | + | 0 | NA | intron (NAluJb S N  | 5336 NM_00117E   | 9564 Hs. 47974    | NM_014567E | ENSG00000BCAR1    | CAS CASI B                       | carc protein-coding              |
| chr10-10C | 11.87964  | 0.406873 | 0.684045 | 0.594805 | 0.551974   | 0.981636 | chr10 | 1E+08    | 1E+08    | + | 0 | NA | intron (NAluSp S N  | 6578 NM_001001E  | 282991 Hs. 34906  | NM_17380E  | ENSG00000BLOC152  | BLOS2 B                          | biogenesis protein-coding        |
| chr16-19E | 9.625401  | -0.46322 | 0.778838 | -0.59476 | 0.552005   | 0.981636 | chr16 | 19575334 | 19575614 | + | 0 | NA | intron (NAluSq2 S N | 19771 NM_00136E  | 57020 Hs. 654964  | NM_020314E | ENSG00000VPS35L   | C16orf62                         | VPS35 encprotein-coding          |
| chr1-154  | 11.92078  | 0.407759 | 0.685819 | 0.594557 | 0.552139   | 0.981636 | chr1  | 1.54E+08 | 1.54E+08 | + | 0 | NA | exon (NM_exon (NM_  | 15692 NM_001367E | 57198 Hs. 43570C  | NM_02045E  | ENSG00000ATPB82   | ATP1D                            | ATPase fεprotein-coding          |
| chr1-1737 | 11.92078  | 0.407759 | 0.685819 | 0.594557 | 0.552139   | 0.981636 | chr1  | 1.74E+08 | 1.74E+08 | + | 0 | NA | intron (NAluJb S N  | 43139 NM_01445E  | 27252 Hs. 49503E  | NM_01445E  | ENSG00000KLHL20   | KHLHX KLF                        | kelch lik protein-coding         |
| chr12-71E | 8.228364  | 0.488151 | 0.821154 | 0.594469 | 0.552198   | 0.981636 | chr12 | 7136131  | 7137448  | + | 0 | NA | intron (Nintron (N  | 6418 NM_01471E   | 9746 Hs. 53537E   | NM_01471E  | ENSG00000CLSTN3   | CDHR14 C                         | csaltryn protein-coding          |
| chr17-28E | 8.228364  | 0.488151 | 0.821154 | 0.594469 | 0.552198   | 0.981636 | chr17 | 28523073 | 28532106 | + | 0 | NA | intron (Nintron (N  | 40320 NM_001267E | 90410 Hs. 53431   | NM_174887E | ENSG00000IFT20    | -                                | intraflag protein-coding         |
| chr19-10E | 8.228364  | 0.488151 | 0.821154 | 0.594469 | 0.552198   | 0.981636 | chr19 | 10365005 | 10366347 | + | 0 | NA | exon (NM_exon (NM_  | 14896 NM_003331E | 7297 Hs. 75516    | NM_003331E | ENSG00000CTYK2    | IMD35 JTK                        | tyrosine protein-coding          |
| chr3-121E | 8.228364  | 0.488151 | 0.821154 | 0.594469 | 0.552198   | 0.981636 | chr3  | 1.22E+08 | 1.22E+08 | + | 0 | NA | intron (Nintron (N  | -7301 NM_00533E  | 3059 Hs. 14601    | NM_00533E  | ENSG00000HCL51    | CTTNL HS1                        | hematopoiprotein-coding          |
| chr3-129E | 8.228364  | 0.488151 | 0.821154 | 0.594469 | 0.552198   | 0.981636 | chr3  | 1.29E+08 | 1.29E+08 | + | 0 | NA | intron (NAluSx S N  | 28680 NM_001204E | 339122 Hs. 38113E | NM_19849E  | ENSG00000RAB43    | RAB11B RA                        | RAB43, mεprotein-coding          |
| chr6-419E | 8.228364  | 0.488151 | 0.821154 | 0.594469 | 0.552198   | 0.981636 | chr6  | 41904386 | 41904831 | + | 0 | NA | TTS (NM_C           | -9233 NM_018561E | 25862 Hs. 59357E  | NM_018561E | ENSG00000CUSP49   | -                                | ubiquitin protein-coding         |
| chr7-6654 | 8.228364  | 0.488151 | 0.821154 | 0.594469 | 0.552198   | 0.981636 | chr7  | 66544521 | 66545778 | + | 0 | NA | intron (Nintron (N  | 47258 NR_111974E | 493754 Hs. 73240E | NR_00293E  | ENSG00000GS1-124E | -                                | RAB guanipseudo                  |
| chr1-6667 | 5.905741  | -0.4933  | 0.830207 | -0.59419 | 0.552387   | 0.981636 | chr1  | 66676073 | 66677403 | + | 0 | NA | intron (Nintron (N  | 48798 NR_03606E  | 1E+08             | NR_03606E  | ENSG00000MIR3117  | mir-3117                         | microRNA ncRNA                   |
| chr1-220C | 7.905741  | -0.4933  | 0.830207 | -0.59419 | 0.552387   | 0.981636 | chr1  | 2.2E+08  | 2.2E+08  | + | 0 | NA | intron (NAluSg S N  | 18949 NM_00444E  | 2058 Hs. 49778E   | NM_00444E  | ENSG00000EPRS     | EARS GLUF                        | glutamyl- protein-coding         |
| chr10-68E | 7.905741  | -0.4933  | 0.830207 | -0.59419 | 0.552387   | 0.981636 | chr10 | 68004039 | 68006615 | + | 0 | NA | intron (N LIMA3 LIN | 5556 NR_131184E  | 1E+08             | NR_131184E | POU5F1P5          | OL4-α                            | POU classpseud                   |
| chr11-11E | 7.905741  | -0.4933  | 0.830207 | -0.59419 | 0.552387   | 0.981636 | chr11 | 1.19E+08 | 1.19E+08 | + | 0 | NA | intron (Nintron (N  | 9074 NM_001144E  | 23187 Hs. 54062E  | NM_015157E | ENSG00000PHLDB1   | L5L5A                            | pleckstrin protein-coding        |
| chr12-10E | 7.905741  | -0.4933  | 0.830207 | -0.59419 | 0.552387   | 0.981636 | chr12 | 1.05E+08 | 1.05E+08 | + | 0 | NA | 3' UTR (N3' UTR (N  | 59359 NM_001251E | 55198 Hs. 50660E  | NM_018171E | ENSG00000APPL2    | DIP13B                           | adaptor fεprotein-coding         |
| chr13-21C | 7.905741  | -0.4933  | 0.830207 | -0.59419 | 0.552387   | 0.981636 | chr13 | 21053620 | 21054113 | + | 0 | NA | intron (N LIMB4 LIN | 7720 NM_01457E   | 26524 Hs. 78960   | NM_01457E  | ENSG00000LATS2    | KPM                              | large tunprotein-coding          |
| chr13-97E | 7.905741  | -0.4933  | 0.830207 | -0.59419 | 0.552387   | 0.981636 | chr13 | 97356943 | 97358740 | + | 0 | NA | intron (Nintron (N  | -76328 NM_02103E | 5911 Hs. 50848E   | NM_02103E  | ENSG00000RAP2A    | K-REV KRE                        | RAP2A, mεprotein-coding          |
| chr14-884 | 7.905741  | -0.4933  | 0.830207 | -0.59419 | 0.552387   | 0.981636 | chr14 | 88406349 | 88407806 | + | 0 | NA | intron (N LIP47 LIN | 21420 NM_01841E  | 55812 Hs. 52551E  | NM_01841E  | ENSG00000SPATA7   | HEL-5-29ε                        | spermatog protein-coding         |
| chr20-137 | 7.905741  | -0.4933  | 0.830207 | -0.59419 | 0.552387   | 0.981636 | chr20 | 13781063 | 13783118 | + | 0 | NA | intron (NAluSz S N  | 2796 NM_01664E   | 51575 Hs. 369284  | NM_01664E  | ENSG00000ESF1     | ABTAP ZC                         | ESF1 nuclprotein-coding          |
| chr20-23E | 7.905741  | -0.4933  | 0.830207 | -0.59419 | 0.552387   | 0.981636 | chr20 | 23389441 | 23390174 | + | 0 | NA | intron (N LIMB7 LIN | 25444 NM_001317E | 64412 Hs. 70946E  | NM_02248E  | ENSG00000GZF1     | JLSM ZBTE                        | EDNF indt protein-coding         |
| chr3-4371 | 7.905741  | -0.4933  | 0.830207 | -0.59419 | 0.552387   | 0.981636 | chr3  | 43711923 | 43713636 | + | 0 | NA | intron (Nintron (N  | -21185 NM_00134E | 55129 Hs. 65665E  | NM_01807E  | ENSG00000ANO10    | SCAR10 TV                        | anoctamir protein-coding         |
| chr4-119E | 7.905741  | -0.4933  | 0.830207 | -0.59419 | 0.552387   | 0.981636 | chr4  | 1.19E+08 | 1.19E+08 | + | 0 | NA | intron (N LIP42 LIN | 26377 NM_001001E | 401152 Hs. 17370E | NM_001001E | ENSG00000C4orf3   | ALN HCVF1                        | chromoson protein-coding         |
| chr7-149E | 7.905741  | -0.4933  | 0.830207 | -0.59419 | 0.552387</ |          |       |          |          |   |   |    |                     |                  |                   |            |                   |                                  |                                  |

|            |          |          |          |          |          |          |       |          |          |   |   |    |                     |        |           |          |                      |                     |                     |                                |                                 |
|------------|----------|----------|----------|----------|----------|----------|-------|----------|----------|---|---|----|---------------------|--------|-----------|----------|----------------------|---------------------|---------------------|--------------------------------|---------------------------------|
| chr2-112c  | 8.35749  | -0.47949 | 0.812118 | -0.59043 | 0.554906 | 0.981636 | chr2  | 11207335 | 11207993 | + | 0 | NA | intron (Nintron (N  | 52197  | NM_001282 | 130814   | Hs.27441ENM_152391   | ENSG00000SLC66A3    | C2orf22             | Fsolute c protein-coding       |                                 |
| chr5-151c  | 8.35749  | -0.47949 | 0.812118 | -0.59043 | 0.554906 | 0.981636 | chr5  | 1.51E+08 | 1.51E+08 | + | 0 | NA | intron (Nintron (N  | 13383  | NM_001325 | 2878     | Hs.386793ENM_002084  | ENSG00000GPX3       | GPx-P               | GSF glutathione protein-coding |                                 |
| chr8-526f  | 12.48394 | 0.401223 | 0.68004  | 0.589999 | 0.555191 | 0.981636 | chr8  | 52657258 | 52657908 | + | 0 | NA | exon (NM_exon (NM   | 56852  | NM_014781 | 9821     | Hs.196102ENM_014781  | ENSG00000CRB1CC1    | ATG17               | CC1RBI induc protein-coding    |                                 |
| chr1-119f  | 7.631931 | 0.501396 | 0.849921 | 0.589933 | 0.555236 | 0.981636 | chr1  | 11956421 | 11957111 | + | 0 | NA | intron (NMIRb SINE  | 22049  | NM_001316 | 5351     | Hs.75093             | NM_000302           | ENSG00000PLOD1      | ED56                           | ED56 procollagen protein-coding |
| chr19-49f  | 7.631931 | 0.501396 | 0.849921 | 0.589933 | 0.555236 | 0.981636 | chr19 | 49161523 | 49161965 | + | 0 | NA | intron (NAluSx1 SI  | 3952   | NM_01763f | 54795    | Hs.467101ENM_01763f  | ENSG00000TRPM4      | LTrpCA4             | PF transient protein-coding    |                                 |
| chr3-188c  | 3.90697  | -0.69548 | 1.178947 | -0.58992 | 0.555247 | 0.981636 | chr3  | 1.88E+08 | 1.88E+08 | + | 0 | NA | intron (NCharlieL   | 102663 | NM_001167 | 4026     | Hs.72022CNM_00557f   | ENSG00000CLPP       | LIM                 | domain protein-coding          |                                 |
| chr6-756c  | 3.90697  | -0.69548 | 1.178947 | -0.58992 | 0.555247 | 0.981636 | chr6  | 75693918 | 75694117 | + | 0 | NA | intron (NAluSp SIN  | -55222 | NM_00136E | 4646     | Hs.149387NM_004499   | ENSG00000MY06       | DFNA22              | DF myosin I V protein-coding   |                                 |
| chr8-672f  | 7.625923 | 0.515088 | 0.873236 | 0.589861 | 0.555284 | 0.981636 | chr8  | 67257335 | 67257534 | + | 0 | NA | intron (Nintron (N  | 86347  | NM_006421 | 10565    | Hs.656902ENM_006421  | ENSG00000ARFGF1F    | ARFGF1              | EADP ribosome protein-coding   |                                 |
| chr11-321d | 10.62274 | -0.42467 | 0.720216 | -0.58965 | 0.555426 | 0.981636 | chr11 | 32101753 | 32106430 | + | 0 | NA | intron (Nintron (N  | 13017  | NM_002901 | 5954     | Hs.97887             | NM_002901           | ENSG00000RCN1       | HEL-S-84                       | reticuloc protein-coding        |
| chr14-52f  | 10.62274 | -0.42467 | 0.720216 | -0.58965 | 0.555426 | 0.981636 | chr14 | 52857737 | 52857271 | + | 0 | NA | intron (NAluV SINE  | -68397 | NM_19806E | 64841    | Hs.174802ENM_19806E  | ENSG00000GNPNAT1    | GNA1                | GNP nucleoside protein-coding  |                                 |
| chr22-20f  | 10.62274 | -0.42467 | 0.720216 | -0.58965 | 0.555426 | 0.981636 | chr22 | 20571241 | 20572931 | + | 0 | NA | intron (Nintron (N  | 64039  | NM_00129f | 51586    | Hs.517421ENM_01588f  | ENSG00000MED15      | ARC105              | CM mediator protein-coding     |                                 |
| chr3-105f  | 10.62274 | -0.42467 | 0.720216 | -0.58965 | 0.555426 | 0.981636 | chr3  | 1.06E+08 | 1.06E+08 | + | 0 | NA | intron (NLIIPA7 LIN | 205312 | NM_001627 | 214      | Hs.59129fENM_001627  | ENSG00000ALCAM      | CD166               | MEM activator protein-coding   |                                 |
| chr3-194d  | 10.62274 | -0.42467 | 0.720216 | -0.58965 | 0.555426 | 0.981636 | chr3  | 1.94E+08 | 1.94E+08 | + | 0 | NA | intron (Nintron (N  | -32371 | NM_00448E | 2814     | Hs.73734             | NM_00448E           | ENSG00000GP5        | CD42d                          | GPV glycoprotein protein-coding |
| chr5-572f  | 10.62274 | -0.42467 | 0.720216 | -0.58965 | 0.555426 | 0.981636 | chr5  | 57230890 | 57235503 | + | 0 | NA | intron (Nintron (N  | 19122  | NM_001127 | 65056    | Hs.44427fENM_02291f  | ENSG00000GPBP1      | GPBP                | SDSH GC-rich protein-coding    |                                 |
| chr7-107f  | 10.62274 | -0.42467 | 0.720216 | -0.58965 | 0.555426 | 0.981636 | chr7  | 1.08E+08 | 1.08E+08 | + | 0 | NA | intron (Nintron (N  | 53363  | NM_00010E | 1738     | Hs.131711NM_00010f   | ENSG00000CLD        | DLDD                | DLDD dihydrolip protein-coding |                                 |
| chr9-110f  | 10.62274 | -0.42467 | 0.720216 | -0.58965 | 0.555426 | 0.981636 | chr9  | 1.11E+08 | 1.11E+08 | + | 0 | NA | intron (NAluSx SIN  | 71791  | NM_00135f | 1902     | Hs.126667NM_001401   | ENSG00000LPAR1      | EDG2                | GP2E lysophosph protein-coding |                                 |
| chr11-72f  | 8.349632 | -0.47793 | 0.810558 | -0.58963 | 0.555439 | 0.981636 | chr11 | 72031679 | 72032015 | + | 0 | NA | intron (Nintron (N  | 17556  | NR_10417f | 1E+08    | Hs.713607NR_10417f   | ENSG00000LOC10012e- |                     | uncharactericnRNA              |                                 |
| chr11-117c | 8.349632 | -0.47793 | 0.810558 | -0.58963 | 0.555439 | 0.981636 | chr11 | 1.17E+08 | 1.17E+08 | + | 0 | NA | intron (NLMC4 LIN   | 9007   | NR_11026E | 5049     | Hs.72848fENM_00257f  | ENSG00000PAFAH1B2   | HEL-S-30c           | platelet protein-coding        |                                 |
| chr19-43f  | 8.349632 | -0.47793 | 0.810558 | -0.58963 | 0.555439 | 0.981636 | chr19 | 43898942 | 43899594 | + | 0 | NA | intron (NAluSc SIN  | 2535   | NR_038334 | 1.01E+08 | Hs.76561             | NR_038334           | ENSG00000LOC10050f- |                                | uncharactericnRNA               |
| chr2-613f  | 8.349632 | -0.47793 | 0.810558 | -0.58963 | 0.555439 | 0.981636 | chr2  | 61341469 | 61342168 | + | 0 | NA | intron (NAluSx1 SI  | 75559  | NR_003707 | 1E+08    | Hs.67582fNR_003707   | ENSG00000SNORA70B   |                     | small nucsnRNA                 |                                 |
| chr3-456f  | 8.349632 | -0.47793 | 0.810558 | -0.58963 | 0.555439 | 0.981636 | chr3  | 45677727 | 45680759 | + | 0 | NA | non-codir-non-codir | 9639   | NR_033947 | 64474    | Hs.71288fNR_033947   | LIMD1-AS1           | LIMD1               | antncRNA                       |                                 |
| chr3-179f  | 8.349632 | -0.47793 | 0.810558 | -0.58963 | 0.555439 | 0.981636 | chr3  | 1.79E+08 | 1.79E+08 | + | 0 | NA | intron (Nintron (N  | 49567  | NM_014407 | 27094    | Hs.59128fENM_014407  | ENSG00000KCNMB3     | BKBETA3             | f potassium protein-coding     |                                 |
| chr3-186f  | 8.349632 | -0.47793 | 0.810558 | -0.58963 | 0.555439 | 0.981636 | chr3  | 1.87E+08 | 1.87E+08 | + | 0 | NA | intron (Nintron (N  | 14109  | NM_01630E | 51726    | Hs.31719fENM_01630f  | ENSG00000DNAJB11    | ABBP-2              | fAeDNAJ heat protein-coding    |                                 |
| chr1-321f  | 5.716767 | -0.57543 | 0.976502 | -0.58927 | 0.555679 | 0.981636 | chr1  | 32154862 | 32155254 | + | 0 | NA | intron (NAluS2 SI   | -24617 | NM_17585E | 200081   | Hs.47887             | NM_17585E           | ENSG00000TXLNA      | IL14                           | TXLIL taxilin protein-coding    |
| chr10-11f  | 5.716767 | -0.57543 | 0.976502 | -0.58927 | 0.555679 | 0.981636 | chr10 | 1109354  | 1109674  | + | 0 | NA | intron (NAluSp SIN  | -50254 | NR_01537f | 399706   | Hs.721191NM_00101C   | ENSG00000LINC0020C  | C10orf13f           | lnc intncRNA                   |                                 |
| chr14-68f  | 5.716767 | -0.57543 | 0.976502 | -0.58927 | 0.555679 | 0.981636 | chr14 | 68930484 | 68931156 | + | 0 | NA | intron (NMIR SINE   | 48482  | NM_00110E | 87       | Hs.23575fENM_00110f  | ENSG00000ACTN1      | BDPLT15             | actinin protein-coding         |                                 |
| chr18-26f  | 5.716767 | -0.57543 | 0.976502 | -0.58927 | 0.555679 | 0.981636 | chr18 | 26059380 | 26060174 | + | 0 | NA | intron (NLM1E1 LIN  | 30836  | NM_001007 | 6760     | Hs.129261NM_005637   | ENSG00000SS18       | SSXT                | SYT SS18 sub protein-coding    |                                 |
| chr9-122f  | 5.716767 | -0.57543 | 0.976502 | -0.58927 | 0.555679 | 0.981636 | chr9  | 1.23E+08 | 1.23E+08 | + | 0 | NA | intron (NLM1E2 LIN  | 29896  | NM_012197 | 23637    | Hs.271341NM_012197   | ENSG00000CRABGAP1   | GAPCENAI            | TRAB GTPase protein-coding     |                                 |
| chr16-70f  | 10.15342 | -0.43873 | 0.744697 | -0.58914 | 0.555766 | 0.981636 | chr16 | 70371792 | 70371991 | + | 0 | NA | intron (Nintron (N  | 24988  | NM_01833E | 55308    | Hs.656037NM_01833f   | ENSG00000CDX19A     | DDX19-DD            | DEAD-box protein-coding        |                                 |
| chr11-704f | 7.168625 | 0.530055 | 0.899756 | 0.589109 | 0.555788 | 0.981636 | chr11 | 70484835 | 70485366 | + | 0 | NA | intron (Nintron (N  | 86573  | NM_001184 | 2017     | Hs.595164NM_005231   | ENSG00000CTTN       | EMS1                | coractin protein-coding        |                                 |
| chr15-801f | 7.168625 | 0.530055 | 0.899756 | 0.589109 | 0.555788 | 0.981636 | chr15 | 80183700 | 80183899 | + | 0 | NA | intron (NMIR SINE   | 30800  | NM_000137 | 2184     | Hs.73875             | NM_000137           | ENSG00000CAFAH      |                                | fumarylac protein-coding        |
| chr16-287f | 7.168625 | 0.530055 | 0.899756 | 0.589109 | 0.555788 | 0.981636 | chr16 | 28722576 | 28722906 | + | 0 | NA | intron (NAluSx SIN  | -1511  | NR_10705E | 1.02E+08 | NR_10705f            | ENSG00000MIR6862-2  | hsa-mir-6           | microRNA ncRNA                 |                                 |
| chr17-78f  | 7.168625 | 0.530055 | 0.899756 | 0.589109 | 0.555788 | 0.981636 | chr17 | 78098880 | 78099666 | + | 0 | NA | intron (NAluJo SIN  | 12526  | NR_040071 | 1E+08    | Hs.635442NR_040071   | ENSG00000TNRC6C-AS  | TM6C                | lnc TNRC6C antncRNA            |                                 |
| chr2-702f  | 7.369864 | -0.52735 | 0.895729 | -0.58874 | 0.556038 | 0.981636 | chr2  | 70291149 | 70291382 | + | 0 | NA | intron (Nintron (N  | 1959   | NM_001317 | 6637     | Hs.465167NM_00309f   | ENSG00000CSNRPG     | SMG                 | Sm-G small nuc protein-coding  |                                 |
| chr1-204f  | 8.20294  | 0.483132 | 0.820653 | 0.588717 | 0.556051 | 0.981636 | chr1  | 20499750 | 20502734 | + | 0 | NA | exon (NM_exon (NM   | 6909   | NM_024544 | 79594    | Hs.10101             | NM_024544           | ENSG00000MUL1       | Clorf166                       | mi tochoanc protein-coding      |
| chr1-156f  | 8.20294  | 0.483132 | 0.820653 | 0.588717 | 0.556051 | 0.981636 | chr1  | 1.56E+08 | 1.56E+08 | + | 0 | NA | intron (NAluJr SIN  | -5376  | NM_00119E | 11243    | Hs.53047fENM_00722f  | ENSG00000PMF1       |                     | polymyanc protein-coding       |                                 |
| chr12-53f  | 8.20294  | 0.483132 | 0.820653 | 0.588717 | 0.556051 | 0.981636 | chr12 | 53513261 | 53515443 | + | 0 | NA | 3' UTR (N3' UTR (N  | 368    | NR_046221 | 1.01E+08 | Hs.63360fNR_046221   | ENSG00000LOC10065f- |                     | uncharactericnRNA              |                                 |
| chr12-11f  | 8.20294  | 0.483132 | 0.820653 | 0.588717 | 0.556051 | 0.981636 | chr12 | 1.1E+08  | 1.1E+08  | + | 0 | NA | intron (Nintron (N  | 15104  | NM_01623E | 51434    | Hs.71993fENM_01623f  | ENSG00000ANAPC7     | APC7                | anaphase protein-coding        |                                 |
| chr16-174f | 8.20294  | 0.483132 | 0.820653 | 0.588717 | 0.556051 | 0.981636 | chr16 | 1748018  | 1749913  | + | 0 | NA | intron (NMER2 DNA   | 13980  | NR_03613E | 1E+08    | NR_03613f            | ENSG00000MIR3177    | mir-3177            | microRNA ncRNA                 |                                 |
| chr16-31f  | 8.20294  | 0.483132 | 0.820653 | 0.588717 | 0.556051 | 0.981636 | chr16 | 31038877 | 31040105 | + | 0 | NA | intron (Nintron (N  | 5933   | NM_004604 | 6810     | Hs.83734             | NM_004604           | ENSG00000STX4       | STX4A                          | p3f syntaxin protein-coding     |
| chr16-69f  | 8.20294  | 0.483132 | 0.820653 | 0.588717 | 0.556051 | 0.981636 | chr16 | 69355576 | 69355964 | + | 0 | NA | intron (NTiger 3b   | -7236  | NM_14467f | 146456   | Hs.72911fENM_14467f  | ENSG00000TMED6      | PR034237            | transmem protein-coding        |                                 |
| chr19-114f | 8.20294  | 0.483132 | 0.820653 | 0.588717 | 0.556051 | 0.981636 | chr19 | 11445345 | 11445568 | + | 0 | NA | exon (NM_exon (NM   | -9672  | NM_00130E | 115948   | Hs.12401fENM_144504f | ENSG00000CCDC151    | CILD30              | coiled-cp protein-coding       |                                 |
| chr19-19f  | 8.20294  | 0.483132 | 0.820653 | 0.588717 | 0.556051 | 0.981636 | chr19 | 19335844 | 19341030 | + | 0 | NA | intron (Nintron (N  | 17608  | NM_01532E | 23383    | Hs.65493fENM_01532f  | ENSG00000MAU2       | KIAA0892            | MAU2 sist protein-coding       |                                 |
| chr19-45f  | 8.20294  | 0.483132 | 0.820653 | 0.588717 | 0.556051 | 0.981636 | chr19 | 45277270 | 45280659 | + | 0 | NA | intron (NAluJo SIN  | 27179  | NM_00119E | 55787    | Hs.34314             | NM_031417           | ENSG00000MARK4      | MARK4L                         | M marker tubul protein-coding   |
| chr20-47f  | 8.20294  | 0.483132 | 0.820653 | 0.588717 | 0.556051 | 0.981636 | chr20 | 47648540 | 47649239 | + | 0 | NA | intron (Nintron (N  | 13715  | NM_018837 | 55959    | Hs.16201fENM_018837  | ENSG00000SULF2      | HSLUF-2             | sulfatase protein-coding       |                                 |
| chr5-507f  | 8.20294  | 0.483132 | 0.820653 | 0.588717 | 0.556051 | 0.981636 | chr5  | 50774057 | 50774534 | + | 0 | NA | intron (NSVA_B Ret  | 106881 | NM_001331 | 79668    | Hs.369581NM_02461f   | ENSG00000PARP8      | ARTD16              | pApo (ADP- protein-coding      |                                 |
| chr5-177f  | 8.20294  | 0.483132 | 0.820653 | 0.588717 | 0.556051 | 0.981636 | chr5  | 1.77E+08 | 1.77E+08 | + | 0 | NA | intron (Nintron (N  | 17262  | NM_00681f | 10960    | Hs.75864             | NM_00681f           | ENSG00000LMAN2      | C5orf8                         | GF lectin, n protein-coding     |
| chr5-179f  | 8.20294  | 0.483132 | 0.820653 | 0.588717 | 0.556051 | 0.981636 | chr5  | 1.8E+08  | 1.8E+08  | + | 0 | NA | intron (NAluSc SIN  | -20948 | NM_14586f | 4056     | Hs.706741NM_14586f   | ENSG00000CLTC4S     |                     | leukotric protein-coding       |                                 |
| chr6-736f  | 8.20294  | 0.483132 | 0.820653 | 0.588717 | 0.556051 | 0.981636 | chr6  | 73640998 | 73641879 | + | 0 | NA | intron (Nintron (N  | 12554  | NM_012434 | 26503    | Hs.597422NM_012434   | ENSG00000SLC17A5    | AST                 | ISSD                           | solute c protein-coding         |
| chr7-989f  | 8.20294  | 0.483132 | 0.820653 | 0.588717 | 0.556051 | 0.981636 | chr7  | 98967821 | 98968810 | + | 0 | NA |                     |        |           |          |                      |                     |                     |                                |                                 |



|                    |           |          |           |          |          |       |          |          |   |   |    |                     |        |              |          |           |                    |              |                      |                   |                   |                   |                  |                |
|--------------------|-----------|----------|-----------|----------|----------|-------|----------|----------|---|---|----|---------------------|--------|--------------|----------|-----------|--------------------|--------------|----------------------|-------------------|-------------------|-------------------|------------------|----------------|
| chr11-655.8.341774 | -0.47641  | 0.811779 | -0.58687  | 0.557289 | 0.981636 | chr11 | 65976547 | 65976756 | + | 0 | NA | intron (NCpG)       | 14917  | NM_00514E    | 9092     | Hs.       | 50288E             | NM_00514E    | ENSG000003SART1      | Aral HAF spliceos | protein-coding    |                   |                  |                |
| chr20-365.8.341774 | -0.47641  | 0.811779 | -0.58687  | 0.557289 | 0.981636 | chr20 | 36927299 | 36929110 | + | 0 | NA | intron (NAIuY SINE) | 23504  | NM_00136E    | 25939    | Hs.       | 580681             | NM_01547E    | ENSG000003SAMH1      | CHBL2 DCI         | SAM and I         | protein-coding    |                  |                |
| chr1-551(8.375056  | -0.4719   | 0.804379 | -0.58666  | 0.557433 | 0.981636 | chr1  | 55104981 | 55106805 | + | 0 | NA | intron (Nintron (N  | 65671  | NR_110451    | 255738   | Hs.       | 18844              | NM_17493E    | ENSG000003PCSK9      | FH3 HCHOI         | proprotein        | protein-coding    |                  |                |
| chr1-228(8.375056  | -0.4719   | 0.804379 | -0.58666  | 0.557433 | 0.981636 | chr1  | 2.28E+08 | 2.28E+08 | + | 0 | NA | intron (Nintron (N  | 669    | NM_001024    | 375      | Hs.       | 286221             | NM_00165E    | ENSG000003ARF1       | PVNH8             | ADP ribos         | protein-coding    |                  |                |
| chr10-145.8.375056 | -0.4719   | 0.804379 | -0.58666  | 0.557433 | 0.981636 | chr10 | 14565946 | 14569002 | + | 0 | NA | intron (NL2 LINE L  | 4525   | NM_00128E    | 83641    | Hs.       | 44631E             | NM_03145E    | ENSG000003FAM107B    | C10orf45          | family wiprotein  | protein-coding    |                  |                |
| chr12-781.8.375056 | -0.4719   | 0.804379 | -0.58666  | 0.557433 | 0.981636 | chr12 | 78129977 | 78130911 | + | 0 | NA | intron (Nintron (N  | 229302 | NR_135021    | 1.05E+08 | Hs.       | 15689E             | NR_135021    | ENSG000003LINC02424- |                   | long intencRNA    |                   |                  |                |
| chr14-103.8.375056 | -0.4719   | 0.804379 | -0.58666  | 0.557433 | 0.981636 | chr14 | 1.03E+08 | 1.03E+08 | + | 0 | NA | intron (NLIMS LINE  | 27400  | NM_00112E    | 4140     | Hs.       | 35828              | NM_00237E    | ENSG000003MARK3      | CTAK1 KP7         | microtub          | protein-coding    |                  |                |
| chr17-307.8.375056 | -0.4719   | 0.804379 | -0.58666  | 0.557433 | 0.981636 | chr17 | 30766220 | 30769125 | + | 0 | NA | intron (NAIuY SINE  | 57020  | NM_01598E    | 51379    | Hs.       | 64937E             | NM_01598E    | ENSG000003CRLF3      | CREME-9           | Cytokine          | protein-coding    |                  |                |
| chr18-587.8.375056 | -0.4719   | 0.804379 | -0.58666  | 0.557433 | 0.981636 | chr18 | 58737841 | 58738231 | + | 0 | NA | intron (Nintron (N  | -66163 | NM_00128E    | 1.02E+08 | Hs.       | 64487E             | NM_001289967 | LOC101927-           |                   | uncharact         | protein-coding    |                  |                |
| chr2-290(8.375056  | -0.4719   | 0.804379 | -0.58666  | 0.557433 | 0.981636 | chr2  | 1.91E+08 | 1.91E+08 | + | 0 | NA | intron (Nintron (N  | 50051  | NM_01490E    | 2744     | Hs.       | 11644E             | NM_01490E    | ENSG000003GLS        | AAD20 CAS         | glutamine         | protein-coding    |                  |                |
| chr2-231(8.375056  | -0.4719   | 0.804379 | -0.58666  | 0.557433 | 0.981636 | chr2  | 2.31E+08 | 2.31E+08 | + | 0 | NA | intron (NL2c LINE   | 11405  | NM_002807    | 5707     | Hs.       | 3887               | NM_002807    | ENSG000003PSMD1      | P112 Rpn2         | proteasom         | protein-coding    |                  |                |
| chr21-348.8.375056 | -0.4719   | 0.804379 | -0.58666  | 0.557433 | 0.981636 | chr21 | 34806405 | 34807863 | + | 0 | NA | intron (NLIMCa LIN  | 61309  | NR_03888E    | 1.01E+08 | Hs.       | 12017E             | NR_03888E    | ENSG000003LINC0142E  | lincRNA-u         | long intencRNA    |                   |                  |                |
| chr5-528.8.375056  | -0.4719   | 0.804379 | -0.58666  | 0.557433 | 0.981636 | chr5  | 1.28E+08 | 1.28E+08 | + | 0 | NA | intron (NL1PABA LI  | 183262 | NM_00104E    | 6558     | Hs.       | 16258E             | NM_00104E    | ENSG000003SLC12A2    | BSC BSC2          | solute c          | protein-coding    |                  |                |
| chr2-1905.7.939023 | -0.4885   | 0.832674 | -0.58666  | 0.557433 | 0.981636 | chr2  | 1.91E+08 | 1.91E+08 | + | 0 | NA | 3' UTR (N3' UTR (N  | 51250  | NM_01326E    | 6772     | Hs.       | 64299E             | NM_00731E    | ENSG000003STAT1      | CANDF 7           | invalign t        | protein-coding    |                  |                |
| chr2-241(7.939023  | -0.4885   | 0.832674 | -0.58666  | 0.557433 | 0.981636 | chr2  | 2.42E+08 | 2.42E+08 | + | 0 | NA | 5' UTR (N5' UTR (N  | 3583   | NM_00133E    | 84289    | Hs.       | 52917E             | NM_03232E    | ENSG000003ING5       | p28 ING5          | inhibitor         | protein-coding    |                  |                |
| chr13-20(8.316351  | -0.48269  | 0.822943 | -0.58654  | 0.557514 | 0.981636 | chr13 | 20010067 | 20010352 | + | 0 | NA | intron (NAIuSz SIN  | 50395  | NR_14836E    | 7750     | Hs.       | 50743E             | NM_00345E    | ENSG000003ZMY2       | FIM MYM           | fzinc fing        | protein-coding    |                  |                |
| chr17-68(10.61488  | -0.42344  | 0.721988 | -0.58649  | 0.557547 | 0.981636 | chr17 | 68037239 | 68047066 | + | 0 | NA | exon (NM exon (NM   | 6162   | NM_00132E    | 3838     | Hs.       | 59423E             | NM_00226E    | ENSG000003KPNA2      | IPOA1 QIF         | karyopher         | protein-coding    |                  |                |
| chr14-771.5.452849 | -0.57726  | 0.984273 | -0.586483 | 0.557551 | 0.981636 | chr14 | 77109803 | 77111033 | + | 0 | NA | intron (Nintron (N  | 12160  | NM_003342E   | 85457    | Hs.       | 70906E             | NM_03342E    | ENSG000003C1PC       | K1AA1737          | CLOCK             | inprotein-coding  |                  |                |
| chr15-657.5.452849 | -0.57726  | 0.984273 | -0.586483 | 0.557551 | 0.981636 | chr15 | 65705273 | 65706849 | + | 0 | NA | intron (Nintron (N  | -9125  | NR_14575E    | 1.1E+08  | NR_14575E | ENSG000003SNORD13E |              | small nucs           | ncRNA             |                   |                   |                  |                |
| chr16-23(5.452849  | -0.57726  | 0.984273 | -0.586483 | 0.557551 | 0.981636 | chr16 | 23067521 | 23068255 | + | 0 | NA | 3' UTR (N3' UTR (N  | 81382  | NM_02071E    | 57478    | Hs.       | 18381E             | NM_02071E    | ENSG000003CUSP3      |                   | ubiquitin         | protein-coding    |                  |                |
| chr17-31(5.452849  | -0.57726  | 0.984273 | -0.586483 | 0.557551 | 0.981636 | chr17 | 31699919 | 31970750 | + | 0 | NA | intron (Nintron (N  | 33327  | NM_01535E    | 23512    | Hs.       | 46273E             | NM_01535E    | ENSG000003SUZ12      | CHET9 JJA         | SUZ12             | polprotein-coding |                  |                |
| chr18-46(5.452849  | -0.57726  | 0.984273 | -0.586483 | 0.557551 | 0.981636 | chr18 | 46037368 | 46040055 | + | 0 | NA | intron (NLTR83 LTF  | 33549  | NM_02443E    | 9050     | Hs.       | 56738E             | NM_02443E    | ENSG000003PSTPIP2    | MAYP              | proline-s         | protein-coding    |                  |                |
| chr2-947(5.452849  | -0.57726  | 0.984273 | -0.586483 | 0.557551 | 0.981636 | chr2  | 9470401  | 9472561  | + | 0 | NA | intron (Nintron (N  | -3070  | NM_00132E    | 285148   | Hs.       | 66722E             | NM_00103E    | ENSG000003IAH1       |                   | isoamyl           | protein-coding    |                  |                |
| chr2-235(5.452849  | -0.57726  | 0.984273 | -0.586483 | 0.557551 | 0.981636 | chr2  | 2.35E+08 | 2.35E+08 | + | 0 | NA | intron (Nintron (N  | -20740 | NM_001371306 | 62084    | NR_04633E | 8603               | Hs.          | 65236E               | NR_00370E         | ENSG000003FAM193A | C4orf8 RE         | family wiprotein | protein-coding |
| chr4-2687(5.452849 | -0.57726  | 0.984273 | -0.586483 | 0.557551 | 0.981636 | chr4  | 2687215  | 2687817  | + | 0 | NA | intron (Nintron (N  | -2578  | NR_03032E    | 593178   | NR_03032E | ENSG000003MIR593   | MIRN593      | lmiRNA               | ncRNA             |                   |                   |                  |                |
| chr7-128(5.452849  | -0.57726  | 0.984273 | -0.586483 | 0.557551 | 0.981636 | chr7  | 28109909 | 28110712 | + | 0 | NA | intron (Nintron (N  | 17171  | NM_001284    | 55140    | Hs.       | 49133E             | NM_01809E    | ENSG000003ELP3       | KAT9              | elongator         | protein-coding    |                  |                |
| chr8-281(5.452849  | -0.57726  | 0.984273 | -0.586483 | 0.557551 | 0.981636 | chr8  | 37872098 | 37875949 | + | 0 | NA | non-codiron-codir   | -14431 | NM_00595E    | 4520     | Hs.       | 47199E             | NM_00595E    | ENSG000003MTF1       | MTF-1 ZRF         | mat reg           | protein-coding    |                  |                |
| chr1-3787(8.699528 | -0.463057 | 0.789772 | -0.586317 | 0.557662 | 0.981636 | chr1  | 1.54E+08 | 1.54E+08 | + | 0 | NA | intron (NMER3 DNA   | 23566  | NM_02301E    | 65123    | Hs.       | 43872E             | NM_02301E    | ENSG000003INTS3      | Clorf193          | integrat          | protein-coding    |                  |                |
| chr1-157(8.699528  | -0.463057 | 0.789772 | -0.586317 | 0.557662 | 0.981636 | chr1  | 1.57E+08 | 1.57E+08 | + | 0 | NA | 3' UTR (N3' UTR (N  | -3599  | NR_00156E    | 360155   | Hs.       | 49180E             | NR_00156E    | ENSG000003CYCSP52    | H6C HPC2          | CYCS              | psseudo           |                  |                |
| chr1-205(8.699528  | -0.463057 | 0.789772 | -0.586317 | 0.557662 | 0.981636 | chr1  | 2.05E+08 | 2.05E+08 | + | 0 | NA | intron (Nintron (N  | -15917 | NM_20337E    | 388730   | Hs.       | 14692E             | NM_20337E    | ENSG000003TMEM81     | HC3107 K          | V transmem        | protein-coding    |                  |                |
| chr1-212(8.699528  | -0.463057 | 0.789772 | -0.586317 | 0.557662 | 0.981636 | chr1  | 2.13E+08 | 2.13E+08 | + | 0 | NA | exon (NM exon (NM   | 30888  | NM_01405E    | 28982    | Hs.       | 7055               | NM_01405E    | ENSG000003FLVCR1     | AXPC1 FLV         | feline l          | protein-coding    |                  |                |
| chr12-52(8.699528  | -0.463057 | 0.789772 | -0.586317 | 0.557662 | 0.981636 | chr12 | 52056822 | 52058076 | + | 0 | NA | exon (NM exon (NM   | 6007   | NM_173157    | 3164     | Hs.       | 52443E             | NM_00213E    | ENSG000003NR4A1      | GFRP1 HMF         | nuclear           | protein-coding    |                  |                |
| chr13-45(8.699528  | -0.463057 | 0.789772 | -0.586317 | 0.557662 | 0.981636 | chr13 | 45533920 | 45534830 | + | 0 | NA | intron (Nintron (N  | 69436  | NM_031431    | 83548    | Hs.       | 50794E             | NM_031431    | ENSG000003COG3       | SEC34             | component         | protein-coding    |                  |                |
| chr15-421(8.699528 | -0.463057 | 0.789772 | -0.586317 | 0.557662 | 0.981636 | chr15 | 42161592 | 42169868 | + | 0 | NA | exon (NM exon (NM   | -9094  | NM_21360E    | 255189   | Hs.       | 23187E             | NM_21360E    | ENSG000003PLA2G4F    | PLA2G4F Z         | phospholip        | protein-coding    |                  |                |
| chr16-574(8.699528 | -0.463057 | 0.789772 | -0.586317 | 0.557662 | 0.981636 | chr16 | 57428553 | 57436688 | + | 0 | NA | intron (Nintron (N  | 14765  | NM_02031E    | 57019    | Hs.       | 4900               | NM_02031E    | ENSG000003CIAPIN1    | Anamorsz          | cytokine          | protein-coding    |                  |                |
| chr17-42(8.699528  | -0.463057 | 0.789772 | -0.586317 | 0.557662 | 0.981636 | chr17 | 42313733 | 42320560 | + | 0 | NA | intron (Nintron (N  | 29090  | NM_00128E    | 6776     | Hs.       | 43705E             | NM_00315E    | ENSG000003STAT5A     | MGF STAT          | signal t          | protein-coding    |                  |                |
| chr18-35(8.699528  | -0.463057 | 0.789772 | -0.586317 | 0.557662 | 0.981636 | chr18 | 35259999 | 35264821 | + | 0 | NA | intron (Nintron (N  | 21361  | NM_032347E   | 84307    | Hs.       | 59106E             | NM_032347E   | ENSG000003ZNF397     | ZNF47 ZS          | zinc fing         | protein-coding    |                  |                |
| chr19-374(8.699528 | -0.463057 | 0.789772 | -0.586317 | 0.557662 | 0.981636 | chr19 | 37458391 | 37455776 | + | 0 | NA | 5' UTR (N5' UTR (N  | 12561  | NM_00133E    | 148266   | Hs.       | 53114E             | NM_15248E    | ENSG000003ZNF569     | ZNF47 ZNF         | zinc fing         | protein-coding    |                  |                |
| chr2-156(8.699528  | -0.463057 | 0.789772 | -0.586317 | 0.557662 | 0.981636 | chr2  | 15605303 | 15608972 | + | 0 | NA | intron (Nintron (N  | 15269  | NM_00493E    | 1653     | Hs.       | 44059E             | NM_00493E    | ENSG000003DDX1       | DBP-RB UK         | DEAD-box          | protein-coding    |                  |                |
| chr2-4431(8.699528 | -0.463057 | 0.789772 | -0.586317 | 0.557662 | 0.981636 | chr2  | 44316607 | 44324734 | + | 0 | NA | 3' UTR (N3' UTR (N  | 39079  | NM_00104E    | 9581     | Hs.       | 44434E             | NM_00603E    | ENSG000003PREPL      | CMS22             | prolyl            | protein-coding    |                  |                |
| chr2-4554(8.699528 | -0.463057 | 0.789772 | -0.586317 | 0.557662 | 0.981636 | chr2  | 45541324 | 45542212 | + | 0 | NA | intron (NMER52A LI  | 69499  | NM_01807E    | 55133    | Hs.       | 14229              | NM_01807E    | ENSG000003SRBD1      |                   | S1 RNA            | biprotein-coding  |                  |                |
| chr2-709(8.699528  | -0.463057 | 0.789772 | -0.586317 | 0.557662 | 0.981636 | chr2  | 70988927 | 70989560 | + | 0 | NA | intron (Nintron (N  | 5630   | NM_14458E    | 113419   | Hs.       | 51608E             | NM_14458E    | ENSG000003TEX261     | TEG-261           | testis            | protein-coding    |                  |                |
| chr4-122(8.699528  | -0.463057 | 0.789772 | -0.586317 | 0.557662 | 0.981636 | chr4  | 1.23E+08 | 1.23E+08 | + | 0 | NA | intron (Nintron (N  | 44970  | NM_00708E    | 11162    | Hs.       | 55845E             | NM_00708E    | ENSG000003NUDT6      | ASFGF2 F          | ncudigen          | protein-coding    |                  |                |
| chr6-361(8.699528  | -0.463057 | 0.789772 | -0.586317 | 0.557662 | 0.981636 | chr6  | 36108641 | 36110840 | + | 0 | NA | 3' UTR (N3' UTR (N  | -20773 | NR_07299E    | 5603     |           |                    |              |                      |                   |                   |                   |                  |                |

|           |           |          |          |          |          |          |       |          |          |   |   |    |                     |                    |          |                    |                     |                          |                                     |
|-----------|-----------|----------|----------|----------|----------|----------|-------|----------|----------|---|---|----|---------------------|--------------------|----------|--------------------|---------------------|--------------------------|-------------------------------------|
| chr2-1332 | 6.144942  | -0.54349 | 0.932217 | -0.58301 | 0.559887 | 0.981636 | chr2  | 1.33E+08 | 1.33E+08 | + | 0 | NA | intron (Nintron (N  | -55504 NR_110294   | 1.02E+08 | Hs.661917NR_110294 | ENSG00000CNCAP5-AS- | NCKAP5                   | arncRNA                             |
| chr2-1897 | 6.144942  | -0.54349 | 0.932217 | -0.58301 | 0.559887 | 0.981636 | chr2  | 1.9E+08  | 1.9E+08  | + | 0 | NA | non-codiron-codir   | -3746 NR_148888    | 64172    | Hs.60772           | NM_022355           | ENSG00000OSGEP11         | OSGEP1 Qr0-sialog protein-coding    |
| chr3-5006 | 6.144942  | -0.54349 | 0.932217 | -0.58301 | 0.559887 | 0.981636 | chr3  | 50063142 | 50063632 | + | 0 | NA | intron (NAluJb SIN  | -25532 NM_005778   | 10181    | Hs.43948           | CNM_005778          | ENSG00000CRBM5           | G15 H37 IRNA bindi protein-coding   |
| chr4-684  | 6.144942  | -0.54349 | 0.932217 | -0.58301 | 0.559887 | 0.981636 | chr4  | 6843575  | 6845283  | + | 0 | NA | intron (NAluSx SI   | 61697 NM_00110C    | 9778     | Hs.79276           | NM_014744           | ENSG00000KIAA0232        | - KIAA0232 protein-coding           |
| chr4-4836 | 6.144942  | -0.54349 | 0.932217 | -0.58301 | 0.559887 | 0.981636 | chr4  | 48382344 | 48382578 | + | 0 | NA | intron (Nintron (N  | 40932 NM_002084C   | 57606    | Hs.479677          | NM_020844           | ENSG00000SLAIN2          | KIAA1458 SLAIN motif protein-coding |
| chr5-738  | 6.144942  | -0.54349 | 0.932217 | -0.58301 | 0.559887 | 0.981636 | chr5  | 73833416 | 73835525 | + | 0 | NA | intron (NLIAMA9 LIN | 20924 NM_001244    | 64283    | Hs.482521          | NM_00108C           | ENSG00000CARHGEP28       | RGNFEP RIFRho guaniprotein-coding   |
| chr6-1546 | 6.144942  | -0.54349 | 0.932217 | -0.58301 | 0.559887 | 0.981636 | chr6  | 1.55E+08 | 1.55E+08 | + | 0 | NA | intron (NMTRe SINE  | -50005 NR_03610C   | 1E+08    | NR_03610C          | ENSG00000MIR1273C   | - microRNA ncRNA         |                                     |
| chr7-4756 | 6.144942  | -0.54349 | 0.932217 | -0.58301 | 0.559887 | 0.981636 | chr7  | 47562121 | 47564217 | + | 0 | NA | intron (Nintron (N  | 18942 NM_022748    | 64759    | Hs.520814          | NR_022748           | ENSG00000TNS3            | TEM6 TENS tensin 3 protein-coding   |
| chr9-123C | 6.144942  | -0.54349 | 0.932217 | -0.58301 | 0.559887 | 0.981636 | chr9  | 1.23E+08 | 1.23E+08 | + | 0 | NA | intron (N(ATTATAT)  | 34774 NR_030331    | 693185   | NR_030331          | ENSG00000MIR600     | MIRN600 tmicroRNA ncRNA  |                                     |
| chr17-434 | 10.19456  | -0.43621 | 0.748203 | -0.58301 | 0.559888 | 0.981636 | chr17 | 43401919 | 43402126 | + | 0 | NA | TTS (NM_C TTS (NM_C | 3029 NM_001661     | 379      | Hs.183155          | NM_001661           | ENSG00000ARL4D           | ARF4L ARLADP ribosprotein-coding    |
| chr1-2402 | 8.39863   | -0.47664 | 0.817562 | -0.58301 | 0.559894 | 0.981636 | chr1  | 2.4E+08  | 2.4E+08  | + | 0 | NA | intron (NMLTIJ LTF  | 192144 NM_020066   | 56776    | Hs.24889           | NM_020066           | ENSG00000FMN2            | - formin 2 protein-coding           |
| chr12-622 | 8.39863   | -0.47664 | 0.817562 | -0.58301 | 0.559894 | 0.981636 | chr12 | 6227734  | 6228026  | + | 0 | NA | intron (Nintron (N  | 27480 NM_00176E    | 928      | Hs.11428           | CNM_00176E          | ENSG00000CD9             | BTCC-1 DFCD9 molecprotein-coding    |
| chr18-505 | 6.60964   | -0.59385 | 1.018667 | -0.58297 | 0.559913 | 0.981636 | chr18 | 50906372 | 50906767 | + | 0 | NA | intron (NAluSx SIN  | 27451 NM_00239E    | 4200     | Hs.233115          | NM_00239E           | ENSG00000CME2            | ODS1 malic enzprotein-coding        |
| chr4-1908 | 6.60964   | -0.59385 | 1.018667 | -0.58297 | 0.559913 | 0.981636 | chr4  | 19818010 | 19804009 | + | 0 | NA | 3' UTR (N3' UTR (N  | 5658 NR_00300A     | 67770    | Hs.676951          | NR_00300A           | ENSG00000SCARNA22        | ACA11 small Ca_ncRNA                |
| chr7-1587 | 6.60964   | -0.59385 | 1.018667 | -0.58297 | 0.559913 | 0.981636 | chr7  | 1.59E+08 | 1.59E+08 | + | 0 | NA | 3' UTR (N3' UTR (N  | -28040 NR_104054   | 54892    | Hs.18616           | NM_01776C           | ENSG00000CNCAP2          | 3KS CAP-Non-SMC cprotein-coding     |
| chr13-19F | 8.128519  | 0.478892 | 0.82156  | 0.582905 | 0.559957 | 0.981636 | chr13 | 19817890 | 19818299 | + | 0 | NA | Intergeni Intergeni | -35058 NR_14905E   | 55269    | Hs.21319E          | NM_00104E           | ENSG00000PSPC1           | PSP1 paraspeck protein-coding       |
| chr7-131C | 10.128519 | 0.478892 | 0.82156  | 0.582905 | 0.559957 | 0.981636 | chr7  | 1.31E+08 | 1.31E+08 | + | 0 | NA | intron (NFLAM_C SI  | 7775 NR_02415E     | 378805   | Hs.15055E          | NM_00108E           | ENSG00000CLINC-PIN1      | LINCncRNA-F long intncRNA           |
| chr1-151E | 6.60388   | -0.42238 | 0.724735 | -0.58281 | 0.560022 | 0.981636 | chr1  | 1.51E+08 | 1.51E+08 | + | 0 | NA | intron (Nintron (N  | 6935 NM_00133C     | 5298     | Hs.63246E          | NM_002651           | ENSG00000P14KB           | NPK1 P14 phosphatiprotein-coding    |
| chr10-11F | 5.493989  | 0.578726 | 0.993115 | 0.582738 | 0.560069 | 0.981636 | chr10 | 1.14E+08 | 1.14E+08 | + | 0 | NA | intron (NTiger1 E   | -7073 NM_001267    | 840      | Hs.9216            | NM_001227           | ENSG00000CASP7           | CASP-7 Cn caspase 7 protein-coding  |
| chr1-952  | 7.931165  | -0.48682 | 0.835526 | -0.58265 | 0.560132 | 0.981636 | chr1  | 95246713 | 95246934 | + | 0 | NA | exon (NM exon (NM   | 12613 NM_01548E    | 25950    | Hs.48351E          | NM_01548E           | ENSG00000CRWD3           | RSUME RWD motif protein-coding      |
| chr14-554 | 7.931165  | -0.48682 | 0.835526 | -0.58265 | 0.560132 | 0.981636 | chr14 | 55053983 | 55054437 | + | 0 | NA | intron (NAluSx SI   | 2563 NM_14457E     | 93487    | Hs.59433E          | NM_14457E           | ENSG00000MAPK11P11       | C14orf32 mitogen-e protein-coding   |
| chr14-584 | 7.931165  | -0.48682 | 0.835526 | -0.58265 | 0.560132 | 0.981636 | chr14 | 58409875 | 58410723 | + | 0 | NA | intron (NAluJb SIN  | 14369 NM_207377    | 387990   | Hs.592307          | NM_207377           | ENSG00000TOMM20L         | UNQ9438 transloc protein-coding     |
| chr2-204  | 7.931165  | -0.48682 | 0.835526 | -0.58265 | 0.560132 | 0.981636 | chr2  | 2.03E+08 | 2.03E+08 | + | 0 | NA | intron (NAluY SINE  | 40767 NM_21358E    | 65059    | Hs.47116E          | NM_02525E           | ENSG00000CRAPH1          | ALS2CR18 Bas assoc protein-coding   |
| chr7-1004 | 7.931165  | -0.48682 | 0.835526 | -0.58265 | 0.560132 | 0.981636 | chr7  | 1E+08    | 1E+08    | + | 0 | NA | TTS (NM_C TTS (NM_C | 2411 NM_14503C     | 221908   | Hs.41335E          | NM_14503C           | ENSG00000PPP1R35         | C7orf47 protein iprotein-coding     |
| chr12-417 | 3.973533  | -0.67555 | 1.159506 | -0.58262 | 0.560149 | 0.981636 | chr12 | 417726   | 418602   | + | 0 | NA | intron (NAluS26 SI  | 16520 NM_00113C    | 84318    | Hs.63165E          | NM_03235E           | ENSG00000CCDC77          | - coiled-c protein-coding           |
| chr9-1364 | 3.973533  | -0.67555 | 1.159506 | -0.58262 | 0.560149 | 0.981636 | chr9  | 1.36E+08 | 1.36E+08 | + | 0 | NA | TTS (NM_C TTS (NM_C | 11232 NM_00131E    | 56623    | Hs.12099E          | NM_01989E           | ENSG00000INPP5E          | CORS1 CPI inositol protein-coding   |
| chr10-104 | 8.69352   | 0.475473 | 0.816195 | 0.582548 | 0.560197 | 0.981636 | chr10 | 1041379  | 1042037  | + | 0 | NA | intron (Nintron (N  | 7178 NM_001317     | 3422     | Hs.28365E          | NM_00450E           | ENSG00000ID11            | IPPI1 IPPI isopenter protein-coding |
| chr15-34F | 7.805897  | -0.50809 | 0.872524 | -0.58233 | 0.560347 | 0.981636 | chr15 | 34900599 | 34900810 | + | 0 | NA | exon (NM exon (NM   | 69038 NM_014691    | 9716     | Hs.51095E          | NM_014691           | ENSG00000AQR             | IBP160 f aquarius protein-coding    |
| chr13-727 | 5.206313  | -0.62195 | 1.068093 | -0.5823  | 0.560364 | 0.981636 | chr13 | 72798900 | 72799099 | + | 0 | NA | intron (N L2a LINE  | 16866 NR_14620E    | 10464    | Hs.44192E          | NM_00634E           | ENSG00000PIBF1           | C13orf24 progester protein-coding   |
| chr12-641 | 8.333916  | -0.47492 | 0.815824 | -0.58214 | 0.560472 | 0.981636 | chr12 | 64111149 | 64111989 | + | 0 | NA | intron (Nintron (N  | 110227 NM_00130C   | 144577   | Hs.444671          | NM_15244C           | ENSG00000C12orf66        | - chromoson protein-coding          |
| chr8-118E | 8.333916  | -0.47492 | 0.815824 | -0.58214 | 0.560472 | 0.981636 | chr8  | 1.19E+08 | 1.19E+08 | + | 0 | NA | intron (Nintron (N  | 2881 NM_00254E     | 4982     | Hs.81791           | NM_00254E           | ENSG00000TNFRSF11E       | OCIF OPG TNF rece protein-coding    |
| chr11-337 | 9.192727  | -0.47706 | 0.819509 | -0.58213 | 0.560476 | 0.981636 | chr11 | 33711209 | 33711536 | + | 0 | NA | intron (N LMB7 LIN  | -10632 NM_00116E   | 1E+08    | Hs.70946E          | NM_00116E           | ENSG00000C11orf91        | - chromoson protein-coding          |
| chr12-11F | 8.666247  | 0.46014  | 0.790438 | 0.582133 | 0.560477 | 0.981636 | chr12 | 1.16E+08 | 1.16E+08 | + | 0 | NA | 3' UTR (N3' UTR (N  | 187565 NR_030351   | 693205   | NR_030351          | ENSG00000MIR620     | MIRN620 tmicroRNA ncRNA  |                                     |
| chr13-75E | 8.666247  | 0.46014  | 0.790438 | 0.582133 | 0.560477 | 0.981636 | chr13 | 75584400 | 75585242 | + | 0 | NA | intron (N LIMEf LIN | 35071 NM_00600E    | 7347     | Hs.162241          | NM_00600E           | ENSG00000UCHL3           | UCH-L3 ubiquitir protein-coding     |
| chr16-67E | 8.666247  | 0.46014  | 0.790438 | 0.582133 | 0.560477 | 0.981636 | chr16 | 67549091 | 67542213 | + | 0 | NA | intron (Nintron (N  | 4140 NM_00119E     | 79567    | Hs.152717          | NM_02451E           | ENSG00000RIPOR1          | FAM65A RHO fam protein-coding       |
| chr19-17E | 8.666247  | 0.46014  | 0.790438 | 0.582133 | 0.560477 | 0.981636 | chr19 | 17269903 | 17270917 | + | 0 | NA | intron (NAluY SINE  | 2530 NM_01417E     | 29086    | Hs.19072E          | NM_01417E           | ENSG00000BABAM1          | C19orf62 BRISC anc protein-coding   |
| chr2-127E | 8.666247  | 0.46014  | 0.790438 | 0.582133 | 0.560477 | 0.981636 | chr2  | 1.28E+08 | 1.28E+08 | + | 0 | NA | 3' UTR (N3' UTR (N  | 11089 NM_00480E    | 5433     | Hs.71534E          | NM_00480E           | ENSG00000POLR2D          | HSRBP4 HSRNA polyn protein-coding   |
| chr3-119E | 8.666247  | 0.46014  | 0.790438 | 0.582133 | 0.560477 | 0.981636 | chr3  | 1.2E+08  | 1.2E+08  | + | 0 | NA | intron (Nintron (N  | 19497 NM_01658E    | 51300    | Hs.477287          | NM_01658E           | ENSG00000TIMMDC1         | C3orf1 MC transloc protein-coding   |
| chr7-1521 | 8.666247  | 0.46014  | 0.790438 | 0.582133 | 0.560477 | 0.981636 | chr7  | 1.52E+08 | 1.52E+08 | + | 0 | NA | exon (NM exon (NM   | 75938 NM_001371474 | 157769   | Hs.459174          | NM_14496E           | ENSG00000CFAM91A1        | - family wiprotein-coding           |
| chr8-1237 | 8.666247  | 0.46014  | 0.790438 | 0.582133 | 0.560477 | 0.981636 | chr8  | 1.24E+08 | 1.24E+08 | + | 0 | NA | intron (Nintron (N  | 6901 NM_14496E     | 157769   | Hs.459174          | NM_14496E           | ENSG00000CFAM91A1        | - family wiprotein-coding           |
| chr9-207E | 8.666247  | 0.46014  | 0.790438 | 0.582133 | 0.560477 | 0.981636 | chr9  | 20767282 | 20767592 | + | 0 | NA | intron (N LIP2 LIN  | -19490 NR_14576E   | 1.1E+08  | NR_14576E          | ENSG00000SNORA30B   | - small nucsnoRNA        |                                     |
| chr18-48E | 5.740341  | -0.58165 | 0.999234 | -0.5821  | 0.560501 | 0.981636 | chr18 | 48577112 | 48577626 | + | 0 | NA | intron (Nintron (N  | 38338 NM_00114E    | 9811     | Hs.14523C          | NM_01477E           | ENSG00000CTIF            | Gm672 K1 cap bindi protein-coding   |
| chr1-3104 | 8.136377  | 0.476981 | 0.819506 | 0.582035 | 0.560543 | 0.981636 | chr1  | 31044228 | 31044729 | + | 0 | NA | intron (N LIMB8 LIN | 21239 NM_00102C    | 9698     | Hs.281707          | NM_01467E           | ENSG00000PUM1            | HSPUM PUM pumilio f protein-coding  |
| chr13-32E | 8.136377  | 0.476981 | 0.819506 | 0.582035 | 0.560543 | 0.981636 | chr13 | 32521010 | 32522194 | + | 0 | NA | intron (Nintron (N  | -12207 NR_02692E   | 116828   | Hs.658751          | NR_02692E           | ENSG00000N4BP2L2-1       | CG030 N4BP2L2 irncRNA               |
| chr18-57E | 8.136377  | 0.476981 | 0.819506 | 0.582035 | 0.560543 | 0.981636 | chr18 | 57690100 | 57697299 | + | 0 | NA | intron (Nintron (N  | 66323 NM_001242    | 1.01E+08 | Hs.66064E          | NM_001242804        | LOC100505E-              | uncharact protein-coding            |
| chr19-43E | 8.136377  | 0.476981 | 0.819506 | 0.582035 | 0.560543 | 0.981636 | chr19 | 43631092 | 43630333 | + | 0 | NA | intron (Nintron (N  | 18535 NM_03288E    | 84954    | Hs.32168E          | NM_03288E           | ENSG00000MPND            | - MPN doma protein-coding           |
| chr1-148E | 12.96296  | 0.386507 | 0.664106 | 0.581996 | 0.56057  | 0.981636 | chr1  | 1.49E+08 | 1.49E+08 | + | 0 | NA | intron (Nintron (N  | 10745 NM_01538E    | 25832    | Hs.53467E          | NM_01538E           | ENSG00000NBPF14          | DJ328E19.NBPF mem protein-coding    |
| chr9-9410 | 10.60702  | -0.42218 | 0.725775 | -0.58169 | 0.560773 | 0.981636 | chr9  | 94175905 | 94177076 | + | 0 | NA | TTS (NR_C TTS (NR_C | 143 NR_02948E      | 406888   | NR_02948E          | ENSG00000MIRLET7F1  | LET7F1 MI microRNA ncRNA |                                     |
| chr2-460E | 8.658389  | 0.461941 | 0.794255 | 0.581603 | 0.560834 | 0.981636 | chr2  | 46093005 | 46095365 | + | 0 | NA | intron (N HAL1 LINE | -203222 NM_00143C  | 2034     | Hs.46841           | NR_00143C           | ENSG00000EPAS1           | ECTY4 HIF endotheliprotein-coding   |
| chr4-1077 | 8.658389  | 0.461941 | 0.794255 | 0.581603 | 0.560834 | 0.981636 | chr4  | 1.08E+08 | 1.08E+08 | + | 0 | NA | intron (N LIM48 LIN | 14331 NM_00544C    | 9061     | Hs.36861           | CNM_00544C          | ENSG00000PAPSS1          | ATPSK1 PA3'-phos protein-coding     |
| chr1-421E | 5.58364   | -0.60371 | 1.038089 | -0.58156 | 0.560863 | 0.981636 | chr1  | 42190090 | 42190289 | + | 0 | NA | intron (Nintron (N  | -25444 NM_03355E   | 2980     | Hs.778             | NM_03355E           | ENSG00000                |                                     |



|           |          |          |          |          |          |          |       |          |          |   |   |    |                     |                  |                  |            |            |                           |                                      |
|-----------|----------|----------|----------|----------|----------|----------|-------|----------|----------|---|---|----|---------------------|------------------|------------------|------------|------------|---------------------------|--------------------------------------|
| chrX-1421 | 8.674105 | 0.458342 | 0.790607 | 0.579735 | 0.562094 | 0.981636 | chrX  | 1421320  | 1423823  | + | 0 | NA | intron (Nintron (N  | 22040 NR_02671C  | 80161 Hs. 521855 | ENM_025091 | ASMTL-AS1  | ASMTL-AS                  | ASMTL antncRNA                       |
| chr10-885 | 8.35934  | -0.46886 | 0.809602 | -0.57913 | 0.562503 | 0.981636 | chr10 | 88935132 | 88935817 | + | 0 | NA | non-codiron-codir   | 2790 NR_125377   | 1E+08            | NR_125377  | ENSG000002 | ACTA2-AS1                 | UC001kfo ACTA2 antncRNA              |
| chr17-28C | 8.35934  | -0.46886 | 0.809602 | -0.57913 | 0.562503 | 0.981636 | chr17 | 28070097 | 28070624 | + | 0 | NA | intron (NAluSc SIN  | 27683 NM_016231  | 51701 Hs. 208755 | ENM_016231 | ENSG000002 | CNKLK                     | nemo like protein-coding             |
| chr2-2061 | 8.35934  | -0.46886 | 0.809602 | -0.57913 | 0.562503 | 0.981636 | chr2  | 2.06E+08 | 2.06E+08 | + | 0 | NA | 3' UTR (N3' UTR (N  | -7496 NR_033248  | 1E+08            | Hs. 356055 | ENR_033248 | GCSHP3                    | glycine cpsudo                       |
| chr20-344 | 8.35934  | -0.46886 | 0.809602 | -0.57913 | 0.562503 | 0.981636 | chr20 | 34428611 | 34429415 | + | 0 | NA | intron (NAluSz SIN  | -37312 NR_030374 | 693228           | NR_030374  | ENSG000002 | MIR644A                   | MIR644 miRNA ncRNA                   |
| chr3-124F | 8.35934  | -0.46886 | 0.809602 | -0.57913 | 0.562503 | 0.981636 | chr3  | 1.25E+08 | 1.25E+08 | + | 0 | NA | intron (Nintron (N  | 46212 NM_002213  | 3693 Hs. 13155   | NM_002213  | ENSG000002 | ITGB5                     | integrin protein-coding              |
| chr6-565F | 8.35934  | -0.46886 | 0.809602 | -0.57913 | 0.562503 | 0.981636 | chr6  | 56557371 | 56557680 | + | 0 | NA | intron (Nintron (N  | 85364 NM_015548  | 667 Hs. 60491    | ENM_001723 | ENSG000002 | DST                       | BP240 BP240 dystonin protein-coding  |
| chr9-271F | 8.35934  | -0.46886 | 0.809602 | -0.57913 | 0.562503 | 0.981636 | chr9  | 27184831 | 27186169 | + | 0 | NA | exon (NM exon (NM   | 76359 NM_000456  | 7010 Hs. 89409   | ENM_000456 | ENSG000002 | TEK                       | CD202B GLTEK receptor protein-coding |
| chr1-5207 | 5.634488 | -0.58441 | 1.009552 | -0.57888 | 0.562672 | 0.981636 | chr1  | 52078219 | 52079183 | + | 0 | NA | intron (N L2c LINE  | 22406 NM_152265  | 91408 Hs. 42983  | ENM_152265 | ENSG000002 | BTF3L4                    | basic trypsin protein-coding         |
| chr9-8161 | 5.634488 | -0.58441 | 1.009552 | -0.57888 | 0.562672 | 0.981636 | chr9  | 81615786 | 81616002 | + | 0 | NA | intron (Nintron (N  | 73641 NM_001303  | 7088 Hs. 11702   | NM_005077  | ENSG000002 | TLE1                      | ESG ESG1 TLE1 family protein-coding  |
| chr1-9231 | 5.701051 | -0.57078 | 0.986175 | -0.57878 | 0.562774 | 0.981636 | chr1  | 92312474 | 92313213 | + | 0 | NA | intron (NAluSz6 SI  | 13784 NM_024813  | 79871 Hs. 444421 | NM_024813  | ENSG000002 | CRPAP2                    | C1orf82 FRNA polyn protein-coding    |
| chr16-464 | 5.701051 | -0.57078 | 0.986175 | -0.57878 | 0.562774 | 0.981636 | chr16 | 46471    | 47437    | + | 0 | NA | 3' UTR (N3' UTR (N  | 6654 NM_01631C   | 51728 Hs. 63222  | ENM_01631C | ENSG000002 | POLR3K                    | C11 C11-FRNA polyn protein-coding    |
| chr1-183  | 6.178223 | -0.53742 | 0.928663 | -0.57871 | 0.562787 | 0.981636 | chr1  | 1830872  | 1831714  | + | 0 | NA | intron (NAluJr SIN  | -51262 NM_001353 | 65220 Hs. 65479  | ENM_023018 | ENSG000002 | NADK                      | dJ283E3. INAD kinase protein-coding  |
| chr1-192C | 6.178223 | -0.53742 | 0.928663 | -0.57871 | 0.562787 | 0.981636 | chr1  | 21928183 | 21929397 | + | 0 | NA | intron (NAluSp SIN  | 8520 NM_001291   | 3339 Hs. 562227  | ENM_005525 | ENSG000002 | HSPG2                     | HSPG PLC heparan s protein-coding    |
| chr1-9336 | 6.178223 | -0.53742 | 0.928663 | -0.57871 | 0.562787 | 0.981636 | chr1  | 93360626 | 93361173 | + | 0 | NA | 3' UTR (N3' UTR (N  | 14992 NM_001938  | 1810 Hs. 34841   | ENM_001938 | ENSG000002 | CDR1                      | NC2 NC2-F down-reg protein-coding    |
| chr13-24F | 6.178223 | -0.53742 | 0.928663 | -0.57871 | 0.562787 | 0.981636 | chr13 | 24505343 | 24506761 | + | 0 | NA | intron (N LTR12C LI | 6726 NM_006437   | 143 Hs. 74485    | ENM_006437 | ENSG000002 | PARP4                     | ADPRTL1 poly (ADP- protein-coding    |
| chr13-11C | 6.178223 | -0.53742 | 0.928663 | -0.57871 | 0.562787 | 0.981636 | chr13 | 1.1E+08  | 1.1E+08  | + | 0 | NA | intron (Nintron (N  | 2908 NM_00184E   | 1284 Hs. 50871   | ENM_00184E | ENSG000002 | COL4A2                    | BSVD2 ICF collagen protein-coding    |
| chr14-67C | 6.178223 | -0.53742 | 0.928663 | -0.57871 | 0.562787 | 0.981636 | chr14 | 67371747 | 67372315 | + | 0 | NA | intron (NAluJo SIN  | 11703 NM_004094  | 1965 Hs. 15177   | ENM_004094 | ENSG000002 | E1F2S1                    | E1F-2 EIF eukaryot protein-coding    |
| chr14-104 | 6.178223 | -0.53742 | 0.928663 | -0.57871 | 0.562787 | 0.981636 | chr14 | 1.05E+08 | 1.05E+08 | + | 0 | NA | exon (NM exon (NM   | 16417 NM_022489  | 64423 Hs. 24956  | NM_022489  | ENSG000002 | INF2                      | C14orf151 inverted protein-coding    |
| chr15-75F | 6.178223 | -0.53742 | 0.928663 | -0.57871 | 0.562787 | 0.981636 | chr15 | 75704427 | 75705828 | + | 0 | NA | intron (Nintron (N  | 7721 NM_001897   | 1464 Hs. 51304   | ENM_001897 | ENSG000002 | CSPG4                     | HMW-MAA chondroitin protein-coding   |
| chr16-191 | 6.178223 | -0.53742 | 0.928663 | -0.57871 | 0.562787 | 0.981636 | chr16 | 19120169 | 19120945 | + | 0 | NA | non-codiron-codir   | 6593 NR_028028   | 162073 Hs. 53089 | ENM_001034 | ENSG000002 | ITPR1PL2                  | ITPRIP1 IPR protein-coding           |
| chr16-64F | 6.178223 | -0.53742 | 0.928663 | -0.57871 | 0.562787 | 0.981636 | chr16 | 64989600 | 64990690 | + | 0 | NA | intron (Nintron (N  | 131918 NM_001797 | 1009 Hs. 116471  | NM_001797  | ENSG000002 | CDH11                     | CAD11 CD1 cadherin protein-coding    |
| chr17-61  | 6.178223 | -0.53742 | 0.928663 | -0.57871 | 0.562787 | 0.981636 | chr17 | 61741534 | 61742821 | + | 0 | NA | intron (N Tigger1 I | 121382 NM_032043 | 83990 Hs. 12890  | ENM_032043 | ENSG000002 | CBR1P1                    | BACHI FANBRCA1 int protein-coding    |
| chr18-232 | 6.178223 | -0.53742 | 0.928663 | -0.57871 | 0.562787 | 0.981636 | chr18 | 23203966 | 23204580 | + | 0 | NA | intron (Nintron (N  | 48448 NM_138375  | 91768 Hs. 11108  | NM_138375  | ENSG000002 | CABLE1                    | CABL1 CAF Cdk5 and protein-coding    |
| chr19-27F | 6.178223 | -0.53742 | 0.928663 | -0.57871 | 0.562787 | 0.981636 | chr19 | 2790894  | 2791798  | + | 0 | NA | intron (Nintron (N  | 5843 NM_003245   | 7064 Hs. 78769   | NM_003245  | ENSG000002 | THOP1                     | EP24.15 thimet ol protein-coding     |
| chr19-211 | 6.178223 | -0.53742 | 0.928663 | -0.57871 | 0.562787 | 0.981636 | chr19 | 21150918 | 21153232 | + | 0 | NA | intron (N PABL_A-ir | 10035 NM_133473  | 170959 Hs. 15625 | ENM_133473 | ENSG000002 | ZNF431                    | zinc fing protein-coding             |
| chr2-856C | 6.178223 | -0.53742 | 0.928663 | -0.57871 | 0.562787 | 0.981636 | chr2  | 85609197 | 85610001 | + | 0 | NA | intron (Nintron (N  | 2467 NM_001013   | 388969 Hs. 51615 | ENM_001013 | ENSG000002 | C2orf68                   | HRCN81 chromosom protein-coding      |
| chr2-134F | 6.178223 | -0.53742 | 0.928663 | -0.57871 | 0.562787 | 0.981636 | chr2  | 1.35E+08 | 1.35E+08 | + | 0 | NA | intron (N LIME3B LI | 5527 NM_001241   | 905 Hs. 74411    | ENM_001241 | ENSG000002 | CCNT2                     | CYCT2 cyclin T2 protein-coding       |
| chr3-370C | 6.178223 | -0.53742 | 0.928663 | -0.57871 | 0.562787 | 0.981636 | chr3  | 37028068 | 37028954 | + | 0 | NA | intron (Nintron (N  | 35161 NM_001258  | 4292 Hs. 19536   | ENM_00024E | ENSG000002 | MLH1                      | COCA2 FCC mutL homc protein-coding   |
| chr5-746F | 6.178223 | -0.53742 | 0.928663 | -0.57871 | 0.562787 | 0.981636 | chr5  | 74693708 | 74694408 | + | 0 | NA | intron (Nintron (N  | 8510 NM_000521   | 3074 Hs. 69293   | NM_000521  | ENSG000002 | HEXB                      | ENC-1AS F hexosamin protein-coding   |
| chr5-157F | 6.178223 | -0.53742 | 0.928663 | -0.57871 | 0.562787 | 0.981636 | chr5  | 1.58E+08 | 1.58E+08 | + | 0 | NA | intron (Nintron (N  | 53259 NM_173491  | 134353 Hs. 23648 | NM_173491  | ENSG000002 | LSM11                     | LMS11, U7 protein-coding             |
| chr6-175C | 6.178223 | -0.53742 | 0.928663 | -0.57871 | 0.562787 | 0.981636 | chr6  | 17507530 | 17508974 | + | 0 | NA | intron (Nintron (N  | 3013 NR_110855   | 1.02E+08         | Hs. 62287  | ENR_110855 | LOC101928                 | uncharacterncRNA                     |
| chr17-205 | 12.90425 | 0.381106 | 0.658798 | 0.578486 | 0.562936 | 0.981636 | chr17 | 20305940 | 20307993 | + | 0 | NA | intron (N LIME1 LI  | -14208 NR_02338C | 348254 Hs. 46247 | ENR_02338C | CCDC144C   | CCDC144C coiled-cp pseudo |                                      |
| chr1-3601 | 6.137084 | -0.54149 | 0.936302 | -0.57833 | 0.563042 | 0.981636 | chr1  | 36014536 | 36015061 | + | 0 | NA | intron (Nintron (N  | -69296 NM_014466 | 27285 Hs. 12711  | NM_014466  | ENSG000002 | TEKT2                     | TEKTB1 Tf tektin 2 protein-coding    |
| chr1-113F | 6.137084 | -0.54149 | 0.936302 | -0.57833 | 0.563042 | 0.981636 | chr1  | 1.14E+08 | 1.14E+08 | + | 0 | NA | intron (N (A)n Simp | -4897 NM_001319  | 64858 Hs. 59141  | ENM_02283E | ENSG000002 | DCLRE1B                   | APOLLO SN DNA cross protein-coding   |
| chr10-876 | 6.137084 | -0.54149 | 0.936302 | -0.57833 | 0.563042 | 0.981636 | chr10 | 875874   | 876209   | + | 0 | NA | intron (N ASTC-int  | 55664 NM_001351  | 23185 Hs. 15906  | ENM_001351 | ENSG000002 | LARP4B                    | KIAA0217 La ribon protein-coding     |
| chr10-877 | 6.137084 | -0.54149 | 0.936302 | -0.57833 | 0.563042 | 0.981636 | chr10 | 87718358 | 87719332 | + | 0 | NA | intron (Nintron (N  | 58967 NM_00101E  | 9060 Hs. 52449   | ENM_00467C | ENSG000002 | PAPSS2                    | ATPSK2 BC3'-phosp protein-coding     |
| chr11-47C | 6.137084 | -0.54149 | 0.936302 | -0.57833 | 0.563042 | 0.981636 | chr11 | 47618443 | 47620182 | + | 0 | NA | intron (NAluSz SIN  | 23227 NM_014342  | 23788 Hs. 26994  | ENM_014342 | ENSG000002 | MTCH2                     | HSPC032 mitochohc protein-coding     |
| chr19-101 | 6.137084 | -0.54149 | 0.936302 | -0.57833 | 0.563042 | 0.981636 | chr19 | 10124741 | 10125946 | + | 0 | NA | IntergeniAluXs LI   | -5444 NM_00375E  | 8666 Hs. 52905   | ENM_00375E | ENSG000002 | EIF3G                     | EIF3-P42 eukaryot protein-coding     |
| chr2-393C | 6.137084 | -0.54149 | 0.936302 | -0.57833 | 0.563042 | 0.981636 | chr2  | 39361928 | 39363452 | + | 0 | NA | intron (N LIMB1 LI  | 74595 NM_00361E  | 8491 Hs. 65575   | ENM_00361E | ENSG000002 | MAP4K3                    | GLK MAPK mitom-ε protein-coding      |
| chr2-2267 | 6.137084 | -0.54149 | 0.936302 | -0.57833 | 0.563042 | 0.981636 | chr2  | 2.27E+08 | 2.27E+08 | + | 0 | NA | intron (Nintron (N  | 7889 NM_005544   | 3667 Hs. 47150   | ENM_005544 | ENSG000002 | IRS1                      | HIRS-1 insulin l protein-coding      |
| chr2-2377 | 6.137084 | -0.54149 | 0.936302 | -0.57833 | 0.563042 | 0.981636 | chr2  | 2.38E+08 | 2.38E+08 | + | 0 | NA | exon (NM exon (NM   | 43070 NM_00473E  | 9208 Hs. 47177   | ENM_00473E | ENSG000002 | LRRFIP1                   | FLAP-1 FL LRR bindi protein-coding   |
| chr20-347 | 6.137084 | -0.54149 | 0.936302 | -0.57833 | 0.563042 | 0.981636 | chr20 | 34740935 | 34742140 | + | 0 | NA | exon (NM exon (NM   | 36818 NM_00132E  | 58476 Hs. 51699  | ENM_02120E | ENSG000002 | TP53INP2                  | C20orf11C tumor prc protein-coding   |
| chr21-391 | 6.137084 | -0.54149 | 0.936302 | -0.57833 | 0.563042 | 0.981636 | chr21 | 39193198 | 39194064 | + | 0 | NA | 3' UTR (N3' UTR (N  | -10117 NM_020343 | 8624 Hs. 47383   | ENM_00372C | ENSG000002 | PSMG1                     | C21LRP DS proteasom protein-coding   |
| chr3-5254 | 6.137084 | -0.54149 | 0.936302 | -0.57833 | 0.563042 | 0.981636 | chr3  | 52540185 | 52542401 | + | 0 | NA | 3' UTR (N3' UTR (N  | 4688 NM_001124   | 440957 Hs. 60577 | ENM_001124 | ENSG000002 | CSM1M4                    | C3orf78 small int protein-coding     |
| chr3-112F | 6.137084 | -0.54149 | 0.936302 | -0.57833 | 0.563042 | 0.981636 | chr3  | 1.13E+08 | 1.13E+08 | + | 0 | NA | 3' UTR (N3' UTR (N  | 17530 NR_10977E  | 1.01E+08         | Hs. 86538  | NR_10977E  | LINC0127E                 | long intncRNA                        |
| chr5-1511 | 6.137084 | -0.54149 | 0.936302 | -0.57833 | 0.563042 | 0.981636 | chr5  | 1.51E+08 | 1.51E+08 | + | 0 | NA | intron (Nintron (N  | 2051 NM_001363   | 309 Hs. 41211    | NM_00115E  | ENSG000002 | ANXA6                     | ANX6 CBP annexin f protein-coding    |
| chr5-177F | 6.137084 | -0.54149 | 0.936302 | -0.57833 | 0.563042 | 0.981636 | chr5  | 1.77E+08 | 1.77E+08 | + | 0 | NA | intron (Nintron (N  | 35440 NM_001031  | 53917 Hs. 16258  | NM_130781  | ENSG000002 | CAB2                      | ARB24, me protein-coding             |
| chr7-3064 | 6.137084 | -0.54149 | 0.936302 | -0.57833 | 0.563042 | 0.981636 | chr7  | 30645206 | 30645526 | + | 0 | NA | IntergeniL2a LINE   | 37090 NM_00188E  | 1395 Hs. 54624   | ENM_00188E | ENSG000002 | CRHR2                     | CRF-RB CF corticot protein-coding    |
| chr9-702F | 6.137084 | -0.54149 | 0.936302 | -0.57833 | 0.563042 | 0.981636 | chr9  | 70286902 | 70287546 | + | 0 | NA | intron (N HAL LINE  | 28246 NM_01511C  | 23137 Hs. 53418  | ENM_01511C | ENSG000002 | SMC5                      | SMC5L1 structure protein-coding      |
| chr14-504 | 11.10777 | -0.41426 | 0.716313 | -0.57832 | 0.563045 | 0.981636 | chr14 | 50420281 | 50420861 |   |   |    |                     |                  |                  |            |            |                           |                                      |

|                    |          |          |          |          |          |       |          |          |   |   |    |                     |                   |                              |                     |                                            |                             |
|--------------------|----------|----------|----------|----------|----------|-------|----------|----------|---|---|----|---------------------|-------------------|------------------------------|---------------------|--------------------------------------------|-----------------------------|
| chr3-1465.6.170365 | -0.53541 | 0.928577 | -0.57659 | 0.564218 | 0.981636 | chr3  | 1.47E+08 | 1.47E+08 | + | 0 | NA | intron (Nintron (N  | 13874 NM_001363   | 5359 Hs. 130755NM_02110f     | ENSG00000PLSCR1     | MMTRA1B                                    | phospholipin-protein-coding |
| chr3-197.6.170365  | -0.53541 | 0.928577 | -0.57659 | 0.564218 | 0.981636 | chr3  | 1.97E+08 | 1.97E+08 | + | 0 | NA | intron (Nintron (N  | -35196 NM_03331f  | 4241 Hs. 184727NM_00592f     | ENSG00000MELTF      | CD228 [MAF melanotransferin protein-coding |                             |
| chr4-757.6.170365  | -0.53541 | 0.928577 | -0.57659 | 0.564218 | 0.981636 | chr4  | 757515   | 758218   | + | 0 | NA | intron (NLMed LIN   | 23982 NR_036511   | 1E+08 Hs. 731755NR_036511    | ENSG00000CLOC10012f | uncharacterized ncRNA                      |                             |
| chr4-171.6.170365  | -0.53541 | 0.928577 | -0.57659 | 0.564218 | 0.981636 | chr4  | 1710441  | 1710853  | + | 0 | NA | intron (NMER4C LTF  | 1672 NM_001130    | 7884 Hs. 29834fNM_00652f     | ENSG00000SLBP       | HBP stem-loop-protein-coding               |                             |
| chr4-399.6.170365  | -0.53541 | 0.928577 | -0.57659 | 0.564218 | 0.981636 | chr4  | 3990219  | 39902770 | + | 0 | NA | intron (Nintron (N  | 75427 NM_001100   | 23244 Hs. 331431NM_01520f    | ENSG00000PDS5A      | PIG54 [SCC PDS5 core-protein-coding        |                             |
| chr4-554.6.170365  | -0.53541 | 0.928577 | -0.57659 | 0.564218 | 0.981636 | chr4  | 55486242 | 55486909 | + | 0 | NA | intron (NHAL1 LINE  | 59357 NM_001267   | 9575 Hs. 43697fNM_00489f     | ENSG00000CLOCK      | KAT13D [bClock circ-protein-coding         |                             |
| chr4-147.6.170365  | -0.53541 | 0.928577 | -0.57659 | 0.564218 | 0.981636 | chr4  | 1.48E+08 | 1.48E+08 | + | 0 | NA | intron (Nintron (N  | 94091 NR_039962   | 1.01E+08 NR_039962           | ENSG00000MIR4799    | microRNA ncRNA                             |                             |
| chr6-373.6.170365  | -0.53541 | 0.928577 | -0.57659 | 0.564218 | 0.981636 | chr6  | 37362557 | 37362557 | + | 0 | NA | intron (NMIR3 SINE  | 7948 NR_046395    | 9025 Hs. 48527fNM_00395f     | ENSG00000RNFB       | hRNFB ring finger-protein-coding           |                             |
| chr6-110.6.170365  | -0.53541 | 0.928577 | -0.57659 | 0.564218 | 0.981636 | chr6  | 1.1E+08  | 1.1E+08  | + | 0 | NA | intron (NLM3 LIN    | 38417 NM_015891   | 51362 Hs. 428147NM_015891    | ENSG00000CDDC40     | EBH3 [PRP1 cell divi-protein-coding        |                             |
| chr7-248.6.170365  | -0.53541 | 0.928577 | -0.57659 | 0.564218 | 0.981636 | chr7  | 24871241 | 24871836 | + | 0 | NA | intron (Nintron (N  | 21083 NR_104111   | 26031 Hs. 52025fNM_01555f    | ENSG00000OSBPL3     | ORP-3 [ORF oxysterol-protein-coding        |                             |
| chr7-102.6.170365  | -0.53541 | 0.928577 | -0.57659 | 0.564218 | 0.981636 | chr7  | 1.02E+08 | 1.02E+08 | + | 0 | NA | intron (NAluSq2 SI  | 3054 NM_001371100 |                              |                     |                                            |                             |
| chr8-233.6.170365  | -0.53541 | 0.928577 | -0.57659 | 0.564218 | 0.981636 | chr8  | 23394552 | 23395217 | + | 0 | NA | intron (NLM8 LIN    | 9236 NM_00231f    | 4017 Hs. 626637NM_00231f     | ENSG00000CLOXL2     | LOR [LOR2] lysyl oxiprotein-coding         |                             |
| chr8-421.6.170365  | -0.53541 | 0.928577 | -0.57659 | 0.564218 | 0.981636 | chr8  | 42166533 | 42169523 | + | 0 | NA | intron (Nintron (N  | 14965 NM_00680f   | 10947 Hs. 65452fNM_00680f    | ENSG00000AP3M2      | AP47B [CLA adaptor r-protein-coding        |                             |
| chrX-273.6.170365  | -0.53541 | 0.928577 | -0.57659 | 0.564218 | 0.981636 | chrX  | 2739454  | 2743514  | + | 0 | NA | TTS (NM_C TTS (NM_C | -10568 NM_001141  | 7499 Hs. 17967fNM_17556f     | ENSG00000CXG        | PBDX Xg glycoprotein-coding                |                             |
| chrX-154.6.170365  | -0.53541 | 0.928577 | -0.57659 | 0.564218 | 0.981636 | chrX  | 1.55E+08 | 1.55E+08 | + | 0 | NA | non-codirnon-codir  | -1599 NR_00296f   | 677817 Hs. 689704NR_00296f   | ENSG00000SNORA36A   | ACA36 small nucsnRNA                       |                             |
| chr15-77.4.856744  | -0.49462 | 0.857964 | -0.57651 | 0.564273 | 0.981636 | chr15 | 77459459 | 77459658 | + | 0 | NA | intron (NLa2 LINE   | 38670 NM_001304   | 10363 Hs. 69594 NM_01820f    | ENSG00000HMG20A     | HMGX1 [HMC high mobiprotein-coding         |                             |
| chr16-59.10.54046  | -0.4293  | 0.74469  | -0.57648 | 0.564291 | 0.981636 | chr16 | 53185668 | 53185872 | + | 0 | NA | intron (NTHEIC-int  | -22195 NM_001352  | 80205 Hs. 59159 NM_01528f    | ENSG00000CHD9       | AD013 [CHE chrodon protein-coding          |                             |
| chr15-59.7.923307  | -0.48505 | 0.841494 | -0.57642 | 0.564335 | 0.981636 | chr15 | 59207784 | 59208032 | + | 0 | NA | exon (NM exon (NM   | 1065 NM_03319f    | 92483 Hs. 307052NM_03319f    | ENSG00000LDHAL6B    | LDH6B [LDF lactate c-protein-coding        |                             |
| chr5-336.4.923307  | -0.48505 | 0.841494 | -0.57642 | 0.564335 | 0.981636 | chr5  | 33645248 | 33645447 | + | 0 | NA | intron (NLMed LIN   | 204571 NR_04767f  | 6897 Hs. 48186fNM_15229f     | ENSG00000TARS       | ThRS thronyl-protein-coding                |                             |
| chr1-155.9.203974  | 0.443477 | 0.769568 | 0.576268 | 0.564434 | 0.981636 | chr1  | 1.55E+08 | 1.55E+08 | + | 0 | NA | intron (Nintron (N  | -7431 NR_03028f   | 693140 NR_03028f             | ENSG00000MIR555     | MIRN555 [microRNA ncRNA                    |                             |
| chr1-173.9.203974  | 0.443477 | 0.769568 | 0.576268 | 0.564434 | 0.981636 | chr1  | 1.74E+08 | 1.74E+08 | + | 0 | NA | intron (Nintron (N  | 41000 NM_001171   | 91687 Hs. 53185fNM_03331f    | ENSG00000CENPL      | Clorf155 [centromer-protein-coding         |                             |
| chr1-231.9.203974  | 0.443477 | 0.769568 | 0.576268 | 0.564434 | 0.981636 | chr1  | 2.32E+08 | 2.32E+08 | + | 0 | NA | intron (NChar1e1f   | 14002 NM_00599f   | 7257 Hs. 13318 NM_00599f     | ENSG00000TSNAX      | C3PO [TRAX translin protein-coding         |                             |
| chr10-10.9.203974  | 0.443477 | 0.769568 | 0.576268 | 0.564434 | 0.981636 | chr10 | 1.03E+08 | 1.03E+08 | + | 0 | NA | intron (NAluSz LIN  | 94621 NM_001351   | 22978 Hs. 97439 NM_01222f    | ENSG00000CNT5C2     | GMP [NT5B] 5'-nuclec-protein-coding        |                             |
| chr13-11.9.203974  | 0.443477 | 0.769568 | 0.576268 | 0.564434 | 0.981636 | chr13 | 1.11E+08 | 1.11E+08 | + | 0 | NA | intron (NLMC4a SI   | 5536 NM_001352    | 79587 Hs. 50872fNM_02453f    | ENSG00000CAR52      | COXP27 [cysteinyln-protein-coding          |                             |
| chr2-227.9.203974  | 0.443477 | 0.769568 | 0.576268 | 0.564434 | 0.981636 | chr2  | 2.28E+08 | 2.28E+08 | + | 0 | NA | intron (NLP1A5 LIN  | 72741 NR_14901f   | 729968 Hs. 68955fNR_14901f   | LOC72996f           | spore coacncRNA                            |                             |
| chr2-30.9.203974   | 0.443477 | 0.769568 | 0.576268 | 0.564434 | 0.981636 | chr2  | 30931390 | 30937385 | + | 0 | NA | intron (Nintron (N  | 12079 NR_02692f   | 150291 Hs. 59220fNM_15304f   | ENSG00000MORC2-AS1  | C22orf27 [MORC2 antncRNA                   |                             |
| chr4-56.9.203974   | 0.443477 | 0.769568 | 0.576268 | 0.564434 | 0.981636 | chr4  | 5661250  | 5662008  | + | 0 | NA | intron (Nintron (N  | 46930 NR_147127   | 132884 Hs. 87306 NM_147127   | ENSG00000EVC2       | LBN [WAD Evc antic-protein-coding          |                             |
| chr14-95.9.237256  | 0.446319 | 0.774681 | 0.576132 | 0.564526 | 0.981636 | chr14 | 95095531 | 95096369 | + | 0 | NA | exon (NM exon (NM   | 37553 NM_00119f   | 23405 Hs. 87889 NM_03062f    | ENSG00000D1CER1     | DDC1 [Dicedicer 1, protein-coding          |                             |
| chr17-40.9.237256  | 0.446319 | 0.774681 | 0.576132 | 0.564526 | 0.981636 | chr17 | 4095202  | 4097148  | + | 0 | NA | intron (Nintron (N  | 46855 NM_01511f   | 23140 Hs. 277624NM_01511f    | ENSG00000ZZEF1      | ZZF4 zinc fing-protein-coding              |                             |
| chr2-241.2.427426  | 0.570004 | 0.989579 | 0.576007 | 0.564611 | 0.981636 | chr2  | 2.41E+08 | 2.41E+08 | + | 0 | NA | intron (Nintron (N  | -18081 NM_00110f  | 4735 Hs. 71234NM_00440f      | ENSG00000SEPTIN2    | DDZ4 [NEI septin 2 protein-coding          |                             |
| chr11-10.11.10962  | -0.40609 | 0.705059 | -0.57597 | 0.564635 | 0.981636 | chr11 | 1.09E+08 | 1.09E+08 | + | 0 | NA | intron (NLMCa LIN   | 43005 NM_00439f   | 1662 Hs. 59193fNM_00439f     | ENSG00000CDDX10     | Ddp4 [HRH-DEAD-box protein-coding          |                             |
| chr3-194.11.10962  | -0.40609 | 0.705059 | -0.57597 | 0.564635 | 0.981636 | chr3  | 1.95E+08 | 1.95E+08 | + | 0 | NA | intron (NCpG        | 2916 NM_13839f    | 93109 Hs. 47872fNM_13839f    | ENSG00000TMEM44     | transment-protein-coding                   |                             |
| chr2-471.2.4897556 | 0.609716 | 1.058841 | 0.575833 | 0.564728 | 0.981636 | chr2  | 47127637 | 47127836 | + | 0 | NA | TTS (NM_C TTS (NM_C | 27572 NM_17364f   | 285051 Hs. 53157fNM_17364f   | ENSG00000STPG4      | C2orf61 [cspemr-taiprotein-coding          |                             |
| chr1-233.17.588    | 0.330646 | 0.574287 | 0.575752 | 0.564783 | 0.981636 | chr1  | 23359518 | 23367155 | + | 0 | NA | intron (NAluSx4 SI  | 5050 NM_03063f    | 80818 Hs. 29379fNM_03063f    | ENSG00000ZNF436     | ZNF [Zfp4 zinc fing-protein-coding         |                             |
| chr1-120.22.28746  | 0.300044 | 0.521247 | 0.576228 | 0.564866 | 0.981636 | chr1  | 1.21E+08 | 1.21E+08 | + | 0 | NA | intron (Nintron (N  | 19704 NR_10408f   | 1.02E+08 NR_10408f           | ENSG00000RNVU1-19   | RNU1-126 [RNA, varisnRNA                   |                             |
| chr17-28.9.188259  | 0.446952 | 0.776498 | 0.575599 | 0.564886 | 0.981636 | chr17 | 28328797 | 28330149 | + | 0 | NA | TTS (NM_C TTS (NM_C | 5999 NM_001267    | 90410 Hs. 70543fNM_17488f    | ENSG00000IFT20      | IFT20 - intraflag-protein-coding           |                             |
| chr1-915.5.468565  | 0.571442 | 0.993051 | 0.575441 | 0.564993 | 0.981636 | chr1  | 9158793  | 9159764  | + | 0 | NA | intron (Nintron (N  | -7501 NR_02961f   | 407040 NR_02961f             | ENSG00000MIR34A     | MIRN34A [microRNA ncRNA                    |                             |
| chr1-170.5.468565  | 0.571442 | 0.993051 | 0.575441 | 0.564993 | 0.981636 | chr1  | 1.71E+08 | 1.71E+08 | + | 0 | NA | IntergeniMLTIH LTF  | -26287 NR_12595f  | 1.02E+08 Hs. 67666fNR_12595f | GORAB-AS1           | GORAB antncRNA                             |                             |
| chr1-201.5.468565  | 0.571442 | 0.993051 | 0.575441 | 0.564993 | 0.981636 | chr1  | 2.02E+08 | 2.02E+08 | + | 0 | NA | intron (Nintron (N  | -4432 NM_001167   | 89796 Hs. 58537fNM_02044f    | ENSG00000NAV1       | POMF1L3 [sneuron r-protein-coding          |                             |
| chr14-49.5.468565  | 0.571442 | 0.993051 | 0.575441 | 0.564993 | 0.981636 | chr14 | 49719423 | 49721092 | + | 0 | NA | intron (NAluSx SIN  | 27137 NM_17219f   | 122773 Hs. 50925fNM_17219f   | ENSG00000KLHDC1     | MSTO25 kelch don-protein-coding            |                             |
| chr15-48.5.468565  | 0.571442 | 0.993051 | 0.575441 | 0.564993 | 0.981636 | chr15 | 48573794 | 48575259 | + | 0 | NA | intron (Nintron (N  | 71262 NM_00013f   | 2200 Hs. 59113fNM_00013f     | ENSG00000FBN1       | ACM1C [EC fibryllin-protein-coding         |                             |
| chr2-30.5.468565   | 0.571442 | 0.993051 | 0.575441 | 0.564993 | 0.981636 | chr2  | 30533974 | 30534502 | + | 0 | NA | intron (N(TC)n SIN  | 86992 NM_001304   | 253558 Hs. 46804fNM_18255f   | ENSG00000LCLAT1     | IAGPAT8 [lysocardiprotein-coding           |                             |
| chr2-46.5.468565   | 0.571442 | 0.993051 | 0.575441 | 0.564993 | 0.981636 | chr2  | 46548654 | 46549668 | + | 0 | NA | intron (Nintron (N  | -6584 NM_00131f   | 90423 Hs. 43769fNM_08065f    | ENSG00000ATP6V1E2   | ATP6E1 [A1ATPase H+protein-coding          |                             |
| chr2-29.5.468565   | 0.571442 | 0.993051 | 0.575441 | 0.564993 | 0.981636 | chr2  | 1.21E+08 | 1.21E+08 | + | 0 | NA | intron (Nintron (N  | 164780 NM_00527f  | 2736 Hs. 11186fNM_00527f     | ENSG00000GLI2       | CJS [HP9] GLI fami1-protein-coding         |                             |
| chr2-22.9.468565   | 0.571442 | 0.993051 | 0.575441 | 0.564993 | 0.981636 | chr2  | 29738831 | 29743102 | + | 0 | NA | intron (Nintron (N  | 20963 NM_18252f   | 164633 Hs. 64360fNM_18252f   | ENSG00000CABP7      | CALN2 calcium t-protein-coding             |                             |
| chr6-44.5.468565   | 0.571442 | 0.993051 | 0.575441 | 0.564993 | 0.981636 | chr6  | 44299992 | 44301264 | + | 0 | NA | exon (NM exon (NM   | -2930 NM_18253f   | 202500 Hs. 18918fNM_18253f   | ENSG00000TCTE1      | D6S46 [DRC t-complex-protein-coding        |                             |
| chr5-49.23.38834   | 0.296368 | 0.515144 | 0.575311 | 0.565081 | 0.981636 | chr5  | 49419249 | 49419511 | + | 0 | NA | IntergeniALR Alpha  | 1021908 NM_19844f | 133418 Hs. 56141fNM_19844f   | ENSG00000EMB        | GP70 embgin protein-coding                 |                             |
| chr12-27.7.606507  | 0.495743 | 0.861751 | 0.575274 | 0.565106 | 0.981636 | chr12 | 2797716  | 2798010  | + | 0 | NA | exon (NM exon (NM   | 2893 NM_002014    | 2288 Hs. 52418fNM_002014     | ENSG00000FKBP4      | FKBP51 [FKBP prol-protein-coding           |                             |
| chr16-28.12.2652   | -0.39933 | 0.694638 | -0.57487 | 0.56538  | 0.981636 | chr16 | 28209699 | 28209033 | + | 0 | NA | intron (Nintron (N  | 3099 NM_015171    | 23214 Hs. 46046fNM_015171    | ENSG00000XPO6       | EXP6 [RAN exportin protein-coding          |                             |
| chr17-13.11.106848 | -0.40824 | 0.710529 | -0.57456 | 0.565587 | 0.981636 | chr17 | 13495978 | 13496965 | + | 0 | NA | exon (NM exon (NM   | 47175 NR_03167f   | 1E+08 NR_03167f              | ENSG00000MIR548H3   | MIR548H-3 [microRNA ncRNA                  |                             |



|                    |          |          |          |          |          |       |          |          |   |      |                     |                   |            |                      |                     |                  |                           |
|--------------------|----------|----------|----------|----------|----------|-------|----------|----------|---|------|---------------------|-------------------|------------|----------------------|---------------------|------------------|---------------------------|
| chr13-951.9.170693 | 0.440688 | 0.770616 | 0.571864 | 0.567414 | 0.981636 | chr13 | 95192724 | 95194733 | + | 0 NA | intron (NLTR45B LI  | -16616 NR_145733  | 1.E+08     | NR_145733            | SNORD13G            | -                | small ncRNA               |
| chr2-607.9.170693  | 0.440688 | 0.770616 | 0.571864 | 0.567414 | 0.981636 | chr2  | 60767999 | 60768551 | + | 0 NA | intron (NAluSq2 SI  | 12007 NM_022894   | 64895 Hs.  | 387471 NM_022894     | ENSG000002PAPOLG    | -                | poly (A) protein-coding   |
| chr5-176.9.170693  | 0.440688 | 0.770616 | 0.571864 | 0.567414 | 0.981636 | chr5  | 1.77E+08 | 1.77E+08 | + | 0 NA | non-codir non-codir | 37801 NM_01629C   | 51720 Hs.  | 232721 NM_01629C     | ENSG000002UIMC1     | RAP80 X2f        | ubiquitin protein-coding  |
| chr7-128.9.170693  | 0.440688 | 0.770616 | 0.571864 | 0.567414 | 0.981636 | chr7  | 1.29E+08 | 1.29E+08 | + | 0 NA | intron (Nintron (N  | 28586 NM_001364   | 3663 Hs.   | 521181 NM_03264C     | ENSG000002IRF5      | SLEB10           | interferon protein-coding |
| chr9-1281.9.170693 | 0.440688 | 0.770616 | 0.571864 | 0.567414 | 0.981636 | chr9  | 1.28E+08 | 1.28E+08 | + | 0 NA | intron (Nintron (N  | 10597 NM_001131   | 25792 Hs.  | 21239E NM_012127     | ENSG000002C1Z1      | LSFR1 NPECDKNA1  | ir protein-coding         |
| chr3-370.7.680929  | 0.499944 | 0.874342 | 0.571794 | 0.567462 | 0.981636 | chr3  | 37051263 | 37051540 | + | 0 NA | TTS (NM_C TTS (NM_C | 58051 NM_00125E   | 4292 Hs.   | 195364 NM_00024E     | ENSG000002MLH1      | COCA2 FCCmutL    | homc protein-coding       |
| chr1-120.6.162508  | -0.53336 | 0.932787 | -0.57179 | 0.567463 | 0.981636 | chr1  | 1.21E+08 | 1.21E+08 | + | 0 NA | intron (Nintron (N  | 7057 NM_001351    | 1.01E+08   | Hs. 53467E NM_001351 | ENSG000002NBPF26    | -                | NBPF memt protein-coding  |
| chr11-79.6.162508  | -0.53336 | 0.932787 | -0.57179 | 0.567463 | 0.981636 | chr11 | 7999527  | 8000107  | + | 0 NA | 3' UTR (N3' UTR (N  | 12480 NM_003754   | 8665 Hs.   | 51602E NM_003754     | ENSG000002EIF3F     | EIF355 MF        | eukaryoti protein-coding  |
| chr12-26.6.162508  | -0.53336 | 0.932787 | -0.57179 | 0.567463 | 0.981636 | chr12 | 26921664 | 26925138 | + | 0 NA | intron (Nintron (N  | 14580 NM_018164   | 55726 Hs.  | 505077 NM_018164     | ENSG000002INTS13    | ASUN C12c        | integratc protein-coding  |
| chr12-96.6.162508  | -0.53336 | 0.932787 | -0.57179 | 0.567463 | 0.981636 | chr12 | 96319653 | 96320521 | + | 0 NA | intron (NLP2A LIN   | 64589 NM_001303   | 2004 Hs.   | 46523 NM_00523C      | ENSG000002ELK3      | ERP NET SETS     | transprotein-coding       |
| chr12-107.6.162508 | -0.53336 | 0.932787 | -0.57179 | 0.567463 | 0.981636 | chr12 | 1.08E+08 | 1.08E+08 | + | 0 NA | IntergeniLIMEg LIN  | -21212 NR_120474  | 1.02E+08   | Hs. 66702E NR_120474 | ENSG000002LOC101929 | -                | uncharactncRNA            |
| chr12-11.6.162508  | -0.53336 | 0.932787 | -0.57179 | 0.567463 | 0.981636 | chr12 | 1.16E+08 | 1.16E+08 | + | 0 NA | intron (Nintron (N  | 142923 NR_030351  | 693205     | NR_030351            | ENSG000002MIR620    | MIRN620 f        | microRNA ncRNA            |
| chr13-7.6.162508   | -0.53336 | 0.932787 | -0.57179 | 0.567463 | 0.981636 | chr13 | 72717550 | 72718833 | + | 0 NA | intron (NMLT1B LTF  | 9438 NM_001071    | 440145 Hs. | 28465 NM_001071      | ENSG000002MZT1      | C13orf37 mitotic | sprotein-coding           |
| chr13-92.6.162508  | -0.53336 | 0.932787 | -0.57179 | 0.567463 | 0.981636 | chr13 | 95788914 | 95792124 | + | 0 NA | intron (Nintron (N  | 11380 NM_00626C   | 5611 Hs.   | 59214 NM_00626C      | ENSG000002DNAJC3    | ACPHD ERcDnaJ    | heat protein-coding       |
| chr13-11.6.162508  | -0.53336 | 0.932787 | -0.57179 | 0.567463 | 0.981636 | chr13 | 1.E+08   | 1.E+08   | + | 0 NA | intron (Nintron (N  | 34531 NM_00184E   | 1282 Hs.   | 17441 NM_00184E      | ENSG000002COL4A1    | BSVD BSVI        | collagen protein-coding   |
| chr14-92.6.162508  | -0.53336 | 0.932787 | -0.57179 | 0.567463 | 0.981636 | chr14 | 92165309 | 92165700 | + | 0 NA | 3' UTR (N3' UTR (N  | 43535 NM_00132E   | 53981 Hs.  | 65763E NM_017437     | ENSG000002CPSF2     | CPSF100          | cleavage protein-coding   |
| chr15-59.6.162508  | -0.53336 | 0.932787 | -0.57179 | 0.567463 | 0.981636 | chr15 | 59201021 | 59202087 | + | 0 NA | intron (NAluSp SIN  | -5289 NM_03319E   | 92483 Hs.  | 30705E NM_03319E     | ENSG000002LDHAL6B   | LDH6B LDF        | lactate cprotein-coding   |
| chr16-6.6.162508   | -0.53336 | 0.932787 | -0.57179 | 0.567463 | 0.981636 | chr16 | 69808059 | 6981368  | + | 0 NA | intron (NLMIEg LIN  | 29933 NM_00137C   | 348174 Hs. | 59206E NM_18261E     | ENSG000002CHL18A    | MRC1 MRC1        | C-type I protein-coding   |
| chr17-45.6.162508  | -0.53336 | 0.932787 | -0.57179 | 0.567463 | 0.981636 | chr17 | 45480928 | 45481478 | + | 0 NA | intron (NLMIB7 LIN  | -5768 NR_03619E   | 1E+08      | NR_03619E            | ENSG000002MIR4315-1 | -                | microRNA ncRNA            |
| chr19-3.6.162508   | -0.53336 | 0.932787 | -0.57179 | 0.567463 | 0.981636 | chr19 | 32364402 | 32365545 | + | 0 NA | intron (NLP1B LIN   | 19363 NM_01491C   | 22847 Hs.  | 20539E NM_01491C     | ENSG000002ZNF507    | -                | zinc fing protein-coding  |
| chr19-32.6.162508  | -0.53336 | 0.932787 | -0.57179 | 0.567463 | 0.981636 | chr19 | 33126351 | 33128108 | + | 0 NA | intron (NLMIE3G LI  | -4885 NM_17347E   | 126248 Hs. | 21104E NM_17347E     | ENSG000002WDR88     | PQWD             | WD repeat protein-coding  |
| chr2-176.6.162508  | -0.53336 | 0.932787 | -0.57179 | 0.567463 | 0.981636 | chr2  | 17694939 | 17696676 | + | 0 NA | intron (Nintron (N  | 58003 NM_00114E   | 79677 Hs.  | 52672E NM_024624     | ENSG000002SMC6      | SMC-6 SMC        | structure protein-coding  |
| chr2-69.6.162508   | -0.53336 | 0.932787 | -0.57179 | 0.567463 | 0.981636 | chr2  | 69543222 | 69544244 | + | 0 NA | intron (Nintron (N  | -23762 NR_00370E  | 1E+08      | Hs. 693447 NR_00370E | ENSG000002SNORA36C  | -                | small ncRNA               |
| chr2-75.6.162508   | -0.53336 | 0.932787 | -0.57179 | 0.567463 | 0.981636 | chr2  | 75242428 | 75242767 | + | 0 NA | IntergeniLIP2a LIN  | 43077 NM_01527E   | 6869 Hs.   | 63301 NM_00105E      | ENSG000002TACR1     | NK1R NK1F        | tachykinin protein-coding |
| chr2-135.6.162508  | -0.53336 | 0.932787 | -0.57179 | 0.567463 | 0.981636 | chr2  | 1.36E+08 | 1.36E+08 | + | 0 NA | intron (NAluJo SIN  | -12953 NR_02967E  | 406915     | NR_02967E            | ENSG000002MIR128-1  | MIR128A f        | microRNA ncRNA            |
| chr2-15.6.162508   | -0.53336 | 0.932787 | -0.57179 | 0.567463 | 0.981636 | chr2  | 1.51E+08 | 1.51E+08 | + | 0 NA | intron (NTrigger3b  | 9082 NM_001177    | 55183 Hs.  | 536537 NM_018151     | ENSG000002RIF1      | -                | replicatiprotein-coding   |
| chr2-15.6.162508   | -0.53336 | 0.932787 | -0.57179 | 0.567463 | 0.981636 | chr2  | 1.51E+08 | 1.51E+08 | + | 0 NA | intron (Nintron (N  | 46609 NM_001177   | 55183 Hs.  | 536537 NM_018151     | ENSG000002RIF1      | -                | replicatiprotein-coding   |
| chr2-2011.6.162508 | -0.53336 | 0.932787 | -0.57179 | 0.567463 | 0.981636 | chr2  | 2.01E+08 | 2.01E+08 | + | 0 NA | non-codir non-codir | -9699 NR_04003C   | 65072 Hs.  | 66461E NR_04003C     | ENSG000002CFLAR-AS1 | ALS2 SCR10       | CFLAR antncRNA            |
| chr2-23.6.162508   | -0.53336 | 0.932787 | -0.57179 | 0.567463 | 0.981636 | chr2  | 2.37E+08 | 2.37E+08 | + | 0 NA | intron (Nintron (N  | 3552 NM_00671C    | 10920 Hs.  | 53171E NM_00671C     | ENSG000002COP58     | COP9 COP9        | sigr protein-coding       |
| chr20-29.6.162508  | -0.53336 | 0.932787 | -0.57179 | 0.567463 | 0.981636 | chr20 | 2924072  | 2925308  | + | 0 NA | intron (NAluSc5 SI  | 1483 NM_08084I    | 5786 Hs.   | 269577 NM_00283E     | ENSG000002PTPRA     | HEPTP HLF        | protein protein-coding    |
| chr20-137.6.162508 | -0.53336 | 0.932787 | -0.57179 | 0.567463 | 0.981636 | chr20 | 13775060 | 13776591 | + | 0 NA | intron (Nintron (N  | 9061 NM_01664E    | 51575 Hs.  | 369284 NM_01664E     | ENSG000002ESF1      | ABTAP C2C        | ESF1 nucl protein-coding  |
| chr3-112.6.162508  | -0.53336 | 0.932787 | -0.57179 | 0.567463 | 0.981636 | chr3  | 11253412 | 11254963 | + | 0 NA | intron (NHERV1P OF  | 1488 NM_000861    | 3269 Hs.   | 1570 NM_000861       | ENSG000002HRH1      | HI-1 HR1         | histamine protein-coding  |
| chr3-17.6.162508   | -0.53336 | 0.932787 | -0.57179 | 0.567463 | 0.981636 | chr3  | 1.72E+08 | 1.72E+08 | + | 0 NA | intron (Nintron (N  | 83212 NM_00113E   | 64778 Hs.  | 74488E NM_02276E     | ENSG000002FND3B     | FAD104 PF        | fibronect protein-coding  |
| chr4-10.6.162508   | -0.53336 | 0.932787 | -0.57179 | 0.567463 | 0.981636 | chr4  | 1.03E+08 | 1.03E+08 | + | 0 NA | intron (Nintron (N  | -105146 NR_136202 | 1.05E+08   | Hs. 15833 NR_136202  | LOC105377-          | -                | uncharactncRNA            |
| chr4-12.6.162508   | -0.53336 | 0.932787 | -0.57179 | 0.567463 | 0.981636 | chr4  | 1.22E+08 | 1.22E+08 | + | 0 NA | intron (NMRB SINE   | 10929 NM_001237   | 890 Hs.    | 58974 NM_001237      | ENSG000002CCNA2     | CCN1 CCNA        | cyclin A2 protein-coding  |
| chr5-5.6.162508    | -0.53336 | 0.932787 | -0.57179 | 0.567463 | 0.981636 | chr5  | 31504473 | 31506139 | + | 0 NA | intron (Nintron (N  | 26787 NR_01323E   | 29102 Hs.  | 97997 NR_01323E      | ENSG000002DROSHA    | ETOH12 HS        | droscha r protein-coding  |
| chr5-140.6.162508  | -0.53336 | 0.932787 | -0.57179 | 0.567463 | 0.981636 | chr5  | 1.41E+08 | 1.41E+08 | + | 0 NA | intron (Nintron (N  | -17043 NM_00373E  | 8637 Hs.   | 594084 NM_00373E     | ENSG000002EIF4EBP3  | 4E-BP3 4E        | eukaryoti protein-coding  |
| chr6-130.6.162508  | -0.53336 | 0.932787 | -0.57179 | 0.567463 | 0.981636 | chr6  | 1.31E+08 | 1.31E+08 | + | 0 NA | intron (NAluSc5 SI  | 17833 NM_00113E   | 2037 Hs.   | 48647C NM_001431     | ENSG000002EPB41L2   | 1-4-G4           | Ierythrocy protein-coding |
| chr7-139.6.162508  | -0.53336 | 0.932787 | -0.57179 | 0.567463 | 0.981636 | chr7  | 1.4E+08  | 1.4E+08  | + | 0 NA | intron (NLa2a LINE1 | 125414 NM_00113E  | 28996 Hs.  | 731417 NM_02274C     | ENSG000002CHP2C     | PROO593          | homoeomd protein-coding   |
| chr3-64.2.642673   | 0.465702 | 0.815132 | 0.571321 | 0.567782 | 0.981636 | chr3  | 64236915 | 64237330 | + | 0 NA | intron (NLTRE1 LTF  | -11656 NM_19885E  | 166336 Hs. | 14810E NM_19885E     | ENSG000002PRICKLE2  | EPM5             | prickle f protein-coding  |
| chr17-19.7.964447  | -0.48178 | 0.843279 | -0.57132 | 0.567784 | 0.981636 | chr17 | 19309642 | 19310171 | + | 0 NA | exon (NM exon (NM   | -3645 NR_04857E   | 1.01E+08   | Hs. 62167E NR_04857E | ENSG000002EPN2-AS1  | -                | EPN2 antncRNA             |
| chr1-91.7.8.425903 | -0.46002 | 0.805328 | -0.57122 | 0.567852 | 0.981636 | chr1  | 9175049  | 9175518  | + | 0 NA | intron (NAluS6 SI   | -6921 NR_13273E   | 1.03E+08   | Hs. 59929E NR_13273E | ENSG000002LNTAM344  | GUARDIN1 f       | long non ncRNA            |
| chr12-53.8.425903  | -0.46002 | 0.805328 | -0.57122 | 0.567852 | 0.981636 | chr12 | 53384352 | 53385582 | + | 0 NA | intron (NAluS6 SI   | 4323 NM_00310E    | 6667 Hs.   | 620754 NM_00310E     | ENSG000002SPI       | -                | Spl trans protein-coding  |
| chr14-2.8.425903   | -0.46002 | 0.805328 | -0.57122 | 0.567852 | 0.981636 | chr14 | 22573018 | 22575163 | + | 0 NA | intron (Nintron (N  | 15134 NM_001344   | 1603 Hs.   | 82890 NM_001344      | ENSG000002DAD1      | OST2             | defender protein-coding   |
| chr16-11.8.425903  | -0.46002 | 0.805328 | -0.57122 | 0.567852 | 0.981636 | chr16 | 11875387 | 11877368 | + | 0 NA | intron (NAluSx1 SI  | -25020 NM_01565E  | 26156 Hs.  | 40184E NM_01565E     | ENSG000002RSL1D1    | CSD1 L12         | ribosomal protein-coding  |
| chr16-58.8.425903  | -0.46002 | 0.805328 | -0.57122 | 0.567852 | 0.981636 | chr16 | 58003306 | 58003543 | + | 0 NA | intron (NAluJb SIN  | 2017 NM_001204    | 79650 Hs.  | 40870E NM_02459E     | ENSG000002USB1      | C16orf57 U6      | snRNA protein-coding      |
| chr18-27.8.425903  | -0.46002 | 0.805328 | -0.57122 | 0.567852 | 0.981636 | chr18 | 2738530  | 2738828  | + | 0 NA | intron (Nintron (N  | 82792 NM_01529E   | 23347 Hs.  | 8118 NM_01529E       | ENSG000002SMCHD1    | BAMS FSH         | structure protein-coding  |
| chr21-33.8.425903  | -0.46002 | 0.805328 | -0.57122 | 0.567852 | 0.981636 | chr21 | 33343660 | 33344163 | + | 0 NA | intron (NAluS6 SI   | 18913 NM_00062E   | 3454 Hs.   | 52940C NM_00062E     | ENSG000002IFNAR1    | AVP IFN-ε        | interferc protein-coding  |
| chr11-64.8.648681  | 0.45358  | 0.794235 | 0.57109  | 0.567938 | 0.981636 | chr11 | 64859742 | 64860021 | + | 0 NA | intron (Nintron (N  | -12228 NM_01752E  | 55561 Hs.  | 29359C NM_01752E     | ENSG000002CDC42BPG  | DMPK2 HSM        | CDC42 bir protein-coding  |





|            |          |          |          |          |          |          |       |          |          |   |   |    |                     |          |            |          |           |                   |                                   |                         |                                      |   |                                   |
|------------|----------|----------|----------|----------|----------|----------|-------|----------|----------|---|---|----|---------------------|----------|------------|----------|-----------|-------------------|-----------------------------------|-------------------------|--------------------------------------|---|-----------------------------------|
| chr4-7614  | 8.410187 | -0.45687 | 0.810553 | -0.56366 | 0.572988 | 0.981636 | chr4  | 76143236 | 76144009 | + | 0 | NA | intron (AluSx4 SI   | 4775     | NM_017426  | 53371    | Hs.43043E | NM_017426         | ENSG000005NUP54                   | -                       | nucleoporin protein-coding           |   |                                   |
| chr5-1503  | 8.410187 | -0.45687 | 0.810553 | -0.56366 | 0.572988 | 0.981636 | chr5  | 1.5E+08  | 1.5E+08  | + | 0 | NA | exon (NM exon (NM   | 16124    | NR_157074  | 972      | Hs.43656E | NM_00435E         | ENSG00000CD74                     | -                       | DHLGAL H ACD74 mole protein-coding   |   |                                   |
| chr15-649  | 9.153127 | 0.434493 | 0.770988 | 0.563553 | 0.573058 | 0.981636 | chr15 | 64971161 | 64974690 | + | 0 | NA | intron (Nintron (N  | 16545    | NM_001127  | 51324    | Hs.24245E | NM_01663E         | ENSG00000SPG21                    | -                       | ABHD21 ACSPG21 abl protein-coding    |   |                                   |
| chr16-756  | 9.153127 | 0.434493 | 0.770988 | 0.563553 | 0.573058 | 0.981636 | chr16 | 75601202 | 75603634 | + | 0 | NA | intron (NMER21C LI  | 20863    | NM_012091  | 23536    | Hs.72931E | NM_012091         | ENSG00000ADAT1                    | -                       | HADAT1 adenosin protein-coding       |   |                                   |
| chr16-84   | 9.153127 | 0.434493 | 0.770988 | 0.563553 | 0.573058 | 0.981636 | chr16 | 84656790 | 84660599 | + | 0 | NA | intron (Nintron (N  | 10183    | NM_024731  | 79786    | Hs.222731 | NM_024731         | ENSG00000KHLH36                   | -                       | 16orf44 kelch lik protein-coding     |   |                                   |
| chr19-509  | 9.153127 | 0.434493 | 0.770988 | 0.563553 | 0.573058 | 0.981636 | chr19 | 5097350  | 5100246  | + | 0 | NA | intron (MLT1A0 LI   | 129685   | NM_00137C  | 23030    | Hs.65481E | NM_01501E         | ENSG00000KDM4B                    | -                       | JMJD2B T lysine deprotein-coding     |   |                                   |
| chr20-117  | 9.153127 | 0.434493 | 0.770988 | 0.563553 | 0.573058 | 0.981636 | chr20 | 1125067  | 1129123  | + | 0 | NA | intron (Nintron (N  | 8493     | NM_001322  | 9491     | Hs.471917 | NM_006814         | ENSG00000PSMF1                    | -                       | PI31 proteasom protein-coding        |   |                                   |
| chr3-1072  | 9.153127 | 0.434493 | 0.770988 | 0.563553 | 0.573058 | 0.981636 | chr3  | 1.08E+08 | 1.08E+08 | + | 0 | NA | exon (NM exon (NM   | 161260   | NR_02427E  | 151568   | Hs.15904E | NR_015414         | ENSG00000LINC0063E                | -                       | long intncRNA                        |   |                                   |
| chr5-177   | 9.153127 | 0.434493 | 0.770988 | 0.563553 | 0.573058 | 0.981636 | chr5  | 1.77E+08 | 1.77E+08 | + | 0 | NA | intron (Nintron (N  | 14964    | NM_00681E  | 10960    | Hs.75864  | NM_00681E         | ENSG00000CLMAN2                   | -                       | C5orf8 GF lectin, n protein-coding   |   |                                   |
| chr6-1334  | 9.153127 | 0.434493 | 0.770988 | 0.563553 | 0.573058 | 0.981636 | chr6  | 1.33E+08 | 1.33E+08 | + | 0 | NA | intron (Nintron (N  | 221076   | NM_001301  | 2070     | Hs.59668E | NM_00410C         | ENSG00000EYAA                     | -                       | CDMD1 DFEYEA transprotein-coding     |   |                                   |
| chr13-11   | 8.343624 | -0.46577 | 0.826698 | -0.56341 | 0.573156 | 0.981636 | chr13 | 1.13E+08 | 1.13E+08 | + | 0 | NA | intron (NLIMEc LI   | 10955    | NM_00125E  | 8858     | Hs.1011   | NM_003891         | ENSG00000PROZ                     | -                       | PZ protein z protein-coding          |   |                                   |
| chr5-9554  | 8.795373 | -0.45482 | 0.807567 | -0.56319 | 0.573303 | 0.981636 | chr5  | 95542797 | 95543058 | + | 0 | NA | intron (Nintron (N  | 12078    | NM_01463E  | 9652     | Hs.48286E | NM_01463E         | ENSG00000TTC37                    | -                       | KIAA0372 tetraatric protein-coding   |   |                                   |
| chr19-46   | 8.218656 | 0.478881 | 0.850324 | 0.563175 | 0.573316 | 0.981636 | chr19 | 46997572 | 46997890 | + | 0 | NA | intron (Nintron (N  | 22106    | NM_002517  | 4861     | Hs.79564  | NM_002517         | ENSG00000NPAS1                    | -                       | MOP5 PASE neuronal protein-coding    |   |                                   |
| chr12-121  | 8.88736  | -0.44031 | 0.781856 | -0.56317 | 0.573322 | 0.981636 | chr12 | 12146459 | 12147756 | + | 0 | NA | intron (NAluY SINE  | 35155    | NR_036052  | 1E+08    | NR_036052 | ENSG00000MIR1244  | -                                 | LMIR1244 microRNA ncRNA |                                      |   |                                   |
| chr12-282  | 8.88736  | -0.44031 | 0.781856 | -0.56317 | 0.573322 | 0.981636 | chr12 | 28270704 | 28271211 | + | 0 | NA | intron (NL2a LINE   | -80219   | NR_14893E  | 729291   | Hs.12927E | NR_14893E         | LOC729291                         | -                       | uncharactncRNA                       |   |                                   |
| chr14-685  | 8.88736  | -0.44031 | 0.781856 | -0.56317 | 0.573322 | 0.981636 | chr14 | 68971020 | 68975425 | + | 0 | NA | intron (Nintron (N  | 6080     | NM_001102  | 87       | Hs.23575E | NM_001102         | ENSG00000ACTN1                    | -                       | BDPLT15 actinin e protein-coding     |   |                                   |
| chr19-111  | 8.88736  | -0.44031 | 0.781856 | -0.56317 | 0.573322 | 0.981636 | chr19 | 11164931 | 11168314 | + | 0 | NA | intron (Nintron (N  | -10810   | NM_001317  | 147841   | Hs.38122E | NM_18251E         | ENSG00000SPC24                    | -                       | SPBC24 zinc cp protein-coding        |   |                                   |
| chr19-522  | 8.88736  | -0.44031 | 0.781856 | -0.56317 | 0.573322 | 0.981636 | chr19 | 52287949 | 52291123 | + | 0 | NA | intron (Nintron (N  | -7633    | NM_001297  | 147657   | Hs.72931E | NM_144684         | ENSG00000ZNF480                   | -                       | SNC2 zinc finger protein-coding      |   |                                   |
| chr2-215   | 8.88736  | -0.44031 | 0.781856 | -0.56317 | 0.573322 | 0.981636 | chr2  | 2.15E+08 | 2.15E+08 | + | 0 | NA | intron (NTiger4a    | 8091     | NM_004044  | 471      | Hs.90280  | NM_004044         | ENSG00000AT1C                     | -                       | AICAR AIC5-aminoin protein-coding    |   |                                   |
| chr20-176  | 8.88736  | -0.44031 | 0.781856 | -0.56317 | 0.573322 | 0.981636 | chr20 | 17676017 | 17679217 | + | 0 | NA | intron (NAluSq2 SI  | 4625     | NM_00136E  | 6238     | Hs.47221E | NM_004587         | ENSG00000CRBP1                    | -                       | ES/130 ES ribosome protein-coding    |   |                                   |
| chr3-1414  | 8.88736  | -0.44031 | 0.781856 | -0.56317 | 0.573322 | 0.981636 | chr3  | 14145874 | 14146617 | + | 0 | NA | intron (Nintron (N  | 21305    | NM_024334  | 79188    | Hs.517817 | NM_024334         | ENSG00000TMEM43                   | -                       | ARVC5 ARV transmem protein-coding    |   |                                   |
| chr3-4567  | 8.88736  | -0.44031 | 0.781856 | -0.56317 | 0.573322 | 0.981636 | chr3  | 45671170 | 45675416 | + | 0 | NA | intron (Nintron (N  | 15589    | NR_033947  | 644714   | Hs.71288E | NR_033947         | L1MD1-AS1                         | -                       | L1MD1 antncRNA                       |   |                                   |
| chr6-1767  | 8.88736  | -0.44031 | 0.781856 | -0.56317 | 0.573322 | 0.981636 | chr6  | 17672730 | 17675737 | + | 0 | NA | intron (NLIME1 LI   | -31897   | NR_13461E  | 1.05E+08 | Hs.71870E | NR_13461E         | ENSG00000LOC105374                | -                       | uncharactncRNA                       |   |                                   |
| chr8-3061  | 8.88736  | -0.44031 | 0.781856 | -0.56317 | 0.573322 | 0.981636 | chr8  | 30611129 | 30614001 | + | 0 | NA | intron (NAluSx SIN  | 30611129 | 30614001   | -260176  | NM_00120E | 1.01E+08          | Hs.65949E                         | NM_00120E               | ENSG00000SMIM18                      | - | small int protein-coding          |
| chr10-691  | 7.848886 | -0.49281 | 0.875183 | -0.56309 | 0.573375 | 0.981636 | chr10 | 69192162 | 69192407 | + | 0 | NA | intron (NLIME3Cz L  | 12050    | NM_00132E  | 6832     | Hs.10646E | NM_003171         | ENSG00000SUPV3L1                  | -                       | SUV3 Suv3 like protein-coding        |   |                                   |
| chr15-654  | 8.895218 | -0.44178 | 0.784603 | -0.56306 | 0.573397 | 0.981636 | chr15 | 65456367 | 65460369 | + | 0 | NA | intron (Nintron (N  | 61532623 | 61539793   | -37041   | NM_02096E | 57722             | Hs.458607                         | NM_02096E               | ENSG00000IGDCC4                      | - | DDM36 NOF immunogl protein-coding |
| chr16-511  | 8.895218 | -0.44178 | 0.784603 | -0.56306 | 0.573397 | 0.981636 | chr16 | 51139793 | 51139793 | + | 0 | NA | intron (Nintron (N  | 12589    | NM_001127  | 6299     | Hs.135781 | NM_02096E         | ENSG00000TMEM43                   | -                       | HEL-S-89 spalt lik protein-coding    |   |                                   |
| chr8-222E  | 8.895218 | -0.44178 | 0.784603 | -0.56306 | 0.573397 | 0.981636 | chr8  | 22253385 | 22254874 | + | 0 | NA | TTS (NR_1TTS (NR_1  | 8996     | NM_001722  | 661      | Hs.14834E | NM_001722         | ENSG00000POLR3D                   | -                       | BN51T RPCRNA polyn protein-coding    |   |                                   |
| chr9-1347  | 8.895218 | -0.44178 | 0.784603 | -0.56306 | 0.573397 | 0.981636 | chr9  | 1.35E+08 | 1.35E+08 | + | 0 | NA | intron (Nintron (N  | 62972    | NR_039691  | 1.01E+08 | NR_039691 | ENSG00000MIR3689C | -                                 | microRNA ncRNA          |                                      |   |                                   |
| chr1-1097  | 8.615399 | 0.450544 | 0.800628 | 0.562739 | 0.573613 | 0.981636 | chr1  | 1.1E+08  | 1.1E+08  | + | 0 | NA | exon (NM exon (NM   | -16364   | NR_02958E  | 406974   | NR_02958E | ENSG00000MIR197   | -                                 | MIRN197 microRNA ncRNA  |                                      |   |                                   |
| chr10-93E  | 8.84622  | -0.44303 | 0.78751  | -0.56258 | 0.573724 | 0.981636 | chr10 | 93668637 | 93670862 | + | 0 | NA | non-codir non-codir | 32823    | NM_001347  | 118924   | Hs.58665E | NM_14524E         | ENSG00000CFRA10AC1                | -                       | C10orf4 FFRA10A as protein-coding    |   |                                   |
| chr11-63E  | 8.84622  | -0.44303 | 0.78751  | -0.56258 | 0.573724 | 0.981636 | chr11 | 63634617 | 63635682 | + | 0 | NA | intron (NAluSzb SI  | -20680   | NM_00112E  | 11145    | Hs.50277E | NM_00706E         | ENSG00000PLAAT3                   | -                       | AdPLA H-F phospholip protein-coding  |   |                                   |
| chr11-10E  | 8.84622  | -0.44303 | 0.78751  | -0.56258 | 0.573724 | 0.981636 | chr11 | 10E+08   | 1.06E+08 | + | 0 | NA | 3' UTR (N3' UTR (N  | -19435   | NM_00133C  | 143879   | Hs.10194E | NM_15243E         | ENSG00000KBTBD3                   | -                       | BKLBHD3 kelch rep protein-coding     |   |                                   |
| chr14-504  | 8.84622  | -0.44303 | 0.78751  | -0.56258 | 0.573724 | 0.981636 | chr14 | 50449687 | 50452720 | + | 0 | NA | intron (NLIM4a LI   | -53905   | NM_001367  | 8814     | Hs.280881 | NM_00419E         | ENSG00000CDKL1                    | -                       | KKIALRE F cyclin deprotein-coding    |   |                                   |
| chr15-297  | 8.84622  | -0.44303 | 0.78751  | -0.56258 | 0.573724 | 0.981636 | chr15 | 29762669 | 29763624 | + | 0 | NA | intron (Nintron (N  | 57528    | NM_00135E  | 7082     | Hs.74399E | NM_003257         | ENSG00000TJPI1                    | -                       | ZO-1 tight jur protein-coding        |   |                                   |
| chr15-38E  | 8.84622  | -0.44303 | 0.78751  | -0.56258 | 0.573724 | 0.981636 | chr15 | 38324807 | 38325838 | + | 0 | NA | intron (NTiger4b    | 72486    | NM_152594  | 161742   | Hs.525781 | NM_152594         | ENSG00000SPRED1                   | -                       | LGSS NFLS sprouty protein-coding     |   |                                   |
| chr17-35E  | 8.84622  | -0.44303 | 0.78751  | -0.56258 | 0.573724 | 0.981636 | chr17 | 35648052 | 35648340 | + | 0 | NA | intron (Nintron (N  | 60874    | NM_00103C  | 163      | Hs.51481E | NM_00128E         | ENSG00000CAP2B1                   | -                       | ADTB2 AP1 adaptor r protein-coding   |   |                                   |
| chr4-1011  | 8.84622  | -0.44303 | 0.78751  | -0.56258 | 0.573724 | 0.981636 | chr4  | 10112593 | 10115958 | + | 0 | NA | intron (Nintron (N  | 2524     | NM_00511E  | 9948     | Hs.12854E | NM_00511E         | ENSG00000WDR1                     | -                       | AIP1 HEL-WD repeat protein-coding    |   |                                   |
| chr6-566E  | 8.84622  | -0.44303 | 0.78751  | -0.56258 | 0.573724 | 0.981636 | chr6  | 56622445 | 56626320 | + | 0 | NA | intron (N(ATTTA)r   | 18507    | NM_01554E  | 667      | Hs.60491E | NM_00172E         | ENSG00000DST                      | -                       | BP240 BP4 dystonin protein-coding    |   |                                   |
| chr6-8561  | 8.84622  | -0.44303 | 0.78751  | -0.56258 | 0.573724 | 0.981636 | chr6  | 85616530 | 85618748 | + | 0 | NA | intron (NMIRc SINE  | -23483   | NM_00135C  | 57231    | Hs.485871 | NM_02046E         | ENSG00000SNX14                    | -                       | RGS-PX2 S sorting r protein-coding   |   |                                   |
| chr1-1801  | 11.5965  | -0.38914 | 0.691983 | -0.56235 | 0.573875 | 0.981636 | chr1  | 1.8E+08  | 1.8E+08  | + | 0 | NA | 3' UTR (N3' UTR (N  | -43623   | NM_001004  | 5768     | Hs.71917E | NM_00282E         | ENSG00000QXQ1                     | -                       | Q6 QSCN6 quiescin protein-coding     |   |                                   |
| chr2-171E  | 11.5965  | -0.38914 | 0.691983 | -0.56235 | 0.573875 | 0.981636 | chr2  | 1.72E+08 | 1.72E+08 | + | 0 | NA | intron (NHERV4_I-i  | 61962    | NM_00370E  | 8604     | Hs.47060E | NM_00370E         | ENSG00000SLC25A12                 | -                       | AGC1 ARAL solute e protein-coding    |   |                                   |
| chr1-236E  | 5.973011 | 0.531716 | 0.945896 | 0.562129 | 0.574028 | 0.981636 | chr1  | 2.37E+08 | 2.37E+08 | + | 0 | NA | intron (Nintron (N  | 32357    | NM_001291  | 4548     | Hs.498187 | NM_000254         | ENSG00000CMT8                     | -                       | HMG MS c5-methylt protein-coding     |   |                                   |
| chr12-76E  | 5.973011 | 0.531716 | 0.945896 | 0.562129 | 0.574028 | 0.981636 | chr12 | 76392508 | 76393434 | + | 0 | NA | intron (Nintron (N  | 30314    | NM_00131E  | 114882   | Hs.43084E | NM_020841         | ENSG00000OSBPL8                   | -                       | MST120 MS oxysterol protein-coding   |   |                                   |
| chr12-105E | 5.973011 | 0.531716 | 0.945896 | 0.562129 | 0.574028 | 0.981636 | chr12 | 1.1E+08  | 1.1E+08  | + | 0 | NA | intron (Nintron (N  | 39695    | NM_10346E  | 88910    | Hs.374067 | NM_13046E         | ENSG00000UBE3B                    | -                       | BPST13 KOS ubiquit protein-coding    |   |                                   |
| chr15-58E  | 5.973011 | 0.531716 | 0.945896 | 0.562129 | 0.574028 | 0.981636 | chr15 | 58679187 | 58680240 | + | 0 | NA | intron (NAluSzb SI  | 13894    | NR_107341E | 664618   | Hs.70224E | NR_020297         | HSP90AB4 HSP90B heat shock pseudo |                         |                                      |   |                                   |
| chr15-801E | 5.973011 | 0.531716 | 0.945896 | 0.562129 | 0.574028 | 0.981636 | chr15 | 80125167 | 80126063 | + | 0 | NA | intron (Nintron (N  | 27199    | NM_001242  | 54649    | Hs.59667E | NM_01900E         | ENSG00000ZFAND6                   | -                       | AWP1 ZAC2 zinc finger protein-coding |   |                                   |
| chr16-81E  | 5.973011 | 0.531716 | 0.945896 | 0.562129 | 0.574028 | 0.981636 | chr16 | 81660873 | 81661843 | + | 0 | NA | intron (Nintron (N  | -3996    | NR_04511E  | 1E+08    | Hs.657151 | NR_04511E         | LOC10012E                         | -                       | uncharactncRNA                       |   |                                   |
| chr20-43E  | 5.973011 | 0.531716 | 0.945896 | 0.562129 | 0.574028 | 0.981636 | chr20 | 43547242 | 43547635 | + | 0 | NA | IntergeniLIMC5a LI  | -11589   | NR_17069E  | 10110    | Hs.30086E | NM_01627E         |                                   |                         |                                      |   |                                   |



|           |          |          |          |          |          |          |       |          |          |   |   |    |                    |                  |          |                                       |                     |                            |
|-----------|----------|----------|----------|----------|----------|----------|-------|----------|----------|---|---|----|--------------------|------------------|----------|---------------------------------------|---------------------|----------------------------|
| chr20-394 | 9.160985 | 0.432774 | 0.772975 | 0.559881 | 0.575561 | 0.981636 | chr20 | 3949156  | 3950215  | + | 0 | NA | intron (NAIuJb SIN | -32122 NR_031722 | 1E+08    | NR_031722 ENSG00000MIR103B2           | MIR103-2-microRNA   | ncRNA                      |
| chr20-518 | 9.160985 | 0.432774 | 0.772975 | 0.559881 | 0.575561 | 0.981636 | chr20 | 5185621  | 5187346  | + | 0 | NA | intron (NAIuJn (N  | 59475 NM_003818  | 8760     | Hs.126857NM_003818 ENSG00000CDS2      | -                   | CDP-diacyprotein-coding    |
| chr21-336 | 9.160985 | 0.432774 | 0.772975 | 0.559881 | 0.575561 | 0.981636 | chr21 | 33620658 | 33621577 | + | 0 | NA | intron (NAIuYe5 SI | 20624 NM_145858  | 9946     | Hs.352671NM_145311 ENSG00000CRYZL1    | 4P11 QOH-crystallin | protein-coding             |
| chr22-314 | 9.160985 | 0.432774 | 0.772975 | 0.559881 | 0.575561 | 0.981636 | chr22 | 31440873 | 31443244 | + | 0 | NA | exon (NM exon (NM  | 42454 NM_004147  | 4733     | Hs.115242NM_004147 ENSG00000DRG1      | NEDD3               | development protein-coding |
| chr6-7137 | 9.160985 | 0.432774 | 0.772975 | 0.559881 | 0.575561 | 0.981636 | chr6  | 71372761 | 71373096 | + | 0 | NA | IntergeniAluSq2 SI | 4103 NR_029598   | 407032   | NR_029598 ENSG00000MIR30C2            | MIRN30C2 microRNA   | ncRNA                      |
| chr7-6626 | 9.160985 | 0.432774 | 0.772975 | 0.559881 | 0.575561 | 0.981636 | chr7  | 66264038 | 66265646 | + | 0 | NA | intron (NLIM4 LINE | 59508 NM_003596  | 8460     | Hs.421194NM_003596 ENSG00000TPST1     | TANGO13A            | tyrosylpr protein-coding   |
| chr19-112 | 8.159951 | 0.470686 | 0.840787 | 0.559815 | 0.575605 | 0.981636 | chr19 | 11232388 | 11233309 | + | 0 | NA | intron (Nintron (N | -6771 NM_018687  | 55908    | Hs.534462NM_018687 ENSG00000ANGPTL8   | C19orf80 angiopoic  | protein-coding             |
| chr1-4562 | 9.690855 | 0.420082 | 0.750889 | 0.559446 | 0.575857 | 0.981636 | chr1  | 45627999 | 45635234 | + | 0 | NA | intron (NLIMC LINE | -7562 NM_001114  | 149483   | Hs.18912 NM_152500 ENSG00000CCDC17    | -                   | coiled-cp protein-coding   |
| chr1-1571 | 9.690855 | 0.420082 | 0.750889 | 0.559446 | 0.575857 | 0.981636 | chr1  | 1.57E+08 | 1.57E+08 | + | 0 | NA | intron (Nintron (N | 3216 NR_001566   | 360155   | Hs.49180ENR_001566 ENSG00000CYCSP52   | HC6 HCP2            | CYCS pset pseudo           |
| chr1-1804 | 9.690855 | 0.420082 | 0.750889 | 0.559446 | 0.575857 | 0.981636 | chr1  | 1.8E+08  | 1.8E+08  | + | 0 | NA | intron (NLIMB8 LIN | -13044 NR_030607 | 1E+08    | NR_030607 ENSG00000MIR3121            | mir-3121            | microRNA                   |
| chr1-2305 | 9.690855 | 0.420082 | 0.750889 | 0.559446 | 0.575857 | 0.981636 | chr1  | 2.31E+08 | 2.31E+08 | + | 0 | NA | intron (Nintron (N | 19485 NM_001346  | 64801    | Hs.27573ENR_002278 ENSG00000ARV1      | EIEE38              | ARV1 homc protein-coding   |
| chr1-2354 | 9.690855 | 0.420082 | 0.750889 | 0.559446 | 0.575857 | 0.981636 | chr1  | 2.35E+08 | 2.35E+08 | + | 0 | NA | TTS (NM_TTS (NM_C  | 57305 NM_15249C  | 148789   | Hs.49814ENR_15249C ENSG00000B3GALNT2  | B3GAlNAc-beta-1,3-  | protein-coding             |
| chr10-718 | 9.690855 | 0.420082 | 0.750889 | 0.559446 | 0.575857 | 0.981636 | chr10 | 71823831 | 71832176 | + | 0 | NA | intron (Nintron (N | 16120 NM_001171  | 64072    | Hs.656032NM_022124 ENSG00000CDH23     | CDHR23 PIcadherin   | protein-coding             |
| chr10-102 | 9.690855 | 0.420082 | 0.750889 | 0.559446 | 0.575857 | 0.981636 | chr10 | 1.02E+08 | 1.02E+08 | + | 0 | NA | intron (Nintron (N | -24440 NM_001288 | 4791     | Hs.73090 NM_002502 ENSG00000NFKB2     | CVI10 H2nuclear     | fprotein-coding            |
| chr17-286 | 9.690855 | 0.420082 | 0.750889 | 0.559446 | 0.575857 | 0.981636 | chr17 | 28615187 | 28622273 | + | 0 | NA | intron (Nintron (N | -4545 NM_001174  | 124923   | Hs.729077NM_14461C ENSG00000CRSKR     | SGK494              | ribosomal protein-coding   |
| chr19-485 | 9.690855 | 0.420082 | 0.750889 | 0.559446 | 0.575857 | 0.981636 | chr19 | 48906653 | 48919374 | + | 0 | NA | exon (NM exon (NM  | 5878 NR_046633   | 1.01E+08 | Hs.569933NR_046633 ENSG00000NUCB1-AS1 | NUCB1               | antncRNA                   |
| chr2-1591 | 9.690855 | 0.420082 | 0.750889 | 0.559446 | 0.575857 | 0.981636 | chr2  | 1.59E+08 | 1.59E+08 | + | 0 | NA | intron (NMLTID LTF | 11479 NR_10694E  | 1.02E+08 | NR_10694E ENSG00000MIR6888            | hsa-mir-6miRNA      | ncRNA                      |
| chr20-359 | 9.690855 | 0.420082 | 0.750889 | 0.559446 | 0.575857 | 0.981636 | chr20 | 35547402 | 35550899 | + | 0 | NA | intron (NMIR SINE  | 7072 NM_015966   | 51614    | Hs.47255ENR_015966 ENSG00000ERGLIC3   | C20orf47 ERGLI      | anc protein-coding         |
| chr2-181  | 9.690855 | 0.420082 | 0.750889 | 0.559446 | 0.575857 | 0.981636 | chr22 | 18079999 | 18081786 | + | 0 | NA | intron (NLIMA6 LIN | 2902 NM_01792E   | 55670    | Hs.517400NM_01792E ENSG00000PEX26     | PBD7A PBE peroxisom | protein-coding             |
| chr4-118  | 9.690855 | 0.420082 | 0.750889 | 0.559446 | 0.575857 | 0.981636 | chr4  | 1.19E+08 | 1.19E+08 | + | 0 | NA | intron (NAIuJo SIN | -19038 NR_10382E | 729218   | Hs.44851ENR_10382E                    | LOC72921E           | uncharacterpseude          |
| chr10-132 | 8.459185 | -0.45541 | 0.814042 | -0.55944 | 0.575862 | 0.981636 | chr10 | 13331354 | 13332548 | + | 0 | NA | intron (NLIMB7 LIN | 16342 NM_012247  | 22929    | Hs.124027NM_012247 ENSG00000SEPHS1    | SELD SPS selenophc  | protein-coding             |
| chr12-962 | 8.459185 | -0.45541 | 0.814042 | -0.55944 | 0.575862 | 0.981636 | chr12 | 96225157 | 96225738 | + | 0 | NA | intron (Nintron (N | -30051 NM_00130C | 2004     | Hs.46523 NM_00523C ENSG00000ELK3      | ERP NET SETS        | transprotein-coding        |
| chr1-1105 | 5.931872 | 0.530258 | 0.947868 | 0.559422 | 0.575874 | 0.981636 | chr1  | 1.1E+08  | 1.1E+08  | + | 0 | NA | TTS (NM_TTS (NM_C  | 8071 NM_02276E   | 64783    | Hs.435947NM_02276E ENSG00000CRBM15    | OTT OTT1 RNA        | bindi protein-coding       |
| chr10-864 | 5.931872 | 0.530258 | 0.947868 | 0.559422 | 0.575874 | 0.981636 | chr10 | 86444982 | 86446358 | + | 0 | NA | intron (NAIuJr4 SI | 76114 NM_00131E  | 23063    | Hs.20309ENR_01504E ENSG00000WAPL      | WAPL KIAACWAPL      | cohe protein-coding        |
| chr10-915 | 5.931872 | 0.530258 | 0.947868 | 0.559422 | 0.575874 | 0.981636 | chr10 | 91951701 | 91952920 | + | 0 | NA | intron (Nintron (N | 28540 NM_00397E  | 9044     | Hs.50052ENR_00397E ENSG00000BTAF1     | MOT1 TAF B-TFIID    | lprotein-coding            |
| chr11-74  | 5.931872 | 0.530258 | 0.947868 | 0.559422 | 0.575874 | 0.981636 | chr11 | 74704018 | 74873471 | + | 0 | NA | intron (NHUERS-P3- | 77147 NM_00127C  | 143570   | Hs.37014ENR_18296E ENSG00000XRR1      | -                   | X-ray ras protein-coding   |
| chr12-77  | 5.931872 | 0.530258 | 0.947868 | 0.559422 | 0.575874 | 0.981636 | chr12 | 77048381 | 77049470 | + | 0 | NA | intron (Nintron (N | 16894 NM_20339A  | 144455   | Hs.61637ENR_20339A ENSG00000E2F7      | -                   | E2F trans protein-coding   |
| chr2-2335 | 5.931872 | 0.530258 | 0.947868 | 0.559422 | 0.575874 | 0.981636 | chr2  | 2.34E+08 | 2.34E+08 | + | 0 | NA | intron (Nintron (N | 11936 NM_01821E  | 55230    | Hs.96513 NM_01821E ENSG00000CUSP40    | -                   | ubiquitin protein-coding   |
| chr22-176 | 5.931872 | 0.530258 | 0.947868 | 0.559422 | 0.575874 | 0.981636 | chr22 | 17606846 | 17608033 | + | 0 | NA | intron (NL2 LINE I | -18247 NM_00128E | 1.02E+08 | Hs.62992ENR_00128E707                 | LOC10192E           | uncharacter protein-coding |
| chr22-178 | 5.931872 | 0.530258 | 0.947868 | 0.559422 | 0.575874 | 0.981636 | chr22 | 17868418 | 17869640 | + | 0 | NA | intron (Nintron (N | 37857 NM_001122  | 57553    | Hs.528024NM_015241 ENSG00000MICAL3    | MICAL-3             | microtub protein-coding    |
| chr4-874  | 5.931872 | 0.530258 | 0.947868 | 0.559422 | 0.575874 | 0.981636 | chr4  | 87438030 | 87440008 | + | 0 | NA | intron (NAIuSx1 SI | 16422 NM_19803E  | 53343    | Hs.14950ENR_02404E ENSG00000NUDT9     | NUDT10              | nudix hyc protein-coding   |
| chr6-111  | 5.931872 | 0.530258 | 0.947868 | 0.559422 | 0.575874 | 0.981636 | chr6  | 1.11E+08 | 1.11E+08 | + | 0 | NA | intron (NAIuSx SIN | 102057 NM_15336E | 91749    | Hs.40057ENR_15336E ENSG00000MFSDB4    | KIAA1919 major      | fag protein-coding         |
| chr9-1015 | 5.931872 | 0.530258 | 0.947868 | 0.559422 | 0.575874 | 0.981636 | chr9  | 1.02E+08 | 1.02E+08 | + | 0 | NA | TTS (NM_TTS (NM_C  | 30487 NM_01959E  | 56254    | Hs.01959ENR_01959E ENSG00000RNF20     | BRE1 BRE1ring       | fing protein-coding        |
| chrX-406  | 5.931872 | 0.530258 | 0.947868 | 0.559422 | 0.575874 | 0.981636 | chrX  | 40601207 | 40601664 | + | 0 | NA | intron (Nintron (N | 20465 NM_00576E  | 10159    | Hs.49596ENR_00576E ENSG00000ATP6AP2   | APT6M8-9 ATPase     | H+ protein-coding          |
| chr1-1175 | 6.63968  | -0.50514 | 0.902977 | -0.55942 | 0.575878 | 0.981636 | chr1  | 1.18E+08 | 1.18E+08 | + | 0 | NA | intron (Nintron (N | 7522 NM_00678A   | 10885    | Hs.31080ENR_00678A ENSG00000WDR3      | DIP2 UTP1WD         | repeat protein-coding      |
| chr11-666 | 6.63968  | -0.50514 | 0.902977 | -0.55942 | 0.575878 | 0.981636 | chr11 | 66630992 | 66631482 | + | 0 | NA | intron (NAIuSx2 SI | -7380 NM_00289E  | 5936     | Hs.52382ENR_00289E ENSG00000RBM4      | LARK RBM4RNA        | bindi protein-coding       |
| chr4-7077 | 5.40986  | 0.559614 | 1.000685 | 0.559231 | 0.576004 | 0.981636 | chr4  | 70779798 | 70780491 | + | 0 | NA | intron (Nintron (N | 45734 NM_00134E  | 22902    | Hs.740904NM_014961 ENSG00000RUFY3     | RIPX SINCRUN        | and fprotein-coding        |
| chr20-492 | 14.31534 | -0.35216 | 0.62977  | -0.5592  | 0.576028 | 0.981636 | chr20 | 49279142 | 49291215 | + | 0 | NA | intron (NHERV1P OE | 4495 NR_00303C   | 692057   | NR_00303C ENSG00000SNORD12            | HBII-99 small       | nucsnRNA                   |
| chr1-2516 | 5.93973  | 0.527647 | 0.944256 | 0.558797 | 0.5763   | 0.981636 | chr1  | 2516830  | 2519082  | + | 0 | NA | intron (Nintron (N | 8640 NM_01821E   | 55229    | Hs.26156 NM_01821E ENSG00000PANK4     | -                   | panthoer protein-coding    |
| chr1-1111 | 5.93973  | 0.527647 | 0.944256 | 0.558797 | 0.5763   | 0.981636 | chr1  | 11119289 | 11121455 | + | 0 | NA | intron (NAIuSx SIN | 20353 NR_13506E  | 1.05E+08 | Hs.63496ENR_13506E ENSG00000EXOSC10-# | EXOSC10             | ncRNA                      |
| chr1-3556 | 5.93973  | 0.527647 | 0.944256 | 0.558797 | 0.5763   | 0.981636 | chr1  | 35565283 | 35566592 | + | 0 | NA | 3' UTR (N3' UTR (N | -7377 NM_17854E  | 339488   | Hs.567844NM_17854E ENSG00000TFAP2E    | AP2E                | transcrip protein-coding   |
| chr1-1865 | 5.93973  | 0.527647 | 0.944256 | 0.558797 | 0.5763   | 0.981636 | chr1  | 1.86E+08 | 1.86E+08 | + | 0 | NA | intron (NAIuY SINE | -5279 NR_02237E  | 10896    | Hs.67923ENR_02237E ENSG00000OCLM      | TISR                | oculomed protein-coding    |
| chr11-622 | 5.93973  | 0.527647 | 0.944256 | 0.558797 | 0.5763   | 0.981636 | chr11 | 6221462  | 6222676  | + | 0 | NA | intron (Nintron (N | 12567 NM_032127  | 84067    | Hs.50179ENR_032127 ENSG00000FAM160A2  | C11orf56 family     | wiprotein-coding           |
| chr12-118 | 5.93973  | 0.527647 | 0.944256 | 0.558797 | 0.5763   | 0.981636 | chr12 | 1.18E+08 | 1.18E+08 | + | 0 | NA | intron (NAIuSx SIN | -52237 NM_00134E | 51347    | Hs.64442ENR_016281 ENSG00000TAOK3     | DPK JIK TAO         | kinas protein-coding       |
| chr14-716 | 5.93973  | 0.527647 | 0.944256 | 0.558797 | 0.5763   | 0.981636 | chr14 | 71627202 | 71627278 | + | 0 | NA | exon (NM exon (NM  | 86217 NM_00128A  | 26037    | Hs.654657NM_01555E ENSG00000SIPAL11   | E6TP1 SPA signal    | ir protein-coding          |
| chr14-745 | 5.93973  | 0.527647 | 0.944256 | 0.558797 | 0.5763   | 0.981636 | chr14 | 74520908 | 74522256 | + | 0 | NA | intron (Nintron (N | 27817 NM_19427E  | 122961   | Hs.29107ENR_19427E ENSG00000ISCA2     | HBLD1 ISA iron-sulf | protein-coding             |
| chr16-311 | 5.93973  | 0.527647 | 0.944256 | 0.558797 | 0.5763   | 0.981636 | chr16 | 3117157  | 3118236  | + | 0 | NA | intron (NAIuJb SIN | -2098 NR_024167  | 81854    | Hs.66949ENR_024166                    | ZNF205-AS-          | ZNF205                     |
| chr17-808 | 5.93973  | 0.527647 | 0.944256 | 0.558797 | 0.5763   | 0.981636 | chr17 | 80884813 | 80886181 | + | 0 | NA | intron (Nintron (N | -79865 NR        |          |                                       |                     |                            |



|           |          |          |          |          |          |          |       |          |          |   |   |    |                       |         |           |          |           |           |                     |               |                                   |                             |
|-----------|----------|----------|----------|----------|----------|----------|-------|----------|----------|---|---|----|-----------------------|---------|-----------|----------|-----------|-----------|---------------------|---------------|-----------------------------------|-----------------------------|
| chr3-1365 | 8.912784 | -0.43474 | 0.782378 | -0.55566 | 0.578441 | 0.981636 | chr3  | 1.37E+08 | 1.37E+08 | + | 0 | NA | exon (NM exon (NM     | -11905  | NM_144717 | 53833    | Hs.61232  | NM_144717 | ENSG000002IL20RB    | DIRS1         | FNI                               | interleukin protein-coding  |
| chr5-1282 | 8.912784 | -0.43474 | 0.782378 | -0.55566 | 0.578441 | 0.981636 | chr5  | 1.28E+08 | 1.28E+08 | + | 0 | NA | intron (N intron (N   | 189250  | NM_001046 | 6558     | Hs.16258  | NM_001046 | ENSG000002SLC12A2   | BSC1 BSC2     | solute carrier protein-coding     |                             |
| chr7-3291 | 8.912784 | -0.43474 | 0.782378 | -0.55566 | 0.578441 | 0.981636 | chr7  | 32916306 | 32917643 | + | 0 | NA | non-coding non-coding | -25214  | NM_015483 | 25948    | Hs.372541 | NM_015483 | ENSG000002KBTBD2    | BKLHD1        | kelch repeat protein-coding       |                             |
| chr7-923  | 9.657573 | 0.417402 | 0.751291 | 0.55579  | 0.578498 | 0.981636 | chr7  | 92397833 | 92399234 | + | 0 | NA | exon (NM exon (NM     | 38781   | NR_145992 | 1.05E+08 |           | NM_001317 | ENSG000002TMB1MP    |               |                                   | transmembrane pseudo        |
| chr3-5261 | 6.495023 | 0.506979 | 0.912565 | 0.555554 | 0.578516 | 0.981636 | chr3  | 52618120 | 52618840 | + | 0 | NA | intron (N intron (N   | 67119   | NM_00135C | 55193    | Hs.189922 | NM_01816E | ENSG000002PBRM1     | BAF180        | PF polybrominated protein-coding  |                             |
| chr13-955 | 8.920641 | -0.43617 | 0.785126 | -0.55555 | 0.578521 | 0.981636 | chr13 | 95578705 | 95579709 | + | 0 | NA | 3' UTR (N 3' UTR (N   | 26487   | NM_006984 | 9071     | Hs.534377 | NM_006984 | ENSG000002CLDN10    | CPETRL3       | Claudin 1 protein-coding          |                             |
| chr7-743  | 5.924014 | 0.532915 | 0.959383 | 0.555477 | 0.578568 | 0.981636 | chr7  | 74366917 | 74367309 | + | 0 | NA | intron (N MLT1C LTF   | 77638   | NM_003388 | 7461     | Hs.64701  | NM_003388 | ENSG000002CLIP2     | CLIP1 CLIFCAP | Glycophorin protein-coding        |                             |
| chr13-494 | 4.39385  | -0.61665 | 1.110148 | -0.55547 | 0.578573 | 0.981636 | chr13 | 49473355 | 49474120 | + | 0 | NA | intron (N intron (N   | -22216  | NM_00104C | 51131    | Hs.36903  | NM_00104C | ENSG000002PHF11     | APY BCAP      | PHD finger protein-coding         |                             |
| chr1-192  | 6.623964 | -0.50132 | 0.902756 | -0.55532 | 0.578674 | 0.981636 | chr1  | 19293987 | 19294246 | + | 0 | NA | non-coding non-coding | 1620    | NR_037847 | 1.01E+08 |           | NR_037847 | LOC100506           |               |                                   | uncharacterized ncRNA       |
| chr12-766 | 6.623964 | -0.50132 | 0.902756 | -0.55532 | 0.578674 | 0.981636 | chr12 | 76809816 | 76810421 | + | 0 | NA | intron (N intron (N   | 45860   | NM_00135E | 23390    | Hs.4014   | NM_01533E | ENSG000002ZDHC17    | DHHC-17       | zinc finger protein-coding        |                             |
| chr15-65  | 6.623964 | -0.50132 | 0.902756 | -0.55532 | 0.578674 | 0.981636 | chr15 | 65509823 | 65510866 | + | 0 | NA | intron (N intron (N   | 6930    | NM_19796E | 54878    | Hs.45860  | NM_01774E | ENSG000002DPP8      | DP8 DRP       | dipeptidyl protein-coding         |                             |
| chr2-556  | 6.623964 | -0.50132 | 0.902756 | -0.55532 | 0.578674 | 0.981636 | chr2  | 55683169 | 55683902 | + | 0 | NA | intron (N AluSg SIN   | 10309   | NM_03310E | 87178    | Hs.38873  | NM_03310E | ENSG000002PNPT1     | COXPDI3       | polyribin protein-coding          |                             |
| chr3-155  | 6.623964 | -0.50132 | 0.902756 | -0.55532 | 0.578674 | 0.981636 | chr3  | 1.56E+08 | 1.56E+08 | + | 0 | NA | intron (N intron (N   | 35943   | NM_00387E | 8833     | Hs.591314 | NM_00387E | ENSG000002GMPS      | GATD7         | guanine protein-coding            |                             |
| chr4-58   | 6.623964 | -0.50132 | 0.902756 | -0.55532 | 0.578674 | 0.981636 | chr4  | 51880896 | 51881473 | + | 0 | NA | intron (N Tigger15e   | 37605   | NM_001287 | 23142    | Hs.60538  | NM_01511E | ENSG000002DCUN1D4   |               |                                   | defective protein-coding    |
| chr4-526  | 6.623964 | -0.50132 | 0.902756 | -0.55532 | 0.578674 | 0.981636 | chr4  | 52628066 | 52628551 | + | 0 | NA | intron (N intron (N   | 28231   | NM_001134 | 64854    | Hs.7966   | NM_02283E | ENSG000002USP46     |               |                                   | ubiquitin protein-coding    |
| chr5-134  | 6.623964 | -0.50132 | 0.902756 | -0.55532 | 0.578674 | 0.981636 | chr5  | 1.34E+08 | 1.34E+08 | + | 0 | NA | intron (N AluS8 SI    | 4328    | NR_149151 | 5515     | Hs.10581  | NM_00271E | ENSG000002PPP2CA    | NEDLBA        | PF protein-coding                 |                             |
| chr6-87   | 6.623964 | -0.50132 | 0.902756 | -0.55532 | 0.578674 | 0.981636 | chr6  | 87218904 | 87219315 | + | 0 | NA | intron (N intron (N   | 63544   | NM_015021 | 23036    | Hs.44480  | NM_015021 | ENSG000002ZNF292    | Nbla00365     | zinc finger protein-coding        |                             |
| chr11-652 | 11.61406 | -0.38372 | 0.691143 | -0.5552  | 0.578759 | 0.981636 | chr11 | 65851391 | 65856857 | + | 0 | NA | TTS (NM  TTS (NM      | 4056    | NM_005507 | 1072     | Hs.17062  | NM_005507 | ENSG000002CFL2      | CFL HEL       | Scofilin 1 protein-coding         |                             |
| chr9-1937 | 11.61406 | -0.38372 | 0.691143 | -0.5552  | 0.578759 | 0.981636 | chr9  | 19374474 | 19379719 | + | 0 | NA | intron (N intron (N   | 3140    | NM_00101C | 6194     | Hs.40807  | NM_00101C | ENSG000002RPS6      | S6            | ribosomal protein-coding          |                             |
| chr11-91  | 6.665104 | -0.4976  | 0.896727 | -0.55491 | 0.578958 | 0.981636 | chr11 | 9152061  | 9152681  | + | 0 | NA | exon (NM exon (NM     | 58008   | NR_02771E | 283102   | Hs.68947  | NR_02771E | ENSG000002KRT8P41   |               |                                   | keratin epsilon pseudo      |
| chr12-105 | 6.665104 | -0.4976  | 0.896727 | -0.55491 | 0.578958 | 0.981636 | chr12 | 1.09E+08 | 1.09E+08 | + | 0 | NA | intron (N AluSx SIN   | 30784   | NR_13389E | 83892    | Hs.524731 | NM_031954 | ENSG000002KCTD10    | BTBD28        | MS potassium protein-coding       |                             |
| chr15-55  | 6.665104 | -0.4976  | 0.896727 | -0.55491 | 0.578958 | 0.981636 | chr15 | 55854907 | 55856606 | + | 0 | NA | intron (N intron (N   | 61375   | NM_001284 | 4734     | Hs.1565   | NM_006154 | ENSG000002NEDD4     | NEDD4-1       | FNEDD4 E3 protein-coding          |                             |
| chr16-24  | 6.665104 | -0.4976  | 0.896727 | -0.55491 | 0.578958 | 0.981636 | chr16 | 23411873 | 23412550 | + | 0 | NA | intron (N intron (N   | 40978   | NM_15360E | 91949    | Hs.185807 | NM_15360E | ENSG000002COG7      | CDG2E         | component protein-coding          |                             |
| chr18-43  | 6.665104 | -0.4976  | 0.896727 | -0.55491 | 0.578958 | 0.981636 | chr18 | 46095621 | 46096571 | + | 0 | NA | intron (N AluSx1 SI   | 2200    | NM_001001 | 498      | Hs.29828  | NM_00404E | ENSG000002ATP5F1A   | ATP5A         | ATF ATP synthetase protein-coding |                             |
| chr2-2387 | 6.665104 | -0.4976  | 0.896727 | -0.55491 | 0.578958 | 0.981636 | chr2  | 23872478 | 23873597 | + | 0 | NA | intron (N intron (N   | 54086   | NM_01755E | 54454    | Hs.46786  | NM_01755E | ENSG000002ATAD2B    |               |                                   | ATPase F protein-coding     |
| chr2-231  | 6.665104 | -0.4976  | 0.896727 | -0.55491 | 0.578958 | 0.981636 | chr2  | 2.31E+08 | 2.31E+08 | + | 0 | NA | intron (N LIPA16 LI   | 47940   | NM_00135E | 80210    | Hs.162411 | NM_02513E | ENSG000002ARMC9     | ARM JBT5      | armadillo protein-coding          |                             |
| chr3-1184 | 6.665104 | -0.4976  | 0.896727 | -0.55491 | 0.578958 | 0.981636 | chr3  | 11840230 | 11842155 | + | 0 | NA | intron (N AluJb SIN   | 5693    | NM_001321 | 132001   | Hs.47547  | NM_138807 | ENSG000002TAMM41    | C3orf31       | PF TAMM41 mit protein-coding      |                             |
| chr5-142  | 6.665104 | -0.4976  | 0.896727 | -0.55491 | 0.578958 | 0.981636 | chr5  | 1.42E+08 | 1.42E+08 | + | 0 | NA | intron (N LIMed LIN   | 13858   | NR_120664 | 1.02E+08 | Hs.65894  | NR_120664 | ENSG000002SPRY4-AS1 | THCAT68       | SPRY4 ant ncRNA                   |                             |
| chr5-172  | 6.665104 | -0.4976  | 0.896727 | -0.55491 | 0.578958 | 0.981636 | chr5  | 1.72E+08 | 1.72E+08 | + | 0 | NA | intron (N intron (N   | 37570   | NM_001171 | 285588   | Hs.716824 | NM_001171 | ENSG000002EFCAB9    |               |                                   | EF-hand c protein-coding    |
| chr7-151  | 6.665104 | -0.4976  | 0.896727 | -0.55491 | 0.578958 | 0.981636 | chr7  | 1.51E+08 | 1.51E+08 | + | 0 | NA | intron (N intron (N   | 3548    | NM_00119E | 6522     | Hs.64706  | NM_00304C | ENSG000002SLC4A2    | AE2 BND3      | solute carrier protein-coding     |                             |
| chr8-143  | 6.665104 | -0.4976  | 0.896727 | -0.55491 | 0.578958 | 0.981636 | chr8  | 1.44E+08 | 1.44E+08 | + | 0 | NA | intron (N intron (N   | 8707    | NM_00113C | 1936     | Hs.33338  | NM_00196C | ENSG000002EEF1D     | EF-1D         | EF1 eukaryotic protein-coding     |                             |
| chr9-1347 | 6.665104 | -0.4976  | 0.896727 | -0.55491 | 0.578958 | 0.981636 | chr9  | 1.35E+08 | 1.35E+08 | + | 0 | NA | intron (N intron (N   | 69608   | NR_039691 | 1.01E+08 |           | NR_039691 | ENSG000002MIR3689C  |               |                                   | microRNA ncRNA              |
| chr10-852 | 10.22072 | 0.408738 | 0.736668 | 0.554847 | 0.578999 | 0.981636 | chr10 | 8022079  | 802622   | + | 0 | NA | intron (N intron (N   | 111255  | NM_001351 | 23185    | Hs.15906  | NM_01515E | ENSG000002LARP4B    | KIAA0217      | La ribon protein-coding           |                             |
| chr1-156  | 9.698713 | 0.418473 | 0.754399 | 0.554711 | 0.579092 | 0.981636 | chr1  | 1.56E+08 | 1.56E+08 | + | 0 | NA | intron (N intron (N   | 9617    | NM_015327 | 23381    | Hs.516837 | NM_015327 | ENSG000002CMG5      | EST1B         | LPM5G5 non protein-coding         |                             |
| chr1-1507 | 9.698713 | 0.418473 | 0.754399 | 0.554711 | 0.579092 | 0.981636 | chr1  | 1.57E+08 | 1.57E+08 | + | 0 | NA | intron (N intron (N   | 23623   | NM_00597E | 5546     | Hs.51694  | NM_00597E | ENSG000002PRCC      | RCCP1         | TPF proline protein-coding        |                             |
| chr1-2308 | 9.698713 | 0.418473 | 0.754399 | 0.554711 | 0.579092 | 0.981636 | chr1  | 2.31E+08 | 2.31E+08 | + | 0 | NA | intron (N LIMB3 LIN   | 14544   | NM_00113E | 84886    | Hs.520494 | NM_03280C | ENSG000002Clorf198  |               |                                   | chromosome protein-coding   |
| chr12-277 | 9.698713 | 0.418473 | 0.754399 | 0.554711 | 0.579092 | 0.981636 | chr12 | 27755801 | 27756229 | + | 0 | NA | 3' UTR (N 3' UTR (N   | 15567   | NM_00114E | 1E+08    |           | NM_00114E | ENSG000002MANSC4    |               |                                   | MANSC domain protein-coding |
| chr3-733  | 9.698713 | 0.418473 | 0.754399 | 0.554711 | 0.579092 | 0.981636 | chr3  | 73383863 | 73385031 | + | 0 | NA | exon (NM exon (NM     | 49548   | NM_00130C | 23024    | Hs.660347 | NM_01500E | ENSG000002PDZRN3    | LNx3          | SEM PDZ domain protein-coding     |                             |
| chr6-135  | 9.698713 | 0.418473 | 0.754399 | 0.554711 | 0.579092 | 0.981636 | chr6  | 1.35E+08 | 1.35E+08 | + | 0 | NA | intron (N intron (N   | 4911    | NM_00114E | 10767    | Hs.37852  | NM_00662C | ENSG000002HBSL1     | EF-1a         | ERF HBS1 like protein-coding      |                             |
| chr6-1438 | 9.697679 | 0.452585 | 0.816349 | 0.554401 | 0.579304 | 0.981636 | chr6  | 1.44E+08 | 1.44E+08 | + | 0 | NA | intron (N AluS6 SI    | -29108  | NM_00132E | 84946    | Hs.18567  | NM_03286C | ENSG000002LTV1      | C6orf93       | cLTV1 rib protein-coding          |                             |
| chr18-76  | 9.127703 | 0.429931 | 0.775615 | 0.554309 | 0.579367 | 0.981636 | chr18 | 76361337 | 76362487 | + | 0 | NA | 3' UTR (N 3' UTR (N   | -129740 | NR_136504 | 1.02E+08 | Hs.66518  | NR_136504 | ENSG000002LOC101927 |               |                                   | uncharacterized ncRNA       |
| chr1-203  | 6.657246 | -0.4957  | 0.894825 | -0.55397 | 0.579602 | 0.981636 | chr1  | 2.04E+08 | 2.04E+08 | + | 0 | NA | intron (N intron (N   | -40600  | NR_00301E | 677843   | Hs.67613  | NR_00301E | ENSG000002SNORA77   | ACA63         | SN small nucleolar RNA            |                             |
| chr1-227  | 6.657246 | -0.4957  | 0.894825 | -0.55397 | 0.579602 | 0.981636 | chr1  | 2.27E+08 | 2.27E+08 | + | 0 | NA | intron (N intron (N   | 78269   | NM_020247 | 56997    | Hs.118241 | NM_020247 | ENSG000002COQ8A     | ADCK3         | ARC coenzyme protein-coding       |                             |
| chr1-241  | 6.657246 | -0.4957  | 0.894825 | -0.55397 | 0.579602 | 0.981636 | chr1  | 2.42E+08 | 2.42E+08 | + | 0 | NA | 3' UTR (N 3' UTR (N   | 3728    | NM_001821 | 1122     | Hs.65454  | NM_001821 | ENSG000002CHML      | REP2          | CHM like protein-coding           |                             |
| chr13-77  | 6.657246 | -0.4957  | 0.894825 | -0.55397 | 0.579602 | 0.981636 | chr13 | 77241373 | 77243102 | + | 0 | NA | intron (N AluSc SIN   | 84857   | NM_015057 | 23077    | Hs.591221 | NM_015057 | ENSG000002MYCBP2    | Myc-bp2       | FMYC binding protein-coding       |                             |
| chr13-102 | 6.657246 | -0.4957  | 0.894825 | -0.55397 | 0.579602 | 0.981636 | chr13 | 1.03E+08 | 1.03E+08 | + | 0 | NA | intron (N intron (N   | 48148   | NM_003291 | 7174     | Hs.432424 | NM_003291 | ENSG000002TPP2      | TPP-2         | TPF tripeptide protein-coding     |                             |
| chr14-101 | 6.657246 | -0.4957  | 0.894825 | -0.55397 | 0.579602 | 0.981636 | chr14 | 1.01E+08 | 1.01E+08 | + | 0 | NA | promoter-promoter-    | -288    | NR_02987E | 494329   |           | NR_02987E | ENSG000002MIR380    |               |                                   | MIR380-3g microRNA ncRNA    |
| chr14-103 | 6.657246 | -0.4957  | 0.894825 | -0.55397 | 0.579602 | 0.981636 | chr14 | 1.04E+08 | 1.04E+08 | + | 0 | NA | intron (N intron (N   | 8385    | NM_00113C | 3831     | Hs.20107  | NM_00555E | ENSG000002KCLC1     | KLC KNS2      | kinesin 1 protein-coding          |                             |
| chr15-282 | 6.657246 | -0.4957  | 0.894825 | -0.55397 | 0.579602 | 0.981636 | chr15 | 28243808 | 28245148 | + | 0 | NA | intron (N intron (N   | 77674   | NM_004667 | 8924     | Hs.43489  | NM_004667 | ENSG000002HERC2     | D15F37S1      | HECT and protein-coding           |                             |
|           |          |          |          |          |          |          |       |          |          |   |   |    |                       |         |           |          |           |           |                     |               |                                   |                             |



|                    |          |          |          |          |          |       |          |          |   |    |                    |                     |                          |                    |                     |                         |                          |                          |
|--------------------|----------|----------|----------|----------|----------|-------|----------|----------|---|----|--------------------|---------------------|--------------------------|--------------------|---------------------|-------------------------|--------------------------|--------------------------|
| chr10-10c.6.672962 | -0.49954 | 0.902876 | -0.55328 | 0.580073 | 0.981636 | chr10 | 1E+08    | 1E+08    | 0 | NA | intron (Nintron (N | -5624 NR_002954     | 677800                   | Hs.662165NR_002954 | ENSG000003SNORA12   | U108                    | small nucsnoRNA          |                          |
| chr12-12c.6.672962 | -0.49954 | 0.902876 | -0.55328 | 0.580073 | 0.981636 | chr12 | 1.22E+08 | 1.22E+08 | 0 | NA | intron (Nintron (N | -10306 NM_001351    | 65082                    | Hs.487883NM_022916 | ENSG000003VPS33A    | MPSPS                   | VPS33A ccprotein-coding  |                          |
| chr12-79f.6.180073 | -0.52294 | 0.945453 | -0.55311 | 0.580188 | 0.981636 | chr12 | 79815419 | 79815738 | + | 0  | NA                 | intron (Nintron (N  | 98333 NM_001143          | 4659               | Hs.49582 NM_00248C  | ENSG000003PPP1R12A      | M130 MBS                 | protein fprotein-coding  |
| chr13-32f.6.180073 | -0.52294 | 0.945453 | -0.55311 | 0.580188 | 0.981636 | chr13 | 32759919 | 32760118 | + | 0  | NA                 | intron (NAluY SINE  | 151634 NR_04702C         | 1.01E+08           | Hs.40629NR_047020   | LINC00422               | -                        | long intencRNA           |
| chr17-34f.6.180073 | -0.52294 | 0.945453 | -0.55311 | 0.580188 | 0.981636 | chr17 | 34992115 | 34992548 | + | 0  | NA                 | intron (Nintron (N  | 11817 NM_013975          | 3980               | Hs.100299NM_002311  | ENSG000003LIG3          | LIG2 LIG3                | long ligasprotein-coding |
| chr2-483c.6.180073 | -0.52294 | 0.945453 | -0.55311 | 0.580188 | 0.981636 | chr2  | 48368007 | 48368423 | + | 0  | NA                 | intron (Nintron (N  | 53533 NM_002158          | 3344               | Hs.468478NM_002158  | ENSG000003FOXN2         | HTLF                     | forkhead protein-coding  |
| chr2-149f.6.180073 | -0.52294 | 0.945453 | -0.55311 | 0.580188 | 0.981636 | chr2  | 1.5E+08  | 1.5E+08  | 0 | NA | intron (Nintron (N | -3572 NR_11024C     | 1.02E+08                 | Hs.5324 NR_11024C  | ENSG000003LOC10192c | -                       | uncharactncRNA           |                          |
| chr3-157f.6.180073 | -0.52294 | 0.945453 | -0.55311 | 0.580188 | 0.981636 | chr3  | 15787181 | 15788361 | + | 0  | NA                 | intron (Nintron (N  | 10208 NM_001345          | 23243              | Hs.335233NM_015199  | ENSG000003ANKRD28       | PITK PPP1                | ankyrin protein-coding   |
| chr5-140f.6.180073 | -0.52294 | 0.945453 | -0.55311 | 0.580188 | 0.981636 | chr5  | 1.41E+08 | 1.41E+08 | 0 | NA | intron (Nintron (N | -8335 NM_003732     | 8637                     | Hs.594084NM_003732 | ENSG000003EIF4EBP3  | 4E-BP3 4E               | eukaryotiiprotein-coding |                          |
| chr5-51f.6.641857  | 0.420651 | 0.761024 | 0.552743 | 0.580444 | 0.981636 | chr5  | 51527235 | 51527434 | + | 0  | NA                 | intron (Nintron (N  | 95437 NR_015263          | 23312              | Hs.511386NM_015263  | ENSG000003DMXL2         | DFNA71 PF                | Dmx like protein-coding  |
| chr8-388f.9.641857 | 0.420651 | 0.761024 | 0.552743 | 0.580444 | 0.981636 | chr8  | 38835930 | 38836810 | + | 0  | NA                 | intron (Nintron (N  | 30920 NM_001352          | 6867               | Hs.279245NM_006283  | ENSG000003TACC1         | Ga55                     | transformprotein-coding  |
| chr2-4657.7.940873 | -0.47622 | 0.861691 | -0.55266 | 0.580498 | 0.981636 | chr2  | 46577950 | 46578374 | + | 0  | NA                 | intron (Nintron (N  | 2076 NR_104182           | 1.01E+08           | Hs.658541NR_104182  | ENSG000003LOC10050c     | -                        | uncharactncRNA           |
| chr12-117.5.980869 | 0.529029 | 0.957286 | 0.552635 | 0.580513 | 0.981636 | chr12 | 1.17E+08 | 1.17E+08 | 0 | NA | intron (Nintron (N | 6252 NM_010002      | 23014                    | Hs.740376NM_015002 | ENSG000003FBX021    | FBX21                   | F-box prprotein-coding   |                          |
| chr15-88f.5.980869 | 0.529029 | 0.957286 | 0.552635 | 0.580513 | 0.981636 | chr15 | 88885074 | 88885760 | + | 0  | NA                 | intron (NAluS6 SI   | 10227 NM_0178232         | 145864             | Hs.447533NM_178232  | ENSG000003CHAPLN3       | EXLD1 Hs1                | hyaluron protein-coding  |
| chr22-46f.5.980869 | 0.529029 | 0.957286 | 0.552635 | 0.580513 | 0.981636 | chr22 | 46663147 | 46664404 | + | 0  | NA                 | intron (Nintron (N  | 43389 NM_015124          | 23151              | Hs.475155NM_015124  | ENSG000003GRAMD4        | DIP                      | GRAM domprotein-coding   |
| chr7-745f.5.980869 | 0.529029 | 0.957286 | 0.552635 | 0.580513 | 0.981636 | chr7  | 74528396 | 74531834 | + | 0  | NA                 | intron (NAluS6 SI   | -65853 NR_162116         | 1.13E+08           | NR_162116           | MIR10525                | -                        | microRNA ncRNA           |
| chr8-253f.5.980869 | 0.529029 | 0.957286 | 0.552635 | 0.580513 | 0.981636 | chr8  | 25393515 | 25394928 | + | 0  | NA                 | intron (NAluJr4 SI  | 30040 NM_001083          | 2796               | Hs.82963 NM_000823  | ENSG000003GNRH1         | GNRH1 GRH1               | gonadotrcprotein-coding  |
| chr9-576f.10.18744 | 0.40614  | 0.735141 | 0.552466 | 0.580629 | 0.981636 | chr9  | 5762266  | 5763755  | + | 0  | NA                 | intron (Nintron (N  | 70105 NM_024896          | 79956              | Hs.591078NM_024896  | ENSG000003ERMP1         | FXNA KIA1                | endoplasmprotein-coding  |
| chr3-170f.8.863786 | -0.43594 | 0.789091 | -0.55246 | 0.580631 | 0.981636 | chr3  | 1.71E+08 | 1.71E+08 | 0 | NA | intron (N2c LINE   | 2942 NR_135255      | 200916                   | Hs.380933NM_001099 | ENSG000003RPL22L1   | -                       | ribosomalprotein-coding  |                          |
| chr5-334f.8.863786 | -0.43594 | 0.789091 | -0.55246 | 0.580631 | 0.981636 | chr5  | 33464143 | 33447570 | + | 0  | NA                 | intron (Nintron (N  | 6080 NR_047676           | 6897               | Hs.481866NM_152295  | ENSG000003TARS          | ThrRS                    | threonyl-protein-coding  |
| chr10-51f.4.419274 | -0.60508 | 1.096301 | -0.55193 | 0.580995 | 0.981636 | chr10 | 51697013 | 51698637 | + | 0  | NA                 | exon (NM exon (NM   | 1770 NM_015233           | 23283              | Hs.591355NM_015233  | ENSG000003CSTF2T        | CstF-64T                 | cleavage protein-coding  |
| chr12-12c.4.419274 | -0.60508 | 1.096301 | -0.55193 | 0.580995 | 0.981636 | chr12 | 1.23E+08 | 1.23E+08 | 0 | NA | intron (NAluS2 SI  | 71992 NR_162094     | 1.13E+08                 | NR_162094          | MIR9902-1           | -                       | microRNA ncRNA           |                          |
| chr12-13c.4.419274 | -0.60508 | 1.096301 | -0.55193 | 0.580995 | 0.981636 | chr12 | 1.33E+08 | 1.33E+08 | 0 | NA | intron (NAluY SINE | 31076 NM_006231     | 5426                     | Hs.524871NM_006231 | ENSG000003POLE      | CRCS12 FIDNA            | polynprotein-coding      |                          |
| chr15-40f.4.419274 | -0.60508 | 1.096301 | -0.55193 | 0.580995 | 0.981636 | chr15 | 4019266  | 4020260  | + | 0  | NA                 | intron (Nintron (N  | 24769 NM_001164          | 5888               | Hs.631709NM_002875  | ENSG000003RAD51         | BRCC5 FAM                | RAD51 reprotein-coding   |
| chr15-50f.4.419274 | -0.60508 | 1.096301 | -0.55193 | 0.580995 | 0.981636 | chr15 | 50626520 | 50627214 | + | 0  | NA                 | intron (Nintron (N  | 59930 NR_149154          | 54822              | Hs.512894NM_017672  | ENSG000003TRPM7         | ALSPDC CF                | transientprotein-coding  |
| chr16-31f.4.419274 | -0.60508 | 1.096301 | -0.55193 | 0.580995 | 0.981636 | chr16 | 3127670  | 3129102  | + | 0  | NA                 | intron (NAluJr SIN  | 6496 NR_11090C           | 1.01E+08           | Hs.522143NR_110900  | ZNF213-AS               | -                        | ZNF213 arncRNA           |
| chr16-57f.4.419274 | -0.60508 | 1.096301 | -0.55193 | 0.580995 | 0.981636 | chr16 | 57776810 | 57777565 | + | 0  | NA                 | intron (Nintron (N  | -2109 NM_001318          | 3801               | Hs.23131 NM_005555  | ENSG000003KIFC3         | -                        | kinesin protein-coding   |
| chr17-24f.4.419274 | -0.60508 | 1.096301 | -0.55193 | 0.580995 | 0.981636 | chr17 | 2471875  | 2472853  | + | 0  | NA                 | intron (Nintron (N  | 39524 NM_024086          | 79066              | Hs.632237NM_024086  | ENSG000003METTL16       | METTL10D                 | methyltrprotein-coding   |
| chr17-50f.4.419274 | -0.60508 | 1.096301 | -0.55193 | 0.580995 | 0.981636 | chr17 | 50481910 | 50483050 | + | 0  | NA                 | intron (Nintron (N  | 3620 NR_018346           | 55316              | Hs.8033 NM_018346   | ENSG000003RSAD1         | HemW                     | radical Sprotein-coding  |
| chr18-67f.4.419274 | -0.60508 | 1.096301 | -0.55193 | 0.580995 | 0.981636 | chr18 | 67505979 | 67506263 | + | 0  | NA                 | TTS (NM_C TTS (NM_C | -10425 NR_033921         | 643542             | Hs.652901NR_033921  | ENSG000003LOC643542     | -                        | uncharactncRNA           |
| chr2-222f.4.419274 | -0.60508 | 1.096301 | -0.55193 | 0.580995 | 0.981636 | chr2  | 2.23E+08 | 2.23E+08 | 0 | NA | intron (NLA_B_Mam  | 41070 NR_130154     | 10056                    | Hs.471452NM_005687 | ENSG000003FARSB     | FARSLB FF               | phenylalprotein-coding   |                          |
| chr4-478f.4.419274 | -0.60508 | 1.096301 | -0.55193 | 0.580995 | 0.981636 | chr4  | 47882163 | 47883001 | + | 0  | NA                 | intron (Nintron (N  | -31645 NR_125875         | 1.02E+08           | Hs.13419CNR_125879  | LOC101927               | -                        | uncharactncRNA           |
| chr6-734f.4.419274 | -0.60508 | 1.096301 | -0.55193 | 0.580995 | 0.981636 | chr6  | 73435658 | 73436886 | + | 0  | NA                 | intron (Nintron (N  | 16025 NM_138441          | 115004             | Hs.658405NM_138441  | ENSG000003CGAS          | G6orf150 cyclic          | Gn protein-coding        |
| chr7-127f.4.419274 | -0.60508 | 1.096301 | -0.55193 | 0.580995 | 0.981636 | chr7  | 1.27E+08 | 1.27E+08 | 0 | NA | 3' UTR (N3' UTR (N | 22471 NM_176814     | 168850                   | Hs.159006NM_176814 | ENSG000003ZNF800    | -                       | zinc fingprotein-coding  |                          |
| chr8-129f.4.419274 | -0.60508 | 1.096301 | -0.55193 | 0.580995 | 0.981636 | chr8  | 1.3E+08  | 1.3E+08  | 0 | NA | intron (Nintron (N | -57560 NM_031415    | 56169                    | Hs.133244NM_031415 | ENSG000003GSDMC     | MLZE                    | gasdermiiprotein-coding  |                          |
| chr10-79f.8.805081 | -0.44602 | 0.808177 | -0.55188 | 0.581032 | 0.981636 | chr10 | 79398023 | 79398282 | + | 0  | NA                 | intron (Nintron (N  | 47472 NR_153367          | 219654             | Hs.52308CNR_153367  | ENSG000003ZCHC24        | C10orf56 zinc            | fingprotein-coding       |
| chr4-564f.7.98987  | -0.47461 | 0.860208 | -0.55174 | 0.581126 | 0.981636 | chr4  | 56496065 | 56497047 | + | 0  | NA                 | intron (Nintron (N  | -8653 NR_206919          | 132946             | Hs.444445NM_206919  | ENSG000003CARL9         | -                        | ADP ribosprotein-coding  |
| chr12-13c.9.202125 | 0.433756 | 0.786355 | 0.551603 | 0.581222 | 0.981636 | chr12 | 1.32E+08 | 1.32E+08 | 0 | NA | intron (Nintron (N | 7184 NR_002975      | 677829                   | Hs.742405NR_002975 | ENSG000003SNORA49   | ACA49                   | small nucsnoRNA          |                          |
| chr16-16f.12.02467 | -0.38099 | 0.690755 | -0.55156 | 0.581248 | 0.981636 | chr16 | 16265712 | 16266231 | + | 0  | NA                 | intron (NAluSx SIN  | 33376 Hs.460141NR_173614 | ENSG000003NOMO2    | Nomo PM5            | NODAL nucprotein-coding |                          |                          |
| chr11-63f.6.469599 | 0.500676 | 0.908003 | 0.551404 | 0.581357 | 0.981636 | chr11 | 63949930 | 63951342 | + | 0  | NA                 | intron (NAluSx3 SI  | 11305 NM_00130C          | 79829              | Hs.523755NM_024771  | ENSG000003NAA40         | NAT11 NatN               | (alpha)-protein-coding   |
| chr13-98f.6.469599 | 0.500676 | 0.908003 | 0.551404 | 0.581357 | 0.981636 | chr13 | 9839135  | 98392088 | + | 0  | NA                 | intron (Nintron (N  | 130404 NM_003575         | 8428               | Hs.508514NM_003575  | ENSG000003STK24         | HEL-H-S-95               | serine/thprotein-coding  |
| chr15-34f.6.469599 | 0.500676 | 0.908003 | 0.551404 | 0.581357 | 0.981636 | chr15 | 34249941 | 34250985 | + | 0  | NA                 | intron (Nintron (N  | 25447 NM_001288          | 51234              | Hs.250906NM_016454  | ENSG000003EMC4          | PILG17 TMEER             | dembrprotein-coding      |
| chr20-35f.6.469599 | 0.500676 | 0.908003 | 0.551404 | 0.581357 | 0.981636 | chr20 | 35944150 | 35945417 | + | 0  | NA                 | intron (NAluSx1 SI  | 9843 NM_03363C           | 51282              | Hs.584905NM_016555  | ENSG000003SCAND1        | RAZ1 SDP1                | SCAN dembrprotein-coding |
| chr9-644f.6.469599 | 0.500676 | 0.908003 | 0.551404 | 0.581357 | 0.981636 | chr9  | 6445428  | 6446711  | + | 0  | NA                 | intron (NAluJb SIN  | 32870 NM_152896          | 115426             | Hs.493401NM_152896  | ENSG000003UHRF2         | NIRF RNFI                | ubiquitiiprotein-coding  |
| chr1-392f.10.1953  | 0.404603 | 0.733823 | 0.551363 | 0.581385 | 0.981636 | chr1  | 39297720 | 39303852 | + | 0  | NA                 | intron (NAluSx SIN  | -108287 NR_015038        | 643314             | Hs.658766NM_015038  | ENSG000003KIAA0754      | -                        | KIAA0754 protein-coding  |
| chr17-81f.10.1953  | 0.404603 | 0.733823 | 0.551363 | 0.581385 | 0.981636 | chr17 | 81921923 | 81922775 | + | 0  | NA                 | 3' UTR (N3' UTR (N  | 1117 NM_032711           | 4097               | Hs.252225NM_002355  | ENSG000003MAFG          | hMAF                     | MAF bZIP protein-coding  |
| chr2-580f.10.1953  | 0.404603 | 0.733823 | 0.551363 | 0.581385 | 0.981636 | chr2  | 58091963 | 58093607 | + | 0  | NA                 | intron (Nintron (N  | 46073 NM_00113C          | 7444               | Hs.715296NM_006299  | ENSG000003VRK2          | -                        | VRK seriprotein-coding   |
| chr7-925f.10.1953  | 0.404603 | 0.733823 | 0.551363 | 0.581385 | 0.981636 | chr7  | 92532582 | 92534171 | + | 0  | NA                 | intron (Nintron (N  | 4587 NM_03212C           | 84060              | Hs.21590 NM_03212C  | ENSG000003CRBM48        | C7orf64 FRNA             | bindiprotein-coding      |
| chr16-30f.5.4177   |          |          |          |          |          |       |          |          |   |    |                    |                     |                          |                    |                     |                         |                          |                          |



|                    |          |          |          |          |          |       |          |           |    |    |                     |                   |                               |                    |                |                                    |
|--------------------|----------|----------|----------|----------|----------|-------|----------|-----------|----|----|---------------------|-------------------|-------------------------------|--------------------|----------------|------------------------------------|
| chr20-175.8.897068 | -0.43182 | 0.784584 | -0.55037 | 0.582062 | 0.981636 | chr20 | 17941139 | 1.7242713 | +0 | NA | 3' UTR (N3' UTR (N  | 21020 NR_00304E   | 692086 Hs. 680747NR_00304E    | ENSG00000SNORD17   | HBI-43         | small nucsnoRNA                    |
| chr3-1504.8.897068 | -0.43182 | 0.784584 | -0.55037 | 0.582062 | 0.981636 | chr3  | 1.5E+08  | 1.5E+08   | +0 | NA | intron (Nintron (N  | 50029 NM_001303   | 9819 Hs. 722477NM_01477E      | ENSG00000TSC22D2   | TILZ4a TITSC22 | donor protein-coding               |
| chr5-1392.8.897068 | -0.43182 | 0.784584 | -0.55037 | 0.582062 | 0.981636 | chr5  | 1.39E+08 | 1.39E+08  | +0 | NA | promoter-promoter-  | -602 NR_00291E    | 26821 Hs. 68489ENR_00291E     | ENSG00000SNORA74A  | RNU19 U19      | small nucsnoRNA                    |
| chr1-155.6.590682  | -0.50732 | 0.921836 | -0.55033 | 0.58209  | 0.981636 | chr1  | 45592356 | 45592932  | +0 | NA | intron (NAluX1 S1   | 8603 NM_15229E    | 4678 Hs. 319334NM_00248E      | ENSG00000NASP      | FLB7527 F      | coiled- $\alpha$ protein-coding    |
| chr2-177.6.045097  | -0.56505 | 1.026896 | -0.55025 | 0.582147 | 0.981636 | chr2  | 1.08E+08 | 1.08E+08  | +0 | NA | intron (Nintron (N  | 23781 NM_019044   | 54520 Hs. 10784ENM_019044     | ENSG00000CCDC93    | -              | coiled- $\alpha$ protein-coding    |
| chr12-48.6.461741  | 0.503157 | 0.914458 | 0.550225 | 0.582165 | 0.981636 | chr12 | 48070717 | 48071572  | +0 | NA | intron (Nintron (N  | -34109 NM_001354  | 5213 Hs. 75160 NM_00028E      | ENSG00000PFKM      | ATP-PFK1 C     | phosphofructokinase protein-coding |
| chr18-24.6.461741  | 0.503157 | 0.914458 | 0.550225 | 0.582165 | 0.981636 | chr18 | 24066721 | 24067615  | +0 | NA | intron (Nintron (N  | -46159 NM_001292  | 125488 Hs. 12857ENM_15321E    | ENSG00000TTC39C    | C18orf17 T     | tetratric protein-coding           |
| chr6-152.6.461741  | 0.503157 | 0.914458 | 0.550225 | 0.582165 | 0.981636 | chr6  | 1.52E+08 | 1.52E+08  | +0 | NA | intron (Nintron (N  | -30172 NR_120501  | 1.01E+08 Hs. 57120ENR_120501  | SYNE1-AS1          | SYNE1          | antncRNA                           |
| chr7-736.6.461741  | 0.503157 | 0.914458 | 0.550225 | 0.582165 | 0.981636 | chr7  | 73697169 | 73697615  | +0 | NA | intron (Nintron (N  | 13795 NR_045512   | 114049 Hs. 64706ENM_01752E    | ENSG00000CUBD23    | HASJ4442 BUD23 | rRNA protein-coding                |
| chr4-2677.9.315535 | -0.42692 | 0.776582 | -0.54975 | 0.582494 | 0.981636 | chr4  | 26770520 | 26771458  | +0 | NA | Intergeni LIME LIN  | 89255 NR_13467E   | 1.05E+08 Hs. 54885ENR_134673  | STIM2-AS1          | STIM2          | antncRNA                           |
| chr12-108.6.221213 | -0.51882 | 0.943763 | -0.54974 | 0.5825   | 0.981636 | chr12 | 1.09E+08 | 1.09E+08  | +0 | NA | intron (NAluSz SIN  | 3836 NM_001161    | 54434 Hs. 19976ENM_018984     | ENSG00000SSH1      | SSH1L          | slingshot protein-coding           |
| chr16-367.6.221213 | -0.51882 | 0.943763 | -0.54974 | 0.5825   | 0.981636 | chr16 | 3670594  | 3670793   | +0 | NA | intron (NAluJo SIN  | 15989 NM_001351   | 1773 Hs. 62963ENM_00522E      | ENSG00000DNASE1    | DNL1 DRN1      | deoxyribonuclease protein-coding   |
| chr8-6056.6.221213 | -0.51882 | 0.943763 | -0.54974 | 0.5825   | 0.981636 | chr8  | 60589596 | 60590082  | +0 | NA | intron (NMER112 DN  | 72852 NM_00286E   | 5862 Hs. 369017NM_00286E      | ENSG00000RAB2A     | LHX1 RAB2      | RAB2A, $\alpha$ protein-coding     |
| chr11-12.6.616106  | -0.49947 | 0.908589 | -0.54972 | 0.58251  | 0.981636 | chr11 | 1.2E+08  | 1.2E+08   | +0 | NA | intron (NLIME LIN   | -7445 NM_001301   | 23365 Hs. 24598 NM_01531E     | ENSG00000ARHGF12   | LARG PRO2      | Rho guanine protein-coding         |
| chr13-95.6.616106  | -0.49947 | 0.908589 | -0.54972 | 0.58251  | 0.981636 | chr13 | 95099461 | 95099712  | +0 | NA | intron (Nintron (N  | -110758 NR_145733 | 1.1E+08 NR_145733             | SNORD13G           | -              | small nucsnoRNA                    |
| chr17-19.6.616106  | -0.49947 | 0.908589 | -0.54972 | 0.58251  | 0.981636 | chr17 | 19939252 | 19939580  | +0 | NA | intron (NL2b LINE   | 38412 NM_007202   | 11216 Hs. 64267ENM_007202E    | ENSG00000AKAP10    | AKAP-10 A      | kinase protein-coding              |
| chr19-56.6.616106  | -0.49947 | 0.908589 | -0.54972 | 0.58251  | 0.981636 | chr19 | 56093390 | 56093741  | +0 | NA | intron (Nintron (N  | -26881 NR_110741  | 1.02E+08 Hs. 43465ENR_110741E | ENSG00000LINC01864 | -              | long intncRNA                      |
| chr20-19.6.616106  | -0.49947 | 0.908589 | -0.54972 | 0.58251  | 0.981636 | chr20 | 19823968 | 19824241  | +0 | NA | Intergeni Intergeni | -62417 NM_001242  | 54453 Hs. 47227ENM_01899E     | ENSG00000RIN2      | MACS RASS      | Ras and F protein-coding           |
| chr4-7697.6.616106 | -0.49947 | 0.908589 | -0.54972 | 0.58251  | 0.981636 | chr4  | 76974260 | 76976222  | +0 | NA | intron (Nintron (N  | 25489 NM_00130E   | 55752 Hs. 12819ENM_01824E     | ENSG00000SEPTIN11  | 11-Sep         | septin 11 protein-coding           |
| chr5-15.6.616106   | -0.49947 | 0.908589 | -0.54972 | 0.58251  | 0.981636 | chr5  | 1.52E+08 | 1.52E+08  | +0 | NA | intron (Nintron (N  | 5181 NM_00404E    | 475 Hs. 12521ENM_00404E       | ENSG00000CATOX1    | ATX1 HAH1      | antioxidant protein-coding         |
| chr6-173.6.616106  | -0.49947 | 0.908589 | -0.54972 | 0.58251  | 0.981636 | chr6  | 17397174 | 17397474  | +0 | NA | intron (NAluSx SIN  | 3729 NM_00636E    | 10486 Hs. 13290ENM_00636E     | ENSG00000CAP2      | -              | cyclase $\epsilon$ protein-coding  |
| chr6-144.6.616106  | -0.49947 | 0.908589 | -0.54972 | 0.58251  | 0.981636 | chr6  | 1.45E+08 | 1.45E+08  | +0 | NA | intron (NAluSz SIN  | 149973 NR_13277E  | 1.07E+08 NR_13277E            | SNORA98            | -              | small nucsnoRNA                    |
| chr8-140.6.616106  | -0.49947 | 0.908589 | -0.54972 | 0.58251  | 0.981636 | chr8  | 1.41E+08 | 1.41E+08  | +0 | NA | intron (NLIMD LINE  | -76003 NR_02989E  | 442893 NR_02989E              | ENSG00000MIR151A   | MIR151 MI      | microRNA ncRNA                     |
| chr9-12.6.616106   | -0.49947 | 0.908589 | -0.54972 | 0.58251  | 0.981636 | chr9  | 1.29E+08 | 1.29E+08  | +0 | NA | intron (Nintron (N  | 38235 NR_16319E   | 56904 Hs. 46023ENM_02014E     | ENSG00000SH3GLB2   | PP6569 PF      | SH3 domain protein-coding          |
| chrX-535.6.616106  | -0.49947 | 0.908589 | -0.54972 | 0.58251  | 0.981636 | chrX  | 53599611 | 53600587  | +0 | NA | intron (Nintron (N  | -42825 NR_029484  | 406889 NR_029484              | ENSG00000MIRLET7F2 | LET7F2 MI      | microRNA ncRNA                     |
| chr6-342.9.356674  | -0.42428 | 0.772917 | -0.54894 | 0.583048 | 0.981636 | chr6  | 34263321 | 34263604  | +0 | NA | Intergeni Intergeni | -14454 NM_001287  | 221491 Hs. 38130ENM_17850E    | ENSG00000SMIM29    | C6orf11 L      | small int protein-coding           |
| chr7-995.6.115552  | -0.38167 | 0.695293 | -0.54894 | 0.583049 | 0.981636 | chr7  | 99560731 | 99562605  | +0 | NA | intron (Nintron (N  | 2834 NM_00136E    | 79027 Hs. 59979ENM_02406E     | ENSG00000ZNF655    | VIK VIK        | zinc finger protein-coding         |
| chr2-190.9.340958  | -0.4214  | 0.767708 | -0.5489  | 0.583071 | 0.981636 | chr2  | 1.91E+08 | 1.91E+08  | +0 | NA | intron (NL2 LINE    | 42253 NM_01490E   | 2744 Hs. 11644ENM_01490E      | ENSG00000GLS       | AAD20 CAS      | glutamine protein-coding           |
| chr12-70.6.128338  | -0.37362 | 0.680693 | -0.54888 | 0.583084 | 0.981636 | chr12 | 7080128  | 7083591   | +0 | NA | intron (Nintron (N  | 10034 NM_001354   | 715 Hs. 524224NM_00173E       | ENSG00000C1R       | EDSPD1         | complement protein-coding          |
| chr1-466.6.477457  | 0.498275 | 0.908075 | 0.548716 | 0.5832   | 0.981636 | chr1  | 46635132 | 46635502  | +0 | NA | 3' UTR (N3' UTR (N  | -18426 NM_021404  | 148932 Hs. 632401NM_14527E    | ENSG00000MOB3C     | MOB1E MOB      | MOB kinase protein-coding          |
| chr1-230.6.477457  | 0.498275 | 0.908075 | 0.548716 | 0.5832   | 0.981636 | chr1  | 2.3E+08  | 2.3E+08   | +0 | NA | intron (Nintron (N  | 136145 NM_004481  | 2590 Hs. 743964NM_004481E     | ENSG00000GALNT2    | GalNAc-T2      | polypeptide protein-coding         |
| chr10-27.6.477457  | 0.498275 | 0.908075 | 0.548716 | 0.5832   | 0.981636 | chr10 | 27214151 | 27215011  | +0 | NA | intron (Nintron (N  | 25905 NM_001301   | 143570 Hs. 530597NM_14569E    | ENSG00000ACDB5     | acyl-CoA       | protein-coding                     |
| chr11-74.6.477457  | 0.498275 | 0.908075 | 0.548716 | 0.5832   | 0.981636 | chr11 | 74867984 | 74869379  | +0 | NA | intron (NLIPA14 LI  | 80410 NM_00127C   | 143570 Hs. 37014ENM_18296E    | ENSG00000XRR1A     | -              | X-ray rac protein-coding           |
| chr12-13.6.477457  | 0.498275 | 0.908075 | 0.548716 | 0.5832   | 0.981636 | chr12 | 1.32E+08 | 1.32E+08  | +0 | NA | intron (Nintron (N  | 24291 NR_00297E   | 677829 Hs. 74240ENR_00297E    | ENSG00000SNORA49   | ACA49          | small nucsnoRNA                    |
| chr19-56.6.477457  | 0.498275 | 0.908075 | 0.548716 | 0.5832   | 0.981636 | chr19 | 56398212 | 56399655  | +0 | NA | non-codiron-codir   | -5081 NM_00115E   | 147949 Hs. 146854NM_15247E    | ENSG00000ZNF583    | -              | zinc finger protein-coding         |
| chr20-33.6.477457  | 0.498275 | 0.908075 | 0.548716 | 0.5832   | 0.981636 | chr20 | 33670969 | 33671769  | +0 | NA | intron (NL3 LINE C  | 3059 NM_03123E    | 63941 Hs. 51698ENM_03123E     | ENSG00000NECAB3    | APBA2BP E      | zinc finger protein-coding         |
| chr4-714.6.477457  | 0.498275 | 0.908075 | 0.548716 | 0.5832   | 0.981636 | chr4  | 71450603 | 71451564  | +0 | NA | intron (Nintron (N  | 112030 NM_00375E  | 8671 Hs. 5462 NM_00375E       | ENSG00000SLC44A    | HNBC1 KNE      | solute $\alpha$ protein-coding     |
| chr7-554.6.477457  | 0.498275 | 0.908075 | 0.548716 | 0.5832   | 0.981636 | chr7  | 55491687 | 55492613  | +0 | NA | intron (Nintron (N  | 34730 NM_001321   | 81552 Hs. 488307NM_03079E     | ENSG00000VOPP1     | ECOP GASF      | VOPP1 WW protein-coding            |
| chrX-4791.6.477457 | 0.498275 | 0.908075 | 0.548716 | 0.5832   | 0.981636 | chrX  | 47915231 | 47916300  | +0 | NA | exon (NM exon (NM   | 78863 NM_001737   | 347344 Hs. 11442ENM_007137E   | ENSG00000ZNF81     | HFZ20 MR       | zinc finger protein-coding         |
| chr17-75.9.673289  | 0.414161 | 0.754996 | 0.548561 | 0.583307 | 0.981636 | chr17 | 7508202  | 7510150   | +0 | NA | exon (NM exon (NM   | 24810 NM_000937   | 5430 Hs. 270017NM_000937      | POLR2A             | POLR2 POL      | RNA polyn protein-coding           |
| chr19-55.9.673289  | 0.414161 | 0.754996 | 0.548561 | 0.583307 | 0.981636 | chr19 | 55302774 | 55304290  | +0 | NA | intron (NMIR3 SINE  | 19535 NM_03243C   | 84446 Hs. 182081NM_03243E     | ENSG00000BRSK1     | hSAD1          | BR serine protein-coding           |
| chr2-22.9.673289   | 0.414161 | 0.754996 | 0.548561 | 0.583307 | 0.981636 | chr2  | 49363214 | 49365390  | +0 | NA | intron (Nintron (N  | 8860 NM_01538C    | 25813 Hs. 505824NM_01538E     | ENSG00000SAMM50    | CGI-51 O       | SAMM50 sc protein-coding           |
| chr4-884.9.673289  | 0.414161 | 0.754996 | 0.548561 | 0.583307 | 0.981636 | chr4  | 88433460 | 88434046  | +0 | NA | intron (NMSTC LTR   | -23366 NM_01632E  | 51191 Hs. 26663 NM_01632E     | ENSG00000CHERC5    | CEB1 CEB       | HCT and protein-coding             |
| chr13-10.5.718617  | -0.55815 | 1.017837 | -0.54836 | 0.583441 | 0.981636 | chr13 | 1.03E+08 | 1.03E+08  | +0 | NA | intron (NAluJr SIN  | 40906 NM_00101C   | 196541 Hs. 50862ENM_00101E    | ENSG00000METTL21C  | C13orf39       | methyltransferase protein-coding   |
| chr5-698.12.09123  | -0.37475 | 0.683424 | -0.54835 | 0.583455 | 0.981636 | chr5  | 69895568 | 69895981  | +0 | NA | intron (NMER3 DNA   | 5796 NR_16065E    | 1.03E+08 Hs. 71115ENR_16065E  | LOC102724          | -              | POM121 trpseud                     |
| chr11-77.4.452555  | -0.59658 | 1.088532 | -0.54806 | 0.583652 | 0.981636 | chr11 | 77926999 | 77927773  | +0 | NA | intron (Nintron (N  | 67282 NM_033547   | 92105 Hs. 53372ENM_033547E    | ENSG00000INTS4     | INT4 MSTC      | integrator protein-coding          |
| chr15-55.4.452555  | -0.59658 | 1.088532 | -0.54806 | 0.583652 | 0.981636 | chr15 | 55987875 | 55988824  | +0 | NA | intron (NLH5 LINE   | 5263 NM_00132E    | 4734 Hs. 1565 NM_00615E       | ENSG00000NEDD4     | NEDD4-1 N      | NEDD4 E3 protein-coding            |
| chr16-88.4.452555  | -0.59658 | 1.088532 | -0.54806 | 0.583652 | 0.981636 | chr16 | 88407862 | 88408415  | +0 | NA | Intergeni Intergeni | -19333 NM_00136E  | 84627 Hs. 54925 NM_001127E    | ENSG00000ZNF469    | BCS BCS1       | zinc finger protein-coding         |
| chr19-79.4.452555  | -0.59658 | 1.088532 | -0.54806 | 0.583652 | 0.981636 | chr19 | 7984287  | 7985162   | +0 | NA | intron (NAGGC n S   | 20917 NM_00141E   | 1994 Hs. 18449ENM_00141E      | ENSG00000ELAVL1    | ELAV1 HUF      | ELAV like protein-coding           |
| chr2-2374.4.452555 | -0.59658 | 1.088532 | -0.54806 | 0.583652 | 0.981636 | chr2  | 2.37E+08 | 2.37E+08  | +0 | NA | intron (Nintron (N  | 3641 NR_10401E    | 79083 Hs. 10240ENM_02410E     | ENSG00000MLPH      | SLAC2          |                                    |

|            |          |           |          |           |          |          |       |          |          |   |   |    |                    |          |              |          |              |                   |                         |                                     |  |
|------------|----------|-----------|----------|-----------|----------|----------|-------|----------|----------|---|---|----|--------------------|----------|--------------|----------|--------------|-------------------|-------------------------|-------------------------------------|--|
| chr5-1317  | 6.682669 | -0.48828  | 0.895047 | -0.54554  | 0.585382 | 0.981636 | chr5  | 38483882 | 38486213 | + | 0 | NA | intron (Nintron (N | 39501    | NM_182801    | 133584   | Hs.20103     | NM_152405         | ENSG00000CEGLM          | AGRINL ACEGF like, protein-coding   |  |
| chr5-1317  | 6.682669 | -0.48828  | 0.895047 | -0.54554  | 0.585382 | 0.981636 | chr5  | 1.32E+08 | 1.32E+08 | + | 0 | NA | intron (NAluSz SIN | 79072    | NM_001008    | 96459    | Hs.591275    | NM_133375         | ENSG00000FN1P1          | - folliculiprotein-coding           |  |
| chr5-1793  | 6.682669 | -0.48828  | 0.895047 | -0.54554  | 0.585382 | 0.981636 | chr5  | 1.79E+08 | 1.79E+08 | + | 0 | NA | intron (Nintron (N | 28917    | NM_014244    | 9509     | Hs.23871     | NM_014244         | ENSG00000CADAMTS2       | ADAM-TS2 ADAM metz protein-coding   |  |
| chr6-3195  | 6.682669 | -0.48828  | 0.895047 | -0.54554  | 0.585382 | 0.981636 | chr6  | 31951289 | 31952800 | + | 0 | NA | TTS (NM_C          | 4886     | NR_031601    | 1E+08    | NR_031601    | ENSG00000MIR1236  | MIRN1236 microRNA ncRNA |                                     |  |
| chr6-1135  | 6.682669 | -0.48828  | 0.895047 | -0.54554  | 0.585382 | 0.981636 | chr6  | 1.14E+08 | 1.14E+08 | + | 0 | NA | non-codiron-codir  | -24337   | NR_125845    | 1.02E+08 | Hs.12928CN   | R_125845          | ENSG00000HDAC2-AS2      | HDAC2 ancncRNA                      |  |
| chr7-1385  | 6.682669 | -0.48828  | 0.895047 | -0.54554  | 0.585382 | 0.981636 | chr7  | 1.39E+08 | 1.39E+08 | + | 0 | NA | intron (Nintron (N | 96750    | NM_001331    | 136306   | Hs.99414     | NM_174955         | ENSG00000CSVOP1         | - SVOP like protein-coding          |  |
| chr9-3245  | 6.682669 | -0.48828  | 0.895047 | -0.54554  | 0.585382 | 0.981636 | chr9  | 32496191 | 32497698 | + | 0 | NA | intron (NLM2 LIN   | 29252    | NM_014314    | 23586    | Hs.190622    | NM_014314         | ENSG00000DDX58          | RIG-I RIC DEX H-bc protein-coding   |  |
| chr1-7741  | 9.366382 | -0.41606  | 0.762807 | -0.54543  | 0.585457 | 0.981636 | chr1  | 77417962 | 77419000 | + | 0 | NA | intron (Nintron (N | 135394   | NM_012093    | 26289    | Hs.559715    | NM_012093         | ENSG00000AK5            | AK6 adenylate protein-coding        |  |
| chr11-625  | 9.366382 | -0.41606  | 0.762807 | -0.54543  | 0.585457 | 0.981636 | chr11 | 62643342 | 62644363 | + | 0 | NA | intron (NAluJo SIN | 2761     | NM_001325    | 23193    | Hs.595071    | NM_014611         | ENSG00000GANAB          | G2AN GII glucosidase protein-coding |  |
| chr15-784  | 9.366382 | -0.41606  | 0.762807 | -0.54543  | 0.585457 | 0.981636 | chr15 | 78439963 | 78442843 | + | 0 | NA | intron (Nintron (N | 2982     | NM_001324    | 3658     | Hs.436031    | NM_004133         | ENSG00000IREB2          | AC03 IRE-iron resp protein-coding   |  |
| chr16-692  | 9.366382 | -0.41606  | 0.762807 | -0.54543  | 0.585457 | 0.981636 | chr16 | 69284472 | 69285104 | + | 0 | NA | intron (NAluSx3 SI | -26562   | NM_013245    | 27183    | Hs.12842CN   | NM_013245         | ENSG00000VPS4A          | SKD1 SKD1 vacuolar protein-coding   |  |
| chr2-3728  | 9.366382 | -0.41606  | 0.762807 | -0.54543  | 0.585457 | 0.981636 | chr2  | 37281137 | 37282160 | + | 0 | NA | intron (NMLT1A LI  | 35436    | NM_005813    | 23683    | Hs.660757    | NM_005813         | ENSG00000PRKD3          | EPK2 PKC-protein k protein-coding   |  |
| chr2-6122  | 9.366382 | -0.41606  | 0.762807 | -0.54543  | 0.585457 | 0.981636 | chr2  | 61222624 | 61223444 | + | 0 | NA | intron (Nintron (N | 45616    | NR_152211    | 130872   | Hs.655602    | NM_152392         | ENSG00000AHSAP2         | AHA1 AHS activator pseudo           |  |
| chr3-3     | 9.366382 | -0.41606  | 0.762807 | -0.54543  | 0.585457 | 0.981636 | chr3  | 12834073 | 12840697 | + | 0 | NA | intron (NLM2E4 LI  | 3065     | NM_001007    | 6161     | Hs.265174    | NM_000994         | ENSG00000RPL32          | L32 PP993 ribosomal protein-coding  |  |
| chr4-1195  | 9.366382 | -0.41606  | 0.762807 | -0.54543  | 0.585457 | 0.981636 | chr4  | 1.2E+08  | 1.2E+08  | + | 0 | NA | intron (NMER5A DNA | 75238    | NR_037630    | 645513   | Hs.677545    | NR_037630         | ENSG00000LOC645513      | - septin 7 pseudo                   |  |
| chr5-3891  | 9.366382 | -0.41606  | 0.762807 | -0.54543  | 0.585457 | 0.981636 | chr5  | 38917359 | 38919089 | + | 0 | NA | intron (NMER115 DN | 72212    | NM_001322    | 9180     | Hs.120655    | NM_003995         | ENSG00000OSMR           | IL-31R-beoncotat protein-coding     |  |
| chr6-154   | 9.366382 | -0.41606  | 0.762807 | -0.54543  | 0.585457 | 0.981636 | chr6  | 1.55E+08 | 1.55E+08 | + | 0 | NA | intron (Nintron (N | -42963   | NR_036100    | 1E+08    | NR_036100    | ENSG00000MIR1273C | - microRNA ncRNA        |                                     |  |
| chr10-62   | 9.640007 | -0.41171  | 0.754487 | -0.545365 | 0.585502 | 0.981636 | chr10 | 6233310  | 6234521  | + | 0 | NA | non-codiron-codir  | 30983    | NM_004566    | 5209     | Hs.195471    | NM_004566         | ENSG00000PFKFB3         | IPPK2 PFK6-phospho protein-coding   |  |
| chr10-615  | 9.640007 | -0.41171  | 0.754487 | -0.545365 | 0.585502 | 0.981636 | chr10 | 61902352 | 61903132 | + | 0 | NA | intron (Nintron (N | 1043     | NM_032195    | 84159    | Hs.535297    | NM_032195         | ENSG00000ARID5B         | DESKT MR AT-rich iprotein-coding    |  |
| chr12-577  | 9.640007 | -0.41171  | 0.754487 | -0.545365 | 0.585502 | 0.981636 | chr12 | 57784994 | 57787850 | + | 0 | NA | intron (Nintron (N | 3635     | NM_001172    | 10102    | Hs.632704    | NM_005725         | ENSG00000TSPM           | EFTS EFTS Ts transl protein-coding  |  |
| chr2-227   | 9.640007 | -0.41171  | 0.754487 | -0.545365 | 0.585502 | 0.981636 | chr2  | 2.28E+08 | 2.28E+08 | + | 0 | NA | exon (NM exon (NM  | 52612    | NM_001133    | 3267     | Hs.352962    | NM_004504         | ENSG00000AGFG1          | HRB SAR Far GAP wiprotein-coding    |  |
| chr3-4937  | 9.640007 | -0.41171  | 0.754487 | -0.545365 | 0.585502 | 0.981636 | chr3  | 49371575 | 49373527 | + | 0 | NA | intron (NAluV SINE | -13951   | NM_001325    | 2876     | Hs.76686     | NM_000581         | ENSG00000GPIX1          | GPXD GSH glutathic protein-coding   |  |
| chr2-6647  | 9.838207 | -0.42908  | 0.786869 | -0.5453   | 0.585545 | 0.981636 | chr2  | 66475545 | 66476204 | + | 0 | NA | intron (Nintron (N | -35544   | NR_046625    | 1.01E+08 | Hs.734695    | NR_046625         | ENSG00000MEIS1-AS2      | MEIS1-AS1 MEIS1 antncRNA            |  |
| chr5-1408  | 9.838207 | -0.42908  | 0.786869 | -0.5453   | 0.585545 | 0.981636 | chr5  | 1.41E+08 | 1.41E+08 | + | 0 | NA | intron (NAluSc8 SI | 5182     | NM_002109    | 3035     | Hs.528035    | NM_002109         | ENSG00000HARS           | CM2W HRS histidyl- protein-coding   |  |
| chr1-1991  | 9.282253 | -0.43134  | 0.791045 | -0.54528  | 0.58556  | 0.981636 | chr1  | 19912380 | 19912579 | + | 0 | NA | 3' UTR (N3' UTR (N | 11138    | NM_014585    | 30814    | Hs.272372    | NM_014585         | ENSG00000PLAZG2E        | G1IE sPLA phospholiprotein-coding   |  |
| chr14-731  | 8.167809 | -0.468247 | 0.85874  | -0.545272 | 0.585566 | 0.981636 | chr14 | 73161265 | 73161561 | + | 0 | NA | intron (Nintron (N | 24906    | NM_007318    | 5663     | Hs.3260      | NM_000021         | ENSG00000PSENI          | ACNIN34B p preniliprotein-coding    |  |
| chr22-387  | 8.946065 | -0.4305   | 0.789629 | -0.54519  | 0.585621 | 0.981636 | chr22 | 38738711 | 38739408 | + | 0 | NA | intron (Nintron (N | 16407    | NM_001195    | 25777    | Hs.517622    | NM_015374         | ENSG00000SUN2           | UNCN8V3 Sadl and protein-coding     |  |
| chr10-792  | 6.64153  | -0.49191  | 0.902434 | -0.54509  | 0.58569  | 0.981636 | chr10 | 79222378 | 79222738 | + | 0 | NA | intron (Nintron (N | -124911  | NM_005725    | 10105    | Hs.381072    | NM_005725         | ENSG00000PPIF           | CYP3 Cyp-peptidyl protein-coding    |  |
| chr14-311  | 6.64153  | -0.49191  | 0.902434 | -0.54509  | 0.58569  | 0.981636 | chr14 | 31172816 | 31173392 | + | 0 | NA | intron (Nintron (N | 34689    | NM_015382    | 25831    | Hs.708017    | NM_015382         | ENSG00000HECTD1         | EULIR HECT dome protein-coding      |  |
| chr15-658  | 6.64153  | -0.49191  | 0.902434 | -0.54509  | 0.58569  | 0.981636 | chr15 | 65880991 | 65882644 | + | 0 | NA | intron (Nintron (N | 12326    | NM_001206    | 8766     | Hs.321541    | NM_004663         | ENSG00000RAB11A         | YL8 RAB11A, n protein-coding        |  |
| chr15-825  | 6.64153  | -0.49191  | 0.902434 | -0.54509  | 0.58569  | 0.981636 | chr15 | 82989703 | 82990465 | + | 0 | NA | TTS (NM_C          | 3874     | NM_031452    | 83640    | Hs.80624     | NM_031452         | ENSG00000CRAMAC         | C15orf18 RNA guaniprotein-coding    |  |
| chr2-3945  | 6.64153  | -0.49191  | 0.902434 | -0.54509  | 0.58569  | 0.981636 | chr2  | 39458485 | 39459480 | + | 0 | NA | intron (NLM2E1 LIN | 21566    | NR_037875    | 728730   | Hs.655344    | NR_037875         | ENSG00000MAP4K3-D1      | MAP4K3 dincRNA                      |  |
| chr2-2066  | 6.64153  | -0.49191  | 0.902434 | -0.54509  | 0.58569  | 0.981636 | chr2  | 2.06E+08 | 2.06E+08 | + | 0 | NA | intron (NAluV SINE | 42439    | NM_001177    | 54891    | Hs.443915    | NM_017755         | ENSG00000INOS8D         | - INOS8 conprotein-coding           |  |
| chr20-938  | 6.64153  | -0.49191  | 0.902434 | -0.54509  | 0.58569  | 0.981636 | chr20 | 9385453  | 9386328  | + | 0 | NA | intron (NSVA_A Ret | 78090    | NM_000933    | 5332     | Hs.472101    | NM_000933         | ENSG00000PLCB4          | ARCND2 P phospholiprotein-coding    |  |
| chr20-595  | 6.64153  | -0.49191  | 0.902434 | -0.54509  | 0.58569  | 0.981636 | chr20 | 59942541 | 59943180 | + | 0 | NA | intron (Nintron (N | 2471     | NM_001190    | 63939    | Hs.54973     | NM_022105         | ENSG00000FAM217B        | C20orf177 family wiprotein-coding   |  |
| chr3-1005  | 6.64153  | -0.49191  | 0.902434 | -0.54509  | 0.58569  | 0.981636 | chr3  | 1E+08    | 1E+08    | + | 0 | NA | 3' UTR (N3' UTR (N | -10677   | NR_020202    | 55161    | Hs.439152    | NM_020202         | ENSG00000CNIT2          | HEL-5-8a nitrilase protein-coding   |  |
| chr4-4194  | 6.64153  | -0.49191  | 0.902434 | -0.54509  | 0.58569  | 0.981636 | chr4  | 41944108 | 41946296 | + | 0 | NA | intron (Nintron (N | 9773     | NM_018125    | 55161    | Hs.31082     | NM_018125         | ENSG00000TMEM33         | 1600019D1 transmemt protein-coding  |  |
| chr4-8296  | 6.64153  | -0.49191  | 0.902434 | -0.54509  | 0.58569  | 0.981636 | chr4  | 82968895 | 82969876 | + | 0 | NA | intron (NLM2C LINE | 41438    | NR_110255    | 132660   | Hs.96952     | NM_194282         | ENSG00000LINS5A         | CCDC1 J Lin-15 Df protein-coding    |  |
| chr5-6938  | 6.64153  | -0.49191  | 0.902434 | -0.54509  | 0.58569  | 0.981636 | chr5  | 69386660 | 69388115 | + | 0 | NA | intron (Nintron (N | 15933    | NM_133335    | 5884     | Hs.16184     | NM_002875         | ENSG00000RAD17          | CCXC HRAI RAD17 pf protein-coding   |  |
| chr7-4441  | 6.64153  | -0.49191  | 0.902434 | -0.54509  | 0.58569  | 0.981636 | chr7  | 44419345 | 44419564 | + | 0 | NA | intron (NLM2A LIN  | 71204    | NM_015332    | 23386    | Hs.488171    | NM_015332         | ENSG00000NUDCD3         | NudCL NudC dome protein-coding      |  |
| chr7-8174  | 6.64153  | -0.49191  | 0.902434 | -0.54509  | 0.58569  | 0.981636 | chr7  | 81747074 | 81748753 | + | 0 | NA | intron (NAluSx SIN | 22134    | NM_001010    | 3082     | Hs.396530    | NM_000601         | ENSG00000HGF            | DFNB39 F-hepatocyt protein-coding   |  |
| chr7-1575  | 6.64153  | -0.49191  | 0.902434 | -0.54509  | 0.58569  | 0.981636 | chr7  | 1.57E+08 | 1.57E+08 | + | 0 | NA | intron (Nintron (N | 40596    | NM_058245    | 10049    | Hs.490745    | NM_005494         | ENSG00000DNABJ6         | DJ4 DnaJ DnaJ heat protein-coding   |  |
| chr8-2816  | 6.64153  | -0.49191  | 0.902434 | -0.54509  | 0.58569  | 0.981636 | chr8  | 28160506 | 28161412 | + | 0 | NA | intron (NAluSx SIN | 67820    | NM_001284    | 55140    | Hs.491335    | NM_018091         | ENSG00000CELP3          | KAT9 heator protein-coding          |  |
| chr8-1406  | 6.64153  | -0.49191  | 0.902434 | -0.54509  | 0.58569  | 0.981636 | chr8  | 1.41E+08 | 1.41E+08 | + | 0 | NA | intron (NLM2B LINE | 20530    | NM_001352    | 5747     | Hs.395482    | NM_005607         | ENSG00000PTK2           | FADK FAK protein t protein-coding   |  |
| chr1-1982  | 8.88921  | -0.43029  | 0.789614 | -0.54494  | 0.585794 | 0.981636 | chr1  | 1.98E+08 | 1.98E+08 | + | 0 | NA | intron (NLM2A LIN  | 55243    | NM_133494    | 140609   | Hs.24119     | NM_133494         | ENSG00000CNEK7          | - NIMA rel protein-coding           |  |
| chr12-925  | 8.88921  | -0.43029  | 0.789614 | -0.54494  | 0.585794 | 0.981636 | chr12 | 92856382 | 92857471 | + | 0 | NA | intron (NAluJr SIN | 72369    | NM_003566    | 8411     | Hs.567367    | NM_003566         | ENSG00000EEA1           | MST105 M early enc protein-coding   |  |
| chr17-44C  | 8.88921  | -0.43029  | 0.789614 | -0.54494  | 0.585794 | 0.981636 | chr17 | 44054497 | 44054833 | + | 0 | NA | intron (Nintron (N | 12006    | NM_001371445 | 12843    | NM_001371428 |                   |                         |                                     |  |
| chr2-2075  | 8.88921  | -0.43029  | 0.789614 | -0.54494  | 0.585794 | 0.981636 | chr2  | 2.08E+08 | 2.08E+08 | + | 0 | NA | intron (NAluSx1 SI | 12368    | NM_018247    | 55754    | Hs.108533    | NM_018247         | ENSG00000TMEM30A        | C6orf67 C transmemt protein-coding  |  |
| chr6-7527  | 8.88921  | -0.43029  | 0.789614 | -0.54494  | 0.585794 | 0.981636 | chr6  | 75271786 | 75273062 | + | 0 | NA | intron (NLM2E1 LI  | -9061    | NR_036214    | 1E+08    | NR_036214    | ENSG00000MIR4253  | - microRNA ncRNA        |                                     |  |
| chr1-2287  | 6.444176 | -0.494447 | 0.907715 | -0.544716 | 0.585949 | 0.981636 | chr1  | 22870824 | 22873750 | + | 0 | NA | intron (NMLT1E2 LI | 62519897 | 62520940     | 77102    | Hs.209155    | NM_014495         | ENSG00000ANGPTL3        | ANG-5 ANG angiopoie protein-coding  |  |
| chr10-4951 | 6.4      |           |          |           |          |          |       |          |          |   |   |    |                    |          |              |          |              |                   |                         |                                     |  |



|           |          |          |          |          |          |          |       |          |          |   |   |    |                                        |                             |                      |                     |                            |                       |
|-----------|----------|----------|----------|----------|----------|----------|-------|----------|----------|---|---|----|----------------------------------------|-----------------------------|----------------------|---------------------|----------------------------|-----------------------|
| chr17-395 | 10.17773 | 0.398975 | 0.734925 | 0.542878 | 0.587214 | 0.981636 | chr17 | 39983754 | 39996546 | + | 0 | NA | exon (NM_exon (NM_9343 NM_002806       | 5709 Hs.12970 NM_002806     | ENSG000003PSMD3      | P58 RPN3            | proteasome protein-coding  |                       |
| chr19-256 | 10.17773 | 0.398975 | 0.734925 | 0.542878 | 0.587214 | 0.981636 | chr19 | 25995177 | 25995652 | + | 0 | NA | Intergeni ALR Alpha -1798017 NR_146733 | 1.02E+08 Hs.567934NR_110687 | ENSG000001LOC101927- |                     | uncharactericRNA           |                       |
| chr19-477 | 10.17773 | 0.398975 | 0.734925 | 0.542878 | 0.587214 | 0.981636 | chr19 | 47701282 | 47702714 | + | 0 | NA | exon (NM_exon (NM_11424 NM_014601      | 30846 Hs.744962NM_014601    | ENSG000004EHD2       | PAST2               | EH domain protein-coding   |                       |
| chr2-105  | 10.17773 | 0.398975 | 0.734925 | 0.542878 | 0.587214 | 0.981636 | chr2  | 1.05E+08 | 1.05E+08 | + | 0 | NA | 3' UTR (N3' UTR (N_9436 NM_001286      | 79074 Hs.549577NM_024093    | ENSG000002C2orf49    | asw                 | chromosome protein-coding  |                       |
| chr1-6674 | 9.389956 | -0.42034 | 0.7743   | -0.54287 | 0.58722  | 0.981636 | chr1  | 66742960 | 66743269 | + | 0 | NA | 3' UTR (N3' UTR (N_9345 NM_152666      | 200132 Hs.479222NM_152666   | ENSG000001CTCX1D1    |                     | telomeric protein-coding   |                       |
| chr20-215 | 5.922164 | 0.51814  | 0.955188 | 0.542449 | 0.587509 | 0.981636 | chr20 | 21365546 | 21366689 | + | 0 | NA | intron (N(TA)n Sin 31409 NM_033176     | 644524                      | NM_033176            | ENSG000002CNKX2-4   | NKX2.4 NKX2 homec          | protein-coding        |
| chr3-815  | 5.922164 | 0.51814  | 0.955188 | 0.542449 | 0.587509 | 0.981636 | chr3  | 81532035 | 81534365 | + | 0 | NA | intron (Nintron (N_228445 NM_000158    | 2632 Hs.436062NM_000158     | ENSG000001GBE1       | APBD GBE1           | 1,4-alpha protein-coding   |                       |
| chr3-1136 | 5.922164 | 0.51814  | 0.955188 | 0.542449 | 0.587509 | 0.981636 | chr3  | 1.14E+08 | 1.14E+08 | + | 0 | NA | intron (Nintron (N_22592 NM_001005     | 205717 Hs.632572NM_001005   | ENSG000001USF3       | KIAA2018            | upstream protein-coding    |                       |
| chr5-1791 | 5.922164 | 0.51814  | 0.955188 | 0.542449 | 0.587509 | 0.981636 | chr5  | 1.79E+08 | 1.79E+08 | + | 0 | NA | intron (Nintron (N_67260 NM_014594     | 30832 Hs.272322NM_014594    | ENSG000002ZNF354C    | KID3                | zinc fing protein-coding   |                       |
| chr7-5485 | 5.922164 | 0.51814  | 0.955188 | 0.542449 | 0.587509 | 0.981636 | chr7  | 5489097  | 5491121  | + | 0 | NA | exon (NM_exon (NM_5808 NR_03031E       | 693174                      | NR_03031E            | ENSG000001MIR589    | MIRN589                    | lmiRNA ncRNA          |
| chr19-404 | 10.21102 | 0.401559 | 0.740366 | 0.542379 | 0.587557 | 0.981636 | chr19 | 4047126  | 4048424  | + | 0 | NA | exon (NM_exon (NM_17754 NM_001317      | 51341 Hs.591384NM_015898    | ENSG000002ZBTB7A     | FBI-1 FBI zinc fing | protein-coding             |                       |
| chr11-356 | 6.582825 | -0.50556 | 0.932118 | -0.54237 | 0.587561 | 0.981636 | chr11 | 35665123 | 35665701 | + | 0 | NA | intron (N(LIME3B LI 2637 NM_017583     | 54765 Hs.192103NM_017583    | ENSG000001TRIM44     | AN3 DIPB            | tripartit protein-coding   |                       |
| chr1-285  | 6.674811 | -0.48637 | 0.896868 | -0.5423  | 0.58761  | 0.981636 | chr1  | 28536319 | 28537056 | + | 0 | NA | intron (Nintron (N_16330 NR_003105     | 54952 Hs.533622NM_017844    | ENSG000001TRNAUIAP   | PRO1902 S           | tRNA sele protein-coding   |                       |
| chr1-2917 | 6.674811 | -0.48637 | 0.896868 | -0.5423  | 0.58761  | 0.981636 | chr1  | 29178254 | 29179345 | + | 0 | NA | intron (Nintron (N_3056 NM_005622E     | 6429 Hs.469972NM_005622     | ENSG000001SRSF4      | SFRS4 SRF           | serine ar protein-coding   |                       |
| chr1-5181 | 6.674811 | -0.48637 | 0.896868 | -0.5423  | 0.58761  | 0.981636 | chr1  | 51811324 | 51813302 | + | 0 | NA | intron (NAluJb SIN 24089 NR_03158C     | 1E+08                       | NR_03158C            | ENSG000001MIR761    | hsa-mir-7                  | miRNA ncRNA           |
| chr1-2254 | 6.674811 | -0.48637 | 0.896868 | -0.5423  | 0.58761  | 0.981636 | chr1  | 2.25E+08 | 2.25E+08 | + | 0 | NA | 3' UTR (N3' UTR (N_25615 NM_002299E    | 3930 Hs.435166NM_002299     | ENSG000001LBR        | C14SR DHC           | lamin B 1 protein-coding   |                       |
| chr10-124 | 6.674811 | -0.48637 | 0.896868 | -0.5423  | 0.58761  | 0.981636 | chr10 | 1.25E+08 | 1.25E+08 | + | 0 | NA | intron (N(Tiger3a  14039 NM_212554     | 399818 Hs.720819NM_212554   | ENSG000001EEFIAMKT2  | C10orf13 EEEF1A     | lys protein-coding         |                       |
| chr11-351 | 6.674811 | -0.48637 | 0.896868 | -0.5423  | 0.58761  | 0.981636 | chr11 | 35168795 | 35169734 | + | 0 | NA | intron (N(L2b LINE  6314 NR_145794     | 1.1E+08                     | NR_145794            | SNORD164            | small nucsnRNA             |                       |
| chr12-327 | 6.674811 | -0.48637 | 0.896868 | -0.5423  | 0.58761  | 0.981636 | chr12 | 32725719 | 32727287 | + | 0 | NA | intron (N(TTC)n Si 29394 NM_00104C     | 51067 Hs.505231NM_015933    | ENSG000001YARS2      | CGI-04 ML           | tyrosyl-t protein-coding   |                       |
| chr12-64  | 6.674811 | -0.48637 | 0.896868 | -0.5423  | 0.58761  | 0.981636 | chr12 | 64071176 | 64071725 | + | 0 | NA | intron (N(L2b LINE  150846 NM_00130C   | 144577 Hs.444671NM_152444   | ENSG000001C12orf66   |                     | chromoson protein-coding   |                       |
| chr12-105 | 6.674811 | -0.48637 | 0.896868 | -0.5423  | 0.58761  | 0.981636 | chr12 | 1.05E+08 | 1.05E+08 | + | 0 | NA | intron (Nintron (N_45440 NM_15231E     | 121053 Hs.225562NM_15231E   | ENSG000001C12orf45   |                     | chromoson protein-coding   |                       |
| chr12-107 | 6.674811 | -0.48637 | 0.896868 | -0.5423  | 0.58761  | 0.981636 | chr12 | 1.08E+08 | 1.08E+08 | + | 0 | NA | intron (N(LIM4 LINE 16079 NM_001317    | 11137 Hs.506652NM_007062    | ENSG000001PWP1       | TEF-SSP-5 PWP1      | homc protein-coding        |                       |
| chr13-454 | 6.674811 | -0.48637 | 0.896868 | -0.5423  | 0.58761  | 0.981636 | chr13 | 4509629  | 45410025 | + | 0 | NA | intron (NAluSx1 SI -8335 NR_047031     | 1.01E+08 Hs.658033NR_047031 | ENSG000001SLC25A30-  | SLC25A30            | ncRNA                      |                       |
| chr14-106 | 6.674811 | -0.48637 | 0.896868 | -0.5423  | 0.58761  | 0.981636 | chr14 | 1.01E+08 | 1.01E+08 | + | 0 | NA | promoter-promoter- 287 NR_00320E       | 767590                      | NR_00320E            | ENSG000001SNORD114- | 14q                        | (II-12 small nucsnRNA |
| chr18-256 | 6.674811 | -0.48637 | 0.896868 | -0.5423  | 0.58761  | 0.981636 | chr18 | 256462   | 259677   | + | 0 | NA | intron (N(LIMEg LIN 9978 NM_005131     | 9984 Hs.712542NM_005131     | ENSG000001THOC1      | HPRI P84 THO        | compl protein-coding       |                       |
| chr2-6121 | 6.674811 | -0.48637 | 0.896868 | -0.5423  | 0.58761  | 0.981636 | chr2  | 61218280 | 61220111 | + | 0 | NA | intron (N(LIMC3 LIN 41777 NR_152211    | 130872 Hs.655602NM_152392   | ENSG000001AHS2P      | AHA1 AHS2           | activator pseudo           |                       |
| chr2-6652 | 6.674811 | -0.48637 | 0.896868 | -0.5423  | 0.58761  | 0.981636 | chr2  | 66520424 | 66521505 | + | 0 | NA | intron (Nintron (N_-53066 NR_110151E   | 1.01E+08 Hs.667942NR_110151 | ENSG000001LINC0179E  |                     | long intencRNA             |                       |
| chr2-2017 | 6.674811 | -0.48637 | 0.896868 | -0.5423  | 0.58761  | 0.981636 | chr2  | 2.02E+08 | 2.02E+08 | + | 0 | NA | intron (NAluSx1 SI -4478 NM_033066E    | 58538 Hs.63085 NM_033066    | ENSG000001MPP4       | ALS2CR5 E           | membrane protein-coding    |                       |
| chr2-227  | 6.674811 | -0.48637 | 0.896868 | -0.5423  | 0.58761  | 0.981636 | chr2  | 27890773 | 27893179 | + | 0 | NA | intron (N(MIR SINE  27238 NM_001284    | 23760 Hs.705322NM_012393    | ENSG000001PITPNB     | PI-TP-beta          | phosphatid protein-coding  |                       |
| chr3-115  | 6.674811 | -0.48637 | 0.896868 | -0.5423  | 0.58761  | 0.981636 | chr3  | 11554721 | 11557553 | + | 0 | NA | TTS (NM_C(TTS (NM_C_12661 NM_00112E    | 9686 Hs.740389NM_014667     | ENSG000001VGLL4      | VGL-4               | vestigial protein-coding   |                       |
| chr3-273  | 6.674811 | -0.48637 | 0.896868 | -0.5423  | 0.58761  | 0.981636 | chr3  | 27304311 | 27305168 | + | 0 | NA | intron (Nintron (N_64644 NM_199347     | 152110 Hs.506119NM_152534   | ENSG000001CNK10      |                     | NIMA rele protein-coding   |                       |
| chr3-1361 | 6.674811 | -0.48637 | 0.896868 | -0.5423  | 0.58761  | 0.981636 | chr3  | 1.36E+08 | 1.36E+08 | + | 0 | NA | exon (NM_exon (NM_49397 NR_001144E     | 55167 Hs.18631 NM_018133    | ENSG000001MSL2       | MSL-2 MSL           | masl protein-coding        |                       |
| chr3-1971 | 6.674811 | -0.48637 | 0.896868 | -0.5423  | 0.58761  | 0.981636 | chr3  | 1.97E+08 | 1.97E+08 | + | 0 | NA | exon (NM_exon (NM_47281 NR_00136E      | 1739 Hs.292545NM_004087     | ENSG000001DLG1       | DLGH1 SAF           | discs lar protein-coding   |                       |
| chr5-164  | 6.674811 | -0.48637 | 0.896868 | -0.5423  | 0.58761  | 0.981636 | chr5  | 16461712 | 16462923 | + | 0 | NA | intron (Nintron (N_3483 NM_033414      | 90441 Hs.60300 NM_033414    | ENSG000001ZNF622     | ZNF622              | zinc fing protein-coding   |                       |
| chr5-6911 | 6.674811 | -0.48637 | 0.896868 | -0.5423  | 0.58761  | 0.981636 | chr5  | 69118625 | 69120734 | + | 0 | NA | intron (N(LIME3G LI 25665 NM_002290E   | 64924 Hs.631977NM_022902    | ENSG000001SLC30A5    | ZNT5 ZNTL           | solute c protein-coding    |                       |
| chr5-1314 | 6.674811 | -0.48637 | 0.896868 | -0.5423  | 0.58761  | 0.981636 | chr5  | 1.31E+08 | 1.31E+08 | + | 0 | NA | intron (NAluJr SIN 164352 NM_00103E    | 56990 Hs.508825NM_020244    | ENSG000001CDC42SE2   | SPEC2               | CD42 nuc protein-coding    |                       |
| chr5-1464 | 6.674811 | -0.48637 | 0.896868 | -0.5423  | 0.58761  | 0.981636 | chr5  | 1.46E+08 | 1.46E+08 | + | 0 | NA | intron (Nintron (N_31662 NM_194251     | 134391 Hs.483732NM_194251   | ENSG000001GPR151     | GALR4 GAI           | G protein-coding           |                       |
| chr7-229  | 6.674811 | -0.48637 | 0.896868 | -0.5423  | 0.58761  | 0.981636 | chr7  | 22969838 | 22979753 | + | 0 | NA | intron (N(L2a LINE  43725 NM_032581    | 84668 Hs.85603 NM_032581    | ENSG000001FAM126A    | DRCTNNB1 f          | family wiprotein-coding    |                       |
| chr7-2332 | 6.674811 | -0.48637 | 0.896868 | -0.5423  | 0.58761  | 0.981636 | chr7  | 23323930 | 23329564 | + | 0 | NA | intron (N(LIP3 LIN 27408 NM_138444E    | 115416 Hs.87385 NM_138444   | ENSG000001MALSU1     | MALSU1              | miRNA tohcn protein-coding |                       |
| chr7-3001 | 6.674811 | -0.48637 | 0.896868 | -0.5423  | 0.58761  | 0.981636 | chr7  | 30016586 | 30019151 | + | 0 | NA | intron (NAluSx4 SI 8834 NR_04647E      | 55033 Hs.390833NM_017944    | ENSG000001FKBP14     | EDSKMH EK           | FKBP pro protein-coding    |                       |
| chr8-479  | 6.674811 | -0.48637 | 0.896868 | -0.5423  | 0.58761  | 0.981636 | chr8  | 47925222 | 47927867 | + | 0 | NA | intron (Nintron (N_33542 NM_001081     | 5591 Hs.491682NM_006904     | ENSG000001PRKDC      | DNA-PKC T           | protein k protein-coding   |                       |
| chr8-6708 | 6.674811 | -0.48637 | 0.896868 | -0.5423  | 0.58761  | 0.981636 | chr8  | 67088962 | 67088962 | + | 0 | NA | intron (Nintron (N_3793 NM_001291      | 79848 Hs.370147NM_024793    | ENSG000001CSP1       | CSP1 JBT            | centroson protein-coding   |                       |
| chr8-1002 | 6.674811 | -0.48637 | 0.896868 | -0.5423  | 0.58761  | 0.981636 | chr8  | 1E+08    | 1E+08    | + | 0 | NA | intron (Nintron (N_13805 NM_001352     | 25897 Hs.292882NM_015433    | ENSG000001RNFP19A    | RNFP19              | ring fing protein-coding   |                       |
| chr8-140  | 6.674811 | -0.48637 | 0.896868 | -0.5423  | 0.58761  | 0.981636 | chr8  | 1.41E+08 | 1.41E+08 | + | 0 | NA | intron (NAluSx1 SI 51860 NM_001164     | 27161 Hs.660189NM_012154    | ENSG000001AGO2       | CASC7 EIF           | argonaute protein-coding   |                       |
| chr9-154  | 6.674811 | -0.48637 | 0.896868 | -0.5423  | 0.58761  | 0.981636 | chr9  | 15437258 | 15440643 | + | 0 | NA | intron (N(LIMB4 LIN 16074 NR_161444E   | 6619 Hs.546295NM_003084     | ENSG000001SNAPC3     | PTFbeta s           | small nuc protein-coding   |                       |
| chr8-6717 | 7.5968   | 0.484871 | 0.894157 | 0.542266 | 0.587635 | 0.981636 | chr8  | 67174620 | 67174990 | + | 0 | NA | intron (Nintron (N_90957 NM_001291     | 79848 Hs.370147NM_024793    | ENSG000001CSP1       | CSP1 JBT            | centroson protein-coding   |                       |
| chr11-618 | 6.485315 | 0.49588  | 0.914677 | 0.542137 | 0.587724 | 0.981636 | chr11 | 61875737 | 61877593 | + | 0 | NA | intron (Nintron (N_1613 NR_106804      | 1.02E+08                    | NR_106804            | ENSG000001MIR6746   | hsa-mir-6                  | miRNA ncRNA           |
| chr11-12  | 6.485315 | 0.49588  | 0.914677 | 0.542137 | 0.587724 | 0.981636 | chr11 | 1.26E+08 | 1.26E+08 | + | 0 | NA | intron (Nintron (N_3995 NR_037647      | 55572 Hs.317193NM_017547    | ENSG000001FOXRED1    | FP634 HI            | FAD deper protein-coding   |                       |
| chr19-556 | 6.485315 | 0.49588  | 0.914677 | 0.542137 | 0.587724 | 0.981636 | chr19 | 55234030 | 55234852 | + | 0 | NA | intron (N(LIM4 LINE -3489 NR_106862    | 1.02E+08                    | NR_106862            | ENSG000001MIR6804   | hsa-mir-6                  | miRNA ncRNA           |
| chr2-2305 | 6.485315 | 0.49588  | 0.914677 | 0.542137 | 0.587724 | 0.981636 | chr2  | 2.3E+08  | 2.3E+08  | + | 0 | NA | intron (N(Tiger1 E -42473 NM_00120E    | 6672 Hs.369056NM_003113     | ENSG000001SP100      | lysp100b            | SP100 nuc protein-coding   |                       |
| chr4-165  | 6.485315 | 0.49588  | 0.914677 | 0.542137 | 0.587724 | 0.981636 | chr4  | 16507718 | 16508193 | + | 0 | NA | intron (Nintron (N_28192 NR_027697     | 202020 Hs.445319NM_152684   | ENSG000001TAPT1-AS1- | TAPT1               | antncRNA                   |                       |
| chr6-108  | 6.485315 | 0.49588  | 0.914677 | 0.542137 | 0.587724 | 0.981636 | chr6  | 1.08E+08 | 1.08E+08 | + | 0 | NA | intron (Nintron (N_41763 NM_00130C     | 8724 Hs.12102 NM_003793     | ENSG000001SNX3       | Grd19 MC            | sorting r protein-coding   |                       |
| chr1-1677 | 9.739852 | 0.419542 | 0.774015 | 0.542033 | 0.587795 | 0.981636 | chr1  | 1.68E+08 | 1.68E+08 | + | 0 | NA | intron (N                              |                             |                      |                     |                            |                       |



|           |          |          |          |          |          |          |       |          |          |   |   |    |                     |                   |          |           |                     |                     |            |                               |                |                |                |
|-----------|----------|----------|----------|----------|----------|----------|-------|----------|----------|---|---|----|---------------------|-------------------|----------|-----------|---------------------|---------------------|------------|-------------------------------|----------------|----------------|----------------|
| chr1-9152 | 10.68403 | 0.393666 | 0.727443 | 0.541164 | 0.588395 | 0.981636 | chr1  | 9152068  | 9152267  | + | 0 | NA | promoter-promoter-  | -390 NR_02961C    | 407040   | NR_02961C | ENSG000002MIR34A    | MIRN34A nmicroRNA   | ncRNA      |                               |                |                |                |
| chr8-1245 | 10.68403 | 0.393666 | 0.727443 | 0.541164 | 0.588395 | 0.981636 | chr8  | 1.25E+08 | 1.25E+08 | + | 0 | NA | exon (NM exon (NM   | 14174 NM_00500F   | 4715     | Hs.15977  | NR_00500F           | ENSG000002NDUFB9    | B22 C1-BE  | NADH:ubiquitin-protein-coding |                |                |                |
| chr1-1247 | 14.89476 | 0.335417 | 0.619864 | 0.541114 | 0.588429 | 0.981636 | chr1  | 1.25E+08 | 1.25E+08 | + | 0 | NA | IntergeniALR/Alpha  | 3210979 NR_00395E | 647121   | Hs.697682 | NR_00395E           | ENSG000002CEMBP1    | -          | emarginin f pseudo            |                |                |                |
| chr11-515 | 14.89476 | 0.335417 | 0.619864 | 0.541114 | 0.588429 | 0.981636 | chr11 | 51965636 | 51966224 | + | 0 | NA | IntergeniALR/Alpha  | 1556783 NR_02450A | 646813   | Hs.684175 | NR_02450A           | LOC646813           | -          | DEXH-box pseudo               |                |                |                |
| chr1-2361 | 3.735224 | 0.643333 | 1.189587 | 0.540804 | 0.588643 | 0.981636 | chr1  | 2.36E+08 | 2.36E+08 | + | 0 | NA | intron (N intron (N | 42758 NM_00327Z   | 7107     | Hs.49816C | NR_00327Z           | ENSG000002GPR137B   | TM7SF1     | G                             | protein-coding |                |                |
| chr12-476 | 8.822646 | -0.4387  | 0.811342 | -0.54071 | 0.588707 | 0.981636 | chr12 | 47661914 | 47662113 | + | 0 | NA | TTS (NM_C TTS (NM_C | 44017 NM_02460A   | 79657    | Hs.43785E | NR_02460A           | ENSG000002CRPAP3    | Tah1 hSpe  | RNA                           | polyn          | protein-coding |                |
| chr11-465 | 9.399664 | -0.41217 | 0.762958 | -0.54023 | 0.589037 | 0.981636 | chr11 | 46308733 | 46314674 | + | 0 | NA | intron (NAluSc SIN  | -21223 NM_20153Z  | 8525     | Hs.502461 | NR_00364F           | ENSG000002DGKZ      | DAGK5 DAC  | diacylgly                     | protein-coding |                |                |
| chr19-585 | 9.399664 | -0.41217 | 0.762958 | -0.54023 | 0.589037 | 0.981636 | chr19 | 58388250 | 58391922 | + | 0 | NA | intron (NAluSq2 SIN | 2817 NM_00100E    | 6193     | Hs.37810E | NR_00100E           | ENSG000002RPS5      | S5         | ribosomal                     | protein-coding |                |                |
| chr20-354 | 9.399664 | -0.41217 | 0.762958 | -0.54023 | 0.589037 | 0.981636 | chr20 | 35469829 | 35470544 | + | 0 | NA | intron (NLa2 LINE   | 10203 NM_00131E   | 11190    | Hs.44397E | NR_00718E           | ENSG000002CEP250    | C-NAP1 CF  | centrosom                     | protein-coding |                |                |
| chr3-1225 | 9.399664 | -0.41217 | 0.762958 | -0.54023 | 0.589037 | 0.981636 | chr3  | 1.23E+08 | 1.23E+08 | + | 0 | NA | TTS (NM_C TTS (NM_C | -16666 NM_00226A  | 3836     | Hs.16100E | NR_00226A           | ENSG000002KPNA1     | IPOA5 NPI  | karyopher                     | protein-coding |                |                |
| chr4-3865 | 9.399664 | -0.41217 | 0.762958 | -0.54023 | 0.589037 | 0.981636 | chr4  | 38694183 | 38698006 | + | 0 | NA | intron (NTigger20e  | -31466 NR_02680A  | 79667    | Hs.29275  | NR_024614           | ENSG000002KLF3-AS1  | -          | KLF3                          | antncRNA       |                |                |
| chr5-6237 | 9.399664 | -0.41217 | 0.762958 | -0.54023 | 0.589037 | 0.981636 | chr5  | 62373887 | 62374247 | + | 0 | NA | intron (NAluJr SIN  | 29838 NM_00134E   | 27292    | Hs.73166E | NR_01447E           | ENSG000002D1MT1     | D1M1 D1M1  | D1M1                          | rR             | protein-coding |                |
| chr5-6925 | 9.399664 | -0.41217 | 0.762958 | -0.54023 | 0.589037 | 0.981636 | chr5  | 69259789 | 69260962 | + | 0 | NA | intron (NAluX3 SIN  | 25489 NM_00179E   | 1022     | Hs.18429E | NR_00179E           | ENSG000002CDK7      | CAK CAK1   | cyclin                        | de             | protein-coding |                |
| chr7-7475 | 8.922491 | -0.42612 | 0.789086 | -0.54002 | 0.589187 | 0.981636 | chr7  | 74721087 | 74722002 | + | 0 | NA | intron (N(AT)n Sin  | 7374 NR_110044    | 1.02E+08 | Hs.65477E | NR_110044           | ENSG000002LOC10192E | -          | uncharactncRNA                |                |                |                |
| chr4-1027 | 7.024893 | 0.484244 | 0.896939 | 0.539885 | 0.589277 | 0.981636 | chr4  | 1.03E+08 | 1.03E+08 | + | 0 | NA | exon (NM exon (NM   | -76460 NR_136202  | 1.05E+08 | Hs.15833  | NR_136202           | LOC105377           | -          | uncharactncRNA                |                |                |                |
| chr21-157 | 8.468893 | -0.44587 | 0.825873 | -0.53988 | 0.589279 | 0.981636 | chr21 | 15781992 | 15782510 | + | 0 | NA | intron (NLMJ2 LINE  | 52269 NM_00135E   | 29761    | Hs.743994 | NR_01339E           | ENSG000002USP25     | USP21      | ubiquitin                     | protein-coding |                |                |
| chr12-53  | 6.138934 | -0.5267  | 0.975773 | -0.53978 | 0.58935  | 0.981636 | chr12 | 53008822 | 53009197 | + | 0 | NA | intron (NAluSg SIN  | 2553 NM_00133C    | 1975     | Hs.648394 | NR_001417           | ENSG000002EIF4B     | EIF-4B PF  | eukaryot                      | protein-coding |                |                |
| chr17-75  | 10.14445 | 0.396395 | 0.73482  | 0.539445 | 0.58958  | 0.981636 | chr17 | 75293707 | 75240285 | + | 0 | NA | exon (NM exon (NM   | 21595 NM_014001   | 23163    | Hs.87726  | NR_014001           | ENSG000002GGA3      | -          | golgi                         | ass            | protein-coding |                |
| chr19-347 | 10.14445 | 0.396395 | 0.73482  | 0.539445 | 0.58958  | 0.981636 | chr19 | 34737987 | 34742300 | + | 0 | NA | intron (N intron (N | 5900 NM_00102E    | 339318   | Hs.72047E | NR_00102E           | ENSG000002ZNF181    | HHZ181     | zinc                          | fin            | protein-coding |                |
| chr7-7647 | 10.14445 | 0.396395 | 0.73482  | 0.539445 | 0.58958  | 0.981636 | chr7  | 76470565 | 76471901 | + | 0 | NA | non-codirnon-codir  | 3767 NR_00326E    | 619190   | Hs.60997E | NR_00326E           | FDPSP2              | FDPSP2 PF  | farnesyl                      | pseudo         |                |                |
| chr1-3233 | 9.391806 | -0.4108  | 0.761577 | -0.5394  | 0.589609 | 0.981636 | chr1  | 32302908 | 32306068 | + | 0 | NA | intron (NAluJr SIN  | 12405 NM_00496A   | 3065     | Hs.88556  | NR_00496A           | ENSG000002HDAC1     | GON-10 HH  | histone                       | protein-coding |                |                |
| chr1-1785 | 9.391806 | -0.4108  | 0.761577 | -0.5394  | 0.589609 | 0.981636 | chr1  | 1.79E+08 | 1.79E+08 | + | 0 | NA | intron (NAluJr SIN  | 47999 NM_00467E   | 9068     | Hs.591474 | NR_00467E           | ENSG000002ANGPTL1   | ANG3 ANG   | angiopoie                     | protein-coding |                |                |
| chr11-12  | 9.391806 | -0.4108  | 0.761577 | -0.5394  | 0.589609 | 0.981636 | chr11 | 1.2E+08  | 1.2E+08  | + | 0 | NA | intron (N intron (N | -44778 NM_01461E  | 2900     | Hs.53873E | NR_01461E           | ENSG000002GRIK4     | EAA1 GRIK  | glutamate                     | protein-coding |                |                |
| chr14-582 | 9.391806 | -0.4108  | 0.761577 | -0.5394  | 0.589609 | 0.981636 | chr14 | 58292810 | 58295644 | + | 0 | NA | intron (NHSMAR1 DN  | 3910 NR_029434    | 379025   | Hs.53108E | NR_029434           | ENSG000002PSMA3-AS1 | -          | PSMA3                         | antncRNA       |                |                |
| chr15-635 | 9.391806 | -0.4108  | 0.761577 | -0.5394  | 0.589609 | 0.981636 | chr15 | 63259681 | 63261955 | + | 0 | NA | intron (N intron (N | -16732 NM_00114E  | 83464    | Hs.51170E | NR_031301           | ENSG000002APH1B     | APH-1B PF  | aph-1                         | non            | protein-coding |                |
| chr16-162 | 9.391806 | -0.4108  | 0.761577 | -0.5394  | 0.589609 | 0.981636 | chr16 | 16272594 | 16273781 | + | 0 | NA | intron (NLa2 LINE   | -26972 NR_12870E  | 1.04E+08 | NR_12870E | ENSG000002MIR3179-4 | hsa-mir-5           | microRNA   | ncRNA                         |                |                |                |
| chr22-385 | 9.391806 | -0.4108  | 0.761577 | -0.5394  | 0.589609 | 0.981636 | chr22 | 58292810 | 58295644 | + | 0 | NA | exon (NM exon (NM   | 5871 NM_00130C    | 23466    | Hs.592201 | NR_01429E           | ENSG000002CBX6      | -          | chromoxo                      | protein-coding |                |                |
| chr3-2744 | 9.391806 | -0.4108  | 0.761577 | -0.5394  | 0.589609 | 0.981636 | chr3  | 27448109 | 27449200 | + | 0 | NA | non-codirnon-codir  | 8124 NM_00125E    | 9497     | Hs.25007E | NR_00361E           | ENSG000002SLCAA7    | NBC2 NBC2  | solute                        | c              | protein-coding |                |
| chr3-1237 | 9.391806 | -0.4108  | 0.761577 | -0.5394  | 0.589609 | 0.981636 | chr3  | 1.24E+08 | 1.24E+08 | + | 0 | NA | intron (N intron (N | 90327 NM_05302E   | 4638     | Hs.47737E | NR_00596E           | ENSG000002MYLK      | AAT7 KRP   | myosin                        | l              | protein-coding |                |
| chr4-1865 | 9.391806 | -0.4108  | 0.761577 | -0.5394  | 0.589609 | 0.981636 | chr4  | 1.87E+08 | 1.87E+08 | + | 0 | NA | IntergeniMLT1E1A L  | -28818 NM_00595E  | 4543     | Hs.243467 | NR_00595E           | ENSG000002MTNR1A    | MEL-1A-IR  | melatonin                     | protein-coding |                |                |
| chr5-122  | 9.391806 | -0.4108  | 0.761577 | -0.5394  | 0.589609 | 0.981636 | chr5  | 1.22E+08 | 1.22E+08 | + | 0 | NA | intron (N intron (N | 6709 NM_001317    | 4015     | Hs.102267 | NR_002317           | ENSG000002CLOX      | AAT10      | lysyl                         | oxi            | protein-coding |                |
| chr5-1285 | 9.391806 | -0.4108  | 0.761577 | -0.5394  | 0.589609 | 0.981636 | chr5  | 1.28E+08 | 1.28E+08 | + | 0 | NA | exon (NM exon (NM   | 22621 NM_00199E   | 2201     | Hs.519294 | NR_00199E           | ENSG000002PBN2      | CCA DA9    | E                             | fibryllir      | protein-coding |                |
| chr6-289  | 9.391806 | -0.4108  | 0.761577 | -0.5394  | 0.589609 | 0.981636 | chr6  | 28915229 | 28921438 | + | 0 | NA | intron (NL2 LINE L  | 5652 NM_00651C    | 5987     | Hs.519294 | NR_00651C           | ENSG000002TRIM27    | RFNRF7     | tripartit                     | protein-coding |                |                |
| chr6-3651 | 9.391806 | -0.4108  | 0.761577 | -0.5394  | 0.589609 | 0.981636 | chr6  | 36519940 | 36521412 | + | 0 | NA | intron (N intron (N | 26803 NM_007271   | 11329    | Hs.40957E | NR_007271           | ENSG000002STK38     | NDR NDR1   | serine/tf                     | protein-coding |                |                |
| chr8-429  | 9.391806 | -0.4108  | 0.761577 | -0.5394  | 0.589609 | 0.981636 | chr8  | 42988619 | 42993140 | + | 0 | NA | intron (NLMJA3 LIN  | -65420 NR_03369E  | 2339     | Hs.37031E | NR_002027           | ENSG000002PNTA      | PPTA PGG1  | farnesyl                      | tr             | protein-coding |                |
| chr9-275  | 9.391806 | -0.4108  | 0.761577 | -0.5394  | 0.589609 | 0.981636 | chr9  | 27217085 | 27226473 | + | 0 | NA | intron (NLMJA7 LIN  | 61014 NR_02667E   | 158035   | Hs.201554 | NR_02667E           | ENSG000002LINC0003Z | C9orf14 L  | long                          | intencRNA      |                |                |
| chr9-1114 | 9.391806 | -0.4108  | 0.761577 | -0.5394  | 0.589609 | 0.981636 | chr9  | 1.11E+08 | 1.11E+08 | + | 0 | NA | intron (NAluJb SIN  | -76667 NM_20585E  | 26248    | Hs.38131E | NR_20585E           | ENSG000002COR2K2    | HSHTPCRHC  | o                             | factory        | protein-coding |                |
| chr1-2008 | 10.12874 | 0.399446 | 0.740568 | 0.539378 | 0.589626 | 0.981636 | chr1  | 2.01E+08 | 2.01E+08 | + | 0 | NA | intron (N intron (N | -19183 NM_00529E  | 2848     | Hs.53431E | NR_00529E           | ENSG000002GPR25     | -          | G                             | protein        | protein-coding |                |
| chr16-675 | 9.407522 | -0.41356 | 0.766753 | -0.53937 | 0.589634 | 0.981636 | chr16 | 67543110 | 67543499 | + | 0 | NA | intron (N intron (N | 5842 NM_00119E    | 79567    | Hs.152717 | NR_02451E           | ENSG000002RIPOR1    | FAM65A     | RHO                           | family         | protein-coding |                |
| chr7-1125 | 9.407522 | -0.41356 | 0.766753 | -0.53937 | 0.589634 | 0.981636 | chr7  | 1.13E+08 | 1.13E+08 | + | 0 | NA | intron (N intron (N | 28568 NM_15255E   | 154743   | Hs.489734 | NR_15255E           | ENSG000002CBMT2     | C7orf60 S  | base                          | metf           | protein-coding |                |
| chr19-445 | 8.705536 | 0.450143 | 0.835234 | 0.539265 | 0.589704 | 0.981636 | chr19 | 44629025 | 44629638 | + | 0 | NA | intron (NL2a LINE   | 90327 NM_00113E   | 5817     | Hs.171844 | NR_00650E           | ENSG000002PVR       | CD155 HVE  | PVR                           | cell           | protein-coding |                |
| chr8-8375 | 11.67277 | -0.37616 | 0.697916 | -0.53898 | 0.589899 | 0.981636 | chr8  | 8372786  | 8373184  | + | 0 | NA | intron (N intron (N | 14259 NM_00136E   | 157285   | Hs.38386E | NR_00108E           | ENSG000002PRAG1     | NACK PEAK  | PEAK1                         | rel            | protein-coding |                |
| chr1-1235 | 10.67432 | 0.386676 | 0.717602 | 0.538845 | 0.589994 | 0.981636 | chr1  | 1.24E+08 | 1.24E+08 | + | 0 | NA | IntergeniALR/Alpha  | 2451193 NR_00395E | 647121   | Hs.697682 | NR_00395E           | ENSG000002CEMBP1    | -          | emarginin                     | f pseudo       |                |                |
| chr1-1503 | 10.67432 | 0.386676 | 0.717602 | 0.538845 | 0.589994 | 0.981636 | chr1  | 1.5E+08  | 1.5E+08  | + | 0 | NA | intron (NAluSp SIN  | 16406 NM_00469E   | 9129     | Hs.11776  | NR_00469E           | ENSG000002PRPF3     | HPRP3 HPF  | pre-mRNA                      | protein-coding |                |                |
| chr1-176  | 10.67432 | 0.386676 | 0.717602 | 0.538845 | 0.589994 | 0.981636 | chr1  | 1.76E+08 | 1.76E+08 | + | 0 | NA | intron (NMER61-int  | 107822 NM_001001  | 64326    | Hs.523744 | NR_022457           | ENSG000002COP1      | FRPFD2 RFN | COP1                          | E3             | u              | protein-coding |
| chr12-125 | 10.67432 | 0.386676 | 0.717602 | 0.538845 | 0.589994 | 0.981636 | chr12 | 1.24E+08 | 1.24E+08 | + | 0 | NA | intron (N MamRep137 | 12131 NM_00151E   | 2967     | Hs.35534E | NR_00151E           | ENSG000002GTF2H3    | BTF2 P3    | general                       | tr             | protein-coding |                |
| chr4-1134 | 10.67432 | 0.386676 | 0.717602 | 0.538845 | 0.589994 | 0.981636 | chr4  | 1.13E+08 | 1.13E+08 | + | 0 | NA | TTS (NM_C TTS (NM_C | 164203 NM_00135A  | 287      | Hs.620557 | NR_00114E           | ENSG000002ANK2      | ANK-2 LQ1  | ankyrin                       | 2              | protein-coding |                |
| chr5-495  | 10.67432 | 0.386676 | 0.717602 | 0.538845 | 0.589994 | 0.981636 | chr5  | 49589319 | 49590088 | + | 0 | NA | IntergeniALR/Alpha  | 851585 NM_19844E  | 133418   | Hs.561411 | NR_19844E           | ENSG000002CEMB      | GP70       | emarginin                     | protein-coding |                |                |
| chr9-1274 | 10.67432 | 0.386676 | 0.717602 | 0.538845 | 0.589994 | 0.981636 | chr9  | 1.27E+08 | 1.27E+08 | + | 0 | NA | intron (NAluJb SIN  | 5181 NM_00713E    | 763      |           |                     |                     |            |                               |                |                |                |



|                    |          |          |          |          |          |       |           |           |   |   |    |                    |                  |                              |                    |                    |                    |
|--------------------|----------|----------|----------|----------|----------|-------|-----------|-----------|---|---|----|--------------------|------------------|------------------------------|--------------------|--------------------|--------------------|
| chr11-47: 6.974045 | 0.472046 | 0.880223 | 0.536279 | 0.591765 | 0.981636 | chr11 | 47323854  | 47324776  | + | 0 | NA | exon (NM exon (NM  | 28387 NM_000256  | 4607 Hs. 52490ENM_000256     | ENSG00000MYBPC3    | CMD1MM C myosin bi | protein-coding     |
| chr8-6721 6.974045 | 0.472046 | 0.880223 | 0.536279 | 0.591765 | 0.981636 | chr8  | 67214567  | 67215134  | + | 0 | NA | intron (MLT1C-int  | 128931 NM_006421 | 10565 Hs. 656902NM_006421    | ENSG00000ARFGF1    | ARFGF1 EADP ribo   | sprotein-coding    |
| chr8-1275 6.974045 | 0.472046 | 0.880223 | 0.536279 | 0.591765 | 0.981636 | chr8  | 1.28E+08  | 1.28E+08  | + | 0 | NA | intron (AluS6 SI   | 23981 NR_03161C  | 1E+08 NR_03161C              | ENSG00000MIR1205   | MIRN1205 microR    | ncRNA              |
| chr17-401 10.15231 | 0.394851 | 0.736542 | 0.536088 | 0.591898 | 0.981636 | chr17 | 40161591  | 40165114  | + | 0 | NA | intron (AluS6 SI   | 1419 NR_106922   | 1.02E+08 NR_106922           | ENSG00000MIR6866   | hsa-mir-61 micro   | ncRNA              |
| chr2-1612 6.518597 | 0.499825 | 0.9329   | 0.535776 | 0.592113 | 0.981636 | chr2  | 1.61E+08  | 1.61E+08  | + | 0 | NA | intron (AluSp SI   | -16325 NR_110162 | 1.01E+08 Hs. 660925NR_110162 | ENSG00000LINC0180C | -                  | long intencRNA     |
| chr6-8965 7.118702 | -0.46873 | 0.875005 | -0.53569 | 0.592174 | 0.981636 | chr6  | 89650081  | 89650779  | + | 0 | NA | intron (intron (   | -11683 NM_020466 | 57226 Hs. 177275NM_020466    | ENSG00000CLYRM2    | DJ12208.2LYR motif | protein-coding     |
| chr8-1287 7.118702 | -0.46873 | 0.875005 | -0.53569 | 0.592174 | 0.981636 | chr8  | 1.28E+08  | 1.28E+08  | + | 0 | NA | intron (intron (   | -2563 NR_031612  | 1E+08 NR_031612              | ENSG00000MIR1207   | MIRN1207 micro     | ncRNA              |
| chr20-465 9.614584 | 0.407064 | 0.760002 | 0.535609 | 0.592229 | 0.981636 | chr20 | 4698746   | 4700629   | + | 0 | NA | exon (NM exon (NM  | 13231 NM_000311  | 5621 Hs. 472011NM_000311     | ENSG00000PRNP      | ASCR AlTfprion pr  | protein-coding     |
| chr1-2036 6.418752 | 0.488188 | 0.911712 | 0.535463 | 0.592333 | 0.981636 | chr1  | 2.04E+08  | 2.04E+08  | + | 0 | NA | intron (intron (   | 13106 NM_001365  | 493 Hs. 343522NM_001684      | ENSG00000ATP2B4    | ATP2B2 MAPATPase p | protein-coding     |
| chr1-224C 6.418752 | 0.488188 | 0.911712 | 0.535463 | 0.592333 | 0.981636 | chr1  | 2.24E+08  | 2.24E+08  | + | 0 | NA | intron (NLIPA7 LI  | 32245 NR_136593  | 1E+08 Hs. 65839CNR_136590    | LOC100287-         | septin 7 pseudo    |                    |
| chr10-10C 6.418752 | 0.488188 | 0.911712 | 0.535463 | 0.592333 | 0.981636 | chr10 | 1E+08     | 1E+08     | + | 0 | NA | intron (intron (   | 33357 NM_001347  | 10613 Hs. 150087NM_00645     | ENSG00000CERLIN1   | C10orf69 ER lipid  | protein-coding     |
| chr10-12F 6.418752 | 0.488188 | 0.911712 | 0.535463 | 0.592333 | 0.981636 | chr10 | 1.25E+08  | 1.25E+08  | + | 0 | NA | intron (intron (   | 27412 NM_001321  | 1488 Hs. 501345NM_00132      | ENSG00000CTBP2     | -                  | C-terminu          |
| chr13-405 6.418752 | 0.488188 | 0.911712 | 0.535463 | 0.592333 | 0.981636 | chr13 | 40946649  | 40947866  | + | 0 | NA | intron (intron (   | -25483 NR_003365 | 283507 Hs. 442781NM_00336    | ENSG00000SUGT1P3   | SUGT1L1 SUGT1      | psuedo             |
| chr14-202 6.418752 | 0.488188 | 0.911712 | 0.535463 | 0.592333 | 0.981636 | chr14 | 203561766 | 203561866 | + | 0 | NA | exon (NM exon (NM  | 13858 NM_001042  | 10038 Hs. 409412NM_00548     | ENSG00000PARP2     | NPM2 AL poly (ADP  | protein-coding     |
| chr16-18E 6.418752 | 0.488188 | 0.911712 | 0.535463 | 0.592333 | 0.981636 | chr16 | 18553058  | 18553257  | + | 0 | NA | intron (AluS2 SI   | 8955 NM_001004   | 283820 Hs. 460141NM_17361    | ENSG00000NOMO2     | ADMT PM5 NODAL     | mocprotein-coding  |
| chr17-26E 6.418752 | 0.488188 | 0.911712 | 0.535463 | 0.592333 | 0.981636 | chr17 | 2697927   | 2698434   | + | 0 | NA | exon (NM exon (NM  | -5261 NR_106834  | 1.02E+08 NR_106834           | ENSG00000MIR6776   | hsa-mir-61 micro   | ncRNA              |
| chr17-454 6.418752 | 0.488188 | 0.911712 | 0.535463 | 0.592333 | 0.981636 | chr17 | 45472309  | 45472762  | + | 0 | NA | intron (intron (   | 2900 NR_036271   | 1E+08 NR_036271              | ENSG00000MIR4315-  | -                  | microRNA           |
| chr18-751 6.418752 | 0.488188 | 0.911712 | 0.535463 | 0.592333 | 0.981636 | chr18 | 74157583  | 74159100  | + | 0 | NA | intron (intron (   | 9818 NM_014177   | 29090 Hs. 532835NM_01417     | ENSG00000TMM21     | C18orf55 transloc  | protein-coding     |
| chr20-414 6.418752 | 0.488188 | 0.911712 | 0.535463 | 0.592333 | 0.981636 | chr20 | 41453500  | 41456183  | + | 0 | NA | intron (intron (   | -88023 NM_05284C | 90187 Hs. 726525NM_05284     | ENSG00000EMILIN3   | C20orf13C elastin  | nprotein-coding    |
| chr22-217 6.418752 | 0.488188 | 0.911712 | 0.535463 | 0.592333 | 0.981636 | chr22 | 21796488  | 21797576  | + | 0 | NA | intron (intron (   | -61238 NM_01331F | 29799 Hs. 517435NM_01331     | ENSG00000CYPEL1    | FKSG3 yippee lip   | protein-coding     |
| chr3-5162 6.418752 | 0.488188 | 0.911712 | 0.535463 | 0.592333 | 0.981636 | chr3  | 51627546  | 51631790  | + | 0 | NA | intron (AluSx SI   | -41507 NM_001125 | 51368 Hs. 517884NM_01592     | ENSG00000TEX264    | ZS1G11 testis e    | protein-coding     |
| chr3-186E 6.418752 | 0.488188 | 0.911712 | 0.535463 | 0.592333 | 0.981636 | chr3  | 1.87E+08  | 1.87E+08  | + | 0 | NA | intron (intron (   | 10141 NM_01630E  | 51726 Hs. 317192NM_01630     | ENSG00000DNAJB11   | ABBP-2 AE DnaJ     | heatprotein-coding |
| chr4-140C 6.418752 | 0.488188 | 0.911712 | 0.535463 | 0.592333 | 0.981636 | chr4  | 1.41E+08  | 1.41E+08  | + | 0 | NA | intron (MLT1A LI   | -13780 NR_07721E | 644962 Hs. 67650CNR_07721    | SNRNP181           | -                  | trinucleu          |
| chr7-153C 6.418752 | 0.488188 | 0.911712 | 0.535463 | 0.592333 | 0.981636 | chr7  | 1536081   | 1536422   | + | 0 | NA | intron (intron (   | -1371 NR_14903E  | 1E+08 Hs. 65698CNR_14903     | LOC100287-         | uncharactncRNA     |                    |
| chr8-423C 6.418752 | 0.488188 | 0.911712 | 0.535463 | 0.592333 | 0.981636 | chr8  | 42327257  | 42327626  | + | 0 | NA | intron (AluS8 SI   | -11053 NM_00269C | 5423 Hs. 654484NM_00269      | ENSG00000POLB      | -                  | DNA poly           |
| chr13-521 6.418995 | -0.44705 | 0.834898 | -0.53546 | 0.592333 | 0.981636 | chr13 | 52185786  | 52186346  | + | 0 | NA | intron (AluJr SI   | 8401 NR_00281E   | 1.01E+08 Hs. 553875NR_00281  | ENSG00000MRPS31P5  | MRPS31P3 mitoch    | ncRNA              |
| chr1-407 6.459891  | 0.489599 | 0.914389 | 0.535439 | 0.592347 | 0.981636 | chr1  | 40762195  | 40764247  | + | 0 | NA | intron (AluSx SI   | 6297 NR_029833   | 407031 NR_029833             | ENSG00000MIR30C1   | MIRN30C1 micro     | ncRNA              |
| chr1-1504 6.459891 | 0.489599 | 0.914389 | 0.535439 | 0.592347 | 0.981636 | chr1  | 1.5E+08   | 1.5E+08   | + | 0 | NA | intron (AluS6 SI   | -24979 NM_001271 | 80222 Hs. 288974NM_02515     | ENSG00000TARS5     | COXP2D1 Threonyl   | -protein-coding    |
| chr10-111 6.459891 | 0.489599 | 0.914389 | 0.535439 | 0.592347 | 0.981636 | chr10 | 1118405   | 1119885   | + | 0 | NA | intron (intron (   | -40623 NR_01537F | 399706 Hs. 721191NM_00101    | ENSG00000LINC0020C | C0orf13F long int  | ncRNA              |
| chr10-734 6.459891 | 0.489599 | 0.914389 | 0.535439 | 0.592347 | 0.981636 | chr10 | 73427380  | 73429298  | + | 0 | NA | intron (intron (   | 5222 NM_001024   | 118490 Hs. 631825NM_00102    | ENSG00000MSS51     | ZMYND17 MSS51      | mi                 |
| chr12-12C 6.459891 | 0.489599 | 0.914389 | 0.535439 | 0.592347 | 0.981636 | chr12 | 1.23E+08  | 1.23E+08  | + | 0 | NA | intron (L2a LINE   | 2308 NM_02084E   | 57605 Hs. 272755NM_02084     | ENSG00000PITPM2    | NIR-3 NIF phosphat | protein-coding     |
| chr16-88E 6.459891 | 0.489599 | 0.914389 | 0.535439 | 0.592347 | 0.981636 | chr16 | 88839170  | 88840878  | + | 0 | NA | intron (intron (   | -16196 NR_134671 | 51693 Hs. 461722NM_01620     | ENSG00000TRAPPCC2  | HSPC176 F traffick | protein-coding     |
| chr17-767 6.459891 | 0.489599 | 0.914389 | 0.535439 | 0.592347 | 0.981636 | chr17 | 76776629  | 76778193  | + | 0 | NA | intron (AluS6 SI   | -21633 NR_110837 | 1.02E+08 Hs. 61720CNR_11083  | ENSG00000LINC0208C | -                  | long intencRNA     |
| chr17-802 6.459891 | 0.489599 | 0.914389 | 0.535439 | 0.592347 | 0.981636 | chr17 | 80272597  | 80274314  | + | 0 | NA | intron (intron (   | 12603 NM_020954  | 57674 Hs. 195642NM_02091     | ENSG00000CRNF213   | AL017 C17ring fin  | protein-coding     |
| chr19-44E 6.459891 | 0.489599 | 0.914389 | 0.535439 | 0.592347 | 0.981636 | chr19 | 4493017   | 4500059   | + | 0 | NA | intron (intron (   | 21948 NM_001367  | 729359 Hs. 591387NM_00108    | ENSG00000PLIN4     | K1AA1881 perlipi   | protein-coding     |
| chr19-514 6.459891 | 0.489599 | 0.914389 | 0.535439 | 0.592347 | 0.981636 | chr19 | 5144818   | 5147211   | + | 0 | NA | intron (intron (   | 176901 NM_00137C | 23030 Hs. 654815NM_01501     | ENSG00000KDM4B     | JMJ2B Tl tyrosine  | deprotein-coding   |
| chr19-10C 6.459891 | 0.489599 | 0.914389 | 0.535439 | 0.592347 | 0.981636 | chr19 | 10360414  | 10361843  | + | 0 | NA | intron (intron (   | 19444 NM_003331  | 7297 Hs. 75516 NM_00333      | ENSG00000TYK2      | IMD35 JTK tyrosine | protein-coding     |
| chr19-117 6.459891 | 0.489599 | 0.914389 | 0.535439 | 0.592347 | 0.981636 | chr19 | 11770240  | 11771463  | + | 0 | NA | intron (AluJb SI   | 3851 NM_152355   | 126068 Hs. 675132NM_15235    | ENSG00000ZNF441    | -                  | zinc fin           |
| chr19-36E 6.459891 | 0.489599 | 0.914389 | 0.535439 | 0.592347 | 0.981636 | chr19 | 36397976  | 36401910  | + | 0 | NA | intron (intron (   | 19151 NM_001321  | 284406 Hs. 558734NM_13346    | ENSG00000ZFP82     | ZNF545 ZFP82       | z                  |
| chr19-45E 6.459891 | 0.489599 | 0.914389 | 0.535439 | 0.592347 | 0.981636 | chr19 | 45825412  | 45826791  | + | 0 | NA | intron (intron (   | -10793 NM_03078E | 81492 Hs. 146544NM_03078     | ENSG00000RSPH6A    | RSHL1 RSF radial   | protein-coding     |
| chr21-43C 6.459891 | 0.489599 | 0.914389 | 0.535439 | 0.592347 | 0.981636 | chr21 | 43028007  | 43029049  | + | 0 | NA | intron (intron (   | 39876 NM_001321  | 875 Hs. 533015NM_000071      | ENSG00000CBS       | CBSL HIP4cystathio | protein-coding     |
| chr22-41F 6.459891 | 0.489599 | 0.914389 | 0.535439 | 0.592347 | 0.981636 | chr22 | 41879884  | 41881614  | + | 0 | NA | exon (NM exon (NM  | -20195 NR_029507 | 407039 NR_029507             | ENSG00000MIR33A    | MIR33 MI fathric   | ncRNA              |
| chr3-144E 6.459891 | 0.489599 | 0.914389 | 0.535439 | 0.592347 | 0.981636 | chr3  | 14480984  | 14482837  | + | 0 | NA | intron (NMIR SINE  | 58432 NM_00108C  | 80852 Hs. 517815NM_00108     | ENSG00000GRIP2     | -                  | glutamate          |
| chr3-182E 6.459891 | 0.489599 | 0.914389 | 0.535439 | 0.592347 | 0.981636 | chr3  | 1.86E+08  | 1.86E+08  | + | 0 | NA | intron (intron (   | 23119 NM_021627  | 59343 Hs. 401385NM_02162     | ENSG00000SEN2      | AXAM2 SMI SUMO     | specprotein-coding |
| chr5-175C 6.459891 | 0.489599 | 0.914389 | 0.535439 | 0.592347 | 0.981636 | chr5  | 1.72E+08  | 1.72E+08  | + | 0 | NA | intron (NMIRb SINE | 56774 NR_130933  | 1E+08 Hs. 531911NM_00100     | 7542 LOC10028E-    | -                  | uncharactncRNA     |
| chr6-425E 6.459891 | 0.489599 | 0.914389 | 0.535439 | 0.592347 | 0.981636 | chr6  | 42596618  | 42597817  | + | 0 | NA | intron (intron (   | 33188 NM_001184  | 23304 Hs. 529925NM_01525     | ENSG00000CUBR2     | C6orf133 ubiquit   | protein-coding     |
| chr6-736E 6.459891 | 0.489599 | 0.914389 | 0.535439 | 0.592347 | 0.981636 | chr6  | 73626705  | 73630188  | + | 0 | NA | intron (AluS6 SI   | 25546 NM_012434  | 26503 Hs. 597422NM_01243     | ENSG00000SLC17A5   | AST ISSD solute    | protein-coding     |
| chr8-473C 6.459891 | 0.489599 | 0.914389 | 0.535439 | 0.592347 | 0.981636 | chr8  | 47330817  | 47331574  | + | 0 | NA | intron (NLIMCa LI  | 70257 NM_00108C  | 23514 Hs. 381055NM_00108     | ENSG00000CPIDR     | K1AA0146 scaffo    | protein-coding     |
| chr9-114C 6.459891 | 0.489599 | 0.914389 | 0.535439 | 0.592347 | 0.981636 | chr9  | 1.14E+08  | 1.14E+08  | + | 0 | NA | intron (AluSx1 SI  | 45203 NM_001633  | 259 Hs. 436911NM_00          |                    |                    |                    |

|            |          |          |          |          |          |          |       |          |          |   |   |    |                    |                   |                              |                     |               |                           |
|------------|----------|----------|----------|----------|----------|----------|-------|----------|----------|---|---|----|--------------------|-------------------|------------------------------|---------------------|---------------|---------------------------|
| chr9-9594  | 6.42661  | 0.485771 | 0.911783 | 0.532771 | 0.594192 | 0.981636 | chr9  | 95942244 | 95943443 | + | 0 | NA | intron (NALIME LI  | 66835 NM_00101C   | 375748 Hs. 432364NM_020207   | ENSG000000ERCC6L2   | BMFS2 C9c     | ERCC exciprotein-coding   |
| chr9-131f  | 6.42661  | 0.485771 | 0.911783 | 0.532771 | 0.594192 | 0.981636 | chr9  | 1.32E+08 | 1.32E+08 | + | 0 | NA | intron (Nintron (N | 43014 NM_00136E   | 642515 NM_00136E             | ENSG000000PRRT1B    | DSPD2 IFI     | proline i protein-coding  |
| chr9-134c  | 6.42661  | 0.485771 | 0.911783 | 0.532771 | 0.594192 | 0.981636 | chr9  | 1.34E+08 | 1.34E+08 | + | 0 | NA | intron (NALuSc8 SI | 11555 NM_00135E   | 266655 Hs. 65486NM_00135E    | ENSG000000BRD30S    | LINC00094BRD3 | oppcprotein-coding        |
| chr9-136f  | 6.42661  | 0.485771 | 0.911783 | 0.532771 | 0.594192 | 0.981636 | chr9  | 1.37E+08 | 1.37E+08 | + | 0 | NA | intron (Nintron (N | -1331 NR_036251   | 1E+08 NR_036251              | ENSG000000MIR4292   | -             | microRNA ncRNA            |
| chrX-288C  | 6.42661  | 0.485771 | 0.911783 | 0.532771 | 0.594192 | 0.981636 | chrX  | 288078   | 288955   | + | 0 | NA | intron (MLT1C LTF  | 5038 NM_00137C    | 55344 Hs. 52256NM_01839C     | ENSG000000PLCXD1    | LLOXC01-      | phosphatiprotein-coding   |
| chr17-60f  | 9.37609  | -0.408   | 0.765996 | -0.53264 | 0.594282 | 0.981636 | chr17 | 60519018 | 60520382 | + | 0 | NA | intron (Nintron (N | 6540 NM_00128E    | 10513 Hs. 84084 NM_00638C    | ENSG000000APPBP2    | APP-BP2 F     | amylloid t protein-coding |
| chr2-2374  | 9.37609  | -0.408   | 0.765996 | -0.53264 | 0.594282 | 0.981636 | chr2  | 2.37E+08 | 2.37E+08 | + | 0 | NA | intron (Nintron (N | 11652 NM_05716E   | 1293 Hs. 23324NM_00436E      | ENSG000000COL6A3    | BTHLM1 D      | collagen protein-coding   |
| chr3-273f  | 9.37609  | -0.408   | 0.765996 | -0.53264 | 0.594282 | 0.981636 | chr3  | 27393487 | 27394796 | + | 0 | NA | intron (NALuJb SIN | -24681 NM_152534  | 152110 Hs. 50611E NM_152534  | ENSG000000NEK10     | -             | NIMA relaprotein-coding   |
| chr11-99f  | 7.144126 | -0.46168 | 0.866837 | -0.5326  | 0.59431  | 0.981636 | chr11 | 9967273  | 9968389  | + | 0 | NA | intron (NALuSp SIN | 128689 NR_12053E  | 1.02E+08 Hs. 585524NR_12053E | ENSG000000LOC10192E | -             | uncharactncRNA            |
| chr16-16f  | 7.144126 | -0.46168 | 0.866837 | -0.5326  | 0.59431  | 0.981636 | chr16 | 1692296  | 1696700  | + | 0 | NA | intron (NLIMC5 LIN | -12000 NM_00131E  | 23162 Hs. 20776E NM_01513E   | ENSG000000MAPK81P3  | J1P-3 J1F     | mitogen-ε protein-coding  |
| chr19-101f | 7.144126 | -0.46168 | 0.866837 | -0.5326  | 0.59431  | 0.981636 | chr19 | 1012830  | 1014702  | + | 0 | NA | intron (Nintron (N | 7357 NM_03342C    | 91304 Hs. 51500E NM_03342C   | ENSG000000TMEM259   | ASBABP1 C     | transmem protein-coding   |
| chr19-43f  | 7.144126 | -0.46168 | 0.866837 | -0.5326  | 0.59431  | 0.981636 | chr19 | 43647321 | 43649055 | + | 0 | NA | TTS (NM_C          | -8338 NM_14529E   | 199731 Hs. 370984NM_14529E   | ENSG000000CADM4     | IGSF4C NF     | cell adheprotein-coding   |
| chr2-333f  | 7.144126 | -0.46168 | 0.866837 | -0.5326  | 0.59431  | 0.981636 | chr2  | 33388401 | 33390265 | + | 0 | NA | intron (Nintron (N | -29183 NR_03962E  | 1.01E+08 NR_03962E           | ENSG000000MIR4430   | -             | microRNA ncRNA            |
| chr2-274f  | 7.144126 | -0.46168 | 0.866837 | -0.5326  | 0.59431  | 0.981636 | chr2  | 46083840 | 46084768 | + | 0 | NA | IntergeniMIR SINE  | -1693 NR_02703E   | 400931 Hs. 23583E NM_20747E  | ENSG000000MIRLET7B  | linc-Ppar     | MIRLET7B ncRNA            |
| chr4-181f  | 7.144126 | -0.46168 | 0.866837 | -0.5326  | 0.59431  | 0.981636 | chr4  | 1818292  | 1818905  | + | 0 | NA | intron (NALuSx3 SI | 25286 NM_00116E   | 2261 Hs. 1420 NM_00014E      | ENSG000000FGFR3     | ACH CD33E     | fibroblas protein-coding  |
| chr4-176f  | 7.144126 | -0.46168 | 0.866837 | -0.5326  | 0.59431  | 0.981636 | chr4  | 1.77E+08 | 1.77E+08 | + | 0 | NA | intron (NLIPA3 LIN | 101055 NM_00542E  | 7424 Hs. 43521E NM_00542E    | ENSG000000VEGFC     | F1t4-L LW     | vascular protein-coding   |
| chr7-475f  | 7.144126 | -0.46168 | 0.866837 | -0.5326  | 0.59431  | 0.981636 | chr7  | 47515521 | 47517998 | + | 0 | NA | intron (Nintron (N | -51956 NR_14581E  | 1.1E+08 NR_14581E            | SNORD151            | -             | small nucsnoRNA           |
| chr8-390f  | 7.144126 | -0.46168 | 0.866837 | -0.5326  | 0.59431  | 0.981636 | chr8  | 39098997 | 39100169 | + | 0 | NA | intron (NLIME4b LI | -7946 NM_00131E   | 203102 Hs. 52154E NM_145004  | ENSG000000ADAM32    | -             | ADAM metaprotein-coding   |
| chr14-39f  | 9.405672 | -0.42346 | 0.795159 | -0.53255 | 0.594343 | 0.981636 | chr14 | 39051636 | 39053105 | + | 0 | NA | intron (NCharlie6  | -50770 NR_14654E  | 1.05E+08 NR_14654E           | ENSG000000SEC23A-AS | -             | SEC23A arncRNA            |
| chr5-176f  | 6.723809 | -0.4844  | 0.907073 | -0.53249 | 0.594389 | 0.981636 | chr5  | 1.73E+08 | 1.73E+08 | + | 0 | NA | intron (Nintron (N | 2969 NM_01398C    | 662 Hs. 14572E NM_00120E     | ENSG000000BNIP1     | NIP1 SEC2     | BCL2 inte protein-coding  |
| chr1-163f  | 15.86251 | 0.320365 | 0.601639 | 0.532486 | 0.594389 | 0.981636 | chr1  | 16602528 | 16603152 | + | 0 | NA | intron (NERVL-E-ir | 10765 NM_01794C   | 55672 Hs. 467587NM_01794C    | ENSG000000NBPF1     | AB13 AB14     | NBPF memt protein-coding  |
| chr15-101f | 7.151984 | -0.4635  | 0.870518 | -0.53244 | 0.594418 | 0.981636 | chr15 | 1.02E+08 | 1.02E+08 | + | 0 | NA | intron (NTigger1 E | -15558 NM_00130E  | 80213 Hs. 28891E NM_025141   | ENSG000000TM2D3     | BLP2          | TM2 domaiprotein-coding   |
| chr17-67f  | 7.151984 | -0.4635  | 0.870518 | -0.53244 | 0.594418 | 0.981636 | chr17 | 6757841  | 6759231  | + | 0 | NA | intron (Nintron (N | 2490 NM_00135E    | 54739 Hs. 44197E NM_01752E   | ENSG000000XAF1      | BIRC4BP F     | XIAP assc protein-coding  |
| chr5-137f  | 7.151984 | -0.4635  | 0.870518 | -0.53244 | 0.594418 | 0.981636 | chr5  | 13780654 | 13781810 | + | 0 | NA | intron (Nintron (N | 163248 NM_00136E  | 1767 Hs. 21236E NM_00136E    | ENSG000000DNAH5     | CILD3 DNF     | dynein α protein-coding   |
| chr1-1514  | 10.69004 | 0.383771 | 0.720839 | 0.532394 | 0.594453 | 0.981636 | chr1  | 1.51E+08 | 1.51E+08 | + | 0 | NA | intron (Nintron (N | 11668 NM_00279E   | 5692 Hs. 89545 NM_00279E     | ENSG000000PSMB4     | HN3 HSN3      | proteasoneprotein-coding  |
| chr1-180C  | 10.69004 | 0.383771 | 0.720839 | 0.532394 | 0.594453 | 0.981636 | chr1  | 1.8E+08  | 1.8E+08  | + | 0 | NA | intron (NTigger2 E | 60258 NM_01481C   | 9857 Hs. 41304E NM_01481C    | ENSG000000CEP350    | CAP350 G      | centrosone protein-coding |
| chr17-601  | 10.69004 | 0.383771 | 0.720839 | 0.532394 | 0.594453 | 0.981636 | chr17 | 60183007 | 60183334 | + | 0 | NA | exon (NM exon (NM  | 33197 NM_000717   | 762 Hs. 89485 NM_000717      | ENSG000000CA4       | CAIV Car4     | carbonic protein-coding   |
| chr9-126f  | 9.827839 | -0.40074 | 0.752875 | -0.53228 | 0.59453  | 0.981636 | chr9  | 1.27E+08 | 1.27E+08 | + | 0 | NA | intron (NL3 LINE C | 4870 NM_00109E    | 403341 Hs. 17763E NM_20348E  | ENSG000000ZBTB34    | ZNF918        | zinc fingprotein-coding   |
| chr20-27f  | 11.20345 | -0.3863  | 0.725771 | -0.53222 | 0.594547 | 0.981636 | chr20 | 27533405 | 27533704 | + | 0 | NA | IntergeniALR/Alphe | 1069111 NR_13231E | 1E+08 Hs. 529357NR_13231E    | ENSG000000FRG1CP    | -             | FSHD regipseudo           |
| chr2-2574  | 9.184559 | 0.427133 | 0.802698 | 0.532122 | 0.594642 | 0.981636 | chr2  | 25749356 | 25750325 | + | 0 | NA | exon (NM exon (NM  | 44851 NM_00136E   | 55252 Hs. 11981E NM_01826E   | ENSG000000ASXL2     | ASXL2 SH      | ASXL tral protein-coding  |
| chr11-51f  | 15.87037 | 0.319372 | 0.600347 | 0.531979 | 0.594741 | 0.981636 | chr11 | 51374666 | 51374930 | + | 0 | NA | IntergeniALR/Alphe | 965651 NR_024504  | 646813 Hs. 68417E NR_024504  | LOC64681E           | -             | DEXH-box pseudo           |
| chr7-648f  | 4.436839 | -0.5907  | 1.110623 | -0.53186 | 0.594821 | 0.981636 | chr7  | 64805198 | 64805611 | + | 0 | NA | intron (NALuSg7 SI | 10976 NM_001217   | 7697 Hs. 18408C NM_00652E    | ENSG000000ZNF138    | pHZ-32        | zinc fingprotein-coding   |
| chr7-873f  | 4.436839 | -0.5907  | 1.110623 | -0.53186 | 0.594821 | 0.981636 | chr7  | 87334513 | 87334870 | + | 0 | NA | intron (NLIMB7 LIN | 10801 NR_015381   | 11257 Hs. 27432E NM_00723E   | ENSG000000TP53TG1   | LINC0009E     | TP53 tarncRNA             |
| chr10-77f  | 6.574967 | -0.50382 | 0.947323 | -0.53183 | 0.59484  | 0.981636 | chr10 | 77813724 | 77813944 | + | 0 | NA | intron (Nintron (N | 112921 NM_004747  | 9231 Hs. 65269C NM_004747    | ENSG000000CDLG5     | LP-DLG P-     | discs lar protein-coding  |
| chr1-120f  | 3.7098   | 0.632911 | 1.190394 | 0.531682 | 0.594946 | 0.981636 | chr1  | 1.21E+08 | 1.21E+08 | + | 0 | NA | intron (Nintron (N | -88351 NR_00324E  | 67846 Hs. 65718E NR_00324E   | ENSG000000PFN1P2    | Clorf152 P    | profilin pseudo           |
| chr10-40f  | 3.7098   | 0.632911 | 1.190394 | 0.531682 | 0.594946 | 0.981636 | chr10 | 40919053 | 40919797 | + | 0 | NA | IntergeniALR/Alphe | 441666 NR_02438C  | 441666 Hs. 25572E NR_02438C  | ENSG000000LOC44166E | -             | zinc fingpseudo           |
| chr8-253f  | 3.7098   | 0.632911 | 1.190394 | 0.531682 | 0.594946 | 0.981636 | chr8  | 25369775 | 25370619 | + | 0 | NA | intron (Nintron (N | -8685 NR_15996E   | 1.05E+08 NR_15996E           | LOC10537E           | -             | uncharactncRNA            |
| chr3-134f  | 12.58782 | -0.35432 | 0.666424 | -0.53167 | 0.594952 | 0.981636 | chr3  | 1.34E+08 | 1.34E+08 | + | 0 | NA | exon (NM exon (NM  | 8473 NR_10688E    | 1.02E+08 NR_10688E           | ENSG000000MIR6827   | hsa-mir-      | ε microRNA ncRNA          |
| chr12-58f  | 9.425087 | -0.40688 | 0.765316 | -0.53165 | 0.59497  | 0.981636 | chr12 | 58871698 | 58874318 | + | 0 | NA | intron (Nintron (N | 46538 NM_00113E   | 121227 Hs. 25373E NM_15337E  | ENSG000000LRIG3     | LIG3          | leucine i protein-coding  |
| chr22-45f  | 9.425087 | -0.40688 | 0.765316 | -0.53165 | 0.59497  | 0.981636 | chr22 | 45518937 | 45521110 | + | 0 | NA | intron (NALuSx1 SI | 17140 NM_00199E   | 2192 Hs. 24601 NM_00199E     | ENSG000000FBLN1     | FBLN1 FIB1    | fibulin I protein-coding  |
| chr9-124f  | 9.425087 | -0.40688 | 0.765316 | -0.53165 | 0.59497  | 0.981636 | chr9  | 1.24E+08 | 1.24E+08 | + | 0 | NA | intron (Nintron (N | 18486 NM_00116E   | 10783 Hs. 197071 NM_01439E   | ENSG000000NEK6      | SID6-151E     | NIMA relaprotein-coding   |
| chr5-142f  | 6.493173 | 0.493418 | 0.928251 | 0.531566 | 0.595033 | 0.981636 | chr5  | 1.42E+08 | 1.42E+08 | + | 0 | NA | intron (Nintron (N | 31087 NM_030571   | 80762 Hs. 9788 NM_030571     | ENSG000000NDF1P1    | N4WBP5        | Nedd4 fanprotein-coding   |
| chr19-271f | 21.67857 | 0.284716 | 0.535846 | 0.53134  | 0.595183 | 0.981636 | chr19 | 27144836 | 27145859 | + | 0 | NA | IntergeniALR/Alphe | -648084 NR_14673E | 1.02E+08 Hs. 567934NR_11068E | ENSG000000LOC101927 | -             | uncharactncRNA            |
| chr10-86f  | 6.989761 | 0.467579 | 0.880432 | 0.531079 | 0.595364 | 0.981636 | chr10 | 86903811 | 86904772 | + | 0 | NA | intron (NLIMEC LIN | -51468 NM_00133C  | 6623 Hs. 34947C NM_00308E    | ENSG000000SNCG      | BCSG1 SR      | synucleir protein-coding  |
| chr15-50f  | 6.989761 | 0.467579 | 0.880432 | 0.531079 | 0.595364 | 0.981636 | chr15 | 50963195 | 50964062 | + | 0 | NA | intron (NLIMA4A LI | 19499 NR_02764E   | 1E+08 Hs. 73049E NR_02764E   | DCAF13P3            | -             | DBD1 and pseudo           |
| chr19-47f  | 6.989761 | 0.467579 | 0.880432 | 0.531079 | 0.595364 | 0.981636 | chr19 | 47224656 | 47225436 | + | 0 | NA | intron (NALuSp SIN | -1896 NR_03615E   | 1E+08 NR_03615E              | ENSG000000MIR3190   | mir-3190      | microRNA ncRNA            |
| chr2-370f  | 6.989761 | 0.467579 | 0.880432 | 0.531079 | 0.595364 | 0.981636 | chr2  | 37076357 | 37078489 | + | 0 | NA | intron (NALuSx SIN | 6949 NM_019024    | 54497 Hs. 744084NM_019024    | ENSG000000HEATR5B   | -             | HEAT repcprotein-coding   |
| chr22-38f  | 6.989761 | 0.467579 | 0.880432 | 0.531079 | 0.595364 | 0.981636 | chr22 | 38227534 | 38228435 | + | 0 | NA | intron (Nintron (N | -3264 NR_132774   | 1.07E+08 NR_132774           | SNORA92             | -             | small nucsnoRNA           |
| chr1-123f  | 14.8772  | 0.331412 | 0.604127 | 0.531    | 0.595419 | 0.981636 | chr1  | 2.24E+08 | 2.24E+08 | + | 0 | NA | IntergeniALR/Alphe | 2039735 NR_00395E | 647121 Hs. 69768E NR_00395E  | ENSG000000EMBP1     | -             | embin g pseudo            |
| chr1-923f  | 6.948622 | 0.466167 | 0.877929 | 0.530984 | 0.59543  | 0.981636 | chr1  | 92328324 | 92330073 | + | 0 | NA | intron (NLIPBa LIN | 30139 NM_02481E   | 79871 Hs. 444421NM_02481E    | ENSG000000RPAP2     | Clorf82 REN   | polyn protein-coding      |
| chr10-12f  | 6.948622 | 0.466167 | 0.877929 | 0.530984 | 0.59543  | 0.981636 | chr10 | 12002380 | 12004235 | + | 0 | NA | intron (Nintron (N | 39502 NM_01554E   | 26019 Hs. 37068E NM_01554E   | ENSG000000UPF2      | HUPF2 REN     | UPF2 regt protein-coding  |
| chr10-124f | 6.948622 | 0.466167 | 0.877929 | 0.530984 | 0.59543  | 0.981636 | chr10 | 1.24E+08 | 1.24E+08 | + | 0 | NA | intron (Nintron (N | 7507 NM_00132E    | 4942 Hs. 52332E NM_000274    | ENSG000000OAT       | GACR HOG      |                           |



|            |          |          |          |          |          |          |        |          |          |   |      |                    |                  |                           |                              |                     |            |                   |                |                |
|------------|----------|----------|----------|----------|----------|----------|--------|----------|----------|---|------|--------------------|------------------|---------------------------|------------------------------|---------------------|------------|-------------------|----------------|----------------|
| chr7-7451  | 6.95648  | 0.463933 | 0.875265 | 0.530049 | 0.596078 | 0.981636 | chr7   | 74517914 | 74523100 | + | 0 NA | intron (MER5A DNA  | 66601 NM_01632E  | 9569 Hs. 647056NM_00568E  | ENSG000002GTF2IRD1           | BEN CREAM           | GTF2I      | ref               | protein-coding |                |
| chr7-8075  | 6.95648  | 0.463933 | 0.875265 | 0.530049 | 0.596078 | 0.981636 | chr7   | 80757598 | 80758495 | + | 0 NA | intron (intron (N  | 111393 NM_00128E | 948 Hs. 120949NM_00007E   | ENSG000002CD36               | BDPLT10             | CCD36      | mole              | protein-coding |                |
| chr7-1404  | 6.95648  | 0.463933 | 0.875265 | 0.530049 | 0.596078 | 0.981636 | chr7   | 1.4E+08  | 1.4E+08  | + | 0 NA | intron (AluSc SIN  | 13689 NM_01344E  | 23608 Hs. 74488E          | ENSG000002MKRN1              | RNF61               | makorin 1  | protein-coding    |                |                |
| chr7-155   | 6.95648  | 0.463933 | 0.875265 | 0.530049 | 0.596078 | 0.981636 | chr7   | 1.55E+08 | 1.55E+08 | + | 0 NA | 3' UTR (N3' UTR (N | 11124 NM_00554E  | 3638 Hs. 52081E           | ENSG000002INS1G1             | CL6                 | insulin 1  | protein-coding    |                |                |
| chr8-4236  | 6.95648  | 0.463933 | 0.875265 | 0.530049 | 0.596078 | 0.981636 | chr8   | 42361387 | 42363018 | + | 0 NA | intron (AluSc SIN  | 15027 NM_01442E  | 27121 Hs. 159311NM_01442E | ENSG000002DKK4               | DKK-4               | dickkopf   | protein-coding    |                |                |
| chr9-9265  | 6.95648  | 0.463933 | 0.875265 | 0.530049 | 0.596078 | 0.981636 | chr9   | 92636180 | 92638135 | + | 0 NA | intron (AluSz SIN  | 19107 NR_03650E  | 1E+08 Hs. 66039E          | NR_03650E                    | LOC10012E           | -          | uncharactericnRNA |                |                |
| chr9-1205  | 6.95648  | 0.463933 | 0.875265 | 0.530049 | 0.596078 | 0.981636 | chr9   | 1.21E+08 | 1.21E+08 | + | 0 NA | intron (AluJb SIN  | 54264 NR_07355E  | 55755 Hs. 26956E          | ENSG000002CDK5RAP2           | C48 Cep21           | CDK5       | regu              | protein-coding |                |
| chr9-1285  | 6.95648  | 0.463933 | 0.875265 | 0.530049 | 0.596078 | 0.981636 | chr9   | 1.29E+08 | 1.29E+08 | + | 0 NA | intron (intron (N  | 37202 NR_16319E  | 56904 Hs. 46002E          | ENSG000002SH3GLB2            | PP6569 PF           | SH3        | doma              | protein-coding |                |
| chr16-148  | 8.979347 | -0.426   | 0.803806 | -0.52998 | 0.596124 | 0.981636 | chr16  | 14838672 | 14838976 | + | 0 NA | intron (MER20 DNA  | 5103 NM_01428E   | 23420 Hs. 74396E          | ENSG000002CNOMO1             | Nomo PM5            | NODAL      | mod               | protein-coding |                |
| chr1-2431  | 6.700235 | -0.47877 | 0.903431 | -0.52995 | 0.596146 | 0.981636 | chr1   | 2.43E+08 | 2.43E+08 | + | 0 NA | intron (intron (N  | -58406 NR_02940E | 731275 Hs. 72235E         | ENSG000002LINC01347          | -                   | long       | intencnRNA        |                |                |
| chr13-985  | 6.700235 | -0.47877 | 0.903431 | -0.52995 | 0.596146 | 0.981636 | chr13  | 98368841 | 98369107 | + | 0 NA | intron (AluXs1 SI  | 153151 NM_00357E | 8428 Hs. 508514NM_00357E  | ENSG000002STK24              | HEL-S-95            | serine/tf  | protein-coding    |                |                |
| chr16-891  | 6.700235 | -0.47877 | 0.903431 | -0.52995 | 0.596146 | 0.981636 | chr16  | 8915949  | 8917554  | + | 0 NA | intron (intron (N  | 19888 NM_00128E  | 7874 Hs. 38693E           | ENSG000002CASP7              | HAUSP TEF           | ubiquitin  | protein-coding    |                |                |
| chr18-91   | 6.700235 | -0.47877 | 0.903431 | -0.52995 | 0.596146 | 0.981636 | chr18  | 9195268  | 9195655  | + | 0 NA | intron (L1MC5a LI  | 23253 NM_00120E  | 23253 Hs. 46458E          | ENSG000002ANKRD12            | ANCO-2 A            | ankyrin 1  | protein-coding    |                |                |
| chr3-1225  | 6.700235 | -0.47877 | 0.903431 | -0.52995 | 0.596146 | 0.981636 | chr3   | 1.23E+08 | 1.23E+08 | + | 0 NA | 3' UTR (N3' UTR (N | -19606 NM_00226E | 3836 Hs. 16100E           | ENSG000002KPN1A1             | IPOA5 NP1           | karyopher  | protein-coding    |                |                |
| chr6-111   | 6.700235 | -0.47877 | 0.903431 | -0.52995 | 0.596146 | 0.981636 | chr6   | 1.1E+08  | 1.1E+08  | + | 0 NA | intron (intron (N  | 28837 NM_03219E  | 84154 Hs. 37226E          | ENSG000002RPF2               | BXDC1 ba            | ribosome   | protein-coding    |                |                |
| chr8-1197  | 6.700235 | -0.47877 | 0.903431 | -0.52995 | 0.596146 | 0.981636 | chr8   | 1.2E+08  | 1.2E+08  | + | 0 NA | intron (intron (N  | 72269 NM_00318E  | 6873 Hs. 12275E           | ENSG000002TAF2               | CIF150 MF           | TATA-box   | protein-coding    |                |                |
| chrX-414   | 6.700235 | -0.47877 | 0.903431 | -0.52995 | 0.596146 | 0.981636 | chrX   | 41149758 | 41150283 | + | 0 NA | intron (intron (N  | 64575 NM_00103E  | 8239 Hs. 77578            | ENSG000002CASP9X             | DFFRX FAF           | ubiquitin  | protein-coding    |                |                |
| chr12-466  | 9.853262 | -0.39561 | 0.746713 | -0.52981 | 0.596246 | 0.981636 | chr12  | 4654982  | 4655346  | + | 0 NA | intron (MER58A DN  | 6050 NM_00500E   | 4704 Hs. 75227            | ENSG000002NUFA9              | CC6 C1-3E           | NADH:ubiq  | protein-coding    |                |                |
| chr18-456  | 9.853262 | -0.39561 | 0.746713 | -0.52981 | 0.596246 | 0.981636 | chr18  | 45952097 | 45953615 | + | 0 NA | intron (intron (N  | 14473 NM_02096E  | 57724 Hs. 51484E          | ENSG000002EPG5               | HEEW1 KI            | ectopic f  | protein-coding    |                |                |
| chr7-1211  | 9.853262 | -0.39561 | 0.746713 | -0.52981 | 0.596246 | 0.981636 | chr7   | 1.21E+08 | 1.21E+08 | + | 0 NA | intron (L1PA8 LIN  | 136069 NM_00110E | 79974 Hs. 18965E          | ENSG000002CPED1              | C7orf58             | cadherin   | protein-coding    |                |                |
| chr12-691  | 7.102986 | -0.46518 | 0.878326 | -0.52962 | 0.596373 | 0.981636 | chr12  | 6918139  | 6918544  | + | 0 NA | intron (intron (N  | 3761 NM_00197E   | 2026 Hs. 51191E           | ENSG000002EN02               | HEL-S-27E           | enolase 2  | protein-coding    |                |                |
| chr7-1395  | 5.963303 | 0.519178 | 0.980396 | 0.529559 | 0.596418 | 0.981636 | chr7   | 1.4E+08  | 1.4E+08  | + | 0 NA | intron (intron (N  | 11653 NM_00136E  | 6916 Hs. 52075E           | ENSG000002TBXAS1             | BDPLT14 C           | thromboxa  | protein-coding    |                |                |
| chrX-111   | 5.963303 | 0.519178 | 0.980396 | 0.529559 | 0.596418 | 0.981636 | chrX   | 11118575 | 11119125 | + | 0 NA | intron (MLT1G LTF  | 7518 NM_00533E   | 3052 Hs. 21157E           | ENSG000002HCCS               | CCHL LSDM           | holocyto   | protein-coding    |                |                |
| chr19-1317 | 10.19345 | 0.395815 | 0.747881 | 0.529249 | 0.596633 | 0.981636 | chr19  | 13768311 | 13769893 | + | 0 NA | intron (intron (N  | 4580 NM_03228E   | 84245 Hs. 43937E          | ENSG000002MR11               | M1P1 MRD1           | methylythi | protein-coding    |                |                |
| chr19-265  | 27.34394 | 0.257414 | 0.486755 | 0.528838 | 0.596918 | 0.981636 | chr19  | 26390848 | 26391677 | + | 0 NA | Intergeni          | ALR Alphe        | -1402169 NR_14673E        | 1.02E+08 Hs. 567934NR_11068E | ENSG000002LOC101927 | -          | uncharactericnRNA |                |                |
| chr19-365  | 7.142276 | -0.47472 | 0.897679 | -0.52883 | 0.596921 | 0.981636 | chr19  | 36511093 | 36511685 | + | 0 NA | 3' UTR (N3' UTR (N | 16882 NM_00116E  | 33924 Hs. 18103           | ENSG000002ZNF260             | OZRF1 PEX           | zinc fing  | protein-coding    |                |                |
| chr20-507  | 4.888588 | -0.55692 | 1.053406 | -0.52869 | 0.597021 | 0.981636 | chr20  | 50924853 | 50926381 | + | 0 NA | intron (intron (N  | -5367 NR_10001E  | 1.02E+08 Hs. 30189E       | ENSG000002ADNP-AS1           | -                   | ADNP       | antncnRNA         |                |                |
| chr3-1386  | 4.888588 | -0.55692 | 1.053406 | -0.52869 | 0.597021 | 0.981636 | chr3   | 1.39E+08 | 1.39E+08 | + | 0 NA | intron (intron (N  | 42270 NM_00125E  | 5291 Hs. 23981E           | ENSG000002PIK3CB             | P110BETA            | phosphati  | protein-coding    |                |                |
| chr15-328  | 9.309527 | -0.41596 | 0.786801 | -0.52867 | 0.597033 | 0.981636 | chr15  | 32898702 | 32898965 | + | 0 NA | intron (intron (N  | 169341 NM_00110E | 342184 Hs. 65764E         | ENSG000002FMN1               | FMN LD              | formin 1   | protein-coding    |                |                |
| chr13-521  | 12.16751 | -0.3623  | 0.685475 | -0.52854 | 0.597121 | 0.981636 | chr13  | 52168713 | 52169239 | + | 0 NA | non-codiron-codir  | -9115 NM_00114E  | 4752 Hs. 40998E           | ENSG000002NEK3               | HSPK36              | NIMA       | rel               | protein-coding |                |
| chr17-416  | 6.659096 | -0.48233 | 0.91272  | -0.52846 | 0.597183 | 0.981636 | chr17  | 41693862 | 41694772 | + | 0 NA | Intergeni          | Intergeni        | 5432 NM_00580E            | 10209 Hs. 15058E             | ENSG000002EIF1      | A121 EIF   | eukaryoti         | protein-coding |                |
| chr2-7137  | 6.659096 | -0.48233 | 0.91272  | -0.52846 | 0.597183 | 0.981636 | chr2   | 71375557 | 71376394 | + | 0 NA | intron (intron (N  | 44193 NM_01449E  | 27332 Hs. 434401NM_01449E | ENSG000002ZNF638             | NP220 ZFN           | zinc fing  | protein-coding    |                |                |
| chr3-5285  | 6.659096 | -0.48233 | 0.91272  | -0.52846 | 0.597183 | 0.981636 | chr3   | 52851137 | 52851424 | + | 0 NA | intron (intron (N  | -4728 NR_10703E  | 1.02E+08 Hs. 10703E       | ENSG000002MIR8064            | hsa-mir-            | miRNA      | ncRNA             |                |                |
| chr4-758   | 6.659096 | -0.48233 | 0.91272  | -0.52846 | 0.597183 | 0.981636 | chr4   | 75807080 | 75807451 | + | 0 NA | intron (intron (N  | 82743 NM_00129E  | 8615 Hs. 74487E           | ENSG000002USO1               | P115 TAP USO1       | vesi       | protein-coding    |                |                |
| chr5-1264  | 6.659096 | -0.48233 | 0.91272  | -0.52846 | 0.597183 | 0.981636 | chr5   | 1.26E+08 | 1.26E+08 | + | 0 NA | intron (intron (N  | 13662 NM_00114E  | 65983 Hs. 36355E          | ENSG000002GRAMD2B            | GRAMD3 NS           | GRAM       | dom               | protein-coding |                |
| chr5-154   | 6.659096 | -0.48233 | 0.91272  | -0.52846 | 0.597183 | 0.981636 | chr5   | 1.54E+08 | 1.54E+08 | + | 0 NA | intron (AluJr SIN  | -41783 NR_03162E | 1E+08 Hs. NR_03162E       | ENSG000002MIR1294            | MIR1294             | miRNA      | ncRNA             |                |                |
| chr6-751   | 6.659096 | -0.48233 | 0.91272  | -0.52846 | 0.597183 | 0.981636 | chr6   | 75173294 | 75173720 | + | 0 NA | intron (AluSq2 SI  | 32546 NM_08064E  | 1303 Hs. 10130E           | ENSG000002COL12A1            | BA209D8.1           | collagen   | protein-coding    |                |                |
| chr12-71   | 8.873494 | -0.42705 | 0.808327 | -0.52831 | 0.597282 | 0.981636 | chr12  | 7106068  | 7106590  | + | 0 NA | intron (HTAL LINE  | -1979 NR_02694E  | 283314 Hs. 74421E         | ENSG000002C1RL-AS1           | MATL2963            | C1RL       | antncnRNA         |                |                |
| chr2-241   | 9.409372 | -0.40411 | 0.764936 | -0.52829 | 0.597298 | 0.981636 | chr2   | 2.41E+08 | 2.41E+08 | + | 0 NA | TTS (NM_C          | 6309 NM_18250E   | 130916 Hs. 15955E         | ENSG000002MTERF4             | MTERF2              | mitochon   | protein-coding    |                |                |
| chr20-375  | 9.409372 | -0.40411 | 0.764936 | -0.52829 | 0.597298 | 0.981636 | chr20  | 37514571 | 37514830 | + | 0 NA | Intergeni          | Intergeni        | 5603 NM_00131E            | 10904 Hs. 47265E             | ENSG000002BLCAP     | BC10       | BLCAP             | apc            | protein-coding |
| chr5-568   | 9.409372 | -0.40411 | 0.764936 | -0.52829 | 0.597298 | 0.981636 | chr5   | 56868755 | 56868903 | + | 0 NA | intron (AluV SINE  | -40621 NR_13655E | 133383 Hs. 85950          | ENSG000002SETD9              | C5orf35             | SET        | doma              | protein-coding |                |
| chr6-170   | 9.409372 | -0.40411 | 0.764936 | -0.52829 | 0.597298 | 0.981636 | chr6   | 1.71E+08 | 1.71E+08 | + | 0 NA | intron (intron (N  | 14013 NM_00319E  | 6908 Hs. 59087E           | ENSG000002TBP                | GTF2D GTF           | TATA-box   | protein-coding    |                |                |
| chr1-8971  | 9.440803 | -0.40959 | 0.77543  | -0.52821 | 0.597356 | 0.981636 | chr1   | 89712777 | 89713221 | + | 0 NA | exon (NM exon (NM  | 79879 NM_03227E  | 84230 Hs. 41283E          | ENSG000002LRRRC8             | AD158 FAI           | leucine    | protein-coding    |                |                |
| chr11-65   | 6.549543 | -0.5124  | 0.970098 | -0.52819 | 0.597368 | 0.981636 | chr11  | 65579467 | 65579666 | + | 0 NA | intron (L2b LINE   | 3513 NM_00109E   | 254102 Hs. 50286E         | ENSG000002EHPB1L1            | -                   | EH         | doma              | protein-coding |                |
| chr1-841   | 9.845404 | -0.39429 | 0.746517 | -0.52817 | 0.597383 | 0.981636 | chr1   | 8415869  | 8416488  | + | 0 NA | intron (intron (N  | 7654 NM_01042E   | 473 Hs. 46304E            | ENSG000002CRERE              | ARG ARP             | arginine   | protein-coding    |                |                |
| chr15-825  | 9.845404 | -0.39429 | 0.746517 | -0.52817 | 0.597383 | 0.981636 | chr15  | 82534856 | 82539500 | + | 0 NA | intron (MER20 DNA  | 3279 NR_11194E   | 6218 Hs. 43342E           | ENSG000002RPS17              | DBA4 RPS1           | ribosomal  | protein-coding    |                |                |
| chr19-404  | 9.845404 | -0.39429 | 0.746517 | -0.52817 | 0.597383 | 0.981636 | chr19  | 40422717 | 40423595 | + | 0 NA | exon (NM exon (NM  | 2836 NM_01337E   | 29950 Hs. 26989E          | ENSG000002SERTAD1            | SEI1 TRIF           | SERTA      | don               | protein-coding |                |
| chr4-1187  | 9.845404 | -0.39429 | 0.746517 | -0.52817 | 0.597383 | 0.981636 | chr4   | 1.19E+08 | 1.19E+08 | + | 0 NA | intron (L2a LINE   | 36277 NM_01482E  | 9871 Hs. 18964E           | ENSG000002SEC24D             | CLCRP2              | SEC24      | hon               | protein-coding |                |
| chr5-347   | 9.845404 | -0.39429 | 0.746517 | -0.52817 | 0.597383 | 0.981636 | chr5</ |          |          |   |      |                    |                  |                           |                              |                     |            |                   |                |                |

|            |          |          |          |          |          |          |       |          |          |   |   |    |                    |        |           |          |           |                    |                     |                   |                |                |                |                |   |
|------------|----------|----------|----------|----------|----------|----------|-------|----------|----------|---|---|----|--------------------|--------|-----------|----------|-----------|--------------------|---------------------|-------------------|----------------|----------------|----------------|----------------|---|
| chr3-5256  | 7.16955  | -0.45479 | 0.864411 | -0.52613 | 0.598796 | 0.981636 | chr3  | 52561218 | 52564126 | + | 0 | NA | intron (AluJo SIN  | 26067  | NM_001124 | 440957   | Hs.660577 | NM_001124          | ENSG000003SMIM4     | C3orf78           | small          | intn           | protein-coding |                |   |
| chr4-1766  | 7.16955  | -0.45479 | 0.864411 | -0.52613 | 0.598796 | 0.981636 | chr4  | 1.77E+08 | 1.77E+08 | + | 0 | NA | intron (NL2 LINE L | 106578 | NM_005425 | 7424     | Hs.43521E | NM_005425          | ENSG000003VEGFC     | Flt4-L            | L L            | vascular       | protein-coding |                |   |
| chr5-1684  | 7.16955  | -0.45479 | 0.864411 | -0.52613 | 0.598796 | 0.981636 | chr5  | 16845524 | 16846612 | + | 0 | NA | intron (CharlieE   | 90220  | NM_012334 | 4651     | Hs.48172C | NM_012334          | ENSG000003MYO10     | -                 | -              | myosin X       | protein-coding |                |   |
| chr5-1575  | 7.16955  | -0.45479 | 0.864411 | -0.52613 | 0.598796 | 0.981636 | chr5  | 1.58E+08 | 1.58E+08 | + | 0 | NA | intron (Nintron (N | -53732 | NR_13620E | 1.03E+08 | Hs.57088E | NR_13620A          | LOC102724           | -                 | -              | uncharactercNA | -              |                |   |
| chr5-1723  | 7.16955  | -0.45479 | 0.864411 | -0.52613 | 0.598796 | 0.981636 | chr5  | 1.72E+08 | 1.72E+08 | + | 0 | NA | intron (Nintron (N | 67637  | NR_136093 | 1E+08    | Hs.531911 | NR_001007542       | LOC10028E           | -                 | -              | uncharactercNA | -              |                |   |
| chr6-3068  | 7.16955  | -0.45479 | 0.864411 | -0.52613 | 0.598796 | 0.981636 | chr6  | 30684337 | 30685303 | + | 0 | NA | exon (NM_exon (NM  | 1825   | NM_133471 | 170954   | Hs.10115C | NM_133471          | ENSG000003PPP1R18   | HKMT1098          |                | protein f      | protein-coding |                |   |
| chr8-1303  | 7.16955  | -0.45479 | 0.864411 | -0.52613 | 0.598796 | 0.981636 | chr8  | 1.3E+08  | 1.3E+08  | + | 0 | NA | intron (NMLTIK LTF | 57827  | NM_001362 | 50807    | Hs.65555E | NM_01848E          | ENSG000003ASAP1     | ADAM1 CEM         | ArfGAP         | wi             | protein-coding |                |   |
| chr9-1285  | 7.16955  | -0.45479 | 0.864411 | -0.52613 | 0.598796 | 0.981636 | chr9  | 1.29E+08 | 1.29E+08 | + | 0 | NA | intron (AluSzl SIN | -28339 | NM_01490E | 22845    | Hs.53156E | NM_01490E          | ENSG000003DOLK      | CDG1M DK          |                | dolichol       | protein-coding |                |   |
| chrX-1371  | 7.16955  | -0.45479 | 0.864411 | -0.52613 | 0.598796 | 0.981636 | chrX  | 13712503 | 13716724 | + | 0 | NA | intron (Nintron (N | 20007  | NM_001011 | 6399     | Hs.59223E | NM_01456E          | ENSG000003TRAPP2    | MIP2A SEI         | trafficki      | protein-coding | -              |                |   |
| chr17-1007 | 12.61325 | -0.35038 | 0.665989 | -0.52611 | 0.598812 | 0.981636 | chr17 | 6764954  | 6774945  | + | 0 | NA | intron (NLMEd LIN  | -6266  | NM_15323C | 162517   | Hs.368364 | NM_15323C          | ENSG000003FBX039    | CT144 Fbx         | F-box          | prc            | protein-coding |                |   |
| chr7-1006  | 12.61325 | -0.35038 | 0.665989 | -0.52611 | 0.598812 | 0.981636 | chr7  | 1E+08    | 1E+08    | + | 0 | NA | intron (Nintron (N | 16715  | NM_001287 | 7586     | Hs.61536C | NM_00343E          | ENSG000003KSCAN1    | KOX18 PHZ         | zinc           | fin            | protein-coding |                |   |
| chr22-317  | 6.625814 | -0.48793 | 0.927442 | -0.52611 | 0.598813 | 0.981636 | chr22 | 31763079 | 31763302 | + | 0 | NA | intron (AluSg SIN  | 9167   | NM_00136E | 9681     | Hs.43502E | NM_01466E          | ENSG000003DEPDC5    | DEP.5 FFED        | DEP            | doma           | protein-coding |                |   |
| chr7-1204  | 6.625814 | -0.48793 | 0.927442 | -0.52611 | 0.598813 | 0.981636 | chr7  | 42048024 | 42048223 | + | 0 | NA | intron (Nintron (N | 189086 | NM_00016E | 2737     | Hs.21509  | NM_00016E          | ENSG000003GLI3      | ACL5 GCP5         | GLI            | family         | protein-coding |                |   |
| chr1-1805  | 10.6979  | 0.382291 | 0.726803 | 0.525989 | 0.598896 | 0.981636 | chr1  | 1.81E+08 | 1.81E+08 | + | 0 | NA | 3' UTR (N3' UTR (N | 8411   | NR_145481 | 1.03E+08 | Hs.66531E | NR_145481          | ENSG000003KIAA1614  | -                 | -              | KIAA1614       | ncRNA          |                |   |
| chr11-115  | 10.6979  | 0.382291 | 0.726803 | 0.525989 | 0.598896 | 0.981636 | chr11 | 1.19E+08 | 1.19E+08 | + | 0 | NA | exon (NM_exon (NM  | 4548   | NM_00113C | 10525    | Hs.277704 | NM_00638E          | ENSG000003HYOU1     | GRP-170           |                | Hypoxia t      | protein-coding |                |   |
| chr1-6255  | 7.177408 | -0.45657 | 0.868081 | -0.52595 | 0.59892  | 0.981636 | chr1  | 62533691 | 62534531 | + | 0 | NA | intron (AluSzl SIN | -63409 | NM_01449E | 27329    | Hs.20915E | NM_01449E          | ENSG000003ANGPTL3   | ANG-5 ANC         | angiopoie      | protein-coding | -              |                |   |
| chr12-111  | 7.177408 | -0.45657 | 0.868081 | -0.52595 | 0.59892  | 0.981636 | chr12 | 1.11E+08 | 1.11E+08 | + | 0 | NA | intron (NLMCS LIN  | 39883  | NM_001291 | 10019    | Hs.506784 | NM_00547E          | ENSG000003SH2B3     | IDDM20 LASH2B     | adap           | protein-coding | -              |                |   |
| chr12-688  | 7.177408 | -0.45657 | 0.868081 | -0.52595 | 0.59892  | 0.981636 | chr12 | 68274423 | 68275420 | + | 0 | NA | exon (NM_exon (NM  | 10395  | NM_00107E | 9057     | Hs.67958C | NM_00398E          | ENSG000003SLC7A6    | LAT-2 LAT1        | solute         | cp             | protein-coding |                |   |
| chr19-403  | 7.177408 | -0.45657 | 0.868081 | -0.52595 | 0.59892  | 0.981636 | chr19 | 4031792  | 4032557  | + | 0 | NA | intron (Nintron (N | 24438  | NM_015897 | 51588    | Hs.10577E | NM_015897          | ENSG000003PIAS4     | PIAS-gamm         | protein        | protein-coding | -              |                |   |
| chr2-850   | 7.177408 | -0.45657 | 0.868081 | -0.52595 | 0.59892  | 0.981636 | chr2  | 85006424 | 85008030 | + | 0 | NA | intron (Nintron (N | 36066  | NM_02012E | 56888    | Hs.65496E | NM_02012E          | ENSG000003KCMF1     | DEBT91 F1         | potassium      | protein-coding | -              |                |   |
| chr6-3218  | 7.177408 | -0.45657 | 0.868081 | -0.52595 | 0.59892  | 0.981636 | chr6  | 32184571 | 32187867 | + | 0 | NA | 3' UTR (N3' UTR (N | -1897  | NM_00120E | 177      | Hs.53434E | NM_00113E          | ENSG000003AGER      | RAGE SCAF         | advanced       | protein-coding | -              |                |   |
| chr7-3058  | 7.177408 | -0.45657 | 0.868081 | -0.52595 | 0.59892  | 0.981636 | chr7  | 30583694 | 30584187 | + | 0 | NA | IntergeniMER4-int  | -6161  | NR_03888E | 401320   | Hs.56170E | NR_03888E          | GARS-DT             | -                 | -              | GARS           | divnc          | ncRNA          |   |
| chr1-2105  | 6.964337 | 0.461714 | 0.878137 | 0.525788 | 0.599035 | 0.981636 | chr1  | 21093644 | 21094612 | + | 0 | NA | intron (Nintron (N | 17255  | NM_00376E | 8672     | Hs.467084 | NM_00376E          | ENSG000003EIF4G3    | eIF-4G 3 eukaryot | protein-coding | -              | -              |                |   |
| chr1-2687  | 6.964337 | 0.461714 | 0.878137 | 0.525788 | 0.599035 | 0.981636 | chr1  | 26878485 | 26880518 | + | 0 | NA | 3' UTR (N3' UTR (N | 10786  | NM_01806E | 54707    | Hs.14333  | NM_01806E          | ENSG000003GPN2      | ATPBD1B GPN       | -              | loop           | protein-coding | -              |   |
| chr1-1445  | 6.964337 | 0.461714 | 0.878137 | 0.525788 | 0.599035 | 0.981636 | chr1  | 1.45E+08 | 1.45E+08 | + | 0 | NA | intron (AluV SINE  | 166292 | NM_00133C | 647135   | Hs.49757E | NM_001271          | ENSG000003SRGAP2B   | SRGAP2L2 SLIT     | -              | ROBc           | protein-coding | -              |   |
| chr10-113  | 6.964337 | 0.461714 | 0.878137 | 0.525788 | 0.599035 | 0.981636 | chr10 | 1.14E+08 | 1.14E+08 | + | 0 | NA | intron (Nintron (N | 5632   | NM_198514 | 374354   | Hs.369924 | NM_198514          | ENSG000003NHLRC2    | FINCA             | NHL            | repe           | protein-coding | -              |   |
| chr11-714  | 6.964337 | 0.461714 | 0.878137 | 0.525788 | 0.599035 | 0.981636 | chr11 | 71494182 | 71501625 | + | 0 | NA | intron (Nintron (N | 24400  | NR_10681E | 1.02E+08 | NR_10681E | ENSG000003MIR6754  | hsa-mir-6           | mi                | microRNA       | ncRNA          | -              |                |   |
| chr12-644  | 6.964337 | 0.461714 | 0.878137 | 0.525788 | 0.599035 | 0.981636 | chr12 | 64466987 | 64469566 | + | 0 | NA | intron (AluSg SIN  | 16156  | NM_013254 | 29110    | Hs.505874 | NM_013254          | ENSG000003TBK1      | FTDLS4 ITAK       | bin            | protein-coding | -              |                |   |
| chr12-101  | 6.964337 | 0.461714 | 0.878137 | 0.525788 | 0.599035 | 0.981636 | chr12 | 1.01E+08 | 1.01E+08 | + | 0 | NA | intron (Nintron (N | -39139 | NR_04983E | 1.01E+08 | NR_04983E | ENSG000003MIR5484Q | -                   | -                 | microRNA       | ncRNA          | -              |                |   |
| chr12-125  | 6.964337 | 0.461714 | 0.878137 | 0.525788 | 0.599035 | 0.981636 | chr12 | 1.24E+08 | 1.24E+08 | + | 0 | NA | intron (Nintron (N | -12480 | NR_01246E | 23545    | Hs.25786  | NR_01246E          | ENSG000003ATP6VAO2  | A2 ARCL           |                | ATPase H+      | protein-coding | -              |   |
| chr14-203  | 6.964337 | 0.461714 | 0.878137 | 0.525788 | 0.599035 | 0.981636 | chr14 | 20368452 | 20369254 | + | 0 | NA | exon (NM_exon (NM  | 25239  | NM_01014E | 10038    | Hs.40941E | NM_00548E          | ENSG000003PARP2     | ADPRT2 AL         | poly           | (ADP-          | protein-coding | -              |   |
| chr14-584  | 6.964337 | 0.461714 | 0.878137 | 0.525788 | 0.599035 | 0.981636 | chr14 | 58408889 | 58409819 | + | 0 | NA | TTS (NM_2TTS (NM_2 | 13424  | NM_207377 | 387990   | Hs.592307 | NM_207377          | ENSG000003TOMM20L   | UNQ9438           | transloc       | protein-coding | -              |                |   |
| chr14-102  | 6.964337 | 0.461714 | 0.878137 | 0.525788 | 0.599035 | 0.981636 | chr14 | 64725    | 64725    | + | 0 | NA | intron (NL2c LINE  | 64725  | NM_00134E | 122416   | Hs.43294E | NM_15232E          | ENSG000003ANKRD9    | -                 | -              | ankyrin        | protein-coding | -              |   |
| chr16-163  | 6.964337 | 0.461714 | 0.878137 | 0.525788 | 0.599035 | 0.981636 | chr16 | 16374356 | 16376414 | + | 0 | NA | promoter-promoter- | -662   | NM_00128E | 1.01E+08 | Hs.63656E | NM_00128E          | ENSG000003NPIP8     | LCR16a9 N         | nuclear        | protein-coding | -              |                |   |
| chr16-234  | 6.964337 | 0.461714 | 0.878137 | 0.525788 | 0.599035 | 0.981636 | chr16 | 23477721 | 23479453 | + | 0 | NA | intron (Nintron (N | -25443 | NM_15360E | 91949    | Hs.185807 | NM_15360E          | ENSG000003COG7      | CDG2E             | component      | protein-coding | -              |                |   |
| chr16-317  | 6.964337 | 0.461714 | 0.878137 | 0.525788 | 0.599035 | 0.981636 | chr16 | 31727389 | 31727926 | + | 0 | NA | intron (NLM9 LIN   | 14428  | NM_00113C | 124411   | Hs.52882E | NM_001004          | ENSG000003ZNF720    | -                 | -              | zinc           | fin            | protein-coding | - |
| chr17-186  | 6.964337 | 0.461714 | 0.878137 | 0.525788 | 0.599035 | 0.981636 | chr17 | 18054379 | 18059198 | + | 0 | NA | intron (Nintron (N | 17380  | NM_02405E | 79018    | Hs.18742E | NM_02405E          | ENSG000003GID4      | C17orf39 GID      | compl          | protein-coding | -              |                |   |
| chr17-215  | 6.964337 | 0.461714 | 0.878137 | 0.525788 | 0.599035 | 0.981636 | chr17 | 21533990 | 21536590 | + | 0 | NA | non-codiron-codir  | 16834  | NR_160801 | 339263   | Hs.51401E | NR_00111E          | ENSG000003LINC0269E | C17orf51          | long           | intnc          | ncRNA          | -              |   |
| chr17-824  | 6.964337 | 0.461714 | 0.878137 | 0.525788 | 0.599035 | 0.981636 | chr17 | 82464420 | 82465500 | + | 0 | NA | intron (NMSTA LTR  | 6219   | NM_01233E | 26502    | Hs.52655E | NM_01233E          | ENSG000003NARF      | IOP2              | nuclear        | protein-coding | -              |                |   |
| chr19-83C  | 6.964337 | 0.461714 | 0.878137 | 0.525788 | 0.599035 | 0.981636 | chr19 | 8309379  | 8316634  | + | 0 | NA | intron (AluSzl SIN | -4648  | NM_01657E | 51293    | Hs.55849E | NM_01657E          | ENSG000003CD320     | 8D6 8D6A          | CD320          | mol            | protein-coding | -              |   |
| chr19-104  | 6.964337 | 0.461714 | 0.878137 | 0.525788 | 0.599035 | 0.981636 | chr19 | 10485429 | 10486713 | + | 0 | NA | TTS (NM_2TTS (NM_2 | 16700  | NM_01228E | 9817     | Hs.46587C | NM_01228E          | ENSG000003KEAP1     | InrF2 KLF         | kelch          | lik            | protein-coding | -              |   |
| chr19-404  | 6.964337 | 0.461714 | 0.878137 | 0.525788 | 0.599035 | 0.981636 | chr19 | 40236338 | 40240376 | + | 0 | NA | intron (Nintron (N | -11668 | NM_024877 | 79935    | Hs.63290E | NM_024877          | ENSG000003CNTD2     | CCNP              | cyclin         | N              | protein-coding | -              |   |
| chr19-52C  | 6.964337 | 0.461714 | 0.878137 | 0.525788 | 0.599035 | 0.981636 | chr19 | 52061824 | 52062262 | + | 0 | NA | intron (HERV4_I-i  | -13205 | NM_01465C | 9668     | Hs.655934 | NM_01465C          | ENSG000003ZNF432    | -                 | -              | zinc           | fin            | protein-coding | - |
| chr2-2591  | 6.964337 | 0.461714 | 0.878137 | 0.525788 | 0.599035 | 0.981636 | chr2  | 55919928 | 55922323 | + | 0 | NA | intron (Nintron (N | 2657   | NM_00103E | 2202     | Hs.76224  | NM_00410E          | ENSG000003EFEMP1    | DHRD DRAI         | EGF            | cont           | protein-coding | -              |   |
| chr2-1304  | 6.964337 | 0.461714 | 0.878137 | 0.525788 | 0.599035 | 0.981636 | chr2  | 1.3E+08  | 1.3E+08  | + | 0 | NA | intron (NLM4 LINE  | 16839  | NR_03323E | 55627    | Hs.51645E | NM_017751          | ENSG000003SMPD4     | NET13 NS          | sphingom       | protein-coding | -              |                |   |
| chr2-2034  | 6.964337 | 0.461714 | 0.878137 | 0.525788 | 0.599035 | 0.981636 | chr2  | 2.03E+08 | 2.03E+08 | + | 0 | NA | 3' UTR (N3' UTR (N | 78154  | NM_00128E | 10152    | Hs.47115E | NM_00575E          | ENSG000003ABI2      | ABI-2 ABI         | abl            | inter          | protein-coding | -              |   |
| chr2-376   | 6.964337 | 0.461714 | 0.878137 | 0.525788 | 0.599035 | 0.981636 | chr2  | 37615977 | 37619703 |   |   |    |                    |        |           |          |           |                    |                     |                   |                |                |                |                |   |



|                    |          |          |          |          |          |       |          |          |   |      |                    |                  |                                               |                                           |                                    |                     |
|--------------------|----------|----------|----------|----------|----------|-------|----------|----------|---|------|--------------------|------------------|-----------------------------------------------|-------------------------------------------|------------------------------------|---------------------|
| chr19-617 9.21784  | 0.42981  | 0.820559 | 0.523801 | 0.600417 | 0.981636 | chr19 | 617265   | 617464   | + | 0 NA | TTS (NM_CTTT (NM_C | 16173 NM_005035  | 5442 Hs. 254111:NM_005035:ENSG000003POLRMT    | APOLMT MI RNA polynprotein-coding         |                                    |                     |
| chr19-358 7.185266 | -0.45837 | 0.875444 | -0.52359 | 0.600563 | 0.981636 | chr19 | 35897040 | 35897860 | + | 0 NA | intron (NAluSz SIN | 2287 NM_001321   | 84807 Hs. 466531:NM_032721:ENSG000003NFKBID   | IKBNS IkeNFKB inhprotein-coding           |                                    |                     |
| chr4-140:9.894402  | -0.39329 | 0.751159 | -0.52357 | 0.600576 | 0.981636 | chr4  | 1.4E+08  | 1.4E+08  | + | 0 NA | 3' UTR (N3' UTR (N | 7752 NM_001153   | 60592 Hs. 48081:NM_032547:ENSG000003SCOC      | HRHFB207short coiprotein-coding           |                                    |                     |
| chr8-179:10.63133  | 0.377329 | 0.720736 | 0.523533 | 0.600604 | 0.981636 | chr8  | 17952886 | 17954808 | + | 0 NA | intron (Nintron (N | 30859 NM_001352  | 5108 Hs. 49114:NM_006197:ENSG000003PCM1       | PTK4 RET pericentriprotein-coding         |                                    |                     |
| chr1-2281 6.393328 | 0.481788 | 0.920407 | 0.523545 | 0.600606 | 0.981636 | chr1  | 2.28E+08 | 2.28E+08 | + | 0 NA | intron (Nintron (N | 1805 NM_001155   | 2908 Hs. 376939:NM_000858:ENSG000003GUK1      | GMC guanylateprotein-coding               |                                    |                     |
| chr12-102 6.997619 | 0.465373 | 0.889118 | 0.523409 | 0.600689 | 0.981636 | chr12 | 1.02E+08 | 1.02E+08 | + | 0 NA | intron (Nintron (N | 12374 NM_016053  | 51019 Hs. 405692:NM_016053:ENSG000003WASHC3   | CCDC53 CCWASH comp protein-coding         |                                    |                     |
| chr13-111 6.997619 | 0.465373 | 0.889118 | 0.523409 | 0.600689 | 0.981636 | chr13 | 1.1E+08  | 1.1E+08  | + | 0 NA | intron (Nintron (N | 8543 NM_001267   | 1E+08 Hs. 640033:NM_001267:COL4A2-AS-         | COL4A2 arprotein-coding                   |                                    |                     |
| chr11-117 6.923198 | 0.460316 | 0.879494 | 0.523387 | 0.600705 | 0.981636 | chr11 | 1.17E+08 | 1.17E+08 | + | 0 NA | intron (Nintron (N | 63508 NM_014956  | 22897 Hs. 504005:NM_014956:ENSG000003CEP164   | NPHP15 centrosonprotein-coding            |                                    |                     |
| chr12-162 6.923198 | 0.460316 | 0.879494 | 0.523387 | 0.600705 | 0.981636 | chr12 | 1637478  | 1637814  | + | 0 NA | intron (NAluSg4 SI | 8415 NM_032642   | 81029 Hs. 306051:NM_030777:ENSG000003WNT5B    | Wnt familprotein-coding                   |                                    |                     |
| chr16-197 6.923198 | 0.460316 | 0.879494 | 0.523387 | 0.600705 | 0.981636 | chr16 | 1977759  | 1979144  | + | 0 NA | TTS (NM_CTTT (NM_C | 3018 NM_172166   | 124056 Hs. 191762:NM_144603:ENSG000003NOX01   | P41NOX P4NADPH oxiprotein-coding          |                                    |                     |
| chr17-285 6.923198 | 0.460316 | 0.879494 | 0.523387 | 0.600705 | 0.981636 | chr17 | 28546958 | 28547480 | + | 0 NA | 3' UTR (N3' UTR (N | 5405 NM_001330   | 9094 Hs. 414045:NM_005144:ENSG000003UNC119    | HRG4 IMD1unc-119 lprotein-coding          |                                    |                     |
| chr17-644 6.923198 | 0.460316 | 0.879494 | 0.523387 | 0.600705 | 0.981636 | chr17 | 64481403 | 64481842 | + | 0 NA | intron (NAluSz SIN | 15432 NM_007215  | 11232 Hs. 437005:NM_007215:ENSG000003POLG2    | HP55 MTPCDNA polynprotein-coding          |                                    |                     |
| chr19-164 6.923198 | 0.460316 | 0.879494 | 0.523387 | 0.600705 | 0.981636 | chr19 | 16424102 | 16425202 | + | 0 NA | intron (Nintron (N | 47318 NM_001258  | 58513 Hs. 654633:NM_021233:ENSG000003EPS15L1  | EPS15R epidermalprotein-coding            |                                    |                     |
| chr2-153 6.923198  | 0.460316 | 0.879494 | 0.523387 | 0.600705 | 0.981636 | chr2  | 15304795 | 15305351 | + | 0 NA | intron (NHEID-int  | 256621 NM_015905 | 51594 Hs. 467755:NM_015905:ENSG000003CNBAS    | ILF52 NAC neuroblasprotein-coding         |                                    |                     |
| chr2-1214 6.923198 | 0.460316 | 0.879494 | 0.523387 | 0.600705 | 0.981636 | chr2  | 1.21E+08 | 1.21E+08 | + | 0 NA | intron (NAluY SINE | -35678 NR_023343 | 1E+08 Hs. 689633:NR_023343:ENSG000003RNU4ATAC | MOPD1 RFWRNA, U4atsnRNA                   |                                    |                     |
| chr20-286 6.923198 | 0.460316 | 0.879494 | 0.523387 | 0.600705 | 0.981636 | chr20 | 2861396  | 2862008  | + | 0 NA | exon (NM exon (NM  | -2493 NM_002838  | 5786 Hs. 269577:NM_002838:ENSG000003PTPRA     | HEPTP HLF protein tprotein-coding         |                                    |                     |
| chr4-1685 6.923198 | 0.460316 | 0.879494 | 0.523387 | 0.600705 | 0.981636 | chr4  | 1.69E+08 | 1.69E+08 | + | 0 NA | IntergeniLIPA15 LI | 27827 NM_032783  | 84869 Hs. 659311:NM_032783:ENSG000003CBRR4    | SDR45C1 carbonyl protein-coding           |                                    |                     |
| chr5-738 6.923198  | 0.460316 | 0.879494 | 0.523387 | 0.600705 | 0.981636 | chr5  | 73785092 | 73785675 | + | 0 NA | intron (Nintron (N | -28163 NM_001244 | 64283 Hs. 482521:NM_001083:ENSG000003ARHGFE28 | RGNFEF RFH Rho guaniprotein-coding        |                                    |                     |
| chr6-1361 6.923198 | 0.460316 | 0.879494 | 0.523387 | 0.600705 | 0.981636 | chr6  | 1.36E+08 | 1.36E+08 | + | 0 NA | intron (Nintron (N | 62348 NM_138415  | 113115 Hs. 121533:NM_138415:ENSG000003MTFR2   | DUF011 FAM mitochoncprotein-coding        |                                    |                     |
| chr8-1442 6.923198 | 0.460316 | 0.879494 | 0.523387 | 0.600705 | 0.981636 | chr8  | 1.44E+08 | 1.44E+08 | + | 0 NA | intron (Nintron (N | 21345 NR_107057  | 1.02E+08                                      | 83660 Hs. 569433:NM_015055:ENSG000003TLN2 | MIR7112-1microRNA ncRNA            |                     |
| chr15-627 7.095129 | -0.46347 | 0.885523 | -0.52339 | 0.600706 | 0.981636 | chr15 | 62720181 | 62720547 | + | 0 NA | intron (Nintron (N | 73053 NM_015055  | 83660 Hs. 569433:NM_015055:ENSG000003TLN2     | ILWEQ talin 2 protein-coding              |                                    |                     |
| chr19-104 7.095129 | -0.46347 | 0.885523 | -0.52339 | 0.600706 | 0.981636 | chr19 | 10400563 | 10400762 | + | 0 NA | intron (NAluJb SIN | 2876 NR_031592   | 1E+08                                         | NR_031592:ENSG000003MIR1181               | MIRN1181 microRNA ncRNA            |                     |
| chr2-681:7.095129  | -0.46347 | 0.885523 | -0.52339 | 0.600706 | 0.981636 | chr2  | 68134225 | 68134438 | + | 0 NA | non-codirnon-codir | 23196 NM_001258  | 116143 Hs. 631877:NM_138458:ENSG000003WDR92   | WD repeatprotein-coding                   |                                    |                     |
| chr3-8164 7.095129 | -0.46347 | 0.885523 | -0.52339 | 0.600706 | 0.981636 | chr3  | 81642684 | 81642883 | + | 0 NA | exon (NM exon (NM  | 118862 NM_000158 | 2632 Hs. 436062:NM_000158:ENSG000003GBE1      | APBD GBC 1,4-alpha protein-coding         |                                    |                     |
| chr13-236 9.870828 | -0.38928 | 0.743809 | -0.52336 | 0.600724 | 0.981636 | chr13 | 23659279 | 23663587 | + | 0 NA | intron (NLIPECC LI | 82073 NM_018647  | 55504 Hs. 149166:NM_018647:ENSG000003TNFRSF19 | TAJ TAJ-2 TNF recep protein-coding        |                                    |                     |
| chr17-287 9.870828 | -0.38928 | 0.743809 | -0.52336 | 0.600724 | 0.981636 | chr17 | 28725048 | 28725604 | + | 0 NA | promoter-promoter- | -388 NR_000014   | 26809                                         | NR_000014:ENSG000003SNORD42A              | RNU42A u small ncnoRNA             |                     |
| chr18-95 9.870828  | -0.38928 | 0.743809 | -0.52336 | 0.600724 | 0.981636 | chr18 | 9557171  | 9557959  | + | 0 NA | intron (NLMC4 LIN  | 59724 NM_052003  | 9989 Hs. 743233:NM_005134:ENSG000003PPP4R1    | MGE1 PP4 protein tprotein-coding          |                                    |                     |
| chr19-175 9.870828 | -0.38928 | 0.743809 | -0.52336 | 0.600724 | 0.981636 | chr19 | 17515843 | 17521770 | + | 0 NA | intron (NAluSx1 SI | -4495 NM_001098  | 199786 Hs. 434133:NM_173544:ENSG000003NIBAN3  | BCNP1 FAM niban apcprotein-coding         |                                    |                     |
| chr2-392:9.870828  | -0.38928 | 0.743809 | -0.52336 | 0.600724 | 0.981636 | chr2  | 39256436 | 39260857 | + | 0 NA | intron (Nintron (N | -14663 NR_144521 | 344387 Hs. 403201:NM_001005:ENSG000003CDKL4   | cyclin dprotein-coding                    |                                    |                     |
| chr22-24:9.870828  | -0.38928 | 0.743809 | -0.52336 | 0.600724 | 0.981636 | chr22 | 24369732 | 24374251 | + | 0 NA | intron (NAluSx SIN | 29883 NR_001254  | 23384 Hs. 474384:NM_015333:ENSG000003SPECCIL  | CYTSA GBE sperm antprotein-coding         |                                    |                     |
| chr3-514:9.870828  | -0.38928 | 0.743809 | -0.52336 | 0.600724 | 0.981636 | chr3  | 51461100 | 51462523 | + | 0 NA | intron (NLIPE4 LIN | 38191 NM_001171  | 9730 Hs. 716623:NM_014703:ENSG000003DCAF1     | RIP VPRB DBD1 and protein-coding          |                                    |                     |
| chr7-130 9.870828  | -0.38928 | 0.743809 | -0.52336 | 0.600724 | 0.981636 | chr7  | 1.31E+08 | 1.31E+08 | + | 0 NA | non-codirnon-codir | -4479 NR_029517  | 407024                                        | NR_029517:ENSG000003MIR29B1               | MIRN29B1 microRNA ncRNA            |                     |
| chr8-9109 9.870828 | -0.38928 | 0.743809 | -0.52336 | 0.600724 | 0.981636 | chr8  | 91014466 | 91019624 | + | 0 NA | intron (NHAL LINE  | 23814 NM_018710  | 450229 Hs. 202517:NM_018710:ENSG000003PIP42   | TMEM55A phosphatiprotein-coding           |                                    |                     |
| chr10-24:4.906154  | -0.54397 | 1.039627 | -0.52324 | 0.600809 | 0.981636 | chr10 | 240979   | 241414   | + | 0 NA | intron (NAluJb SIN | 61202 NM_001202  | 10771 Hs. 292265:NM_006624:ENSG000003ZMYND11  | BRAM1 BSZ zinc fing protein-coding        |                                    |                     |
| chr10-35:4.906154  | -0.54397 | 1.039627 | -0.52324 | 0.600809 | 0.981636 | chr10 | 35041674 | 35043170 | + | 0 NA | intron (NMER21A LI | 31861 NM_001198  | 8453 Hs. 82919                                | NR_003591:ENSG000003CUL2                  | cullin 2 protein-coding            |                     |
| chr11-201 4.906154 | -0.54397 | 1.039627 | -0.52324 | 0.600809 | 0.981636 | chr11 | 20107796 | 20108873 | + | 0 NA | intron (Nintron (N | 52142 NM_001025  | 120237                                        | NR_001025:ENSG000003DBX1                  | developiprotein-coding             |                     |
| chr13-11:4.906154  | -0.54397 | 1.039627 | -0.52324 | 0.600809 | 0.981636 | chr13 | 1.13E+08 | 1.13E+08 | + | 0 NA | intron (Nintron (N | 25801 NM_001008  | 8451 Hs. 339733:NM_003585:ENSG000003CUL4A     | cullin 4 protein-coding                   |                                    |                     |
| chr15-28:4.906154  | -0.54397 | 1.039627 | -0.52324 | 0.600809 | 0.981636 | chr15 | 28642611 | 28643623 | + | 0 NA | IntergeniLMB5 LIN  | -11325 NR_036443 | 440248 Hs. 531505:NM_199045:ENSG000003HERC2P9 | hect dompseudoe                           |                                    |                     |
| chr19-21:4.906154  | -0.54397 | 1.039627 | -0.52324 | 0.600809 | 0.981636 | chr19 | 21040416 | 21040850 | + | 0 NA | intron (NMTB LTR   | 19976 NM_001172  | 80264 Hs. 729020:NM_025185:ENSG000003ZNF430   | zinc fing protein-coding                  |                                    |                     |
| chr4-175:4.906154  | -0.54397 | 1.039627 | -0.52324 | 0.600809 | 0.981636 | chr4  | 17592138 | 17592820 | + | 0 NA | intron (NLMEM2 LIN | 15175 NM_015907  | 51056 Hs. 570791:NM_015907:ENSG000003CLAP3    | HEL-S-10c leucine epsilon protein-coding  |                                    |                     |
| chr5-430:4.906154  | -0.54397 | 1.039627 | -0.52324 | 0.600809 | 0.981636 | chr5  | 43054432 | 43055796 | + | 0 NA | intron (NLIPE6 LIN | 11857 NR_034127  | 1E+08                                         | LOC100132                                 | uncharactncRNA                     |                     |
| chr5-1504 4.906154 | -0.54397 | 1.039627 | -0.52324 | 0.600809 | 0.981636 | chr5  | 1.54E+08 | 1.54E+08 | + | 0 NA | exon (NM exon (NM  | 14517 NM_001242  | 4238 Hs. 432818:NM_005927:ENSG000003MFAP3     | microfractprotein-coding                  |                                    |                     |
| chr6-734:4.906154  | -0.54397 | 1.039627 | -0.52324 | 0.600809 | 0.981636 | chr6  | 73428109 | 73429260 | + | 0 NA | intron (Nintron (N | 23613 NM_138441  | 115004 Hs. 658405:NM_138441:ENSG000003CGAP3   | C6orf150 cyclic GW protein-coding         |                                    |                     |
| chr7-109:4.906154  | -0.54397 | 1.039627 | -0.52324 | 0.600809 | 0.981636 | chr7  | 10993961 | 10994902 | + | 0 NA | intron (NAluSz SIN | 20559 NR_033433  | 9678 Hs. 655688:NM_014663:ENSG000003PHF14     | PHD fingeprotein-coding                   |                                    |                     |
| chr8-377:4.906154  | -0.54397 | 1.039627 | -0.52324 | 0.600809 | 0.981636 | chr8  | 37773274 | 37752208 | + | 0 NA | intron (Nintron (N | 11606 NM_001345  | 11212 Hs. 304792:NM_007195:ENSG000003PLPBP    | EPVB6D PF finger protein-coding           |                                    |                     |
| chr11-662 9.159135 | 0.422324 | 0.807527 | 0.522984 | 0.600985 | 0.981636 | chr11 | 66275972 | 66276204 | + | 0 NA | exon (NM exon (NM  | -2087 NR_073078  | 254263 Hs. 437072:NM_182555:ENSG000003CNH2    | CNH2-2 Cr cornichon protein-coding        |                                    |                     |
| chr19-451 9.159135 | 0.422324 | 0.807527 | 0.522984 | 0.600985 | 0.981636 | chr19 | 45145392 | 45145717 | + | 0 NA | exon (NM exon (NM  | 14596 NM_198478  | 284353 Hs. 299255:NM_198478                   | NKPD1                                     | NTPase K protein-coding            |                     |
| chr5-112:7.069710  | -0.47091 | 0.900459 | -0.52296 | 0.601    | 0.981636 | chr5  | 1.13E+08 | 1.13E+08 | + | 0 NA | intron (Nintron (N | 19543 NM_003135  | 6728 Hs. 637001:NM_003135:ENSG000003SRP19     | signal rprotein-coding                    |                                    |                     |
| chr8-477:16.88712  | 0.305977 | 0.585339 | 0.522735 | 0.601159 | 0.981636 | chr8  | 47735922 | 47737655 | + | 0 NA | TTS (NM_CTTT (NM_C | 1376 NM_005195   | 1052 Hs. 440231:NM_005195:ENSG000003CEBPD     | C/EBP-de CCAAT enr protein-coding         |                                    |                     |
| chr17-501 11.68248 | -0.36928 | 0.706654 | -0.52257 | 0.601273 | 0.981636 | chr17 | 50186655 | 50186938 | + | 0 NA | exon (NM exon (NM  | -14320 NR_024192 | 373861 Hs. 25934                              | NR_194072                                 | HLS1                               | H1.9 histone lpsudo |
| chr1-246:6.931056  | 0.458097 | 0.876822 | 0.522452 | 0.601356 | 0.981636 | chr1  | 2.47E+08 | 2.47E+08 | + | 0 NA | intron (Nintron (N | 14864 NM_022366  | 64216 Hs. 7395                                | NR_022366:ENSG000003TFB2M                 | Hkp1 mtTF transcrip protein-coding |                     |
| chr1-245:6.931056  | 0.458097 | 0.876822 | 0.522452 | 0.601356 | 0.981636 | chr1  | 2.47E+08 | 2.47E+08 | + | 0 NA | intron (NLMB2      |                  |                                               |                                           |                                    |                     |

|           |          |          |          |          |          |          |       |          |          |   |   |    |                    |         |           |          |           |                   |                     |                          |                                     |
|-----------|----------|----------|----------|----------|----------|----------|-------|----------|----------|---|---|----|--------------------|---------|-----------|----------|-----------|-------------------|---------------------|--------------------------|-------------------------------------|
| chr3-1362 | 4.939436 | -0.53643 | 1.03114  | -0.52023 | 0.602901 | 0.981636 | chr3  | 1.36E+08 | 1.36E+08 | + | 0 | NA | intron (AluX3 S1   | 67851   | NM_000532 | 5096     | Hs.63788  | NM_000532         | ENSG000000CCB       | -                        | propionylprotein-coding             |
| chr4-1064 | 4.939436 | -0.53643 | 1.03114  | -0.52023 | 0.602901 | 0.981636 | chr4  | 1.06E+08 | 1.06E+08 | + | 0 | NA | intron (intron (N  | -15290  | NM_001142 | 9255     | Hs.59168  | NM_004757         | ENSG000000AIMP1     | -                        | EMAP2 EM2 aminoacylprotein-coding   |
| chr7-1557 | 4.939436 | -0.53643 | 1.03114  | -0.52023 | 0.602901 | 0.981636 | chr7  | 1.56E+08 | 1.56E+08 | + | 0 | NA | 3' UTR (N3' UTR (N | 28425   | NR_132318 | 6469     | Hs.164537 | NM_000193         | ENSG000000CSHM      | -                        | HHG1 HLP2 sonic hecprotein-coding   |
| chr8-1054 | 4.939436 | -0.53643 | 1.03114  | -0.52023 | 0.602901 | 0.981636 | chr8  | 1.05E+08 | 1.05E+08 | + | 0 | NA | intron (NLTR12C LI | 67517   | NM_001362 | 23414    | Hs.431009 | NM_012082         | ENSG000000ZFPM2     | -                        | DIH3 FOG2 zinc fingprotein-coding   |
| chr9-3744 | 4.939436 | -0.53643 | 1.03114  | -0.52023 | 0.602901 | 0.981636 | chr9  | 37449444 | 37449932 | + | 0 | NA | intron (AluSx SIN  | 15762   | NM_014872 | 9925     | Hs.16127  | NM_014872         | ENSG000000ZBTB5     | -                        | zinc fingprotein-coding             |
| chr9-1377 | 4.939436 | -0.53643 | 1.03114  | -0.52023 | 0.602901 | 0.981636 | chr9  | 1.38E+08 | 1.38E+08 | + | 0 | NA | intron (LIMEf LIN  | 20173   | NR_147508 | 651337   | Hs.60319  | NR_147508         | ENSG000000LOC651337 | -                        | uncharactncRNA                      |
| chr13-277 | 7.120552 | -0.45636 | 0.877249 | -0.52022 | 0.602913 | 0.981636 | chr13 | 27094133 | 27094332 | + | 0 | NA | intron (AluJr4 S1  | -13101  | NR_046547 | 1.01E+08 | Hs.524922 | NR_046547         | USP12-AS1           | -                        | USP12 antncRNA                      |
| chr13-422 | 7.120552 | -0.45636 | 0.877249 | -0.52022 | 0.602913 | 0.981636 | chr13 | 42286391 | 42288009 | + | 0 | NA | intron (intron (N  | 15048   | NM_016248 | 11215    | Hs.10510  | NM_016248         | ENSG000000AKAP11    | -                        | AKAP-11 A-kinase protein-coding     |
| chr14-507 | 7.120552 | -0.45636 | 0.877249 | -0.52022 | 0.602913 | 0.981636 | chr14 | 50759469 | 50760205 | + | 0 | NA | intron (intron (N  | -61960  | NR_135258 | 1.05E+08 | Hs.569387 | NR_135258         | ENSG000000LOC10537  | -                        | uncharactncRNA                      |
| chr14-576 | 7.120552 | -0.45636 | 0.877249 | -0.52022 | 0.602913 | 0.981636 | chr14 | 57235883 | 57236802 | + | 0 | NA | intron (intron (N  | 32923   | NM_006544 | 10640    | Hs.743987 | NM_006544         | ENSG000000EXOC5     | -                        | HSEC10 PFexocyst (protein-coding    |
| chr2-365  | 7.120552 | -0.45636 | 0.877249 | -0.52022 | 0.602913 | 0.981636 | chr2  | 36590382 | 36591065 | + | 0 | NA | intron (intron (N  | 7445    | NM_001042 | 9637     | Hs.25856  | NM_005102         | ENSG000000FEZ2      | -                        | HUM3CL fasciculprotein-coding       |
| chr5-324  | 7.120552 | -0.45636 | 0.877249 | -0.52022 | 0.602913 | 0.981636 | chr5  | 32428101 | 32428300 | + | 0 | NA | intron (AluSx SIN  | 16540   | NR_144318 | 51663    | Hs.435231 | NM_016107         | ENSG000000ZFR       | -                        | SPG71 ZFF zinc fingprotein-coding   |
| chr5-113  | 7.120552 | -0.45636 | 0.877249 | -0.52022 | 0.602913 | 0.981636 | chr5  | 1.13E+08 | 1.13E+08 | + | 0 | NA | intron (NLIMB4 LIN | 28693   | NM_152624 | 167227   | Hs.44387  | NM_152624         | ENSG000000DCP2      | -                        | NUDT20 decappingprotein-coding      |
| chr6-756  | 7.120552 | -0.45636 | 0.877249 | -0.52022 | 0.602913 | 0.981636 | chr6  | 75624170 | 75625117 | + | 0 | NA | intron (MER104 DN  | 22913   | NM_015571 | 26054    | Hs.458784 | NM_015571         | ENSG000000SEN6      | -                        | SSP1 SUSF SUMO specprotein-coding   |
| chr7-9261 | 7.120552 | -0.45636 | 0.877249 | -0.52022 | 0.602913 | 0.981636 | chr7  | 92613856 | 92614112 | + | 0 | NA | 3' UTR (N3' UTR (N | -23594  | NM_001040 | 257415   | Hs.18564  | NM_152788         | ENSG000000FAM133B   | -                        | family wiprotein-coding             |
| chr7-1039 | 7.120552 | -0.45636 | 0.877249 | -0.52022 | 0.602913 | 0.981636 | chr7  | 1.39E+08 | 1.39E+08 | + | 0 | NA | intron (intron (N  | 30285   | NM_016015 | 51631    | Hs.731488 | NM_016015         | ENSG000000LUCTL2    | -                        | CGI-59 CUCUC7 likeprotein-coding    |
| chr8-1019 | 8.296889 | -0.39166 | 0.752909 | -0.5202  | 0.602923 | 0.981636 | chr8  | 1.01E+08 | 1.01E+08 | + | 0 | NA | intron (intron (N  | 5838    | NM_016096 | 51123    | Hs.374488 | NM_016096         | ENSG000000ZNF706    | -                        | HSPC038 Fzinc fingprotein-coding    |
| chr1-2647 | 9.86297  | -0.38795 | 0.745849 | -0.52015 | 0.602958 | 0.981636 | chr1  | 26473958 | 26476335 | + | 0 | NA | exon (NM exon (NM  | 2706    | NM_005517 | 3151     | Hs.18116  | NM_005517         | ENSG000000HMG2      | -                        | HMG17 high mobiprotein-coding       |
| chr10-314 | 9.86297  | -0.38795 | 0.745849 | -0.52015 | 0.602958 | 0.981636 | chr10 | 31461172 | 31470131 | + | 0 | NA | intron (AluJr4 S1  | -65896  | NM_001368 | 1.01E+08 | Hs.730227 | NM_001368         | LOC100505           | -                        | putative protein-coding             |
| chr18-274 | 9.86297  | -0.38795 | 0.745849 | -0.52015 | 0.602958 | 0.981636 | chr18 | 2747291  | 2749252  | + | 0 | NA | intron (LTR105 Mc  | 92389   | NM_015298 | 23347    | Hs.8118   | NM_015298         | ENSG000000SMCHD1    | -                        | BAMS FSH structureprotein-coding    |
| chr18-325 | 9.86297  | -0.38795 | 0.745849 | -0.52015 | 0.602958 | 0.981636 | chr18 | 3253359  | 3259252  | + | 0 | NA | TTS (NM_CTS (NM_C  | 4092    | NM_001303 | 10627    | Hs.19008  | NM_006471         | ENSG000000MYL12A    | -                        | HEL-5-24 myosin I protein-coding    |
| chr2-1514 | 9.86297  | -0.38795 | 0.745849 | -0.52015 | 0.602958 | 0.981636 | chr2  | 1.51E+08 | 1.51E+08 | + | 0 | NA | intron (Charlie4z  | 60441   | NM_001177 | 55183    | Hs.536537 | NM_018151         | ENSG000000CRIF1     | -                        | replicatiprotein-coding             |
| chr20-198 | 9.86297  | -0.38795 | 0.745849 | -0.52015 | 0.602958 | 0.981636 | chr20 | 19895491 | 1989967  | + | 0 | NA | intron (AluJr SIN  | 8163    | NM_018993 | 54453    | Hs.47227  | NM_018993         | ENSG000000CRIN2     | -                        | MACS RASS Ras and Fprotein-coding   |
| chr4-559  | 9.86297  | -0.38795 | 0.745849 | -0.52015 | 0.602958 | 0.981636 | chr4  | 55902241 | 55902804 | + | 0 | NA | exon (NM exon (NM  | -46423  | NM_025009 | 9662     | Hs.518767 | NM_01464          | ENSG000000CEP135    | -                        | CEP14 KIAF centrosomeprotein-coding |
| chr5-3892 | 9.86297  | -0.38795 | 0.745849 | -0.52015 | 0.602958 | 0.981636 | chr5  | 38926570 | 38928739 | + | 0 | NA | intron (THE1C-int  | 81642   | NM_001323 | 9180     | Hs.12065  | NM_003999         | ENSG000000OSMR      | -                        | IL-31R-beoncostatiprotein-coding    |
| chr1-110  | 7.153834 | -0.45122 | 0.867682 | -0.52003 | 0.603041 | 0.981636 | chr1  | 1.1E+08  | 1.1E+08  | + | 0 | NA | intron (intron (N  | 18548   | NM_001201 | 9122     | Hs.35130  | NM_004699         | ENSG000000SLC16A4   | -                        | MCT4 MCT5olute cprotein-coding      |
| chr10-68  | 7.153834 | -0.45122 | 0.867682 | -0.52003 | 0.603041 | 0.981636 | chr10 | 68000068 | 68001481 | + | 0 | NA | intron (MLT1C LTF  | 10109   | NR_131184 | 1E+08    | NR_131184 | POU5F1P5          | -                   | Oct4-pg5 POU classpseudo |                                     |
| chr10-12  | 7.153834 | -0.45122 | 0.867682 | -0.52003 | 0.603041 | 0.981636 | chr10 | 1.23E+08 | 1.23E+08 | + | 0 | NA | intron (intron (N  | 16946   | NM_024942 | 80007    | Hs.50128  | NM_024942         | ENSG000000C10orf88  | -                        | chromosonprotein-coding             |
| chr12-934 | 7.153834 | -0.45122 | 0.867682 | -0.52003 | 0.603041 | 0.981636 | chr12 | 9340905  | 93411140 | + | 0 | NA | intron (intron (N  | 31594   | NM_001301 | 11163    | Hs.50632  | NM_019094         | ENSG000000NUD4      | -                        | DIPP-2B Iundix hycprotein-coding    |
| chr12-107 | 7.153834 | -0.45122 | 0.867682 | -0.52003 | 0.603041 | 0.981636 | chr12 | 1.09E+08 | 1.09E+08 | + | 0 | NA | intron (intron (N  | 18326   | NR_039717 | 1.01E+08 | NR_039717 | ENSG000000MIR4496 | -                   | microRNA ncRNA           |                                     |
| chr12-11  | 7.153834 | -0.45122 | 0.867682 | -0.52003 | 0.603041 | 0.981636 | chr12 | 1.12E+08 | 1.12E+08 | + | 0 | NA | intron (LIME3G LI  | 2724    | NR_037430 | 1.01E+08 | NR_037430 | ENSG000000MIR3657 | -                   | microRNA ncRNA           |                                     |
| chr14-617 | 7.153834 | -0.45122 | 0.867682 | -0.52003 | 0.603041 | 0.981636 | chr14 | 61786434 | 61789134 | + | 0 | NA | intron (MERS7A1 LI | -24378  | NM_001367 | 83851    | Hs.40413  | NM_031914         | ENSG000000SYT16     | -                        | CHR14SYT synaptotprotein-coding     |
| chr15-58  | 7.153834 | -0.45122 | 0.867682 | -0.52003 | 0.603041 | 0.981636 | chr15 | 58845164 | 58846315 | + | 0 | NA | intron (L1MA2 LIN  | 74437   | NM_001040 | 54629    | Hs.59112  | NM_019092         | ENSG000000MINDY2    | -                        | FAM63B MINDY lysprotein-coding      |
| chr15-67  | 7.153834 | -0.45122 | 0.867682 | -0.52003 | 0.603041 | 0.981636 | chr15 | 67233673 | 67235428 | + | 0 | NA | intron (L3 LINE C  | 20111   | NM_024666 | 79719    | Hs.25464  | NM_024666         | ENSG000000AAGAB     | -                        | KPPP1 PPPalpha ancprotein-coding    |
| chr17-17  | 7.153834 | -0.45122 | 0.867682 | -0.52003 | 0.603041 | 0.981636 | chr17 | 1781261  | 1782359  | + | 0 | NA | intron (AluSq2 S1  | 10139   | NM_001328 | 5176     | Hs.53276  | NM_00261          | ENSG000000SERPINF1  | -                        | EPC-1 O1serpin fprotein-coding      |
| chr17-46  | 7.153834 | -0.45122 | 0.867682 | -0.52003 | 0.603041 | 0.981636 | chr17 | 46215738 | 46216210 | + | 0 | NA | intron (AluSx SIN  | 9400    | NM_001193 | 284058   | Hs.64874  | NM_01544          | ENSG000000KANSL1    | -                        | CENP-36 KAT8 regprotein-coding      |
| chr18-25  | 7.153834 | -0.45122 | 0.867682 | -0.52003 | 0.603041 | 0.981636 | chr18 | 25090571 | 25091351 | + | 0 | NA | intron (intron (N  | -102982 | NR_146903 | 1.05E+08 | NR_146903 | LINCO1894         | -                   | long intncRNA            |                                     |
| chr19-13  | 7.153834 | -0.45122 | 0.867682 | -0.52003 | 0.603041 | 0.981636 | chr19 | 43659601 | 43661519 | + | 0 | NA | intron (7SLRNA sr  | 9609    | NM_002656 | 5329     | Hs.46687  | NM_002656         | ENSG000000PLAUR     | -                        | CD87 U-Pp plasminogenprotein-coding |
| chr2-43   | 7.153834 | -0.45122 | 0.867682 | -0.52003 | 0.603041 | 0.981636 | chr2  | 1.36E+08 | 1.36E+08 | + | 0 | NA | intron (intron (N  | -6104   | NR_110200 | 1.02E+08 | Hs.60217  | NR_110196         | ENSG000000DARS-AS1  | -                        | DARS antncRNA                       |
| chr2-179  | 7.153834 | -0.45122 | 0.867682 | -0.52003 | 0.603041 | 0.981636 | chr2  | 1.8E+08  | 1.8E+08  | + | 0 | NA | intron (intron (N  | 42074   | NM_020943 | 57703    | Hs.31136  | NM_020943         | ENSG000000CWC22     | -                        | EIF4GL NCWC22 splprotein-coding     |
| chr2-206  | 7.153834 | -0.45122 | 0.867682 | -0.52003 | 0.603041 | 0.981636 | chr2  | 2.07E+08 | 2.07E+08 | + | 0 | NA | exon (NM exon (NM  | -4661   | NR_036077 | 1E+08    | NR_036077 | ENSG000000MIR3130 | -                   | MIR3130-2 microRNA ncRNA |                                     |
| chr2-364  | 7.153834 | -0.45122 | 0.867682 | -0.52003 | 0.603041 | 0.981636 | chr2  | 36473689 | 36474323 | + | 0 | NA | intron (intron (N  | 7634    | NM_012473 | 25828    | Hs.21192  | NM_012473         | ENSG000000TXN2      | -                        | COXP29 thiaredoxin protein-coding   |
| chr4-478  | 7.153834 | -0.45122 | 0.867682 | -0.52003 | 0.603041 | 0.981636 | chr4  | 47890340 | 47890549 | + | 0 | NA | intron (MIRc SINE  | -23783  | NR_125878 | 1.02E+08 | Hs.13419  | NR_125879         | LOC101927           | -                        | uncharactncRNA                      |
| chr5-143  | 7.153834 | -0.45122 | 0.867682 | -0.52003 | 0.603041 | 0.981636 | chr5  | 1.43E+08 | 1.43E+08 | + | 0 | NA | intron (LIME3G LI  | 16766   | NM_001364 | 2908     | Hs.12292  | NM_00017          | ENSG000000NR3C1     | -                        | GCCR GCCR nuclear rprotein-coding   |
| chr6-317  | 7.153834 | -0.45122 | 0.867682 | -0.52003 | 0.603041 | 0.981636 | chr6  | 31789567 | 31793904 | + | 0 | NA | exon (NM exon (NM  | 4017    | NM_006295 | 7407     | Hs.52002  | NM_006295         | ENSG000000CVARS     | -                        | G7A NDMSC valyl-tR protein-coding   |
| chr6-41   | 7.153834 | -0.45122 | 0.867682 | -0.52003 | 0.603041 | 0.981636 | chr6  | 41788634 | 41791063 | + | 0 | NA | TTS (NM_CTS (NM_C  | 2405    | NM_001134 | 1E+08    | Hs.73163  | NM_001134         | ENSG000000TOMM6     | -                        | OTAP TOM6 translocprotein-coding    |
| chr6-83   | 7.153834 | -0.45122 | 0.867682 | -0.52003 | 0.603041 | 0.981636 | chr6  | 83184360 | 83185385 | + | 0 | NA | intron (L2 LINE L  | 8393    | NM_001195 | 5238     | Hs.66166  | NM_015599         | ENSG000000PGM3      | -                        | AGM1 IMD2 phosphog protein-coding   |
| chr6-96   | 7.153834 | -0.45122 | 0.867682 | -0.52003 | 0.603041 | 0.981636 | chr6  | 96544729 | 96544731 | + | 0 | NA | intron (Tigger6b   | -18445  | NM_020482 | 9457     | Hs.63260  | NM_020482         | ENSG000000FHL5      | -                        | 17000276Cfour and protein-coding    |
| chr6-152  | 7.153834 | -0.45122 | 0.867682 | -0.52003 | 0.603041 | 0.981636 | chr6  | 152324   | 152E+08  | + | 0 | NA | intron (intron (N  | -49227  | NM_001347 | 23345    | Hs.12967  | NM_015299         | ENSG000000SYNE1     | -                        | 8B ARCA1 spectrin protein-coding    |
| chr7-35   | 7.153834 | -0.45122 | 0.867682 | -0.52003 | 0.603041 | 0.981636 | chr7  | 35902378 | 35       |   |   |    |                    |         |           |          |           |                   |                     |                          |                                     |





|                    |          |          |          |          |          |       |          |          |        |                     |                  |                               |                    |               |                               |
|--------------------|----------|----------|----------|----------|----------|-------|----------|----------|--------|---------------------|------------------|-------------------------------|--------------------|---------------|-------------------------------|
| chr1-2111 7.187115 | -0.44611 | 0.867345 | -0.51433 | 0.607018 | 0.981636 | chr1  | 21100184 | 21100784 | + 0 NA | intron (Nintron (N  | 10899 NM_00376C  | 8672 Hs. 467084NM_00376C      | ENSG00000CEIF4G3   | eIF-4G 3      | eukaryotiiprotein-coding      |
| chr10-69 7.187115  | -0.44611 | 0.867345 | -0.51433 | 0.607018 | 0.981636 | chr10 | 69011208 | 69011932 | + 0 NA | intron (NAluJb SIN  | 22767 NM_015634  | 26128 Hs. 27958C NM_015634    | ENSG00000KIF1BP    | KBP KIAA1K1F1 | bincprotein-coding            |
| chr12-98 7.187115  | -0.44611 | 0.867345 | -0.51433 | 0.607018 | 0.981636 | chr12 | 98670912 | 98673094 | + 0 NA | intron (NMIR SINE   | 26703 NM_18186E  | 317 Hs. 552567NM_00116C       | ENSG00000CAPAF1    | APAF-1        | Cfapoptoticprotein-coding     |
| chr12-13 7.187115  | -0.44611 | 0.867345 | -0.51433 | 0.607018 | 0.981636 | chr12 | 1.32E+08 | 1.32E+08 | + 0 NA | intron (Nintron (N  | -21858 NR_00329E | 347918 Hs. 12211E NM_18261C   | ENSG00000EP400P1   | EPA400NL      | EP400 pseudo                  |
| chr14-39 7.187115  | -0.44611 | 0.867345 | -0.51433 | 0.607018 | 0.981636 | chr14 | 39133864 | 39134500 | + 0 NA | intron (Nintron (N  | 19898 NM_00361E  | 8487 Hs. 652307NM_00361E      | ENSG00000GEMIN2    | SIP1 SIP1ip   | nucleprotein-coding           |
| chr15-80 7.187115  | -0.44611 | 0.867345 | -0.51433 | 0.607018 | 0.981636 | chr15 | 80131585 | 80132086 | + 0 NA | intron (Nl2c LINE   | -21164 NM_000137 | 2184 Hs. 73875 NM_000137      | ENSG00000CFAH      | -             | fumarylacprotein-coding       |
| chr2-263 7.187115  | -0.44611 | 0.867345 | -0.51433 | 0.607018 | 0.981636 | chr2  | 26367093 | 26368941 | + 0 NA | intron (Nl2a LINE   | -21228 NM_001321 | 165082 Hs. 63187E NM_15383E   | ENSG00000ADGRF3    | GPR113        | PCadhesion protein-coding     |
| chr2-105 7.187115  | -0.44611 | 0.867345 | -0.51433 | 0.607018 | 0.981636 | chr2  | 1.05E+08 | 1.05E+08 | + 0 NA | intron (Nintron (N  | 18990 NM_00131E  | 2274 Hs. 443687NM_00145C      | ENSG00000FHL2      | AAG11 DRF4    | and protein-coding            |
| chr2-175 7.187115  | -0.44611 | 0.867345 | -0.51433 | 0.607018 | 0.981636 | chr2  | 1.75E+08 | 1.75E+08 | + 0 NA | TTS (NM_C TTS (NM_C | 53814 NR_03063C  | NR_03063C                     | ENSG00000MIR933    | MIRN933       | microRNA ncRNA                |
| chr2-196 7.187115  | -0.44611 | 0.867345 | -0.51433 | 0.607018 | 0.981636 | chr2  | 1.97E+08 | 1.97E+08 | + 0 NA | exon (NM exon (NM   | 23242 NM_00120E  | 9330 Hs. 47099E NM_01208E     | ENSG00000GTF3C3    | TFIIIC102     | general tprotein-coding       |
| chr21-29 7.187115  | -0.44611 | 0.867345 | -0.51433 | 0.607018 | 0.981636 | chr21 | 29320752 | 29323620 | + 0 NA | intron (THE1B LTF   | 16982 NR_02765E  | 571 Hs. 15427E NM_00118E      | ENSG00000BACH1     | BACH-1 BTBT   | domaiprotein-coding           |
| chr21-37 7.187115  | -0.44611 | 0.867345 | -0.51433 | 0.607018 | 0.981636 | chr21 | 37509162 | 37509638 | + 0 NA | intron (NlIME4b LI  | 89101 NM_13043E  | 1859 Hs. 36824C NM_00139E     | ENSG00000DYRK1A    | DYRK DYRK     | dual specprotein-coding       |
| chr9-100 7.187115  | -0.44611 | 0.867345 | -0.51433 | 0.607018 | 0.981636 | chr9  | 1E+08    | 1E+08    | + 0 NA | intron (Nintron (N  | 79164 NM_001161  | 5488 Hs. 49464E NM_01774E     | ENSG00000TEXT10    | Ipil hA2C     | testis eprotein-coding        |
| chr9-134 7.187115  | -0.44611 | 0.867345 | -0.51433 | 0.607018 | 0.981636 | chr9  | 1.35E+08 | 1.35E+08 | + 0 NA | intron (Nintron (N  | 57679 NR_039691  | NR_039691                     | ENSG00000MIR3689C  | -             | microRNA ncRNA                |
| chr11-70 7.605583  | -0.43893 | 0.853394 | -0.51433 | 0.607019 | 0.981636 | chr11 | 70798368 | 70798567 | + 0 NA | exon (NM exon (NM   | -64323 NR_07353E | 220070 Hs. 32676E NM_14530E   | ENSG00000SHANK2-AS | Cl1orf76      | SHANK2 arncRNA                |
| chr12-10 6.409044  | 0.476744 | 0.927035 | 0.514267 | 0.607065 | 0.981636 | chr12 | 1.09E+08 | 1.09E+08 | + 0 NA | intron (NAluSp SIN  | -4621 NR_03899E  | 1E+08 Hs. 66099E NR_03899E    | USP30-AS1-         | USP30         | antncRNA                      |
| chr17-8 6.409044   | 0.476744 | 0.927035 | 0.514267 | 0.607065 | 0.981636 | chr17 | 82062507 | 82063362 | + 0 NA | exon (NM exon (NM   | 2870 NM_02215E   | 64118 Hs. 51459E NM_02215E    | ENSG00000CDUS1L    | DUS1          | PP31dihydruprotein-coding     |
| chr2-99 6.409044   | 0.476744 | 0.927035 | 0.514267 | 0.607065 | 0.981636 | chr2  | 99553484 | 99554735 | + 0 NA | intron (NlIME4a LI  | -64092 NR_13565E | 51455 Hs. 443077NM_01631E     | ENSG00000REV1      | AIBP80 RE     | REV1 DNA protein-coding       |
| chr3-47 6.409044   | 0.476744 | 0.927035 | 0.514267 | 0.607065 | 0.981636 | chr3  | 47411273 | 47411964 | + 0 NA | exon (NM exon (NM   | 30597 NM_001304  | 25930 Hs. 25524 NM_01546E     | ENSG00000PTPN23    | HD-PTP        | HE protein tprotein-coding    |
| chr5-43 10.1426    | 0.387325 | 0.753482 | 0.514047 | 0.607219 | 0.981636 | chr5  | 43127437 | 43127961 | + 0 NA | intron (Nintron (N  | 6134 NM_00133C   | 7690 Hs. 535804NM_00343E      | ENSG00000ZNF131    | ZBTB35        | pf zinc fingprotein-coding    |
| chr5-13 9.638157   | 0.401642 | 0.78149  | 0.513944 | 0.607291 | 0.981636 | chr5  | 1.35E+08 | 1.35E+08 | + 0 NA | 3' UTR (N3' UTR (N  | -6923 NM_00130C  | 9879 Hs. 40654E NM_01482E     | ENSG00000DDX46     | PRPF5 Pr      | DEAD-box protein-coding       |
| chr19-48 17.44057  | 0.300202 | 0.584177 | 0.51389  | 0.607329 | 0.981636 | chr19 | 48965697 | 48967343 | + 0 NA | intron (Nintron (N  | 1211 NM_00014E   | 2512 Hs. 43367C NM_00014E     | ENSG00000FTL       | LFTD NBL1     | ferritin protein-coding       |
| chr10-68 7.145976  | -0.44938 | 0.874787 | -0.5137  | 0.607464 | 0.981636 | chr10 | 68057929 | 68059360 | + 0 NA | intron (NAluSc SIN  | 16639 NM_00127E  | 26091 Hs. 51891 NM_015601     | ENSG00000CHERC4    | -             | HECT and protein-coding       |
| chr11-70 7.145976  | -0.44938 | 0.874787 | -0.5137  | 0.607464 | 0.981636 | chr11 | 70377013 | 70377337 | + 0 NA | intron (Nintron (N  | -21331 NM_13856E | 2017 Hs. 596164NM_005231      | ENSG00000CTTN      | EMS1          | contactiiprotein-coding       |
| chr11-83 7.145976  | -0.44938 | 0.874787 | -0.5137  | 0.607464 | 0.981636 | chr11 | 83201044 | 83201641 | + 0 NA | intron (NlIP8 LIN   | 7630 NM_00130C   | 338699 Hs. 50343E NM_18260E   | ENSG00000ANKRD42   | PPP1R79       | Sankyrin iiprotein-coding     |
| chr12-30 7.145976  | -0.44938 | 0.874787 | -0.5137  | 0.607464 | 0.981636 | chr12 | 80070268 | 80671383 | + 0 NA | intron (Nintron (N  | 6419 NM_00119C   | 10526 Hs. 50513E NM_00639E    | ENSG00000IP08      | RANBP8        | importin protein-coding       |
| chr13-11 7.145976  | -0.44938 | 0.874787 | -0.5137  | 0.607464 | 0.981636 | chr13 | 1.11E+08 | 1.11E+08 | + 0 NA | intron (Nintron (N  | 7212 NM_01821E   | 55739 Hs. 408327NM_01821E     | ENSG00000NAXD      | CARND         | LPENAD PHX protein-coding     |
| chr17-41 7.145976  | -0.44938 | 0.874787 | -0.5137  | 0.607464 | 0.981636 | chr17 | 41974535 | 41974870 | + 0 NA | 3' UTR (N3' UTR (N  | 6905 NM_00133C   | 1267 Hs. 273621NM_03313E      | ENSG00000CNP       | CNP1          | 2', 3'-cycprotein-coding      |
| chr19-34 7.145976  | -0.44938 | 0.874787 | -0.5137  | 0.607464 | 0.981636 | chr19 | 34472281 | 34473163 | + 0 NA | Intergeni LIM5a LI  | -9036 NM_00108C  | 126374 Hs. 58501C NM_00108C   | ENSG00000WTIP      | -             | WT1 interprotein-coding       |
| chr19-53 7.145976  | -0.44938 | 0.874787 | -0.5137  | 0.607464 | 0.981636 | chr19 | 53154928 | 53155208 | + 0 NA | intron (NAluSj SIN  | 3985 NM_032584   | 84671 Hs. 46723E NM_032584    | ENSG00000ZNF347    | ZNF1111       | zinc fingprotein-coding       |
| chr2-12 7.145976   | -0.44938 | 0.874787 | -0.5137  | 0.607464 | 0.981636 | chr2  | 1.28E+08 | 1.28E+08 | + 0 NA | intron (NlIMEg LI   | 25632 NM_01796E  | 55677 Hs. 46987E NM_01796E    | ENSG00000IWS1      | -             | interactsprotein-coding       |
| chr2-128 7.145976  | -0.44938 | 0.874787 | -0.5137  | 0.607464 | 0.981636 | chr2  | 1.28E+08 | 1.28E+08 | + 0 NA | intron (Nintron (N  | 2180 NM_004807   | 9394 Hs. 512841NM_004807      | ENSG00000HS6ST1    | HH15          | HS6heparan sprotein-coding    |
| chr2-218 7.145976  | -0.44938 | 0.874787 | -0.5137  | 0.607464 | 0.981636 | chr2  | 2.19E+08 | 2.19E+08 | + 0 NA | intron (NAluSj SIN  | 5272 NM_001271   | 9125 Hs. 448767NM_005444      | ENSG00000CNOT9     | CAF40         | CTICCR4-NOT protein-coding    |
| chr2-219 7.145976  | -0.44938 | 0.874787 | -0.5137  | 0.607464 | 0.981636 | chr2  | 2.19E+08 | 2.19E+08 | + 0 NA | intron (NlIME3 SINE | 3658 NM_00131E   | 23549 Hs. 258551NM_01210C     | ENSG00000DNPEP     | ASPEP         | DAFaspartyl protein-coding    |
| chr4-13 7.145976   | -0.44938 | 0.874787 | -0.5137  | 0.607464 | 0.981636 | chr4  | 13569585 | 13569992 | + 0 NA | 3' UTR (N3' UTR (N  | -21964 NR_01545C | 285548 Hs. 529284NR_015450    | LINC0109E-         | -             | long intncRNA                 |
| chr4-12 7.145976   | -0.44938 | 0.874787 | -0.5137  | 0.607464 | 0.981636 | chr4  | 1.23E+08 | 1.23E+08 | + 0 NA | intron (Nintron (N  | 26719 NM_00134E  | 166378 Hs. 70964E NM_145207   | ENSG00000SPATA5    | AFG2          | EHLML spermatogprotein-coding |
| chr5-17 7.145976   | -0.44938 | 0.874787 | -0.5137  | 0.607464 | 0.981636 | chr5  | 1.78E+08 | 1.78E+08 | + 0 NA | intron (Nintron (N  | 3511 NM_00136E   | 54540 Hs. 48428E NM_019057    | ENSG00000FAM193B   | IRIZIO        | family wiprotein-coding       |
| chr6-12 7.145976   | -0.44938 | 0.874787 | -0.5137  | 0.607464 | 0.981636 | chr6  | 1.28E+08 | 1.28E+08 | + 0 NA | intron (Nintron (N  | -52421 NR_125849 | 1.02E+08 Hs. 65677E NR_125849 | LOC10192E-         | -             | uncharactncRNA                |
| chr9-10 7.145976   | -0.44938 | 0.874787 | -0.5137  | 0.607464 | 0.981636 | chr9  | 1.1E+08  | 1.1E+08  | + 0 NA | intron (Nintron (N  | 12949 NM_00119E  | 445815 Hs. 59190E NM_00720E   | ENSG00000PALM2-AK1 | AKAP-2 AK     | PALM2-AK1 protein-coding      |
| chrX-27 7.145976   | -0.44938 | 0.874787 | -0.5137  | 0.607464 | 0.981636 | chrX  | 2734835  | 2735734  | + 0 NA | 3' UTR (N3' UTR (N  | -16768 NM_001141 | 7499 Hs. 17967E NM_17556E     | ENSG00000CXG       | PBDX          | Xg glycofprotein-coding       |
| chr1-150 11.64023  | 0.354608 | 0.689274 | 0.513682 | 0.607474 | 0.981636 | chr1  | 1.5E+08  | 1.5E+08  | + 0 NA | non-codirnon-codir  | 2491 NM_001077   | 51107 Hs. 10840E NM_01602E    | ENSG00000APH1A     | 6530402NC     | aph-1 honprotein-coding       |
| chr1-178 6.897774  | 0.454401 | 0.885021 | 0.513435 | 0.607647 | 0.981636 | chr1  | 1.79E+08 | 1.79E+08 | + 0 NA | non-codirnon-codir  | 5479 NR_00318E   | 400798 Hs. 66808E NM_207467   | ENSG00000C1orf220  | -             | chromosomncRNA                |
| chr10-42 6.897774  | 0.454401 | 0.885021 | 0.513435 | 0.607647 | 0.981636 | chr10 | 42592469 | 42594048 | + 0 NA | exon (NM exon (NM   | -40388 NR_026777 | 1E+08 Hs. 278064NR_026777     | ENSG00000ZNF37BP   | KOX21         | ZNF zinc fingpseudo           |
| chr16-4 6.897774   | 0.454401 | 0.885021 | 0.513435 | 0.607647 | 0.981636 | chr16 | 47152948 | 47153948 | + 0 NA | TTS (NM_C TTS (NM_C | 9380 NR_110904   | 1.02E+08 Hs. 63465E NR_110903 | ITFG1-AS1-         | ITFG1         | antncRNA                      |
| chr17-63 6.897774  | 0.454401 | 0.885021 | 0.513435 | 0.607647 | 0.981636 | chr17 | 63711979 | 63712343 | + 0 NA | intron (Nintron (N  | 11823 NR_04627E  | 729683 Hs. 534931NR_04627E    | LOC72968E-         | -             | uncharactncRNA                |
| chr2-38 6.897774   | 0.454401 | 0.885021 | 0.513435 | 0.607647 | 0.981636 | chr2  | 38342674 | 38343634 | + 0 NA | intron (NAluJb SIN  | 33376 NM_00133C  | 64225 Hs. 59495E NM_02237E    | ENSG00000ATL2      | ARL3IP2       | atlastin protein-coding       |
| chr4-13 6.897774   | 0.454401 | 0.885021 | 0.513435 | 0.607647 | 0.981636 | chr4  | 13592747 | 13593454 | + 0 NA | intron (NlTiger4a   | 36425 NM_148894  | 259282 Hs. 74493E NM_148894   | ENSG00000BOD1L1    | BOD1L         | PFMBiorientprotein-coding     |
| chr9-12 6.897774   | 0.454401 | 0.885021 | 0.513435 | 0.607647 | 0.981636 | chr9  | 1.29E+08 | 1.29E+08 | + 0 NA | exon (NM exon (NM   | 22240 NR_16319E  | 56904 Hs. 46023E NM_02014E    | ENSG00000SH3GLB2   | PP6569        | PF SH3 domaiprotein-coding    |
| chr1-19 6.897774   | -0.50889 | 0.991459 | -0.51328 | 0.607757 | 0.981636 | chr1  | 19626159 | 19626374 | + 0 NA | intron (Nintron (N  | -16963 NM_182744 | 4681 Hs. 65450E NM_00538C     | ENSG00000CNBL1     | D1S1733E      | NBL1, DA protein-coding       |
| chr11-6 5.888394   | -0.38294 | 0.746442 | -0.51303 | 0.607932 | 0.981636 | chr11 | 65119196 | 65121436 | + 0 NA | TTS (NM_C TTS (NM_C | 1818 NM_001997   | 2197 Hs. 38720E NM_001997     | ENSG00000FAU       | FAU1          | Fub1FAU ubiq protein-coding   |
| chr15-4 9.888394   | -0.38294 | 0.746442 | -0.51303 | 0.607932 | 0.981636 | chr15 | 42217657 | 42220354 | + 0 NA | intron (NlIMA8 LIN  | -10701 NM_01528E | 23339 Hs. 88025 NM_01528E     | ENSG00000CVPS39    | TLP           | VAMV6 VPS39 subprotein-coding |
| chr19-12 9.888394  |          |          |          |          |          |       |          |          |        |                     |                  |                               |                    |               |                               |



|           |          |          |          |          |          |          |       |          |          |   |   |    |                     |                    |                               |                    |           |                                |
|-----------|----------|----------|----------|----------|----------|----------|-------|----------|----------|---|---|----|---------------------|--------------------|-------------------------------|--------------------|-----------|--------------------------------|
| chr1-1261 | 6.946772 | 0.453513 | 0.888391 | 0.510488 | 0.60971  | 0.981636 | chr1  | 1.76E+08 | 1.76E+08 | + | 0 | NA | intron (Nintron (N  | 44536 NM_001001    | 64326 Hs. 523744NM_022457     | ENSG00000COP1      | RFWD2     | RNF COP1 E3 tprotein-coding    |
| chr11-685 | 6.946772 | 0.453513 | 0.888391 | 0.510488 | 0.60971  | 0.981636 | chr11 | 68936223 | 68938162 | + | 0 | NA | intron (Nintron (N  | 33341 NM_00218C    | 3508 Hs. 503044NM_00218C      | ENSG00000IGHMBP2   | CATF1     | CM1 immunogl protein-coding    |
| chr15-43C | 6.946772 | 0.453513 | 0.888391 | 0.510488 | 0.60971  | 0.981636 | chr15 | 43008022 | 43008908 | + | 0 | NA | intron (NMER52A LI  | -87687 NM_17350C   | 146057 Hs. 646511NM_17350C    | ENSG00000CTBK2     | SCA11     | TTE tau tubulprotein-coding    |
| chr15-74E | 6.946772 | 0.453513 | 0.888391 | 0.510488 | 0.60971  | 0.981636 | chr15 | 74800784 | 74802630 | + | 0 | NA | exon (NM exon (NM   | -11128 NM_002181E  | 79748 Hs. 620644NM_02181E     | ENSG00000LMAN1L    | ARGC1-53L | lectin, nprotein-coding        |
| chr16-68E | 6.946772 | 0.453513 | 0.888391 | 0.510488 | 0.60971  | 0.981636 | chr16 | 68249205 | 68250936 | + | 0 | NA | intron (Nintron (N  | 4697 NM_00136E     | 23659 Hs. 632199NM_01232C     | ENSG00000PLA2G15   | AGC       | GXVPL phospholiprotein-coding  |
| chr17-647 | 6.946772 | 0.453513 | 0.888391 | 0.510488 | 0.60971  | 0.981636 | chr17 | 64785167 | 64786739 | + | 0 | NA | intron (Nintron (N  | -3954 NR_02689E    | 1.09E+08 Hs. 117855NR_02689E  | ENSG00000CARHGP27F | -         | ARHGP27F pseudo                |
| chr19-104 | 6.946772 | 0.453513 | 0.888391 | 0.510488 | 0.60971  | 0.981636 | chr19 | 10450355 | 10450794 | + | 0 | NA | intron (Nintron (N  | -2358 NM_00620E    | 5141 Hs. 89901 NM_00620E      | ENSG00000PDE4A     | DPD2E     | PDF phosphodi protein-coding   |
| chr19-214 | 6.946772 | 0.453513 | 0.888391 | 0.510488 | 0.60971  | 0.981636 | chr19 | 21400251 | 21400619 | + | 0 | NA | intron (Nintron (N  | 3302 NM_14532E     | 284443 Hs. 656555NM_14532E    | ENSG00000ZNF493    | -         | zinc fingprotein-coding        |
| chr19-45E | 6.946772 | 0.453513 | 0.888391 | 0.510488 | 0.60971  | 0.981636 | chr19 | 45296834 | 45298102 | + | 0 | NA | intron (Nintron (N  | 25407 NM_00182A    | 1158 Hs. 334347NM_00182A      | ENSG00000CKM       | CKMM      | CPK- creatine protein-coding   |
| chr2-117E | 6.946772 | 0.453513 | 0.888391 | 0.510488 | 0.60971  | 0.981636 | chr2  | 11781742 | 11784585 | + | 0 | NA | intron (Nintron (N  | 15719 NR_03607I    | 1E+08 NR_03607I               | ENSG00000MIR548S   | -         | microRNA ncRNA                 |
| chr2-554C | 6.946772 | 0.453513 | 0.888391 | 0.510488 | 0.60971  | 0.981636 | chr2  | 55402922 | 55403253 | + | 0 | NA | intron (NCharlele   | 16769 NM_00136E    | 55704 Hs. 292922NM_01808A     | ENSG00000CCDC88A   | APE       | GIRDI coiled-cprotein-coding   |
| chr3-185E | 6.946772 | 0.453513 | 0.888391 | 0.510488 | 0.60971  | 0.981636 | chr3  | 1.85E+08 | 1.85E+08 | + | 0 | NA | non-codiron-codir   | 9269 NM_00124E     | 9175 Hs. 591306NM_00472I      | ENSG00000MAP3K13   | LZK       | MEKK1 mitogen-ε protein-coding |
| chr4-896E | 6.946772 | 0.453513 | 0.888391 | 0.510488 | 0.60971  | 0.981636 | chr4  | 896601   | 897071   | + | 0 | NA | intron (Nintron (N  | 35480 NM_00525E    | 2580 Hs. 369607NM_00525E      | ENSG00000GAK       | DNAJ26    | DN cyclin G protein-coding     |
| chr9-126E | 6.946772 | 0.453513 | 0.888391 | 0.510488 | 0.60971  | 0.981636 | chr9  | 1.27E+08 | 1.27E+08 | + | 0 | NA | intron (NLIM4 LINE  | 13751 NM_014007    | 23099 Hs. 555581NM_014007     | ENSG00000ZBTB43    | ZBTB22B   | zinc fing protein-coding       |
| chr9-129C | 6.946772 | 0.453513 | 0.888391 | 0.510488 | 0.60971  | 0.981636 | chr9  | 1.29E+08 | 1.29E+08 | + | 0 | NA | exon (NM exon (NM   | 14352 NR_07298E    | 57171 Hs. 21701 NM_02043E     | ENSG00000ZLPPP1    | LSFR2     | dolichylc protein-coding       |
| chrX-130C | 6.946772 | 0.453513 | 0.888391 | 0.510488 | 0.60971  | 0.981636 | chrX  | 1.3E+08  | 1.3E+08  | + | 0 | NA | intron (Nintron (N  | 46988 NM_00118A    | 63035 Hs. 49674E NM_02194E    | ENSG00000BCORL1    | BCOR-L1   | CBCL6 core protein-coding      |
| chrX-130E | 6.946772 | 0.453513 | 0.888391 | 0.510488 | 0.60971  | 0.981636 | chrX  | 1.3E+08  | 1.3E+08  | + | 0 | NA | non-codiron-codir   | 3825 NM_00136E     | 1654 Hs. 728565NM_00135E      | ENSG00000DDX3X     | Cap-Rf    | DEAD-box protein-coding        |
| chr1-2131 | 7.476641 | 0.435574 | 0.853565 | 0.5103   | 0.609841 | 0.981636 | chr1  | 21327827 | 2133E+08 | + | 0 | NA | intron (NLIP46 LIN  | 109506 NM_01224A   | 26750 Hs. 59141E NM_01242A    | ENSG00000RPS6KC1   | RPK118    | RS ribosomal protein-coding    |
| chr12-124 | 7.476641 | 0.435574 | 0.853565 | 0.5103   | 0.609841 | 0.981636 | chr12 | 1.24E+08 | 1.24E+08 | + | 0 | NA | intron (NMIRb SINE  | -8941 NR_10694C    | 1.02E+08 NR_10694C            | ENSG00000MIR6880   | hsa-mir-ε | microRNA ncRNA                 |
| chr15-41E | 7.476641 | 0.435574 | 0.853565 | 0.5103   | 0.609841 | 0.981636 | chr15 | 41274863 | 41275385 | + | 0 | NA | intron (Nintron (N  | -8866 NR_15282E    | 729082 Hs. 380164NR_02675E    | ENSG00000OIP5-AS1  | cyano     | lOIP5 anticrncRNA              |
| chr16-74E | 7.476641 | 0.435574 | 0.853565 | 0.5103   | 0.609841 | 0.981636 | chr16 | 74907174 | 74908820 | + | 0 | NA | TTS (NM_C TTS (NM_C | 77126 NM_03058I    | 79726 Hs. 280951NM_03058I     | ENSG00000WDR59     | CDW12     | FPF WD repeat protein-coding   |
| chr17-647 | 7.476641 | 0.435574 | 0.853565 | 0.5103   | 0.609841 | 0.981636 | chr17 | 64755673 | 64758624 | + | 0 | NA | intron (NAluJr SIN  | -23611 NR_10672E   | 1.02E+08 NR_10672E            | ENSG00000MIR6080   | hsa-mir-ε | microRNA ncRNA                 |
| chr2-744  | 7.476641 | 0.435574 | 0.853565 | 0.5103   | 0.609841 | 0.981636 | chr2  | 67409751 | 67410387 | + | 0 | NA | 3' UTR (N3' UTR (N  | 12736 NM_01900E    | 54465 Hs. 353022NM_01900E     | ENSG00000ETAA1     | ETAA16    | ETAA1 actprotein-coding        |
| chr2-747  | 7.476641 | 0.435574 | 0.853565 | 0.5103   | 0.609841 | 0.981636 | chr2  | 74474373 | 74475613 | + | 0 | NA | exon (NM exon (NM   | -2313 NM_05305C    | 116540 Hs. 534527NM_05305C    | ENSG00000MRPL53    | L53MT     | mitochondr protein-coding      |
| chr20-62E | 7.476641 | 0.435574 | 0.853565 | 0.5103   | 0.609841 | 0.981636 | chr20 | 62279260 | 62283762 | + | 0 | NA | intron (Nintron (N  | -21385 NM_17557E   | 11047 Hs. 90107 NM_00700E     | ENSG00000ADRM1     | ARM-1     | ARM adhesion protein-coding    |
| chr4-271E | 7.476641 | 0.435574 | 0.853565 | 0.5103   | 0.609841 | 0.981636 | chr4  | 2719504  | 2722014  | + | 0 | NA | intron (NLIME3B LI  | 35577 NM_02430E    | 79155 Hs. 368551NM_02430E     | ENSG00000TNIP2     | ABIN2     | FLNINFAIP3 iprotein-coding     |
| chr1-1114 | 7.179257 | -0.44426 | 0.870762 | -0.5102  | 0.609912 | 0.981636 | chr1  | 1.1E+08  | 1.1E+08  | + | 0 | NA | intron (NHV1 scrNA  | 2418 NM_02410E     | 79084 Hs. 20477E NM_02410E    | ENSG00000WDR77     | HKMT1069  | WD repeat protein-coding       |
| chr10-31E | 7.179257 | -0.44426 | 0.870762 | -0.5102  | 0.609912 | 0.981636 | chr10 | 3128399  | 3129028  | + | 0 | NA | intron (Nintron (N  | -5391 NR_13275E    | 1.07E+08 NR_13275E            | SNORD142           | SNORA85   | s small nucsnoRNA              |
| chr14-31E | 7.179257 | -0.44426 | 0.870762 | -0.5102  | 0.609912 | 0.981636 | chr14 | 31370448 | 31371647 | + | 0 | NA | intron (NMER58A DN  | 49503 NM_01547E    | 25938 Hs. 74497E NM_01547E    | ENSG00000HEATR5A   | C14orf12E | HEAT repeat protein-coding     |
| chr15-101 | 7.179257 | -0.44426 | 0.870762 | -0.5102  | 0.609912 | 0.981636 | chr15 | 1.02E+08 | 1.02E+08 | + | 0 | NA | intron (NMER72 LTR  | 23735 NM_15233A    | 123283 Hs. 65716E NM_15233A   | ENSG00000TARSL2    | -         | thronyl- protein-coding        |
| chr2-864E | 7.179257 | -0.44426 | 0.870762 | -0.5102  | 0.609912 | 0.981636 | chr2  | 86492121 | 86493222 | + | 0 | NA | TTS (NM_C TTS (NM_C | 51210 NM_00114E    | 55818 Hs. 55742E NM_01843E    | ENSG00000KDM3A     | JHDM2A    | JF lysine deprotein-coding     |
| chr2-1957 | 7.179257 | -0.44426 | 0.870762 | -0.5102  | 0.609912 | 0.981636 | chr2  | 1.96E+08 | 1.96E+08 | + | 0 | NA | intron (Nintron (N  | 51783 NM_02034E    | 57181 Hs. 65015E NM_02034E    | ENSG00000SLC39A10  | LZT-Hs2   | solute c protein-coding        |
| chr2-210E | 7.179257 | -0.44426 | 0.870762 | -0.5102  | 0.609912 | 0.981636 | chr2  | 2.02E+08 | 2.02E+08 | + | 0 | NA | intron (NLIMed LIN  | 34074 NM_00126I    | 65061 Hs. 348711NM_13915E     | ENSG00000CDK15     | ALS2CR7   | F cyclin deprotein-coding      |
| chr3-580E | 7.179257 | -0.44426 | 0.870762 | -0.5102  | 0.609912 | 0.981636 | chr3  | 58096131 | 58096906 | + | 0 | NA | intron (NAluSx1 SI  | 74117 NR_13553A    | 1.05E+08 Hs. 613914NR_13553A  | ENSG00000FLNB-AS1  | -         | FLNB anticrncRNA               |
| chr4-150E | 7.179257 | -0.44426 | 0.870762 | -0.5102  | 0.609912 | 0.981636 | chr4  | 1.51E+08 | 1.51E+08 | + | 0 | NA | intron (NTiger2 E   | 187200 NM_00119E   | 987 Hs. 48093E NM_00672E      | ENSG00000LRBA      | BGL       | CDCA1 LPS resp protein-coding  |
| chr5-371E | 7.179257 | -0.44426 | 0.870762 | -0.5102  | 0.609912 | 0.981636 | chr5  | 37190204 | 37190602 | + | 0 | NA | intron (NAluJo SIN  | -58643 NR_13426E   | 1.05E+08 Hs. 17099E NR_13426E | ENSG00000LOC105374 | -         | uncharacterncRNA               |
| chr5-693E | 7.179257 | -0.44426 | 0.870762 | -0.5102  | 0.609912 | 0.981636 | chr5  | 69355257 | 69355988 | + | 0 | NA | intron (Nintron (N  | -13675 NM_13334E   | 5884 Hs. 16184 NM_00287E      | ENSG00000CRAD17    | CCYC      | HRAI RAD17 cheprotein-coding   |
| chr5-115E | 7.179257 | -0.44426 | 0.870762 | -0.5102  | 0.609912 | 0.981636 | chr5  | 1.16E+08 | 1.16E+08 | + | 0 | NA | intron (Nintron (N  | 5841 NM_02017E     | 56929 Hs. 47367E NM_02017E    | ENSG00000FEMIC     | EURO2     | IMAGE fem-1 hon protein-coding |
| chr8-5621 | 7.179257 | -0.44426 | 0.870762 | -0.5102  | 0.609912 | 0.981636 | chr8  | 56216637 | 56217421 | + | 0 | NA | intron (Nintron (N  | 5240 NM_00101I     | 79145 Hs. 43691E NM_02430C    | ENSG00000CHHD7     | CXO23     | coiled-c protein-coding        |
| chr9-324E | 7.179257 | -0.44426 | 0.870762 | -0.5102  | 0.609912 | 0.981636 | chr9  | 32431604 | 32431952 | + | 0 | NA | exon (NM exon (NM   | 47135 NM_00136E    | 48 Hs. 56722E NM_00219E       | ENSG00000AC01      | ACONS     | HEI acitase protein-coding     |
| chr11-99E | 10.35771 | -0.37111 | 0.727727 | -0.50996 | 0.610079 | 0.981636 | chr11 | 9989110  | 9989520  | + | 0 | NA | intron (NLIPA17 LI  | 150173 NR_12053E   | 1.02E+08 Hs. 585524NR_12053E  | ENSG00000LOC10192E | -         | uncharacterncRNA               |
| chr17-64E | 10.35771 | -0.37111 | 0.727727 | -0.50996 | 0.610079 | 0.981636 | chr17 | 64535734 | 64566089 | + | 0 | NA | intron (Nintron (N  | 43934 NR_13364A    | 90799 Hs. 56973E NM_13836E    | ENSG00000CEP95     | CCDC45    | centrosom protein-coding       |
| chr19-404 | 10.35771 | -0.37111 | 0.727727 | -0.50996 | 0.610079 | 0.981636 | chr19 | 40440308 | 40442030 | + | 0 | NA | 3' UTR (N3' UTR (N  | 1429 NM_01336E     | 29946 Hs. 51541E NM_01336E    | ENSG00000SERTAD3   | RBT1      | SERTA don protein-coding       |
| chr19-58E | 10.35771 | -0.37111 | 0.727727 | -0.50996 | 0.610079 | 0.981636 | chr19 | 58297827 | 58298286 | + | 0 | NA | 3' UTR (N3' UTR (N  | -7318 NR_14444E    | 1.05E+08 Hs. 435404NR_14444E  | ENSG00000ERVK3-1   | -         | endogeno ncRNA                 |
| chr9-836E | 10.35771 | -0.37111 | 0.727727 | -0.50996 | 0.610079 | 0.981636 | chr9  | 83651702 | 83652307 | + | 0 | NA | Intergeni LIMB8 LIN | 28860 NM_00100I    | 414328 Hs. 530261NM_00100I    | ENSG00000IDNK      | C9orf103  | IDNK glucr protein-coding      |
| chr19-26E | 37.97564 | 0.216625 | 0.424906 | 0.509818 | 0.610179 | 0.981636 | chr19 | 26549334 | 26550130 | + | 0 | NA | Intergeni ALR Alpha | -1243699 NR_14673E | 1.02E+08 Hs. 567934NR_110687  | ENSG00000LOC101927 | -         | uncharacterncRNA               |
| chr1-274C | 7.44336  | 0.432141 | 0.848033 | 0.50958  | 0.610345 | 0.981636 | chr1  | 27406937 | 27409650 | + | 0 | NA | exon (NM exon (NM   | 15671 NM_00528I    | 8227 Hs. 66542 NM_00528I      | ENSG00000GPR3      | ACCA      | G protein-coding               |
| chr1-388E | 7.44336  | 0.432141 | 0.848033 | 0.50958  | 0.610345 | 0.981636 | chr1  | 38853176 | 38857047 | + | 0 | NA | intron (Nintron (N  | 4661 NM_00127I     | 6421 Hs. 532461NM_02215E      | ENSG00000CRRAGC    | GTR2      | RAGC Ras relat protein-coding  |
| chr1-1204 | 7.44336  | 0.432141 | 0.848033 | 0.50958  | 0.610345 | 0.981636 | chr1  | 1.2E+08  | 1.2E+08  | + | 0 | NA | intron (NMIRc SINE  | -62651 NR_00324E   | 767846 Hs. 65718E NM_00324E   | ENSG00000PFN1P2    | Clorf152  | profilin pseudo                |
| chr1-213C | 7.44336  | 0.432141 | 0.848033 | 0.50958  | 0.610345 | 0.981636 | chr1  | 2.13E+08 | 2.13E+08 | + | 0 | NA | exon (NM exon (NM   | 7129 NM_00130C     | 90806 Hs. 15707E NM_14456E    | ENSG00000ANGEL2    | Cer4d     | KI angel hon protein-coding    |
| chr1-2191 | 7.44336  | 0.432141 | 0.848033 | 0.50958  | 0.610345 | 0.981636 | chr1  | 2.19E+08 | 2.19E+08 | + | 0 | NA | intron (NLIPA10 LI  | 22195 NM_00130C    | 127018 Hs. 657617NM_13879A    | ENSG00000LYPLAL1   | Q96A0     | lyosphos protein-coding        |
| chr10-13E | 7.44336  | 0.432141 | 0.848033 | 0.50958  | 0.610345 | 0.981636 | chr10 | 13321757 | 13322764 | + | 0 | NA | intron (NAluSx SIN  | 21230 NM_00132E    | 5264 Hs. 49873E NM_00621A     |                    |           |                                |

|             |          |          |          |          |          |          |       |          |          |   |   |    |                    |                  |                          |                 |                                   |                                    |                   |
|-------------|----------|----------|----------|----------|----------|----------|-------|----------|----------|---|---|----|--------------------|------------------|--------------------------|-----------------|-----------------------------------|------------------------------------|-------------------|
| chr13-98c   | 7.61529  | -0.42885 | 0.843217 | -0.50858 | 0.611045 | 0.981636 | chr13 | 98377938 | 98378309 | + | 0 | NA | intron (Nintron (N | 144002 NM_003576 | 8428 Hs. 508514NM_003576 | ENSG000003STK24 | HEL-S-95 serine/tf protein-coding |                                    |                   |
| chr15-57c   | 7.61529  | -0.42885 | 0.843217 | -0.50858 | 0.611045 | 0.981636 | chr15 | 57285320 | 57288469 | + | 0 | NA | 3' UTR (N3' UTR (N | -8237 NR_145748  | 1.1E+08                  | NR_145748       | ENSG000003SNORD13D                | - small nucsnoRNA                  |                   |
| chr16-69c   | 7.61529  | -0.42885 | 0.843217 | -0.50858 | 0.611045 | 0.981636 | chr16 | 69372856 | 69373214 | + | 0 | NA | intron (Nintron (N | 12972 NM_005652  | 7014 Hs. 63335           | NM_005652       | ENSG000003TERF2                   | TRBF2 TRF telomeric protein-coding |                   |
| chr20-38c   | 7.61529  | -0.42885 | 0.843217 | -0.50858 | 0.611045 | 0.981636 | chr20 | 38542824 | 38543490 | + | 0 | NA | intron (Nintron (N | 26394 NR_039606  | 1.01E+08                 | NR_039606       | ENSG000003MIR54802                | - microRNA ncRNA                   |                   |
| chr5-6607   | 7.61529  | -0.42885 | 0.843217 | -0.50858 | 0.611045 | 0.981636 | chr5  | 66075728 | 66077321 | + | 0 | NA | intron (Nintron (N | -67716 NM_001322 | 140890 Hs. 49367         | NM_001322       | ENSG000003SREK1                   | SFRS12 SF splicing protein-coding  |                   |
| chr2-5814   | 4.222104 | 0.565297 | 1.111567 | 0.508558 | 0.611062 | 0.981636 | chr2  | 58142720 | 58143641 | + | 0 | NA | intron (Nintron (N | 96468 NM_00113C  | 7444 Hs. 71529           | ENM_00629E      | ENSG000003CVRK2                   | - VRK serir protein-coding         |                   |
| chr15-847   | 7.982397 | 0.426055 | 0.837963 | 0.508441 | 0.611144 | 0.981636 | chr15 | 84767956 | 84768490 | + | 0 | NA | intron (NAluSz SIN | 19631 NM_01463C  | 9640 Hs. 79347           | NM_01463C       | ENSG000003ZNF592                  | CAMOS SC2 zinc fing protein-coding |                   |
| chr7-1124   | 10.38128 | -0.37502 | 0.73789  | -0.50824 | 0.611286 | 0.981636 | chr7  | 1124E+08 | 1.12E+08 | + | 0 | NA | intron (Nintron (N | 11210 NM_001197  | 3475 Hs. 7879            | NM_001155C      | ENSG000003IFRD1                   | PC4 TIS7 interfecc protein-coding  |                   |
| chr1-123c   | 6.91349  | 0.449895 | 0.885227 | 0.508226 | 0.611295 | 0.981636 | chr1  | 12321909 | 12322999 | + | 0 | NA | intron (Nintron (N | 92424 NM_01537E  | 55187 Hs. 439381         | NM_01537E       | ENSG000003VPS13D                  | SCAR4 vacuolar protein-coding      |                   |
| chr15-42c   | 6.91349  | 0.449895 | 0.885227 | 0.508226 | 0.611295 | 0.981636 | chr15 | 42981273 | 42981926 | + | 0 | NA | intron (NAluS SINE | -60821 NM_17350C | 146057 Hs. 646511        | NM_17350C       | ENSG000003TTBK2                   | SCA11 TTE tau tubul protein-coding |                   |
| chr16-24c   | 6.91349  | 0.449895 | 0.885227 | 0.508226 | 0.611295 | 0.981636 | chr16 | 24971143 | 24975500 | + | 0 | NA | intron (Nintron (N | -16380 NM_00119E | 527 Hs. 899107           | NM_00169A       | ENSG000003ATP6VOC                 | ATP6C ATF ATPase H+ protein-coding |                   |
| chr19-344   | 6.91349  | 0.449895 | 0.885227 | 0.508226 | 0.611295 | 0.981636 | chr19 | 34490992 | 34492535 | + | 0 | NA | intron (NAluSc8 SI | 10005 NM_00108C  | 126374 Hs. 58501         | CNM_00108C      | ENSG000003WTIP                    | - WT1 inter protein-coding         |                   |
| chr20-29c   | 6.91349  | 0.449895 | 0.885227 | 0.508226 | 0.611295 | 0.981636 | chr20 | 2951237  | 2951813  | + | 0 | NA | intron (NMER74A LI | 28318 NM_080841  | 5786 Hs. 269577          | NM_00283E       | ENSG000003PTPRA                   | HEPT1 HLF protein t protein-coding |                   |
| chr1-857f   | 9.880536 | -0.38156 | 0.750774 | -0.50823 | 0.611295 | 0.981636 | chr1  | 85703160 | 85706299 | + | 0 | NA | intron (Nintron (N | 3704 NM_00117C   | 54680 Hs. 5111           | NM_01795E       | ENSG000003ZNHT6                   | BKD1 Clorzinc fing protein-coding  |                   |
| chr1-109c   | 9.880536 | -0.38156 | 0.750774 | -0.50823 | 0.611295 | 0.981636 | chr1  | 1.09E+08 | 1.09E+08 | + | 0 | NA | intron (NAluJb SIN | 7376 NM_00564E   | 6884 Hs. 63242E          | NM_00564E       | ENSG000003TAF13                   | MRT60 TAF TATA-box protein-coding  |                   |
| chr17-75c   | 9.880536 | -0.38156 | 0.750774 | -0.50823 | 0.611295 | 0.981636 | chr17 | 75210495 | 75210963 | + | 0 | NA | intron (NAluY SINE | 5050 NM_024844   | 79902 Hs. 362817         | NM_024844       | ENSG000003NUP85                   | FROUNT NF nucleopor protein-coding |                   |
| chr5-1037f  | 9.880536 | -0.38156 | 0.750774 | -0.50823 | 0.611295 | 0.981636 | chr5  | 10379460 | 10379849 | + | 0 | NA | intron (NAluY SINE | -22710 NR_162106 | 1.13E+08                 | MIR10397        | - microRNA ncRNA                  |                                    |                   |
| chr19-1371f | 12.14467 | 0.343897 | 0.676729 | 0.508175 | 0.611331 | 0.981636 | chr19 | 37126636 | 37128521 | + | 0 | NA | exon (NM exon (NM  | 44858 NM_19912E  | 199704 Hs. 65923E        | NM_15265E       | ENSG000003ZNF585A                 | - zinc fing protein-coding         |                   |
| chr14-30c   | 4.964859 | -0.52637 | 1.035896 | -0.50813 | 0.611362 | 0.981636 | chr14 | 30637218 | 30638012 | + | 0 | NA | intron (Nintron (N | 15296 NM_01610E  | 23256 Hs. 36916E         | NM_01610E       | ENSG000003SCFD1                   | C14orf16 secl fam protein-coding   |                   |
| chr5-1294   | 4.964859 | -0.52637 | 1.035896 | -0.50813 | 0.611362 | 0.981636 | chr5  | 1.72E+08 | 1.72E+08 | + | 0 | NA | intron (Nricksha_C | 62378 NM_00599C  | 6793 Hs. 74400E          | ENM_00599C      | ENSG000003STK10                   | LOK PRO27serine/tf protein-coding  |                   |
| chr7-1274   | 4.964859 | -0.52637 | 1.035896 | -0.50813 | 0.611362 | 0.981636 | chr7  | 1.29E+08 | 1.29E+08 | + | 0 | NA | intron (NHERVL-int | 14579 NM_001134  | 57464 Hs. 48998E         | NM_02070A       | ENSG000003STRIP2                  | FAM40B F3 striatin protein-coding  |                   |
| chr15-63c   | 7.419786 | 0.438448 | 0.862967 | 0.50807  | 0.611404 | 0.981636 | chr15 | 63649008 | 63649879 | + | 0 | NA | intron (Nintron (N | -48616 NR_03408C | 1E+08                    | Hs. 63116E      | NR_03408C                         | ENSG000003USP3-AS1                 | - USP3 anticncRNA |
| chr19-40c   | 7.419786 | 0.438448 | 0.862967 | 0.50807  | 0.611404 | 0.981636 | chr19 | 4021897  | 4022126  | + | 0 | NA | intron (NAluJo SIN | 14275 NM_015897  | 51588 Hs. 10577E         | NM_015897       | ENSG000003PIAS4                   | PIAS-gamm protein i protein-coding |                   |
| chr9-100c   | 7.419786 | 0.438448 | 0.862967 | 0.50807  | 0.611404 | 0.981636 | chr9  | 1E+08    | 1E+08    | + | 0 | NA | intron (NAluSx SIN | 125996 NM_001161 | 54881 Hs. 49464E         | NM_01774E       | ENSG000003TEX10                   | Ipil ba2C testis e protein-coding  |                   |
| chr1-121c   | 11.11821 | 0.359931 | 0.708679 | 0.50789  | 0.611531 | 0.981636 | chr1  | 1.21E+08 | 1.21E+08 | + | 0 | NA | intron (Nintron (N | 10460 NR_10418E  | 1.01E+08                 | Hs. 56852E      | NR_10418E                         | ENSG000003SRGAP2-AS-               | SRGAP2 arncRNA    |
| chr11-87c   | 6.717801 | -0.46863 | 0.922977 | -0.50774 | 0.611637 | 0.981636 | chr11 | 8751378  | 8751630  | + | 0 | NA | intron (NLTR12C LI | -12724 NR_12059E | 1.03E+08                 | Hs. 61327E      | NR_120590                         | LOC102724-                         | uncharactncRNA    |
| chr19-19c   | 13.61567 | -0.37339 | 0.735526 | -0.50765 | 0.611695 | 0.981636 | chr19 | 1993177  | 1993394  | + | 0 | NA | intron (Nintron (N | 22429 NM_017797  | 55643 Hs. 46554E         | NM_017797       | ENSG000003BTBD2                   | - BTB domain protein-coding        |                   |
| chr1-2074   | 10.34985 | -0.36985 | 0.728571 | -0.50763 | 0.61171  | 0.981636 | chr1  | 20743417 | 20750252 | + | 0 | NA | intron (NAluJb SIN | -14131 NM_00110E | 400745 Hs. 59152E        | NM_00110E       | ENSG000003SH2D5                   | - SH2 domain protein-coding        |                   |
| chr1-402c   | 10.34985 | -0.36985 | 0.728571 | -0.50763 | 0.61171  | 0.981636 | chr1  | 40235610 | 40237341 | + | 0 | NA | exon (NM exon (NM  | -11462 NM_00100E | 127391 Hs. 40626E        | NM_00100E       | ENSG000003TMC02                   | dJ39G22.2 transmem protein-coding  |                   |
| chr19-21c   | 10.34985 | -0.36985 | 0.728571 | -0.50763 | 0.61171  | 0.981636 | chr19 | 21326062 | 21327646 | + | 0 | NA | intron (NAluSp SIN | 2556 NM_02126E   | 7562 Hs. 46629E          | NM_02126E       | ENSG000003ZNF708                  | KOXS ZNF zinc fing protein-coding  |                   |
| chr2-2267   | 10.34985 | -0.36985 | 0.728571 | -0.50763 | 0.61171  | 0.981636 | chr2  | 2.27E+08 | 2.27E+08 | + | 0 | NA | intron (NAluSz SIN | 13254 NM_005544  | 3667 Hs. 47150E          | NM_005544       | ENSG000003IRS1                    | HIRS-1 insulin r protein-coding    |                   |
| chr4-119c   | 10.34985 | -0.36985 | 0.728571 | -0.50763 | 0.61171  | 0.981636 | chr4  | 1.2E+08  | 1.2E+08  | + | 0 | NA | intron (Nintron (N | 70209 NR_03763C  | 645513 Hs. 67754E        | NR_03763C       | ENSG000003LOC64551E               | septin 7 pseudo                    |                   |
| chr5-349c   | 10.34985 | -0.36985 | 0.728571 | -0.50763 | 0.61171  | 0.981636 | chr5  | 34921631 | 34923663 | + | 0 | NA | intron (Nintron (N | -6912 NM_00101E  | 134218 Hs. 131887        | NM_19428E       | ENSG000003DNJC21                  | BMF53 DNADnaJ heat protein-coding  |                   |
| chr5-128c   | 10.34985 | -0.36985 | 0.728571 | -0.50763 | 0.61171  | 0.981636 | chr5  | 1.28E+08 | 1.28E+08 | + | 0 | NA | intron (Nintron (N | 195240 NM_00104E | 6558 Hs. 16258E          | NM_00104E       | ENSG000003SLC12A2                 | BSC BSC2 solute c protein-coding   |                   |
| chr5-1764   | 10.34985 | -0.36985 | 0.728571 | -0.50763 | 0.61171  | 0.981636 | chr5  | 1.76E+08 | 1.76E+08 | + | 0 | NA | intron (Nintron (N | 43704 NM_014901  | 22838 Hs. 43488E         | NM_014901       | ENSG000003RNF44                   | - ring fing protein-coding         |                   |
| chr10-77c   | 7.65643  | -0.42575 | 0.838975 | -0.50747 | 0.611827 | 0.981636 | chr10 | 8771525  | 8772457  | + | 0 | NA | intron (NAluSq SIN | 6002 NM_012311   | 22944 Hs. 39791E         | NM_012311       | ENSG000003KIN                     | BTCD KIN17 DN protein-coding       |                   |
| chr10-87c   | 7.65643  | -0.42575 | 0.838975 | -0.50747 | 0.611827 | 0.981636 | chr10 | 87711684 | 87717489 | + | 0 | NA | intron (Nintron (N | 54708 NM_00101E  | 9060 Hs. 524491          | NM_00467C       | ENSG000003PAPSS2                  | ATPSK2 BC3'-phospf protein-coding  |                   |
| chr12-57c   | 7.65643  | -0.42575 | 0.838975 | -0.50747 | 0.611827 | 0.981636 | chr12 | 57957559 | 57958270 | + | 0 | NA | 3' UTR (N3' UTR (N | 16347 NM_03327E  | 91419 Hs. 61188          | NM_03327E       | ENSG000003ATP23                   | KUB3 XRCC ATP23 met protein-coding |                   |
| chr2-1961   | 7.65643  | -0.42575 | 0.838975 | -0.50747 | 0.611827 | 0.981636 | chr2  | 1.96E+08 | 1.96E+08 | + | 0 | NA | intron (Nintron (N | 25961 NM_00422E  | 9262 Hs. 88297           | NM_00422E       | ENSG000003STK17B                  | DRAK2 serine/tf protein-coding     |                   |
| chr3-533c   | 7.65643  | -0.42575 | 0.838975 | -0.50747 | 0.611827 | 0.981636 | chr3  | 53333759 | 53334977 | + | 0 | NA | intron (NLMEd LIN  | -1241 NR_14571E  | 1.1E+08                  | NR_14571E       | ENSG000003SNORD38C                | - small nucsnoRNA                  |                   |
| chr4-757c   | 7.65643  | -0.42575 | 0.838975 | -0.50747 | 0.611827 | 0.981636 | chr4  | 75799332 | 75802019 | + | 0 | NA | exon (NM exon (NM  | 67052 NM_00129C  | 8615 Hs. 744877          | NM_00371E       | ENSG000003USP1                    | P115 TAP USO1 vesiprotein-coding   |                   |
| chr5-1317   | 7.65643  | -0.42575 | 0.838975 | -0.50747 | 0.611827 | 0.981636 | chr5  | 1.32E+08 | 1.32E+08 | + | 0 | NA | intron (NAluSp SIN | 76173 NM_00100E  | 96459 Hs. 59127E         | NM_13337E       | ENSG000003FNIP1                   | - follicul protein-coding          |                   |
| chr7-7344   | 7.65643  | -0.42575 | 0.838975 | -0.50747 | 0.611827 | 0.981636 | chr7  | 73449421 | 73451360 | + | 0 | NA | intron (Nintron (N | 16612 NM_00350E  | 8326 Hs. 64702E          | NM_00350E       | ENSG000003FZD9                    | CD349 FZI frizzled protein-coding  |                   |
| chr8-266c   | 7.65643  | -0.42575 | 0.838975 | -0.50747 | 0.611827 | 0.981636 | chr8  | 26655307 | 26657343 | + | 0 | NA | 3' UTR (N3' UTR (N | 77920 NM_001244  | 1808 Hs. 593187          | NM_00138E       | ENSG000003DPYSL2                  | CRMP-2 CF dihydrase protein-coding |                   |
| chr1-1541   | 11.68922 | 0.353701 | 0.69707  | 0.50741  | 0.611867 | 0.981636 | chr1  | 1.61E+08 | 1.61E+08 | + | 0 | NA | exon (NM exon (NM  | 4214 NM_00118E   | 4817 Hs. 14640E          | NM_00560C       | ENSG000003CNIT1                   | - nitrilase protein-coding         |                   |
| chr1-161c   | 12.15253 | 0.342623 | 0.675815 | 0.506977 | 0.612171 | 0.981636 | chr1  | 1.55E+08 | 1.55E+08 | + | 0 | NA | intron (NTiger3b   | 10882 NM_00119E  | 103 Hs. 12341            | NM_001111       | ENSG000003ADAR                    | ADAR1 AGS adenosine protein-coding |                   |
| chr1-160c   | 12.15253 | 0.342623 | 0.675815 | 0.506977 | 0.612171 | 0.981636 | chr1  | 1.6E+08  | 1.6E+08  | + | 0 | NA | intron (NAluSp SIN | -13015 NR_00219C | 474338 Hs. 62117E        | NR_002190       | SUMO1P3                           | - SUMO1 pseudo                     |                   |
| chr1-105f   | 7.965372 | 0.418626 | 0.825935 | 0.50685  | 0.61226  | 0.981636 | chr1  | 1.85E+08 | 1.85E+08 | + | 0 | NA | intron (Nintron (N | 28720 NM_030934  | 81627 Hs. 10714E         | NM_030934       | ENSG000003TRMT1L                  | C1orf25 t rRNA metf protein-coding |                   |
| chr10-181c  | 7.965372 | 0.418626 | 0.825935 | 0.50685  | 0.61226  | 0.981636 | chr10 | 1.1E+08  | 1.1E+08  | + | 0 | NA | intron (NLC2 LINE  | 16348 NM_001324  | 7511 Hs. 39062E          | NM_02038E       | ENSG000003XPNPEP1                 | APP1 SAMF X-prolyl protein-coding  |                   |
| chr12-31c   | 7.965372 | 0.418626 | 0.825935 | 0.50685  | 0.61226  | 0.981636 | chr12 | 31972263 | 31972559 | + | 0 | NA | intron (NAluY SINE | 12996 NM_01816E  | 55196 Hs. 44512E         | NM_01816E       | ENSG000003RESF1                   | C12orf35 retroel protein-coding    |                   |
| chr3-100c   | 7.965372 | 0.418626 | 0.825935 | 0.50685  | 0.61226  | 0.981636 | chr3  | 1E+08    | 1E+08    | + | 0 | NA | intron (NAluSx SIN | 19033 NM_00119E  | 55773 Hs. 47700E         | NM_01830E       | ENSG000003TBC1D23                 | NS4ATP1 FBC1 dom protein-coding    |                   |
| chr7-591c   | 7.965372 | 0.418626 | 0.825935 | 0.50685  | 0.61226  | 0.981636 | chr7  | 5912628  | 5913071  | + | 0 | NA | exon (NM exon (NM  | 14116 NM_0       |                          |                 |                                   |                                    |                   |



|           |          |          |          |          |          |          |       |          |          |   |   |    |                     |        |           |          |           |                   |                     |                |                           |                   |
|-----------|----------|----------|----------|----------|----------|----------|-------|----------|----------|---|---|----|---------------------|--------|-----------|----------|-----------|-------------------|---------------------|----------------|---------------------------|-------------------|
| chr10-734 | 7.451218 | 0.430045 | 0.853135 | 0.504075 | 0.614208 | 0.981636 | chr10 | 73422948 | 73426310 | + | 0 | NA | exon (NM exon (NM   | 8932   | NR_001024 | 118490   | Hs.631822 | NR_001024         | ENSG000000MSS51     | ZMYND17        | MSS51                     | mitprotein-coding |
| chr11-947 | 7.451218 | 0.430045 | 0.853135 | 0.504075 | 0.614208 | 0.981636 | chr11 | 9473475  | 9474887  | + | 0 | NA | intron (Nintron (N  | 13169  | NR_003442 | 7702     | Hs.523471 | NR_003442         | ENSG000000ZNF143    | SBF1 STAR      | zinc fingprotein-coding   |                   |
| chr11-727 | 7.451218 | 0.430045 | 0.853135 | 0.504075 | 0.614208 | 0.981636 | chr11 | 72707012 | 72709822 | + | 0 | NA | intron (Nintron (N  | 7943   | NR_146788 | 1.01E+08 | Hs.50316E | NR_146788         | ENSG000000ARAF1-AS2 | ARAF1          | antncRNA                  |                   |
| chr11-12  | 7.451218 | 0.430045 | 0.853135 | 0.504075 | 0.614208 | 0.981636 | chr11 | 1.2E+08  | 1.2E+08  | + | 0 | NA | intron (Nintron (N  | 54536  | NR_001301 | 23365    | Hs.24598  | NR_001301         | ENSG000000ARHGFP12  | LARG PRO2      | Rho guanoprotein-coding   |                   |
| chr12-496 | 7.451218 | 0.430045 | 0.853135 | 0.504075 | 0.614208 | 0.981636 | chr12 | 49800262 | 49804644 | + | 0 | NA | intron (NAluScl SIN | 25960  | NR_001366 | 57701    | Hs.143067 | NR_001366         | ENSG000000CNKAP5L   | Cep169 FFNCK   | ascoprotein-coding        |                   |
| chr15-228 | 7.451218 | 0.430045 | 0.853135 | 0.504075 | 0.614208 | 0.981636 | chr15 | 22880569 | 22883729 | + | 0 | NA | intron (Nintron (N  | 35164  | NR_001033 | 23191    | Hs.26704  | NR_001033         | ENSG000000CYFIP1    | P140SRA-1      | cytoplasm protein-coding  |                   |
| chr16-16  | 7.451218 | 0.430045 | 0.853135 | 0.504075 | 0.614208 | 0.981636 | chr16 | 1637374  | 1638922  | + | 0 | NA | intron (Nintron (N  | 23508  | NR_002082 | 57585    | Hs.60367  | NR_002082         | ENSG000000CRAMP1    | CRAMP1L        | cramped protein-coding    |                   |
| chr17-18  | 7.451218 | 0.430045 | 0.853135 | 0.504075 | 0.614208 | 0.981636 | chr17 | 18065139 | 18065835 | + | 0 | NA | 3' UTR (N3' UTR (N  | -22461 | NR_001388 | 1819     | Hs.178582 | NR_001388         | ENSG000000DRG2      | -              | developm protein-coding   |                   |
| chr17-38  | 7.451218 | 0.430045 | 0.853135 | 0.504075 | 0.614208 | 0.981636 | chr17 | 38366118 | 38369943 | + | 0 | NA | exon (NM exon (NM   | 16186  | NR_014598 | 30837    | Hs.514132 | NR_014598         | ENSG000000SOC7S     | NAP4 NCKA      | suppress protein-coding   |                   |
| chr18-361 | 7.451218 | 0.430045 | 0.853135 | 0.504075 | 0.614208 | 0.981636 | chr18 | 36171183 | 36173231 | + | 0 | NA | intron (NAluJr SIN  | 15228  | NR_13460E | 1.02E+08 | Hs.60067  | NR_13460E         | ENSG000000LOC101927 | -              | uncharactncRNA            |                   |
| chr19-311 | 7.451218 | 0.430045 | 0.853135 | 0.504075 | 0.614208 | 0.981636 | chr19 | 311270   | 312255   | + | 0 | NA | intron (Nintron (N  | -20359 | NR_00371E | 8612     | Hs.46550E | NR_00371E         | ENSG000000PLP2      | LPP2 PAP       | phospholiprotein-coding   |                   |
| chr19-40  | 7.451218 | 0.430045 | 0.853135 | 0.504075 | 0.614208 | 0.981636 | chr19 | 4032575  | 4034424  | + | 0 | NA | exon (NM exon (NM   | 25763  | NR_015897 | 51588    | Hs.10577E | NR_015897         | ENSG000000PIA5A     | PIA5-gamm      | protein iprotein-coding   |                   |
| chr19-11  | 7.451218 | 0.430045 | 0.853135 | 0.504075 | 0.614208 | 0.981636 | chr19 | 11213982 | 11216261 | + | 0 | NA | intron (NAluV SINE  | 11493  | NR_13490E | 1.05E+08 | Hs.579864 | NR_13490E         | ENSG000000LOC105372 | -              | uncharactncRNA            |                   |
| chr19-162 | 7.451218 | 0.430045 | 0.853135 | 0.504075 | 0.614208 | 0.981636 | chr19 | 16228066 | 16233263 | + | 0 | NA | intron (NAluSg SIN  | 32753  | NR_03249E | 8907     | Hs.71040  | NR_03249E         | ENSG000000AP1M1     | AP47 CLAF      | adaptor rprotein-coding   |                   |
| chr2-262  | 7.451218 | 0.430045 | 0.853135 | 0.504075 | 0.614208 | 0.981636 | chr2  | 26286667 | 26288294 | + | 0 | NA | intron (Nintron (N  | 31569  | NR_00114E | 165082   | Hs.63187E | NR_00114E         | ENSG000000ADGRF3    | GPR113 PC      | adhesion protein-coding   |                   |
| chr2-950  | 7.451218 | 0.430045 | 0.853135 | 0.504075 | 0.614208 | 0.981636 | chr2  | 95092777 | 95093524 | + | 0 | NA | intron (NLIAP6 LIN  | 28407  | NR_001321 | 64969    | Hs.65525E | NR_001321         | ENSG000000MRP5S     | MRP-5S         | SEmitochonprotein-coding  |                   |
| chr2-117  | 7.451218 | 0.430045 | 0.853135 | 0.504075 | 0.614208 | 0.981636 | chr2  | 1.18E+08 | 1.18E+08 | + | 0 | NA | intron (Nintron (N  | 18414  | NR_019044 | 54520    | Hs.10784E | NR_019044         | ENSG000000CCDC93    | -              | coiled-c protein-coding   |                   |
| chr2-242  | 7.451218 | 0.430045 | 0.853135 | 0.504075 | 0.614208 | 0.981636 | chr2  | 2.42E+08 | 2.42E+08 | + | 0 | NA | intron (Nintron (N  | 14758  | NR_17832E | 23192    | Hs.28361E | NR_17832E         | ENSG000000ATG4B     | APG4B AU1      | autophagy protein-coding  |                   |
| chr20-25  | 7.451218 | 0.430045 | 0.853135 | 0.504075 | 0.614208 | 0.981636 | chr20 | 25683342 | 25686638 | + | 0 | NA | intron (NLIAP7 LIN  | 1949   | NR_00129C | 26152    | Hs.61881  | NR_00129C         | ENSG000000ZNF337    | -              | zinc fingprotein-coding   |                   |
| chr20-49  | 7.451218 | 0.430045 | 0.853135 | 0.504075 | 0.614208 | 0.981636 | chr20 | 49241640 | 49243202 | + | 0 | NA | intron (NMIRb SINE  | 23126  | NR_01789E | 55661    | Hs.65234  | NR_01789E         | ENSG000000DDX27     | DRS1 Drs1      | DEAD-box protein-coding   |                   |
| chr22-46  | 7.451218 | 0.430045 | 0.853135 | 0.504075 | 0.614208 | 0.981636 | chr22 | 46219618 | 46221366 | + | 0 | NA | intron (NAluJo SIN  | 29801  | NR_207327 | 150383   | Hs.10311E | NR_207327         | ENSG000000CDPF1     | C22orf40       | cysteine protein-coding   |                   |
| chr3-162  | 7.451218 | 0.430045 | 0.853135 | 0.504075 | 0.614208 | 0.981636 | chr3  | 16221976 | 16223013 | + | 0 | NA | intron (Nintron (N  | 5718   | NR_00131E | 117248   | Hs.41130E | NR_00131E         | ENSG000000GALNT15   | GALNACT15      | polypeptiprotein-coding   |                   |
| chr4-181  | 7.451218 | 0.430045 | 0.853135 | 0.504075 | 0.614208 | 0.981636 | chr4  | 1813782  | 1817005  | + | 0 | NA | intron (Nintron (N  | 22081  | NR_00116E | 2261     | Hs.1420   | NR_00116E         | ENSG000000FGFR3     | ACH CD33       | fibroblas protein-coding  |                   |
| chr4-174  | 7.451218 | 0.430045 | 0.853135 | 0.504075 | 0.614208 | 0.981636 | chr4  | 17488621 | 17497119 | + | 0 | NA | intron (NMIR SINE   | 22420  | NR_00032C | 5860     | Hs.75438  | NR_00032C         | ENSG000000QDPR      | DHPR HDHf      | quinoid protein-coding    |                   |
| chr5-374  | 7.451218 | 0.430045 | 0.853135 | 0.504075 | 0.614208 | 0.981636 | chr5  | 37479491 | 37482765 | + | 0 | NA | intron (NTHE1B-int  | 101810 | NR_00134E | 55100    | Hs.21369E | NR_00134E         | ENSG000000WDR70     | -              | WD repeatprotein-coding   |                   |
| chr8-186  | 7.451218 | 0.430045 | 0.853135 | 0.504075 | 0.614208 | 0.981636 | chr8  | 18629667 | 18631829 | + | 0 | NA | intron (NMER2 DNA   | 178119 | NR_20690E | 178119   | Hs.43425E | NR_20690E         | ENSG000000PSD3      | EFA6D EFAP     | pleckstriprotein-coding   |                   |
| chr8-377  | 7.451218 | 0.430045 | 0.853135 | 0.504075 | 0.614208 | 0.981636 | chr8  | 3775325  | 37754309 | + | 0 | NA | intron (Nintron (N  | -5771  | NR_003671 | 728024   | Hs.64713E | NR_003671         | ENSG000000LOC728024 | -              | chromosom pseudo          |                   |
| chr8-378  | 7.451218 | 0.430045 | 0.853135 | 0.504075 | 0.614208 | 0.981636 | chr8  | 37829851 | 37831978 | + | 0 | NA | exon (NM exon (NM   | 18947  | NR_01831C | 55290    | Hs.709301 | NR_01831C         | ENSG000000BRF2      | BRFU TF11      | BRF2 RNA protein-coding   |                   |
| chr9-32   | 7.451218 | 0.430045 | 0.853135 | 0.504075 | 0.614208 | 0.981636 | chr9  | 34250067 | 34251509 | + | 0 | NA | intron (Nintron (N  | 71745  | NR_001171 | 51271    | Hs.26896E | NR_001171         | ENSG000000UBAP1     | NAG20 SPC      | ubiquitin protein-coding  |                   |
| chr9-129  | 7.451218 | 0.430045 | 0.853135 | 0.504075 | 0.614208 | 0.981636 | chr9  | 1.29E+08 | 1.29E+08 | + | 0 | NA | intron (NLI2b LINE  | 13050  | NR_00400C | 1384     | Hs.12068  | NR_00400C         | ENSG000000CRAT      | CAT CAT1       | carnitine protein-coding  |                   |
| chr2-171  | 10.38313 | -0.36637 | 0.726835 | -0.50407 | 0.614214 | 0.981636 | chr2  | 1.71E+08 | 1.71E+08 | + | 0 | NA | intron (NLI2b LIN   | -2573  | NR_02477C | 79828    | Hs.13514E | NR_02477C         | ENSG000000METHL8    | TIP            | methyltr protein-coding   |                   |
| chr4-118  | 10.38313 | -0.36637 | 0.726835 | -0.50407 | 0.614214 | 0.981636 | chr4  | 1.19E+08 | 1.19E+08 | + | 0 | NA | intron (Nintron (N  | 42694  | NR_00209E | 57721    | Hs.59687E | NR_00209E         | ENSG000000METHL14   | hMETHL14       | methyltr protein-coding   |                   |
| chr7-728  | 10.38313 | -0.36637 | 0.726835 | -0.50407 | 0.614214 | 0.981636 | chr7  | 72881548 | 72886713 | + | 0 | NA | intron (NAluJr SIN  | 4773   | NR_001367 | 9883     | Hs.65521E | NR_001367         | ENSG000000POMI21    | P145 POM1      | POM121 rprotein-coding    |                   |
| chr8-377  | 7.079413 | -0.46005 | 0.91271  | -0.50405 | 0.61423  | 0.981636 | chr8  | 37768586 | 37768833 | + | 0 | NA | TTS (NM_TTS (NM_C   | 6064   | NR_00134E | 11212    | Hs.30479E | NR_00134E         | ENSG000000PLPBP     | EPVB6D PF      | pyridoxalprotein-coding   |                   |
| chr1-244  | 7.1714   | -0.44233 | 0.877889 | -0.50386 | 0.614362 | 0.981636 | chr1  | 2.45E+08 | 2.45E+08 | + | 0 | NA | Intergeni Intergeni | 5170   | NR_13278E | 1.07E+08 | NR_13278E | SNORA100          | -                   | small nucsnRNA |                           |                   |
| chr13-306 | 7.1714   | -0.44233 | 0.877889 | -0.50386 | 0.614362 | 0.981636 | chr13 | 30624027 | 30624776 | + | 0 | NA | intron (NAluJo SIN  | 6481   | NR_001321 | 10208    | Hs.533831 | NR_001321         | ENSG000000USPL1     | C13orf22       | ubiquitin protein-coding  |                   |
| chr17-371 | 7.1714   | -0.44233 | 0.877889 | -0.50386 | 0.614362 | 0.981636 | chr17 | 37187848 | 37188232 | + | 0 | NA | intron (Nintron (N  | -56761 | NR_13277E | 1.07E+08 | NR_13277E | SNORA90           | -                   | small nucsnRNA |                           |                   |
| chr18-797 | 7.1714   | -0.44233 | 0.877889 | -0.50386 | 0.614362 | 0.981636 | chr18 | 79704169 | 79704399 | + | 0 | NA | intron (Nintron (N  | 22854  | NR_00120E | 9150     | Hs.46549E | NR_00120E         | ENSG000000CTDP1     | CCFDN FCF      | CTD phosphprotein-coding  |                   |
| chr2-134  | 7.1714   | -0.44233 | 0.877889 | -0.50386 | 0.614362 | 0.981636 | chr2  | 1.35E+08 | 1.35E+08 | + | 0 | NA | intron (NTrigger2 I | 22709  | NR_001241 | 905      | Hs.74411E | NR_001241         | ENSG000000CCNT2     | CYCT2          | cyclin T2 protein-coding  |                   |
| chr22-31  | 7.1714   | -0.44233 | 0.877889 | -0.50386 | 0.614362 | 0.981636 | chr22 | 31618037 | 31618706 | + | 0 | NA | TTS (NM_TTS (NM_C   | 3160   | NR_10695E | 1.02E+08 | NR_10695E | ENSG000000MIR7109 | hsa-mir-7           | microRNA ncRNA |                           |                   |
| chr8-233  | 7.1714   | -0.44233 | 0.877889 | -0.50386 | 0.614362 | 0.981636 | chr8  | 23306151 | 23306814 | + | 0 | NA | intron (Nintron (N  | 18377  | NR_00113E | 203069   | Hs.45864E | NR_00113E         | ENSG000000R3HCC1    | -              | R3H domaiprotein-coding   |                   |
| chr8-585  | 7.1714   | -0.44233 | 0.877889 | -0.50386 | 0.614362 | 0.981636 | chr8  | 58565506 | 58566337 | + | 0 | NA | intron (Nintron (N  | 12660  | NR_00562E | 6386     | Hs.200804 | NR_00562E         | ENSG000000SDCBP     | MDA-9 MD       | SDCyanecan protein-coding |                   |
| chr12-71  | 10.34199 | -0.36858 | 0.731532 | -0.50385 | 0.614368 | 0.981636 | chr12 | 71650902 | 71660298 | + | 0 | NA | intron (NLIIME1 LIN | 8248   | NR_14498E | 196441   | Hs.24579E | NR_14498E         | ENSG000000ZFC3H1    | CCDC131 Czinc  | fingprotein-coding        |                   |
| chr7-416  | 10.34199 | -0.36858 | 0.731532 | -0.50385 | 0.614368 | 0.981636 | chr7  | 41689036 | 41690903 | + | 0 | NA | exon (NM exon (NM   | -3950  | NR_02711E | 285954   | Hs.65686E | NR_02711E         | ENSG000000INHBA-AS1 | -              | INHBA antncRNA            |                   |
| chr11-12  | 7.607432 | -0.4272  | 0.847997 | -0.50377 | 0.614423 | 0.981636 | chr11 | 1.22E+08 | 1.22E+08 | + | 0 | NA | intron (Nintron (N  | 553    | NR_13718E | 399959   | Hs.44098  | NR_13718E         | ENSG000000MIR100HG  | AGD1 linc      | mir-100-ncRNA             |                   |
| chr15-417 | 7.607432 | -0.4272  | 0.847997 | -0.50377 | 0.614423 | 0.981636 | chr15 | 41767019 | 41767572 | + | 0 | NA | 3' UTR (N3' UTR (N  | -7189  | NR_00126E | 23005    | Hs.513661 | NR_00126E         | ENSG000000MAPKBP1   | JNKBP-1 Jmi    | togen-ε protein-coding    |                   |
| chr7-129  | 7.607432 | -0.4272  | 0.847997 | -0.50377 | 0.614423 | 0.981636 | chr7  | 1.3E+08  | 1.3E+08  | + | 0 | NA | intron (Nintron (N  | 74207  | NR_003344 | 7328     | Hs.64354E | NR_003344         | ENSG000000UBE2H     | E2-20K G       | ubiquitin protein-coding  |                   |
| chr8-128  | 7.607432 | -0.4272  | 0.847997 | -0.50377 | 0.614423 | 0.981636 | chr8  | 1.28E+08 | 1.28E+08 | + | 0 | NA | intron (NLIIME4a LI | -50465 | NR_03161E | 1E+08    | NR_03161E | ENSG000000MIR1208 | MIRN1208            | microRNA ncRNA |                           |                   |
| chr9-110  | 7.607432 | -0.4272  | 0.847997 | -0.50377 | 0.614423 | 0.981636 | chr9  | 1.1E+08  | 1.1E+08  | + | 0 | NA | intron (NLIIP44 LIN | -56665 | NR_00128E | 255220   | Hs.147064 | NR_00128E         | ENSG000000TXND8     | SP             |                           |                   |

|                    |          |          |          |          |          |       |          |          |   |      |                    |                   |                            |                     |                                                |                                     |
|--------------------|----------|----------|----------|----------|----------|-------|----------|----------|---|------|--------------------|-------------------|----------------------------|---------------------|------------------------------------------------|-------------------------------------|
| chr5-1135 7.939948 | 0.413404 | 0.823847 | 0.501797 | 0.61581  | 0.981636 | chr5  | 1.14E+08 | 1.14E+08 | + | 0 NA | intron (NLIPA11 LI | 57447 NM_00134E   | 64848 Hs. 231942NM_022828  | ENSG000004YTHDC2    | CAHL hYTF YTH domain protein-coding            |                                     |
| chr7-5745 7.939948 | 0.413404 | 0.823847 | 0.501797 | 0.61581  | 0.981636 | chr7  | 5745938  | 5746981  | + | 0 NA | intron (Nintron (N | -34549 NR_106934  | 1.02E+08                   | NR_106934           | ENSG000004MIR6874                              | hsa-mir-ε microRNA ncRNA            |
| chr9-3246 7.939948 | 0.413404 | 0.823847 | 0.501797 | 0.61581  | 0.981636 | chr9  | 32467279 | 32467478 | + | 0 NA | intron (NL2 LINE I | 58818 NM_014314   | 23586 Hs. 190622NM_014314  | ENSG000004DDX58     | RIG-I RICDEd/H-bc protein-coding               |                                     |
| chr1-1791 10.37527 | -0.3651  | 0.727678 | -0.50174 | 0.615852 | 0.981636 | chr1  | 77954351 | 77971977 | + | 0 NA | intron (Nintron (N | 15908 NR_130152   | 8880 Hs. 56738CN_003902    | ENSG000004FUBP1     | FBP FUBP far upst protein-coding               |                                     |
| chr1-1791 10.37527 | -0.3651  | 0.727678 | -0.50174 | 0.615852 | 0.981636 | chr1  | 1.79E+08 | 1.79E+08 | + | 0 NA | intron (Nintron (N | 16757 NM_00515E   | 27 Hs. 159472NM_00515E     | ENSG000004ABL2      | ABLL ARG ABL prot protein-coding               |                                     |
| chr15-40C 10.37527 | -0.3651  | 0.727678 | -0.50174 | 0.615852 | 0.981636 | chr15 | 40025597 | 40027394 | + | 0 NA | intron (Nintron (N | 12686 NM_003134   | 6727 Hs. 533732NM_003134   | ENSG000004SRP14     | ALURBP signal re protein-coding                |                                     |
| chr17-43C 10.37527 | -0.3651  | 0.727678 | -0.50174 | 0.615852 | 0.981636 | chr17 | 43002140 | 43005024 | + | 0 NA | TTS (NR TTS (NR_1  | -3202 NM_00133C   | 3430 Hs. 63225E            | ENSG000004IF135     | IFP35 interfe protein-coding                   |                                     |
| chr5-1432 10.37527 | -0.3651  | 0.727678 | -0.50174 | 0.615852 | 0.981636 | chr5  | 14327189 | 14329157 | + | 0 NA | intron (Nintron (N | -135810 NR_14581E | 1.1E+08                    | NR_14581E           | SNORD170                                       | small nucsnoRNA                     |
| chr19-46C 7.484499 | 0.433471 | 0.864049 | 0.501674 | 0.615897 | 0.981636 | chr19 | 46383303 | 46384399 | + | 0 NA | exon (NM exon (NM  | 29713 NM_03204C   | 83987 Hs. 9787E            | ENSG000004CCDC8     | 3M3 PPP1F coiled-c protein-coding              |                                     |
| chr6-1697 7.484499 | 0.433471 | 0.864049 | 0.501674 | 0.615897 | 0.981636 | chr6  | 1.7E+08  | 1.7E+08  | + | 0 NA | intron (NL2 LINE I | -17637 NM_02678C  | 80069 Hs. 677182NM_025002  | ENSG000004LINC00574 | G6orf208 long intencRNA                        |                                     |
| chr1-4361 7.417936 | 0.426618 | 0.851132 | 0.501236 | 0.616205 | 0.981636 | chr1  | 43619254 | 43619938 | + | 0 NA | intron (Nintron (N | -30553 NM_01466E  | 9682 Hs. 155983NM_01466E   | ENSG000004KDM4A     | JHDM3A JM lysine de protein-coding             |                                     |
| chr1-176C 7.417936 | 0.426618 | 0.851132 | 0.501236 | 0.616205 | 0.981636 | chr1  | 1.76E+08 | 1.76E+08 | + | 0 NA | intron (NLIPA16 LI | -108600 NR_00299E | 677679                     | NR_00299E           | ENSG000004SCARNA3                              | HBI-100 small Ca <sub>v</sub> ncRNA |
| chr1-201E 7.417936 | 0.426618 | 0.851132 | 0.501236 | 0.616205 | 0.981636 | chr1  | 2.02E+08 | 2.02E+08 | + | 0 NA | intron (Nintron (N | 2299 NR_106797    | 1.02E+08                   | NR_106797           | ENSG000004MIR6739                              | hsa-mir-ε microRNA ncRNA            |
| chr1-236E 7.417936 | 0.426618 | 0.851132 | 0.501236 | 0.616205 | 0.981636 | chr1  | 2.37E+08 | 2.37E+08 | + | 0 NA | intron (NMERGB DNA | 16482 NM_001291   | 4548 Hs. 498187NM_000254   | ENSG000004MTR       | HMG MS c5-methylp protein-coding               |                                     |
| chr10-72Z 7.417936 | 0.426618 | 0.851132 | 0.501236 | 0.616205 | 0.981636 | chr10 | 72208648 | 72211231 | + | 0 NA | intron (NMSTB LTR  | 6017 NM_00136E    | 51008 Hs. 500007NM_015947  | ENSG000004ASCC1     | ASC1P50 cactivatir protein-coding              |                                     |
| chr10-13Z 7.417936 | 0.426618 | 0.851132 | 0.501236 | 0.616205 | 0.981636 | chr10 | 1.33E+08 | 1.33E+08 | + | 0 NA | exon (NM exon (NM  | 5060 NM_138384    | 92170 Hs. 50157E           | ENSG000004MTG1      | GTP GTPBF mitochondon protein-coding           |                                     |
| chr11-66Z 7.417936 | 0.426618 | 0.851132 | 0.501236 | 0.616205 | 0.981636 | chr11 | 666232   | 666634   | + | 0 NA | intron (Nintron (N | 27664 NM_000797   | 1815 Hs. 99922 NM_000797   | ENSG000004DRD4      | D4DR dopamine protein-coding                   |                                     |
| chr12-121 7.417936 | 0.426618 | 0.851132 | 0.501236 | 0.616205 | 0.981636 | chr12 | 1.21E+08 | 1.21E+08 | + | 0 NA | intron (Nintron (N | 24544 NM_00127C   | 10645 Hs. 29734E           | ENSG000004CAMK2C    | CAMK2C CAM calcium/c protein-coding            |                                     |
| chr12-13Z 7.417936 | 0.426618 | 0.851132 | 0.501236 | 0.616205 | 0.981636 | chr12 | 1.32E+08 | 1.32E+08 | + | 0 NA | intron (Nintron (N | 21896 NR_00297E   | 677829 Hs. 74240E          | ENSG000004SNORA49   | ACA49 small nucsnoRNA                          |                                     |
| chr12-13Z 7.417936 | 0.426618 | 0.851132 | 0.501236 | 0.616205 | 0.981636 | chr12 | 1.33E+08 | 1.33E+08 | + | 0 NA | intron (Nintron (N | 2677 NM_015394    | 7556 Hs. 57398E            | ENSG000004ZNF10     | KOX1 zinc fing protein-coding                  |                                     |
| chr14-57Z 7.417936 | 0.426618 | 0.851132 | 0.501236 | 0.616205 | 0.981636 | chr14 | 57208431 | 57208713 | + | 0 NA | 3' UTR (N3' UTR (N | 60333 NM_006544   | 10640 Hs. 743987NM_006544  | ENSG000004EXOC5     | HES10 PF exocyst c protein-coding              |                                     |
| chr14-911 7.417936 | 0.426618 | 0.851132 | 0.501236 | 0.616205 | 0.981636 | chr14 | 91160596 | 91165850 | + | 0 NA | intron (NALuSx SIN | 36797 NR_00370E   | 1E+08                      | NR_00370E           | ENSG000004SNORA11B                             | small nucsnoRNA                     |
| chr16-19E 7.417936 | 0.426618 | 0.851132 | 0.501236 | 0.616205 | 0.981636 | chr16 | 1985710  | 1987018  | + | 0 NA | 3' UTR (N3' UTR (N | 2171 NM_00526E    | 2671 Hs. 27184 NM_00526E   | ENSG000004CFER      | ALR ERV1 growth f protein-coding               |                                     |
| chr16-24E 7.417936 | 0.426618 | 0.851132 | 0.501236 | 0.616205 | 0.981636 | chr16 | 24802003 | 24802450 | + | 0 NA | intron (Nintron (N | -43637 NM_00125E  | 115584 Hs. 16411E          | ENSG000004SLC5A11   | KST1 RKST1 solute c protein-coding             |                                     |
| chr19-10Z 7.417936 | 0.426618 | 0.851132 | 0.501236 | 0.616205 | 0.981636 | chr19 | 10374801 | 10375644 | + | 0 NA | intron (Nintron (N | 5350 NM_003331    | 7297 Hs. 7551E             | ENSG000004TYK2      | IMD35 JTB tyrosine protein-coding              |                                     |
| chr2-552 7.417936  | 0.426618 | 0.851132 | 0.501236 | 0.616205 | 0.981636 | chr2  | 55203977 | 55205704 | + | 0 NA | intron (NLIMA3 LIN | -27045 NM_00113E  | 6233 Hs. 31164E            | ENSG000004RPS27A    | CEP80 HEL ribosomal protein-coding             |                                     |
| chr2-1591 7.417936 | 0.426618 | 0.851132 | 0.501236 | 0.616205 | 0.981636 | chr2  | 1.31E+08 | 1.31E+08 | + | 0 NA | intron (Nintron (N | 1131 NR_10694E    | 1.02E+08                   | NR_10694E           | ENSG000004MIR6888                              | hsa-mir-ε microRNA ncRNA            |
| chr22-37E 7.417936 | 0.426618 | 0.851132 | 0.501236 | 0.616205 | 0.981636 | chr22 | 37925868 | 37929494 | + | 0 NA | exon (NM exon (NM  | 21384 NM_03338E   | 85377 Hs. 51761E           | ENSG000004MICAL1    | MICAL-L1 MICAL Ii protein-coding               |                                     |
| chr22-41Z 7.417936 | 0.426618 | 0.851132 | 0.501236 | 0.616205 | 0.981636 | chr22 | 41224303 | 41228184 | + | 0 NA | intron (NALuSx1 SI | -8616 NR_14820C   | 1.01E+08                   | NR_14820C           | ENSG000004LOC10050E                            | uncharactncRNA                      |
| chr3-473Z 7.417936 | 0.426618 | 0.851132 | 0.501236 | 0.616205 | 0.981636 | chr3  | 47334877 | 47337692 | + | 0 NA | intron (Nintron (N | 44737 NR_01546E   | 25930 Hs. 25524 NM_01546E  | ENSG000004PTP23     | HD-PTP HP protein-coding                       |                                     |
| chr3-484Z 7.417936 | 0.426618 | 0.851132 | 0.501236 | 0.616205 | 0.981636 | chr3  | 48453044 | 48453610 | + | 0 NA | intron (Nintron (N | 6201 NM_001271    | 84126 Hs. 69484E           | ENSG000004ATRIP     | ATR inter protein-coding                       |                                     |
| chr5-110Z 7.417936 | 0.426618 | 0.851132 | 0.501236 | 0.616205 | 0.981636 | chr5  | 71060520 | 71061842 | + | 0 NA | intron (Nintron (N | 6471 NM_00109E    | 728340 Hs. 19135E          | ENSG000004GTF2H2C   | GTF2H2C_2 GTF2H2 F protein-coding              |                                     |
| chr5-1414 7.417936 | 0.426618 | 0.851132 | 0.501236 | 0.616205 | 0.981636 | chr5  | 1.41E+08 | 1.41E+08 | + | 0 NA | exon (NM exon (NM  | 2421 NM_03209E    | 56107 Hs. 36816E           | ENSG000004PCDHGA9   | PCDH-GAMM prot protein-coding                  |                                     |
| chr6-154Z 7.417936 | 0.426618 | 0.851132 | 0.501236 | 0.616205 | 0.981636 | chr6  | 15487258 | 15489520 | + | 0 NA | intron (Nintron (N | 174639 NR_03644E  | 84062 Hs. 57114E           | ENSG000004DTNBP1    | BLOC158 D dystrobre protein-coding             |                                     |
| chr7-199Z 7.417936 | 0.426618 | 0.851132 | 0.501236 | 0.616205 | 0.981636 | chr7  | 91993115 | 91994297 | + | 0 NA | intron (Nintron (N | 52831 NM_005751   | 10142 Hs. 651221NM_005751  | ENSG000004AKAP9     | AKAP-9 AK-A-kinase protein-coding              |                                     |
| chr7-129E 7.417936 | 0.426618 | 0.851132 | 0.501236 | 0.616205 | 0.981636 | chr7  | 1.3E+08  | 1.3E+08  | + | 0 NA | intron (NALuSx1 SI | 15808 NM_003344   | 7328 Hs. 64354E            | ENSG000004UBE2H     | E2-20K Gluhiquitir protein-coding              |                                     |
| chr7-143Z 7.417936 | 0.426618 | 0.851132 | 0.501236 | 0.616205 | 0.981636 | chr7  | 1.43E+08 | 1.43E+08 | + | 0 NA | TTS (NM TTS (NM_C  | -8161 NR_04645E   | 1180 Hs. 12148E            | ENSG000004CLCN1     | CLC1 chloride protein-coding                   |                                     |
| chr8-304Z 7.417936 | 0.426618 | 0.851132 | 0.501236 | 0.616205 | 0.981636 | chr8  | 30401755 | 30402237 | + | 0 NA | intron (Nintron (N | -16596 NR_04620E  | 1E+08                      | NR_04620E           | ENSG000004RBPMS-AS1                            | RBPM5 antncRNA                      |
| chr11-864 3.20406  | -0.64115 | 1.279173 | -0.50123 | 0.616212 | 0.981636 | chr11 | 86409563 | 86410377 | + | 0 NA | intron (Nintron (N | 35083 NM_00115E   | 60494 Hs. 14491E           | ENSG000004CCDC81    | coiled-cnc protein-coding                      |                                     |
| chr2-325Z 9.839396 | -0.38382 | 0.766229 | -0.50092 | 0.616426 | 0.981636 | chr2  | 32531326 | 32532076 | + | 0 NA | promoter-promoter- | -452 NR_03028E    | 693143                     | NR_03028E           | ENSG000004MIR558                               | MIRN558 microRNA ncRNA              |
| chr1-2861 7.947806 | 0.411462 | 0.821789 | 0.500691 | 0.616589 | 0.981636 | chr1  | 28611385 | 28613566 | + | 0 NA | intron (Nintron (N | 19980 NM_00119E   | 115273 Hs. 652321NM_152304 | ENSG000004RAB42     | RAB42, m protein-coding                        |                                     |
| chr1-379E 7.947806 | 0.411462 | 0.821789 | 0.500691 | 0.616589 | 0.981636 | chr1  | 37967303 | 37970131 | + | 0 NA | intron (NMER117 DN | 21305 NM_00680E   | 10946 Hs. 77897 NM_00680E  | ENSG000004SF3A3     | PRP9 PRPF splicing protein-coding              |                                     |
| chr1-532Z 7.947806 | 0.411462 | 0.821789 | 0.500691 | 0.616589 | 0.981636 | chr1  | 53208135 | 53214662 | + | 0 NA | intron (Nintron (N | 9236 NM_017887    | 54987 Hs. 525391NM_017887  | ENSG000004CZIB      | Clorf123 CXXC motif protein-coding             |                                     |
| chr1-121Z 7.947806 | 0.411462 | 0.821789 | 0.500691 | 0.616589 | 0.981636 | chr1  | 1.21E+08 | 1.21E+08 | + | 0 NA | intron (Nintron (N | 21657 NR_10418E   | 1.01E+08                   | NR_10418E           | ENSG000004SRGAP2-AS                            | SRGAP2 antncRNA                     |
| chr1-180Z 7.947806 | 0.411462 | 0.821789 | 0.500691 | 0.616589 | 0.981636 | chr1  | 1.81E+08 | 1.81E+08 | + | 0 NA | intron (NLIMEg LIN | -38524 NM_02095C  | 57710 Hs. 73481E           | ENSG000004KIAA1614  | KIAA1614 protein-coding                        |                                     |
| chr1-180Z 7.947806 | 0.411462 | 0.821789 | 0.500691 | 0.616589 | 0.981636 | chr1  | 1.84E+08 | 1.84E+08 | + | 0 NA | intron (Nintron (N | 50694 NM_00043E   | 4688 Hs. 58755E            | ENSG000004NCF2      | NCF-2 NO <sub>2</sub> nitrophil protein-coding |                                     |
| chr1-1851 7.947806 | 0.411462 | 0.821789 | 0.500691 | 0.616589 | 0.981636 | chr1  | 1.85E+08 | 1.85E+08 | + | 0 NA | intron (NALuJb SIN | 32439 NM_030934   | 81627 Hs. 10714E           | ENSG000004TRMT1L    | Clorf25 l tRNA metl protein-coding             |                                     |
| chr1-225E 7.947806 | 0.411462 | 0.821789 | 0.500691 | 0.616589 | 0.981636 | chr1  | 2.26E+08 | 2.26E+08 | + | 0 NA | intron (Nintron (N | 7724 NM_01469E    | 9725 Hs. 119387NM_01469E   | ENSG000004TMEM63A   | KIAA0792 transmem protein-coding               |                                     |
| chr1-230E 7.947806 | 0.411462 | 0.821789 | 0.500691 | 0.616589 | 0.981636 | chr1  | 2.31E+08 | 2.31E+08 | + | 0 NA | intron (Nintron (N | 2870 NM_03280C    | 84886 Hs. 520494NM_03280C  | ENSG000004Clorf198  | chromoson protein-coding                       |                                     |
| chr10-73Z 7.947806 | 0.411462 | 0.821789 | 0.500691 | 0.616589 | 0.981636 | chr10 | 73377711 | 73385127 | + | 0 NA | intron (Nintron (N | -22555 NM_001367  | 118491 Hs. 591367NM_14517E | ENSG000004CFAP70    | TTTC18 cilia anc protein-coding                |                                     |
| chr10-101 7.947806 | 0.411462 | 0.821789 | 0.500691 | 0.616589 | 0.981636 | chr10 | 1.02E+08 | 1.02E+08 | + | 0 NA | intron (Nintron (N | 65636 NM_024541   | 79591 Hs. 16004 NM_024541  | ENSG000004ARMH3     | C10orf76 armadill protein-coding               |                                     |
| chr11-354 7.947806 | 0.411462 | 0.821789 | 0.5      |          |          |       |          |          |   |      |                    |                   |                            |                     |                                                |                                     |



|                    |          |          |          |          |          |       |          |          |        |                     |                  |                                 |                      |                              |                                      |
|--------------------|----------|----------|----------|----------|----------|-------|----------|----------|--------|---------------------|------------------|---------------------------------|----------------------|------------------------------|--------------------------------------|
| chr10-798 7.632856 | -0.4207  | 0.843426 | -0.4988  | 0.617918 | 0.981636 | chr10 | 79801877 | 79803122 | + 0 NA | intron (Nintron (N  | -23403 NR_029407 | 642361 Hs. 164299NR_029407      | ENSG00000CLOC642361- | uncharactercncRNA            |                                      |
| chr10-115 7.632856 | -0.4207  | 0.843426 | -0.4988  | 0.617918 | 0.981636 | chr10 | 1.2E+08  | 1.2E+08  | + 0 NA | intron (N2b LINE    | 10570 NR_136663  | 7073 Hs. 501203NR_003252        | ENSG00000TIAL1       | TCBP TIAF1TIAI               | cytc protein-coding                  |
| chr11-94C 7.632856 | -0.4207  | 0.843426 | -0.4988  | 0.617918 | 0.981636 | chr11 | 9408965  | 9412708  | + 0 NA | intron (Nintron (N  | -17930 NR_002962 | 677808 Hs. 689722NR_002962      | ENSG00000SNORA23     | ACA23                        | small nucsnoRNA                      |
| chr11-181 7.632856 | -0.4207  | 0.843426 | -0.4988  | 0.617918 | 0.981636 | chr11 | 18102842 | 18103085 | + 0 NA | intron (Nintron (N  | 3119 NM_138421   | 113174 Hs. 591998NM_138421      | ENSG00000SAAL1       | SPAC1A1                      | serum amyprotein-coding              |
| chr12-511 7.632856 | -0.4207  | 0.843426 | -0.4988  | 0.617918 | 0.981636 | chr12 | 51115363 | 51115951 | + 0 NA | intron (N1MB3 LIN   | -32061 NM_030805 | 81566 Hs. 524425NR_030805       | ENSG00000CSRNP2      | C12orf2 C                    | cysteine protein-coding              |
| chr12-105 7.632856 | -0.4207  | 0.843426 | -0.4988  | 0.617918 | 0.981636 | chr12 | 1.05E+08 | 1.05E+08 | + 0 NA | TTS (NM_C TTS (NM_C | 61902 NM_001293  | 23325 Hs. 12144 NM_015272       | ENSG00000WASHC4      | KIAA1033 WASH                | comp protein-coding                  |
| chr14-55 7.632856  | -0.4207  | 0.843426 | -0.4988  | 0.617918 | 0.981636 | chr14 | 55056748 | 55065355 | + 0 NA | intron (NAluSx SIN  | 6994 NM_144578   | 93487 Hs. 594338NM_144578       | ENSG00000MAPK11P11   | C14orf32 mitogen- $\epsilon$ | protein-coding                       |
| chr15-605 7.632856 | -0.4207  | 0.843426 | -0.4988  | 0.617918 | 0.981636 | chr15 | 60368064 | 60370689 | + 0 NA | intron (Nintron (N  | 28610 NM_001002  | 302 Hs. 511605NM_004033         | ENSG00000ANXA2       | ANX2 ANX2                    | anexin f protein-coding              |
| chr15-902 7.632856 | -0.4207  | 0.843426 | -0.4988  | 0.617918 | 0.981636 | chr15 | 90272219 | 90272808 | + 0 NA | TTS (NR_C TTS (NR_C | -6754 NR_102428  | 10519 Hs. 715555NM_006384       | ENSG00000CIB1        | CIB CIBP calcium $\epsilon$  | protein-coding                       |
| chr19-55 7.632856  | -0.4207  | 0.843426 | -0.4988  | 0.617918 | 0.981636 | chr19 | 55515069 | 55515268 | + 0 NA | intron (NAluSq SIN  | 21965 NM_001377  | 646643 Hs. 532677NM_001101      | ENSG00000SBK2        | SGK069                       | SH3 domainprotein-coding             |
| chr2-652E 7.632856 | -0.4207  | 0.843426 | -0.4988  | 0.617918 | 0.981636 | chr2  | 65265722 | 65267165 | + 0 NA | intron (N2a LINE    | 38748 NM_001005  | 10097 Hs. 643727NM_005722       | ENSG00000ACTR2       | ARP2                         | actin relprotein-coding              |
| chr2-173C 7.632856 | -0.4207  | 0.843426 | -0.4988  | 0.617918 | 0.981636 | chr2  | 1.74E+08 | 1.74E+08 | + 0 NA | 3' UTR (N3' UTR (N  | 54176 NM_001017  | 6670 Hs. 531587NM_003111        | ENSG00000SP3         | SPR2                         | Sp3 relprotein-coding                |
| chr2-216 7.632856  | -0.4207  | 0.843426 | -0.4988  | 0.617918 | 0.981636 | chr2  | 2.16E+08 | 2.16E+08 | + 0 NA | intron (NMLT1F1 LI  | 4588 NM_022144   | 7520 Hs. 388733NM_021141        | ENSG00000XRCC5       | KARP-1 KAP- $\lambda$        | ray refprotein-coding                |
| chr2-321 7.632856  | -0.4207  | 0.843426 | -0.4988  | 0.617918 | 0.981636 | chr21 | 32361388 | 32361885 | + 0 NA | intron (Nintron (N  | 15686 NR_002996  | 677846 Hs. 712292NR_002996      | ENSG00000SNORA80A    | ACA67 SNC                    | small nucsnoRNA                      |
| chr3-579 7.632856  | -0.4207  | 0.843426 | -0.4988  | 0.617918 | 0.981636 | chr3  | 57908704 | 57909308 | + 0 NA | intron (Nintron (N  | 19004 NM_001304  | 7871 Hs. 476432NM_007155        | ENSG00000SLMAP       | SLAP                         | sarcolemin protein-coding            |
| chr3-709 7.632856  | -0.4207  | 0.843426 | -0.4988  | 0.617918 | 0.981636 | chr3  | 70958902 | 70959386 | + 0 NA | non-codirnon-codir  | 105780 NM_001345 | 27086 Hs. 59368 NM_032682       | ENSG00000POXP1       | L2CC4 HSF                    | forkhead protein-coding              |
| chr4-554 7.632856  | -0.4207  | 0.843426 | -0.4988  | 0.617918 | 0.981636 | chr4  | 55448589 | 55450794 | + 0 NA | intron (Nintron (N  | 53734 NM_018472  | 55858 Hs. 479766NM_018472       | ENSG00000TMEM165     | CDGK2 FT2                    | transmemt protein-coding             |
| chr7-990 7.632856  | -0.4207  | 0.843426 | -0.4988  | 0.617918 | 0.981636 | chr7  | 99047936 | 99048135 | + 0 NA | intron (Nintron (N  | 34870 NR_110102  | 1.02E+08 Hs. 636662NR_110102    | ENSG00000LOC101927-  | uncharactercncRNA            |                                      |
| chr7-140 7.632856  | -0.4207  | 0.843426 | -0.4988  | 0.617918 | 0.981636 | chr7  | 1.4E+08  | 1.4E+08  | + 0 NA | non-codirnon-codir  | 25720 NM_013446  | 23608 Hs. 744883NM_013446       | ENSG00000MKRN1       | RNF61                        | makorin r protein-coding             |
| chr1-379 7.673996  | -0.41767 | 0.837608 | -0.49865 | 0.618026 | 0.981636 | chr1  | 37934070 | 37934712 | + 0 NA | intron (NMIRb SINE  | -2600 NR_158631  | 3633 Hs. 449942NM_005544        | ENSG00000INPP5B      | 5PTase                       | inositol protein-coding              |
| chr10-11 7.673996  | -0.41767 | 0.837608 | -0.49865 | 0.618026 | 0.981636 | chr10 | 1.11E+08 | 1.11E+08 | + 0 NA | intron (NAluSg7 SI  | 17672 NM_005445  | 9126 Hs. 24485 NM_005445        | ENSG00000SMC3        | BAM BMH C                    | structur $\epsilon$ protein-coding   |
| chr11-47 7.673996  | -0.41767 | 0.837608 | -0.49865 | 0.618026 | 0.981636 | chr11 | 47172681 | 47173504 | + 0 NA | intron (Nintron (N  | 3787 NM_032385   | 84364 Hs. 436204NM_032385       | ENSG00000ARFGAP2     | TRZ NBLA1                    | ADP ribos protein-coding             |
| chr11-74 7.673996  | -0.41767 | 0.837608 | -0.49865 | 0.618026 | 0.981636 | chr11 | 74246030 | 74247234 | + 0 NA | intron (Nintron (N  | -64730 NR_120555 | 1.02E+08 Hs. 569022NR_120555    | ENSG00000P4HA3-AS1-  | P4HA3                        | antncRNA                             |
| chr12-10 7.673996  | -0.41767 | 0.837608 | -0.49865 | 0.618026 | 0.981636 | chr12 | 1.05E+08 | 1.05E+08 | + 0 NA | 3' UTR (N3' UTR (N  | 21865 NM_152317  | 121053 Hs. 295562NM_152317      | ENSG00000C12orf45    | -                            | chromosonprotein-coding              |
| chr12-12 7.673996  | -0.41767 | 0.837608 | -0.49865 | 0.618026 | 0.981636 | chr12 | 1.21E+08 | 1.21E+08 | + 0 NA | intron (Nintron (N  | -19440 NM_153495 | 10645 Hs. 297342NM_006545       | ENSG00000CAMKK2      | CAMKK CAM                    | calcium/c protein-coding             |
| chr13-97 7.673996  | -0.41767 | 0.837608 | -0.49865 | 0.618026 | 0.981636 | chr13 | 97382177 | 97382922 | + 0 NA | intron (Nintron (N  | -51620 NM_021033 | 5911 Hs. 508488NM_021033        | ENSG00000RAP2A       | K-BOV KRF                    | RAP2A, m $\epsilon$ protein-coding   |
| chr16-71 7.673996  | -0.41767 | 0.837608 | -0.49865 | 0.618026 | 0.981636 | chr16 | 71848421 | 71848991 | + 0 NA | intron (Nintron (N  | 2730 NM_001137   | 342371 Hs. 743223NM_001137      | ENSG00000ATXN1L      | KEAT BOA1                    | ataxin 1 protein-coding              |
| chr17-53 7.673996  | -0.41767 | 0.837608 | -0.49865 | 0.618026 | 0.981636 | chr17 | 5380326  | 5382669  | + 0 NA | exon (NM exon (NM   | -38144 NM_00116C | 84268 Hs. 462085NM_032308       | ENSG00000RPAIN       | HRIP RIP                     | RPA interprotein-coding              |
| chr2-218 7.673996  | -0.41767 | 0.837608 | -0.49865 | 0.618026 | 0.981636 | chr2  | 2.18E+08 | 2.18E+08 | + 0 NA | TTS (NR_C TTS (NR_C | 292 NR_02950C    | 407017 NR_02950C                | ENSG00000MIR26B      | MIRN26B f                    | microRNA ncRNA                       |
| chr20-34 7.673996  | -0.41767 | 0.837608 | -0.49865 | 0.618026 | 0.981636 | chr20 | 34416498 | 34419223 | + 0 NA | intron (Nintron (N  | -48465 NR_030374 | 693229 NR_030374                | ENSG00000MIR644A     | MIR644 mi                    | microRNA ncRNA                       |
| chr22-45 7.673996  | -0.41767 | 0.837608 | -0.49865 | 0.618026 | 0.981636 | chr22 | 45183611 | 45187043 | + 0 NA | 3' UTR (N3' UTR (N  | 6285 NR_146602   | 1.05E+08 NR_146602              | LOC1053737-          | uncharactercncRNA            |                                      |
| chr3-47 7.673996   | -0.41767 | 0.837608 | -0.49865 | 0.618026 | 0.981636 | chr3  | 47708915 | 47710465 | + 0 NA | intron (NAluSx SIN  | -47996 NR_145791 | 1.1E+08 NR_145791               | SNORD146             | -                            | small nucsnoRNA                      |
| chr3-170 7.673996  | -0.41767 | 0.837608 | -0.49865 | 0.618026 | 0.981636 | chr3  | 1.7E+08  | 1.7E+08  | + 0 NA | intron (Nintron (N  | 53403 NM_024947  | 80012 Hs. 529592NM_024947       | ENSG00000PHC3        | EDR3 HPHE                    | polymucron protein-coding            |
| chr3-18 7.673996   | -0.41767 | 0.837608 | -0.49865 | 0.618026 | 0.981636 | chr3  | 1.87E+08 | 1.87E+08 | + 0 NA | intron (Nintron (N  | -40323 NR_135551 | 1.02E+08 NR_135551              | ENSG00000LOC101925-  | uncharactercncRNA            |                                      |
| chr4-800 7.673996  | -0.41767 | 0.837608 | -0.49865 | 0.618026 | 0.981636 | chr4  | 80024189 | 80025352 | + 0 NA | intron (NAluJb SIN  | 48459 NM_00128E  | 118429 Hs. 162962NM_005817      | ENSG00000ANTXR2      | CMG-2 CMC                    | ANTXR celprotein-coding              |
| chr5-568 7.673996  | -0.41767 | 0.837608 | -0.49865 | 0.618026 | 0.981636 | chr5  | 56887426 | 56888853 | + 0 NA | intron (Nintron (N  | -21121 NR_136555 | 133383 Hs. 89590 NM_153705      | ENSG00000SETD9       | C5orf35                      | SET domainprotein-coding             |
| chr5-692 7.673996  | -0.41767 | 0.837608 | -0.49865 | 0.618026 | 0.981636 | chr5  | 69272432 | 69273976 | + 0 NA | intron (Nintron (N  | 38318 NM_001795  | 1022 Hs. 184295NM_001795        | ENSG00000CDK7        | CAK CAK1 cyclin              | d $\epsilon$ protein-coding          |
| chr5-13 7.673996   | -0.41767 | 0.837608 | -0.49865 | 0.618026 | 0.981636 | chr5  | 1.32E+08 | 1.32E+08 | + 0 NA | exon (NM exon (NM   | -16642 NM_001164 | 51735 Hs. 483325NM_016344       | ENSG00000RAPGEF6     | KIAA0011B Rap                | guani protein-coding                 |
| chr5-180 7.673996  | -0.41767 | 0.837608 | -0.49865 | 0.618026 | 0.981636 | chr5  | 1.81E+08 | 1.81E+08 | + 0 NA | TTS (NM_C TTS (NM_C | 27016 NM_006133  | 830 Hs. 446122NM_006133         | ENSG00000CAPZA2      | CAPPA2 C $\beta$             | capping $\epsilon$ protein-coding    |
| chr7-116 7.673996  | -0.41767 | 0.837608 | -0.49865 | 0.618026 | 0.981636 | chr7  | 1.04E+08 | 1.04E+08 | + 0 NA | intron (Nintron (N  | -13686 NR_03033C | 693127 NR_03033C                | ENSG00000MIR548A3    | MIRN548A3 mi                 | microRNA ncRNA                       |
| chr8-104 7.673996  | -0.41767 | 0.837608 | -0.49865 | 0.618026 | 0.981636 | chr8  | 1.2E+08  | 1.2E+08  | + 0 NA | intron (NMLT1A1 LI  | 40123 NM_003184  | 6873 Hs. 122752NM_003184        | ENSG00000TAF2        | CIF150 MF                    | TATA-box protein-coding              |
| chr9-374 7.673996  | -0.41767 | 0.837608 | -0.49865 | 0.618026 | 0.981636 | chr9  | 37488741 | 37491056 | + 0 NA | intron (N2a LINE    | 3950 NM_02249C   | 64425 Hs. 591087NM_02249C       | ENSG00000POLR1E      | PAF53 PR                     | RNA polyn protein-coding             |
| chr9-108 7.673996  | -0.41767 | 0.837608 | -0.49865 | 0.618026 | 0.981636 | chr9  | 1.09E+08 | 1.09E+08 | + 0 NA | exon (NM exon (NM   | 7550 NM_00131E   | 8518 Hs. 494733NM_003644        | ENSG00000ELP1        | DYS FD F $\beta$             | elongator protein-coding             |
| chr9-124 7.673996  | -0.41767 | 0.837608 | -0.49865 | 0.618026 | 0.981636 | chr9  | 1.24E+08 | 1.24E+08 | + 0 NA | intron (Nintron (N  | -8597 NR_02740E  | 1E+08 Hs. 654983NR_02740E       | LOC100125-           | uncharactercncRNA            |                                      |
| chr9-134 7.673996  | -0.41767 | 0.837608 | -0.49865 | 0.618026 | 0.981636 | chr9  | 1.35E+08 | 1.35E+08 | + 0 NA | intron (NMLT1C LTF  | -93231 NR_138045 | 414316 Hs. 571561NR_138045      | ENSG00000COL5A1-AS   | C9orf104 COL5A1              | ar ncRNA                             |
| chr12-68 7.689712  | -0.421   | 0.844424 | -0.49856 | 0.618088 | 0.981636 | chr12 | 68692190 | 68693777 | + 0 NA | intron (NAluSx1 SI  | 6005 NM_020401   | 57122 Hs. 524574NM_020401       | ENSG00000NUP107      | NPHS1 NL                     | nucleopor protein-coding             |
| chr9-100 7.689712  | -0.421   | 0.844424 | -0.49856 | 0.618088 | 0.981636 | chr9  | 1E+08    | 1E+08    | + 0 NA | intron (Nintron (N  | 1084 NM_00119E   | 1.01E+08 Hs. 598103NM_001198812 | MSANTD3-1            | C9orf2 C9                    | MSANTD3-1 protein-coding             |
| chr1-932 7.915862  | -0.52861 | 1.060317 | -0.49854 | 0.618105 | 0.981636 | chr1  | 93237036 | 93237681 | + 0 NA | intron (N2a LINE    | 56642 NM_00130C  | 343099 Hs. 482872NM_026888      | ENSG00000CCDC18      | NY-SAR-4 coiled-c $\epsilon$ | protein-coding                       |
| chr10-49 7.915862  | -0.52861 | 1.060317 | -0.49854 | 0.618105 | 0.981636 | chr10 | 49913987 | 49914441 | + 0 NA | intron (Nintron (N  | 27813 NR_136755  | 8505 Hs. 535295NM_003631        | ENSG00000PARG        | PARG99                       | poly (ADP- $\epsilon$ protein-coding |
| chrX-270 7.915862  | -0.52861 | 1.060317 | -0.49854 | 0.618105 | 0.981636 | chrX  | 2700319  | 2700616  | + 0 NA | intron (N(ATCC)n S  | 9172 NM_002414   | 4267 Hs. 653345NM_002414        | ENSG00000CCD99       | HBA71 MIC                    | CD99 mole protein-coding             |
| chr6-83 7.915862   | -0.52861 | 1.060317 | -0.49854 | 0.618105 | 0.981636 | chr6  | 8316307  | 83181958 | + 0 NA | intron (N(AT)n Si   | 6192 NM_001195   | 5238 Hs. 661665NM_015595        | ENSG00000PGM3        | AGM1 TMD2                    | phosphog protein-coding              |
|                    |          |          |          |          |          |       |          |          |        |                     |                  |                                 |                      |                              |                                      |

|           |          |          |          |          |          |          |       |          |          |   |   |    |                   |           |        |           |           |                    |                    |                   |             |                 |                 |                |                |
|-----------|----------|----------|----------|----------|----------|----------|-------|----------|----------|---|---|----|-------------------|-----------|--------|-----------|-----------|--------------------|--------------------|-------------------|-------------|-----------------|-----------------|----------------|----------------|
| chr11-738 | 7.666138 | -0.41598 | 0.83907  | -0.49576 | 0.620061 | 0.981636 | chr11 | 73871068 | 73872942 | + | 0 | NA | TTS (NM_CTTT)     | (NM_C     | -4694  | NM_001267 | 80227     | Hs.525017NM_025155 | ENSG0000CPA1F1     | PAAF1             | RpnI        | protease        | protein-coding  |                |                |
| chr11-13C | 7.666138 | -0.41598 | 0.83907  | -0.49576 | 0.620061 | 0.981636 | chr11 | 1.31E+08 | 1.31E+08 | + | 0 | NA | intron (Nintron)  | (N        | 3044   | NM_001301 | 399979    | Hs.444024NM_014758 | ENSG0000SNX19      | CHE78             | sorting     | rprotein-coding |                 |                |                |
| chr13-48C | 7.666138 | -0.41598 | 0.83907  | -0.49576 | 0.620061 | 0.981636 | chr13 | 48373701 | 48375808 | + | 0 | NA | intron (Nintron)  | (N        | 38359  | NM_001162 | 10161     | Hs.123464NM_005767 | ENSG0000CLPAR6     | ARWH1             | HYF         | lyso            | phospho         | protein-coding |                |
| chr14-301 | 7.666138 | -0.41598 | 0.83907  | -0.49576 | 0.620061 | 0.981636 | chr14 | 30955207 | 30954685 | + | 0 | NA | intron (NLM3E3A)  | (LI       | 60796  | NR_030354 | 693209    | NR_030354          | ENSG0000MIR624     | MIRN624           | [hmicroRNA  | ncRNA           |                 |                |                |
| chr14-105 | 7.666138 | -0.41598 | 0.83907  | -0.49576 | 0.620061 | 0.981636 | chr14 | 1.02E+08 | 1.02E+08 | + | 0 | NA | intron (Nintron)  | (N        | -69692 | NM_001376 | 1778      | Hs.61408CNR_001376 | ENSG0000DYNC1H1    | CMT20             | DHC         | cyto            | intron          | protein-coding |                |
| chr15-62F | 7.666138 | -0.41598 | 0.83907  | -0.49576 | 0.620061 | 0.981636 | chr15 | 62810523 | 62810723 | + | 0 | NA | intron (Nintron)  | (N        | -13334 | NR_029709 | 406965    | NR_029709          | ENSG0000MIR190A    | MIR190            | [MmicroRNA  | ncRNA           |                 |                |                |
| chr15-651 | 7.666138 | -0.41598 | 0.83907  | -0.49576 | 0.620061 | 0.981636 | chr15 | 65106110 | 65106352 | + | 0 | NA | 5' UTR (N5' UTR)  | (N        | 128    | NM_001162 | 390595    | Hs.659255NM_001162 | ENSG0000UBAP1L     | UBAP-1L           | ubiquitin   | protein-coding  |                 |                |                |
| chr15-71F | 7.666138 | -0.41598 | 0.83907  | -0.49576 | 0.620061 | 0.981636 | chr15 | 71887546 | 71888077 | + | 0 | NA | intron (NMER34A)  | (LI       | 77257  | NM_014245 | 10002     | Hs.187354NM_014245 | ENSG0000CNR2E3     | ESCS              | [Pnr]       | nuclear         | rprotein-coding |                |                |
| chr16-29C | 7.666138 | -0.41598 | 0.83907  | -0.49576 | 0.620061 | 0.981636 | chr16 | 29918029 | 29920286 | + | 0 | NA | intron (NLMC5a)   | (LI       | 7069   | NR_110933 | 253980    | Hs.53459CNR_178863 | ENSG0000KCTD13     | BACURD1           | [Fpotassium | protein-coding  |                 |                |                |
| chr16-58F | 7.666138 | -0.41598 | 0.83907  | -0.49576 | 0.620061 | 0.981636 | chr16 | 58565713 | 58568109 | + | 0 | NA | intron (NALuSp)   | (SIN      | -6980  | NR_002298 | 523635    | Hs.67751ENR_002298 | ENSG0000SNORA50A   | ACA50             | [Snc        | small           | nucsnRNA        |                |                |
| chr17-82F | 7.666138 | -0.41598 | 0.83907  | -0.49576 | 0.620061 | 0.981636 | chr17 | 82594895 | 82595768 | + | 0 | NA | intron (NALuJo)   | (SIN      | 53113  | NM_019613 | 56270     | Hs.132161NM_019613 | ENSG0000WDR45B     | NEDSBAS           | [WWD        | repeat          | protein-coding  |                |                |
| chr18-21F | 7.666138 | -0.41598 | 0.83907  | -0.49576 | 0.620061 | 0.981636 | chr18 | 21581114 | 21581328 | + | 0 | NA | intron (NALuY)    | (SINE     | 19483  | NM_052911 | 114799    | Hs.464733NM_052911 | ENSG0000ESCO1      | A930014           | [I]establis | protein-coding  |                 |                |                |
| chr2-371C | 7.666138 | -0.41598 | 0.83907  | -0.49576 | 0.620061 | 0.981636 | chr2  | 37101030 | 37103438 | + | 0 | NA | 3' UTR (N3' UTR)  | (N        | 17783  | NM_001278 | 253635    | Hs.59525CNR_174931 | ENSG0000GPATCH11   | CDC75             | [CEG        | patch           | rprotein-coding |                |                |
| chr2-695F | 7.666138 | -0.41598 | 0.83907  | -0.49576 | 0.620061 | 0.981636 | chr2  | 69502485 | 69504084 | + | 0 | NA | intron (Nintron)  | (N        | 16707  | NR_00370E | 1E+08     | Hs.693447NR_00370E | ENSG0000SNORA36C   | -                 | small       | nucsnRNA        |                 |                |                |
| chr2-860F | 7.666138 | -0.41598 | 0.83907  | -0.49576 | 0.620061 | 0.981636 | chr2  | 86069424 | 86071490 | + | 0 | NA | intron (Nintron)  | (N        | 35429  | NM_01542E | 25885     | Hs.53181ENM_01542E | ENSG0000POLR1A     | A190              | [AFDCRA     | polyn           | protein-coding  |                |                |
| chr2-1087 | 7.666138 | -0.41598 | 0.83907  | -0.49576 | 0.620061 | 0.981636 | chr2  | 1.09E+08 | 1.09E+08 | + | 0 | NA | intron (NALuJo)   | (SIN      | 10357  | NM_006267 | 5903      | Hs.199561NM_006267 | ENSG0000CRANBP2    | ADANE             | [ANF        | RAN             | bindi           | protein-coding |                |
| chr2-216C | 7.666138 | -0.41598 | 0.83907  | -0.49576 | 0.620061 | 0.981636 | chr2  | 2.1E+08  | 2.1E+08  | + | 0 | NA | 3' UTR (N3' UTR)  | (N        | -9678  | NR_110291 | 1.02E+08  | Hs.63555ENR_110291 | LOC10192E-         | -                 | uncharact   | ncRNA           |                 |                |                |
| chr2-210C | 7.666138 | -0.41598 | 0.83907  | -0.49576 | 0.620061 | 0.981636 | chr2  | 2.16E+08 | 2.16E+08 | + | 0 | NA | intron (NMIR3)    | (SINE     | 2484   | NM_021141 | 7520      | Hs.388733NM_021141 | ENSG0000XRC5C      | KARP-1            | [KX         | X-ray           | re              | protein-coding |                |
| chr2-216C | 7.666138 | -0.41598 | 0.83907  | -0.49576 | 0.620061 | 0.981636 | chr2  | 2.16E+08 | 2.16E+08 | + | 0 | NA | intron (Nintron)  | (N        | 20075  | NM_021141 | 7520      | Hs.388733NM_021141 | ENSG0000XRC5C      | KARP-1            | [KX         | X-ray           | re              | protein-coding |                |
| chr20-35F | 7.666138 | -0.41598 | 0.83907  | -0.49576 | 0.620061 | 0.981636 | chr20 | 35543426 | 35543807 | + | 0 | NA | intron (Nintron)  | (N        | 1538   | NM_01596E | 51614     | Hs.47255ENM_01596E | ENSG0000CERC3      | C2orf47           | [E          | RGIC            | anc             | protein-coding |                |
| chr22-197 | 7.666138 | -0.41598 | 0.83907  | -0.49576 | 0.620061 | 0.981636 | chr22 | 19389387 | 19390049 | + | 0 | NA | intron (Nintron)  | (N        | 42015  | NM_00332E | 7290      | Hs.47420ENM_00332E | ENSG0000HIRA       | DGCR1             | [TUF        | histone         | rprotein-coding |                |                |
| chr4-2454 | 7.666138 | -0.41598 | 0.83907  | -0.49576 | 0.620061 | 0.981636 | chr4  | 24548219 | 24549932 | + | 0 | NA | intron (Nintron)  | (N        | -28785 | NR_03029E | 693158    | NR_03029E          | ENSG0000MIR573     | MIRN573           | [hmicroRNA  | ncRNA           |                 |                |                |
| chr4-243C | 7.666138 | -0.41598 | 0.83907  | -0.49576 | 0.620061 | 0.981636 | chr4  | 26392492 | 26394495 | + | 0 | NA | intron (NALuS)    | (SIN      | 72265  | NM_00136E | 3516      | Hs.47939ENM_00534E | ENSG0000CRBPJ      | AOS3              | [CBF1       | recomb          | protein-coding  |                |                |
| chr4-562F | 7.666138 | -0.41598 | 0.83907  | -0.49576 | 0.620061 | 0.981636 | chr4  | 54238843 | 54244119 | + | 0 | NA | intron (NALuSq2)  | (SI       | 7671   | NM_001347 | 5156      | Hs.74615           | NM_00620E          | ENSG0000PDGFR     | CD140A      | [PT             | platelet        | protein-coding |                |
| chr4-108F | 7.666138 | -0.41598 | 0.83907  | -0.49576 | 0.620061 | 0.981636 | chr4  | 1.09E+08 | 1.09E+08 | + | 0 | NA | TTS (NM_CTTT)     | (NM_C     | 10039  | NM_00131E | 6164      | Hs.438227NM_00099E | ENSG0000RPL34      | L34               | ribosomal   | protein-coding  |                 |                |                |
| chr5-3237 | 7.666138 | -0.41598 | 0.83907  | -0.49576 | 0.620061 | 0.981636 | chr5  | 32375485 | 32373458 | + | 0 | NA | intron (NALuSx4)  | (SI       | 18004  | NR_03030E | 693164    | NR_03030E          | ENSG0000MIR579     | MIRN579           | [hmicroRNA  | ncRNA           |                 |                |                |
| chr7-436F | 7.666138 | -0.41598 | 0.83907  | -0.49576 | 0.620061 | 0.981636 | chr7  | 43632447 | 43633116 | + | 0 | NA | non-cod           | non-cod   | 49733  | NR_00476E | 9263      | Hs.70948ENM_00476E | ENSG0000STK17A     | DRAK1             | serine/t    | protein-coding  |                 |                |                |
| chr8-179F | 7.666138 | -0.41598 | 0.83907  | -0.49576 | 0.620061 | 0.981636 | chr8  | 17969827 | 17970532 | + | 0 | NA | intron (Nintron)  | (N        | 47191  | NM_00135E | 5108      | Hs.49114ENM_00619E | ENSG0000PCMI       | PTCA              | [RET]       | pericent        | protein-coding  |                |                |
| chr8-9914 | 7.666138 | -0.41598 | 0.83907  | -0.49576 | 0.620061 | 0.981636 | chr8  | 99148104 | 99149540 | + | 0 | NA | intron (NLTR75)   | (LTF      | 135556 | NM_01789E | 157680    | Hs.19154CNR_01524E | ENSG0000VPS13B     | CHS1              | [COH1       | vacuolar        | protein-coding  |                |                |
| chr9-9801 | 7.666138 | -0.41598 | 0.83907  | -0.49576 | 0.620061 | 0.981636 | chr9  | 98011090 | 98017402 | + | 0 | NA | intron (NALuY)    | (SINE     | 39095  | NM_006401 | 10541     | Hs.730654NM_006401 | ENSG0000ANP32B     | APRIL             | [PH         | acidic          | rprotein-coding |                |                |
| chr16-70F | 8.477675 | 0.398264 | 0.803334 | 0.495764 | 0.620061 | 0.981636 | chr16 | 70370440 | 70371078 | + | 0 | NA | intron (NALuSp)   | (SIN      | 23856  | NM_01833E | 55308     | Hs.656037NM_01833E | ENSG0000DDX19A     | DDX19             | [DDX        | DEAD            | box             | protein-coding |                |
| chr2-231C | 8.477675 | 0.398264 | 0.803334 | 0.495764 | 0.620061 | 0.981636 | chr2  | 2.31E+08 | 2.31E+08 | + | 0 | NA | intron (Nintron)  | (N        | 81472  | NM_00135E | 80210     | Hs.162411NM_02513E | ENSG0000ARMC9      | ARM               | [JBT52      | armadil         | l1c             | protein-coding |                |
| chr5-134F | 8.477675 | 0.398264 | 0.803334 | 0.495764 | 0.620061 | 0.981636 | chr5  | 1.35E+08 | 1.35E+08 | + | 0 | NA | intron (Nintron)  | (N        | 36143  | NM_02198E | 10802     | Hs.59554CNR_02198E | ENSG0000SEC24A     | -                 | SEC24       | hom             | protein-coding  |                |                |
| chr9-9821 | 7.924232 | 0.417499 | 0.842151 | 0.495754 | 0.620068 | 0.981636 | chr9  | 98217139 | 98218123 | + | 0 | NA | intron (Nintron)  | (N        | -4080  | NM_001267 | 55357     | Hs.37101ENM_01842E | ENSG0000TBC1D2     | PARIS-1           | [TBC1       | dom             | protein-coding  |                |                |
| chr6-436F | 8.469818 | 0.40016  | 0.807201 | 0.495738 | 0.620079 | 0.981636 | chr6  | 43604711 | 43606014 | + | 0 | NA | intron (Nintron)  | (N        | 21991  | NM_00128E | 54676     | Hs.48544ENM_01909E | ENSG0000GTPBP2     | JABELS            | [GTP        | bidi            | protein-coding  |                |                |
| chr1-164F | 7.425794 | 0.424472 | 0.856255 | 0.495731 | 0.620084 | 0.981636 | chr1  | 16485133 | 16487264 | + | 0 | NA | intron (NALuSx)   | (SIN      | 6503   | NR_02338E | 114819    | Hs.597881NR_02338E | ENSG0000CROCCP3    | CROCC2            | [L          | CROCC           | pseudo          |                |                |
| chr1-2251 | 7.425794 | 0.424472 | 0.856255 | 0.495731 | 0.620084 | 0.981636 | chr1  | 22519390 | 22520503 | + | 0 | NA | intron (Nintron)  | (N        | -43543 | NM_00100E | 2046      | Hs.28361ENM_02052E | ENSG0000CEPHA8     | EEL               | [EK3        | [E              | EPH             | re             | protein-coding |
| chr1-1807 | 7.425794 | 0.424472 | 0.856255 | 0.495731 | 0.620084 | 0.981636 | chr1  | 1.81E+08 | 1.81E+08 | + | 0 | NA | Intergeni         | THEIA-int | -      | -5316     | NR_145481 | 1.03E+08           | Hs.66531ENR_145481 | ENSG0000KIAA1614- | -           | KIAA1614        | ncRNA           |                |                |
| chr1-2117 | 7.425794 | 0.424472 | 0.856255 | 0.495731 | 0.620084 | 0.981636 | chr1  | 2.12E+08 | 2.12E+08 | + | 0 | NA | 3' UTR (N3' UTR)  | (N        | 72815  | NR_148994 | 91548     | Hs.36783ENR_148994 | LOC91548           | -                 | uncharact   | ncRNA           |                 |                |                |
| chr1-228F | 7.425794 | 0.424472 | 0.856255 | 0.495731 | 0.620084 | 0.981636 | chr1  | 2.28E+08 | 2.28E+08 | + | 0 | NA | TTS (NR_TTS)      | (NR_T     | 949    | NR_10680C | 1.02E+08  | NR_10680C          | ENSG0000MIR6742    | hsa-mir-6         | microRNA    | ncRNA           |                 |                |                |
| chr10-977 | 7.425794 | 0.424472 | 0.856255 | 0.495731 | 0.620084 | 0.981636 | chr10 | 97753289 | 97755899 | + | 0 | NA | intron (NALuJb)   | (SIN      | 15962  | NM_00100E | 118813    | Hs.74407ENM_14458E | ENSG0000ZFVY27     | PROTRUD1          | zinc        | finger          | protein-coding  |                |                |
| chr11-63F | 7.425794 | 0.424472 | 0.856255 | 0.495731 | 0.620084 | 0.981636 | chr11 | 63952952 | 63956662 | + | 0 | NA | 3' UTR (N3' UTR)  | (N        | 15476  | NM_00130C | 79829     | Hs.52375ENM_02477E | ENSG0000NAA40      | NAT11             | [Nat        | (alpha)         | protein-coding  |                |                |
| chr11-12C | 7.425794 | 0.424472 | 0.856255 | 0.495731 | 0.620084 | 0.981636 | chr11 | 1.22E+08 | 1.22E+08 | + | 0 | NA | intron (NLIMA2)   | (LIN      | 47472  | NR_029671 | 406911    | NR_029671          | ENSG0000MIR125B1   | MIRN125B1         | [hmicroRNA  | ncRNA           |                 |                |                |
| chr12-55F | 7.425794 | 0.424472 | 0.856255 | 0.495731 | 0.620084 | 0.981636 | chr12 | 5580704  | 55809555 | + | 0 | NA | intron (NALuJb)   | (SIN      | 8595   | NM_03308E | 84324     | Hs.50567ENM_03308E | ENSG0000SARNP      | CIP29             | [HCC        | SAP             | doma            | protein-coding |                |
| chr12-10F | 7.425794 | 0.424472 | 0.856255 | 0.495731 | 0.620084 | 0.981636 | chr12 | 1.09E+08 | 1.09E+08 | + | 0 | NA | intron (N(TATG)n) | (S        | 8160   | NM_00114E | 121642    | Hs.37445ENM_00100E | ENSG0000ALKBH2     | ABH2              | alkB        | hom             | protein-coding  |                |                |
| chr16-22C | 7.425794 | 0.424472 | 0.856255 | 0.495731 | 0.620084 | 0.981636 | chr16 | 2231391  | 2234400  | + | 0 | NA | exon (NM exon)    | (NM       | -3549  | NM_001374 | 1775      | Hs.10350ENM_001374 | ENSG0000DNASE1L2   | DNAS1L2           | deoxyrib    | protein-coding  |                 |                |                |
| chr16-16C | 7.425794 | 0.424472 | 0.856255 | 0.495731 | 0.620084 | 0.981636 | chr16 | 16236777 | 16239603 | + | 0 | NA | intron (NLM3E3G)  | (LI       | 5595   | NM_173614 | 283820    | Hs.460141NM_173614 | ENSG0000NOMO2      | Nomo              | [PM5        | NODAL           | mo              | protein-coding |                |
| chr16-19F | 7.425794 | 0.424472 | 0.856255 | 0.495731 | 0.620084 | 0.981636 | chr16 | 19651935 |          |   |   |    |                   |           |        |           |           |                    |                    |                   |             |                 |                 |                |                |



|                    |          |          |          |          |          |       |          |          |   |      |                       |                  |                            |                    |                                          |                                        |
|--------------------|----------|----------|----------|----------|----------|-------|----------|----------|---|------|-----------------------|------------------|----------------------------|--------------------|------------------------------------------|----------------------------------------|
| chr13-106 7.922382 | 0.406278 | 0.822914 | 0.493706 | 0.621514 | 0.981636 | chr13 | 1.06E+08 | 1.06E+08 | + | 0 NA | 3' UTR (N3' UTR (N    | 42210 NM_004093  | 1948 Hs. 149232NM_004093   | ENSG000002EFNB2    | EPLG5 HTF ephrin Bz protein-coding       |                                        |
| chr14-67 7.922382  | 0.406278 | 0.822914 | 0.493706 | 0.621514 | 0.981636 | chr14 | 67340764 | 67341850 | + | 0 NA | intron (N SVA_A Ret   | 18497 NM_015994  | 51382 Hs. 272632NM_015994  | ENSG000002ATP6V1D  | ATP6M VAT ATPase H+ protein-coding       |                                        |
| chr15-427 7.922382 | 0.406278 | 0.822914 | 0.493706 | 0.621514 | 0.981636 | chr15 | 42733368 | 42735095 | + | 0 NA | exon (NM_exon (NM     | 2897 NM_138477   | 146059 Hs. 599232NM_138477 | ENSG000002CDAN1    | CDAN1 CDAN1 codanin I protein-coding     |                                        |
| chr15-567 7.922382 | 0.406278 | 0.822914 | 0.493706 | 0.621514 | 0.981636 | chr15 | 56703201 | 56704879 | + | 0 NA | intron (N intron (N   | 30046 NM_001288  | 54816 Hs. 511477NM_001288  | ENSG000002ZNF280D  | SUHW4 ZNF zinc finger protein-coding     |                                        |
| chr15-84 7.922382  | 0.406278 | 0.822914 | 0.493706 | 0.621514 | 0.981636 | chr15 | 84484950 | 84486464 | + | 0 NA | intron (N MamGypl TF  | -16868 NM_003378 | 440299 Hs. 454641NR_003378 | DNM1P41            | DNM1DN1-dynamin I pseudo                 |                                        |
| chr16-146 7.922382 | 0.406278 | 0.822914 | 0.493706 | 0.621514 | 0.981636 | chr16 | 14603803 | 14610306 | + | 0 NA | intron (N AluY SINE   | 23206 NM_002582  | 5073 Hs. 253197NM_002582   | ENSG000002PARN     | DAN DKCB poly (A)-s protein-coding       |                                        |
| chr17-22 7.922382  | 0.406278 | 0.822914 | 0.493706 | 0.621514 | 0.981636 | chr17 | 2286569  | 2286971  | + | 0 NA | intron (N AluSx SIN   | 15665 NM_017575  | 23293 Hs. 448342NM_017575  | ENSG000002SMG6     | C17orf31 SMG6 nons protein-coding        |                                        |
| chr17-79 7.922382  | 0.406278 | 0.822914 | 0.493706 | 0.621514 | 0.981636 | chr17 | 7901628  | 7904922  | + | 0 NA | exon (NM_exon (NM     | -2848 NR_003000  | 677763                     | NR_003000          | ENSG000002SCARNA21                       | ACA68 SCA small Ca <sup>2+</sup> ncRNA |
| chr17-312 7.922382 | 0.406278 | 0.822914 | 0.493706 | 0.621514 | 0.981636 | chr17 | 31260704 | 31261836 | + | 0 NA | intron (N intron (N   | 35969 NM_002544  | 4974 Hs. 113874NM_002544   | ENSG000002CMG      | OMGP oligodendrocyte protein-coding      |                                        |
| chr17-146 7.922382 | 0.406278 | 0.822914 | 0.493706 | 0.621514 | 0.981636 | chr17 | 46047652 | 46048138 | + | 0 NA | intron (N intron (N   | 48645 NM_001007  | 246744 Hs. 661831NM_001007 | ENSG000002STH      | MAPTIT saitohin protein-coding           |                                        |
| chr19-12 7.922382  | 0.406278 | 0.822914 | 0.493706 | 0.621514 | 0.981636 | chr19 | 12660822 | 12665151 | + | 0 NA | intron (N AluSz SIN   | 3756 NM_000528   | 4125 Hs. 356765NM_000528   | ENSG000002MAN2B1   | LANMAN MAN mannose protein-coding        |                                        |
| chr19-38 7.922382  | 0.406278 | 0.822914 | 0.493706 | 0.621514 | 0.981636 | chr19 | 38099808 | 38102283 | + | 0 NA | intron (N intron (N   | -62051 NR_145800 | 1.1E+08                    | NR_145800          | SNORD152                                 | small nucleolar RNA                    |
| chr19-53 7.922382  | 0.406278 | 0.822914 | 0.493706 | 0.621514 | 0.981636 | chr19 | 53080419 | 53087582 | + | 0 NA | intron (N LTR36 LTF   | 3037 NM_001322   | 90338 Hs. 655967NM_001322  | ENSG000002ZNF160   | F11 Hkr1 zinc finger protein-coding      |                                        |
| chr2-159 7.922382  | 0.406278 | 0.822914 | 0.493706 | 0.621514 | 0.981636 | chr2  | 1.59E+08 | 1.59E+08 | + | 0 NA | intron (N LIMB2 LIN   | 35501 NR_106949  | 1.02E+08                   | NR_106949          | ENSG000002MIR6888                        | hsa-mir-6888 microRNA ncRNA            |
| chr2-2304 7.922382 | 0.406278 | 0.822914 | 0.493706 | 0.621514 | 0.981636 | chr2  | 2.3E+08  | 2.3E+08  | + | 0 NA | intron (N intron (N   | 50156 NM_001200  | 6672 Hs. 369055NM_001200   | ENSG000002SP100    | lysp100b SP100 nucleotide protein-coding |                                        |
| chr3-486 7.922382  | 0.406278 | 0.822914 | 0.493706 | 0.621514 | 0.981636 | chr3  | 48624801 | 48628579 | + | 0 NA | intron (N intron (N   | -4921 NM_001008  | 440955 Hs. 631922NM_001008 | ENSG000002TMEM89   | transmembrane protein-coding             |                                        |
| chr3-489 7.922382  | 0.406278 | 0.822914 | 0.493706 | 0.621514 | 0.981636 | chr3  | 48983062 | 48983348 | + | 0 NA | non-coding non-coding | -6503 NM_177932  | 54681 Hs. 654944NM_177932  | ENSG000002P4HTM    | EGLN4 HIF prolyl 4-protein-coding        |                                        |
| chr3-197 7.922382  | 0.406278 | 0.822914 | 0.493706 | 0.621514 | 0.981636 | chr3  | 1.98E+08 | 1.98E+08 | + | 0 NA | intron (N intron (N   | -18461 NR_030627 | 1E+08                      | NR_030627          | ENSG000002GN1922                         | MIRN922 microRNA ncRNA                 |
| chr5-4074 7.922382 | 0.406278 | 0.822914 | 0.493706 | 0.621514 | 0.981636 | chr5  | 40740691 | 40742903 | + | 0 NA | intron (N LIME1 LIN   | 14615 NM_012382  | 23548 Hs. 348915NM_012382  | ENSG000002TTC33    | OSRF tetrahydropteridine protein-coding  |                                        |
| chr6-995 7.922382  | 0.406278 | 0.822914 | 0.493706 | 0.621514 | 0.981636 | chr6  | 99554686 | 99555973 | + | 0 NA | intron (N intron (N   | 13331 NM_005190  | 892 Hs. 430645NM_005190    | ENSG000002CCNC     | CycC SRB1 cyclin C protein-coding        |                                        |
| chr7-801 7.922382  | 0.406278 | 0.822914 | 0.493706 | 0.621514 | 0.981636 | chr7  | 80199279 | 80206887 | + | 0 NA | intron (N intron (N   | 67299 NM_001256  | 2770 Hs. 134587NM_001256   | ENSG000002GN11     | Gi G protein-coding                      |                                        |
| chr7-1314 7.922382 | 0.406278 | 0.822914 | 0.493706 | 0.621514 | 0.981636 | chr7  | 1.31E+08 | 1.31E+08 | + | 0 NA | exon (NM_exon (NM     | 109941 NM_001321 | 4289 Hs. 44693 NM_013255   | ENSG000002MKLN1    | TWA2 muskelin protein-coding             |                                        |
| chrX-154 7.922382  | 0.406278 | 0.822914 | 0.493706 | 0.621514 | 0.981636 | chrX  | 1.54E+08 | 1.54E+08 | + | 0 NA | intron (N intron (N   | 24403 NM_001118  | 2316 Hs. 195464NM_001118   | ENSG000002FLNA     | ABP-280 filamin A protein-coding         |                                        |
| chr2-9517 12.14282 | 0.336516 | 0.681929 | 0.493477 | 0.621675 | 0.981636 | chr2  | 95179071 | 95182778 | + | 0 NA | intron (N intron (N   | 15115 NM_001291  | 7549 Hs. 590910NM_001291   | ENSG000002ZNF2     | A1-5 ZNF zinc finger protein-coding      |                                        |
| chr4-988 8.110029  | -0.40484 | 0.820792 | -0.49323 | 0.621847 | 0.981636 | chr4  | 98898181 | 98898380 | + | 0 NA | intron (N Charliel    | 30853 NM_001133  | 1977 Hs. 13211 NM_001968   | ENSG000002EIF4E    | AUTS19 CE eukaryotic protein-coding      |                                        |
| chr10-27 7.384654  | 0.423082 | 0.857797 | 0.493219 | 0.621858 | 0.981636 | chr10 | 27206428 | 27207237 | + | 0 NA | intron (N intron (N   | 33654 NM_001301  | 91452 Hs. 530597NM_145698  | ENSG000002ACBD5    | acyl-CoA protein-coding                  |                                        |
| chr19-45 7.384654  | 0.423082 | 0.857797 | 0.493219 | 0.621858 | 0.981636 | chr19 | 4511621  | 45127133 | + | 0 NA | exon (NM_exon (NM     | 3101 NM_001322   | 23403 Hs. 128702NM_001088  | ENSG000002FBX046   | 20D7-FC4 F-box protein-coding            |                                        |
| chr20-35 7.384654  | 0.423082 | 0.857797 | 0.493219 | 0.621858 | 0.981636 | chr20 | 35503473 | 35504182 | + | 0 NA | exon (NM_exon (NM     | 25825 NR_026933  | 140873 Hs. 158688NM_080828 | ENSG000002C20orf17 | dJ47704.4 chromosome protein-coding      |                                        |
| chr3-197 7.384654  | 0.423082 | 0.857797 | 0.493219 | 0.621858 | 0.981636 | chr3  | 1.98E+08 | 1.98E+08 | + | 0 NA | intron (N intron (N   | 31540 NR_026788  | 89782 Hs. 518542NM_033025  | ENSG000002LMLN     | GP63 INV leishmanin protein-coding       |                                        |
| chr5-728 7.384654  | 0.423082 | 0.857797 | 0.493219 | 0.621858 | 0.981636 | chr5  | 72825516 | 72826115 | + | 0 NA | intron (N MLT1A0 LI   | 9154 NM_001364   | 3842 Hs. 482497NM_002270   | ENSG000002TNP01    | IP02 KPN transport protein-coding        |                                        |
| chr5-112 7.384654  | 0.423082 | 0.857797 | 0.493219 | 0.621858 | 0.981636 | chr5  | 1.13E+08 | 1.13E+08 | + | 0 NA | intron (N intron (N   | -32747 NM_001204 | 6728 Hs. 637001NM_003135   | ENSG000002SRP19    | signal receptor protein-coding           |                                        |
| chr7-770 7.384654  | 0.423082 | 0.857797 | 0.493219 | 0.621858 | 0.981636 | chr7  | 77002586 | 77003103 | + | 0 NA | intron (N intron (N   | 22022 NR_023388  | 441263 Hs. 675888NR_023388 | ENSG000002DTX2P1   | UFPM2S11 DTX2P1-UF pseudo                |                                        |
| chr1-8671 7.906666 | 0.41016  | 0.831612 | 0.493211 | 0.621863 | 0.981636 | chr1  | 86719571 | 86721149 | + | 0 NA | intron (N intron (N   | 15784 NR_016005  | 51100 Hs. 136305NM_016005  | ENSG000002SH3GLB1  | Bif-1 CGI SH3 domain protein-coding      |                                        |
| chr15-63 7.906666  | 0.41016  | 0.831612 | 0.493211 | 0.621863 | 0.981636 | chr15 | 63591434 | 63591809 | + | 0 NA | non-coding non-coding | -5766 NM_001367  | 283807 Hs. 631165NM_203375 | ENSG000002FBXL22   | Fb122 F-box anc protein-coding           |                                        |
| chr18-45 7.906666  | 0.41016  | 0.831612 | 0.493211 | 0.621863 | 0.981636 | chr18 | 45932997 | 45934096 | + | 0 NA | intron (N AluSz SIN   | 33783 NM_020964  | 57724 Hs. 514845NM_020964  | ENSG000002EPG5     | HEWE1 KIF ectopic F protein-coding       |                                        |
| chr1-214 9.968823  | -0.387   | 0.784917 | -0.49304 | 0.621985 | 0.981636 | chr1  | 2.14E+08 | 2.14E+08 | + | 0 NA | intron (N intron (N   | 78878 NM_020197  | 56950 Hs. 66170 NM_020197  | ENSG000002SMYD2    | HSKM-B KMS ET and B protein-coding       |                                        |
| chr12-49 7.386504  | 0.435021 | 0.882699 | 0.492831 | 0.622132 | 0.981636 | chr12 | 49654192 | 49654416 | + | 0 NA | intron (N intron (N   | 23760 NM_001363  | 25766 Hs. 706827NM_012272  | ENSG000002PRPF40B  | HYPIC pre-mRNA protein-coding            |                                        |
| chr2-107 7.376797  | 0.425127 | 0.862703 | 0.492785 | 0.622165 | 0.981636 | chr2  | 10794970 | 10795206 | + | 0 NA | intron (N intron (N   | 17697 NM_005742  | 10130 Hs. 212102NM_005742  | ENSG000002PDIA6    | PERP5 P5 protein c protein-coding        |                                        |
| chr6-169 7.376797  | 0.425127 | 0.862703 | 0.492785 | 0.622165 | 0.981636 | chr6  | 1.7E+08  | 1.7E+08  | + | 0 NA | intron (N intron (N   | 17427 NM_001278  | 55780 Hs. 47546 NM_018341  | ENSG000002ERMARD   | ER6770 FER membrane protein-coding       |                                        |
| chr6-3667 13.17714 | 0.322405 | 0.654253 | 0.492783 | 0.622166 | 0.981636 | chr6  | 36678787 | 36687689 | + | 0 NA | intron (N MIR SINE    | 4524 NM_000388   | 1026 Hs. 370771NM_000388   | ENSG000002CDKN1A   | CAP20 CDK cyclin d protein-coding        |                                        |
| chr19-44 10.82887  | -0.35222 | 0.715475 | -0.49229 | 0.622515 | 0.981636 | chr19 | 48614913 | 48618205 | + | 0 NA | intron (N intron (N   | 2619 NM_001270   | 6141 Hs. 515517NM_000975   | ENSG000002RPL18    | DBA18 L18 ribosomal protein-coding       |                                        |
| chr2-1121 10.82887 | -0.35222 | 0.715475 | -0.49229 | 0.622515 | 0.981636 | chr2  | 11213738 | 11216066 | + | 0 NA | exon (NM_exon (NM     | 59435 NM_001282  | 130814 Hs. 274415NM_152391 | ENSG000002SLC66A3  | C2orf22 Fsolute c protein-coding         |                                        |
| chr1-3284 5.418458 | -0.4853  | 0.985853 | -0.49227 | 0.622532 | 0.981636 | chr1  | 32843491 | 32844318 | + | 0 NA | intron (N intron (N   | 18591 NR_135100  | 64766 Hs. 440888NM_022755  | ENSG000002S100BPB  | S100BPBR S100P bir protein-coding        |                                        |
| chr10-12 5.418458  | -0.4853  | 0.985853 | -0.49227 | 0.622532 | 0.981636 | chr10 | 1.27E+08 | 1.27E+08 | + | 0 NA | intron (N intron (N   | 88816 NM_001291  | 1793 Hs. 159195NM_001388   | ENSG000002DOCK1    | DOCK180 dedicator protein-coding         |                                        |
| chr10-131 5.418458 | -0.4853  | 0.985853 | -0.49227 | 0.622532 | 0.981636 | chr10 | 1.32E+08 | 1.32E+08 | + | 0 NA | intron (N intron (N   | 40088 NM_001291  | 55844 Hs. 380372NM_018461  | ENSG000002PPP2R2D  | B55D B55c protein c protein-coding       |                                        |
| chr11-34 5.418458  | -0.4853  | 0.985853 | -0.49227 | 0.622532 | 0.981636 | chr11 | 34959388 | 34960642 | + | 0 NA | intron (N LIMB3 LIN   | 18178 NR_039830  | 1E+08                      | NR_039830          | ENSG000002MIR1343                        | microRNA ncRNA                         |
| chr11-481 5.418458 | -0.4853  | 0.985853 | -0.49227 | 0.622532 | 0.981636 | chr11 | 48155752 | 48158469 | + | 0 NA | intron (N AluS5 SI    | -59700 NM_001005 | 119765 Hs. 553566NM_001005 | ENSG000002COR4B1   | OR11-106 olfactory protein-coding        |                                        |
| chr12-52 5.418458  | -0.4853  | 0.985853 | -0.49227 | 0.622532 | 0.981636 | chr12 | 52950556 | 52951482 | + | 0 NA | intron (N intron (N   | -1159 NM_001256  | 3856 Hs. 533782NM_002275   | ENSG000002KRT8     | CARD2 CK-keratin 8 protein-coding        |                                        |
| chr12-12 5.418458  | -0.4853  | 0.985853 | -0.49227 | 0.622532 | 0.981636 | chr12 | 1.21E+08 | 1.21E+08 | + | 0 NA | TTS (NR_C TTS (NR_C   | 755 NR_039849    | 1.01E+08                   | NR_039849          | ENSG000002MIR4700                        | miR-4700 microRNA ncRNA                |
| chr13-114 5.418458 | -0.4853  | 0.985853 | -0.49227 | 0.622532 | 0.981636 | chr13 | 1.14E+08 | 1.14E+08 | + | 0 NA | intron (N intron (N   | 1436 NM_001322   | 22821 Hs. 593075NM_007368  | ENSG000002RAS3A    | GAP1IP4 BFRAS p21 f protein-coding       |                                        |
| chr15-73 5.418458  | -0.4853  | 0.985853 | -0.49227 | 0.       |          |       |          |          |   |      |                       |                  |                            |                    |                                          |                                        |

|                                                                 |       |          |          |   |   |    |                      |        |           |          |           |                      |                                            |                                       |
|-----------------------------------------------------------------|-------|----------|----------|---|---|----|----------------------|--------|-----------|----------|-----------|----------------------|--------------------------------------------|---------------------------------------|
| chr19-131.7.392512.0.420981.0.857924.0.490697.0.623641.0.981636 | chr19 | 13135320 | 13135909 | + | 0 | NA | exon (NM exon (NM    | 14761  | NM_001271 | 8677     | Hs.43812  | NM_003765            | ENSG000003STX10                            | SYN10 hsysyntaxin protein-coding      |
| chr2-1277.7.392512.0.420981.0.857924.0.490697.0.623641.0.981636 | chr2  | 1.28E+08 | 1.28E+08 | + | 0 | NA | exon (NM exon (NM    | 8071   | NM_03274C | 84826    | Hs.345844 | NM_03274C            | ENSG000003SFT2D3                           | - SFT2 dom protein-coding             |
| chr5-1764.7.392512.0.420981.0.857924.0.490697.0.623641.0.981636 | chr5  | 1.76E+08 | 1.76E+08 | + | 0 | NA | intron (N intron (N  | 37544  | NM_014613 | 23197    | Hs.484242 | NM_014613            | ENSG000003CAF2                             | ETEA UBX1 Fas assoc protein-coding    |
| chr1-3265.7.196823.0.43504.0.886814.0.49057.0.623734.0.981636   | chr1  | 32652700 | 32653014 | + | 0 | NA | intron (N intron (N  | 1499   | NM_001133 | 529      | Hs.16003  | NM_00561C            | ENSG000003RBBP4                            | NURF55 RE RB bindir protein-coding    |
| chr1-2146.7.963522.0.407571.0.83107.0.490418.0.623838.0.981636  | chr1  | 21480590 | 21482892 | + | 0 | NA | non-codir-non-codir  | -2743  | NM_00136E | 249      | Hs.75431  | NM_00047E            | ENSG000003ALPL                             | AP-TNAP alkaline protein-coding       |
| chr1-1165.7.963522.0.407571.0.83107.0.490418.0.623838.0.981636  | chr1  | 1.16E+08 | 1.16E+08 | + | 0 | NA | intron (N intron (N  | 1989   | NM_00116C | 476      | Hs.37188E | NM_000701            | ENSG000003ATP1A1                           | CMT2DD HCATPase N protein-coding      |
| chr10-625.7.963522.0.407571.0.83107.0.490418.0.623838.0.981636  | chr10 | 6230133  | 6230260  | + | 0 | NA | intron (N intron (N  | 28165  | NM_00456E | 5209     | Hs.195471 | NM_00456E            | ENSG000003PFKFB3                           | IPPK2 PFK6 phospho protein-coding     |
| chr12-715.7.963522.0.407571.0.83107.0.490418.0.623838.0.981636  | chr12 | 7199345  | 7203442  | + | 0 | NA | intron (N (AT)n Sin  | 11030  | NM_00031E | 5830     | Hs.567327 | NM_00031E            | ENSG000003PEX5                             | PBD2A PBE peroxisome protein-coding   |
| chr12-928.7.963522.0.407571.0.83107.0.490418.0.623838.0.981636  | chr12 | 92836931 | 92837443 | + | 0 | NA | intron (N MIR SINE   | 92108  | NM_00356E | 8411     | Hs.567367 | NM_00356E            | ENSG000003CEEA1                            | MST105 MS early enc protein-coding    |
| chr19-326.7.963522.0.407571.0.83107.0.490418.0.623838.0.981636  | chr19 | 32613569 | 32617628 | + | 0 | NA | intron (N Alu Jo SIN | -7129  | NR_14571E | 1.1E+08  | NR_14571E | ENSG000003SNORA68B   | - small nc snoRNA                          |                                       |
| chr2-1135.7.963522.0.407571.0.83107.0.490418.0.623838.0.981636  | chr2  | 1.14E+08 | 1.14E+08 | + | 0 | NA | intron (N intron (N  | -12072 | NR_14850T | 440900   | Hs.66220E | NR_03412E            | ENSG000003LINC01191VIN lnc-# long intncRNA |                                       |
| chr20-455.7.963522.0.407571.0.83107.0.490418.0.623838.0.981636  | chr20 | 45961150 | 45961841 | + | 0 | NA | intron (N MER103C I  | 10708  | NM_02209E | 63925    | Hs.17419E | NM_02209E            | ENSG000003ZNF335                           | MCPH10 Nizinc fing protein-coding     |
| chr22-335.7.963522.0.407571.0.83107.0.490418.0.623838.0.981636  | chr22 | 43996517 | 43997477 | + | 0 | NA | TTS (NM_CTS (NM_C    | -2214  | NM_00100Q | 29780    | Hs.475074 | NM_013327            | ENSG000003PARV                             | CGI-56 parvin beta protein-coding     |
| chr6-303.7.963522.0.407571.0.83107.0.490418.0.623838.0.981636   | chr6  | 30335356 | 30335975 | + | 0 | NA | intron (N intron (N  | 6354   | NM_00119E | 202658   | Hs.41349E | NM_00119E            | ENSG000003TRIM39-IF                        | TRIM39R TRIM39-IF protein-coding      |
| chr7-2992.7.963522.0.407571.0.83107.0.490418.0.623838.0.981636  | chr7  | 29922169 | 29923748 | + | 0 | NA | 3' UTR (N 3' UTR (N  | 66843  | NM_01476E | 9805     | Hs.52074C | NM_01476E            | ENSG000003SCRN1                            | SES1 secernin protein-coding          |
| chr9-1271.7.963522.0.407571.0.83107.0.490418.0.623838.0.981636  | chr9  | 1.27E+08 | 1.27E+08 | + | 0 | NA | intron (N intron (N  | 18481  | NM_01209E | 23452    | Hs.65326E | NM_01209E            | ENSG000003ANGPTL2                          | ARP2 HARF angiopoietin protein-coding |
| chr17-604.10.86215.0.4389.0.711537.0.49035.0.623888.0.981636    | chr17 | 60471642 | 60472764 | + | 0 | NA | intron (N LIMB4 LIN  | 49714  | NM_18170T | 124773   | Hs.129312 | NM_18170T            | ENSG000003CC10orf64                        | - chromosom protein-coding            |
| chr2-9725.10.86215.0.4389.0.711537.0.49035.0.623888.0.981636    | chr2  | 97230028 | 97231431 | + | 0 | NA | intron (N LIPA3 LIN  | -47988 | NR_10373Z | 1.01E+08 | Hs.73261E | NR_10373Z            | LOC100500E                                 | - uncharactncRNA                      |
| chr7-1005.7.40407.0.44321.0.90426.0.490136.0.624038.0.981636    | chr7  | 1.01E+08 | 1.01E+08 | + | 0 | NA | intron (N FLAM_C SI  | -1276  | NM_00129E | 1.02E+08 | Hs.125742 | NM_001289933         | ZASP                                       | - Z0-2 assc protein-coding            |
| chr1-1764.7.93024.0.404326.0.825274.0.48993.0.624183.0.981636   | chr1  | 1764485  | 1765601  | + | 0 | NA | intron (N intron (N  | -6401  | NM_00119E | 65220    | Hs.65479E | NM_02301E            | ENSG000003CNADK                            | dJ283E3.1NAD kinase protein-coding    |
| chr1-3832.7.93024.0.404326.0.825274.0.48993.0.624183.0.981636   | chr1  | 3832413  | 3833184  | + | 0 | NA | intron (N Alu Jb SIN | 24413  | NM_01470A | 9731     | Hs.13308E | NM_01470A            | ENSG000003CEP104                           | CFAP256 centrosom protein-coding      |
| chr1-1106.7.93024.0.404326.0.825274.0.48993.0.624183.0.981636   | chr1  | 11065026 | 11071702 | + | 0 | NA | intron (N intron (N  | -8346  | NM_00313Z | 6723     | Hs.76244  | NM_00313Z            | ENSG000003SRM                              | PAPT SPDS spermidir protein-coding    |
| chr1-3591.7.93024.0.404326.0.825274.0.48993.0.624183.0.981636   | chr1  | 35915206 | 35918066 | + | 0 | NA | intron (N AluSz SIN  | -14469 | NM_17742Z | 192669   | Hs.65765E | NM_02485E            | ENSG000003CAGO3                            | EIF2C3 argonaute protein-coding       |
| chr1-1515.7.93024.0.404326.0.825274.0.48993.0.624183.0.981636   | chr1  | 1.52E+08 | 1.52E+08 | + | 0 | NA | intron (N AluSc SIN  | 24707  | NR_03028C | 693139   | NR_03028C | ENSG000003MIR554     | MIRN554 microRNA ncRNA                     |                                       |
| chr1-2057.7.93024.0.404326.0.825274.0.48993.0.624183.0.981636   | chr1  | 2.06E+08 | 2.06E+08 | + | 0 | NA | 3' UTR (N 3' UTR (N  | -15105 | NM_00113E | 8934     | Hs.11532E | NM_00392E            | ENSG000003RAB29                            | RABTL1 RAF RAB29, mc protein-coding   |
| chr11-455.7.93024.0.404326.0.825274.0.48993.0.624183.0.981636   | chr11 | 45969686 | 45971602 | + | 0 | NA | intron (N intron (N  | 47988  | NM_00130C | 120071   | Hs.86543  | NM_15231Z            | ENSG000003LARGE2                           | GYLT1B FLARGE xyl protein-coding      |
| chr11-675.7.93024.0.404326.0.825274.0.48993.0.624183.0.981636   | chr11 | 67310200 | 67310620 | + | 0 | NA | intron (N intron (N  | 6880   | NM_01785T | 54961    | Hs.29173  | NM_01785T            | ENSG000003SSH3                             | SSH3 slingshot protein-coding         |
| chr11-685.7.93024.0.404326.0.825274.0.48993.0.624183.0.981636   | chr11 | 68908779 | 68911776 | + | 0 | NA | intron (N intron (N  | 6426   | NM_00218C | 3508     | Hs.50304E | NM_00218C            | ENSG000003IGHMBP2                          | CATF1 CMT immunogl protein-coding     |
| chr12-477.7.93024.0.404326.0.825274.0.48993.0.624183.0.981636   | chr12 | 47792012 | 47795576 | + | 0 | NA | intron (N intron (N  | 20556  | NM_01784Z | 55652    | Hs.438867 | NM_01784Z            | ENSG000003SLC48A1                          | HRG-1 HRG solute c protein-coding     |
| chr12-507.7.93024.0.404326.0.825274.0.48993.0.624183.0.981636   | chr12 | 50724808 | 50725385 | + | 0 | NA | intron (N intron (N  | -39005 | NM_00517I | 466      | Hs.64856E | NM_00517I            | ENSG000003ATF1                             | EWS-ATF1 activator protein-coding     |
| chr12-100.7.93024.0.404326.0.825274.0.48993.0.624183.0.981636   | chr12 | 1E+08    | 1E+08    | + | 0 | NA | intron (N Alu Jb SIN | 7178   | NR_04856E | 64431    | Hs.11508E | NM_02249E            | ENSG000003ACTR6                            | ARP6 CDA1 actin rel protein-coding    |
| chr12-105.7.93024.0.404326.0.825274.0.48993.0.624183.0.981636   | chr12 | 1.05E+08 | 1.05E+08 | + | 0 | NA | 3' UTR (N 3' UTR (N  | 26994  | NM_15231E | 121053   | Hs.29556E | NM_15231E            | ENSG000003C12orf45                         | - chromosom protein-coding            |
| chr12-132.7.93024.0.404326.0.825274.0.48993.0.624183.0.981636   | chr12 | 1.32E+08 | 1.32E+08 | + | 0 | NA | intron (N intron (N  | -17389 | NM_00117Z | 2802     | Hs.50733E | NM_00589E            | ENSG000003GOLGA3                           | GCP170 ME golgin A protein-coding     |
| chr14-912.7.93024.0.404326.0.825274.0.48993.0.624183.0.981636   | chr14 | 91215565 | 91217194 | + | 0 | NA | intron (N Alu Jr SIN | 28325  | NM_00117Z | 8111     | Hs.8882   | NM_00348E            | ENSG000003GPR68                            | AT2A6 GPF6 proteir protein-coding     |
| chr15-428.7.93024.0.404326.0.825274.0.48993.0.624183.0.981636   | chr15 | 42802147 | 42802542 | + | 0 | NA | intron (N intron (N  | -65216 | NM_13847T | 146059   | Hs.59923E | NM_13847T            | ENSG000003CDAN1                            | CDAN1 CDA1 codanin I protein-coding   |
| chr15-900.7.93024.0.404326.0.825274.0.48993.0.624183.0.981636   | chr15 | 90087471 | 90088811 | + | 0 | NA | intron (N Alu Jr SIN | -5934  | NR_146321 | 1.1E+08  | Hs.65524E | NR_146321            | ENSG000003ZNF710-AS-                       | ZNF710 arncRNA                        |
| chr15-945.7.93024.0.404326.0.825274.0.48993.0.624183.0.981636   | chr15 | 94399429 | 94400582 | + | 0 | NA | intron (N intron (N  | 44075  | NM_00115E | 55784    | Hs.33368  | NM_01834E            | ENSG000003MCTP2                            | - multiple protein-coding             |
| chr16-311.7.93024.0.404326.0.825274.0.48993.0.624183.0.981636   | chr16 | 31119606 | 31121807 | + | 0 | NA | intron (N MIR3 SINE  | 3042   | NM_03218E | 84148    | Hs.53380E | NM_03218E            | ENSG000003KAT8                             | MOF MYST1 lysine ac protein-coding    |
| chr17-488.7.93024.0.404326.0.825274.0.48993.0.624183.0.981636   | chr17 | 4885797  | 4888435  | + | 0 | NA | exon (NM exon (NM    | -12420 | NM_00114E | 1E+08    | Hs.57924E | NM_00114E            | ENSG000003C17orf107-                       | chromosom protein-coding              |
| chr17-648.7.93024.0.404326.0.825274.0.48993.0.624183.0.981636   | chr17 | 64819715 | 64824907 | + | 0 | NA | promoter-promoter-   | -209   | NR_03627I | 1E+08    | NR_03627I | ENSG000003MIR4315-2- | microRNA ncRNA                             |                                       |
| chr17-788.7.93024.0.404326.0.825274.0.48993.0.624183.0.981636   | chr17 | 78802756 | 78807164 | + | 0 | NA | intron (N intron (N  | -22618 | NM_00476E | 9267     | Hs.19121E | NM_00476E            | ENSG000003CYTH1                            | B2-1 CYTC cytohesin protein-coding    |
| chr18-232.7.93024.0.404326.0.825274.0.48993.0.624183.0.981636   | chr18 | 23255915 | 23257558 | + | 0 | NA | intron (N Alu Sx1 SI | 100911 | NM_13837E | 91768    | Hs.11108  | NM_13837E            | ENSG000003CABLES1                          | CABL1 CAF Cdk5 and protein-coding     |
| chr18-420.7.93024.0.404326.0.825274.0.48993.0.624183.0.981636   | chr18 | 42003277 | 42005195 | + | 0 | NA | intron (N MamRep40E  | 49002  | NM_00264T | 5289     | Hs.464971 | NM_00264T            | ENSG000003PIK3C3                           | VPS34 Vps phosphatid protein-coding   |
| chr18-796.7.93024.0.404326.0.825274.0.48993.0.624183.0.981636   | chr18 | 79699880 | 79701054 | + | 0 | NA | intron (N Tigger1 I  | 19037  | NM_00120Z | 9150     | Hs.46549E | NM_00471E            | ENSG000003CTDP1                            | CCFDN1 FCFCTD phospho protein-coding  |
| chr19-146.7.93024.0.404326.0.825274.0.48993.0.624183.0.981636   | chr19 | 14697790 | 14704333 | + | 0 | NA | intron (N HALL1 LINE | 11008  | NM_00135Z | 84449    | Hs.51521E | NM_03243E            | ENSG000003ZNF333                           | - zinc fing protein-coding            |
| chr19-215.7.93024.0.404326.0.825274.0.48993.0.624183.0.981636   | chr19 | 21518234 | 21523985 | + | 0 | NA | TTS (NR_ITTS (NR_I   | 15507  | NM_00134E | 353088   | Hs.572567 | NM_001001            | ENSG000003ZNF429                           | - zinc fing protein-coding            |
| chr19-350.7.93024.0.404326.0.825274.0.48993.0.624183.0.981636   | chr19 | 35019283 | 35022382 | + | 0 | NA | intron (N L2a LINE   | -9638  | NM_00103T | 6324     | Hs.43664E | NM_00103T            | ENSG000003SCN1B                            | ATFB13 BF sodium v protein-coding     |
| chr19-355.7.93024.0.404326.0.825274.0.48993.0.624183.0.981636   | chr19 | 35630565 | 35636791 | + | 0 | NA | intron (N intron (N  | 4642   | NM_02432I | 79171    | Hs.5086   | NM_02432I            | ENSG000003CRBM42                           | - RNA bind protein-coding             |
| chr19-365.7.93024.0.404326.0.825274.0.48993.0.624183.0.981636   | chr19 | 36936769 | 36943099 | + | 0 | NA | intron (N intron (N  | 23602  | NM_00120A | 374900   | Hs.40422C | NM_19853E            | ENSG000003ZNF568                           | ZFP568 zinc fing protein-coding       |
| chr19-415.7.93024.0.404326.0.825274.0.48993.0.624183.0.981636   | chr19 | 41901090 | 41905266 | + | 0 | NA | intron (N Alu Jr SIN | 18735  | NM_19900Z | 9138     | Hs.63155E | NM_00470E            | ENSG000003ARHGFP1                          | GEF1 IMD2 Rho guaniprotein-coding     |
| chr19-445.7.93024.0.404326.0.825274.0.48993.0.624183.0.981636   | chr19 | 44974452 | 44980505 | + | 0 | NA | intron (N intron (N  | 22098  | NM_00129A | 1209     | Hs.444441 | NM_00129A            | ENSG000003CLPTM1                           | - CLPTM1 re protein-coding            |
| chr19-500.7.93024.0.404326.0.825274.0.48993.0.624183.0.981636   | chr19 | 50013205 | 50019027 |   |   |    |                      |        |           |          |           |                      |                                            |                                       |



|           |          |          |          |          |          |          |       |          |          |   |   |    |                      |                  |                              |                     |               |                             |
|-----------|----------|----------|----------|----------|----------|----------|-------|----------|----------|---|---|----|----------------------|------------------|------------------------------|---------------------|---------------|-----------------------------|
| chr2-1084 | 13.15171 | 0.319128 | 0.653563 | 0.48829  | 0.625345 | 0.981636 | chr2  | 1.08E+08 | 1.08E+08 | + | 0 | NA | intron (Nintron (N   | 34560 NR_028063  | 9648 Hs. 436505NM_181455     | ENSG000002GCC2      | GCC185 R      | GRIP and protein-coding     |
| chr9-7025 | 7.591717 | -0.42387 | 0.868451 | -0.48807 | 0.625497 | 0.981636 | chr9  | 70298405 | 70298704 | + | 0 | NA | intron (Nintron (N   | 39576 NM_01511C  | 23137 Hs. 534189NM_01511C    | ENSG000002SMC5      | SMC5L1        | structure protein-coding    |
| chr7-1396 | 8.094313 | -0.40167 | 0.823474 | -0.48778 | 0.625708 | 0.981636 | chr7  | 1.4E+08  | 1.4E+08  | + | 0 | NA | intron (Ntigger1 I   | 92059 NM_001113  | 28996 Hs. 731417NM_02274C    | ENSG000002CHIPK2    | PRO0593       | homeodomain protein-coding  |
| chr1-5146 | 7.699419 | -0.41117 | 0.842946 | -0.48778 | 0.625709 | 0.981636 | chr1  | 51461935 | 51462266 | + | 0 | NA | intron (NAluSp SIN   | -40005 NM_001155 | 2060 Hs. 83722 NM_001981     | ENSG000002EPS15     | AF-1P AF1     | epidermal protein-coding    |
| chr2-1275 | 7.699419 | -0.41117 | 0.842946 | -0.48778 | 0.625709 | 0.981636 | chr2  | 1.27E+08 | 1.27E+08 | + | 0 | NA | intron (NAluSq2 SI   | -22097 NM_000122 | 2071 Hs. 469872NM_000122     | ENSG000002ERCC3     | BTf2 GTf2     | ERCC exciprotein-coding     |
| chr16-888 | 7.715135 | -0.41445 | 0.849798 | -0.48777 | 0.625761 | 0.981636 | chr16 | 88394586 | 88394879 | + | 0 | NA | IntergeniIntergeni   | -32739 NM_001367 | 84627 Hs. 54925 NM_001127    | ENSG000002ZNF469    | BCS BCS1      | zinc finger protein-coding  |
| chr19-496 | 7.715135 | -0.41445 | 0.849798 | -0.48777 | 0.625761 | 0.981636 | chr19 | 49649284 | 49650137 | + | 0 | NA | intron (NAluSp SIN   | 7501 NM_021228   | 58506 Hs. 103521NM_021228    | ENSG000002SCAF1     | SRA1          | SR-related protein-coding   |
| chr1-1976 | 8.127594 | -0.39174 | 0.814361 | -0.48767 | 0.625781 | 0.981636 | chr1  | 1.98E+08 | 1.98E+08 | + | 0 | NA | intron (Nintron (N   | 86671 NM_001195  | 163486 Hs. 125056NM_019045   | ENSG000002DENND1B   | CRF18 L1      | CENND domain protein-coding |
| chr10-118 | 8.127594 | -0.39174 | 0.814361 | -0.48767 | 0.625781 | 0.981636 | chr10 | 1.18E+08 | 1.18E+08 | + | 0 | NA | intron (Nintron (N   | 16722 NM_022063  | 63877 Hs. 105577NM_022063    | ENSG000002FAM204A   | C10orf84      | family wiprotein-coding     |
| chr11-781 | 8.127594 | -0.39174 | 0.814361 | -0.48767 | 0.625781 | 0.981636 | chr11 | 78196460 | 78196850 | + | 0 | NA | exon (NM exon (NM    | 7736 NM_020798   | 57558 Hs. 531245NM_020798    | ENSG000002USP35     | -             | ubiquitin protein-coding    |
| chr11-866 | 8.127594 | -0.39174 | 0.814361 | -0.48767 | 0.625781 | 0.981636 | chr11 | 86004691 | 86013652 | + | 0 | NA | intron (NAluXs1 SI   | 59913 NM_001766  | 8301 Hs. 163892NM_001766     | ENSG000002PICALM    | CALM CLTf     | phosphatidyl protein-coding |
| chr13-253 | 8.127594 | -0.39174 | 0.814361 | -0.48767 | 0.625781 | 0.981636 | chr13 | 25312341 | 25316690 | + | 0 | NA | intron (NAluSq2 SI   | 12890 NM_014088  | 9818 Hs. 507537NM_014088     | ENSG000002CNP58     | NUP45 NUP     | nucleoporin protein-coding  |
| chr16-135 | 8.127594 | -0.39174 | 0.814361 | -0.48767 | 0.625781 | 0.981636 | chr16 | 13926513 | 13927191 | + | 0 | NA | intron (Nintron (N   | 6695 NM_005233   | 2072 Hs. 567265NM_005233     | ENSG000002ERCC4     | ERCC11 F      | ERCC exciprotein-coding     |
| chr2-1274 | 8.127594 | -0.39174 | 0.814361 | -0.48767 | 0.625781 | 0.981636 | chr2  | 1.27E+08 | 1.27E+08 | + | 0 | NA | intron (Nintron (N   | 43894 NM_017965  | 55677 Hs. 469872NM_017965    | ENSG000002IWS1      | -             | interact protein-coding     |
| chr3-5815 | 8.127594 | -0.39174 | 0.814361 | -0.48767 | 0.625781 | 0.981636 | chr3  | 58153798 | 58156696 | + | 0 | NA | intron (Nintron (N   | 15388 NR_135534  | 1.05E+08 Hs. 613914NR_135534 | ENSG000002FLNB-AS1  | -             | FLNB anticrRNA              |
| chr6-1135 | 8.127594 | -0.39174 | 0.814361 | -0.48767 | 0.625781 | 0.981636 | chr6  | 1.14E+08 | 1.14E+08 | + | 0 | NA | non-codirnon-codir   | -27944 NR_125845 | 1.02E+08 Hs. 129282NR_125845 | ENSG000002HDAC2-AS2 | -             | HDAC2 anticrRNA             |
| chr8-4778 | 8.127594 | -0.39174 | 0.814361 | -0.48767 | 0.625781 | 0.981636 | chr8  | 47781969 | 47783098 | + | 0 | NA | exon (NM exon (NM    | -44369 NM_005195 | 1052 Hs. 440825NM_005195     | ENSG000002CEBPD     | C/EBP-d CCAAT | encl protein-coding         |
| chr9-272  | 8.127594 | -0.39174 | 0.814361 | -0.48767 | 0.625781 | 0.981636 | chr9  | 27204933 | 27206757 | + | 0 | NA | intron (Nintron (N   | 76948 NR_026675  | 158035 Hs. 201554NR_026675   | ENSG000002LINC00032 | C9orf14 L     | long intencrRNA             |
| chr9-1244 | 8.127594 | -0.39174 | 0.814361 | -0.48767 | 0.625781 | 0.981636 | chr9  | 1.24E+08 | 1.24E+08 | + | 0 | NA | intron (NAlu SINE    | 5353 NM_002795   | 5695 Hs. 213477NM_002795     | ENSG000002PSMB7     | Z             | proteasome protein-coding   |
| chr4-824  | 10.8543  | -0.34768 | 0.713302 | -0.48742 | 0.625958 | 0.981636 | chr4  | 82423380 | 82428713 | + | 0 | NA | non-codirnon-codir   | 4179 NM_001207   | 9987 Hs. 527105NM_005463     | ENSG000002HNRNPDL   | HNRNP HNF     | heterog protein-coding      |
| chr1-1565 | 5.4106   | -0.48299 | 0.991192 | -0.48728 | 0.626057 | 0.981636 | chr1  | 1569331  | 1570668  | + | 0 | NA | intron (Nintron (N   | 4864 NM_014188   | 29101 Hs. 30026 NM_014188    | ENSG000002SSU72     | HSPC182 F     | SSU72 honprotein-coding     |
| chr10-246 | 5.4106   | -0.48299 | 0.991192 | -0.48728 | 0.626057 | 0.981636 | chr10 | 24630440 | 24632183 | + | 0 | NA | intron (NAluSq2 SI   | -8468 NR_160025  | 57584 Hs. 524195NM_020824    | ENSG000002ARHGAP21  | ARHGAP10 Rho  | GTPase protein-coding       |
| chr10-681 | 5.4106   | -0.48299 | 0.991192 | -0.48728 | 0.626057 | 0.981636 | chr10 | 68194422 | 68196034 | + | 0 | NA | intron (Nintron (N   | 36885 NM_145178  | 220202 Hs. 175396NM_145178   | ENSG000002ATO7H     | Math5 NCF     | atona1 bl protein-coding    |
| chr11-855 | 5.4106   | -0.48299 | 0.991192 | -0.48728 | 0.626057 | 0.981636 | chr11 | 85984813 | 85985901 | + | 0 | NA | intron (Nintron (N   | 83727 NM_007166  | 8301 Hs. 163892NM_007166     | ENSG000002PICALM    | CALM CLTf     | phosphatidyl protein-coding |
| chr12-955 | 5.4106   | -0.48299 | 0.991192 | -0.48728 | 0.626057 | 0.981636 | chr12 | 95519949 | 95522319 | + | 0 | NA | exon (NM exon (NM    | 27104 NM_001275  | 84101 Hs. 646421NM_032147    | ENSG000002USP44     | -             | ubiquitin protein-coding    |
| chr14-605 | 5.4106   | -0.48299 | 0.991192 | -0.48728 | 0.626057 | 0.981636 | chr14 | 60977564 | 60978224 | + | 0 | NA | intron (Nintron (N   | 3185 NM_001355   | 57570 Hs. 380155NM_02081C    | ENSG000002TRMT5     | COXP26 K      | tRNA methyl protein-coding  |
| chr14-885 | 5.4106   | -0.48299 | 0.991192 | -0.48728 | 0.626057 | 0.981636 | chr14 | 88595923 | 88596323 | + | 0 | NA | intron (Nintron (N   | 1723 NM_020766   | 79882 Hs. 684046NM_024824    | ENSG000002ZC3H14    | MRT56 MSU     | zinc finger protein-coding  |
| chr15-526 | 5.4106   | -0.48299 | 0.991192 | -0.48728 | 0.626057 | 0.981636 | chr15 | 52603382 | 52603752 | + | 0 | NA | intron (NLM3A3 LI    | -34121 NM_001306 | 10776 Hs. 512905NM_006628    | ENSG000002ARPP19    | ARPP-16 a     | cAMP regu protein-coding    |
| chr15-663 | 5.4106   | -0.48299 | 0.991192 | -0.48728 | 0.626057 | 0.981636 | chr15 | 66351785 | 66352264 | + | 0 | NA | intron (Nintron (N   | 4661 NM_017855   | 54962 Hs. 744305NM_017855    | ENSG000002TIPIN     | -             | TIMELESS protein-coding     |
| chr17-435 | 5.4106   | -0.48299 | 0.991192 | -0.48728 | 0.626057 | 0.981636 | chr17 | 43513317 | 43516810 | + | 0 | NA | intron (NLM44a LI    | 14372 NM_001261  | 2118 Hs. 434055NM_001988     | ENSG000002ETV4      | E1A-F E1A     | variet protein-coding       |
| chr18-130 | 5.4106   | -0.48299 | 0.991192 | -0.48728 | 0.626057 | 0.981636 | chr18 | 13092630 | 13093924 | + | 0 | NA | intron (NLMC4 LI     | 101915 NM_032142 | 55125 Hs. 100914NM_018065    | ENSG000002CEP192    | PPP1R62       | centrosome protein-coding   |
| chr19-966 | 5.4106   | -0.48299 | 0.991192 | -0.48728 | 0.626057 | 0.981636 | chr19 | 9667158  | 9668615  | + | 0 | NA | intron (NAluJo SIN   | 7214 NM_017655   | 54811 Hs. 371107NM_017655    | ENSG000002ZNF562    | -             | zinc finger protein-coding  |
| chr2-1057 | 5.4106   | -0.48299 | 0.991192 | -0.48728 | 0.626057 | 0.981636 | chr2  | 10574007 | 10578520 | + | 0 | NA | intron (Nintron (N   | 115062 NM_024894 | 79954 Hs. 222494NM_024894    | ENSG000002NOL10     | PQB5          | nucleolar protein-coding    |
| chr2-3046 | 5.4106   | -0.48299 | 0.991192 | -0.48728 | 0.626057 | 0.981636 | chr2  | 30466840 | 30468169 | + | 0 | NA | intron (NLM5A5 LI    | 20258 NM_001304  | 253558 Hs. 468045NM_182551   | ENSG000002CLAT1     | IAGPAT8 A     | lysocardiprotein-coding     |
| chr2-3264 | 5.4106   | -0.48299 | 0.991192 | -0.48728 | 0.626057 | 0.981636 | chr2  | 32649363 | 32651414 | + | 0 | NA | intron (Nintron (N   | 15133 NR_039922  | 1.01E+08 Hs. NR_039922       | ENSG000002MIR4765   | -             | microRNA ncRNA              |
| chr2-1277 | 5.4106   | -0.48299 | 0.991192 | -0.48728 | 0.626057 | 0.981636 | chr2  | 1.28E+08 | 1.28E+08 | + | 0 | NA | intron (Nintron (N   | 5452 NM_032744   | 84826 Hs. 345845NM_032744    | ENSG000002SFT2D3    | -             | SFT2 domain protein-coding  |
| chr2-1350 | 5.4106   | -0.48299 | 0.991192 | -0.48728 | 0.626057 | 0.981636 | chr2  | 1.35E+08 | 1.35E+08 | + | 0 | NA | intron (NMER2 DNA    | 30865 NM_012233  | 22930 Hs. 306327NM_012233    | ENSG000002CRAB3GAP1 | P130 RAB3     | GTPase protein-coding       |
| chr2-1726 | 5.4106   | -0.48299 | 0.991192 | -0.48728 | 0.626057 | 0.981636 | chr2  | 1.73E+08 | 1.73E+08 | + | 0 | NA | 3' UTR (N3' UTR (N   | 45551 NM_00261C  | 5163 Hs. 470633NM_00261C     | ENSG000002PDK1      | -             | pyruvate protein-coding     |
| chr2-1891 | 5.4106   | -0.48299 | 0.991192 | -0.48728 | 0.626057 | 0.981636 | chr2  | 1.89E+08 | 1.89E+08 | + | 0 | NA | intron (NLM2 LINE L  | 7668 NM_000393   | 1290 Hs. 445827NM_000393     | ENSG000002COL5A2    | EDSC EDSC     | collagen protein-coding     |
| chr20-315 | 5.4106   | -0.48299 | 0.991192 | -0.48728 | 0.626057 | 0.981636 | chr20 | 31516151 | 31517264 | + | 0 | NA | intron (NLM2c LINE L | 2265 NM_178582   | 81502 Hs. 373741NM_030788    | ENSG000002CHM13     | H13 IMP1      | histocomp protein-coding    |
| chr3-1231 | 5.4106   | -0.48299 | 0.991192 | -0.48728 | 0.626057 | 0.981636 | chr3  | 1.23E+08 | 1.23E+08 | + | 0 | NA | intron (NLM2a LINE L | -45780 NR_106966 | 1.02E+08 Hs. NR_106966       | ENSG000002MIR7110   | hsa-mir-7     | microRNA ncRNA              |
| chr3-1291 | 5.4106   | -0.48299 | 0.991192 | -0.48728 | 0.626057 | 0.981636 | chr3  | 1.29E+08 | 1.29E+08 | + | 0 | NA | intron (Nintron (N   | 6664 NM_001127   | 7555 Hs. 518245NM_003418     | ENSG000002CNBP      | CNBP1 DM2     | CCHC-type protein-coding    |
| chr3-1884 | 5.4106   | -0.48299 | 0.991192 | -0.48728 | 0.626057 | 0.981636 | chr3  | 1.88E+08 | 1.88E+08 | + | 0 | NA | intron (Nintron (N   | 159814 NR_046623 | 1.01E+08 Hs. 674993NR_046623 | ENSG000002LPP-AS1   | -             | LPP anticrRNA               |
| chr3-1953 | 5.4106   | -0.48299 | 0.991192 | -0.48728 | 0.626057 | 0.981636 | chr3  | 1.95E+08 | 1.95E+08 | + | 0 | NA | intron (NLM1 LINE L  | 78776 NM_012287  | 23527 Hs. 593373NM_012287    | ENSG000002ACAP2     | CENTB2 CN     | ARFGAP wiprotein-coding     |
| chr4-7317 | 5.4106   | -0.48299 | 0.991192 | -0.48728 | 0.626057 | 0.981636 | chr4  | 73174560 | 73177696 | + | 0 | NA | intron (NLM2A2 LI    | 46929 NM_001286  | 26057 Hs. 601206NM_015574    | ENSG000002ANKRD17   | GTAR MASK     | ankyrin 1 protein-coding    |
| chr4-8466 | 5.4106   | -0.48299 | 0.991192 | -0.48728 | 0.626057 | 0.981636 | chr4  | 84667103 | 84667893 | + | 0 | NA | IntergeniIntergeni   | 48371 NM_001263  | 1040 Hs. 654899NM_001263     | ENSG000002CDS1      | CDS1          | CDP-diacy protein-coding    |
| chr4-1682 | 5.4106   | -0.48299 | 0.991192 | -0.48728 | 0.626057 | 0.981636 | chr4  | 1.68E+08 | 1.68E+08 | + | 0 | NA | intron (Nintron (N   | 35979 NM_017631  | 55601 Hs. 591711NM_017631    | ENSG000002DDX60     | -             | DEX/H-hc protein-coding     |
| chr5-7475 | 5.4106   | -0.48299 | 0.991192 | -0.48728 | 0.626057 | 0.981636 | chr5  | 74734108 | 74736101 | + | 0 | NA | intron (Nintron (N</ |                  |                              |                     |               |                             |



|                     |          |          |           |          |          |       |          |           |       |                    |                |                     |                      |           |          |                    |                     |               |                              |                    |
|---------------------|----------|----------|-----------|----------|----------|-------|----------|-----------|-------|--------------------|----------------|---------------------|----------------------|-----------|----------|--------------------|---------------------|---------------|------------------------------|--------------------|
| chr15-74c.467968    | 0.389674 | 0.804195 | 0.484552  | 0.627994 | 0.981636 | chr15 | 74022959 | 74024316  | +     | 0                  | NA             | intron (NMER91A DN  | 28921                | NM_033244 | 5371     | Hs.526464NM_002675 | ENSG000000PML       | MYL1P867      | promyelocytic protein-coding |                    |
| chr19-19c.467968    | 0.389674 | 0.804195 | 0.484552  | 0.627994 | 0.981636 | chr19 | 19307478 | 19311037  | +     | 0                  | NA             | intron (NALuJo SIN  | 11252                | NM_172231 | 57794    | Hs.515274NM_021164 | ENSG000000SUGP1     | F23858 RE     | SURP and protein-coding      |                    |
| chr6-157c.467968    | 0.389674 | 0.804195 | 0.484552  | 0.627994 | 0.981636 | chr6  | 1.58E+08 | 1.58E+08  | +     | 0                  | NA             | intron (NMER21C LI  | 74250                | NM_016224 | 51429    | Hs.19121cNM_016224 | ENSG000000SNX9      | SDP1 SH3F     | sorting rprotein-coding      |                    |
| chr9-136a.467968    | 0.389674 | 0.804195 | 0.484552  | 0.627994 | 0.981636 | chr9  | 1.36E+08 | 1.36E+08  | +     | 0                  | NA             | intron (NFLAM_C SI  | 10218                | NM_015166 | 23203    | Hs.495471NM_015166 | ENSG000000PMPCA     | Alpha-MPF     | peptidase protein-coding     |                    |
| chr13-111c.377318   | -0.48995 | 1.011515 | -0.48437  | 0.628123 | 0.981636 | chr13 | 1.11E+08 | 1.11E+08  | +     | 0                  | NA             | intron (NINtron (N  | -6447                | NM_001354 | 8874     | Hs.50873cNM_003895 | ENSG000000ARHGFE7   | BETA-PIX HO   | guanine protein-coding       |                    |
| chr14-10c.377318    | -0.48995 | 1.011515 | -0.48437  | 0.628123 | 0.981636 | chr14 | 1E+08    | 1E+08     | +     | 0                  | NA             | exon (NM_exon (NM   | 13119                | NM_001352 | 123096   | Hs.57810cNM_152333 | ENSG000000SLC25A29  | C14orf69 solu | te c protein-coding          |                    |
| chr13-771c.781243   | 0.404884 | 0.836067 | 0.484272  | 0.628193 | 0.981636 | chr13 | 77150094 | 77150525  | +     | 0                  | NA             | intron (NALuJr SIN  | 74795                | NR_046716 | 1.01E+08 | Hs.56928cNR_046716 | ENSG000000MYCBP2-AS | -             | MYCBP2                       | arcncRNA           |
| chr1-123c.14.21931  | 0.309354 | 0.639011 | -0.484113 | 0.628306 | 0.981636 | chr1  | 2.73E+08 | 1.23E+08  | +     | 0                  | NA             | IntergeniALR/Alpha  | 1878538              | NR_003956 | 647121   | Hs.69768cNR_003956 | ENSG000000EMBP1     | -             | embylin                      | psudo              |
| chr11-27c.119736    | -0.39556 | 0.817184 | -0.48406  | 0.628347 | 0.981636 | chr11 | 27697578 | 27698795  | +     | 0                  | NA             | TTS (NR_C TTS (NR_C | 1481                 | NM_170734 | 627      | Hs.50218cNM_001707 | ENSG000000BDNF      | ANON2 BUL     | brain derprotein-coding      |                    |
| chr14-71c.119736    | -0.39556 | 0.817184 | -0.48406  | 0.628347 | 0.981636 | chr14 | 71057734 | 71058718  | +     | 0                  | NA             | intron (NLIMB5 LIN  | 150767               | NM_001308 | 22990    | Hs.44655cNM_014982 | ENSG000000PCNX1     | PCNX PCN      | pecanex Iprotein-coding      |                    |
| chr18-26c.119736    | -0.39556 | 0.817184 | -0.48406  | 0.628347 | 0.981636 | chr18 | 26083248 | 26087401  | +     | 0                  | NA             | intron (NALuJr SIN  | 5289                 | NM_001007 | 6760     | Hs.129261NM_005637 | ENSG000000SS18      | SSXT SYT      | SS18 subprotein-coding       |                    |
| chr2-3247c.119736   | -0.39556 | 0.817184 | -0.48406  | 0.628347 | 0.981636 | chr2  | 32477208 | 32478743  | +     | 0                  | NA             | intron (NINtron (N  | -54178               | NR_030285 | 693143   | NR_030285          | ENSG000000MIR558    | MIRN558 mi    | croRNA ncRNA                 |                    |
| chr3-690c.119736    | -0.39556 | 0.817184 | -0.48406  | 0.628347 | 0.981636 | chr3  | 69032858 | 69033561  | +     | 0                  | NA             | intron (NALuSx SIN  | 14626                | NR_036087 | 1E+08    | NR_036087          | ENSG000000MIR3136   | mir-3136      | microRNA ncRNA               |                    |
| chr6-176c.119736    | -0.39556 | 0.817184 | -0.48406  | 0.628347 | 0.981636 | chr6  | 17636629 | 17637370  | +     | 0                  | NA             | intron (NINtron (N  | 36697                | NM_016255 | 51439    | Hs.95260           | ENSG000000FAM8A1    | ahp           | family wiprotein-coding      |                    |
| chr9-122c.119736    | -0.39556 | 0.817184 | -0.48406  | 0.628347 | 0.981636 | chr9  | 1.23E+08 | 1.23E+08  | +     | 0                  | NA             | intron (NALuJb SIN  | 45969                | NM_012197 | 23637    | Hs.271341NM_012197 | ENSG000000RABGAP1   | GAPCENA TRAB  | GTPase protein-coding        |                    |
| chr1-154c.13.15957  | 0.317938 | 0.656828 | 0.48405   | 0.62835  | 0.981636 | chr1  | 1.55E+08 | 1.55E+08  | +     | 0                  | NA             | exon (NM_exon (NM   | 17223                | NM_000748 | 1141     | Hs.2306            | ENSG000000CHRN2B    | EFNL3 nAc     | cholinerg protein-coding     |                    |
| chr1-100c.7.650422  | -0.41242 | 0.852067 | -0.48403  | 0.628366 | 0.981636 | chr1  | 1.01E+08 | 1.01E+08  | +     | 0                  | NA             | intron (NINtron (N  | 3004                 | NM_001144 | 14867    | Hs.53390cNM_13349c | ENSG000000SLC30A7   | ZNT7 ZnT      | solute c protein-coding      |                    |
| chr1-229c.7.650422  | -0.41242 | 0.852067 | -0.48403  | 0.628366 | 0.981636 | chr1  | 2.29E+08 | 2.29E+08  | +     | 0                  | NA             | intron (NINtron (N  | -14994               | NM_006542 | 10638    | Hs.29616cNM_006542 | ENSG000000SPHAR     | S-phase       | protein-coding               |                    |
| chr12-121c.7.650422 | -0.41242 | 0.852067 | -0.48403  | 0.628366 | 0.981636 | chr12 | 1.22E+08 | 1.22E+08  | +     | 0                  | NA             | intron (NINtron (N  | 17296                | NM_001178 | 144406   | Hs.709837NM_14466c | ENSG000000WDR66     | CFAP251 CWD   | repeat protein-coding        |                    |
| chr1-206c.8.428678  | 0.399159 | 0.824752 | 0.483975  | 0.628404 | 0.981636 | chr1  | 2.06E+08 | 2.06E+08  | +     | 0                  | NA             | intron (NINtron (N  | -65104               | NM_014002 | 9641     | Hs.32104cNM_014002 | ENSG000000IKBKE     | IKK-E IKK     | inhibitor protein-coding     |                    |
| chr15-224c.7.11257  | 0.546462 | 1.129113 | 0.483975  | 0.628404 | 0.981636 | chr15 | 22945676 | 22946422  | +     | 0                  | NA             | intron (NALuJb SIN  | -28736               | NM_001033 | 23191    | Hs.26704           | ENSG000000CYFIP1    | P140SR4       | -lyctoplasm protein-coding   |                    |
| chr19-13c.4.171257  | 0.546462 | 1.129113 | 0.483975  | 0.628404 | 0.981636 | chr19 | 13307785 | 13308439  | +     | 0                  | NA             | intron (NINtron (N  | 157701               | NM_004907 | 9592     | Hs.50162cNM_004907 | ENSG000000IER2      | ETR101        | immediate protein-coding     |                    |
| chr10-35c.7.237963  | -0.4314  | 0.8916   | -0.48385  | 0.628489 | 0.981636 | chr10 | 35051259 | 35051670  | +     | 0                  | NA             | intron (NALuYe5 SI  | 22819                | NM_001198 | 8453     | Hs.812919          | ENSG000000CUL2      | -             | cullin 2                     | protein-coding     |
| chr16-48c.7.237963  | -0.4314  | 0.8916   | -0.48385  | 0.628489 | 0.981636 | chr16 | 48551909 | 48552575  | +     | 0                  | NA             | intron (NINtron (N  | 57938                | NM_153025 | 9683     | Hs.51183cNM_153025 | ENSG000000N4BP1     | -             | NEDD4                        | bir protein-coding |
| chr6-111c.7.237963  | -0.4314  | 0.8916   | -0.48385  | 0.628489 | 0.981636 | chr6  | 1.11E+08 | 1.11E+08  | +     | 0                  | NA             | exon (NM_exon (NM   | -109387              | NR_034105 | 643749   | Hs.48622cNR_034105 | ENSG000000TRAF3IP2  | C6UAS C6c     | TRAF3IP2                     | ncRNA              |
| chr4-8297c.2.213767 | -0.61802 | 1.277995 | -0.48359  | 0.628679 | 0.981636 | chr4  | 82971361 | 82972166  | +     | 0                  | NA             | intron (NL3 LINE C  | 39060                | NR_110255 | 132660   | Hs.96952           | ENSG000000CLIN5A    | CXDCD1 JCl    | in-54 Df                     | protein-coding     |
| chr1-653c.8.434686  | 0.386566 | 0.799485 | 0.483519  | 0.628727 | 0.981636 | chr1  | 6530834  | 6533415   | +     | 0                  | NA             | intron (NINtron (N  | -12063               | NM_198681 | 57449    | Hs.28423cNM_020631 | ENSG000000PLEKHG5   | CMTRIC DS     | pleckstrin protein-coding    |                    |
| chr1-431c.8.434686  | 0.386566 | 0.799485 | 0.483519  | 0.628727 | 0.981636 | chr1  | 43165790 | 43169621  | +     | 0                  | NA             | intron (NINtron (N  | 4007                 | NR_106791 | 1.02E+08 | NR_106791          | ENSG000000MIR6733   | hsa-mir-62    | microRNA ncRNA               |                    |
| chr1-681c.8.434686  | 0.386566 | 0.799485 | 0.483519  | 0.628727 | 0.981636 | chr1  | 68147807 | 68149414  | +     | 0                  | NA             | exon (NM_exon (NM   | 35000                | NR_031664 | 1E+08    | NR_031664          | ENSG000000MIR1262   | MIRN1262 mi   | croRNA ncRNA                 |                    |
| chr1-1114c.8.434686 | 0.386566 | 0.799485 | 0.483519  | 0.628727 | 0.981636 | chr1  | 1.11E+08 | 1.11E+08  | +     | 0                  | NA             | non-codiron-codir   | 8328                 | NM_024102 | 79084    | Hs.20477cNM_024102 | ENSG000000WDR77     | HKMT1069 WD   | repeat protein-coding        |                    |
| chr1-2027c.8.434686 | 0.386566 | 0.799485 | 0.483519  | 0.628727 | 0.981636 | chr1  | 2.03E+08 | 2.03E+08  | +     | 0                  | NA             | intron (NINtron (N  | 10428                | NM_001347 | 10765    | Hs.18891           | ENSG000000KDM5B     | CT31 JAR1     | lysine deprotein-coding      |                    |
| chr1-2302c.8.434686 | 0.386566 | 0.799485 | 0.483519  | 0.628727 | 0.981636 | chr1  | 2.3E+08  | 2.3E+08   | +     | 0                  | NA             | intron (NINtron (N  | 150115               | NM_001258 | 79605    | Hs.52046cNM_024554 | ENSG000000PGDB5     | -             | pyggyBac                     | protein-coding     |
| chr11-47c.8.434686  | 0.386566 | 0.799485 | 0.483519  | 0.628727 | 0.981636 | chr11 | 47280731 | 47286876  | +     | 0                  | NA             | intron (NALuSzl SIN | -11693               | NR_120566 | 1.02E+08 | Hs.66495cNR_120566 | ENSG000000LOC101925 | -             | uncharactercna               | ncRNA              |
| chr11-687c.8.434686 | 0.386566 | 0.799485 | 0.483519  | 0.628727 | 0.981636 | chr11 | 68755938 | 68763547  | +     | 0                  | NA             | intron (NINtron (N  | -8222                | NM_001035 | 9633     | Hs.14593cNM_004923 | ENSG000000TESMIN    | CXDCD2 MI     | testis e protein-coding      |                    |
| chr11-71c.8.434686  | 0.386566 | 0.799485 | 0.483519  | 0.628727 | 0.981636 | chr11 | 71091025 | 71092266  | +     | 0                  | NA             | intron (NINtron (N  | 133151               | NM_012305 | 22941    | Hs.26872cNM_012305 | ENSG000000SHANK2    | AUTS17 CS     | SH3 and nprotein-coding      |                    |
| chr12-53c.8.434686  | 0.386566 | 0.799485 | 0.483519  | 0.628727 | 0.981636 | chr12 | 53210411 | 53213313  | +     | 0                  | NA             | intron (NMER3 DNA   | -5611                | NM_000088 | 3695     | Hs.65447cNM_000088 | ENSG000000ITGB7     | -             | integrin                     | protein-coding     |
| chr13-244c.8.434686 | 0.386566 | 0.799485 | 0.483519  | 0.628727 | 0.981636 | chr13 | 24489273 | 24498289  | +     | 0                  | NA             | intron (NINtron (N  | 18997                | NM_006437 | 143      | Hs.74485cNM_006437 | ENSG000000PARP4     | ADPRTL1 A     | poly (ADP- protein-coding    |                    |
| chr13-95c.8.434686  | 0.386566 | 0.799485 | 0.483519  | 0.628727 | 0.981636 | chr13 | 95582506 | 95588153  | +     | 0                  | NA             | intron (NINtron (N  | 32609                | NM_006984 | 9071     | Hs.534377NM_006984 | ENSG000000CLDN10    | CEPML3 F      | claudin Iprotein-coding      |                    |
| chr14-34c.8.434686  | 0.386566 | 0.799485 | 0.483519  | 0.628727 | 0.981636 | chr14 | 9132     | NM_018453 | 55837 | Hs.43326cNM_018453 | ENSG000000EAPP | EMO36 C14E2F        | assoc protein-coding |           |          |                    |                     |               |                              |                    |
| chr14-497c.8.434686 | 0.386566 | 0.799485 | 0.483519  | 0.628727 | 0.981636 | chr14 | 49775428 | 49777978  | +     | 0                  | NA             | intron (NALuSzl SI  | 8550                 | NM_014315 | 23588    | Hs.509264NM_014315 | ENSG000000KLHDC2    | HCLP-1 HC     | kelch dom protein-coding     |                    |
| chr15-56c.8.434686  | 0.386566 | 0.799485 | 0.483519  | 0.628727 | 0.981636 | chr15 | 56231085 | 56234058  | +     | 0                  | NA             | intron (THEIB-int   | 11303                | NM_001367 | 64864    | Hs.74508cNM_022841 | ENSG000000RFXY7     | RFXDC2        | regulator protein-coding     |                    |
| chr15-90c.8.434686  | 0.386566 | 0.799485 | 0.483519  | 0.628727 | 0.981636 | chr15 | 90938715 | 90952565  | +     | 0                  | NA             | intron (NALuSzl SIN | -9403                | NM_001101 | 91433    | Hs.65589cNM_033544 | ENSG000000CCDC1     | -             | RCC1                         | dom protein-coding |
| chr16-487c.8.434686 | 0.386566 | 0.799485 | 0.483519  | 0.628727 | 0.981636 | chr16 | 4879941  | 4882338   | +     | 0                  | NA             | 3' UTR (N3' UTR (N  | 32759                | NM_001288 | 29855    | Hs.44021cNM_01693c | ENSG000000UBN1      | VT VT4        | ubinucler protein-coding     |                    |
| chr16-15c.8.434686  | 0.386566 | 0.799485 | 0.483519  | 0.628727 | 0.981636 | chr16 | 15600884 | 15604269  | +     | 0                  | NA             | intron (NGA-rich L  | 8519                 | NR_106761 | 1.02E+08 | NR_106761          | ENSG000000MIR6506   | hsa-mir-62    | microRNA ncRNA               |                    |
| chr16-274c.8.434686 | 0.386566 | 0.799485 | 0.483519  | 0.628727 | 0.981636 | chr16 | 27496915 | 27507397  | +     | 0                  | NA             | intron (NMIR3 SINE  | 47757                | NM_00152C | 2975     | Hs.37171cNM_00152C | ENSG000000GTF3C1    | TFI11C TF     | general t protein-coding     |                    |
| chr16-564c.8.434686 | 0.386566 | 0.799485 | 0.483519  | 0.628727 | 0.981636 | chr16 | 56496172 | 56499143  | +     | 0                  | NA             | intron (NINtron (N  | 22367                | NM_031885 | 583      | Hs.33373cNM_031885 | ENSG000000CBS2      | BBS RP74      | Bardet-Bi protein-coding     |                    |
| chr16-717c.8.434686 | 0.386566 | 0.799485 | 0.483519  | 0.628727 | 0.981636 | chr16 | 71757739 | 71760137  | +     | 0                  | NA             |                     |                      |           |          |                    |                     |               |                              |                    |



|                    |          |          |          |          |          |       |          |          |   |   |    |                    |                  |                              |                                   |                                       |
|--------------------|----------|----------|----------|----------|----------|-------|----------|----------|---|---|----|--------------------|------------------|------------------------------|-----------------------------------|---------------------------------------|
| chr1-2847 5.443882 | -0.47629 | 0.985743 | -0.48318 | 0.628967 | 0.981636 | chr1  | 28476671 | 28479250 | + | 0 | NA | intron (AluJb SIN  | -27983 NM_001048 | 1104 Hs. 469722NM_001266     | ENSG000000CC1                     | CHC1 RC1 boxator protein-coding       |
| chr12-118 5.443882 | -0.47629 | 0.985743 | -0.48318 | 0.628967 | 0.981636 | chr12 | 1.18E+08 | 1.18E+08 | + | 0 | NA | intron (AluSq2 SI  | 24098 NM_001346  | 51347 Hs. 644422NM_016281    | ENSG000000TAOK3                   | DPK JJK TAO kinase protein-coding     |
| chr13-49C 5.443882 | -0.47629 | 0.985743 | -0.48318 | 0.628967 | 0.981636 | chr13 | 49005899 | 49006772 | + | 0 | NA | intron (intron (N  | 29673 NR_103528  | 22862 Hs. 50801CNM_014923    | ENSG000000FNDC3A                  | FNDC3 HUC fibronectin protein-coding  |
| chr13-77I 5.443882 | -0.47629 | 0.985743 | -0.48318 | 0.628967 | 0.981636 | chr13 | 77044330 | 77045584 | + | 0 | NA | 3' UTR (N3' UTR (N | -17798 NM_012158 | 26224 Hs. 508284NM_012158    | ENSG000000FBXL3                   | FBXL3 FBLX2 F-box ancr protein-coding |
| chr13-77I 5.443882 | -0.47629 | 0.985743 | -0.48318 | 0.628967 | 0.981636 | chr13 | 77183889 | 77185269 | + | 0 | NA | intron (LIM5 LINE  | 109665 NR_046716 | 1.01E+08 Hs. 569288NR_046716 | ENSG000000MYCBP2-AS-              | MYCBP2 arncRNA                        |
| chr14-21C 5.443882 | -0.47629 | 0.985743 | -0.48318 | 0.628967 | 0.981636 | chr14 | 21074427 | 21075173 | + | 0 | NA | exon (NM_exon (NM  | -3928 NM_001282  | 57447 Hs. 52520ENM_01625C    | ENSG000000NDRG2                   | SYLD NDRG famiprotein-coding          |
| chr14-10I 5.443882 | -0.47629 | 0.985743 | -0.48318 | 0.628967 | 0.981636 | chr14 | 1.04E+08 | 1.04E+08 | + | 0 | NA | intron (intron (N  | 11878 NM_001100  | 7517 Hs. 592232NM_005432     | ENSG000000XRCC3                   | CMW6 X-ray rep protein-coding         |
| chr15-61S 5.443882 | -0.47629 | 0.985743 | -0.48318 | 0.628967 | 0.981636 | chr15 | 61989245 | 61991646 | + | 0 | NA | intron (intron (N  | 70002 NM_017684  | 54832 Hs. 511668NM_017684    | ENSG000000VPS13C                  | PRMK23 vacuolar protein-coding        |
| chr15-77I 5.443882 | -0.47629 | 0.985743 | -0.48318 | 0.628967 | 0.981636 | chr15 | 77178598 | 77179529 | + | 0 | NA | exon (NM_exon (NM  | 46341 NR_026813  | 81698 Hs. 65693ENM_030944    | LINCO0597C15orf5                  | long intencRNA                        |
| chr17-11F 5.443882 | -0.47629 | 0.985743 | -0.48318 | 0.628967 | 0.981636 | chr17 | 17810626 | 17811666 | + | 0 | NA | TTS (NM_CTS (NM_C  | 2399 NR_106833   | 1.02E+08 NR_106833           | ENSG000000MIR6777                 | hsa-mir-6777 miRNA ncRNA              |
| chr19-11E 5.443882 | -0.47629 | 0.985743 | -0.48318 | 0.628967 | 0.981636 | chr19 | 11654476 | 11655278 | + | 0 | NA | IntergeniIntergeni | 12212 NR_002944  | 664709 Hs. 534822NR_002944   | HNRNP1P1 HNRPA1L-2 heterog pseudo |                                       |
| chr19-16C 5.443882 | -0.47629 | 0.985743 | -0.48318 | 0.628967 | 0.981636 | chr19 | 16392702 | 16393496 | + | 0 | NA | intron (N(ATA)n SI | 68273 NM_01627C  | 10365 Hs. 68513CNM_01627C    | ENSG000000KLF2                    | LKLF Kruppel protein-coding           |
| chr2-5394 5.443882 | -0.47629 | 0.985743 | -0.48318 | 0.628967 | 0.981636 | chr2  | 53941845 | 53942633 | + | 0 | NA | intron (intron (N  | 28754 NM_014614  | 23198 Hs. 413801NM_014614    | ENSG000000PSME4                   | PAZ00 proteasone protein-coding       |
| chr2-1087 5.443882 | -0.47629 | 0.985743 | -0.48318 | 0.628967 | 0.981636 | chr2  | 1.09E+08 | 1.09E+08 | + | 0 | NA | intron (intron (N  | 8761 NM_144978   | 165055 Hs. 362702NM_144978   | ENSG000000CCDC138                 | coiled-co protein-coding              |
| chr3-274E 5.443882 | -0.47629 | 0.985743 | -0.48318 | 0.628967 | 0.981636 | chr3  | 27463082 | 27463820 | + | 0 | NA | intron (AluY SINE  | -6673 NM_00361E  | 9497 Hs. 250072NM_00361E     | ENSG000000SLC4A7                  | NBC2 NBC2 solute c protein-coding     |
| chr3-709S 5.443882 | -0.47629 | 0.985743 | -0.48318 | 0.628967 | 0.981636 | chr3  | 70997176 | 70997515 | + | 0 | NA | intron (intron (N  | 67579 NM_001345  | 27086 Hs. 59368 NM_032682    | ENSG000000FOX1P                   | 12CC4 HSF forkhead protein-coding     |
| chr5-169 5.443882  | -0.47629 | 0.985743 | -0.48318 | 0.628967 | 0.981636 | chr5  | 16908000 | 16909770 | + | 0 | NA | intron (LIMB5 LIN  | 27403 NM_012334  | 4651 Hs. 48172CNM_012334     | ENSG000000MYO10                   | myosin X protein-coding               |
| chr5-146 5.443882  | -0.47629 | 0.985743 | -0.48318 | 0.628967 | 0.981636 | chr5  | 1.46E+08 | 1.46E+08 | + | 0 | NA | intron (intron (N  | 31444 NM_194251  | 134391 Hs. 483732NM_194251   | ENSG000000GPR151                  | GALR4 GAI G protein-coding            |
| chr6-756S 5.443882 | -0.47629 | 0.985743 | -0.48318 | 0.628967 | 0.981636 | chr6  | 75686004 | 75686847 | + | 0 | NA | intron (LIP46 LIN  | -62814 NM_001368 | 4646 Hs. 149387NM_004999     | ENSG000000MYO6                    | DFNA22 DF myosin I protein-coding     |
| chr6-1114 5.443882 | -0.47629 | 0.985743 | -0.48318 | 0.628967 | 0.981636 | chr6  | 1.11E+08 | 1.11E+08 | + | 0 | NA | intron (intron (N  | -16140 NR_034108 | 643749 Hs. 486222NR_034108   | ENSG000000TRAF3IP2                | C6UAS C6c TRAF3IP2 ncRNA              |
| chr7-102E 5.443882 | -0.47629 | 0.985743 | -0.48318 | 0.628967 | 0.981636 | chr7  | 1.02E+08 | 1.02E+08 | + | 0 | NA | intron (LIP45 SI   | -11545 NM_024652 | 79706 Hs. 722104NM_024652    | ENSG000000PRKRIP1                 | C114 KRBC PRKR inte protein-coding    |
| chr8-192T 5.443882 | -0.47629 | 0.985743 | -0.48318 | 0.628967 | 0.981636 | chr8  | 1927584  | 1928110  | + | 0 | NA | intron (AluSg SIN  | -43550 NR_12634E | 1.04E+08 Hs. 734498NR_12634E | ENSG000000KBTBD11-C               | KBTBD11 cnrRNA                        |
| chr8-291I 5.443882 | -0.47629 | 0.985743 | -0.48318 | 0.628967 | 0.981636 | chr8  | 29114750 | 29115683 | + | 0 | NA | intron (intron (N  | 147854 NM_015254 | 23303 Hs. 444767NM_015254    | ENSG000000KIF13B                  | GAKIN kinesin I protein-coding        |
| chrX-154E 5.443882 | -0.47629 | 0.985743 | -0.48318 | 0.628967 | 0.981636 | chrX  | 1.55E+08 | 1.55E+08 | + | 0 | NA | intron (AluSc5 SI  | 2238 NM_001321   | 43505 Hs. 43505 NM_003639    | ENSG000000IKBK9                   | AMCBX1 IE inhibitor protein-coding    |
| chr4-560Z 7.61714  | -0.41719 | 0.863778 | -0.48298 | 0.62911  | 0.981636 | chr4  | 56025012 | 56025236 | + | 0 | NA | intron (AluJb SIN  | 76224 NM_025005  | 9662 Hs. 518767NM_01464E     | ENSG000000CEP135                  | CEP4 KIAA centrosome protein-coding   |
| chr7-6434 7.61714  | -0.41719 | 0.863778 | -0.48298 | 0.62911  | 0.981636 | chr7  | 64346541 | 64346807 | + | 0 | NA | intron (LIMB2 LIN  | 32713 NM_00117C  | 728927 Hs. 386162NM_00117C   | ENSG000000ZNF736                  | zinc fing protein-coding              |
| chr8-306Z 7.61714  | -0.41719 | 0.863778 | -0.48298 | 0.62911  | 0.981636 | chr8  | 30623690 | 30624620 | + | 0 | NA | intron (LIP45 LIN  | -14425 NM_00120E | 1.01E+08 Hs. 659499NM_00120E | ENSG000000SMIM18                  | small int protein-coding              |
| chr17-41E 11.32361 | -0.33849 | 0.700893 | -0.48294 | 0.629137 | 0.981636 | chr17 | 41904370 | 41906862 | + | 0 | NA | exon (NM_exon (NM  | 13335 NM_00109E  | 47 Hs. 387567NM_00109E       | ENSG000000ACLY                    | ACL ATPCI ATP citr protein-coding     |
| chr5-138E 8.956698 | 0.37724  | 0.781385 | 0.482784 | 0.629249 | 0.981636 | chr5  | 13857937 | 13858530 | + | 0 | NA | intron (LIP47 LIN  | 86337 NM_00136E  | 1767 Hs. 212362NM_00136E     | ENSG000000DNAH5                   | CILD3 DNA dynein a protein-coding     |
| chr5-390I 8.956698 | 0.37724  | 0.781385 | 0.482784 | 0.629249 | 0.981636 | chr5  | 39011019 | 39012561 | + | 0 | NA | intron (THE1C-int  | 62609 NM_00128E  | 253260 Hs. 40792CNM_15275E   | ENSG000000RICTOR                  | ACTO3 PIA RPTOR inte protein-coding   |
| chr6-309I 8.956698 | 0.37724  | 0.781385 | 0.482784 | 0.629249 | 0.981636 | chr6  | 30912070 | 30912398 | + | 0 | NA | intron (intron (N  | -1974 NM_02044E  | 57176 Hs. 59752CNM_02044E    | ENSG000000CVARS2                  | COXP20 v valyl-tRNA protein-coding    |
| chr16-47E 11.07522 | 0.350419 | 0.726008 | 0.482655 | 0.629334 | 0.981636 | chr16 | 47654152 | 47654643 | + | 0 | NA | intron (LIP45 LIN  | 193066 NM_001031 | 5257 Hs. 78060 NM_00029E     | ENSG000000PHKB                    | phosphory protein-coding              |
| chr2-975E 8.086455 | -0.40013 | 0.829437 | -0.48241 | 0.629515 | 0.981636 | chr2  | 97580016 | 97580215 | + | 0 | NA | intron (intron (N  | 9762 NM_00135E   | 57730 Hs. 532921NM_02097C    | ENSG000000ANKRD36B                | KIAA1641 ankyrin I protein-coding     |
| chr12-307 8.94884  | 0.379044 | 0.786755 | 0.481782 | 0.629961 | 0.981636 | chr12 | 30746388 | 30747442 | + | 0 | NA | intron (Tigger1 I  | 7599 NM_00131E   | 65981 Hs. 234355NM_02392E    | ENSG000000CAPRIN2                 | C1QDC1 EF caprin f protein-coding     |
| chr3-432E 8.94884  | 0.379044 | 0.786755 | 0.481782 | 0.629961 | 0.981636 | chr3  | 43282743 | 43291557 | + | 0 | NA | intron (AluJb SIN  | 92977 NM_00134E  | 55129 Hs. 656657NM_01807E    | ENSG000000ANO10                   | SCAR10 TV anactamir protein-coding    |
| chr1-122E 8.964556 | 0.375503 | 0.779746 | 0.481572 | 0.63011  | 0.981636 | chr1  | 12249785 | 12250736 | + | 0 | NA | intron (MER21C LIN | 20230 NM_001537E | 55187 Hs. 439381NM_01537E    | ENSG000000VPS13D                  | SCAR4 vacuolar protein-coding         |
| chr3-149C 8.964556 | 0.375503 | 0.779746 | 0.481572 | 0.63011  | 0.981636 | chr3  | 1.49E+08 | 1.49E+08 | + | 0 | NA | intron (AluSq2 SI  | -24745 NR_04664E | 1.01E+08 Hs. 742422NR_04664E | ENSG000000HLTF-AS1                | HLTF antincRNA                        |
| chr6-169E 8.964556 | 0.375503 | 0.779746 | 0.481572 | 0.63011  | 0.981636 | chr6  | 1.7E+08  | 1.7E+08  | + | 0 | NA | intron (LIM2c LIN  | 15356 NM_00135E  | 253769 Hs. 131902NM_18255E   | ENSG000000WDR27                   | WD repeat protein-coding              |
| chr7-115E 8.964556 | 0.375503 | 0.779746 | 0.481572 | 0.63011  | 0.981636 | chr7  | 1153320  | 1155870  | + | 0 | NA | intron (intron (N  | 5601 NM_00136E   | 90637 Hs. 648111NM_182491    | ENSG000000ZFAND2A                 | AIRAP zinc fing protein-coding        |
| chr7-101I 8.176592 | -0.39593 | 0.822167 | -0.48157 | 0.630112 | 0.981636 | chr7  | 1.01E+08 | 1.01E+08 | + | 0 | NA | intron (AluYm SI   | 2127 NM_00060Z   | 5054 Hs. 414799NM_00060Z     | ENSG000000SERPINE1                | PAI1 PAI-1 serpin f protein-coding    |
| chr3-52I 8.997837  | 0.378558 | 0.786451 | 0.481349 | 0.630268 | 0.981636 | chr3  | 5256177  | 5216206  | + | 0 | NA | exon (NM_exon (NM  | 28204 NM_014674  | 9695 Hs. 22461CNM_014674     | ENSG000000EDEMI                   | EDEM ER degrac protein-coding         |
| chr10-57E 8.153018 | -0.39115 | 0.812626 | -0.48134 | 0.630274 | 0.981636 | chr10 | 5756790  | 5770826  | + | 0 | NA | TTS (NM_CTS (NM_C  | 49266 NM_001494  | 2665 Hs. 229055NM_001494     | ENSG000000GDI2                    | HEL-S-46C di sc protein-coding        |
| chr12-95E 8.153018 | -0.39115 | 0.812626 | -0.48134 | 0.630274 | 0.981636 | chr12 | 95512797 | 95515624 | + | 0 | NA | non-codirnon-codir | 34028 NM_00127E  | 84101 Hs. 646421NM_032147    | ENSG000000CASP4                   | ubiquitin protein-coding              |
| chr15-44E 8.153018 | -0.39115 | 0.812626 | -0.48134 | 0.630274 | 0.981636 | chr15 | 44656090 | 44660124 | + | 0 | NA | intron (Charlie5   | 5555 NM_00116E   | 80208 Hs. 656271NM_025137    | ENSG000000SPG11                   | ALS5 CMT2 SPG11 ves protein-coding    |
| chr15-55I 8.153018 | -0.39115 | 0.812626 | -0.48134 | 0.630274 | 0.981636 | chr15 | 55192053 | 55192880 | + | 0 | NA | intron (intron (N  | 4475 NM_016304   | 51187 Hs. 274772NM_016304    | ENSG000000RSL24D1                 | C15orf15 ribosomal protein-coding     |
| chr15-55E 8.153018 | -0.39115 | 0.812626 | -0.48134 | 0.630274 | 0.981636 | chr15 | 55836260 | 55844411 | + | 0 | NA | intron (intron (N  | 76796 NM_001284  | 4734 Hs. 1565 NM_006154      | ENSG000000NEDD4                   | NEDD4-1 NEDD4 E3 protein-coding       |
| chr15-55E 8.153018 | -0.39115 | 0.812626 | -0.48134 | 0.630274 | 0.981636 | chr15 | 55849905 | 55852518 | + | 0 | NA | intron (MLTIN2 LI  | 65920 NM_001284  | 4734 Hs. 1565 NM_006154      | ENSG000000NEDD4                   | NEDD4-1 NEDD4 E3 protein-coding       |
| chr18-10E 8.153018 | -0.39115 | 0.812626 | -0.48134 | 0.630274 | 0.981636 | chr18 | 10552377 | 10555442 | + | 0 | NA | IntergeniMamRep1E  | 27882 NM_00382E  | 8774 Hs. 464622NM_00382E     | ENSG000000CNAPG                   | GAMMASNAF NSF attac protein-coding    |
| chr19-43E 8.153018 | -0.39115 | 0.812626 | -0.48134 | 0.630274 | 0.981636 | chr19 | 43663732 | 43667992 | + | 0 | NA | intron (LIP47 SIN  | 4307 NM_00265E   | 5329 Hs. 466871NM_00265E     | ENSG000000PLAUR                   | CD87 MU plasminog protein-coding      |
| chr2-702I 8.153018 | -0.39115 | 0.812626 | -0.48134 | 0.630274 | 0.981636 | chr2  | 70215548 | 70218769 | + | 0 | NA | intron (intron (N  | -26139 NR_14597C | 54980 Hs. 720049NM_01788C    | ENSG000000C2orf42                 | chromosome protein-coding             |
| chr2-216I 8.153018 | -0.39115 | 0.812626 | -0.48134 | 0.630274 | 0.981636 | chr2  | 2.16E+08 | 2.16E+08 | + | 0 | NA | intron (intron (N  | 52850 NM_021141  | 7520 Hs. 388735NM_021141     | ENSG000000XRCC5                   | KARP-1 KX-ray rep protein-coding      |
| chr2-229E 8.153018 | -0.39115 | 0.812626 | -0.48134 | 0.630274 | 0.981636 | chr2  | 2.3E+08  | 2.3E+08  | + | 0 | NA | exon (NM_exon (NM  | -84427 NM_001284 | 92737 Hs. 234074NM_13907E    | ENSG000000DNER                    | WDB4 betdelta not protein-coding      |
| chr20-19E 8.153018 | -0.39115 | 0.812626 | -0.48134 | 0.630274 | 0.981636 | chr20 | 19995988 | 20001836 | + | 0 | NA | intron (intron (N  | -18378 NM_18152E | 51126 Hs. 368783NM_01610C    | ENSG000000NAA20                   | NAT3 NAT3N(alpha)- protein-coding     |
| chr20-50E 8.153018 | -0.39115 | 0.812626 | -0.481   |          |          |       |          |          |   |   |    |                    |                  |                              |                                   |                                       |



|           |          |          |          |          |          |          |       |          |           |       |                    |                  |                     |         |                    |                  |                    |                        |                     |                           |                          |
|-----------|----------|----------|----------|----------|----------|----------|-------|----------|-----------|-------|--------------------|------------------|---------------------|---------|--------------------|------------------|--------------------|------------------------|---------------------|---------------------------|--------------------------|
| chr5-3494 | 8.442544 | 0.38473  | 0.803672 | 0.478715 | 0.632141 | 0.981636 | chr5  | 34943822 | 34946299  | +     | 0                  | NA               | intron (Nintron (N  | 15467   | NM_00134E          | 134218           | Hs.131887NM_194283 | ENSG000002DNAJC21      | BMFS3 DN^DnaJ       | heatprotein-coding        |                          |
| chr8-1406 | 8.442544 | 0.38473  | 0.803672 | 0.478715 | 0.632141 | 0.981636 | chr8  | 1.41E+08 | 1.41E+08  | +     | 0                  | NA               | intron (NAluV SINE  | 28366   | NM_001352          | 5747             | Hs.395482NM_005607 | ENSG000002PTK2         | FADK FAK            | protein-coding            |                          |
| chr9-9355 | 8.442544 | 0.38473  | 0.803672 | 0.478715 | 0.632141 | 0.981636 | chr9  | 93557704 | 93559087  | +     | 0                  | NA               | intron (Nintron (N  | -18189  | NM_005392          | 5253             | Hs.211441NM_005392 | ENSG000002PHF2         | CENP-35 CPHD        | fingerprotein-coding      |                          |
| chr10-844 | 8.111878 | -0.39397 | 0.823104 | -0.47864 | 0.632192 | 0.981636 | chr10 | 84438320 | 84438747  | +     | 0                  | NA               | exon (NM exon (NM   | 13364   | NM_001284          | 54462            | Hs.461988NM_018999 | ENSG000002CCSER2       | FAM190B coiled-cc   | protein-coding            |                          |
| chr14-214 | 8.111878 | -0.39397 | 0.823104 | -0.47864 | 0.632192 | 0.981636 | chr14 | 21497500 | 21499447  | +     | 0                  | NA               | 3' UTR (N 3' UTR (N | 12867   | NM_019852          | 56339            | Hs.168798NM_019852 | ENSG000002METTL3       | IME4 ME6A           | methyltransferase         |                          |
| chr16-882 | 8.111878 | -0.39397 | 0.823104 | -0.47864 | 0.632192 | 0.981636 | chr16 | 8828246  | 8828892   | +     | 0                  | NA               | intron (NHERV35 I   | -20900  | NR_147908          | 1E+08            | Hs.73551ENR_147908 | LOC100130C-            |                     | uncharacterncRNA          |                          |
| chr16-247 | 8.111878 | -0.39397 | 0.823104 | -0.47864 | 0.632192 | 0.981636 | chr16 | 24786747 | 24787146  | +     | 0                  | NA               | intron (NAluSx3 S1  | 57295   | NM_014494          | 27327            | Hs.655057NM_014494 | ENSG000002TNRC6A       | CAGH26 F7           | trinculecprotein-coding   |                          |
| chr3-9887 | 8.111878 | -0.39397 | 0.823104 | -0.47864 | 0.632192 | 0.981636 | chr3  | 98879903 | 98880950  | +     | 0                  | NA               | intron (Nintron (N  | 21269   | NM_080927          | 131566           | Hs.203691NM_080927 | ENSG000002DCBLD2       | L1E5 ESI            | dicoidinprotein-coding    |                          |
| chr7-4498 | 8.111878 | -0.39397 | 0.823104 | -0.47864 | 0.632192 | 0.981636 | chr7  | 44982323 | 44985581  | +     | 0                  | NA               | non-codiron-codir   | 1558    | NR_002952          | 677798           | Hs.74474ENR_002952 | ENSG000002SNORA9       | ACA9 SNOF           | small nuc snoRNA          |                          |
| chr3-9406 | 8.940982 | 0.38095  | 0.796161 | 0.478483 | 0.632306 | 0.981636 | chr3  | 9460349  | 9461388   | +     | 0                  | NA               | intron (Nintron (N  | 63168   | NM_01028C          | 55209            | Hs.288164NM_018187 | ENSG000002SETD5        |                     | SET domainprotein-coding  |                          |
| chr1-1204 | 8.401404 | 0.383453 | 0.801772 | 0.478257 | 0.632467 | 0.981636 | chr1  | 1.2E+08  | 1.2E+08   | +     | 0                  | NA               | intron (Nintron (N  | -16308  | NR_003242          | 767846           | Hs.65718ENR_003242 | ENSG000002PFN1P2       |                     | Clorf152 profilin pseudo  |                          |
| chr1-2444 | 8.401404 | 0.383453 | 0.801772 | 0.478257 | 0.632467 | 0.981636 | chr1  | 2.44E+08 | 2.44E+08  | +     | 0                  | NA               | IntergeniLIMB7 LIN  | 49002   | NM_00112E          | 159              | Hs.49831ENM_00112E | ENSG000002ADSS         | ADEH ADS            | adenylost protein-coding  |                          |
| chr11-354 | 8.401404 | 0.383453 | 0.801772 | 0.478257 | 0.632467 | 0.981636 | chr11 | 35492745 | 35494900  | +     | 0                  | NA               | intron (Nintron (N  | 32244   | NM_001001          | 25891            | Hs.55044           | NM_01543C              | ENSG000002PAMR1     | DKFZP586F                 | peptidaseprotein-coding  |
| chr11-831 | 8.401404 | 0.383453 | 0.801772 | 0.478257 | 0.632467 | 0.981636 | chr11 | 83198675 | 83198942  | +     | 0                  | NA               | intron (NMLT1G3 LI  | 5096    | NM_00130C          | 338699           | Hs.50343ENM_18260E | ENSG000002ANKRD42      | PPP1R79 Sankyrin    | 1 protein-coding          |                          |
| chr11-118 | 8.401404 | 0.383453 | 0.801772 | 0.478257 | 0.632467 | 0.981636 | chr11 | 1.18E+08 | 1.18E+08  | +     | 0                  | NA               | intron (NLTR1B2 LI  | 40825   | NM_00593C          | 4297             | Hs.25885ENM_00593C | ENSG000002KMT2A        | ALL-1 CX            | lysine meprotein-coding   |                          |
| chr17-414 | 8.401404 | 0.383453 | 0.801772 | 0.478257 | 0.632467 | 0.981636 | chr17 | 814239   | 815201    | +     | 0                  | NA               | intron (Nintron (N  | 32367   | NM_01814E          | 55178            | Hs.18272ENM_01814E | ENSG000002MRM3         | RMLT1 RN            | michoncprotein-coding     |                          |
| chr17-448 | 8.401404 | 0.383453 | 0.801772 | 0.478257 | 0.632467 | 0.981636 | chr17 | 44858266 | 44860319  | +     | 0                  | NA               | intron (Nintron (N  | 11409   | NR_073504          | 51751            | Hs.151787NM_01643E | ENSG000002CHIGD1B      | CLST1124 CHIG1      | hypcprotein-coding        |                          |
| chr2-306  | 8.401404 | 0.383453 | 0.801772 | 0.478257 | 0.632467 | 0.981636 | chr2  | 30600072 | 30600271  | +     | 0                  | NA               | intron (NLIPI3 LINE | 152925  | NM_001304          | 253558           | Hs.46804ENM_18255I | ENSG000002CLLAT1       | 1AGPAT8 A           | lysocacidprotein-coding   |                          |
| chr4-254  | 8.401404 | 0.383453 | 0.801772 | 0.478257 | 0.632467 | 0.981636 | chr4  | 25409944 | 25410885  | +     | 0                  | NA               | intron (Nintron (N  | 33151   | NM_013367          | 29945            | Hs.15217ENM_013367 | ENSG000002ANAPCA       | APCA                | anaphase protein-coding   |                          |
| chr4-122  | 8.401404 | 0.383453 | 0.801772 | 0.478257 | 0.632467 | 0.981636 | chr4  | 1.22E+08 | 1.22E+08  | +     | 0                  | NA               | intron (Nintron (N  | 77050   | NM_015312          | 84162            | Hs.40814ENM_015312 | ENSG000002KIAA1109     | ALKKUCS FKIAA1109   |                           | protein-coding           |
| chr4-183  | 8.401404 | 0.383453 | 0.801772 | 0.478257 | 0.632467 | 0.981636 | chr4  | 1.84E+08 | 1.84E+08  | +     | 0                  | NA               | intron (NAluSz SIN  | 17560   | NM_021942          | 60684            | Hs.44324ENM_021942 | ENSG000002TRAPP11      | C4orf41 F           | traffickiprotein-coding   |                          |
| chr4-184  | 8.401404 | 0.383453 | 0.801772 | 0.478257 | 0.632467 | 0.981636 | chr4  | 1.85E+08 | 1.85E+08  | +     | 0                  | NA               | intron (NAluSz SIN  | -5853   | NR_131967          | 1.05E+08         | Hs.338354NR_13196E | ENSG000002LINC0236E    | LVCAT8              | long intencRNA            |                          |
| chr5-1604 | 8.401404 | 0.383453 | 0.801772 | 0.478257 | 0.632467 | 0.981636 | chr5  | 1.6E+08  | 1.6E+08   | +     | 0                  | NA               | exon (NM exon (NM   | 6598    | NM_00136E          | 10569            | Hs.43534ENM_00642E | ENSG000002CSLU7        | 9G8 hsLu7 SLU7      | homcprotein-coding        |                          |
| chr9-106  | 8.401404 | 0.383453 | 0.801772 | 0.478257 | 0.632467 | 0.981636 | chr9  | 1.07E+08 | 1.07E+08  | +     | 0                  | NA               | intron (Nintron (N  | 73011   | NM_021224          | 58499            | Hs.37037ENM_021224 | ENSG000002ZNF462       | ZFP1P Zf            | zinc fingprotein-coding   |                          |
| chr9-110  | 8.401404 | 0.383453 | 0.801772 | 0.478257 | 0.632467 | 0.981636 | chr9  | 1.11E+08 | 1.11E+08  | +     | 0                  | NA               | intron (NMan SINE1  | 30054   | NM_15336E          | 79987            | Hs.522334NM_15336E | ENSG000002SVPEP1       | C9orf13 Cushi,      | vcprotein-coding          |                          |
| chr10-158 | 8.393546 | 0.385262 | 0.805641 | 0.478206 | 0.632503 | 0.981636 | chr10 | 15800697 | 15801953  | +     | 0                  | NA               | intron (NTigger2 I  | 59182   | NM_02494E          | 80013            | Hs.15887ENM_02494E | ENSG000002MINDY3       | C10orf97 MINDY      | lysprotein-coding         |                          |
| chr16-581 | 8.393546 | 0.385262 | 0.805641 | 0.478206 | 0.632503 | 0.981636 | chr16 | 58191018 | 58191300  | +     | 0                  | NA               | intron (NLMIB3 LIN  | 6947    | NM_00189E          | 1459             | Hs.82201           | NM_00189E              | ENSG000002CSNK2A2   | CK2A2 CK2                 | casein kiprotein-coding  |
| chr4-5344 | 8.393546 | 0.385262 | 0.805641 | 0.478206 | 0.632503 | 0.981636 | chr4  | 53443904 | 53445153  | +     | 0                  | NA               | intron (Nintron (N  | -55549  | NR_046622          | 1.01E+08         | Hs.66237ENR_046622 | ENSG000002LNX1-AS1     |                     | LNX1 anticncRNA           |                          |
| chr1-124  | 5.436024 | -0.47391 | 0.99108  | -0.47818 | 0.632524 | 0.981636 | chr1  | 12497640 | 12498334  | +     | 0                  | NA               | intron (NCharlie2   | -9259   | NR_00302E          | 677885           | Hs.65845ENR_00302E | ENSG000002SNORA59A     | ACA59               | small nuc snoRNA          |                          |
| chr10-86  | 5.436024 | -0.47391 | 0.99108  | -0.47818 | 0.632524 | 0.981636 | chr10 | 86509159 | 86510601  | +     | 0                  | NA               | intron (NAluSx3 S1  | 11724   | NM_00131E          | 23063            | Hs.20309ENM_01504E | ENSG000002WAPL         | F0E KIAAC           | WAPL coheprotein-coding   |                          |
| chr12-557 | 5.436024 | -0.47391 | 0.99108  | -0.47818 | 0.632524 | 0.981636 | chr12 | 55774195 | 55775062  | +     | 0                  | NA               | intron (NAluS2 S1   | 31506   | NM_00581I          | 10220            | Hs.60088ENM_00581I | ENSG000002GDF11        | BMP-11 B            | growth diprotein-coding   |                          |
| chr12-89  | 5.436024 | -0.47391 | 0.99108  | -0.47818 | 0.632524 | 0.981636 | chr12 | 89598836 | 89600179  | +     | 0                  | NA               | intron (Nintron (N  | -73244  | NM_00119E          | 1.01E+08         | Hs.25130           | NM_00119E              | ENSG000002POC1B-GAI | IMP4 GAI                  | POC1B-GAI protein-coding |
| chr14-24  | 5.436024 | -0.47391 | 0.99108  | -0.47818 | 0.632524 | 0.981636 | chr14 | 24186091 | 24187096  | +     | 0                  | NA               | intron (Nintron (N  | 2221    | NM_02465E          | 79711            | Hs.41186ENM_02465E | ENSG000002IPO4         | Imp4                | importin protein-coding   |                          |
| chr14-914 | 5.436024 | -0.47391 | 0.99108  | -0.47818 | 0.632524 | 0.981636 | chr14 | 91455463 | 91457256  | +     | 0                  | NA               | TTS (NM_C TTS (NM_C | -38539  | NM_00108C          | 440193           | Hs.52553ENM_00108C | ENSG000002CCDC88C      | DAPLE HKF           | coiled-ccprotein-coding   |                          |
| chr15-84  | 5.436024 | -0.47391 | 0.99108  | -0.47818 | 0.632524 | 0.981636 | chr15 | 74800276 | 74800674  | +     | 0                  | NA               | exon (NM exon (NM   | -11718  | NR_03973E          | 1.01E+08         | NR_03973E          | ENSG000002MIR4513      |                     | microRNA ncRNA            |                          |
| chr15-84  | 5.436024 | -0.47391 | 0.99108  | -0.47818 | 0.632524 | 0.981636 | chr15 | 84604922 | 84605189  | +     | 0                  | NA               | intron (Nintron (N  | 4046    | NM_001007          | 54993            | Hs.59402ENM_017894 | ENSG000002ZSCAN2       | ZFP29 ZNF           | zinc fingprotein-coding   |                          |
| chr17-364 | 5.436024 | -0.47391 | 0.99108  | -0.47818 | 0.632524 | 0.981636 | chr17 | 36494645 | 36496523  | +     | 0                  | NA               | TTS (NM_C TTS (NM_C | 8903    | NM_00128I          | 9326             | Hs.2210            | NM_00477E              | ENSG000002ZNHIT3    | PEHO TRIF                 | zinc fingprotein-coding  |
| chr17-56  | 5.436024 | -0.47391 | 0.99108  | -0.47818 | 0.632524 | 0.981636 | chr17 | 56935615 | 56936133  | +     | 0                  | NA               | IntergeniCharlie1e  | -21825  | NM_00508E          | 7706             | Hs.52895ENM_00508E | ENSG000002TRIM25       | IFP RNFI4           | tripartitprotein-coding   |                          |
| chr2-936  | 5.436024 | -0.47391 | 0.99108  | -0.47818 | 0.632524 | 0.981636 | chr2  | 9368666  | 9369270   | +     | 0                  | NA               | intron (Nintron (N  | 53623   | NM_00131E          | 9270             | Hs.46766ENM_00476E | ENSG000002ITGB1BP1     | ICAP-1A I           | integrin protein-coding   |                          |
| chr2-133  | 5.436024 | -0.47391 | 0.99108  | -0.47818 | 0.632524 | 0.981636 | chr2  | 1.33E+08 | 1.33E+08  | +     | 0                  | NA               | intron (Nintron (N  | 166255  | NR_13557E          | 1.02E+08         | Hs.680114NR_13557E | ENSG000002CNKAP5-AS-   |                     | NCKAP5 arncRNA            |                          |
| chr2-169  | 5.436024 | -0.47391 | 0.99108  | -0.47818 | 0.632524 | 0.981636 | chr2  | 1.7E+08  | 1.7E+08   | +     | 0                  | NA               | intron (Nintron (N  | 78376   | NM_17207C          | 130507           | Hs.37954ENM_17207C | ENSG000002UBR3         | ZNF650              | ubiquitin protein-coding  |                          |
| chr3-522  | 5.436024 | -0.47391 | 0.99108  | -0.47818 | 0.632524 | 0.981636 | chr3  | 52253470 | 52254701  | +     | 0                  | NA               | TTS (NM_C TTS (NM_C | 7918    | NM_001122          | 132160           | Hs.37356ENM_14464I | ENSG000002PPM1M        | PP2C-eta            | protein-coding            |                          |
| chr5-786  | 5.436024 | -0.47391 | 0.99108  | -0.47818 | 0.632524 | 0.981636 | chr5  | 7864100  | 7865888   | +     | 0                  | NA               | intron (NLMIME3G LI | 4037    | NM_02409I          | 79072            | Hs.65316ENM_02409I | ENSG000002FASTKD3      |                     | FAST kinaseprotein-coding |                          |
| chr5-170  | 5.436024 | -0.47391 | 0.99108  | -0.47818 | 0.632524 | 0.981636 | chr5  | 1.71E+08 | 1.71E+08  | +     | 0                  | NA               | intron (NLIPI2 LINE | 37395   | NM_002289          | 64901            | Hs.41081ENM_02289E | ENSG000002RANBP17      |                     | RAN bindiprotein-coding   |                          |
| chr6-713  | 5.436024 | -0.47391 | 0.99108  | -0.47818 | 0.632524 | 0.981636 | chr6  | 1.11857  | NM_02457E | 79627 | Hs.648434NM_02457E | ENSG000002OGFRL1 |                     | 79627   | Hs.648434NM_02457E | ENSG000002OGFRL1 | dJ331H24.          | opioid gprotein-coding |                     |                           |                          |
| chr6-140  | 5.436024 | -0.47391 | 0.99108  | -0.47818 | 0.632524 | 0.981636 | chr6  | 1.41E+08 | 1.41E+08  | +     | 0                  | NA               | IntergeniLIMA1 LIN  | -147827 | NR_03967E          | 1.01E+08         | NR_03967E          | ENSG000002MIR4465      |                     | microRNA ncRNA            |                          |
| chr6-167  | 5.436024 | -0.47391 | 0.99108  | -0.47818 | 0.632524 | 0.981636 | chr6  | 1.67E+08 | 1.67E+08  | +     | 0                  | NA               | intron (Nintron (N  | 6087    | NM_19442E          | 11116            | Hs.48717ENM_00704E | ENSG000002FGFR10P      | FOP                 | FGFR11                    | oncprotein-coding        |
| chr7-14   | 5.436024 | -0.47391 | 0.99108  | -0.47818 | 0.632524 | 0.981636 | chr7  | 1.4E+08  | 1.4E+08   | +     | 0                  | NA               | intron (Nintron (N  | 50325   | NM_00136E          | 84255            | Hs.446021NM_03229E | ENSG000002SLC37A3      |                     | solute cprotein-coding    |                          |
| chr8-47   | 5.436024 | -0.47391 | 0.99108  | -0.47818 | 0.632524 | 0.981636 | chr8  | 47784646 | 47786562  | +     | 0                  | NA               | intron (NAluJo SIN  | -47440  | NM_00519E          | 1052             | Hs.44082ENM_00519E | ENSG000002CEBPD        | C/EBP-de CCAAT      | enprotein-coding          |                          |
| chr9-278  | 5.436024 | -0.47391 | 0.99108  | -0.47818 | 0.632524 | 0.981636 | chr9  | 2782471  | 2783427   | +     | 0                  | NA               | IntergeniMERS7      |         |                    |                  |                    |                        |                     |                           |                          |



|                    |          |          |          |          |          |       |           |          |   |    |                     |                   |          |                        |                                     |                                      |
|--------------------|----------|----------|----------|----------|----------|-------|-----------|----------|---|----|---------------------|-------------------|----------|------------------------|-------------------------------------|--------------------------------------|
| chr3-1967.7.408228 | 0.416414 | 0.873691 | 0.476614 | 0.633637 | 0.981636 | chr3  | 1.96E+08  | 1.96E+08 | 0 | NA | intron (NLIPA6 LIN  | -42117 NR_037950  | 1.01E+08 | Hs. 73318CRN_037950    | TM4SF19-1-                          | TM4SF19-1ncRNA                       |
| chr5-177.7.408228  | 0.416414 | 0.873691 | 0.476614 | 0.633637 | 0.981636 | chr5  | 1.77E+08  | 1.77E+08 | 0 | NA | intron (Nintron (N  | 21892 NM_001308   | 23567    | Hs. 484256NM_012275    | ENSG000003ZNF346                    | JAZ Zfp34zinc finger protein-coding  |
| chr7-1287.7.408228 | 0.416414 | 0.873691 | 0.476614 | 0.633637 | 0.981636 | chr7  | 1.29E+08  | 1.29E+08 | 0 | NA | promoter-promoter-  | -709 NM_001195    | 1E+08    | Hs. 641532NM_001195    | ENSG000003ATP6V1FN6-                | ATP6V1F rprotein-coding              |
| chr1-1175.8.596909 | -0.38224 | 0.803123 | -0.47595 | 0.634112 | 0.981636 | chr1  | 1.1795686 | 11793985 | 0 | NA | intron (Nintron (N  | 9842 NM_00133C    | 4524     | Hs. 211442NM_005957    | ENSG000003MTHFR                     | methyleneprotein-coding              |
| chr12-125.8.596909 | -0.38224 | 0.803123 | -0.47595 | 0.634112 | 0.981636 | chr12 | 1.24E+08  | 1.24E+08 | 0 | NA | intron (NLTRIOCL LI | 30335 NM_001304   | 80212    | Hs. 114111NM_02514C    | ENSG000003CCDC92                    | coiled-ccprotein-coding              |
| chr1-4668.8.409262 | 0.381629 | 0.801936 | 0.475885 | 0.634156 | 0.981636 | chr1  | 46688201  | 46690181 | 0 | NA | intron (Nintron (N  | 15155 NR_03882E   | 1E+08    | Hs. 56864ENR_038827    | ENSG000003EFCB41A-#KIAA0494-EFCB41A | ncRNA                                |
| chr1-2201.8.409262 | 0.381629 | 0.801936 | 0.475885 | 0.634156 | 0.981636 | chr1  | 2.2E+08   | 2.2E+08  | 0 | NA | intron (NAluSz SIN  | -10868 NR_029711  | 406969   | NR_029711              | ENSG000003MIR194-1                  | MIRN194-1microRNA ncRNA              |
| chr1-2315.8.409262 | 0.381629 | 0.801936 | 0.475885 | 0.634156 | 0.981636 | chr1  | 2.31E+08  | 2.31E+08 | 0 | NA | 3' UTR (N3' UTR (N  | 13705 NM_001010C  | 83932    | Hs. 554892NM_03201F    | ENSG000003SPR1N                     | Clorf124 SprT-like protein-coding    |
| chr12-928.8.409262 | 0.381629 | 0.801936 | 0.475885 | 0.634156 | 0.981636 | chr12 | 92858004  | 92859716 | 0 | NA | intron (Nintron (N  | 70435 NM_00356E   | 8411     | Hs. 567367NM_00356E    | ENSG000003CEEA1                     | MST105 MSearly encprotein-coding     |
| chr13-973.8.409262 | 0.381629 | 0.801936 | 0.475885 | 0.634156 | 0.981636 | chr13 | 973755078 | 97375900 | 0 | NA | intron (Nintron (N  | -58680 NR_021033  | 5911     | Hs. 50848CM_021033     | ENSG000003RAP2A                     | K-REV KRE RAP2A, meprotein-coding    |
| chr14-738.8.409262 | 0.381629 | 0.801936 | 0.475885 | 0.634156 | 0.981636 | chr14 | 73211567  | 73214440 | 0 | NA | intron (Nintron (N  | -24503 NR_158677  | 89932    | Hs. 509905NM_17346E    | ENSG000003PAPLN                     | PPN papilin, protein-coding          |
| chr15-658.8.409262 | 0.381629 | 0.801936 | 0.475885 | 0.634156 | 0.981636 | chr15 | 65884201  | 65886080 | 0 | NA | intron (NAluSc8 SI  | 15649 NM_00120E   | 8766     | Hs. 321541NM_00466E    | ENSG000003CRAB11A                   | YL8 RAB11A, nprotein-coding          |
| chr17-572.8.409262 | 0.381629 | 0.801936 | 0.475885 | 0.634156 | 0.981636 | chr17 | 57262057  | 57265284 | 0 | NA | intron (Nintron (N  | 6651 NM_140721    | 124540   | Hs. 658922NM_13896E    | ENSG000003MSI2                      | MSI2H musashi fprotein-coding        |
| chr18-468.8.409262 | 0.381629 | 0.801936 | 0.475885 | 0.634156 | 0.981636 | chr18 | 46888418  | 46890885 | 0 | NA | intron (NLIMB3 LIN  | 27856 NR_148702   | 9063     | Hs. 57769 NM_004671    | ENSG000003PIA52                     | ARIP3 DIF protein-coding             |
| chr21-425.8.409262 | 0.381629 | 0.801936 | 0.475885 | 0.634156 | 0.981636 | chr21 | 42908766  | 42911703 | 0 | NA | 3' UTR (N3' UTR (N  | 15364 NM_00130E   | 90625    | NR_001308491           | ERVH48-1                            | C2orf105 endogeno protein-coding     |
| chr4-3172.8.409262 | 0.381629 | 0.801936 | 0.475885 | 0.634156 | 0.981636 | chr4  | 3172600   | 3175389  | 0 | NA | intron (Nintron (N  | -70375 NM_00133C  | 345222   | Hs. 442291NM_00101E    | ENSG000003MSANTD1                   | C4orf44 Myb/SANT protein-coding      |
| chr4-1278.8.409262 | 0.381629 | 0.801936 | 0.475885 | 0.634156 | 0.981636 | chr4  | 1.29E+08  | 1.29E+08 | 0 | NA | intron (NLIMC5 LIN  | 132718 NM_001287  | 79960    | Hs. 12420 NM_02490C    | ENSG000003JADE1                     | PHF17 jade fasp protein-coding       |
| chr5-1074.8.409262 | 0.381629 | 0.801936 | 0.475885 | 0.634156 | 0.981636 | chr5  | 10747146  | 10748822 | 0 | NA | intron (Nintron (N  | 13250 NM_004394   | 1611     | Hs. 75189 NM_004394    | ENSG000003DAP                       | death assprotein-coding              |
| chr5-4865.8.409262 | 0.381629 | 0.801936 | 0.475885 | 0.634156 | 0.981636 | chr5  | 48650730  | 48651968 | 0 | NA | IntergeniALR Alpha  | 1789939 NM_198445 | 133418   | Hs. 561411NM_19844E    | ENSG000003EMB                       | GR70 embigin protein-coding          |
| chr5-9581.8.409262 | 0.381629 | 0.801936 | 0.475885 | 0.634156 | 0.981636 | chr5  | 95814318  | 95817522 | 0 | NA | intron (NL2a LINE   | 6806 NM_002064    | 2745     | Hs. 28988 NM_002064    | ENSG000003CLRX                      | GRX GRX1 glutaredc protein-coding    |
| chr6-3185.8.409262 | 0.381629 | 0.801936 | 0.475885 | 0.634156 | 0.981636 | chr6  | 31891385  | 31893229 | 0 | NA | intron (Nintron (N  | 4682 NM_00131E    | 10919    | Hs. 70921ENM_00670E    | ENSG000003EHMT2                     | BAT8 C6or euchromat protein-coding   |
| chr7-3822.8.409262 | 0.381629 | 0.801936 | 0.475885 | 0.634156 | 0.981636 | chr7  | 38229337  | 38230419 | 0 | NA | intron (Nintron (N  | 43769 NM_00100C   | 445347   | Hs. 534032NM_001003799 | TARP                                | CD3G TCRC TCR gammeprotein-coding    |
| chr7-1074.8.409262 | 0.381629 | 0.801936 | 0.475885 | 0.634156 | 0.981636 | chr7  | 1.07E+08  | 1.07E+08 | 0 | NA | intron (Nintron (N  | 31563 NM_012257   | 26959    | Hs. 162032NM_012257    | ENSG000003HBP1                      | HMG-box tprotein-coding              |
| chr7-1498.8.409262 | 0.381629 | 0.801936 | 0.475885 | 0.634156 | 0.981636 | chr7  | 1.49E+08  | 1.49E+08 | 0 | NA | intron (NHAL1 LINE  | 15394 NM_015694   | 27153    | Hs. 38512 NM_015694    | ENSG000003ZNF777                    | zinc finger protein-coding           |
| chr9-3504.8.409262 | 0.381629 | 0.801936 | 0.475885 | 0.634156 | 0.981636 | chr9  | 35047768  | 35048014 | 0 | NA | IntergeniAluSz6 SI  | 5651 NM_20329E    | 138724   | Hs. 148255NM_20329E    | ENSG000003C9orf131                  | chromosonprotein-coding              |
| chr9-1287.8.409262 | 0.381629 | 0.801936 | 0.475885 | 0.634156 | 0.981636 | chr9  | 1.29E+08  | 1.29E+08 | 0 | NA | intron (Nintron (N  | 11871 NM_018201   | 54662    | Hs. 3376 NM_018201     | ENSG000003TBC1D13                   | TBC1 domeprotein-coding              |
| chr9-4355.19.28824 | 0.263595 | 0.554055 | 0.475755 | 0.634249 | 0.981636 | chr9  | 43588022  | 43588348 | 0 | NA | IntergeniALR Alpha  | 462019 NR_16066E  | 1.03E+08 | NR_160669              | LOC102724-                          | methylenepseudo                      |
| chr13-114.8.604767 | -0.38388 | 0.807512 | -0.47539 | 0.634508 | 0.981636 | chr13 | 1.14E+08  | 1.14E+08 | 0 | NA | intron (NCPG        | 37112 NM_00132C   | 22821    | Hs. 593075NM_00736E    | ENSG000003CRAS3                     | GAP1 IP4 BFB RAS p21 fprotein-coding |
| chr7-1162.8.078597 | -0.39859 | 0.838742 | -0.47522 | 0.634629 | 0.981636 | chr7  | 1.16E+08  | 1.16E+08 | 0 | NA | intron (NTHE1C-int  | 21733 NM_15282E   | 26136    | Hs. 59228E NM_015641   | ENSG000003TES                       | TEST TES testin L protein-coding     |
| chr17-246.7.642564 | -0.41051 | 0.864173 | -0.47504 | 0.634762 | 0.981636 | chr17 | 2466340   | 2469937  | 0 | NA | intron (Nintron (N  | 48100 NM_02408E   | 79066    | Hs. 632237NM_02408E    | ENSG000003METTL16                   | METT MET methyltr lprotein-coding    |
| chr9-1311.7.642564 | -0.41051 | 0.864173 | -0.47504 | 0.634762 | 0.981636 | chr9  | 1.31E+08  | 1.31E+08 | 0 | NA | intron (Nintron (N  | 24914 NM_00131E   | 8021     | Hs. 654533NM_00508E    | ENSG000003NUP214                    | CAIN CAN nucleopor protein-coding    |
| chrX-1295.7.642564 | -0.41051 | 0.864173 | -0.47504 | 0.634762 | 0.981636 | chrX  | 1.3E+08   | 1.3E+08  | 0 | NA | intron (Nintron (N  | 11308 NM_00128E   | 6594     | Hs. 152292NM_00306E    | ENSG000003SMARCA1                   | ISWI NURF SWI SNF rprotein-coding    |
| chr14-771.7.44151  | 0.419764 | 0.883648 | 0.475035 | 0.634762 | 0.981636 | chr14 | 77113752  | 77114907 | 0 | NA | 3' UTR (N3' UTR (N  | 16071 NM_03342E   | 85457    | Hs. 709066NM_03342E    | ENSG000003CIPC                      | KIAA1737 CLOCK intron-coding         |
| chr19-415.11.27461 | -0.3395  | 0.714855 | -0.47493 | 0.63484  | 0.981636 | chr19 | 41300307  | 41301011 | 0 | NA | intron (Nintron (N  | -9513 NM_05284E   | 90324    | Hs. 437497NM_05284E    | ENSG000003CCDC97                    | coiled-ccprotein-coding              |
| chr10-115.8.589051 | -0.38068 | 0.801557 | -0.47492 | 0.634841 | 0.981636 | chr10 | 11920994  | 11921203 | 0 | NA | 3' UTR (N3' UTR (N  | -26388 NR_038222  | 219731   | Hs. 576787NR_038222    | ENSG000003PROSER2-#                 | PROSER2 ncRNA                        |
| chr11-108.8.589051 | -0.38068 | 0.801557 | -0.47492 | 0.634841 | 0.981636 | chr11 | 1.08E+08  | 1.08E+08 | 0 | NA | intron (NAluJb SIN  | 66363 NM_001351   | 472      | Hs. 367437NM_000051    | ENSG000003ATM                       | AT1 ATA1 ATM serir protein-coding    |
| chr17-388.8.589051 | -0.38068 | 0.801557 | -0.47492 | 0.634841 | 0.981636 | chr17 | 38319136  | 38319541 | 0 | NA | intron (NAluSp SIN  | 22170 NM_032351   | 84311    | Hs. 537275NM_032351    | ENSG000003MRPL45                    | L45mt MRf mitochondonprotein-coding  |
| chr12-131.7.863677 | 0.397603 | 0.837303 | 0.474862 | 0.634886 | 0.981636 | chr12 | 1.32E+08  | 1.32E+08 | 0 | NA | intron (Nintron (N  | 35020 NM_00459E   | 6433     | Hs. 30817 NM_00459E    | ENSG000003SFSWAP                    | SFRS8 SW splicing protein-coding     |
| chr20-397.7.863677 | 0.397603 | 0.837303 | 0.474862 | 0.634886 | 0.981636 | chr20 | 3989702   | 3990004  | 0 | NA | intron (NMLT11 LTF  | 25705 NM_001134   | 11237    | Hs. 547575NM_00721E    | ENSG000003RNF24                     | GILF ring finger protein-coding      |
| chr20-355.9.47871  | 0.36942  | 0.778283 | 0.47466  | 0.635029 | 0.981636 | chr20 | 35688935  | 35689395 | 0 | NA | intron (Nintron (N  | 10187 NM_00119E   | 9054     | Hs. 194692NM_02110C    | ENSG000003CNFS1                     | HUSSY-08 NFS1 cyst protein-coding    |
| chr12-121.7.912674 | 0.396975 | 0.836664 | 0.474474 | 0.635162 | 0.981636 | chr12 | 1.21E+08  | 1.21E+08 | 0 | NA | intron (NAluXs3 SI  | -20471 NM_15349E  | 10645    | Hs. 29734E NM_00654E   | ENSG000003CAMKK2                    | CKMK CAM calcium/cprotein-coding     |
| chr16-311.7.912674 | 0.396975 | 0.836664 | 0.474474 | 0.635162 | 0.981636 | chr16 | 31112139  | 31112789 | 0 | NA | 3' UTR (N3' UTR (N  | 4078 NM_001122    | 10295    | Hs. 51352C NM_005881   | ENSG000003BCKDK                     | BCKDK BE branched protein-coding     |
| chr18-215.7.912674 | 0.396975 | 0.836664 | 0.474474 | 0.635162 | 0.981636 | chr18 | 21563577  | 21563832 | 0 | NA | intron (Nintron (N  | 37000 NM_052911   | 114799   | Hs. 464733NM_052911    | ENSG000003ESCO1                     | A9300141 establist protein-coding    |
| chr21-403.7.912674 | 0.396975 | 0.836664 | 0.474474 | 0.635162 | 0.981636 | chr21 | 43741570  | 43747681 | 0 | NA | intron (Nintron (N  | 5929 NM_001331    | 8566     | Hs. 284491NM_003681    | ENSG000003PDXK                      | C2orf124 pyridoxal protein-coding    |
| chr3-1307.7.912674 | 0.396975 | 0.836664 | 0.474474 | 0.635162 | 0.981636 | chr3  | 1E+08     | 1E+08    | 0 | NA | intron (Nintron (N  | 22532 NM_00119E   | 55773    | Hs. 477003NM_01830E    | ENSG000003TBC1D23                   | NS4orf11 TBC1 domeprotein-coding     |
| chr5-3242.7.912674 | 0.396975 | 0.836664 | 0.474474 | 0.635162 | 0.981636 | chr5  | 32428879  | 32429091 | 0 | NA | intron (NAluYml SI  | 15755 NR_14431E   | 51663    | Hs. 435231NM_016107    | ENSG000003ZFR                       | SPG71 ZFF zinc finger protein-coding |
| chr5-811.7.912674  | 0.396975 | 0.836664 | 0.474474 | 0.635162 | 0.981636 | chr5  | 81137558  | 81137805 | 0 | NA | intron (NMLT1B LTF  | -95639 NM_00182E  | 1160     | Hs. 80691 NM_00182E    | ENSG000003CKMT2                     | SMTCCK creatine protein-coding       |
| chr1-2115.8.194158 | -0.38828 | 0.818601 | -0.47432 | 0.635272 | 0.981636 | chr1  | 2.11E+08  | 2.11E+08 | 0 | NA | intron (Nintron (N  | -23042 NM_00461E  | 7188     | Hs. 52393CNM_00461E    | ENSG000003TRAF5                     | MGC:3978C TNF receeprotein-coding    |
| chr16-892.8.194158 | -0.38828 | 0.818601 | -0.47432 | 0.635272 | 0.981636 | chr16 | 89269733  | 89270920 | 0 | NA | intron (Nintron (N  | -25802 NR_13633E  | 1.05E+08 | Hs. 657381NR_13633E    | ENSG000003LOC105371                 | uncharactncRNA                       |
| chr7-9945.14.14304 | 0.300054 | 0.6326   | 0.474319 | 0.635272 | 0.981636 | chr7  | 99492189  | 99497512 | 0 | NA | in                  |                   |          |                        |                                     |                                      |

|                     |           |          |           |          |          |       |           |          |   |      |                                        |                   |                                               |                   |                          |                          |
|---------------------|-----------|----------|-----------|----------|----------|-------|-----------|----------|---|------|----------------------------------------|-------------------|-----------------------------------------------|-------------------|--------------------------|--------------------------|
| chr12-641.8.173402  | -0.38513  | 0.815281 | -0.47239  | 0.636651 | 0.981636 | chr12 | 64140598  | 64140842 | + | 0 NA | intron (N)LIPA2 LIN                    | 81576 NM_00130C   | 144577 Hs. 444671NM_15244CENS00000C12orf66    | -                 | chromosomprotein-coding  |                          |
| chr15-658.8.178442  | -0.38513  | 0.815281 | -0.47239  | 0.636651 | 0.981636 | chr15 | 65597848  | 65598936 | + | 0 NA | exon (NM) exon (NM)                    | 12739 NM_00136E   | 81556 Hs. 6686 NM_03080CENS00000INTS14        | C15orf44          | integratrprotein-coding  |                          |
| chr16-211.8.178442  | -0.38513  | 0.815281 | -0.47239  | 0.636651 | 0.981636 | chr16 | 2113327   | 2114054  | + | 0 NA | intron (N)intron (N)                   | -6937 NR_106777E  | 1.02E+08 NR_106777EENS00000MIR6511B1MIR6511B- | microRNA ncRNA    |                          |                          |
| chr19-491.8.178442  | -0.38513  | 0.815281 | -0.47239  | 0.636651 | 0.981636 | chr19 | 49861767  | 49862202 | + | 0 NA | intron (N)CpG-1495E                    | -2695 NR_110733C  | 1.02E+08 Hs. 710299NR_110730                  | PTOV1-AS2-        | PTOV1 antncRNA           |                          |
| chr2-2918.8.178442  | -0.38513  | 0.815281 | -0.47239  | 0.636651 | 0.981636 | chr2  | 29137238  | 29137652 | + | 0 NA | intron (N)LIPA17 LI                    | 22030 NM_001287   | 79745 Hs. 122927NM_02469EENS00000CLIP4        | RSNL2             | CAP-Gly protein-coding   |                          |
| chr2-6132.8.178442  | -0.38513  | 0.815281 | -0.47239  | 0.636651 | 0.981636 | chr2  | 61328864  | 61329178 | + | 0 NA | intron (N)AluSp SIN                    | 88356 NR_003707   | 1E+08 Hs. 67582ENR_003707ENS00000SNORA70B     | -                 | small nucsnoRNA          |                          |
| chr2-2016.8.178442  | -0.38513  | 0.815281 | -0.47239  | 0.636651 | 0.981636 | chr2  | 2.02E+08  | 2.02E+08 | + | 0 NA | intron (N)intron (N)                   | 6171 NM_152388    | 65062 Hs. 12319 NM_152388ENS00000TMEM237      | ALS2CR4 J         | transmemprotein-coding   |                          |
| chr20-1918.8.178442 | -0.38513  | 0.815281 | -0.47239  | 0.636651 | 0.981636 | chr20 | 19966247  | 19968952 | + | 0 NA | intron (N)intron (N)                   | -49691 NM_18152E  | 51126 Hs. 368788NM_01610CENS00000NAA20        | NAT3 NAT3(alpha)- | protein-coding           |                          |
| chr3-9858.8.178442  | -0.38513  | 0.815281 | -0.47239  | 0.636651 | 0.981636 | chr3  | 98585602  | 98586244 | + | 0 NA | intron (N)AluY SINE                    | 7688 NM_000097    | 1371 Hs. 476982NM_000097ENS00000CPOX          | -                 | COX CPO C                | coproporf protein-coding |
| chr3-1237.8.178442  | -0.38513  | 0.815281 | -0.47239  | 0.636651 | 0.981636 | chr3  | 1.24E+08  | 1.24E+08 | + | 0 NA | intron (N)MERC33 DN                    | 63456 NR_046622E  | 1.01E+08 Hs. 66731ENR_046622ENS00000MYLK-AS2  | -                 | MYLK antncRNA            |                          |
| chr6-1005.8.178442  | -0.38513  | 0.815281 | -0.47239  | 0.636651 | 0.981636 | chr6  | 1.01E+08  | 1.01E+08 | + | 0 NA | intron (N)intron (N)                   | -125336 NM_00506E | 6492 Hs. 52029ENR_00506EENS00000SLM1          | bHLHe14           | SIM bHLH protein-coding  |                          |
| chr7-139C.8.178442  | -0.38513  | 0.815281 | -0.47239  | 0.636651 | 0.981636 | chr7  | 1.39E+08  | 1.39E+08 | + | 0 NA | intron (N)AluSp SIN                    | -8421 NR_16210E   | 1.13E+08 NR_16210E                            | MIR10399          | -                        | microRNA ncRNA           |
| chr6-9954.8.581193  | -0.37917  | 0.802772 | -0.47233  | 0.636693 | 0.981636 | chr6  | 99547906  | 99548190 | + | 0 NA | intron (N)L2 LINE L                    | 20612 NM_00519C   | 892 Hs. 43064ENM_00519CENS00000CCNC           | -                 | CycC SRB cyclin C        | protein-coding           |
| chr11-74.8.137302   | -0.3879   | 0.821348 | -0.47227  | 0.636731 | 0.981636 | chr11 | 74208138  | 74208162 | + | 0 NA | intron (N)intron (N)                   | 38128 NM_001271   | 51400 Hs. 503251NM_016147ENS00000PPME1        | ABDH19 P          | protein-coding           |                          |
| chr14-584.8.137302  | -0.3879   | 0.821348 | -0.47227  | 0.636731 | 0.981636 | chr14 | 58411579  | 58412407 | + | 0 NA | intron (N)intron (N)                   | 15249 NM_001304   | 26520 Hs. 44052ENM_01246CENS00000TIMM9        | TIM9 TIM9         | translocprotein-coding   |                          |
| chr2-4392.8.137302  | -0.3879   | 0.821348 | -0.47227  | 0.636731 | 0.981636 | chr2  | 439252347 | 43925852 | + | 0 NA | intron (N)intron (N)                   | 70390 NM_13325E   | 10128 Hs. 368084NM_13325EENS00000LRPPRC       | CLONE-23E         | leucine rprotein-coding  |                          |
| chr3-478.8.137302   | -0.3879   | 0.821348 | -0.47227  | 0.636731 | 0.981636 | chr3  | 47832815  | 47833283 | + | 0 NA | intron (N)FLAM_C SI                    | -16506 NR_03159E  | 1E+08 NR_03159EENS00000MIR1226                | MIRN1226          | microRNA ncRNA           |                          |
| chr3-998E.137302    | -0.3879   | 0.821348 | -0.47227  | 0.636731 | 0.981636 | chr3  | 99866726  | 99867243 | + | 0 NA | intron (N)intron (N)                   | 8989 NM_00137C    | 11259 Hs. 10467ENM_01489CENS00000FILIP1L      | D0C-1 DOC         | filamin A protein-coding |                          |
| chr4-845E.8.137302  | -0.3879   | 0.821348 | -0.47227  | 0.636731 | 0.981636 | chr4  | 8458010   | 8458415  | + | 0 NA | intron (N)Tiger2 E                     | 17415 NM_00135C   | 152992 Hs. 566191NM_02495CENS00000TRM744      | C4orf23           | mRNA metprotein-coding   |                          |
| chr4-942E.8.137302  | -0.3879   | 0.821348 | -0.47227  | 0.636731 | 0.981636 | chr4  | 94282726  | 94283835 | + | 0 NA | exon (NM) exon (NM)                    | 29971 NM_001254   | 56916 Hs. 41040ENM_02015EENS00000SMARCAD1     | ADERM BAS         | SWI/SNF-1 protein-coding |                          |
| chr6-854E.8.137302  | -0.3879   | 0.821348 | -0.47227  | 0.636731 | 0.981636 | chr6  | 85466870  | 85467789 | + | 0 NA | intron (N)intron (N)                   | 17246 NM_00252E   | 4907 Hs. 15395ENM_00252EENS00000CTN5E         | CALJA CD75        | -nuclecprotein-coding    |                          |
| chr8-616E.8.137302  | -0.3879   | 0.821348 | -0.47227  | 0.636731 | 0.981636 | chr8  | 61600279  | 61601187 | + | 0 NA | intron (N)LIM2 LINE                    | 89078 NM_001164   | 444 Hs. 33242ENM_00431EENS00000ASPH           | AAH BAH           | caspartateprotein-coding |                          |
| chr1-1931.8.614475  | -0.37487  | 0.793838 | -0.47222  | 0.63677  | 0.981636 | chr1  | 1.93E+08  | 1.93E+08 | + | 0 NA | exon (NM) exon (NM)                    | 5389 NR_031691    | 1E+08 NR_031691ENS00000MIR1278                | MIRN1278          | microRNA ncRNA           |                          |
| chr11-658.8.614475  | -0.37487  | 0.793838 | -0.47222  | 0.63677  | 0.981636 | chr11 | 65538122  | 65539843 | + | 0 NA | TTS (NM_C)TTS (NM_C)                   | 13899 NM_00104E   | 57410 Hs. 23883ENM_02068CENS00000SCYL1        | GKLP HTO1         | SCY1 like protein-coding |                          |
| chr12-214.8.614475  | -0.37487  | 0.793838 | -0.47222  | 0.63677  | 0.981636 | chr12 | 21472718  | 21473513 | + | 0 NA | intron (N)intron (N)                   | 28520 NM_002907   | 5965 Hs. 23506ENM_002907ENS00000RECQL         | RECQL1 ReCq       | like protein-coding      |                          |
| chr13-111.8.614475  | -0.37487  | 0.793838 | -0.47222  | 0.63677  | 0.981636 | chr13 | 1.1E+08   | 1.1E+08  | + | 0 NA | intron (N)intron (N)                   | 1824 NM_001267    | 1E+08 Hs. 64003ENM_001267044                  | COL4A2-AS-        | COL4A2 arprotein-coding  |                          |
| chr2-1281.8.614475  | -0.37487  | 0.793838 | -0.47222  | 0.63677  | 0.981636 | chr2  | 1.28E+08  | 1.28E+08 | + | 0 NA | intron (N)LIMB7 LIN                    | 57352 NM_0027671  | 56886 Hs. 74330ENM_02012CENS00000UGGT1        | HUGT1 UCG         | UDP-glucprotein-coding   |                          |
| chr3-8694.8.614475  | -0.37487  | 0.793838 | -0.47222  | 0.63677  | 0.981636 | chr3  | 86944631  | 86944830 | + | 0 NA | 3' UTR (N)3' UTR (N)                   | 46419 NM_00132C   | 389136 Hs. 606507NM_01620CENS00000VGLL3       | VGL-3 VGL         | vestigialprotein-coding  |                          |
| chr9-134E.8.614475  | -0.37487  | 0.793838 | -0.47222  | 0.63677  | 0.981636 | chr9  | 1.35E+08  | 1.35E+08 | + | 0 NA | intron (N)intron (N)                   | -39677 NR_13804E  | 414316 Hs. 571561NR_13804EENS00000COL5A1-AS   | C9orf104 COL5A1   | arncRNA                  |                          |
| chr12-95E.8.90585   | -0.367861 | 0.780273 | -0.471452 | 0.637318 | 0.981636 | chr12 | 95504162  | 95505491 | + | 0 NA | intron (N)intron (N)                   | 30674 NM_001317   | 10988 Hs. 44498ENM_00683EENS00000METAP2       | MMP2 MNPE         | methionylprotein-coding  |                          |
| chr13-79E.8.90585   | -0.367861 | 0.780273 | -0.471452 | 0.637318 | 0.981636 | chr13 | 79369940  | 79372377 | + | 0 NA | exon (NM) exon (NM)                    | 35063 NM_00128E   | 64062 Hs. 55852ENM_01860EENS00000CRBM26       | ARRS2 C1E         | RNA bindiprotein-coding  |                          |
| chr14-921.8.90585   | -0.367861 | 0.780273 | -0.471452 | 0.637318 | 0.981636 | chr14 | 92133693  | 92133998 | + | 0 NA | intron (N)intron (N)                   | 11876 NM_001322   | 53981 Hs. 65762ENM_017437ENS00000CPSF2        | CPSF100           | cleavage protein-coding  |                          |
| chr19-52E.8.90585   | -0.367861 | 0.780273 | -0.471452 | 0.637318 | 0.981636 | chr19 | 52595943  | 52596882 | + | 0 NA | promoter-promoter-intron (N)intron (N) | -272 NR_02313E    | 7696 Hs. 37364ENM_003438                      | ZNF137 p          | zinc fingpseudo          |                          |
| chr21-371.8.90585   | -0.367861 | 0.780273 | -0.471452 | 0.637318 | 0.981636 | chr21 | 37126677  | 37130092 | + | 0 NA | intron (N)intron (N)                   | 45437 NM_00331E   | 7267 Hs. 368214NM_00331EENS00000CTTC3         | DCRR1 RN          | tetratricprotein-coding  |                          |
| chrX-248E.8.90585   | -0.367861 | 0.780273 | -0.471452 | 0.637318 | 0.981636 | chrX  | 2489750   | 2490422  | + | 0 NA | exon (NM) exon (NM)                    | 10453 NM_001171   | 9189 Hs. 13145ENM_00472EENS00000ZBED1         | ALTE DREF         | zinc fingprotein-coding  |                          |
| chr1-2202.8.450402  | -0.382835 | 0.812133 | -0.471394 | 0.637359 | 0.981636 | chr1  | 2.2E+08   | 2.2E+08  | + | 0 NA | intron (N)intron (N)                   | 13985 NR_001587   | 6791 Hs. 65484ENR_001587                      | AURKAP1           | AURKAP1 aurora k         | pseudo                   |
| chr16-66E.8.450402  | -0.382835 | 0.812133 | -0.471394 | 0.637359 | 0.981636 | chr16 | 66609594  | 66610767 | + | 0 NA | intron (N)intron (N)                   | 5449 NR_03761E    | 123920 Hs. 29819ENM_144601ENS00000CMTM3       | BNAS2 CKI         | CKLF like protein-coding |                          |
| chr2-1201.8.450402  | -0.382835 | 0.812133 | -0.471394 | 0.637359 | 0.981636 | chr2  | 1.2E+08   | 1.2E+08  | + | 0 NA | intron (N)LIMB7 LIN                    | 67824 NM_024121   | 79134 Hs. 376722NM_024121ENS00000TMEM185B     | FAM11B            | transmemprotein-coding   |                          |
| chr20-377.8.450402  | -0.382835 | 0.812133 | -0.471394 | 0.637359 | 0.981636 | chr20 | 37737697  | 37738645 | + | 0 NA | intron (N)intron (N)                   | 44141 NM_030877   | 56259 Hs. 472667ENM_030877ENS00000CTNBL1      | C0orf33           | catenin hprotein-coding  |                          |
| chr3-333E.8.450402  | -0.382835 | 0.812133 | -0.471394 | 0.637359 | 0.981636 | chr3  | 33388973  | 33390198 | + | 0 NA | 3' UTR (N)3' UTR (N)                   | 50793 NM_00112E   | 7342 Hs. 72912CNM_014517ENS00000CUBP1         | LBP-1B L          | upstream protein-coding  |                          |
| chr15-40E.8.104021  | -0.39236  | 0.832348 | -0.47138  | 0.637366 | 0.981636 | chr15 | 40028351  | 40029036 | + | 0 NA | intron (N)intron (N)                   | 10488 NM_003134   | 6727 Hs. 53373ENM_003134ENS00000SRP14         | ALURBP            | signal rprotein-coding   |                          |
| chr1-1224.8.41712   | -0.379756 | 0.806137 | -0.471081 | 0.637583 | 0.981636 | chr1  | 12242282  | 12244865 | + | 0 NA | intron (N)AluJr SIN                    | 13543 NM_01537E   | 55187 Hs. 43938ENM_01537EENS00000VPS13D       | SCAR4             | vacuolar protein-coding  |                          |
| chr1-316E.8.41712   | -0.379756 | 0.806137 | -0.471081 | 0.637583 | 0.981636 | chr1  | 31630391  | 31630938 | + | 0 NA | exon (NM) exon (NM)                    | 12964 NM_00152E   | 3061 Hs. 38822ENM_00152EENS00000HCRTR1        | OX1R              | hypocretinprotein-coding |                          |
| chr1-450E.8.41712   | -0.379756 | 0.806137 | -0.471081 | 0.637583 | 0.981636 | chr1  | 45005137  | 45009276 | + | 0 NA | intron (N)intron (N)                   | 4118 NM_02460E    | 79654 Hs. 525084NM_02460EENS00000HECTD3       | -                 | HECT domprotein-coding   |                          |
| chr1-211E.8.41712   | -0.379756 | 0.806137 | -0.471081 | 0.637583 | 0.981636 | chr1  | 2.11E+08  | 2.11E+08 | + | 0 NA | intron (N)AluJo SIN                    | 24803 NM_018254   | 55758 Hs. 35639ENM_018254ENS00000RCOR3        | -                 | REST coreprotein-coding  |                          |
| chr10-28E.8.41712   | -0.379756 | 0.806137 | -0.471081 | 0.637583 | 0.981636 | chr10 | 28558719  | 28558950 | + | 0 NA | intron (N)intron (N)                   | 25716 NM_01662E   | 51322 Hs. 74322ENM_01662EENS00000WAC          | BM-016 DE         | WF domain protein-coding |                          |
| chr11-12E.8.41712   | -0.379756 | 0.806137 | -0.471081 | 0.637583 | 0.981636 | chr11 | 1.3E+08   | 1.3E+08  | + | 0 NA | intron (N)intron (N)                   | 19907 NM_00616E   | 4798 Hs. 53053ENM_00616EENS00000NFRKB         | IN080G            | nuclear fprotein-coding  |                          |
| chr12-501.8.41712   | -0.379756 | 0.806137 | -0.471081 | 0.637583 | 0.981636 | chr12 | 50140639  | 50142924 | + | 0 NA | intron (N)AluSx SIN                    | 25588 NM_14719C   | 91012 Hs. 27052ENM_14719CENS00000CCERS5       | LASS5 Trt         | ceramide protein-coding  |                          |
| chr12-50E.8.41712   | -0.379756 | 0.806137 | -0.471081 | 0.637583 | 0.981636 | chr12 | 50994896  | 50995609 | + | 0 NA | intron (N)AluSx1 SI                    | 13963 NM_001174   | 4891 Hs. 50554ENM_000617ENS00000SLC11A2       | AHM101 D          | solute cprotein-coding   |                          |
| chr14-10E.8.41712   | -0.379756 | 0.806137 | -0.471081 | 0.637583 | 0.981636 | chr14 | 1.03E+08  | 1.03E+08 | + | 0 NA | intron (N)AluSq SIN                    | 54493 NM_00112E   | 4140 Hs. 35828 NM_00237EENS00000MARK3         | CTAK1 KP7         | microtub protein-coding  |                          |
| chr15-74E.8.41712   | -0.379756 | 0.806137 | -0.471081 | 0.637583 | 0.981636 | chr15 | 74671157  | 74671633 | + | 0 NA | intron (N)intron (N)                   | 24629 NM_00114E   | 80153 Hs. 96852 ENM_02508EENS00000EDC3        | LSM16 MR1         | enhancer protein-coding  |                          |



|                     |          |          |          |          |          |       |          |          |   |      |                      |                    |                             |                     |                                      |
|---------------------|----------|----------|----------|----------|----------|-------|----------|----------|---|------|----------------------|--------------------|-----------------------------|---------------------|--------------------------------------|
| chr17-597.7.879393  | 0.39364  | 0.837599 | 0.469962 | 0.638382 | 0.981636 | chr17 | 59735854 | 59736872 | + | 0 NA | intron (AluSx SIN    | 28709 NM_001325    | 81671 Hs.444566NM_03093f    | ENSG000000VMP1      | EPG3 TANC vacuole nprotein-coding    |
| chr5-1396.7.879393  | 0.39364  | 0.837599 | 0.469962 | 0.638382 | 0.981636 | chr5  | 1.4E+08  | 1.4E+08  | + | 0 NA | intron (MSTA LTR     | -27207 NM_001317   | 51523 Hs.189115NM_01646f    | ENSG000000CX5C      | CF5 HSPC1CX5C fingprotein-coding     |
| chr10-103.5.872057  | -0.45139 | 0.96084  | -0.46979 | 0.638505 | 0.981636 | chr10 | 1.04E+08 | 1.04E+08 | + | 0 NA | intron (Nintron (N   | 35248 NM_001365    | 9644 Hs.678727NM_01463f     | ENSG000000SH3PXD2A  | FISH SH3W SH3 and fprotein-coding    |
| chr1-193.9.443578   | 0.356786 | 0.759514 | 0.469756 | 0.638529 | 0.981636 | chr1  | 1.93E+08 | 1.93E+08 | + | 0 NA | intron (Nintron (N   | -28866 NM_003783   | 8707 Hs.518834NM_00378f     | ENSG000000B3GALT2   | BETA3GAL beta-1,3-protein-coding     |
| chr14-73.9.443578   | 0.356786 | 0.759514 | 0.469756 | 0.638529 | 0.981636 | chr14 | 73022308 | 73022487 | + | 0 NA | intron (N(TA N Sin   | 3709 NM_02126C     | 53349 Hs.33510fNM_02126f    | ENSG000000ZFVYE1    | DFCP1 PPF zinc fingprotein-coding    |
| chr15-504.9.443578  | 0.356786 | 0.759514 | 0.469756 | 0.638529 | 0.981636 | chr15 | 50495982 | 50497103 | + | 0 NA | intron (Nintron (N   | 50124 NM_203494    | 373509 Hs.677755NM_20349f   | ENSG000000CUSP50    | - ubiquitin protein-coding           |
| chr16-134.9.443578  | 0.356786 | 0.759514 | 0.469756 | 0.638529 | 0.981636 | chr16 | 53470536 | 53471117 | + | 0 NA | exon (NM exon (NM    | 32383 NM_02247f    | 64400 Hs.380897NM_02247f    | ENSG000000AKTIP     | FT1 FTS AKT interprotein-coding      |
| chr19-535.5.469305  | -0.46706 | 0.994502 | -0.46964 | 0.63861  | 0.981636 | chr19 | 13924033 | 13924565 | + | 0 NA | intron (Alu SINE     | 14118 NM_00137C    | 79883 Hs.44849fNM_02482f    | ENSG000000PODNL1    | SLRR5  podocan lprotein-coding       |
| chr2-325.5.469305   | -0.46706 | 0.994502 | -0.46964 | 0.63861  | 0.981636 | chr2  | 32590154 | 32590959 | + | 0 NA | intron (Nintron (N   | -15738 NR_12579f   | 1.04E+08 Hs.666092NR_12579f | ENSG000000BIRC6-AS2 | linc-birc6 BIRC6 antncRNA            |
| chr2-457.5.469305   | -0.46706 | 0.994502 | -0.46964 | 0.63861  | 0.981636 | chr2  | 45715348 | 45715764 | + | 0 NA | intron (MERA3 DNF    | 43722 NM_01523f    | 25814 Hs.47512fNM_01523f    | ENSG000000ATXN10    | E46L HUM ataxin 1 protein-coding     |
| chr4-983.5.469305   | -0.46706 | 0.994502 | -0.46964 | 0.63861  | 0.981636 | chr4  | 98330351 | 98330825 | + | 0 NA | intron (N(SVA B Ret  | 69204 NM_02115f    | 5910 Hs.13285fNM_02115f     | ENSG000000RAP1GDS1  | GDS1 SmgGrap1 GTPe protein-coding    |
| chr8-1175.5.469305  | -0.46706 | 0.994502 | -0.46964 | 0.63861  | 0.981636 | chr8  | 1.18E+08 | 1.18E+08 | + | 0 NA | intron (Nintron (N   | -51487 NR_14579f   | 1.1E+08 NR_14579f           | SNORD168            | - small nucsnoRNA                    |
| chr14-678.8.606617  | -0.37336 | 0.79504  | -0.46962 | 0.63863  | 0.981636 | chr14 | 67677588 | 67678011 | + | 0 NA | 3' UTR (N3' UTR (N   | -3167 NM_00637f    | 10490 Hs.741177NM_00637f    | ENSG000000VTI1B     | VTI1 VTI1vesicle tprotein-coding     |
| chr2-37.8.606617    | -0.37336 | 0.79504  | -0.46962 | 0.63863  | 0.981636 | chr2  | 37881597 | 37883667 | + | 0 NA | intron (AluSx SIN    | -23665 NM_03338f   | 85377 Hs.51761fNM_03338f    | ENSG000000MICAL1    | MICAL-L1 MICAL Ii protein-coding     |
| chr3-177.8.606617   | -0.37336 | 0.79504  | -0.46962 | 0.63863  | 0.981636 | chr3  | 1.77E+08 | 1.77E+08 | + | 0 NA | intron (N(LIME3 Cz I | 165889 NM_001321   | 79718 Hs.714201NM_02466f    | ENSG000000TBL1XR1   | C21 DC42  transducin protein-coding  |
| chr7-7764.8.606617  | -0.37336 | 0.79504  | -0.46962 | 0.63863  | 0.981636 | chr7  | 77644344 | 77644493 | + | 0 NA | Intergeni Intergeni  | 52347 NR_134254    | 1.01E+08 Hs.72451 NR_03836f | ENSG000000APTR      | RSBN1L-AS Alu-mediated ncRNA         |
| chr15-985.8.375981  | 0.378447 | 0.807307 | 0.468777 | 0.639229 | 0.981636 | chr15 | 98933291 | 98933886 | + | 0 NA | intron (AluJb SIN    | 72038 NM_00110f    | 145814 Hs.592021NM_00110f   | ENSG000000PGPEP1L   | - pyroglutamate protein-coding       |
| chr10-61.8.170584   | -0.38349 | 0.818105 | -0.46875 | 0.639247 | 0.981636 | chr10 | 61955376 | 61954608 | + | 0 NA | intron (AluSp SIN    | 52393 NM_03219f    | 84159 Hs.535297NM_03219f    | ENSG000000ARID5B    | DESRT MR AT-rich iprotein-coding     |
| chr11-832.8.170584  | -0.38349 | 0.818105 | -0.46875 | 0.639247 | 0.981636 | chr11 | 83270710 | 83274305 | + | 0 NA | intron (Nintron (N   | 13900 NM_00128f    | 60492 Hs.36886fNM_02182f    | ENSG000000CCDC90B   | MDSO11 ME coiled-c protein-coding    |
| chr12-194.8.170584  | -0.38349 | 0.818105 | -0.46875 | 0.639247 | 0.981636 | chr12 | 50439026 | 50439660 | + | 0 NA | intron (Nintron (N   | -17228 NR_13275f   | 1.07E+08 NR_13275f          | SNORD133            | L124 Z4 small nucsnoRNA              |
| chr13-506.8.170584  | -0.38349 | 0.818105 | -0.46875 | 0.639247 | 0.981636 | chr13 | 19854127 | 19854473 | + | 0 NA | intron (AluSc SIN    | 9336 NM_00103f     | 9205 Hs.53098fNM_01424f     | ENSG000000ZMYM5     | HSPC050 Zinc fingprotein-coding      |
| chr15-424.8.170584  | -0.38349 | 0.818105 | -0.46875 | 0.639247 | 0.981636 | chr15 | 42465144 | 42465447 | + | 0 NA | intron (AluJo SIN    | -7728 NM_001284    | 64397 Hs.51114fNM_02247f    | ENSG000000ZNF106    | SH3BP3 Zf zinc fingprotein-coding    |
| chr17-296.8.170584  | -0.38349 | 0.818105 | -0.46875 | 0.639247 | 0.981636 | chr17 | 29688426 | 29688673 | + | 0 NA | intron (AluSx3 SI    | -87126 NM_032854   | 84940 Hs.14304fNM_03285f    | ENSG000000COR06     | - coronin fprotein-coding            |
| chr4-122.8.170584   | -0.38349 | 0.818105 | -0.46875 | 0.639247 | 0.981636 | chr4  | 1.22E+08 | 1.22E+08 | + | 0 NA | intron (Nintron (N   | 18265 NM_01531f    | 84162 Hs.452597NM_01531f    | ENSG000000KIAA1109  | ALKKUCS FK IAA1109 protein-coding    |
| chr7-6736.8.170584  | -0.38349 | 0.818105 | -0.46875 | 0.639247 | 0.981636 | chr7  | 6739838  | 6740790  | + | 0 NA | intron (Nintron (N   | 5009 NR_00221f     | 441194 Hs.71559fNR_00221f   | ENSG000000PMS2CL    | PMS2P13 PMS2 C-t pseudo              |
| chr9-1212.8.170584  | -0.38349 | 0.818105 | -0.46875 | 0.639247 | 0.981636 | chr9  | 1.21E+08 | 1.21E+08 | + | 0 NA | non-codiron-codir    | 836 NR_10356f      | 57700 Hs.52237fNM_02025f    | ENSG000000GSN-AS1   | C9orf31 G SN antiscRNA               |
| chr5-173.8.368123   | 0.380246 | 0.811203 | 0.468744 | 0.639253 | 0.981636 | chr5  | 1.73E+08 | 1.73E+08 | + | 0 NA | TTS (NR_CTS (NR_C    | 895 NR_00298f      | 67744 Hs.69272fNR_00298f    | ENSG000000SNOR47B   | U19-27 small nucsnoRNA               |
| chr5-8227.11.32546  | -0.33061 | 0.705439 | -0.46866 | 0.63931  | 0.981636 | chr5  | 82274435 | 82277071 | + | 0 NA | 3' UTR (N3' UTR (N   | 2601 NM_00102f     | 6228 Hs.52719fNM_00102f     | ENSG000000RPS23     | BTDD MAB ribosomal protein-coding    |
| chr2-272.5.394884   | -0.47819 | 1.020494 | -0.46858 | 0.639367 | 0.981636 | chr2  | 27216362 | 27216657 | + | 0 NA | promoter-promoter-   | -860 NM_004341     | 790 Hs.37701fNM_004341      | ENSG000000CAD       | CDG1Z EIF carbamoyl protein-coding   |
| chr20-496.7.979238  | 0.40378  | 0.861001 | 0.468499 | 0.639428 | 0.981636 | chr20 | 49842750 | 49842976 | + | 0 NA | intron (MLTIC1 LTR   | -20996 NR_16213f   | 1.13E+08 NR_16213f          | MIR12122            | - microRNA ncRNA                     |
| chr1-149.8.547911   | -0.38379 | 0.81938  | -0.46839 | 0.639504 | 0.981636 | chr1  | 1.49E+08 | 1.49E+08 | + | 0 NA | intron (Nintron (N   | 4494 NM_001364     | 1.01E+08 NM_001364          | ENSG000000NOTCH2NL2 | CN2N NOTCH notch 2 lprotein-coding   |
| chr12-29.9.427862   | 0.360159 | 0.769323 | 0.468151 | 0.639677 | 0.981636 | chr12 | 29356223 | 29356422 | + | 0 NA | intron (Nintron (N   | 24850 NM_01657f    | 51290 Hs.33945fNM_01657f    | ENSG000000ERGC12    | CDNA14 ERV ERC ancprotein-coding     |
| chr20-336.9.427862  | 0.360159 | 0.769323 | 0.468151 | 0.639677 | 0.981636 | chr20 | 33636706 | 33637404 | + | 0 NA | intron (Nintron (N   | -25452 NM_08082f   | 128864 Hs.32410fNM_08082f   | ENSG000000C20orf144 | dJ63M2.6 chromoson protein-coding    |
| chr6-1508.8.573335  | -0.3777  | 0.806813 | -0.46814 | 0.639683 | 0.981636 | chr6  | 1.51E+08 | 1.51E+08 | + | 0 NA | intron (AluSx SIN    | 24653 NM_00135f    | 25902 Hs.59134fNM_01544f    | ENSG000000MTHFD1L   | FTFHS SDC1  methylene protein-coding |
| chr10-177.8.647756  | -0.37072 | 0.791903 | -0.46814 | 0.639688 | 0.981636 | chr10 | 17721616 | 17723602 | + | 0 NA | Intergeni LIP3 LIN   | -29592 NM_00109f   | 653567 Hs.56413fNM_00101f   | ENSG000000TMEM236   | FAM23A PF transmem protein-coding    |
| chr13-946.8.647756  | -0.37072 | 0.791903 | -0.46814 | 0.639688 | 0.981636 | chr13 | 94619444 | 94619850 | + | 0 NA | intron (Nintron (N   | 17790 NR_18098f    | 160897 Hs.43936fNM_18098f   | ENSG000000GPR180    | ITR G protein protein-coding         |
| chr14-501.8.647756  | -0.37072 | 0.791903 | -0.46814 | 0.639688 | 0.981636 | chr14 | 50198188 | 50199564 | + | 0 NA | intron (Nintron (N   | 32702 NM_00693f    | 6655 Hs.29153fNM_00693f     | ENSG000000SOS2      | NS9 SOS-2 SOS Ras/fprotein-coding    |
| chr14-693.8.647756  | -0.37072 | 0.791903 | -0.46814 | 0.639688 | 0.981636 | chr14 | 69083817 | 69082511 | + | 0 NA | intron (Nintron (N   | 68094 NR_001284    | 8816 Hs.50978fNM_00386f     | ENSG000000DCAF5     | BCRG2 BCF DDB1 and protein-coding    |
| chr14-73.8.647756   | -0.37072 | 0.791903 | -0.46814 | 0.639688 | 0.981636 | chr14 | 73726383 | 73727513 | + | 0 NA | exon (NM exon (NM    | -12563 NM_00602f   | 9240 Hs.19470fNM_00602f     | ENSG000000PNMA1     | MA1 PNMA famprotein-coding           |
| chr17-307.8.647756  | -0.37072 | 0.791903 | -0.46814 | 0.639688 | 0.981636 | chr17 | 30770422 | 30772740 | + | 0 NA | intron (AluSx1 SI    | 53111 NM_01598f    | 51379 Hs.64937fNM_01598f    | ENSG000000CRLF3     | CREME-9 cytokine protein-coding      |
| chr17-568.8.647756  | -0.37072 | 0.791903 | -0.46814 | 0.639688 | 0.981636 | chr17 | 56897660 | 56899521 | + | 0 NA | intron (NMER106A I   | -7235 NR_03740f    | 1.01E+08 NR_03740f          | ENSG000000MIR3614   | mir-3614 microRNA ncRNA              |
| chr2-6104.8.647756  | -0.37072 | 0.791903 | -0.46814 | 0.639688 | 0.981636 | chr2  | 61047802 | 61049883 | + | 0 NA | 3' UTR (N3' UTR (N   | -17028 NM_00133f   | 84542 Hs.46865fNM_03250f    | ENSG000000KIAA1841  | - KIAA1841 protein-coding            |
| chr2-2307.8.647756  | -0.37072 | 0.791903 | -0.46814 | 0.639688 | 0.981636 | chr2  | 2.31E+08 | 2.31E+08 | + | 0 NA | intron (Nintron (N   | -71868 NM_001287   | 81618 Hs.111577NM_03092f    | ENSG000000ITM2C     | BRI3 BRIC integral protein-coding    |
| chr5-1284.8.647756  | -0.37072 | 0.791903 | -0.46814 | 0.639688 | 0.981636 | chr5  | 1.28E+08 | 1.28E+08 | + | 0 NA | intron (NMER11B LI   | 90601 NM_00119f    | 2201 Hs.519294NM_00119f     | ENSG000000FBN2      | CCA DA9 E fibriillin protein-coding  |
| chr6-872.8.647756   | -0.37072 | 0.791903 | -0.46814 | 0.639688 | 0.981636 | chr6  | 87254967 | 87258255 | + | 0 NA | exon (NM exon (NM    | -65977 NM_001287   | 57150 Hs.70769 NM_02042f    | ENSG000000SMIM8     | C6orf162 small intprotein-coding     |
| chr7-665.8.647756   | -0.37072 | 0.791903 | -0.46814 | 0.639688 | 0.981636 | chr7  | 6650842  | 6655810  | + | 0 NA | exon (NM exon (NM    | 16008 NM_00127f    | 1E+08 Hs.11266fNM_00127f    | ENSG000000ZNF316    | MZF-3 zinc fingprotein-coding        |
| chr9-1348.8.647756  | -0.37072 | 0.791903 | -0.46814 | 0.639688 | 0.981636 | chr9  | 1.35E+08 | 1.35E+08 | + | 0 NA | intron (Nintron (N   | 23875 NR_039691    | 1.01E+08 NR_039691          | ENSG000000MIR3689C  | - microRNA ncRNA                     |
| chr10-615.4.683561  | 0.495611 | 1.059526 | 0.467766 | 0.639952 | 0.981636 | chr10 | 61981134 | 61981869 | + | 0 NA | intron (AluSx6 SI    | -67856 NM_001244   | 84159 Hs.535297NM_03219f    | ENSG000000CARID5B   | DESRT MR AT-rich iprotein-coding     |
| chr7-7737.4.683561  | 0.495611 | 1.059526 | 0.467766 | 0.639952 | 0.981636 | chr7  | 77375433 | 77376466 | + | 0 NA | intron (Nintron (N   | -7375433 NR_11007f | 1.02E+08 Hs.54775fNR_11007f | LOC101927-          | uncharacterncRNA                     |
| chr9-9600.4.683561  | 0.495611 | 1.059526 | 0.467766 | 0.639952 | 0.981636 | chr9  | 96004503 | 96005168 | + | 0 NA | intron (Nintron (N   | 16976 NR_02412f    | 1E+08 Hs.43431fNR_02412f    | ENSG000000LINC00092 | NCRNA0009 long intncRNA              |
| chr6-304.8.11.83591 | -0.32064 | 0.685586 | -0.46769 | 0.640007 | 0.981636 | chr6  | 30490388 | 30493890 | + | 0 NA | intron (Nintron (N   | 2629 NM_00551f     | 3133 Hs.650174NM_00551f     | ENSG00000           |                                      |

|             |          |          |          |          |          |          |       |          |          |   |   |    |                     |        |           |          |           |                    |                   |                            |                              |                          |
|-------------|----------|----------|----------|----------|----------|----------|-------|----------|----------|---|---|----|---------------------|--------|-----------|----------|-----------|--------------------|-------------------|----------------------------|------------------------------|--------------------------|
| chr20-355   | 8.921566 | 0.364425 | 0.780629 | 0.466834 | 0.640618 | 0.981636 | chr20 | 35913275 | 35915977 | + | 0 | NA | intron (NLM2 LINE   | 40000  | NM_03363C | 51282    | Hs.58490  | ENSG00000SCAND1    | RAZ1 SDP1SCAN     | dom protein-coding         |                              |                          |
| chr3-3801   | 8.921566 | 0.364425 | 0.780629 | 0.466834 | 0.640618 | 0.981636 | chr3  | 38014899 | 38016837 | + | 0 | NA | intron (Nintron (N  | 8652   | NM_00113C | 5333     | Hs.80776  | NM_00622F          | ENSG00000PLCD1    | NDNC3 PLC                  | phospholipase protein-coding |                          |
| chr5-967f   | 8.921566 | 0.364425 | 0.780629 | 0.466834 | 0.640618 | 0.981636 | chr5  | 96762326 | 96762909 | + | 0 | NA | 3' UTR (N3' UTR (N  | 19015  | NR_10428E | 831      | Hs.43618  | ENSG00000CAST      | BS-17 PLA         | calpastat protein-coding   |                              |                          |
| chr6-136f   | 8.921566 | 0.364425 | 0.780629 | 0.466834 | 0.640618 | 0.981636 | chr6  | 1.37E+08 | 1.37E+08 | + | 0 | NA | intron (NTHE1D-int  | 9630   | NM_00028E | 5191     | Hs.28093  | ENSG00000PEX7      | PBB9 PTS          | peroxisome protein-coding  |                              |                          |
| chr7-4401   | 8.921566 | 0.364425 | 0.780629 | 0.466834 | 0.640618 | 0.981636 | chr7  | 44011238 | 44013779 | + | 0 | NA | intron (Nintron (N  | 6686   | NR_00365E | 84820    | Hs.65702  | ENSG00000POLR2J4   | RB11-phiRNA       | polynpseudo                |                              |                          |
| chr7-647f   | 8.921566 | 0.364425 | 0.780629 | 0.466834 | 0.640618 | 0.981636 | chr7  | 64706147 | 64707135 | + | 0 | NA | exon (NM_exon (NM   | 27577  | NR_10689E | 1.02E+08 | NR_10689E | ENSG00000MIR6839   | hsa-mir-ε         | microRNA ncRNA             |                              |                          |
| chr7-741f   | 8.921566 | 0.364425 | 0.780629 | 0.466834 | 0.640618 | 0.981636 | chr7  | 74105007 | 74113336 | + | 0 | NA | intron (NMIR3 SINE  | 15954  | NM_001204 | 3984     | Hs.64703  | ENSG00000LIMK1     | LIMK1 LIMLIM      | doma protein-coding        |                              |                          |
| chr7-1314   | 8.921566 | 0.364425 | 0.780629 | 0.466834 | 0.640618 | 0.981636 | chr7  | 1.31E+08 | 1.31E+08 | + | 0 | NA | intron (Nintron (N  | 90054  | NM_00101E | 5420     | Hs.74421  | ENSG00000PODXL     | Gp200 PC          | podocaly protein-coding    |                              |                          |
| chr7-139c   | 8.921566 | 0.364425 | 0.780629 | 0.466834 | 0.640618 | 0.981636 | chr7  | 1.39E+08 | 1.39E+08 | + | 0 | NA | exon (NM_exon (NM   | -32244 | NR_16210E | 1.13E+08 | NR_16210E | MIR10399           | -                 | microRNA ncRNA             |                              |                          |
| chr7-143f   | 8.921566 | 0.364425 | 0.780629 | 0.466834 | 0.640618 | 0.981636 | chr7  | 1.44E+08 | 1.44E+08 | + | 0 | NA | intron (Nintron (N  | 9587   | NM_00120E | 9747     | Hs.73514  | ENSG00000TCAP1     | FAM115A           | TRPM8                      | chem protein-coding          |                          |
| chr9-151f   | 8.921566 | 0.364425 | 0.780629 | 0.466834 | 0.640618 | 0.981636 | chr9  | 15195661 | 15196662 | + | 0 | NA | intron (NTrigger1 E | 54057  | NM_00116E | 158219   | Hs.56363  | ENSG00000TTC39B    | C9orf52           | tetratric protein-coding   |                              |                          |
| chr19-12f   | 14.62206 | 0.290537 | 0.62237  | 0.466824 | 0.640626 | 0.981636 | chr19 | 12523553 | 12532858 | + | 0 | NA | intron (Nintron (N  | 23277  | NM_14497E | 163050   | Hs.65561  | ENSG00000ZNF564    | -                 | zinc fing protein-coding   |                              |                          |
| chr1-210f   | 5.89748  | -0.44293 | 0.949299 | -0.46658 | 0.640797 | 0.981636 | chr1  | 21086881 | 21087896 | + | 0 | NA | intron (NALuJb SIN  | 23995  | NM_00376E | 8672     | Hs.46708  | ENSG00000EIF4G3    | eIF-4G 3 eukaryot | protein-coding             |                              |                          |
| chr12-10f   | 5.89748  | -0.44293 | 0.949299 | -0.46658 | 0.640797 | 0.981636 | chr12 | 1.1E+08  | 1.1E+08  | + | 0 | NA | intron (Nintron (N  | 31292  | NM_05716E | 9815     | Hs.43499  | ENSG00000GIT2      | CAT-2 CAIGIT      | Arfg protein-coding        |                              |                          |
| chr14-92f   | 5.89748  | -0.44293 | 0.949299 | -0.46658 | 0.640797 | 0.981636 | chr14 | 92144715 | 92146901 | + | 0 | NA | intron (Nintron (N  | 23839  | NM_00132E | 53981    | Hs.65763  | ENSG00000CPSF2     | CPSF100           | cleavage protein-coding    |                              |                          |
| chr15-24f   | 5.89748  | -0.44293 | 0.949299 | -0.46658 | 0.640797 | 0.981636 | chr15 | 24997900 | 24998771 | + | 0 | NA | intron (Nintron (N  | 11405  | NR_00129E | 33827    | NR_00129E | ENSG00000SNORD108  | HBI1-437          | small nucsnRNA             |                              |                          |
| chr15-76f   | 5.89748  | -0.44293 | 0.949299 | -0.46658 | 0.640797 | 0.981636 | chr15 | 76933686 | 76934255 | + | 0 | NA | intron (NMIRb SINE  | 2221   | NM_00290E | 5955     | Hs.79088  | ENSG00000RCRN2     | E6BP ERC          | reticuloc protein-coding   |                              |                          |
| chr16-67f   | 5.89748  | -0.44293 | 0.949299 | -0.46658 | 0.640797 | 0.981636 | chr16 | 67071612 | 67074532 | + | 0 | NA | intron (NBLACKJACK  | -36869 | NM_00132C | 80262    | Hs.51366  | ENSG00000C16orf70  | C16orf67          | l chromosom protein-coding |                              |                          |
| chr16-71f   | 5.89748  | -0.44293 | 0.949299 | -0.46658 | 0.640797 | 0.981636 | chr16 | 71933648 | 71934614 | + | 0 | NA | intron (Nintron (N  | 38600  | NM_00127C | 9798     | Hs.23219  | ENSG00000ISTI      | CHMP8 OLC         | ISTI fact protein-coding   |                              |                          |
| chr16-75f   | 5.89748  | -0.44293 | 0.949299 | -0.46658 | 0.640797 | 0.981636 | chr16 | 75643265 | 75644101 | + | 0 | NA | intron (Nintron (N  | 4004   | NM_00113C | 3735     | Hs.3100   | ENSG00000CKARS     | CMTR1B DF         | lysyl-tRNA protein-coding  |                              |                          |
| chr17-15f   | 5.89748  | -0.44293 | 0.949299 | -0.46658 | 0.640797 | 0.981636 | chr17 | 15969880 | 15971239 | + | 0 | NA | intron (Nintron (N  | 25642  | NM_00067E | 136      | Hs.16704  | ENSG00000ADORA2B   | ADORA2            | adenosine protein-coding   |                              |                          |
| chr17-64f   | 5.89748  | -0.44293 | 0.949299 | -0.46658 | 0.640797 | 0.981636 | chr17 | 64634343 | 64636411 | + | 0 | NA | intron (NLMIB7 LIN  | 26930  | NM_02273E | 64750    | Hs.51501  | ENSG00000SMURF2    | -                 | SMAD spec protein-coding   |                              |                          |
| chr19-46f   | 5.89748  | -0.44293 | 0.949299 | -0.46658 | 0.640797 | 0.981636 | chr19 | 46379224 | 46380526 | + | 0 | NA | intron (NMER105 DN  | 32788  | NM_006247 | 5536     | Hs.65460  | ENSG00000PPP5C     | PP5 PPP5          | protein f protein-coding   |                              |                          |
| chr2-324f   | 5.89748  | -0.44293 | 0.949299 | -0.46658 | 0.640797 | 0.981636 | chr2  | 32475347 | 32476372 | + | 0 | NA | intron (Nintron (N  | -56294 | NR_03028E | 693143   | NR_03028E | ENSG00000MIR558    | MIRN558           | tmicroRNA ncRNA            |                              |                          |
| chr2-610f   | 5.89748  | -0.44293 | 0.949299 | -0.46658 | 0.640797 | 0.981636 | chr2  | 61077442 | 61078491 | + | 0 | NA | intron (NCharlie    | 11757  | NM_00133C | 84542    | Hs.46865  | ENSG00000KIAA1841  | -                 | KIAA1841                   | protein-coding               |                          |
| chr2-108f   | 5.89748  | -0.44293 | 0.949299 | -0.46658 | 0.640797 | 0.981636 | chr2  | 1.09E+08 | 1.09E+08 | + | 0 | NA | intron (NLMIP2 LIN  | 15212  | NM_14497E | 165055   | Hs.36270  | ENSG00000CCDC138   | -                 | coiled-c protein-coding    |                              |                          |
| chr2-182f   | 5.89748  | -0.44293 | 0.949299 | -0.46658 | 0.640797 | 0.981636 | chr2  | 1.83E+08 | 1.83E+08 | + | 0 | NA | intron (Nintron (N  | 25724  | NR_073367 | 54431    | Hs.51663  | ENSG00000DNACJ10   | ErdJ5 JPE         | DnaJ                       | heat protein-coding          |                          |
| chr20-35f   | 5.89748  | -0.44293 | 0.949299 | -0.46658 | 0.640797 | 0.981636 | chr20 | 35053985 | 35054760 | + | 0 | NA | intron (NMIRc SINE  | 38435  | NM_01563E | 26133    | Hs.16807  | ENSG00000TRPC4AP   | C20orf18          | transient protein-coding   |                              |                          |
| chr21-33f   | 5.89748  | -0.44293 | 0.949299 | -0.46658 | 0.640797 | 0.981636 | chr21 | 33512628 | 33514075 | + | 0 | NA | intron (NALuSg SIN  | -21628 | NM_00132C | 54943    | Hs.45830  | ENSG00000DNACJ28   | C2orf155          | DnaJ                       | heat protein-coding          |                          |
| chr22-40f   | 5.89748  | -0.44293 | 0.949299 | -0.46658 | 0.640797 | 0.981636 | chr22 | 40958713 | 40959964 | + | 0 | NA | intron (Nintron (N  | 7960   | NM_01424E | 9978     | Hs.47494  | ENSG00000RBI1      | BA554C2           | ring-box                   | protein-coding               |                          |
| chr22-42f   | 5.89748  | -0.44293 | 0.949299 | -0.46658 | 0.640797 | 0.981636 | chr22 | 42605559 | 42607231 | + | 0 | NA | intron (NALuJo SIN  | 8488   | NR_10382C | 84271    | Hs.50580  | ENSG00000POLDIP3   | PDIP3 PD1         | DNA polyn                  | protein-coding               |                          |
| chr3-283f   | 5.89748  | -0.44293 | 0.949299 | -0.46658 | 0.640797 | 0.981636 | chr3  | 28335753 | 28337730 | + | 0 | NA | exon (NM_exon (NM   | -11980 | NM_00104C | 152098   | Hs.51063  | ENSG00000ZCWPW2    | ZCW2              | zinc fing                  | protein-coding               |                          |
| chr3-489f   | 5.89748  | -0.44293 | 0.949299 | -0.46658 | 0.640797 | 0.981636 | chr3  | 48961733 | 48963225 | + | 0 | NA | intron (Nintron (N  | -27429 | NM_00103E | 54681    | Hs.65494  | ENSG00000P4HTM     | EGLN4 HIF         | prolyl 4-                  | protein-coding               |                          |
| chr3-142f   | 5.89748  | -0.44293 | 0.949299 | -0.46658 | 0.640797 | 0.981636 | chr3  | 1.42E+08 | 1.42E+08 | + | 0 | NA | intron (NALuSx SIN  | 11576  | NM_00103E | 256356   | Hs.13590  | ENSG00000CGK5      | -                 | glycerol                   | protein-coding               |                          |
| chr3-172f   | 5.89748  | -0.44293 | 0.949299 | -0.46658 | 0.640797 | 0.981636 | chr3  | 1.72E+08 | 1.72E+08 | + | 0 | NA | intron (Nintron (N  | 32131  | NM_00113E | 64778    | Hs.74488  | ENSG00000FNDC3B    | FAD104 PF         | fibronect                  | protein-coding               |                          |
| chr4-731f   | 5.89748  | -0.44293 | 0.949299 | -0.46658 | 0.640797 | 0.981636 | chr4  | 73161274 | 73163066 | + | 0 | NA | intron (NALuJo SIN  | 60887  | NM_00128E | 26057    | Hs.60120  | ENSG00000ANKRD17   | GTAR MAS          | ankryn r                   | protein-coding               |                          |
| chr5-372f   | 5.89748  | -0.44293 | 0.949299 | -0.46658 | 0.640797 | 0.981636 | chr5  | 37217972 | 37219012 | + | 0 | NA | intron (NMER68 LTF  | -30554 | NR_13426E | 1.05E+08 | Hs.17099  | ENSG00000LOC105374 | -                 | uncharact                  | ncRNA                        |                          |
| chr5-112f   | 5.89748  | -0.44293 | 0.949299 | -0.46658 | 0.640797 | 0.981636 | chr5  | 1.13E+08 | 1.13E+08 | + | 0 | NA | intron (NALuSp SIN  | 16724  | NM_152624 | 167227   | Hs.44387  | ENSG00000DCP2      | NUDT20            | decapping                  | protein-coding               |                          |
| chr5-176f   | 5.89748  | -0.44293 | 0.949299 | -0.46658 | 0.640797 | 0.981636 | chr5  | 1.76E+08 | 1.76E+08 | + | 0 | NA | intron (Nintron (N  | -8801  | NM_00125E | 51491    | Hs.69628  | ENSG00000NOP16     | HSPC111 FNOP16    | nucprotein-coding          | R-PTP-ka                     | protein t protein-coding |
| chr6-128f   | 5.89748  | -0.44293 | 0.949299 | -0.46658 | 0.640797 | 0.981636 | chr6  | 1.28E+08 | 1.28E+08 | + | 0 | NA | intron (N(T)n Simp  | 123291 | NM_001291 | 5796     | Hs.15591  | ENSG00000PTPRK     | -                 | uncharact                  | ncRNA                        |                          |
| chr6-136f   | 5.89748  | -0.44293 | 0.949299 | -0.46658 | 0.640797 | 0.981636 | chr6  | 1.37E+08 | 1.37E+08 | + | 0 | NA | intron (NALuSx SIN  | 66255  | NR_12585E | 1.02E+08 | Hs.66651  | ENSG00000LOC10192E | -                 | uncharact                  | ncRNA                        |                          |
| chr8-477f   | 5.89748  | -0.44293 | 0.949299 | -0.46658 | 0.640797 | 0.981636 | chr8  | 47796745 | 47800872 | + | 0 | NA | intron (Nintron (N  | -60644 | NM_00519E | 1052     | Hs.44082  | ENSG00000CEBPD     | C/EBP-de          | CCAAT                      | enh protein-coding           |                          |
| chr11-11f   | 8.383839 | 0.376606 | 0.807471 | 0.466402 | 0.640928 | 0.981636 | chr11 | 1.1E+08  | 1.1E+08  | + | 0 | NA | exon (NM_exon (NM   | 72036  | NM_03339C | 85463    | Hs.37628  | ENSG00000ZC3H12C   | MCPIP3            | zinc fing                  | protein-coding               |                          |
| chr17-21f   | 8.383839 | 0.376606 | 0.807471 | 0.466402 | 0.640928 | 0.981636 | chr17 | 21313333 | 21313675 | + | 0 | NA | exon (NM_exon (NM   | 25468  | NM_00275E | 5606     | Hs.51401  | ENSG00000MAP2K3    | MAPK3 ME          | mitogen-ε                  | protein-coding               |                          |
| chr17-42f   | 8.383839 | 0.376606 | 0.807471 | 0.466402 | 0.640928 | 0.981636 | chr17 | 42685059 | 42686115 | + | 0 | NA | intron (NMIRc SINE  | 3056   | NM_00363E | 8506     | Hs.40873  | ENSG00000CNTNAP1   | CASPR KCH         | contacti                   | protein-coding               |                          |
| chr20-16f   | 8.383839 | 0.376606 | 0.807471 | 0.466402 | 0.640928 | 0.981636 | chr20 | 16740364 | 16740987 | + | 0 | NA | intron (Nintron (N  | -7678  | NM_020157 | 56914    | Hs.41119  | ENSG00000OTOR      | FDP MI            | lotorapli                  | protein-coding               |                          |
| chr4-701f   | 8.383839 | 0.376606 | 0.807471 | 0.466402 | 0.640928 | 0.981636 | chr4  | 7011197  | 7011277  | + | 0 | NA | intron (NMIRb SINE  | 23954  | NM_00128E | 57533    | Hs.51861  | ENSG00000TBC1D14   | -                 | TBC1                       | dom protein-coding           |                          |
| chr17-41f   | 8.23951  | -0.26581 | 0.570118 | -0.46624 | 0.641041 | 0.981636 | chr17 | 41689500 | 41692900 | + | 0 | NA | 3' UTR (N3' UTR (N  | 2360   | NM_005801 | 10209    | Hs.15058  | ENSG00000EIF1      | A121 EIF          | eukaryot                   | protein-coding               |                          |
| chr16-58f   | 8.070739 | -0.39703 | 0.851731 | -0.46615 | 0.641111 | 0.981636 | chr16 | 58194555 | 58194754 | + | 0 | NA | intron (Nintron (N  | 3452   | NM_00189E | 1459     | Hs.82201  | ENSG00000CSNK2A2   | CK2A2 CK2         | casein                     | protein-coding               |                          |
| chr17-20f   | 13.11658 | 0.310021 | 0.665613 | 0.465767 | 0.641382 | 0.981636 | chr17 | 20257566 | 20258664 | + | 0 | NA | intron (Nintron (N  | -63059 | NR_02338C | 348254   | Hs.46247  | ENSG00000CCDC144C  | CCDC144C          | coiled-c                   | pseudo                       |                          |
| chr19-57f   | 11.39988 | -0.32549 | 0.698936 | -0.46659 | 0.641435 | 0.981636 | chr19 | 57841061 | 57841512 | + | 0 | NA | exon (NM_exon (NM   | -8573  | NM_00328E | 84914    | Hs.64259  | ENSG00000ZNF587    | ZF6               | zinc fing                  | protein-coding               |                          |
| chr6-328f</ |          |          |          |          |          |          |       |          |          |   |   |    |                     |        |           |          |           |                    |                   |                            |                              |                          |



|                    |          |          |          |          |          |       |          |          |   |   |    |                     |                  |                               |                     |                                      |
|--------------------|----------|----------|----------|----------|----------|-------|----------|----------|---|---|----|---------------------|------------------|-------------------------------|---------------------|--------------------------------------|
| chr16-31 5.213431  | 0.465375 | 1.002892 | 0.464033 | 0.642624 | 0.981636 | chr16 | 31037390 | 31037714 | + | 0 | NA | intron (NAuSc SIN   | 3994 NM_004604   | 6810 Hs. 83734 NM_004604      | ENSG000003STX4      | STX4A p3ε syntaxin protein-coding    |
| chr17-195 5.213431 | 0.465375 | 1.002892 | 0.464033 | 0.642624 | 0.981636 | chr17 | 19950900 | 19952191 | + | 0 | NA | intron (NSVA_B Ret  | 26283 NM_007202  | 11216 Hs. 642676 NM_007202    | ENSG000003AKAP10    | AKAP-10 A-kinase protein-coding      |
| chr18-265 5.213431 | 0.465375 | 1.002892 | 0.464033 | 0.642624 | 0.981636 | chr18 | 2691394  | 2691837  | + | 0 | NA | intron (NLTR67B LI  | 35728 NM_015295  | 23347 Hs. 8118 NM_015295      | ENSG000003SMCHD1    | BAMS FSH structure protein-coding    |
| chr2-1577 5.213431 | 0.465375 | 1.002892 | 0.464033 | 0.642624 | 0.981636 | chr2  | 1.58E+08 | 1.58E+08 | + | 0 | NA | intron (Nintron (N  | 70088 NM_001347  | 90 Hs. 470316 NM_001110       | ENSG000003ACVR1     | ACTR1 ACV activin β protein-coding   |
| chr20-135 5.213431 | 0.465375 | 1.002892 | 0.464033 | 0.642624 | 0.981636 | chr20 | 1351653  | 1352527  | + | 0 | NA | intron (NLIM3 LIN   | -22951 NM_080498 | 27111 Hs. 657015 NM_015685    | ENSG000003SDCBP2    | SITAC1 S1 syndecan protein-coding    |
| chr6-2825 5.213431 | 0.465375 | 1.002892 | 0.464033 | 0.642624 | 0.981636 | chr6  | 28283860 | 28284632 | + | 0 | NA | intron (Nintron (N  | 2709 NM_032507   | 84547 Hs. 144527 NM_032507    | ENSG000003PGBD1     | HUCEP-4 SpiggyBac protein-coding     |
| chr7-1405 5.213431 | 0.465375 | 1.002892 | 0.464033 | 0.642624 | 0.981636 | chr7  | 1.4E+08  | 1.4E+08  | + | 0 | NA | intron (NAuJ SINE   | 52416 NM_001362  | 84255 Hs. 446021 NM_032295    | ENSG000003SLC37A3   | - solute cε protein-coding           |
| chr15-735 5.213431 | 0.465375 | 1.002892 | 0.464033 | 0.642624 | 0.981636 | chr15 | 73949499 | 73949711 | + | 0 | NA | intron (Nintron (N  | -21357 NR_040066 | 1E+08 Hs. 599785 NR_040066    | ENSG000003LOXL1-AS1 | - LOXL1 antcRNA                      |
| chr19-240 5.213431 | 0.465375 | 1.002892 | 0.464033 | 0.642624 | 0.981636 | chr19 | 24094370 | 24094933 | + | 0 | NA | intron (NLIPREC2 I  | 7464 NM_001275   | 9534 Hs. 434406 NM_004875     | ENSG000003ZNF254    | BZMF-5 HE zinc fing protein-coding   |
| chr13-111 5.213431 | 0.465375 | 1.002892 | 0.464033 | 0.642624 | 0.981636 | chr13 | 1.13E+08 | 1.13E+08 | + | 0 | NA | intron (Nintron (N  | 12869 NM_001255  | 8858 Hs. 1011 NM_003891       | ENSG000003PROZ      | PZ protein-z protein-coding          |
| chr3-1415 5.213431 | 0.465375 | 1.002892 | 0.464033 | 0.642624 | 0.981636 | chr3  | 1.42E+08 | 1.42E+08 | + | 0 | NA | intron (Nigger18a   | 35514 NM_001675  | 483 Hs. 477785 NM_001675      | ENSG000003ATP1B3    | ATPB-3 CAT protein-z protein-coding  |
| chr9-1141 5.213431 | 0.465375 | 1.002892 | 0.464033 | 0.642624 | 0.981636 | chr9  | 1.14E+08 | 1.14E+08 | + | 0 | NA | intron (Nintron (N  | -19335 NR_030255 | 619556 NR_030255              | ENSG000003MIR455    | MIRN455 microRNA ncRNA               |
| chr1-2306 5.213431 | 0.465375 | 1.002892 | 0.464033 | 0.642624 | 0.981636 | chr1  | 2.31E+08 | 2.31E+08 | + | 0 | NA | intron (N(TATT)n S  | 33134 NM_007357  | 22796 Hs. 21180C NM_007357    | ENSG000003COG2      | CDG2Q LDL component protein-coding   |
| chr14-501 5.213431 | 0.465375 | 1.002892 | 0.464033 | 0.642624 | 0.981636 | chr14 | 50160658 | 50161154 | + | 0 | NA | intron (NAuJb SIN   | -44334 NR_049738 | 79609 Hs. 558541 NM_024555    | ENSG000003VCPKMT    | C14orf138 valosin c protein-coding   |
| chr3-1952 5.213431 | 0.465375 | 1.002892 | 0.464033 | 0.642624 | 0.981636 | chr3  | 1.95E+08 | 1.95E+08 | + | 0 | NA | intron (NMER2 DNA   | -17767 NM_152531 | 152002 Hs. 478741 NM_152531   | ENSG000003XXYLT1    | C3orf21 xyloside protein-coding      |
| chr7-1314 5.213431 | 0.465375 | 1.002892 | 0.464033 | 0.642624 | 0.981636 | chr7  | 1.31E+08 | 1.31E+08 | + | 0 | NA | intron (NAuSx SIN   | 83768 NM_001321  | 4289 Hs. 44693 NM_013255      | ENSG000003MKLN1     | TWA2 muskelin protein-coding         |
| chr1-227 5.213431  | 0.465375 | 1.002892 | 0.464033 | 0.642624 | 0.981636 | chr1  | 2.27E+08 | 2.27E+08 | + | 0 | NA | intron (NLIMEg LIN  | 143702 NM_020247 | 56997 Hs. 118241 NM_020247    | ENSG000003COQ8A     | ADCK3 ARC coenzyme protein-coding    |
| chr20-381 5.213431 | 0.465375 | 1.002892 | 0.464033 | 0.642624 | 0.981636 | chr20 | 28158312 | 28161842 | + | 0 | NA | intron (Nintron (N  | 5193 NM_001322   | 7052 Hs. 517035 NM_004615     | ENSG000003TGM2      | TG(C) TG transglut protein-coding    |
| chr22-425 5.213431 | 0.465375 | 1.002892 | 0.464033 | 0.642624 | 0.981636 | chr22 | 42840426 | 42841112 | + | 0 | NA | intron (NAuJo SIN   | 16504 NM_014577  | 26286 Hs. 685225 NM_014577    | ENSG000003ARFGAP3   | ARFGAP1 ADP ribos protein-coding     |
| chr9-471 5.213431  | 0.465375 | 1.002892 | 0.464033 | 0.642624 | 0.981636 | chr9  | 4716012  | 4719834  | + | 0 | NA | intron (Nintron (N  | 8704 NM_001195   | 50808 Hs. 732022 NM_016285    | ENSG000003CAK3      | AK3L1 ADP adenylatε protein-coding   |
| chr1-4595 5.213431 | 0.465375 | 1.002892 | 0.464033 | 0.642624 | 0.981636 | chr1  | 45961465 | 45962246 | + | 0 | NA | intron (NLIPA5 LIN  | 9307 NM_001324   | 23139 Hs. 319481 NM_015115    | ENSG000003MAST2     | MAST205 microtubul protein-coding    |
| chr1-2195 5.213431 | 0.465375 | 1.002892 | 0.464033 | 0.642624 | 0.981636 | chr1  | 2.2E+08  | 2.2E+08  | + | 0 | NA | intron (Nintron (N  | -56608 NR_046437 | 55532 Hs. 284455 NM_018715    | ENSG000003SLC30A10  | HMDPC HMD solute cε protein-coding   |
| chr10-745 5.213431 | 0.465375 | 1.002892 | 0.464033 | 0.642624 | 0.981636 | chr10 | 74838994 | 74839725 | + | 0 | NA | intron (NAuS2 SI    | 12759 NM_001377  | 23522 Hs. 35758 NM_012335     | ENSG000003KAT6B     | GTPTS MOF lysine ac protein-coding   |
| chr14-584 5.213431 | 0.465375 | 1.002892 | 0.464033 | 0.642624 | 0.981636 | chr14 | 58418615 | 58421826 | + | 0 | NA | intron (NLIMD1 LI   | 7022 NM_001304   | 26520 Hs. 440525 NM_012465    | ENSG000003TIMM9     | TIM9 TIMε translocε protein-coding   |
| chr17-735 5.213431 | 0.465375 | 1.002892 | 0.464033 | 0.642624 | 0.981636 | chr17 | 7382277  | 7420112  | + | 0 | NA | intron (Nintron (N  | 7523 NM_024792   | 79850 Hs. 154395 NM_024792    | ENSG000003TLC3DA    | CT120 FAM TLC doma protein-coding    |
| chr17-215 5.213431 | 0.465375 | 1.002892 | 0.464033 | 0.642624 | 0.981636 | chr17 | 75694859 | 75695463 | + | 0 | NA | intron (NMER20 DNA  | -26298 NM_001321 | 3691 Hs. 632225 NM_000215     | ENSG000003ITGB4     | CD104 GPI integrin protein-coding    |
| chr19-257 5.213431 | 0.465375 | 1.002892 | 0.464033 | 0.642624 | 0.981636 | chr19 | 21752126 | 21753708 | + | 0 | NA | non-codir non-codir | 2172 NR_024525   | 641367 Hs. 680125 NR_024525   | ENSG000003LOC641367 | - cyclin Y pseudo                    |
| chr2-2635 5.213431 | 0.465375 | 1.002892 | 0.464033 | 0.642624 | 0.981636 | chr2  | 26389336 | 26391586 | + | 0 | NA | non-codir non-codir | -11459 NM_145035 | 92749 Hs. 393714 NM_145035    | ENSG000003DRC1      | C2orf39 Cdynein rε protein-coding    |
| chr2-305 5.213431  | 0.465375 | 1.002892 | 0.464033 | 0.642624 | 0.981636 | chr2  | 30563097 | 30563750 | + | 0 | NA | intron (Nintron (N  | 116177 NM_001304 | 235558 Hs. 468045 NM_182551   | ENSG000003LCLAT1    | LAPGAT8 β lysolacardi protein-coding |
| chr2-1325 5.213431 | 0.465375 | 1.002892 | 0.464033 | 0.642624 | 0.981636 | chr2  | 1.33E+08 | 1.33E+08 | + | 0 | NA | intron (Nintron (N  | -58770 NR_135572 | 1.02E+08 Hs. 680114 NR_135572 | ENSG000003NCKAP5-AS | - NCKAP5 arncRNA                     |
| chr2-1355 5.213431 | 0.465375 | 1.002892 | 0.464033 | 0.642624 | 0.981636 | chr2  | 1.36E+08 | 1.36E+08 | + | 0 | NA | intron (Nintron (N  | -53223 NM_005915 | 4175 Hs. 444115 NM_005915     | ENSG000003MCM6      | MCG40308 minichron protein-coding    |
| chr20-195 5.213431 | 0.465375 | 1.002892 | 0.464033 | 0.642624 | 0.981636 | chr20 | 19945893 | 19946556 | + | 0 | NA | intron (Nintron (N  | 56658 NM_018995  | 54453 Hs. 472272 NM_018995    | ENSG000003RIN2      | MACS RRSε Ras and F protein-coding   |
| chr3-1283 5.213431 | 0.465375 | 1.002892 | 0.464033 | 0.642624 | 0.981636 | chr3  | 12831518 | 12832451 | + | 0 | NA | intron (Nintron (N  | 8466 NM_001007   | 6161 Hs. 265174 NM_000994     | ENSG000003RPL32     | L32 PPP9ε ribosomal protein-coding   |
| chr3-1415 5.213431 | 0.465375 | 1.002892 | 0.464033 | 0.642624 | 0.981636 | chr3  | 1.42E+08 | 1.42E+08 | + | 0 | NA | intron (NLIMC4a LI  | 63446 NM_001305  | 5922 Hs. 98445 NM_006505      | ENSG000003RASA2     | GAP1M RAS p21 ε protein-coding       |
| chr4-4755 5.213431 | 0.465375 | 1.002892 | 0.464033 | 0.642624 | 0.981636 | chr4  | 47569295 | 47569722 | + | 0 | NA | intron (Nintron (N  | -83161 NR_107022 | 1.02E+08 NR_107022            | ENSG000003MIR8053   | hsa-mir-ε microRNA ncRNA             |
| chr4-1685 5.213431 | 0.465375 | 1.002892 | 0.464033 | 0.642624 | 0.981636 | chr4  | 1.68E+08 | 1.68E+08 | + | 0 | NA | intron (Nintron (N  | -41702 NR_017631 | 55601 Hs. 591715 NM_017631    | ENSG000003DDX60     | - DEX/H-ε protein-coding             |
| chr5-1491 5.213431 | 0.465375 | 1.002892 | 0.464033 | 0.642624 | 0.981636 | chr5  | 1.49E+08 | 1.49E+08 | + | 0 | NA | intron (NAuJb SIN   | 4137 NM_001377   | 22885 Hs. 49688 NM_014945     | ENSG000003ABLIM3    | HMFN1661 actin bir protein-coding    |
| chr7-6705 5.213431 | 0.465375 | 1.002892 | 0.464033 | 0.642624 | 0.981636 | chr7  | 67057583 | 67058187 | + | 0 | NA | intron (NLIME2 LIN  | 56512 NR_039794  | 1.01E+08 NR_039794            | ENSG000003MIR4650-2 | - microRNA ncRNA                     |
| chr7-7424 5.213431 | 0.465375 | 1.002892 | 0.464033 | 0.642624 | 0.981636 | chr7  | 74248253 | 74249648 | + | 0 | NA | intron (Nintron (N  | 5449 NM_181471   | 5982 Hs. 647062 NM_002914     | ENSG000003RFC2      | RFC40 replicatε protein-coding       |
| chr7-9462 5.213431 | 0.465375 | 1.002892 | 0.464033 | 0.642624 | 0.981636 | chr7  | 94622265 | 94622774 | + | 0 | NA | intron (NAuS2 SI    | 33614 NM_001095  | 8910 Hs. 371195 NM_003915     | ENSG000003SGCE      | DYT11 ESC sarcoglyc protein-coding   |
| chr7-9825 5.213431 | 0.465375 | 1.002892 | 0.464033 | 0.642624 | 0.981636 | chr7  | 98260354 | 98261783 | + | 0 | NA | IntergeniAluS2 SIN  | -8832 NM_015395  | 25851 Hs. 592281 NM_015395    | ENSG000003TECP1     | - tectonin protein-coding            |
| chr7-1355 5.213431 | 0.465375 | 1.002892 | 0.464033 | 0.642624 | 0.981636 | chr7  | 1.36E+08 | 1.36E+08 | + | 0 | NA | exon (NM exon (NM   | -45364 NM_001133 | 647087 Hs. 200022 NM_001133   | ENSG000003STMP1     | C7orf73 Fshort trε protein-coding    |
| chr7-1515 5.213431 | 0.465375 | 1.002892 | 0.464033 | 0.642624 | 0.981636 | chr7  | 1.51E+08 | 1.51E+08 | + | 0 | NA | intron (Nintron (N  | 3829 NR_030407   | 768213 NR_030407              | ENSG000003MIR671    | MIRN671 microRNA ncRNA               |
| chr8-6155 5.213431 | 0.465375 | 1.002892 | 0.464033 | 0.642624 | 0.981636 | chr8  | 61533300 | 61534624 | + | 0 | NA | intron (NAuSp SIN   | 155849 NM_001164 | 444 Hs. 332422 NM_004315      | ENSG000003ASPH      | AAH BAH Caspartatε protein-coding    |
| chr8-1422 5.213431 | 0.465375 | 1.002892 | 0.464033 | 0.642624 | 0.981636 | chr8  | 1.43E+08 | 1.43E+08 | + | 0 | NA | exon (NM exon (NM   | 4887 NM_001275   | 8629 Hs. 535905 NM_003724     | ENSG000003JRK       | JH8 jerky Jrk heliε protein-coding   |
| chr2-1325 5.213431 | 0.465375 | 1.002892 | 0.464033 | 0.642624 | 0.981636 | chr2  | 1.33E+08 | 1.33E+08 | + | 0 | NA | intron (NLIMC3 LIN  | -58278 NR_110294 | 1.02E+08 Hs. 661917 NR_110294 | ENSG000003NCKAP5-AS | - NCKAP5 arncRNA                     |
| chr2-2061 5.213431 | 0.465375 | 1.002892 | 0.464033 | 0.642624 | 0.981636 | chr2  | 2.06E+08 | 2.06E+08 | + | 0 | NA | promoter-promoter-  | 71 NR_002585     | 26798 NR_002585               | ENSG000003SNORD51   | RNU51 U51 small nuc snoRNA           |
| chr6-573 5.213431  | 0.465375 | 1.002892 | 0.464033 | 0.642624 | 0.981636 | chr6  | 57325421 | 57329898 | + | 0 | NA | intron (Nintron (N  | 10029 NM_000947  | 5558 Hs. 654585 NM_000947     | ENSG000003PRIM2     | PRIM2A pε DNA nucε protein-coding    |
| chr13-244 5.213431 | 0.465375 | 1.002892 | 0.464033 | 0.642624 | 0.981636 | chr13 | 24458086 | 24458786 | + | 0 | NA | intron (NAuJb SIN   | 54342 NM_006437  | 143 Hs. 744855 NM_006437      | ENSG000003PARP4     | ADPRT-3 ε poly (ADP- protein-coding  |
| chr1-5514 5.213431 | 0.465375 | 1.002892 | 0.464033 |          |          |       |          |          |   |   |    |                     |                  |                               |                     |                                      |



|                    |          |          |          |          |          |       |          |          |   |      |                     |                  |                              |                     |   |                                                |
|--------------------|----------|----------|----------|----------|----------|-------|----------|----------|---|------|---------------------|------------------|------------------------------|---------------------|---|------------------------------------------------|
| chr19-211 8.929424 | 0.362651 | 0.786361 | 0.461177 | 0.644672 | 0.981636 | chr19 | 21180522 | 21180769 | + | 0 NA | intron (N LIMB2 LIN | 38605 NM_133473  | 170959 Hs. 156255NM_133473   | ENSG000002ZNF431    | - | zinc fingerprotein-coding                      |
| chr19-422 8.929424 | 0.362651 | 0.786361 | 0.461177 | 0.644672 | 0.981636 | chr19 | 42287649 | 42291154 | + | 0 NA | exon (NM exon (NM   | 4736 NM_015122   | 23152 Hs. 388233NM_015122    | ENSG000002C1C       | - | MRD45 capicua protein-coding                   |
| chr4-3208 8.929424 | 0.362651 | 0.786361 | 0.461177 | 0.644672 | 0.981636 | chr4  | 3208815  | 3210758  | + | 0 NA | intron (N intron (N | -34583 NM_001330 | 345222 Hs. 442291NM_001012   | ENSG000002MSANTD1   | - | C4orf44 Myb/SANT protein-coding                |
| chr5-138 8.929424  | 0.362651 | 0.786361 | 0.461177 | 0.644672 | 0.981636 | chr5  | 1.39E+08 | 1.39E+08 | + | 0 NA | intron (N intron (N | 50370 NM_001322  | 1495 Hs. 445981NM_001903     | ENSG000002CTNNA1    | - | CAP102 MYC catenin ε protein-coding            |
| chr13-772 5.221289 | 0.462452 | 1.002854 | 0.461136 | 0.644701 | 0.981636 | chr13 | 77220849 | 77221369 | + | 0 NA | intron (N intron (N | 105985 NM_001507 | 23077 Hs. 591221NM_015057    | ENSG000002MYCBP2    | - | Myc-bp2 MYC band protein-coding                |
| chr14-102 5.221289 | 0.462452 | 1.002854 | 0.461136 | 0.644701 | 0.981636 | chr14 | 1.02E+08 | 1.02E+08 | + | 0 NA | intron (N intron (N | 54432 NM_001348  | 122416 Hs. 432945NM_152322   | ENSG000002ANKRD9    | - | ankyrin 1 protein-coding                       |
| chr3-3908 5.221289 | 0.462452 | 1.002854 | 0.461136 | 0.644701 | 0.981636 | chr3  | 39085849 | 39086873 | + | 0 NA | non-cod non-codir   | 21266 NM_001278  | 64689 Hs. 721945NM_031899    | ENSG000002GORASP1   | - | GOLPH5 GF golgi ree protein-coding             |
| chr5-7045 5.221289 | 0.462452 | 1.002854 | 0.461136 | 0.644701 | 0.981636 | chr5  | 70431093 | 70431999 | + | 0 NA | intron (N Tigger I  | 16172 NM_001515  | 2966 Hs. 191355NM_001515     | ENSG000002GTF2H2    | - | BTF2 BTF2 general protein-coding               |
| chr6-5308 5.221289 | 0.462452 | 1.002854 | 0.461136 | 0.644701 | 0.981636 | chr6  | 53007289 | 53009675 | + | 0 NA | intron (N AluS2 SIN | 12862 NR_001445  | 125050 NR_001445             | ENSG000002CRN7SK    | - | 7SK RNA compc snRNA                            |
| chr6-1522 5.221289 | 0.462452 | 1.002854 | 0.461136 | 0.644701 | 0.981636 | chr6  | 1.52E+08 | 1.52E+08 | + | 0 NA | intron (N intron (N | -15763 NM_001347 | 23345 Hs. 12967 NM_015293    | ENSG000002SYNE1     | - | 8B ARCA1 spectrin protein-coding               |
| chr7-6708 5.221289 | 0.462452 | 1.002854 | 0.461136 | 0.644701 | 0.981636 | chr7  | 67003712 | 67004563 | + | 0 NA | intron (N MER65A LI | 7304 NM_018264   | 55253 Hs. 520917NM_018264    | ENSG000002TYW1      | - | RSAFD1 TY tRNA-yW s protein-coding             |
| chrX-4508 5.221289 | 0.462452 | 1.002854 | 0.461136 | 0.644701 | 0.981636 | chrX  | 45084710 | 45086032 | + | 0 NA | intron (N Tigger5b  | 115505 NM_176815 | 79742 Hs. 98321 NM_024685    | ENSG000002DIPK2B    | - | 4930578C1 divergent protein-coding             |
| chr10-177 5.889622 | -0.44081 | 0.956519 | -0.46085 | 0.644908 | 0.981636 | chr10 | 7769332  | 7769844  | + | 0 NA | intron (N intron (N | 18405 NM_012311  | 22944 Hs. 397915NM_012311    | ENSG000002KIN       | - | BTDC KIN1 kin17 DN <sup>β</sup> protein-coding |
| chr10-766 5.889622 | -0.44081 | 0.956519 | -0.46085 | 0.644908 | 0.981636 | chr10 | 16762825 | 16763512 | + | 0 NA | intron (N intron (N | 54256 NM_012425  | 6251 Hs. 524161NM_012425     | ENSG000002CRSU1     | - | RSP-1 Ras suppr protein-coding                 |
| chr12-106 5.889622 | -0.44081 | 0.956519 | -0.46085 | 0.644908 | 0.981636 | chr12 | 1.06E+08 | 1.06E+08 | + | 0 NA | intron (N LIPA3 LIN | 13777 NM_001160  | 55703 Hs. 62696 NM_018082    | ENSG000002POLR3B    | - | C128 HLD <sup>ε</sup> RNA polyn protein-coding |
| chr13-771 5.889622 | -0.44081 | 0.956519 | -0.46085 | 0.644908 | 0.981636 | chr13 | 77186896 | 77187954 | + | 0 NA | intron (N intron (N | 111911 NR_046711 | 1.01E+08 Hs. 569288NR_046711 | ENSG000002MYCBP2-AS | - | MYCBP2 arncRNA                                 |
| chr16-281 5.889622 | -0.44081 | 0.956519 | -0.46085 | 0.644908 | 0.981636 | chr16 | 28171719 | 28173504 | + | 0 NA | intron (N intron (N | 39354 NM_015171  | 23214 Hs. 460465NM_015171    | ENSG000002XPO6      | - | EXP6 RANE exportin protein-coding              |
| chr16-691 5.889622 | -0.44081 | 0.956519 | -0.46085 | 0.644908 | 0.981636 | chr16 | 69698206 | 69699945 | + | 0 NA | 3' UTR (N3' UTR (N  | 9600 NR_145753   | 1.1E+08 NR_145753            | SNORD13H            | - | small nucsnRNA                                 |
| chr2-4228 5.889622 | -0.44081 | 0.956519 | -0.46085 | 0.644908 | 0.981636 | chr2  | 42286386 | 42287401 | + | 0 NA | intron (N intron (N | 73145 NR_134948  | 9167 Hs. 339635NM_004715     | ENSG000002COX7A2L   | - | COX7AR CC cytochron protein-coding             |
| chr2-2381 5.889622 | -0.44081 | 0.956519 | -0.46085 | 0.644908 | 0.981636 | chr2  | 2.38E+08 | 2.38E+08 | + | 0 NA | intron (N AluSq2 SI | 12222 NM_001291  | 151176 Hs. 24951 NM_152521   | ENSG000002ERFE      | - | C1QTNF15 erythrof protein-coding               |
| chr3-133 5.889622  | -0.44081 | 0.956519 | -0.46085 | 0.644908 | 0.981636 | chr3  | 1.34E+08 | 1.34E+08 | + | 0 NA | intron (N intron (N | 43111 NM_001282  | 55573 Hs. 518265NM_017545    | ENSG000002CDV3      | - | H41 CDV3 homc protein-coding                   |
| chr3-1841 5.889622 | -0.44081 | 0.956519 | -0.46085 | 0.644908 | 0.981636 | chr3  | 1.84E+08 | 1.84E+08 | + | 0 NA | intron (N AluS2 SI  | 3038 NM_003907   | 8893 Hs. 283551NM_003907     | ENSG000002EIF2B5    | - | CACH CLE eukaryot protein-coding               |
| chr4-182 5.889622  | -0.44081 | 0.956519 | -0.46085 | 0.644908 | 0.981636 | chr4  | 1820692  | 1820988  | + | 0 NA | intron (N AluSx1 SI | 27528 NM_001163  | 2261 Hs. 1420 NM_000142      | ENSG000002FGFR3     | - | ACH CD33 <sup>ε</sup> fibroblas protein-coding |
| chr6-182 5.889622  | -0.44081 | 0.956519 | -0.46085 | 0.644908 | 0.981636 | chr6  | 18253331 | 18254220 | + | 0 NA | intron (N AluJo SIN | 10755 NM_001134  | 7913 Hs. 484813NM_003472     | ENSG000002DEK       | - | D6S231E DEK protc protein-coding               |
| chr6-5656 5.889622 | -0.44081 | 0.956519 | -0.46085 | 0.644908 | 0.981636 | chr6  | 56568204 | 56568741 | + | 0 NA | exon (NM exon (NM   | 74417 NM_015548  | 667 Hs. 604915NM_001723      | ENSG000002CST       | - | BP240 BP <sup>α</sup> dystonin protein-coding  |
| chr7-143 5.889622  | -0.44081 | 0.956519 | -0.46085 | 0.644908 | 0.981636 | chr7  | 1.44E+08 | 1.44E+08 | + | 0 NA | intron (N L2a LINE  | 3865 NM_001363   | 28596 Hs. 743565NM_173675    | ENSG000002TCAP2     | - | FAM115C FTRPM8 che protein-coding              |
| chr8-5621 5.889622 | -0.44081 | 0.956519 | -0.46085 | 0.644908 | 0.981636 | chr8  | 56218238 | 56219019 | + | 0 NA | non-cod non-codir   | 6839 NM_001011   | 79145 Hs. 436913NM_024300    | ENSG000002CHHD7     | - | COX23 coiled-cc protein-coding                 |
| chr14-526 8.67318  | -0.36507 | 0.792413 | -0.46071 | 0.645005 | 0.981636 | chr14 | 52645285 | 52646363 | + | 0 NA | intron (N AluSx SIN | 49734 NM_014584  | 30001 Hs. 525335NM_014584    | ENSG000002ERO1A     | - | ERO1-L EF endoplasm protein-coding             |
| chr15-596 8.67318  | -0.36507 | 0.792413 | -0.46071 | 0.645005 | 0.981636 | chr15 | 59637962 | 59639112 | + | 0 NA | 3' UTR (N3' UTR (N  | 18768 NM_001322  | 2958 Hs. 512934NM_004492     | ENSG000002GTF2A2    | - | HsT18745 nervon t protein-coding               |
| chr15-756 8.67318  | -0.36507 | 0.792413 | -0.46071 | 0.645005 | 0.981636 | chr15 | 75679685 | 75683254 | + | 0 NA | intron (N intron (N | 31379 NM_001897  | 1464 Hs. 513044NM_001897     | ENSG000002CSGP4     | - | HMW-MAA χ chondroit protein-coding             |
| chr19-131 8.67318  | -0.36507 | 0.792413 | -0.46071 | 0.645005 | 0.981636 | chr19 | 13136542 | 13137492 | + | 0 NA | intron (N intron (N | 13358 NM_001271  | 8677 Hs. 43812 NM_003765     | ENSG000002STX10     | - | SYN10 hsysyntaxin protein-coding               |
| chr2-1213 8.67318  | -0.36507 | 0.792413 | -0.46071 | 0.645005 | 0.981636 | chr2  | 1.21E+08 | 1.21E+08 | + | 0 NA | 3' UTR (N3' UTR (N  | -55323 NM_014555 | 29842 Hs. 156471NM_014555    | ENSG000002TFCP2L1   | - | CRTR1 LBF transcrip protein-coding             |
| chr2-1330 8.67318  | -0.36507 | 0.792413 | -0.46071 | 0.645005 | 0.981636 | chr2  | 1.33E+08 | 1.33E+08 | + | 0 NA | intron (N AluY SINE | -17428 NM_110294 | 1.02E+08 Hs. 661917NR_110294 | ENSG000002NCKAP5-AS | - | NCKAP5 arncRNA                                 |
| chr6-995 8.67318   | -0.36507 | 0.792413 | -0.46071 | 0.645005 | 0.981636 | chr6  | 99531651 | 99532545 | + | 0 NA | 3' UTR (N3' UTR (N  | 11104 NM_001195  | 1E+08 Hs. 634505NM_001195    | ENSG000002CTSD3     | - | thiosulf <sup>ε</sup> protein-coding           |
| chr7-325 8.67318   | -0.36507 | 0.792413 | -0.46071 | 0.645005 | 0.981636 | chr7  | 32554118 | 32554953 | + | 0 NA | intron (N intron (N | 59246 NM_015060  | 23080 Hs. 128055NM_015060    | ENSG000002AVL9      | - | KIAA0241 AVL9 cell protein-coding              |
| chr9-1124 5.25457  | 0.467288 | 1.014813 | 0.460467 | 0.645181 | 0.981636 | chr9  | 1.12E+08 | 1.12E+08 | + | 0 NA | intron (N MER75B DN | 40726 NM_032303  | 84263 Hs. 59486 NM_032303    | ENSG000002HSDL2     | - | C9orf99 SHydroxyst protein-coding              |
| chr1-4497 8.624182 | -0.36618 | 0.795537 | -0.46029 | 0.645308 | 0.981636 | chr1  | 44976421 | 44978350 | + | 0 NA | intron (N LIME2 LIN | 9210 NM_020365   | 8891 Hs. 533545NM_020365     | ENSG000002EIF2B3    | - | EIF-2B E eukaryot protein-coding               |
| chr15-57 8.624182  | -0.36618 | 0.795537 | -0.46029 | 0.645308 | 0.981636 | chr15 | 57252855 | 57255069 | + | 0 NA | intron (N intron (N | 24695 NR_145748  | 1.1E+08 NR_145748            | ENSG000002SNORD13D  | - | small nucsnRNA                                 |
| chr17-313 8.624182 | -0.36618 | 0.795537 | -0.46029 | 0.645308 | 0.981636 | chr17 | 31326170 | 31327781 | + | 0 NA | intron (N AluSx1 SI | -5353 NM_001003  | 2123 Hs. 591195NM_014212     | ENSG000002E1Z2A     | - | EVDA EVL <sup>ε</sup> ectropic protein-coding  |
| chr2-664 8.624182  | -0.36618 | 0.795537 | -0.46029 | 0.645308 | 0.981636 | chr2  | 66463972 | 66465363 | + | 0 NA | intron (N intron (N | -24337 NR_046625 | 1.01E+08 Hs. 734695NR_046625 | ENSG000002MEI51-AS2 | - | MEI51-AS1 MEI51 antncRNA                       |
| chr20-133 8.624182 | -0.36618 | 0.795537 | -0.46029 | 0.645308 | 0.981636 | chr20 | 1.33E+08 | 1.33E+08 | + | 0 NA | intron (N intron (N | -54270 NR_110294 | 1.02E+08 Hs. 661917NR_110294 | ENSG000002NCKAP5-AS | - | NCKAP5 arncRNA                                 |
| chr20-573 8.624182 | -0.36618 | 0.795537 | -0.46029 | 0.645308 | 0.981636 | chr20 | 57358674 | 57358873 | + | 0 NA | 3' UTR (N3' UTR (N  | 725 NM_001190    | 1E+08 NM_001190              | ENSG000002MTRNR2L3  | - | HN3 MT-RNR2 protein-coding                     |
| chr5-1441 8.624182 | -0.36618 | 0.795537 | -0.46029 | 0.645308 | 0.981636 | chr5  | 1.44E+08 | 1.44E+08 | + | 0 NA | intron (N MamRTE1 I | 2625 NM_001271   | 81555 Hs. 372055NM_030795    | ENSG000002YIPF5     | - | FinGER5 C yip1 dome protein-coding             |
| chr16-71 8.681038  | -0.36657 | 0.796753 | -0.46008 | 0.645466 | 0.981636 | chr16 | 71918131 | 71919076 | + | 0 NA | intron (N AluSx3 SI | 23072 NM_001272  | 9798 Hs. 232194NM_014761     | ENSG000002ISTI      | - | CHMP8 OLC ISTI factc protein-coding            |
| chr14-506 8.665322 | -0.36358 | 0.790862 | -0.45972 | 0.645716 | 0.981636 | chr14 | 50638915 | 50642482 | + | 0 NA | intron (N intron (N | 27608 NM_021815  | 60485 Hs. 642842NM_021815    | ENSG000002CAV1      | - | SUV45 salvador protein-coding                  |
| chr14-607 8.665322 | -0.36358 | 0.790862 | -0.45972 | 0.645716 | 0.981636 | chr14 | 60716079 | 60718005 | + | 0 NA | intron (N intron (N | 7309 NM_017422   | 51804 Hs. 97849 NM_017422    | ENSG000002SIX4      | - | AREC3 SIX homec protein-coding                 |
| chr18-68 8.665322  | -0.36358 | 0.790862 | -0.45972 | 0.645716 | 0.981636 | chr18 | 68696216 | 68698239 | + | 0 NA | exon (NM exon (NM   | 17881 NM_001350  | 54495 Hs. 440534NM_019022    | ENSG000002TMX3      | - | PDIA13 TX thioeredo protein-coding             |
| chr2-2267 8.665322 | -0.36358 | 0.790862 | -0.45972 | 0.645716 | 0.981636 | chr2  | 2.27E+08 | 2.27E+08 | + | 0 NA | intron (N intron (N | 17620 NM_005544  | 3667 Hs. 471505NM_005544     | ENSG000002IRS1      | - | HIRS-1 insulin 1 protein-coding                |
| chr22-24 8.665322  | -0.36358 | 0.790862 | -0.45972 | 0.645716 | 0.981636 | chr22 | 24364924 | 24365382 | + | 0 NA | intron (N AluS2 SIN | 23045 NM_001254  | 23384 Hs. 474384NM_015330    | ENSG000002SPECC1L   | - | CYLLA GBE sperm ant protein-coding             |
| chr3-122 8.66532   |          |          |          |          |          |       |          |          |   |      |                     |                  |                              |                     |   |                                                |



|           |          |          |          |          |          |          |       |          |          |   |   |    |                                   |         |                     |                 |                     |                          |                                       |                                   |
|-----------|----------|----------|----------|----------|----------|----------|-------|----------|----------|---|---|----|-----------------------------------|---------|---------------------|-----------------|---------------------|--------------------------|---------------------------------------|-----------------------------------|
| chr2-1994 | 8.896143 | 0.359689 | 0.784231 | 0.458651 | 0.646485 | 0.981636 | chr2  | 1.99E+08 | 1.99E+08 | + | 0 | NA | exon (NM_exon (NM_24513 NR_134967 | 23314   | Hs. 516617NM_015266 | ENSG000003SATB2 | GLSS                | SATB home protein-coding |                                       |                                   |
| chr20-37  | 8.896143 | 0.359689 | 0.784231 | 0.458651 | 0.646485 | 0.981636 | chr20 | 37365585 | 37366327 | + | 0 | NA | intron (NLIME4b LI                | 19828   | NM_198291           | 6714            | Hs. 195656NM_005417 | ENSG000003SRC            | ASV SRC1 SRC protc protein-coding     |                                   |
| chr11-12  | 11.84562 | -0.31424 | 0.685155 | -0.45864 | 0.646493 | 0.981636 | chr11 | 1.23E+08 | 1.23E+08 | + | 0 | NA | TTS (NR_TTS (NR_C                 | 223     | NR_003125           | 85391           | NR_003125           | ENSG000003SNORD14E       | -                                     | small nucsnoRNA                   |
| chr7-2618 | 11.84562 | -0.31424 | 0.685155 | -0.45864 | 0.646493 | 0.981636 | chr7  | 26187840 | 26197691 | + | 0 | NA | intron (Nintron (N                | 7981    | NM_002137           | 3181            | Hs. 487774NM_002137 | ENSG000003HNRNP2A2B1     | HNRNP2A2B1                            | F hetero gene protein-coding      |
| chr15-43  | 9.394581 | 0.357381 | 0.792445 | 0.458625 | 0.646504 | 0.981636 | chr15 | 43335925 | 43336224 | + | 0 | NA | intron (NAluJr SIN                | 5402    | NM_001012           | 161823          | Hs. 533913NM_001012 | ENSG000003ADAL           | -                                     | adenosine protein-coding          |
| chr12-53  | 9.96374  | 0.341135 | 0.744382 | 0.458279 | 0.646752 | 0.981636 | chr12 | 53516456 | 53517422 | + | 0 | NA | non-codiron-codir                 | 2955    | NR_046221           | 1.01E+08        | Hs. 633602NR_046221 | ENSG000003LOC100652      | -                                     | uncharactncRNA                    |
| chr9-125  | 9.96374  | 0.341135 | 0.744382 | 0.458279 | 0.646752 | 0.981636 | chr9  | 1.25E+08 | 1.25E+08 | + | 0 | NA | intron (Nintron (N                | 93805   | NM_00133C           | 26130           | NM_00133C           | ENSG000003GAPVD1         | GAPX5 GAGTPase ac protein-coding      |                                   |
| chr3-4471 | 9.9226   | 0.339944 | 0.74219  | 0.458028 | 0.646932 | 0.981636 | chr3  | 44719857 | 44722452 | + | 0 | NA | exon (NM_exon (NM_                | 8452    | NM_145044           | 115560          | Hs. 401045NM_145044 | ENSG000003ZNF501         | ZNF ZNF52 zinc fing protein-coding    |                                   |
| chr3-1566 | 9.9226   | 0.339944 | 0.74219  | 0.458028 | 0.646932 | 0.981636 | chr3  | 1.57E+08 | 1.57E+08 | + | 0 | NA | intron (Nintron (N                | 20297   | NM_001184           | 25976           | Hs. 744055NM_015505 | ENSG000003TIPARP         | ARTD14 P TCCD indt protein-coding     |                                   |
| chr9-125  | 9.9226   | 0.339944 | 0.74219  | 0.458028 | 0.646932 | 0.981636 | chr9  | 1.1E+08  | 1.1E+08  | + | 0 | NA | intron (Nintron (N                | 82789   | NM_153266           | 79987           | Hs. 522334NM_153266 | ENSG000003SVEP1          | C9orf13 Cushi, v protein-coding       |                                   |
| chr1-1104 | 9.412146 | 0.363691 | 0.794869 | 0.457824 | 0.647079 | 0.981636 | chr1  | 1.84E+08 | 1.84E+08 | + | 0 | NA | intron (NAluSz SIN                | 55856   | NM_000433           | 4688            | Hs. 587555NM_000433 | ENSG000003NCF2           | NCF-2 NOA neurotrophin protein-coding |                                   |
| chr1-778  | 9.43387  | 0.349077 | 0.762651 | 0.457716 | 0.647156 | 0.981636 | chr1  | 7789384  | 7791577  | + | 0 | NA | intron (NTHE1C LTF                | 6051    | NM_00128E           | 8863            | Hs. 162202NM_016831 | ENSG000003PER3           | FASPS3 G period ciprotein-coding      |                                   |
| chr1-1554 | 9.43387  | 0.349077 | 0.762651 | 0.457716 | 0.647156 | 0.981636 | chr1  | 15547246 | 15548086 | + | 0 | NA | intron (NAluSz SIN                | 5500    | NR_135613           | 1.07E+08        | NR_135613           | ENSG000003SCARNA21E      | -                                     | small Ca;ncRNA                    |
| chr1-192  | 9.43387  | 0.349077 | 0.762651 | 0.457716 | 0.647156 | 0.981636 | chr1  | 19236589 | 19240318 | + | 0 | NA | intron (Nintron (N                | 13041   | NM_001271           | 23065           | Hs. 439202NM_015047 | ENSG000003EMC1           | CAV1PMR BER membr protein-coding      |                                   |
| chr1-216  | 9.43387  | 0.349077 | 0.762651 | 0.457716 | 0.647156 | 0.981636 | chr1  | 21693100 | 21693512 | + | 0 | NA | intron (Nintron (N                | -23949  | NM_00135C           | 5909            | Hs. 148175NM_002885 | ENSG000003RAP1GAP        | RAP1GAP1 FRAP1 GTPe protein-coding    |                                   |
| chr1-2201 | 9.43387  | 0.349077 | 0.762651 | 0.457716 | 0.647156 | 0.981636 | chr1  | 2.2E+08  | 2.2E+08  | + | 0 | NA | intron (Nintron (N                | 7230    | NR_03170E           | 1E+08           | NR_03170E           | ENSG000003MIR664A        | MIR664 MimicroRNA ncRNA               |                                   |
| chr16-841 | 9.43387  | 0.349077 | 0.762651 | 0.457716 | 0.647156 | 0.981636 | chr16 | 84129183 | 84129707 | + | 0 | NA | intron (Nintron (N                | -12503  | NM_003791           | 8720            | Hs. 75890           | NR_003791                | ENSG000003MBTFS1                      | PCSK8 SIF membrane protein-coding |
| chr17-15  | 9.43387  | 0.349077 | 0.762651 | 0.457716 | 0.647156 | 0.981636 | chr17 | 15639427 | 15641998 | + | 0 | NA | intron (Nintron (N                | -121008 | NM_001282           | 374286          | Hs. 548021NM_006382 | ENSG000003CDRT1          | C17ORF1 CMT1A dup protein-coding      |                                   |
| chr19-21C | 9.43387  | 0.349077 | 0.762651 | 0.457716 | 0.647156 | 0.981636 | chr19 | 2101310  | 2102500  | + | 0 | NA | 3' UTR (N3' UTR (N                | 4990    | NM_00103E           | 113177          | Hs. 424045NM_052875 | ENSG000003IZUM04         | C19orf36 IZUMO fan protein-coding     |                                   |
| chr19-10  | 9.43387  | 0.349077 | 0.762651 | 0.457716 | 0.647156 | 0.981636 | chr19 | 10627401 | 10640480 | + | 0 | NA | intron (NAluSj SIN                | 8387    | NR_02002E           | 57153           | Hs. 534566NM_020425 | ENSG000003SLC44A2        | CTL2 PP12 solute ce protein-coding    |                                   |
| chr2-8617 | 9.43387  | 0.349077 | 0.762651 | 0.457716 | 0.647156 | 0.981636 | chr2  | 86178432 | 86179763 | + | 0 | NA | intron (N(AAAACA)r                | 14011   | NR_03993E           | 1.01E+08        | NR_03993E           | ENSG000003MIR4779        | -                                     | microRNA ncRNA                    |
| chr20-381 | 9.43387  | 0.349077 | 0.762651 | 0.457716 | 0.647156 | 0.981636 | chr20 | 38135347 | 38140382 | + | 0 | NA | TTS (NM_TTS (NM_I                 | 27406   | NM_00132E           | 7052            | Hs. 517033NM_004613 | ENSG000003TGM2           | TG(C) TCG transglut protein-coding    |                                   |
| chr3-524  | 9.43387  | 0.349077 | 0.762651 | 0.457716 | 0.647156 | 0.981636 | chr3  | 52403180 | 52406604 | + | 0 | NA | intron (Nintron (N                | 5116    | NM_00465E           | 8314            | Hs. 106674NM_00465E | ENSG000003BAP1           | HUCEP-13 BRCA1 ass protein-coding     |                                   |
| chr8-431  | 9.43387  | 0.349077 | 0.762651 | 0.457716 | 0.647156 | 0.981636 | chr8  | 43160321 | 43166760 | + | 0 | NA | intron (NAluSg7 SI                | 23076   | NM_15231E           | 138050          | Hs. 600384NM_15231E | ENSG000003HGSNAT         | HGNAT MPS heparan-e protein-coding    |                                   |
| chr9-703  | 9.109213 | -0.35659 | 0.779196 | -0.45764 | 0.647211 | 0.981636 | chr9  | 70327963 | 70329158 | + | 0 | NA | intron (NMSTA-int                 | 69582   | NM_01511C           | 23137           | Hs. 534185NM_01511C | ENSG000003SMC5           | SMC5L1 structure protein-coding       |                                   |
| chr22-317 | 9.109213 | -0.35659 | 0.779196 | -0.45764 | 0.647211 | 0.981636 | chr22 | 31700144 | 31701681 | + | 0 | NA | intron (Nintron (N                | -38348  | NM_00132E           | 23761           | Hs. 420555NM_014335 | ENSG000003PISD           | DJ858B16 phosphatiprotein-coding      |                                   |
| chr11-63  | 8.342699 | 0.375097 | 0.820093 | 0.457383 | 0.647396 | 0.981636 | chr11 | 63854052 | 63854382 | + | 0 | NA | intron (N(TG)n SIN                | 15107   | NM_00116E           | 2011            | Hs. 567261NM_004954 | ENSG000003MARK2          | EMK-1 EMK microtub protein-coding     |                                   |
| chr15-50  | 8.342699 | 0.375097 | 0.820093 | 0.457383 | 0.647396 | 0.981636 | chr15 | 50944424 | 50945018 | + | 0 | NA | non-codiron-codir                 | 592     | NR_027642           | 1E+08           | Hs. 730493NR_027642 | DCAF13P3                 | -                                     | DBD1 and pseudo                   |
| chr8-871  | 8.350557 | 0.373297 | 0.816159 | 0.457383 | 0.647396 | 0.981636 | chr8  | 38119551 | 38119780 | + | 0 | NA | intron (NAluSz SIN                | 13872   | NM_00110E           | 9070            | Hs. 512533NM_004674 | ENSG000003ASH2L          | ASH2 ASH2ASH2 like protein-coding     |                                   |
| chr7-7764 | 9.101355 | -0.35509 | 0.776433 | -0.45734 | 0.647427 | 0.981636 | chr7  | 77641755 | 77642179 | + | 0 | NA | IntergeniAluSp SIN                | 54298   | NR_134254           | 1.01E+08        | Hs. 72451           | NR_038361                | ENSG000003APTR                        | RSBN1L-ASAlu-medi ncRNA           |
| chr10-114 | 9.392731 | 0.347872 | 0.760896 | 0.457188 | 0.647536 | 0.981636 | chr10 | 1.15E+08 | 1.15E+08 | + | 0 | NA | intron (NMER6B LI                 | 4969    | NM_13916E           | 142940          | Hs. 21187           | NR_13916E                | ENSG000003TRUB1                       | PUS4 TruB pset protein-coding     |
| chr12-11  | 9.392731 | 0.347872 | 0.760896 | 0.457188 | 0.647536 | 0.981636 | chr12 | 1.18E+08 | 1.18E+08 | + | 0 | NA | intron (Nintron (N                | 24831   | NM_002567           | 5037            | Hs. 433862NM_002567 | ENSG000003PEBP1          | HCNP HCNF phosphatiprotein-coding     |                                   |
| chr3-256  | 9.392731 | 0.347872 | 0.760896 | 0.457188 | 0.647536 | 0.981636 | chr3  | 25608895 | 25609098 | + | 0 | NA | intron (Nintron (N                | 55376   | NM_00106E           | 7155            | Hs. 475733NM_00106E | ENSG000003TOP2B          | TOP2B TbDNA topoiprotein-coding       |                                   |
| chr11-37  | 8.657464 | -0.36206 | 0.792059 | -0.45711 | 0.647593 | 0.981636 | chr11 | 3792443  | 3794784  | + | 0 | NA | intron (Nintron (N                | 3933    | NR_157591           | 4928            | Hs. 524755NM_005387 | ENSG000003CNP98          | ADIR2 NUF nucleopor protein-coding    |                                   |
| chr11-85  | 8.657464 | -0.36206 | 0.792059 | -0.45711 | 0.647593 | 0.981636 | chr11 | 85991797 | 85995742 | + | 0 | NA | intron (Nintron (N                | 75315   | NM_00716E           | 8301            | Hs. 163893NM_00716E | ENSG000003PICALM         | CALM CLTF phosphatiprotein-coding     |                                   |
| chr13-11  | 8.657464 | -0.36206 | 0.792059 | -0.45711 | 0.647593 | 0.981636 | chr13 | 1.14E+08 | 1.14E+08 | + | 0 | NA | intron (NTigger3b                 | 35039   | NM_00134E           | 55002           | Hs. 317593NM_01790E | ENSG000003MTC03          | C13orf11 transmem protein-coding      |                                   |
| chr15-43  | 8.657464 | -0.36206 | 0.792059 | -0.45711 | 0.647593 | 0.981636 | chr15 | 43020256 | 43023021 | + | 0 | NA | intron (NMER2 DNA                 | 84400   | NM_17491E           | 197131          | Hs. 591121NM_17491E | ENSG000003CUBR1          | JBS ubiquitin protein-coding          |                                   |
| chr18-54  | 8.657464 | -0.36206 | 0.792059 | -0.45711 | 0.647593 | 0.981636 | chr18 | 54158362 | 54159778 | + | 0 | NA | intron (Nintron (N                | 63242   | NR_00297C           | 677819          | Hs. 655869NR_00297C | ENSG000003SNORA37        | ACA37 small nucsnoRNA                 |                                   |
| chr2-546  | 8.657464 | -0.36206 | 0.792059 | -0.45711 | 0.647593 | 0.981636 | chr2  | 54650096 | 54651174 | + | 0 | NA | intron (Nintron (N                | -73967  | NM_00103E           | 400954          | Hs. 656692NM_00103E | ENSG000003EML6           | -                                     | EMAP like protein-coding          |
| chr3-1327 | 8.657464 | -0.36206 | 0.792059 | -0.45711 | 0.647593 | 0.981636 | chr3  | 1.33E+08 | 1.33E+08 | + | 0 | NA | intron (NAluSc SIN                | -3910   | NR_002811           | 348808          | Hs. 586111NR_002811 | ENSG000003PNHP3-AS1      | NCRNAA0011NHP3 antncRNA               |                                   |
| chr3-1837 | 8.657464 | -0.36206 | 0.792059 | -0.45711 | 0.647593 | 0.981636 | chr3  | 1.84E+08 | 1.84E+08 | + | 0 | NA | intron (NAluSp SIN                | 49131   | NR_046727           | 1.01E+08        | NR_046727           | YEATS2-AS-               | YEATS2 arncRNA                        |                                   |
| chr5-1381 | 8.657464 | -0.36206 | 0.792059 | -0.45711 | 0.647593 | 0.981636 | chr5  | 13819535 | 13820263 | + | 0 | NA | intron (NAluSp SIN                | 124581  | NM_00136E           | 1767            | Hs. 212366NM_00136E | ENSG000003DNAH5          | CILD3 DNA dynein ap protein-coding    |                                   |
| chr5-1764 | 8.657464 | -0.36206 | 0.792059 | -0.45711 | 0.647593 | 0.981636 | chr5  | 1.76E+08 | 1.77E+08 | + | 0 | NA | intron (NAluJb SIN                | 39339   | NM_014901           | 22838           | Hs. 434885NM_014901 | ENSG000003CRNF44         | -                                     | ring fing protein-coding          |
| chr6-5662 | 8.657464 | -0.36206 | 0.792059 | -0.45711 | 0.647593 | 0.981636 | chr6  | 56627297 | 56632281 | + | 0 | NA | intron (Nintron (N                | 13100   | NM_01554E           | 667             | Hs. 604915NM_001725 | ENSG000003DST            | BP240 BP dystonin protein-coding      |                                   |
| chr6-854  | 8.657464 | -0.36206 | 0.792059 | -0.45711 | 0.647593 | 0.981636 | chr6  | 85486907 | 85488485 | + | 0 | NA | intron (NAluJr SIN                | 37613   | NM_00252E           | 4907            | Hs. 153952NM_00252E | ENSG000003CNT5E          | CALJA CD75-e nuclec protein-coding    |                                   |
| chr7-3821 | 8.657464 | -0.36206 | 0.792059 | -0.45711 | 0.647593 | 0.981636 | chr7  | 38217120 | 38217624 | + | 0 | NA | intron (Nintron (N                | 39127   | NM_03201E           | 83930           | Hs. 309755NM_03201E | ENSG000003STARD3NL       | MENTHO STARD3 N- protein-coding       |                                   |
| chr9-9214 | 8.657464 | -0.36206 | 0.792059 | -0.45711 | 0.647593 | 0.981636 | chr9  | 92147675 | 92149079 | + | 0 | NA | intron (Nintron (N                | 6910    | NR_027341           | 158314          | Hs. 149944NR_027341 | LINC00475                | C9orf44 long intncRNA                 |                                   |
| chr10-61  | 8.196007 | -0.37726 | 0.825332 | -0.45711 | 0.647603 | 0.981636 | chr10 | 61958184 | 61958805 | + | 0 | NA | intron (NAluSg4 SI                | 56818   | NM_03219E           | 84159           | Hs. 535297NM_03219E | ENSG000003ARID5B         | DESRT MRFA7 rich protein-coding       |                                   |
| chr11-12  | 8.196007 | -0.37726 | 0.825332 | -0.45711 | 0.647603 | 0.981636 | chr11 | 1.22E+08 | 1.22E+08 | + | 0 | NA | intron (Nintron (N                | -7343   | NR_13718E           | 399599          | Hs. 44098           | NR_02443C                | ENSG000003MIR100HG                    | AGD1 lincmir-100 lncRNA           |
| chr5-154  | 8.196007 | -0.37726 | 0.825332 | -0.45711 | 0.647603 | 0.981636 | chr5  | 1.55E+08 | 1.55E+08 | + | 0 | NA | intron (NLM3 LINE                 | 7356    | NM_001301           | 9337            | Hs. 26703           | NM_00477E                | ENSG000003CNOT8                       | CAF1 CAL1 CCR4-NOT protein-coding |
| chr8-128  | 8.196007 | -0.37726 | 0.825332 | -0.45711 | 0.647603 | 0.981636 | chr   |          |          |   |   |    |                                   |         |                     |                 |                     |                          |                                       |                                   |



|                     |          |          |           |          |          |       |          |          |   |   |    |                    |                  |          |           |                  |                           |                                     |                           |
|---------------------|----------|----------|-----------|----------|----------|-------|----------|----------|---|---|----|--------------------|------------------|----------|-----------|------------------|---------------------------|-------------------------------------|---------------------------|
| chr3-585 5.915046   | -0.4325  | 0.952885 | -0.45388  | 0.649914 | 0.981636 | chr3  | 58500862 | 58502489 | + | 0 | NA | 3' UTR (N3' UTR (N | 3310 NM_153331   | 200845   | Hs.13982  | NM_153331        | ENSG00000CKTD6            | KCASH3                              | potassium protein-coding  |
| chr3-1556 5.915046  | -0.4325  | 0.952885 | -0.45388  | 0.649914 | 0.981636 | chr3  | 1.56E+08 | 1.56E+08 | + | 0 | NA | intron (Nintron (N | 66349 NM_003875  | 8833     | Hs.591314 | NM_003875        | ENSG00000GMPS             | GATD7                               | guanine protein-coding    |
| chr3-1972 5.915046  | -0.4325  | 0.952885 | -0.45388  | 0.649914 | 0.981636 | chr3  | 1.97E+08 | 1.97E+08 | + | 0 | NA | intron (NLM3f LIN  | 44685 NR_039966  | 1.01E+08 | NR_039966 | ENSG00000CIR4797 | -                         | microRNA ncRNA                      |                           |
| chr4-534 5.915046   | -0.4325  | 0.952885 | -0.45388  | 0.649914 | 0.981636 | chr4  | 53434692 | 53435842 | + | 0 | NA | intron (Nintron (N | 57614 NM_001134  | 81608    | Hs.555109 | NM_001134        | ENSG00000FIP1L1           | FIP1 Rhe factor i protein-coding    |                           |
| chr4-1228 5.915046  | -0.4325  | 0.952885 | -0.45388  | 0.649914 | 0.981636 | chr4  | 1.23E+08 | 1.23E+08 | + | 0 | NA | intron (Nintron (N | 33548 NM_007088  | 11162    | Hs.558458 | NM_007088        | ENSG00000NUD76            | ASF62 FCnudi hycprotein-coding      |                           |
| chr5-7861 5.915046  | -0.4325  | 0.952885 | -0.45388  | 0.649914 | 0.981636 | chr5  | 78618522 | 78619257 | + | 0 | NA | intron (Nintron (N | 29883 NM_005775  | 10184    | Hs.79299  | NM_005775        | ENSG00000LHFFL2           | LHFFL2 tetprotein-coding            |                           |
| chr6-3072 5.915046  | -0.4325  | 0.952885 | -0.45388  | 0.649914 | 0.981636 | chr6  | 30726251 | 30727622 | + | 0 | NA | TTS (NM_CTS (NM_C  | 5433 NM_001293   | 203068   | Hs.63648C | NM_178014        | ENSG00000TUBB             | CDC6M CS tubulin t protein-coding   |                           |
| chr8-4796 5.915046  | -0.4325  | 0.952885 | -0.45388  | 0.649914 | 0.981636 | chr8  | 47962387 | 47965146 | + | 0 | NA | intron (Nintron (N | 2825 NM_182746   | 4173     | Hs.460184 | NM_005914        | ENSG00000MCM4             | CDC21 CDCminichron protein-coding   |                           |
| chr8-1023 5.915046  | -0.4325  | 0.952885 | -0.45388  | 0.649914 | 0.981636 | chr8  | 1.02E+08 | 1.02E+08 | + | 0 | NA | intron (NMIR SINE  | 73900 NM_001282  | 51366    | Hs.49244E | NM_015902        | ENSG00000CUBR5            | DD5 EDD Eubiquitin protein-coding   |                           |
| chr9-9664 5.915046  | -0.4325  | 0.952885 | -0.45388  | 0.649914 | 0.981636 | chr9  | 96644186 | 96645540 | + | 0 | NA | intron (Nintron (N | 10454 NM_153698  | 195827   | Hs.44640  | NM_153698        | ENSG00000PRXL2C           | AAED1 C9cperoxidase protein-coding  |                           |
| chr1-1704 8.432836  | 0.375705 | 0.827943 | -0.453782 | 0.649986 | 0.981636 | chr1  | 1704046  | 1705094  | + | 0 | NA | exon (NM exon (NM  | 4631 NR_002946   | 8511     | Hs.67176C | NR_002946        | ENSG00000MMP23A           | MIFR MIFF matrix pseudo             |                           |
| chr1-2582 9.938316  | 0.336864 | 0.742586 | 0.453636  | 0.650091 | 0.981636 | chr1  | 25826048 | 25834614 | + | 0 | NA | intron (Nintron (N | -6725 NR_024498  | 646471   | Hs.727271 | NR_024498        | LOC646471                 | -                                   | uncharactericrNA          |
| chr1-2048 9.938316  | 0.336864 | 0.742586 | 0.453636  | 0.650091 | 0.981636 | chr1  | 40487041 | 40493718 | + | 0 | NA | intron (Nintron (N | 13089 NM_00132C  | 339559   | Hs.43438E | NM_198494        | ENSG00000ZFP69            | ZFP69A ZFP699 zfp protein-coding    |                           |
| chr1-4045 9.938316  | 0.336864 | 0.742586 | 0.453636  | 0.650091 | 0.981636 | chr1  | 2.05E+08 | 2.05E+08 | + | 0 | NA | intron (Nintron (N | 32320 NM_00239C  | 4194     | Hs.49749E | NM_00239C        | ENSG00000MMD4             | HDMX MDM4MDM4 reg protein-coding    |                           |
| chr12-102 9.938316  | 0.336864 | 0.742586 | 0.453636  | 0.650091 | 0.981636 | chr12 | 1.02E+08 | 1.02E+08 | + | 0 | NA | intron (NSVA_A Ret | -27281 NM_001301 | 51019    | Hs.40569E | NM_01605C        | ENSG00000WASHC3           | CCDC53 CCWASH comp protein-coding   |                           |
| chr16-111 9.938316  | 0.336864 | 0.742586 | 0.453636  | 0.650091 | 0.981636 | chr16 | 11551343 | 11557248 | + | 0 | NA | intron (Nintron (N | -27048 NM_00137C | 400499   | Hs.459937 | NM_00137C        | ENSG00000LOC400499        | -                                   | putative protein-coding   |
| chr16-572 9.938316  | 0.336864 | 0.742586 | 0.453636  | 0.650091 | 0.981636 | chr16 | 57250997 | 57253336 | + | 0 | NA | exon (NM exon (NM  | 6907 NM_01210C   | 23568    | Hs.63287E | NM_01210C        | ENSG00000MRL2BP           | BART BARTADP ribos protein-coding   |                           |
| chr19-458 9.938316  | 0.336864 | 0.742586 | 0.453636  | 0.650091 | 0.981636 | chr19 | 45898260 | 45900147 | + | 0 | NA | intron (NAluSp SIN | 3410 NM_001012   | 339344   | Hs.51547E | NM_001012        | ENSG00000CARYLP           | P42pop Myb relat protein-coding     |                           |
| chr19-484 9.938316  | 0.336864 | 0.742586 | 0.453636  | 0.650091 | 0.981636 | chr19 | 48472892 | 48475712 | + | 0 | NA | exon (NM exon (NM  | 4933 NM_00422E   | 9266     | Hs.144011 | NM_00422E        | ENSG00000CYTH2            | ARNO CTS1 cytohesin protein-coding  |                           |
| chr2-2019 9.938316  | 0.336864 | 0.742586 | 0.453636  | 0.650091 | 0.981636 | chr2  | 2.02E+08 | 2.02E+08 | + | 0 | NA | intron (NLM2D LIN  | -16610 NM_03306E | 58538    | Hs.63085  | NM_03306E        | ENSG00000MPP4             | ALS2CR5 Lmembrane protein-coding    |                           |
| chr2-2164 9.938316  | 0.336864 | 0.742586 | 0.453636  | 0.650091 | 0.981636 | chr2  | 2.16E+08 | 2.16E+08 | + | 0 | NA | intron (NMSTB LTR  | 36389 NM_001127  | 50485    | Hs.516674 | NM_01414C        | ENSG00000SMARCAL1         | HARP HHA4 SWI/SNF protein-coding    |                           |
| chr9-8627 9.938316  | 0.336864 | 0.742586 | 0.453636  | 0.650091 | 0.981636 | chr9  | 86270097 | 86272264 | + | 0 | NA | intron (NTiger3c   | 11358 NM_03094C  | 81689    | Hs.449291 | NM_03094C        | ENSG00000TSCA1            | HBLD2 ISA iron-sulf protein-coding  |                           |
| chr1-3512 12.30708  | -0.30608 | 0.67476  | -0.45361  | 0.65011  | 0.981636 | chr1  | 35175203 | 35191897 | + | 0 | NA | 3' UTR (N3' UTR (N | 9685 NR_13670E   | 6421     | Hs.355934 | NM_00506E        | ENSG00000SFPQ             | POMP100 Fsplicing protein-coding    |                           |
| chr12-129 13.134636 | -0.35116 | 0.774222 | -0.45356  | 0.650145 | 0.981636 | chr12 | 1.2E+08  | 1.2E+08  | + | 0 | NA | intron (Nintron (N | -12448 NR_03971E | 1.01E+08 | NR_03971E | ENSG00000MIR4498 | mir-4498 microRNA ncRNA   |                                     |                           |
| chr19-108 9.134636  | -0.35116 | 0.774222 | -0.45356  | 0.650145 | 0.981636 | chr19 | 40800665 | 40801773 | + | 0 | NA | exon (NM exon (NM  | 1697 NM_05304E   | 112398   | Hs.515417 | NM_01755E        | ENSG00000EGLN2            | EIT-6 EITe1g1-9 fan protein-coding  |                           |
| chr7-1236 8.855003  | 0.358343 | 0.790405 | 0.453636  | 0.650285 | 0.981636 | chr7  | 1.04E+08 | 1.24E+08 | + | 0 | NA | intron (NAluSg SIN | 43428 NM_20716E  | 442721   | Hs.59226C | NM_20716E        | ENSG00000LMD02            | C-LMOD Cl leiomodir protein-coding  |                           |
| chr1-187 9.126779   | -0.34969 | 0.771473 | -0.45328  | 0.650346 | 0.981636 | chr1  | 1875067  | 1875772  | + | 0 | NA | intron (NAluS26 SI | 15668 NM_002074  | 2782     | Hs.43042E | NM_002074        | ENSG00000GNB1             | MRD42 G protein protein-coding      |                           |
| chr1-3625 9.126779  | -0.34969 | 0.771473 | -0.45328  | 0.650346 | 0.981636 | chr1  | 36290364 | 36295074 | + | 0 | NA | intron (Nintron (N | -13649 NM_00116E | 79729    | Hs.52449E | NM_02467E        | ENSG00000SH3D21           | Clorf113 SH3 doma protein-coding    |                           |
| chr10-311 9.126779  | -0.34969 | 0.771473 | -0.45328  | 0.650346 | 0.981636 | chr10 | 3111241  | 3120002  | + | 0 | NA | intron (Nintron (N | 11012 NM_00132E  | 5214     | Hs.26010  | NM_00262E        | ENSG00000PFK              | ATP-PFK Fphosphofr protein-coding   |                           |
| chr10-319 9.126779  | -0.34969 | 0.771473 | -0.45328  | 0.650346 | 0.981636 | chr10 | 3168062  | 3170731  | + | 0 | NA | intron (Nintron (N | 3320 NM_001347   | 10513    | Hs.52830C | NM_01488E        | ENSG00000PITRM1           | MP1 PreP1 ptrilysyl protein-coding  |                           |
| chr11-235 9.126779  | -0.34969 | 0.771473 | -0.45328  | 0.650346 | 0.981636 | chr11 | 2396074  | 2397457  | + | 0 | NA | intron (Nintron (N | -3985 NM_001297  | 10078    | Hs.523424 | NM_00570E        | ENSG00000TSSC4            | -                                   | tumor sup protein-coding  |
| chr14-68 9.126779   | -0.34969 | 0.771473 | -0.45328  | 0.650346 | 0.981636 | chr14 | 68896502 | 68898746 | + | 0 | NA | intron (Nintron (N | 81678 NM_001102  | 87       | Hs.23575C | NM_00110E        | ENSG00000ACTN1            | BDPLT15 actinin t protein-coding    |                           |
| chr16-69 9.126779   | -0.34969 | 0.771473 | -0.45328  | 0.650346 | 0.981636 | chr16 | 69341167 | 69344293 | + | 0 | NA | TTS (NM_CTS (NM_C  | 2958 NM_01610E   | 51388    | Hs.58572E | NM_01610E        | ENSG00000NIP7             | ACT1-37 HS nucleolar protein-coding |                           |
| chr2-372 9.126779   | -0.34969 | 0.771473 | -0.45328  | 0.650346 | 0.981636 | chr2  | 37256901 | 37257322 | + | 0 | NA | TTS (NR_CTS (NR_C  | 2545 NR_14640E   | 55471    | Hs.43346E | NM_01860E        | ENSG00000NDUFA7           | C2orf56 NADH:ubiq protein-coding    |                           |
| chr3-177 9.126779   | -0.34969 | 0.771473 | -0.45328  | 0.650346 | 0.981636 | chr3  | 1.77E+08 | 1.77E+08 | + | 0 | NA | intron (Nintron (N | 150557 NM_001324 | 79718    | Hs.714201 | NM_02466E        | ENSG00000TBL1XR1          | R21 DC42 transducin protein-coding  |                           |
| chr6-174 9.126779   | -0.34969 | 0.771473 | -0.45328  | 0.650346 | 0.981636 | chr6  | 17848235 | 17849700 | + | 0 | NA | intron (NAluSx SIN | 138668 NM_001123 | 63917    | Hs.94499  | NM_02211E        | ENSG00000K1F13A           | CKBIN baEkinasin f protein-coding   |                           |
| chr7-776 9.126779   | -0.34969 | 0.771473 | -0.45328  | 0.650346 | 0.981636 | chr7  | 77632833 | 77634258 | + | 0 | NA | intron (NAluS8 SI  | 62720 NR_134254  | 1.01E+08 | NR_03836E | ENSG00000CAPTR   | RSBN1L-AS Alu-medie ncRNA |                                     |                           |
| chr9-656 9.126779   | -0.34969 | 0.771473 | -0.45328  | 0.650346 | 0.981636 | chr9  | 65693005 | 65693843 | + | 0 | NA | 5' UTR (N5' UTR (N | 17496 NM_00136E  | 220869   | Hs.35595C | NM_001024        | ENSG00000CBWD5            | CBWD3 DC2 COBW dome protein-coding  |                           |
| chr15-898 9.37282   | 0.360798 | 0.796138 | 0.453185  | 0.650415 | 0.981636 | chr15 | 89800671 | 89805265 | + | 0 | NA | intron (Nintron (N | 11884 NM_00115C  | 290      | Hs.1239   | NM_00115C        | ENSG00000ANPEP            | APN CD13 alanyl an protein-coding   |                           |
| chr1-186 8.904001   | 0.357866 | 0.789987 | 0.453003  | 0.650547 | 0.981636 | chr1  | 1.86E+08 | 1.86E+08 | + | 0 | NA | intron (Nintron (N | 35786 NM_00329E  | 7175     | Hs.27964C | NM_00329E        | ENSG00000TPR              | -                                   | translocat protein-coding |
| chr2-2317 8.904001  | 0.357866 | 0.789987 | 0.453003  | 0.650547 | 0.981636 | chr2  | 2.32E+08 | 2.32E+08 | + | 0 | NA | intron (Nintron (N | 10217 NM_00128E  | 64708    | Hs.335061 | NM_02273C        | ENSG00000COPS7B           | CSN7B SGN COP9 sig protein-coding   |                           |
| chr2-402 8.904001   | 0.357866 | 0.789987 | 0.453003  | 0.650547 | 0.981636 | chr2  | 40317168 | 40317841 | + | 0 | NA | intron (NAluSc SIN | -28996 NM_00136E | 158      | Hs.75527  | NM_00002E        | ENSG00000ADSL             | AMPS ASAS adenylos protein-coding   |                           |
| chr6-176 8.904001   | 0.357866 | 0.789987 | 0.453003  | 0.650547 | 0.981636 | chr6  | 17637654 | 17638163 | + | 0 | NA | intron (Nintron (N | 37606 NM_01625E  | 51439    | Hs.95260  | NM_01625E        | ENSG00000FAM8A1           | AHCP family w protein-coding        |                           |
| chr1-2058 10.46819  | 0.329942 | 0.728361 | 0.452992  | 0.650554 | 0.981636 | chr1  | 2.06E+08 | 2.06E+08 | + | 0 | NA | intron (Nintron (N | 3297 NM_17385A   | 254428   | Hs.20274  | NM_17385A        | ENSG00000SLC41A1          | MgtE translocat protein-coding      |                           |
| chr10-882 8.649606  | -0.3605  | 0.796047 | -0.45286  | 0.650651 | 0.981636 | chr10 | 882870   | 883240   | + | 0 | NA | intron (Nintron (N | 48650 NM_001351  | 23185    | Hs.15906E | NM_01515E        | ENSG00000CLARP4B          | KIAA0217 La ribon protein-coding    |                           |
| chr11-122 8.649606  | -0.3605  | 0.796047 | -0.45286  | 0.650651 | 0.981636 | chr11 | 1.2E+08  | 1.2E+08  | + | 0 | NA | intron (NAluS2 SIN | -51755 NM_01461E | 2900     | Hs.53873E | NM_01461E        | ENSG00000GRK4             | EAA1 GRK1 glutamate protein-coding  |                           |
| chr17-187 8.649606  | -0.3605  | 0.796047 | -0.45286  | 0.650651 | 0.981636 | chr17 | 18795943 | 18796566 | + | 0 | NA | intron (NCharlie4e | 7219 NM_00131E   | 51030    | Hs.87295  | NM_01607E        | ENSG00000TVP23B           | CGI-148 F trans-gol protein-coding  |                           |
| chr18-48 8.649606   | -0.3605  | 0.796047 | -0.45286  | 0.650651 | 0.981636 | chr18 | 48822810 | 48823150 | + | 0 | NA | intron (NLM1B LIN  | 119827 NM_00119E |          |           |                  |                           |                                     |                           |





|           |          |          |          |          |          |          |       |           |           |   |   |    |                     |        |           |          |            |                     |                     |                    |                          |                            |                |
|-----------|----------|----------|----------|----------|----------|----------|-------|-----------|-----------|---|---|----|---------------------|--------|-----------|----------|------------|---------------------|---------------------|--------------------|--------------------------|----------------------------|----------------|
| chr15-422 | 6.38436  | -0.40922 | 0.915288 | -0.4471  | 0.654804 | 0.981636 | chr15 | 42212471  | 42213226  | + | 0 | NA | intron (NAL1 LINE)  | -4544  | NM_015288 | 23339    | Hs. 88025  | NM_015288           | ENSG000000VPS39     | TLP VAM6 VPS39     | sufl protein-coding      |                            |                |
| chr15-772 | 6.38436  | -0.40922 | 0.915288 | -0.4471  | 0.654804 | 0.981636 | chr15 | 77260747  | 77261431  | + | 0 | NA | intron (NL1P3 LIN)  | -35685 | NR_026813 | 81698    | Hs. 656938 | NM_030944           | LINC00597           | C15orf5            | long intencRNA           |                            |                |
| chr2-132f | 6.38436  | -0.40922 | 0.915288 | -0.4471  | 0.654804 | 0.981636 | chr2  | 1.33E+08  | 1.33E+08  | + | 0 | NA | exon (NM_exon (NM_  | 24088  | NM_001321 | 116372   | Hs. 432398 | NM_144586           | ENSG000000LYPD1     | LYPDC1 PLYL6 PLAUF | protein-coding           |                            |                |
| chr20-314 | 6.38436  | -0.40922 | 0.915288 | -0.4471  | 0.654804 | 0.981636 | chr20 | 3148554   | 3148753   | + | 0 | NA | exon (NM_exon (NM_  | 11212  | NM_02182f | 60493    | Hs. 741168 | NM_02182f           | ENSG000000FASTKD5   | dJ1187M17          | FAST                     | kinase protein-coding      |                |
| chr4-139f | 6.38436  | -0.40922 | 0.915288 | -0.4471  | 0.654804 | 0.981636 | chr4  | 1.39E+08  | 1.39E+08  | + | 0 | NA | intron (N intron (N | 68995  | NR_15996f | 1.08E+08 | Hs. 605782 | NR_159963           | LOC107984           | -                  | -                        | uncharacterRNA             |                |
| chr7-659f | 6.38436  | -0.40922 | 0.915288 | -0.4471  | 0.654804 | 0.981636 | chr7  | 65901634  | 65902082  | + | 0 | NA | intron (NLIMEc LIN  | 28784  | NM_001284 | 154807   | Hs. 427232 | NM_173517           | ENSG000000VKORC1L1  | -                  | -                        | vitamin K protein-coding   |                |
| chr19-121 | 6.608467 | -0.36302 | 0.812545 | -0.44677 | 0.655038 | 0.981636 | chr19 | 21170773  | 21171053  | + | 0 | NA | intron (NALuSx3 SI  | 28873  | NM_13347f | 170959   | Hs. 156256 | NM_13347f           | ENSG000000ZNF431    | -                  | -                        | zinc finger protein-coding |                |
| chr18-112 | 10.40162 | 0.32470  | 0.727309 | 0.446441 | 0.655278 | 0.981636 | chr18 | 12355773  | 12356880  | + | 0 | NA | intron (NALuSz SI   | 20950  | NM_00679f | 10939    | Hs. 726355 | NM_00679f           | ENSG000000AFG3L2    | SCA28 SPA AFG3     | like protein-coding      |                            |                |
| chr15-49f | 12.32465 | -0.301   | 0.674304 | -0.44638 | 0.655321 | 0.981636 | chr15 | 49624088  | 49626403  | + | 0 | NA | exon (NM_exon (NM_  | 4197   | NM_001144 | 56986    | Hs. 127432 | NM_020234           | ENSG000000DTWD1     | MDS009             | DTW                      | domain protein-coding      |                |
| chr8-224f | 5.486871 | -0.45465 | 1.018778 | -0.44627 | 0.655399 | 0.981636 | chr8  | 22406623  | 22407173  | + | 0 | NA | intron (NManRep60f  | 14062  | NM_001351 | 23516    | Hs. 491238 | NM_01535f           | ENSG000000SLC39A14  | HCIN HMN           | solute c protein-coding  |                            |                |
| chr11-32f | 9.167918 | -0.34726 | 0.778338 | -0.44616 | 0.655484 | 0.981636 | chr11 | 32600710  | 32601734  | + | 0 | NA | TTS (NM_C TTS (NM_C | 17391  | NM_00636f | 10480    | Hs. 502244 | NM_00636f           | ENSG000000EIF3M     | B5 GA17 Eukaryot   | protein-coding           |                            |                |
| chr1-180f | 10.40948 | 0.323227 | 0.724674 | 0.44603  | 0.655575 | 0.981636 | chr1  | 1.8E+08   | 1.8E+08   | + | 0 | NA | intron (NALuSx1 SI  | -73829 | NM_001004 | 5768     | Hs. 71917f | NM_00282f           | ENSG000000QSOX1     | Q6 QSCN6           | quiescent protein-coding |                            |                |
| chr1-2007 | 10.40948 | 0.323227 | 0.724674 | 0.44603  | 0.655575 | 0.981636 | chr1  | 2.01E+08  | 2.01E+08  | + | 0 | NA | intron (NALuSz SI   | 23541  | NM_001297 | 23271    | Hs. 23585  | NM_20345f           | ENSG000000CAMSAP2   | CAMSAP1 Lcal       | modulin protein-coding   |                            |                |
| chr11-118 | 10.40948 | 0.323227 | 0.724674 | 0.44603  | 0.655575 | 0.981636 | chr11 | 1.18E+08  | 1.19E+08  | + | 0 | NA | intron (NL2a LINE)  | -31871 | NM_00134f | 143941   | Hs. 653445 | NM_00108f           | ENSG000000TTC36     | HBP21              | tetratric protein-coding |                            |                |
| chr14-49f | 10.40948 | 0.323227 | 0.724674 | 0.44603  | 0.655575 | 0.981636 | chr14 | 49830430  | 49838455  | + | 0 | NA | exon (NM_exon (NM_  | 18346  | NM_00471f | 9147     | Hs. 655964 | NM_00471f           | ENSG000000CNEMF     | NY-CO-1 S          | nuclear e protein-coding |                            |                |
| chr6-431f | 10.40948 | 0.323227 | 0.724674 | 0.44603  | 0.655575 | 0.981636 | chr6  | 43152444  | 43153404  | + | 0 | NA | intron (NALuSz SI   | -18345 | NM_003131 | 6722     | Hs. 52014C | NM_003131           | ENSG000000SRF       | MCMI               | serum res protein-coding |                            |                |
| chr1-108f | 12.36578 | -0.29921 | 0.670957 | -0.44595 | 0.655633 | 0.981636 | chr1  | 1.09E+08  | 1.09E+08  | + | 0 | NA | 5' UTR (N5' UTR (N  | 5693   | NM_00134f | 55119    | Hs. 342307 | NM_18061f           | ENSG000000PRPF38B   | NET1               | pre-mRNA                 | protein-coding             |                |
| chr22-384 | 12.36578 | -0.29921 | 0.670957 | -0.44595 | 0.655633 | 0.981636 | chr22 | 38482351  | 38491647  | + | 0 | NA | intron (NALuSz SI   | 18903  | NM_00685f | 11015    | Hs. 74507f | NM_00685f           | ENSG000000KDELR3    | ERD2L3             | KDEL                     | endc protein-coding        |                |
| chr4-788f | 5.907188 | -0.4302  | 0.965648 | -0.44551 | 0.655954 | 0.981636 | chr4  | 78877461  | 78879009  | + | 0 | NA | intron (N intron (N | 61203  | NM_00104f | 152559   | Hs. 657312 | NM_17745f           | ENSG000000PAQR3     | RKTG               | progester protein-coding |                            |                |
| chr6-405f | 5.907188 | -0.4302  | 0.965648 | -0.44551 | 0.655954 | 0.981636 | chr6  | 4053978   | 4054383   | + | 0 | NA | intron (NALuJr4 SI  | 24957  | NM_17356f | 222826   | Hs. 657342 | NM_17356f           | ENSG000000FAM217A   | G6orf146           | family wiprotein-coding  |                            |                |
| chr6-154f | 5.907188 | -0.4302  | 0.965648 | -0.44551 | 0.655954 | 0.981636 | chr6  | 1.55E+08  | 1.55E+08  | + | 0 | NA | intron (N intron (N | -46983 | NR_03610f | 1E+08    | NR_03610f  | ENSG000000LOC1273C  | -                   | -                  | microRNA                 | ncRNA                      |                |
| chr1-5511 | 9.144344 | -0.34294 | 0.77003  | -0.44536 | 0.656059 | 0.981636 | chr1  | 55119027  | 55127410  | + | 0 | NA | intron (NL2c LINE)  | 82996  | NR_110451 | 255738   | Hs. 18844  | NM_17493f           | ENSG000000PCSK9     | FH3 HCHOI          | proprate protein-coding  |                            |                |
| chr1-109f | 9.144344 | -0.34294 | 0.77003  | -0.44536 | 0.656059 | 0.981636 | chr1  | 1.09E+08  | 1.09E+08  | + | 0 | NA | 3' UTR (N3' UTR (N  | 11552  | NM_00564f | 6884     | Hs. 63242f | NM_00564f           | ENSG000000TAF13     | MRT60 TAF          | TATA-box                 | protein-coding             |                |
| chr11-741 | 9.144344 | -0.34294 | 0.77003  | -0.44536 | 0.656059 | 0.981636 | chr11 | 74112726  | 74114171  | + | 0 | NA | intron (N intron (N | 57254  | NM_015531 | 26005    | Hs. 55793f | NM_015531           | ENSG000000C2CD3     | OFD14              | C2                       | domain protein-coding      |                |
| chr13-211 | 9.144344 | -0.34294 | 0.77003  | -0.44536 | 0.656059 | 0.981636 | chr13 | 21142360  | 21144343  | + | 0 | NA | intron (NLIMB4 LIN  | 2349   | NM_00136f | 10284    | Hs. 52489f | NM_00587f           | ENSG000000SAP18     | 2HOR0202 Sin3A     | ass                      | protein-coding             |                |
| chr13-37f | 9.144344 | -0.34294 | 0.77003  | -0.44536 | 0.656059 | 0.981636 | chr13 | 36973918  | 36976343  | + | 0 | NA | intron (NALuSc LIN  | 24210  | NM_01333f | 29880    | Hs. 50776f | NM_01333f           | ENSG000000ALG5      | ba421P11           | ALG5                     | doliprotein-coding         |                |
| chr15-761 | 9.144344 | -0.34294 | 0.77003  | -0.44536 | 0.656059 | 0.981636 | chr15 | 77480018  | 77480246  | + | 0 | NA | intron (NALuJb SI   | -45469 | NR_13569f | 1.02E+08 | Hs. 637111 | NR_13569f           | ENSG000000LOC10192f | -                  | -                        | uncharacterRNA             |                |
| chr16-91f | 9.144344 | -0.34294 | 0.77003  | -0.44536 | 0.656059 | 0.981636 | chr16 | 9103004   | 9108100   | + | 0 | NA | intron (N intron (N | 13908  | NM_014117 | 29035    | Hs. 22149f | NM_014117           | ENSG000000C16orf72  | PROO149            | chromoson                | protein-coding             |                |
| chr2-7021 | 9.144344 | -0.34294 | 0.77003  | -0.44536 | 0.656059 | 0.981636 | chr2  | 70219442  | 70224741  | + | 0 | NA | intron (NLIMB7 LIN  | 26537  | NR_147227 | 7072     | Hs. 41312f | NM_022037           | ENSG000000TIA1      | TIA-1 WDM          | TIA1                     | cyt protein-coding         |                |
| chr2-1121 | 9.144344 | -0.34294 | 0.77003  | -0.44536 | 0.656059 | 0.981636 | chr2  | 1.02E+08  | 1.12E+08  | + | 0 | NA | intron (N intron (N | -30126 | NR_153214 | 129804   | Hs. 43769f | NM_153214           | ENSG000000FBLN7     | TM14               | fibulin 7                | protein-coding             |                |
| chr3-385f | 9.144344 | -0.34294 | 0.77003  | -0.44536 | 0.656059 | 0.981636 | chr3  | 38501927  | 38502436  | + | 0 | NA | intron (NALuSx1 SI  | 5841   | NR_13493f | 9941     | Hs. 51789f | NM_005107           | ENSG000000EXOG      | ENDOGL1 Exo        | endor                    | protein-coding             |                |
| chr3-179f | 9.144344 | -0.34294 | 0.77003  | -0.44536 | 0.656059 | 0.981636 | chr3  | 1.79E+08  | 1.79E+08  | + | 0 | NA | intron (NALuSp SI   | 8018   | NM_016331 | 51193    | Hs. 63257f | NM_016331           | ENSG000000ZNF639    | ANC-2H01 zinc      | finger                   | protein-coding             |                |
| chr3-191f | 9.144344 | -0.34294 | 0.77003  | -0.44536 | 0.656059 | 0.981636 | chr3  | 1.91E+08  | 1.91E+08  | + | 0 | NA | intron (N intron (N | -44055 | NR_12060f | 1.03E+08 | NR_12060f  | LINC-00f            | -                   | -                  | uncharacterRNA           |                            |                |
| chr5-1107 | 9.144344 | -0.34294 | 0.77003  | -0.44536 | 0.656059 | 0.981636 | chr5  | 1.11E+08  | 1.11E+08  | + | 0 | NA | intron (NALuY SINE  | 6424   | NM_00130f | 91137    | Hs. 75639  | NM_13877f           | ENSG000000SLC25A46  | HMSN6B             | solute c protein-coding  |                            |                |
| chr6-565f | 9.144344 | -0.34294 | 0.77003  | -0.44536 | 0.656059 | 0.981636 | chr6  | 56562753  | 56567080  | + | 0 | NA | intron (NL1P47 LIN  | 77973  | NM_01554f | 667      | Hs. 60491f | NM_00172f           | ENSG000000DST       | BP240 BP           | dystonin                 | protein-coding             |                |
| chr7-995f | 9.144344 | -0.34294 | 0.77003  | -0.44536 | 0.656059 | 0.981636 | chr7  | 99563417  | 99570138  | + | 0 | NA | intron (NALuJb SI   | 7943   | NM_00136f | 79027    | Hs. 59979f | NM_024061           | ENSG000000ZNF655    | VIK VIK-1          | zinc                     | finger                     | protein-coding |
| chr8-102f | 9.144344 | -0.34294 | 0.77003  | -0.44536 | 0.656059 | 0.981636 | chr8  | 1.03E+08  | 1.03E+08  | + | 0 | NA | intron (N intron (N | 11954  | NM_001301 | 51582    | Hs. 45910f | NM_01587f           | ENSG000000CAZIN1    | AZI AZI1 antizyme  | protein-coding           |                            |                |
| chr16-11f | 10.45062 | 0.324378 | 0.728555 | 0.445234 | 0.65615  | 0.981636 | chr16 | 11548228  | 11550903  | + | 0 | NA | non-codiron-codir   | -22318 | NM_00137f | 400499   | Hs. 45993f | NM_00137f           | ENSG000000LOC40049f | -                  | -                        | putative                   | protein-coding |
| chr10-87  | 3.69279  | -0.53141 | 1.193628 | -0.4452  | 0.656172 | 0.981636 | chr10 | 87014534  | 870145927 | + | 0 | NA | IntergeniFLAM_C     | 25242  | NM_00114f | 643161   | Hs. 72994f | NM_00114f           | ENSG000000FAM25A    | ba96C23.5          | family wiprotein-coding  |                            |                |
| chr1-160f | 5.203723 | 0.451674 | 1.014858 | 0.445061 | 0.656276 | 0.981636 | chr1  | 1.6E+08   | 1.6E+08   | + | 0 | NA | IntergeniIntergeni  | -5950  | NM_00559f | 4807     | Hs. 30956  | NM_00559f           | ENSG000000CNHLH1    | HEN1 NSCI          | nescient                 | protein-coding             |                |
| chr11-621 | 5.203723 | 0.451674 | 1.014858 | 0.445061 | 0.656276 | 0.981636 | chr11 | 62121704  | 62133438  | + | 0 | NA | intron (N intron (N | 7469   | NM_17352f | 160298   | Hs. 278221 | NM_17352f           | ENSG000000C11orf42  | -                  | -                        | chromoson                  | protein-coding |
| chr16-57f | 5.203723 | 0.451674 | 1.014858 | 0.445061 | 0.656276 | 0.981636 | chr16 | 57055161  | 57055884  | + | 0 | NA | intron (NAG-rich I  | -37061 | NM_152727 | 22184    | Hs. 39800f | NM_152727           | ENSG000000CPNE2     | COPN2 CPN          | copine 2                 | protein-coding             |                |
| chr18-46f | 5.203723 | 0.451674 | 1.014858 | 0.445061 | 0.656276 | 0.981636 | chr18 | 46032489  | 46033527  | + | 0 | NA | intron (N intron (N | 39252  | NM_02443f | 9050     | Hs. 567384 | NM_02443f           | ENSG000000PSTPIP2   | MAYP               | proline-s                | protein-coding             |                |
| chr18-55f | 5.203723 | 0.451674 | 1.014858 | 0.445061 | 0.656276 | 0.981636 | chr18 | 55259973  | 55260610  | + | 0 | NA | intron (NMIR3 SINE  | 42369  | NM_00134f | 6925     | Hs. 60515f | NM_00319f           | ENSG000000TCF4      | E2-2 FECI          | transcri                 | protein-coding             |                |
| chrX-535f | 5.203723 | 0.451674 | 1.014858 | 0.445061 | 0.656276 | 0.981636 | chrX  | 53563790  | 53565011  | + | 0 | NA | intron (N intron (N | -7126  | NR_02948f | 406889   | NR_02948f  | ENSG000000MIRLET7F2 | LET7F2 M            | microRNA           | ncRNA                    |                            |                |
| chr17-41f | 6.351079 | -0.41519 | 0.932939 | -0.44504 | 0.656294 | 0.981636 | chr17 | 118677142 | 11867514  | + | 0 | NA | 3' UTR (N3' UTR (N  | -1905  | NM_01814f | 55175    | Hs. 13268  | NM_01814f           | ENSG000000KLHL11    | -                  | -                        | kelch 11                   | protein-coding |
| chr19-581 | 8.911858 | 0.355938 | 0.799801 | 0.445034 | 0.656295 | 0.981636 | chr19 | 58177721  | 58178645  | + | 0 | NA | IntergeniIntergeni  | -4806  | NM_016324 | 10782    | Hs. 83761  | NM_016324           | ENSG000000ZNF274    | HFB101 Zf          | zinc                     | finger                     | protein-coding |
| chr2-231f | 8.911858 | 0.355938 | 0.799801 | 0.445034 | 0.656295 | 0.981636 | chr2  | 2.31E+08  | 2.31E+08  | + | 0 | NA | non-codiron-codir   | -73736 | NR_039937 | 1.01E+08 | NR_039937  | ENSG000000MIR4777   | -                   | -                  | microRNA                 | ncRNA                      |                |



|           |          |          |          |          |          |          |       |          |          |   |   |    |                    |          |           |          |           |           |           |            |           |            |                    |                |
|-----------|----------|----------|----------|----------|----------|----------|-------|----------|----------|---|---|----|--------------------|----------|-----------|----------|-----------|-----------|-----------|------------|-----------|------------|--------------------|----------------|
| chr3-5262 | 8.67503  | -0.35472 | 0.800584 | -0.44307 | 0.657715 | 0.981636 | chr3  | 52625068 | 52625416 | + | 0 | NA | intron (Nintron (N | 60357    | NM_00135C | 55193    | Hs.189922 | CNM_01816 | ENSG00000 | PBRM1      | BAF180    | PE         | polybrom           | protein-coding |
| chr6-1046 | 5.162583 | 0.449804 | 1.015213 | 0.443063 | 0.65772  | 0.981636 | chr6  | 1.05E+08 | 1.05E+08 | + | 0 | NA | intron (Nintron (N | 53486    | NM_001321 | 57531    | Hs.43434C | NM_020771 | ENSG00000 | HACE1      | SPPRS     | HECT       | dom                | protein-coding |
| chr7-5985 | 5.162583 | 0.449804 | 1.015213 | 0.443063 | 0.65772  | 0.981636 | chr7  | 5985771  | 5986507  | + | 0 | NA | intron (Nintron (N | -15456   | NM_17356E | 222967   | Hs.44233E | NM_17356E | ENSG00000 | CRSPH10B   | -         | -          | radial s           | protein-coding |
| chr7-470  | 9.588235 | -0.33744 | 0.761634 | -0.44305 | 0.657729 | 0.981636 | chr7  | 4742050  | 4743300  | + | 0 | NA | intron (NAluJo SIN | -32933   | NM_001364 | 9907     | Hs.55844C | NM_01485E | ENSG00000 | AP521      | KIAA0415  | adaptor    | protein-coding     |                |
| chr1-4106 | 6.376503 | -0.40726 | 0.919509 | -0.44291 | 0.657831 | 0.981636 | chr1  | 41000561 | 41003195 | + | 0 | NA | intron (Nintron (N | -12712   | NR_03786E | 1.01E+08 | Hs.66005E | NR_03786E | ENSG00000 | SLFN1L-AS- | SLFN1L    | arc        | ncRNA              |                |
| chr15-425 | 6.376503 | -0.40726 | 0.919509 | -0.44291 | 0.657831 | 0.981636 | chr15 | 42566490 | 42567287 | + | 0 | NA | 3' UTR (N3' UTR (N | -8718    | NM_02075E | 57519    | Hs.122061 | NM_02075E | ENSG00000 | STARD9     | KIF16A    | STAR       | rel                | protein-coding |
| chr2-1301 | 6.376503 | -0.40726 | 0.919509 | -0.44291 | 0.657831 | 0.981636 | chr2  | 1.3E+08  | 1.3E+08  | + | 0 | NA | intron (Nintron (N | 7625     | NR_03232C | 55627    | Hs.51645C | NM_017751 | ENSG00000 | SMPP4      | NET13     | INSM       | shingomy           | protein-coding |
| chr21-255 | 6.376503 | -0.40726 | 0.919509 | -0.44291 | 0.657831 | 0.981636 | chr21 | 25980439 | 25981004 | + | 0 | NA | intron (Nintron (N | 159699   | NM_00113E | 351      | Hs.43498C | NM_000484 | ENSG00000 | APP        | AAA ABET  | amyloid t  | protein-coding     |                |
| chr22-395 | 6.376503 | -0.40726 | 0.919509 | -0.44291 | 0.657831 | 0.981636 | chr22 | 39524210 | 39525384 | + | 0 | NA | IntergeniL2a LINE  | 4233     | NM_18281C | 468      | Hs.496487 | NM_00167E | ENSG00000 | ATF4       | CREB-2    | CF         | activatir          | protein-coding |
| chr4-757  | 6.376503 | -0.40726 | 0.919509 | -0.44291 | 0.657831 | 0.981636 | chr4  | 75766653 | 75767509 | + | 0 | NA | intron (NL2 LINE I | 42559    | NM_00129C | 8615     | Hs.744877 | NM_00371E | ENSG00000 | USO1       | P115      | TAP USO1   | vesiprotein-coding |                |
| chr4-1026 | 6.376503 | -0.40726 | 0.919509 | -0.44291 | 0.657831 | 0.981636 | chr4  | 1.03E+08 | 1.03E+08 | + | 0 | NA | intron (Nzaphod3 I | 78498    | NM_00590E | 4126     | Hs.48041E | NM_00590E | ENSG00000 | MAN5A      | MAN5B     | mannoside  | protein-coding     |                |
| chr8-8644 | 6.376503 | -0.40726 | 0.919509 | -0.44291 | 0.657831 | 0.981636 | chr8  | 86448757 | 86449159 | + | 0 | NA | intron (NAluJr SIN | 59728    | NM_01603E | 51115    | Hs.14538E | NM_01603E | ENSG00000 | CRMDN1     | CGI-90    | F          | regulator          | protein-coding |
| chr5-177  | 9.449586 | 0.345645 | 0.780591 | 0.442798 | 0.657912 | 0.981636 | chr5  | 1.78E+08 | 1.78E+08 | + | 0 | NA | intron (Nintron (N | -6910    | NM_01622E | 51428    | Hs.48428E | NM_01622E | ENSG00000 | DDX41      | ABS IMPLF | DEAD-box   | protein-coding     |                |
| chr1-217  | 5.692453 | 0.426497 | 0.963324 | 0.442735 | 0.657957 | 0.981636 | chr1  | 2.18E+08 | 2.18E+08 | + | 0 | NA | intron (Nintron (N | 12386    | NM_001297 | 55105    | Hs.36234  | NM_01804C | ENSG00000 | GPATCH2    | CT110     | GP         | G-patch            | protein-coding |
| chr13-20  | 5.692453 | 0.426497 | 0.963324 | 0.442735 | 0.657957 | 0.981636 | chr13 | 20050922 | 20051591 | + | 0 | NA | intron (N(T)n Simp | -51445   | NR_12638C | 1.04E+08 | Hs.57801E | NR_12638C | ENSG00000 | LINC01072  | -         | -          | long intenc        | ncRNA          |
| chr14-954 | 5.692453 | 0.426497 | 0.963324 | 0.442735 | 0.657957 | 0.981636 | chr14 | 95432867 | 95433605 | + | 0 | NA | intron (Nintron (N | 42599    | NM_00136E | 161176   | Hs.41502  | NM_02463E | ENSG00000 | SYN3E      | C14orf13  | se         | protein-coding     |                |
| chr15-43  | 5.692453 | 0.426497 | 0.963324 | 0.442735 | 0.657957 | 0.981636 | chr15 | 43394912 | 43396295 | + | 0 | NA | exon (NM exon (NM  | 24502    | NM_00128E | 27229    | Hs.584887 | NM_01444E | ENSG00000 | TGBCP4     | W67       | GPC-4      | tubulin            | protein-coding |
| chr17-15  | 5.692453 | 0.426497 | 0.963324 | 0.442735 | 0.657957 | 0.981636 | chr17 | 15566614 | 15561446 | + | 0 | NA | intron (NL2 LINE I | 2453     | NM_001204 | 1.01E+08 | Hs.65701E | NM_01568E | ENSG00000 | TVP23C-CI  | FAM18B2   | F          | TVP23C-CI          | protein-coding |
| chr17-49  | 5.692453 | 0.426497 | 0.963324 | 0.442735 | 0.657957 | 0.981636 | chr17 | 49804156 | 49805489 | + | 0 | NA | intron (Nintron (N | 16141    | NM_00119E | 11143    | Hs.21907  | NM_00706E | ENSG00000 | KAT7       | HBO1      | HBO        | lysine ac          | protein-coding |
| chr2-112  | 5.692453 | 0.426497 | 0.963324 | 0.442735 | 0.657957 | 0.981636 | chr2  | 1.12E+08 | 1.12E+08 | + | 0 | NA | intron (NLM5 LINE  | 7304     | NM_03282A | 84910    | Hs.65629E | NM_03282A | ENSG00000 | TMEM87B    | -         | -          | transmem           | protein-coding |
| chr20-13  | 5.692453 | 0.426497 | 0.963324 | 0.442735 | 0.657957 | 0.981636 | chr20 | 1332927  | 1333738  | + | 0 | NA | intron (NMR13 SINE | -4193    | NM_08049E | 27111    | Hs.65701E | NM_01568E | ENSG00000 | SDCBP2     | SITAC     | SIT        | syndecan           | protein-coding |
| chr22-37  | 5.692453 | 0.426497 | 0.963324 | 0.442735 | 0.657957 | 0.981636 | chr22 | 37665834 | 37666520 | + | 0 | NA | 3' UTR (N3' UTR (N | 7454     | NM_02031E | 57026    | Hs.63276E | NM_02031E | ENSG00000 | PDXP       | CIN PLP   | cyridoxal  | protein-coding     |                |
| chr22-50  | 5.692453 | 0.426497 | 0.963324 | 0.442735 | 0.657957 | 0.981636 | chr22 | 50300310 | 50301141 | + | 0 | NA | intron (Nintron (N | 6921     | NM_012401 | 23654    | Hs.3989   | NM_012401 | ENSG00000 | PLXNB2     | MM1       | Nb         | aCplexin B         | protein-coding |
| chr3-735  | 5.692453 | 0.426497 | 0.963324 | 0.442735 | 0.657957 | 0.981636 | chr3  | 73595777 | 73597525 | + | 0 | NA | intron (NLMC4 LIN  | -26917   | NR_046681 | 1.02E+08 | Hs.733334 | NR_046681 | ENSG00000 | PDZRN3-AS- | PDZRN3    | arc        | ncRNA              |                |
| chr4-7614 | 5.692453 | 0.426497 | 0.963324 | 0.442735 | 0.657957 | 0.981636 | chr4  | 76140863 | 76141489 | + | 0 | NA | intron (Nintron (N | 7221     | NM_01742E | 53371    | Hs.43043E | NM_01742E | ENSG00000 | NUP54      | -         | -          | nucleopor          | protein-coding |
| chr6-570  | 5.692453 | 0.426497 | 0.963324 | 0.442735 | 0.657957 | 0.981636 | chr6  | 57055501 | 57055974 | + | 0 | NA | TTS (NM_C          | 8990     | NM_00128E | 57691    | Hs.709521 | NM_020931 | ENSG00000 | KIAA1586   | -         | -          | KIAA1586           | protein-coding |
| chr7-396  | 5.692453 | 0.426497 | 0.963324 | 0.442735 | 0.657957 | 0.981636 | chr7  | 39660809 | 39661713 | + | 0 | NA | intron (THEIB-int  | 37899    | NM_00540E | 5898     | Hs.6906   | NM_00540E | ENSG00000 | RALA       | RAL       | RAS        | like               | protein-coding |
| chr7-5607 | 5.692453 | 0.426497 | 0.963324 | 0.442735 | 0.657957 | 0.981636 | chr7  | 56076149 | 56076862 | + | 0 | NA | intron (NCharlielC | 12219    | NM_00136E | 25870    | Hs.27969E | NM_015411 | ENSG00000 | SUMF2      | pFGE      | sulfatas   | protein-coding     |                |
| chr8-334  | 5.692453 | 0.426497 | 0.963324 | 0.442735 | 0.657957 | 0.981636 | chr8  | 33450144 | 33450717 | + | 0 | NA | intron (Nintron (N | 22715    | NM_03266A | 84750    | Hs.45871E | NM_03266A | ENSG00000 | FUT10      | FUCTY     | fucosyltr  | protein-coding     |                |
| chr11-91  | 8.94514  | 0.35883  | 0.810534 | 0.442708 | 0.657977 | 0.981636 | chr11 | 9165192  | 9165421  | + | 0 | NA | intron (Nintron (N | 70943    | NR_02771E | 283100   | Hs.68947E | NR_02771E | ENSG00000 | KRT8P41    | -         | -          | keratin            | psudo          |
| chr22-324 | 8.94514  | 0.35883  | 0.810534 | 0.442708 | 0.657977 | 0.981636 | chr22 | 32485246 | 32485581 | + | 0 | NA | intron (Nintron (N | 10176    | NM_00103E | 25793    | Hs.5912   | NM_01217E | ENSG00000 | FBX07      | FBX       | FBX07F-box | prc                | protein-coding |
| chr6-8974 | 5.237004 | 0.456386 | 1.030935 | 0.442691 | 0.657989 | 0.981636 | chr6  | 89743377 | 89744513 | + | 0 | NA | intron (NAluSp SIN | 75669    | NM_014611 | 23195    | Hs.52994E | NM_014611 | ENSG00000 | MDM1       | Real      | midasin    | protein-coding     |                |
| chr20-13  | 8.221431 | -0.37071 | 0.837619 | -0.44258 | 0.658072 | 0.981636 | chr20 | 13817872 | 13818071 | + | 0 | NA | non-codirnon-codir | 32943    | NR_14798E | 87130    | Hs.47216E | NR_02412C | ENSG00000 | NDUFAF5    | C2orf7    | NADH       | ubiq               | protein-coding |
| chr11-671 | 9.920751 | 0.331015 | 0.748021 | 0.442521 | 0.658112 | 0.981636 | chr11 | 671140   | 675393   | + | 0 | NA | intron (NAluSx1 SI | -22325   | NM_00127E | 283232   | Hs.448664 | NM_17494C | ENSG00000 | TMEM80     | -         | -          | transmem           | protein-coding |
| chr19-46  | 9.920751 | 0.331015 | 0.748021 | 0.442521 | 0.658112 | 0.981636 | chr19 | 4668200  | 4668703  | + | 0 | NA | intron (Nintron (N | 1952     | NM_019107 | 56005    | Hs.46564E | NM_019107 | ENSG00000 | MYDGF      | C19orf10  | myeloid    | protein-coding     |                |
| chr2-69   | 9.920751 | 0.331015 | 0.748021 | 0.442521 | 0.658112 | 0.981636 | chr2  | 69039861 | 69044172 | + | 0 | NA | intron (NL2a LINE  | 28872    | NM_053034 | 84168    | Hs.47216E | NR_02412C | ENSG00000 | ANTXR1     | ATR GAPO  | ANTXR      | cel                | protein-coding |
| chr3-150  | 9.920751 | 0.331015 | 0.748021 | 0.442521 | 0.658112 | 0.981636 | chr3  | 15083999 | 15085966 | + | 0 | NA | intron (Nintron (N | 14166    | NM_00130E | 64145    | Hs.47556E | NM_02234C | ENSG00000 | CRBSN      | Rabenosyr | rabenosyr  | protein-coding     |                |
| chr3-179  | 9.920751 | 0.331015 | 0.748021 | 0.442521 | 0.658112 | 0.981636 | chr3  | 1.79E+08 | 1.79E+08 | + | 0 | NA | intron (NLR17 LTF  | 17166    | NM_15224C | 64393    | Hs.37160E | NM_02247C | ENSG00000 | ZMAT3      | PAG608    | Wizinc     | finger             | protein-coding |
| chr16-22  | 15.60368 | 0.27051  | 0.610852 | 0.442416 | 0.658188 | 0.981636 | chr16 | 22533199 | 22537473 | + | 0 | NA | exon (NM exon (NM  | -10302   | NR_00367E | 653786   | Hs.56494E | NR_00367E | ENSG00000 | OTOA1      | -         | -          | OTOA               | psuedo         |
| chr19-254 | 16.64585 | 0.262327 | 0.5933   | 0.442149 | 0.658382 | 0.981636 | chr19 | 25454775 | 25456535 | + | 0 | NA | IntergeniALR/Alpha | -1292208 | NR_00360E | 1E+08    | Hs.14931E | NR_00360E | ENSG00000 | HAVCR1P1   | -         | -          | hepatitis          | psuedo         |
| chr10-314 | 9.136486 | -0.34149 | 0.772403 | -0.44212 | 0.658406 | 0.981636 | chr10 | 31407941 | 31409652 | + | 0 | NA | intron (NLRPA3 LIN | -9041    | NM_00136E | 1.01E+08 | Hs.730227 | NM_00136E | ENSG00000 | LOC10050E  | -         | -          | putative           | protein-coding |
| chr10-68  | 9.136486 | -0.34149 | 0.772403 | -0.44212 | 0.658406 | 0.981636 | chr10 | 68023429 | 68038720 | + | 0 | NA | intron (Nintron (N | -20191   | NR_131184 | 1E+08    | NR_131184 | POU5F1P5  | Oct4-pg5  | POU        | class     | psuedo     |                    |                |
| chr11-18  | 9.136486 | -0.34149 | 0.772403 | -0.44212 | 0.658406 | 0.981636 | chr11 | 18365797 | 18366102 | + | 0 | NA | 3' UTR (N3' UTR (  |          |           |          |           |           |           |            |           |            |                    |                |



|                    |          |          |          |          |          |       |                 |          |   |   |    |                     |                  |                             |                     |                                     |
|--------------------|----------|----------|----------|----------|----------|-------|-----------------|----------|---|---|----|---------------------|------------------|-----------------------------|---------------------|-------------------------------------|
| chr7-129f.5.700311 | 0.423835 | 0.959648 | 0.441657 | 0.658738 | 0.981636 | chr7  | 1.3E+08         | 1.3E+08  | + | 0 | NA | intron (Nintron (N  | 57037 NM_003344  | 7328 Hs. 64354ENM_003344    | ENSG000003CUBE2H    | E2-20K G ubiquitin protein-coding   |
| chr7-140f.5.700311 | 0.423835 | 0.959648 | 0.441657 | 0.658738 | 0.981636 | chr7  | 1.4E+08         | 1.4E+08  | + | 0 | NA | intron (NAluSx1 SI  | -30660 NR_130117 | 64761 Hs. 12646 NM_02275C   | ENSG000003PARP12    | ARTD12 MS poly (ADP- protein-coding |
| chr8-480f.5.700311 | 0.423835 | 0.959648 | 0.441657 | 0.658738 | 0.981636 | chr8  | 48056727        | 48058163 | + | 0 | NA | intron (NAluS6 SI   | 49014 NM_00335C  | 7336 Hs. 49169ENM_00335C    | ENSG000003CUBE2V2   | DDVIT1 DE ubiquitin protein-coding  |
| chr8-144f.5.700311 | 0.423835 | 0.959648 | 0.441657 | 0.658738 | 0.981636 | chr8  | 1.44E+08        | 1.44E+08 | + | 0 | NA | intron (Nintron (N  | 5342 NM_015201   | 23246 Hs. 535901ENM_015201  | ENSG000003BOP1      | - BOP1 ribc protein-coding          |
| chr9-110f.5.700311 | 0.423835 | 0.959648 | 0.441657 | 0.658738 | 0.981636 | chr9  | 1.1E+08         | 1.1E+08  | + | 0 | NA | intron (NAluSp SIN  | 5813 NM_00119E   | 445815 Hs. 59190ENM_00720C  | ENSG000003PALM2-AK1 | AKAP-2 AK PALM2-AK1 protein-coding  |
| chr9-114f.5.700311 | 0.423835 | 0.959648 | 0.441657 | 0.658738 | 0.981636 | chr9  | 1.14E+08        | 1.14E+08 | + | 0 | NA | 3' UTR (N3' UTR (N  | 7007 NM_00060E   | 5005 Hs. 719954ENM_00060E   | ENSG000003CORM2     | AGP-B AGF orosomuc protein-coding   |
| chr5-128f.9.954032 | 0.333719 | 0.755621 | 0.441649 | 0.658743 | 0.981636 | chr5  | 1.29E+08        | 1.29E+08 | + | 0 | NA | intron (NTHE1B-int  | 34036 NM_00199E  | 2201 Hs. 519294ENM_00199E   | ENSG000003FBN2      | CCA DA9 F fibullin protein-coding   |
| chr12-57f.8.332991 | 0.366028 | 0.828886 | 0.441559 | 0.658786 | 0.981636 | chr12 | 57615596        | 57615863 | + | 0 | NA | intron (Nintron (N  | -4181 NM_13348E  | 65012 Hs. 72772ENM_13348E   | ENSG000003SLC26A10  | - solute c protein-coding           |
| chr9-437f.17.60575 | 0.253809 | 0.574813 | 0.441555 | 0.658815 | 0.981636 | chr9  | 43777445        | 43777877 | + | 0 | NA | IntergeniALR/Alpha  | 651495 NR_16066E | 1.03E+08 NR_160669          | LOC102724           | - methylene pseudo                  |
| chr2-880f.5.873906 | -0.43644 | 0.988463 | -0.44154 | 0.658825 | 0.981636 | chr2  | 86035480        | 86035684 | + | 0 | NA | intron (NMLT1J LTF  | 20201 NM_001304  | 51315 Hs. 469254ENM_01661E  | ENSG000003KRCC1     | CHBP2  lysine i protein-coding      |
| chr19-36f.9.069923 | -0.34941 | 0.791537 | -0.44144 | 0.658897 | 0.981636 | chr19 | 38218795        | 36219193 | + | 0 | NA | intron (NAluV SINE  | -3910 NM_00104C  | 147929 Hs. 59633ENM_152477  | ENSG000003ZNF565    | - zinc fin protein-coding           |
| chr1-159f.10.95507 | 0.314458 | 0.712446 | 0.441378 | 0.65894  | 0.981636 | chr1  | 1.59E+08        | 1.59E+08 | + | 0 | NA | intron (NLMeh LIN   | 25013 NM_00120C  | 3428 Hs. 38025CENM_005531   | ENSG000003IFI16     | IFNGI1P1 F interferc protein-coding |
| chr17-39f.10.95507 | 0.314458 | 0.712446 | 0.441378 | 0.65894  | 0.981636 | chr17 | 39470315        | 39471801 | + | 0 | NA | exon (NM exon (NM   | 9572 NM_01508E   | 51755 Hs. 34502ENM_01508E   | ENSG000003CDK12     | CRK7 CRKf cyclin de protein-coding  |
| chr16-69f.6.869685 | 0.383351 | 0.868787 | 0.441249 | 0.659033 | 0.981636 | chr16 | 6867255         | 6871101  | + | 0 | NA | exon (NM exon (NM   | -2584 NM_00132E  | 339123 Hs. 533771ENM_00100E | ENSG000003JMJD8     | C16orf20 jumoni c protein-coding    |
| chr16-69f.6.255604 | 0.411399 | 0.932663 | 0.441101 | 0.65914  | 0.981636 | chr16 | 69375430        | 69375913 | + | 0 | NA | intron (NFLAM_A SI  | 10336 NM_00565E  | 7014 Hs. 63335 NM_00565E    | ENSG000003TERP2     | TRBP2 TRF telomeric protein-coding  |
| chr16-74f.6.247746 | 0.414028 | 0.939135 | 0.440861 | 0.659313 | 0.981636 | chr16 | 74955227        | 74955744 | + | 0 | NA | intron (NFLSINE_Ve  | 29638 NM_030581  | 79726 Hs. 280951ENM_030581  | ENSG000003WDR59     | CDW12 FPFWD repeat protein-coding   |
| chr4-176f.5.684595 | 0.429235 | 0.975026 | 0.440229 | 0.659771 | 0.981636 | chr4  | 1.76E+08        | 1.76E+08 | + | 0 | NA | IntergeniMER52A LI  | 23388 NM_02192E  | 60559 Hs. 42194 NM_02192E   | ENSG000003SPCS3     | PRO3567 Signal p protein-coding     |
| chr5-125f.5.684595 | 0.429235 | 0.975026 | 0.440229 | 0.659771 | 0.981636 | chr5  | 13295336        | 13296167 | + | 0 | NA | intron (NMT1Rb SINE | 102065 NM_00493E | 1004 Hs. 12477ENM_00493E    | ENSG000003CDH6      | CAD6 KCAL cadherin protein-coding   |
| chr1-255f.5.170441 | 0.44683  | 1.015171 | 0.440152 | 0.659827 | 0.981636 | chr1  | 25555095        | 25556284 | + | 0 | NA | intron (Nintron (N  | 12104 NM_015627  | 26119 Hs. 590911ENM_015627  | ENSG000003LDLRAP1   | ARH ARH1 low densi protein-coding   |
| chr14-99f.5.170441 | 0.44683  | 1.015171 | 0.440152 | 0.659827 | 0.981636 | chr14 | 99397626        | 99398288 | + | 0 | NA | 3' UTR (N3' UTR (N  | 82902 NM_19912E  | 84193 Hs. 510407ENM_03223E  | ENSG000003SETD3     | C14orf154SET domain protein-coding  |
| chr21-32f.5.170441 | 0.44683  | 1.015171 | 0.440152 | 0.659827 | 0.981636 | chr21 | 22361 NR_00299E | 32351766 | + | 0 | NA | intron (Nintron (N  | 26361 NR_00299E  | 677846 Hs. 71229ENM_00299E  | ENSG000003SNORA80A  | ACA67 SNC small nucsnRNA            |
| chr4-112f.5.170441 | 0.44683  | 1.015171 | 0.440152 | 0.659827 | 0.981636 | chr4  | 1.12E+08        | 1.12E+08 | + | 0 | NA | intron (NLa2 LINE   | 5718 NM_025144   | 80216 Hs. 65282ENM_025144   | ENSG000003ALPK1     | 8430410J1 alpha kir protein-coding  |
| chr9-890f.5.170441 | 0.44683  | 1.015171 | 0.440152 | 0.659827 | 0.981636 | chr9  | 89075112        | 89075772 | + | 0 | NA | intron (Nintron (N  | 83974 NM_00522E  | 1903 Hs. 58511ENM_00522E    | ENSG000003S1PR3     | EDG-3 EDC sphingosiprotein-coding   |
| chr1-360f.10.98835 | 0.317058 | 0.720447 | 0.440085 | 0.659876 | 0.981636 | chr1  | 36014068        | 36014420 | + | 0 | NA | intron (NAluSx SIN  | -69850 NM_01446E | 27285 Hs. 127111ENM_01446E  | ENSG000003TEKT2     | TEKT1 TE tektin 2 protein-coding    |
| chr2-111f.10.4252  | 0.320287 | 0.727926 | 0.439999 | 0.659938 | 0.981636 | chr2  | 11195053        | 11198367 | + | 0 | NA | intron (Nintron (N  | 41243 NM_00128E  | 130814 Hs. 27441ENM_152391  | ENSG000003SLC66A3   | C2orf22 F solute c protein-coding   |
| chr3-475f.10.4252  | 0.320287 | 0.727926 | 0.439999 | 0.659938 | 0.981636 | chr3  | 47509240        | 47510224 | + | 0 | NA | intron (Nintron (N  | 3613 NM_00136E   | 54859 Hs. 31110CENM_01771E  | ENSG000003ELP6      | C3orf75 Telongator protein-coding   |
| chr13-49f.9.887469 | 0.328298 | 0.746148 | 0.439999 | 0.659944 | 0.981636 | chr13 | 49162881        | 49164937 | + | 0 | NA | intron (NLM2 LINE   | 53592 NM_01492E  | 52862 Hs. 50801ENM_01492E   | ENSG000003FNDC3A    | FNDC3 FN fibronectin protein-coding |
| chr1-329f.10.3762  | 0.32061  | 0.728911 | 0.439849 | 0.660047 | 0.981636 | chr1  | 32943285        | 32943484 | + | 0 | NA | intron (NAluSc8 SI  | 21425 NM_001127  | 127544 Hs. 591504ENM_153341 | ENSG000003RNF19B    | IBRDC3 N ring fin protein-coding    |
| chr15-50f.10.3762  | 0.32061  | 0.728911 | 0.439849 | 0.660047 | 0.981636 | chr15 | 50609315        | 50609609 | + | 0 | NA | intron (Nintron (N  | -62796 NM_203494 | 373509 Hs. 67775ENM_203494  | ENSG000003USP50     | - ubiquitin protein-coding          |
| chr13-52f.9.613659 | -0.33225 | 0.755404 | -0.43984 | 0.660055 | 0.981636 | chr13 | 52473877        | 52474565 | + | 0 | NA | intron (NAluJb SIN  | -14772 NR_00279E | 220115 Hs. 52844ENR_00279E  | TPTE2P3             | TPTEps1 transment pseudo            |
| chr17-49f.9.613659 | -0.33225 | 0.755404 | -0.43984 | 0.660055 | 0.981636 | chr17 | 49798886        | 49800619 | + | 0 | NA | intron (NAluJo SIN  | 11071 NM_00119E  | 11143 Hs. 21907 NM_00706E   | ENSG000003KAT7      | HBO1 HBO lysine ac protein-coding   |
| chr6-856f.9.613659 | -0.33225 | 0.755404 | -0.43984 | 0.660055 | 0.981636 | chr6  | 85626798        | 85626997 | + | 0 | NA | intron (Nintron (N  | 14554 NM_00115E  | 10492 Hs. 571177ENM_00637E  | ENSG000003SYNCRIP   | GRY7-RBP C synaptot protein-coding  |
| chr1-100f.10.92178 | 0.31193  | 0.709235 | 0.439812 | 0.660074 | 0.981636 | chr1  | 90013001        | 90029117 | + | 0 | NA | intron (Nintron (N  | 25949 NM_01187E  | 284965 Hs. 306221ENM_181781 | ENSG000003ZNF326    | ZNF75 Z fin zinc fin protein-coding |
| chr10-73f.10.92178 | 0.31193  | 0.709235 | 0.439812 | 0.660074 | 0.981636 | chr10 | 73846103        | 73848716 | + | 0 | NA | non-codnon-codir    | 27146 NM_001367  | 818 Hs. 52304ENM_00122E     | ENSG000003CAMK2G    | CAMK CAM calcium/c protein-coding   |
| chr12-11f.10.92178 | 0.31193  | 0.709235 | 0.439812 | 0.660074 | 0.981636 | chr12 | 1.1E+08         | 1.1E+08  | + | 0 | NA | intron (NAluSz SIN  | 32301 NM_001347  | 28981 Hs. 52838ENM_01405E   | ENSG000003IFT81     | CDV-1 CDV intraflag protein-coding  |
| chr5-180f.10.92178 | 0.31193  | 0.709235 | 0.439812 | 0.660074 | 0.981636 | chr5  | 1.8E+08         | 1.8E+08  | + | 0 | NA | intron (NLa2 LINE   | 17581 NM_00130E  | 5601 Hs. 484371ENM_00275E   | ENSG000003MAPK9     | JNK-55 J mitogen- protein-coding    |
| chr18-59f.9.621517 | -0.33369 | 0.759206 | -0.43952 | 0.660286 | 0.981636 | chr18 | 59903058        | 59903257 | + | 0 | NA | 3' UTR (N3' UTR (N  | 3161 NM_021127   | 5366 Hs. 96 NM_021127       | ENSG000003PMA1P1    | APR NOXA phorbol-1 protein-coding   |
| chr7-76f.9.621517  | -0.33369 | 0.759206 | -0.43952 | 0.660286 | 0.981636 | chr7  | 76304029        | 76304739 | + | 0 | NA | TTS (NM_C TTS (NM_C | 1711 NM_00154C   | 3315 Hs. 52097ENM_00154C    | ENSG000003HSPB1     | CM2F7 HEL heat shoc protein-coding  |
| chr10-10f.10.38406 | 0.319149 | 0.72627  | 0.439436 | 0.660346 | 0.981636 | chr10 | 1.03E+08        | 1.03E+08 | + | 0 | NA | intron (NLM1E LIN   | -3962 NM_001351  | 22978 Hs. 97439 NM_01222E   | ENSG000003CNT5C2    | GMP NT5B 5' -nuclec protein-coding  |
| chr2-191f.10.38406 | 0.319149 | 0.72627  | 0.439436 | 0.660346 | 0.981636 | chr2  | 1.91E+08        | 1.91E+08 | + | 0 | NA | intron (Nintron (N  | 127015 NM_001161 | 4430 Hs. 43962CENM_01222E   | ENSG000003MYO1B     | MMI-alpha myosin II protein-coding  |
| chr5-115f.8.63389  | -0.35718 | 0.813055 | -0.43931 | 0.660438 | 0.981636 | chr5  | 1.16E+08        | 1.16E+08 | + | 0 | NA | intron (Nintron (N  | 9238 NM_18183E   | 51014 Hs. 642817ENM_18183E  | ENSG000003TMED7     | CK1-109 transment protein-coding    |
| chr5-149f.8.63389  | -0.35718 | 0.813055 | -0.43931 | 0.660438 | 0.981636 | chr5  | 1.5E+08         | 1.5E+08  | + | 0 | NA | intron (Nintron (N  | 8854 NM_001271   | 1452 Hs. 52986ENM_00189E    | ENSG000003CSNK1A1   | CK1 CK1a casein kiprotein-coding    |
| chr22-24f.9.183634 | -0.35027 | 0.797691 | -0.43911 | 0.660581 | 0.981636 | chr22 | 24546024        | 24546474 | + | 0 | NA | intron (NAluYk3 SI  | 8889 NM_001284   | 83606 Hs. 9850 NM_031444    | ENSG000003GUCD1     | C22orf13 guanyl yl protein-coding   |
| chr19-11f.17.62146 | 0.252036 | 0.574013 | 0.439077 | 0.660606 | 0.981636 | chr19 | 11613548        | 11621395 | + | 0 | NA | exon (NM exon (NM   | 19988 NM_14529E  | 199692 Hs. 52666ENM_14529E  | ENSG000003ZNF627    | - zinc fin protein-coding           |
| chr16-10f.9.177626 | -0.33904 | 0.727577 | -0.43884 | 0.660778 | 0.981636 | chr16 | 10962644        | 10963988 | + | 0 | NA | intron (NMLT1B LTF  | 18752 NM_01522E  | 23274 Hs. 35490 NM_01522E   | ENSG000003CLEC16A   | Gop-1 K IAC-type I protein-coding   |
| chr16-53f.9.177626 | -0.33904 | 0.727577 | -0.43884 | 0.660778 | 0.981636 | chr16 | 53285770        | 53289257 | + | 0 | NA | intron (NAluSq2 SI  | 79062 NM_00135E  | 80205 Hs. 59159 NM_015287   | ENSG000003CHD9      | AD013 CHI chromodn protein-coding   |
| chr3-381f.9.177626 | -0.33904 | 0.727577 | -0.43884 | 0.660778 | 0.981636 | chr3  | 38190845        | 38191348 | + | 0 | NA | intron (NAluJr SIN  | 25559 NM_00510E  | 9943 Hs. 47597ENM_00510E    | ENSG000003OXS1      | OSR1 oxidative protein-coding       |
| chr5-129f.9.177626 | -0.33904 | 0.727577 | -0.43884 | 0.660778 | 0.981636 | chr5  | 1.3E+08         | 1.3E+08  | + | 0 | NA | intron (NLIPIA10 LI | -38120 NM_001257 | 1E+08 Hs. 582534ENM_001257  | ENSG000003MINAR2    | KIAA1024 membrane protein-coding    |
| chr6-142f.6.343221 | -0.41331 | 0.941862 | -0.43882 | 0.660793 | 0.981636 | chr6  | 1.4E+08         | 1.4E+08  | + | 0 | NA | 3' UTR (N3' UTR (N  | 71772 NM_01648E  | 51534 Hs. 431367ENM_01648E  | ENSG000003VTA1      | C6orf55 vesicle tr protein-coding   |



|                    |          |          |          |          |          |       |           |           |   |    |                     |                   |                             |                     |                     |                            |
|--------------------|----------|----------|----------|----------|----------|-------|-----------|-----------|---|----|---------------------|-------------------|-----------------------------|---------------------|---------------------|----------------------------|
| chr2-112:5.708169  | 0.421158 | 0.963359 | 0.437176 | 0.661984 | 0.981636 | chr2  | 1.12E+08  | 1.12E+08  | 0 | NA | intron (Nintron (N  | 60701 NM_005054   | 84220 Hs.469633NM_005054    | ENSG00000CRGPD5     | BS-63 BSE RANBP2    | liprotein-coding           |
| chr20-37:5.708169  | 0.421158 | 0.963359 | 0.437176 | 0.661984 | 0.981636 | chr20 | 37385704  | 37387763  | 0 | NA | intron (Nintron (N  | 40605 NM_198291   | 6714 Hs.195656NM_005417     | ENSG00000SRC        | ASV SRC1 SRC        | protcprotein-coding        |
| chr21-41:5.708169  | 0.421158 | 0.963359 | 0.437176 | 0.661984 | 0.981636 | chr21 | 41901111  | 41902038  | 0 | NA | intron (Nintron (N  | -22092 NM_02211E  | 63977 Hs.47389ENM_02211E    | ENSG00000PRDM15     | C21orf83 PR SET     | dcprotein-coding           |
| chr3-185:5.708169  | 0.421158 | 0.963359 | 0.437176 | 0.661984 | 0.981636 | chr3  | 1.85E+08  | 1.85E+08  | 0 | NA | intron (Nintron (N  | 4621 NM_080652    | 90407 Hs.677577NM_080652    | ENSG00000TMEM41A    | 2900010K transment  | protein-coding             |
| chr6-105:5.708169  | 0.421158 | 0.963359 | 0.437176 | 0.661984 | 0.981636 | chr6  | 1.05E+08  | 1.05E+08  | 0 | NA | 3' UTR (N3' UTR (N  | 36018 NM_147147   | 11149 Hs.22166CNC_00707E    | ENSG00000BVES       | CARICK HE blood     | vesprotein-coding          |
| chr8-9714:5.708169 | 0.421158 | 0.963359 | 0.437176 | 0.661984 | 0.981636 | chr8  | 97143145  | 97144980  | 0 | NA | TTS (NM_C TTS (NM_C | 133866 NM_033512  | 85453 Hs.173094NM_033512    | ENSG00000TSPYL5     | TSPY                | likeprotein-coding         |
| chr9-131:5.708169  | 0.421158 | 0.963359 | 0.437176 | 0.661984 | 0.981636 | chr9  | 1.3132288 | 1.3132878 | 0 | NA | intron (Nintron (N  | 146981 NM_003822  | 8777 Hs.16937ENM_003822     | ENSG00000MPDZ       | H9C7 MUPF           | multiple protein-coding    |
| chr9-128:5.708169  | 0.421158 | 0.963359 | 0.437176 | 0.661984 | 0.981636 | chr9  | 1.28E+08  | 1.28E+08  | 0 | NA | intron (Nintron (N  | 7733 NR_04974Z    | 81605 Hs.49522ENM_030914    | ENSG00000URMI       | Cyrc74              | ubiquitirprotein-coding    |
| chr14-70:11.45951  | 0.305433 | 0.698658 | 0.437171 | 0.661987 | 0.981636 | chr14 | 70946959  | 70948546  | 0 | NA | intron (NMER11B LI  | 40293 NM_00130E   | 22990 Hs.44655ENM_01498E    | ENSG00000PCNX1      | PCNX PCNX           | pancanex lprotein-coding   |
| chr12-147:8.667172 | -0.35302 | 0.807528 | -0.43717 | 0.661991 | 0.981636 | chr12 | 98728027  | 98728968  | 0 | NA | intron (NAluSz6 SI  | 83197 NM_18186E   | 317 Hs.552567NM_00116C      | ENSG00000APAF1      | APAF-1 C            | apoptoticprotein-coding    |
| chr4-147:8.667172  | -0.35302 | 0.807528 | -0.43717 | 0.661991 | 0.981636 | chr4  | 1.48E+08  | 1.48E+08  | 0 | NA | intron (NLIPIA11 LI | 149829 NR_03996Z  | 1.01E+08 NR_03996Z          | ENSG00000MIR4799    | -                   | microRNA ncRNA             |
| chr5-172:8.667172  | -0.35302 | 0.807528 | -0.43717 | 0.661991 | 0.981636 | chr5  | 1.73E+08  | 1.73E+08  | 0 | NA | intron (NAluJb SIN  | 14145 NM_00394E   | 8992 Hs.48418ENM_00394E     | ENSG00000ATP6VOE1   | ATP6H ATF           | ATPase H+protein-coding    |
| chr12-49:9.169768  | -0.3376  | 0.77239  | -0.43708 | 0.66205  | 0.981636 | chr12 | 49564328  | 49564540  | 0 | NA | intron (Nintron (N  | 2005 NM_001012    | 10445 Hs.25313 NM_006337    | ENSG00000MCRS1      | ICP22BP1 mi         | microspherprotein-coding   |
| chr14-59:9.169768  | -0.3376  | 0.77239  | -0.43708 | 0.66205  | 0.981636 | chr14 | 59494933  | 59495532  | 0 | NA | intron (Nintron (N  | 10715 NM_001647E  | 51528 Hs.44685ENM_01647E    | ENSG00000JKAMP      | C14orf10C JNK1 MAP3 | protein-coding             |
| chr6-723:9.169768  | -0.3376  | 0.77239  | -0.43708 | 0.66205  | 0.981636 | chr6  | 7230422   | 7231288   | 0 | NA | exon (NM exon (NM   | 82344 NM_001292   | 6745 Hs.11403ENM_003144     | ENSG00000SSR1       | TRAPA               | signal sprotein-coding     |
| chrX-137:9.169768  | -0.3376  | 0.77239  | -0.43708 | 0.66205  | 0.981636 | chrX  | 13729208  | 13730092  | 0 | NA | intron (NAluSp SIN  | 4970 NM_001011    | 6399 Hs.59223ENM_01456E     | ENSG00000TRAPP2C    | MIP2A SEE           | traffickiprotein-coding    |
| chr5-175:12.00695  | 0.306156 | 0.700515 | 0.437044 | 0.662079 | 0.981636 | chr5  | 1.74E+08  | 1.74E+08  | 0 | NA | exon (NM exon (NM   | -39120 NM_001144  | 133491 Hs.13146ENM_001144   | ENSG00000CC5orf47   | -                   | chromosonprotein-coding    |
| chr5-73:8.845295   | 0.349827 | 0.80047  | 0.437027 | 0.662092 | 0.981636 | chr15 | 75612113  | 75612489  | 0 | NA | intron (NAluSx SIN  | 13424 NM_005701   | 10073 Hs.21577 NM_005701    | ENSG00000SNUPN      | KPNBL RNL           | snurportirprotein-coding   |
| chr17-18:8.845295  | 0.349827 | 0.80047  | 0.437027 | 0.662092 | 0.981636 | chr17 | 18206490  | 18207474  | 0 | NA | intron (Nintron (N  | -18653 NM_00414C  | 3996 Hs.51398ENM_00414C     | ENSG00000LLGL1      | DLG4 HUGL           | LLGL scriprotein-coding    |
| chr1-154:10.92964  | 0.310535 | 0.710758 | 0.436906 | 0.662179 | 0.981636 | chr1  | 1.54E+08  | 1.54E+08  | 0 | NA | intron (NAluSx SIN  | 8099 NM_001367    | 57198 Hs.43570CNC_02045E    | ENSG00000ATP8B2     | ATP1D               | ATPase pfprotein-coding    |
| chr11-75:10.92964  | 0.310535 | 0.710758 | 0.436906 | 0.662179 | 0.981636 | chr11 | 75612113  | 75612489  | 0 | NA | exon (NM exon (NM   | 11520 NM_00675E   | 6888 Hs.43867ENM_00675E     | ENSG00000TALD01     | TAL TAL-            | T transaldolprotein-coding |
| chr12-13:10.92964  | 0.310535 | 0.710758 | 0.436906 | 0.662179 | 0.981636 | chr12 | 1.33E+08  | 1.33E+08  | 0 | NA | intron (Nintron (N  | 12686 NM_15294Z   | 10795 Hs.124047NM_00341E    | ENSG00000ZNF268     | HZF3                | zinc fingprotein-coding    |
| chr19-147:10.92964 | 0.310535 | 0.710758 | 0.436906 | 0.662179 | 0.981636 | chr19 | 14712977  | 14723334  | 0 | NA | intron (Nintron (N  | 28107 NM_00135Z   | 84449 Hs.51521ENM_03243E    | ENSG00000ZNF333     | -                   | zinc fingprotein-coding    |
| chr19-57:10.92964  | 0.310535 | 0.710758 | 0.436906 | 0.662179 | 0.981636 | chr19 | 57251800  | 57256063  | 0 | NA | exon (NM exon (NM   | 13299 NM_00102Z   | 390980 Hs.22488 NM_00102Z   | ENSG00000ZNF805     | -                   | zinc fingprotein-coding    |
| chr20-50:10.92964  | 0.310535 | 0.710758 | 0.436906 | 0.662179 | 0.981636 | chr20 | 50617549  | 50627237  | 0 | NA | intron (NAluSz SIN  | -7608 NR_031634   | 1E+08 NR_031634             | ENSG00000MIR1302    | -                   | MIRN1302-microRNA ncRNA    |
| chr6-896:8.340849  | 0.363995 | 0.833193 | 0.436867 | 0.662208 | 0.981636 | chr6  | 89692307  | 89692973  | 0 | NA | exon (NM exon (NM   | -53893 NM_02046E  | 57226 Hs.17727ENM_02046E    | ENSG00000LYRM2      | DJ12208.2 LYR       | motifprotein-coding        |
| chr16-57:6.368645  | -0.40531 | 0.928302 | -0.43661 | 0.662391 | 0.981636 | chr16 | 57755663  | 57779237  | 0 | NA | promoter-promoter-  | -672 NM_00131E    | 3801 Hs.23131 NM_00555C     | ENSG00000KIFC3      | -                   | kinesin fprotein-coding    |
| chr3-143:6.368645  | -0.40531 | 0.928302 | -0.43661 | 0.662391 | 0.981636 | chr3  | 1.43E+08  | 1.43E+08  | 0 | NA | exon (NM exon (NM   | 49469 NM_00132C   | 23350 Hs.59657ENM_00108C    | ENSG00000U2SURP     | SR140 f5A U2        | snRNP protein-coding       |
| chr4-563:5.74145   | 0.425606 | 0.975218 | 0.436422 | 0.662531 | 0.981636 | chr4  | 5633089   | 5633928   | 0 | NA | intron (NMIR SINE   | 75051 NM_147127   | 132884 Hs.87306 NM_147127   | ENSG00000EVC2       | LBN WAD             | EVC ciliE protein-coding   |
| chr4-70:5.74145    | 0.425606 | 0.975218 | 0.436422 | 0.662531 | 0.981636 | chr4  | 70725978  | 70726645  | 0 | NA | intron (NL2 LINE L  | 4347 NM_001037    | 22902 Hs.740904NM_014961    | ENSG00000RUFY3      | RIPX SINC           | RUN and Fprotein-coding    |
| chr12-88:9.597943  | -0.32949 | 0.755016 | -0.43641 | 0.662541 | 0.981636 | chr12 | 88116874  | 88117989  | 0 | NA | intron (Nintron (N  | 24785 NM_025114   | 80184 Hs.150444NM_025114    | ENSG00000CEP290     | 3H11Ag BE           | centrososnprotein-coding   |
| chr3-17:9.597943   | -0.32949 | 0.755016 | -0.43641 | 0.662541 | 0.981636 | chr3  | 1.77E+08  | 1.77E+08  | 0 | NA | intron (Nintron (N  | 146881 NM_001321  | 79718 Hs.714201NM_02466E    | ENSG00000TBL1XR1    | C21 DC42            | transduciprotein-coding    |
| chr1-123:9.349741  | 0.337071 | 0.773071 | 0.435994 | 0.662841 | 0.981636 | chr1  | 12323810  | 12325485  | 0 | NA | intron (NMIR SINE   | 94617 NM_01537E   | 55187 Hs.439381NM_01537E    | ENSG00000VPS13D     | SCARA               | vacuolar protein-coding    |
| chr2-132:9.564661  | -0.33331 | 0.764686 | -0.43588 | 0.662922 | 0.981636 | chr2  | 1.33E+08  | 1.33E+08  | 0 | NA | intron (Nintron (N  | -121864 NR_13557Z | 1.02E+08 Hs.680114NR_13557Z | ENSG00000CNKAP5-AS- | -                   | NCKAP5 arncRNA             |
| chr2-21:12.42264   | -0.29954 | 0.687223 | -0.43587 | 0.662934 | 0.981636 | chr2  | 2.18E+08  | 2.18E+08  | 0 | NA | intron (Nintron (N  | -1318 NR_14579Z   | 1.1E+08 NR_14579Z           | SNORA115            | -                   | small nucsnoRNA            |
| chr15-49:9.424162  | 0.341021 | 0.782609 | 0.435749 | 0.663019 | 0.981636 | chr15 | 49105965  | 49106358  | 0 | NA | IntergeniMLT1C LTF  | 49438 NM_00114Z   | 9318 Hs.369614NM_00423E     | ENSG00000COPS2      | ALIEN CSN           | COP9 sigr protein-coding   |
| chr15-63:9.424162  | 0.341021 | 0.782609 | 0.435749 | 0.663019 | 0.981636 | chr15 | 63303598  | 63303925  | 0 | NA | intron (NAluJb SIN  | 26156 NM_031301   | 83464 Hs.51170ENM_031301    | ENSG00000APHIB      | APH-1B PF           | aph-1 honprotein-coding    |
| chr10-27:6.443066  | -0.39608 | 0.909215 | -0.43563 | 0.663104 | 0.981636 | chr10 | 27231117  | 27232408  | 0 | NA | exon (NM exon (NM   | 8724 NM_001301    | 91452 Hs.530599NM_14569E    | ENSG00000ACBD5      | -                   | acyl-CoA protein-coding    |
| chr11-11:6.443066  | -0.39608 | 0.909215 | -0.43563 | 0.663104 | 0.981636 | chr11 | 1.17E+08  | 1.17E+08  | 0 | NA | exon (NM exon (NM   | 15803 NM_03272E   | 84811 Hs.437341NM_03272E    | ENSG00000BUD13      | Cwc26 f6A BUD13     | honprotein-coding          |
| chr12-67:6.443066  | -0.39608 | 0.909215 | -0.43563 | 0.663104 | 0.981636 | chr12 | 6726003   | 6726349   | 0 | NA | intron (NAluY SINE  | 1889 NM_001164    | 50813 Hs.53082ENM_01631E    | ENSG00000COPS7A     | CSN7 CSN7           | COP9 sigr protein-coding   |
| chr14-77:6.443066  | -0.39608 | 0.909215 | -0.43563 | 0.663104 | 0.981636 | chr14 | 77550668  | 77557037  | 0 | NA | intron (NAluSx SIN  | -57237 NM_19929E  | 145501 Hs.29742 NM_18250E   | ENSG00000ISM2       | TAIL1 THE           | isthmin 2protein-coding    |
| chr15-84:6.443066  | -0.39608 | 0.909215 | -0.43563 | 0.663104 | 0.981636 | chr15 | 84688663  | 84690277  | 0 | NA | intron (Nintron (N  | 26669 NM_01430C   | 23478 Hs.9534 NM_01430C     | ENSG00000SEC11A     | 1810012E SEC11      | honprotein-coding          |
| chr2-118:6.443066  | -0.39608 | 0.909215 | -0.43563 | 0.663104 | 0.981636 | chr2  | 11807163  | 11808317  | 0 | NA | intron (Nintron (N  | 29246 NR_03622E   | 1E+08 NR_03622E             | ENSG00000MIR4262    | -                   | microRNA ncRNA             |
| chr2-332:6.443066  | -0.39608 | 0.909215 | -0.43563 | 0.663104 | 0.981636 | chr2  | 33297373  | 33294419  | 0 | NA | intron (NAluSx SIN  | -124420 NR_03962E | 1.01E+08 NR_03962E          | ENSG00000MIR4430    | -                   | microRNA ncRNA             |
| chr20-50:6.443066  | -0.39608 | 0.909215 | -0.43563 | 0.663104 | 0.981636 | chr20 | 50595990  | 5096497   | 0 | NA | intron (Nintron (N  | 16833 NM_00100E   | 29058 Hs.472024NM_01414E    | ENSG00000TMEM230    | C20orf30 transment  | protein-coding             |
| chr20-31:6.443066  | -0.39608 | 0.909215 | -0.43563 | 0.663104 | 0.981636 | chr20 | 31523990  | 31525199  | 0 | NA | intron (NLIIME4b LI | 10152 NM_17858Z   | 81502 Hs.373741NM_03078E    | ENSG00000HMI3       | H13 IMP1            | histocomr protein-coding   |
| chr4-75:6.443066   | -0.39608 | 0.909215 | -0.43563 | 0.663104 | 0.981636 | chr4  | 75485334  | 75486459  | 0 | NA | intron (NMERS7A-ir  | 23400 NR_10372E   | 25898 Hs.48297 NM_01543E    | ENSG00000RCHY1      | ARNIP CHI           | ring fingprotein-coding    |
| chr5-181:6.443066  | -0.39608 | 0.909215 | -0.43563 | 0.663104 | 0.981636 | chr5  | 1810642   | 1813024   | 0 | NA | intron (NLMCS5-LIN  | 10426 NM_00455E   | 4726 Hs.408257NM_00455E     | ENSG00000CNDUF56    | CI-13K1 C           | NADH:ubiprotein-coding     |
| chr6-74:6.443066   | -0.39608 | 0.909215 | -0.43563 | 0.663104 | 0.981636 | chr6  | 7416435   | 7417143   | 0 | NA | intron (NAluJo SIN  | 26960 NM_00134E   | 83732 Hs.43747ENM_03148C    | ENSG00000RIOK1      | AD034 RIC           | RIO kinasprotein-coding    |
| chr8-431:6.443066  | -0.39608 | 0.909215 | -0.43563 | 0.663104 | 0.981636 | chr8  | 43113881  | 43116599  | 0 | NA | intron (Nintron (N  | 21725 NM_032237   | 84197 Hs.49164ENM_032237    | ENSG00000POMK       | MDDGAI2 W           |                            |

|                    |          |          |          |          |          |       |                  |          |   |      |                     |                   |                           |                  |                      |                   |                          |                           |                |                |
|--------------------|----------|----------|----------|----------|----------|-------|------------------|----------|---|------|---------------------|-------------------|---------------------------|------------------|----------------------|-------------------|--------------------------|---------------------------|----------------|----------------|
| chr19-166 6.435208 | -0.39409 | 0.909115 | -0.43349 | 0.664661 | 0.981636 | chr19 | 16873022         | 16874103 | + | 0 NA | intron (Nintron (N  | 10288 NM_001297   | 23309 Hs. 13999 NM_015262 | ENSG000003IN3B   | -                    | SIN3              | trarprotein-coding       |                           |                |                |
| chr2-9915 6.435208 | -0.39409 | 0.909115 | -0.43349 | 0.664661 | 0.981636 | chr2  | 99191494         | 99193055 | + | 0 NA | intron (Nintron (N  | 11090 NR_028356   | 51263 Hs. 346736          | NR_016503        | ENSG000003MRPL30     | -                 | L28MT L3C                | mitochondncprotein-coding |                |                |
| chr2-1275 6.435208 | -0.39409 | 0.909115 | -0.43349 | 0.664661 | 0.981636 | chr2  | 1.28E+08         | 1.28E+08 | + | 0 NA | intron (Nintron (N  | 52863 NM_001145   | 79595 Hs. 32995 NM_024545 | ENSG000003CAP130 | -                    | Sin3A             | assprotein-coding        |                           |                |                |
| chr2-1591 6.435208 | -0.39409 | 0.909115 | -0.43349 | 0.664661 | 0.981636 | chr2  | 1.59E+08         | 1.59E+08 | + | 0 NA | intron (NAluSx1 SI  | -13312 NR_106949  | 1.02E+08                  | NR_106949        | ENSG000003MIR6888    | -                 | hsa-mir-6                | microRNA ncRNA            |                |                |
| chr20-446 6.435208 | -0.39409 | 0.909115 | -0.43349 | 0.664661 | 0.981636 | chr20 | 44512680         | 44513448 | + | 0 NA | intron (Nintron (N  | 9006 NM_006811    | 10955 Hs. 272166          | NR_006811        | ENSG000003SERINC3    | -                 | AIGP1 DIF                | serine rprotein-coding    |                |                |
| chr3-1448 6.435208 | -0.39409 | 0.909115 | -0.43349 | 0.664661 | 0.981636 | chr3  | 14485807         | 14486698 | + | 0 NA | non-codinnon-codir  | 54090 NM_00108C   | 80852 Hs. 51781           | ENM_00108C       | ENSG000003GRIP2      | -                 |                          | glutamateprotein-coding   |                |                |
| chr3-2733 6.435208 | -0.39409 | 0.909115 | -0.43349 | 0.664661 | 0.981636 | chr3  | 27338770         | 27338465 | + | 0 NA | intron (NLIPIA6 LIN | 31216 NM_199347   | 152110 Hs. 50611          | ENM_152534       | ENSG000003NEK10      | -                 |                          | NIMA relaprotein-coding   |                |                |
| chr3-1496 6.435208 | -0.39409 | 0.909115 | -0.43349 | 0.664661 | 0.981636 | chr3  | 1.39E+08         | 1.49E+08 | + | 0 NA | intron (Nintron (N  | 46412 NM_00413C   | 2992 Hs. 477892           | NR_00413C        | ENSG000003GYG1       | -                 | GSD15 GV                 | glycogenprotein-coding    |                |                |
| chr3-1837 6.435208 | -0.39409 | 0.909115 | -0.43349 | 0.664661 | 0.981636 | chr3  | 1.84E+08         | 1.84E+08 | + | 0 NA | intron (Nintron (N  | 46785 NR_046727   | 1.01E+08                  | NR_046727        | YEATS2-AS-           |                   | YEATS2                   | arncRNA                   |                |                |
| chr4-1656 6.435208 | -0.39409 | 0.909115 | -0.43349 | 0.664661 | 0.981636 | chr4  | 16508869         | 16510380 | + | 0 NA | intron (NLMIR SINE  | 282961 NR_027697  | 202020 Hs. 44531          | ENM_152684       | ENSG000003TAPT1-AS1  | -                 |                          | TAPT1                     | antncRNA       |                |
| chr4-2672 6.435208 | -0.39409 | 0.909115 | -0.43349 | 0.664661 | 0.981636 | chr4  | 26724612         | 26725730 | + | 0 NA | intron (NLM4 LINE   | 135073 NR_134675  | 1.05E+08                  | Hs. 54885        | NR_134673            | STIM2-AS1-        |                          | STIM2                     | antncRNA       |                |
| chr4-7562 6.435208 | -0.39409 | 0.909115 | -0.43349 | 0.664661 | 0.981636 | chr4  | 75651460         | 75651758 | + | 0 NA | intron (Nintron (N  | -21081 NM_00133C  | 8999 Hs. 59169            | ENM_003945       | ENSG000003CDKL2      | -                 | KKIAMRE F                | cyclin dprotein-coding    |                |                |
| chr6-4256 6.435208 | -0.39409 | 0.909115 | -0.43349 | 0.664661 | 0.981636 | chr6  | 42594899         | 42596524 | + | 0 NA | intron (NAluJb SIN  | 31682 NM_001184   | 23304 Hs. 52992           | ENM_015255       | ENSG000003UBR2       | -                 | G6orf133                 | ubiquitinrprotein-coding  |                |                |
| chr6-1114 6.435208 | -0.39409 | 0.909115 | -0.43349 | 0.664661 | 0.981636 | chr6  | 1.11E+08         | 1.11E+08 | + | 0 NA | intron (NLI2 LINE N | -75882 NR_034105  | 643749 Hs. 48622          | ENR_034105       | ENSG000003TRAF3IP2-6 | CUAS C6c          | TRAF3IP2                 | ncRNA                     |                |                |
| chr6-1366 6.435208 | -0.39409 | 0.909115 | -0.43349 | 0.664661 | 0.981636 | chr6  | 1.37E+08         | 1.37E+08 | + | 0 NA | intron (NMIIRb SINE | 27920 NR_125855   | 1.02E+08                  | Hs. 66651        | ENR_125858           | LOC101925-        |                          | uncharactncRNA            |                |                |
| chr6-1496 6.435208 | -0.39409 | 0.909115 | -0.43349 | 0.664661 | 0.981636 | chr6  | 1.5E+08          | 1.5E+08  | + | 0 NA | intron (Nintron (N  | -3126 NR_077247   | 645958 Hs. 632614         | NR_077247        | RPS18P9              | RPS18_6_7         | ribosomalpseudo          |                           |                |                |
| chr6-158 6.435208  | -0.39409 | 0.909115 | -0.43349 | 0.664661 | 0.981636 | chr6  | 1.58E+08         | 1.58E+08 | + | 0 NA | intron (Nintron (N  | 56007 NM_001175   | 8871 Hs. 43449            | 494NM_003895     | ENSG000003SYN2J      | -                 | INPP5H                   | synaptoterpprotein-coding |                |                |
| chr7-112 6.435208  | -0.39409 | 0.909115 | -0.43349 | 0.664661 | 0.981636 | chr7  | 1.12E+08         | 1.12E+08 | + | 0 NA | intron (Nintron (N  | -97818 NM_001197  | 3475 Hs. 7879 NM_001155   | ENSG000003IFRD1  | -                    | PC4 TIS7          | interfercpprotein-coding |                           |                |                |
| chr7-1406 6.435208 | -0.39409 | 0.909115 | -0.43349 | 0.664661 | 0.981636 | chr7  | 1.41E+08         | 1.41E+08 | + | 0 NA | intron (Nintron (N  | -54912 NR_117084  | 23608 Hs. 74488           | ENM_013445       | ENSG000003MKRN1      | -                 | RNF61                    | makorin rprotein-coding   |                |                |
| chr8-6156 6.435208 | -0.39409 | 0.909115 | -0.43349 | 0.664661 | 0.981636 | chr8  | 61502047         | 61502376 | + | 0 NA | TTS (NM_TTS (NM_I   | 187595 NM_001164  | 444 Hs. 33242             | ENM_004315       | ENSG000003CASPH      | -                 | AAH BAH C                | aspartateprotein-coding   |                |                |
| chr9-9356 6.435208 | -0.39409 | 0.909115 | -0.43349 | 0.664661 | 0.981636 | chr9  | 93551059         | 93552899 | + | 0 NA | intron (Nintron (N  | -23915 NM_005392  | 5253 Hs. 211441           | ENM_005392       | ENSG000003PHF2       | -                 | CENP-35 C                | PHD fingprotein-coding    |                |                |
| chr17-818 5.178299 | 0.443657 | 1.024264 | 0.433147 | 0.664908 | 0.981636 | chr17 | 81822514         | 81823245 | + | 0 NA | 3' UTR (N3' UTR (N  | 10412 NM_001285   | 348262 Hs. 51463          | ENM_207365       | ENSG000003MCRIP1     | -                 | FAM195B C                | MAPK regu                 | protein-coding |                |
| chr3-1885 10.87279 | 0.312271 | 0.721086 | 0.433057 | 0.664973 | 0.981636 | chr3  | 1.89E+08         | 1.89E+08 | + | 0 NA | intron (NAluSx1 SI  | 43506 NR_046623   | 1.01E+08                  | Hs. 67499        | ENR_046623           | ENSG000003LPP-AS1 | -                        |                           | LPP            | antisncRNA     |
| chr1-2095 5.667029 | 0.419331 | 0.968559 | 0.432944 | 0.665056 | 0.981636 | chr1  | 20930266         | 20930694 | + | 0 NA | intron (NTigger1 I  | 57952 NR_031657   | 1E+08                     | NR_031657        | ENSG000003MIR1256    | -                 | MIRN1256                 | microRNA ncRNA            |                |                |
| chr12-191 5.667029 | 0.419331 | 0.968559 | 0.432944 | 0.665056 | 0.981636 | chr12 | 19127002         | 19127427 | + | 0 NA | IntergeniTigger1 E  | -2519 NM_019012   | 54477 Hs. 188614          | ENM_019012       | ENSG000003PLEKHA5    | -                 | PEPP-2 P                 | PFleckstriprotein-coding  |                |                |
| chr3-3702 5.667029 | 0.419331 | 0.968559 | 0.432944 | 0.665056 | 0.981636 | chr3  | 37025927         | 37026454 | + | 0 NA | intron (Nintron (N  | 32840 NM_001255   | 4292 Hs. 19536            | 494NM_000245     | ENSG000003MLH1       | -                 | COCA2 FCC                | mutL homc                 | protein-coding |                |
| chr6-8975 5.667029 | 0.419331 | 0.968559 | 0.432944 | 0.665056 | 0.981636 | chr6  | 89758299         | 89759876 | + | 0 NA | intron (Nintron (N  | 61157 NM_014611   | 23195 Hs. 52994           | ENM_014611       | ENSG000003MDM1       | -                 | Real                     | midasin fprotein-coding   |                |                |
| chr7-1284 5.667029 | 0.419331 | 0.968559 | 0.432944 | 0.665056 | 0.981636 | chr7  | 1.28E+08         | 1.28E+08 | + | 0 NA | intron (Nintron (N  | 20414 NM_018395   | 55798 Hs. 43321           | ENM_018395       | ENSG000003METTL2B    | -                 | METL MET                 | methyltrp                 | protein-coding |                |
| chr7-1492 5.667029 | 0.419331 | 0.968559 | 0.432944 | 0.665056 | 0.981636 | chr7  | 1.49E+08         | 1.49E+08 | + | 0 NA | intron (NLIIMA3 LIN | 8282 NR_144367    | 1E+08                     | Hs. 49051        | ENM_001195           | ENSG000003ZNF783  | -                        |                           | zinc fing      | protein-coding |
| chr8-4166 5.667029 | 0.419331 | 0.968559 | 0.432944 | 0.665056 | 0.981636 | chr8  | 41609157         | 41609915 | + | 0 NA | intron (Nintron (N  | 31020 NM_001365   | 137964 Hs. 35575          | ENM_178815       | ENSG000003GPAT4      | -                 | 1-AGPAT                  | glycogenl-protein-coding  |                |                |
| chr1-1566 9.654798 | -0.33    | 0.762743 | -0.43265 | 0.665269 | 0.981636 | chr1  | 1.57E+08         | 1.57E+08 | + | 0 NA | exon (NM_exon (NM   | 4419 NM_006617    | 10763 Hs. 52797           | 197NM_006617     | ENSG000003CNES       | -                 | Nbla0017C                | nestin                    | protein-coding |                |
| chr13-114 7.207456 | 0.578916 | 1.338677 | 0.432454 | 0.665411 | 0.981636 | chr13 | 1.14E+08         | 1.14E+08 | + | 0 NA | intron (Nintron (N  | -11998 NR_039724  | 1.01E+08                  | NR_039724        | ENSG000003MIR4502    | -                 |                          | microRNA ncRNA            |                |                |
| chr10-414 10.9375  | 0.309127 | 0.714953 | 0.432374 | 0.665469 | 0.981636 | chr10 | 41313961         | 41314259 | + | 0 NA | IntergeniALR Alpha  | 1053935 NR_02438C | 441666 Hs. 25572          | ENR_02438C       | ENSG000003LOC441666  | -                 |                          | zinc fingpseudo           |                |                |
| chr4-9888 10.19142 | 0.521658 | 1.207508 | 0.432012 | 0.665732 | 0.981636 | chr4  | 98880947         | 98881146 | + | 0 NA | exon (NM_exon (NM   | 48087 NM_00113C   | 1977 Hs. 13211            | NM_001965        | ENSG000003EIF4E      | -                 | AUTS19 C                 | eukaryoti                 | protein-coding |                |
| chr11-13 5.674887  | 0.416681 | 0.964854 | 0.431859 | 0.665844 | 0.981636 | chr11 | 1.3E+08          | 1.3E+08  | + | 0 NA | exon (NM_exon (NM   | -18246 NM_002197  | 6768 Hs. 50433            | ENM_021975       | ENSG000003ST14       | -                 | ARCT11 H                 | suppressi                 | protein-coding |                |
| chr12-461 5.674887 | 0.416681 | 0.964854 | 0.431859 | 0.665844 | 0.981636 | chr12 | 4612670          | 4613968  | + | 0 NA | intron (NMIIR SINE  | 8456 NM_001282    | 8798 Hs. 43953            | ENM_003845       | ENSG000003DYRK4      | -                 |                          | dual spec                 | protein-coding |                |
| chr12-885 5.674887 | 0.416681 | 0.964854 | 0.431859 | 0.665844 | 0.981636 | chr12 | 88516926         | 88518821 | + | 0 NA | intron (Nintron (N  | 62598 NM_000895   | 4254 Hs. 1048             | NM_000895        | ENSG000003KITLG      | -                 | DCUA DFN                 | KIT ligar                 | protein-coding |                |
| chr15-891 5.674887 | 0.416681 | 0.964854 | 0.431859 | 0.665844 | 0.981636 | chr15 | 89185376         | 89187107 | + | 0 NA | intron (Nintron (N  | 35308 NM_000325   | 6017 Hs. 1933             | NM_000325        | ENSG000003RLBP1      | -                 | CRALBP                   | retinalde                 | protein-coding |                |
| chr16-372 5.674887 | 0.416681 | 0.964854 | 0.431859 | 0.665844 | 0.981636 | chr16 | -12863 NM_016292 | 3729767  | + | 0 NA | intron (Nintron (N  | -10131 Hs. 30345  | NM_016292                 | ENSG000003TRAP1  | -                    | HSP 75 H          | SNF recep                | protein-coding            |                |                |
| chr16-68 5.674887  | 0.416681 | 0.964854 | 0.431859 | 0.665844 | 0.981636 | chr16 | 68053602         | 68056605 | + | 0 NA | intron (Nintron (N  | -30267 NM_173163  | 4775 Hs. 43658            | ENM_004555       | ENSG000003NFATC3     | -                 | NF-AT4c N                | nuclear f                 | protein-coding |                |
| chr19-18 5.674887  | 0.416681 | 0.964854 | 0.431859 | 0.665844 | 0.981636 | chr19 | 18310800         | 18313958 | + | 0 NA | intron (Nintron (N  | 10697 NM_012321   | 25804 Hs. 51525           | ENM_012321       | ENSG000003LSM4       | -                 | GRP YER11                | LSM4 homc                 | protein-coding |                |
| chr21-448 5.674887 | 0.416681 | 0.964854 | 0.431859 | 0.665844 | 0.981636 | chr21 | 44809395         | 44810579 | + | 0 NA | intron (Nintron (N  | 7746 NR_109925    | 1.02E+08                  | Hs. 11614        | ENR_109928           | LINC01424-        |                          | long intc                 | ncRNA          |                |
| chr3-1503 5.674887 | 0.416681 | 0.964854 | 0.431859 | 0.665844 | 0.981636 | chr3  | 15030961         | 15032701 | + | 0 NA | intron (NAluSx SIN  | 33484 NM_022497   | 64432 Hs. 65776           | 494NM_022497     | ENSG000003MRPS25     | -                 | MRP-S25 F                | mitochnc                  | protein-coding |                |
| chr7-5334 5.674887 | 0.416681 | 0.964854 | 0.431859 | 0.665844 | 0.981636 | chr7  | 5334264          | 5335135  | + | 0 NA | intron (Nintron (N  | 51756 NM_00104C   | 222962 Hs. 4302           | ENM_153247       | ENSG000003SLC29A4    | -                 | ENT4 PMA1                | solute c                  | protein-coding |                |
| chr7-6684 5.674887 | 0.416681 | 0.964854 | 0.431859 | 0.665844 | 0.981636 | chr7  | 6684941          | 6685596  | + | 0 NA | IntergeniAluY SINE  | 21679 NM_006955   | 7559 Hs. 43147            | 197NM_006955     | ENSG000003ZNF12      | -                 | G10T-3 H                 | zinc fing                 | protein-coding |                |
| chr7-1587 5.674887 | 0.416681 | 0.964854 | 0.431859 | 0.665844 | 0.981636 | chr7  | 1.59E+08         | 1.59E+08 | + | 0 NA | exon (NM_exon (NM   | -54687 NR_104054  | 54892 Hs. 18616           | NM_01776C        | ENSG000003NCAPG2     | -                 | 3KS CAP-                 | non-SMC                   | protein-coding |                |
| chr8-4295 5.674887 | 0.416681 | 0.964854 | 0.431859 | 0.665844 | 0.981636 | chr8  | 42956758         | 42957629 | + | 0 NA | intron (Nintron (N  | 60215 NM_03241C   | 84376 Hs. 16285           | ENM_03241C       | ENSG000003HOOK3      | -                 | HK3                      | hook micr                 | protein-coding |                |
|                    |          |          |          |          |          |       |                  |          |   |      |                     |                   |                           |                  |                      |                   |                          |                           |                |                |



|            |          |          |          |          |          |          |       |          |          |   |   |    |                     |                   |                              |                                   |                                       |                   |
|------------|----------|----------|----------|----------|----------|----------|-------|----------|----------|---|---|----|---------------------|-------------------|------------------------------|-----------------------------------|---------------------------------------|-------------------|
| chr11-944  | 6.42735  | -0.39204 | 0.913445 | -0.42919 | 0.667786 | 0.981636 | chr11 | 9445355  | 9446397  | + | 0 | NA | 3' UTR (N3' UTR (N  | 14822 NR_03653E   | 644656 Hs. 59784eNR_03653E   | ENSG000001C064465E                | -                                     | uncharactericrRNA |
| chr11-137  | 6.42735  | -0.39204 | 0.913445 | -0.42919 | 0.667786 | 0.981636 | chr11 | 13714860 | 13715855 | + | 0 | NA | intron (Nintron (N  | 46689 NM_03222E   | 84188 Hs. 501991NM_03222E    | ENSG000001FARI                    | MLSTD2 PF fatty acyprotein-coding     |                   |
| chr12-12f  | 6.42735  | -0.39204 | 0.913445 | -0.42919 | 0.667786 | 0.981636 | chr12 | 1263335  | 1264445  | + | 0 | NA | intron (NAluSq10 S  | 236142 NM_001301  | 23085 Hs. 60121eNM_17803E    | ENSG000001CERC1                   | Cast2 ELK/ELKS/RABc protein-coding    |                   |
| chr12-66f  | 6.42735  | -0.39204 | 0.913445 | -0.42919 | 0.667786 | 0.981636 | chr12 | 6603877  | 6604622  | + | 0 | NA | intron (NAluSx1 S1  | 2202 NM_001297    | 1108 Hs. 16223eNM_00127E     | ENSG000001CHD4                    | CHD-4 Mi- chromodomain protein-coding |                   |
| chr12-101f | 6.42735  | -0.39204 | 0.913445 | -0.42919 | 0.667786 | 0.981636 | chr12 | 1.06E+08 | 1.02E+08 | + | 0 | NA | 3' UTR (N3' UTR (N  | 45425 NM_01837C   | 55332 Hs. 525634NM_01837C    | ENSG000001DRAM1                   | DRAM DNA damage protein-coding        |                   |
| chr12-122f | 6.42735  | -0.39204 | 0.913445 | -0.42919 | 0.667786 | 0.981636 | chr12 | 1.22E+08 | 1.22E+08 | + | 0 | NA | 3' UTR (N3' UTR (N  | 28103 NM_00135C   | 55596 Hs. 37706 NM_01761E    | ENSG000001ZCCHC8                  | - zinc fing protein-coding            |                   |
| chr14-347f | 6.42735  | -0.39204 | 0.913445 | -0.42919 | 0.667786 | 0.981636 | chr14 | 34789710 | 34792455 | + | 0 | NA | intron (NAluSp SIN  | -76259 NR_02813C  | 1073 Hs. 180141NM_021914     | ENSG000001CF12                    | NEM7 cofilin 2 protein-coding         |                   |
| chr14-747f | 6.42735  | -0.39204 | 0.913445 | -0.42919 | 0.667786 | 0.981636 | chr14 | 74787807 | 74789979 | + | 0 | NA | intron (NAluV SINE  | 25077 NR_01958E   | 56252 Hs. 531111NM_01958E    | ENSG000001YLP1M1                  | C14orf17 YLP motif protein-coding     |                   |
| chr17-394f | 6.42735  | -0.39204 | 0.913445 | -0.42919 | 0.667786 | 0.981636 | chr17 | 39468052 | 39468926 | + | 0 | NA | intron (NAluSp SIN  | 7003 NM_01508E    | 51755 Hs. 34502eNM_01508E    | ENSG000001CDK12                   | CRK7 CRKF cyclin d protein-coding     |                   |
| chr17-444f | 6.42735  | -0.39204 | 0.913445 | -0.42919 | 0.667786 | 0.981636 | chr17 | 44422665 | 44423567 | + | 0 | NA | intron (NAluSq4 S1  | 13735 NM_001304   | 23131 Hs. 46312eNM_00100E    | ENSG000001GPATCH8                 | GPATCH8 KIG-patch c protein-coding    |                   |
| chr17-826f | 6.42735  | -0.39204 | 0.913445 | -0.42919 | 0.667786 | 0.981636 | chr17 | 82633882 | 82634519 | + | 0 | NA | intron (NLM2B2 LIN  | 14244 NM_01961E   | 56270 Hs. 132161NM_01961E    | ENSG000001WDR45B                  | NEDSBAS WWD repeat protein-coding     |                   |
| chr19-126f | 6.42735  | -0.39204 | 0.913445 | -0.42919 | 0.667786 | 0.981636 | chr19 | 12671369 | 12671935 | + | 0 | NA | TTS (NR_1TTS (NR_1  | 1899 NM_03233E    | 84292 Hs. 657204NM_03233E    | ENSG000001WDR83                   | MORGI1 WD repeat protein-coding       |                   |
| chr2-4357f | 6.42735  | -0.39204 | 0.913445 | -0.42919 | 0.667786 | 0.981636 | chr2  | 4357442  | 43575663 | + | 0 | NA | intron (Nintron (N  | 20772 NM_00108E   | 63892 Hs. 36959eNM_02206E    | ENSG000001THADA                   | ARMC13 GI THADA arn protein-coding    |                   |
| chr2-237f  | 6.42735  | -0.39204 | 0.913445 | -0.42919 | 0.667786 | 0.981636 | chr2  | 2.38E+08 | 2.38E+08 | + | 0 | NA | intron (Nintron (N  | 26065 NM_00127E   | 140739 Hs. 4718eNM_08067E    | ENSG000001UBE2F                   | NCE2 ubiquitin protein-coding         |                   |
| chr20-200f | 6.42735  | -0.39204 | 0.913445 | -0.42919 | 0.667786 | 0.981636 | chr20 | 20028047 | 20029346 | + | 0 | NA | intron (N(ATATAC)r  | 10901 NM_181527   | 51126 Hs. 36878eNM_01610E    | ENSG000001NAA20                   | NAT3 NAT3(N(alpha)- protein-coding    |                   |
| chr20-508f | 6.42735  | -0.39204 | 0.913445 | -0.42919 | 0.667786 | 0.981636 | chr20 | 50897104 | 50898128 | + | 0 | NA | intron (NTigger-3 I | 12175 NM_00128E   | 23394 Hs. 29373eNM_01533E    | ENSG000001ADNP                    | ADNP1 HWT activator protein-coding    |                   |
| chr21-437f | 6.42735  | -0.39204 | 0.913445 | -0.42919 | 0.667786 | 0.981636 | chr21 | 43763507 | 43783269 | + | 0 | NA | IntergeniAluSg SIN  | 12687 NM_00100E   | 1476 Hs. 695 NM_00100E       | ENSG000001CCSTB                   | CPI-1 CST1 cystatin protein-coding    |                   |
| chr3-141f  | 6.42735  | -0.39204 | 0.913445 | -0.42919 | 0.667786 | 0.981636 | chr3  | 14181116 | 14183820 | + | 0 | NA | intron (Nintron (N  | 3651 NM_01446E    | 27258 Hs. 11163eNM_01446E    | ENSG000001LSM3                    | SMX4 USS2 LSM3 homc protein-coding    |                   |
| chr3-3708f | 6.42735  | -0.39204 | 0.913445 | -0.42919 | 0.667786 | 0.981636 | chr3  | 37082414 | 37082613 | + | 0 | NA | intron (NLMC1 LIN   | 89163 NM_00125E   | 4292 Hs. 195364NM_00024E     | ENSG000001MLH1                    | COCA2 FCC mutL homc protein-coding    |                   |
| chr3-1882f | 6.42735  | -0.39204 | 0.913445 | -0.42919 | 0.667786 | 0.981636 | chr3  | 1.88E+08 | 1.88E+08 | + | 0 | NA | intron (NMLT1F2 LI  | 5795 NM_00116E    | 4026 Hs. 72022eNM_00557E     | ENSG000001LPP                     | - LIM doma protein-coding             |                   |
| chr4-2541f | 6.42735  | -0.39204 | 0.913445 | -0.42919 | 0.667786 | 0.981636 | chr4  | 25414779 | 25415661 | + | 0 | NA | intron (Nintron (N  | 37957 NM_013367   | 29945 Hs. 15217eNM_013367    | ENSG000001ANAPC4                  | APC4 anaphase protein-coding          |                   |
| chr6-719Cf | 6.42735  | -0.39204 | 0.913445 | -0.42919 | 0.667786 | 0.981636 | chr6  | 7190914  | 7192563  | + | 0 | NA | intron (NLM8B LIN   | 83777 NM_00100E   | 6239 Hs. 29824eNM_00295E     | ENSG000001RREB1                   | FINB HNT ras respc protein-coding     |                   |
| chr6-1751f | 6.42735  | -0.39204 | 0.913445 | -0.42919 | 0.667786 | 0.981636 | chr6  | 17514449 | 17514831 | + | 0 | NA | intron (NAluSx SIN  | -3375 NR_11085E   | 1.02E+08 Hs. 62287eNR_11085E | LOC10192E                         | - uncharactericrRNA                   |                   |
| chr6-1091f | 6.42735  | -0.39204 | 0.913445 | -0.42919 | 0.667786 | 0.981636 | chr6  | 1.09E+08 | 1.09E+08 | + | 0 | NA | intron (Nintron (N  | -11389 NR_15243E  | 221262 Hs. 373914NM_117367   | ENSG000001CCDC162F                | G6orf183 coiled-c pseudo              |                   |
| chr7-1352f | 6.42735  | -0.39204 | 0.913445 | -0.42919 | 0.667786 | 0.981636 | chr7  | 1.35E+08 | 1.35E+08 | + | 0 | NA | intron (NAluSx SIN  | 1339 NR_106764    | 1.02E+08 Hs. NR_106764       | ENSG000001MIR6509                 | hsa-mir-ε microRNA ncRNA              |                   |
| chr8-3821f | 6.42735  | -0.39204 | 0.913445 | -0.42919 | 0.667786 | 0.981636 | chr8  | 38214128 | 38215866 | + | 0 | NA | IntergeniAluSx SIN  | -16494 NM_00116E  | 23259 Hs. 43496eNM_015214    | ENSG000001DDHD2                   | SAMWD1 SF DDHD doma protein-coding    |                   |
| chr9-9348f | 6.42735  | -0.39204 | 0.913445 | -0.42919 | 0.667786 | 0.981636 | chr9  | 93484516 | 93484769 | + | 0 | NA | intron (NAluSx SIN  | 350364NM_19884E   | ENSG000001FAM120AOC          | C9orf100C family wiprotein-coding |                                       |                   |
| chr16-85f  | 5.716027 | 0.418375 | 0.975097 | 0.42906  | 0.667879 | 0.981636 | chr16 | 85075504 | 85076139 | + | 0 | NA | intron (Nintron (N  | 12609 NM_00128E   | 9764 Hs. 30165eNM_01473E     | ENSG000001K1AA0513                | - KIAA0513 protein-coding             |                   |
| chr6-3175f | 5.716027 | 0.418375 | 0.975097 | 0.42906  | 0.667879 | 0.981636 | chr6  | 31778100 | 31779130 | + | 0 | NA | intron (NAluJb SIN  | -1276 NM_02525E   | 80737 Hs. 55855eNM_02525E    | ENSG000001VWA7                    | C6orf27 Cvon Willec protein-coding    |                   |
| chr7-433f  | 5.716027 | 0.418375 | 0.975097 | 0.42906  | 0.667879 | 0.981636 | chr7  | 44391279 | 44392130 | + | 0 | NA | intron (Nintron (N  | -66073 NM_17207E  | 816 Hs. 351887NM_00122C      | ENSG000001CAMK2B                  | CAM2 CAMM calcium/c protein-coding    |                   |
| chr7-128f  | 5.716027 | 0.418375 | 0.975097 | 0.42906  | 0.667879 | 0.981636 | chr7  | 1.28E+08 | 1.28E+08 | + | 0 | NA | TTS (NR_1TTS (NR_C  | 248 NR_030324     | 693178 Hs. NR_030324         | ENSG000001MIR593                  | MIRN593 ε microRNA ncRNA              |                   |
| chr16-210f | 5.716027 | 0.418375 | 0.975097 | 0.42906  | 0.667879 | 0.981636 | chr16 | 2170279  | 2170864  | + | 0 | NA | intron (Nintron (N  | 14789 NM_032271   | 84231 Hs. 71363eNM_032271    | ENSG000001TRAF7                   | CAPDADD TNF recep protein-coding      |                   |
| chr1-247f  | 5.965893 | -0.41539 | 0.968394 | -0.42894 | 0.667964 | 0.981636 | chr1  | 2.4E+08  | 2.4E+08  | + | 0 | NA | intron (NLM2D LIN   | 22587 NM_02006E   | 56776 Hs. 24889 NM_02006E    | ENSG000001FNM2                    | - formin 2 protein-coding             |                   |
| chr12-78f  | 5.965893 | -0.41539 | 0.968394 | -0.42894 | 0.667964 | 0.981636 | chr12 | 78029833 | 78030313 | + | 0 | NA | intron (NTigger4 I  | 199179 NM_01490E  | 89795 Hs. 655301NM_01490E    | ENSG000001NAV3                    | POMFILL1 S neuron n protein-coding    |                   |
| chr17-824f | 5.965893 | -0.41539 | 0.968394 | -0.42894 | 0.667964 | 0.981636 | chr17 | 82471004 | 82471518 | + | 0 | NA | intron (NAluV SINE  | 12520 NM_01233E   | 26502 Hs. 25652eNM_01233E    | ENSG000001NARF                    | TOP2 nuclear f protein-coding         |                   |
| chr2-7307f | 5.965893 | -0.41539 | 0.968394 | -0.42894 | 0.667964 | 0.981636 | chr2  | 73079277 | 73079629 | + | 0 | NA | intron (Nintron (N  | -7617 NM_14457E   | 94097 Hs. 368171NM_14457E    | ENSG000001SFXN5                   | BBG-TCC Ssiderofle protein-coding     |                   |
| chr11-134f | 6.871241 | -0.38051 | 0.887091 | -0.42894 | 0.667966 | 0.981636 | chr11 | 1.34E+08 | 1.34E+08 | + | 0 | NA | intron (Nintron (N  | -16379 NR_14579C  | 1.1E+08 Hs. NR_145790        | SNORD153                          | - small nucsnRNA                      |                   |
| chr12-56f  | 6.871241 | -0.38051 | 0.887091 | -0.42894 | 0.667966 | 0.981636 | chr12 | 56525255 | 56525744 | + | 0 | NA | intron (NAluSx6 S1  | 3664 NM_00289E    | 5939 Hs. 50572eNM_00289E     | ENSG000001RBM52                   | SXC3 RNA bindi protein-coding         |                   |
| chr2-1134f | 6.871241 | -0.38051 | 0.887091 | -0.42894 | 0.667966 | 0.981636 | chr2  | 1.13E+08 | 1.13E+08 | + | 0 | NA | intron (NTigger16a  | -27807 NM_0012184 | 200350 Hs. 591554NM_012184   | ENSG000001FOXDL1                  | FOXD5 ba3 forkhead protein-coding     |                   |
| chr2-2011f | 6.871241 | -0.38051 | 0.887091 | -0.42894 | 0.667966 | 0.981636 | chr2  | 2.01E+08 | 2.01E+08 | + | 0 | NA | intron (Nintron (N  | 767 NR_04003C     | 65072 Hs. 66461eNR_04003C    | ENSG000001CFLAR-AS1               | ALS2CR10 CFLAR antcRNA                |                   |
| chr1-156f  | 6.212615 | 0.395574 | 0.922535 | 0.428791 | 0.668075 | 0.981636 | chr1  | 1.56E+08 | 1.56E+08 | + | 0 | NA | intron (Nintron (N  | 4905 NM_020131    | 56893 Hs. 28373eNM_020131    | ENSG000001UBQLN4                  | A1U A1U ubiquitin protein-coding      |                   |
| chr1-241f  | 6.212615 | 0.395574 | 0.922535 | 0.428791 | 0.668075 | 0.981636 | chr1  | 2.4E+08  | 2.4E+08  | + | 0 | NA | 3' UTR (N3' UTR (N  | 40482 NM_001821   | 1122 Hs. 65454eNM_001821     | ENSG000001CHML                    | REP2 CHM like protein-coding          |                   |
| chr10-366f | 6.212615 | 0.395574 | 0.922535 | 0.428791 | 0.668075 | 0.981636 | chr10 | 366073   | 369135   | + | 0 | NA | intron (NLMC LINE   | 187610 NM_00120E  | 10771 Hs. 29226eNM_006624    | ENSG000001ZMYND11                 | BRAM1 BSε zinc fing protein-coding    |                   |
| chr14-77f  | 6.212615 | 0.395574 | 0.922535 | 0.428791 | 0.668075 | 0.981636 | chr14 | 77679013 | 77679732 | + | 0 | NA | intron (Nintron (N  | 28651 NM_00602C   | 8846 Hs. 94542 NM_00602C     | ENSG000001ALKBH1                  | ABH1 ABH1 alkB homc protein-coding    |                   |
| chr14-101f | 6.212615 | 0.395574 | 0.922535 | 0.428791 | 0.668075 | 0.981636 | chr14 | 50920374 | 50922300 | + | 0 | NA | intron (Nintron (N  | -59725 NM_00137E  | 1778 Hs. 61408eNM_00137E     | ENSG000001DNC1H1                  | CMT20 DHC dynein c protein-coding     |                   |
| chr15-505f | 6.212615 | 0.395574 | 0.922535 | 0.428791 | 0.668075 | 0.981636 | chr15 | 50920374 | 50922300 | + | 0 | NA | intron (Nintron (N  | 12654 NM_00125E   | 23431 Hs. 41336eNM_007347    | ENSG000001AP4E1                   | CPSQ4 SPC adaptor i protein-coding    |                   |
| chr16-727f | 6.212615 | 0.395574 | 0.922535 | 0.428791 | 0.668075 | 0.981636 | chr16 | 72798307 | 72799048 | + | 0 | NA | exon (NM exon (NM   | -133707 NR_12633C | 1.02E+08 Hs. 63725eNR_12633C | ENSG000001LINC0157Z               | - long intencRNA                      |                   |
| chr17-265f | 6.212615 | 0.395574 | 0.922535 | 0.428791 | 0.668075 | 0.981636 | chr17 | 2699451  | 2700099  | + | 0 | NA | intron (NAluSx4 SI  | -6851 NR_106834   | ENSG000001MIR6776            | hsa-mir-ε microRNA ncRNA          |                                       |                   |
| chr17-411f | 6.212615 | 0.395574 | 0.922535 | 0.428791 | 0.668075 | 0.981636 | chr17 | 4118428  | 4119351  | + | 0 | NA | intron (NHERV L     | 21441 NM_01511E   | 23140 Hs. 277624NM_01511E    | ENSG000001ZPEF1                   | ZZZ4 zinc fing protein-coding         |                   |
| chr17-57f  | 6.212615 | 0.395574 | 0.922535 | 0.428791 | 0.668075 | 0.981636 | chr17 | 57001812 | 57002738 | + | 0 | NA | intron (Nintron (N  | 24168 NM_02162E   | 59342 Hs. 51495eNM_02162E    | ENSG000001SCPEP1                  | HSCP1 RIS serine c protein-coding     |                   |
| chr17-64f  | 6.212615 | 0.395574 | 0.922535 | 0.428791 | 0.668075 | 0.981636 | chr17 | 64815634 | 64816633 | + | 0 | NA | intron (Nintron (N  | 5969 NR_03619E    | 1E+08 Hs. NR_03619E          | ENSG000001MIR4315-1               | - microRNA ncRNA                      |                   |
| chr18-62f  | 6.212615 | 0.395574 | 0.922535 | 0.428791 | 0.668075 | 0.981636 | chr18 | 62542987 | 62543808 | + | 0 | NA | intron (Nintron (N  | 20372 NR_126534   | 54877 Hs. 114191NM_01774E    | ENSG000001ZCHC2                   | C18orf49 zinc fing protein-coding     |                   |
| chr19-32f  | 6.212615 | 0.395574 | 0.922535 | 0.428791 | 0.668075 | 0.981636 | chr19 | 32630591 | 32631    |   |   |    |                     |                   |                              |                                   |                                       |                   |



|                     |          |          |          |          |          |       |          |          |   |      |                     |                    |          |                    |                     |                                   |                                   |                           |
|---------------------|----------|----------|----------|----------|----------|-------|----------|----------|---|------|---------------------|--------------------|----------|--------------------|---------------------|-----------------------------------|-----------------------------------|---------------------------|
| chr9-325 6.904522   | -0.37527 | 0.880845 | -0.42604 | 0.670079 | 0.981636 | chr19 | 32595100 | 32596104 | + | 0 NA | IntergeniAluSc SIN  | 12867 NR_14571E    | 1.1E+08  | NR_14571E          | ENSG00000SNORA68B   | -                                 | small ncRNA                       |                           |
| chr2-1214 6.904522  | -0.37527 | 0.880845 | -0.42604 | 0.670079 | 0.981636 | chr2  | 1.21E+08 | 1.21E+08 | + | 0 NA | intron (N LIP1 LINE | -91800 NR_023344   | 1E+08    | Hs.68963E          | NR_023344           | ENSG00000RNU4ATAC                 | MOPD1 RFW RNA, U4atsRNA           |                           |
| chr5-1093 6.904522  | -0.37527 | 0.880845 | -0.42604 | 0.670079 | 0.981636 | chr5  | 1.09E+08 | 1.09E+08 | + | 0 NA | 3' UTR (N3' UTR (N  | -10545 NR_14904C   | 285638   | Hs.532104NR_14904C | ENSG00000LOC28563E  | -                                 | uncharacterncRNA                  |                           |
| chr7-1521 6.904522  | -0.37527 | 0.880845 | -0.42604 | 0.670079 | 0.981636 | chr7  | 1.52E+08 | 1.52E+08 | + | 0 NA | intron (Nintron (N  | 66344 NM_001371474 |          |                    |                     |                                   |                                   |                           |
| chr8-7011 6.904522  | -0.37527 | 0.880845 | -0.42604 | 0.670079 | 0.981636 | chr8  | 70113116 | 70113938 | + | 0 NA | 3' UTR (N3' UTR (N  | -42275 NM_024504   | 63978    | Hs.736037NM_024504 | ENSG00000PRDM14     | PFM11 PR/SET dcprotein-coding     |                                   |                           |
| chr10-427 6.863383  | -0.37865 | 0.888918 | -0.42597 | 0.670133 | 0.981636 | chr10 | 42788511 | 42788917 | + | 0 NA | intron (Nintron (N  | 5919 NM_01475E     | 9790     | Hs.10848 NM_01475E | ENSG00000CBMS1      | ACC BMS1 BMS1 ribcprotein-coding  |                                   |                           |
| chr17-803 6.863383  | -0.37865 | 0.888918 | -0.42597 | 0.670133 | 0.981636 | chr17 | 80394667 | 80398133 | + | 0 NA | 3' UTR (N3' UTR (N  | -19927 NR_148041   | 284131   | Hs.38967E          | NR_173627           | ENSG00000ENDOV                    | -                                 | endonuclcprotein-coding   |
| chr2-4714 6.863383  | -0.37865 | 0.888918 | -0.42597 | 0.670133 | 0.981636 | chr2  | 47145069 | 47146337 | + | 0 NA | intron (N2a LINE    | 9605 NM_17364E     | 285051   | Hs.53157E          | NR_17364E           | ENSG00000STPG64                   | C2orf61 Csperm-taiprotein-coding  |                           |
| chr4-5261 6.863383  | -0.37865 | 0.888918 | -0.42597 | 0.670133 | 0.981636 | chr4  | 52610176 | 52610883 | + | 0 NA | intron (Nintron (N  | 46010 NM_001134    | 64854    | Hs.7966 NM_02283E  | ENSG00000CSP46      | -                                 | ubiquitin protein-coding          |                           |
| chr7-444 6.863383   | -0.37865 | 0.888918 | -0.42597 | 0.670133 | 0.981636 | chr7  | 44403121 | 44403811 | + | 0 NA | intron (Nintron (N  | -77835 NM_17207E   | 816      | Hs.351887NM_00122C | ENSG00000CAMK2B     | CAM2 CAM2calcium protein-coding   |                                   |                           |
| chr9-3712 6.863383  | -0.37865 | 0.888918 | -0.42597 | 0.670133 | 0.981636 | chr9  | 37126490 | 37127900 | + | 0 NA | intron (Nintron (N  | 6597 NM_00128E     | 84186    | Hs.65470C          | NR_03222E           | ENSG00000ZCHC7                    | AIR1 HSPC zinc finprotein-coding  |                           |
| chr9-1347 6.863383  | -0.37865 | 0.888918 | -0.42597 | 0.670133 | 0.981636 | chr9  | 1.35E+08 | 1.35E+08 | + | 0 NA | intron (NMLT1C LTF  | 51524 NR_039691    | 1.01E+08 | NR_039691          | ENSG00000MIR3689C   | -                                 | microRNA ncRNA                    |                           |
| chr1-180E 6.869903  | 0.322239 | 0.756539 | 0.425939 | 0.670152 | 0.981636 | chr1  | 1806220  | 1806818  | + | 0 NA | exon (NM exon (NM   | -26488 NM_00135E   | 65220    | Hs.65479E          | NR_02301E           | ENSG00000NADK                     | dJ283E3.1NAD kinaseprotein-coding |                           |
| chr19-411 6.91238   | -0.37723 | 0.886851 | -0.42536 | 0.670577 | 0.981636 | chr19 | 41329672 | 41332588 | + | 0 NA | exon (NM exon (NM   | 20653 NM_00134E    | 90324    | Hs.437497NM_02584E | ENSG00000CCDC97     | -                                 | coiled-cpprotein-coding           |                           |
| chr5-361E 6.91238   | -0.37723 | 0.886851 | -0.42536 | 0.670577 | 0.981636 | chr5  | 36162363 | 36162672 | + | 0 NA | intron (N2a LINE    | 10406 NM_032637    | 6502     | Hs.23348 NM_00598E | ENSG00000SKP2       | FBL1 FBX1 S-phase protein-coding  |                                   |                           |
| chr1-1511 11.91311  | 0.289907 | 0.68179  | 0.425215 | 0.67068  | 0.981636 | chr1  | 1.51E+08 | 1.51E+08 | + | 0 NA | intron (NAluY SINE  | 4580 NM_02457E     | 79626    | Hs.43236C          | NR_02457E           | ENSG00000TNFAIP8L                 | TIPE2 TNF alpheprotein-coding     |                           |
| chr22-393 13.32383  | -0.27584 | 0.648853 | -0.42513 | 0.670744 | 0.981636 | chr22 | 39311570 | 39319065 | + | 0 NA | promoter-promoter-  | -10 NR_000027      | 116937   | NR_000027          | ENSG00000SNORD83A   | RNU83A U6small ncRNA              |                                   |                           |
| chr2-2312 6.742485  | 0.380087 | 0.894133 | 0.42509  | 0.670771 | 0.981636 | chr2  | 2.31E+08 | 2.31E+08 | + | 0 NA | intron (NLM4Ea LI   | 8029 NM_00135E     | 80210    | Hs.162411NM_02513E | ENSG00000ARMC9      | ARM JBT5 armadilic protein-coding |                                   |                           |
| chr13-49E 6.692596  | -0.34695 | 0.816388 | -0.42499 | 0.670848 | 0.981636 | chr13 | 49687633 | 49687832 | + | 0 NA | intron (NLTR40A1 L  | 3754 NM_03256E     | 84650    | Hs.43327E          | NR_03256E           | ENSG00000EBPL                     | EBRP EBP like protein-coding      |                           |
| chr18-23E 6.692596  | -0.34695 | 0.816388 | -0.42499 | 0.670848 | 0.981636 | chr18 | 23257665 | 23258222 | + | 0 NA | non-codinon-codir   | 102118 NR_13837E   | 91768    | Hs.11108 NM_13837E | ENSG00000CABLES1    | CABL1 CAE Cdk5 and protein-coding |                                   |                           |
| chr20-28E 7.0.79918 | -0.22817 | 0.536979 | -0.42492 | 0.670895 | 0.981636 | chr20 | 28387973 | 28388196 | + | 0 NA | IntergeniALR Alpha  | 214581 NR_13231E   | 1E+08    | Hs.52935E          | NR_13231E           | ENSG00000FRG1CP                   | -                                 | FSDH regipseudo           |
| chr1-1934 6.896664  | -0.37338 | 0.878793 | -0.42488 | 0.670923 | 0.981636 | chr1  | 19340704 | 19341465 | + | 0 NA | intron (Nintron (N  | 28758 NM_00104C    | 54896    | Hs.64762C          | NR_01776E           | ENSG00000SLC66A1                  | LAAT-1 LAsolute cpprotein-coding  |                           |
| chr1-3754 6.896664  | -0.37338 | 0.878793 | -0.42488 | 0.670923 | 0.981636 | chr1  | 37543930 | 37545401 | + | 0 NA | intron (Nintron (N  | 9628 NM_02470C     | 79753    | Hs.47232 NM_02470C | ENSG00000SNIP1      | PML1 PMRE Smad nuclprotein-coding |                                   |                           |
| chr10-12E 6.896664  | -0.37338 | 0.878793 | -0.42488 | 0.670923 | 0.981636 | chr10 | 1.25E+08 | 1.25E+08 | + | 0 NA | intron (Nintron (N  | 3375 NM_00136E     | 1488     | Hs.50134E          | NR_00132E           | ENSG00000CTBP2                    | -                                 | C-terminprotein-coding    |
| chr11-47E 6.896664  | -0.37338 | 0.878793 | -0.42488 | 0.670923 | 0.981636 | chr11 | 47844403 | 47846103 | + | 0 NA | intron (NAluSq2 SI  | 2947 NR_13463E     | 23279    | Hs.64352E          | NR_01523E           | ENSG00000NUP160                   | NPH519 nucleoporprotein-coding    |                           |
| chr11-12E 6.896664  | -0.37338 | 0.878793 | -0.42488 | 0.670923 | 0.981636 | chr11 | 1.26E+08 | 1.26E+08 | + | 0 NA | intron (NAluSz SIN  | 25239 NR_00313E    | 6734     | Hs.36837E          | NR_00313E           | ENSG00000SRRA                     | DP SRPR SRP recepprotein-coding   |                           |
| chr12-65E 6.896664  | -0.37338 | 0.878793 | -0.42488 | 0.670923 | 0.981636 | chr12 | 65419170 | 65420796 | + | 0 NA | intron (Nintron (N  | 137328 NR_13503E   | 1.05E+08 | Hs.738044NR_13503E | ENSG00000LOC10536E  | -                                 | uncharacterncRNA                  |                           |
| chr12-104 6.896664  | -0.37338 | 0.878793 | -0.42488 | 0.670923 | 0.981636 | chr12 | 1.04E+08 | 1.04E+08 | + | 0 NA | intron (NAluY SINE  | -14495 NM_001261   | 7296     | Hs.65492E          | NR_00333E           | ENSG00000TXNRD1                   | GRIM-12 Thioredo protein-coding   |                           |
| chr14-67E 6.896664  | -0.37338 | 0.878793 | -0.42488 | 0.670923 | 0.981636 | chr14 | 67316983 | 67318533 | + | 0 NA | intron (Nintron (N  | 42046 NM_015994    | 51382    | Hs.27263C          | NR_015994           | ENSG00000ATP6V1D                  | ATP6M VAI ATPase H+protein-coding |                           |
| chr19-56E 6.896664  | -0.37338 | 0.878793 | -0.42488 | 0.670923 | 0.981636 | chr19 | 5699994  | 5702439  | + | 0 NA | intron (NAluJo SIN  | 10921 NM_015414    | 25873    | Hs.40801E          | NR_015414           | ENSG00000RPL36                    | L36 ribosomalprotein-coding       |                           |
| chr19-194 6.896664  | -0.37338 | 0.878793 | -0.42488 | 0.670923 | 0.981636 | chr19 | 19493583 | 19495373 | + | 0 NA | intron (Nintron (N  | 21070 NM_032037    | 83983    | Hs.532711NM_032037 | ENSG00000TSSK6      | CT72 FKSC testis spprotein-coding |                                   |                           |
| chr2-993E 6.896664  | -0.37338 | 0.878793 | -0.42488 | 0.670923 | 0.981636 | chr2  | 99385031 | 99385536 | + | 0 NA | intron (NAluSp SIN  | 47894 NM_015904    | 9669     | Hs.15868E          | NR_015904           | ENSG00000EIF5B                    | IF2 eukaryotiprotein-coding       |                           |
| chr2-132E 6.896664  | -0.37338 | 0.878793 | -0.42488 | 0.670923 | 0.981636 | chr2  | 1.33E+08 | 1.33E+08 | + | 0 NA | intron (NAluSc8 SI  | 72766 NR_13557E    | 1.02E+08 | Hs.680114NR_13557E | ENSG00000NCKAP5-AS- | NCKAP5 arncRNA                    |                                   |                           |
| chr2-2031 6.896664  | -0.37338 | 0.878793 | -0.42488 | 0.670923 | 0.981636 | chr2  | 2.03E+08 | 2.03E+08 | + | 0 NA | intron (NAluSq2 SI  | -40611 NM_17753E   | 57404    | Hs.44606E          | NR_020674           | ENSG00000CYP20A1                  | CYP-M cytochronprotein-coding     |                           |
| chr3-125E 6.896664  | -0.37338 | 0.878793 | -0.42488 | 0.670923 | 0.981636 | chr3  | 1.26E+08 | 1.26E+08 | + | 0 NA | intron (NLM87 LIN   | 17254 NM_02277E    | 114885   | Hs.47744C          | NR_02277E           | ENSG00000OSBPL11                  | ORP-11 Ofosoprotein-coding        |                           |
| chr5-785E 6.896664  | -0.37338 | 0.878793 | -0.42488 | 0.670923 | 0.981636 | chr5  | 7859466  | 7860967  | + | 0 NA | intron (Nintron (N  | 8815 NM_024091     | 79072    | Hs.65316E          | NR_024091           | ENSG00000FASTKD3                  | -                                 | FAST kinaseprotein-coding |
| chr5-723E 6.896664  | -0.37338 | 0.878793 | -0.42488 | 0.670923 | 0.981636 | chr5  | 72361496 | 72361954 | + | 0 NA | 3' UTR (N3' UTR (N  | 41352 NM_001284    | 79810    | Hs.12690E          | NR_024754           | ENSG00000PTCD2                    | -                                 | pentatricprotein-coding   |
| chr6-717E 6.896664  | -0.37338 | 0.878793 | -0.42488 | 0.670923 | 0.981636 | chr6  | 7178235  | 7180666  | + | 0 NA | intron (Nintron (N  | 71489 NM_00100C    | 6239     | Hs.29824E          | NR_00295E           | ENSG00000RREB1                    | FINB HNT ras respprotein-coding   |                           |
| chr7-2357 6.896664  | -0.37338 | 0.878793 | -0.42488 | 0.670923 | 0.981636 | chr7  | 2357319  | 2359720  | + | 0 NA | intron (Nintron (N  | 3692 NM_001037     | 8662     | Hs.371001NM_003751 | ENSG00000EIF3B      | EIF3-ETA eukaryotiprotein-coding  |                                   |                           |
| chr9-134E 6.896664  | -0.37338 | 0.878793 | -0.42488 | 0.670923 | 0.981636 | chr9  | 1.35E+08 | 1.35E+08 | + | 0 NA | intron (Nintron (N  | 17753 NR_039691    | 1.01E+08 | NR_039691          | ENSG00000MIR3689C   | -                                 | microRNA ncRNA                    |                           |
| chrX-109E 6.896664  | -0.37338 | 0.878793 | -0.42488 | 0.670923 | 0.981636 | chrX  | 1.1E+08  | 1.1E+08  | + | 0 NA | intron (N2C LINE    | -33401 NM_01228E   | 23630    | Hs.52275E          | NR_01228E           | ENSG00000KCNVE                    | KCNE1L potassiumprotein-coding    |                           |
| chr1-1801 11.41652  | 0.296547 | 0.698048 | 0.424823 | 0.670966 | 0.981636 | chr1  | 1.8E+08  | 1.8E+08  | + | 0 NA | intron (NMLRb SINE  | 31078 NR_00282E    | 5768     | Hs.71917E          | NR_00282E           | ENSG00000QSOX1                    | Q6 QSCN6 quiescin protein-coding  |                           |
| chr15-73E 11.41652  | 0.296547 | 0.698048 | 0.424823 | 0.670966 | 0.981636 | chr15 | 73287502 | 73288459 | + | 0 NA | intron (Nintron (N  | -11930 NR_16214E   | 1.13E+08 | NR_16214E          | MIR12135            | -                                 | microRNA ncRNA                    |                           |
| chr11-10E 11.36753  | 0.296806 | 0.698706 | 0.424794 | 0.670987 | 0.981636 | chr11 | 1.08E+08 | 1.08E+08 | + | 0 NA | exon (NM exon (NM   | 27475 NM_001351    | 472      | Hs.367437NM_000051 | ENSG00000ATM        | AT1 ATA ATM serirprotein-coding   |                                   |                           |
| chr13-441 11.36753  | 0.296806 | 0.698706 | 0.424794 | 0.670987 | 0.981636 | chr13 | 4432851  | 4434705  | + | 0 NA | 3' UTR (N3' UTR (N  | 3080 NM_006022     | 8848     | Hs.43638E          | NR_006022           | ENSG00000TSC22D1                  | Ptg-2 TGF TSC2 donprotein-coding  |                           |
| chr1-6231 10.08482  | -0.31391 | 0.739056 | -0.42474 | 0.671025 | 0.981636 | chr1  | 6231726  | 6231950  | + | 0 NA | intron (NLM87 LIN   | 4126 NM_01240E     | 23463    | Hs.51568E          | NR_01240E           | ENSG00000ICMT                     | HSTE14 MIsoprenylprotein-coding   |                           |
| chr20-32E 10.08482  | -0.31391 | 0.739056 | -0.42474 | 0.671025 | 0.981636 | chr20 | 32826167 | 32827449 | + | 0 NA | intron (NAluSz SIN  | 6854 NM_01232E     | 22919    | Hs.472437NM_01232E | ENSG00000MAPRE1     | EB1 microtub protein-coding       |                                   |                           |
| chr9-154E 10.08482  | -0.31391 | 0.739056 | -0.42474 | 0.671025 | 0.981636 | chr9  | 15425377 | 15426627 | + | 0 NA | intron (NAluSp SIN  | 3126 NR_16144E     | 6619     | Hs.54629E          | NR_003084           | ENSG00000SNAPC3                   | PTFbeta Ssmall ncprotein-coding   |                           |
| chr14-347 4.154246  | -0.48059 | 1.13171  | -0.42466 | 0.671083 | 0.981636 | chr14 | 44753470 | 44753138 | + | 0 NA | TTS (NM TTS (NM_1   | -37981 NR_02813C   | 1073     | Hs.180141NM_021914 | ENSG00000CFL2       | NEM7 cofilin 2protein-coding      |                                   |                           |
| chr15-22E 4.154246  | -0.48059 | 1.13171  | -0.42466 | 0.671083 | 0.981636 | chr15 | 22548158 |          |   |      |                     |                    |          |                    |                     |                                   |                                   |                           |



|                      |          |          |          |          |          |       |          |          |   |      |                     |                   |                 |               |                      |                   |                |                 |                |                |
|----------------------|----------|----------|----------|----------|----------|-------|----------|----------|---|------|---------------------|-------------------|-----------------|---------------|----------------------|-------------------|----------------|-----------------|----------------|----------------|
| chr7-7417 6. 419492  | -0.38991 | 0.92217  | -0.42281 | 0.672432 | 0.981636 | chr7  | 74178956 | 74180136 | + | 0 NA | intron (AluSx1 SI   | 5190 NM_031992    | 7458 Hs. 520945 | ENSG0000EIF4H | WBSR1 W              | eukaryoti         | protein-coding |                 |                |                |
| chr9-2036 6. 419492  | -0.38991 | 0.92217  | -0.42281 | 0.672432 | 0.981636 | chr9  | 20360882 | 20361195 | + | 0 NA | intron (MIR SINE    | 50200 NR_039684   | 1.01E+08        | NR_039684     | ENSG0000MIR4473      | -                 | microRNA ncRNA |                 |                |                |
| chr15-304 10. 12596  | -0.31172 | 0.737673 | -0.42258 | 0.672605 | 0.981636 | chr15 | 30479693 | 30482323 | + | 0 NA | intron (intron (    | 7025 NR_03665C    | 1E+08           | Hs. 56262     | CNR_036650           | WHAMMP1           | WHDC1P1        | WAS             | prote          | pseudo         |
| chr3-3725 10. 12596  | -0.31172 | 0.737673 | -0.42258 | 0.672605 | 0.981636 | chr3  | 37298771 | 37300369 | + | 0 NA | intron (intron (    | 55375 NR_14902E   | 152048          | Hs. 59617     | ENSG0000LOC15204E    | -                 | uncharact      | ncRNA           |                |                |
| chr20-294 13. 36497  | -0.27421 | 0.649006 | -0.42251 | 0.672651 | 0.981636 | chr20 | 29485095 | 29485504 | + | 0 NA | intron (L1ME4b LI   | 12035 NR_146067   | 1.03E+08        | NR_146067     | FRG1EP               | -                 | FSHD           | regipseudo      |                |                |
| chr11-672 11. 92097  | 0.288628 | 0.683154 | 0.422494 | 0.672665 | 0.981636 | chr11 | 67252925 | 67255851 | + | 0 NA | exon (NM_exon (NM   | -12085 NM_00161E  | 156             | Hs. 83636     | NM_00161E            | ENSG0000CGRK2     | ADRBK1 B       | G               | protein        | protein-coding |
| chr11-185 10. 3272   | 0.320908 | 0.759621 | 0.422458 | 0.672691 | 0.981636 | chr11 | 18505813 | 18506604 | + | 0 NA | intron (AluSx SIN   | 21004 NM_00629E   | 7251            | Hs. 52351     | NM_00629E            | ENSG0000TSG101    | TSG101 VPS     | tumor           | protein-coding |                |
| chr19-355 6. 830101  | -0.38433 | 0.909848 | -0.42242 | 0.672721 | 0.981636 | chr19 | 3535310  | 3536020  | + | 0 NA | 3' UTR (3' UTR (    | -3492 NM_00113E   | 1E+08           | Hs. 66497     | NM_00113E            | ENSG0000CPL9orf71 | -              | chromosom       | protein-coding |                |
| chr12-198 9. 607651  | -0.32165 | 0.761585 | -0.42234 | 0.672777 | 0.981636 | chr12 | 1985198  | 1987906  | + | 0 NA | intron (intron (    | 17905 NM_00131E   | 196513          | Hs. 13093     | NM_15264C            | ENSG0000DCP1B     | DCP1           | decapping       | protein-coding |                |
| chr6-630 9. 607651   | -0.32165 | 0.761585 | -0.42234 | 0.672777 | 0.981636 | chr6  | 1.31E+08 | 1.31E+08 | + | 0 NA | intron (intron (    | 15487 NM_00135E   | 2037            | Hs. 48647     | NM_001431            | ENSG0000EPB41L2   | 4.1-G 4.       | lerythrocy      | protein-coding |                |
| chr15-1307 11. 38324 | 0.29413  | 0.69668  | 0.422189 | 0.672887 | 0.981636 | chr15 | 63744364 | 63749045 | + | 0 NA | intron (L2c LINE    | 87244 NM_03092E   | 8925            | Hs. 21038     | NM_00392E            | ENSG0000HCERC1    | MDFFPMR p      | HECT            | and            | protein-coding |
| chr14-69C 10. 1181   | -0.31039 | 0.73524  | -0.42216 | 0.672907 | 0.981636 | chr14 | 69053284 | 69055009 | + | 0 NA | exon (NM_exon (NM   | 74464 NR_07342E   | 161159          | Hs. 60334     | NR_07342E            | ENSG0000ACTN1-AS1 | C14orf84       | ACTN1           | antncRNA       |                |
| chr14-10C 10. 1181   | -0.31039 | 0.73524  | -0.42216 | 0.672907 | 0.981636 | chr14 | 1E+08    | 1E+08    | + | 0 NA | intron (intron (    | 19485 NM_00418E   | 7453            | Hs. 49759     | NM_00418E            | ENSG0000WARS      | GAMMA-2 F      | tryptoph        | protein-coding |                |
| chr15-82E 10. 1181   | -0.31039 | 0.73524  | -0.42216 | 0.672907 | 0.981636 | chr15 | 82833183 | 82837605 | + | 0 NA | 3' UTR (3' UTR (    | 25766 NM_00108C   | 123720          | Hs. 37736     | NM_00108C            | ENSG0000WHAMM     | WHAMM1 W       | WASP            | homc           | protein-coding |
| chr17-35E 10. 1181   | -0.31039 | 0.73524  | -0.42216 | 0.672907 | 0.981636 | chr17 | 35258299 | 35259008 | + | 0 NA | 5' UTR (5' UTR (    | 15581 NM_14497E   | 162394          | Hs. 58579     | NM_14497E            | ENSG0000SLFN5     | -              | schlafen        | protein-coding |                |
| chr2-302E 10. 1181   | -0.31039 | 0.73524  | -0.42216 | 0.672907 | 0.981636 | chr2  | 30232742 | 30252584 | + | 0 NA | intron (L1ME4a LI   | 11129 NM_03091E   | 81606           | Hs. 56759     | NM_03091E            | ENSG0000LBH       | -              | LBH             | regul          | protein-coding |
| chr7-751E 10. 1181   | -0.31039 | 0.73524  | -0.42216 | 0.672907 | 0.981636 | chr7  | 75188595 | 75190022 | + | 0 NA | intron (intron (    | -17310 NR_00318E  | 654817          | Hs. 64704     | NR_00318E            | ENSG0000CNCFC1C   | SH3PXD1C       | neutrophipseudo |                |                |
| chr1-110E 6. 460632  | -0.38641 | 0.915872 | -0.4219  | 0.673097 | 0.981636 | chr1  | 11057817 | 11058258 | + | 0 NA | intron (AluSx SIN   | 1981 NM_00313E    | 6723            | Hs. 76244     | NM_00313E            | ENSG0000SRM       | PAPT SPD       | spermidir       | protein-coding |                |
| chr1-233E 6. 460632  | -0.38641 | 0.915872 | -0.4219  | 0.673097 | 0.981636 | chr1  | 23325317 | 23325894 | + | 0 NA | intron (intron (    | 18679 NM_00110E   | 10236           | Hs. 37376     | NM_00582E            | ENSG0000HNRNPR    | HNRNPR h       | heteroger       | protein-coding |                |
| chr14-88E 6. 460632  | -0.38641 | 0.915872 | -0.4219  | 0.673097 | 0.981636 | chr14 | 88604473 | 88604974 | + | 0 NA | intron (AluSz SIN   | 10302 NM_20766E   | 79882           | Hs. 68404     | NM_02482E            | ENSG0000CZC3H14   | MRT56 MS       | zinc            | finger         | protein-coding |
| chr17-39E 6. 460632  | -0.38641 | 0.915872 | -0.4219  | 0.673097 | 0.981636 | chr17 | 39997036 | 39997621 | + | 0 NA | exon (NM_exon (NM   | 16523 NM_00280E   | 5709            | Hs. 12970     | NM_00280E            | ENSG0000PCSDM3    | P58 RPN3       | proteasom       | protein-coding |                |
| chr22-20E 6. 460632  | -0.38641 | 0.915872 | -0.4219  | 0.673097 | 0.981636 | chr22 | 20562092 | 20563684 | + | 0 NA | intron (AluJb SIN   | 54841 NM_00129E   | 51586           | Hs. 51742     | NM_01588E            | ENSG0000MED15     | ARC105 C       | mediator        | protein-coding |                |
| chr4-10E 6. 460632   | -0.38641 | 0.915872 | -0.4219  | 0.673097 | 0.981636 | chr4  | 1.05E+08 | 1.05E+08 | + | 0 NA | exon (NM_exon (NM   | 88843 NM_00112E   | 54790           | Hs. 36763     | NM_01762E            | ENSG0000TET2      | KIAA1546       | tet             | methy          | protein-coding |
| chr4-168E 6. 460632  | -0.38641 | 0.915872 | -0.4219  | 0.673097 | 0.981636 | chr4  | 1.68E+08 | 1.68E+08 | + | 0 NA | intron (intron (    | 63233 NM_0017631  | 55601           | Hs. 59173     | NM_0017631           | ENSG0000DDX60     | -              | DEXd/H          | b              | protein-coding |
| chr5-146E 6. 460632  | -0.38641 | 0.915872 | -0.4219  | 0.673097 | 0.981636 | chr5  | 14679192 | 14679391 | + | 0 NA | intron (intron (    | 14573 NM_13834E   | 90268           | Hs. 40633     | NM_13834E            | ENSG0000OTULIN    | AIPDS FAM      | OTU             | deub           | protein-coding |
| chr7-878E 6. 460632  | -0.38641 | 0.915872 | -0.4219  | 0.673097 | 0.981636 | chr7  | 87871169 | 87871761 | + | 0 NA | intron (MLT1F2 LI   | 4895 NM_01884E    | 55972           | Hs. 20841     | NM_01884E            | ENSG0000SLC25A40  | MCFP           | solute          | c              | protein-coding |
| chr8-767E 6. 460632  | -0.38641 | 0.915872 | -0.4219  | 0.673097 | 0.981636 | chr8  | 76707798 | 76708162 | + | 0 NA | intron (intron (    | -24925 NR_02436E  | 1E+08           | Hs. 59642     | CNR_02436E           | ENSG0000ZFHX4-AS1 | -              | ZFHX4           | antncRNA       |                |
| chr10-57E 6. 888806  | -0.37152 | 0.880599 | -0.4219  | 0.673101 | 0.981636 | chr10 | 5771816  | 5773076  | + | 0 NA | intron (intron (    | 40988 NM_00149A   | 2665            | Hs. 29905     | NM_00149A            | ENSG0000GDI2      | HEL-S-46       | GDP             | disc           | protein-coding |
| chr10-96E 6. 888806  | -0.37152 | 0.880599 | -0.4219  | 0.673101 | 0.981636 | chr10 | 96539644 | 96540533 | + | 0 NA | intron (NL3 LINE C  | -26162 NM_01246E  | 7093            | Hs. 15429     | NM_01246E            | ENSG0000TLL2      | -              | tolloid         | l              | protein-coding |
| chr12-62E 6. 888806  | -0.37152 | 0.880599 | -0.4219  | 0.673101 | 0.981636 | chr12 | 62510615 | 62510814 | + | 0 NA | intron (L1MB2 LIN   | 43888 NM_01502E   | 23041           | Hs. 38937     | NM_01502E            | ENSG0000MON2      | -              | MON2            | homc           | protein-coding |
| chr14-10C 6. 888806  | -0.37152 | 0.880599 | -0.4219  | 0.673101 | 0.981636 | chr14 | 1.01E+08 | 1.01E+08 | + | 0 NA | promoter-promoter-  | -310 NR_00321C    | 767595          | NR_00321C     | ENSG0000SNORD114-14q | (I1-17            | small          | nuc             | snoRNA         |                |
| chr16-11E 6. 888806  | -0.37152 | 0.880599 | -0.4219  | 0.673101 | 0.981636 | chr16 | 11893879 | 11895483 | + | 0 NA | intron (AluJr SIN   | 21275 NM_00209A   | 2935            | Hs. 52878     | NM_00209A            | ENSG0000GSP17     | 55169.         | 2 E             | G              | protein-coding |
| chr17-76E 6. 888806  | -0.37152 | 0.880599 | -0.4219  | 0.673101 | 0.981636 | chr17 | 76712960 | 76714552 | + | 0 NA | 3' UTR (3' UTR (    | -2791 NM_00100E   | 439921          | Hs. 52788     | NM_00100E            | ENSG0000MXR47     | -              | matrix          | re             | protein-coding |
| chr18-51E 6. 888806  | -0.37152 | 0.880599 | -0.4219  | 0.673101 | 0.981636 | chr18 | 51058596 | 51059372 | + | 0 NA | intron (intron (    | 28771 NM_00535E   | 4089            | Hs. 75862     | NM_00535E            | ENSG0000CMAD4     | DPC4 JIP       | SMAD            | fami           | protein-coding |
| chr2-111E 6. 888806  | -0.37152 | 0.880599 | -0.4219  | 0.673101 | 0.981636 | chr2  | 11188647 | 11190039 | + | 0 NA | intron (intron (    | 33876 NM_00128E   | 130814          | Hs. 27441     | NM_152391            | ENSG0000SLC66A3   | C2orf22 F      | solute          | c              | protein-coding |
| chr2-876E 6. 888806  | -0.37152 | 0.880599 | -0.4219  | 0.673101 | 0.981636 | chr2  | 87609597 | 87612152 | + | 0 NA | Intergeni Intergeni | -18881 NR_039634  | 1.01E+08        | NR_039634     | ENSG0000MIR4435-1mir | -                 | 4435-1         | microRNA        | ncRNA          |                |
| chr22-28E 6. 888806  | -0.37152 | 0.880599 | -0.4219  | 0.673101 | 0.981636 | chr22 | 28751896 | 28753558 | + | 0 NA | intron (AluY SINE   | 10046 NM_00131E   | 150274          | Hs. 63278     | NM_17200E            | ENSG0000CHSCB     | DNAJC20 F      | HscB            | mitc           | protein-coding |
| chr3-256E 6. 888806  | -0.37152 | 0.880599 | -0.4219  | 0.673101 | 0.981636 | chr3  | 25613567 | 25616161 | + | 0 NA | intron (intron (    | 49508 NM_00106E   | 7155            | Hs. 47573     | NM_00106E            | ENSG0000TOP2B     | TOP1IB c       | tDNA            | topoi          | protein-coding |
| chr3-172E 6. 888806  | -0.37152 | 0.880599 | -0.4219  | 0.673101 | 0.981636 | chr3  | 1.72E+08 | 1.72E+08 | + | 0 NA | intron (intron (    | 90403 NM_00412E   | 2693            | Hs. 13021     | NM_00412E            | ENSG0000GHSR      | GHPD           | growth          | h              | protein-coding |
| chr3-179A 6. 888806  | -0.37152 | 0.880599 | -0.4219  | 0.673101 | 0.981636 | chr3  | 1.79E+08 | 1.79E+08 | + | 0 NA | intron (AluJo SIN   | 39169 NM_02162E   | 59345           | Hs. 17303     | CNR_02162E           | ENSG0000GNB4      | CMTD1F         | G               | protein        | protein-coding |
| chr4-847E 6. 888806  | -0.37152 | 0.880599 | -0.4219  | 0.673101 | 0.981636 | chr4  | 84794326 | 84795197 | + | 0 NA | intron (intron (    | -170855 NR_15277A | 404201          | Hs. 46730     | NM_20585E            | ENSG0000WDFY3-AS2 | C4orf12 F      | WDYF3           | antncRNA       |                |
| chr5-323E 6. 888806  | -0.37152 | 0.880599 | -0.4219  | 0.673101 | 0.981636 | chr5  | 32356153 | 32356879 | + | 0 NA | intron (AluSx SIN   | 37059 NR_03030E   | 693164          | NR_03030E     | ENSG0000MIR579       | MIRN579           | microRNA       | ncRNA           |                |                |
| chr5-140E 6. 888806  | -0.37152 | 0.880599 | -0.4219  | 0.673101 | 0.981636 | chr5  | 1.4E+08  | 1.4E+08  | + | 0 NA | intron (AluSx1 SI   | 24919 NM_00262E   | 5201            | Hs. 48356     | NM_00262E            | ENSG0000PFDDN1    | PDF PDF1       | prefoldir       | protein-coding |                |
| chr6-322A 6. 888806  | -0.37152 | 0.880599 | -0.4219  | 0.673101 | 0.981636 | chr6  | 3224970  | 32252787 | + | 0 NA | exon (NM_exon (NM   | 2275 NM_17801E    | 347733          | Hs. 30070     | NM_17801E            | ENSG0000TUBB2B    | CDCBMT P       | tubulin         | t              | protein-coding |
| chr6-145E 6. 888806  | -0.37152 | 0.880599 | -0.4219  | 0.673101 | 0.981636 | chr6  | 1.46E+08 | 1.46E+08 | + | 0 NA | intron (L1ME3E LI   | 44133 NM_17308E   | 257218          | Hs. 72329     | NM_17308E            | ENSG0000SHPRH     | Ba54515.       | 2.SNF2          | hist           | protein-coding |
| chr7-448E 6. 888806  | -0.37152 | 0.880599 | -0.4219  | 0.673101 | 0.981636 | chr7  | 44832425 | 44836671 | + | 0 NA | exon (NM_exon (NM   | 13578 NM_20143E   | 94239           | Hs. 48818     | NM_01241E            | ENSG0000H2APV     | H2A.2-1 H2A    | histc           | protein-coding |                |
| chr7-873E 6. 888806  | -0.37152 | 0.880599 | -0.4219  | 0.673101 | 0.981636 | chr7  | 87392925 | 87394892 | + | 0 NA | intron (Tigger2 E   | 48244 NM_00114E   | 54677           | Hs. 12503     | NM_02115E</          |                   |                |                 |                |                |

|                    |          |          |          |          |          |       |          |          |   |      |                    |                   |                              |                     |                    |                                 |
|--------------------|----------|----------|----------|----------|----------|-------|----------|----------|---|------|--------------------|-------------------|------------------------------|---------------------|--------------------|---------------------------------|
| chr17-296 6.717061 | 0.373869 | 0.889409 | 0.420357 | 0.674225 | 0.981636 | chr17 | 29674606 | 29676479 | + | 0 NA | intron (NAIuJr SIN | -54119 NM_032854  | 84940 Hs. 14304cNM_032854    | ENSG00000COR06      | -                  | coronin f protein-coding        |
| chr19-374 6.717061 | 0.373869 | 0.889409 | 0.420357 | 0.674225 | 0.981636 | chr19 | 37456613 | 37461023 | + | 0 NA | intron (NLIMCa LIN | 8626 NM_00133C    | 148266 Hs. 51184fNM_152484   | ENSG00000ZNF569     | ZAP1 ZNF           | zinc finger protein-coding      |
| chr2-737 6.717061  | 0.373869 | 0.889409 | 0.420357 | 0.674225 | 0.981636 | chr2  | 73751476 | 73752871 | + | 0 NA | IntergeniPABL_B-ir | -14767 NM_00133C  | 51002 Hs. 157401NM_01605f    | ENSG00000TPRKB      | CGI-121 CTP53Rk    | biprotein-coding                |
| chr2-2304 6.717061 | 0.373869 | 0.889409 | 0.420357 | 0.674225 | 0.981636 | chr2  | 2.3E+08  | 2.3E+08  | + | 0 NA | intron (NLIMa8 LIN | 40486 NM_00120E   | 6672 Hs. 36905eNM_00311f     | ENSG00000SP100      | lysp100b           | SP100 nucleotide protein-coding |
| chr21-336 6.717061 | 0.373869 | 0.889409 | 0.420357 | 0.674225 | 0.981636 | chr21 | 33616150 | 33618074 | + | 0 NA | intron (NALuSz SIN | 24629 NM_00133E   | 9946 Hs. 352671NM_14531f     | ENSG00000CRYZL1     | 4P11 Q0H           | crystallin protein-coding       |
| chr22-238 6.717061 | 0.373869 | 0.889409 | 0.420357 | 0.674225 | 0.981636 | chr22 | 23820244 | 23820964 | + | 0 NA | intron (NLIMB3 LIN | 18402 NM_00113E   | 91319 Hs. 59367eNM_19844f    | ENSG00000CERL3      | C22orf14 derlin 3  | protein-coding                  |
| chr22-265 6.717061 | 0.373869 | 0.889409 | 0.420357 | 0.674225 | 0.981636 | chr22 | 26524771 | 26526214 | + | 0 NA | 3' UTR (N3' UTR (N | 12960 NR_144522f  | 1.01E+08 Hs. 405877NR_144529 | LOC100507-          |                    | uncharacterized                 |
| chr22-406 6.717061 | 0.373869 | 0.889409 | 0.420357 | 0.674225 | 0.981636 | chr22 | 40551017 | 40552285 | + | 0 NA | intron (NALuSx SIN | -17824 NM_00131E  | 57591 Hs. 65468eNM_02083f    | ENSG00000MRFTA      | BSAC MAL           | myocardin protein-coding        |
| chr3-968 6.717061  | 0.373869 | 0.889409 | 0.420357 | 0.674225 | 0.981636 | chr3  | 9680364  | 9681042  | + | 0 NA | intron (NALuY SINE | -23130 NM_15363E  | 151835 Hs. 12133eNM_15363f   | ENSG00000CPNE9      | -                  | copine f2 protein-coding        |
| chr4-2257 6.717061 | 0.373869 | 0.889409 | 0.420357 | 0.674225 | 0.981636 | chr4  | 2257239  | 2258174  | + | 0 NA | intron (Nintron (N | 4403 NM_006454    | 10608 Hs. 65502cNM_006454    | ENSG00000MXD4       | MAD4 MST1MXA       | dimer protein-coding            |
| chr6-3127 6.717061 | 0.373869 | 0.889409 | 0.420357 | 0.674225 | 0.981636 | chr6  | 3127845  | 3130221  | + | 0 NA | intron (Nintron (N | 10322 NM_00433E   | 670 Hs. 10136 NM_00433f      | ENSG00000BPDL       | BPH-RP MCBiphenyl  | protein-coding                  |
| chr6-4293 6.717061 | 0.373869 | 0.889409 | 0.420357 | 0.674225 | 0.981636 | chr6  | 42934536 | 42936173 | + | 0 NA | intron (Nintron (N | 5874 NM_00658E    | 10695 Hs. 41409eNM_00658f    | ENSG00000CNPY3      | CAG4A EIF          | canopy FC protein-coding        |
| chr7-2207 6.717061 | 0.373869 | 0.889409 | 0.420357 | 0.674225 | 0.981636 | chr7  | 2207396  | 2207861  | + | 0 NA | intron (NMER2 BL L | 25317 NM_001304   | 8379 Hs. 65483eNM_00355f     | ENSG00000MADL1L     | MAD1 PIGE          | mitotic e protein-coding        |
| chr10-920 6.701345 | 0.378524 | 0.900842 | 0.42019  | 0.674347 | 0.981636 | chr10 | 92013870 | 92014398 | + | 0 NA | intron (Nintron (N | 90364 NM_00397E   | 9044 Hs. 50052eNM_00397f     | ENSG00000BTAF1      | MOT1 TAF-B TFIID   | l protein-coding                |
| chr17-667 6.701345 | 0.378524 | 0.900842 | 0.42019  | 0.674347 | 0.981636 | chr17 | 66741946 | 66743051 | + | 0 NA | intron (Nintron (N | -44574 NR_030364  | 693219 NR_030364             | ENSG00000MIR634     | MIRN634 l          | microRNA ncRNA                  |
| chr2-2067 6.701345 | 0.378524 | 0.900842 | 0.42019  | 0.674347 | 0.981636 | chr2  | 2.07E+08 | 2.07E+08 | + | 0 NA | exon (NM exon (NM  | 1719 NM_00113E    | 22868 Hs. 5930 NM_01492f     | ENSG00000FASTKD2    | KIAA0971           | FAST kinase protein-coding      |
| chr5-1506 6.701345 | 0.378524 | 0.900842 | 0.42019  | 0.674347 | 0.981636 | chr5  | 1.51E+08 | 1.51E+08 | + | 0 NA | intron (NLIME1 LIN | 9277 NM_00113E    | 51164 Hs. 675564NM_01622f    | ENSG00000CDCTNA     | DYN4 P62           | dyactin protein-coding          |
| chr1-1547 6.701345 | 0.378524 | 0.900842 | 0.42019  | 0.674347 | 0.981636 | chr1  | 1.55E+08 | 1.55E+08 | + | 0 NA | exon (NM exon (NM  | 4854 NM_00119E    | 103 Hs. 12341 NM_00111f      | ENSG00000ADAR       | ADAR1 AGC          | adenosine protein-coding        |
| chr19-271 11.42438 | 0.295174 | 0.703255 | 0.419726 | 0.674686 | 0.981636 | chr19 | 27134786 | 27136295 | + | 0 NA | IntergeniALR/Alph  | -657891 NR_14673E | 1.02E+08 Hs. 567934NR_11068f | ENSG00000LOC101927- |                    | uncharacterized                 |
| chr2-201 6.163617  | 0.396364 | 0.944845 | 0.419501 | 0.67485  | 0.981636 | chr2  | 2.01E+08 | 2.01E+08 | + | 0 NA | intron (NLIM1 LINE | 16424 NR_11062C   | 130540 Hs. 107944NM_13916f   | ENSG00000FLACC1     | ALS2CR12           | flagellin protein-coding        |
| chr7-1587 6.163617 | 0.396364 | 0.944845 | 0.419501 | 0.67485  | 0.981636 | chr7  | 1.59E+08 | 1.59E+08 | + | 0 NA | intron (NLIMB3 LIN | 37835 NM_02072E   | 57488 Hs. 49079eNM_02072f    | ENSG00000ESY2T      | CHR2SYT E          | extended protein-coding         |
| chr13-984 5.649464 | 0.409321 | 0.975842 | 0.419454 | 0.674884 | 0.981636 | chr13 | 98438378 | 98439426 | + | 0 NA | intron (Nintron (N | 83223 NM_00357E   | 8428 Hs. 508514NM_00357f     | ENSG00000STK24      | HEL-S-95 serine/tl | protein-coding                  |
| chr15-443 5.649464 | 0.409321 | 0.975842 | 0.419454 | 0.674884 | 0.981636 | chr15 | 44390805 | 44391143 | + | 0 NA | intron (NMLTIA1 LI | -36653 NM_01639E  | 51496 Hs. 497967NM_01639f    | ENSG00000CTDSP12    | HSPC058 I          | CTD small protein-coding        |
| chr19-365 5.649464 | 0.409321 | 0.975842 | 0.419454 | 0.674884 | 0.981636 | chr19 | 36808646 | 36809168 | + | 0 NA | intron (NMER94B DN | 11341 NR_04002E   | 284408 Hs. 57001cNR_04002f   | ENSG00000ZNF790-A   | -                  | ZNF790 arncRNA                  |
| chr1-1846 4.17967  | -0.46881 | 1.117666 | -0.41945 | 0.674885 | 0.981636 | chr1  | 1846357  | 1847140  | + | 0 NA | intron (NALuJr4 SI | 44339 NM_002074   | 2782 Hs. 43042eNM_002074     | ENSG00000GNB1       | MRD42              | G proteir protein-coding        |
| chr17-826 4.17967  | -0.46881 | 1.117666 | -0.41945 | 0.674885 | 0.981636 | chr17 | 82609041 | 82610801 | + | 0 NA | IntergeniLIM4 LINE | 38523 NM_01961f   | 56270 Hs. 132161NM_01961f    | ENSG00000WDR45B     | NEDSBAS W          | WD repeat protein-coding        |
| chr2-2027 4.17967  | -0.46881 | 1.117666 | -0.41945 | 0.674885 | 0.981636 | chr2  | 20277307 | 20278031 | + | 0 NA | intron (Nintron (N | 49717 NM_00128E   | 23369 Hs. 46728eNM_01531f    | ENSG00000PUM2       | PUMH2 PUM          | pumilio f protein-coding        |
| chr2-1905 4.17967  | -0.46881 | 1.117666 | -0.41945 | 0.674885 | 0.981636 | chr2  | 1.9E+08  | 1.9E+08  | + | 0 NA | intron (NLIME3A LI | 54611 NM_00104E   | 84281 Hs. 389311NM_03232f    | ENSG00000C2orf88    | smAKAP             | chromosom protein-coding        |
| chr3-3698 4.17967  | -0.46881 | 1.117666 | -0.41945 | 0.674885 | 0.981636 | chr3  | 36988778 | 36989751 | + | 0 NA | 3' UTR (N3' UTR (N | 3867 NM_01480E    | 9852 Hs. 28020 NM_01480f     | ENSG00000EPM2A1P    | -                  | EPM2A intr protein-coding       |
| chr3-4815 4.17967  | -0.46881 | 1.117666 | -0.41945 | 0.674885 | 0.981636 | chr3  | 48159405 | 48160220 | + | 0 NA | intron (NL2a LINE  | 28605 NM_00178E   | 993 Hs. 43770fNM_00178f      | ENSG00000CDC25A     | -                  | CDC25A2 cell div protein-coding |
| chr4-1851 4.17967  | -0.46881 | 1.117666 | -0.41945 | 0.674885 | 0.981636 | chr4  | 1.85E+08 | 1.85E+08 | + | 0 NA | intron (NALuSc SIN | 15810 NM_00129E   | 57587 Hs. 535734NM_02082f    | ENSG00000CFAP97     | KIAA1430 cilia anc | protein-coding                  |
| chr5-4316 4.17967  | -0.46881 | 1.117666 | -0.41945 | 0.674885 | 0.981636 | chr5  | 43169565 | 43171168 | + | 0 NA | intron (Nintron (N | -21859 NM_15336E  | 167359 Hs. 25845 NM_15336f   | ENSG00000NIM1K      | NIM1               | NIM1 seriprotein-coding         |
| chr5-8112 4.17967  | -0.46881 | 1.117666 | -0.41945 | 0.674885 | 0.981636 | chr5  | 81129803 | 81130583 | + | 0 NA | intron (Nintron (N | -103127 NM_00182E | 1160 Hs. 80691 NM_00182f     | ENSG00000CKMT2      | SMTCCK             | creatine protein-coding         |
| chr5-1128 4.17967  | -0.46881 | 1.117666 | -0.41945 | 0.674885 | 0.981636 | chr5  | 1.13E+08 | 1.13E+08 | + | 0 NA | intron (NALuJb SIN | 28505 NM_00313E   | 6728 Hs. 637001NM_00313f     | ENSG00000CRP19      | -                  | signal re protein-coding        |
| chr6-3541 4.17967  | -0.46881 | 1.117666 | -0.41945 | 0.674885 | 0.981636 | chr6  | 35410499 | 35410999 | + | 0 NA | intron (Nintron (N | -41612 NM_02192E  | 2178 Hs. 30200eNM_02192f     | ENSG00000FANCE      | FACE FAE           | FA comp protein-coding          |
| chr7-3251 4.17967  | -0.46881 | 1.117666 | -0.41945 | 0.674885 | 0.981636 | chr7  | 32510226 | 32511930 | + | 0 NA | intron (Nintron (N | 15488 NM_01506E   | 23080 Hs. 12800eNM_01506f    | ENSG00000AVL9       | KIAA0241 AVL9      | cell protein-coding             |
| chr7-5601 4.17967  | -0.46881 | 1.117666 | -0.41945 | 0.674885 | 0.981636 | chr7  | 56011918 | 56013376 | + | 0 NA | intron (NALuSx SIN | 38797 NM_00137C   | 5723 Hs. 51265eNM_00457f     | ENSG00000PSPH       | PSP PSPH           | phospho e protein-coding        |
| chr8-123C 4.17967  | -0.46881 | 1.117666 | -0.41945 | 0.674885 | 0.981636 | chr8  | 1.23E+08 | 1.23E+08 | + | 0 NA | intron (NMER2 BL L | 9803 NM_00136E    | 93594 Hs. 49271fNM_14564f    | ENSG00000TBC1D31    | Gm85 WDRc          | TBC1 dom e protein-coding       |
| chr9-9207 4.17967  | -0.46881 | 1.117666 | -0.41945 | 0.674885 | 0.981636 | chr9  | 92071151 | 92072356 | + | 0 NA | intron (NLTR7C LTF | 43660 NM_00641E   | 10558 Hs. 90458 NM_00641f    | ENSG00000SPTLC1     | HSA1 HSA           | serine e protein-coding         |
| chr11-106 6.929946 | -0.36828 | 0.878355 | -0.41928 | 0.67501  | 0.981636 | chr11 | 1.06E+08 | 1.06E+08 | + | 0 NA | IntergeniMER11B LI | 18872 NM_032424   | 84437 Hs. 26678eNM_032424    | ENSG00000MSANTD4    | KIAA1826 Myb/SANT  | protein-coding                  |
| chr12-11 6.929946  | -0.36828 | 0.878355 | -0.41928 | 0.67501  | 0.981636 | chr12 | 1.12E+08 | 1.12E+08 | + | 0 NA | intron (Nintron (N | 73456 NM_080601   | 5781 Hs. 50685eNM_002834     | ENSG00000PTPN11     | BPTP3 CF           | protein protein-coding          |
| chr13-77 6.929946  | -0.36828 | 0.878355 | -0.41928 | 0.67501  | 0.981636 | chr13 | 77059052 | 77052190 | + | 0 NA | intron (Nintron (N | -23943 NR_04671f  | 1.01E+08 Hs. 56928eNR_04671f | ENSG00000MYCBP2-AS- | MYCBP2             | arncRNA                         |
| chr14-35 6.929946  | -0.36828 | 0.878355 | -0.41928 | 0.67501  | 0.981636 | chr14 | 35093028 | 35094371 | + | 0 NA | intron (NALuY SINE | 12618 NR_11041E   | 1.02E+08 Hs. 61713eNR_11041E | ENSG00000LOC101927- |                    | uncharacterized                 |
| chr14-911 6.929946 | -0.36828 | 0.878355 | -0.41928 | 0.67501  | 0.981636 | chr14 | 91124326 | 91125666 | + | 0 NA | intron (NLTR10C LI | -1430 NR_00370E   | 1E+08 Hs. 693444NR_00370f    | ENSG00000SNORA11B   | -                  | small nucsnRNA                  |
| chr16-57 6.929946  | -0.36828 | 0.878355 | -0.41928 | 0.67501  | 0.981636 | chr16 | 57624952 | 57767099 | + | 0 NA | intron (Nintron (N | 6327 NR_10683C    | NR_10683C                    | ENSG00000MIR6772    | hsa-mir-6          | miRNA ncRNA                     |
| chr19-406 6.929946 | -0.36828 | 0.878355 | -0.41928 | 0.67501  | 0.981636 | chr19 | 40628576 | 40631458 | + | 0 NA | TTS (NM_TTS (NM_C  | 28648 NM_00104E   | 8425 Hs. 46676eNM_00357f     | ENSG00000LTBP4      | ARL1C LI           | latent t protein-coding         |
| chr4-713 6.929946  | -0.36828 | 0.878355 | -0.41928 | 0.67501  | 0.981636 | chr4  | 71356338 | 71359244 | + | 0 NA | intron (Nintron (N | 18738 NM_00375E   | 8671 Hs. 5462 NM_00375f      | ENSG00000SLC44A     | HNBC1 KNE          | solute e protein-coding         |
| chr5-1364 6.929946 | -0.36828 | 0.878355 | -0.41928 | 0.67501  | 0.981636 | chr5  | 1.38E+08 | 1.38E+08 | + | 0 NA | 3' UTR (N3' UTR (N | -2617 NR_07344E   | 51308 Hs. 41609cNM_01660f    | ENSG00000CREEP2     | C5orf19 S          | receptor protein-coding         |
| chr6-1366 6.929946 | -0.36828 | 0.878355 | -0.41928 | 0.67501  | 0.981636 | chr6  | 1.37E+08 | 1.37E+08 | + | 0 NA | intron (Nintron (N | 21708 NR_12585E   | 1.02E+08 Hs. 66651eNR_12585E | LOC10192E-          |                    | uncharacterized                 |
| chr9-9426 6.929946 | -0.36828 | 0.878355 | -0.41928 | 0.67501  | 0.981636 | chr9  | 94280028 | 94280978 | + | 0 NA | intron (Nintron (N | -21192 NR_16077E  | 158257 Hs.                   |                     |                    |                                 |



|                    |          |          |          |          |          |       |          |          |   |      |                      |                  |                               |                    |                                     |
|--------------------|----------|----------|----------|----------|----------|-------|----------|----------|---|------|----------------------|------------------|-------------------------------|--------------------|-------------------------------------|
| chr3-4566 6.880949 | -0.36966 | 0.886364 | -0.41706 | 0.676637 | 0.981636 | chr3  | 45665845 | 45666500 | + | 0 NA | intron (Nintron (N   | 22710 NR_033947  | 644714 Hs. 712889NR_033947    | LIMD1-AS1          | LIMD1 antncRNA                      |
| chr4-5271 6.880949 | -0.36966 | 0.886364 | -0.41706 | 0.676637 | 0.981636 | chr4  | 52713793 | 52714228 | + | 0 NA | TTS (NR_C TTS (NR_C  | 761 NR_003016    | 677810 Hs. 635034NR_003016    | ENSG000003SNORA26  | HBI-6 small nucsnoRNA               |
| chr4-5691 6.880949 | -0.36966 | 0.886364 | -0.41706 | 0.676637 | 0.981636 | chr4  | 56917798 | 56918238 | + | 0 NA | intron (NAluY SINE   | 9105 NM_001193   | 5978 Hs. 307838NM_005612      | ENSG00000CREST     | DFNA27 GIRE1 silerprotein-coding    |
| chr6-1191 6.880949 | -0.36966 | 0.886364 | -0.41706 | 0.676637 | 0.981636 | chr6  | 1.19E+08 | 1.19E+08 | + | 0 NA | intron (Nintron (N   | -44551 NM_001288 | 79632 Hs. 443789NM_024581     | ENSG00000FAM184A   | C6orf60 family wiprotein-coding     |
| chr7-1356 6.880949 | -0.36966 | 0.886364 | -0.41706 | 0.676637 | 0.981636 | chr7  | 1.36E+08 | 1.36E+08 | + | 0 NA | intron (NAluJr SIN   | -29531 NM_00113C | 647087 Hs. 200022NM_00113C    | ENSG00000STMP1     | C7orf73 short trprotein-coding      |
| chr9-5735 6.880949 | -0.36966 | 0.886364 | -0.41706 | 0.676637 | 0.981636 | chr9  | 5739916  | 5740790  | + | 0 NA | intron (NHERVL-int   | 92764 NM_02489E  | 79956 Hs. 591078NM_02489E     | ENSG00000CERMP1    | FXNA KIAA endoplasm protein-coding  |
| chr9-2187 6.880949 | -0.36966 | 0.886364 | -0.41706 | 0.676637 | 0.981636 | chr9  | 21858005 | 21859592 | + | 0 NA | intron (Nintron (N   | 56162 NM_002451  | 4507 Hs. 193268NM_002451      | ENSG00000MTAP      | BGDMF DM5F methylthioprotein-coding |
| chr1-1035 6.880949 | -0.36966 | 0.886364 | -0.41706 | 0.676637 | 0.981636 | chr1  | 1.04E+08 | 1.04E+08 | + | 0 NA | intron (NAluSp SIN   | 12296 NM_01761E  | 55599 Hs. 632422NM_01761E     | ENSG00000CRNPC3    | IGHDF5 RBM RNA bindiprotein-coding  |
| chr1-4338 11.89555 | 0.285008 | 0.683406 | 0.41704  | 0.676649 | 0.981636 | chr1  | 43383984 | 43387962 | + | 0 NA | intron (Nintron (N   | 3827 NM_001001   | 112950 Hs. 301756NM_052877    | ENSG00000MED8      | ARC32 mediator protein-coding       |
| chr15-824 11.89555 | 0.285008 | 0.683406 | 0.41704  | 0.676649 | 0.981636 | chr15 | 82459766 | 82461377 | + | 0 NA | IntergeniMamGypLTF   | -15702 NR_12037E | 1.03E+08 Hs. 694638NR_12037E  | LOC102724          | uncharactcRNA                       |
| chr4-5625 5.723885 | 0.41539  | 0.996268 | 0.416946 | 0.676718 | 0.981636 | chr4  | 56259943 | 5630362  | + | 0 NA | intron (Nintron (N   | 78407 NR_147127  | 132884 Hs. 87306 NM_147127    | ENSG00000CEVC2     | LBN WAD EvC cilieprotein-coding     |
| chr7-7432 5.723885 | 0.41539  | 0.996268 | 0.416946 | 0.676718 | 0.981636 | chr7  | 74323687 | 74324137 | + | 0 NA | intron (NTigger3 I   | 34437 NM_00338E  | 7461 Hs. 647018NM_00338E      | ENSG00000CLIP2     | CLIP CLIFCAP-Gly cprotein-coding    |
| chr1-1552 12.39213 | 0.279101 | 0.669398 | 0.416944 | 0.67672  | 0.981636 | chr1  | 1.56E+08 | 1.56E+08 | + | 0 NA | intron (NAluYa5 SI   | 2908 NR_00300E   | 677771 Hs. 678902NR_00300E    | ENSG00000SCARNA4   | ACA26 small Ca;ncRNA                |
| chr10-105 12.39213 | 0.279101 | 0.669398 | 0.416944 | 0.67672  | 0.981636 | chr10 | 1.03E+08 | 1.03E+08 | + | 0 NA | TTS (NM_C TTS (NM_C  | 63298 NM_001351  | 22978 Hs. 97439 NM_01222E     | ENSG00000CNT5C2    | GMP NT5B 5' nuclecprotein-coding    |
| chr4-2667 10.15139 | -0.30692 | 0.73676  | -0.41658 | 0.676987 | 0.981636 | chr4  | 26676829 | 26680833 | + | 0 NA | intron (NPRIMA4_L1   | 94747 NM_018317  | 55296 Hs. 479403NM_018317     | ENSG00000TBC1D19   | TBC1 dom;protein-coding             |
| chr9-1346 10.15139 | -0.30692 | 0.73676  | -0.41658 | 0.676987 | 0.981636 | chr9  | 1.35E+08 | 1.35E+08 | + | 0 NA | intron (Nintron (N   | -48562 NR_13804E | 414316 Hs. 571561NR_13804E    | ENSG00000COL5A1-AS | C9orf104 COL5A1 arncRNA             |
| chr16-900 11.33424 | 0.29433  | 0.706818 | 0.416416 | 0.677106 | 0.981636 | chr16 | 90031239 | 90032244 | + | 0 NA | intron (NMIRb SINE   | -1840 NR_122031  | 750 Hs. 633032NM_001214       | ENSG00000GAS8-AS1  | A16orf3 GAS8 antncRNA               |
| chr1-1786 6.724919 | 0.37163  | 0.892453 | 0.416414 | 0.677107 | 0.981636 | chr1  | 1.79E+08 | 1.79E+08 | + | 0 NA | intron (NTigger3a I  | 42721 NM_00467E  | 9068 Hs. 591474NM_00467E      | ENSG00000ANGPTL1   | C6orf3 ANGF angiopoieprotein-coding |
| chr1-1966 6.724919 | 0.37163  | 0.892453 | 0.416414 | 0.677107 | 0.981636 | chr1  | 1.97E+08 | 1.97E+08 | + | 0 NA | intron (NLTR9D LTF   | 38777 NM_00018E  | 3075 Hs. 36339E NM_00018E     | ENSG00000CFH       | AHUS1 AME complemerprotein-coding   |
| chr1-2354 6.724919 | 0.37163  | 0.892453 | 0.416414 | 0.677107 | 0.981636 | chr1  | 2.35E+08 | 2.35E+08 | + | 0 NA | intron (NAluSq2 SI   | 64038 NM_15249E  | 148789 Hs. 498143NM_15249E    | ENSG00000B3GALNT2  | B3GALNAc-beta-1,3-protein-coding    |
| chr1-2467 6.724919 | 0.37163  | 0.892453 | 0.416414 | 0.677107 | 0.981636 | chr1  | 2.47E+08 | 2.47E+08 | + | 0 NA | intron (Nintron (N   | -25153 NR_015422 | 149134 Hs. 720494NM_207326    | LINC01341          | long intncRNA                       |
| chr11-108 6.724919 | 0.37163  | 0.892453 | 0.416414 | 0.677107 | 0.981636 | chr11 | 1.08E+08 | 1.08E+08 | + | 0 NA | intron (NMERSA1 DN   | 47709 NM_00001E  | 38 Hs. 23237E NM_00001E       | ENSG00000ACAT1     | ACAT MAT acetyl-Ccprotein-coding    |
| chr12-71 6.724919  | 0.37163  | 0.892453 | 0.416414 | 0.677107 | 0.981636 | chr12 | 7103732  | 7105150  | + | 0 NA | intron (NMER6A DNA   | -3867 NR_026947  | 283314 Hs. 744212NR_026947    | ENSG00000C1RL-AS1  | MATL2963 C1RL antncRNA              |
| chr15-731 6.724919 | 0.37163  | 0.892453 | 0.416414 | 0.677107 | 0.981636 | chr15 | 73151108 | 73151815 | + | 0 NA | intron (NTHEIC LTF   | 98977 NM_00117E  | 4756 Hs. 38861E NM_00249E     | ENSG00000NEO1      | IGDC22 NC neogenin protein-coding   |
| chr16-433 6.724919 | 0.37163  | 0.892453 | 0.416414 | 0.677107 | 0.981636 | chr16 | 4337000  | 4338001  | + | 0 NA | exon (NM exon (NM    | 5276 NM_03257E   | 84662 Hs. 592087NM_03257E     | ENSG00000GLIS2     | NKL NPHP7 GLIS famiprotein-coding   |
| chr16-665 6.724919 | 0.37163  | 0.892453 | 0.416414 | 0.677107 | 0.981636 | chr16 | 66526656 | 66531591 | + | 0 NA | intron (Nintron (N   | 20999 NM_001271  | 7084 Hs. 51261E NM_004614     | ENSG00000TK2       | MTDPS2 MI thymidineprotein-coding   |
| chr16-702 6.724919 | 0.37163  | 0.892453 | 0.416414 | 0.677107 | 0.981636 | chr16 | 70329761 | 70334364 | + | 0 NA | intron (Nintron (N   | 14685 NR_003997  | 1.01E+08 Hs. 63500E NR_003997 | ENSG00000LOC10050E | uncharactcRNA                       |
| chr16-891 6.724919 | 0.37163  | 0.892453 | 0.416414 | 0.677107 | 0.981636 | chr16 | 89101171 | 89103389 | + | 0 NA | intron (Nintron (N   | 8428 NR_10429E   | 197322 Hs. 461727NM_174917    | ENSG00000ACSF3     | acyl-CoA protein-coding             |
| chr16-895 6.724919 | 0.37163  | 0.892453 | 0.416414 | 0.677107 | 0.981636 | chr16 | 89537674 | 89538728 | + | 0 NA | TTS (NM_C TTS (NM_C  | -22456 NM_00124E | 6137 Hs. 410817NM_000977      | ENSG00000RPL13     | BBC1 D16S ribosomal protein-coding  |
| chr19-186 6.724919 | 0.37163  | 0.892453 | 0.416414 | 0.677107 | 0.981636 | chr19 | 18928452 | 18929038 | + | 0 NA | TTS (NR_C TTS (NR_C  | 9030 NM_01907E   | 5155 Hs. 143187NM_01907E      | ENSG00000DDX49     | Dbbp8 R27C DEAD-box protein-coding  |
| chr21-454 6.724919 | 0.37163  | 0.892453 | 0.416414 | 0.677107 | 0.981636 | chr21 | 45482858 | 45483701 | + | 0 NA | intron (Nintron (N   | 5013 NR_10687E   | 1.02E+08 NR_10687E            | ENSG00000MIR6815   | hsa-mir-6microRNA ncRNA             |
| chr21-463 6.724919 | 0.37163  | 0.892453 | 0.416414 | 0.677107 | 0.981636 | chr21 | 46345826 | 46347100 | + | 0 NA | intron (Nintron (N   | 21796 NM_00131E  | 5116 Hs. 47406E NM_006031     | ENSG00000PCNT      | KEN MOPD2 peritactprotein-coding    |
| chr3-1005 6.724919 | 0.37163  | 0.892453 | 0.416414 | 0.677107 | 0.981636 | chr3  | 1E+08    | 1E+08    | + | 0 NA | intron (Nintron (N   | 19987 NR_02020E  | 56954 Hs. 43915E NM_02020E    | ENSG00000NIT2      | HEL-S-8a nitrilaseprotein-coding    |
| chr3-1848 6.724919 | 0.37163  | 0.892453 | 0.416414 | 0.677107 | 0.981636 | chr3  | 1.85E+08 | 1.85E+08 | + | 0 NA | intron (NLIMEc LIN   | 51740 NM_00134E  | 23355 Hs. 26926E NM_01530E    | ENSG00000VPS8      | KIAA0804 VPS8 subprotein-coding     |
| chr8-2326 6.724919 | 0.37163  | 0.892453 | 0.416414 | 0.677107 | 0.981636 | chr8  | 23290166 | 23290587 | + | 0 NA | exon (NM exon (NM    | 2268 NM_00113E   | 230369 Hs. 458644NM_00113E    | ENSG00000R3HCC1    | R3H domaiprotein-coding             |
| chr9-8934 6.724919 | 0.37163  | 0.892453 | 0.416414 | 0.677107 | 0.981636 | chr9  | 89347988 | 89349180 | + | 0 NA | intron (Nintron (N   | 29733 NM_00128E  | 79048 Hs. 59904 NM_024077     | ENSG00000SECI5BP2  | SBP2 SECIS birprotein-coding        |
| chr9-1365 6.724919 | 0.37163  | 0.892453 | 0.416414 | 0.677107 | 0.981636 | chr9  | 1.36E+08 | 1.36E+08 | + | 0 NA | intron (Nintron (N   | -10385 NM_05281E | 64170 Hs. 694071NM_05281E     | ENSG00000CARD9     | CANDF2 hCaspase irprotein-coding    |
| chr12-126 10.14353 | -0.30561 | 0.734329 | -0.41617 | 0.677283 | 0.981636 | chr12 | 12671998 | 12975402 | + | 0 NA | intron (NL2 LINE I   | -6137 NR_03892E  | 1.01E+08 Hs. 12771E NR_03892E | ENSG00000GPRC5D-AS | GPRC5D arncRNA                      |
| chr20-177 10.14353 | -0.30561 | 0.734329 | -0.41617 | 0.677283 | 0.981636 | chr20 | 17656841 | 17660381 | + | 0 NA | exon (NM exon (NM    | 23628 NM_00136E  | 6238 Hs. 47221E NM_004587     | ENSG00000RRBP1     | ES/130 ES ribosome protein-coding   |
| chr3-1886 10.14353 | -0.30561 | 0.734329 | -0.41617 | 0.677283 | 0.981636 | chr3  | 1.89E+08 | 1.89E+08 | + | 0 NA | intron (NLTR16E2 I   | -41379 NR_04662E | 1.01E+08 Hs. 67499E NR_04662E | ENSG00000LPP-AS1   | LPP antisncRNA                      |
| chr2-1181 7.239073 | 0.363407 | 0.873481 | 0.416045 | 0.677377 | 0.981636 | chr2  | 11815476 | 11815936 | + | 0 NA | intron (Nintron (N   | 21280 NR_03622E  | 1E+08 NR_03622E               | ENSG00000MIR4262   | microRNA ncRNA                      |
| chr21-171 7.239073 | 0.363407 | 0.873481 | 0.416045 | 0.677377 | 0.981636 | chr21 | 39297740 | 39299132 | + | 0 NA | exon (NM exon (NM    | 15196 NR_01896E  | 54014 Hs. 62713E NM_01896E    | ENSG00000BRWD1     | C21orf107 bromodome protein-coding  |
| chr17-485 10.34893 | 0.307746 | 0.739709 | 0.416036 | 0.677383 | 0.981636 | chr17 | 48940481 | 48941295 | + | 0 NA | intron (Nintron (N   | 3954 NM_001317   | 11267 Hs. 12724E NM_007241    | ENSG00000SNF8      | Dot3 EAP2 SNF8 subprotein-coding    |
| chr5-1725 6.945662 | -0.37209 | 0.894577 | -0.41594 | 0.677456 | 0.981636 | chr5  | 1.72E+08 | 1.72E+08 | + | 0 NA | intron (NLIMB7 LIN   | 60248 NR_13093E  | 1E+08 Hs. 531911NM_01007542   | LOC10028E          | uncharactcRNA                       |
| chr16-855 5.999175 | -0.40584 | 0.982235 | -0.41593 | 0.677459 | 0.981636 | chr16 | 85676339 | 85677083 | + | 0 NA | TTS (NM_C TTS (NM_C  | 12243 NM_01609E  | 51659 Hs. 43318E NM_01609E    | ENSG00000GINS2     | HSPC037 GINS comp protein-coding    |
| chr1-1800 10.85337 | 0.298661 | 0.71834  | 0.415765 | 0.677582 | 0.981636 | chr1  | 1.8E+08  | 1.8E+08  | + | 0 NA | intron (NLIMEg LIN   | -97897 NM_001004 | 5768 Hs. 71917E NM_00282E     | ENSG00000QSOX1     | Q6 QSCN6 quiescin protein-coding    |
| chr8-1034 9.633074 | -0.31652 | 0.762171 | -0.41529 | 0.677929 | 0.981636 | chr8  | 1.03E+08 | 1.03E+08 | + | 0 NA | intron (Nintron (N   | 12598 NM_01542E  | 25879 Hs. 53226E NM_01542E    | ENSG00000DCAF13    | GMB3 HSPCDBD1 and protein-coding    |
| chr1-1614 6.91423  | -0.36454 | 0.878107 | -0.41514 | 0.678037 | 0.981636 | chr1  | 16142640 | 16143723 | + | 0 NA | intron (N (GATG) N S | 12888 NM_00132E  | 1969 Hs. 17159E NM_004431     | ENSG00000CEPHA2    | ARCC2 CTFEPH receprotein-coding     |
| chr1-2330 6.91423  | -0.36454 | 0.878107 | -0.41514 | 0.678037 | 0.981636 | chr1  | 23303524 | 23306391 | + | 0 NA | 3' UTR (N3' UTR (N   | -19439 NR_11061E | 1.01E+08 Hs. 99836 NR_11061E  | LINC0135E          | long intncRNA                       |
| chr1-2023 6.91423  | -0.36454 | 0.878107 | -0.41514 | 0.678037 | 0.981636 | chr1  | 2.02E+08 | 2.02E+08 | + | 0 NA | exon (NM exon (NM    | 8624 NM_01417E   | 29089 Hs. 5199 NM_01417E      | ENSG00000UBE2T     | FANCT HSF1 ubiquitir protein-coding |
| chr10-355 6.91423  | -0.36454 | 0.878107 | -0.41514 | 0.678037 | 0.981636 | chr10 | 35533661 | 35535998 | + | 0 NA | intron (NLIMB8 LIN   | -70512 NM_15336E | 219770 Hs. 63892E NM_15336E   | ENSG00000CGJD4     |                                     |

|           |          |          |          |          |          |          |       |          |          |   |   |    |                    |         |           |          |           |              |           |             |                   |                |                |                |
|-----------|----------|----------|----------|----------|----------|----------|-------|----------|----------|---|---|----|--------------------|---------|-----------|----------|-----------|--------------|-----------|-------------|-------------------|----------------|----------------|----------------|
| chr4-1357 | 5.657322 | 0.406513 | 0.979788 | 0.414899 | 0.678216 | 0.981636 | chr4  | 13578389 | 13578931 | + | 0 | NA | intron (AluJo SIN  | -30836  | NR_015450 | 285548   | Hs.529284 | NR_015450    | LINC01096 | -           | long              | intcncRNA      |                |                |
| chr6-1697 | 5.657322 | 0.406513 | 0.979788 | 0.414899 | 0.678216 | 0.981636 | chr6  | 1.7E+08  | 1.7E+08  | + | 0 | NA | intron (intron (   | 8983    | NR_001278 | 55780    | Hs.47546  | NR_018341    | ENS00000  | ERMARD      | C6orf70           | FER            | membr          | protein-coding |
| chr1-2251 | 6.683779 | 0.369976 | 0.891935 | 0.414801 | 0.678288 | 0.981636 | chr1  | 22513030 | 22514542 | + | 0 | NA | intron (intron (   | -49703  | NR_001006 | 2046     | Hs.28361  | ENS00000     | CEPHAS    | EEL EK3 EPH | recept            | protein-coding |                |                |
| chr1-3208 | 6.683779 | 0.369976 | 0.891935 | 0.414801 | 0.678288 | 0.981636 | chr1  | 32087017 | 32087140 | + | 0 | NA | intron (intron (   | -5129   | NR_049858 | 1.01E+08 | NR_049858 | ENS00000     | MIR5585   | -           | microRNA          | ncRNA          |                |                |
| chr1-5275 | 6.683779 | 0.369976 | 0.891935 | 0.414801 | 0.678288 | 0.981636 | chr1  | 52750759 | 52758645 | + | 0 | NA | intron (intron (   | 37399   | NR_024646 | 79699    | Hs.47628  | ENS00000     | ZYG11B    | ZYG11       | zinc              | finger         | protein-coding |                |
| chr1-2294 | 6.683779 | 0.369976 | 0.891935 | 0.414801 | 0.678288 | 0.981636 | chr1  | 2.29E+08 | 2.29E+08 | + | 0 | NA | intron (MER44 DN   | 28791   | NR_018230 | 55746    | Hs.12457  | NR_018230    | ENS00000  | CNUP133     | GAMOS8            | NF             | nucleopor      | protein-coding |
| chr11-18  | 6.683779 | 0.369976 | 0.891935 | 0.414801 | 0.678288 | 0.981636 | chr11 | 18343147 | 18344521 | + | 0 | NA | intron (L2b LINE   | 21267   | NR_005316 | 29655    | Hs.57720  | NR_005316    | ENS00000  | GTF2H1      | BTF2 P62          | general        | tRNA           | protein-coding |
| chr11-115 | 6.683779 | 0.369976 | 0.891935 | 0.414801 | 0.678288 | 0.981636 | chr11 | 1.19E+08 | 1.19E+08 | + | 0 | NA | 3' UTR (3' UTR (   | 9692    | NR_106814 | 1.02E+08 | NR_106814 | ENS00000     | MIR6756   | hsa-mir-6   | microRNA          | ncRNA          |                |                |
| chr14-77  | 6.683779 | 0.369976 | 0.891935 | 0.414801 | 0.678288 | 0.981636 | chr14 | 77595893 | 77597058 | + | 0 | NA | intron (AluYh3 SI  | 20292   | NR_004863 | 9517     | Hs.43566  | NR_004863    | ENS00000  | SPTLC2      | HSNIC LCE         | serine         | protein-coding |                |
| chr15-641 | 6.683779 | 0.369976 | 0.891935 | 0.414801 | 0.678288 | 0.981636 | chr15 | 64115240 | 64115591 | + | 0 | NA | intron (intron (   | 19434   | NR_001242 | 6642     | Hs.18863  | NR_003099    | ENS00000  | SNX1        | HST17379          | sortin         | r              | protein-coding |
| chr16-44  | 6.683779 | 0.369976 | 0.891935 | 0.414801 | 0.678288 | 0.981636 | chr16 | 4431169  | 4431593  | + | 0 | NA | intron (intron (   | 5668    | NR_001135 | 9093     | Hs.45977  | NR_005147    | ENS00000  | DNAJA3      | HCA57 TII         | DNAJ           | heat           | protein-coding |
| chr16-28  | 6.683779 | 0.369976 | 0.891935 | 0.414801 | 0.678288 | 0.981636 | chr16 | 28395511 | 28396529 | + | 0 | NA | intron (Tigger4b   | -4969   | NR_106922 | 1.02E+08 | NR_106922 | ENS00000     | MIR6862   | hsa-mir-6   | microRNA          | ncRNA          |                |                |
| chr16-574 | 6.683779 | 0.369976 | 0.891935 | 0.414801 | 0.678288 | 0.981636 | chr16 | 57437592 | 57439147 | + | 0 | NA | intron (intron (   | 9016    | NR_020313 | 57019    | Hs.4900   | NR_020313    | ENS00000  | CIAP1N1     | Anamorsircytokine | protein-coding |                |                |
| chr17-318 | 6.683779 | 0.369976 | 0.891935 | 0.414801 | 0.678288 | 0.981636 | chr17 | 31851783 | 31853941 | + | 0 | NA | exon (NM exon (NM  | 6100    | NR_001330 | 55352    | Hs.46272  | NR_018406    | ENS00000  | COPRS       | C1orf79           | coordinat      | protein-coding |                |
| chr21-371 | 6.683779 | 0.369976 | 0.891935 | 0.414801 | 0.678288 | 0.981636 | chr21 | 37176374 | 37177822 | + | 0 | NA | intron (MLTIH LTF  | 16828   | NR_046651 | 1.01E+08 | Hs.57041  | NR_046651    | ENS00000  | TTC3-AS1    | -                 | TTC3           | antincRNA      |                |
| chr22-42  | 6.683779 | 0.369976 | 0.891935 | 0.414801 | 0.678288 | 0.981636 | chr22 | 42874046 | 42874499 | + | 0 | NA | intron (AluJr SIN  | -16999  | NR_001142 | 26286    | Hs.68522  | NR_014570    | ENS00000  | ARFGAP3     | ARFGAP1           | ADP            | ribos          | protein-coding |
| chr3-102  | 6.683779 | 0.369976 | 0.891935 | 0.414801 | 0.678288 | 0.981636 | chr3  | 10269940 | 10271460 | + | 0 | NA | exon (NM exon (NM  | -9651   | NR_162141 | 1.13E+08 | MIR12127  | -            | microRNA  | ncRNA       |                   |                |                |                |
| chr3-393  | 6.683779 | 0.369976 | 0.891935 | 0.414801 | 0.678288 | 0.981636 | chr3  | 39395919 | 39397381 | + | 0 | NA | 3' UTR (3' UTR (   | -10070  | NR_001304 | 3921     | Hs.44990  | NR_002299    | ENS00000  | RPSA        | 37LRP 67I         | ribosomal      | protein-coding |                |
| chr3-525  | 6.683779 | 0.369976 | 0.891935 | 0.414801 | 0.678288 | 0.981636 | chr3  | 52557458 | 52558415 | + | 0 | NA | intron (intron (   | 21331   | NR_001124 | 440957   | Hs.66057  | NR_001124    | ENS00000  | SMIM4       | C3orf78           | small          | int            | protein-coding |
| chr6-905  | 6.683779 | 0.369976 | 0.891935 | 0.414801 | 0.678288 | 0.981636 | chr6  | 90555457 | 90556477 | + | 0 | NA | intron (Tigger17   | 30955   | NR_003188 | 6885     | Hs.59483  | NR_003188    | ENS00000  | MAP3K7      | CSCF FMD2         | mitogen-       | protein-coding |                |
| chr8-234  | 6.683779 | 0.369976 | 0.891935 | 0.414801 | 0.678288 | 0.981636 | chr8  | 234090   | 235420   | + | 0 | NA | intron (intron (   | 2299    | NR_001042 | 169270   | Hs.59138  | NR_173530    | ENS00000  | ZNF596      | -                 | zinc           | finger         | protein-coding |
| chr9-111  | 6.683779 | 0.369976 | 0.891935 | 0.414801 | 0.678288 | 0.981636 | chr9  | 1.11E+08 | 1.11E+08 | + | 0 | NA | intron (Tigger1 E  | -49573  | NR_205858 | 26248    | Hs.38131  | NR_205858    | ENS00000  | COR2K2      | HSHTPCRH C        | factory        | protein-coding |                |
| chrX-457  | 6.683779 | 0.369976 | 0.891935 | 0.414801 | 0.678288 | 0.981636 | chrX  | 45754590 | 45755987 | + | 0 | NA | IntergeniLIPB1 LIN | -8164   | NR_029630 | 407007   | NR_029630 | ENS00000     | MIR222    | MIRN222     | microRNA          | ncRNA          |                |                |
| chr1-200  | 11.35782 | 0.290325 | 0.699989 | 0.414756 | 0.67832  | 0.981636 | chr1  | 1.2E+08  | 1.2E+08  | + | 0 | NA | intron (intron (   | 65268   | NR_021440 | 4853     | Hs.48736  | NR_024408    | ENS00000  | NOTCH2      | AGS2 HJC          | cytoth         | recept         | protein-coding |
| chr7-6664 | 6.7582   | 0.375648 | 0.905858 | 0.414687 | 0.678371 | 0.981636 | chr7  | 66642862 | 66643504 | + | 0 | NA | TTS (NM_TTS (NM_I  | -11336  | NR_110037 | 1.01E+08 | Hs.66740  | NR_110037    | LOC100996 | -           | uncharact         | ncRNA          |                |                |
| chr1-676  | 10.13567 | -0.3043  | 0.734128 | -0.4145  | 0.678506 | 0.981636 | chr1  | 67686052 | 67690093 | + | 0 | NA | 3' UTR (3' UTR (   | 2871    | NR_001924 | 1647     | Hs.80409  | NR_001924    | ENS00000  | GADD45A     | DDIT1 GAI         | growth         | ar             | protein-coding |
| chr10-74  | 10.13567 | -0.3043  | 0.734128 | -0.4145  | 0.678506 | 0.981636 | chr10 | 7473070  | 74736333 | + | 0 | NA | intron (intron (   | 76127   | NR_001320 | 26985    | Hs.50010  | NR_012099    | ENS00000  | AP3M1       | -                 | adaptor        | protein-coding |                |
| chr11-12  | 10.13567 | -0.3043  | 0.734128 | -0.4145  | 0.678506 | 0.981636 | chr11 | 1.28E+08 | 1.28E+08 | + | 0 | NA | 3' UTR (3' UTR (   | 60657   | NR_005238 | 2113     | Hs.36943  | NR_005238    | ENS00000  | EYS1        | ETS-1 EWS         | ETS            | protc          | protein-coding |
| chr12-654 | 10.13567 | -0.3043  | 0.734128 | -0.4145  | 0.678506 | 0.981636 | chr12 | 6544537  | 6547372  | + | 0 | NA | intron (MER44 DN   | 10088   | NR_080730 | 25900    | Hs.15243  | NR_015430    | ENS00000  | IFFO1       | HOM-TRES I        | intermedi      | protein-coding |                |
| chr14-504 | 10.13567 | -0.3043  | 0.734128 | -0.4145  | 0.678506 | 0.981636 | chr14 | 50421738 | 50425950 | + | 0 | NA | intron (LTR16C LI  | -26546  | NR_001367 | 8814     | Hs.28088  | NR_004190    | ENS00000  | CDKL1       | KKIALRE F         | cyclin         | de             | protein-coding |
| chr2-3647 | 10.13567 | -0.3043  | 0.734128 | -0.4145  | 0.678506 | 0.981636 | chr2  | 36479213 | 36481898 | + | 0 | NA | intron (intron (   | 117613  | NR_001042 | 9637     | Hs.25856  | NR_005102    | ENS00000  | FEZ2        | HUM3CL            | fascicu        | protein-coding |                |
| chr2-1357 | 10.13567 | -0.3043  | 0.734128 | -0.4145  | 0.678506 | 0.981636 | chr2  | 1.36E+08 | 1.36E+08 | + | 0 | NA | exon (NM exon (NM  | -12914  | NR_163478 | 1.08E+08 | Hs.59124  | NR_001365239 | LOC107980 | -           | uncharact         | ncRNA          |                |                |
| chr2-1974 | 10.13567 | -0.3043  | 0.734128 | -0.4145  | 0.678506 | 0.981636 | chr2  | 1.97E+08 | 1.97E+08 | + | 0 | NA | intron (intron (   | 6175    | NR_002150 | 3329     | Hs.59505  | NR_002150    | ENS00000  | HSPD1       | CPN60 GR          | heat           | shoc           | protein-coding |
| chr3-1224 | 10.13567 | -0.3043  | 0.734128 | -0.4145  | 0.678506 | 0.981636 | chr3  | 1.22E+08 | 1.22E+08 | + | 0 | NA | intron (AluSc5 SI  | 47240   | NR_125400 | 1.03E+08 | Hs.67505  | NR_125400    | ENS00000  | LOC102722   | -                 | uncharact      | ncRNA          |                |
| chr5-9551 | 10.13567 | -0.3043  | 0.734128 | -0.4145  | 0.678506 | 0.981636 | chr5  | 95516274 | 95517268 | + | 0 | NA | intron (intron (   | 38234   | NR_014630 | 9652     | Hs.48286  | NR_014630    | ENS00000  | TTC37       | KIAA0372          | tetratric      | protein-coding |                |
| chr7-7471 | 10.13567 | -0.3043  | 0.734128 | -0.4145  | 0.678506 | 0.981636 | chr7  | 74710849 | 74718140 | + | 0 | NA | intron (intron (   | 14424   | NR_110044 | 1.02E+08 | Hs.65477  | NR_110044    | ENS00000  | LOC101920   | -                 | uncharact      | ncRNA          |                |
| chr19-22  | 6.847667 | -0.37504 | 0.904868 | -0.41446 | 0.678534 | 0.981636 | chr19 | 2234226  | 2234459  | + | 0 | NA | promoter-promoter- | -193    | NR_031590 | 1E+08    | NR_031590 | ENS00000     | MIR1227   | MIRN1227    | microRNA          | ncRNA          |                |                |
| chr3-487  | 6.847667 | -0.37504 | 0.904868 | -0.41446 | 0.678534 | 0.981636 | chr3  | 48702679 | 48703027 | + | 0 | NA | intron (L2a LINE   | 13468   | NR_001000 | 51447    | Hs.59598  | NR_016291    | ENS00000  | IP6K2       | IHPK2 Ins         | inositol       | protein-coding |                |
| chr17-187 | 6.228331 | 0.390572 | 0.942975 | 0.414191 | 0.678734 | 0.981636 | chr17 | 18732978 | 18733840 | + | 0 | NA | intron (L2b LINE   | -10645  | NR_051988 | 10517    | Hs.59212  | NR_031450    | ENS00000  | FBXW10      | Fbw10 HRE         | F-box          | anc            | protein-coding |
| chr3-1977 | 6.79682  | -0.39072 | 0.944098 | -0.41385 | 0.678981 | 0.981636 | chr3  | 1.98E+08 | 1.98E+08 | + | 0 | NA | TTS (NM_TTS (NM_C  | -5963   | NR_001363 | 84859    | Hs.51841  | NR_032770    | ENS00000  | LRCH3       | -                 | leucine        | protein-coding |                |
| chr11-12  | 4.212952 | -0.46028 | 1.112771 | -0.41363 | 0.679144 | 0.981636 | chr11 | 12531943 | 12532984 | + | 0 | NA | 3' UTR (3' UTR (   | -142003 | NR_021961 | 7003     | Hs.65539  | NR_021961    | ENS00000  | TEAD1       | AA NTEF-1         | TEA            | doma           | protein-coding |
| chr12-69  | 4.212952 | -0.46028 | 1.112771 | -0.41363 | 0.679144 | 0.981636 | chr12 | 69373805 | 69375719 | + | 0 | NA | intron (SVA_B Ret  | 15019   | NR_006530 | 8089     | Hs.40229  | NR_006530    | ENS00000  | YEATS4      | 4930573H YEATS    | don            | protein-coding |                |
| chr2-6111 | 4.212952 | -0.46028 | 1.112771 | -0.41363 | 0.679144 | 0.981636 | chr2  | 61111787 | 61112715 | + | 0 | NA | intron (LIME1 LIN  | 32724   | NR_036490 | 339803   | Hs.25243  | NR_036490    | ENS00000  | LOC339800   | -                 | uncharact      | ncRNA          |                |
| chr1-985  | 6.691637 | 0.367721 | 0.889082 | 0.413597 | 0.67917  | 0.981636 | chr1  | 9853344  | 9854790  | + | 0 | NA | intron (LIMS1 LINE | -29545  | NR_014944 | 22883    | Hs.29665  | NR_014944    | ENS00000  | CLSTN1      | ALC-ALPHA         | calys          | ter            | protein-coding |
| chr1-122  | 6.691637 | 0.367721 | 0.889082 | 0.413597 | 0.67917  | 0.981636 | chr1  | 12282831 | 12285470 | + | 0 | NA | intron (intron (   | 54120   | NR_015370 | 5587     | Hs.43938  | NR_015370    | ENS00000  | VPS13D      | SCAR4             | vacuol         | protein-coding |                |
| chr1-328  | 6.691637 | 0.367721 | 0.889082 | 0.413597 | 0.67917  | 0.981636 | chr1  | 32852528 | 32853884 | + | 0 | NA | intron (AluSc8 SI  | 17607   | NR_001171 | 252995   | Hs.52423  | NR_015370    | ENS00000  | PND50       | PRCP2 iri         | fibro          | ect            | protein-coding |
| chr1-115  | 6.691637 | 0.367721 | 0.889082 | 0.413597 | 0.67917  | 0.981636 | chr1  | 1.16E+08 | 1.16E+08 | + | 0 | NA | intron (intron (   | 22824   | NR_001172 | 81839    | Hs.51513  | NR_138950    | ENS00000  | VANGL1      | KITENIN I         | VANGL          | pl             | protein-coding |
| chr1-124  | 6.691637 | 0.367721 | 0.889082 | 0.413597 | 0.67917  | 0.981636 | chr1  | 1.24E+08 | 1.24E+08 | + | 0 | NA | IntergeniALR Alpha | 2956338 | NR_003950 | 647121   | Hs.69768  | NR_003950    | ENS00000  |             |                   |                |                |                |



|           |           |          |          |          |          |          |       |          |          |   |   |    |                    |                  |                              |                     |             |                          |
|-----------|-----------|----------|----------|----------|----------|----------|-------|----------|----------|---|---|----|--------------------|------------------|------------------------------|---------------------|-------------|--------------------------|
| chr1-1603 | 12.90444  | 0.271296 | 0.65769  | 0.412498 | 0.679974 | 0.981636 | chr1  | 1.6E+08  | 1.6E+08  | + | 0 | NA | intron (AluSx SIN  | 12213 NM_001098  | 1314 Hs. 162121NM_004371     | ENSG00000COPA       | A1LJK HEF   | coatomer protein-coding  |
| chr1-1828 | 12.90444  | 0.271296 | 0.65769  | 0.412498 | 0.679974 | 0.981636 | chr1  | 1.83E+08 | 1.83E+08 | + | 0 | NA | non-codnon-codir   | -27398 NR_148933 | 647070 Hs. 191518NR_148933   | LOC647070           | -           | uncharactncRNA           |
| chr1-1836 | 12.90444  | 0.271296 | 0.65769  | 0.412498 | 0.679974 | 0.981636 | chr1  | 1.84E+08 | 1.84E+08 | + | 0 | NA | intron (ALIMB4 LIN | 6032 NM_005717   | 10092 Hs. 518609NM_005717    | ENSG00000CARPC5     | ARC16 dJ    | lactin relprotein-coding |
| chr19-57  | 12.90444  | 0.271296 | 0.65769  | 0.412498 | 0.679974 | 0.981636 | chr19 | 57327387 | 57300382 | + | 0 | NA | exon (NM exon (NM  | 8262 NM_213598   | 125919 Hs. 202544NM_213598   | ENSG00000ZNF543     | -           | zinc fingprotein-coding  |
| chr7-9952 | 12.90444  | 0.271296 | 0.65769  | 0.412498 | 0.679974 | 0.981636 | chr7  | 99524144 | 99533980 | + | 0 | NA | intron (intron (N  | 23052 NM_145111  | 221786 Hs. 596587NM_145111   | ENSG00000FAM200A    | C7orf38     | family wiprotein-coding  |
| chr2-1012 | 7.365979  | -0.35768 | 0.867346 | -0.41238 | 0.680062 | 0.981636 | chr2  | 1.01E+08 | 1.01E+08 | + | 0 | NA | promoter-promoter- | -33 NR_00307C    | 692205 Hs. 656509NR_00307C   | ENSG00000SNORD89    | HB11-289    | small nucsnoRNA          |
| chr9-4171 | 7.365979  | -0.35768 | 0.867346 | -0.41238 | 0.680079 | 0.981636 | chr9  | 41011142 | 41014048 | + | 0 | NA | intron (intron (N  | 20334 NR_034006  | 1E+08 Hs. 231861NR_034006    | FRG1HP              | -           | FSHD regpseudo           |
| chr1-1101 | 7.213649  | 0.357442 | 0.867219 | 0.41217  | 0.680215 | 0.981636 | chr1  | 1.01E+08 | 1.01E+08 | + | 0 | NA | intron (intron (N  | 9276 NM_006784   | 10885 Hs. 310809NM_006784    | ENSG00000WDR3       | DIP2 UTP1   | WD repeatprotein-coding  |
| chr17-615 | 7.213649  | 0.357442 | 0.867219 | 0.41217  | 0.680215 | 0.981636 | chr17 | 61907507 | 61908265 | + | 0 | NA | intron (intron (N  | 20096 NM_020748  | 57508 Hs. 279646NM_020748    | ENSG00000INTS2      | INT2 KIAI   | integratcprotein-coding  |
| chr17-633 | 7.213649  | 0.357442 | 0.867219 | 0.41217  | 0.680215 | 0.981636 | chr17 | 63393566 | 63393988 | + | 0 | NA | intron (AluSq2 SI  | 46490 NM_00133C  | 1534 Hs. 355264NM_00191E     | ENSG00000CYB561     | CYB561A1    | cytochronprotein-coding  |
| chr2-2245 | 7.213649  | 0.357442 | 0.867219 | 0.41217  | 0.680215 | 0.981636 | chr2  | 2.25E+08 | 2.25E+08 | + | 0 | NA | intron (Tigger2 I  | -2877 NM_001257  | 8452 Hs. 372286NM_00359C     | ENSG00000CUL3       | CUL-3 PHA   | cullin 3 protein-coding  |
| chr1-3941 | 4.171812  | -0.46581 | 1.1304   | -0.41207 | 0.680286 | 0.981636 | chr1  | 39416669 | 39418379 | + | 0 | NA | intron (intron (N  | 8451 NM_01503E   | 643314 Hs. 658766NM_01503E   | ENSG00000KIAA0754   | -           | KIAA0754 protein-coding  |
| chr5-1325 | 4.171812  | -0.46581 | 1.1304   | -0.41207 | 0.680286 | 0.981636 | chr5  | 1.33E+08 | 1.33E+08 | + | 0 | NA | intron (NL2 LINE I | 37369 NM_005732  | 10111 Hs. 633509NM_005732    | ENSG00000RAD50      | NBSLD RAI   | RAD50 dotprotein-coding  |
| chr12-121 | 7.221507  | 0.355267 | 0.862305 | 0.411997 | 0.680342 | 0.981636 | chr12 | 1.22E+08 | 1.22E+08 | + | 0 | NA | intron (AluJo SIN  | -9152 NM_14466E  | 144406 Hs. 709837NM_14466E   | ENSG00000WDR66      | CFAP251 CWD | repatprotein-coding      |
| chr14-313 | 7.221507  | 0.355267 | 0.862305 | 0.411997 | 0.680342 | 0.981636 | chr14 | 31331115 | 31334290 | + | 0 | NA | intron (NTigger1 I | 87848 NM_01547E  | 25938 Hs. 744979NM_01547E    | ENSG00000HEATR5A    | C14orf12E   | HEAT repeprotein-coding  |
| chr14-914 | 7.221507  | 0.355267 | 0.862305 | 0.411997 | 0.680342 | 0.981636 | chr14 | 91466661 | 91467435 | + | 0 | NA | intron (intron (N  | 42656 NM_00136E  | 55671 Hs. 533887NM_01793E    | ENSG00000PPP4R3A    | FLFL1 KIAI  | protein fprotein-coding  |
| chr14-102 | 7.221507  | 0.355267 | 0.862305 | 0.411997 | 0.680342 | 0.981636 | chr14 | 1.03E+08 | 1.03E+08 | + | 0 | NA | intron (intron (N  | 32791 NM_03094E  | 81693 Hs. 534494NM_03094E    | ENSG00000CAM        | PRO1028     | eamion asprotein-coding  |
| chr15-445 | 7.221507  | 0.355267 | 0.862305 | 0.411997 | 0.680342 | 0.981636 | chr15 | 44594190 | 44595937 | + | 0 | NA | intron (AluS2 SIN  | 57916 NM_00375E  | 8669 Hs. 404056NM_00375E     | ENSG00000EIF3J      | EIF3J2      | eukaryotprotein-coding   |
| chr15-636 | 7.221507  | 0.355267 | 0.862305 | 0.411997 | 0.680342 | 0.981636 | chr15 | 63677354 | 63678006 | + | 0 | NA | intron (intron (N  | -76853 NR_03408C | 1E+08 Hs. 631163NR_03408C    | ENSG00000USP3-AS1   | -           | USP3 antincRNA           |
| chr15-945 | 7.221507  | 0.355267 | 0.862305 | 0.411997 | 0.680342 | 0.981636 | chr15 | 94336183 | 94337039 | + | 0 | NA | intron (intron (N  | -19319 NM_00115E | 55784 Hs. 33368 NM_01834E    | ENSG00000CMCTP2     | -           | multiple protein-coding  |
| chr4-1406 | 7.221507  | 0.355267 | 0.862305 | 0.411997 | 0.680342 | 0.981636 | chr4  | 1.81E+08 | 1.41E+08 | + | 0 | NA | intron (intron (N  | -18731 NR_07721E | 644962 Hs. 676509NR_07721E   | TNRC18P1            | -           | trinuclecpseudo          |
| chr5-1802 | 7.221507  | 0.355267 | 0.862305 | 0.411997 | 0.680342 | 0.981636 | chr5  | 1.8E+08  | 1.8E+08  | + | 0 | NA | 3' UTR (N3' UTR (N | -26616 NM_17506E | 255426 Hs. 190556NM_17506E   | ENSG00000CRASGEF1C  | -           | RasGEF dcprotein-coding  |
| chr1-193  | 12.40785  | 0.276634 | 0.671997 | 0.411659 | 0.680589 | 0.981636 | chr1  | 1.93E+08 | 1.93E+08 | + | 0 | NA | intron (ALIMB4 LIN | -18387 NM_00135C | 51377 Hs. 145469NM_01598A    | ENSG00000UCHL5      | CGI-70 I    | ubiquitir protein-coding |
| chr10-675 | 10.12781  | -0.30297 | 0.736157 | -0.41156 | 0.680661 | 0.981636 | chr10 | 67969418 | 67980533 | + | 0 | NA | intron (AluSq2 SI  | 35908 NR_131184  | 1E+08 NR_131184              | POU5F1P5            | Oct4-pg5    | POU classpseudo          |
| chr15-412 | 10.12781  | -0.30297 | 0.736157 | -0.41156 | 0.680661 | 0.981636 | chr15 | 41285370 | 41289048 | + | 0 | NA | intron (AluSx SIN  | 1867 NR_152821   | 72908 Hs. 380164NR_026757    | ENSG00000OIP5-AS1   | cyrano I    | OIP5 antincRNA           |
| chr15-928 | 10.12781  | -0.30297 | 0.736157 | -0.41156 | 0.680661 | 0.981636 | chr15 | 92885103 | 92896004 | + | 0 | NA | intron (intron (N  | 7257 NR_03760E   | 1.01E+08 Hs. 622504NR_03760E | LINCO157E           | -           | long intencRNA           |
| chr16-698 | 10.12781  | -0.30297 | 0.736157 | -0.41156 | 0.680661 | 0.981636 | chr16 | 16283191 | 16289362 | + | 0 | NA | exon (NM exon (NM  | 16283 NR_14575E  | 1.1E+08 NR_145753            | SNORD13H            | -           | small nucsnoRNA          |
| chr2-6524 | 10.12781  | -0.30297 | 0.736157 | -0.41156 | 0.680661 | 0.981636 | chr2  | 65240355 | 65241911 | + | 0 | NA | intron (intron (N  | 13438 NM_00100E  | 10097 Hs. 643727NM_00572E    | ENSG00000ACTR2      | ARP2        | actin relprotein-coding  |
| chr2-189C | 10.12781  | -0.30297 | 0.736157 | -0.41156 | 0.680661 | 0.981636 | chr2  | 1.89E+08 | 1.89E+08 | + | 0 | NA | intron (intron (N  | 68044 NR_03607E  | 1E+08 NR_03607E              | ENSG00000MIR3129    | mir-3129    | microRNA ncRNA           |
| chr5-1135 | 10.12781  | -0.30297 | 0.736157 | -0.41156 | 0.680661 | 0.981636 | chr5  | 1.14E+08 | 1.14E+08 | + | 0 | NA | intron (intron (N  | 40240 NM_00134E  | 64848 Hs. 231942NM_02282E    | ENSG00000YTHDC2     | CAHL hYTF   | YTH domaiprotein-coding  |
| chr8-2335 | 9.666356  | -0.31283 | 0.760194 | -0.41151 | 0.680695 | 0.981636 | chr8  | 23333150 | 23333431 | + | 0 | NA | intron (intron (N  | -2918 NR_03832E  | 1.01E+08 Hs. 66113CNR_03832E | ENSG00000CLOC100507 | -           | uncharactncRNA           |
| chr13-255 | 6.444916  | -0.38205 | 0.928871 | -0.4113  | 0.680852 | 0.981636 | chr13 | 25311474 | 25311170 | + | 0 | NA | intron (AluSq2 SI  | 9967 NM_01408E   | 9818 Hs. 507537NM_01408E     | ENSG00000NUP58      | NUP45 NUF   | nucleopor protein-coding |
| chr17-376 | 6.444916  | -0.38205 | 0.928871 | -0.4113  | 0.680852 | 0.981636 | chr17 | 37898553 | 37899914 | + | 0 | NA | intron (AluU SINE  | 19685 NM_08055C  | 11276 Hs. 594647NM_007247    | ENSG00000SYNRG      | API6BP1     | Synergir protein-coding  |
| chrX-1294 | 6.444916  | -0.38205 | 0.928871 | -0.4113  | 0.680852 | 0.981636 | chrX  | 1.29E+08 | 1.29E+08 | + | 0 | NA | intron (AluSx1 SI  | 52694 NM_00128E  | 6594 Hs. 152292NM_00306E     | ENSG00000SMARCA1    | ISWI NURF   | SWI/SNF iprotein-coding  |
| chr1-310  | 10.86123  | 0.297158 | 0.722569 | 0.411251 | 0.680888 | 0.981636 | chr1  | 31003532 | 31003861 | + | 0 | NA | intron (AluSq2 SI  | -35459 NR_00306E | 692200 NR_003066             | SNORD103C           | HB11-251    | small nucsnoRNA          |
| chr1-2241 | 12.366671 | 0.275615 | 0.670467 | 0.411078 | 0.681015 | 0.981636 | chr1  | 2.24E+08 | 2.24E+08 | + | 0 | NA | intron (AluSx1 SI  | 18093 NM_01517E  | 23219 Hs. 64691 NR_01517E    | ENSG00000FBX028     | CENP-30 FF  | -box prcprotein-coding   |
| chr7-102f | 10.61284  | -0.29776 | 0.724861 | -0.41078 | 0.681233 | 0.981636 | chr7  | 1.03E+08 | 1.03E+08 | + | 0 | NA | intron (intron (N  | 10054 NM_00116E  | 1E+08 Hs. 433879NM_00116E    | ENSG00000SPDYE2B    | SPDYE2L     | speedy/R1 protein-coding |
| chr20-38  | 9.212757  | -0.32488 | 0.790993 | -0.41072 | 0.681278 | 0.981636 | chr20 | 38098954 | 38099197 | + | 0 | NA | 3' UTR (N3' UTR (N | 56279 NM_00121E  | 58490 Hs. 278832NM_00212E    | ENSG00000RPRD1B     | C0orf77     | regulaticprotein-coding  |
| chr12-121 | 6.161768  | 0.382246 | 0.931638 | 0.410295 | 0.68159  | 0.981636 | chr12 | 1.21E+08 | 1.21E+08 | + | 0 | NA | intron (MLT1A0 LI  | 6704 NM_00128E   | 64897 Hs. 528671NM_02289E    | ENSG00000C12orf43   | Custos      | chromosonprotein-coding  |
| chr16-718 | 6.161768  | 0.382246 | 0.931638 | 0.410295 | 0.68159  | 0.981636 | chr16 | 71800331 | 71801677 | + | 0 | NA | intron (AluSp SIN  | 7830 NM_00103C   | 164 Hs. 461252NM_00112E      | ENSG00000CAGP1G1    | ADTG CLAF   | adaptor iprotein-coding  |
| chr2-6076 | 6.161768  | 0.382246 | 0.931638 | 0.410295 | 0.68159  | 0.981636 | chr2  | 60797383 | 60797809 | + | 0 | NA | 3' UTR (N3' UTR (N | 41328 NM_022894  | 64895 Hs. 387471NM_022894    | ENSG00000PAPOLG     | -           | poly (A) iprotein-coding |
| chr10-101 | 6.873091  | -0.36778 | 0.896399 | -0.41029 | 0.681597 | 0.981636 | chr10 | 1.02E+08 | 1.02E+08 | + | 0 | NA | intron (LJMEf LIN  | 106042 NM_024541 | 79591 Hs. 18004 NM_024541    | ENSG00000ARMH3      | C10orf76    | armadillcprotein-coding  |
| chr11-12C | 6.873091  | -0.36778 | 0.896399 | -0.41029 | 0.681597 | 0.981636 | chr11 | 1.2E+08  | 1.2E+08  | + | 0 | NA | intron (intron (N  | 39112 NM_001301  | 23365 Hs. 24598 NM_01531E    | ENSG00000ARHGEF12   | LARG PROE   | Rho guaniprotein-coding  |
| chr20-636 | 6.873091  | -0.36778 | 0.896399 | -0.41029 | 0.681597 | 0.981636 | chr20 | 63667208 | 63667485 | + | 0 | NA | intron (intron (N  | 9536 NM_032957   | 51750 Hs. 745057NM_016434    | ENSG00000RTEL1      | C20orf41    | regulatoreprotein-coding |
| chr1-2797 | 6.906372  | -0.36263 | 0.883853 | -0.41028 | 0.681602 | 0.981636 | chr1  | 27977506 | 27977299 | + | 0 | NA | intron (AluSx4 SI  | 18190 NM_01805E  | 55113 Hs. 55024 NM_01805E    | ENSG00000XKR8       | XKR8 hXkr   | Xkr relateprotein-coding |
| chr1-8564 | 6.906372  | -0.36263 | 0.883853 | -0.41028 | 0.681602 | 0.981636 | chr1  | 85648485 | 85651214 | + | 0 | NA | 3' UTR (N3' UTR (N | 58584 NM_00117C  | 54680 Hs. 5111 NM_01795E     | ENSG00000ZNHIT6     | BCD1 Clor   | zinc fingprotein-coding  |
| chr10-84C | 6.906372  | -0.36263 | 0.883853 | -0.41028 | 0.681602 | 0.981636 | chr10 | 84389338 | 84384722 | + | 0 | NA | intron (NLIPB4 LIN | -40609 NM_001284 | 54462 Hs. 461988NM_01899E    | ENSG00000CCSER2     | FAM190B     | coiled-cprotein-coding   |
| chr11-671 | 6.906372  | -0.36263 | 0.883853 | -0.41028 | 0.681602 | 0.981636 | chr11 | 67126921 | 67128363 | + | 0 | NA | intron (intron (N  | 8379 NR_01230E   | 22992 Hs. 124147NM_01230E    | ENSG00000KDM2A      | CXXC8 FBI   | lysine dcprotein-coding  |
| chr12-781 | 6.906372  | -0.36263 | 0.883853 | -0.41028 | 0.681602 | 0.981636 | chr12 | 78118088 | 78119449 | + | 0 | NA | intron (intron (N  | 240978 NR_135021 | 1.05E+08 Hs. 156899NR_135021 | ENSG00000LINC02424  | -           | long intencRNA           |
| chr15-43C | 6.906372  | -0.36263 | 0.883853 | -0.41028 | 0.681602 | 0.981636 | chr15 | 43066580 | 43067942 | + | 0 | NA | intron (intron (N  | 38777 NM_17491E  | 197131 Hs. 591121NM_17491E   | ENSG00000UBR1       | JBS         | ubiquitir protein-coding |
| chr15-67C | 6.906372  | -0.36263 | 0.883853 | -0.41028 | 0.681602 | 0.981636 | chr15 | 67077300 | 67077887 | + | 0 | NA | intron (NL2c LINE  | 11991 NM_00590E  | 4088 Hs. 727989NM_00590E     | ENSG00000SMAD3      | HSPC193 E   | SMAD famiprotein-coding  |
| chr15-101 | 6.906372  | -0.36263 | 0.883853 | -0.41028 | 0.681602 | 0.981636 | chr15 | 1.02E+08 | 1.02E+08 | + | 0 | NA | intron (AluSp SIN  | 28846 NM_152334  |                              |                     |             |                          |

|           |          |          |          |          |           |          |       |          |          |   |   |    |                     |         |           |          |                     |                   |                     |                                          |                                           |
|-----------|----------|----------|----------|----------|-----------|----------|-------|----------|----------|---|---|----|---------------------|---------|-----------|----------|---------------------|-------------------|---------------------|------------------------------------------|-------------------------------------------|
| chr19-435 | 6.699495 | 0.365458 | 0.892125 | 0.409649 | 0.682063  | 0.981636 | chr19 | 43540445 | 43544597 | + | 0 | NA | TTS (NM_C TTS (NM_C | 9333    | NM_17494E | 284346   | Hs. 213534NM_17494E | ENSG000002ZNF575  | -                   | zinc finger protein-coding               |                                           |
| chr2-3867 | 6.699495 | 0.365458 | 0.892125 | 0.409649 | 0.682063  | 0.981636 | chr2  | 38678862 | 38681767 | + | 0 | NA | intron (Alu)Jb SIN  | 14200   | NM_138801 | 130589   | Hs. 435012NM_138801 | ENSG000002GALM    | -                   | BLOCK25 Galactose protein-coding         |                                           |
| chr2-6075 | 6.699495 | 0.365458 | 0.892125 | 0.409649 | 0.682063  | 0.981636 | chr2  | 60791449 | 60792713 | + | 0 | NA | intron (intron)     | 35813   | NM_022894 | 64895    | Hs. 387471NM_022894 | ENSG000002PAPOLG  | -                   | poly(A) protein-coding                   |                                           |
| chr2-2376 | 6.699495 | 0.365458 | 0.892125 | 0.409649 | 0.682063  | 0.981636 | chr2  | 2.38E+08 | 2.38E+08 | + | 0 | NA | intron (Alu)Szl SIN | 6922    | NM_001278 | 140739   | Hs. 47178E          | ENSG000002UBEZF   | -                   | ubiquitin protein-coding                 |                                           |
| chr20-214 | 6.699495 | 0.365458 | 0.892125 | 0.409649 | 0.682063  | 0.981636 | chr20 | 2144457  | 2145033  | + | 0 | NA | 3' UTR (3' UTR)     | 42918   | NM_08083E | 140901   | Hs. 100057NM_08083E | ENSG000002STK35   | -                   | CLK1 STK serine/threonine protein-coding |                                           |
| chr20-351 | 6.699495 | 0.365458 | 0.892125 | 0.409649 | 0.682063  | 0.981636 | chr20 | 35138862 | 35139463 | + | 0 | NA | intron (Alu)Sc8 SI  | 8174    | NM_00114E | 55741    | Hs. 720177NM_018217 | ENSG000002CEDEM2  | -                   | C20orf31 ER degrad protein-coding        |                                           |
| chr21-437 | 6.699495 | 0.365458 | 0.892125 | 0.409649 | 0.682063  | 0.981636 | chr21 | 43795039 | 43801896 | + | 0 | NA | intron (intron)     | 8890    | NM_00368E | 8568     | Hs. 110757NM_00368E | ENSG000002RRP1    | -                   | D21S2056F ribosomal protein-coding       |                                           |
| chr22-492 | 6.699495 | 0.365458 | 0.892125 | 0.409649 | 0.682063  | 0.981636 | chr22 | 49220401 | 49221631 | + | 0 | NA | intron (Tigger3a)   | 2382    | NM_024324 | 79174    | Hs. 211282NM_024324 | ENSG000002CRELD2  | -                   | cysteine protein-coding                  |                                           |
| chr22-502 | 6.699495 | 0.365458 | 0.892125 | 0.409649 | 0.682063  | 0.981636 | chr22 | 50222439 | 50223511 | + | 0 | NA | intron (intron)     | 21964   | NM_031454 | 83642    | Hs. 36540E          | ENSG000002SELENOO | -                   | SELO selenoprotein-coding                |                                           |
| chr3-524E | 6.699495 | 0.365458 | 0.892125 | 0.409649 | 0.682063  | 0.981636 | chr3  | 52463155 | 52465214 | + | 0 | NA | intron (Alu)S6 SI   | 8580    | NM_001784 | 11188    | Hs. 435292NM_007184 | ENSG000002NISCH   | -                   | I-1 IR1 Inischarin protein-coding        |                                           |
| chr3-1362 | 6.699495 | 0.365458 | 0.892125 | 0.409649 | 0.682063  | 0.981636 | chr3  | 1.36E+08 | 1.36E+08 | + | 0 | NA | intron (LIM4) LINE  | 29791   | NM_00053E | 5096     | Hs. 63788           | NM_00053E         | ENSG000002PCCB      | -                                        | prionin protein-coding                    |
| chr4-131E | 6.699495 | 0.365458 | 0.892125 | 0.409649 | 0.682063  | 0.981636 | chr4  | 1316197  | 1318828  | + | 0 | NA | intron (intron)     | 7721    | NM_001297 | 10296    | Hs. 13989E          | ENSG000002MAEA    | -                   | EMLP EMP macrophage protein-coding       |                                           |
| chr4-271E | 6.699495 | 0.365458 | 0.892125 | 0.409649 | 0.682063  | 0.981636 | chr4  | 2716084  | 2717594  | + | 0 | NA | intron (Alu)Sx1 SI  | 39497   | NM_02430E | 79155    | Hs. 368551NM_02430E | ENSG000002TNIP2   | -                   | ABIN2 FLI1 TNFAIP3 protein-coding        |                                           |
| chr4-5801 | 6.699495 | 0.365458 | 0.892125 | 0.409649 | 0.682063  | 0.981636 | chr4  | 5801725  | 5803142  | + | 0 | NA | intron (MERIA) DNA  | 85830   | NM_00128E | 1400     | Hs. 13527NM_00131E  | ENSG000002CRMP1   | -                   | CRMP-1 DF collapsin protein-coding       |                                           |
| chr4-581E | 6.699495 | 0.365458 | 0.892125 | 0.409649 | 0.682063  | 0.981636 | chr4  | 5818380  | 5821395  | + | 0 | NA | TTS (NM_C TTS (NM_C | 67926   | NM_00128E | 1400     | Hs. 13527NM_00131E  | ENSG000002CRMP1   | -                   | CRMP-1 DF collapsin protein-coding       |                                           |
| chr4-156E | 6.699495 | 0.365458 | 0.892125 | 0.409649 | 0.682063  | 0.981636 | chr4  | 1.57E+08 | 1.57E+08 | + | 0 | NA | intron (THEIC-int)  | 131466  | NR_036641 | 56034    | Hs. 57085E          | NM_01620E         | ENSG000002PDGFC     | -                                        | FALL0TEIN platelet protein-coding         |
| chr5-171E | 6.699495 | 0.365458 | 0.892125 | 0.409649 | 0.682063  | 0.981636 | chr5  | 1719306  | 37119959 | + | 0 | NA | intron (Alu)Sp SIN  | -129414 | NR_13426E | 1.05E+08 | Hs. 17099E          | NR_13426E         | ENSG000002LOC105374 | -                                        | uncharactericnRNA                         |
| chr5-176E | 6.699495 | 0.365458 | 0.892125 | 0.409649 | 0.682063  | 0.981636 | chr5  | 1.77E+08 | 1.77E+08 | + | 0 | NA | intron (intron)     | -31636  | NM_00211E | 3101     | Hs. 41169E          | NM_00211E         | ENSG000002HK3       | -                                        | HKIII HXK hexokinase protein-coding       |
| chr6-386E | 6.699495 | 0.365458 | 0.892125 | 0.409649 | 0.682063  | 0.981636 | chr6  | 38681953 | 38684266 | + | 0 | NA | intron (AAT)n Si    | 20036   | NM_00670E | 2739     | Hs. 26884E          | NM_00670E         | ENSG000002GLO1      | -                                        | GLOD1 GLYglyoxalase protein-coding        |
| chr6-875E | 6.699495 | 0.365458 | 0.892125 | 0.409649 | 0.682063  | 0.981636 | chr6  | 87552416 | 87553192 | + | 0 | NA | intron (intron)     | 37183   | NM_02032E | 57038    | Hs. 48591NM_02032E  | ENSG000002CARS2   | -                   | ArgRS DAL arginyl-t protein-coding       |                                           |
| chr8-2904 | 6.699495 | 0.365458 | 0.892125 | 0.409649 | 0.682063  | 0.981636 | chr8  | 29048309 | 29049587 | + | 0 | NA | intron (intron)     | 157634  | NM_001324 | 79618    | Hs. 56356E          | NM_02456E         | ENSG000002HMB0X1    | -                                        | HNF1LA Hc homeobox protein-coding         |
| chr9-797E | 6.699495 | 0.365458 | 0.892125 | 0.409649 | 0.682063  | 0.981636 | chr9  | 79727135 | 79727693 | + | 0 | NA | TTS (NM_C TTS (NM_C | -97116  | NR_12121E | 1.02E+08 | Hs. 57163E          | NR_12121E         | LINC01507           | XLOC_000E                                | long intencnRNA                           |
| chr9-9764 | 6.699495 | 0.365458 | 0.892125 | 0.409649 | 0.682063  | 0.981636 | chr9  | 97641334 | 97642631 | + | 0 | NA | intron (intron)     | 8161    | NM_00248E | 4686     | Hs. 59566E          | NM_00248E         | ENSG000002NCBP1     | -                                        | CBP80 NCF nuclear protein-coding          |
| chr9-108E | 6.699495 | 0.365458 | 0.892125 | 0.409649 | 0.682063  | 0.981636 | chr9  | 1.99E+08 | 1.09E+08 | + | 0 | NA | intron (MIRb) SINE  | 26519   | NM_00131E | 8518     | Hs. 49473E          | NM_00364E         | ENSG000002ELP1      | -                                        | DYS FD Elongator protein-coding           |
| chr9-135E | 6.699495 | 0.365458 | 0.892125 | 0.409649 | 0.682063  | 0.981636 | chr9  | 1.36E+08 | 1.36E+08 | + | 0 | NA | intron (intron)     | 88208   | NM_015447 | 157922   | Hs. 52249E          | NM_015447         | ENSG000002CAMSAP1   | -                                        | calmodulin protein-coding                 |
| chr9-137E | 6.699495 | 0.365458 | 0.892125 | 0.409649 | 0.682063  | 0.981636 | chr9  | 1.38E+08 | 1.38E+08 | + | 0 | NA | intron (intron)     | 10085   | NR_14750E | 651337   | Hs. 60319E          | NR_14750E         | ENSG000002LOC651337 | -                                        | uncharactericnRNA                         |
| chr1-1112 | 7.229365 | 0.353169 | 0.862427 | 0.409506 | 0.682168  | 0.981636 | chr1  | 11123842 | 11125111 | + | 0 | NA | intron (intron)     | -19422  | NR_04660E | 1.01E+08 | Hs. 67913E          | NR_04660E         | ENSG000002MOR-AS1   | -                                        | MTOR antincRNA                            |
| chr10-10E | 7.229365 | 0.353169 | 0.862427 | 0.409506 | 0.682168  | 0.981636 | chr10 | 1.03E+08 | 1.03E+08 | + | 0 | NA | intron (LTR86B) L   | 15593   | NM_001351 | 22978    | Hs. 97439           | NM_01222E         | ENSG000002NT5C2     | -                                        | GMP NT5B 5'-nuclec protein-coding         |
| chr14-20E | 7.229365 | 0.353169 | 0.862427 | 0.409506 | 0.682168  | 0.981636 | chr14 | 20369406 | 20371922 | + | 0 | NA | intron (LIM3E) LIN  | 27050   | NM_00104E | 10038    | Hs. 40941E          | NM_00548E         | ENSG000002PARP2     | -                                        | ADPRT2 AI poly(ADP- protein-coding        |
| chr19-24E | 7.229365 | 0.353169 | 0.862427 | 0.409506 | 0.682168  | 0.981636 | chr19 | 24065612 | 24056825 | + | 0 | NA | intron (BMSR Beta)  | 23034   | NM_00127E | 9534     | Hs. 43440E          | NM_00487E         | ENSG000002ZNF254    | -                                        | ZFP69A ZK2F699 zinc finger protein-coding |
| chr20-50E | 7.229365 | 0.353169 | 0.862427 | 0.409506 | 0.682168  | 0.981636 | chr20 | 50634184 | 50635152 | + | 0 | NA | intron (intron)     | 2250    | NM_08082E | 140876   | Hs. 37257E          | NM_08082E         | ENSG000002RIPOR3    | -                                        | C20orf17E RIPOR fan protein-coding        |
| chr21-37E | 7.229365 | 0.353169 | 0.862427 | 0.409506 | 0.682168  | 0.981636 | chr21 | 37181354 | 37181763 | + | 0 | NA | intron (intron)     | 12368   | NR_046651 | 1.01E+08 | Hs. 57041E          | NR_046651         | ENSG000002TTC3-AS1  | -                                        | TTC3 antincRNA                            |
| chr10-60E | 5.916896 | -0.41608 | 1.016301 | -0.40941 | -0.682242 | 0.981636 | chr10 | 60878508 | 60878802 | + | 0 | NA | intron (intron)     | 65530   | NM_00135E | 9886     | Hs. 73737E          | NM_01483E         | ENSG000002RHOBTB1   | -                                        | RHO relat protein-coding                  |
| chr12-62E | 4.205094 | -0.45725 | 1.11691  | -0.40939 | 0.682254  | 0.981636 | chr12 | 62336706 | 62337650 | + | 0 | NA | TTS (NM_C TTS (NM_C | 76774   | NR_14708E | 9958     | Hs. 43495E          | NM_00631E         | ENSG000002CUSP15    | -                                        | UNPH-2 Ubiquitin protein-coding           |
| chr15-40E | 4.205094 | -0.45725 | 1.11691  | -0.40939 | 0.682254  | 0.981636 | chr15 | 40975957 | 40977293 | + | 0 | NA | Intergeni Intergeni | 23154   | NM_00114E | 79094    | Hs. 15556E          | NM_02411E         | ENSG000002CHAC1     | -                                        | ChaC glut protein-coding                  |
| chr2-202E | 4.205094 | -0.45725 | 1.11691  | -0.40939 | 0.682254  | 0.981636 | chr2  | 2.03E+08 | 2.03E+08 | + | 0 | NA | intron (intron)     | -10988  | NM_17351E | 150864   | Hs. 47113E          | NR_17351E         | ENSG000002FAM117B   | -                                        | ALS2CR13 family wiprotein-coding          |
| chr7-158E | 4.205094 | -0.45725 | 1.11691  | -0.40939 | 0.682254  | 0.981636 | chr7  | 1.59E+08 | 1.59E+08 | + | 0 | NA | intron (Alu)Sp SIN  | 49978   | NM_00135E | 55112    | Hs. 38994E          | NM_01805E         | ENSG000002WDR60     | -                                        | FAP163 SFWD repeat protein-coding         |
| chr1-404E | 7.391403 | -0.35086 | 0.857306 | -0.40926 | 0.68235   | 0.981636 | chr1  | 40483852 | 40484695 | + | 0 | NA | intron (Alu)Sx1 SI  | 6983    | NM_00132E | 339559   | Hs. 4438E           | NM_19849E         | ENSG000002ZFP69     | -                                        | ZFP69A ZK2F699 zinc finger protein-coding |
| chr9-324E | 7.391403 | -0.35086 | 0.857306 | -0.40926 | 0.68235   | 0.981636 | chr9  | 32498696 | 32500298 | + | 0 | NA | intron (Alu)Sx2 SI  | 26699   | NM_014314 | 23586    | Hs. 19062E          | NM_014314         | ENSG000002DDX58     | -                                        | RIG-1 RIC DEXD Hc protein-coding          |
| chr16-701 | 12.37457 | 0.27438  | 0.670691 | 0.409101 | 0.682466  | 0.981636 | chr16 | 70121849 | 70124783 | + | 0 | NA | intron (Alu)Jb SIN  | 9690    | NM_00132E | 55066    | Hs. 74404E          | NM_01799E         | ENSG000002PDPR      | -                                        | PDP3 pyruvate protein-coding              |
| chr2-9514 | 12.37457 | 0.27438  | 0.670691 | 0.409101 | 0.682466  | 0.981636 | chr2  | 95147656 | 95157613 | + | 0 | NA | intron (intron)     | 6951    | NM_00131E | 84874    | Hs. 35566E          | NM_03278E         | ENSG000002ZNF514    | -                                        | zinc finger protein-coding                |
| chr12-10E | 7.383545 | -0.34903 | 0.853619 | -0.40889 | 0.682624  | 0.981636 | chr12 | 1.05E+08 | 1.05E+08 | + | 0 | NA | intron (MIR SINE)   | 5495    | NM_001251 | 55198    | Hs. 50660E          | NM_01817E         | ENSG000002APL2      | -                                        | DIP13B adaptor protein-coding             |
| chr14-574 | 7.383545 | -0.34903 | 0.853619 | -0.40889 | 0.682624  | 0.981636 | chr14 | 57409589 | 57410147 | + | 0 | NA | 3' UTR (3' UTR)     | 19282   | NM_001011 | 122830   | Hs. 16546E          | NM_001011         | ENSG000002NAA30     | -                                        | C14orf35 N(alpha)-protein-coding          |
| chr21-14E | 7.383545 | -0.34903 | 0.853619 | -0.40889 | 0.682624  | 0.981636 | chr21 | 14373739 | 14375601 | + | 0 | NA | intron (intron)     | 8476    | NM_00694E | 6782     | Hs. 35234E          | NM_00694E         | ENSG000002HSPA13    | -                                        | STCH heat shock protein-coding            |
| chr9-1284 | 7.383545 | -0.34903 | 0.853619 | -0.40889 | 0.682624  | 0.981636 | chr9  | 1.28E+08 | 1.28E+08 | + | 0 | NA | intron (MER103) E   | -22477  | NM_00100E | 2733     | Hs. 52241E          | NM_00149E         | ENSG000002CGLE1     | -                                        | CAAH CA GLE1 RNA protein-coding           |
| chr3-470E | 10.17681 | -0.3021  | 0.738902 | -0.40885 | 0.682649  | 0.981636 | chr3  | 47037397 | 47038937 | + | 0 | NA | intron (intron)     | 26625   | NR_02404E | 1E+08    | Hs. 20152E          | NR_02404E         | NRADDP              | -                                        | neurotroph pseudo                         |
| chr10-94E | 6.947512 | -0.35942 | 0.879386 | -0.40872 | 0.682747  | 0.981636 | chr10 | 94336363 | 94336694 | + | 0 | NA | intron (MER85) DNA  | 26911   | NM_022451 | 64318    | Hs. 74899           | NM_022451         | ENSG000002NOC3L     | -                                        | AD24 C10C NOC3 like protein-coding        |
| chr11-64E | 6.947512 | -0.35942 | 0.879386 | -0.40872 | 0.682747  | 0.981636 | chr11 | 64261973 | 64263594 | + | 0 | NA | exon (NM exon (NM   | 11254   | NM_00093E | 5331     | Hs. 52376E          | NM_00093E         | ENSG000002CLCB3     | -                                        | phospholip protein-coding                 |
| chr13-197 | 6.947512 | -0.35942 | 0.879386 | -0.40872 | 0.682747  | 0.981636 | chr13 | 19758795 | 19759735 | + | 0 | NA | intron (intron)     | 23680   | NM_001354 | 55269    | Hs. 21319E          | NM_00104E         | ENSG000002PSPC1     | -                                        | PSP1 paraspeck protein-c                  |



|                    |          |          |          |          |          |       |          |          |   |   |    |                     |         |           |          |            |           |                   |                |                |                |                |
|--------------------|----------|----------|----------|----------|----------|-------|----------|----------|---|---|----|---------------------|---------|-----------|----------|------------|-----------|-------------------|----------------|----------------|----------------|----------------|
| chr7-9248 7.196083 | 0.349472 | 0.859992 | 0.406367 | 0.684473 | 0.981636 | chr7  | 92487810 | 92489204 | + | 0 | NA | intron (NCharlie23  | -10561  | NM_00113C | 30816    | ENV ENW    | endogenot | protein-coding    |                |                |                |                |
| chr7-112 7.196083  | 0.349472 | 0.859992 | 0.406367 | 0.684473 | 0.981636 | chr7  | 1.12E+08 | 1.12E+08 | + | 0 | NA | intron (NAluV SINE  | -102124 | NM_001197 | 3475     | Hs. 7879   | ENV ENW   | interferc         | protein-coding |                |                |                |
| chr9-511 7.196083  | 0.349472 | 0.859992 | 0.406367 | 0.684473 | 0.981636 | chr9  | 5113828  | 5114309  | + | 0 | NA | intron (Nintron (N  | 71571   | NM_007175 | 11172    | Hs. 63264  | ENV ENW   | insulin l         | protein-coding |                |                |                |
| chr9-3397 7.196083 | 0.349472 | 0.859992 | 0.406367 | 0.684473 | 0.981636 | chr9  | 33970922 | 33972229 | + | 0 | NA | intron (Nintron (N  | -18721  | NR_00368E | 1E+08    | ENV ENW    | small nuc | snoRNA            |                |                |                |                |
| chr9-1017 7.196083 | 0.349472 | 0.859992 | 0.406367 | 0.684473 | 0.981636 | chr9  | 1.02E+08 | 1.02E+08 | + | 0 | NA | intron (Nintron (N  | 28023   | NM_019592 | 56254    | Hs. 72908  | ENV ENW   | BRE1 BRE1         | ring finger    | protein-coding |                |                |
| chr6-133 9.658498  | -0.31131 | 0.766124 | -0.40635 | 0.684489 | 0.981636 | chr6  | 1.34E+08 | 1.34E+08 | + | 0 | NA | intron (Nintron (N  | 31771   | NM_00486E | 9519     | Hs. 486507 | ENV ENW   | MGC:8389 TATA-box | protein-coding |                |                |                |
| chr2-7141 7.342405 | -0.35227 | 0.866926 | -0.40634 | 0.684491 | 0.981636 | chr2  | 71412438 | 71412996 | + | 0 | NA | intron (N LHS LINE  | -40844  | NM_00113C | 8291     | Hs. 25218  | ENV ENW   | FER1L1 LC         | dysferlin      | protein-coding |                |                |
| chr14-675 11.87798 | 0.280026 | 0.689221 | 0.406293 | 0.684527 | 0.981636 | chr14 | 67321258 | 67321470 | + | 0 | NA | intron (Nintron (N  | 38440   | NM_015994 | 51382    | Hs. 27263  | ENV ENW   | ATP6M VIA         | ATPase H       | protein-coding |                |                |
| chr2-921 12.92015  | 0.268925 | 0.662202 | 0.406108 | 0.684663 | 0.981636 | chr2  | 92198845 | 92200155 | + | 0 | NA | IntergeniALR/Alpha  | 258367  | NR_027714 | 440888   | Hs. 73023  | ENV ENW   | ACTR3BP2          | FKSG73         | ACTR3B         | ps             | pseudo         |
| chr11-10 6.658356  | 0.363781 | 0.895884 | 0.406058 | 0.6847   | 0.981636 | chr11 | 1.08E+08 | 1.08E+08 | + | 0 | NA | intron (Nintron (N  | 80970   | NM_001351 | 472      | Hs. 367437 | ENV ENW   | ATM               | ATM            | serin          | protein-coding |                |
| chr16-12 6.658356  | 0.363781 | 0.895884 | 0.406058 | 0.6847   | 0.981636 | chr16 | 12052331 | 12052866 | + | 0 | NA | intron (Nintron (N  | 75864   | NM_032167 | 92017    | Hs. 458401 | ENV ENW   | SNX29             | SNX29          | l              | protein-coding |                |
| chr2-134 6.658356  | 0.363781 | 0.895884 | 0.406058 | 0.6847   | 0.981636 | chr2  | 1.34E+08 | 1.34E+08 | + | 0 | NA | intron (Nintron (N  | 88187   | NM_00241C | 4249     | Hs. 4988   | ENV ENW   | MGAT5             | GNT-V GNI      | alpha-1, f     | protein-coding |                |
| chr2-402 6.658356  | 0.363781 | 0.895884 | 0.406058 | 0.6847   | 0.981636 | chr2  | 40278637 | 40279019 | + | 0 | NA | intron (NAluS SIN   | -67672  | NM_00136E | 158      | Hs. 75527  | ENV ENW   | ADSL              | AMP5 ASAS      | adenylot       | protein-coding |                |
| chr7-748 6.658356  | 0.363781 | 0.895884 | 0.406058 | 0.6847   | 0.981636 | chr7  | 7487569  | 74858663 | + | 0 | NA | IntergeniLIMB4 LIN  | -6575   | NM_001281 | 84163    | Hs. 647017 | ENV ENW   | GTF2IRD2          | FP630 GTF      | GTF2I          | rep            | protein-coding |
| chr8-970 6.658356  | 0.363781 | 0.895884 | 0.406058 | 0.6847   | 0.981636 | chr8  | 9706432  | 9707509  | + | 0 | NA | exon (NM exon (NM   | -34702  | NR_030327 | 693182   | ENV ENW    | MIR597    | mi                | microRNA       | ncRNA          |                |                |
| chr12-45 6.202907  | 0.38378  | 0.945152 | 0.406051 | 0.684705 | 0.981636 | chr12 | 45874160 | 45875192 | + | 0 | NA | intron (NTigger1 I  | 115898  | NM_00471E | 9169     | Hs. 210367 | ENV ENW   | SCAF11            | CASP11 SF      | SR-relate      | protein-coding |                |
| chr18-54 12.38243  | 0.273127 | 0.67307  | 0.405792 | 0.684895 | 0.981636 | chr18 | 54924912 | 54927104 | + | 0 | NA | intron (NMamRep I   | 32040   | NM_00114E | 80323    | Hs. 12079  | ENV ENW   | CCDC68            | SE57-1         | coiled-c       | protein-coding |                |
| chr12-54 10.63041  | -0.29187 | 0.7193   | -0.40577 | 0.684908 | 0.981636 | chr12 | 54394013 | 54411130 | + | 0 | NA | intron (NAluSg S    | -11273  | NM_00113C | 25946    | Hs. 50565  | ENV ENW   | ZNF385A           | HZF RZF        | zinc           | finger         | protein-coding |
| chr5-128 10.63041  | -0.29187 | 0.7193   | -0.40577 | 0.684908 | 0.981636 | chr5  | 1.29E+08 | 1.29E+08 | + | 0 | NA | intron (Nintron (N  | 2594    | NM_00199E | 2201     | Hs. 51929  | ENV ENW   | PBN2              | CCA DA9 E      | fibri          | protein-coding |                |
| chr6-362 10.63041  | -0.29187 | 0.7193   | -0.40577 | 0.684908 | 0.981636 | chr6  | 36201054 | 36201880 | + | 0 | NA | exon (NM exon (NM   | 4723    | NM_01569E | 27154    | Hs. 52009  | ENV ENW   | BRPF3             | -              | bromodome      | protein-coding |                |
| chr7-134 10.63041  | -0.29187 | 0.7193   | -0.40577 | 0.684908 | 0.981636 | chr7  | 1.35E+08 | 1.35E+08 | + | 0 | NA | intron (Nintron (N  | -24692  | NR_10209E | 340351   | Hs. 64861  | ENV ENW   | AGBL3             | CCP3           | ATP GTP        | l              | protein-coding |
| chr1-838 6.939654  | -0.35752 | 0.881191 | -0.40572 | 0.684948 | 0.981636 | chr1  | 8388365  | 8390369  | + | 0 | NA | intron (Nintron (N  | 34465   | NM_00104E | 473      | Hs. 463041 | ENV ENW   | ERERE             | ARG ARP A      | arginine-      | protein-coding |                |
| chr1-539 6.939654  | -0.35752 | 0.881191 | -0.40572 | 0.684948 | 0.981636 | chr1  | 53965173 | 53966864 | + | 0 | NA | intron (Nintron (N  | 19668   | NM_00125E | 115353   | Hs. 40094  | ENV ENW   | LRRRC42           | dJ167A19.      | leucine        | protein-coding |                |
| chr1-1137 6.939654 | -0.35752 | 0.881191 | -0.40572 | 0.684948 | 0.981636 | chr1  | 1.14E+08 | 1.14E+08 | + | 0 | NA | intron (Nintron (N  | -15135  | NM_00132E | 10745    | Hs. 65582  | ENV ENW   | PHTF1             | PHTF1          | putative       | protein-coding |                |
| chr12-48 6.939654  | -0.35752 | 0.881191 | -0.40572 | 0.684948 | 0.981636 | chr12 | 48678565 | 48679005 | + | 0 | NA | intron (Nintron (N  | 3453    | NM_01782E | 54934    | Hs. 50541  | ENV ENW   | KANSL2            | C12orf41 KAT8  | regu           | protein-coding |                |
| chr12-12 6.939654  | -0.35752 | 0.881191 | -0.40572 | 0.684948 | 0.981636 | chr12 | 1.22E+08 | 1.22E+08 | + | 0 | NA | intron (NAluSx SIN  | 26193   | NM_00135E | 55596    | Hs. 37706  | ENV ENW   | ZCCHC8            | -              | zinc           | finger         | protein-coding |
| chr15-42 6.939654  | -0.35752 | 0.881191 | -0.40572 | 0.684948 | 0.981636 | chr15 | 42229502 | 42229912 | + | 0 | NA | intron (Nintron (N  | -21403  | NM_01528E | 23339    | Hs. 88025  | ENV ENW   | VP39              | TLP VAM6       | VPS39          | sub            | protein-coding |
| chr16-69 6.939654  | -0.35752 | 0.881191 | -0.40572 | 0.684948 | 0.981636 | chr16 | 69787446 | 69788122 | + | 0 | NA | intron (N L2a LINE  | 25452   | NM_007014 | 11060    | Hs. 40845  | ENV ENW   | WPP2              | AIP2 WPP2      | WW             | domain         | protein-coding |
| chr2-272 6.939654  | -0.35752 | 0.881191 | -0.40572 | 0.684948 | 0.981636 | chr2  | 27219003 | 27219341 | + | 0 | NA | intron (Nintron (N  | 1782    | NM_00130E | 790      | Hs. 37701  | ENV ENW   | CCAD              | CDG1Z EIF      | carbamoyl      | protein-coding |                |
| chr2-32 6.939654   | -0.35752 | 0.881191 | -0.40572 | 0.684948 | 0.981636 | chr2  | 32859448 | 32862143 | + | 0 | NA | 3' UTR (N3' UTR (N  | 59997   | NM_00036E | 7078     | Hs. 64463  | ENV ENW   | TIMP3             | HSMRK222 TIMP  | met            | protein-coding |                |
| chr4-118 6.939654  | -0.35752 | 0.881191 | -0.40572 | 0.684948 | 0.981636 | chr4  | 1.19E+08 | 1.19E+08 | + | 0 | NA | exon (NM exon (NM   | 46108   | NM_020961 | 57721    | Hs. 59687  | ENV ENW   | MTTL14            | hMETTL14       | methyl         | protein-coding |                |
| chr7-233 6.939654  | -0.35752 | 0.881191 | -0.40572 | 0.684948 | 0.981636 | chr7  | 23321380 | 23322118 | + | 0 | NA | intron (N LIPA3 LI  | 22410   | NM_13844E | 115416   | Hs. 87385  | ENV ENW   | MALSU1            | C7orf30 NMI    | tochon         | protein-coding |                |
| chr8-230 6.939654  | -0.35752 | 0.881191 | -0.40572 | 0.684948 | 0.981636 | chr8  | 23011281 | 23013940 | + | 0 | NA | intron (N LIME3B LI | 13800   | NM_01517E | 23221    | Hs. 37268  | ENV ENW   | RHOBT2            | DBC2 EIFE      | Rho            | relat          | protein-coding |
| chr14-751 10.63827 | -0.29315 | 0.722658 | -0.40565 | 0.684998 | 0.981636 | chr14 | 75133753 | 75135735 | + | 0 | NA | 3' UTR (N3' UTR (N  | -7696   | NM_00132E | 91754    | Hs. 7200   | ENV ENW   | CNEK9             | APUG LCCS      | NIMA           | rel            | protein-coding |
| chr16-317 10.90237 | 0.298603 | 0.735002 | 0.405527 | 0.68509  | 0.981636 | chr16 | 31723534 | 31723821 | + | 0 | NA | intron (Nintron (N  | 10448   | NM_00113C | 124411   | Hs. 52882  | ENV ENW   | ZNF720            | -              | zinc           | finger         | protein-coding |
| chr6-965 5.616182  | 0.404283 | 0.997624 | 0.405246 | 0.685297 | 0.981636 | chr6  | 96540436 | 96540892 | + | 0 | NA | intron (Nintron (N  | 18858   | NM_01532E | 23376    | Hs. 149367 | ENV ENW   | UFL1              | KIAA0776 UFMI  | spec           | protein-coding |                |
| chr6-321 10.86909  | 0.295575 | 0.729629 | 0.405103 | 0.685402 | 0.981636 | chr6  | 32187876 | 32188075 | + | 0 | NA | exon (NM exon (NM   | 2227    | NM_00258E | 5089     | Hs. 50954  | ENV ENW   | PBX2              | G17 HOX12      | PBX            | home           | protein-coding |
| chr1-111 6.666214  | 0.361536 | 0.893013 | 0.40485  | 0.685588 | 0.981636 | chr1  | 11197034 | 11199714 | + | 0 | NA | intron (Nintron (N  | 9019    | NM_02114E | 10218    | Hs. 14655  | ENV ENW   | ANGPTL7           | AngX CDT       | angiopoie      | protein-coding |                |
| chr10-91 6.666214  | 0.361536 | 0.893013 | 0.40485  | 0.685588 | 0.981636 | chr10 | 91966806 | 91968160 | + | 0 | NA | intron (Nintron (N  | 43713   | NM_00397E | 9044     | Hs. 50052  | ENV ENW   | BTAF1             | MOT1 TAF       | B-TFID         | l              | protein-coding |
| chr11-78 6.666214  | 0.361536 | 0.893013 | 0.40485  | 0.685588 | 0.981636 | chr11 | 78206024 | 78206251 | + | 0 | NA | intron (Nintron (N  | 17218   | NM_02079E | 57558    | Hs. 53124  | ENV ENW   | CUSP35            | -              | ubiquit        | protein-coding |                |
| chr14-40 6.666214  | 0.361536 | 0.893013 | 0.40485  | 0.685588 | 0.981636 | chr14 | 30673799 | 30675751 | + | 0 | NA | intron (Nintron (N  | 52456   | NM_01610E | 23256    | Hs. 36916  | ENV ENW   | SCDF1             | C14orf16E      | secl           | fam            | protein-coding |
| chr14-44 6.666214  | 0.361536 | 0.893013 | 0.40485  | 0.685588 | 0.981636 | chr14 | 44939957 | 44941969 | + | 0 | NA | intron (NAluSg SIN  | 20522   | NM_00130E | 54813    | Hs. 55090  | ENV ENW   | KLHL28            | BTBD5          | kelch          | lik            | protein-coding |
| chr16-70 6.666214  | 0.361536 | 0.893013 | 0.40485  | 0.685588 | 0.981636 | chr16 | 70009488 | 70013931 | + | 0 | NA | intron (Nintron (N  | -18637  | NR_03626E | 1E+08    | ENV ENW    | MIR1972-2 | -                 | microRNA       | ncRNA          |                |                |
| chr16-87 6.666214  | 0.361536 | 0.893013 | 0.40485  | 0.685588 | 0.981636 | chr16 | 87409770 | 87411845 | + | 0 | NA | intron (NMERSB DNA  | 18471   | NM_02281E | 81631    | Hs. 356061 | ENV ENW   | MAP1LC3B          | ATG8F LC       | microtub       | protein-coding |                |
| chr17-56 6.666214  | 0.361536 | 0.893013 | 0.40485  | 0.685588 | 0.981636 | chr17 | 54958383 | 54961581 | + | 0 | NA | intron (Nintron (N  | 8672    | NR_135677 | 1353     | Hs. 59117  | ENV ENW   | COX11             | COX11P         | cytochro       | protein-coding |                |
| chr17-74 6.666214  | 0.361536 | 0.893013 | 0.40485  | 0.685588 | 0.981636 | chr17 | 76768936 | 76771438 | + | 0 | NA | intron (NAluY SINE  | -28857  | NR_110837 | 1.02E+08 | Hs. 61720  | ENV ENW   | LINC0208C         | -              | long           | int            | ncRNA          |
| chr18-48 6.666214  | 0.361536 | 0.893013 | 0.40485  | 0.685588 | 0.981636 | chr18 | 48816709 | 48820076 | + | 0 | NA | intron (N L2 LINE L | 124415  | NM_00119C | 4        |            |           |                   |                |                |                |                |



|                    |          |          |          |          |          |       |          |          |   |   |    |                    |                   |                            |                     |                     |                               |                           |
|--------------------|----------|----------|----------|----------|----------|-------|----------|----------|---|---|----|--------------------|-------------------|----------------------------|---------------------|---------------------|-------------------------------|---------------------------|
| chr6-8761 7.203941 | 0.347381 | 0.860114 | 0.403879 | 0.686302 | 0.981636 | chr6  | 87611266 | 87613862 | + | 0 | NA | intron (Nintron (N | 22497 NM_012381   | 23595 Hs. 41022ENM_012381  | ENSG000000C0RC3     | LAT1                | LATHE origin reprotein-coding |                           |
| chr6-1057 7.203941 | 0.347381 | 0.860114 | 0.403879 | 0.686302 | 0.981636 | chr6  | 1.05E+08 | 1.05E+08 | + | 0 | NA | intron (Nintron (N | 50949 NM_00272f   | 5550 Hs. 436564NM_00272f   | ENSG000000PREP      | PE1                 | PEP prolyl erprotein-coding   |                           |
| chr7-591f 7.203941 | 0.347381 | 0.860114 | 0.403879 | 0.686302 | 0.981636 | chr7  | 5910169  | 5912094  | + | 0 | NA | intron (Nintron (N | 12398 NM_015622   | 51622 Hs. 530000NM_015622  | ENSG000000CCZ1      | C7orf28A            | CCZ1 homcprotein-coding       |                           |
| chr7-101f 7.203941 | 0.347381 | 0.860114 | 0.403879 | 0.686302 | 0.981636 | chr7  | 1.01E+08 | 1.01E+08 | + | 0 | NA | intron (NAluX1 S1  | 6481 NM_001084    | 8985 Hs. 153357NM_001084   | ENSG000000PLOD3     | LH3                 | procollagprotein-coding       |                           |
| chr9-128f 7.203941 | 0.347381 | 0.860114 | 0.403879 | 0.686302 | 0.981636 | chr9  | 1.29E+08 | 1.29E+08 | + | 0 | NA | intron (Nintron (N | -14584 NM_00443f  | 2021 Hs. 745161NM_00443f   | ENSG000000ENDOG     | -                   | endonucleprotein-coding       |                           |
| chr9-132f 7.203941 | 0.347381 | 0.860114 | 0.403879 | 0.686302 | 0.981636 | chr9  | 1.32E+08 | 1.32E+08 | + | 0 | NA | intron (NAluX3 S1  | 17405 NR_13452f   | 7270 Hs. 54780 NM_007344   | ENSG000000TTF1      | TTF-1               | TTF transcrip protein-coding  |                           |
| chrX-166f 7.203941 | 0.347381 | 0.860114 | 0.403879 | 0.686302 | 0.981636 | chrX  | 16692955 | 16693349 | + | 0 | NA | exon (NM exon (NM  | 19065 NM_001144   | 56474 Hs. 227049NM_019857  | ENSG000000CTPS2     | -                   | CTP syntp protein-coding      |                           |
| chrX-406f 7.203941 | 0.347381 | 0.860114 | 0.403879 | 0.686302 | 0.981636 | chrX  | 40688336 | 40688673 | + | 0 | NA | exon (NM exon (NM  | -40943 NM_00133C  | 159013 Hs. 495961NM_14497  | ENSG000000CXorf38   | -                   | chromosonprotein-coding       |                           |
| chr6-149f 10.15324 | -0.29815 | 0.738298 | -0.40383 | 0.686337 | 0.981636 | chr6  | 1.5E+08  | 1.5E+08  | + | 0 | NA | non-codiron-codir  | -13058 NM_001204  | 11104 Hs. 450177NM_007044  | ENSG000000KATNA1    | -                   | katanin cprotein-coding       |                           |
| chr12-114 7.416826 | -0.34427 | 0.852675 | -0.40376 | 0.68639  | 0.981636 | chr12 | 1.15E+08 | 1.15E+08 | + | 0 | NA | intron (Nintron (N | 8991 NM_01656f    | 6926 Hs. 74401fNM_00599f   | ENSG000000TBX3      | TBX3-ISO1           | T-box tr3protein-coding       |                           |
| chr15-55f 7.416826 | -0.34427 | 0.852675 | -0.40376 | 0.68639  | 0.981636 | chr15 | 55830179 | 55831075 | + | 0 | NA | intron (Nintron (N | 86504 NM_001284   | 4734 Hs. 1565 NM_006154    | ENSG000000NEDD4     | NEDD4-1             | fNEDD4 e3 protein-coding      |                           |
| chr16-10f 7.416826 | -0.34427 | 0.852675 | -0.40376 | 0.68639  | 0.981636 | chr16 | 10927478 | 10928903 | + | 0 | NA | TTS (NM_TTS (NM_C  | 14278 NM_01401f   | 28955 Hs. 592051NM_01401f  | ENSG000000DEX1      | MYLE                | Dexi homcprotein-coding       |                           |
| chr18-58f 7.416826 | -0.34427 | 0.852675 | -0.40376 | 0.68639  | 0.981636 | chr18 | 58500417 | 58502959 | + | 0 | NA | intron (NMTIR SINE | -50536 NR_03989f  | NR_03989f                  | ENSG000000MIR3591   | -                   | microRNA ncRNA                |                           |
| chr2-227 7.416826  | -0.34427 | 0.852675 | -0.40376 | 0.68639  | 0.981636 | chr2  | 2.33E+08 | 2.33E+08 | + | 0 | NA | intron (NAluX1 S1  | -20215 NM_00117f  | 3769 Hs. 46733fNM_00224f   | ENSG000000KCNJ13    | KIR1.4              | KIpotassiumprotein-coding     |                           |
| chr4-168f 7.416826 | -0.34427 | 0.852675 | -0.40376 | 0.68639  | 0.981636 | chr4  | 1.68E+08 | 1.68E+08 | + | 0 | NA | intron (Nintron (N | 79974 NM_001291   | 91351 Hs. 535011NM_00101f  | ENSG000000DDX60L    | -                   | DEX/H-bcprotein-coding        |                           |
| chr5-782f 7.416826 | -0.34427 | 0.852675 | -0.40376 | 0.68639  | 0.981636 | chr5  | 78259010 | 78260062 | + | 0 | NA | intron (NLMIA1 LIN | 35162 NM_001271   | 8546 Hs. 532091NM_003664   | ENSG000000AP3B1     | ADTB3               | AD1adaptor rprotein-coding    |                           |
| chr9-132f 7.416826 | -0.34427 | 0.852675 | -0.40376 | 0.68639  | 0.981636 | chr9  | 1.33E+08 | 1.33E+08 | + | 0 | NA | intron (Nintron (N | -6448 NR_024514   | 11093 Hs. 13143fNM_13902f  | ENSG000000ADAMTS13  | ADAM-TS1f           | ADAM meteprotein-coding       |                           |
| chr1-126 6.898514  | -0.36064 | 0.893856 | -0.40346 | 0.686607 | 0.981636 | chr1  | 1.13E+08 | 1.13E+08 | + | 0 | NA | exon (NM exon (NM  | 10871 NM_001042   | 389 Hs. 50265fNM_17574f    | ENSG000000RHOC      | ARH9                | ARHc ras homolprotein-coding  |                           |
| chr10-501 6.898514 | -0.36064 | 0.893856 | -0.40346 | 0.686607 | 0.981636 | chr10 | 50112863 | 50113157 | + | 0 | NA | intron (NLMIB7 LIN | 45056 NM_00100f   | 387680 Hs. 36528fNM_01823f | ENSG000000WASHC2A   | FAM21A              | fWASH comprotein-coding       |                           |
| chr14-73f 6.898514 | -0.36064 | 0.893856 | -0.40346 | 0.686607 | 0.981636 | chr14 | 73913091 | 73913538 | + | 0 | NA | intron (NLTRE1 LTF | 26455 NR_040251   | 57862 Hs. 27086fNM_02118f  | ENSG000000ZNF410    | APA-1               | APAzinc fingprotein-coding    |                           |
| chr17-82f 6.898514 | -0.36064 | 0.893856 | -0.40346 | 0.686607 | 0.981636 | chr17 | 82329129 | 8229453  | + | 0 | NA | intron (Nintron (N | -5248 NR_026951   | 284209 Hs. 12169fNM_17362f | ENSG000000C17orf44  | C17orf44            | long intcncRNA                |                           |
| chr17-42f 6.898514 | -0.36064 | 0.893856 | -0.40346 | 0.686607 | 0.981636 | chr17 | 42380741 | 42380940 | + | 0 | NA | intron (NAluJb SIN | 7602 NM_00136f    | 6774 Hs. 46305fNM_00315f   | ENSG000000STAT3     | ADM10               | ADM signal tprotein-coding    |                           |
| chr2-179f 6.898514 | -0.36064 | 0.893856 | -0.40346 | 0.686607 | 0.981636 | chr2  | 1.8E+08  | 1.8E+08  | + | 0 | NA | intron (Nintron (N | 37251 NM_02094f   | 57703 Hs. 31136fNM_02094f  | ENSG000000CWC22     | EIF4GL              | NCWC22 splprotein-coding      |                           |
| chr22-36f 6.898514 | -0.36064 | 0.893856 | -0.40346 | 0.686607 | 0.981636 | chr22 | 36359450 | 36359886 | + | 0 | NA | intron (Nintron (N | 28399 NM_00247f   | 4627 Hs. 474751NM_00247f   | ENSG000000MYH9      | BDPLT6              | DFmyosin heprotein-coding     |                           |
| chr3-132f 6.898514 | -0.36064 | 0.893856 | -0.40346 | 0.686607 | 0.981636 | chr3  | 1.33E+08 | 1.33E+08 | + | 0 | NA | intron (NLMIP7 LIN | 14962 NM_17844f   | 51554 Hs. 31051fNM_01655f  | ENSG000000ACKR4     | CC-CKR              | -11atypical protein-coding    |                           |
| chr4-474f 6.898514 | -0.36064 | 0.893856 | -0.40346 | 0.686607 | 0.981636 | chr4  | 47578267 | 47578913 | + | 0 | NA | intron (Nintron (N | -74709 NR_10702C  | 1.02E+08                   | NR_10702C           | ENSG000000MIR8053   | hsa-mir-5                     | microRNA ncRNA            |
| chr5-145f 6.898514 | -0.36064 | 0.893856 | -0.40346 | 0.686607 | 0.981636 | chr5  | 1.49E+08 | 1.49E+08 | + | 0 | NA | intron (Nintron (N | 51330 NM_001271   | 1452 Hs. 52986fNM_00189f   | ENSG000000CSNK1A1   | K11                 | CK1acasein kiprotein-coding   |                           |
| chr5-154f 6.898514 | -0.36064 | 0.893856 | -0.40346 | 0.686607 | 0.981636 | chr5  | 1.54E+08 | 1.54E+08 | + | 0 | NA | intron (NMTIR SINE | -48536 NR_03162f  | fE+08                      | NR_03162f           | ENSG000000MIR1294   | MIRN1294                      | microRNA ncRNA            |
| chr8-119f 6.898514 | -0.36064 | 0.893856 | -0.40346 | 0.686607 | 0.981636 | chr8  | 1.19E+08 | 1.19E+08 | + | 0 | NA | TTS (NM_TTS (NM_C  | -40569 NR_13429f  | 1.02E+08                   | Hs. 67659fNR_13429f | ENSG000000LOC101927 | -                             | uncharactncRNA            |
| chr9-129f 6.898514 | -0.36064 | 0.893856 | -0.40346 | 0.686607 | 0.981636 | chr9  | 1.3E+08  | 1.3E+08  | + | 0 | NA | 3' UTR (N3' UTR (N | 20025 NR_106914   | 1.02E+08                   | NR_106914           | ENSG000000MIR6855   | hsa-mir-5                     | microRNA ncRNA            |
| chr1-246f 7.408968 | -0.3425  | 0.849006 | -0.40341 | 0.686647 | 0.981636 | chr1  | 24673882 | 24677432 | + | 0 | NA | Intergenil2 LINE I | 32078 NM_00136f   | 10250 Hs. 1819f            | NM_00583f           | ENSG000000SSRM1     | 160-KD                        | PCserine arprotein-coding |
| chr1-326f 7.408968 | -0.3425  | 0.849006 | -0.40341 | 0.686647 | 0.981636 | chr1  | 32691253 | 32692409 | + | 0 | NA | intron (NMER33 DNA | 10939 NM_001161   | 81943 Hs. 712631NM_03078f  | ENSG000000SYNC      | SYNC1               | SYN syncoilir protein-coding  |                           |
| chr1-333f 7.408968 | -0.3425  | 0.849006 | -0.40341 | 0.686647 | 0.981636 | chr1  | 33358961 | 33359804 | + | 0 | NA | intron (Nintron (N | 9030 NR_12597f    | 1.02E+08                   | Hs. 56862fNR_12597f | ENSG000000LOC10192f | -                             | uncharactncRNA            |
| chr1-519f 7.408968 | -0.3425  | 0.849006 | -0.40341 | 0.686647 | 0.981636 | chr1  | 51939461 | 51945109 | + | 0 | NA | intron (Nintron (N | 48415 NM_00286f   | 5865 Hs. 12307fNM_00286f   | ENSG000000CRAB3B    | -                   | RAB3B, meprotein-coding       |                           |
| chr10-12f 7.408968 | -0.3425  | 0.849006 | -0.40341 | 0.686647 | 0.981636 | chr10 | 1.25E+08 | 1.25E+08 | + | 0 | NA | intron (Nintron (N | 50156 NM_001321   | 1488 Hs. 50134fNM_00132f   | ENSG000000CTBP2     | -                   | C-termin protein-coding       |                           |
| chr11-56f 7.408968 | -0.3425  | 0.849006 | -0.40341 | 0.686647 | 0.981636 | chr11 | 5668593  | 5670762  | + | 0 | NA | intron (Nintron (N | 15397 NR_03309f   | 85363 Hs. 12530fNM_03303f  | ENSG000000TRIM5     | RNF88               | TRI tripartitprotein-coding   |                           |
| chr16-84f 7.408968 | -0.3425  | 0.849006 | -0.40341 | 0.686647 | 0.981636 | chr16 | 84563710 | 84569667 | + | 0 | NA | 3' UTR (N3' UTR (N | 51390 NM_02114f   | 23406 Hs. 28909fNM_02114f  | ENSG000000COTL1     | CLP                 | coactosir protein-coding      |                           |
| chr17-36f 7.408968 | -0.3425  | 0.849006 | -0.40341 | 0.686647 | 0.981636 | chr17 | 36571792 | 36573526 | + | 0 | NA | intron (NAluJb SIN | -19220 NM_02430f  | 79154 Hs. 46285fNM_02430f  | ENSG000000DHR511    | ARGH836             | Scdehydrogprotein-coding      |                           |
| chr17-74f 7.408968 | -0.3425  | 0.849006 | -0.40341 | 0.686647 | 0.981636 | chr17 | 74206149 | 74207149 | + | 0 | NA | intron (NAluY SINE | 3142 NM_00103f    | 6169 Hs. 38095fNM_00099f   | ENSG000000RPL38     | L38                 | ribosomalprotein-coding       |                           |
| chr17-77f 7.408968 | -0.3425  | 0.849006 | -0.40341 | 0.686647 | 0.981636 | chr17 | 77214888 | 77218463 | + | 0 | NA | 3' UTR (N3' UTR (N | 31462 NM_001144   | 6397 Hs. 464184NM_00300f   | ENSG000000SEC14L1   | PRELID4A            | SEC14 ilkprotein-coding       |                           |
| chr19-17f 7.408968 | -0.3425  | 0.849006 | -0.40341 | 0.686647 | 0.981636 | chr19 | 17204084 | 17209748 | + | 0 | NA | intron (Nintron (N | -8440 NM_01846f   | 58550 Hs. 16187            | NM_01846f           | ENSG000000USE1      | D12                           | MDSOconventprotein-coding |
| chr19-48f 7.408968 | -0.3425  | 0.849006 | -0.40341 | 0.686647 | 0.981636 | chr19 | 48188049 | 48189482 | + | 0 | NA | intron (NAluY SINE | 18085 NR_1199341  | 374920 Hs. 664054NM_199341 | ENSG000000ZSWIM9    | C19orf68            | zinc fingprotein-coding       |                           |
| chr2-951f 7.408968 | -0.3425  | 0.849006 | -0.40341 | 0.686647 | 0.981636 | chr2  | 9519165  | 9522523  | + | 0 | NA | intron (NAluSp SIN | 34986 NM_00318f   | 6868 Hs. 404914NM_00318f   | ENSG000000ADAM17    | ADAM18              | CI ADAM meteprotein-coding    |                           |
| chr2-156f 7.408968 | -0.3425  | 0.849006 | -0.40341 | 0.686647 | 0.981636 | chr2  | 15620935 | 15633854 | + | 0 | NA | intron (Nintron (N | 35526 NM_00493f   | 1653 Hs. 44059fNM_00493f   | ENSG000000DDX1      | DBP-RE              | UBDEAD-box protein-coding     |                           |
| chr2-1327 7.408968 | -0.3425  | 0.849006 | -0.40341 | 0.686647 | 0.981636 | chr2  | 1.33E+08 | 1.33E+08 | + | 0 | NA | intron (Nintron (N | -110282 NR_00107f | 116372 Hs. 43239fNM_14458f | ENSG000000LYPD1     | LYPD1               | PL-LY6/PLAUf protein-coding   |                           |
| chr20-38f 7.408968 | -0.3425  | 0.849006 | -0.40341 | 0.686647 | 0.981636 | chr20 | 3800748  | 38006470 | + | 0 | NA | intron (Nintron (N | 3547 NM_001287    | 994 Hs. 15375fNM_00435f    | ENSG000000CDC25B    | -                   | cell diviprotein-coding       |                           |
| chr21-25f 7.408968 | -0.3425  | 0.849006 | -0.40341 | 0.686647 | 0.981636 | chr21 | 25596295 | 25597355 | + | 0 | NA | intron (NTiger19a  | 10664 NM_01744f   | 54148 Hs. 42069fNM_01744f  | ENSG000000MRPL39    | C21orf92            | mitochoncprotein-coding       |                           |
| chr3-472f 7.408968 | -0.3425  | 0.849006 | -0.40341 | 0.686647 | 0.981636 | chr3  | 47728161 | 47728966 | + | 0 | NA | intron (NLM5 LINE  | 53330 NM_003074   | 6599 Hs. 47617fNM_003074   | ENSG000000SMARCC1   | BAP155              | CFSWI/ SNF rprotein-coding    |                           |
| chr3-177f 7.408968 | -0.3425  | 0.849006 | -0.40341 | 0.686647 | 0.981636 | chr3  | 1.72E+08 |          |   |   |    |                    |                   |                            |                     |                     |                               |                           |



|           |          |          |          |          |          |          |       |          |           |   |      |                     |                  |                   |           |                     |                                       |
|-----------|----------|----------|----------|----------|----------|----------|-------|----------|-----------|---|------|---------------------|------------------|-------------------|-----------|---------------------|---------------------------------------|
| chr15-801 | 7.40111  | -0.34074 | 0.848863 | -0.40141 | 0.68812  | 0.981636 | chr15 | 80122732 | 80123942  | + | 0 NA | intron (Nintron (N  | 24921 NM_001242  | 54469 Hs. 596679  | NR_019006 | ENSG000002ZFAND6    | AWP1 ZA2C zinc finger protein-coding  |
| chr16-676 | 7.40111  | -0.34074 | 0.848863 | -0.40141 | 0.68812  | 0.981636 | chr16 | 67619841 | 67621710  | + | 0 NA | exon (NM exon (NM   | -24369 NM_001013 | 146206 Hs. 611432 | NR_001013 | ENSG000003CARMIL2   | CARMIL2 capping protein-coding        |
| chr17-497 | 7.40111  | -0.34074 | 0.848863 | -0.40141 | 0.68812  | 0.981636 | chr17 | 4970541  | 4973004   | + | 0 NA | intron (NAluS6 SI   | -1622 NR_106925  | 1.02E+08          | NR_106925 | ENSG000003MIR6865   | hsa-mir-6microRNA ncRNA               |
| chr17-275 | 7.40111  | -0.34074 | 0.848863 | -0.40141 | 0.68812  | 0.981636 | chr17 | 27315519 | 27318348  | + | 0 NA | IntergeniMER30 DNA  | 22819 NM_134265  | 26118 Hs. 446017  | NR_015626 | ENSG000003WSB1      | SWP1 WSEWD repeat protein-coding      |
| chr17-356 | 7.40111  | -0.34074 | 0.848863 | -0.40141 | 0.68812  | 0.981636 | chr17 | 35684631 | 356897243 | + | 0 NA | intron (NAluSq2 SI  | -45702 NM_033315 | 91608 Hs. 744994  | NR_033315 | ENSG000003RASL10B   | RRP17 VTSRAS like protein-coding      |
| chr17-376 | 7.40111  | -0.34074 | 0.848863 | -0.40141 | 0.68812  | 0.981636 | chr17 | 37617146 | 37620174  | + | 0 NA | intron (NAluSp SIN  | -3621 NR_106744  | 1.02E+08          | NR_106744 | ENSG000003MIR378J   | hsa-mir-3microRNA ncRNA               |
| chr17-385 | 7.40111  | -0.34074 | 0.848863 | -0.40141 | 0.68812  | 0.981636 | chr17 | 38323131 | 38323603  | + | 0 NA | TTS (NM_CTS (NM_C   | 20443 NM_001004  | 440435 Hs. 462915 | NR_001004 | ENSG000003GPR179    | CSNB1E GFG protein protein-coding     |
| chr17-400 | 7.40111  | -0.34074 | 0.848863 | -0.40141 | 0.68812  | 0.981636 | chr17 | 40025086 | 40026686  | + | 0 NA | TTS (NR_ITTS (NR_I  | 523 NR_106944    | 1.02E+08          | NR_106944 | ENSG000003MIR6884   | hsa-mir-6microRNA ncRNA               |
| chr17-470 | 7.40111  | -0.34074 | 0.848863 | -0.40141 | 0.68812  | 0.981636 | chr17 | 47049405 | 47049799  | + | 0 NA | IntergeniIntergeni  | -70349 NM_20340C | 388394 Hs. 367999 | NR_20340C | ENSG000003RPRML     | - reprimol protein-coding             |
| chr18-96C | 7.40111  | -0.34074 | 0.848863 | -0.40141 | 0.68812  | 0.981636 | chr18 | 9600638  | 9601423   | + | 0 NA | intron (Nintron (N  | 13529 NR_052003  | 9989 Hs. 743236   | NR_005134 | ENSG000003PPP4R1    | MEG1 PP4 protein protein-coding       |
| chr2-9355 | 7.40111  | -0.34074 | 0.848863 | -0.40141 | 0.68812  | 0.981636 | chr2  | 9359013  | 9360424   | + | 0 NA | intron (Nintron (N  | 62964 NM_001315  | 9270 Hs. 467662   | NR_004765 | ENSG000003ITGB1BP1  | ICAP-1A Integrin protein-coding       |
| chr2-261C | 7.40111  | -0.34074 | 0.848863 | -0.40141 | 0.68812  | 0.981636 | chr2  | 26109738 | 26113448  | + | 0 NA | intron (NAluSp SIN  | -61495 NM_001168 | 150946 Hs. 187912 | NR_001168 | ENSG000003GAREM2    | FAM59B GARGB2 asc protein-coding      |
| chr2-8648 | 7.40111  | -0.34074 | 0.848863 | -0.40141 | 0.68812  | 0.981636 | chr2  | 86488498 | 86491814  | + | 0 NA | intron (Nintron (N  | 48660 NM_001146  | 55818 Hs. 557422  | NR_018433 | ENSG000003KDM3A     | JHDM2A JF lysine deprotein-coding     |
| chr2-1087 | 7.40111  | -0.34074 | 0.848863 | -0.40141 | 0.68812  | 0.981636 | chr2  | 1.09E+08 | 1.09E+08  | + | 0 NA | intron (Nintron (N  | -5131 NM_001351  | 165055 Hs. 362702 | NR_106930 | ENSG000003CCDC138   | - coiled-co protein-coding            |
| chr2-1357 | 7.40111  | -0.34074 | 0.848863 | -0.40141 | 0.68812  | 0.981636 | chr2  | 1.36E+08 | 1.36E+08  | + | 0 NA | 3' UTR (N3' UTR (N  | -35654 NR_04548E | 1.01E+08          | NR_04548E | ENSG000003LOC100507 | - uncharactericncRNA                  |
| chr21-648 | 7.40111  | -0.34074 | 0.848863 | -0.40141 | 0.68812  | 0.981636 | chr21 | 6489074  | 6493711   | + | 0 NA | intron (Nintron (N  | 7856 NM_00132C   | 1.03E+08          | NR_00132C | ENSG000003U2AF1L5   | - U2 small protein-coding             |
| chr3-4767 | 7.40111  | -0.34074 | 0.848863 | -0.40141 | 0.68812  | 0.981636 | chr3  | 47675379 | 47679276  | + | 0 NA | intron (NAluSx1 SI  | -15633 NR_145791 | 1.1E+08           | NR_145791 | SNORD146            | - small nucsnoRNA                     |
| chr3-158E | 7.40111  | -0.34074 | 0.848863 | -0.40141 | 0.68812  | 0.981636 | chr3  | 1.59E+08 | 1.59E+08  | + | 0 NA | intron (Nintron (N  | 7642 NM_02016E   | 56925 Hs. 478067  | NR_02016E | ENSG000003LXN       | ECI TCI latexin protein-coding        |
| chr4-143E | 7.40111  | -0.34074 | 0.848863 | -0.40141 | 0.68812  | 0.981636 | chr4  | 1.44E+08 | 1.44E+08  | + | 0 NA | intron (NMER20 DNA  | -16716 NR_104027 | 1E+08             | NR_104027 | ENSG000003SMARCA5-A | SMARCA5 encRNA                        |
| chr5-149C | 7.40111  | -0.34074 | 0.848863 | -0.40141 | 0.68812  | 0.981636 | chr5  | 1490338  | 1493011   | + | 0 NA | intron (NLooper DN  | 19182 NR_106722  | 1.02E+08          | NR_106722 | ENSG000003MIR6075   | hsa-mir-6microRNA ncRNA               |
| chr5-4312 | 7.40111  | -0.34074 | 0.848863 | -0.40141 | 0.68812  | 0.981636 | chr5  | 43123553 | 43127401  | + | 0 NA | intron (Nintron (N  | 3912 NM_00133C   | 7690 Hs. 535804   | NR_003432 | ENSG000003ZNF131    | ZBTB35 p/zinc finger protein-coding   |
| chr5-4361 | 7.40111  | -0.34074 | 0.848863 | -0.40141 | 0.68812  | 0.981636 | chr5  | 43610258 | 43610832  | + | 0 NA | intron (NTiger15e   | -7315 NR_073111  | 1.01E+08          | NR_073111 | NNT-AS1             | - NNT antisncRNA                      |
| chr5-1591 | 7.40111  | -0.34074 | 0.848863 | -0.40141 | 0.68812  | 0.981636 | chr5  | 1.59E+08 | 1.59E+08  | + | 0 NA | intron (Nintron (N  | 47386 NM_00119E  | 153830 Hs. 349306 | NR_144722 | ENSG000003CRNF145   | - ring finger protein-coding          |
| chr5-1772 | 7.40111  | -0.34074 | 0.848863 | -0.40141 | 0.68812  | 0.981636 | chr5  | 1.77E+08 | 1.77E+08  | + | 0 NA | intron (Nintron (N  | 53406 NM_001031  | 53917 Hs. 16258   | NR_130781 | ENSG000003RAB24     | - RAB24, m protein-coding             |
| chr6-426E | 7.40111  | -0.34074 | 0.848863 | -0.40141 | 0.68812  | 0.981636 | chr6  | 42657793 | 42659297  | + | 0 NA | intron (Nintron (N  | 64052 NM_000322  | 5961 Hs. 654488   | NR_000322 | ENSG000003PRPH2     | AOFMD1 AVW peripheral protein-coding  |
| chr6-995E | 7.40111  | -0.34074 | 0.848863 | -0.40141 | 0.68812  | 0.981636 | chr6  | 99556063 | 99558040  | + | 0 NA | intron (Nintron (N  | 11609 NM_00519C  | 892 Hs. 430642    | NR_00519C | ENSG000003CCNC      | CycC SRB1 cyclin C protein-coding     |
| chr6-145E | 7.40111  | -0.34074 | 0.848863 | -0.40141 | 0.68812  | 0.981636 | chr6  | 1.45E+08 | 1.45E+08  | + | 0 NA | intron (Nintron (N  | 51108 NM_17308E  | 257218 Hs. 17308E | NR_17308E | ENSG000003SHPRH     | ba54515.2 SNP2 hist protein-coding    |
| chr7-103E | 7.40111  | -0.34074 | 0.848863 | -0.40141 | 0.68812  | 0.981636 | chr7  | 1.03E+08 | 1.03E+08  | + | 0 NA | intron (Nintron (N  | 18443 NM_004275  | 9512 Hs. 184211   | NR_004275 | ENSG000003PMPCB     | Beta-MPP peptidase protein-coding     |
| chr8-253E | 7.40111  | -0.34074 | 0.848863 | -0.40141 | 0.68812  | 0.981636 | chr8  | 25323987 | 25324388  | + | 0 NA | intron (Nintron (N  | -12125 NR_106933 | 1.02E+08          | NR_106933 | ENSG000003MIR687E   | hsa-mir-6microRNA ncRNA               |
| chr8-305E | 7.40111  | -0.34074 | 0.848863 | -0.40141 | 0.68812  | 0.981636 | chr8  | 30559933 | 30562498  | + | 0 NA | intron (Nintron (N  | -77365 NM_00120E | 1.01E+08          | NR_00120E | ENSG000003SMIM18    | - small intron protein-coding         |
| chr8-6151 | 7.40111  | -0.34074 | 0.848863 | -0.40141 | 0.68812  | 0.981636 | chr8  | 61511799 | 61517540  | + | 0 NA | intron (NAluY SINE  | 175142 NM_001164 | 444 Hs. 332422    | NR_00431E | ENSG000003ASPH      | AAH BAH Caspartate protein-coding     |
| chr8-9371 | 7.40111  | -0.34074 | 0.848863 | -0.40141 | 0.68812  | 0.981636 | chr8  | 93714734 | 93721976  | + | 0 NA | intron (Nintron (N  | 17790 NR_15645E  | 137392 Hs. 125038 | NR_14526E | ENSG000003FAM92A    | FAM92A1 F family wiprotein-coding     |
| chr9-280E | 7.40111  | -0.34074 | 0.848863 | -0.40141 | 0.68812  | 0.981636 | chr9  | 28061703 | 28071941  | + | 0 NA | intron (NAluY SINE  | 37118 NM_01487E  | 9933 Hs. 493306   | NR_01487E | ENSG000003PUM3      | HA-8 HLA-pumilio F protein-coding     |
| chr14-105 | 4.163954 | -0.46268 | 1.153944 | -0.40096 | 0.68845  | 0.981636 | chr14 | 1.05E+08 | 1.05E+08  | + | 0 NA | TTS (NM_ITTS (NM_I  | 12295 NM_01795E  | 55038 Hs. 34045   | NR_01795E | ENSG000003CDCA4     | HEPP SEI-cell divi protein-coding     |
| chr1-178E | 6.674071 | 0.359234 | 0.896072 | 0.400899 | 0.688495 | 0.981636 | chr1  | 1.79E+08 | 1.79E+08  | + | 0 NA | intron (NLIPIA15 LI | 37153 NM_15266E  | 55103 Hs. 63248E  | NR_018037 | ENSG000003RALGPS2   | dJ5952.1 RAL GF w protein-coding      |
| chr1-183E | 6.674071 | 0.359234 | 0.896072 | 0.400899 | 0.688495 | 0.981636 | chr1  | 1.84E+08 | 1.84E+08  | + | 0 NA | intron (Nintron (N  | 46103 NM_001331  | 9887 Hs. 59146E   | NR_014837 | ENSG000003SMG7      | Clof16 ESMG7 nons protein-coding      |
| chr1-234E | 6.674071 | 0.359234 | 0.896072 | 0.400899 | 0.688495 | 0.981636 | chr1  | 2.34E+08 | 2.34E+08  | + | 0 NA | intron (NLa2 LINE   | 6288 NM_001301   | 388753 Hs. 23198  | NR_001012 | ENSG000003COA6      | Clof31 Cytochron protein-coding       |
| chr10-10C | 6.674071 | 0.359234 | 0.896072 | 0.400899 | 0.688495 | 0.981636 | chr10 | 30312373 | 30313896  | + | 0 NA | 3' UTR (N3' UTR (N  | 36204 NM_01810E  | 55149 Hs. 17394E  | NR_01810E | ENSG000003MTPAP     | PAPD1 SP mitochoncon protein-coding   |
| chr10-103 | 6.674071 | 0.359234 | 0.896072 | 0.400899 | 0.688495 | 0.981636 | chr10 | 1.03E+08 | 1.03E+08  | + | 0 NA | intron (Nintron (N  | 46929 NM_001351  | 22978 Hs. 97439   | NR_01222E | ENSG000003NT5C2     | GMP NT5B 5' nucloce protein-coding    |
| chr11-12E | 6.674071 | 0.359234 | 0.896072 | 0.400899 | 0.688495 | 0.981636 | chr11 | 1.23E+08 | 1.23E+08  | + | 0 NA | intron (NAluJr SIN  | 40078 NM_02476E  | 79827 Hs. 59194E  | NR_02476E | ENSG000003CLMP      | ACAM ASAM CXADR 1i protein-coding     |
| chr11-134 | 6.674071 | 0.359234 | 0.896072 | 0.400899 | 0.688495 | 0.981636 | chr11 | 1.34E+08 | 1.34E+08  | + | 0 NA | intron (Nintron (N  | 9329 NM_014174   | 29087 Hs. 13645   | NR_014174 | ENSG000003THYN1     | HSPC144 Thymocyte protein-coding      |
| chr13-205 | 6.674071 | 0.359234 | 0.896072 | 0.400899 | 0.688495 | 0.981636 | chr13 | 20994653 | 20995066  | + | 0 NA | intron (NAluJo SIN  | -45431 NR_10405E | 1.02E+08          | NR_10405E | ENSG000003LINC00367 | - long intncRNA                       |
| chr15-70C | 6.674071 | 0.359234 | 0.896072 | 0.400899 | 0.688495 | 0.981636 | chr15 | 70054575 | 70056292  | + | 0 NA | intron (Nintron (N  | 24035 NR_030714  | 693214 Hs. 17608  | NR_007364 | ENSG000003TMED3     | MIRN629 f microRNA ncRNA              |
| chr15-79E | 6.674071 | 0.359234 | 0.896072 | 0.400899 | 0.688495 | 0.981636 | chr15 | 79317621 | 79319284  | + | 0 NA | intron (Nintron (N  | 7340 NM_001301   | 23423 Hs. 71608   | NR_007364 | ENSG000003TMED3     | C15orf22 transmem protein-coding      |
| chr17-294 | 6.674071 | 0.359234 | 0.896072 | 0.400899 | 0.688495 | 0.981636 | chr17 | 29476648 | 29477020  | + | 0 NA | intron (NMER2 DNA   | 85909 NM_02514E  | 57551 Hs. 597434  | NR_020791 | ENSG000003TAOK1     | KFC-F2 MAF TA0 kinas protein-coding   |
| chr18-35E | 6.674071 | 0.359234 | 0.896072 | 0.400899 | 0.688495 | 0.981636 | chr18 | 35309484 | 35310057  | + | 0 NA | non-codirnon-codir  | 19498 NR_02456E  | 10778 Hs. 31424E  | NR_00662E | ENSG000003ZNF271P   | CT-ZFP48 zinc fing pseudo             |
| chr19-84C | 6.674071 | 0.359234 | 0.896072 | 0.400899 | 0.688495 | 0.981636 | chr19 | 8402142  | 8402868   | + | 0 NA | exon (NM exon (NM   | -10798 NM_00100E | 51257 Hs. 631861  | NR_01649E | ENSG000003          | 2-Mar HSPC240 membrane protein-coding |
| chr19-45E | 6.674071 | 0.359234 | 0.896072 | 0.400899 | 0.688495 | 0.981636 | chr19 | 45284662 | 45285292  | + | 0 NA | intron (NAluSq2 SI  | 33706 NM_00119E  | 57787 Hs. 34314   | NR_031417 | ENSG000003MARK4     | MARK4 M microtrub protein-coding      |
| chr2-1547 | 6.674071 | 0.359234 | 0.896072 | 0.400899 | 0.688495 | 0.981636 | chr2  | 15471938 | 15473723  | + | 0 NA | intron (NLR1A1B LI  | 88504 NM_01590E  | 51594 Hs. 46775E  | NR_01590E | ENSG000003NBAS      | ILF52 NAC neuroblas protein-coding    |
| chr2-109E | 6.674071 | 0.359234 | 0.896072 | 0.400899 | 0.688495 | 0.981636 | chr2  | 1.1E+08  | 1.1E+08   | + | 0 NA | intron (Nintron (N  | -51653 NR_03809E | 1E+08             | NR_03809E | ENSG000003LIMS4     | LIMS3L LIM zinc protein-coding        |
| chr2-113E | 6.674071 | 0.359234 | 0.896072 | 0.400899 | 0.688495 | 0.981636 | chr2  | 1.14E+08 | 1.14E+08  | + | 0 NA | intron (NLR79 LTF   | 2731 NM_001354   | 11159 Hs. 44642E  | NR_00708E | ENSG000003RABL2A    | - RAB, memt protein-coding            |
| chr21-46E | 6.674071 | 0.359234 | 0.896072 | 0.400899 | 0.688495 | 0.981636 | chr21 | 46291322 | 46291956  | + | 0 NA | 3' UTR (N3' UTR (N  | 5297 NM_001314   | 54059 Hs. 47406E  | NR_058181 | ENSG000003YBEY      | C21orf57 ybeY meta protein-coding     |
| chr22-17E | 6.674071 | 0.359234 | 0.896072 | 0.400899 | 0.688495 | 0.981636 | chr22 | 17885007 | 17885933  | + | 0 NA | intron (NLM4Ea LI   | 21416 NM_001122  | 57553 Hs. 528024  | NR_015241 | ENSG000003MICAL3    | MICAL-3 microtrub protein-coding      |

|           |          |          |          |          |          |          |       |          |          |   |   |    |                     |         |           |          |           |              |           |                         |                                      |                          |
|-----------|----------|----------|----------|----------|----------|----------|-------|----------|----------|---|---|----|---------------------|---------|-----------|----------|-----------|--------------|-----------|-------------------------|--------------------------------------|--------------------------|
| chr3-4877 | 7.211799 | 0.345279 | 0.865263 | 0.399045 | 0.68986  | 0.981636 | chr3  | 48770664 | 48771381 | + | 0 | NA | intron (AluSx SIN   | -53744  | NM_001146 | 51447    | Hs.595982 | NM_016291    | ENSG00000 | IP6K2                   | IHPK2 Insinositol protein-coding     |                          |
| chr4-3764 | 7.211799 | 0.345279 | 0.865263 | 0.399045 | 0.68986  | 0.981636 | chr4  | 37646508 | 37647152 | + | 0 | NA | intron (AluJr SIN   | 39546   | NM_00108E | 768211   | Hs.28337E | NM_00108E    | ENSG00000 | RELL1                   | - RELT like protein-coding           |                          |
| chr5-3124 | 7.211799 | 0.345279 | 0.865263 | 0.399045 | 0.68986  | 0.981636 | chr5  | 31249248 | 31251434 | + | 0 | NA | intron (Nintron (N  | 56655   | NM_004932 | 1004     | Hs.12477E | NM_004932    | ENSG00000 | CDH6                    | CAD6 KCAI cadherin protein-coding    |                          |
| chr8-287  | 7.211799 | 0.345279 | 0.865263 | 0.399045 | 0.68986  | 0.981636 | chr8  | 28739740 | 28740219 | + | 0 | NA | intron (Nintron (N  | 38478   | NR_07346E | 2137     | Hs.491354 | NM_00144C    | ENSG00000 | EXTL3                   | BOTV EXTL exostosin protein-coding   |                          |
| chr8-1275 | 7.211799 | 0.345279 | 0.865263 | 0.399045 | 0.68986  | 0.981636 | chr8  | 1.28E+08 | 1.28E+08 | + | 0 | NA | intron (Nintron (N  | 5300    | NR_10355E | 641384   | Hs.629674 | NM_001037    | ENSG00000 | TMEM75                  | - transmembrane ncRNA                |                          |
| chrX-382  | 7.211799 | 0.345279 | 0.865263 | 0.399045 | 0.68986  | 0.981636 | chrX  | 3825319  | 3827688  | + | 0 | NA | intron (AluSx3 SI   | 17391   | NR_034031 | 389906   | Hs.63619E | NM_001045547 | LOC38990E | -                       | zinc finger pseudo                   |                          |
| chr1-118  | 7.17066  | 0.3437   | 0.861509 | 0.398951 | 0.689929 | 0.981636 | chr1  | 11832656 | 11836344 | + | 0 | NA | non-codiron-codir   | -5819   | NR_03780E | 1E+08    | Hs.71001E | NR_03780E    | NPPA-AS1  | NPPA NPPA antincRNA     |                                      |                          |
| chr1-776  | 7.17066  | 0.3437   | 0.861509 | 0.398951 | 0.689929 | 0.981636 | chr1  | 77693301 | 77695883 | + | 0 | NA | IntergeniIntergeni  | -11165  | NM_00130E | 26009    | Hs.48050E | NM_015534    | ENSG00000 | ZZZ3                    | ATTA1  zinc finger protein-coding    |                          |
| chr1-926  | 7.17066  | 0.3437   | 0.861509 | 0.398951 | 0.689929 | 0.981636 | chr1  | 92656718 | 92659191 | + | 0 | NA | intron (MSTA LTR    | 127154  | NM_00135C | 7813     | Hs.594434 | NM_00566E    | ENSG00000 | CEV15                   | EVI-5 NB4 ecotropic protein-coding   |                          |
| chr1-1471 | 7.17066  | 0.3437   | 0.861509 | 0.398951 | 0.689929 | 0.981636 | chr1  | 1.47E+08 | 1.47E+08 | + | 0 | NA | intron (AluYm SI    | 7234    | NR_10387C | 5565     | Hs.50732  | NM_00539E    | ENSG00000 | PRKAB2                  | - protein lprotein-coding            |                          |
| chr10-38C | 7.17066  | 0.3437   | 0.861509 | 0.398951 | 0.689929 | 0.981636 | chr10 | 92819925 | 92810131 | + | 0 | NA | intron (MER11C LI   | 5836    | NM_00132A | 7587     | Hs.29257E | NM_003421    | ENSG00000 | ZNF37A                  | KOX21 ZNF zinc finger protein-coding |                          |
| chr11-24C | 7.17066  | 0.3437   | 0.861509 | 0.398951 | 0.689929 | 0.981636 | chr11 | 2402266  | 2403105  | + | 0 | NA | exon (NM exon (NM   | 1935    | NM_001297 | 10078    | Hs.523424 | NM_00570E    | ENSG00000 | TSSC4                   | - tumor sup protein-coding           |                          |
| chr12-63C | 7.17066  | 0.3437   | 0.861509 | 0.398951 | 0.689929 | 0.981636 | chr12 | 6339310  | 6340721  | + | 0 | NA | intron (Nintron (N  | 2061    | NM_00134E | 7132     | Hs.279594 | NM_00106E    | ENSG00000 | TNFRSF1A                | CD120a FFTN receptor protein-coding  |                          |
| chr12-92E | 7.17066  | 0.3437   | 0.861509 | 0.398951 | 0.689929 | 0.981636 | chr12 | 92816404 | 92820144 | + | 0 | NA | intron (NLIME1 LIN  | 81785   | NM_00100A | 440107   | Hs.59101E | NM_00100A    | ENSG00000 | PLEKHG7                 | - pleckstrin protein-coding          |                          |
| chr12-10C | 7.17066  | 0.3437   | 0.861509 | 0.398951 | 0.689929 | 0.981636 | chr12 | 1E+08    | 1E+08    | + | 0 | NA | intron (NLIPA15 LI  | 60558   | NM_00100E | 23074    | Hs.572154 | NM_015054    | ENSG00000 | UHRF1BP1                | SHIP164 UHRF1 bir protein-coding     |                          |
| chr12-121 | 7.17066  | 0.3437   | 0.861509 | 0.398951 | 0.689929 | 0.981636 | chr12 | 1.21E+08 | 1.21E+08 | + | 0 | NA | intron (NLTR16C LI  | 725     | NM_00127C | 10645    | Hs.29734E | NM_00654E    | ENSG00000 | CAMKK2                  | CAMKK CAM calcium/c protein-coding   |                          |
| chr14-55E | 7.17066  | 0.3437   | 0.861509 | 0.398951 | 0.689929 | 0.981636 | chr14 | 55662125 | 55662832 | + | 0 | NA | intron (Nintron (N  | 82271   | NM_00107E | 3895     | Hs.509414 | NM_00498E    | ENSG00000 | CKTN1                   | CG1 KNT kinecin protein-coding       |                          |
| chr14-60E | 7.17066  | 0.3437   | 0.861509 | 0.398951 | 0.689929 | 0.981636 | chr14 | 60881840 | 60884556 | + | 0 | NA | intron (NLIM2 LIN   | 97881   | NM_00135C | 57570    | Hs.38015E | NM_02081C    | ENSG00000 | TRMT5                   | COXP26 tRNA methyl protein-coding    |                          |
| chr14-73E | 7.17066  | 0.3437   | 0.861509 | 0.398951 | 0.689929 | 0.981636 | chr14 | 73574147 | 73575635 | + | 0 | NA | TTS (NM_C TTS (NM_C | 5832    | NM_00136A | 10965    | Hs.44668E | NM_00682E    | ENSG00000 | ACOT2                   | CTE-1A CTacyl-CoA protein-coding     |                          |
| chr15-417 | 7.17066  | 0.3437   | 0.861509 | 0.398951 | 0.689929 | 0.981636 | chr15 | 41760105 | 41760978 | + | 0 | NA | intron (Nintron (N  | -13943  | NM_00126E | 23005    | Hs.513661 | NM_01499A    | ENSG00000 | MAPKBP1                 | JNKBP-1 Jmiotogen-ε protein-coding   |                          |
| chr15-43C | 7.17066  | 0.3437   | 0.861509 | 0.398951 | 0.689929 | 0.981636 | chr15 | 43337314 | 43337801 | + | 0 | NA | intron (Nintron (N  | 6885    | NM_00101E | 161823   | Hs.53391E | NM_00101E    | ENSG00000 | ADAL                    | - adenosine protein-coding           |                          |
| chr15-65E | 7.17066  | 0.3437   | 0.861509 | 0.398951 | 0.689929 | 0.981636 | chr15 | 65665370 | 65666024 | + | 0 | NA | intron (Nintron (N  | 22818   | NM_00125A | 9187     | Hs.17309E | NM_00472E    | ENSG00000 | SLC24A1                 | CSNB1D Hsolute cε protein-coding     |                          |
| chr15-731 | 7.17066  | 0.3437   | 0.861509 | 0.398951 | 0.689929 | 0.981636 | chr15 | 73176889 | 73178028 | + | 0 | NA | intron (Nintron (N  | -122452 | NR_162148 | 1.13E+08 | NR_162148 | MIR12135     | -         | microRNA ncRNA          |                                      |                          |
| chr16-29E | 7.17066  | 0.3437   | 0.861509 | 0.398951 | 0.689929 | 0.981636 | chr16 | 29920512 | 29922182 | + | 0 | NA | intron (NLIME5 LIN  | 4879    | NR_11093C | 253980   | Hs.53459C | NM_17886E    | ENSG00000 | CTD13                   | BACURD1 Fpotassium protein-coding    |                          |
| chr18-92E | 7.17066  | 0.3437   | 0.861509 | 0.398951 | 0.689929 | 0.981636 | chr18 | 9227452  | 9228277  | + | 0 | NA | intron (NLIM4A LI   | 90301   | NM_00120A | 23253    | Hs.46458E | NM_01520E    | ENSG00000 | ANKRD12                 | ANCO-2 ANankyrin r protein-coding    |                          |
| chr19-381 | 7.17066  | 0.3437   | 0.861509 | 0.398951 | 0.689929 | 0.981636 | chr19 | 38152978 | 38153863 | + | 0 | NA | intron (AluSx SIN   | -9676   | NR_14580C | 1.1E+08  | NR_14580C | SNORD152     | -         | small nucleosRNA        |                                      |                          |
| chr2-581E | 7.17066  | 0.3437   | 0.861509 | 0.398951 | 0.689929 | 0.981636 | chr2  | 58159741 | 58161614 | + | 0 | NA | TTS (NM_C TTS (NM_C | 80703   | NM_00117E | 55120    | Hs.63189C | NM_01806E    | ENSG00000 | FANCL                   | FAAP43 PFA nuc protein-coding        |                          |
| chr2-2307 | 7.17066  | 0.3437   | 0.861509 | 0.398951 | 0.689929 | 0.981636 | chr2  | 2.31E+08 | 2.31E+08 | + | 0 | NA | intron (NL3 LINE C  | -63582  | NM_001287 | 81618    | Hs.111577 | NM_03092E    | ENSG00000 | ITM2C                   | BRI3 BRIC integral protein-coding    |                          |
| chr2-238C | 7.17066  | 0.3437   | 0.861509 | 0.398951 | 0.689929 | 0.981636 | chr2  | 2.38E+08 | 2.38E+08 | + | 0 | NA | intron (Nintron (N  | -29445  | NM_01651C | 51540    | Hs.73190E | NM_01651C    | ENSG00000 | SCLY                    | SCL hsSCL senescens protein-coding   |                          |
| chr3-114C | 7.17066  | 0.3437   | 0.861509 | 0.398951 | 0.689929 | 0.981636 | chr3  | 1.14E+08 | 1.14E+08 | + | 0 | NA | intron (Nintron (N  | -4563   | NM_00116A | 26137    | Hs.202577 | NM_01564E    | ENSG00000 | ZBTB20                  | DPZF HOF zinc finger protein-coding  |                          |
| chr3-184C | 7.17066  | 0.3437   | 0.861509 | 0.398951 | 0.689929 | 0.981636 | chr3  | 1.84E+08 | 1.84E+08 | + | 0 | NA | intron (Nintron (N  | 4786    | NM_00568E | 10057    | Hs.36856E | NM_00568E    | ENSG00000 | ABCC5                   | ABC33 ESIATP bindi protein-coding    |                          |
| chr4-175C | 7.17066  | 0.3437   | 0.861509 | 0.398951 | 0.689929 | 0.981636 | chr4  | 17500421 | 17502268 | + | 0 | NA | intron (Nintron (N  | 10746   | NM_00032C | 5860     | Hs.75438  | NM_00032C    | ENSG00000 | QDPR                    | DHPR HDHF quinoid protein-coding     |                          |
| chr4-1844 | 7.17066  | 0.3437   | 0.861509 | 0.398951 | 0.689929 | 0.981636 | chr4  | 1.84E+08 | 1.84E+08 | + | 0 | NA | intron (Nintron (N  | -44935  | NR_12593C | 1.03E+08 | Hs.432281 | NR_12593E    | ENSG00000 | LINC0236E               | -                                    | long intncRNA            |
| chr5-435E | 7.17066  | 0.3437   | 0.861509 | 0.398951 | 0.689929 | 0.981636 | chr5  | 43536303 | 43538791 | + | 0 | NA | intron (Nintron (N  | 19530   | NM_006451 | 10605    | Hs.48203E | NM_006451    | ENSG00000 | PAIP1                   | -                                    | poly(A) t protein-coding |
| chr5-957E | 7.17066  | 0.3437   | 0.861509 | 0.398951 | 0.689929 | 0.981636 | chr5  | 95733469 | 95734270 | + | 0 | NA | intron (NMIRb SINE  | -1767   | NM_00134E | 83890    | Hs.50499  | NM_03195E    | ENSG00000 | SPATA9                  | NYD-SP16 spermatog protein-coding    |                          |
| chr5-113E | 7.17066  | 0.3437   | 0.861509 | 0.398951 | 0.689929 | 0.981636 | chr5  | 1.14E+08 | 1.14E+08 | + | 0 | NA | intron (NMSMAR2 DN  | 46514   | NM_00134E | 64848    | Hs.23194E | NM_00228E    | ENSG00000 | YTHDC2                  | CAHL HYTH YTH domain protein-coding  |                          |
| chr6-7894 | 7.17066  | 0.3437   | 0.861509 | 0.398951 | 0.689929 | 0.981636 | chr6  | 78948792 | 78950412 | + | 0 | NA | intron (NMER74B LI  | 82051   | NM_00101C | 134728   | Hs.65621E | NM_00101C    | ENSG00000 | IRAK1BP1                | AIP70 SIV interleuk protein-coding   |                          |
| chr6-132E | 7.17066  | 0.3437   | 0.861509 | 0.398951 | 0.689929 | 0.981636 | chr6  | 1.32E+08 | 1.32E+08 | + | 0 | NA | intron (NLIPA8A LI  | 90935   | NM_01552E | 26002    | Hs.6909   | NM_01552E    | ENSG00000 | MOXD1                   | MOX PR057 monooxyg protein-coding    |                          |
| chr7-989E | 7.17066  | 0.3437   | 0.861509 | 0.398951 | 0.689929 | 0.981636 | chr7  | 98980251 | 98986452 | + | 0 | NA | exon (NM exon (NM   | -29814  | NR_11010E | 1.02E+08 | Hs.63666E | NR_11010E    | LOC101927 | -                       | uncharacterncRNA                     |                          |
| chr7-129E | 7.17066  | 0.3437   | 0.861509 | 0.398951 | 0.689929 | 0.981636 | chr7  | 1.3E+08  | 1.3E+08  | + | 0 | NA | intron (Nintron (N  | -60518  | NR_02961E | 406959   | NR_02961E | ENSG00000    | MIR183    | MIRN183 microRNA ncRNA  |                                      |                          |
| chr8-102E | 7.17066  | 0.3437   | 0.861509 | 0.398951 | 0.689929 | 0.981636 | chr8  | 1.02E+08 | 1.02E+08 | + | 0 | NA | intron (Nintron (N  | 37036   | NR_12541E | 1.02E+08 | Hs.49244E | NR_12541E    | ENSG00000 | UBR5-AS1                | -                                    | UBR5 antincRNA           |
| chr9-134C | 7.17066  | 0.3437   | 0.861509 | 0.398951 | 0.689929 | 0.981636 | chr9  | 1.34E+08 | 1.34E+08 | + | 0 | NA | intron (Nintron (N  | 5993    | NM_00135E | 266655   | Hs.65486E | NM_00135E    | ENSG00000 | BRD30S                  | LINC00094 BRD3 oppc protein-coding   |                          |
| chrX-142E | 7.17066  | 0.3437   | 0.861509 | 0.398951 | 0.689929 | 0.981636 | chrX  | 1425020  | 1425660  | + | 0 | NA | intron (Nintron (N  | 24809   | NR_02671C | 80161    | Hs.52185E | NM_025091    | ASMTL-AS1 | ASMTL-AS ASMTL antncRNA |                                      |                          |
| chr6-888E | 4.674408 | -0.42245 | 1.059262 | -0.39882 | 0.69026  | 0.981636 | chr6  | 88885272 | 88886225 | + | 0 | NA | intron (NLIMC4a LI  | 77870   | NM_00128E | 8732     | Hs.56737E | NM_00380C    | ENSG00000 | RNGTT                   | CAP1A HCE RNA guany protein-coding   |                          |
| chr10-92C | 7.692671 | 0.335712 | 0.842434 | 0.398503 | 0.690259 | 0.981636 | chr10 | 92026141 | 92028101 | + | 0 | NA | intron (Nintron (N  | 103351  | NM_00397E | 9044     | Hs.50052E | NM_00397E    | ENSG00000 | BTAF1                   | MOT1 TAF(B-TFIID l protein-coding    |                          |
| chr17-281 | 10.64797 | -0.28606 | 0.718686 | -0.39803 | 0.690605 | 0.981636 | chr17 | 28184842 | 28187487 | + | 0 | NA | intron (Nintron (N  | -40399  | NR_00306A | 23615    | Hs.15719E | NM_02109E    | ENSG00000 | PYY2                    | -                                    | peptide l pseudo         |
| chr2-756E | 10.64797 | -0.28606 | 0.718686 | -0.39803 | 0.690605 | 0.981636 | chr2  | 75652649 | 75653986 | + | 0 | NA | intron (Nintron (N  | 6534    | NM_01476E | 9801     | Hs.44024  | NM_01476E    | ENSG00000 | MRPL19                  | L19mt MRF mitochondon protein-coding |                          |
| chr9-884E | 8.273388 | 0.338549 | 0.850759 | 0.397937 | 0.690676 | 0.981636 | chr9  | 88449076 | 88449515 | + | 0 | NA | intron (Nintron (N  | 60851   | NM_006717 | 10927    | Hs.146804 | NM_006717    | ENSG00000 | CSPIN1                  | SPIN MDRI spindlin protein-coding    |                          |
| chr1-246  | 7.359971 | -0.3438  | 0.863992 | -0.39792 | 0.690692 | 0.981636 | chr1  | 2.47E+08 | 2.47E+08 | + | 0 | NA | intron (NPABL_B ir  | 60225   | NM_01544E | 25909    | Hs.300887 | NM_01544E    | ENSG00000 | AHCTF1                  | ELYS MDST1AT-hook c protein-coding   |                          |
| chr10-11E | 7.359971 | -0.3438  | 0.863992 | -0.39792 | 0.690692 | 0.981636 | chr10 | 1.19E+08 |          |   |   |    |                     |         |           |          |           |              |           |                         |                                      |                          |



|                                                                 |       |          |          |   |   |    |                     |        |           |          |           |                     |                                            |                       |
|-----------------------------------------------------------------|-------|----------|----------|---|---|----|---------------------|--------|-----------|----------|-----------|---------------------|--------------------------------------------|-----------------------|
| chr12-511.7.178517.0.341603.0.86163.0.396461.0.691765.0.981636  | chr12 | 51100580 | 51103847 | + | 0 | NA | intron (Nintron (N  | -18617 | NR_030809 | 81566    | Hs.524422 | ENSG000003CSRNP2    | C12orf2 Cysteine protein-coding            |                       |
| chr12-111.7.178517.0.341603.0.86163.0.396461.0.691765.0.981636  | chr12 | 1.12E+08 | 1.12E+08 | + | 0 | NA | intron (Nintron (N  | -7359  | NR_106815 | 1.02E+08 | NR_106815 | ENSG000003MIR6761   | hsa-mir-εmicroRNA ncRNA                    |                       |
| chr13-45.7.178517.0.341603.0.86163.0.396461.0.691765.0.981636   | chr13 | 45397610 | 45400629 | + | 0 | NA | intron (Nintron (N  | -19043 | NR_047031 | 1.01E+08 | Hs.65803  | ENSG000003SLC25A30- | SLC25A30 ncRNA                             |                       |
| chr13-95.7.178517.0.341603.0.86163.0.396461.0.691765.0.981636   | chr13 | 95120145 | 95121511 | + | 0 | NA | intron (Nintron (N  | -89516 | NR_145733 | 1.1E+08  | NR_145733 | SNORD13G            | small nucleolar RNA                        |                       |
| chr14-351.7.178517.0.341603.0.86163.0.396461.0.691765.0.981636  | chr14 | 35004290 | 35005569 | + | 0 | NA | intron (Nintron (N  | 21937  | NR_003136 | 6729     | Hs.16753  | ENSG000003SRP54     | signal protein-coding                      |                       |
| chr15-417.7.178517.0.341603.0.86163.0.396461.0.691765.0.981636  | chr15 | 41709061 | 41711982 | + | 0 | NA | intron (NAluJr SIN  | 18936  | NR_030356 | 693211   | NR_030356 | ENSG000003MIR626    | MIRN626 microRNA ncRNA                     |                       |
| chr15-657.7.178517.0.341603.0.86163.0.396461.0.691765.0.981636  | chr15 | 65724954 | 65729270 | + | 0 | NA | intron (NAluJr4 SI  | -7780  | NR_039736 | 1.01E+08 | NR_039736 | ENSG000003MIR4511   | mir-4511 microRNA ncRNA                    |                       |
| chr15-732.7.178517.0.341603.0.86163.0.396461.0.691765.0.981636  | chr15 | 73282977 | 73283992 | + | 0 | NA | intron (NLTR33 LTF  | -16426 | NR_162148 | 1.13E+08 | NR_162148 | MIR12135            | microRNA ncRNA                             |                       |
| chr15-856.7.178517.0.341603.0.86163.0.396461.0.691765.0.981636  | chr15 | 85693440 | 85695491 | + | 0 | NA | intron (NMER58B DN  | 64260  | NR_120366 | 1.02E+08 | Hs.51311  | NR_120366           | LOC101925                                  | uncharacterized ncRNA |
| chr16-37.7.178517.0.341603.0.86163.0.396461.0.691765.0.981636   | chr16 | 3773959  | 3775169  | + | 0 | NA | intron (Nintron (N  | -57040 | NR_016292 | 10131    | Hs.30345  | ENSG000003TRAP1     | HSP 75 HSP TRF receptor protein-coding     |                       |
| chr16-704.7.178517.0.341603.0.86163.0.396461.0.691765.0.981636  | chr16 | 70494618 | 70499943 | + | 0 | NA | exon (NM exon (NM   | 26274  | NR_001366 | 25839    | Hs.20868  | ENSG000003COG4      | CDG2 COE component protein-coding          |                       |
| chr16-743.7.178517.0.341603.0.86163.0.396461.0.691765.0.981636  | chr16 | 74356305 | 74360192 | + | 0 | NA | intron (NAluSx SIN  | 10007  | NR_026950 | 283922   | Hs.55872  | ENSG000003LOC283922 | pyruvate pseudo                            |                       |
| chr16-748.7.178517.0.341603.0.86163.0.396461.0.691765.0.981636  | chr16 | 74891485 | 74893879 | + | 0 | NA | intron (Nintron (N  | 92441  | NR_030581 | 79726    | Hs.28095  | ENSG000003WDR59     | CDW12 FPFWD repeat protein-coding          |                       |
| chr16-778.7.178517.0.341603.0.86163.0.396461.0.691765.0.981636  | chr16 | 78794458 | 78798146 | + | 0 | NA | intron (Nintron (N  | -3428  | NR_162122 | 1.13E+08 | NR_162122 | MIR11401            | microRNA ncRNA                             |                       |
| chr17-225.7.178517.0.341603.0.86163.0.396461.0.691765.0.981636  | chr17 | 2294945  | 2300313  | + | 0 | NA | intron (Nintron (N  | 6156   | NR_017575 | 23293    | Hs.44834  | ENSG000003SMG6      | C17orf31 SMG6 nonprotein-coding            |                       |
| chr17-417.7.178517.0.341603.0.86163.0.396461.0.691765.0.981636  | chr17 | 4174796  | 4181364  | + | 0 | NA | intron (Nintron (N  | 34383  | NR_001254 | 124936   | Hs.51387  | ENSG000003CYB5D2    | cytochrome protein-coding                  |                       |
| chr17-107.7.178517.0.341603.0.86163.0.396461.0.691765.0.981636  | chr17 | 10790203 | 10712310 | + | 0 | NA | TTS (NM_C TTS (NM_C | 5826   | NR_049723 | 1.01E+08 | Hs.67437  | ENSG000003MAGOHP2   | MAGOHP2 mago homologue pseudo              |                       |
| chr17-397.7.178517.0.341603.0.86163.0.396461.0.691765.0.981636  | chr17 | 39707762 | 39713141 | + | 0 | NA | exon (NM exon (NM   | 10473  | NR_110533 | 2064     | Hs.44635  | ENSG000003ERBB2     | CD340 HEF erb-b2 receptor protein-coding   |                       |
| chr17-481.7.178517.0.341603.0.86163.0.396461.0.691765.0.981636  | chr17 | 48112710 | 48114391 | + | 0 | NA | intron (NAluJr SIN  | 5965   | NR_013322 | 29916    | Hs.15827  | ENSG000003SNX11     | sorting protein-coding                     |                       |
| chr17-634.7.178517.0.341603.0.86163.0.396461.0.691765.0.981636  | chr17 | 63411500 | 63416266 | + | 0 | NA | intron (Nintron (N  | 26384  | NR_001330 | 1534     | Hs.35526  | ENSG000003CYB561    | CYB561A1 cytochrome protein-coding         |                       |
| chr17-787.7.178517.0.341603.0.86163.0.396461.0.691765.0.981636  | chr17 | 78794458 | 78798146 | + | 0 | NA | 3' UTR (N3' UTR (N  | -14259 | NR_004762 | 9267     | Hs.19121  | ENSG000003CYTH1     | B2-1 CYT cytohesin protein-coding          |                       |
| chr19-591.7.178517.0.341603.0.86163.0.396461.0.691765.0.981636  | chr19 | 5915488  | 5919316  | + | 0 | NA | 3' UTR (N3' UTR (N  | 3148   | NR_004058 | 828      | Hs.58474  | ENSG000003CAPS      | CAPS1 calyphos protein-coding              |                       |
| chr19-420.7.178517.0.341603.0.86163.0.396461.0.691765.0.981636  | chr19 | 42078716 | 42081326 | + | 0 | NA | exon (NM exon (NM   | 3855   | NR_022752 | 64763    | Hs.13323  | ENSG000003ZNF574    | FPF92 zinc finger protein-coding           |                       |
| chr2-272.7.178517.0.341603.0.86163.0.396461.0.691765.0.981636   | chr2  | 27236030 | 27242335 | + | 0 | NA | exon (NM exon (NM   | 21792  | NR_001306 | 790      | Hs.37701  | ENSG000003CAD       | CDG13 EIF carbamoyl protein-coding         |                       |
| chr2-3687.7.178517.0.341603.0.86163.0.396461.0.691765.0.981636  | chr2  | 36876471 | 36876968 | + | 0 | NA | intron (Nintron (N  | 89817  | NR_003162 | 6801     | Hs.12748  | ENSG000003STRN      | PPP2R6A striatin protein-coding            |                       |
| chr2-7114.7.178517.0.341603.0.86163.0.396461.0.691765.0.981636  | chr2  | 71142972 | 71145634 | + | 0 | NA | intron (Nintron (N  | 13669  | NR_005791 | 10199    | Hs.65620  | ENSG000003MPSH1     | CT90 MPP1M-phase I protein-coding          |                       |
| chr2-9792.7.178517.0.341603.0.86163.0.396461.0.691765.0.981636  | chr2  | 97923488 | 97925897 | + | 0 | NA | intron (NAluJb SIN  | 70806  | NR_015348 | 23505    | Hs.46937  | ENSG000003TMM131    | CC28 PRO1 transmembrane protein-coding     |                       |
| chr2-2295.7.178517.0.341603.0.86163.0.396461.0.691765.0.981636  | chr2  | 2.3E+08  | 2.3E+08  | + | 0 | NA | intron (Nintron (N  | 13460  | NR_001348 | 9320     | Hs.57264  | ENSG000003TRIP12    | MRD49 TRI thyroid protein-coding           |                       |
| chr20-325.7.178517.0.341603.0.86163.0.396461.0.691765.0.981636  | chr20 | 3252226  | 3253620  | + | 0 | NA | intron (Nintron (N  | -13733 | NR_001174 | 89359    | Hs.10560  | ENSG000003SLC4A11   | BTR1 CDPL solute carrier protein-coding    |                       |
| chr20-138.7.178517.0.341603.0.86163.0.396461.0.691765.0.981636  | chr20 | 13808189 | 13812212 | + | 0 | NA | intron (N L2b LINE  | 25172  | NR_147982 | 79133    | Hs.47216  | ENSG000003NDUFAF5   | C20orf7 NADH:ubiquinone protein-coding     |                       |
| chr20-636.7.178517.0.341603.0.86163.0.396461.0.691765.0.981636  | chr20 | 63667671 | 63669051 | + | 0 | NA | intron (N L2a LINE  | 10551  | NR_032957 | 51750    | Hs.74505  | ENSG000003CTEL1     | C20orf41 regulator protein-coding          |                       |
| chr21-39.7.178517.0.341603.0.86163.0.396461.0.691765.0.981636   | chr21 | 39235210 | 39238512 | + | 0 | NA | intron (Nintron (N  | -53347 | NR_020343 | 8624     | Hs.47383  | ENSG000003PSMG1     | C21LRP DIS proteasome protein-coding       |                       |
| chr3-144.7.178517.0.341603.0.86163.0.396461.0.691765.0.981636   | chr3  | 14146905 | 14148637 | + | 0 | NA | intron (Nintron (N  | 22381  | NR_024334 | 79188    | Hs.51781  | ENSG000003TMM43     | ARVC5 ARV transmembrane protein-coding     |                       |
| chr3-576.7.178517.0.341603.0.86163.0.396461.0.691765.0.981636   | chr3  | 57627353 | 57630730 | + | 0 | NA | intron (Nintron (N  | 31252  | NR_132366 | 1.06E+08 | Hs.66720  | ENSG000003ARF4-AS1  | ARF4 antinuclear RNA                       |                       |
| chr3-195.7.178517.0.341603.0.86163.0.396461.0.691765.0.981636   | chr3  | 1.96E+08 | 1.96E+08 | + | 0 | NA | intron (Nintron (N  | 10287  | NR_106887 | 1.02E+08 | NR_106887 | ENSG000003MIR6829   | hsa-mir-εmicroRNA ncRNA                    |                       |
| chr4-137.7.178517.0.341603.0.86163.0.396461.0.691765.0.981636   | chr4  | 13579490 | 13581880 | + | 0 | NA | intron (Nintron (N  | -32861 | NR_015450 | 285548   | Hs.52928  | ENSG000003LINC01096 | long intergenic ncRNA                      |                       |
| chr5-1321.7.178517.0.341603.0.86163.0.396461.0.691765.0.981636  | chr5  | 1.32E+08 | 1.32E+08 | + | 0 | NA | intron (N HAL1 LINE | 9168   | NR_047470 | 1.01E+08 | Hs.51956  | ENSG000003P4HA2-AS1 | P4HA2 antinuclear RNA                      |                       |
| chr5-1797.7.178517.0.341603.0.86163.0.396461.0.691765.0.981636  | chr5  | 1.8E+08  | 1.8E+08  | + | 0 | NA | 3' UTR (N3' UTR (N  | -17363 | NR_145867 | 4056     | Hs.70674  | ENSG000003LTC4S     | leukotriene protein-coding                 |                       |
| chr6-4206.7.178517.0.341603.0.86163.0.396461.0.691765.0.981636  | chr6  | 42067980 | 42069172 | + | 0 | NA | exon (NM exon (NM   | 18052  | NR_138572 | 129685   | Hs.52012  | ENSG000003TAF8      | II TAF TATA-box protein-coding             |                       |
| chr6-905.7.178517.0.341603.0.86163.0.396461.0.691765.0.981636   | chr6  | 90558707 | 90560324 | + | 0 | NA | intron (Nintron (N  | 27557  | NR_003188 | 6885     | Hs.59483  | ENSG000003MAP3K7    | CSCF FMD2 mitogen-activated protein-coding |                       |
| chr7-764.7.178517.0.341603.0.86163.0.396461.0.691765.0.981636   | chr7  | 764084   | 766274   | + | 0 | NA | intron (N MR1 SINE  | -37503 | NR_001164 | 5575     | Hs.52085  | ENSG000003PRKAR1B   | PRKAR1B protein kinase-coding              |                       |
| chr7-265.7.178517.0.341603.0.86163.0.396461.0.691765.0.981636   | chr7  | 2656378  | 2658505  | + | 0 | NA | intron (N GTGATG T  | -22801 | NR_133463 | 155185   | Hs.42221  | ENSG000003AMZ1      | archaealysin protein-coding                |                       |
| chr7-755.7.178517.0.341603.0.86163.0.396461.0.691765.0.981636   | chr7  | 75505331 | 75508175 | + | 0 | NA | TTS (NR_C TTS (NR_C | 13126  | NR_001306 | 442590   | Hs.63229  | ENSG000003SPDYE5    | speedy/RI protein-coding                   |                       |
| chr7-106.7.178517.0.341603.0.86163.0.396461.0.691765.0.981636   | chr7  | 1.06E+08 | 1.06E+08 | + | 0 | NA | 3' UTR (N3' UTR (N  | 34286  | NR_005746 | 10135    | Hs.48961  | ENSG000003NAMPT     | 111003501 nicotinamide protein-coding      |                       |
| chr7-158.7.178517.0.341603.0.86163.0.396461.0.691765.0.981636   | chr7  | 1.59E+08 | 1.59E+08 | + | 0 | NA | intron (N AluY SINE | -70866 | NR_024394 | 154822   | Hs.54478  | ENSG000003LINC00685 | long intergenic ncRNA                      |                       |
| chr9-114.7.178517.0.341603.0.86163.0.396461.0.691765.0.981636   | chr9  | 1.14E+08 | 1.14E+08 | + | 0 | NA | exon (NM exon (NM   | 29019  | NR_001633 | 259      | Hs.43691  | ENSG000003AMB       | A1M EDC1 alpha-1-n protein-coding          |                       |
| chr9-130.7.178517.0.341603.0.86163.0.396461.0.691765.0.981636   | chr9  | 1.31E+08 | 1.31E+08 | + | 0 | NA | intron (Nintron (N  | 18922  | NR_003934 | 8939     | Hs.98751  | ENSG000003FUBP3     | FUBP3 far upstream protein-coding          |                       |
| chr19-115.13.87034.0.252213.0.636363.0.396335.0.691858.0.981636 | chr19 | 11902175 | 11906451 | + | 0 | NA | intron (N AluJr SIN | 16531  | NR_001364 | 7620     | Hs.56528  | ENSG000003ZNF69     | Cos5 hZNF zinc finger protein-coding       |                       |
| chr1-747.4.66655-0.41975.1.059319-0.39624.0.691926.0.981636     | chr1  | 74703322 | 74704096 | + | 0 | NA | Intergeni Intergeni | 29341  | NR_001888 | 1429     | Hs.83114  | ENSG000003CRYZ      | crystallin protein-coding                  |                       |
| chr12-132.4.66655-0.41975.1.059319-0.39624.0.691926.0.981636    | chr12 | 1.33E+08 | 1.33E+08 | + | 0 | NA | intron (Nintron (N  | 24570  | NR_170682 | 22953    | Hs.25858  | ENSG000003P2RX2     | DFNA41 P2E intergenic protein-coding       |                       |
| chr13-503.4.66655-0.41975.1.059319-0.39624.0.691926.0.981636    | chr13 | 50380608 | 50381300 | + | 0 | NA | intron (N LTR85b LI | 146495 | NR_125753 | 1.04E+08 | Hs.72223  | ENSG000003DLEU1-AS1 | LINC01308 DLEU1 antinuclear RNA            |                       |
| chr17-618.4.66655-0.41975.1.059319-0.39624.0.691926.0.981636    | chr17 | 61894073 | 61894678 | + | 0 | NA | intron (Nintron (N  | -38016 | NR_032043 | 83990    | Hs.12890  | ENSG000003BRIP1     | BACH1 FANBRCA1 antinuclear RNA             |                       |
| chr2-1572.4.66655-0.41975.1.059319-0.39624.0.691926.0.981636    | chr2  | 1.57E+08 | 1.57E+08 | + | 0 | NA | intron (Nintron (N  | 12042  | NR_001325 | 11227    | Hs.26902  | ENSG000003GALNT5    | GALNAC-T6 polypeptide protein-coding       |                       |
| chr21-348.4.66655-0.41975.1.059319-0.39624.0.691926.0.981636    | chr21 | 34842882 | 34843677 | + | 0 | NA | intron (N CA)n Sin  | 45420  | NR_001001 | 861      | Hs.14926  | ENSG000003RUNX1     | AML1 AML1RUNX1 family protein-coding       |                       |
| chr3-3063.4.66655-0.41975.1.059319-0.39624.0.691926.0.981636    | chr3  | 30630848 | 306      |   |   |    |                     |        |           |          |           |                     |                                            |                       |



|                    |          |          |          |          |          |       |          |           |   |   |    |                                      |                             |                      |                    |                              |                          |                |                |                |
|--------------------|----------|----------|----------|----------|----------|-------|----------|-----------|---|---|----|--------------------------------------|-----------------------------|----------------------|--------------------|------------------------------|--------------------------|----------------|----------------|----------------|
| chr1-2688 7.426534 | -0.33426 | 0.84924  | -0.3936  | 0.693875 | 0.981636 | chr1  | 26888828 | 268889133 | + | 0 | NA | exon (NM_exon (NM_1303 NM_018066     | 54707 Hs. 14333 NM_018066   | ENSG00000CPN2        | ATPBD1B            | GPN-loop protein-coding      |                          |                |                |                |
| chr1-3125 7.426534 | -0.33426 | 0.84924  | -0.3936  | 0.693875 | 0.981636 | chr1  | 31258347 | 31259535  | + | 0 | NA | TTS (NM_TTS (NM_C -19054 NM_024522   | 79570 Hs. 470256 NM_024522  | ENSG00000NKAIN1      | FAM77C             | sodium/po protein-coding     |                          |                |                |                |
| chr1-1085 7.426534 | -0.33426 | 0.84924  | -0.3936  | 0.693875 | 0.981636 | chr1  | 1.09E+08 | 1.09E+08  | + | 0 | NA | intron (NLIM3 LINE 22881 NM_001278   | 23155 Hs. 658489 NM_015127  | ENSG00000CLCC1       | MCLC               | chloride protein-coding      |                          |                |                |                |
| chr1-1147 7.426534 | -0.33426 | 0.84924  | -0.3936  | 0.693875 | 0.981636 | chr1  | 1.15E+08 | 1.15E+08  | + | 0 | NA | intron (Nintron (N 18369 NM_001242   | 7812 Hs. 69855 NM_007158    | ENSG00000CSDE1       | DIS155E            | colloid shock protein-coding |                          |                |                |                |
| chr1-2237 7.426534 | -0.33426 | 0.84924  | -0.3936  | 0.693875 | 0.981636 | chr1  | 2.24E+08 | 2.24E+08  | + | 0 | NA | intron (Nintron (N 5788 NM_001748    | 824 Hs. 350899 NM_001748    | ENSG00000CAPN2       | CANP2              | Ca/calpain 2 protein-coding  |                          |                |                |                |
| chr1-2435 7.426534 | -0.33426 | 0.84924  | -0.3936  | 0.693875 | 0.981636 | chr1  | 2.43E+08 | 2.43E+08  | + | 0 | NA | intron (Nintron (N -41240 NR_039824  | 1.01E+08                    | NR_039824            | ENSG00000MIR4677   | mir-4677                     | microRNA ncRNA           |                |                |                |
| chr10-104 7.426534 | -0.33426 | 0.84924  | -0.3936  | 0.693875 | 0.981636 | chr10 | 1.04E+08 | 1.04E+08  | + | 0 | NA | intron (NLIME3Cz L 34101 NM_01472C   | 9748 Hs. 591922 NM_01472C   | ENSG00000SLK         | LOSK STRK STE20    | lik protein-coding           |                          |                |                |                |
| chr10-124 7.426534 | -0.33426 | 0.84924  | -0.3936  | 0.693875 | 0.981636 | chr10 | 1.25E+08 | 1.25E+08  | + | 0 | NA | 3' UTR (N3' UTR (N -15961 NM_014661  | 9679 Hs. 129199 NM_014661   | ENSG00000FAM53B      | LIAA0140           | family wiprotein-coding      |                          |                |                |                |
| chr12-216 7.426534 | -0.33426 | 0.84924  | -0.3936  | 0.693875 | 0.981636 | chr12 | 21635000 | 21638257  | + | 0 | NA | intron (Nintron (N 21166 NM_001174   | 3945 Hs. 446149 NM_00230C   | ENSG00000LDHB        | HEL-S-281          | lactate c protein-coding     |                          |                |                |                |
| chr12-78 7.426534  | -0.33426 | 0.84924  | -0.3936  | 0.693875 | 0.981636 | chr12 | 78022063 | 78023192  | + | 0 | NA | intron (Nintron (N 191733 NM_01490C  | 8975 Hs. 655301 NM_01490C   | ENSG00000NAV3        | POMF1L1            | Neuron n protein-coding      |                          |                |                |                |
| chr13-514 7.426534 | -0.33426 | 0.84924  | -0.3936  | 0.693875 | 0.981636 | chr13 | 51427863 | 51430245  | + | 0 | NA | intron (NMIRc SINE 23982 NM_012141   | 26512 Hs. 43944C NM_012141  | ENSG00000INTS6       | DBI-1              | DD integrat protein-coding   |                          |                |                |                |
| chr14-356 7.426534 | -0.33426 | 0.84924  | -0.3936  | 0.693875 | 0.981636 | chr14 | 35621645 | 35622360  | + | 0 | NA | intron (NLIPA6 LIN 87838 NM_032594   | 84684 Hs. 62813 NM_032594   | ENSG00000INSM2       | IA-6 IA6 INSM      | trar protein-coding          |                          |                |                |                |
| chr15-415 7.426534 | -0.33426 | 0.84924  | -0.3936  | 0.693875 | 0.981636 | chr15 | 41394166 | 41395286  | + | 0 | NA | intron (NAluSx SIN 7770 NR_04562C    | 51103 Hs. 106525 NM_01601C  | ENSG00000NDUFAF1     | CGI-65 CCNADH:ubic | protein-coding               |                          |                |                |                |
| chr15-425 7.426534 | -0.33426 | 0.84924  | -0.3936  | 0.693875 | 0.981636 | chr15 | 42560456 | 42560286  | + | 0 | NA | TTS (NM_TTS (NM_C 12873 NM_00113C    | 55142 Hs. 14347 NM_018097   | ENSG00000HAUS2       | C15orf25 HAUS      | augn protein-coding          |                          |                |                |                |
| chr15-505 7.426534 | -0.33426 | 0.84924  | -0.3936  | 0.693875 | 0.981636 | chr15 | 50559297 | 50559775  | + | 0 | NA | non-codiron-codir -12870 NM_203494   | 373509 Hs. 677758 NM_203494 | ENSG00000CUSP50      | -                  | ubiquitir protein-coding     |                          |                |                |                |
| chr16-89C 7.426534 | -0.33426 | 0.84924  | -0.3936  | 0.693875 | 0.981636 | chr16 | 8905693  | 8908235   | + | 0 | NA | intron (Nintron (N 29675 NM_00128E   | 7874 Hs. 386939 NM_00347C   | ENSG00000CUSP7       | HAUSP TEF          | ubiquitir protein-coding     |                          |                |                |                |
| chr16-224 7.426534 | -0.33426 | 0.84924  | -0.3936  | 0.693875 | 0.981636 | chr16 | 22496551 | 22498288  | + | 0 | NA | Intergeni Intergeni -7030 NR_02445E  | 1E+08                       | Hs. 648439 NR_02445E | LOC10019C          | -                            | uncharactncRNA           |                |                |                |
| chr16-311 7.426534 | -0.33426 | 0.84924  | -0.3936  | 0.693875 | 0.981636 | chr16 | 31122114 | 31123003  | + | 0 | NA | intron (NMER3 DNA 4894 NM_03218E     | 84148 Hs. 53380E NM_03218E  | ENSG00000KAT8        | MOF MYST1          | lysine ac protein-coding     |                          |                |                |                |
| chr17-171 7.426534 | -0.33426 | 0.84924  | -0.3936  | 0.693875 | 0.981636 | chr17 | 17182277 | 17183874  | + | 0 | NA | intron (Nintron (N 23258 NM_17883E   | 201164 Hs. 729075 NM_17883E | ENSG00000PLD6        | ZUC                | phospholip protein-coding    |                          |                |                |                |
| chr17-315 7.426534 | -0.33426 | 0.84924  | -0.3936  | 0.693875 | 0.981636 | chr17 | 31986924 | 31987634  | + | 0 | NA | intron (NL2 LINE L -20104 NM_00132E  | 114659 Hs. 514071 NM_05288E | ENSG00000LRRC37B     | LRRC37             | leucine i protein-coding     |                          |                |                |                |
| chr17-376 7.426534 | -0.33426 | 0.84924  | -0.3936  | 0.693875 | 0.981636 | chr17 | 37637342 | 37638441  | + | 0 | NA | intron (NHSMAR2 DN 5555 NM_001291    | 11056 Hs. 590937 NM_00701C  | ENSG00000DDX52       | HUSSY19            | F DExD-box                   | protein-coding           |                |                |                |
| chr2-2005 7.426534 | -0.33426 | 0.84924  | -0.3936  | 0.693875 | 0.981636 | chr2  | 2E+08    | 2E+08     | + | 0 | NA | intron (NLIPA4 LIN 24906 NM_00128E   | 26010 Hs. 12032E NM_01553E  | ENSG00000SPATS2L     | DNAPT6             | Spermatog protein-coding     |                          |                |                |                |
| chr2-2014 7.426534 | -0.33426 | 0.84924  | -0.3936  | 0.693875 | 0.981636 | chr2  | 2.02E+08 | 2.02E+08  | + | 0 | NA | intron (Nintron (N 15166 NM_02091E   | 57679 Hs. 47109E NM_02091E  | ENSG00000CALS2       | ALS2CR6            | Ala sin Rch                  | protein-coding           |                |                |                |
| chr2-564 7.426534  | -0.33426 | 0.84924  | -0.3936  | 0.693875 | 0.981636 | chr2  | 56406571 | 56408206  | + | 0 | NA | Intergeni LIMB7 LIN -4648 NM_001164  | 57091 Hs. 473144 NM_02035E  | ENSG00000CASS4       | C20orf32           | Ca s                         | protein-coding           |                |                |                |
| chr3-5275 7.426534 | -0.33426 | 0.84924  | -0.3936  | 0.693875 | 0.981636 | chr3  | 52728535 | 52729965  | + | 0 | NA | intron (NMER1A LI 23144 NM_014041    | 28972 Hs. 11125 NM_014041   | ENSG00000SPCS1       | HSPC033            | S signal                     | protein-coding           |                |                |                |
| chr3-1055 7.426534 | -0.33426 | 0.84924  | -0.3936  | 0.693875 | 0.981636 | chr3  | 1.06E+08 | 1.06E+08  | + | 0 | NA | intron (Nintron (N 179601 NM_001627  | 214 Hs. 59129E NM_001627    | ENSG00000ALCAM       | CD166              | MEV                          | activat                  | protein-coding |                |                |
| chr4-676E 7.426534 | -0.33426 | 0.84924  | -0.3936  | 0.693875 | 0.981636 | chr4  | 67663732 | 67667432  | + | 0 | NA | intron (NLIM5 LINE 55236 NM_018227   | 55236 Hs. 212774 NM_018227  | ENSG00000UBA6        | E1-L2              | MOF                          | ubiquitir protein-coding |                |                |                |
| chr4-999 7.426534  | -0.33426 | 0.84924  | -0.3936  | 0.693875 | 0.981636 | chr4  | 99902398 | 99904687  | + | 0 | NA | intron (NMIRb SINE -8996 NR_02417C   | 8649 Hs. 43333E NM_02197C   | ENSG00000LAMTOR3     | MAP2K1             | IP1 late end                 | protein-coding           |                |                |                |
| chr5-7964 7.426534 | -0.33426 | 0.84924  | -0.3936  | 0.693875 | 0.981636 | chr5  | 79643174 | 79647164  | + | 0 | NA | exon (NM_exon (NM 32728 NM_00134E    | 167153 Hs. 41819E NM_173797 | ENSG00000TENT2       | APD4 GLD2          | terminal                     | protein-coding           |                |                |                |
| chr5-8735 7.426534 | -0.33426 | 0.84924  | -0.3936  | 0.693875 | 0.981636 | chr5  | 87329989 | 87338134  | + | 0 | NA | intron (Nintron (N -10023 NR_13092E  | 644285 Hs. 70925E NR_13092E | LOC64428E            | -                  | uncharactncRNA               |                          |                |                |                |
| chr5-1435 7.426534 | -0.33426 | 0.84924  | -0.3936  | 0.693875 | 0.981636 | chr5  | 1.43E+08 | 1.43E+08  | + | 0 | NA | TTS (NM_TTS (NM_C 101351 NR_04681E   | 1.01E+08                    | Hs. 666717 NR_04681E | ENSG00000ARHGAP26  | -                            | ARHGAP26                 | ncRNA          |                |                |
| chr6-517 7.426534  | -0.33426 | 0.84924  | -0.3936  | 0.693875 | 0.981636 | chr6  | 51789440 | 51791108  | + | 0 | NA | TTS (NM_TTS (NM_C 17974 NM_00428E    | 9532 Hs. 74504E NM_00428E   | ENSG00000BAG2        | BAG-2              | dJ4BCL2                      | asc                      | protein-coding |                |                |
| chr6-1697 7.426534 | -0.33426 | 0.84924  | -0.3936  | 0.693875 | 0.981636 | chr6  | 1.7E+08  | 1.7E+08   | + | 0 | NA | intron (NAluYb SIN -10497 NR_002678C | 80069 Hs. 677182E NM_02500E | ENSG00000LINC00574   | G6orf208           | long                         | intncRNA                 |                |                |                |
| chr7-1055 7.426534 | -0.33426 | 0.84924  | -0.3936  | 0.693875 | 0.981636 | chr7  | 1.06E+08 | 1.06E+08  | + | 0 | NA | intron (Nintron (N 3137 NM_00131E    | 54517 Hs. 52061E NM_01904E  | ENSG00000CUSP7       | IDDABS             | pseudour                     | protein-coding           |                |                |                |
| chr7-127 7.426534  | -0.33426 | 0.84924  | -0.3936  | 0.693875 | 0.981636 | chr7  | 1.28E+08 | 1.28E+08  | + | 0 | NA | intron (Nintron (N 155713 NM_01439C  | 27044 Hs. 12252E NM_01439C  | ENSG00000SND1        | TDRD11             | Tu s                         | staphyloc                | protein-coding |                |                |
| chr8-1301 7.426534 | -0.33426 | 0.84924  | -0.3936  | 0.693875 | 0.981636 | chr8  | 1.3E+08  | 1.3E+08   | + | 0 | NA | intron (NL2b LINE E -19241 NR_04538E | 1.01E+08                    | Hs. 10601E NR_04538E | ENSG00000ASAP1-IT2 | -                            | ASAP1                    | intncRNA       |                |                |
| chr9-1222 7.426534 | -0.33426 | 0.84924  | -0.3936  | 0.693875 | 0.981636 | chr9  | 1.22E+08 | 1.22E+08  | + | 0 | NA | intron (NLIMEi LIN 12562 NM_00134E   | 92399 Hs. 368011 NM_13877E  | ENSG00000MRRF        | MRRF               | MTRF                         | mitochon                 | protein-coding |                |                |
| chr9-1305 7.426534 | -0.33426 | 0.84924  | -0.3936  | 0.693875 | 0.981636 | chr9  | 1.31E+08 | 1.31E+08  | + | 0 | NA | intron (Nintron (N 16239 NM_003934   | 8939 Hs. 98751 NM_003934    | ENSG00000FUBP3       | FUBP3              | f                            | fast p                   | protein-coding |                |                |
| chrX-6575 7.426534 | -0.33426 | 0.84924  | -0.3936  | 0.693875 | 0.981636 | chrX  | 65734771 | 65735414  | + | 0 | NA | intron (NMIR3 SINE 64738 NM_002444   | 4478 Hs. 87752 NM_002444    | ENSG00000MSN         | HEL70              | IM                           | moesin                   | protein-coding |                |                |
| chr19-797 6.715211 | 0.360663 | 0.916433 | 0.393551 | 0.693912 | 0.981636 | chr19 | 7972484  | 7974345   | + | 0 | NA | intron (NAluY SINE -29748 NM_006351  | 10469 Hs. 465784 NM_006351  | ENSG00000TIMM44      | TIM44              | transloc                     | protein-coding           |                |                |                |
| chr5-1545 7.749527 | 0.33332  | 0.847005 | 0.393528 | 0.69393  | 0.981636 | chr5  | 1.54E+08 | 1.54E+08  | + | 0 | NA | intron (NMIRb SINE 29752 NR_03162E   | 1E+08                       | NR_03162E            | ENSG00000MIR1294   | -                            | MIRN1294                 | microRNA       | ncRNA          |                |
| chr2-8733 6.965078 | -0.35027 | 0.890115 | -0.39351 | 0.693946 | 0.981636 | chr2  | 8730050  | 8730390   | + | 0 | NA | 3' UTR (N3' UTR (N 48164 NM_00216E   | 3398 Hs. 18091E NM_00216E   | ENSG00000ID2         | GIG8               | ID2                          | inhibitor                | protein-coding |                |                |
| chr2-2307 6.965078 | -0.35027 | 0.890115 | -0.39351 | 0.693946 | 0.981636 | chr2  | 2.31E+08 | 2.31E+08  | + | 0 | NA | intron (Nintron (N 26301 NM_00113C   | 51719 Hs. 603933 NM_01628E  | ENSG00000CAB39       | CGI-66             | MC                           | calcium t                | protein-coding |                |                |
| chr4-7612 6.965078 | -0.35027 | 0.890115 | -0.39351 | 0.693946 | 0.981636 | chr4  | 76129165 | 76129762  | + | 0 | NA | intron (NLIMD2 LIN 18934 NM_01742E   | 53371 Hs. 43043E NM_01742E  | ENSG00000NUP54       | -                  | nucleopor                    | protein-coding           |                |                |                |
| chr5-1284 6.965078 | -0.35027 | 0.890115 | -0.39351 | 0.693946 | 0.981636 | chr5  | 1.28E+08 | 1.28E+08  | + | 0 | NA | intron (NLIP3 LIN 49584 NM_001199E   | 2201 Hs. 519294 NM_001199E  | ENSG00000FBN2        | CCA DA9            | E                            | fibrillin                | protein-coding |                |                |
| chr8-4241 6.965078 | -0.35027 | 0.890115 | -0.39351 | 0.693946 | 0.981636 | chr8  | 42416807 | 42417064  | + | 0 | NA | 3' UTR (N3' UTR (N 25055 NM_00566E   | 7419 Hs. 699301 NM_00566E   | ENSG00000VDAC3       | HD-VDAC3           | voltage                      | protein-coding           |                |                |                |
| chr12-928 11.10157 | -0.27696 | 0.703997 | -0.39342 | 0.694013 | 0.981636 | chr12 | 92840359 | 92843453  | + | 0 | NA | intron (NLIMB2 LIN 87389 NM_00356E   | 8411 Hs. 567367 NM_00356E   | ENSG00000EEA1        | MST105             | MS                           | early en                 | protein-coding |                |                |
| chr6-1105 11.10157 | -0.27696 | 0.703997 | -0.39342 | 0.694013 | 0.981636 | chr6  | 1.11E+08 | 1.11E+08  | + | 0 | NA | TTS (NM_TTS (NM_C 31488 NM_001287    | 262 Hs. 15911E NM_001634    | ENSG00000AMD1        | ADOMETDC           | adenosyl                     | protein-coding           |                |                |                |
| chr7-1078 11.10157 | -0.27696 | 0.703997 | -0.39342 | 0.694013 | 0.981636 | chr7  | 1.08E+08 | 1.08E+08  | + | 0 | NA | intron (Nigger3a  23279 NM_002291    | 3912 Hs. 65058E NM_002291   | ENSG00000LAMB1       | CLM LIS5           | laminin                      | protein-coding           |                |                |                |
| chr1-1005 7.675106 | 0.328217 | 0.835277 | 0.392943 | 0.694361 | 0.981636 | chr1  | 1.01E+08 | 1.01E+08  | + | 0 | NA | intron (NLIMB3 LIN 41457 NM_001144   | 148867 Hs. 53390E NM_13349E | ENSG00000SLC30A7     | ZNT7               | ZnT                          | solute c                 | protein-coding |                |                |
| chr1-1145 7.675106 | 0.328217 | 0.835277 | 0.392943 | 0.694361 | 0.981636 | chr1  | 1.15E+08 | 1.15E+08  | + | 0 | NA | intron (Nintron (N 11179 NM_00587E   | 10286 Hs. 22960 NM_00587E   | ENSG00000BCAS2       | CAM1               | SPD2                         | BCAS2                    | pr             | protein-coding |                |
| chr1-1165 7.675106 | 0.328217 | 0.835277 | 0.392943 | 0.694361 | 0.981636 | chr1  | 1.16E+08 | 1.16E+08  | + | 0 | NA | exon (NM_exon (NM 10338 NM_00116C    | 476 Hs. 37188E NM_00701C    | ENSG00000ATP1A1      | DMT2               | SZF2                         | HAT                      | AtPase         | n              | protein-coding |
| chr1-1475 7.675106 | 0.328217 | 0.835277 | 0.392943 | 0.694361 | 0.981636 | chr1  | 1.48E+08 | 1.48E+08  | + | 0 | NA | intron (Nintron (N 17222 NM_016334   | 51463 Hs. 50432C NM_016334  | ENSG00000GPR89B      | GPHR               | GPR8                         | G                        |                |                |                |



|           |          |          |          |          |          |          |       |          |          |   |   |    |                     |         |           |          |                     |                    |                 |                                        |                                         |
|-----------|----------|----------|----------|----------|----------|----------|-------|----------|----------|---|---|----|---------------------|---------|-----------|----------|---------------------|--------------------|-----------------|----------------------------------------|-----------------------------------------|
| chr4-5186 | 7.186375 | 0.339455 | 0.866792 | 0.391622 | 0.695338 | 0.981636 | chr4  | 51866891 | 51868056 | + | 0 | NA | intron (NMER52A L1  | 23894   | NM_001287 | 23142    | Hs.60538ENM_01511E  | ENSG00000CDUN1D4   | -               | defective protein-coding               |                                         |
| chr5-1377 | 7.186375 | 0.339455 | 0.866792 | 0.391622 | 0.695338 | 0.981636 | chr5  | 13774292 | 13776934 | + | 0 | NA | intron (NMIR3 SINE  | 168867  | NM_001366 | 1767     | Hs.21236CNM_00136E  | ENSG00000DNAH5     | -               | CILD3 DNAdynein a protein-coding       |                                         |
| chr6-4268 | 7.186375 | 0.339455 | 0.866792 | 0.391622 | 0.695338 | 0.981636 | chr6  | 42688151 | 42689889 | + | 0 | NA | intron (NL2a LINE   | 33577   | NM_000322 | 5961     | Hs.65448ENM_000322E | ENSG00000PRPH2     | -               | AOFMD AVWperipherin protein-coding     |                                         |
| chr6-160C | 7.186375 | 0.339455 | 0.866792 | 0.391622 | 0.695338 | 0.981636 | chr6  | 1.6E+08  | 1.6E+08  | + | 0 | NA | intron (NLTR5A LTF  | -9788   | NR_003288 | 729603   | Hs.67481CNR_003288E | ENSG00000LOC72960C | -               | calciuretic pseudo                     |                                         |
| chr7-6505 | 7.186375 | 0.339455 | 0.866792 | 0.391622 | 0.695338 | 0.981636 | chr7  | 65056104 | 65056823 | + | 0 | NA | intron (NALu5A SINE | -9536   | NR_145725 | 1.1E+08  | NR_145725E          | ENSG00000SNORA22C  | -               | small ncnRNA                           |                                         |
| chr7-755E | 7.186375 | 0.339455 | 0.866792 | 0.391622 | 0.695338 | 0.981636 | chr7  | 75591220 | 75591827 | + | 0 | NA | intron (Nintron (N  | -63400  | NR_02805E | 5387     | Hs.659871NM_00539E  | ENSG00000PMS2P3    | -               | PMS2L3 PWPMS1 homopseudo               |                                         |
| chr1-122C | 7.682963 | 0.326259 | 0.833189 | 0.391579 | 0.695369 | 0.981636 | chr1  | 1220849  | 1223745  | + | 0 | NA | intron (Nintron (N  | -8144   | NM_003327 | 7293     | Hs.12978CNM_003327E | ENSG00000TNFRSF4   | -               | ACT35 CD1TNF receptor protein-coding   |                                         |
| chr1-1241 | 7.682963 | 0.326259 | 0.833189 | 0.391579 | 0.695369 | 0.981636 | chr1  | 12416692 | 12418377 | + | 0 | NA | intron (Nintron (N  | -89712  | NR_00302E | 677885   | Hs.65845CNR_00302E  | ENSG00000SNORA59A  | -               | ACA59 small ncnRNA                     |                                         |
| chr1-868E | 7.682963 | 0.326259 | 0.833189 | 0.391579 | 0.695369 | 0.981636 | chr1  | 86899274 | 86900168 | + | 0 | NA | intron (NSVA_D Ret  | 14405   | NM_004261 | 9403     | Hs.36272ENM_004261E | ENSG00000SELENOF   | -               | 15-Seq selenoprotein-coding            |                                         |
| chr1-1111 | 7.682963 | 0.326259 | 0.833189 | 0.391579 | 0.695369 | 0.981636 | chr1  | 1.11E+08 | 1.11E+08 | + | 0 | NA | intron (Nintron (N  | 10153   | NM_13848E | 10390    | Hs.363572NM_00609E  | ENSG00000CEPT1     | -               | choline/epsilon protein-coding         |                                         |
| chr1-1508 | 7.682963 | 0.326259 | 0.833189 | 0.391579 | 0.695369 | 0.981636 | chr1  | 1.51E+08 | 1.51E+08 | + | 0 | NA | intron (NALuJr SIN  | 3794    | NM_00128E | 405      | Hs.63244ENM_00166E  | ENSG00000ARNT      | -               | HIF-1-beta-yl hydrolase protein-coding |                                         |
| chr1-198E | 7.682963 | 0.326259 | 0.833189 | 0.391579 | 0.695369 | 0.981636 | chr1  | 1.99E+08 | 1.99E+08 | + | 0 | NA | intron (NL2a LINE   | -19607  | NR_02962E | 406995   | NR_02962E           | ENSG00000MIR181A1  | -               | MIR213 MiRNA ncRNA                     |                                         |
| chr1-2064 | 7.682963 | 0.326259 | 0.833189 | 0.391579 | 0.695369 | 0.981636 | chr1  | 2.06E+08 | 2.06E+08 | + | 0 | NA | intron (Nintron (N  | -31320  | NM_01400E | 9641     | Hs.32104ENM_01400E  | ENSG00000IKBKE     | -               | IKK-E IKK inhibitor protein-coding     |                                         |
| chr1-2352 | 7.682963 | 0.326259 | 0.833189 | 0.391579 | 0.695369 | 0.981636 | chr1  | 2.35E+08 | 2.35E+08 | + | 0 | NA | intron (NALuJo SIN  | -19950  | NR_03900E | 1.01E+08 | NR_03900E           | ENSG00000MIR4753   | -               | mir-4753 microRNA ncRNA                |                                         |
| chr10-131 | 7.682963 | 0.326259 | 0.833189 | 0.391579 | 0.695369 | 0.981636 | chr10 | 13140609 | 13144884 | + | 0 | NA | Intergeni Intergeni | -18812  | NM_01851E | 55388    | Hs.19836CNM_01851E  | ENSG00000MCM10     | -               | CNA43 DNAmichron protein-coding        |                                         |
| chr10-79C | 7.682963 | 0.326259 | 0.833189 | 0.391579 | 0.695369 | 0.981636 | chr10 | 79207503 | 79210480 | + | 0 | NA | intron (Nintron (N  | -138478 | NM_00572E | 10105    | Hs.381072NM_00572E  | ENSG00000PPIF      | -               | CYP3 CyP-peptidyl protein-coding       |                                         |
| chr11-57C | 7.682963 | 0.326259 | 0.833189 | 0.391579 | 0.695369 | 0.981636 | chr11 | 57312411 | 57314349 | + | 0 | NA | exon (NM exon (NM   | 11572   | NM_03339E | 85456    | Hs.53073CNM_03339E  | ENSG00000TNKS1BP1  | -               | TAB182 tankyrase protein-coding        |                                         |
| chr12-67C | 7.682963 | 0.326259 | 0.833189 | 0.391579 | 0.695369 | 0.981636 | chr12 | 6794320  | 6796664  | + | 0 | NA | intron (Nintron (N  | 5964    | NM_00119E | 920      | Hs.63165CNM_00061E  | ENSG00000CD4       | -               | CD4mut CD4 molecule protein-coding     |                                         |
| chr12-144 | 7.682963 | 0.326259 | 0.833189 | 0.391579 | 0.695369 | 0.981636 | chr12 | 14473584 | 14476249 | + | 0 | NA | intron (Nintron (N  | 89635   | NM_18135E | 55729    | Hs.50485CNM_01817E  | ENSG00000ATF71P    | -               | AM ATF-1 activator protein-coding      |                                         |
| chr12-55E | 7.682963 | 0.326259 | 0.833189 | 0.391579 | 0.695369 | 0.981636 | chr12 | 55979303 | 55982027 | + | 0 | NA | intron (Nintron (N  | 6587    | NM_00286E | 5869     | Hs.15765CNM_00286E  | ENSG00000RAB5B     | -               | RAB5B, meprotein-coding                |                                         |
| chr12-57E | 7.682963 | 0.326259 | 0.833189 | 0.391579 | 0.695369 | 0.981636 | chr12 | 54522708 | 54525417 | + | 0 | NA | intron (NMIRc SINE  | -6385   | NM_00128E | 246329   | Hs.41759CNM_14506E  | ENSG00000STAC3     | -               | MYPBB NAM SH3 and cprotein-coding      |                                         |
| chr13-102 | 7.682963 | 0.326259 | 0.833189 | 0.391579 | 0.695369 | 0.981636 | chr13 | 1.03E+08 | 1.03E+08 | + | 0 | NA | intron (NL2c LINE   | 9916    | NM_00012E | 2073     | Hs.25842CNM_00012E  | ENSG00000ERC5C     | -               | COF53 ERC ERCC exciprotein-coding      |                                         |
| chr14-52C | 7.682963 | 0.326259 | 0.833189 | 0.391579 | 0.695369 | 0.981636 | chr14 | 52315524 | 52317247 | + | 0 | NA | intron (Nintron (N  | 2073    | NM_00095E | 5732     | Hs.2090             | NM_00095E          | ENSG00000PTGER2 | -                                      | EP2 prostaglandin protein-coding        |
| chr14-54E | 7.682963 | 0.326259 | 0.833189 | 0.391579 | 0.695369 | 0.981636 | chr14 | 54522708 | 54525417 | + | 0 | NA | intron (NL2 LINE L  | 14156   | NM_00658E | 10668    | Hs.59106            | NM_00658E          | ENSG00000CGRFR1 | -                                      | CGR19 RNFC cell growth protein-coding   |
| chr14-88E | 7.682963 | 0.326259 | 0.833189 | 0.391579 | 0.695369 | 0.981636 | chr14 | 88878259 | 88882557 | + | 0 | NA | non-codiron-codiron | 55757   | NM_00136E | 123016   | Hs.30305CNM_14459E  | ENSG00000TTC8      | -               | BBS8 RP51tetraatric protein-coding     |                                         |
| chr15-34E | 7.682963 | 0.326259 | 0.833189 | 0.391579 | 0.695369 | 0.981636 | chr15 | 34916716 | 34918944 | + | 0 | NA | intron (NALuJo SIN  | 51912   | NM_014691 | 9716     | Hs.51095CNM_014691E | ENSG00000AQR       | -               | IBP160 fSquarius protein-coding        |                                         |
| chr15-61E | 7.682963 | 0.326259 | 0.833189 | 0.391579 | 0.695369 | 0.981636 | chr15 | 61915662 | 61915844 | + | 0 | NA | exon (NM exon (NM   | 144744  | NM_017684 | 54832    | Hs.51166CNM_017684E | ENSG00000VPS13C    | -               | PARK23 vacuolar protein-coding         |                                         |
| chr15-73E | 7.682963 | 0.326259 | 0.833189 | 0.391579 | 0.695369 | 0.981636 | chr15 | 73297820 | 73304764 | + | 0 | NA | intron (Nintron (N  | 1382    | NR_16214E | 1.13E+08 | NR_16214E           | MIR12135           | -               | microRNA ncRNA                         |                                         |
| chr16-15E | 7.682963 | 0.326259 | 0.833189 | 0.391579 | 0.695369 | 0.981636 | chr16 | 15882010 | 15883795 | + | 0 | NA | intron (NALuSx3 SI  | 5696    | NM_00130E | 123811   | Hs.51417CNM_14460E  | ENSG00000FOPNL     | -               | C16orf63 FGFR10P lprotein-coding       |                                         |
| chr16-28E | 7.682963 | 0.326259 | 0.833189 | 0.391579 | 0.695369 | 0.981636 | chr16 | 28980779 | 28984500 | + | 0 | NA | intron (NMIR SINE   | -2164   | NM_00101E | 27040    | Hs.63217CNM_01438E  | ENSG00000LAT       | -               | LM52 LAT linker fprotein-coding        |                                         |
| chr16-56E | 7.682963 | 0.326259 | 0.833189 | 0.391579 | 0.695369 | 0.981636 | chr16 | 56399586 | 56405443 | + | 0 | NA | intron (Nintron (N  | 22475   | NM_00132E | 267      | Hs.295137NM_00114E  | ENSG00000AMFR      | -               | GP78 RNFA4autocrine protein-coding     |                                         |
| chr16-57E | 7.682963 | 0.326259 | 0.833189 | 0.391579 | 0.695369 | 0.981636 | chr16 | 57464147 | 57468052 | + | 0 | NA | intron (Nintron (N  | 3420    | NM_00329E | 5432     | Hs.79402            | NM_00269E          | ENSG00000POLR2C | -                                      | RLP3 RPB2 RNA polymerase protein-coding |
| chr17-82C | 7.682963 | 0.326259 | 0.833189 | 0.391579 | 0.695369 | 0.981636 | chr17 | 82091511 | 82095738 | + | 0 | NA | exon (NM exon (NM   | -3484   | NR_13275E | 1.07E+08 | NR_13275E           | SNORD134           | -               | ZN22 small ncnRNA                      |                                         |
| chr19-107 | 7.682963 | 0.326259 | 0.833189 | 0.391579 | 0.695369 | 0.981636 | chr19 | 10793009 | 10796995 | + | 0 | NA | intron (NALuJo SIN  | 14748   | NR_03990E | 1.01E+08 | NR_03990E           | ENSG00000MIR4748   | -               | mir-4748 microRNA ncRNA                |                                         |
| chr19-11C | 7.682963 | 0.326259 | 0.833189 | 0.391579 | 0.695369 | 0.981636 | chr19 | 11022898 | 11024578 | + | 0 | NA | intron (Nintron (N  | 39586   | NM_00112E | 6597     | Hs.327527NM_00307E  | ENSG00000SMARCA4   | -               | BAF190 BAF57 SNF1 protein-coding       |                                         |
| chr19-33E | 7.682963 | 0.326259 | 0.833189 | 0.391579 | 0.695369 | 0.981636 | chr19 | 33088253 | 33090063 | + | 0 | NA | intron (NMIRc SINE  | 7977    | NM_01802E | 55094    | Hs.46643CNM_01802E  | ENSG00000GPATCH1   | -               | EGCP GPA1G-patch cprotein-coding       |                                         |
| chr19-41E | 7.682963 | 0.326259 | 0.833189 | 0.391579 | 0.695369 | 0.981636 | chr19 | 41316726 | 41318595 | + | 0 | NA | intron (NALuJb SIN  | 7183    | NM_00134E | 90324    | Hs.437497NM_05284E  | ENSG00000CCDC97    | -               | coiled-co protein-coding               |                                         |
| chr19-57E | 7.682963 | 0.326259 | 0.833189 | 0.391579 | 0.695369 | 0.981636 | chr19 | 57325129 | 57326866 | + | 0 | NA | intron (Nintron (N  | 5525    | NM_21359E | 125919   | Hs.202544NM_21359E  | ENSG00000ZNF543    | -               | zinc fing protein-coding               |                                         |
| chr2-2011 | 7.682963 | 0.326259 | 0.833189 | 0.391579 | 0.695369 | 0.981636 | chr2  | 2.01E+08 | 2.01E+08 | + | 0 | NA | 3' UTR (A3' UTR (A  | -1176   | NM_00120E | 8837     | Hs.39073CNM_00387E  | ENSG00000CFLAR     | -               | CASH CASFP8 ancon protein-coding       |                                         |
| chr20-33E | 7.682963 | 0.326259 | 0.833189 | 0.391579 | 0.695369 | 0.981636 | chr20 | 33382941 | 33383742 | + | 0 | NA | intron (NALuSx1 SI  | 18178   | NM_01640E | 51654    | Hs.43595CNM_01608E  | ENSG00000CDK5RAP1  | -               | C20orf34 CDK5 regt protein-coding      |                                         |
| chr20-49E | 7.682963 | 0.326259 | 0.833189 | 0.391579 | 0.695369 | 0.981636 | chr20 | 49004601 | 49007459 | + | 0 | NA | intron (NALuSg2 LI  | 40026   | NR_11062E | 1.03E+08 | NR_11062E           | ENSG00000CSEIL-AS1 | -               | CSEIL antncRNA                         |                                         |
| chr21-33E | 7.682963 | 0.326259 | 0.833189 | 0.391579 | 0.695369 | 0.981636 | chr21 | 33611295 | 33614005 | + | 0 | NA | intron (NLIME3E LI  | -23966  | NM_01761E | 29980    | Hs.436341NM_01761E  | ENSG00000DONSON    | -               | B17 C21orf2downstrep protein-coding    |                                         |
| chr22-264 | 7.682963 | 0.326259 | 0.833189 | 0.391579 | 0.695369 | 0.981636 | chr22 | 26493856 | 26496994 | + | 0 | NA | TTS (NM_C TTS (NM_C | 11548   | NM_00101E | 402055   | Hs.709914NM_00101E  | ENSG00000SRRD      | -               | HC/HCC SFSRR1 dome protein-coding      |                                         |
| chr22-29E | 7.682963 | 0.326259 | 0.833189 | 0.391579 | 0.695369 | 0.981636 | chr22 | 29671700 | 29677134 | + | 0 | NA | intron (Nintron (N  | -45586  | NM_182527 | 164633   | Hs.64360CNM_182527E | ENSG00000CABP7     | -               | CALN2 calcium tprotein-coding          |                                         |
| chr3-1014 | 7.682963 | 0.326259 | 0.833189 | 0.391579 | 0.695369 | 0.981636 | chr3  | 10148851 | 10154690 | + | 0 | NA | 3' UTR (A3' UTR (A  | 9992    | NM_19815E | 7428     | Hs.51779CNM_000551E | ENSG00000CVHL      | -               | HRCAL RCVn Hippe protein-coding        |                                         |
| chr3-3341 | 7.682963 | 0.326259 | 0.833189 | 0.391579 | 0.695369 | 0.981636 | chr3  | 33418897 | 33419617 | + | 0 | NA | intron (NALuSg SIN  | 21121   | NM_00112E | 7342     | Hs.72912CNM_001451E | ENSG00000UBP1      | -               | LBP-1B LUF upstream protein-coding     |                                         |
| chr3-3701 | 7.682963 | 0.326259 | 0.833189 | 0.391579 | 0.695369 | 0.981636 | chr3  | 37018618 | 37021121 | + | 0 | NA | intron (NALuS5 SI   | 26519   | NM_00125E | 4292     | Hs.195364NM_00024E  | ENSG00000MLH1      | -               | COCA2 FCCmutL homoprotein-coding       |                                         |
| chr3-497E | 7.682963 | 0.326259 | 0.833189 | 0.391579 | 0.695369 | 0.981636 | chr3  | 49734596 | 49736494 | + | 0 | NA | intron (Nintron (N  | -11571  | NM_01333E | 29925    | Hs.56748CNM_01333E  | ENSG00000GMPBP     | -               | LGM19 GDP bindp protein-coding         |                                         |
| chr3-5007 | 7.682963 | 0.326259 | 0.833189 | 0.391579 | 0.695369 | 0.981636 | chr3  | 50072930 | 50077621 | + | 0 | NA | exon (NM exon (NM   | -13644  | NM_00577E | 10181    | Hs.43948CNM_00577E  | ENSG00000RBM5      | -               | G15 H37 RNA binding protein-coding     |                                         |
| chr3-125E | 7.682963 | 0.326259 | 0.833189 | 0.391579 | 0.695369 | 0.981636 | chr3  | 1.26E+08 | 1.26E+08 | + | 0 | NA | ex                  |         |           |          |                     |                    |                 |                                        |                                         |

|                    |          |          |          |          |          |       |          |          |   |      |                    |                   |                              |                     |   |                                        |
|--------------------|----------|----------|----------|----------|----------|-------|----------|----------|---|------|--------------------|-------------------|------------------------------|---------------------|---|----------------------------------------|
| chr11-914.11.14271 | -0.27503 | 0.705733 | -0.38971 | 0.696751 | 0.981636 | chr11 | 9149210  | 9150206  | + | 0 NA | intron (Nintron (N | 55345 NR_027713   | 283102 Hs. 689472NR_027713   | ENSG00000CKRT8P41   | - | keratin εpseud                         |
| chr1-2522.7.145236 | 0.337857 | 0.86696  | 0.389703 | 0.696756 | 0.981636 | chr1  | 25229596 | 25231083 | + | 0 NA | intron (Nintron (N | 2163 NM_015484    | 25949 Hs. 20013 NM_015484    | ENSG00000SYF2       | - | CBP1N NTC SYF2 pre-protein-coding      |
| chr10-69.7.145236  | 0.337857 | 0.86696  | 0.389703 | 0.696756 | 0.981636 | chr10 | 69365903 | 69366370 | + | 0 NA | intron (NMIR SINE  | 47289 NM_000188   | 3098 Hs. 37036ENM_000188     | ENSG00000CHK1       | - | HK HK1-αhexokinase protein-coding      |
| chr15-424.7.145236 | 0.337857 | 0.86696  | 0.389703 | 0.696756 | 0.981636 | chr15 | 42411912 | 42413575 | + | 0 NA | TTS (NM_1TTS (NM_1 | 7964 NM_173088    | 825 Hs. 143261NM_00007C      | ENSG00000CAPN3      | - | CANP3 CAN calpain 3 protein-coding     |
| chr17-647.7.145236 | 0.337857 | 0.86696  | 0.389703 | 0.696756 | 0.981636 | chr17 | 64792421 | 64792421 | + | 0 NA | intron (Nintron (N | -9843 NR_026899   | 1.09E+08 Hs. 117855NR_026899 | ENSG00000ARHGAP27F1 | - | ARHGAP27 pseudo                        |
| chr18-127.7.145236 | 0.337857 | 0.86696  | 0.389703 | 0.696756 | 0.981636 | chr18 | 12709582 | 12711587 | + | 0 NA | intron (NLMC5a LI  | 7542 NM_020232    | 56984 Hs. 464652NM_020232    | ENSG00000PSMG2      | - | CLAST3 HC proteasome protein-coding    |
| chr2-235.7.145236  | 0.337857 | 0.86696  | 0.389703 | 0.696756 | 0.981636 | chr2  | 2.35E+08 | 2.35E+08 | + | 0 NA | intron (Nintron (N | -18892 NR_001371  | 1306                         |                     |   |                                        |
| chr20-35.7.145236  | 0.337857 | 0.86696  | 0.389703 | 0.696756 | 0.981636 | chr20 | 35011666 | 35012305 | + | 0 NA | intron (NL2c LINE  | -21513 NR_039912  | 1.01E+08 NR_039912           | ENSG00000MIR499B    | - | MIR499A l-microRNA ncRNA               |
| chr20-35.7.145236  | 0.337857 | 0.86696  | 0.389703 | 0.696756 | 0.981636 | chr20 | 35557393 | 35558102 | + | 0 NA | TTS (NM_1TTS (NM_1 | 15669 NM_015966   | 51614 Hs. 472555NM_015966    | ENSG00000CERGIC3    | - | C20orf47 ERGIC anc protein-coding      |
| chr5-180.7.145236  | 0.337857 | 0.86696  | 0.389703 | 0.696756 | 0.981636 | chr5  | 1.81E+08 | 1.81E+08 | + | 0 NA | intron (Nintron (N | 8819 NM_001137    | 57472 Hs. 60838CM_01545E     | ENSG00000CNOT6      | - | CCR4 Ccr4 CCR4-NOT protein-coding      |
| chr1-109.8.220691  | 0.316136 | 0.811724 | 0.389463 | 0.696934 | 0.981636 | chr1  | 1.09E+08 | 1.09E+08 | + | 0 NA | exon (NM exon (NM  | 30730 NM_001142   | 22911 Hs. 570055NM_01496E    | ENSG00000WDR47      | - | WD repeat protein-coding               |
| chr10-778.8.220691 | 0.316136 | 0.811724 | 0.389463 | 0.696934 | 0.981636 | chr10 | 77852524 | 77854854 | + | 0 NA | intron (Nintron (N | 73066 NM_004747   | 9231 Hs. 652629NM_004747     | ENSG00000CDLG5      | - | LP-DLG P-discs lar protein-coding      |
| chr13-84.8.220691  | 0.316136 | 0.811724 | 0.389463 | 0.696934 | 0.981636 | chr13 | 24284340 | 24286872 | + | 0 NA | intron (NAluSq SIN | 14856 NM_00128E   | 221178 Hs. 434298NM_15302E   | ENSG00000SPATA13    | - | ARHGFE29 spermatog protein-coding      |
| chr14-212.8.220691 | 0.316136 | 0.811724 | 0.389463 | 0.696934 | 0.981636 | chr14 | 81486388 | 81490411 | + | 0 NA | intron (Nintron (N | -38242 NR_109999  | 1.01E+08 Hs. 116304NR_109999 | ENSG00000LINC02303E | - | long intncRNA                          |
| chr17-276.8.220691 | 0.316136 | 0.811724 | 0.389463 | 0.696934 | 0.981636 | chr17 | 27622871 | 27624335 | + | 0 NA | 3' UTR (N3' UTR (N | -7585 NM_00230E   | 3965 Hs. 81337 NM_00230E     | ENSG00000CLGALS9    | - | HUAT Lgalactin protein-coding          |
| chr2-134.8.220691  | 0.316136 | 0.811724 | 0.389463 | 0.696934 | 0.981636 | chr2  | 1.34E+08 | 1.34E+08 | + | 0 NA | intron (Nintron (N | 64362 NM_00241C   | 4249 Hs. 4988 NM_00241C      | ENSG00000MGAT5      | - | GNT-V GNT alpha-1, f protein-coding    |
| chr2-151.8.220691  | 0.316136 | 0.811724 | 0.389463 | 0.696934 | 0.981636 | chr2  | 1.51E+08 | 1.51E+08 | + | 0 NA | intron (Nintron (N | 6953 NM_198557    | 375287 Hs. 302442NM_198557   | ENSG00000CRBM43     | - | C2orf38 RNA bindi protein-coding       |
| chr2-225.8.220691  | 0.316136 | 0.811724 | 0.389463 | 0.696934 | 0.981636 | chr2  | 2.25E+08 | 2.25E+08 | + | 0 NA | intron (NAluJr SIN | 27261 NM_001257   | 8452 Hs. 372288NM_00359C     | ENSG00000CUL3       | - | CUL-3 PHF cullin 3 protein-coding      |
| chr4-5581.8.220691 | 0.316136 | 0.811724 | 0.389463 | 0.696934 | 0.981636 | chr4  | 5581521  | 5581826  | + | 0 NA | intron (NMSTA-int  | 56517 NR_126517   | 10141 Hs. 177972NM_00575C    | ENSG00000LINC01587C | - | 4orf6 a long intncRNA                  |
| chr6-893.8.220691  | 0.316136 | 0.811724 | 0.389463 | 0.696934 | 0.981636 | chr6  | 89340541 | 89342331 | + | 0 NA | intron (Nintron (N | 11286 NM_016021   | 51465 Hs. 163776NM_016021    | ENSG00000CUBE2J1    | - | CGI-76 Hs ubiquitin protein-coding     |
| chr7-100.7.220691  | 0.316136 | 0.811724 | 0.389463 | 0.696934 | 0.981636 | chr7  | 1E+08    | 1E+08    | + | 0 NA | intron (NL2b LINE  | 3274 NM_17823E    | 29990 Hs. 632314NM_01344C    | ENSG00000PILRB      | - | PDFACT1 Pfair in protein-coding        |
| chrX-1674.8.220691 | 0.316136 | 0.811724 | 0.389463 | 0.696934 | 0.981636 | chrX  | 16748863 | 16749407 | + | 0 NA | intron (NAluJb SIN | 29523 NM_03279E   | 94056 Hs. 744256NM_03279E    | ENSG00000SYAP1      | - | BSTA PRO2 synapse protein-coding       |
| chr14-10.7.895849  | -0.32165 | 0.826176 | -0.38933 | 0.697036 | 0.981636 | chr14 | 1.04E+08 | 1.04E+08 | + | 0 NA | IntergeniAluY SINE | 14581 NM_00182E   | 1152 Hs. 173724NM_00182E     | ENSG00000CCKB       | - | B-C BCK creatine protein-coding        |
| chr15-904.7.895849 | -0.32165 | 0.826176 | -0.38933 | 0.697036 | 0.981636 | chr15 | 90409563 | 90410043 | + | 0 NA | intron (NLIpA5 LIN | 21561 NM_00387C   | 8826 Hs. 430551NM_00387C     | ENSG00000IQGAP1     | - | HUMORFA01 IQ motif protein-coding      |
| chr2-665.7.895849  | -0.32165 | 0.826176 | -0.38933 | 0.697036 | 0.981636 | chr2  | 66525717 | 66526535 | + | 0 NA | intron (Nintron (N | -47904 NR_11015E  | 1.01E+08 Hs. 667942NR_11015E | ENSG00000LINC0179E  | - | long intncRNA                          |
| chr2-170.7.895849  | -0.32165 | 0.826176 | -0.38933 | 0.697036 | 0.981636 | chr2  | 1.7E+08  | 1.7E+08  | + | 0 NA | intron (Nintron (N | -116317 NR_04568E | 140469 Hs. 671902NM_13899E   | ENSG00000MYO3B      | - | myosin II protein-coding               |
| chr2-182.7.895849  | -0.32165 | 0.826176 | -0.38933 | 0.697036 | 0.981636 | chr2  | 1.83E+08 | 1.83E+08 | + | 0 NA | intron (Nintron (N | 81845 NM_01343E   | 10787 Hs. 603732NM_01343E    | ENSG00000CKAP1      | - | HEM2 NAP1NCK assoc protein-coding      |
| chr2-241.7.895849  | -0.32165 | 0.826176 | -0.38933 | 0.697036 | 0.981636 | chr2  | 2.42E+08 | 2.42E+08 | + | 0 NA | 3' UTR (N3' UTR (N | -13672 NR_03334E  | 1E+08 Hs. 621122NR_03334E    | BOK-AS1             | - | BOK-AS BOK antisncRNA                  |
| chr3-313.7.895849  | -0.32165 | 0.826176 | -0.38933 | 0.697036 | 0.981636 | chr3  | 3139667  | 3141369  | + | 0 NA | exon (NM exon (NM  | 13578 NR_15994C   | 51095 Hs. 732722NM_01600C    | ENSG00000TRNT1      | - | CCA1 CGI- tRNA nucle protein-coding    |
| chr3-3064.7.895849 | -0.32165 | 0.826176 | -0.38933 | 0.697036 | 0.981636 | chr3  | 30645074 | 30647992 | + | 0 NA | intron (NL3 LINE C | 39932 NM_00324E   | 7048 Hs. 82028 NM_00324E     | ENSG00000TGFB7E     | - | AAT3 FAA3 transform protein-coding     |
| chr4-769.7.895849  | -0.32165 | 0.826176 | -0.38933 | 0.697036 | 0.981636 | chr4  | 76989401 | 76990314 | + | 0 NA | intron (NTiger3a   | 40105 NM_00130E   | 55752 Hs. 128195NM_01824E    | ENSG00000SEPTIN11   | - | 11-Sep septin 11 protein-coding        |
| chr7-446.7.895849  | -0.32165 | 0.826176 | -0.38933 | 0.697036 | 0.981636 | chr7  | 44659916 | 44661147 | + | 0 NA | intron (NLMda LIN  | 53904 NM_00100C   | 4967 Hs. 488181NM_002541     | ENSG00000CGDH       | - | AKGHD1 E1h oxoglutarate protein-coding |
| chr7-475.7.895849  | -0.32165 | 0.826176 | -0.38933 | 0.697036 | 0.981636 | chr7  | 47505165 | 47507195 | + | 0 NA | intron (Nintron (N | -41377 NR_145811  | 1.1E+08 NR_145811            | SNORD151            | - | small nucsnoRNA                        |
| chr8-1407.7.895849 | -0.32165 | 0.826176 | -0.38933 | 0.697036 | 0.981636 | chr8  | 1.41E+08 | 1.41E+08 | + | 0 NA | intron (NLMb7 LIN  | -26605 NR_02989E  | 442893 NR_02989E             | ENSG00000MIR151A    | - | MIR151 Ml-microRNA ncRNA               |
| chr15-437.11.13485 | -0.27383 | 0.703555 | -0.3892  | 0.697126 | 0.981636 | chr15 | 43764345 | 43769289 | + | 0 NA | exon (NM exon (NM  | 10149 NM_02516E   | 80237 Hs. 70634E NM_02516E   | ENSG00000ELL3       | - | elongactin protein-coding              |
| chr15-671.11.13485 | -0.27383 | 0.703555 | -0.3892  | 0.697126 | 0.981636 | chr15 | 6179219  | 61782799 | + | 0 NA | intron (Nintron (N | 14854 NM_00114E   | 4088 Hs. 72798CM_00590E      | ENSG00000SMAD3      | - | HSPC193 E SMAD fam protein-coding      |
| chr2-1717.11.13485 | -0.27383 | 0.703555 | -0.3892  | 0.697126 | 0.981636 | chr2  | 1.72E+08 | 1.72E+08 | + | 0 NA | 3' UTR (N3' UTR (N | 61345 NM_00132C   | 1781 Hs. 546255NM_00137E     | ENSG00000DYNC1I2    | - | DIC74 DNC dynein cy protein-coding     |
| chr3-139.11.13485  | -0.27383 | 0.703555 | -0.3892  | 0.697126 | 0.981636 | chr3  | 1.39E+08 | 1.39E+08 | + | 0 NA | TTS (NM_1TTS (NM_C | 12997 NM_00136E   | 56945 Hs. 745001NM_020191    | ENSG00000MRP52      | - | C3orf5 CCmitch protein-coding          |
| chr11-86.7.65939   | 0.332288 | 0.853795 | 0.38919  | 0.697136 | 0.981636 | chr11 | 86328451 | 86328995 | + | 0 NA | intron (NAluSg7 SI | 26483 NM_00132E   | 51501 Hs. 283322NM_016401    | ENSG00000HIKESHI    | - | Clorf173 heat choc protein-coding      |
| chr1-5427.7.903707 | -0.32337 | 0.831224 | -0.38903 | 0.697252 | 0.981636 | chr1  | 54279557 | 54280429 | + | 0 NA | intron (Nintron (N | 43550 NR_103541   | 619518 Hs. 591433NM_001034   | ENSG00000SSBP3-AS1  | - | Clorf191 SSBP3 antncRNA                |
| chr17-171.7.903707 | -0.32337 | 0.831224 | -0.38903 | 0.697252 | 0.981636 | chr17 | 17164438 | 17164865 | + | 0 NA | exon (NM exon (NM  | 41682 NM_17883E   | 201164 Hs. 729075NM_17883E   | ENSG00000PLD6       | - | ZUC phospholipid protein-coding        |
| chr20-46.7.903707  | -0.32337 | 0.831224 | -0.38903 | 0.697252 | 0.981636 | chr20 | 46365900 | 46367409 | + | 0 NA | 3' UTR (N3' UTR (N | -2196 NM_001281   | 51006 Hs. 593344NM_01594E    | ENSG00000SLC35C2    | - | BA39402.1 solute c protein-coding      |
| chr3-120.7.903707  | -0.32337 | 0.831224 | -0.38903 | 0.697252 | 0.981636 | chr3  | 1.2E+08  | 1.2E+08  | + | 0 NA | 3' UTR (N3' UTR (N | 18917 NM_00109E   | 116064 Hs. 518084NM_00109E   | ENSG00000LRRCS8     | - | leucine r protein-coding               |
| chr13-33.8.742703  | 0.31097  | 0.799605 | 0.388904 | 0.697347 | 0.981636 | chr13 | 33223932 | 33224854 | + | 0 NA | intron (NMLT1 LTF  | -18343 NM_00124E  | 90627 Hs. 156551NM_052851    | ENSG00000STARD13    | - | ARHGAP37 StAR rel protein-coding       |
| chr1-1514.7.724103 | 0.327787 | 0.843011 | 0.388829 | 0.697403 | 0.981636 | chr1  | 1.51E+08 | 1.51E+08 | + | 0 NA | intron (Nintron (N | 14909 NM_00279E   | 5692 Hs. 89545 NM_00279E     | ENSG00000PSMB4      | - | HN3 Hsn3 proteasome protein-coding     |
| chr14-75.7.724103  | 0.327787 | 0.843011 | 0.388829 | 0.697403 | 0.981636 | chr14 | 75109341 | 75111048 | + | 0 NA | intron (Nintron (N | 16854 NM_00132E   | 91754 Hs. 7200 NM_03311E     | ENSG00000NEK9       | - | APUG LCCS NIMA rel protein-coding      |
| chr3-114.7.724103  | 0.327787 | 0.843011 | 0.388829 | 0.697403 | 0.981636 | chr3  | 11407681 | 11408500 | + | 0 NA | intron (NTHE1B-int | 135693 NM_001144  | 10533 Hs. 38032 NM_00639E    | ENSG00000ATG7       | - | APG7-LIKE autophagy protein-coding     |
| chr4-867.7.724103  | 0.327787 | 0.843011 | 0.388829 | 0.697403 | 0.981636 | chr4  | 86762086 | 86762839 | + | 0 NA | intron (Nintron (N | 86922 NM_19796E   | 345274 Hs. 452996NM_19796E   | ENSG00000SLC10A6    | - | SOAT solute c protein-coding           |
| chr8-144.7.724103  | 0.327787 | 0.843011 | 0.388829 | 0.697403 | 0.981636 | chr8  | 1.44E+08 | 1.44E+08 | + | 0 NA | intron (Nintron (N | 3206 NM_01620E    | 51160 Hs. 41817E NM_01620E   | ENSG00000VPS28      | - | VPS28 solute c protein-coding          |
| chr10-797.4.691974 | -0.40951 | 0.053694 | -0.38864 | 0.697541 | 0.981636 | chr10 | 79753336 | 79755583 | + | 0 NA | intron (NLIpA14 LI | 51232 NM_00127E   | 729262 Hs. 742755NM_0        |                     |   |                                        |



|                    |          |          |          |          |          |       |          |          |     |   |    |                    |         |           |          |           |                     |           |           |                |                |                |                |
|--------------------|----------|----------|----------|----------|----------|-------|----------|----------|-----|---|----|--------------------|---------|-----------|----------|-----------|---------------------|-----------|-----------|----------------|----------------|----------------|----------------|
| chr19-615.7.690821 | 0.324297 | 0.835563 | 0.388118 | 0.697929 | 0.981636 | chr19 | 619685   | 622126   | +   | 0 | NA | intron (NCpG-1289E | 12632   | NM_005035 | 5442     | Hs.254111 | ENSG000003POLRMT    | APOLMT    | MI        | RNA            | polyn          | protein-coding |                |
| chr19-141.7.690821 | 0.324297 | 0.835563 | 0.388118 | 0.697929 | 0.981636 | chr19 | 1418375  | 1425695  | +   | 0 | NA | intron (Nintron (N | 14449   | NM_001352 | 26528    | Hs.222511 | ENSG000003DAZAP1    | -         | DAZ       | assoc          | protein-coding |                |                |
| chr19-111.7.690821 | 0.324297 | 0.835563 | 0.388118 | 0.697929 | 0.981636 | chr19 | 11026064 | 11037251 | +   | 0 | NA | intron (Nintron (N | 47505   | NM_001128 | 6597     | Hs.327527 | ENSG000003SMARCA4   | BAF190    | BA        | SWI/SNF        | r              | protein-coding |                |
| chr19-136.7.690821 | 0.324297 | 0.835563 | 0.388118 | 0.697929 | 0.981636 | chr19 | 13840649 | 13841445 | +   | 0 | NA | non-codiron-codir  | 1871    | NR_03651E | 284454   | Hs.43642E | ENSG000003LOC284454 | -         | uncharact | ncRNA          | -              |                |                |
| chr19-167.7.690821 | 0.324297 | 0.835563 | 0.388118 | 0.697929 | 0.981636 | chr19 | 16517416 | 16518364 | +   | 0 | NA | intron (Nintron (N | 14412   | NM_006387 | 10523    | Hs.740364 | ENSG000003CHERP     | DAN16     | SCA       | calcium        | protein-coding |                |                |
| chr19-172.7.690821 | 0.324297 | 0.835563 | 0.388118 | 0.697929 | 0.981636 | chr19 | 17271423 | 17275132 | +   | 0 | NA | intron (Nintron (N | 5834    | NM_01417E | 29086    | Hs.190722 | ENSG000003BABAM1    | C19orf62  | BRISC     | anc            | protein-coding |                |                |
| chr19-394.7.690821 | 0.324297 | 0.835563 | 0.388118 | 0.697929 | 0.981636 | chr19 | 39455699 | 39461179 | +   | 0 | NA | intron (Nintron (N | -9784   | NR_14580E | 1.1E+08  | NR_14580E | SNORD175            | -         | small     | nuc            | snoRNA         |                |                |
| chr19-575.7.690821 | 0.324297 | 0.835563 | 0.388118 | 0.697929 | 0.981636 | chr19 | 57921316 | 57922233 | +   | 0 | NA | TTS (NM_C          | -5262   | NM_15247E | 147687   | Hs.567711 | ENSG000003ZNF417    | -         | zinc      | fin            | protein-coding |                |                |
| chr19-584.7.690821 | 0.324297 | 0.835563 | 0.388118 | 0.697929 | 0.981636 | chr19 | 58469577 | 58473110 | +   | 0 | NA | exon (NM_exon (NM  | 4263    | NM_014347 | 25799    | Hs.51566C | ENSG000003ZNF324    | ZF5128    | Z         | zinc           | fin            | protein-coding |                |
| chr2-9625.7.690821 | 0.324297 | 0.835563 | 0.388118 | 0.697929 | 0.981636 | chr2  | 96294727 | 96296273 | +   | 0 | NA | intron (Nintron (N | 9806    | NM_014014 | 23020    | Hs.24611E | ENSG000003SNRNP200  | ASCC3L1   | E         | small          | nuc            | protein-coding |                |
| chr20-245.7.690821 | 0.324297 | 0.835563 | 0.388118 | 0.697929 | 0.981636 | chr20 | 2494423  | 2494742  | +   | 0 | NA | intron (NAluSg SIN | 12968   | NM_001321 | 79175    | Hs.51684E | ENSG000003ZNF343    | dJ734P14  | Z         | zinc           | fin            | protein-coding |                |
| chr20-347.7.690821 | 0.324297 | 0.835563 | 0.388118 | 0.697929 | 0.981636 | chr20 | 34724848 | 34727579 | +   | 0 | NA | intron (Nl2a LINE  | 21494   | NM_00132E | 58476    | Hs.516994 | ENSG000003TP53INP2  | C20orf11C | tumor     | prc            | protein-coding |                |                |
| chr20-463.7.690821 | 0.324297 | 0.835563 | 0.388118 | 0.697929 | 0.981636 | chr20 | 46379577 | 46388552 | +   | 0 | NA | intron (Nl1ME4a LI | -19606  | NM_001281 | 51006    | Hs.593344 | ENSG000003SLC35C2   | BA39402   | I         | solute         | c              | protein-coding |                |
| chr22-264.7.690821 | 0.324297 | 0.835563 | 0.388118 | 0.697929 | 0.981636 | chr22 | 26457751 | 26458152 | +   | 0 | NA | exon (NM_exon (NM  | 21537   | NR_07313E | 89781    | Hs.47443E | ENSG000003HPS4      | BLOC352   | L         | HPS4           | b              | protein-coding |                |
| chr22-382.7.690821 | 0.324297 | 0.835563 | 0.388118 | 0.697929 | 0.981636 | chr22 | 38223977 | 38226449 | +   | 0 | NA | promoter-promoter- | -493    | NR_132774 | 1.07E+08 | NR_132774 | SNORA92             | -         | small     | nuc            | snoRNA         |                |                |
| chr3-5205.7.690821 | 0.324297 | 0.835563 | 0.388118 | 0.697929 | 0.981636 | chr3  | 5209960  | 5214795  | +   | 0 | NA | intron (Nintron (N | 24670   | NM_014674 | 9695     | Hs.22461E | ENSG000003EDEMI     | EDEM      | ER        | degrac         | protein-coding |                |                |
| chr3-1851.7.690821 | 0.324297 | 0.835563 | 0.388118 | 0.697929 | 0.981636 | chr3  | 1.85E+08 | 1.85E+08 | +   | 0 | NA | intron (Nintron (N | 18630   | NR_10671E | 1.01E+08 | NR_10671E | ENSG000003MIR5588   | -         | micro     | RNA            | ncRNA          |                |                |
| chr4-762.7.690821  | 0.324297 | 0.835563 | 0.388118 | 0.697929 | 0.981636 | chr4  | 76160322 | 76164834 | +   | 0 | NA | intron (Nintron (N | -14063  | NR_103781 | 53371    | Hs.40343E | ENSG000003NUP54     | -         | nucleop   | r              | protein-coding |                |                |
| chr5-313.7.690821  | 0.324297 | 0.835563 | 0.388118 | 0.697929 | 0.981636 | chr5  | 31309615 | 31310920 | +   | 0 | NA | intron (NMSTA-int  | 116581  | NM_004932 | 1004     | Hs.12477E | ENSG000003CDH6      | CAD6      | KCAI      | cadherin       | protein-coding |                |                |
| chr5-721.7.690821  | 0.324297 | 0.835563 | 0.388118 | 0.697929 | 0.981636 | chr5  | 72184191 | 72185571 | +   | 0 | NA | intron (Nl1MB7 LIN | 5094    | NM_00132E | 4131     | Hs.33507E | ENSG000003MAP1B     | FUTSCH    | M         | microtub       | protein-coding |                |                |
| chr5-177E.7.690821 | 0.324297 | 0.835563 | 0.388118 | 0.697929 | 0.981636 | chr5  | 1.78E+08 | 1.78E+08 | +   | 0 | NA | intron (Nintron (N | -11592  | NM_016222 | 51428    | Hs.48428E | ENSG000003DDX41     | ABS MLPF  | DEAD      | -box           | protein-coding |                |                |
| chr6-111.7.690821  | 0.324297 | 0.835563 | 0.388118 | 0.697929 | 0.981636 | chr6  | 1.11E+08 | 1.11E+08 | +   | 0 | NA | intron (Nintron (N | 62251   | NM_15336E | 91749    | Hs.40057E | ENSG000003MFS4B     | KIAA1919  | ma        | jo             | fac            | protein-coding |                |
| chr7-549E.7.690821 | 0.324297 | 0.835563 | 0.388118 | 0.697929 | 0.981636 | chr7  | 5498512  | 5501116  | +   | 0 | NA | intron (NAluJo SIN | -3897   | NR_03031E | 693174   | NR_03031E | ENSG000003MIR589    | MIRN589   | I         | micro          | RNA            | ncRNA          |                |
| chr7-3305.7.690821 | 0.324297 | 0.835563 | 0.388118 | 0.697929 | 0.981636 | chr7  | 33095116 | 33102294 | +   | 0 | NA | intron (NHALI LINE | 10699   | NM_20328E | 6100     | Hs.3268E  | ENSG000003RP9       | PAP-1     | PAF       | RP9            | pre            | -n             | protein-coding |
| chr9-954E.7.690821 | 0.324297 | 0.835563 | 0.388118 | 0.697929 | 0.981636 | chr9  | 95453576 | 95454422 | +   | 0 | NA | intron (Nintron (N | -9610   | NR_03898E | 1.01E+08 | Hs.661847 | ENSG000003LOC100507 | -         | uncharact | ncRNA          | -              |                |                |
| chr9-136.7.690821  | 0.324297 | 0.835563 | 0.388118 | 0.697929 | 0.981636 | chr9  | 1.36E+08 | 1.36E+08 | +   | 0 | NA | exon (NM_exon (NM  | 45369   | NM_14465E | 13815    | Hs.11289E | ENSG000003NACC2     | BEND9     | BTE       | NACC           | fam            | protein-coding |                |
| chr9-269.7.690821  | 0.324297 | 0.835563 | 0.388118 | 0.697929 | 0.981636 | chr9  | 26909711 | 26909910 | +   | 0 | NA | intron (NAluSx1 SI | 10699   | NM_001167 | 79886    | Hs.17835E | ENSG000003CAAP1     | C9orf82   | C         | cas            | protein-coding |                |                |
| chr17-388.11.127   | -0.27262 | 0.703343 | -0.3876  | 0.69831  | 0.981636 | chr17 | 38846679 | 38853111 | +   | 0 | NA | 3' UTR (N3' UTR (N | 1763    | NR_145761 | 1.1E+08  | NR_145761 | ENSG000003SNORA21B  | -         | small     | nuc            | snoRNA         |                |                |
| chr5-143.11.127    | -0.27262 | 0.703343 | -0.3876  | 0.69831  | 0.981636 | chr5  | 14330498 | 14340114 | +   | 0 | NA | intron (Nintron (N | -128677 | NR_14581E | 1.1E+08  | NR_14581E | SNORD170            | -         | small     | nuc            | snoRNA         |                |                |
| chr17-501.8.750561 | 0.309173 | 0.797933 | 0.387468 | 0.69841  | 0.981636 | chr17 | 5015507  | 5015968  | +   | 0 | NA | intron (NAluSx SIN | 4356    | NR_12066E | 1.03E+08 | Hs.666487 | ENSG000003LOC102724 | -         | uncharact | ncRNA          | -              |                |                |
| chr22-364.8.750561 | 0.309173 | 0.797933 | 0.387468 | 0.69841  | 0.981636 | chr22 | 36477365 | 36477931 | +   | 0 | NA | intron (Nintron (N | 3992    | NM_01247E | 25828    | Hs.21192E | ENSG000003TXN2      | COXP29    | I         | thio           | protein-coding |                |                |
| chr1-393.7.153094  | 0.335741 | 0.86708  | 0.387209 | 0.698602 | 0.981636 | chr1  | 39305483 | 39306690 | +   | 0 | NA | intron (Nl2a LINE  | -102987 | NM_01503E | 643314   | Hs.65876E | ENSG000003KIAA0754  | -         | KIAA0754  | protein-coding |                |                |                |
| chr1-156E.7.153094 | 0.335741 | 0.86708  | 0.387209 | 0.698602 | 0.981636 | chr1  | 1.57E+08 | 1.57E+08 | +   | 0 | NA | exon (NM_exon (NM  | 13131   | NM_00108C | 375033   | Hs.14200E | ENSG000003PEAR1     | JEDI      | MEGF      | lat            | protein-coding |                |                |
| chr10-10.7.153094  | 0.335741 | 0.86708  | 0.387209 | 0.698602 | 0.981636 | chr10 | 1.04E+08 | 1.04E+08 | +   | 0 | NA | 3' UTR (N3' UTR (N | 76914   | NM_00136E | 9644     | Hs.678727 | ENSG000003SH3PXD2A  | FISH      | SH3       | SH3            | and            | protein-coding |                |
| chr11-44.7.153094  | 0.335741 | 0.86708  | 0.387209 | 0.698602 | 0.981636 | chr11 | 4494160  | 44946408 | +   | 0 | NA | intron (Nintron (N | 3876    | NM_00125E | 9537     | Hs.554791 | ENSG000003TP53I11   | PIG11     | tumor     | prc            | protein-coding |                |                |
| chr12-26E.7.153094 | 0.335741 | 0.86708  | 0.387209 | 0.698602 | 0.981636 | chr12 | 26002628 | 26003411 | +   | 0 | NA | intron (Nl1P4 LINE | 29264   | NM_001164 | 11228    | Hs.69643E | ENSG000003RASSF8    | C1orf2    | F         | ras            | protein-coding |                |                |
| chr13-114.7.153094 | 0.335741 | 0.86708  | 0.387209 | 0.698602 | 0.981636 | chr13 | 1.14E+08 | 1.14E+08 | +   | 0 | NA | intron (NAluSq2 SI | -11677  | NM_03243E | 283489   | Hs.7542   | ENSG000003CHAMP1    | C13orf8   | C         | chromos        | protein-coding |                |                |
| chr14-677.7.153094 | 0.335741 | 0.86708  | 0.387209 | 0.698602 | 0.981636 | chr14 | 67799697 | 67800554 | +   | 0 | NA | intron (Nintron (N | 16465   | NM_01534E | 23503    | Hs.98041  | ENSG000003ZFVYE26   | FYVE      | CEN       | zinc           | fin            | protein-coding |                |
| chr15-73E.7.153094 | 0.335741 | 0.86708  | 0.387209 | 0.698602 | 0.981636 | chr15 | 73699271 | 73699979 | +   | 0 | NA | 5' UTR (N5' UTR (N | 14855   | NM_00132E | 80381    | Hs.74491E | ENSG000003CD276     | 41G-B7    | H         | CD276          | m              | protein-coding |                |
| chr19-127.7.153094 | 0.335741 | 0.86708  | 0.387209 | 0.698602 | 0.981636 | chr19 | 12746957 | 12748220 | +   | 0 | NA | exon (NM_exon (NM  | -4203   | NM_01768E | 54831    | Hs.435611 | ENSG000003BEST2     | VMD2L1    | best      | protein-coding |                |                |                |
| chr20-621.7.153094 | 0.335741 | 0.86708  | 0.387209 | 0.698602 | 0.981636 | chr20 | 62189166 | 62189952 | +   | 0 | NA | intron (NAluJr SIN | 6534    | NM_01566E | 26164    | Hs.34063E | ENSG000003MTG2      | GTPBP5    | O         | mito           | chonc          | protein-coding |                |
| chr5-784.7.153094  | 0.335741 | 0.86708  | 0.387209 | 0.698602 | 0.981636 | chr5  | 78440048 | 78441323 | +   | 0 | NA | intron (Nl1P46 LIN | 80287   | NM_00486E | 9522     | Hs.482587 | ENSG000003SCAMP1    | SCAMP     | SCA       | secretory      | protein-coding |                |                |
| chr7-778.7.153094  | 0.335741 | 0.86708  | 0.387209 | 0.698602 | 0.981636 | chr7  | 77820026 | 77821619 | +   | 0 | NA | intron (Nl1MA5A LI | -19306  | NM_02043E | 57157    | Hs.20396E | ENSG000003PHTF2     | -         | putative  | protein-coding |                |                |                |
| chr8-231E.7.153094 | 0.335741 | 0.86708  | 0.387209 | 0.698602 | 0.981636 | chr8  | 23158168 | 23159244 | +   | 0 | NA | intron (Nl1MEf LIN | 5321    | NM_00384C | 8793     | Hs.213467 | ENSG000003TNFRSF10E | CD264     | DCF       | TNF            | rec            | protein-coding |                |
| chr9-106E.7.153094 | 0.335741 | 0.86708  | 0.387209 | 0.698602 | 0.981636 | chr9  | 1.07E+08 | 1.07E+08 | +   | 0 | NA | intron (Nintron (N | 76247   | NM_021224 | 58499    | Hs.37037E | ENSG000003ZNF462    | ZFP1P     | Zf        | zinc           | fin            | protein-coding |                |
| chr1-101E.7.179552 | 0.314681 | 0.813358 | 0.386891 | 0.698837 | 0.981636 | chr1  | 10105390 | 10106482 | +</ |   |    |                    |         |           |          |           |                     |           |           |                |                |                |                |

|                    |           |          |          |          |          |       |          |          |   |      |                             |          |          |                          |                     |   |                                     |
|--------------------|-----------|----------|----------|----------|----------|-------|----------|----------|---|------|-----------------------------|----------|----------|--------------------------|---------------------|---|-------------------------------------|
| chr5-723: 8.228549 | 0.314321  | 0.81595  | 0.385221 | 0.700074 | 0.981636 | chr5  | 72335076 | 72336636 | + | 0 NA | exon (NM exon (NM_001284    | 15483    | 79810    | Hs.126906                | ENSG000002PTCD2     | - | pentatricprotein-coding             |
| chr4-1431          | 7.77058   | -0.34349 | 0.89169  | -0.38521 | 0.700084 | chr4  | 1.43E+08 | 1.43E+08 | + | 0 NA | intron (Nintron (N_00129C   | 5601     | 84640    | Hs.48084E                | ENSG000002USP38     | - | HP43.8KD ubiquitin protein-coding   |
| chr11-118          | 7.649682  | 0.322755 | 0.83834  | 0.384992 | 0.700243 | chr11 | 1.18E+08 | 1.18E+08 | + | 0 NA | TTS (NR_TTS (NR_C_03375E    | -20296   | 10632    | Hs.48636C                | ENSG000002ATP5MG    | - | ATP5JG ATATP syntf protein-coding   |
| chr19-757          | 7.649682  | 0.322755 | 0.83834  | 0.384992 | 0.700243 | chr19 | 7550174  | 7551396  | + | 0 NA | intron (NCPg-13551          | 15068    | 10908    | Hs.61386E                | ENSG000002PNPLA6    | - | BNHS LNMC patatin I protein-coding  |
| chr2-1717          | 7.649682  | 0.322755 | 0.83834  | 0.384992 | 0.700243 | chr2  | 1.72E+08 | 1.72E+08 | + | 0 NA | exon (NM exon (NM_00132C    | 60033    | 1781     | Hs.546255C               | ENSG000002DYNCL12   | - | DC17C4 DNcyein cy protein-coding    |
| chr4-731C          | 7.649682  | 0.322755 | 0.83834  | 0.384992 | 0.700243 | chr4  | 73108546 | 73109710 | + | 0 NA | intron (NAluSx SIN          | -39369   | 285521   | Hs.356697N               | ENSG000002COX18     | - | COX18HS cytochron protein-coding    |
| chr4-761F          | 7.649682  | 0.322755 | 0.83834  | 0.384992 | 0.700243 | chr4  | 76165713 | 76166652 | + | 0 NA | intron (Nintron (N_10378F   | -17667   | 53371    | Hs.43043E                | ENSG000002NUP54     | - | nucleopor protein-coding            |
| chr5-528F          | 7.649682  | 0.322755 | 0.83834  | 0.384992 | 0.700243 | chr5  | 52888152 | 52888357 | + | 0 NA | intron (NAluSx SIN          | 100338   | 3672     | Hs.44435E                | ENSG000002ITGA1     | - | CD49A VLA integrin protein-coding   |
| chr4-119F          | 11.11914  | -0.2714  | 0.705099 | -0.38491 | 0.700305 | chr4  | 1.2E+08  | 1.2E+08  | + | 0 NA | intron (Nintron (N_03763C   | 83150    | 645513   | Hs.67754E                | ENSG000002LOC64551E | - | septin 7 pseudo                     |
| chr11-337          | 6.689787  | 0.354221 | 0.920494 | 0.384816 | 0.700374 | chr11 | 33759899 | 33760523 | + | 0 NA | intron (NLM3E3 ALI          | 14310    | FBA FBX3 | F-box prc protein-coding |                     |   |                                     |
| chr14-344          | 6.689787  | 0.354221 | 0.920494 | 0.384816 | 0.700374 | chr14 | 34444076 | 34444599 | + | 0 NA | intron (NLM3E3 ALI          | 17905    | 171546   | Hs.740577N               | ENSG000002SPTSSA    | - | C14orf147 serine pr protein-coding  |
| chr7-1042          | 6.689787  | 0.354221 | 0.920494 | 0.384816 | 0.700374 | chr7  | 1.04E+08 | 1.04E+08 | + | 0 NA | intron (NMIR SINE           | 4381     | 5001     | Hs.43294E                | ENSG000002ORC5      | - | ORC5L ORC origin re protein-coding  |
| chr12-88C          | 6.095204  | 0.327903 | 0.969646 | 0.384577 | 0.700551 | chr12 | 880338   | 880588   | + | 0 NA | intron (Nintron (N_001297   | 52613    | 5893     | Hs.41035E                | ENSG000002RAD52     | - | RAD52 hom protein-coding            |
| chr12-296          | 7.410818  | -0.3306  | 0.859694 | -0.38455 | 0.700568 | chr12 | 29652490 | 29652720 | + | 0 NA | intron (NLM2C LINE          | 131337   | 83857    | Hs.401954N               | ENSG000002TMTC1     | - | ARG99 OLF transmemt protein-coding  |
| chr12-62F          | 7.410818  | -0.3306  | 0.859694 | -0.38455 | 0.700568 | chr12 | 62509060 | 62509791 | + | 0 NA | intron (NLM2B LIN           | 42599    | 23041    | Hs.38937E                | ENSG000002MON2      | - | MON2 homc protein-coding            |
| chr13-262          | 7.410818  | -0.3306  | 0.859694 | -0.38455 | 0.700568 | chr13 | 26219276 | 26219485 | + | 0 NA | intron (Nintron (N_18304A   | 20377    | 6049     | Hs.13688E                | ENSG000002RNF6      | - | ring fing protein-coding            |
| chr15-637          | 7.410818  | -0.3306  | 0.859694 | -0.38455 | 0.700568 | chr15 | 63711706 | 63711940 | + | 0 NA | intron (NMIRc SINE          | -110996  | 1E+08    | Hs.63116E                | ENSG000002CASP3-AS1 | - | USP3 anticrRNA                      |
| chr16-874          | 7.410818  | -0.3306  | 0.859694 | -0.38455 | 0.700568 | chr16 | 87419091 | 87419397 | + | 0 NA | intron (NAluSx SIN          | 26908    | 81631    | Hs.356661N               | ENSG000002MAP1LC3B  | - | ATG8F LC microtub protein-coding    |
| chr3-133F          | 7.410818  | -0.3306  | 0.859694 | -0.38455 | 0.700568 | chr3  | 1.34E+08 | 1.34E+08 | + | 0 NA | intron (Nintron (N_16349I   | 5731     | 58477    | Hs.12152                 | ENSG000002SRPRB     | - | APMCF1 SFRS1 recep protein-coding   |
| chr20-384          | 11.58845  | -0.26565 | 0.691134 | -0.38437 | 0.700703 | chr20 | 38422837 | 38426130 | + | 0 NA | TTS (NR_TTS (NR_C_00291C    | 847      | 26776    | Hs.40087E                | ENSG000002SNORA71B  | - | RNU71B U7small nuc snoRNA           |
| chr7-3001          | 8.725137  | 0.304146 | 0.791374 | 0.384327 | 0.700736 | chr7  | 30013315 | 30014184 | + | 0 NA | non-codir non-codir         | 12953    | 55033    | Hs.39083E                | ENSG000002FKBP14    | - | EDSKMH EL FKBP pr protein-coding    |
| chr20-91F          | 7.194233  | 0.337203 | 0.877405 | 0.384319 | 0.700742 | chr20 | 9131603  | 9131924  | + | 0 NA | intron (NMLT1H2 LI          | 62709    | 5332     | Hs.472101N               | ENSG000002PLCB4     | - | ARCND2 PI phospholip protein-coding |
| chr4-122F          | 7.194233  | 0.337203 | 0.877405 | 0.384319 | 0.700742 | chr4  | 1.22E+08 | 1.22E+08 | + | 0 NA | intron (NLM3C LIN           | -59056   | 132612   | Hs.518957N               | ENSG000002CADAD1    | - | Tenr adenosine protein-coding       |
| chr5-172C          | 7.194233  | 0.337203 | 0.877405 | 0.384319 | 0.700742 | chr5  | 1.72E+08 | 1.72E+08 | + | 0 NA | intron (NMLT1E2 LI          | -45404   | 23291    | Hs.48413E                | ENSG000002FBXW11    | - | BTRC2 BTF F-box anc protein-coding  |
| chr7-4997          | 7.194233  | 0.337203 | 0.877405 | 0.384319 | 0.700742 | chr7  | 4997331  | 4997784  | + | 0 NA | non-codir non-codir         | 23570    | 441191   | Hs.52063E                | ENSG000002RNF216P1  | - | RNF216L ring fing pseudo            |
| chr7-755F          | 7.194233  | 0.337203 | 0.877405 | 0.384319 | 0.700742 | chr7  | 75559961 | 75560794 | + | 0 NA | intron (NAluJo SIN          | -32254   | 5387     | Hs.659871N               | ENSG000002PMS2P3    | - | PMS2L3 PW PMS1 homc pseudo          |
| chr1-246E          | 7.641824  | 0.324707 | 0.845071 | 0.384237 | 0.700803 | chr1  | 24640060 | 24640676 | + | 0 NA | exon (NM exon (NM_016002    | 77044    | 51097    | Hs.498397N               | ENSG000002PCDH1     | - | EDSKMH EL FKBP pr protein-coding    |
| chr20-62F          | 7.641824  | 0.324707 | 0.845071 | 0.384237 | 0.700803 | chr20 | 62285834 | 62286836 | + | 0 NA | intron (NAluSx SIN          | -16561   | 11047    | Hs.90107                 | ENSG000002ADRM1     | - | ARM-1 ARM adhesion protein-coding   |
| chr6-264C          | 7.641824  | 0.324707 | 0.845071 | 0.384237 | 0.700803 | chr6  | 26406400 | 26406676 | + | 0 NA | intron (Nintron (N_19444I   | 4263     | 11119    | Hs.19151C                | ENSG000002BTN3A1    | - | BT3.1 BTF buty protein-coding       |
| chr17-821          | 10.165768 | -0.27885 | 0.725951 | -0.38411 | 0.700894 | chr17 | 82195064 | 82195299 | + | 0 NA | intron (NAluJb SIN          | 17661    | 284001   | Hs.631724N               | ENSG000002CCDC57    | - | coiled-c protein-coding             |
| chr1-1737          | 8.195267  | 0.310985 | 0.809622 | 0.384111 | 0.700896 | chr1  | 1.74E+08 | 1.74E+08 | + | 0 NA | intron (NAluJb SIN          | 45712    | 91687    | Hs.53185E                | ENSG000002CENPL     | - | C1orf155 centromer protein-coding   |
| chr1-246F          | 8.195267  | 0.310985 | 0.809622 | 0.384111 | 0.700896 | chr1  | 2.47E+08 | 2.47E+08 | + | 0 NA | intron (Nintron (N_15144E   | 25411    | 25909    | Hs.300887N               | ENSG000002AHCTF1    | - | ELYS MS1AT-hook cr protein-coding   |
| chr10-125          | 8.195267  | 0.310985 | 0.809622 | 0.384111 | 0.700896 | chr10 | 1.26E+08 | 1.26E+08 | + | 0 NA | intron (Nintron (N_12063E   | 1.02E+08 | 5830     | Hs.63426E                | ENSG000002EDRF1-AS1 | - | EDRF1 anticrRNA                     |
| chr11-134          | 8.195267  | 0.310985 | 0.809622 | 0.384111 | 0.700896 | chr11 | 13412176 | 13413849 | + | 0 NA | intron (Nintron (N_001297   | 27267    | 84280    | Hs.33238E                | ENSG000002BTBD10    | - | GMRP-1 GWBTB doma protein-coding    |
| chr11-43           | 8.195267  | 0.310985 | 0.809622 | 0.384111 | 0.700896 | chr11 | 43447976 | 43452605 | + | 0 NA | intron (Nintron (N_18255E   | 91370    | 55761    | Hs.50118E                | ENSG000002TTC17     | - | tetratric protein-coding            |
| chr11-115          | 8.195267  | 0.310985 | 0.809622 | 0.384111 | 0.700896 | chr11 | 1.19E+08 | 1.19E+08 | + | 0 NA | intron (Nintron (N_100135I  | 12228    | 25988    | Hs.194091N               | ENSG000002HINFP     | - | HINFP MI histone f protein-coding   |
| chr12-72C          | 8.195267  | 0.310985 | 0.809622 | 0.384111 | 0.700896 | chr12 | 7207485  | 7210956  | + | 0 NA | intron (Nintron (N_00031E   | 18858    | 5830     | Hs.567327N               | ENSG000002PEX5      | - | PBD2A PBE peroxison protein-coding  |
| chr12-804          | 8.195267  | 0.310985 | 0.809622 | 0.384111 | 0.700896 | chr12 | 8047161  | 8050664  | + | 0 NA | intron (Nintron (N_18141E   | 16196    | 55810    | Hs.120844N               | ENSG000002FOXJ2     | - | FHX forkhead protein-coding         |
| chr12-194          | 8.195267  | 0.310985 | 0.809622 | 0.384111 | 0.700896 | chr12 | 19473095 | 19475068 | + | 0 NA | intron (Nintron (N_1001267  | 33482    | 51347    | Hs.126497N               | ENSG000002AEBP2     | - | AE bindir protein-coding            |
| chr12-118          | 8.195267  | 0.310985 | 0.809622 | 0.384111 | 0.700896 | chr12 | 1.18E+08 | 1.18E+08 | + | 0 NA | intron (NAluJb SIN          | 10228    | 51347    | Hs.64442C                | ENSG000002TAOK3     | - | DPK JIK VTAO kinas protein-coding   |
| chr14-212          | 8.195267  | 0.310985 | 0.809622 | 0.384111 | 0.700896 | chr14 | 21239780 | 21240111 | + | 0 NA | intron (Nintron (N_031314   | 29534    | 3183     | Hs.50884E                | ENSG000002HNRNP     | - | C1 C2 HNF heteroger protein-coding  |
| chr16-287          | 8.195267  | 0.310985 | 0.809622 | 0.384111 | 0.700896 | chr16 | 28734088 | 28734894 | + | 0 NA | intron (Nintron (N_100113C  | 10239    | 1.02E+08 | Hs.106922E               | ENSG000002MIR6862-1 | - | hsa-mir-6 microRNA ncRNA            |
| chr16-577          | 8.195267  | 0.310985 | 0.809622 | 0.384111 | 0.700896 | chr16 | 57796467 | 57798045 | + | 0 NA | intron (Nintron (N_012091   | 25460    | 3801     | Hs.23131                 | ENSG000002KIFC3     | - | kinesin f protein-coding            |
| chr16-75E          | 8.195267  | 0.310985 | 0.809622 | 0.384111 | 0.700896 | chr16 | 75597420 | 75598292 | + | 0 NA | 3' UTR (N3' UTR (N_10012091 | 25460    | 23536    | Hs.72931E                | ENSG000002ADAT1     | - | HADAT1 adenosine protein-coding     |
| chr16-89F          | 8.195267  | 0.310985 | 0.809622 | 0.384111 | 0.700896 | chr16 | 89522172 | 89535723 | + | 0 NA | intron (NAluSg SIN          | 20579    | 6687     | Hs.185597N               | ENSG000002SPG7      | - | CAR CMAR SPG7 mat protein-coding    |
| chr17-72E          | 8.195267  | 0.310985 | 0.809622 | 0.384111 | 0.700896 | chr17 | 7212942  | 7231088  | + | 0 NA | exon (NM exon (NM_02989E    | -3136    | 442898   | Hs.185597N               | ENSG000002MIR324    | - | MIRN324 mi microRNA ncRNA           |
| chr17-17E          | 8.195267  | 0.310985 | 0.809622 | 0.384111 | 0.700896 | chr17 | 17213001 | 17214955 | + | 0 NA | intron (Nintron (N_17883E   | -7645    | 201164   | Hs.72907E                | ENSG000002PLD6      | - | ZUC phospholip protein-coding       |
| chr17-494          | 8.195267  | 0.310985 | 0.809622 | 0.384111 | 0.700896 | chr17 | 4940403  | 49412849 | + | 0 NA | intron (Nintron (N_001281   | 6412     | 5245     | Hs.51430E                | ENSG000002CPHB      | - | HEL-215 E prohibit protein-coding   |
| chr17-62F          | 8.195267  | 0.310985 | 0.809622 | 0.384111 | 0.700896 | chr17 | 62686855 | 62688855 | + | 0 NA | intron (Nintron (N_14788E   | -22170   | 1.05E+08 | Hs.44626E                | ENSG000002LOC105371 | - | uncharactncRNA                      |
| chr17-76E          | 8.195267  | 0.310985 | 0.809622 | 0.384111 | 0.700896 | chr17 | 76394021 | 76398504 | + | 0 NA | exon (NM exon (NM_001142    | 10984    | 8877     | Hs.68061                 | ENSG000002SPHK1     | - | SPHK sphingosin protein-coding      |
| chr19-114          | 8.195267  | 0.310985 | 0.809622 | 0.384111 | 0.700896 | chr19 | 11439318 | 11442693 | + | 0 NA | intron (Nintron (N_00130E   | -5223    | 115948   | Hs.12401C                | ENSG000002CCDC151   | - | CILD30 coiled-c protein-coding      |
| chr2-257F          | 8.195267  | 0.310985 | 0.809622 | 0.384111 | 0.700896 | chr2  | 25770786 | 25771431 | + | 0 NA | intron (NAluSc SIN          | 25273    | 55252    | Hs.11981E                | ENSG000002ASXL2     | - | ASXL2 SHH ASXL trar protein-coding  |
| chr2-1087          | 8.195267  | 0.310985 | 0.809622 | 0.384111 | 0.700896 | chr2  | 1.09E+08 | 1.09E+08 | + | 0 NA | intron (Nintron (N_00135I   | -8466    | 165055   | Hs.3                     |                     |   |                                     |



|                     |          |          |          |          |          |       |          |          |   |   |    |                     |                           |                               |                                  |                                     |
|---------------------|----------|----------|----------|----------|----------|-------|----------|----------|---|---|----|---------------------|---------------------------|-------------------------------|----------------------------------|-------------------------------------|
| chr19-23c.7.921272  | -0.31557 | 0.8244   | -0.38279 | 0.701876 | 0.981636 | chr19 | 23389579 | 23390977 | + | 0 | NA | intron (AluSp SIN   | 5193 NM_00343C            | 7644 Hs. 58834 NM_00343C      | ENSG000002ZNF91                  | HPF7 HTF1zinc fingprotein-coding    |
| chr2-241c.7.921272  | -0.31557 | 0.8244   | -0.38279 | 0.701876 | 0.981636 | chr2  | 2.41E+08 | 2.41E+08 | + | 0 | NA | TTS (NM_C TTS (NM_C | 13986 NM_182501           | 130916 Hs. 159556 NM_182501   | ENSG000002MTERF4                 | MTERF2D mitochondonprotein-coding   |
| chr4-534c.7.921272  | -0.31557 | 0.8244   | -0.38279 | 0.701876 | 0.981636 | chr4  | 53401616 | 53406445 | + | 0 | NA | intron (LIPA3 LIN   | 26377 NM_001134           | 81608 Hs. 555105 NM_030917    | ENSG000002CIP1L1                 | FIP1 Rhe factor irprotein-coding    |
| chr4-122c.7.921272  | -0.31557 | 0.8244   | -0.38279 | 0.701876 | 0.981636 | chr4  | 1.22E+08 | 1.22E+08 | + | 0 | NA | intron (N intron (N | 39802 NM_015312           | 84162 Hs. 408142 NM_015312    | ENSG000002KIAA1109               | ALKKUCS FKIAA1109 protein-coding    |
| chr5-1297c.7.921272 | -0.31557 | 0.8244   | -0.38279 | 0.701876 | 0.981636 | chr5  | 1.3E+08  | 1.3E+08  | + | 0 | NA | intron (N intron (N | -43187 NM_001257          | 1E+08 Hs. 582534 NM_001257    | ENSG000002M1NAR2                 | KIAA1024I membrane protein-coding   |
| chr5-146c.7.921272  | -0.31557 | 0.8244   | -0.38279 | 0.701876 | 0.981636 | chr5  | 1.46E+08 | 1.46E+08 | + | 0 | NA | exon (NM_exon (NM   | 58035 NM_01898E           | 54439 Hs. 61441 NM_01898E     | ENSG000002CRBM27                 | ARRS1 PscRNA bindiprotein-coding    |
| chr6-111c.7.921272  | -0.31557 | 0.8244   | -0.38279 | 0.701876 | 0.981636 | chr6  | 1.11E+08 | 1.11E+08 | + | 0 | NA | intron (AluSj SIN   | -111760 NR_03410E         | 643749 Hs. 486222 NR_03410E   | ENSG000002TRAF3IP2               | C6UAS C6c TRAF3IP2 ncRNA            |
| chr7-649c.7.921272  | -0.31557 | 0.8244   | -0.38279 | 0.701876 | 0.981636 | chr7  | 64923209 | 64928185 | + | 0 | NA | intron (AluSg SIN   | 22455 NM_02114E           | 10793 Hs. 520885 NM_02114E    | ENSG000002ZNF273                 | HZF9 zinc fingprotein-coding        |
| chr9-127c.7.921272  | -0.31557 | 0.8244   | -0.38279 | 0.701876 | 0.981636 | chr9  | 1.28E+08 | 1.28E+08 | + | 0 | NA | intron (MIRb SINE   | 3287 NR_136302            | 1.03E+08 NR_136302            | ENSG000002LOC102722              | zinc fingprotein-coding             |
| chr9-137c.7.921272  | -0.31557 | 0.8244   | -0.38279 | 0.701876 | 0.981636 | chr9  | 1.35E+08 | 1.35E+08 | + | 0 | NA | intron (N intron (N | 96183 NR_039691           | 1.01E+08 NR_039691            | ENSG000002MIR3689C               | microRNA ncRNA                      |
| chr12-447c.3.470382 | 0.468262 | 1.223617 | 0.382687 | 0.701952 | 0.981636 | chr12 | 47642679 | 47643452 | + | 0 | NA | Intergeni(LIMDa LIN | 62965 NM_024604           | 79657 Hs. 437855 NM_024604    | ENSG000002CRPAP3                 | Tah1 hSpaRNA polynprotein-coding    |
| chr1-543c.7.698679  | 0.322287 | 0.842555 | 0.382511 | 0.702082 | 0.981636 | chr1  | 54391708 | 54394205 | + | 0 | NA | intron (N intron (N | 13438 NM_00100E           | 23648 Hs. 476706 NM_01807C    | ENSG000002SSBP3                  | CSDP SSDFsingle stprotein-coding    |
| chr1-214c.7.698679  | 0.322287 | 0.842555 | 0.382511 | 0.702082 | 0.981636 | chr1  | 2.14E+08 | 2.14E+08 | + | 0 | NA | intron (N intron (N | 83673 NM_020197           | 56950 Hs. 66170 NM_020197     | ENSG000002SMYD2                  | HSKM-B KMS SET and M protein-coding |
| chr1-214c.7.698679  | 0.322287 | 0.842555 | 0.382511 | 0.702082 | 0.981636 | chr1  | 2.14E+08 | 2.14E+08 | + | 0 | NA | intron (L2 LINE L   | 89218 NM_020197           | 56950 Hs. 66170 NM_020197     | ENSG000002SMYD2                  | HSKM-B KMS SET and M protein-coding |
| chr10-69c.7.698679  | 0.322287 | 0.842555 | 0.382511 | 0.702082 | 0.981636 | chr10 | 69387955 | 69389848 | + | 0 | NA | intron (N intron (N | 28017 NM_001057           | 6865 Hs. 88372 NM_001057      | ENSG000002TACR2                  | NK2R NKN tachykininprotein-coding   |
| chr10-73c.7.698679  | 0.322287 | 0.842555 | 0.382511 | 0.702082 | 0.981636 | chr10 | 73859160 | 73860897 | + | 0 | NA | intron (N intron (N | 14527 NM_001367           | 818 Hs. 52304E NM_00122E      | ENSG000002CAMK2G                 | CAMK CAMM calcium c protein-coding  |
| chr11-64c.7.698679  | 0.322287 | 0.842555 | 0.382511 | 0.702082 | 0.981636 | chr11 | 64804391 | 64806549 | + | 0 | NA | intron (N intron (N | -2256 NM_001307           | 5871 Hs. 534341 NM_00457E     | ENSG000002MAP4K2                 | BL44 GCM mitogen-e protein-coding   |
| chr11-11c.7.698679  | 0.322287 | 0.842555 | 0.382511 | 0.702082 | 0.981636 | chr11 | 1.17E+08 | 1.17E+08 | + | 0 | NA | intron (AluSx1 SI   | 3216 NM_03272E            | 84811 Hs. 437341 NM_03272E    | ENSG000002BUD13                  | Cwc26 fS BUD13 honprotein-coding    |
| chr15-42c.7.698679  | 0.322287 | 0.842555 | 0.382511 | 0.702082 | 0.981636 | chr15 | 42516258 | 42518705 | + | 0 | NA | intron (N intron (N | 21849 NM_00382E           | 8773 Hs. 511145 NM_00382E     | ENSG000002SNAP23                 | HsT17016 synaptosc protein-coding   |
| chr19-11c.7.698679  | 0.322287 | 0.842555 | 0.382511 | 0.702082 | 0.981636 | chr19 | 11361557 | 11364315 | + | 0 | NA | intron (MERR6B DN   | 7504 NM_00117C            | 64748 Hs. 6846 NM_022737      | ENSG000002PLP2R2                 | PLP2R2 PRC phospholiprotein-coding  |
| chr19-12c.7.698679  | 0.322287 | 0.842555 | 0.382511 | 0.702082 | 0.981636 | chr19 | 12602797 | 12603677 | + | 0 | NA | intron (AluJo SIN   | 7576 NM_020714            | 57474 Hs. 65586C NM_020714    | ENSG000002ZNF490                 | zinc fingprotein-coding             |
| chr2-120c.7.698679  | 0.322287 | 0.842555 | 0.382511 | 0.702082 | 0.981636 | chr2  | 1.21E+08 | 1.21E+08 | + | 0 | NA | exon (NM_exon (NM   | 196900 NM_00527C          | 2736 Hs. 111867 NM_00527C     | ENSG000002GLI2                   | CJS HPe9 GLI famil protein-coding   |
| chr22-46c.7.698679  | 0.322287 | 0.842555 | 0.382511 | 0.702082 | 0.981636 | chr22 | 46218492 | 46219189 | + | 0 | NA | intron (N intron (N | 31453 NM_207327           | 150383 Hs. 103111 NM_207327   | ENSG000002CDPFI1                 | C2orf40 cysteine protein-coding     |
| chr22-50c.7.698679  | 0.322287 | 0.842555 | 0.382511 | 0.702082 | 0.981636 | chr22 | 50282804 | 50284687 | + | 0 | NA | exon (NM_exon (NM   | -13365 NR_110887          | 5600 Hs. 57732 NM_002751      | ENSG000002MAPK11                 | P38B P38E mitogen-e protein-coding  |
| chr3-144c.7.698679  | 0.322287 | 0.842555 | 0.382511 | 0.702082 | 0.981636 | chr3  | 14461680 | 14464375 | + | 0 | NA | intron (MERR4L34    | 60421 NM_001134           | 6533 Hs. 52948E NM_00304E     | ENSG000002SLC6A6                 | TAUT solute c protein-coding        |
| chr3-184c.7.698679  | 0.322287 | 0.842555 | 0.382511 | 0.702082 | 0.981636 | chr3  | 1.85E+08 | 1.85E+08 | + | 0 | NA | intron (N intron (N | 159851 NM_00134E          | 23355 Hs. 26926E NM_01530E    | ENSG000002VP58                   | KIAA0804 VP58 sub protein-coding    |
| chr7-149c.7.698679  | 0.322287 | 0.842555 | 0.382511 | 0.702082 | 0.981636 | chr7  | 1.49E+08 | 1.49E+08 | + | 0 | NA | intron (AluYe6 SI   | 8724 NR_163909            |                               |                                  |                                     |
| chr8-415c.7.698679  | 0.322287 | 0.842555 | 0.382511 | 0.702082 | 0.981636 | chr8  | 41598443 | 41599505 | + | 0 | NA | 5' UTR (N5' UTR (N  | 20458 NM_00136E           | 137964 Hs. 35575E NM_17881E   | ENSG000002GPAT4                  | 1-AGPAT e glycerol - protein-coding |
| chr17-38c.7.92913   | -0.31724 | 0.829437 | -0.38248 | 0.702108 | 0.981636 | chr17 | 38878586 | 38879383 | + | 0 | NA | intron (N TCCA)n    | 8926 NM_00614E            | 3927 Hs. 74115E NM_00614E     | ENSG000002CLASP1                 | Lasp-1 MLIM and S protein-coding    |
| chr19-51c.7.92913   | -0.31724 | 0.829437 | -0.38248 | 0.702108 | 0.981636 | chr19 | 51694427 | 51695478 | + | 0 | NA | intron (MIRb SINE   | -11896 NR_10810C          | 1.02E+08 Hs. 64018E NR_10810C | ENSG000002SPACA6P                | LINC0112E SPACA6P ncRNA             |
| chr3-123c.7.92913   | -0.31724 | 0.829437 | -0.38248 | 0.702108 | 0.981636 | chr3  | 12380912 | 12382560 | + | 0 | NA | intron (N intron (N | 30234 NM_01586E           | 5468 Hs. 16264E NM_005037     | ENSG000002PPARG                  | CIMT1 GLA peroxisom protein-coding  |
| chr4-3971c.7.160952 | -0.33273 | 0.856858 | -0.38247 | 0.702109 | 0.981636 | chr4  | 39717893 | 39718120 | + | 0 | NA | intron (N LTR12C LI | 19870 NM_001111           | 3093 Hs. 50308 NM_00533E      | ENSG000002UBE2K                  | E2-25K H ubiquitin protein-coding   |
| chr1-2037c.7.160952 | 0.333534 | 0.872275 | 0.382373 | 0.702185 | 0.981636 | chr1  | 2.04E+08 | 2.04E+08 | + | 0 | NA | intron (N intron (N | 5357 NR_04621E            | 84719 Hs. 66117E NM_032633    | LINC0026C Clorf217               | long intncRNA                       |
| chr17-794c.7.160952 | 0.333534 | 0.872275 | 0.382373 | 0.702185 | 0.981636 | chr17 | 7947403  | 7948543  | + | 0 | NA | exon (NM_exon (NM   | 15767 NM_00135E           | 116840 Hs. 34801E NM_053051   | ENSG000002CNTROB                 | LIP8 PPI2 centrobir protein-coding  |
| chr2-121c.7.160952  | 0.333534 | 0.872275 | 0.382373 | 0.702185 | 0.981636 | chr2  | 1.21E+08 | 1.21E+08 | + | 0 | NA | intron (N intron (N | -66702 NR_101455E         | 29842 Hs. 156471 NM_01455E    | ENSG000002TFCP2L1                | CRTR1 LFB transcri protein-coding   |
| chr5-694c.7.160952  | 0.333534 | 0.872275 | 0.382373 | 0.702185 | 0.981636 | chr5  | 69408660 | 69409778 | + | 0 | NA | intron (N LIM4b LIN | -5897 NM_001244           | 153562 Hs. 657687 NM_14472E   | ENSG000002MARVELD2               | DFNB49 MARVELD2 protein-coding      |
| chr6-373c.7.160952  | 0.333534 | 0.872275 | 0.382373 | 0.702185 | 0.981636 | chr6  | 37368471 | 37369330 | + | 0 | NA | exon (NM_exon (NM   | 14917 NR_04639E           | 9025 Hs. 48527E NM_00395E     | ENSG000002CRNF8                  | hRNF8 ring fingprotein-coding       |
| chr7-4007c.7.160952 | 0.333534 | 0.872275 | 0.382373 | 0.702185 | 0.981636 | chr7  | 44014981 | 44016281 | + | 0 | NA | intron (N intron (N | 3563 NR_00365E            | 84820 Hs. 65702E NM_032734    | ENSG000002POLR2J4                | hsa-mir-7 microRNA ncRNA            |
| chr8-1101c.11.5806  | -0.26449 | 0.691846 | -0.3823  | 0.702241 | 0.981636 | chr8  | 1.01E+08 | 1.01E+08 | + | 0 | NA | intron (N intron (N | -7364 NR_10699E           | 1.02E+08 NR_10699E            | ENSG000002MIR7705                | hsa-mir-43 replicat protein-coding  |
| chr20-564c.6.607508 | 0.350882 | 0.917958 | 0.382242 | 0.702282 | 0.981636 | chr20 | 56447187 | 56447426 | + | 0 | NA | intron (N LTR78 LTF | -21279 NM_016407          | 51507 Hs. 517134 NM_016407    | ENSG000002CRTF2                  | C2orf43 replicat protein-coding     |
| chr2-113c.11.16028  | -0.26946 | 0.705519 | -0.38193 | 0.702513 | 0.981636 | chr2  | 1.14E+08 | 1.14E+08 | + | 0 | NA | TTS (NR_C TTS (NR_C | 3031 NR_02400E            | 84771 Hs. 71294C NR_024004    | DDX11L2                          | - DEAD/H- bc pseudo                 |
| chr8-4784c.11.16028 | -0.26946 | 0.705519 | -0.38193 | 0.702513 | 0.981636 | chr8  | 47848073 | 47849157 | + | 0 | NA | intron (N LIPA16 LI | 1052 Hs. 44082E NM_00519E | ENSG000002CEBPD               | C/EBP-de CCAAT en protein-coding |                                     |
| chr7-102c.6.949362  | -0.34598 | 0.906039 | -0.38186 | 0.702566 | 0.981636 | chr7  | 1.03E+08 | 1.03E+08 | + | 0 | NA | Intergeni(AluJo SIN | 9025 NM_001114            | 1E+08 Hs. 61025E NM_001114    | ENSG000002UPK3BL1                | UPK3BL UFU roplakir protein-coding  |
| chr12-101c.8.163836 | 0.318648 | 0.834613 | 0.381791 | 0.702616 | 0.981636 | chr12 | 1.01E+08 | 1.01E+08 | + | 0 | NA | intron (N L2b LINE  | 7539 NM_001177            | 400 Hs. 37261E NM_001177      | ENSG000002ARL1                   | ARFL1 ADP ribos protein-coding      |
| chr9-1934c.9.255007 | 0.298387 | 0.781847 | 0.381644 | 0.702726 | 0.981636 | chr9  | 19346367 | 19346898 | + | 0 | NA | exon (NM_exon (NM   | 33604 NM_00101C           | 6194 Hs. 40807E NM_00101C     | ENSG000002CRPS6                  | S6 ribosomal protein-coding         |
| chr1-402c.7.913414  | -0.31392 | 0.822635 | -0.3816  | 0.702759 | 0.981636 | chr1  | 40231547 | 40232988 | + | 0 | NA | intron (N intron (N | -15670 NM_00100E          | 127391 Hs. 40626E NM_00100E   | ENSG000002TMC02                  | dJ39G22.2 transmem protein-coding   |
| chr1-2254c.7.913414 | -0.31392 | 0.822635 | -0.3816  | 0.702759 | 0.981636 | chr1  | 2.25E+08 | 2.25E+08 | + | 0 | NA | intron (N intron (N | 15743 NM_00229E           | 3930 Hs. 43516E NM_00229E     | ENSG000002LBR                    | C14SR DHC lamin B protein-coding    |
| chr10-924c.7.913414 | -0.31392 | 0.822635 | -0.3816  | 0.702759 | 0.981636 | chr10 | 92486033 | 92490238 | + | 0 | NA | intron (N AluSx4 SI | 9626 NM_00132E            | 3416 Hs. 50054E NM_00496E     | ENSG000002IDE                    | INSULYSIN insulin c protein-coding  |
| chr11-32c.7.913414  | -0.31392 | 0.822635 | -0.3816  | 0.702759 | 0.981636 | chr11 | 32601974 | 32602352 | + | 0 | NA | TTS (NM_C TTS (NM_C | 18332 NM_00636E           | 10480 Hs. 50224E NM_00636E    | ENSG000002EIF3M                  | B5 GA17 Eukaryot protein-coding     |
| chr12-14c.7.913414  | -0.31392 | 0.822635 | -0.3816  | 0.702759 | 0.981636 | chr12 | 14379440 | 14379779 | + | 0 | NA | intron (N HAL LINE  | -5672 NM_18135E           | 55729 Hs. 50485E NM_01817E    | ENSG000002ATF7IP                 | AM ATF- I activat protein-coding    |
| chr12-29c.7.913414  | -0.31392 | 0.822635 | -0.3816  | 0.702759 | 0.981636 | chr12 | 29659183 | 29660696 | + | 0 | NA | exon (NM_exon (NM   | 124003 NM_00136E          | 83857 Hs. 401954 NM_03192C    | ENSG000002TMTC1                  | ARG99 OLF transmem protein-coding   |
| chr12-79c.7.913414  | -0.31392 | 0.822635 | -0.3816  | 0.702759 | 0.981636 | chr12 | 79866913 | 79868166 | + | 0 | NA | intron (N LIM5 LIN  | 46372 NM_00114E           | 4659 Hs. 49582 NM_00248C      | ENSG000002PPP1R12A               | M130 MBS protein protein-coding     |
| chr12-10c.7.913414  | -0.31392 | 0.822635 | -0.3816  | 0.702759 | 0.981636 | chr12 | 1.05E+08 | 1.05E+08 | + | 0 | NA | intron (N intron (N | 37093 NM_001251           | 55198 Hs. 50660E NM_01817E    | ENSG000002APPL2                  | DIP13B adaptor protein-coding       |
| chr15-              |          |          |          |          |          |       |          |          |   |   |    |                     |                           |                               |                                  |                                     |

|           |          |          |          |          |          |          |       |          |          |   |   |    |                    |        |           |          |           |                 |                 |            |                  |                           |                |
|-----------|----------|----------|----------|----------|----------|----------|-------|----------|----------|---|---|----|--------------------|--------|-----------|----------|-----------|-----------------|-----------------|------------|------------------|---------------------------|----------------|
| chr3-1836 | 7.665398 | 0.318813 | 0.838625 | 0.380162 | 0.703825 | 0.981636 | chr3  | 1.84E+08 | 1.84E+08 | + | 0 | NA | intron (Nintron (N | -17647 | NM_024871 | 79929    | Hs.47846  | ENSG0000024871  | ENSG0000024871  | MAP6D1     | MAP6D1 SMAP6     | dom protein-coding        |                |
| chr5-728  | 7.665398 | 0.318813 | 0.838625 | 0.380162 | 0.703825 | 0.981636 | chr5  | 72852519 | 72853548 | + | 0 | NA | intron (Nintron (N | 4894   | NM_001364 | 3842     | Hs.482497 | ENSG0000020227  | ENSG0000020227  | TNP01      | IPO2 KPNF        | transport protein-coding  |                |
| chr6-315  | 7.665398 | 0.318813 | 0.838625 | 0.380162 | 0.703825 | 0.981636 | chr6  | 31506555 | 31508357 | + | 0 | NA | exon (NM_exon (NM  | 9311   | NM_001285 | 4277     | Hs.73144  | ENSG0000000593  | ENSG0000000593  | MICB       | PERB1.2          | MHC class protein-coding  |                |
| chr8-219  | 7.665398 | 0.318813 | 0.838625 | 0.380162 | 0.703825 | 0.981636 | chr8  | 21988886 | 21989305 | + | 0 | NA | intron (Nintron (N | -35039 | NM_001286 | 10361    | Hs.13105  | ENSG0000018279  | ENSG0000018279  | NPM2       | -                | nucleoph protein-coding   |                |
| chr9-9991 | 7.665398 | 0.318813 | 0.838625 | 0.380162 | 0.703825 | 0.981636 | chr9  | 99915321 | 99916411 | + | 0 | NA | intron (Nintron (N | 9212   | NM_017915 | 55014    | Hs.704031 | ENSG0000017915  | ENSG0000017915  | STX17      | -                | synxin protein-coding     |                |
| chr9-134  | 7.665398 | 0.318813 | 0.838625 | 0.380162 | 0.703825 | 0.981636 | chr9  | 1.35E+08 | 1.35E+08 | + | 0 | NA | intron (Nintron (N | 28888  | NR_039691 | 1.01E+08 | NR_039691 | ENSG0000039691  | ENSG0000039691  | MIR3689C   | -                | microRNA ncRNA            |                |
| chr1-220  | 8.154128 | 0.309519 | 0.814463 | 0.380029 | 0.703924 | 0.981636 | chr1  | 22086016 | 22088234 | + | 0 | NA | intron (Nintron (N | 34416  | NM_044472 | 998      | Hs.467637 | ENSG0000010179  | ENSG0000010179  | CDC42      | CDC42Hs Cell     | div protein-coding        |                |
| chr14-516 | 8.154128 | 0.309519 | 0.814463 | 0.380029 | 0.703924 | 0.981636 | chr14 | 51642249 | 51642334 | + | 0 | NA | intron (Nintron (N | 9253   | NR_037676 | 145438   | Hs.64541  | ENSG0000037676  | ENSG0000037676  | FRMD6-AS1  | C14orf82 FRMD6   | antncRNA                  |                |
| chr2-223  | 8.154128 | 0.309519 | 0.814463 | 0.380029 | 0.703924 | 0.981636 | chr2  | 2.24E+08 | 2.24E+08 | + | 0 | NA | intron (Nintron (N | 40111  | NM_02083C | 57590    | Hs.36835  | ENSG000002083C  | ENSG000002083C  | WDFY1      | FENS-1 FEW       | repeat protein-coding     |                |
| chr7-109  | 8.154128 | 0.309519 | 0.814463 | 0.380029 | 0.703924 | 0.981636 | chr7  | 10932648 | 10933766 | + | 0 | NA | 3' UTR (N3' UTR (N | 6946   | NM_00248E | 6946     | Hs.50098  | ENSG000000248E  | ENSG000000248E  | NDUFA4     | CI-9k CI-NDUFA4  | mit protein-coding        |                |
| chr7-939  | 8.154128 | 0.309519 | 0.814463 | 0.380029 | 0.703924 | 0.981636 | chr7  | 93993720 | 93996419 | + | 0 | NA | intron (Nintron (N | 9286   | NM_001317 | 10282    | Hs.48913  | ENSG000000586E  | ENSG000000586E  | BET1       | HEBET1           | Bet1 gol protein-coding   |                |
| chr8-306  | 8.154128 | 0.309519 | 0.814463 | 0.380029 | 0.703924 | 0.981636 | chr8  | 30686391 | 30688472 | + | 0 | NA | intron (Nintron (N | -29195 | NM_00209E | 2961     | Hs.77100  | ENSG000000209E  | ENSG000000209E  | GTF2E2     | FE TF2E2 general | protein-coding            |                |
| chr14-23  | 5.647614 | 0.391899 | 1.031681 | 0.379864 | 0.704046 | 0.981636 | chr14 | 23091844 | 23092101 | + | 0 | NA | intron (Nintron (N | -3533  | NM_017924 | 55017    | Hs.52523  | ENSG0000017924  | ENSG0000017924  | C14orf11C  | -                | chromoson protein-coding  |                |
| chr1-133  | 8.203125 | 0.309144 | 0.81384  | 0.379859 | 0.70405  | 0.981636 | chr1  | 1337621  | 1339477  | + | 0 | NA | exon (NM_exon (NM  | 1159   | NR_10686E | 1.02E+08 | NR_10686E | ENSG0000010686  | ENSG0000010686  | MIR6808    | hsa-mir-6        | microRNA ncRNA            |                |
| chr1-331  | 8.203125 | 0.309144 | 0.81384  | 0.379859 | 0.70405  | 0.981636 | chr1  | 33157901 | 33159686 | + | 0 | NA | intron (Nintron (N | 17757  | NM_00133C | 55223    | Hs.65600  | ENSG0000018207  | ENSG0000018207  | TRIM62     | DEAR1            | tripartit protein-coding  |                |
| chr1-543  | 8.203125 | 0.309144 | 0.81384  | 0.379859 | 0.70405  | 0.981636 | chr1  | 54395106 | 54395912 | + | 0 | NA | intron (Nintron (N | 10885  | NM_00100E | 23648    | Hs.47670  | ENSG000001807C  | ENSG000001807C  | SSBP3      | CSDP SSDF        | single st protein-coding  |                |
| chr1-888  | 8.203125 | 0.309144 | 0.81384  | 0.379859 | 0.70405  | 0.981636 | chr1  | 88862405 | 88863645 | + | 0 | NA | intron (Nintron (N | 2854   | NM_001514 | 2959     | Hs.48185  | ENSG0000001514  | ENSG0000001514  | GTF2B      | TF2B TFII        | general t protein-coding  |                |
| chr10-93  | 8.203125 | 0.309144 | 0.81384  | 0.379859 | 0.70405  | 0.981636 | chr10 | 93313295 | 93314579 | + | 0 | NA | intron (Nintron (N | 168397 | NM_013451 | 26509    | Hs.60208  | ENSG0000013451  | ENSG0000013451  | MYOF       | FERIL3           | myoferlin protein-coding  |                |
| chr11-77  | 8.203125 | 0.309144 | 0.81384  | 0.379859 | 0.70405  | 0.981636 | chr11 | 77740018 | 77740948 | + | 0 | NA | intron (Nintron (N | 80351  | NM_01657E | 51773    | Hs.42022  | ENSG000001657E  | ENSG000001657E  | RSF1       | HBXAP RSF        | retomolir protein-coding  |                |
| chr16-24  | 8.203125 | 0.309144 | 0.81384  | 0.379859 | 0.70405  | 0.981636 | chr16 | 26140519 | 2617709  | + | 0 | NA | intron (Nintron (N | 12497  | NR_015441 | 65272    | Hs.72044  | ENSG0000015441  | ENSG0000015441  | LOC655227E | -                | potassiu pseudo           |                |
| chr16-14  | 8.203125 | 0.309144 | 0.81384  | 0.379859 | 0.70405  | 0.981636 | chr16 | 14930919 | 14935694 | + | 0 | NA | intron (Nintron (N | 2486   | NR_107061 | 1.02E+08 | NR_107061 | ENSG0000010761  | ENSG0000010761  | MIR6770    | hsa-mir-6        | microRNA ncRNA            |                |
| chr17-58  | 8.203125 | 0.309144 | 0.81384  | 0.379859 | 0.70405  | 0.981636 | chr17 | 58345023 | 58350725 | + | 0 | NA | intron (Nintron (N | 4327   | NM_00316E | 6827     | Hs.43948  | ENSG000000316E  | ENSG000000316E  | SUPT4H1    | SPT4 SPT4SPT4    | homc protein-coding       |                |
| chr2-132  | 8.203125 | 0.309144 | 0.81384  | 0.379859 | 0.70405  | 0.981636 | chr2  | 1.33E+08 | 1.33E+08 | + | 0 | NA | intron (Nintron (N | -59083 | NM_001077 | 116372   | Hs.43239  | ENSG0000014458  | ENSG0000014458  | LYPD1      | LYPD1 PL         | PL/PLAUF                  | protein-coding |
| chr20-35  | 8.203125 | 0.309144 | 0.81384  | 0.379859 | 0.70405  | 0.981636 | chr20 | 35686691 | 35688760 | + | 0 | NA | intron (Nintron (N | 11627  | NM_00119E | 9054     | Hs.19469  | ENSG0000002110  | ENSG0000002110  | NFS1       | HUSSY-08 NFS1    | cyst protein-coding       |                |
| chr21-28  | 8.203125 | 0.309144 | 0.81384  | 0.379859 | 0.70405  | 0.981636 | chr21 | 28874479 | 28875775 | + | 0 | NA | TTS (NM_TTS (NM_I  | 10240  | NM_01324C | 29104    | Hs.16384  | ENSG000001324C  | ENSG000001324C  | N6AMT1     | C21orf127N-6     | adeni protein-coding      |                |
| chr22-42  | 8.203125 | 0.309144 | 0.81384  | 0.379859 | 0.70405  | 0.981636 | chr22 | 42584779 | 42585928 | + | 0 | NA | non-codiron-codir  | -3342  | NR_002184 | 91695    | Hs.53404  | ENSG0000002184  | ENSG0000002184  | RRP7B      | RRP7B dJ         | ribosomal pseudo          |                |
| chr3-48   | 8.203125 | 0.309144 | 0.81384  | 0.379859 | 0.70405  | 0.981636 | chr3  | 48782694 | 48782980 | + | 0 | NA | intron (Nintron (N | 65037  | NM_001321 | 5576     | Hs.63192  | ENSG0000004157  | ENSG0000004157  | PRKAR2B    | PKR2 PRK         | ribosom l protein-coding  |                |
| chr3-49   | 8.203125 | 0.309144 | 0.81384  | 0.379859 | 0.70405  | 0.981636 | chr3  | 49675967 | 49679435 | + | 0 | NA | intron (Nintron (N | 3350   | NM_00164C | 327      | Hs.51796  | ENSG000000164C  | ENSG000000164C  | APEH       | AARE ACPF        | acylaminc protein-coding  |                |
| chr3-195  | 8.203125 | 0.309144 | 0.81384  | 0.379859 | 0.70405  | 0.981636 | chr3  | 1.95E+08 | 1.95E+08 | + | 0 | NA | intron (Nintron (N | -48515 | NM_152531 | 152002   | Hs.47874  | ENSG0000015253  | ENSG0000015253  | XXYL1      | C3orf21          | xyloside protein-coding   |                |
| chr5-53   | 8.203125 | 0.309144 | 0.81384  | 0.379859 | 0.70405  | 0.981636 | chr5  | 53082687 | 53084673 | + | 0 | NA | intron (Nintron (N | 26077  | NM_17680E | 4338     | Hs.16364  | ENSG0000004531  | ENSG0000004531  | MOC52      | MCPBE MOC        | myobndent protein-coding  |                |
| chr6-37   | 8.203125 | 0.309144 | 0.81384  | 0.379859 | 0.70405  | 0.981636 | chr6  | 37460243 | 37463876 | + | 0 | NA | exon (NM_exon (NM  | 28838  | NM_01505C | 23070    | Hs.52010  | ENSG000001505C  | ENSG000001505C  | CMTR1      | FTSJD2 K1        | cap methy protein-coding  |                |
| chr7-15   | 8.203125 | 0.309144 | 0.81384  | 0.379859 | 0.70405  | 0.981636 | chr7  | 1.51E+08 | 1.51E+08 | + | 0 | NA | exon (NM_exon (NM  | 5382   | NM_00671E | 10922    | Hs.64709  | ENSG000000671E  | ENSG000000671E  | PASTK      | PAST             | Fas acti protein-coding   |                |
| chr9-135  | 8.203125 | 0.309144 | 0.81384  | 0.379859 | 0.70405  | 0.981636 | chr9  | 1.36E+08 | 1.36E+08 | + | 0 | NA | intron (Nintron (N | 15488  | NM_01617E | 10422    | Hs.9194   | ENSG0000001617E | ENSG0000001617E | UBAC1      | GBDR1 KPC        | UBA domain protein-coding |                |
| chr1-45   | 8.699713 | 0.29923  | 0.787876 | 0.379793 | 0.704099 | 0.981636 | chr1  | 45566818 | 45567470 | + | 0 | NA | intron (Nintron (N | 16318  | NM_00606E | 10327    | Hs.47458  | ENSG000000606E  | ENSG000000606E  | AKR1A1     | ALDR1 AL         | Faldo-ketc protein-coding |                |
| chr16-20  | 8.699713 | 0.29923  | 0.787876 | 0.379793 | 0.704099 | 0.981636 | chr16 | 20859143 | 20862308 | + | 0 | NA | intron (Nintron (N | -39157 | NM_002042 | 57149    | Hs.74501  | ENSG0000002042  | ENSG0000002042  | LYRM1      | AL11C6.1         | LYR motif protein-coding  |                |
| chr19-10  | 8.699713 | 0.29923  | 0.787876 | 0.379793 | 0.704099 | 0.981636 | chr19 | 10552222 | 10554823 | + | 0 | NA | TTS (NR_TTS (NR_I  | 1400   | NR_03160E | 1E+08    | NR_03160E | ENSG0000003160  | ENSG0000003160  | MIR1238    | MIRN1238         | microRNA ncRNA            |                |
| chr19-10  | 8.699713 | 0.29923  | 0.787876 | 0.379793 | 0.704099 | 0.981636 | chr19 | 10775610 | 10778785 | + | 0 | NA | exon (NM_exon (NM  | -3057  | NR_03990E | 1.01E+08 | NR_03990E | ENSG0000003990  | ENSG0000003990  | MIR4748    | mir-4748         | microRNA ncRNA            |                |
| chr19-36  | 8.699713 | 0.29923  | 0.787876 | 0.379793 | 0.704099 | 0.981636 | chr19 | 36689541 | 36695579 | + | 0 | NA | intron (Nintron (N | 6937   | NM_00132E | 163081   | Hs.41251  | ENSG000000132E  | ENSG000000132E  | ZNF567     | -                | zinc fing protein-coding  |                |
| chr19-52  | 8.699713 | 0.29923  | 0.787876 | 0.379793 | 0.704099 | 0.981636 | chr19 | 52378130 | 52379141 | + | 0 | NA | intron (Nintron (N | 8712   | NM_00114E | 400713   | Hs.50231  | ENSG000000114E  | ENSG000000114E  | ZNF880     | -                | zinc fing protein-coding  |                |
| chr2-32   | 8.699713 | 0.29923  | 0.787876 | 0.379793 | 0.704099 | 0.981636 | chr2  | 32463786 | 32465750 | + | 0 | NA | exon (NM_exon (NM  | -67385 | NR_03028E | 693143   | NR_03028E | ENSG0000003028  | ENSG0000003028  | MIR558     | MIRN558          | microRNA ncRNA            |                |
| chr2-71   | 8.699713 | 0.29923  | 0.787876 | 0.379793 | 0.704099 | 0.981636 | chr2  | 71363418 | 71366712 | + | 0 | NA | intron (Nintron (N | 33283  | NM_014497 | 27332    | Hs.43440  | ENSG00000014497 | ENSG00000014497 | ZNF638     | NP220 ZNF        | zinc fing protein-coding  |                |
| chr5-57   | 8.699713 | 0.29923  | 0.787876 | 0.379793 | 0.704099 | 0.981636 | chr5  | 37172764 | 37173804 | + | 0 | NA | intron (Nintron (N | -37662 | NR_13426E | 1.05E+08 | NR_13426E | ENSG00000013426 | ENSG00000013426 | LOC105374  | -                | uncharactncRNA            |                |
| chr6-8    | 8.699713 | 0.29923  | 0.787876 | 0.379793 | 0.704099 | 0.981636 | chr6  | 87581202 | 87583399 | + | 0 | NA | intron (Nintron (N | 7687   | NM_02032C | 57038    | Hs.48591  | ENSG0000002032C | ENSG0000002032C | CRARS2     | ArgRS DAL        | arginyl-t protein-coding  |                |
| chr9-13   | 8.699713 | 0.29923  | 0.787876 | 0.379793 | 0.704099 | 0.981636 | chr9  | 1.31E+08 | 1.31E+08 | + | 0 | NA | intron (Nintron (N | -25952 | NR_00305C | 692093   | NR_00305C | ENSG000000305C  | ENSG000000305C  | SNORD62B   | U62 U62B         | small nucsnRNA            |                |
| chr5-6    | 9.221725 | 0.295248 | 0.777443 | 0.379768 | 0.704118 | 0.981636 | chr5  | 635839   | 636128   | + | 0 | NA | intron (Nintron (N | 23643  | NM_01814C | 55722    | Hs.59174  | ENSG0000001814C | ENSG0000001814C | CEP72      | -                | centroson protein-coding  |                |
| chr8-9    | 9.221725 | 0.295248 | 0.777443 | 0.379768 | 0.704118 | 0.981636 | chr8  | 94857150 | 94857626 | + | 0 | NA | intron (Nintron (N | 34098  | NR_073444 | 55656    | Hs.72766  | ENSG0000001786  | ENSG0000001786  | INTS8      | C8orf52 I        | integratc protein-coding  |                |
| chr1-5    | 7.4441   | -0.32583 | 0.858017 | -0.37974 | 0.704135 | 0.981636 | chr1  | 51824884 | 51825513 | + | 0 | NA | intron (Nintron (N |        |           |          |           |                 |                 |            |                  |                           |                |



|                    |          |          |          |          |            |       |          |           |   |   |    |                     |                   |                              |                     |            |                |                |
|--------------------|----------|----------|----------|----------|------------|-------|----------|-----------|---|---|----|---------------------|-------------------|------------------------------|---------------------|------------|----------------|----------------|
| chr5-1591 7.905556 | -0.31225 | 0.824081 | -0.37891 | 0.704756 | 0.981636   | chr5  | 1.59E+08 | 1.59E+08  | + | 0 | NA | intron (NLIMB7 LIN  | 17671 NM_001199   | 153830 Hs. 349306NM_14472c   | ENSG00000CRNF145    | -          | ring fing      | protein-coding |
| chr5-1687 7.905556 | -0.31225 | 0.824081 | -0.37891 | 0.704756 | 0.981636   | chr5  | 1.69E+08 | 1.69E+08  | + | 0 | NA | intron (Nintron (N  | 15382 NM_002887   | 5917 Hs. 654907NM_002887     | ENSG00000CARS       | ArgRS      | [DAL arginyl-t | protein-coding |
| chr7-2281 7.905556 | -0.31225 | 0.824081 | -0.37891 | 0.704756 | 0.981636   | chr7  | 22811673 | 22814571  | + | 0 | NA | 3' UTR (N3' UTR (N  | 9727 NM_01905e    | 54543 Hs. 11231eNM_01905e    | ENSG00000CTOMM7     | TOM7       | transloc       | protein-coding |
| chr8-2635 7.905556 | -0.31225 | 0.824081 | -0.37891 | 0.704756 | 0.981636   | chr8  | 26392666 | 26393172  | + | 0 | NA | intron (Nintron (N  | 2778 NM_00133C    | 665 Hs. 13122eNM_004331      | ENSG00000BNIP3L     | BNIP3a     | [N1ECL2] int   | protein-coding |
| chr8-6151 7.905556 | -0.31225 | 0.824081 | -0.37891 | 0.704756 | 0.981636   | chr8  | 61517595 | 61518129  | + | 0 | NA | intron (Nintron (N  | 171549 NM_001164  | 444 Hs. 33242eNM_00431f      | ENSG00000ASPH       | ANH BAH    | Caspasate      | protein-coding |
| chr8-1232 7.905556 | -0.31225 | 0.824081 | -0.37891 | 0.704756 | 0.981636   | chr8  | 1.23E+08 | 1.23E+08  | + | 0 | NA | intron (NAluSz SIN  | 6492 NM_032847    | 84933 Hs. 707401NM_032847    | ENSG00000C8orf76    | -          | chromosom      | protein-coding |
| chr9-3333 7.905556 | -0.31225 | 0.824081 | -0.37891 | 0.704756 | 0.981636   | chr9  | 33333015 | 33335677  | + | 0 | NA | intron (NAluJr4 SI  | 43830 NM_147134   | 4799 Hs. 413074NM_002504     | ENSG00000NFX1       | NFX2 TEG-  | nuclear t      | protein-coding |
| chr9-1278 7.905556 | -0.31225 | 0.824081 | -0.37891 | 0.704756 | 0.981636   | chr9  | 1.28E+08 | 1.28E+08  | + | 0 | NA | intron (Nintron (N  | -3057 NM_001278   | 2022 Hs. 376753 NM_00011f    | ENSG00000CENG       | -          | endoglin       | protein-coding |
| chrX-4857 7.905556 | -0.31225 | 0.824081 | -0.37891 | 0.704756 | 0.981636   | chrX  | 48575442 | 48578544  | + | 0 | NA | intron (Nintron (N  | 2509 NM_006743    | 5935 Hs. 301404NM_006743     | ENSG00000CRBM3      | IS1-RNPL   | RNA bindi      | protein-coding |
| chr15-425 9.213867 | 0.297065 | 0.784186 | 0.378819 | 0.704822 | 0.981636   | chr15 | 42983743 | 42984043  | + | 0 | NA | intron (Nintron (N  | -63115 NM_17350C  | 146057 Hs. 646511NM_17350C   | ENSG00000CTBK2      | SCA11 TTE  | tau tubul      | protein-coding |
| chr22-318 7.111954 | 0.333913 | 0.881668 | 0.378729 | 0.704889 | 0.981636   | chr22 | 31804133 | 31804712  | + | 0 | NA | intron (NAluJr SIN  | 50399 NM_00136e   | 9681 Hs. 432502NM_014663     | ENSG00000DEPDC5     | DEP.5 FJF  | DEP domain     | protein-coding |
| chr16-368 12.04991 | -0.25941 | 0.685191 | -0.3786  | 0.704988 | 0.981636   | chr16 | 36858852 | 36859055  | + | 0 | NA | IntergeniALR Alpha  | 1112401 NR_03398f | 400533 Hs. 499133NR_03398f   | ENSG00000CLINCO2167 | -          | long intenc    | ncRNA          |
| chr16-164 7.347597 | -0.31931 | 0.843456 | -0.37857 | 0.705005 | 0.981636   | chr16 | 74456288 | 74456528  | + | 0 | NA | intron (NAluJ4 SI   | -34938 NM_001011  | 497190 Hs. 45467cNM_001011   | ENSG00000CLEC18B    | MRLC2      | C-type l       | protein-coding |
| chr19-72 8.119812  | 0.331466 | 0.876666 | 0.378534 | 0.705034 | 0.981636   | chr19 | 12698110 | 12698634  | + | 0 | NA | TTS (NM_C TTS (NM_C | -1741 NM_032301   | 84261 Hs. 515154NM_032301    | ENSG00000CFBXW9     | Fbw9 MEC-  | F-box anc      | protein-coding |
| chr1-1125 6.495763 | -0.36486 | 0.965862 | -0.37776 | 0.70561  | 0.981636   | chr1  | 1.13E+08 | 1.13E+08  | + | 0 | NA | intron (NAluS2 SI   | 19034 NM_138727   | 54879 Hs. 201921NM_017744    | ENSG00000ST7L       | FAM4B ST7  | suppressi      | protein-coding |
| chr8-1301 11.14456 | -0.26701 | 0.707067 | -0.37763 | 0.705702 | 0.981636   | chr8  | 1.3E+08  | 1.3E+08   | + | 0 | NA | intron (NL2 LINE L  | -74275 NR_04538E  | 1.01E+08 Hs. 10601fNR_04538E | ENSG00000ASAP1-IT2  | -          | ASAP1 intnc    | ncRNA          |
| chr1-179 10.60996  | -0.27542 | 0.729421 | -0.37759 | 0.705738 | 0.981636   | chr1  | 1.79E+08 | 1.79E+08  | + | 0 | NA | intron (NLIMC1 LIN  | -25929 NM_022371  | 64222 Hs. 584957NM_022371    | ENSG00000CTOR3A     | ADIR ADIF  | torsin f       | protein-coding |
| chr11-666 7.40296  | -0.32864 | 0.870801 | -0.3774  | 0.705879 | 0.981636   | chr11 | 66657792 | 66658134  | + | 0 | NA | intron (NAluJb SIN  | 19260 NM_001198   | 5936 Hs. 52382eNM_00289c     | ENSG00000RBM4       | LARK RBM4  | RNA bindi      | protein-coding |
| chr2-1345 7.40296  | -0.32864 | 0.870801 | -0.3774  | 0.705879 | 0.981636   | chr2  | 1.35E+08 | 1.35E+08  | + | 0 | NA | intron (NAluSg7 SI  | 31214 NM_001241   | 905 Hs. 74411eNM_001241      | ENSG00000CCNT2      | CYCT2      | cyclin T2      | protein-coding |
| chr3-1493 7.40296  | -0.32864 | 0.870801 | -0.3774  | 0.705879 | 0.981636   | chr3  | 1.49E+08 | 1.49E+08  | + | 0 | NA | 3' UTR (N3' UTR (N  | 8416 NM_01422C    | 4071 Hs. 35131eNM_01422C     | ENSG00000TM4SF1     | H-L6 L6    | transmem       | protein-coding |
| chr5-394C 7.40296  | -0.32864 | 0.870801 | -0.3774  | 0.705879 | 0.981636   | chr5  | 39405431 | 39406414  | + | 0 | NA | intron (NMamGyL TF  | 19058 NM_001343   | 1601 Hs. 696631NM_001343     | ENSG00000DAB2       | DOC-2 DOC  | DAB adapt      | protein-coding |
| chr5-1414 7.40296  | -0.32864 | 0.870801 | -0.3774  | 0.705879 | 0.981636   | chr5  | 1.41E+08 | 1.41E+08  | + | 0 | NA | promoter-promoter-  | 90 NM_032091      | 56105 Hs. 36816cNM_018914    | ENSG00000PCDHGA11   | PCDH-GAMM  | protocad       | protein-coding |
| chr1-212 8.169844  | 0.305844 | 0.810719 | 0.377251 | 0.705987 | 0.981636   | chr1  | 21235545 | 21238201  | + | 0 | NA | intron (Nintron (N  | 42742 NM_001113   | 1889 Hs. 19508cNM_001397     | ENSG00000ECE1       | ECE        | endotheli      | protein-coding |
| chr1-214 8.169844  | 0.305844 | 0.810719 | 0.377251 | 0.705987 | 0.981636   | chr1  | 21444833 | 21447137  | + | 0 | NA | intron (Nintron (N  | 5858 NM_00125e    | 84224 Hs. 32542eNM_032264    | ENSG00000NBPF3      | AEE        | NBPF mem       | protein-coding |
| chr1-1787 8.169844 | 0.305844 | 0.810719 | 0.377251 | 0.705987 | 0.981636   | chr1  | 1.79E+08 | 1.79E+08  | + | 0 | NA | intron (NAluJb SIN  | 11596 NM_152663   | 55103 Hs. 63248eNM_018037    | ENSG00000RALGPS2    | dJ595C2.1  | RAL GEF w      | protein-coding |
| chr1-244 8.169844  | 0.305844 | 0.810719 | 0.377251 | 0.705987 | 0.981636   | chr1  | 2.4E+08  | 2.4E+08   | + | 0 | NA | intron (Nintron (N  | 172689 NM_022463  | 64388 Hs. 98206 NM_022463    | ENSG00000GREM2      | CKT5F1B2   | gremlin 2      | protein-coding |
| chr10-707 8.169844 | 0.305844 | 0.810719 | 0.377251 | 0.705987 | 0.981636   | chr10 | 7775470  | 7780570   | + | 0 | NA | intron (Nintron (N  | 8938 NM_012311    | 22944 Hs. 39791eNM_012311    | ENSG00000KIN        | BTCD KIN1  | kin17 DN       | protein-coding |
| chr10-687 8.169844 | 0.305844 | 0.810719 | 0.377251 | 0.705987 | 0.981636   | chr10 | 68784859 | 68786744  | + | 0 | NA | intron (NLIMB8 LIN  | 30629 NR_00307e   | 692211 NR_00307e             | ENSG00000SNORD98    | -          | small nucs     | ncRNA          |
| chr10-741 8.169844 | 0.305844 | 0.810719 | 0.377251 | 0.705987 | 0.981636   | chr10 | 74130828 | 74134293  | + | 0 | NA | intron (NAluJb SIN  | 18268 NM_00132C   | 26985 Hs. 500104NM_01209f    | ENSG00000AP3M1      | -          | adaptor i      | protein-coding |
| chr10-10 8.169844  | 0.305844 | 0.810719 | 0.377251 | 0.705987 | 0.981636   | chr10 | 1.03E+08 | 1.03E+08  | + | 0 | NA | intron (Nintron (N  | 12072 NM_001011   | 84108 Hs. 33580fNM_032154    | ENSG00000PCGFB      | MBLR RNFI  | polycomb       | protein-coding |
| chr11-455 8.169844 | 0.305844 | 0.810719 | 0.377251 | 0.705987 | 0.981636   | chr11 | 45912878 | 45915129  | + | 0 | NA | intron (Nintron (N  | 3874 NM_004813    | 9409 Hs. 10091eNM_004813     | ENSG00000PEX16      | PBD8A PBE  | peroxisom      | protein-coding |
| chr11-61 8.169844  | 0.305844 | 0.810719 | 0.377251 | 0.705987 | 0.981636   | chr11 | 61327333 | 61330841  | + | 0 | NA | intron (Nintron (N  | -4095 NM_001351   | 26007 Hs. 6278 NM_015533     | ENSG00000TKFC       | DAK NET4f  | trikiolas      | protein-coding |
| chr11-714 8.169844 | 0.305844 | 0.810719 | 0.377251 | 0.705987 | 0.981636   | chr11 | 71454888 | 71461922  | + | 0 | NA | intron (Nintron (N  | 5202 NM_018161    | 55191 Hs. 55698eNM_018161    | ENSG00000NADSYN1    | -          | NAD synt       | protein-coding |
| chr11-116 8.169844 | 0.305844 | 0.810719 | 0.377251 | 0.705987 | 0.981636   | chr11 | 1.17E+08 | 1.17E+08  | + | 0 | NA | intron (Nintron (N  | -9189 NM_00003e   | 335 Hs. 93194 NM_00003e      | ENSG00000CAPOA1     | apo(a)     | apolipop       | protein-coding |
| chr11-125 8.169844 | 0.305844 | 0.810719 | 0.377251 | 0.705987 | 0.981636   | chr11 | 1.3E+08  | 1.3E+08   | + | 0 | NA | intron (Nintron (N  | -18988 NM_001143  | 4798 Hs. 53053eNM_00616e     | ENSG00000NFRKB      | IN080G     | nuclear f      | protein-coding |
| chr11-134 8.169844 | 0.305844 | 0.810719 | 0.377251 | 0.705987 | 0.981636   | chr11 | 1.34E+08 | 1.34E+08  | + | 0 | NA | intron (NMERSA DNA  | 9894 NM_014384    | 27034 Hs. 14791 NM_014384    | ENSG00000ACAD8      | ACAD-8 AFA | yl-CoA         | protein-coding |
| chr12-37 8.169844  | 0.305844 | 0.810719 | 0.377251 | 0.705987 | 0.981636   | chr12 | 370028   | 370694    | + | 0 | NA | intron (NAluSx1 SI  | 18959 NM_001042   | 5927 Hs. 76272 NM_00505c     | ENSG00000KDM5A      | RBBP-2 RE  | lysine de      | protein-coding |
| chr12-80 8.169844  | 0.305844 | 0.810719 | 0.377251 | 0.705987 | 0.981636   | chr12 | 8051651  | 8053565   | + | 0 | NA | intron (Nintron (N  | 13751 NM_00132e   | 719 Hs. 50465eNM_004054      | ENSG00000C3AR1      | AZ3B C3A   | f complex      | protein-coding |
| chr12-93 8.169844  | 0.305844 | 0.810719 | 0.377251 | 0.705987 | 0.981636   | chr12 | 93394891 | 93398462  | + | 0 | NA | intron (NAluSx4 SI  | 18098 NM_001301   | 11163 Hs. 50632eNM_019094    | ENSG00000NUDT4      | DIPP-2B I  | nudix h        | protein-coding |
| chr12-105 8.169844 | 0.305844 | 0.810719 | 0.377251 | 0.705987 | 0.981636   | chr12 | 1.09E+08 | 1.09E+08  | + | 0 | NA | intron (NMER102c I  | 11161 NM_00114e   | 121642 Hs. 37445eNM_001001   | ENSG00000ALKBH2     | ABH2       | alkB hom       | protein-coding |
| chr12-122 8.169844 | 0.305844 | 0.810719 | 0.377251 | 0.705987 | 0.981636   | chr12 | 1.22E+08 | 1.22E+08  | + | 0 | NA | intron (NAluJb SIN  | -49739 NM_001351  | 65082 Hs. 48788eNM_02291f    | ENSG00000VPS3A      | MPSPS      | VPS33A c       | protein-coding |
| chr12-133 8.169844 | 0.305844 | 0.810719 | 0.377251 | 0.705987 | 0.981636   | chr12 | 1.33E+08 | 1.33E+08  | + | 0 | NA | intron (Nintron (N  | 24405 NM_015114   | 23141 Hs. 65462eNM_015114    | ENSG00000ANKLE2     | K1AA0692   | ankle1 i       | protein-coding |
| chr13-952 8.169844 | 0.305844 | 0.810719 | 0.377251 | 0.705987 | 0.981636   | chr13 | 95260038 | 95260722  | + | 0 | NA | intron (Nintron (N  | 41066 NM_00584e   | 10257 Hs. 50842eNM_00584e    | ENSG00000ABCC4      | MOAT-B MC  | ATP bindi      | protein-coding |
| chr14-34 8.169844  | 0.305844 | 0.810719 | 0.377251 | 0.705987 | 0.981636   | chr14 | 34518416 | 34526279  | + | 0 | NA | intron (NLIM3f LIN  | 17354 NM_01845e   | 58937 Hs. 43326eNM_01845e    | ENSG00000EAPP       | EMO36 C14  | E2F assoc      | protein-coding |
| chr14-731 8.169844 | 0.305844 | 0.810719 | 0.377251 | 0.705987 | 0.981636   | chr14 | 71319321 | 713195618 | + | 0 | NA | intron (NAluJr SIN  | -43062 NR_15867f  | 89932 Hs. 50990eNM_173462    | ENSG00000PAPLN      | PPN        | papilin, p     | protein-coding |
| chr14-81 8.169844  | 0.305844 | 0.810719 | 0.377251 | 0.705987 | 0.981636   | chr14 | 81201310 | 81204832  | + | 0 | NA | promoter-promoter-  | -237 NR_003021    | 677845 Hs. 693251NR_003021   | ENSG00000SNORA79    | ACA65 SNC  | small nucs     | ncRNA          |
| chr14-99 8.169844  | 0.305844 | 0.810719 | 0.377251 | 0.705987 | 0.981636   | chr14 | 99504664 | 99508504  | + | 0 | NA | 3' UTR (N3' UTR (N  | 25175 NM_00119e   | 8812 Hs. 51040eNM_00385f     | ENSG00000CCNK       | CPR4 IDDF  | cyclin K       | protein-coding |
| chr15-44 8.169844  | 0.305844 | 0.810719 | 0.377251 | 0.705987 | 0.981636</ |       |          |           |   |   |    |                     |                   |                              |                     |            |                |                |

|           |          |          |          |          |          |          |       |          |          |   |   |    |                     |          |            |          |                    |                     |                    |                           |                         |                |                |
|-----------|----------|----------|----------|----------|----------|----------|-------|----------|----------|---|---|----|---------------------|----------|------------|----------|--------------------|---------------------|--------------------|---------------------------|-------------------------|----------------|----------------|
| chr6-1497 | 8.382729 | -0.30335 | 0.806966 | -0.37591 | 0.706982 | 0.981636 | chr6  | 1.5E+08  | 1.5E+08  | + | 0 | NA | intron (Nintron (N  | 44594    | NM_00136C  | 5110     | Hs.279257NM_00538  | ENSG00000PCMT1      | PIMT               | protein-lprotein-coding   |                         |                |                |
| chr6-1514 | 8.382729 | -0.30335 | 0.806966 | -0.37591 | 0.706982 | 0.981636 | chr6  | 1.51E+08 | 1.51E+08 | + | 0 | NA | intron (NAluSx SI   | 7639     | NM_024573  | 79624    | Hs.15929           | NM_024573           | ENSG00000ARMT1     | C6orf211                  | acidic rprotein-coding  |                |                |
| chr3-195  | 15.3564  | 0.229507 | 0.610854 | 0.375715 | 0.707129 | 0.981636 | chr3  | 1.96E+08 | 1.96E+08 | + | 0 | NA | intron (Nintron (N  | 21507    | NR_003264  | 255812   | Hs.566872NR_003264 | ENSG00000SDHAP1     | SDHAL1 SE          | succinate pseudo          |                         |                |                |
| chr13-111 | 4.214802 | -0.43808 | 1.166189 | -0.37565 | 0.707175 | 0.981636 | chr13 | 1.11E+08 | 1.11E+08 | + | 0 | NA | intron (NAluJb SIN  | 11034    | NM_001352  | 79587    | Hs.508722NM_024537 | ENSG00000CAR52      | COXP27 c           | cysteiny protein-coding   |                         |                |                |
| chr5-1464 | 4.676258 | -0.40391 | 1.075531 | -0.37554 | 0.707259 | 0.981636 | chr5  | 1.46E+08 | 1.46E+08 | + | 0 | NA | intron (NLM6B LIN   | 36839    | NM_0201137 | 51520    | Hs.432674NM_01646C | ENSG00000LARS       | HSPC192 l          | leucyl-tfprotein-coding   |                         |                |                |
| chr6-312  | 4.676258 | -0.40391 | 1.075531 | -0.37554 | 0.707259 | 0.981636 | chr6  | 31200344 | 31201154 | + | 0 | NA | intron (NLa2 LINE   | 2989     | NR_026791  | 253018   | Hs.659816NR_026791 | ENSG00000CHCG27     | bcX101P6           | HLA complncRNA            |                         |                |                |
| chr6-1496 | 4.676258 | -0.40391 | 1.075531 | -0.37554 | 0.707259 | 0.981636 | chr6  | 1.5E+08  | 1.5E+08  | + | 0 | NA | intron (NAluJr SIN  | 21133    | NR_077247  | 645958   | Hs.632614NR_077247 | RPS18P9             | RPS18_6            | 7ribosomalpseudo          |                         |                |                |
| chr9-9594 | 4.676258 | -0.40391 | 1.075531 | -0.37554 | 0.707259 | 0.981636 | chr9  | 95948433 | 95949395 | + | 0 | NA | intron (NLM14 LINE  | 72897    | NR_024125  | 1E+08    | Hs.43431CNR_024125 | ENSG00000LINC00092  | NCRNA0009          | long intncRNA             |                         |                |                |
| chr10-731 | 7.864417 | -0.31499 | 0.838812 | -0.37552 | 0.707277 | 0.981636 | chr10 | 73132124 | 73132808 | + | 0 | NA | TTS (NM_C           | -6259    | NR_145776  | 1.1E+08  | NR_145776          | ENSG00000SNORA11F   | small              | nucsnRNA                  |                         |                |                |
| chr14-697 | 7.864417 | -0.31499 | 0.838812 | -0.37552 | 0.707277 | 0.981636 | chr14 | 69088936 | 69091851 | + | 0 | NA | 3' UTR (N3' UTR (N  | 62206    | NM_001284  | 8816     | Hs.50978CNM_003861 | ENSG00000DCAF5      | BCRG2 BCF          | DBD1 and protein-coding   |                         |                |                |
| chr5-7377 | 7.864417 | -0.31499 | 0.838812 | -0.37552 | 0.707277 | 0.981636 | chr5  | 73779617 | 73779981 | + | 0 | NA | intron (Nintron (N  | -33747   | NM_001244  | 64283    | Hs.482521NM_00108C | ENSG00000ARHGF28    | RGNF RIF           | Rho guaniprotein-coding   |                         |                |                |
| chr10-918 | 8.374871 | -0.30172 | 0.803811 | -0.37537 | 0.707388 | 0.981636 | chr10 | 91847433 | 91849985 | + | 0 | NA | intron (Nintron (N  | 50283    | NM_025235  | 80351    | Hs.329327NM_025235 | ENSG00000TNKS2      | ARTD6 PAF          | tankyrase protein-coding  |                         |                |                |
| chr19-115 | 8.374871 | -0.30172 | 0.803811 | -0.37537 | 0.707388 | 0.981636 | chr19 | 1150459  | 1154399  | + | 0 | NA | intron (Nintron (N  | -20207   | NM_001100  | 22904    | Hs.408706NM_014963 | ENSG00000SBN02      | KIAA0963 s         | trawberry protein-coding  |                         |                |                |
| chr8-4305 | 8.374871 | -0.30172 | 0.803811 | -0.37537 | 0.707388 | 0.981636 | chr8  | 43097669 | 43098343 | + | 0 | NA | intron (NLMB7 LIN   | 4691     | NM_032237  | 84197    | Hs.491646NM_032237 | ENSG00000POMK       | MDGA12 N           | protein (protein-coding   |                         |                |                |
| chr1-3795 | 5.153431 | -0.38032 | 1.013219 | -0.37536 | 0.707391 | 0.981636 | chr1  | 37998341 | 37998897 | + | 0 | NA | intron (Nintron (N  | 6895     | NM_004466  | 2275     | Hs.57687           | NM_004466           | ENSG00000PHL3      | SLIM2                     | four and protein-coding |                |                |
| chr1-2175 | 5.153431 | -0.38032 | 1.013219 | -0.37536 | 0.707391 | 0.981636 | chr1  | 2.18E+08 | 2.18E+08 | + | 0 | NA | intron (Nintron (N  | 116470   | NM_001297  | 55105    | Hs.362343NM_01804C | ENSG00000PATCH2     | CT110 GP           | A-G-patch cprotein-coding |                         |                |                |
| chr5-4308 | 5.153431 | -0.38032 | 1.013219 | -0.37536 | 0.707391 | 0.981636 | chr5  | 43083281 | 43084228 | + | 0 | NA | intron (NLTR49-int  | -16315   | NR_104651  | 648987   | Hs.649466NR_03408E | ENSG00000LOC648987  | uncharactncRNA     |                           |                         |                |                |
| chr22-411 | 5.153431 | -0.38032 | 1.013219 | -0.37536 | 0.707391 | 0.981636 | chr22 | 41134603 | 41139152 | + | 0 | NA | intron (NAluS2 SIN  | 44285    | NM_001362  | 2033     | Hs.517517NM_00142E | ENSG00000EP300      | KAT3B MKI          | E1A bindiprotein-coding   |                         |                |                |
| chr7-9941 | 9.204159 | 0.288802 | 0.769539 | 0.375292 | 0.707443 | 0.981636 | chr7  | 99414732 | 99419010 | + | 0 | NA | 3' UTR (N3' UTR (N  | 7699     | NR_162133  | 1.13E+08 | NR_162133          | MIR12119            | microRNA           | ncRNA                     |                         |                |                |
| chr9-1311 | 9.204159 | 0.288802 | 0.769539 | 0.375292 | 0.707443 | 0.981636 | chr9  | 1.31E+08 | 1.31E+08 | + | 0 | NA | intron (Nintron (N  | 19894    | NM_001318  | 8021     | Hs.654533NM_00508E | ENSG00000CNP214     | CAIN CAN           | nucleopor protein-coding  |                         |                |                |
| chr1-2087 | 8.666432 | 0.296093 | 0.788992 | 0.375281 | 0.707452 | 0.981636 | chr1  | 20859967 | 20860368 | + | 0 | NA | intron (Nintron (N  | -73479   | NM_016287  | 5809     | Hs.142442NM_016287 | ENSG00000HP1BP3     | HP1-BP74 h         | eterochr protein-coding   |                         |                |                |
| chr1-3531 | 8.666432 | 0.296093 | 0.788992 | 0.375281 | 0.707452 | 0.981636 | chr1  | 35310634 | 35312070 | + | 0 | NA | intron (NAluS2 SIN  | 42643    | NM_00135C  | 9202     | Hs.269211NM_00509E | ENSG00000ZMYM4      | CDIR MYM           | zinc fingprotein-coding   |                         |                |                |
| chr1-1502 | 8.666432 | 0.296093 | 0.788992 | 0.375281 | 0.707452 | 0.981636 | chr1  | 1.5E+08  | 1.5E+08  | + | 0 | NA | intron (NAluS2 SIN  | 9035     | NM_001135  | 81611    | Hs.656466NM_03092C | ENSG00000ANP32E     | LANP-L L           | acidic nprotein-coding    |                         |                |                |
| chr1-1557 | 8.666432 | 0.296093 | 0.788992 | 0.375281 | 0.707452 | 0.981636 | chr1  | 1.56E+08 | 1.56E+08 | + | 0 | NA | intron (Nintron (N  | -17725   | NR_024117  | 1E+08    | Hs.656361NR_024117 | MST02P              | misato f           | pseudo                    |                         |                |                |
| chr10-295 | 8.666432 | 0.296093 | 0.788992 | 0.375281 | 0.707452 | 0.981636 | chr10 | 29549400 | 29552404 | + | 0 | NA | exon (NM_exon (NM   | -5820    | NR_03033E  | 693189   | NR_03033E          | ENSG00000MIR604     | MIRN604 f          | microRNA                  | ncRNA                   |                |                |
| chr11-115 | 8.666432 | 0.296093 | 0.788992 | 0.375281 | 0.707452 | 0.981636 | chr11 | 1.19E+08 | 1.19E+08 | + | 0 | NA | intron (NAluSx SIN  | 27172    | NM_00518E  | 867      | Hs.504096NM_00518E | ENSG00000CBL        | C-CBL CBI          | Cbl protcprotein-coding   |                         |                |                |
| chr12-485 | 8.666432 | 0.296093 | 0.788992 | 0.375281 | 0.707452 | 0.981636 | chr12 | 48527489 | 48530076 | + | 0 | NA | intron (NCharlie17  | 4575     | NM_00165E  | 377      | Hs.119177NM_00165E | ENSG00000ARF3       | ADP                | ribotcprotein-coding      |                         |                |                |
| chr14-527 | 8.666432 | 0.296093 | 0.788992 | 0.375281 | 0.707452 | 0.981636 | chr14 | 52760964 | 52761546 | + | 0 | NA | intron (NAluSp SIN  | 30352    | NM_19806E  | 64841    | Hs.478022NM_19806E | ENSG00000GNPNAT1    | GNAI1 GNP          | glucosami protein-coding  |                         |                |                |
| chr15-618 | 8.666432 | 0.296093 | 0.788992 | 0.375281 | 0.707452 | 0.981636 | chr15 | 61892777 | 61893707 | + | 0 | NA | intron (NLM1A4 LIN  | 163324   | NR_146444  | 1.01E+08 | Hs.42265           | NR_146444           | ENSG00000LINC0234E | long                      | intncRNA                |                |                |
| chr16-85  | 8.666432 | 0.296093 | 0.788992 | 0.375281 | 0.707452 | 0.981636 | chr16 | 85666478 | 85666906 | + | 0 | NA | intron (Nintron (N  | 22262    | NM_01609E  | 51659    | Hs.43318CNM_01609E | ENSG00000GINS2      | HSPC037 E          | GINS comrprotein-coding   |                         |                |                |
| chr2-5375 | 8.666432 | 0.296093 | 0.788992 | 0.375281 | 0.707452 | 0.981636 | chr2  | 53794702 | 53796141 | + | 0 | NA | intron (Nintron (N  | 8377     | NM_015701  | 27248    | Hs.438336NM_015701 | ENSG00000CERLEC1    | C2orf30 C          | endoplasr protein-coding  |                         |                |                |
| chr2-7102 | 8.666432 | 0.296093 | 0.788992 | 0.375281 | 0.707452 | 0.981636 | chr2  | 1.9E+08  | 1.9E+08  | + | 0 | NA | intron (NMLT2A1 LI  | 62483    | NM_001042  | 84281    | Hs.389311NM_032321 | ENSG00000C2orf88    | SKMAP              | chromosom                 | protein-coding          |                |                |
| chr4-714  | 8.666432 | 0.296093 | 0.788992 | 0.375281 | 0.707452 | 0.981636 | chr4  | 714273   | 714486   | + | 0 | NA | intron (Nintron (N  | 8547     | NM_001317  | 10336    | Hs.144306NM_00631E | ENSG00000PCGF3      | DONK1 RN           | polycomb                  | protein-coding          |                |                |
| chr4-541  | 8.666432 | 0.296093 | 0.788992 | 0.375281 | 0.707452 | 0.981636 | chr4  | 5416811  | 5418877  | + | 0 | NA | intron (NMLT1H2 LI  | -106725  | NR_12651E  | 10141    | Hs.177972NM_00575C | ENSG00000LINC01587C | 4orf6 a            | c long intncRNA           |                         |                |                |
| chr5-521  | 8.666432 | 0.296093 | 0.788992 | 0.375281 | 0.707452 | 0.981636 | chr5  | 52141716 | 52150441 | + | 0 | NA | intron (NAluSp SIN  | 534      | NM_001127  | 65056    | Hs.444279NM_02291E | ENSG00000GPBP1      | GPBP SSH           | GC-rich f                 | protein-coding          |                |                |
| chr9-9134 | 8.666432 | 0.296093 | 0.788992 | 0.375281 | 0.707452 | 0.981636 | chr9  | 91341563 | 91343060 | + | 0 | NA | intron (NMLT1D LTF  | 19613    | NM_00169E  | 549      | Hs.175995NM_00169E | ENSG00000AUH        | AU                 | RNA b                     | protein-coding          |                |                |
| chr9-125  | 8.666432 | 0.296093 | 0.788992 | 0.375281 | 0.707452 | 0.981636 | chr9  | 1.25E+08 | 1.25E+08 | + | 0 | NA | intron (NAluSg4 SI  | 71329    | NM_00133C  | 26130    | Hs.42376           | NM_01563E           | ENSG00000GAPVD1    | GAPX5 G                   | ATPase ac               | protein-coding |                |
| chr17-54  | 7.16881  | 0.331185 | 0.882952 | 0.375088 | 0.707595 | 0.981636 | chr17 | 5402509  | 5403157  | + | 0 | NA | intron (NAluJb SIN  | -16808   | NM_00116E  | 84268    | Hs.462086NM_03230E | ENSG00000RPAIN      | HRIP RIP           | RPA                       | inter protein-coding    |                |                |
| chr8-1197 | 7.16881  | 0.331185 | 0.882952 | 0.375088 | 0.707595 | 0.981636 | chr8  | 1.2E+08  | 1.2E+08  | + | 0 | NA | intron (NLP4 LINE   | 64209    | NM_003184  | 6873     | Hs.125752NM_003184 | ENSG00000TAF2       | CIF150 MF          | TATA-box                  | protein-coding          |                |                |
| chr9-717  | 7.16881  | 0.331185 | 0.882952 | 0.375088 | 0.707595 | 0.981636 | chr9  | 71708689 | 71709698 | + | 0 | NA | intron (Nintron (N  | 59320    | NM_00113E  | 23670    | Hs.494146NM_01339C | ENSG00000CEMP2      | TMEM2              | cell migr                 | protein-coding          |                |                |
| chr2-1527 | 4.592129 | -0.43475 | 1.159454 | -0.37496 | 0.707688 | 0.981636 | chr2  | 1.53E+08 | 1.53E+08 | + | 0 | NA | intron (NMERS1C LI  | 34274    | NR_146422  | 151188   | Hs.64358CNM_15252E | ENSG00000ARL61P6    | AIP-6 AIF          | ADP                       | ribosprotein-coding     |                |                |
| chr1-1971 | 4.592129 | -0.43475 | 1.159454 | -0.37496 | 0.707688 | 0.981636 | chr1  | 1.97E+08 | 1.97E+08 | + | 0 | NA | non-codir non-codir | -12773   | NR_00120E  | 259266   | Hs.121026NM_01813E | ENSG00000ASPM       | ASP Caln           | abnormal                  | protein-coding          |                |                |
| chr1-151  | 4.592129 | -0.43475 | 1.159454 | -0.37496 | 0.707688 | 0.981636 | chr1  | 1.51E+08 | 1.51E+08 | + | 0 | NA | non-codir non-codir | -1880    | NM_13827E  | 149428   | Hs.591477NM_13827E | ENSG00000BNIPL      | BNIP-S B           | NBCL2                     | intc                    | protein-coding |                |
| chr4-609  | 4.592129 | -0.43475 | 1.159454 | -0.37496 | 0.707688 | 0.981636 | chr4  | 1.69E+08 | 1.69E+08 | + | 0 | NA | intron (NTiger4a    | -117701  | NM_03278E  | 84869    | Hs.659311NM_03278E | ENSG00000CBR4       | SDR45C1            | carboxyl                  | protein-coding          |                |                |
| chr5-7075 | 4.592129 | -0.43475 | 1.159454 | -0.37496 | 0.707688 | 0.981636 | chr5  | 70795886 | 70796502 | + | 0 | NA | intron (Nintron (N  | 70795886 | 70796502   | 1.02E+08 | Hs.634012NR_157804 | LOC10192E           | putative           | pseudo                    |                         |                |                |
| chr1-586  | 7.897698 | -0.31055 | 0.828804 | -0.3747  | 0.707883 | 0.981636 | chr1  | 58663060 | 58664933 | + | 0 | NA | intron (NLM1E4 LIN  | 36066    | NM_00108E  | 114803   | Hs.744921NM_00108E | ENSG00000MYSM1      | 2A-DUB 2           | Myb like                  | protein-coding          |                |                |
| chr10-495 | 7.897698 | -0.31055 | 0.828804 | -0.3747  | 0.707883 | 0.981636 | chr10 | 49575812 | 49576658 | + | 0 | NA | intron (NMLT1A0 LI  | -12083   | NM_00136E  | 414189   | Hs.536156NM_001077 | ENSG00000AGAP6      | AGAP-6 C           | ArFGAP                    | wiprotein-coding        |                |                |
| chr10-96  | 7.897698 | -0.31055 | 0.828804 | -0.3747  | 0.707883 | 0.981636 | chr10 | 96525553 | 96526819 | + | 0 | NA | intron (NMIRb SINE  | -12260   | NM_01246E  | 7093     | Hs.154296NM_01246E | ENSG00000TLL2       | tolloid            | lprotein-coding           |                         |                |                |
| chr10-111 | 7.897698 | -0.31055 | 0.828804 | -0.3747  | 0.707883 | 0.981636 | chr10 | 1.11E+08 | 1.11E+08 | + | 0 | NA | intron (Nintron (N  | 36118    | NM_00544E  | 9126     | Hs.24485           | NM_00544E           | ENSG00000SMC3      | BAM BMH                   | C                       | structure      | protein-coding |
| chr15-644 | 7.897698 | -0.31055 | 0.828804 | -0.3747  | 0.707883 | 0.981636 | chr15 | 64409371 | 64412    |   |   |    |                     |          |            |          |                    |                     |                    |                           |                         |                |                |



|            |          |          |          |          |          |          |       |          |          |   |      |                       |                   |                              |                     |            |                                            |
|------------|----------|----------|----------|----------|----------|----------|-------|----------|----------|---|------|-----------------------|-------------------|------------------------------|---------------------|------------|--------------------------------------------|
| chr19-40c  | 8.67429  | 0.294362 | 0.787335 | 0.373872 | 0.7085   | 0.981636 | chr19 | 40010863 | 40015384 | + | 0 NA | intron (Nintron (N    | 16063 NM_178544   | 339327 Hs. 125008NM_178544   | ENSG000002ZNF546    | ZNF49      | zinc finger protein-coding                 |
| chr19-43c  | 8.67429  | 0.294362 | 0.787335 | 0.373872 | 0.7085   | 0.981636 | chr19 | 43654639 | 43656593 | + | 0 NA | intron (Nintron (N    | 14553 NM_002656   | 5329 Hs. 466871NM_002656     | ENSG000002PLAUR     | CD87 U-P   | plasminogen protein-coding                 |
| chr19-45c  | 8.67429  | 0.294362 | 0.787335 | 0.373872 | 0.7085   | 0.981636 | chr19 | 45618665 | 45621885 | + | 0 NA | intron (NAluS SIN     | -18063 NM_005282  | 2828 Hs. 17170 NM_005282     | ENSG000002GPR4      | -          | G protein-coding                           |
| chr19-47c  | 8.67429  | 0.294362 | 0.787335 | 0.373872 | 0.7085   | 0.981636 | chr19 | 47352191 | 47363647 | + | 0 NA | exon (NM exon (NM     | 8604 NM_014681    | 9704 Hs. 151706NM_014681     | ENSG000002DHC34     | DDX34 HRE  | DEH-box protein-coding                     |
| chr2-272c  | 8.67429  | 0.294362 | 0.787335 | 0.373872 | 0.7085   | 0.981636 | chr2  | 27221222 | 27227300 | + | 0 NA | intron (Nintron (N    | 6871 NM_001306    | 790 Hs. 37701NM_001306       | ENSG000002CAD       | CDG1Z EIE  | carbamoyl protein-coding                   |
| chr2-394c  | 8.67429  | 0.294362 | 0.787335 | 0.373872 | 0.7085   | 0.981636 | chr2  | 39442515 | 39444181 | + | 0 NA | intron (NMamTip3 I    | 5932 NR_037875    | 728730 Hs. 655344NR_037875   | ENSG000002MAP4K3-D1 | -          | MAP4K3 dincRNA                             |
| chr2-197c  | 8.67429  | 0.294362 | 0.787335 | 0.373872 | 0.7085   | 0.981636 | chr2  | 1.97E+08 | 1.97E+08 | + | 0 NA | intron (Nintron (N    | 6859 NM_001132    | 80219 Hs. 606592NM_001132    | ENSG000002COQ10B    | -          | coenzyme protein-coding                    |
| chr2-203c  | 8.67429  | 0.294362 | 0.787335 | 0.373872 | 0.7085   | 0.981636 | chr2  | 2.03E+08 | 2.03E+08 | + | 0 NA | intron (NAluSq2 SI    | 94799 NR_001114   | 65065 Hs. 648844NM_198944    | ENSG000002NBEAL1    | A530083 C  | neurobeac protein-coding                   |
| chr20-31c  | 8.67429  | 0.294362 | 0.787335 | 0.373872 | 0.7085   | 0.981636 | chr20 | 3199107  | 3201412  | + | 0 NA | intron (Nintron (N    | 4423 NM_023935    | 65992 Hs. 471977NM_023935    | ENSG000002DDRDK1    | C20orf11 C | DDRDK domain protein-coding                |
| chr20-35c  | 8.67429  | 0.294362 | 0.787335 | 0.373872 | 0.7085   | 0.981636 | chr20 | 35916870 | 35919923 | + | 0 NA | intron (Nintron (N    | 36229 NM_033633   | 51282 Hs. 584909NM_016558    | ENSG000002SCAND1    | S1SDP S1N  | domain protein-coding                      |
| chr20-45c  | 8.67429  | 0.294362 | 0.787335 | 0.373872 | 0.7085   | 0.981636 | chr20 | 45964492 | 45966674 | + | 0 NA | intron (Nintron (N    | 6620 NM_022095    | 63925 Hs. 171493NM_022095    | ENSG000002ZNF335    | MCPH10 N   | zinc finger protein-coding                 |
| chr20-47c  | 8.67429  | 0.294362 | 0.787335 | 0.373872 | 0.7085   | 0.981636 | chr20 | 47635558 | 47636508 | + | 0 NA | exon (NM exon (NM     | 134146 NM_001174  | 8202 Hs. 592142NM_006534     | ENSG000002NCOA3     | ACTR AIB   | nuclear protein-coding                     |
| chr22-42c  | 8.67429  | 0.294362 | 0.787335 | 0.373872 | 0.7085   | 0.981636 | chr22 | 42592661 | 42599605 | + | 0 NA | intron (Nintron (N    | -12772 NR_002184  | 91695 Hs. 534041NR_002184    | ENSG000002RRP7BP    | RRP7B dJ2  | ribosomal pseudo                           |
| chr22-45c  | 8.67429  | 0.294362 | 0.787335 | 0.373872 | 0.7085   | 0.981636 | chr22 | 45811619 | 45812076 | + | 0 NA | intron (Nintron (N    | 51233 NR_039911   | 1.01E+08 NR_039911           | ENSG000002MIR4762   | -          | microRNA ncRNA                             |
| chr3-146c  | 8.67429  | 0.294362 | 0.787335 | 0.373872 | 0.7085   | 0.981636 | chr3  | 14654561 | 14667632 | + | 0 NA | intron (Nintron (N    | 9334 NM_016474    | 51244 Hs. 517822NM_016474    | ENSG000002CCDC174   | C3orf19 F  | coiled-coil protein-coding                 |
| chr3-583c  | 8.67429  | 0.294362 | 0.787335 | 0.373872 | 0.7085   | 0.981636 | chr3  | 58309908 | 58318710 | + | 0 NA | intron (NAluSx SIN    | 8064 NM_001348    | 1.1E+08 Hs. 446323NM_001348  | ENSG000002HTD2      | -          | hydroxyacid protein-coding                 |
| chr3-101c  | 8.67429  | 0.294362 | 0.787335 | 0.373872 | 0.7085   | 0.981636 | chr3  | 1.02E+08 | 1.02E+08 | + | 0 NA | non-coding non-coding | 19267 NM_020357   | 57092 Hs. 732632NM_020357    | ENSG000002PCPN      | -          | PEST protein-coding                        |
| chr3-197c  | 8.67429  | 0.294362 | 0.787335 | 0.373872 | 0.7085   | 0.981636 | chr3  | 1.98E+08 | 1.98E+08 | + | 0 NA | intron (Nintron (N    | -18065 NM_001363  | 84859 Hs. 518414NM_032777    | ENSG000002LRCH3     | -          | leucine protein-coding                     |
| chr4-321c  | 8.67429  | 0.294362 | 0.787335 | 0.373872 | 0.7085   | 0.981636 | chr4  | 3211908  | 3216848  | + | 0 NA | intron (Nintron (N    | -29991 NM_001330  | 345222 Hs. 442291NM_001012   | ENSG000002MSANTD1   | C4orf44    | Myb/SANT protein-coding                    |
| chr5-136c  | 8.67429  | 0.294362 | 0.787335 | 0.373872 | 0.7085   | 0.981636 | chr5  | 1.36E+08 | 1.36E+08 | + | 0 NA | intron (Nintron (N    | 17762 NM_001350   | 389332 Hs. 127682NM_001350   | ENSG000002SMIM32    | -          | small intron protein-coding                |
| chr5-150c  | 8.67429  | 0.294362 | 0.787335 | 0.373872 | 0.7085   | 0.981636 | chr5  | 1.5E+08  | 1.5E+08  | + | 0 NA | intron (Nintron (N    | 36482 NR_109966   | 1436 Hs. 586211NM_005211     | ENSG000002CSF1R     | C-FMS CDI  | colony stromal protein-coding              |
| chr6-410c  | 8.67429  | 0.294362 | 0.787335 | 0.373872 | 0.7085   | 0.981636 | chr6  | 41092838 | 41098949 | + | 0 NA | intron (Nintron (N    | 1894 NM_001325    | 221443 Hs. 227457NM_145063   | ENSG000002CARD1     | C6orf130 O | acyl-AI protein-coding                     |
| chr6-435c  | 8.67429  | 0.294362 | 0.787335 | 0.373872 | 0.7085   | 0.981636 | chr6  | 43586078 | 43592559 | + | 0 NA | intron (NLM5 LINE     | 13133 NM_001291   | 5429 Hs. 655467NM_006502     | ENSG000002POLH      | RAD30 RAI  | RNA polymerase protein-coding              |
| chr8-991c  | 8.67429  | 0.294362 | 0.787335 | 0.373872 | 0.7085   | 0.981636 | chr8  | 99165988 | 99166913 | + | 0 NA | intron (NMERS8 DN     | 153184 NM_017890  | 157680 Hs. 191544NM_015242   | ENSG000002VPS13B    | RAS1 COH   | vacuolar protein-coding                    |
| chrX-167c  | 8.67429  | 0.294362 | 0.787335 | 0.373872 | 0.7085   | 0.981636 | chrX  | 16740689 | 16743303 | + | 0 NA | intron (NAluSx SIN    | 22384 NM_032796   | 94056 Hs. 744256NM_032796    | ENSG000002SYAP1     | BSTA PRO   | synapse protein-coding                     |
| chr2-4657  | 11.1367  | -0.26574 | 0.710837 | -0.37384 | 0.708526 | 0.981636 | chr2  | 46576454 | 46577164 | + | 0 NA | intron (NMIR SINE     | 3429 NR_104182    | 1.01E+08 Hs. 658541NR_104182 | ENSG000002LOC100506 | -          | uncharacterized ncRNA                      |
| chr14-20c  | 8.210983 | 0.30726  | 0.822367 | 0.373629 | 0.708681 | 0.981636 | chr14 | 20354363 | 20354768 | + | 0 NA | intron (NAluJb SINE   | 10958 NM_001042   | 10038 Hs. 409412NM_005484    | ENSG000002PARP2     | ADPRT2 A   | poly(ADP-ribose) polymerase protein-coding |
| chr19-571c | 8.210983 | 0.30726  | 0.822367 | 0.373629 | 0.708681 | 0.981636 | chr19 | 5711048  | 5714663  | + | 0 NA | intron (NAluJo SIN    | 7291 NR_076392    | 9361 Hs. 350266NM_004793     | ENSG000002LONP1     | CODASS L   | luciferase protein-coding                  |
| chr20-321c | 8.210983 | 0.30726  | 0.822367 | 0.373629 | 0.708681 | 0.981636 | chr20 | 32136887 | 32137985 | + | 0 NA | intron (NMIRb SINE    | 27708 NM_001362   | 9777 Hs. 654666NM_014742     | ENSG000002TM9SF4    | dJ836N17   | transmembrane protein-coding               |
| chr20-561c | 8.210983 | 0.30726  | 0.822367 | 0.373629 | 0.708681 | 0.981636 | chr20 | 56480653 | 56481553 | + | 0 NA | intron (Nintron (N    | 12518 NM_001283   | 51507 Hs. 517134NM_016407    | ENSG000002RTF2      | C20orf43   | replisome protein-coding                   |
| chr6-1697c | 8.210983 | 0.30726  | 0.822367 | 0.373629 | 0.708681 | 0.981636 | chr6  | 1.7E+08  | 1.7E+08  | + | 0 NA | intron (NMLT1 J LTF   | 11651 NM_001278   | 55780 Hs. 47546 NM_018341    | ENSG000002CERMARD   | C6orf70 F  | ER membrane protein-coding                 |
| chr8-4237c | 8.210983 | 0.30726  | 0.822367 | 0.373629 | 0.708681 | 0.981636 | chr8  | 42371594 | 42372719 | + | 0 NA | TTS (NM_C TTS (NM_C   | 5073 NM_014422    | 27121 Hs. 159311NM_014422    | ENSG000002DKK4      | DKK-4      | dishevelled protein-coding                 |
| chr16-11f  | 2.469718 | -0.53648 | 1.435908 | -0.37361 | 0.708691 | 0.981636 | chr16 | 11579200 | 11580025 | + | 0 NA | intron (NLM3D3 LIN    | 66278 NM_004862   | 9516 Hs. 459944NM_004862     | ENSG000002LITAF     | PIG7 SIMF  | lipophilin protein-coding                  |
| chr15-41c  | 8.367013 | -0.30014 | 0.80364  | -0.37348 | 0.708792 | 0.981636 | chr15 | 41089519 | 41093509 | + | 0 NA | intron (NLMIP10 LI    | 24732 NR_104038   | 54617 Hs. 292949NM_017555    | ENSG000002IN080     | IN080A I   | IN080 complex protein-coding               |
| chr16-70c  | 8.367013 | -0.30014 | 0.80364  | -0.37348 | 0.708792 | 0.981636 | chr16 | 70300988 | 70301979 | + | 0 NA | intron (NHAL LINE     | 2430 NM_001257    | 11269 Hs. 221761NM_007242    | ENSG000002DDX19B    | DBP5 DDX1  | DEAD-box protein-coding                    |
| chr16-821c | 8.367013 | -0.30014 | 0.80364  | -0.37348 | 0.708792 | 0.981636 | chr16 | 81251549 | 82151115 | + | 0 NA | intron (Nintron (N    | 19419 NR_005792   | 10200 Hs. 344400NM_005792    | ENSG000002MPHOSPH6  | MPP MDX    | EM-phase protein-coding                    |
| chr17-73c  | 8.367013 | -0.30014 | 0.80364  | -0.37348 | 0.708792 | 0.981636 | chr17 | 73235010 | 73235925 | + | 0 NA | intron (Nintron (N    | 2806 NR_110105    | 55028 Hs. 12929 NM_017941    | ENSG000002C17orf80  | HLC-8 MIC  | chromosome protein-coding                  |
| chr19-46c  | 8.367013 | -0.30014 | 0.80364  | -0.37348 | 0.708792 | 0.981636 | chr19 | 4692149  | 4693927  | + | 0 NA | intron (Nintron (N    | 13756 NM_001242   | 1E+08 Hs. 678132NM_001242    | ENSG000002DPP9-AS1  | -          | DPP9 antiprotein-coding                    |
| chr2-237c  | 8.367013 | -0.30014 | 0.80364  | -0.37348 | 0.708792 | 0.981636 | chr2  | 2.37E+08 | 2.37E+08 | + | 0 NA | 3' UTR (N3' UTR (N    | 14219 NM_006710   | 10920 Hs. 531712NM_006710    | ENSG000002COP58     | COP9 CSNE  | COP9 signal protein-coding                 |
| chr4-267c  | 8.367013 | -0.30014 | 0.80364  | -0.37348 | 0.708792 | 0.981636 | chr4  | 26722661 | 26723019 | + | 0 NA | intron (NMIR SINE     | 137404 NR_134675  | 1.05E+08 Hs. 548855NR_134675 | ENSG000002STIM2-AS1 | -          | STIM2 antncRNA                             |
| chr5-407c  | 8.367013 | -0.30014 | 0.80364  | -0.37348 | 0.708792 | 0.981636 | chr5  | 40787937 | 40788724 | + | 0 NA | intron (NLM16 LIN     | 9847 NM_001355    | 5562 Hs. 43322 NM_006251     | ENSG000002PRKAA1    | AMPK AMP   | protein kinase protein-coding              |
| chr9-1207c | 8.367013 | -0.30014 | 0.80364  | -0.37348 | 0.708792 | 0.981636 | chr9  | 1.21E+08 | 1.21E+08 | + | 0 NA | intron (Nintron (N    | 5655 NM_021264    | 26190 Hs. 494982NM_012164    | ENSG000002FBXW2     | FBW2 Fwz   | F-box protein-coding                       |
| chr16-75c  | 11.3384  | 0.276081 | 0.73998  | 0.373092 | 0.70908  | 0.981636 | chr16 | 75234920 | 75235545 | + | 0 NA | exon (NM exon (NM     | 3428 NM_001170    | 9564 Hs. 479747NM_014567     | ENSG000002BCAR1     | CAS CAS1   | BCAR1 subunit protein-coding               |
| chr1-1704c | 9.212017 | 0.287163 | 0.769725 | 0.373073 | 0.709094 | 0.981636 | chr1  | 17043593 | 17045012 | + | 0 NA | intron (Nintron (N    | 9868 NM_003000    | 6390 Hs. 465924NM_003000     | ENSG000002SDHB      | CWS2 IP    | fuscinatase protein-coding                 |
| chr19-55c  | 9.212017 | 0.287163 | 0.769725 | 0.373073 | 0.709094 | 0.981636 | chr19 | 55662607 | 55663953 | + | 0 NA | intron (NLA2 LINE     | 9230 NM_007275    | 11338 Hs. 528007NM_007275    | ENSG000002U2AF2     | U2AF52     | U2 small protein-coding                    |
| chr20-54c  | 9.212017 | 0.287163 | 0.769725 | 0.373073 | 0.709094 | 0.981636 | chr20 | 540504   | 541086   | + | 0 NA | intron (NMLTIE2 LI    | 2995 NM_001362    | 1457 Hs. 644056NM_001895     | ENSG000002CSNK2A1   | CK2A1 CKI  | casein kinase protein-coding               |
| chr4-799c  | 9.212017 | 0.287163 | 0.769725 | 0.373073 | 0.709094 | 0.981636 | chr4  | 79905289 | 79907716 | + | 0 NA | 3' UTR (N3' UTR (N    | 79031 NR_026555   | 118425 Hs. 104215NR_026555   | ENSG000002PCAT4     | GDEP PCA   | astrocyte ncRNA                            |
| chr5-810c  | 9.212017 | 0.287163 | 0.769725 | 0.373073 | 0.709094 | 0.981636 | chr5  | 81086050 | 81087591 | + | 0 NA | intron (Nintron (N    | -125913 NR_105015 | 1.03E+08 Hs. 737155NR_105015 | ENSG000002RASGRF2-A | -          | RASGRF2 ncRNA                              |
| chr6-138c  | 9.212017 | 0.287163 | 0.769725 | 0.373073 | 0.709094 | 0.981636 | chr6  | 1.38E+08 | 1.38E+08 | + |      |                       |                   |                              |                     |            |                                            |

|                    |          |          |          |          |          |       |          |          |   |   |    |                     |                    |                   |                  |                                     |                          |
|--------------------|----------|----------|----------|----------|----------|-------|----------|----------|---|---|----|---------------------|--------------------|-------------------|------------------|-------------------------------------|--------------------------|
| chr1-161:8.682148  | 0.292628 | 0.78934  | 0.370724 | 0.710843 | 0.981636 | chr1  | 1.61E+08 | 1.61E+08 | + | 0 | NA | intron (AluSc8 SI   | 26654 NM_001278    | 6391 Hs. 444472   | ENS00000SDHC     | CYB560 Cy succinate protein-coding  |                          |
| chr1-179:8.682148  | 0.292628 | 0.78934  | 0.370724 | 0.710843 | 0.981636 | chr1  | 1.79E+08 | 1.79E+08 | + | 0 | NA | exon (NM exon (NM   | 12907 NM_022371    | 64222 Hs. 584957  | ENS00000TOR3A    | ADIR ADIF torsin F protein-coding   |                          |
| chr10-10:8.682148  | 0.292628 | 0.78934  | 0.370724 | 0.710843 | 0.981636 | chr10 | 1.03E+08 | 1.03E+08 | + | 0 | NA | intron (intron (N   | 13633 NM_014976    | 22984 Hs. 239495  | ENS00000PDCD11   | ALG-4 ALC programme protein-coding  |                          |
| chr10-10:8.682148  | 0.292628 | 0.78934  | 0.370724 | 0.710843 | 0.981636 | chr10 | 1.03E+08 | 1.03E+08 | + | 0 | NA | intron (AluYb8 SI   | 25233 NM_014976    | 22984 Hs. 239495  | ENS00000PDCD11   | ALG-4 ALC programme protein-coding  |                          |
| chr11-57:8.682148  | 0.292628 | 0.78934  | 0.370724 | 0.710843 | 0.981636 | chr11 | 57552324 | 57555086 | + | 0 | NA | intron (AluSx SIN   | 11064 NM_001105    | 219537 Hs. 68756  | ENS00000SMTNL1   | CHAS2 smooth like protein-coding    |                          |
| chr11-61:8.682148  | 0.292628 | 0.78934  | 0.370724 | 0.710843 | 0.981636 | chr11 | 61299979 | 61304641 | + | 0 | NA | exon (NM exon (NM   | -6994 NM_152718    | 220001 Hs. 60640  | ENS00000CVWCE    | URG11 VWC von Wille protein-coding  |                          |
| chr11-65:8.682148  | 0.292628 | 0.78934  | 0.370724 | 0.710843 | 0.981636 | chr11 | 65402785 | 65410797 | + | 0 | NA | intron (AluSp SIN   | -16007 NR_131012   | 283131 Hs. 523789 | ENS00000NEAT1    | LINC00084 nuclear ncRNA             |                          |
| chr12-64:8.682148  | 0.292628 | 0.78934  | 0.370724 | 0.710843 | 0.981636 | chr12 | 6463111  | 64662366 | + | 0 | NA | 3' UTR (3' UTR (N   | 6004 NM_01683C     | 6843 Hs. 20021    | ENS00000VAMP1    | CMS25 SPVA vesicle protein-coding   |                          |
| chr12-66:8.682148  | 0.292628 | 0.78934  | 0.370724 | 0.710843 | 0.981636 | chr12 | 6666881  | 6679669  | + | 0 | NA | exon (NM exon (NM   | -10156 NM_001127   | 51147 Hs. 52421   | ENS00000ING4     | my036 p25 inhibitor protein-coding  |                          |
| chr12-124:8.682148 | 0.292628 | 0.78934  | 0.370724 | 0.710843 | 0.981636 | chr12 | 1.24E+08 | 1.24E+08 | + | 0 | NA | intron (intron (N   | -5524 NR_105914    | 1.02E+08          | NR_10694C        | ENS00000MIR6880                     | hsa-mir-6microRNA ncRNA  |
| chr12-13:8.682148  | 0.292628 | 0.78934  | 0.370724 | 0.710843 | 0.981636 | chr12 | 1.33E+08 | 1.33E+08 | + | 0 | NA | exon (NM exon (NM   | -20619 NM_015114   | 23141 Hs. 65462   | ENS00000ANKLE2   | KIAA0692 ankyrin 1 protein-coding   |                          |
| chr15-76:8.682148  | 0.292628 | 0.78934  | 0.370724 | 0.710843 | 0.981636 | chr15 | 76224399 | 76225849 | + | 0 | NA | intron (intron (N   | 35028 NR_02851C    | 7302 Hs. 68488    | ENS00000TYRO3P   | TYRO3P pseudo                       |                          |
| chr15-77:8.682148  | 0.292628 | 0.78934  | 0.370724 | 0.710843 | 0.981636 | chr15 | 77132406 | 77132647 | + | 0 | NA | intron (AluSq2 LI   | -61417 NM_198902   | 10099 Hs. 74486   | ENS00000TSPAN3   | TM4-A TM4 tetraspan protein-coding  |                          |
| chr16-44:8.682148  | 0.292628 | 0.78934  | 0.370724 | 0.710843 | 0.981636 | chr16 | 4468082  | 4469515  | + | 0 | NA | intron (L1PA16 SI   | 5827 NM_001351     | 57407 Hs. 28896   | ENS00000NMRAL1   | HSCARG SE NmrA like protein-coding  |                          |
| chr16-29:8.682148  | 0.292628 | 0.78934  | 0.370724 | 0.710843 | 0.981636 | chr16 | 29858610 | 29861154 | + | 0 | NA | intron (AluS6 SI    | 3344 NM_00631E     | 10423 Hs. 12154   | ENS00000CDIPT    | PIS PIS1 CDP-diacy protein-coding   |                          |
| chr17-17:8.682148  | 0.292628 | 0.78934  | 0.370724 | 0.710843 | 0.981636 | chr17 | 17216177 | 17231881 | + | 0 | NA | exon (NM exon (NM   | 13139 NM_001355    | 201163 Hs. 31652  | ENS00000FLCN     | BHD DENN1 follicular protein-coding |                          |
| chr17-40:8.682148  | 0.292628 | 0.78934  | 0.370724 | 0.710843 | 0.981636 | chr17 | 40274112 | 40280534 | + | 0 | NA | intron (AluSx3 SI   | -10556 NM_001254   | 990 Hs. 40595     | ENS00000CCDC6    | CDC18L Hs cell divi protein-coding  |                          |
| chr17-50:8.682148  | 0.292628 | 0.78934  | 0.370724 | 0.710843 | 0.981636 | chr17 | 50057500 | 50085665 | + | 0 | NA | intron (L2c LINE    | -14055 NM_001199   | 5164 Hs. 25666    | ENS00000PK2      | PDHK2 PDH pyruvate protein-coding   |                          |
| chr17-81:8.682148  | 0.292628 | 0.78934  | 0.370724 | 0.710843 | 0.981636 | chr17 | 81699870 | 81701931 | + | 0 | NA | intron (intron (N   | -2467 NM_002949    | 6182 Hs. 10905    | ENS00000MRPL12   | 5c5-2 L12 mitochoon protein-coding  |                          |
| chr19-38:8.682148  | 0.292628 | 0.78934  | 0.370724 | 0.710843 | 0.981636 | chr19 | 38620741 | 38631570 | + | 0 | NA | intron (intron (N   | 6967 NM_013234     | 27335 Hs. 31435   | ENS00000EIF3F    | ARG134 Eukaryoti protein-coding     |                          |
| chr2-46:8.682148   | 0.292628 | 0.78934  | 0.370724 | 0.710843 | 0.981636 | chr2  | 46621536 | 46622574 | + | 0 | NA | intron (intron (N   | 4840 NM_014171     | 9419 Hs. 13399    | ENS00000CRIPT    | HSPC139 SCXXC rep protein-coding    |                          |
| chr2-85:8.682148   | 0.292628 | 0.78934  | 0.370724 | 0.710843 | 0.981636 | chr2  | 85598943 | 85598545 | + | 0 | NA | TTS (NM_TTS (NM_C   | 1999 NM_016494     | 51255 Hs. 35618   | ENS00000RNF181   | HSPC238 ring fing protein-coding    |                          |
| chr2-160:8.682148  | 0.292628 | 0.78934  | 0.370724 | 0.710843 | 0.981636 | chr2  | 1.6E+08  | 1.6E+08  | + | 0 | NA | intron (intron (N   | -23242 NR_03994E   | 1.01E+08          | NR_03994E        | ENS00000MIR4785                     | mir-4785 microRNA ncRNA  |
| chr20-67:8.682148  | 0.292628 | 0.78934  | 0.370724 | 0.710843 | 0.981636 | chr20 | 6778136  | 6779089  | + | 0 | NA | exon (NM exon (NM   | 10926 NM_00120C    | 650 Hs. 73853     | ENS00000BMP2     | BDA2 BMP2 bone mori protein-coding  |                          |
| chr20-35:8.682148  | 0.292628 | 0.78934  | 0.370724 | 0.710843 | 0.981636 | chr20 | 35471461 | 35474139 | + | 0 | NA | exon (NM exon (NM   | 12817 NM_00131E    | 11190 Hs. 44397   | ENS00000CEP250   | C-NAP1 CF centroson protein-coding  |                          |
| chr20-36:8.682148  | 0.292628 | 0.78934  | 0.370724 | 0.710843 | 0.981636 | chr20 | 36525817 | 36528713 | + | 0 | NA | 3' UTR (3' UTR (N   | -14254 NM_18152E   | 10398 Hs. 50468   | ENS00000MYL9     | LC20 MLC- myosin 1 protein-coding   |                          |
| chr20-49:8.682148  | 0.292628 | 0.78934  | 0.370724 | 0.710843 | 0.981636 | chr20 | 49012708 | 49015946 | + | 0 | NA | intron (intron (N   | 31729 NR_11062E    | 1.03E+08          | HS. 20900        | ENS00000CSEIL-AS1                   | CSEIL antncRNA           |
| chr20-62:8.682148  | 0.292628 | 0.78934  | 0.370724 | 0.710843 | 0.981636 | chr20 | 62125083 | 62131943 | + | 0 | NA | intron (intron (N   | 6038 NM_14470E     | 149986 Hs. 10537  | ENS00000LSM14B   | C20orf40 LSM famil protein-coding   |                          |
| chr21-46:8.682148  | 0.292628 | 0.78934  | 0.370724 | 0.710843 | 0.981636 | chr21 | 46251863 | 46280925 | + | 0 | NA | intron (intron (N   | 19217 NM_00390E    | 8888 Hs. 38903    | ENS00000MCM3AP   | GANP MAP6 minichron protein-coding  |                          |
| chr22-50:8.682148  | 0.292628 | 0.78934  | 0.370724 | 0.710843 | 0.981636 | chr22 | 50414021 | 50424367 | + | 0 | NA | intron (intron (N   | 11752 NR_16212E    | 1.13E+08          | NR_162128        | MIR12114                            | microRNA ncRNA           |
| chr5-13:8.682148   | 0.292628 | 0.78934  | 0.370724 | 0.710843 | 0.981636 | chr5  | 1.33E+08 | 1.33E+08 | + | 0 | NA | intron (intron (N   | 3090 NR_132124     | 1.02E+08          | Hs. 59881        | ENS00000TH2LCRR                     | TH2-LCR T helper ncRNA   |
| chr5-140:8.682148  | 0.292628 | 0.78934  | 0.370724 | 0.710843 | 0.981636 | chr5  | 1.41E+08 | 1.41E+08 | + | 0 | NA | intron (intron (N   | -3769 NM_14472E    | 153527 Hs. 35019  | ENS00000ZMAT2    | Ptg-12 Src zinc fing protein-coding |                          |
| chr7-57:8.682148   | 0.292628 | 0.78934  | 0.370724 | 0.710843 | 0.981636 | chr7  | 5709425  | 5716113  | + | 0 | NA | promoter-promoter-  | -859 NR_106934     | 1.02E+08          | NR_106934        | ENS00000MIR6874                     | hsa-mir-6microRNA ncRNA  |
| chr7-43:8.682148   | 0.292628 | 0.78934  | 0.370724 | 0.710843 | 0.981636 | chr7  | 43865603 | 43867210 | + | 0 | NA | TTS (NM_TTS (NM_C   | 3111 NM_032014     | 64951 Hs. 28428   | ENS00000MRPS24   | HSPC335 mitochoon protein-coding    |                          |
| chr7-70:8.682148   | 0.292628 | 0.78934  | 0.370724 | 0.710843 | 0.981636 | chr7  | 76056595 | 76067277 | + | 0 | NA | intron (MERS DNA    | 13830 NM_00591E    | 4191 Hs. 52096    | ENS00000MDH2     | EIEE51 malate de protein-coding     |                          |
| chr7-102:8.682148  | 0.292628 | 0.78934  | 0.370724 | 0.710843 | 0.981636 | chr7  | 1.02E+08 | 1.02E+08 | + | 0 | NA | intron (AluJo SIN   | 6482 NM_017621     | 54784 Hs. 65859   | ENS00000ALKBH4   | ABH4 alkB homc protein-coding       |                          |
| chr7-152:8.682148  | 0.292628 | 0.78934  | 0.370724 | 0.710843 | 0.981636 | chr7  | 1.52E+08 | 1.52E+08 | + | 0 | NA | Intergeni LIMEc LIN | 49837 NM_001371474 |                   |                  |                                     |                          |
| chr8-144:8.682148  | 0.292628 | 0.78934  | 0.370724 | 0.710843 | 0.981636 | chr8  | 1.45E+08 | 1.45E+08 | + | 0 | NA | intron (L1M5 LINE   | 29765 NM_138367    | 90987 Hs. 53451   | ENS00000ZNF251   | zinc fing protein-coding            |                          |
| chr15-98:7.477381  | -0.32081 | 0.8654   | -0.37071 | 0.710852 | 0.981636 | chr15 | 98955394 | 98956017 | + | 0 | NA | intron (intron (N   | 49951 NM_001102    | 145814 Hs. 59202  | ENS00000PGPEP1L  | pyrglut protein-coding              |                          |
| chr17-49:7.477381  | -0.32081 | 0.8654   | -0.37071 | 0.710852 | 0.981636 | chr17 | 49311340 | 49311692 | + | 0 | NA | intron (intron (N   | -23062 NR_10674E   | 1.02E+08          | NR_10674E        | ENS00000MIR6129                     | hsa-mir-6microRNA ncRNA  |
| chr1-223:7.00747   | 0.281157 | 0.758524 | 0.370663 | 0.710888 | 0.981636 | chr1  | 2.24E+08 | 2.24E+08 | + | 0 | NA | intron (intron (N   | 16205 NM_00174E    | 824 Hs. 35089     | ENS00000CAPN2    | CANP2 CAN calpain 2 protein-coding  |                          |
| chr11-68:7.639974  | 0.313211 | 0.84537  | 0.370501 | 0.711009 | 0.981636 | chr11 | 68899521 | 68900073 | + | 0 | NA | intron (intron (N   | 4035 NM_181514     | 219927 Hs. 50304  | ENS00000MRPL21   | L21mt MRP mitochoon protein-coding  |                          |
| chr11-12:7.639974  | 0.313211 | 0.84537  | 0.370501 | 0.711009 | 0.981636 | chr11 | 1.23E+08 | 1.23E+08 | + | 0 | NA | intron (intron (N   | 9755 NM_02476E     | 79827 Hs. 59194   | ENS00000CLMP     | ACAM ASAM CXADR 1i protein-coding   |                          |
| chr16-44:7.639974  | 0.313211 | 0.84537  | 0.370501 | 0.711009 | 0.981636 | chr16 | 4463003  | 4463900  | + | 0 | NA | non-codiron-codir   | 11174 NM_001351    | 57407 Hs. 28896   | ENS00000NMRAL1   | HSCARG SE NmrA like protein-coding  |                          |
| chr18-21:7.639974  | 0.313211 | 0.84537  | 0.370501 | 0.711009 | 0.981636 | chr18 | 21429294 | 21501110 | + | 0 | NA | intron (MERSA DNA   | -6123 NM_13837E    | 91768 Hs. 11108   | ENS00000CABLES1  | CABL1 CAE Cdk5 and protein-coding   |                          |
| chr20-41:7.639974  | 0.313211 | 0.84537  | 0.370501 | 0.711009 | 0.981636 | chr20 | 41421740 | 41422891 | + | 0 | NA | intron (intron (N   | -55497 NM_05284E   | 90187 Hs. 72652   | ENS00000EMILIN3  | C20orf13C elastin n protein-coding  |                          |
| chr8-124:7.639974  | 0.313211 | 0.84537  | 0.370501 | 0.711009 | 0.981636 | chr8  | 1.25E+08 | 1.25E+08 | + | 0 | NA | TTS (NR_TTS (NR_I   | 1030 NR_10690E     | 1.02E+08          | NR_10690E        | ENS00000MIR6844                     | hsa-mir-6microRNA ncRNA  |
| chr1-240:8.408153  | -0.29758 | 0.803417 | -0.3704  | 0.711086 | 0.981636 | chr1  | 2.4E+08  | 2.4E+08  | + | 0 | NA | intron (L1MB3 LIN   | 32199 NM_02006E    | 56776 Hs. 24889   | ENS00000CFMN2    | formin 2 protein-coding             |                          |
| chr10-60:8.408153  | -0.29758 | 0.803417 | -0.3704  | 0.711086 | 0.981636 | chr10 | 60881043 | 60881922 | + | 0 | NA | intron (intron (N   | 62703 NM_00135C    | 9886 Hs. 73737    | ENS00000RHOBTB1  | Rho relat protein-coding            |                          |
| chr13-30:8.408153  | -0.29758 | 0.803417 | -0.3704  | 0.711086 | 0.981636 | chr13 | 30657146 | 30657592 | + | 0 | NA | intron (intron (N   | 23154 NM_001321    | 10208 Hs. 53383   | ENS00000USPL1    | C13orf22 ubiquiti r protein-coding  |                          |
| chr13-11:8.408153  | -0.29758 | 0.803417 | -0.3704  | 0.711086 | 0.981636 | chr13 | 1.1E+08  | 1.1E+08  | + | 0 | NA | intron (intron (N   | -4749 NM_001267    | 1E+08             | Hs. 64003        | ENS00000COL4A2-AS-                  | COL4A2-AS protein-coding |
| chr14-10:8.408153  | -0.29758 | 0.803417 | -0.3704  | 0.711086 | 0.981636 | chr14 | 1E+08    | 1E+08    | + | 0 | NA | intron (AluJr4 SI   | 14431 NM_00135C    | 28300 Hs. 10826   | ENS00000SLC25A47 | C14orf68 solute c protein-coding    |                          |
| chr2-94:8.408153   | -0.29758 | 0.803417 | -0.3704  | 0.711086 | 0.981636 | chr2  | 9496417  | 9497409  | + | 0 | NA | intron (intron (N   | 21858 NM_00132C    | 285148 Hs. 66722  | ENS00000IAH1     | isoamyl e protein-coding            |                          |
| chr2-113:8.408153  | -0.29758 | 0.803417 | -0.3704  | 0.711086 | 0.981636 | chr2  | 1.14E+08 | 1.14E+08 | + | 0 | NA | intron (NMSTB LTR   | -14958 NR_121187   | 1.03E+08          | Hs. 9015         | ENS00000PGM5P4-AS                   | FAM233C PGM5P4 arncRNA   |
| chr22-36:8.408153  | -0.29758 | 0.803417 | -0.3704  | 0.711086 | 0.981636 | chr22 | 36347401 | 36348789 | + | 0 | NA | intron (L1MC LINE   | 39972 NM_00247E    | 4627 Hs. 47475    | ENS00000MYH9     | BDPLT6 DF myosin protein-coding     |                          |
| chr22-41:8.408153  | -0.29758 | 0.803417 | -0.3704  | 0.711086 | 0.981636 | chr22 | 41676988 | 41680604 | + | 0 | NA | intron (intron (N   | 10071 NM_00100E    | 4809 Hs. 18225    | ENS00000SNU13    | 15.5K FA- small nuc protein-coding  |                          |
|                    |          |          |          |          |          |       |          |          |   |   |    |                     |                    |                   |                  |                                     |                          |



|           |          |          |          |          |          |          |       |          |          |   |   |    |                    |         |            |          |                     |                     |                  |                                |                          |
|-----------|----------|----------|----------|----------|----------|----------|-------|----------|----------|---|---|----|--------------------|---------|------------|----------|---------------------|---------------------|------------------|--------------------------------|--------------------------|
| chr1-161  | 9.749745 | 0.280932 | 0.760176 | 0.369561 | 0.711709 | 0.981636 | chr1  | 1.61E+08 | 1.61E+08 | + | 0 | NA | promoter-promoter- | -774    | NM_001113  | 1E+08    | Hs.72003CNM_001113  | ENSG000002TSTD1     | KAT TST          | thiosulfate protein-coding     |                          |
| chr20-411 | 9.749745 | 0.280932 | 0.760176 | 0.369561 | 0.711709 | 0.981636 | chr20 | 41104096 | 41104573 | + | 0 | NA | intron (L2b LINE   | -33209  | NM_182811  | 5335     | Hs.268177NM_002666  | ENSG00000PLCG1      | NCKAP3 PI        | phospholipase protein-coding   |                          |
| chr11-185 | 5.178854 | -0.37102 | 1.004181 | -0.36947 | 0.711775 | 0.981636 | chr11 | 18561471 | 18563070 | + | 0 | NA | intron (AluSx SIN  | 17248   | NM_001261  | 55293    | Hs.407991NM_018314  | ENSG00000CUEVLD     | ATTP UEV UEV     | and lprotein-coding            |                          |
| chr11-517 | 5.178854 | -0.37102 | 1.004181 | -0.36947 | 0.711775 | 0.981636 | chr11 | 51715182 | 51716196 | + | 0 | NA | IntergeniALR Alpha | 1306542 | NR_024504  | 646813   | Hs.684175NR_024504  | LOC646813           | -                | DEX-h box pseudo               |                          |
| chr12-118 | 5.178854 | -0.37102 | 1.004181 | -0.36947 | 0.711775 | 0.981636 | chr12 | 11847070 | 11847476 | + | 0 | NA | intron (L2 LINE L  | 197419  | NM_001987  | 2120     | Hs.504766NM_001987  | ENSG00000ETV6       | TEL TEL AETS     | varic protein-coding           |                          |
| chr13-465 | 5.178854 | -0.37102 | 1.004181 | -0.36947 | 0.711775 | 0.981636 | chr13 | 46010551 | 46011455 | + | 0 | NA | intron (intron (S  | 41743   | NM_001330  | 23091    | Hs.136102NM_015070  | ENSG00000CZC3H13    | KIAA0853 zinc    | finger protein-coding          |                          |
| chr13-958 | 5.178854 | -0.37102 | 1.004181 | -0.36947 | 0.711775 | 0.981636 | chr13 | 95876683 | 95877259 | + | 0 | NA | intron (AluS6 S1   | 176430  | NM_020121  | 55757    | Hs.193222NM_020121  | ENSG00000UGGT2      | HUGT2 UGC        | UDP-glucose protein-coding     |                          |
| chr14-585 | 5.178854 | -0.37102 | 1.004181 | -0.36947 | 0.711775 | 0.981636 | chr14 | 58368771 | 58370366 | + | 0 | NA | intron (AluS6 S1   | -26362  | NM_207377  | 387990   | Hs.592307NM_207377  | ENSG00000TOMM20L    | UNQ9438          | translocase protein-coding     |                          |
| chr21-455 | 5.178854 | -0.37102 | 1.004181 | -0.36947 | 0.711775 | 0.981636 | chr21 | 45529361 | 45530149 | + | 0 | NA | intron (GT)n Sin   | 5001    | NM_001205  | 6573     | Hs.84190            | NM_003050           | ENSG00000SLC19A1 | CHMD FOL                       | soluble c protein-coding |
| chr3-1367 | 5.178854 | -0.37102 | 1.004181 | -0.36947 | 0.711775 | 0.981636 | chr3  | 1.37E+08 | 1.37E+08 | + | 0 | NA | intron (AluSq SIN  | 39315   | NM_005862  | 10274    | Hs.412586NM_005862  | ENSG00000STAG1      | MRD47 SAI        | stromal protein-coding         |                          |
| chr3-1725 | 5.178854 | -0.37102 | 1.004181 | -0.36947 | 0.711775 | 0.981636 | chr3  | 1.72E+08 | 1.72E+08 | + | 0 | NA | intron (intron (S  | 29174   | NM_001135  | 64778    | Hs.744886NM_022763  | ENSG00000FNDC3B     | FAD104 PF        | fibronectin protein-coding     |                          |
| chr4-5271 | 5.178854 | -0.37102 | 1.004181 | -0.36947 | 0.711775 | 0.981636 | chr4  | 52716337 | 52717277 | + | 0 | NA | intron (MLT1D LTF  | 3558    | NR_003010  | 677810   | Hs.635034NR_003010  | ENSG00000SNORA26    | HBI-6            | small nucleolar RNA            |                          |
| chr4-7315 | 5.178854 | -0.37102 | 1.004181 | -0.36947 | 0.711775 | 0.981636 | chr4  | 73153966 | 73155022 | + | 0 | NA | intron (intron (S  | 68563   | NM_001280  | 26057    | Hs.601200NM_015574  | ENSG00000ANKRD17    | GTAR MASF        | ankyrin 1 protein-coding       |                          |
| chr5-4361 | 5.178854 | -0.37102 | 1.004181 | -0.36947 | 0.711775 | 0.981636 | chr5  | 43618216 | 43618788 | + | 0 | NA | intron (intron (S  | -15272  | NR_073113  | 1.01E+08 | Hs.482042NR_073113  | NNT-AS1             | -                | NNT antisense RNA              |                          |
| chr7-5905 | 5.178854 | -0.37102 | 1.004181 | -0.36947 | 0.711775 | 0.981636 | chr7  | 5909644  | 5910065  | + | 0 | NA | intron (intron (S  | 11121   | NM_015621  | 51622    | Hs.530000NM_015622  | ENSG00000CCZ1       | C7orf28A CCZ1    | home protein-coding            |                          |
| chr9-2796 | 5.178854 | -0.37102 | 1.004181 | -0.36947 | 0.711775 | 0.981636 | chr9  | 2796245  | 2797924  | + | 0 | NA | IntergeniMER104 DN | 46921   | NM_014878  | 9933     | Hs.493300NM_014878  | ENSG00000PUM3       | HA-8 HLA         | pumilio 1 protein-coding       |                          |
| chrX-1184 | 5.178854 | -0.37102 | 1.004181 | -0.36947 | 0.711775 | 0.981636 | chrX  | 1.18E+08 | 1.18E+08 | + | 0 | NA | intron (intron (S  | 20420   | NR_031685  | 1E+08    | NR_031685           | ENSG00000CMIR1277   | MIRN1277         | microRNA ncRNA                 |                          |
| chr1-166  | 17.3899  | 0.213956 | 0.579379 | 0.369286 | 0.711915 | 0.981636 | chr1  | 16605802 | 16608020 | + | 0 | NA | intron (intron (S  | 6694    | NM_017940  | 55672    | Hs.467587NM_017940  | ENSG00000BNPFP1     | AB13 AB14 BNPFP  | membrane protein-coding        |                          |
| chr7-668  | 9.219875 | 0.285544 | 0.773285 | 0.369261 | 0.711933 | 0.981636 | chr7  | 66805441 | 66806321 | + | 0 | NA | intron (AluJr SIN  | 38945   | NR_003934  | 729156   | Hs.709878NR_003934  | ENSG00000GTF2IR1DF1 | -                | GTF2I repeat pseudo            |                          |
| chr7-1055 | 9.219875 | 0.285544 | 0.773285 | 0.369261 | 0.711933 | 0.981636 | chr7  | 1.06E+08 | 1.06E+08 | + | 0 | NA | non-codiron-codir  | 13978   | NM_001355  | 1E+08    | Hs.719432NM_001355  | ENSG00000EFCAB10    | -                | EF-hand c protein-coding       |                          |
| chr11-115 | 7.889841 | -0.3088  | 0.837003 | -0.36893 | 0.712176 | 0.981636 | chr11 | 1.14E+08 | 1.14E+08 | + | 0 | NA | intron (NMERSA DNA | 32898   | NM_0044724 | 9183     | Hs.503886NM_0044724 | ENSG00000ZW10       | HWZ10 KNI        | zinc finger protein-coding     |                          |
| chr13-455 | 7.889841 | -0.3088  | 0.837003 | -0.36893 | 0.712176 | 0.981636 | chr13 | 45031544 | 45032596 | + | 0 | NA | intron (intron (S  | 42532   | NM_018555  | 55425    | Hs.731811NM_018555  | ENSG00000GPALP1     | ADQ29 KIA        | GPALP1 protein-coding          |                          |
| chr5-1812 | 7.889841 | -0.3088  | 0.837003 | -0.36893 | 0.712176 | 0.981636 | chr5  | 1.81E+08 | 1.81E+08 | + | 0 | NA | intron (AluY SINE  | 4186    | NM_201627  | 90933    | Hs.441488NM_033545  | ENSG00000TRIM41     | RINCK            | tripartite protein-coding      |                          |
| chr6-4206 | 7.889841 | -0.3088  | 0.837003 | -0.36893 | 0.712176 | 0.981636 | chr6  | 42064267 | 42064532 | + | 0 | NA | intron (AluSx S1   | 13875   | NM_138572  | 129685   | Hs.520122NM_138572  | ENSG00000TAF8       | II TAF TAF       | TATA-box protein-coding        |                          |
| chr15-101 | 11.12885 | -0.26441 | 0.716699 | -0.36893 | 0.712181 | 0.981636 | chr15 | 1.02E+08 | 1.02E+08 | + | 0 | NA | intron (THE1C LTF  | 3721    | NM_152334  | 123283   | Hs.657163NM_152334  | ENSG00000TARSL2     | -                | threonyl- protein-coding       |                          |
| chr11-124 | 8.14442  | 0.300642 | 0.815082 | 0.368849 | 0.71224  | 0.981636 | chr11 | 1.24E+08 | 1.24E+08 | + | 0 | NA | 3' UTR (S' UTR (S  | 31239   | NM_001130  | 4013     | Hs.152944NM_014622  | ENSG00000CVA5A      | BCSC-1 BC        | von Willebrand protein-coding  |                          |
| chr15-644 | 8.14442  | 0.300642 | 0.815082 | 0.368849 | 0.71224  | 0.981636 | chr15 | 64423434 | 64424739 | + | 0 | NA | exon (NM exon (NM  | 36250   | NM_001321  | 9325     | Hs.500340NM_016210  | ENSG00000TRIP4      | ASC-1 ASC        | thyroid l protein-coding       |                          |
| chr16-211 | 8.14442  | 0.300642 | 0.815082 | 0.368849 | 0.71224  | 0.981636 | chr16 | 211628   | 212518   | + | 0 | NA | intron (AluSp SIN  | 17376   | NM_018032  | 55692    | Hs.16803            | NM_018032           | ENSG00000LUC7L   | LUC7B1 Lu                      | LUC7 like protein-coding |
| chr19-198 | 8.14442  | 0.300642 | 0.815082 | 0.368849 | 0.71224  | 0.981636 | chr19 | 1988288  | 1991297  | + | 0 | NA | intron (intron (S  | 25922   | NM_017797  | 55643    | Hs.465542NM_017797  | ENSG00000BTBD2      | -                | BTB domain protein-coding      |                          |
| chr2-853  | 8.14442  | 0.300642 | 0.815082 | 0.368849 | 0.71224  | 0.981636 | chr2  | 85306329 | 85307898 | + | 0 | NA | intron (intron (S  | 20876   | NM_001368  | 10618    | Hs.506382NM_006464  | ENSG00000TGLN2      | TGN38 TG         | trans-golgi protein-coding     |                          |
| chr2-966  | 8.14442  | 0.300642 | 0.815082 | 0.368849 | 0.71224  | 0.981636 | chr2  | 96633503 | 96633829 | + | 0 | NA | intron (AluSx SIN  | 4325    | NR_047655  | 55683    | Hs.516341NM_017991  | ENSG00000KANSL3     | KIAA1310 KAT8    | regulator protein-coding       |                          |
| chr2-2414 | 8.14442  | 0.300642 | 0.815082 | 0.368849 | 0.71224  | 0.981636 | chr2  | 2.41E+08 | 2.41E+08 | + | 0 | NA | intron (L1PA10 L1  | -56749  | NR_036083  | 1E+08    | NR_036083           | ENSG00000MIR3133    | -                | microRNA ncRNA                 |                          |
| chr22-457 | 8.14442  | 0.300642 | 0.815082 | 0.368849 | 0.71224  | 0.981636 | chr22 | 45702053 | 45704094 | + | 0 | NA | intron (L2c LINE   | 31239   | NM_013230  | 25814    | Hs.475122NM_013230  | ENSG00000ATXN10     | E46L HUME        | ataxin 10 protein-coding       |                          |
| chr3-478  | 8.14442  | 0.300642 | 0.815082 | 0.368849 | 0.71224  | 0.981636 | chr3  | 47891334 | 47892736 | + | 0 | NA | intron (intron (S  | 42480   | NR_031595  | 1E+08    | NR_031595           | ENSG00000MIR1226    | MIRN1226         | microRNA ncRNA                 |                          |
| chr6-1085 | 8.14442  | 0.300642 | 0.815082 | 0.368849 | 0.71224  | 0.981636 | chr6  | 1.09E+08 | 1.09E+08 | + | 0 | NA | intron (MLT1C LTF  | 10497   | NM_001455  | 2309     | Hs.220950NM_001455  | ENSG00000FOX03      | AF6q21 PF        | forkhead protein-coding        |                          |
| chr7-273  | 8.14442  | 0.300642 | 0.815082 | 0.368849 | 0.71224  | 0.981636 | chr7  | 2730725  | 2731573  | + | 0 | NA | 3' UTR (S' UTR (S  | 31991   | NM_001282  | 2768     | Hs.487341NM_007355  | ENSG00000GNA12      | NNX3 RMP         | G protein protein-coding       |                          |
| chr7-1311 | 8.14442  | 0.300642 | 0.815082 | 0.368849 | 0.71224  | 0.981636 | chr7  | 1.31E+08 | 1.31E+08 | + | 0 | NA | intron (AluSx SIN  | 5203    | NR_024153  | 378805   | Hs.150555NM_001085  | ENSG00000LINC-PIN1  | LincRNA-F        | long intergenic ncRNA          |                          |
| chr8-945  | 8.14442  | 0.300642 | 0.815082 | 0.368849 | 0.71224  | 0.981636 | chr8  | 94532101 | 94532853 | + | 0 | NA | intron (L1MD2 LIN  | 20989   | NM_015496  | 25962    | Hs.202233NM_015496  | ENSG00000VIRMA      | KIAA1429 vir     | like protein-coding            |                          |
| chr10-294 | 8.642858 | 0.301594 | 0.81799  | 0.368702 | 0.71235  | 0.981636 | chr10 | 29494779 | 29495767 | + | 0 | NA | intron (intron (S  | 49824   | NR_030335  | 693189   | NR_030335           | ENSG00000MIR604     | MIRN604          | microRNA ncRNA                 |                          |
| chr16-236 | 7.97027  | -0.31438 | 0.852996 | -0.36856 | 0.712454 | 0.981636 | chr16 | 23690331 | 23690984 | + | 0 | NA | TTS (NM_C          | 11768   | NM_005030  | 5347     | Hs.592045NM_005030  | ENSG00000PLK1       | PLK STPK1        | polo like protein-coding       |                          |
| chrX-464  | 7.856559 | -0.31326 | 0.850886 | -0.36816 | 0.712753 | 0.981636 | chrX  | 46451061 | 46451279 | + | 0 | NA | intron (intron (S  | 3873    | NM_001125  | 55634    | Hs.632800NM_017770  | ENSG00000KRBOX4     | ZNF673           | KRAB box protein-coding        |                          |
| chr1-1555 | 8.392437 | -0.29442 | 0.800102 | -0.36798 | 0.712885 | 0.981636 | chr1  | 15538850 | 15540299 | + | 0 | NA | intron (AluSx SIN  | -2245   | NR_135611  | 1.07E+08 | NR_135611           | ENSG00000SCARN2A1E  | -                | small box ncRNA                |                          |
| chr1-208  | 8.392437 | -0.29442 | 0.800102 | -0.36798 | 0.712885 | 0.981636 | chr1  | 20808835 | 20811516 | + | 0 | NA | intron (AluS8 S1   | -23487  | NM_016287  | 50809    | Hs.142442NM_016287  | ENSG00000CHP1BP3    | HP1-BP74         | heterochromatin protein-coding |                          |
| chr1-4634 | 8.392437 | -0.29442 | 0.800102 | -0.36798 | 0.712885 | 0.981636 | chr1  | 46349347 | 46350805 | + | 0 | NA | intron (MIRc SINE  | 8898    | NM_001255  | 387338   | Hs.163424NM_199044  | ENSG00000NSUN4      | SHTAP            | NOP2/Sun                       | protein-coding           |
| chr1-1081 | 8.392437 | -0.29442 | 0.800102 | -0.36798 | 0.712885 | 0.981636 | chr1  | 1.08E+08 | 1.08E+08 | + | 0 | NA | intron (THE1C LTF  | 19472   | NM_213651  | 29957    | Hs.656870NM_013388  | ENSG00000SLC25A24   | APC1 SCAM        | soluble c protein-coding       |                          |
| chr10-312 | 8.392437 | -0.29442 | 0.800102 | -0.36798 | 0.712885 | 0.981636 | chr10 | 3129886  | 3141688  | + | 0 | NA | exon (NM exon (NM  | 1683    | NR_132755  | 1E+08    | NR_132755           | SNORD142            | SNORA85 S        | small nucleolar RNA            |                          |
| chr10-245 | 8.392437 | -0.29442 | 0.800102 | -0.36798 | 0.712885 | 0.981636 | chr10 | 24598837 | 24602987 | + | 0 | NA | exon (NM exon (NM  | 21931   | NM_001367  | 57584    | Hs.524195NM_020824  | ENSG00000ARHGAP21   | ARHGAP10         | Rho                            | GTPase protein-coding    |
| chr10-73  | 8.392437 | -0.29442 | 0.800102 | -0.36798 | 0.712885 | 0.981636 | chr10 | 73004761 | 73012624 | + | 0 | NA | intron (intron (S  | -53886  | NM_032562  | 84647    | Hs.333175NM_032562  | ENSG00000PLA2G12B   | FKSG71 G         | phospholipase protein-coding   |                          |
| chr10-74  | 8.392437 | -0.29442 | 0.800102 | -0.36798 | 0.712885 | 0.981636 | chr10 | 74061534 | 74067492 | + | 0 | NA | intron (AluJo SIN  | 66397   | NM_003373  | 7414     | Hs.643896NM_003373  | ENSG00000CVC1       | CMD1W CMF        | vinculin protein-coding        |                          |
| chr10-952 | 8.392437 | -0.29442 | 0.800102 | -0.36798 | 0.712885 | 0.981636 | chr10 | 95238308 | 95242017 | + | 0 | NA | intron (L1PA11 L1  | 45962   | NM_207321  | 142827   | Hs.134225NM_207321  | ENSG00000ACSM6      | C10orf           |                                |                          |

|           |          |          |          |          |          |          |       |          |          |   |   |    |                     |          |           |          |                                      |                           |                          |                         |
|-----------|----------|----------|----------|----------|----------|----------|-------|----------|----------|---|---|----|---------------------|----------|-----------|----------|--------------------------------------|---------------------------|--------------------------|-------------------------|
| chr19-952 | 17.35662 | 0.212256 | 0.577143 | 0.36777  | 0.713045 | 0.981636 | chr19 | 9523588  | 9536541  | + | 0 | NA | intron (AluSx SIN   | 8581     | NM_00131E | 79088    | Hs.38647ENM_02410ENSG00000ZNF426     | K-RBP                     | zinc fingprotein-coding  |                         |
| chr1-6655 | 8.63315  | 0.292932 | 0.796851 | 0.367612 | 0.713162 | 0.981636 | chr1  | 66554321 | 66560162 | + | 0 | NA | intron (intron (N   | 23088    | NM_032291 | 84251    | Hs.132121NM_032291ENSG00000SGIP1     | -                         | SH3 domaiprotein-coding  |                         |
| chr15-987 | 8.63315  | 0.292932 | 0.796851 | 0.367612 | 0.713162 | 0.981636 | chr15 | 98707786 | 98708802 | + | 0 | NA | intron (intron (N   | -57073   | NR_126455 | 1.04E+08 | Hs.34904ENR_126453                   | IRAIN                     | IGF1R-AS IGF1R antncRNA  |                         |
| chr5-9554 | 8.63315  | 0.292932 | 0.796851 | 0.367612 | 0.713162 | 0.981636 | chr5  | 95524448 | 95525559 | + | 0 | NA | intron (AluSx SIN   | 30002    | NM_01463E | 9652     | Hs.48286ENM_01463ENSG00000TTC37      | KIAA0372                  | tetratricprotein-coding  |                         |
| chr10-124 | 8.818762 | -0.29891 | 0.813555 | -0.36741 | 0.713331 | 0.981636 | chr10 | 1.25E+08 | 1.25E+08 | + | 0 | NA | 3' UTR (3' UTR (N   | 20483    | NM_00136E | 1488     | Hs.50134ENM_00132ENSG00000CTBP2      | -                         | C-terminalprotein-coding |                         |
| chr10-38E | 8.423868 | -0.30088 | 0.819154 | -0.36731 | 0.713387 | 0.981636 | chr10 | 389864   | 390260   | + | 0 | NA | exon (NM_exon (NM   | 210068   | NM_00120E | 10771    | Hs.29226ENM_00662ENSG00000ZMYND11    | BRAMI BS                  | zinc fingprotein-coding  |                         |
| chr1-5241 | 7.428384 | -0.3218  | 0.87628  | -0.36723 | 0.713446 | 0.981636 | chr1  | 52419747 | 52420070 | + | 0 | NA | 3' UTR (3' UTR (N   | 15307    | NM_032864 | 84950    | Hs.5301                              | NM_032284ENSG00000PRPF38A | PRP38A Pr                | pre-mRNA protein-coding |
| chr4-4302 | 7.469524 | -0.31891 | 0.868838 | -0.36706 | 0.713577 | 0.981636 | chr4  | 4302251  | 4302500  | + | 0 | NA | exon (NM_exon (NM   | 11224    | NM_00133C | 166793   | Hs.419997NM_145291ENSG00000ZBTB49    | ZNF509                    | zinc fingprotein-coding  |                         |
| chr22-287 | 12.08504 | -0.24904 | 0.67857  | -0.367   | 0.713618 | 0.981636 | chr22 | 28793465 | 28798704 | + | 0 | NA | exon (NM_exon (NM   | 4488     | NM_00107E | 7494     | Hs.43763ENM_00508ENSG00000XBP1       | TREB-5 TFX                | box birprotein-coding    |                         |
| chr12-19E | 8.18556  | 0.302019 | 0.823485 | 0.366757 | 0.713801 | 0.981636 | chr12 | 1950859  | 1956500  | + | 0 | NA | exon (NM_exon (NM   | -16653   | NR_03654E | 1E+08    | Hs.737031NR_03654ENSG00000LINC0094C  | -                         | long intncRNA            |                         |
| chr3-3684 | 8.18556  | 0.302019 | 0.823485 | 0.366757 | 0.713801 | 0.981636 | chr3  | 36845878 | 36846077 | + | 0 | NA | intron (L1ME3G LI   | -23477   | NR_147141 | 1.05E+08 | Hs.33386ENR_147141ENSG00000LINC0203E | -                         | long intncRNA            |                         |
| chr4-515E | 8.18556  | 0.302019 | 0.823485 | 0.366757 | 0.713801 | 0.981636 | chr4  | 515247   | 516449   | + | 0 | NA | intron (intron (N   | 16638    | NM_001127 | 54872    | Hs.7099                              | NM_01773ENSG00000PIGG     | GPI7 LAS                 | phosphatiprotein-coding |
| chr6-1437 | 8.18556  | 0.302019 | 0.823485 | 0.366757 | 0.713801 | 0.981636 | chr6  | 1.44E+08 | 1.44E+08 | + | 0 | NA | intron (intron (N   | -82378   | NM_00132E | 83496    | Hs.18567ENM_03286ENSG00000LTV1       | C6orf93 cLTV1             | ribcprotein-coding       |                         |
| chr9-131E | 8.18556  | 0.302019 | 0.823485 | 0.366757 | 0.713801 | 0.981636 | chr9  | 1.32E+08 | 1.32E+08 | + | 0 | NA | intron (L2a LINE    | 2542     | NM_03143E | 83549    | Hs.9597                              | NM_03143ENSG00000UCK1     | URK1                     | uridine-cprotein-coding |
| chr9-135E | 8.18556  | 0.302019 | 0.823485 | 0.366757 | 0.713801 | 0.981636 | chr9  | 1.36E+08 | 1.36E+08 | + | 0 | NA | exon (NM_exon (NM   | 96193    | NM_015447 | 157922   | Hs.52249ENM_015447ENSG00000CAMSAP1   | -                         | calmodulinprotein-coding |                         |
| chr19-267 | 15.4054  | 0.229286 | 0.625221 | 0.366728 | 0.713822 | 0.981636 | chr19 | 26734101 | 26734918 | + | 0 | NA | IntergeniALR Alph   | -1058922 | NR_14673E | 1.02E+08 | Hs.567934NR_110687ENSG00000LOC101927 | -                         | uncharactncRNA           |                         |
| chr11-117 | 7.681114 | 0.31454  | 0.857796 | 0.366684 | 0.713855 | 0.981636 | chr11 | 1.19E+08 | 1.19E+08 | + | 0 | NA | TTS (NM_C TTS (NM_C | 5005     | NM_03296E | 643      | Hs.11391ENM_00171ENSG00000CCXCR5     | BLR1 CD1E                 | C-X-C motprotein-coding  |                         |
| chr14-67E | 7.681114 | 0.31454  | 0.857796 | 0.366684 | 0.713855 | 0.981636 | chr14 | 67760622 | 67761735 | + | 0 | NA | intron (intron (N   | 55412    | NM_01534E | 23503    | Hs.98041                             | NM_01534ENSG00000ZFYVE26  | FYVE-CEN1                | zinc fingprotein-coding |
| chr16-85E | 7.681114 | 0.31454  | 0.857796 | 0.366684 | 0.713855 | 0.981636 | chr16 | 85661278 | 85661961 | + | 0 | NA | exon (NM_exon (NM   | 27335    | NM_01609E | 51659    | Hs.43318CNM_01609ENSG00000GINS2      | HSPC037 GINS              | comprotein-coding        |                         |
| chr1-1557 | 8.648866 | 0.289478 | 0.789753 | 0.366542 | 0.71396  | 0.981636 | chr1  | 1.56E+08 | 1.56E+08 | + | 0 | NA | intron (AluSp SIN   | -16194   | NR_132767 | 1.07E+08 | NR_132767                            | SCARNA26E                 | -                        | small Ca_ncRNA          |
| chr15-62E | 8.648866 | 0.289478 | 0.789753 | 0.366542 | 0.71396  | 0.981636 | chr15 | 62835976 | 62836549 | + | 0 | NA | intron (L2b LINE    | 12305    | NR_02970E | 406965   | NR_02970ENSG00000MIR190A             | MIR190 MI                 | microRNA ncRNA           |                         |
| chr17-407 | 8.648866 | 0.289478 | 0.789753 | 0.366542 | 0.71396  | 0.981636 | chr17 | 4074149  | 4077004  | + | 0 | NA | intron (intron (N   | 67436    | NM_01511E | 23140    | Hs.277624NM_01511ENSG00000ZZEF1      | ZZZ4                      | zinc fingprotein-coding  |                         |
| chr17-19E | 8.648866 | 0.289478 | 0.789753 | 0.366542 | 0.71396  | 0.981636 | chr17 | 19292648 | 19932371 | + | 0 | NA | intron (AluJr SIN   | 46819    | NM_00720E | 11216    | Hs.64267ENM_00720ENSG00000AKAP10     | AKAP-10 A                 | kinase protein-coding    |                         |
| chr17-28E | 8.648866 | 0.289478 | 0.789753 | 0.366542 | 0.71396  | 0.981636 | chr17 | 28648038 | 28649329 | + | 0 | NA | non-codiron-codir   | -3524    | NM_00136E | 9703     | Hs.151761NM_01468ENSG00000KIAA0100   | BCOX BCO                  | KIAA0100 protein-coding  |                         |
| chr17-57E | 8.648866 | 0.289478 | 0.789753 | 0.366542 | 0.71396  | 0.981636 | chr17 | 57975948 | 57977947 | + | 0 | NA | intron (intron (N   | 11307    | NM_00714E | 7716     | Hs.46356ENM_00714ENSG00000VEZF1      | DB1 ZNF1E                 | vascular protein-coding  |                         |
| chr2-885  | 8.648866 | 0.289478 | 0.789753 | 0.366542 | 0.71396  | 0.981636 | chr2  | 88592590 | 88593164 | + | 0 | NA | intron (intron (N   | 32052    | NM_00131E | 9451     | Hs.59158ENM_00483ENSG00000EIF2AK3    | PEK PERK                  | ubiquitiprotein-coding   |                         |
| chr2-17E  | 8.648866 | 0.289478 | 0.789753 | 0.366542 | 0.71396  | 0.981636 | chr2  | 17594089 | 17595092 | + | 0 | NA | intron (intron (N   | -17096   | NR_14907E | 1.11E+08 | Hs.60713ENR_14907ENSG00000BTG3-AS1   | ASEL                      | BTG3 antncRNA            |                         |
| chr3-491E | 8.648866 | 0.289478 | 0.789753 | 0.366542 | 0.71396  | 0.981636 | chr3  | 49126856 | 49129182 | + | 0 | NA | intron (AluSc SIN   | 5031     | NM_00229E | 3913     | Hs.43972ENM_00229ENSG00000LAMB2      | LAMS NPHS                 | laminin sprotein-coding  |                         |
| chr3-101E | 8.648866 | 0.289478 | 0.789753 | 0.366542 | 0.71396  | 0.981636 | chr3  | 1.02E+08 | 1.02E+08 | + | 0 | NA | intron (AluJo SIN   | 16522    | NM_02035E | 57092    | Hs.73263ENM_02035ENSG00000PCNP       | -                         | PEST protprotein-coding  |                         |
| chr6-128E | 8.648866 | 0.289478 | 0.789753 | 0.366542 | 0.71396  | 0.981636 | chr6  | 1.28E+08 | 1.28E+08 | + | 0 | NA | intron (THE1B-int   | 144259   | NM_001291 | 5796     | Hs.15591ENM_002844ENSG00000PTPRK     | R-PTP-ka                  | protein tprotein-coding  |                         |
| chr8-6707 | 8.648866 | 0.289478 | 0.789753 | 0.366542 | 0.71396  | 0.981636 | chr8  | 67077657 | 67078975 | + | 0 | NA | intron (MIR SINE    | -5532    | NM_001291 | 79848    | Hs.370147NM_02479ENSG00000CSPP1      | CSPP JBT                  | centrosonprotein-coding  |                         |
| chr11-53  | 9.724321 | 0.276387 | 0.754414 | 0.366359 | 0.714097 | 0.981636 | chr11 | 532443   | 534148   | + | 0 | NA | exon (NM_exon (NM   | 2272     | NM_16799E | 3265     | Hs.37003                             | NM_00534ENSG00000HRAS     | C-BAS HAS                | HRAS protprotein-coding |
| chr11-117 | 9.683182 | 0.275036 | 0.750879 | 0.366286 | 0.714152 | 0.981636 | chr11 | 1.17E+08 | 1.17E+08 | + | 0 | NA | intron (L1PA7 LIN   | 77556    | NM_01495E | 22897    | Hs.50400ENM_01495ENSG00000CEP164     | NPHP15                    | centrosonprotein-coding  |                         |
| chr2-6127 | 9.683182 | 0.275036 | 0.750879 | 0.366286 | 0.714152 | 0.981636 | chr2  | 61277320 | 61278422 | + | 0 | NA | intron (THE1B LTF   | 100453   | NR_152211 | 130872   | Hs.65560ENM_15239ENSG00000AHS2P      | AHA1 AHS                  | activatorpseudo          |                         |
| chr14-301 | 8.844185 | -0.29289 | 0.799848 | -0.36618 | 0.714228 | 0.981636 | chr14 | 1.02E+08 | 1.02E+08 | + | 0 | NA | exon (NM_exon (NM   | -70021   | NM_00137E | 1778     | Hs.61408CNM_00137ENSG00000DYNCH1     | CMT20 DHC                 | dynein cyprotein-coding  |                         |
| chr1-1221 | 7.923122 | -0.3044  | 0.831479 | -0.36609 | 0.714298 | 0.981636 | chr1  | 32216714 | 32216916 | + | 0 | NA | TTS (NM_C TTS (NM_C | -4769    | NM_00375E | 8668     | Hs.53009ENM_00375ENSG00000EIF3E      | EIF3E2 PF                 | eukaryotiprotein-coding  |                         |
| chr16-14E | 7.923122 | -0.3044  | 0.831479 | -0.36609 | 0.714298 | 0.981636 | chr16 | 14260782 | 14261116 | + | 0 | NA | exon (NM_exon (NM   | -41339   | NR_13298E | 1E+08    | Hs.19074ENR_13298E                   | MIR193BHC                 | -                        | MIR193B lncRNA          |
| chr5-3697 | 7.923122 | -0.3044  | 0.831479 | -0.36609 | 0.714298 | 0.981636 | chr5  | 36975953 | 36977331 | + | 0 | NA | intron (intron (N   | 99873    | NM_015384 | 25836    | Hs.481922NM_015384ENSG00000NIPBL     | CDLS CDLS                 | NIPBL cofprotein-coding  |                         |
| chr11-77E | 5.137715 | -0.37548 | 1.025796 | -0.36604 | 0.714336 | 0.981636 | chr11 | 77632714 | 77633121 | + | 0 | NA | intron (AluSx SI    | 4874     | NM_001311 | 1207     | Hs.43073ENM_00129ENSG00000CLNS1A     | CLC1 CLNS                 | chloride protein-coding  |                         |
| chr19-36E | 5.137715 | -0.37548 | 1.025796 | -0.36604 | 0.714336 | 0.981636 | chr19 | 36840524 | 36842166 | + | 0 | NA | intron (AluSx SIN   | -2958    | NM_206894 | 388536   | Hs.282067NM_206894ENSG00000ZNF790    | -                         | zinc fingprotein-coding  |                         |
| chr2-364E | 5.137715 | -0.37548 | 1.025796 | -0.36604 | 0.714336 | 0.981636 | chr2  | 36400613 | 36401426 | + | 0 | NA | intron (intron (N   | 45264    | NM_016441 | 51232    | Hs.699247NM_016441ENSG00000CRIM1     | CRIM-1 SE                 | cysteine protein-coding  |                         |
| chr1-159E | 5.137715 | -0.37548 | 1.025796 | -0.36604 | 0.714336 | 0.981636 | chr1  | 15926115 | 15927122 | + | 0 | NA | intron (L2a LINE    | 49518    | NM_001324 | 7709     | Hs.433764NM_00344ENSG00000ZBTB17     | MIZ-1 ZNF                 | zinc fingprotein-coding  |                         |
| chr1-950E | 5.137715 | -0.37548 | 1.025796 | -0.36604 | 0.714336 | 0.981636 | chr1  | 95063004 | 95064075 | + | 0 | NA | intron (L1PA11 LI   | 1943     | NR_13278E | 1.02E+08 | Hs.73009ENR_13278ENSG00000LOC10192E  | -                         | uncharactncRNA           |                         |
| chr11-481 | 5.137715 | -0.37548 | 1.025796 | -0.36604 | 0.714336 | 0.981636 | chr11 | 48130799 | 48131718 | + | 0 | NA | intron (AluS6 SI    | 34476    | NR_03611E | 1E+08    | NR_03611ENSG00000MIR3161             | -                         | microRNA ncRNA           |                         |
| chr12-45E | 5.137715 | -0.37548 | 1.025796 | -0.36604 | 0.714336 | 0.981636 | chr12 | 45900290 | 45900785 | + | 0 | NA | intron (HAL LINE    | 90037    | NR_00471E | 9169     | Hs.210367NM_00471ENSG00000SCAF11     | CASP11 SF                 | SFR-relateprotein-coding |                         |
| chr13-42E | 5.137715 | -0.37548 | 1.025796 | -0.36604 | 0.714336 | 0.981636 | chr13 | 42952915 | 42953455 | + | 0 | NA | intron (MIR SINE    | 39056    | NM_00100E | 94240    | Hs.546467NM_03325ENSG00000EPST11     | BRES11                    | epitheliEprotein-coding  |                         |
| chr13-10E | 5.137715 | -0.37548 | 1.025796 | -0.36604 | 0.714336 | 0.981636 | chr13 | 1.06E+08 | 1.06E+08 | + | 0 | NA | 3' UTR (3' UTR (N   | 43227    | NM_00409E | 1948     | Hs.14923ENM_00409ENSG00000EFNB2      | EPLG5 HTF                 | ephrin B2protein-coding  |                         |
| chr14-99E | 5.137715 | -0.37548 | 1.025796 | -0.36604 | 0.714336 | 0.981636 | chr14 | 99458441 | 99459671 | + | 0 | NA | intron (intron (N   | 21803    | NM_19912E | 84193    | Hs.510407NM_03223ENSG00000CETD3      | C14orf154                 | SET domainprotein-coding |                         |
| chr14-101 | 5.137715 | -0.37548 | 1.025796 | -0.36604 | 0.714336 | 0.981636 | chr14 | 1.02E+08 | 1.02E+08 | + | 0 | NA | intron (intron (N   | -63483   | NM_00137E | 1778     | Hs.61408CNM_00137ENSG00000DYNCH1     | CMT20 DHC                 | dynein cyprotein-coding  |                         |
| chr17-54E | 5.137715 | -0.37548 | 1.025796 | -0.36604 | 0.714336 | 0.981636 | chr17 | 5446107  | 5446820  | + | 0 | NA | intron (MIR SINE    | -7308    | NM_00121E | 708      | Hs.55586ENM_00121ENSG00000C1QP       | COXPD33 C                 | complexerprotein-coding  |                         |
| chr17-35E | 5.137715 | -0.37548 | 1.025796 | -0.36604 | 0.714336 | 0.981636 | chr17 | 5547682  | 5549577  | + | 0 | NA | intron (L2b LINE    | 35880    | NM_033004 | 22861    | Hs.65227ENM_01492ENSG00000NLRP1      | ATADK CAF                 | NLR familprotein-coding  |                         |
| chr17-574 | 5        |          |          |          |          |          |       |          |          |   |   |    |                     |          |           |          |                                      |                           |                          |                         |



|                     |          |          |          |          |          |       |                  |          |   |      |                     |                           |                            |                     |                         |                           |                         |
|---------------------|----------|----------|----------|----------|----------|-------|------------------|----------|---|------|---------------------|---------------------------|----------------------------|---------------------|-------------------------|---------------------------|-------------------------|
| chr7-103: 8.384579  | -0.29285 | 0.802902 | -0.36474 | 0.715308 | 0.981636 | chr7  | 1.03E+08         | 1.03E+08 | + | 0 NA | intron (N L2c LINE  | 3891 NM_014377            | 27000 Hs. 55847ENR_014377  | ENSG000002DNAJ2C2   | MPHOSPH11DnaJ           | heatprotein-coding        |                         |
| chr7-107: 8.384579  | -0.29285 | 0.802902 | -0.36474 | 0.715308 | 0.981636 | chr7  | 1.08E+08         | 1.08E+08 | + | 0 NA | intron (N intron (N | 3764 NM_002291            | 3912 Hs. 65058ENR_002291   | ENSG000002LAMB1     | CLM LIS5                | laminin sprotein-coding   |                         |
| chr7-124: 8.384579  | -0.29285 | 0.802902 | -0.36474 | 0.715308 | 0.981636 | chr7  | 1.25E+08         | 1.25E+08 | + | 0 NA | intron (N AluJb SIN | 6668 NM_005302            | 2861 Hs. 406094NM_005302   | ENSG000002GPR37     | EDNRBL PAG              | protein-coding            |                         |
| chr8-117: 8.384579  | -0.29285 | 0.802902 | -0.36474 | 0.715308 | 0.981636 | chr8  | 1.18E+08         | 1.18E+08 | + | 0 NA | intron (N intron (N | 86249 NR_145799           | 1.1E+08                    | NR_145799           | SNORD168                | small nucsnRNA            |                         |
| chr9-110: 8.384579  | -0.29285 | 0.802902 | -0.36474 | 0.715308 | 0.981636 | chr9  | 1.11E+08         | 1.11E+08 | + | 0 NA | intron (N L1P1 LINE | 104836 NM_001351          | 1902 Hs. 126667NR_001401   | ENSG000002LPAR1     | EDG2 GPR2               | lysophosphprotein-coding  |                         |
| chr12-11: 8.152278  | 0.298722 | 0.819329 | 0.364594 | 0.715414 | 0.981636 | chr12 | 1.1E+08          | 1.1E+08  | + | 0 NA | intron (N intron (N | 25999 NM_016238           | 51434 Hs. 71993ENR_016238  | ENSG000002CANAP7    | APC7                    | anaphase protein-coding   |                         |
| chr12-11: 8.152278  | 0.298722 | 0.819329 | 0.364594 | 0.715414 | 0.981636 | chr12 | 1.18E+08         | 1.18E+08 | + | 0 NA | intron (N L1ME3Cz L | -38297 NM_001346          | 51347 Hs. 644422NR_016281  | ENSG000002TAOK3     | DPK JIK VTAO            | kinasprotein-coding       |                         |
| chr15-90: 8.152278  | 0.298722 | 0.819329 | 0.364594 | 0.715414 | 0.981636 | chr15 | 90625923         | 90627170 | + | 0 NA | intron (N intron (N | -33688 NR_120371          | 1.02E+08                   | Hs. 61534ENR_120371 | ENSG000002LINC0158E     | -                         | long intencRNA          |
| chr5-119: 8.152278  | 0.298722 | 0.819329 | 0.364594 | 0.715414 | 0.981636 | chr5  | 1.19E+08         | 1.19E+08 | + | 0 NA | intron (N intron (N | 11302 NR_049892           | 1.01E+08                   | NR_049892           | ENSG000002MIR5706       | -                         | microRNA ncRNA          |
| chr20-50: 9.145454  | 0.281159 | 0.771581 | 0.364393 | 0.715564 | 0.981636 | chr20 | 50933977         | 50936564 | + | 0 NA | intron (N intron (N | -3833 NM_181442           | 23394 Hs. 29373ENR_01533E  | ENSG000002ADNP      | ADNP1 HV                | actinprotein-coding       |                         |
| chr17-67: 4.6684    | -0.40084 | 1.100371 | -0.36428 | 0.715651 | 0.981636 | chr17 | 67105175         | 67105726 | + | 0 NA | intron (N L1MB7 LIN | 60896 NM_000727           | 786 Hs. 14798ENR_000727    | ENSG000002CACNG1    | CACNLG                  | calcium vprotein-coding   |                         |
| chr4-8807           | 4.6684   | -0.40084 | 1.100371 | -0.36428 | 0.715651 | chr4  | 88077886         | 88078149 | + | 0 NA | TTS (NM_C           | 70382 NR_156488           | 5311 Hs. 18127ENR_000297   | ENSG000002PKD2      | APKD2 PC2               | polycystinprotein-coding  |                         |
| chr1-234: 7.14395   | 0.317942 | 0.872942 | 0.364129 | 0.715694 | 0.981636 | chr1  | 2.34E+08         | 2.34E+08 | + | 0 NA | intron (N (GA)n Sin | 3383 NM_001301            | 388753 Hs. 23198 NR_001012 | ENSG000002COA6      | Clorf31 C               | cytochrome protein-coding |                         |
| chr1-168: 9.194452  | 0.280879 | 0.771343 | 0.364142 | 0.715752 | 0.981636 | chr1  | 1.68E+08         | 1.68E+08 | + | 0 NA | intron (N intron (N | 5381 NR_031702            | 1E+08                      | NR_031702           | ENSG000002MIR1255B2     | MIR1255B                  | microRNA ncRNA          |
| chr10-12: 9.194452  | 0.280879 | 0.771343 | 0.364142 | 0.715752 | 0.981636 | chr10 | 1.26E+08         | 1.26E+08 | + | 0 NA | exon (NM exon (NM   | 28765 NM_07846E           | 56647 Hs. 37029ENR_016567  | ENSG000002BCC1P     | TOK-1 TOK               | BRCA2 ancprotein-coding   |                         |
| chr12-12: 9.194452  | 0.280879 | 0.771343 | 0.364142 | 0.715752 | 0.981636 | chr12 | 1.2E+08          | 1.2E+08  | + | 0 NA | TTS (NR_C           | 12177 NR_038924           | 1.01E+08                   | Hs. 56920ENR_038924 | ENSG000002PXN-AS1       | EyeLinc4                  | PXN antisncRNA          |
| chr13-11: 9.194452  | 0.280879 | 0.771343 | 0.364142 | 0.715752 | 0.981636 | chr13 | 1.14E+08         | 1.14E+08 | + | 0 NA | exon (NM exon (NM   | -39147 NM_00136E          | 1.01E+08                   | Hs. 704267NM_00136E | ENSG000002C13orf46      | -                         | chromosonprotein-coding |
| chr15-84: 9.194452  | 0.280879 | 0.771343 | 0.364142 | 0.715752 | 0.981636 | chr15 | 84541387         | 84543058 | + | 0 NA | non-codirnon-codir  | -25375 NM_001267          | 643707 Hs. 49834ENR_001267 | ENSG000002GOLG6L4   | -                       | golgin A protein-coding   |                         |
| chr17-72: 9.194452  | 0.280879 | 0.771343 | 0.364142 | 0.715752 | 0.981636 | chr17 | 7254870          | 7256349  | + | 0 NA | intron (N intron (N | 3183 NR_14551E            | 23587 Hs. 41702ENR_01536E  | ENSG000002ELP5      | C17orf81 e              | elongator protein-coding  |                         |
| chr17-30: 9.194452  | 0.280879 | 0.771343 | 0.364142 | 0.715752 | 0.981636 | chr17 | 39918996         | 39923491 | + | 0 NA | 3' UTR (N3' UTR (N  | -2593 NM_00116E           | 55876 Hs. 306777NM_01853C  | ENSG000002GSDMB     | GSDML PP4               | gasdermir protein-coding  |                         |
| chr19-19: 9.194452  | 0.280879 | 0.771343 | 0.364142 | 0.715752 | 0.981636 | chr19 | 5722 NR_03990E   | 10790447 | + | 0 NA | intron (N AluXl SI  | 5722 NR_03990E            | 1.01E+08                   | NR_03990E           | ENSG000002MIR4748       | mir-4748                  | microRNA ncRNA          |
| chr19-38: 9.194452  | 0.280879 | 0.771343 | 0.364142 | 0.715752 | 0.981636 | chr19 | 38906935         | 38908437 | + | 0 NA | non-codirnon-codir  | 4472 NM_00124C            | 643669 Hs. 355357NM_00124C | ENSG000002CCER2     | -                       | coiled-c protein-coding   |                         |
| chr19-49: 9.194452  | 0.280879 | 0.771343 | 0.364142 | 0.715752 | 0.981636 | chr19 | 49791984         | 49797431 | + | 0 NA | intron (N AluSq2 SI | 2841 NR_106857            | 1.02E+08                   | NR_106857           | ENSG000002MIR6799       | hsa-mir-6                 | microRNA ncRNA          |
| chr20-40: 9.194452  | 0.280879 | 0.771343 | 0.364142 | 0.715752 | 0.981636 | chr20 | 4009729          | 4010446  | + | 0 NA | intron (N L2 LINE L | 5971 NM_001134            | 11237 Hs. 54757ENR_000721E | ENSG000002RNF24     | G1L                     | ring fingprotein-coding   |                         |
| chr3-5247           | 9.194452 | 0.280879 | 0.771343 | 0.364142 | 0.981636 | chr3  | 52479314         | 52481568 | + | 0 NA | exon (NM exon (NM   | -14897 NM_01513E          | 23166 Hs. 30198ENR_01513E  | ENSG000002STAB1     | CLEVER1 s               | stabilin protein-coding   |                         |
| chr5-957: 9.194452  | 0.280879 | 0.771343 | 0.364142 | 0.715752 | 0.981636 | chr5  | 95787825         | 95788960 | + | 0 NA | intron (N intron (N | 34334 NM_002064           | 2745 Hs. 28988 NR_002064   | ENSG000002GLRX      | GRX GRX1                | glutaredc protein-coding  |                         |
| chr11-434: 7.143386 | 0.324966 | 0.819329 | 0.363983 | 0.715871 | 0.981636 | chr11 | 43414275         | 43414806 | + | 0 NA | intron (N intron (N | 55620 NM_01825E           | 55761 Hs. 19118ENR_01825E  | ENSG000002TTC17     | -                       | tetratric protein-coding  |                         |
| chr6-146: 4.701682  | -0.39329 | 1.080624 | -0.36395 | 0.715898 | 0.981636 | chr6  | 1.47E+08         | 1.47E+08 | + | 0 NA | intron (N intron (N | 6944 NM_006834            | 10981 Hs. 287714NM_006834  | ENSG000002RAB32     | -                       | RAB32, meprotein-coding   |                         |
| chr16-30: 2.11832   | -0.24617 | 0.676577 | -0.36385 | 0.715974 | 0.981636 | chr16 | 30265792         | 30267448 | + | 0 NA | Intergeni Intergeni | -18207 NM_001321          | 613037 Hs. 58573ENR_001321 | ENSG000002NPIP13    | -                       | nuclear f protein-coding  |                         |
| chr1-211: 9.153312  | 0.279521 | 0.768394 | 0.363774 | 0.716027 | 0.981636 | chr1  | 21104924         | 21105487 | + | 0 NA | intron (N AluXl SIN | 6178 NM_00376E            | 8672 Hs. 467084NM_00376E   | ENSG000002EIF4G3    | eIF-4G 3 e              | ukaryotiprotein-coding    |                         |
| chr1-217: 9.153312  | 0.279521 | 0.768394 | 0.363774 | 0.716027 | 0.981636 | chr1  | 21753032         | 21756460 | + | 0 NA | intron (N LTRA1 LTF | 28403 NM_00135C           | 84196 Hs. 467524NM_03223E  | ENSG000002CUP48     | RAP1GA1 u               | ubiquitiprotein-coding    |                         |
| chr1-3934: 9.153312 | 0.279521 | 0.768394 | 0.363774 | 0.716027 | 0.981636 | chr1  | 39345083         | 39355783 | + | 0 NA | intron (N intron (N | -58640 NM_01503E          | 643314 Hs. 65876ENR_01503E | ENSG000002KIAA0754  | -                       | KIAA0754 protein-coding   |                         |
| chr1-167: 9.153312  | 0.279521 | 0.768394 | 0.363774 | 0.716027 | 0.981636 | chr1  | -5330 NR_031702  | 1.68E+08 | + | 0 NA | exon (NM exon (NM   | 8057 NR_03990E            | 1.01E+08                   | NR_03990E           | ENSG000002MIR1255B2     | MIR1255B                  | microRNA ncRNA          |
| chr1-2351: 9.153312 | 0.279521 | 0.768394 | 0.363774 | 0.716027 | 0.981636 | chr1  | 2.35E+08         | 2.35E+08 | + | 0 NA | exon (NM exon (NM   | 14826 NM_00602E           | 8872 Hs. 41284ENR_00602E   | ENSG000002CDC123    | C10orf7 C               | ell diviprotein-coding    |                         |
| chr15-99: 9.153312  | 0.279521 | 0.768394 | 0.363774 | 0.716027 | 0.981636 | chr15 | 99599722         | 99600815 | + | 0 NA | intron (N intron (N | -32710 NM_00113C          | 4205 Hs. 26867ENR_005587   | ENSG000002MEF2A     | ADCAD1 RS               | myocyte e protein-coding  |                         |
| chr19-16: 9.153312  | 0.279521 | 0.768394 | 0.363774 | 0.716027 | 0.981636 | chr19 | 16389409         | 16392539 | + | 0 NA | intron (N intron (N | 66148 NM_01627C           | 10365 Hs. 68513ENR_01627C  | ENSG000002KLF2      | LKLF                    | Kruppel lprotein-coding   |                         |
| chr19-37: 9.153312  | 0.279521 | 0.768394 | 0.363774 | 0.716027 | 0.981636 | chr19 | 37634133         | 37640119 | + | 0 NA | intron (N intron (N | 18339 NM_00132C           | 22835 Hs. 686737NM_01489E  | ENSG000002ZFP30     | ZNF745                  | ZFP30 zirprotein-coding   |                         |
| chr2-3654           | 9.153312 | 0.279521 | 0.768394 | 0.363774 | 0.981636 | chr2  | 36547146         | 36548426 | + | 0 NA | intron (N intron (N | 50382 NM_00104E           | 9637 Hs. 25857ENR_00510E   | ENSG000002FEZ2      | HUM3CL                  | fascicul protein-coding   |                         |
| chr2-101: 9.153312  | 0.279521 | 0.768394 | 0.363774 | 0.716027 | 0.981636 | chr2  | 1.02E+08         | 1.02E+08 | + | 0 NA | intron (N Mirb SINE | -116708 NR_103791         | 1.01E+08                   | Hs. 51624ENR_103791 | LINC01127-              | long intencRNA            |                         |
| chr20-44: 9.153312  | 0.279521 | 0.768394 | 0.363774 | 0.716027 | 0.981636 | chr20 | 44902638         | 44903598 | + | 0 NA | intron (N intron (N | -6942 NR_13498E           | 80336 Hs. 641481NM_001124  | ENSG000002PABPC1L   | C20orf15 p              | oly(A) t protein-coding   |                         |
| chr3-426: 9.153312  | 0.279521 | 0.768394 | 0.363774 | 0.716027 | 0.981636 | chr3  | -20566 NM_14516E | 1.4516E  | + | 0 NA | intron (N AluJr4 SI | 92999 Hs. 409561NM_14516E | ENSG000002ZBT47            | ZNF651              | zinc fingprotein-coding |                           |                         |
| chr4-488: 9.153312  | 0.279521 | 0.768394 | 0.363774 | 0.716027 | 0.981636 | chr4  | 48833791         | 48837992 | + | 0 NA | intron (N intron (N | 4585 NM_00116E            | 54940 Hs. 51875ENR_01783C  | ENSG000002OCIAD1    | ASRJ1 OCI               | OClA dom protein-coding   |                         |
| chr6-315: 9.153312  | 0.279521 | 0.768394 | 0.363774 | 0.716027 | 0.981636 | chr6  | 31509296         | 31511535 | + | 0 NA | 3' UTR (N3' UTR (N  | 12270 NM_00128E           | 4277 Hs. 73144ENR_005931   | ENSG000002MIBC      | PERB1L.2                | MHC class protein-coding  |                         |
| chr8-384: 9.153312  | 0.279521 | 0.768394 | 0.363774 | 0.716027 | 0.981636 | chr8  | 38456969         | 38457436 | + | 0 NA | intron (N intron (N | 10522 NM_001174           | 2260 Hs. 264887NM_01585E   | ENSG000002FGFR1     | BFGFR CD                | fibrolas protein-coding   |                         |
| chr2-2004           | 10.19734 | 0.274546 | 0.755371 | 0.63459  | 0.716262 | chr2  | 2E+08            | 2E+08    | + | 0 NA | intron (N LTRID1 LI | 33493 NM_001321           | 130535 Hs. 60577ENR_152387 | ENSG000002KCTD18    | 6530404F                | Ipotassium protein-coding |                         |
| chr1-2312           | 9.153312 | 0.279521 | 0.768394 | 0.363774 | 0.981636 | chr1  | 2.31E+08         | 2.31E+08 | + | 0 NA | exon (NM exon (NM   | 32783 NM_00131E           | 8443 Hs. 49802ENR_01423E   | ENSG000002GNPAT     | DAP-AT D                | glyceron protein-coding   |                         |
| chr1-155: 8.656724  | 0.287722 | 0.791765 | 0.363393 | 0.716311 | 0.981636 | chr1  | 1.55E+08         | 1.55E+08 | + | 0 NA | intron (N AluXs SIN | 18706 NR_03418E           | 645682 Hs. 63248ENR_03418E | ENSG000002POU5F1P4  | OC3 OC4                 | POU class pseudo          |                         |
| chr11-434           | 7.143386 | 0.324966 | 0.819329 | 0.363983 | 0.715871 | chr11 | 1.75E+08         | 1.75E+08 | + | 0 NA | intron (N intron (N | 5677 NM_02210C            | 643931 Hs. 65485ENR_02210C | ENSG000002MRP514    | COXP238 I               | mitochonc protein-coding  |                         |
| chr11-29: 8.656724  | 0.287722 | 0.791765 | 0.363393 | 0.716311 | 0.981636 | chr11 | 2964095          | 2966577  | + | 0 NA | intron (N Tigger3a  | -1443 NR_00298E           | 677833 Hs. 68969ENR_00298E | ENSG000002SNORA54   | ACA54                   | small nucsnRNA            |                         |
| chr14-21: 8.656724  | 0.287722 | 0.791765 | 0.363393 | 0.716311 | 0        |       |                  |          |   |      |                     |                           |                            |                     |                         |                           |                         |

|           |          |          |           |          |          |          |       |          |          |   |   |    |                     |                  |                               |                     |                                     |
|-----------|----------|----------|-----------|----------|----------|----------|-------|----------|----------|---|---|----|---------------------|------------------|-------------------------------|---------------------|-------------------------------------|
| chr15-746 | 9.16117  | 0.277884 | 0.768579  | 0.361555 | 0.717685 | 0.981636 | chr15 | 74619669 | 74631090 | + | 0 | NA | intron (Nintron (N  | 10385 NM_00113C  | 1198 Hs. 51179CNM_001292      | ENSG00000CLK3       | PHCLK3 PFCD3 like protein-coding    |
| chr15-754 | 9.16117  | 0.277884 | 0.768579  | 0.361555 | 0.717685 | 0.981636 | chr15 | 75408753 | 75413730 | + | 0 | NA | intron (NAluSx3 SI  | 40449 NM_015477  | 25942 Hs. 513039NM_015477     | ENSG00000SIN3A      | WITKOS SIN3 trarprotein-coding      |
| chr15-847 | 9.16117  | 0.277884 | 0.768579  | 0.361555 | 0.717685 | 0.981636 | chr15 | 84798161 | 84802514 | + | 0 | NA | intron (NMIRc SINE  | -16343 NM_020778 | 57538 Hs. 459189NM_020778     | ENSG00000CALPK3     | CMH27 MAKalpha kirprotein-coding    |
| chr16-443 | 9.16117  | 0.277884 | 0.768579  | 0.361555 | 0.717685 | 0.981636 | chr16 | 4437090  | 4447243  | + | 0 | NA | intron (Nintron (N  | 16298 NM_00113E  | 9093 Hs. 459779NM_005147      | ENSG00000DNAJA3     | HCA57 TII DnaJ heatprotein-coding   |
| chr16-15C | 9.16117  | 0.277884 | 0.768579  | 0.361555 | 0.717685 | 0.981636 | chr16 | 15038820 | 15041433 | + | 0 | NA | intron (Nintron (N  | 15948 NM_017347  | 123803 Hs. 592049NM_173474    | ENSG00000NTAN1      | PNA1 PNAI-N-terminus protein-coding |
| chr16-15E | 9.16117  | 0.277884 | 0.768579  | 0.361555 | 0.717685 | 0.981636 | chr16 | 15631345 | 15632530 | + | 0 | NA | intron (NLIPA8 LIN  | 11217 NM_014647  | 9665 Hs. 173524NM_014647      | ENSG00000CMARF1     | KIAA0430 meiosis I protein-coding   |
| chr16-574 | 9.16117  | 0.277884 | 0.768579  | 0.361555 | 0.717685 | 0.981636 | chr16 | 57468917 | 57471384 | + | 0 | NA | intron (Nintron (N  | 7471 NM_03294C   | 5432 Hs. 79402 NM_002694      | ENSG00000POLR2C     | RPP3 RPBc RNA polynprotein-coding   |
| chr17-408 | 9.16117  | 0.277884 | 0.768579  | 0.361555 | 0.717685 | 0.981636 | chr17 | 4084199  | 4088752  | + | 0 | NA | intron (Nintron (N  | 56555 NM_015113  | 23140 Hs. 277624NM_015113     | ENSG00000ZZEF1      | ZZZ4 zinc fingprotein-coding        |
| chr17-13C | 9.16117  | 0.277884 | 0.768579  | 0.361555 | 0.717685 | 0.981636 | chr17 | 13007359 | 13016306 | + | 0 | NA | intron (Nintron (N  | 6195 NM_018127   | 60528 Hs. 434232NM_018127     | ENSG00000ELAC2      | COXP17 FeLaC ribcprotein-coding     |
| chr17-212 | 9.16117  | 0.277884 | 0.768579  | 0.361555 | 0.717685 | 0.981636 | chr17 | 21299604 | 21305900 | + | 0 | NA | intron (NL4_A_Mam)  | 14716 NM_00275E  | 5606 Hs. 514012NM_00275E      | ENSG00000MAP2K3     | MAPK3 MEIinogen-ε protein-coding    |
| chr17-313 | 9.16117  | 0.277884 | 0.768579  | 0.361555 | 0.717685 | 0.981636 | chr17 | 31348972 | 31350700 | + | 0 | NA | intron (Nintron (N  | -28214 NM_001003 | -2123 Hs. 591199NM_01421C     | ENSG00000EVI2A      | EVD4 EVI-ecotopicprotein-coding     |
| chr17-478 | 9.16117  | 0.277884 | 0.768579  | 0.361555 | 0.717685 | 0.981636 | chr17 | 47823382 | 47827282 | + | 0 | NA | intron (NAluSq2 SI  | -3538 NM_14579E  | 114881 Hs. 463322NM_017731    | ENSG00000OSBPL7     | ORP7 oxysterolprotein-coding        |
| chr2-4661 | 9.16117  | 0.277884 | 0.768579  | 0.361555 | 0.717685 | 0.981636 | chr2  | 46619634 | 46621077 | + | 0 | NA | intron (NAluJb SIN  | 3140 NM_014171   | 9419 Hs. 133999NM_014171      | ENSG00000CRIPT      | HSPC139 CXCC reprotein-coding       |
| chr2-110E | 9.16117  | 0.277884 | 0.768579  | 0.361555 | 0.717685 | 0.981636 | chr2  | 1.11E+08 | 1.11E+08 | + | 0 | NA | intron (Nintron (N  | -49583 NR_02714E | 1E+08 Hs. 535619NR_027144     | ENSG00000LIMS3-LOC  | LIMS3-L3LOCncRNA                    |
| chr21-462 | 9.16117  | 0.277884 | 0.768579  | 0.361555 | 0.717685 | 0.981636 | chr21 | 46250587 | 46251456 | + | 0 | NA | non-codiron-codir   | 21790 NR_11056E  | 114044 Hs. 655099NR_00277C    | ENSG00000MCM3AP-AS  | C21orf85 MCM3AP arncRNA             |
| chr22-24C | 9.16117  | 0.277884 | 0.768579  | 0.361555 | 0.717685 | 0.981636 | chr22 | 24084336 | 24086682 | + | 0 | NA | intron (Nintron (N  | 74139 NM_00119E  | 23523 Hs. 517478NM_01229E     | ENSG00000CABIN1     | CAIN KB-ε calcineurinprotein-coding |
| chr3-1224 | 9.16117  | 0.277884 | 0.768579  | 0.361555 | 0.717685 | 0.981636 | chr3  | 1.22E+08 | 1.22E+08 | + | 0 | NA | intron (Nintron (N  | 17218 NR_12540E  | 1.03E+08 Hs. 675059NR_12540E  | ENSG00000CLOC10272E | uncharactncRNA                      |
| chr4-122A | 9.16117  | 0.277884 | 0.768579  | 0.361555 | 0.717685 | 0.981636 | chr4  | 1.22E+08 | 1.22E+08 | + | 0 | NA | exon (NM exon (NM   | 53962 NM_015312  | 84162 Hs. 408142NM_015312     | ENSG00000KIAA1109   | ALKKUCS FKIAA1109 protein-coding    |
| chr5-1387 | 9.16117  | 0.277884 | 0.768579  | 0.361555 | 0.717685 | 0.981636 | chr5  | 13877523 | 13885158 | + | 0 | NA | intron (NLIM3de LI  | 63140 NM_00136E  | 1767 Hs. 212366NM_00136E      | ENSG00000DNAH5      | CILD3 DNA dynein α protein-coding   |
| chr5-1191 | 9.16117  | 0.277884 | 0.768579  | 0.361555 | 0.717685 | 0.981636 | chr5  | 1.19E+08 | 1.19E+08 | + | 0 | NA | intron (NLIPA4 LINE | 43893 NR_04989E  | 1.01E+08 NR_04989E            | ENSG00000CIR5706    | microRNA ncRNA                      |
| chr6-2487 | 9.16117  | 0.277884 | 0.768579  | 0.361555 | 0.717685 | 0.981636 | chr6  | 24871638 | 24875692 | + | 0 | NA | exon (NM exon (NM   | 3605 NM_015864   | 9750 Hs. 559459NM_01472E      | ENSG00000RIPOR2     | C6orf32 RHO fami protein-coding     |
| chr7-613E | 9.16117  | 0.277884 | 0.768579  | 0.361555 | 0.717685 | 0.981636 | chr7  | 6139077  | 6140224  | + | 0 | NA | intron (Nintron (N  | 32487 NM_001367  | 9265 Hs. 487479NM_004227      | ENSG00000CYTH3      | ARN03 GRF cytohesin protein-coding  |
| chr7-1023 | 9.16117  | 0.277884 | 0.768579  | 0.361555 | 0.717685 | 0.981636 | chr7  | 1.02E+08 | 1.02E+08 | + | 0 | NA | intron (NLIME3D LI  | 15712 NM_001347  | 1E+08 Hs. 406399NM_001242713  | LOC10028E           | uncharactprotein-coding             |
| chr8-2302 | 9.16117  | 0.277884 | 0.768579  | 0.361555 | 0.717685 | 0.981636 | chr8  | 23022153 | 23030648 | + | 0 | NA | intron (Nintron (N  | 26821 NM_01517E  | 23221 Hs. 372688NM_01517E     | ENSG00000RHOBTB2    | DBC2 EIEE Rho relatprotein-coding   |
| chr9-3433 | 9.16117  | 0.277884 | 0.768579  | 0.361555 | 0.717685 | 0.981636 | chr9  | 34338918 | 34339227 | + | 0 | NA | intron (Nintron (N  | 9353 NM_147173   | 318 Hs. 493767NM_001161       | ENSG00000NUD2T      | APAH1 nudix hycprotein-coding       |
| chrX-1674 | 9.16117  | 0.277884 | 0.768579  | 0.361555 | 0.717685 | 0.981636 | chrX  | 16746929 | 16748616 | + | 0 | NA | intron (NLIMC5a LI  | 28160 NM_03279E  | 94056 Hs. 744255NM_03279E     | ENSG00000SYAP1      | BSTA PRO: synapse ε protein-coding  |
| chr20-41C | 12.11047 | -0.24504 | 0.678112  | -0.36135 | 0.717835 | 0.981636 | chr20 | 41099700 | 41102771 | + | 0 | NA | exon (NM exon (NM   | -36308 NM_182811 | 5335 Hs. 268177NM_00266C      | ENSG00000PLCG1      | NCKAP3 PI phospholiprotein-coding   |
| chr9-137E | 12.11047 | -0.24504 | 0.678112  | -0.36135 | 0.717835 | 0.981636 | chr9  | 1.37E+08 | 1.37E+08 | + | 0 | NA | TTS (NM_C TTS (NM_C | 1557 NM_00608E   | 10383 Hs. 433619NM_00608E     | ENSG00000TUBB4B     | Beta2 LCβ tubulin tprotein-coding   |
| chr1-1552 | 8.11138  | 0.29718  | 0.822757  | 0.3612   | 0.71795  | 0.981636 | chr1  | 1.55E+08 | 1.55E+08 | + | 0 | NA | intron (NAluSc SIN  | 2177 NM_052837   | 10067 Hs. 200609NM_00569E     | ENSG00000SCAMP3     | Clorf3 secretoryprotein-coding      |
| chr4-8307 | 5.21994  | -0.36674 | 0.1016283 | -0.36665 | 0.718202 | 0.981636 | chr4  | 83076598 | 83077426 | + | 0 | NA | IntergeniLIMCa LIN  | 32877 NM_00113C  | 51316 Hs. 546392NM_01661E     | ENSG00000PLAC8      | C15 DGC placenta protein-coding     |
| chr1-150E | 9.657758 | 0.27061  | 0.750279  | 0.36068  | 0.718339 | 0.981636 | chr1  | 1.51E+08 | 1.51E+08 | + | 0 | NA | intron (NAluY SINE  | 21090 NM_00128E  | 405 Hs. 632449NM_00166E       | ENSG00000CARNT      | HIF-1-βetaryl hydriprotein-coding   |
| chr10-312 | 9.657758 | 0.27061  | 0.750279  | 0.36068  | 0.718339 | 0.981636 | chr10 | 32284580 | 32287732 | + | 0 | NA | intron (Nintron (N  | 61002 NM_00127E  | 80314 Hs. 16780E NM_02520E    | ENSG00000EPC1       | Ep11 enhancer protein-coding        |
| chr10-92E | 9.657758 | 0.27061  | 0.750279  | 0.36068  | 0.718339 | 0.981636 | chr10 | 91833798 | 91835523 | + | 0 | NA | intron (NMERSA DNA  | 36234 NM_02523E  | 80351 Hs. 329327NM_02523E     | ENSG00000TNK52      | ARTD6 PAF thnkyrase protein-coding  |
| chr14-52C | 9.657758 | 0.27061  | 0.750279  | 0.36068  | 0.718339 | 0.981636 | chr14 | 52065865 | 52067963 | + | 0 | NA | intron (Nintron (N  | 2145 NM_007361   | 22795 Hs. 369844NM_007361     | ENSG00000CNID2      | NID-2 nidogen 2 protein-coding      |
| chr17-81E | 9.657758 | 0.27061  | 0.750279  | 0.36068  | 0.718339 | 0.981636 | chr17 | 81685643 | 81689631 | + | 0 | NA | intron (Nintron (N  | 3626 NM_00471E   | 9146 Hs. 66105E NM_00471E     | ENSG00000HGS        | HRS hepatocytprotein-coding         |
| chr2-232E | 9.657758 | 0.27061  | 0.750279  | 0.36068  | 0.718339 | 0.981636 | chr2  | 2.33E+08 | 2.33E+08 | + | 0 | NA | intron (Nintron (N  | -21292 NM_00134E | 389084 Hs. 65750E NM_20689E   | ENSG00000SNORC      | ASCL830 c secondaryprotein-coding   |
| chr5-1343 | 9.657758 | 0.27061  | 0.750279  | 0.36068  | 0.718339 | 0.981636 | chr5  | 1.34E+08 | 1.34E+08 | + | 0 | NA | intron (Nintron (N  | 18488 NM_003337  | 7320 Hs. 61209E NM_003337     | ENSG00000CUBE2B     | E2-17kDa ubiquitin protein-coding   |
| chr7-358E | 9.657758 | 0.27061  | 0.750279  | 0.36068  | 0.718339 | 0.981636 | chr7  | 35832716 | 35833975 | + | 0 | NA | intron (Nintron (N  | 3622 NM_00136E   | 989 Hs. 19134E NM_00178E      | ENSG00000SEPTIN7    | CDC10 CDC septin 7 protein-coding   |
| chr1-433E | 8.41786  | -0.28873 | 0.800597  | -0.36065 | 0.718362 | 0.981636 | chr1  | 43360262 | 43365518 | + | 0 | NA | TTS (NM_C TTS (NM_C | 1643 NR_10679E   | 1.02E+08 NR_10679E            | ENSG00000MIR6734    | hsa-mir-ε microRNA ncRNA            |
| chr10-14E | 8.41786  | -0.28873 | 0.800597  | -0.36065 | 0.718362 | 0.981636 | chr10 | 14906945 | 14909344 | + | 0 | NA | non-codiron-codir   | 29244 NM_02467C  | 79723 Hs. 55488E NM_02467C    | ENSG00000SUV39H2    | KMT1B suppresscprotein-coding       |
| chr10-67E | 8.41786  | -0.28873 | 0.800597  | -0.36065 | 0.718362 | 0.981636 | chr10 | 67983434 | 67988774 | + | 0 | NA | intron (Nintron (N  | 24779 NR_131184  | 1E+08 NR_131184               | POU5F1P5            | Oc14-pg5 POU classpseudo            |
| chr12-10E | 8.41786  | -0.28873 | 0.800597  | -0.36065 | 0.718362 | 0.981636 | chr12 | 1.05E+08 | 1.05E+08 | + | 0 | NA | intron (NATATATAI   | 46719 NM_001251  | 55198 Hs. 50660E NM_018171    | ENSG00000APPL2      | DIP13B adaptor iprotein-coding      |
| chr14-60E | 8.41786  | -0.28873 | 0.800597  | -0.36065 | 0.718362 | 0.981636 | chr14 | 60991391 | 60995043 | + | 0 | NA | intron (NMIR SINE   | -11527 NM_00135C | 57570 Hs. 38015E NM_02081C    | ENSG00000TRMT5      | COXP26 tRNA meti protein-coding     |
| chr16-16E | 8.41786  | -0.28873 | 0.800597  | -0.36065 | 0.718362 | 0.981636 | chr16 | 1698229  | 1698449  | + | 0 | NA | intron (Nintron (N  | -7844 NM_00131E  | 23162 Hs. 20776E NM_01513E    | ENSG00000MAPK8IP3   | JIP-3 JIPinogen-ε protein-coding    |
| chr17-59C | 8.41786  | -0.28873 | 0.800597  | -0.36065 | 0.718362 | 0.981636 | chr17 | 59087666 | 59088261 | + | 0 | NA | intron (Nintron (N  | 18917 NR_148347  | 4591 Hs. 579079NM_015294      | ENSG00000TRIM37     | MUL POBI tripartitprotein-coding    |
| chr17-673 | 8.41786  | -0.28873 | 0.800597  | -0.36065 | 0.718362 | 0.981636 | chr17 | 67341154 | 67344362 | + | 0 | NA | intron (NAluJr4 SI  | 23819 NM_00281E  | 5718 Hs. 4295 NM_00281E       | ENSG00000PSMD12     | Rpn5 STIS proteasone protein-coding |
| chr2-9457 | 8.41786  | -0.28873 | 0.800597  | -0.36065 | 0.718362 | 0.981636 | chr2  | 9457961  | 9458209  | + | 0 | NA | intron (Nintron (N  | -16469 NM_00132C | 285148 Hs. 66722E NM_00103E   | ENSG00000IAH1       | isoamyl ε protein-coding            |
| chr2-364E | 8.41786  | -0.28873 | 0.800597  | -0.36065 | 0.718362 | 0.981636 | chr2  | 36458300 | 36458493 | + | 0 | NA | intron (Nintron (N  | 102621 NM_016441 | 51232 Hs. 699247NM_016441     | ENSG00000CRIM1      | CRIM-1 Sε cysteine protein-coding   |
| chr2-664E | 8.41786  | -0.28873 | 0.800597  | -0.36065 | 0.718362 | 0.981636 | chr2  | 66481802 | 66485751 | + | 0 | NA | intron (Nintron (N  | -43446 NR_04662E | 1.01E+08 Hs. 73469E NR_04662E | ENSG00000MEI51-AS2  | MEI51-AS1 MEI51 antncRNA            |
| chr2-1597 | 8.41786  | -0.28873 | 0.800597  | -0.36065 | 0.718362 | 0.981636 | chr2  | 1.6E+08  | 1.6E+08  | + | 0 | NA | intron (Nintron (N  | 6123 NM_02282E   | 64844 Hs. 52927E NM_02282E    | ENSG000007-Mar      | AXO AXOT membrane protein-coding    |
| chr2-172E | 8.41786  | -0.28873 | 0.800597  | -0.36065 | 0.718362 | 0.981636 | chr2  | 1.73E+08 | 1.73E+08 | + | 0 | NA | intron (NLTR33 LTF  | 33304 NM_00261C  | 5163 Hs. 47063E NM_00261C     | ENSG00000CPDK1      | pyruvate protein-coding             |
| chr2-2034 | 8.41786  | -0.28873 | 0.800597  | -0.36065 | 0.718362 | 0.981636 | chr2  | 2.03E+08 | 2.03E+08 | + | 0 | NA | 3' UTR (N3' UTR (N  | 77081 NM_00128E  | 10152 Hs. 47115E NM_00575E    | ENSG00000ABI2       | ABI-2 ABIab1 interprotein-coding    |
| chr2-41E  | 8.41786  | -0.28873 | 0.800597  | -0.36065 | 0.718362 | 0.981636 | chr2  | 41214740 | 41215674 | + | 0 | NA | intron (Nintron (N  | 2420 NR          |                               |                     |                                     |



|           |          |          |          |          |            |          |       |          |          |   |   |    |                          |        |           |          |           |                     |                           |                                    |
|-----------|----------|----------|----------|----------|------------|----------|-------|----------|----------|---|---|----|--------------------------|--------|-----------|----------|-----------|---------------------|---------------------------|------------------------------------|
| chr6-3166 | 9.665616 | 0.269057 | 0.748934 | 0.359253 | 0.719406   | 0.981636 | chr6  | 31666725 | 31673574 | + | 0 | NA | promoter-promoter-       | -802   | NM_021221 | 58496    | Hs.70871  | ENM_021221          | ENSG000004LY665B          | C6orf19 Clymphocytprotein-coding   |
| chr9-125  | 9.665616 | 0.269057 | 0.748934 | 0.359253 | 0.719406   | 0.981636 | chr9  | 1.25E+08 | 1.25E+08 | + | 0 | NA | non-codnon-codir         | 101980 | NM_00133C | 26130    | Hs.42376  | NM_01563F           | ENSG000004GAPVD1          | GAPX5 GAGTase acprotein-coding     |
| chr9-1308 | 9.665616 | 0.269057 | 0.748934 | 0.359253 | 0.719406   | 0.981636 | chr9  | 1.31E+08 | 1.31E+08 | + | 0 | NA | intron (Nintron (N       | 21689  | NM_19818C | 347148   | Hs.660704 | NM_19818C           | ENSG000004QRFP            | 26RFA P51pyroglutεprotein-coding   |
| chr17-601 | 8.615584 | 0.286241 | 0.796917 | 0.359186 | 0.719456   | 0.981636 | chr17 | 60189413 | 60191065 | + | 0 | NA | intron (NMSTB LTF        | 40266  | NM_000717 | 762      | Hs.89485  | NM_000717           | ENSG000004CA4             | CA1V Car4carbonic protein-coding   |
| chr9-6922 | 8.615584 | 0.286241 | 0.796917 | 0.359186 | 0.719456   | 0.981636 | chr9  | 69227855 | 69228326 | + | 0 | NA | exon (NM_exon (NM        | 22935  | NM_00136E | 9414     | Hs.50382  | NM_004817           | ENSG000004TJP2            | C9DU P21.tight jur protein-coding  |
| chr1-247  | 8.697864 | 0.289022 | 0.804948 | 0.359056 | 0.719553   | 0.981636 | chr1  | 2.47E+08 | 2.47E+08 | + | 0 | NA | intron (Nintron (N       | 2737   | NM_00132E | 84838    | Hs.168677 | NM_03275Z           | ENSG000004ZNF496          | NIZP1 ZFF zinc fingprotein-coding  |
| chr20-46  | 8.697864 | 0.289022 | 0.804948 | 0.359056 | 0.719553   | 0.981636 | chr20 | 46371829 | 46373297 | + | 0 | NA | intron (NAluSq2 S1       | -8105  | NM_001281 | 51006    | Hs.593344 | NM_01594F           | ENSG000004SLC35C2         | BA39402. Isolute εprotein-coding   |
| chr8-1302 | 7.61455  | 0.307402 | 0.85615  | 0.359051 | 0.719557   | 0.981636 | chr8  | 1.3E+08  | 1.3E+08  | + | 0 | NA | intron (Nintron (N       | 82725  | NR_00276E | 29065    | Hs.63931  | NR_00276E           | ASAP1-IT1 ASAP1 intrncRNA |                                    |
| chr15-844 | 8.607726 | 0.287946 | 0.802386 | 0.358862 | 0.719698   | 0.981636 | chr15 | 84483361 | 84483560 | + | 0 | NA | intron (Nintron (N       | -19115 | NR_033787 | 440299   | Hs.454641 | NR_033787           | DNM1P41                   | DNM1DN11-dynamin lpseudo           |
| chr2-319  | 8.607726 | 0.287946 | 0.802386 | 0.358862 | 0.719698   | 0.981636 | chr2  | 31902042 | 31902338 | + | 0 | NA | intron (NAluS6 S1        | -98210 | NR_146994 | 1.05E+08 | Hs.58038  | NR_146994           | ENSG000004LINC0194E       | - long intencRNA                   |
| chr9-976  | 9.20231  | 0.279208 | 0.778431 | 0.358668 | 0.719834   | 0.981636 | chr9  | 97669845 | 97670200 | + | 0 | NA | intron (NAluSx1 S1       | 27387  | NR_149094 | 7507     | Hs.654364 | NM_00038C           | ENSG000004XPA             | XP1 XPAC XPA, DNA protein-coding   |
| chr10-687 | 8.887175 | -0.28012 | 0.78136  | -0.3585  | 0.719967   | 0.981636 | chr10 | 68723258 | 68726559 | + | 0 | NA | intron (NAluSp SIN       | 3669   | NM_00128E | 55749    | Hs.49853  | NM_018237           | ENSG000004CCAR1           | - cell diviprotein-coding          |
| chr11-14  | 8.887175 | -0.28012 | 0.78136  | -0.3585  | 0.719967   | 0.981636 | chr11 | 14506285 | 14507980 | + | 0 | NA | intron (NMLTIH LI        | -7237  | NM_001144 | 1315     | Hs.33927  | NR_016451           | ENSG000004COPB1           | COPB                               |
| chr12-114 | 8.887175 | -0.28012 | 0.78136  | -0.3585  | 0.719967   | 0.981636 | chr12 | 1.14E+08 | 1.14E+08 | + | 0 | NA | intron (N) (N)  S1       | 45418  | NM_18148E | 6910     | Hs.38171  | ENM_00019Z          | ENSG000004TBX5            | HOS                                |
| chr14-39  | 8.887175 | -0.28012 | 0.78136  | -0.3585  | 0.719967   | 0.981636 | chr14 | 39029480 | 39033835 | + | 0 | NA | TTS (NM_TTS (NM_C        | -71483 | NR_14654E | 1.05E+08 | NR_14654E | ENSG000004SEC23A-AS | - SEC23A arncRNA          |                                    |
| chr15-944 | 8.887175 | -0.28012 | 0.78136  | -0.3585  | 0.719967   | 0.981636 | chr15 | 94401605 | 94403163 | + | 0 | NA | intron (Nintron (N       | 46454  | NM_00115E | 55784    | Hs.33368  | NM_01834E           | ENSG000004MCTP2           | - multiple protein-coding          |
| chr16-563 | 8.887175 | -0.28012 | 0.78136  | -0.3585  | 0.719967   | 0.981636 | chr16 | 56408350 | 56408993 | + | 0 | NA | intron (Nintron (N       | 16318  | NM_00132E | 267      | Hs.295137 | NM_001144           | ENSG000004CAMFR           | GP78 RNFA4autocrincprotein-coding  |
| chr19-217 | 8.887175 | -0.28012 | 0.78136  | -0.3585  | 0.719967   | 0.981636 | chr19 | 21726382 | 21728397 | + | 0 | NA | exon (NM_exon (NM        | -23356 | NR_02452Z | 641367   | Hs.68012  | NR_02452Z           | ENSG000004LOC641367       | - cyclin Y pseudo                  |
| chr2-174  | 8.887175 | -0.28012 | 0.78136  | -0.3585  | 0.719967   | 0.981636 | chr2  | 1.75E+08 | 1.75E+08 | + | 0 | NA | intron (Nintron (N       | 25125  | NM_00120E | 1123     | Hs.38013  | NM_00182Z           | ENSG000004CHN1            | ARHGAP2 Chimerin protein-coding    |
| chr5-137  | 8.887175 | -0.28012 | 0.78136  | -0.3585  | 0.719967   | 0.981636 | chr5  | 1.38E+08 | 1.38E+08 | + | 0 | NA | intron (NAluSx SIN       | 58190  | NM_01438E | 27039    | Hs.716884 | NM_01438E           | ENSG000004PKD2L2          | TRPP5                              |
| chr7-101  | 8.887175 | -0.28012 | 0.78136  | -0.3585  | 0.719967   | 0.981636 | chr7  | 1.01E+08 | 1.01E+08 | + | 0 | NA | exon (NM_exon (NM        | 3005   | NM_030961 | 81844    | Hs.521092 | NM_030961           | ENSG000004TRIM56          | TRIP109                            |
| chr7-105  | 8.887175 | -0.28012 | 0.78136  | -0.3585  | 0.719967   | 0.981636 | chr7  | 1.05E+08 | 1.05E+08 | + | 0 | NA | intron (NAluS6 S1        | 27861  | NM_182931 | 55904    | Hs.59226  | NM_01868Z           | ENSG000004KMT2E           | HDCMC04 lysine mcprotein-coding    |
| chr7-134  | 8.887175 | -0.28012 | 0.78136  | -0.3585  | 0.719967   | 0.981636 | chr7  | 1.34E+08 | 1.34E+08 | + | 0 | NA | intron (Nintron (N       | 21710  | NM_03282E | 84912    | Hs.490181 | NM_03282E           | ENSG000004SLC35B4         | YEA YEA4 solute εprotein-coding    |
| chr8-143  | 8.887175 | -0.28012 | 0.78136  | -0.3585  | 0.719967   | 0.981636 | chr8  | 1.44E+08 | 1.44E+08 | + | 0 | NA | intron (Nintron (N       | -4683  | NM_00044E | 5339     | Hs.43424  | NR_00044E           | ENSG000004PLEC            | EBS1 EBSN plectin protein-coding   |
| chr9-657  | 8.887175 | -0.28012 | 0.78136  | -0.3585  | 0.719967   | 0.981636 | chr9  | 65700251 | 65701509 | + | 0 | NA | intron (Nintron (N       | 24952  | NM_00136E | 220869   | Hs.35595  | NM_00102Z           | ENSG000004CBWD5           | CBWD3 DC3COB mcprotein-coding      |
| chrX-271  | 8.887175 | -0.28012 | 0.78136  | -0.3585  | 0.719967   | 0.981636 | chrX  | 271452   | 2721181  | + | 0 | NA | intron (Nintron (N       | 28021  | NM_002414 | 4267     | Hs.65334  | NR_002414           | ENSG000004CD99            | HBA71 MICCD99 mcprotein-coding     |
| chr12-194 | 12.1516  | -0.24328 | 0.678621 | -0.3585  | 0.719972   | 0.981636 | chr12 | 1945200  | 1946990  | + | 0 | NA | TTS (NM_TTS (NM_L        | -9179  | NR_03654E | 1E+08    | Hs.737031 | NR_03654E           | ENSG000004LINC0094C       | - long intencRNA                   |
| chr7-100  | 8.895033 | -0.28166 | 0.785696 | -0.35849 | 0.719979   | 0.981636 | chr7  | 1E+08    | 1E+08    | + | 0 | NA | intron (NAluJr SIN       | -7535  | NR_03656E | 1.02E+08 | Hs.52107  | NR_03656E           | ENSG000004TAG3L5P         | FDFACT LC3TAG3L5P-ncRNA            |
| chr11-63  | 8.664582 | 0.285904 | 0.79755  | 0.358478 | 0.719986   | 0.981636 | chr11 | 63990944 | 63991669 | + | 0 | NA | intron (Nintron (N       | 5453   | NR_00308E | 55611    | Hs.47378  | NM_01767C           | ENSG000004OTUB1           | HSPC263 COTU deubiprotein-coding   |
| chr15-504 | 8.664582 | 0.285904 | 0.79755  | 0.358478 | 0.719986   | 0.981636 | chr15 | 50471988 | 50471859 | + | 0 | NA | intron (NAluSx SIN       | 47682  | NM_00112E | 9101     | Hs.443731 | NM_005154           | ENSG000004USP8            | HumORF8 Fubiquitin protein-coding  |
| chr19-88  | 8.664582 | 0.285904 | 0.79755  | 0.358478 | 0.719986   | 0.981636 | chr19 | 8806994  | 8807527  | + | 0 | NA | 3' UTR (N3' UTR (N       | 14803  | NM_001304 | 148156   | Hs.349444 | NM_14469Z           | ENSG000004ZNF558          | - zinc fingprotein-coding          |
| chr9-954  | 8.664582 | 0.285904 | 0.79755  | 0.358478 | 0.719986   | 0.981636 | chr9  | 95455464 | 95456847 | + | 0 | NA | intron (Nintron (N       | -7454  | NR_03898Z | 1.01E+08 | Hs.661847 | NR_03898Z           | LOC100507                 | - uncharactncRNA                   |
| chr16-197 | 8.160136 | 0.296698 | 0.82791  | 0.35837  | 0.720066   | 0.981636 | chr16 | 1976834  | 1976834  | + | 0 | NA | exon (NM_exon (NM        | 4206   | NM_09645E | 10607    | Hs.513267 | NM_00645E           | ENSG000004TBL3            | SAZD UTP1 transduciprotein-coding  |
| chr2-134  | 8.160136 | 0.296698 | 0.82791  | 0.35837  | 0.720066   | 0.981636 | chr2  | 1.34E+08 | 1.34E+08 | + | 0 | NA | intron (Nintron (N       | 16907  | NM_00241C | 4249     | Hs.4988   | NM_00241C           | ENSG000004MGAT5           | GNT-V GNT1alpha-1,εprotein-coding  |
| chr4-1027 | 8.160136 | 0.296698 | 0.82791  | 0.35837  | 0.720066   | 0.981636 | chr4  | 1.03E+08 | 1.03E+08 | + | 0 | NA | intron (N) (N)  LI       | 41667  | NM_00590E | 4126     | Hs.48041  | NR_00590E           | ENSG000004MANBA           | MANB1                              |
| chr22-362 | 12.61306 | -0.23805 | 0.665317 | -0.35781 | 0.720489   | 0.981636 | chr22 | 36279776 | 36301624 | + | 0 | NA | intron (N) (N)  Ret      | -3793  | NR_106877 | 1.02E+08 | NR_106877 | ENSG000004MIR6819   | hsa-mir-εmicroRNA ncRNA   |                                    |
| chr5-5451 | 12.61306 | -0.23805 | 0.665317 | -0.35781 | 0.720489   | 0.981636 | chr5  | 54518523 | 54522735 | + | 0 | NA | 3' UTR (N3' UTR (N       | 2870   | NM_00110Z | 112574   | Hs.43275  | NR_05287C           | ENSG000004SNX18           | SH3PX2 SF sorting rprotein-coding  |
| chr12-534 | 8.623442 | 0.284511 | 0.795241 | 0.357767 | 0.720518   | 0.981636 | chr12 | 5340008  | 53402037 | + | 0 | NA | intron (N) (N)  LMB8 LIN | 19463  | NM_00310E | 6667     | Hs.620754 | NM_00310E           | ENSG000004SP1             | - Spl transprotein-coding          |
| chr17-81  | 8.623442 | 0.284511 | 0.795241 | 0.357767 | 0.720518   | 0.981636 | chr17 | 81911827 | 81913022 | + | 0 | NA | exon (NM_exon (NM        | -1030  | NM_00133C | 5833     | Hs.56984  | NM_002861           | ENSG000004PCYT2           | ET                                 |
| chr3-160  | 8.623442 | 0.284511 | 0.795241 | 0.357767 | 0.720518   | 0.981636 | chr3  | 1.61E+08 | 1.61E+08 | + | 0 | NA | promoter-promoter-       | -668   | NR_003001 | 677767   | Hs.67595  | NR_003001           | ENSG000004SCARNA7         | U90                                |
| chr1-193  | 9.169028 | 0.276217 | 0.772138 | 0.357731 | 0.720545   | 0.981636 | chr1  | 19305323 | 19308423 | + | 0 | NA | intron (Nintron (N       | 5269   | NM_00368E | 8574     | Hs.57188  | NM_00368E           | ENSG000004AKR7A2          | AFAR AFAlaldo-ketεprotein-coding   |
| chr1-179  | 9.169028 | 0.276217 | 0.772138 | 0.357731 | 0.720545   | 0.981636 | chr1  | 1.8E+08  | 1.8E+08  | + | 0 | NA | exon (NM_exon (NM        | 42336  | NM_01481C | 9857     | Hs.41304  | NM_01481C           | ENSG000004CEP350          | CAP350 Gε centroson protein-coding |
| chr1-225  | 9.169028 | 0.276217 | 0.772138 | 0.357731 | 0.720545   | 0.981636 | chr1  | 2.26E+08 | 2.26E+08 | + | 0 | NA | intron (Nintron (N       | 20355  | NM_01469E | 9725     | Hs.119387 | NM_01469E           | ENSG000004TMEM63A         | KIAA0792                           |
| chr11-63  | 9.169028 | 0.276217 | 0.772138 | 0.357731 | 0.720545   | 0.981636 | chr11 | 63818104 | 63825791 | + | 0 | NA | intron (NAluJo SIN       | 8491   | NM_138471 | 144097   | Hs.50279  | NM_138471           | ENSG000004SPINDOC         | C1lorf84 spindin protein-coding    |
| chr11-77  | 9.169028 | 0.276217 | 0.772138 | 0.357731 | 0.720545   | 0.981636 | chr11 | 77309044 | 77731852 | + | 0 | NA | intron (N) (N)  int      | 89436  | NM_01657E | 51773    | Hs.42022  | NR_01657E           | ENSG000004RSF1            | HXBXP RSF remodεlir protein-coding |
| chr12-53  | 9.169028 | 0.276217 | 0.772138 | 0.357731 | 0.720545   | 0.981636 | chr12 | 53074208 | 53075903 | + | 0 | NA | intron (Nintron (N       | 4335   | NM_03284C | 84926    | Hs.343334 | NM_03284C           | ENSG000004SPRYD3          | - SPRY domε protein-coding         |
| chr12-54  | 9.169028 | 0.276217 | 0.772138 | 0.357731 | 0.720545   | 0.981636 | chr12 | 54345510 | 54350489 | + | 0 | NA | intron (Nintron (N       | -5692  | NR_12048E | 1.03E+08 | Hs.670941 | NR_12048E           | ENSG000004LOC102724       | - uncharactncRNA                   |
| chr13-48  | 9.169028 | 0.276217 | 0.772138 | 0.357731 | 0.720545   | 0.981636 | chr13 | 48001451 | 4801650  | + | 0 | NA | TTS (NM_TTS (NM_C        | 3824   | NR_01828Z | 55270    | Hs.144407 | NM_01828Z           | ENSG000004NUDT15          | MTH2 NUDT1nudix hycprotein-coding  |
| chr15-78  | 9.169028 | 0.276217 | 0.772138 | 0.357731 | 0.720545   | 0.981636 | chr15 | 78041257 | 78063227 | + | 0 | NA | exon (NM_exon (NM        | -7467  | NR_02699E | 91450    | Hs.40676  | NR_02699E           | LOC91450                  | - uncharactncRNA                   |
| chr15-84  | 9.169028 | 0.276217 | 0.772138 | 0.357731 | 0.720545   | 0.981636 | chr15 | 84186664 | 84189201 | + | 0 | NA | IntergeniMamGypL TF      | -3916  | NR_03373E | 440300   | Hs.54656  | NR_03373E           | LOC44030C                 | - chondroitpseudo                  |
| chr17-78  | 9.169028 | 0.276217 | 0.772138 | 0.357731 | 0.720545</ |          |       |          |          |   |   |    |                          |        |           |          |           |                     |                           |                                    |

|            |          |          |          |          |          |          |       |          |          |   |      |                     |                  |                   |            |                     |                                     |                |
|------------|----------|----------|----------|----------|----------|----------|-------|----------|----------|---|------|---------------------|------------------|-------------------|------------|---------------------|-------------------------------------|----------------|
| chr2-1175  | 5.19642  | -0.35935 | 1.007005 | -0.35685 | 0.721201 | 0.981636 | chr2  | 1.18E+08 | 1.18E+08 | + | 0 NA | intron (NLIPA4 LIN  | 90149 NR_158155  | 1.08E+08          | NR_158150  | LOC10798E-          | uncharactncRNA                      |                |
| chr2-1282  | 5.19642  | -0.35935 | 1.007005 | -0.35685 | 0.721201 | 0.981636 | chr2  | 1.28E+08 | 1.28E+08 | + | 0 NA | intron (NLIMB3 LIN  | 20681 NM_004807  | 9394 Hs. 512841   | NR_004807  | ENSG000004HS6ST1    | HHL15 HSGS heparan s protein-coding |                |
| chr2-1615  | 5.19642  | -0.35935 | 1.007005 | -0.35685 | 0.721201 | 0.981636 | chr2  | 1.61E+08 | 1.61E+08 | + | 0 NA | intron (Nintron (N  | -47915 NM_006593 | 10716 Hs. 210862  | NR_006593  | ENSG00000CTBR1      | IDDAS TBFT-box br protein-coding    |                |
| chr20-184  | 5.19642  | -0.35935 | 1.007005 | -0.35685 | 0.721201 | 0.981636 | chr20 | 18471032 | 18471997 | + | 0 NA | TTS (NR_CTS (NR_C   | 899 NR_03616C    | 1E+08             | NR_03616C  | ENSG00000MIR3192    | mir-3192 microRNA ncRNA             |                |
| chr22-457  | 5.19642  | -0.35935 | 1.007005 | -0.35685 | 0.721201 | 0.981636 | chr22 | 45733554 | 45733941 | + | 0 NA | intron (NALuSx1 SI  | -26777 NR_03991E | 1.01E+08          | NR_03991E  | ENSG00000MIR4762    | microRNA ncRNA                      |                |
| chr3-3784  | 5.19642  | -0.35935 | 1.007005 | -0.35685 | 0.721201 | 0.981636 | chr3  | 37843728 | 37844645 | + | 0 NA | intron (NLIPA6 LIN  | 17594 NR_110532  | 1.02E+08          | Hs. 657314 | NR_110532           | ENSG00000ITGA9-AS1                  | ITGA9 antncRNA |
| chr3-4705  | 5.19642  | -0.35935 | 1.007005 | -0.35685 | 0.721201 | 0.981636 | chr3  | 47052554 | 47053829 | + | 0 NA | intron (Nintron (N  | 41649 NR_02404C  | 1E+08             | Hs. 201522 | NR_02404C           | NRADDP                              | neurotropseudo |
| chr3-5140  | 5.19642  | -0.35935 | 1.007005 | -0.35685 | 0.721201 | 0.981636 | chr3  | 51402095 | 51403651 | + | 0 NA | intron (NMERS5A DN  | 11588 NM_01328E  | 29890 Hs. 11873E  | NR_01328E  | ENSG00000RBM15B     | HUMAGGGB RNA bindi protein-coding   |                |
| chr3-5758  | 5.19642  | -0.35935 | 1.007005 | -0.35685 | 0.721201 | 0.981636 | chr3  | 57585101 | 57585859 | + | 0 NA | intron (Nintron (N  | 11864 NM_00166C  | 378 Hs. 65218E    | NR_00166C  | ENSG00000CARF4      | ARF2 ADP ribos protein-coding       |                |
| chr3-1422  | 5.19642  | -0.35935 | 1.007005 | -0.35685 | 0.721201 | 0.981636 | chr3  | 1.42E+08 | 1.42E+08 | + | 0 NA | intron (Nintron (N  | 14235 NM_00103E  | 256356 Hs. 135904 | NR_15277E  | ENSG00000CGK5       | glycerol protein-coding             |                |
| chr4-309C  | 5.19642  | -0.35935 | 1.007005 | -0.35685 | 0.721201 | 0.981636 | chr4  | 3090911  | 3093563  | + | 0 NA | intron (NALuSx3 SI  | 17556 NM_00211E  | 3064 Hs. 51845C   | NR_00211E  | ENSG00000HHT        | HD IT15 Luntingtiprotein-coding     |                |
| chr5-7357  | 5.19642  | -0.35935 | 1.007005 | -0.35685 | 0.721201 | 0.981636 | chr5  | 73571409 | 73572973 | + | 0 NA | intron (Nintron (N  | 6448 NM_03217E   | 84135 Hs. 40670E  | NR_03217E  | ENSG00000UTP15      | NET21 UTP15 sm protein-coding       |                |
| chr5-1025  | 5.19642  | -0.35935 | 1.007005 | -0.35685 | 0.721201 | 0.981636 | chr5  | 1.03E+08 | 1.03E+08 | + | 0 NA | intron (NLIM4A LI   | 116945 NM_00091E | 5066 Hs. 36943C   | NR_00091E  | ENSG00000PAM        | PAL PHM peptidyl protein-coding     |                |
| chr7-3301  | 5.19642  | -0.35935 | 1.007005 | -0.35685 | 0.721201 | 0.981636 | chr7  | 33017029 | 33018858 | + | 0 NA | intron (Nintron (N  | 22963 NM_00135E  | 51251 Hs. 48793E  | NR_00135E  | ENSG00000NT5C3A     | NT5C3 P5' 5' nucle protein-coding   |                |
| chr7-1574  | 5.19642  | -0.35935 | 1.007005 | -0.35685 | 0.721201 | 0.981636 | chr7  | 1.57E+08 | 1.57E+08 | + | 0 NA | intron (NALuSp SIN  | 64388 NM_05824E  | 10049 Hs. 49074E  | NR_00549E  | ENSG00000DNAJB6     | DJ4 DnaJ DnaJ heat protein-coding   |                |
| chr9-1908  | 5.19642  | -0.35935 | 1.007005 | -0.35685 | 0.721201 | 0.981636 | chr9  | 19080862 | 19081624 | + | 0 NA | intron (Nintron (N  | -17457 NR_00300E | 677776 Hs. 68963E | NR_00300E  | ENSG00000SCARN28    | U92 small Ca ncRNA                  |                |
| chr9-2201  | 5.19642  | -0.35935 | 1.007005 | -0.35685 | 0.721201 | 0.981636 | chr9  | 22016084 | 22016740 | + | 0 NA | intron (NLIP1 LINE  | -7099 NM_07848E  | 1030 Hs. 72901    | NR_00493E  | ENSG00000CDKN2B     | CDK4I INK cyclin d protein-coding   |                |
| chrX-1685  | 5.19642  | -0.35935 | 1.007005 | -0.35685 | 0.721201 | 0.981636 | chrX  | 16853268 | 16854530 | + | 0 NA | intron (NALuSx SIN  | 15964 NM_00119E  | 5931 Hs. 49575E   | NR_00289E  | ENSG00000RBPB7      | RbAp46 Rb bindi protein-coding      |                |
| chr10-245  | 5.19642  | -0.35935 | 1.007005 | -0.35685 | 0.721201 | 0.981636 | chr10 | 24590256 | 24590455 | + | 0 NA | non-codir non-codir | 32488 NM_001367  | 57584 Hs. 52419E  | NR_02082E  | ENSG00000ARHGAP21   | ARHGAP10 Rho GTPas protein-coding   |                |
| chr17-401  | 10.17006 | 0.261115 | 0.73221  | 0.356612 | 0.721382 | 0.981636 | chr17 | 40167563 | 40168372 | + | 0 NA | intron (Nintron (N  | 6034 NR_10692E   | 1.02E+08          | NR_10692E  | ENSG00000MIR6866    | hsa-mir-6866 microRNA ncRNA         |                |
| chr17-1681 | 10.17006 | 0.261115 | 0.73221  | 0.356612 | 0.721382 | 0.981636 | chr17 | 1.68E+08 | 1.68E+08 | + | 0 NA | intron (Nintron (N  | 20910 NM_001031  | 261726 Hs. 209431 | NR_15290E  | ENSG00000TIPRL      | TIP TIP41TOR sign protein-coding    |                |
| chr15-671  | 10.17006 | 0.261115 | 0.73221  | 0.356612 | 0.721382 | 0.981636 | chr15 | 67164807 | 67167187 | + | 0 NA | promoter-promoter-  | -158 NM_00114E   | 4088 Hs. 72798E   | NR_00590E  | ENSG00000SMAD3      | HSPC193 SMAD fami protein-coding    |                |
| chr19-167  | 10.17006 | 0.261115 | 0.73221  | 0.356612 | 0.721382 | 0.981636 | chr19 | 36744912 | 36753847 | + | 0 NA | exon (NM exon (NM   | 23428 NM_00119E  | 342892 Hs. 406307 | NR_00119E  | ENSG00000ZNF850     | ZNF850P zinc fing protein-coding    |                |
| chr5-368   | 10.17006 | 0.261115 | 0.73221  | 0.356612 | 0.721382 | 0.981636 | chr5  | 1.69E+08 | 1.69E+08 | + | 0 NA | intron (NFRAM SINE  | -11111 NM_00135E | 345630 Hs. 16626E | NR_00135E  | ENSG00000FBLL1      | fibillar protein-coding             |                |
| chr1-2085  | 10.70779 | 0.25661  | 0.71968  | 0.356561 | 0.721421 | 0.981636 | chr1  | 20892353 | 20893591 | + | 0 NA | intron (NALuJr LI   | 95460 NR_03165E  | 1E+08             | NR_03165E  | ENSG00000MIR1256    | MIRN1256 microRNA ncRNA             |                |
| chr16-875  | 5.640311 | -0.34801 | 0.976241 | -0.35648 | 0.72148  | 0.981636 | chr16 | 87978545 | 87978545 | + | 0 NA | intron (NLIME4a LI  | 8155 NM_00117E   | 54971 Hs. 46170E  | NR_01786E  | ENSG00000BANP       | BENDI SM BTG3 ass protein-coding    |                |
| chr17-365  | 5.640311 | -0.34801 | 0.976241 | -0.35648 | 0.72148  | 0.981636 | chr17 | 36969067 | 36969999 | + | 0 NA | intron (NHAL LINE   | 20579 NM_01213E  | 26574 Hs. 19574C  | NR_01213E  | ENSG00000AATF       | BFR2 CHE apoptos protein-coding     |                |
| chr1-1444  | 9.673474 | 0.267502 | 0.750669 | 0.356351 | 0.721578 | 0.981636 | chr1  | 1.44E+08 | 1.44E+08 | + | 0 NA | intron (NLIP2 LINE  | 20699 NR_10407E  | 1.02E+08          | NR_10407E  | ENSG00000RNVU1-15   | RNU1-121 RNA, varisnRNA             |                |
| chr1-1542  | 9.673474 | 0.267502 | 0.750669 | 0.356351 | 0.721578 | 0.981636 | chr1  | 1.54E+08 | 1.54E+08 | + | 0 NA | intron (NALuSg4 SI  | -5299 NM_00611E  | 10456 Hs. 19962E  | NR_00611E  | ENSG00000HAX1       | HCLSBP1 HCLSL1 ass protein-coding   |                |
| chr1-1629  | 9.673474 | 0.267502 | 0.750669 | 0.356351 | 0.721578 | 0.981636 | chr1  | 1.63E+08 | 1.63E+08 | + | 0 NA | intron (Nintron (N  | -20541 NM_00130A | 51478 Hs. 49292E  | NR_00130A  | ENSG00000HSD17B7    | PRP1 SDR hydroxost protein-coding   |                |
| chr1-2195  | 9.673474 | 0.267502 | 0.750669 | 0.356351 | 0.721578 | 0.981636 | chr1  | 2.2E+08  | 2.2E+08  | + | 0 NA | intron (Nintron (N  | -57945 NR_046437 | 55532 Hs. 28445C  | NR_01871E  | ENSG00000SLC30A10   | HMDPC HMM solute c protein-coding   |                |
| chr10-588  | 9.673474 | 0.267502 | 0.750669 | 0.356351 | 0.721578 | 0.981636 | chr10 | 5881608  | 5886510  | + | 0 NA | exon (NM exon (NM   | -5513 NM_00125E  | 84893 Hs. 49854E  | NR_03280E  | ENSG00000FBH1       | GYLO18 PF F-box DN protein-coding   |                |
| chr11-455  | 9.673474 | 0.267502 | 0.750669 | 0.356351 | 0.721578 | 0.981636 | chr11 | 45978509 | 45979247 | + | 0 NA | intron (Nintron (N  | 56222 NM_00130C  | 120071 Hs. 86543  | NR_15231E  | ENSG00000LARGE2     | FBLTL BL LARGE xy protein-coding    |                |
| chr11-722  | 9.673474 | 0.267502 | 0.750669 | 0.356351 | 0.721578 | 0.981636 | chr11 | 72228292 | 72235877 | + | 0 NA | intron (Nintron (N  | 7317 NM_001567   | 3636 Hs. 52387E   | NR_001567  | ENSG00000INPPL1     | OPSM SHI inositol protein-coding    |                |
| chr12-488  | 9.673474 | 0.267502 | 0.750669 | 0.356351 | 0.721578 | 0.981636 | chr12 | 48853210 | 48856636 | + | 0 NA | promoter-promoter-  | -393 NR_03162E   | 1E+08             | NR_03162E  | ENSG00000MIR1291    | MIRN1291 microRNA ncRNA             |                |
| chr12-108  | 9.673474 | 0.267502 | 0.750669 | 0.356351 | 0.721578 | 0.981636 | chr12 | 1.09E+08 | 1.09E+08 | + | 0 NA | intron (Nintron (N  | 8920 NM_00707E   | 11153 Hs. 661891  | NR_00707E  | ENSG00000FICD       | HIP13 HYF FIC domai protein-coding  |                |
| chr12-118  | 9.673474 | 0.267502 | 0.750669 | 0.356351 | 0.721578 | 0.981636 | chr12 | 1.18E+08 | 1.18E+08 | + | 0 NA | intron (NL2b LINE   | 14463 NM_00134E  | 51347 Hs. 64442C  | NR_01628E  | ENSG00000TAOK3      | DPK JIK VTAO kinas protein-coding   |                |
| chr14-102  | 9.673474 | 0.267502 | 0.750669 | 0.356351 | 0.721578 | 0.981636 | chr14 | 1.03E+08 | 1.03E+08 | + | 0 NA | intron (NLIM5c LI   | 39333 NM_03094E  | 81693 Hs. 534494  | NR_03094E  | ENSG00000AMN        | PR01028 eamion as protein-coding    |                |
| chr16-89   | 9.673474 | 0.267502 | 0.750669 | 0.356351 | 0.721578 | 0.981636 | chr16 | 89882253 | 89891449 | + | 0 NA | intron (NALuSx1 SI  | 12359 NM_01497E  | 22890 Hs. 41533C  | NR_01497E  | ENSG00000TCF25      | FKSG26 Hx transcrip protein-coding  |                |
| chr17-155  | 9.673474 | 0.267502 | 0.750669 | 0.356351 | 0.721578 | 0.981636 | chr17 | 15625940 | 15636711 | + | 0 NA | intron (NLIMC4a LI  | -11621 NM_00128E | 374286 Hs. 548021 | NR_00638E  | ENSG00000CDRT1      | C17ORF1 CCMT1A dup protein-coding   |                |
| chr17-67   | 9.673474 | 0.267502 | 0.750669 | 0.356351 | 0.721578 | 0.981636 | chr17 | 67236518 | 67238977 | + | 0 NA | intron (NALuSx SIN  | -7029 NR_13639E  | 1.02E+08          | NR_13639E  | LOC10192E-          | uncharactncRNA                      |                |
| chr19-982  | 9.673474 | 0.267502 | 0.750669 | 0.356351 | 0.721578 | 0.981636 | chr19 | 9809611  | 9811938  | + | 0 NA | 3' UTR (N3' UTR (N  | 8305 NM_00131E   | 54850 Hs. 12439   | NR_01770E  | ENSG00000FBXL12     | Fbl12 F-box anc protein-coding      |                |
| chr19-435  | 9.673474 | 0.267502 | 0.750669 | 0.356351 | 0.721578 | 0.981636 | chr19 | 43991427 | 43997463 | + | 0 NA | intron (NMER77B LI  | 8425 NR_110727   | 1.02E+08          | NR_110727  | ENSG00000LOC10192E- | uncharactncRNA                      |                |
| chr19-535  | 9.673474 | 0.267502 | 0.750669 | 0.356351 | 0.721578 | 0.981636 | chr19 | 53571660 | 53579819 | + | 0 NA | intron (NALuSx1 SI  | 20432 NM_00107E  | 55422 Hs. 185674  | NR_01855E  | ENSG00000ZNF331     | RITA ZNF2 zinc fing protein-coding  |                |
| chr20-385  | 9.673474 | 0.267502 | 0.750669 | 0.356351 | 0.721578 | 0.981636 | chr20 | 3854181  | 3866109  | + | 0 NA | intron (Nintron (N  | 1331 NR_03792E   | 57506 Hs. 57036E  | NR_02074E  | ENSG00000CMV5       | CARDIF IFI mitocho protein-coding   |                |
| chr22-302  | 9.673474 | 0.267502 | 0.750669 | 0.356351 | 0.721578 | 0.981636 | chr22 | 30240893 | 30246086 | + | 0 NA | 3' UTR (N3' UTR (N  | -2721 NR_14894E  | 91370 Hs. 65899E  | NR_05285E  | ENSG00000LOC91370   | uncharactncRNA                      |                |
| chr3-4905  | 9.673474 | 0.267502 | 0.750669 | 0.356351 | 0.721578 | 0.981636 | chr3  | 49098713 | 49103196 | + | 0 NA | intron (NALuSx SIN  | -1040 NR_10695E  | 1.02E+08          | NR_10695E  | ENSG00000MIR6890    | hsa-mir-6890 microRNA ncRNA         |                |
| chr4-289   | 9.673474 | 0.267502 | 0.750669 | 0.356351 | 0.721578 | 0.981636 | chr4  | 2896485  | 2901017  | + | 0 NA | intron (Nintron (N  | 35486 NM_00112C  | 10227 Hs. 632581  | NR_00112C  | ENSG00000MFSD10     | TETRA NF major fac protein-coding   |                |
| chr7-2361  | 9.673474 | 0.267502 | 0.750669 | 0.356351 | 0.721578 | 0.981636 | chr7  | 2361895  | 2367632  | + | 0 NA | intron (Nintron (N  | 14436 NM_001037  | 8662 Hs. 371001   | NR_00375E  | EN                  |                                     |                |



|           |           |          |          |          |          |          |       |          |          |   |   |    |                     |        |           |          |           |                   |                     |                          |                             |  |
|-----------|-----------|----------|----------|----------|----------|----------|-------|----------|----------|---|---|----|---------------------|--------|-----------|----------|-----------|-------------------|---------------------|--------------------------|-----------------------------|--|
| chr2-6912 | 9.135746  | 0.273203 | 0.772142 | 0.353825 | 0.72347  | 0.981636 | chr2  | 69128489 | 69129365 | + | 0 | NA | intron (Nintron (N  | 25245  | NR_036073 | 1E+08    | NR_036073 | ENSG000003MIR3126 | mir-3126            | microRNA                 | ncRNA                       |  |
| chr6-432  | 9.135746  | 0.273203 | 0.772142 | 0.353825 | 0.72347  | 0.981636 | chr6  | 43205881 | 43206924 | + | 0 | NA | exon (NM exon (NM   | 23079  | NR_199184 | 10591    | Hs.109752 | NR_006443         | ENSG000003DNPH1     | G6orf108 2'              | -deoxyribose protein-coding |  |
| chr1-1804 | 9.624476  | 0.267732 | 0.756728 | 0.353802 | 0.723487 | 0.981636 | chr1  | 1.8E+08  | 1.8E+08  | + | 0 | NA | intron (NCharlieLz  | 4041   | NR_032366 | 84320    | Hs.200051 | NR_032366         | ENSG000003ACBD6     | -                        | acyl-CoA protein-coding     |  |
| chr6-443  | 9.624476  | 0.267732 | 0.756728 | 0.353802 | 0.723487 | 0.981636 | chr6  | 44392674 | 44392851 | + | 0 | NA | intron (NMER21B LI  | 9556   | NR_001252 | 988      | Hs.485471 | NR_001252         | ENSG000003CDC5L     | CDC5 CDC5                | cell divi protein-coding    |  |
| chr18-736 | 10.617451 | 0.25395  | 0.717935 | 0.353723 | 0.723546 | 0.981636 | chr18 | 736333   | 736605   | + | 0 | NA | intron (NMER20 DN   | -23805 | NR_148705 | 55556    | Hs.658551 | NR_017512         | ENSG000003ENOSF1    | FDCU RTS                 | enolase protein-coding      |  |
| chr19-174 | 4.487132  | 0.383317 | 1.085066 | 0.353266 | 0.723889 | 0.981636 | chr19 | 17422841 | 17423733 | + | 0 | NA | intron (NAluSq SI   | 3240   | NR_138401 | 93343    | Hs.515242 | NR_138401         | ENSG000003MVB12A    | CFBP FAM1                | multivesi protein-coding    |  |
| chr1-284  | 8.402144  | -0.28547 | 0.809278 | -0.35275 | 0.724278 | 0.981636 | chr1  | 28466259 | 28467614 | + | 0 | NA | intron (NAluSc8 SI  | 28786  | NR_002392 | 65979    | Hs.225641 | NR_002392         | ENSG000003PHACTR4   | PPP1R124                 | phosphatase protein-coding  |  |
| chr13-415 | 8.402144  | -0.28547 | 0.809278 | -0.35275 | 0.724278 | 0.981636 | chr13 | 41340221 | 41342360 | + | 0 | NA | intron (Nintron (N  | -29252 | NR_001354 | 9617     | Hs.381276 | NR_004294         | ENSG000003MTRF1     | MRF1 MTTF                | mitochondr protein-coding   |  |
| chr13-728 | 8.402144  | -0.28547 | 0.809278 | -0.35275 | 0.724278 | 0.981636 | chr13 | 72895815 | 72896974 | + | 0 | NA | intron (NLIPB1 LIN  | 114261 | NR_146205 | 10464    | Hs.441922 | NR_006346         | ENSG000003PIBF1     | C13orf24                 | progester protein-coding    |  |
| chr2-1278 | 8.402144  | -0.28547 | 0.809278 | -0.35275 | 0.724278 | 0.981636 | chr2  | 1.28E+08 | 1.28E+08 | + | 0 | NA | intron (NAluSx1 SI  | 7058   | NR_001354 | 5433     | Hs.715342 | NR_004805         | ENSG000003POLR2D    | HSRBP4 HS                | RNA polymer protein-coding  |  |
| chr4-849  | 8.402144  | -0.28547 | 0.809278 | -0.35275 | 0.724278 | 0.981636 | chr4  | 849384   | 849583   | + | 0 | NA | 3' UTR (N3' UTR (N  | -23354 | NR_006651 | 10815    | Hs.478933 | NR_006651         | ENSG000003CPLX1     | CPX-1 CPX                | complexir protein-coding    |  |
| chr4-1216 | 8.402144  | -0.28547 | 0.809278 | -0.35275 | 0.724278 | 0.981636 | chr4  | 1.22E+08 | 1.22E+08 | + | 0 | NA | intron (Nintron (N  | 8291   | NR_001154 | 308      | Hs.480652 | NR_001154         | ENSG000003ANXA5     | ANX5 ENX                 | anexin protein-coding       |  |
| chr7-9278 | 8.402144  | -0.28547 | 0.809278 | -0.35275 | 0.724278 | 0.981636 | chr7  | 92788419 | 92789201 | + | 0 | NA | intron (NLIM4 LINE  | 45149  | NR_001252 | 1021     | Hs.119882 | NR_001252         | ENSG000003CDK6      | MCPH12 PI                | cyclin deprotein-coding     |  |
| chr1-178  | 8.592011  | 0.291408 | 0.826186 | 0.352715 | 0.724302 | 0.981636 | chr1  | 1.79E+08 | 1.79E+08 | + | 0 | NA | intron (Nintron (N  | 4312   | NR_022371 | 64222    | Hs.584952 | NR_022371         | ENSG000003TOR3A     | ADIR ADIF                | torsin protein-coding       |  |
| chr1-2468 | 9.640192  | 0.264631 | 0.750877 | 0.35243  | 0.724516 | 0.981636 | chr1  | 2.47E+08 | 2.47E+08 | + | 0 | NA | intron (NAluJr4 SI  | 42498  | NR_015446 | 25909    | Hs.300887 | NR_015446         | ENSG000003AHCTF1    | ELYS MST1                | AT-hook protein-coding      |  |
| chr11-628 | 9.640192  | 0.264631 | 0.750877 | 0.35243  | 0.724516 | 0.981636 | chr11 | 62813492 | 62827912 | + | 0 | NA | intron (NAluJ SINE  | 11349  | NR_003164 | 6811     | Hs.654602 | NR_003164         | ENSG000003STX5      | SED5 STX                 | syntaxis protein-coding     |  |
| chr12-104 | 9.640192  | 0.264631 | 0.750877 | 0.35243  | 0.724516 | 0.981636 | chr12 | 1.04E+08 | 1.04E+08 | + | 0 | NA | intron (NMLT1H LTF  | 6971   | NR_013322 | 29915    | Hs.510655 | NR_013322         | ENSG000003HCF2      | HCF-2 HCF                | host cell protein-coding    |  |
| chr1-75   | 9.640192  | 0.264631 | 0.750877 | 0.35243  | 0.724516 | 0.981636 | chr15 | 75684417 | 75685620 | + | 0 | NA | intron (NMLTB SINE  | 27830  | NR_001897 | 1464     | Hs.513044 | NR_001897         | ENSG000003CSPG4     | HMW-MAA H                | chondroitin protein-coding  |  |
| chr2-8612 | 9.640192  | 0.264631 | 0.750877 | 0.35243  | 0.724516 | 0.981636 | chr2  | 86125377 | 86129156 | + | 0 | NA | exon (NM exon (NM   | -8604  | NR_004378 | 692225   | Hs.723087 | NR_004378         | ENSG000003SNORD94   | U94                      | small nucsnRNA              |  |
| chr9-324  | 9.640192  | 0.264631 | 0.750877 | 0.35243  | 0.724516 | 0.981636 | chr9  | 32433174 | 32434250 | + | 0 | NA | intron (Nintron (N  | 49069  | NR_001362 | 48       | Hs.567222 | NR_002197         | ENSG000003CACO1     | ACONS HEL                | aconitase protein-coding    |  |
| chr1-455  | 10.68237  | 0.252531 | 0.716824 | 0.352292 | 0.724619 | 0.981636 | chr1  | 45509859 | 45519980 | + | 0 | NA | exon (NM exon (NM   | 6965   | NR_181697 | 5052     | Hs.180909 | NR_002574         | ENSG000003PRDX1     | MSP23 NKF                | peroxidase protein-coding   |  |
| chr1-2038 | 10.68237  | 0.252531 | 0.716824 | 0.352292 | 0.724619 | 0.981636 | chr1  | 2.04E+08 | 2.04E+08 | + | 0 | NA | intron (NLIMC4 LIN  | 22940  | NR_001174 | 1E+08    | NR_001174 | ENSG000003ZBED6   | MGR                 | zinc fing protein-coding |                             |  |
| chr14-747 | 10.68237  | 0.252531 | 0.716824 | 0.352292 | 0.724619 | 0.981636 | chr14 | 74723999 | 74724812 | + | 0 | NA | intron (NAluJb SIN  | 11261  | NR_001318 | 51077    | Hs.579822 | NR_015962         | ENSG000003FCF1      | Bka C14orf               | FCF1 rRNA protein-coding    |  |
| chr19-457 | 10.68237  | 0.252531 | 0.716824 | 0.352292 | 0.724619 | 0.981636 | chr19 | 45775949 | 45779571 | + | 0 | NA | exon (NM exon (NM   | 1859   | NR_001288 | 1760     | Hs.631596 | NR_004405         | ENSG000003DMPK      | DM1 DM1                  | DM1 prote protein-coding    |  |
| chr22-40  | 9.176886  | 0.274495 | 0.779235 | 0.352262 | 0.724641 | 0.981636 | chr22 | 40365558 | 40366342 | + | 0 | NA | intron (NL2c LINE   | -4644  | NR_146413 | 27352    | Hs.474914 | NR_015705         | ENSG000003SGSM3     | CIP85 MAF                | small G protein-coding      |  |
| chr10-741 | 8.912599  | -0.27474 | 0.780076 | -0.35219 | 0.724692 | 0.981636 | chr10 | 74113848 | 74122984 | + | 0 | NA | 3' UTR (N3' UTR (N  | 32412  | NR_001322 | 26985    | Hs.500104 | NR_012095         | ENSG000003APM3      | -                        | adaptor protein-coding      |  |
| chr11-671 | 8.912599  | -0.27474 | 0.780076 | -0.35219 | 0.724692 | 0.981636 | chr11 | 67133881 | 67135361 | + | 0 | NA | intron (NAluSx1 SIN | 11538  | NR_012308 | 22992    | Hs.124147 | NR_012308         | ENSG000003KDM2A     | CXXC8 FBL                | lysine deprotein-coding     |  |
| chr12-105 | 8.912599  | -0.27474 | 0.780076 | -0.35219 | 0.724692 | 0.981636 | chr12 | 1.05E+08 | 1.05E+08 | + | 0 | NA | intron (NAluSc5 SI  | 25303  | NR_001034 | 160428   | Hs.42572  | NR_001034         | ENSG000003ALDH1L2   | mtFHD                    | aldehyde protein-coding     |  |
| chr12-11  | 8.912599  | -0.27474 | 0.780076 | -0.35219 | 0.724692 | 0.981636 | chr12 | 1.1E+08  | 1.1E+08  | + | 0 | NA | intron (Nintron (N  | 13021  | NR_001347 | 28981    | Hs.528382 | NR_014055         | ENSG000003IFT81     | CDV-1 CDV                | intraflag protein-coding    |  |
| chr12-124 | 8.912599  | -0.27474 | 0.780076 | -0.35219 | 0.724692 | 0.981636 | chr12 | 1.25E+08 | 1.25E+08 | + | 0 | NA | intron (Nintron (N  | 28921  | NR_003265 | 57647    | Hs.107382 | NR_032656         | ENSG000003DHX37     | DDX37 Dhr                | DEAH-box protein-coding     |  |
| chr13-11  | 8.912599  | -0.27474 | 0.780076 | -0.35219 | 0.724692 | 0.981636 | chr13 | 1.14E+08 | 1.14E+08 | + | 0 | NA | intron (NCpG        | -42917 | NR_02658C | 7027     | Hs.79353  | NR_007111         | ENSG000003TFDP1     | DILC DP1                 | transcrip protein-coding    |  |
| chr14-95  | 8.912599  | -0.27474 | 0.780076 | -0.35219 | 0.724692 | 0.981636 | chr14 | 95093585 | 95094113 | + | 0 | NA | intron (Nintron (N  | 39654  | NR_001199 | 23405    | Hs.87889  | NR_030621         | ENSG000003DICER1    | DCR1 Dicer               | dicer 1, protein-coding     |  |
| chr14-951 | 8.912599  | -0.27474 | 0.780076 | -0.35219 | 0.724692 | 0.981636 | chr14 | 95124044 | 95125079 | + | 0 | NA | exon (NM exon (NM   | 8942   | NR_001199 | 23405    | Hs.87889  | NR_030621         | ENSG000003DICER1    | DCR1 Dicer               | dicer 1, protein-coding     |  |
| chr20-63  | 8.912599  | -0.27474 | 0.780076 | -0.35219 | 0.724692 | 0.981636 | chr20 | 63557724 | 63562532 | + | 0 | NA | intron (NCpG        | 5969   | NR_001319 | 79025    | Hs.197755 | NR_024055         | ENSG000003FNDC11    | C20orf19                 | fibronect protein-coding    |  |
| chr22-45  | 8.912599  | -0.27474 | 0.780076 | -0.35219 | 0.724692 | 0.981636 | chr22 | 45541057 | 45544891 | + | 0 | NA | intron (NMTR SINE   | 40091  | NR_001999 | 2192     | Hs.24601  | NR_001999         | ENSG000003FBLN1     | FBLN FBL                 | fibulin 1 protein-coding    |  |
| chr3-5205 | 8.912599  | -0.27474 | 0.780076 | -0.35219 | 0.724692 | 0.981636 | chr3  | 52055051 | 52052120 | + | 0 | NA | intron (Nintron (N  | 5236   | NR_001947 | 1849     | Hs.591664 | NR_001947         | ENSG000003DUSP7     | MKPX PYS                 | tubal spec protein-coding   |  |
| chr5-1321 | 8.912599  | -0.27474 | 0.780076 | -0.35219 | 0.724692 | 0.981636 | chr5  | 1.32E+08 | 1.32E+08 | + | 0 | NA | intron (Nintron (N  | 10378  | NR_04747C | 1.01E+08 | Hs.519562 | NR_04747C         | ENSG000003P4HA2-AS1 | -                        | P4HA2 antncRNA              |  |
| chr6-315  | 8.912599  | -0.27474 | 0.780076 | -0.35219 | 0.724692 | 0.981636 | chr6  | 3152608  | 3156016  | + | 0 | NA | TTS (NM_TTS (NM_C   | 3232   | NR_00131C | 7280     | Hs.654542 | NR_001069         | ENSG000003TUBB2A    | ORC5M5 T                 | tubulin protein-coding      |  |
| chr7-104  | 8.912599  | -0.27474 | 0.780076 | -0.35219 | 0.724692 | 0.981636 | chr7  | 1.04E+08 | 1.04E+08 | + | 0 | NA | intron (NMSTD LTR   | 8185   | NR_002555 | 5001     | Hs.432942 | NR_002555         | ENSG000003ORC5      | ORC5L ORC                | ubiquitin protein-coding    |  |
| chr19-11  | 8.920456  | -0.27624 | 0.784405 | -0.35216 | 0.724716 | 0.981636 | chr19 | 1107946  | 1110386  | + | 0 | NA | exon (NM exon (NM   | 4516   | NR_001035 | 2879     | Hs.433951 | NR_002085         | ENSG000003GPX4      | GPX-4 GSF                | glutathic protein-coding    |  |
| chr19-18  | 8.920456  | -0.27624 | 0.784405 | -0.35216 | 0.724716 | 0.981636 | chr19 | 18538235 | 18538472 | + | 0 | NA | exon (NM exon (NM   | 5220   | NR_012181 | 23770    | Hs.173464 | NR_012181         | ENSG000003FKBP8     | FKBP38 FK                | FKBP prol protein-coding    |  |
| chr5-129  | 8.920456  | -0.27624 | 0.784405 | -0.35216 | 0.724716 | 0.981636 | chr5  | 1.3E+08  | 1.3E+08  | + | 0 | NA | intron (Nintron (N  | -52523 | NR_001257 | 1E+08    | Hs.582534 | NR_001257         | ENSG000003MINAR2    | KIAA1024                 | membrane protein-coding     |  |
| chr1-236  | 9.681332  | 0.26592  | 0.755552 | 0.351954 | 0.724873 | 0.981636 | chr1  | 2.36E+08 | 2.36E+08 | + | 0 | NA | intron (NAluSq SIN  | 36104  | NR_002508 | 4811     | Hs.356624 | NR_002508         | ENSG000003CNID1     | NID                      | nidogen 1 protein-coding    |  |
| chr11-67  | 9.681332  | 0.26592  | 0.755552 | 0.351954 | 0.724873 | 0.981636 | chr11 | 67226694 | 67230092 | + | 0 | NA | intron (Nintron (N  | -11621 | NR_001255 | 22992    | Hs.124147 | NR_012308         | ENSG000003KDM2A     | CXXC8 FBL                | lysine deprotein-coding     |  |
| chr19-161 | 9.681332  | 0.26592  | 0.755552 | 0.351954 | 0.724873 | 0.981636 | chr19 | 16126366 | 1616306  | + | 0 | NA | exon (NM exon (NM   | 10009  | NR_00683C | 10975    | Hs.8372   | NR_00683C         | ENSG000003UCR11     | U10008D                  | ubiquinol protein-coding    |  |
| chr7-939  | 9.681332  | 0.26592  | 0.755552 | 0.351954 | 0.724873 | 0.981636 | chr7  | 93997643 | 93998906 | + | 0 | NA | intron (Nintron (N  | 6081   | NR_001317 | 10282    | Hs.489132 | NR_005865         | ENSG000003BET1      | HBET1                    | Bet1 golg protein-coding    |  |
| chr9-1314 | 9.681332  | 0.26592  | 0.755552 | 0.351954 | 0.724873 | 0.981636 | chr9  | 1.31E+08 | 1.31E+08 | + | 0 | NA | intron (Nintron (N  | 14806  | NR_013318 | 84726    | Hs.743955 | NR_013318         | ENSG000003PRRC2B    | BAT2L BAT                | proline protein-coding      |  |
| chr1-170  | 5.665734  | -0.33939 | 0.964488 | -0.35188 | 0.724926 | 0.981636 | chr1  | 17037321 | 17037772 | + | 0 | NA | intron (NAluS6 SI   | 16624  | NR_00300C | 6390     | Hs.465924 | NR_00300C         | ENSG000003SDHB      | IP1 F                    | succinate protein-coding    |  |
| chr1-     |           |          |          |          |          |          |       |          |          |   |   |    |                     |        |           |          |           |                   |                     |                          |                             |  |



|                    |          |          |          |          |          |       |          |          |   |    |                     |                  |                   |                    |                                    |                           |
|--------------------|----------|----------|----------|----------|----------|-------|----------|----------|---|----|---------------------|------------------|-------------------|--------------------|------------------------------------|---------------------------|
| chr7-1051 8.904741 | -0.27325 | 0.778525 | -0.35098 | 0.725602 | 0.981636 | chr7  | 1.05E+08 | 1.05E+08 | 0 | NA | intron (Nintron (N  | 96936 NM_182931  | 55904 Hs. 592262  | ENSG00000CKMT2E    | HDCMC04P lysine mεprotein-coding   |                           |
| chr9-9208 8.904741 | -0.27325 | 0.778525 | -0.35098 | 0.725602 | 0.981636 | chr9  | 92088847 | 92089349 | 0 | NA | intron (NLMed LIN   | 26495 NM_00641E  | 10558 Hs. 90458   | ENSG00000SPTLC1    | HSAN1 HsN serine εprotein-coding   |                           |
| chr14-582 9.340773 | -0.26973 | 0.768835 | -0.35083 | 0.725713 | 0.981636 | chr14 | 58286387 | 58286702 | 0 | NA | intron (NAluSx1 SI  | -1489 NR_14659E  | 55451             | NR_14659E          | ENSG00000CLINC0021E                | C14orf107 long intεncRNA  |
| chr7-9277 10.12892 | 0.259875 | 0.741057 | 0.350682 | 0.725827 | 0.981636 | chr7  | 92777376 | 92777370 | 0 | NA | intron (NLIPIA7 LIN | 56406 NM_00125E  | 1021 Hs. 119882   | ENSG00000CDK6      | MCPH12 PI cyclin εprotein-coding   |                           |
| chr22-502 12.63063 | -0.23314 | 0.664962 | -0.35062 | 0.725885 | 0.981636 | chr22 | 50275200 | 50277661 | 0 | NA | intron (Nintron (N  | -6050 NR_110887  | 5600 Hs. 57732    | ENSG00000MAPK11    | P38E myotogen-εprotein-coding      |                           |
| chr1-193C 10.14464 | 0.256896 | 0.732277 | 0.350582 | 0.725902 | 0.981636 | chr1  | 1.93E+08 | 1.93E+08 | 0 | NA | intron (NSVA_F Ret  | 21617 NM_19796E  | 51022 Hs. 45828E  | ENSG00000GLRX2     | CGI-133 Cglutaredεprotein-coding   |                           |
| chr11-33C 10.14464 | 0.256896 | 0.732277 | 0.350582 | 0.725902 | 0.981636 | chr11 | 33098533 | 33099137 | 0 | NA | intron (Nintron (N  | 22685 NR_015451  | 283267 Hs. 533701 | ENSG00000LINC0029A | NCRN0029 long intεncRNA            |                           |
| chr13-497 10.14464 | 0.256896 | 0.732277 | 0.350582 | 0.725902 | 0.981636 | chr13 | 49714586 | 49722493 | 0 | NA | intron (Nintron (N  | -27052 NM_00127E | 84650 Hs. 43327E  | ENSG00000EBPL      | EBRPA EBP like protein-coding      |                           |
| chr14-52C 10.14464 | 0.256896 | 0.732277 | 0.350582 | 0.725902 | 0.981636 | chr14 | 52003719 | 52013060 | 0 | NA | 3' UTR (N3' UTR (N  | 18843 NM_01603E  | 51637 Hs. 534457  | ENSG00000CTRAF     | C14orf16εRNA transprotein-coding   |                           |
| chr7-754C 10.14464 | 0.256896 | 0.732277 | 0.350582 | 0.725902 | 0.981636 | chr7  | 75427134 | 75439695 | 0 | NA | intron (NAluY SINE  | 23092 NR_10401E  | 155400 Hs. 436034 | ENSG00000NSUN5P1   | NSUN5B WE NSUN5 pεpseudo           |                           |
| chr11-434 9.143604 | 0.271502 | 0.775716 | 0.350002 | 0.726337 | 0.981636 | chr11 | 43491850 | 43492776 | 0 | NA | intron (Nintron (N  | -67343 NR_031577 | 1E+08             | NR_031577          | ENSG00000MIR670                    | hsa-mir-εmicroRNA ncRNA   |
| chr17-602 9.143604 | 0.271502 | 0.775716 | 0.350002 | 0.726337 | 0.981636 | chr17 | 60218738 | 60219515 | 0 | NA | intron (Nintron (N  | 12519 NR_00299E  | 677681            | NR_00299E          | ENSG00000SCARNA20                  | ACA66 small Ca_ncRNA      |
| chr18-205 9.143604 | 0.271502 | 0.775716 | 0.350002 | 0.726337 | 0.981636 | chr18 | 20967934 | 20969308 | 0 | NA | intron (Nintron (N  | 143192 NM_00540E | 6093 Hs. 306307   | ENSG00000ROCK1     | P16OROCK Rho assocprotein-coding   |                           |
| chr20-137 9.143604 | 0.271502 | 0.775716 | 0.350002 | 0.726337 | 0.981636 | chr20 | 13769361 | 13769743 | 0 | NA | intron (NAluSz6 SI  | 15334 NM_01664E  | 51575 Hs. 369284  | ENSG00000CESF1     | ABTAP C2CESF1 nucleprotein-coding  |                           |
| chr5-7841 9.143604 | 0.271502 | 0.775716 | 0.350002 | 0.726337 | 0.981636 | chr5  | 78416617 | 78416996 | 0 | NA | intron (Nintron (N  | 56189 NM_00486E  | 9522 Hs. 482587   | ENSG00000SCAMP1    | SCAMP SCεsecretory protein-coding  |                           |
| chr3-1014 5.624595 | -0.34348 | 0.981582 | -0.34992 | 0.726398 | 0.981636 | chr3  | 10143204 | 10143520 | 0 | NA | intron (NAluSx SIN  | 1584 NM_19815E   | 7428 Hs. 517792   | ENSG00000VHL       | HRCAL RCεvon Hippεprotein-coding   |                           |
| chr1-162F 11.18681 | 0.246091 | 0.703484 | 0.349817 | 0.726476 | 0.981636 | chr1  | 1.63E+08 | 1.63E+08 | 0 | NA | intron (NAluSq SIN  | 15155 NM_17586E  | 127933 Hs. 12731C | ENSG00000UHMK1     | KIS KIST U2AF homεprotein-coding   |                           |
| chr9-8367 11.18681 | 0.246091 | 0.703484 | 0.349817 | 0.726476 | 0.981636 | chr9  | 83677059 | 83678186 | 0 | NA | intron (Nintron (N  | -30213 NR_13583E | 1.05E+08          | NR_13583E          | ENSG00000LOC10537E                 | uncharactεncRNA           |
| chr11-12E 8.639158 | 0.280562 | 0.803083 | 0.349717 | 0.726551 | 0.981636 | chr11 | 1.26E+08 | 1.26E+08 | 0 | NA | intron (NHAL LINE   | 26730 NM_02455E  | 79607 Hs. 27631E  | ENSG00000FAM118B   | - family wiprotein-coding          |                           |
| chrX-1307 7.940688 | -0.29613 | 0.847043 | -0.34961 | 0.726633 | 0.981636 | chrX  | 13751528 | 13751766 | 0 | NA | intron (NAluSx1 SI  | 16899 NM_00361E  | 8481 Hs. 6483     | ENSG00000CFD1      | 71-7A CXCFD1 centprotein-coding    |                           |
| chr3-100C 10.69022 | 0.251129 | 0.718354 | 0.349589 | 0.726647 | 0.981636 | chr3  | 1E+08    | 1E+08    | 0 | NA | intron (NLIPIA3 LIN | 16429 NM_02020E  | 56954 Hs. 43915E  | ENSG00000CNT2      | HEL-5-8a nitrilaseprotein-coding   |                           |
| chr1-625E 5.657877 | -0.33711 | 0.964439 | -0.34953 | 0.726688 | 0.981636 | chr1  | 62537945 | 62539058 | 0 | NA | intron (NLa2 LINE   | -59019 NM_01449E | 27329 Hs. 20915E  | ENSG00000ANGPTL3   | ANG-5 ANG angiopoicεprotein-coding |                           |
| chr11-69C 5.657877 | -0.33711 | 0.964439 | -0.34953 | 0.726688 | 0.981636 | chr11 | 69094091 | 69092112 | 0 | NA | TTS (NM_TTS (NM_C   | 8125 NR_03612E   | 1E+08             | NR_03612E          | ENSG00000MIR3164                   | - microRNA ncRNA          |
| chr11-702 5.657877 | -0.33711 | 0.964439 | -0.34953 | 0.726688 | 0.981636 | chr11 | 70205235 | 70205736 | 0 | NA | intron (NMLT1D LTF  | 2322 NM_003824   | 8772 Hs. 86131    | ENSG00000FADD      | GIG3 MORT1Fas assocprotein-coding  |                           |
| chr11-902 5.657877 | -0.33711 | 0.964439 | -0.34953 | 0.726688 | 0.981636 | chr11 | 90205612 | 90206650 | 0 | NA | intron (Nintron (N  | 16918 NM_012124  | 26973 Hs. 22857   | ENSG00000CHORDC1   | CHP1 cysteine protein-coding       |                           |
| chr15-80E 5.657877 | -0.33711 | 0.964439 | -0.34953 | 0.726688 | 0.981636 | chr15 | 80555957 | 80556899 | 0 | NA | non-codirnon-codir  | 6516 NR_12036E   | 1.02E+08          | NR_12036E          | ENSG00000LOC10192E                 | uncharactεncRNA           |
| chr15-82E 5.657877 | -0.33711 | 0.964439 | -0.34953 | 0.726688 | 0.981636 | chr15 | 82540328 | 82241062 | 0 | NA | intron (Nintron (N  | 21833 NM_00132E  | 79631 Hs. 459114  | ENSG00000EFL1      | EFTUD1 Fεelongaticεprotein-coding  |                           |
| chr17-29E 5.657877 | -0.33711 | 0.964439 | -0.34953 | 0.726688 | 0.981636 | chr17 | 29672355 | 29673505 | 0 | NA | TTS (NM_TTS (NM_C   | -51507 NM_032854 | 84940 Hs. 14304E  | ENSG00000COR06     | - coronin εprotein-coding          |                           |
| chr17-42E 5.657877 | -0.33711 | 0.964439 | -0.34953 | 0.726688 | 0.981636 | chr17 | 42616190 | 42416653 | 0 | NA | IntergeniAluYJ4 SI  | 6740 NM_00107E   | 7283 Hs. 27966E   | ENSG00000TUBG1     | CDCBM4 GC tubulin εprotein-coding  |                           |
| chr17-49E 5.657877 | -0.33711 | 0.964439 | -0.34953 | 0.726688 | 0.981636 | chr17 | 49833870 | 49835098 | 0 | NA | 3' UTR (N3' UTR (N  | 11426 NM_00124E  | 729220 Hs. 43413E | ENSG00000FLJ45513  | - uncharactεprotein-coding         |                           |
| chr18-351 5.657877 | -0.33711 | 0.964439 | -0.34953 | 0.726688 | 0.981636 | chr18 | 35102052 | 35102509 | 0 | NA | intron (Nintron (N  | 60867 NM_01426E  | 10982 Hs. 532824  | ENSG00000MAPRE2    | CSCSC2 Eεmicrotubεprotein-coding   |                           |
| chr2-1117 5.657877 | -0.33711 | 0.964439 | -0.34953 | 0.726688 | 0.981636 | chr2  | 1.12E+08 | 1.12E+08 | 0 | NA | 3' UTR (N3' UTR (N  | 2307 NR_03992E   | 1.01E+08          | NR_03992E          | ENSG00000MIR4771-1                 | - microRNA ncRNA          |
| chr20-367 5.657877 | -0.33711 | 0.964439 | -0.34953 | 0.726688 | 0.981636 | chr20 | 36791590 | 36791974 | 0 | NA | intron (NMLT10 LTF  | -18019 NM_00114E | 79980 Hs. 63226E  | ENSG00000DSN1      | C20orf172 DSN1 comεprotein-coding  |                           |
| chr22-38E 5.657877 | -0.33711 | 0.964439 | -0.34953 | 0.726688 | 0.981636 | chr22 | 38263880 | 38264444 | 0 | NA | intron (Nintron (N  | 8502 NM_00119E   | 25829 Hs. 18262E  | ENSG00000TMEM184B  | C22orf5 F transmemtεprotein-coding |                           |
| chr3-138E 5.657877 | -0.33711 | 0.964439 | -0.34953 | 0.726688 | 0.981636 | chr3  | 1.39E+08 | 1.39E+08 | 0 | NA | intron (NMER1A LI   | 46100 NM_00132C  | 80321 Hs. 53196E  | ENSG00000CEPT0     | BITE centrosomεprotein-coding      |                           |
| chr5-321E 5.657877 | -0.33711 | 0.964439 | -0.34953 | 0.726688 | 0.981636 | chr5  | 32132917 | 32135347 | 0 | NA | intron (NAluJr4 SI  | 40187 NM_02213C  | 64083 Hs. 40890E  | ENSG00000GOLPH3    | GOPPI GFP golgi phεprotein-coding  |                           |
| chr5-129E 5.657877 | -0.33711 | 0.964439 | -0.34953 | 0.726688 | 0.981636 | chr5  | 1.3E+08  | 1.3E+08  | 0 | NA | intron (NLIPI3 LINE | -63271 NR_12574E | 1.04E+08          | NR_12574E          | ENSG00000ADAMTS19-                 | ADAMTS19 ncRNA            |
| chr9-5027 5.657877 | -0.33711 | 0.964439 | -0.34953 | 0.726688 | 0.981636 | chr9  | 5027421  | 5028244  | 0 | NA | intron (NTigger1 E  | -13861 NM_00132E | 3717 Hs. 65621E   | ENSG00000JAK2      | JTK10 THCJanus kirεprotein-coding  |                           |
| chr9-3507 5.657877 | -0.33711 | 0.964439 | -0.34953 | 0.726688 | 0.981636 | chr9  | 35076463 | 35077287 | 0 | NA | intron (Nintron (N  | 3141 NM_00462E   | 2189 Hs. 591084   | ENSG00000FANGC     | FAG XRCC5 FA comεprotein-coding    |                           |
| chr9-1347 5.657877 | -0.33711 | 0.964439 | -0.34953 | 0.726688 | 0.981636 | chr9  | 1.35E+08 | 1.35E+08 | 0 | NA | intron (Nintron (N  | 78762 NR_039691  | 1.01E+08          | NR_039691          | ENSG00000MIR3689C                  | - microRNA ncRNA          |
| chr1-150E 9.64805  | 0.263059 | 0.752616 | 0.349526 | 0.726695 | 0.981636 | chr1  | 1.51E+08 | 1.51E+08 | 0 | NA | exon (NM exon (NM   | 2988 NM_00120E   | 1893 Hs. 81071    | ENSG00000ECM1      | URBWD extracellεprotein-coding     |                           |
| chr1-214E 9.64805  | 0.263059 | 0.752616 | 0.349526 | 0.726695 | 0.981636 | chr1  | 2.14E+08 | 2.14E+08 | 0 | NA | intron (Nintron (N  | 112423 NM_020197 | 56950 Hs. 66170   | ENSG00000SMDY2     | HSKM-B KMT SET and εprotein-coding |                           |
| chr1-227C 9.64805  | 0.263059 | 0.752616 | 0.349526 | 0.726695 | 0.981636 | chr1  | 2.27E+08 | 2.27E+08 | 0 | NA | intron (Nintron (N  | 150647 NM_020247 | 56997 Hs. 118241  | ENSG00000COQ8A     | ADCK3 ARCoenzymε protein-coding    |                           |
| chr10-102 9.64805  | 0.263059 | 0.752616 | 0.349526 | 0.726695 | 0.981636 | chr10 | 1.02E+08 | 1.02E+08 | 0 | NA | intron (Nintron (N  | -40799 NM_00128E | 4791 Hs. 73090    | ENSG00000NFKB2     | CVI10 Hεnuclear fεprotein-coding   |                           |
| chr11-11E 9.64805  | 0.263059 | 0.752616 | 0.349526 | 0.726695 | 0.981636 | chr11 | 1.19E+08 | 1.19E+08 | 0 | NA | exon (NM exon (NM   | -2419 NM_00210E  | 3014 Hs. 47787E   | ENSG00000H2AFX     | H2A.X H2A histεprotein-coding      |                           |
| chr12-12C 9.64805  | 0.263059 | 0.752616 | 0.349526 | 0.726695 | 0.981636 | chr12 | 1.2E+08  | 1.2E+08  | 0 | NA | exon (NM exon (NM   | -18622 NR_03971E | 1.01E+08          | NR_03971E          | ENSG00000MIR4498                   | mir-4498 microRNA ncRNA   |
| chr14-731 9.64805  | 0.263059 | 0.752616 | 0.349526 | 0.726695 | 0.981636 | chr14 | 73120200 | 73120440 | 0 | NA | 3' UTR (N3' UTR (N  | -16187 NM_000021 | 5663 Hs. 3260     | ENSG00000PSEN1     | ACIN1V3 Aεpreseniliprotein-coding  |                           |
| chr14-747 9.64805  | 0.263059 | 0.752616 | 0.349526 | 0.726695 | 0.981636 | chr14 | 74778921 | 74783567 | 0 | NA | intron (Nintron (N  | 17928 NM_01958E  | 56252 Hs. 531111  | ENSG00000CYLPM1    | C14orf17 CYLP motifεprotein-coding |                           |
| chr19-441 9.64805  | 0.263059 | 0.752616 | 0.349526 | 0.726695 | 0.981636 | chr19 | 44117245 | 44125297 | 0 | NA | intron (NLIPIB1 LIN | 7872 NM_01336E   | 7768 Hs. 27956E   | ENSG00000ZNF225    | - zinc fingεprotein-coding         |                           |
| chr19-45E 9.64805  | 0.263059 | 0.752616 | 0.349526 | 0.726695 | 0.981636 | chr19 | 45610633 | 45614300 | 0 | NA | intron (NAluJb SIN  | -10254 NM_00528E | 2828 Hs. 17170    | ENSG00000GPR4      | - GPR5εprotein-coding              |                           |
| chr22-451 9.64805  | 0.263059 | 0.752616 | 0.349526 | 0.726695 | 0.981636 | chr22 | 45132567 | 45136157 | 0 | NA | non-codirnon-codir  | 18274 NR_038957  | 1.01E+08          | NR_038957          | ENSG00000NUP50-DT                  | NUP50-AS1 NUP50 divεncRNA |
| chr3-48E 9.64805   | 0.263059 | 0.752616 | 0.349526 | 0.726695 | 0.981636 | chr3  | 48629627 | 48633687 | 0 | NA | intron (N(CCTG)n    | 2091 NR_10688E   | 1.02E+08          | NR_10688E          | ENSG00000MIR6824                   | hs                        |



|           |          |          |          |          |          |          |       |                  |                           |                 |          |                            |                   |                               |                    |                          |                                  |
|-----------|----------|----------|----------|----------|----------|----------|-------|------------------|---------------------------|-----------------|----------|----------------------------|-------------------|-------------------------------|--------------------|--------------------------|----------------------------------|
| chr13-414 | 10.65694 | 0.248489 | 0.716184 | 0.346962 | 0.72862  | 0.981636 | chr13 | 41463233         | 41471697                  | +               | 0 NA     | intron (Nintron (N         | 9915 NM_01405E    | 28984 Hs. 507866NM_01405E     | ENSG00000CRGCC     | C13orf15                 | regulator protein-coding         |
| chr22-411 | 10.65694 | 0.248489 | 0.716184 | 0.346962 | 0.72862  | 0.981636 | chr22 | 41145450         | 41159470                  | +               | 0 NA     | intron (Nintron (N         | 45041 NR_110514   | 1.02E+08 Hs. 517517NR_110514  | EP300-AS1          | EP300 antncRNA           |                                  |
| chr4-412f | 10.65694 | 0.248489 | 0.716184 | 0.346962 | 0.72862  | 0.981636 | chr4  | 41260199         | 41265728                  | +               | 0 NA     | intron (NMIR SINE          | 6035 NM_004181    | 7345 Hs. 518731NM_004181      | ENSG00000UCHL1     | HEL-117                  | ubiquitin protein-coding         |
| chr15-61f | 9.102465 | 0.270084 | 0.778433 | 0.346959 | 0.728622 | 0.981636 | chr15 | 61967091         | 61967327                  | +               | 0 NA     | intron (Nintron (N         | 93238 NM_017684   | 54832 Hs. 511668NM_017684     | ENSG00000VPS13C    | PARR23                   | vacuolar protein-coding          |
| chr6-441f | 9.102465 | 0.270084 | 0.778433 | 0.346959 | 0.728622 | 0.981636 | chr6  | 44152741         | 44153101                  | +               | 0 NA     | intron (Nintron (N         | -5899 NM_00705E   | 11131 Hs. 225955NM_00705E     | ENSG00000CAPN11    | calpainII calpain I      | protein-coding                   |
| chr16-864 | 9.366197 | -0.26451 | 0.762549 | -0.34688 | 0.728681 | 0.981636 | chr16 | 86481264         | 86487435                  | +               | 0 NA     | intron (MLTI LTF           | 24511 NR_03392E   | 400550 Hs. 448822NR_03392E    | ENSG00000FENDRR    | FOXF1-AS1 FOXF1 ad_ncRNA |                                  |
| chr3-124f | 9.366197 | -0.26451 | 0.762549 | -0.34688 | 0.728681 | 0.981636 | chr3  | 1.25E+08         | 1.25E+08                  | +               | 0 NA     | 3' UTR (N3' UTR (N         | -34753 NM_03304E  | 56667 Hs. 5940 NM_03304E      | ENSG00000MUC13     | DRCC1                    | MUC mucin 13, protein-coding     |
| chr5-988f | 9.366197 | -0.26451 | 0.762549 | -0.34688 | 0.728681 | 0.981636 | chr5  | 98869497         | 98870560                  | +               | 0 NA     | intron (Nintron (N         | 56506 NM_00127C   | 1105 Hs. 64346E NM_00127C     | ENSG00000CHD1      | CHD-1                    | PII chromodomain protein-coding  |
| chr9-137f | 9.366197 | -0.26451 | 0.762549 | -0.34688 | 0.728681 | 0.981636 | chr9  | 1.38E+08         | 1.38E+08                  | +               | 0 NA     | intron (Nintron (N         | -20986 NR_03033E  | 693187 NR_03033E              | ENSG00000MIR602    | MIRN602                  | microRNA ncRNA                   |
| chr1-775f | 8.394287 | -0.28374 | 0.818466 | -0.34667 | 0.72884  | 0.981636 | chr1  | 77577735         | 77578904                  | +               | 0 NA     | intron (Nintron (N         | 104339 NM_015534  | 26009 Hs. 48050E NM_015534    | ENSG00000ZZZ3      | ATAC1                    | zinc finger protein-coding       |
| chr17-40f | 8.394287 | -0.28374 | 0.818466 | -0.34667 | 0.72884  | 0.981636 | chr17 | 4090142          | 4090341                   | +               | 0 NA     | intron (Nintron (N         | 52789 NM_01511E   | 23140 Hs. 277624NM_01511E     | ENSG00000ZZEF1     | ZZZA                     | zinc finger protein-coding       |
| chr9-131f | 8.394287 | -0.28374 | 0.818466 | -0.34667 | 0.72884  | 0.981636 | chr9  | 1.31E+08         | 1.31E+08                  | +               | 0 NA     | intron (Nintron (N         | 2540 NM_00131E    | 8021 Hs. 654533NM_00508E      | ENSG00000NUP214    | CAIN CAN                 | nucleoporin protein-coding       |
| chr7-166f | 8.855743 | -0.27412 | 0.791864 | -0.34617 | 0.729218 | 0.981636 | chr7  | 16606086         | 16606404                  | +               | 0 NA     | intron (Nintron (N         | 39509 NM_02031E   | 57037 Hs. 15737E NM_02031E    | ENSG00000ANKMY2    | ZMYND20                  | ankyrin I protein-coding         |
| chr15-75f | 10.19364 | 0.256659 | 0.741507 | 0.346131 | 0.729244 | 0.981636 | chr15 | 75521576         | 75524336                  | +               | 0 NA     | intron (Nintron (N         | 56359 NM_00283E   | 5780 Hs. 44577E NM_00283E     | ENSG00000PTPN9     | MEG2                     | PTP protein-coding               |
| chr22-20f | 10.19364 | 0.256659 | 0.741507 | 0.346131 | 0.729244 | 0.981636 | chr22 | 20564702         | 20564992                  | +               | 0 NA     | intron (Nintron (N         | 56800 NM_00129E   | 51586 Hs. 517421NM_01588E     | ENSG00000MED15     | ARC105 C                 | mediator protein-coding          |
| chr11-67f | 9.68919  | 0.264287 | 0.763786 | 0.346022 | 0.729326 | 0.981636 | chr11 | 67397770         | 67399552                  | +               | 0 NA     | TTS (NM_CTS (NM_C          | 3197 NM_20687E    | 5499 Hs. 183994NM_00270E      | ENSG00000PPP1CA    | PP-1A                    | PP1 protein-coding               |
| chr12-58f | 9.68919  | 0.264287 | 0.763786 | 0.346022 | 0.729326 | 0.981636 | chr12 | 58880104         | 58880789                  | +               | 0 NA     | intron (Nintron (N         | 39100 NM_00113E   | 121227 Hs. 25373E NM_15337E   | ENSG00000CLRIG3    | LIG3                     | leucine I protein-coding         |
| chr16-19f | 9.68919  | 0.264287 | 0.763786 | 0.346022 | 0.729326 | 0.981636 | chr16 | 16829297         | 19842321                  | +               | 0 NA     | intron (Nintron (N         | -32842 NM_00130E  | 124152 Hs. 460217NM_15320E    | ENSG00000IQCK      | -                        | IQ motif protein-coding          |
| chr9-128f | 9.68919  | 0.264287 | 0.763786 | 0.346022 | 0.729326 | 0.981636 | chr9  | 1.28E+08         | 1.28E+08                  | +               | 0 NA     | exon (NM_exon (NM_         | -14147 NR_03611E  | 1E+08 NR_03611E               | ENSG00000MIR3154   | mir-3154                 | microRNA ncRNA                   |
| chr6-334f | 4.461708 | 0.374116 | 1.081422 | 0.345948 | 0.729381 | 0.981636 | chr6  | 33449082         | 33449401                  | +               | 0 NA     | intron (Nintron (N         | -5335 NM_15273E   | 221504 Hs. 59180E NM_15273E   | ENSG00000ZBTB9     | ZNF199                   | zinc finger protein-coding       |
| chr16-214 | 12.61491 | -0.23094 | 0.667851 | -0.3458  | 0.729494 | 0.981636 | chr16 | 21438849         | 21438849                  | +               | 0 NA     | Intergeni LIPA5 LIN        | -4215 NR_02445E   | 1E+08 Hs. 64843E NR_02445E    | LOC10019C          | -                        | uncharacterized ncRNA            |
| chr11-974 | 9.606911 | 0.261694 | 0.756797 | 0.345791 | 0.7295   | 0.981636 | chr11 | 9749773          | 9750240                   | +               | 0 NA     | 3' UTR (N3' UTR (N         | -8287 NR_03648E   | 283104 Hs. 63215E NR_03648E   | ENSG00000SBF2-AS1  | -                        | SBF2 antncRNA                    |
| chr11-12f | 10.69808 | 0.249723 | 0.722571 | 0.345603 | 0.729641 | 0.981636 | chr11 | 1.24E+08         | 1.24E+08                  | +               | 0 NA     | intron (Nintron (N         | 3268 NM_001301    | 7753 Hs. 11255E NM_00345E     | ENSG00000ZNF202    | ZKSCAN10                 | zinc finger protein-coding       |
| chr1-183f | 11.14567 | 0.244955 | 0.708842 | 0.34557  | 0.729666 | 0.981636 | chr1  | 1.84E+08         | 1.84E+08                  | +               | 0 NA     | intron (Nintron (N         | 57126 NM_00043E   | 4688 Hs. 58755E NM_00043E     | ENSG00000NCF2      | NCF-2                    | NOX2 neuropeptide protein-coding |
| chr17-15f | 11.14567 | 0.244955 | 0.708842 | 0.34557  | 0.729666 | 0.981636 | chr17 | 15544965         | 15546889                  | +               | 0 NA     | intron (Nintron (N         | 17556 NM_001204   | 1.01E+08 Hs. 16459E NM_001204 | ENSG00000TVP23C-CI | FAM18B2 F                | TVP23C-CI protein-coding         |
| chrX-5364 | 9.389771 | -0.26907 | 0.778851 | -0.34548 | 0.729737 | 0.981636 | chrX  | 53640116         | 53640349                  | +               | 0 NA     | intron (Nintron (N         | 46487 NM_031407   | 10075 Hs. 13690E NM_031407    | ENSG00000CHUWE1    | ARF-BP1                  | FHECT, UB1 protein-coding        |
| chr4-168f | 8.739003 | 0.29021  | 0.84017  | 0.345428 | 0.729773 | 0.981636 | chr4  | 1.68E+08         | 1.68E+08                  | +               | 0 NA     | intron (Nintron (N         | 37276 NM_017631   | 55601 Hs. 59171E NM_017631    | ENSG00000DDX60     | -                        | DexD/Hc-box protein-coding       |
| chr14-75f | 9.391838 | 0.397966 | 1.15225  | 0.345381 | 0.729808 | 0.981636 | chr14 | 75021546         | 75022143                  | +               | 0 NA     | intron (Nintron (N         | 18923 NM_01423E   | 8892 Hs. 409137NM_01423E      | ENSG00000EIF2B2    | EIF-2B2                  | eukaryotic protein-coding        |
| chr1-379f | 5.650019 | -0.33485 | 0.969746 | -0.3453  | 0.72987  | 0.981636 | chr1  | 37963279         | 37964264                  | +               | 0 NA     | intron (Nintron (N         | -16714 NR_15862E  | 3633 Hs. 44994E NM_00554E     | ENSG00000INPP5B    | 5PTase                   | inositol protein-coding          |
| chr1-426f | 5.650019 | -0.33485 | 0.969746 | -0.3453  | 0.72987  | 0.981636 | chr1  | 42693356         | 42694863                  | +               | 0 NA     | intron (Nintron (N         | 10973 NR_132737   | 4904 Hs. 47358E NM_00455E     | ENSG00000YBX1      | BP-8 CBF-                | Y-box bir protein-coding         |
| chr1-565f | 5.650019 | -0.33485 | 0.969746 | -0.3453  | 0.72987  | 0.981636 | chr1  | 56526017         | 56527164                  | +               | 0 NA     | intron (Nintron (N         | 52973 NM_00371E   | 8613 Hs. 40515E NM_00371E     | ENSG00000PLPP3     | Dri42 LPF                | phospholipid protein-coding      |
| chr1-923f | 5.650019 | -0.33485 | 0.969746 | -0.3453  | 0.72987  | 0.981636 | chr1  | 92352092         | 92352965                  | +               | 0 NA     | intron (Nintron (N         | 53469 NM_02481E   | 79871 Hs. 444421NM_02481E     | ENSG00000RPAP2     | Clorf82                  | RNA polymer protein-coding       |
| chr1-173f | 5.650019 | -0.33485 | 0.969746 | -0.3453  | 0.72987  | 0.981636 | chr1  | 1.74E+08         | 1.74E+08                  | +               | 0 NA     | intron (Nintron (N         | 38983 NM_01445E   | 27252 Hs. 49503E NM_01445E    | ENSG00000KHLH20    | KHLHX                    | KLH kelch like protein-coding    |
| chr10-60f | 5.650019 | -0.33485 | 0.969746 | -0.3453  | 0.72987  | 0.981636 | chr10 | 60890891         | 60892768                  | +               | 0 NA     | intron (Nintron (N         | 52356 NM_00135E   | 9886 Hs. 737374NM_01483E      | ENSG00000RHOTB1    | -                        | Rho relat protein-coding         |
| chr12-45f | 5.650019 | -0.33485 | 0.969746 | -0.3453  | 0.72987  | 0.981636 | chr12 | 45823965         | 45824741                  | +               | 0 NA     | intron (Nintron (N         | 94644 NM_001347   | 196528 Hs. 317304NM_15264E    | ENSG00000ARID2     | BAF200                   | CSAT-rich iprotein-coding        |
| chr14-54f | 5.650019 | -0.33485 | 0.969746 | -0.3453  | 0.72987  | 0.981636 | chr14 | 54431261         | 54431966                  | +               | 0 NA     | intron (Nintron (N         | 9761 NM_00577E    | 10175 Hs. 29460E NM_00577E    | ENSG00000CNH1      | CNH1                     | CNH1 cornichon protein-coding    |
| chr14-64f | 5.650019 | -0.33485 | 0.969746 | -0.3453  | 0.72987  | 0.981636 | chr14 | 64425302         | 64427362                  | +               | 0 NA     | intron (Nintron (N         | 37979 NM_001364   | 4522 Hs. 65230E NM_00595E     | ENSG00000MTHFD1    | CIMAH                    | MTF methylene protein-coding     |
| chr17-47f | 5.650019 | -0.33485 | 0.969746 | -0.3453  | 0.72987  | 0.981636 | chr17 | 47563820         | 47565101                  | +               | 0 NA     | intron (Nintron (N         | 33352 NM_00631E   | 9520 Hs. 443837NM_00631E      | ENSG00000NPEPPS    | ARP-5                    | IMP1 aminopept protein-coding    |
| chr17-49f | 5.650019 | -0.33485 | 0.969746 | -0.3453  | 0.72987  | 0.981636 | chr17 | 49031593         | 49033398                  | +               | 0 NA     | intron (Nintron (N         | 35110 NM_00116E   | 10642 Hs. 14493E NM_00654E    | ENSG00000IGF2BP1   | CADP-BP                  | CF insulin I protein-coding      |
| chr18-12f | 5.650019 | -0.33485 | 0.969746 | -0.3453  | 0.72987  | 0.981636 | chr18 | 12974419         | 12974999                  | +               | 0 NA     | intron (Nintron (N         | -16653 NM_03214E  | 55125 Hs. 100914NM_01806E     | ENSG00000CEP192    | PPP1R62                  | centrosome protein-coding        |
| chr19-34f | 5.650019 | -0.33485 | 0.969746 | -0.3453  | 0.72987  | 0.981636 | chr19 | 34496568         | 34497430                  | +               | 0 NA     | intron (Nintron (N         | 15241 NM_00108E   | 126374 Hs. 58501E NM_00108E   | ENSG00000WTIP      | -                        | WT1 interprotein-coding          |
| chr2-154f | 5.650019 | -0.33485 | 0.969746 | -0.3453  | 0.72987  | 0.981636 | chr2  | 15460961         | 15461202                  | +               | 0 NA     | intron (Nintron (N         | 100253 NM_00108E  | 51594 Hs. 46775E NM_01590E    | ENSG00000CNBAS     | ILF52                    | NAC neurobasal protein-coding    |
| chr2-133f | 5.650019 | -0.33485 | 0.969746 | -0.3453  | 0.72987  | 0.981636 | chr2  | 1.33E+08         | 1.33E+08                  | +               | 0 NA     | intron (Nintron (N         | -109698 NR_110294 | 1.02E+08 Hs. 661917NR_110294  | ENSG00000CNKAP5-AS | -                        | NCKAP5 arncRNA                   |
| chr3-390f | 5.650019 | -0.33485 | 0.969746 | -0.3453  | 0.72987  | 0.981636 | chr3  | 39097427         | 39098069                  | +               | 0 NA     | non-codiron-codir          | 9879 NM_00127E    | 64689 Hs. 72194E NM_03189E    | ENSG00000GORASP1   | GOLPH5                   | GF golgi ree protein-coding      |
| chr3-195f | 5.650019 | -0.33485 | 0.969746 | -0.3453  | 0.72987  | 0.981636 | chr3  | 1.7E+08          | 1.7E+08                   | +               | 0 NA     | 3' UTR (N3' UTR (N         | 29286 NM_00326E   | 7095 Hs. 74485E NM_00326E     | ENSG00000SEC62     | Dtrp1                    | HEC62 hom protein-coding         |
| chr3-195f | 5.650019 | -0.33485 | 0.969746 | -0.3453  | 0.72987  | 0.981636 | chr3  | 1.96E+08         | 1.96E+08                  | +               | 0 NA     | intron (Nintron (N         | 4861 NM_00130E    | 10188 Hs. 51851E NM_005781    | ENSG00000TNK2      | ACK1                     | tyrosine protein-coding          |
| chr6-354f | 5.650019 | -0.33485 | 0.969746 | -0.3453  | 0.72987  | 0.981636 | chr6  | 35455736         | 35456301                  | +               | 0 NA     | exon (NM_exon (NM_         | 3657 NM_02192E    | 2178 Hs. 30200E NM_02192E     | ENSG00000FANCE     | FACE                     | FAE Fae complex protein-coding   |
| chr6-148f | 5.650019 | -0.33485 | 0.969746 | -0.3453  | 0.72987  | 0.981636 | chr6  | 1.49E+08         | 1.49E+08                  | +               | 0 NA     | intron (Nintron (N         | 18726 NM_00134E   | 23328 Hs. 19313E NM_01527E    | ENSG00000CSASH1    | CAPOK                    | DUF SAM and S protein-coding     |
| chr7-149f | 5.650019 | -0.33485 | 0.969746 | -0.3453  | 0.72987  | 0.981636 | chr7  | -19369 NM_01225E | 7988 Hs. 49051E NM_01225E | ENSG00000ZNF212 | C2H2-150 | zinc finger protein-coding |                   |                               |                    |                          |                                  |
| chr8-586f | 5.650019 | -0.33485 | 0.9      |          |          |          |       |                  |                           |                 |          |                            |                   |                               |                    |                          |                                  |

|           |          |          |          |          |          |          |       |                  |          |   |   |    |                    |                   |          |                   |                   |                                       |                                     |
|-----------|----------|----------|----------|----------|----------|----------|-------|------------------|----------|---|---|----|--------------------|-------------------|----------|-------------------|-------------------|---------------------------------------|-------------------------------------|
| chr11-621 | 11.16925 | 0.24085  | 0.702006 | 0.343088 | 0.731532 | 0.981636 | chr11 | 62792380         | 62803877 | + | 0 | NA | intron (AluSz SIN  | -5357 NR_106766   | 1.02E+08 | NR_106766         | ENSG000002MIR6514 | hsa-mir-6microRNA ncRNA               |                                     |
| chr16-756 | 11.16925 | 0.24085  | 0.702006 | 0.343088 | 0.731532 | 0.981636 | chr16 | 75654271         | 75657285 | + | 0 | NA | intron (L2a LINE   | 8005 NM_018975    |          | 54386 Hs. 301415  | ENSG000002TERF2IP | DRIP5 RAF TERF2 intron protein-coding |                                     |
| chr2-1866 | 11.16925 | 0.24085  | 0.702006 | 0.343088 | 0.731532 | 0.981636 | chr2  | 1.87E+08         | 1.87E+08 | + | 0 | NA | intron (L1MB7 LIN  | -22431 NM_177454  |          | 165215 Hs. 28872  | NM_177454         | ENSG000002FAM171B                     | KIAA1946 family wiprotein-coding    |
| chr17-204 | 8.682098 | 0.281952 | 0.821937 | 0.343034 | 0.731573 | 0.981636 | chr17 | 30498521         | 30498746 | + | 0 | NA | intron (intron (N  | 121225 NM_001007  |          | 9527 Hs. 462628   | NM_004871         | ENSG000002GOSR1                       | GOLM2 GC golgi SN protein-coding    |
| chr1-307  | 8.930164 | -0.26786 | 0.780887 | -0.34302 | 0.731584 | 0.981636 | chr1  | 26840 NR_125345  |          |   | 0 | NA | intron (L1PA15 LI  | 26840 NR_125345   |          | 1604 Hs. 126517   | NM_000574         | ENSG000002CD55                        | CHAPLE CF CD55 moleprotein-coding   |
| chr14-242 | 8.930164 | -0.26786 | 0.780887 | -0.34302 | 0.731584 | 0.981636 | chr14 | 24200877         | 24203614 | + | 0 | NA | IntergeniMER11C LI | -3451 NM_001184   |          | 283629 Hs. 314432 | NM_174944         | ENSG000002TSSK4                       | C14orf20 testis sf protein-coding   |
| chr16-84  | 8.930164 | -0.26786 | 0.780887 | -0.34302 | 0.731584 | 0.981636 | chr16 | 84466409         | 84466539 | + | 0 | NA | promoter-promoter- | -113 NR_146503    | 1.05E+08 | Hs. 610979        | NR_146503         | ENSG000002ATP2C2-AS-                  | ATP2C2 arncRNA                      |
| chr17-302 | 8.930164 | -0.26786 | 0.780887 | -0.34302 | 0.731584 | 0.981636 | chr17 | 30265867         | 30266838 | + | 0 | NA | intron (AluV SINE  | 25592 NM_000386   |          | 642 Hs. 371914    | NM_000386         | ENSG000002BLMH                        | BH BMH bleomycin protein-coding     |
| chr3-1792 | 8.930164 | -0.26786 | 0.780887 | -0.34302 | 0.731584 | 0.981636 | chr3  | 1.79E+08         | 1.79E+08 | + | 0 | NA | intron (L2a LINE   | 40732 NM_014407   |          | 27094 Hs. 59128   | NM_014407         | ENSG000002KCNMB3                      | BKBETA3 f potassium protein-coding  |
| chr3-1964 | 8.930164 | -0.26786 | 0.780887 | -0.34302 | 0.731584 | 0.981636 | chr3  | 1.96E+08         | 1.96E+08 | + | 0 | NA | intron (intron (N  | 20335 NM_152617   |          | 165918 Hs. 250642 | NM_152617         | ENSG000002RNF168                      | hRNF168 ring fing protein-coding    |
| chr7-1491 | 8.930164 | -0.26786 | 0.780887 | -0.34302 | 0.731584 | 0.981636 | chr7  | 1.49E+08         | 1.49E+08 | + | 0 | NA | intron (LOR1a LTF  | 4345 NM_020781    |          | 57541 Hs. 632032  | NM_020781         | ENSG000002ZNF398                      | P51 P71 Zzinc fing protein-coding   |
| chr2-2332 | 8.647016 | 0.278858 | 0.813001 | 0.342999 | 0.731599 | 0.981636 | chr2  | 2.33E+08         | 2.33E+08 | + | 0 | NA | exon (NM exon (NM  | -2736 NR_003008   |          | 677775 Hs. 66361  | NR_003008         | ENSG000002SCARNA5                     | U87 small Ca_ncRNA                  |
| chr1-1456 | 8.484424 | -0.28011 | 0.817315 | -0.34272 | 0.731811 | 0.981636 | chr1  | 1.46E+08         | 1.46E+08 | + | 0 | NA | intron (intron (N  | 41124 NM_001097   |          | 653519 Hs. 504322 | NM_001097         | ENSG000002GPR89A                      | GPHR GPR8G proteir protein-coding   |
| chr11-661 | 5.180704 | -0.35395 | 1.032933 | -0.34267 | 0.731847 | 0.981636 | chr11 | 66199106         | 66199991 | + | 0 | NA | intron (L1MA3 LIN  | -57746 NM_001134  |          | 64837 Hs. 280792  | NM_022822         | ENSG000002KLC2                        | - kinesin l protein-coding          |
| chr3-2391 | 13.57896 | -0.22064 | 0.644253 | -0.34247 | 0.732    | 0.981636 | chr3  | 23917860         | 23920695 | + | 0 | NA | exon (NM exon (NM  | 2145 NM_001255    |          | 6138 Hs. 38121    | NM_002948         | ENSG000002RPL15                       | DBA12 EC4 ribosomal protein-coding  |
| chr11-86C | 7.93283  | -0.29406 | 0.859158 | -0.34227 | 0.732149 | 0.981636 | chr11 | 86014688         | 86014976 | + | 0 | NA | intron (intron (N  | 54252 NM_007166   |          | 8301 Hs. 16389    | NM_007166         | ENSG000002PICALM                      | CALM CLTF phosphat i protein-coding |
| chr17-824 | 7.93283  | -0.29406 | 0.859158 | -0.34227 | 0.732149 | 0.981636 | chr17 | 82465900         | 82466099 | + | 0 | NA | intron (intron (N  | 7258 NM_012336    |          | 26502 Hs. 25652   | NM_012336         | ENSG000002NCARF                       | IOP2 nuclear i protein-coding       |
| chr1-1175 | 5.6833   | -0.32876 | 0.960747 | -0.34219 | 0.73221  | 0.981636 | chr1  | 11795643         | 11796671 | + | 0 | NA | intron (intron (N  | 7520 NM_001033    |          | 4524 Hs. 214142   | NM_005957         | ENSG000002MTHFR                       | - methylene protein-coding          |
| chr1-5145 | 5.6833   | -0.32876 | 0.960747 | -0.34219 | 0.73221  | 0.981636 | chr1  | 51458398         | 51459395 | + | 0 | NA | intron (intron (N  | -36801 NM_001155  |          | 2060 Hs. 83722    | NM_001981         | ENSG000002EPS15                       | AF-1P AF1 epidermal protein-coding  |
| chr1-8672 | 5.6833   | -0.32876 | 0.960747 | -0.34219 | 0.73221  | 0.981636 | chr1  | 86728800         | 86730536 | + | 0 | NA | intron (intron (N  | 25092 NM_016009   |          | 51100 Hs. 13630   | NM_016009         | ENSG000002CSH3GLB1                    | Bif-1 CG1SH3 domaiprotein-coding    |
| chr1-2201 | 5.6833   | -0.32876 | 0.960747 | -0.34219 | 0.73221  | 0.981636 | chr1  | 2.2E+08          | 2.2E+08  | + | 0 | NA | intron (intron (N  | 37261 NR_031705   |          | 11E+08            | NR_031705         | ENSG000002MIR664A                     | MIR664 MimicroRNA ncRNA             |
| chr10-285 | 5.6833   | -0.32876 | 0.960747 | -0.34219 | 0.73221  | 0.981636 | chr10 | 28555978         | 28557500 | + | 0 | NA | intron (L1M3 LINE  | 23621 NM_016628   |          | 51322 Hs. 743224  | NM_016628         | ENSG000002WAC                         | BM-016 DFW domair protein-coding    |
| chr10-124 | 5.6833   | -0.32876 | 0.960747 | -0.34219 | 0.73221  | 0.981636 | chr10 | 1.25E+08         | 1.25E+08 | + | 0 | NA | intron (AluSx SIN  | 7134 NM_121554    |          | 399818 Hs. 72081  | NM_121554         | ENSG000002EEF1AKMT2                   | C10orf13 EEF1A lys protein-coding   |
| chr11-122 | 5.6833   | -0.32876 | 0.960747 | -0.34219 | 0.73221  | 0.981636 | chr11 | 12215884         | 12216673 | + | 0 | NA | exon (NM exon (NM  | 52595 NR_106733   | 1.02E+08 | NR_106733         | ENSG000002MIR6124 | hsa-mir-6microRNA ncRNA               |                                     |
| chr11-33C | 5.6833   | -0.32876 | 0.960747 | -0.34219 | 0.73221  | 0.981636 | chr11 | 33077682         | 33079156 | + | 0 | NA | non-codirnon-codir | -2269 NR_015451   |          | 283267 Hs. 533701 | NR_015451         | ENSG000002LINC00294                   | NCRNA0029 long intncRNA             |
| chr11-684 | 5.6833   | -0.32876 | 0.960747 | -0.34219 | 0.73221  | 0.981636 | chr11 | 68427735         | 68428558 | + | 0 | NA | intron (AluSq2 SI  | -32606 NM_001355  |          | 55291 Hs. 503022  | NM_018312         | ENSG000002PPP6R3                      | C1orf273 protein i protein-coding   |
| chr11-102 | 5.6833   | -0.32876 | 0.960747 | -0.34219 | 0.73221  | 0.981636 | chr11 | 171047 NM_001195 |          |   | 0 | NA | intron (intron (N  | 171047 NM_001195  |          | 10413 Hs. 503692  | NM_006109         | ENSG000002YAP1                        | COB1 YAP Yes assoc protein-coding   |
| chr11-124 | 5.6833   | -0.32876 | 0.960747 | -0.34219 | 0.73221  | 0.981636 | chr11 | 1.25E+08         | 1.25E+08 | + | 0 | NA | TTS (NR TTS (NR C  | 13978 NR_016021   |          | 84897 Hs. 43641   | NM_032811         | ENSG000002TBRG1                       | NIAM TB-ε transform protein-coding  |
| chr14-214 | 5.6833   | -0.32876 | 0.960747 | -0.34219 | 0.73221  | 0.981636 | chr14 | 21480365         | 21481400 | + | 0 | NA | intron (AluSp SIN  | 3687 NM_001303    |          | 9878 Hs. 55591    | NR_014828         | ENSG000002TOX4                        | C14orf92 TOX4 high protein-coding   |
| chr14-313 | 5.6833   | -0.32876 | 0.960747 | -0.34219 | 0.73221  | 0.981636 | chr14 | 517664           | 51363818 | + | 0 | NA | intron (AluSx SIN  | 57564 NM_015473   |          | 25938 Hs. 74497   | NR_015473         | ENSG000002HEATR5A                     | MIR664 MimicroRNA ncRNA             |
| chr14-601 | 5.6833   | -0.32876 | 0.960747 | -0.34219 | 0.73221  | 0.981636 | chr14 | 60132215         | 60134388 | + | 0 | NA | intron (L1MB7 LIN  | 32097 NM_016025   |          | 51635 Hs. 59719   | NM_016025         | ENSG000002DHRS7                       | CGI-86 SE dehydroge protein-coding  |
| chr15-417 | 5.6833   | -0.32876 | 0.960747 | -0.34219 | 0.73221  | 0.981636 | chr15 | 41754811         | 41755738 | + | 0 | NA | intron (intron (N  | -19210 NM_001265  |          | 23005 Hs. 51366   | NM_014994         | ENSG000002MAPKBP1                     | JNKBP-1 Jmi toe protein-coding      |
| chr15-515 | 5.6833   | -0.32876 | 0.960747 | -0.34219 | 0.73221  | 0.981636 | chr15 | 51955561         | 51956780 | + | 0 | NA | intron (AluSx SIN  | 19210 NM_001322   |          | 123169 Hs. 567662 | NM_001322         | ENSG000002LEO1                        | RDL LEO1 homc protein-coding        |
| chr15-712 | 5.6833   | -0.32876 | 0.960747 | -0.34219 | 0.73221  | 0.981636 | chr15 | 71232830         | 71235211 | + | 0 | NA | intron (MamGypLTF  | -44961 NR_120345  | 1.02E+08 | Hs. 680472        | NR_120348         | THSD4-AS1-                            | THSD4 antncRNA                      |
| chr16-676 | 5.6833   | -0.32876 | 0.960747 | -0.34219 | 0.73221  | 0.981636 | chr16 | 67616684         | 67618830 | + | 0 | NA | intron (L1M5 LINE  | -27387 NR_001013  |          | 142606 Hs. 611432 | NM_001013         | ENSG000002CARMIL2                     | CARMIL2 capping i protein-coding    |
| chr16-727 | 5.6833   | -0.32876 | 0.960747 | -0.34219 | 0.73221  | 0.981636 | chr16 | 72795845         | 72796253 | + | 0 | NA | exon (NM exon (NM  | -131079 NR_126333 | 1.02E+08 | Hs. 637255        | NR_126333         | ENSG000002LINC01572                   | long intncRNA                       |
| chr16-892 | 5.6833   | -0.32876 | 0.960747 | -0.34219 | 0.73221  | 0.981636 | chr16 | 89297120         | 89298331 | + | 0 | NA | non-codirnon-codir | 1597 NR_136335    | 1.05E+08 | Hs. 657381        | NR_136335         | ENSG000002LOC105371                   | uncharactncRNA                      |
| chr17-307 | 5.6833   | -0.32876 | 0.960747 | -0.34219 | 0.73221  | 0.981636 | chr17 | 30773989         | 30776812 | + | 0 | NA | intron (intron (N  | 49292 NM_015986   |          | 51379 Hs. 649372  | NM_015986         | ENSG000002CRLF3                       | CREME-9 Ccytokine protein-coding    |
| chr17-375 | 5.6833   | -0.32876 | 0.960747 | -0.34219 | 0.73221  | 0.981636 | chr17 | 37541941         | 37542964 | + | 0 | NA | exon (NM exon (NM  | 52561 NM_007026   |          | 11072 Hs. 91448   | NM_007026         | ENSG000002DUSP14                      | MKP-L MKF dual spec protein-coding  |
| chr17-475 | 5.6833   | -0.32876 | 0.960747 | -0.34219 | 0.73221  | 0.981636 | chr17 | 47546326         | 47551606 | + | 0 | NA | intron (intron (N  | 17858 NM_006310   |          | 9520 Hs. 443837   | NM_006310         | ENSG000002NPEPPS                      | AAP-S M aminopept protein-coding    |
| chr18-13C | 5.6833   | -0.32876 | 0.960747 | -0.34219 | 0.73221  | 0.981636 | chr18 | 13019744         | 13020354 | + | 0 | NA | intron (AluSz SIN  | 28687 NM_032142   |          | 55125 Hs. 100914  | NM_018069         | ENSG000002CEP192                      | PPP1R26 centroson protein-coding    |
| chr19-49F | 5.6833   | -0.32876 | 0.960747 | -0.34219 | 0.73221  | 0.981636 | chr19 | 4950726          | 4953958  | + | 0 | NA | intron (AluSx1 SI  | -16771 NM_015015  |          | 23030 Hs. 65481   | NM_015015         | ENSG000002KDM4B                       | JMJD2B TI lysine de protein-coding  |
| chr19-344 | 5.6833   | -0.32876 | 0.960747 | -0.34219 | 0.73221  | 0.981636 | chr19 | 34440900         | 34441295 | + | 0 | NA | intron (L1M5 LINE  | 12716 NM_005499   |          | 10054 Hs. 63158   | NM_005499         | ENSG000002UBA2                        | ARX HRH7 ubiquitir protein-coding   |
| chr2-3237 | 5.6833   | -0.32876 | 0.960747 | -0.34219 | 0.73221  | 0.981636 | chr2  | 32371620         | 32373923 | + | 0 | NA | intron (AluJb SIN  | 15743 NM_016252   |          | 57448 Hs. 150107  | NM_016252         | ENSG000002BTRC6                       | APOLLON Ebaculovir protein-coding   |
| chr2-370C | 5.6833   | -0.32876 | 0.960747 | -0.34219 | 0.73221  | 0.981636 | chr2  | 37005495         | 37006364 | + | 0 | NA | intron (intron (N  | -39393 NM_003162  |          | 6801 Hs. 12748    | NM_003162         | ENSG000002CSTRN                       | PPP2R6A S triatin protein-coding    |
| chr2-538E | 5.6833   | -0.32876 | 0.960747 | -0.34219 | 0.73221  | 0.981636 | chr2  | 53854264         | 53854773 | + | 0 | NA | exon (NM exon (NM  | -5313 NR_037455   | 1.01E+08 | NR_037455         | ENSG000002MIR3682 | mir-3682 microRNA ncRNA               |                                     |
| chr2-860S | 5.6833   | -0.32876 | 0.960747 | -0.34219 | 0.73221  | 0.981636 | chr2  | 86092273         | 86094448 | + | 0 | NA | intron (L1M4C LIN  | 12526 NM_015422   |          | 25885 Hs. 53181   | NM_015422         | ENSG000002POLR1A                      | A190 AFDCRNA poly protein-coding    |
| chr2-171S | 5.6833   | -0.32876 | 0.960747 | -0.34219 | 0.73221  | 0.981636 | chr2  | 1.72E+08         | 1.72E+08 | + | 0 | NA | intron (L1M8 LIN   | 4762 NM_003642    |          | 8520 Hs. 632532   | NM_003642         | ENSG000002CHAT1                       | KAT1 histone ε protein-coding       |
| chr2-230C | 5.6833   | -0.32876 | 0.960747 | -0.34219 | 0.73221  | 0.981636 | chr2  | 2.3E+08          | 2.3E+08  | + | 0 | NA | intron (L1H5 LINE  | 13708 NM_001352   |          | 93349 Hs. 589661  | NM_138402         | ENSG000002SP140L                      | - SP140 nuc protein-coding          |
| chr2-2311 | 5.6833   | -0.32876 | 0.960747 | -0.34219 | 0.73221  | 0.981636 | chr2  | 2.31E+08         | 2.31E+08 | + | 0 | NA | IntergeniIntergeni | -22325 NM_025135  |          | 80210 Hs. 162411  | NM_025135         | ENSG000002ARMC9                       | ARM JBTS armadill i protein-coding  |
| chr20-367 | 5.6833   | -0.32876 | 0.960747 | -0.34219 | 0.73221  | 0.981636 | chr20 | 36756779         | 36758538 | + | 0 | NA | intron (intron (N  | -11568 NM_032013  |          | 57446 Hs. 43733   | NM_022477         | ENSG000002CNDRG3                      | - NDRG fami protein-coding          |
| chr20-37E | 5.6833   |          |          |          |          |          |       |                  |          |   |   |    |                    |                   |          |                   |                   |                                       |                                     |



|           |           |          |          |          |          |          |       |          |          |   |   |    |                     |         |           |          |                    |                     |                    |                          |                  |                |                |  |
|-----------|-----------|----------|----------|----------|----------|----------|-------|----------|----------|---|---|----|---------------------|---------|-----------|----------|--------------------|---------------------|--------------------|--------------------------|------------------|----------------|----------------|--|
| chr4-1222 | 9.391621  | -0.25941 | 0.759771 | -0.34143 | 0.732779 | 0.981636 | chr4  | 1.22E+08 | 1.22E+08 | + | 0 | NA | intron (Nintron (N  | 93617   | NM_015312 | 84162    | Hs.408142NM_015312 | ENSG00000KIAA1109   | ALKKUCS FKIAA1109  | protein-coding           |                  |                |                |  |
| chr5-3852 | 9.391621  | -0.25941 | 0.759771 | -0.34143 | 0.732779 | 0.981636 | chr5  | 38521232 | 38524225 | + | 0 | NA | intron (Nintron (N  | 33918   | NM_001127 | 3977     | Hs.133421NM_00231  | ENSG00000LIFR       | CD118 LIFLIF       | receptor protein-coding  |                  |                |                |  |
| chr5-128  | 9.391621  | -0.25941 | 0.759771 | -0.34143 | 0.732779 | 0.981636 | chr5  | 1.28E+08 | 1.28E+08 | + | 0 | NA | intron (Nintron (N  | 184839  | NM_001995 | 2201     | Hs.519294NM_001995 | ENSG00000FBN2       | CCA DA9 E          | fibrillin protein-coding |                  |                |                |  |
| chr7-728  | 9.391621  | -0.25941 | 0.759771 | -0.34143 | 0.732779 | 0.981636 | chr7  | 72890205 | 72894352 | + | 0 | NA | intron (Nintron (N  | 1651    | NM_17202C | 9833     | Hs.655217NM_17202C | ENSG00000POM121     | P145 POM1          | POM121                   | protein-coding   |                |                |  |
| chr7-1432 | 9.391621  | -0.25941 | 0.759771 | -0.34143 | 0.732779 | 0.981636 | chr7  | 1.43E+08 | 1.43E+08 | + | 0 | NA | intron (NAluX S     | 3415    | NM_001224 | 855      | Hs.368982NM_001224 | ENSG00000CASP2      | CASP-2 C           | caspace 2                | protein-coding   |                |                |  |
| chr8-1197 | 9.391621  | -0.25941 | 0.759771 | -0.34143 | 0.732779 | 0.981636 | chr8  | 1.2E+08  | 1.2E+08  | + | 0 | NA | intron (Nintron (N  | 29917   | NM_003184 | 6873     | Hs.122752NM_003184 | ENSG00000TAF2       | CIF150 MT          | TATA-box                 | protein-coding   |                |                |  |
| chr9-122  | 9.391621  | -0.25941 | 0.759771 | -0.34143 | 0.732779 | 0.981636 | chr9  | 1.23E+08 | 1.23E+08 | + | 0 | NA | intron (NAluJr S N  | 2478    | NM_005388 | 5082     | Hs.271749NM_005388 | ENSG00000PDCL       | PHLP               | phosphudic               | protein-coding   |                |                |  |
| chr12-125 | 10.12707  | 0.25116  | 0.735928 | 0.341283 | 0.73289  | 0.981636 | chr12 | 1.29E+08 | 1.29E+08 | + | 0 | NA | intron (Nintron (N  | 8717    | NR_03892C | 1.01E+08 | Hs.127718NR_03892C | ENSG00000GPRC5D-AS- | GPRC5D             | arncRNA                  |                  |                |                |  |
| chr16-582 | 10.12707  | 0.25116  | 0.735928 | 0.341283 | 0.73289  | 0.981636 | chr16 | 58578884 | 58579261 | + | 0 | NA | intron (NLMC5a L    | -1914   | NR_00298C | 677830   | Hs.677518NR_00298C | ENSG00000SNORA50A   | ACA50 SNC          | small                    | nucsnRNA         |                |                |  |
| chr17-146 | 10.12707  | 0.25116  | 0.735928 | 0.341283 | 0.73289  | 0.981636 | chr17 | 48848231 | 48850437 | + | 0 | NA | exon (NM exon (NM   | 18299   | NM_001261 | 10241    | Hs.514922NM_005831 | ENSG00000CALCOCO2   | NDP52              | calcium                  | protein-coding   |                |                |  |
| chr17-168 | 10.922306 | -0.26634 | 0.782075 | -0.34056 | 0.733434 | 0.981636 | chr17 | 16091371 | 16091631 | + | 0 | NA | TTS (NM_C TTS (NM_C | 61695   | NR_145787 | 1.1E+08  | NR_145787          | SNORD163            | -                  | small                    | nucsnRNA         |                |                |  |
| chr2-2298 | 8.922306  | -0.26634 | 0.782075 | -0.34056 | 0.733434 | 0.981636 | chr2  | 2.3E+08  | 2.3E+08  | + | 0 | NA | intron (Nintron (N  | -91887  | NM_13907Z | 92737    | Hs.234074NM_13907Z | ENSG00000CDNER      | UNQ26 bet          | delta/not                | protein-coding   |                |                |  |
| chr3-2741 | 8.922306  | -0.26634 | 0.782075 | -0.34056 | 0.733434 | 0.981636 | chr3  | 27414065 | 27415052 | + | 0 | NA | intron (NTiger2 I   | 42220   | NM_00125E | 9497     | Hs.250072NM_00361E | ENSG00000SLC4A7     | NBC2 NBC2          | solute                   | carrier          | protein-coding |                |  |
| chr7-2295 | 8.922306  | -0.26634 | 0.782075 | -0.34056 | 0.733434 | 0.981636 | chr7  | 22959048 | 22960909 | + | 0 | NA | intron (Nintron (N  | 54152   | NM_032581 | 84668    | Hs.85603           | NM_032581           | ENSG00000FAM126A   | DRCTNNB1 family          | wiprotein-coding |                |                |  |
| chr11-118 | 10.63152  | 0.24444  | 0.717762 | 0.340559 | 0.733436 | 0.981636 | chr11 | 1.19E+08 | 1.19E+08 | + | 0 | NA | intron (Nintron (N  | -5972   | NM_00134E | 143941   | Hs.653444NM_00108C | ENSG00000TTC36      | HBP21              | tetracy                  | protein-coding   |                |                |  |
| chr16-302 | 10.63152  | 0.24444  | 0.717762 | 0.340559 | 0.733436 | 0.981636 | chr16 | 30241056 | 30245434 | + | 0 | NA | intron (Nintron (N  | 2656    | NM_00135E | 440353   | NM_001355401       | NPIPBI2             | -                  | nuclear                  | protein-coding   |                |                |  |
| chr7-5474 | 10.63152  | 0.24444  | 0.717762 | 0.340559 | 0.733436 | 0.981636 | chr7  | 54748357 | 54748800 | + | 0 | NA | Intergeni Intergeni | 10633   | NM_01430Z | 23480    | Hs.488282NM_01430Z | ENSG00000SEC61G     | SSS1               | SEC1                     | tr               | protein-coding |                |  |
| chr11-578 | 10.961596 | -0.27377 | 0.80444  | -0.34032 | 0.733616 | 0.981636 | chr11 | 5703100  | 5703800  | + | 0 | NA | intron (NAluY S N   | 13660   | NM_006074 | 10346    | Hs.501778NM_006074 | ENSG00000TRIM22     | GPSTAF50 tripartit | protein-coding           |                  |                |                |  |
| chr2-5523 | 13.10179  | -0.2227  | 0.654389 | -0.34031 | 0.733621 | 0.981636 | chr2  | 55233992 | 55236595 | + | 0 | NA | TTS (NR_C TTS (NR_C | 1129    | NR_039624 | 1.01E+08 | NR_039624          | ENSG00000MIR4426    | -                  | microRNA                 | ncRNA            |                |                |  |
| chr22-364 | 10.70594  | 0.248294 | 0.729616 | 0.340308 | 0.733625 | 0.981636 | chr22 | 36475634 | 36476876 | + | 0 | NA | intron (Nintron (N  | 5385    | NM_01247Z | 25828    | Hs.211925NM_01247Z | ENSG00000TXN2       | COXP29 D           | thiorodopsin             | protein-coding   |                |                |  |
| chr1-1567 | 10.67266  | 0.245646 | 0.72193  | 0.340264 | 0.733658 | 0.981636 | chr1  | 1.57E+08 | 1.57E+08 | + | 0 | NA | intron (NAluSz S N  | 20386   | NM_00597Z | 5546     | Hs.516948NM_00597Z | ENSG00000PRCC       | RCP1 TPF           | proline                  | protein-coding   |                |                |  |
| chr1-161  | 10.67266  | 0.245646 | 0.72193  | 0.340264 | 0.733658 | 0.981636 | chr1  | 1.61E+08 | 1.61E+08 | + | 0 | NA | exon (NM exon (NM   | -2695   | NM_00111Z | 1E+08    | Hs.720033NM_00111Z | ENSG00000TSTD1      | KAT TST            | thiosulfate              | protein-coding   |                |                |  |
| chr19-347 | 10.67266  | 0.245646 | 0.72193  | 0.340264 | 0.733658 | 0.981636 | chr19 | 34762380 | 34770777 | + | 0 | NA | intron (Nintron (N  | 6637    | NM_001007 | 148103   | Hs.590961NM_001007 | ENSG00000ZNF599     | -                  | zinc                     | finger           | protein-coding |                |  |
| chr20-94  | 10.67266  | 0.245646 | 0.72193  | 0.340264 | 0.733658 | 0.981636 | chr20 | 9436912  | 9439768  | + | 0 | NA | intron (NAluYk4 S   | -76018  | NM_00119E | 21411    | Hs.22920           | NM_012261           | ENSG00000LAMP5     | BAD-LAMP lysosomal       | protein-coding   |                |                |  |
| chr4-1187 | 11.12811  | 0.239667 | 0.704429 | 0.340228 | 0.733685 | 0.981636 | chr4  | 1.19E+08 | 1.19E+08 | + | 0 | NA | intron (Nintron (N  | 20141   | NM_020961 | 57721    | Hs.596872NM_020961 | ENSG00000METTL14    | hMETTL14           | methyltra                | protein-coding   |                |                |  |
| chr5-1295 | 8.14257   | 0.288947 | 0.849479 | 0.340146 | 0.733746 | 0.981636 | chr5  | 1.3E+08  | 1.3E+08  | + | 0 | NA | intron (Nintron (N  | -139261 | NR_12574E | 1.04E+08 | Hs.628635NR_12574E | ENSG00000ADAMTS19-  | ADAMTS19           | ncRNA                    |                  |                |                |  |
| chr4-676  | 10.16821  | 0.252374 | 0.742076 | 0.340091 | 0.733788 | 0.981636 | chr4  | 67667894 | 67668493 | + | 0 | NA | intron (Nintron (N  | 32962   | NM_018227 | 55236    | Hs.212774NM_018227 | ENSG00000UBA6       | E1-L2 MOF          | ubiquitin                | protein-coding   |                |                |  |
| chr3-197  | 19.30414  | 0.189126 | 0.556134 | 0.340073 | 0.733802 | 0.981636 | chr3  | 1.98E+08 | 1.98E+08 | + | 0 | NA | intron (Nintron (N  | 4421    | NR_00326E | 220729   | Hs.478854NR_00326E | ENSG00000LOC220729- | -                  | succinate                | pseudo           |                |                |  |
| chr15-65  | 9.415195  | -0.26381 | 0.776026 | -0.33996 | 0.73389  | 0.981636 | chr15 | 65674383 | 65674796 | + | 0 | NA | intron (NAluJb S N  | 22347   | NR_14575E | 1.1E+08  | NR_14575E          | ENSG00000SNORD13E   | -                  | small                    | nucsnRNA         |                |                |  |
| chr2-691  | 9.415195  | -0.26381 | 0.776026 | -0.33996 | 0.73389  | 0.981636 | chr2  | 69155994 | 69156906 | + | 0 | NA | intron (Nintron (N  | 52768   | NR_03607Z | 1E+08    | NR_03607Z          | ENSG00000MIR3126    | mir-3126           | microRNA                 | ncRNA            |                |                |  |
| chr10-105 | 10.10535  | 0.264742 | 0.77882  | 0.339927 | 0.733911 | 0.981636 | chr10 | 1.03E+08 | 1.03E+08 | + | 0 | NA | intron (Nintron (N  | 62066   | NM_001351 | 22978    | Hs.97439           | NM_01222E           | ENSG00000CNT5C2    | GMP NT5B 5'              | -nuclec          | protein-coding |                |  |
| chr1-225  | 11.1771   | 0.239503 | 0.704689 | 0.33987  | 0.733955 | 0.981636 | chr1  | 2.26E+08 | 2.26E+08 | + | 0 | NA | exon (NM exon (NM   | 6805    | NM_15260E | 163859   | Hs.520192NM_15260E | ENSG00000SDE2       | Clorf55 SDE2       | telc                     | protein-coding   |                |                |  |
| chr13-327 | 11.1771   | 0.239503 | 0.704689 | 0.33987  | 0.733955 | 0.981636 | chr13 | 32712541 | 32714879 | + | 0 | NA | intron (NLM6 LINE   | 127258  | NM_01503Z | 23047    | Hs.744901NM_01503Z | ENSG00000PDS5B      | APRIN ASE          | PDS5                     | cohc             | protein-coding |                |  |
| chr1-3754 | 8.881167  | -0.26865 | 0.790559 | -0.33982 | 0.733989 | 0.981636 | chr1  | 37542504 | 37542786 | + | 0 | NA | intron (NAluJb S N  | 11648   | NM_02470C | 79753    | Hs.47232           | NM_02470C           | ENSG00000CSNIP1    | PML1 PMRE                | Smad             | nucl           | protein-coding |  |
| chr13-41  | 8.881167  | -0.26865 | 0.790559 | -0.33982 | 0.733989 | 0.981636 | chr13 | 41358834 | 41359278 | + | 0 | NA | TTS (NM_C TTS (NM_C | -47018  | NM_001354 | 9617     | Hs.382177NM_004294 | ENSG00000MTRF1      | MRF1 MTTF          | mitochon                 | protein-coding   |                |                |  |
| chr1-149  | 12.17814  | 0.229896 | 0.676897 | 0.339765 | 0.734033 | 0.981636 | chr1  | 1.49E+08 | 1.49E+08 | + | 0 | NA | TTS (NM_C TTS (NM_C | 2687    | NM_001277 | 400818   | Hs.445082NM_001037 | ENSG00000NBPF9      | MBP1               | NBPF                     | memt             | protein-coding |                |  |
| chr1-2271 | 9.84337   | -0.25997 | 0.765403 | -0.33965 | 0.73412  | 0.981636 | chr1  | 2.27E+08 | 2.27E+08 | + | 0 | NA | intron (NMIR S N E  | 171525  | NM_020247 | 56997    | Hs.118241NM_020247 | ENSG00000COQ8A      | ADCK3 ARC          | coenzyme                 | protein-coding   |                |                |  |
| chr10-954 | 9.383763  | -0.25799 | 0.759579 | -0.33964 | 0.734125 | 0.981636 | chr10 | 95256055 | 95265022 | + | 0 | NA | intron (Nintron (N  | 30280   | NM_02099Z | 9124     | Hs.368522NM_02099Z | ENSG00000PDL1M1     | CLM1 CLF           | PDZ                      | and I            | protein-coding |                |  |
| chr10-97  | 9.383763  | -0.25799 | 0.759579 | -0.33964 | 0.734125 | 0.981636 | chr10 | 97429625 | 97434554 | + | 0 | NA | intron (NAluJr S N  | 4127    | NM_001317 | 5223     | Hs.632918NM_00262E | ENSG00000NBPF9      | HEL1-S-35 phosphog | protein-coding           |                  |                |                |  |
| chr11-112 | 9.383763  | -0.25799 | 0.759579 | -0.33964 | 0.734125 | 0.981636 | chr11 | 1.12E+08 | 1.12E+08 | + | 0 | NA | intron (Nintron (N  | 3075    | NM_00108Z | 55216    | Hs.195062NM_01819E | ENSG00000CNKAPD1    | C1lorf57           | NKAP                     | dom              | protein-coding |                |  |
| chr12-51  | 9.383763  | -0.25799 | 0.759579 | -0.33964 | 0.734125 | 0.981636 | chr12 | 51053741 | 51054707 | + | 0 | NA | intron (Nintron (N  | 5897    | NR_04502C | 25875    | Hs.655272NM_01541E | ENSG00000LETMD1     | 111001901 LETM1    | don                      | protein-coding   |                |                |  |
| chr12-56  | 9.383763  | -0.25799 | 0.759579 | -0.33964 | 0.734125 | 0.981636 | chr12 | 56663661 | 56662753 | + | 0 | NA | intron (NAluSq2 S   | 19880   | NR_10421E | 10728    | Hs.50425           | NM_006601           | ENSG00000PTGES3    | P23 TEBP                 | prostagl         | protein-coding |                |  |
| chr12-123 | 9.383763  | -0.25799 | 0.759579 | -0.33964 | 0.734125 | 0.981636 | chr12 | 1.24E+08 | 1.24E+08 | + | 0 | NA | intron (Nintron (N  | 8259    | NM_001321 | 10959    | Hs.733403NM_00681E | ENSG00000TMED2      | P24A RNP2          | transgl                  | protein-coding   |                |                |  |
| chr14-504 | 9.383763  | -0.25799 | 0.759579 | -0.33964 | 0.734125 | 0.981636 | chr14 | 50455460 | 50457527 | + | 0 | NA | intron (Nintron (N  | -59195  | NM_001367 | 8814     | Hs.280881NM_00419E | ENSG00000CDKL1      | KKIALRE Cyc        | clin                     | de               | protein-coding |                |  |
| chr15-44  | 9.383763  | -0.25799 | 0.759579 | -0.33964 | 0.734125 | 0.981636 | chr15 | 44645193 | 44648288 | + | 0 | NA | intron (NLM1A15 L   | 16922   | NM_00116C | 80208    | Hs.656273NM_025137 | ENSG00000SPG11      | ALS5 CMT2          | SPG11                    | ves              | protein-coding |                |  |
| chr15-59  | 9.383763  | -0.25799 | 0.759579 | -0.33964 | 0.734125 | 0.981636 | chr15 | 59650211 | 59652764 | + | 0 | NA | intron (Nintron (N  | 5818    | NM_00132C | 2958     | Hs.512934NM_00449Z | ENSG00000GTF2A2     | HS18745 general    | protein-coding           |                  |                |                |  |
| chr17-62  | 9.383763  | -0.25799 | 0.759579 | -0.33964 | 0.734125 | 0.981636 | chr17 | 62536135 | 62537891 | + | 0 | NA | intron (Nintron (N  | 55900   | NM_001284 | 11011    | Hs.445078NM_00685E | ENSG00000TLK2       | HsHPK MRE          | tousled                  | l                | protein-coding |                |  |
| chr18-93  | 9.383763  | -0.25799 | 0.759579 | -0.33964 | 0.734125 | 0.981636 | chr18 | 9337455  | 9346636  | + | 0 | NA | intron (Nintron (N  | 7272    | NM_02064E | 57045    | Hs.514688NM_02064E | ENSG00000TWSG1      | TSG                | twisted                  | protein-coding   |                |                |  |
| chr18-93  | 9.383763  | -0.25799 | 0.759579 | -0.3396  |          |          |       |          |          |   |   |    |                     |         |           |          |                    |                     |                    |                          |                  |                |                |  |

|           |          |          |          |          |          |          |       |          |          |   |   |    |                     |        |           |          |     |         |                   |                          |                                     |
|-----------|----------|----------|----------|----------|----------|----------|-------|----------|----------|---|---|----|---------------------|--------|-----------|----------|-----|---------|-------------------|--------------------------|-------------------------------------|
| chr22-365 | 11.14382 | 0.23697  | 0.702388 | 0.337377 | 0.735833 | 0.981636 | chr22 | 36510669 | 36527488 | + | 0 | NA | intron (Nintron (N  | 10088  | NM_003753 | 8664     | Hs. | 55682   | NM_003753         | ENSG00000EIF3D           | EIF3S7 eukaryotic protein-coding    |
| chr3-1251 | 11.14382 | 0.23697  | 0.702388 | 0.337377 | 0.735833 | 0.981636 | chr3  | 1.26E+08 | 1.26E+08 | + | 0 | NA | intron (NAluSq SIN  | 10966  | NM_003794 | 8723     | Hs. | 50724E  | NM_003794         | ENSG00000SNX4            | ATG24B sorting rprotein-coding      |
| chr3-1254 | 12.25256 | 0.23701  | 0.692976 | 0.337242 | 0.735934 | 0.981636 | chr3  | 1.25E+08 | 1.25E+08 | + | 0 | NA | intron (NAluY SINE  | 64409  | NM_003794 | 8723     | Hs. | 50724E  | NM_003794         | ENSG00000SNX4            | ATG24B sorting rprotein-coding      |
| chr1-1645 | 9.630484 | 0.25688  | 0.762104 | 0.337067 | 0.736066 | 0.981636 | chr1  | 16455386 | 16457452 | + | 0 | NA | intron (Nintron (N  | -4529  | NR_14721C | 1.08E+08 | Hs. | 52831E  | NR_14721C         | ENSG00000LINC01772       | - long intencRNA                    |
| chr1-4029 | 6.930484 | 0.25688  | 0.762104 | 0.337067 | 0.736066 | 0.981636 | chr1  | 40291896 | 40294001 | + | 0 | NA | exon (NM exon (NM   | 24838  | NM_001852 | 1298     | Hs. | 41801E  | NM_001852         | ENSG00000COL9A2          | DJ39G22.4 collagen protein-coding   |
| chr12-489 | 6.930484 | 0.25688  | 0.762104 | 0.337067 | 0.736066 | 0.981636 | chr12 | 48825032 | 48825700 | + | 0 | NA | intron (Nintron (N  | 6870   | NM_001206 | 784      | Hs. | 25071E  | NM_00072E         | ENSG00000CACNB3          | CAB3 CAC calcium vprotein-coding    |
| chr19-525 | 8.46085  | -0.27529 | 0.816798 | -0.33704 | 0.736087 | 0.981636 | chr19 | 52388596 | 52389178 | + | 0 | NA | TTS (NR_1TTS (NR_1  | 8870   | NR_12534F | 1.03E+08 | Hs. | 18868E  | NR_12534F         | ENSG00000ZNF528-AS       | - ZNF528 arnRNA                     |
| chr8-5397 | 8.46085  | -0.27529 | 0.816798 | -0.33704 | 0.736087 | 0.981636 | chr8  | 53978027 | 53978578 | + | 0 | NA | TTS (NR_1TTS (NR_1  | 44146  | NM_201437 | 6917     | Hs. | 49174E  | NM_00675E         | ENSG00000TCEA1           | GTf25 SII transcript protein-coding |
| chr17-765 | 8.109289 | 0.285526 | 0.847636 | 0.336849 | 0.73623  | 0.981636 | chr17 | 7695548  | 7695773  | + | 0 | NA | intron (Nintron (N  | 7183   | NM_001143 | 55135    | Hs. | 40831E  | NM_018081         | ENSG00000WRAP53          | DKCB3 TC WD repeat protein-coding   |
| chr17-152 | 8.914448 | -0.26478 | 0.786048 | -0.33685 | 0.736233 | 0.981636 | chr17 | 15261777 | 15243472 | + | 0 | NA | intron (NLM3 LINE   | 9072   | NR_03988A | 1.01E+08 | Hs. | 03988A  | ENSG00000MIR4731  | - microRNA ncRNA         |                                     |
| chr3-1414 | 8.914448 | -0.26478 | 0.786048 | -0.33685 | 0.736233 | 0.981636 | chr3  | 1.41E+08 | 1.41E+08 | + | 0 | NA | intron (NLM3 SINE   | 1994   | NM_00135C | 253461   | Hs. | 518301E | NM_15253E         | ENSG00000ZBTB38          | CIBZ PPP zinc fing protein-coding   |
| chr17-406 | 9.853077 | -0.25189 | 0.747831 | -0.33682 | 0.73625  | 0.981636 | chr17 | 4069122  | 4071598  | + | 0 | NA | intron (NMIR3 SINE  | 72670  | NM_015113 | 23140    | Hs. | 277624E | NM_015113         | ENSG00000ZZEF1           | ZZZ4 zinc fing protein-coding       |
| chr10-732 | 9.375905 | -0.25656 | 0.761939 | -0.33672 | 0.73633  | 0.981636 | chr10 | 73241362 | 73244431 | + | 0 | NA | 3' UTR (N3' UTR (N  | 4359   | NM_01519C | 23234    | Hs. | 408577E | NM_01519C         | ENSG00000DNAJ9C          | HDJ9C JDE DnaJ heat protein-coding  |
| chr11-122 | 9.375905 | -0.25656 | 0.761939 | -0.33672 | 0.73633  | 0.981636 | chr11 | 1.23E+08 | 1.23E+08 | + | 0 | NA | intron (Nintron (N  | 5924   | NR_029671 | 406911   | NR  | 029671  | ENSG00000MIR125B1 | MIRN125B1 microRNA ncRNA |                                     |
| chr11-123 | 9.375905 | -0.25656 | 0.761939 | -0.33672 | 0.73633  | 0.981636 | chr11 | 1.23E+08 | 1.23E+08 | + | 0 | NA | intron (NMLT1F2 LI  | -53819 | NM_006597 | 3312     | Hs. | 180414E | NM_006597         | ENSG00000HSPA8           | HEL-33 HE heat shock protein-coding |
| chr13-272 | 9.375905 | -0.25656 | 0.761939 | -0.33672 | 0.73633  | 0.981636 | chr13 | 27253553 | 27260287 | + | 0 | NA | TTS (NM_1TTS (NM_C  | 1519   | NR_00257E | 619499   | Hs. | 68971E  | NR_00257E         | ENSG00000SNORA27         | ACN27 small nucsnRNA                |
| chr16-667 | 9.375905 | -0.25656 | 0.761939 | -0.33672 | 0.73633  | 0.981636 | chr16 | 66742426 | 66743826 | + | 0 | NA | intron (NAluS2 SIN  | 8483   | NM_006141 | 1783     | Hs. | 36906E  | NM_006141         | ENSG00000DYNCL1L2        | DNCL2 LD dyallin cyprotein-coding   |
| chr2-1135 | 9.375905 | -0.25656 | 0.761939 | -0.33672 | 0.73633  | 0.981636 | chr2  | 1.14E+08 | 1.14E+08 | + | 0 | NA | intron (Nintron (N  | -21367 | NR_148507 | 440900   | Hs. | 66220E  | NR_03412E         | ENSG00000LINC019191      | VIN Inc-? long intencRNA            |
| chr3-1565 | 9.375905 | -0.25656 | 0.761939 | -0.33672 | 0.73633  | 0.981636 | chr3  | 1.57E+08 | 1.57E+08 | + | 0 | NA | intron (NLA_C Mam   | 7050   | NM_00130E | 6747     | Hs. | 51834E  | NM_007107         | ENSG00000SSR3            | TRAPG signal se protein-coding      |
| chr4-379  | 9.375905 | -0.25656 | 0.761939 | -0.33672 | 0.73633  | 0.981636 | chr4  | 1.38E+08 | 1.38E+08 | + | 0 | NA | intron (Nintron (N  | 9586   | NM_014331 | 23657    | Hs. | 390594E | NM_014331         | ENSG00000CLC7A11         | CCBR1 X solute c protein-coding     |
| chr5-755  | 9.375905 | -0.25656 | 0.761939 | -0.33672 | 0.73633  | 0.981636 | chr5  | 75560679 | 75560919 | + | 0 | NA | intron (NLIPA7 LIN  | -48818 | NM_00113C | 10087    | Hs. | 270437E | NM_00571E         | ENSG00000CERT1           | CERT CER ceramide protein-coding    |
| chr7-1308 | 9.375905 | -0.25656 | 0.761939 | -0.33672 | 0.73633  | 0.981636 | chr7  | 1.31E+08 | 1.31E+08 | + | 0 | NA | Intergeni THEIA LTF | 14552  | NR_02950C | 407021   | NR  | 02950C  | ENSG00000MIR29A   | MIRN29 MI microRNA ncRNA |                                     |
| chr8-3907 | 9.375905 | -0.25656 | 0.761939 | -0.33672 | 0.73633  | 0.981636 | chr8  | 39077149 | 39078891 | + | 0 | NA | intron (NMLT1M LTF  | -29509 | NM_001313 | 203102   | Hs. | 52154E  | NM_145004         | ENSG00000ADAM32          | - ADAM meta protein-coding          |
| chr8-720  | 9.375905 | -0.25656 | 0.761939 | -0.33672 | 0.73633  | 0.981636 | chr8  | 72060632 | 72069149 | + | 0 | NA | intron (Nintron (N  | 10698  | NM_007332 | 8989     | Hs. | 71681E  | NM_007332         | ENSG00000TRPA1           | ANKMT1 FE transient protein-coding  |
| chr8-998  | 9.375905 | -0.25656 | 0.761939 | -0.33672 | 0.73633  | 0.981636 | chr8  | 99885300 | 99887546 | + | 0 | NA | intron (NLM2B LIN   | 7284   | NM_004374 | 1345     | Hs. | 35187E  | NM_004374         | ENSG00000COX6C           | - cytochron protein-coding          |
| chr16-281 | 11.64827 | 0.231441 | 0.68784  | 0.336475 | 0.736513 | 0.981636 | chr16 | 28155455 | 28156577 | + | 0 | NA | intron (Nintron (N  | 55949  | NM_015171 | 23214    | Hs. | 46046E  | NM_015171         | ENSG00000XPO6            | EXP6 RANE exportin protein-coding   |
| chr17-165 | 11.64827 | 0.231441 | 0.68784  | 0.336475 | 0.736513 | 0.981636 | chr17 | 16504547 | 16507432 | + | 0 | NA | intron (Nintron (N  | -9078  | NM_03143C | 83547    | Hs. | 534497E | NM_03143C         | ENSG00000RILP            | PIP10141 Rab interprotein-coding    |
| chr17-167 | 11.64827 | 0.231441 | 0.68784  | 0.336475 | 0.736513 | 0.981636 | chr17 | 16703000 | 16834479 | + | 0 | NA | intron (Nintron (N  | 7978   | NM_00644E | 10594    | Hs. | 18136E  | NM_00644E         | ENSG00000PRPF8           | HPRP8 PRF pre-mRNA protein-coding   |
| chr20-358 | 11.64827 | 0.231441 | 0.68784  | 0.336475 | 0.736513 | 0.981636 | chr20 | 35842343 | 35844420 | + | 0 | NA | intron (NAluSx3 SI  | 71366  | NM_01643C | 51230    | Hs. | 517044E | NM_01643C         | ENSG00000PHF20           | AROF10 PHD finger protein-coding    |
| chr5-3938 | 11.64827 | 0.231441 | 0.68784  | 0.336475 | 0.736513 | 0.981636 | chr5  | 39385498 | 39394645 | + | 0 | NA | intron (Nintron (N  | -25576 | NM_001737 | 735      | Hs. | 65444E  | NM_001737         | ENSG00000C               | CARM15 5C compleher protein-coding  |
| chr6-2597 | 11.64827 | 0.231441 | 0.68784  | 0.336475 | 0.736513 | 0.981636 | chr6  | 25972338 | 25977333 | + | 0 | NA | intron (Nintron (N  | 12033  | NM_00635E | 10475    | Hs. | 584851E | NM_00635E         | ENSG00000TRIM38          | RNF15 ROF tripartit protein-coding  |
| chr19-405 | 9.077041 | 0.265156 | 0.788075 | 0.33646  | 0.736524 | 0.981636 | chr19 | 40320780 | 40321070 | + | 0 | NA | TTS (NM_1TTS (NM_C  | 27472  | NR_046202 | 126526   | Hs. | 631557E | NM_17883C         | ENSG00000C19orf47        | - chromoson protein-coding          |
| chr16-717 | 9.581487 | 0.257096 | 0.764152 | 0.336446 | 0.736535 | 0.981636 | chr16 | 71742564 | 71742778 | + | 0 | NA | intron (Nintron (N  | 15816  | NR_00305E | 692111   | NR  | 00305E  | ENSG00000SNORD71  | HBI1-239 small nucsnRNA  |                                     |
| chr6-1252 | 9.581487 | 0.257096 | 0.764152 | 0.336446 | 0.736535 | 0.981636 | chr6  | 1.25E+08 | 1.25E+08 | + | 0 | NA | intron (NHALIM8 LI  | 16581  | NM_01606E | 51020    | Hs. | 3282E   | NM_01606E         | ENSG00000HDDC2           | C6orf74 CHD domair protein-coding   |
| chr2-1124 | 4.436284 | 0.364958 | 1.085765 | 0.33613  | 0.736773 | 0.981636 | chr2  | 11242048 | 11242744 | + | 0 | NA | intron (Nintron (N  | 86929  | NM_00128E | 130814   | Hs. | 27441E  | NM_152391         | ENSG00000CLC66A3         | C2orf22 f solute c protein-coding   |
| chr5-1771 | 4.436284 | 0.364958 | 1.085765 | 0.33613  | 0.736773 | 0.981636 | chr5  | 1.77E+08 | 1.77E+08 | + | 0 | NA | intron (NAluYh3 SI  | 46874  | NM_00136E | 64324    | Hs. | 106861E | NM_02245E         | ENSG00000NSD1            | ARA267 K nuclear rprotein-coding    |
| chr3-1884 | 6.152615 | -0.31299 | 0.93231  | -0.33571 | 0.737089 | 0.981636 | chr3  | 1.88E+08 | 1.88E+08 | + | 0 | NA | intron (Nintron (N  | 126152 | NR_04662E | 1.01E+08 | Hs. | 67499E  | NR_04662E         | ENSG00000LPP-AS1         | - LPP antisncRNA                    |
| chr5-1504 | 6.152615 | -0.31299 | 0.93231  | -0.33571 | 0.737089 | 0.981636 | chr5  | 1.5E+08  | 1.5E+08  | + | 0 | NA | TTS (NM_1TTS (NM_C  | 12258  | NR_157074 | 972      | Hs. | 43656E  | NM_00435E         | ENSG00000CD74            | DHLAG HLA CD74 molc protein-coding  |
| chr4-1234 | 4.966154 | 0.347077 | 1.034051 | 0.335648 | 0.737137 | 0.981636 | chr4  | 1.23E+08 | 1.23E+08 | + | 0 | NA | intron (NMLT2B3 LI  | 129654 | NM_00134E | 166378   | Hs. | 70964E  | NM_145207         | ENSG00000SPATA5          | AFG2 EHL spermatog protein-coding   |
| chr17-406 | 6.160473 | -0.31526 | 0.939662 | -0.3355  | 0.737245 | 0.981636 | chr17 | 40019772 | 40020360 | + | 0 | NA | intron (Nintron (N  | 4626   | NM_17221E | 1440     | Hs. | 2233    | NM_00075E         | ENSG00000CSF3            | C17orf33 colony st protein-coding   |
| chr19-465 | 6.160473 | -0.31526 | 0.939662 | -0.3355  | 0.737245 | 0.981636 | chr19 | 4697533  | 4698102  | + | 0 | NA | intron (NMLT1C LTF  | 18535  | NM_00124E | 1E+08    | Hs. | 67813E  | NM_001242901      | DPP9-AS1                 | - DPP9 anti protein-coding          |
| chr17-81  | 9.126038 | 0.26483  | 0.789383 | 0.33483  | 0.737255 | 0.981636 | chr17 | 81249618 | 81249937 | + | 0 | NA | intron (Nintron (N  | 9863   | NR_14842E | 28184    | Hs. | 35654E  | NM_00108E         | ENSG00000NDUFAF8         | C17orf89 NADH ubic protein-coding   |
| chr21-394 | 12.15271 | 0.22638  | 0.675297 | 0.33523  | 0.737451 | 0.981636 | chr21 | 39405330 | 39406823 | + | 0 | NA | exon (NM exon (NM   | 18313  | NR_14661E | 7485     | Hs. | 19830E  | NM_004627         | ENSG00000GET1            | CHD5 WRB guided er protein-coding   |
| chr9-324  | 12.15271 | 0.22638  | 0.675297 | 0.33523  | 0.737451 | 0.981636 | chr9  | 32405210 | 32412469 | + | 0 | NA | intron (Nintron (N  | 24196  | NM_00136E | 48       | Hs. | 56722E  | NM_002197         | ENSG00000AC01            | ACONS HEL aconitase protein-coding  |
| chr15-422 | 9.424902 | -0.25574 | 0.763089 | -0.33514 | 0.737519 | 0.981636 | chr15 | 42251536 | 42253218 | + | 0 | NA | intron (NLIPA6 LIN  | 21056  | NM_015497 | 259663   | Hs. | 51113E  | NM_015497         | ENSG00000TMEM87A         | - transmemt protein-coding          |
| chr20-455 | 9.424902 | -0.25574 | 0.763089 | -0.33514 | 0.737519 | 0.981636 | chr20 | 45938728 | 45940132 | + | 0 | NA | intron (NLA2B LINE  | 4747   | NM_022104 | 63935    | Hs. | 47285E  | NM_022104         | ENSG00000PCIP1           | C20orf67 PDX1 C-? protein-coding    |
| chr3-9967 | 9.424902 | -0.25574 | 0.763089 | -0.33514 | 0.737519 | 0.981636 | chr3  | 9967539  | 9969524  | + | 0 | NA | intron (NLM1B7 LIN  | -16116 | NM_00131E | 285368   | Hs. | 598147E | NM_207351         | ENSG00000PRRT3           | - proline r protein-coding          |
| chr3-191  | 10.09379 | 0.24832  | 0.741176 | 0.335035 | 0.737599 | 0.981636 | chr3  | 1.91E+08 | 1.91E+08 | + | 0 | NA | intron (Nintron (N  | -31922 | NM_19815E | 257313   | Hs. | 51849E  | NM_19815E         | ENSG00000UTS2B           | U2B URP t urotensin protein-coding  |
| chr14-501 | 6.68147  | -0.2253  | 0.672861 | -0.33484 | 0.737743 | 0.981636 | chr14 | 50112939 | 50113138 | + | 0 | NA | intron (NAluSg SIN  | 3534   | NR_04973E | 79609    | Hs. | 558541E | NM_02455E         | ENSG00000VCPKMT          | C14orf138                           |



|           |          |          |          |          |          |          |       |          |          |   |      |                     |                   |                              |                       |               |                                      |                                 |
|-----------|----------|----------|----------|----------|----------|----------|-------|----------|----------|---|------|---------------------|-------------------|------------------------------|-----------------------|---------------|--------------------------------------|---------------------------------|
| chr8-1124 | 11.61499 | 0.228996 | 0.690061 | 0.331849 | 0.740003 | 0.981636 | chr8  | 71841675 | 71842550 | + | 0 NA | 3' UTR (N3' UTR (N  | -1011 NR_033652   | 1E+08 Hs. 137674NR_033651    | ENSG000000MSC-AS1     | -             | MSC antisenseRNA                     |                                 |
| chr10-876 | 5.667584 | -0.32405 | 0.977239 | -0.3316  | 0.740191 | 0.981636 | chr10 | 87683821 | 87684118 | + | 0 NA | intron (NAluJr SIN  | 24091 NM_001015   | 9060 Hs. 524491NM_004676     | ENSG000000PAPSS2      | -             | ATPSK2 BC3'-phospho protein-coding   |                                 |
| chr13-95  | 5.667584 | -0.32405 | 0.977239 | -0.3316  | 0.740191 | 0.981636 | chr13 | 95076644 | 95077353 | + | 0 NA | intron (NAluJo SIN  | 116957 NR_047487  | 1.01E+08 Hs. 48706 NR_047487 | ENSG000000CLINCO0557- | -             | long introncRNA                      |                                 |
| chr17-55  | 5.667584 | -0.32405 | 0.977239 | -0.3316  | 0.740191 | 0.981636 | chr17 | 5566552  | 5567304  | + | 0 NA | intron (NLM1A1 LIN  | 17581 NM_033004   | 22861 Hs. 652277NM_014922    | ENSG000000NLRP1       | -             | AIADK CAF NLR fam1 protein-coding    |                                 |
| chr2-158  | 5.667584 | -0.32405 | 0.977239 | -0.3316  | 0.740191 | 0.981636 | chr2  | 159E+08  | 1.59E+08 | + | 0 NA | intron (Nintron (N  | 56889 NR_135242   | 8008 Hs. 630724NR_135242     | ENSG000000PKP4-AS1    | -             | PKP4 anticRNA                        |                                 |
| chr2-177  | 5.667584 | -0.32405 | 0.977239 | -0.3316  | 0.740191 | 0.981636 | chr2  | 1.77E+08 | 1.77E+08 | + | 0 NA | intron (NLM5 LINE   | 40364 NM_003655   | 8540 Hs. 516545NM_003655     | ENSG000000CAGPS       | -             | ADAP-S AI alkylglyc protein-coding   |                                 |
| chr20-414 | 5.667584 | -0.32405 | 0.977239 | -0.3316  | 0.740191 | 0.981636 | chr20 | 41486441 | 41486790 | + | 0 NA | intron (Nintron (N  | -191797 NR_052844 | 90187 Hs. 726522NM_052844    | ENSG000000EMILIN3     | -             | C20orf13 elastin n protein-coding    |                                 |
| chr3-157  | 5.667584 | -0.32405 | 0.977239 | -0.3316  | 0.740191 | 0.981636 | chr3  | 15740607 | 15742136 | + | 0 NA | intron (NL3 LINE C  | 15176 NM_001195   | 23243 Hs. 335235NM_015199    | ENSG000000ANKRD28     | -             | PITK PPP1lankyrin r protein-coding   |                                 |
| chr3-130  | 5.667584 | -0.32405 | 0.977239 | -0.3316  | 0.740191 | 0.981636 | chr3  | 1.31E+08 | 1.31E+08 | + | 0 NA | intron (NLTR87 LTF  | 65871 NM_001001   | 27032 Hs. 584884NM_014382    | ENSG000000ATP2C1      | -             | ATP2C1A EATPase s e protein-coding   |                                 |
| chr3-142  | 5.667584 | -0.32405 | 0.977239 | -0.3316  | 0.740191 | 0.981636 | chr3  | 1.42E+08 | 1.42E+08 | + | 0 NA | intron (NAluSq2 SI  | 45643 NM_001282   | 54464 Hs. 435103NM_019001    | ENSG000000XRN1        | -             | 1-Sep 5'-3' exc protein-coding       |                                 |
| chr5-35   | 5.667584 | -0.32405 | 0.977239 | -0.3316  | 0.740191 | 0.981636 | chr5  | 356127   | 356889   | + | 0 NA | intron (NCPg        | 52332 NM_020731   | 57491 Hs. 50823              | NM_020731             | ENSG000000AHR | -                                    | AHH AHH aryl-hyd protein-coding |
| chr6-87   | 5.667584 | -0.32405 | 0.977239 | -0.3316  | 0.740191 | 0.981636 | chr6  | 87525626 | 87526531 | + | 0 NA | intron (NLM1A7 LIN  | 53104 NM_006416   | 10559 Hs. 423163NM_006416    | ENSG000000SLC35A1     | -             | CDG2F CMF solute c e protein-coding  |                                 |
| chr6-159  | 5.667584 | -0.32405 | 0.977239 | -0.3316  | 0.740191 | 0.981636 | chr6  | 1.6E+08  | 1.6E+08  | + | 0 NA | intron (NLM1E7 LIN  | 7933 NR_002966    | 677806 Hs. 689705NR_002966   | ENSG000000SNORA20     | -             | ACA20 small nucRNA                   |                                 |
| chr9-12   | 5.667584 | -0.32405 | 0.977239 | -0.3316  | 0.740191 | 0.981636 | chr9  | 1.22E+08 | 1.22E+08 | + | 0 NA | intron (NLM1TIK LTF | 8355 NM_014222    | 4702 Hs. 495035NM_014222     | ENSG000000NDUF8       | -             | CI-19KD CNADH:ubiq protein-coding    |                                 |
| chr13-72  | 5.496024 | 0.333189 | 1.005769 | 0.331278 | 0.740435 | 0.981636 | chr13 | 72833105 | 72834020 | + | 0 NA | intron (NLM1PA7 LIN | 51429 NR_146205   | 10464 Hs. 441922NM_006344    | ENSG000000PIBF1       | -             | C13orf24 progester protein-coding    |                                 |
| chr10-72  | 6.136899 | -0.30872 | 0.932146 | -0.33119 | 0.740498 | 0.981636 | chr10 | 72235061 | 72235377 | + | 0 NA | non-codirnon-codir  | -18085 NR_045564  | 51008 Hs. 500007NM_015947    | ENSG000000ASCC1       | -             | ASC1p50 cactivat r protein-coding    |                                 |
| chr16-24  | 6.136899 | -0.30872 | 0.932146 | -0.33119 | 0.740498 | 0.981636 | chr16 | 24917595 | 24918651 | + | 0 NA | IntergeniIntergeni  | 71892 NM_052944   | 115584 Hs. 164115NM_052944   | ENSG000000CLSC5A11    | -             | KST1 RKST1 solute c e protein-coding |                                 |
| chr17-37  | 6.136899 | -0.30872 | 0.932146 | -0.33119 | 0.740498 | 0.981636 | chr17 | 37472254 | 37473716 | + | 0 NA | intron (NAluJr SIN  | -16906 NM_007026  | 11072 Hs. 91448 NM_007026    | ENSG000000DUSP14      | -             | MKP-L MKF dual spec protein-coding   |                                 |
| chr2-85   | 6.136899 | -0.30872 | 0.932146 | -0.33119 | 0.740498 | 0.981636 | chr2  | 85759126 | 85759667 | + | 0 NA | intron (Nintron (N  | 5405 NM_032827    | 84913 Hs. 135566NM_032827    | ENSG000000ATOH8       | -             | HATH6 bHL atonal b protein-coding    |                                 |
| chr2-186  | 6.136899 | -0.30872 | 0.932146 | -0.33119 | 0.740498 | 0.981636 | chr2  | 1.86E+08 | 1.86E+08 | + | 0 NA | intron (Nintron (N  | 11537 NM_018471   | 55854 Hs. 74118CNM_018471    | ENSG000000ZC3H15      | -             | HTO10 LEF zinc b protein-coding      |                                 |
| chr3-48   | 6.136899 | -0.30872 | 0.932146 | -0.33119 | 0.740498 | 0.981636 | chr3  | 48173831 | 48176013 | + | 0 NA | intron (Nintron (N  | 13495 NM_001785   | 993 Hs. 437705NM_001785      | ENSG000000CDC25A      | -             | CDC25A2 cell divi protein-coding     |                                 |
| chr4-73   | 6.136899 | -0.30872 | 0.932146 | -0.33119 | 0.740498 | 0.981636 | chr4  | 73122681 | 73123420 | + | 0 NA | intron (Nintron (N  | -53291 NM_001300  | 285521 Hs. 356697NM_173827   | ENSG000000COX18       | -             | COX18HS cytochron protein-coding     |                                 |
| chr8-10   | 6.136899 | -0.30872 | 0.932146 | -0.33119 | 0.740498 | 0.981636 | chr8  | 1.03E+08 | 1.03E+08 | + | 0 NA | promoter-promoter-  | -437 NR_145795    | 1.1E+08 NR_145795            | SNORD173              | -             | small nucRNA                         |                                 |
| chr22-40  | 9.638342 | 0.255124 | 0.770392 | 0.331161 | 0.740523 | 0.981636 | chr22 | 40431079 | 40431301 | + | 0 NA | intron (Nintron (N  | 32250 NM_001282   | 57591 Hs. 654688NM_020831    | ENSG000000MRFTA       | -             | BSAC MAL myocardir protein-coding    |                                 |
| chr9-16   | 9.638342 | 0.255124 | 0.770392 | 0.331161 | 0.740523 | 0.981636 | chr9  | 16552441 | 16552754 | + | 0 NA | exon (NM exon (NM   | -174217 NR_151723 | 1.11E+08 Hs. 609215NR_151723 | ENSG000000BNC2-AS1    | -             | BNC2 anticRNA                        |                                 |
| chr3-98   | 9.707798 | -0.25676 | 0.775374 | -0.33114 | 0.740538 | 0.981636 | chr3  | 98580586 | 98580785 | + | 0 NA | exon (NM exon (NM   | 12926 NM_000097   | 1371 Hs. 476982NM_000097     | ENSG000000CPOX        | -             | COX CPO copropor r protein-coding    |                                 |
| chr19-44  | 9.74773  | -0.26081 | 0.788192 | -0.3309  | 0.740724 | 0.981636 | chr19 | 44754846 | 44755464 | + | 0 NA | intron (Nintron (N  | -3502 NR_107052   | 1.02E+08 NR_107052           | ENSG000000MIR8085     | -             | hsa-mir-5 microRNA ncRNA             |                                 |
| chr1-180  | 9.870643 | -0.24562 | 0.742384 | -0.33086 | 0.740754 | 0.981636 | chr1  | 1800957  | 1805747  | + | 0 NA | intron (NAluJr SIN  | -23321 NM_001353  | 65220 Hs. 654792NM_023018    | ENSG000000NADK        | -             | dJ283E3.1NAD kinase protein-coding   |                                 |
| chr11-37  | 9.870643 | -0.24562 | 0.742384 | -0.33086 | 0.740754 | 0.981636 | chr11 | 3729901  | 3731993  | + | 0 NA | intron (NLM1E4a LI  | -59565 NM_001303  | 57053 Hs. 732805NM_020402    | ENSG000000CHRNA10     | -             | choliner g protein-coding            |                                 |
| chr11-37  | 9.870643 | -0.24562 | 0.742384 | -0.33086 | 0.740754 | 0.981636 | chr11 | 3776575  | 3779688  | + | 0 NA | intron (NAluY SINE  | 19442 NR_157591   | 4928 Hs. 524755NM_005387     | ENSG000000NUP98       | -             | ADIR2 NUF nucleor protein-coding     |                                 |
| chr11-47  | 9.870643 | -0.24562 | 0.742384 | -0.33086 | 0.740754 | 0.981636 | chr11 | 47716012 | 47726215 | + | 0 NA | intron (NAluY SINE  | -5744 NM_024783   | 79841 Hs. 147377NM_024783    | ENSG000000AGBL2       | -             | CCP2 ATP/GTP t protein-coding        |                                 |
| chr18-7   | 9.870643 | -0.24562 | 0.742384 | -0.33086 | 0.740754 | 0.981636 | chr18 | 76894006 | 76898232 | + | 0 NA | intron (Nintron (N  | 71959 NM_007345   | 7776 Hs. 719137NM_007345     | ENSG000000ZNF236      | -             | ZNF236A zinc fing protein-coding     |                                 |
| chr19-45  | 9.870643 | -0.24562 | 0.742384 | -0.33086 | 0.740754 | 0.981636 | chr19 | 45522491 | 4552833  | + | 0 NA | intron (NAluJr4 SI  | 17683 NM_003337   | 7408 Hs. 515466NM_003337     | ENSG000000VASP        | -             | vasodilat protein-coding             |                                 |
| chr2-19   | 9.870643 | -0.24562 | 0.742384 | -0.33086 | 0.740754 | 0.981636 | chr2  | 1.91E+08 | 1.91E+08 | + | 0 NA | intron (NL2a LINE   | 119435 NM_001161  | 4430 Hs. 439622NM_012222     | ENSG000000MYO1B       | -             | MMI-alpha myosin II protein-coding   |                                 |
| chr3-12   | 9.870643 | -0.24562 | 0.742384 | -0.33086 | 0.740754 | 0.981636 | chr3  | 1.24E+08 | 1.24E+08 | + | 0 NA | intron (Nintron (N  | -23483 NR_046622  | 1.01E+08 Hs. 667315NR_046622 | ENSG000000MYLK-AS2    | -             | MYLK anticRNA                        |                                 |
| chr5-12   | 9.870643 | -0.24562 | 0.742384 | -0.33086 | 0.740754 | 0.981636 | chr5  | 1.27E+08 | 1.27E+08 | + | 0 NA | intron (N (A)n Simp | -13323 NM_020740  | 389320 Hs. 177983NM_207405   | ENSG000000TEX43       | -             | C5orf48 12testis e protein-coding    |                                 |
| chr1-26   | 9.870643 | -0.33025 | 0.998895 | -0.33061 | 0.740938 | 0.981636 | chr1  | 26844336 | 26844602 | + | 0 NA | intron (NLM1E3a LI  | 17781 NM_032283   | 84243 Hs. 52371CNM_032283    | ENSG000000ZDHC18      | -             | DHHC-18 Zinc fing protein-coding     |                                 |
| chr13-3   | 9.870643 | -0.33025 | 0.998895 | -0.33061 | 0.740938 | 0.981636 | chr13 | 32042850 | 32043057 | + | 0 NA | intron (Nintron (N  | 11179 NM_023037   | 10129 Hs. 507666NM_023037    | ENSG000000FRY         | -             | LINC0A73 FRY micr protein-coding     |                                 |
| chr3-19   | 13.62195 | -0.2125  | 0.642801 | -0.33059 | 0.740957 | 0.981636 | chr3  | 1.96E+08 | 1.96E+08 | + | 0 NA | intron (NLM1C5a LI  | 1430 NR_122105    | 440993 Hs. 708995NM_01013714 | MIR570HG              | -             | LINC00966 MIR570 hncRNA              |                                 |
| chr2-10   | 11.62284 | 0.227707 | 0.689129 | 0.330427 | 0.741077 | 0.981636 | chr2  | 1.05E+08 | 1.05E+08 | + | 0 NA | intron (Nintron (N  | 14035 NM_001318   | 2274 Hs. 443687NM_001455     | ENSG000000FHL2        | -             | AAG11 DR4 four and protein-coding    |                                 |
| chr6-3    | 10.61395 | 0.238986 | 0.72315  | 0.330355 | 0.741132 | 0.981636 | chr6  | 36059764 | 36060111 | + | 0 NA | intron (Nintron (N  | 32133 NM_139013   | 1432 Hs. 485233NM_001318     | ENSG000000MAPK14      | -             | CSBP CSBF mitogen-e protein-coding   |                                 |
| chr3-27   | 10.61395 | -0.31472 | 0.953075 | -0.33022 | 0.741233 | 0.981636 | chr3  | 27472641 | 27473528 | + | 0 NA | intron (NAluSx SIN  | 11300 NM_001321   | 9497 Hs. 250072NM_003615     | ENSG000000SLCAA7      | -             | NBC2 NBC1 solute c e protein-coding  |                                 |
| chr8-1    | 10.61395 | -0.31472 | 0.953075 | -0.33022 | 0.741233 | 0.981636 | chr8  | 1.28E+08 | 1.28E+08 | + | 0 NA | intron (Nintron (N  | -14718 NR_031611  | 1E+08 NR_031611              | ENSG000000MIR1206     | -             | MIRN1206 microRNA ncRNA              |                                 |
| chr5-6    | 10.61395 | -0.31472 | 0.953075 | -0.33022 | 0.741233 | 0.981636 | chr5  | 61533809 | 61534877 | + | 0 NA | intron (Nintron (N  | -103402 NR_161251 | 285668 Hs. 683866NR_126522   | ENSG000000C5orf64     | -             | chromosomncRNA                       |                                 |
| chr1-150  | 9.829504 | -0.2478  | 0.750843 | -0.33003 | 0.74138  | 0.981636 | chr1  | 1.5E+08  | 1.5E+08  | + | 0 NA | intron (Nintron (N  | 4084 NM_001304    | 51177 Hs. 438822NM_016274    | ENSG000000PLEKH01     | -             | CKIP-1 Ck pleckstri protein-coding   |                                 |
| chr8-10   | 8.411852 | -0.27582 | 0.835971 | -0.32994 | 0.741445 | 0.981636 | chr8  | 1.03E+08 | 1.03E+08 | + | 0 NA | intron (Nintron (N  | 25743 NM_015420   | 25879 Hs. 532265NM_015420    | ENSG000000DCAF13      | -             | GM83 HSPCDB1 and protein-coding      |                                 |
| chr1-17   | 12.12729 | 0.22279  | 0.67554  | 0.329795 | 0.741555 | 0.981636 | chr1  | 1.72E+08 | 1.72E+08 | + | 0 NA | exon (NM exon (NM   | -53143 NM_001368  | 1.11E+08 NM_001368164        | MYOCOS                | -             | myocilin protein-coding              |                                 |
| chr15-6   | 12.12729 | 0.22279  | 0.67554  | 0.329795 | 0.741555 | 0.981636 | chr15 | 65876993 | 65880779 | + | 0 NA | intron (Nintron (N  | 9395 NM_001206    | 8766 Hs. 321541NM_004665     | ENSG000000CRAB11A     | -             | YL8 RAB11A, n protein-coding         |                                 |
| chr12-6   | 9.401329 | -0.25146 | 0.762514 | -0.32977 | 0.741571 | 0.981636 | chr12 | 6457896  | 6458095  | + | 0 NA | intron (Nintron (N  | 5953 NM_001351    | 55080 Hs. 504597NM_018005    | ENSG00000             |               |                                      |                                 |

|           |          |          |          |          |          |          |       |          |          |   |   |    |                    |                   |                              |                    |                                      |
|-----------|----------|----------|----------|----------|----------|----------|-------|----------|----------|---|---|----|--------------------|-------------------|------------------------------|--------------------|--------------------------------------|
| chr1-2036 | 12.13515 | -0.22155 | 0.675762 | 0.327852 | 0.743024 | 0.981636 | chr1  | 2.04E+08 | 2.04E+08 | + | 0 | NA | intron (Nintron (N | -26505 NM_003094  | 6635 Hs. 334612NM_003094     | ENSG000003NRPE     | HYPT11 SM small nucprotein-coding    |
| chr1-2175 | 5.700866 | -0.31798 | 0.969939 | -0.32784 | 0.743035 | 0.981636 | chr1  | 21732289 | 21732940 | + | 0 | NA | intron (NCharlie2E | 50535 NM_00135C   | 84196 Hs. 467524NM_03223E    | ENSG00000USP48     | RAP1GA1 ubiquitin protein-coding     |
| chr1-3547 | 5.700866 | -0.31798 | 0.969939 | -0.32784 | 0.743035 | 0.981636 | chr1  | 35473722 | 35474929 | + | 0 | NA | intron (NMIRB SINE | 83078 NM_024874   | 79932 Hs. 456507NM_024874    | ENSG00000KIAA03191 | AAVR AAVF KIAA0319 protein-coding    |
| chr11-434 | 5.700866 | -0.31798 | 0.969939 | -0.32784 | 0.743035 | 0.981636 | chr11 | 43452722 | 43454470 | + | 0 | NA | intron (NLIM8 LINE | 94676 NM_01825E   | 55761 Hs. 191188NM_01825E    | ENSG00000TTC17     | - tetraatric protein-coding          |
| chr18-205 | 5.700866 | -0.31798 | 0.969939 | -0.32784 | 0.743035 | 0.981636 | chr18 | 20957449 | 20958723 | + | 0 | NA | intron (NLIME2 LIN | 153727 NM_00540E  | 6093 Hs. 306307NM_00540E     | ENSG00000ROCK1     | P16OROCK Rho assoc protein-coding    |
| chr2-4235 | 5.700866 | -0.31798 | 0.969939 | -0.32784 | 0.743035 | 0.981636 | chr2  | 42335870 | 42336353 | + | 0 | NA | intron (Nintron (N | 23927 NR_13494E   | 9167 Hs. 339635NM_00471E     | ENSG00000COX7A2L   | COX7AR CC cytochron protein-coding   |
| chr2-1215 | 5.700866 | -0.31798 | 0.969939 | -0.32784 | 0.743035 | 0.981636 | chr2  | 1.22E+08 | 1.22E+08 | + | 0 | NA | intron (Nintron (N | -6436 NR_02334E   | 1E+08 Hs. 689635NR_02334E    | ENSG00000RNU4ATAC  | MOPD1 RFM RNA, 4eat snRNA            |
| chr2-1827 | 5.700866 | -0.31798 | 0.969939 | -0.32784 | 0.743035 | 0.981636 | chr2  | 1.83E+08 | 1.83E+08 | + | 0 | NA | intron (NLIPA6 LIN | 53480 NR_073367   | 54431 Hs. 516632NM_018981    | ENSG00000DNAJC10   | ERJ5 JPE DnaJ heat protein-coding    |
| chr3-475  | 5.700866 | -0.31798 | 0.969939 | -0.32784 | 0.743035 | 0.981636 | chr3  | 47505699 | 47507116 | + | 0 | NA | intron (NMER11C LI | 6938 NM_00136E    | 54859 Hs. 31110CNM_01771E    | ENSG00000CELP6     | C3orf75 Telongator protein-coding    |
| chr3-4935 | 5.700866 | -0.31798 | 0.969939 | -0.32784 | 0.743035 | 0.981636 | chr3  | 49394119 | 49394951 | + | 0 | NA | intron (NALuSz SIN | 17441 NM_00131E   | 387 Hs. 247077NM_001664      | ENSG00000RHOA      | ARH12 ARF ras homol protein-coding   |
| chr3-1305 | 5.700866 | -0.31798 | 0.969939 | -0.32784 | 0.743035 | 0.981636 | chr3  | 1.31E+08 | 1.31E+08 | + | 0 | NA | intron (Nintron (N | 60457 NM_01406E   | 28990 Hs. 100878NM_01406E    | ENSG00000ASTE1     | HT001 asteroid protein-coding        |
| chr5-131E | 5.700866 | -0.31798 | 0.969939 | -0.32784 | 0.743035 | 0.981636 | chr5  | 1.32E+08 | 1.32E+08 | + | 0 | NA | intron (Nintron (N | -12165 NM_001164  | 51735 Hs. 483325NM_01634C    | ENSG00000CRAPGEF6  | KIA0011B Rap guani protein-coding    |
| chr6-875E | 5.700866 | -0.31798 | 0.969939 | -0.32784 | 0.743035 | 0.981636 | chr6  | 87584801 | 87585546 | + | 0 | NA | non-codiron-codir  | 4814 NM_02032E    | 57038 Hs. 485914NM_02032E    | ENSG00000RARS2     | ArgRS DAL arginyl-t protein-coding   |
| chr6-8975 | 5.700866 | -0.31798 | 0.969939 | -0.32784 | 0.743035 | 0.981636 | chr6  | 89730399 | 89732480 | + | 0 | NA | intron (NLIPA8 LIN | 8835 NM_01461E    | 23195 Hs. 459666NM_01461E    | ENSG00000MDN1      | ReagL midasin f protein-coding       |
| chr8-474  | 5.700866 | -0.31798 | 0.969939 | -0.32784 | 0.743035 | 0.981636 | chr8  | 47400952 | 47401842 | + | 0 | NA | intron (NLIPA5 LIN | 140459 NM_00108C  | 23514 Hs. 381055NM_00108C    | ENSG00000SPIDR     | KIAA0146 scaffold protein-coding     |
| chr8-1095 | 5.700866 | -0.31798 | 0.969939 | -0.32784 | 0.743035 | 0.981636 | chr8  | 1.09E+08 | 1.09E+08 | + | 0 | NA | intron (Nintron (N | 7274 NR_03647E    | 56943 Hs. 492555NM_02018E    | ENSG00000ENY2      | DC6 Susi ENY2 trar protein-coding    |
| chr15-664 | 4.948588 | 0.335699 | 1.02511  | 0.327476 | 0.743308 | 0.981636 | chr15 | 66446899 | 66447880 | + | 0 | NA | intron (Nintron (N | 49645 NR_039737   | 1.01E+08 NR_039737           | ENSG00000MIR4512   | - microRNA ncRNA                     |
| chr7-6674 | 4.948588 | 0.335699 | 1.02511  | 0.327476 | 0.743308 | 0.981636 | chr7  | 66721015 | 66722288 | + | 0 | NA | intron (NMLT1D LTF | -19082 NM_001367  | 27342 Hs. 530052NM_014504    | ENSG00000RABGEF1   | RABEX5 RAB guani protein-coding      |
| chr9-9634 | 4.948588 | 0.335699 | 1.02511  | 0.327476 | 0.743308 | 0.981636 | chr9  | 96348628 | 96349681 | + | 0 | NA | intron (NLTRA8B LI | 34556 NR_104627   | 11046 Hs. 494556NM_007001    | ENSG00000SLC35D2   | HFRFC1 SQV solute c protein-coding   |
| chr9-1302 | 4.948588 | 0.335699 | 1.02511  | 0.327476 | 0.743308 | 0.981636 | chr9  | 1.3E+08  | 1.3E+08  | + | 0 | NA | intron (Nintron (N | 3175 NM_00112E    | 23413 Hs. 642944NM_01428E    | ENSG00000NCNS1     | FLU1 FRE neuronal protein-coding     |
| chr1-1101 | 4.63959  | 0.21708  | 0.663008 | 0.327416 | 0.743353 | 0.981636 | chr1  | 11013689 | 11023851 | + | 0 | NA | exon (NM exon (NM  | 6148 NM_00737E    | 23435 Hs. 300624NM_00737E    | ENSG00000TARDBP    | ALU10 TDF TAR DNA t protein-coding   |
| chr1-2306 | 6.193754 | -0.30966 | 0.945917 | -0.32737 | 0.743389 | 0.981636 | chr1  | 2.31E+08 | 2.31E+08 | + | 0 | NA | intron (Nintron (N | 34476 NM_00002E   | 183 Hs. 19383 NM_00002E      | ENSG00000AGT       | ANHU SERF angiotens protein-coding   |
| chr18-797 | 5.478458 | 0.32224  | 0.984474 | 0.327322 | 0.743424 | 0.981636 | chr18 | 79722520 | 79723412 | + | 0 | NA | intron (Nintron (N | 41536 NM_00120E   | 9150 Hs. 46549CNM_00471E     | ENSG00000CTDP1     | CCFDN CFCD2 phosph protein-coding    |
| chr19-185 | 5.478458 | 0.32224  | 0.984474 | 0.327322 | 0.743424 | 0.981636 | chr19 | 18312905 | 18315558 | + | 0 | NA | intron (NALuJo SIN | 7845 NM_012321    | 25804 Hs. 512555NM_012321    | ENSG00000LSM4      | GRP1 YER11LSM4 homc protein-coding   |
| chr3-1264 | 5.478458 | 0.32224  | 0.984474 | 0.327322 | 0.743424 | 0.981636 | chr3  | 1.26E+08 | 1.26E+08 | + | 0 | NA | intron (Nintron (N | 11886 NM_02511E   | 79364 Hs. 440045NM_02511E    | ENSG00000ZXDC      | ZXDL ZXD famil protein-coding        |
| chr7-128  | 5.478458 | 0.32224  | 0.984474 | 0.327322 | 0.743424 | 0.981636 | chr7  | 1.28E+08 | 1.28E+08 | + | 0 | NA | intron (Nintron (N | 7000 NR_030324    | 693178 NR_030324             | ENSG00000MIR593    | MIRN593 t microRNA ncRNA             |
| chr3-1974 | 4.752529 | -0.36986 | 1.13028  | -0.32723 | 0.743497 | 0.981636 | chr3  | 1.98E+08 | 1.98E+08 | + | 0 | NA | intron (Nintron (N | 57119 NM_00136E   | 84859 Hs. 518414NM_03277E    | ENSG00000LRCH3     | - leucine r protein-coding           |
| chr19-458 | 8.939872 | -0.25919 | 0.792187 | -0.32719 | 0.743525 | 0.981636 | chr19 | 45824779 | 45825182 | + | 0 | NA | intron (Nintron (N | -9672 NM_03078E   | 81492 Hs. 146544NM_03078E    | ENSG00000RSPH6A    | RSHL1 RSF radial s protein-coding    |
| chr6-8751 | 8.939872 | -0.25919 | 0.792187 | -0.32719 | 0.743525 | 0.981636 | chr6  | 87510141 | 87512114 | + | 0 | NA | intron (Nintron (N | 38153 NM_00641E   | 10559 Hs. 423162NM_00641E    | ENSG00000SLC35A1   | CDGF2 CF solute c protein-coding     |
| chr9-9764 | 6.133996 | -0.24503 | 0.735268 | -0.32713 | 0.743568 | 0.981636 | chr9  | 97647054 | 97648266 | + | 0 | NA | intron (Nintron (N | 14064 NM_00248E   | 4686 Hs. 595666NM_00248E     | ENSG00000NCBP1     | CBP80 NCF nuclec c protein-coding    |
| chr14-954 | 4.989728 | 0.338018 | 1.033875 | 0.326943 | 0.743711 | 0.981636 | chr14 | 95466829 | 95467686 | + | 0 | NA | intron (NMIRB SINE | 8578 NM_00136E    | 161176 Hs. 41502 NM_02463E   | ENSG00000CYNE3     | C14orf13 spectrin protein-coding     |
| chr7-6804 | 4.989728 | 0.338018 | 1.033875 | 0.326943 | 0.743711 | 0.981636 | chr7  | 6804507  | 6806148  | + | 0 | NA | intron (Nintron (N | 20968 NM_198097   | 221960 Hs. 567775NM_198097   | ENSG00000CCZ1B     | SP7orf28A CCZ1 homc protein-coding   |
| chr9-1101 | 14.06769 | -0.20695 | 0.633509 | -0.32668 | 0.743912 | 0.981636 | chr9  | 1.1E+08  | 1.1E+08  | + | 0 | NA | intron (NALuJb SIN | -61809 NM_00128E  | 255220 Hs. 143766NM_00100E   | ENSG00000TXND8     | CPTXorf3 S thioeredox protein-coding |
| chr2-2015 | 12.68073 | 0.21817  | 0.668224 | 0.326492 | 0.744052 | 0.981636 | chr2  | 2.01E+08 | 2.01E+08 | + | 0 | NA | exon (NM exon (NM  | -23228 NM_13916E  | 130540 Hs. 107944NM_13916E   | ENSG00000FLACC1    | ALS2CR12 flagellun protein-coding    |
| chr11-171 | 6.129041 | -0.30665 | 0.93934  | -0.32646 | 0.74408  | 0.981636 | chr11 | 17119135 | 17119987 | + | 0 | NA | intron (Nintron (N | -41894 NM_001017  | 6207 Hs. 446588NM_001017     | ENSG00000RPS13     | S13 ribosomal protein-coding         |
| chr4-3986 | 6.129041 | -0.30665 | 0.93934  | -0.32646 | 0.74408  | 0.981636 | chr4  | 39878279 | 39879102 | + | 0 | NA | intron (Nintron (N | 99221 NM_00110C   | 23244 Hs. 331431NM_01520C    | ENSG00000PDS5A     | P1G54 SCC PDS5 cohe protein-coding   |
| chr6-8395 | 6.129041 | -0.30665 | 0.93934  | -0.32646 | 0.74408  | 0.981636 | chr6  | 83936555 | 83937226 | + | 0 | NA | intron (Nintron (N | 77201 NM_01623C   | 51167 Hs. 5741 NM_01623C     | ENSG00000CYB5R4    | NCB50R ct cytochron protein-coding   |
| chr9-9591 | 6.129041 | -0.30665 | 0.93934  | -0.32646 | 0.74408  | 0.981636 | chr9  | 95918602 | 95919024 | + | 0 | NA | intron (Nintron (N | 42804 NM_00101C   | 375748 Hs. 432364NM_020207   | ENSG00000ERCC6L2   | BMF52 C9c ERCC exciprotein-coding    |
| chr1-7975 | 8.445134 | -0.27158 | 0.831986 | -0.32643 | 0.744099 | 0.981636 | chr1  | 79757635 | 7979844  | + | 0 | NA | intron (NALuJr4 SI | 18028 NM_00726E   | 11315 Hs. 41964CNM_00726E    | ENSG00000PARK7     | DJ-1 DJ1 Parkinson protein-coding    |
| chr14-512 | 5.4706   | 0.325193 | 0.996412 | 0.326364 | 0.744149 | 0.981636 | chr14 | 51245676 | 51246622 | + | 0 | NA | intron (Nintron (N | 5902 NM_03075E    | 81542 Hs. 125221NM_03075E    | ENSG00000TMX1      | PDIA11 TV thioeredox protein-coding  |
| chr9-124  | 9.424268 | -0.24919 | 0.764279 | -0.32604 | 0.744392 | 0.981636 | chr9  | 1.24E+08 | 1.24E+08 | + | 0 | NA | intron (NLIME3 LIN | -15526 NR_02740E  | 1E+08 Hs. 65498CNR_02740E    | LOC10012E          | - uncharactncRNA                     |
| chr1-1185 | 9.903925 | -0.24216 | 0.742837 | -0.32599 | 0.74443  | 0.981636 | chr1  | 11838617 | 11839875 | + | 0 | NA | intron (Nintron (N | -1073 NR_03780E   | 1E+08 Hs. 710015NR_03780E    | NPPA-AS1           | NPPA-AS1 NPPA antncRNA               |
| chr3-1695 | 9.903925 | -0.24216 | 0.742837 | -0.32599 | 0.74443  | 0.981636 | chr3  | 1.7E+08  | 1.7E+08  | + | 0 | NA | intron (NALuY SINE | 11232 NM_00326E   | 7095 Hs. 744855NM_00326E     | ENSG00000SEC62     | Dtrp1 HTF SEC62 hon protein-coding   |
| chr5-692E | 9.903925 | -0.24216 | 0.742837 | -0.32599 | 0.74443  | 0.981636 | chr5  | 69267568 | 69270525 | + | 0 | NA | intron (NALuS6 SI  | 34160 NM_00179E   | 1022 Hs. 184298NM_00179E     | ENSG00000CDK7      | CAC CAC1 cyclin d protein-coding     |
| chr5-1285 | 9.903925 | -0.24216 | 0.742837 | -0.32599 | 0.74443  | 0.981636 | chr5  | 1.28E+08 | 1.28E+08 | + | 0 | NA | intron (Nintron (N | 17774 NM_00104E   | 6558 Hs. 162588NM_00104E     | ENSG00000SLC12A2   | BASC BASC2 solute c protein-coding   |
| chr5-1285 | 9.903925 | -0.24216 | 0.742837 | -0.32599 | 0.74443  | 0.981636 | chr5  | 1.28E+08 | 1.28E+08 | + | 0 | NA | intron (NALuS2 SI  | 193491 NM_00199E  | 2201 Hs. 519294NM_00199E     | ENSG00000PBN2      | CCA DA9 Fibrillin protein-coding     |
| chr6-7905 | 9.903925 | -0.24216 | 0.742837 | -0.32599 | 0.74443  | 0.981636 | chr6  | 79052778 | 79053588 | + | 0 | NA | intron (NALuSz SIN | 25071 NM_017934   | 55023 Hs. 511817NM_017934    | ENSG00000PHIP      | BRWD2 DC pleckstri protein-coding    |
| chr7-7765 | 9.903925 | -0.24216 | 0.742837 | -0.32599 | 0.74443  | 0.981636 | chr7  | 77620672 | 77622729 | + | 0 | NA | intron (NTigger3b  | 74565 NR_134254   | 1.01E+08 Hs. 72451 NR_038361 | ENSG00000CAPTR     | RSBN1L-AS1 u-medicncRNA              |
| chr2-1137 | 10.57821 | 0.237562 | 0.728978 | 0.325884 | 0.744512 | 0.981636 | chr2  | 1.14E+08 | 1.14E+08 | + | 0 | NA | non-codiron-codir  | 8817 NR_038942    | 1.01E+08 NR_038942           | ENSG00000MIR4782   | - microRNA ncRNA                     |
| chr22-505 | 5.486316 | 0.319471 | 0.980716 | 0.325752 | 0.744612 | 0.981636 | chr22 | 50303530 | 50304360 | + | 0 | NA | intron (Nintron (N | 3701 NM_012401    | 23654 Hs. 3989 NM_012401     | ENSG00000PLXNB2    | MM1 Nbla cplexin B2 protein-coding   |
| chr5-1105 | 5.486316 | 0.319471 | 0.980716 | 0.325752 | 0.744612 | 0.981636 | chr5  | 71059127 | 71059675 | + | 0 | NA | intron (NALuSc SIN | 8251 NM_00109E    | 728340 Hs. 191355NM_00109E   | ENSG00000GTF2H2C   | GTF2H2C_2 GTF2H2 f2 protein-coding   |
| chr15-797 | 25.23823 | 0.16098  | 0.49419  | 0.325744 | 0.744618 | 0.981636 | chr15 | 79775509 | 79779864 | + | 0 | NA | IntergeniALR/Alpha | -505058 NR_03883E | 646096 Hs. 448789NR_03883E   | ENSG00000CHEK2P2   | - checkpoi pseudo                    |
| chr1-9995 | 9.821646 | -0.24646 | 0.756763 | -0.32568 | 0.744669 | 0.981636 | chr1  | 99991598 | 99992028 | + | 0 | NA | intron (NALuSc SIN | 21296 NM          |                              |                    |                                      |



|                    |          |          |          |          |          |       |                |          |        |                     |                    |                              |                         |                                      |                           |
|--------------------|----------|----------|----------|----------|----------|-------|----------------|----------|--------|---------------------|--------------------|------------------------------|-------------------------|--------------------------------------|---------------------------|
| chr3-9452 9.896067 | -0.2408  | 0.741454 | -0.32477 | 0.745354 | 0.981636 | chr3  | 9452893        | 9458812  | + 0 NA | intron (Nintron (N  | 58152 NM_00108C    | 55209 Hs. 288164NM_018187    | ENSG000000CSETD5        | -                                    | SET domain protein-coding |
| chr3-1837 9.896067 | -0.2408  | 0.741454 | -0.32477 | 0.745354 | 0.981636 | chr3  | 1.84E+08       | 1.84E+08 | + 0 NA | intron (NLMB7 LIN   | 23565 NR_046727    | 1.01E+08 NR_046727           | YEATS2-AS-              | YEATS2 arncRNA                       |                           |
| chr4-7701 9.896067 | -0.2408  | 0.741454 | -0.32477 | 0.745354 | 0.981636 | chr4  | 77014127       | 77016297 | + 0 NA | intron (NMIR3 SINE  | 59698 NM_00134E    | 10983 Hs. 518827NM_00683E    | ENSG000000CCNI          | CCNI1 CYC cyclin I protein-coding    |                           |
| chr5-2544 9.896067 | -0.2408  | 0.741454 | -0.32477 | 0.745354 | 0.981636 | chr5  | 254427         | 262975   | + 0 NA | IntergeniCpG        | 12823 NR_10461E    | 1.02E+08 Hs. 36832ENR_104613 | HRAT5                   | heart tiscrRNA                       |                           |
| chr5-1711 9.896067 | -0.2408  | 0.741454 | -0.32477 | 0.745354 | 0.981636 | chr5  | 1.71E+08       | 1.71E+08 | + 0 NA | intron (NAluSx SIN  | 13319 NM_00135E    | 4869 Hs. 55755ENR_00252C     | ENSG000000NP1M          | B23 NPM nucleoph protein-coding      |                           |
| chr6-404 9.896067  | -0.2408  | 0.741454 | -0.32477 | 0.745354 | 0.981636 | chr6  | 4040106        | 4045177  | + 0 NA | intron (Nintron (N  | 21341 NM_00391E    | 8899 Hs. 159014NM_00391E     | ENSG000000PRPF4B        | PR4H PRP4pre-mRNA protein-coding     |                           |
| chr7-8734 9.896067 | -0.2408  | 0.741454 | -0.32477 | 0.745354 | 0.981636 | chr7  | 87348710       | 87355828 | + 0 NA | intron (NLOR1-int)  | 6605 NM_00114E     | 54677 Hs. 12503ENR_021151    | ENSG000000CROT          | COT carnitine protein-coding         |                           |
| chr7-1124 9.896067 | -0.2408  | 0.741454 | -0.32477 | 0.745354 | 0.981636 | chr7  | 1.12E+08       | 1.12E+08 | + 0 NA | intron (Nintron (N  | 12026 NM_001134    | 286006 Hs. 39618ENR_182597   | ENSG000000LSMEM1        | C7orf53 leucine protein-coding       |                           |
| chr7-1395 9.896067 | -0.2408  | 0.741454 | -0.32477 | 0.745354 | 0.981636 | chr7  | 1.4E+08        | 1.4E+08  | + 0 NA | intron (Nintron (N  | 80380 NM_00108C    | 154790 Hs. 57806 NM_00108C   | ENSG000000CLEC2L        | - C-type Ie protein-coding           |                           |
| chr11-107 10.32244 | -0.23785 | 0.732617 | -0.32465 | 0.745445 | 0.981636 | chr11 | 10761115       | 10761321 | + 0 NA | intron (Nintron (N  | 9972 NM_00134E     | 9646 Hs. 725151NM_01463E     | ENSG000000CT9R          | SH2BP1 TSCR9 homc protein-coding     |                           |
| chr16-84 9.956446  | 0.332715 | 1.02505  | 0.324585 | 0.745495 | 0.981636 | chr16 | 84054539       | 84055112 | + 0 NA | intron (Nintron (N  | -12668 NM_00108C   | 146167 NM_00108C             | ENSG000000SLC38A8       | FVH2 solute c protein-coding         |                           |
| chr9-125 9.956446  | 0.332715 | 1.02505  | 0.324585 | 0.745495 | 0.981636 | chr9  | 1.25E+08       | 1.25E+08 | + 0 NA | intron (NLMIP3 LIN  | -71133 NM_002077   | 2800 Hs. 59504 NM_002077     | ENSG000000GOLGA1        | golgin-97 golgin A1 protein-coding   |                           |
| chr14-305 10.11736 | 0.243615 | 0.750558 | 0.324578 | 0.7455   | 0.981636 | chr14 | 30949389       | 30949924 | + 0 NA | intron (NAluSx3 SI  | -59848 NR_03835E   | 1.01E+08 Hs. 72919ENR_03835E | ENSG000000LOC10050E     | uncharactercncRNA                    |                           |
| chr13-455 9.43461  | -0.24776 | 0.764087 | -0.32425 | 0.745746 | 0.981636 | chr13 | 45531771       | 45352192 | + 0 NA | intron (NAluJb SIN  | 10636 NR_02445E    | 1E+08 Hs. 37576ENR_02445E    | TPT1-AS1                | TPT1 antncRNA                        |                           |
| chr17-598 6.606213 | -0.29618 | 0.916471 | -0.32317 | 0.746565 | 0.981636 | chr17 | 59812342       | 59812695 | + 0 NA | intron (Nintron (N  | -28748 NR_02949E   | 406991 Hs. 44456ENR_02949E   | ENSG000000MIR21         | MIRN21 hs microRNA ncRNA             |                           |
| chr6-3091 8.98887  | -0.2581  | 0.798736 | -0.32314 | 0.746589 | 0.981636 | chr6  | 3091904        | 3092472  | + 0 NA | intron (NCpG        | 23694 NM_00135E    | 8737 Hs. 51984ENR_003804     | ENSG000000R1PK1         | IMP57 RIE receptor protein-coding    |                           |
| chr17-461 12.60631 | 0.214803 | 0.664854 | 0.323083 | 0.746632 | 0.981636 | chr17 | 46170086       | 46172222 | + 0 NA | exon (NM exon (NM   | 21628 NM_00119E    | 284058 Hs. 648744NM_01544E   | ENSG000000CKANSL1       | ENSP-36 KAT8 regt protein-coding     |                           |
| chr2-3554 10.36538 | -0.23581 | 0.730084 | -0.32298 | 0.746708 | 0.981636 | chr2  | 3554863        | 3556150  | + 0 NA | intron (Nintron (N  | 2827 NM_00128E     | 246243 Hs. 56800ENR_00293E   | ENSG000000RNASEH1       | HIRNA PEC ribonucle protein-coding   |                           |
| chr10-151 9.888209 | -0.23944 | 0.74244  | -0.3225  | 0.747072 | 0.981636 | chr10 | 15126127       | 15128402 | + 0 NA | intron (Nintron (N  | 28083 NR_03650E    | 1E+08 Hs. 714691NR_03650E    | ENSG000000PPIAP30       | - peptidyl pseudo                    |                           |
| chr12-437 9.888209 | -0.23944 | 0.74244  | -0.3225  | 0.747072 | 0.981636 | chr12 | 43793079       | 43795579 | + 0 NA | non-codir non-codir | 11988 NM_00124E    | 5756 Hs. 18907ENR_00282E     | ENSG000000TWF1          | A6 PTK9 twinfilr protein-coding      |                           |
| chr12-111 9.888209 | -0.23944 | 0.74244  | -0.3225  | 0.747072 | 0.981636 | chr12 | 1.1E+08        | 1.1E+08  | + 0 NA | intron (Nintron (N  | 10337 NM_17066E    | 488 Hs. 50675ENR_001681      | ENSG000000ATP2A2        | ATP2B DAF ATPase s protein-coding    |                           |
| chr14-921 9.888209 | -0.23944 | 0.74244  | -0.3225  | 0.747072 | 0.981636 | chr14 | 92154477       | 92156371 | + 0 NA | intron (Nintron (N  | 33455 NM_00132E    | 53981 Hs. 65763ENR_017437    | ENSG000000CPSF2         | CPSF100 cleavage protein-coding      |                           |
| chr16-75 9.888209  | -0.23944 | 0.74244  | -0.3225  | 0.747072 | 0.981636 | chr16 | 75240634       | 75243257 | + 0 NA | intron (Nintron (N  | -3285 NM_00117E    | 9564 Hs. 479747NM_014567     | ENSG000000BCAR1         | CAS CAS1 BCAR1 sc protein-coding     |                           |
| chr3-123 9.888209  | -0.23944 | 0.74244  | -0.3225  | 0.747072 | 0.981636 | chr3  | 1.24E+08       | 1.24E+08 | + 0 NA | intron (Nintron (N  | -6549 NM_05303E    | 4638 Hs. 47737ENR_00596E     | ENSG000000MYLK          | AAL7 KRP myosin I1 protein-coding    |                           |
| chr5-141 9.888209  | -0.23944 | 0.74244  | -0.3225  | 0.747072 | 0.981636 | chr5  | 14162761       | 14164878 | + 0 NA | intron (Nintron (N  | 20477 NM_00711E    | 7204 Hs. 130031NM_00711E     | ENSG000000TR10          | ARHGEF23 trio Rho protein-coding     |                           |
| chr8-130 9.888209  | -0.23944 | 0.74244  | -0.3225  | 0.747072 | 0.981636 | chr8  | 1.3E+08        | 1.3E+08  | + 0 NA | intron (NTigger12c  | -5247 NR_04538E    | 1.01E+08 Hs. 10601ENR_04538E | ENSG000000ASAP1-IT2     | ASAP1 intncRNA                       |                           |
| chr1-1461 14.66524 | 0.20137  | 0.624833 | 0.322279 | 0.747242 | 0.981636 | chr1  | 1.46E+08       | 1.46E+08 | + 0 NA | intron (NLMIP8 LIN  | 41890 NM_001364    | 388677 Hs. 65515ENR_20345E   | ENSG000000NOTCH2NL2 N2N | NOTCH2 notch 2 protein-coding        |                           |
| chr1-551 10.31638  | -0.23656 | 0.734654 | -0.322   | 0.747455 | 0.981636 | chr1  | 55154007       | 55154206 | + 0 NA | intron (Nintron (N  | 61258 NM_01530E    | 23358 Hs. 47700ENR_01530E    | ENSG000000USP24         | - ubiquitin protein-coding           |                           |
| chr7-6497 13.15976 | 0.210667 | 0.654333 | 0.321957 | 0.747485 | 0.981636 | chr7  | 64978273       | 64982801 | + 0 NA | intron (Nintron (N  | 10499 NM_01585E    | 51351 Hs. 25069ENR_01585E    | ENSG000000ZNF117        | H-p1k HPF zinc finger protein-coding |                           |
| chr12-12 8.981012  | -0.25661 | 0.797164 | -0.32191 | 0.747523 | 0.981636 | chr12 | 8233 NR_14574E | 1.1E+08  | + 0 NA | intron (Nintron (N  | 8233 NR_14574E     | 1.1E+08                      | ENSG000000SNORA9B       | small nucsnoRNA                      |                           |
| chr14-74 10.58853  | 0.234676 | 0.729397 | 0.32174  | 0.74765  | 0.981636 | chr14 | 74666910       | 74667255 | + 0 NA | intron (Nintron (N  | 45998 NM_00103E    | 9870 Hs. 497417NM_014821     | ENSG000000AREL1         | FIEL1 KI apoptosis protein-coding    |                           |
| chr1-384 5.693008  | -0.31545 | 0.981023 | -0.32155 | 0.747794 | 0.981636 | chr1  | 3849967        | 3850785  | + 0 NA | intron (Nintron (N  | 6835 NM_014704     | 9731 Hs. 13308ENR_014704     | ENSG000000CEP104        | CFAP256 centrosom protein-coding     |                           |
| chr3-1237 5.693008 | -0.31545 | 0.981023 | -0.32155 | 0.747794 | 0.981636 | chr3  | 1.24E+08       | 1.24E+08 | + 0 NA | intron (Nintron (N  | 66928 NR_04662E    | 1.01E+08 Hs. 66731ENR_04662E | ENSG000000MYLK-AS2      | - MYLK antncRNA                      |                           |
| chr6-1167 5.693008 | -0.31545 | 0.981023 | -0.32155 | 0.747794 | 0.981636 | chr6  | 1.17E+08       | 1.17E+08 | + 0 NA | intron (Nintron (N  | 35185 NM_00136E    | 3841 Hs. 182971NM_00226E     | ENSG000000KPN5A5        | IPOA6 SRF karyopher protein-coding   |                           |
| chr8-144 5.693008  | -0.31545 | 0.981023 | -0.32155 | 0.747794 | 0.981636 | chr8  | 1.45E+08       | 1.45E+08 | + 0 NA | intron (NAluSq2 SI  | 18645 NM_138367    | 90987 Hs. 53451ENR_138367    | ENSG000000ZNF251        | zinc finger protein-coding           |                           |
| chr16-595 6.203462 | -0.29756 | 0.925957 | -0.32135 | 0.747943 | 0.981636 | chr16 | 599326         | 599994   | + 0 NA | intron (NCpG        | 9583 NM_00117E     | 57799 Hs. 45963ENR_02116E    | ENSG000000RAB40C        | RARL RASL RAB40C, n protein-coding   |                           |
| chr2-857 6.203462  | -0.29756 | 0.925957 | -0.32135 | 0.747943 | 0.981636 | chr2  | 85782725       | 85783391 | + 0 NA | TTS (NR_TTS (NR_1   | 619 NR_10671E      | 1.02E+08                     | NR_10671E               | ENSG000000MIR6071                    | hsa-mir-6 microRNA ncRNA  |
| chr2-2377 6.203462 | -0.29756 | 0.925957 | -0.32135 | 0.747943 | 0.981636 | chr2  | 2.38E+08       | 2.38E+08 | + 0 NA | intron (NLMED LIN   | -22078 NM_00108C   | 375316 Hs. 60726ENR_19885E   | ENSG000000RBM44         | - RNA bindi protein-coding           |                           |
| chr6-160 6.203462  | -0.29756 | 0.925957 | -0.32135 | 0.747943 | 0.981636 | chr6  | 1.6E+08        | 1.6E+08  | + 0 NA | intron (Nintron (N  | -24849 NR_047511   | 1E+08 Hs. 74216ENR_047511    | ENSG000000A1RN          | AIR IGF2F antisense ncRNA            |                           |
| chr4-388 9.426752  | -0.24628 | 0.766456 | -0.32132 | 0.747967 | 0.981636 | chr4  | 38887804       | 38888476 | + 0 NA | intron (Nintron (N  | 20108 NR_03030C    | 693159 NR_03030C             | ENSG000000MIR574        | MIR574-3 microRNA ncRNA              |                           |
| chr9-717 9.426752  | -0.24628 | 0.766456 | -0.32132 | 0.747967 | 0.981636 | chr9  | 71724851       | 71725050 | + 0 NA | intron (Nintron (N  | 43563 NM_00113E    | 23670 Hs. 49414ENR_01339E    | ENSG000000CEM1P2        | TMEM2 cell migr protein-coding       |                           |
| chr12-37 13.60735  | 0.208189 | 0.648565 | 0.320999 | 0.748211 | 0.981636 | chr12 | 37236154       | 37236174 | + 0 NA | IntergeniALR Alphe  | -1080975 NM_00130E | 144245 Hs. 25930ENR_00101E   | ENSG000000ALG10B        | ALG10 KCFALG10 al protein-coding     |                           |
| chr11-364 6.639495 | -0.29066 | 0.905682 | -0.32093 | 0.748264 | 0.981636 | chr11 | 36485378       | 36486205 | + 0 NA | 3' UTR (N3' UTR (N  | 24481 NM_14580E    | 7189 Hs. 44417ENR_00462C     | ENSG000000TRAF6         | MGC:3310 TNF rece protein-coding     |                           |
| chr12-661 9.847069 | -0.24153 | 0.752658 | -0.32069 | 0.748288 | 0.981636 | chr12 | 66122669       | 66125074 | + 0 NA | exon (NM exon (NM   | 6879 NM_03233E     | 84298 Hs. 50482ENR_03233E    | ENSG000000LLPH          | C12orf31 LLP homol protein-coding    |                           |
| chr1-205 11.60528  | 0.222612 | 0.693791 | 0.320863 | 0.748314 | 0.981636 | chr1  | 2.05E+08       | 2.05E+08 | + 0 NA | 3' UTR (N3' UTR (N  | -3601 NM_20337E    | 388730 Hs. 14692ENR_20337E   | ENSG000000TMEM81        | HC3107 KV transmem protein-coding    |                           |
| chr13-111 5.453034 | 0.314589 | 0.981445 | 0.320536 | 0.748562 | 0.981636 | chr13 | 1.13E+08       | 1.13E+08 | + 0 NA | intron (NAluSx SIN  | 84712 NM_00632E    | 10426 Hs. 22415ENR_00632E    | ENSG000000TUBGCP3       | 104P ALPF tubulin g protein-coding   |                           |
| chr17-185 5.453034 | 0.314589 | 0.981445 | 0.320536 | 0.748562 | 0.981636 | chr17 | 18977971       | 18978940 | + 0 NA | exon (NM exon (NM   | 26290 NM_00127E    | 125206 Hs. 46241ENR_152351   | ENSG000000SLC5A10       | SGLT-5 SC solute c protein-coding    |                           |
| chr7-650 5.453034  | 0.314589 | 0.981445 | 0.320536 | 0.748562 | 0.981636 | chr7  | 65069425       | 65070221 | + 0 NA | promoter-promoter-  | -715 NR_14571E     | 1.1E+08                      | NR_14571E               | ENSG000000SNORA15B-SNORA15C          | small nucsnoRNA           |
| chr8-117 5.453034  | 0.314589 | 0.981445 | 0.320536 | 0.748562 | 0.981636 | chr8  | 1.18E+08       | 1.18E+08 | + 0 NA | intron (Nintron (N  | 32113 NR_14579E    | 1E+08                        | NR_14579E               | SNORD168                             | small nucsnoRNA           |
| chr2-613 10.34967  | -0.23316 | 0.727445 | -0.32052 | 0.748572 | 0.981636 | chr2  | 61354633       | 61354938 | + 0 NA | intron (Nintron (N  | 62592 NR_00370E    | 1E+08 Hs. 67582ENR_00370E    | ENSG000000SNORA70B      | small nucsnoRNA                      |                           |
| chr1-246 6.154465  | -0.29886 | 0.932765 | -0.3204  | 0.748663 | 0.981636 | chr1  | 2.47E+08       | 2.47E+08 | + 0 NA | intron (NAluS6 SI   | 20369 NM_01600E    | 51097 Hs. 498397NM_01600E    | ENSG000000SCCPD4        | CGI-49 NF sacchar protein-coding     |                           |
| chr11-437 6.154465 | -0.29886 | 0.932765 | -0.3204  | 0.748663 | 0.981636 | chr11 | 43898686       | 43899312 | + 0 NA | non-codir non-codir | 1696 NR_02695E     | 729799 Hs. 36892ENR_02695E   | ENSG000000SEC14L1P1     | SEC14 lip pseudo                     |                           |
| chr12-62 6.154465  | -0.29886 | 0.932765 | -0.3204  | 0.748663 |          |       |                |          |        |                     |                    |                              |                         |                                      |                           |

|                     |          |          |          |          |          |       |          |          |   |      |                     |                  |                              |                       |                    |                             |                            |
|---------------------|----------|----------|----------|----------|----------|-------|----------|----------|---|------|---------------------|------------------|------------------------------|-----------------------|--------------------|-----------------------------|----------------------------|
| chr9-9445 5.460892  | 0.311866 | 0.977698 | 0.31898  | 0.749742 | 0.981636 | chr9  | 94453642 | 94455598 | + | 0 NA | intron (AluSx1 SI   | 80051 NM_032558  | 84641 Hs.555999NM_032558     | ENSG000003MFS14B      | HIATL1             | major facprotein-coding     |                            |
| chr2-9225 14.17651  | 0.202447 | 0.634846 | 0.318892 | 0.749808 | 0.981636 | chr2  | 92235686 | 92236549 | + | 0 NA | IntergeniALR Alpha  | 294984 NR_027714 | 440888 Hs.730236NM_001032412 | ACTR3BP2              | FKSG73             | ACTR3B pseudo               |                            |
| chr12-125 4.964304  | 0.329655 | 1.033997 | 0.318816 | 0.749866 | 0.981636 | chr12 | 1.25E+08 | 1.25E+08 | + | 0 NA | intron (intron (N   | 22257 NM_023928  | 65985 Hs.656072NM_023928     | ENSG00000CAACS        | ACSF1 SUF          | acetoacetprotein-coding     |                            |
| chr2-2636 4.964304  | 0.329655 | 1.033997 | 0.318816 | 0.749866 | 0.981636 | chr2  | 26369768 | 26370497 | + | 0 NA | intron (NSVA_D Ret  | -23343 NM_001321 | 165082 Hs.631878NM_153835    | ENSG00000ADGRF3       | GPR13 PC           | adhesion protein-coding     |                            |
| chr2-7385 4.964304  | 0.329655 | 1.033997 | 0.318816 | 0.749866 | 0.981636 | chr2  | 73850599 | 73851237 | + | 0 NA | intron (intron (N   | 21950 NM_001352  | 10617 Hs.469018NM_006463     | ENSG00000STAMPB       | AMH MICC           | STAM bincprotein-coding     |                            |
| chr3-4693 4.964304  | 0.329655 | 1.033997 | 0.318816 | 0.749866 | 0.981636 | chr3  | 46937569 | 46938191 | + | 0 NA | intron (intron (N   | 38621 NR_102266  | 151903 Hs.631918NM_144716    | ENSG00000CCDC12       | -                  | coiled-co protein-coding    |                            |
| chr4-1254 4.964304  | 0.329655 | 1.033997 | 0.318816 | 0.749866 | 0.981636 | chr4  | 1.25E+08 | 1.25E+08 | + | 0 NA | intron (intron (N   | -25801 NR_031746 | 1E+08                        | NR_031746             | ENSG00000MIR2054   | hsa-mir-2                   | miRNA ncRNA                |
| chr18-576 9.937206  | -0.23865 | 0.748769 | -0.31872 | 0.749937 | 0.981636 | chr18 | 57641703 | 57642865 | + | 0 NA | intron (LTR12C LI   | 11953 NM_001242  | 1.01E+08                     | Hs.660646NM_001242804 | LOC100505E         | -                           | uncharacter protein-coding |
| chr2-1572 9.937206  | -0.23865 | 0.748769 | -0.31872 | 0.749937 | 0.981636 | chr2  | 1.57E+08 | 1.57E+08 | + | 0 NA | intron (AluSx1 SI   | 23532 NM_001322  | 11227 Hs.269027NM_014568     | ENSG00000GALNT5       | GALNAC-T           | polypeptiprotein-coding     |                            |
| chr11-182 9.929348  | -0.23731 | 0.744979 | -0.31855 | 0.750068 | 0.981636 | chr11 | 18348860 | 18349243 | + | 0 NA | intron (AluS6 SI    | 26484 NM_005316  | 29655 Hs.577202NM_005316     | ENSG00000GTF2H1       | BTF2 P62           | general tprotein-coding     |                            |
| chr16-506 6.623779  | -0.28657 | 0.901151 | -0.318   | 0.750482 | 0.981636 | chr16 | 50217756 | 50218963 | + | 0 NA | intron (AluSx4 SI   | -48192 NM_001114 | 113 Hs.513578NM_001114       | ENSG00000ADCY7        | AC7                | adenylate protein-coding    |                            |
| chr3-1968 6.623779  | -0.28657 | 0.901151 | -0.318   | 0.750482 | 0.981636 | chr3  | 1.97E+08 | 1.97E+08 | + | 0 NA | intron (intron (N   | 18776 NM_152699  | 205564 Hs.240777NM_152699    | ENSG00000SENP5        | -                  | SUMO specprotein-coding     |                            |
| chr12-103 10.34181  | -0.23187 | 0.72947  | -0.31786 | 0.750592 | 0.981636 | chr12 | 1.04E+08 | 1.04E+08 | + | 0 NA | intron (AluJr SIN   | 15972 NM_003211  | 6996 Hs.584809NM_003211      | ENSG00000TDG          | htDG               | thymine lprotein-coding     |                            |
| chr2-2-111 10.34181 | -0.23187 | 0.72947  | -0.31786 | 0.750592 | 0.981636 | chr2  | 1.11E+08 | 1.11E+08 | + | 0 NA | intron (NMIRc SINE  | -9960 NR_039634  | 1.01E+08                     | NR_039634             | ENSG00000MIR4435-1 | mir-4435                    | microRNA ncRNA             |
| chr1-4664 10.39081  | -0.23117 | 0.727859 | -0.31761 | 0.750783 | 0.981636 | chr1  | 46649503 | 46651923 | + | 0 NA | intron (NLIMA5 LIN  | 15165 NM_001256  | 64756 Hs.100874NM_022745     | ENSG00000ATPAF1       | ATP11 ATF          | ATP syntp protein-coding    |                            |
| chr1-1596 10.39081  | -0.23117 | 0.727859 | -0.31761 | 0.750783 | 0.981636 | chr1  | 1.6E+08  | 1.6E+08  | + | 0 NA | exon (NM exon (NM   | 4419 NM_001277   | 8407 Hs.517168NM_003564      | ENSG00000TAGLN2       | HA1756             | transgeliprotein-coding     |                            |
| chr14-35 10.39081   | -0.23117 | 0.727859 | -0.31761 | 0.750783 | 0.981636 | chr14 | 35028398 | 35029300 | + | 0 NA | intron (NMIR SINE   | -16058 NM_001075 | 283635 Hs.446357NM_173607    | ENSG00000CFAM177A1    | C14orf24           | family wiprotein-coding     |                            |
| chr16-294 10.39081  | -0.23117 | 0.727859 | -0.31761 | 0.750783 | 0.981636 | chr16 | 29483141 | 29484068 | + | 0 NA | TTS (NM_C TTS (NM_C | -16026 NR_002557 | 613038 Hs.569588NR_002557    | ENSG00000LOC613038    | -                  | SAGA compseudo              |                            |
| chr6-312 10.39081   | -0.23117 | 0.727859 | -0.31761 | 0.750783 | 0.981636 | chr6  | 31267845 | 31270930 | + | 0 NA | intron (intron (N   | 2705 NM_002117   | 3107 Hs.656022NM_002117      | ENSG00000CHLA-C       | D6S204 HL          | major hisprotein-coding     |                            |
| chr16-151 4.426577  | 0.348766 | 1.098371 | 0.31753  | 0.750841 | 0.981636 | chr16 | 1513021  | 1514481  | + | 0 NA | intron (AluY SINE   | -14927 NM_001256 | 79652 Hs.459652NM_024600     | ENSG00000TMEM204      | C16orf30           | transmem protein-coding     |                            |
| chr10-112 9.175036  | 0.263609 | 0.830447 | 0.31743  | 0.750917 | 0.981636 | chr10 | 1.12E+08 | 1.12E+08 | + | 0 NA | intron (intron (N   | 24024 NM_020918  | 57678 Hs.572262NM_020918     | ENSG00000GPAM         | GPAT GPA1          | glycerol -protein-coding    |                            |
| chr12-108 9.921491  | -0.23596 | 0.743593 | -0.31733 | 0.750995 | 0.981636 | chr12 | 1.09E+08 | 1.09E+08 | + | 0 NA | intron (intron (N   | 16605 NM_001161  | 54434 Hs.199763NM_018984     | ENSG00000SSH1         | SSH1L              | slingshotprotein-coding     |                            |
| chr14-609 9.921491  | -0.23596 | 0.743593 | -0.31733 | 0.750995 | 0.981636 | chr14 | 60997679 | 60998913 | + | 0 NA | intron (LTRIF1 LI   | -16606 NM_001335 | 57570 Hs.380155NM_020810     | ENSG00000TRMT5        | COXP26 k           | trRNA metp protein-coding   |                            |
| chr5-1387 9.921491  | -0.23596 | 0.743593 | -0.31733 | 0.750995 | 0.981636 | chr5  | 13870338 | 13870973 | + | 0 NA | intron (intron (N   | 73825 NM_001366  | 1767 Hs.212362NM_001366      | ENSG00000DNAH5        | C1LD3 DN           | dynein aprotein-coding      |                            |
| chr5-1798 9.921491  | -0.23596 | 0.743593 | -0.31733 | 0.750995 | 0.981636 | chr5  | 1.8E+08  | 1.8E+08  | + | 0 NA | intron (intron (N   | 23796 NM_198866  | 23061 Hs.155822NM_015043     | ENSG00000TBC1D9B      | GRAMD9B            | TBC1 domain protein-coding  |                            |
| chr1-1505 13.63878  | 0.203708 | 0.642162 | 0.317222 | 0.751075 | 0.981636 | chr1  | 1.51E+08 | 1.51E+08 | + | 0 NA | intron (intron (N   | 4612 NM_001366   | 9869 Hs.643565NM_012432      | ENSG00000SETDB1       | ESET H3-K          | SET domain protein-coding   |                            |
| chr12-133 13.63878  | 0.203708 | 0.642162 | 0.317222 | 0.751075 | 0.981636 | chr12 | 1.33E+08 | 1.33E+08 | + | 0 NA | intron (NLIMC1 LIN  | 9445 NM_001300   | 7699 Hs.181552NM_003440      | ENSG00000ZNF140       | PHZ-39             | zinc fingerprotein-coding   |                            |
| chr16-285 4.915307  | 0.330301 | 1.04131  | 0.317198 | 0.751094 | 0.981636 | chr16 | 28952634 | 28952991 | + | 0 NA | intron (AluSq2 SI   | 1815 NM_032815   | 84901 Hs.513477NM_032815     | ENSG00000NFATC21P     | ESCC NIP4          | nuclear fprotein-coding     |                            |
| chr7-1566 4.915307  | 0.330301 | 1.04131  | 0.317198 | 0.751094 | 0.981636 | chr7  | 1.57E+08 | 1.57E+08 | + | 0 NA | intron (LTR12C LI   | 20058 NM_001335  | 64327 Hs.209988NM_022458     | ENSG00000LMBR1        | ACHP C7c           | limb devp protein-coding    |                            |
| chr4-1694 4.923165  | 0.327348 | 1.032155 | 0.31715  | 0.75113  | 0.981636 | chr4  | 1.7E+08  | 1.7E+08  | + | 0 NA | intron (intron (N   | 38025 NM_001243  | 1182 Hs.481188NM_001825      | ENSG00000CLNC3        | CLNC3 C7c          | chloride protein-coding     |                            |
| chr5-1464 11.17525  | 0.23123  | 0.729144 | 0.317125 | 0.751149 | 0.981636 | chr5  | 1.46E+08 | 1.46E+08 | + | 0 NA | intron (intron (N   | 33366 NM_194251  | 134391 Hs.483732NM_194251    | ENSG00000GPR151       | GALR4 GALG         | protein-coding              |                            |
| chr20-317 10.38295  | -0.22986 | 0.72543  | -0.31686 | 0.751346 | 0.981636 | chr20 | 31706524 | 31707776 | + | 0 NA | intron (intron (N   | -14357 NR_131907 | 1.03E+08                     | NR_131907             | ENSG00000ABALON    | INXS                        | apoptoticncRNA             |
| chr12-67 10.38295   | -0.22986 | 0.72543  | -0.31686 | 0.751346 | 0.981636 | chr12 | 67304697 | 67306164 | + | 0 NA | exon (NM exon (NM   | 36072 NM_001325  | 55832 Hs.546407NM_018448     | ENSG00000CAND1        | TIP120 TI          | cellular protein-coding     |                            |
| chr14-497 10.38295  | -0.22986 | 0.72543  | -0.31686 | 0.751346 | 0.981636 | chr14 | 49787246 | 49788635 | + | 0 NA | intron (intron (N   | 19787 NM_014315  | 23588 Hs.509264NM_014315     | ENSG00000KLHDC2       | HCLP-1 H           | kelch domprotein-coding     |                            |
| chr14-68 10.38295   | -0.22986 | 0.72543  | -0.31686 | 0.751346 | 0.981636 | chr14 | 68999987 | 68912377 | + | 0 NA | intron (NLIMB3 LIN  | 73120 NM_001102  | 87 Hs.235755NM_001102        | ENSG00000ACTN1        | BDPLT15            | actinin eprotein-coding     |                            |
| chr15-64 10.38295   | -0.22986 | 0.72543  | -0.31686 | 0.751346 | 0.981636 | chr15 | 64153965 | 64162275 | + | 0 NA | TTS (NM_C TTS (NM_C | 5035 NM_000942   | 5479 Hs.434937NM_000942      | ENSG00000PP1B         | B CYP-S1           | peptidylp protein-coding    |                            |
| chr19-145 10.38295  | -0.22986 | 0.72543  | -0.31686 | 0.751346 | 0.981636 | chr19 | 1439066  | 1442547  | + | 0 NA | TTS (NM_C TTS (NM_C | 2381 NM_001308   | 6209 Hs.406683NM_001018      | ENSG00000CRPS15       | RIG S15            | ribosomal protein-coding    |                            |
| chr2-371 10.38295   | -0.22986 | 0.72543  | -0.31686 | 0.751346 | 0.981636 | chr2  | 37105946 | 37109674 | + | 0 NA | intron (intron (N   | 23359 NM_001278  | 253635 Hs.592525NM_174931    | ENSG00000GPATCH11     | CCDC75 CF          | patch cprotein-coding       |                            |
| chr20-564 10.38295  | -0.22986 | 0.72543  | -0.31686 | 0.751346 | 0.981636 | chr20 | 56458482 | 56459820 | + | 0 NA | 3' UTR (3' UTR (N   | -9434 NM_016407  | 51507 Hs.517134NM_016407     | ENSG00000CAND1        | C2orf43 C          | replicatiprotein-coding     |                            |
| chr5-1428 10.38295  | -0.22986 | 0.72543  | -0.31686 | 0.751346 | 0.981636 | chr5  | 14286288 | 14291274 | + | 0 NA | intron (intron (N   | 145439 NM_007118 | 7204 Hs.130031NM_007118      | ENSG00000TRIO         | ARHGEP23           | trio Rho protein-coding     |                            |
| chr5-1774 10.38295  | -0.22986 | 0.72543  | -0.31686 | 0.751346 | 0.981636 | chr5  | 1.77E+08 | 1.77E+08 | + | 0 NA | intron (intron (N   | 8691 NR_103804   | 9260 Hs.533040NM_005451      | ENSG00000PDLIM7       | LMP1 LMP2          | PDZ and lprotein-coding     |                            |
| chr6-3162 10.38295  | -0.22986 | 0.72543  | -0.31686 | 0.751346 | 0.981636 | chr6  | 31622679 | 31640535 | + | 0 NA | exon (NM exon (NM   | -2180 NR_106890  | 1.02E+08                     | NR_106890             | ENSG00000MIR6832   | hsa-mir-6                   | microRNA ncRNA             |
| chr9-2717 10.38295  | -0.22986 | 0.72543  | -0.31686 | 0.751346 | 0.981636 | chr9  | 27177189 | 27178520 | + | 0 NA | intron (NLIMA9 LIN  | 68713 NM_000455  | 7010 Hs.89640 NM_000455      | ENSG00000TEK          | CD202B G           | TEK recep protein-coding    |                            |
| chr1-1808 6.187746  | -0.29333 | 0.925788 | -0.31685 | 0.751361 | 0.981636 | chr1  | 1808163  | 1809961  | + | 0 NA | intron (intron (N   | -29031 NM_001353 | 65220 Hs.654792NM_023018     | ENSG00000NADK         | dJ283E3            | INAD kinase protein-coding  |                            |
| chr1-6702 6.187746  | -0.29333 | 0.925788 | -0.31685 | 0.751361 | 0.981636 | chr1  | 67027296 | 67028371 | + | 0 NA | intron (AluS6 SI    | 26315 NM_015135  | 23169 Hs.213642NM_015135     | ENSG00000SLCS35D1     | SHNKND             | INAD solute cprotein-coding |                            |
| chr1-7785 6.187746  | -0.29333 | 0.925788 | -0.31685 | 0.751361 | 0.981636 | chr1  | 77855443 | 77856315 | + | 0 NA | intron (NLIPB1 LIN  | -32636 NM_144573 | 91624 Hs.612388NM_144573     | ENSG00000NEXN         | CMH20 NEL          | nexlin lprotein-coding      |                            |
| chr1-1546 6.187746  | -0.29333 | 0.925788 | -0.31685 | 0.751361 | 0.981636 | chr1  | 1.55E+08 | 1.55E+08 | + | 0 NA | intron (intron (N   | 434 NM_001193    | 103 Hs.12341 NM_001111       | ENSG00000ADAR         | ADAR1 AGS          | adenosine protein-coding    |                            |
| chr1-285 6.187746   | -0.29333 | 0.925788 | -0.31685 | 0.751361 | 0.981636 | chr1  | 2.26E+08 | 2.26E+08 | + | 0 NA | intron (AluSx SIN   | 53477 NM_001008  | 55740 Hs.497893NM_018212     | ENSG00000ENAH         | ENA MENA           | ENAH actiprotein-coding     |                            |
| chr10-336 6.187746  | -0.29333 | 0.925788 | -0.31685 | 0.751361 | 0.981636 | chr10 | 38018175 | 38020640 | + | 0 NA | intron (NLIP4 LIN   | 8732 NM_001278   | 7581 Hs.435747NM_006954      | ENSG00000ZNF33A       | KOX2 KOX           | zinc fingerprotein-coding   |                            |
| chr10-10 6.187746   | -0.29333 | 0.925788 | -0.31685 | 0.751361 | 0.981636 | chr10 | 1E+08    | 1E+08    | + | 0 NA | intron (Tigger3a    | -11224 NR_144755 | 10613 Hs.150087NM_006455     | ENSG00000ERLIN1       | C10orf69 ER        |                             |                            |



|           |          |          |          |          |          |          |       |          |          |   |      |                     |                  |                              |                      |                   |                              |                       |                |
|-----------|----------|----------|----------|----------|----------|----------|-------|----------|----------|---|------|---------------------|------------------|------------------------------|----------------------|-------------------|------------------------------|-----------------------|----------------|
| chr14-754 | 6.657061 | -0.28133 | 0.892821 | -0.3151  | 0.752686 | 0.981636 | chr14 | 75445770 | 75446512 | + | 0 NA | intron (NLIMB8 LIN  | 14007 NM_001135  | 122953 Hs. 196482NM_130466   | ENSG000004JDP2       | JUNDM2            | Jun dimer protein-coding     |                       |                |
| chr14-101 | 6.657061 | -0.28133 | 0.892821 | -0.3151  | 0.752686 | 0.981636 | chr14 | 1.01E+08 | 1.01E+08 | + | 0 NA | promoter-promoter-  | 162 NR_029875    | 494330 NR_029875             | ENSG000004MIR381     | MIRN381           | hmicrorna ncRNA              |                       |                |
| chr22-376 | 6.657061 | -0.28133 | 0.892821 | -0.3151  | 0.752686 | 0.981636 | chr22 | 37690189 | 37691753 | + | 0 NA | intron (Nintron (N  | 4628 NM_024313   | 79159 Hs. 632777NM_024313    | ENSG000004NOL12      | Nov25 dJ3         | nucleolar protein-coding     |                       |                |
| chr3-757  | 6.657061 | -0.28133 | 0.892821 | -0.3151  | 0.752686 | 0.981636 | chr3  | 75771234 | 75772643 | + | 0 NA | intron (NMERS2A LI  | 13064 NM_001324  | 1E+08 Hs. 556877NM_001128    | ENSG000004ZNF717     | OB1 X17           | zinc finger protein-coding   |                       |                |
| chr4-5542 | 6.657061 | -0.28133 | 0.892821 | -0.3151  | 0.752686 | 0.981636 | chr4  | 55429640 | 55431449 | + | 0 NA | 3' UTR (N3' UTR (N  | 34587 NM_001847  | 55858 Hs. 479766NM_018477    | ENSG000004TMEM165    | CD2K FT2          | transmembrane protein-coding |                       |                |
| chr5-3745 | 6.657061 | -0.28133 | 0.892821 | -0.3151  | 0.752686 | 0.981636 | chr5  | 37452706 | 37453629 | + | 0 NA | intron (NMER9a2 LI  | 73849 NM_001345  | 55100 Hs. 21369CNM_018034    | ENSG000004WDR70      | WD repeat         | protein-coding               |                       |                |
| chr5-1705 | 6.657061 | -0.28133 | 0.892821 | -0.3151  | 0.752686 | 0.981636 | chr5  | 1.71E+08 | 1.71E+08 | + | 0 NA | intron (NLIP2 LINE  | 39310 NM_0022897 | 64901 Hs. 41081CNM_022897    | ENSG000004RANBP17    | RAM bindin        | protein-coding               |                       |                |
| chr8-1407 | 6.657061 | -0.28133 | 0.892821 | -0.3151  | 0.752686 | 0.981636 | chr8  | 1.41E+08 | 1.41E+08 | + | 0 NA | intron (Nintron (N  | -45507 NR_029892 | 442893 NR_029892             | ENSG000004MIR151A    | MIR151            | microRNA ncRNA               |                       |                |
| chr10-111 | 9.913633 | -0.23459 | 0.74458  | -0.31506 | 0.752718 | 0.981636 | chr10 | 1.11E+08 | 1.11E+08 | + | 0 NA | intron (Nintron (N  | 10861 NM_005445  | 9126 Hs. 24485 NM_005445     | ENSG000004SMC3       | BAM BMH C         | structure protein-coding     |                       |                |
| chr12-722 | 9.913633 | -0.23459 | 0.74458  | -0.31506 | 0.752718 | 0.981636 | chr12 | 72286721 | 72287435 | + | 0 NA | intron (Nintron (N  | -13569 NR_026836 | 283392 Hs. 363603NM_001022   | ENSG000004TRHDE-AS1  | TRHDE             | antncRNA                     |                       |                |
| chr2-3928 | 9.913633 | -0.23459 | 0.74458  | -0.31506 | 0.752718 | 0.981636 | chr2  | 39287691 | 39289163 | + | 0 NA | intron (Nintron (N  | -44444 NR_144521 | 344387 Hs. 403201NM_001005   | ENSG000004CDKL4      | CDKL4             | cyclin d                     | protein-coding        |                |
| chr10-751 | 5.46875  | 0.309163 | 0.98145  | 0.315006 | 0.752757 | 0.981636 | chr10 | 75176559 | 75178226 | + | 0 NA | 3' UTR (N3' UTR (N  | -32762 NM_003375 | 7417 Hs. 355927NM_003375     | ENSG000004VDAC2      | POR               | voltage c                    | protein-coding        |                |
| chr12-316 | 5.46875  | 0.309163 | 0.98145  | 0.315006 | 0.752757 | 0.981636 | chr12 | 31682749 | 31683729 | + | 0 NA | intron (NAluSz SIN  | 23551 NM_001133  | 254013 Hs. 740625NM_173802   | ENSG000004ETFBKMT    | C12orf72          | electron                     | protein-coding        |                |
| chr14-547 | 5.46875  | 0.309163 | 0.98145  | 0.315006 | 0.752757 | 0.981636 | chr14 | 54782104 | 54783303 | + | 0 NA | intron (Nintron (N  | 27870 NM_001161  | 23034 Hs. 98259 NM_015585    | ENSG000004SAMD4A     | SAMD4 SMA         | struc                        | protein-coding        |                |
| chr14-572 | 5.46875  | 0.309163 | 0.98145  | 0.315006 | 0.752757 | 0.981636 | chr14 | 57213878 | 57215419 | + | 0 NA | intron (NL2 LINE I  | 54257 NM_006544  | 10640 Hs. 743987NM_006544    | ENSG000004EXOC5      | HSEC10 PF         | exocyst                      | protein-coding        |                |
| chr15-988 | 5.46875  | 0.309163 | 0.98145  | 0.315006 | 0.752757 | 0.981636 | chr15 | 98828315 | 98828993 | + | 0 NA | intron (Nintron (N  | 44228 NR_039864  | 1.01E+08 NR_039864           | ENSG000004MIR4714    | MIR4714           | microRNA ncRNA               |                       |                |
| chr16-465 | 5.46875  | 0.309163 | 0.98145  | 0.315006 | 0.752757 | 0.981636 | chr16 | 463008   | 463878   | + | 0 NA | intron (NAluSp SIN  | -11481 NM_001142 | 9727 Hs. 531642NM_01470C     | ENSG000004RAB11FIP5  | CART1 FIF         | RAB11 fan                    | protein-coding        |                |
| chr17-364 | 5.46875  | 0.309163 | 0.98145  | 0.315006 | 0.752757 | 0.981636 | chr17 | 36492202 | 36492968 | + | 0 NA | intron (Nintron (N  | 5904 NM_001281   | 9326 Hs. 2210 NM_004477      | ENSG000004ZNHT3      | PEHO TRIF         | zinc                         | finger protein-coding |                |
| chr7-2256 | 5.46875  | 0.309163 | 0.98145  | 0.315006 | 0.752757 | 0.981636 | chr7  | 2256828  | 2257556  | + | 0 NA | TTS (NR_1TTS (NR_1  | 385 NR_106895    | 1.02E+08 NR_106895           | ENSG000004MIR6836    | hsa-mir-6836      | microRNA ncRNA               |                       |                |
| chr8-3065 | 5.46875  | 0.309163 | 0.98145  | 0.315006 | 0.752757 | 0.981636 | chr8  | 30693811 | 30694480 | + | 0 NA | intron (Nigger19e   | 33701 NM_000637  | 2936 Hs. 27151CNM_000637     | ENSG000004GCSR       | GR HEL-75         | glutathion                   | protein-coding        |                |
| chr9-134  | 5.46875  | 0.309163 | 0.98145  | 0.315006 | 0.752757 | 0.981636 | chr9  | 1.34E+08 | 1.34E+08 | + | 0 NA | intron (Nintron (N  | -10283 NR_135122 | 1E+08 Hs. 671095NR_135122    | ENSG000004LOC100130C | uncharact         | ncRNA                        |                       |                |
| chr2-1205 | 5.72629  | -0.30918 | 0.98163  | -0.31497 | 0.752785 | 0.981636 | chr2  | 1.21E+08 | 1.21E+08 | + | 0 NA | intron (NAluJo SIN  | 186758 NM_00527C | 2736 Hs. 111867NM_00527C     | ENSG000004GLI2       | CJ5 HP59          | GLI fami                     | protein-coding        |                |
| chr6-8892 | 5.72629  | -0.30918 | 0.98163  | -0.31497 | 0.752785 | 0.981636 | chr6  | 88922925 | 88923523 | + | 0 NA | intron (NLIMC5a LI  | 40394 NM_00128C  | 8732 Hs. 567377NM_00380C     | ENSG000004RNGTT      | CAP1A HCF         | RNA guan                     | protein-coding        |                |
| chr1-220  | 10.02723 | 0.24214  | 0.768843 | -0.31494 | 0.752807 | 0.981636 | chr1  | 2.2E+08  | 2.2E+08  | + | 0 NA | intron (Nintron (N  | 17118 NM_00608E  | 10380 Hs. 406134NM_00608E    | ENSG000004BPNT1      | HEL20 PIF 3' (2') | epsilon                      | protein-coding        |                |
| chr1-1561 | 14.65553 | 0.196229 | 0.623163 | 0.314893 | 0.752843 | 0.981636 | chr1  | 1.56E+08 | 1.56E+08 | + | 0 NA | intron (Nintron (N  | 8928 NM_001257   | 4000 Hs. 594444NM_005572     | ENSG000004LMNA       | CDCD1 CDE         | lamin A/C                    | protein-coding        |                |
| chr19-50  | 14.15108 | 0.199295 | 0.633391 | 0.314648 | 0.753029 | 0.981636 | chr19 | 50042316 | 50046922 | + | 0 NA | intron (Nintron (N  | -5970 NR_027257  | 400710 Hs. 628965NR_027257   | ENSG000004LOC40071C  | uncharact         | ncRNA                        |                       |                |
| chr16-581 | 6.615921 | -0.28463 | 0.905356 | -0.31439 | 0.753225 | 0.981636 | chr16 | 58195933 | 58196525 | + | 0 NA | intron (Nintron (N  | 1877 NM_00189E   | 1459 Hs. 82201 NM_00189E     | ENSG000004CSNK2A2    | CK2A2 CK2         | casein                       | kinase protein-coding |                |
| chr5-1545 | 6.615921 | -0.28463 | 0.905356 | -0.31439 | 0.753225 | 0.981636 | chr5  | 1.55E+08 | 1.55E+08 | + | 0 NA | exon (NM exon (NM   | 30437 NM_01546E  | 25929 Hs. 483921NM_01546E    | ENSG000004GEMIN5     | GEMIN-5           | gem nucl                     | protein-coding        |                |
| chr19-444 | 7.983677 | -0.2799  | 0.89056  | -0.31423 | 0.753296 | 0.981636 | chr19 | 44438255 | 44438483 | + | 0 NA | intron (NLIME3G LI  | 10103 NR_103551  | 7772 Hs. 709345NM_01451E     | ENSG000004ZNF229     | zinc              | finger protein-coding        |                       |                |
| chr20-58  | 4.931023 | 0.324336 | 1.032092 | 0.314251 | 0.75333  | 0.981636 | chr20 | 58697757 | 58699585 | + | 0 NA | intron (Nintron (N  | 5871 NM_02466E   | 79716 Hs. 654868NM_02466E    | ENSG000004NPEPL1     | ba261P9           | zaminogen                    | protein-coding        |                |
| chr4-868  | 4.931023 | 0.324336 | 1.032092 | 0.314251 | 0.75333  | 0.981636 | chr4  | 86886147 | 86887160 | + | 0 NA | TTS (NM_1TTS (NM_C  | 5769 NM_00136E   | 132989 Hs. 339645NM_14464E   | ENSG000004Corf36     | chromosom         | protein-coding               |                       |                |
| chr5-572  | 10.33395 | -0.23057 | 0.733779 | -0.31423 | 0.753349 | 0.981636 | chr5  | 57250342 | 57251429 | + | 0 NA | intron (Nintron (N  | 36831 NR_001127  | 65056 Hs. 444275NM_02291E    | ENSG000004GPBP1      | GPBP SSH6         | GC-rich                      | protein-coding        |                |
| chr1-1657 | 12.0843  | 0.214266 | 0.681883 | 0.314227 | 0.753349 | 0.981636 | chr1  | 16573298 | 16575069 | + | 0 NA | intron (Nintron (N  | 25249 NR_03744E  | 1.01E+08 NR_03744E           | ENSG000004MIR3675    | MIR3675           | microRNA ncRNA               |                       |                |
| chr4-122  | 10.85226 | -0.22569 | 0.718374 | -0.31417 | 0.753392 | 0.981636 | chr4  | 1.22E+08 | 1.22E+08 | + | 0 NA | intron (NAluY SINE  | 96544 NM_01531E  | 84162 Hs. 408142NM_01531E    | ENSG000004KIAA1109   | ALKKUCS FK        | IAA1109                      | protein-coding        |                |
| chr5-1501 | 10.85226 | -0.22569 | 0.718374 | -0.31417 | 0.753392 | 0.981636 | chr5  | 1.5E+08  | 1.5E+08  | + | 0 NA | intron (Nintron (N  | -15670 NM_005211 | 1436 Hs. 586215NM_005211     | ENSG000004CSF1R      | C-FMS CD1         | colony st                    | protein-coding        |                |
| chr1-2241 | 5.95748  | 0.297144 | 0.946417 | 0.313967 | 0.753546 | 0.981636 | chr1  | 2.24E+08 | 2.24E+08 | + | 0 NA | non-codirnon-codir  | -23847 NM_001321 | 8560 Hs. 299878NM_00367E     | ENSG000004DEGS1      | DEGS DEGS         | delta 4-c                    | protein-coding        |                |
| chr15-908 | 5.95748  | 0.297144 | 0.946417 | 0.313967 | 0.753546 | 0.981636 | chr15 | 90879067 | 90880461 | + | 0 NA | exon (NM exon (NM   | -4740 NM_001143  | 2242 Hs. 7636 NM_00200E      | ENSG000004CFES       | FPS               | FES protc                    | protein-coding        |                |
| chr17-354 | 5.95748  | 0.297144 | 0.946417 | 0.313967 | 0.753546 | 0.981636 | chr17 | 35418452 | 35419168 | + | 0 NA | intron (NLIME4E LIN | 13690 NM_01804E  | 55106 Hs. 663545NM_01804E    | ENSG000004SLFN12     | SLFN3             | schlafen                     | protein-coding        |                |
| chr6-1325 | 5.95748  | 0.297144 | 0.946417 | 0.313967 | 0.753546 | 0.981636 | chr6  | 1.82E+08 | 1.82E+08 | + | 0 NA | intron (NLIM2 LINE  | 5404 NM_01552E   | 26002 Hs. 6909 NM_01552E     | ENSG000004MOXD1      | MOX PRO57         | monooxyg                     | protein-coding        |                |
| chr7-1284 | 10.8444  | -0.22438 | 0.715007 | -0.31382 | 0.753661 | 0.981636 | chr7  | 1.28E+08 | 1.28E+08 | + | 0 NA | intron (Nintron (N  | 2821 NM_01839E   | 55798 Hs. 433215NM_01839E    | ENSG000004METTL2B    | METL METI         | methyltr                     | protein-coding        |                |
| chr20-365 | 6.146607 | -0.29666 | 0.945442 | -0.31378 | 0.753688 | 0.981636 | chr20 | 36910219 | 36910862 | + | 0 NA | intron (NAluSx SIN  | 34402 NM_08062E  | 140711 Hs. 472623NM_08062E   | ENSG000004TLCDC2     | C20orf11E         | TBC/LysM                     | protein-coding        |                |
| chr4-143  | 6.146607 | -0.29666 | 0.945442 | -0.31378 | 0.753688 | 0.981636 | chr4  | 14359108 | 1435938  | + | 0 NA | exon (NM exon (NM   | 29836 NM_00129C  | 84640 Hs. 480845NM_032557    | ENSG000004USP38      | HP43              | KBD ubiquit                  | protein-coding        |                |
| chr6-4355 | 6.146607 | -0.29666 | 0.945442 | -0.31378 | 0.753688 | 0.981636 | chr6  | 43594875 | 43595544 | + | 0 NA | intron (NAluSx3 SI  | 19024 NM_001291  | 5429 Hs. 655467NM_00650E     | ENSG000004POLH       | RAD30 RAI         | DNA polyn                    | protein-coding        |                |
| chr8-1334 | 6.146607 | -0.29666 | 0.945442 | -0.31378 | 0.753688 | 0.981636 | chr8  | 1.33E+08 | 1.33E+08 | + | 0 NA | intron (Nintron (N  | 71322 NM_003033  | 6482 Hs. 374257NM_003033     | ENSG000004ST3GAL1    | Gal-1             | Nac6S                        | T3 beta               | protein-coding |
| chr10-598 | 8.637308 | 0.268828 | 0.857086 | 0.313654 | 0.753784 | 0.981636 | chr10 | 59811680 | 59811895 | + | 0 NA | intron (NMER8 DNA   | -58332 NM_001304 | 1.01E+08 Hs. 64879CNM_001304 | ENSG000004MRLN       | LINC0094E         | myoregulin                   | protein-coding        |                |
| chr1-2302 | 5.965338 | 0.294584 | 0.939737 | 0.313475 | 0.75392  | 0.981636 | chr1  | 2.3E+08  | 2.3E+08  | + | 0 NA | intron (Nintron (N  | 175426 NM_00125E | 79605 Hs. 520465NM_024554    | ENSG000004PGDB5      | pyggyBac          | protein-coding               |                       |                |
| chr12-135 | 5.965338 | 0.294584 | 0.939737 | 0.313475 | 0.75392  | 0.981636 | chr12 | 1.33E+08 | 1.33E+08 | + | 0 NA | intron (Nintron (N  | 20248 NM_006231  | 5426 Hs. 524871NM_006231     | ENSG000004POLE       | CRCS12 F1D        | NA polyn                     | protein-coding        |                |
| chr16-165 | 5.965338 | 0.294584 | 0.939737 | 0.313475 | 0.75392  | 0.981636 | chr16 | 16344610 | 16345445 | + | 0 NA | intron (NAluSx SIN  | 9097 NM_00698E   | 9284 Hs. 672625NM_00698E     | ENSG000004NP1PA1     | NP1 NP1F          | nuclear f                    | protein-coding        |                |
| chr22-245 | 5.965338 | 0.294584 | 0.939737 | 0.313475 | 0.75392  | 0.981636 | chr22 | 24379891 | 24380952 | + | 0 NA | intron (Nintron (N  | 38313 NM_001254  | 23384 Hs. 474388NM_01533C    | ENSG000004SPECC1L    | CYTSA GFE         | sperm ant                    | protein-coding        |                |
| chr4-351  | 5.965338 | 0.294584 | 0.939737 | 0.313475 | 0.75392  | 0.981636 | chr4  | 3510857  | 3512422  | + | 0 NA | non-codirnon-codir  | 20510 NR_11000E  | 4043 Hs. 40966 NM_002337     | ENSG000004LRPAP1     | A2MRAP A2         | LDL recep                    | protein-coding        |                |
| chr6-855  | 5.965338 | 0.294584 | 0.939737 | 0.313475 | 0.75392  | 0.981636 | chr6  | 85532347 | 85533422 | + | 0 NA | intron (Nintron (N  | 60974 NM_15381E  | 57231 Hs. 485871NM_02046E    | ENSG000004SNX14      | RGS-PX2           | Sorting r                    | protein-coding        |                |
| chr8-4227 | 5.965338 | 0.294584 | 0.939737 | 0.313475 | 0.75392  | 0.981636 | chr8  | 42279258 | 42280174 | + | 0 NA | intron (NMRB SINE   | 8414 NR_03381E   | 3551 Hs. 597664NM_00155E     | ENSG000004IKKBK      |                   |                              |                       |                |

|           |          |          |          |          |          |          |       |           |           |   |    |                     |         |           |          |                    |                      |                   |                                |                              |
|-----------|----------|----------|----------|----------|----------|----------|-------|-----------|-----------|---|----|---------------------|---------|-----------|----------|--------------------|----------------------|-------------------|--------------------------------|------------------------------|
| chr9-1275 | 5.427611 | 0.306975 | 0.984384 | 0.311844 | 0.755159 | 0.981636 | chr9  | 1.28E+08  | 1.28E+08  | 0 | NA | intron (NMIRb SINE  | 25141   | NM_022833 | 64855    | Hs.522401NM_022833 | ENSG000002CNBAN2     | C9orf88           | Fniban apc protein-coding      |                              |
| chr12-121 | 9.905775 | -0.23317 | 0.747974 | -0.31173 | 0.755245 | 0.981636 | chr12 | 1.21E+08  | 1.21E+08  | 0 | NA | exon (NM exon (NM   | 18971   | NM_00127C | 10645    | Hs.297344NM_006544 | ENSG000002CAMKK2     | CAMKK1            | CAV calcium/c protein-coding   |                              |
| chr3-1137 | 9.905775 | -0.23317 | 0.747974 | -0.31173 | 0.755245 | 0.981636 | chr3  | 1.14E+08  | 1.14E+08  | 0 | NA | 3' UTR (N3' UTR (N  | -24323  | NR_111981 | 205717   | Hs.63257CNM_001005 | ENSG000002USF3       | KIAA2018          | upstream protein-coding        |                              |
| chr5-968  | 3.443478 | -0.3839  | 1.231589 | -0.31171 | 0.755263 | 0.981636 | chr5  | 9.6885042 | 9.6885757 | 0 | NA | intron (Nintron (N  | 9466    | NR_137637 | 64167    | Hs.48291CNM_02235C | ENSG000002ERAP2      | L-RAP1            | LR1 endoplasmic protein-coding |                              |
| chr14-391 | 6.503066 | 0.28442  | 0.913663 | 0.311296 | 0.755575 | 0.981636 | chr14 | 9.313849  | 9.3132658 | 0 | NA | intron (NAluSx1 SI  | 17969   | NM_00361E | 8487     | Hs.652307NM_00361E | ENSG000002GEMIN2     | SIP1              | SIP1em nucleprotein-coding     |                              |
| chr15-925 | 13.65708 | -0.20313 | 0.652558 | -0.31129 | 0.755583 | 0.981636 | chr15 | 92901198  | 92901434  | 0 | NA | intron (Nintron (N  | 992     | NM_001271 | 1106     | Hs.220864NM_001271 | ENSG000002CHD2       | EEOC              | chromodon protein-coding       |                              |
| chr11-977 | 10.41623 | -0.22656 | 0.728488 | -0.31101 | 0.755796 | 0.981636 | chr11 | 9779847   | 9782080   | 0 | NA | intron (Nintron (N  | -21430  | NR_033972 | 440028   | Hs.677541NR_033972 | ENSG000002LINC02705  | -                 | long intencRNA                 |                              |
| chr13-114 | 10.41623 | -0.22656 | 0.728488 | -0.31101 | 0.755796 | 0.981636 | chr13 | 1.14E+08  | 1.14E+08  | 0 | NA | promoter-promoter-  | -785    | NR_039724 | 1.01E+08 | NR_039724          | ENSG000002MIR4502    | -                 | microRNA ncRNA                 |                              |
| chr1-155  | 5.419753 | 0.309706 | 0.996342 | 0.310843 | 0.75592  | 0.981636 | chr1  | 15534319  | 15535366  | 0 | NA | intron (Nintron (N  | -7324   | NR_135613 | 1.07E+08 | NR_135613          | ENSG000002SCARNA21E  | -                 | small Ca_ncRNA                 |                              |
| chr10-871 | 5.973196 | 0.292108 | 0.939786 | 0.310824 | 0.755935 | 0.981636 | chr10 | 87108276  | 87109198  | 0 | NA | intron (Nintron (N  | 13531   | NM_019054 | 54537    | Hs.500415NM_019054 | ENSG000002SHLD2      | FAM35A            | F3shieldin protein-coding      |                              |
| chr15-641 | 5.973196 | 0.292108 | 0.939786 | 0.310824 | 0.755935 | 0.981636 | chr15 | 64184544  | 64185590  | 0 | NA | intron (Nintron (N  | -21912  | NM_000942 | 5479     | Hs.434937NM_000942 | ENSG000002PPIB       | B/CYP-51          | peptidylr protein-coding       |                              |
| chr16-735 | 5.973196 | 0.292108 | 0.939786 | 0.310824 | 0.755935 | 0.981636 | chr16 | 735284    | 737654    | 0 | NA | intron (Nintron (N  | 4528    | NM_022493 | 64428    | Hs.513247NM_022493 | ENSG000002CIAO3      | HPRN              | IOP1 cytosolic protein-coding  |                              |
| chr2-2804 | 5.973196 | 0.292108 | 0.939786 | 0.310824 | 0.755935 | 0.981636 | chr2  | 280452    | 280947    | 0 | NA | intron (Nintron (N  | 7392    | NM_001002 | 285016   | Hs.355207NM_001002 | ENSG000002ALKAL2     | AUGA              | FAM1ALK and I protein-coding   |                              |
| chr20-344 | 5.973196 | 0.292108 | 0.939786 | 0.310824 | 0.755935 | 0.981636 | chr20 | 34423760  | 34424197  | 0 | NA | intron (Nintron (N  | -42347  | NR_030374 | 93229    | NR_030374          | ENSG000002MIR644A    | MIR644            | M1microRNA ncRNA               |                              |
| chr3-125  | 5.973196 | 0.292108 | 0.939786 | 0.310824 | 0.755935 | 0.981636 | chr3  | 1.26E+08  | 1.26E+08  | 0 | NA | intron (Nintron (N  | 27798   | NM_02277E | 114885   | Hs.47744CNM_02277E | ENSG000002OSBPL11    | ORP-11            | OF oxysterol protein-coding    |                              |
| chr4-1027 | 5.973196 | 0.292108 | 0.939786 | 0.310824 | 0.755935 | 0.981636 | chr4  | 1.03E+08  | 1.03E+08  | 0 | NA | intron (Nintron (N  | 9747    | NM_00590E | 4126     | Hs.480415NM_00590E | ENSG000002MANBA      | MANB1             | mannoside protein-coding       |                              |
| chr4-109  | 5.973196 | 0.292108 | 0.939786 | 0.310824 | 0.755935 | 0.981636 | chr4  | 1.1E+08   | 1.1E+08   | 0 | NA | intron (NAluJb SIN  | 30231   | NR_030302 | 693161   | NR_030302          | ENSG000002MIR576     | MIRN576           | I microRNA ncRNA               |                              |
| chr6-316  | 5.973196 | 0.292108 | 0.939786 | 0.310824 | 0.755935 | 0.981636 | chr6  | 31686281  | 31687351  | 0 | NA | TTS (NM_CTS (NM_C   | -6443   | NM_025262 | 80741    | Hs.25738           | NM_025262            | ENSG000002L1665C  | C6orf20                        | C lymphocyt protein-coding   |
| chr15-735 | 10.82869 | -0.22186 | 0.714587 | -0.31047 | 0.756202 | 0.981636 | chr15 | 73559647  | 73559896  | 0 | NA | TTS (NM_CTS (NM_C   | 9772    | NR_103844 | 1.01E+08 | Hs.656678NR_103844 | ENSG000002NPTN-IT1   | lncRNA-LE         | NPTN intrncRNA                 |                              |
| chr3-444  | 14.63011 | 0.193187 | 0.622452 | 0.310364 | 0.756284 | 0.981636 | chr3  | 44446869  | 44451279  | 0 | NA | intron (Nintron (N  | 21502   | NR_14443E | 1.01E+08 | Hs.180744NR_14443E | ENSG000002LINC0198E  | -                 | long intencRNA                 |                              |
| chr1-188  | 5.435469 | 0.304277 | 0.980619 | 0.310291 | 0.75634  | 0.981636 | chr1  | 18907678  | 18908198  | 0 | NA | 3' UTR (N3' UTR (N  | -5182   | NM_00131E | 8659     | Hs.77448           | NM_00374E            | ENSG000002ALDHA1A | ALDHA4                         | P5C aldehyde protein-coding  |
| chr1-3634 | 5.435469 | 0.304277 | 0.980619 | 0.310291 | 0.75634  | 0.981636 | chr1  | 36345522  | 36346217  | 0 | NA | intron (Nintron (N  | -21715  | NM_01816E | 55194    | Hs.87016           | NM_01816E            | ENSG000002EVA1B   | Clorf78                        | Feva-1 hon protein-coding    |
| chr1-146  | 5.435469 | 0.304277 | 0.980619 | 0.310291 | 0.75634  | 0.981636 | chr1  | 1.47E+08  | 1.47E+08  | 0 | NA | intron (N (TTCC)n S | 6377    | NM_00127E | 149013   | Hs.666981NM_00127E | ENSG000002NBPF12     | COAS1             | KI/NBPF memt protein-coding    |                              |
| chr1-2344 | 5.435469 | 0.304277 | 0.980619 | 0.310291 | 0.75634  | 0.981636 | chr1  | 2.34E+08  | 2.34E+08  | 0 | NA | intron (Nintron (N  | 13310   | NM_00564E | 6894     | Hs.498127NM_00564E | ENSG000002TARBP1     | TRM3              | TRM1TAR (HIV- protein-coding   |                              |
| chr12-12  | 5.435469 | 0.304277 | 0.980619 | 0.310291 | 0.75634  | 0.981636 | chr12 | 1.23E+08  | 1.23E+08  | 0 | NA | intron (Nintron (N  | -1259   | NR_036187 | 1E+08    | NR_036187          | ENSG000002MIR4304    | -                 | microRNA ncRNA                 |                              |
| chr14-527 | 5.435469 | 0.304277 | 0.980619 | 0.310291 | 0.75634  | 0.981636 | chr14 | 52747053  | 52747762  | 0 | NA | intron (Nintron (N  | 17241   | NM_145251 | 6815     | Hs.36498CNM_145251 | ENSG000002STYX       | -                 | serine/tR protein-coding       |                              |
| chr15-434 | 5.435469 | 0.304277 | 0.980619 | 0.310291 | 0.75634  | 0.981636 | chr15 | 43433844  | 43436995  | 0 | NA | intron (Nintron (N  | 57737   | NM_001141 | 7158     | Hs.440962NM_005657 | ENSG000002TP53BP1    | 53BP1             | TDF tumor prc protein-coding   |                              |
| chr16-70  | 5.435469 | 0.304277 | 0.980619 | 0.310291 | 0.75634  | 0.981636 | chr16 | 70006208  | 70006794  | 0 | NA | intron (NMERIB DNA  | -23845  | NR_03626E | 1E+08    | NR_03626E          | ENSG000002MIR1972-2  | -                 | microRNA ncRNA                 |                              |
| chr18-31  | 5.435469 | 0.304277 | 0.980619 | 0.310291 | 0.75634  | 0.981636 | chr18 | 31874723  | 31875532  | 0 | NA | intron (Nintron (N  | 68001   | NM_01493E | 22878    | Hs.202001NM_01493E | ENSG000002TRAPPC8    | GSG1              | HsT2 traffickin protein-coding |                              |
| chr18-48  | 5.435469 | 0.304277 | 0.980619 | 0.310291 | 0.75634  | 0.981636 | chr18 | 48940994  | 48942311  | 0 | NA | intron (Nintron (N  | 1155    | NM_00119C | 4092     | Hs.465087NM_005904 | ENSG000002SMAD7      | CRCS3             | MAI SMAD fami protein-coding   |                              |
| chr2-932  | 5.435469 | 0.304277 | 0.980619 | 0.310291 | 0.75634  | 0.981636 | chr2  | 93209564  | 93210740  | 0 | NA | IntergeniALR/Alphe  | 998267  | NR_14610E | 728034   | NR_14610E          | BMS1P14              | -                 | BMS1 pset pseudo               |                              |
| chr3-524  | 5.435469 | 0.304277 | 0.980619 | 0.310291 | 0.75634  | 0.981636 | chr3  | 52467822  | 52469160  | 0 | NA | intron (Nintron (N  | 12887   | NM_007184 | 11188    | Hs.43529CNM_007184 | ENSG000002NISCH      | I-1 IR1           | I nischari protein-coding      |                              |
| chr5-312  | 5.435469 | 0.304277 | 0.980619 | 0.310291 | 0.75634  | 0.981636 | chr5  | 31206414  | 31207070  | 0 | NA | intron (Nintron (N  | 13456   | NM_004932 | 1004     | Hs.12477E          | NM_004932            | ENSG000002CDH6    | CAD6                           | KCAL cadherin protein-coding |
| chrX-106  | 5.435469 | 0.304277 | 0.980619 | 0.310291 | 0.75634  | 0.981636 | chrX  | 1.07E+08  | 1.07E+08  | 0 | NA | exon (NM exon (NM   | 21766   | NM_020384 | 9075     | Hs.52274E          | NM_020384            | ENSG000002CLDN2   | -                              | claudin 2 protein-coding     |
| chr17-18  | 10.40837 | -0.22527 | 0.726058 | -0.31027 | 0.756358 | 0.981636 | chr17 | 18801185  | 18806815  | 0 | NA | intron (Nintron (N  | 14965   | NM_00131E | 51030    | Hs.87295           | NM_01607E            | ENSG000002TVP23B  | CGI-148                        | F trans-gol protein-coding   |
| chr18-361 | 10.40837 | -0.22527 | 0.726058 | -0.31027 | 0.756358 | 0.981636 | chr18 | 36174573  | 36175617  | 0 | NA | non-codiron-codir   | 12340   | NR_13460E | 1.02E+08 | Hs.600673NR_13460E | ENSG000002LOC101927- | -                 | uncharactncRNA                 |                              |
| chr9-954  | 10.40837 | -0.22527 | 0.726058 | -0.31027 | 0.756358 | 0.981636 | chr9  | 95453070  | 95453561  | 0 | NA | intron (NAluSg7 SI  | -10294  | NR_038982 | 1.01E+08 | Hs.661847NR_038982 | LOC100507-           | -                 | uncharactncRNA                 |                              |
| chr5-313  | 9.96263  | -0.23369 | 0.754067 | -0.30991 | 0.756633 | 0.981636 | chr5  | 31306101  | 31306538  | 0 | NA | intron (Nintron (N  | 112633  | NM_004932 | 1004     | Hs.12477E          | NM_004932            | ENSG000002CDH6    | CAD6                           | KCAL cadherin protein-coding |
| chr1-284  | 6.641345 | -0.2774  | 0.896887 | -0.30929 | 0.757098 | 0.981636 | chr1  | 28491418  | 28492854  | 0 | NA | intron (Nintron (N  | -13807  | NM_00104E | 1104     | Hs.469722NM_00126E | ENSG000002RCC1       | CHC1              | RCC1 regulator protein-coding  |                              |
| chr1-388  | 6.641345 | -0.2774  | 0.896887 | -0.30929 | 0.757098 | 0.981636 | chr1  | 38839708  | 38840358  | 0 | NA | intron (NAluY SINE  | 19739   | NM_001271 | 64121    | Hs.532461NM_022157 | ENSG000002RRAC       | GTR2              | RAGC Ras relat protein-coding  |                              |
| chr1-666  | 6.641345 | -0.2774  | 0.896887 | -0.30929 | 0.757098 | 0.981636 | chr1  | 66631448  | 66633573  | 0 | NA | intron (NFAM SINE   | 4070    | NR_03606E | 1E+08    | NR_03606E          | ENSG000002MIR3117    | mir-3117          | microRNA ncRNA                 |                              |
| chr11-68  | 6.641345 | -0.2774  | 0.896887 | -0.30929 | 0.757098 | 0.981636 | chr11 | 68527812  | 68528153  | 0 | NA | intron (Nintron (N  | 67230   | NM_001352 | 55291    | Hs.503022NM_018312 | ENSG000002PPP6R3     | C1orfF23          | protein r protein-coding       |                              |
| chr12-307 | 6.641345 | -0.2774  | 0.896887 | -0.30929 | 0.757098 | 0.981636 | chr12 | 30737446  | 30738160  | 0 | NA | intron (NAluY SINE  | 16711   | NM_00131E | 65981    | Hs.234355NM_02392E | ENSG000002CAPRIN2    | C1QDC1            | EF caprin f2 protein-coding    |                              |
| chr12-102 | 6.641345 | -0.2774  | 0.896887 | -0.30929 | 0.757098 | 0.981636 | chr12 | 1.02E+08  | 1.02E+08  | 0 | NA | intron (Nintron (N  | 2548    | NM_01605E | 51019    | Hs.405692NM_01605E | ENSG000002WASHC3     | CCDC53            | CC WASH com protein-coding     |                              |
| chr12-112 | 6.641345 | -0.2774  | 0.896887 | -0.30929 | 0.757098 | 0.981636 | chr12 | 1.12E+08  | 1.12E+08  | 0 | NA | intron (Nintron (N  | -106543 | NR_106921 | 1.02E+08 | NR_106921          | ENSG000002MIR6861    | hsa-mir-6         | microRNA ncRNA                 |                              |
| chr12-124 | 6.641345 | -0.2774  | 0.896887 | -0.30929 | 0.757098 | 0.981636 | chr12 | 1.24E+08  | 1.24E+08  | 0 | NA | intron (Nintron (N  | -18061  | NR_10694C | 1.02E+08 | NR_10694C          | ENSG000002MIR6880    | hsa-mir-6         | microRNA ncRNA                 |                              |
| chr17-47  | 6.641345 | -0.2774  | 0.896887 | -0.30929 | 0.757098 | 0.981636 | chr17 | 47607033  | 47607885  | 0 | NA | intron (NLa2 LINE   | -42460  | NM_00226E | 3837     | Hs.532793NM_00226E | ENSG000002KPNB1      | IMB1              | IPO1 karyofer protein-coding   |                              |
| chr19-15  | 6.641345 | -0.2774  | 0.896887 | -0.30929 | 0.757098 | 0.981636 | chr19 | 1583407   | 1584755   | 0 | NA | intron (NAluSx SIN  | 8784    | NM_001281 | 53615    | Hs.17872E          | NM_00392E            | ENSG000002CMBD3   | -                              | methyl-Cf protein-coding     |
| chr2-378  | 6.641345 | -0.2774  | 0.896887 | -0.30929 | 0.757098 | 0.981636 | chr2  | 37315765  | 37316062  | 0 | NA | intron (NAluSx1 SI  | 1171    | NM_00581E | 23683    | Hs.660757NM_00581E | ENSG000002PRKD3      | EPK2              | PKC- protein r protein-coding  |                              |
| chr2-134  | 6.641345 | -0.2774  | 0.896887 | -0.30929 | 0.757098 | 0.981636 | chr2  | 1.34E+08  | 1.34E+08  | 0 | NA | intron (NLMC5a LI   | 98407   | NM_00241C | 4249     | Hs.4988            | NM_00241C            | ENSG000002MGAT5   | GNT-V                          | GN1alpha-1, f protein-coding |
| chr2-200  | 6.641345 | -0.2774  | 0.896887 | -0.30929 | 0.757098 | 0.981636 | chr2  | 2.01E+08  | 2.01E+08  | 0 | NA | intron (Nintron (N  | 28036   | NM_001142 | 60491    | Hs.145284NM_021824 | ENSG000002CN1F3L1    | ALS2CR1           | I GNG11                        |                              |



|            |          |           |          |           |          |          |       |          |          |   |   |    |                      |                   |          |           |                   |                      |               |                         |                |                |
|------------|----------|-----------|----------|-----------|----------|----------|-------|----------|----------|---|---|----|----------------------|-------------------|----------|-----------|-------------------|----------------------|---------------|-------------------------|----------------|----------------|
| chr9-109C  | 6.682484 | -0.27426  | 0.89013  | -0.30811  | 0.758    | 0.981636 | chr9  | 1.09E+08 | 1.09E+08 | + | 0 | NA | promoter-promoter-   | -120 NR_02950E    | 407036   | NR_02950E | ENSG000002MIR32   | MIRN32 hs            | microRNA      | ncRNA                   |                |                |
| chr11-59E  | 6.6982   | -0.27824  | 0.903511 | -0.30795  | 0.758119 | 0.981636 | chr11 | 59602392 | 59603056 | + | 0 | NA | intron (Alu)Jb SIN   | -7566 NR_03612C   | 1E+08    | NR_03612C | ENSG000002MIR3162 | mir-3162             | microRNA      | ncRNA                   |                |                |
| chr5-347E  | 6.6982   | -0.27824  | 0.903511 | -0.30795  | 0.758119 | 0.981636 | chr5  | 34755578 | 34756178 | + | 0 | NA | intron (MIR SINE     | 68319 NR_00114E   | 26064    | Hs.43140C | NR_015577         | ENSG000002CRAI14     | NORPEG R      | retinoic protein-coding |                |                |
| chr19-357  | 6.461926 | -0.282536 | 0.917702 | -0.307873 | 0.758179 | 0.981636 | chr19 | 35768169 | 35768561 | + | 0 | NA | intron (intron (N    | -7199 NR_005294E  | 115703   | Hs.515364 | NR_005294E        | ENSG000002ARHGAP33   | NOMA-GAP Rho  | GTPase protein-coding   |                |                |
| chr1-666G  | 10.86197 | -0.21869  | 0.710412 | -0.30783  | 0.75821  | 0.981636 | chr1  | 66634117 | 66636946 | + | 0 | NA | intron (intron (N    | 7091 NR_03606C    | 1E+08    | NR_03606C | ENSG000002MIR3117 | mir-3117             | microRNA      | ncRNA                   |                |                |
| chr10-11E  | 10.86197 | -0.21869  | 0.710412 | -0.30783  | 0.75821  | 0.981636 | chr10 | 1.19E+08 | 1.19E+08 | + | 0 | NA | intron (Alu)Jo SIN   | 4526 NR_002917    | 641451   | Hs.68865E | NR_002917         | ENSG000002CSNORA19   | ACA19         | small                   | nucsnRNA       |                |
| chr12-56I  | 10.86197 | -0.21869  | 0.710412 | -0.30783  | 0.75821  | 0.981636 | chr12 | 56159335 | 56164539 | + | 0 | NA | TTS (NM_C TTS (NM_C  | 3578 NR_002101E   | 4637     | Hs.632717 | NR_002101E        | ENSG000002MYL6       | ESMLC LCI     | myosin I protein-coding |                |                |
| chr12-13C  | 10.86197 | -0.21869  | 0.710412 | -0.30783  | 0.75821  | 0.981636 | chr12 | 1.31E+08 | 1.31E+08 | + | 0 | NA | intron (intron (N    | 2708 NR_00632E    | 5901     | Hs.10842  | NR_00632E         | ENSG000002CRAN       | ARA24 GSF     | RAN, mem                | protein-coding |                |
| chr20-34I  | 10.86197 | -0.21869  | 0.710412 | -0.30783  | 0.75821  | 0.981636 | chr20 | 34100959 | 34105714 | + | 0 | NA | intron (intron (N    | 8907 NR_00131E    | 8894     | Hs.42918C | NR_00390E         | ENSG000002EIF2S2     | EIF2 EIF2     | eukaryoti               | protein-coding |                |
| chr5-145L  | 10.86197 | -0.21869  | 0.710412 | -0.30783  | 0.75821  | 0.981636 | chr5  | 14506538 | 14508904 | + | 0 | NA | intron (intron (N    | 43738 NR_14581E   | 1.1E+08  | NR_14581E | SNORD170          | -                    | small         | nucsnRNA                |                |                |
| chr5-728E  | 10.86197 | -0.21869  | 0.710412 | -0.30783  | 0.75821  | 0.981636 | chr5  | 72880616 | 72899056 | + | 0 | NA | exon (NM_exon (NM    | 11245 NR_03996E   | 1.01E+08 | NR_03996E | ENSG000002MIR4804 | -                    | microRNA      | ncRNA                   |                |                |
| chr9-111E  | 15.10016 | -0.18872  | 0.613633 | -0.30755  | 0.758425 | 0.981636 | chr9  | 1.12E+08 | 1.12E+08 | + | 0 | NA | intron (Alu)Sc SIN   | 32176 NR_01221E   | 22949    | Hs.584864 | NR_01221E         | ENSG000002PTGR1      | LTB4DH PC     | prostagla               | protein-coding |                |
| chr2-159E  | 9.897917 | -0.23169  | 0.753869 | -0.30733  | 0.758589 | 0.981636 | chr2  | 1.59E+08 | 1.59E+08 | + | 0 | NA | TTS (NM_C TTS (NM_C  | 48295 NR_10694E   | 1.02E+08 | NR_10694E | ENSG000002MIR6888 | hsa-mir-ε            | microRNA      | ncRNA                   |                |                |
| chr21-49E  | 9.897917 | -0.23169  | 0.753869 | -0.30733  | 0.758589 | 0.981636 | chr21 | 46656205 | 46656419 | + | 0 | NA | intron (MSTB1 LTF    | 20638 NR_20696E   | 3275     | Hs.15416E | NR_00153E         | ENSG000002PRMT2      | HRMT1L L      | protein α               | protein-coding |                |
| chr11-92C  | 5.932057 | 0.290078  | 0.946242 | 0.306558  | 0.75918  | 0.981636 | chr11 | 9202329  | 9203012  | + | 0 | NA | intron (NL2a LINE    | 62656 NR_14596E   | 23258    | Hs.501857 | NR_01521E         | ENSG000002DENND5A    | EIEE49 R      | DENN dom                | protein-coding |                |
| chr11-65E  | 5.932057 | 0.290078  | 0.946242 | 0.306558  | 0.75918  | 0.981636 | chr11 | 65044330 | 65044810 | + | 0 | NA | TTS (NM_C TTS (NM_C  | 3360 NR_01329E    | 29901    | Hs.23642  | NR_01329E         | ENSG000002SAC3D1     | HSU7926E SAC3 | dom                     | protein-coding |                |
| chr14-96E  | 5.932057 | 0.290078  | 0.946242 | 0.306558  | 0.75918  | 0.981636 | chr14 | 96211313 | 96233501 | + | 0 | NA | intron (MIR113 DN    | -23503 NR_00071C  | 623      | Hs.52557E | NR_00071C         | ENSG000002BDRKB1     | B1BKR B1F     | bradykin                | protein-coding |                |
| chr16-23A  | 5.932057 | 0.290078  | 0.946242 | 0.306558  | 0.75918  | 0.981636 | chr16 | 23414865 | 23416152 | + | 0 | NA | intron (intron (N    | 37681 NR_15360C   | 91949    | Hs.185807 | NR_15360E         | ENSG000002COG7       | CDG2E         | component               | protein-coding |                |
| chr18-13C  | 5.932057 | 0.290078  | 0.946242 | 0.306558  | 0.75918  | 0.981636 | chr18 | 13077512 | 13079391 | + | 0 | NA | intron (NLIP47 LIN   | 87089 NR_03214E   | 55125    | Hs.100914 | NR_01806E         | ENSG000002CEP192     | PPP1R62       | centrosom               | protein-coding |                |
| chr19-35E  | 5.932057 | 0.290078  | 0.946242 | 0.306558  | 0.75918  | 0.981636 | chr19 | 3509025  | 3510711  | + | 0 | NA | intron (NLIMB5 LIN   | 3557 NR_01626E    | 51343    | Hs.41313E | NR_01626E         | ENSG000002FZRI       | CDC20C C      | fizzy anc               | protein-coding |                |
| chr2-157E  | 5.932057 | 0.290078  | 0.946242 | 0.306558  | 0.75918  | 0.981636 | chr2  | 1.58E+08 | 1.58E+08 | + | 0 | NA | intron (MER20B DN    | 39398 NR_001347   | 90       | Hs.47031E | NR_00110E         | ENSG000002ACVR1      | ACTRI AC      | activin β               | protein-coding |                |
| chrX-123E  | 5.932057 | 0.290078  | 0.946242 | 0.306558  | 0.75918  | 0.981636 | chrX  | 1.24E+08 | 1.24E+08 | + | 0 | NA | intron (Alu)Sc8 SI   | 28944 NR_001167   | 331      | Hs.35607E | NR_001167         | ENSG000002XIAP       | API3 BIRC     | X-linked                | protein-coding |                |
| chr11-12E  | 6.477642 | 0.27751   | 0.906076 | 0.306542  | 0.759192 | 0.981636 | chr11 | 1.3E+08  | 1.3E+08  | + | 0 | NA | intron (NLIME3Cz I   | 2471 NR_00616E    | 4798     | Hs.53053E | NR_00616E         | ENSG000002NFRKB      | IN080G        | nuclear f               | protein-coding |                |
| chr12-50E  | 6.477642 | 0.27751   | 0.906076 | 0.306542  | 0.759192 | 0.981636 | chr12 | 50722434 | 50723519 | + | 0 | NA | intron (intron (N    | -4125 NR_00517I   | 466      | Hs.64856E | NR_00517I         | ENSG000002ATF1       | EWS-ATF1      | activati                | protein-coding |                |
| chr13-11E  | 6.477642 | 0.27751   | 0.906076 | 0.306542  | 0.759192 | 0.981636 | chr13 | 1.13E+08 | 1.13E+08 | + | 0 | NA | intron (intron (N    | -65494 NR_04666I  | 1.01E+08 | Hs.65869E | NR_04666I         | ENSG000002ATP11A-AS- | ATP11A        | anc                     | ncRNA          |                |
| chr14-29E  | 6.477642 | 0.27751   | 0.906076 | 0.306542  | 0.759192 | 0.981636 | chr14 | 29665090 | 29665806 | + | 0 | NA | intron (NLIPB3 LIN   | 261648 NR_00134E  | 5587     | Hs.50899E | NR_00274E         | ENSG000002PRKD1      | CHDED PKC     | protein-coding          |                |                |
| chr16-25E  | 6.477642 | 0.27751   | 0.906076 | 0.306542  | 0.759192 | 0.981636 | chr16 | 25142942 | 25143578 | + | 0 | NA | intron (PRIMA41-i    | 7772 NR_03999E    | 1.01E+08 | Hs.65757E | NR_03999E         | ENSG000002LCMT1-AS2- | LCMT1         | ant                     | ncRNA          |                |
| chr8-103E  | 6.477642 | 0.27751   | 0.906076 | 0.306542  | 0.759192 | 0.981636 | chr8  | 1.04E+08 | 1.04E+08 | + | 0 | NA | intron (NLIMC1 LIN   | 145012 NR_00134E  | 9699     | Hs.655271 | NR_01467E         | ENSG000002RIMS2      | OBOE RAB      | regulati                | protein-coding |                |
| chr8-670A  | 11.32943 | -0.22389  | 0.730372 | -0.30654  | 0.759192 | 0.981636 | chr8  | 67045551 | 67045899 | + | 0 | NA | intron (intron (N    | 16408 NR_006837   | 10987    | Hs.49191E | NR_006837         | ENSG000002COPS5      | CSN5 JAB1     | COP9 sig                | protein-coding |                |
| chr9-606E  | 16.62247 | 0.180472  | 0.58893  | 0.30644   | 0.759269 | 0.981636 | chr9  | 60625264 | 60626506 | + | 0 | NA | Intergeni ALR Alpha  | -288522 NR_00111E | 727905   | Hs.64549E | NR_00111E         | ENSG000002SPATA31A   | FAM75A5       | SPATA31                 | s              | protein-coding |
| chr14-35A  | 15.61357 | 0.184978  | 0.603758 | 0.306377  | 0.759318 | 0.981636 | chr14 | 35400380 | 35403856 | + | 0 | NA | intron (intron (N    | 2636 NR_02052E    | 4792     | Hs.81328  | NR_02052E         | ENSG000002NFKBIA     | EDAID2 I      | NFKB                    | inh            | protein-coding |
| chr1-323E  | 5.443327 | 0.301526  | 0.984386 | 0.306309  | 0.75937  | 0.981636 | chr1  | 32392188 | 32392842 | + | 0 | NA | intron (intron (N    | 1926 NR_00130C    | 55108    | Hs.353454 | NR_01804E         | ENSG000002BSCD1      | -             | BSD                     | dom            | protein-coding |
| chr11-10E  | 5.443327 | 0.301526  | 0.984386 | 0.306309  | 0.75937  | 0.981636 | chr11 | 1.08E+08 | 1.08E+08 | + | 0 | NA | intron (Alu)Y SINE   | 13247 NR_00001E   | 38       | Hs.23237E | NR_00001E         | ENSG000002ACAT1      | ACAT MAT      | acetyl-C                | protein-coding |                |
| chr12-12E  | 5.443327 | 0.301526  | 0.984386 | 0.306309  | 0.75937  | 0.981636 | chr12 | 1.23E+08 | 1.23E+08 | + | 0 | NA | intron (Alu)Sx1 SI   | 2185 NR_00114E    | 91574    | Hs.31912E | NR_15226E         | ENSG000002C12orf65   | COXPD7 S      | F                       | chromosom      | protein-coding |
| chr12-12E  | 5.443327 | 0.301526  | 0.984386 | 0.306309  | 0.75937  | 0.981636 | chr12 | 1.23E+08 | 1.23E+08 | + | 0 | NA | intron (MIR SINE     | 13864 NR_13070G   | 196383   | Hs.48817E | NR_14505E         | ENSG000002RILPL2     | RLP2          | Rab                     | int            | protein-coding |
| chr12-12E  | 5.443327 | 0.301526  | 0.984386 | 0.306309  | 0.75937  | 0.981636 | chr12 | 1.25E+08 | 1.25E+08 | + | 0 | NA | intron (NL2a LINE    | 13575 NR_00239E   | 65985    | Hs.65607E | NR_00239E         | ENSG000002AACS       | ACSF1 SUF     | acetoac                 | protein-coding |                |
| chr16-88E  | 5.443327 | 0.301526  | 0.984386 | 0.306309  | 0.75937  | 0.981636 | chr16 | 88698016 | 88700057 | + | 0 | NA | exon (NM_exon (NM    | 4545 NR_00117I    | 115992   | Hs.513804 | NR_17884I         | ENSG000002CRNF166    | -             | ring                    | ring           | protein-coding |
| chr17-74E  | 5.443327 | 0.301526  | 0.984386 | 0.306309  | 0.75937  | 0.981636 | chr17 | 74793732 | 74795638 | + | 0 | NA | intron (intron (N    | 18186 NR_01772E   | 54868    | Hs.37026E | NR_01772E         | ENSG000002MEM104     | -             | transmem                | protein-coding |                |
| chr19-621E | 5.443327 | 0.301526  | 0.984386 | 0.306309  | 0.75937  | 0.981636 | chr19 | 6210986  | 6212898  | + | 0 | NA | 3' UTR (3' UTR (N    | 68033 NR_005934   | 4298     | Hs.10095  | NR_005934         | ENSG000002MLL17      | ENL L         | TLG1 MLL1               | sup            | protein-coding |
| chr19-44E  | 5.443327 | 0.301526  | 0.984386 | 0.306309  | 0.75937  | 0.981636 | chr19 | 44984390 | 44986693 | + | 0 | NA | intron (intron (N    | -15923 NR_00650E  | 5971     | Hs.65440E | NR_00650E         | ENSG000002RELB       | I-REL IM      | RELB                    | prot           | protein-coding |
| chr19-45E  | 5.443327 | 0.301526  | 0.984386 | 0.306309  | 0.75937  | 0.981636 | chr19 | 45003446 | 45004376 | + | 0 | NA | intron (Alu)Sx1 SI   | 2447 NR_00650E    | 5971     | Hs.65440E | NR_00650E         | ENSG000002RELB       | I-REL IM      | RELB                    | prot           | protein-coding |
| chr19-55E  | 5.443327 | 0.301526  | 0.984386 | 0.306309  | 0.75937  | 0.981636 | chr19 | 55298563 | 55299766 | + | 0 | NA | intron (Alu)Sx3 SI   | 15167 NR_03243C   | 84446    | Hs.12081N | NR_03243C         | ENSG000002BRSK1      | hSAD1         | BR                      | serine         | protein-coding |
| chr21-37E  | 5.443327 | 0.301526  | 0.984386 | 0.306309  | 0.75937  | 0.981636 | chr21 | 37239143 | 37239758 | + | 0 | NA | intron (intron (N    | 27884 NR_00605E   | 10311    | Hs.36948E | NR_00605E         | ENSG000002VPS26C     | DCRA DSCF     | VPS26                   | enc            | protein-coding |
| chr22-23E  | 5.443327 | 0.301526  | 0.984386 | 0.306309  | 0.75937  | 0.981636 | chr22 | 23821274 | 23822075 | + | 0 | NA | intron (Alu)Sx1 SI   | 17327 NR_00113E   | 91319    | Hs.59367E | NR_19844C         | ENSG000002DERL3      | C22orf14 d    | erlin 3                 | protein-coding |                |
| chr4-573E  | 5.443327 | 0.301526  | 0.984386 | 0.306309  | 0.75937  | 0.981636 | chr4  | 5737039  | 5737789  | + | 0 | NA | intron (Tigger1 I    | 26208 NR_15371I   | 2121     | Hs.64689E | NR_01455E         | ENSG000002CEC1       | DWF-1 EVC     | EVC cili                | protein-coding |                |
| chr4-169A  | 5.443327 | 0.301526  | 0.984386 | 0.306309  | 0.75937  | 0.981636 | chr4  | 1.69E+08 | 1.7E+08  | + | 0 | NA | intron (NLPI1 LINE   | 112219 NR_00119E  | 4750     | Hs.48118E | NR_01222E         | ENSG000002NEK1       | ALS24 NY      | NIMA                    | rel            | protein-coding |
| chr5-173E  | 5.443327 | 0.301526  | 0.984386 | 0.306309  | 0.75937  | 0.981636 | chr5  | 1.73E+08 | 1.73E+08 | + | 0 | NA | intron (NLIME1 LIN   | -32755 NR_00120E  | 662      | Hs.14572E | NR_00120E         | ENSG000002BNIP1      | NIP1 SEC      | E                       | int            | protein-coding |
| chr9-107E  | 5.443327 | 0.301526  | 0.984386 | 0.306309  | 0.75937  | 0.981636 | chr9  | 1.07E+08 | 1.07E+08 | + | 0 | NA | intron (intron (N    | 93736 NR_12602E   | 340512   | Hs.43252E | NR_12602E         | ENSG000002LOC34051E- | -             | uncharact               | ncRNA          |                |
| chr16-21E  | 3.69897  | -0.24505  | 0.800382 | -0.30616  | 0.759482 | 0.981636 | chr16 | 21898106 | 21898370 | + | 0 | NA | Intergeni Alu Jb SIN | -31503 NR_02445E  | 1E+08    | Hs.64843E | NR                |                      |               |                         |                |                |

|                    |          |          |          |          |          |       |          |          |   |      |                     |                   |                              |                     |                  |                                |                           |
|--------------------|----------|----------|----------|----------|----------|-------|----------|----------|---|------|---------------------|-------------------|------------------------------|---------------------|------------------|--------------------------------|---------------------------|
| chr3-881f 6.674626 | -0.27229 | 0.890018 | -0.30594 | 0.759652 | 0.981636 | chr3  | 88153495 | 88159567 | + | 0 NA | exon (NM exon (NM   | 6572 NM_173824    | 285237 Hs. 476944NM_173824   | ENSG000003orf38     | -                | chromosomprotein-coding        |                           |
| chr3-1424 6.674626 | -0.27229 | 0.890018 | -0.30594 | 0.759652 | 0.981636 | chr3  | 1.42E+08 | 1.42E+08 | + | 0 NA | intron (AluJr4 SI   | -34782 NM_001282  | 5464 Hs. 435103NM_019001     | ENSG000003XRN1      | -                | 1-Sep 5'-3' exc protein-coding |                           |
| chr4-4271 6.674626 | -0.27229 | 0.890018 | -0.30594 | 0.759652 | 0.981636 | chr4  | 4271522  | 4274445  | + | 0 NA | intron (Nintron (N  | 17038 NM_00114f   | 55646 Hs. 425427NM_01781f    | ENSG000003LYAR      | ZC2HC2 ZlLyl     | antit protein-coding           |                           |
| chr4-2642 6.674626 | -0.27229 | 0.890018 | -0.30594 | 0.759652 | 0.981636 | chr4  | 26421660 | 26426915 | + | 0 NA | intron (Nintron (N  | 66199 NM_00073C   | 886 Hs. 129                  | NM_00073C           | ENSG000003CKAR   | CCR-A CCR                      | cholecyst protein-coding  |
| chr4-3888 6.674626 | -0.27229 | 0.890018 | -0.30594 | 0.759652 | 0.981636 | chr4  | 38884677 | 38885989 | + | 0 NA | intron (AluJr4 SI   | 17301 NR_03003C   | 693159                       | NR_03003C           | ENSG000003MIR574 | MIR574-3f                      | microRNA ncRNA            |
| chr4-3991 6.674626 | -0.27229 | 0.890018 | -0.30594 | 0.759652 | 0.981636 | chr4  | 39915719 | 39916582 | + | 0 NA | intron (AluJo SIN   | 61761 NM_00110C   | 23244 Hs. 331431NM_01520C    | ENSG000003PDS5A     | PIG54 SCC        | PDS5 cohe protein-coding       |                           |
| chr4-5262 6.674626 | -0.27229 | 0.890018 | -0.30594 | 0.759652 | 0.981636 | chr4  | 52603841 | 52606096 | + | 0 NA | intron (Nintron (N  | 51571 NM_001134   | 64854 Hs. 7966               | NM_02283f           | ENSG000003USP46  | -                              | ubiquitin protein-coding  |
| chr4-7315 6.674626 | -0.27229 | 0.890018 | -0.30594 | 0.759652 | 0.981636 | chr4  | 73133968 | 73134890 | + | 0 NA | intron (Nintron (N  | -64670 NM_00130C  | 285521 Hs. 356697NM_17382f   | ENSG000003COX18     | COX18HS          | cytochom protein-coding        |                           |
| chr4-7891 6.674626 | -0.27229 | 0.890018 | -0.30594 | 0.759652 | 0.981636 | chr4  | 78910685 | 78912029 | + | 0 NA | TTS (NR_TTS (NR_I   | 28081 NM_00104C   | 152559 Hs. 657312NM_17745f   | ENSG000003PAQR3     | RKTG             | progestr protein-coding        |                           |
| chr4-8676 6.674626 | -0.27229 | 0.890018 | -0.30594 | 0.759652 | 0.981636 | chr4  | 86764507 | 86767070 | + | 0 NA | intron (Nintron (N  | 83821 NM_19796f   | 345274 Hs. 452999NM_19796f   | ENSG000003SLC10A6   | SOAT             | solute c protein-coding        |                           |
| chr4-1451 6.674626 | -0.27229 | 0.890018 | -0.30594 | 0.759652 | 0.981636 | chr4  | 1.45E+08 | 1.45E+08 | + | 0 NA | intron (Nintron (N  | -8035 NM_00125f   | 10393 Hs. 48087fNM_01488f    | ENSG000003ANAPC10   | APC10 DOC        | anaphase protein-coding        |                           |
| chr5-7044 6.674626 | -0.27229 | 0.890018 | -0.30594 | 0.759652 | 0.981636 | chr5  | 70446972 | 70448603 | + | 0 NA | TTS (NM_TTS (NM_C   | 32413 NM_00151f   | 2966 Hs. 19135fNM_00151f     | ENSG000003GTF2H2    | BTF2 BTF2        | general t protein-coding       |                           |
| chr5-7776 6.674626 | -0.27229 | 0.890018 | -0.30594 | 0.759652 | 0.981636 | chr5  | 77766728 | 77767951 | + | 0 NA | intron (Nintron (N  | 9000 NM_00129f    | 6902 Hs. 29121fNM_00460f     | ENSG000003TBCA      | -                | tubulin f protein-coding       |                           |
| chr5-1322 6.674626 | -0.27229 | 0.890018 | -0.30594 | 0.759652 | 0.981636 | chr5  | 1.33E+08 | 1.33E+08 | + | 0 NA | intron (NLM2D LIN   | 31524 NM_00573f   | 10111 Hs. 63350fNM_00573f    | ENSG000003RAD50     | NBSLD RAD        | RAD50 dot protein-coding       |                           |
| chr5-140f 6.674626 | -0.27229 | 0.890018 | -0.30594 | 0.759652 | 0.981636 | chr5  | 1.41E+08 | 1.41E+08 | + | 0 NA | intron (Nintron (N  | -6227 NM_00373f   | 8637 Hs. 594084NM_00373f     | ENSG000003EIF4EBP3  | 4E-BP3 4E        | eukaryoti protein-coding       |                           |
| chr5-160C 6.674626 | -0.27229 | 0.890018 | -0.30594 | 0.759652 | 0.981636 | chr5  | 1.6E+08  | 1.6E+08  | + | 0 NA | intron (Nintron (N  | 26657 NM_003314   | 7265 Hs. 51971fNM_003314     | ENSG000003TTC1      | TPR1             | tetratric protein-coding       |                           |
| chr5-178f 6.674626 | -0.27229 | 0.890018 | -0.30594 | 0.759652 | 0.981636 | chr5  | 1.79E+08 | 1.79E+08 | + | 0 NA | intron (Nintron (N  | -18291 NM_17346f  | 91522 Hs. 66002fNM_17346f    | ENSG000003COL23A1   | -                | collagen protein-coding        |                           |
| chr6-244C 6.674626 | -0.27229 | 0.890018 | -0.30594 | 0.759652 | 0.981636 | chr6  | 24405401 | 24406429 | + | 0 NA | intron (AluV SINE   | 2979 NR_10442f    | 57380 Hs. 65861fNM_02066f    | ENSG000003MRS2      | HPT MRS2         | magnesium protein-coding       |                           |
| chr6-5714 6.674626 | -0.27229 | 0.890018 | -0.30594 | 0.759652 | 0.981636 | chr6  | 57142405 | 57146546 | + | 0 NA | intron (AluSzl SIN  | 27738 NR_110742   | 1.02E+08 Hs. 70571fNR_110742 | ZNF451-AS-          | ZNF451           | rencRNA                        |                           |
| chr6-147f 6.674626 | -0.27229 | 0.890018 | -0.30594 | 0.759652 | 0.981636 | chr6  | 1.47E+08 | 1.47E+08 | + | 0 NA | intron (Nintron (N  | -145513 NM_00103C | 389432 Hs. 56797fNM_00103C   | ENSG000003SAMD5     | dJ875H10         | sterile e protein-coding       |                           |
| chr6-149f 6.674626 | -0.27229 | 0.890018 | -0.30594 | 0.759652 | 0.981636 | chr6  | 1.5E+08  | 1.5E+08  | + | 0 NA | exon (NM exon (NM   | 52600 NM_00136C   | 5110 Hs. 27925fNM_00538f     | ENSG000003PCMT1     | P1MT             | protein-l protein-coding       |                           |
| chr6-166f 6.674626 | -0.27229 | 0.890018 | -0.30594 | 0.759652 | 0.981636 | chr6  | 1.66E+08 | 1.66E+08 | + | 0 NA | intron (NMLT1A LTF  | 13734 NM_14516f   | 113402 Hs. 48714fNM_14516f   | ENSG000003SFT2D1    | C6orf83 SFT2     | dom protein-coding             |                           |
| chr7-2474 6.674626 | -0.27229 | 0.890018 | -0.30594 | 0.759652 | 0.981636 | chr7  | 24748544 | 24749277 | + | 0 NA | intron (NLTR52 LTF  | 8554 NM_00112f    | 1687 Hs. 52070fNM_00440f     | ENSG000003GSDME     | DFNA5 ICF        | gasderm protein-coding         |                           |
| chr7-6654 6.674626 | -0.27229 | 0.890018 | -0.30594 | 0.759652 | 0.981636 | chr7  | 66546595 | 66548684 | + | 0 NA | intron (AluSx1 SI   | 44768 NR_111974   | 493754 Hs. 73240fNR_02093f   | ENSG000003GS1-124fE | -                | RAB guanipseudo                |                           |
| chr7-135f 6.674626 | -0.27229 | 0.890018 | -0.30594 | 0.759652 | 0.981636 | chr7  | 1.36E+08 | 1.36E+08 | + | 0 NA | exon (NM exon (NM   | -39690 NM_00113C  | 647087 Hs. 20002fNM_00113C   | ENSG000003TMTP1     | C7orf73 F        | short tr protein-coding        |                           |
| chr8-388C 6.674626 | -0.27229 | 0.890018 | -0.30594 | 0.759652 | 0.981636 | chr8  | 38809802 | 38812470 | + | 0 NA | intron (Nintron (N  | 5686 NM_00135f    | 6867 Hs. 27924fNM_00628f     | ENSG000003TACC1     | Gas5             | transform protein-coding       |                           |
| chr9-282f 6.674626 | -0.27229 | 0.890018 | -0.30594 | 0.759652 | 0.981636 | chr9  | 2825291  | 2829741  | + | 0 NA | intron (NChar1e E   | 16579 NM_01487f   | 9933 Hs. 49330fNM_01487f     | ENSG000003PUM3      | HA-5 HLA         | pumilio f protein-coding       |                           |
| chr9-324f 6.674626 | -0.27229 | 0.890018 | -0.30594 | 0.759652 | 0.981636 | chr9  | 32453397 | 32455383 | + | 0 NA | TTS (NM_TTS (NM_C   | 69747 NM_00136f   | 48 Hs. 56722fNM_00219f       | ENSG000003ACO1      | ACONS HEI        | aconitase protein-coding       |                           |
| chr9-362f 6.674626 | -0.27229 | 0.890018 | -0.30594 | 0.759652 | 0.981636 | chr9  | 36239515 | 36240872 | + | 0 NA | intron (NLIPIA17 LI | 18255 NM_00119f   | 10020 Hs. 5920               | NM_00547f           | ENSG000003GNE    | DMRV GLCN                      | glucosamin protein-coding |
| chr9-982C 6.674626 | -0.27229 | 0.890018 | -0.30594 | 0.759652 | 0.981636 | chr9  | 98201173 | 98202555 | + | 0 NA | intron (Nintron (N  | -9227 NM_05282f   | 7464 Hs. 113094NM_00338f     | ENSG000003CORO2A    | CLIP INB I       | conon e protein-coding         |                           |
| chr9-111f 6.674626 | -0.27229 | 0.890018 | -0.30594 | 0.759652 | 0.981636 | chr9  | 1.12E+08 | 1.12E+08 | + | 0 NA | intron (Nintron (N  | 2828 NM_00101f    | 2790 Hs. 53419fNM_00101f     | ENSG000003GNG10     | -                | G protei protein-coding        |                           |
| chr9-114f 6.674626 | -0.27229 | 0.890018 | -0.30594 | 0.759652 | 0.981636 | chr9  | 1.14E+08 | 1.14E+08 | + | 0 NA | intron (NFLAM_A SI  | -24973 NM_00060f  | 5004 Hs. 52235fNM_00060f     | ENSG000003ORM1      | AGP-A AGF        | orosomucc protein-coding       |                           |
| chr9-127f 6.674626 | -0.27229 | 0.890018 | -0.30594 | 0.759652 | 0.981636 | chr9  | 1.27E+08 | 1.27E+08 | + | 0 NA | intron (NLIPIA16 LI | 7248 NM_000713f   | 7633 Hs. 52239fNM_000713f    | ENSG000003ZNF79     | p17              | zinc fng protein-coding        |                           |
| chr9-1284 6.674626 | -0.27229 | 0.890018 | -0.30594 | 0.759652 | 0.981636 | chr9  | 1.28E+08 | 1.28E+08 | + | 0 NA | intron (NMIR SINE   | 4315 NM_15343f    | 4957 Hs. 12905fNM_00254f     | ENSG000003ODF2      | CT134 ODF        | outer der protein-coding       |                           |
| chr9-130f 6.674626 | -0.27229 | 0.890018 | -0.30594 | 0.759652 | 0.981636 | chr9  | 1.31E+08 | 1.31E+08 | + | 0 NA | intron (NLA2A LINE  | 3205 NM_01428f    | 23404 Hs. 65464fNM_01428f    | ENSG000003EXOSC2    | RRP4 Rrp4        | exosome c protein-coding       |                           |
| chr9-132f 6.674626 | -0.27229 | 0.890018 | -0.30594 | 0.759652 | 0.981636 | chr9  | 1.33E+08 | 1.33E+08 | + | 0 NA | intron (NLIPIA LINE | 27868 NM_00136f   | 7248 Hs. 370854NM_00036f     | ENSG000003TSC1      | LAM TSC          | compl protein-coding           |                           |
| chrX-7811 6.674626 | -0.27229 | 0.890018 | -0.30594 | 0.759652 | 0.981636 | chrX  | 78117472 | 78119961 | + | 0 NA | intron (NLTR33 LTF  | 14468 NM_000291   | 5230 Hs. 78771               | NM_000291           | ENSG000003CPGK1  | HEL-S-68f                      | phosphogl protein-coding  |
| chr11-10f 6.6121   | 0.229772 | 0.751086 | 0.305919 | 0.759666 | 0.981636 | chr11 | 1.08E+08 | 1.08E+08 | + | 0 NA | intron (Nintron (N  | 48143 NM_001351   | 472 Hs. 367437NM_000051      | ENSG000003ATM       | ATI ATA ATM      | seri protein-coding            |                           |
| chr16-224 10.39265 | -0.22265 | 0.727873 | -0.30589 | 0.759691 | 0.981636 | chr16 | 22479264 | 22483357 | + | 0 NA | intron (Nintron (N  | -23139 NR_02445f  | 1E+08 Hs. 64843fNR_02445f    | LOC10019C-          | -                | uncharactcRNA                  |                           |
| chr5-7021 15.65471 | 0.185906 | 0.607893 | 0.305821 | 0.759741 | 0.981636 | chr5  | 70218959 | 70220106 | + | 0 NA | non-codiron-codir   | 6263 NR_024054    | 11039 Hs. 58250fNM_006780    | SMA4                | SMA3 b55c        | glucuronipseudo                |                           |
| chr11-73 10.85411  | -0.21744 | 0.711243 | -0.30572 | 0.759819 | 0.981636 | chr11 | 73366447 | 73366820 | + | 0 NA | intron (AluJb SIN   | -9756 NM_15222f   | 84957 Hs. 53372fNM_032871    | ENSG000003RELT      | A13C TNF         | RELT TNF protein-coding        |                           |
| chr12-437 10.85411 | -0.21744 | 0.711243 | -0.30572 | 0.759819 | 0.981636 | chr12 | 43744212 | 43746386 | + | 0 NA | intron (THEIC LINE  | 13491 NM_00109f   | 83448 Hs. 23554              | NM_03129f           | ENSG000003PUSL7  | -                              | pseudouri protein-coding  |
| chr2-365f 10.85411 | -0.21744 | 0.711243 | -0.30572 | 0.759819 | 0.981636 | chr2  | 36586622 | 36586943 | + | 0 NA | intron (AluJr SIN   | 11386 NM_00104f   | 9637 Hs. 25856fNM_00510f     | ENSG000003FEZ2      | HUM3CL           | fascicul protein-coding        |                           |
| chr20-35f 10.85411 | -0.21744 | 0.711243 | -0.30572 | 0.759819 | 0.981636 | chr20 | 35653075 | 35655316 | + | 0 NA | promoter-promoter-  | -287 NM_00391f    | 8904 Hs. 24641fNM_00391f     | ENSG000003CPNE1     | COPN1 CPN        | copine l protein-coding        |                           |
| chr20-44f 10.85411 | -0.21744 | 0.711243 | -0.30572 | 0.759819 | 0.981636 | chr20 | 44904086 | 44907836 | + | 0 NA | intron (Nintron (N  | -4099 NR_13498f   | 80336 Hs. 641481NM_00112f    | ENSG000003PABPCL    | C2orf11f         | poly (A) t protein-coding      |                           |
| chr21-33f 10.85411 | -0.21744 | 0.711243 | -0.30572 | 0.759819 | 0.981636 | chr21 | 33549189 | 33563094 | + | 0 NA | intron (Nintron (N  | 5479 NR_10675f    | 1.02E+08 NR_10675f           | ENSG000003MIR6501   | hosa-mir-        | microRNA ncRNA                 |                           |
| chr14-601 7.110659 | -0.26759 | 0.875448 | -0.30566 | 0.759863 | 0.981636 | chr14 | 60146944 | 60147834 | + | 0 NA | 3' UTR (N3' UTR (N  | -18009 NM_01602f  | 51635 Hs. 59719              | NM_01602f           | ENSG000003DHR57  | CGI-86 SE                      | dehydrog protein-coding   |
| chr2-112f 7.110659 | -0.26759 | 0.875448 | -0.30566 | 0.759863 | 0.981636 | chr2  | 1.13E+08 | 1.13E+08 | + | 0 NA | intron (NAluSx SIN  | -12738 NR_136321  | 1.05E+08 Hs. 59954fNR_136321 | LOC10537f-          | -                | uncharactcRNA                  |                           |
| chr1-410f 3.427762 | -0.3765  | 1.232251 | -0.30554 | 0.759956 | 0.981636 | chr1  | 41065369 | 41066259 | + | 0 NA | intron (NLM1C LIN   | -44059 NM_00116f  | 200172 Hs. 19460fNM_14499f   | ENSG000003SLFN11    | -                | schlafen protein-coding        |                           |
| chr15-637 6.17203  | -0.28878 | 0.945592 | -0.30539 | 0.760066 | 0.981636 | chr15 | 63729277 | 63729856 | + | 0 NA | exon (NM exon (NM   | 104382 NM_00392f  | 89                           |                     |                  |                                |                           |



|           |          |          |          |          |          |          |       |          |          |   |   |    |                    |         |           |          |                    |                    |                  |                            |
|-----------|----------|----------|----------|----------|----------|----------|-------|----------|----------|---|---|----|--------------------|---------|-----------|----------|--------------------|--------------------|------------------|----------------------------|
| chr3-1395 | 10.43379 | -0.22063 | 0.72954  | -0.30242 | 0.762331 | 0.981636 | chr3  | 1.39E+08 | 1.39E+08 | + | 0 | NA | intron (NL2a LINE) | 8113    | NM_004766 | 9276     | Hs.68161ENM_004766 | ENSG00000COPB2     | MCPH19           | beoatomer protein-coding   |
| chr1-1081 | 6.666769 | -0.2703  | 0.894161 | -0.30229 | 0.762431 | 0.981636 | chr1  | 1.08E+08 | 1.08E+08 | + | 0 | NA | intron (Nintron (N | 53437   | NM_213651 | 29957    | Hs.656877NM_01338E | ENSG00000SLC25A24  | APC1 SCAM        | solute cεprotein-coding    |
| chr11-20C | 6.666769 | -0.2703  | 0.894161 | -0.30229 | 0.762431 | 0.981636 | chr11 | 20077955 | 20078809 | + | 0 | NA | intron (Nintron (N | -29079  | NR_046672 | 1.01E+08 | Hs.55791ENR_046672 | ENSG00000NAV2-AS2  | NAV2             | antincRNA                  |
| chr11-102 | 6.666769 | -0.2703  | 0.894161 | -0.30229 | 0.762431 | 0.981636 | chr11 | 1.02E+08 | 1.02E+08 | + | 0 | NA | intron (Nintron (N | -99346  | NM_001166 | 330      | Hs.127799NM_001166 | ENSG00000BIRC3     | AIP1 AP2         | baculovir protein-coding   |
| chr12-62  | 6.666769 | -0.2703  | 0.894161 | -0.30229 | 0.762431 | 0.981636 | chr12 | 62537225 | 62539880 | + | 0 | NA | intron (Nintron (N | 64882   | NR_121682 | 283416   | Hs.375881NM_17589E | ENSG00000LINC01465 | C12orf61         | long intencRNA             |
| chr13-484 | 6.666769 | -0.2703  | 0.894161 | -0.30229 | 0.762431 | 0.981636 | chr13 | 48478586 | 48479223 | + | 0 | NA | intron (Nintron (N | -34235  | NM_005767 | 10161    | Hs.123464NM_005767 | ENSG00000CLPAR6    | ARWH1 HYF        | lysofosf protein-coding    |
| chr14-605 | 6.666769 | -0.2703  | 0.894161 | -0.30229 | 0.762431 | 0.981636 | chr14 | 60956507 | 60958063 | + | 0 | NA | intron (THE1B LTF  | 23794   | NM_00135C | 57570    | Hs.380159NM_02081C | ENSG00000TRMT5     | CPXD26 K         | tRNA methyl protein-coding |
| chr18-275 | 6.666769 | -0.2703  | 0.894161 | -0.30229 | 0.762431 | 0.981636 | chr18 | 2750130  | 2753877  | + | 0 | NA | intron (NMER33 DNA | -95003  | NM_032048 | 84034    | Hs.53281ENM_03204E | ENSG00000EMILIN2   | EMILIN-2 elastin | nprotein-coding            |
| chr19-515 | 6.666769 | -0.2703  | 0.894161 | -0.30229 | 0.762431 | 0.981636 | chr19 | 51576758 | 51578833 | + | 0 | NA | intron (NALuY SINE | 6512    | NM_007147 | 7728     | Hs.119014NM_007147 | ENSG00000ZNF175    | OTK18            | zinc fing protein-coding   |
| chr2-652  | 6.666769 | -0.2703  | 0.894161 | -0.30229 | 0.762431 | 0.981636 | chr2  | 65235650 | 65235606 | + | 0 | NA | intron (Nintron (N | 7398    | NM_00100E | 10097    | Hs.643727NM_00572E | ENSG00000ACTR2     | ARP2             | actin relprotein-coding    |
| chr2-6915 | 6.666769 | -0.2703  | 0.894161 | -0.30229 | 0.762431 | 0.981636 | chr2  | 69158431 | 69158722 | + | 0 | NA | intron (NMER47A DN | 54894   | NR_036073 | 1E+08    | NR_036073          | ENSG00000MIR3126   | mir-3126         | microRNA ncRNA             |
| chr3-4728 | 6.666769 | -0.2703  | 0.894161 | -0.30229 | 0.762431 | 0.981636 | chr3  | 47288400 | 47288928 | + | 0 | NA | intron (Nintron (N | 5720    | NM_02501C | 23276    | Hs.51794ENM_02501C | ENSG00000KLHL18    | -                | kelch lik protein-coding   |
| chr3-5756 | 6.666769 | -0.2703  | 0.894161 | -0.30229 | 0.762431 | 0.981636 | chr3  | 57565660 | 57566897 | + | 0 | NA | 3' UTR (N3' UTR (N | 10004   | NM_00132E | 201626   | Hs.57299ENM_17796E | ENSG00000PDEL2     | 2'-PDE 2-        | phosphodi protein-coding   |
| chr3-1565 | 6.666769 | -0.2703  | 0.894161 | -0.30229 | 0.762431 | 0.981636 | chr3  | 1.57E+08 | 1.57E+08 | + | 0 | NA | 3' UTR (N3' UTR (N | 13103   | NM_00130E | 6747     | Hs.51834ENM_00710E | ENSG00000CSSR3     | TRAP3            | signal sεprotein-coding    |
| chr4-121C | 6.666769 | -0.2703  | 0.894161 | -0.30229 | 0.762431 | 0.981636 | chr4  | 1210469  | 1211373  | + | 0 | NA | TTS (NM_TTS (NM_C  | 801     | NR_104331 | 285463   | Hs.707614NR_104331 | ENSG00000CTBP1-AS  | PCAT10           | CTBP1 antncRNA             |
| chr4-287E | 6.666769 | -0.2703  | 0.894161 | -0.30229 | 0.762431 | 0.981636 | chr4  | 2876352  | 2876970  | + | 0 | NA | intron (NALuY SINE | 32511   | NM_00128E | 118      | Hs.18370ENM_00111E | ENSG00000ADD1      | ADDA             | adducin lprotein-coding    |
| chr4-128E | 6.666769 | -0.2703  | 0.894161 | -0.30229 | 0.762431 | 0.981636 | chr4  | 1.28E+08 | 1.28E+08 | + | 0 | NA | intron (Nintron (N | 9878    | NM_00632C | 10424    | Hs.50791ENM_00632C | ENSG00000PGRMC2    | DG6 PMBP         | progester protein-coding   |
| chr5-150E | 6.666769 | -0.2703  | 0.894161 | -0.30229 | 0.762431 | 0.981636 | chr5  | 13768945 | 13769662 | + | 0 | NA | intron (NALuYc SIN | 175177  | NM_00136E | 1767     | Hs.21236ENM_00136E | ENSG00000DNAH5     | C1LD3 DN         | dynein αprotein-coding     |
| chr5-1341 | 6.666769 | -0.2703  | 0.894161 | -0.30229 | 0.762431 | 0.981636 | chr5  | 1.34E+08 | 1.34E+08 | + | 0 | NA | 3' UTR (N3' UTR (N | 25437   | NR_17067E | 6500     | Hs.17162ENM_00693C | ENSG00000SKP1      | EMC19 OCF5       | -phase lprotein-coding     |
| chr5-150E | 6.666769 | -0.2703  | 0.894161 | -0.30229 | 0.762431 | 0.981636 | chr5  | 1.5E+08  | 1.5E+08  | + | 0 | NA | intron (Nintron (N | 22337   | NR_157074 | 972      | Hs.43656ENM_00435E | ENSG00000CD74      | DHLAG HLA        | CD74 mole protein-coding   |
| chr6-591E | 6.666769 | -0.2703  | 0.894161 | -0.30229 | 0.762431 | 0.981636 | chr6  | 591950   | 592567   | + | 0 | NA | intron (Nintron (N | 64706   | NR_14895E | 135458   | Hs.66903ENM_14895E | ENSG00000HUS1B     | -                | HUS1 checprotein-coding    |
| chr6-789E | 6.666769 | -0.2703  | 0.894161 | -0.30229 | 0.762431 | 0.981636 | chr6  | 78996132 | 78996699 | + | 0 | NA | intron (NLTR79 LTF | 81839   | NM_017934 | 55023    | Hs.511817NM_017934 | ENSG00000PHIP      | BRWD2 DC         | pleckstri protein-coding   |
| chr6-1497 | 6.666769 | -0.2703  | 0.894161 | -0.30229 | 0.762431 | 0.981636 | chr6  | 1.5E+08  | 1.5E+08  | + | 0 | NA | intron (NMLT1J LTF | 10596   | NM_00136E | 5110     | Hs.279257NM_00538E | ENSG00000PCMT1     | P1MT             | protein-l protein-coding   |
| chr7-300E | 6.666769 | -0.2703  | 0.894161 | -0.30229 | 0.762431 | 0.981636 | chr7  | 30062967 | 30064318 | + | 0 | NA | intron (Nintron (N | 18557   | NM_00136E | 84725    | Hs.23349ENM_03263E | ENSG00000PLEKH8A   | FAPP2            | pleckstri protein-coding   |
| chr7-121E | 6.666769 | -0.2703  | 0.894161 | -0.30229 | 0.762431 | 0.981636 | chr7  | 1.21E+08 | 1.21E+08 | + | 0 | NA | intron (Nintron (N | -80935  | NM_016087 | 51384    | Hs.27237ENM_016087 | ENSG00000WNT16     | -                | Wnt familt protein-coding  |
| chr8-889C | 6.666769 | -0.2703  | 0.894161 | -0.30229 | 0.762431 | 0.981636 | chr8  | 8890891  | 8892357  | + | 0 | NA | exon (NM exon (NM  | 2006    | NM_00422E | 9258     | Hs.379414NM_00422E | ENSG00000MFHAS1    | LRRC65           | mantant protein-coding     |
| chr8-3044 | 6.666769 | -0.2703  | 0.894161 | -0.30229 | 0.762431 | 0.981636 | chr8  | 30445872 | 30447144 | + | 0 | NA | intron (Nintron (N | -6107   | NR_04620E | 1E+08    | Hs.12681ENR_04620E | ENSG00000RBPMS-AS1 | RBPMS            | antncRNA                   |
| chr8-123E | 6.666769 | -0.2703  | 0.894161 | -0.30229 | 0.762431 | 0.981636 | chr8  | 1.23E+08 | 1.23E+08 | + | 0 | NA | intron (Nintron (N | 3652    | NM_032847 | 84933    | Hs.707401NM_032847 | ENSG00000C8orf76   | -                | chromoson protein-coding   |
| chr9-773E | 6.666769 | -0.2703  | 0.894161 | -0.30229 | 0.762431 | 0.981636 | chr9  | 77370625 | 77373038 | + | 0 | NA | intron (NLIPA2 LIN | -75181  | NR_121184 | 1.02E+08 | Hs.434324NR_121184 | ENSG00000GNA14-AS1 | GNA14            | antncRNA                   |
| chr1-272E | 6.820888 | 0.265549 | 0.878574 | 0.302249 | 0.762462 | 0.981636 | chr1  | 27264470 | 27265083 | + | 0 | NA | intron (NALuJr SIN | 30144   | NM_01502E | 23038    | Hs.469154NM_01502E | ENSG00000WDC1C     | ADP DCAF9        | WD and tεprotein-coding    |
| chr16-23E | 6.820888 | 0.265549 | 0.878574 | 0.302249 | 0.762462 | 0.981636 | chr16 | 23531786 | 23532204 | + | 0 | NA | intron (NALuSx SIN | -21501  | NM_015044 | 23062    | Hs.46033ENM_015044 | ENSG00000CGA2      | VEAR             | golgi ass protein-coding   |
| chr2-170E | 6.820888 | 0.265549 | 0.878574 | 0.302249 | 0.762462 | 0.981636 | chr2  | 1.7E+08  | 1.7E+08  | + | 0 | NA | intron (Nintron (N | -106392 | NR_04568E | 140469   | Hs.67190CNM_13899E | ENSG00000MYO3B     | -                | myosin lI protein-coding   |
| chr22-42E | 6.820888 | 0.265549 | 0.878574 | 0.302249 | 0.762462 | 0.981636 | chr22 | 42890237 | 42891001 | + | 0 | NA | intron (NALuSx SIN | -33346  | NM_001142 | 26286    | Hs.68522ENM_01457C | ENSG00000ARFGAP3   | ARFGAP1          | ADP ribos protein-coding   |
| chr5-149E | 6.820888 | 0.265549 | 0.878574 | 0.302249 | 0.762462 | 0.981636 | chr5  | 1.5E+08  | 1.5E+08  | + | 0 | NA | intron (NALuS6 SI  | 18346   | NM_001271 | 1452     | Hs.52986ENM_00189E | ENSG00000CSNK1A1   | CK1 CK1a         | casein kiprotein-coding    |
| chr4-1187 | 10.3848  | -0.22129 | 0.732171 | -0.30223 | 0.762475 | 0.981636 | chr4  | 1.19E+08 | 1.19E+08 | + | 0 | NA | intron (Nintron (N | 54498   | NM_020961 | 57721    | Hs.59687ENM_020961 | ENSG00000METTL14   | hMETTL14         | methyltrε protein-coding   |
| chr1-320E | 9.43646  | -0.23764 | 0.786753 | -0.30205 | 0.762613 | 0.981636 | chr1  | 32022142 | 32022399 | + | 0 | NA | intron (NALuSc SIN | 8403    | NM_001271 | 10657    | Hs.44589ENM_00655E | ENSG00000KHDRB51   | Sam68 p62        | KH RNA bε protein-coding   |
| chr12-98E | 10.88739 | -0.21431 | 0.709745 | -0.30195 | 0.762687 | 0.981636 | chr12 | 98596157 | 98604421 | + | 0 | NA | TTS (NR_TTS (NR_C  | 654     | NR_00301E | 677832   | Hs.69325ENR_00301E | ENSG00000SNORA53   | ACA53            | small nuc snoRNA           |
| chr18-35E | 10.88739 | -0.21431 | 0.709745 | -0.30195 | 0.762687 | 0.981636 | chr18 | 35331853 | 35340534 | + | 0 | NA | 3' UTR (N3' UTR (N | 8227    | NM_00130E | 7572     | Hs.51480ENM_00696E | ENSG00000ZNF24     | KOX17 RSC        | zinc fing protein-coding   |
| chr19-52E | 10.88739 | -0.21431 | 0.709745 | -0.30195 | 0.762687 | 0.981636 | chr19 | 52015322 | 52025861 | + | 0 | NA | intron (NMER77B LI | 7788    | NM_02504C | 80110    | Hs.29233ENM_02504C | ENSG00000ZNF614    | -                | zinc fing protein-coding   |
| chr2-324E | 10.88739 | -0.21431 | 0.709745 | -0.30195 | 0.762687 | 0.981636 | chr2  | 32466664 | 32469777 | + | 0 | NA | intron (Nintron (N | -63933  | NR_03028E | 693143   | NR_03028E          | ENSG00000MIR558    | MIRN558          | microRNA ncRNA             |
| chr2-3927 | 10.88739 | -0.21431 | 0.709745 | -0.30195 | 0.762687 | 0.981636 | chr2  | 39276275 | 39279215 | + | 0 | NA | intron (NALuS2 SI  | -33762  | NR_144521 | 344387   | Hs.403201NM_00100E | ENSG00000CDKL4     | -                | cyclin dε protein-coding   |
| chr9-577E | 10.88739 | -0.21431 | 0.709745 | -0.30195 | 0.762687 | 0.981636 | chr9  | 5776554  | 5780651  | + | 0 | NA | Intergeni LIMB7 LI | 54515   | NM_02489E | 79956    | Hs.59107ENM_02489E | ENSG00000CERMP1    | FXNA KIAA        | endoplasm protein-coding   |
| chr1-154E | 6.444361 | 0.273521 | 0.906217 | 0.301827 | 0.762784 | 0.981636 | chr1  | 1.55E+08 | 1.55E+08 | + | 0 | NA | intron (NL2a LINE) | -2844   | NM_01865E | 55891    | Hs.27239ENM_01865E | ENSG00000LENEP     | LEP503           | lens epit protein-coding   |
| chr11-96E | 6.444361 | 0.273521 | 0.906217 | 0.301827 | 0.762784 | 0.981636 | chr11 | 96382019 | 96382975 | + | 0 | NA | 3' UTR (N3' UTR (N | 7319    | NM_00136E | 79780    | Hs.52508ENM_01414E | ENSG00000CCDC82    | HSPC048          | coiled-cε protein-coding   |
| chr16-10E | 6.444361 | 0.273521 | 0.906217 | 0.301827 | 0.762784 | 0.981636 | chr16 | 105570   | 106321   | + | 0 | NA | intron (Nintron (N | 27720   | NM_00101E | 4350     | Hs.45959ENM_00243C | ENSG00000MPG       | AAG ADPG         | N-methyl l protein-coding  |
| chr16-13E | 6.444361 | 0.273521 | 0.906217 | 0.301827 | 0.762784 | 0.981636 | chr16 | 132416   | 1325161  | + | 0 | NA | 3' UTR (N3' UTR (N | -8757   | NM_00119E | 8938     | Hs.458427NM_00393C | ENSG00000BTAIP3    | BAP3             | BAN1 assε protein-coding   |
| chr18-947 | 6.444361 | 0.273521 | 0.906217 | 0.301827 | 0.762784 | 0.981636 | chr18 | 9478894  | 9479414  | + | 0 | NA | intron (NALuJb SIN | 3641    | NM_00678E | 10928    | Hs.52899ENM_00678E | ENSG00000RALBP1    | RIP1 RLIF        | raIA binc protein-coding   |
| chr2-171E | 6.444361 | 0.273521 | 0.906217 | 0.301827 | 0.762784 | 0.981636 | chr2  | 1.71E+08 | 1.71E+08 | + | 0 | NA | intron (NLIMB7 LI  | -3291   | NM_00113E | 9874     | Hs.744917NM_01229C | ENSG00000TLK1      | PKU-beta         | tousled l protein-coding   |
| chr4-106E | 6.444361 | 0.273521 | 0.906217 | 0.301827 | 0.762784 | 0.981636 | chr4  | 1.06E+08 | 1.06E+08 | + | 0 | NA | intron (NA-rich Lc | -83122  | NM_001142 | 9255     | Hs.59168ENM_00475E | ENSG00000AIMP1     | EMAP2 EM         | aminoacyl protein-coding   |
| chr5-6124 | 6.444361 | 0.273521 | 0.906217 | 0.301827 | 0.762784 | 0.981636 | chr5  | 61249173 | 61250543 | + | 0 | NA | TTS (NR_TTS (NR_I  | 15071   | NR_146624 | 1.05E+08 | Hs.62168ENR_146624 | ENSG00000LINC02057 | -                | long intencRNA             |
| chr5-6941 |          |          |          |          |          |          |       |          |          |   |   |    |                    |         |           |          |                    |                    |                  |                            |

|            |          |          |          |          |          |          |       |          |          |   |   |    |                     |         |           |          |           |                   |                     |            |                            |                           |
|------------|----------|----------|----------|----------|----------|----------|-------|----------|----------|---|---|----|---------------------|---------|-----------|----------|-----------|-------------------|---------------------|------------|----------------------------|---------------------------|
| chr4-12962 | 5.451184 | 0.29863  | 0.996341 | 0.299727 | 0.764385 | 0.981636 | chr4  | 1299087  | 1300633  | + | 0 | NA | intron (NL2a LINE)  | -9583   | NM_001297 | 10296    | Hs.13989  | ENM_005882        | ENSG000000MAEA      | EMLP EMP   | macrophag protein-coding   |                           |
| chr9-1085  | 5.451184 | 0.29863  | 0.996341 | 0.299727 | 0.764385 | 0.981636 | chr9  | 1.09E+08 | 1.09E+08 | + | 0 | NA | intron (Nintron (N  | 13235   | NM_001318 | 8518     | Hs.49473  | ENM_003642        | ENSG000000ELP1      | DYS FD Fk  | elongator protein-coding   |                           |
| chr1-8564  | 5.410045 | 0.296528 | 0.989771 | 0.299592 | 0.764488 | 0.981636 | chr1  | 85644701 | 85645691 | + | 0 | NA | Intergeni LIPA3 LIN | 63237   | NM_00117C | 54680    | Hs.5111   | NM_017953         | ENSG000000ZNHIT6    | BCD1 Clor  | zinc fing protein-coding   |                           |
| chr14-100  | 5.410045 | 0.296528 | 0.989771 | 0.299592 | 0.764488 | 0.981636 | chr14 | 1.01E+08 | 1.01E+08 | + | 0 | NA | Intergeni Intergeni | -1216   | NM_001134 | 388015   | Hs.298602 | NM_001134         | ENSG000000RTL1      | HUR1 MAR1  | retrotrans protein-coding  |                           |
| chr2-9408  | 5.410045 | 0.296528 | 0.989771 | 0.299592 | 0.764488 | 0.981636 | chr2  | 9408885  | 9409869  | + | 0 | NA | intron (Nintron (N  | 13214   | NM_00131E | 9270     | Hs.467662 | ENM_004763        | ENSG000000ITGB1BP1  | ICAP-1A I  | integrin protein-coding    |                           |
| chr2-2034  | 5.410045 | 0.296528 | 0.989771 | 0.299592 | 0.764488 | 0.981636 | chr2  | 2.03E+08 | 2.03E+08 | + | 0 | NA | intron (Nintron (N  | 83647   | NM_21358E | 65059    | Hs.471162 | NM_025252         | ENSG000000CRAPH1    | ALS2CR18   | Ras assoc protein-coding   |                           |
| chr5-1574  | 6.428645 | 0.278402 | 0.930587 | 0.299166 | 0.764812 | 0.981636 | chr5  | 1.57E+08 | 1.57E+08 | + | 0 | NA | intron (NMIRb SINE  | -32691  | NR_13620E | 1.03E+08 | Hs.57088  | NR_13620A         | LOC102724-          |            | uncharactncRNA             |                           |
| chr1-2176  | 6.707908 | -0.26717 | 0.893358 | -0.29906 | 0.764896 | 0.981636 | chr1  | 2.18E+08 | 2.18E+08 | + | 0 | NA | intron (NLIPA13 LI  | 82760   | NM_001297 | 55105    | Hs.362342 | ENM_001804        | ENSG000000GPATCH2   | CT110 GP   | A-parach protein-coding    |                           |
| chr13-956  | 6.707908 | -0.26717 | 0.893358 | -0.29906 | 0.764896 | 0.981636 | chr13 | 95599216 | 95600160 | + | 0 | NA | intron (Nintron (N  | 45018   | NM_19896E | 22873    | Hs.65658  | ENM_014934        | ENSG000000CDZIP1    | DZIP DZIF  | DAZ inter protein-coding   |                           |
| chr15-446  | 6.707908 | -0.26717 | 0.893358 | -0.29906 | 0.764896 | 0.981636 | chr15 | 44521206 | 44521646 | + | 0 | NA | intron (Nintron (N  | 15474   | NR_03417I | 645212   | Hs.594287 | NR_03417O         | E1F3J3-DT           | E1F3J3-AS1 | E1F3J3                     | dincRNA                   |
| chr18-137  | 6.707908 | -0.26717 | 0.893358 | -0.29906 | 0.764896 | 0.981636 | chr18 | 13734613 | 13735385 | + | 0 | NA | intron (Nintron (N  | 8326    | NM_00130E | 8731     | Hs.592347 | ENM_003799        | ENSG000000CRNMT     | CMT1 CMT1  | RNA guiv protein-coding    |                           |
| chr2-1134  | 6.707908 | -0.26717 | 0.893358 | -0.29906 | 0.764896 | 0.981636 | chr2  | 1.13E+08 | 1.13E+08 | + | 0 | NA | intron (NLIPA3 LIN  | -21779  | NM_01218A | 200350   | Hs.591554 | ENM_012184        | ENSG000000FOXDL1    | FOXD5 ba   | forkhead protein-coding    |                           |
| chr5-1674  | 6.707908 | -0.26717 | 0.893358 | -0.29906 | 0.764896 | 0.981636 | chr5  | 16748932 | 16749950 | + | 0 | NA | intron (NALuSz SIN  | -132383 | NM_001034 | 54463    | Hs.481704 | NM_01900C         | ENSG000000RETRG1    | FAM1348 J  | reticulo protein-coding    |                           |
| chr7-9962  | 6.707908 | -0.26717 | 0.893358 | -0.29906 | 0.764896 | 0.981636 | chr7  | 99626518 | 99627535 | + | 0 | NA | intron (NLIMC5a LI  | 10080   | NM_00135C | 221785   | Hs.446297 | NM_14511E         | ENSG000000ZSCAN25   | ZNF498     | zinc fing protein-coding   |                           |
| chr9-1284  | 6.707908 | -0.26717 | 0.893358 | -0.29906 | 0.764896 | 0.981636 | chr9  | 1.28E+08 | 1.28E+08 | + | 0 | NA | exon (NM exon (NM   | -5592   | NM_001003 | 2733     | Hs.52241E | ENM_001499        | ENSG000000GLE1      | CAAHG CA   | GLE1 RNA protein-coding    |                           |
| chr3-1015  | 11.34099 | -0.20849 | 0.697428 | -0.29895 | 0.76498  | 0.981636 | chr3  | 1.02E+08 | 1.02E+08 | + | 0 | NA | exon (NM exon (NM   | 5633    | NM_020357 | 57092    | Hs.732633 | NM_020357         | ENSG000000PCNP      | -          | PEST prot                  | protein-coding            |
| chr19-375  | 5.988912 | 0.287119 | 0.960504 | 0.298926 | 0.764997 | 0.981636 | chr19 | 37352708 | 37353253 | + | 0 | NA | intron (NALuSz SIN  | -18119  | NM_032453 | 84503    | Hs.59094  | ENM_032453        | ENSG000000ZNF527    | -          | zinc fing protein-coding   |                           |
| chr2-275   | 5.988912 | 0.287119 | 0.960504 | 0.298926 | 0.764997 | 0.981636 | chr2  | 27594410 | 27594868 | + | 0 | NA | intron (NSVA_A Ret  | 11597   | NM_032434 | 84503    | Hs.52917E | ENM_032434        | ENSG000000ZNF512    | -          | zinc fing protein-coding   |                           |
| chr1-199   | 7.094493 | -0.26396 | 0.883073 | -0.29891 | 0.765011 | 0.981636 | chr1  | 19904291 | 19905147 | + | 0 | NA | intron (Nintron (N  | 18898   | NM_01458E | 30814    | Hs.27237E | NM_01458E         | ENSG000000PLA2G2E   | GIE        | sPLA                       | phospholip protein-coding |
| chr6-172   | 5.751713 | -0.29975 | 1.003085 | -0.29882 | 0.765074 | 0.981636 | chr6  | 17283095 | 17283512 | + | 0 | NA | intron (NTrigger19e | 602     | NM_15302C | 221662   | Hs.519904 | NM_15302C         | ENSG000000CRBM24    | RNPC6 dJ   | RNA bindi protein-coding   |                           |
| chr1-539   | 7.128225 | -0.25893 | 0.867102 | -0.29862 | 0.765231 | 0.981636 | chr1  | 53967885 | 53971093 | + | 0 | NA | Intergeni AluJb SIN | 23139   | NM_00125E | 115353   | Hs.419004 | NM_005294         | ENSG000000LRRC42    | dJ167A19   | leucine i protein-coding   |                           |
| chr17-534  | 7.128225 | -0.25893 | 0.867102 | -0.29862 | 0.765231 | 0.981636 | chr17 | 5347302  | 5348485  | + | 0 | NA | intron (Nintron (N  | 65609   | NM_00129I | 9135     | Hs.584784 | NM_00470C         | ENSG000000RABEP1    | RAB5EP RA  | rabaptin, protein-coding   |                           |
| chr18-57   | 7.128225 | -0.25893 | 0.867102 | -0.29862 | 0.765231 | 0.981636 | chr18 | 57618483 | 57619941 | + | 0 | NA | intron (NALuJb SIN  | 2624    | NM_00453E | 4677     | Hs.465224 | NM_00453E         | ENSG000000CNARS     | ASNRs NAF  | asparagir protein-coding   |                           |
| chr4-122   | 7.128225 | -0.25893 | 0.867102 | -0.29862 | 0.765231 | 0.981636 | chr4  | 1.22E+08 | 1.22E+08 | + | 0 | NA | intron (NLIPB1 LIN  | 45120   | NM_015312 | 84162    | Hs.408142 | NM_015312         | ENSG000000K1AA1109  | ALFKUCs FK | IAA1109 protein-coding     |                           |
| chr7-6141  | 7.128225 | -0.25893 | 0.867102 | -0.29862 | 0.765231 | 0.981636 | chr7  | 6141139  | 6141547  | + | 0 | NA | intron (NALuSx4 SI  | 30794   | NM_001367 | 9265     | Hs.48747E | NM_004227         | ENSG000000CYTH3     | ARN03 GRF  | cytohesir protein-coding   |                           |
| chr8-1794  | 7.128225 | -0.25893 | 0.867102 | -0.29862 | 0.765231 | 0.981636 | chr8  | 17947654 | 17951363 | + | 0 | NA | intron (NALuSz SIN  | 26520   | NM_00135E | 5108     | Hs.49114E | NM_006197         | ENSG000000PCMI      | PTC4 RET   | pericytl protein-coding    |                           |
| chr9-9808  | 7.128225 | -0.25893 | 0.867102 | -0.29862 | 0.765231 | 0.981636 | chr9  | 98087490 | 98087831 | + | 0 | NA | exon (NM exon (NM   | 39028   | NM_01894E | 54187    | Hs.522621 | ENM_01894E        | ENSG000000NANS      | HEL-S-10C  | N-acetyl protein-coding    |                           |
| chr11-69   | 5.95563  | 0.282579 | 0.946387 | 0.298587 | 0.765255 | 0.981636 | chr11 | 69078787 | 69080031 | + | 0 | NA | intron (Nintron (N  | -3767   | NR_036122 | 1E+08    | NR_036122 | ENSG000000MIR3164 | -                   | microRNA   | ncRNA                      |                           |
| chr16-177  | 5.95563  | 0.282579 | 0.946387 | 0.298587 | 0.765255 | 0.981636 | chr16 | 17762029 | 1777622  | + | 0 | NA | TTS (NM_C TTS (NM_C | 3597    | NM_001257 | 197342   | Hs.7247   | NM_00101C         | ENSG000000EME2      | SLX2B gs   | lesential protein-coding   |                           |
| chr17-537  | 5.95563  | 0.282579 | 0.946387 | 0.298587 | 0.765255 | 0.981636 | chr17 | 5372147  | 5372462  | + | 0 | NA | intron (NALuSx3 SI  | -4737   | NM_00116C | 84268    | Hs.46208E | NM_03230E         | ENSG000000RPAIN     | HRIP RIP   | RPA inter protein-coding   |                           |
| chr17-438  | 5.95563  | 0.282579 | 0.946387 | 0.298587 | 0.765255 | 0.981636 | chr17 | 43829578 | 43830165 | + | 0 | NA | intron (Nintron (N  | 3323    | NR_14834E | 4356     | Hs.39656E | NM_001932         | ENSG000000MPP3      | DLG3       | membrane protein-coding    |                           |
| chr2-364   | 5.95563  | 0.282579 | 0.946387 | 0.298587 | 0.765255 | 0.981636 | chr2  | 36483423 | 36484189 | + | 0 | NA | intron (Nintron (N  | 114362  | NM_001042 | 9637     | Hs.25856E | NM_005102         | ENSG000000PEZ2      | HUM3CL     | fasciculE protein-coding   |                           |
| chr20-63   | 5.95563  | 0.282579 | 0.946387 | 0.298587 | 0.765255 | 0.981636 | chr20 | 63891284 | 63892752 | + | 0 | NA | TTS (NM_C TTS (NM_C | -3108   | NM_02521E | 80331    | Hs.16441E | NM_02521E         | ENSG000000DNAJC5    | CLN4 CLN4  | DnaJ heat protein-coding   |                           |
| chr22-497  | 5.95563  | 0.282579 | 0.946387 | 0.298587 | 0.765255 | 0.981636 | chr22 | 49783414 | 49785733 | + | 0 | NA | intron (NCpG        | 39758   | NR_14633A | 23774    | Hs.12795  | ENM_014577        | ENSG000000CBRD1     | BRL BRPF1  | bromodomE protein-coding   |                           |
| chr4-488   | 5.95563  | 0.282579 | 0.946387 | 0.298587 | 0.765255 | 0.981636 | chr4  | 48853744 | 48855510 | + | 0 | NA | intron (Nintron (N  | 5576    | NR_14680E | 1.01E+08 | Hs.66106E | NR_14680E         | ENSG000000OCIAD1-AS | -          | OCIAD1                     | arcncRNA                  |
| chr4-128   | 5.95563  | 0.282579 | 0.946387 | 0.298587 | 0.765255 | 0.981636 | chr4  | 1.29E+08 | 1.29E+08 | + | 0 | NA | intron (Nintron (N  | 127506  | NM_001287 | 79960    | Hs.12420  | NM_02490C         | ENSG000000JADE1     | PHF17      | jade fami protein-coding   |                           |
| chr4-182   | 5.95563  | 0.282579 | 0.946387 | 0.298587 | 0.765255 | 0.981636 | chr4  | 1.83E+08 | 1.83E+08 | + | 0 | NA | intron (NMIRc SINE  | 14181   | NM_00135I | 1635     | Hs.18385  | ENM_001921        | ENSG000000CDDTD     | -          | dCMP                       | dean protein-coding       |
| chr4-184   | 5.95563  | 0.282579 | 0.946387 | 0.298587 | 0.765255 | 0.981636 | chr4  | 1.84E+08 | 1.84E+08 | + | 0 | NA | intron (NALuSx8 SI  | -24070  | NR_125933 | 1.03E+08 | Hs.432281 | NR_125933         | ENSG000000LINC02362 | -          | long intencRNA             |                           |
| chr7-146   | 5.95563  | 0.282579 | 0.946387 | 0.298587 | 0.765255 | 0.981636 | chr7  | 1469881  | 1472008  | + | 0 | NA | exon (NM exon (NM   | 11474   | NM_18292A | 79778    | Hs.376617 | ENM_02472E        | ENSG000000MICALL2   | JRAB MIC   | MICAL2 linc protein-coding |                           |
| chr7-254   | 5.95563  | 0.282579 | 0.946387 | 0.298587 | 0.765255 | 0.981636 | chr7  | 2544679  | 2545532  | + | 0 | NA | intron (NALuSg SIN  | 10419   | NM_00135C | 221927   | Hs.52062E | ENM_15274E        | ENSG000000BRAT1     | BAAT1 C7c  | BRCA1 asE protein-coding   |                           |
| chr1-923   | 6.948807 | 0.261569 | 0.878952 | 0.297591 | 0.766015 | 0.981636 | chr1  | 92520397 | 92321041 | + | 0 | NA | intron (Nintron (N  | 21660   | NM_02481E | 79871    | Hs.444421 | NM_02481E         | ENSG000000RPAP2     | ClorF82 F  | RNA poly protein-coding    |                           |
| chr12-95   | 6.948807 | 0.261569 | 0.878952 | 0.297591 | 0.766015 | 0.981636 | chr12 | 95508800 | 95508873 | + | 0 | NA | intron (NMLT1_J-int | 34574   | NM_001317 | 10988    | Hs.44498E | NM_00683E         | ENSG000000MAP2      | MAP2 MNP   | methionyl protein-coding   |                           |
| chr15-64   | 6.948807 | 0.261569 | 0.878952 | 0.297591 | 0.766015 | 0.981636 | chr15 | 64694369 | 64695461 | + | 0 | NA | intron (Nintron (N  | 8366    | NM_00130I | 4947     | Hs.744924 | NM_002537         | ENSG000000OAZ2      | AZ2        | ornithine protein-coding   |                           |
| chr2-199   | 6.948807 | 0.261569 | 0.878952 | 0.297591 | 0.766015 | 0.981636 | chr2  | 1.99E+08 | 1.99E+08 | + | 0 | NA | intron (Nintron (N  | 149336  | NR_134967 | 23314    | Hs.516617 | NM_01526E         | ENSG000000SATB2     | GLSS       | SATB                       | home protein-coding       |
| chr3-158   | 6.948807 | 0.261569 | 0.878952 | 0.297591 | 0.766015 | 0.981636 | chr3  | 1.55E+08 | 1.55E+08 | + | 0 | NA |                     |         |           |          |           |                   |                     |            |                            |                           |





|                    |          |          |          |          |          |       |          |           |        |                     |                 |                     |         |            |                |                      |                     |                    |                |                    |                |                |
|--------------------|----------|----------|----------|----------|----------|-------|----------|-----------|--------|---------------------|-----------------|---------------------|---------|------------|----------------|----------------------|---------------------|--------------------|----------------|--------------------|----------------|----------------|
| chr19-555.6.964522 | 0.257269 | 0.874094 | 0.294327 | 0.768508 | 0.981636 | chr19 | 55595356 | 55597562  | +      | 0                   | NA              | intron (NL2a LINE   | 3058    | NR_032836  | 84922          | Hs.515617NM_032836   | ENSG000003FIZ1      | ZNF798             | FLT3           | intcprotein-coding |                |                |
| chr20-625.6.964522 | 0.257269 | 0.874094 | 0.294327 | 0.768508 | 0.981636 | chr20 | 62340833 | 62342365  | +      | 0                   | NA              | intron (NLIMS LINE  | -9042   | NR_039911  | 1.01E+08       | NR_039911            | ENSG000003MIR4758   | -                  | microRNA       | ncRNA              |                |                |
| chr22-298.6.964522 | 0.257269 | 0.874094 | 0.294327 | 0.768508 | 0.981636 | chr22 | 29833554 | 29834439  | +      | 0                   | NA              | intron (NFLAM_C SI  | 4278    | NR_001366  | 84164          | Hs.731754NM_032204   | ENSG000003ACC2      | ASC1p100           | activatir      | protein-coding     |                |                |
| chr4-136.6.964522  | 0.257269 | 0.874094 | 0.294327 | 0.768508 | 0.981636 | chr4  | 13606039 | 13606892  | +      | 0                   | NA              | intron (Nintron (N  | 21260   | NR_148894  | 259282         | Hs.744935NM_148894   | ENSG000003BOD1L1    | BOD1L              | IFAM           | biorentc           | protein-coding |                |
| chr5-3705.6.964522 | 0.257269 | 0.874094 | 0.294327 | 0.768508 | 0.981636 | chr5  | 37052938 | 37054135  | +      | 0                   | NA              | intron (NMER44A DN  | 176767  | NR_015384  | 25836          | Hs.481927NM_015384   | ENSG000003NPBL      | CDDL3 CDDL3NPBL    | col            | protein-coding     |                |                |
| chr9-1276.6.964522 | 0.257269 | 0.874094 | 0.294327 | 0.768508 | 0.981636 | chr9  | 1.28E+08 | 1.28E+08  | +      | 0                   | NA              | intron (NAluSx1 SI  | 29982   | NR_037477  | 1.01E+08       | NR_037477            | ENSG000003MIR3911   | mir-3911           | microRNA       | ncRNA              |                |                |
| chr1-193.6.964522  | 0.257269 | 0.874094 | 0.294327 | 0.768508 | 0.981636 | chr1  | 19302134 | 19303321  | +      | 0                   | NA              | TTS (NM_C TTS (NM_C | -6991   | NR_037847  | 1.01E+08       | NR_037847            | LOC100506           | -                  | uncharactncRNA |                    |                |                |
| chr10-104.6.964522 | 0.257269 | 0.874094 | 0.294327 | 0.768508 | 0.981636 | chr10 | 1.04E+08 | 1.04E+08  | +      | 0                   | NA              | intron (Nintron (N  | 23768   | NR_03076C  | 1E+08          | NR_03076C            | ENSG000003MIR936    | MIRN936            | tmicroRNA      | ncRNA              |                |                |
| chr11-435.6.964522 | 0.257269 | 0.874094 | 0.294327 | 0.768508 | 0.981636 | chr11 | 43397943 | 43398856  | +      | 0                   | NA              | intron (Nintron (N  | 39479   | NR_01825E  | 55761          | Hs.191186NM_01825E   | ENSG000003TTC17     | -                  | tetratric      | protein-coding     |                |                |
| chr11-434.6.964522 | 0.257269 | 0.874094 | 0.294327 | 0.768508 | 0.981636 | chr11 | 43474918 | 43477846  | +      | 0                   | NA              | intron (NLIMC5 LIN  | -83274  | NR_031577  | 1E+08          | NR_031577            | ENSG000003MIR670    | hsa-mir-670        | microRNA       | ncRNA              |                |                |
| chr13-282.6.964522 | 0.257269 | 0.874094 | 0.294327 | 0.768508 | 0.981636 | chr13 | 28281945 | 28283253  | +      | 0                   | NA              | intron (N(CACATG) R | -143425 | NR_029383  | 1E+08          | Hs.123191NR_029383   | PAN3-AS1            | -                  | PAN3           | anticrRNA          |                |                |
| chr15-985.6.964522 | 0.257269 | 0.874094 | 0.294327 | 0.768508 | 0.981636 | chr15 | 98823763 | 98825176  | +      | 0                   | NA              | intron (Nintron (N  | 40043   | NR_039864  | 1.01E+08       | NR_039864            | ENSG000003MIR4714   | -                  | microRNA       | ncRNA              |                |                |
| chr16-274.6.964522 | 0.257269 | 0.874094 | 0.294327 | 0.768508 | 0.981636 | chr16 | 27474385 | 27475696  | +      | 0                   | NA              | intron (Nintron (N  | -21647  | NR_03125E  | 283888         | Hs.66093E NR_03125E  | ENSG000003IL21R-AS1 | -                  | IL21R          | anticrRNA          |                |                |
| chr17-756.6.964522 | 0.257269 | 0.874094 | 0.294327 | 0.768508 | 0.981636 | chr17 | 75672748 | 75673496  | +      | 0                   | NA              | intron (Nintron (N  | 5784    | NR_013716C | 29115          | Hs.65508E NR_013716C | ENSG000003SAP30BP   | HNGP HTF           | SAP30          | bir                | protein-coding |                |
| chr18-768.6.964522 | 0.257269 | 0.874094 | 0.294327 | 0.768508 | 0.981636 | chr18 | 76879099 | 76881953  | +      | 0                   | NA              | intron (Nintron (N  | 56366   | NR_00734E  | 7776           | Hs.719137NM_00734E   | ENSG000003ZNF236    | ZNF236A            | Z              | zinc               | fin            | protein-coding |
| chr19-137.6.964522 | 0.257269 | 0.874094 | 0.294327 | 0.768508 | 0.981636 | chr19 | 13738021 | 13738549  | +      | 0                   | NA              | intron (Nintron (N  | 6533    | NR_00132C  | 81576          | Hs.24998             | NR_03081E           | ENSG000003CCDC130  | -              | coiled-c           | protein-coding |                |
| chr20-185.6.964522 | 0.257269 | 0.874094 | 0.294327 | 0.768508 | 0.981636 | chr20 | 18551863 | 18552856  | +      | 0                   | NA              | intron (Nintron (N  | -15061  | NR_00134E  | 388789         | Hs.34909E NR_00134E  | ENSG000003SMIM26    | LINC00495          | small          | int                | protein-coding |                |
| chr3-144.6.964522  | 0.257269 | 0.874094 | 0.294327 | 0.768508 | 0.981636 | chr3  | 14465785 | 14467091  | +      | 0                   | NA              | intron (NMIRc SINE  | 63832   | NR_001134  | 6533           | Hs.52948E NR_00304E  | ENSG000003SLC6A6    | TAUT               | solute         | c                  | protein-coding |                |
| chr3-142.6.964522  | 0.257269 | 0.874094 | 0.294327 | 0.768508 | 0.981636 | chr3  | 1.42E+08 | 1.42E+08  | +      | 0                   | NA              | intron (Nintron (N  | 88017   | NR_001282  | 54646          | Hs.43510E NR_019001  | ENSG000003XRN1      | 1-Sep 5'-3'        | exc            | protein-coding     |                |                |
| chr4-2337.6.964522 | 0.257269 | 0.874094 | 0.294327 | 0.768508 | 0.981636 | chr4  | 2337964  | 23395058  | +      | 0                   | NA              | intron (NAluSx1 SI  | 26303   | NR_00117E  | 57732          | Hs.29205E NR_02097E  | ENSG000003ZFVE28    | LST2 LYST          | zinc           | fin                | protein-coding |                |
| chr4-561.6.964522  | 0.257269 | 0.874094 | 0.294327 | 0.768508 | 0.981636 | chr4  | 5613777  | 5615521   | +      | 0                   | NA              | intron (Nintron (N  | 89493   | NR_126517  | 10141          | Hs.17797E NR_00575E  | ENSG000003LINC01587 | C4orf6             | f              | linc               | ncRNA          |                |
| chr5-1755.6.964522 | 0.257269 | 0.874094 | 0.294327 | 0.768508 | 0.981636 | chr5  | 1.76E+08 | 1.76E+08  | +      | 0                   | NA              | TTS (NM_C TTS (NM_C | 36054   | NR_022754  | 94081          | Hs.36944E NR_022754  | ENSG000003SFXN1     | SLC56A1            | l              | siderofl           | protein-coding |                |
| chr6-995.6.964522  | 0.257269 | 0.874094 | 0.294327 | 0.768508 | 0.981636 | chr6  | 99533437 | 99535375  | +      | 0                   | NA              | IntergeniLIMEg LIN  | 13412   | NR_00119E  | 1E+08          | Hs.63450E NR_00119E  | ENSG000003TSTD3     | -                  | thiosulf       | protein-coding     |                |                |
| chr6-1116.6.964522 | 0.257269 | 0.874094 | 0.294327 | 0.768508 | 0.981636 | chr6  | 11162081 | 11164729  | +      | 0                   | NA              | intron (NMIRb SINE  | 68431   | NR_15304E  | 2534           | Hs.39056E NR_002037  | ENSG000003FYN       | SLK SYN            | f              | YFN                | prot           | protein-coding |
| chrX-5341.6.964522 | 0.257269 | 0.874094 | 0.294327 | 0.768508 | 0.981636 | chrX  | 53412301 | 53413380  | +      | 0                   | NA              | intron (Nintron (N  | -7075   | NR_10691E  | 1.02E+08       | NR_10691E            | ENSG000003MIR6857   | hsa-mir-6857       | microRNA       | ncRNA              |                |                |
| chr13-321.7.59754  | -0.25118 | 0.853981 | -0.29413 | 0.768658 | 0.981636 | chr13 | 32171214 | 32171895  | +      | 0                   | NA              | intron (NAluSx6 SI  | 139780  | NR_023037  | 10129          | Hs.50766E NR_023037  | ENSG000003FRY       | 13CDNA73           | FRY            | micr               | protein-coding |                |
| chr1-3924.6.418937 | 0.266994 | 0.908283 | 0.293955 | 0.768792 | 0.981636 | chr1  | 39249828 | 39251196  | +      | 0                   | NA              | intron (Nintron (N  | -15857  | NR_01503E  | 643314         | Hs.65876E NR_01503E  | ENSG000003KIAA0754  | -                  | KIAA0754       | protein-coding     |                |                |
| chr1-1656.6.418937 | 0.266994 | 0.908283 | 0.293955 | 0.768792 | 0.981636 | chr1  | 1.66E+08 | 1.66E+08  | +      | 0                   | NA              | intron (NAluJr SIN  | -1295   | NR_037431  | 1.01E+08       | NR_037431            | ENSG000003MIR3658   | -                  | microRNA       | ncRNA              |                |                |
| chr1-2276.6.418937 | 0.266994 | 0.908283 | 0.293955 | 0.768792 | 0.981636 | chr1  | 2.27E+08 | 2.27E+08  | +      | 0                   | NA              | intron (Nintron (N  | 158838  | NR_00136E  | 8476           | Hs.35433             | NR_003607           | ENSG000003CDC42BPA | MRCK MRCKC     | CD42               | bir            | protein-coding |
| chr10-421.6.418937 | 0.266994 | 0.908283 | 0.293955 | 0.768792 | 0.981636 | chr10 | 42816453 | 42818310  | +      | 0                   | NA              | exon (NM exon (NM   | 34586   | NR_01475E  | 9790           | Hs.10848             | NR_01475E           | ENSG000003BMS1     | ACC BMS1       | BMS1               | rib            | protein-coding |
| chr11-134.6.418937 | 0.266994 | 0.908283 | 0.293955 | 0.768792 | 0.981636 | chr11 | 1.34E+08 | 1.34E+08  | +      | 0                   | NA              | 3' UTR (N3' UTR (N  | 2170    | NR_14579C  | 1.1E+08        | NR_145790            | SNORD153            | -                  | small          | nuc                | snoRNA         |                |
| chr12-881.6.418937 | 0.266994 | 0.908283 | 0.293955 | 0.768792 | 0.981636 | chr12 | 88179851 | 88181145  | +      | 0                   | NA              | intron (NHERVK22-i  | 38191   | NR_00136E  | 160418         | Hs.33126E NR_18178E  | ENSG000003TMTC3     | LIS8 SMI1          | trans          | protein-coding     |                |                |
| chr12-108.6.418937 | 0.266994 | 0.908283 | 0.293955 | 0.768792 | 0.981636 | chr12 | 36722    | NR_001161 | 54434  | Hs.19976E           | NR_001161       | ENSG000003SSH1      | SSH1L   | slingshot  | protein-coding |                      |                     |                    |                |                    |                |                |
| chr15-415.6.418937 | 0.266994 | 0.908283 | 0.293955 | 0.768792 | 0.981636 | chr15 | 41908729 | 41910530  | +      | 0                   | NA              | intron (Nintron (N  | -11788  | NR_12033E  | 1.02E+08       | Hs.68019E NR_12033E  | EHD4-AS1            | -                  | EHD4           | anticrRNA          |                |                |
| chr15-525.6.418937 | 0.266994 | 0.908283 | 0.293955 | 0.768792 | 0.981636 | chr15 | 52553938 | 52554782  | +      | 0                   | NA              | intron (Nintron (N  | 14472   | NR_00133C  | 10776          | Hs.51290E NR_00662E  | ENSG000003ARPP19    | ARPP-16            | ac             | AMP                | reg            | protein-coding |
| chr16-252.6.418937 | 0.266994 | 0.908283 | 0.293955 | 0.768792 | 0.981636 | chr16 | 1658     | NR_00104E | 752014 | Hs.43349E NR_00104E | ENSG000003CEMP1 | CP-23 CP2           | ce      | mentum     | protein-coding |                      |                     |                    |                |                    |                |                |
| chr16-185.6.418937 | 0.266994 | 0.908283 | 0.293955 | 0.768792 | 0.981636 | chr16 | 18361875 | 18364214  | +      | 0                   | NA              | intron (NLIMEg LIN  | -10599  | NR_14633E  | 1.1E+08        | Hs.63615E NR_14633E  | PKD1P4-NF           | -                  | PKD1P4-NF      | pseudo             |                |                |
| chr17-601.6.418937 | 0.266994 | 0.908283 | 0.293955 | 0.768792 | 0.981636 | chr17 | 60180110 | 60182081  | +      | 0                   | NA              | intron (NAluJb SIN  | 31122   | NR_000717  | 762            | Hs.89485             | NR_000717           | ENSG000003CA4      | CAIV Car4      | car                | protein-coding |                |
| chr19-402.6.418937 | 0.266994 | 0.908283 | 0.293955 | 0.768792 | 0.981636 | chr19 | 40281639 | 40282226  | +      | 0                   | NA              | TTS (NR_C TTS (NR_C | 7099    | NR_030371  | 693226         | NR_030371            | ENSG000003MIR641    | MIRN641            | tmicroRNA      | ncRNA              |                |                |
| chr2-2017.6.418937 | 0.266994 | 0.908283 | 0.293955 | 0.768792 | 0.981636 | chr2  | 2.02E+08 | 2.02E+08  | +      | 0                   | NA              | intron (NMIRb SINE  | 27946   | NR_02091E  | 57679          | Hs.47109E NR_02091E  | ENSG000003CALS2     | ALS2CR6            | al             | sin                | Rhc            | protein-coding |
| chr20-621.6.418937 | 0.266994 | 0.908283 | 0.293955 | 0.768792 | 0.981636 | chr20 | 62133341 | 62133811  | +      | 0                   | NA              | intron (Nintron (N  | 9818    | NR_00279E  | 5688           | Hs.23395E NR_00279E  | ENSG000003PSMA7     | C6 HEL-5           | pro            | teaso              | protein-coding |                |
| chr3-136.6.418937  | 0.266994 | 0.908283 | 0.293955 | 0.768792 | 0.981636 | chr3  | 1.36E+08 | 1.36E+08  | +      | 0                   | NA              | intron (NAluSx2 SI  | 69414   | NR_181897  | 5523           | Hs.51815E NR_00271E  | ENSG000003PPP2R3A   | PPP2R3             | PF             | pro                | tein           | protein-coding |
| chr4-266.6.418937  | 0.266994 | 0.908283 | 0.293955 | 0.768792 | 0.981636 | chr4  | 26632748 | 26634140  | +      | 0                   | NA              | intron (NTiger2 I   | 49360   | NR_018317  | 55296          | Hs.47940E NR_018317  | ENSG000003TBC1D19   | -                  | TBC1           | dom                | protein-coding |                |
| chr5-159.6.418937  | 0.266994 | 0.908283 | 0.293955 | 0.768792 | 0.981636 | chr5  | 1.59E+08 | 1.59E+08  | +      | 0                   | NA              | exon (NM exon (NM   | 15058   | NR_14504E  | 134510         | Hs.59173E NR_14504E  | ENSG000003UBLCP1    | CPUB1              | ubiquitin      | protein-coding     |                |                |
| chr5-1754.6.418937 | 0.266994 | 0.908283 | 0.293955 | 0.768792 | 0.981636 | chr5  | 1.77E+08 | 1.77E+08  | +      | 0                   | NA              | intron (Nintron (N  | -47590  | NR_00211E  | 3101           | Hs.41169E NR_00211E  | ENSG000003CHK3      | HKIII HXK          | h              | u                  | kin            | protein-coding |
| chr5-1754.11.83559 | -0.20271 | 0.689647 | -0.29393 | 0.768813 |          |       |          |           |        |                     |                 |                     |         |            |                |                      |                     |                    |                |                    |                |                |



|                    |          |          |          |          |          |       |          |          |   |      |                       |                     |                              |                    |                                                                         |                               |
|--------------------|----------|----------|----------|----------|----------|-------|----------|----------|---|------|-----------------------|---------------------|------------------------------|--------------------|-------------------------------------------------------------------------|-------------------------------|
| chr5-1772.7.153649 | -0.25232 | 0.8624   | -0.29258 | 0.769843 | 0.981636 | chr5  | 1.77E+08 | 1.77E+08 | + | 0 NA | intron (N LIMB1 LIN   | 80830 NM_001365     | 64324 Hs. 106861NM_022455    | ENSG00000CNSD1     | ARA267 KV nuclear rprotein-coding                                       |                               |
| chr6-2666.7.153649 | -0.25232 | 0.8624   | -0.29258 | 0.769843 | 0.981636 | chr6  | 26650007 | 26657576 | + | 0 NA | intron (N LIMC4 LIN   | 5955 NM_024635      | 79692 Hs. 126289NM_024635    | ENSG00000ZNF322    | HCG12 ZNF zinc finger protein-coding                                    |                               |
| chr7-4725.7.153649 | -0.25232 | 0.8624   | -0.29258 | 0.769843 | 0.981636 | chr7  | 47292265 | 47297711 | + | 0 NA | intron (N intron (N   | 169815 NR_145813    | 1.E+08 NR_145813             | SNORD151           | small nucleolar RNA                                                     |                               |
| chr7-5517.7.153649 | -0.25232 | 0.8624   | -0.29258 | 0.769843 | 0.981636 | chr7  | 55182575 | 55184265 | + | 0 NA | intron (N MLT1C LITF  | 5529 NR_047551      | 0.01E+08 Hs. 720489NR_047551 | ENSG00000EGFR-AS1  | EGFR anticancer                                                         |                               |
| chr7-1301.7.153649 | -0.25232 | 0.8624   | -0.29258 | 0.769843 | 0.981636 | chr7  | 1.3E+08  | 1.3E+08  | + | 0 NA | intron (N LIMB1 LIN   | 7432 NM_032842      | 84928 Hs. 267245NM_032842    | ENSG00000TMEM209   | NET31 transmembrane protein-coding                                      |                               |
| chr8-9624.7.153649 | -0.25232 | 0.8624   | -0.29258 | 0.769843 | 0.981636 | chr8  | 96241681 | 96245487 | + | 0 NA | intron (N intron (N   | -7950 NM_006294     | 7381 Hs. 131255NM_006294     | ENSG00000UCRBR     | MC3DN3 QCubiquinol protein-coding                                       |                               |
| chr9-2691.7.153649 | -0.25232 | 0.8624   | -0.29258 | 0.769843 | 0.981636 | chr9  | 26916566 | 26918738 | + | 0 NA | intron (N L2a LINE    | -24824 NM_001167    | 79886 Hs. 178357NM_024825    | ENSG00000CAAP1     | C9orf82 caspase 9 protein-coding                                        |                               |
| chr9-111.7.153649  | -0.25232 | 0.8624   | -0.29258 | 0.769843 | 0.981636 | chr9  | 1.1E+08  | 1.1E+08  | + | 0 NA | intron (N intron (N   | 32964 NM_001351     | 1902 Hs. 126667NM_001401     | ENSG00000LPAR1     | EDG2 GPR2 lysophospholipid protein-coding                               |                               |
| chr9-136.7.153649  | -0.25232 | 0.8624   | -0.29258 | 0.769843 | 0.981636 | chr9  | 1.36E+08 | 1.36E+08 | + | 0 NA | intron (N LIMEc LIN   | 55374 NM_144655     | 138151 Hs. 112895NM_144655   | ENSG00000NACC2     | BEND9 BTE NACC famiprotein-coding                                       |                               |
| chr1-112.6.426795  | 0.264715 | 0.905517 | 0.292336 | 0.770029 | 0.981636 | chr1  | 11235245 | 11236867 | + | 0 NA | intron (N L2a LINE    | 26495 NM_004958     | 2475 Hs. 338207NM_004958     | ENSG00000MTOR      | FRAP FRAF mechanistic protein-coding                                    |                               |
| chr1-2545.6.426795 | 0.264715 | 0.905517 | 0.292336 | 0.770029 | 0.981636 | chr1  | 25496603 | 25498384 | + | 0 NA | intron (N intron (N   | -46092 NM_015627    | 26119 Hs. 590911NM_015627    | ENSG00000LDLRAP1   | ARH ARH1 low density lipoprotein receptor class B type 1 protein-coding |                               |
| chr1-514.6.426795  | 0.264715 | 0.905517 | 0.292336 | 0.770029 | 0.981636 | chr1  | 51400982 | 51405871 | + | 0 NA | exon (NM exon (NM     | 18669 NM_001155     | 2060 Hs. 83722 NM_001981     | ENSG00000ECP515    | AF-1P AF1 epidermal protein-coding                                      |                               |
| chr10-12.6.426795  | 0.264715 | 0.905517 | 0.292336 | 0.770029 | 0.981636 | chr10 | 72560086 | 72560671 | + | 0 NA | intron (N intron (N   | -36392 NM_001195    | 10367 Hs. 524367NM_006077    | ENSG00000M1CU1     | CALC CBFAf mitochon protein-coding                                      |                               |
| chr10-72.6.426795  | 0.264715 | 0.905517 | 0.292336 | 0.770029 | 0.981636 | chr10 | 1.27E+08 | 1.27E+08 | + | 0 NA | intron (N intron (N   | 86067 NM_001035     | 642938 Hs. 613882NM_001035   | ENSG00000INSYN2A   | C10orf14 inhibitor protein-coding                                       |                               |
| chr10-127.6.426795 | 0.264715 | 0.905517 | 0.292336 | 0.770029 | 0.981636 | chr10 | 1.27E+08 | 1.27E+08 | + | 0 NA | intron (N MER1B DNA   | -52416 NM_001035    | 642938 Hs. 613882NM_001035   | ENSG00000INSYN2A   | C10orf14 inhibitor protein-coding                                       |                               |
| chr11-94.6.426795  | 0.264715 | 0.905517 | 0.292336 | 0.770029 | 0.981636 | chr11 | 9499922  | 9502938  | + | 0 NA | intron (N intron (N   | 40418 NM_003442     | 7702 Hs. 523471NM_003442     | ENSG00000ZNF143    | SBF STAF zinc finger protein-coding                                     |                               |
| chr12-77.6.426795  | 0.264715 | 0.905517 | 0.292336 | 0.770029 | 0.981636 | chr12 | 77029853 | 77031246 | + | 0 NA | intron (N intron (N   | 35020 NM_203394     | 144455 Hs. 416377NM_203394   | ENSG00000E2F7      | E2F trans protein-coding                                                |                               |
| chr12-105.6.426795 | 0.264715 | 0.905517 | 0.292336 | 0.770029 | 0.981636 | chr12 | 1.1E+08  | 1.1E+08  | + | 0 NA | 3' UTR (N 3' UTR (N   | 16579 NM_032300     | 84260 Hs. 410924NM_032300    | ENSG00000TCHP      | TpMs trichoplein protein-coding                                         |                               |
| chr12-112.6.426795 | 0.264715 | 0.905517 | 0.292336 | 0.770029 | 0.981636 | chr12 | 1.12E+08 | 1.12E+08 | + | 0 NA | intron (N intron (N   | -101386 NR_106921   | 1.02E+08 NR_106921           | ENSG00000MIR6861   | hsa-mir-61 microRNA ncRNA                                               |                               |
| chr13-41.6.426795  | 0.264715 | 0.905517 | 0.292336 | 0.770029 | 0.981636 | chr13 | 41748148 | 41750232 | + | 0 NA | intron (N LIPA4 LIN   | -180795 NR_049803   | 0.01E+08 NR_049803           | ENSG00000MIR5006   | miRNA ncRNA                                                             |                               |
| chr13-117.6.426795 | 0.264715 | 0.905517 | 0.292336 | 0.770029 | 0.981636 | chr13 | 1.1E+08  | 1.1E+08  | + | 0 NA | intron (N intron (N   | 13264 NM_01821C     | 55739 Hs. 408324NM_01821C    | ENSG00000NAXD      | CARKD LP2(N)HX protein-coding                                           |                               |
| chr14-73.6.426795  | 0.264715 | 0.905517 | 0.292336 | 0.770029 | 0.981636 | chr14 | 73074709 | 73075570 | + | 0 NA | intron (N FAM SINE    | 16605 NM_021235     | 58517 Hs. 531106NM_021235    | ENSG00000RBM25     | NET52 RE1 RNA binding protein-coding                                    |                               |
| chr15-44.6.426795  | 0.264715 | 0.905517 | 0.292336 | 0.770029 | 0.981636 | chr15 | 44347055 | 44348809 | + | 0 NA | intron (N LIMA3 LIN   | 59213 NR_157845     | 113201 Hs. 512867NM_138425   | ENSG00000CASC4     | H63 cancer suppressor protein-coding                                    |                               |
| chr16-351.6.426795 | 0.264715 | 0.905517 | 0.292336 | 0.770029 | 0.981636 | chr16 | 35189991 | 3520820  | + | 0 NA | exon (NM exon (NM     | 10011 NM_024793     | 23059 Hs. 155999NM_015041    | ENSG00000CLUAP1    | CFAP22 CF2 clusterin protein-coding                                     |                               |
| chr16-356.6.426795 | 0.264715 | 0.905517 | 0.292336 | 0.770029 | 0.981636 | chr16 | 3583205  | 3584736  | + | 0 NA | intron (N Alu Jo SIN  | -6567 NR_075083     | 197358 Hs. 592091NM_178844   | ENSG00000NLR3C     | CLR16.2 NLR family protein-coding                                       |                               |
| chr16-25.6.426795  | 0.264715 | 0.905517 | 0.292336 | 0.770029 | 0.981636 | chr16 | 2525249  | 25253759 | + | 0 NA | intron (N MER102a SIN | 4492 NM_001012      | 342357 Hs. 513451NM_001012   | ENSG00000ZKSCAN2   | ZNF694 ZS zinc finger protein-coding                                    |                               |
| chr17-264.6.426795 | 0.264715 | 0.905517 | 0.292336 | 0.770029 | 0.981636 | chr17 | 26242417 | 2643972  | + | 0 NA | intron (N Alu Jo SIN  | 49540 NM_00043C     | 5048 Hs. 77318 NM_00043C     | ENSG00000PAFAH1B1  | LISI LIS2 platelet protein-coding                                       |                               |
| chr17-662.6.426795 | 0.264715 | 0.905517 | 0.292336 | 0.770029 | 0.981636 | chr17 | 6620217  | 6623159  | + | 0 NA | intron (N intron (N   | 19023 NM_001351     | 9851 Hs. 28070 NM_014804     | ENSG00000K1AA0753  | MNR OFIP K1AA0753 protein-coding                                        |                               |
| chr19-11.6.426795  | 0.264715 | 0.905517 | 0.292336 | 0.770029 | 0.981636 | chr19 | 11000534 | 11001136 | + | 0 NA | intron (N Alu Sx4 SIN | 16683 NM_001125     | 6597 Hs. 327527NM_003072     | ENSG00000SMARCA4   | BAF190 BFI SMF1 rprotein-coding                                         |                               |
| chr19-161.6.426795 | 0.264715 | 0.905517 | 0.292336 | 0.770029 | 0.981636 | chr19 | 16128244 | 16134019 | + | 0 NA | intron (N Alu Jo SIN  | -2897 NM_032855     | 84941 Hs. 631617NM_032855    | ENSG00000HSH2D     | ALX HSH2 hemopoietic protein-coding                                     |                               |
| chr2-387.6.426795  | 0.264715 | 0.905517 | 0.292336 | 0.770029 | 0.981636 | chr2  | 38732054 | 38734568 | + | 0 NA | intron (N CharlielC   | 18050 NM_001031     | 6432 Hs. 309099NM_006272     | ENSG00000CSRSF7    | 9G8 AAG3 serine ar protein-coding                                       |                               |
| chr2-2004.6.426795 | 0.264715 | 0.905517 | 0.292336 | 0.770029 | 0.981636 | chr2  | 2E+08    | 2E+08    | + | 0 NA | intron (N intron (N   | 87379 NM_001321     | 130535 Hs. 605777NM_152387   | ENSG00000KCTD18    | 6530404F1 potassium protein-coding                                      |                               |
| chr2-235.6.426795  | 0.264715 | 0.905517 | 0.292336 | 0.770029 | 0.981636 | chr2  | 2.35E+08 | 2.35E+08 | + | 0 NA | intron (N intron (N   | -11889 NM_001371306 | 5116 Hs. 474065NM_006031     | ENSG00000PCNT      | KEN MOPD2 pericentriolar protein-coding                                 |                               |
| chr2-21.6.426795   | 0.264715 | 0.905517 | 0.292336 | 0.770029 | 0.981636 | chr2  | 21611080 | 21612980 | + | 0 NA | intron (N intron (N   | 17992 NR_163925     | 3985 Hs. 474599NM_005565     | ENSG00000LIMK2     | LIM domain protein-coding                                               |                               |
| chr22-311.6.426795 | 0.264715 | 0.905517 | 0.292336 | 0.770029 | 0.981636 | chr22 | 31186489 | 31187731 | + | 0 NA | non-coding-non-coding | -25188 NM_005565    | 55007 Hs. 265015NM_017911    | ENSG00000FAM118A   | C22orf8 family wiprotein-coding                                         |                               |
| chr22-45.6.426795  | 0.264715 | 0.905517 | 0.292336 | 0.770029 | 0.981636 | chr22 | 45338756 | 45340964 | + | 0 NA | intron (N intron (N   | 16271631            | 16272307                     | 0.01E+08           | ENSG00000OXNAD1                                                         | oxidoreductase protein-coding |
| chr3-1627.6.426795 | 0.264715 | 0.905517 | 0.292336 | 0.770029 | 0.981636 | chr3  | 43591159 | 43594059 | + | 0 NA | intron (N LIP45 LIN   | 29317 NM_001346     | 951206 Hs. 656657NM_018075   | ENSG00000ANO10     | SCAR10 TANoctamer protein-coding                                        |                               |
| chr3-172.6.426795  | 0.264715 | 0.905517 | 0.292336 | 0.770029 | 0.981636 | chr3  | 1.73E+08 | 1.73E+08 | + | 0 NA | intron (N intron (N   | -38709 NR_146714    | 1.05E+08 Hs. 186265NR_146714 | ENSG00000LINC02065 | long intergenic ncRNA                                                   |                               |
| chr5-113.6.426795  | 0.264715 | 0.905517 | 0.292336 | 0.770029 | 0.981636 | chr5  | 1.14E+08 | 1.14E+08 | + | 0 NA | intron (N LIP11 LIN   | 58840 NM_001346     | 64848 Hs. 231942NM_022825    | ENSG00000YTHDC2    | CAHL HYTH YTH domain protein-coding                                     |                               |
| chr6-3211.6.426795 | 0.264715 | 0.905517 | 0.292336 | 0.770029 | 0.981636 | chr6  | 32117482 | 32119482 | + | 0 NA | intron (N Alu Sx3 SIN | -9144 NM_001365     | 7148 Hs. 485104NM_019105     | ENSG00000TNXB      | EDS3 EDS3 tenascin protein-coding                                       |                               |
| chr7-967.6.426795  | 0.264715 | 0.905517 | 0.292336 | 0.770029 | 0.981636 | chr7  | 967829   | 970292   | + | 0 NA | 3' UTR (N 3' UTR (N   | 6489 NM_001031      | 90639 Hs. 121595NM_001031    | ENSG00000COX19     | cytochrome protein-coding                                               |                               |
| chr7-129.6.426795  | 0.264715 | 0.905517 | 0.292336 | 0.770029 | 0.981636 | chr7  | 1.3E+08  | 1.3E+08  | + | 0 NA | intron (N L2a LINE    | 82018 NM_003344     | 7328 Hs. 643545NM_003344     | ENSG00000UBE2H     | E2-20K G1ubiquitin protein-coding                                       |                               |
| chr8-2874.6.426795 | 0.264715 | 0.905517 | 0.292336 | 0.770029 | 0.981636 | chr8  | 28741200 | 28743320 | + | 0 NA | intron (N MER63D DN   | 40759 NR_073465     | 2137 Hs. 491354NM_00144C     | ENSG00000EXTL3     | BOTV EXTI extensin protein-coding                                       |                               |
| chr8-701.6.426795  | 0.264715 | 0.905517 | 0.292336 | 0.770029 | 0.981636 | chr8  | 70137675 | 70138362 | + | 0 NA | intron (N intron (N   | -66766 NM_024504    | 63978 Hs. 736039NM_024504    | ENSG00000PRDM14    | PFM11 PR/SET domain protein-coding                                      |                               |
| chr8-9958.6.426795 | 0.264715 | 0.905517 | 0.292336 | 0.770029 | 0.981636 | chr8  | 99584099 | 99585597 | + | 0 NA | intron (N L2a LINE    | -47987 NR_030595    | 1E+08 NR_030595              | ENSG00000MIR875    | MIRN875 miRNA ncRNA                                                     |                               |
| chr8-144.6.426795  | 0.264715 | 0.905517 | 0.292336 | 0.770029 | 0.981636 | chr8  | 1.45E+08 | 1.45E+08 | + | 0 NA | intron (N Kangald I   | 2973 NM_001345      | 7553 Hs. 493215NM_003415     | ENSG00000ZNF7      | HF.16 K0X zinc finger protein-coding                                    |                               |
| chr9-124.6.426795  | 0.264715 | 0.905517 | 0.292336 | 0.770029 | 0.981636 | chr9  | 1.25E+08 | 1.25E+08 | + | 0 NA | intron (N LIMEg LIN   | 30490 NM_030978     | 81873 Hs. 132429NM_030978    | ENSG00000ARPC5L    | ARL16-2 actin related protein-coding                                    |                               |
| chr9-124.6.426795  | 0.264715 | 0.905517 | 0.292336 | 0.770029 | 0.981636 | chr9  | 1.25E+08 | 1.25E+08 | + | 0 NA | intron (N Alu Sg SIN  | 3731 NM_002077      | 2800 Hs. 59504 NM_002077     | ENSG00000GOLGA1    | golgin-97 golgin A protein-coding                                       |                               |
| chr9-131.6.426795  | 0.264715 | 0.905517 | 0.292336 | 0.770029 | 0.981636 | chr9  | 1.32E+08 | 1.32E+08 | + | 0 NA | TTS (NM TTS (NM C     | 7497 NM_031432      | 83549 Hs. 9597 NM_031432     | ENSG00000UCK1      | URK1 uridine C-protein-coding                                           |                               |
| chr9-136.6.426795  | 0.264715 | 0.905517 | 0.292336 | 0.770029 | 0.981636 | chr9  | 1.36E+08 | 1.36E+08 | + | 0 NA | intron (N intron (N   | -9082 NM_178138     | 8022 Hs. 148427NM_014564     | ENSG00000LHX3      | CPHD3 LTM LIM homeobox protein-coding                                   |                               |
| chrX-715.6.426795  | 0.264715 | 0.905517 | 0.292336 | 0.770029 | 0.981636 | chrX  | 71561    |          |   |      |                       |                     |                              |                    |                                                                         |                               |

|                    |          |          |          |          |          |       |          |          |   |   |    |                      |                   |                              |                     |                    |                             |
|--------------------|----------|----------|----------|----------|----------|-------|----------|----------|---|---|----|----------------------|-------------------|------------------------------|---------------------|--------------------|-----------------------------|
| chr16-234 6.931241 | 0.253307 | 0.873619 | 0.289952 | 0.771853 | 0.981636 | chr16 | 23404515 | 23405653 | + | 0 | NA | intron (Nintron (N   | 48105 NM_153603   | 91949 Hs. 185807NM_153603    | ENSG000003COG7      | CDG2E              | componentprotein-coding     |
| chr16-682 6.931241 | 0.253307 | 0.873619 | 0.289952 | 0.771853 | 0.981636 | chr16 | 68290453 | 68296275 | + | 0 | NA | intron (NAluSx SIN   | 17582 NM_032178   | 84138 Hs. 729522NM_032178    | ENSG000003SLCTA60S  | -                  | solute cprotein-coding      |
| chr16-745 6.931241 | 0.253307 | 0.873619 | 0.289952 | 0.771853 | 0.981636 | chr16 | 74920407 | 74922109 | + | 0 | NA | intron (NLIPIREC2 I  | 63865 NM_030581   | 79726 Hs. 280951NM_030581    | ENSG000003WDR59     | CDW12 FPFWD        | repeatprotein-coding        |
| chr16-84 6.931241  | 0.253307 | 0.873619 | 0.289952 | 0.771853 | 0.981636 | chr16 | 84306257 | 84306703 | + | 0 | NA | intron (Nintron (N   | 11602 NM_021197   | 58189 Hs. 36688 NM_021197    | ENSG000003WFDC1     | PS20               | WAP four-protein-coding     |
| chr17-756 6.931241 | 0.253307 | 0.873619 | 0.289952 | 0.771853 | 0.981636 | chr17 | 75650038 | 75651614 | + | 0 | NA | 3' UTR (N3' UTR (N   | 4575 NM_001162    | 1E+08 Hs. 662541NM_001162    | ENSG000003SMIM6     | C17orf11C          | small intronprotein-coding  |
| chr17-822 6.931241 | 0.253307 | 0.873619 | 0.289952 | 0.771853 | 0.981636 | chr17 | 82243775 | 82244283 | + | 0 | NA | non-codingnon-coding | 7361 NR_106845    | 1.02E+08 NR_106845           | ENSG000003MIR6787   | hsa-mir-ε          | microRNA ncRNA              |
| chr19-956 6.931241 | 0.253307 | 0.873619 | 0.289952 | 0.771853 | 0.981636 | chr19 | 959504   | 961453   | + | 0 | NA | intron (Nintron (N   | -23850 NM_024100  | 57418 Hs. 325321NM_024100    | ENSG000003WDR18     | Ipi3 R321D         | repeatprotein-coding        |
| chr19-564 6.931241 | 0.253307 | 0.873619 | 0.289952 | 0.771853 | 0.981636 | chr19 | 5642297  | 5642879  | + | 0 | NA | intron (Nintron (N   | 19505 NM_002967   | 6294 Hs. 728802NM_002967     | ENSG000003SAFB      | HAP HET S          | scaffold protein-coding     |
| chr19-105 6.931241 | 0.253307 | 0.873619 | 0.289952 | 0.771853 | 0.981636 | chr19 | 10920799 | 10921763 | + | 0 | NA | TTS (NM_C TTS (NM_C  | 7358 NM_024025    | 78992 Hs. 164025NM_024025    | ENSG000003YIPF2     | FinGER2            | Yipl dom protein-coding     |
| chr2-8824 6.931241 | 0.253307 | 0.873619 | 0.289952 | 0.771853 | 0.981636 | chr2  | 8824350  | 8826514  | + | 0 | NA | intron (NLM2 LIN     | 12181 NM_001134   | 57498 Hs. 9873 NM_020738     | ENSG000003KIDINS22C | ARMS SINC          | kinase D protein-coding     |
| chr2-6355 6.931241 | 0.253307 | 0.873619 | 0.289952 | 0.771853 | 0.981636 | chr2  | 63593648 | 63596711 | + | 0 | NA | intron (Nintron (N   | 6028 NM_001195    | 4190 Hs. 526521NM_005917     | ENSG000003MDHI      | HEL-S-32           | malate deprotein-coding     |
| chr2-9592 6.931241 | 0.253307 | 0.873619 | 0.289952 | 0.771853 | 0.981636 | chr2  | 95923240 | 95924291 | + | 0 | NA | intron (Nintron (N   | 68059 NM_001310   | 400986 Hs. 646315NM_001010   | ENSG000003ANKRD36C  | -                  | ankyrin rprotein-coding     |
| chr2-1012 6.931241 | 0.253307 | 0.873619 | 0.289952 | 0.771853 | 0.981636 | chr2  | 1.01E+08 | 1.01E+08 | + | 0 | NA | 3' UTR (N3' UTR (N   | 3038 NR_003077    | 692205 Hs. 656503NR_003077   | ENSG000003SNORD89   | HBII-289           | small nucleolar             |
| chr2-162 6.931241  | 0.253307 | 0.873619 | 0.289952 | 0.771853 | 0.981636 | chr2  | 1.62E+08 | 1.62E+08 | + | 0 | NA | intron (Nintron (N   | 65485 NR_001935   | 1803 Hs. 368912NM_001935     | ENSG000003DPPP4     | ADABP ADC          | dipeptid protein-coding     |
| chr2-203 6.931241  | 0.253307 | 0.873619 | 0.289952 | 0.771853 | 0.981636 | chr2  | 2.03E+08 | 2.03E+08 | + | 0 | NA | intron (NAluSp SIN   | 80468 NM_001114   | 65065 Hs. 648844NM_198945    | ENSG000003NBEAL1    | A530083I           | neurohepatic protein-coding |
| chr2-2161 6.931241 | 0.253307 | 0.873619 | 0.289952 | 0.771853 | 0.981636 | chr2  | 2.16E+08 | 2.16E+08 | + | 0 | NA | intron (Nintron (N   | -50353 NR_037701  | 150967 Hs. 56876 NM_001195   | ENSG000003LINC01965 | PKI55              | long intncRNA               |
| chr2-233 6.931241  | 0.253307 | 0.873619 | 0.289952 | 0.771853 | 0.981636 | chr2  | 2.33E+08 | 2.33E+08 | + | 0 | NA | intron (Nintron (N   | 2618 NR_003005    | 677775 Hs. 663615NR_003005   | ENSG000003SCARNA5   | U87                | small Ca ncRNA              |
| chr2-2416 6.931241 | 0.253307 | 0.873619 | 0.289952 | 0.771853 | 0.981636 | chr2  | 2.42E+08 | 2.42E+08 | + | 0 | NA | intron (NAluSp SIN   | 8772 NR_033255    | 1841 Hs. 471875NM_012145     | ENSG000003DTMYK     | CDC8 PP37          | deoxythymine protein-coding |
| chr20-487 6.931241 | 0.253307 | 0.873619 | 0.289952 | 0.771853 | 0.981636 | chr20 | 4879905  | 4881333  | + | 0 | NA | intron (NHAL LINE    | -57011 NM_014737  | 9770 Hs. 631504NM_014737     | ENSG000003CRASSF2   | CENP-34 Fas        | assoc protein-coding        |
| chr20-357 6.931241 | 0.253307 | 0.873619 | 0.289952 | 0.771853 | 0.981636 | chr20 | 35782694 | 35783894 | + | 0 | NA | intron (Nintron (N   | 11279 NM_016435   | 51230 Hs. 517044NM_016435    | ENSG000003PHF20     | C20orf104PHD       | finger protein-coding       |
| chr20-472 6.931241 | 0.253307 | 0.873619 | 0.289952 | 0.771853 | 0.981636 | chr20 | 47212242 | 47213468 | + | 0 | NA | intron (Nintron (N   | 45888 NR_037411   | 1.01E+08 NR_037411           | ENSG000003MIR3616   | mir-3616           | microRNA ncRNA              |
| chr21-392 6.931241 | 0.253307 | 0.873619 | 0.289952 | 0.771853 | 0.981636 | chr21 | 39262665 | 39269404 | + | 0 | NA | intron (NCharlie2C   | 47598 NM_018962   | 54014 Hs. 627135NM_018962    | ENSG000003BRWD1     | C21orf107          | bromodomain protein-coding  |
| chr22-18 6.931241  | 0.253307 | 0.873619 | 0.289952 | 0.771853 | 0.981636 | chr22 | 18086201 | 18088157 | + | 0 | NA | intron (NAluS6 SI    | 9189 NM_017925    | 55670 Hs. 517400NM_017925    | ENSG000003PEX26     | PBD7A PBE          | peroxisome protein-coding   |
| chr22-426 6.931241 | 0.253307 | 0.873619 | 0.289952 | 0.771853 | 0.981636 | chr22 | 42888639 | 42889869 | + | 0 | NA | intron (NLM2 LINE    | -31981 NM_001142  | 26286 Hs. 685225NM_014570    | ENSG000003ARFGAP3   | ARFGAP1            | ADP ribosome protein-coding |
| chr3-1341 6.931241 | 0.253307 | 0.873619 | 0.289952 | 0.771853 | 0.981636 | chr3  | 1.34E+08 | 1.34E+08 | + | 0 | NA | IntergeniIntergeni   | 96304 NM_002955   | 6259 Hs. 654562NM_002955     | ENSG000003CRVK      | D3BC3195 Jreceptor | protein-coding              |
| chr3-184 6.931241  | 0.253307 | 0.873619 | 0.289952 | 0.771853 | 0.981636 | chr3  | 1.84E+08 | 1.84E+08 | + | 0 | NA | intron (NAluY SINE   | 4409 NM_001275    | 5437 Hs. 432574NM_006235     | ENSG000003POLR2H    | RPAC3 RF           | RNA polyn protein-coding    |
| chr4-1981 6.931241 | 0.253307 | 0.873619 | 0.289952 | 0.771853 | 0.981636 | chr4  | 1981344  | 1984056  | + | 0 | NA | TTS (NM_C TTS (NM_C  | 3777 NR_030641    | 1E+08 NR_030641              | ENSG000003MIR943    | MIR943 J           | microRNA ncRNA              |
| chr4-5725 6.931241 | 0.253307 | 0.873619 | 0.289952 | 0.771853 | 0.981636 | chr4  | 5729528  | 5733929  | + | 0 | NA | intron (NMIRc SINE   | 20527 NM_153717   | 2121 Hs. 646895NM_014555     | ENSG000003EVC       | DWF-1 EVC          | cylic protein-coding        |
| chr4-1218 6.931241 | 0.253307 | 0.873619 | 0.289952 | 0.771853 | 0.981636 | chr4  | 1.22E+08 | 1.22E+08 | + | 0 | NA | intron (NAluJb SIN   | -8331 NM_001237   | 890 Hs. 58974 NM_001237      | ENSG000003CCNA2     | CCN1 CCN           | cyclin A2 protein-coding    |
| chr4-1507 6.931241 | 0.253307 | 0.873619 | 0.289952 | 0.771853 | 0.981636 | chr4  | 1.51E+08 | 1.51E+08 | + | 0 | NA | intron (NAluS6 SI    | 14878 NM_006435   | 10586 Hs. 584852NM_006435    | ENSG000003MAB21L2   | MCN514 J           | ubiquitin 1 protein-coding  |
| chr6-303 6.931241  | 0.253307 | 0.873619 | 0.289952 | 0.771853 | 0.981636 | chr6  | 30337609 | 30338739 | + | 0 | NA | intron (NTigger1 I   | -6982 NM_001195   | 79897 Hs. 183232NM_024835    | ENSG000003CRPP21    | C6orf135 J         | ribonucle protein-coding    |
| chr6-875 6.931241  | 0.253307 | 0.873619 | 0.289952 | 0.771853 | 0.981636 | chr6  | 87595626 | 87597319 | + | 0 | NA | intron (Nintron (N   | 6405 NM_012381    | 23595 Hs. 410225NM_012381    | ENSG000003ORC3      | LAT LATH           | origin re protein-coding    |
| chr7-7697 6.931241 | 0.253307 | 0.873619 | 0.289952 | 0.771853 | 0.981636 | chr7  | 76979805 | 76979932 | + | 0 | NA | IntergeniAluSx1 SI   | -1454 NR_023383   | 441263 Hs. 675885NR_023383   | ENSG000003DTX2P1-UF | PMS2L11            | DTX2P1-UF pseudo            |
| chr7-1212 6.931241 | 0.253307 | 0.873619 | 0.289952 | 0.771853 | 0.981636 | chr7  | 1.21E+08 | 1.21E+08 | + | 0 | NA | intron (NLIPIA4 LIN  | -76864 NM_016087  | 51384 Hs. 272375NM_016087    | ENSG000003WNT16     | -                  | Wnt famil protein-coding    |
| chr7-1494 6.931241 | 0.253307 | 0.873619 | 0.289952 | 0.771853 | 0.981636 | chr7  | 1.49E+08 | 1.49E+08 | + | 0 | NA | intron (Nintron (N   | -15736 NM_015694  | 27153 Hs. 38512 NM_015694    | ENSG000003ZNF777    | -                  | zinc fing protein-coding    |
| chr8-9632 6.931241 | 0.253307 | 0.873619 | 0.289952 | 0.771853 | 0.981636 | chr8  | 96330664 | 96331631 | + | 0 | NA | intron (Nintron (N   | 55501 NR_125825   | 1.03E+08 Hs. 571415NR_125825 | ENSG000003LOC102724 | -                  | uncharacterncRNA            |
| chr8-1434 6.931241 | 0.253307 | 0.873619 | 0.289952 | 0.771853 | 0.981636 | chr8  | 1.43E+08 | 1.43E+08 | + | 0 | NA | intron (NLM5 LINE    | -13819 NM_201585  | 389692 NM_201585             | ENSG000003MAFA      | INSDM RF           | MFAF bZIP protein-coding    |
| chr9-1101 6.931241 | 0.253307 | 0.873619 | 0.289952 | 0.771853 | 0.981636 | chr9  | 1.1E+08  | 1.1E+08  | + | 0 | NA | intron (NMIR SINE    | 25287 NR_001136   | 445815 Hs. 591905NM_007205   | ENSG000003PALM2-AK  | AKAP-2 AK          | PALM2-AK protein-coding     |
| chr9-1302 6.931241 | 0.253307 | 0.873619 | 0.289952 | 0.771853 | 0.981636 | chr9  | 1.3E+08  | 1.3E+08  | + | 0 | NA | intron (NAluSg4 SI   | -8750 NR_162144   | 1.13E+08 NR_162140           | MIR12126            | -                  | microRNA ncRNA              |
| chr22-355 11.41541 | -0.20369 | 0.70287  | -0.2898  | 0.771969 | 0.981636 | chr22 | 35808357 | 35810285 | + | 0 | NA | intron (Nintron (N   | 31143 NM_001345   | 23543 Hs. 282995NM_014305    | ENSG000003RFX2      | FOX2 F             | ox-RNA bindi protein-coding |
| chr1-268 6.915525  | 0.257447 | 0.889066 | 0.289796 | 0.771973 | 0.981636 | chr1  | 26837821 | 26838180 | + | 0 | NA | intron (NAluSp SIN   | 11312 NM_032283   | 84243 Hs. 520311NM_032283    | ENSG000003DHHIC18   | DHHIC-18 Zinc      | fing protein-coding         |
| chr10-871 6.915525 | 0.257447 | 0.889066 | 0.289796 | 0.771973 | 0.981636 | chr10 | 87105222 | 87106282 | + | 0 | NA | intron (NMLTIL LTF   | 10546 NM_019054   | 54537 Hs. 500411NM_019054    | ENSG000003SHLD2     | FAM35A F           | shieldin protein-coding     |
| chr1-1567 5.930207 | 0.275428 | 0.951552 | 0.289452 | 0.772236 | 0.981636 | chr1  | 1.57E+08 | 1.57E+08 | + | 0 | NA | TTS (NM_C TTS (NM_C  | 7391 NM_001370    | 81875 Hs. 301904NM_030980    | ENSG000003ISG20L2   | HSD38              | interferc protein-coding    |
| chr1-2438 5.930207 | 0.275428 | 0.951552 | 0.289452 | 0.772236 | 0.981636 | chr1  | 2.44E+08 | 2.44E+08 | + | 0 | NA | intron (NLIPIA10 LI  | 23901 NM_181696   | 10000 Hs. 498292NM_005465    | ENSG000003AKT3      | MPPH MPP           | AKT serir protein-coding    |
| chr10-975 5.930207 | 0.275428 | 0.951552 | 0.289452 | 0.772236 | 0.981636 | chr10 | 97568304 | 97569457 | + | 0 | NA | intron (NAluSp SIN   | -3561 NM_001291   | 26287 Hs. 73708 NM_020345    | ENSG000003ANKRD2    | ARPP               | ankyrin rprotein-coding     |
| chr13-112 5.930207 | 0.275428 | 0.951552 | 0.289452 | 0.772236 | 0.981636 | chr13 | 1.13E+08 | 1.13E+08 | + | 0 | NA | intron (NAluSx1 SI   | -100671 NR_046661 | 1.01E+08 Hs. 658692NR_046661 | ENSG000003ATP11A-AS | -                  | ATP11A arncRNA              |
| chr14-75 5.930207  | 0.275428 | 0.951552 | 0.289452 | 0.772236 | 0.981636 | chr14 | 75095698 | 75097963 | + | 0 | NA | intron (Nintron (N   | 27639 NM_001042   | 79696 Hs. 48642 NM_024645    | ENSG000003ZC2H1C1C  | C14orf14           | zinc fing protein-coding    |
| chr17-765 5.930207 | 0.275428 | 0.951552 | 0.289452 | 0.772236 | 0.981636 | chr17 | 76342226 | 76343752 | + | 0 | NA | intron (NAluSx1 SI   | 10924 NM_002765   | 5635 Hs. 77498 NM_002765     | ENSG000003PRPSAP1   | PAP39              | phosphoriprotein-coding     |
| chr19-1            |          |          |          |          |          |       |          |          |   |   |    |                      |                   |                              |                     |                    |                             |



|                     |          |          |          |          |          |       |           |          |   |   |    |                     |        |           |          |            |                   |                      |           |                                      |
|---------------------|----------|----------|----------|----------|----------|-------|-----------|----------|---|---|----|---------------------|--------|-----------|----------|------------|-------------------|----------------------|-----------|--------------------------------------|
| chr4-847( 7.145791  | -0.25045 | 0.868109 | -0.28851 | 0.772959 | 0.981636 | chr4  | 84707435  | 84708727 | + | 0 | NA | intron (Nintron (N  | 124954 | NM_001263 | 1040     | Hs. 654899 | ENSG000001263     | ENSG000000CDS1       | CDS 1     | CDP-diacylprotein-coding             |
| chr5-5305( 7.145791 | -0.25045 | 0.868109 | -0.28851 | 0.772959 | 0.981636 | chr5  | 53097321  | 53098634 | + | 0 | NA | 3' UTR (N3' UTR (N  | 11780  | NM_17680E | 4338     | Hs. 16364E | ENSG00000100453   | ENSG000000MOC52      | MCPBE     | MOL molybdenum protein-coding        |
| chr7-801E( 7.145791 | -0.25045 | 0.868109 | -0.28851 | 0.772959 | 0.981636 | chr7  | 80189171  | 80189866 | + | 0 | NA | intron (Nintron (N  | 53734  | NM_00125E | 2770     | Hs. 134587 | ENSG00000100206   | ENSG000000CGNA11     | Gi        | G protein protein-coding             |
| chr3-170( 7.615105  | -0.24292 | 0.842266 | -0.28841 | 0.773033 | 0.981636 | chr3  | 1.7E+08   | 1.7E+08  | + | 0 | NA | exon (NM exon (NM   | -27672 | NM_00560E | 5010     | Hs. 31595  | ENSG00000100560   | ENSG000000CLDN11     | OSP       | OTM claudin 1 protein-coding         |
| chr7-277E( 7.615105 | -0.24292 | 0.842266 | -0.28841 | 0.773033 | 0.981636 | chr7  | 27792922  | 27793728 | + | 0 | NA | intron (Nintron (N  | 53230  | NM_00107E | 8887     | Hs. 34576  | ENSG00000100602   | ENSG000000TAX1BP1    | CALCOC03  | Tax1 binc protein-coding             |
| chr11-592( 6.684334 | -0.26099 | 0.906084 | -0.28804 | 0.773318 | 0.981636 | chr11 | 59205965  | 59206341 | + | 0 | NA | 3' UTR (N3' UTR (N  | 6774   | NM_00103E | 219972   | Hs. 74492  | ENSG00000100103E  | ENSG000000CMPEG1     | MPG1      | MPS1 macrophage protein-coding       |
| chr15-801( 6.684334 | -0.26099 | 0.906084 | -0.28804 | 0.773318 | 0.981636 | chr15 | 80159852  | 80160051 | + | 0 | NA | intron (Nintron (N  | 6952   | NM_000137 | 2184     | Hs. 73875  | ENSG000001000137  | ENSG000000FAH        | FAH       | fumarylac protein-coding             |
| chr17-177( 6.684334 | -0.26099 | 0.906084 | -0.28804 | 0.773318 | 0.981636 | chr17 | 17705503  | 17705702 | + | 0 | NA | intron (NAluSx SIN  | 24144  | NM_03066E | 10743    | Hs. 65539E | ENSG00000103066E  | ENSG000000RAI1       | SMCR      | SMS retinoic protein-coding          |
| chr2-134( 6.684334  | -0.26099 | 0.906084 | -0.28804 | 0.773318 | 0.981636 | chr2  | 1.34E+08  | 1.34E+08 | + | 0 | NA | intron (Nintron (N  | 102166 | NM_00241C | 4249     | Hs. 4988   | ENSG00000100241C  | ENSG000000MGAT5      | GNT-V     | GNT1 alpha-1, epsilon protein-coding |
| chr20-42E( 6.684334 | -0.26099 | 0.906084 | -0.28804 | 0.773318 | 0.981636 | chr20 | 429067    | 429541   | + | 0 | NA | intron (NAluSp SIN  | 21005  | NM_00646E | 10616    | Hs. 29546  | ENSG00000100646E  | ENSG000000RBCK1      | C20orf18  | RANBP2-ty protein-coding             |
| chr4-6761( 6.684334 | -0.26099 | 0.906084 | -0.28804 | 0.773318 | 0.981636 | chr4  | 67619316  | 67620238 | + | 0 | NA | intron (Nintron (N  | 61050  | NM_001317 | 26228    | Hs. 43557E | ENSG0000010210E   | ENSG000000STAP1      | BRDG1     | ST1 signal t protein-coding          |
| chr4-128E( 6.684334 | -0.26099 | 0.906084 | -0.28804 | 0.773318 | 0.981636 | chr4  | 1.29E+08  | 1.29E+08 | + | 0 | NA | intron (Nintron (N  | 37370  | NM_001287 | 79960    | Hs. 12420  | ENSG00000102490C  | ENSG000000JADE1      | PHF17     | jade fami protein-coding             |
| chrX-5364( 6.684334 | -0.26099 | 0.906084 | -0.28804 | 0.773318 | 0.981636 | chrX  | 53647311  | 53647986 | + | 0 | NA | intron (Nintron (N  | 39071  | NM_031407 | 10075    | Hs. 13690E | ENSG000001031407  | ENSG000000HUWE1      | ARF-BP1   | FHECT, UB1 protein-coding            |
| chr1-102E( 7.18693  | -0.24761 | 0.860974 | -0.2876  | 0.773656 | 0.981636 | chr1  | 10262696  | 10265067 | + | 0 | NA | intron (N(L2a LINE  | 33416  | NM_00136E | 23095    | Hs. 97858  | ENSG00000105074   | ENSG000000KIF1B      | CMT2      | CMT2 kinesin f protein-coding        |
| chr1-9357( 7.18693  | -0.24761 | 0.860974 | -0.2876  | 0.773656 | 0.981636 | chr1  | 93573894  | 93576639 | + | 0 | NA | intron (Nintron (N  | 8986   | NM_00130E | 8412     | Hs. 36958  | ENSG000001003567  | ENSG000000BCAR3      | AND-34    | NSBCAR3 adp protein-coding           |
| chr1-1174( 7.18693  | -0.24761 | 0.860974 | -0.2876  | 0.773656 | 0.981636 | chr1  | 1.17E+08  | 1.17E+08 | + | 0 | NA | intron (N(LIP47 LIN | 108213 | NM_00669E | 10905    | Hs. 43593E | ENSG00000100669E  | ENSG000000MAN1A2     | MAN1B     | mannosidp protein-coding             |
| chr1-1787( 7.18693  | -0.24761 | 0.860974 | -0.2876  | 0.773656 | 0.981636 | chr1  | 1.79E+08  | 1.79E+08 | + | 0 | NA | intron (N(LIM1 LINE | 33754  | NM_15266E | 55103    | Hs. 63248E | ENSG00000108037   | ENSG000000CRALGPS2   | dJ595C2.1 | RAL GEF w protein-coding             |
| chr1-225E( 7.18693  | -0.24761 | 0.860974 | -0.2876  | 0.773656 | 0.981636 | chr1  | 2.26E+08  | 2.26E+08 | + | 0 | NA | intron (N(X7A LINE  | 86365  | NM_00100E | 55740    | Hs. 49789E | ENSG00000101821E  | ENSG000000ENAH       | ENA MEN4  | ENAH acti protein-coding             |
| chr10-14E( 7.18693  | -0.24761 | 0.860974 | -0.2876  | 0.773656 | 0.981636 | chr10 | 14866661  | 14868831 | + | 0 | NA | exon (NM exon (NM   | -11037 | NM_00119E | 79723    | Hs. 55488E | ENSG00000102467C  | ENSG000000SUV39H2    | KMT1B     | suppressc protein-coding             |
| chr10-431( 7.18693  | -0.24761 | 0.860974 | -0.2876  | 0.773656 | 0.981636 | chr10 | 43177314  | 43178619 | + | 0 | NA | intron (N(LIMB7 LIN | 23069  | NM_00131E | 55454    | Hs. 65756E | ENSG00000101859C  | ENSG000000CSGALNACT1 | CHGN2     | Chc chondroit protein-coding         |
| chr10-704( 7.18693  | -0.24761 | 0.860974 | -0.2876  | 0.773656 | 0.981636 | chr10 | 70427056  | 70428226 | + | 0 | NA | 3' UTR (N3' UTR (N  | 14040  | NM_01805E | 4838     | Hs. 37041E | ENSG00000101805E  | ENSG000000NADAL      | HTX5      | nodal grc protein-coding             |
| chr10-73E( 7.18693  | -0.24761 | 0.860974 | -0.2876  | 0.773656 | 0.981636 | chr10 | 73863571  | 73864069 | + | 0 | NA | intron (Nintron (N  | 10735  | NM_001367 | 818      | Hs. 52304E | ENSG00000100122E  | ENSG000000CAMK2G     | CAMK      | CAMM calcium/c protein-coding        |
| chr10-102( 7.18693  | -0.24761 | 0.860974 | -0.2876  | 0.773656 | 0.981636 | chr10 | 1.02E+08  | 1.02E+08 | + | 0 | NA | intron (N(MIRc SINE | 15646  | NM_00119E | 8729     | Hs. 29024E | ENSG00000100419E  | ENSG000000GBF1       | ARF1GEF   | golgi brp protein-coding             |
| chr12-11E( 7.18693  | -0.24761 | 0.860974 | -0.2876  | 0.773656 | 0.981636 | chr12 | 1.18E+08  | 1.18E+08 | + | 0 | NA | TTS (NM_TTS (NM_C   | 15832  | NM_00737C | 5985     | Hs. 73190E | ENSG00000100737C  | ENSG000000RFC5       | RFC36     | replicat protein-coding              |
| chr13-20C( 7.18693  | -0.24761 | 0.860974 | -0.2876  | 0.773656 | 0.981636 | chr13 | 20033807  | 20034096 | + | 0 | NA | intron (Nintron (N  | -68750 | NR_12638C | 1.04E+08 | Hs. 57801E | ENSG00000102638C  | ENSG000000LINC01072  | -         | long intncRNA                        |
| chr14-99E( 7.18693  | -0.24761 | 0.860974 | -0.2876  | 0.773656 | 0.981636 | chr14 | 99904518  | 99905513 | + | 0 | NA | intron (N(MER41-int | -66407 | NM_00133C | 51466    | Hs. 125867 | ENSG000001016337  | ENSG000000CEVL       | RNB6      | Enah/Vasf protein-coding             |
| chr15-73E( 7.18693  | -0.24761 | 0.860974 | -0.2876  | 0.773656 | 0.981636 | chr15 | 731916245 | 73191997 | + | 0 | NA | TTS (NR_TTS (NR_C   | -9841  | NM_00557E | 4016     | Hs. 65436  | ENSG00000100557E  | ENSG000000LOXL1      | LNL6      | LOXL1 lysyl x protein-coding         |
| chr16-30E( 7.18693  | -0.24761 | 0.860974 | -0.2876  | 0.773656 | 0.981636 | chr16 | 30942761  | 30945448 | + | 0 | NA | intron (Nintron (N  | -4964  | NM_15228E | 93129    | Hs. 745104 | ENSG00000105228E  | ENSG000000ORAI3      | TMEM142C  | ORAI cal protein-coding              |
| chr16-534( 7.18693  | -0.24761 | 0.860974 | -0.2876  | 0.773656 | 0.981636 | chr16 | 53496667  | 53497062 | + | 0 | NA | intron (Nintron (N  | 6345   | NM_02247E | 64400    | Hs. 380897 | ENSG00000100247E  | ENSG000000AKTIP      | FT1       | FTS AKT inter protein-coding         |
| chr17-10E( 7.18693  | -0.24761 | 0.860974 | -0.2876  | 0.773656 | 0.981636 | chr17 | 1054771   | 1055577  | + | 0 | NA | intron (N(FLAM_C SI | -23343 | NM_00125E | 29       | Hs. 15930E | ENSG00000100109E  | ENSG000000ABR        | MFB       | ABR acti protein-coding              |
| chr17-62C( 7.18693  | -0.24761 | 0.860974 | -0.2876  | 0.773656 | 0.981636 | chr17 | 62046715  | 62048559 | + | 0 | NA | intron (N(LIP48 LIN | 17641  | NM_005121 | 9969     | Hs. 28267E | ENSG000001005121  | ENSG000000MED13      | ARC250    | DF mediator protein-coding           |
| chr2-4697( 7.18693  | -0.24761 | 0.860974 | -0.2876  | 0.773656 | 0.981636 | chr2  | 46974808  | 46976295 | + | 0 | NA | intron (Nintron (N  | -3369E | NM_001171 | 90411    | Hs. 66215E | ENSG000001013927E | ENSG000000MCFD2      | F5F8D     | F5F multiple protein-coding          |
| chr2-702E( 7.18693  | -0.24761 | 0.860974 | -0.2876  | 0.773656 | 0.981636 | chr2  | 70264193  | 70264608 | + | 0 | NA | intron (NAluSz SIN  | 6263   | NM_016297 | 51449    | Hs. 56750E | ENSG000001016297  | ENSG000000PCYOX1     | PCL1      | prenylcy protein-coding              |
| chr2-971E( 7.18693  | -0.24761 | 0.860974 | -0.2876  | 0.773656 | 0.981636 | chr2  | 97191492  | 97192984 | + | 0 | NA | intron (Nintron (N  | 79085  | NM_001354 | 375248   | Hs. 541894 | ENSG000001019855E | ENSG000000ANKRD36    | UNQ2430   | ankyrin t protein-coding             |
| chr2-1327( 7.18693  | -0.24761 | 0.860974 | -0.2876  | 0.773656 | 0.981636 | chr2  | 1.33E+08  | 1.33E+08 | + | 0 | NA | intron (N(Tiger3b   | -99757 | NM_001077 | 116372   | Hs. 43239E | ENSG00000104458E  | ENSG000000LYPD1      | LYPD1     | PLF, PF6, PLAUf protein-coding       |
| chr2-199E( 7.18693  | -0.24761 | 0.860974 | -0.2876  | 0.773656 | 0.981636 | chr2  | 2E+08     | 2E+08    | + | 0 | NA | intron (NAluJb SIN  | 7756   | NM_15368E | 205327   | Hs. 154494 | ENSG00000105368E  | ENSG000000C2orf69    | -         | chromoson protein-coding             |
| chr2-224E( 7.18693  | -0.24761 | 0.860974 | -0.2876  | 0.773656 | 0.981636 | chr2  | 2.25E+08  | 2.25E+08 | + | 0 | NA | intron (N(ERV3-16A3 | 117495 | NM_00129C | 55619    | Hs. 46578  | ENSG00000101468E  | ENSG000000DOCK10     | DRIP2     | Nbl dedicator protein-coding         |
| chr20-19E( 7.18693  | -0.24761 | 0.860974 | -0.2876  | 0.773656 | 0.981636 | chr20 | 19935191  | 19937886 | + | 0 | NA | intron (Nintron (N  | 46972  | NM_01899E | 54453    | Hs. 47227E | ENSG00000100189E  | ENSG000000RIN2       | MACS      | RARS Ras and F protein-coding        |
| chr20-584( 7.18693  | -0.24761 | 0.860974 | -0.2876  | 0.773656 | 0.981636 | chr20 | 58443986  | 58446317 | + | 0 | NA | non-codiron-codir   | 55372  | NR_03663C | 9217     | Hs. 18262E | ENSG00000100473E  | ENSG000000VAPB       | ALS8      | VAMF VAMP assc protein-coding        |
| chr3-1837( 7.18693  | -0.24761 | 0.860974 | -0.2876  | 0.773656 | 0.981636 | chr3  | 1.84E+08  | 1.84E+08 | + | 0 | NA | intron (N(MIR SINE  | 18543  | NR_046727 | 1.01E+08 | NR_046727  | YEATS2-AS-        | YEATS2               | arncRNA   |                                      |
| chr3-184E( 7.18693  | -0.24761 | 0.860974 | -0.2876  | 0.773656 | 0.981636 | chr3  | 1.85E+08  | 1.85E+08 | + | 0 | NA | intron (Nintron (N  | 50640  | NM_00134E | 23355    | Hs. 26926E | ENSG00000101530E  | ENSG000000VPS8       | KIAA0804  | VPS8 sub protein-coding              |
| chr4-1134( 7.18693  | -0.24761 | 0.860974 | -0.2876  | 0.773656 | 0.981636 | chr4  | 1.13E+08  | 1.13E+08 | + | 0 | NA | intron (NAluSx1 SI  | 184817 | NM_001354 | 287      | Hs. 620557 | ENSG00000100114E  | ENSG000000ANK2       | ANK-2     | LQ1ankyrin z protein-coding          |
| chr4-119E( 7.18693  | -0.24761 | 0.860974 | -0.2876  | 0.773656 | 0.981636 | chr4  | 1.19E+08  | 1.19E+08 | + | 0 | NA | intron (N(LIP42 LIN | 25113  | NM_001001 | 401152   | Hs. 17370E | ENSG000001001001  | ENSG000000C4orf3     | ANK-2     | LQ1ankyrin z protein-coding          |
| chr4-1684( 7.18693  | -0.24761 | 0.860974 | -0.2876  | 0.773656 | 0.981636 | chr4  | 1.68E+08  | 1.68E+08 | + | 0 | NA | intron (Nintron (N  | 49412  | NM_001291 | 91351    | Hs. 53011E | ENSG00000100101E  | ENSG000000DDX60L     | -         | Ddx6/H-bc protein-coding             |
| chr5-6937( 7.18693  | -0.24761 | 0.860974 | -0.2876  | 0.773656 | 0.981636 | chr5  | 69374657  | 69379135 | + | 0 | NA |                     |        |           |          |            |                   |                      |           |                                      |



|                     |          |          |          |          |          |       |          |          |   |      |                     |                   |              |                  |                     |                |                                 |
|---------------------|----------|----------|----------|----------|----------|-------|----------|----------|---|------|---------------------|-------------------|--------------|------------------|---------------------|----------------|---------------------------------|
| chr7-752:6.939099   | 0.251188 | 0.873732 | 0.287488 | 0.773738 | 0.981636 | chr7  | 75232134 | 75233248 | + | 0 NA | intron (AluSz SIN   | -4496 NR_146079   | 643862       | NR_146079        | SPDYE10P            | -              | speedy/R1pseudo                 |
| chr7-130C:6.939099  | 0.251188 | 0.873732 | 0.287488 | 0.773738 | 0.981636 | chr7  | 1.3E+08  | 1.3E+08  | + | 0 NA | TTS (NM_C TTS (NM_C | 33511 NM_001363   | 51530 Hs.    | 194157NM_016478  | ENSG000002C3HC1     | HSPC216        | zinc fingprotein-coding         |
| chr7-1491:6.939099  | 0.251188 | 0.873732 | 0.287488 | 0.773738 | 0.981636 | chr7  | 1.49E+08 | 1.49E+08 | + | 0 NA | intron (N intron (N | -18332 NM_001303  | 8427 Hs.     | 729056NM_003575  | ENSG000002ZNF282    | HUB1           | zinc fingprotein-coding         |
| chr8-428:6.939099   | 0.251188 | 0.873732 | 0.287488 | 0.773738 | 0.981636 | chr8  | 42837731 | 42838349 | + | 0 NA | exon (NM exon (NM   | 5285 NM_018105    | 55145 Hs.    | 7432 NM_018105   | ENSG000002THAP1     | DY16           | THAP dome protein-coding        |
| chr8-5697:6.939099  | 0.251188 | 0.873732 | 0.287488 | 0.773738 | 0.981636 | chr8  | 56976856 | 56979824 | + | 0 NA | intron (N LIPA13 LI | 15527 NM_017813   | 54928 Hs.    | 438689NM_017813  | ENSG000002IMPAD1    | GPAPP          | IMF inotop protein-coding       |
| chr8-672C:6.939099  | 0.251188 | 0.873732 | 0.287488 | 0.773738 | 0.981636 | chr8  | 67200118 | 67207333 | + | 0 NA | intron (N L2 LINE I | 119877 NM_001291  | 79848 Hs.    | 370147NM_02479C  | ENSG000002CSPP1     | CSPP           | JBT:centrosom protein-coding    |
| chr8-9625:6.939099  | 0.251188 | 0.873732 | 0.287488 | 0.773738 | 0.981636 | chr8  | 96259601 | 96297363 | + | 0 NA | intron (N AluJ SINE | 34310 NM_014754   | 9791 Hs.     | 292579NM_014754  | ENSG000002PTDSS1    | LMHD           | PSS1 phosphat i protein-coding  |
| chr9-111F:6.939099  | 0.251188 | 0.873732 | 0.287488 | 0.773738 | 0.981636 | chr9  | 1.12E+08 | 1.12E+08 | + | 0 NA | intron (N MRB SINE  | 2721 NM_133464    | 158399 Hs.   | 584864NM_133464  | ENSG000002ZNF483    | ZKSCAN16       | zinc fingprotein-coding         |
| chr1-6592:7.435687  | 0.243469 | 0.847124 | 0.287406 | 0.773801 | 0.981636 | chr1  | 6592576  | 6595070  | + | 0 NA | 3' UTR (N3' UTR (N  | 9046 NM_001324    | 9903 Hs.     | 7764 NM_014851   | ENSG000002KLHL21    | -              | kelch lik protein-coding        |
| chr1-254F:7.435687  | 0.243469 | 0.847124 | 0.287406 | 0.773801 | 0.981636 | chr1  | 25459031 | 25461110 | + | 0 NA | intron (N intron (N | 29173 NM_018202   | 55219 Hs.    | 179978NM_018202  | ENSG000002MACO1     | MACO1 IN       | macoilin protein-coding         |
| chr1-3302:7.435687  | 0.243469 | 0.847124 | 0.287406 | 0.773801 | 0.981636 | chr1  | 33023690 | 33024596 | + | 0 NA | intron (N AluSx1 SI | 12740 NM_001195   | 204 Hs.      | 470907NM_001625  | ENSG000002AK2       | ADK2           | adenylatc protein-coding        |
| chr11-775:7.435687  | 0.243469 | 0.847124 | 0.287406 | 0.773801 | 0.981636 | chr11 | 77978037 | 77981179 | + | 0 NA | intron (N intron (N | 15060 NM_033547   | 92105 Hs.    | 533722NM_033547  | ENSG000002INTS4     | INT4           | MSTC integratc protein-coding   |
| chr13-77C:7.435687  | 0.243469 | 0.847124 | 0.287406 | 0.773801 | 0.981636 | chr13 | 77920665 | 77940004 | + | 0 NA | exon (NM exon (NM   | 17722 NR_046716   | 1.01E+08 Hs. | 569286NR_046716  | ENSG000002MYCBP2-AS | -              | MYCBP2 arncRNA                  |
| chr13-772:7.435687  | 0.243469 | 0.847124 | 0.287406 | 0.773801 | 0.981636 | chr13 | 77020665 | 77205885 | + | 0 NA | intron (N LIPA3 LI  | 123819 NM_015057  | 23077 Hs.    | 591221NM_015057  | ENSG000002MYCBP2    | Myc-bp2        | MYC bndiprotein-coding          |
| chr14-761F:7.435687 | 0.243469 | 0.847124 | 0.287406 | 0.773801 | 0.981636 | chr14 | 76182277 | 76184326 | + | 0 NA | intron (N intron (N | 28947 NR_110314   | 55668 Hs.    | 410231NM_017925  | ENSG000002PATCH2L   | C14orf11E      | G-patch c protein-coding        |
| chr15-73Z:7.435687  | 0.243469 | 0.847124 | 0.287406 | 0.773801 | 0.981636 | chr15 | 73289622 | 73291879 | + | 0 NA | intron (N intron (N | -9164 NR_162148   | 1.13E+08     | MIR12135         | -                   | microRNA ncRNA |                                 |
| chr16-695:7.435687  | 0.243469 | 0.847124 | 0.287406 | 0.773801 | 0.981636 | chr16 | 69988151 | 69988999 | + | 0 NA | intron (N intron (N | 37395 NM_00137C   | 348174 Hs.   | 592064NM_182615  | ENSG000002CLEC18A   | MRCL           | MRC1 C-type I c protein-coding  |
| chr2-7017:7.435687  | 0.243469 | 0.847124 | 0.287406 | 0.773801 | 0.981636 | chr2  | 70177006 | 70178776 | + | 0 NA | intron (N AluJb SIN | 12820 NR_145971   | 54980 Hs.    | 720045NM_01788C  | ENSG000002CP9F42    | -              | chromosom protein-coding        |
| chr2-1914:7.435687  | 0.243469 | 0.847124 | 0.287406 | 0.773801 | 0.981636 | chr2  | 1.91E+08 | 1.91E+08 | + | 0 NA | intron (N Tiger1 E  | 160745 NM_001161  | 4430 Hs.     | 439622NM_012225  | ENSG000002MYO1B     | MMI-1          | alpha myosin I f protein-coding |
| chr2-2182:7.435687  | 0.243469 | 0.847124 | 0.287406 | 0.773801 | 0.981636 | chr2  | 2.19E+08 | 2.19E+08 | + | 0 NA | TTS (NM_C TTS (NM_C | 7190 NM_001366    | 7701 Hs.     | 657969NM_001105  | ENSG000002ZNF142    | HA4654         | NE zinc fing protein-coding     |
| chr22-505:7.435687  | 0.243469 | 0.847124 | 0.287406 | 0.773801 | 0.981636 | chr22 | 50238986 | 50239453 | + | 0 NA | intron (N AluJb SIN | 5804 NM_020461    | 85378 Hs.    | 336431NM_020461  | ENSG000002TUBGCP6   | GCP-6          | GFC tubulin f protein-coding    |
| chr4-121F:7.435687  | 0.243469 | 0.847124 | 0.287406 | 0.773801 | 0.981636 | chr4  | 1.22E+08 | 1.22E+08 | + | 0 NA | exon (NM exon (NM   | 7248 NM_176824    | 55212 Hs.    | 591694NM_01819C  | ENSG000002BBS7      | BBS2L1         | Bardet-Bi protein-coding        |
| chr5-326F:7.435687  | 0.243469 | 0.847124 | 0.287406 | 0.773801 | 0.981636 | chr5  | 32604145 | 32605227 | + | 0 NA | TTS (NM_C TTS (NM_C | 19129 NM_006713   | 10923 Hs.    | 229641NM_006713  | ENSG000002SUB1      | P15 PC4        | SUB1 regt protein-coding        |
| chr5-1421:7.435687  | 0.243469 | 0.847124 | 0.287406 | 0.773801 | 0.981636 | chr5  | 1.42E+08 | 1.42E+08 | + | 0 NA | intron (N intron (N | 36827 NM_030571   | 80762 Hs.    | 9788 NM_030571   | ENSG000002NDF1P1    | N4WBFP5        | Necdd4 fan protein-coding       |
| chr6-321F:7.435687  | 0.243469 | 0.847124 | 0.287406 | 0.773801 | 0.981636 | chr6  | 32156378 | 32158396 | + | 0 NA | intron (N AluSz SIN | -3022 NR_037172   | 1.01E+08 Hs. | 549204NR_037165  | ENSG000002LOC100507 | -              | uncharactncRNA                  |
| chr7-4008:7.435687  | 0.243469 | 0.847124 | 0.287406 | 0.773801 | 0.981636 | chr7  | 40088405 | 40089896 | + | 0 NA | intron (N AluS6 SI  | 45427 NM_138701   | 136647 Hs.   | 654989NM_138701  | ENSG000002MPLKIP    | ABHS           | C7orfM-phase s protein-coding   |
| chr7-9208:7.435687  | 0.243469 | 0.847124 | 0.287406 | 0.773801 | 0.981636 | chr7  | 92082868 | 92089210 | + | 0 NA | intron (N intron (N | 49030 NM_00078E   | 1595 Hs.     | 417077NM_00078E  | ENSG000002CYP51A1   | CP51           | CYPE cytochrom protein-coding   |
| chr7-139Z:7.435687  | 0.243469 | 0.847124 | 0.287406 | 0.773801 | 0.981636 | chr7  | 1.39E+08 | 1.39E+08 | + | 0 NA | intron (N AluSz SIN | 31257 NM_173565   | 254048 Hs.   | 153458NM_173565  | ENSG000002UBN2      | -              | ubnuclei protein-coding         |
| chr8-172Z:7.435687  | 0.243469 | 0.847124 | 0.287406 | 0.773801 | 0.981636 | chr8  | 17293456 | 17295638 | + | 0 NA | intron (N LIPA7 LI  | 47589 NM_001363   | 137492 Hs.   | 343875NM_152415  | ENSG000002VPS37A    | HCRPI          | PQE VPS37A s protein-coding     |
| chr19-447:11.39184  | -0.20011 | 0.696299 | -0.28739 | 0.773817 | 0.981636 | chr19 | 47737656 | 47742428 | + | 0 NA | intron (N intron (N | -5504 NM_015176   | 29997 Hs.    | 4121907NM_015171 | ENSG000002NOP53     | GLTSCR2        | FNOP53 rit protein-coding       |
| chr12-715:5.368905  | 0.293759 | 1.022283 | 0.287356 | 0.77384  | 0.981636 | chr12 | 7133844  | 7134182  | + | 0 NA | intron (N MRB SINE  | 3642 NM_014715    | 9746 Hs.     | 535377NM_014715  | ENSG000002CLSTN3    | CDHR14         | CS calsynter protein-coding     |
| chr5-179F:5.368905  | 0.293759 | 1.022283 | 0.287356 | 0.77384  | 0.981636 | chr5  | 1.8E+08  | 1.8E+08  | + | 0 NA | intron (N intron (N | -2252 NR_110566   | 1.02E+08 Hs. | 663255NR_110566  | ENSG000002LOC101925 | -              | uncharactncRNA                  |
| chr19-18Z:4.921315  | 0.308607 | 1.076327 | 0.287322 | 0.774325 | 0.981636 | chr19 | 1827361  | 1827711  | + | 0 NA | exon (NM exon (NM   | 5447 NR_152847    | 1E+08 Hs.    | 662425NR_034114  | ENSG000002LOC10028E | -              | uncharactncRNA                  |
| chr17-211:7.981272  | 0.236608 | 0.825226 | 0.286719 | 0.774327 | 0.981636 | chr17 | 21197519 | 21198147 | + | 0 NA | TTS (NR_C TTS (NR_C | 16762 NR_024547   | 8834 Hs.     | 592949NM_003875  | ENSG000002TMEM11    | C17orf35       | transmemt protein-coding        |
| chr19-13Z:7.981272  | 0.236608 | 0.825226 | 0.286719 | 0.774327 | 0.981636 | chr19 | 1357382  | 1358987  | + | 0 NA | intron (N intron (N | 765 NR_163145     | 84939 Hs.    | 515015NM_03222C  | ENSG000002PWWP3A    | EXPAND1        | F PWW dome protein-coding       |
| chr14-24Z:7.656245  | -0.24201 | 0.839641 | -0.28608 | 0.774814 | 0.981636 | chr14 | 24235201 | 24236673 | + | 0 NA | intron (N intron (N | 3008 NM_016576    | 51292 Hs.    | 368855NM_016576  | ENSG000002GMPR2     | GMPR 2         | guanosin protein-coding         |
| chr17-507:7.656245  | -0.24201 | 0.839641 | -0.28608 | 0.774814 | 0.981636 | chr17 | 50754011 | 50754626 | + | 0 NA | 3' UTR (N3' UTR (N  | 13200 NM_001355   | 55018 Hs.    | 389466NM_017925  | ENSG000002ANKRD40C1 | C17orf73       | ANKRD40 ( protein-coding        |
| chr19-387:7.656245  | -0.24201 | 0.839641 | -0.28608 | 0.774814 | 0.981636 | chr19 | 38730796 | 38731998 | + | 0 NA | 3' UTR (N3' UTR (N  | 13077 NM_144691   | 147968 Hs.   | 731775NM_144691  | ENSG000002CAPN12    | -              | calpain I protein-coding        |
| chr5-178F:7.656245  | -0.24201 | 0.839641 | -0.28608 | 0.774814 | 0.981636 | chr5  | 1.79E+08 | 1.79E+08 | + | 0 NA | intron (N LIME3G LI | 3161 NM_001324    | 6940 Hs.     | 484324NM_005645  | ENSG000002ZNF354A   | EZNF           | HEL1 zinc fing protein-coding   |
| chr9-893Z:7.656245  | -0.24201 | 0.839641 | -0.28608 | 0.774814 | 0.981636 | chr9  | 89332597 | 89334544 | + | 0 NA | intron (N Charliel  | 14719 NM_001282   | 79048 Hs.    | 59804 NM_024077  | ENSG000002SECS1BP2  | SBP2           | SECS1 bir protein-coding        |
| chr9-974F:7.656245  | -0.24201 | 0.839641 | -0.28608 | 0.774814 | 0.981636 | chr9  | 97485741 | 97488943 | + | 0 NA | intron (N intron (N | 62549 NM_001166   | 7111 Hs.     | 404289NM_003275  | ENSG000002TMD01     | D9S57E         | ET1 tropomod protein-coding     |
| chr19-571F:5.889067 | 0.273276 | 0.955704 | 0.285942 | 0.774922 | 0.981636 | chr19 | 57197821 | 57198278 | + | 0 NA | intron (N HERVL-int | -12938 NM_003417  | 9422 Hs.     | 515633NM_003417  | ENSG000002ZNF264    | -              | zinc fing protein-coding        |
| chr3-1805:6.156314  | -0.28353 | 0.991992 | -0.28582 | 0.775015 | 0.981636 | chr3  | 1.81E+08 | 1.81E+08 | + | 0 NA | intron (N intron (N | 2436 NM_001363    | 8087 Hs.     | 478407NM_005087  | ENSG000002FXR1      | FXR1P          | FMR1 autc protein-coding        |
| chr15-731:6.725474  | -0.25788 | 0.902231 | -0.28582 | 0.775016 | 0.981636 | chr15 | 73184679 | 73185410 | + | 0 NA | intron (N LMC1 LI   | -114866 NR_162148 | 1.13E+08     | MIR12135         | -                   | microRNA ncRNA |                                 |
| chr9-976F:6.725474  | -0.25788 | 0.902231 | -0.28582 | 0.775016 | 0.981636 | chr9  | 97682296 | 97682746 | + | 0 NA | intron (N LIME LINE | 14888 NR_149094   | 7507 Hs.     | 654364NM_00038C  | ENSG000002XPA       | XP1 XPAC       | XPA, DNA protein-coding         |
| chr12-875:6.462145  | 0.234785 | 0.821546 | 0.285785 | 0.775043 | 0.981636 | chr12 | 879790   | 880188   | + | 0 NA | exon (NM exon (NM   | 53088 NM_001297   | 5893 Hs.     | 410355NM_134422  | ENSG000002RAD52     | -              | RAD52 hon protein-coding        |
| chr5-7151:6.462145  | 0.234785 | 0.821546 | 0.285785 | 0.775043 | 0.981636 | chr5  | 71515346 | 71515825 | + | 0 NA | intron (N Tiger14a  | 59934 NM_018425   | 55814 Hs.    | 258272NM_018425  | ENSG000002BDP1      | DFNB112        | EB double protein-coding        |
| chr19-191F:6.641103 | -0.24205 | 0.846978 | -0.28578 | 0.775047 | 0.981636 | chr19 | 1912436  | 1913553  | + | 0 NA | exon (NM exon (NM   | 7595 NM_001325    | 113178 Hs.   | 144988NM_079834  | ENSG000002SCAMP4    | SCAMP-4        | secretory protein-coding        |
| chr1-105Z:7.443545  | 0.241481 | 0.845008 | 0.285773 | 0.775052 | 0.981636 | chr1  | 1050463  | 1053157  | + |      |                     |                   |              |                  |                     |                |                                 |



|                    |          |          |            |          |          |       |          |          |   |    |                    |                     |                           |                            |                                  |                                    |
|--------------------|----------|----------|------------|----------|----------|-------|----------|----------|---|----|--------------------|---------------------|---------------------------|----------------------------|----------------------------------|------------------------------------|
| chr11-108.7.648387 | -0.23843 | 0.835975 | -0.28521   | 0.775484 | 0.981636 | chr11 | 1.08E+08 | 1.08E+08 | 0 | NA | intron (AluSc SIN  | 25391 NM_000019     | 38 Hs. 232375NM_000019    | ENSG00000ACAT1             | ACAT MAT acetyl-Ccprotein-coding |                                    |
| chr11-117.7.648387 | -0.23843 | 0.835975 | -0.28521   | 0.775484 | 0.981636 | chr11 | 1.17E+08 | 1.17E+08 | 0 | NA | intron (AluJb SIN  | 11506 NM_001077     | 257160 Hs. 591934NM_20734 | ENSG00000RNF214            | - ring fingprotein-coding        |                                    |
| chr14-305.7.648387 | -0.23843 | 0.835975 | -0.28521   | 0.775484 | 0.981636 | chr14 | 30998053 | 30999717 | + | 0  | NA                 | intron (FLAM_A SI   | 15857 NR_030354           | 693209 NR_030354           | ENSG00000MIR624                  | MIRN624 microRNA ncRNA             |
| chr14-104.7.648387 | -0.23843 | 0.835975 | -0.28521   | 0.775484 | 0.981636 | chr14 | 1.01E+08 | 1.01E+08 | 0 | NA | intron (NA-rich LC | -7580 NR_030528     | 768222 NR_030528          | ENSG00000MIR770            | MIRN770 microRNA ncRNA           |                                    |
| chr15-430.7.648387 | -0.23843 | 0.835975 | -0.28521   | 0.775484 | 0.981636 | chr15 | 40360737 | 40361902 | + | 0  | NA                 | intron (AluJb SIN   | 31837 NM_001141           | 7158 Hs. 440966NM_005657   | ENSG00000TP53BP1                 | 53BP1 TDF tumor prcprotein-coding  |
| chr19-49C.7.648387 | -0.23843 | 0.835975 | -0.28521   | 0.775484 | 0.981636 | chr19 | 49096324 | 49097701 | + | 0  | NA                 | intron (AluSx SIN   | 11561 NM_001301           | 6625 Hs. 467097NM_00308    | ENSG00000SNRNP70                 | RNPUIZ RF small nucprotein-coding  |
| chr2-333C.7.648387 | -0.23843 | 0.835975 | -0.28521   | 0.775484 | 0.981636 | chr2  | 33306463 | 33308063 | + | 0  | NA                 | intron (L1ME2 LIN   | -111253 NR_039628         | 1.01E+08 NR_039628         | ENSG00000MIR4430                 | - microRNA ncRNA                   |
| chr2-365E.7.648387 | -0.23843 | 0.835975 | -0.28521   | 0.775484 | 0.981636 | chr2  | 36537126 | 36538956 | + | 0  | NA                 | intron (intron (N   | 60127 NM_001042           | 9637 Hs. 258566NM_00510    | ENSG00000FEZ2                    | HUM3CL fasciculaprotein-coding     |
| chr2-174E.7.648387 | -0.23843 | 0.835975 | -0.28521   | 0.775484 | 0.981636 | chr2  | 1.75E+08 | 1.75E+08 | + | 0  | NA                 | intron (L3 LINE C   | -40754 NM_00103E          | 1134 Hs. 434479NM_00007    | ENSG00000CHRNA1                  | ACHRA ACF cholinerprotein-coding   |
| chr20-472.7.648387 | -0.23843 | 0.835975 | -0.28521   | 0.775484 | 0.981636 | chr20 | 47226460 | 47229142 | + | 0  | NA                 | intron (intron (N   | 60834 NR_037411           | 1.01E+08 NR_037411         | ENSG00000MIR3616                 | mir-3616 microRNA ncRNA            |
| chr3-1327.7.648387 | -0.23843 | 0.835975 | -0.28521   | 0.775484 | 0.981636 | chr3  | 1.33E+08 | 1.33E+08 | + | 0  | NA                 | exon (NM exon (NM   | -13494 NR_002811          | 348808 Hs. 586111NR_002811 | ENSG00000NPHP3-AS1               | NCRNA0011NPHP3 antncRNA            |
| chr3-136E.7.648387 | -0.23843 | 0.835975 | -0.28521   | 0.775484 | 0.981636 | chr3  | 1.37E+08 | 1.37E+08 | + | 0  | NA                 | intron (L1MB3 LIN   | 28661 NM_00615E           | 4690 Hs. 126889NM_00615E   | ENSG00000CNCK1                   | NCK NCKa NCK adaptprotein-coding   |
| chr4-7141.7.648387 | -0.23843 | 0.835975 | -0.28521   | 0.775484 | 0.981636 | chr4  | 71418184 | 71420232 | + | 0  | NA                 | intron (L1PA3 LIN   | 80155 NM_00375E           | 8671 Hs. 5462 NM_00375E    | ENSG00000SLC44A                  | HNBC1 KNE solute cprotein-coding   |
| chr5-7475.7.648387 | -0.23843 | 0.835975 | -0.28521   | 0.775484 | 0.981636 | chr5  | 74736362 | 74739324 | + | 0  | NA                 | intron (L2a LINE    | 29274 NR_10400E           | 84340 Hs. 277154NM_03238   | ENSG00000GFM2                    | EF-G2nt EG elongatprotein-coding   |
| chr5-1404.7.648387 | -0.23843 | 0.835975 | -0.28521   | 0.775484 | 0.981636 | chr5  | 1.4E+08  | 1.4E+08  | + | 0  | NA                 | exon (NM exon (NM   | -61936 NM_00373E          | 8637 Hs. 594084NM_00373E   | ENSG00000EIF4EBP3                | 4E-BP3 4Eukaryotiiprotein-coding   |
| chr7-765E.7.648387 | -0.23843 | 0.835975 | -0.28521   | 0.775484 | 0.981636 | chr7  | 76561255 | 76562548 | + | 0  | NA                 | intron (L1PA4 LIN   | 12560 NR_029411           | 1E+08 Hs. 712837NR_029411  | ENSG00000LOC100103E              | - uncharactncRNA                   |
| chr7-1211.7.648387 | -0.23843 | 0.835975 | -0.28521   | 0.775484 | 0.981636 | chr7  | 1.21E+08 | 1.21E+08 | + | 0  | NA                 | intron (L1MA4 LIN   | 166929 NM_00110E          | 79974 Hs. 189656NM_02491E  | ENSG00000CCPED1                  | C7orf58 cadherin protein-coding    |
| chr7-128E.7.648387 | -0.23843 | 0.835975 | -0.28521   | 0.775484 | 0.981636 | chr7  | 1.29E+08 | 1.29E+08 | + | 0  | NA                 | intron (intron (N   | 33764 NM_001364           | 3663 Hs. 521181NM_03264E   | ENSG00000IRF5                    | SLEB10 interfercprotein-coding     |
| chr7-139E.7.648387 | -0.23843 | 0.835975 | -0.28521   | 0.775484 | 0.981636 | chr7  | 1.4E+08  | 1.4E+08  | + | 0  | NA                 | 3' UTR (3' UTR (N   | 45224 NM_00108C           | 154790 Hs. 57806 NM_00108C | ENSG00000CLEC2L                  | - C-type lprotein-coding           |
| chr8-173E.7.648387 | -0.23843 | 0.835975 | -0.28521   | 0.775484 | 0.981636 | chr8  | 17303757 | 17304832 | + | 0  | NA                 | intron (intron (N   | 57336 NM_00136E           | 137492 Hs. 343877NM_15241E | ENSG00000VPS37A                  | HCRP1 PQE VPS37A st protein-coding |
| chr8-265E.7.648387 | -0.23843 | 0.835975 | -0.28521   | 0.775484 | 0.981636 | chr8  | 26584003 | 26587305 | + | 0  | NA                 | intron (intron (N   | 7249 NM_001244            | 1808 Hs. 593187NM_00138E   | ENSG00000KIFAP5L2                | CRMP-2 CF dihydroyprotein-coding   |
| chr9-3624.7.648387 | -0.23843 | 0.835975 | -0.28521   | 0.775484 | 0.981636 | chr9  | 36244763 | 36247013 | + | 0  | NA                 | intron (intron (N   | 12560 NM_00119C           | 10020 Hs. 5920 NM_00547E   | ENSG00000CNE                     | DMRV GLCN glucosamiprotein-coding  |
| chr9-9684.7.648387 | -0.23843 | 0.835975 | -0.28521   | 0.775484 | 0.981636 | chr9  | 96843778 | 96844719 | + | 0  | NA                 | intron (L1ME1 LIN   | 10266 NM_00134E           | 158431 Hs. 30567NM_001001  | ENSG00000ZNF782                  | - zinc fingprotein-coding          |
| chr9-128E.7.648387 | -0.23843 | 0.835975 | -0.28521   | 0.775484 | 0.981636 | chr9  | 1.29E+08 | 1.29E+08 | + | 0  | NA                 | intron (intron (N   | -4170 NM_00135E           | 883 Hs. 49525NM_00405E     | ENSG00000KYAT1                   | CCBL1 GTR kynureniniprotein-coding |
| chrX-242C.7.648387 | -0.23843 | 0.835975 | -0.28521   | 0.775484 | 0.981636 | chrX  | 24207409 | 24209146 | + | 0  | NA                 | exon (NM exon (NM   | 58548 NM_00117E           | 7543 Hs. 336681NM_00341C   | ENSG00000ZFX                     | ZNF926 zinc fingprotein-coding     |
| chr15-632.11.38398 | -0.19889 | 0.698047 | -0.28492   | 0.775706 | 0.981636 | chr15 | 63258429 | 63258662 | + | 0  | NA                 | intron (NMER51A LI  | -19005 NM_00114E          | 83464 Hs. 51170NM_031301   | ENSG00000APH1B                   | APH-1B PF aph-1 honprotein-coding  |
| chr19-477.11.38398 | -0.19889 | 0.698047 | -0.28492   | 0.775706 | 0.981636 | chr19 | 47276906 | 47278893 | + | 0  | NA                 | intron (AluSx1 SI   | 14477 NM_014601           | 30846 Hs. 744966NM_014601  | ENSG00000EHD2                    | PAST2 EF domainiprotein-coding     |
| chr2-971E.11.38398 | -0.19889 | 0.698047 | -0.28492   | 0.775706 | 0.981636 | chr2  | 97194901 | 97195165 | + | 0  | NA                 | intron (MERS5A DN   | 81880 NM_001354           | 375248 Hs. 541894NM_19855E | ENSG00000ANKRD36                 | UNQ2430 ankryn iprotein-coding     |
| chr1-900C.7.179072 | -0.24575 | 0.862754 | -0.28484   | 0.775766 | 0.981636 | chr1  | 90005202 | 90006004 | + | 0  | NA                 | 3' UTR (3' UTR (N   | 10493 NM_181781           | 284695 Hs. 306221NM_181781 | ENSG00000ZNF326                  | ZAN75 ZIF zinc fingprotein-coding  |
| chr1-170C.7.179072 | -0.24575 | 0.862754 | -0.28484   | 0.775766 | 0.981636 | chr1  | 1.7E+08  | 1.7E+08  | + | 0  | NA                 | intron (intron (N   | 52801 NM_001204           | 22920 Hs. 433442NM_01497C  | ENSG00000KIFAP3                  | FLA3 KAP-kinesin iprotein-coding   |
| chr11-115.7.179072 | -0.24575 | 0.862754 | -0.28484   | 0.775766 | 0.981636 | chr11 | 11905398 | 11906389 | + | 0  | NA                 | intron (intron (N   | 64470 NM_00133C           | 55031 Hs. 57725NM_01794E   | ENSG00000CUSP47                  | TRFP ubiquitiiprotein-coding       |
| chr15-784.7.179072 | -0.24575 | 0.862754 | -0.28484   | 0.775766 | 0.981636 | chr15 | 78445377 | 78446154 | + | 0  | NA                 | intron (intron (N   | 7344 NM_00132C            | 3658 Hs. 436031NM_00413E   | ENSG00000IREB2                   | AC03 IRE-iron resiprotein-coding   |
| chr16-21E.7.179072 | -0.24575 | 0.862754 | -0.28484   | 0.775766 | 0.981636 | chr16 | 21888886 | 21890583 | + | 0  | NA                 | Intergeni Intergeni | -22999 NR_02445E          | LOC100109C                 | - uncharactncRNA                 |                                    |
| chr17-46E.7.179072 | -0.24575 | 0.862754 | -0.28484   | 0.775766 | 0.981636 | chr17 | 46209084 | 46209910 | + | 0  | NA                 | intron (AluSz SIN   | 15877 NM_00119E           | 284058 Hs. 648744NM_01544E | ENSG00000KANSL1                  | CENP-36 KAT8 regiprotein-coding    |
| chr2-261E.7.179072 | -0.24575 | 0.862754 | -0.28484   | 0.775766 | 0.981636 | chr2  | 26134796 | 26135733 | + | 0  | NA                 | 3' UTR (3' UTR (N   | -37824 NM_00116E          | 150946 Hs. 187912NM_00116E | ENSG00000GAREM2                  | FAM59B GARGB2 ascprotein-coding    |
| chr2-737E.7.179072 | -0.24575 | 0.862754 | -0.28484   | 0.775766 | 0.981636 | chr2  | 37251362 | 37256394 | + | 0  | NA                 | non-codiron-codir   | 28220 NR_14640E           | 55471 Hs. 433466NM_01860E  | ENSG00000NDUFAF7                 | C2orf56 WADH:ubiciprotein-coding   |
| chr2-390C.7.179072 | -0.24575 | 0.862754 | -0.28484   | 0.775766 | 0.981636 | chr2  | 39005143 | 39006679 | + | 0  | NA                 | intron (intron (N   | -45567 NR_02838E          | 375196 Hs. 65903NR_02838E  | ENSG00000LOC37519E               | - uncharactncRNA                   |
| chr2-130C.7.179072 | -0.24575 | 0.862754 | -0.28484   | 0.775766 | 0.981636 | chr2  | 1.3E+08  | 1.3E+08  | + | 0  | NA                 | intron (intron (N   | -2581 NM_001321           | 84317 Hs. 10420E           | ENSG00000CCDC115                 | CDG20 ccpcolide-cprotein-coding    |
| chr22-297.7.179072 | -0.24575 | 0.862754 | -0.28484   | 0.775766 | 0.981636 | chr22 | 29794325 | 29795183 | + | 0  | NA                 | intron (L1ME3G LI   | 27385 NM_013387           | 29796 Hs. 284292NM_013387  | ENSG00000UCRQ10                  | HSPC051 H ubiquinoliprotein-coding |
| chr22-414.7.179072 | -0.24575 | 0.862754 | -0.28484   | 0.775766 | 0.981636 | chr22 | 41438931 | 41441118 | + | 0  | NA                 | intron (intron (N   | 6777 NM_01627E            | 10766 Hs. 47497E           | ENSG00000TOB2                    | APRO5 TOE transducepprotein-coding |
| chr3-187E.7.179072 | -0.24575 | 0.862754 | -0.28484   | 0.775766 | 0.981636 | chr3  | 1.87E+08 | 1.87E+08 | + | 0  | NA                 | intron (intron (N   | -7049 NR_135551           | 1.02E+08 NR_135551         | ENSG00000LOC10192E               | - uncharactncRNA                   |
| chr3-191E.7.179072 | -0.24575 | 0.862754 | -0.28484   | 0.775766 | 0.981636 | chr3  | 1.91E+08 | 1.91E+08 | + | 0  | NA                 | intron (intron (N   | -33886 NR_12060E          | 1.03E+08 NR_12060E         | LINC1-00C                        | - uncharactncRNA                   |
| chr4-675E.7.179072 | -0.24575 | 0.862754 | -0.28484   | 0.775766 | 0.981636 | chr4  | 67538538 | 67539723 | + | 0  | NA                 | intron (L1M5 LINE   | 6373 NM_00181E            | 1060 Hs. 479867NM_00181E   | ENSG00000CENPC                   | CENP-C CF centromeriprotein-coding |
| chr4-999C.7.179072 | -0.24575 | 0.862754 | -0.28484   | 0.775766 | 0.981636 | chr4  | 99905966 | 99907712 | + | 0  | NA                 | intron (intron (N   | -12293 NR_02417E          | 8649 Hs. 433332NM_02197C   | ENSG00000LAMTOR3                 | MAP2K1 IPI late endcprotein-coding |
| chr5-347E.7.179072 | -0.24575 | 0.862754 | -0.28484   | 0.775766 | 0.981636 | chr5  | 34723452 | 34724356 | + | 0  | NA                 | intron (intron (N   | 36345 NM_00114E           | 26064 Hs. 431403NM_01557E  | ENSG00000CRAI14                  | NORPEG Rretinoic protein-coding    |
| chr5-657E.7.179072 | -0.24575 | 0.862754 | -0.28484   | 0.775766 | 0.981636 | chr5  | 65701739 | 65702130 | + | 0  | NA                 | intron (MER3 DNA    | 20155 NM_01907E           | 54557 Hs. 482301NM_01907E  | ENSG00000SGTB                    | SGT2 small gltprotein-coding       |
| chr6-1224.7.179072 | -0.24575 | 0.862754 | -0.28484   | 0.775766 | 0.981636 | chr6  | 1.22E+08 | 1.22E+08 | + | 0  | NA                 | Intergeni L1PA14 LI | 33127 NM_02075E           | 57515 Hs. 146666NM_02075E  | ENSG00000SERINC1                 | TDEL1 TDE serine irprotein-coding  |
| chr6-149E.7.179072 | -0.24575 | 0.862754 | -0.28484   | 0.775766 | 0.981636 | chr6  | 1.5E+08  | 1.5E+08  | + | 0  | NA                 | promoter-promoter-  | -146 NR_077247            | 645958 Hs. 632614NR_077247 | RPS18P9                          | RPS18_6_7ribosomalpseudo           |
| chr8-557E.7.179072 | -0.24575 | 0.862754 | -0.28484   | 0.775766 | 0.981636 | chr8  | 55794743 | 55797715 | + | 0  | NA                 | intron (intron (N   | 22783 NM_00136E           | 96764 Hs. 335066NM_024831  | ENSG00000TGS1                    | NCOA61P T trimethyliprotein-coding |
| chr9-105E.7.179072 | -0.24575 | 0.862754 | -0.28484   | 0.775766 | 0.981636 | chr9  | 1.06E+08 | 1.06E+08 | + | 0  | NA                 | intron (intron (N   | 15597 NR_10426E           | 26134 Hs. 11315CNR_10426E  | ENSG00000CALGAP1E                | GARNL2 GaRAL GTPaspseudo           |
| chr13-491.7.940133 | 0.234932 | 0.825042 | 0.284751</ |          |          |       |          |          |   |    |                    |                     |                           |                            |                                  |                                    |

|                     |          |          |          |          |          |       |           |          |   |   |    |                      |        |           |          |            |                        |                     |                          |                           |                |                |
|---------------------|----------|----------|----------|----------|----------|-------|-----------|----------|---|---|----|----------------------|--------|-----------|----------|------------|------------------------|---------------------|--------------------------|---------------------------|----------------|----------------|
| chr11-77: 6.946957  | 0.249036 | 0.878933 | 0.283338 | 0.776917 | 0.981636 | chr11 | 77330405  | 77331505 | + | 0 | NA | intron (N)LP4A LIN   | -29289 | NM_182833 | 220032   | Hs. 249799 | ENSG000002GDPD4        | GDE6                | glycerolp protein-coding |                           |                |                |
| chr12-22: 6.946957  | 0.249036 | 0.878933 | 0.283338 | 0.776917 | 0.981636 | chr12 | 22678730  | 22679484 | + | 0 | NA | intron (N)MLT2B3 LI  | 53936  | NM_001035 | 55500    | Hs. 29464  | NM_018633              | ENSG000002ETNK1     | EKI1 EKI1                | lethanolan protein-coding |                |                |
| chr12-48: 6.946957  | 0.249036 | 0.878933 | 0.283338 | 0.776917 | 0.981636 | chr12 | 48139780  | 48141301 | + | 0 | NA | intron (N)intron (N) | 7743   | NR_106766 | 1.02E+08 | NR_106766  | ENSG000002MIR6505      | hsa-mir-6           | microRNA ncRNA           |                           |                |                |
| chr12-11: 6.946957  | 0.249036 | 0.878933 | 0.283338 | 0.776917 | 0.981636 | chr12 | 1.12E+08  | 1.12E+08 | + | 0 | NA | intron (N)intron (N) | -12267 | NR_106921 | 1.02E+08 | NR_106921  | ENSG000002MIR6861      | hsa-mir-6           | microRNA ncRNA           |                           |                |                |
| chr12-11: 6.946957  | 0.249036 | 0.878933 | 0.283338 | 0.776917 | 0.981636 | chr12 | 1.13E+08  | 1.13E+08 | + | 0 | NA | intron (N)MER58A DN  | -11173 | NR_106956 | 1.02E+08 | NR_106956  | ENSG000002MIR7106      | hsa-mir-7           | microRNA ncRNA           |                           |                |                |
| chr12-12: 6.946957  | 0.249036 | 0.878933 | 0.283338 | 0.776917 | 0.981636 | chr12 | 1.24E+08  | 1.24E+08 | + | 0 | NA | intron (N)intron (N) | -23520 | NM_207437 | 196385   | Hs. 622654 | NM_207437              | ENSG000002DNAH10    | -                        | dynein a                  | protein-coding |                |
| chr15-42: 6.946957  | 0.249036 | 0.878933 | 0.283338 | 0.776917 | 0.981636 | chr15 | 62723503  | 62727131 | + | 0 | NA | intron (N)intron (N) | 11811  | NM_138477 | 146059   | Hs. 599232 | NM_138477              | ENSG000002CDAM1     | CDAI1 CDAI1              | codanin 1                 | protein-coding |                |
| chr16-68: 6.946957  | 0.249036 | 0.878933 | 0.283338 | 0.776917 | 0.981636 | chr16 | 68254068  | 68256154 | + | 0 | NA | intron (N)intron (N) | -9415  | NM_003983 | 9057     | Hs. 679582 | NM_003983              | ENSG000002SLCTA6    | LAT-2 LAT1               | solute c                  | protein-coding |                |
| chr16-69: 6.946957  | 0.249036 | 0.878933 | 0.283338 | 0.776917 | 0.981636 | chr16 | 69876493  | 69877352 | + | 0 | NA | intron (N)Tiger1 I   | 38185  | NM_001270 | 11060    | Hs. 408458 | NM_007014              | ENSG000002WWP2      | WWP2 WWP2                | WW domain                 | protein-coding |                |
| chr16-71: 6.946957  | 0.249036 | 0.878933 | 0.283338 | 0.776917 | 0.981636 | chr16 | 71476098  | 71478550 | + | 0 | NA | intron (N)intron (N) | 12000  | NM_006961 | 7567     | Hs. 660070 | NM_006961              | ENSG000002ZNF19     | KOX12                    | zinc finger               | protein-coding |                |
| chr16-82: 6.946957  | 0.249036 | 0.878933 | 0.283338 | 0.776917 | 0.981636 | chr16 | 89277873  | 89283169 | + | 0 | NA | exon (NM)exon (NM)   | -15607 | NR_136333 | 1.05E+08 | Hs. 657381 | NR_136333              | ENSG000002LOC105371 | -                        | uncharacter               | ncRNA          |                |
| chr17-76: 6.946957  | 0.249036 | 0.878933 | 0.283338 | 0.776917 | 0.981636 | chr17 | 76328798  | 76329405 | + | 0 | NA | intron (N)AluJo SIN  | -21421 | NM_032134 | 84074    | Hs. 252733 | NM_032134              | ENSG000002QRICH2    | SPGF35                   | glutamine                 | protein-coding |                |
| chr17-77: 6.946957  | 0.249036 | 0.878933 | 0.283338 | 0.776917 | 0.981636 | chr17 | 77167403  | 77168578 | + | 0 | NA | intron (N)LTR10B1 I  | -17223 | NM_001144 | 6397     | Hs. 464184 | NM_003003              | ENSG000002SECI4L1   | PRELID4A SECI4           | lik                       | protein-coding |                |
| chr18-23: 6.946957  | 0.249036 | 0.878933 | 0.283338 | 0.776917 | 0.981636 | chr18 | 23244119  | 23247608 | + | 0 | NA | intron (N)intron (N) | 90038  | NM_138373 | 91768    | Hs. 11108  | NM_138373              | ENSG000002CABLES1   | CABL1 CAF                | Cdk5 and                  | protein-coding |                |
| chr19-184: 6.946957 | 0.249036 | 0.878933 | 0.283338 | 0.776917 | 0.981636 | chr19 | 18435439  | 18435992 | + | 0 | NA | intron (N)CpG-14071  | 1594   | NM_001255 | 51477    | Hs. 405873 | NM_016368              | ENSG000002ISYNA1    | INO1 INOS                | inositol-                 | protein-coding |                |
| chr2-201: 6.946957  | 0.249036 | 0.878933 | 0.283338 | 0.776917 | 0.981636 | chr2  | 2.01E+08  | 2.01E+08 | + | 0 | NA | intron (N)intron (N) | 15042  | NM_033355 | 841      | Hs. 599762 | NM_001228              | ENSG000002CASP8     | ALPS2B CASP8             | caspase                   | protein-coding |                |
| chr2-239: 6.946957  | 0.249036 | 0.878933 | 0.283338 | 0.776917 | 0.981636 | chr2  | 2.39E+08  | 2.39E+08 | + | 0 | NA | promoter-promoter-   | -518   | NR_039948 | 1.01E+08 | NR_039948  | ENSG000002MIR2467      | mir-2467            | microRNA ncRNA           |                           |                |                |
| chr20-94: 6.946957  | 0.249036 | 0.878933 | 0.283338 | 0.776917 | 0.981636 | chr20 | 9435917   | 9436706  | + | 0 | NA | intron (N)intron (N) | -78047 | NM_001199 | 24141    | Hs. 22920  | NM_012261              | ENSG000002LAMP5     | BAD-LAMP                 | lysosomal                 | protein-coding |                |
| chr20-414: 6.946957 | 0.249036 | 0.878933 | 0.283338 | 0.776917 | 0.981636 | chr20 | 41414356  | 41416080 | + | 0 | NA | exon (NM)exon (NM)   | -48400 | NM_052846 | 90187    | Hs. 726522 | NM_052846              | ENSG000002EMILIN3   | C20orf130                | elastin                   | protein-coding |                |
| chr21-39: 6.946957  | 0.249036 | 0.878933 | 0.283338 | 0.776917 | 0.981636 | chr21 | 39308254  | 39311584 | + | 0 | NA | intron (N)LMC5a LI   | 3713   | NM_018963 | 54014    | Hs. 627135 | NM_018963              | ENSG000002BRWD1     | C21orf107                | bromodomain               | protein-coding |                |
| chr21-35: 6.946957  | 0.249036 | 0.878933 | 0.283338 | 0.776917 | 0.981636 | chr22 | 35389836  | 35394701 | + | 0 | NA | intron (N)Charlie2   | -7872  | NM_006733 | 4174     | Hs. 517582 | NM_006733              | ENSG000002MCM5      | CD46 MG                  | minichrom                 | protein-coding |                |
| chr22-501: 6.946957 | 0.249036 | 0.878933 | 0.283338 | 0.776917 | 0.981636 | chr22 | 50193330  | 50194930 | + | 0 | NA | intron (N)intron (N) | 3543   | NM_001320 | 80305    | Hs. 517731 | NM_025204              | ENSG000002TRABD     | LP6054 PF                | TraB domain               | protein-coding |                |
| chr3-488: 6.946957  | 0.249036 | 0.878933 | 0.283338 | 0.776917 | 0.981636 | chr3  | 48837882  | 48839069 | + | 0 | NA | intron (N)AluSx SIN  | 9399   | NM_001321 | 5576     | Hs. 631922 | NM_004157              | ENSG000002PRKAR2A   | PKR2 PRK2                | protein                   | protein-coding |                |
| chr5-1067: 6.946957 | 0.249036 | 0.878933 | 0.283338 | 0.776917 | 0.981636 | chr5  | 10679713  | 10683101 | + | 0 | NA | intron (N)intron (N) | 79823  | NM_004394 | 1611     | Hs. 75189  | NM_004394              | ENSG000002DAP       | -                        | death                     | protein-coding |                |
| chr7-2214: 6.946957 | 0.249036 | 0.878933 | 0.283338 | 0.776917 | 0.981636 | chr7  | 2214821   | 2218330  | + | 0 | NA | intron (N)LMC1 LIN   | 16370  | NM_001304 | 8379     | Hs. 654838 | NM_003550              | ENSG000002MAD1L1    | MAD1 PIG6                | mitotic                   | protein-coding |                |
| chr7-102: 6.946957  | 0.249036 | 0.878933 | 0.283338 | 0.776917 | 0.981636 | chr7  | 1.03E+08  | 1.03E+08 | + | 0 | NA | intron (N)LP4A LIN   | 78562  | NM_001144 | 222234   | Hs. 202543 | NM_147194              | ENSG000002FAM185A   | -                        | family w                  | protein-coding |                |
| chr8-277: 6.946957  | 0.249036 | 0.878933 | 0.283338 | 0.776917 | 0.981636 | chr8  | 27750881  | 27752583 | + | 0 | NA | intron (N)intron (N) | 20908  | NR_156432 | 55246    | Hs. 445512 | NM_018240              | ENSG000002CCDC25    | -                        | coiled-c                  | protein-coding |                |
| chr8-1334: 6.946957 | 0.249036 | 0.878933 | 0.283338 | 0.776917 | 0.981636 | chr8  | 1.33E+08  | 1.33E+08 | + | 0 | NA | intron (N)intron (N) | 75539  | NM_003033 | 6482     | Hs. 374257 | NM_003033              | ENSG000002ST3GAL1   | Gal-1 Nac6S              | ST3 beta-                 | protein-coding |                |
| chrX-155: 5.896259  | 0.270743 | 0.955749 | 0.282378 | 0.776964 | 0.981636 | chrX  | 1.55E+08  | 1.55E+08 | + | 0 | NA | intron (N)LMIEc LIN  | 6453   | NM_001242 | 79184    | Hs. 558537 | NM_024332              | ENSG000002BRCC3     | BRCC36 C                 | BRCA1/BRC                 | protein-coding |                |
| chr1-244: 6.946957  | 0.23669  | 0.835824 | -0.28318 | 0.777041 | 0.981636 | chr1  | 24466030  | 24467263 | + | 0 | NA | TTS (NM)_TTS (NM)_C  | -35698 | NM_001251 | 11123    | Hs. 656799 | NM_013441              | ENSG000002RCAN3     | DISCR1L2 N               | RCAN1                     | protein-coding |                |
| chr1-108: 7.640529  | -0.23669 | 0.835824 | -0.28318 | 0.777041 | 0.981636 | chr1  | 1.09E+08  | 1.09E+08 | + | 0 | NA | 3' UTR (N)3' UTR (N) | 20246  | NM_001278 | 23155    | Hs. 658485 | NM_015127              | ENSG000002CLCC1     | MCLC                     | chloride                  | protein-coding |                |
| chr10-87: 7.640529  | -0.23669 | 0.835824 | -0.28318 | 0.777041 | 0.981636 | chr10 | 87665651  | 87667590 | + | 0 | NA | intron (N)intron (N) | 6742   | NM_001016 | 9060     | Hs. 524491 | NM_004670              | ENSG000002PAPSS2    | ATPSK2 BC3               | 3'-phosph                 | protein-coding |                |
| chr10-88: 7.640529  | -0.23669 | 0.835824 | -0.28318 | 0.777041 | 0.981636 | chr10 | 88936891  | 88943119 | + | 0 | NA | TTS (NR)_TTS (NR)_I  | 7321   | NR_125373 | 1E+08    | NR_125373  | ENSG000002ACTA2-AS1    | UC001kfo ACTA2      | ant                      | ncRNA                     |                |                |
| chr10-10: 7.640529  | -0.23669 | 0.835824 | -0.28318 | 0.777041 | 0.981636 | chr10 | 1.01E+08  | 1.01E+08 | + | 0 | NA | intron (N)AluSq4 SI  | -15141 | NM_017893 | 57715    | Hs. 591922 | NM_017893              | ENSG000002SEMA4G    | -                        | semaphori                 | protein-coding |                |
| chr10-10: 7.640529  | -0.23669 | 0.835824 | -0.28318 | 0.777041 | 0.981636 | chr10 | 1.1E+08   | 1.1E+08  | + | 0 | NA | exon (NM)exon (NM)   | 34668  | NM_001324 | 7511     | Hs. 390622 | NM_020383              | ENSG000002XPNP1     | APPI SAMF                | X-prolyl                  | protein-coding |                |
| chr10-11: 7.640529  | -0.23669 | 0.835824 | -0.28318 | 0.777041 | 0.981636 | chr10 | 1.2E+08   | 1.2E+08  | + | 0 | NA | intron (N)LMIE4b LI  | 27318  | NM_007190 | 19116    | Hs. 435004 | NM_007190              | ENSG000002SEC23IP   | MPT053 F                 | SEC23                     | intron         | protein-coding |
| chr11-29: 7.640529  | -0.23669 | 0.835824 | -0.28318 | 0.777041 | 0.981636 | chr11 | 2953475   | 2955216  | + | 0 | NA | intron (N)intron (N) | 9548   | NR_002982 | 677833   | Hs. 689696 | NR_002982              | ENSG000002SNORA54   | ACA54                    | small                     | nucsnRNA       |                |
| chr11-33: 7.640529  | -0.23669 | 0.835824 | -0.28318 | 0.777041 | 0.981636 | chr11 | 3308474   | 33088262 | + | 0 | NA | intron (N)intron (N) | 9636   | NR_015451 | 283267   | Hs. 533701 | NR_015451              | ENSG000002LINC00294 | hsa-miR-6                | microRNA ncRNA            |                |                |
| chr12-53: 7.640529  | -0.23669 | 0.835824 | -0.28318 | 0.777041 | 0.981636 | chr12 | 53055164  | 53059730 | + | 0 | NA | TTS (NR)_TTS (NR)_I  | 503    | NR_106811 | 1.02E+08 | NR_106811  | ENSG000002MIR6757      | hsa-mir-6           | microRNA ncRNA           |                           |                |                |
| chr12-111: 7.640529 | -0.23669 | 0.835824 | -0.28318 | 0.777041 | 0.981636 | chr12 | 1.11E+08  | 1.11E+08 | + | 0 | NA | 3' UTR (N)3' UTR (N) | 15043  | NM_001291 | 10019    | Hs. 506784 | NM_005477              | ENSG000002SH2B3     | IDDM20 L                 | SH2B adaf                 | protein-coding |                |
| chr14-96: 7.640529  | -0.23669 | 0.835824 | -0.28318 | 0.777041 | 0.981636 | chr14 | 96521603  | 96522455 | + | 0 | NA | intron (N)AluSz SIN  | 19114  | NM_001293 | 10914    | Hs. 253722 | NM_032632              | ENSG000002PAPOLA    | PAP PAP                  | -poly (A)                 | protein-coding |                |
| chr14-10: 7.640529  | -0.23669 | 0.835824 | -0.28318 | 0.777041 | 0.981636 | chr14 | 1.11E+08  | 1.01E+08 | + | 0 | NA | TTS (NR)_TTS (NR)_C  | 116    | NR_003198 | 767582   | NR_003198  | ENSG000002SNORD114-14q | (11-6)              | small                    | nucsnRNA                  |                |                |
| chr14-101: 7.640529 | -0.23669 | 0.835824 | -0.28318 | 0.777041 | 0.981636 | chr14 | 1.01E+08  | 1.01E+08 | + | 0 | NA | promoter-promoter-   | -900   | NR_029874 | 494331   | NR_029874  | ENSG000002MIR382       | MIRN382             | microRNA ncRNA           |                           |                |                |
| chr15-28: 7.640529  | -0.23669 | 0.835824 | -0.28318 | 0.777041 | 0.981636 | chr15 | 28311053  | 28313054 | + | 0 | NA | intron (N)intron (N) | 10099  | NM_004667 | 8924     | Hs. 434893 | NM_004667              | ENSG000002HERC2     | D15F37S1                 | HECT and                  | protein-coding |                |
| chr16-89: 7.640529  | -0.23669 | 0.835824 | -0.28318 | 0.777041 | 0.981636 | chr16 | 8929543</ |          |   |   |    |                      |        |           |          |            |                        |                     |                          |                           |                |                |



|           |          |          |          |          |          |          |       |          |          |   |   |    |                      |                   |                              |                                 |                                         |
|-----------|----------|----------|----------|----------|----------|----------|-------|----------|----------|---|---|----|----------------------|-------------------|------------------------------|---------------------------------|-----------------------------------------|
| chr6-3033 | 8.990164 | 0.22243  | 0.787552 | 0.282432 | 0.777612 | 0.981636 | chr6  | 30335992 | 30336931 | + | 0 | NA | intron (N)Tigger1 I  | 7150 NM_001199    | 202658 Hs. 413495NM_001199   | ENSG000003TRIM39-<br>RF TRIM39R | TRIM39-<br>RF protein-coding            |
| chr14-73C | 6.717616 | -0.25576 | 0.906427 | -0.28217 | 0.777817 | 0.981636 | chr14 | 73082081 | 73082304 | + | 0 | NA | intron (N)HAL LINE   | 23658 NM_021235   | 58517 Hs. 531106NM_021235    | ENSG000003RBM25                 | NET52 REI RNA bindi<br>protein-coding   |
| chr14-102 | 6.717616 | -0.25576 | 0.906427 | -0.28217 | 0.777817 | 0.981636 | chr14 | 1.03E+08 | 1.03E+08 | + | 0 | NA | 3' UTR (N)3' UTR (N) | -49741 NM_001199  | 7187 Hs. 510525NM_00330C     | ENSG000003TRAF3                 | CAP-1 CAITNF rece<br>protein-coding     |
| chr20-945 | 6.717616 | -0.25576 | 0.906427 | -0.28217 | 0.777817 | 0.981636 | chr20 | 9455657  | 9456041  | + | 0 | NA | intron (N)intron (N) | -58509 NM_001199  | 24141 Hs. 22920 NM_012261    | ENSG000003LAMP5                 | BAD-LAMP lysosomal<br>protein-coding    |
| chr9-125  | 6.717616 | -0.25576 | 0.906427 | -0.28217 | 0.777817 | 0.981636 | chr9  | 1.25E+08 | 1.25E+08 | + | 0 | NA | intron (N)L1P43 LIN  | -69303 NM_002077  | 2800 Hs. 59504 NM_002077     | ENSG000003GOLGA1                | golgin-97 golgin Al<br>protein-coding   |
| chr17-604 | 8.966591 | 0.228067 | 0.808311 | 0.282152 | 0.777827 | 0.981636 | chr17 | 60478900 | 60479220 | + | 0 | NA | intron (N)intron (N) | 47180 NM_001282   | 10513 Hs. 84084 NM_00638C    | ENSG000003APPBP2                | APP-BP2 Famlyoid t<br>protein-coding    |
| chr4-867  | 8.444579 | 0.227485 | 0.806545 | 0.282049 | 0.777906 | 0.981636 | chr4  | 86750901 | 86751100 | + | 0 | NA | intron (N)intron (N) | 98384 NM_197966   | 345274 Hs. 452996NM_197966   | ENSG000003SLC10A6               | SOAT solute c<br>protein-coding         |
| chr6-358  | 8.444579 | 0.227485 | 0.806545 | 0.282049 | 0.777906 | 0.981636 | chr6  | 35863942 | 35864956 | + | 0 | NA | intron (N)L1MA2 LIN  | 56649 NM_003137   | 6732 Hs. 443861NM_003137     | ENSG000003SRPK1                 | SFRSK1 SRSF<br>protein-coding           |
| chr9-999  | 8.444579 | 0.227485 | 0.806545 | 0.282049 | 0.777906 | 0.981636 | chr9  | 99923864 | 99924327 | + | 0 | NA | intron (N)MER21A LI  | 17441 NM_017919   | 55014 Hs. 704031NM_017919    | ENSG000003STX17                 | - syntaxin<br>protein-coding            |
| chr1-394  | 11.87872 | -0.19227 | 0.682233 | -0.28182 | 0.778083 | 0.981636 | chr1  | 39435046 | 39450893 | + | 0 | NA | intron (N)intron (N) | 33896 NM_015038   | 643314 Hs. 658766NM_015038   | ENSG000003KIAA0754              | - KIAA0754<br>protein-coding            |
| chr1-2431 | 11.87872 | -0.19227 | 0.682233 | -0.28182 | 0.778083 | 0.981636 | chr1  | 2.43E+08 | 2.43E+08 | + | 0 | NA | exon (NM)exon (NM)   | -63312 NR_029401  | 731275 Hs. 722353NR_029401   | ENSG000003LINC01347             | - long intncRNA                         |
| chr21-466 | 11.87872 | -0.19227 | 0.682233 | -0.28182 | 0.778083 | 0.981636 | chr21 | 46643466 | 46646622 | + | 0 | NA | intron (N)AluJr SIN  | 9370 NM_206962    | 3275 Hs. 154163NM_001535     | ENSG000003PRMT2                 | HRMT1L1 protein<br>protein-coding       |
| chr22-363 | 11.87872 | -0.19227 | 0.682233 | -0.28182 | 0.778083 | 0.981636 | chr22 | 36325537 | 36327193 | + | 0 | NA | intron (N)intron (N) | -39458 NR_106877  | 1.02E+08 NR_106877           | ENSG000003MIR6819               | hpa-mir-6819<br>ncRNA                   |
| chr3-519  | 11.87872 | -0.19227 | 0.682233 | -0.28182 | 0.778083 | 0.981636 | chr3  | 51991623 | 51994870 | + | 0 | NA | TTS (NM)TTS (NM)C    | 2649 NM_000992    | 6159 Hs. 425125NM_000992     | ENSG000003RPL29                 | HIS HMR1 ribosomal<br>protein-coding    |
| chr2-3867 | 8.493576 | 0.227325 | 0.806778 | 0.281769 | 0.778121 | 0.981636 | chr2  | 38675846 | 38676412 | + | 0 | NA | intron (N)intron (N) | 10015 NM_138801   | 130589 Hs. 435012NM_138801   | ENSG000003GALM                  | BLOCK25 Galactose<br>protein-coding     |
| chr1-3547 | 6.905817 | 0.247196 | 0.877495 | 0.281706 | 0.778169 | 0.981636 | chr1  | 35477702 | 35479021 | + | 0 | NA | intron (N)L1MA2 LIN  | 79042 NM_024874   | 79932 Hs. 456507NM_024874    | ENSG000003KIAA03191             | AAVR AAVKIAA0319<br>protein-coding      |
| chr1-426  | 6.905817 | 0.247196 | 0.877495 | 0.281706 | 0.778169 | 0.981636 | chr1  | 42666204 | 42667055 | + | 0 | NA | intron (N)intron (N) | 8206 NM_006347    | 10465 Hs. 256635NM_006347    | ENSG000003CPII                  | CYP-20 Cpeptidyl<br>protein-coding      |
| chr10-375 | 6.905817 | 0.247196 | 0.877495 | 0.281706 | 0.778169 | 0.981636 | chr10 | 375065   | 376046   | + | 0 | NA | intron (N)intron (N) | 195561 NM_001202  | 10771 Hs. 292265NM_006624    | ENSG000003MYND11                | BRAM1 BS5 zinc<br>finger protein-coding |
| chr11-75  | 6.905817 | 0.247196 | 0.877495 | 0.281706 | 0.778169 | 0.981636 | chr11 | 75983498 | 75984151 | + | 0 | NA | intron (N)Tigger3a   | 168614 NM_003366  | 7405 Hs. 202477NM_003366     | ENSG000003UVRAG                 | DHTX VPS5UV radiat<br>protein-coding    |
| chr12-481 | 6.905817 | 0.247196 | 0.877495 | 0.281706 | 0.778169 | 0.981636 | chr12 | 48123803 | 48125376 | + | 0 | NA | intron (N)intron (N) | 1942 NM_001166    | 5213 Hs. 75160 NM_000285     | ENSG000003PFKM                  | ATP-PFK1 Cphospho<br>protein-coding     |
| chr13-64  | 6.905817 | 0.247196 | 0.877495 | 0.281706 | 0.778169 | 0.981636 | chr13 | 64154379 | 64154738 | + | 0 | NA | intron (N)THE1B LTF  | -49178 NM_001278  | 84650 Hs. 433278NM_032565    | ENSG000003EBPL                  | EBP EB like<br>protein-coding           |
| chr14-10C | 6.905817 | 0.247196 | 0.877495 | 0.281706 | 0.778169 | 0.981636 | chr14 | 1.01E+08 | 1.01E+08 | + | 0 | NA | intron (N)intron (N) | 1655 NR_146000    | 79104 Hs. 118101NR_024149    | MEG8                            | Bsr Irm maternal<br>ncRNA               |
| chr16-195 | 6.905817 | 0.247196 | 0.877495 | 0.281706 | 0.778169 | 0.981636 | chr16 | 19500109 | 19501445 | + | 0 | NA | TTS (NM)TTS (NM)C    | 21321 NR_136688   | 51573 Hs. 512607NM_016641    | ENSG000003GDE1                  | 363E6.2 glycerol<br>protein-coding      |
| chr17-85  | 6.905817 | 0.247196 | 0.877495 | 0.281706 | 0.778169 | 0.981636 | chr17 | 8512147  | 8512566  | + | 0 | NA | intron (N)intron (N) | 76472 NM_030808   | 81565 Hs. 372122NM_030808    | ENSG000003NDEL1                 | EOPA MIT1 nudE<br>protein-coding        |
| chr20-334 | 6.905817 | 0.247196 | 0.877495 | 0.281706 | 0.778169 | 0.981636 | chr20 | 33412008 | 33412433 | + | 0 | NA | intron (N)MIR3 SINE  | -10651 NM_016082  | 51654 Hs. 435952NM_016082    | ENSG000003CDK5RAP1              | C20orf34 CDK5 reg<br>protein-coding     |
| chr3-370  | 6.905817 | 0.247196 | 0.877495 | 0.281706 | 0.778169 | 0.981636 | chr3  | 37022172 | 37022448 | + | 0 | NA | intron (N)MER21A LI  | 29860 NM_001258   | 4292 Hs. 195364NM_000245     | ENSG000003MLH1                  | COCA2 FCCmutL<br>home protein-coding    |
| chr3-641  | 6.905817 | 0.247196 | 0.877495 | 0.281706 | 0.778169 | 0.981636 | chr3  | 64154379 | 64154738 | + | 0 | NA | intron (N)AluY SINE  | -32986 NR_046702  | 1.01E+08 Hs. 670843NR_046702 | ENSG000003PRICKLE2-             | PRICKLE2<br>ncRNA                       |
| chr3-149  | 6.905817 | 0.247196 | 0.877495 | 0.281706 | 0.778169 | 0.981636 | chr3  | 1.5E+08  | 1.5E+08  | + | 0 | NA | intron (N)intron (N) | 86015 NM_001168   | 25937 Hs. 477921NM_015475    | ENSG000003WVTR1                 | TAZ WW domair<br>protein-coding         |
| chr4-133  | 6.905817 | 0.247196 | 0.877495 | 0.281706 | 0.778169 | 0.981636 | chr4  | 1330742  | 1331248  | + | 0 | NA | intron (N)intron (N) | -16213 NM_020894  | 57654 Hs. 380475NM_020894    | ENSG000003UVSSA                 | KIAA1530 UV stimu<br>protein-coding     |
| chr7-994  | 6.905817 | 0.247196 | 0.877495 | 0.281706 | 0.778169 | 0.981636 | chr7  | 99426636 | 99429799 | + | 0 | NA | intron (N)AluY SINE  | 10581 NM_015545   | 26024 Hs. 632313NM_015545    | ENSG000003PTCD1                 | - pentatric<br>protein-coding           |
| chr7-115  | 6.905817 | 0.247196 | 0.877495 | 0.281706 | 0.778169 | 0.981636 | chr7  | 1.12E+08 | 1.12E+08 | + | 0 | NA | intron (N)AluY SINE  | 130866 NR_103800  | 1.01E+08 Hs. 677515NR_103800 | ENSG000003DOCK4-AS1-            | DOCK4 antncRNA                          |
| chr17-44  | 6.222878 | -0.27225 | 0.966455 | -0.2817  | 0.778171 | 0.981636 | chr17 | 44064249 | 44064514 | + | 0 | NA | intron (N)intron (N) | 2290 NM_001371445 | 146057 Hs. 646511NM_17350C   | ENSG000003TTBK2                 | SCA11 TTE tau tubul<br>protein-coding   |
| chr15-42  | 8.452437 | 0.225641 | 0.801071 | 0.281674 | 0.778193 | 0.981636 | chr15 | 42946157 | 42947443 | + | 0 | NA | intron (N)intron (N) | -26022 NM_173500  | 146057 Hs. 646511NM_17350C   | ENSG000003TTBK2                 | SCA11 TTE tau tubul<br>protein-coding   |
| chr19-17  | 8.452437 | 0.225641 | 0.801071 | 0.281674 | 0.778193 | 0.981636 | chr19 | 17577696 | 17578957 | + | 0 | NA | intron (N)MIR3 SINE  | 22677 NM_024655   | 79709 Hs. 418795NM_024655    | ENSG000003COLGALT1              | BVSD3 Colcollagen<br>protein-coding     |
| chr2-2067 | 8.452437 | 0.225641 | 0.801071 | 0.281674 | 0.778193 | 0.981636 | chr2  | 2.07E+08 | 2.07E+08 | + | 0 | NA | intron (N)LM1B LIN   | -7258 NR_036078   | NR_036078                    | ENSG000003MIR3130-2             | MIR3130-4<br>microRNA ncRNA             |
| chr20-45  | 8.452437 | 0.225641 | 0.801071 | 0.281674 | 0.778193 | 0.981636 | chr20 | 45961945 | 45962377 | + | 0 | NA | exon (NM)exon (NM)   | 10042 NR_022095   | 63925 Hs. 174193NM_022095    | ENSG000003ZNF335                | MCPH10 Nizinc<br>finger protein-coding  |
| chr7-147  | 8.452437 | 0.225641 | 0.801071 | 0.281674 | 0.778193 | 0.981636 | chr7  | 1473412  | 1473953  | + | 0 | NA | exon (NM)exon (NM)   | -14212 NM_182924  | 79778 Hs. 376617NM_024725    | ENSG000003MICALL2               | JRAB MIC MICAL lik<br>protein-coding    |
| chr7-149  | 8.452437 | 0.225641 | 0.801071 | 0.281674 | 0.778193 | 0.981636 | chr7  | 1.5E+08  | 1.5E+08  | + | 0 | NA | intron (N)AluJr4 SI  | -54417 NM_152557  | 155061 Hs. 24643 NM_152557   | ENSG000003ZNF746                | PARIS zinc<br>finger protein-coding     |
| chr5-957  | 11.37612 | -0.19674 | 0.7018   | -0.28161 | 0.778239 | 0.981636 | chr5  | 95737227 | 95740432 | + | 0 | NA | intron (N)L2c LINE   | -6727 NM_001345   | 83890 Hs. 50499 NM_031955    | ENSG000003SPATA9                | ND5-SP16 spermatog<br>protein-coding    |
| chr12-45  | 6.890101 | 0.251432 | 0.89302  | 0.281552 | 0.778287 | 0.981636 | chr12 | 45932011 | 45932595 | + | 0 | NA | intron (N)intron (N) | 58271 NM_004715   | 9169 Hs. 210367NM_004715     | ENSG000003SCAF11                | CASP11 SFR-relate<br>protein-coding     |
| chr12-101 | 6.890101 | 0.251432 | 0.89302  | 0.281552 | 0.778287 | 0.981636 | chr12 | 1.01E+08 | 1.01E+08 | + | 0 | NA | intron (N)L2c LINE   | -27473 NR_049838  | 1.01E+08 NR_049838           | ENSG000003MIR548A               | microRNA ncRNA                          |
| chr2-105  | 6.890101 | 0.251432 | 0.89302  | 0.281552 | 0.778287 | 0.981636 | chr2  | 1.06E+08 | 1.06E+08 | + | 0 | NA | exon (NM)exon (NM)   | 30421 NM_001004   | 8440 Hs. 529244NM_003581     | ENSG000003CNCK2                 | GRB4 NCK1NCK adapt<br>protein-coding    |
| chr22-26  | 6.890101 | 0.251432 | 0.89302  | 0.281552 | 0.778287 | 0.981636 | chr22 | 26527722 | 26528377 | + | 0 | NA | intron (N)intron (N) | 15517 NR_144525   | 1.01E+08 Hs. 405877NR_144529 | LOC100507-                      | uncharacterncRNA                        |
| chr10-294 | 7.955849 | 0.231176 | 0.821256 | 0.28149  | 0.778334 | 0.981636 | chr10 | 29468157 | 29470746 | + | 0 | NA | TTS (NR)TTS (NR)1    | 59208 NR_110928   | 1.03E+08 Hs. 499205NR_00393C | ENSG000003SVIL-AS1              | SVIL antincRNA                          |
| chr10-84  | 7.955849 | 0.231176 | 0.821256 | 0.28149  | 0.778334 | 0.981636 | chr10 | 84442206 | 84443853 | + | 0 | NA | intron (N)L1P47 LIN  | 17863 NM_001284   | 54462 Hs. 461985NM_018995    | ENSG000003CCSER2                | FAM190B Coiled-cc<br>protein-coding     |
| chr10-924 | 7.955849 | 0.231176 | 0.821256 | 0.28149  | 0.778334 | 0.981636 | chr10 | 92468085 | 92470493 | + | 0 | NA | intron (N)intron (N) | 28472 NM_001322   | 3416 Hs. 500545NM_004965     | ENSG000003IDE                   | INSULYSIN insulin<br>protein-coding     |
| chr10-97  | 7.955849 | 0.231176 | 0.821256 | 0.28149  | 0.778334 | 0.981636 | chr10 | 97394768 | 97397701 | + | 0 | NA | exon (NM)exon (NM)   | 5106 NM_015175    | 23223 Hs. 434251NM_015175    | ENSG000003RRP12                 | KIAA0690 ribosomal<br>protein-coding    |
| chr12-90  | 7.955849 | 0.231176 | 0.821256 | 0.28149  | 0.778334 | 0.981636 | chr12 | 900037   | 906523   | + | 0 | NA | intron (N)intron (N) | 29796 NM_001297   | 5893 Hs. 410355NM_134422     | ENSG000003RAD52                 | - RAD52 hon<br>protein-coding           |
| chr12-11  | 7.955849 | 0.231176 | 0.821256 | 0.28149  | 0.778334 | 0.981636 | chr12 | 1.12E+08 | 1.12E+08 | + | 0 | NA | intron (N)LTR10C LI  | 25777 NM_025247   | 80724 Hs. 331141NM_025247    | ENSG000003ACAD10                | - acyl-CoA<br>protein-coding            |
| chr14-234 | 7.955849 | 0.231176 | 0.821256 | 0.28149  | 0.778334 | 0.981636 | chr14 | 23470962 | 23477872 | + | 0 | NA | intron (N)intron (N) | 4714 NM_001042    | 25983 Hs. 9043 NM_015514     | ENSG000003NGDN                  | C14orf12C neurogic<br>protein-coding    |
| chr17-42  | 7.955849 | 0.231176 | 0.821256 | 0.28149  | 0.778334 | 0.981636 | chr17 | 42500434 | 42505352 | + | 0 | NA | intron (N)intron (N) | 7924 NR_049845    | 1.01E+08 NR_049845           | ENSG000003MIR548AT              | microRNA ncRNA                          |
| chr19-37  | 7.955849 | 0.231176 | 0.821256 | 0.28149  | 0.778334 | 0.981636 | chr19 | 37090264 | 37096453 | + | 0 | NA | intron (N)AluSg SIN  | 14925 NM_001325   | 147923 Hs. 444992NM_1446     |                                 |                                         |



|           |          |          |          |          |          |          |       |          |          |   |   |    |                     |        |           |          |           |                      |                |                             |
|-----------|----------|----------|----------|----------|----------|----------|-------|----------|----------|---|---|----|---------------------|--------|-----------|----------|-----------|----------------------|----------------|-----------------------------|
| chr9-1114 | 8.460295 | 0.223867 | 0.799392 | 0.280047 | 0.779441 | 0.981636 | chr9  | 1.11E+08 | 1.11E+08 | + | 0 | NA | intron (Nintron (N  | 44682  | NM_001364 | 23392    | Hs.368255 | ENSG000002ECPAS      | ECM29 KIF23    | prcprotein-coding           |
| chr1-1554 | 7.632671 | -0.23495 | 0.839188 | -0.27998 | 0.779494 | 0.981636 | chr1  | 15544599 | 15546772 | + | 0 | NA | intron (N2 LINE L   | 3519   | NR_135611 | 1.07E+08 | NR_135611 | ENSG000002SCARNA21E  | -              | small Ca <sub>v</sub> ncRNA |
| chr1-9678 | 7.632671 | -0.23495 | 0.839188 | -0.27998 | 0.779494 | 0.981636 | chr1  | 96786366 | 96787786 | + | 0 | NA | intron (NAluSx SIN  | 64438  | NR_125356 | 58155    | Hs.596061 | ENSG000002PTBP2      | PTBLP brf      | polypyriminprotein-coding   |
| chr10-15c | 7.632671 | -0.23495 | 0.839188 | -0.27998 | 0.779494 | 0.981636 | chr10 | 15671419 | 15671618 | + | 0 | NA | intron (Nintron (N  | 48404  | NM_003638 | 8516     | Hs.171311 | ENSG000002ITGA8      | -              | integrin protein-coding     |
| chr10-10c | 7.632671 | -0.23495 | 0.839188 | -0.27998 | 0.779494 | 0.981636 | chr10 | 1E+08    | 1E+08    | + | 0 | NA | intron (Nintron (N  | 13817  | NR_144755 | 10613    | Hs.150087 | ENSG000002ERL1N1     | C10orf69 ER    | lipid protein-coding        |
| chr11-124 | 7.632671 | -0.23495 | 0.839188 | -0.27998 | 0.779494 | 0.981636 | chr11 | 12479925 | 12480668 | + | 0 | NA | intron (Nintron (N  | 102725 | NM_018222 | 55742    | Hs.432914 | ENSG000002PARVA      | CH-ILKBP parv  | alprotein-coding            |
| chr12-10c | 7.632671 | -0.23495 | 0.839188 | -0.27998 | 0.779494 | 0.981636 | chr12 | 1.06E+08 | 1.06E+08 | + | 0 | NA | intron (NMIR SINE E | 5741   | NM_006822 | 10970    | Hs.74368  | ENSG000002CKAP4      | CLMP6-63 cyto  | skeletalprotein-coding      |
| chr14-69c | 7.632671 | -0.23495 | 0.839188 | -0.27998 | 0.779494 | 0.981636 | chr14 | 69383648 | 69387376 | + | 0 | NA | intron (N2a LINE E  | 12787  | NM_00445C | 2079     | Hs.599791 | ENSG000002ERH        | DROER          | ERH mRNA protein-coding     |
| chr18-234 | 7.632671 | -0.23495 | 0.839188 | -0.27998 | 0.779494 | 0.981636 | chr18 | 23428541 | 23430447 | + | 0 | NA | intron (NAluSp SIN  | 8467   | NM_03293C | 85019    | Hs.137562 | ENSG000002MEM241     | C18orf45 trans | memt protein-coding         |
| chr19-357 | 7.632671 | -0.23495 | 0.839188 | -0.27998 | 0.779494 | 0.981636 | chr19 | 35760177 | 35761211 | + | 0 | NA | intron (NAluSq SIN  | 2518   | NM_001039 | 148137   | Hs.527982 | ENSG000002PROSER3    | C19orf55       | proline ε protein-coding    |
| chr19-44c | 7.632671 | -0.23495 | 0.839188 | -0.27998 | 0.779494 | 0.981636 | chr19 | 44301701 | 44302583 | + | 0 | NA | intron (Nintron (N  | 2883   | NM_004234 | 9310     | Hs.613424 | ENSG000002ZNF235     | ANF270 HZ      | zinc fing protein-coding    |
| chr2-179c | 7.632671 | -0.23495 | 0.839188 | -0.27998 | 0.779494 | 0.981636 | chr2  | 1.8E+08  | 1.8E+08  | + | 0 | NA | intron (Nintron (N  | 55058  | NM_02094C | 57703    | Hs.31136C | ENSG000002CWC22      | EIF4GL NC      | CWC22 spl protein-coding    |
| chr2-2161 | 7.632671 | -0.23495 | 0.839188 | -0.27998 | 0.779494 | 0.981636 | chr2  | 2.16E+08 | 2.16E+08 | + | 0 | NA | intron (NMER49 LTF  | -47523 | NR_037701 | 150967   | Hs.56876  | ENSG000002LINC0196C  | PKI55          | long intencRNA              |
| chr2-2384 | 7.632671 | -0.23495 | 0.839188 | -0.27998 | 0.779494 | 0.981636 | chr2  | 2.38E+08 | 2.38E+08 | + | 0 | NA | 3' UTR (N3' UTR (N  | 21740  | NM_00104C | 51665    | Hs.516788 | ENSG000002ASB1       | ASB-1          | ankyrin i protein-coding    |
| chr20-46c | 7.632671 | -0.23495 | 0.839188 | -0.27998 | 0.779494 | 0.981636 | chr20 | 46685163 | 46686873 | + | 0 | NA | 3' UTR (N3' UTR (N  | -1533  | NM_00119C | 64849    | Hs.65549E | ENSG000002SLC13A3    | ARLIAK N       | solute ε protein-coding     |
| chr20-50c | 7.632671 | -0.23495 | 0.839188 | -0.27998 | 0.779494 | 0.981636 | chr20 | 50092822 | 50097511 | + | 0 | NA | TTS (NR_TTS (NR_1   | 17984  | NM_001257 | 7335     | Hs.42052E | ENSG000002UBE2V1     | CIR1 CROC      | ubiquitin protein-coding    |
| chr21-24c | 7.632671 | -0.23495 | 0.839188 | -0.27998 | 0.779494 | 0.981636 | chr21 | 24649133 | 24649180 | + | 0 | NA | intron (Nintron (N  | 29185  | NR_04640C | 1.01E+08 | Hs.73716E | ENSG000002DIP2A-IT1  | -              | DIP2A intncRNA              |
| chr22-264 | 7.632671 | -0.23495 | 0.839188 | -0.27998 | 0.779494 | 0.981636 | chr22 | 24334657 | 24335775 | + | 0 | NA | intron (N2c LINE E  | -6892  | NM_001254 | 23384    | Hs.474384 | ENSG000002SPECC1L    | CYTSA G        | BE sperm ant protein-coding |
| chr3-5254 | 7.632671 | -0.23495 | 0.839188 | -0.27998 | 0.779494 | 0.981636 | chr3  | 52547981 | 52550691 | + | 0 | NA | intron (NAluJr4 SI  | 12731  | NM_001124 | 440957   | Hs.660577 | ENSG000002SMIM4      | C3orf78        | small intprotein-coding     |
| chr3-138c | 7.632671 | -0.23495 | 0.839188 | -0.27998 | 0.779494 | 0.981636 | chr3  | 1.38E+08 | 1.38E+08 | + | 0 | NA | intron (NAluSc SIN  | 37762  | NM_001127 | 25852    | Hs.74486E | ENSG000002ARMC8      | GID5 HSP       | cardiil protein-coding      |
| chr6-289c | 7.632671 | -0.23495 | 0.839188 | -0.27998 | 0.779494 | 0.981636 | chr6  | 28901229 | 28902112 | + | 0 | NA | IntergeniIntergeni  | 5140   | NR_104117 | 414767   | Hs.21100E | ENSG000002HCG14      | dJ111M5.4HLA   | complncRNA                  |
| chr6-107c | 7.632671 | -0.23495 | 0.839188 | -0.27998 | 0.779494 | 0.981636 | chr6  | 1.08E+08 | 1.08E+08 | + | 0 | NA | intron (Nintron (N  | -51624 | NM_00128E | 256380   | Hs.48610E | ENSG000002SCML4      | dJ47M23.1Scm   | polycprotein-coding         |
| chr7-481c | 7.632671 | -0.23495 | 0.839188 | -0.27998 | 0.779494 | 0.981636 | chr7  | 48101759 | 48103532 | + | 0 | NA | intron (Nintron (N  | 13380  | NM_003364 | 7378     | Hs.48824C | ENSG000002UPP1       | UDRPASE urid   | ine protein-coding          |
| chr1-239c | 7.187086 | -0.19111 | 0.682938 | -0.27983 | 0.779608 | 0.981636 | chr1  | 23969094 | 23963998 | + | 0 | NA | 3' UTR (N3' UTR (N  | 2668   | NM_017761 | 55629    | Hs.7862   | ENSG000002PNRC2      | -              | proline i protein-coding    |
| chr3-526c | 11.87086 | -0.19111 | 0.682938 | -0.27983 | 0.779608 | 0.981636 | chr3  | 52687458 | 52696670 | + | 0 | NA | promoter-promoter-  | -672   | NR_003057 | 692109   | NR_003057 | ENSG000002SNORD69    | HBII-210       | small nucsnRNA              |
| chr8-122c | 12.33232 | -0.18781 | 0.671274 | -0.27977 | 0.779651 | 0.981636 | chr8  | 12205494 | 12206704 | + | 0 | NA | IntergeniIntergeni  | -11967 | NR_14887E | 653333   | Hs.45841E | ENSG000002FAM86B2    | -              | family wiprotein-coding     |
| chr18-48c | 7.22807  | -0.24457 | 0.874441 | -0.27969 | 0.779718 | 0.981636 | chr18 | 4827349  | 4827746  | + | 0 | NA | intron (NTigger1 E  | 19741  | NM_03256E | 84656    | Hs.38725E | ENSG000002GLYR1      | BM045 HIF      | glyoxylat protein-coding    |
| chr20-35c | 7.22807  | -0.24457 | 0.874441 | -0.27969 | 0.779718 | 0.981636 | chr20 | 35852187 | 35852758 | + | 0 | NA | intron (Nintron (N  | 80457  | NM_01643E | 51230    | Hs.517044 | ENSG000002PHF20      | C20orf104 PHD  | fingc protein-coding        |
| chr6-149c | 7.22807  | -0.24457 | 0.874441 | -0.27969 | 0.779718 | 0.981636 | chr6  | 1.5E+08  | 1.5E+08  | + | 0 | NA | intron (NLMIMEf LIN | -12625 | NM_001204 | 11104    | Hs.45017E | ENSG000002KATNA1     | -              | katanin c protein-coding    |
| chr14-54c | 7.220212 | -0.24278 | 0.868438 | -0.27956 | 0.779813 | 0.981636 | chr14 | 54754924 | 54754920 | + | 0 | NA | promoter-promoter-  | -76    | NM_001161 | 23034    | Hs.98259  | ENSG000002SAMD4A     | SAMD4 SM       | sterile ε protein-coding    |
| chr19-47c | 7.220212 | -0.24278 | 0.868438 | -0.27956 | 0.779813 | 0.981636 | chr19 | 47208852 | 47209285 | + | 0 | NA | intron (NMER20 DNA  | -17874 | NR_03615E | 1E+08    | NR_03615E | ENSG000002MIR3190    | mir-3190       | microRNA ncRNA              |
| chr2-160c | 8.949025 | -0.22096 | 0.791007 | -0.27934 | 0.779984 | 0.981636 | chr2  | 1.6E+08  | 1.6E+08  | + | 0 | NA | intron (Nintron (N  | -9563  | NR_10377E | 1.01E+08 | Hs.72953E | ENSG000002LINC0247E  | -              | long intencRNA              |
| chr6-147c | 8.949025 | -0.22096 | 0.791007 | -0.27934 | 0.779984 | 0.981636 | chr6  | 1.47E+08 | 1.47E+08 | + | 0 | NA | intron (NLPAP7 LIN  | -47374 | NR_03411E | 29178    | Hs.55760E | ENSG000002STXBP5-AS- | STXBP5-AS-     | arncRNA                     |
| chr1-846c | 7.681669 | -0.23403 | 0.837819 | -0.27934 | 0.779987 | 0.981636 | chr1  | 84653631 | 84656462 | + | 0 | NA | intron (Nintron (N  | -20026 | NR_02737E | 439927   | Hs.407054 | ENSG000002LINC0155E  | C1orf180       | long intencRNA              |
| chr10-59c | 7.681669 | -0.23403 | 0.837819 | -0.27934 | 0.779987 | 0.981636 | chr10 | 5934872  | 5936186  | + | 0 | NA | intron (Nintron (N  | 33399  | NM_001351 | 3601     | Hs.445124 | ENSG000002IL15RA     | CD215          | interleuk protein-coding    |
| chr13-75c | 7.681669 | -0.23403 | 0.837819 | -0.27934 | 0.779987 | 0.981636 | chr13 | 75836671 | 75837151 | + | 0 | NA | intron (Nintron (N  | -34127 | NM_001257 | 729420   | Hs.58682C | ENSG000002LM07DN     | C13orf45       | LM07 dowr protein-coding    |
| chr17-351 | 7.681669 | -0.23403 | 0.837819 | -0.27934 | 0.779987 | 0.981636 | chr17 | 35132114 | 35138590 | + | 0 | NA | exon (NM exon (NM   | 6899   | NM_001014 | 54475    | Hs.85570  | ENSG000002CNLE1      | NLE            | notchless protein-coding    |
| chr5-7151 | 7.681669 | -0.23403 | 0.837819 | -0.27934 | 0.779987 | 0.981636 | chr5  | 71516851 | 71518743 | + | 0 | NA | intron (NAluJo SIN  | 62146  | NM_01842E | 55814    | Hs.25827E | ENSG000002BDP1       | DFNB112 EB     | double protein-coding       |
| chr6-166c | 7.681669 | -0.23403 | 0.837819 | -0.27934 | 0.779987 | 0.981636 | chr6  | 1.67E+08 | 1.67E+08 | + | 0 | NA | intron (Nintron (N  | 5688   | NR_031734 | 1E+08    | NR_031734 | ENSG000002MIR1913    | MIRN1913 micro | RNA ncRNA                   |
| chr1-100c | 6.409229 | 0.255732 | 0.915514 | 0.279332 | 0.77999  | 0.981636 | chr1  | 1E+08    | 1E+08    | + | 0 | NA | intron (Nintron (N  | 35575  | NM_00191E | 1629     | Hs.709187 | ENSG000002CBT        | BCATE2 BC      | dihydroliprotein-coding     |
| chr12-101 | 6.409229 | 0.255732 | 0.915514 | 0.279332 | 0.77999  | 0.981636 | chr12 | 1.02E+08 | 1.02E+08 | + | 0 | NA | intron (Nintron (N  | 28742  | NM_01837C | 55332    | Hs.526564 | ENSG000002DRAM1      | DRAM           | DNA damag protein-coding    |
| chr16-68c | 6.409229 | 0.255732 | 0.915514 | 0.279332 | 0.77999  | 0.981636 | chr16 | 68073755 | 68074945 | + | 0 | NA | intron (Nintron (N  | -11020 | NR_17316E | 4775     | Hs.43658E | ENSG000002NFATC3     | NF-AT4C        | nuclear f protein-coding    |
| chr18-76c | 6.409229 | 0.255732 | 0.915514 | 0.279332 | 0.77999  | 0.981636 | chr18 | 76910532 | 76911507 | + | 0 | NA | intron (Nintron (N  | 86859  | NM_00734E | 7776     | Hs.719137 | ENSG000002ZNF236     | ZNF236A z      | zinc fing protein-coding    |
| chr20-32c | 6.409229 | 0.255732 | 0.915514 | 0.279332 | 0.77999  | 0.981636 | chr20 | 32702830 | 32703768 | + | 0 | NA | 3' UTR (N3' UTR (N  | -29358 | NM_182584 | 284805   | Hs.35326E | ENSG000002C20orf20C  | -              | chromoson protein-coding    |
| chr3-515c | 6.409229 | 0.255732 | 0.915514 | 0.279332 | 0.77999  | 0.981636 | chr3  | 51590873 | 51591267 | + | 0 | NA | intron (Nintron (N  | 49481  | NM_001322 | 23132    | Hs.10539E | ENSG000002RAD54L2    | ARIP4 HSF      | RAD54 L1k protein-coding    |
| chr6-116c | 6.409229 | 0.255732 | 0.915514 | 0.279332 | 0.77999  | 0.981636 | chr6  | 1.16E+08 | 1.16E+08 | + | 0 | NA | intron (Nintron (N  | -6325  | NM_00108C | 29940    | Hs.45835E | ENSG000002DSE        | DS-epil1 D     | ermatan protein-coding      |
| chr1-662c | 6.913675 | 0.245063 | 0.877608 | 0.27924  | 0.780061 | 0.981636 | chr1  | 6627853  | 6632116  | + | 0 | NA | intron (Nintron (N  | 4834   | NM_00119E | 90326    | Hs.68900E | ENSG000002THAP3      | -              | THAP domε protein-coding    |
| chr1-102c | 6.913675 | 0.245063 | 0.877608 | 0.27924  | 0.780061 | 0.981636 | chr1  | 10282049 | 10285073 | + | 0 | NA | intron (Nintron (N  | -15405 | NR_104084 | 1.02E+08 | NR_104084 | ENSG000002CRNU6-7    | U6-7           | RNA, u6 ε snRNA             |
| chr1-109c | 6.913675 | 0.245063 | 0.877608 | 0.27924  | 0.780061 | 0.981636 | chr1  | 1.09E+08 | 1.09E+08 | + | 0 | NA | intron (Nintron (N  | 42286  | NM_00120E | 6272     | Hs.48519E | ENSG000002SORT1      | Gp95 LDL       | C sirtilin protein-coding   |
| chr12-12c | 6.913675 | 0.245063 | 0.877608 | 0.27924  | 0.780061 | 0.981636 | chr12 | 1.21E+08 | 1.21E+08 | + | 0 | NA | 3' UTR (N3' UTR (N  | -10337 | NM_00108C | 84747    | Hs.12761C | ENSG000002UNC119B    | POC7B          | unc-119 l protein-coding    |
| chr12-121 | 6.913675 | 0.245063 | 0.877608 | 0.27924  | 0.780061 | 0.981636 | chr12 | 1.21E+08 | 1.21E+08 | + | 0 | NA | intron (Nintron (N  | 10943  | NM_00127C | 10645    | Hs.29734E | ENSG000002CAMK2C     | CAMKK CA       | calcium/c protein-coding    |
| chr15-24c | 6.913675 | 0.245063 | 0.       |          |          |          |       |          |          |   |   |    |                     |        |           |          |           |                      |                |                             |



|           |          |          |          |          |          |          |       |          |          |   |   |    |                     |        |           |          |            |           |           |                        |                                     |                          |
|-----------|----------|----------|----------|----------|----------|----------|-------|----------|----------|---|---|----|---------------------|--------|-----------|----------|------------|-----------|-----------|------------------------|-------------------------------------|--------------------------|
| chr22-504 | 7.418121 | 0.235774 | 0.846484 | 0.278533 | 0.780603 | 0.981636 | chr22 | 50426581 | 50433032 | + | 0 | NA | intron (NMIR SINE   | 22364  | NR_162128 | 1.13E+08 | NR_162128  | MIR12114  | -         | microRNA ncRNA         |                                     |                          |
| chr3-1136 | 7.418121 | 0.235774 | 0.846484 | 0.278533 | 0.780603 | 0.981636 | chr3  | 11360197 | 11362757 | + | 0 | NA | intron (NALuSg SIN  | 89080  | NM_001144 | 10533    | Hs. 38032  | NR_006399 | ENSG00000 | ATG7                   | APG7-LIKE autophagy protein-coding  |                          |
| chr3-1198 | 7.418121 | 0.235774 | 0.846484 | 0.278533 | 0.780603 | 0.981636 | chr3  | 1.2E+08  | 1.2E+08  | + | 0 | NA | intron (NTigger1 I  | 75011  | NM_022002 | 8856     | Hs. 7303   | NR_003889 | ENSG00000 | CNR12                  | BXR ONR1 nuclear rprotein-coding    |                          |
| chr3-1224 | 7.418121 | 0.235774 | 0.846484 | 0.278533 | 0.780603 | 0.981636 | chr3  | 1.22E+08 | 1.22E+08 | + | 0 | NA | intron (Nintron (N  | 42078  | NR_125405 | 1.03E+08 | Hs. 675059 | NR_125405 | ENSG00000 | LOC102722              | -                                   | uncharacterncRNA         |
| chr4-1234 | 7.418121 | 0.235774 | 0.846484 | 0.278533 | 0.780603 | 0.981636 | chr4  | 1234901  | 1237596  | + | 0 | NA | intron (Nintron (N  | 12882  | NR_001328 | 1487     | Hs. 208597 | NM_001328 | ENSG00000 | CTBP1                  | BARS HADE C-terminus protein-coding |                          |
| chr4-2625 | 7.418121 | 0.235774 | 0.846484 | 0.278533 | 0.780603 | 0.981636 | chr4  | 2629859  | 2632494  | + | 0 | NA | intron (Nintron (N  | 5744   | NR_046335 | 8603     | Hs. 652364 | NM_003704 | ENSG00000 | FAM193A                | C4orf8 RF family wiprotein-coding   |                          |
| chr4-8288 | 7.418121 | 0.235774 | 0.846484 | 0.278533 | 0.780603 | 0.981636 | chr4  | 82887363 | 82890297 | + | 0 | NA | intron (Nintron (N  | 2323   | NM_001077 | 22872    | Hs. 370024 | NM_014933 | ENSG00000 | SEC31A                 | ABP125 AF SEC31 honprotein-coding   |                          |
| chr4-1585 | 7.418121 | 0.235774 | 0.846484 | 0.278533 | 0.780603 | 0.981636 | chr4  | 1585908  | 1592950  | + | 0 | NA | intron (NLIM45 LIN  | 56796  | NM_001322 | 57600    | Hs. 652441 | NM_020844 | ENSG00000 | FNIP2                  | FNIP1 MAF follicular protein-coding |                          |
| chr5-1384 | 7.418121 | 0.235774 | 0.846484 | 0.278533 | 0.780603 | 0.981636 | chr5  | 13847961 | 13850090 | + | 0 | NA | intron (NL4_A_Mam   | 95455  | NM_001366 | 1767     | Hs. 21236  | NM_001366 | ENSG00000 | CNAH5                  | CILD3 DN dynein a protein-coding    |                          |
| chr5-9675 | 7.418121 | 0.235774 | 0.846484 | 0.278533 | 0.780603 | 0.981636 | chr5  | 96796290 | 96797501 | + | 0 | NA | intron (NALuJr SIN  | 11050  | NM_00104C | 51752    | Hs. 666524 | NM_016442 | ENSG00000 | ERAP1                  | A-LAP AL endoplasm protein-coding   |                          |
| chr5-1597 | 7.418121 | 0.235774 | 0.846484 | 0.278533 | 0.780603 | 0.981636 | chr5  | 1597508  | 1597508  | + | 0 | NA | exon (NM exon (NM   | 21616  | NM_14504A | 134510   | Hs. 59173  | NM_14504A | ENSG00000 | UBLCP1                 | CPUB1 ubiquitin protein-coding      |                          |
| chr5-1798 | 7.418121 | 0.235774 | 0.846484 | 0.278533 | 0.780603 | 0.981636 | chr5  | 1.8E+08  | 1.8E+08  | + | 0 | NA | intron (Nintron (N  | 15523  | NM_19886E | 23061    | Hs. 15582  | NM_015043 | ENSG00000 | TBC1D9B                | GRAMD9B TBC1 dom protein-coding     |                          |
| chr6-1166 | 7.418121 | 0.235774 | 0.846484 | 0.278533 | 0.780603 | 0.981636 | chr6  | 1.17E+08 | 1.17E+08 | + | 0 | NA | intron (Nintron (N  | 16512  | NM_14506E | 221302   | Hs. 29857  | NM_14506E | ENSG00000 | ZUP1                   | C6orf113 zinc fing protein-coding   |                          |
| chr7-1667 | 7.418121 | 0.235774 | 0.846484 | 0.278533 | 0.780603 | 0.981636 | chr7  | 16600302 | 16602673 | + | 0 | NA | intron (Nintron (N  | 44267  | NM_02031E | 57037    | Hs. 15737  | NM_02031E | ENSG00000 | ANKMY2                 | ZMYND20 ankyrin rprotein-coding     |                          |
| chr7-1392 | 7.418121 | 0.235774 | 0.846484 | 0.278533 | 0.780603 | 0.981636 | chr7  | 1.39E+08 | 1.39E+08 | + | 0 | NA | intron (NALuSp SIN  | 43492  | NM_17356E | 254048   | Hs. 15345  | NM_17356E | ENSG00000 | UBN2                   | -                                   | ubiquitin protein-coding |
| chr8-6482 | 7.418121 | 0.235774 | 0.846484 | 0.278533 | 0.780603 | 0.981636 | chr8  | 6482099  | 6483096  | + | 0 | NA | intron (Nintron (N  | 75444  | NM_001322 | 79648    | Hs. 593807 | NM_02459E | ENSG00000 | MCPH1                  | BRIT1 MC microcep protein-coding    |                          |
| chr8-4317 | 7.418121 | 0.235774 | 0.846484 | 0.278533 | 0.780603 | 0.981636 | chr8  | 43188070 | 43189057 | + | 0 | NA | intron (NLIPA5 LIN  | 48099  | NM_15241E | 138050   | Hs. 600384 | NM_15241E | ENSG00000 | HGSNAT                 | HGNAT MP speran-ε protein-coding    |                          |
| chr8-9484 | 7.418121 | 0.235774 | 0.846484 | 0.278533 | 0.780603 | 0.981636 | chr8  | 94843090 | 94845792 | + | 0 | NA | intron (NALuSj SIN  | 21151  | NR_073444 | 55656    | Hs. 72760  | NM_00113E | ENSG00000 | INTS8                  | C8orf52 I integrat protein-coding   |                          |
| chr9-9652 | 7.418121 | 0.235774 | 0.846484 | 0.278533 | 0.780603 | 0.981636 | chr9  | 96521017 | 96523589 | + | 0 | NA | intron (Nintron (N  | 44528  | NM_001351 | 8555     | Hs. 40582  | NM_003671 | ENSG00000 | CDC14B                 | CDC14B3 Cell divi protein-coding    |                          |
| chr9-9765 | 7.418121 | 0.235774 | 0.846484 | 0.278533 | 0.780603 | 0.981636 | chr9  | 97688317 | 97688773 | + | 0 | NA | intron (Nintron (N  | 8864   | NR_149094 | 7507     | Hs. 654364 | NM_00038C | ENSG00000 | XPA                    | XPI XPAC XPA, DNA protein-coding    |                          |
| chr9-1257 | 7.418121 | 0.235774 | 0.846484 | 0.278533 | 0.780603 | 0.981636 | chr9  | 1.25E+08 | 1.25E+08 | + | 0 | NA | intron (NALuSc8 SI  | 12150  | NM_001174 | 10244    | Hs. 19012  | NM_005833 | ENSG00000 | RABEPK                 | RAB9P40 t Bab9 eff protein-coding   |                          |
| chr9-1281 | 7.418121 | 0.235774 | 0.846484 | 0.278533 | 0.780603 | 0.981636 | chr9  | 1.28E+08 | 1.28E+08 | + | 0 | NA | intron (Nintron (N  | -4424  | NR_033374 | 1E+08    | Hs. 69379  | NR_033374 | SLC25A25  | -                      | SLC25A25 ncRNA                      |                          |
| chr9-1347 | 7.418121 | 0.235774 | 0.846484 | 0.278533 | 0.780603 | 0.981636 | chr9  | 1.35E+08 | 1.35E+08 | + | 0 | NA | intron (Nintron (N  | 59778  | NR_039691 | 1.01E+08 | NR_039691  | ENSG00000 | MIR3689C  | -                      | microRNA ncRNA                      |                          |
| chrX-4721 | 7.418121 | 0.235774 | 0.846484 | 0.278533 | 0.780603 | 0.981636 | chrX  | 47215296 | 47216677 | + | 0 | NA | TTS (NM_C TTS (NM_C | -2317  | NM_03301E | 5127     | Hs. 49606  | NM_006201 | ENSG00000 | CDK16                  | PCTAIRE F cyclin d protein-coding   |                          |
| chr20-397 | 5.904783 | 0.268044 | 0.962493 | 0.278489 | 0.780637 | 0.981636 | chr20 | 397217   | 397499   | + | 0 | NA | 3' UTR (N3' UTR (N  | -10692 | NM_001322 | 10616    | Hs. 29546  | NM_00646E | ENSG00000 | RBCK1                  | C20orf18 RANBP2-ty protein-coding   |                          |
| chr3-1567 | 5.904783 | 0.268044 | 0.962493 | 0.278489 | 0.780637 | 0.981636 | chr3  | 1.57E+08 | 1.57E+08 | + | 0 | NA | 3' UTR (N3' UTR (N  | 29203  | NM_00118A | 25976    | Hs. 74405  | NM_01550E | ENSG00000 | TIPARP                 | ARTD14 P T CD  ind protein-coding   |                          |
| chr1-4481 | 7.673811 | -0.23229 | 0.834161 | -0.27848 | 0.780647 | 0.981636 | chr1  | 44813774 | 44814837 | + | 0 | NA | TTS (NM_C TTS (NM_C | 5823   | NM_00113E | 149478   | Hs. 63240  | NM_00113E | ENSG00000 | BTBD19                 | -                                   | BTB dom protein-coding   |
| chr1-8445 | 7.673811 | -0.23229 | 0.834161 | -0.27848 | 0.780647 | 0.981636 | chr1  | 84490368 | 84491761 | + | 0 | NA | intron (Nintron (N  | 11798  | NM_02506E | 80135    | Hs. 48120  | NM_02506E | ENSG00000 | RPF1                   | BXDC5 ribosome protein-coding       |                          |
| chr1-9117 | 7.673811 | -0.23229 | 0.834161 | -0.27848 | 0.780647 | 0.981636 | chr1  | 91319785 | 93120180 | + | 0 | NA | intron (Nintron (N  | 40699  | NM_00735E | 22823    | Hs. 31016  | NM_00735E | ENSG00000 | MTF2                   | M96 PCL2 metal res protein-coding   |                          |
| chr10-111 | 7.673811 | -0.23229 | 0.834161 | -0.27848 | 0.780647 | 0.981636 | chr10 | 1.11E+08 | 1.11E+08 | + | 0 | NA | intron (NMIR SINE   | 25123  | NM_00544E | 9126     | Hs. 24485  | NM_00544E | ENSG00000 | SMC3                   | BAM BMH c structure protein-coding  |                          |
| chr11-115 | 7.673811 | -0.23229 | 0.834161 | -0.27848 | 0.780647 | 0.981636 | chr11 | 11961536 | 11968146 | + | 0 | NA | intron (Nintron (N  | 43798  | NM_00101E | 27122    | Hs. 29215  | NM_01325E | ENSG00000 | DKK3                   | REIC RIG dickkopf protein-coding    |                          |
| chr11-671 | 7.673811 | -0.23229 | 0.834161 | -0.27848 | 0.780647 | 0.981636 | chr11 | 67193555 | 67194505 | + | 0 | NA | intron (Nintron (N  | -45984 | NM_00125E | 22992    | Hs. 12414  | NM_01230E | ENSG00000 | KDM2A                  | CXXC8 FBL lysine d protein-coding   |                          |
| chr13-244 | 7.673811 | -0.23229 | 0.834161 | -0.27848 | 0.780647 | 0.981636 | chr13 | 24437067 | 24440134 | + | 0 | NA | intron (NChap1_Man  | 14788  | NM_006437 | 143      | Hs. 74485  | NM_006437 | ENSG00000 | PARP4                  | ADPRTL1 A poly (ADP- protein-coding |                          |
| chr14-105 | 7.673811 | -0.23229 | 0.834161 | -0.27848 | 0.780647 | 0.981636 | chr14 | 1.03E+08 | 1.03E+08 | + | 0 | NA | intron (NALuSp SIN  | 28510  | NM_00182E | 1152     | Hs. 17372  | NM_00182E | ENSG00000 | CKKB                   | B-CK BCK creatine protein-coding    |                          |
| chr15-226 | 7.673811 | -0.23229 | 0.834161 | -0.27848 | 0.780647 | 0.981636 | chr15 | 22852111 | 22852474 | + | 0 | NA | intron (Nintron (N  | 14555  | NM_00100E | 81614    | Hs. 59100  | NM_03092E | ENSG00000 | NIP2A                  | SLC57A2 NIP4 magr protein-coding    |                          |
| chr15-666 | 7.673811 | -0.23229 | 0.834161 | -0.27848 | 0.780647 | 0.981636 | chr15 | 66328860 | 66330235 | + | 0 | NA | intron (Nintron (N  | 17795  | NR_00438E | 692149   | NR_00438E  | ENSG00000 | SCARNA14  | U100 small Ca ncRNA    |                                     |                          |
| chr15-706 | 7.673811 | -0.23229 | 0.834161 | -0.27848 | 0.780647 | 0.981636 | chr15 | 70670294 | 70670665 | + | 0 | NA | intron (NMER50 LTF  | 31803  | NM_00100E | 55075    | Hs. 10804  | NM_01800E | ENSG00000 | CUACA                  | NUCLING uveal aut protein-coding    |                          |
| chr17-307 | 7.673811 | -0.23229 | 0.834161 | -0.27848 | 0.780647 | 0.981636 | chr17 | 30751997 | 30754619 | + | 0 | NA | intron (NALuSj SIN  | 43700  | NR_14439E | 440423   | Hs. 62888  | NR_024187 | SUZ12P1   | SUZ12P SUZ12 pse pseud |                                     |                          |
| chr19-467 | 7.673811 | -0.23229 | 0.834161 | -0.27848 | 0.780647 | 0.981636 | chr19 | 46841586 | 46845683 | + | 0 | NA | intron (NALuSj SIN  | 6680   | NM_001301 | 1175     | Hs. 11959  | NM_00406E | ENSG00000 | AP2S1                  | AP17 CLAF adaptor r protein-coding  |                          |
| chr2-1078 | 7.673811 | -0.23229 | 0.834161 | -0.27848 | 0.780647 | 0.981636 | chr2  | 10780947 | 10786629 | + | 0 | NA | 3' UTR (N3' UTR (N  | 28997  | NM_00574E | 10130    | Hs. 21210  | NM_00574E | ENSG00000 | PDIA6                  | ERP5 P5 I protein c protein-coding  |                          |
| chr2-1137 | 7.673811 | -0.23229 | 0.834161 | -0.27848 | 0.780647 | 0.981636 | chr2  | 1.14E+08 | 1.14E+08 | + | 0 | NA | intron (NALuSc5 SI  | 7763   | NM_00133E | 80255    | Hs. 35565  | NM_025181 | ENSG00000 | SLC35F5                | -                                   | solute c protein-coding  |
| chr2-1275 | 7.673811 | -0.23229 | 0.834161 | -0.27848 | 0.780647 | 0.981636 | chr2  | 1.28E+08 | 1.28E+08 | + | 0 | NA | intron (NLIMB7 LIN  | 8600   | NM_01796E | 55677    | Hs. 46987  | NM_01796E | ENSG00000 | IWS1                   | -                                   | interact protein-coding  |
| chr20-467 | 7.673811 | -0.23229 | 0.834161 | -0.27848 | 0.780647 | 0.981636 | chr20 | 46718167 | 46720313 | + | 0 | NA | intron (Nintron (N  | 9591   | NM_030777 | 81031    | Hs. 30597  | NM_030777 | ENSG00000 | SLC2A10                | ATORS ATS solute c protein-coding   |                          |
| chr22-187 | 7.673811 | -0.23229 | 0.834161 | -0.27848 | 0.780647 | 0.981636 | chr22 | 18083286 | 18085522 | + | 0 | NA | intron (NALu SINE   | 6414   | NM_01792E | 55670    | Hs. 51740  | NM_01792E | ENSG00000 | PEX26                  | PBD7A PBE peroxisom protein-coding  |                          |
| chr3-1255 | 7.673811 | -0.23229 | 0.834161 | -0.27848 | 0.780647 | 0.981636 | chr3  | 12599623 | 12601873 | + | 0 | NA | intron (NALuSx SIN  | 43661  | NM_01416C | 23609    | Hs. 59166  | NM_01416C | ENSG00000 | MKRN2                  | HSPC070 Fmakorin protein-coding     |                          |
| chr3-1267 | 7.673811 | -0.23229 | 0.834161 | -0.27848 | 0.780647 | 0.981636 | chr3  | 12603618 | 12604417 | + | 0 | NA | intron (Nintron (N  | 46930  | NM_01416C | 23609    | Hs. 59166  | NM_01416C | ENSG00000 | MKRN2                  | HSPC070 Fmakorin protein-coding     |                          |
| chr3-1465 | 7.673811 | -0.23229 | 0.834161 | -0.27848 | 0.780647 | 0.981636 | chr3  | 1.47E+08 | 1.47E+08 | + | 0 | NA | intron (NLIM45 LIN  | 17378  | NM_00136E | 5359     | Hs. 13075  | NM_02110E | ENSG00000 | PLSCR1                 | MMTRA1B phospholip protein-coding   |                          |
| chr3-1687 | 7.673811 | -0.23229 | 0.834161 | -0.27848 | 0.780647 | 0.981636 | chr3  | 1.68E+08 | 1.68E+08 | + | 0 | NA | intron (Nintron (N  | 73215  | NM_01449E | 27333    | Hs. 14360  | NM_01449E | ENSG00000 | GOLIM4                 | GIMPC GOL golgi int protein-coding  |                          |
| chr4-8467 | 7.673811 | -0.23229 | 0.834161 | -0.27848 | 0.780647 | 0.981636 | chr4  | 84678173 | 84680312 | + | 0 | NA | exon (NM exon (     |        |           |          |            |           |           |                        |                                     |                          |



|                    |          |          |          |          |          |       |          |          |   |   |    |                    |                  |                                |                     |                      |                            |                |
|--------------------|----------|----------|----------|----------|----------|-------|----------|----------|---|---|----|--------------------|------------------|--------------------------------|---------------------|----------------------|----------------------------|----------------|
| chr16-905.7.922567 | 0.227651 | 0.820622 | 0.277413 | 0.781463 | 0.981636 | chr16 | 9099802  | 9102162  | + | 0 | NA | intron (Nintron (N | 9338 NM_014117   | 29035 Hs. 221497NM_014117      | ENSG00000160r72     | PR00149              | chromosonprotein-coding    |                |
| chr16-157.7.922567 | 0.227651 | 0.820622 | 0.277413 | 0.781463 | 0.981636 | chr16 | 15073991 | 15077926 | + | 0 | NA | intron (NLTR16A1 L | 18377 NM_001301  | 54700 Hs. 460077NM_018427      | ENSG000000RRN3      | A-270G1.2RRN3        | homcprotein-coding         |                |
| chr16-157.7.922567 | 0.227651 | 0.820622 | 0.277413 | 0.781463 | 0.981636 | chr16 | 15595637 | 15597672 | + | 0 | NA | 3' UTR (N3' UTR (N | 14441 NR_106761  | 1.02E+08                       | NR_106761           | ENSG000000MIR6506    | hsa-mir-6microRNA ncRNA    |                |
| chr16-896.7.922567 | 0.227651 | 0.820622 | 0.277413 | 0.781463 | 0.981636 | chr16 | 89980169 | 89986539 | + | 0 | NA | intron (Nintron (N | -10522 NM_145039 | 92806 Hs. 513832NM_145039      | ENSG000000CENPBD1   | -                    | CENPB DN/protein-coding    |                |
| chr17-697.7.922567 | 0.227651 | 0.820622 | 0.277413 | 0.781463 | 0.981636 | chr17 | 690125   | 690667   | + | 0 | NA | intron (NMER102b L | 24453 NM_00112F  | 55275 Hs. 461819NM_018289      | ENSG000000VPS53     | HCCS1 PCFVPS53       | snr-protein-coding         |                |
| chr17-404.7.922567 | 0.227651 | 0.820622 | 0.277413 | 0.781463 | 0.981636 | chr17 | 4042431  | 4046980  | + | 0 | NA | intron (NAluSc SIN | 67602 NR_146884  | 1.05E+08                       | Hs. 579239NR_146884 | LINC0197F            | -                          | long intencRNA |
| chr17-307.7.922567 | 0.227651 | 0.820622 | 0.277413 | 0.781463 | 0.981636 | chr17 | 30504695 | 30506242 | + | 0 | NA | intron (NTigger1 L | 28060 NM_001007  | 9527 Hs. 462688NM_004871       | ENSG000000GOSR1     | GOLIM2 GC golgi SNr  | protein-coding             |                |
| chr17-597.7.922567 | 0.227651 | 0.820622 | 0.277413 | 0.781463 | 0.981636 | chr17 | 59945680 | 59946797 | + | 0 | NA | intron (NLa2a LINE | 18502 NM_01612F  | 51136 Hs. 531701NM_01612F      | ENSG000000CRNFT1    | PTD016               | ring fingprotein-coding    |                |
| chr17-627.7.922567 | 0.227651 | 0.820622 | 0.277413 | 0.781463 | 0.981636 | chr17 | 62599319 | 62603071 | + | 0 | NA | intron (Nintron (N | -26475 NM_00603E | 9902 Hs. 7835 NM_00603E        | ENSG000000MRC2      | CD280 CLFmannose r   | protein-coding             |                |
| chr19-167.7.922567 | 0.227651 | 0.820622 | 0.277413 | 0.781463 | 0.981636 | chr19 | 16831430 | 16837499 | + | 0 | NA | intron (Nintron (N | 5066 NM_001297   | 23309 Hs. 13999 NM_01526E      | ENSG000000SIN3B     | -                    | SIN3 trnprotein-coding     |                |
| chr19-574.7.922567 | 0.227651 | 0.820622 | 0.277413 | 0.781463 | 0.981636 | chr19 | 57442584 | 57446834 | + | 0 | NA | exon (NM exon (NM  | 9384 NM_001321   | 388567 Hs. 467355NM_00102E     | ENSG000000ZNF749    | -                    | zinc fingerprotein-coding  |                |
| chr2-162C.7.922567 | 0.227651 | 0.820622 | 0.277413 | 0.781463 | 0.981636 | chr2  | 1.62E+08 | 1.62E+08 | + | 0 | NA | intron (Nintron (N | 30588 NM_00193E  | 1803 Hs. 368912NM_00193E       | ENSG000000DPP4      | ADABP ADC dipeptid   | protein-coding             |                |
| chr2-178.7.922567  | 0.227651 | 0.820622 | 0.277413 | 0.781463 | 0.981636 | chr2  | 1.78E+08 | 1.79E+08 | + | 0 | NA | intron (NTigger16a | -20512 NR_03827E | 1.01E+08                       | Hs. 710694NR_03827E | ENSG000000TTN-AS1    | -                          | TTN antiscRNA  |
| chr20-454.7.922567 | 0.227651 | 0.820622 | 0.277413 | 0.781463 | 0.981636 | chr20 | 45801190 | 45811299 | + | 0 | NA | intron (NAluSp SIN | -6332 NM_001281  | 11065 Hs. 93002 NM_00701E      | ENSG000000UBE2C     | UBCH10 DjubiQuitin r | protein-coding             |                |
| chr22-238.7.922567 | 0.227651 | 0.820622 | 0.277413 | 0.781463 | 0.981636 | chr22 | 23816973 | 23819383 | + | 0 | NA | intron (NAluV SINE | 20828 NM_00113E  | 91319 Hs. 593679NM_19844C      | ENSG000000DERL3     | C2orf14 delrin 3     | protein-coding             |                |
| chr22-247.7.922567 | 0.227651 | 0.820622 | 0.277413 | 0.781463 | 0.981636 | chr22 | 24064318 | 24065680 | + | 0 | NA | intron (NSVA_D Ret | 53629 NM_00119E  | 23523 Hs. 517478NM_01229E      | ENSG000000CABIN1    | CAIN KB-3            | calcineurin protein-coding |                |
| chr22-296.7.922567 | 0.227651 | 0.820622 | 0.277413 | 0.781463 | 0.981636 | chr22 | 29667471 | 29669719 | + | 0 | NA | intron (Nintron (N | -51408 NM_182527 | 164633 Hs. 643608NM_182527     | ENSG000000CABP7     | CALN2                | calcium tprotein-coding    |                |
| chr3-152.7.922567  | 0.227651 | 0.820622 | 0.277413 | 0.781463 | 0.981636 | chr3  | 15230711 | 15237337 | + | 0 | NA | intron (Nintron (N | -20160 NR_046084 | 1.01E+08                       | Hs. 745022NR_046084 | ENSG000000SH3BP5-AS  | -                          | SH3BP5 arncRNA |
| chr3-1541.7.922567 | 0.227651 | 0.820622 | 0.277413 | 0.781463 | 0.981636 | chr3  | 15413074 | 15417423 | + | 0 | NA | intron (NMIRc SINE | 12296 NM_00133C  | 131965 Hs. 149487NM_15239E     | ENSG000000METTL6    | -                    | methyltra protein-coding   |                |
| chr3-475.7.922567  | 0.227651 | 0.820622 | 0.277413 | 0.781463 | 0.981636 | chr3  | 47501189 | 47503683 | + | 0 | NA | intron (NAluSz SIN | 10909 NM_00136E  | 54859 Hs. 31110CNM_01771E      | ENSG000000CELP6     | C3orf75 Telangorin r | protein-coding             |                |
| chr3-5187.7.922567 | 0.227651 | 0.820622 | 0.277413 | 0.781463 | 0.981636 | chr3  | 51886854 | 51889308 | + | 0 | NA | intron (Nintron (N | 59511 NM_003794  | 8723 Hs. 50724E NM_003794      | ENSG000000SNX4      | ATG24B               | sorting rprotein-coding    |                |
| chr3-1297.7.922567 | 0.227651 | 0.820622 | 0.277413 | 0.781463 | 0.981636 | chr3  | 1.29E+08 | 1.29E+08 | + | 0 | NA | intron (NAluJo SIN | 11969 NM_00137C  | 56941 Hs. 45832CNM_02018E      | ENSG000000HMCE5     | C3orf37 E5-hydroxy   | protein-coding             |                |
| chr4-3157.7.922567 | 0.227651 | 0.820622 | 0.277413 | 0.781463 | 0.981636 | chr4  | 3155770  | 3158189  | + | 0 | NA | intron (Nintron (N | 82298 NM_002111  | 3064 Hs. 51845CNM_002111       | ENSG000000CHTT      | HD IT15 L            | huntingtprotein-coding     |                |
| chr4-5187.7.922567 | 0.227651 | 0.820622 | 0.277413 | 0.781463 | 0.981636 | chr4  | 51886854 | 51889308 | + | 0 | NA | intron (Nintron (N | 44502 NM_001287  | 23142 Hs. 605388NM_01511E      | ENSG000000DCUN1D4   | -                    | defectiveprotein-coding    |                |
| chr4-1227.7.922567 | 0.227651 | 0.820622 | 0.277413 | 0.781463 | 0.981636 | chr4  | 1.22E+08 | 1.22E+08 | + | 0 | NA | intron (NLM1 LINE  | 81507 NM_01531E  | 84162 Hs. 408142NM_01531E      | ENSG000000K1AA1109  | ALKKUCS FK1AA1109    | protein-coding             |                |
| chr5-172E.7.922567 | 0.227651 | 0.820622 | 0.277413 | 0.781463 | 0.981636 | chr5  | 17260876 | 17261800 | + | 0 | NA | intron (Nintron (N | 43707 NM_006317  | 10409 Hs. 201641NM_006317      | ENSG000000BASP1     | CAP-23 C             | brain abt protein-coding   |                |
| chr5-371E.7.922567 | 0.227651 | 0.820622 | 0.277413 | 0.781463 | 0.981636 | chr5  | 37156284 | 37157888 | + | 0 | NA | intron (Nintron (N | -91960 NR_13426E | 1.05E+08                       | Hs. 170999NR_13426E | ENSG000000LOC105374  | -                          | uncharactncRNA |
| chr5-9674.7.922567 | 0.227651 | 0.820622 | 0.277413 | 0.781463 | 0.981636 | chr5  | 96747652 | 96750895 | + | 0 | NA | intron (Nintron (N | 5671 NR_10428E   | 831 Hs. 43618CNM_00175E        | ENSG000000CAST      | BS-17 PLA            | calpastatprotein-coding    |                |
| chr5-1384.7.922567 | 0.227651 | 0.820622 | 0.277413 | 0.781463 | 0.981636 | chr5  | 1.38E+08 | 1.38E+08 | + | 0 | NA | intron (Nintron (N | -9234 NR_07344E  | 51308 Hs. 41609CNM_01660E      | ENSG000000REEP2     | C5orf19 I            | receptor protein-coding    |                |
| chr5-160.7.922567  | 0.227651 | 0.820622 | 0.277413 | 0.781463 | 0.981636 | chr5  | 1.6E+08  | 1.6E+08  | + | 0 | NA | intron (NLM1E2 LIN | 3734 NM_003314   | 7265 Hs. 519718NM_003314       | ENSG000000TTC1      | TPR1                 | tetratric protein-coding   |                |
| chr6-9657.7.922567 | 0.227651 | 0.820622 | 0.277413 | 0.781463 | 0.981636 | chr6  | 96532043 | 96532753 | + | 0 | NA | intron (NMSTAI LTF | 10592 NM_01532E  | 23376 Hs. 149367NM_01532E      | ENSG000000UFL1      | K1AA0776 UFM1        | specprotein-coding         |                |
| chr6-1112.7.922567 | 0.227651 | 0.820622 | 0.277413 | 0.781463 | 0.981636 | chr6  | 1.11E+08 | 1.11E+08 | + | 0 | NA | intron (NMER11B LI | 41238 NM_15336E  | 91749 Hs. 400572NM_15336E      | ENSG000000MFSFD4B   | K1AA1919 major       | facprotein-coding          |                |
| chr6-1121.7.922567 | 0.227651 | 0.820622 | 0.277413 | 0.781463 | 0.981636 | chr6  | 1.12E+08 | 1.12E+08 | + | 0 | NA | intron (Nintron (N | -70124 NR_12119E | 1.02E+08                       | Hs. 510007NR_12119E | LOC101927            | -                          | uncharactncRNA |
| chr6-1387.7.922567 | 0.227651 | 0.820622 | 0.277413 | 0.781463 | 0.981636 | chr6  | 1.39E+08 | 1.39E+08 | + | 0 | NA | intron (NMER58C DN | 80213 NM_00112E  | 85021 Hs. 33460E NM_03192E     | ENSG000000CREP51    | NBIA7 RALRALBP1      | asprotein-coding           |                |
| chr6-1402.7.922567 | 0.227651 | 0.820622 | 0.277413 | 0.781463 | 0.981636 | chr6  | 1.42E+08 | 1.42E+08 | + | 0 | NA | intron (NMSTA-int  | 66102 NM_01648E  | 51534 Hs. 431367NM_01648E      | ENSG000000VTA1      | C6orf55 I            | vesicle tprotein-coding    |                |
| chr7-7307.7.922567 | 0.227651 | 0.820622 | 0.277413 | 0.781463 | 0.981636 | chr7  | 73096778 | 73098817 | + | 0 | NA | IntergeniAluJr SIN | -11763 NR_003664 | 728524 Hs. 57127E NM_00102356E | SPDYEP              | -                    | speedy/RJ pseudo           |                |
| chr7-7457.922567   | 0.227651 | 0.820622 | 0.277413 | 0.781463 | 0.981636 | chr7  | 74597078 | 74598173 | + | 0 | NA | intron (NAluSz SIN | 1657 NR_16211E   | 1.13E+08                       | NR_16211E           | MIR10525             | -                          | microRNA ncRNA |
| chr7-801E.7.922567 | 0.227651 | 0.820622 | 0.277413 | 0.781463 | 0.981636 | chr7  | 80169986 | 80170756 | + | 0 | NA | intron (NLM1B8 LIN | 34587 NM_00125E  | 2770 Hs. 134587NM_00206E       | ENSG000000GNA11     | Gi                   | G rprotein-coding          |                |
| chr7-101E.7.922567 | 0.227651 | 0.820622 | 0.277413 | 0.781463 | 0.981636 | chr7  | 1.05E+08 | 1.05E+08 | + | 0 | NA | intron (Nintron (N | 49756 NM_182931  | 55904 Hs. 59226E NM_01868E     | ENSG000000KMT2E     | HDHC04P I            | lysine mprotein-coding     |                |
| chr7-1287.922567   | 0.227651 | 0.820622 | 0.277413 | 0.781463 | 0.981636 | chr7  | 1.28E+08 | 1.28E+08 | + | 0 | NA | exon (NM exon (NM  | 28892 NM_018077  | 55131 Hs. 27426E NM_018077     | ENSG000000CRBM28    | ANES                 | RNA bindiprotein-coding    |                |
| chr8-2021.7.922567 | 0.227651 | 0.820622 | 0.277413 | 0.781463 | 0.981636 | chr8  | 20211237 | 20213751 | + | 0 | NA | intron (Nintron (N | 15113 NM_00169E  | 526 Hs. 295917NM_00169E        | ENSG000000ATPGV1B2  | ATPG61B2 ATPase      | Hprotein-coding            |                |
| chr8-6721.7.922567 | 0.227651 | 0.820622 | 0.277413 | 0.781463 | 0.981636 | chr8  | 67218997 | 67227606 | + | 0 | NA | intron (NAluJr SIN | 120480 NM_006421 | 10565 Hs. 65690E NM_006421     | ENSG000000ARFGF1    | ARFGF1 EADP          | Rprotein-coding            |                |
| chr8-1238.7.922567 | 0.227651 | 0.820622 | 0.277413 | 0.781463 | 0.981636 | chr8  | 1.24E+08 | 1.24E+08 | + | 0 | NA | intron (N(TA)n Sin | 40420 NM_14496E  | 157769 Hs. 459174NM_14496E     | ENSG000000FAM91A1   | -                    | family wiprotein-coding    |                |
| chr9-921E.7.922567 | 0.227651 | 0.820622 | 0.277413 | 0.781463 | 0.981636 | chr9  | 92105121 | 92109037 | + | 0 | NA | intron (NLM1S LINE | 8334 NM_00641E   | 10558 Hs. 90458 NM_00641E      | ENSG000000SPTLC1    | HSAN1 HS             | serine rprotein-coding     |                |
| chr9-1087.9.922567 | 0.227651 | 0.820622 | 0.277413 | 0.781463 | 0.981636 | chr9  | 1.09E+08 | 1.09E+08 | + | 0 | NA | intron (Nintron (N | 28700 NM_006687  | 10881 Hs. 12353CNM_006687      | ENSG000000ACTL7A    | -                    | actin lprotein-coding      |                |
| chr9-706E.9.461329 | 0.213431 | 0.770019 | 0.277177 | 0.781644 | 0.981636 | chr9  | 70658547 | 70659404 | + | 0 | NA | intron (NAluSx3 SI | 10210 NM_016027  | 51110 Hs. 118554NM_016027      | ENSG000000LACTB2    | CGI-83               | lactamase protein-coding   |                |
| chr11-112.8.468153 | 0.222132 | 0.801411 | 0.277176 | 0.781645 | 0.981636 | chr11 | 1.12E+08 | 1.12E+08 | + | 0 | NA | 3' UTR (N3' UTR (N | -5613 NM_001931  | 1737 Hs. 335551NM_001931       | ENSG000000DLAT      | DLTA E2 F            | dihydroliprotein-coding    |                |
| chr17-305.8.468153 | 0.222132 | 0.801411 | 0.277176 | 0.781645 | 0.981636 | chr17 | 30507347 | 30507546 | + | 0 | NA | intron (NAluSx SIN | 30038 NM_001007  | 9527 Hs. 462688NM_004871       | ENSG000000GOSR1     | GOLIM2 GC gol        |                            |                |



|           |          |          |          |          |          |          |       |          |          |   |   |    |                     |        |           |          |           |                     |                       |                       |                             |
|-----------|----------|----------|----------|----------|----------|----------|-------|----------|----------|---|---|----|---------------------|--------|-----------|----------|-----------|---------------------|-----------------------|-----------------------|-----------------------------|
| chr1-1612 | 8.972599 | 0.215772 | 0.78118  | 0.276213 | 0.782384 | 0.981636 | chr1  | 1.61E+08 | 1.61E+08 | + | 0 | NA | TTS (NM_C           | 1687   | NR_049815 | 1.01E+08 | NR_049815 | ENSG000002MIR5187   | mir-5187              | microRNA              | ncRNA                       |
| chr21-334 | 8.972599 | 0.215772 | 0.78118  | 0.276213 | 0.782384 | 0.981636 | chr21 | 33421463 | 33422572 | + | 0 | NA | intron (MER58A)DN   | 19121  | NR_001325 | 3460     | Hs.634632 | NR_005534           | ENSG000001FNGR2       | AF-1 IFG              | interferon protein-coding   |
| chr14-102 | 8.094128 | -0.22728 | 0.822854 | -0.27621 | 0.782386 | 0.981636 | chr14 | 1.02E+08 | 1.02E+08 | + | 0 | NA | intron (intron)     | 40463  | NR_005348 | 3320     | Hs.525600 | NR_005348           | ENSG000002HSP90AA1    | EL52 HEL-             | heat shock protein-coding   |
| chr2-2332 | 8.094128 | -0.22728 | 0.822854 | -0.27621 | 0.782386 | 0.981636 | chr2  | 2.33E+08 | 2.33E+08 | + | 0 | NA | intron (intron)     | 5387   | NR_003008 | 677775   | Hs.663615 | NR_003008           | ENSG000002SCARNA5     | U87                   | small Ca_ncRNA              |
| chr16-300 | 12.3656  | -0.18506 | 0.67003  | -0.27619 | 0.7824   | 0.981636 | chr16 | 30727255 | 30821052 | + | 0 | NA | Intergeni Intergeni | -30740 | NR_001321 | 613037   | Hs.585737 | NR_001321           | ENSG000002NPIP13      | U87                   | nuclear protein-coding      |
| chr1-1565 | 8.427013 | 0.22052  | 0.798955 | 0.27601  | 0.78254  | 0.981636 | chr1  | 1.57E+08 | 1.57E+08 | + | 0 | NA | intron (intron)     | 3987   | NR_015599 | 54865    | Hs.193832 | NR_015599           | ENSG000002CPATCH4     | GPATC4                | G-patch protein-coding      |
| chr1-213  | 8.427013 | 0.22052  | 0.798955 | 0.27601  | 0.78254  | 0.981636 | chr1  | 2.13E+08 | 2.13E+08 | + | 0 | NA | intron (NLTR41B)LI  | 37034  | NR_012424 | 26750    | Hs.59141  | NR_012424           | ENSG000002RPS6K1      | RPK118 RS             | ribosomal protein-coding    |
| chr10-11  | 8.427013 | 0.22052  | 0.798955 | 0.27601  | 0.78254  | 0.981636 | chr10 | 1.11E+08 | 1.11E+08 | + | 0 | NA | exon (NM exon)      | 14916  | NR_005444 | 9126     | Hs.24485  | NR_005444           | ENSG000002SMC3        | BAM BMH               | cytoskeletal protein-coding |
| chr10-124 | 8.427013 | 0.22052  | 0.798955 | 0.27601  | 0.78254  | 0.981636 | chr10 | 1.24E+08 | 1.24E+08 | + | 0 | NA | intron (intron)     | 13712  | NR_001322 | 4942     | Hs.523332 | NR_000274           | ENSG000002OAT         | GACR HOG              | ornithine protein-coding    |
| chr12-644 | 8.427013 | 0.22052  | 0.798955 | 0.27601  | 0.78254  | 0.981636 | chr12 | 6.04E+08 | 6.04E+08 | + | 0 | NA | intron (ALuSc8)SI   | 37449  | NR_013254 | 29110    | Hs.505874 | NR_013254           | ENSG000002TBK1        | FTDAL54 ITANK         | bin protein-coding          |
| chr12-105 | 8.427013 | 0.22052  | 0.798955 | 0.27601  | 0.78254  | 0.981636 | chr12 | 1.05E+08 | 1.05E+08 | + | 0 | NA | intron (intron)     | 15756  | NR_001251 | 55198    | Hs.506602 | NR_018171           | ENSG000002APPL2       | DIP13B                | adaptor protein-coding      |
| chr13-302 | 8.427013 | 0.22052  | 0.798955 | 0.27601  | 0.78254  | 0.981636 | chr13 | 30275040 | 30276270 | + | 0 | NA | intron (LIMA9)LIN   | 31356  | NR_001014 | 84056    | Hs.243599 | NR_032111           | ENSG000002KATNAL1     | -                     | katanin protein-coding      |
| chr14-92  | 8.427013 | 0.22052  | 0.798955 | 0.27601  | 0.78254  | 0.981636 | chr14 | 92012967 | 92014356 | + | 0 | NA | intron (intron)     | 26318  | NR_004233 | 9321     | Hs.632332 | NR_004233           | ENSG000002TRIP11      | ACG14 CEV             | thyroid l protein-coding    |
| chr14-101 | 8.427013 | 0.22052  | 0.798955 | 0.27601  | 0.78254  | 0.981636 | chr14 | 1.02E+08 | 1.02E+08 | + | 0 | NA | 3' UTR (3' UTR)     | -39128 | NR_001376 | 1778     | Hs.614089 | NR_001376           | ENSG000002DYNCH1H     | CGM20 DHC             | dynein cy protein-coding    |
| chr16-158 | 8.427013 | 0.22052  | 0.798955 | 0.27601  | 0.78254  | 0.981636 | chr16 | 15870360 | 15871216 | + | 0 | NA | intron (ALuJr)SIN   | -13758 | NR_022844 | 4629     | Hs.460109 | NR_002474           | ENSG000002MYH11       | AAT4 FAA              | myosin he protein-coding    |
| chr18-62  | 8.427013 | 0.22052  | 0.798955 | 0.27601  | 0.78254  | 0.981636 | chr18 | 62574430 | 62575483 | + | 0 | NA | exon (NM exon)      | 51931  | NR_126534 | 54877    | Hs.114191 | NR_017742           | ENSG000002ZCHC2       | C18orf49              | zinc finger protein-coding  |
| chr22-378 | 8.427013 | 0.22052  | 0.798955 | 0.27601  | 0.78254  | 0.981636 | chr22 | 37858703 | 37861477 | + | 0 | NA | intron (ML2a)LINE   | 10721  | NR_001363 | 51386    | Hs.446852 | NR_016091           | ENSG000002EIF3F       | EIF3EIP E             | leukaryot protein-coding    |
| chr4-267  | 8.427013 | 0.22052  | 0.798955 | 0.27601  | 0.78254  | 0.981636 | chr4  | 2671027  | 2674605  | + | 0 | NA | intron (intron)     | 47384  | NR_046333 | 8603     | Hs.652364 | NR_003704           | ENSG000002FAM193A     | C4orf8 RF             | family w protein-coding     |
| chr7-473  | 8.427013 | 0.22052  | 0.798955 | 0.27601  | 0.78254  | 0.981636 | chr7  | 47300850 | 47305154 | + | 0 | NA | exon (NM exon)      | 161801 | NR_145811 | 1.1E+08  | NR_145813 | SNORD151            | -                     | small nucsnoRNA       |                             |
| chr7-994  | 8.427013 | 0.22052  | 0.798955 | 0.27601  | 0.78254  | 0.981636 | chr7  | 99457740 | 99458864 | + | 0 | NA | TTS (NM_C           | 7865   | NR_001198 | 1.01E+08 | NR_001198 | ENSG000002ATP5MF-P1 | PIATP5J2 PIATP5       | 5MF-P1 protein-coding |                             |
| chr8-538  | 8.427013 | 0.22052  | 0.798955 | 0.27601  | 0.78254  | 0.981636 | chr8  | 53826669 | 53829520 | + | 0 | NA | intron (NLIPREC2)I  | 14948  | NR_213623 | 51606    | Hs.491737 | NR_015941           | ENSG000002ATP6V1H     | CGI-11 MS             | ATPase H protein-coding     |
| chr9-111  | 8.427013 | 0.22052  | 0.798955 | 0.27601  | 0.78254  | 0.981636 | chr9  | 1.12E+08 | 1.12E+08 | + | 0 | NA | non-codiron-codir   | -8129  | NR_001198 | 2790     | Hs.534199 | NR_001017           | ENSG000002CNG10       | -                     | G protein protein-coding    |
| chr9-1308 | 8.427013 | 0.22052  | 0.798955 | 0.27601  | 0.78254  | 0.981636 | chr9  | 1.31E+08 | 1.31E+08 | + | 0 | NA | intron (Tiger11a    | 29702  | NR_005157 | 25       | Hs.431048 | NR_005157           | ENSG000002CABL1       | ABL CHDS              | ABL protc protein-coding    |
| chr13-41  | 8.143125 | -0.2264  | 0.820315 | -0.27599 | 0.782558 | 0.981636 | chr13 | 41081317 | 41081722 | + | 0 | NA | intron (ALuJb)SIN   | 19581  | NR_036127 | 1E+08    | NR_036127 | ENSG000002MIR3168   | -                     | microRNA              | ncRNA                       |
| chr17-568 | 8.143125 | -0.2264  | 0.820315 | -0.27599 | 0.782558 | 0.981636 | chr17 | 56899953 | 56901543 | + | 0 | NA | intron (L2b)LINE    | -9393  | NR_037408 | 1.01E+08 | NR_037408 | ENSG000002MIR3614   | mir-3614              | microRNA              | ncRNA                       |
| chr20-365 | 8.143125 | -0.2264  | 0.820315 | -0.27599 | 0.782558 | 0.981636 | chr20 | 36518994 | 36519240 | + | 0 | NA | intron (ALuSg)SIN   | -22402 | NR_181522 | 10398    | Hs.504687 | NR_006097           | ENSG000002MYL9        | LCN20 MLC             | myosin I protein-coding     |
| chr9-935  | 7.898993 | 0.23344  | 0.846034 | -0.27599 | 0.782602 | 0.981636 | chr9  | 93529379 | 93530962 | + | 0 | NA | 3' UTR (3' UTR)     | -46414 | NR_005392 | 5253     | Hs.211441 | NR_005392           | ENSG000002PHF2        | PCN-35 CPHD           | finger protein-coding       |
| chr1-278  | 7.624813 | -0.23321 | 0.846228 | -0.27559 | 0.782866 | 0.981636 | chr1  | 27833434 | 27833708 | + | 0 | NA | promoter-promoter   | -830   | NR_002997 | 677774   | Hs.689694 | NR_002997           | ENSG000002SCARNA1     | ACA35                 | small Ca_ncRNA              |
| chr13-771 | 7.624813 | -0.23321 | 0.846228 | -0.27559 | 0.782866 | 0.981636 | chr13 | 77193652 | 77193983 | + | 0 | NA | intron (intron)     | 118258 | NR_046711 | 1.01E+08 | Hs.569288 | NR_046711           | ENSG000002MYCBP2-AS1  | -                     | MYCBP2 arncRNA              |
| chr16-302 | 7.624813 | -0.23321 | 0.846228 | -0.27559 | 0.782866 | 0.981636 | chr16 | 3027294  | 3028229  | + | 0 | NA | TTS (NM_C           | -3475  | NR_001288 | 54985    | Hs.423103 | NR_017888           | ENSG000002HCFC1R1     | HP1P                  | host cell protein-coding    |
| chr2-995  | 7.624813 | -0.23321 | 0.846228 | -0.27559 | 0.782866 | 0.981636 | chr2  | 99933593 | 99933900 | + | 0 | NA | intron (LIPA8)LIN   | 171837 | NR_001025 | 3899     | Hs.444414 | NR_002288           | ENSG000002AFF3        | LAF4 MLL1             | AFA/FMR2 protein-coding     |
| chr3-729  | 7.624813 | -0.23321 | 0.846228 | -0.27559 | 0.782866 | 0.981636 | chr3  | 72967565 | 72968046 | + | 0 | NA | intron (intron)     | -28938 | NR_001318 | 51987    | Hs.431092 | NR_174907           | ENSG000002PPP4R2      | PP4R2                 | protein f protein-coding    |
| chr1-518  | 7.135267 | -0.22467 | 0.815269 | -0.27557 | 0.782877 | 0.981636 | chr1  | 51818494 | 51919933 | + | 0 | NA | 3' UTR (3' UTR)     | -40276 | NR_002522 | 4898     | Hs.584782 | NR_002522           | ENSG000002NRDC        | NRD1 hNR              | nardylis protein-coding     |
| chr16-305 | 7.135267 | -0.22467 | 0.815269 | -0.27557 | 0.782877 | 0.981636 | chr16 | 30936183 | 30936561 | + | 0 | NA | intron (MIR SINE)   | 11797  | NR_001095 | 54620    | Hs.152149 | NR_019088           | ENSG000002FBXL19      | CXXC11 Ft             | F-box anc protein-coding    |
| chr2-382  | 7.135267 | -0.22467 | 0.815269 | -0.27557 | 0.782877 | 0.981636 | chr2  | 38229247 | 38231710 | + | 0 | NA | intron (intron)     | -5758  | NR_132774 | 1.07E+08 | NR_132774 | SNORA92             | -                     | small nucsnoRNA       |                             |
| chr4-766  | 7.135267 | -0.22467 | 0.815269 | -0.27557 | 0.782877 | 0.981636 | chr4  | 766664   | 768428   | + | 0 | NA | 3' UTR (3' UTR)     | 14302  | NR_036511 | 1E+08    | Hs.731759 | NR_036511           | ENSG000002LOC10010225 | -                     | uncharactercna              |
| chr4-207  | 7.135267 | -0.22467 | 0.815269 | -0.27557 | 0.782877 | 0.981636 | chr4  | 20722008 | 20722344 | + | 0 | NA | intron (LIPA5)LIN   | 21718  | NR_001333 | 133015   | Hs.479299 | NR_145048           | ENSG000002PACRGL      | C4orf28               | parkin cc protein-coding    |
| chr4-731  | 7.135267 | -0.22467 | 0.815269 | -0.27557 | 0.782877 | 0.981636 | chr4  | 73168461 | 73169977 | + | 0 | NA | intron (Tiger17a    | 53838  | NR_001288 | 26057    | Hs.601209 | NR_015574           | ENSG000002ANKRD17     | G17AR MAS             | ankyrin I protein-coding    |
| chr2-289  | 7.386689 | 0.243956 | 0.88548  | 0.275507 | 0.782927 | 0.981636 | chr2  | 28902029 | 28902831 | + | 0 | NA | intron (LTR50)LIT   | 7763   | NR_001123 | 23160    | Hs.622982 | NR_015131           | ENSG000002WDR43       | NET12 UTF             | WD repeat protein-coding    |
| chr8-382  | 7.411297 | -0.22419 | 0.813982 | 0.275423 | 0.782991 | 0.981636 | chr8  | 38262921 | 38264100 | + | 0 | NA | TTS (NM_C           | 5710   | NR_032483 | 84513    | Hs.567619 | NR_032483           | ENSG000002PLPP5       | DPPL1 HTF             | phospholipid protein-coding |
| chr1-152  | 7.425979 | 0.233774 | 0.848878 | 0.275391 | 0.783016 | 0.981636 | chr1  | 1525174  | 1526634  | + | 0 | NA | intron (ALuJb)SIN   | 13374  | NR_001177 | 55210    | Hs.23413  | NR_018188           | ENSG000002ATAD3A      | HAYOS                 | ATPase f protein-coding     |
| chr1-269  | 7.425979 | 0.233774 | 0.848878 | 0.275391 | 0.783016 | 0.981636 | chr1  | 26933789 | 26934736 | + | 0 | NA | intron (THEIC)LIT   | 12519  | NR_006607 | 10726    | Hs.263812 | NR_006607           | ENSG000002NUDC        | NUDC MN               | nuclear c protein-coding    |
| chr1-434  | 7.425979 | 0.233774 | 0.848878 | 0.275391 | 0.783016 | 0.981636 | chr1  | 43420327 | 43421870 | + | 0 | NA | intron (intron)     | -27441 | NR_106799 | 1.02E+08 | NR_106799 | ENSG000002MIR6735   | hsa-mir-6             | microRNA              | ncRNA                       |
| chr1-446  | 7.425979 | 0.233774 | 0.848878 | 0.275391 | 0.783016 | 0.981636 | chr1  | 44638419 | 44640902 | + | 0 | NA | intron (intron)     | 31396  | NR_145811 | 1.1E+08  | NR_145811 | SNORD145            | -                     | small nucsnoRNA       |                             |
| chr1-165  | 7.425979 | 0.233774 | 0.848878 | 0.275391 | 0.783016 | 0.981636 | chr1  | 1.66E+08 | 1.66E+08 | + | 0 | NA | intron (intron)     | 32645  | NR_004528 | 4259     | Hs.191734 | NR_004528           | ENSG000002MGST3       | GST-III               | microsome protein-coding    |
| chr10-13  | 7.425979 | 0.233774 | 0.848878 | 0.275391 | 0.783016 | 0.981636 | chr10 | 13652950 | 13654067 | + | 0 | NA | intron (intron)     | 54059  | NR_001318 | 55691    | Hs.330462 | NR_018027           | ENSG000002PRMD4A      | CCAFCA FF             | FERM dom protein-coding     |
| chr10-13  | 7.425979 | 0.233774 | 0.848878 | 0.275391 | 0.783016 | 0.981636 | chr10 | 1.33E+08 | 1.33E+08 | + | 0 | NA | intron (intron)     | -7953  | NR_001164 | 101      | Hs.501574 | NR_001109           | ENSG000002ADAM8       | CD156 CD1             | ADAM metc protein-coding    |
| chr11-11  | 7.425979 | 0.233774 | 0.848878 | 0.275391 | 0.783016 | 0.981636 | chr11 | 1.12E+08 | 1.12E+08 | + | 0 | NA | exon (NM exon)      | 13018  | NR_138785 | 120379   | Hs.420662 | NR_138785           | ENSG000002PIH1D2      | -                     | PIH1 dom protein-coding     |
| chr12-90  | 7.425979 | 0.233774 | 0.848878 | 0.275391 | 0.783016 | 0.981636 | chr12 | 9067936  | 9070726  | + | 0 | NA | intron (intron)     | 4154   | NR_137424 | 144571   | Hs.592432 | NR_026971           | ENSG000002A2M-AS1     | -                     | A2M antiscRNA               |
| chr12-65  | 7.425979 | 0.233774 | 0.848878 | 0.275391 | 0.783016 | 0.981636 | chr12 | 65218918 | 65219878 | + | 0 | NA | in                  |        |           |          |           |                     |                       |                       |                             |



|           |          |          |          |        |          |          |       |          |          |   |   |    |                      |        |           |          |           |                |                                     |
|-----------|----------|----------|----------|--------|----------|----------|-------|----------|----------|---|---|----|----------------------|--------|-----------|----------|-----------|----------------|-------------------------------------|
| chr1-2402 | 7.930425 | 0.225796 | 0.820776 | 0.2751 | 0.783239 | 0.981636 | chr1  | 2.4E+08  | 2.4E+08  | + | 0 | NA | intron (N)LP1A7 LIN  | 132129 | NM_020066 | 56776    | Hs.24889  | ENSG0000020066 | formin 2 protein-coding             |
| chr1-2488 | 7.930425 | 0.225796 | 0.820776 | 0.2751 | 0.783239 | 0.981636 | chr1  | 2.49E+08 | 2.49E+08 | + | 0 | NA | intron (N)LM1E4a LI  | 10246  | NM_001322 | 80851    | Hs.29857  | ENSG0000020064 | SH3 binding protein-coding          |
| chr10-122 | 7.930425 | 0.225796 | 0.820776 | 0.2751 | 0.783239 | 0.981636 | chr10 | 12217303 | 12219074 | + | 0 | NA | intron (N)(TATA)n S  | 22000  | NM_006023 | 8872     | Hs.41284  | ENSG0000020062 | C10orf71 cell divi protein-coding   |
| chr10-451 | 7.930425 | 0.225796 | 0.820776 | 0.2751 | 0.783239 | 0.981636 | chr10 | 45769439 | 45774758 | + | 0 | NA | intron (N)LM1B7 LIN  | 44832  | NM_001367 | 253725   | Hs.36528  | ENSG0000020062 | FAM21A FAM21A protein-coding        |
| chr10-507 | 7.930425 | 0.225796 | 0.820776 | 0.2751 | 0.783239 | 0.981636 | chr10 | 50106354 | 50112424 | + | 0 | NA | intron (N)intron (N) | 41435  | NM_001005 | 387680   | Hs.36528  | ENSG0000020062 | FAM21A FAM21A protein-coding        |
| chr10-507 | 7.930425 | 0.225796 | 0.820776 | 0.2751 | 0.783239 | 0.981636 | chr10 | 50342905 | 50344332 | + | 0 | NA | exon (NM)exon (NM)   | -95008 | NM_001143 | 56624    | Hs.51264  | ENSG0000020062 | BCDase HIN-acyl spl protein-coding  |
| chr10-685 | 7.930425 | 0.225796 | 0.820776 | 0.2751 | 0.783239 | 0.981636 | chr10 | 68917251 | 68920786 | + | 0 | NA | intron (N)Tiger3 c   | 17703  | NM_024045 | 79009    | Hs.52298  | ENSG0000020062 | GU2 GUB FDBX-d box protein-coding   |
| chr10-877 | 7.930425 | 0.225796 | 0.820776 | 0.2751 | 0.783239 | 0.981636 | chr10 | 87060323 | 87064036 | + | 0 | NA | intron (N)AluSx SIN  | 31908  | NM_001318 | 2746     | Hs.50040  | ENSG0000020062 | GDH GDH1 glutamate protein-coding   |
| chr10-918 | 7.930425 | 0.225796 | 0.820776 | 0.2751 | 0.783239 | 0.981636 | chr10 | 91854755 | 91861409 | + | 0 | NA | intron (N)intron (N) | 51404  | NM_152425 | 143282   | Hs.46612  | ENSG0000020062 | C10orf13 fibroblas protein-coding   |
| chr10-105 | 7.930425 | 0.225796 | 0.820776 | 0.2751 | 0.783239 | 0.981636 | chr10 | 1.1E+08  | 1.1E+08  | + | 0 | NA | intron (N)intron (N) | 50137  | NM_001324 | 7511     | Hs.39062  | ENSG0000020062 | APP1 SAMF-X-prolyl protein-coding   |
| chr11-871 | 7.930425 | 0.225796 | 0.820776 | 0.2751 | 0.783239 | 0.981636 | chr11 | 8710153  | 8716230  | + | 0 | NA | intron (N)intron (N) | 27752  | NR_002977 | 677826   | Hs.74555  | ENSG0000020062 | ACA3-2 SN small nucsnRNA            |
| chr11-125 | 7.930425 | 0.225796 | 0.820776 | 0.2751 | 0.783239 | 0.981636 | chr11 | 12936990 | 12941146 | + | 0 | NA | 3' UTR (N)3' UTR (N) | 50480  | NR_038904 | 1.01E+08 | Hs.15340  | ENSG0000020062 | BLACAT2 long intencRNA              |
| chr11-182 | 7.930425 | 0.225796 | 0.820776 | 0.2751 | 0.783239 | 0.981636 | chr11 | 18554308 | 18558546 | + | 0 | NA | intron (N)intron (N) | 23091  | NM_001261 | 55293    | Hs.40799  | ENSG0000020062 | ATTP UEV2 UEV and lprotein-coding   |
| chr11-626 | 7.930425 | 0.225796 | 0.820776 | 0.2751 | 0.783239 | 0.981636 | chr11 | 62699135 | 62699505 | + | 0 | NA | intron (N)AluY SINE  | -2290  | NM_203422 | 221091   | Hs.42744  | ENSG0000020062 | LRRN4 C-tprotein-coding             |
| chr11-672 | 7.930425 | 0.225796 | 0.820776 | 0.2751 | 0.783239 | 0.981636 | chr11 | 67231103 | 67232753 | + | 0 | NA | exon (NM)exon (NM)   | -8086  | NM_001255 | 22992    | Hs.12414  | ENSG0000020062 | CXXC8 FBI lysine deprotein-coding   |
| chr11-703 | 7.930425 | 0.225796 | 0.820776 | 0.2751 | 0.783239 | 0.981636 | chr11 | 70320265 | 70338339 | + | 0 | NA | intron (N)intron (N) | 48997  | NR_031262 | 1E+08    | NR_031262 | ENSG0000020062 | MIRN548K microRNA ncRNA             |
| chr11-756 | 7.930425 | 0.225796 | 0.820776 | 0.2751 | 0.783239 | 0.981636 | chr11 | 75055550 | 75060031 | + | 0 | NA | exon (NM)exon (NM)   | 16857  | NM_001367 | 10825    | Hs.19107  | ENSG0000020062 | SIAL3 neuramin protein-coding       |
| chr12-195 | 7.930425 | 0.225796 | 0.820776 | 0.2751 | 0.783239 | 0.981636 | chr12 | 1961524  | 1967547  | + | 0 | NA | intron (N)LM1E5 LINE | -27959 | NR_036545 | 1E+08    | Hs.73703  | ENSG0000020062 | long intencRNA                      |
| chr12-908 | 7.930425 | 0.225796 | 0.820776 | 0.2751 | 0.783239 | 0.981636 | chr12 | 9087318  | 9095734  | + | 0 | NA | intron (N)intron (N) | 24703  | NM_001347 | 2        | Hs.88556  | ENSG0000020062 | A2M CPAM alpha-2-n protein-coding   |
| chr12-144 | 7.930425 | 0.225796 | 0.820776 | 0.2751 | 0.783239 | 0.981636 | chr12 | 14470216 | 14473400 | + | 0 | NA | intron (N)THE1C LTF  | 86347  | NM_181355 | 55729    | Hs.50485  | ENSG0000020062 | AM ATF-1 activator protein-coding   |
| chr12-195 | 7.930425 | 0.225796 | 0.820776 | 0.2751 | 0.783239 | 0.981636 | chr12 | 19357608 | 19359897 | + | 0 | NA | intron (N)intron (N) | -80740 | NM_001114 | 121536   | Hs.12649  | ENSG0000020062 | AE bindin protein-coding            |
| chr12-276 | 7.930425 | 0.225796 | 0.820776 | 0.2751 | 0.783239 | 0.981636 | chr12 | 27678988 | 27680570 | + | 0 | NA | intron (N)intron (N) | -16668 | NM_001025 | 387849   | Hs.26983  | ENSG0000020062 | RAB15EP RAB15 eff protein-coding    |
| chr12-767 | 7.930425 | 0.225796 | 0.820776 | 0.2751 | 0.783239 | 0.981636 | chr12 | 76363664 | 76370591 | + | 0 | NA | intron (N)LM1M4 LINE | -18712 | NM_024685 | 79738    | Hs.96322  | ENSG0000020062 | C12orf58 Bardet-Bi protein-coding   |
| chr12-773 | 7.930425 | 0.225796 | 0.820776 | 0.2751 | 0.783239 | 0.981636 | chr12 | 77023423 | 77026158 | + | 0 | NA | intron (N)intron (N) | 40779  | NM_203394 | 144455   | Hs.41637  | ENSG0000020062 | E2F transprotein-coding             |
| chr12-132 | 7.930425 | 0.225796 | 0.820776 | 0.2751 | 0.783239 | 0.981636 | chr12 | 1.23E+08 | 1.23E+08 | + | 0 | NA | intron (N)intron (N) | 19944  | NR_107035 | 1.02E+08 | NR_107035 | ENSG0000020062 | hsa-mir-5 microRNA ncRNA            |
| chr12-132 | 7.930425 | 0.225796 | 0.820776 | 0.2751 | 0.783239 | 0.981636 | chr12 | 1.32E+08 | 1.32E+08 | + | 0 | NA | intron (N)AluSx1 SI  | 28266  | NR_003292 | 347918   | Hs.12211  | ENSG0000020062 | EP400L EP400 pse pseudo             |
| chr13-244 | 7.930425 | 0.225796 | 0.820776 | 0.2751 | 0.783239 | 0.981636 | chr13 | 24450423 | 24457534 | + | 0 | NA | intron (N)AluSx1 SI  | 58800  | NM_006437 | 143      | Hs.74485  | ENSG0000020062 | ADPRTL1 poly (ADP- protein-coding   |
| chr13-244 | 7.930425 | 0.225796 | 0.820776 | 0.2751 | 0.783239 | 0.981636 | chr13 | 24474803 | 24481162 | + | 0 | NA | intron (N)intron (N) | 34796  | NM_006437 | 143      | Hs.74485  | ENSG0000020062 | ADPRTL1 poly (ADP- protein-coding   |
| chr13-321 | 7.930425 | 0.225796 | 0.820776 | 0.2751 | 0.783239 | 0.981636 | chr13 | 32179215 | 32179931 | + | 0 | NA | intron (N)intron (N) | 132381 | NM_001136 | 646799   | Hs.56925  | ENSG0000020062 | Z3CXXC Zzygote ar protein-coding    |
| chr13-793 | 7.930425 | 0.225796 | 0.820776 | 0.2751 | 0.783239 | 0.981636 | chr13 | 79395600 | 79397160 | + | 0 | NA | intron (N)LM1E6 LIN  | 941    | NM_001288 | 64062    | Hs.55825  | ENSG0000020062 | ARRS2 C1C1R bindin protein-coding   |
| chr14-505 | 7.930425 | 0.225796 | 0.820776 | 0.2751 | 0.783239 | 0.981636 | chr14 | 50904263 | 50915542 | + | 0 | NA | exon (NM)exon (NM)   | 34581  | NM_002863 | 5836     | Hs.28241  | ENSG0000020062 | GSD6 glycogen protein-coding        |
| chr14-928 | 7.930425 | 0.225796 | 0.820776 | 0.2751 | 0.783239 | 0.981636 | chr14 | 92824220 | 92830286 | + | 0 | NA | intron (N)Tiger1 I   | 32948  | NM_005113 | 9950     | Hs.10432  | ENSG0000020062 | GOLGA5 Golgin A5 protein-coding     |
| chr14-102 | 7.930425 | 0.225796 | 0.820776 | 0.2751 | 0.783239 | 0.981636 | chr14 | 1.03E+08 | 1.03E+08 | + | 0 | NA | intron (N)intron (N) | 19419  | NM_030942 | 81693    | Hs.53449  | ENSG0000020062 | PRO1028 eamion as protein-coding    |
| chr15-421 | 7.930425 | 0.225796 | 0.820776 | 0.2751 | 0.783239 | 0.981636 | chr15 | 42171022 | 42179000 | + | 0 | NA | intron (N)L2b LINE   | -18375 | NM_213600 | 255189   | Hs.23187  | ENSG0000020062 | PLA2G4F phospholipid protein-coding |
| chr15-421 | 7.930425 | 0.225796 | 0.820776 | 0.2751 | 0.783239 | 0.981636 | chr15 | 42179828 | 42185633 | + | 0 | NA | intron (N)L2b LINE   | 16932  | NR_030357 | 933212   | NR_030357 | ENSG0000020062 | MIRN627 microRNA ncRNA              |
| chr15-425 | 7.930425 | 0.225796 | 0.820776 | 0.2751 | 0.783239 | 0.981636 | chr15 | 42958728 | 42959273 | + | 0 | NA | intron (N)AluSx1 SI  | -8222  | NM_173500 | 646057   | Hs.64651  | ENSG0000020062 | SCA11 TTE tau tubul protein-coding  |
| chr15-848 | 7.930425 | 0.225796 | 0.820776 | 0.2751 | 0.783239 | 0.981636 | chr15 | 84804845 | 84805120 | + | 0 | NA | 3' UTR (N)3' UTR (N) | -11698 | NM_020778 | 57538    | Hs.45918  | ENSG0000020062 | CMH27 MAK alpha kir protein-coding  |
| chr15-943 | 7.930425 | 0.225796 | 0.820776 | 0.2751 | 0.783239 | 0.981636 | chr15 | 94313233 | 94317833 | + | 0 | NA | exon (NM)exon (NM)   | 17332  | NM_001155 | 55784    | Hs.33368  | ENSG0000020062 | multiple protein-coding             |
| chr16-374 | 7.930425 | 0.225796 | 0.820776 | 0.2751 | 0.783239 | 0.981636 | chr16 | 37420665 | 37452641 | + | 0 | NA | intron (N)intron (N) | -26140 | NM_016292 | 10131    | Hs.30345  | ENSG0000020062 | HSP 75 HSP75 recep protein-coding   |
| chr16-444 | 7.930425 | 0.225796 | 0.820776 | 0.2751 | 0.783239 | 0.981636 | chr16 | 4448184  | 4453966  | + | 0 | NA | intron (N)intron (N) | 23550  | NM_001351 | 57407    | Hs.28896  | ENSG0000020062 | HSCARG SEMrA like protein-coding    |
| chr16-156 | 7.930425 | 0.225796 | 0.820776 | 0.2751 | 0.783239 | 0.981636 | chr16 | 15622651 | 15625751 | + | 0 | NA | intron (N)AluY SINE  | -13106 | NR_106761 | 1.02E+08 | NR_106761 | ENSG0000020062 | hsa-mir-5 microRNA ncRNA            |
| chr16-185 | 7.930425 | 0.225796 | 0.820776 | 0.2751 | 0.783239 | 0.981636 | chr16 | 18554155 | 18556796 | + | 0 | NA | intron (N)LM1E3G LI  | 6137   | NM_001004 | 283820   | Hs.46014  | ENSG0000020062 | NOMO PMS5 NODAL moc protein-coding  |
| chr16-252 | 7.930425 | 0.225796 | 0.820776 | 0.2751 | 0.783239 | 0.981636 | chr16 | 25245852 | 25247563 | + | 0 | NA | exon (NM)exon (NM)   | 11138  | NM_001012 | 342357   | Hs.51345  | ENSG0000020062 | ZNF694 Zs zinc fing protein-coding  |
| chr16-275 | 7.930425 | 0.225796 | 0.820776 | 0.2751 | 0.783239 | 0.981636 | chr16 | 27507688 | 27511047 | + | 0 | NA | intron (N)intron (N) | 40546  | NM_001125 | 2975     | Hs.37171  | ENSG0000020062 | TFIIIC TF general t protein-coding  |
| chr16-286 | 7.930425 | 0.225796 | 0.820776 | 0.2751 | 0.783239 | 0.981636 | chr16 | 28099324 | 28103334 | + | 0 | NA | intron (N)intron (N) | -37615 | NM_001105 | 146395   | Hs.91910  | ENSG0000020062 | PRO19651 GSG1 like protein-coding   |
| chr16-295 | 7.930425 | 0.225796 | 0.820776 | 0.2751 | 0.783239 | 0.981636 | chr16 | 29987336 | 29991811 | + | 0 | NA | intron (N)(CTC)n SI  | 6044   | NM_003605 | 8479     | Hs.56737  | ENSG0000020062 | HIRA inte protein-coding            |
| chr16-702 | 7.930425 | 0.225796 | 0.820776 | 0.2751 | 0.783239 | 0.981636 | chr16 | 70511545 | 70515110 | + | 0 | NA | intron (N)intron (N) | 10227  | NM_001365 | 25839    | Hs.20868  | ENSG0000020062 | CDGJ COE component protein-coding   |
| chr16-722 | 7.930425 | 0.225796 | 0.820776 | 0.2751 | 0.783239 | 0.981636 | chr16 | 72087922 | 72090326 | + | 0 | NA | exon (NM)exon (NM)   | 4496   |           |          |           |                |                                     |



|                     |          |          |          |          |          |       |          |          |   |   |    |                   |        |           |          |                     |                     |   |                   |                          |                             |                          |
|---------------------|----------|----------|----------|----------|----------|-------|----------|----------|---|---|----|-------------------|--------|-----------|----------|---------------------|---------------------|---|-------------------|--------------------------|-----------------------------|--------------------------|
| chr20-21: 6.921533  | 0.242854 | 0.882834 | 0.275085 | 0.783251 | 0.981636 | chr20 | 21334976 | 21337709 | + | 0 | NA | intron (AluSx1 SI | 32844  | NM_001317 | 22803    | Hs. 255932NM_012255 | ENSG00000XRN2       | - | 5'-3'             | excprotein-coding        |                             |                          |
| chr22-31: 6.921533  | 0.242854 | 0.882834 | 0.275085 | 0.783251 | 0.981636 | chr22 | 31201294 | 31202139 | + | 0 | NA | intron (intron (N | -10582 | NM_005566 | 3985     | Hs. 474596NM_005566 | ENSG00000LIMK2      | - |                   | LIM domainprotein-coding |                             |                          |
| chr22-387: 6.921533 | 0.242854 | 0.882834 | 0.275085 | 0.783251 | 0.981636 | chr22 | 38716264 | 38717245 | + | 0 | NA | exon (NM_exon (NM | 10810  | NM_004288 | 9567     | Hs. 276922NM_004288 | ENSG00000GTPBP1     | - | GP-1 GP1 GTP      | bindiprotein-coding      |                             |                          |
| chr22-46: 6.921533  | 0.242854 | 0.882834 | 0.275085 | 0.783251 | 0.981636 | chr22 | 46350388 | 46352836 | + | 0 | NA | intron (intron (N | 15898  | NM_001282 | 55687    | Hs. 439524NM_018006 | ENSG00000TRMU       | - | LCAL3 MT cRNA     | 5-mcprotein-coding       |                             |                          |
| chr3-179: 6.921533  | 0.242854 | 0.882834 | 0.275085 | 0.783251 | 0.981636 | chr3  | 1.79E+08 | 1.79E+08 | + | 0 | NA | intron (L1PA6 LIN | 27121  | NM_152244 | 64393    | Hs. 371606NM_022477 | ENSG00000ZMAT3      | - | PAG608 Wlinc      | fm-protein-coding        |                             |                          |
| chr5-377: 6.921533  | 0.242854 | 0.882834 | 0.275085 | 0.783251 | 0.981636 | chr5  | 37726926 | 37728317 | + | 0 | NA | intron (AluJr4 SI | 107201 | NM_001278 | 2668     | Hs. 248114NM_000514 | ENSG00000GDNF       | - | ATF ATF1 glial    | cellprotein-coding       |                             |                          |
| chr8-127: 6.921533  | 0.242854 | 0.882834 | 0.275085 | 0.783251 | 0.981636 | chr8  | 1.28E+08 | 1.28E+08 | + | 0 | NA | intron (intron (N | -13493 | NR_031611 | 1E+08    | Hs. 031611NM_000000 | MIR1206             | - | MIRN1206 microRNA | ncRNA                    |                             |                          |
| chr3-185: 12.35774  | -0.18394 | 0.66981  | -0.27462 | 0.783607 | 0.981636 | chr3  | 1.86E+08 | 1.86E+08 | + | 0 | NA | exon (NM_exon (NM | 16883  | NM_004599 | 6434     | Hs. 533122NM_004599 | ENSG00000TRA2B      | - | Htra2-beta        | transformprotein-coding  |                             |                          |
| chr17-31: 8.931459  | 0.214237 | 0.780707 | 0.274415 | 0.783766 | 0.981636 | chr17 | 31373745 | 31374709 | + | 0 | NA | 3' UTR (3' UTR (N | -17448 | NM_032932 | 84440    | Hs. 406788NM_032932 | ENSG00000CRAB11FIP4 | - | FIP4-Rab1         | RAB11 fanprotein-coding  |                             |                          |
| chr2-443: 8.931459  | 0.214237 | 0.780707 | 0.274415 | 0.783766 | 0.981636 | chr2  | 44336417 | 44336752 | + | 0 | NA | intron (L1PA15 LI | 23165  | NM_001042 | 9581     | Hs. 444349NM_006036 | ENSG00000PREPL      | - | CMS22             | prolyl erprotein-coding  |                             |                          |
| chr5-1327: 8.931459 | 0.214237 | 0.780707 | 0.274415 | 0.783766 | 0.981636 | chr5  | 1.33E+08 | 1.33E+08 | + | 0 | NA | intron (intron (N | -19359 | NR_134248 | 1.05E+08 | Hs. 73917           | NR_134248           | - | LOC105375         | uncharacterncRNA         |                             |                          |
| chr7-103: 8.931459  | 0.214237 | 0.780707 | 0.274415 | 0.783766 | 0.981636 | chr7  | 1.03E+08 | 1.03E+08 | + | 0 | NA | intron (AluSp SIN | 9025   | NM_004279 | 9512     | Hs. 184211NM_004279 | ENSG00000PMPCB      | - | Beta-MPP          | peptidaseprotein-coding  |                             |                          |
| chr9-122: 8.931459  | 0.214237 | 0.780707 | 0.274415 | 0.783766 | 0.981636 | chr9  | 1.22E+08 | 1.22E+08 | + | 0 | NA | non-codiron-codir | -12127 | NM_014368 | 26468    | Hs. 103137NM_014368 | ENSG00000LHX6       | - | LHX6.1            | LIM homeprotein-coding   |                             |                          |
| chr1-174: 8.434871  | 0.218765 | 0.792728 | 0.27439  | 0.783785 | 0.981636 | chr1  | 1714962  | 1722336  | + | 0 | NA | intron (AluYml SI | 5708   | NM_024011 | 728642   | Hs. 651228NM_024011 | ENSG00000CDK11A     | - | CDK2L2 C          | cyclin deprotein-coding  |                             |                          |
| chr1-163: 8.434871  | 0.218765 | 0.792728 | 0.27439  | 0.783785 | 0.981636 | chr1  | 16307533 | 16309826 | + | 0 | NA | intron (AluJb SIN | 43801  | NM_018994 | 54455    | Hs. 522384NM_018994 | ENSG00000FBX042     | - | Fbx42 JFK         | box prcprotein-coding    |                             |                          |
| chr1-2694: 8.434871 | 0.218765 | 0.792728 | 0.27439  | 0.783785 | 0.981636 | chr1  | 26941500 | 26947238 | + | 0 | NA | intron (AluJb SIN | 16099  | NM_15236E | 126695   | Hs. 188881NM_15236E | ENSG00000KDF1       | - | Clorf172          | keratinocprotein-coding  |                             |                          |
| chr1-393: 8.434871  | 0.218765 | 0.792728 | 0.27439  | 0.783785 | 0.981636 | chr1  | 39360927 | 39373287 | + | 0 | NA | intron (AluSz SIN | 41696  | NM_01503E | 643314   | Hs. 658766NM_01503E | ENSG00000KIAA0754   | - | KIAA0754          | protein-coding           |                             |                          |
| chr1-240: 8.434871  | 0.218765 | 0.792728 | 0.27439  | 0.783785 | 0.981636 | chr1  | 2.4E+08  | 2.4E+08  | + | 0 | NA | intron (intron (N | 247273 | NM_02246E | 64388    | Hs. 98206           | NM_02246E           | - | GREM2             | CTKTSF1B2                | gremlin 2protein-coding     |                          |
| chr11-93: 8.434871  | 0.218765 | 0.792728 | 0.27439  | 0.783785 | 0.981636 | chr11 | 9369812  | 93698729 | + | 0 | NA | exon (NM_exon (NM | -23744 | NR_00256E | 619383   | Hs. 66066E          | NR_00256E           | - | ENSG00000SCARN9   | Z32 mqU2-                | small Ca <sub>v</sub> ncRNA |                          |
| chr11-11: 8.434871  | 0.218765 | 0.792728 | 0.27439  | 0.783785 | 0.981636 | chr11 | 1.18E+08 | 1.18E+08 | + | 0 | NA | intron (HALI LINE | -13936 | NR_03375E | 10632    | Hs. 486366NM_00647E | ENSG00000ATP5MG     | - | ATP5JG A1ATP      | syntfprotein-coding      |                             |                          |
| chr12-29: 8.434871  | 0.218765 | 0.792728 | 0.27439  | 0.783785 | 0.981636 | chr12 | 291221   | 298084   | + | 0 | NA | intron (intron (N | -13779 | NM_00119C | 6540     | Hs. 504398NM_01661E | ENSG00000SLC6A13    | - | GAT-2 GAI         | solute cprotein-coding   |                             |                          |
| chr12-48: 8.434871  | 0.218765 | 0.792728 | 0.27439  | 0.783785 | 0.981636 | chr12 | 48937306 | 48941068 | + | 0 | NA | intron (intron (N | -13640 | NM_001143 | 51303    | Hs. 655103NM_016594 | ENSG00000FKBP11     | - | FKBP19            | FKBP proprotein-coding   |                             |                          |
| chr12-53: 8.434871  | 0.218765 | 0.792728 | 0.27439  | 0.783785 | 0.981636 | chr12 | 53406306 | 53412813 | + | 0 | NA | exon (NM_exon (NM | -14294 | NM_001164 | 269      | Hs. 659889NM_020547 | ENSG00000AMHR2      | - | AMHR MISF         | anti-Mullprotein-coding  |                             |                          |
| chr12-624: 8.434871 | 0.218765 | 0.792728 | 0.27439  | 0.783785 | 0.981636 | chr12 | 62554471 | 62557329 | + | 0 | NA | intron (intron (N | 47534  | NR_121682 | 283416   | Hs. 375881NM_17589E | ENSG00000LINC0146E  | - | C12orf61          | long intncRNA            |                             |                          |
| chr12-12: 8.434871  | 0.218765 | 0.792728 | 0.27439  | 0.783785 | 0.981636 | chr12 | 1.23E+08 | 1.23E+08 | + | 0 | NA | intron (AluSc5 SI | 32830  | NR_10703E | 1.02E+08 | NR_10703E           | ENSG00000MIR8072    | - | hsa-mir-5         | microRNA ncRNA           |                             |                          |
| chr14-49: 8.434871  | 0.218765 | 0.792728 | 0.27439  | 0.783785 | 0.981636 | chr14 | 49842832 | 49851146 | + | 0 | NA | intron (AluSg SIN | 5799   | NM_00471E | 9147     | Hs. 655964NM_00471E | ENSG00000CNEMF      | - | NY-CO-1 S         | nuclear cprotein-coding  |                             |                          |
| chr14-73: 8.434871  | 0.218765 | 0.792728 | 0.27439  | 0.783785 | 0.981636 | chr14 | 73920707 | 73930751 | + | 0 | NA | intron (intron (N | -24205 | NM_18248C | 51004    | Hs. 13155E          | NM_18247E           | - | ENSG00000COQ6     | CG1-10 C                 | nuclease protein-coding     |                          |
| chr15-42: 8.434871  | 0.218765 | 0.792728 | 0.27439  | 0.783785 | 0.981636 | chr15 | 42948352 | 42954355 | + | 0 | NA | intron (AluSg SIN | -30575 | NM_17350C | 146057   | Hs. 646511NM_17350C | ENSG00000TTBR2      | - | SCA11 TTE         | tau tubulprotein-coding  |                             |                          |
| chr15-65: 8.434871  | 0.218765 | 0.792728 | 0.27439  | 0.783785 | 0.981636 | chr15 | 65695392 | 65697335 | + | 0 | NA | TTS (NR_TTS (NR_C | 573    | NR_14575E | 1.1E+08  | NR_14575E           | ENSG00000SNORD13E   | - | small nucsnRNA    |                          |                             |                          |
| chr15-94: 8.434871  | 0.218765 | 0.792728 | 0.27439  | 0.783785 | 0.981636 | chr15 | 94476793 | 94479733 | + | 0 | NA | intron (intron (N | 122353 | NM_00115E | 55784    | Hs. 33368           | NM_01834E           | - | ENSG00000MCTP2    | -                        | multiple                    | protein-coding           |
| chr16-88: 8.434871  | 0.218765 | 0.792728 | 0.27439  | 0.783785 | 0.981636 | chr16 | 88714474 | 88717687 | + | 0 | NA | TTS (NM_TTS (NM_C | 257    | NR_03987E | 1.01E+08 | NR_03987E           | ENSG00000MIR4722    | - | microRNA          | ncRNA                    |                             |                          |
| chr17-76: 8.434871  | 0.218765 | 0.792728 | 0.27439  | 0.783785 | 0.981636 | chr17 | 7616416  | 778927   | + | 0 | NA | intron (L1ME4a LI | 10735  | NM_00136C | 51031    | Hs. 279061NM_01608E | ENSG00000GLOD4      | - | C17orf25          | glyoxalaseprotein-coding |                             |                          |
| chr17-18: 8.434871  | 0.218765 | 0.792728 | 0.27439  | 0.783785 | 0.981636 | chr17 | 18208512 | 18208711 | + | 0 | NA | 3' UTR (3' UTR (N | -17024 | NM_00414C | 3996     | Hs. 51398E          | NM_00414C           | - | ENSG00000LLGL1    | DLG4 HUGL                | LLGL scriprotein-coding     |                          |
| chr17-42: 8.434871  | 0.218765 | 0.792728 | 0.27439  | 0.783785 | 0.981636 | chr17 | 42494050 | 42497014 | + | 0 | NA | TTS (NR_TTS (NR_C | 759    | NR_04984E | 1.01E+08 | NR_04984E           | ENSG00000MIR548AT   | - | microRNA          | ncRNA                    |                             |                          |
| chr17-67: 8.434871  | 0.218765 | 0.792728 | 0.27439  | 0.783785 | 0.981636 | chr17 | 67295592 | 67309877 | + | 0 | NA | intron (intron (N | 65372  | NM_18165E | 284018   | Hs. 90790           | NM_18165E           | - | ENSG00000C17orf58 | -                        | chromoson                   | protein-coding           |
| chr18-23: 8.434871  | 0.218765 | 0.792728 | 0.27439  | 0.783785 | 0.981636 | chr18 | 23530502 | 23534404 | + | 0 | NA | TTS (NM_TTS (NM_C | 28942  | NM_01332E | 29919    | Hs. 46477E          | NM_01332E           | - | ENSG00000RMC1     | -                        | C18orf8 F                   | regulatorprotein-coding  |
| chr19-84: 8.434871  | 0.218765 | 0.792728 | 0.27439  | 0.783785 | 0.981636 | chr19 | 8455458  | 8456819  | + | 0 | NA | intron (intron (N | 11163  | NM_03120E | 4670     | Hs. 46580E          | NM_00596E           | - | ENSG00000HNRNPM   | -                        | CEAR HNR                    | heteroger protein-coding |
| chr19-12: 8.434871  | 0.218765 | 0.792728 | 0.27439  | 0.783785 | 0.981636 | chr19 | 12284346 | 12285876 | + | 0 | NA | intron (intron (N | 9700   | NM_00135E | 51710    | Hs. 296731NM_016264 | ENSG00000ZNF44      | - | GIOT-2 Kc         | zinc fingprotein-coding  |                             |                          |
| chr19-19: 8.434871  | 0.218765 | 0.792728 | 0.27439  | 0.783785 | 0.981636 | chr19 | 19005561 | 19012172 | + | 0 | NA | intron (MLTIH LTF | 24651  | NR_14791E | 10147    | Hs. 77876           | NM_014884           | - | ENSG00000SUGP2    | SFRS14 SF                | SURP and protein-coding     |                          |
| chr19-19: 8.434871  | 0.218765 | 0.792728 | 0.27439  | 0.783785 | 0.981636 | chr19 | 19500487 | 19503488 | + | 0 | NA | exon (NM_exon (NM | 13561  | NM_032037 | 83983    | Hs. 532711NM_032037 | ENSG00000TSSK6      | - | CT72 FKS          | testis sprotein-coding   |                             |                          |
| chr19-24: 8.434871  | 0.218765 | 0.792728 | 0.27439  | 0.783785 | 0.981636 | chr19 | 24116415 | 24124006 | + | 0 | NA | intron (THEIB LTF | 33223  | NM_00127E | 9534     | Hs. 43440E          | NM_00487E           | - | ENSG00000ZNF254   | BMFZ-5 Hc                | zinc fingprotein-coding     |                          |
| chr19-43: 8.434871  | 0.218765 | 0.792728 | 0.27439  | 0.783785 | 0.981636 | chr19 | 43508410 | 43512204 | + | 0 | NA | intron (intron (N | -5474  | NM_19885E | 653583   | Hs. 631581NM_19885E | ENSG00000PHLDB3     | - | pleckstri         | protein-coding           |                             |                          |
| chr2-653: 8.434871  | 0.218765 | 0.792728 | 0.27439  | 0.783785 | 0.981636 | chr2  | 65311803 | 65313812 | + | 0 | NA | 3' UTR (3' UTR (N | 53971  | NM_00112E | 200734   | Hs. 59332           | NM_181784           | - | ENSG00000SPRED2   | -                        | Spred-2                     | sprouty iprotein-coding  |
| chr2-86: 8.434871   | 0.218765 | 0.792728 | 0.27439  | 0.783785 | 0.981636 | chr2  | 86169978 | 86171592 | + | 0 | NA | exon (NM_exon (NM | 22323  | NR_03993E | 1.01E+08 | NR_03993E           | ENSG00000MIR4779    | - | microRNA          | ncRNA                    |                             |                          |
| chr2-174: 8.434871  | 0.218765 | 0.792728 | 0.27439  | 0.783785 | 0.981636 | chr2  | 1.74E+08 | 1.74E+08 | + | 0 | NA | intron (intron (N | 35379  | NR_00193E | 1803     | Hs. 368912NM_00193E | ENSG00000DPP4       | - | ADABP ADC         | diptidylprotein-coding   |                             |                          |
| chr2-162: 8.434871  |          |          |          |          |          |       |          |          |   |   |    |                   |        |           |          |                     |                     |   |                   |                          |                             |                          |



|                    |          |          |          |          |          |       |          |          |        |                     |                  |                               |                     |                            |                                     |
|--------------------|----------|----------|----------|----------|----------|-------|----------|----------|--------|---------------------|------------------|-------------------------------|---------------------|----------------------------|-------------------------------------|
| chr2-4358 7.658095 | -0.2288  | 0.837364 | -0.27324 | 0.784672 | 0.981636 | chr2  | 43584457 | 43585153 | + 0 NA | intron (HAL1 LINE   | 11169 NM_001083  | 63892 Hs. 369592NM_022066     | ENSG000003THADA     | ARMC13 GIT1THADA           | arnprotein-coding                   |
| chr2-4395 7.658095 | -0.2288  | 0.837364 | -0.27324 | 0.784672 | 0.981636 | chr2  | 43955628 | 43958070 | + 0 NA | intron (L1MC4 LIN   | 40140 NM_133255  | 10128 Hs. 368084NM_133255     | ENSG000003LRPPRC    | CLONE-239                  | leucine i protein-coding            |
| chr2-8758 7.658095 | -0.2288  | 0.837364 | -0.27324 | 0.784672 | 0.981636 | chr2  | 87584410 | 87585038 | + 0 NA | Intergeni Intergeni | -45031 NR_039634 | 1.01E+08 NR_039634            | ENSG000003MIR4435-1 | mir-4435                   | microRNA ncRNA                      |
| chr2-1011 7.658095 | -0.2288  | 0.837364 | -0.27324 | 0.784672 | 0.981636 | chr2  | 1.02E+08 | 1.02E+08 | + 0 NA | intron (intron (N   | 141536 NM_145687 | 9448 Hs. 701013NM_004834      | ENSG000003MAP4K4    | FLH21957 mitogen- $\alpha$ | protein-coding                      |
| chr2-1711 7.658095 | -0.2288  | 0.837364 | -0.27324 | 0.784672 | 0.981636 | chr2  | 1.71E+08 | 1.71E+08 | + 0 NA | intron (intron (N   | 44197 NM_001136  | 9874 Hs. 744919NM_012299      | ENSG000003TLK1      | PKU-beta                   | tousled l protein-coding            |
| chr2-2182 7.658095 | -0.2288  | 0.837364 | -0.27324 | 0.784672 | 0.981636 | chr2  | 2.18E+08 | 2.18E+08 | + 0 NA | intron (intron (N   | 3602 NM_005731   | 10109 Hs. 529303NM_005731     | ENSG000003CARPC2    | ARC34 PN $\beta$           | actin rel protein-coding            |
| chr2-2411 7.658095 | -0.2288  | 0.837364 | -0.27324 | 0.784672 | 0.981636 | chr2  | 2.42E+08 | 2.42E+08 | + 0 NA | intron (intron (N   | 22078 NM_178322  | 23192 Hs. 282613NM_013327     | ENSG000003ATG4B     | APG4B AU1                  | autophagy protein-coding            |
| chr3-1806 7.658095 | -0.2288  | 0.837364 | -0.27324 | 0.784672 | 0.981636 | chr3  | 1.81E+08 | 1.81E+08 | + 0 NA | intron (intron (N   | 2533 NM_001042   | 151613 Hs. 432133 NM_133462   | ENSG000003TTC14     | DRDL5813                   | tetratric protein-coding            |
| chr3-1895 7.658095 | -0.2288  | 0.837364 | -0.27324 | 0.784672 | 0.981636 | chr3  | 1.9E+08  | 1.9E+08  | + 0 NA | intron (AluSx SIN   | 141485 NM_018192 | 55214 Hs. 374191NM_018192     | ENSG000003CP3H2     | LEPREL1  $\beta$           | prolyl 3- protein-coding            |
| chr4-5203 7.658095 | -0.2288  | 0.837364 | -0.27324 | 0.784672 | 0.981636 | chr4  | 52031860 | 52032495 | + 0 NA | intron (HAL1 LINE   | 6142 NM_000232   | 6443 Hs. 122875NM_000232      | ENSG000003SGCB      | A3b LGM2 $\beta$           | sarcoglyc protein-coding            |
| chr4-1588 7.658095 | -0.2288  | 0.837364 | -0.27324 | 0.784672 | 0.981636 | chr4  | 1.59E+08 | 1.59E+08 | + 0 NA | intron (L1PA7 LIN   | 91522 NM_001323  | 57600 Hs. 652441NM_020848     | ENSG000003FNIP2     | FNIP1 MAF                  | follicular protein-coding           |
| chr5-1135 7.658095 | -0.2288  | 0.837364 | -0.27324 | 0.784672 | 0.981636 | chr5  | 1.14E+08 | 1.14E+08 | + 0 NA | intron (HAL1 LINE   | 36257 NM_001345  | 64848 Hs. 231942NM_022828     | ENSG000003YTHDC2    | CAHL HYTF                  | YTH domain protein-coding           |
| chr5-134 7.658095  | -0.2288  | 0.837364 | -0.27324 | 0.784672 | 0.981636 | chr5  | 1.34E+08 | 1.34E+08 | + 0 NA | intron (intron (N   | 3595 NM_003337   | 7320 Hs. 612096NM_003337      | ENSG000003UBE2B     | E2-17kDa                   | ubiquitin protein-coding            |
| chr6-1287 7.658095 | -0.2288  | 0.837364 | -0.27324 | 0.784672 | 0.981636 | chr6  | 7275584  | 7288849  | + 0 NA | non-codir-non-codir | 24983 NM_001292  | 6745 Hs. 114033NM_003144      | ENSG000003SSR1      | TRAPA                      | signal se protein-coding            |
| chr7-7471 7.658095 | -0.2288  | 0.837364 | -0.27324 | 0.784672 | 0.981636 | chr7  | 74718328 | 74719937 | + 0 NA | intron (intron (N   | 9786 NR_110044   | 1.02E+08 Hs. 654772NR_110044  | ENSG000003LOC101926 | -                          | uncharactercncRNA                   |
| chr7-1503 7.658095 | -0.2288  | 0.837364 | -0.27324 | 0.784672 | 0.981636 | chr7  | 1.5E+08  | 1.5E+08  | + 0 NA | exon (NM exon (NM   | -8103 NR_027237  | 728743 Hs. 650365NM_001080852 | LOC278743           | -                          | zinc fingpseudo                     |
| chr8-1194 7.658095 | -0.2288  | 0.837364 | -0.27324 | 0.784672 | 0.981636 | chr8  | 41940424 | 41942336 | + 0 NA | TTS (NM TTS (NM C   | -44639 NM_001142 | 286 Hs. 654433NM_000037       | ENSG000003CANK1     | ANK SPH1                   | ankyrin l protein-coding            |
| chr8-1197 7.658095 | -0.2288  | 0.837364 | -0.27324 | 0.784672 | 0.981636 | chr8  | 1.2E+08  | 1.2E+08  | + 0 NA | exon (NM exon (NM   | 44495 NM_003184  | 6873 Hs. 122755NM_003184      | ENSG000003TAF2      | CIF150 MF                  | TATA-box protein-coding             |
| chr9-2184 7.658095 | -0.2288  | 0.837364 | -0.27324 | 0.784672 | 0.981636 | chr9  | 21840357 | 21841825 | + 0 NA | intron (L1PBI LIN   | 38455 NM_002451  | 4507 Hs. 193266NM_002451      | ENSG000003MTAP      | BDMF DMSF                  | methylthi protein-coding            |
| chr9-7034 7.658095 | -0.2288  | 0.837364 | -0.27324 | 0.784672 | 0.981636 | chr9  | 70347155 | 70349861 | + 0 NA | intron (AluS6 SI    | 66149 NM_001206  | 687 Hs. 150557NM_001206       | ENSG000003KLF9      | BTEB BTEK                  | Kruppel l protein-coding            |
| chr1-8875 3.932208 | -0.31499 | 1.1531   | -0.27317 | 0.784723 | 0.981636 | chr1  | 88751500 | 88752021 | + 0 NA | intron (intron (N   | 99807 NM_001514  | 2959 Hs. 481852NM_001514      | ENSG000003GTF2B     | TF2B TF1                   | general t protein-coding            |
| chr2-1344 3.932208 | -0.31499 | 1.1531   | -0.27317 | 0.784723 | 0.981636 | chr2  | 1.34E+08 | 1.34E+08 | + 0 NA | intron (intron (N   | 163939 NM_00241C | 4249 Hs. 4988 NM_00241C       | ENSG000003MGAT5     | GNT-V GNT                  | $\alpha$ 1,6 protein-coding         |
| chr1-1558 8.403439 | 0.226172 | 0.828227 | 0.27308  | 0.784792 | 0.981636 | chr1  | 1.56E+08 | 1.56E+08 | + 0 NA | intron (AluS6 SI    | -26919 NR_132767 | 1.07E+08 NR_132767            | SCARNA26F           | -                          | small Ca <sub>n</sub> cRNA          |
| chr1-1231 8.476011 | 0.220404 | 0.807227 | 0.273039 | 0.784823 | 0.981636 | chr1  | 12311773 | 12312788 | + 0 NA | intron (intron (N   | 82250 NM_015378  | 55187 Hs. 439381NM_015378     | ENSG000003VPS13D    | SCAR4                      | vacuolar protein-coding             |
| chr22-428 8.476011 | 0.220404 | 0.807227 | 0.273039 | 0.784823 | 0.981636 | chr22 | 42838803 | 42839443 | + 0 NA | intron (AluV SINE   | 18150 NM_01457C  | 26286 Hs. 685222NM_01457C     | ENSG000003ARFGAP3   | ARFGAP1                    | ADP ribos protein-coding            |
| chr4-8802 8.476011 | 0.220404 | 0.807227 | 0.273039 | 0.784823 | 0.981636 | chr4  | 88025790 | 88026708 | + 0 NA | intron (THE1D-int   | 18614 NR_156488  | 5311 Hs. 181272NM_000297      | ENSG000003PKD2      | APKD2 PC2                  | polycysti protein-coding            |
| chr3-1970 8.476011 | -0.19997 | 0.732707 | -0.27291 | 0.78492  | 0.981636 | chr3  | 1.97E+08 | 1.97E+08 | + 0 NA | intron (AluV SINE   | 29300 NM_003316  | 4241 Hs. 184727NM_005925      | ENSG000003MELTF     | CD228 MAF                  | melanotr protein-coding             |
| chr14-756 6.872536 | 0.243036 | 0.890916 | 0.272793 | 0.785012 | 0.981636 | chr14 | 75650186 | 75650842 | + 0 NA | 3' UTR (3' UTR (N   | 10362 NM_00717E  | 11161 Hs. 15106 NM_00717E     | ENSG000003ERG28     | C14orf11                   | ergosterc protein-coding            |
| chr11-862 8.08627  | -0.22568 | 0.827613 | -0.27269 | 0.785092 | 0.981636 | chr11 | 86306529 | 86306918 | + 0 NA | intron (intron (N   | 4431 NM_001322   | 5950 Hs. 283322NM_016401      | ENSG000003HIKESHI   | HI1orf73                   | heat shoc protein-coding            |
| chr12-105 8.08627  | -0.22568 | 0.827613 | -0.27269 | 0.785092 | 0.981636 | chr12 | 1.09E+08 | 1.09E+08 | + 0 NA | intron (intron (N   | 15722 NM_130466  | 8190 Hs. 374067NM_130466      | ENSG000003UBE3B     | C11orf3                    | KOsubiquitir protein-coding         |
| chr1-2081 9.435905 | 0.208686 | 0.765294 | 0.272687 | 0.785094 | 0.981636 | chr1  | 20812749 | 20813116 | + 0 NA | intron (intron (N   | -26244 NM_016287 | 50809 Hs. 142442NM_016287     | ENSG000003HP1BP3    | HP1-BP74                   | heteroch protein-coding             |
| chr1-1195 9.435905 | 0.208686 | 0.765294 | 0.272687 | 0.785094 | 0.981636 | chr1  | 1.2E+08  | 1.2E+08  | + 0 NA | exon (NM exon (NM   | -19656 NM_021794 | 11085 Hs. 283011NM_021794     | ENSG000003ADAM30    | svch1                      | ADAM met $\alpha$ protein-coding    |
| chr15-425 12.34988 | -0.18283 | 0.617139 | -0.27263 | 0.785368 | 0.981636 | chr15 | 42955698 | 42957931 | + 0 NA | intron (L1MC4 LIN   | -36036 NR_02984E | 146057 Hs. 646511NM_17350C    | ENSG000003TTBK2     | SCVA11 TTE                 | tua tubul protein-coding            |
| chr17-312 9.443763 | 0.207043 | 0.760764 | 0.272151 | 0.785506 | 0.981636 | chr17 | 31229100 | 31231026 | + 0 NA | intron (intron (N   | 67176 NM_002544  | 4974 Hs. 113874NM_002544      | ENSG000003COMG      | OMGP                       | oligodenc protein-coding            |
| chr3-1002 9.443763 | 0.207043 | 0.760764 | 0.272151 | 0.785506 | 0.981636 | chr3  | 1E+08    | 1E+08    | + 0 NA | intron (intron (N   | -35375 NM_002020 | 50754 Hs. 439152NM_002020     | ENSG000003NIT2      | MLR-5-8a                   | nitrilase protein-coding            |
| chr1-4074 6.880393 | 0.240944 | 0.885866 | 0.271987 | 0.785632 | 0.981636 | chr1  | 40749564 | 40749853 | + 0 NA | intron (intron (N   | -4647 NR_02984E  | 469334 NR_02984E              | ENSG000003MIR30E    | MIRN30E                    | microRNA ncRNA                      |
| chr12-652 6.880393 | 0.240944 | 0.885866 | 0.271987 | 0.785632 | 0.981636 | chr12 | 6525287  | 6525857  | + 0 NA | intron (intron (N   | -8945 NM_00128E  | 2597 Hs. 544577NM_00204C      | ENSG000003GAPDH     | G3PD GAP1                  | glyceralc protein-coding            |
| chr13-114 6.880393 | 0.240944 | 0.885866 | 0.271987 | 0.785632 | 0.981636 | chr13 | 1.14E+08 | 1.14E+08 | + 0 NA | intron (intron (N   | 41858 NM_00132C  | 22821 Hs. 593076NM_00736E     | ENSG000003RASA3     | GAP1IP4B                   | RAF Ras p21 i protein-coding        |
| chr2-4395 6.880393 | 0.240944 | 0.885866 | 0.271987 | 0.785632 | 0.981636 | chr2  | 43959387 | 43961037 | + 0 NA | intron (AluS6 SIN   | 36227 NM_133255  | 10128 Hs. 368084NM_133255     | ENSG000003LRPPRC    | CLONE-239                  | leucine i protein-coding            |
| chr2-9937 6.880393 | 0.240944 | 0.885866 | 0.271987 | 0.785632 | 0.981636 | chr2  | 99376662 | 99377164 | + 0 NA | intron (intron (N   | 39524 NM_015904  | 9669 Hs. 158688NM_015904      | ENSG000003EIF5B     | IF2                        | eukaryoti protein-coding            |
| chr16-224 11.02366 | 0.199665 | 0.73476  | 0.271742 | 0.78582  | 0.981636 | chr16 | 22444278 | 22445205 | + 0 NA | intron (NL2 LINE L  | -7251 NR_02746C  | 1E+08 Hs. 709576NR_02746C     | RRN3P3              | -                          | RRN3 hompseudo                      |
| chr11-677 7.376982 | 0.233919 | 0.860842 | 0.271733 | 0.785828 | 0.981636 | chr11 | 67501276 | 67502675 | + 0 NA | intron (intron (N   | 2938 NM_00491E   | 9600 Hs. 37229E NM_00491C     | ENSG000003PTPMM1    | DRES9 NIF                  | phosphat i protein-coding           |
| chr16-155 7.376982 | 0.233919 | 0.860842 | 0.271733 | 0.785828 | 0.981636 | chr16 | 15972462 | 15972843 | + 0 NA | intron (MLT1J LTF   | 23036 NM_00499E  | 4363 Hs. 391464NM_00499E      | ENSG000003ABCC1     | ABC29 ABC                  | ATP bindi protein-coding            |
| chr20-321 7.376982 | 0.233919 | 0.860842 | 0.271733 | 0.785828 | 0.981636 | chr20 | 3215230  | 3215429  | + 0 NA | intron (intron (N   | 5831 NM_18149E   | 3704 Hs. 415299NM_00345E      | ENSG000003ITPA      | C20orf37                   | inosine t protein-coding            |
| chr16-84 7.467119  | 0.235421 | 0.866657 | 0.271643 | 0.785897 | 0.981636 | chr16 | 84083817 | 84084467 | + 0 NA | intron (AluSx1 SI   | 32800 NM_003791  | 8702 Hs. 75890 NM_003791      | ENSG000003MBTPS1    | PCSK8 SIF                  | membrane protein-coding             |
| chr17-624 7.467119 | 0.235421 | 0.866657 | 0.271643 | 0.785897 | 0.981636 | chr17 | 62672250 | 62672494 | + 0 NA | intron (MIR SINE E  | -33834 NR_14788E | 1.05E+08 Hs. 446268NR_14788E  | ENSG000003LOC105371 | -                          | uncharactercncRNA                   |
| chr1-3128 8.119551 | -0.22135 | 0.814938 | -0.27162 | 0.785913 | 0.981636 | chr1  | 31280343 | 31281786 | + 0 NA | intron (intron (N   | 15724 NM_004814  | 9410 Hs. 33962 NM_004814      | ENSG000003SNRP40    | 40K HPRP                   | small nuc protein-coding            |
| chr10-118 8.119551 | -0.22135 | 0.814938 | -0.27162 | 0.785913 | 0.981636 | chr10 | 18668355 | 18669994 | + 0 NA | intron (intron (N   | 9716 NM_17881E   | 221079 Hs. 25362 NM_17881E    | ENSG000003CARL5B    | ARL8                       | ADP ribos protein-coding            |
| chr10-411 8.119551 | -0.22135 | 0.814938 | -0.27162 | 0.785913 | 0.981636 | chr10 | 1.11E+08 | 1.11E+08 | + 0 NA | intron (intron (N   | 21213 NM_00544E  | 9126 Hs. 24485 NM_00544E      | ENSG000003SMC3      | BAM BMH                    | C structure $\alpha$ protein-coding |
| chr12-585 8.119551 | -0.22135 | 0.814938 | -0.27162 | 0.785913 | 0.981636 | chr12 | 58911892 | 58912370 | + 0 NA | intron (intron (N   | 7415 NM_001136   | 121227 Hs. 25373E NM_153377   | ENSG000003LRIG3     | LIG3                       | leucine i protein-coding            |
| chr13-445 8.119551 | -0.22135 | 0.814938 | -0.27162 | 0.785913 | 0.981636 | chr13 | 44985741 | 44986512 | + 0 NA | intron (Tigger1 E   |                  |                               |                     |                            |                                     |



|                    |          |          |          |          |          |       |          |          |   |   |    |                     |         |           |          |                     |                     |                                    |                         |                          |                   |
|--------------------|----------|----------|----------|----------|----------|-------|----------|----------|---|---|----|---------------------|---------|-----------|----------|---------------------|---------------------|------------------------------------|-------------------------|--------------------------|-------------------|
| chr17-412.7.938283 | 0.223918 | 0.825028 | 0.271407 | 0.786078 | 0.981636 | chr17 | 4120601  | 4124089  | + | 0 | NA | intron (Nintron (N  | 20685   | NM_015113 | 23140    | Hs. 277624NM_015113 | ENSG000003ZEF1      | ZZZA                               | zinc_fingprotein-coding |                          |                   |
| chr18-244.7.938283 | 0.223918 | 0.825028 | 0.271407 | 0.786078 | 0.981636 | chr18 | 24438842 | 24439125 | + | 0 | NA | intron (NMLT2D LTF  | 12313   | NM_018435 | 55364    | Hs. 515317NM_018435 | ENSG000003IMPACT    | RWDD5                              | impact_RWprotein-coding |                          |                   |
| chr18-765.7.938283 | 0.223918 | 0.825028 | 0.271407 | 0.786078 | 0.981636 | chr18 | 76359589 | 76360171 | + | 0 | NA | 3' UTR (N3' UTR (N  | -131772 | NR_136504 | 1.02E+08 | Hs. 665186NR_136504 | ENSG000003LOC101927 | -                                  | uncharactncRNA          |                          |                   |
| chr19-211.7.938283 | 0.223918 | 0.825028 | 0.271407 | 0.786078 | 0.981636 | chr19 | 2105054  | 2119375  | + | 0 | NA | intron (NLTMS LINE  | 15299   | NM_001039 | 113177   | Hs. 424045NM_002878 | ENSG000003IZUM04    | C19orf36 IZUM04                    | fanprotein-coding       |                          |                   |
| chr19-101.7.938283 | 0.223918 | 0.825028 | 0.271407 | 0.786078 | 0.981636 | chr19 | 10133028 | 10133298 | + | 0 | NA | TTS (NMT_C NM_C     | -13264  | NM_003755 | 8666     | Hs. 529055NM_003755 | ENSG000003EIF3G     | EIF3-P42 eukaryotprotein-coding    |                         |                          |                   |
| chr19-105.7.938283 | 0.223918 | 0.825028 | 0.271407 | 0.786078 | 0.981636 | chr19 | 10987060 | 10993701 | + | 0 | NA | intron (NAluSx SIN  | 6228    | NM_001128 | 6597     | Hs. 327527NM_003072 | ENSG000003SMARCA4   | BAF190 BAF190 SNF1                 | protein-coding          |                          |                   |
| chr19-204.7.938283 | 0.223918 | 0.825028 | 0.271407 | 0.786078 | 0.981636 | chr19 | 24049553 | 24051555 | + | 0 | NA | intron (NBSR Beta)  | 17105   | NM_001278 | 9534     | Hs. 434400NM_004878 | ENSG000003ZNF254    | BMZF5-5 Hh zinc_fingprotein-coding |                         |                          |                   |
| chr2-603.7.938283  | 0.223918 | 0.825028 | 0.271407 | 0.786078 | 0.981636 | chr2  | 60785548 | 60790641 | + | 0 | NA | intron (NLM4EAb LI  | 31826   | NM_022894 | 64895    | Hs. 387471NM_022894 | ENSG000003PAPOLG    | -                                  | poly(A) protein-coding  |                          |                   |
| chr20-362.7.938283 | 0.223918 | 0.825028 | 0.271407 | 0.786078 | 0.981636 | chr20 | 36243961 | 36248972 | + | 0 | NA | intron (Nintron (N  | 9988    | NM_001271 | 25980    | Hs. 11314           | NM_015511           | ENSG000003CAAR2                    | C20orf4 CAAR2           | spliprotein-coding       |                   |
| chr20-632.7.938283 | 0.223918 | 0.825028 | 0.271407 | 0.786078 | 0.981636 | chr20 | 63275493 | 63283824 | + | 0 | NA | intron (Nintron (N  | -4652   | NR_104022 | 55738    | Hs. 25584           | NM_018209           | ENSG000003ARFGAP1                  | ARFGAP1 EADP            | ribosprotein-coding      |                   |
| chr22-305.7.938283 | 0.223918 | 0.825028 | 0.271407 | 0.786078 | 0.981636 | chr22 | 30292909 | 30297854 | + | 0 | NA | exon (NM_exon (NM   | -5319   | NM_001037 | 652968   | Hs. 444955NM_001037 | ENSG000003CASTOR1   | CASTOR1                            | cytosolicprotein-coding |                          |                   |
| chr3-5312.7.938283 | 0.223918 | 0.825028 | 0.271407 | 0.786078 | 0.981636 | chr3  | 53120424 | 53120840 | + | 0 | NA | intron (Nintron (N  | 9803    | NM_052855 | 91869    | Hs. 631911NM_052855 | ENSG000003CRFT1     | CDG1N                              | RFT1                    | homprotein-coding        |                   |
| chr5-1815.7.938283 | 0.223918 | 0.825028 | 0.271407 | 0.786078 | 0.981636 | chr5  | 1813378  | 1816942  | + | 0 | NA | intron (Nintron (N  | 13753   | NM_004552 | 4726     | Hs. 408257NM_004552 | ENSG000003NDUFS6    | NDUFS6                             | cytosolicprotein-coding |                          |                   |
| chr5-615.7.938283  | 0.223918 | 0.825028 | 0.271407 | 0.786078 | 0.981636 | chr5  | 61537303 | 61539539 | + | 0 | NA | intron (Nintron (N  | -99339  | NR_161251 | 285668   | Hs. 683866NR_126522 | ENSG000003C5orf64   | -                                  | chromosomncRNA          |                          |                   |
| chr5-7815.7.938283 | 0.223918 | 0.825028 | 0.271407 | 0.786078 | 0.981636 | chr5  | 78153901 | 78156404 | + | 0 | NA | intron (NLM1 LINE   | 139546  | NM_001271 | 8546     | Hs. 532091NM_003664 | ENSG000003AP3B1     | ADTB3 AD1                          | adaptor protein-coding  |                          |                   |
| chr5-1462.7.938283 | 0.223918 | 0.825028 | 0.271407 | 0.786078 | 0.981636 | chr5  | 1.46E+08 | 1.46E+08 | + | 0 | NA | intron (NAluSx SIN  | 34160   | NM_018988 | 54439    | Hs. 61441           | NM_018988           | ENSG000003RBM27                    | ARRS1 Psc               | RNA bindiprotein-coding  |                   |
| chr6-4265.7.938283 | 0.223918 | 0.825028 | 0.271407 | 0.786078 | 0.981636 | chr6  | 42636067 | 42637906 | + | 0 | NA | intron (Nintron (N  | 72957   | NM_001184 | 23304    | Hs. 529922NM_015255 | ENSG000003CUBR2     | C6orf133 ubiquitin                 | protein-coding          |                          |                   |
| chr6-1275.7.938283 | 0.223918 | 0.825028 | 0.271407 | 0.786078 | 0.981636 | chr6  | 1.28E+08 | 1.28E+08 | + | 0 | NA | intron (NAluSx3 SI  | -47882  | NR_125849 | 1.02E+08 | Hs. 656775NR_125849 | LOC101928           | -                                  | uncharactncRNA          |                          |                   |
| chr7-7764.7.938283 | 0.223918 | 0.825028 | 0.271407 | 0.786078 | 0.981636 | chr7  | 77646032 | 77647113 | + | 0 | NA | IntergeniAluSg7 SI  | 49693   | NR_134254 | 1.01E+08 | Hs. 72451           | NR_038361           | ENSG000003APTR                     | RSNBL-AS                | Alu-medicncRNA           |                   |
| chr7-1565.7.938283 | 0.223918 | 0.825028 | 0.271407 | 0.786078 | 0.981636 | chr7  | 1.57E+08 | 1.57E+08 | + | 0 | NA | intron (Nintron (N  | 15129   | NM_138400 | 64434    | Hs. 15825           | NM_138400           | ENSG000003NOM1                     | C7orf3 PF               | nucleolar protein-coding |                   |
| chr8-4217.7.938283 | 0.223918 | 0.825028 | 0.271407 | 0.786078 | 0.981636 | chr8  | 42176284 | 42181581 | + | 0 | NA | exon (NM_exon (NM   | 25865   | NM_006803 | 10947    | Hs. 654522NM_006803 | ENSG000003AP3M2     | AP47B CL                           | adaptor protein-coding  |                          |                   |
| chr8-9485.7.938283 | 0.223918 | 0.825028 | 0.271407 | 0.786078 | 0.981636 | chr8  | 94853880 | 94855194 | + | 0 | NA | intron (Nintron (N  | 31247   | NR_073444 | 55656    | Hs. 727666NM_017864 | ENSG000003INTS8     | C8orf52 Integratc                  | protein-coding          |                          |                   |
| chr9-3461.7.938283 | 0.223918 | 0.825028 | 0.271407 | 0.786078 | 0.981636 | chr9  | 34616987 | 34618269 | + | 0 | NA | intron (Nintron (N  | 2867    | NM_007234 | 11258    | Hs. 511768NM_007234 | ENSG000003DCTN3     | DCTN-22 Dyadnatin                  | protein-coding          |                          |                   |
| chr9-9646.7.938283 | 0.223918 | 0.825028 | 0.271407 | 0.786078 | 0.981636 | chr9  | 96465814 | 96472706 | + | 0 | NA | intron (Nintron (N  | 19091   | NM_014282 | 22927    | Hs. 494566NM_014282 | ENSG000003HABP4     | IHABP-4 Hyaluron                   | protein-coding          |                          |                   |
| chrX-1402.7.938283 | 0.223918 | 0.825028 | 0.271407 | 0.786078 | 0.981636 | chrX  | 1402236  | 1408108  | + | 0 | NA | intron (N(TGGA)n S  | 4641    | NR_026710 | 80161    | Hs. 521855NM_025091 | ASMTL-AS1 ASMTL     | ASMTL                              | antncRNA                |                          |                   |
| chrX-1547.7.938283 | 0.223918 | 0.825028 | 0.271407 | 0.786078 | 0.981636 | chrX  | 1.54E+08 | 1.54E+08 | + | 0 | NA | intron (Nintron (N  | 8989    | NM_006014 | 8270     | Hs. 444615NM_006014 | ENSG000003LAGE3     | CVG5 DXS                           | L                       | antigen protein-coding   |                   |
| chrX-137.7.938283  | -0.23706 | 0.873907 | -0.27127 | 0.786184 | 0.981636 | chr11 | 13726772 | 13728804 | + | 0 | NA | intron (Nintron (N  | -56598  | NR_149108 | 1.05E+08 | Hs. 577257NR_149108 | ENSG000003LINC02548 | -                                  | long intncRNA           |                          |                   |
| chr3-3814.7.938283 | -0.23706 | 0.873907 | -0.27127 | 0.786184 | 0.981636 | chr3  | 38141403 | 38141781 | + | 0 | NA | 3' UTR (N3' UTR (N  | 2931    | NM_001172 | 4615     | Hs. 82116           | NM_002468           | ENSG000003MYD88                    | MYD88                   | MYD88                    | inrprotein-coding |
| chr5-1711.7.938283 | -0.23706 | 0.873907 | -0.27127 | 0.786184 | 0.981636 | chr5  | 1.71E+08 | 1.71E+08 | + | 0 | NA | intron (NTigger1 I  | -123581 | NM_021025 | 30012    | Hs. 249125NM_021025 | ENSG000003TLX3      | HFN11L2 FT                         | cell l1                 | protein-coding           |                   |
| chr6-7568.7.938283 | -0.23706 | 0.873907 | -0.27127 | 0.786184 | 0.981636 | chr6  | 75687941 | 75688373 | + | 0 | NA | intron (NLI1PA6 LIN | -61082  | NM_001368 | 4646     | Hs. 149387NM_004996 | ENSG000003MYO6      | DFX22 DF                           | myosin VI               | protein-coding           |                   |
| chrX-1415.7.938283 | -0.23706 | 0.873907 | -0.27127 | 0.786184 | 0.981636 | chrX  | 1413482  | 1413759  | + | 0 | NA | TTS (NR_C TTS (NR_C | 13089   | NR_026710 | 80161    | Hs. 521855NM_025091 | ASMTL-AS1 ASMTL     | ASMTL                              | antncRNA                |                          |                   |
| chr1-1627.8.947175 | 0.210899 | 0.777675 | 0.271192 | 0.786244 | 0.981636 | chr1  | 1.63E+08 | 1.63E+08 | + | 0 | NA | intron (Nintron (N  | 73741   | NM_006182 | 4921     | Hs. 275757NM_006182 | ENSG000003DDR2      | MIG20a MI                          | discoidin               | protein-coding           |                   |
| chr1-2225.8.947175 | 0.210899 | 0.777675 | 0.271192 | 0.786244 | 0.981636 | chr1  | 2.23E+08 | 2.23E+08 | + | 0 | NA | intron (Nintron (N  | -13248  | NM_024746 | 79802    | Hs. 665666NM_024746 | ENSG000003HHIPL2    | KIAA1822 HHIP                      | like                    | protein-coding           |                   |
| chr1-2355.8.947175 | 0.210899 | 0.777675 | 0.271192 | 0.786244 | 0.981636 | chr1  | 2.35E+08 | 2.35E+08 | + | 0 | NA | intron (Nintron (N  | 7239    | NR_036605 | 9453     | Hs. 730766NM_004837 | ENSG000003GGPS1     | GGPPS GGF                          | geranyl                 | protein-coding           |                   |
| chr10-136.8.947175 | 0.210899 | 0.777675 | 0.271192 | 0.786244 | 0.981636 | chr10 | 13693550 | 13694388 | + | 0 | NA | exon (NM_exon (NM   | 13598   | NM_001318 | 55691    | Hs. 330462NM_018027 | ENSG000003FRMD4A    | CCAFCA FF                          | FERM                    | domain                   | protein-coding    |
| chr11-134.8.947175 | 0.210899 | 0.777675 | 0.271192 | 0.786244 | 0.981636 | chr11 | 35489855 | 35490668 | + | 0 | NA | intron (NTHEI1 LTF  | 35355   | NM_001001 | 25891    | Hs. 55044           | NM_015430           | ENSG000003PAMR1                    | DKFZP586E               | peptidase                | protein-coding    |
| chr11-118.8.947175 | 0.210899 | 0.777675 | 0.271192 | 0.786244 | 0.981636 | chr11 | 1.18E+08 | 1.18E+08 | + | 0 | NA | intron (Nintron (N  | -42749  | NM_001346 | 143941   | Hs. 653445NM_001080 | ENSG000003TTC36     | HBP21                              | tetratric               | protein-coding           |                   |
| chr12-51.8.947175  | 0.210899 | 0.777675 | 0.271192 | 0.786244 | 0.981636 | chr12 | 51063516 | 51069132 | + | 0 | NA | intron (NAluSc SIN  | 17272   | NR_045072 | 81566    | Hs. 524422NM_030809 | ENSG000003CSRNP2    | C12orf2 C                          | cysteine                | protein-coding           |                   |
| chr12-135.8.947175 | 0.210899 | 0.777675 | 0.271192 | 0.786244 | 0.981636 | chr12 | 1.32E+08 | 1.32E+08 | + | 0 | NA | intron (Nintron (N  | 19362   | NM_175066 | 317781   | Hs. 445168NM_175066 | ENSG000003DDX51     | -                                  | DEAD-box                | protein-coding           |                   |
| chr13-321.8.947175 | 0.210899 | 0.777675 | 0.271192 | 0.786244 | 0.981636 | chr13 | 32184724 | 32187690 | + | 0 | NA | intron (Nintron (N  | 125747  | NM_001136 | 646799   | Hs. 569254NM_001136 | ENSG000003ZARIL     | Z3CXXC7 z                          | zygote                  | protein-coding           |                   |
| chr13-497.8.947175 | 0.210899 | 0.777675 | 0.271192 | 0.786244 | 0.981636 | chr13 | 49558593 | 49559875 | + | 0 | NA | intron (NLM1B3 LIN  | 26324   | NM_001352 | 55213    | Hs. 508021NM_018191 | ENSG000003RCBTB1    | CLLD7 CL                           | RCC1                    | and                      | protein-coding    |
| chr15-575.8.947175 | 0.210899 | 0.777675 | 0.271192 | 0.786244 | 0.981636 | chr15 | 57121211 | 57115949 | + | 0 | NA | intron (NAluY SINE  | 7321    | NM_015532 | 81488    | Hs. 437255NM_015532 | ENSG000003POLR2M    | GCOM1 GR                           | RNA                     | polynprotein-coding      |                   |
| chr15-906.8.947175 | 0.210899 | 0.777675 | 0.271192 | 0.786244 | 0.981636 | chr15 | 90631805 | 90637191 | + | 0 | NA | intron (Nintron (N  | -25736  | NR_120371 | 1.02E+08 | Hs. 615345NR_120371 | ENSG000003LINC01585 | -                                  | long intncRNA           |                          |                   |
| chr16-353.8.947175 | 0.210899 | 0.777675 | 0.271192 | 0.786244 | 0.981636 | chr16 | 3530164  | 3531367  | + | 0 | NA | intron (Nintron (N  | 20871   | NM_024793 | 23059    | Hs. 155995NM_015041 | ENSG000003CTUAP1    | CFAP22 F                           | clusterin               | protein-coding           |                   |
| chr16-225.8.947175 | 0.210899 | 0.777675 | 0.271192 | 0.786244 | 0.981636 | chr16 | 22529923 | 22530455 | + | 0 | NA | intron (Nintron (N  | -15509  | NR_003676 | 653786   | Hs. 564945NR_003676 | ENSG000003OIAOP1    | -                                  | OTOA                    | pseudoprotein-coding     |                   |
| chr16-581.8.947175 | 0.210899 | 0.777675 | 0.271192 | 0.786244 | 0.981636 | chr16 |          |          |   |   |    |                     |         |           |          |                     |                     |                                    |                         |                          |                   |





|                   |          |          |          |          |          |       |          |          |   |   |    |                     |                  |                              |                     |            |                               |
|-------------------|----------|----------|----------|----------|----------|-------|----------|----------|---|---|----|---------------------|------------------|------------------------------|---------------------|------------|-------------------------------|
| chr1-110.8.152833 | -0.21721 | 0.809909 | -0.26819 | 0.788551 | 0.981636 | chr1  | 1.1E+08  | 1.1E+08  | + | 0 | NA | 3' UTR (N3' UTR (N  | -8938 NM_00127C  | 85369 Hs. 584999NM_033088    | ENSG000003STRIP1    | FAM40A F   | striatin protein-coding       |
| chr1-110.8.152833 | -0.21721 | 0.809909 | -0.26819 | 0.788551 | 0.981636 | chr1  | 1.1E+08  | 1.1E+08  | + | 0 | NA | exon (NM exon (NM   | 11838 NM_018372  | 55791 Hs. 25245 NM_018372    | ENSG000003LRIF1     | C1orf103   | ligand deprotein-coding       |
| chr1-112.8.152833 | -0.21721 | 0.809909 | -0.26819 | 0.788551 | 0.981636 | chr1  | 1.13E+08 | 1.13E+08 | + | 0 | NA | intron (NL2c LINE   | 22101 NM_138727  | 54879 Hs. 201921NM_017744    | ENSG000003ST7L      | FAM4B ST7  | suppressin protein-coding     |
| chr10-51.8.152833 | -0.21721 | 0.809909 | -0.26819 | 0.788551 | 0.981636 | chr10 | 50129582 | 50132313 | + | 0 | NA | exon (NM exon (NM   | 62993 NM_00100E  | 387680 Hs. 365288NM_018232   | ENSG000003WASHC2A   | FAM21A F   | WASH comp protein-coding      |
| chr10-60.8.152833 | -0.21721 | 0.809909 | -0.26819 | 0.788551 | 0.981636 | chr10 | 61960725 | 61961963 | + | 0 | NA | intron (NMER11 DN   | 59645 NM_03219E  | 84159 Hs. 535297NM_03219E    | ENSG000003ARID5B    | DESK2 MR   | AT-rich protein-coding        |
| chr10-93.8.152833 | -0.21721 | 0.809909 | -0.26819 | 0.788551 | 0.981636 | chr10 | 93305049 | 93308467 | + | 0 | NA | 3' UTR (N3' UTR (N  | 175576 NM_013451 | 26509 Hs. 602088NM_013451    | ENSG000003MYOF      | FER1L3     | myoferlin protein-coding      |
| chr11-10.8.152833 | -0.21721 | 0.809909 | -0.26819 | 0.788551 | 0.981636 | chr11 | 10686358 | 10688665 | + | 0 | NA | intron (NLTR79 LTF  | 6063 NM_00110C   | 10335 Hs. 501898NM_13038E    | ENSG000003MRV11     | TRAG JAW   | murine rprotein-coding        |
| chr11-43.8.152833 | -0.21721 | 0.809909 | -0.26819 | 0.788551 | 0.981636 | chr11 | 43415087 | 43415508 | + | 0 | NA | intron (NLTR79 LTF  | 56377 NM_01825E  | 55761 Hs. 191188NM_01825E    | ENSG000003TTC17     | -          | triatric protein-coding       |
| chr11-47.8.152833 | -0.21721 | 0.809909 | -0.26819 | 0.788551 | 0.981636 | chr11 | 47632998 | 47637304 | + | 0 | NA | intron (NALuJb SIN  | 7408 NM_01434E   | 23788 Hs. 269944NM_01434E    | ENSG000003MTCH2     | HSPC032    | mitochondr protein-coding     |
| chr11-11.8.152833 | -0.21721 | 0.809909 | -0.26819 | 0.788551 | 0.981636 | chr11 | 1.19E+08 | 1.19E+08 | + | 0 | NA | intron (NL2a LINE   | -10778 NM_00134E | 143941 Hs. 653445NM_00108C   | ENSG000003TTC36     | HBP21      | triatric protein-coding       |
| chr11-11.8.152833 | -0.21721 | 0.809909 | -0.26819 | 0.788551 | 0.981636 | chr11 | 1.19E+08 | 1.19E+08 | + | 0 | NA | intron (NALuSx1 SI  | 35858 NR_106814  | NR_106814                    | ENSG000003MIR6756   | hsa-mir-6  | microRNA ncRNA                |
| chr12-45.8.152833 | -0.21721 | 0.809909 | -0.26819 | 0.788551 | 0.981636 | chr12 | 45922501 | 45930948 | + | 0 | NA | exon (NM exon (NM   | 63850 NM_00471E  | 9169 Hs. 210367NM_00471E     | ENSG000003SCAF11    | CASP11 S   | FRS-related protein-coding    |
| chr12-56.8.152833 | -0.21721 | 0.809909 | -0.26819 | 0.788551 | 0.981636 | chr12 | 56566505 | 56577726 | + | 0 | NA | intron (NALuSx1 SI  | 50295 NM_00289E  | 5939 Hs. 505725NM_00289E     | ENSG000003RBMS2     | SCR3       | RNA bindin protein-coding     |
| chr12-64.8.152833 | -0.21721 | 0.809909 | -0.26819 | 0.788551 | 0.981636 | chr12 | 64741529 | 6473922  | + | 0 | NA | intron (Nintron (N  | 16681 NM_00207E  | 2799 Hs. 334534NM_00207E     | ENSG000003GNS       | G6S        | glucosamin protein-coding     |
| chr12-76.8.152833 | -0.21721 | 0.809909 | -0.26819 | 0.788551 | 0.981636 | chr12 | 76389362 | 76390474 | + | 0 | NA | intron (Nintron (N  | 33367 NM_00131E  | 114882 Hs. 430845NM_020841   | ENSG000003OSBPL8    | MST120     | MS oxysterol protein-coding   |
| chr12-10.8.152833 | -0.21721 | 0.809909 | -0.26819 | 0.788551 | 0.981636 | chr12 | 1.09E+08 | 1.09E+08 | + | 0 | NA | intron (Nintron (N  | -5284 NR_03035C  | 693204 NR_03035C             | ENSG000003MIR619    | MIRN619    | microRNA ncRNA                |
| chr12-11.8.152833 | -0.21721 | 0.809909 | -0.26819 | 0.788551 | 0.981636 | chr12 | 1.12E+08 | 1.12E+08 | + | 0 | NA | intron (NALuJo SIN  | 55530 NM_080601  | 5781 Hs. 506852NM_002834     | ENSG000003PTPN1     | BTP3       | CF protein-coding             |
| chr13-49.8.152833 | -0.21721 | 0.809909 | -0.26819 | 0.788551 | 0.981636 | chr13 | 49919075 | 49921861 | + | 0 | NA | intron (Nintron (N  | 15872 NM_02045E  | 57213 Hs. 44235 NM_02045E    | ENSG000003SPRYD7    | C13orf11   | CSPRY dom protein-coding      |
| chr13-11.8.152833 | -0.21721 | 0.809909 | -0.26819 | 0.788551 | 0.981636 | chr13 | 1.1E+08  | 1.1E+08  | + | 0 | NA | intron (Nintron (N  | 36768 NR_148221  | 1.05E+08 Hs. 134725NR_148221 | LOC10537C           | -          | uncharactncRNA                |
| chr14-23.8.152833 | -0.21721 | 0.809909 | -0.26819 | 0.788551 | 0.981636 | chr14 | 23309142 | 23312942 | + | 0 | NA | 3' UTR (N3' UTR (N  | 4182 NM_00119E   | 599 Hs. 410025NM_00405C      | ENSG000003BCL2L2    | BCL-2 BCL2 | like protein-coding           |
| chr14-31.8.152833 | -0.21721 | 0.809909 | -0.26819 | 0.788551 | 0.981636 | chr14 | 31107870 | 31123512 | + | 0 | NA | intron (NALuJb SIN  | 89048 NM_001254  | 11154 Hs. 293411NM_007077    | ENSG000003AP4S1     | AP47B CL   | adaptor protein-coding        |
| chr14-52.8.152833 | -0.21721 | 0.809909 | -0.26819 | 0.788551 | 0.981636 | chr14 | 52027096 | 52029771 | + | 0 | NA | intron (NALuJo SIN  | 38887 NM_01603E  | 51637 Hs. 534457NM_01603E    | ENSG000003RTRAF     | C14orf16   | RNA trans protein-coding      |
| chr14-73.8.152833 | -0.21721 | 0.809909 | -0.26819 | 0.788551 | 0.981636 | chr14 | 52723873 | 52728737 | + | 0 | NA | intron (Nintron (N  | -3861 NM_00113C  | 6815 Hs. 364988NM_145251     | ENSG000003STYX      | -          | serine/t protein-coding       |
| chr14-52.8.152833 | -0.21721 | 0.809909 | -0.26819 | 0.788551 | 0.981636 | chr14 | 73419881 | 73420798 | + | 0 | NA | intron (Nintron (N  | 38241 NM_00100E  | 8650 Hs. 525445NM_003744     | ENSG000003NUMB      | C14orf41   | NUMB dom protein-coding       |
| chr15-29.8.152833 | -0.21721 | 0.809909 | -0.26819 | 0.788551 | 0.981636 | chr15 | 29738713 | 29742917 | + | 0 | NA | intron (NMER20 DNA  | 65880 NR_135221  | 1E+08 Hs. 525725NR_135221    | ENSG000003LOC10013C | -          | uncharactncRNA                |
| chr15-29.8.152833 | -0.21721 | 0.809909 | -0.26819 | 0.788551 | 0.981636 | chr15 | 29764618 | 29765853 | + | 0 | NA | intron (NL2b LINE   | 55439 NM_00135E  | 7082 Hs. 743999NM_003257     | ENSG000003TJP1      | ZO-1       | tight jur protein-coding      |
| chr15-78.8.152833 | -0.21721 | 0.809909 | -0.26819 | 0.788551 | 0.981636 | chr15 | 78492542 | 78499082 | + | 0 | NA | intron (NMER106A E  | -11752 NM_00108E | 123688 Hs. 307962NM_00101E   | ENSG000003HYKK      | AGPHD1     | hydroxyl protein-coding       |
| chr16-53.8.152833 | -0.21721 | 0.809909 | -0.26819 | 0.788551 | 0.981636 | chr16 | 53685328 | 53686248 | + | 0 | NA | intron (NLIPA1 LI   | 18071 NM_001127  | 23322 Hs. 298382NM_01527E    | ENSG000003RPRGIP1L  | CORS3      | FTV RPRGRI1 protein-coding    |
| chr17-7.8.152833  | -0.21721 | 0.809909 | -0.26819 | 0.788551 | 0.981636 | chr17 | 7935858  | 7937902  | + | 0 | NA | intron (Nintron (N  | 4674 NM_00135E   | 116840 Hs. 348012NM_053051   | ENSG000003CNTROB    | LIP8       | PP12 centrobri protein-coding |
| chr17-32.8.152833 | -0.21721 | 0.809909 | -0.26819 | 0.788551 | 0.981636 | chr17 | 32451356 | 32458095 | + | 0 | NA | intron (Nintron (N  | 10215 NM_002281E | 5717 Hs. 443375NM_002281E    | ENSG000003PSMD11    | Rpn6 S9    | proteasom protein-coding      |
| chr17-66.8.152833 | -0.21721 | 0.809909 | -0.26819 | 0.788551 | 0.981636 | chr17 | 66321124 | 66322187 | + | 0 | NA | intron (NALuSx SIN  | 19042 NM_002737  | 5578 Hs. 531704NM_002737     | ENSG000003PRKCA     | AAG6       | PKC- protein protein-coding   |
| chr17-67.8.152833 | -0.21721 | 0.809909 | -0.26819 | 0.788551 | 0.981636 | chr17 | 67734502 | 67742768 | + | 0 | NA | intron (NPLAM_C SI  | -2080 NR_00370E  | 1E+08 Hs. 693445NR_00370E    | ENSG000003SNORA38B  | -          | small ncsnoRNA                |
| chr17-77.8.152833 | -0.21721 | 0.809909 | -0.26819 | 0.788551 | 0.981636 | chr17 | 76742759 | 76747359 | + | 0 | NA | intron (Nintron (N  | 7558 NM_024311   | 79157 Hs. 73965 NM_024311    | ENSG000003MFSD11    | ET         | major fac protein-coding      |
| chr18-29.8.152833 | -0.21721 | 0.809909 | -0.26819 | 0.788551 | 0.981636 | chr18 | 2921947  | 2925935  | + | 0 | NA | intron (Nintron (N  | 22682 NR_02665E  | 727896 Hs. 673125NR_02665E   | LOC72789E           | -          | cysteine pseudo               |
| chr19-23.8.152833 | -0.21721 | 0.809909 | -0.26819 | 0.788551 | 0.981636 | chr19 | 23221734 | 23231409 | + | 0 | NA | intron (Nintron (N  | 23823 NM_00135E  | 440519 Hs. 657814NM_00135E   | ENSG000003ZNF724    | ZNF724P    | zinc fing protein-coding      |
| chr19-54.8.152833 | -0.21721 | 0.809909 | -0.26819 | 0.788551 | 0.981636 | chr19 | 54459935 | 54462423 | + | 0 | NA | TTS (NM_C TTS (NM_C | 2599 NM_19899E   | 94059 Hs. 590977NM_19899E    | ENSG000003LENG9     | -          | leucocyte protein-coding      |
| chr19-58.8.152833 | -0.21721 | 0.809909 | -0.26819 | 0.788551 | 0.981636 | chr19 | 58229713 | 58239479 | + | 0 | NA | intron (Nintron (N  | 5682 NM_00132C   | 27300 Hs. 438994NM_01448C    | ENSG000003ZNF544    | -          | zinc fing protein-coding      |
| chr2-27.8.152833  | -0.21721 | 0.809909 | -0.26819 | 0.788551 | 0.981636 | chr2  | 27684903 | 27689488 | + | 0 | NA | intron (NLIMA4a LI  | -23355 NM_00128E | 9913 Hs. 6232 NM_01486C      | ENSG000003SUPT7L    | SPT7L      | ST7SPT7 like protein-coding   |
| chr2-17.8.152833  | -0.21721 | 0.809909 | -0.26819 | 0.788551 | 0.981636 | chr2  | 1.75E+08 | 1.75E+08 | + | 0 | NA | intron (NSVA_C Ret  | 59668 NR_03063C  | NR_03063C                    | ENSG000003MIR933    | MIRN933    | microRNA ncRNA                |
| chr2-18.8.152833  | -0.21721 | 0.809909 | -0.26819 | 0.788551 | 0.981636 | chr2  | 1.9E+08  | 1.9E+08  | + | 0 | NA | intron (NALuSx SIN  | 11772 NM_001321  | 5378 Hs. 111745NM_000534     | ENSG000003PMS1      | HNPCC3     | ML PMS1 homc protein-coding   |
| chr2-21.8.152833  | -0.21721 | 0.809909 | -0.26819 | 0.788551 | 0.981636 | chr2  | 2.16E+08 | 2.16E+08 | + | 0 | NA | intron (NLIPA5 LI   | -43035 NM_00099E | 6168 Hs. 433701NM_00099E     | ENSG000003RPL37A    | L37A       | ribosomal protein-coding      |
| chr20-31.8.152833 | -0.21721 | 0.809909 | -0.26819 | 0.788551 | 0.981636 | chr20 | 31544748 | 31556862 | + | 0 | NA | intron (Nintron (N  | 21108 NR_04685E  | 1.01E+08 Hs. 373741NR_04685E | ENSG000003HM13-AS1  | -          | HM13 antncRNA                 |
| chr22-27.8.152833 | -0.21721 | 0.809909 | -0.26819 | 0.788551 | 0.981636 | chr22 | 27894020 | 27899698 | + | 0 | NA | intron (Nintron (N  | 22355 NM_001284  | 23760 Hs. 705325NM_01239E    | ENSG000003PITPNB    | PI-TP-     | betphosphati protein-coding   |
| chr3-16.8.152833  | -0.21721 | 0.809909 | -0.26819 | 0.788551 | 0.981636 | chr3  | 16469860 | 16472773 | + | 0 | NA | intron (NMIR SINE   | 42383 NM_01515E  | 23180 Hs. 98910 NM_01515E    | ENSG000003RFTN1     | MIG2       | P1B1 raftlin, protein-coding  |
| chr3-33.8.152833  | -0.21721 | 0.809909 | -0.26819 | 0.788551 | 0.981636 | chr3  | 33384173 | 33388060 | + | 0 | NA | non-codirnon-codir  | 54262 NM_00112E  | 7342 Hs. 729125NM_014517     | ENSG000003UBP1      | LBP-1      | UPstream protein-coding       |
| chr3-37.8.152833  | -0.21721 | 0.809909 | -0.26819 | 0.788551 | 0.981636 | chr3  | 37057946 | 37058988 | + | 0 | NA | intron (NALuSx1 SI  | 65117 NM_00125E  | 4292 Hs. 195368NM_00024E     | ENSG000003MLH1      | COCA2      | FLC mutl homc protein-coding  |
| chr3-47.8.152833  | -0.21721 | 0.809909 | -0.26819 | 0.788551 | 0.981636 | chr3  | 47845966 | 47848801 | + | 0 | NA | intron (Nintron (N  | -2172 NR_03159E  | 1E+08 NR_03159E              | ENSG000003MIR1226   | MIRN1226   | microRNA ncRNA                |
| chr3-53.8.152833  | -0.21721 | 0.809909 | -0.26819 | 0.788551 | 0.981636 | chr3  | 53317304 | 53320297 | + | 0 | NA | intron (Nintron (N  | 14327 NR_14571E  | 1.1E+08 NR_14571E            | ENSG000003SNORD38C  | -          | small ncsnoRNA                |
| chr3-56.8.152833  | -0.21721 | 0.809909 | -0.26819 | 0.788551 | 0.981636 | chr3  | 56645420 | 56648541 | + | 0 | NA | exon (NM exon (NM   | 17066 NM_015224  | 23272 Hs. 116877NM_015224</  |                     |            |                               |

|                    |          |          |          |          |          |       |          |          |   |   |    |                      |                  |                              |                     |                    |                                         |                             |
|--------------------|----------|----------|----------|----------|----------|-------|----------|----------|---|---|----|----------------------|------------------|------------------------------|---------------------|--------------------|-----------------------------------------|-----------------------------|
| chr18-295 8.409447 | 0.21368  | 0.798347 | 0.267653 | 0.788967 | 0.981636 | chr18 | 2950327  | 2955799  | + | 0 | NA | intron (Nintron (N   | -6440 NR_026655  | 727896 Hs. 67312cNR_026659   | LOC727896           | -                  | cysteine pseudo                         |                             |
| chr19-488 8.409447 | 0.21368  | 0.798347 | 0.267653 | 0.788967 | 0.981636 | chr19 | 48863796 | 48865418 | + | 0 | NA | intron (NAluJb SIN   | 4010 NM_001161   | 57664 Hs. 9469               | NM_020904           | ENSG00000.PLEKHA4  | PEPPI                                   | pleckstrinprotein-coding    |
| chr2-9481 8.409447 | 0.21368  | 0.798347 | 0.267653 | 0.788967 | 0.981636 | chr2  | 9481503  | 9494777  | + | 0 | NA | TTS (NM_C TTS (NM_C  | 13085 NM_00132c  | 285148 Hs. 66722cNM_00103c   | ENSG00000.IAH1      | -                  | isoamylase protein-coding               |                             |
| chr2-2101 8.409447 | 0.21368  | 0.798347 | 0.267653 | 0.788967 | 0.981636 | chr2  | 26194531 | 26202960 | + | 0 | NA | intron (N L3 LINE C  | 18029 NM_001191  | 150946 Hs. 187912cNM_00116c  | ENSG00000.GAREM2    | FAM59B GA GRB2     | ascp protein-coding                     |                             |
| chr2-2108 8.409447 | 0.21368  | 0.798347 | 0.267653 | 0.788967 | 0.981636 | chr2  | 2.1E+08  | 2.1E+08  | + | 0 | NA | exon (NM_exon (NM_   | -12410 NR_110291 | 1.02E+08 Hs. 124091c         | ENSG00000.LOC10192c | -                  | uncharacterized RNA                     |                             |
| chr21-366 8.409447 | 0.21368  | 0.798347 | 0.267653 | 0.788967 | 0.981636 | chr21 | 36043407 | 36046090 | + | 0 | NA | intron (Nintron (N   | 15616 NM_001007  | 54093 Hs. 60620cNM_01743c    | ENSG00000.CSETD4    | C21orf18 SET       | domain protein-coding                   |                             |
| chr21-436 8.409447 | 0.21368  | 0.798347 | 0.267653 | 0.788967 | 0.981636 | chr21 | 43802762 | 43803036 | + | 0 | NA | intron (Nintron (N   | 9668 NR_026961   | 284837 Hs. 59215cNM_19431c   | ENSG00000.AATBC     | -                  | apoptosis ncRNA                         |                             |
| chr22-196 8.409447 | 0.21368  | 0.798347 | 0.267653 | 0.788967 | 0.981636 | chr22 | 19850454 | 19852221 | + | 0 | NA | exon (NM_exon (NM_   | 3537 NM_053004   | 54584 Hs. 105642cNM_053004c  | ENSG00000.GNBL1     | DGCRK3 FBX         | protein-coding                          |                             |
| chr22-382 8.409447 | 0.21368  | 0.798347 | 0.267653 | 0.788967 | 0.981636 | chr22 | 38290961 | 38294634 | + | 0 | NA | intron (Nintron (N   | -19787 NM_00119c | 25829 Hs. 18262cNM_01226c    | ENSG00000.TMEM184B  | C22orf5 F          | transmembrane protein-coding            |                             |
| chr22-462 8.409447 | 0.21368  | 0.798347 | 0.267653 | 0.788967 | 0.981636 | chr22 | 46209421 | 46209845 | + | 0 | NA | intron (N LIME1 LIN  | 40660 NM_207327  | 150383 Hs. 10311cNM_207327c  | ENSG00000.CDPF7     | C22orf40           | cysteine protein-coding                 |                             |
| chr3-1136 8.409447 | 0.21368  | 0.798347 | 0.267653 | 0.788967 | 0.981636 | chr3  | 11307401 | 11310863 | + | 0 | NA | intron (Nintron (N   | 36735 NM_001144  | 10533 Hs. 38032              | NM_00639c           | ENSG00000.APG7     | APG7-LIKE                               | autophagy protein-coding    |
| chr3-1126 8.409447 | 0.21368  | 0.798347 | 0.267653 | 0.788967 | 0.981636 | chr3  | 1.13E+08 | 1.13E+08 | + | 0 | NA | intron (Nintron (N   | -9429 NR_10977c  | 1.01E+08 Hs. 86538           | NR_10977c           | LINC0127c          | -                                       | long intergenic RNA         |
| chr4-2196 8.409447 | 0.21368  | 0.798347 | 0.267653 | 0.788967 | 0.981636 | chr4  | 2693482  | 2698153  | + | 0 | NA | intron (NAluJo SIN   | 60519 NM_02430c  | 79155 Hs. 368551cNM_02430c   | ENSG00000.TNIP2     | ABIN2 FLI1 TNFAIP3 | iprotein-coding                         |                             |
| chr4-519 8.409447  | 0.21368  | 0.798347 | 0.267653 | 0.788967 | 0.981636 | chr4  | 51908729 | 51910386 | + | 0 | NA | intron (N MamRTE L S | 65978 NM_001287  | 23142 Hs. 60538cNM_01511c    | ENSG00000.DCUN1D4   | -                  | defective protein-coding                |                             |
| chr4-1451 8.409447 | 0.21368  | 0.798347 | 0.267653 | 0.788967 | 0.981636 | chr4  | 1.45E+08 | 1.45E+08 | + | 0 | NA | intron (NAluY SINE   | 15826 NM_01749c  | 54726 Hs. 270851cNM_01749c   | ENSG00000.OTUD4     | DUBA6 HINOTU       | deubiquitinase protein-coding           |                             |
| chr5-6556 8.409447 | 0.21368  | 0.798347 | 0.267653 | 0.788967 | 0.981636 | chr5  | 65598074 | 65605014 | + | 0 | NA | intron (N THEIA L TF | 22789 NM_00165c  | 373 Hs. 792                  | NM_00165c           | ENSG00000.TRIM23   | ARD1 ARF1                               | tripartite protein-coding   |
| chr6-4267 8.409447 | 0.21368  | 0.798347 | 0.267653 | 0.788967 | 0.981636 | chr6  | 42673246 | 42688025 | + | 0 | NA | intron (N MR3 SINE   | 41962 NM_00032c  | 5961 Hs. 65448cNM_00032c     | ENSG00000.CPRH2     | AOFM6 AVM          | peripherin protein-coding               |                             |
| chr6-4358 8.409447 | 0.21368  | 0.798347 | 0.267653 | 0.788967 | 0.981636 | chr6  | 43568099 | 43570889 | + | 0 | NA | intron (NAluSx1 S S  | 6544 NM_02075c   | 57510 Hs. 20320cNM_02075c    | ENSG00000.XP05      | exp5               | exportin protein-coding                 |                             |
| chr6-158 8.409447  | 0.21368  | 0.798347 | 0.267653 | 0.788967 | 0.981636 | chr6  | 1.58E+08 | 1.58E+08 | + | 0 | NA | intron (Nintron (N   | 74457 NM_032861  | 84947 Hs. 15470cNM_032861c   | ENSG00000.SERAC1    | -                  | serine acetyltransferase protein-coding |                             |
| chr7-1058 8.409447 | 0.21368  | 0.798347 | 0.267653 | 0.788967 | 0.981636 | chr7  | 1.06E+08 | 1.06E+08 | + | 0 | NA | intron (Nintron (N   | 11412 NM_02193c  | 60561 Hs. 53138cNM_02193c    | ENSG00000.CRINT1    | RINT-1             | rad50 protein-coding                    |                             |
| chr7-1314 8.409447 | 0.21368  | 0.798347 | 0.267653 | 0.788967 | 0.981636 | chr7  | 1.31E+08 | 1.31E+08 | + | 0 | NA | intron (Nintron (N   | 102206 NM_001321 | 4289 Hs. 44693               | NM_01325c           | ENSG00000.MKLN1    | TWA2                                    | muskelin protein-coding     |
| chr9-5074 8.409447 | 0.21368  | 0.798347 | 0.267653 | 0.788967 | 0.981636 | chr9  | 5074691  | 5075444  | + | 0 | NA | intron (N Tigger1 E  | 33374 NM_001322  | 3717 Hs. 65621cNM_00497c     | ENSG00000.JAK2      | JTK10 THC          | Janus kinase protein-coding             |                             |
| chr9-872 8.409447  | 0.21368  | 0.798347 | 0.267653 | 0.788967 | 0.981636 | chr9  | 87272556 | 87731953 | + | 0 | NA | intron (Nintron (N   | 3635 NM_00191c   | 1514 Hs. 731507cNM_00191c    | ENSG00000.CTSL      | CATL CTSL          | cathepsin protein-coding                |                             |
| chr16-295 11.92957 | -0.18413 | 0.688214 | -0.26755 | 0.789045 | 0.981636 | chr16 | 29537327 | 29538343 | + | 0 | NA | Intergeni Intergeni  | -31961 NM_00135c | 440353                       | NR_001355401        | NPIPBI2            | -                                       | nuclear protein-coding      |
| chr1-3785 7.905001 | 0.220387 | 0.82379  | 0.267528 | 0.789062 | 0.981636 | chr1  | 37837167 | 37839631 | + | 0 | NA | intron (Nintron (N   | 21193 NM_00595c  | 4520 Hs. 471991cNM_00595c    | ENSG00000.MTF1      | MTF-1 ZRF          | metal regulatory protein-coding         |                             |
| chr1-2367 7.905001 | 0.220387 | 0.82379  | 0.267528 | 0.789062 | 0.981636 | chr1  | 2.37E+08 | 2.37E+08 | + | 0 | NA | intron (Nintron (N   | 13062 NM_01807c  | 55127 Hs. 708114cNM_01807c   | ENSG00000.CHEATR1   | BAP28 UTF          | heat shock protein-coding               |                             |
| chr15-437 7.905001 | 0.220387 | 0.82379  | 0.267528 | 0.789062 | 0.981636 | chr15 | 43761218 | 43761852 | + | 0 | NA | intron (Nintron (N   | 15097 NM_00531c  | 2923 Hs. 59109cNM_00531c     | ENSG00000.PDIA3     | ER60 ERp           | protein-coding                          |                             |
| chr16-211 7.905001 | 0.220387 | 0.82379  | 0.267528 | 0.789062 | 0.981636 | chr16 | 21173480 | 21174685 | + | 0 | NA | exon (NM_exon (NM_   | -14641 NM_01753c | 55567 Hs. 52650cNM_01753c    | ENSG00000.DNAH3     | DNAH3C-3 dynein    | alpha protein-coding                    |                             |
| chr16-58 7.905001  | 0.220387 | 0.82379  | 0.267528 | 0.789062 | 0.981636 | chr16 | 58564139 | 58565570 | + | 0 | NA | intron (NAluS2 S S   | -4923 NR_00298c  | 677830 Hs. 67751cNR_00298c   | ENSG00000.SNORA50A  | ACU50 SNC          | small nucleolar RNA                     |                             |
| chr16-744 7.905001 | 0.220387 | 0.82379  | 0.267528 | 0.789062 | 0.981636 | chr16 | 74461539 | 74463690 | + | 0 | NA | exon (NM_exon (NM_   | 41144 NM_001011  | 497190 Hs. 45467cNM_001011c  | ENSG00000.CLEC18B   | MRC2L2             | C-type lectin protein-coding            |                             |
| chr17-17 7.905001  | 0.220387 | 0.82379  | 0.267528 | 0.789062 | 0.981636 | chr17 | 17246921 | 17248959 | + | 0 | NA | intron (Nintron (N   | -10772 NM_14460c | 201163 Hs. 31652             | NM_14460c           | ENSG00000.FCLN     | BHD DENN                                | follicular protein-coding   |
| chr17-394 7.905001 | 0.220387 | 0.82379  | 0.267528 | 0.789062 | 0.981636 | chr17 | 39474630 | 39474906 | + | 0 | NA | intron (Nintron (N   | 13282 NM_01508c  | 51755 Hs. 34502cNM_01508c    | ENSG00000.CDK12     | CRK7 CRKF          | cyclin dependent protein-coding         |                             |
| chr19-94 7.905001  | 0.220387 | 0.82379  | 0.267528 | 0.789062 | 0.981636 | chr19 | 9494307  | 948433   | + | 0 | NA | intron (N CpG        | 21655 NM_005224  | 1820 Hs. 50129cNM_005224c    | ENSG00000.ARID3A    | BRIGHT DFAT        | rich protein-coding                     |                             |
| chr19-465 7.905001 | 0.220387 | 0.82379  | 0.267528 | 0.789062 | 0.981636 | chr19 | 4656506  | 4660795  | + | 0 | NA | intron (Nintron (N   | 11753 NM_019107  | 56005 Hs. 46564cNM_019107c   | ENSG00000.CMYDG     | C19orf10 myeloid   | protein-coding                          |                             |
| chr19-171 7.905001 | 0.220387 | 0.82379  | 0.267528 | 0.789062 | 0.981636 | chr19 | 17183116 | 17190135 | + | 0 | NA | intron (Nintron (N   | -28732 NM_018467 | 55850 Hs. 16187              | NM_018467c          | ENSG00000.USE1     | D12 MSD5                                | unconvent protein-coding    |
| chr19-458 7.905001 | 0.220387 | 0.82379  | 0.267528 | 0.789062 | 0.981636 | chr19 | 45858294 | 45860695 | + | 0 | NA | intron (NAluS26 S S  | 3653 NM_00481c   | 8189 Hs. 51547cNM_00481c     | ENSG00000.SYMPK     | SPK SYM            | sympkin protein-coding                  |                             |
| chr2-6908 7.905001 | 0.220387 | 0.82379  | 0.267528 | 0.789062 | 0.981636 | chr2  | 69081007 | 69082330 | + | 0 | NA | intron (N MRB SINE   | -22014 NR_03607c | 1E+08                        | NR_03607c           | ENSG00000.MIR3126  | mir-3126                                | microRNA ncRNA              |
| chr2-9628 7.905001 | 0.220387 | 0.82379  | 0.267528 | 0.789062 | 0.981636 | chr2  | 96286163 | 96286648 | + | 0 | NA | exon (NM_exon (NM_   | 19142 NM_014014  | 23020 Hs. 24611cNM_014014c   | ENSG00000.SNRNP200  | ASCC3L1 Esmal      | nucleo protein-coding                   |                             |
| chr2-1605 7.905001 | 0.220387 | 0.82379  | 0.267528 | 0.789062 | 0.981636 | chr2  | 1.6E+08  | 1.6E+08  | + | 0 | NA | intron (Nintron (N   | -40599 NR_10377c | 1.01E+08 Hs. 72953cNR_10377c | ENSG00000.LINC0247c | -                  | long intergenic RNA                     |                             |
| chr2-1796 7.905001 | 0.220387 | 0.82379  | 0.267528 | 0.789062 | 0.981636 | chr2  | 1.8E+08  | 1.8E+08  | + | 0 | NA | intron (Nintron (N   | 34260 NM_02094c  | 57703 Hs. 31136cNM_02094c    | ENSG00000.CWC22     | EIF4GL NC          | CWC22 sp1 protein-coding                |                             |
| chr20-248 7.905001 | 0.220387 | 0.82379  | 0.267528 | 0.789062 | 0.981636 | chr20 | 2485964  | 2486808  | + | 0 | NA | intron (Nintron (N   | -15597 NM_19821c | 6628 Hs. 83753               | NM_003091c          | ENSG00000.SNRPB    | CCMS COD                                | small nucleo protein-coding |
| chr21-316 7.905001 | 0.220387 | 0.82379  | 0.267528 | 0.789062 | 0.981636 | chr21 | 31682463 | 31684795 | + | 0 | NA | intron (Nintron (N   | 24007 NM_000454  | 6647 Hs. 443914cNM_000454c   | ENSG00000.COD1      | ALS ALS1           | superoxide protein-coding               |                             |
| chr22-215 7.905001 | 0.220387 | 0.82379  | 0.267528 | 0.789062 | 0.981636 | chr22 | 21928385 | 21931413 | + | 0 | NA | intron (Nintron (N   | -8338 NR_14762c  | 1E+08 Hs. 65918cNR_14762c    | LOC10028c           | -                  | uncharacterized RNA                     |                             |
| chr22-295 7.905001 | 0.220387 | 0.82379  | 0.267528 | 0.789062 | 0.981636 | chr22 | 29510389 | 29512553 | + | 0 | NA | intron (Nintron (N   | 31253 NM_02107c  | 4744 Hs. 19876cNM_02107c     | ENSG00000.NEFH      | CMT2CC NF          | neurofilament protein-coding            |                             |
| chr22-427 7.905001 | 0.220387 | 0.82379  | 0.267528 | 0.789062 | 0.981636 | chr22 | 42797564 | 42803619 | + | 0 | NA | intron (Nintron (N   | 56682 NM_01457c  | 26286 Hs. 68522cNM_01457c    | ENSG00000.ARFGAP3   | ARFGAP1            | ADP ribosyl protein-coding              |                             |
| chr5-327 7.905001  | 0.220387 | 0.82379  | 0.267528 | 0.789062 | 0.981636 | chr5  | 37236661 | 37240701 | + | 0 | NA | intron (NAluJo SIN   | -10365 NR_13426c | 1.05E+08 Hs. 17099cNR_13426c | ENSG00000.LOC10537c | -                  | uncharacterized RNA                     |                             |
| chr5-1774 7.905001 | 0.220387 | 0.82379  | 0.267528 | 0.789062 | 0.981636 | chr5  | 1.77E+08 | 1.77E+08 | + | 0 | NA | intron (Nintron (N   | 7002 NM_00208c   | 2870 Hs. 23511cNM_00208c     | ENSG00000.GRKB      | GRPK6              | G protein protein-coding                |                             |
| chr7-6807 7.905001 | 0.220387 | 0.82379  | 0.267528 | 0.789062 | 0.981636 | chr7  | 6808867  | 6812206  | + | 0 | NA | intron (NAluJr SIN   | 15759 NM_198097  | 22196 Hs. 56777cNM_198097c   | ENSG00000.CCZ1B     | C7orf28A CCZ1      | homoc protein-coding                    |                             |
| chr7-1001 7.905001 | 0.220387 | 0.823    |          |          |          |       |          |          |   |   |    |                      |                  |                              |                     |                    |                                         |                             |



|                    |          |          |          |          |          |       |          |           |   |   |    |                      |         |           |          |                    |                      |                    |                            |                          |
|--------------------|----------|----------|----------|----------|----------|-------|----------|-----------|---|---|----|----------------------|---------|-----------|----------|--------------------|----------------------|--------------------|----------------------------|--------------------------|
| chr3-1559.9.418339 | 0.202421 | 0.758817 | 0.266759 | 0.789655 | 0.981636 | chr3  | 15598801 | 15599345  | + | 0 | NA | intron (NL2c LINE    | -2279   | NM_001281 | 686      | Hs.444197NM_001281 | ENSG000000CBTD       | -                  | biotinidase protein-coding |                          |
| chr3-6415.9.418339 | 0.202421 | 0.758817 | 0.266759 | 0.789655 | 0.981636 | chr3  | 64196646 | 64198816  | + | 0 | NA | intron (NLP1A13 LI   | 10187   | NR_046702 | 1.01E+08 | Hs.67084CNR_046702 | ENSG000000PRICKLE2-  | -                  | PRICKLE2 ncRNA             |                          |
| chr4-1229.9.418339 | 0.202421 | 0.758817 | 0.266759 | 0.789655 | 0.981636 | chr4  | 1.22E+08 | 1.22E+08  | + | 0 | NA | intron (Nintron (N   | -61297  | NM_139243 | 132612   | Hs.518957NM_139243 | ENSG000000CADAD1     | Tenr               | adenosine protein-coding   |                          |
| chr5-1341.9.418339 | 0.202421 | 0.758817 | 0.266759 | 0.789655 | 0.981636 | chr5  | 1.34E+08 | 1.34E+08  | + | 0 | NA | intron (NL2 LINE I   | 7969    | NM_170675 | 6500     | Hs.17162CNM_00693C | ENSG000000SKP1       | EMC19 OCF5-phase I | protein-coding             |                          |
| chr7-1487.9.418339 | 0.202421 | 0.758817 | 0.266759 | 0.789655 | 0.981636 | chr7  | 1.49E+08 | 1.49E+08  | + | 0 | NA | intron (Nintron (N   | 87152   | NM_00137C | 8454     | Hs.14680CNM_00359E | ENSG000000CULL1      | -                  | cullin 1 protein-coding    |                          |
| chr8-9915.9.418339 | 0.202421 | 0.758817 | 0.266759 | 0.789655 | 0.981636 | chr8  | 99150457 | 99151696  | + | 0 | NA | intron (NLMC1 LIN    | 137810  | NM_01789C | 157680   | Hs.19154CNM_01524E | ENSG000000CVPS13B    | CHS1 COH1          | vacuolar protein-coding    |                          |
| chr1-1864.9.402624 | 0.205692 | 0.771232 | 0.266705 | 0.789696 | 0.981636 | chr1  | 1.86E+08 | 1.86E+08  | + | 0 | NA | intron (NL2c LINE    | 9406    | NM_02237F | 10896    | Hs.67923CNM_02237F | ENSG000000OCLM       | TISR               | oculomedial protein-coding |                          |
| chr16-572.8.630005 | -0.21426 | 0.804033 | -0.26648 | 0.789871 | 0.981636 | chr16 | 57230163 | 57230921  | + | 0 | NA | intron (NMER104 DN   | -14717  | NM_01210E | 23568    | Hs.63287CNM_01210E | ENSG000000ARL2BP     | BART BARTADP       | ribos protein-coding       |                          |
| chr12-123.8.622147 | -0.21256 | 0.797793 | -0.26643 | 0.789909 | 0.981636 | chr12 | 1.24E+08 | 1.24E+08  | + | 0 | NA | intron (Nintron (N   | 18618   | NM_00151E | 2967     | Hs.35534CNM_00151E | ENSG000000GTF2H3     | BT2F P34           | general t protein-coding   |                          |
| chr15-327.6.424945 | 0.250509 | 0.940284 | 0.266418 | 0.789917 | 0.981636 | chr15 | 32727818 | 32728043  | + | 0 | NA | intron (NLP13 LINE   | -9065   | NR_109767 | 1E+08    | Hs.61054ENR_109767 | ENSG000000LOC100131  | -                  | uncharacterized ncRNA      |                          |
| chr9-1365.6.424945 | 0.250509 | 0.940284 | 0.266418 | 0.789917 | 0.981636 | chr9  | 1.36E+08 | 1.36E+08  | + | 0 | NA | intron (Nintron (N   | 7038    | NM_00308E | 6621     | Hs.11326CNM_00308E | ENSG000000SNAPC4     | PTFalpha small     | nuc protein-coding         |                          |
| chr16-214.12.37531 | -0.17896 | 0.67203  | -0.26629 | 0.790016 | 0.981636 | chr16 | 21451480 | 21453763  | + | 0 | NA | non-codirnon-codir   | -18166  | NR_02445E | 1E+08    | Hs.64843ENR_02445E | LOC10019C-           | -                  | uncharacterized ncRNA      |                          |
| chr5-4057.12.37531 | -0.17896 | 0.67203  | -0.26629 | 0.790016 | 0.981636 | chr5  | 40826544 | 40834722  | + | 0 | NA | 3' UTR (N3' UTR (N   | 2102    | NR_00258E | 619564   | NR_00258E          | ENSG000000SNORD72    | HBII-240           | small nuc snRNA            |                          |
| chr1-1582.7.946141 | 0.221981 | 0.833626 | 0.266283 | 0.790021 | 0.981636 | chr1  | 1.56E+08 | 1.56E+08  | + | 0 | NA | intron (NAluSg7 SI   | -26035  | NR_024117 | 1E+08    | Hs.656361NR_024117 | MSTO2P               | misato f pseudo    |                            |                          |
| chr13-102.7.946141 | 0.221981 | 0.833626 | 0.266283 | 0.790021 | 0.981636 | chr13 | 1.03E+08 | 1.03E+08  | + | 0 | NA | intron (Nintron (N   | 17302   | NM_00101C | 196541   | Hs.50862CNM_00101C | ENSG000000METTL21C   | C13orf39           | methyltra protein-coding   |                          |
| chr15-731.7.946141 | 0.221981 | 0.833626 | 0.266283 | 0.790021 | 0.981636 | chr15 | 73132706 | 73132905  | + | 0 | NA | intron (NLP1B1 LIN   | 80321   | NM_00117E | 4756     | Hs.38861CNM_00249E | ENSG000000NE01       | IGDC2C Nc          | neogenin protein-coding    |                          |
| chr19-172.7.946141 | 0.221981 | 0.833626 | 0.266283 | 0.790021 | 0.981636 | chr19 | 17231454 | 17232487  | + | 0 | NA | 3' UTR (N3' UTR (N   | 5790    | NM_02457E | 79629    | Hs.42267CNM_02457E | ENSG000000CECEL1     | FWP009 SE          | occludin/ protein-coding   |                          |
| chr6-1601.7.946141 | 0.221981 | 0.833626 | 0.266283 | 0.790021 | 0.981636 | chr6  | 1.6E+08  | 1.6E+08   | + | 0 | NA | exon (NM exon (NM    | 11765   | NR_00328E | 729603   | Hs.67481CNR_00328E | ENSG000000LOC72960E  | -                  | calcineur pseudo           |                          |
| chr17-595.7.979423 | 0.225521 | 0.847599 | 0.266071 | 0.790185 | 0.981636 | chr17 | 59931602 | 59932336  | + | 0 | NA | intron (Nintron (N   | 32771   | NM_01612E | 51136    | Hs.531701NM_01612E | ENSG000000RNFT1      | PTD106             | ring fing protein-coding   |                          |
| chr5-3395.9.914927 | 0.199266 | 0.749098 | 0.266007 | 0.790233 | 0.981636 | chr5  | 33988134 | 33988604  | + | 0 | NA | non-codirnon-codir   | -3676   | NM_01618C | 51151    | Hs.27896CNM_01618C | ENSG000000SLC45A2    | 1A1 AIM1           | solute c protein-coding    |                          |
| chr6-3611.9.914927 | 0.199266 | 0.749098 | 0.266007 | 0.790233 | 0.981636 | chr6  | 36107518 | 36108511  | + | 0 | NA | intron (NMIR1 Am     | -22499  | NR_07299E | 5603     | Hs.17869CNM_002754 | ENSG000000MAPK13     | MAPK 13            | mitogen e protein-coding   |                          |
| chr2-2391.13.76754 | -0.17277 | 0.649546 | -0.26599 | 0.790246 | 0.981636 | chr2  | 2.39E+08 | 2.39E+08  | + | 0 | NA | intron (NLMB7 LIN    | -39169  | NR_03964E | 1.01E+08 | NR_03964E          | ENSG000000MIR4441    | -                  | microRNA ncRNA             |                          |
| chr14-348.9.922785 | 0.197966 | 0.743435 | 0.265922 | 0.790299 | 0.981636 | chr14 | 34802399 | 34803333  | + | 0 | NA | exon (NM exon (NM    | -71325  | NR_16077E | 1.12E+08 | Hs.50914CNR_16077E | LOC11226E-           | -                  | uncharacterized ncRNA      |                          |
| chr9-6925.6.458227 | 0.254624 | 0.95761  | 0.265896 | 0.790332 | 0.981636 | chr9  | 69254129 | 69254554  | + | 0 | NA | exon (NM exon (NM    | 49186   | NM_00136E | 9414     | Hs.50382           | NM_00481E            | ENSG000000TJP2     | C9DUPq21.2                 | tight jur protein-coding |
| chr12-292.7.18878  | -0.23494 | 0.8839   | -0.2658  | 0.790394 | 0.981636 | chr12 | 2927948  | 2928365   | + | 0 | NA | intron (Nintron (N   | -31241  | NM_00321E | 7004     | Hs.94865           | NM_00321E            | ENSG000000TEAD4    | EFTR-2 RTTEA               | doma protein-coding      |
| chr12-292.7.18878  | -0.23494 | 0.8839   | -0.2658  | 0.790394 | 0.981636 | chr12 | 29280801 | 29281702  | + | 0 | NA | intron (Nintron (N   | -121563 | NM_00135E | 341350   | Hs.67458CNM_18337E | ENSG000000OVCHI      | OVCH               | ovochymas protein-coding   |                          |
| chr15-615.7.18878  | -0.23494 | 0.8839   | -0.2658  | 0.790394 | 0.981636 | chr15 | 61982093 | 61982142  | + | 0 | NA | intron (Nintron (N   | 79275   | NM_01768A | 54832    | Hs.51166CNM_01768A | ENSG000000VPS13C     | PARK23             | vacuolar protein-coding    |                          |
| chr3-1491.7.18878  | -0.23494 | 0.8839   | -0.2658  | 0.790394 | 0.981636 | chr3  | 1.49E+08 | 1.49E+08  | + | 0 | NA | intron (Nintron (N   | 45695   | NM_00009E | 1356     | Hs.558314NM_00009E | ENSG000000CP         | CP-2               | cerulopl protein-coding    |                          |
| chr1-6701.8.144975 | -0.21557 | 0.811342 | -0.2657  | 0.790474 | 0.981636 | chr1  | 67010364 | 67012900  | + | 0 | NA | intron (NAluJb SIN   | 5410    | NM_01513E | 23169    | Hs.21364CNM_01513E | ENSG000000SLC35D1    | SHNKND UC          | solute c protein-coding    |                          |
| chr1-1531.8.144975 | -0.21557 | 0.811342 | -0.2657  | 0.790474 | 0.981636 | chr1  | 1.50E+08 | 1.54E+08  | + | 0 | NA | exon (NM exon (NM    | 759     | NM_01462A | 6277     | Hs.27524CNM_01462A | ENSG000000S100A6     | OAG9 5B10 S100     | calc protein-coding        |                          |
| chr1-2431.8.144975 | -0.21557 | 0.811342 | -0.2657  | 0.790474 | 0.981636 | chr1  | 2.43E+08 | 2.43E+08  | + | 0 | NA | intron (Nintron (N   | 58328   | NM_01481E | 9859     | Hs.53363CNM_01481E | ENSG000000CEP170     | FAM68A K           | centrosom protein-coding   |                          |
| chr10-125.8.144975 | -0.21557 | 0.811342 | -0.2657  | 0.790474 | 0.981636 | chr10 | 12236966 | 12237377  | + | 0 | NA | intron (Nintron (N   | 41174   | NM_00602E | 8872     | Hs.41284CNM_00602E | ENSG000000CDC123     | C10orf7 I          | cell div protein-coding    |                          |
| chr10-68.8.144975  | -0.21557 | 0.811342 | -0.2657  | 0.790474 | 0.981636 | chr10 | 68912599 | 68915794  | + | 0 | NA | exon (NM exon (NM    | 12881   | NM_02404E | 79009    | Hs.522984NM_02404E | ENSG000000DDX50      | GU2 GUB F          | DEX-hv protein-coding      |                          |
| chr11-671.8.144975 | -0.21557 | 0.811342 | -0.2657  | 0.790474 | 0.981636 | chr11 | 67180321 | 67183044  | + | 0 | NA | intron (NLMIME4a LI  | -58332  | NM_00125E | 22992    | Hs.124147NM_01230E | ENSG000000KDM2A      | CXXC8 FBI          | lysine de protein-coding   |                          |
| chr11-117.8.144975 | -0.21557 | 0.811342 | -0.2657  | 0.790474 | 0.981636 | chr11 | 1.12E+08 | 1.12E+08  | + | 0 | NA | intron (NAluSx SIN   | 5635    | NR_16040C | 26521    | Hs.27991CNM_01245E | ENSG000000TIMM8B     | DDP2 TIM           | transloc protein-coding    |                          |
| chr11-112.8.144975 | -0.21557 | 0.811342 | -0.2657  | 0.790474 | 0.981636 | chr11 | 1.17E+08 | 1.17E+08  | + | 0 | NA | non-codirnon-codir   | -9227   | NM_00104C | 51092    | Hs.712144NM_01599E | ENSG000000SIDT2      | CGI-40             | SIDI tra protein-coding    |                          |
| chr12-487.8.144975 | -0.21557 | 0.811342 | -0.2657  | 0.790474 | 0.981636 | chr12 | 48710316 | 48712487  | + | 0 | NA | intron (N(AAAT)n S   | 5306    | NM_00124C | 904      | Hs.92308           | NM_00124C            | ENSG000000CCNT1    | CCNT CYC1                  | cyclin T1 protein-coding |
| chr12-927.8.144975 | -0.21557 | 0.811342 | -0.2657  | 0.790474 | 0.981636 | chr12 | 92793881 | 92797572  | + | 0 | NA | intron (NLP1A6 LIN   | 58327   | NM_00100A | 440107   | Hs.59101CNM_00100A | ENSG000000PLEKHG7    | -                  | pleckstrin protein-coding  |                          |
| chr13-946.8.144975 | -0.21557 | 0.811342 | -0.2657  | 0.790474 | 0.981636 | chr13 | 94621163 | 946125200 | + | 0 | NA | exon (NM exon (NM    | 21324   | NM_18098E | 160897   | Hs.43936CNM_18098E | ENSG000000GPR180     | ITR                | G protein protein-coding   |                          |
| chr14-602.8.144975 | -0.21557 | 0.811342 | -0.2657  | 0.790474 | 0.981636 | chr14 | 60291858 | 60292810  | + | 0 | NA | intron (Nintron (N   | -30862  | NR_146481 | 1.02E+08 | NR_146481          | ENSG000000LINC02322- | -                  | long intencRNA             |                          |
| chr14-602.8.144975 | -0.21557 | 0.811342 | -0.2657  | 0.790474 | 0.981636 | chr14 | 60984879 | 60990242  | + | 0 | NA | intron (NMR1b SINE   | -5870   | NM_00135E | 57570    | Hs.38015CNM_02081C | ENSG000000TRMT5      | COXP26 K           | RNA meth protein-coding    |                          |
| chr14-761.8.144975 | -0.21557 | 0.811342 | -0.2657  | 0.790474 | 0.981636 | chr14 | 76177386 | 76179467  | + | 0 | NA | 3' UTR (N3' UTR (N   | 24072   | NM_11031A | 55668    | Hs.410231NM_01792E | ENSG000000GPATCH2L   | C14orf11E          | G-patch protein-coding     |                          |
| chr15-503.8.144975 | -0.21557 | 0.811342 | -0.2657  | 0.790474 | 0.981636 | chr15 | 50302915 | 50303654  | + | 0 | NA | intron (NAluJb SIN   | -37558  | NM_00211E | 3067     | Hs.1481            | NM_00211E            | ENSG000000CHDC     | -                          | histidine protein-coding |
| chr17-535.8.144975 | -0.21557 | 0.811342 | -0.2657  | 0.790474 | 0.981636 | chr17 | 5399631  | 5401386   | + | 0 | NA | intron (NAluSg SIN   | -19133  | NM_00116E | 84268    | Hs.46208CNM_03230E | ENSG000000RPA1N      | HRIP RIP           | RPA inter protein-coding   |                          |
| chr17-545.8.144975 | -0.21557 | 0.811342 | -0.2657  | 0.790474 | 0.981636 | chr17 | 54961709 | 54964971  | + | 0 | NA | exon (NM exon (NM    | 5314    | NR_13567E | 1353     | Hs.591171NM_00437E | ENSG000000COX11      | COX11P             | cytochon protein-coding    |                          |
| chr19-343.8.144975 | -0.21557 | 0.811342 | -0.2657  | 0.790474 | 0.981636 | chr19 | 34389802 | 34392044  | + | 0 | NA | intron (Nintron (N   | -13475  | NM_00135E | 84306    | Hs.515344NM_03234E | ENSG000000PDCD2L     | -                  | programme protein-coding   |                          |
| chr2-6385.8.144975 | -0.21557 | 0.811342 | -0.2657  | 0.790474 | 0.981636 | chr2  | 63857925 | 63859347  | + | 0 | NA | intron (Nintron (N</ |         |           |          |                    |                      |                    |                            |                          |







|           |          |          |          |          |          |          |       |          |          |   |   |    |                     |                   |           |                |                   |                    |                     |                                     |       |
|-----------|----------|----------|----------|----------|----------|----------|-------|----------|----------|---|---|----|---------------------|-------------------|-----------|----------------|-------------------|--------------------|---------------------|-------------------------------------|-------|
| chr4-1478 | 8.137117 | -0.21391 | 0.816037 | -0.26213 | 0.793219 | 0.981636 | chr4  | 1.48E+08 | 1.48E+08 | + | 0 | NA | intron (Nkangal DN  | 50397 NR_039962   | 1.01E+08  | NR_039962      | ENSG00000MIR4799  | -                  | microRNA            | ncRNA                               |       |
| chr5-4361 | 8.137117 | -0.21391 | 0.816037 | -0.26213 | 0.793219 | 0.981636 | chr5  | 43619762 | 43620114 | + | 0 | NA | intron (NMSTB1 LTF  | -16708 NR_073111  | 1.01E+08  | Hs.482045      | NR_073111         | NNT-AS1            | -                   | NNT antisenseRNA                    |       |
| chr5-1158 | 8.137117 | -0.21391 | 0.816037 | -0.26213 | 0.793219 | 0.981636 | chr5  | 1.16E+08 | 1.16E+08 | + | 0 | NA | intron (NMADE2 DN   | 5390 NM_004707    | 9140      | Hs.264482      | NM_004707         | ENSG00000CATG12    | APG12 APC           | autophagy protein-coding            |       |
| chr6-8748 | 8.137117 | -0.21391 | 0.816037 | -0.26213 | 0.793219 | 0.981636 | chr6  | 87483579 | 87484712 | + | 0 | NA | intron (NHERY1P OF  | 11171 NM_006416   | 10559     | Hs.423162      | NM_006416         | ENSG00000SLC35A1   | CDG2F CM            | solute carrier protein-coding       |       |
| chr8-1188 | 8.137117 | -0.21391 | 0.816037 | -0.26213 | 0.793219 | 0.981636 | chr8  | 1.81E+08 | 1.81E+08 | + | 0 | NA | intron (Nintron (N  | 18355 NM_000127   | 2131      | Hs.492618      | NM_000127         | ENSG00000EXT1      | EXT LGC             | extosin protein-coding              |       |
| chr15-648 | 8.20183  | -0.21638 | 0.825665 | -0.26207 | 0.793269 | 0.981636 | chr15 | 64866718 | 64867981 | + | 0 | NA | 3' UTR (N3' UTR (N  | 25434 NM_025201   | 80301     | Hs.709337      | NM_025201         | ENSG00000PLEKH02   | PLEKHQ1 F           | pleckstrin protein-coding           |       |
| chr1-7741 | 4.426947 | -0.28376 | 1.082835 | -0.26205 | 0.793282 | 0.981636 | chr1  | 77412731 | 77413572 | + | 0 | NA | intron (Nintron (N  | 130064 NM_012093  | 26289     | Hs.559718      | NM_012093         | ENSG00000AK5       | AK6                 | adenylate protein-coding            |       |
| chr2-5534 | 4.426947 | -0.28376 | 1.082835 | -0.26205 | 0.793282 | 0.981636 | chr2  | 55349399 | 55349987 | + | 0 | NA | intron (Nintron (N  | 67374 NR_027258   | 344405    | Hs.445292      | NR_027258         | ENSG00000PRORSD1P  | NCRNA0011           | prolyl-tf pseudo                    |       |
| chr3-6416 | 4.426947 | -0.28376 | 1.082835 | -0.26205 | 0.793282 | 0.981636 | chr3  | 64165747 | 64166915 | + | 0 | NA | intron (Nintron (N  | -21213 NR_046702  | 1.01E+08  | Hs.67084       | CNR_046702        | ENSG00000PRICKLE2- | PRICKLE2            | ncRNA                               |       |
| chr5-6236 | 4.426947 | -0.28376 | 1.082835 | -0.26205 | 0.793282 | 0.981636 | chr5  | 62368529 | 62369119 | + | 0 | NA | intron (Nintron (N  | 27292 Hs.73166    | NM_014473 | ENSG00000DIMT1 | DIM1 DIM1         | DIMT1 rRNA         | protein-coding      |                                     |       |
| chr11-767 | 7.863862 | 0.218585 | 0.834295 | 0.261999 | 0.793322 | 0.981636 | chr11 | 76546095 | 76546380 | + | 0 | NA | exon (NM exon (NM   | 101212 NM_020134  | 56946     | Hs.35258       | NM_020134         | ENSG00000EMSY      | C1orf30 EMSY        | trp protein-coding                  |       |
| chr21-288 | 7.863862 | 0.218585 | 0.834295 | 0.261999 | 0.793322 | 0.981636 | chr21 | 28881148 | 28882199 | + | 0 | NA | intron (NAluJb SIN  | 3694 NM_013240    | 29104     | Hs.16384       | CNM_013240        | ENSG00000N6AMT1    | C21orf127           | N-6 adenylate protein-coding        |       |
| chr4-422  | 7.863862 | 0.218585 | 0.834295 | 0.261999 | 0.793322 | 0.981636 | chr4  | 1.22E+08 | 1.22E+08 | + | 0 | NA | intron (NHSMAR2 DN  | -100479 NM_139243 | 132612    | Hs.51895       | NM_139243         | ENSG00000ADAD1     | Tenr                | adenosine protein-coding            |       |
| chr13-194 | 12.86219 | -0.17255 | 0.658683 | -0.26197 | 0.793345 | 0.981636 | chr13 | 49460861 | 49464154 | + | 0 | NA | intron (NMER21C LI  | 18233 NM_001320   | 83852     | Hs.63178       | NM_001320         | ENSG00000SETDB2    | C3orf41 CSET        | domain protein-coding               |       |
| chr2-2314 | 12.86219 | -0.17255 | 0.658683 | -0.26197 | 0.793345 | 0.981636 | chr2  | 2.31E+08 | 2.31E+08 | + | 0 | NA | intron (Nintron (N  | 1853 NR_004398    | 25826     | NR_004398      | ENSG00000SNORD82  | RNU82 U82          | small nucleolar RNA |                                     |       |
| chr5-1796 | 12.86219 | -0.17255 | 0.658683 | -0.26197 | 0.793345 | 0.981636 | chr5  | 1.8E+08  | 1.8E+08  | + | 0 | NA | intron (Nintron (N  | 2532 NM_001364    | 3187      | Hs.604001      | NM_005520         | ENSG00000HNRNPH1   | HNRPH HNF           | heterolog protein-coding            |       |
| chr5-1812 | 12.86219 | -0.17255 | 0.658683 | -0.26197 | 0.793345 | 0.981636 | chr5  | 1.81E+08 | 1.81E+08 | + | 0 | NA | exon (NM exon (NM   | 2348 NR_002592    | 619571    | NR_002592      | ENSG00000SNORD96A | U96A               | small nucleolar RNA |                                     |       |
| chr12-101 | 7.351558 | 0.227946 | 0.870544 | 0.261843 | 0.793442 | 0.981636 | chr12 | 1E+08    | 1E+08    | + | 0 | NA | intron (Nintron (N  | -19435 NM_001146  | 246213    | Hs.116871      | NM_139319         | ENSG00000SLC17A8   | DFNA25 VC           | solute carrier protein-coding       |       |
| chr1-1612 | 8.929609 | 0.204403 | 0.780694 | 0.261823 | 0.793458 | 0.981636 | chr1  | 16123301 | 16134900 | + | 0 | NA | intron (NMIRb SINE  | 26969 NM_001325   | 1969      | Hs.17159       | NM_004431         | ENSG00000EPHA4     | ARCC2 CTF           | EPH receptor protein-coding         |       |
| chr1-5868 | 8.929609 | 0.204403 | 0.780694 | 0.261823 | 0.793458 | 0.981636 | chr1  | 58693114 | 58695381 | + | 0 | NA | intron (NML2c LINE  | 5815 NM_001088    | 114803    | Hs.744921      | NM_001088         | ENSG00000MYSM1     | 2A-DUB 2Myb         | like, protein-coding                |       |
| chr11-958 | 8.929609 | 0.204403 | 0.780694 | 0.261823 | 0.793458 | 0.981636 | chr11 | 959673   | 961465   | + | 0 | NA | intron (NAluSp SIN  | 34699 NM_012305   | 161       | Hs.19121       | NM_012305         | ENSG00000AP2A2     | ADTAB CLF           | adaptor protein-coding              |       |
| chr11-188 | 8.929609 | 0.204403 | 0.780694 | 0.261823 | 0.793458 | 0.981636 | chr11 | 18500017 | 18502804 | + | 0 | NA | intron (NLMMA4A LI  | 25532 NM_006292   | 7251      | Hs.52351       | NM_006292         | ENSG00000TSG101    | TSG10 VPS           | tumor suppressor protein-coding     |       |
| chr13-978 | 8.929609 | 0.204403 | 0.780694 | 0.261823 | 0.793458 | 0.981636 | chr13 | 97993030 | 97995554 | + | 0 | NA | intron (NAluSq2 SI  | 40617 NM_002271   | 3843      | Hs.71259       | NM_002271         | ENSG00000IPO5      | IMB3 KPNE           | importin protein-coding             |       |
| chr14-94  | 8.929609 | 0.204403 | 0.780694 | 0.261823 | 0.793458 | 0.981636 | chr14 | 94058062 | 94062343 | + | 0 | NA | exon (NM exon (NM   | 21000 NM_020414   | 57062     | Hs.51032       | NM_020414         | ENSG00000DDX24     | -                   | DEAD-box protein-coding             |       |
| chr15-238 | 8.929609 | 0.204403 | 0.780694 | 0.261823 | 0.793458 | 0.981636 | chr15 | 23009104 | 23011211 | + | 0 | NA | intron (Nintron (N  | -29259 NM_001324  | 23191     | Hs.26704       | NM_014608         | ENSG00000CYFIP1    | P140SR              | A-lycopolysaccharide protein-coding |       |
| chr16-518 | 8.929609 | 0.204403 | 0.780694 | 0.261823 | 0.793458 | 0.981636 | chr16 | 55579    | 59142    | + | 0 | NA | TTS (NM_CTTT        | 3532 NM_024571    | 79622     | Hs.15277       | NM_024571         | ENSG00000SNRNP25   | C16orf33            | small nucleolar protein-coding      |       |
| chr16-255 | 8.929609 | 0.204403 | 0.780694 | 0.261823 | 0.793458 | 0.981636 | chr16 | 21981487 | 21984560 | + | 0 | NA | TTS (NM_CTTT        | 18093 NM_001363   | 255762    | Hs.98244       | NM_173800         | ENSG00000PDZD9     | C16orf65            | PDZ domain protein-coding           |       |
| chr16-848 | 8.929609 | 0.204403 | 0.780694 | 0.261823 | 0.793458 | 0.981636 | chr16 | 84319759 | 84329026 | + | 0 | NA | intron (Nintron (N  | 29514 NM_021197   | 58189     | Hs.36688       | NM_021197         | ENSG00000WFD1      | W20                 | WAP four-protein-coding             |       |
| chr17-402 | 8.929609 | 0.204403 | 0.780694 | 0.261823 | 0.793458 | 0.981636 | chr17 | 40232673 | 40234999 | + | 0 | NA | intron (NAluSp SIN  | 14532 NM_133264   | 147179    | Hs.42162       | NM_133264         | ENSG00000WIPF2     | WICH WIRE           | WAS/WASL protein-coding             |       |
| chr17-628 | 8.929609 | 0.204403 | 0.780694 | 0.261823 | 0.793458 | 0.981636 | chr17 | 62674334 | 62674334 | + | 0 | NA | exon (NM exon (NM   | -30320 NR_147888  | 1.01E+08  | Hs.44626       | NR_147888         | ENSG00000LOC105371 | -                   | uncharacterized RNA                 |       |
| chr19-398 | 8.929609 | 0.204403 | 0.780694 | 0.261823 | 0.793458 | 0.981636 | chr19 | 39393591 | 39394405 | + | 0 | NA | intron (Nintron (N  | 2620 NR_133918    | 55588     | Hs.61154       | NM_017592         | ENSG00000MED29     | IXL MED2            | mediator protein-coding             |       |
| chr2-1608 | 8.929609 | 0.204403 | 0.780694 | 0.261823 | 0.793458 | 0.981636 | chr2  | 1.6E+08  | 1.6E+08  | + | 0 | NA | intron (NAluJo SIN  | -30466 NR_103777  | 1.01E+08  | Hs.72953       | NR_103777         | ENSG00000LINC02478 | -                   | long intergenic RNA                 |       |
| chr20-388 | 8.929609 | 0.204403 | 0.780694 | 0.261823 | 0.793458 | 0.981636 | chr20 | 38500330 | 38501344 | + | 0 | NA | intron (NTigger L   | -15726 NR_039608  | 1.01E+08  | NR_039608      | ENSG00000MIR54802 | -                  | microRNA            | ncRNA                               |       |
| chr22-208 | 8.929609 | 0.204403 | 0.780694 | 0.261823 | 0.793458 | 0.981636 | chr22 | 20582579 | 20585246 | + | 0 | NA | intron (Nintron (N  | 75865 NM_001292   | 51586     | Hs.51742       | NM_015888         | ENSG00000MED15     | ARC105 C            | mediator protein-coding             |       |
| chr3-1708 | 8.929609 | 0.204403 | 0.780694 | 0.261823 | 0.793458 | 0.981636 | chr3  | 1.7E+08  | 1.7E+08  | + | 0 | NA | intron (NAluSz SIN  | 67412 NM_002744   | 5584      | Hs.47819       | NM_002744         | ENSG00000PRKCI     | DXS1179E            | protein kinase protein-coding       |       |
| chr7-4984 | 8.929609 | 0.204403 | 0.780694 | 0.261823 | 0.793458 | 0.981636 | chr7  | 4984187  | 4990936  | + | 0 | NA | intron (Nintron (N  | 13576 NR_023388   | 441191    | Hs.52063       | NR_023388         | ENSG00000RNF216P1  | RNF216L             | tring finger pseudo                 |       |
| chr7-4404 | 8.929609 | 0.204403 | 0.780694 | 0.261823 | 0.793458 | 0.981636 | chr7  | 44049707 | 44051167 | + | 0 | NA | intron (Nintron (N  | -1329 NR_106898   | 1.02E+08  | NR_106898      | ENSG00000MIR6837  | -                  | hsa-mir-6           | microRNA                            | ncRNA |
| chr7-994  | 8.929609 | 0.204403 | 0.780694 | 0.261823 | 0.793458 | 0.981636 | chr7  | 99401766 | 99403516 | + | 0 | NA | intron (NAluSc8 SI  | 5956 NM_004891    | 11333     | Hs.63229       | NM_014891         | ENSG00000PDAP1     | HASPP28 T           | PDGFA as protein-coding             |       |
| chr8-4218 | 8.929609 | 0.204403 | 0.780694 | 0.261823 | 0.793458 | 0.981636 | chr8  | 42188134 | 42188738 | + | 0 | NA | intron (NTCATCTA    | 20686 NM_009033   | 5327      | Hs.49105       | NM_009033         | ENSG00000PLAT      | T-PA TPA            | plasminogen protein-coding          |       |
| chr16-568 | 8.368308 | 0.212012 | 0.809857 | 0.261789 | 0.793484 | 0.981636 | chr16 | 56395572 | 56397659 | + | 0 | NA | intron (NLMIPA5 LI  | 28374 NM_001322   | 267       | Hs.29513       | NM_001144         | ENSG00000CAMFR     | GP78 RNF            | 4 autocrine protein-coding          |       |
| chr19-320 | 8.368308 | 0.212012 | 0.809857 | 0.261789 | 0.793484 | 0.981636 | chr19 | 32635911 | 32636170 | + | 0 | NA | intron (Nintron (N  | -27571 NR_145718  | 1.1E+08   | NR_145718      | ENSG00000SNORA68B | -                  | small nucleolar RNA |                                     |       |
| chr5-160  | 7.359416 | 0.226016 | 0.863637 | 0.261702 | 0.793551 | 0.981636 | chr5  | 1.6E+08  | 1.6E+08  | + | 0 | NA | intron (NLA_C_Mam   | 29326 NM_000314   | 7265      | Hs.51971       | NM_000314         | ENSG00000TTC1      | TPR1                | tetratricopeptide-coding            |       |
| chr18-488 | 6.694042 | -0.24834 | 0.949113 | -0.26166 | 0.793586 | 0.981636 | chr18 | 48559701 | 48560024 | + | 0 | NA | intron (NLMIPB4 LI  | 20831 NM_001142   | 9811      | Hs.14523       | CNM_014772        | ENSG00000CTIF      | Gm672 KI            | cap binding protein-coding          |       |
| chr7-3254 | 7.856004 | 0.220404 | 0.842673 | 0.261553 | 0.793666 | 0.981636 | chr7  | 32548905 | 32550070 | + | 0 | NA | intron (NAluJb SIN  | 53998 NM_015066   | 23080     | Hs.12805       | NM_015066         | ENSG00000AVL9      | KIAA0241            | AVL9 cell protein-coding            |       |
| chr12-428 | 6.847112 | 0.236528 | 0.904424 | 0.261523 | 0.793689 | 0.981636 | chr12 | 42356273 | 42356494 | + | 0 | NA | intron (NLTR40b LI  | 24585 NM_001364   | 51535     | Hs.44415       | NM_016488         | ENSG00000PPHLN1    | CR HSPC2            | periplakin protein-coding           |       |
| chr1-2368 | 8.376166 | 0.210282 | 0.804353 | 0.26143  | 0.793761 | 0.981636 | chr1  | 2.37E+08 | 2.37E+08 | + | 0 | NA | intron (NLMIME3B LI | 55729 NM_001291   | 4548      | Hs.49818       | NM_000254         | ENSG00000MTR       | HMG MS C            | 5-methyl protein-coding             |       |
| chr16-288 | 8.376166 | 0.210282 | 0.804353 | 0.26143  | 0.793761 | 0.981636 | chr16 | 28960090 | 28960787 | + | 0 | NA | intron (NMLT1C-int  | 1855 NR_039742    | 1.01E+08  | NR_039742      | ENSG00000MIR4517  | -                  | mir-4517            | microRNA                            | ncRNA |
| chr17-568 | 8.376166 | 0.210282 | 0.804353 | 0.26143  | 0.793761 | 0.981636 | chr17 | 56985422 | 56986255 | + | 0 | NA | intron (Nintron (N  | 7841 NM_021622    | 59342     | Hs.51495       | CNM_021622        | ENSG00000SCPEP1    | HSCP1 RI            | Serine protease protein-coding      |       |
| chr2-2248 | 8.376166 | 0.210282 | 0.804353 | 0.26143  | 0.793761 | 0.981636 | chr2  | 2.25E+08 | 2.25E+08 | + | 0 | NA | exon (NM exon (NM   | 66947 NM_001257   | 8452      | Hs.37228       | NM_003590         | ENSG00000CUL3      | CUL-3 PH            | cullin 3 protein-coding             |       |
| chr5-134  | 8.376166 | 0.210282 | 0.804353 | 0.26143  | 0.793761 | 0.981636 | chr5  | 1.34E+08 | 1.34E+08 | + | 0 | NA | intron (NLMIME3G LI | 5849 NM_003337    | 7320      | Hs.61209       | NM_003337         | ENSG00000UBEZB     | E2-17kDa            | ubiquitin protein-coding            |       |
| chr       |          |          |          |          |          |          |       |          |          |   |   |    |                     |                   |           |                |                   |                    |                     |                                     |       |



|           |          |          |          |          |          |          |       |          |          |   |   |    |                     |          |            |          |                    |                                |                                            |                                           |
|-----------|----------|----------|----------|----------|----------|----------|-------|----------|----------|---|---|----|---------------------|----------|------------|----------|--------------------|--------------------------------|--------------------------------------------|-------------------------------------------|
| chr10-89c | 9.392916 | 0.197823 | 0.759589 | 0.260434 | 0.794529 | 0.981636 | chr10 | 89007362 | 89012871 | + | 0 | NA | intron (Nintron (N  | -17141   | NR_028371  | 1E+08    | Hs.24413cNR_028371 | FAS-AS1                        | FAS-AS1 FAS antisncRNA                     |                                           |
| chr11-117 | 9.392916 | 0.197823 | 0.759589 | 0.260434 | 0.794529 | 0.981636 | chr11 | 1.17E+08 | 1.17E+08 | + | 0 | NA | exon (NM exon (NM   | -11293   | NM_00104C  | 51092    | Hs.712144NM_01599c | ENSG00000                      | S1D1 trarprotein-coding                    |                                           |
| chr15-40f | 9.392916 | 0.197823 | 0.759589 | 0.260434 | 0.794529 | 0.981636 | chr15 | 40978716 | 40981212 | + | 0 | NA | non-codiron-codir   | 26493    | NM_00114Z  | 79094    | Hs.15556c          | ENSG00000                      | CHAC1 - ChaC glutprotein-coding            |                                           |
| chr17-43f | 9.392916 | 0.197823 | 0.759589 | 0.260434 | 0.794529 | 0.981636 | chr17 | 43521399 | 43524234 | + | 0 | NA | intron (NAluXs SI   | 7619     | NM_001261  | 2118     | Hs.43405c          | ENSG00000                      | ETV4 E1A-F E1A/ETS variaprotein-coding     |                                           |
| chr2-1914 | 9.392916 | 0.197823 | 0.759589 | 0.260434 | 0.794529 | 0.981636 | chr2  | 1.91E+08 | 1.91E+08 | + | 0 | NA | exon (NM exon (NM   | 168682   | NM_001161  | 4110     | Hs.43962c          | ENSG00000                      | MYO1B MMI-alpha myosin I protein-coding    |                                           |
| chr2-2267 | 9.392916 | 0.197823 | 0.759589 | 0.260434 | 0.794529 | 0.981636 | chr2  | 2.27E+08 | 2.27E+08 | + | 0 | NA | intron (Nintron (N  | 49083    | NM_005544  | 3667     | Hs.47150c          | ENSG00000                      | IRS1 HIRS-2 insulin I protein-coding       |                                           |
| chr5-139f | 9.392916 | 0.197823 | 0.759589 | 0.260434 | 0.794529 | 0.981636 | chr5  | 1.39E+08 | 1.39E+08 | + | 0 | NA | 3' UTR (N3' UTR (N  | -11679   | NR_10983C  | 51247    | Hs.396644NM_01648c | ENSG00000                      | PAIP2 PAIP-2 P poly(A) t protein-coding    |                                           |
| chr5-7104 | 9.392916 | 0.197823 | 0.759589 | 0.260434 | 0.794529 | 0.981636 | chr5  | 71040932 | 71041347 | + | 0 | NA | intron (NMER63B DN  | -16025   | NM_02289Z  | 4671     | Hs.646951NM_00453c | ENSG00000                      | NAIP BIRC1 N FLNLR faml protein-coding     |                                           |
| chr17-187 | 10.95525 | 0.185483 | 0.712352 | 0.260381 | 0.79457  | 0.981636 | chr17 | 18797497 | 18800080 | + | 0 | NA | intron (Nintron (N  | 9753     | NM_00131f  | 51030    | Hs.87295           | NR_01607c                      | ENSG00000                                  | TVP23B CGI-148 F trans-gol protein-coding |
| chr11-202 | 8.88847  | 0.202882 | 0.779325 | 0.260331 | 0.794609 | 0.981636 | chr11 | 202834   | 205717   | + | 0 | NA | 3' UTR (N3' UTR (N  | 3147     | NM_00109E  | 51272    | Hs.41441c          | ENSG00000                      | BET1L BET1L GC bet1 gol protein-coding     |                                           |
| chr11-122 | 8.88847  | 0.202882 | 0.779325 | 0.260331 | 0.794609 | 0.981636 | chr11 | 1.22E+08 | 1.22E+08 | + | 0 | NA | intron (NAluJr SIN  | 40719    | NR_029671  | 406911   | NR_029671          | ENSG00000                      | MIR125B1                                   | MIRN125B1 microRNA ncRNA                  |
| chr13-331 | 8.88847  | 0.202882 | 0.779325 | 0.260331 | 0.794609 | 0.981636 | chr13 | 33158252 | 33159179 | + | 0 | NA | intron (Nintron (N  | 27376    | NM_00124z  | 90627    | Hs.156551NM_052851 | ENSG00000                      | STARD13 ARHGAP37 StAR relaprotein-coding   |                                           |
| chr20-354 | 8.88847  | 0.202882 | 0.779325 | 0.260331 | 0.794609 | 0.981636 | chr20 | 35462371 | 35462974 | + | 0 | NA | intron (Nintron (N  | 2689     | NM_00131E  | 11190    | Hs.44397c          | ENSG00000                      | CEP250 C-NAP1 CE centrosome protein-coding |                                           |
| chr20-45f | 8.88847  | 0.202882 | 0.779325 | 0.260331 | 0.794609 | 0.981636 | chr20 | 45896629 | 45897259 | + | 0 | NA | intron (Nintron (N  | -5657    | NM_00074E  | 140825   | Hs.517094NM_08074c | ENSG00000                      | NEURL2 C20orf16 neuralize protein-coding   |                                           |
| chr9-122f | 8.88847  | 0.202882 | 0.779325 | 0.260331 | 0.794609 | 0.981636 | chr9  | 1.23E+08 | 1.23E+08 | + | 0 | NA | 3' UTR (N3' UTR (N  | 5304     | NR_003071  | 692206   | Hs.69325c          | NR_003071                      | ENSG00000                                  | SNORD90 HBII-295 small nucsnRNA           |
| chr3-167f | 8.209688 | -0.21808 | 0.837969 | -0.26024 | 0.794676 | 0.981636 | chr3  | 1.68E+08 | 1.68E+08 | + | 0 | NA | IntergeniL1MC4 LIN  | -18891   | NM_00134E  | 511790   | Hs.21376c          | NM_17882c                      | ENSG00000                                  | WDR49 - WD repeat protein-coding          |
| chr1-354f | 9.897362 | 0.193293 | 0.742823 | 0.260214 | 0.794699 | 0.981636 | chr1  | 35403344 | 35403560 | + | 0 | NA | intron (NAluXs SI   | -37375   | NR_04665f  | 1.01E+08 | Hs.585397NR_04665c | ENSG00000                      | ZMY4-AS1-ZMY4A antncRNA                    |                                           |
| chr6-5714 | 9.897362 | 0.193293 | 0.742823 | 0.260214 | 0.794699 | 0.981636 | chr6  | 57147577 | 57148679 | + | 0 | NA | exon (NM exon (NM   | 57147577 | NR_11074Z  | 1.02E+08 | Hs.70571c          | NR_11074Z                      | ZNF451-AC-ZNF451 rencRNA                   |                                           |
| chr1-666f | 8.639713 | -0.20542 | 0.789557 | -0.26017 | 0.794729 | 0.981636 | chr1  | 66698268 | 66700588 | + | 0 | NA | intron (N L2 LINE L | -53031   | NM_15266E  | 200132   | Hs.47922c          | NM_15266E                      | ENSG00000                                  | TCTEX1D1 - Tctex1 d protein-coding        |
| chr10-121 | 8.639713 | -0.20542 | 0.789557 | -0.26017 | 0.794729 | 0.981636 | chr10 | 12156952 | 12159887 | + | 0 | NA | intron (Nintron (N  | -27603   | NR_03969f  | 1.01E+08 | NR_03969f          | ENSG00000                      | MIR548A                                    | - microRNA ncRNA                          |
| chr10-131 | 8.639713 | -0.20542 | 0.789557 | -0.26017 | 0.794729 | 0.981636 | chr10 | 1.32E+08 | 1.32E+08 | + | 0 | NA | intron (Nintron (N  | 11649    | NM_00405Z  | 664      | Hs.14487c          | NR_00405Z                      | ENSG00000                                  | BNI3P3 NIP3 - BCL2 int protein-coding     |
| chr12-69f | 8.639713 | -0.20542 | 0.789557 | -0.26017 | 0.794729 | 0.981636 | chr12 | 6965003  | 6969328  | + | 0 | NA | TTS (NR_C TTS (NR_C | 441      | NR_00301C  | 677777   | Hs.68963c          | NR_00301C                      | ENSG00000                                  | SCARNA12 U89 small Ca ncRNA               |
| chr12-881 | 8.639713 | -0.20542 | 0.789557 | -0.26017 | 0.794729 | 0.981636 | chr12 | 88108322 | 88108826 | + | 0 | NA | intron (Nintron (N  | 33642    | NM_025114  | 80184    | Hs.150444NM_025114 | ENSG00000                      | CEP290 3H11Ag BE centrosome protein-coding |                                           |
| chr12-132 | 8.639713 | -0.20542 | 0.789557 | -0.26017 | 0.794729 | 0.981636 | chr12 | 1.33E+08 | 1.33E+08 | + | 0 | NA | intron (N Kangal L  | -28696   | NM_015114  | 23141    | Hs.65462c          | NM_015114                      | ENSG00000                                  | ANKLE2 KIAA0692 ankyrin I protein-coding  |
| chr14-311 | 8.639713 | -0.20542 | 0.789557 | -0.26017 | 0.794729 | 0.981636 | chr14 | 31104789 | 31106832 | + | 0 | NA | intron (Nintron (N  | 79167    | NM_001254  | 11154    | Hs.293411NM_00707c | ENSG00000                      | AP451 AP47B CL adaptor I protein-coding    |                                           |
| chr14-54f | 8.639713 | -0.20542 | 0.789557 | -0.26017 | 0.794729 | 0.981636 | chr14 | 54789049 | 54791126 | + | 0 | NA | 3' UTR (N3' UTR (N  | 35255    | NM_001161  | 23034    | Hs.98259           | NR_01558c                      | ENSG00000                                  | SAMD4A SAMD4 SM sterile ep protein-coding |
| chr2-3654 | 8.639713 | -0.20542 | 0.789557 | -0.26017 | 0.794729 | 0.981636 | chr2  | 36544183 | 36544161 | + | 0 | NA | intron (Nintron (N  | 55846    | NM_00104Z  | 9637     | Hs.25856c          | ENSG00000                      | FEZ2 5846 SM fasciculation protein-coding  |                                           |
| chr2-127f | 8.639713 | -0.20542 | 0.789557 | -0.26017 | 0.794729 | 0.981636 | chr2  | 1.27E+08 | 1.27E+08 | + | 0 | NA | intron (NAluJo SIN  | 23991    | NM_00130z  | -2071    | Hs.46987c          | NR_00012c                      | ENSG00000                                  | ERC33 BTF2 GTF ERC3 exciprotein-coding    |
| chr20-331 | 8.639713 | -0.20542 | 0.789557 | -0.26017 | 0.794729 | 0.981636 | chr20 | 3310710  | 3312021  | + | 0 | NA | intron (NAluJo SIN  | -72175   | NM_001174  | 83959    | Hs.105607NM_03203c | ENSG00000                      | SLC4A11 BTRP1 CDP solute ep protein-coding |                                           |
| chr20-17f | 8.639713 | -0.20542 | 0.789557 | -0.26017 | 0.794729 | 0.981636 | chr20 | 17613859 | 17619815 | + | 0 | NA | exon (NM exon (NM   | 46762    | NM_00687C  | 11034    | Hs.30419c          | NR_00687C                      | ENSG00000                                  | CALD1 ACD ATP destrin, protein-coding     |
| chr4-113f | 8.639713 | -0.20542 | 0.789557 | -0.26017 | 0.794729 | 0.981636 | chr4  | 1.14E+08 | 1.14E+08 | + | 0 | NA | intron (Nintron (N  | 222391   | NM_001354  | 287      | Hs.620557NM_00114c | ENSG00000                      | ANK2 ANK-2 LQ ankyrin 2 protein-coding     |                                           |
| chr4-122  | 8.639713 | -0.20542 | 0.789557 | -0.26017 | 0.794729 | 0.981636 | chr4  | 1.22E+08 | 1.22E+08 | + | 0 | NA | intron (Nintron (N  | -45003   | NM_13924Z  | 132612   | Hs.518957NM_13924c | ENSG00000                      | ADADD Tenr adenosine protein-coding        |                                           |
| chr4-168f | 8.639713 | -0.20542 | 0.789557 | -0.26017 | 0.794729 | 0.981636 | chr4  | 1.69E+08 | 1.69E+08 | + | 0 | NA | intron (Nintron (N  | 88514    | NM_001367  | 23022    | Hs.15122c          | NM_016081                      | ENSG00000                                  | PALLD CGI-151 cadallan, protein-coding    |
| chr5-1284 | 8.639713 | -0.20542 | 0.789557 | -0.26017 | 0.794729 | 0.981636 | chr5  | 1.28E+08 | 1.28E+08 | + | 0 | NA | intron (NAluY SINE  | 68896    | NM_00199f  | 2201     | Hs.519294NM_00199c | ENSG00000                      | FBN2 CCA DA9 F fibrillin I protein-coding  |                                           |
| chr7-102f | 8.639713 | -0.20542 | 0.789557 | -0.26017 | 0.794729 | 0.981636 | chr7  | 1.02E+08 | 1.02E+08 | + | 0 | NA | intron (NAluJb SIN  | 8487     | NM_00114E  | 729597   | Hs.48944c          | NR_00114c                      | ENSG00000                                  | SPDYE6 speedy RI protein-coding           |
| chr7-134f | 8.639713 | -0.20542 | 0.789557 | -0.26017 | 0.794729 | 0.981636 | chr7  | 1.35E+08 | 1.35E+08 | + | 0 | NA | exon (NM exon (NM   | 42309    | NM_003314C | 800      | Hs.49020c          | NR_003314C                     | ENSG00000                                  | CALD1 CDM H-CAL caldesmon protein-coding  |
| chr7-139f | 8.639713 | -0.20542 | 0.789557 | -0.26017 | 0.794729 | 0.981636 | chr7  | 1.4E+08  | 1.4E+08  | + | 0 | NA | intron (Nintron (N  | 58327    | NM_00108C  | 154790   | Hs.57806           | NR_00108C                      | ENSG00000                                  | CLEC2L - C-type I protein-coding          |
| chr7-140f | 8.639713 | -0.20542 | 0.789557 | -0.26017 | 0.794729 | 0.981636 | chr7  | 1.41E+08 | 1.41E+08 | + | 0 | NA | intron (Nintron (N  | 29134    | NR_13447f  | 27147    | Hs.6385            | NR_01568c                      | ENSG00000                                  | DENN2DA FAM3D1 D DENN2 protein-coding     |
| chr9-697f | 8.639713 | -0.20542 | 0.789557 | -0.26017 | 0.794729 | 0.981636 | chr9  | 69722611 | 69724578 | + | 0 | NA | exon (NM exon (NM   | 36417    | NR_15951f  | 375743   | Hs.74419c          | NR_00109c                      | ENSG00000                                  | PTAR1 - protein I protein-coding          |
| chr20-35f | 7.367274 | 0.224029 | 0.861474 | 0.260053 | 0.794823 | 0.981636 | chr20 | 3591250  | 3591937  | + | 0 | NA | intron (NMER76 LTF  | 71806    | NM_02213c  | 64096    | Hs.30202c          | NR_02213c                      | ENSG00000                                  | GFR4 - GDNF fami protein-coding           |
| chr7-128f | 7.367274 | 0.224029 | 0.861474 | 0.260053 | 0.794823 | 0.981636 | chr7  | 1.29E+08 | 1.29E+08 | + | 0 | NA | IntergeniAluJb SIN  | -77248   | NR_02436E  | 402483   | Hs.72235c          | NR_00103968Z                   | LINC0100C - long intencRNA                 |                                           |
| chr1-153f | 8.384024 | 0.208537 | 0.802663 | 0.259807 | 0.795013 | 0.981636 | chr1  | 1.56E+08 | 1.56E+08 | + | 0 | NA | intron (N L1MC4 LIN | -12514   | NR_024117  | 1E+08    | Hs.656361NR_024117 | MSTO2P - MSTO2 misato f pseudo |                                            |                                           |
| chr11-43f | 8.384024 | 0.208537 | 0.802663 | 0.259807 | 0.795013 | 0.981636 | chr11 | 43320683 | 43321467 | + | 0 | NA | intron (Nintron (N  | 9079     | NM_00114Z  | 8539     | Hs.435771NM_00659c | ENSG00000                      | API5 AAC-11 A apoptosis protein-coding     |                                           |
| chr11-77f | 8.384024 | 0.208537 | 0.802663 | 0.259807 | 0.795013 | 0.981636 | chr11 | 77921547 | 77921906 | + | 0 | NA | intron (Nintron (N  | 72942    | NM_00354f  | 92103    | Hs.53372c          | NR_00354f                      | ENSG00000                                  | INTS4 INT4 MSTC integrat protein-coding   |
| chr12-48f | 8.384024 | 0.208537 | 0.802663 | 0.259807 | 0.795013 | 0.981636 | chr12 | 48922045 | 48924191 | + | 0 | NA | TTS (NM_C TTS (NM_C | 1875     | NM_00114z  | 51035    | Hs.65510c          | NR_016594c                     | ENSG00000                                  | FKBP11 FKBP19 FKBP prol protein-coding    |
| chr13-45f | 8.384024 | 0.208537 | 0.802663 | 0.259807 | 0.795013 | 0.981636 | chr13 | 45966802 | 45968934 | + | 0 | NA | exon (NM exon (NM   | 84878    | NM_00133C  | 23091    | Hs.13610c          | NR_01507c                      | ENSG00000                                  | CZCH13 KIAA0853 zinc fing protein-coding  |
| chr15-654 | 8.384024 | 0.208537 | 0.802663 | 0.259807 | 0.795013 | 0.981636 | chr15 | 65488977 | 65490287 | + | 0 | NA | intron (NAluY SINE  | 27642    | NM_19796C  | 54878    | Hs.45860c          | NR_01774c                      | ENSG00000                                  | DPP8 DP8 DPRP- dipeptidyl protein-coding  |
| chr16-111 | 8.384024 | 0.208537 | 0.802663 | 0.259807 | 0.795013 | 0.981636 | chr16 | 11732272 | 11734494 | + | 0 | NA | intron (NAluYf1 SI  | 9474     | NM_00130z  | 51061    | Hs.313847NM_015914 | ENSG00000                      | TXNDC11 EFP1 thiredoxin protein-coding     |                                           |
| chr18-307 | 8.384024 | 0.208537 | 0.802663 | 0.259807 | 0.795013 | 0.981636 | chr18 | 3010781  | 3011739  | + | 0 | NA | intron (Nintron (N  | 687      | NM_01464c  | 9663     | Hs.13234c          | NR_01464c                      | ENSG00000                                  | LPIN2 - lipin 2 protein-coding            |
| chr5-737f | 8.384024 | 0.208537 | 0.802663 | 0.259807 | 0.795013 | 0.981636 | chr5  | 73780194 | 73781366 | + | 0 | NA | intron (Nintron (N  | -32766   | NM_001244  | 64283    | Hs.482521NM_00108c | ENSG00000                      | ARHGEP28 RGNF RF Rho guan protein-coding   |                                           |
| chr6-433f | 8.384024 | 0.208537 | 0.802663 | 0.259807 |          |          |       |          |          |   |   |    |                     |          |            |          |                    |                                |                                            |                                           |



|                    |           |          |           |          |          |       |          |          |        |                      |                  |                     |                      |                          |                              |
|--------------------|-----------|----------|-----------|----------|----------|-------|----------|----------|--------|----------------------|------------------|---------------------|----------------------|--------------------------|------------------------------|
| chr19-361.8.170399 | -0.20981  | 0.811822 | -0.25844  | 0.796067 | 0.981636 | chr19 | 3611054  | 3612416  | + 0 NA | 3' UTR (N3' UTR (N   | 4488 NR_038866   | 404665 Hs. 719722   | ENSG000003CACTIN-AS1 | C9orf29-CTACTIN          | ar ncRNA                     |
| chr2-5395.8.170399 | -0.20981  | 0.811822 | -0.25844  | 0.796067 | 0.981636 | chr2  | 53930109 | 53932791 | + 0 NA | intron (Nintron (N   | 39543 NM_014614  | 23198 Hs. 413801    | ENSG000003PSMF4      | PA200                    | proteasome protein-coding    |
| chr2-1357.8.170399 | -0.20981  | 0.811822 | -0.25844  | 0.796067 | 0.981636 | chr2  | 1.36E+08 | 1.36E+08 | + 0 NA | intron (NAluJb SIN   | -6394 NR_163478  | 1.08E+08 Hs. 591242 | ENSG000003LOC107985  |                          | uncharacterized ncRNA        |
| chr2-1717.8.170399 | -0.20981  | 0.811822 | -0.25844  | 0.796067 | 0.981636 | chr2  | 1.72E+08 | 1.72E+08 | + 0 NA | intron (Nintron (N   | 42787 NM_00132C  | 1781 Hs. 546256     | ENSG000003DYNCL12    | DIC74 DNC                | dynein cy protein-coding     |
| chr20-444.8.170399 | -0.20981  | 0.811822 | -0.25844  | 0.796067 | 0.981636 | chr20 | 44488091 | 44491069 | + 0 NA | 3' UTR (N3' UTR (N   | 13706 NM_001261  | 79183 Hs. 283866    | ENSG000003TTPAL      | C2orf121                 | alpha cy protein-coding      |
| chr20-588.8.170399 | -0.20981  | 0.811822 | -0.25844  | 0.796067 | 0.981636 | chr20 | 58902783 | 58905456 | + 0 NA | intron (Nintron (N   | 11956 NR_132272  | 2778 Hs. 125898     | ENSG000003GNAS       | AHO C2orf                | GNAS comp protein-coding     |
| chr3-1014.8.170399 | -0.20981  | 0.811822 | -0.25844  | 0.796067 | 0.981636 | chr3  | 10146483 | 10147941 | + 0 NA | intron (NAluSc8 S1   | 5434 NM_198156   | 7428 Hs. 517792     | ENSG000003VHL        | HRAA1 RCV                | Hippe protein-coding         |
| chr6-1511.8.170399 | -0.20981  | 0.811822 | -0.25844  | 0.796067 | 0.981636 | chr6  | 1.51E+08 | 1.51E+08 | + 0 NA | intron (NAluSg7 S1   | 9541 NM_00135C   | 25902 Hs. 591342    | ENSG000003MTHFD1L    | HTF5FDC1                 | methylenase protein-coding   |
| chr7-1786.8.170399 | -0.20981  | 0.811822 | -0.25844  | 0.796067 | 0.981636 | chr7  | 17867621 | 17868130 | + 0 NA | intron (Nintron (N   | 72619 NM_00135C  | 23161 Hs. 487648    | ENSG000003SNX13      | RGS-PX1                  | sorting r protein-coding     |
| chr7-4366.8.170399 | -0.20981  | 0.811822 | -0.25844  | 0.796067 | 0.981636 | chr7  | 43680054 | 43612051 | + 0 NA | intron (Nintron (N   | 26944 NM_00476C  | 9263 Hs. 709482     | ENSG000003STK17A     | DRAK1                    | serine/th protein-coding     |
| chr7-7506.8.170399 | -0.20981  | 0.811822 | -0.25844  | 0.796067 | 0.981636 | chr7  | 75062761 | 75064643 | + 0 NA | intron (NAluSx1 S1   | 10100 NM_00136C  | 81554 Hs. 529622    | ENSG000003RCC1L      | WBSRCR16                 | RCC1 like protein-coding     |
| chr7-1514.8.170399 | -0.20981  | 0.811822 | -0.25844  | 0.796067 | 0.981636 | chr7  | 1.51E+08 | 1.51E+08 | + 0 NA | intron (NMER58B DN   | 30203 NM_005614  | 6009 Hs. 283521     | ENSG000003RHEB       | RHEB2                    | Ras homol protein-coding     |
| chr8-1188.8.170399 | -0.20981  | 0.811822 | -0.25844  | 0.796067 | 0.981636 | chr8  | 1.19E+08 | 1.19E+08 | + 0 NA | intron (Nintron (N   | 6228 NM_00254E   | 4982 Hs. 81791      | ENSG000003TNFRSF11E  | OC1F OPC                 | TNF recee protein-coding     |
| chr9-3758.8.170399 | -0.20981  | 0.811822 | -0.25844  | 0.796067 | 0.981636 | chr9  | 37588103 | 37588702 | + 0 NA | TTS (NM_C TTS (NM_C  | 4195 NM_001001   | 401505 Hs. 130774   | ENSG000003TOMM5      | C9orf105                 | translocat protein-coding    |
| chr1-8882.4.419089 | -0.28086  | 1.086927 | -0.2584   | 0.796096 | 0.981636 | chr1  | 88835064 | 88837025 | + 0 NA | 3' UTR (N3' UTR (N   | 55523 NM_001514  | 2959 Hs. 481852     | ENSG000003GTF2B      | TF2B TF1I                | general t protein-coding     |
| chr3-1805.4.419089 | -0.28086  | 1.086927 | -0.2584   | 0.796096 | 0.981636 | chr3  | 1.81E+08 | 1.81E+08 | + 0 NA | intron (NMLT1D LTF   | 24022 NM_00119C  | 131118 Hs. 230601   | ENSG000003DNAJC19    | PAM18 TJM                | DnaJ heat protein-coding     |
| chr6-8558.4.419089 | -0.28086  | 1.086927 | -0.2584   | 0.796096 | 0.981636 | chr6  | 85583263 | 85584285 | + 0 NA | intron (NLIPTA7 LTF  | 10084 NM_15381E  | 57231 Hs. 485871    | ENSG000003SNX14      | RGS-PX2                  | Sorting r protein-coding     |
| chr7-1007.4.419089 | -0.28086  | 1.086927 | -0.2584   | 0.796096 | 0.981636 | chr7  | 1.01E+08 | 1.01E+08 | + 0 NA | TTS (NM_C TTS (NM_C  | 1628 NM_005837   | 10248 Hs. 416993    | ENSG000003POPT7      | OG61003                  | POPT7 homc protein-coding    |
| chrX-1542.7.7168   | -0.21808  | 0.843973 | -0.2584   | 0.796102 | 0.981636 | chrX  | 1.54E+08 | 1.54E+08 | + 0 NA | intron (Nintron (N   | 17583 NM_00111C  | 2316 Hs. 195464     | ENSG000003FLNA       | ABP-280                  | filamin A protein-coding     |
| chr3-1134.11.41856 | -0.20982  | 0.700296 | -0.258351 | 0.796136 | 0.981636 | chr3  | 11348165 | 11349130 | + 0 NA | intron (NLTR12 LTF   | 76250 NM_001144  | 10533 Hs. 38032     | ENSG000003ATG7       | APG7-LIKE                | autophagy protein-coding     |
| chr1-2331.8.631855 | -0.20386  | 0.78938  | -0.25826  | 0.796209 | 0.981636 | chr1  | 23315796 | 23321583 | + 0 NA | exon (NM_exon (NM    | 25595 NM_001102  | 10236 Hs. 373736    | ENSG000003HNRNP      | HNRNP                    | hnf heterog protein-coding   |
| chr1-5181.8.631855 | -0.20386  | 0.78938  | -0.25826  | 0.796209 | 0.981636 | chr1  | 51804915 | 51809810 | + 0 NA | intron (Nintron (N   | 29040 NR_03158C  | 1E+08 NR_03158C     | ENSG000003MIR761     | hsa-mir-7                | microRNA ncRNA               |
| chr1-1001.8.631855 | -0.20386  | 0.78938  | -0.25826  | 0.796209 | 0.981636 | chr1  | 1E+08    | 1E+08    | + 0 NA | intron (Nintron (N   | 6075 NR_13507E   | 54488 Hs. 729098    | ENSG000003TRMT13     | CCDC76                   | tRNA met protein-coding      |
| chr1-2237.8.631855 | -0.20386  | 0.78938  | -0.25826  | 0.796209 | 0.981636 | chr1  | 2.24E+08 | 2.24E+08 | + 0 NA | TTS (NM_C TTS (NM_C  | 64050 NM_00174E  | 824 Hs. 350898      | ENSG000003CAPN2      | CANP2 CAM                | calpain 2 protein-coding     |
| chr11-373.8.631855 | -0.20386  | 0.78938  | -0.25826  | 0.796209 | 0.981636 | chr11 | 3733490  | 3736593  | + 0 NA | intron (Nintron (N   | 62505 NR_157591  | 4928 Hs. 524756     | ENSG000003NUP98      | ADIR2 NUF                | nucleopor protein-coding     |
| chr11-330.8.631855 | -0.20386  | 0.78938  | -0.25826  | 0.796209 | 0.981636 | chr11 | 33058089 | 33059181 | + 0 NA | intron (Nintron (N   | -17514 NR_015451 | 283267 Hs. 533701   | ENSG000003LINC00294  | NCRNA0025                | long intncRNA                |
| chr15-596.8.631855 | -0.20386  | 0.78938  | -0.25826  | 0.796209 | 0.981636 | chr15 | 5966240  | 59666503 | + 0 NA | intron (NAluV SINE   | -6955 NM_00132C  | 2958 Hs. 512934     | ENSG000003GTF2A2     | HS118745                 | general t protein-coding     |
| chr16-587.8.631855 | -0.20386  | 0.78938  | -0.25826  | 0.796209 | 0.981636 | chr16 | 58715214 | 58716436 | + 0 NA | intron (NAluSp SIN   | 18491 NM_00128E  | 2806 Hs. 599477     | ENSG000003GOT2       | KAT4 KATI                | glutamic protein-coding      |
| chr19-441.8.631855 | -0.20386  | 0.78938  | -0.25826  | 0.796209 | 0.981636 | chr19 | 44144665 | 44145969 | + 0 NA | intron (Nintron (N   | 3663 NM_001144   | 10780 Hs. 235992    | ENSG000003ZNF234     | HZF4 ZNF2                | zinc fing protein-coding     |
| chr2-6816.8.631855 | -0.20386  | 0.78938  | -0.25826  | 0.796209 | 0.981636 | chr2  | 68160191 | 68164980 | + 0 NA | exon (NM_exon (NM    | 4697 NM_020143   | 56902 Hs. 262858    | ENSG000003PNO1       | KHRBP1                   | RFP partner c protein-coding |
| chr2-1053.8.631855 | -0.20386  | 0.78938  | -0.25826  | 0.796209 | 0.981636 | chr2  | 1.05E+08 | 1.05E+08 | + 0 NA | intron (Nintron (N   | 8751 NM_00131E   | 2274 Hs. 443687     | ENSG000003FHL2       | AAG11 DRA                | four and protein-coding      |
| chr2-414.8.631855  | -0.20386  | 0.78938  | -0.25826  | 0.796209 | 0.981636 | chr2  | 41432221 | 41437866 | + 0 NA | 3' UTR (N3' UTR (N   | 11758 NM_01627Z  | 10766 Hs. 474978    | ENSG000003TOB2       | APRO5                    | TOE transduce protein-coding |
| chr3-3335.8.631855 | -0.20386  | 0.78938  | -0.25826  | 0.796209 | 0.981636 | chr3  | 33391282 | 33392636 | + 0 NA | intron (NLa2 LINE    | 48419 NM_00112E  | 7342 Hs. 729122     | ENSG000003UBP1       | LBP-1B                   | LE upstre protein-coding     |
| chr3-1237.8.631855 | -0.20386  | 0.78938  | -0.25826  | 0.796209 | 0.981636 | chr3  | 1.24E+08 | 1.24E+08 | + 0 NA | intron (Nintron (N   | 32370 NR_04662E  | 1.01E+08 Hs. 667318 | ENSG000003MYLK-AS2   | MYLK                     | antincRNA                    |
| chr3-1321.8.631855 | -0.20386  | 0.78938  | -0.25826  | 0.796209 | 0.981636 | chr3  | 1.33E+08 | 1.33E+08 | + 0 NA | intron (NAluYk4 S1   | -67671 NM_016557 | 51554 Hs. 310512    | ENSG000003ACKR4      | CK-CR                    | -11atypical protein-coding   |
| chr3-1438.8.631855 | -0.20386  | 0.78938  | -0.25826  | 0.796209 | 0.981636 | chr3  | 1.43E+08 | 1.43E+08 | + 0 NA | intron (NLM1B7 LIN   | 16760 NM_00132C  | 23350 Hs. 596572    | ENSG000003USURP      | SRI401                   | f5A12 snRNP protein-coding   |
| chr5-5688.8.631855 | -0.20386  | 0.78938  | -0.25826  | 0.796209 | 0.981636 | chr5  | 56880346 | 56884114 | + 0 NA | exon (NM_exon (NM    | -27030 NR_13655E | 133383 Hs. 85950    | ENSG000003SETD9      | C5orf35                  | SET doma protein-coding      |
| chr5-1316.8.631855 | -0.20386  | 0.78938  | -0.25826  | 0.796209 | 0.981636 | chr5  | 1.32E+08 | 1.32E+08 | + 0 NA | intron (NLM1J LINE   | -34607 NM_001164 | 51735 Hs. 483328    | ENSG000003RAPGEF6    | KIA0011B                 | Rap guaniprotein-coding      |
| chr5-1733.8.631855 | -0.20386  | 0.78938  | -0.25826  | 0.796209 | 0.981636 | chr5  | 1.73E+08 | 1.73E+08 | + 0 NA | intron (NCPg         | 2394 NM_003714   | 8614 Hs. 233166     | ENSG000003STC2       | STC-2                    | STC stannic protein-coding   |
| chr6-5658.8.631855 | -0.20386  | 0.78938  | -0.25826  | 0.796209 | 0.981636 | chr6  | 56597043 | 56598818 | + 0 NA | exon (NM_exon (NM    | 44959 NM_01554E  | 667 Hs. 604918      | ENSG000003COST       | BP240                    | BP dystonin protein-coding   |
| chr7-3588.8.631855 | -0.20386  | 0.78938  | -0.25826  | 0.796209 | 0.981636 | chr7  | 35882332 | 35884817 | + 0 NA | intron (Nintron (N   | 82355 NM_00136C  | 989 Hs. 191346      | ENSG000003SEPTIN7    | CDC10                    | CDC septin 7 protein-coding  |
| chr7-7298.8.631855 | -0.20386  | 0.78938  | -0.25826  | 0.796209 | 0.981636 | chr7  | 72980420 | 72982152 | + 0 NA | Intergeni MLT1H2 LI1 | 11604 NR_104007  | 1E+08 Hs. 695008    | ENSG000003LOC100101  |                          | FKBP prolpseudo              |
| chr7-7648.8.631855 | -0.20386  | 0.78938  | -0.25826  | 0.796209 | 0.981636 | chr7  | 76482253 | 76482859 | + 0 NA | exon (NM_exon (NM    | 2046 NM_001102   | 113878 Hs. 187058   | ENSG000003CDTX2      | RNF58                    | deltex E3 protein-coding     |
| chr7-1212.8.631855 | -0.20386  | 0.78938  | -0.25826  | 0.796209 | 0.981636 | chr7  | 1.21E+08 | 1.21E+08 | + 0 NA | intron (Nintron (N   | -87864 NM_016087 | 51384 Hs. 272378    | ENSG000003WNT16      | Wnt                      | famil protein-coding         |
| chr8-6712.8.631855 | -0.20386  | 0.78938  | -0.25826  | 0.796209 | 0.981636 | chr8  | 67122926 | 67123754 | + 0 NA | intron (NLM1B3 LIN   | 39492 NM_001291  | 79848 Hs. 370147    | ENSG000003CSPPI1     | CSPP                     | JBT centroson protein-coding |
| chr8-1301.8.631855 | -0.20386  | 0.78938  | -0.25826  | 0.796209 | 0.981636 | chr8  | 1.3E+08  | 1.3E+08  | + 0 NA | intron (Nintron (N   | -33949 NR_04538E | 1.01E+08 Hs. 106018 | ENSG000003ASAP1-IT2  | ASAP1                    | intncRNA                     |
| chr9-3332.8.631855 | -0.20386  | 0.78938  | -0.25826  | 0.796209 | 0.981636 | chr9  | 33321588 | 33325523 | + 0 NA | intron (NAluSg SIN   | 33039 NM_147134  | 4799 Hs. 413074     | ENSG000003NFX1       | NFX2                     | TEG-nuclear t protein-coding |
| chr9-1011.8.631855 | -0.20386  | 0.78938  | -0.25826  | 0.796209 | 0.981636 | chr9  | 1.01E+08 | 1.01E+08 | + 0 NA | 3' UTR (N3' UTR (N   | -5436 NM_001701  | 570 Hs. 284712      | ENSG000003BAAT       | BACAT                    | BATbile acic protein-coding  |
| chr9-1313.8.631855 | -0.20386  | 0.78938  | -0.25826  | 0.796209 | 0.981636 | chr9  | 1.31E+08 | 1.31E+08 | + 0 NA | intron (Nintron (N   | 8021 Hs. 654538  | ENSG000003NUP214    | CAIN CAN             | nucleopor protein-coding |                              |
| chrX-4511.8.631855 | -0.20386  | 0.78938  | -0.25826  | 0.796209 | 0.981636 | chrX  | 45107928 | 45108446 | + 0 NA | intron (NL2c LINE    | 92689 NM_17681E  | 79742 Hs. 98321     | ENSG000003DIPK2B     | 4930578C1                | divergent protein-coding     |
| chr5-1606.8.628228 | -0.23223  | 0.899412 | -0.258203 | 0.796251 | 0.981636 | chr5  | 1.6E+08  | 1.6E+08  | + 0 NA | 3' UTR (N3' UTR (N   | 54337 NR_146217  | 114825 Hs. 744968   | ENSG000003PWWP2A     | MST101                   | PWWP dome protein-coding     |
| chr1-3797.8.896328 | -0.201223 | 0.779506 | -0.258142 | 0.796297 | 0.981636 | chr1  | 37971016 | 37987790 | + 0 NA | intron (Nintron (N   | 10619 NM_00680Z  | 10946 Hs. 77899     | ENSG000003F3A3       | PRP9                     | PRPF splicing protein-coding |
| chr1-1241.8.896328 | -0.201223 | 0.779506 | -0.258142 | 0.796297 | 0        |       |          |          |        |                      |                  |                     |                      |                          |                              |



|                    |          |          |          |          |          |       |          |          |   |   |    |                     |                   |          |                    |                    |                     |                          |                 |                    |                |  |
|--------------------|----------|----------|----------|----------|----------|-------|----------|----------|---|---|----|---------------------|-------------------|----------|--------------------|--------------------|---------------------|--------------------------|-----------------|--------------------|----------------|--|
| chr6-3057 9.913078 | 0.190306 | 0.740345 | 0.25705  | 0.79714  | 0.981636 | chr6  | 30576517 | 30588913 | + | 0 | NA | intron (AluJb SIN   | -1617 NR_03061E   | 1E+08    | NR_03061E          | ENSG00000MIR877    | MIRN877 lmiRNA      | ncRNA                    |                 |                    |                |  |
| chr6-1587 9.913078 | 0.190306 | 0.740345 | 0.25705  | 0.79714  | 0.981636 | chr6  | 1.59E+08 | 1.59E+08 | + | 0 | NA | intron (intron (N   | -4547 NR_037482   | 1.01E+08 | NR_037482          | ENSG00000MIR3918   | mir-3918            | microRNA                 | ncRNA           |                    |                |  |
| chrX-532C 9.913078 | 0.190306 | 0.740345 | 0.25705  | 0.79714  | 0.981636 | chrX  | 53202688 | 53220685 | + | 0 | NA | intron (intron (N   | -12741 NR_106954  | 1.02E+08 | NR_106954          | ENSG00000MIR6894   | hsa-mir-ε           | microRNA                 | ncRNA           |                    |                |  |
| chr17-441 8.391882 | 0.206747 | 0.804691 | 0.256927 | 0.797235 | 0.981636 | chr17 | 44195176 | 44195944 | + | 0 | NA | intron (intron (N   | 2601 NM_0010098   | 56970    | Hs.512651NM_02021E | ENSG00000ATXN7L3   | ataxin 7            | protein-coding           |                 |                    |                |  |
| chr2-2312 8.391882 | 0.206747 | 0.804691 | 0.256927 | 0.797235 | 0.981636 | chr2  | 2.31E+08 | 2.31E+08 | + | 0 | NA | intron (AluSzl SIN  | 1060 NM_001352    | 80210    | Hs.162411NM_02513E | ENSG00000ARMC9     | ARM JBT5 armadillo  | protein-coding           |                 |                    |                |  |
| chr4-828C 8.391882 | 0.206747 | 0.804691 | 0.256927 | 0.797235 | 0.981636 | chr4  | 82832333 | 82833369 | + | 0 | NA | intron (LIPA6 LIN   | -33994 NM_02490E  | 79966    | Hs.379191NM_02490E | ENSG00000CSD5      | ACOD4 FAI           | stearoyl- protein-coding |                 |                    |                |  |
| chr7-358E 8.391882 | 0.206747 | 0.804691 | 0.256927 | 0.797235 | 0.981636 | chr7  | 35888819 | 35889920 | + | 0 | NA | intron (intron (N   | 88150 NM_00136C   | 989      | Hs.19134NM_00178E  | ENSG00000SEPTIN7   | CDCl0 CDC           | septin 7                 | protein-coding  |                    |                |  |
| chr7-927F 8.391882 | 0.206747 | 0.804691 | 0.256927 | 0.797235 | 0.981636 | chr7  | 92705253 | 92705950 | + | 0 | NA | intron (intron (N   | -115211 NM_00104C | 257415   | Hs.18346NM_15278E  | ENSG00000FAMI33B   | -                   | family wiprotein-coding  |                 |                    |                |  |
| chr1-230C 7.375132 | 0.221946 | 0.863906 | 0.25691  | 0.797249 | 0.981636 | chr1  | 2.31E+08 | 2.31E+08 | + | 0 | NA | 3' UTR (3' UTR (N   | 20351 NM_00002E   | 183      | Hs.19383           | NR_00002E          | ENSG00000CAGT       | ANHU SERF                | angiotensin     | protein-coding     |                |  |
| chr19-46E 8.590716 | -0.20629 | 0.803151 | -0.25685 | 0.797296 | 0.981636 | chr19 | 46674474 | 46674873 | + | 0 | NA | intron (intron (N   | 13295 NR_040041   | 1.01E+08 | Hs.434327NR_040041 | ENSG00000DACT3-AS1 | -                   | DACT3                    | antncRNA        |                    |                |  |
| chr2-1217 6.432803 | 0.247501 | 0.965032 | 0.25647  | 0.797588 | 0.981636 | chr2  | 1.22E+08 | 1.22E+08 | + | 0 | NA | intron (MER1B DNA   | 4707 NM_004622    | 7247     | Hs.75066           | NR_004622          | ENSG00000TSN        | BCLF1 C                  | translin        | protein-coding     |                |  |
| chr1-230C 9.408632 | 0.19468  | 0.759972 | 0.256168 | 0.797821 | 0.981636 | chr1  | 2306590  | 2308560  | + | 0 | NA | 3' UTR (3' UTR (N   | 45086 NR_02448E   | 1E+08    | Hs.65531E          | NR_001127          | ENSG00000CLOC10012E | -                        | small nucpseudo |                    |                |  |
| chr1-669E 9.408632 | 0.19468  | 0.759972 | 0.256168 | 0.797821 | 0.981636 | chr1  | 66981723 | 66984088 | + | 0 | NA | intron (intron (N   | 52649 NM_0010077  | 57708    | Hs.60543E          | NR_02094E          | ENSG00000MIER1      | ERI MI-EMFIER1           | trε             | protein-coding     |                |  |
| chr11-344 9.408632 | 0.19468  | 0.759972 | 0.256168 | 0.797821 | 0.981636 | chr11 | 34470983 | 34473177 | + | 0 | NA | TTS (NM TTS (NM C   | 33146 NM_001175Z  | 847      | Hs.50230E          | NR_001175Z         | ENSG00000CAT        | -                        | catalase        | protein-coding     |                |  |
| chr11-73C 9.408632 | 0.19468  | 0.759972 | 0.256168 | 0.797821 | 0.981636 | chr11 | 73358623 | 73366456 | + | 0 | NA | exon (NM exon (NM   | -13860 NM_15222Z  | 84957    | Hs.53372C          | NR_032871          | ENSG00000CRELT      | AI3C TNFF                | RELT            | TNF                | protein-coding |  |
| chr12-10E 9.408632 | 0.19468  | 0.759972 | 0.256168 | 0.797821 | 0.981636 | chr12 | 1.1E+08  | 1.1E+08  | + | 0 | NA | intron (intron (N   | 37762 NM_03230C   | 84260    | Hs.410924NM_03230C | ENSG00000TCHP      | TpMs                | trichople                | protein-coding  |                    |                |  |
| chr12-12C 9.408632 | 0.19468  | 0.759972 | 0.256168 | 0.797821 | 0.981636 | chr12 | 1.2E+08  | 1.2E+08  | + | 0 | NA | exon (NM exon (NM   | 16792 NR_03971E   | 1.01E+08 | NR_03971E          | ENSG00000MIR4498   | mir-4498            | microRNA                 | ncRNA           |                    |                |  |
| chr13-11C 9.408632 | 0.19468  | 0.759972 | 0.256168 | 0.797821 | 0.981636 | chr13 | 1.3E+08  | 1.3E+08  | + | 0 | NA | intron (intron (N   | -17053 NR_10704Z  | 1.02E+08 | NR_10704Z          | ENSG00000MIR8075   | hsa-mir-ε           | microRNA                 | ncRNA           |                    |                |  |
| chr15-904 9.408632 | 0.19468  | 0.759972 | 0.256168 | 0.797821 | 0.981636 | chr15 | 90496895 | 90500653 | + | 0 | NA | intron (AluSxl SIN  | -31149 NM_02276E  | 64784    | Hs.56752E          | NR_02276E          | ENSG00000CRTC3      | TORC-3 TC                | CREB            | reg                | protein-coding |  |
| chr17-84F 9.408632 | 0.19468  | 0.759972 | 0.256168 | 0.797821 | 0.981636 | chr17 | 8459873  | 8463038  | + | 0 | NA | intron (AluJo SIN   | 25571 NM_03080E   | 81565    | Hs.37212E          | NR_03080E          | ENSG00000CNDEL1     | EOPA MITA                | nudE            | neur               | protein-coding |  |
| chr2-958F 9.408632 | 0.19468  | 0.759972 | 0.256168 | 0.797821 | 0.981636 | chr2  | 95874286 | 95875215 | + | 0 | NA | intron (LIPA3 LIN   | -47769 NR_103734  | 150759   | Hs.50346E          | NR_103734          | LINC0034Z           | NCRNA0034                | long            | intncRNA           |                |  |
| chr2-215F 9.408632 | 0.19468  | 0.759972 | 0.256168 | 0.797821 | 0.981636 | chr2  | 2.15E+08 | 2.15E+08 | + | 0 | NA | intron (AluSxl SIN  | 14273 NM_004044   | 471      | Hs.90280           | NR_004044          | ENSG00000ATIC       | AICAR AIC                | 5-aminoin       | protein-coding     |                |  |
| chr20-35E 9.408632 | 0.19468  | 0.759972 | 0.256168 | 0.797821 | 0.981636 | chr20 | 35627882 | 35631212 | + | 0 | NA | intron (MIR SINE    | 13663 NM_001317   | 6676     | Hs.12315E          | NR_00311E          | ENSG00000CPAG4      | CT127 SUN                | sperm           | ass                | protein-coding |  |
| chr20-50E 9.408632 | 0.19468  | 0.759972 | 0.256168 | 0.797821 | 0.981636 | chr20 | 50574351 | 50680104 | + | 0 | NA | intron (NL2b LINE   | -8559 NR_03037E   | 693230   | NR_03037E          | ENSG00000MIR645    | MIRN645 lmiRNA      | ncRNA                    |                 |                    |                |  |
| chr20-50E 9.408632 | 0.19468  | 0.759972 | 0.256168 | 0.797821 | 0.981636 | chr20 | 50598835 | 50606217 | + | 0 | NA | non-codir non-codir | 12259 NR_031634   | 1E+08    | NR_031634          | ENSG00000MIR1302-ε | MIRN1302-ε          | microRNA                 | ncRNA           |                    |                |  |
| chr3-155E 9.408632 | 0.19468  | 0.759972 | 0.256168 | 0.797821 | 0.981636 | chr3  | 15588251 | 15589517 | + | 0 | NA | intron (intron (N   | -12428 NM_001281  | 686      | Hs.444197NM_001281 | ENSG00000CMTD      | -                   | biotinidε                | protein-coding  |                    |                |  |
| chr3-583C 9.408632 | 0.19468  | 0.759972 | 0.256168 | 0.797821 | 0.981636 | chr3  | 58394401 | 58401457 | + | 0 | NA | intron (intron (N   | 583903            | 5162     | Hs.161357NM_00092E | ENSG00000PDHB      | PDHBD PDF           | pyruvate                 | protein-coding  |                    |                |  |
| chr3-869F 9.408632 | 0.19468  | 0.759972 | 0.256168 | 0.797821 | 0.981636 | chr3  | 86977194 | 86978096 | + | 0 | NA | intron (MER5A DNA   | 13504 NM_00132C   | 389136   | Hs.606507NM_01620E | ENSG00000VGLL3     | VGL-3 VGL           | vestigial                | protein-coding  |                    |                |  |
| chr4-716F 9.408632 | 0.19468  | 0.759972 | 0.256168 | 0.797821 | 0.981636 | chr4  | 76167496 | 76170733 | + | 0 | NA | intron (intron (N   | -20599 NR_103781  | 53371    | Hs.43043E          | NR_01742E          | ENSG00000CNP54      | -                        | nucleopor       | protein-coding     |                |  |
| chr5-113C 9.408632 | 0.19468  | 0.759972 | 0.256168 | 0.797821 | 0.981636 | chr5  | 1.14E+08 | 1.14E+08 | + | 0 | NA | intron (AluSp SIN   | 19720 NM_00134E   | 64848    | Hs.23194E          | NR_02282E          | ENSG00000YTHDC2     | CAHL HYT                 | YTH             | doma               | protein-coding |  |
| chr6-306E 9.408632 | 0.19468  | 0.759972 | 0.256168 | 0.797821 | 0.981636 | chr6  | 30628766 | 30631829 | + | 0 | NA | intron (AluJb SIN   | 3423 NM_001031    | 79969    | Hs.65479E          | NR_02490E          | ENSG00000CATAT1     | C6orf134 α               | tul             | protein-coding     |                |  |
| chr6-3061 11.43427 | 0.178256 | 0.696075 | 0.256087 | 0.797883 | 0.981636 | chr6  | 30619656 | 30621966 | + | 0 | NA | intron (AluSx3 SI   | 2971 NM_01404E    | 28973    | Hs.65532E          | NR_01404E          | ENSG00000MRP51B     | C6orf14 f                | mitochnc        | protein-coding     |                |  |
| chr1-1097 10.92983 | 0.181432 | 0.709492 | 0.255721 | 0.798166 | 0.981636 | chr1  | 1.1E+08  | 1.1E+08  | + | 0 | NA | intron (intron (N   | 3726 NR_024537    | 2947     | Hs.20008E          | ENSG00000CSTM3     | GST5 GSTE           | glutathion               | protein-coding  |                    |                |  |
| chr1-212F 10.92983 | 0.181432 | 0.709492 | 0.255721 | 0.798166 | 0.981636 | chr1  | 2.13E+08 | 2.13E+08 | + | 0 | NA | intron (intron (N   | 2909 NM_00120E    | 467      | Hs.460             | NR_001674          | ENSG00000CATF3      | -                        | activatir       | protein-coding     |                |  |
| chr12-96E 10.92983 | 0.181432 | 0.709492 | 0.255721 | 0.798166 | 0.981636 | chr12 | 96241712 | 96247742 | + | 0 | NA | exon (NM exon (NM   | -8071 NM_00130C   | 2004     | Hs.46523           | NR_00523C          | ENSG00000ELK3       | ERP NET SETS             | trans           | protein-coding     |                |  |
| chr16-31E 10.92983 | 0.181432 | 0.709492 | 0.255721 | 0.798166 | 0.981636 | chr16 | 31912891 | 31918524 | + | 0 | NA | exon (NM exon (NM   | 41900 NM_003414   | 10308    | Hs.46064E          | NR_003414          | ENSG00000ZNF267     | HFZ2                     | zinc            | protein-coding     |                |  |
| chr5-134E 10.92983 | 0.181432 | 0.709492 | 0.255721 | 0.798166 | 0.981636 | chr5  | 1.35E+08 | 1.35E+08 | + | 0 | NA | intron (AluSq2 SI   | 32528 NM_02198Z   | 10802    | Hs.59554C          | NR_02198Z          | ENSG00000SEC24A     | -                        | SEC24           | hon                | protein-coding |  |
| chr8-431F 9.954217 | 0.191712 | 0.750102 | 0.255581 | 0.798274 | 0.981636 | chr8  | 43183114 | 43185019 | + | 0 | NA | intron (LIPA5 LIN   | 43602 NM_15241E   | 138050   | Hs.600384NM_15241E | ENSG00000HGSNAT    | HGNAT MP            | heparan-ε                | protein-coding  |                    |                |  |
| chr1-196E 4.460228 | -0.27622 | 1.080887 | -0.25555 | 0.798302 | 0.981636 | chr1  | 19689726 | 19690518 | + | 0 | NA | intron (LITR2B LIN  | 25247 NM_000871   | 3362     | Hs.22180           | NR_000871          | ENSG00000CHTR6      | 5-HTf5-1-5               | -hydroxy        | protein-coding     |                |  |
| chr17-47E 4.460228 | -0.27622 | 1.080887 | -0.25555 | 0.798302 | 0.981636 | chr17 | 47572069 | 47573004 | + | 0 | NA | intron (HAL1 LINE   | 41428 NM_00631C   | 9520     | Hs.443837NM_00631C | ENSG00000NPEPPS    | AAP-S MP            | laminopept               | protein-coding  |                    |                |  |
| chr4-169E 4.460228 | -0.27622 | 1.080887 | -0.25555 | 0.798302 | 0.981636 | chr4  | 1.7E+08  | 1.7E+08  | + | 0 | NA | intron (intron (N   | 17917 NM_00182E   | 1182     | Hs.48118E          | NR_00182E          | ENSG00000CLCN3      | CLC3 CIC                 | -chloride       | protein-coding     |                |  |
| chr1-353E 8.623997 | -0.20231 | 0.792165 | -0.25539 | 0.798423 | 0.981636 | chr1  | 35385482 | 35388234 | + | 0 | NA | intron (L2a LINE    | -20781 NR_04665E  | 1.01E+08 | NR_04665E          | ENSG00000ZMYM4-AS1 | -                   | ZMYM4                    | antncRNA        |                    |                |  |
| chr10-10C 8.623997 | -0.20231 | 0.792165 | -0.25539 | 0.798423 | 0.981636 | chr10 | 1.01E+08 | 1.01E+08 | + | 0 | NA | intron (AluSxl SI   | -27601 NM_01789E  | 57715    | Hs.59192E          | NR_01789E          | ENSG00000SEMA4G     | -                        | semaphor        | protein-coding     |                |  |
| chr10-11C 8.623997 | -0.20231 | 0.792165 | -0.25539 | 0.798423 | 0.981636 | chr10 | 1.11E+08 | 1.11E+08 | + | 0 | NA | intron (intron (N   | 11291 NM_00441E   | 1847     | Hs.2128            | NR_00441E          | ENSG00000DUSP5      | DUSP HVH                 | dual            | spec               | protein-coding |  |
| chr11-62E 8.623997 | -0.20231 | 0.792165 | -0.25539 | 0.798423 | 0.981636 | chr11 | 62700904 | 62702058 | + | 0 | NA | intron (MER47A DN   | 4834 NM_00113C    | 26580    | Hs.53370E          | NR_03266E          | ENSG00000BSC12      | GN3LG HM                 | BSC12           | lε                 | protein-coding |  |
| chr13-331 8.623997 | -0.20231 | 0.792165 | -0.25539 | 0.798423 | 0.981636 | chr13 | 33129098 | 33131098 | + | 0 | NA | exon (NM exon (NM   | 55993 NM_00124Z   | 90627    | Hs.156551NM_052851 | ENSG00000STARD13   | ARHGAP37 StAR       | relε                     | protein-coding  |                    |                |  |
| chr15-58E 8.623997 | -0.20231 | 0.792165 | -0.25539 | 0.798423 | 0.981636 | chr15 | 58618959 | 58620984 | + | 0 | NA | intron (intron (N   | 73636 NR_07341E   | 664618   | Hs.670224NR_002927 | HSP90ABF4          | HSP90b              | heat                     | shoc            | pseudo             |                |  |
| chr15-61E 8.623997 | -0.20231 | 0.792165 | -0.25539 | 0.798423 | 0.981636 | chr15 | 61753067 | 61756545 | + | 0 | NA | intron (intron (N   | -11349 NM_00114E  | 4088     | Hs.72798E          | NR_00590E          | ENSG00000CSMAD3     | HSPC193 F                | SMAD            | famiprotein-coding |                |  |
| chr2-131C 8.623997 | -0.20231 | 0.792165 | -0.25539 | 0.798423 | 0.981636 | chr2  | 1.31E+08 | 1.31E+08 | + | 0 | NA | intron (AluSc5 SI   | 18875 NM_001321   | 130074   | Hs.53467E          | NR_00100E          | ENSG00000FAMI68B    | MAN1                     | family          | wiprotein-coding   |                |  |
| chr3-1231 8.623997 | -0.20231 | 0.792165 | -0.25539 | 0.798423 | 0.981636 | chr3  | 12315028 | 12315668 | + | 0 | NA | intron (L1MA5 LIN   |                   |          |                    |                    |                     |                          |                 |                    |                |  |

|           |          |          |          |          |          |          |       |          |          |   |   |    |                       |        |            |          |            |                    |                                            |
|-----------|----------|----------|----------|----------|----------|----------|-------|----------|----------|---|---|----|-----------------------|--------|------------|----------|------------|--------------------|--------------------------------------------|
| chr2-951  | 0.449771 | 0.196088 | 0.77239  | 0.253872 | 0.799594 | 0.981636 | chr2  | 95107841 | 95109780 | + | 0 | NA | intron (N LIME3G LI   | 12747  | NM_001321  | 64969    | Hs. 655259 | ENSG00000MRP55     | MRP-55 SE mitochondrial protein-coding     |
| chr4-5542 | 0.449771 | 0.196088 | 0.77239  | 0.253872 | 0.799594 | 0.981636 | chr4  | 55426612 | 55426919 | + | 0 | NA | TTS (NM_C TTS (NM_C   | 30808  | NM_018475  | 55858    | Hs. 479766 | ENSG00000TMEM165   | CDGK2 FT2 transmembrane protein-coding     |
| chr16-351 | 8.211538 | -0.20726 | 0.816716 | -0.25378 | 0.799667 | 0.981636 | chr16 | 3515886  | 3516545  | + | 0 | NA | intron (N intron (N   | 6321   | NM_024793  | 23059    | Hs. 155999 | ENSG00000CLUAP1    | CFAP22 FA clusterin protein-coding         |
| chr1-5655 | 4.45237  | -0.27331 | 1.077019 | -0.25376 | 0.799668 | 0.981636 | chr1  | 56557317 | 56558163 | + | 0 | NA | intron (N intron (N   | 21813  | NM_003713  | 8613     | Hs. 405156 | ENSG00000PLPP3     | DR142 LFP phospholipid protein-coding      |
| chr10-895 | 4.45237  | -0.27331 | 1.077019 | -0.25376 | 0.799668 | 0.981636 | chr10 | 89598178 | 89599036 | + | 0 | NA | intron (N intron (N   | -5795  | NR_029524  | 406901   | NR_029524  | ENSG00000MIR107    | MIRN107 miR microRNA ncRNA                 |
| chr10-125 | 4.45237  | -0.27331 | 1.077019 | -0.25376 | 0.799668 | 0.981636 | chr10 | 1.26E+08 | 1.26E+08 | + | 0 | NA | TTS (NM_C TTS (NM_C   | 26747  | NM_01818C  | 55760    | Hs. 370292 | ENSG00000DXH32     | DDX32 DHL DEAH-box protein-coding          |
| chr11-685 | 4.45237  | -0.27331 | 1.077019 | -0.25376 | 0.799668 | 0.981636 | chr11 | 68568560 | 68569255 | + | 0 | NA | intron (N intron (N   | 108490 | NM_001352  | 55291    | Hs. 503022 | ENSG00000PPP6R3    | C1orf23 protein [protein] protein-coding   |
| chr15-628 | 4.45237  | -0.27331 | 1.077019 | -0.25376 | 0.799668 | 0.981636 | chr15 | 62820498 | 62821481 | + | 0 | NA | intron (N intron (N   | -2968  | NR_029705  | 406965   | NR_029705  | ENSG00000MIR190A   | MIR190 miR microRNA ncRNA                  |
| chr19-104 | 4.45237  | -0.27331 | 1.077019 | -0.25376 | 0.799668 | 0.981636 | chr19 | 10456333 | 10457162 | + | 0 | NA | intron (N intron (N   | 3815   | NM_006202  | 5141     | Hs. 89901  | ENSG00000PDE4A     | DPDE2 PDF phosphodiesterase protein-coding |
| chr7-7511 | 4.45237  | -0.27331 | 1.077019 | -0.25376 | 0.799668 | 0.981636 | chr7  | 75112161 | 75112689 | + | 0 | NA | exon (NM exon (NM     | 18393  | NM_001368  | 389524   | Hs. 647017 | ENSG00000GTF21RD2E | GTF21RD2 GTF2I repressor protein-coding    |
| chr9-1145 | 4.45237  | -0.27331 | 1.077019 | -0.25376 | 0.799668 | 0.981636 | chr9  | 1.14E+08 | 1.14E+08 | + | 0 | NA | exon (NM exon (NM     | -12450 | NM_000607  | 5004     | Hs. 522356 | ENSG00000CORM1     | AGP-A AGF orosomucoid protein-coding       |
| chr12-716 | 10.37638 | 0.185016 | 0.729094 | 0.253761 | 0.799668 | 0.981636 | chr12 | 71649828 | 71650349 | + | 0 | NA | intron (N AluY SINE   | 13760  | NM_144982  | 196441   | Hs. 245799 | ENSG00000ZFC3H1    | CCDC131 Zinc finger protein-coding         |
| chr1-5645 | 8.665137 | -0.2     | 0.788246 | -0.25373 | 0.799706 | 0.981636 | chr1  | 56499813 | 56501003 | + | 0 | NA | intron (N L2c LINE    | 79155  | NM_003713  | 8613     | Hs. 405156 | ENSG00000PLPP3     | DR142 LFP phospholipid protein-coding      |
| chr1-8674 | 8.665137 | -0.2     | 0.788246 | -0.25373 | 0.799706 | 0.981636 | chr1  | 86741706 | 86744049 | + | 0 | NA | intron (N AluJb SIN   | 38301  | NM_016005  | 51100    | Hs. 136305 | ENSG00000SH3GLB1   | Bif-1 CGI SH3 domain protein-coding        |
| chr1-1472 | 8.665137 | -0.2     | 0.788246 | -0.25373 | 0.799706 | 0.981636 | chr1  | 1.47E+08 | 1.47E+08 | + | 0 | NA | non-coding non-coding | 52435  | NM_001348  | 9557     | Hs. 191164 | ENSG00000CHD1L     | ALC1 CHD1 chromatin protein-coding         |
| chr11-104 | 8.665137 | -0.2     | 0.788246 | -0.25373 | 0.799706 | 0.981636 | chr11 | 1.05E+08 | 1.05E+08 | + | 0 | NA | intron (N intron (N   | 14904  | NM_003306  | 837      | Hs. 138378 | ENSG00000CASP4     | ICE (rel1) caspase 4 protein-coding        |
| chr12-682 | 8.665137 | -0.2     | 0.788246 | -0.25373 | 0.799706 | 0.981636 | chr12 | 6836770  | 6839558  | + | 0 | NA | intron (N intron (N   | -2761  | NM_001297  | 2784     | Hs. 631657 | ENSG00000GNB3      | CSNB1H G protein-coding                    |
| chr12-125 | 8.665137 | -0.2     | 0.788246 | -0.25373 | 0.799706 | 0.981636 | chr12 | 1.22E+08 | 1.22E+08 | + | 0 | NA | intron (N AluSx1 SI   | -23537 | NR_045382  | 1.01E+08 | Hs. 624255 | ENSG00000CLIP1-AS1 | CLIP1-AS1 CLIP1 antcncRNA                  |
| chr14-505 | 8.665137 | -0.2     | 0.788246 | -0.25373 | 0.799706 | 0.981636 | chr14 | 50922685 | 50924074 | + | 0 | NA | intron (N AluSx1 SI   | 21104  | NM_002862  | 5836     | Hs. 282417 | ENSG00000PYGL      | GSD6 glycogen protein-coding               |
| chr14-512 | 8.665137 | -0.2     | 0.788246 | -0.25373 | 0.799706 | 0.981636 | chr14 | 51256980 | 51258405 | + | 0 | NA | TTS (NM_C TTS (NM_C   | 17445  | NM_030755  | 81542    | Hs. 152221 | ENSG00000TMX1      | PDIA11 Thioredoxin protein-coding          |
| chr14-812 | 8.665137 | -0.2     | 0.788246 | -0.25373 | 0.799706 | 0.981636 | chr14 | 81214575 | 81216317 | + | 0 | NA | intron (N Charlie1E   | 5513   | NM_015855  | 2957     | Hs. 592334 | ENSG00000GTF2A1    | TF2A1 TFII general transcription factor    |
| chr14-921 | 8.665137 | -0.2     | 0.788246 | -0.25373 | 0.799706 | 0.981636 | chr14 | 92161343 | 92165074 | + | 0 | NA | 3' UTR (N3' UTR (N    | 41239  | NM_001322  | 53981    | Hs. 657632 | ENSG00000CPSF2     | CPSF100 cleavage factor protein-coding     |
| chr16-728 | 8.665137 | -0.2     | 0.788246 | -0.25373 | 0.799706 | 0.981636 | chr16 | 72950403 | 72950774 | + | 0 | NA | exon (NM exon (NM     | 97540  | NM_006885  | 463      | Hs. 598297 | ENSG00000ZFHX3     | ATBF1 ATF zinc finger protein-coding       |
| chr17-304 | 8.665137 | -0.2     | 0.788246 | -0.25373 | 0.799706 | 0.981636 | chr17 | 30491838 | 30497388 | + | 0 | NA | intron (N AluSx1 SI   | 17205  | NM_001007  | 9527     | Hs. 462688 | ENSG00000GOSR1     | GOLM2 Golggi SNAP protein-coding           |
| chr17-511 | 8.665137 | -0.2     | 0.788246 | -0.25373 | 0.799706 | 0.981636 | chr17 | 51169803 | 51172206 | + | 0 | NA | intron (N intron (N   | 4282   | NM_001018  | 4831     | Hs. 463456 | ENSG00000NME2      | NDBK NDP/NME/NM23 protein-coding           |
| chr17-565 | 8.665137 | -0.2     | 0.788246 | -0.25373 | 0.799706 | 0.981636 | chr17 | 56948860 | 56950787 | + | 0 | NA | intron (N intron (N   | 11227  | NM_004645  | 8161     | Hs. 532795 | ENSG00000COIL      | CLN80 p8 coilin protein-coding             |
| chr17-618 | 8.665137 | -0.2     | 0.788246 | -0.25373 | 0.799706 | 0.981636 | chr17 | 61959780 | 61962807 | + | 0 | NA | intron (N AluSx1 SI   | -33311 | NM_001133C | 57508    | Hs. 279645 | ENSG00000INTS2     | INT2 KIAF integrator protein-coding        |
| chr17-675 | 8.665137 | -0.2     | 0.788246 | -0.25373 | 0.799706 | 0.981636 | chr17 | 67352618 | 67356459 | + | 0 | NA | intron (N intron (N   | 12039  | NM_002818  | 5718     | Hs. 4295   | ENSG00000PSMD12    | Rpn5 ST15 proteasome protein-coding        |
| chr18-127 | 8.665137 | -0.2     | 0.788246 | -0.25373 | 0.799706 | 0.981636 | chr18 | 12706532 | 12709414 | + | 0 | NA | intron (N intron (N   | 4931   | NM_020232  | 56984    | Hs. 464652 | ENSG00000PSMG2     | CLAST3 HC proteasome protein-coding        |
| chr19-215 | 8.665137 | -0.2     | 0.788246 | -0.25373 | 0.799706 | 0.981636 | chr19 | 12367174 | 12374455 | + | 0 | NA | intron (N intron (N   | 11814  | NM_001355  | 148203   | Hs. 124384 | ENSG00000ZNF738    | ZNF738 zinc finger protein-coding          |
| chr19-475 | 8.665137 | -0.2     | 0.788246 | -0.25373 | 0.799706 | 0.981636 | chr19 | 47364725 | 47368039 | + | 0 | NA | intron (N AluSz SIN   | 17067  | NM_014681  | 9704     | Hs. 151706 | ENSG00000DXH34     | DDX34 HRE DEXH-box protein-coding          |
| chr2-3924 | 8.665137 | -0.2     | 0.788246 | -0.25373 | 0.799706 | 0.981636 | chr2  | 39249916 | 39255759 | + | 0 | NA | intron (N intron (N   | -8874  | NR_144521  | 344387   | Hs. 403201 | ENSG00000CDKL4     | cyclin D6 protein-coding                   |
| chr2-8503 | 8.665137 | -0.2     | 0.788246 | -0.25373 | 0.799706 | 0.981636 | chr2  | 85037189 | 85037859 | + | 0 | NA | intron (N intron (N   | 29823  | NR_146455  | 1.01E+08 | Hs. 434398 | ENSG00000LINC01964 | long intcncRNA                             |
| chr2-1105 | 8.665137 | -0.2     | 0.788246 | -0.25373 | 0.799706 | 0.981636 | chr2  | 1.11E+08 | 1.11E+08 | + | 0 | NA | intron (N intron (N   | 44914  | NM_005054  | 84220    | Hs. 469633 | ENSG00000CRGPD5    | BS-63 BSR/RANBP2 lip protein-coding        |
| chr2-2395 | 8.665137 | -0.2     | 0.788246 | -0.25373 | 0.799706 | 0.981636 | chr2  | 2.4E+08  | 2.4E+08  | + | 0 | NA | intron (N LIMEF LIN   | -27199 | NR_039944  | 1.01E+08 | NR_039944  | ENSG00000MIR4786   | miR-4786 microRNA ncRNA                    |
| chr2-2416 | 8.665137 | -0.2     | 0.788246 | -0.25373 | 0.799706 | 0.981636 | chr2  | 2.42E+08 | 2.42E+08 | + | 0 | NA | intron (N intron (N   | 4550   | NM_001192  | 51078    | Hs. 435755 | ENSG00000THAP4     | CGI-36 NE THAP domain protein-coding       |
| chr3-937  | 8.665137 | -0.2     | 0.788246 | -0.25373 | 0.799706 | 0.981636 | chr3  | 9370512  | 9378927  | + | 0 | NA | intron (N intron (N   | 11665  | NM_015453  | 25917    | Hs. 443081 | ENSG00000THUMP3    | THUMP domain protein-coding                |
| chr3-1007 | 8.665137 | -0.2     | 0.788246 | -0.25373 | 0.799706 | 0.981636 | chr3  | 1.01E+08 | 1.01E+08 | + | 0 | NA | intron (N intron (N   | 35635  | NM_001192  | 10342    | Hs. 518122 | ENSG00000TFG       | HMSNP SPC trafficking protein-coding       |
| chr3-1055 | 8.665137 | -0.2     | 0.788246 | -0.25373 | 0.799706 | 0.981636 | chr3  | 1.06E+08 | 1.06E+08 | + | 0 | NA | intron (N intron (N   | 175957 | NM_001167  | 214      | Hs. 591293 | ENSG00000ALCAM     | CD166 MEM activator protein-coding         |
| chr4-3908 | 8.665137 | -0.2     | 0.788246 | -0.25373 | 0.799706 | 0.981636 | chr4  | 39081518 | 39083421 | + | 0 | NA | intron (N intron (N   | 20237  | NM_199035  | 51088    | Hs. 272251 | ENSG00000KLHL5     | kelch like protein-coding                  |
| chr4-3925 | 8.665137 | -0.2     | 0.788246 | -0.25373 | 0.799706 | 0.981636 | chr4  | 39296119 | 39297638 | + | 0 | NA | intron (N LIP2 LIN    | 69184  | NM_001204  | 5981     | Hs. 507475 | ENSG00000RFC1      | A1 CANVAS replicator protein-coding        |
| chr4-825  | 8.665137 | -0.2     | 0.788246 | -0.25373 | 0.799706 | 0.981636 | chr4  | 1.83E+08 | 1.83E+08 | + | 0 | NA | intron (N AluSx1 SI   | 3164   | NM_001351  | 1635     | Hs. 138355 | ENSG00000CDDT      | dCMP deaminase protein-coding              |
| chr5-1282 | 8.665137 | -0.2     | 0.788246 | -0.25373 | 0.799706 | 0.981636 | chr5  | 1.28E+08 | 1.28E+08 | + | 0 | NA | intron (N intron (N   | 206396 | NM_001046  | 6558     | Hs. 162558 | ENSG00000SLC12A2   | BSC BSC2 soluble cytochrome protein-coding |
| chr5-1775 | 8.665137 | -0.2     | 0.788246 | -0.25373 | 0.799706 | 0.981636 | chr5  | 1.78E+08 | 1.78E+08 | + | 0 | NA | intron (N intron (N   | -3938  | NM_016222  | 51428    | Hs. 484288 | ENSG00000DDX41     | NBS MLPF DEAD-box protein-coding           |
| chr6-8722 | 8.665137 | -0.2     | 0.788246 | -0.25373 | 0.799706 | 0.981636 | chr6  | 87223016 | 87224703 | + | 0 | NA | intron (N LMC3 LIN    | 68294  | NM_015021  | 23036    | Hs. 44480C | ENSG00000ZNF292    | Nbla00365 zinc finger protein-coding       |
| chr6-1437 | 8.665137 | -0.2     | 0.788246 | -0.25373 | 0.799706 | 0.981636 | chr6  | 1.44E+08 | 1.44E+08 | + | 0 | NA | intron (N LIMD2 LIN   | 47623  | NM_001100  | 9749     | Hs. 102471 | ENSG00000PACTR2    | C6orf35 phosphatase protein-coding         |
| chr7-4796 | 8.665137 | -0.2     | 0.788246 | -0.25373 | 0.799706 | 0.981636 | chr7  | 47963079 | 47967261 | + | 0 | NA | 3' UTR (N3' UTR (N    | 14445  | NM_001363  | 3364     | Hs. 152983 | ENSG00000HUS1      | hHUS1 HUS1 checr protein-coding            |
| chr7-7438 | 8.665137 | -0.2     | 0.788246 | -0.25373 | 0.799706 | 0.981636 | chr7  | 74386486 | 74391206 | + | 0 | NA | intron (N AluJo SIN   | -65060 | NM_005685  | 9569     | Hs. 647055 | ENSG00000GTF21RD1  | BEN CREAM/GTF2I repressor protein-coding   |
| chr8-3841 | 8.665137 | -0.2     | 0.788246 | -0.25373 | 0.799706 | 0.981636 | chr8  | 38412257 | 38415065 | + | 0 | NA | exon (NM exon (NM     | 26530  | NM_001199  | 137994   | Hs. 696457 | ENSG00000LETM2     | SLC55A2 leucine zipper protein-coding      |
| chr9-5716 | 8.665137 | -0.2     | 0.788246 | -0.25373 | 0.799706 | 0.981636 | chr9  | 5716894  | 5717546  | + | 0 | NA | intron (N LIMEF LIN   | 88101  | NM_001206  | 57589    | Hs. 21152C | ENSG00000R1C1      | CIP150 K1R1C1 home protein-coding          |
| chr9-1122 | 8.665137 | -0.2     | 0.788246 | -0.25373 | 0.799706 | 0.981636 | chr9  | 1.12E+08 | 1.12E+08 | + | 0 | NA | intron (N intron (N   | -52364 | NM_001282  | 64420    | Hs. 494827 | ENSG00000SUSD1     | sushi domain protein-coding                |
| chr9-1228 | 8.665137 | -0.2     | 0.788246 | -0.25373 | 0.799706 | 0.981636 | chr9  | 1.23E+08 | 1.23E+08 | + | 0 | NA | intron (N AluSx1 SI   | 11997  | NM_018833  | 54542    | Hs. 533492 | ENSG00000C3H2      | MNAB RNFringer finger protein-coding       |
| chr7-1378 | 9.359634 | 0.194742 | 0.767675 | 0.253677 | 0.799745 | 0.981636 | chr7  | 1.38E+08 | 1.38E+08 | + | 0 | NA | intron (N             |        |            |          |            |                    |                                            |



|                     |          |          |          |          |          |       |          |          |   |      |                     |                  |            |                      |                     |                    |                          |
|---------------------|----------|----------|----------|----------|----------|-------|----------|----------|---|------|---------------------|------------------|------------|----------------------|---------------------|--------------------|--------------------------|
| chr13-11: 8.657279  | -0.19844 | 0.788068 | -0.25181 | 0.801187 | 0.981636 | chr13 | 1.13E+08 | 1.13E+08 | + | 0 NA | intron (NLMC1 LIN   | -6097 NR_107042  | 1.02E+08   | NR_107042            | ENSG000002MIR8075   | hsa-mir-ε microRNA | ncRNA                    |
| chr14-23: 8.657279  | -0.19844 | 0.788068 | -0.25181 | 0.801187 | 0.981636 | chr14 | 23087070 | 23091246 | + | 0 NA | intron (NLMC1 LIN   | -9529 NR_017924  | 55017 Hs.  | 525238 NR_017924     | ENSG000002C14orf119 | -                  | chromosom protein-coding |
| chr14-307: 8.657279 | -0.19844 | 0.788068 | -0.25181 | 0.801187 | 0.981636 | chr14 | 30734939 | 30736856 | + | 0 NA | TTS (NM_1TTS (NM_1  | 113578 NR_016106 | 23256 Hs.  | 369168 NR_016106     | ENSG000002SCFD1     | C14orf16: secl     | famiprotein-coding       |
| chr14-35: 8.657279  | -0.19844 | 0.788068 | -0.25181 | 0.801187 | 0.981636 | chr14 | 35029858 | 35033601 | + | 0 NA | Intergeni Intergeni | -13178 NR_001075 | 283635 Hs. | 446357 NR_173607     | ENSG000002FAM177A1  | C14orf24           | famly wiprotein-coding   |
| chr14-60: 8.657279  | -0.19844 | 0.788068 | -0.25181 | 0.801187 | 0.981636 | chr14 | 60811290 | 60813841 | + | 0 NA | intron (NLTR28 LTF  | 77804 NR_002431  | 4331 Hs.   | 509525 NR_002431     | ENSG000002MNAT1     | CAP35 MA1MNAT1     | con protein-coding       |
| chr14-69: 8.657279  | -0.19844 | 0.788068 | -0.25181 | 0.801187 | 0.981636 | chr14 | 69388220 | 69396353 | + | 0 NA | intron (Nintron (N  | 6013 NR_00445C   | 2079 Hs.   | 509791 NR_00445C     | ENSG000002CERH      | DROER ERH mRNA     | protein-coding           |
| chr14-73: 8.657279  | -0.19844 | 0.788068 | -0.25181 | 0.801187 | 0.981636 | chr14 | 73097434 | 73103620 | + | 0 NA | intron (Nintron (N  | -35980 NR_000021 | 5663 Hs.   | 3260 NR_000021       | ENSG000002PSEN1     | ACIN1V3 Ppresenil1 | protein-coding           |
| chr15-65: 8.657279  | -0.19844 | 0.788068 | -0.25181 | 0.801187 | 0.981636 | chr15 | 65025392 | 65027023 | + | 0 NA | intron (Nintron (N  | 3432 NR_139242   | 123263 Hs. | 531615 NR_139242     | ENSG000002MTFMT     | COPXD15 Fmitohonc  | protein-coding           |
| chr16-50: 8.657279  | -0.19844 | 0.788068 | -0.25181 | 0.801187 | 0.981636 | chr16 | 50318446 | 50322060 | + | 0 NA | exon (NM exon (NM   | 27637 NR_10682E  | 1.02E+08   | NR_10682E            | ENSG000002MIR6771   | hsa-mir-ε microRNA | ncRNA                    |
| chr16-69: 8.657279  | -0.19844 | 0.788068 | -0.25181 | 0.801187 | 0.981636 | chr16 | 69663448 | 69672487 | + | 0 NA | intron (NALuSj SIN  | 40708 NR_14575E  | 1.1E+08    | NR_145753            | SNORD13H            | -                  | small nucsnRNA           |
| chr17-16: 8.657279  | -0.19844 | 0.788068 | -0.25181 | 0.801187 | 0.981636 | chr17 | 16052169 | 16059851 | + | 0 NA | intron (NLMC5 LIN   | 56186 NR_01777E  | 54902 Hs.  | 462316 NR_01777E     | ENSG000002TTC19     | 201020401          | tetratric protein-coding |
| chr17-161: 8.657279 | -0.19844 | 0.788068 | -0.25181 | 0.801187 | 0.981636 | chr17 | 16144905 | 16145411 | + | 0 NA | intron (NSVA_B Ret  | 8038 NR_145787   | 1.1E+08    | NR_145787            | SNORD163            | -                  | small nucsnRNA           |
| chr18-93: 8.657279  | -0.19844 | 0.788068 | -0.25181 | 0.801187 | 0.981636 | chr18 | 9307608  | 9370249  | + | 0 NA | intron (NALuSj SIN  | 33885 NR_02064E  | 57045 Hs.  | 514685 NR_02064E     | ENSG000002TWSG1     | TSG                | twisted protein-coding   |
| chr18-21: 8.657279  | -0.19844 | 0.788068 | -0.25181 | 0.801187 | 0.981636 | chr18 | 21808966 | 21810285 | + | 0 NA | intron (NLMB3 LIN   | 11660 NR_02967E  | 406922     | NR_02967E            | ENSG000002MIR133A1  | MIR133A1           | microRNA                 |
| chr19-18: 8.657279  | -0.19844 | 0.788068 | -0.25181 | 0.801187 | 0.981636 | chr19 | 18864563 | 18868165 | + | 0 NA | intron (Nintron (N  | 29794 NR_001492  | 2657 Hs.   | 412355 NR_001492     | ENSG000002GDF1      | CERS1 CHI          | growth diprotein-coding  |
| chr2-55: 8.657279   | -0.19844 | 0.788068 | -0.25181 | 0.801187 | 0.981636 | chr2  | 55866615 | 55868984 | + | 0 NA | intron (Nintron (N  | 55983 NR_00103E  | 2202 Hs.   | 76224 NR_00410E      | ENSG000002EFEMP1    | DHRD DRAI          | EGF cont protein-coding  |
| chr2-61: 8.657279   | -0.19844 | 0.788068 | -0.25181 | 0.801187 | 0.981636 | chr2  | 61477651 | 61485095 | + | 0 NA | intron (NALuSc SIN  | -10339 NR_01470E | 9736 Hs.   | 644705 NR_01470E     | ENSG000002CUSP34    | -                  | ubiquit protein-coding   |
| chr2-74: 8.657279   | -0.19844 | 0.788068 | -0.25181 | 0.801187 | 0.981636 | chr2  | 74877015 | 74877569 | + | 0 NA | exon (NM exon (NM   | -31839 NR_125792 | 1.03E+08   | Hs. 70864E NR_125792 | ENSG000002LINC01291 | -                  | long intncRNA            |
| chr2-86: 8.657279   | -0.19844 | 0.788068 | -0.25181 | 0.801187 | 0.981636 | chr2  | 86160890 | 86161974 | + | 0 NA | intron (NALuSj SIN  | 25562 NR_00437E  | 692225 Hs. | 723087 NR_00437E     | ENSG000002SNORD94   | U94                | small nucsnRNA           |
| chr2-171: 8.657279  | -0.19844 | 0.788068 | -0.25181 | 0.801187 | 0.981636 | chr2  | 1.71E+08 | 1.71E+08 | + | 0 NA | intron (NALuSj SIN  | 38828 NR_00113E  | 9874 Hs.   | 744917 NR_01229C     | ENSG000002TLK1      | PKU-beta           | talled lprotein-coding   |
| chr20-34: 8.657279  | -0.19844 | 0.788068 | -0.25181 | 0.801187 | 0.981636 | chr20 | 34486037 | 34497996 | + | 0 NA | intron (Nintron (N  | -24368 NR_00131E | 83658 Hs.  | 59392C NR_01418E     | ENSG000002DYNLRB1   | BITH BLP           | dynein l1protein-coding  |
| chr21-34: 8.657279  | -0.19844 | 0.788068 | -0.25181 | 0.801187 | 0.981636 | chr21 | 34870734 | 34875558 | + | 0 NA | intron (Nintron (N  | 15553 NR_001001  | 861 Hs.    | 149261 NR_00175E     | ENSG000002RUNX1     | AML1 AML1          | RUNX famiprotein-coding  |
| chr22-42: 8.657279  | -0.19844 | 0.788068 | -0.25181 | 0.801187 | 0.981636 | chr22 | 42632514 | 42635177 | + | 0 NA | intron (NALuJo SIN  | 6756 NR_00116E   | 267020 Hs. | 664737 NR_00116E     | ENSG000002ATP5MGL   | ATP5K2 A1ATP       | syntf protein-coding     |
| chr3-170: 8.657279  | -0.19844 | 0.788068 | -0.25181 | 0.801187 | 0.981636 | chr3  | 1.7E+08  | 1.7E+08  | + | 0 NA | intron (Nintron (N  | 45814 NR_021497  | 80012 Hs.  | 529592 NR_024947     | ENSG000002PHC3      | EDR3 HPH           | polyhomec protein-coding |
| chr3-183: 8.657279  | -0.19844 | 0.788068 | -0.25181 | 0.801187 | 0.981636 | chr3  | 1.84E+08 | 1.84E+08 | + | 0 NA | intron (NALuJr SIN  | 18226 NR_001351  | 55689 Hs.  | 632575 NR_01802E     | ENSG000002YEATS2    | -                  | YEATS dom protein-coding |
| chr3-197: 8.657279  | -0.19844 | 0.788068 | -0.25181 | 0.801187 | 0.981636 | chr3  | 1.98E+08 | 1.98E+08 | + | 0 NA | intron (Nintron (N  | 8005 NR_02784C   | 84248 Hs.  | 27553E NR_03228E     | ENSG000002FYTDD1    | UIF                | forty-two protein-coding |
| chr4-68: 8.657279   | -0.19844 | 0.788068 | -0.25181 | 0.801187 | 0.981636 | chr4  | 68322637 | 68325054 | + | 0 NA | intron (Nintron (N  | 26245 NR_00133C  | 91746 Hs.  | 17595E NR_13337C     | ENSG000002YTHDC1    | YTS21 YTE          | YTH dom protein-coding   |
| chr4-118: 8.657279  | -0.19844 | 0.788068 | -0.25181 | 0.801187 | 0.981636 | chr4  | 1.19E+08 | 1.19E+08 | + | 0 NA | intron (NSVA_B Ret  | 43239 NR_01482E  | 9871 Hs.   | 189641 NR_01482E     | ENSG000002SEC24D    | CLCRP2             | SEC24 hom protein-coding |
| chr5-103: 8.657279  | -0.19844 | 0.788068 | -0.25181 | 0.801187 | 0.981636 | chr5  | 10390504 | 10393364 | + | 0 NA | intron (Nintron (N  | -10430 NR_16210E | 1.13E+08   | NR_16210E            | MIR10397            | -                  | microRNA                 |
| chr5-104: 8.657279  | -0.19844 | 0.788068 | -0.25181 | 0.801187 | 0.981636 | chr5  | 10414969 | 10417534 | + | 0 NA | intron (Nintron (N  | 13887 NR_16210E  | 1.13E+08   | NR_16210E            | MIR10397            | -                  | microRNA                 |
| chr5-95: 8.657279   | -0.19844 | 0.788068 | -0.25181 | 0.801187 | 0.981636 | chr5  | 95920046 | 95925090 | + | 0 NA | intron (Nintron (N  | 39283 NR_012081  | 22936 Hs.  | 192221 NR_012081     | ENSG000002CELL2     | MRCRAT1            | elongatic protein-coding |
| chr5-140: 8.657279  | -0.19844 | 0.788068 | -0.25181 | 0.801187 | 0.981636 | chr5  | 1.12E+08 | 1.12E+08 | + | 0 NA | non-codir non-codir | 2307 NR_002922   | 654322 Hs. | 68970E NR_002922     | ENSG000002SNORA13   | ACA13              | small nucsnRNA           |
| chr5-142: 8.657279  | -0.19844 | 0.788068 | -0.25181 | 0.801187 | 0.981636 | chr5  | 1.4E+08  | 1.4E+08  | + | 0 NA | exon (NM exon (NM   | 47419 NR_01797E  | 54882 Hs.  | 594084 NR_017747     | ENSG000002ANKHD1    | MASK MAS5          | ankyrin protein-coding   |
| chr5-174: 8.657279  | -0.19844 | 0.788068 | -0.25181 | 0.801187 | 0.981636 | chr5  | 1.77E+08 | 1.77E+08 | + | 0 NA | intron (Nintron (N  | 3609 NR_001364   | 1627 Hs.   | 13031E NR_00439E     | ENSG000002DBN1      | DOS117E            | drebrin l1protein-coding |
| chr6-28: 8.657279   | -0.19844 | 0.788068 | -0.25181 | 0.801187 | 0.981636 | chr6  | 28902563 | 28906887 | + | 0 NA | intron (Nintron (N  | 8240 NR_104117   | 414760 Hs. | 21100E NR_104117     | ENSG000002HCG14     | dJ111M5.4HLA       | complncRNA               |
| chr6-170: 8.657279  | -0.19844 | 0.788068 | -0.25181 | 0.801187 | 0.981636 | chr6  | 1.7E+08  | 1.7E+08  | + | 0 NA | intron (Nintron (N  | -6755 NR_039787  | 1.01E+08   | NR_039787            | ENSG000002MIR4644   | -                  | microRNA                 |
| chr7-29: 8.657279   | -0.19844 | 0.788068 | -0.25181 | 0.801187 | 0.981636 | chr7  | 29930344 | 29931796 | + | 0 NA | intron (Nintron (N  | 58731 NR_01476E  | 9805 Hs.   | 52074C NR_01476E     | ENSG000002SCRNI     | SES1               | secernin protein-coding  |
| chr7-45: 8.657279   | -0.19844 | 0.788068 | -0.25181 | 0.801187 | 0.981636 | chr7  | 45724147 | 45729232 | + | 0 NA | intron (NMER9a2 LI  | 42329 NR_024271  | 641977 Hs. | 723477 NR_024271     | ENSG000002SEPT13    | SEPT13             | 7 pseudo                 |
| chr7-75: 8.657279   | -0.19844 | 0.788068 | -0.25181 | 0.801187 | 0.981636 | chr7  | 75479993 | 75484322 | + | 0 NA | intron (NLMC5 LIN   | 4142 NR_16030E   | 1E+08      | NR_16030E            | ENSG000002POM121C   | POM121-2           | POM121 tr protein-coding |
| chr7-100: 8.657279  | -0.19844 | 0.788068 | -0.25181 | 0.801187 | 0.981636 | chr7  | 1E+08    | 1E+08    | + | 0 NA | TTS (NM_1TTS (NM_1  | 14358 NR_00136E  | 7589 Hs.   | 632294 NR_145914     | ENSG000002ZSCAN21   | NY-REN-21          | zinc fing protein-coding |
| chr7-139: 8.657279  | -0.19844 | 0.788068 | -0.25181 | 0.801187 | 0.981636 | chr7  | 1.39E+08 | 1.39E+08 | + | 0 NA | intron (Nintron (N  | 30979 NR_02011E  | 56829 Hs.  | 13351E NR_02011E     | ENSG000002C3HAV1    | ARTD13 FLI         | zinc fing protein-coding |
| chr7-139: 8.657279  | -0.19844 | 0.788068 | -0.25181 | 0.801187 | 0.981636 | chr7  | 1.4E+08  | 1.4E+08  | + | 0 NA | intron (NALuSx SIN  | 99850 NR_00108C  | 154790 Hs. | 57806 NR_00108C      | ENSG000002CLEC2L    | -                  | C-type l1protein-coding  |
| chr8-23: 8.657279   | -0.19844 | 0.788068 | -0.25181 | 0.801187 | 0.981636 | chr8  | 23378989 | 23379902 | + | 0 NA | intron (NLIPA5 LIN  | 24675 NR_00231E  | 4017 Hs.   | 626637 NR_00231E     | ENSG000002CLOXL2    | LOR LOR2           | lysyl oxiprotein-coding  |
| chr8-58: 8.657279   | -0.19844 | 0.788068 | -0.25181 | 0.801187 | 0.981636 | chr8  | 58578966 | 58582637 | + | 0 NA | intron (Nintron (N  | 27540 NR_00562E  | 6386 Hs.   | 200804 NR_00562E     | ENSG000002SDCBP     | MDA-9 MDA9         | syndecan protein-coding  |
| chr8-108: 8.657279  | -0.19844 | 0.788068 | -0.25181 | 0.801187 | 0.981636 | chr8  | 108E+08  | 1.08E+08 | + | 0 NA | intron (NALuSx SIN  | 14477 NR_00156E  | 3646 Hs.   | 405594 NR_00156E     | ENSG000002EIF3E     | EIF3-4 8           | eukaryot iprotein-coding |
| chr8-133: 8.657279  | -0.19844 | 0.788068 | -0.25181 | 0.801187 | 0.981636 | chr8  | 1.33E+08 | 1.33E+08 | + | 0 NA | intron (NMER58A DN  | 14513 NR_00113E  | 10397 Hs.  | 372914 NR_00609E     | ENSG000002NDRG1     | CAP43 CMI          | myc dow protein-coding   |
| chr9-730: 8.657279  | -0.19844 | 0.788068 | -0.25181 | 0.801187 | 0.981636 | chr9  | 730170   | 732720   | + | 0 NA | intron (Nintron (N  | 24768 NR_001354  | 23189 Hs.  | 306764 NR_01515E     | ENSG000002KANK1     | ANKRD15 CKN        | motif protein-coding     |
| chr9-65: 8.657279   | -0.19844 | 0.788068 | -0.25181 | 0.801187 | 0.981636 | chr9  | 65683089 | 65683908 | + | 0 NA | intron (Nintron (N  | 7570 NR_00136E   | 220869 Hs. | 35595C NR_001024     | ENSG000002CBWD5     | CBWD3 C5C          | COBW dom protein-coding  |
| chr9-70: 8.657279   | -0.19844 | 0.788068 | -0.25181 | 0.801187 | 0.981636 | chr9  | 70264242 | 70269609 | + | 0 NA | intron (NMIR SINE   | 7947 NR_001511C  | 23137 Hs.  | 53418E NR_01511C     | ENSG000002SMC5      | SMC5L1             | structure protein-coding |
| chr9-11: 8.657279   | -0.19844 | 0.788068 |          |          |          |       |          |          |   |      |                     |                  |            |                      |                     |                    |                          |

|                     |          |          |          |          |          |       |          |          |   |   |    |                     |         |              |          |                     |                   |                                     |               |                                   |
|---------------------|----------|----------|----------|----------|----------|-------|----------|----------|---|---|----|---------------------|---------|--------------|----------|---------------------|-------------------|-------------------------------------|---------------|-----------------------------------|
| chr1-2481 4. 444512 | -0.27038 | 1.081078 | -0.2501  | 0.802511 | 0.981636 | chr1  | 24812478 | 24813270 | + | 0 | NA | intron (AluSc SIN   | 67427   | NM_013943    | 25932    | Hs. 440544NM_013943 | ENSG00000CLIC4    | CLIC4L Hichloride protein-coding    |               |                                   |
| chr1-1147 4. 444512 | -0.27038 | 1.081078 | -0.2501  | 0.802511 | 0.981636 | chr1  | 1.15E+08 | 1.15E+08 | + | 0 | NA | non-codirnon-codir  | 9249    | NM_025073    | 80143    | Hs. 709277NM_025073 | ENSG00000SIKE1    | SIKE suppressor protein-coding      |               |                                   |
| chr12-754 4. 444512 | -0.27038 | 1.081078 | -0.2501  | 0.802511 | 0.981636 | chr12 | 75483028 | 75484285 | + | 0 | NA | intron (NL2c LINE   | 2901    | NM_006851    | 11010    | Hs. 205555NM_006851 | ENSG00000GLIPR1   | CRISP7 GLI pathc protein-coding     |               |                                   |
| chr12-76 4. 444512  | -0.27038 | 1.081078 | -0.2501  | 0.802511 | 0.981636 | chr12 | 76381772 | 76382848 | + | 0 | NA | intron (NLIME1 LIN  | -33895  | NM_024688    | 79738    | Hs. 96322NM_024688  | ENSG00000BBS10    | C12orf58 Bardet-Bi protein-coding   |               |                                   |
| chr13-973 4. 444512 | -0.27038 | 1.081078 | -0.2501  | 0.802511 | 0.981636 | chr13 | 97379137 | 97380050 | + | 0 | NA | intron (NMIR SINE   | -54576  | NM_021033    | 5911     | Hs. 508489NM_021033 | ENSG00000RAP2A    | K-REV1 KRF RAP2A, m protein-coding  |               |                                   |
| chr14-951 4. 444512 | -0.27038 | 1.081078 | -0.2501  | 0.802511 | 0.981636 | chr14 | 95101697 | 95102394 | + | 0 | NA | intron (Nintron (N  | 31458   | NM_001195    | 23405    | Hs. 87889NM_030621  | ENSG00000DCICER1  | DCR1 Dicer 1, protein-coding        |               |                                   |
| chr15-806 4. 444512 | -0.27038 | 1.081078 | -0.2501  | 0.802511 | 0.981636 | chr15 | 80591769 | 80592570 | + | 0 | NA | intron (Nintron (N  | 11066   | NR_049837    | 1.01E+08 | NR_049837           | ENSG00000MIR5572  | - microRNA ncRNA                    |               |                                   |
| chr16-568 4. 444512 | -0.27038 | 1.081078 | -0.2501  | 0.802511 | 0.981636 | chr16 | 56822221 | 56823771 | + | 0 | NA | intron (Nintron (N  | -35522  | NR_029688    | 406930   | NR_029688           | ENSG00000MIR138-2 | MIRN138-2 microRNA ncRNA            |               |                                   |
| chr16-716 4. 444512 | -0.27038 | 1.081078 | -0.2501  | 0.802511 | 0.981636 | chr16 | 71676457 | 71678572 | + | 0 | NA | intron (Nintron (N  | 21187   | NR_033337    | 1.07E+08 | Hs. 725111NR_033337 | ENSG00000SNORA70D | U70D small nucsnoRNA                |               |                                   |
| chr17-372 4. 444512 | -0.27038 | 1.081078 | -0.2501  | 0.802511 | 0.981636 | chr17 | 37235278 | 37235850 | + | 0 | NA | intron (Nintron (N  | -9215   | NR_132772    | 1.07E+08 | NR_132772           | SNORA90           | - small nucsnoRNA                   |               |                                   |
| chr17-825 4. 444512 | -0.27038 | 1.081078 | -0.2501  | 0.802511 | 0.981636 | chr17 | 82564336 | 82565001 | + | 0 | NA | intron (NMIR LIR    | 44936   | NM_004514    | 3607     | Hs. 591144NM_004514 | ENSG00000FOXK2    | ILF1 ILF-1 forkhead protein-coding  |               |                                   |
| chr19-365 4. 444512 | -0.27038 | 1.081078 | -0.2501  | 0.802511 | 0.981636 | chr19 | 36509887 | 36510313 | + | 0 | NA | TTS (NM_C           | 18171   | NM_001166    | 339324   | Hs. 18103NM_001011  | ENSG00000ZNF260   | OZRP1 PEX zinc fing protein-coding  |               |                                   |
| chr2-2247 4. 444512 | -0.27038 | 1.081078 | -0.2501  | 0.802511 | 0.981636 | chr2  | 2.25E+08 | 2.25E+08 | + | 0 | NA | intron (NMLTIK LTF  | 151585  | NM_00129C    | 55619    | Hs. 46578NM_014688  | ENSG00000DOCK10   | DRIP2 Nbl dedicator protein-coding  |               |                                   |
| chr3-7352 4. 444512 | -0.27038 | 1.081078 | -0.2501  | 0.802511 | 0.981636 | chr3  | 73522493 | 73523264 | + | 0 | NA | intron (Nintron (N  | 1556    | NR_121666    | 1.02E+08 | Hs. 662045NR_121666 | LOC101927-        | uncharactercncRNA                   |               |                                   |
| chr5-3151 4. 444512 | -0.27038 | 1.081078 | -0.2501  | 0.802511 | 0.981636 | chr5  | 31515281 | 31516773 | + | 0 | NA | intron (NAluJb SIN  | 16066   | NM_013235    | 29102    | Hs. 97997NM_013235  | ENSG00000CDROSHA  | ETOHI2 HS drosha riprotein-coding   |               |                                   |
| chr6-1456 4. 444512 | -0.27038 | 1.081078 | -0.2501  | 0.802511 | 0.981636 | chr6  | 1.46E+08 | 1.46E+08 | + | 0 | NA | intron (NLMIG LIN   | 48735   | NM_173082    | 257218   | Hs. 723297NM_173082 | ENSG00000SHPRH    | ba54515.2 SNP2 hist protein-coding  |               |                                   |
| chr6-147 4. 444512  | -0.27038 | 1.081078 | -0.2501  | 0.802511 | 0.981636 | chr6  | 1.47E+08 | 1.47E+08 | + | 0 | NA | intron (NMIR SINE   | -115152 | NR_132444    | 1.06E+08 | Hs. 57539CNR_132444 | ENSG00000LUAD1    | - lung adncRNA                      |               |                                   |
| chr7-9954 4. 444512 | -0.27038 | 1.081078 | -0.2501  | 0.802511 | 0.981636 | chr7  | 99508900 | 99510381 | + | 0 | NA | intron (NAluY SINE  | 3635    | NM_001318    | 23660    | Hs. 110833NM_014568 | ENSG00000ZKSCAN5  | ZFP-95 ZF zinc fing protein-coding  |               |                                   |
| chr7-151 4. 444512  | -0.27038 | 1.081078 | -0.2501  | 0.802511 | 0.981636 | chr7  | 1.51E+08 | 1.51E+08 | + | 0 | NA | intron (NAluSx SIN  | 6838    | NM_001363    | 51667    | Hs. 647082NM_016118 | ENSG00000NUIB1    | BS4 NUIB1 negative protein-coding   |               |                                   |
| chr7-151f 4. 444512 | -0.27038 | 1.081078 | -0.2501  | 0.802511 | 0.981636 | chr7  | 1.52E+08 | 1.52E+08 | + | 0 | NA | intron (Nintron (N  | 6755    | NM_024425    | 51422    | Hs. 647072NM_016203 | ENSG00000PRKAG2   | AAKG AAK protein f protein-coding   |               |                                   |
| chr8-5397 4. 444512 | -0.27038 | 1.081078 | -0.2501  | 0.802511 | 0.981636 | chr8  | 53971280 | 53974044 | + | 0 | NA | intron (Nintron (N  | 49786   | NM_0201437   | 6917     | Hs. 491745NM_006758 | ENSG00000TCEA1    | GTF2S SII transcrip protein-coding  |               |                                   |
| chr9-1252 4. 444512 | -0.27038 | 1.081078 | -0.2501  | 0.802511 | 0.981636 | chr9  | 1.25E+08 | 1.25E+08 | + | 0 | NA | intron (NAluSx SIN  | 8074    | NM_00133C    | 26130    | Hs. 42376NM_015633  | ENSG00000GAPVD1   | GAPX5 GATPase ac protein-coding     |               |                                   |
| chr17-418 8. 870904 | 0.196289 | 0.784952 | 0.250065 | 0.802537 | 0.981636 | chr17 | 4183031  | 4185312  | + | 0 | NA | intron (Nintron (N  | 40474   | NM_001254    | 124936   | Hs. 513871NM_144611 | ENSG00000CYB5D2   | - cytochro protein-coding           |               |                                   |
| chr2-2005 8. 870904 | 0.196289 | 0.784952 | 0.250065 | 0.802537 | 0.981636 | chr2  | 2.01E+08 | 2.01E+08 | + | 0 | NA | 3' UTR (N3' UTR (N  | -17325  | NM_00619C    | 4999     | Hs. 44487CNM_00619C | ENSG00000ORC2     | ORC2L origin re protein-coding      |               |                                   |
| chr3-1125 8. 870904 | 0.196289 | 0.784952 | 0.250065 | 0.802537 | 0.981636 | chr3  | 1.13E+08 | 1.13E+08 | + | 0 | NA | IntergeniSATR2 Sat  | -30055  | NM_18178C    | 151888   | Hs. 445162NM_18178C | ENSG00000BTLA     | BTLA1 CD2B and T l protein-coding   |               |                                   |
| chr3-1962 8. 870904 | 0.196289 | 0.784952 | 0.250065 | 0.802537 | 0.981636 | chr3  | 1.96E+08 | 1.96E+08 | + | 0 | NA | intron (NAluSx SIN  | 30920   | NM_001312    | 5130     | Hs. 135997NM_005017 | ENSG00000PCYT1A   | CCTA CT C phosphate protein-coding  |               |                                   |
| chr4-3984 8. 870904 | 0.196289 | 0.784952 | 0.250065 | 0.802537 | 0.981636 | chr4  | 39840302 | 39841672 | + | 0 | NA | intron (NAluSx SIN  | 136924  | NM_00110C    | 23244    | Hs. 331431NM_01520C | ENSG00000PDS5A    | PIG54 SCC PDS5 coe protein-coding   |               |                                   |
| chr7-661f 8. 870904 | 0.196289 | 0.784952 | 0.250065 | 0.802537 | 0.981636 | chr7  | 66158060 | 66158878 | + | 0 | NA | IntergeniMSTL LIR   | 43622   | NM_014475    | 27297    | Hs. 300684NM_014475 | ENSG00000CRCP     | CGRP-RCP CGRP recep protein-coding  |               |                                   |
| chr13-197 7. 895294 | 0.210797 | 0.843442 | 0.249925 | 0.802645 | 0.981636 | chr13 | 19738232 | 19738703 | + | 0 | NA | intron (NMER2 DNA   | 44478   | NM_001354    | 55269    | Hs. 213198NM_001042 | ENSG00000PSPC1    | PSP1 paraspecl protein-coding       |               |                                   |
| chr9-1344 7. 895294 | 0.210797 | 0.843442 | 0.249925 | 0.802645 | 0.981636 | chr9  | 1.34E+08 | 1.34E+08 | + | 0 | NA | intron (NAluY SINE  | 23582   | NM_001291    | 6256     | Hs. 590886NM_002957 | ENSG00000XRRA     | NR2B1 retinoid protein-coding       |               |                                   |
| chr10-131 9. 928793 | 0.187269 | 0.749489 | 0.249862 | 0.802694 | 0.981636 | chr10 | 13115814 | 13118732 | + | 0 | NA | intron (NAluY SINE  | 17110   | NM_001005    | 10133    | Hs. 332706NM_02198C | ENSG00000OPTN     | ALS12 FIF opt neur iprotein-coding  |               |                                   |
| chr20-381 9. 928793 | 0.187269 | 0.749489 | 0.249862 | 0.802694 | 0.981636 | chr20 | 38147373 | 38151804 | + | 0 | NA | intron (NAluY SINE  | 15682   | NM_001322    | 7052     | Hs. 517033NM_004613 | ENSG00000TGM2     | GTG TG translu protein-coding       |               |                                   |
| chr14-717 7. 75794  | -0.21494 | 0.860282 | -0.24985 | 0.802705 | 0.981636 | chr14 | 71735337 | 71735900 | + | 0 | NA | intron (NTiger15e   | 149320  | NM_001284    | 26037    | Hs. 654657NM_015556 | ENSG00000SIPALL1  | E6TP1 SP signal iprotein-coding     |               |                                   |
| chr12-121 4. 880545 | -0.26368 | 1.055397 | -0.24984 | 0.802715 | 0.981636 | chr12 | 1.21E+08 | 1.21E+08 | + | 0 | NA | TTS (NM_C           | 26692   | NM_00256C    | 5025     | Hs. 321705NM_00256C | ENSG00000P2RX4    | P2X4 P2X4 purinergi protein-coding  |               |                                   |
| chr13-191 4. 880545 | -0.26368 | 1.055397 | -0.24984 | 0.802715 | 0.981636 | chr13 | 19989919 | 19989816 | + | 0 | NA | intron (NAluSx SIN  | 29553   | NR_148366    | 7750     | Hs. 507433NM_003455 | ENSG00000ZMYM2    | FIM MYM f zinc fing protein-coding  |               |                                   |
| chr1-731f 8. 195822 | -0.20396 | 0.816382 | -0.24983 | 0.802719 | 0.981636 | chr1  | 731035   | 732077   | + | 0 | NA | IntergeniAluJr SIN  | -1205   | NR_028327    | 1E+08    | Hs. 728864NR_028327 | LOC1010135-       | uncharactercncRNA                   |               |                                   |
| chr1-938f 8. 195822 | -0.20396 | 0.816382 | -0.24983 | 0.802719 | 0.981636 | chr1  | 93882628 | 93883750 | + | 0 | NA | IntergeniLIME2 LIN  | -3983   | NM_014597    | 30836    | Hs. 85769NM_014597  | ENSG00000DNTTIP2  | ERBP FCF2 deoxy nucl protein-coding |               |                                   |
| chr10-887 8. 195822 | -0.20396 | 0.816382 | -0.24983 | 0.802719 | 0.981636 | chr10 | 68726776 | 68729591 | + | 0 | NA | intron (Nintron (N  | 6944    | NM_001282    | 55749    | Hs. 49853NM_018237  | ENSG00000CCAR1    | cell divi protein-coding            |               |                                   |
| chr10-84 8. 195822  | -0.20396 | 0.816382 | -0.24983 | 0.802719 | 0.981636 | chr10 | 84458966 | 84459716 | + | 0 | NA | intron (NLMIE1 LIN  | 34170   | NM_001284    | 54642    | Hs. 461988NM_01899C | ENSG00000CCSER2   | FAM190B c cell dc protein-coding    |               |                                   |
| chr2-5393 8. 195822 | -0.20396 | 0.816382 | -0.24983 | 0.802719 | 0.981636 | chr2  | 53933699 | 53934511 | + | 0 | NA | intron (NMLTID LTF  | 36888   | NM_014614    | 23198    | Hs. 413801NM_014614 | ENSG00000PSME4    | PA200 proteason protein-coding      |               |                                   |
| chr2-207 8. 195822  | -0.20396 | 0.816382 | -0.24983 | 0.802719 | 0.981636 | chr2  | 2.08E+08 | 2.08E+08 | + | 0 | NA | intron (NMLTID LTF  | 30416   | NM_001371428 | -7504    | NR_026645           | 670               | Hs. 10136NM_004332                  | ENSG00000BPPL | BPH-RP MC biphenyl protein-coding |
| chrX-291f 8. 195822 | -0.20396 | 0.816382 | -0.24983 | 0.802719 | 0.981636 | chrX  | 291324   | 291645   | + | 0 | NA | intron (Nintron (N  | 8006    | NM_00137C    | 55344    | Hs. 522568NM_01839C | ENSG00000PLCXD1   | LLOXNC01-phosphati protein-coding   |               |                                   |
| chr7-1497 43. 93386 | 0.100128 | 0.400986 | 0.249703 | 0.802817 | 0.981636 | chr7  | 1.5E+08  | 1.5E+08  | + | 0 | NA | exon (NM exon (NM   | 8121    | NM_20733C    | 168544   | Hs. 726477NM_20733C | ENSG00000ZNF467   | EZ1 Zfp467 zinc fing protein-coding |               |                                   |
| chr1-1627 10. 39996 | 0.18074  | 0.725682 | 0.249062 | 0.803313 | 0.981636 | chr1  | 1.63E+08 | 1.63E+08 | + | 0 | NA | intron (Nintron (N  | -3461   | NM_001304    | 51478    | Hs. 492925NM_016371 | ENSG00000HSD17B7  | MIR3 SDR hydroxyst protein-coding   |               |                                   |
| chr1-2242 10. 39996 | 0.18074  | 0.725682 | 0.249062 | 0.803313 | 0.981636 | chr1  | 2.24E+08 | 2.24E+08 | + | 0 | NA | intron (NAluJb SIN  | 7948    | NR_031574    | 1E+08    | NR_031574           | ENSG00000MIR320B2 | MIR320B-2 microRNA ncRNA            |               |                                   |
| chr11-354 10. 39996 | 0.18074  | 0.725682 | 0.249062 | 0.803313 | 0.981636 | chr11 | 35448216 | 35449885 | + | 0 | NA | intron (NLIPIA10 LI | -28992  | NM_001195    | 6506     | Hs. 502338NM_004171 | ENSG00000SLCIA2   | EAAT2 EIE solute c protein-coding   |               |                                   |
| chr12-62 10. 39996  | 0.18074  | 0.725682 | 0.249062 | 0.803313 | 0.981636 | chr12 | 62393233 | 62394335 | + | 0 | NA | intron (NAluSx SIN  | -73042  | NM_001275    | 23041    | Hs. 389378NM_01502C | ENSG00000MON2     | - MON2 homc protein-coding          |               |                                   |
| chr17-802 10. 39996 | 0.18074  | 0.725682 | 0.249062 | 0.803313 | 0.981636 | chr17 | 80287439 | 80131462 | + | 0 | NA | intron (NAluSx SIN  | 39948   | NM_020954    | 57674    | Hs. 195642NM_020914 | ENSG00000RNF213   | ALO17 C17 ring fing protein-coding  |               |                                   |
| chr3-4935 10. 39996 | 0.18074  | 0.725682 | 0.249062 | 0.803313 | 0.981636 | chr3  | 49396200 | 49396821 | + | 0 | NA | intron (NAluSx SIN  | 15466   | NM_001313    | 387      | Hs. 247077NM_001664 | ENSG00000RHOA     | ARH12 ARF ras homol protein-coding  |               |                                   |
| chr5-166 10. 39996  | 0.18074  | 0.725682 | 0.249062 | 0.803313 | 0.981636 | chr5  | 16692730 | 16695158 | + | 0 | NA | intron (Nintron (N  | -76886  | NM_001034    | 54463    | Hs. 481704NM_01900C | ENSG00000RETREG1  | FAM134B J reticulof protein-coding  |               |                                   |
| chr10-622 7. 750082 | -0.21325 | 0.856558 | -0.24986 | 0.803393 | 0.981636 | chr10 | 62005988 | 62006456 | + | 0 | NA | intron (NAluSx SIN  | 41335   | NM_001244    | 84159    | Hs. 535297NM_032199 | ENSG00000ARID5B   | DESRT MRF AT-rich iprotein-coding   |               |                                   |
| chr1-8901 8. 649421 | -0.19687 | 0.790847 | -0.24893 | 0.8      |          |       |          |          |   |   |    |                     |         |              |          |                     |                   |                                     |               |                                   |



|                    |          |          |          |          |          |       |          |          |   |      |                      |                   |                              |                   |                   |                             |                 |
|--------------------|----------|----------|----------|----------|----------|-------|----------|----------|---|------|----------------------|-------------------|------------------------------|-------------------|-------------------|-----------------------------|-----------------|
| chr14-212 8.878762 | 0.194548 | 0.78856  | 0.246713 | 0.805131 | 0.981636 | chr14 | 21257662 | 21257959 | + | 0 NA | intron (NA)uJr4 SI   | 11669 NM_031314   | 3183 Hs. 50884ENM_00450C     | ENSG00000CHNRNPC  | C1 C2 HNF         | heteroger protein-coding    |                 |
| chr19-196 8.878762 | 0.194548 | 0.78856  | 0.246713 | 0.805131 | 0.981636 | chr19 | 19658522 | 19659447 | + | 0 NA | intron (N)intron (N) | 4692 NM_02041C    | 57130 Hs. 501794NM_02041C    | ENSG00000ATP13A1  | ATP13A CCATPase 1 | protein-coding              |                 |
| chr10-322 9.152017 | -0.18979 | 0.769471 | -0.24666 | 0.805175 | 0.981636 | chr10 | 32290096 | 32291084 | + | 0 NA | intron (N)intron (N) | 56568 NM_001272   | 80314 Hs. 16780ENM_02520E    | ENSG00000CEPC1    | Epl1              | enhancer protein-coding     |                 |
| chr10-736 9.152017 | -0.18979 | 0.769471 | -0.24666 | 0.805175 | 0.981636 | chr10 | 73674374 | 73675969 | + | 0 NA | exon (NM)exon (NM)   | -19142 NM_001114  | 79933 Hs. 64527ENM_02487E    | ENSG00000SYNP02L  | -                 | synaptoz protein-coding     |                 |
| chr11-65 9.152017  | -0.18979 | 0.769471 | -0.24666 | 0.805175 | 0.981636 | chr11 | 65920814 | 65923981 | + | 0 NA | TTS (NM_C)TTS (NM_C) | 2971 NM_006442    | 10589 Hs. 356742NM_006442    | ENSG00000DRAP1    | NC2-alphaDR1      | assoc protein-coding        |                 |
| chr12-164 9.152017 | -0.18979 | 0.769471 | -0.24666 | 0.805175 | 0.981636 | chr12 | 1645873  | 1648996  | + | 0 NA | TTS (NM_C)TTS (NM_C) | 12946 NR_037422   | 1.01E+08                     | NR_037422         | ENSG00000CIR3649  | -                           | microRNA ncRNA  |
| chr12-132 9.152017 | -0.18979 | 0.769471 | -0.24666 | 0.805175 | 0.981636 | chr12 | 1.32E+08 | 1.32E+08 | + | 0 NA | intron (N)intron (N) | 10054 NR_003299   | 347918 Hs. 12211ENM_18261E   | ENSG00000EP400P1  | EP400NL           | EP400 pscpseudo             |                 |
| chr12-139 9.152017 | -0.18979 | 0.769471 | -0.24666 | 0.805175 | 0.981636 | chr12 | 1.33E+08 | 1.33E+08 | + | 0 NA | intron (N)intron (N) | 10912 NM_015114   | 23141 Hs. 65462ENM_015114    | ENSG00000ANKLE2   | KIAA0692 ankyrin  | intron protein-coding       |                 |
| chr13-113 9.152017 | -0.18979 | 0.769471 | -0.24666 | 0.805175 | 0.981636 | chr13 | 1.13E+08 | 1.14E+08 | + | 0 NA | exon (NM)exon (NM)   | 9023 NM_00134E    | 55002 Hs. 31759ENM_01790E    | ENSG00000TMC03    | C13orf11          | transmemt protein-coding    |                 |
| chr15-51 9.152017  | -0.18979 | 0.769471 | -0.24666 | 0.805175 | 0.981636 | chr15 | 15920916 | 15903716 | + | 0 NA | intron (N)intron (N) | 28084 NR_10977E   | 1E+08 Hs. 66478ENR_10977E    | LOC100422-        | LE01              | homopseudo                  |                 |
| chr15-56 9.152017  | -0.18979 | 0.769471 | -0.24666 | 0.805175 | 0.981636 | chr15 | 56093014 | 56095896 | + | 0 NA | exon (NM)exon (NM)   | 95477 NM_00137C   | 64864 Hs. 74508ENM_02284E    | ENSG00000CRFX7    | RFXC2             | regulator protein-coding    |                 |
| chr15-632 9.152017 | -0.18979 | 0.769471 | -0.24666 | 0.805175 | 0.981636 | chr15 | 63588596 | 63590544 | + | 0 NA | intron (N)HALIME LI  | -7817 NM_001367   | 283807 Hs. 63116ENM_20337E   | ENSG00000FBXL22   | Fb122             | F-box anc protein-coding    |                 |
| chr15-96 9.152017  | -0.18979 | 0.769471 | -0.24666 | 0.805175 | 0.981636 | chr15 | 96334008 | 96336742 | + | 0 NA | intron (N)intron (N) | 1610 NM_00114E    | 7026 Hs. 347991NM_02100E     | ENSG00000NR2F2    | ARP-1 ARF         | nucleic acid protein-coding |                 |
| chr17-424 9.152017 | -0.18979 | 0.769471 | -0.24666 | 0.805175 | 0.981636 | chr17 | 42469658 | 42472721 | + | 0 NA | intron (N)AluY SINE  | 12311 NM_001547   | 535 Hs. 463074NM_005177      | ENSG00000ATP6VOA1 | ATP6N1 A1ATPase H | protein-coding              |                 |
| chr19-324 9.152017 | -0.18979 | 0.769471 | -0.24666 | 0.805175 | 0.981636 | chr19 | 324230   | 332427   | + | 0 NA | intron (N)LMC LINE   | 16513 NM_00134E   | 54531 Hs. 101891NM_01755E    | ENSG00000MIER2    | KIAA1193 MIER     | famiprotein-coding          |                 |
| chr2-1044 9.152017 | -0.18979 | 0.769471 | -0.24666 | 0.805175 | 0.981636 | chr2  | 10440084 | 10444830 | + | 0 NA | intron (N)intron (N) | 4392 NR_028374    | 1E+08 Hs. 73052ENR_028374    | ENSG00000SNORA80B | ACA67B            | small nucsnoRNA             |                 |
| chr2-438 9.152017  | -0.18979 | 0.769471 | -0.24666 | 0.805175 | 0.981636 | chr2  | 43887764 | 43889863 | + | 0 NA | intron (N)intron (N) | 49842 NM_022437   | 64241 Hs. 413931NM_022437    | ENSG00000ACBC68   | GBD4 STSL         | ATP bindiprotein-coding     |                 |
| chr2-860 9.152017  | -0.18979 | 0.769471 | -0.24666 | 0.805175 | 0.981636 | chr2  | 86032909 | 86034005 | + | 0 NA | intron (N)intron (N) | 72429 NM_01542E   | 25885 Hs. 53181ENM_01542E    | ENSG00000POLR1A   | A190 AFDC         | RNA polynprotein-coding     |                 |
| chr3-1031 9.152017 | -0.18979 | 0.769471 | -0.24666 | 0.805175 | 0.981636 | chr3  | 10311014 | 10319341 | + | 0 NA | intron (N)intron (N) | 5864 NM_00113E    | 6396 Hs. 166924NM_03067E     | ENSG00000SEC13    | D3S1231E SEC13    | homprotein-coding           |                 |
| chr3-581 9.152017  | -0.18979 | 0.769471 | -0.24666 | 0.805175 | 0.981636 | chr3  | 5818050  | 58115146 | + | 0 NA | intron (N)intron (N) | 59037 NR_135534   | 1.05E+08 Hs. 613914NR_135534 | ENSG00000FLNB-AS1 | -                 | FLNB anticrRNA              |                 |
| chr3-155 9.152017  | -0.18979 | 0.769471 | -0.24666 | 0.805175 | 0.981636 | chr3  | 1.56E+08 | 1.56E+08 | + | 0 NA | intron (N)LMBB LIN   | 45739 NM_00387E   | 8833 Hs. 591314NM_00387E     | ENSG00000GMP5     | GATD7             | guanine nprotein-coding     |                 |
| chr4-580 9.152017  | -0.18979 | 0.769471 | -0.24666 | 0.805175 | 0.981636 | chr4  | 5808426  | 5812928  | + | 0 NA | intron (N)intron (N) | 77136 NM_00128E   | 1400 Hs. 13527NM_00131E      | ENSG00000CRMP1    | CRMP-1 DF         | collapsir protein-coding    |                 |
| chr6-154 9.152017  | -0.18979 | 0.769471 | -0.24666 | 0.805175 | 0.981636 | chr6  | 1.55E+08 | 1.55E+08 | + | 0 NA | exon (NM)exon (NM)   | -21139 NR_03610C  | NR_03610C                    | ENSG00000MIR1273C | -                 | microRNA ncRNA              |                 |
| chr7-139 9.152017  | -0.18979 | 0.769471 | -0.24666 | 0.805175 | 0.981636 | chr7  | 1.4E+08  | 1.4E+08  | + | 0 NA | intron (N)LMBA LIN   | 63107 NM_00108C   | 154790 Hs. 57806 NM_00108C   | ENSG00000CLEC2L   | -                 | C-type 1e protein-coding    |                 |
| chr1-156 11.88787  | 0.167928 | 0.681258 | 0.246498 | 0.805297 | 0.981636 | chr1  | 1.56E+08 | 1.56E+08 | + | 0 NA | intron (N)L3 LINE C  | -17130 NM_001004  | 391104 Hs. 53237ENM_001004   | ENSG00000VHLL     | VHLP VLP          | VHL like protein-coding     |                 |
| chr11-66 11.88787  | 0.167928 | 0.681258 | 0.246498 | 0.805297 | 0.981636 | chr11 | 66054034 | 66068084 | + | 0 NA | intron (N)AluSx1 SI  | 7915 NR_145738    | 1.1E+08                      | NR_145738         | SNORD13F          | -                           | small nucsnoRNA |
| chr19-344 11.88787 | 0.167928 | 0.681258 | 0.246498 | 0.805297 | 0.981636 | chr19 | 34943418 | 34944318 | + | 0 NA | exon (NM)exon (NM)   | 16965 NR_02401E   | 90075 Hs. 657402NM_19432E    | ENSG00000ZNF30    | KOX28             | zinc fingprotein-coding     |                 |
| chr3-1841 9.572334 | -0.18778 | 0.762104 | -0.2464  | 0.805371 | 0.981636 | chr3  | 1.84E+08 | 1.84E+08 | + | 0 NA | 3' UTR (N)3' UTR (N) | -3025 NM_001311   | 1173 Hs. 51846CNM_00406E     | ENSG00000AP2M1    | AP50 CLAF         | adaptor r protein-coding    |                 |
| chr15-305 8.187964 | -0.2022  | 0.821098 | -0.24625 | 0.805486 | 0.981636 | chr15 | 30923460 | 30923785 | + | 0 NA | intron (N)intron (N) | 19707 NM_014967   | 22909 Hs. 58486ENM_014967    | ENSG00000CFAN1    | KIAA1018 FANCD2   | ar protein-coding           |                 |
| chr14-311 8.690561 | -0.19456 | 0.790611 | -0.24609 | 0.805615 | 0.981636 | chr14 | 31126335 | 31127940 | + | 0 NA | intron (N)AluSx1 SI  | 80656 NM_01538E   | 25831 Hs. 708017NM_01538E    | ENSG00000HECTD1   | EULR              | HECT dom protein-coding     |                 |
| chr15-827 8.690561 | -0.19456 | 0.790611 | -0.24609 | 0.805615 | 0.981636 | chr15 | 82754707 | 82756413 | + | 0 NA | promoter-promoter-   | -385 NR_003011    | 677778 Hs. 74389ENR_003011   | ENSG00000SCARNA15 | ACA45             | small Ca_ncRNA              |                 |
| chr3-1697 8.690561 | -0.19456 | 0.790611 | -0.24609 | 0.805615 | 0.981636 | chr3  | 1.7E+08  | 1.7E+08  | + | 0 NA | intron (N)intron (N) | 11902 NM_00118E   | 55892 Hs. 50702ENM_01865E    | ENSG00000MYNN     | OSZF SBB1         | myoneurir protein-coding    |                 |
| chr4-533 8.690561  | -0.19456 | 0.790611 | -0.24609 | 0.805615 | 0.981636 | chr4  | 53397916 | 53401505 | + | 0 NA | intron (N)intron (N) | 22057 NM_001134   | 81608 Hs. 55510ENM_030917    | ENSG00000FIP1L1   | FIP1 Rhe          | factor ir protein-coding    |                 |
| chr6-365 8.690561  | -0.19456 | 0.790611 | -0.24609 | 0.805615 | 0.981636 | chr6  | 36505070 | 36506739 | + | 0 NA | intron (N)Charlie2C  | 41575 NM_007271   | 11329 Hs. 40957ENM_007271    | ENSG00000CTK38    | NDR NDR1          | serine/tf protein-coding    |                 |
| chr8-263 8.690561  | -0.19456 | 0.790611 | -0.24609 | 0.805615 | 0.981636 | chr8  | 26394902 | 26396436 | + | 0 NA | intron (N)LIPI2 LIN  | 5256 NM_00133C    | 665 Hs. 13122ENM_00433E      | ENSG00000BNIP3L   | BNIP3a NBCL2      | inte protein-coding         |                 |
| chr8-144 8.690561  | -0.19456 | 0.790611 | -0.24609 | 0.805615 | 0.981636 | chr8  | 1.45E+08 | 1.45E+08 | + | 0 NA | intron (N)intron (N) | 6491 NR_00695E    | 7564 Hs. 49322ENM_00695E     | ENSG00000ZNF16    | HZF1 KOX          | zinc fingprotein-coding     |                 |
| chr14-32 4.872687  | -0.2611  | 0.062587 | -0.24572 | 0.805896 | 0.981636 | chr14 | 32095694 | 32096062 | + | 0 NA | intron (N)intron (N) | 18574 NM_00117E   | 394 Hs. 59231ENM_00117E      | ENSG00000CARHGAP5 | GF12 RhoC         | Rho GTPas protein-coding    |                 |
| chr1-201 12.40018  | 0.164343 | 0.66883  | 0.245717 | 0.805901 | 0.981636 | chr1  | 2.02E+08 | 2.02E+08 | + | 0 NA | intron (N)intron (N) | 6437 NM_00633E    | 10440 Hs. 20716 NM_00633E    | ENSG00000TIMM17A  | TIM17 TIM         | translocac protein-coding   |                 |
| chr19-444 12.40018 | 0.164343 | 0.66883  | 0.245717 | 0.805901 | 0.981636 | chr19 | 44477193 | 44487672 | + | 0 NA | intron (N)intron (N) | 18090 NM_01325E   | 7733 Hs. 22305 NM_01325E     | ENSG00000ZNF180   | HZH168            | zinc fing protein-coding    |                 |
| chr17-213 10.40782 | 0.179281 | 0.729923 | 0.245616 | 0.805979 | 0.981636 | chr17 | 21308058 | 21312300 | + | 0 NA | intron (N)AluSp SIN  | 22143 NM_00275E   | 5606 Hs. 51401ENM_00275E     | ENSG00000MAP2K3   | MAPKK3 MF         | mitogen-ε protein-coding    |                 |
| chr2-1018 10.40782 | 0.179281 | 0.729923 | 0.245616 | 0.805979 | 0.981636 | chr2  | 1.02E+08 | 1.02E+08 | + | 0 NA | intron (N)intron (N) | -112727 NR_103791 | 1.01E+08 Hs. 51624ENR_103791 | LINC01127-        | -                 | long intncRNA               |                 |
| chr20-354 10.40782 | 0.179281 | 0.729923 | 0.245616 | 0.805979 | 0.981636 | chr20 | 35406987 | 35410053 | + | 0 NA | intron (N)LMB3 LIN   | 3453 NM_018244    | 55245 Hs. 72629CNM_018244    | ENSG00000UQC1     | BFZB C20c         | ubiquitin protein-coding    |                 |
| chr22-502 10.40782 | 0.179281 | 0.729923 | 0.245616 | 0.805979 | 0.981636 | chr22 | 50278142 | 50282043 | + | 0 NA | intron (N)intron (N) | -9712 NR_110887   | 5600 Hs. 57732 NM_002751     | ENSG00000MAPK11   | P38B P38E         | mitogen-ε protein-coding    |                 |
| chr7-7541 10.40782 | 0.179281 | 0.729923 | 0.245616 | 0.805979 | 0.981636 | chr7  | 75416792 | 75419161 | + | 0 NA | 3' UTR (N)3' UTR (N) | 7654 NR_10401E    | 155400 Hs. 436034NM_00103E   | ENSG00000NSUN5P1  | NSUN5B WE         | NSUN5 pscpseudo             |                 |
| chr7-128 10.40782  | 0.179281 | 0.729923 | 0.245616 | 0.805979 | 0.981636 | chr7  | 1.29E+08 | 1.29E+08 | + | 0 NA | intron (N)intron (N) | 15966 NR_14905E   | 1.11E+08 Hs. 73592ENR_14905E | ENSG00000FLNC-AS1 | -                 | FLNC anticrRNA              |                 |
| chr2-691 11.42457  | 0.171786 | 0.699463 | 0.245597 | 0.805994 | 0.981636 | chr2  | 69101989 | 69105597 | + | 0 NA | TTS (NR_C)TTS (NR_C) | 111 NR_03607E     | NR_03607E                    | ENSG00000MIR3126  | mir-3126          | microRNA ncRNA              |                 |
| chr12-306 9.10302  | -0.19051 | 0.775874 | -0.24554 | 0.806038 | 0.981636 | chr12 | 30630486 | 30631002 | + | 0 NA | 3' UTR (N)3' UTR (N) | 46500 NM_00119C   | 10526 Hs. 50513ENM_00639C    | ENSG00000IPOS     | RANBP8            | importin protein-coding     |                 |
| chr1-2017 11.38343 | 0.170538 | 0.694747 | 0.245468 | 0.806094 | 0.981636 | chr1  | 2.02E+08 | 2.02E+08 | + | 0 NA | intron (N)TGn Sin    | -1563 NR_03159E   | 1E+08                        | NR_03159E         | ENSG00000MIR1231  | MIRN1231                    | microRNA ncRNA  |
| chr11-281 11.38343 | 0.170538 | 0.694747 | 0.245468 | 0.806094 | 0.981636 | chr11 | 28173004 | 28174453 | + | 0 NA | intron (N)LMC3 LIN   | 65340 NM_15263E   | 196074 Hs. 24332ENM_15263E   | ENSG00000METTL15  | METT5D1           | methyltr protein-coding     |                 |
| chr13-422 11.38343 | 0.170538 | 0.694747 | 0.245468 | 0.806094 | 0.981636 | chr13 | 42298644 | 42300029 | + | 0 NA | intron (N)intron (N) |                   |                              |                   |                   |                             |                 |

|           |          |          |          |          |          |          |       |          |          |   |   |    |                    |         |            |          |                    |           |                 |                 |                            |                          |
|-----------|----------|----------|----------|----------|----------|----------|-------|----------|----------|---|---|----|--------------------|---------|------------|----------|--------------------|-----------|-----------------|-----------------|----------------------------|--------------------------|
| chr15-41  | 0.682703 | -0.193   | 0.790432 | -0.24417 | 0.8071   | 0.981636 | chr15 | 41094636 | 41095959 | + | 0 | NA | intron (AluSq2 SI  | 20949   | NR_10403E  | 54617    | Hs.29294ENM_01755  | ENSG00000 | IN080           | IN080A IN       | IN080                      | conprotein-coding        |
| chr15-807 | 0.682703 | -0.193   | 0.790432 | -0.24417 | 0.8071   | 0.981636 | chr15 | 80724979 | 80726313 | + | 0 | NA | intron (AluJo SIN  | 30336   | NM_021214  | 58489    | Hs.459072NM_021214 | ENSG00000 | ABHD17C         | FAM108C1        | abhydrolase protein-coding |                          |
| chr19-374 | 0.682703 | -0.193   | 0.790432 | -0.24417 | 0.8071   | 0.981636 | chr19 | 37462500 | 37465139 | + | 0 | NA | intron (Tigger3b   | 3625    | NM_00133C  | 148266   | Hs.51184ENM_152484 | ENSG00000 | ZNF569          | ZAP1 ZNF        | zinc finger protein-coding |                          |
| chr2-993  | 0.682703 | -0.193   | 0.790432 | -0.24417 | 0.8071   | 0.981636 | chr2  | 99390460 | 99391534 | + | 0 | NA | intron (Tigger2a   | 53608   | NM_015904  | 9669     | Hs.15868ENM_015904 | ENSG00000 | E1F5B           | IF2             | eukaryotic protein-coding  |                          |
| chr4-308  | 0.682703 | -0.193   | 0.790432 | -0.24417 | 0.8071   | 0.981636 | chr4  | 30890800 | 30892524 | + | 0 | NA | intron (AluY SINE  | 14622   | NM_002111  | 3064     | Hs.51845ENM_002111 | ENSG00000 | CTH             | HD IT15 I       | huntingtin protein-coding  |                          |
| chr6-1091 | 0.682703 | -0.193   | 0.790432 | -0.24417 | 0.8071   | 0.981636 | chr6  | 1.09E+08 | 1.09E+08 | + | 0 | NA | intron (LIPA3 LIN  | -17472  | NR_15243E  | 221262   | Hs.373914NM_173671 | ENSG00000 | CCDC162P        | C6orf183        | coiled-co pseudo           |                          |
| chr9-9501 | 0.682703 | -0.193   | 0.790432 | -0.24417 | 0.8071   | 0.981636 | chr9  | 95019731 | 95022140 | + | 0 | NA | intron (AluJb SIN  | -44415  | NR_106722E | 1.02E+08 | NR_106722ENSG00000 | MIR6081   | hsa-mir-6       | microRNA ncRNA  |                            |                          |
| chr10-500 | 0.87898  | 0.173391 | 0.710403 | 0.244075 | 0.807173 | 0.981636 | chr10 | 50097763 | 50101968 | + | 0 | NA | intron (intron (N  | 31911   | NM_00100E  | 387680   | Hs.36528ENM_01823E | ENSG00000 | WASHC2A         | FAM21A F        | WASH comp protein-coding   |                          |
| chr14-754 | 0.605616 | -0.18416 | 0.754847 | -0.24397 | 0.807253 | 0.981636 | chr14 | 75444223 | 75444952 | + | 0 | NA | intron (MIRc SINE  | 12453   | NM_00113E  | 122953   | Hs.19648ENM_13046E | ENSG00000 | JDP2            | JUNDM2          | Jun dimer protein-coding   |                          |
| chr14-819 | 0.605616 | -0.18416 | 0.754847 | -0.24397 | 0.807253 | 0.981636 | chr14 | 81527480 | 81527488 | + | 0 | NA | intron (L1MC5a LI  | 9289    | NM_00506E  | 6400     | Hs.18130ENM_00506E | ENSG00000 | SEELL           | Hrd3 PRO1       | SEELL adex protein-coding  |                          |
| chr7-1001 | 0.605616 | -0.18416 | 0.754847 | -0.24397 | 0.807253 | 0.981636 | chr7  | 1E+08    | 1E+08    | + | 0 | NA | intron (AluJo SIN  | 7771    | NM_001364  | 6800     | Hs.48930ENM_00564E | ENSG00000 | TAF6            | ALYUS MG        | CATATA-box protein-coding  |                          |
| chr14-607 | 0.564476 | -0.18639 | 0.764484 | -0.24381 | 0.807379 | 0.981636 | chr14 | 60718908 | 60720545 | + | 0 | NA | intron (intron (N  | 4625    | NM_01742C  | 51804    | Hs.97849           | NM_01742C | ENSG00000       | SIX4            | AREC3                      | SIX homec protein-coding |
| chr3-494  | 0.374316 | 0.199505 | 0.818363 | 0.243786 | 0.807397 | 0.981636 | chr3  | 49403115 | 49403727 | + | 0 | NA | intron (intron (N  | 8555    | NM_00131E  | 387      | Hs.247077NM_001664 | ENSG00000 | RHOA            | ARH12 AR        | ras homol protein-coding   |                          |
| chr1-210  | 0.92012  | 0.174657 | 0.716792 | 0.243665 | 0.80749  | 0.981636 | chr1  | 2.4E+08  | 2.4E+08  | + | 0 | NA | intron (L1PA7 LIN  | 128848  | NM_00206E  | 56776    | Hs.24889           | NM_00206E | ENSG00000       | FMN2            | -                          | formin 2 protein-coding  |
| chr12-13  | 12.40803 | 0.163146 | 0.670071 | 0.243476 | 0.807637 | 0.981636 | chr12 | 1.33E+08 | 1.33E+08 | + | 0 | NA | intron (L1MA6 LIN  | 22969   | NM_00130C  | 7699     | Hs.181552NM_00344C | ENSG00000 | ZNF140          | pHZ-39          | zinc finger protein-coding |                          |
| chr20-33  | 9.349926 | 0.186889 | 0.768186 | 0.243286 | 0.807784 | 0.981636 | chr20 | 33381711 | 33382106 | + | 0 | NA | intron (L1MD3 LIN  | 19611   | NM_01640E  | 51654    | Hs.435952NM_01608E | ENSG00000 | CDK5RAP1        | C20orf34        | CDK5 regu protein-coding   |                          |
| chr1-1557 | 9.90337  | 0.1828   | 0.751431 | 0.24327  | 0.807797 | 0.981636 | chr1  | 1.56E+08 | 1.56E+08 | + | 0 | NA | intron (intron (N  | 5962    | NR_024117  | 1E+08    | Hs.656361NR_024117 | MSTO21P   | MSTO2           | misato f pseudo |                            |                          |
| chr11-10  | 9.90337  | 0.1828   | 0.751431 | 0.24327  | 0.807797 | 0.981636 | chr11 | 1.08E+08 | 1.08E+08 | + | 0 | NA | intron (AluJr SIN  | -41300  | NR_00001E  | 38       | Hs.23237ENM_00001E | ENSG00000 | ACAT1           | ACAT MAT        | acetyl-Cc protein-coding   |                          |
| chr1-151  | 11.39128 | 0.169231 | 0.69612  | 0.243107 | 0.807923 | 0.981636 | chr1  | 1.52E+08 | 1.52E+08 | + | 0 | NA | intron (L1MA2 LIN  | 46483   | NM_00117E  | 11189    | Hs.26047           | NM_00718E | ENSG00000       | CELF3           | BRUNOL1                    | CUGBP E1e protein-coding |
| chr19-52  | 11.39128 | 0.169231 | 0.69612  | 0.243107 | 0.807923 | 0.981636 | chr19 | 52543596 | 52560999 | + | 0 | NA | intron (AluY SINE  | -17976  | NM_01826C  | 55762    | Hs.235167NM_01826C | ENSG00000 | ZNF701          | -               | zinc finger protein-coding |                          |
| chr20-10  | 11.39128 | 0.169231 | 0.69612  | 0.243107 | 0.807923 | 0.981636 | chr20 | 10639060 | 10649648 | + | 0 | NA | intron (intron (N  | 5341    | NR_10693C  | 1.02E+08 | NR_10693CENSG00000 | MIR6870   | hsa-mir-6       | microRNA ncRNA  |                            |                          |
| chr7-102  | 11.39128 | 0.169231 | 0.69612  | 0.243107 | 0.807923 | 0.981636 | chr7  | 1.03E+08 | 1.03E+08 | + | 0 | NA | intron (intron (N  | 4286    | NM_001097  | 548644   | Hs.61025ENM_00101E | ENSG00000 | POLR2J3         | POLR2J2 F       | RNA polyn protein-coding   |                          |
| chr20-50  | 8.837622 | 0.192897 | 0.793507 | 0.243095 | 0.807932 | 0.981636 | chr20 | 50923389 | 50923851 | + | 0 | NA | intron (AluSx SIN  | -7364   | NR_11000E  | 1.02E+08 | Hs.30189ENR_11000E | ENSG00000 | ADNP-AS1        | -               | ADNP anticRNA              |                          |
| chr2-3327 | 9.86223  | 0.181445 | 0.746797 | 0.242965 | 0.808033 | 0.981636 | chr2  | 33276249 | 33277194 | + | 0 | NA | intron (AluS6 SI   | -141745 | NR_03962E  | 1.01E+08 | NR_03962ENSG00000  | MIR4430   | -               | microRNA ncRNA  |                            |                          |
| chr22-387 | 9.86223  | 0.181445 | 0.746797 | 0.242965 | 0.808033 | 0.981636 | chr22 | 38727984 | 38729345 | + | 0 | NA | intron (intron (N  | 22720   | NM_00428E  | 9567     | Hs.27692ENM_00428E | ENSG00000 | GTPBP1          | GP-1 GPI        | GTP bindi protein-coding   |                          |
| chr6-756  | 9.86223  | 0.181445 | 0.746797 | 0.242965 | 0.808033 | 0.981636 | chr6  | 75627114 | 75627324 | + | 0 | NA | intron (AluSx SIN  | 25339   | NM_015571  | 26054    | Hs.485784NM_015571 | ENSG00000 | SENP6           | SSP1 SUS        | SUMO spec protein-coding   |                          |
| chr12-11  | 4.477794 | -0.26283 | 1.081833 | -0.24295 | 0.808046 | 0.981636 | chr12 | 1.12E+08 | 1.12E+08 | + | 0 | NA | TTS (NR_1TTS (NR_1 | 396     | NR_106921  | 1.02E+08 | NR_106921ENSG00000 | MIR6861   | hsa-mir-6       | microRNA ncRNA  |                            |                          |
| chr22-451 | 4.477794 | -0.26283 | 1.081833 | -0.24295 | 0.808046 | 0.981636 | chr22 | 45151164 | 45151729 | + | 0 | NA | intron (Charlie1E  | 1138    | NR_038957  | 1.01E+08 | Hs.18990ENR_03895E | NUP50-DT  | NUP50-AS1 NUP50 | divncRNA        |                            |                          |
| chr4-107  | 4.477794 | -0.26283 | 1.081833 | -0.24295 | 0.808046 | 0.981636 | chr4  | 1.08E+08 | 1.08E+08 | + | 0 | NA | intron (L1PA4 LIN  | 43749   | NR_00544E  | 9061     | Hs.36861ENM_00544E | ENSG00000 | PAPSS1          | ATL3 P3'        | phosph protein-coding      |                          |
| chr1-8494 | 9.136301 | -0.18683 | 0.769096 | -0.24292 | 0.808068 | 0.981636 | chr1  | 8494816  | 8496146  | + | 0 | NA | promoter-promoter- | -568    | NR_13275E  | 1.07E+08 | NR_13275E          | SNORD128  | Z3K3            | small nucsnRNA  |                            |                          |
| chr1-269  | 9.136301 | -0.18683 | 0.769096 | -0.24292 | 0.808068 | 0.981636 | chr1  | 26924080 | 26927208 | + | 0 | NA | intron (intron (N  | 3901    | NM_00660C  | 10726    | Hs.26381ENM_00660C | ENSG00000 | NUDC            | HNUDC MN        | nuclear c protein-coding   |                          |
| chr1-394  | 9.136301 | -0.18683 | 0.769096 | -0.24292 | 0.808068 | 0.981636 | chr1  | 39432533 | 39434744 | + | 0 | NA | intron (intron (N  | 24565   | NM_01503E  | 643314   | Hs.65876ENM_01503E | ENSG00000 | KIAA0754        | -               | KIAA0754 protein-coding    |                          |
| chr11-11  | 9.136301 | -0.18683 | 0.769096 | -0.24292 | 0.808068 | 0.981636 | chr11 | 1.1E+08  | 1.1E+08  | + | 0 | NA | intron (intron (N  | 62985   | NM_00126C  | 5962     | Hs.263671NM_00290E | ENSG00000 | RDX             | DFNB24          | radixin protein-coding     |                          |
| chr11-11  | 9.136301 | -0.18683 | 0.769096 | -0.24292 | 0.808068 | 0.981636 | chr11 | 1.19E+08 | 1.19E+08 | + | 0 | NA | intron (AluSg SIN  | 3931    | NM_00102E  | 6230     | Hs.51267ENM_00102E | ENSG00000 | CRPS25          | S25             | ribosomal protein-coding   |                          |
| chr11-12  | 9.136301 | -0.18683 | 0.769096 | -0.24292 | 0.808068 | 0.981636 | chr11 | 1.25E+08 | 1.25E+08 | + | 0 | NA | intron (intron (N  | 3416    | NR_016021  | 84897    | Hs.43641ENM_03281E | ENSG00000 | TBRG1           | NIAM TB         | E-growth protein-coding    |                          |
| chr12-55  | 9.136301 | -0.18683 | 0.769096 | -0.24292 | 0.808068 | 0.981636 | chr12 | 55757348 | 55761134 | + | 0 | NA | intron (intron (N  | 16119   | NM_005811  | 10220    | Hs.60088ENM_00581E | ENSG00000 | GDF11           | BMP-11 B        | growth di protein-coding   |                          |
| chr12-13  | 9.136301 | -0.18683 | 0.769096 | -0.24292 | 0.808068 | 0.981636 | chr12 | 1.32E+08 | 1.32E+08 | + | 0 | NA | intron (AluJb SIN  | 7603    | NR_00329C  | 347918   | Hs.12211ENM_18261E | ENSG00000 | CEP400P1        | EP400NL         | EP400 pse pseudo           |                          |
| chr13-49  | 9.136301 | -0.18683 | 0.769096 | -0.24292 | 0.808068 | 0.981636 | chr13 | 49923581 | 49926980 | + | 0 | NA | intron (AluSx4 SI  | 11060   | NM_00204E  | 57213    | Hs.44235           | NM_02045E | ENSG00000       | SPRYD7          | C13orf1                    | (SPRYD) protein-coding   |
| chr13-11  | 9.136301 | -0.18683 | 0.769096 | -0.24292 | 0.808068 | 0.981636 | chr13 | 1.13E+08 | 1.13E+08 | + | 0 | NA | exon (NM exon (NM  | -11035  | NM_00127E  | 8451     | Hs.33973ENM_00358E | ENSG00000 | CUL4A           | -               | cullin 4 protein-coding    |                          |
| chr15-484 | 9.136301 | -0.18683 | 0.769096 | -0.24292 | 0.808068 | 0.981636 | chr15 | 48441377 | 48448493 | + | 0 | NA | intron (intron (N  | 112738  | NM_00194E  | 1854     | Hs.52798ENM_00194E | ENSG00000 | CDUT            | dUTPase         | deoxyuric protein-coding   |                          |
| chr16-7   | 9.136301 | -0.18683 | 0.769096 | -0.24292 | 0.808068 | 0.981636 | chr16 | 75021304 | 75021435 | + | 0 | NA | intron (AluSq2 SI  | 22210   | NM_003226E | 84937    | Hs.427284NM_03226E | ENSG00000 | ZNRF1           | NIN283          | zinc and protein-coding    |                          |
| chr17-41  | 9.136301 | -0.18683 | 0.769096 | -0.24292 | 0.808068 | 0.981636 | chr17 | 41912731 | 41939112 | + | 0 | NA | intron (intron (N  | 48895   | NM_001254  | 124936   | Hs.513871NM_14461E | ENSG00000 | CYB5D2          | -               | cytochon protein-coding    |                          |
| chr17-54  | 9.136301 | -0.18683 | 0.769096 | -0.24292 | 0.808068 | 0.981636 | chr17 | 5476525  | 5482565  | + | 0 | NA | intron (intron (N  | 6633    | NM_016041  | 51009    | Hs.286131NM_016041 | ENSG00000 | CERL2           | CGI-101 E       | derlin 2 protein-coding    |                          |
| chr17-16  | 9.136301 | -0.18683 | 0.769096 | -0.24292 | 0.808068 | 0.981636 | chr17 | 16029433 | 16031313 | + | 0 | NA | TTS (NM_1TTS (NM_C | 30549   | NM_01777E  | 54902    | Hs.46231ENM_01777E | ENSG00000 | TTC19           | 201020401       | tetratric protein-coding   |                          |
| chr17-68  | 9.136301 | -0.18683 | 0.769096 | -0.24292 | 0.808068 | 0.981636 | chr17 | 68515424 | 68519726 | + | 0 | NA | intron (THEIC LTF  | 2181    | NM_00127E  | 5573     | Hs.28034ENM_002734 | ENSG00000 | PRKARIA         | ACRDY51 A       | protein k protein-coding   |                          |
| chr18-27  | 9.136301 | -0.18683 | 0.769096 | -0.24292 | 0.808068 | 0.981636 | chr18 | 27575529 | 2778895  | + | 0 | NA | intron (intron (N  | -69760  | NM_03204E  | 84034    | Hs.53281ENM_03204E | ENSG00000 | EMILIN2         | EMILIN-2 E      | elastin protein-coding     |                          |
| chr19-47  | 9.136301 | -0.18683 | 0.769096 | -0.24292 | 0.808068 | 0.981636 | chr19 | 4710601  | 4713270  | + | 0 | NA | intron (MLT1D LTF  | 11907   | NR_15869E  | 91039    | Hs.515081NM_13915E | ENSG00000 | DP9P            | DP9 DPLP        | di peptide protein-coding  |                          |
| chr2-324  | 9.136301 | -0.18683 | 0.769096 | -0.24292 | 0.808068 | 0.981636 | chr2  | 32405525 | 32409508 | + | 0 | NA | intron (intron (N  | 50538   | NM_01625E  | 57448    | Hs.150107NM_01625E | ENSG00000 | BIRC6           | APOLLON E       | baculovir protein-coding   |                          |
| chr2-674  | 9.136301 | -0.18683 | 0.769096 | -0.24292 | 0.808068 | 0.981636 | chr2  | 67402850 | 67406452 | + | 0 | NA | exon (NM exon (NM  | 7318    | NM_019002  | 54465    | Hs.35302ENM_01900E | ENSG00000 | ETAA1           | ETAA1E          | act protein-coding         |                          |
| chr2-127  | 9.136301 | -0.18683 | 0.769096 | -0.24292 | 0.808068 | 0.981636 | chr2  | 1.28E+08 |          |   |   |    |                    |         |            |          |                    |           |                 |                 |                            |                          |



|            |          |          |          |          |          |          |       |          |          |   |   |    |                    |        |            |          |           |                    |                                    |                                  |                   |                |                |
|------------|----------|----------|----------|----------|----------|----------|-------|----------|----------|---|---|----|--------------------|--------|------------|----------|-----------|--------------------|------------------------------------|----------------------------------|-------------------|----------------|----------------|
| chr15-49c  | 10.8457  | 0.170685 | 0.714017 | 0.239049 | 0.811068 | 0.981636 | chr15 | 49042345 | 49043093 | + | 0 | NA | intron (Nintron (N | 3727   | NM_001193  | 9728     | Hs.9997   | NM_014701          | ENSG000003SECISBP2 SBP2L SLF SECIS | bir protein-coding               |                   |                |                |
| chr6-130s  | 10.8457  | 0.170685 | 0.714017 | 0.239049 | 0.811068 | 0.981636 | chr6  | 1.31E+08 | 1.31E+08 | + | 0 | NA | intron (NMLT1A LI  | 16696  | NM_00135C  | 2037     | Hs.48647C | NM_001431          | ENSG000003EPB41L2                  | 4.1-G 4.lerythrocyprotein-coding |                   |                |                |
| chr1-262f  | 9.63104  | -0.17924 | 0.750746 | -0.23874 | 0.811304 | 0.981636 | chr1  | 26268335 | 26270166 | + | 0 | NA | promoter-promoter- | -29    | NM_001281  | 64793    | Hs.63795  | NM_02277E          | ENSG000003CEP85                    | CCDC21 centrosonprotein-coding   |                   |                |                |
| chr1-518z  | 9.63104  | -0.17924 | 0.750746 | -0.23874 | 0.811304 | 0.981636 | chr1  | 51822965 | 51823183 | + | 0 | NA | intron (Nintron (N | 13013  | NR_03158C  | 1E+08    | NR_03158C | ENSG000003MIR761   | hsa-mir-761                        | miRNA ncRNA                      |                   |                |                |
| chr1-846e  | 9.63104  | -0.17924 | 0.750746 | -0.23874 | 0.811304 | 0.981636 | chr1  | 84650296 | 84652166 | + | 0 | NA | intron (NAluJo SIN | -1621  | NR_027375  | 439927   | Hs.407054 | NM_001033          | ENSG000003LINC01555E               | ClaMir180 long                   | intcncRNA         |                |                |
| chr11-62f  | 9.63104  | -0.17924 | 0.750746 | -0.23874 | 0.811304 | 0.981636 | chr11 | 62516782 | 62538745 | + | 0 | NA | exon (NM_exon (NM_ | 17901  | NM_00134E  | 79026    | Hs.50275E | NM_00162C          | ENSG000003AHNAK                    | AHNAK FAHNAK                     | nucprotein-coding |                |                |
| chr12-57f  | 9.63104  | -0.17924 | 0.750746 | -0.23874 | 0.811304 | 0.981636 | chr12 | 57530107 | 57530534 | + | 0 | NA | TTS (NM_CTS (NM_C  | 7496   | NM_052897  | 114785   | Hs.52425E | NM_052897          | ENSG000003MBD6                     | methy1-Cp                        | protein-coding    |                |                |
| chr17-26f  | 9.63104  | -0.17924 | 0.750746 | -0.23874 | 0.811304 | 0.981636 | chr17 | 2669555  | 2678961  | + | 0 | NA | exon (NM_exon (NM_ | 18661  | NR_106834  | 1.02E+08 | NR_106834 | ENSG000003MIR6776  | hsa-mir-6776                       | miRNA ncRNA                      |                   |                |                |
| chr19-56z  | 9.63104  | -0.17924 | 0.750746 | -0.23874 | 0.811304 | 0.981636 | chr19 | 56372856 | 56377780 | + | 0 | NA | intron (Nintron (N | -6935  | NM_001322  | 79149    | Hs.17768E | NM_02430E          | ENSG000003ZSCAN5A                  | ZNF495 Z                         | zinc fing         | protein-coding |                |
| chr4-770C  | 9.63104  | -0.17924 | 0.750746 | -0.23874 | 0.811304 | 0.981636 | chr4  | 77003952 | 77006858 | + | 0 | NA | intron (Nintron (N | 55653  | NM_00130C  | 55752    | Hs.128199 | NM_01824E          | ENSG000003SEPTIN11                 | 11-Sep                           | septin 11         | protein-coding |                |
| chr5-128f  | 9.63104  | -0.17924 | 0.750746 | -0.23874 | 0.811304 | 0.981636 | chr5  | 1.29E+08 | 1.29E+08 | + | 0 | NA | intron (Nintron (N | 18266  | NM_001199E | 2201     | Hs.519294 | NM_001199E         | ENSG000003FBN2                     | CCA DA9 F                        | fibrillir         | protein-coding |                |
| chr8-130C  | 9.63104  | -0.17924 | 0.750746 | -0.23874 | 0.811304 | 0.981636 | chr8  | 1.3E+08  | 1.3E+08  | + | 0 | NA | intron (Nintron (N | 28455  | NR_04538E  | 1.01E+08 | Hs.10601E | NR_04538E          | ENSG000003ASAP1-IT2                | ASAP1                            | intcncRNA         |                |                |
| chr19-21C  | 11.87031 | 0.162967 | 0.682754 | 0.238691 | 0.811345 | 0.981636 | chr19 | 21054762 | 21057931 | + | 0 | NA | intron (NAluSx SIN | -25801 | NR_117087  | 148206   | Hs.72918E | NM_18251E          | ENSG000003ZNF714                   | zinc                             | fing              | protein-coding |                |
| chr16-21C  | 10.33339 | 0.175072 | 0.733626 | 0.238639 | 0.811385 | 0.981636 | chr16 | 21054958 | 21835238 | + | 0 | NA | exon (NM_exon (NM_ | -14613 | NM_018427  | 54700    | Hs.46007E | NM_018427E         | ENSG000003RRN3                     | A-270G1.2                        | RRN3              | home           | protein-coding |
| chr1-330I  | 9.169583 | -0.18319 | 0.768484 | -0.23837 | 0.811591 | 0.981636 | chr1  | 33012299 | 33014703 | + | 0 | NA | intron (Nintron (N | 23382  | NM_001119E | 204      | Hs.470907 | NM_00162E          | ENSG000003CAK2                     | ADK2                             | adenylate         | protein-coding |                |
| chr1-113E  | 9.169583 | -0.18319 | 0.768484 | -0.23837 | 0.811591 | 0.981636 | chr1  | 1.14E+08 | 1.14E+08 | + | 0 | NA | intron (NLM1A1 LIN | -11814 | NM_00128E  | 56944    | Hs.9315   | NM_02019C          | ENSG000003OLFML3                   | HNOEL-isc                        | olfactome         | protein-coding |                |
| chr10-30C  | 9.169583 | -0.18319 | 0.768484 | -0.23837 | 0.811591 | 0.981636 | chr10 | 30032984 | 30034652 | + | 0 | NA | intron (Nintron (N | 25768  | NM_00135E  | 57608    | Hs.53395E | NM_02084E          | ENSG000003JCAD                     | KIAA1462                         | junctione         | protein-coding |                |
| chr10-74I  | 9.169583 | -0.18319 | 0.768484 | -0.23837 | 0.811591 | 0.981636 | chr10 | 74111066 | 74113538 | + | 0 | NA | intron (Nintron (N | 38256  | NM_00132C  | 26985    | Hs.500104 | NM_01209E          | ENSG000003AP3M1                    | -                                | adaptor           | r              | protein-coding |
| chr11-337E | 9.169583 | -0.18319 | 0.768484 | -0.23837 | 0.811591 | 0.981636 | chr11 | 33732251 | 33733380 | + | 0 | NA | intron (NMLT1E2 LI | 3664   | NM_203331  | 966      | Hs.27857E | NM_000611          | ENSG000003CD59                     | 16.3A5 F                         | CD59              | mole           | protein-coding |
| chr12-64E  | 9.169583 | -0.18319 | 0.768484 | -0.23837 | 0.811591 | 0.981636 | chr12 | 64050825 | 64051379 | + | 0 | NA | intron (NLMC5a LI  | 171194 | NM_00130C  | 144577   | Hs.444671 | NM_15244C          | ENSG000003C12orf66                 | -                                | chromoson         | protein-coding |                |
| chr13-327E | 9.169583 | -0.18319 | 0.768484 | -0.23837 | 0.811591 | 0.981636 | chr13 | 32761070 | 32762004 | + | 0 | NA | intron (NLM1E4b LI | 150565 | NR_04702C  | 1.01E+08 | Hs.40629C | NR_04702C          | LINC0042E                          | -                                | long              | intcncRNA      |                |
| chr13-99E  | 9.169583 | -0.18319 | 0.768484 | -0.23837 | 0.811591 | 0.981636 | chr13 | 99508721 | 99509626 | + | 0 | NA | intron (NMSTA-int  | 7701   | NM_00480C  | 9375     | Hs.60789E | NM_00480C          | ENSG000003TM9SF2                   | P76                              | transmem          | protein-coding |                |
| chr15-42E  | 9.169583 | -0.18319 | 0.768484 | -0.23837 | 0.811591 | 0.981636 | chr15 | 42258303 | 42268608 | + | 0 | NA | intron (NLM1B4 LIN | 9978   | NM_015497  | 25963    | Hs.51113E | NM_015497E         | ENSG000003TMEM87A                  | -                                | transmem          | protein-coding |                |
| chr15-42E  | 9.169583 | -0.18319 | 0.768484 | -0.23837 | 0.811591 | 0.981636 | chr15 | 42972070 | 42973528 | + | 0 | NA | intron (NLM1C1 LIN | -52021 | NM_17350C  | 146057   | Hs.646511 | NM_17350C          | ENSG000003TTRK2                    | SCA11 TTE                        | tau               | tubul          | protein-coding |
| chr17-84E  | 9.169583 | -0.18319 | 0.768484 | -0.23837 | 0.811591 | 0.981636 | chr17 | 8466751  | 8468871  | + | 0 | NA | 3' UTR (N3' UTR (N | 31927  | NM_03080E  | 81565    | Hs.37212E | NM_03080E          | ENSG000003NDEL1                    | EOPA MIT                         | nude              | nu             | protein-coding |
| chr17-304I | 9.169583 | -0.18319 | 0.768484 | -0.23837 | 0.811591 | 0.981636 | chr17 | 30479583 | 30481014 | + | 0 | NA | intron (NAluSx SIN | 2890   | NM_001007  | 9527     | Hs.46268C | NM_004871          | ENSG000003GOSR1                    | GOLM12 G                         | golgi             | SN             | protein-coding |
| chr2-365I  | 9.169583 | -0.18319 | 0.768484 | -0.23837 | 0.811591 | 0.981636 | chr2  | 36514690 | 36519541 | + | 0 | NA | intron (NLM1C1 LIN | 81053  | NM_001042  | 9637     | Hs.25856E | NM_00510E          | ENSG000003FEZ2                     | HUM3CL                           | fascicul          | protein-coding |                |
| chr2-203A  | 9.169583 | -0.18319 | 0.768484 | -0.23837 | 0.811591 | 0.981636 | chr2  | 2.03E+08 | 2.03E+08 | + | 0 | NA | exon (NM_exon (NM_ | 45606  | NM_21358E  | 65059    | Hs.47116E | NM_02525E          | ENSG000003CRAPH1                   | ALS2CR18                         | Ras               | assoc          | protein-coding |
| chr5-150E  | 9.169583 | -0.18319 | 0.768484 | -0.23837 | 0.811591 | 0.981636 | chr5  | 1.51E+08 | 1.51E+08 | + | 0 | NA | intron (Nintron (N | 38299  | NM_00154E  | 3340     | Hs.22205E | NM_00154E          | ENSG000003NDST1                    | HSST MR74                        | N-deacety         | protein-coding |                |
| chr7-540E  | 9.169583 | -0.18319 | 0.768484 | -0.23837 | 0.811591 | 0.981636 | chr7  | 5405618  | 5406632  | + | 0 | NA | intron (NLM1B3 LIN | 17421  | NM_00108C  | 84629    | Hs.52063E | NM_00101E          | ENSG000003CAGL8                    | C1879 T                          | triacetyl         | protein-coding |                |
| chr7-871E  | 9.169583 | -0.18319 | 0.768484 | -0.23837 | 0.811591 | 0.981636 | chr7  | 87164553 | 87175244 | + | 0 | NA | intron (NLM2a LINE | 17344  | NM_02114E  | 9988     | Hs.19612E | NM_02114E          | ENSG000003DMTF1                    | DMP1 DMT                         | cyclin D          | protein-coding |                |
| chr8-1447E | 9.169583 | -0.18319 | 0.768484 | -0.23837 | 0.811591 | 0.981636 | chr8  | 1.45E+08 | 1.45E+08 | + | 0 | NA | intron (NMLT1A LTI | 10990  | NM_138367  | 90987    | Hs.53451E | NM_138367E         | ENSG000003ZNF251                   | -                                | zinc              | fing           | protein-coding |
| chr12-19E  | 8.382174 | 0.197439 | 0.828394 | 0.23834  | 0.811617 | 0.981636 | chr12 | 1912536  | 19512913 | + | 0 | NA | intron (NAluS6 SI  | 72125  | NM_001267  | 121536   | Hs.52457E | NM_153207E         | ENSG000003AEBP2                    | -                                | Ae                | bindir         | protein-coding |
| chr15-56C  | 8.382174 | 0.197439 | 0.828394 | 0.23834  | 0.811617 | 0.981636 | chr15 | 56097308 | 56097516 | + | 0 | NA | intron (Nintron (N | 92520  | NM_00137C  | 64864    | Hs.74508E | NM_022841E         | ENSG000003CRFX7                    | RFXDC2                           | regulator         | protein-coding |                |
| chr9-1377E | 8.382174 | 0.197439 | 0.828394 | 0.23834  | 0.811617 | 0.981636 | chr9  | 1.38E+08 | 1.38E+08 | + | 0 | NA | 3' UTR (N3' UTR (N | 25273  | NR_14750E  | 651337   | Hs.60319E | NR_14750E          | ENSG000003LOC651337                | -                                | uncharact         | ncRNA          |                |
| chr6-736I  | 8.723842 | -0.19052 | 0.799909 | -0.23818 | 0.811742 | 0.981636 | chr6  | 73614112 | 73615271 | + | 0 | NA | intron (NMER21B LI | 39301  | NM_012434  | 26503    | Hs.59742E | NM_012434E         | ENSG000003SLC17A5                  | AST ISSD                         | solute c          | protein-coding |                |
| chr15-101I | 14.82727 | -0.14708 | 0.617593 | -0.23815 | 0.811768 | 0.981636 | chr15 | 1.02E+08 | 1.02E+08 | + | 0 | NA | intron (NLM2c LINE | 3555   | NR_00365E  | 374666   | Hs.45957E | NM_199163          | WASH3P                             | FAM39DP                          | WASP              | famipse        | pseudo         |
| chr11-87E  | 9.112228 | 0.181143 | 0.760736 | 0.238115 | 0.811792 | 0.981636 | chr11 | 8729957  | 8730197  | + | 0 | NA | exon (NM_exon (NM_ | -38701 | NR_12059E  | 1.03E+08 | Hs.61327E | NR_12059E          | LOC102724                          | -                                | uncharact         | ncRNA          |                |
| chr13-99E  | 9.662471 | -0.18527 | 0.778135 | -0.2381  | 0.811804 | 0.981636 | chr13 | 99521304 | 99521601 | + | 0 | NA | intron (Nintron (N | 19980  | NM_00480C  | 9375     | Hs.60789E | NM_00480C          | ENSG000003TM9SF2                   | P76                              | transmem          | protein-coding |                |
| chr1-103C  | 4.931393 | -0.24421 | 0.126031 | -0.23801 | 0.81187  | 0.981636 | chr1  | 1036313  | 1037121  | + | 0 | NA | intron (Nintron (N | 2724   | NM_001364  | 375790   | Hs.27333C | NM_19857E          | ENSG000003AGRN                     | AGRN C                           | agrin             | protein-coding |                |
| chr10-294  | 4.931393 | -0.24421 | 0.126031 | -0.23801 | 0.81187  | 0.981636 | chr10 | 29425142 | 29426118 | + | 0 | NA | intron (Nintron (N | 15387  | NR_11092E  | 1.03E+08 | Hs.49920E | NR_00393C          | ENSG000003SVIL-AS1                 | -                                | SVIL              | antinc         | RNA            |
| chr11-43C  | 4.931393 | -0.24421 | 0.126031 | -0.23801 | 0.81187  | 0.981636 | chr11 | 43381936 | 43383810 | + | 0 | NA | intron (NLM1C5 LIN | 23953  | NM_01825E  | 55761    | Hs.19118E | NM_01825E          | ENSG000003TTC17                    | -                                | tetratric         | protein-coding |                |
| chr15-66C  | 4.931393 | -0.24421 | 0.126031 | -0.23801 | 0.81187  | 0.981636 | chr15 | 66333288 | 66335777 | + | 0 | NA | TTS (NM_CTS (NM_C  | 12810  | NR_00438E  | 692149   | NR_00438E | ENSG000003SCARNA14 | U100                               | small                            | Ca <sub>v</sub>   | ncRNA          |                |
| chr16-74E  | 4.931393 | -0.24421 | 0.126031 | -0.23801 | 0.81187  | 0.981636 | chr16 | 74899403 | 74900514 | + | 0 | NA | intron (Nintron (N | 85165  | NM_030581  | 79726    | Hs.280951 | NM_030581E         | ENSG000003WDR59                    | CDW12 FP                         | WD                | repeate        | protein-coding |
| chr17-41E  | 4.931393 | -0.24421 | 0.126031 | -0.23801 | 0.81187  | 0.981636 | chr17 | 4164425  | 4164934  | + | 0 | NA | non-codiron-codir  | 20982  | NM_001254  | 124936   | Hs.513871 | NM_144611E         | ENSG000003CYB5D2                   | -                                | cytochro          | n              | protein-coding |
| chr18-13E  | 4.931393 | -0.24421 | 0.126031 | -0.23801 | 0.81187  | 0.981636 | chr18 | 13665816 | 13668130 | + | 0 | NA | intron (Nintron (N | 25215  | NM_00127E  | 753      | Hs.697787 | NM_00433E          | ENSG000003DLR4D4                   | C18orf1                          | low               | densip         | protein-coding |
| chr18-57E  | 4.931393 | -0.24421 | 0.126031 | -0.23801 | 0.81187  | 0.981636 | chr18 | 57697455 | 57698453 | + | 0 | NA | intron (Nintron (N | 67623  | NM_001242  | 1.01E+08 | Hs.66064E | NM_001242804       | LOC10050E                          | -                                | uncharact         | protein-coding |                |
| chr19-214  | 4.931393 | -0.24421 | 0.126031 | -0.23801 | 0.81187  | 0.981636 | chr19 | 2149120  | 2150139  | + | 0 | NA | intron (Nintron (N | 1937   | NM_00393E  | 8943     | Hs.51281E | NM_00393E          | ENSG00000                          |                                  |                   |                |                |

|                    |          |          |          |          |          |       |          |          |   |      |                     |                   |                              |                    |                     |                           |                |
|--------------------|----------|----------|----------|----------|----------|-------|----------|----------|---|------|---------------------|-------------------|------------------------------|--------------------|---------------------|---------------------------|----------------|
| chr4-527.9.615324  | -0.17641 | 0.752899 | -0.23431 | 0.814743 | 0.981636 | chr14 | 52708978 | 52710311 | + | 0 NA | 5' UTR (N5' UTR (N  | 2444 NR_158967    | 5706 Hs. 156171NM_002806     | ENSG000003PCMC6    | SUG2 p42            | proteasome protein-coding |                |
| chr7-776.9.615324  | -0.17641 | 0.752899 | -0.23431 | 0.814743 | 0.981636 | chr7  | 77635044 | 77636611 | + | 0 NA | exon (NM exon (NM   | 60438 NR_134254   | 1.01E+08 Hs. 72451 NR_038361 | ENSG000003APTR     | RSBN1L-AS           | Alu-mediated ncRNA        |                |
| chr8-172.9.615324  | -0.17641 | 0.752899 | -0.23431 | 0.814743 | 0.981636 | chr8  | 17226954 | 17235381 | + | 0 NA | TTS (NM_TTS (NM_C   | 15291 NM_001322   | 29883 Hs. 58746NM_013354     | ENSG000003CN077    | CAF-1 CAFCCR4-NOT   | protein-coding            |                |
| chr8-937.9.615324  | -0.17641 | 0.752899 | -0.23431 | 0.814743 | 0.981636 | chr8  | 93708934 | 93713708 | + | 0 NA | intron (Nintron (N  | 10771 NR_156452   | 137392 Hs. 125038NM_145266   | ENSG000003FAM92A   | FAM92A1 F           | family wiprotein-coding   |                |
| chr22-42.8.625847  | -0.19182 | 0.818654 | -0.23431 | 0.814746 | 0.981636 | chr22 | 42846965 | 42847448 | + | 0 NA | intron (NAluJr SIN  | 10676 NR_01457C   | 26326 Hs. 68522NM_01457C     | ENSG000003ARFGAP3  | ARFGAP1             | ADP ribosprotein-coding   |                |
| chr5-493.17.87882  | 0.134234 | 0.573232 | 0.234171 | 0.814852 | 0.981636 | chr5  | 49385351 | 49385556 | + | 0 NA | IntergeniALR/Alpha  | 1055835 NM_19844E | 133418 Hs. 561411NM_19844E   | ENSG000003CEMB     | GP70                | embigin protein-coding    |                |
| chr1-922.4.923535  | -0.24156 | 1.032974 | -0.23384 | 0.815106 | 0.981636 | chr1  | 92267441 | 92268400 | + | 0 NA | exon (NM exon (NM   | 31067 NM_053274   | 11146 Hs. 49105 NM_00707C    | ENSG000003GLMN     | FAP FAP4E           | glomulin, protein-coding  |                |
| chr10-90.4.923535  | -0.24156 | 1.032974 | -0.23384 | 0.815106 | 0.981636 | chr10 | 90886408 | 90887232 | + | 0 NA | intron (Nintron (N  | 14846 NM_001104   | 10556 Hs. 13912NM_00641E     | ENSG000003RPP30    | TSG15               | ribonucleprotein-coding   |                |
| chr13-21.4.923535  | -0.24156 | 1.032974 | -0.23384 | 0.815106 | 0.981636 | chr13 | 21040123 | 21040800 | + | 0 NA | intron (Nintron (N  | 21125 NM_01457E   | 26524 Hs. 78960 NM_01457E    | ENSG000003CLATS2   | KPM                 | large tunprotein-coding   |                |
| chr15-25.4.923535  | -0.24156 | 1.032974 | -0.23384 | 0.815106 | 0.981636 | chr15 | 25679853 | 25680818 | + | 0 NA | intron (Nintron (N  | 168490 NR_03986E  | 1.01E+08 Hs. NR_03986E       | ENSG000003MIR4715  | -                   | microRNA ncRNA            |                |
| chr2-694.4.923535  | -0.24156 | 1.032974 | -0.23384 | 0.815106 | 0.981636 | chr2  | 69422764 | 69423438 | + | 0 NA | intron (NAluJb SIN  | 14334 NR_04563Z   | 27247 Hs. 43043NM_01570C     | ENSG000003NFU1     | CGI-33 HNF1U        | iror protein-coding       |                |
| chr2-1311.4.923535 | -0.24156 | 1.032974 | -0.23384 | 0.815106 | 0.981636 | chr2  | 1.31E+08 | 1.31E+08 | + | 0 NA | intron (NAluSq SIN  | 4865 NM_00130E    | 55041 Hs. 469944NM_01795E    | ENSG000003PLEKHB2  | EVT2                | pleckstriprotein-coding   |                |
| chr20-247.4.923535 | -0.24156 | 1.032974 | -0.23384 | 0.815106 | 0.981636 | chr20 | 2476136  | 2476749  | + | 0 NA | IntergeniIntergeni  | -5653 NM_19821E   | 6628 Hs. 83753 NM_003091     | ENSG000003SNRPB    | CCOR3 COD           | small ncprotein-coding    |                |
| chr20-44.4.923535  | -0.24156 | 1.032974 | -0.23384 | 0.815106 | 0.981636 | chr20 | 44945269 | 44946020 | + | 0 NA | intron (NMLTIG LTF  | 14082 NR_13498E   | 80336 Hs. 641481NM_001124    | ENSG000003PABPCIL  | CCorf11E poly (A)   | tprotein-coding           |                |
| chr3-2397.4.923535 | -0.24156 | 1.032974 | -0.23384 | 0.815106 | 0.981636 | chr3  | 23973944 | 23976536 | + | 0 NA | intron (NAluJo SIN  | 29119 NM_00114E   | 9975 Hs. 37288 NM_00512C     | ENSG000003NR1D2    | BD73 EAR            | nuclear lprotein-coding   |                |
| chr3-141.4.923535  | -0.24156 | 1.032974 | -0.23384 | 0.815106 | 0.981636 | chr3  | 1.42E+08 | 1.42E+08 | + | 0 NA | exon (NM exon (NM   | -82030 NR_13619C  | 646730 Hs. 570677NR_136190   | LINC0261E          | -                   | long intncRNA             |                |
| chr4-904.4.923535  | -0.24156 | 1.032974 | -0.23384 | 0.815106 | 0.981636 | chr4  | 904450   | 905411   | + | 0 NA | intron (NMER51A LI  | 27386 NM_00525E   | 2580 Hs. 36907NM_00525E      | ENSG000003CGAK     | DNAJ26 DN           | cyclin G protein-coding   |                |
| chr5-170.4.923535  | -0.24156 | 1.032974 | -0.23384 | 0.815106 | 0.981636 | chr5  | 1.71E+08 | 1.71E+08 | + | 0 NA | intron (Nintron (N  | 35242 NM_022897   | 64901 Hs. 41081NM_022897     | ENSG000003RANBP17  | -                   | RAN bindi protein-coding  |                |
| chr6-365.4.923535  | -0.24156 | 1.032974 | -0.23384 | 0.815106 | 0.981636 | chr6  | 36528812 | 36529583 | + | 0 NA | intron (NLMC5a LI   | 18282 NM_007271   | 11329 Hs. 40957NM_007271     | ENSG000003STK38    | NDR NDR1            | serine/tprotein-coding    |                |
| chr6-116.4.923535  | -0.24156 | 1.032974 | -0.23384 | 0.815106 | 0.981636 | chr6  | 1.16E+08 | 1.16E+08 | + | 0 NA | 3' UTR (N3' UTR (N  | -4955 NM_00108C   | 29940 Hs. 45835NM_01335E     | ENSG000003DSE      | DS-epil E           | dermatan protein-coding   |                |
| chr7-128.4.923535  | -0.24156 | 1.032974 | -0.23384 | 0.815106 | 0.981636 | chr7  | 1.28E+08 | 1.28E+08 | + | 0 NA | intron (Nintron (N  | 18112 NM_018077   | 55131 Hs. 27426NM_018077     | ENSG000003RBM28    | ANES                | RAN bindi protein-coding  |                |
| chr17-75.9.672179  | -0.17721 | 0.757885 | -0.23382 | 0.815122 | 0.981636 | chr17 | 7565477  | 7567279  | + | 0 NA | intron (NAluXs SI   | 4386 NR_03792E    | 1.01E+08 Hs. 129677NR_03792E | SEN3-EIF           | -                   | SEN3-EIF ncRNA            |                |
| chr5-372.9.672179  | -0.17721 | 0.757885 | -0.23382 | 0.815122 | 0.981636 | chr5  | 37225177 | 37225568 | + | 0 NA | intron (NAluJb SIN  | -23674 NR_13426E  | 1.05E+08 Hs. 17099E          | NR_13426E          | ENSG000003LOC105374 | -                         | uncharactncRNA |
| chr1-1461.13.37394 | 0.151345 | 0.64752  | 0.23373  | 0.815195 | 0.981636 | chr1  | 1.46E+08 | 1.46E+08 | + | 0 NA | intron (NLIPI4 LIN  | 14258 NM_00130Z   | 1E+08 Hs. 714127NM_00103E    | ENSG000003NBPF10   | AB6 AG1 NBPF        | memt protein-coding       |                |
| chr1-220.9.664321  | -0.17578 | 0.752533 | -0.23359 | 0.815304 | 0.981636 | chr1  | 2.2E+08  | 2.2E+08  | + | 0 NA | exon (NM exon (NM   | -16415 NM_00444E  | 2058 Hs. 49778NM_00444E      | ENSG000003EPRS     | EAR5 GLUF           | glutamyl-protein-coding   |                |
| chr14-34.9.664321  | -0.17578 | 0.752533 | -0.23359 | 0.815304 | 0.981636 | chr14 | 34581434 | 34586938 | + | 0 NA | intron (Nintron (N  | -2779 NR_00440C   | 26863 NR_00440C              | ENSG000003RNVU1-18 | RNU1-25 FRNA,       | varisnRNA                 |                |
| chr16-89.9.664321  | -0.17578 | 0.752533 | -0.23359 | 0.815304 | 0.981636 | chr16 | 8904082  | 8904840  | + | 0 NA | exon (NM exon (NM   | 32178 NM_00128E   | 7874 Hs. 38693NM_00347C      | ENSG000003USP7     | HAUSP TEF           | ubiquitir protein-coding  |                |
| chr12-48.4.462078  | -0.25661 | 1.098717 | -0.23355 | 0.815333 | 0.981636 | chr12 | 48071710 | 48072823 | + | 0 NA | intron (NTigger7 E  | -32987 NM_001354  | 5213 Hs. 75160 NM_00028E     | ENSG000003PFKM     | ATP-PFK1 C          | phosphofr protein-coding  |                |
| chr7-101.7.836588  | 0.201016 | 0.860817 | 0.233517 | 0.81536  | 0.981636 | chr7  | 1.01E+08 | 1.01E+08 | + | 0 NA | intron (Nintron (N  | -1846 NM_00118E   | 24146 Hs. 38738 NM_01434E    | ENSG000003CLDN15   | -                   | small lncsnoRNA           |                |
| chr1-244.14.34955  | 0.146341 | 0.626761 | 0.233488 | 0.815382 | 0.981636 | chr1  | 2.45E+08 | 2.45E+08 | + | 0 NA | intron (NAluXs SI   | -3076 NR_13278E   | 1.07E+08 Hs. NR_13278E       | SNORA100           | -                   | small nucsnRNA            |                |
| chr3-4871.10.12578 | -0.17249 | 0.739849 | -0.23314 | 0.815649 | 0.981636 | chr3  | 48714191 | 48715529 | + | 0 NA | intron (NAluYc3 SI  | 2361 NM_00100E    | 51447 Hs. 59598NM_016291     | ENSG000003IP6K2    | IHPK2 Ins           | inositol protein-coding   |                |
| chr7-5602.10.12578 | -0.17249 | 0.739849 | -0.23314 | 0.815649 | 0.981636 | chr7  | 5602372  | 5606434  | + | 0 NA | intron (Nintron (N  | 11587 NM_00308E   | 6624 Hs. 11840NM_00308E      | ENSG000003PSCN1    | FAN1 HSN            | fascin acprotein-coding   |                |
| chr9-944.5.392489  | -0.23161 | 0.994247 | -0.23295 | 0.815803 | 0.981636 | chr9  | 94461242 | 94462768 | + | 0 NA | TTS (NM_TTS (NM_C   | 87436 NM_03255E   | 84641 Hs. 55599NM_03255E     | ENSG000003MFSD14B  | HATL1 C11c          | A-kinase protein-coding   |                |
| chr1-156.9.153867  | -0.18016 | 0.773604 | -0.23289 | 0.815849 | 0.981636 | chr1  | 15651743 | 15652211 | + | 0 NA | intron (Nintron (N  | -7736 NM_006511   | 6248 Hs. 23945NM_006511      | ENSG000003RSC1A1   | RS1                 | regulator protein-coding  |                |
| chr1-159.9.656463  | -0.17437 | 0.749796 | -0.23256 | 0.816103 | 0.981636 | chr1  | 1.59E+08 | 1.59E+08 | + | 0 NA | intron (NAluXs SI   | 7717 NM_00120E    | 3428 Hs. 38025NM_005531      | ENSG000003IF116    | IFNGIP1 F           | interferc protein-coding  |                |
| chr11-89.9.656463  | -0.17437 | 0.749796 | -0.23256 | 0.816103 | 0.981636 | chr11 | 8918049  | 8922961  | + | 0 NA | TTS (NR_TTS (NR_C   | 9316 NM_00120E    | 56672 Hs. 13118NM_02064E     | ENSG000003AKIP1    | BCA3 C11c           | A-kinase protein-coding   |                |
| chr13-97.9.656463  | -0.17437 | 0.749796 | -0.23256 | 0.816103 | 0.981636 | chr13 | 97985428 | 97989276 | + | 0 NA | intron (NCharlie7   | 33677 NM_002271   | 3843 Hs. 71259NM_002271      | ENSG000003IPO5     | IMB3 KPNE           | importin protein-coding   |                |
| chr14-61.9.656463  | -0.17437 | 0.749796 | -0.23256 | 0.816103 | 0.981636 | chr14 | 61767256 | 61770850 | + | 0 NA | intron (Nintron (N  | 6633 NM_00308E    | 6617 Hs. 17931NM_00308E      | ENSG000003SNAPC1   | PTFGamma small      | nucprotein-coding         |                |
| chr17-19.9.656463  | -0.17437 | 0.749796 | -0.23256 | 0.816103 | 0.981636 | chr17 | 19966713 | 19969545 | + | 0 NA | intron (NAluY SINE  | 9699 NM_00720E    | 11216 Hs. 64267NM_00720E     | ENSG000003AKAP10   | AKAP-10 IA          | kinase protein-coding     |                |
| chr17-30.9.656463  | -0.17437 | 0.749796 | -0.23256 | 0.816103 | 0.981636 | chr17 | 30521968 | 30524278 | + | 0 NA | 3' UTR (N3' UTR (N  | 45715 NM_001007   | 9527 Hs. 46268NM_004871      | ENSG000003GOSR1    | GOLIM2 GC           | golgi SNr protein-coding  |                |
| chr17-35.9.656463  | -0.17437 | 0.749796 | -0.23256 | 0.816103 | 0.981636 | chr17 | 35600487 | 35611574 | + | 0 NA | intron (Nintron (N  | 22488 NM_00103C   | 163 Hs. 51481NM_00128E       | ENSG000003AP2B1    | ADTB2 AP1           | adaptor rprotein-coding   |                |
| chr18-95.9.656463  | -0.17437 | 0.749796 | -0.23256 | 0.816103 | 0.981636 | chr18 | 9579613  | 9584668  | + | 0 NA | intron (NLM4b LIN   | 32411 NR_05200C   | 9989 Hs. 74323NM_005134      | ENSG000003PPP4R1   | ADT1 PP4            | protein rprotein-coding   |                |
| chr19-227.9.656463 | -0.17437 | 0.749796 | -0.23256 | 0.816103 | 0.981636 | chr19 | 2271262  | 2273491  | + | 0 NA | intron (NAluSq4 SI  | 2890 NM_00415E    | 4946 Hs. 446427NM_00415E     | ENSG000003OAZ1     | AZ1 AZI             | Cornithine protein-coding |                |
| chr2-699.9.656463  | -0.17437 | 0.749796 | -0.23256 | 0.816103 | 0.981636 | chr2  | 69905625 | 69906231 | + | 0 NA | TTS (NM_TTS (NM_C   | -9113 NM_00120E   | 4084 Hs. 46890NM_00235E      | ENSG000003MXD1     | BHLHC58 MAX         | dimer protein-coding      |                |
| chr3-435.9.656463  | -0.17437 | 0.749796 | -0.23256 | 0.816103 | 0.981636 | chr3  | 43595380 | 43598337 | + | 0 NA | intron (NLIPIA5 LIN | 24968 NM_00134E   | 55129 Hs. 65665NM_01807E     | ENSG000003ANO10    | SCAR10 T            | anactimr protein-coding   |                |
| chr3-124.9.656463  | -0.17437 | 0.749796 | -0.23256 | 0.816103 | 0.981636 | chr3  | 1.25E+08 | 1.25E+08 | + | 0 NA | intron (Nintron (N  | 59297 NM_02073E   | 57493 Hs. 47422NM_02073E     | ENSG000003HEG1     | HEG MS11            | heart dev protein-coding  |                |
| chr4-395.9.656463  | -0.17437 | 0.749796 | -0.23256 | 0.816103 | 0.981636 | chr4  | 39502933 | 39513529 | + | 0 NA | intron (NAluJr SIN  | 19008 NM_00335E   | 7358 Hs. 57251NM_00335E      | ENSG000003UGDH     | GDH UDP-C           | UDP-gluc protein-coding   |                |
| chr4-570.9.656463  | -0.17437 | 0.749796 | -0.23256 | 0.816103 | 0.981636 | chr4  | 57009423 | 57013543 | + | 0 NA | intron (NAluXs SIN  | 32587 NM_00093E   | 5431 Hs. 602757NM_00093E     | ENSG000003POLR2B   | POLR2B RF           | RNA polyn protein-coding  |                |
| chr4-800.9.656463  | -0.17437 | 0.749796 | -0.23256 | 0.816103 | 0.981636 | chr4  | 80066687 | 80069261 | + | 0 NA | intron (NLIPIA10 LI | 5255 NM_00128E    | 118429 Hs. 16296NM_05817E    | ENSG000003ANTXR2   | CMG-2 CMK           | ANTXR cel protein-coding  |                |
| chr5-347.9.656463  | -0.17437 | 0.749796 | -0.23256 | 0.816103 | 0.981636 | chr5  | 34793499 | 34806528 | + | 0 NA | intron (Nintron (N  | -39151 NM_14472E  | 153657 Hs. 43574NM_14472E    | ENSG000003TTC23L   |                     |                           |                |



|                    |           |           |          |          |          |       |          |          |   |      |                      |                  |          |                     |                   |   |                  |                                 |
|--------------------|-----------|-----------|----------|----------|----------|-------|----------|----------|---|------|----------------------|------------------|----------|---------------------|-------------------|---|------------------|---------------------------------|
| chr4-451.9.187149  | -0.17649  | 0.773608  | -0.22813 | 0.819542 | 0.981636 | chr14 | 45107461 | 45108128 | + | 0 NA | intron (AluSx SIN    | -3081 NR_003691  | 1E+08    | Hs. 712501NR_003691 | ENSG00000SNORD127 | - | small            | nucsnRNA                        |
| chr2-2017.9.187149 | -0.17649  | 0.773608  | -0.22813 | 0.819542 | 0.981636 | chr2  | 2.02E+08 | 2.02E+08 | + | 0 NA | exon (NM exon (NM    | 19786 NM_020919  | 57679    | Hs. 471096NM_020919 | ENSG00000ALS2     | - | ALS2CR6          | Aalsin Rhcprotein-coding        |
| chr4-7594.9.187149 | -0.17649  | 0.773608  | -0.22813 | 0.819542 | 0.981636 | chr4  | 75946603 | 75948075 | + | 0 NA | IntergeniKangalb I   | -6326 NM_001042  | 27163    | Hs. 43736NM_01443   | ENSG00000CNA      | - | ASAH PLTN        | acyletfprotein-coding           |
| chr8-1066.9.187149 | -0.17649  | 0.773608  | -0.22813 | 0.819542 | 0.981636 | chr8  | 1.07E+08 | 1.07E+08 | + | 0 NA | intron (NL1PBI LI    | 28050 NM_181354  | 55074    | Hs. 12728NM_01800   | ENSG00000CXR1     | - | NblA00307        | oxidatorprotein-coding          |
| chr1-2255.9.640747 | -0.17153  | 0.751945  | -0.22812 | 0.819552 | 0.981636 | chr1  | 2.26E+08 | 2.26E+08 | + | 0 NA | intron (NL1ME3A LI   | 96261 NM_001006  | 55740    | Hs. 49789NR_001006  | ENSG00000ENAH     | - | ENA MENA ENAH    | actiprotein-coding              |
| chr12-955.9.640747 | -0.17153  | 0.751945  | -0.22812 | 0.819552 | 0.981636 | chr12 | 95308224 | 95308690 | + | 0 NA | promoter-promoter-   | 37 NR_029895     | 442903   | NR_029895           | ENSG00000CIR331   | - | MIRN331          | microRNA ncRNA                  |
| chr2-1894.9.640747 | -0.17153  | 0.751945  | -0.22812 | 0.819552 | 0.981636 | chr2  | 1.89E+08 | 1.89E+08 | + | 0 NA | intron (Nintron (N   | 27777 NM_032166  | 84128    | Hs. 399984NM_032166 | ENSG00000WDR75    | - | NET16 UTF        | repeatprotein-coding            |
| chr3-1895.9.640747 | -0.17153  | 0.751945  | -0.22812 | 0.819552 | 0.981636 | chr3  | 1.9E+08  | 1.9E+08  | + | 0 NA | exon (NM exon (NM    | 143060 NR_030642 | 1E+08    | NR_030642           | ENSG00000CIR944   | - | MIRN944          | microRNA ncRNA                  |
| chr17-766.4.915677 | -0.23882  | 0.1047828 | -0.22792 | 0.819706 | 0.981636 | chr17 | 7665672  | 7666598  | + | 0 NA | IntergeniAluSx SIN   | 9109 NM_001276   | 7157     | Hs. 43746NM_00054   | ENSG00000TP53     | - | BCC7 BMF5        | tumor prcprotein-coding         |
| chr18-205.4.915677 | -0.23882  | 0.1047828 | -0.22792 | 0.819706 | 0.981636 | chr18 | 20974817 | 20975383 | + | 0 NA | intron (NL2a LINE    | 136713 NM_005406 | 6093     | Hs. 306307NM_005406 | ENSG00000ROCK1    | - | P16OROCK         | hso assocprotein-coding         |
| chr1-2085.10.1512  | -0.1678   | 0.737591  | -0.2275  | 0.820036 | 0.981636 | chr1  | 20857597 | 20859132 | + | 0 NA | intron (NL2a LINE    | -71676 NM_016287 | 50809    | Hs. 14244NM_016287  | ENSG00000HP1BP3   | - | HP1-BP74         | heterochprotein-coding          |
| chr11-301.10.1512  | -0.1678   | 0.737591  | -0.2275  | 0.820036 | 0.981636 | chr11 | 3014097  | 3018928  | + | 0 NA | intron (AluY SINE    | -12882 NR_04658C | 1.01E+08 | Hs. 27487NR_04658C  | ENSG00000CARS-AS1 | - | CARS             | anticrRNA                       |
| chr4-2662.10.1512  | -0.1678   | 0.737591  | -0.2275  | 0.820036 | 0.981636 | chr4  | 26627280 | 26628797 | + | 0 NA | intron (NL1PA3 LIN   | 43954 NM_018317  | 55296    | Hs. 47940NM_018317  | ENSG00000TBC1D19  | - | TBC1             | domprotein-coding               |
| chr3-7295.8.869054 | 0.185548  | 0.815846  | -0.2272  | 0.820175 | 0.981636 | chr3  | 72928856 | 72929379 | + | 0 NA | intron (CpG          | 41071 NM_00108C  | 727936   | Hs. 71027NM_00108C  | ENSG00000GXYLT2   | - | GLT8D4           | glucosideprotein-coding         |
| chr1-3846.5.418273 | -0.22286  | 0.982254  | -0.22689 | 0.820509 | 0.981636 | chr1  | 3846873  | 3847347  | + | 0 NA | intron (NMER33 DNA   | 10101 NM_014704  | 9731     | Hs. 13308NM_014704  | ENSG00000CEPT104  | - | CFAP256          | centrosomeprotein-coding        |
| chr13-452.5.418273 | -0.22286  | 0.982254  | -0.22689 | 0.820509 | 0.981636 | chr13 | 45285297 | 45287536 | + | 0 NA | IntergeniAluSx1 SI   | 50031 NR_14598E  | 1.1E+08  | NR_14572f           | ENSG00000SNORA31B | - | small            | nucsnRNA                        |
| chr16-366.5.418273 | -0.22286  | 0.982254  | -0.22689 | 0.820509 | 0.981636 | chr16 | 3660787  | 3661641  | + | 0 NA | intron (NL1ME3B LI   | 6420 NM_001351   | 1773     | Hs. 62963ENM_00522  | ENSG00000CDNAE1   | - | DNL1 DRN1        | deoxyribonucleaseprotein-coding |
| chr17-752.5.418273 | -0.22286  | 0.982254  | -0.22689 | 0.820509 | 0.981636 | chr17 | 75223023 | 75224126 | + | 0 NA | intron (NL1AluSx SIN | 17895 NM_024844  | 79902    | Hs. 36281NM_024844  | ENSG00000NUP85    | - | FRONT NF         | neocyporprotein-coding          |
| chr19-108.5.418273 | -0.22286  | 0.982254  | -0.22689 | 0.820509 | 0.981636 | chr19 | 10830202 | 10830917 | + | 0 NA | intron (NMIRb SINE   | 1586 NR_106851   | 1.02E+08 | NR_106851           | ENSG00000MIR6793  | - | hsa-mir-6        | microRNA ncRNA                  |
| chr5-955.5.418273  | -0.22286  | 0.982254  | -0.22689 | 0.820509 | 0.981636 | chr5  | 95507844 | 95508520 | + | 0 NA | intron (Nintron (N   | 46823 NM_014635  | 9652     | Hs. 48286ENM_014635 | ENSG00000TTC37    | - | KIAA0372         | tetratricprotein-coding         |
| chr6-1705.5.418273 | -0.22286  | 0.982254  | -0.22689 | 0.820509 | 0.981636 | chr6  | 1.7E+08  | 1.7E+08  | + | 0 NA | intron (NL1PA8 LIN   | 9987 NR_039787   | 1.01E+08 | NR_039787           | ENSG00000MIR4644  | - | microRNA         | ncRNA                           |
| chr11-112.10.14334 | -0.16643  | 0.733815  | -0.2268  | 0.820576 | 0.981636 | chr11 | 1.12E+08 | 1.12E+08 | + | 0 NA | intron (Nintron (N   | 21216 NM_001931  | 1737     | Hs. 335551NM_001931 | ENSG00000CDLAT    | - | DLTA E2 F        | dihydroliprotein-coding         |
| chr15-491.10.14334 | -0.16643  | 0.733815  | -0.2268  | 0.820576 | 0.981636 | chr15 | 49126454 | 49130300 | + | 0 NA | intron (Nintron (N   | 27222 NM_001143  | 9318     | Hs. 369614NM_00423  | ENSG00000COPS2    | - | ALIEN CSN        | COP9 sigrprotein-coding         |
| chr17-384.10.14334 | -0.16643  | 0.733815  | -0.2268  | 0.820576 | 0.981636 | chr17 | 38487958 | 38494662 | + | 0 NA | intron (Nintron (N   | 62846 NM_001199  | 57636    | Hs. 37444NM_02087   | ENSG00000ARHGAP23 | - | Rho              | GTPasprotein-coding             |
| chr2-651.10.14334  | -0.16643  | 0.733815  | -0.2268  | 0.820576 | 0.981636 | chr2  | 65103091 | 65104746 | + | 0 NA | intron (NAluSc8 SI   | 26188 NM_004161  | 5861     | Hs. 31064NM_004161  | ENSG00000RAB1A    | - | RAB1 YPT1 RAB1A, | mcprotein-coding                |
| chr3-1237.10.14334 | -0.16643  | 0.733815  | -0.2268  | 0.820576 | 0.981636 | chr3  | 1.24E+08 | 1.24E+08 | + | 0 NA | intron (Nintron (N   | 4814 NR_04662E   | 1.01E+08 | Hs. 66731cNR_04662E | ENSG00000MYLK-AS2 | - | MYLK             | anticrRNA                       |
| chr5-4191.10.14334 | -0.169206 | 0.745452  | -0.22643 | 0.820623 | 0.981636 | chr5  | 41917084 | 41917435 | + | 0 NA | exon (NM exon (NM    | -7993 NM_001297  | 26272    | Hs. 16557NM_001217  | ENSG00000FBX04    | - | FBX4             | F-box prcprotein-coding         |
| chr10-105.10.6048  | -0.16375  | 0.723494  | -0.22633 | 0.820948 | 0.981636 | chr10 | 1.1E+08  | 1.1E+08  | + | 0 NA | 3' UTR (N3' UTR (N   | 58251 NM_001324  | 7511     | Hs. 39062NM_02038   | ENSG00000XPNPEP1  | - | APP1 SAMFX       | prolyl protein-coding           |
| chr17-644.14.82912 | -0.14097  | 0.62299   | -0.22628 | 0.820987 | 0.981636 | chr17 | 64498485 | 64505373 | + | 0 NA | promoter-promoter-   | -616 NR_03996E   | 1.01E+08 | NR_03996E           | ENSG00000MIR5047  | - | microRNA         | ncRNA                           |
| chr16-581.10.93435 | -0.16703  | 0.739039  | -0.22601 | 0.821192 | 0.981636 | chr16 | 58113588 | 58114951 | + | 0 NA | intron (NAluSx1 SI   | 15112 NM_013242  | 29105    | Hs. 53275NM_013242  | ENSG00000CFAP20   | - | BUG22 Clc        | cilicia ancrprotein-coding      |
| chr1-844.10.62837  | -0.16809  | 0.744976  | -0.22563 | 0.821486 | 0.981636 | chr1  | 84483402 | 84483604 | + | 0 NA | intron (NAluSx1 SI   | 4237 NM_02506E   | 80135    | Hs. 48120NM_02506E  | ENSG00000CRPF1    | - | BXD5C            | ribosome protein-coding         |
| chr20-136.4.49536  | -0.24876  | 1.102706  | -0.22559 | 0.821519 | 0.981636 | chr20 | 1316432  | 1316980  | + | 0 NA | intron (Nintron (N   | 31678 NR_14798E  | 79133    | Hs. 47216NM_02412   | ENSG00000NDUFAP5  | - | C20orf7 w        | NADH:ubiq protein-coding        |
| chr1-1657.15.82775 | -0.13529  | 0.600147  | -0.22548 | 0.821646 | 0.981636 | chr1  | 16578067 | 16579272 | + | 0 NA | intron (Nintron (N   | 29755 NR_03744E  | 1.01E+08 | NR_03744E           | ENSG00000MIR3675  | - | microRNA         | ncRNA                           |
| chr17-294.9.681887 | -0.16949  | 0.751936  | -0.2254  | 0.821664 | 0.981636 | chr17 | 29498457 | 29500637 | + | 0 NA | intron (Nintron (N   | 67490 NM_198147  | 116236   | Hs. 10651NM_198147  | ENSG00000ABHD15   | - | abhydrol         | protein-coding                  |
| chr22-379.9.681887 | -0.16949  | 0.751936  | -0.2254  | 0.821664 | 0.981636 | chr22 | 37886883 | 37887208 | + | 0 NA | intron (NAluS2 SIN   | -19252 NM_00338E | 85377    | Hs. 51761NM_00338E  | ENSG00000MICALL1  | - | MICAL-L1         | MICAL likprotein-coding         |
| chr11-367.10.13549 | -0.16508  | 0.732431  | -0.22539 | 0.821678 | 0.981636 | chr11 | 3675032  | 3676934  | + | 0 NA | non-codiron-codir    | -4599 NM_00130C  | 57053    | Hs. 73280NM_02040   | ENSG00000CHRNA10  | - | cholinerg        | protein-coding                  |
| chr11-34C.10.13549 | -0.16508  | 0.732431  | -0.22539 | 0.821678 | 0.981636 | chr11 | 34076252 | 34101444 | + | 0 NA | intron (Nintron (N   | -16781 NM_02466E | 55226    | Hs. 57728NM_02466E  | ENSG00000CNAT10   | - | ALP Kre3 N       | acetylprotein-coding            |
| chr12-501.10.13549 | -0.16508  | 0.732431  | -0.22539 | 0.821678 | 0.981636 | chr12 | 50176260 | 50182010 | + | 0 NA | intron (NAluS26 SI   | -11602 NM_001281 | 91012    | Hs. 27052NM_14719   | ENSG00000CERS5    | - | LASS5 T          | tricaramide protein-coding      |
| chr12-644.10.13549 | -0.16508  | 0.732431  | -0.22539 | 0.821678 | 0.981636 | chr12 | 64409893 | 64437191 | + | 0 NA | intron (NAluS26 SI   | 19195 NM_00723E  | 11260    | Hs. 85951NM_00723E  | ENSG00000XPOT     | - | XPO3             | expotin protein-coding          |
| chr12-12C.10.13549 | -0.16508  | 0.732431  | -0.22539 | 0.821678 | 0.981636 | chr12 | 1.2E+08  | 1.2E+08  | + | 0 NA | exon (NM exon (NM    | 21333 NR_038924  | 1.01E+08 | Hs. 56920ENR_038924 | ENSG00000CPXN-AS1 | - | EyeLine4         | PXN anticrRNA                   |
| chr16-705.10.13549 | -0.16508  | 0.732431  | -0.22539 | 0.821678 | 0.981636 | chr16 | 70554222 | 70573053 | + | 0 NA | intron (Nintron (N   | -16258 NM_15245E | 146433   | Hs. 461214NM_15245E | ENSG00000IL34     | - | C16orf77         | interleukprotein-coding         |
| chr17-415.10.13549 | -0.16508  | 0.732431  | -0.22539 | 0.821678 | 0.981636 | chr17 | 41908089 | 41911063 | + | 0 NA | intron (Nintron (N   | 9826 NM_00109E   | 47       | Hs. 387567NM_00109E | ENSG00000ACLY     | - | ACL ATPCI        | ATP citrprotein-coding          |
| chr17-816.10.13549 | -0.16508  | 0.732431  | -0.22539 | 0.821678 | 0.981636 | chr17 | 81604128 | 81607247 | + | 0 NA | intron (Nintron (N   | -28254 NR_13013E | 55666    | Hs. 46433NM_017921  | ENSG00000CNPLOC4  | - | NPL4             | NPL4 homprotein-coding          |
| chr19-412.10.13549 | -0.16508  | 0.732431  | -0.22539 | 0.821678 | 0.981636 | chr19 | 41230975 | 41262044 | + | 0 NA | intron (NAluS26 SI   | -16048 NM_14473E | 11100    | Hs. 15521NM_00704   | ENSG00000HNRNPUL1 | - | E1B-AP5 E        | heterogerprotein-coding         |
| chr2-549.10.13549  | -0.16508  | 0.732431  | -0.22539 | 0.821678 | 0.981636 | chr2  | 54980643 | 54982711 | + | 0 NA | intron (Nintron (N   | 28595 NM_00700E  | 57142    | Hs. 63785NM_00700E  | ENSG00000CRTN4    | - | ASY N122         | Creticularprotein-coding        |
| chr21-461.10.13549 | -0.16508  | 0.732431  | -0.22539 | 0.821678 | 0.981636 | chr21 | 46110884 | 46132336 | + | 0 NA | exon (NM exon (NM    | 23491 NM_05817E  | 1292     | Hs. 42026NM_00184   | ENSG00000COL6A2   | - | BTHLM1 P         | collagen protein-coding         |
| chr3-522C.10.13549 | -0.16508  | 0.732431  | -0.22539 | 0.821678 | 0.981636 | chr3  | 52265741 | 52270119 | + | 0 NA | TTS (NR_C            | 431 NR_02966E    | 406890   | NR_02966E           | ENSG00000MIRLET7G | - | LET7G MIF        | microRNA ncRNA                  |
| chr3-142C.10.13549 | -0.16508  | 0.732431  | -0.22539 | 0.821678 | 0.981636 | chr3  | 1.42E+08 | 1.42E+08 | + | 0 NA | intron (NL1PA16 LI   | 92889 NM_00128E  | 54464    | Hs. 43510ENM_019001 | ENSG00000CXRN1    | - | 1-Sep 5'-3'      | excrprotein-coding              |
| chr4-7082.10.13549 | -         |           |          |          |          |       |          |          |   |      |                      |                  |          |                     |                   |   |                  |                                 |

|            |          |          |          |          |          |          |       |           |           |        |                     |        |           |          |           |                     |           |            |                     |                |                |                |
|------------|----------|----------|----------|----------|----------|----------|-------|-----------|-----------|--------|---------------------|--------|-----------|----------|-----------|---------------------|-----------|------------|---------------------|----------------|----------------|----------------|
| chr18-876  | 10.16877 | -0.1618  | 0.734435 | -0.2203  | 0.825636 | 0.981636 | chr18 | 8761041   | 8763618   | + 0 NA | intron (Nintron (N  | 4498   | NM_01521C | 23255    | Hs.70792C | ENSG00000MTCL1      | CCDC165   | microtubul | protein-coding      |                |                |                |
| chr19-555  | 10.16877 | -0.1618  | 0.734435 | -0.2203  | 0.825636 | 0.981636 | chr19 | 55386564  | 55390376  | + 0 NA | TTS (NR_1TTS (NR_1  | 289    | NR_10686E | 1.02E+08 | NR_10686E | ENSG00000MIR6805    | hsa-mir-ε | microRNA   | ncRNA               |                |                |                |
| chr22-411  | 10.16877 | -0.1618  | 0.734435 | -0.2203  | 0.825636 | 0.981636 | chr22 | 41117011  | 41117897  | + 0 NA | exon (NM_exon (NM_  | 24862  | NM_00136E | 2033     | Hs.157157 | ENSG00000CEP300     | KAT3B     | MEK1E1A    | bindiprotein-coding |                |                |                |
| chr3-172   | 10.16877 | -0.1618  | 0.734435 | -0.2203  | 0.825636 | 0.981636 | chr3  | 1.72E+08  | 1.72E+08  | + 0 NA | intron (NL2c LINE   | 100375 | NM_00412E | 2693     | Hs.130212 | ENSG00000GHSR       | GHPD      | major h    | protein-coding      |                |                |                |
| chr6-2994  | 10.16877 | -0.1618  | 0.734435 | -0.2203  | 0.825636 | 0.981636 | chr6  | 29943354  | 29946219  | + 0 NA | intron (Nintron (N  | 2254   | NM_00211E | 3105     | Hs.181244 | ENSG00000HLA-A      | HLLA      | major h    | protein-coding      |                |                |                |
| chr6-135C  | 10.16877 | -0.1618  | 0.734435 | -0.2203  | 0.825636 | 0.981636 | chr6  | 1.35E+08  | 1.35E+08  | + 0 NA | exon (NM_exon (NM_  | 17695  | NM_00114E | 10767    | Hs.378532 | ENSG00000CHBS1L     | EF-1a     | ERF        | HBS1 like           | protein-coding |                |                |
| chr7-748E  | 10.16877 | -0.1618  | 0.734435 | -0.2203  | 0.825636 | 0.981636 | chr7  | 7488857   | 7488616   | + 0 NA | intron (Nintron (N  | 4526   | NR_04058A | 442582   | Hs.63231  | ENSG00000STAG3L2    | STAG3L1   | Sstromal   | ε                   | pseudogene     |                |                |
| chr11-764  | 5.46727  | -0.22182 | 1.007145 | -0.22024 | 0.825682 | 0.981636 | chr11 | 76464062  | 76464903  | + 0 NA | intron (Nintron (N  | 19457  | NM_02019E | 56946    | Hs.352588 | ENSG00000EMSY       | C11orf30  | EMSY       | trarp               | protein-coding |                |                |
| chr1-702   | 10.62237 | -0.15795 | 0.717688 | -0.22008 | 0.825808 | 0.981636 | chr1  | 70235633  | 70238060  | + 0 NA | intron (NAluSc8 SI  | 15466  | NM_00135C | 9295     | Hs.47969E | ENSG00000CSRF11     | NET2      | SFRS       | serine ar           | protein-coding |                |                |
| chr1-1092  | 10.62237 | -0.15795 | 0.717688 | -0.22008 | 0.825808 | 0.981636 | chr1  | 1.09E+08  | 1.09E+08  | + 0 NA | intron (Nintron (N  | 14101  | NM_00140E | 1952     | Hs.57652  | ENSG00000CELSR2     | ADGR2     | C          | cadherin            | protein-coding |                |                |
| chr14-528  | 10.62237 | -0.15795 | 0.717688 | -0.22008 | 0.825808 | 0.981636 | chr14 | 52867079  | 52873400  | + 0 NA | intron (NTrigger3b  | 78632  | NM_19806E | 64841    | Hs.47802E | ENSG00000GNPNAT1    | GNAI1     | GNP        | glucosamin          | protein-coding |                |                |
| chr17-422  | 4.907819 | -0.23594 | 1.072229 | -0.22005 | 0.825833 | 0.981636 | chr17 | 42223539  | 42223892  | + 0 NA | intron (Nintron (N  | 29221  | NM_00114E | 84514    | Hs.38039  | ENSG00000GHDC       | D11LGP1   | I          | GH3                 | domain         | protein-coding |                |
| chr13-326  | 5.402557 | -0.21804 | 0.994417 | -0.21926 | 0.826447 | 0.981636 | chr13 | 32509346  | 32509985  | + 0 NA | promoter-promoter-  | 270    | NR_02692E | 116828   | Hs.658751 | ENSG00000N4BP2L2-1  | CG3030    | N4BP2      | lincRNA             |                |                |                |
| chr18-26E  | 5.402557 | -0.21804 | 0.994417 | -0.21926 | 0.826447 | 0.981636 | chr18 | 26012244  | 26013092  | + 0 NA | IntergeniIntergeni  | 77945  | NM_001007 | 6760     | Hs.129261 | ENSG00000CSS18      | SLX1      | SYT        | SS18                | sub            | protein-coding |                |
| chr3-325E  | 5.402557 | -0.21804 | 0.994417 | -0.21926 | 0.826447 | 0.981636 | chr3  | 32539630  | 32541144  | + 0 NA | intron (Nintron (N  | 30471  | NM_01614I | 51143    | Hs.52949E | ENSG00000DYNCL1L1   | DLX-A     | DN         | dynein              | c              | protein-coding |                |
| chr4-159E  | 5.402557 | -0.21804 | 0.994417 | -0.21926 | 0.826447 | 0.981636 | chr4  | 1.59E+08  | 1.59E+08  | + 0 NA | intron (NL2a LINE   | 49578  | NM_00135E | 9693     | Hs.744884 | ENSG00000RAPGEF2    | CNrasGEF  | Rap        | guanine             | protein-coding |                |                |
| chr5-863E  | 5.402557 | -0.21804 | 0.994417 | -0.21926 | 0.826447 | 0.981636 | chr5  | 863058    | 864298    | + 0 NA | TTS (NR_1TTS (NR_1  | 12692  | NM_02478E | 79844    | Hs.654874 | ENSG00000ZDHHC11    | ZNF399    | zinc       | fin                 | protein-coding |                |                |
| chr5-179E  | 5.402557 | -0.21804 | 0.994417 | -0.21926 | 0.826447 | 0.981636 | chr5  | 1.8E+08   | 1.8E+08   | + 0 NA | intron (NAluSp SIN  | 20895  | NR_10566E | 1.02E+08 | Hs.66325E | ENSG00000LOC10192E  |           |            |                     | uncharact      | ncRNA          |                |
| chr6-342E  | 5.402557 | -0.21804 | 0.994417 | -0.21926 | 0.826447 | 0.981636 | chr6  | 34287032  | 34287876  | + 0 NA | 3' UTR (N3' UTR (N  | 38346  | NM_001287 | 221491   | Hs.38130C | ENSG00000SMIM29     | G6orf1    | LE         | small               | in             | protein-coding |                |
| chr6-897E  | 5.402557 | -0.21804 | 0.994417 | -0.21926 | 0.826447 | 0.981636 | chr6  | 89755884  | 89756649  | + 0 NA | intron (Nintron (N  | 63528  | NM_01461I | 23195    | Hs.52994E | ENSG00000MDN1       | Real      | midasin    | γ                   | protein-coding |                |                |
| chr6-107E  | 5.402557 | -0.21804 | 0.994417 | -0.21926 | 0.826447 | 0.981636 | chr6  | 1.08E+08  | 1.08E+08  | + 0 NA | intron (Nintron (N  | 56575  | NM_00128E | 256380   | Hs.48610E | ENSG00000SCML4      | DJ47M23   | 15cm       | poly                | protein-coding |                |                |
| chr9-108E  | 5.402557 | -0.21804 | 0.994417 | -0.21926 | 0.826447 | 0.981636 | chr9  | 1.09E+08  | 1.09E+08  | + 0 NA | intron (Nintron (N  | 18381  | NM_00668E | 10881    | Hs.12353C | ENSG00000ACTL7A     |           |            |                     | actin          | lik            | protein-coding |
| chr1-124C  | 5.443697 | -0.21438 | 0.978456 | -0.2191  | 0.826575 | 0.981636 | chr1  | 12403269  | 12403681  | + 0 NA | intron (Nintron (N  | 103771 | NR_00302E | 677885   | Hs.65845C | ENSG00000SNORA59A   | ACA59     | small      | nuc                 | snoRNA         |                |                |
| chr1-466E  | 5.443697 | -0.21438 | 0.978456 | -0.2191  | 0.826575 | 0.981636 | chr1  | 46633051  | 46633975  | + 0 NA | IntergeniMIRb SINE  | 16622  | NM_20140C | 148932   | Hs.632401 | ENSG00000MOB3C      | MOBE      | MOE        | MOB                 | kinas          | protein-coding |                |
| chr11-64E  | 5.443697 | -0.21438 | 0.978456 | -0.2191  | 0.826575 | 0.981636 | chr11 | 64237448  | 64238608  | + 0 NA | intron (Nintron (N  | 3067   | NM_00447C | 2286     | Hs.22772E | ENSG00000FKBP2      | FKBP-13   | FKBP       | prol                | protein-coding |                |                |
| chr17-161E | 5.443697 | -0.21438 | 0.978456 | -0.2191  | 0.826575 | 0.981636 | chr17 | 160270628 | 160271396 | + 0 NA | intron (Nintron (N  | 39367  | NR_00299E | 677681   | NR_00299E | ENSG00000SCARNA20   | ACA66     | small      | Ca                  | ncRNA          |                |                |
| chr19-160E | 5.443697 | -0.21438 | 0.978456 | -0.2191  | 0.826575 | 0.981636 | chr19 | 162123148 | 16225241  | + 0 NA | intron (Nintron (N  | 9834   | NM_03285E | 84941    | Hs.631617 | ENSG00000HSH2D      | ALX1      | HSH2       | hemato              | protein-coding |                |                |
| chr2-985E  | 5.443697 | -0.21438 | 0.978456 | -0.2191  | 0.826575 | 0.981636 | chr2  | 98595154  | 98595842  | + 0 NA | IntergeniLIP2 LIN   | 13014  | NM_00100E | 493753   | Hs.596537 | ENSG00000COA5       | 6330578E1 | cyto       | chron               | protein-coding |                |                |
| chr2-158E  | 5.443697 | -0.21438 | 0.978456 | -0.2191  | 0.826575 | 0.981636 | chr2  | 1.59E+08  | 1.59E+08  | + 0 NA | intron (Nintron (N  | 113081 | NR_13524E | 1E+08    | Hs.630724 | ENSG00000PKP4-AS1   |           |            |                     | PKP4           | ant            | ncRNA          |
| chr20-39E  | 5.443697 | -0.21438 | 0.978456 | -0.2191  | 0.826575 | 0.981636 | chr20 | 39008885  | 39010824  | + 0 NA | intron (Nintron (N  | 47510  | NM_00119C | 60625    | Hs.44452C | ENSG00000DHX35      | C20orf15  | DEAH       | h                   | protein-coding |                |                |
| chr3-390E  | 5.443697 | -0.21438 | 0.978456 | -0.2191  | 0.826575 | 0.981636 | chr3  | 39099040  | 39100844  | + 0 NA | intron (Nintron (N  | 7685   | NM_00127E | 64689    | Hs.72194E | ENSG00000GORASP1    | GOLPH5    | G          | golgi               | rec            | protein-coding |                |
| chr3-412E  | 5.443697 | -0.21438 | 0.978456 | -0.2191  | 0.826575 | 0.981636 | chr3  | 41240921  | 41241493  | + 0 NA | TTS (NM_CTTS (NM_C  | 41702  | NM_00109E | 1499     | Hs.47601E | ENSG00000CTNNB1     | CTNBB1    | EVF        | catenin             | γ              | protein-coding |                |
| chr4-558E  | 5.443697 | -0.21438 | 0.978456 | -0.2191  | 0.826575 | 0.981636 | chr4  | 55888777  | 55890023  | + 0 NA | intron (Nintron (N  | 35750  | NM_01826I | 55763    | Hs.26966E | ENSG00000EXOC1      | BM-102    | SE         | exocyt              | c              | protein-coding |                |
| chr5-129E  | 5.443697 | -0.21438 | 0.978456 | -0.2191  | 0.826575 | 0.981636 | chr5  | 1.3E+08   | 1.3E+08   | + 0 NA | intron (NLIPIA13 LI | 113245 | NM_001257 | 1E+08    | Hs.582534 | ENSG00000CMINAR2    | KIAA1024  | membrane   | protein-coding      |                |                |                |
| chr5-141E  | 5.443697 | -0.21438 | 0.978456 | -0.2191  | 0.826575 | 0.981636 | chr5  | 1.42E+08  | 1.42E+08  | + 0 NA | IntergeniLMC3 LIN   | 21628  | NM_00547I | 10007    | Hs.63385E | ENSG00000GNPDA1     | GNP1      | GNP1       | glucosami           | protein-coding |                |                |
| chr6-205E  | 5.443697 | -0.21438 | 0.978456 | -0.2191  | 0.826575 | 0.981636 | chr6  | 20595947  | 20596423  | + 0 NA | intron (NLIPIA7 LIN | 61728  | NM_01777A | 54901    | Hs.657604 | ENSG00000CDKAL1     |           |            |                     | CDK5           | reg            | protein-coding |
| chr7-446E  | 5.443697 | -0.21438 | 0.978456 | -0.2191  | 0.826575 | 0.981636 | chr7  | 44666803  | 44667508  | + 0 NA | intron (NAluJb SIN  | 60528  | NM_00100C | 406886   | Hs.488181 | ENSG00000COGDH      | AKGHD1    | E          | oxoglutar           | protein-coding |                |                |
| chr9-941E  | 5.443697 | -0.21438 | 0.978456 | -0.2191  | 0.826575 | 0.981636 | chr9  | 94182735  | 94183665  | + 0 NA | intron (NAluJb SIN  | 4366   | NR_02948I | 406886   | NR_02948I | ENSG00000MIRLET7D   | LET7D     | M          | micro               | ncRNA          |                |                |
| chrX-714E  | 5.443697 | -0.21438 | 0.978456 | -0.2191  | 0.826575 | 0.981636 | chrX  | 71455246  | 71455877  | + 0 NA | intron (NMIIRb SINE | 36888  | NR_00222E | 27160    | Hs.72180E | ENSG00000INGX       | ING1      | like       | inhibitor           | pseudo         |                |                |
| chr20-39E  | 9.212572 | -0.17112 | 0.781107 | -0.21907 | 0.826592 | 0.981636 | chr20 | 3989107   | 3989613   | + 0 NA | intron (NAluY SINE  | 26198  | NM_00113A | 11237    | Hs.54757E | ENSG00000CRNF24     | GIL       | ring       | fin                 | protein-coding |                |                |
| chr13-20E  | 10.16091 | -0.16045 | 0.733051 | -0.21889 | 0.826739 | 0.981636 | chr13 | 20972815  | 20977469  | + 0 NA | exon (NM_exon (NM_  | 25714  | NR_10405E | 1.02E+08 | Hs.63763E | ENSG00000LINC00367- |           |            |                     | long           | int            | ncRNA          |
| chr13-491  | 10.16091 | -0.16045 | 0.733051 | -0.21889 | 0.826739 | 0.981636 | chr13 | 49136632  | 49137563  | + 0 NA | intron (NAluJo SIN  | 26780  | NM_01492E | 22862    | Hs.50801C | ENSG00000FND3A      | FND3      | HUC        | fibronect           | protein-coding |                |                |
| chr14-21E  | 10.16091 | -0.16045 | 0.733051 | -0.21889 | 0.826739 | 0.981636 | chr14 | 21351408  | 21355079  | + 0 NA | intron (Nintron (N  | 30776  | NM_00719E | 11198    | Hs.213724 | ENSG00000SUPT16H    | CDC68     | FAC        | SPT16               | hon            | protein-coding |                |
| chr16-224  | 10.16091 | -0.16045 | 0.733051 | -0.21889 | 0.826739 | 0.981636 | chr16 | 22467332  | 22471153  | + 0 NA | intron (Nintron (N  | 31527  | NR_02746E | 1E+08    | Hs.70957E | ENSG00000RRN3P3     |           |            |                     | RRN3           | hom            | pseudo         |
| chr16-554  | 10.16091 | -0.16045 | 0.733051 | -0.21889 | 0.826739 | 0.981636 | chr16 | 55495443  | 55498364  | + 0 NA | intron (Nintron (N  | 12169  | NM_01783E | 54947    | Hs.460857 | ENSG00000LPCAT2     | AGPAT11   | γ          | lysophos            | ph             | protein-coding |                |
| chr2-331E  | 10.16091 | -0.16045 | 0.733051 | -0.21889 | 0.826739 | 0.981636 | chr2  | 33186393  | 33190349  | + 0 NA | intron (NAluSq2 SI  | 53775  | NM_00116E | 4052     | Hs.61931E | ENSG00000LTBP1      |           |            |                     | latent         | γ              | protein-coding |
| chr2-650E  | 10.16091 | -0.16045 | 0.733051 | -0.21889 | 0.826739 | 0.981636 | chr2  | 65085606  | 65086690  | + 0 NA | TTS (NM_CTTS (NM_C  | 29732  | NM_00131E | 23177    | Hs.709257 | ENSG00000CEP68      | KIA       |            |                     |                |                |                |



|                    |          |          |          |          |          |       |           |          |   |      |                    |                  |                               |                    |                                     |
|--------------------|----------|----------|----------|----------|----------|-------|-----------|----------|---|------|--------------------|------------------|-------------------------------|--------------------|-------------------------------------|
| chr9-2721 5.435839 | -0.21194 | 0.981398 | -0.21596 | 0.829022 | 0.981636 | chr9  | 27200261  | 27201010 | + | 0 NA | intron (Nintron (N | 82158 NR_026675  | 158035 Hs. 201554NR_026675    | ENSG000003C9orf14  | long intencRNA                      |
| chr9-8841 5.435839 | -0.21194 | 0.981398 | -0.21596 | 0.829022 | 0.981636 | chr9  | 88416367  | 88417308 | + | 0 NA | intron (NAluSp SIN | 28393 NM_006717  | 10927 Hs. 146804NM_006717     | ENSG000003SPIN1    | SPIN TDRE spindlin protein-coding   |
| chr9-9205 5.435839 | -0.21194 | 0.981398 | -0.21596 | 0.829022 | 0.981636 | chr9  | 92055769  | 92056319 | + | 0 NA | intron (NLMC5a LI  | 59369 NM_006415  | 10558 Hs. 90458 NM_006415     | ENSG000003PTLC1    | HSAN1 HNS serine pε protein-coding  |
| chr9-1284 5.435839 | -0.21194 | 0.981398 | -0.21596 | 0.829022 | 0.981636 | chr9  | 1.28E+08  | 1.28E+08 | + | 0 NA | intron (NAluSq2 SI | 19447 NM_153437  | 4957 Hs. 129055NM_00254C      | ENSG000003ODF2     | CT134 ODF outer der protein-coding  |
| chr10-32 10.60665  | -0.15536 | 0.71949  | -0.21594 | 0.829036 | 0.981636 | chr10 | 32025889  | 32039459 | + | 0 NA | intron (Nintron (N | 23751 NM_004521  | 3799 Hs. 327735NM_004521      | ENSG000003K1F5B    | HEL-S-61 kinesin f protein-coding   |
| chr2-1772 10.60665 | -0.15536 | 0.71949  | -0.21594 | 0.829036 | 0.981636 | chr2  | 1.77E+08  | 1.77E+08 | + | 0 NA | intron (Nintron (N | 19517 NR_13847C  | 220988 Hs. 516535NM_194247    | ENSG000003HNRNP3   | 2610510D1 heteroger protein-coding  |
| chr19-154 10.66351 | -0.15613 | 0.724124 | -0.21561 | 0.829288 | 0.981636 | chr19 | 15422425  | 15426324 | + | 0 NA | exon (NM exon (NM  | -5386 NM_001291  | 26993 Hs. 399800NM_014371     | ENSG000003AKAP8L   | HA95 HAPK-A-kinase protein-coding   |
| chr2-2312 10.66351 | -0.15613 | 0.724124 | -0.21561 | 0.829288 | 0.981636 | chr2  | 2.31E+08  | 2.31E+08 | + | 0 NA | intron (NAluSx4 SI | -71035 NR_039937 | 1.01E+08 NR_039937            | ENSG000003MIR4777  | - microRNA ncRNA                    |
| chr9-4105 10.66351 | -0.15613 | 0.724124 | -0.21561 | 0.829288 | 0.981636 | chr9  | 41050329  | 41051167 | + | 0 NA | intron (NLM2 LINE  | 23877 NR_00283C  | 595135 Hs. 571595NR_00283C    | ENSG000003PGM5P2   | - phosphogl pseudo                  |
| chr12-214 9.699453 | -0.16309 | 0.757038 | -0.21543 | 0.829432 | 0.981636 | chr12 | 21483003  | 21483361 | + | 0 NA | intron (Nintron (N | 18453 NM_002907  | 5965 Hs. 235065NM_002907      | ENSG000003RECQL    | RECQL1 ReCq like protein-coding     |
| chr11-445 5.830732 | -0.21551 | 1.000665 | -0.21537 | 0.829448 | 0.981636 | chr11 | 44934009  | 44934411 | + | 0 NA | non-codirnon-codir | 15950 NM_001255  | 9537 Hs. 554791NM_006034      | ENSG000003TP53I11  | PIG11 tumor pr protein-coding       |
| chr10-501 10.67136 | -0.15746 | 0.731199 | -0.21535 | 0.829495 | 0.981636 | chr10 | 50128003  | 50128550 | + | 0 NA | intron (Nintron (N | 60322 NM_001005  | 387680 Hs. 365285NM_018232    | ENSG000003WASHC2A  | FAM21A FβWASH com protein-coding    |
| chr11-105 10.65565 | -0.15483 | 0.719429 | -0.21521 | 0.829606 | 0.981636 | chr11 | 10579214  | 10580597 | + | 0 NA | intron (Nintron (N | -11240 NM_006691 | 10894 Hs. 655332NM_006691     | ENSG000003LYVE1    | CRSBP-1 F lymphatic protein-coding  |
| chr14-306 10.65565 | -0.15483 | 0.719429 | -0.21521 | 0.829606 | 0.981636 | chr14 | 30663705  | 30664597 | + | 0 NA | intron (NLP2 LINE  | 41932 NM_01610E  | 23256 Hs. 369165NM_01610E     | ENSG000003SCFD1    | C14orf163 secl fami protein-coding  |
| chr2-1691 10.65565 | -0.15483 | 0.719429 | -0.21521 | 0.829606 | 0.981636 | chr2  | 1691430   | 1693055  | + | 0 NA | intron (Nintron (N | 52273 NM_012293  | 7837 Hs. 332197NM_012293      | ENSG000003PXDN     | ASG7D COF peroxidase protein-coding |
| chr4-3894 10.65565 | -0.15483 | 0.719429 | -0.21521 | 0.829606 | 0.981636 | chr4  | 38943968  | 38945630 | + | 0 NA | non-codirnon-codir | 76767 NR_03030C  | 693159 NR_03030C              | ENSG000003MIR574   | MIR574-3r microRNA ncRNA            |
| chr15-997 11.10925 | -0.15148 | 0.705006 | -0.21487 | 0.829869 | 0.981636 | chr15 | 99712580  | 99712955 | + | 0 NA | exon (NM exon (NM  | 20670 NM_001284  | 145748 Hs. 562565NM_152445    | ENSG000003CLYSD4   | - LysM dome protein-coding          |
| chr1-5135 5.897295 | -0.20292 | 0.94673  | -0.21434 | 0.830282 | 0.981636 | chr1  | 51396907  | 51398353 | + | 0 NA | intron (Nintron (N | 24465 NM_001155  | 2060 Hs. 83722 NM_001198      | ENSG000003EPS15    | AF-1P AF1 epidermal protein-coding  |
| chr1-8425 5.897295 | -0.20292 | 0.94673  | -0.21434 | 0.830282 | 0.981636 | chr1  | 84231467  | 84232691 | + | 0 NA | intron (NLP3A3 LIN | 50447 NM_001242  | 5567 Hs. 487325NM_002731      | ENSG000003PRKACB   | PKA C-βet protein f protein-coding  |
| chr1-1656 5.897295 | -0.20292 | 0.94673  | -0.21434 | 0.830282 | 0.981636 | chr1  | 1.66E+08  | 1.66E+08 | + | 0 NA | intron (NLP3A6 LIN | 7231 NM_001365   | 223 Hs. 2533 NM_000695        | ENSG000003ALDH9A1  | ALDH4 ALAldehyde protein-coding     |
| chr1-2005 5.897295 | -0.20292 | 0.94673  | -0.21434 | 0.830282 | 0.981636 | chr1  | 2.01E+08  | 2.01E+08 | + | 0 NA | intron (Nintron (N | -29838 NM_005298 | 2848 Hs. 534315NM_005298      | ENSG000003GPR25    | - G protein protein-coding          |
| chr11-101 5.897295 | -0.20292 | 0.94673  | -0.21434 | 0.830282 | 0.981636 | chr11 | 10193039  | 10193673 | + | 0 NA | intron (NAluV SINE | 100851 NM_030962 | 81846 Hs. 577252NM_030962     | ENSG000003SFB2     | CMT4B2 DESET bindi protein-coding   |
| chr11-125 5.897295 | -0.20292 | 0.94673  | -0.21434 | 0.830282 | 0.981636 | chr11 | 1.23E+08  | 1.23E+08 | + | 0 NA | intron (Nintron (N | 46482 NM_02476E  | 79827 Hs. 591945NM_02476E     | ENSG000003CLMP     | ACAM ASACXADR 1i protein-coding     |
| chr12-252 5.897295 | -0.20292 | 0.94673  | -0.21434 | 0.830282 | 0.981636 | chr12 | 25235536  | 25236039 | + | 0 NA | intron (NMER1B DNA | 15142 NM_001366  | 3845 Hs. 505035NM_004985      | ENSG000003KRAS     | C-K-RAS KRAS prot protein-coding    |
| chr17-455 5.897295 | -0.20292 | 0.94673  | -0.21434 | 0.830282 | 0.981636 | chr17 | 45026804  | 45027250 | + | 0 NA | intron (Nintron (N | 24605 NM_001285  | 79877 Hs. 463145NM_024815     | ENSG000003DCAKD    | - dephosph protein-coding           |
| chr18-623 5.897295 | -0.20292 | 0.94673  | -0.21434 | 0.830282 | 0.981636 | chr18 | 632411768 | 63242842 | + | 0 NA | intron (NHAL1 LINE | -22925 NM_000657 | 596 Hs. 150745NM_000635       | ENSG000003BCL2     | Bcl-2 PPFBCL2 apor protein-coding   |
| chr19-221 5.897295 | -0.20292 | 0.94673  | -0.21434 | 0.830282 | 0.981636 | chr19 | 2231116   | 2231623  | + | 0 NA | intron (Nintron (N | 20780 NR_03159E  | 1E+08 NR_03159E               | ENSG000003MIR1227  | MIRN1227 microRNA ncRNA             |
| chr19-364 5.897295 | -0.20292 | 0.94673  | -0.21434 | 0.830282 | 0.981636 | chr19 | 3647663   | 3648265  | + | 0 NA | intron (NAluSx SIN | -21149 NM_021231 | 58509 Hs. 128425NM_021231     | ENSG000003CACTIN   | C19orf29 cactin, s protein-coding   |
| chr3-1395 5.897295 | -0.20292 | 0.94673  | -0.21434 | 0.830282 | 0.981636 | chr3  | 1.39E+08  | 1.39E+08 | + | 0 NA | exon (NM exon (NM  | 2368 NM_001363   | 56945 Hs. 745001NM_020191     | ENSG000003MRPS22   | C3orf5 CCmitochon protein-coding    |
| chr4-1548 5.897295 | -0.20292 | 0.94673  | -0.21434 | 0.830282 | 0.981636 | chr4  | 1.55E+08  | 1.55E+08 | + | 0 NA | exon (NM exon (NM  | 2669 NM_00266E   | 5356 Hs. 249999NM_00266E      | ENSG000003PLRG1    | Cwcl PRL1pleiotro protein-coding    |
| chr6-4367 5.897295 | -0.20292 | 0.94673  | -0.21434 | 0.830282 | 0.981636 | chr6  | 43672448  | 43673355 | + | 0 NA | TTS (NM_TTS (NM_I  | 14911 NM_01813E  | 55168 Hs. 520145NM_01813E     | ENSG000003MRPS18A  | HumanS18 mt tochon protein-coding   |
| chr8-8794 5.897295 | -0.20292 | 0.94673  | -0.21434 | 0.830282 | 0.981636 | chr8  | 8794743   | 8797097  | + | 0 NA | intron (Nintron (N | 93983 NM_194284  | 137075 Hs. 183617NM_194284    | ENSG000003CLDN23   | CLDNL hCClaudin 2 protein-coding    |
| chr11-831 10.64779 | -0.15354 | 0.717005 | -0.21413 | 0.830442 | 0.981636 | chr11 | 83193068  | 83192261 | + | 0 NA | intron (NAluSq2 SI | 2355 NR_14901C   | 1.01E+08 Hs. 585502NM_018705  | LOC100505C         | uncharactncRNA                      |
| chr19-164 10.64779 | -0.15354 | 0.717005 | -0.21413 | 0.830442 | 0.981636 | chr19 | 16417176  | 16417429 | + | 0 NA | intron (Nintron (N | 54668 NM_001255  | 58513 Hs. 654635NM_021235     | ENSG000003EPL5L1   | EPL5R epidermal protein-coding      |
| chr5-1711 10.64779 | -0.15354 | 0.717005 | -0.21413 | 0.830442 | 0.981636 | chr5  | 1.71E+08  | 1.71E+08 | + | 0 NA | intron (Nintron (N | 6626 NM_001355   | 4869 Hs. 557555NM_00252C      | ENSG000003NPM1     | B23 NPM nucleoph protein-coding     |
| chr9-9214 10.64779 | -0.15354 | 0.717005 | -0.21413 | 0.830442 | 0.981636 | chr9  | 92142579  | 92145984 | + | 0 NA | intron (Nintron (N | 2814 NR_027341   | 158314 Hs. 149944NR_027341    | LINC00475C9orf47   | long intencRNA                      |
| chrX-1176 4.974382 | -0.22245 | 1.041782 | -0.21353 | 0.830916 | 0.981636 | chrX  | 11761442  | 11762106 | + | 0 NA | intron (Nintron (N | 2127 NM_00680C   | 10943 Hs. 655285NM_00680C     | ENSG000003MSL3     | MSL3L1 MSL compl protein-coding     |
| chr11-274 11.10139 | -0.15023 | 0.703754 | -0.21347 | 0.830962 | 0.981636 | chr11 | 27498014  | 27498675 | + | 0 NA | 3' UTR (N3' UTR (N | 8425 NM_018362   | 55327 Hs. 91393 NM_018362     | ENSG000003LINC7    | LINC7-7 lin-7 hon protein-coding    |
| chr7-5522 11.10139 | -0.15023 | 0.703754 | -0.21347 | 0.830962 | 0.981636 | chr7  | 55200000  | 55206672 | + | 0 NA | TTS (NM_TTS (NM_C  | -14432 NR_047551 | 1.01E+08 Hs. 720485NR_047551  | ENSG000003EGFR-AS1 | EGFR anticncRNA                     |
| chr9-1142 11.10139 | -0.15023 | 0.703754 | -0.21347 | 0.830962 | 0.981636 | chr9  | 1.14E+08  | 1.14E+08 | + | 0 NA | intron (NLM1E1 LIN | -27534 NM_000607 | 5004 Hs. 522355NM_000607      | ENSG000003ORM1     | AGP-A AGF orosomu protein-coding    |
| chr3-6744 5.394699 | -0.21557 | 1.010965 | -0.21323 | 0.831147 | 0.981636 | chr3  | 67400047  | 67400897 | + | 0 NA | intron (NMER103C L | 175008 NR_036234 | 1E+08 NR_036234               | ENSG000003MIR4272  | - microRNA ncRNA                    |
| chr8-1868 5.394699 | -0.21557 | 1.010965 | -0.21323 | 0.831147 | 0.981636 | chr8  | 1868877   | 1869218  | + | 0 NA | intron (NA-rich LC | 45121 NM_00130E  | 9639 Hs. 98594 NM_014625      | ENSG000003ARHGEF10 | GEF10 SNC Rho guaniprotein-coding   |
| chr9-8634 10.19419 | -0.15711 | 0.737928 | -0.21291 | 0.831396 | 0.981636 | chr9  | 86342141  | 86342522 | + | 0 NA | intron (Nintron (N | 12079 NM_024617  | 79670 Hs. 597057NM_024617     | ENSG000003TUT7     | PAPD6 TEM terminal protein-coding   |
| chr2-9275 20.42878 | 0.119449 | 0.56188  | 0.212588 | 0.831648 | 0.981636 | chr2  | 92758961  | 92759252 | + | 0 NA | IntergeniALR/Alpha | 817960 NR_027714 | 440888 Hs. 730235NM_001032412 | ACTR3BP2           | FKSG73 ACTR3B ps pseudo             |
| chr10-351 10.63993 | -0.15224 | 0.716797 | -0.2124  | 0.831798 | 0.981636 | chr10 | 28535666  | 28541462 | + | 0 NA | intron (NAluSx1 SI | 5446 NM_01662E   | 51322 Hs. 743224NM_01662E     | ENSG000003WAC      | BM-016 DEWW domain protein-coding   |
| chr11-285 10.63993 | -0.15224 | 0.716797 | -0.2124  | 0.831798 | 0.981636 | chr11 | 35175637  | 35189923 | + | 0 NA | intron (NLTR101 Me | 19830 NR_145794  | 1.1E+08 NR_145794             | SNORD164           | small nuc snoRNA                    |
| chr11-596 10.63993 | -0.15224 | 0.716797 | -0.2124  | 0.831798 | 0.981636 | chr11 | 59663355  | 59666834 | + | 0 NA | intron (Nintron (N | 3943 NM_15271E   | 219988 Hs. 591965NM_15271E    | ENSG000003PATL1    | Pat1b hPePAT1 homc protein-coding   |
| chr2-6985 10.63993 | -0.15224 | 0.716797 | -0.2124  | 0.831798 | 0.981636 | chr2  | 69895315  | 69897652 | + | 0 NA | exon (NM exon (NM  | 2527 NM_006857   | 11017 Hs. 54649 NM_006857     | ENSG000003SNRNP27  | 27K RY1 small nuc protein-coding    |
| chr4-5697 10.63993 | -0.15224 | 0.716797 | -0.2124  | 0.831798 | 0.981636 | chr4  | 56970284  | 56973924 | + | 0 NA | intron (NAluYf1 SI | 5502 NM_03231C   | 84273 Hs. 8715 NM_03231C      | ENSG000003NOA1     | C4orf14 vnitric o protein-coding    |
| chr4-7577 10.63993 | -0.15224 | 0.716797 | -0.2124  | 0.831798 | 0.981636 | chr4  | 75773697  | 75781095 | + | 0 NA | intron (NLMC2 LIN  | 52874 NM_00129C  | 8615 Hs. 744877NM_00371E      | ENSG000003USO1     | P115 TAP USO1 vesi protein-coding   |
| chr4-1382 10.63993 | -0.15224 | 0.716797 | -0.2124  | 0.831798 | 0.981636 | chr4  | 1.38E+08  | 1.38E+08 | + | 0 NA | intron (Nintron (N | 25699 NM_014331  | 23657 Hs. 390594NM_014331     | ENSG000003SLC7A11  | CCBR1 Xc1solute cε protein-coding   |
|                    |          |          |          |          |          |       |           |          |   |      |                    |                  |                               |                    |                                     |

|                    |          |          |          |          |          |       |          |          |   |   |    |                     |                    |          |           |                   |             |                |                                |                          |
|--------------------|----------|----------|----------|----------|----------|-------|----------|----------|---|---|----|---------------------|--------------------|----------|-----------|-------------------|-------------|----------------|--------------------------------|--------------------------|
| chr17-501.11.12681 | -0.146   | 0.701939 | -0.208   | 0.835232 | 0.981636 | chr17 | 50184820 | 50186367 | + | 0 | NA | exon (NM exon (NM   | -13117 NR_024192   | 373861   | Hs.25934  | NR_194072         | HILS1       | HI.9           | histone Ipseudo                |                          |
| chr2-1128.11.12681 | -0.146   | 0.701939 | -0.208   | 0.835232 | 0.981636 | chr2  | 11283688 | 11285710 | + | 0 | NA | intron (NL3 LINE C  | 59937 NR_00485C    | 9475     | Hs.68174  | ENS0000000485C    | ROCK2       | ROCK-II        | Rho assoc protein-coding       |                          |
| chr3-189C.11.12681 | -0.146   | 0.701939 | -0.208   | 0.835232 | 0.981636 | chr2  | 1.89E+08 | 1.89E+08 | + | 0 | NA | intron (NL2c LINE   | 64413 NR_037401.1  | 0.01E+08 | NR_037401 | ENS000000037401   | MIR3606     | mir-3606       | microRNA ncRNA                 |                          |
| chr3-1236.11.12681 | -0.146   | 0.701939 | -0.208   | 0.835232 | 0.981636 | chr3  | 1.24E+08 | 1.24E+08 | + | 0 | NA | intron (Nintron (N  | 1648 NR_04662E     | 0.01E+08 | Hs.66731  | ENS00000004662E   | MYLK-AS2    | -              | MYLK anticRNA                  |                          |
| chr5-1796.11.12681 | -0.146   | 0.701939 | -0.208   | 0.835232 | 0.981636 | chr5  | 1.8E+08  | 1.8E+08  | + | 0 | NA | intron (NAluJb SIN  | 8982 NR_00390C     | 8878     | Hs.58729  | ENS00000000390C   | SQSTM1      | A170 DMR3      | sequestosome1 protein-coding   |                          |
| chr6-3152.11.12681 | -0.146   | 0.701939 | -0.208   | 0.835232 | 0.981636 | chr6  | 31529764 | 31541049 | + | 0 | NA | TTS (NR_C TTS (NR_C | 1043 NR_00314C     | 692233   | NR_00314C | ENS00000000314C   | SNORD117    | U83            | small nucleolar RNA            |                          |
| chr7-2351.11.12681 | -0.146   | 0.701939 | -0.208   | 0.835232 | 0.981636 | chr7  | 23512135 | 23522365 | + | 0 | NA | intron (NAluV SINE  | 14731 NR_00136Z    | 29896    | Hs.44565  | ENS00000000136Z   | TRAZA       | AWMS1 HSU      | transform protein-coding       |                          |
| chr9-9204.11.12681 | -0.146   | 0.701939 | -0.208   | 0.835232 | 0.981636 | chr9  | 92041105 | 92045308 | + | 0 | NA | intron (NL2-3 Crp   | 72207 NR_00641F    | 10558    | Hs.90458  | ENS00000000641F   | SPTLC1      | HSAN1 HSN      | serine protease protein-coding |                          |
| chr17-424.6.407749 | -0.19508 | 0.93792  | -0.208   | 0.835233 | 0.981636 | chr17 | 4241604  | 4242252  | + | 0 | NA | intron (NAluSc8 SI  | 21919 NR_001257    | 51479    | Hs.69608  | ENS00000001257    | ANKFY1      | ANKHZN BT      | ankyrin 1 protein-coding       |                          |
| chr3-531C.4.966524 | -0.21934 | 0.105656 | -0.2076  | 0.835543 | 0.981636 | chr3  | 53109180 | 53109908 | + | 0 | NA | intron (NAluJr SIN  | 20891 NR_005285E   | 91869    | Hs.63191  | ENS000000005285E  | RFT1        | CDGIN          | RFT1                           | hom protein-coding       |
| chr1-199C.5.922719 | -0.19509 | 0.940246 | -0.20749 | 0.835629 | 0.981636 | chr1  | 19901624 | 19903051 | + | 0 | NA | intron (NAluY SINE  | 19942 NR_015207    | 23252    | Hs.37498  | ENS000000015207   | OTUD3       | DUBA4          | OTU                            | ubiquitin protein-coding |
| chr1-542F.5.922719 | -0.19509 | 0.940246 | -0.20749 | 0.835629 | 0.981636 | chr1  | 54250660 | 54251690 | + | 0 | NA | intron (NMIRc SINE  | 14732 NR_10354I    | 619518   | Hs.59143  | ENS00000000354I   | SSBP3-AS1   | Clorf191 SSBP3 | antncRNA                       |                          |
| chr1-199C.5.922719 | -0.19509 | 0.940246 | -0.20749 | 0.835629 | 0.981636 | chr1  | 59673414 | 59674106 | + | 0 | NA | intron (Nintron (N  | 59536 NR_039861.1  | 0.01E+08 | NR_039861 | ENS000000039861   | MIR4711     | -              | microRNA ncRNA                 |                          |
| chr1-110C.5.922719 | -0.19509 | 0.940246 | -0.20749 | 0.835629 | 0.981636 | chr1  | 1.1E+08  | 1.1E+08  | + | 0 | NA | Intergeni Intergeni | 13957 NR_00649Z    | 257      | Hs.66995  | ENS00000000649Z   | ALX3        | FND FND1       | ALX homeobox protein-coding    |                          |
| chr10-92C.5.922719 | -0.19509 | 0.940246 | -0.20749 | 0.835629 | 0.981636 | chr10 | 92311070 | 92314311 | + | 0 | NA | intron (NCharlie2F  | 21523 NR_017824    | 54708    | Hs.57349  | ENS000000017824   | 5-Mar       | MARCH-V V      | membrane protein-coding        |                          |
| chr11-108.5.922719 | -0.19509 | 0.940246 | -0.20749 | 0.835629 | 0.981636 | chr11 | 1.08E+08 | 1.08E+08 | + | 0 | NA | intron (NAluSp SIN  | 25111 NR_00135T    | 472      | Hs.36743  | ENS00000000135T   | ATM         | ATI ATA ATM    | serin protein-coding           |                          |
| chr12-87F.5.922719 | -0.19509 | 0.940246 | -0.20749 | 0.835629 | 0.981636 | chr12 | 878064   | 879400   | + | 0 | NA | intron (Nintron (N  | 54344 NR_00129T    | 5893     | Hs.41035  | ENS00000000129T   | CRAD52      | -              | RAD52                          | hom protein-coding       |
| chr12-62E.5.922719 | -0.19509 | 0.940246 | -0.20749 | 0.835629 | 0.981636 | chr12 | 62571474 | 62572226 | + | 0 | NA | intron (Nintron (N  | 31584 NR_012168Z   | 283416   | Hs.37588  | ENS0000000012168Z | LINC0146E   | C12orf61       | long intncRNA                  |                          |
| chr12-11C.5.922719 | -0.19509 | 0.940246 | -0.20749 | 0.835629 | 0.981636 | chr12 | 1.1E+08  | 1.1E+08  | + | 0 | NA | intron (NAluJo SIN  | 61353 NR_001347    | 28981    | Hs.52382  | ENS000000001347   | IFT81       | CDV-1 CDV      | intraflagellar protein-coding  |                          |
| chr14-73F.5.922719 | -0.19509 | 0.940246 | -0.20749 | 0.835629 | 0.981636 | chr14 | 73352760 | 73353649 | + | 0 | NA | intron (NAluSp SIN  | 105376 NR_00100E   | 8650     | Hs.52544  | ENS00000000100E   | NUMB        | C14orf41 NUMB  | endc protein-coding            |                          |
| chr15-64C.5.922719 | -0.19509 | 0.940246 | -0.20749 | 0.835629 | 0.981636 | chr15 | 64977264 | 64987121 | + | 0 | NA | intron (Nintron (N  | 11778 NR_001127    | 51324    | Hs.24245  | ENS000000001127   | SPG21       | ABHD21 AC      | SPG21                          | abf protein-coding       |
| chr15-74C.5.922719 | -0.19509 | 0.940246 | -0.20749 | 0.835629 | 0.981636 | chr15 | 74014144 | 74016273 | + | 0 | NA | intron (Nintron (N  | 20492 NR_033244    | 5371     | Hs.52646  | ENS000000033244   | PML         | MYL PP867      | promyeloc protein-coding       |                          |
| chr16-14F.5.922719 | -0.19509 | 0.940246 | -0.20749 | 0.835629 | 0.981636 | chr16 | 14580490 | 14581086 | + | 0 | NA | intron (Nintron (N  | 49472 NR_00258Z    | 5073     | Hs.25319  | ENS00000000258Z   | PARN        | DAN DKCB       | poly(A)-s protein-coding       |                          |
| chr16-19C.5.922719 | -0.19509 | 0.940246 | -0.20749 | 0.835629 | 0.981636 | chr16 | 19528925 | 19530069 | + | 0 | NA | intron (NLMC5a LI   | 5555 NR_00119E     | 9738     | Hs.27992  | ENS00000000119E   | CCP110      | CP110 C        | cytochrome protein-coding      |                          |
| chr16-281.5.922719 | -0.19509 | 0.940246 | -0.20749 | 0.835629 | 0.981636 | chr16 | 28175379 | 28180980 | + | 0 | NA | intron (Nintron (N  | 33786 NR_01517I    | 23214    | Hs.46046  | ENS00000001517I   | XPO6        | EXP6 RANE      | exportin protein-coding        |                          |
| chr16-48C.5.922719 | -0.19509 | 0.940246 | -0.20749 | 0.835629 | 0.981636 | chr16 | 48348165 | 48352991 | + | 0 | NA | intron (NHALIME LI  | 15309 NR_00100E    | 6477     | Hs.70682  | ENS00000000100E   | SIAH1       | SIAHA          | siah 1 protein-coding          |                          |
| chr17-62A.5.922719 | -0.19509 | 0.940246 | -0.20749 | 0.835629 | 0.981636 | chr17 | 62491912 | 62493252 | + | 0 | NA | intron (NAluSx1 SI  | 11469 NR_001284    | 11011    | Hs.44507  | ENS000000001284   | TLK2        | HsHPK MKR      | tousled 1 protein-coding       |                          |
| chr17-72A.5.922719 | -0.19509 | 0.940246 | -0.20749 | 0.835629 | 0.981636 | chr17 | 72417722 | 72418465 | + | 0 | NA | intron (Nintron (N  | 75282 NR_13522Z    | 146795   | Hs.65174  | ENS000000013522Z  | LINC0200E   | -              | long intncRNA                  |                          |
| chr18-95F.5.922719 | -0.19509 | 0.940246 | -0.20749 | 0.835629 | 0.981636 | chr18 | 9523471  | 9525152  | + | 0 | NA | intron (Nintron (N  | 48798 NR_00678E    | 10928    | Hs.52899  | ENS00000000678E   | RALBP1      | RIP1 RLIF      | ralA binc protein-coding       |                          |
| chr18-48E.5.922719 | -0.19509 | 0.940246 | -0.20749 | 0.835629 | 0.981636 | chr18 | 48803460 | 48804946 | + | 0 | NA | intron (Nintron (N  | 133603 NR_039897.1 | 0.01E+08 | NR_039897 | ENS000000039897   | MIR4743     | -              | microRNA ncRNA                 |                          |
| chr19-11F.5.922719 | -0.19509 | 0.940246 | -0.20749 | 0.835629 | 0.981636 | chr19 | 11553321 | 11553755 | + | 0 | NA | 3' UTR (N3' UTR (N  | 1929 NR_00136Z     | 84337    | Hs.63163  | ENS00000000136Z   | CELOF1      | ELF1           | elongatic protein-coding       |                          |
| chr2-42F.5.922719  | -0.19509 | 0.940246 | -0.20749 | 0.835629 | 0.981636 | chr2  | 42350945 | 42352814 | + | 0 | NA | intron (NAluJb SIN  | 8159 NR_13494F     | 9167     | Hs.33963  | ENS0000000013494F | COX7A2L     | COX7AR C       | cytochrome protein-coding      |                          |
| chr2-112C.5.922719 | -0.19509 | 0.940246 | -0.20749 | 0.835629 | 0.981636 | chr2  | 1.13E+08 | 1.13E+08 | + | 0 | NA | intron (NLMIEF LIN  | -12669 NR_001304   | 84269    | Hs.37507  | ENS000000001304   | CHCHD5      | C2orf9 C       | cytochrome protein-coding      |                          |
| chr21-15E.5.922719 | -0.19509 | 0.940246 | -0.20749 | 0.835629 | 0.981636 | chr21 | 15874714 | 15877223 | + | 0 | NA | intron (Nintron (N  | 145986 NR_00135Z   | 29761    | Hs.74399  | ENS00000000135Z   | USP25       | USP21          | ubiquitin protein-coding       |                          |
| chr21-29C.5.922719 | -0.19509 | 0.940246 | -0.20749 | 0.835629 | 0.981636 | chr21 | 29035906 | 29036544 | + | 0 | NA | intron (Nintron (N  | 11557 NR_006447    | 10600    | Hs.99819  | ENS000000006447   | USP16       | UBP-M UBF      | ubiquitin protein-coding       |                          |
| chr21-46F.5.922719 | -0.19509 | 0.940246 | -0.20749 | 0.835629 | 0.981636 | chr21 | 46505475 | 46507117 | + | 0 | NA | intron (NAluSz SIN  | 43825 NR_04640C    | 0.01E+08 | Hs.73716  | ENS00000004640C   | DIP2A-IT1   | -              | DIP2A                          | intncRNA                 |
| chr22-29C.5.922719 | -0.19509 | 0.940246 | -0.20749 | 0.835629 | 0.981636 | chr22 | 29648355 | 29649332 | + | 0 | NA | intron (NAluJb SIN  | 45210 NR_18183I    | 4771     | Hs.18789  | ENS00000000183I   | CNF2        | ACN BANF       | neurofibr protein-coding       |                          |
| chr22-31F.5.922719 | -0.19509 | 0.940246 | -0.20749 | 0.835629 | 0.981636 | chr22 | 31737360 | 31740055 | + | 0 | NA | exon (NM exon (NM   | 11425 NR_17356E    | 253143   | Hs.43890  | ENS00000007356E   | PRR14L      | C22orf30       | proline 1 protein-coding       |                          |
| chr22-45T.5.922719 | -0.19509 | 0.940246 | -0.20749 | 0.835629 | 0.981636 | chr22 | 45749712 | 45751046 | + | 0 | NA | intron (NAluJb SIN  | -10145 NR_03991E.1 | 0.01E+08 | NR_03991E | ENS00000003991E   | MIR4762     | -              | microRNA ncRNA                 |                          |
| chr3-689T.5.922719 | -0.19509 | 0.940246 | -0.20749 | 0.835629 | 0.981636 | chr3  | 68976404 | 68976816 | + | 0 | NA | non-codiron-codir   | 37074 NR_10382E    | 285203   | Hs.51805  | ENS00000000382E   | EOGT        | AER61 AOS      | EGF domain protein-coding      |                          |
| chr5-1371.5.922719 | -0.19509 | 0.940246 | -0.20749 | 0.835629 | 0.981636 | chr5  | 13716912 | 13718507 | + | 0 | NA | intron (Nintron (N  | 226771 NR_00136E   | 1767     | Hs.21236  | ENS00000000136E   | DNAH5       | CILD3 DN       | dynein a protein-coding        |                          |
| chr5-1374.5.922719 | -0.19509 | 0.940246 | -0.20749 | 0.835629 | 0.981636 | chr5  | 13747331 | 13748890 | + | 0 | NA | intron (NLIIP45 LIN | 926771 NR_00136E   | 1767     | Hs.21236  | ENS00000000136E   | DNAH5       | CILD3 DN       | dynein a protein-coding        |                          |
| chr5-371F.5.922719 | -0.19509 | 0.940246 | -0.20749 | 0.835629 | 0.981636 | chr5  | 37192329 | 37194180 | + | 0 | NA | intron (NLMC5 LIN   | -55792 NR_13426E   | 0.05E+08 | Hs.17099  | ENS000000013426E  | LINC0105374 | -              | uncharactncRNA                 |                          |
| chr5-739A.5.922719 | -0.19509 | 0.940246 | -0.20749 | 0.835629 | 0.981636 | chr5  | 73941364 | 73943814 | + | 0 | NA | TTS (NM_C TTS (NM_C | 129043 NR_001244   | 64283    | Hs.48252  | ENS000000001244   | ARHGFB2     | RGNEF RFI      | Rho guanine protein-coding     |                          |
| chr6-354T.5.922719 | -0.19509 | 0.940246 | -0.20749 | 0.835629 | 0.981636 | chr6  | 35478720 | 35480921 | + | 0 | NA | intron (Nintron (N  | 24924 NR_015704    | 972      | Hs.43656  | ENS000000015704   | CD74        | DHA-GL HLA     | CD74                           | mole protein-coding      |
| chr6-535C.5.922719 | -0.19509 | 0.940246 | -0.20749 | 0.835629 | 0.981636 | chr6  | 53539947 | 53542276 | + | 0 | NA | intron (NAluS2 SI   | 3990 NR_00149E     | 2729     | Hs.65446  | ENS00000000149E   | GCLC        | GCL GCS        | glutamate protein-coding       |                          |
| chr7-222T.5.922719 | -0.19509 | 0.940246 | -0.20749 | 0.835629 | 0.981636 | chr7  | 2227314  | 2227900  | + | 0 | NA | intron (Nintron (N  | 5338 NR_001304     | 8379     | Hs.65483  | ENS000000001304   | CMAD1L1     | MAD1 PIG       | epitonic protein-coding        |                          |
| chr8-526T.5.       |          |          |          |          |          |       |          |          |   |   |    |                     |                    |          |           |                   |             |                |                                |                          |



|                    |           |          |           |          |          |       |          |           |   |      |                    |                   |                              |                  |                     |                                     |
|--------------------|-----------|----------|-----------|----------|----------|-------|----------|-----------|---|------|--------------------|-------------------|------------------------------|------------------|---------------------|-------------------------------------|
| chr11-685 6.376318 | -0.18611  | 0.917656 | -0.20281  | 0.839282 | 0.981636 | chr11 | 68576338 | 68580096  | + | 0 NA | intron (Nintron (N | -106327 NM_015973 | 51083 Hs. 278959NM_015973    | ENSG000000000000 | GAL                 | ETL8 GAL-galanin ε protein-coding   |
| chr20-327 6.376318 | -0.18611  | 0.917656 | -0.20281  | 0.839282 | 0.981636 | chr20 | 3273453  | 3273918   | + | 0 NA | intron (MSTB LTR   | -34495 NM_0011174 | 83959 Hs. 105607NM_032034    | ENSG000000000000 | SLC4A11             | BTR1 CDPI solute cε protein-coding  |
| chr10-124 5.963858 | -0.19179  | 0.945789 | -0.20278  | 0.839304 | 0.981636 | chr10 | 1.25E+08 | 1.25E+08  | + | 0 NA | intron (Nintron (N | 3711 NM_212554    | 399818 Hs. 720819NM_212554   | ENSG000000000000 | EEF1AKMT2           | C10orf13 EEF1A lys protein-coding   |
| chr1-234 4.230147  | -0.223664 | 1.10466  | -0.202473 | 0.839547 | 0.981636 | chr1  | 2.34E+08 | 2.34E+08  | + | 0 NA | intron (Nintron (N | 32661 NM_005646   | 6894 Hs. 498116NM_005646     | ENSG000000000000 | TARBP1              | TRM3 TRM1 TAR (HIV- protein-coding  |
| chr14-100 6.425315 | -0.18516  | 0.916528 | -0.20203  | 0.839895 | 0.981636 | chr14 | 1E+08    | 1E+08     | + | 0 NA | intron (MIR SINE   | 4720 NM_004184    | 7453 Hs. 497599NM_004184     | ENSG000000000000 | WARS                | GAMMA-2 ε tryptophan protein-coding |
| chr15-228 6.425315 | -0.18516  | 0.916528 | -0.20203  | 0.839895 | 0.981636 | chr15 | 22899867 | 22900386  | + | 0 NA | intron (MLT1C LTF  | 17187 NM_001033   | 23191 Hs. 26704 NM_014608    | ENSG000000000000 | CYFIP1              | P140SRA-1 cytoplasm protein-coding  |
| chr20-188 6.425315 | -0.18516  | 0.916528 | -0.20203  | 0.839895 | 0.981636 | chr20 | 18528376 | 18529006  | + | 0 NA | intron (Nintron (N | 20751 NM_032988   | 10843 Hs. 369377NM_006363    | ENSG000000000000 | SEC23B              | CDA-11 C SEC23 hom protein-coding   |
| chr5-684 6.425315  | -0.18516  | 0.916528 | -0.20203  | 0.839895 | 0.981636 | chr5  | 64844868 | 64845670  | + | 0 NA | 3' UTR (N3' UTR (N | 76339 NM_001364   | 10283 Hs. 371372NM_005863    | ENSG000000000000 | CWC27               | NY-CO-10 CWC27 spl protein-coding   |
| chr5-1798 6.425315 | -0.18516  | 0.916528 | -0.20203  | 0.839895 | 0.981636 | chr5  | 1.8E+08  | 1.8E+08   | + | 0 NA | intron (NCharlie4ε | 6017 NM_001142    | 8878 Hs. 587292NM_003900     | ENSG000000000000 | SQSTM1              | A170 DMRV sequestos protein-coding  |
| chr1-2255 11.60583 | -0.13911  | 0.688887 | -0.20193  | 0.839969 | 0.981636 | chr1  | 2.26E+08 | 2.26E+08  | + | 0 NA | intron (Nintron (N | -78045 NM_194442  | 3930 Hs. 435166NM_002229     | ENSG000000000000 | LBR                 | C14SR DHC lamin B1 protein-coding   |
| chr19-215 11.60583 | -0.13911  | 0.688887 | -0.20193  | 0.839969 | 0.981636 | chr19 | 21375148 | 213800247 | + | 0 NA | 3' UTR (N3' UTR (N | 18697 NM_001355   | 148203 Hs. 124384NM_001355   | ENSG000000000000 | ZNF738              | - zinc finger protein-coding        |
| chr3-1224 11.60583 | -0.13911  | 0.688887 | -0.20193  | 0.839969 | 0.981636 | chr3  | 1.22E+08 | 1.22E+08  | + | 0 NA | intron (Nintron (N | 21407 NR_125405   | 1.03E+08 Hs. 675056NR_125405 | ENSG000000000000 | LOC102722           | - uncharactericnRNA                 |
| chr1-2645 5.453404 | -0.20075  | 0.994503 | -0.20186  | 0.840028 | 0.981636 | chr1  | 26455500 | 26456659  | + | 0 NA | intron (Nintron (N | 11333 NR_125952   | 1.02E+08 Hs. 663256NR_125952 | LOC101928        | - uncharactericnRNA |                                     |
| chr1-2645 5.453404 | -0.20075  | 0.994503 | -0.20186  | 0.840028 | 0.981636 | chr1  | 2.4E+08  | 2.4E+08   | + | 0 NA | intron (NLM5 LINE  | 210748 NM_020066  | 56776 Hs. 24889 NM_020066    | ENSG000000000000 | FMN2                | - formin 2 protein-coding           |
| chr3-168 5.453404  | -0.20075  | 0.994503 | -0.20186  | 0.840028 | 0.981636 | chr3  | 1.68E+08 | 1.68E+08  | + | 0 NA | exon (NM exon (NM  | 55076 NM_014498   | 27333 Hs. 143600NM_014498    | ENSG000000000000 | GOLIM4              | GIMPC GOL golgi intr protein-coding |
| chr5-712 5.453404  | -0.20075  | 0.994503 | -0.20186  | 0.840028 | 0.981636 | chr5  | 71257453 | 71258169  | + | 0 NA | intron (Nintron (N | 1484 NR_033968    | 1E+08 Hs. 665231NR_033968    | GUSBP9           | - GUSB pseudo       |                                     |
| chr5-138 5.453404  | -0.20075  | 0.994503 | -0.20186  | 0.840028 | 0.981636 | chr5  | 1.39E+08 | 1.39E+08  | + | 0 NA | intron (Nintron (N | 42866 NM_001323   | 1495 Hs. 445981NM_001903     | ENSG000000000000 | CTNNA1              | CAP102 ML catenin ε protein-coding  |
| chr6-720 5.453404  | -0.20075  | 0.994503 | -0.20186  | 0.840028 | 0.981636 | chr6  | 7203515  | 7203931   | + | 0 NA | intron (Nintron (N | 95762 NM_001003   | 6239 Hs. 298248NM_002955     | ENSG000000000000 | NRBE1               | F1NB HNT ras resp protein-coding    |
| chr7-878 5.453404  | -0.20075  | 0.994503 | -0.20186  | 0.840028 | 0.981636 | chr7  | 87858406 | 87859498  | + | 0 NA | intron (Nintron (N | 17408 NM_018842   | 55972 Hs. 208414NM_018842    | ENSG000000000000 | SLC25A40            | MCFP solute cε protein-coding       |
| chr1-180 11.15224  | -0.14178  | 0.702598 | -0.2018   | 0.840076 | 0.981636 | chr1  | 1.8E+08  | 1.8E+08   | + | 0 NA | intron (Nintron (N | 69406 NM_014810   | 9857 Hs. 413045NM_014810     | ENSG000000000000 | CEP350              | CAP350 GW centrosome protein-coding |
| chr1-2098 11.15224 | -0.14178  | 0.702598 | -0.2018   | 0.840076 | 0.981636 | chr1  | 2.1E+08  | 2.1E+08   | + | 0 NA | intron (Nintron (N | 14866 NM_014388   | 27042 Hs. 194754NM_014388    | ENSG000000000000 | UTP25               | Clorf107 UTP25 smε protein-coding   |
| chr2-463 11.15224  | -0.14178  | 0.702598 | -0.2018   | 0.840076 | 0.981636 | chr2  | 46364789 | 46386977  | + | 0 NA | intron (Nintron (N | 18284 NR_146999   | 1.05E+08 Hs. 570163NR_146999 | ENSG000000000000 | LOC100182           | - long intencnRNA                   |
| chr7-265 4.718878  | 0.218058  | 1.081219 | 0.201678  | 0.840169 | 0.981636 | chr7  | 2658754  | 2659526   | + | 0 NA | intron (Nintron (N | -20382 NM_133463  | 155185 Hs. 42221 NM_133463   | ENSG000000000000 | CAMZ1               | - archaealys protein-coding         |
| chr10-136 5.956    | -0.18957  | 0.940431 | -0.20158  | 0.840245 | 0.981636 | chr10 | 13699506 | 13700616  | + | 0 NA | intron (Nintron (N | 7506 NM_001318    | 55691 Hs. 330463NM_018027    | ENSG000000000000 | FRMD4A              | CCAFCA FFFERM domε protein-coding   |
| chr11-938 5.956    | -0.18957  | 0.940431 | -0.20158  | 0.840245 | 0.981636 | chr11 | 93813644 | 93815022  | + | 0 NA | 3' UTR (N3' UTR (N | 30051 NM_004266   | 9440 Hs. 444931NM_004266     | ENSG000000000000 | MED17               | CRSP6 CRS mediator protein-coding   |
| chr12-87 5.956     | -0.18957  | 0.940431 | -0.20158  | 0.840245 | 0.981636 | chr12 | 8754702  | 8755348   | + | 0 NA | intron (NAluSx1 SI | 57034 NR_147946   | 57494 Hs. 504677NM_020734    | ENSG000000000000 | RIMKLB              | FAM80B Nε ribosomal protein-coding  |
| chr13-95 5.956     | -0.18957  | 0.940431 | -0.20158  | 0.840245 | 0.981636 | chr13 | 95613790 | 95614979  | + | 0 NA | intron (NAluSx1 SI | 30322 NM_198968   | 22873 Hs. 656588NM_014934    | ENSG000000000000 | DZIP1               | DZIP DZIP DAZ inter protein-coding  |
| chr13-111 5.956    | -0.18957  | 0.940431 | -0.20158  | 0.840245 | 0.981636 | chr13 | 1.11E+08 | 1.11E+08  | + | 0 NA | intron (NLM1 LINE  | 17901 NM_001354   | 8874 Hs. 508738NM_003893     | ENSG000000000000 | ARHGEP7             | BETA-PIX Rho guaniprotein-coding    |
| chr19-21 5.956     | -0.18957  | 0.940431 | -0.20158  | 0.840245 | 0.981636 | chr19 | 21365403 | 21366341  | + | 0 NA | intron (NAluSx1 SI | 6872 NM_001355    | 148203 Hs. 124384NM_001355   | ENSG000000000000 | ZNF738              | - zinc finger protein-coding        |
| chr19-48 5.956     | -0.18957  | 0.940431 | -0.20158  | 0.840245 | 0.981636 | chr19 | 48850710 | 48851932  | + | 0 NA | intron (Nintron (N | -14830 NM_016246  | 51171 Hs. 18788 NM_016246    | ENSG000000000000 | HSD17B14            | DHR510 SE hydroxyst protein-coding  |
| chr19-55 5.956     | -0.18957  | 0.940431 | -0.20158  | 0.840245 | 0.981636 | chr19 | 55682123 | 55686688  | + | 0 NA | intron (Nintron (N | 7780 NM_001130    | 29924 Hs. 279953NM_013333    | ENSG000000000000 | CEPN1               | - epsin 1 protein-coding            |
| chr2-202 5.956     | -0.18957  | 0.940431 | -0.20158  | 0.840245 | 0.981636 | chr2  | 2.02E+08 | 2.02E+08  | + | 0 NA | intron (NAluY SINE | 10065 NM_001005   | 7341 Hs. 81424 NM_003335     | ENSG000000000000 | SUMO1               | DAP1 GMP1 small ubi protein-coding  |
| chr3-142 5.956     | -0.18957  | 0.940431 | -0.20158  | 0.840245 | 0.981636 | chr3  | 1.42E+08 | 1.42E+08  | + | 0 NA | intron (Nintron (N | 98322 NM_001282   | 54646 Hs. 435103NM_019001    | ENSG000000000000 | XRN1                | 1-Sep 5'-3' ex protein-coding       |
| chr4-67 5.956      | -0.18957  | 0.940431 | -0.20158  | 0.840245 | 0.981636 | chr4  | 67678783 | 67679388  | + | 0 NA | intron (NLMC5a LI  | 22070 NM_018227   | 55236 Hs. 212774NM_018227    | ENSG000000000000 | CUBA6               | E1-L2 MOF ubiquitir protein-coding  |
| chr4-769 5.956     | -0.18957  | 0.940431 | -0.20158  | 0.840245 | 0.981636 | chr4  | 76942453 | 76943388  | + | 0 NA | IntergeniAluSx SIN | -6827 NM_018242   | 55752 Hs. 128199NM_018242    | ENSG000000000000 | SEPTIN13            | 11-Sep septin 11 protein-coding     |
| chr7-647 5.956     | -0.18957  | 0.940431 | -0.20158  | 0.840245 | 0.981636 | chr7  | 64798593 | 64799839  | + | 0 NA | exon (NM exon (NM  | 4813 NM_001271    | 7697 Hs. 184088NM_006524     | ENSG000000000000 | ZNF138              | pH2-32 zinc finger protein-coding   |
| chr8-900 5.956     | -0.18957  | 0.940431 | -0.20158  | 0.840245 | 0.981636 | chr8  | 90005608 | 90006309  | + | 0 NA | intron (Nintron (N | 4481 NM_001355    | 1666 Hs. 492212NM_001355     | ENSG000000000000 | DECR1               | DECR NDF2, 4-dienε protein-coding   |
| chr1-361 6.417457  | -0.18298  | 0.909101 | -0.20127  | 0.840487 | 0.981636 | chr1  | 36138035 | 36138526  | + | 0 NA | intron (Nintron (N | 11206 NM_014408   | 27095 Hs. 523131NM_014408    | ENSG000000000000 | TRAPP3              | BET3 traffickiprotein-coding        |
| chr11-68 6.417457  | -0.18298  | 0.909101 | -0.20127  | 0.840487 | 0.981636 | chr11 | 68830171 | 68830750  | + | 0 NA | intron (Nintron (N | 11456 NM_001876   | 1374 Hs. 50304NM_001876      | ENSG000000000000 | CPT1A               | CPT1 CPT carnitine protein-coding   |
| chr16-23 6.417457  | -0.18298  | 0.909101 | -0.20127  | 0.840487 | 0.981636 | chr16 | 23648920 | 23649700  | + | 0 NA | intron (NLM2 LINE  | 7844 NM_032488    | 84516 Hs. 435941NM_032488    | ENSG000000000000 | CCTN5               | - dynactin protein-coding           |
| chr17-16 6.417457  | -0.18298  | 0.909101 | -0.20127  | 0.840487 | 0.981636 | chr17 | 16420721 | 16421130  | + | 0 NA | intron (NLM3E3 LI  | 5354 NM_016113    | 51393 Hs. 279746NM_016113    | ENSG000000000000 | TRPV2               | VRL VRL-1 transient protein-coding  |
| chr17-62 6.417457  | -0.18298  | 0.909101 | -0.20127  | 0.840487 | 0.981636 | chr17 | 62034290 | 62035926  | + | 0 NA | intron (NAluSx1 SI | 30170 NM_005121   | 9699 Hs. 282678NM_005121     | ENSG000000000000 | MED13               | ARC250 DF mediator protein-coding   |
| chr19-16 6.417457  | -0.18298  | 0.909101 | -0.20127  | 0.840487 | 0.981636 | chr19 | 16433265 | 16434859  | + | 0 NA | intron (Nintron (N | 37908 NM_001258   | 58513 Hs. 654633NM_021233    | ENSG000000000000 | EPS15L1             | EPS15R epidermal protein-coding     |
| chr2-320 6.417457  | -0.18298  | 0.909101 | -0.20127  | 0.840487 | 0.981636 | chr2  | 32032685 | 32033700  | + | 0 NA | intron (NAluSx1 SI | 6613 NM_001321    | 84661 Hs. 531788NM_032574    | ENSG000000000000 | DPY30               | Cps25 HDF dyf-30 hiprotein-coding   |
| chr2-132 6.417457  | -0.18298  | 0.909101 | -0.20127  | 0.840487 | 0.981636 | chr2  | 1.33E+08 | 1.33E+08  | + | 0 NA | intron (Nintron (N | 43957 NR_135572   | 1.02E+08 Hs. 680114NR_135572 | ENSG000000000000 | CNKAP5-AS           | - NCKAP5 arncRNA                    |
| chr2-135 6.417457  | -0.18298  | 0.909101 | -0.20127  | 0.840487 | 0.981636 | chr2  | 1.36E+08 | 1.36E+08  | + | 0 NA | intron (Nintron (N | -19415 NR_029672  | 406915 NR_029672             | ENSG000000000000 | MIR128-1            | MIR128A vmicroRNA ncRNA             |
| chr2-157 6.417457  | -0.18298  | 0.909101 | -0.20127  | 0.840487 | 0.981636 | chr2  | 1.58E+08 | 1.58E+08  | + | 0 NA | intron (Nintron (N | 77793 NM_001347   | 90 Hs. 470316NM_001108       | ENSG000000000000 | ACVR1               | ACTR1 ACV activin ε protein-coding  |
| chr3-142 6.417457  | -0.18298  | 0.909101 | -0.20127  | 0.840487 | 0.981636 | chr3  | 1.42E+08 | 1.42E+08  | + | 0 NA | intron (NAluSx1 SI | 78142 NM_001282   | 54464 Hs. 435103NM_019001    | ENSG000000000000 | XRN1                | 1-Sep 5'-3' ex protein-coding       |
| chr4-267 6.417457  | -0.18298  | 0.909101 | -0.20127  | 0.840487 | 0.981636 | chr4  | 26709782 | 26710450  | + | 0 NA | intron (NLM4A LIN  | 126032 NM_018317  | 55296 Hs. 479403NM_018317    |                  |                     |                                     |

|           |          |          |          |          |          |          |       |          |          |   |   |    |                     |        |           |          |           |            |            |           |            |             |                       |                |
|-----------|----------|----------|----------|----------|----------|----------|-------|----------|----------|---|---|----|---------------------|--------|-----------|----------|-----------|------------|------------|-----------|------------|-------------|-----------------------|----------------|
| chr17-59c | 5.948143 | -0.18733 | 0.940364 | -0.19921 | 0.842096 | 0.981636 | chr17 | 59056447 | 59057471 | + | 0 | NA | exon (NM exon (NM   | 49921  | NR_148347 | 4591     | Hs.579079 | ENM_015294 | ENSG000003 | TRIM37    | MUL POB1   | tripartit   | protein-coding        |                |
| chr18-12c | 5.948143 | -0.18733 | 0.940364 | -0.19921 | 0.842096 | 0.981636 | chr18 | 12333738 | 12334060 | + | 0 | NA | intron (NMIR SINE   | 25658  | NM_001303 | 84617    | Hs.193491 | NM_03252f  | ENSG000003 | TUBB6     | FPVEP Hs   | tubulin t   | protein-coding        |                |
| chr2-177c | 5.948143 | -0.18733 | 0.940364 | -0.19921 | 0.842096 | 0.981636 | chr2  | 1.77E+08 | 1.77E+08 | + | 0 | NA | intron (Nintron (N  | 3660   | NR_03607f | 1E+08    | NR_03607f | ENSG000003 | MIR3128    | mir-3128  | microRNA   | ncRNA       |                       |                |
| chr3-112f | 5.948143 | -0.18733 | 0.940364 | -0.19921 | 0.842096 | 0.981636 | chr3  | 1.13E+08 | 1.13E+08 | + | 0 | NA | intron (Nintron (N  | 10869  | NM_00134f | 55032    | Hs.23748C | NM_01794f  | ENSG000003 | SLC35A5   | -          | solute c    | protein-coding        |                |
| chr4-438f | 5.948143 | -0.18733 | 0.940364 | -0.19921 | 0.842096 | 0.981636 | chr4  | 438972   | 440905   | + | 0 | NA | TTS (NM_TTS (NM_L   | 34271  | NR_002451 | 79963    | Hs.67749f | NM_02490f  | ENSG000003 | ABCA11P   | ABCA11 ES  | ATP bindi   | pseudo                |                |
| chr4-250c | 5.948143 | -0.18733 | 0.940364 | -0.19921 | 0.842096 | 0.981636 | chr4  | 2503934  | 2504886  | + | 0 | NA | intron (NLM5 LINE   | -30965 | NM_00136f | 8603     | Hs.652364 | NM_00370f  | ENSG000003 | FAM193A   | C4orf8 RF  | family w    | protein-coding        |                |
| chr4-531f | 5.948143 | -0.18733 | 0.940364 | -0.19921 | 0.842096 | 0.981636 | chr4  | 53183117 | 53183595 | + | 0 | NA | intron (NLIP44 LIN  | 182705 | NM_15254f | 152579   | Hs.302287 | NM_15254f  | ENSG000003 | SCFD2     | STXBPL1 L  | secl1       | family protein-coding |                |
| chr4-122c | 5.948143 | -0.18733 | 0.940364 | -0.19921 | 0.842096 | 0.981636 | chr4  | 1.22E+08 | 1.22E+08 | + | 0 | NA | intron (Nintron (N  | 56655  | NM_01531f | 84162    | Hs.408142 | NM_01531f  | ENSG000003 | KIAA1109  | ALKKUCS FK | IAA109      | protein-coding        |                |
| chr5-131c | 5.948143 | -0.18733 | 0.940364 | -0.19921 | 0.842096 | 0.981636 | chr5  | 1.31E+08 | 1.31E+08 | + | 0 | NA | intron (NLIP44 LIN  | 73567  | NM_00103f | 56990    | Hs.50882f | NM_02024f  | ENSG000003 | CDC42SE2  | SPEC2      | CDC42 sm    | protein-coding        |                |
| chr6-110f | 5.948143 | -0.18733 | 0.940364 | -0.19921 | 0.842096 | 0.981636 | chr6  | 11096936 | 11097717 | + | 0 | NA | intron (NMLT1B LTF  | 3492   | NM_00113f | 221710   | Hs.65660C | NM_00113f  | ENSG000003 | SMIM13    | C6orf228   | small int   | protein-coding        |                |
| chr6-831c | 5.948143 | -0.18733 | 0.940364 | -0.19921 | 0.842096 | 0.981636 | chr6  | 83135882 | 83137800 | + | 0 | NA | intron (Nintron (N  | 56424  | NM_00119f | 5238     | Hs.66166f | NM_01559f  | ENSG000003 | PGM3      | AGM1 TMD   | 2 phospho   | protein-coding        |                |
| chr7-659f | 5.948143 | -0.18733 | 0.940364 | -0.19921 | 0.842096 | 0.981636 | chr7  | 65970432 | 65971011 | + | 0 | NA | intron (NALuY SINE  | 11492  | NM_00129f | 2990     | Hs.25523C | NM_00018f  | ENSG000003 | GUSB      | BG MP57    | glucuron    | protein-coding        |                |
| chr16-74c | 5.907003 | -0.19054 | 0.956589 | -0.19918 | 0.842119 | 0.981636 | chr16 | 74451456 | 74452090 | + | 0 | NA | non-codir non-codir | -30303 | NM_001011 | 497190   | Hs.45467C | NM_001011  | ENSG000003 | CLEC18B   | MRC12      | C-type l    | protein-coding        |                |
| chr6-113c | 5.907003 | -0.19054 | 0.956589 | -0.19918 | 0.842119 | 0.981636 | chr6  | 1.14E+08 | 1.14E+08 | + | 0 | NA | non-codir non-codir | -30600 | NR_12584f | 1.02E+08 | Hs.12928C | NM_12584f  | ENSG000003 | HDAC2-AS2 | -          | HDAC2 anc   | ncRNA                 |                |
| chr8-1334 | 5.907003 | -0.19054 | 0.956589 | -0.19918 | 0.842119 | 0.981636 | chr8  | 1.33E+08 | 1.33E+08 | + | 0 | NA | intron (Nintron (N  | 100917 | NM_00303f | 6482     | Hs.374257 | NM_00303f  | ENSG000003 | ST3GAL1   | Gal-Nac6S  | ST3 beta    | protein-coding        |                |
| chr9-1131 | 5.907003 | -0.19054 | 0.956589 | -0.19918 | 0.842119 | 0.981636 | chr9  | 1.13E+08 | 1.13E+08 | + | 0 | NA | exon (NM exon (NM   | 27202  | NM_01525f | 23307    | Hs.522351 | NM_01525f  | ENSG000003 | FKBP15    | FKBP133 F  | FKBP pro    | protein-coding        |                |
| chr4-707c | 6.36846  | -0.18408 | 0.924819 | -0.19905 | 0.842224 | 0.981636 | chr4  | 70798200 | 70798399 | + | 0 | NA | intron (NALuJo SIN  | 41204  | NM_00109f | 2926     | Hs.30976f | NM_00209f  | ENSG000003 | GRSF1     | -          | G-rich R    | protein-coding        |                |
| chr5-662c | 6.36846  | -0.18408 | 0.924819 | -0.19905 | 0.842224 | 0.981636 | chr5  | 66021068 | 66022006 | + | 0 | NA | intron (Nintron (N  | -75964 | NR_028474 | 1E+08    | Hs.60806C | NR_028474  | LOC10030f  | -         | -          | LSM3 hom    | pseudo                |                |
| chr5-785c | 6.36846  | -0.18408 | 0.924819 | -0.19905 | 0.842224 | 0.981636 | chr5  | 78563419 | 78563618 | + | 0 | NA | intron (NALuSz SIN  | 85254  | NM_00577f | 10184    | Hs.79299  | NM_00577f  | ENSG000003 | LHFPL2    | -          | LHFPL       | tet                   | protein-coding |
| chr5-149f | 6.878914 | -0.17776 | 0.893762 | -0.19889 | 0.842349 | 0.981636 | chr5  | 1.5E+08  | 1.5E+08  | + | 0 | NA | intron (Nintron (N  | 16615  | NM_001271 | 1452     | Hs.52986f | NM_00189f  | ENSG000003 | CSNK1A1   | CK1 CK1a   | casein k    | protein-coding        |                |
| chr22-36c | 11.63912 | -0.13262 | 0.688626 | -0.19787 | 0.843145 | 0.981636 | chr22 | 36303783 | 36324679 | + | 0 | NA | exon (NM exon (NM   | -27324 | NR_106877 | 1.02E+08 | NR_106877 | ENSG000003 | MIR6819    | hsa-mir-6 | microRNA   | ncRNA       |                       |                |
| chr10-102 | 6.871056 | -0.17566 | 0.889338 | -0.19752 | 0.843419 | 0.981636 | chr10 | 1.02E+08 | 1.02E+08 | + | 0 | NA | intron (NALuSg SIN  | -48809 | NM_00128f | 4791     | Hs.73090  | NM_00250f  | ENSG000003 | NFKB2     | CVID10 H   | 2 nuclear f | protein-coding        |                |
| chr4-730f | 6.871056 | -0.17566 | 0.889338 | -0.19752 | 0.843419 | 0.981636 | chr4  | 73083630 | 73084270 | + | 0 | NA | intron (N(A)n Simp  | -14191 | NM_00130f | 285521   | Hs.356697 | NM_17382f  | ENSG000003 | COX18     | COX18HS    | cytochro    | protein-coding        |                |
| chr1-155f | 6.401741 | -0.17879 | 0.908907 | -0.19671 | 0.844055 | 0.981636 | chr1  | 15568857 | 15569979 | + | 0 | NA | non-codir non-codir | 15633  | NM_00247f | 79814    | Hs.46153f | NM_0247f   | ENSG000003 | AGX18     | -          | agmatina    | protein-coding        |                |
| chr1-757c | 6.401741 | -0.17879 | 0.908907 | -0.19671 | 0.844055 | 0.981636 | chr1  | 75734519 | 75735690 | + | 0 | NA | intron (NALuSz SIN  | 9909   | NR_13074f | 1744     | Hs.52545f | NR_13074f  | DLSTP1     | DLSTP     | dihydroli  | pseudo      |                       |                |
| chr1-204f | 6.401741 | -0.17879 | 0.908907 | -0.19671 | 0.844055 | 0.981636 | chr1  | 2.05E+08 | 2.05E+08 | + | 0 | NA | intron (NALuY SINE  | 18819  | NM_00239f | 4194     | Hs.49749f | NM_00239f  | ENSG000003 | MDM4      | HDMX MDM   | MDM4 reg    | protein-coding        |                |
| chr1-236f | 6.401741 | -0.17879 | 0.908907 | -0.19671 | 0.844055 | 0.981636 | chr1  | 2.36E+08 | 2.36E+08 | + | 0 | NA | exon (NM exon (NM   | 19505  | NM_00250f | 4811     | Hs.356624 | NM_00250f  | ENSG000003 | ND1       | NID        | nidogen l   | protein-coding        |                |
| chr10-934 | 6.401741 | -0.17879 | 0.908907 | -0.19671 | 0.844055 | 0.981636 | chr10 | 93443043 | 93445001 | + | 0 | NA | intron (Nintron (N  | 38312  | NM_013451 | 26509    | Hs.60208f | NM_013451  | ENSG000003 | MYOF      | FERIL3     | myoferli    | protein-coding        |                |
| chr10-97f | 6.401741 | -0.17879 | 0.908907 | -0.19671 | 0.844055 | 0.981636 | chr10 | 97670576 | 97673700 | + | 0 | NA | intron (NALuSg SIN  | 15088  | NM_02173f | 60370    | Hs.23918  | NM_02173f  | ENSG000003 | AVP11     | PP5395 V   | arginine    | protein-coding        |                |
| chr11-367 | 6.401741 | -0.17879 | 0.908907 | -0.19671 | 0.844055 | 0.981636 | chr11 | 3672748  | 3673694  | + | 0 | NA | Intergeni ALuY SINE | -2337  | NM_00130f | 57053    | Hs.73280f | NM_02040f  | ENSG000003 | CHRNA10   | -          | choline     | protein-coding        |                |
| chr11-73f | 6.401741 | -0.17879 | 0.908907 | -0.19671 | 0.844055 | 0.981636 | chr11 | 73684512 | 73685312 | + | 0 | NA | intron (Nintron (N  | 35999  | NM_00113f | 58473    | Hs.44548f | NM_02120f  | ENSG000003 | PLEKHB1   | KPL1 PHR   | 1 pleckst   | protein-coding        |                |
| chr11-93f | 6.401741 | -0.17879 | 0.908907 | -0.19671 | 0.844055 | 0.981636 | chr11 | 93669528 | 93672650 | + | 0 | NA | intron (NALuSx1 SI  | 9407   | NM_00339f | 85459    | Hs.45841f | NM_00339f  | ENSG000003 | CEP295    | KIAA1731   | centrosom   | protein-coding        |                |
| chr11-12f | 6.401741 | -0.17879 | 0.908907 | -0.19671 | 0.844055 | 0.981636 | chr11 | 1.26E+08 | 1.26E+08 | + | 0 | NA | intron (NALuSz SIN  | 16097  | NM_00313f | 6734     | Hs.36837f | NM_00313f  | ENSG000003 | SRPRA     | DP SRPR    | SRP rec     | protein-coding        |                |
| chr12-124 | 6.401741 | -0.17879 | 0.908907 | -0.19671 | 0.844055 | 0.981636 | chr12 | 1.25E+08 | 1.25E+08 | + | 0 | NA | intron (NMLT1C LTF  | 4110   | NM_03265f | 57647    | Hs.10738f | NM_03265f  | ENSG000003 | DHX37     | DDX37 Dh   | DEAH-box    | protein-coding        |                |
| chr13-49f | 6.401741 | -0.17879 | 0.908907 | -0.19671 | 0.844055 | 0.981636 | chr13 | 49999295 | 50000433 | + | 0 | NA | intron (NMTR3 SINE  | 2822   | NM_052811 | 10206    | Hs.43692f | NM_00579f  | ENSG000003 | TRIM13    | CAR DLEU   | f tripartit | protein-coding        |                |
| chr14-69f | 6.401741 | -0.17879 | 0.908907 | -0.19671 | 0.844055 | 0.981636 | chr14 | 69443793 | 69444796 | + | 0 | NA | intron (NCharlie4   | -40434 | NM_001161 | 40224    | Hs.50979f | NM_001161  | ENSG000003 | PLEKHD1   | UPF0639    | pleckstri   | protein-coding        |                |
| chr14-10f | 6.401741 | -0.17879 | 0.908907 | -0.19671 | 0.844055 | 0.981636 | chr14 | 1.01E+08 | 1.01E+08 | + | 0 | NA | promoter-promoter-  | -503   | NR_14600f | 79104    | Hs.11810f | NR_02414f  | MEG8       | Bsr Irm   | maternal   | ncRNA       |                       |                |
| chr15-79f | 6.401741 | -0.17879 | 0.908907 | -0.19671 | 0.844055 | 0.981636 | chr15 | 79877000 | 79878730 | + | 0 | NA | intron (NLM14a LI   | 19132  | NR_037654 | 10588    | Hs.194294 | NM_00644f  | ENSG000003 | MTHFS     | HsT1926b   | methenyl    | protein-coding        |                |
| chr17-381 | 6.401741 | -0.17879 | 0.908907 | -0.19671 | 0.844055 | 0.981636 | chr17 | 3813743  | 3815304  | + | 0 | NA | intron (Nintron (N  | -13335 | NM_00220f | 3682     | Hs.51386f | NM_00220f  | ENSG000003 | ITGAE     | CD103 HUM  | integen     | protein-coding        |                |
| chr18-361 | 6.401741 | -0.17879 | 0.908907 | -0.19671 | 0.844055 | 0.981636 | chr18 | 36161620 | 36163146 | + | 0 | NA | intron (NLM1E LIN   | 25052  | NR_13460f | 1.02E+08 | Hs.60067f | NR_13460f  | ENSG000003 | LOC101927 | -          | uncharact   | ncRNA                 |                |
| chr19-13f | 6.401741 | -0.17879 | 0.908907 | -0.19671 | 0.844055 | 0.981636 | chr19 | 13998851 | 14000626 | + | 0 | NA | intron (NMERS5B DN  | 6861   | NM_00291f | 5989     | Hs.65521f | NM_00291f  | ENSG000003 | RFX1      | EFC REF    | regulator   | protein-coding        |                |
| chr19-17f | 6.401741 | -0.17879 | 0.908907 | -0.19671 | 0.844055 | 0.981636 | chr19 | 17219541 | 17219811 | + | 0 | NA | exon (NM exon (NM   | 4319   | NM_01846f | 55850    | Hs.16187  | NM_01846f  | ENSG000003 | USE1      | D12 MDS0   | 5 uncon     | protein-coding        |                |
| chr2-991f | 6.401741 | -0.17879 | 0.908907 | -0.19671 | 0.844055 | 0.981636 | chr2  | 99189353 | 99190147 | + | 0 | NA | intron (Nintron (N  | 8566   | NR_02835f | 51263    | Hs.34673f | NM_01650f  | ENSG000003 | MRPL30    | L28MT L3   | C mitochond | protein-coding        |                |
| chr2-171f | 6.401741 | -0.17879 | 0.908907 | -0.19671 | 0.844055 | 0.981636 | chr2  | 1.72E+08 | 1.72E+08 | + | 0 | NA | intron (NMLT1C LTF  | 19415  | NM_00132f | 1781     | Hs.54625f | NM_00137f  | ENSG000003 | DYNC112   | DIC74 DNC  | dynein c    | protein-coding        |                |
| chr20-11f | 6.401741 | -0.17879 | 0.908907 | -0.19671 | 0.844055 | 0.981636 | chr20 | 1130626  | 1133417  | + | 0 | NA | intron (NLM1D LINE  | 4919   | NM_00132f | 9791     | Hs.47191f | NM_00681f  | ENSG000003 | PSMF1     | P131       | proteasom   | protein-coding        |                |
| chr22-31f | 6.401741 | -0.17879 | 0.908907 | -0.19671 | 0.844055 | 0.981636 | chr22 | 31689721 | 31690717 | + | 0 | NA | intron (NALuSx2 SI  | -27655 | NM_00132f | 23761    | Hs.42055f | NM_01433f  | ENSG000003 | PISD      | DJ858B16   | phosphat    | protein-coding        |                |
| chr22-41f | 6.401741 | -0.17879 | 0.908907 | -0.19671 | 0.844055 | 0.981636 | chr22 | 41575281 | 41577833 | + | 0 | NA | TTS (NM_TTS (NM_C   | 13283  | NM_00267f | 5372     | Hs.75835  | NM_00267f  | ENSG000003 | PMM1      | PMM 1 PMM  | phosphom    | protein-coding        |                |
| chr3-478f | 6.401741 | -0       |          |          |          |          |       |          |          |   |   |    |                     |        |           |          |           |            |            |           |            |             |                       |                |



|                    |          |          |          |          |          |       |          |          |   |   |    |                     |         |           |          |                     |                    |                |                     |                  |                |                |        |                |
|--------------------|----------|----------|----------|----------|----------|-------|----------|----------|---|---|----|---------------------|---------|-----------|----------|---------------------|--------------------|----------------|---------------------|------------------|----------------|----------------|--------|----------------|
| chr7-133c 6.442881 | -0.17578 | 0.906479 | -0.19392 | 0.846239 | 0.981636 | chr7  | 1.33E+08 | 1.33E+08 | + | 0 | NA | intron (AluY SINE   | 14014   | NM_017812 | 54927    | Hs.65501CNM_017812  | ENSG00000CHCHD3    | MICOS19        | coiled-cc           | protein-coding   |                |                |        |                |
| chr9-5657 6.442881 | -0.17578 | 0.906479 | -0.19392 | 0.846239 | 0.981636 | chr9  | 5657464  | 5658103  | + | 0 | NA | intron (Cheshire    | 28664   | NM_001206 | 57589    | Hs.21152CNM_020822  | ENSG00000R1C1      | CIP150 KIR1C1  | homc                | protein-coding   |                |                |        |                |
| chr9-1284 6.442881 | -0.17578 | 0.906479 | -0.19392 | 0.846239 | 0.981636 | chr9  | 1.28E+08 | 1.28E+08 | + | 0 | NA | TTS (NM_TTS (NM_C   | -8987   | NM_001003 | 2733     | Hs.52241ENM_001495  | ENSG00000GLE1      | CAAHG CA^GLE1  | RNA                 | protein-coding   |                |                |        |                |
| chr15-101 6.912195 | -0.17229 | 0.892308 | -0.19377 | 0.846358 | 0.981636 | chr15 | 1.02E+08 | 1.02E+08 | + | 0 | NA | intron (MLT1H1 IR   | 26032   | NM_152334 | 123283   | Hs.65716CNM_152334  | ENSG00000TARSL2    | -              | thryonil-           | protein-coding   |                |                |        |                |
| chr18-362 6.693454 | 0.208742 | 1.077444 | 0.193738 | 0.846381 | 0.981636 | chr18 | 36229896 | 36231586 | + | 0 | NA | intron (L1JMB1 Lin  | 43244   | NM_017947 | 55034    | Hs.40502ENM_017947  | ENSG00000MOCOS     | HMCS MCS       | molybden            | protein-coding   |                |                |        |                |
| chr6-3644 11.58226 | -0.13549 | 0.700192 | -0.19351 | 0.846559 | 0.981636 | chr6  | 36448828 | 36449539 | + | 0 | NA | intron (LTR12 LTF   | 6183    | NM_173562 | 222658   | Hs.188757NM_173562  | ENSG00000KCTD20    | C6orf69 c      | potassium           | protein-coding   |                |                |        |                |
| chr1-1247 4.204724 | 0.21376  | 1.105168 | 0.193418 | 0.846631 | 0.981636 | chr1  | 1.25E+08 | 1.25E+08 | + | 0 | NA | IntergeniALR Alpha  | 3182870 | NR_003955 | 647121   | Hs.697682NR_003955  | ENSG00000EMBP1     | 10426          | Hs.224152NM_006322  | ENSG00000TUBGPC3 | 104p ALP6      | ubigin         | psuedo |                |
| chr13-112 6.904337 | -0.17077 | 0.883429 | -0.19333 | 0.846721 | 0.981636 | chr13 | 1.13E+08 | 1.13E+08 | + | 0 | NA | intron (N intron (N | 34194   | NM_006322 | 10426    | Hs.224152NM_006322  | ENSG00000TUBGPC3   | 104p ALP6      | ubigin              | psuedo           |                |                |        |                |
| chr15-286 6.904337 | -0.17077 | 0.883429 | -0.19333 | 0.846721 | 0.981636 | chr15 | 28651645 | 28652294 | + | 0 | NA | IntergeniMLT1C LTF  | -2473   | NR_036443 | 440248   | Hs.531505NM_199044  | ENSG00000CHERC2P9  | -              | hect dom            | psuedo           |                |                |        |                |
| chr16-252 6.904337 | -0.17077 | 0.883429 | -0.19333 | 0.846721 | 0.981636 | chr16 | 25248300 | 25249238 | + | 0 | NA | intron (NL1MA7 LIN  | 9036    | NM_001012 | 342357   | Hs.513451NM_001012  | ENSG00000ZKSCAN2   | 342357         | Hs.513451NM_001012  | ENSG00000ZKSCAN2 | ZNF694 Z       | zinc           | finger | protein-coding |
| chr3-4905 6.904337 | -0.17077 | 0.883429 | -0.19333 | 0.846721 | 0.981636 | chr3  | 49051767 | 49053037 | + | 0 | NA | intron (N intron (N | -23004  | NM_000084 | 3615     | Hs.654400CNM_000084 | ENSG00000LMPDH2    | 3615           | Hs.654400CNM_000084 | ENSG00000LMPDH2  | IMF            | inosine        | n      | protein-coding |
| chr9-1363 6.904337 | -0.17077 | 0.883429 | -0.19333 | 0.846721 | 0.981636 | chr9  | 1.36E+08 | 1.36E+08 | + | 0 | NA | intron (N intron (N | -3648   | NM_001145 | 26086    | Hs.23937CNM_015597  | ENSG00000GSPSM1    | AGS3           | G                   | protein          | protein-coding |                |        |                |
| chr10-701 5.205758 | 0.196095 | 1.0151   | 0.193178 | 0.846819 | 0.981636 | chr10 | 70116799 | 70117482 | + | 0 | NA | intron (N intron (N | 15685   | NM_032797 | 84883    | Hs.65068CNM_032797  | ENSG00000AIFM2     | AMID PRG3      | apoptosis           | protein-coding   |                |                |        |                |
| chr17-351 5.899145 | -0.18813 | 0.974261 | -0.19310 | 0.846883 | 0.981636 | chr17 | 35009661 | 35010173 | + | 0 | NA | TTS (NM_TTS (NM_C   | 29405   | NM_013979 | 3980     | Hs.100295NM_002311  | ENSG00000LIG3      | LIG2 LIG3      | DNA                 | ligas            | protein-coding |                |        |                |
| chr2-1903 4.70917  | 0.202312 | 1.048    | 0.193046 | 0.846923 | 0.981636 | chr2  | 1.9E+08  | 1.9E+08  | + | 0 | NA | intron (N intron (N | 12176   | NM_014362 | 26275    | Hs.656685NM_014362  | ENSG00000HIBCH     | HIBYLCOAF3     | -3                  | hydroxy          | protein-coding |                |        |                |
| chr2-2187 4.70917  | 0.202312 | 1.048    | 0.193046 | 0.846923 | 0.981636 | chr2  | 2.19E+08 | 2.19E+08 | + | 0 | NA | intron (N intron (N | 29009   | NM_014640 | 9654     | Hs.471405NM_014640  | ENSG00000TTL4      | -              | tubulin             | protein-coding   |                |                |        |                |
| chr4-1358 4.70917  | 0.202312 | 1.048    | 0.193046 | 0.846923 | 0.981636 | chr4  | 13582740 | 13584355 | + | 0 | NA | intron (N intron (N | -35723  | NR_015450 | 285548   | Hs.529284NR_015450  | LINC01099-         | -              | long                | intencRNA        |                |                |        |                |
| chr12-686 6.393883 | -0.17671 | 0.916145 | -0.19289 | 0.847046 | 0.981636 | chr12 | 68700756 | 68701431 | + | 0 | NA | intron (N intron (N | 14115   | NM_020401 | 57122    | Hs.524574NM_020401  | ENSG00000NUP107    | NPHS11 N       | nucleopor           | protein-coding   |                |                |        |                |
| chr15-447 6.393883 | -0.17671 | 0.916145 | -0.19289 | 0.847046 | 0.981636 | chr15 | 44731623 | 44732744 | + | 0 | NA | non-codiron-codir   | 3195    | NR_125376 | 1E+08    | Hs.489254NR_125376  | LOC100419-         | -              | ring                | finger           | psuedo         |                |        |                |
| chr2-5532 6.393883 | -0.17671 | 0.916145 | -0.19289 | 0.847046 | 0.981636 | chr2  | 55320073 | 55321506 | + | 0 | NA | intron (N intron (N | 38470   | NR_027255 | 344405   | Hs.445292NM_001080  | ENSG00000PRORSD1P  | NCRNA0011      | prolyl-tf           | psuedo           |                |                |        |                |
| chr21-392 6.393883 | -0.17671 | 0.916145 | -0.19289 | 0.847046 | 0.981636 | chr21 | 39216805 | 39217321 | + | 0 | NA | intron (N ATn Sin   | -33549  | NR_203433 | 8624     | Hs.473835NM_003720  | ENSG00000PSMG1     | C21LRP DS      | proteasom           | protein-coding   |                |                |        |                |
| chr4-1767 6.393883 | -0.17671 | 0.916145 | -0.19289 | 0.847046 | 0.981636 | chr4  | 1.77E+08 | 1.77E+08 | + | 0 | NA | intron (N intron (N | 88542   | NM_005425 | 7424     | Hs.43521ENM_005425  | ENSG00000VEGFC     | F14-L L        | vascular            | protein-coding   |                |                |        |                |
| chr4-1832 6.393883 | -0.17671 | 0.916145 | -0.19289 | 0.847046 | 0.981636 | chr4  | 1.83E+08 | 1.83E+08 | + | 0 | NA | intron (N intron (N | 30958   | NM_001111 | 53842    | Hs.333175NM_001111  | ENSG00000CLDN22    | CLDN21         | claudin             | 2                | protein-coding |                |        |                |
| chr5-113 6.393883  | -0.17671 | 0.916145 | -0.19289 | 0.847046 | 0.981636 | chr5  | 1.13E+08 | 1.13E+08 | + | 0 | NA | intron (NL1PA5 LIN  | 103243  | NM_152624 | 167227   | Hs.443875NM_152624  | ENSG00000DCP2      | NUTD20         | decapping           | protein-coding   |                |                |        |                |
| chr6-178 6.393883  | -0.17671 | 0.916145 | -0.19289 | 0.847046 | 0.981636 | chr6  | 17807707 | 17808147 | + | 0 | NA | intron (N AACn Si   | 100884  | NR_134611 | 1.05E+08 | Hs.718703NR_134611  | ENSG00000LOC105374 | -              | uncharact           | ncRNA            |                |                |        |                |
| chr6-1456 6.393883 | -0.17671 | 0.916145 | -0.19289 | 0.847046 | 0.981636 | chr6  | 1.46E+08 | 1.46E+08 | + | 0 | NA | intron (N intron (N | 22204   | NM_173082 | 257218   | Hs.723297NM_173082  | ENSG00000SHPRH     | BAS54515.2     | SNF2                | hist             | protein-coding |                |        |                |
| chr8-1275 6.393883 | -0.17671 | 0.916145 | -0.19289 | 0.847046 | 0.981636 | chr8  | 1.28E+08 | 1.28E+08 | + | 0 | NA | intron (N intron (N | 17398   | NR_031610 | 1E+08    | NR_031610           | ENSG00000MIR1205   | MIRN1205       | microRNA            | ncRNA            |                |                |        |                |
| chr8-1408 6.393883 | -0.17671 | 0.916145 | -0.19289 | 0.847046 | 0.981636 | chr8  | 1.41E+08 | 1.41E+08 | + | 0 | NA | intron (NL1PA13 LI  | -81583  | NR_029892 | 442893   | NR_029892           | ENSG00000MIR151A   | MIR151 M       | microRNA            | ncRNA            |                |                |        |                |
| chr4-1682 6.466455 | -0.18234 | 0.945505 | -0.19285 | 0.847077 | 0.981636 | chr4  | 1.68E+08 | 1.68E+08 | + | 0 | NA | intron (N TATGn S   | 44962   | NM_017631 | 55601    | Hs.59171CNM_017631  | ENSG00000CDDX60    | -              | DexH/H-bc           | protein-coding   |                |                |        |                |
| chr1-2366 5.213616 | 0.193152 | 1.002969 | 0.19258  | 0.847288 | 0.981636 | chr1  | 2.36E+08 | 2.36E+08 | + | 0 | NA | intron (N intron (N | 48358   | NM_002508 | 4811     | Hs.356624NM_002508  | ENSG00000NID1      | NID            | nidogen             | protein-coding   |                |                |        |                |
| chr11-122 5.213616 | 0.193152 | 1.002969 | 0.19258  | 0.847288 | 0.981636 | chr11 | 12221683 | 12223439 | + | 0 | NA | intron (N intron (N | 58878   | NR_106735 | 1.02E+08 | NR_106735           | ENSG00000MIR6124   | hsa-mir-6      | microRNA            | ncRNA            |                |                |        |                |
| chr12-686 5.213616 | 0.193152 | 1.002969 | 0.19258  | 0.847288 | 0.981636 | chr12 | 68697252 | 68698333 | + | 0 | NA | intron (N AluX1 S1  | 10813   | NM_020401 | 57122    | Hs.524574NM_020401  | ENSG00000NUP107    | NPHS11 N       | nucleopor           | protein-coding   |                |                |        |                |
| chr13-95 5.213616  | 0.193152 | 1.002969 | 0.19258  | 0.847288 | 0.981636 | chr13 | 95089750 | 95090523 | + | 0 | NA | intron (NL1PB1 LIN  | -120208 | NR_145733 | 1.1E+08  | NR_145733           | SNORD13G           | -              | small               | nucsnRNA         |                |                |        |                |
| chr14-102 5.213616 | 0.193152 | 1.002969 | 0.19258  | 0.847288 | 0.981636 | chr14 | 1.02E+08 | 1.02E+08 | + | 0 | NA | intron (N AluY SINE | 53020   | NM_001348 | 122416   | Hs.43294ENM_152322  | ENSG00000ANKRD9    | -              | ankyrin             | protein-coding   |                |                |        |                |
| chr15-444 5.213616 | 0.193152 | 1.002969 | 0.19258  | 0.847288 | 0.981636 | chr15 | 44632961 | 44643883 | + | 0 | NA | intron (N intron (N | 30240   | NM_001163 | 80208    | Hs.656271NM_025137  | ENSG00000SPG11     | ALS5 CMT2      | SPG11               | ves              | protein-coding |                |        |                |
| chr19-366 5.213616 | 0.193152 | 1.002969 | 0.19258  | 0.847288 | 0.981636 | chr19 | 36430111 | 36431446 | + | 0 | NA | intron (N intron (N | -16763  | NM_021126 | 55809    | Hs.12842ENM_021231  | ENSG00000CACTIN    | C19orf29 c     | actin,              | protein-coding   |                |                |        |                |
| chr2-1175 5.213616 | 0.193152 | 1.002969 | 0.19258  | 0.847288 | 0.981636 | chr2  | 1.18E+08 | 1.18E+08 | + | 0 | NA | intron (N intron (N | 64585   | NM_019044 | 54520    | Hs.10784ENM_019044  | ENSG00000CCDC93    | -              | coiled-cc           | protein-coding   |                |                |        |                |
| chr2-1621 5.213616 | 0.193152 | 1.002969 | 0.19258  | 0.847288 | 0.981636 | chr2  | 1.62E+08 | 1.62E+08 | + | 0 | NA | TTS (NR_TTS (NR_1   | -21025  | NM_002054 | 2641     | Hs.516494NM_002054  | ENSG00000CGG       | GLP-1 GLF      | glucagon            | protein-coding   |                |                |        |                |
| chr12-574 12.11814 | -0.13005 | 0.675388 | -0.19255 | 0.847308 | 0.981636 | chr12 | 57489146 | 57493144 | + | 0 | NA | intron (N ALuG3 SIN | -2321   | NM_001319 | 64333    | Hs.43712ENM_032496  | ENSG00000ARHGAP9   | 10C RGL1       | Rho                 | GTPas            | protein-coding |                |        |                |
| chr18-42c 6.85534  | -0.17177 | 0.893403 | -0.19226 | 0.847537 | 0.981636 | chr18 | 42029848 | 42030047 | + | 0 | NA | intron (N MIR SINE  | 74713   | NM_002647 | 5289     | Hs.464971NM_002647  | ENSG00000PIK3C3    | VPS34 Vps      | phosphati           | protein-coding   |                |                |        |                |
| chr1-8382 6.435023 | -0.17371 | 0.904047 | -0.19214 | 0.84763  | 0.981636 | chr1  | 8382168  | 8383737  | + | 0 | NA | intron (N intron (N | 40880   | NM_001042 | 473      | Hs.463041NM_012102  | ENSG00000RERE      | ARG ARP        | arginine            | protein-coding   |                |                |        |                |
| chr1-2876 6.435023 | -0.17371 | 0.904047 | -0.19214 | 0.84763  | 0.981636 | chr1  | 28765515 | 28766233 | + | 0 | NA | intron (NL1MC4 LIN  | 28934   | NM_001172 | 51441    | Hs.53228ENM_016255  | ENSG00000YTHDF2    | CAHL HGR       | CYTH                | N6-mc            | protein-coding |                |        |                |
| chr1-2237 6.435023 | -0.17371 | 0.904047 | -0.19214 | 0.84763  | 0.981636 | chr1  | 2.24E+08 | 2.24E+08 | + | 0 | NA | intron (N intron (N | 54524   | NM_001031 | 7159     | Hs.52396ENM_005422  | ENSG00000TP53BP2   | 53BP2 ASF      | ythrom              | prc              | protein-coding |                |        |                |
| chr10-186 6.435023 | -0.17371 | 0.904047 | -0.19214 | 0.84763  | 0.981636 | chr10 | 18672855 | 18675724 | + | 0 | NA | intron (N intron (N | 14858   | NM_178815 | 221079   | Hs.25362            | NR_178815          | ENSG00000ARL5B | ARL8                | ADP              | ribos          | protein-coding |        |                |
| chr12-111 6.435023 | -0.17371 | 0.904047 | -0.19214 | 0.84763  | 0.981636 | chr12 | 1.18E+08 | 1.18E+08 | + | 0 | NA | intron (N intron (N | 16885   | NM_001346 | 51347    | Hs.64442CNM_016281  | ENSG00000TAOK3     | DPK JJK W      | TAD                 | kinas            | protein-coding |                |        |                |
| chr13-118 6.435023 | -0.17371 | 0.904047 | -0.19214 | 0.84763  | 0.981636 | chr13 | 1.13E+08 | 1.13E+08 | + | 0 | NA | intron (N intron (N | -25445  | NR_107042 | 1.02E+08 | NR_107042           | ENSG00000MIR8075   | hsa-mir-5      | microRNA            | ncRNA            |                |                |        |                |
| chr14-884 6.435023 | -0.17371 | 0.904047 | -0.19214 | 0.84763  | 0.981636 | chr14 | 88469069 | 88470189 | + | 0 | NA | exon (NM exon (NM   | 83972   | NM_018418 | 55812    | Hs.52551ENM_018418  | ENSG00000SPATA7    | HEL-5-29c      | spermatog           | protein-coding   |                |                |        |                |
| chr15-251 6.435023 | -0.17371 | 0.904047 | -0.19214 | 0.84763  | 0.981636 | chr15 | 25107184 | 25110326 | + | 0 | NA | TTS (NR_TTS (NM_C   | 487     | NR_047032 | 1.01E+08 | NR_047032           | ENSG00000SNORD116  | HBII-85-2      | small               | nucsnRNA         |                |                |        |                |
| chr15-504 6.435023 | -0.17371 | 0.904047 | -0.19214 | 0.84763  | 0.981636 | chr15 | 50443126 | 50444349 | + | 0 | NA | intron (N AluSx4 S1 | 19332   | NM_001128 | 9101     | Hs.443731NM_005154  |                    |                |                     |                  |                |                |        |                |

|           |          |          |          |          |          |          |       |          |          |   |   |    |                     |         |           |          |                    |                     |                 |                                      |                                   |
|-----------|----------|----------|----------|----------|----------|----------|-------|----------|----------|---|---|----|---------------------|---------|-----------|----------|--------------------|---------------------|-----------------|--------------------------------------|-----------------------------------|
| chr11-534 | 5.221474 | 0.190358 | 0.999142 | 0.190522 | 0.8489   | 0.981636 | chr11 | 53408632 | 53409609 | + | 0 | NA | IntergeniALR/Alpha  | 1194878 | NM_001004 | 119749   | Hs.553564NM_001004 | ENSG00000404C46     | -               | olfactoryprotein-coding              |                                   |
| chr17-171 | 5.221474 | 0.190358 | 0.999142 | 0.190522 | 0.8489   | 0.981636 | chr17 | 17133312 | 17134072 | + | 0 | NA | intron (Nintron (N  | 72641   | NM_178836 | 201164   | Hs.729075NM_178836 | ENSG000004PLD6      | -               | ZUC phospholiprotein-coding          |                                   |
| chr18-685 | 5.221474 | 0.190358 | 0.999142 | 0.190522 | 0.8489   | 0.981636 | chr18 | 6897328  | 6898079  | + | 0 | NA | intron (NLM2D LIN   | 32166   | NR_034100 | 400643   | Hs.25392CNM_001103 | ENSG000004LINC00066 | -               | long intencRNA                       |                                   |
| chr19-161 | 5.221474 | 0.190358 | 0.999142 | 0.190522 | 0.8489   | 0.981636 | chr19 | 16125760 | 16126353 | + | 0 | NA | intron (Nintron (N  | -7972   | NM_032855 | 84941    | Hs.631617NM_032855 | ENSG000004HSH2D     | -               | ALX HSH2 hematopoieticprotein-coding |                                   |
| chr10-804 | 5.478828 | -0.19173 | 1.00639  | -0.19052 | 0.848906 | 0.981636 | chr10 | 80469490 | 80470627 | + | 0 | NA | intron (NMER2 DNA   | 1795    | NM_001351 | 81619    | Hs.30861ENM_030927 | ENSG000004TSPAN14   | -               | DC-TM4F2  tetraspaninprotein-coding  |                                   |
| chr19-444 | 5.478828 | -0.19173 | 1.00639  | -0.19052 | 0.848906 | 0.981636 | chr19 | 44444901 | 44445415 | + | 0 | NA | intron (NLa2 LINE   | 3314    | NR_103551 | 7772     | Hs.70934ENM_014518 | ENSG000004ZNF229    | -               | zinc fingprotein-coding              |                                   |
| chr5-722  | 5.478828 | -0.19173 | 1.00639  | -0.19052 | 0.848906 | 0.981636 | chr5  | 72225151 | 72227131 | + | 0 | NA | intron (NLa3b LINE  | 46854   | NM_001324 | 4131     | Hs.335079NM_005909 | ENSG000004MAP1B     | -               | FUTSCH MAP1BmicroRNA ncRNA           |                                   |
| chr13-111 | 4.717028 | 0.199274 | 1.047917 | 0.190162 | 0.849183 | 0.981636 | chr13 | 1.1E+08  | 1.1E+08  | + | 0 | NA | intron (Nintron (N  | 66336   | NR_148221 | 1.05E+08 | Hs.13472ENR_148221 | LOC105370           | -               | uncharacterncRNA                     |                                   |
| chr2-232  | 4.717028 | 0.199274 | 1.047917 | 0.190162 | 0.849183 | 0.981636 | chr2  | 2.33E+08 | 2.33E+08 | + | 0 | NA | intron (NAluSx1 SI  | -25324  | NM_001346 | 389084   | Hs.65750ENM_206899 | ENSG000004SNORC     | -               | ASCL830 Secondaryprotein-coding      |                                   |
| chr5-7357 | 7.751562 | 0.162366 | 0.855223 | 0.189852 | 0.849425 | 0.981636 | chr5  | 73577034 | 73578137 | + | 0 | NA | intron (Nintron (N  | 11842   | NM_032175 | 84135    | Hs.40670ENM_032175 | ENSG000004UTP15     | -               | NET21 UTP15 smprotein-coding         |                                   |
| chr18-235 | 11.65668 | -0.13101 | 0.690235 | -0.1898  | 0.849465 | 0.981636 | chr18 | 23566967 | 23567679 | + | 0 | NA | intron (NLMC1 LIN   | 19183   | NM_000271 | 4864     | Hs.46477ENM_000271 | ENSG000004NPC1      | -               | NPC POG2 NPC intronprotein-coding    |                                   |
| chr5-134  | 11.65668 | -0.13101 | 0.690235 | -0.1898  | 0.849465 | 0.981636 | chr5  | 1.35E+08 | 1.35E+08 | + | 0 | NA | intron (NLMB4 LIN   | 40357   | NM_021982 | 10802    | Hs.59554CNM_021982 | ENSG000004SEC24A    | -               | SEC24 homprotein-coding              |                                   |
| chr1-1447 | 6.888621 | -0.16678 | 0.878929 | -0.18976 | 0.849498 | 0.981636 | chr1  | 1.45E+08 | 1.45E+08 | + | 0 | NA | intron (NLMec LIN   | 6841    | NR_027354 | 645166   | Hs.74418ENR_027354 | LSP1P5              | -               | LSP1 pseudoprotein-coding            |                                   |
| chr10-965 | 6.888621 | -0.16678 | 0.878929 | -0.18976 | 0.849498 | 0.981636 | chr10 | 96527962 | 96532440 | + | 0 | NA | intron (Nintron (N  | -16275  | NM_012465 | 7093     | Hs.15429ENM_012465 | ENSG000004TLL2      | -               | tolloid lprotein-coding              |                                   |
| chr12-100 | 6.888621 | -0.16678 | 0.878929 | -0.18976 | 0.849498 | 0.981636 | chr12 | 1.01E+08 | 1.01E+08 | + | 0 | NA | intron (Nintron (N  | 40992   | NM_001286 | 121601   | Hs.58785           | NM_178826           | ENSG000004CAN04 | -                                    | TMEM16D anoctaminprotein-coding   |
| chr14-103 | 6.888621 | -0.16678 | 0.878929 | -0.18976 | 0.849498 | 0.981636 | chr14 | 1.03E+08 | 1.03E+08 | + | 0 | NA | exon (NM exon (NM   | 66564   | NM_001122 | 4140     | Hs.35828           | NM_002376           | ENSG000004MARK3 | -                                    | CTAK1 KPT1 microRNA ncRNA         |
| chr15-83  | 6.888621 | -0.16678 | 0.878929 | -0.18976 | 0.849498 | 0.981636 | chr15 | 83054111 | 83056567 | + | 0 | NA | intron (NAluS6 SI   | 11913   | NM_001101 | 53339    | Hs.45914ENM_025238 | ENSG000004BTBD1     | -               | C15orf1 MTBT domainprotein-coding    |                                   |
| chr16-28  | 6.888621 | -0.16678 | 0.878929 | -0.18976 | 0.849498 | 0.981636 | chr16 | 2896908  | 2897644  | + | 0 | NA | intron (Nintron (N  | 14061   | NM_138433 | 114984   | Hs.53452ENM_138433 | ENSG000004FLYWCH2   | -               | FLYWCH2 protein-coding               |                                   |
| chr16-564 | 6.888621 | -0.16678 | 0.878929 | -0.18976 | 0.849498 | 0.981636 | chr16 | 56411756 | 56412986 | + | 0 | NA | intron (Nintron (N  | 12618   | NM_001322 | 267      | Hs.295137NM_001144 | ENSG000004AMFR      | -               | GP78 RNFA4 autocrineprotein-coding   |                                   |
| chr17-302 | 6.888621 | -0.16678 | 0.878929 | -0.18976 | 0.849498 | 0.981636 | chr17 | 30270171 | 30271106 | + | 0 | NA | intron (Nintron (N  | 21306   | NM_000382 | 642      | Hs.371914NM_000382 | ENSG000004BLMH      | -               | BH BMH bleomycinprotein-coding       |                                   |
| chr17-306 | 6.888621 | -0.16678 | 0.878929 | -0.18976 | 0.849498 | 0.981636 | chr17 | 30800070 | 30800228 | + | 0 | NA | intron (NAluJr SIN  | 23543   | NM_015986 | 51379    | Hs.649372NM_015986 | ENSG000004CRLF3     | -               | CREME-9 cytokine protein-coding      |                                   |
| chr20-137 | 6.888621 | -0.16678 | 0.878929 | -0.18976 | 0.849498 | 0.981636 | chr20 | 13740737 | 13742172 | + | 0 | NA | intron (NLM3E3 LI   | 43432   | NM_016645 | 51575    | Hs.369284NM_016645 | ENSG000004ESF1      | -               | ABTAP C2C ESF1 nucleprotein-coding   |                                   |
| chr5-349  | 6.888621 | -0.16678 | 0.878929 | -0.18976 | 0.849498 | 0.981636 | chr5  | 34954041 | 34955064 | + | 0 | NA | intron (Nintron (N  | 24959   | NM_001348 | 134218   | Hs.131887NM_194288 | ENSG000004DNAJC21   | -               | BMF53 DNAJ heatprotein-coding        |                                   |
| chr6-373  | 6.888621 | -0.16678 | 0.878929 | -0.18976 | 0.849498 | 0.981636 | chr6  | 37386296 | 37386829 | + | 0 | NA | intron (Nintron (N  | 32579   | NR_046399 | 9025     | Hs.48527ENM_003958 | ENSG000004RNF8      | -               | hRNF8 ring fingprotein-coding        |                                   |
| chr6-107  | 6.888621 | -0.16678 | 0.878929 | -0.18976 | 0.849498 | 0.981636 | chr6  | 1.08E+08 | 1.08E+08 | + | 0 | NA | intron (NAluJb SIN  | 36593   | NM_007214 | 11231    | Hs.26904           | NM_007214           | ENSG000004SEC63 | -                                    | DNAJC23 SEC63 homprotein-coding   |
| chr8-38   | 6.888621 | -0.16678 | 0.878929 | -0.18976 | 0.849498 | 0.981636 | chr8  | 38123841 | 38125612 | + | 0 | NA | intron (Nintron (N  | 18933   | NM_001105 | 9070     | Hs.52153CNM_004674 | ENSG000004ASH2L     | -               | ASH2 ASH2 likeprotein-coding         |                                   |
| chr21-37  | 7.793969 | -0.16981 | 0.895215 | -0.18969 | 0.849554 | 0.981636 | chr21 | 37089942 | 37090070 | + | 0 | NA | intron (NAluSx SIN  | 7009    | NM_003316 | 7267     | Hs.368214NM_003316 | ENSG000004TTC3      | -               | DCRR1 RNFTetrahelicprotein-coding    |                                   |
| chr10-58  | 6.206792 | 0.185489 | 0.978134 | 0.189635 | 0.849595 | 0.981636 | chr10 | 58233463 | 58233662 | + | 0 | NA | intron (NLM3A6 LIN  | 34332   | NM_152230 | 253430   | Hs.30280           | NM_152230           | ENSG000004IPMK  | -                                    | inositol protein-coding           |
| chr1-111  | 5.973566 | -0.17943 | 0.947235 | -0.18942 | 0.849762 | 0.981636 | chr1  | 1.11E+08 | 1.11E+08 | + | 0 | NA | intron (Nintron (N  | 18031   | NM_024901 | 79961    | Hs.55785CNM_024901 | ENSG000004DENND2D   | -               | DENN domainprotein-coding            |                                   |
| chr10-35  | 5.973566 | -0.17943 | 0.947235 | -0.18942 | 0.849762 | 0.981636 | chr10 | 35037239 | 35038381 | + | 0 | NA | intron (NAluSg SIN  | 36473   | NM_001198 | 8453     | Hs.82919           | NM_003591           | ENSG000004CUL2  | -                                    | cullin 2 protein-coding           |
| chr12-11  | 5.973566 | -0.17943 | 0.947235 | -0.18942 | 0.849762 | 0.981636 | chr12 | 1.17E+08 | 1.17E+08 | + | 0 | NA | intron (NAluSx SIN  | 18046   | NM_012174 | 26259    | Hs.624537NM_012174 | ENSG000004FBXW8     | -               | FBW6 FBWF-box anprotein-coding       |                                   |
| chr3-183  | 5.973566 | -0.17943 | 0.947235 | -0.18942 | 0.849762 | 0.981636 | chr3  | 1.84E+08 | 1.84E+08 | + | 0 | NA | TTS (NM_C TTS (NM_C | -23416  | NR_046577 | 1.01E+08 | Hs.57069ENR_046577 | ENSG000004ABCC5-AS1 | -               | ABCC5 antncRNA                       |                                   |
| chr4-143  | 5.973566 | -0.17943 | 0.947235 | -0.18942 | 0.849762 | 0.981636 | chr4  | 143759   | 144303   | + | 0 | NA | intron (NMERS1B LI  | 15910   | NM_001288 | 255403   | Hs.66363ENM_001038 | ENSG000004ZNF178    | -               | zinc fingprotein-coding              |                                   |
| chr11-621 | 4.212582 | 0.210322 | 1.110405 | 0.18941  | 0.849771 | 0.981636 | chr11 | 62128946 | 62129549 | + | 0 | NA | intron (Nintron (N  | 5236    | NM_001040 | 3619     | Hs.14217ENM_020238 | ENSG000004INCENP    | -               | inner cenprotein-coding              |                                   |
| chr1-259  | 6.427165 | -0.17162 | 0.906283 | -0.18936 | 0.849808 | 0.981636 | chr1  | 25959350 | 25961986 | + | 0 | NA | 3' UTR (N3' UTR (N  | 37395   | NM_000437 | 5051     | Hs.47708ENM_000437 | ENSG000004PAFAH2    | -               | HSD-PLA2 platelet protein-coding     |                                   |
| chr1-3334 | 6.427165 | -0.17162 | 0.906283 | -0.18936 | 0.849808 | 0.981636 | chr1  | 33341708 | 33343242 | + | 0 | NA | intron (Nintron (N  | 7374    | NM_004427 | 1912     | Hs.524271NM_004427 | ENSG000004PHC2      | -               | EDR2 HPHE polymorphicprotein-coding  |                                   |
| chr1-6814 | 6.427165 | -0.17162 | 0.906283 | -0.18936 | 0.849808 | 0.981636 | chr1  | 68145306 | 68146840 | + | 0 | NA | intron (Nintron (N  | 37537   | NR_031664 | 1E+08    | NR_031664          | ENSG000004MIR1262   | -               | MIRN1262 microRNA ncRNA              |                                   |
| chr1-200  | 6.427165 | -0.17162 | 0.906283 | -0.18936 | 0.849808 | 0.981636 | chr1  | 2.01E+08 | 2.01E+08 | + | 0 | NA | intron (Nintron (N  | -20827  | NM_005299 | 2848     | Hs.53431ENM_005299 | ENSG000004GPR25     | -               | G proteinprotein-coding              |                                   |
| chr1-2202 | 6.427165 | -0.17162 | 0.906283 | -0.18936 | 0.849808 | 0.981636 | chr1  | 2.2E+08  | 2.2E+08  | + | 0 | NA | intron (NAluSx4 SI  | -1808   | NR_001587 | 6791     | Hs.65484ENR_001587 | AURKAP1             | -               | AURKAP1 aurora kipseudo              |                                   |
| chr10-31  | 6.427165 | -0.17162 | 0.906283 | -0.18936 | 0.849808 | 0.981636 | chr10 | 31337862 | 31338688 | + | 0 | NA | intron (NMIR SINE   | 16615   | NM_001323 | 6935     | Hs.12450ENM_030751 | ENSG000004ZEB1      | -               | AREB6 BZF zinc fingprotein-coding    |                                   |
| chr11-41  | 6.427165 | -0.17162 | 0.906283 | -0.18936 | 0.849808 | 0.981636 | chr11 | 4119509  | 4124038  | + | 0 | NA | intron (Nintron (N  | 5695    | NM_001333 | 6240     | Hs.44570ENM_001038 | ENSG000004RRM1      | -               | R1 R1R1 ribonucleprotein-coding      |                                   |
| chr11-11  | 6.427165 | -0.17162 | 0.906283 | -0.18936 | 0.849808 | 0.981636 | chr11 | 1.12E+08 | 1.12E+08 | + | 0 | NA | intron (Nintron (N  | 7473    | NM_001193 | 1737     | Hs.335551NM_001931 | ENSG000004DLAT      | -               | DLTA E2 Dihydroliprotein-coding      |                                   |
| chr11-12  | 6.427165 | -0.17162 | 0.906283 | -0.18936 | 0.849808 | 0.981636 | chr11 | 1.3E+08  | 1.3E+08  | + | 0 | NA | TTS (NM_C TTS (NM_C | 29219   | NM_006165 | 4798     | Hs.53053ENM_006165 | ENSG000004NFRKB     | -               | IN080G nuclear fprotein-coding       |                                   |
| chr12-29  | 6.427165 | -0.17162 | 0.906283 | -0.18936 | 0.849808 | 0.981636 | chr12 | 29602091 | 29603284 | + | 0 | NA | intron (Nintron (N  | -102994 | NM_001355 | 341350   | Hs.67458ENM_183378 | ENSG000004OVCH1     | -               | OVCH ovochymaspromtein-coding        |                                   |
| chr12-31  | 6.427165 | -0.17162 | 0.906283 | -0.18936 | 0.849808 | 0.981636 | chr12 | 31295004 | 31295594 | + | 0 | NA | exon (NM exon (NM   | -29017  | NR_026806 | 79857    | Hs.53448ENM_024798 | ENSG000004FLJ13224  | -               | uncharacterncRNA                     |                                   |
| chr12-53  | 6.427165 | -0.17162 | 0.906283 | -0.18936 | 0.849808 | 0.981636 | chr12 | 53511300 | 53512364 | + | 0 | NA | TTS (NM_C TTS (NM_C | -2152   | NR_046221 | 1.01E+08 | Hs.63360ENR_046221 | ENSG000004LOC100655 | -               | uncharacterncRNA                     |                                   |
| chr12-96  | 6.427165 | -0.17162 | 0.906283 | -0.18936 | 0.849808 | 0.981636 | chr12 | 96291446 | 96294694 | + | 0 | NA | intron (NCharlie S  | 37572   | NM_001303 | 2004     | Hs.46523           | NM_005230           | ENSG000004ELK3  | -                                    | ERP NET1 SETS transprotein-coding |
| chr14-75  | 6.427165 | -0.17162 | 0.906283 | -0.18936 | 0.849808 | 0.981636 | chr14 | 75036891 | 75038453 | + | 0 | NA | intron (NFLAM_C SI  | 13795   | NM_014381 | 27030    | Hs.43665CNM_014381 | ENSG000004MLH3      | -               | HNPC27 mutL homprotein-coding        |                                   |
| chr14-91  | 6.427165 | -0.17162 | 0.906283 | -0.18936 | 0.849808 | 0.981636 | chr14 | 91879554 | 91882053 | + | 0 | NA | intron (NAluSx SIN  | -13267  | NM_001128 | 123036   | Hs.51026ENM_152338 | ENSG000004TC2N      | -               | C14orf47 tandem C2protein-coding     |                                   |
| chr15-65  | 6.427165 | -0.17162 | 0.906283 | -0.18936 | 0.849808 | 0.981636 | chr15 | 65891322 | 65893121 | + | 0 | NA | TTS (NM_C TTS (NM_C | 22730   | NM_001206 | 8766     | Hs.321541NM_004665 | ENSG000004RAB11A    |                 |                                      |                                   |



|                    |          |          |          |          |          |       |          |          |        |                     |                  |          |            |                    |                     |                 |                                     |
|--------------------|----------|----------|----------|----------|----------|-------|----------|----------|--------|---------------------|------------------|----------|------------|--------------------|---------------------|-----------------|-------------------------------------|
| chr1-2317 6.929761 | -0.16401 | 0.878632 | -0.18667 | 0.851921 | 0.981636 | chr1  | 23070812 | 23071481 | + 0 NA | intron (Nintron (N  | 26841 NR_036057  | 1E+08    | NR_036057  | ENSG000003MIR3115  | mir-3115            | microRNA        | ncRNA                               |
| chr1-3231 6.929761 | -0.16401 | 0.878632 | -0.18667 | 0.851921 | 0.981636 | chr1  | 32319665 | 32320711 | + 0 NA | intron (NAlu SINE   | 16045 NM_023005  | 65108    | Hs. 75061  | NM_023005          | ENSG000003MIR3115   | F52 MACM MARCKS | liprotein-coding                    |
| chr12-111 6.929761 | -0.16401 | 0.878632 | -0.18667 | 0.851921 | 0.981636 | chr12 | 1.12E+08 | 1.12E+08 | + 0 NA | exon (NM_exon (NM   | -29958 NM_00069C | 217      | Hs. 604551 | NM_00069C          | ENSG000003ALDH2     | ALDH-E2         | aldehyde protein-coding             |
| chr16-31 6.929761  | -0.16401 | 0.878632 | -0.18667 | 0.851921 | 0.981636 | chr16 | 31898153 | 31900498 | + 0 NA | intron (NLIPI LINE  | 25518 NM_003414  | 10308    | Hs. 46064E | NM_003414          | ENSG000003ZNF267    | HZF2            | zinc finger protein-coding          |
| chr19-161 6.929761 | -0.16401 | 0.878632 | -0.18667 | 0.851921 | 0.981636 | chr19 | 1618921  | 16190272 | + 0 NA | exon (NM_exon (NM   | -13858 NM_00683C | 10975    | Hs. 8372   | NM_00683C          | ENSG000003UQR11     | 071008DC        | ubiquitin protein-coding            |
| chr19-468 6.929761 | -0.16401 | 0.878632 | -0.18667 | 0.851921 | 0.981636 | chr19 | 4685202  | 4686699  | + 0 NA | TTS (NM_TTS (NM_C   | 6668 NM_001242   | 1E+08    | Hs. 67813E | NM_001242901       | DPP9-AS1            | DPP9            | antiprotein-coding                  |
| chr19-381 6.929761 | -0.16401 | 0.878632 | -0.18667 | 0.851921 | 0.981636 | chr19 | 38110809 | 38114502 | + 0 NA | intron (NLM3Cz L    | -50441 NR_14580C | 1.1E+08  | NR_14580C  | SNORD152           |                     | small nucleolar |                                     |
| chr2-877 6.929761  | -0.16401 | 0.878632 | -0.18667 | 0.851921 | 0.981636 | chr2  | 8778591  | 8779531  | + 0 NA | exon (NM_exon (NM   | 58552 NM_00134E  | 57498    | Hs. 9873   | NM_02073E          | ENSG000003KIDIN522C | ARMS SINC       | kinase D protein-coding             |
| chr2-157 6.929761  | -0.16401 | 0.878632 | -0.18667 | 0.851921 | 0.981636 | chr2  | 1.57E+08 | 1.57E+08 | + 0 NA | intron (NLIPIA6 LIN | 21916 NM_00132E  | 11227    | Hs. 269027 | NM_01456E          | ENSG000003GALNT5    | GALNAC-T        | polypeptide protein-coding          |
| chr2-1577 6.929761 | -0.16401 | 0.878632 | -0.18667 | 0.851921 | 0.981636 | chr2  | 1.58E+08 | 1.58E+08 | + 0 NA | intron (Nintron (N  | 72166 NM_001347  | 90       | Hs. 47031E | NM_00110E          | ENSG000003ACVR1     | ACTR1 AC        | activin $\beta$ protein-coding      |
| chr2-2304 6.929761 | -0.16401 | 0.878632 | -0.18667 | 0.851921 | 0.981636 | chr2  | 2.3E+08  | 2.3E+08  | + 0 NA | intron (Nintron (N  | 19496 NM_00120E  | 6672     | Hs. 36905E | NM_00311E          | ENSG000003SP100     | lysp100b        | SP100 nucleoprotein-coding          |
| chr2-2396 6.929761 | -0.16401 | 0.878632 | -0.18667 | 0.851921 | 0.981636 | chr2  | 2.4E+08  | 2.4E+08  | + 0 NA | intron (Ntigger3b   | 25324 NR_136157  | 4705     | Hs. 277677 | NM_004544          | ENSG000003NDUFA10   | CI-42KD C       | NADH:ubiquinone protein-coding      |
| chr3-566 6.929761  | -0.16401 | 0.878632 | -0.18667 | 0.851921 | 0.981636 | chr3  | 56639236 | 56641114 | + 0 NA | intron (Nintron (N  | 23871 NM_015224  | 23272    | Hs. 116877 | NM_015224          | ENSG000003TASOR     | C3orf63 F       | transcriptin protein-coding         |
| chr4-3911 6.929761 | -0.16401 | 0.878632 | -0.18667 | 0.851921 | 0.981636 | chr4  | 39115919 | 39119586 | + 0 NA | intron (Nintron (N  | 55520 NM_199035  | 51088    | Hs. 272251 | NM_01599E          | ENSG000003KLHL5     |                 | kelch like protein-coding           |
| chr5-388 6.929761  | -0.16401 | 0.878632 | -0.18667 | 0.851921 | 0.981636 | chr5  | 38895316 | 38896744 | + 0 NA | intron (NLIPI LINE  | 50018 NM_00132E  | 9180     | Hs. 12065E | NM_00399E          | ENSG000003OSMR      | IL-31R-be       | oncostatin protein-coding           |
| chr5-126 6.929761  | -0.16401 | 0.878632 | -0.18667 | 0.851921 | 0.981636 | chr5  | 1.27E+08 | 1.27E+08 | + 0 NA | intron (NAluXs1 SI  | 43869 NM_001201  | 501      | Hs. 48323E | NM_00118E          | ENSG000003ALDH7A1   | ATQ1 EPD        | aldehyde protein-coding             |
| chr7-661 6.929761  | -0.16401 | 0.878632 | -0.18667 | 0.851921 | 0.981636 | chr7  | 6601972  | 6603423  | + 0 NA | intron (NMIRc SINE  | 12676 NM_00130E  | 79034    | Hs. 487511 | NM_02406E          | ENSG000003Corf26    |                 | chromosome protein-coding           |
| chr11-66 6.945477  | -0.16817 | 0.901332 | -0.18558 | 0.851988 | 0.981636 | chr11 | 66633587 | 66634280 | + 0 NA | intron (NAluSp SIN  | -4684 NM_00289E  | 5936     | Hs. 523822 | NM_00289E          | ENSG000003RBM4      | LARK RBM4       | RNA binding protein-coding          |
| chr11-29 6.965708  | -0.17704 | 0.9525   | -0.18587 | 0.852544 | 0.981636 | chr11 | 2962252  | 2963135  | + 0 NA | intron (Nintron (N  | 1200 NR_00298E   | 67783    | Hs. 68969E | NR_00298E          | ENSG000003SNORA54   | ACA54           | small nucleolar                     |
| chr12-881 6.965708 | -0.17704 | 0.9525   | -0.18587 | 0.852544 | 0.981636 | chr12 | 88105141 | 88105974 | + 0 NA | intron (NLM5Ca LI   | 36659 NM_025114  | 80184    | Hs. 150444 | NM_025114          | ENSG000003CEP290    | 3H11Ag B        | epsilon protein-coding              |
| chr2-947 6.965708  | -0.17704 | 0.9525   | -0.18587 | 0.852544 | 0.981636 | chr2  | 9472804  | 9473576  | + 0 NA | TTS (NM_TTS (NM_C   | -1361 NM_00132C  | 285148   | Hs. 66722E | NM_00103E          | ENSG000003TAH1      |                 | isoamyl $\epsilon$ protein-coding   |
| chr5-132 6.965708  | -0.17704 | 0.9525   | -0.18587 | 0.852544 | 0.981636 | chr5  | 1.33E+08 | 1.33E+08 | + 0 NA | intron (Nintron (N  | 261 NR_132124    | 1.02E+08 | Hs. 59881E | NR_132124          | ENSG000003TH2LCRR   | TH2-LCR         | T helper ncRNA                      |
| chrX-156 6.965708  | -0.17704 | 0.9525   | -0.18587 | 0.852544 | 0.981636 | chrX  | 15691503 | 15692791 | + 0 NA | intron (NAluJr SIN  | 16689 NR_160542  | 340591   | Hs. 732244 | NR_026551          | ENSG000003CA5BP1    | CA5BL CA        | epsilon carbonic pseudo             |
| chr8-220 7.34222   | -0.16117 | 0.867365 | -0.18581 | 0.852592 | 0.981636 | chr8  | 22000407 | 22001149 | + 0 NA | intron (Ntigger19a  | -23356 NM_00128E | 10361    | Hs. 13105E | NM_18279E          | ENSG000003NPM2      |                 | nucleophorin-coding                 |
| chr9-357 8.784027  | 0.15148  | 0.815663 | 0.185714 | 0.852669 | 0.981636 | chr9  | 35737988 | 35738378 | + 0 NA | intron (Nintron (N  | 5261 NR_10691E   | 1.02E+08 | NR_10691E  | ENSG000003MIR6853  | hsa-mir- $\epsilon$ | microRNA        | ncRNA                               |
| chr6-434 8.230584  | 0.153636 | 0.827552 | 0.185651 | 0.852718 | 0.981636 | chr6  | 43442958 | 43443196 | + 0 NA | exon (NM_exon (NM   | 8535 NR_106894   | 1.02E+08 | NR_106894  | ENSG000003MIR6780B | hsa-mir- $\epsilon$ | microRNA        | ncRNA                               |
| chr14-55 6.246082  | 0.172428 | 0.928888 | 0.185628 | 0.852737 | 0.981636 | chr14 | 55311879 | 55312657 | + 0 NA | intron (NTHEID-int  | 40114 NM_152231  | 55030    | Hs. 52534E | NM_01794E          | ENSG000003FBX034    | CGI-301 F       | -box prc protein-coding             |
| chr17-49 6.724886  | 0.196203 | 1.05699  | 0.185624 | 0.852739 | 0.981636 | chr17 | 4900562  | 4901250  | + 0 NA | exon (NM_exon (NM   | 1370 NM_00114E   | 1E+08    | Hs. 57924E | NM_00114E          | ENSG000003C17orf107 |                 | chromosome protein-coding           |
| chr1-217 6.419307  | -0.16947 | 0.913497 | -0.18552 | 0.852821 | 0.981636 | chr1  | 21704587 | 21705538 | + 0 NA | intron (Nintron (N  | -35705 NM_00135E | 5909     | Hs. 14817E | NM_00288E          | ENSG000003RAP1GAP   | RAP1GAP1        | FRAP1 GTP $\epsilon$ protein-coding |
| chr1-409 6.419307  | -0.16947 | 0.913497 | -0.18552 | 0.852821 | 0.981636 | chr1  | 40986164 | 40987827 | + 0 NA | intron (Nintron (N  | -1524 NM_001301  | 1503     | Hs. 473087 | NM_00190E          | ENSG000003CTPS1     | CTPS GATC       | CTP synthetase protein-coding       |
| chr1-1081 6.419307 | -0.16947 | 0.913497 | -0.18552 | 0.852821 | 0.981636 | chr1  | 1.08E+08 | 1.08E+08 | + 0 NA | intron (NLMAS8 LIN  | 14329 NM_213651  | 29957    | Hs. 65687C | NM_01338E          | ENSG000003SLC25A24  | APC1 SCAM       | solute carrier protein-coding       |
| chr10-35 6.419307  | -0.16947 | 0.913497 | -0.18552 | 0.852821 | 0.981636 | chr10 | 359833   | 360492   | + 0 NA | intron (Nintron (N  | 180168 NM_00120E | 10771    | Hs. 29226E | NM_00662E          | ENSG000003ZMYND11   | BRM1 BSE        | zinc finger protein-coding          |
| chr11-85 6.419307  | -0.16947 | 0.913497 | -0.18552 | 0.852821 | 0.981636 | chr11 | 85656044 | 85658508 | + 0 NA | TTS (NM_TTS (NM_C   | 7853 NR_02802E   | 58487    | Hs. 53531E | NM_02121E          | ENSG000003CREBZF    | SRALE1 Z        | CREB/ATF protein-coding             |
| chr11-12 6.419307  | -0.16947 | 0.913497 | -0.18552 | 0.852821 | 0.981636 | chr11 | 1.23E+08 | 1.23E+08 | + 0 NA | intron (Nintron (N  | 3731 NM_02476E   | 79827    | Hs. 59194E | NM_02476E          | ENSG000003CLMP      | ACAM ASAX       | CXADR like protein-coding           |
| chr12-121 6.419307 | -0.16947 | 0.913497 | -0.18552 | 0.852821 | 0.981636 | chr12 | 1.21E+08 | 1.21E+08 | + 0 NA | intron (Nintron (N  | 4222 NM_00127C   | 10645    | Hs. 29734E | NM_00654E          | ENSG000003CAMKK2    | CAMKK CA        | calcium/calmodulin protein-coding   |
| chr13-11 6.419307  | -0.16947 | 0.913497 | -0.18552 | 0.852821 | 0.981636 | chr13 | 1.1E+08  | 1.1E+08  | + 0 NA | intron (NLM3 LIN    | 58034 NM_00184E  | 1282     | Hs. 17441  | NM_00184E          | ENSG000003COL4A1    | BSV BSVI        | collagen protein-coding             |
| chr15-494 6.419307 | -0.16947 | 0.913497 | -0.18552 | 0.852821 | 0.981636 | chr15 | 49453467 | 49454797 | + 0 NA | intron (Nintron (N  | 30890 NM_00200E  | 2252     | Hs. 56726E | NM_00200E          | ENSG000003CFG7      | HBGF-7 K        | C fibroblast protein-coding         |
| chr16-16 6.419307  | -0.16947 | 0.913497 | -0.18552 | 0.852821 | 0.981636 | chr16 | 16027955 | 16028700 | + 0 NA | intron (NLM2 LINE   | 78711 NM_00499E  | 4363     | Hs. 39146E | NM_00499E          | ENSG000003ABCC1     | ABC29 ABC       | ATP binding protein-coding          |
| chr17-624 6.419307 | -0.16947 | 0.913497 | -0.18552 | 0.852821 | 0.981636 | chr17 | 62443610 | 62444419 | + 0 NA | intron (Nintron (N  | 20129 NM_18172E  | 339175   | Hs. 381204 | NM_18172E          | ENSG000003METTL2A   | METTL2          | methyltransferase protein-coding    |
| chr17-751 6.419307 | -0.16947 | 0.913497 | -0.18552 | 0.852821 | 0.981636 | chr17 | 75135532 | 75136276 | + 0 NA | non-codirnon-codir  | -4109 NM_00125E  | 30833    | Hs. 67201  | NM_01459E          | ENSG000003CNT5C     | DNT DNT1        | 5', 3'-nt protein-coding            |
| chr2-393 6.419307  | -0.16947 | 0.913497 | -0.18552 | 0.852821 | 0.981636 | chr2  | 39391643 | 39392074 | + 0 NA | intron (NMER63B DI  | 45427 NM_00361E  | 8491     | Hs. 65575E | NM_00361E          | ENSG000003MAP4K3    | GLK MAPK        | mitogen-activated protein-coding    |
| chr2-237 6.419307  | -0.16947 | 0.913497 | -0.18552 | 0.852821 | 0.981636 | chr2  | 2.38E+08 | 2.38E+08 | + 0 NA | intron (NAluXs1 SI  | 6028 NM_00127E   | 140739   | Hs. 47178E | NM_08067E          | ENSG000003UBEZF     | NCE2            | ubiquitin protein-coding            |
| chr20-167 6.419307 | -0.16947 | 0.913497 | -0.18552 | 0.852821 | 0.981636 | chr20 | 16737354 | 16740128 | + 0 NA | intron (Nintron (N  | 8715 NM_19822C   | 6629     | Hs. 28037E | NM_00309E          | ENSG000003SNRPB2    | Msl1 U2B        | small nucleoprotein-coding          |
| chr3-1461 6.419307 | -0.16947 | 0.913497 | -0.18552 | 0.852821 | 0.981636 | chr3  | 1.46E+08 | 1.46E+08 | + 0 NA | intron (NMER11B LI  | -45060 NR_146297 | 1.1E+08  | NR_146297  | ENSG000003LNCsRLR  | lncRNA-SF           | lncRNA          | scncRNA                             |
| chr3-195 6.419307  | -0.16947 | 0.913497 | -0.18552 | 0.852821 | 0.981636 | chr3  | 1.96E+08 | 1.96E+08 | + 0 NA | non-codirnon-codir  | 26837 NR_133014  | 5504     | Hs. 535731 | NM_00624E          | ENSG000003PPP1R2    | IPP-2 IP        | protein-coding                      |
| chr4-182 6.419307  | -0.16947 | 0.913497 | -0.18552 | 0.852821 | 0.981636 | chr4  | 1.83E+08 | 1.83E+08 | + 0 NA | intron (Nintron (N  | 18482 NM_001351  | 1635     | Hs. 18385E | NM_00192E          | ENSG000003DCTD      |                 | dCMP deaminase protein-coding       |
| chr5-149 6.419307  | -0.16947 | 0.913497 | -0.18552 | 0.852821 | 0.981636 | chr5  | 1.5E+08  | 1.5E+08  | + 0 NA | intron (Nintron (N  | 29570 NM_001271  | 1452     | Hs. 52986E | NM_00189E          | ENSG000003CSNK1A1   | CK1 CK1a        | casein kinase protein-coding        |
| chr7-178 6.419307  | -0.16947 | 0.913497 | -0.18552 | 0.852821 | 0.981636 | chr7  | 17855825 | 17857722 | + 0 NA | intron (NAluJb SIN  | 83721 NM_00135E  | 23161    | Hs. 48764E | NM_01513E          | ENSG000003SNX13     | RGS-PX1         | sorting receptor protein-coding     |
| chr7-9897 6.419307 | -0.16947 | 0.913497 | -0.18552 | 0.852821 | 0.981636 | chr7  | 98973548 | 98975030 | + 0 NA | intron (Nintron (N  | -38876 NR_110102 |          |            |                    |                     |                 |                                     |

|                    |          |          |          |          |          |       |          |          |   |     |    |                    |                   |                              |                     |                 |                              |
|--------------------|----------|----------|----------|----------|----------|-------|----------|----------|---|-----|----|--------------------|-------------------|------------------------------|---------------------|-----------------|------------------------------|
| chr19-342 6.197084 | 0.172519 | 0.932074 | 0.185092 | 0.853157 | 0.981636 | chr19 | 34206903 | 34207492 | + | 0   | NA | intron (Nintron (N | 34693 NM_001114   | 26065 Hs. 744009NM_015577    | ENSG000001LSM14A    | C19orf13 LSM14A | mfprotein-coding             |
| chr3-3068 6.197084 | 0.172519 | 0.932074 | 0.185092 | 0.853157 | 0.981636 | chr3  | 30687569 | 30688407 | + | 0   | NA | intron (MER106A I  | 81387 NM_003242   | 7048 Hs. 82028 NM_003242     | ENSG000001TGFR2     | AAT3 FAA3       | transformprotein-coding      |
| chr1-2308 7.726138 | 0.156308 | 0.844787 | 0.185027 | 0.853208 | 0.981636 | chr1  | 23080264 | 23080823 | + | 0   | NA | intron (ML2b LINE  | 36238 NR_036057   | 1E+08 NR_036057              | ENSG000001MIR3115   | mir-3115        | microRNA ncRNA               |
| chr19-501 4.675888 | 0.19639  | 1.061474 | 0.185016 | 0.853216 | 0.981636 | chr19 | 5056396  | 5057112  | + | 0   | NA | intron (MLT1E3 LI  | 87641 NM_001373   | 23030 Hs. 654819NM_015017    | ENSG000001KDM4B     | JMJD2B T        | lysine deprotein-coding      |
| chr5-8111 4.675888 | 0.19639  | 1.061474 | 0.185016 | 0.853216 | 0.981636 | chr5  | 81119825 | 81120696 | + | 0   | NA | intron (MLA_Mam    | 1101826 NM_001822 | 1160 Hs. 80691 NM_001822     | ENSG000001CKMT2     | SMTCK           | creatine protein-coding      |
| chr14-391 5.180334 | 0.187807 | 1.015159 | 0.185003 | 0.853227 | 0.981636 | chr14 | 39157865 | 39158448 | + | 0   | NA | intron (Nintron (N | 12177 NM_001075   | 122553 Hs. 13303 NM_177452   | ENSG000001TRAPPC6B  | NEDMEBA T       | traffickiprotein-coding      |
| chr6-1421 5.180334 | 0.187807 | 1.015159 | 0.185003 | 0.853227 | 0.981636 | chr6  | 1.42E+08 | 1.42E+08 | + | 0   | NA | intron (NLM1EF LIN | 31745 NM_016488   | 51534 Hs. 431367NM_016488    | ENSG000001VTA1      | C6orf55 V       | vesicle t protein-coding     |
| chr7-1392 5.180334 | 0.187807 | 1.015159 | 0.185003 | 0.853227 | 0.981636 | chr7  | 1.39E+08 | 1.39E+08 | + | 0   | NA | intron (NALuJb SIN | 13822 NM_173566   | 254048 Hs. 153458NM_173566   | ENSG000001UBN2      | -               | ubinculeiprotein-coding      |
| chr11-182 7.38336  | -0.15832 | 0.855924 | -0.18497 | 0.853249 | 0.981636 | chr11 | 18310952 | 18311312 | + | 0   | NA | intron (Nintron (N | 11008 NM_007216   | 11234 Hs. 437599NM_007216    | ENSG000001CHPS5     | A1BP63 BI       | HP55 bioe protein-coding     |
| chr5-1796 7.38336  | -0.15832 | 0.855924 | -0.18497 | 0.853249 | 0.981636 | chr5  | 1.8E+08  | 1.8E+08  | + | 0   | NA | intron (Nintron (N | 14316 NR_134283   | 1.01E+08 Hs. 314414NR_134283 | ENSG000001LOC100996 | -               | uncharactncRNA               |
| chr7-5743 5.68478  | 0.180841 | 0.977969 | 0.184914 | 0.853296 | 0.981636 | chr7  | 5743573  | 5745183  | + | 0   | NA | intron (NLIMEg LIN | -32468 NR_106934  | 1.02E+08 NR_106934           | ENSG000001MIR6874   | hsa-mir-6       | miRNA ncRNA                  |
| chr1-4663 5.692638 | 0.178148 | 0.963761 | 0.184846 | 0.85335  | 0.981636 | chr1  | 46635945 | 46636980 | + | 0   | NA | intron (Nintron (N | -19571 NM_201403  | 148932 Hs. 632401NM_145279   | ENSG000001MOB3C     | MOB1E MO        | MOB kinase protein-coding    |
| chr11-337 6.692638 | 0.178148 | 0.963761 | 0.184846 | 0.85335  | 0.981636 | chr11 | 452743   | 453545   | + | 0   | NA | intron (Nintron (N | 81490 NM_001325   | 81490 Hs. 12851 NM_030783    | ENSG000001PTDSS2    | PSS2            | phosphatiprotein-coding      |
| chr14-762 5.692638 | 0.178148 | 0.963761 | 0.184846 | 0.85335  | 0.981636 | chr14 | 76007210 | 76007774 | + | 0   | NA | intron (Nintron (N | 21729 NM_001252   | 112752 Hs. 623622NM_052873   | ENSG000001IFT43     | C14orf175       | intrinflag protein-coding    |
| chr2-551 5.692638  | 0.178148 | 0.963761 | 0.184846 | 0.85335  | 0.981636 | chr2  | 55191871 | 55192368 | + | 0   | NA | intron (NLM1B7 LIN | -39784 NM_001133  | 6233 Hs. 311642NM_002954     | ENSG000001RPS27A    | CEP80 HEL       | ribosomal protein-coding     |
| chr2-1201 5.692638 | 0.178148 | 0.963761 | 0.184846 | 0.85335  | 0.981636 | chr2  | 1.2E+08  | 1.2E+08  | + | 0   | NA | intron (NLM1E3A LI | 53250 NM_024121   | 79134 Hs. 376722NM_024121    | ENSG000001MEM185B   | FAM11B          | transment protein-coding     |
| chr3-382 5.692638  | 0.178148 | 0.963761 | 0.184846 | 0.85335  | 0.981636 | chr3  | 38236982 | 38238608 | + | 0   | NA | intron (Nintron (N | -28017 NM_004256  | 9390 Hs. 225941NM_004256     | ENSG000001SLC22A13  | OAT10 OCI       | solute c protein-coding      |
| chr4-676 5.692638  | 0.178148 | 0.963761 | 0.184846 | 0.85335  | 0.981636 | chr4  | 67669801 | 67671033 | + | 0   | NA | intron (Nintron (N | 30738 NM_018227   | 55236 Hs. 212774NM_018227    | ENSG000001UBA6      | E1-L2 MO        | ubiquitir protein-coding     |
| chr4-886 5.692638  | 0.178148 | 0.963761 | 0.184846 | 0.85335  | 0.981636 | chr4  | 88606877 | 88608893 | + | 0   | NA | intron (Nintron (N | 15405 NM_001318   | 8916 Hs. 35804 NM_014600     | ENSG000001HERC3     | -               | HECT and protein-coding      |
| chr5-147 5.692638  | 0.178148 | 0.963761 | 0.184846 | 0.85335  | 0.981636 | chr5  | 14707939 | 14709465 | + | 0   | NA | 3' UTR (N3' UTR (N | -3992 NR_046285   | 1E+08 Hs. 660555NR_046285    | LOC100133C          | -               | uncharactncRNA               |
| chr5-3621 5.692638 | 0.178148 | 0.963761 | 0.184846 | 0.85335  | 0.981636 | chr5  | 36219993 | 36220945 | + | 0   | NA | intron (Nintron (N | 20922 NM_001287   | 133686 Hs. 81907 NM_153013   | ENSG000001NADR2     | C5orf33 I       | NAD kinase protein-coding    |
| chr6-422 5.692638  | 0.178148 | 0.963761 | 0.184846 | 0.85335  | 0.981636 | chr6  | 42263938 | 42264747 | + | 0   | NA | intron (Nintron (N | -46481 NM_018141  | 55173 Hs. 380887NM_018141    | ENSG000001MRP510    | MRP-S10 F       | mitochonc protein-coding     |
| chr9-965 5.692638  | 0.178148 | 0.963761 | 0.184846 | 0.85335  | 0.981636 | chr9  | 96527823 | 96528244 | + | 0   | NA | intron (NLM1B3 LIN | 38798 NM_001351   | 8555 Hs. 40582 NM_003671     | ENSG000001CDC14B    | CDC14B3 C       | cell diviprotein-coding      |
| chr11-337 6.709388 | 0.165484 | 0.895363 | 0.184823 | 0.853368 | 0.981636 | chr11 | 33756135 | 33757001 | + | 0   | NA | intron (Nintron (N | 17952 NM_033406   | 26273 Hs. 406787NM_012177    | ENSG000001FBX03     | FBA FBX3        | F-box prcprotein-coding      |
| chr14-594 6.709388 | 0.165484 | 0.895363 | 0.184823 | 0.853368 | 0.981636 | chr14 | 59471533 | 59472062 | + | 0   | NA | TTS (NM_C          | -6417 NM_022571   | 64582 Hs. 647573NM_022571    | ENSG000001GPR135    | -               | HECT and protein-coding      |
| chr18-48 6.709388  | 0.165484 | 0.895363 | 0.184823 | 0.853368 | 0.981636 | chr18 | 48619544 | 48620467 | + | 0   | NA | intron (Nintron (N | -50595 NR_039897  | 1.01E+08 NR_039897           | ENSG000001MIR4743   | -               | microRNA ncRNA               |
| chr2-739 6.709388  | 0.165484 | 0.895363 | 0.184823 | 0.853368 | 0.981636 | chr2  | 73932813 | 73933096 | + | 0   | NA | intron (Nintron (N | 6074 NR_134898    | 1716 Hs. 469022NM_001925     | ENSG000001DGUOK     | MTDPS3 N        | Cdeoxyguar protein-coding    |
| chr3-393 6.709388  | 0.165484 | 0.895363 | 0.184823 | 0.853368 | 0.981636 | chr3  | 39392872 | 39394533 | + | 0   | NA | intron (NALuS6 SI  | 10332 NM_017875   | 54977 Hs. 369619NM_017875    | ENSG000001SLC25A38  | SIDBA2          | solute c protein-coding      |
| chr3-526 6.709388  | 0.165484 | 0.895363 | 0.184823 | 0.853368 | 0.981636 | chr3  | 52666000 | 52666712 | + | 0   | NA | intron (NALuSx1 SI | 19243 NM_001355   | 55193 Hs. 189922NM_018167    | ENSG000001PBRM1     | BAF180 P        | polybro protein-coding       |
| chr7-990 6.709388  | 0.165484 | 0.895363 | 0.184823 | 0.853368 | 0.981636 | chr7  | 99059705 | 99060308 | + | 0   | NA | intron (Nintron (N | 46841 NR_110102   | 1.02E+08 Hs. 636663NR_110102 | LOC101927           | -               | uncharactncRNA               |
| chr7-112 6.709388  | 0.165484 | 0.895363 | 0.184823 | 0.853368 | 0.981636 | chr7  | 1.13E+08 | 1.13E+08 | + | 0   | NA | intron (Nintron (N | 25137 NM_152556   | 154743 Hs. 489734NM_152556   | ENSG000001CBMT2     | C7orf60 S       | base metf protein-coding     |
| chr8-127 6.709388  | 0.165484 | 0.895363 | 0.184823 | 0.853368 | 0.981636 | chr8  | 1.28E+08 | 1.28E+08 | + | 0   | NA | intron (Nintron (N | -17801 NR_031611  | 1E+08 NR_031611              | ENSG000001MIR1206   | MIRN1206        | microRNA ncRNA               |
| chr9-363 6.709388  | 0.165484 | 0.895363 | 0.184823 | 0.853368 | 0.981636 | chr9  | 36352102 | 36352733 | + | 0   | NA | intron (Nintron (N | 47852 NM_194325   | 152006 Hs. 333503NM_022781   | ENSG000001RNF38     | -               | ring fingprotein-coding      |
| chr9-132 6.709388  | 0.165484 | 0.895363 | 0.184823 | 0.853368 | 0.981636 | chr9  | 1.33E+08 | 1.33E+08 | + | 0   | NA | intron (Nintron (N | 25187 NM_001316   | 11092 Hs. 62595 NM_018956    | ENSG000001SPACA9    | C9orf9 M        | sperm acp protein-coding     |
| chr10-89 11.64097  | -0.12853 | 0.965718 | -0.18474 | 0.853429 | 0.981636 | chr10 | 89017777 | 89018450 | + | 0   | NA | Intergeni TRI2C LI | -25138 NR_028371  | 1E+08 Hs. 244139NR_028371    | FAS-AS1             | FAS-AS1 F       | Fas antiscncRNA              |
| chr12-100 5.924569 | -0.18    | 0.974361 | -0.18474 | 0.853432 | 0.981636 | chr12 | 1E+08    | 1E+08    | + | 0   | NA | intron (Nintron (N | -22160 NM_001145  | 246213 Hs. 116871NM_139313   | ENSG000001SLC17A8   | DFNA25 V        | solute c protein-coding      |
| chr14-391 5.924569 | -0.18    | 0.974361 | -0.18474 | 0.853432 | 0.981636 | chr14 | 39137004 | 39137215 | + | 0   | NA | TTS (NM_C          | 22825 NM_003616   | 8487 Hs. 652307NM_003616     | ENSG000001GEMIN2    | SIP1 SIP1       | gem nucle protein-coding     |
| chr5-112 5.924569  | -0.18    | 0.974361 | -0.18474 | 0.853432 | 0.981636 | chr5  | 1.13E+08 | 1.13E+08 | + | 0   | NA | intron (NLM1B8 LIN | 60066 NM_001354   | 324 Hs. 158932NM_000038      | ENSG000001APC       | BTP52 DP2       | APC regul protein-coding     |
| chr18-62 8.238442  | 0.151684 | 0.821981 | 0.184534 | 0.853594 | 0.981636 | chr18 | 62264224 | 62265575 | + | 0   | NA | intron (Nintron (N | -60388 NM_001274  | 8792 Hs. 204044NM_003838     | ENSG000001NFRS11A   | CD265 F         | EC TNF regul protein-coding  |
| chr3-196 8.238442  | 0.151684 | 0.821981 | 0.184534 | 0.853594 | 0.981636 | chr3  | 1.97E+08 | 1.97E+08 | + | 0   | NA | 3' UTR (N3' UTR (N | -8240 NR_046630   | 1.01E+08 Hs. 591671NR_046630 | NCBP2-AS1           | -               | NCBP2 antncRNA               |
| chr1-742 5.188192  | 0.184986 | 1.003017 | 0.18443  | 0.853676 | 0.981636 | chr1  | 74202530 | 74203948 | + | 0   | NA | intron (NTiger 3b  | 5027 NM_001196    | 8790 Hs. 480089NM_003838     | ENSG000001PPGT      | GFPP            | fuco-1- protein-coding       |
| chr16-111 5.188192 | 0.184986 | 1.003017 | 0.18443  | 0.853676 | 0.981636 | chr16 | 11039911 | 11040393 | + | 0   | NA | intron (NALuS6 SI  | 95808 NM_015226   | 23274 Hs. 35490 NM_015226    | ENSG000001CLEC16A   | Gep-1 K1A       | C-type I protein-coding      |
| chr17-827 5.188192 | 0.184986 | 1.003017 | 0.18443  | 0.853676 | 0.981636 | chr17 | 82782231 | 82782762 | + | 0   | NA | intron (Nintron (N | 30431 NM_005993   | 6904 Hs. 464391NM_005993     | ENSG000001TBCD      | PEBAT S         | SE tubulin f protein-coding  |
| chr2-692 5.188192  | 0.184986 | 1.003017 | 0.18443  | 0.853676 | 0.981636 | chr2  | 69204236 | 69204750 | + | 0   | NA | intron (Nintron (N | 100811 NR_036073  | 1E+08 NR_036073              | ENSG000001MIR3126   | mir-3126        | microRNA ncRNA               |
| chr5-107 5.188192  | 0.184986 | 1.003017 | 0.18443  | 0.853676 | 0.981636 | chr5  | 10755012 | 10756641 | + | 0   | NA | intron (Nintron (N | 5408 NM_004394    | 1611 Hs. 75189 NM_004394     | ENSG000001CDAP      | -               | death ass protein-coding     |
| chr5-777 5.188192  | 0.184986 | 1.003017 | 0.18443  | 0.853676 | 0.981636 | chr5  | 77733034 | 77735169 | + | 0   | NA | intron (NTiger1 I  | 42238 NM_001297   | 6902 Hs. 291212NM_004607     | ENSG000001TBCA      | -               | tubulin protein-coding       |
| chrX-119 5.188192  | 0.184986 | 1.003017 | 0.18443  | 0.853676 | 0.981636 | chrX  | 1.2E+08  | 1.2E+08  | + | 0   | NA | exon (NM exon (NM  | 2785 NM_001173    | 55922 Hs. 437084NM_017544    | ENSG000001NKRF      | ITBA4 N         | RNF NFKB repr protein-coding |
| chr1-225 6.204942  | 0.170071 | 0.9231   | 0.184239 | 0.853826 | 0.981636 | chr1  | 22521748 | 22522349 | + | 0   | NA | intron (NMIRb SINE | -4144 NM_001006   | 2046 Hs. 283619NM_020526     | ENSG000001EPHA8     | EEL EK3 E       | EPH recep protein-coding     |
| chr11-182 6.204942 | 0.170071 | 0.9231   | 0.184239 | 0.853826 | 0.981636 | chr11 | 18284240 | 18285442 | + | 0</ |    |                    |                   |                              |                     |                 |                              |



|                    |         |          |          |          |          |       |          |          |        |                       |                    |                              |                          |                                                |                                   |
|--------------------|---------|----------|----------|----------|----------|-------|----------|----------|--------|-----------------------|--------------------|------------------------------|--------------------------|------------------------------------------------|-----------------------------------|
| chr10-798.6.914045 | -0.1601 | 0.874155 | -0.18315 | 0.854684 | 0.981636 | chr10 | 79811974 | 79814641 | + 0 NA | intron (N LIMB4 LIN   | -12595 NR_029407   | 642361 Hs. 164298NR_029407   | ENSG000003LOC642361-     | uncharactericnRNA                              |                                   |
| chr10-876.6.914045 | -0.1601 | 0.874155 | -0.18315 | 0.854684 | 0.981636 | chr10 | 87070422 | 87074293 | + 0 NA | intron (N LIM4 LINE   | 21730 NM_001318    | 2746 Hs. 500409NM_005271     | ENSG000003GLUD1          | GDH GDH1 glutamate protein-coding              |                                   |
| chr11-274.6.914045 | -0.1601 | 0.874155 | -0.18315 | 0.854684 | 0.981636 | chr11 | 27499871 | 27502690 | + 0 NA | intron (N intron (N   | 5489 NM_018362     | 55327 Hs. 91393 NM_018362    | ENSG000003LIN7C          | LIN-7-C lin-7 hon protein-coding               |                                   |
| chr11-436.6.914045 | -0.1601 | 0.874155 | -0.18315 | 0.854684 | 0.981636 | chr11 | 43889042 | 43893376 | + 0 NA | intron (N MRB SINE    | -6094 NR_026952    | 727999 Hs. 368929NR_026952   | ENSG000003SEC14L1P1-     | SEC14 lik pseudo                               |                                   |
| chr11-736.6.914045 | -0.1601 | 0.874155 | -0.18315 | 0.854684 | 0.981636 | chr11 | 73676434 | 73680598 | + 0 NA | intron (N AluSx SIN   | 29603 NM_00113C    | 58473 Hs. 445489NM_02120C    | ENSG000003PLEKH1         | KPL1 PHR1 plekstrin protein-coding             |                                   |
| chr11-117.6.914045 | -0.1601 | 0.874155 | -0.18315 | 0.854684 | 0.981636 | chr11 | 1.17E+08 | 1.17E+08 | + 0 NA | intron (N intron (N   | -1047 NR_037803    | 1E+08 Hs. 73630ENR_037803    | BACE1-AS                 | BACE1-AS1 BACE1 antncRNA                       |                                   |
| chr12-651.6.914045 | -0.1601 | 0.874155 | -0.18315 | 0.854684 | 0.981636 | chr12 | 6511237  | 6513220  | + 0 NA | intron (N AluYc SIN   | 2006 NR_004387     | 692148 Hs. NR_004387         | ENSG000003SCARNA10       | U85 small Ca <sub>2</sub> ncRNA                |                                   |
| chr12-295.6.914045 | -0.1601 | 0.874155 | -0.18315 | 0.854684 | 0.981636 | chr12 | 29565057 | 29566426 | + 0 NA | intron (N AluS SIN    | -66048 NR_001353   | 341350 Hs. 674588NM_183378   | ENSG000003OVCH1          | OVCH ovochymase protein-coding                 |                                   |
| chr12-48C.6.914045 | -0.1601 | 0.874155 | -0.18315 | 0.854684 | 0.981636 | chr12 | 48073685 | 48074437 | + 0 NA | intron (N Tigger4a    | -31192 NM_001354   | 5213 Hs. 75160 NM_00028E     | ENSG000003PFKM           | ATP-PFK1 phosphofr protein-coding              |                                   |
| chr12-101.6.914045 | -0.1601 | 0.874155 | -0.18315 | 0.854684 | 0.981636 | chr12 | 1.01E+08 | 1.01E+08 | + 0 NA | intron (N intron (N   | -15560 NR_049838   | 1.01E+08 Hs. NR_049838       | ENSG000003MIR548AQ       | - microRNA ncRNA                               |                                   |
| chr13-46C.6.914045 | -0.1601 | 0.874155 | -0.18315 | 0.854684 | 0.981636 | chr13 | 46008777 | 46009470 | + 0 NA | intron (N intron (N   | 43623 NM_00133C    | 23091 Hs. 136192NM_01507C    | ENSG000003CZ3H13         | KIAA0853 zinc fing protein-coding              |                                   |
| chr13-114.6.914045 | -0.1601 | 0.874155 | -0.18315 | 0.854684 | 0.981636 | chr13 | 1.14E+08 | 1.14E+08 | + 0 NA | non-codiron-codir     | -9086 NM_03243C    | 283489 Hs. 7542 NM_03243C    | ENSG000003CHAMP1         | C13orf8 chromoson protein-coding               |                                   |
| chr14-34C.6.914045 | -0.1601 | 0.874155 | -0.18315 | 0.854684 | 0.981636 | chr14 | 34612148 | 34613307 | + 0 NA | intron (N AluSx SIN   | 17421 NR_15935E    | 58533 Hs. 27652ENR_02124C    | ENSG000003SNX6           | MSTP010 sorting r protein-coding               |                                   |
| chr14-35C.6.914045 | -0.1601 | 0.874155 | -0.18315 | 0.854684 | 0.981636 | chr14 | 35081260 | 35082585 | + 0 NA | 3' UTR (N3' UTR (N    | 1071 NR_11041E     | 1.02E+08 Hs. 61713ENR_11041E | ENSG000003LOC101927-     | uncharactericnRNA                              |                                   |
| chr14-67E.6.914045 | -0.1601 | 0.874155 | -0.18315 | 0.854684 | 0.981636 | chr14 | 67658714 | 67659764 | + 0 NA | intron (N intron (N   | 15393 NM_00637C    | 10490 Hs. 741177NM_00637C    | ENSG000003VTI1B          | VTI1 VTI1 vesicle t protein-coding             |                                   |
| chr15-454.6.914045 | -0.1601 | 0.874155 | -0.18315 | 0.854684 | 0.981636 | chr15 | 45413436 | 45417673 | + 0 NA | intron (N intron (N   | 13218 NR_13664A    | 79029 Hs. 369657NM_02406C    | ENSG000003SPATA5L1       | - spermatog protein-coding                     |                                   |
| chr15-717.6.914045 | -0.1601 | 0.874155 | -0.18315 | 0.854684 | 0.981636 | chr15 | 17171483 | 17172424 | + 0 NA | intron (N intron (N   | -38601 NM_01634E   | 10002 Hs. 187354NM_01424E    | ENSG000003NR2E3          | ESCS PNR nuclear l protein-coding              |                                   |
| chr15-774.6.914045 | -0.1601 | 0.874155 | -0.18315 | 0.854684 | 0.981636 | chr15 | 77463652 | 77468627 | + 0 NA | intron (N AluSp SIN   | 45251 NM_001304    | 10363 Hs. 69594 NM_01820C    | ENSG000003HMG20A         | HMGX1 HMC high mob protein-coding              |                                   |
| chr16-89C.6.914045 | -0.1601 | 0.874155 | -0.18315 | 0.854684 | 0.981636 | chr16 | 89302422 | 89305379 | + 0 NA | intron (N intron (N   | 7772 NR_13633E     | 1.05E+08 Hs. 657381NR_13633E | ENSG000003LOC105371-     | uncharactericnRNA                              |                                   |
| chr17-17E.6.914045 | -0.1601 | 0.874155 | -0.18315 | 0.854684 | 0.981636 | chr17 | 17251019 | 17254642 | + 0 NA | intron (N intron (N   | -15662 NM_14460E   | 201163 Hs. 31652 NM_14460E   | ENSG000003FLCN           | BHD DENNE folliculiprotein-coding              |                                   |
| chr17-37E.6.914045 | -0.1601 | 0.874155 | -0.18315 | 0.854684 | 0.981636 | chr17 | 37240170 | 37247601 | + 0 NA | intron (N LMC LINE    | 2354 NR_13277E     | 0.07E+08 NR_13277E           | SNORA90                  | - small nucsnRNA                               |                                   |
| chr17-401.6.914045 | -0.1601 | 0.874155 | -0.18315 | 0.854684 | 0.981636 | chr17 | 40146031 | 40147003 | + 0 NA | intron (N AluSx3 SI   | 5980 NM_00735E     | 22794 Hs. 743287NM_00735E    | ENSG000003CASC3          | BTZ MLN51 CASC3 excp protein-coding            |                                   |
| chr17-49C.6.914045 | -0.1601 | 0.874155 | -0.18315 | 0.854684 | 0.981636 | chr17 | 49052434 | 49053383 | + 0 NA | 3' UTR (N3' UTR (N    | 55233 NM_00116E    | 10642 Hs. 14493ENR_00654E    | ENSG000003IGF2BP1        | CRD-BP CF insulin l protein-coding             |                                   |
| chr17-62E.6.914045 | -0.1601 | 0.874155 | -0.18315 | 0.854684 | 0.981636 | chr17 | 62608487 | 62614637 | + 0 NA | intron (N LMC1 LIN    | -16108 NM_00603E   | 9902 Hs. 7835 NM_00603E      | ENSG000003MRC2           | CD280 CLEmannose l protein-coding              |                                   |
| chr19-32C.6.914045 | -0.1601 | 0.874155 | -0.18315 | 0.854684 | 0.981636 | chr19 | 32356854 | 32363323 | + 0 NA | intron (N intron (N   | 14478 NM_01491C    | 22847 Hs. 205392NM_01491C    | ENSG000003ZNF507         | - zinc fing protein-coding                     |                                   |
| chr2-173C.6.914045 | -0.1601 | 0.874155 | -0.18315 | 0.854684 | 0.981636 | chr2  | 1735018  | 1735585  | + 0 NA | intron (N Tigger1 I   | 9214 NM_01229E     | 7837 Hs. 332197NM_01229E     | ENSG000003PXD            | ASG7 COF peroxidase protein-coding             |                                   |
| chr2-156E.6.914045 | -0.1601 | 0.874155 | -0.18315 | 0.854684 | 0.981636 | chr2  | 15609001 | 15610841 | + 0 NA | intron (N intron (N   | 18053 NM_00449E    | 1653 Hs. 440599NM_00449E     | ENSG000003DDX1           | DBP-RB UBI DEAD-box protein-coding             |                                   |
| chr2-276C.6.914045 | -0.1601 | 0.874155 | -0.18315 | 0.854684 | 0.981636 | chr2  | 27605463 | 27606027 | + 0 NA | intron (N AluS6 SI    | 22703 NM_03243A    | 84450 Hs. 52917ENR_03243A    | ENSG000003ZNF512         | - zinc fing protein-coding                     |                                   |
| chr2-613E.6.914045 | -0.1601 | 0.874155 | -0.18315 | 0.854684 | 0.981636 | chr2  | 61381598 | 61382702 | + 0 NA | intron (N L2a LINE    | 35227 NR_003707    | 1E+08 Hs. 67582ENR_003707    | ENSG000003SNORA70B       | - small nucsnRNA                               |                                   |
| chr2-993C.6.914045 | -0.1601 | 0.874155 | -0.18315 | 0.854684 | 0.981636 | chr2  | 99392933 | 99397170 | + 0 NA | intron (N intron (N   | 57622 NM_015904    | 9669 Hs. 158688NM_015904     | ENSG000003EIF5B          | IF2 eukaryot protein-coding                    |                                   |
| chr2-127E.6.914045 | -0.1601 | 0.874155 | -0.18315 | 0.854684 | 0.981636 | chr2  | 1.27E+08 | 1.27E+08 | + 0 NA | intron (N HAL1 LINE   | 16316 NM_001303    | 2071 Hs. 46987ENR_00012E     | ENSG000003ERCC3          | BTf2 GTF2 ERCC exciprotein-coding              |                                   |
| chr2-234C.6.914045 | -0.1601 | 0.874155 | -0.18315 | 0.854684 | 0.981636 | chr2  | 2.35E+08 | 2.35E+08 | + 0 NA | intron (N intron (N   | 11545 NM_001371305 | 25666 NM_00131E              | 1434 Hs. 90073 NM_00131E | ENSG000003CE1L                                 | CAS CSE1 chromoson protein-coding |
| chr20-49C.6.914045 | -0.1601 | 0.874155 | -0.18315 | 0.854684 | 0.981636 | chr20 | 49071555 | 49072402 | + 0 NA | TTS (NM_C TTS (NM_C   | 39968 NM_00135C    | 27352 Hs. 474914NM_01570E    | ENSG000003SGSM3          | CIP85 MAF small G <sub>1</sub> protein-coding  |                                   |
| chr3-162E.6.914045 | -0.1601 | 0.874155 | -0.18315 | 0.854684 | 0.981636 | chr3  | 16258974 | 16260812 | + 0 NA | 3' UTR (N3' UTR (N    | 5050 NM_001047     | 285381 Hs. 388087NM_206831   | ENSG000003DPH3           | DELGIP DE diphthamiprotein-coding              |                                   |
| chr3-4734.6.914045 | -0.1601 | 0.874155 | -0.18315 | 0.854684 | 0.981636 | chr3  | 47344234 | 47345720 | + 0 NA | 3' UTR (N3' UTR (N    | -36044 NM_01546E   | 25930 Hs. 25524 NM_01546E    | ENSG000003PTPN23         | HD-PTP HE protein t protein-coding             |                                   |
| chr3-525E.6.914045 | -0.1601 | 0.874155 | -0.18315 | 0.854684 | 0.981636 | chr3  | 52553792 | 52555097 | + 0 NA | intron (N intron (N   | 17839 NM_001124    | 440957 Hs. 660577NM_001124   | ENSG000003SMIM4          | C3orf78 small int protein-coding               |                                   |
| chr3-6411.6.914045 | -0.1601 | 0.874155 | -0.18315 | 0.854684 | 0.981636 | chr3  | 64114373 | 64115595 | + 0 NA | intron (N LIPA13 LI   | 11514 NR_046701    | 1.01E+08 Hs. 668874NR_046701 | PRICKLE2-                | PRICKLE2 ncRNA                                 |                                   |
| chr3-136E.6.914045 | -0.1601 | 0.874155 | -0.18315 | 0.854684 | 0.981636 | chr3  | 1.37E+08 | 1.37E+08 | + 0 NA | intron (N THE1B LTL   | 11403 NM_00615E    | 4690 Hs. 12688ENR_00615E     | ENSG000003CNCK1          | NCK NCKA NCK adapt protein-coding              |                                   |
| chr3-154E.6.914045 | -0.1601 | 0.874155 | -0.18315 | 0.854684 | 0.981636 | chr3  | 1.54E+08 | 1.54E+08 | + 0 NA | intron (N intron (N   | 26452 NM_02086E    | 170506 Hs. 446277NM_02086E   | ENSG000003DHX36          | DDX36 G4F DEAH-box protein-coding              |                                   |
| chr3-195E.6.914045 | -0.1601 | 0.874155 | -0.18315 | 0.854684 | 0.981636 | chr3  | 1.95E+08 | 1.95E+08 | + 0 NA | intron (N AluY SINE   | -22983 NM_152531   | 152002 Hs. 478741NM_152531   | ENSG000003XXYL1T         | C3orf21 xyloseid protein-coding                |                                   |
| chr4-423C.6.914045 | -0.1601 | 0.874155 | -0.18315 | 0.854684 | 0.981636 | chr4  | 4236407  | 4231229  | + 0 NA | intron (N AluJb SIN   | 9405 NM_001297     | 85013 Hs. 12845 NM_032927    | ENSG000003TMEM128        | - transmemt protein-coding                     |                                   |
| chr4-2674.6.914045 | -0.1601 | 0.874155 | -0.18315 | 0.854684 | 0.981636 | chr4  | 26743534 | 26744503 | + 0 NA | intron (N intron (N   | 116226 NR_13467E   | 1.05E+08 Hs. 54885ENR_13467E | STIM2-AS1                | STIM2 antncRNA                                 |                                   |
| chr4-526E.6.914045 | -0.1601 | 0.874155 | -0.18315 | 0.854684 | 0.981636 | chr4  | 52600209 | 52602405 | + 0 NA | intron (N intron (N   | 55322 NM_001134    | 64854 Hs. 7966 NM_02283E     | ENSG000003USP46          | - ubiquitin protein-coding                     |                                   |
| chr4-106E.6.914045 | -0.1601 | 0.874155 | -0.18315 | 0.854684 | 0.981636 | chr4  | 1.06E+08 | 1.06E+08 | + 0 NA | intron (N AluSx SIN   | -21372 NM_00114E   | 9255 Hs. 59168CNR_00475E     | ENSG000003AIMP1          | EMAP2 EM2 aminoacyl protein-coding             |                                   |
| chr5-545E.6.914045 | -0.1601 | 0.874155 | -0.18315 | 0.854684 | 0.981636 | chr5  | 5459418  | 5462247  | + 0 NA | exon (NM exon (NM     | 38155 NM_01532E    | 23379 Hs. 44929ENR_01532E    | ENSG000003ICE1           | KIAA0947 interact protein-coding               |                                   |
| chr5-432E.6.914045 | -0.1601 | 0.874155 | -0.18315 | 0.854684 | 0.981636 | chr5  | 43293325 | 43294770 | + 0 NA | intron (N intron (N   | 19134 NM_001324    | 3157 Hs. 39772ENR_00213C     | ENSG000003HMGCS1         | HMGCS3 3-hydroxy protein-coding                |                                   |
| chr5-695E.6.914045 | -0.1601 | 0.874155 | -0.18315 | 0.854684 | 0.981636 | chr5  | 69569919 | 69574195 | + 0 NA | intron (N Kalgac I    | 11812 NM_00109E    | 728340 Hs. 19135ENR_00109E   | ENSG000003GTF2H2C        | GTF2H2C_2 GTF2H2 f <sub>2</sub> protein-coding |                                   |
| chr5-7231.6.914045 | -0.1601 | 0.874155 | -0.18315 | 0.854684 | 0.981636 | chr5  | 72311352 | 72312013 | + 0 NA | intron (N MSTC LTR    | 8558 NM_00128E     | 23107 Hs. 482491NM_01508A    | ENSG000003MRP527         | MRP-527 Smi tohcon protein-coding              |                                   |
| chr5-135E.6.914045 | -0.1601 | 0.874155 | -0.18315 | 0.854684 | 0.981636 | chr5  | 1.35E+08 | 1.35E+08 | + 0 NA | intron (N MRc SINE    | 12175 NM_13860E    | 9555 Hs. 42027ENR_00489E     | ENSG000003H2AFY          | H2A, y H2B H2A haso protein-coding             |                                   |
| chr5-176A.6.914045 | -0.1601 | 0.874155 | -0.18315 | 0.854684 | 0.981636 | chr5  | 1.76E+08 | 1.76E+08 | + 0 NA | intron (N AluSx1 SI   | 39718 NM_01461E    | 23197 Hs. 48424ENR_01461E    | ENSG000003FAF2           | ETEA UBX1 Fas assoc protein-coding             |                                   |
| chr5-180A.6.914045 | -0.1601 | 0.874155 | -0.18315 | 0.854684 | 0.981636 | chr5  | 1.81E+08 | 1.81E+08 | + 0 NA | exon (NM exon (NM     | 24310 NM_00137C    | 57472 Hs. 60838CNR_01545E    | ENSG000003CNOT6          | CCR4 CCR4-NOT protein-coding                   |                                   |
| chr6-282E.6.914045 | -0.1601 | 0.874155 | -0.18315 | 0.854684 | 0.981636 | chr6  | 28272361 | 28274047 | + 0 NA | intron (N AluJo SIN</ |                    |                              |                          |                                                |                                   |

|           |          |          |          |          |          |          |       |          |           |       |           |       |                                    |         |              |          |                                        |                               |                |                     |                |                |
|-----------|----------|----------|----------|----------|----------|----------|-------|----------|-----------|-------|-----------|-------|------------------------------------|---------|--------------|----------|----------------------------------------|-------------------------------|----------------|---------------------|----------------|----------------|
| chr15-925 | 12.62258 | -0.1206  | 0.663541 | -0.18175 | 0.855782 | 0.981636 | chr15 | 92931351 | 92959875  | +     | 0         | NA    | intron (AluXs1 SI                  | 41214   | NR_036136    | 1E+08    | NR_036136 ENSG000003MIR3175            | mir-3175                      | microRNA       | ncRNA               |                |                |
| chr18-494 | 12.62258 | -0.1206  | 0.663541 | -0.18175 | 0.855782 | 0.981636 | chr18 | 49487821 | 49491602  | +     | 0         | NA    | promoter-promoter-                 | -387    | NR_003701    | 1E+08    | NR_003701                              | SNORD58C                      | U58            | small               | nucsnRNA       |                |
| chr20-357 | 12.62258 | -0.1206  | 0.663541 | -0.18175 | 0.855782 | 0.981636 | chr20 | 35703073 | 35740984  | +     | 0         | NA    | intron (LIMB4 LIN                  | 20232   | NR_040723    | 9584     | Hs.282901NM_004902 ENSG000003CRBM39    | CAPER CAF                     | RNA            | bindiprotein-coding |                |                |
| chr8-1308 | 12.62258 | -0.1206  | 0.663541 | -0.18175 | 0.855782 | 0.981636 | chr8  | 13082998 | 13105246  | +     | 0         | NA    | intron (Nintron (N                 | 22122   | NM_001164    | 10395    | Hs.134229NM_006094 ENSG000003DLCL1     | ARHGAP7 DLCL1                 | R30            | protein-coding      |                |                |
| chr16-224 | 13.57878 | -0.11728 | 0.64577  | -0.18162 | 0.855881 | 0.981636 | chr16 | 22502649 | 22462848  | +     | 0         | NA    | intron (AluSc SIN                  | -25033  | NR_027460    | 1E+08    | Hs.709576NR_027460                     | RRN3P3                        | RRN3           | homo                | pseudo         |                |
| chr11-741 | 8.709606 | 0.145949 | 0.804304 | 0.18146  | 0.856006 | 0.981636 | chr11 | 74166528 | 74168236  | +     | 0         | NA    | intron (Nintron (N                 | 3620    | NM_015531    | 26005    | Hs.557938NM_015531 ENSG000003CC2CD3    | OFD14                         | C2             | domain              | protein-coding |                |
| chr7-356  | 13.13304 | -0.11976 | 0.660191 | -0.1814  | 0.856053 | 0.981636 | chr7  | 35664700 | 35666557  | +     | 0         | NA    | intron (NLI P45 LIN                | 29507   | NM_0022373   | 64224    | Hs.743051NM_0022373 ENSG000003HERPUD2  | HERPUD2                       | HERPUD2        | protein-coding      |                |                |
| chr17-615 | 7.741854 | 0.152419 | 0.840924 | 0.181251 | 0.85617  | 0.981636 | chr17 | 61909238 | 61910228  | +     | 0         | NA    | intron (NLI P44 LIN                | 18249   | NM_020748    | 57508    | Hs.269646NM_020748 ENSG000003INTS2     | INT2 KIAA                     | integrated     | protein-coding      |                |                |
| chr19-277 | 5.95785  | -0.17449 | 0.963518 | -0.18109 | 0.856294 | 0.981636 | chr19 | 2777487  | 2778052   | +     | 0         | NA    | intron (AluXs1 SI                  | 5504    | NM_003021    | 6449     | Hs.20391CNM_003021 ENSG000003SGTA      | SGT alpha                     | small          | glt                 | protein-coding |                |
| chr1-200  | 6.725104 | 0.161092 | 0.890422 | 0.180917 | 0.856433 | 0.981636 | chr1  | 2.01E+08 | 2.01E+08  | +     | 0         | NA    | intron (NMER58B DN                 | 10424   | NM_001320C   | 83479    | Hs.183983NM_001320C ENSG000003DDX59    | DDX59                         | DDX59          | protein-coding      |                |                |
| chr13-111 | 6.725104 | 0.161092 | 0.890422 | 0.180917 | 0.856433 | 0.981636 | chr13 | 1.11E+08 | 1.11E+08  | +     | 0         | NA    | exon (NM exon (NM                  | -29960  | NM_001320C   | 121793   | Hs.210677NM_001320C ENSG000003TEX29    | TEX29                         | TEX29          | protein-coding      |                |                |
| chr2-2194 | 6.725104 | 0.161092 | 0.890422 | 0.180917 | 0.856433 | 0.981636 | chr2  | 2.19E+08 | 2.19E+08  | +     | 0         | NA    | exon (NM exon (NM                  | -12446  | NM_001177C   | 10290    | Hs.21639                               | NM_005876 ENSG000003SPEG      | SPEG           | APEG-1 AF           | striated       | protein-coding |
| chr19-153 | 8.197302 | 0.15003  | 0.829585 | 0.18085  | 0.856485 | 0.981636 | chr19 | 15341803 | 15342058  | +     | 0         | NA    | Intergeni MER58B DN                | -9391   | NM_001330C   | 23476    | Hs.187763NM_014299 ENSG000003BRD4      | BRD4                          | HUNK bromodome | protein-coding      |                |                |
| chr1-4601 | 5.708354 | 0.173069 | 0.957167 | 0.180814 | 0.856514 | 0.981636 | chr1  | 46010400 | 46011322  | +     | 0         | NA    | exon (NM exon (NM                  | 119780  | NM_001328C   | 8503     | Hs.655387NM_003625 ENSG000003PIK3R3    | PIK3R3                        | p55            | phosphor            | protein-coding |                |
| chr1-2238 | 5.708354 | 0.173069 | 0.957167 | 0.180814 | 0.856514 | 0.981636 | chr1  | 2.24E+08 | 2.24E+08  | +     | 0         | NA    | intron (AluXs1 SI                  | 27367   | NM_001031    | 7159     | Hs.523968NM_005422 ENSG000003TP53BP2   | TP53BP2                       | ASF            | trans               | protein-coding |                |
| chr10-738 | 5.708354 | 0.173069 | 0.957167 | 0.180814 | 0.856514 | 0.981636 | chr10 | 73813638 | 73814622  | +     | 0         | NA    | non-codirnon-codir                 | -2310   | NR_160743    | 8509     | Hs.654758NM_003633 ENSG000003NDST2     | NDST2                         | HSST2 N-F-N    | deacetyl            | protein-coding |                |
| chr10-115 | 5.708354 | 0.173069 | 0.957167 | 0.180814 | 0.856514 | 0.981636 | chr10 | 1.1E+08  | 1.1E+08   | +     | 0         | NA    | intron (Nintron (N                 | -94658  | NR_038943    | 1.01E+08 | Hs.604103NR_038943                     | ADD3-AS1                      | ADD3           | ant                 | ncRNA          |                |
| chr15-225 | 5.708354 | 0.173069 | 0.957167 | 0.180814 | 0.856514 | 0.981636 | chr15 | 22571357 | 22572044  | +     | 0         | NA    | intron (Nintron (N                 | 46154   | NM_001282C   | 653073   | Hs.574257NM_001282C ENSG000003GOLGA8J  | GOLGA8J                       | golgin         | A8                  | protein-coding |                |
| chr15-412 | 5.708354 | 0.173069 | 0.957167 | 0.180814 | 0.856514 | 0.981636 | chr15 | 41276520 | 41277390  | +     | 0         | NA    | intron (NMLT1 L LTF                | -7035   | NR_152822    | 729082   | Hs.380164NR_026757 ENSG000003OIP5-AS1  | OIP5-AS1                      | cyrano li      | OIP5                | ant            | ncRNA          |
| chr15-851 | 5.708354 | 0.173069 | 0.957167 | 0.180814 | 0.856514 | 0.981636 | chr15 | 85116840 | 85118431  | +     | 0         | NA    | intron (Nintron (N                 | 117146  | NR_158175    | 1.02E+08 | Hs.681665NR_158175                     | LOC101929C                    | golgin         | A2                  | pseudo         |                |
| chr17-656 | 5.708354 | 0.173069 | 0.957167 | 0.180814 | 0.856514 | 0.981636 | chr17 | 6580848  | 6582410   | +     | 0         | NA    | intron (NLI MC4a LI                | -25074  | NR_001166    | 83394    | Hs.183983NM_031222 ENSG000003PITPNM3   | PITPNM3                       | ACKR6 COF      | PITPNM              | protein-coding |                |
| chr18-764 | 5.708354 | 0.173069 | 0.957167 | 0.180814 | 0.856514 | 0.981636 | chr18 | 76432562 | 76434311  | +     | 0         | NA    | intron (Nintron (N                 | -58216  | NR_136504    | 1.02E+08 | Hs.665188NR_136504 ENSG000003LOC101927 | LOC101927                     | uncharact      | ncRNA               |                |                |
| chr4-8484 | 5.708354 | 0.173069 | 0.957167 | 0.180814 | 0.856514 | 0.981636 | chr4  | 84848183 | 84850003  | +     | 0         | NA    | intron (NHAL1 LINE                 | -116523 | NR_152774    | 404201   | Hs.46730                               | NM_205857 ENSG000003WDFY3-AS2 | C4orf12 WDFY3  | ant                 | ncRNA          |                |
| chr8-224C | 5.708354 | 0.173069 | 0.957167 | 0.180814 | 0.856514 | 0.981636 | chr8  | 22404938 | 22406144  | +     | 0         | NA    | intron (Nintron (N                 | 12705   | NM_001351    | 23516    | Hs.491232NM_015355 ENSG000003SLC39A14  | SLC39A14                      | HCIN ZMNL      | solute              | protein-coding |                |
| chr9-1298 | 5.708354 | 0.173069 | 0.957167 | 0.180814 | 0.856514 | 0.981636 | chr9  | 1.3E+08  | 1.3E+08   | +     | 0         | NA    | intron (Nintron (N                 | 9847    | NM_000113    | 1861     | Hs.534312NM_000113 ENSG000003TOR1A     | TOR1A                         | DQ2 DYT1       | torsin              | protein-coding |                |
| chr9-137  | 5.708354 | 0.173069 | 0.957167 | 0.180814 | 0.856514 | 0.981636 | chr9  | 1.37E+08 | 1.37E+08  | +     | 0         | NA    | intron (Nintron (N                 | 11318   | NR_045720C   | 11253    | Hs.279881NM_016215 ENSG000003MAN1B1    | MAN1B1                        | ERMAN EF       | mannosid            | protein-coding |                |
| chrX-4118 | 5.708354 | 0.173069 | 0.957167 | 0.180814 | 0.856514 | 0.981636 | chrX  | 4118235  | 41191362  | +     | 0         | NA    | intron (Nintron (N                 | -85941  | NR_135611    | 1.05E+08 | Hs.546115NR_135611 ENSG000003LINC02601 | LINC02601                     | long           | int                 | ncRNA          |                |
| chrX-1185 | 5.708354 | 0.173069 | 0.957167 | 0.180814 | 0.856514 | 0.981636 | chrX  | 1.18E+08 | 1.18E+08  | +     | 0         | NA    | intron (Nigger15e                  | 13096   | NR_03168E    | 1E+08    | NR_03168E ENSG000003MIR1277            | MIR1277                       | microRNA       | ncRNA               |                |                |
| chr1-664  | 6.452589 | -0.1644  | 0.909524 | -0.18075 | 0.856561 | 0.981636 | chr1  | 6643885  | 6645466   | +     | 0         | NA    | intron (Nintron (N                 | 19525   | NM_001199E   | 90326    | Hs.689006NM_138355 ENSG000003THAP3     | THAP3                         | THAP           | dome                | protein-coding |                |
| chr1-151  | 6.452589 | -0.1644  | 0.909524 | -0.18075 | 0.856561 | 0.981636 | chr1  | 1.52E+08 | 1.52E+08  | +     | 0         | NA    | intron (NMSTAI1 LTF                | 48739   | NM_001172    | 11189    | Hs.26047                               | NR_00718E ENSG000003CELF3     | CELF3          | BRUNOL1 CCUGBP      | EL             | protein-coding |
| chr10-332 | 6.452589 | -0.1644  | 0.909524 | -0.18075 | 0.856561 | 0.981636 | chr10 | 33224705 | 33225836  | +     | 0         | NA    | intron (Nintron (N                 | -108463 | NR_160030C   | 1.02E+08 | NR_160030                              | IATPR                         | TCONS_00C      | ITGB1               | ad             | ncRNA          |
| chr11-74  | 6.452589 | -0.1644  | 0.909524 | -0.18075 | 0.856561 | 0.981636 | chr11 | 74887474 | 74888716  | +     | 0         | NA    | intron (NLI P44 LIN                | 60996   | NM_001277C   | 143570   | Hs.370145NM_182966 ENSG000003XRR1A     | XRR1A                         | X              | ray                 | protein-coding |                |
| chr13-197 | 6.452589 | -0.1644  | 0.909524 | -0.18075 | 0.856561 | 0.981636 | chr13 | 19734597 | 19735355  | +     | 0         | NA    | intron (NLI P45 LIN                | 47969   | NM_001354    | 52695    | Hs.213198NM_001042 ENSG000003PSPC1     | PSPC1                         | PSP1           | parasac             | protein-coding |                |
| chr13-215 | 6.452589 | -0.1644  | 0.909524 | -0.18075 | 0.856561 | 0.981636 | chr13 | 21385442 | 21386454  | +     | 0         | NA    | intron (NLI MEc LIN                | -41089  | NR_103841    | 1.01E+08 | Hs.659199NR_103840                     | LINC0053E                     | LINC00422      | long                | int            | ncRNA          |
| chr14-505 | 6.452589 | -0.1644  | 0.909524 | -0.18075 | 0.856561 | 0.981636 | chr14 | 50932297 | 50933131  | +     | 0         | NA    | intron (NMLT1M LTF                 | 11769   | NM_002862C   | 5836     | Hs.282417NM_002862 ENSG000003PYGL      | PYGL                          | GSD6           | glycogen            | protein-coding |                |
| chr19-586 | 6.452589 | -0.1644  | 0.909524 | -0.18075 | 0.856561 | 0.981636 | chr19 | 58583117 | 58583928  | +     | 0         | NA    | non-codirnon-codir                 | 8123    | NR_026052    | 65996    | Hs.541177NM_023939 ENSG000003CENPBD1P1 | CENPBD1P1                     | CENPB          | DN                  | pseudo         |                |
| chr2-369  | 6.452589 | -0.1644  | 0.909524 | -0.18075 | 0.856561 | 0.981636 | chr2  | 36998970 | 37002138  | +     | 0         | NA    | intron (Nintron (N                 | -34018  | NR_003162    | 6801     | Hs.127488NM_003162 ENSG000003STRN      | STRN                          | PPP2R6A S      | striatin            | protein-coding |                |
| chr3-117  | 6.452589 | -0.1644  | 0.909524 | -0.18075 | 0.856561 | 0.981636 | chr3  | 11798317 | 11799613  | +     | 0         | NA    | intron (NAluJo SIN                 | 47920   | NM_001321    | 132001   | Hs.475472NM_138807 ENSG000003TAMM41    | TAMM41                        | C3orf31 F      | TAMM41              | mit            | protein-coding |
| chr4-183  | 6.452589 | -0.1644  | 0.909524 | -0.18075 | 0.856561 | 0.981636 | chr4  | 1.84E+08 | 1.84E+08  | +     | 0         | NA    | intron (Nintron (N                 | 10627   | NM_152682    | 201965   | Hs.133337NM_152682 ENSG000003RWDMA     | RWDMA                         | FAM28A RW      | RWD                 | doma           | protein-coding |
| chr5-370  | 6.452589 | -0.1644  | 0.909524 | -0.18075 | 0.856561 | 0.981636 | chr5  | 37078950 | 37079721  | +     | 0         | NA    | Intergeni LIPA11 LI                | -169711 | NR_134263    | 1.05E+08 | Hs.170999NR_134263 ENSG000003LOC105374 | LOC105374                     | uncharact      | ncRNA               |                |                |
| chr6-153  | 6.452589 | -0.1644  | 0.909524 | -0.18075 | 0.856561 | 0.981636 | chr6  | 1.53E+08 | 1.53E+08  | +     | 0         | NA    | intron (Nintron (N                 | -40581  | NM_001301    | 54516    | Hs.225833NM_019041 ENSG000003MTRF1L    | MTRF1L                        | MMF            | mitochon            | protein-coding |                |
| chr7-152  | 6.452589 | -0.1644  | 0.909524 | -0.18075 | 0.856561 | 0.981636 | chr7  | 1.52E+08 | 1.52E+08  | +     | 0         | NA    | intron (Nintron (N                 | 150662  | NM_001371474 | 159090   | Hs.404706NM_145284 ENSG000003FAM122B   | FAM122B                       | SPACIA2        | family              | wi             | protein-coding |
| chrX-1347 | 6.452589 | -0.1644  | 0.909524 | -0.18075 | 0.856561 | 0.981636 | chrX  | 9333     | NR_145284 | 39998 | NR_017646 | 54802 | Hs.356554NM_017646 ENSG000003TRIT1 | TRIT1   | COXP235 C    | RNA      | iso                                    | protein-coding                |                |                     |                |                |
| chr1-3984 | 7.367644 | -0.15462 | 0.855641 | -0.18071 | 0.856596 | 0.981636 | chr1  | 39843135 | 39843878  | +     | 0         | NA    | intron (Nintron (N                 | 2693    | NM_001330C   | 9921     | Hs.442798NM_014868 ENSG000003RNF10     | RNF10                         | RIE2           | ring                | protein-coding |                |
| chr13-427 | 7.367644 | -0.15462 | 0.855641 | -0.18071 | 0.856596 | 0.981636 | chr13 | 4053721  | 40754076  | +     | 0         | NA    | intron (Nintron (N                 | 17292   | NM_005830C   | 10240    | Hs.596607NM_005830C ENSG000003MRP53    | MRP53                         | IMOGN38 mi     | tochon              | protein-coding |                |
| chr5-103  | 7.367644 | -0.15462 | 0.855641 | -0.18071 | 0.856596 | 0.981636 | chr5  | 10381430 | 10382702  | +     | 0         | NA    | intron (Nintron (N                 | -20298  | NR_162106    | 1.13E+08 | NR_162106                              | MIR10397                      | microRNA       | ncRNA               |                |                |
| chr5-323  | 7.367644 | -0.15462 | 0.855641 | -0.18071 | 0.856596 | 0.981636 | chr5  | 32381945 | 32383759  | +     | 0         | NA    | intron (Nintron (N                 | 11623   | NR_030305    | 693164   | NR_030305 ENSG000003MIR579             | MIR579                        | MIRN579        | mi                  | ncRNA          |                |
| chr6-9954 | 7.367644 | -0.15462 | 0.855641 | -0.18071 | 0.856596 | 0.981636 | chr6  | 99544956 | 99545484  | +     | 0         | NA    | exon (NM exon (NM                  | 23440   | NM_005199C   | 892      | Hs.430646NM_005199C ENSG000003CCNC     | CCNC                          | CycC SRB1      | cyclin              | C              | protein-coding |
| chr6-1587 | 7.367644 | -0.15462 | 0.855641 | -0.18071 | 0.856596 | 0.981636 | chr6  | 1.59E+08 | 1.59E+08  | +     | 0         | NA</  |                                    |         |              |          |                                        |                               |                |                     |                |                |



|           |           |          |          |          |          |          |       |           |           |   |   |    |                     |        |           |          |                    |                     |                     |                  |                |                |                |
|-----------|-----------|----------|----------|----------|----------|----------|-------|-----------|-----------|---|---|----|---------------------|--------|-----------|----------|--------------------|---------------------|---------------------|------------------|----------------|----------------|----------------|
| chr10-305 | 7.18841   | 0.155467 | 0.867697 | 0.179172 | 0.857803 | 0.981636 | chr10 | 30993940  | 30994669  | + | 0 | NA | intron (NMSTC LTR)  | 5213   | NM_001143 | 220929   | Hs.660642NM_182755 | ENSG000002ZNF438    | ba330011.zinc       | finger           | protein-coding |                |                |
| chr12-123 | 7.18841   | 0.155467 | 0.867697 | 0.179172 | 0.857803 | 0.981636 | chr12 | 1.24E+08  | 1.24E+08  | + | 0 | NA | 3' UTR (3' UTR (N   | 35072  | NM_001304 | 10335    | Hs.114111NM_02514C | ENSG000002CCDC92    | -                   | coiled-coil      | protein-coding |                |                |
| chr14-105 | 7.18841   | 0.155467 | 0.867697 | 0.179172 | 0.857803 | 0.981636 | chr14 | 1.05E+08  | 1.05E+08  | + | 0 | NA | 3' UTR (3' UTR (N   | 10031  | NM_017955 | 55038    | Hs.34045           | NM_017955           | ENSG000002CDCA4     | HEPP SEI-cell    | divi           | protein-coding |                |
| chr19-114 | 7.18841   | 0.155467 | 0.867697 | 0.179172 | 0.857803 | 0.981636 | chr19 | 1.1442778 | 1.1443219 | + | 0 | NA | intron (NAluX1 S1   | -7216  | NM_001302 | 115948   | Hs.12401C          | NM_145045           | ENSG000002CCDC151   | CILD30           | coiled-coil    | protein-coding |                |
| chr3-137  | 7.18841   | 0.155467 | 0.867697 | 0.179172 | 0.857803 | 0.981636 | chr3  | 1.14E+08  | 1.14E+08  | + | 0 | NA | intron (NLM1E2z L1  | -45872 | NM_017577 | 54762    | Hs.24583           | NM_017577           | ENSG000002GRAMD1C   | -                | GRAM dom       | protein-coding |                |
| chr5-8857 | 7.18841   | 0.155467 | 0.867697 | 0.179172 | 0.857803 | 0.981636 | chr5  | 885706    | 886089    | + | 0 | NA | intron (Nintron (N  | 6625   | NR_134296 | 65980    | Hs.449275NM_023924 | ENSG000002BRD9      | LAVS3040 bromodome  | protein-coding   |                |                |                |
| chr10-611 | 6.955185  | -0.15733 | 0.878961 | -0.17899 | 0.857943 | 0.981636 | chr10 | 61978986  | 61979702  | + | 0 | NA | intron (Nintron (N  | -70013 | NM_001244 | 84159    | Hs.535297NM_032199 | ENSG000002ARID5B    | DESRT MRAT-rich     | protein-coding   |                |                |                |
| chr11-111 | 6.955185  | -0.15733 | 0.878961 | -0.17899 | 0.857943 | 0.981636 | chr11 | 1.12E+08  | 1.12E+08  | + | 0 | NA | TTS (NM_1TTS (NM_1  | 40150  | NM_002716 | 5519     | Hs.269125NM_002716 | ENSG000002PPP2R1B   | PP2A BET-AT-rich    | protein-coding   |                |                |                |
| chr17-365 | 6.955185  | -0.15733 | 0.878961 | -0.17899 | 0.857943 | 0.981636 | chr17 | 36574358  | 36575905  | + | 0 | NA | intron (Nintron (N  | -16748 | NM_024308 | 79154    | Hs.462855NM_024308 | ENSG000002DHRS11    | ARPG836 S-dehydroge | protein-coding   |                |                |                |
| chr19-135 | 6.955185  | -0.15733 | 0.878961 | -0.17899 | 0.857943 | 0.981636 | chr19 | 13914638  | 13915606  | + | 0 | NA | intron (NCharlie2E  | 8921   | NM_017721 | 54862    | Hs.269592NM_017721 | ENSG000002CC2D1A    | FREUD-1 Coiled-coil | protein-coding   |                |                |                |
| chr20-628 | 6.955185  | -0.15733 | 0.878961 | -0.17899 | 0.857943 | 0.981636 | chr20 | 62856848  | 62857955  | + | 0 | NA | exon (NM exon (NM   | 4421   | NM_006602 | 10732    | Hs.126245NM_006602 | ENSG000002TCFL5     | CHA E2BP-transcrip  | protein-coding   |                |                |                |
| chr22-300 | 6.955185  | -0.15733 | 0.878961 | -0.17899 | 0.857943 | 0.981636 | chr22 | 30006631  | 30008083  | + | 0 | NA | TTS (NR_1TTS (NR_1  | 308    | NR_106876 | 1.02E+08 | NR_106876          | ENSG000002MIR6818   | hsa-mir-6           | microRNA         | ncRNA          |                |                |
| chr10-130 | 7.408783  | -0.15198 | 0.849383 | -0.17893 | 0.857992 | 0.981636 | chr10 | 1.33E+08  | 1.33E+08  | + | 0 | NA | intron (NAluSp SIN  | 13650  | NM_138384 | 92170    | Hs.501575NM_138384 | ENSG000002MTG1      | GTP GTPBFmitochon   | protein-coding   |                |                |                |
| chr11-106 | 7.408783  | -0.15198 | 0.849383 | -0.17893 | 0.857992 | 0.981636 | chr11 | 10628076  | 10634116  | + | 0 | NA | intron (NMLTIK LTF  | 21205  | NM_001098 | 10335    | Hs.501895NM_130385 | ENSG000002PRRV11    | IRAG JAW1murine     | reprotein-coding |                |                |                |
| chr13-210 | 7.408783  | -0.15198 | 0.849383 | -0.17893 | 0.857992 | 0.981636 | chr13 | 21042470  | 21043613  | + | 0 | NA | intron (Nintron (N  | 18545  | NM_014572 | 26524    | Hs.78960           | NM_014572           | ENSG000002CLATS2    | KPM              | large tun      | protein-coding |                |
| chr13-111 | 7.408783  | -0.15198 | 0.849383 | -0.17893 | 0.857992 | 0.981636 | chr13 | 1.14E+08  | 1.14E+08  | + | 0 | NA | intron (Nintron (N  | -18875 | NM_001366 | 1.01E+08 | Hs.704267NM_001366 | ENSG000002C13orf46  | -                   | chromosom        | protein-coding |                |                |
| chr16-211 | 7.408783  | -0.15198 | 0.849383 | -0.17893 | 0.857992 | 0.981636 | chr16 | 21176049  | 21176565  | + | 0 | NA | intron (NCharlie1E  | -16866 | NM_017535 | 55567    | Hs.52650C          | NM_017535           | ENSG000002DNAH3     | DNAH3C-B dynein  | protein-coding |                |                |
| chr16-744 | 7.408783  | -0.15198 | 0.849383 | -0.17893 | 0.857992 | 0.981636 | chr16 | 74494428  | 74496417  | + | 0 | NA | intron (Nintron (N  | -73952 | NM_001011 | 497190   | Hs.45467C          | NM_001011           | ENSG000002CLEC18B   | MRLC2            | C-type I       | protein-coding |                |
| chr19-191 | 7.408783  | -0.15198 | 0.849383 | -0.17893 | 0.857992 | 0.981636 | chr19 | 19283757  | 19285546  | + | 0 | NA | intron (NTiger2 E   | -11350 | NM_001001 | 53345    | Hs.531624NM_20351C | ENSG000002TM6SF2    | -                   | transment        | protein-coding |                |                |
| chr2-156  | 7.408783  | -0.15198 | 0.849383 | -0.17893 | 0.857992 | 0.981636 | chr2  | 15617312  | 15619501  | + | 0 | NA | intron (NMER52D L1  | 26538  | NM_004935 | 1653     | Hs.440595NM_004935 | ENSG000002DDX1      | DBP-RB UKDEAD-box   | protein-coding   |                |                |                |
| chr2-553  | 7.408783  | -0.15198 | 0.849383 | -0.17893 | 0.857992 | 0.981636 | chr2  | 55300997  | 55302164  | + | 0 | NA | intron (Nintron (N  | 19261  | NR_027258 | 344405   | Hs.445297NM_00108C | ENSG000002PRORS1P   | NCRNA0011           | prolyl-tf        | pseudo         |                |                |
| chr2-203  | 7.408783  | -0.15198 | 0.849383 | -0.17893 | 0.857992 | 0.981636 | chr2  | 2.03E+08  | 2.03E+08  | + | 0 | NA | intron (NMLT1A-int  | 57342  | NM_001114 | 65065    | Hs.648845NM_198945 | ENSG000002NBEAL1    | A530083C neurobeac  | protein-coding   |                |                |                |
| chr3-273  | 7.408783  | -0.15198 | 0.849383 | -0.17893 | 0.857992 | 0.981636 | chr3  | 27391271  | 27392057  | + | 0 | NA | intron (Nintron (N  | -22204 | NM_152534 | 152110   | Hs.506115NM_152534 | ENSG000002CNEK10    | -                   | NIMA rel         | protein-coding |                |                |
| chr3-338  | 7.408783  | -0.15198 | 0.849383 | -0.17893 | 0.857992 | 0.981636 | chr3  | 33857253  | 33858722  | + | 0 | NA | intron (NLM5 LINE   | 59357  | NM_013374 | 10015    | Hs.475895NM_013374 | ENSG000002PDC61P    | A1P1 AL1 program    | protein-coding   |                |                |                |
| chr3-4931 | 7.408783  | -0.15198 | 0.849383 | -0.17893 | 0.857992 | 0.981636 | chr3  | 49315311  | 49318711  | + | 0 | NA | intron (Nintron (N  | 23042  | NM_001251 | 7375     | Hs.77500           | NM_003363           | ENSG000002USP4      | UNP Unph         | ubiquitin      | protein-coding |                |
| chr5-179  | 7.408783  | -0.15198 | 0.849383 | -0.17893 | 0.857992 | 0.981636 | chr5  | 1.8E+08   | 1.8E+08   | + | 0 | NA | intron (N2a LINE    | 4508   | NR_110566 | 1.02E+08 | Hs.663255NR_110566 | ENSG000002LOC101925 | -                   | uncharact        | ncRNA          |                |                |
| chr6-3621 | 7.408783  | -0.15198 | 0.849383 | -0.17893 | 0.857992 | 0.981636 | chr6  | 36217368  | 36219174  | + | 0 | NA | intron (Nintron (N  | 21527  | NM_015698 | 27154    | Hs.520095NM_015698 | ENSG000002BRPF3     | -                   | bromodome        | protein-coding |                |                |
| chr7-644  | 7.408783  | -0.15198 | 0.849383 | -0.17893 | 0.857992 | 0.981636 | chr7  | 6442817   | 6443552   | + | 0 | NA | intron (NAluYk4 S1  | 4770   | NM_139175 | 221955   | Hs.487495NM_139175 | ENSG000002DAGLB     | DAGLBETA diacylgly  | protein-coding   |                |                |                |
| chr7-447  | 7.408783  | -0.15198 | 0.849383 | -0.17893 | 0.857992 | 0.981636 | chr7  | 44760403  | 44761608  | + | 0 | NA | intron (NCharlie4z  | 4817   | NM_174925 | 83637    | Hs.77978           | NM_031445           | ENSG000002ZMIZ2     | NET27 TR3        | zinc           | finger         | protein-coding |
| chr7-151  | 7.408783  | -0.15198 | 0.849383 | -0.17893 | 0.857992 | 0.981636 | chr7  | 1.51E+08  | 1.51E+08  | + | 0 | NA | intron (Nintron (N  | 10658  | NM_001308 | 116988   | Hs.647075NM_031945 | ENSG000002AGAP3     | AGAP-3 CEArFGAP     | wiprotein-coding |                |                |                |
| chr9-9261 | 7.408783  | -0.15198 | 0.849383 | -0.17893 | 0.857992 | 0.981636 | chr9  | 92614793  | 92616378  | + | 0 | NA | TTS (NM_1TTS (NM_1  | -2465  | NR_036505 | 1E+08    | Hs.660395NR_036505 | LOC100125           | -                   | uncharact        | ncRNA          |                |                |
| chr1-316  | 5.203908  | 0.179458 | 1.002982 | 0.178924 | 0.857997 | 0.981636 | chr1  | 31654742  | 31655619  | + | 0 | NA | intron (Nintron (N  | -10304 | NR_033688 | 553115   | Hs.470417NM_012392 | ENSG000002PEP1      | ABP32 PEF           | penta-EF-        | protein-coding |                |                |
| chr10-425 | 5.203908  | 0.179458 | 1.002982 | 0.178924 | 0.857997 | 0.981636 | chr10 | 422447    | 4226377   | + | 0 | NA | intron (Nintron (N  | -20502 | NR_147612 | 1.02E+08 | Hs.654707NR_147612 | ENSG000002LOC10193C | -                   | uncharact        | ncRNA          |                |                |
| chr14-745 | 5.203908  | 0.179458 | 1.002982 | 0.178924 | 0.857997 | 0.981636 | chr14 | 74691942  | 74693143  | + | 0 | NA | intron (Nintron (N  | 20538  | NM_001035 | 9870     | Hs.497417NM_014821 | ENSG000002CAREL1    | FIEL1 KI1           | apoptosis        | protein-coding |                |                |
| chr14-102 | 5.203908  | 0.179458 | 1.002982 | 0.178924 | 0.857997 | 0.981636 | chr14 | 1.03E+08  | 1.03E+08  | + | 0 | NA | intron (Nintron (N  | 11348  | NM_030942 | 81693    | Hs.534494NM_030942 | ENSG000002AMN       | PRO1028 amamion     | protein-coding   |                |                |                |
| chr16-156 | 5.203908  | 0.179458 | 1.002982 | 0.178924 | 0.857997 | 0.981636 | chr16 | 15629702  | 15630129  | + | 0 | NA | intron (Nintron (N  | 13239  | NM_014647 | 9665     | Hs.173524NM_014647 | ENSG000002MARF1     | KIAA0430 meiosis    | protein-coding   |                |                |                |
| chr22-315 | 5.203908  | 0.179458 | 1.002982 | 0.178924 | 0.857997 | 0.981636 | chr22 | 31340281  | 31341201  | + | 0 | NA | TTS (NM_1TTS (NM_1  | 5392   | NR_110542 | 1.02E+08 | Hs.661715NR_110542 | ENSG000002PIK3I1P1  | -                   | PIK3I1           | ncRNA          |                |                |
| chr5-112  | 5.203908  | 0.179458 | 1.002982 | 0.178924 | 0.857997 | 0.981636 | chr5  | 1.13E+08  | 1.13E+08  | + | 0 | NA | intron (NLM1Eg2 L1  | 22580  | NM_001354 | 324      | Hs.158932NM_000035 | ENSG000002APC       | BTPS2 DP2           | APC              | regul          | protein-coding |                |
| chr5-1725 | 5.203908  | 0.179458 | 1.002982 | 0.178924 | 0.857997 | 0.981636 | chr5  | 1.73E+08  | 1.73E+08  | + | 0 | NA | intron (Nintron (N  | 7174   | NM_001317 | 51121    | Hs.546395NM_016095 | ENSG000002RPL26L1   | RPL26P1             | ribosomal        | protein-coding |                |                |
| chr8-388  | 5.203908  | 0.179458 | 1.002982 | 0.178924 | 0.857997 | 0.981636 | chr8  | 38800957  | 38802210  | + | 0 | NA | intron (NLM1B8 L1N  | -3867  | NM_001352 | 6867     | Hs.279245NM_006285 | ENSG000002TACCI1    | Ga55                | transfor         | protein-coding |                |                |
| chr2-200  | 13.10946  | -0.11651 | 0.652007 | -0.17879 | 0.858175 | 0.981636 | chr2  | 2.01E+08  | 2.01E+08  | + | 0 | NA | intron (NAluSc8 S1  | 8402   | NM_001162 | 1195     | Hs.433732NM_004071 | ENSG000002CLK1      | CLK CLK SCDC        | like             | protein-coding |                |                |
| chr15-101 | 20.207864 | -0.09667 | 0.540971 | -0.17869 | 0.858179 | 0.981636 | chr15 | 1.02E+08  | 1.02E+08  | + | 0 | NA | intron (NMIR SINE   | 6005   | NR_003655 | 374666   | Hs.459575NM_199163 | WASH3P              | FAM39DP             | WASP             | fam            | pseudo         |                |
| chr5-6924 | 7.67714   | 0.157071 | 0.879608 | 0.17857  | 0.858276 | 0.981636 | chr5  | 69241036  | 69241378  | + | 0 | NA | intron (NLM1A3 L1N  | 6321   | NM_001795 | 1022     | Hs.184295NM_001795 | ENSG000002CDK7      | CAK CAK1            | cyclin           | de             | protein-coding |                |
| chr11-745 | 7.893814  | -0.15555 | 0.871192 | -0.17855 | 0.858288 | 0.981636 | chr11 | 74980028  | 74980340  | + | 0 | NA | Intergeni Intergeni | -8460  | NM_001367 | 10825    | Hs.191074NM_006655 | ENSG000002NEU3      | SIAL3               | neuramin         | protein-coding |                |                |
| chr1-226  | 6.676106  | 0.161247 | 0.903303 | 0.178509 | 0.858324 | 0.981636 | chr1  | 2.26E+08  | 2.26E+08  | + | 0 | NA | intron (NMIR SINE   | 43835  | NM_001618 | 1425     | Hs.177766NM_001618 | ENSG000002PARP1     | ADPRT ADFPoly       | (ADP-            | protein-coding |                |                |
| chr3-816  | 7.87024   | -0.14931 | 0.836546 | -0.17848 | 0.858345 | 0.981636 | chr3  | 81629550  | 81629894  | + | 0 | NA | intron (NLM1A4 L1N  | 131923 | NM_000158 | 2632     | Hs.437062NM_000158 | ENSG000002GBE1      | APBD GBE 1,4-       | protein-coding   |                |                |                |
| chr22-404 | 7.172694  | 0.160073 | 0.89816  | 0.178223 | 0.858548 | 0.981636 | chr22 | 40461763  | 40462024  | + | 0 | NA | intron (N2a LINE    | 1547   | NM_001282 | 57591    | Hs.654688NM_020831 | ENSG000002MRFTA     | BSAC MAL            | myocardin        | protein-coding |                |                |
| chr1-212  | 7.196268  | 0.153368 | 0.860844 | 0.178161 | 0.858597 | 0.981636 | chr1  | 21232950  | 21233905  | + | 0 | NA | intron (NMIR SINE   | 46188  | NM_001113 | 1889     | Hs.19508C          | NM_001397           | ENSG000002ECE1      | ECE              | endothel       | protein-coding |                |
| chr1-363  | 7.196268  |          |          |          |          |          |       |           |           |   |   |    |                     |        |           |          |                    |                     |                     |                  |                |                |                |

|                    |          |          |          |          |          |       |          |           |   |      |                     |                    |                            |                    |                  |                |                             |                |
|--------------------|----------|----------|----------|----------|----------|-------|----------|-----------|---|------|---------------------|--------------------|----------------------------|--------------------|------------------|----------------|-----------------------------|----------------|
| chr11-784 7.359786 | -0.15284 | 0.86136  | -0.17743 | 0.859167 | 0.981636 | chr11 | 78410210 | 78410568  | + | 0 NA | intron (NAluSz SIN  | 7431 NM_080491     | 9846 Hs. 429434NM_01229c   | ENSG00000GAB2      | -                | GRB2           | asc protein-coding          |                |
| chr16-566 7.359786 | -0.15284 | 0.86136  | -0.17743 | 0.859167 | 0.981636 | chr16 | 56368019 | 56369416  | + | 0 NA | intron (NMERS5A DN  | 56272 NM_001322    | 267 Hs. 295137NM_001144    | ENSG00000AMFR      | -                | GP78 RNFA4     | autocrine protein-coding    |                |
| chr2-5397 7.359786 | -0.15284 | 0.86136  | -0.17743 | 0.859167 | 0.981636 | chr2  | 53973479 | 53974292  | + | 0 NA | intron (N(TG)n Sin  | 2772 NM_00132c     | 98 Hs. 516172NM_13844f     | ENSG00000ACYP2     | -                | ACYM ACVf      | acylphosph protein-coding   |                |
| chr4-2457 7.359786 | -0.15284 | 0.86136  | -0.17743 | 0.859167 | 0.981636 | chr4  | 24552945 | 24554054  | + | 0 NA | intron (NAluSx1 LI  | 30879 NM_00135E    | 1665 Hs. 696074NM_00135f   | ENSG00000DHH15     | -                | DBP1 DDX1      | DEAH-box protein-coding     |                |
| chr12-456 6.163802 | 0.16798  | 0.9476   | 0.177269 | 0.859297 | 0.981636 | chr12 | 45363933 | 45364189  | + | 0 NA | intron (NLM1B7 LSI  | 71371 NM_001142    | 196527 Hs. 505393NM_00102f | ENSG00000ANO6      | -                | RNU35B UC      | snRNA                       |                |
| chr2-1711 6.163802 | 0.16798  | 0.9476   | 0.177269 | 0.859297 | 0.981636 | chr2  | 1.71E+08 | 1.71E+08  | + | 0 NA | intron (NLooper DN  | 45775 NM_01229c    | 9874 Hs. 744917NM_01229c   | ENSG00000CTLK1     | -                | PKU-beta       | tousled l protein-coding    |                |
| chr6-1611 6.163802 | 0.16798  | 0.9476   | 0.177269 | 0.859297 | 0.981636 | chr6  | 1.61E+08 | 1.61E+08  | + | 0 NA | intron (Nintron (N  | 50245 NR_024277    | 79992 Hs. 664873NM_02492c  | ENSG00000AGPAT4-1  | -                | G6orf59 AGPAT4 | lncRNA                      |                |
| chr19-494 12.65587 | -0.11795 | 0.665476 | -0.17725 | 0.859314 | 0.981636 | chr19 | 49197296 | 49500258  | + | 0 NA | TTS (NR_C TTS (NR_C | 1058 NR_00128E     | 44544 Hs. 505393NM_00102f  | ENSG00000SNORD35B  | -                | RNU35B UC      | small nuc snoRNA            |                |
| chr1-2378 7.400925 | -0.15013 | 0.847334 | -0.17718 | 0.859363 | 0.981636 | chr1  | 23783509 | 23784606  | + | 0 NA | intron (NMIR SINE   | 5639 NM_02036E     | 57095 Hs. 31819 NM_02036E  | ENSG00000PITHD1    | -                | Clorf128 PITH  | dom protein-coding          |                |
| chr1-6257 7.400925 | -0.15013 | 0.847334 | -0.17718 | 0.859363 | 0.981636 | chr1  | 62571686 | 62573052  | + | 0 NA | intron (NMIR SINE   | -25151 NM_01449E   | 27329 Hs. 209155NM_01449E  | ENSG00000ANGPTL3   | -                | ANG-5 ANC      | angiopoietin protein-coding |                |
| chr10-617 7.400925 | -0.15013 | 0.847334 | -0.17718 | 0.859363 | 0.981636 | chr10 | 6108218  | 6113300   | + | 0 NA | intron (Nintron (N  | 21428 NM_00114E    | 84991 Hs. 498548NM_03290f  | ENSG00000RBM17     | -                | SPF45          | RNA bindi protein-coding    |                |
| chr10-877 7.400925 | -0.15013 | 0.847334 | -0.17718 | 0.859363 | 0.981636 | chr10 | 87075294 | 87075763  | + | 0 NA | intron (Nintron (N  | 18559 NM_00131E    | 2746 Hs. 500409NM_005271   | ENSG00000GLUD1     | -                | GDH GDH1       | glutamate protein-coding    |                |
| chr10-996 7.400925 | -0.15013 | 0.847334 | -0.17718 | 0.859363 | 0.981636 | chr10 | 99679236 | 99681550  | + | 0 NA | intron (Nintron (N  | 20764 NM_00134E    | 57089 Hs. 28236 NM_02035f  | ENSG00000ENTPD7    | -                | LALP1          | ectonucle protein-coding    |                |
| chr10-137 7.400925 | -0.15013 | 0.847334 | -0.17718 | 0.859363 | 0.981636 | chr10 | 1.3E+08  | 1.3E+08   | + | 0 NA | intron (Nintron (N  | 30413 NM_001321    | 10539 Hs. 42644 NM_006541  | ENSG00000GLRX3     | -                | GLRX4 GR       | glutared protein-coding     |                |
| chr11-368 7.400925 | -0.15013 | 0.847334 | -0.17718 | 0.859363 | 0.981636 | chr11 | 3687145  | 3689490   | + | 0 NA | intron (NAluY SINE  | -16933 NM_00130E   | 57053 Hs. 732809NM_02040E  | ENSG00000CHRNA10   | -                | -              | choliner protein-coding     |                |
| chr11-662 7.400925 | -0.15013 | 0.847334 | -0.17718 | 0.859363 | 0.981636 | chr11 | 66262350 | 66263342  | + | 0 NA | exon (NM exon (NM   | 5143 NM_00131E     | 64837 Hs. 280792NM_02282E  | ENSG00000KLC2      | -                | -              | kinesin l protein-coding    |                |
| chr11-111 7.400925 | -0.15013 | 0.847334 | -0.17718 | 0.859363 | 0.981636 | chr11 | 1.11E+08 | 1.11E+08  | + | 0 NA | 3' UTR (N3' UTR (N  | 132583 NM_00125E   | 57569 Hs. 6136 NM_02080f   | ENSG00000CARHGAP20 | -                | RARHOGAP       | Rho GTPas protein-coding    |                |
| chr11-117 7.400925 | -0.15013 | 0.847334 | -0.17718 | 0.859363 | 0.981636 | chr11 | 1.12E+08 | 1.12E+08  | + | 0 NA | intron (NLM1E4b LI  | 13287 NM_03342E    | 85458 Hs. 655622NM_03342f  | ENSG00000DXDC1     | -                | CCD1           | DIX domain protein-coding   |                |
| chr11-112 7.400925 | -0.15013 | 0.847334 | -0.17718 | 0.859363 | 0.981636 | chr11 | 1.12E+08 | 1.12E+08  | + | 0 NA | intron (Nintron (N  | 9545 NM_001931     | 1737 Hs. 335551NM_001931   | ENSG00000DLAT      | -                | DLTA E2F       | dihydroli protein-coding    |                |
| chr12-567 7.400925 | -0.15013 | 0.847334 | -0.17718 | 0.859363 | 0.981636 | chr12 | 56165362 | 56167571  | + | 0 NA | intron (Nintron (N  | 8107 NM_02101E     | 4637 Hs. 632717NM_02101E   | ENSG00000MYL6      | -                | ESMLC LCL      | myosin l protein-coding     |                |
| chr12-777 7.400925 | -0.15013 | 0.847334 | -0.17718 | 0.859363 | 0.981636 | chr12 | 77042125 | 77042711  | + | 0 NA | intron (Nintron (N  | 23151 NM_203394    | 144455 Hs. 416377NM_203394 | ENSG00000E2F7      | -                | -              | E2F trans protein-coding    |                |
| chr12-102 7.400925 | -0.15013 | 0.847334 | -0.17718 | 0.859363 | 0.981636 | chr12 | 1.02E+08 | 1.02E+08  | + | 0 NA | intron (Nintron (N  | 13480 NM_024057    | 79023 Hs. 444276NM_024057  | ENSG00000NUP37     | -                | MCPH24 p       | nucleopor protein-coding    |                |
| chr12-132 7.400925 | -0.15013 | 0.847334 | -0.17718 | 0.859363 | 0.981636 | chr12 | 1.32E+08 | 1.32E+08  | + | 0 NA | intron (NLM1E1 LI   | 25826 NR_00297E    | 677829 Hs. 742409NR_00297E | ENSG00000SNORA49   | -                | ACA49          | small nuc snoRNA            |                |
| chr14-357 7.400925 | -0.15013 | 0.847334 | -0.17718 | 0.859363 | 0.981636 | chr14 | 35007136 | 350010538 | + | 0 NA | intron (Nintron (N  | 25845 NM_00313E    | 6729 Hs. 167535NM_00313E   | ENSG00000SRP54     | -                | -              | signal re protein-coding    |                |
| chr14-584 7.400925 | -0.15013 | 0.847334 | -0.17718 | 0.859363 | 0.981636 | chr14 | 58443408 | 58444903  | + | 0 NA | exon (NM exon (NM   | 4474 NM_00124E     | 9786 Hs. 232532NM_01474E   | ENSG00000KIAA0586  | -                | JBT523 SF      | KIAA0586 protein-coding     |                |
| chr15-424 7.400925 | -0.15013 | 0.847334 | -0.17718 | 0.859363 | 0.981636 | chr15 | 42445839 | 42448646  | + | 0 NA | intron (NFLAM_A SI  | 10325 NM_02247E    | 64397 Hs. 511143NM_02247E  | ENSG00000ZNF106    | -                | SH3BP3 Zf      | zinc fing protein-coding    |                |
| chr15-784 7.400925 | -0.15013 | 0.847334 | -0.17718 | 0.859363 | 0.981636 | chr15 | 78499813 | 78501576  | + | 0 NA | 3' UTR (N3' UTR (N  | -6870 NM_00108E    | 123688 Hs. 307962NM_00108E | ENSG00000HYKK      | -                | AGPHD1         | hydroxyl protein-coding     |                |
| chr16-317 7.400925 | -0.15013 | 0.847334 | -0.17718 | 0.859363 | 0.981636 | chr16 | 31061437 | 31064321  | + | 0 NA | intron (NAluSp SIN  | 2209 NM_00117E     | 79759 Hs. 102928NM_02470E  | ENSG00000ZNF668    | -                | -              | zinc fing protein-coding    |                |
| chr17-752 7.400925 | -0.15013 | 0.847334 | -0.17718 | 0.859363 | 0.981636 | chr17 | 75235963 | 75236969  | + | 0 NA | TTS (NM_C TTS (NM_C | 25140 NR_101400    | 23166 Hs. 87726 NM_014001  | ENSG00000CGA3      | -                | 23663          | golgi as protein-coding     |                |
| chr17-817 7.400925 | -0.15013 | 0.847334 | -0.17718 | 0.859363 | 0.981636 | chr17 | 81558929 | 81563200  | + | 0 NA | intron (NAluSx1 SIN | 6136 NR_13014C     | 53163 Hs. 464338NM_017921  | ENSG00000NPL0C4    | -                | NPL4           | NPL4 hom protein-coding     |                |
| chr18-686 7.400925 | -0.15013 | 0.847334 | -0.17718 | 0.859363 | 0.981636 | chr18 | 68675830 | 68677601  | + | 0 NA | 3' UTR (N3' UTR (N  | 38393 NM_00135E    | 54495 Hs. 440534NM_01902E  | ENSG00000TMX3      | -                | PDIA13 T       | thioredo protein-coding     |                |
| chr19-101 7.400925 | -0.15013 | 0.847334 | -0.17718 | 0.859363 | 0.981636 | chr19 | 10151866 | 10155174  | + | 0 NA | intron (NAluSx1 SI  | -33621 NM_00375E   | 8666 Hs. 529055NM_00375E   | ENSG00000EIF3G     | -                | EIF3F-P42      | euaryot protein-coding      |                |
| chr2-5467 7.400925 | -0.15013 | 0.847334 | -0.17718 | 0.859363 | 0.981636 | chr2  | 54657856 | 54663856  | + | 0 NA | 3' UTR (N3' UTR (N  | -64156 NM_00103E   | 400954 Hs. 656692NM_00103E | ENSG00000EML6      | -                | -              | EMAP like protein-coding    |                |
| chr2-1137 7.400925 | -0.15013 | 0.847334 | -0.17718 | 0.859363 | 0.981636 | chr2  | 1.14E+08 | 1.14E+08  | + | 0 NA | intron (Nintron (N  | -7993 NR_03994E    | 1.01E+08                   | NR_03994E          | ENSG00000MIR4782 | -              | -                           | microRNA ncRNA |
| chr2-2357 7.400925 | -0.15013 | 0.847334 | -0.17718 | 0.859363 | 0.981636 | chr2  | 2.35E+08 | 2.35E+08  | + | 0 NA | intron (Nintron (N  | 22068 NM_001371305 | 6780 Hs. 596704NM_00460E   | ENSG00000STAU1     | -                | PPP1R150       | staufen c protein-coding    |                |
| chr20-491 7.400925 | -0.15013 | 0.847334 | -0.17718 | 0.859363 | 0.981636 | chr20 | 49149678 | 49153419  | + | 0 NA | intron (Nintron (N  | 36822 NM_001322    | 5116 Hs. 474069NM_006031   | ENSG00000PCNT      | -                | KEN MOPD2      | pericentr protein-coding    |                |
| chr21-463 7.400925 | -0.15013 | 0.847334 | -0.17718 | 0.859363 | 0.981636 | chr21 | 46336822 | 46339781  | + | 0 NA | intron (NLM1C3 LI   | 13634 NM_00131E    | 84164 Hs. 731754NM_03220f  | ENSG00000ASCC2     | -                | ASC1 p100      | activatir protein-coding    |                |
| chr22-294 7.400925 | -0.15013 | 0.847334 | -0.17718 | 0.859363 | 0.981636 | chr22 | 29830627 | 29832451  | + | 0 NA | intron (Nintron (N  | 6735 NM_00136E     | 6533 Hs. 529488NM_00304E   | ENSG00000SLC6A6    | -                | TAUT           | solute c protein-coding     |                |
| chr3-1447 7.400925 | -0.15013 | 0.847334 | -0.17718 | 0.859363 | 0.981636 | chr3  | 14417255 | 14418070  | + | 0 NA | intron (NAluY SINE  | 15056 NM_001134    | 51368 Hs. 517864NM_01592E  | ENSG00000TEX264    | -                | ZSIG11         | testis ex protein-coding    |                |
| chr3-5163 7.400925 | -0.15013 | 0.847334 | -0.17718 | 0.859363 | 0.981636 | chr3  | 51638742 | 51639674  | + | 0 NA | intron (Nintron (N  | -31967 NM_00112E   | 25871 Hs. 591288NM_01541E  | ENSG00000NEPRO     | -                | C3orf17 N      | nucleolus protein-coding    |                |
| chr3-1136 7.400925 | -0.15013 | 0.847334 | -0.17718 | 0.859363 | 0.981636 | chr3  | 1.13E+08 | 1.13E+08  | + | 0 NA | intron (Nintron (N  | 7583 NM_00131E     | 59343 Hs. 401389NM_02162E  | ENSG00000SEN2      | -                | AXAM2 SM1      | SUMO spec protein-coding    |                |
| chr3-1856 7.400925 | -0.15013 | 0.847334 | -0.17718 | 0.859363 | 0.981636 | chr3  | 1.86E+08 | 1.86E+08  | + | 0 NA | intron (NMERS5A DN  | 26788 NM_02162E    | 132946 Hs. 444444NM_20691E | ENSG00000CARL9     | -                | -              | ADP ribos protein-coding    |                |
| chr4-5645 7.400925 | -0.15013 | 0.847334 | -0.17718 | 0.859363 | 0.981636 | chr4  | 56491949 | 56493870  | + | 0 NA | intron (NFRAM SINE  | -12300 NM_20691E   | 1767 Hs. 212366NM_00136E   | ENSG00000DNAH5     | -                | CILD3 DN       | lysine as protein-coding    |                |
| chr5-1376 7.400925 | -0.15013 | 0.847334 | -0.17718 | 0.859363 | 0.981636 | chr5  | 13756472 | 13757540  | + | 0 NA | intron (NLM1A13 LI  | 187474 NM_00136E   | 1E+08 Hs. 608069NR_028474  | LOC10030E          | -                | -              | LSM3 hom pseudo             |                |
| chr5-6596 7.400925 | -0.15013 | 0.847334 | -0.17718 | 0.859363 | 0.981636 | chr5  | 65995150 | 65995592  | + | 0 NA | intron (NLM1A8 LI   | -49798 NR_028474   | 51520 Hs. 432674NM_01646E  | ENSG00000CLARS     | -                | HSPC192 I      | leucyl-tf protein-coding    |                |
| chr5-1461 7.400925 | -0.15013 | 0.847334 | -0.17718 | 0.859363 | 0.981636 | chr5  | 1.46E+08 | 1.46E+08  | + | 0 NA | intron (Nintron (N  | 32200 NM_020117    | 6492 Hs. 520293NM_00506E   | ENSG00000SIM1      | -                | bHLHe14 SIM    | bHLH protein-coding         |                |
| chr6-1007 7.400925 | -0.15013 | 0.847334 | -0.17718 | 0.859363 | 0.981636 | chr6  | 1.01E+08 | 1.01E+08  | + | 0 NA | intron (NManRep137  | -18862 NM_00506E   | 10973 Hs. 486031NM_00682E  | ENSG00000ASCC3     | -                | ASC1p200       | activatir protein-coding    |                |
| chr6-1017 7.400925 | -0.15013 | 0.847334 | -0.17718 | 0.859363 | 0.981636 | chr6  | 1.01E+08 | 1.01E+08  | + | 0 NA | intron (NMER4B LTF  | 115674 NM_00682E   | 383 Hs. 346926NM_00004E    | ENSG00000ARG1      | -                | -              | arginase protein-coding     |                |
| chr6-1315 7.400925 | -0.15013 | 0.847334 | -0.17718 | 0.859363 | 0.981636 | chr6  | 1.32E+08 | 1.32E+08  | + | 0 NA |                     |                    |                            |                    |                  |                |                             |                |



|                    |          |          |          |          |          |       |          |          |   |   |    |                     |        |           |          |                    |                     |                    |                 |                    |                   |                 |                 |
|--------------------|----------|----------|----------|----------|----------|-------|----------|----------|---|---|----|---------------------|--------|-----------|----------|--------------------|---------------------|--------------------|-----------------|--------------------|-------------------|-----------------|-----------------|
| chr22-317.6.691822 | 0.156789 | 0.887536 | 0.176656 | 0.859778 | 0.981636 | chr22 | 31709880 | 31712707 | + | 0 | NA | intron (AluSx SIN   | 38839  | NM_173566 | 253143   | Hs.438906NM_173566 | ENSG000000PRR14L    | C22orf30           | proline         | rprotein-coding    |                   |                 |                 |
| chr3-477.6.691822  | 0.156789 | 0.887536 | 0.176656 | 0.859778 | 0.981636 | chr3  | 47756894 | 47757665 | + | 0 | NA | intron (L1MED LIN   | 24614  | NM_003074 | 6599     | Hs.476175NM_003074 | ENSG000000SMARCC1   | BAF155 CFSWI SNF   | rprotein-coding |                    |                   |                 |                 |
| chr3-132f.6.691822 | 0.156789 | 0.887536 | 0.176656 | 0.859778 | 0.981636 | chr3  | 1.33E+08 | 1.33E+08 | + | 0 | NA | intron (Nintron (N  | 21580  | NM_001321 | 79876    | Hs.170737NM_024818 | ENSG000000CUBA5     | EIEE44 SCubiquitin | rprotein-coding |                    |                   |                 |                 |
| chr3-130f.6.691822 | 0.156789 | 0.887536 | 0.176656 | 0.859778 | 0.981636 | chr3  | 1.34E+08 | 1.34E+08 | + | 0 | NA | intron (Nintron (N  | 50150  | NM_002958 | 6259     | Hs.654562NM_002958 | ENSG000000RYK       | D3S3195 Jreceptor  | rprotein-coding |                    |                   |                 |                 |
| chr4-442f.6.691822 | 0.156789 | 0.887536 | 0.176656 | 0.859778 | 0.981636 | chr4  | 4437843  | 4438599  | + | 0 | NA | intron (Nintron (N  | 23751  | NM_001346 | 53407    | Hs.584915NM_016938 | ENSG000000STX18     | Ufe1               | syntaxin        | rprotein-coding    |                   |                 |                 |
| chr5-5694.6.691822 | 0.156789 | 0.887536 | 0.176656 | 0.859778 | 0.981636 | chr5  | 56940158 | 56946137 | + | 0 | NA | intron (AluJr SIN   | 8983   | NM_001297 | 166968   | Hs.657594NM_152622 | ENSG000000MIER3     |                    | MIER            | famiprotein-coding |                   |                 |                 |
| chr5-138f.6.691822 | 0.156789 | 0.887536 | 0.176656 | 0.859778 | 0.981636 | chr5  | 1.39E+08 | 1.39E+08 | + | 0 | NA | intron (AluSp SIN   | -46750 | NR_134244 | 1.05E+08 | Hs.445981NR_134244 | ENSG000000LOC105379 |                    |                 | uncharactericRNA   |                   |                 |                 |
| chr5-149f.6.691822 | 0.156789 | 0.887536 | 0.176656 | 0.859778 | 0.981636 | chr5  | 1.49E+08 | 1.49E+08 | + | 0 | NA | intron (MLT1A0 LI   | -53389 | NM_001322 | 134265   | Hs.629301NR_152400 | ENSG000000AFAP1L1   |                    |                 | actin              | filprotein-coding |                 |                 |
| chr5-175f.6.691822 | 0.156789 | 0.887536 | 0.176656 | 0.859778 | 0.981636 | chr5  | 1.76E+08 | 1.76E+08 | + | 0 | NA | 3' UTR (N3' UTR (N  | 48451  | NM_022754 | 94081    | Hs.369444NM_022754 | ENSG000000SFXM1     |                    |                 | SLC56A1 Tsideroflc | rprotein-coding   |                 |                 |
| chr8-118f.6.691822 | 0.156789 | 0.887536 | 0.176656 | 0.859778 | 0.981636 | chr8  | 11831256 | 11833086 | + | 0 | NA | intron (Nintron (N  | 23027  | NM_001287 | 2222     | Hs.593928NM_004462 | ENSG000000FDFT1     | DGPT ERGC          | farnesyl-       | rprotein-coding    |                   |                 |                 |
| chr8-671f.6.691822 | 0.156789 | 0.887536 | 0.176656 | 0.859778 | 0.981636 | chr8  | 67136301 | 67138142 | + | 0 | NA | intron (AluS26 SI   | 53373  | NM_001291 | 79848    | Hs.370147NM_024790 | ENSG000000CSPF1     | CSPF JBTs          | centrosom       | rprotein-coding    |                   |                 |                 |
| chr8-140f.6.691822 | 0.156789 | 0.887536 | 0.176656 | 0.859778 | 0.981636 | chr8  | 1.41E+08 | 1.41E+08 | + | 0 | NA | intron (Nintron (N  | 32212  | NR_040712 | 54108    | Hs.279704NM_017444 | ENSG000000CHRAC1    | CHARC1 CF          | chromatin       | rprotein-coding    |                   |                 |                 |
| chr9-340f.6.691822 | 0.156789 | 0.887536 | 0.176656 | 0.859778 | 0.981636 | chr9  | 34012674 | 34013793 | + | 0 | NA | intron (Nintron (N  | 35654  | NR_163242 | 55833    | Hs.493735NM_018445 | ENSG000000UBAP2     | UBAP-2             | ubiquitin       | rprotein-coding    |                   |                 |                 |
| chr9-114f.6.691822 | 0.156789 | 0.887536 | 0.176656 | 0.859778 | 0.981636 | chr9  | 1.14E+08 | 1.14E+08 | + | 0 | NA | intron (Nintron (N  | -22851 | NM_000607 | 5004     | Hs.522355NM_000607 | ENSG000000CORM1     | AGP-A AGF          | omomucc         | rprotein-coding    |                   |                 |                 |
| chr9-37f.6.691822  | 0.156789 | 0.887536 | 0.176656 | 0.859778 | 0.981636 | chr9  | 3758339  | 3758852  | + | 0 | NA | intron (Nintron (N  | 3097   | NM_004886 | 9546     | Hs.25527           | NM_004886           | ENSG000000APBA3    | MGC:15815       | amyloid t          | rprotein-coding   |                 |                 |
| chr20-584.6.691822 | 0.156789 | 0.887536 | 0.176656 | 0.859778 | 0.981636 | chr20 | 58419901 | 58420414 | + | 0 | NA | intron (AluS2 SIN   | 30928  | NR_036633 | 9217     | Hs.182622NM_004738 | ENSG000000VAPB      | AL58 VAMF          | VAMP            | asc                | rprotein-coding   |                 |                 |
| chr11-63f.6.691822 | 0.170614 | 0.966631 | 0.176504 | 0.859898 | 0.981636 | chr11 | 63652805 | 63653688 | + | 0 | NA | intron (AluSx SIN   | 18130  | NM_015455 | 25923    | Hs.356715NM_015455 | ENSG000000CATL3     | HSNF1              | atlastin        | rprotein-coding    |                   |                 |                 |
| chr11-68f.6.691822 | 0.170614 | 0.966631 | 0.176504 | 0.859898 | 0.981636 | chr11 | 68544938 | 68546082 | + | 0 | NA | intron (LFSLINE_Ve  | 84758  | NM_001352 | 55291    | Hs.503022NM_018312 | ENSG000000PPP6R3    | C11orf23           | protein         | rprotein-coding    |                   |                 |                 |
| chr12-13f.6.691822 | 0.170614 | 0.966631 | 0.176504 | 0.859898 | 0.981636 | chr12 | 1.32E+08 | 1.32E+08 | + | 0 | NA | intron (Nintron (N  | -2028  | NR_002975 | 677829   | Hs.742405NR_002975 | ENSG000000SNORA49   | ACA49              | small           | ncsnoRNA           |                   |                 |                 |
| chr16-48f.6.691822 | 0.170614 | 0.966631 | 0.176504 | 0.859898 | 0.981636 | chr16 | 4834906  | 4835831  | + | 0 | NA | intron (Nintron (N  | 11920  | NM_032566 | 84656    | Hs.387255NM_032566 | ENSG000000GLYR1     | BM045 HIE          | glyoxylat       | rprotein-coding    |                   |                 |                 |
| chr19-19f.6.691822 | 0.170614 | 0.966631 | 0.176504 | 0.859898 | 0.981636 | chr19 | 19201327 | 19202089 | + | 0 | NA | exon (NM exon (NM   | 1706   | NM_176888 | 126382   | Hs.708155NM_176888 | ENSG000000NRC2AP    | TRA16              | nuclear         | rprotein-coding    |                   |                 |                 |
| chr5-164f.6.691822 | 0.170614 | 0.966631 | 0.176504 | 0.859898 | 0.981636 | chr5  | 16459317 | 16460452 | + | 0 | NA | intron (L1ME3A LI   | 5916   | NM_033414 | 90441    | Hs.60300           | NM_033414           | ENSG000000ZNF622   | ZPR9            | zinc               | fin               | rprotein-coding |                 |
| chr5-170f.6.691822 | 0.170614 | 0.966631 | 0.176504 | 0.859898 | 0.981636 | chr5  | 1.71E+08 | 1.71E+08 | + | 0 | NA | intron (Nintron (N  | 49196  | NM_022897 | 64901    | Hs.410814NM_022897 | ENSG000000CRANBP17  |                    |                 | RAN                | bindi             | rprotein-coding |                 |
| chr9-129f.6.691822 | 0.170614 | 0.966631 | 0.176504 | 0.859898 | 0.981636 | chr9  | 1.29E+08 | 1.29E+08 | + | 0 | NA | intron (AluY SINE   | 17913  | NM_001193 | 5524     | Hs.400742NM_021131 | ENSG000000PTPA      | PP2A PPP2          | protein         | rprotein-coding    |                   |                 |                 |
| chr19-51f.6.691822 | 0.176413 | 0.859969 | 0.176413 | 0.859969 | 0.981636 | chr19 | 51874237 | 51874545 | + | 0 | NA | intron (L2a LINE    | 13545  | NM_001136 | 84765    | Hs.723015NM_032675 | ENSG000000ZNF577    |                    |                 | zinc               | fin               | rprotein-coding |                 |
| chr17-79f.6.691822 | 0.187119 | 0.061211 | 0.176326 | 0.860038 | 0.981636 | chr17 | 7908406  | 79084570 | + | 0 | NA | intron (N1MB2 LIN   | 9371   | NM_001042 | 64772    | Hs.29288           | NM_022755           | ENSG000000ENGASE   |                 |                    | endo-             | fin             | rprotein-coding |
| chr1-180f.6.691822 | 0.151344 | 0.858697 | 0.176249 | 0.860098 | 0.981636 | chr1  | 1.81E+08 | 1.81E+08 | + | 0 | NA | exon (NM exon (NM   | 19198  | NR_145481 | 1.03E+08 | Hs.665315NR_145481 | ENSG000000K1AA1614  |                    |                 | K1AA1614           | ncRNA             |                 |                 |
| chr1-222f.6.691822 | 0.151344 | 0.858697 | 0.176249 | 0.860098 | 0.981636 | chr1  | 2.23E+08 | 2.23E+08 | + | 0 | NA | intron (L1ME1 LIN   | -20482 | NM_024746 | 79802    | Hs.665666NM_024746 | ENSG000000HHIPL2    | K1AA1822 HHIP      | like            | rprotein-coding    |                   |                 |                 |
| chr1-231f.6.691822 | 0.151344 | 0.858697 | 0.176249 | 0.860098 | 0.981636 | chr1  | 2.32E+08 | 2.32E+08 | + | 0 | NA | 3' UTR (N3' UTR (N  | 36315  | NM_005999 | 7257     | Hs.13318           | NM_005999           | ENSG000000TSNAX    | C3PO TRAX       | translin           | rprotein-coding   |                 |                 |
| chr16-15f.6.691822 | 0.151344 | 0.858697 | 0.176249 | 0.860098 | 0.981636 | chr16 | 15696212 | 15700664 | + | 0 | NA | intron (Nintron (N  | 48193  | NM_017668 | 54820    | Hs.655378NM_017668 | ENSG000000NDX1      | HOM-TES-E          | nu              | rprotein-coding    |                   |                 |                 |
| chr16-29f.6.691822 | 0.151344 | 0.858697 | 0.176249 | 0.860098 | 0.981636 | chr16 | 29400947 | 29403886 | + | 0 | NA | intron (Nintron (N  | 2129   | NM_001310 | 728888   | Hs.720286NM_001310 | ENSG000000NPIP11    | NPIP               | nuclear         | rprotein-coding    |                   |                 |                 |
| chr17-31f.6.691822 | 0.151344 | 0.858697 | 0.176249 | 0.860098 | 0.981636 | chr17 | 31217329 | 31218939 | + | 0 | NA | intron (Nintron (N  | 79105  | NM_002544 | 4974     | Hs.113874NM_002544 | ENSG000000OMG       | OMGP               | oligodenc       | rprotein-coding    |                   |                 |                 |
| chr17-42f.6.691822 | 0.151344 | 0.858697 | 0.176249 | 0.860098 | 0.981636 | chr17 | 42542623 | 42543687 | + | 0 | NA | exon (NM exon (NM   | 6914   | NM_000263 | 4669     | Hs.50727           | NM_000263           | ENSG000000NAGLU    | CMT2V MP5N      | acetyl-            | rprotein-coding   |                 |                 |
| chr17-81f.6.691822 | 0.151344 | 0.858697 | 0.176249 | 0.860098 | 0.981636 | chr17 | 81573768 | 81574692 | + | 0 | NA | intron (Nintron (N  | 3203   | NR_130135 | 55666    | Hs.464335NM_017921 | ENSG000000NPLOC4    | NPL4               | NPL4            | homc               | rprotein-coding   |                 |                 |
| chr17-82f.6.691822 | 0.151344 | 0.858697 | 0.176249 | 0.860098 | 0.981636 | chr17 | 82055204 | 82056169 | + | 0 | NA | intron (Nintron (N  | 3723   | NM_212492 | 2873     | Hs.268533NM_004127 | ENSG000000GPS1      | COP51 CSNG         | proteir         | rprotein-coding    |                   |                 |                 |
| chr18-27f.6.691822 | 0.151344 | 0.858697 | 0.176249 | 0.860098 | 0.981636 | chr18 | 27200500 | 27211631 | + | 0 | NA | intron (HAL LINE    | 64718  | NM_015295 | 23347    | Hs.8118            | NM_015295           | ENSG000000SMCHD1   | BAMS FSH        | structure          | rprotein-coding   |                 |                 |
| chr18-86f.6.691822 | 0.151344 | 0.858697 | 0.176249 | 0.860098 | 0.981636 | chr18 | 8625520  | 8627473  | + | 0 | NA | intron (Nintron (N  | 17051  | NM_001025 | 201475   | Hs.270074NM_001025 | ENSG000000CRAB12    |                    |                 | RAB12,             | mc                | rprotein-coding |                 |
| chr2-203f.6.691822 | 0.151344 | 0.858697 | 0.176249 | 0.860098 | 0.981636 | chr2  | 1.28E+08 | 1.28E+08 | + | 0 | NA | intron (AluSx SIN   | 36652  | NR_027671 | 56886    | Hs.743306NM_020120 | ENSG000000UGGT1     | HUGT1 UGC          | UDP-            | gluc               | rprotein-coding   |                 |                 |
| chr2-128f.6.691822 | 0.151344 | 0.858697 | 0.176249 | 0.860098 | 0.981636 | chr2  | 2.03E+08 | 2.03E+08 | + | 0 | NA | intron (AluSx SIN   | 36617  | NM_001114 | 65065    | Hs.648846NM_198945 | ENSG000000BEAL1     | A530083 C1         | neurobac        | rprotein-coding    |                   |                 |                 |
| chr20-33f.6.691822 | 0.151344 | 0.858697 | 0.176249 | 0.860098 | 0.981636 | chr20 | 3323658  | 3325283  | + | 0 | NA | intron (Nintron (N  | 83192  | NM_001005 | 25943    | Hs.516855NM_001005 | ENSG000000C2orf194  |                    |                 | chromosom          | rprotein-coding   |                 |                 |
| chr2-42f.6.691822  | 0.151344 | 0.858697 | 0.176249 | 0.860098 | 0.981636 | chr2  | 42590629 | 42592392 | + | 0 | NA | intron (Nintron (N  | -9499  | NR_002184 | 91695    | Hs.534041NR_002184 | ENSG000000RR7BP     | RR7BP dJ           | ribosom         | pseudo             |                   |                 |                 |
| chr4-84f.6.691822  | 0.151344 | 0.858697 | 0.176249 | 0.860098 | 0.981636 | chr4  | 84735131 | 84735659 | + | 0 | NA | intron (LTR16A LI   | 152268 | NM_001263 | 1040     | Hs.654896NM_001263 | ENSG000000CDS1      | CDS1               | C1DP-           | diac               | rprotein-coding   |                 |                 |
| chr5-113f.6.691822 | 0.151344 | 0.858697 | 0.176249 | 0.860098 | 0.981636 | chr5  | 1.13E+08 | 1.13E+08 | + | 0 | NA | non-codiron-codir   | 36760  | NM_152624 | 167227   | Hs.443875NM_152624 | ENSG000000DPC2      | NUDT20             | decappin        | rprotein-coding    |                   |                 |                 |
| chr5-148f.6.691822 | 0.151344 | 0.858697 | 0.176249 | 0.860098 | 0.981636 | chr5  | 1.48E+08 | 1.48E+08 | + | 0 | NA | intron (Nintron (N  | 56293  | NM_030793 | 81545    | Hs.483772NM_030793 | ENSG000000FBX038    | Fbx38 HBM          | F-box           | prc                | rprotein-coding   |                 |                 |
| chr6-321f.6.691822 | 0.151344 | 0.858697 | 0.176249 | 0.860098 | 0.981636 | chr6  | 32168112 | 32170195 | + | 0 | NA | TTS (NM_C TTS (NM_C | 963    | NR_106775 | 1.02E+08 | NR_106775          | ENSG000000MIR6721   |                    |                 |                    |                   |                 |                 |



|                     |          |          |          |          |          |       |          |          |   |   |    |                     |         |           |          |           |             |                     |            |            |                |                |
|---------------------|----------|----------|----------|----------|----------|-------|----------|----------|---|---|----|---------------------|---------|-----------|----------|-----------|-------------|---------------------|------------|------------|----------------|----------------|
| chr13-445.6.675072  | 0.168104 | 0.959975 | 0.175113 | 0.860991 | 0.981636 | chr13 | 44512464 | 44513592 | + | 0 | NA | intron (NL2c LINE   | -38727  | NM_001243 | 8848     | Hs.436388 | NM_006022   | ENSG000002TSC22D1   | Ptg-2 TGF  | TSC22      | don            | protein-coding |
| chr15-492.5.675072  | 0.168104 | 0.959975 | 0.175113 | 0.860991 | 0.981636 | chr15 | 49261585 | 49263848 | + | 0 | NA | intron (NL1PA3 LIN  | 92469   | NM_001298 | 2585     | Hs.122006 | NM_002044   | ENSG000002GALK2     | GK2        | galactoki  | protein-coding |                |
| chr15-715.5.675072  | 0.168104 | 0.959975 | 0.175113 | 0.860991 | 0.981636 | chr15 | 71989761 | 71990359 | + | 0 | NA | intron (Nintron (N  | -124198 | NM_001166 | 123228   | Hs.513002 | NM_145204   | ENSG000002SEN8P     | DEN1 NEDF  | SUMO       | pept           | protein-coding |
| chr16-315.5.675072  | 0.168104 | 0.959975 | 0.175113 | 0.860991 | 0.981636 | chr16 | 31909777 | 31910198 | + | 0 | NA | intron (NL1M1 LINE  | 36540   | NM_003414 | 10308    | Hs.46064E | NM_003414   | ENSG000002ZNF267    | HZF2       | zinc       | finger         | protein-coding |
| chr16-686.5.675072  | 0.168104 | 0.959975 | 0.175113 | 0.860991 | 0.981636 | chr16 | 68075788 | 68078649 | + | 0 | NA | intron (NALuSg7 SI  | -8152   | NM_173163 | 4775     | Hs.43658E | NM_00455E   | ENSG000002NFATC3    | NF-AT4c    | nuclear    | f              | protein-coding |
| chr16-705.5.675072  | 0.168104 | 0.959975 | 0.175113 | 0.860991 | 0.981636 | chr16 | 70500396 | 70501179 | + | 0 | NA | intron (NMIR3 SINE  | 22767   | NM_001365 | 25839    | Hs.20868C | NM_01538E   | ENSG000002COG4      | CDG2J COI  | component  | protein-coding |                |
| chr19-155.5.675072  | 0.168104 | 0.959975 | 0.175113 | 0.860991 | 0.981636 | chr19 | 15388225 | 15389627 | + | 0 | NA | intron (Nintron (N  | -9139   | NM_005858 | 10270    | Hs.59449E | NM_00585E   | ENSG000002AKAP8     | AKAP 95 A- | kinase     | protein-coding |                |
| chr20-252.5.675072  | 0.168104 | 0.959975 | 0.175113 | 0.860991 | 0.981636 | chr20 | 25271537 | 25273162 | + | 0 | NA | intron (Nintron (N  | 24264   | NM_002862 | 58730    | Hs.368157 | NM_00286E   | ENSG000002PYGB      | GPBB       | glycogen   | protein-coding |                |
| chr3-5764.5.675072  | 0.168104 | 0.959975 | 0.175113 | 0.860991 | 0.981636 | chr3  | 57640861 | 57643712 | + | 0 | NA | intron (NALuSx3 SI  | 44497   | NR_132366 | 1.06E+08 | Hs.667207 | NR_13236E   | ENSG000002ARF4-AS1  | -          | ARF4       | anticrNA       |                |
| chr6-358E.5.675072  | 0.168104 | 0.959975 | 0.175113 | 0.860991 | 0.981636 | chr6  | 35851123 | 35852745 | + | 0 | NA | intron (Nintron (N  | 46582   | NM_182548 | 222662   | Hs.367947 | NM_18254E   | ENSG000002LHFP15    | DFNB67 TM  | LHFP14     | tet            | protein-coding |
| chr6-111C.5.675072  | 0.168104 | 0.959975 | 0.175113 | 0.860991 | 0.981636 | chr6  | 1.11E+08 | 1.11E+08 | + | 0 | NA | intron (NMIRb SINE  | 27521   | NM_032194 | 84154    | Hs.37226E | NM_032194   | ENSG000002RPF2      | BXDC1 ba3  | ribosome   | protein-coding |                |
| chr8-225E.5.675072  | 0.168104 | 0.959975 | 0.175113 | 0.860991 | 0.981636 | chr8  | 22591628 | 22593098 | + | 0 | NA | intron (NALuSx1 SI  | -7236   | NM_001013 | 541565   | Hs.74350E | NM_17368E   | ENSG000002C8orf58   | -          | chromosom  | protein-coding |                |
| chr8-9504.5.675072  | 0.168104 | 0.959975 | 0.175113 | 0.860991 | 0.981636 | chr8  | 95046178 | 95048173 | + | 0 | NA | intron (Nintron (N  | 22186   | NR_148913 | 137682   | Hs.43550C | NM_15241E   | ENSG000002DUFAP6    | C8orf58 H  | NADH:ubiq  | protein-coding |                |
| chr9-3238.5.675072  | 0.168104 | 0.959975 | 0.175113 | 0.860991 | 0.981636 | chr9  | 32386612 | 32388148 | + | 0 | NA | intron (NMER63A DN  | 2737    | NM_001362 | 48       | Hs.56722E | NM_002197   | ENSG000002AC01      | AC08F3E    | 3H         | NADH:ubiq      | protein-coding |
| chrX-219E.5.675072  | 0.168104 | 0.959975 | 0.175113 | 0.860991 | 0.981636 | chrX  | 21992956 | 21993533 | + | 0 | NA | intron (Nintron (N  | -39081  | NM_001282 | 5251     | Hs.495834 | NM_000444   | ENSG000002PHEX      | HPDR HPDF  | phosphat   | protein-coding |                |
| chrX-685E.5.675072  | 0.168104 | 0.959975 | 0.175113 | 0.860991 | 0.981636 | chrX  | 68523313 | 68525641 | + | 0 | NA | intron (N(AT)n Sin  | 25426   | NM_173834 | 286451   | Hs.82719  | NM_173834   | ENSG000002YIPF6     | FinGER6    | Yip1       | dom            | protein-coding |
| chrX-7157.5.675072  | 0.168104 | 0.959975 | 0.175113 | 0.860991 | 0.981636 | chrX  | 71379710 | 71382730 | + | 0 | NA | intron (NLIME3G LI  | 14863   | NR_104387 | 6872     | Hs.15856C | NM_00460E   | ENSG000002TAF1      | BA2R CCG1  | TATA-box   | protein-coding |                |
| chr15-734.6.171879  | 0.144888 | 0.825562 | 0.175018 | 0.861066 | 0.981636 | chr15 | 75478635 | 75479142 | + | 0 | NA | intron (Nintron (N  | -23073  | NM_00114E | 25942    | Hs.51303E | NM_01547E   | ENSG000002SIN3A     | WITKOS     | SIN3       | trarp          | protein-coding |
| chr17-44C.6.171879  | 0.144888 | 0.825562 | 0.175018 | 0.861066 | 0.981636 | chr17 | 44082168 | 44082489 | + | 0 | NA | intron (Nintron (N  | 11417   | NR_028582 | 92579    | Hs.29400E | NM_13838E   | ENSG000002G6PC3     | SCN4 UGRF  | glucose-t  | protein-coding |                |
| chr1-244.5.162768   | 0.176756 | 1.009944 | 0.175016 | 0.861067 | 0.981636 | chr1  | 24440201 | 24441019 | + | 0 | NA | intron (Nintron (N  | 24585   | NM_00132E | 57185    | Hs.52344E | NM_02044E   | ENSG000002NPAL3     | DJ462023   | NIPA       | like           | protein-coding |
| chr3-186E.5.162768  | 0.176756 | 1.009944 | 0.175016 | 0.861067 | 0.981636 | chr3  | 1.87E+08 | 1.87E+08 | + | 0 | NA | intron (NMLT1J2 LI  | 4212    | NM_01813E | 55171    | Hs.51846E | NM_01813E   | ENSG000002TBCCD1    | -          | TBCC       | dom            | protein-coding |
| chr2-229E.7.854524  | -0.14572 | 0.832696 | -0.175   | 0.861078 | 0.981636 | chr2  | 2.3E+08  | 2.3E+08  | + | 0 | NA | 3' UTR (N3' UTR (N  | 87168   | NM_00134E | 9320     | Hs.57264E | NM_00423E   | ENSG000002TRIP12    | MRD49 TRI  | thyroid    | protein-coding |                |
| chr17-49E.8.228734  | 0.142568 | 0.814704 | 0.174994 | 0.861084 | 0.981636 | chr17 | 49821330 | 49822681 | + | 0 | NA | intron (Nintron (N  | -23905  | NM_001247 | 729220   | Hs.43413E | NM_00124791 | FLJ45513            | -          | uncharact  | protein-coding |                |
| chr13-951.6.228516  | 0.163105 | 0.932368 | 0.174937 | 0.861129 | 0.981636 | chr13 | 95123091 | 95124394 | + | 0 | NA | intron (Nintron (N  | -86602  | NR_145733 | 1.1E+08  | NR_145733 | SNORD13G    | -                   | small      | nucsnRNA   |                |                |
| chr15-49C.6.228516  | 0.163105 | 0.932368 | 0.174937 | 0.861129 | 0.981636 | chr15 | 49018926 | 49019446 | + | 0 | NA | intron (Nintron (N  | 27260   | NM_00119E | 9728     | Hs.9997   | NM_014701   | ENSG000002SECSBP2L  | SBP2L SLA  | SECIS      | bir            | protein-coding |
| chr8-480E.6.228516  | 0.163105 | 0.932368 | 0.174937 | 0.861129 | 0.981636 | chr8  | 48025108 | 48025865 | + | 0 | NA | intron (NALuSz SIN  | 17055   | NM_00335E | 7336     | Hs.49169E | NM_00335E   | ENSG000002UBE2V2    | DDVIT1 DE  | ubiquitin  | protein-coding |                |
| chr1-328E.6.187376  | 0.160825 | 0.920072 | 0.174796 | 0.86124  | 0.981636 | chr1  | 32838488 | 32839599 | + | 0 | NA | intron (NFLAM_A SI  | 13729   | NR_13510E | 64766    | Hs.44088C | NM_02275E   | ENSG000002S100BP    | S100BPBR   | S100P      | bir            | protein-coding |
| chr1-358E.6.187376  | 0.160825 | 0.920072 | 0.174796 | 0.86124  | 0.981636 | chr1  | 35824821 | 35829734 | + | 0 | NA | intron (NALuSx1 SI  | 19261   | NM_01762E | 192670   | Hs.74485E | NM_01762E   | ENSG000002AG04      | E1F2C4     | argonaut   | protein-coding |                |
| chr1-405E.6.187376  | 0.160825 | 0.920072 | 0.174796 | 0.86124  | 0.981636 | chr1  | 40503039 | 40503890 | + | 0 | NA | Intergeni Intergeni | -5255   | NM_00134E | 64789    | Hs.59584  | NM_02277E   | ENSG000002EX05      | Clorf176   | exonuc     | protein-coding |                |
| chr1-776E.6.187376  | 0.160825 | 0.920072 | 0.174796 | 0.86124  | 0.981636 | chr1  | 77633269 | 77634024 | + | 0 | NA | intron (NMIR SINE   | 49012   | NM_015534 | 26009    | Hs.48050E | NM_015534   | ENSG000002ZZZ3      | ATAC1      | zinc       | finger         | protein-coding |
| chr1-211E.6.187376  | 0.160825 | 0.920072 | 0.174796 | 0.86124  | 0.981636 | chr1  | 2.11E+08 | 2.11E+08 | + | 0 | NA | intron (NLIMed LI   | 26190   | NM_018254 | 55758    | Hs.35639E | NM_018254E  | ENSG000002RCOR3     | -          | REST       | core           | protein-coding |
| chr10-79E.6.187376  | 0.160825 | 0.920072 | 0.174796 | 0.86124  | 0.981636 | chr10 | 79200166 | 79204014 | + | 0 | NA | intron (NFLAM_C SI  | 133124  | NM_02033E | 57178    | Hs.19311E | NM_02033E   | ENSG000002ZM1Z1     | MIZ RAI17  | zinc       | finger         | protein-coding |
| chr10-80E.6.187376  | 0.160825 | 0.920072 | 0.174796 | 0.86124  | 0.981636 | chr10 | 80517667 | 80520150 | + | 0 | NA | 3' UTR (N3' UTR (N  | 17034   | NR_100661 | 1.02E+08 | Hs.59366E | NR_120661   | ENSG000002LOC10192E | -          | uncharact  | crNA           |                |
| chr11-74C.6.187376  | 0.160825 | 0.920072 | 0.174796 | 0.86124  | 0.981636 | chr11 | 74089989 | 74095377 | + | 0 | NA | intron (Nintron (N  | 78319   | NM_015531 | 26005    | Hs.55793E | NM_015531E  | ENSG000002C2CD3     | OFD14      | C2         | domair         | protein-coding |
| chr12-10F.6.187376  | 0.160825 | 0.920072 | 0.174796 | 0.86124  | 0.981636 | chr12 | 1.05E+08 | 1.05E+08 | + | 0 | NA | 3' UTR (N3' UTR (N  | 16424   | NM_15231E | 121053   | Hs.29556E | NM_15231E   | ENSG000002C12orf45  | -          | chromosom  | protein-coding |                |
| chr12-11F.6.187376  | 0.160825 | 0.920072 | 0.174796 | 0.86124  | 0.981636 | chr12 | 1.17E+08 | 1.17E+08 | + | 0 | NA | intron (NMER58B DN  | 17509   | NM_01500E | 23014    | Hs.74037E | NM_01500E   | ENSG000002FBX021    | FBX21      | F-box      | prc            | protein-coding |
| chr13-20E.6.187376  | 0.160825 | 0.920072 | 0.174796 | 0.86124  | 0.981636 | chr13 | 20837019 | 20839175 | + | 0 | NA | intron (Nintron (N  | -64136  | NM_00131E | 221143   | Hs.26674  | NM_17492E   | ENSG000002EEF1AKMT1 | ESP13 N6A  | EEF1A      | lys            | protein-coding |
| chr13-99E.6.187376  | 0.160825 | 0.920072 | 0.174796 | 0.86124  | 0.981636 | chr13 | 99559588 | 99561885 | + | 0 | NA | intron (NALuYk2 SI  | -16377  | NR_12639E | 1.04E+08 | Hs.63938E | NR_126390   | LINC0103E           | -          | long       | intcrNA        |                |
| chr13-102E.6.187376 | 0.160825 | 0.920072 | 0.174796 | 0.86124  | 0.981636 | chr13 | 1.03E+08 | 1.03E+08 | + | 0 | NA | intron (Nintron (N  | 19671   | NM_00101E | 196541   | Hs.50862E | NM_00101E   | ENSG000002METTL21C  | C13orf39   | methyl     | transferase    | protein-coding |
| chr13-114E.6.187376 | 0.160825 | 0.920072 | 0.174796 | 0.86124  | 0.981636 | chr13 | 1.14E+08 | 1.14E+08 | + | 0 | NA | intron (NLIM5 LINE  | 30505   | NM_00132E | 22821    | Hs.59307E | NM_00736E   | ENSG000002CRASA3    | GAP11P4B   | FRAS       | p21            | protein-coding |
| chr15-22E.6.187376  | 0.160825 | 0.920072 | 0.174796 | 0.86124  | 0.981636 | chr15 | 22902276 | 22903932 | + | 0 | NA | intron (Nintron (N  | 14209   | NM_00100E | 23191    | Hs.26704  | NM_01460E   | ENSG000002CYF1P1    | P140SRA    | 1-cytoplas | protein-coding |                |
| chr16-35E.6.187376  | 0.160825 | 0.920072 | 0.174796 | 0.86124  | 0.981636 | chr16 | 3507405  | 3508460  | + | 0 | NA | intron (NLIME4b LI  | -1958   | NM_02479E | 23059    | Hs.15599E | NM_015041   | ENSG000002CLUAP1    | CFAP22 F   | cytoplasm  | protein-coding |                |
| chr16-43E.6.187376  | 0.160825 | 0.920072 | 0.174796 | 0.86124  | 0.981636 | chr16 | 4332931  | 4333686  | + | 0 | NA | intron (Nintron (N  | 1084    | NM_03257E | 84662    | Hs.59208E | NM_03257E   | ENSG000002GLIS2     | NKL NPHP7  | GLIS       | fami           | protein-coding |
| chr16-87E.6.187376  | 0.160825 | 0.920072 | 0.174796 | 0.86124  | 0.981636 | chr16 | 87753809 | 87755987 | + | 0 | NA | intron (Nintron (N  | 11088   | NM_00118E | 54758    | Hs        |             |                     |            |            |                |                |



|            |          |          |           |          |          |          |       |          |          |   |   |    |                      |                  |          |                     |           |                  |                                    |
|------------|----------|----------|-----------|----------|----------|----------|-------|----------|----------|---|---|----|----------------------|------------------|----------|---------------------|-----------|------------------|------------------------------------|
| chr16-862  | 6.69968  | 0.154643 | 0.887641  | 0.174218 | 0.861694 | 0.981636 | chr16 | 86272927 | 86273969 | + | 0 | NA | intron (Nintron (N   | 12799 NR_104139  | 1.01E+08 | Hs. 640512NR_104139 | LINC01081 | TCONS0002        | long intencRNA                     |
| chr17-475  | 6.69968  | 0.154643 | 0.887641  | 0.174218 | 0.861694 | 0.981636 | chr17 | 47944854 | 47945679 | + | 0 | NA | intron (Nintron (N   | 3695 NM_018125   | 55163    | Hs. 631742NM_018125 | ENSG00000 | PNPO             | HEL-5-302 pyridoxan protein-coding |
| chr17-815  | 6.69968  | 0.154643 | 0.887641  | 0.174218 | 0.861694 | 0.981636 | chr17 | 81544672 | 81550366 | + | 0 | NA | exon (NM_exon (NM    | 4834 NM_025161   | 80233    | Hs. 31390ENM_025161 | ENSG00000 | FAAP100          | C17orf70 FA core cprotein-coding   |
| chr18-487  | 6.69968  | 0.154643 | 0.887641  | 0.174218 | 0.861694 | 0.981636 | chr18 | 48761606 | 48763389 | + | 0 | NA | intron (Nintron (N   | 91897 NR_039897  | 1.01E+08 | NR_039897           | ENSG00000 | MIR4743          | - microRNA ncRNA                   |
| chr19-163  | 6.69968  | 0.154643 | 0.887641  | 0.174218 | 0.861694 | 0.981636 | chr19 | 16340305 | 16417171 | + | 0 | NA | intron (NAluY SINE   | 14739 NM_001136  | 69229    | Hs. 371282NM_003200 | ENSG00000 | TCF3             | AGM8 E2A transcrip protein-coding  |
| chr19-445  | 6.69968  | 0.154643 | 0.887641  | 0.174218 | 0.861694 | 0.981636 | chr19 | 44981543 | 44982432 | + | 0 | NA | intron (MER33 DNA    | -19477 NM_006509 | 5971     | Hs. 654402NM_006509 | ENSG00000 | CRELB            | I-REL IML RELB protprotein-coding  |
| chr2-8607  | 6.69968  | 0.154643 | 0.887641  | 0.174218 | 0.861694 | 0.981636 | chr2  | 86073963 | 86075065 | + | 0 | NA | intron (MER117 DN    | 31372 NM_015424  | 25885    | Hs. 53181ENM_015424 | ENSG00000 | POLR1A           | A190 AFDC RNA polyprotein-coding   |
| chr2-9941  | 6.69968  | 0.154643 | 0.887641  | 0.174218 | 0.861694 | 0.981636 | chr2  | 99411772 | 99410696 | + | 0 | NA | intron (NAluSx3 SI   | 74845 NM_015920  | 9669     | Hs. 158688NM_015904 | ENSG00000 | E1F5B            | IF22 eukaryotprotein-coding        |
| chr2-1215  | 6.69968  | 0.154643 | 0.887641  | 0.174218 | 0.861694 | 0.981636 | chr2  | 1.22E+08 | 1.22E+08 | + | 0 | NA | intron (Nintron (N   | -5330 NR_023343  | 1E+08    | Hs. 68963ENR_023343 | ENSG00000 | RNU4ATAC         | MOPD1 RFWRNA, U4atsnRNA            |
| chr2-1602  | 6.69968  | 0.154643 | 0.887641  | 0.174218 | 0.861694 | 0.981636 | chr2  | 1.6E+08  | 1.6E+08  | + | 0 | NA | intron (Nintron (N   | -1072 NR_103776  | 1.01E+08 | Hs. 726623NR_103776 | ENSG00000 | LINC02478        | - long intencRNA                   |
| chr3-5148  | 6.69968  | 0.154643 | 0.887641  | 0.174218 | 0.861694 | 0.981636 | chr3  | 51482768 | 51483330 | + | 0 | NA | intron (NAluSq2 SI   | 16954 NM_001171  | 9730     | Hs. 716623NM_014700 | ENSG00000 | DCAF1            | RIP VPRBF DDB1 and protein-coding  |
| chr3-129C  | 6.69968  | 0.154643 | 0.887641  | 0.174218 | 0.861694 | 0.981636 | chr3  | 1.29E+08 | 1.29E+08 | + | 0 | NA | 3' UTR (N3' UTR (N   | 29810 NM_000174  | 2815     | Hs. 1144 NM_000174  | ENSG00000 | GP9              | CD42a GPIglycoprotprotein-coding   |
| chr5-660C  | 6.69968  | 0.154643 | 0.887641  | 0.174218 | 0.861694 | 0.981636 | chr5  | 6600887  | 6602752  | + | 0 | NA | intron (Nintron (N   | 18543 NR_024424  | 255167   | Hs. 43551ENR_024424 | ENSG00000 | LINC01018        | SRHC long intencRNA                |
| chr6-4224  | 6.69968  | 0.154643 | 0.887641  | 0.174218 | 0.861694 | 0.981636 | chr6  | 42244455 | 42245810 | + | 0 | NA | intron (N MamTip2 E  | -27281 NM_018141 | 55173    | Hs. 380887NM_018141 | ENSG00000 | MRRP50           | MRP-S10 Mitochon protein-coding    |
| chr6-430C  | 6.69968  | 0.154643 | 0.887641  | 0.174218 | 0.861694 | 0.981636 | chr6  | 43031176 | 43031526 | + | 0 | NA | IntergeniAluY SINE   | 9728 NM_033112   | 88745    | Hs. 309231NM_033112 | ENSG00000 | CRP36            | C6orf153 ribosomal protein-coding  |
| chr6-1094  | 6.69968  | 0.154643 | 0.887641  | 0.174218 | 0.861694 | 0.981636 | chr6  | 1.09E+08 | 1.09E+08 | + | 0 | NA | intron (NLa2a LINE   | -6902 NM_001286  | 64780    | Hs. 33476 NM_022766 | ENSG00000 | MICAL1           | MICAL MICrotub protein-coding      |
| chr7-848E  | 6.69968  | 0.154643 | 0.887641  | 0.174218 | 0.861694 | 0.981636 | chr7  | 848602   | 852684   | + | 0 | NA | intron (Nintron (N   | 9269 NM_001367   | 23353    | Hs. 438072NM_025154 | ENSG00000 | CCSUN1           | UNC4A Sad1 and protein-coding      |
| chr7-2711  | 6.69968  | 0.154643 | 0.887641  | 0.174218 | 0.861694 | 0.981636 | chr7  | 27115573 | 27117620 | + | 0 | NA | intron (Nintron (N   | 2999 NM_030661   | 3200     | Hs. 659337NM_030661 | ENSG00000 | H0XA3            | H0X1 H0Xhomeobox protein-coding    |
| chr8-4227  | 6.69968  | 0.154643 | 0.887641  | 0.174218 | 0.861694 | 0.981636 | chr8  | 42274084 | 42275987 | + | 0 | NA | intron (NAluSx SIN   | 3733 NR_033818   | 3551     | Hs. 597664NM_001556 | ENSG00000 | IKBK             | IKK-beta inhibitor protein-coding  |
| chr9-982C  | 6.69968  | 0.154643 | 0.887641  | 0.174218 | 0.861694 | 0.981636 | chr9  | 98234773 | 98235966 | + | 0 | NA | intron (Nintron (N   | -6152 NR_106913  | 1.02E+08 | NR_106913           | ENSG00000 | MIR6854          | hsa-mir-6854 microRNA ncRNA        |
| chrX-535E  | 6.69968  | 0.154643 | 0.887641  | 0.174218 | 0.861694 | 0.981636 | chrX  | 53582676 | 53583424 | + | 0 | NA | intron (NLa2a LINE   | -25776 NR_029484 | 406889   | NR_029484           | ENSG00000 | MIRLET7F2        | LET7F2 Mi microRNA ncRNA           |
| chrX-129F  | 6.69968  | 0.154643 | 0.887641  | 0.174218 | 0.861694 | 0.981636 | chrX  | 1.3E+08  | 1.3E+08  | + | 0 | NA | intron (Nintron (N   | 16056 NM_001282  | 6594     | Hs. 152292NM_003066 | ENSG00000 | SMARCA1          | TSWI NURF SWI/SNF i protein-coding |
| chr8-1002  | 4.650464 | 0.187149 | 0.1074392 | 0.174191 | 0.861716 | 0.981636 | chr8  | 1E+08    | 1E+08    | + | 0 | NA | intron (Nintron (N   | 28522 NM_001355  | 25897    | Hs. 292882NM_015434 | ENSG00000 | RNF19A           | RNF19 ring fing protein-coding     |
| chr14-1023 | 13.58849 | -0.1117  | 0.641725  | -0.17406 | 0.861816 | 0.981636 | chr14 | 1.03E+08 | 1.03E+08 | + | 0 | NA | intron (Nintron (N   | 1572 NR_002964   | 67811    | Hs. 658237NR_002964 | ENSG00000 | SNORA28          | ACA28 small nucsnoRNA              |
| chr5-1511  | 9.212202 | 0.134049 | 0.770689  | 0.173934 | 0.861917 | 0.981636 | chr5  | 1.51E+08 | 1.51E+08 | + | 0 | NA | intron (NMLTIC LTF   | -16596 NM_001252 | 10318    | Hs. 355141NM_006056 | ENSG00000 | TNIP1            | ABIN-1 NFNFAIP3 i protein-coding   |
| chrX-159   | 2.212202 | 0.134049 | 0.770689  | 0.173934 | 0.861917 | 0.981636 | chrX  | 1593787  | 1595080  | + | 0 | NA | intron (Nintron (N   | -1022 NM_004043  | 438      | Hs. 522572NM_004043 | ENSG00000 | ASMT             | ASMTY Hicacytiser protein-coding   |
| chr1-217E  | 8.699898 | 0.137173 | 0.788829  | 0.173895 | 0.861948 | 0.981636 | chr1  | 21728445 | 21729228 | + | 0 | NA | intron (Nintron (N   | 54313 NM_001355  | 84196    | Hs. 467524NM_032236 | ENSG00000 | USP48            | RAP1GAI1 ubiquitir protein-coding  |
| chr1-538E  | 8.699898 | 0.137173 | 0.788829  | 0.173895 | 0.861948 | 0.981636 | chr1  | 53881683 | 53882914 | + | 0 | NA | intron (NLIIP8A LI   | 7499 NR_03664C   | 54432    | Hs. 11923 NM_018982 | ENSG00000 | YIPF1            | DJ167A19. Yipl dome protein-coding |
| chr11-71E  | 8.699898 | 0.137173 | 0.788829  | 0.173895 | 0.861948 | 0.981636 | chr11 | 71237967 | 71240631 | + | 0 | NA | IntergeniMIR1_Amm    | -14503 NM_012305 | 22941    | Hs. 268722NM_012305 | ENSG00000 | SHANK2           | AUS17 CSH3 and n protein-coding    |
| chr12-651E | 8.699898 | 0.137173 | 0.788829  | 0.173895 | 0.861948 | 0.981636 | chr12 | 6514388  | 6516009  | + | 0 | NA | intron (NAluJr SIN   | 4976 NR_004387   | 692148   | NR_004387           | ENSG00000 | SCARN10          | U85 small Ca_ncrNA                 |
| chr14-30E  | 8.699898 | 0.137173 | 0.788829  | 0.173895 | 0.861948 | 0.981636 | chr14 | 30630632 | 30632357 | + | 0 | NA | intron (NMER47A DN   | 9175 NM_016106   | 23256    | Hs. 369166NM_016106 | ENSG00000 | SCFD1            | C14orf16;secl fami protein-coding  |
| chr16-48E  | 8.699898 | 0.137173 | 0.788829  | 0.173895 | 0.861948 | 0.981636 | chr16 | 48270079 | 48270837 | + | 0 | NA | intron (Nintron (N   | -22919 NM_001377 | 85320    | Hs. 562267NM_032583 | ENSG00000 | ABCC11           | EHWB MRPE ATP bindi protein-coding |
| chr2-2627  | 8.699898 | 0.137173 | 0.788829  | 0.173895 | 0.861948 | 0.981636 | chr2  | 26279494 | 26280688 | + | 0 | NA | exon (NM_exon (NM    | 31552 NM_001281  | 3032     | Hs. 51584NM_000183  | ENSG00000 | HADHB            | ECCB MSF hydroxycap protein-coding |
| chr2-276C  | 8.699898 | 0.137173 | 0.788829  | 0.173895 | 0.861948 | 0.981636 | chr2  | 27634643 | 27636171 | + | 0 | NA | intron (Nintron (N   | 6357 NM_007266   | 11321    | Hs. 18259 NM_007266 | ENSG00000 | CPNP1            | ATPBD1A GPN-loop protein-coding    |
| chr2-6987  | 8.699898 | 0.137173 | 0.788829  | 0.173895 | 0.861948 | 0.981636 | chr2  | 69870115 | 69871081 | + | 0 | NA | intron (NLMIB3 LIN   | -23358 NR_03786E | 11017    | Hs. 54649 NM_006857 | ENSG00000 | SNRNP27          | 27K RY1 small nuc protein-coding   |
| chr20-627  | 8.699898 | 0.137173 | 0.788829  | 0.173895 | 0.861948 | 0.981636 | chr20 | 62797980 | 62800088 | + | 0 | NA | exon (NM_exon (NM    | 2561 NR_136405   | 55257    | Hs. 44326CNR_01827C | ENSG00000 | MRGBP            | C20orf20 MRG domai protein-coding  |
| chr4-871E  | 8.699898 | 0.137173 | 0.788829  | 0.173895 | 0.861948 | 0.981636 | chr4  | 87127322 | 87127662 | + | 0 | NA | intron (N (CTCCTT) r | 92776 NM_001292  | 57563    | Hs. 106601NM_020803 | ENSG00000 | KLHL8            | - kelch lik protein-coding         |
| chr5-104E  | 8.699898 | 0.137173 | 0.788829  | 0.173895 | 0.861948 | 0.981636 | chr5  | 10406754 | 10408825 | + | 0 | NA | intron (NAluJp SIN   | 5425 NR_162106   | 1.13E+08 | NR_162106           | MIR10397  | - microRNA ncRNA |                                    |
| chr5-324C  | 8.699898 | 0.137173 | 0.788829  | 0.173895 | 0.861948 | 0.981636 | chr5  | 32409576 | 32410715 | + | 0 | NA | intron (NAluJb SIN   | -15670 NR_030305 | 693164   | NR_030305           | ENSG00000 | MIR579           | MIRN579 microRNA ncRNA             |
| chr5-770E  | 8.699898 | 0.137173 | 0.788829  | 0.173895 | 0.861948 | 0.981636 | chr5  | 77059675 | 77062699 | + | 0 | NA | intron (NLMIME3A LI  | 19384 NR_003014  | 677828   | Hs. 69324ENR_003014 | ENSG00000 | SNORA47          | HBI-115 small nucsnoRNA            |
| chr6-411E  | 8.699898 | 0.137173 | 0.788829  | 0.173895 | 0.861948 | 0.981636 | chr6  | 4115389  | 4117643  | + | 0 | NA | intron (NAluSx1 SI   | 18952 NM_001166  | 10455    | Hs. 15250 NM_006117 | ENSG00000 | EC12             | ACBD2 DRS enoyl-CoA protein-coding |
| chr3-107E  | 9.724506 | 0.131289 | 0.755385  | 0.173805 | 0.862019 | 0.981636 | chr3  | 1.08E+08 | 1.08E+08 | + | 0 | NA | 3' UTR (N3' UTR (N   | 72445 NR_02427E  | 151658   | Hs. 15904ENR_015414 | ENSG00000 | LINC0063E        | - long intencRNA                   |
| chr17-37E  | 7.667433 | 0.14673  | 0.844551  | 0.173738 | 0.862072 | 0.981636 | chr17 | 37578812 | 37579748 | + | 0 | NA | intron (Nintron (N   | 30138 NM_08055C  | 11276    | Hs. 594647NM_007247 | ENSG00000 | SYNRG            | APIGBP1 Synergim protein-coding    |
| chr2-218E  | 7.667433 | 0.14673  | 0.844551  | 0.173738 | 0.862072 | 0.981636 | chr2  | 2.19E+08 | 2.19E+08 | + | 0 | NA | intron (Nintron (N   | -16572 NM_01464C | 9654     | Hs. 47140ENM_01464C | ENSG00000 | TTL4             | - tubulin t protein-coding         |
| chr3-502E  | 7.667433 | 0.14673  | 0.844551  | 0.173738 | 0.862072 | 0.981636 | chr3  | 50288527 | 50288919 | + | 0 | NA | TTS (NM_C TTS (NM_C  | 3872 NM_006764   | 7866     | Hs. 315177NM_006764 | ENSG00000 | IFRD2            | IFNRP SKM interferc protein-coding |
| chr1-125E  | 6.48587  | -0.15913 | 0.916328  | -0.17366 | 0.862132 | 0.981636 | chr1  | 12574677 | 12575458 | + | 0 | NA | intron (NAluSx1 SI   | 3956 NR_106788   | 1.02E+08 | NR_106788           | ENSG00000 | MIR6730          | hsa-mir-6730 microRNA ncRNA        |
| chr10-10C  | 6.48587  | -0.15913 | 0.916328  | -0.17366 | 0.862132 | 0.981636 | chr10 | 1E+08    | 1E+08    | + | 0 | NA | intron (NAluY SINE   | -7210 NR_002954  | 6778     |                     |           |                  |                                    |

|                    |           |          |           |          |          |       |          |          |   |   |    |                    |                   |                              |                     |                    |                                |
|--------------------|-----------|----------|-----------|----------|----------|-------|----------|----------|---|---|----|--------------------|-------------------|------------------------------|---------------------|--------------------|--------------------------------|
| chr4-1327.7.724288 | 0.144793  | 0.838988 | 0.172581  | 0.862981 | 0.981636 | chr4  | 1327765  | 1329701  | + | 0 | NA | intron (NCpG)      | -18475 NM_020894  | 57654 Hs. 380477ENM_020894   | ENSG00000CVSSA      | KIAA1530 UV        | stimulprotein-coding           |
| chr7-5918.7.724288 | 0.144793  | 0.838988 | 0.172581  | 0.862981 | 0.981636 | chr7  | 5918551  | 5919324  | + | 0 | NA | intron (Nintron (N | 20204 NM_015622   | 51622 Hs. 530000NM_015622    | ENSG00000CCZ1       | C7orf28A CCZ1      | homcprotein-coding             |
| chr1-1506.11.69144 | 0.119923  | 0.69517  | 0.172508  | 0.863038 | 0.981636 | chr1  | 1.51E+08 | 1.51E+08 | + | 0 | NA | TTS (NM_2TTS (NM_2 | 1996 NM_207047    | 2029 Hs. 632454ENM_004436    | ENSG00000CENSA      | ARPP-19e           | endosulfiprotein-coding        |
| chr1-427.5.68293   | 0.165581  | 0.960008 | 0.172478  | 0.863061 | 0.981636 | chr1  | 42706353 | 42707451 | + | 0 | NA | IntergeniAluSx1 S1 | 23766 NR_132737   | 4904 Hs. 473582NM_004455     | ENSG00000YBX1       | BP-8 CBF-Y-box     | birprotein-coding              |
| chr1-1093.5.68293  | 0.165581  | 0.960008 | 0.172478  | 0.863061 | 0.981636 | chr1  | 1.09E+08 | 1.09E+08 | + | 0 | NA | intron (NAluSq2 S1 | 40060 NM_00120E   | 6272 Hs. 485195NM_002955     | ENSG00000SORT1      | Gp95 LDLc          | stortilin protein-coding       |
| chr10-466.5.68293  | 0.165581  | 0.960008 | 0.172478  | 0.863061 | 0.981636 | chr10 | 466262   | 468593   | + | 0 | NA | intron (NLIPA2 LIN | -161137 NR_147612 | 1.02E+08 Hs. 654707NR_147612 | ENSG00000CLOC10193C | -                  | uncharactncRNA                 |
| chr17-166.5.68293  | 0.165581  | 0.960008 | 0.172478  | 0.863061 | 0.981636 | chr17 | 16643443 | 16646141 | + | 0 | NA | intron (NLTR65 LTF | 9058 NM_020787    | 57547 Hs. 128078NM_020787    | ENSG00000ZNF624     | -                  | zinc fingprotein-coding        |
| chr17-463.5.68293  | 0.165581  | 0.960008 | 0.172478  | 0.863061 | 0.981636 | chr17 | 46356677 | 46357331 | + | 0 | NA | intron (NAluS2 S1  | 4783 NM_001366    | 1.01E+08 Hs. 529555NM_001033 | ENSG00000ARL17B     | ARL17 ARI          | ADP ribosprotein-coding        |
| chr19-493.5.68293  | 0.165581  | 0.960008 | 0.172478  | 0.863061 | 0.981636 | chr19 | 49357300 | 49357748 | + | 0 | NA | intron (Nintron (N | 3993 NM_00125E    | 8463 Hs. 515534NM_00359E     | ENSG00000TEAD2      | ETF TEAD-TEA       | domaiprotein-coding            |
| chr21-327.5.68293  | 0.165581  | 0.960008 | 0.172478  | 0.863061 | 0.981636 | chr21 | 32767436 | 32768203 | + | 0 | NA | intron (NTHE1A LTF | 3936 NM_01332E    | 94104 Hs. 644004NM_01332E    | ENSG00000PAXBP1     | BMO20 C21PAX3      | and protein-coding             |
| chr21-392.5.68293  | 0.165581  | 0.960008 | 0.172478  | 0.863061 | 0.981636 | chr21 | 39219113 | 39221038 | + | 0 | NA | intron (NMIRb SINE | -36561 NM_203433  | 8624 Hs. 473838NM_00372C     | ENSG00000PSMG1      | C21LRP DS          | proteasoneprotein-coding       |
| chr3-3312.5.68293  | 0.165581  | 0.960008 | 0.172478  | 0.863061 | 0.981636 | chr3  | 33121380 | 33123343 | + | 0 | NA | intron (Nintron (N | 8403 NM_006371    | 10491 Hs. 517888NM_006371    | ENSG00000CRTAP      | CASP LEPF          | cartilageprotein-coding        |
| chr3-1238.5.68293  | 0.165581  | 0.960008 | 0.172478  | 0.863061 | 0.981636 | chr3  | 1.24E+08 | 1.24E+08 | + | 0 | NA | intron (Nintron (N | 64477 NM_05302E   | 4638 Hs. 477377NM_00596E     | ENSG00000MYLK       | AAT7 KRP myosin    | liprotein-coding               |
| chr4-1225.5.68293  | 0.165581  | 0.960008 | 0.172478  | 0.863061 | 0.981636 | chr4  | 1.23E+08 | 1.23E+08 | + | 0 | NA | intron (NHERV32-i  | 30237 NM_00134E   | 166378 Hs. 709645NM_145207   | ENSG00000SPATA5     | AFG2 EHL spermatog | protein-coding                 |
| chr4-1766.5.68293  | 0.165581  | 0.960008 | 0.172478  | 0.863061 | 0.981636 | chr4  | 1.77E+08 | 1.77E+08 | + | 0 | NA | intron (NLIPA3 LIN | 95792 NM_00542E   | 7424 Hs. 435215NM_00542E     | ENSG00000VEGFC      | Flt4-L Ll          | vascular protein-coding        |
| chr7-2996.5.68293  | 0.165581  | 0.960008 | 0.172478  | 0.863061 | 0.981636 | chr7  | 29966588 | 29967626 | + | 0 | NA | intron (Nintron (N | 22694 NM_01476E   | 9805 Hs. 52074CNM_01476E     | ENSG00000SCRN1      | SES1               | secernin protein-coding        |
| chr7-931C.5.68293  | 0.165581  | 0.960008 | 0.172478  | 0.863061 | 0.981636 | chr7  | 93109642 | 93110766 | + | 0 | NA | intron (NLIPA5 LIN | 7775 NM_017654    | 54809 Hs. 65641 NM_017654    | ENSG00000SAMD9      | C7orf5 DF          | estriin epsilon protein-coding |
| chr8-9748.5.68293  | 0.165581  | 0.960008 | 0.172478  | 0.863061 | 0.981636 | chr8  | 9748161  | 9752805  | + | 0 | NA | intron (NMLTIH-int | 8811 NR_030327    | 693182 NR_030327             | ENSG00000MIR597     | MIRN597 hmicroRNA  | ncRNA                          |
| chr8-2534.5.68293  | 0.165581  | 0.960008 | 0.172478  | 0.863061 | 0.981636 | chr8  | 25347010 | 25347785 | + | 0 | NA | intron (Nintron (N | 1995 NR_10693E    | 1.02E+08 Hs. 10693E          | ENSG00000MIR6876    | hsa-mir-6          | microRNA ncRNA                 |
| chr8-305C.5.68293  | 0.165581  | 0.960008 | 0.172478  | 0.863061 | 0.981636 | chr8  | 30509947 | 30511176 | + | 0 | NA | intron (Nintron (N | -125160 NR_04620E | 1E+08 Hs. 126812NR_04620E    | ENSG00000RBPMS-AS1  | RBPMS              | antncRNA                       |
| chr8-9002.5.68293  | 0.165581  | 0.960008 | 0.172478  | 0.863061 | 0.981636 | chr8  | 90022011 | 90024171 | + | 0 | NA | intron (Nintron (N | 21614 NM_00135E   | 1666 Hs. 492212NM_00135E     | ENSG00000DEC1       | DEC1 NADF2         | 4-dienccprotein-coding         |
| chr1-1102.6.931611 | -0.15146  | 0.878592 | -0.17239  | 0.86313  | 0.981636 | chr1  | 11026144 | 11027503 | + | 0 | NA | 3' UTR (N3' UTR (N | 14201 NM_00737E   | 23435 Hs. 300624NM_00737E    | ENSG00000TARDBP     | ALS10 TDF          | TAR DNA tprotein-coding        |
| chr1-5276.6.931611 | -0.15146  | 0.878592 | -0.17239  | 0.86313  | 0.981636 | chr1  | 5276027  | 5279608  | + | 0 | NA | exon (NM exon (NM  | -46431 NM_00130E  | 440590 Hs. 658455NM_001004   | ENSG00000CYG11A     | ZYG11              | zym-11 f2 protein-coding       |
| chr1-202C.6.931611 | -0.15146  | 0.878592 | -0.17239  | 0.86313  | 0.981636 | chr1  | 202E+08  | 2.02E+08 | + | 0 | NA | TTS (NM_2TTS (NM_2 | 3346 NR_10679E    | 1.02E+08 Hs. 10679E          | ENSG00000MIR6740    | hsa-mir-6          | microRNA ncRNA                 |
| chr11-951.6.931611 | -0.15146  | 0.878592 | -0.17239  | 0.86313  | 0.981636 | chr11 | 9513330  | 9514305  | + | 0 | NA | intron (NAluS2 SIN | 52805 NM_00344E   | 7702 Hs. 523471NM_00344E     | ENSG00000ZNF143     | SBF STAF zinc      | fingprotein-coding             |
| chr11-116.6.931611 | -0.15146  | 0.878592 | -0.17239  | 0.86313  | 0.981636 | chr11 | 11925308 | 11925744 | + | 0 | NA | intron (NLMCa LIN  | 83114 NM_00101E   | 27122 Hs. 292155NM_01325E    | ENSG00000DKK3       | NRIC RIG           | dickkopf protein-coding        |
| chr11-478.6.931611 | -0.15146  | 0.878592 | -0.17239  | 0.86313  | 0.981636 | chr11 | 47819100 | 47820019 | + | 0 | NA | intron (Nintron (N | 28791 NR_13463E   | 23279 Hs. 643525NM_015231    | ENSG00000NUP160     | PHS19              | nucleopor protein-coding       |
| chr12-567.6.931611 | -0.15146  | 0.878592 | -0.17239  | 0.86313  | 0.981636 | chr12 | 56715843 | 56716433 | + | 0 | NA | exon (NM exon (NM  | 9161 NM_005594    | 4666 Hs. 50573E              | ENSG00000NACA       | HSD48 NAC          | nascent fprotein-coding        |
| chr12-105.6.931611 | -0.15146  | 0.878592 | -0.17239  | 0.86313  | 0.981636 | chr12 | 1.05E+08 | 1.05E+08 | + | 0 | NA | intron (NLMIEg LIN | 26507 NM_00129E   | 23325 Hs. 12144 NM_01527E    | ENSG00000WASHC4     | KIAA1033 WASH      | comf protein-coding            |
| chr14-582.6.931611 | -0.15146  | 0.878592 | -0.17239  | 0.86313  | 0.981636 | chr14 | 58212975 | 58213863 | + | 0 | NA | intron (Nintron (N | 13270 NM_018477   | 55860 Hs. 509451NM_018477    | ENSG00000ACTR10     | ACTR11 AR          | actin relprotein-coding        |
| chr15-253.6.931611 | -0.15146  | 0.878592 | -0.17239  | 0.86313  | 0.981636 | chr15 | 25347501 | 25348355 | + | 0 | NA | intron (NLMIE2 LIN | 69585 NR_00128E   | 338429 NR_00128E             | ENSG00000SNORD109E  | HBI1-438E          | small nucsnoRNA                |
| chr17-294.6.931611 | -0.15146  | 0.878592 | -0.17239  | 0.86313  | 0.981636 | chr17 | 29403694 | 29405297 | + | 0 | NA | intron (Nintron (N | 13570 NM_02514E   | 57551 Hs. 597434NM_020791    | ENSG00000TAOK1      | KFC-B MAF          | TAO kinasprotein-coding        |
| chr17-454.6.931611 | -0.15146  | 0.878592 | -0.17239  | 0.86313  | 0.981636 | chr17 | 45458217 | 45458626 | + | 0 | NA | exon (NM exon (NM  | 17014 NR_036271   | 1E+08 Hs. 036271             | ENSG00000MIR4315-2  | -                  | microRNA ncRNA                 |
| chr19-525.6.931611 | -0.15146  | 0.878592 | -0.17239  | 0.86313  | 0.981636 | chr19 | 52562071 | 52564352 | + | 0 | NA | IntergeniIntergeni | -7062 NM_01826E   | 55762 Hs. 235167NM_01826E    | ENSG00000ZNF701     | -                  | zinc fingprotein-coding        |
| chr2-2407.6.931611 | -0.15146  | 0.878592 | -0.17239  | 0.86313  | 0.981636 | chr2  | 24079188 | 24080025 | + | 0 | NA | exon (NM exon (NM  | 2773 NR_11192E    | 375190 Hs. 710377NM_19855E   | ENSG00000FAM228B    | -                  | family wiprotein-coding        |
| chr2-3318.6.931611 | -0.15146  | 0.878592 | -0.17239  | 0.86313  | 0.981636 | chr2  | 33180771 | 33184267 | + | 0 | NA | intron (NAluV SINE | 47922 NM_00116E   | 4052 Hs. 193361NM_000627     | ENSG00000LTPB1      | -                  | latent tprotein-coding         |
| chr20-496.6.931611 | -0.15146  | 0.878592 | -0.17239  | 0.86313  | 0.981636 | chr20 | 49645339 | 49647163 | + | 0 | NA | intron (NTiger3 I  | 67627 NM_00477E   | 9334 Hs. 370487NM_00477E     | ENSG00000CB4GALT5   | B4Gal-T5 beta-1,4- | protein-coding                 |
| chr22-388.6.931611 | -0.15146  | 0.878592 | -0.17239  | 0.86313  | 0.981636 | chr22 | 38504090 | 38505104 | + | 0 | NA | intron (Nintron (N | 1696 NM_00109E    | 10521 Hs. 52830E             | ENSG00000DDX17      | P72 RH70           | DEAD-box protein-coding        |
| chr3-3705.6.931611 | -0.15146  | 0.878592 | -0.17239  | 0.86313  | 0.981636 | chr3  | 37051759 | 37053561 | + | 0 | NA | TTS (NM_2TTS (NM_2 | 59310 NM_00125E   | 4292 Hs. 195364NM_00024E     | ENSG00000MLH1       | COC42 FCC          | mutL homcprotein-coding        |
| chr3-196C.6.931611 | -0.15146  | 0.878592 | -0.17239  | 0.86313  | 0.981636 | chr3  | 1.96E+08 | 1.96E+08 | + | 0 | NA | 3' UTR (N3' UTR (N | 30792 NM_00112E   | 7037 Hs. 529615NM_003234     | ENSG00000TFRC       | CD71 IMD4          | transferr protein-coding       |
| chr6-116.6.931611  | -0.15146  | 0.878592 | -0.17239  | 0.86313  | 0.981636 | chr6  | 1.17E+08 | 1.17E+08 | + | 0 | NA | TTS (NM_2TTS (NM_2 | 18214 NM_00101E   | 345895 Hs. 16038NM_00101E    | ENSG00000RSPH4A     | CILD11 RS          | radial sprotein-coding         |
| chr7-1215.6.931611 | -0.15146  | 0.878592 | -0.17239  | 0.86313  | 0.981636 | chr7  | 1.21E+08 | 1.21E+08 | + | 0 | NA | intron (NTiger3a I | 8824 NM_01488E    | 10447 Hs. 434055NM_01488E    | ENSG00000FAM3C      | GS3786 II          | family wiprotein-coding        |
| chr7-1237.6.931611 | -0.15146  | 0.878592 | -0.17239  | 0.86313  | 0.981636 | chr7  | 1.24E+08 | 1.24E+08 | + | 0 | NA | intron (Nintron (N | 41616 NM_003941   | 8976 Hs. 14372ENM_003941     | ENSG00000WASL       | N-WASP NWASP       | likeprotein-coding             |
| chr8-2305.6.931611 | -0.15146  | 0.878592 | -0.17239  | 0.86313  | 0.981636 | chr8  | 23055622 | 23057194 | + | 0 | NA | intron (NAluS2 SIN | -11621 NR_03887E  | 286059 Hs. 306677NR_03887E   | ENSG00000LOC28605E  | -                  | TNF recep pseudo               |
| chr8-963C.6.931611 | -0.15146  | 0.878592 | -0.17239  | 0.86313  | 0.981636 | chr8  | 96305164 | 96307534 | + | 0 | NA | intron (Nintron (N | 44247 NM_014754   | 9791 Hs. 292575NM_014754     | ENSG00000PTDSS1     | LMHD PSS           | phosphatiprotein-coding        |
| chr8-9852.6.931611 | -0.15146  | 0.878592 | -0.17239  | 0.86313  | 0.981636 | chr8  | 98524285 | 98525218 | + | 0 | NA | intron (NMLTIH LTF | 97939 NM_02069E   | 3788 Hs. 38804E              | ENSG00000CKNS2      | KV9.2              | potassium protein-coding       |
| chr8-1327.6.931611 | -0.15146  | 0.878592 | -0.17239  | 0.86313  | 0.981636 | chr8  | 1.33E+08 | 1.33E+08 | + | 0 | NA | intron (Nintron (N | 20006 NM_01601E   | 51105 Hs. 304362NM_01601E    | ENSG00000PHF20L1    | CGI-72 IT          | PHD fingprotein-coding         |
| chr9-1907.6.931611 | -0.15146  | 0.878592 | -0.17239  | 0.86313  | 0.981636 | chr9  | 19077394 | 19080034 | + | 0 | NA | intron (NAluSq2 S1 | -14928 NR_00300E  | 677776 Hs. 68963E            | ENSG00000SCARN8     | U92                | small Ca_ncRNA                 |
| chr5-1415.6.931611 | -0.151498 | 0.879374 | -0.172279 | 0.863218 | 0.981636 | chr5  | 1415E+08 | 1.42E+08 | + | 0 | NA | intron (NLMIC4 LIN | -                 |                              |                     |                    |                                |





|                    |          |          |          |          |          |       |          |          |   |      |                     |                   |                              |                    |                    |                             |
|--------------------|----------|----------|----------|----------|----------|-------|----------|----------|---|------|---------------------|-------------------|------------------------------|--------------------|--------------------|-----------------------------|
| chr18-137.7.170845 | 0.147342 | 0.860453 | 0.171238 | 0.864037 | 0.981636 | chr18 | 13752614 | 13754840 | + | 0 NA | intron (AluYm1 S1   | 27054 NM_001308   | 8731 Hs. 592347NM_003799     | ENSG00000CRNMT     | CMT1 CMT1RNA       | guanine-protein-coding      |
| chr18-234.7.170845 | 0.147342 | 0.860453 | 0.171238 | 0.864037 | 0.981636 | chr18 | 23455203 | 23456926 | + | 0 NA | intron (AluSc SIN   | 2777 NR_145477    | 8780 Hs. 445511NM_003831     | ENSG00000R10K3     | SUDD               | RIO kinase-protein-coding   |
| chr19-116.7.170845 | 0.147342 | 0.860453 | 0.171238 | 0.864037 | 0.981636 | chr19 | 11603899 | 11604769 | + | 0 NA | 5' UTR (5' UTR (N   | 6851 NM_145295    | 199692 Hs. 526665NM_145295   | ENSG00000ZNF627    |                    | zinc finger-protein-coding  |
| chr2-234.7.170845  | 0.147342 | 0.860453 | 0.171238 | 0.864037 | 0.981636 | chr2  | 2.35E+08 | 2.35E+08 | + | 0 NA | intron (AluSc8 S1   | 6943 NM_001371305 |                              |                    |                    |                             |
| chr2-205.7.170845  | 0.147342 | 0.860453 | 0.171238 | 0.864037 | 0.981636 | chr2  | 20566766 | 20568632 | + | 0 NA | intron (Nintron (N  | 59652 NM_001299   | 51586 Hs. 517421NM_015889    | ENSG00000MED15     | ARC105 C/mediator  | protein-coding              |
| chr3-425.7.170845  | 0.147342 | 0.860453 | 0.171238 | 0.864037 | 0.981636 | chr3  | 42560820 | 42561200 | + | 0 NA | intron (Nintron (N  | -20830 NM_016305  | 51188 Hs. 534454NM_016305    | ENSG00000CSS18L2   | KIAA-iso SS18 like | protein-coding              |
| chr3-1207.7.170845 | 0.147342 | 0.860453 | 0.171238 | 0.864037 | 0.981636 | chr3  | 1.21E+08 | 1.21E+08 | + | 0 NA | intron (NLM2 LIN    | -20671 NM_000187  | 3081 Hs. 368254NM_000187     | ENSG00000HGD       | UKO HGO            | homogentisin-protein-coding |
| chr3-1605.7.170845 | 0.147342 | 0.860453 | 0.171238 | 0.864037 | 0.981636 | chr3  | 1.61E+08 | 1.61E+08 | + | 0 NA | TTS (NR_C TTS (NR_C | 989 NR_003001     | 677767 Hs. 675955NR_003001   | ENSG00000SCARNA7   | A90                | small Cajal                 |
| chr3-185.7.170845  | 0.147342 | 0.860453 | 0.171238 | 0.864037 | 0.981636 | chr3  | 1.86E+08 | 1.86E+08 | + | 0 NA | intron (HALIME LI   | -48808 NR_126325  | 646600 Hs. 647949NR_027317   | ENSG00000IGF2BP2   | 3Corf65            | IGF2BP2 ncRNA               |
| chr5-129.7.170845  | 0.147342 | 0.860453 | 0.171238 | 0.864037 | 0.981636 | chr5  | 1.3E+08  | 1.3E+08  | + | 0 NA | intron (Nintron (N  | -124844 NM_001257 | 1E+08 Hs. 529234NM_001257    | ENSG00000MINAR2    | KIAA1024 membrane  | protein-coding              |
| chr6-1497.7.170845 | 0.147342 | 0.860453 | 0.171238 | 0.864037 | 0.981636 | chr6  | 1.5E+08  | 1.5E+08  | + | 0 NA | intron (Nintron (N  | -123344 NM_001270 | 9113 Hs. 549084NM_004699     | ENSG00000LATS1     | WARTS wts large    | tumour-protein-coding       |
| chr7-4404.7.170845 | 0.147342 | 0.860453 | 0.171238 | 0.864037 | 0.981636 | chr7  | 44046815 | 44047473 | + | 0 NA | intron (Nintron (N  | 2442 NM_001122    | 28988 Hs. 436500NM_014065    | ENSG00000DBNL      | ABP1 HIP-1         | drebrin 1 protein-coding    |
| chr7-763.7.170845  | 0.147342 | 0.860453 | 0.171238 | 0.864037 | 0.981636 | chr7  | 76325811 | 76326326 | + | 0 NA | TTS (NM_C TTS (NM_C | 23395 NM_001540   | 3315 Hs. 520975NM_001540     | ENSG00000HSPB1     | CMT2F HEL heat     | shock-protein-coding        |
| chr8-672.7.170845  | 0.147342 | 0.860453 | 0.171238 | 0.864037 | 0.981636 | chr8  | 67215580 | 67218048 | + | 0 NA | intron (Nintron (N  | 126967 NM_006421  | 10565 Hs. 656992NM_006421    | ENSG00000ARFGEF1   | ARFGEF1 EADP       | rhoc-protein-coding         |
| chr8-8654.7.170845 | 0.147342 | 0.860453 | 0.171238 | 0.864037 | 0.981636 | chr8  | 86540038 | 86540237 | + | 0 NA | intron (Nintron (N  | 25702 NM_003905   | 8895 Hs. 191215NM_003905     | ENSG00000CPNE3     | CPN3 PRO1          | copine 3 protein-coding     |
| chr8-1434.7.170845 | 0.147342 | 0.860453 | 0.171238 | 0.864037 | 0.981636 | chr8  | 1.43E+08 | 1.43E+08 | + | 0 NA | intron (Nintron (N  | 31030 NR_145785   | 1.1E+08 NR_145785            | SNORD149           |                    | small nucleolar             |
| chr9-1367.7.170845 | 0.147342 | 0.860453 | 0.171238 | 0.864037 | 0.981636 | chr9  | 1.37E+08 | 1.37E+08 | + | 0 NA | intron (Nintron (N  | 17099 NR_039821   | 1.01E+08 NR_039821           | ENSG00000MIR4673   |                    | microRNA ncRNA              |
| chrX-479.7.170845  | 0.147342 | 0.860453 | 0.171238 | 0.864037 | 0.981636 | chrX  | 47977161 | 47986561 | + | 0 NA | intron (AluSc8 S1   | 22128 NM_006962   | 7569 Hs. 189699NM_006962     | ENSG00000ZNF182    | HHZ150 KZC         | zinc finger-protein-coding  |
| chr14-697.13.12703 | -0.11184 | 0.653312 | -0.17119 | 0.864074 | 0.981636 | chr14 | 69767939 | 69776448 | + | 0 NA | TTS (NM_C TTS (NM_C | -4480 NR_029378   | 1E+08 Hs. 729252NR_029378    | LOC100289          |                    | uncharacterized             |
| chr4-386.13.12703  | -0.11184 | 0.653312 | -0.17119 | 0.864074 | 0.981636 | chr4  | 38688203 | 38691581 | + | 0 NA | intron (Nintron (N  | -25264 NR_026804  | 79667 Hs. 29725 NM_024614    | ENSG00000KLF3-AS1  |                    | KLF3 anticRNA               |
| chr20-46.9.732364  | 0.129814 | 0.758492 | 0.171147 | 0.864108 | 0.981636 | chr20 | 46375070 | 46375486 | + | 0 NA | exon (NM_exon (NM   | -10820 NM_001281  | 51006 Hs. 593344NM_015945    | ENSG00000SLC35C2   | BA39402            | Isolute c                   |
| chr1-111.6.890471  | -0.15408 | 0.900504 | -0.1711  | 0.864145 | 0.981636 | chr1  | 1.12E+08 | 1.12E+08 | + | 0 NA | intron (NLM2c LINE  | 27399 NM_001370   | 5906 Hs. 190334NM_002884     | ENSG00000CRAP1A    | C21KG G-2          | RAP1A, me protein-coding    |
| chr11-61.10.20353  | 0.125783 | 0.735168 | 0.171094 | 0.86415  | 0.981636 | chr11 | 61364405 | 61365609 | + | 0 NA | intron (AluSx SIN   | 2633 NM_016464    | 51524 Hs. 406533NM_016464    | ENSG00000TMEI138   | HSPC196            | transmembrane               |
| chr15-41.12.18655  | -0.11706 | 0.684713 | -0.17096 | 0.864256 | 0.981636 | chr15 | 41093575 | 41093791 | + | 0 NA | intron (AluJb SIN   | 22563 NR_104038   | 54617 Hs. 292945NM_017555    | ENSG00000IN080     | IN080A IN          | IN080 component-coding      |
| chr3-195.11.16379  | -0.12608 | 0.737546 | -0.17094 | 0.864268 | 0.981636 | chr3  | 1.96E+08 | 1.96E+08 | + | 0 NA | intron (AluJb SIN   | 30088 NR_003264   | 255812 Hs. 566872NR_003264   | ENSG00000SDHAP1    | SDHAL1 SE          | succinate pseudo            |
| chr11-77.6.478012  | -0.15696 | 0.918594 | -0.17087 | 0.864326 | 0.981636 | chr11 | 77701641 | 77702460 | + | 0 NA | exon (NM_exon (NM   | -64244 NM_001311  | 1207 Hs. 430733NM_001295     | ENSG00000CLNS1A    | CLCI CLNS          | chloride protein-coding     |
| chr7-77.6.478012   | -0.15696 | 0.918594 | -0.17087 | 0.864326 | 0.981636 | chr7  | 77160797 | 77161212 | + | 0 NA | intron (NLM3 LIN    | 38389 NM_002087   | 57639 Hs. 113943NM_002087    | ENSG00000CCDC146   |                    | coiled-coil                 |
| chr1-162.6.650683  | 0.154691 | 0.905354 | 0.170862 | 0.864332 | 0.981636 | chr1  | 16252465 | 16253074 | + | 0 NA | intron (Nintron (N  | -15586 NM_030907  | 79363 Hs. 546433NM_030907    | ENSG00000CPLANE2   | C1orf89 F          | cilicogene protein-coding   |
| chr10-27.6.650683  | 0.154691 | 0.905354 | 0.170862 | 0.864332 | 0.981636 | chr10 | 27218489 | 27219275 | + | 0 NA | intron (AluSx1 S1   | 21604 NM_001301   | 91452 Hs. 530597NM_145699    | ENSG00000ACBD5     |                    | acyl-CoA                    |
| chr12-89.6.650683  | 0.154691 | 0.905354 | 0.170862 | 0.864332 | 0.981636 | chr12 | 89623876 | 89624789 | + | 0 NA | exon (NM_exon (NM   | 84506 NM_001366   | 490 Hs. 506276NM_001682      | ENSG00000ATP2B1    | PMCA1 PM           | ATPase 1 protein-coding     |
| chr1-669.9.691225  | 0.12815  | 0.750488 | 0.170756 | 0.864416 | 0.981636 | chr1  | 66998457 | 66999062 | + | 0 NA | TTS (NM_C TTS (NM_C | 55389 NM_015135   | 23169 Hs. 213642NM_015135    | ENSG00000SLC35D1   | SHNKND UC          | solute c                    |
| chr12-90.9.691225  | 0.12815  | 0.750488 | 0.170756 | 0.864416 | 0.981636 | chr12 | 907310   | 908569   | + | 0 NA | exon (NM_exon (NM   | 25137 NM_001297   | 5893 Hs. 410355NM_134422     | ENSG00000RAD52     |                    | RAD52 hom                   |
| chr13-41.9.691225  | 0.12815  | 0.750488 | 0.170756 | 0.864416 | 0.981636 | chr13 | 41367529 | 41370749 | + | 0 NA | exon (NM_exon (NM   | -57100 NM_001354  | 9617 Hs. 382172NM_004294     | ENSG00000MTRF1     | MRF1 MTF           | mitochondrial               |
| chr14-30.9.691225  | 0.12815  | 0.750488 | 0.170756 | 0.864416 | 0.981636 | chr14 | 30945098 | 30948293 | + | 0 NA | intron (Nintron (N  | -56887 NR_038355  | 1.01E+08 Hs. 729199NR_038355 | ENSG00000LOC100505 |                    | uncharacterized             |
| chr8-93.9.691225   | 0.12815  | 0.750488 | 0.170756 | 0.864416 | 0.981636 | chr8  | 93292084 | 93292699 | + | 0 NA | exon (NM_exon (NM   | 5944 NM_001161    | 54704 Hs. 22265 NM_018444    | ENSG00000PDP1      | PDH PDP            | pyruvate protein-coding     |
| chr10-12.6.707538  | 0.152487 | 0.893027 | 0.170753 | 0.864418 | 0.981636 | chr10 | 1.21E+08 | 1.21E+08 | + | 0 NA | exon (NM_exon (NM   | 51815 NM_081117   | 55717 Hs. 144447NM_018117    | ENSG00000WDR11     | BRWD2 DR1          | WD repeat                   |
| chr14-31.6.707538  | 0.152487 | 0.893027 | 0.170753 | 0.864418 | 0.981636 | chr14 | 31305175 | 31305751 | + | 0 NA | intron (AluSx SIN   | -97670 NM_015382  | 25831 Hs. 708017NM_015382    | ENSG00000HECTD1    | EULIR HECT         | domain                      |
| chr19-49.6.707538  | 0.152487 | 0.893027 | 0.170753 | 0.864418 | 0.981636 | chr19 | 49610047 | 49610472 | + | 0 NA | intron (AluSq10 S   | 19077 NM_020715   | 57479 Hs. 590971NM_020715    | ENSG00000PRR12     | KIAA1205           | proline 1                   |
| chr2-148.6.707538  | 0.152487 | 0.893027 | 0.170753 | 0.864418 | 0.981636 | chr2  | 1.48E+08 | 1.48E+08 | + | 0 NA | intron (NLM3A5 LI   | -218611 NM_181742 | 5000 Hs. 556364NM_002555     | ENSG00000CORC4     | ORCAL ORC          | origin                      |
| chr3-575.6.707538  | 0.152487 | 0.893027 | 0.170753 | 0.864418 | 0.981636 | chr3  | 57593770 | 57594277 | + | 0 NA | intron (AluSq2 S1   | 3321 NM_001660    | 378 Hs. 652185NM_001660      | ENSG00000ARF4      | ARF2               | ADP                         |
| chr9-816.6.707538  | 0.152487 | 0.893027 | 0.170753 | 0.864418 | 0.981636 | chr9  | 81611300 | 81612176 | + | 0 NA | intron (Nintron (N  | 77797 NM_001303   | 7088 Hs. 197323NM_005077     | ENSG00000TLE1      | ESG ESG            | TLE family                  |
| chr9-9207.7.465639 | -0.15354 | 0.899348 | -0.17072 | 0.864445 | 0.981636 | chr9  | 92079809 | 92080828 | + | 0 NA | intron (Nintron (N  | 35599 NM_006415   | 10558 Hs. 90458 NM_006415    | ENSG00000SPTLC1    | HSAH1 HSA          | serine                      |
| chr10-10.10.66684  | 0.123663 | 0.724906 | 0.170592 | 0.864545 | 0.981636 | chr10 | 1.03E+08 | 1.03E+08 | + | 0 NA | intron (Nintron (N  | 27185 NM_000102   | 1586 Hs. 438015NM_000102     | ENSG00000CYP17A1   | CPT7 CYP1          | cytochrome                  |
| chr15-49.10.66684  | 0.123663 | 0.724906 | 0.170592 | 0.864545 | 0.981636 | chr15 | 49260092 | 49260337 | + | 0 NA | intron (NLM3A3 LIN  | 89967 NM_001285   | 2585 Hs. 122005NM_002044     | ENSG00000GALK2     | GK2                | galactokinase               |
| chr1-100.6.658541  | 0.152505 | 0.894734 | 0.170447 | 0.864659 | 0.981636 | chr1  | 1.0E+08  | 1.0E+08  | + | 0 NA | intron (Nintron (N  | 24057 NM_033055   | 64645 Hs. 124155NM_033055    | ENSG00000MFSUD14A  | HIAT1              | major                       |
| chr1-2294.6.658541 | 0.152505 | 0.894734 | 0.170447 | 0.864659 | 0.981636 | chr1  | 2.29E+08 | 2.29E+08 | + | 0 NA | intron (AluJb SIN   | 34682 NM_018230   | 55746 Hs. 12457 NM_018230    | ENSG00000NUP133    | GAMOS8 N           | major nucleolar             |
| chr10-101.6.658541 | 0.152505 | 0.894734 | 0.170447 | 0.864659 | 0.981636 | chr10 | 1.01E+08 | 1.01E+08 | + | 0 NA | intron (AluSq2 S1   | 50749 NM_003935   | 8945 Hs. 643802NM_003935     | ENSG00000BTRC      | BETA-TRC           | beta-tran                   |
| chr11-10.6.658541  | 0.152505 | 0.894734 | 0.170447 | 0.864659 | 0.981636 | chr11 | 10044805 | 10045684 | + | 0 NA | intron (AluSx1 S1   | 206102 NR_120535  | 1.02E+08 Hs. 585524NR_120535 | ENSG00000LOC101925 |                    | uncharacterized             |
| chr11-68.6.658541  | 0.152505 | 0.894734 | 0.170447 | 0.864659 | 0.981636 | chr11 | 68564411 | 68565510 | + | 0 NA | intron (Nintron (N  | 104208 NM_001352  | 55291 Hs. 503022NM_018312    | ENSG00000PPP6R3    | C11orf23 P         | protein                     |
| chr12-10.6.658541  | 0.152505 | 0.894734 | 0.170447 | 0.864659 | 0.981636 | chr12 | 1.07E+08 | 1.07E+08 | + | 0 NA | intron (NLM2c LINE  | 3124 NM_001033    | 80298 Hs. 5009 NM_025195     | ENSG00000MTERF2    | MTERFD3 E          | mitochondrial               |
|                    |          |          |          |          |          |       |          |          |   |      |                     |                   |                              |                    |                    |                             |



|                     |          |          |          |          |          |       |          |          |   |      |                     |                  |                              |                     |                   |             |                |                |                |
|---------------------|----------|----------|----------|----------|----------|-------|----------|----------|---|------|---------------------|------------------|------------------------------|---------------------|-------------------|-------------|----------------|----------------|----------------|
| chr8-4787 7.426349  | -0.14394 | 0.845477 | -0.17024 | 0.864819 | 0.981636 | chr8  | 47875938 | 47882148 | + | 0 NA | intron (Nintron (N  | 81093 NM_001081  | 5591 Hs. 491682NM_006904     | ENSG000003PRK3D     | DNA-PKC I         | protein f   | protein-coding |                |                |
| chr8-1447 7.426349  | -0.14394 | 0.845477 | -0.17024 | 0.864819 | 0.981636 | chr8  | 1.45E+08 | 1.45E+08 | + | 0 NA | intron (NAluJr SIN  | 6351 NM_138367   | 90987 Hs. 534516NM_138367    | ENSG000003ZNF251    | -                 | zinc fing   | protein-coding |                |                |
| chr9-3305 7.426349  | -0.14394 | 0.845477 | -0.17024 | 0.864819 | 0.981636 | chr9  | 33053106 | 33059436 | + | 0 NA | intron (Nintron (N  | 20403 NM_018225  | 55234 Hs. 565351NM_018225    | ENSG000003CSMU1     | BWD SMU-1SMU1     | DNA         | protein-coding |                |                |
| chr9-982 7.426349   | -0.14394 | 0.845477 | -0.17024 | 0.864819 | 0.981636 | chr9  | 98239131 | 98244347 | + | 0 NA | intron (Nintron (N  | -12522 NR_106911 | 1.02E+08                     | NR_106911           | ENSG000003MIR6854 | hsa-mir-6   | miRNA ncRNA    |                |                |
| chr1-2402 9.178921  | 0.130809 | 0.768558 | 0.170201 | 0.864852 | 0.981636 | chr1  | 2.4E+08  | 2.4E+08  | + | 0 NA | intron (Nintron (N  | 180656 NM_020066 | 56776 Hs. 24889              | NR_020066           | ENSG000003FMN2    | -           | formin 2       | protein-coding |                |
| chr11-703 9.178921  | 0.130809 | 0.768558 | 0.170201 | 0.864852 | 0.981636 | chr11 | 70372714 | 70374345 | + | 0 NA | intron (Nintron (N  | -24977 NM_138566 | 2017 Hs. 596164NM_005231     | ENSG000003CTTN      | EMS1              | cortactin   | protein-coding |                |                |
| chr15-503 9.178921  | 0.130809 | 0.768558 | 0.170201 | 0.864852 | 0.981636 | chr15 | 50307891 | 50308227 | + | 0 NA | intron (NLM3B LI    | -42333 NM_002112 | 3067 Hs. 1481                | NR_002112           | ENSG000003HDC     | -           | histidine      | protein-coding |                |
| chr18-633 9.178921  | 0.130809 | 0.768558 | 0.170201 | 0.864852 | 0.981636 | chr18 | 63333558 | 63335401 | + | 0 NA | intron (NAluSg SIN  | -15099 NM_000657 | 596 Hs. 150745NM_000633      | ENSG000003BCL2      | Bcl-2 PPF         | BCL2        | apopt          | protein-coding |                |
| chr20-417 9.178921  | 0.130809 | 0.768558 | 0.170201 | 0.864852 | 0.981636 | chr20 | 4177150  | 4179411  | + | 0 NA | intron (NAluSg SIN  | -14810 NR_033917 | 728228 Hs. 636379NR_033917   | ENSG000003LINC01433 | -                 | long intenc | ncRNA          |                |                |
| chr5-6605 9.178921  | 0.130809 | 0.768558 | 0.170201 | 0.864852 | 0.981636 | chr5  | 66055345 | 66055537 | + | 0 NA | exon (NM exon (NM   | -89759 NM_001322 | 140890 Hs. 49367             | NR_139168           | ENSG000003SREK1   | SFRS12 SF   | splicing       | protein-coding |                |
| chr5-1093 9.178921  | 0.130809 | 0.768558 | 0.170201 | 0.864852 | 0.981636 | chr5  | 1.09E+08 | 1.09E+08 | + | 0 NA | intron (Nintron (N  | -36162 NR_14904C | 285638 Hs. 532104NR_14904C   | ENSG000003LOC285638 | -                 | uncharacter | ncRNA          |                |                |
| chr5-1604 9.178921  | 0.130809 | 0.768558 | 0.170201 | 0.864852 | 0.981636 | chr5  | 1.6E+08  | 1.6E+08  | + | 0 NA | exon (NM exon (NM   | -6525 NM_001303  | 63920 Hs. 529464NM_02209C    | ENSG000003ZBED8     | Buster3 C         | zinc fing   | protein-coding |                |                |
| chr19-403 6.642825  | 0.15697  | 0.922514 | 0.170155 | 0.864888 | 0.981636 | chr19 | 40328201 | 40328472 | + | 0 NA | intron (Nintron (N  | 20061 NR_046202  | 126526 Hs. 631557NM_17883C   | ENSG000003C19orf47  | -                 | chromosom   | protein-coding |                |                |
| chr5-3478 6.642825  | 0.15697  | 0.922514 | 0.170155 | 0.864888 | 0.981636 | chr5  | 34786785 | 34787228 | + | 0 NA | intron (NMER9a3 LI  | -52158 NM_14472E | 153657 Hs. 435742NM_14472E   | ENSG000003TTC9C     | MC25-1            | tetratric   | protein-coding |                |                |
| chr8-767 8.658759   | 0.135543 | 0.796767 | 0.170116 | 0.864919 | 0.981636 | chr8  | 76704429 | 76704949 | + | 0 NA | exon (NM exon (NM   | -21414 NR_02436C | 1E+08 Hs. 596423NR_02436C    | ENSG000003ZFHX4-AS1 | -                 | ZFHX4       | antncRNA       |                |                |
| chr1-2475 8.659091  | 0.137365 | 0.807515 | 0.170108 | 0.864925 | 0.981636 | chr1  | 24756971 | 24757313 | + | 0 NA | intron (NAluSp SIN  | 11695 NM_013943  | 25932 Hs. 440544NM_013943    | ENSG000003CLY4      | CHLICAL H         | chiclike    | protein-coding |                |                |
| chr5-1423 4.66618   | 0.181067 | 1.064675 | 0.170068 | 0.864957 | 0.981636 | chr5  | 1.42E+08 | 1.42E+08 | + | 0 NA | intron (NAluJb SIN  | 69716 NR_120664  | 1.02E+08 Hs. 658949NR_120664 | ENSG000003SPRY4-AS1 | THLCAF68          | SPRY4       | antncRNA       |                |                |
| chr18-993 12.17047  | 0.11579  | 0.681685 | 0.169858 | 0.865122 | 0.981636 | chr18 | 9936170  | 9937082  | + | 0 NA | intron (NAluJb SIN  | 22610 NM_003574  | 9218 Hs. 165195NR_003574     | ENSG000003VAPA      | VAP-33 V          | VAMP        | assoc          | protein-coding |                |
| chr16-577 7.219842  | 0.147352 | 0.868214 | 0.169719 | 0.865231 | 0.981636 | chr16 | 57770569 | 57771304 | + | 0 NA | intron (Nintron (N  | 1416 NR_10683C   | 1.02E+08                     | NR_10683C           | ENSG000003MIR6772 | hsa-mir-6   | miRNA ncRNA    |                |                |
| chr19-108 7.219842  | 0.147352 | 0.868214 | 0.169719 | 0.865231 | 0.981636 | chr19 | 1087716  | 1089855  | + | 0 NA | TTS (NM_TTS (NM_C   | 6590 NM_00269E   | 5434 Hs. 24301               | NR_00269E           | ENSG000003POLR2E  | RPABC1 R    | RNA            | protein-coding |                |
| chr3-575 7.219842   | 0.147352 | 0.868214 | 0.169719 | 0.865231 | 0.981636 | chr3  | 57558485 | 57559597 | + | 0 NA | intron (NLMC5 LI    | -30873 NM_001311 | 7871 Hs. 476432NM_00715E     | ENSG000003SLMAP     | SLAP              | sarcolem    | protein-coding |                |                |
| chr6-9051 7.219842  | 0.147352 | 0.868214 | 0.169719 | 0.865231 | 0.981636 | chr6  | 90518309 | 90519275 | + | 0 NA | intron (Nintron (N  | 68280 NM_00318E  | 6885 Hs. 594838NM_00318E     | ENSG000003MAP3K7    | CSCF FMD          | mitogen-e   | protein-coding |                |                |
| chr6-1345 7.219842  | 0.147352 | 0.868214 | 0.169719 | 0.865231 | 0.981636 | chr6  | 1.35E+08 | 1.35E+08 | + | 0 NA | intron (Nintron (N  | 13530 NR_03743E  | 1.01E+08                     | NR_03743E           | ENSG000003MIR3662 | mir-3662    | microRNA       | ncRNA          |                |
| chr6-3061 18.12813  | 0.098417 | 0.580064 | 0.169665 | 0.865273 | 0.981636 | chr6  | 30616390 | 30617026 | + | 0 NA | non-codiron-codir   | 535 NM_002714    | 5514 Hs. 106015NM_002714     | ENSG000003PPR110    | CAT53 FBI         | protein f   | protein-coding |                |                |
| chr19-344 8.341404  | -0.13795 | 0.813382 | -0.1696  | 0.865327 | 0.981636 | chr19 | 3441195  | 3441569  | + | 0 NA | intron (NLMRc SINE  | 39143 NM_00113E  | 284422 Hs. 130714NM_00113E   | ENSG000003SMIM24    | C19orf77 s        | small int   | protein-coding |                |                |
| chr11-294 7.879948  | -0.13974 | 0.824698 | -0.16944 | 0.86545  | 0.981636 | chr11 | 2949138  | 2950440  | + | 0 NA | intron (Nintron (N  | 14104 NR_00298E  | 677833 Hs. 689696NR_00298E   | ENSG000003SNORA54   | ACA54             | small nuc   | ncRNA          |                |                |
| chr11-614 7.879948  | -0.13974 | 0.824698 | -0.16944 | 0.86545  | 0.981636 | chr11 | 61446507 | 61449313 | + | 0 NA | Intergeni Intergeni | 17785 NM_011784I | 54949 Hs. 313247NM_011784I   | ENSG000003SDHAF2    | CL10r79 F         | succinate   | protein-coding |                |                |
| chr12-965 7.879948  | -0.13974 | 0.824698 | -0.16944 | 0.86545  | 0.981636 | chr12 | 96322007 | 96324205 | + | 0 NA | intron (NLMEd LI    | 67608 NM_001303  | 2004 Hs. 46523               | NR_00523C           | ENSG000003ELK3    | ERP NET S   | ETS            | trans          | protein-coding |
| chr13-111 7.879948  | -0.13974 | 0.824698 | -0.16944 | 0.86545  | 0.981636 | chr13 | 1.11E+08 | 1.11E+08 | + | 0 NA | 3' UTR (N3' UTR (N  | -11543 NM_001303 | 121793 Hs. 210677NM_152324   | ENSG000003TEX29     | C19orf16 t        | testis e    | protein-coding |                |                |
| chr16-294 7.879948  | -0.13974 | 0.824698 | -0.16944 | 0.86545  | 0.981636 | chr16 | 29423129 | 29426771 | + | 0 NA | TTS (NR_TTS (NR_1   | -20405 NM_00131C | 728888 Hs. 270286NR_00131C   | ENSG000003NPIP11    | NPIP              | nuclear f   | protein-coding |                |                |
| chr17-818 7.879948  | -0.13974 | 0.824698 | -0.16944 | 0.86545  | 0.981636 | chr17 | 81863440 | 81863739 | + | 0 NA | IntergeniAluJb SIN  | -3054 NM_00091E  | 5034 Hs. 464336NM_00091E     | ENSG000003P4HB      | CLCRP1 D          | prolyl 4-   | protein-coding |                |                |
| chr18-956 7.879948  | -0.13974 | 0.824698 | -0.16944 | 0.86545  | 0.981636 | chr18 | 9566430  | 9573885  | + | 0 NA | exon (NM exon (NM   | 44402 NR_052003  | 9989 Hs. 743233NM_005134     | ENSG000003PPP4R1    | MEG1 PPA          | (protein f  | protein-coding |                |                |
| chr20-311 7.879948  | -0.13974 | 0.824698 | -0.16944 | 0.86545  | 0.981636 | chr20 | 3154180  | 3153301  | + | 0 NA | intron (NHAL LINE   | 5125 NM_02182E   | 60493 Hs. 741166NM_02182E    | ENSG000003FASTKD5   | CL1187M17         | FAST        | kinase         | protein-coding |                |
| chr20-355 7.879948  | -0.13974 | 0.824698 | -0.16944 | 0.86545  | 0.981636 | chr20 | 35380496 | 35384395 | + | 0 NA | intron (Nintron (N  | 29528 NM_018244  | 55245 Hs. 726299NM_018244    | ENSG000003UCQC1     | FBZF C20          | cubiquinol  | protein-coding |                |                |
| chr22-205 7.879948  | -0.13974 | 0.824698 | -0.16944 | 0.86545  | 0.981636 | chr22 | 20949196 | 20953713 | + | 0 NA | 3' UTR (N3' UTR (N  | -5638 NR_110537  | 1.02E+08 Hs. 648264NR_110537 | ENSG000003LINC01637 | -                 | long intenc | ncRNA          |                |                |
| chr22-235 7.879948  | -0.13974 | 0.824698 | -0.16944 | 0.86545  | 0.981636 | chr22 | 23971221 | 23971881 | + | 0 NA | exon (NM exon (NM   | 2940 NM_001084   | 1652 Hs. 656723NR_00135E     | ENSG000003DDT       | D-DT DDC1         | D-dopach    | protein-coding |                |                |
| chr4-4262 7.879948  | -0.13974 | 0.824698 | -0.16944 | 0.86545  | 0.981636 | chr4  | 426204   | 426432   | + | 0 NA | non-codiron-codir   | 47891 NR_00245I  | 79963 Hs. 677493NM_02490E    | ENSG000003ABCA11P   | ABCA11 E          | ATP         | bindipseudo    |                |                |
| chr5-4352 7.879948  | -0.13974 | 0.824698 | -0.16944 | 0.86545  | 0.981636 | chr5  | 43525273 | 43531320 | + | 0 NA | intron (Nintron (N  | -13148 NM_19856E | 375444 Hs. 661641NM_19856E   | ENSG000003C5orf34   | -                 | chromosom   | protein-coding |                |                |
| chr5-1592 7.879948  | -0.13974 | 0.824698 | -0.16944 | 0.86545  | 0.981636 | chr5  | 1.59E+08 | 1.59E+08 | + | 0 NA | intron (NAluJo SIN  | 7894 NM_14504E   | 134510 Hs. 591733NM_14504E   | ENSG000003UBLCP1    | CPUB1             | ubiquitin   | protein-coding |                |                |
| chr7-1396 7.879948  | -0.13974 | 0.824698 | -0.16944 | 0.86545  | 0.981636 | chr7  | 1.4E+08  | 1.4E+08  | + | 0 NA | intron (NLMB5 LI    | 79781 NM_001113  | 28996 Hs. 731417NM_02274C    | ENSG000003CHIPK2    | PRO0593           | homeodom    | protein-coding |                |                |
| chr9-3777 7.879948  | -0.13974 | 0.824698 | -0.16944 | 0.86545  | 0.981636 | chr9  | 37779524 | 37783393 | + | 0 NA | intron (Nintron (N  | 3607 NM_016042   | 51010 Hs. 602571NM_016042    | ENSG000003EXOSC3    | NCU1-102 F        | exosome     | protein-coding |                |                |
| chr1-1265 8.666617  | 0.133802 | 0.789947 | 0.169381 | 0.865497 | 0.981636 | chr1  | 1265898  | 1268701  | + | 0 NA | intron (Nintron (N  | 6555 NM_19445E   | 118424 Hs. 191587NM_058167   | ENSG000003UBEJ2     | NCUBE-2 N         | ubiquitin   | protein-coding |                |                |
| chr10-733 8.666617  | 0.133802 | 0.789947 | 0.169381 | 0.865497 | 0.981636 | chr10 | 73375250 | 73376093 | + | 0 NA | 3' UTR (N3' UTR (N  | -16807 NM_001367 | 118491 Hs. 591367NM_14517C   | ENSG000003CFAP70    | TTC18             | cilia anc   | protein-coding |                |                |
| chr11-945 8.666617  | 0.133802 | 0.789947 | 0.169381 | 0.865497 | 0.981636 | chr11 | 9497258  | 9498772  | + | 0 NA | intron (NAluV SINE  | 37003 NM_003442  | 7702 Hs. 523471NM_003442     | ENSG000003ZNF143    | SBF STAR z        | inc         | protein-coding |                |                |
| chr12-64 8.666617   | 0.133802 | 0.789947 | 0.169381 | 0.865497 | 0.981636 | chr12 | 64481768 | 64482896 | + | 0 NA | intron (NAluSx1 SI  | 30212 NM_013254  | 29110 Hs. 505874NM_013254    | ENSG000003TBK1      | FTDLS4 I          | TANK        | binc           | protein-coding |                |
| chr14-102 8.666617  | 0.133802 | 0.789947 | 0.169381 | 0.865497 | 0.981636 | chr14 | 1.02E+08 | 1.02E+08 | + | 0 NA | intron (NAluSx1 SI  | 4200 NM_03263C   | 51550 Hs. 129634NM_03263C    | ENSG000003CINP      | -                 | cyclin d    | protein-coding |                |                |
| chr16-375 8.666617  | 0.133802 | 0.789947 | 0.169381 | 0.865497 | 0.981636 | chr16 | 3756489  | 3758838  | + | 0 NA | intron (Nintron (N  | -40139 NM_016292 | 10131 Hs. 30345              | NR_016292           | ENSG000003TRAP1   | HSP 75 H    | TNF            | recep          | protein-coding |
| chr16-628 8.666617  | 0.133802 | 0.789947 | 0.169381 | 0.865497 | 0.981636 | chr16 | 68315835 | 68316713 | + | 0 NA | intron (Nintron (N  | 5160 NM_00129C   | 54496 Hs. 640222NM_01902E    | ENSG000003PRMT7     | SBIDD5            | protein e   | protein-coding |                |                |
| chr16-78 8.666617</ |          |          |          |          |          |       |          |          |   |      |                     |                  |                              |                     |                   |             |                |                |                |

|           |          |          |          |          |          |          |       |          |          |   |   |    |                     |                  |                            |                   |                     |                             |                             |                     |                |
|-----------|----------|----------|----------|----------|----------|----------|-------|----------|----------|---|---|----|---------------------|------------------|----------------------------|-------------------|---------------------|-----------------------------|-----------------------------|---------------------|----------------|
| chr6-2832 | 7.691006 | 0.140981 | 0.832356 | 0.169375 | 0.865501 | 0.981636 | chr6  | 2833645  | 2834326  | + | 0 | NA | non-codirnon-codir  | 7878 NR_073112   | 1992 Hs. 381167NM_030666   | ENSG00000SERPINB1 | EI ELANH2           | serpin fε                   | protein-coding              |                     |                |
| chr6-8412 | 7.691006 | 0.140981 | 0.832356 | 0.169375 | 0.865501 | 0.981636 | chr6  | 8412563  | 8414256  | + | 0 | NA | non-codirnon-codir  | 22136 NM_00137C  | 51000 Hs. 285847NM_015948  | ENSG00000SLC35B3  | C6orf196            | solute cε                   | protein-coding              |                     |                |
| chr6-1437 | 7.691006 | 0.140981 | 0.832356 | 0.169375 | 0.865501 | 0.981636 | chr6  | 1.44E+08 | 1.44E+08 | + | 0 | NA | intron (Nintron (N  | -62142 NM_00132E | 84946 Hs. 185677NM_03286C  | ENSG00000CLTV1    | C6orf93 cLTV1       | ribc                        | protein-coding              |                     |                |
| chr7-6596 | 7.691006 | 0.140981 | 0.832356 | 0.169375 | 0.865501 | 0.981636 | chr7  | 65965710 | 65968532 | + | 0 | NA | intron (Nintron (N  | 15092 NM_00129E  | 2990 Hs. 255233NM_000181   | ENSG00000GUSB     | MBP MS7             | glucuronil                  | protein-coding              |                     |                |
| chr7-989C | 7.691006 | 0.140981 | 0.832356 | 0.169375 | 0.865501 | 0.981636 | chr7  | 98902602 | 98911868 | + | 0 | NA | intron (NAluSp SIN  | 25538 NR_00129E  | 1.07E+08                   | NR_132754         | SCARNA28            | ZL1                         | small Ca <sub>v</sub> ncRNA |                     |                |
| chr7-1023 | 7.691006 | 0.140981 | 0.832356 | 0.169375 | 0.865501 | 0.981636 | chr7  | 1.02E+08 | 1.02E+08 | + | 0 | NA | intron (Nintron (N  | -2224 NR_03166E  | 1E+08                      | NR_03166E         | ENSG00000MIR5480    | MIRN5480                    | microRNA ncRNA              |                     |                |
| chr8-2197 | 7.691006 | 0.140981 | 0.832356 | 0.169375 | 0.865501 | 0.981636 | chr8  | 21974878 | 21988345 | + | 0 | NA | intron (Nintron (N  | -42523 NM_00128E | 10361 Hs. 131055NM_18279E  | ENSG00000NPM2     | -                   | nucleophc                   | protein-coding              |                     |                |
| chr8-1442 | 7.691006 | 0.140981 | 0.832356 | 0.169375 | 0.865501 | 0.981636 | chr8  | 1.44E+08 | 1.44E+08 | + | 0 | NA | intron (NAluSx SIN  | 6888 NM_00552E   | 3297 Hs. 530227NM_00552E   | ENSG00000HSF1     | HSTF1               | heat shoc                   | protein-coding              |                     |                |
| chr9-190C | 7.691006 | 0.140981 | 0.832356 | 0.169375 | 0.865501 | 0.981636 | chr9  | 19062880 | 19063153 | + | 0 | NA | TTS (NR_C TTS (NR_C | 770 NR_00300E    | 677776 Hs. 689633NR_00300E | ENSG00000SCARNA8  | U92                 | small Ca <sub>v</sub> ncRNA |                             |                     |                |
| chr9-3247 | 7.691006 | 0.140981 | 0.832356 | 0.169375 | 0.865501 | 0.981636 | chr9  | 32478524 | 32481557 | + | 0 | NA | intron (Nintron (N  | 46156 NM_01431E  | 23586 Hs. 190622NM_01431E  | ENSG00000DDX58    | RIG-I RIC DEXD/H-hc | protein-coding              |                             |                     |                |
| chr9-378E | 7.691006 | 0.140981 | 0.832356 | 0.169375 | 0.865501 | 0.981636 | chr9  | 37890946 | 37891525 | + | 0 | NA | intron (NAluSx SIN  | 11092 NM_00341E  | 92014 Hs. 634122NM_03341E  | ENSG00000SLC25A51 | CG7943 MC           | solute cε                   | protein-coding              |                     |                |
| chr1-119C | 7.178702 | 0.145338 | 0.858305 | 0.169332 | 0.865536 | 0.981636 | chr1  | 11961688 | 11966292 | + | 0 | NA | intron (Nintron (N  | -16191 NM_014874 | 9927 Hs. 376681NM_014874   | ENSG00000MFN2     | CMT2A CMT1          | mitofusir                   | protein-coding              |                     |                |
| chr1-244E | 7.178702 | 0.145338 | 0.858305 | 0.169332 | 0.865536 | 0.981636 | chr1  | 24453219 | 24461719 | + | 0 | NA | intron (Nintron (N  | 41444 NM_00132E  | 57185 Hs. 523442NM_02044E  | ENSG00000NIPAL3   | DJ462023            | NIPA                        | like                        | protein-coding      |                |
| chr1-326E | 7.178702 | 0.145338 | 0.858305 | 0.169332 | 0.865536 | 0.981636 | chr1  | 32696251 | 32697592 | + | 0 | NA | intron (NAluSz SIN  | 5849 NM_00116E   | 81493 Hs. 712631NM_03078E  | ENSG00000SYNC     | SYNC1 SYN           | cooilir                     | protein-coding              |                     |                |
| chr1-3301 | 7.178702 | 0.145338 | 0.858305 | 0.169332 | 0.865536 | 0.981636 | chr1  | 33018703 | 33022446 | + | 0 | NA | intron (NAluSz SIN  | 16309 NM_00119E  | 204 Hs. 470907NM_00162E    | ENSG00000AK2      | ADK2                | adenylate                   | protein-coding              |                     |                |
| chr1-360C | 7.178702 | 0.145338 | 0.858305 | 0.169332 | 0.865536 | 0.981636 | chr1  | 36027077 | 36030599 | + | 0 | NA | intron (NLIP3 LIN   | -55256 NM_01446E | 27285 Hs. 127111NM_01446E  | ENSG00000TEKT2    | TEKTB1 TE           | tektin 2                    | protein-coding              |                     |                |
| chr1-3603 | 7.178702 | 0.145338 | 0.858305 | 0.169332 | 0.865536 | 0.981636 | chr1  | 36039897 | 36041827 | + | 0 | NA | intron (NAluSz LIN  | -43232 NM_01446E | 27285 Hs. 127111NM_01446E  | ENSG00000TEKT2    | TEKTB1 TE           | tektin 2                    | protein-coding              |                     |                |
| chr1-437E | 7.178702 | 0.145338 | 0.858305 | 0.169332 | 0.865536 | 0.981636 | chr1  | 4371549  | 43771150 | + | 0 | NA | intron (NLT79 LTF   | 24200 NM_01466E  | 9682 Hs. 155982NM_01466E   | ENSG00000KDMA4    | JHDM3A JH           | lysine dε                   | protein-coding              |                     |                |
| chr1-446E | 7.178702 | 0.145338 | 0.858305 | 0.169332 | 0.865536 | 0.981636 | chr1  | 44634452 | 44638030 | + | 0 | NA | intron (Nintron (N  | 34815 NR_14581E  | 1.1E+08                    | NR_14581E         | SNORD145            | -                           | small nucsnRNA              |                     |                |
| chr1-922E | 7.178702 | 0.145338 | 0.858305 | 0.169332 | 0.865536 | 0.981636 | chr1  | 92253388 | 92256605 | + | 0 | NA | intron (NLIP47 LIN  | 37081 NM_00101E  | 388649 Hs. 558822NM_00101E | ENSG00000C1orf146 | -                   | chromoson                   | protein-coding              |                     |                |
| chr1-9311 | 7.178702 | 0.145338 | 0.858305 | 0.169332 | 0.865536 | 0.981636 | chr1  | 93115099 | 93116296 | + | 0 | NA | intron (Nintron (N  | 36414 NM_00735E  | 22823 Hs. 31016            | NR_00735E         | ENSG00000MTF2       | M96 PCL2                    | metal res                   | protein-coding      |                |
| chr1-945E | 7.178702 | 0.145338 | 0.858305 | 0.169332 | 0.865536 | 0.981636 | chr1  | 94508812 | 94511722 | + | 0 | NA | intron (NLIP3 LIN   | 31492 NM_00199E  | 2152 Hs. 62192             | NR_00199E         | ENSG00000CF3        | CD142 TF                    | coagulatip                  | protein-coding      |                |
| chr1-161E | 7.178702 | 0.145338 | 0.858305 | 0.169332 | 0.865536 | 0.981636 | chr1  | 1.61E+08 | 1.61E+08 | + | 0 | NA | intron (NAluSx SIN  | 2654 NM_00116E   | 4720 Hs. 173611NM_00455C   | ENSG00000NDUFS2   | CI-49 MC1           | NADH:ubiq                   | protein-coding              |                     |                |
| chr1-172E | 7.178702 | 0.145338 | 0.858305 | 0.169332 | 0.865536 | 0.981636 | chr1  | 1.73E+08 | 1.73E+08 | + | 0 | NA | intron (Nintron (N  | 25317 NM_01428E  | 51430 Hs. 204559NM_01428E  | ENSG00000SUCO     | Clorf9 CF           | SUN                         | domaiprotein-coding         |                     |                |
| chr1-173E | 7.178702 | 0.145338 | 0.858305 | 0.169332 | 0.865536 | 0.981636 | chr1  | 1.74E+08 | 1.74E+08 | + | 0 | NA | intron (Nintron (N  | 17934 NM_00117E  | 91687 Hs. 53185E           | NR_03331E         | ENSG00000CENPL      | Clorf155                    | centromer                   | protein-coding      |                |
| chr1-221E | 7.178702 | 0.145338 | 0.858305 | 0.169332 | 0.865536 | 0.981636 | chr1  | 2.2E+08  | 2.2E+08  | + | 0 | NA | intron (NLIME4b LI  | 3002 NR_02962E   | 406997                     | NR_02962E         | ENSG00000MIR215     | MIRN215                     | nmicroRNA                   | ncRNA               |                |
| chr10-310 | 7.178702 | 0.145338 | 0.858305 | 0.169332 | 0.865536 | 0.981636 | chr10 | 314808   | 3155428  | + | 0 | NA | intron (NAluJb SIN  | 10142 NR_038284  | 1.01E+08                   | Hs. 66536E        | NR_038284           | ENSG00000PITRM1-AS-         | -                           | PITRM1              | arcncRNA       |
| chr10-68E | 7.178702 | 0.145338 | 0.858305 | 0.169332 | 0.865536 | 0.981636 | chr10 | 68934294 | 68938531 | + | 0 | NA | intron (NAluY SINE  | -19758 NM_00472E | 9188 Hs. 223141NM_00472E   | ENSG00000DDX21    | GUA GURDE           | DEXD-box                    | protein-coding              |                     |                |
| chr10-731 | 7.178702 | 0.145338 | 0.858305 | 0.169332 | 0.865536 | 0.981636 | chr10 | 73161558 | 73163916 | + | 0 | NA | intron (Nintron (N  | 5271 NM_00726E   | 11319 Hs. 631822NM_00726E  | ENSG00000ECD      | GCR2 HSG1           | pedysc                      | lprotein-coding             |                     |                |
| chr10-777 | 7.178702 | 0.145338 | 0.858305 | 0.169332 | 0.865536 | 0.981636 | chr10 | 77782482 | 77833412 | + | 0 | NA | Intergeni Intergeni | 143808 NM_00474E | 9231 Hs. 65269C            | NR_00474E         | ENSG00000DLG5       | LP-DLG P-                   | discs lar                   | protein-coding      |                |
| chr10-864 | 7.178702 | 0.145338 | 0.858305 | 0.169332 | 0.865536 | 0.981636 | chr10 | 86464742 | 86467171 | + | 0 | NA | intron (Nintron (N  | 55828 NM_00131E  | 23063 Hs. 20309E           | NR_01504E         | ENSG00000WAPL       | FOE KIAAC                   | WAPL                        | cohc                | protein-coding |
| chr10-874 | 7.178702 | 0.145338 | 0.858305 | 0.169332 | 0.865536 | 0.981636 | chr10 | 87065517 | 87069328 | + | 0 | NA | intron (NAluJb SIN  | 26665 NM_00131E  | 2746 Hs. 50040E            | NR_005271E        | ENSG00000GLUD1      | GDH GDH1                    | glutamate                   | protein-coding      |                |
| chr10-984 | 7.178702 | 0.145338 | 0.858305 | 0.169332 | 0.865536 | 0.981636 | chr10 | 98440777 | 98445251 | + | 0 | NA | intron (Nintron (N  | -3307 NR_13445E  | 1.02E+08                   | Hs. 43488E        | NR_13445E           | LOC101927-                  | -                           | uncharactncRNA      |                |
| chr10-103 | 7.178702 | 0.145338 | 0.858305 | 0.169332 | 0.865536 | 0.981636 | chr10 | 1.04E+08 | 1.04E+08 | + | 0 | NA | intron (Nintron (N  | 61359 NM_00136E  | 9644 Hs. 678727NM_014631   | ENSG00000SH3PXD2A | FISH SH3            | SH3                         | and f                       | protein-coding      |                |
| chr11-89E | 7.178702 | 0.145338 | 0.858305 | 0.169332 | 0.865536 | 0.981636 | chr11 | 8951657  | 8956780  | + | 0 | NA | intron (NLIMB7 LIN  | 10224 NM_02064E  | 56674 Hs. 50185E           | NR_02064E         | ENSG00000TMEM9B     | Clorf10E TMEM9              | domin                       | protein-coding      |                |
| chr11-27E | 7.178702 | 0.145338 | 0.858305 | 0.169332 | 0.865536 | 0.981636 | chr11 | 57677608 | 57678554 | + | 0 | NA | intron (Nintron (N  | 9967 NM_01545E   | 25921 Hs. 27239            | NR_01545E         | ENSG00000ZDHHCS     | DHHC5 ZNF                   | zinc fng                    | protein-coding      |                |
| chr11-68E | 7.178702 | 0.145338 | 0.858305 | 0.169332 | 0.865536 | 0.981636 | chr11 | 68594706 | 68598916 | + | 0 | NA | intron (Nintron (N  | -87733 NM_01597E | 51083 Hs. 27895E           | NR_01597E         | ENSG00000CGAL       | ETL8 GAL-                   | galanin ε                   | protein-coding      |                |
| chr11-83E | 7.178702 | 0.145338 | 0.858305 | 0.169332 | 0.865536 | 0.981636 | chr11 | 83261192 | 83264822 | + | 0 | NA | intron (NMRB SINE   | 23400 NM_00128E  | 60492 Hs. 36886E           | NR_02182E         | ENSG00000CCDC90B    | MDSO11 MC                   | coiled-c                    | protein-coding      |                |
| chr12-46E | 7.178702 | 0.145338 | 0.858305 | 0.169332 | 0.865536 | 0.981636 | chr12 | 4655606  | 4656929  | + | 0 | NA | intron (Nintron (N  | 9173 NM_00500E   | 4704 Hs. 75227             | NR_00500E         | ENSG00000NDUFA9     | C6 C1-3E                    | NADH:ubiq                   | protein-coding      |                |
| chr12-501 | 7.178702 | 0.145338 | 0.858305 | 0.169332 | 0.865536 | 0.981636 | chr12 | 50115213 | 50116570 | + | 0 | NA | intron (Nintron (N  | 3655 NM_00125E   | 84987 Hs. 38864E           | NR_03290E         | ENSG00000COX14      | C12orf62                    | cytochron                   | protein-coding      |                |
| chr12-53E | 7.178702 | 0.145338 | 0.858305 | 0.169332 | 0.865536 | 0.981636 | chr12 | 53252643 | 53300800 | + | 0 | NA | intron (NAluSx SI   | 14527 NR_046221  | 1.01E+08                   | Hs. 63360E        | NR_046221E          | ENSG00000LOC10065E          | -                           | uncharactncRNA      |                |
| chr12-57E | 7.178702 | 0.145338 | 0.858305 | 0.169332 | 0.865536 | 0.981636 | chr12 | 57394129 | 57395476 | + | 0 | NA | intron (Nintron (N  | 36241 NM_00135E  | 22864 Hs. 59111E           | NR_00135E         | ENSG00000R3HDM2     | CAG6 PRO1                   | R3H                         | domaiprotein-coding |                |
| chr12-88E | 7.178702 | 0.145338 | 0.858305 | 0.169332 | 0.865536 | 0.981636 | chr12 | 88526616 | 88528278 | + | 0 | NA | intron (Nintron (N  | 53024 NM_00089E  | 4254 Hs. 1048              | NR_00089E         | ENSG00000KITLG      | DCUA DFN                    | KIT                         | ligar               | protein-coding |
| chr12-95E | 7.178702 | 0.145338 | 0.858305 | 0.169332 | 0.865536 | 0.981636 | chr12 | 95234640 | 95235194 | + | 0 | NA | intron (NSVA_D Ret  | 17110 NM_01759E  | 55591 Hs. 24135            | NR_01759E         | ENSG00000VEZT       | VEZATIN                     | vezatin,                    | protein-coding      |                |
| chr12-11E | 7.178702 | 0.145338 | 0.858305 | 0.169332 | 0.865536 | 0.981636 | chr12 | 1.18E+08 | 1.18E+08 | + | 0 | NA | intron (NMRB SINE   | 35399 NM_02249E  | 64426 Hs. 41663C           | NR_02249E         | ENSG00000SUDS3      | SAP45 SDS                   | SZ3                         | homc                | protein-coding |
| chr12-12E | 7.178702 | 0.145338 | 0.858305 | 0.169332 | 0.865536 | 0.981636 | chr12 | 1.23E+08 | 1.23E+08 | + | 0 | NA | intron (Nintron (N  | 9793 NR_03618E   | 1E+08                      | NR_03618E         | ENSG00000MIR4304    | -                           | microRNA                    | ncRNA               |                |
| chr13-27E | 7.178702 | 0.145338 | 0.858305 | 0.169332 | 0.865536 | 0.981636 | chr13 | 27067864 | 27071059 | + | 0 | NA | intron (NLIME3 LIN  | -56072 NR_04654E | 1.01E+08                   | Hs. 52492E        | NR_04654E           | USP12-AS1-                  | -                           | USP12               | antncRNA       |
| chr13-39E | 7.178702 | 0.145338 | 0.858305 | 0.169332 | 0.865536 | 0.981636 | chr13 | 39010602 | 39011527 | + | 0 | NA | 3' UTR (N3' UTR (N  | -20205 NM_00114E | 161003 Hs. 327794NM_14528E | ENSG00000CSTOML3  | Epb7.21 S           | tomatoin                    | protein-coding              |                     |                |
| chr14-24E | 7.178702 | 0.145338 | 0.858305 | 0.169332 | 0.865536 | 0.981636 | chr14 | 24210386 | 24211501 | + | 0 | NA | intron (NAluSx SIN  | 2545 NM_01416E   | 29082 Hs. 27976E           | NR_01416E         | ENSG00000CHMP4A     | C14orf12E                   | charged n                   | protein-coding      |                |
| chr14-63E | 7.178702 | 0.145338 | 0.858305 | 0.169332 | 0.865536 | 0.981636 | chr14 | 63380371 | 63382157 | + | 0 |    |                     |                  |                            |                   |                     |                             |                             |                     |                |



|           |          |          |          |          |          |          |       |          |          |   |   |    |                     |        |              |          |                    |                     |                     |                           |                         |
|-----------|----------|----------|----------|----------|----------|----------|-------|----------|----------|---|---|----|---------------------|--------|--------------|----------|--------------------|---------------------|---------------------|---------------------------|-------------------------|
| chr1-2205 | 6.666399 | 0.15036  | 0.889541 | 0.169031 | 0.865772 | 0.981636 | chr1  | 22094597 | 22095680 | + | 0 | NA | 3' UTR (N3' UTR (N  | 42429  | NM_044472    | 998      | Hs.467637NM_001791 | ENSG000003CDC42     | CDC42Hs Cell divi   |                           |                         |
| chr11-341 | 6.666399 | 0.15036  | 0.889541 | 0.169031 | 0.865772 | 0.981636 | chr11 | 34108080 | 34108605 | + | 0 | NA | intron (Nintron (N  | 2713   | NM_001144    | 55226    | Hs.577281NM_024662 | ENSG000003NAT10     | ALP Kre3N-acetyl    |                           |                         |
| chr11-765 | 6.666399 | 0.15036  | 0.889541 | 0.169031 | 0.865772 | 0.981636 | chr11 | 76500428 | 76501533 | + | 0 | NA | intron (NMER2 DNA   | 55955  | NM_020193    | 56946    | Hs.352588NM_020193 | ENSG000003EMSY      | C11orf30 EMSY       |                           |                         |
| chr11-765 | 6.666399 | 0.15036  | 0.889541 | 0.169031 | 0.865772 | 0.981636 | chr11 | 76529976 | 76530390 | + | 0 | NA | intron (NAluSq SIN  | 85158  | NM_020193    | 56946    | Hs.352588NM_020193 | ENSG000003EMSY      | C11orf30 EMSY       |                           |                         |
| chr12-206 | 6.666399 | 0.15036  | 0.889541 | 0.169031 | 0.865772 | 0.981636 | chr12 | 26683371 | 26684650 | + | 0 | NA | intron (Nintron (N  | 149184 | NM_002222    | 3709     | Hs.512233NM_002222 | ENSG000003ITPR2     | ANHD CFAF inositol  |                           |                         |
| chr12-987 | 6.666399 | 0.15036  | 0.889541 | 0.169031 | 0.865772 | 0.981636 | chr12 | 98731955 | 98732762 | + | 0 | NA | intron (Nintron (N  | 87058  | NM_181868    | 317      | Hs.552567NM_00116C | ENSG000003APAF1     | APAF-1 Cafapoptotic |                           |                         |
| chr12-111 | 6.666399 | 0.15036  | 0.889541 | 0.169031 | 0.865772 | 0.981636 | chr12 | 1.12E+08 | 1.12E+08 | + | 0 | NA | intron (NLMJ LINE   | -13914 | NR_106819    | 1.02E+08 | NR_106819          | ENSG000003MIR6761   | hsa-mir-6761        |                           |                         |
| chr12-122 | 6.666399 | 0.15036  | 0.889541 | 0.169031 | 0.865772 | 0.981636 | chr12 | 1.22E+08 | 1.22E+08 | + | 0 | NA | intron (Nintron (N  | 17329  | NM_00135C    | 55596    | Hs.37706           | NM_017612           | ENSG000003ZCHC8     | zinc fingerprotein-coding |                         |
| chr13-495 | 6.666399 | 0.15036  | 0.889541 | 0.169031 | 0.865772 | 0.981636 | chr13 | 49547556 | 49549504 | + | 0 | NA | intron (NLMB5 LIN   | 37028  | NM_001352    | 55213    | Hs.508021NM_018191 | ENSG000003RCBTB1    | CLLD7 CLIRCC1       |                           |                         |
| chr13-671 | 6.666399 | 0.15036  | 0.889541 | 0.169031 | 0.865772 | 0.981636 | chr13 | 77109294 | 77110619 | + | 0 | NA | intron (NMER11A LI  | 34442  | NR_046711    | 1.01E+08 | Hs.569288NR_046711 | ENSG000003MYCBP2-AS | MYCBP2              |                           |                         |
| chr15-644 | 6.666399 | 0.15036  | 0.889541 | 0.169031 | 0.865772 | 0.981636 | chr15 | 64417054 | 64422354 | + | 0 | NA | intron (Nintron (N  | 31868  | NM_001321    | 9325     | Hs.50034C          | NM_016215           | ENSG000003TRIP4     | ASC-1 ASC thyroid         |                         |
| chr15-771 | 6.666399 | 0.15036  | 0.889541 | 0.169031 | 0.865772 | 0.981636 | chr15 | 77112798 | 77115317 | + | 0 | NA | 3' UTR (N3' UTR (N  | -42948 | NM_198902    | 10099    | Hs.744863NM_005724 | ENSG000003SPAN3     | TM4-A TM4           |                           |                         |
| chr15-824 | 6.666399 | 0.15036  | 0.889541 | 0.169031 | 0.865772 | 0.981636 | chr15 | 84791845 | 84794719 | + | 0 | NA | intron (NAluSx SIN  | -23398 | NM_020778    | 57538    | Hs.459183NM_020778 | ENSG000003ALPK3     | CMH27 MAA           |                           |                         |
| chr16-22C | 6.666399 | 0.15036  | 0.889541 | 0.169031 | 0.865772 | 0.981636 | chr16 | 22085714 | 22086633 | + | 0 | NA | IntergeniMIR3 SINE  | -6517  | NM_107376    | 146177   | Hs.10697           | NM_173615           | ENSG000003VWA3A     | Wille                     |                         |
| chr17-536 | 6.666399 | 0.15036  | 0.889541 | 0.169031 | 0.865772 | 0.981636 | chr17 | 5369334  | 5370557  | + | 0 | NA | intron (NAluSp SIN  | -49696 | NM_00116C    | 84268    | Hs.462088NM_032308 | ENSG000003RPAIN     | HRIP RIP            |                           |                         |
| chr17-161 | 6.666399 | 0.15036  | 0.889541 | 0.169031 | 0.865772 | 0.981636 | chr17 | 16134061 | 16135078 | + | 0 | NA | intron (Nintron (N  | 18627  | NR_145787    | 1.1E+08  | NR_145787          | SNORD163            | small nucsnoRNA     |                           |                         |
| chr17-62C | 6.666399 | 0.15036  | 0.889541 | 0.169031 | 0.865772 | 0.981636 | chr17 | 62666730 | 62668863 | + | 0 | NA | intron (NLM2c LINE  | -38410 | NR_147888    | 1.05E+08 | Hs.446268NR_147888 | ENSG000003LOC105371 | uncharactncRNA      |                           |                         |
| chr17-62C | 6.666399 | 0.15036  | 0.889541 | 0.169031 | 0.865772 | 0.981636 | chr17 | 62643599 | 62644331 | + | 0 | NA | intron (Nintron (N  | -16887 | NM_001252    | 57674    | Hs.195642NM_020914 | ENSG000003RNF213    | ALO17 C17ring       |                           |                         |
| chr19-34C | 6.666399 | 0.15036  | 0.889541 | 0.169031 | 0.865772 | 0.981636 | chr19 | 34327562 | 34331224 | + | 0 | NA | intron (Nintron (N  | -35347 | NM_001184    | 2821     | Hs.466471NM_000177 | ENSG000003GPI       | AMF GNP1            |                           |                         |
| chr2-127C | 6.666399 | 0.15036  | 0.889541 | 0.169031 | 0.865772 | 0.981636 | chr2  | 12736077 | 12737356 | + | 0 | NA | promoter-promoter-  | -561   | NR_036072    | 1E+08    | NR_036072          | ENSG000003MIR3125   | mir-3125            |                           |                         |
| chr2-456C | 6.666399 | 0.15036  | 0.889541 | 0.169031 | 0.865772 | 0.981636 | chr2  | 45600495 | 45602164 | + | 0 | NA | intron (NMaamRep60E | 9938   | NM_018075    | 55133    | Hs.14229           | NM_018075           | ENSG000003SRBD1     | SI RNA                    |                         |
| chr2-208C | 6.666399 | 0.15036  | 0.889541 | 0.169031 | 0.865772 | 0.981636 | chr2  | 2.08E+08 | 2.08E+08 | + | 0 | NA | intron (NAluSx SIN  | -21684 | NM_001305    | 5746     | Hs.570296NM_005048 | ENSG000003PTH2R     | PTH2R               |                           |                         |
| chr2-230C | 6.666399 | 0.15036  | 0.889541 | 0.169031 | 0.865772 | 0.981636 | chr2  | 2.3E+08  | 2.3E+08  | + | 0 | NA | intron (NMLT1C LTF  | 3590   | NM_004500    | 3431     | Hs.14515C          | NM_004500           | ENSG000003SP110     | IF141 IF1SP110            |                         |
| chr2-241C | 6.666399 | 0.15036  | 0.889541 | 0.169031 | 0.865772 | 0.981636 | chr2  | 2.41E+08 | 2.41E+08 | + | 0 | NA | intron (Nintron (N  | 3282   | NM_182501    | 130916   | Hs.159556NM_182501 | ENSG000003MYERF4    | MYERF4              |                           |                         |
| chr20-35C | 6.666399 | 0.15036  | 0.889541 | 0.169031 | 0.865772 | 0.981636 | chr20 | 35551878 | 35552785 | + | 0 | NA | intron (NLM2a LINE  | 10253  | NM_015966    | 51614    | Hs.472558NM_015966 | ENSG000003ERGIC3    | C20orf47 ERGIC      |                           |                         |
| chr20-367 | 6.666399 | 0.15036  | 0.889541 | 0.169031 | 0.865772 | 0.981636 | chr20 | 36785466 | 36787366 | + | 0 | NA | 3' UTR (N3' UTR (N  | -12653 | NM_001145    | 79980    | Hs.632268NM_024918 | ENSG000003DSN1      | C20orf172 DSN1      |                           |                         |
| chr21-334 | 6.666399 | 0.15036  | 0.889541 | 0.169031 | 0.865772 | 0.981636 | chr21 | 33456612 | 33457176 | + | 0 | NA | intron (Nintron (N  | 23808  | NM_006134    | 757      | Hs.433666NM_006134 | ENSG000003TMEM50B   | C21orf47 E          |                           |                         |
| chr22-205 | 6.666399 | 0.15036  | 0.889541 | 0.169031 | 0.865772 | 0.981636 | chr22 | 20990762 | 20992782 | + | 0 | NA | exon (NM exon (NM   | 9475   | NM_006767    | 8216     | Hs.78788           | NM_006767           | ENSG000003LZTR1     | BTBD29 LZ                 |                         |
| chr22-314 | 6.666399 | 0.15036  | 0.889541 | 0.169031 | 0.865772 | 0.981636 | chr22 | 31465327 | 31467998 | + | 0 | NA | intron (NLMIE1 LIN  | 22894  | NM_001164    | 56478    | Hs.517555NM_019843 | ENSG000003EIF4ENIF1 | EIF4E T             |                           |                         |
| chr3-4257 | 6.666399 | 0.15036  | 0.889541 | 0.169031 | 0.865772 | 0.981636 | chr3  | 42573578 | 42576319 | + | 0 | NA | intron (NAluJr SIN  | -6892  | NM_01630E    | 51188    | Hs.534454NM_01630E | ENSG000003SSL82     | KIAA-iso            |                           |                         |
| chr3-6411 | 6.666399 | 0.15036  | 0.889541 | 0.169031 | 0.865772 | 0.981636 | chr3  | 64119549 | 64121284 | + | 0 | NA | intron (NMIRc SINE  | 16946  | NR_046701    | 1.01E+08 | Hs.668874NR_046701 | PRICKLE2-           | PRICKLE2            |                           |                         |
| chr3-141C | 6.666399 | 0.15036  | 0.889541 | 0.169031 | 0.865772 | 0.981636 | chr3  | 1.41E+08 | 1.41E+08 | + | 0 | NA | intron (Nintron (N  | -10405 | NM_00135C    | 253461   | Hs.518301NM_152533 | ENSG000003ZBTB38    | CIBZ PPP1           |                           |                         |
| chr4-676C | 6.666399 | 0.15036  | 0.889541 | 0.169031 | 0.865772 | 0.981636 | chr4  | 67654905 | 67656205 | + | 0 | NA | intron (NLMIP13 LI  | 45600  | NM_018227    | 55236    | Hs.212774NM_018227 | ENSG000003UBA6      | EI-12 MOF           |                           |                         |
| chr5-876C | 6.666399 | 0.15036  | 0.889541 | 0.169031 | 0.865772 | 0.981636 | chr5  | 876821   | 877365   | + | 0 | NA | intron (Nintron (N  | 15429  | NR_13429E    | 65980    | Hs.449278NM_023924 | ENSG000003BRD9      | LAVS3040 bromodome  |                           |                         |
| chr5-659C | 6.666399 | 0.15036  | 0.889541 | 0.169031 | 0.865772 | 0.981636 | chr5  | 65929832 | 65930947 | + | 0 | NA | intron (NAluY SINE  | 3814   | NM_001252    | 55914    | Hs.591774NM_018695 | ENSG000003ERBIN     | ERBB2 P             |                           |                         |
| chr5-747  | 6.666399 | 0.15036  | 0.889541 | 0.169031 | 0.865772 | 0.981636 | chr5  | 74777089 | 74777643 | + | 0 | NA | TTS (NR_CTS (NR_C   | -9995  | NR_170681    | 84340    | Hs.277154NM_03238C | ENSG000003GFM2      | EF-G2nt EG          |                           |                         |
| chr5-1381 | 6.666399 | 0.15036  | 0.889541 | 0.169031 | 0.865772 | 0.981636 | chr5  | 1.38E+08 | 1.38E+08 | + | 0 | NA | exon (NM exon (NM   | 14888  | NM_004661    | 8697     | Hs.73625           | NM_004661           | ENSG000003CDC23     | ANAPC8 AF                 |                         |
| chr5-1507 | 6.666399 | 0.15036  | 0.889541 | 0.169031 | 0.865772 | 0.981636 | chr5  | 1.51E+08 | 1.51E+08 | + | 0 | NA | intron (NLMIP3 LIN  | 10705  | NM_001133    | 51164    | Hs.675564NM_016221 | ENSG000003DCTN4     | DYN1 P62            |                           |                         |
| chr5-154C | 6.666399 | 0.15036  | 0.889541 | 0.169031 | 0.865772 | 0.981636 | chr5  | 1.55E+08 | 1.55E+08 | + | 0 | NA | intron (NLMIP3 LIN  | 36331  | NM_015466    | 25929    | Hs.483921NM_015466 | ENSG000003GEMIN5    | GEMIN-5             |                           |                         |
| chr6-431C | 6.666399 | 0.15036  | 0.889541 | 0.169031 | 0.865772 | 0.981636 | chr6  | 43192000 | 43193944 | + | 0 | NA | intron (Nintron (N  | 10776  | NM_01508E    | 23113    | Hs.485434NM_01508E | ENSG000003CUL9      | H7AP1 PAF           |                           |                         |
| chr6-143C | 6.666399 | 0.15036  | 0.889541 | 0.169031 | 0.865772 | 0.981636 | chr6  | 1.44E+08 | 1.44E+08 | + | 0 | NA | intron (NLM2a LINE  | -24030 | NM_001322    | 84946    | Hs.185675NM_03286C | ENSG000003LTV1      | C6orf93 LTV1        |                           |                         |
| chr7-1521 | 6.666399 | 0.15036  | 0.889541 | 0.169031 | 0.865772 | 0.981636 | chr7  | 1.52E+08 | 1.52E+08 | + | 0 | NA | intron (NLMJ SINE   | 109840 | NM_001371474 | -108238  | NM_001200          | 1.01E+08            | Hs.659493NM_001200  | ENSG000003SMIM18          | small intprotein-coding |
| chr8-3774 | 6.666399 | 0.15036  | 0.889541 | 0.169031 | 0.865772 | 0.981636 | chr8  | 37744505 | 37745209 | + | 0 | NA | intron (NMIR3 SINE  | 2939   | NR_003671    | 728024   | Hs.647133NR_003671 | LOC728024           | chromoson pseudo    |                           |                         |
| chr8-419C | 6.666399 | 0.15036  | 0.889541 | 0.169031 | 0.865772 | 0.981636 | chr8  | 41931195 | 41933256 | + | 0 | NA | exon (NM exon (NM   | -35848 | NR_001142    | 286      | Hs.654433NM_000037 | ENSG000003ANK1      | ANK SPH1            |                           |                         |
| chr9-936C | 6.666399 | 0.15036  | 0.889541 | 0.169031 | 0.865772 | 0.981636 | chr9  | 93636392 | 93638406 | + | 0 | NA | intron (NLMIB8 LIN  | 42558  | NR_049855    | 1.01E+08 | NR_049855          | ENSG000003MIR548AU  | microRNA            |                           |                         |
| chr3-881C | 6.92725  | -0.14866 | 0.88004  | -0.16893 | 0.865853 | 0.981636 | chr3  | 88130217 | 88130701 | + | 0 | NA | intron (NAluJb SIN  | 19407  | NM_00119E    | 8545     | Hs.444818NM_003663 | ENSG000003CGGBP1    | CGGBP1 p2CGG        |                           |                         |
| chr15-101 | 13.11917 | -0.11074 | 0.65577  | -0.16893 | 0.865854 | 0.981636 | chr15 | 1.02E+08 | 1.02E+08 | + | 0 | NA | intron (Nintron (N  | 1083   | NR_107062    | 1.02E+08 | NR_107062          | ENSG000003MIR6859   | hsa-mir-6859        |                           |                         |
| chr10-791 | 8.715614 | 0.133854 | 0.792609 | 0.168878 | 0.865892 | 0.981636 | chr10 | 79120226 | 79121617 | + | 0 | NA | intron (Nintron (N  | 51955  | NM_020338    | 57178    | Hs.193118NM_020338 | ENSG000003ZM121     | MIZ RAI17zinc       |                           |                         |
| chr19-411 | 8.715614 | 0.133854 | 0.792609 | 0.168878 | 0.865892 | 0.981636 | chr19 | 4112368  | 4114233  | + | 0 | NA | intron (Nintron (N  | 10829  | NM_030662    | 5605     | Hs.465627NM_030662 | ENSG000003MAP2K2    | CFCA4 MAPK          |                           |                         |
| chr6-875  | 8.715614 | 0.133854 | 0.792609 | 0.168878 | 0.865892 | 0.981636 | chr6  | 87246587 | 87247276 | + | 0 | NA | intron (NAluS6 SI   | -75657 | NM_001287    | 57150    | Hs.70769           | NM_020425           | ENSG000003SMIM8     | C6orf162 small            |                         |
| chr20-352 | 10.21139 | 0.124361 | 0.736711 | 0.168806 | 0.865949 | 0.981636 | chr20 | 35014850 | 35016369 | + | 0 | NA | intron (NAluSx1 SI  | -25137 | NR_039912    | 1.01E+08 | NR_039912          | ENSG000003MIR499B   | MIR499A microRNA    |                           |                         |
| chr1-2217 | 13.61391 | -0.1082  |          |          |          |          |       |          |          |   |   |    |                     |        |              |          |                    |                     |                     |                           |                         |

|                     |          |          |          |          |          |       |          |          |   |   |    |                     |        |           |          |                    |                     |                                       |                                     |
|---------------------|----------|----------|----------|----------|----------|-------|----------|----------|---|---|----|---------------------|--------|-----------|----------|--------------------|---------------------|---------------------------------------|-------------------------------------|
| chr13-772.8.674475  | 0.132112 | 0.786705 | 0.167931 | 0.866638 | 0.981636 | chr13 | 77291239 | 77292058 | + | 0 | NA | intron (AluSp SIN   | 35446  | NM_015057 | 23077    | Hs.591221NM_015057 | ENSG000005MYCBP2    | Myc-bp2 MYC bindiprotein-coding       |                                     |
| chr13-1118.8.674475 | 0.132112 | 0.786705 | 0.167931 | 0.866638 | 0.981636 | chr13 | 1.11E+08 | 1.11E+08 | + | 0 | NA | intron (L1P45 LIN   | 36121  | NM_001352 | 79587    | Hs.508722NM_024537 | ENSG000005CARS2     | COXP27 cysteinyprotein-coding         |                                     |
| chr13-1118.8.674475 | 0.132112 | 0.786705 | 0.167931 | 0.866638 | 0.981636 | chr13 | 1.13E+08 | 1.13E+08 | + | 0 | NA | intron (intron (    | 13460  | NM_005561 | 3916     | Hs.494419NM_005561 | ENSG000005LAMP1     | CD107a LAMP1 lysosomal protein-coding |                                     |
| chr13-1118.8.674475 | 0.132112 | 0.786705 | 0.167931 | 0.866638 | 0.981636 | chr13 | 1.14E+08 | 1.14E+08 | + | 0 | NA | 3' UTR (3' UTR (    | 18667  | NM_001366 | 1.01E+08 | Hs.704267NM_001366 | ENSG000005C13orf46  | chromosom protein-coding              |                                     |
| chr14-358.8.674475  | 0.132112 | 0.786705 | 0.167931 | 0.866638 | 0.981636 | chr14 | 35011849 | 35020209 | + | 0 | NA | intron (L2b LINE    | -28878 | NM_001075 | 283635   | Hs.446357NM_173607 | ENSG000005FAM177A1  | C14orf24 family wiprotein-coding      |                                     |
| chr14-498.8.674475  | 0.132112 | 0.786705 | 0.167931 | 0.866638 | 0.981636 | chr14 | 49802014 | 49806478 | + | 0 | NA | intron (AluSg SIN   | 36093  | NM_014315 | 23588    | Hs.509264NM_014315 | ENSG000005KLHDC2    | HCLP-1 Hckelch don protein-coding     |                                     |
| chr14-678.8.674475  | 0.132112 | 0.786705 | 0.167931 | 0.866638 | 0.981636 | chr14 | 67684745 | 67692622 | + | 0 | NA | intron (FLAM_C SI   | 7081   | NM_001252 | 51109    | Hs.719922NM_016026 | ENSG000005RDH11     | ARSDR1 Ccr etaloin protein-coding     |                                     |
| chr14-758.8.674475  | 0.132112 | 0.786705 | 0.167931 | 0.866638 | 0.981636 | chr14 | 75016530 | 75020716 | + | 0 | NA | intron (intron (    | 15702  | NM_014235 | 8892     | Hs.409137NM_014235 | ENSG000005EIF2B2    | EIF-2B2eukaryotiprotein-coding        |                                     |
| chr15-434.8.674475  | 0.132112 | 0.786705 | 0.167931 | 0.866638 | 0.981636 | chr15 | 43419765 | 43423083 | + | 0 | NA | intron (intron (    | 50323  | NM_001286 | 27229    | Hs.584887NM_014444 | ENSG000005TUBGCP4   | 76P GCP-4 tubulin protein-coding      |                                     |
| chr15-636.8.674475  | 0.132112 | 0.786705 | 0.167931 | 0.866638 | 0.981636 | chr15 | 63262144 | 63262937 | + | 0 | NA | intron (intron (    | -26903 | NR_034088 | 1E+08    | Hs.631162NR_034088 | ENSG000005USP3-AS1  | USP3 antincRNA                        |                                     |
| chr15-762.8.674475  | 0.132112 | 0.786705 | 0.167931 | 0.866638 | 0.981636 | chr15 | 76281110 | 76286202 | + | 0 | NA | intron (intron (    | -23504 | NR_028510 | 7302     | Hs.684881NR_022721 | TYR03P              | TYR03P prpseudo                       |                                     |
| chr16-116.8.674475  | 0.132112 | 0.786705 | 0.167931 | 0.866638 | 0.981636 | chr16 | 11687421 | 11688020 | + | 0 | NA | intron (intron (    | 19265  | NM_003498 | 8303     | Hs.618522NM_003498 | ENSG000005CSNN      | stannin protein-coding                |                                     |
| chr16-468.8.674475  | 0.132112 | 0.786705 | 0.167931 | 0.866638 | 0.981636 | chr16 | 46955424 | 46961216 | + | 0 | NA | intron (AluV SINE   | 15354  | NM_005888 | 10294    | Hs.368072NM_005888 | ENSG000005DNAJ2     | CPR3 DJ3 DnaJ heatprotein-coding      |                                     |
| chr16-588.8.674475  | 0.132112 | 0.786705 | 0.167931 | 0.866638 | 0.981636 | chr16 | 58595462 | 58599324 | + | 0 | NA | intron (AluSx1 SI   | 32343  | NM_206999 | 23019    | Hs.460922NM_016284 | ENSG000005CNOT1     | AD-005 CCCR4-NOT protein-coding       |                                     |
| chr16-703.8.674475  | 0.132112 | 0.786705 | 0.167931 | 0.866638 | 0.981636 | chr16 | 70350702 | 70360141 | + | 0 | NA | intron (intron (    | 8518   | NM_018332 | 55308    | Hs.656037NM_018332 | ENSG000005DDX19A    | DDX19-DDXDEAD-box protein-coding      |                                     |
| chr17-406.8.674475  | 0.132112 | 0.786705 | 0.167931 | 0.866638 | 0.981636 | chr17 | 4060074  | 4066605  | + | 0 | NA | intron (FLAM_C SI   | 79691  | NM_015113 | 23140    | Hs.277624NM_015113 | ENSG000005ZZEF1     | ZZZ4 zinc finger protein-coding       |                                     |
| chr17-658.8.674475  | 0.132112 | 0.786705 | 0.167931 | 0.866638 | 0.981636 | chr17 | 6593412  | 6596166  | + | 0 | NA | intron (NLIME2z LI  | -38234 | NM_001166 | 83394    | Hs.183983NM_031222 | ENSG000005PITPNM3   | ACKR6 COF PITPNM3 protein-coding      |                                     |
| chr17-168.8.674475  | 0.132112 | 0.786705 | 0.167931 | 0.866638 | 0.981636 | chr17 | 16061115 | 16067118 | + | 0 | NA | exon (NM exon (NM   | 64292  | NM_011777 | 54902    | Hs.462313NM_011777 | ENSG000005TTC19     | 201020401 tetraetric protein-coding   |                                     |
| chr17-403.8.674475  | 0.132112 | 0.786705 | 0.167931 | 0.866638 | 0.981636 | chr17 | 40351909 | 40352601 | + | 0 | NA | intron (intron (    | -9119  | NR_110861 | 1.02E+08 | Hs.655717NR_110861 | ENSG000005RARA-AS1  | RARA antincRNA                        |                                     |
| chr18-458.8.674475  | 0.132112 | 0.786705 | 0.167931 | 0.866638 | 0.981636 | chr18 | 45897928 | 45918341 | + | 0 | NA | intron (intron (    | 59195  | NM_020964 | 57724    | Hs.514842NM_020964 | ENSG000005CEPG5     | HEEWI K1 ectopic I protein-coding     |                                     |
| chr18-2738.8.674475 | 0.132112 | 0.786705 | 0.167931 | 0.866638 | 0.981636 | chr18 | 27376943 | 27377816 | + | 0 | NA | non-codiron-codir   | 3065   | NM_001201 | 130557   | Hs.515872NM_144631 | ENSG000005ZNF513    | HMF10656 zinc finger protein-coding   |                                     |
| chr20-341.8.674475  | 0.132112 | 0.786705 | 0.167931 | 0.866638 | 0.981636 | chr20 | 34109058 | 34110377 | + | 0 | NA | intron (intron (    | 2526   | NM_001316 | 8894     | Hs.429180NM_003908 | ENSG000005EIF2S2    | EIF2 EIF2eukaryotiprotein-coding      |                                     |
| chr20-508.8.674475  | 0.132112 | 0.786705 | 0.167931 | 0.866638 | 0.981636 | chr20 | 50937951 | 50954451 | + | 0 | NA | intron (intron (    | 12363  | NM_001317 | 8813     | Hs.654951NM_003858 | ENSG000005DPM1      | CDG1E MP1 dolichyl protein-coding     |                                     |
| chr21-328.8.674475  | 0.132112 | 0.786705 | 0.167931 | 0.866638 | 0.981636 | chr21 | 32663214 | 32665101 | + | 0 | NA | intron (LTR2 LTR    | -51786 | NM_001350 | 56683    | Hs.5811            | NM_017833           | ENSG000005CFAP298                     | Ar4orf48 cilia antincRNA            |
| chr22-215.8.674475  | 0.132112 | 0.786705 | 0.167931 | 0.866638 | 0.981636 | chr22 | 21944617 | 21946101 | + | 0 | NA | intron (MLTIC SIN   | 7122   | NR_147620 | 1E+08    | Hs.659182NR_147620 | LOC100286           | uncharactncRNA                        |                                     |
| chr22-428.8.674475  | 0.132112 | 0.786705 | 0.167931 | 0.866638 | 0.981636 | chr22 | 42834558 | 42837603 | + | 0 | NA | intron (AluSx SIN   | 21193  | NM_014570 | 26286    | Hs.685222NM_014570 | ENSG000005ARFGAP3   | ARFGAP1 ADP ribos protein-coding      |                                     |
| chr3-378.8.674475   | 0.132112 | 0.786705 | 0.167931 | 0.866638 | 0.981636 | chr3  | 37382812 | 37384065 | + | 0 | NA | Intergeni L1PRE2C L | -2831  | NM_178344 | 339883   | Hs.475942NM_178333 | ENSG000005C3orf35   | APRGI chromosom protein-coding        |                                     |
| chr4-9907.8.674475  | 0.132112 | 0.786705 | 0.167931 | 0.866638 | 0.981636 | chr4  | 99071141 | 99077947 | + | 0 | NA | intron (intron (    | 14244  | NM_000671 | 128      | Hs.78989           | NM_000671           | ENSG000005ADH5                        | ADH-3 ADFA alcohol c protein-coding |
| chr4-1438.8.674475  | 0.132112 | 0.786705 | 0.167931 | 0.866638 | 0.981636 | chr4  | 1.44E+08 | 1.44E+08 | + | 0 | NA | intron (L2b LINE    | -3699  | NR_104027 | 1E+08    | Hs.707572NR_104027 | ENSG000005SMARCA5-1 | SMARCA5 antncRNA                      |                                     |
| chr5-1242.8.674475  | 0.132112 | 0.786705 | 0.167931 | 0.866638 | 0.981636 | chr5  | 1.28E+08 | 1.28E+08 | + | 0 | NA | intron (intron (    | 30355  | NM_130805 | 133619   | Hs.483255NM_130805 | ENSG000005PRRC1     | proline rprotein-coding               |                                     |
| chr6-7382.8.674475  | 0.132112 | 0.786705 | 0.167931 | 0.866638 | 0.981636 | chr6  | 73821060 | 73821634 | + | 0 | NA | intron (L1P1A17 LI  | 125144 | NM_133493 | 135228   | Hs.399891NM_133493 | ENSG000005CD109     | CPAMD7 pCD109 mol protein-coding      |                                     |
| chr6-8752.8.674475  | 0.132112 | 0.786705 | 0.167931 | 0.866638 | 0.981636 | chr6  | 87529665 | 87530866 | + | 0 | NA | intron (L2a LINE    | 57291  | NM_006416 | 10559    | Hs.423162NM_006416 | ENSG000005SLC35A1   | CDG2F CMF solute c protein-coding     |                                     |
| chr7-9933.8.674475  | 0.132112 | 0.786705 | 0.167931 | 0.866638 | 0.981636 | chr7  | 99333659 | 99344697 | + | 0 | NA | intron (NLIME3G LI  | 13280  | NM_006405 | 10552    | Hs.124122NM_006405 | ENSG000005ARPC1A    | Ar40 HEL actin l protein-coding       |                                     |
| chr7-9954.8.674475  | 0.132112 | 0.786705 | 0.167931 | 0.866638 | 0.981636 | chr7  | 99546651 | 99550367 | + | 0 | NA | intron (intron (    | 3605   | NM_145111 | 221786   | Hs.596587NM_145111 | ENSG000005FAM200A   | C7orf38 family wiprotein-coding       |                                     |
| chr8-1798.8.674475  | 0.132112 | 0.786705 | 0.167931 | 0.866638 | 0.981636 | chr8  | 17957378 | 17969620 | + | 0 | NA | intron (intron (    | 40511  | NM_001352 | 5108     | Hs.491142NM_006197 | ENSG000005PCM1      | PTCA RET pericent protein-coding      |                                     |
| chr8-9452.8.674475  | 0.132112 | 0.786705 | 0.167931 | 0.866638 | 0.981636 | chr8  | 94526544 | 94531909 | + | 0 | NA | exon (NM exon (NM   | 24243  | NM_015496 | 25962    | Hs.422232NM_015496 | ENSG000005VIRMA     | KIAA1429 vir like protein-coding      |                                     |
| chr8-1023.8.674475  | 0.132112 | 0.786705 | 0.167931 | 0.866638 | 0.981636 | chr8  | 1.02E+08 | 1.02E+08 | + | 0 | NA | intron (intron (    | 54099  | NM_001282 | 51366    | Hs.492442NM_015902 | ENSG000005CUBR5     | DD5 EDD Eubiquitir protein-coding     |                                     |
| chr9-1364.8.674475  | 0.132112 | 0.786705 | 0.167931 | 0.866638 | 0.981636 | chr9  | 1.36E+08 | 1.36E+08 | + | 0 | NA | intron (AluJb SIN   | 4381   | NM_015166 | 23203    | Hs.495471NM_015166 | ENSG000005PMPCA     | Alpha-MPF peptidase protein-coding    |                                     |
| chr1-2142.8.418491  | -0.1421  | 0.847236 | -0.16773 | 0.866798 | 0.981636 | chr1  | 21427150 | 21427728 | + | 0 | NA | Intergeni Intergeni | -12698 | NM_001256 | 84224    | Hs.325422NM_032264 | ENSG000005NBPF3     | AE2 NBPF memb protein-coding          |                                     |
| chr1-2821.8.418491  | -0.1421  | 0.847236 | -0.16773 | 0.866798 | 0.981636 | chr1  | 28213999 | 28214556 | + | 0 | NA | intron (AluSx SIN   | 18752  | NM_014280 | 22826    | Hs.433542NM_014280 | ENSG000005DNAJC8    | HSPC331 S DnaJ heatprotein-coding     |                                     |
| chr1-1175.8.418491  | -0.1421  | 0.847236 | -0.16773 | 0.866798 | 0.981636 | chr1  | 1.18E+08 | 1.18E+08 | + | 0 | NA | exon (NM exon (NM   | 22632  | NM_006784 | 10885    | Hs.310805NM_006784 | ENSG000005WDR3      | DIP2 UTP1WD repeat protein-coding     |                                     |
| chr10-132.8.418491  | -0.1421  | 0.847236 | -0.16773 | 0.866798 | 0.981636 | chr10 | 32270041 | 32273045 | + | 0 | NA | intron (intron (    | 72615  | NM_001272 | 80314    | Hs.167802NM_025205 | ENSG000005EPC1      | Epl1 enhancer protein-coding          |                                     |
| chr10-500.8.418491  | -0.1421  | 0.847236 | -0.16773 | 0.866798 | 0.981636 | chr10 | 50075969 | 50081056 | + | 0 | NA | intron (NLIM5 LINE  | 10558  | NM_001005 | 387680   | Hs.365282NM_018232 | ENSG000005WASHC2A   | FAM21A F WASH com protein-coding      |                                     |
| chr11-123.8.418491  | -0.1421  | 0.847236 | -0.16773 | 0.866798 | 0.981636 | chr11 | 1.23E+08 | 1.23E+08 | + | 0 | NA | intron (MLT1A LTF   | 38719  | NM_024766 | 79827    | Hs.591945NM_024766 | ENSG000005CLMP      | ACAM ASAM CXADR lik protein-coding    |                                     |
| chr12-557.8.418491  | -0.1421  | 0.847236 | -0.16773 | 0.866798 | 0.981636 | chr12 | 55781016 | 55789823 | + | 0 | NA | intron (intron (    | 32305  | NM_033082 | 84324    | Hs.505672NM_033082 | ENSG000005SARNP     | CIP29 HCCSAP domaiprotein-coding      |                                     |
| chr12-888.8.418491  | -0.1421  | 0.847236 | -0.16773 | 0.866798 | 0.981636 | chr12 | 88043628 | 88051361 | + | 0 | NA | intron (intron (    | 11958  | NM_001005 | 91298    | Hs.591005NM_001005 | ENSG000005C12orf29  | chromosom protein-coding              |                                     |
| chr12-115.8.418491  | -0.1421  | 0.847236 | -0.16773 | 0.866798 | 0.981636 | chr12 | 1.2E+08  | 1.2E+08  | + | 0 | NA | intron (THEID LTF   | 3367   | NM_006255 | 5564     | Hs.741184NM_006255 | ENSG000005PRKAB1    | AMPK HAMF protein l protein-coding    |                                     |
| chr13-306.8.418491  | -0.1421  | 0.847236 | -0.1677  |          |          |       |          |          |   |   |    |                     |        |           |          |                    |                     |                                       |                                     |



|                    |          |          |          |          |          |       |           |           |   |   |    |                    |         |           |          |            |           |                 |           |                                      |
|--------------------|----------|----------|----------|----------|----------|-------|-----------|-----------|---|---|----|--------------------|---------|-----------|----------|------------|-----------|-----------------|-----------|--------------------------------------|
| chr13-491.8.162171 | 0.135382 | 0.809898 | 0.16716  | 0.867244 | 0.981636 | chr13 | 49191061  | 49194949  | + | 0 | NA | intron (Nintron (N | -27333  | NM_001507 | 2862     | Hs. 248126 | NM_001507 | ENSG00000000000 | MLNR      | GPR38 MTI motilin rprotein-coding    |
| chr14-556.8.162171 | 0.135382 | 0.809898 | 0.16716  | 0.867244 | 0.981636 | chr14 | 55641809  | 55642669  | + | 0 | NA | intron (Nintron (N | 62032   | NM_001075 | 3895     | Hs. 509414 | NM_004986 | ENSG00000000000 | KTN1      | CG1 KNT kineinectin protein-coding   |
| chr14-635.8.162171 | 0.135382 | 0.809898 | 0.16716  | 0.867244 | 0.981636 | chr14 | 63536333  | 63539786  | + | 0 | NA | intron (Nintron (N | -4725   | NR_158218 | 1.12E+08 | Hs. 632347 | NR_158218 |                 | LOC112266 | loricrin ncRNA                       |
| chr14-100.8.162171 | 0.135382 | 0.809898 | 0.16716  | 0.867244 | 0.981636 | chr14 | 1.01E+08  | 1.01E+08  | + | 0 | NA | TTS (NR_CTS (NR_C  | 327     | NR_029696 | 406914   |            | NR_029696 | ENSG00000000000 | MIR127    | MIRN127 nmicroRNA ncRNA              |
| chr15-566.8.162171 | 0.135382 | 0.809898 | 0.16716  | 0.867244 | 0.981636 | chr15 | 56699349  | 56701462  | + | 0 | NA | 3' UTR (N3' UTR (N | 33681   | NM_001288 | 54816    | Hs. 511477 | NM_017661 | ENSG00000000000 | ZNF280D   | SUHW4 ZNF zinc finger protein-coding |
| chr18-270.8.162171 | 0.135382 | 0.809898 | 0.16716  | 0.867244 | 0.981636 | chr18 | 2709059   | 2712757   | + | 0 | NA | intron (Nintron (N | 55021   | NM_015295 | 23347    | Hs. 8118   | NM_015295 | ENSG00000000000 | CSMCHD1   | BAMS FSH structure protein-coding    |
| chr18-566.8.162171 | 0.135382 | 0.809898 | 0.16716  | 0.867244 | 0.981636 | chr18 | 56613255  | 56618135  | + | 0 | NA | intron (Nintron (N | 22897   | NR_024546 | 9352     | Hs. 114412 | NM_004788 | ENSG00000000000 | TXNL1     | HEL-5-114 thioredoxin protein-coding |
| chr2-2765.8.162171 | 0.135382 | 0.809898 | 0.16716  | 0.867244 | 0.981636 | chr2  | 27638633  | 27640740  | + | 0 | NA | intron (Nintron (N | 11321   | NR_007266 | 11321    | Hs. 18259  | NR_007266 | ENSG00000000000 | GPN1      | ATPBD1A WGNP-loop protein-coding     |
| chr2-3331.8.162171 | 0.135382 | 0.809898 | 0.16716  | 0.867244 | 0.981636 | chr2  | 33313225  | 33315863  | + | 0 | NA | intron (Nintron (N | -103972 | NR_039628 | 1.01E+08 |            | NR_039628 | ENSG00000000000 | MIR4430   | microRNA ncRNA                       |
| chr2-612.8.162171  | 0.135382 | 0.809898 | 0.16716  | 0.867244 | 0.981636 | chr2  | 61202327  | 61209659  | + | 0 | NA | intron (Nintron (N | 28575   | NR_152211 | 130872   | Hs. 655602 | NM_152392 | ENSG00000000000 | AHS2P     | AHA1 AHS activator pseudo            |
| chr2-2038.8.162171 | 0.135382 | 0.809898 | 0.16716  | 0.867244 | 0.981636 | chr2  | 2.03E+08  | 2.03E+08  | + | 0 | NA | intron (Nintron (N | 50412   | NM_001114 | 65065    | Hs. 648844 | NM_198944 | ENSG00000000000 | NBEAL1    | A530083 C neurobeac protein-coding   |
| chr2-2161.8.162171 | 0.135382 | 0.809898 | 0.16716  | 0.867244 | 0.981636 | chr2  | 2.16E+08  | 2.16E+08  | + | 0 | NA | intron (Nintron (N | 46593   | NM_021141 | 7520     | Hs. 388733 | NM_021141 | ENSG00000000000 | XRCC5     | KARP-1 KAX-ray ref protein-coding    |
| chr20-344.8.162171 | 0.135382 | 0.809898 | 0.16716  | 0.867244 | 0.981636 | chr20 | 34424805  | 34426975  | + | 0 | NA | intron (Nintron (N | -40435  | NR_030374 | 693229   |            | NR_030374 | ENSG00000000000 | MIR644A   | MIR644 MI microRNA ncRNA             |
| chr20-368.8.162171 | 0.135382 | 0.809898 | 0.16716  | 0.867244 | 0.981636 | chr20 | 36814918  | 36816264  | + | 0 | NA | exon (NM exon (NM  | -14828  | NM_001145 | 79980    | Hs. 632266 | NM_024918 | ENSG00000000000 | CDSN1     | C20orf172 DSN1 comp protein-coding   |
| chr3-1543.8.162171 | 0.135382 | 0.809898 | 0.16716  | 0.867244 | 0.981636 | chr3  | 15439864  | 15440640  | + | 0 | NA | 3' UTR (N3' UTR (N | 12654   | NM_033083 | 85403    | Hs. 716733 | NM_033083 | ENSG00000000000 | EAF1      | ELL assoc protein-coding             |
| chr3-4777.8.162171 | 0.135382 | 0.809898 | 0.16716  | 0.867244 | 0.981636 | chr3  | 47771443  | 47772896  | + | 0 | NA | intron (Nintron (N | 9724    | NM_003074 | 6599     | Hs. 476175 | NM_003074 | ENSG00000000000 | SMARCC1   | BAF155 CF SWI/SNF rprotein-coding    |
| chr4-139.8.162171  | 0.135382 | 0.809898 | 0.16716  | 0.867244 | 0.981636 | chr4  | 1.39E+08  | 1.39E+08  | + | 0 | NA | intron (Nintron (N | 12644   | NM_001276 | 1998     | Hs. 634040 | NM_006874 | ENSG00000000000 | CELF2     | EU32 NERF E74 like protein-coding    |
| chr4-1398.8.162171 | 0.135382 | 0.809898 | 0.16716  | 0.867244 | 0.981636 | chr4  | 1.39E+08  | 1.39E+08  | + | 0 | NA | intron (Nintron (N | -26183  | NM_001184 | 4717     | Hs. 84549  | NR_002494 | ENSG00000000000 | NUFDC1    | KFYI1 NADH:ubiquinone protein-coding |
| chr5-1295.8.162171 | 0.135382 | 0.809898 | 0.16716  | 0.867244 | 0.981636 | chr5  | 1.3E+08   | 1.3E+08   | + | 0 | NA | intron (Nintron (N | -65391  | NR_125748 | 1.04E+08 | Hs. 628633 | NR_125748 | ENSG00000000000 | ADAMTS19  | ADAMTS19 ncRNA                       |
| chr5-1768.8.162171 | 0.135382 | 0.809898 | 0.16716  | 0.867244 | 0.981636 | chr5  | 1.79E+08  | 1.79E+08  | + | 0 | NA | TTS (NM_CTS (NM_C  | -9942   | NM_030613 | 80108    | Hs. 654533 | NM_030613 | ENSG00000000000 | ZFP2      | ZNF751 zfZFP2 zinc protein-coding    |
| chr6-1066.8.162171 | 0.135382 | 0.809898 | 0.16716  | 0.867244 | 0.981636 | chr6  | 1.07E+08  | 1.07E+08  | + | 0 | NA | intron (Nintron (N | -26472  | NM_001318 | 84816    | Hs. 155823 | NM_032730 | ENSG00000000000 | RTN4IP1   | NIMP OPA1 reticular protein-coding   |
| chr6-1121.8.162171 | 0.135382 | 0.809898 | 0.16716  | 0.867244 | 0.981636 | chr6  | 1.12E+08  | 1.12E+08  | + | 0 | NA | intron (Nintron (N | 31285   | NM_001033 | 619208   | Hs. 591340 | NM_001033 | ENSG00000000000 | FAM229B   | C6orf225 family wiprotein-coding     |
| chr7-1297.8.162171 | 0.135382 | 0.809898 | 0.16716  | 0.867244 | 0.981636 | chr7  | 1.3E+08   | 1.3E+08   | + | 0 | NA | intron (Nintron (N | 52972   | NR_029614 | 406958   |            | NR_029614 | ENSG00000000000 | MIR182    | MIRN182 nmicroRNA ncRNA              |
| chr9-982.8.162171  | 0.135382 | 0.809898 | 0.16716  | 0.867244 | 0.981636 | chr9  | 98228553  | 98231876  | + | 0 | NA | promoter-promoter- | -997    | NR_106913 | 1.02E+08 |            | NR_106913 | ENSG00000000000 | MIR6854   | hsa-mir-6854 microRNA ncRNA          |
| chr9-1104.8.162171 | 0.135382 | 0.809898 | 0.16716  | 0.867244 | 0.981636 | chr9  | 1.1E+08   | 1.1E+08   | + | 0 | NA | intron (Nintron (N | 116726  | NM_153366 | 79987    | Hs. 522334 | NM_153366 | ENSG00000000000 | SVPEP1    | C9orf13 Cushi, vcp protein-coding    |
| chr1-2084.6.470154 | -0.15464 | 0.925741 | -0.16705 | 0.867335 | 0.981636 | chr1  | 20848767  | 20849367  | + | 0 | NA | intron (Nintron (N | -62379  | NM_016287 | 50809    | Hs. 142442 | NM_016287 | ENSG00000000000 | HP1BP3    | HP1-BP74 thioredoxin protein-coding  |
| chr1-2255.5.641791 | 0.162952 | 0.975885 | 0.166978 | 0.867387 | 0.981636 | chr1  | 2.26E+08  | 2.26E+08  | + | 0 | NA | exon (NM exon (NM  | 23162   | NM_000120 | 2052     | Hs. 89649  | NR_000120 | ENSG00000000000 | EPHX1     | EPHX EPOxetoxide f protein-coding    |
| chr5-1415.5.641791 | 0.162952 | 0.975885 | 0.166978 | 0.867387 | 0.981636 | chr5  | 1.42E+08  | 1.42E+08  | + | 0 | NA | intron (Nintron (N | 2812    | NM_004290 | 9604     | Hs. 483611 | NM_004290 | ENSG00000000000 | RNF14     | ARA54 HFE ring finger protein-coding |
| chr1-1825.6.964893 | -0.14671 | 0.879916 | -0.16673 | 0.867584 | 0.981636 | chr1  | 1829024   | 1830060   | + | 0 | NA | intron (Nintron (N | -49511  | NM_001355 | 65220    | Hs. 654792 | NM_023018 | ENSG00000000000 | CNADK     | dJ283E3.1NAD kinase protein-coding   |
| chr1-1626.6.964893 | -0.14671 | 0.879916 | -0.16673 | 0.867584 | 0.981636 | chr1  | 1.63E+08  | 1.63E+08  | + | 0 | NA | intron (Nintron (N | 16814   | NM_001324 | 6675     | Hs. 492856 | NM_003111 | ENSG00000000000 | UAP1      | AGX1 UDP-N-acetyl protein-coding     |
| chr10-105.6.964893 | -0.14671 | 0.879916 | -0.16673 | 0.867584 | 0.981636 | chr10 | 1.03E+08  | 1.03E+08  | + | 0 | NA | 5' UTR (N5' UTR (N | 407     | NM_001351 | 22978    | Hs. 97439  | NM_012225 | ENSG00000000000 | NT5C2     | GMP NT5B 5' -nucleo protein-coding   |
| chr10-115.6.964893 | -0.14671 | 0.879916 | -0.16673 | 0.867584 | 0.981636 | chr10 | 1.19E+08  | 1.19E+08  | + | 0 | NA | intron (Nintron (N | 26710   | NM_001303 | 404636   | Hs. 434241 | NM_207000 | ENSG00000000000 | DENN10    | FAM45A DENN dome protein-coding      |
| chr11-345.6.964893 | -0.14671 | 0.879916 | -0.16673 | 0.867584 | 0.981636 | chr11 | 34951257  | 34952108  | + | 0 | NA | intron (Nintron (N | 945     | NR_039833 | 1.01E+08 |            | NR_039833 | ENSG00000000000 | MIR1343   | microRNA ncRNA                       |
| chr11-475.6.964893 | -0.14671 | 0.879916 | -0.16673 | 0.867584 | 0.981636 | chr11 | 47315615  | 47316394  | + | 0 | NA | intron (Nintron (N | 36698   | NM_000256 | 4607     | Hs. 524900 | NM_000256 | ENSG00000000000 | MYBPC3    | CMD1M C myosin bi protein-coding     |
| chr11-122.6.964893 | -0.14671 | 0.879916 | -0.16673 | 0.867584 | 0.981636 | chr11 | 1.23E+08  | 1.23E+08  | + | 0 | NA | exon (NM exon (NM  | -49286  | NM_019604 | 56253    | Hs. 159523 | NM_019604 | ENSG00000000000 | CRTAM     | CD355 cytotoxin protein-coding       |
| chr17-324.6.964893 | -0.14671 | 0.879916 | -0.16673 | 0.867584 | 0.981636 | chr17 | 32459283  | 32461248  | + | 0 | NA | intron (Nintron (N | 15755   | NM_002815 | 5717     | Hs. 443375 | NM_002815 | ENSG00000000000 | PSMD11    | Rpn6 59 proteasome protein-coding    |
| chr17-666.6.964893 | -0.14671 | 0.879916 | -0.16673 | 0.867584 | 0.981636 | chr17 | 66646130  | 66646432  | + | 0 | NA | intron (Nintron (N | -140791 | NR_030364 | 693219   |            | NR_030364 | ENSG00000000000 | MIR634    | MIRN634 microRNA ncRNA               |
| chr19-522.6.964893 | -0.14671 | 0.879916 | -0.16673 | 0.867584 | 0.981636 | chr19 | 52310653  | 52311047  | + | 0 | NA | intron (Nintron (N | 13681   | NM_001297 | 147657   | Hs. 729317 | NM_144684 | ENSG00000000000 | ZNF480    | zinc finger protein-coding           |
| chr2-4224.6.964893 | -0.14671 | 0.879916 | -0.16673 | 0.867584 | 0.981636 | chr2  | 42246014  | 42246934  | + | 0 | NA | intron (Nintron (N | -76243  | NR_110584 | 1.03E+08 | Hs. 639822 | NR_110584 |                 | LOC102722 | uncharacterncRNA                     |
| chr4-2824.6.964893 | -0.14671 | 0.879916 | -0.16673 | 0.867584 | 0.981636 | chr4  | 2824045   | 2824886   | + | 0 | NA | intron (Nintron (N | 5651    | NM_003023 | 6452     | Hs. 167675 | NM_003023 | ENSG00000000000 | SH3BP2    | 3BP-2 3BF SH3 doma protein-coding    |
| chr4-4854.6.964893 | -0.14671 | 0.879916 | -0.16673 | 0.867584 | 0.981636 | chr4  | 48543563  | 48544156  | + | 0 | NA | exon (NM exon (NM  | 53607   | NM_175611 | 326340   | Hs. 276457 | NM_175611 | ENSG00000000000 | ZARI      | Z3CXXC6 zygote ar protein-coding     |
| chr5-3705.6.964893 | -0.14671 | 0.879916 | -0.16673 | 0.867584 | 0.981636 | chr5  | 37025084  | 37025542  | + | 0 | NA | intron (Nintron (N | 148544  | NM_015384 | 25836    | Hs. 481927 | NM_015384 | ENSG00000000000 | IPBL      | CDLS CDLSNIPBL col protein-coding    |
| chr6-3620.6.964893 | -0.14671 | 0.879916 | -0.16673 | 0.867584 | 0.981636 | chr6  | 36202953  | 36203538  | + | 0 | NA | intron (Nintron (N | 6501    | NM_015699 | 27154    | Hs. 520099 | NM_015699 | ENSG00000000000 | BRPF3     | bromodome protein-coding             |
| chr7-9275.6.964893 | -0.14671 | 0.879916 | -0.16673 | 0.867584 | 0.981636 | chr7  | 92758510  | 92759318  | + | 0 | NA | intron (Nintron (N | 75045   | NM_001255 | 1021     | Hs. 119882 | NM_001255 | ENSG00000000000 | CDK6      | MCPH12 PI cyclin d protein-coding    |
| chr13-758.7.87209  | -0.13803 | 0.828044 | -0.16673 | 0.867609 | 0.981636 | chr13 | 518800774 | 518801665 | + | 0 | NA | intron (Nintron (N | 40558   | NM_015842 | 4008     |            |           |                 |           |                                      |

|           |         |          |         |          |          |          |       |          |          |   |   |    |                   |         |           |          |                    |                   |                                     |                                         |
|-----------|---------|----------|---------|----------|----------|----------|-------|----------|----------|---|---|----|-------------------|---------|-----------|----------|--------------------|-------------------|-------------------------------------|-----------------------------------------|
| chr14-103 | 7.18656 | 0.143327 | 0.86071 | 0.166522 | 0.867747 | 0.981636 | chr14 | 1.04E+08 | 1.04E+08 | + | 0 | NA | intron (AluSx SIN | 10222   | NR_001302 | 84334    | Hs.598441NM_001302 | ENSG000002COA8    | APOP APOF cytochrome protein-coding |                                         |
| chr15-70C | 7.18656 | 0.143327 | 0.86071 | 0.166522 | 0.867747 | 0.981636 | chr15 | 70068971 | 70072134 | + | 0 | NA | intron (AluSx SIN | 8916    | NR_030714 | 693214   | NR_030714          | ENSG000002MIR629  | MIRN629 tmicroRNA ncRNA             |                                         |
| chr16-37C | 7.18656 | 0.143327 | 0.86071 | 0.166522 | 0.867747 | 0.981636 | chr16 | 3733773  | 3738811  | + | 0 | NA | intron (AluSx SIN | -18768  | NR_016292 | 10131    | Hs.30345           | NR_016292         | ENSG000002TRAP1                     | HSP 75 HSTNF receptor protein-coding    |
| chr16-211 | 7.18656 | 0.143327 | 0.86071 | 0.166522 | 0.867747 | 0.981636 | chr16 | 21164201 | 21166144 | + | 0 | NA | intron (AluSx SIN | -5732   | NR_017533 | 55567    | Hs.52650           | NR_017533         | ENSG000002DNAH3                     | DNAH3-3 dyad protein-coding             |
| chr16-314 | 7.18656 | 0.143327 | 0.86071 | 0.166522 | 0.867747 | 0.981636 | chr16 | 31497723 | 31500662 | + | 0 | NA | intron (AluSx SIN | 9199    | NR_022744 | 64755    | Hs.9003            | NR_022744         | ENSG000002C16orf58                  | RNAC chromosom protein-coding           |
| chr16-564 | 7.18656 | 0.143327 | 0.86071 | 0.166522 | 0.867747 | 0.981636 | chr16 | 56457931 | 56463980 | + | 0 | NA | intron (AluSx SIN | 8871    | NR_001324 | 55239    | Hs.23188           | NR_018233         | ENSG000002COGFD1                    | TPA1 2-oxoglutarate protein-coding      |
| chr16-666 | 7.18656 | 0.143327 | 0.86071 | 0.166522 | 0.867747 | 0.981636 | chr16 | 66807056 | 66808758 | + | 0 | NA | intron (AluSx SIN | -6287   | NR_001136 | 283847   | Hs.37650           | NR_173616         | ENSG000002TERB1                     | CCDC79 telomere protein-coding          |
| chr16-897 | 7.18656 | 0.143327 | 0.86071 | 0.166522 | 0.867747 | 0.981636 | chr16 | 89730226 | 89732439 | + | 0 | NA | intron (AluSx SIN | 9795    | NR_001113 | 92822    | Hs.29015           | NR_152287         | ENSG000002ZNF276                    | CENP-Z CenZinc finger protein-coding    |
| chr17-60C | 7.18656 | 0.143327 | 0.86071 | 0.166522 | 0.867747 | 0.981636 | chr17 | 60665047 | 60666833 | + | 0 | NA | 3' UTR (AluSx SIN | -1191   | NR_001099 | 54828    | Hs.65502           | NR_017679         | ENSG000002BCAS3                     | GAOBI MA BCAS3 microprotein-coding      |
| chr17-75C | 7.18656 | 0.143327 | 0.86071 | 0.166522 | 0.867747 | 0.981636 | chr17 | 75231762 | 75234889 | + | 0 | NA | intron (AluSx SIN | 27646   | NR_021444 | 79902    | Hs.36281           | NR_024844         | ENSG000002NUP85                     | FRONT NF nucleosom protein-coding       |
| chr18-13C | 7.18656 | 0.143327 | 0.86071 | 0.166522 | 0.867747 | 0.981636 | chr18 | 13095003 | 13098729 | + | 0 | NA | intron (AluSx SIN | 105504  | NR_032144 | 55125    | Hs.10091           | NR_018066         | ENSG000002CEP192                    | PPP1R62 centrosom protein-coding        |
| chr19-30C | 7.18656 | 0.143327 | 0.86071 | 0.166522 | 0.867747 | 0.981636 | chr19 | 3052736  | 3054077  | + | 0 | NA | 3' UTR (AluSx SIN | -5771   | NR_001144 | 7089     | Hs.33217           | NR_003266         | ENSG000002TLE2                      | ESG ESG2 TLE famil protein-coding       |
| chr19-79C | 7.18656 | 0.143327 | 0.86071 | 0.166522 | 0.867747 | 0.981636 | chr19 | 7935720  | 7938697  | + | 0 | NA | intron (AluSx SIN | 6458    | NR_006351 | 10469    | Hs.46578           | NR_006351         | ENSG000002TIMM44                    | TIM44 translocase protein-coding        |
| chr19-107 | 7.18656 | 0.143327 | 0.86071 | 0.166522 | 0.867747 | 0.981636 | chr19 | 10772461 | 10774555 | + | 0 | NA | intron (AluSx SIN | -6746   | NR_039903 | 1.01E+08 | NR_039903          | ENSG000002MIR4748 | mir-4748 microRNA ncRNA             |                                         |
| chr19-17C | 7.18656 | 0.143327 | 0.86071 | 0.166522 | 0.867747 | 0.981636 | chr19 | 17317949 | 17322727 | + | 0 | NA | 3' UTR (AluSx SIN | 10775   | NR_024056 | 79016    | Hs.46615           | NR_024056         | ENSG000002CDDA1                     | C19orf58 DET1 and protein-coding        |
| chr19-19C | 7.18656 | 0.143327 | 0.86071 | 0.166522 | 0.867747 | 0.981636 | chr19 | 19323917 | 19328756 | + | 0 | NA | intron (AluSx SIN | 5507    | NR_015325 | 23383    | Hs.65493           | NR_015325         | ENSG000002MAU2                      | KIAA0892 MAU2 sistr protein-coding      |
| chr2-3711 | 7.18656 | 0.143327 | 0.86071 | 0.166522 | 0.867747 | 0.981636 | chr2  | 37116856 | 37117413 | + | 0 | NA | intron (AluSx SIN | 30688   | NR_001135 | 5610     | Hs.13143           | NR_002755         | ENSG000002EIF2AK2                   | EIF2AK1 Eukaryotic protein-coding       |
| chr2-628C | 7.18656 | 0.143327 | 0.86071 | 0.166522 | 0.867747 | 0.981636 | chr2  | 62831674 | 62834392 | + | 0 | NA | intron (AluSx SIN | 126136  | NR_001354 | 23301    | Hs.21767           | NR_015252         | ENSG000002HBP1                      | HPC12 NAC Hich domain protein-coding    |
| chr2-711C | 7.18656 | 0.143327 | 0.86071 | 0.166522 | 0.867747 | 0.981636 | chr2  | 71109230 | 71110684 | + | 0 | NA | 3' UTR (AluSx SIN | 20272   | NR_032601 | 84693    | Hs.94949           | NR_032601         | ENSG000002MCEE                      | GLOD2 methylmalonate protein-coding     |
| chr2-1121 | 7.18656 | 0.143327 | 0.86071 | 0.166522 | 0.867747 | 0.981636 | chr2  | 1.12E+08 | 1.12E+08 | + | 0 | NA | 3' UTR (AluSx SIN | -22085  | NR_153214 | 129804   | Hs.43769           | NR_153214         | ENSG000002FBLN7                     | TM14 fibulin 1 protein-coding           |
| chr2-117C | 7.18656 | 0.143327 | 0.86071 | 0.166522 | 0.867747 | 0.981636 | chr2  | 1.18E+08 | 1.18E+08 | + | 0 | NA | intron (AluSx SIN | 20841   | NR_019044 | 54520    | Hs.10784           | NR_019044         | ENSG000002CCDC93                    | - coiled-coil protein-coding            |
| chr2-121C | 7.18656 | 0.143327 | 0.86071 | 0.166522 | 0.867747 | 0.981636 | chr2  | 1.21E+08 | 1.21E+08 | + | 0 | NA | intron (AluSx SIN | -11576  | NR_014553 | 29842    | Hs.15647           | NR_014553         | ENSG000002TFCP2L1                   | CRTR1 LFB transcrip protein-coding      |
| chr2-131C | 7.18656 | 0.143327 | 0.86071 | 0.166522 | 0.867747 | 0.981636 | chr2  | 1.32E+08 | 1.32E+08 | + | 0 | NA | intron (AluSx SIN | 9665    | NR_026922 | 150776   | Hs.53562           | NR_026922         | ENSG000002LOC150776                 | - sphingomy pseudo                      |
| chr2-201C | 7.18656 | 0.143327 | 0.86071 | 0.166522 | 0.867747 | 0.981636 | chr2  | 2.01E+08 | 2.01E+08 | + | 0 | NA | intron (AluSx SIN | 8152    | NR_001257 | 4709     | Hs.10976           | NR_002491         | ENSG000002NDFB3                     | B12 C1-B1NADH:ubiquinone protein-coding |
| chr2-203C | 7.18656 | 0.143327 | 0.86071 | 0.166522 | 0.867747 | 0.981636 | chr2  | 2.03E+08 | 2.03E+08 | + | 0 | NA | intron (AluSx SIN | 54754   | NR_001114 | 56065    | Hs.64884           | NR_19894          | ENSG000002NBEAL1                    | A530083 C1 neurobeac protein-coding     |
| chr21-46C | 7.18656 | 0.143327 | 0.86071 | 0.166522 | 0.867747 | 0.981636 | chr21 | 46502876 | 46504822 | + | 0 | NA | intron (AluSx SIN | 41378   | NR_046400 | 1.01E+08 | Hs.73716           | NR_046400         | ENSG000002DIP2A-IT1                 | - DIP2A intrncRNA                       |
| chr22-201 | 7.18656 | 0.143327 | 0.86071 | 0.166522 | 0.867747 | 0.981636 | chr22 | 20112541 | 20115358 | + | 0 | NA | TTS (AluSx SIN    | 802     | NR_106874 | 1.02E+08 | NR_106874          | ENSG000002MIR6816 | hsa-mir-6816 microRNA ncRNA         |                                         |
| chr3-484C | 7.18656 | 0.143327 | 0.86071 | 0.166522 | 0.867747 | 0.981636 | chr3  | 48495811 | 48496565 | + | 0 | NA | intron (AluSx SIN | 8177    | NR_001272 | 51246    | Hs.41457           | NR_016475         | ENSG000002SHISA5                    | SCOTIN shisa fan protein-coding         |
| chr3-639C | 7.18656 | 0.143327 | 0.86071 | 0.166522 | 0.867747 | 0.981636 | chr3  | 63988662 | 63991664 | + | 0 | NA | intron (AluSx SIN | -13859  | NR_03828E | 1.01E+08 | Hs.15253           | NR_03828E         | ENSG000002PSMD6-AS2                 | PSMD6 antncRNA                          |
| chr3-119C | 7.18656 | 0.143327 | 0.86071 | 0.166522 | 0.867747 | 0.981636 | chr3  | 1.19E+08 | 1.19E+08 | + | 0 | NA | intron (AluSx SIN | -12522  | NR_046574 | 1.01E+08 | Hs.72130           | NR_046574         | ENSG000002B4GALT4-7                 | B4GALT4 4 ncRNA                         |
| chr4-856C | 7.18656 | 0.143327 | 0.86071 | 0.166522 | 0.867747 | 0.981636 | chr4  | 856604   | 859474   | + | 0 | NA | intron (AluSx SIN | -31910  | NR_006651 | 10815    | Hs.47893           | NR_006651         | ENSG000002CPLX1                     | CPX-1 CPX complexin protein-coding      |
| chr4-267C | 7.18656 | 0.143327 | 0.86071 | 0.166522 | 0.867747 | 0.981636 | chr4  | 2675122  | 2676886  | + | 0 | NA | intron (AluSx SIN | 50572   | NR_046333 | 8603     | Hs.65236           | NR_003704         | ENSG000002FAM193A                   | C4orf8 RF family w protein-coding       |
| chr4-702C | 7.18656 | 0.143327 | 0.86071 | 0.166522 | 0.867747 | 0.981636 | chr4  | 7025427  | 7025871  | + | 0 | NA | exon (AluSx SIN   | 17752   | NR_053376 | 257236   | Hs.65675           | NR_153376         | ENSG000002CCDC96                    | - coiled-coil protein-coding            |
| chr4-730C | 7.18656 | 0.143327 | 0.86071 | 0.166522 | 0.867747 | 0.981636 | chr4  | 73056544 | 73061795 | + | 0 | NA | intron (AluSx SIN | 10547   | NR_001297 | 285521   | Hs.35669           | NR_173827         | ENSG000002COX18                     | COX18H8 cytochrome protein-coding       |
| chr4-761C | 7.18656 | 0.143327 | 0.86071 | 0.166522 | 0.867747 | 0.981636 | chr4  | 76120693 | 76123718 | + | 0 | NA | intron (AluSx SIN | 26192   | NR_017426 | 53371    | Hs.43043           | NR_017426         | ENSG000002NUP54                     | - nucleosom protein-coding              |
| chr4-118C | 7.18656 | 0.143327 | 0.86071 | 0.166522 | 0.867747 | 0.981636 | chr4  | 1.19E+08 | 1.19E+08 | + | 0 | NA | intron (AluSx SIN | -11244  | NR_103825 | 729218   | Hs.44851           | NR_103825         | LOC279218                           | - uncharacter pseudo                    |
| chr4-185C | 7.18656 | 0.143327 | 0.86071 | 0.166522 | 0.867747 | 0.981636 | chr4  | 1.85E+08 | 1.85E+08 | + | 0 | NA | intron (AluSx SIN | 8653    | NR_018355 | 55325    | Hs.71354           | NR_018355         | ENSG000002UFSP2                     | BHD C4orfUM1 spec protein-coding        |
| chr5-2037 | 7.18656 | 0.143327 | 0.86071 | 0.166522 | 0.867747 | 0.981636 | chr5  | 203763   | 205676   | + | 0 | NA | 3' UTR (AluSx SIN | 13224   | NR_001088 | 389257   | Hs.10314           | NR_001088         | ENSG000002LRRC14B                   | - leucine i protein-coding              |
| chr5-3711 | 7.18656 | 0.143327 | 0.86071 | 0.166522 | 0.867747 | 0.981636 | chr5  | 37111211 | 37115192 | + | 0 | NA | intron (AluSx SIN | -135345 | NR_134263 | 1.05E+08 | Hs.17099           | NR_134263         | ENSG000002LOC105374                 | - uncharacter pseudo                    |
| chr5-177C | 7.18656 | 0.143327 | 0.86071 | 0.166522 | 0.867747 | 0.981636 | chr5  | 1.78E+08 | 1.78E+08 | + | 0 | NA | intron (AluSx SIN | -17462  | NR_016222 | 51428    | Hs.48428           | NR_016222         | ENSG000002CDDX41                    | ABS MPLPF DEAD-box protein-coding       |
| chr6-100C | 7.18656 | 0.143327 | 0.86071 | 0.166522 | 0.867747 | 0.981636 | chr6  | 1.01E+08 | 1.01E+08 | + | 0 | NA | intron (AluSx SIN | -17770  | NR_005066 | 6492     | Hs.52029           | NR_005066         | ENSG000002SIM1                      | bHLHeL4 SIM bHLH protein-coding         |
| chr6-160C | 7.18656 | 0.143327 | 0.86071 | 0.166522 | 0.867747 | 0.981636 | chr6  | 1.6E+08  | 1.6E+08  | + | 0 | NA | intron (AluSx SIN | -36177  | NR_047511 | 1E+08    | Hs.74216           | NR_047511         | ENSG000002AIRN                      | AIR IGF2 antisense ncRNA                |
| chr7-570C | 7.18656 | 0.143327 | 0.86071 | 0.166522 | 0.867747 | 0.981636 | chr7  | 5702133  | 5703590  | + | 0 | NA | intron (AluSx SIN | 9049    | NR_106934 | 1.02E+08 | NR_106934          | ENSG000002MIR6874 | hsa-mir-6874 microRNA ncRNA         |                                         |
| chr7-139C | 7.18656 | 0.143327 | 0.86071 | 0.166522 | 0.867747 | 0.981636 | chr7  | 13930462 | 13931792 | + | 0 | NA | intron (AluSx SIN | 55387   | NR_001163 | 2115     | Hs.22634           | NR_004956         | ENSG000002ETV1                      | ER81 ETS variat protein-coding          |
| chr7-107C | 7.18656 | 0.143327 | 0.86071 | 0.166522 | 0.867747 | 0.981636 | chr7  | 1.08E+08 | 1.08E+08 | + | 0 | NA | intron (AluSx SIN | 24991   | NR_001018 | 1738     | Hs.13171           | NR_001018         | ENSG000002CCLD                      | DLDD DLDF dihydrolip protein-coding     |
| chr7-111C | 7.18656 | 0.143327 | 0.86071 | 0.166522 | 0.867747 | 0.981636 | chr7  | 1.12E+08 | 1.12E+08 | + | 0 | NA | intron (AluSx SIN | 35969   | NR_103806 | 1.01E+08 | Hs.67751           | NR_103806         | ENSG000002DOCK4-AS1                 | - DOCK4 antncRNA                        |
| chr7-140C | 7.18656 | 0.143327 | 0.86071 | 0.166522 | 0.867747 | 0.981636 | chr7  | 1.4E+08  | 1.4E+08  | + | 0 | NA | intron (AluSx SIN | 18755   | NR_013446 | 23608    | Hs.74488           | NR_013446         | ENSG000002MKRN1                     | RNF61 makorin i protein-coding          |
| chr8-224C | 7.18656 | 0.143327 | 0.86071 | 0.166522 | 0.867747 | 0.981636 | chr8  | 22408364 | 22410475 | + | 0 | NA | intron (AluSx SIN | 16583   | NR_001351 | 23516    | Hs.49123           | NR_015355         | ENSG000002SLC39A14                  | HCIN HMN solute c protein-coding        |
| chr8-335C | 7.18656 | 0.143327 | 0.86071 | 0.166522 | 0.867747 | 0.981636 | chr8  | 33501212 | 33509236 | + | 0 | NA | intron (AluSx SIN | 7911    | NR_001333 | 80185    | Hs.77135           | NR_025111         | ENSG000002TT12                      | C8orf41 VTELO2 intr protein-coding      |
| chr8-864C | 7.18656 | 0.143327 | 0.86071 | 0.166522 | 0.867747 | 0.981636 | chr8  | 86433546 | 86436219 | + | 0 | NA | intron (AluSx SIN | 73804   | NR        |          |                    |                   |                                     |                                         |



|           |          |          |          |          |          |          |       |          |           |   |   |    |                     |                  |                            |                  |                                    |                                    |
|-----------|----------|----------|----------|----------|----------|----------|-------|----------|-----------|---|---|----|---------------------|------------------|----------------------------|------------------|------------------------------------|------------------------------------|
| chr2-7395 | 8.374686 | -0.13389 | 0.805915 | -0.16613 | 0.868054 | 0.981636 | chr2  | 73950495 | 73952046  | + | 0 | NA | intron (intron (N   | 24390 NR_13489E  | 1716 Hs. 469022NM_00192E   | ENSG00000CDGUOK  | MTDPS3 NC deoxyguar protein-coding |                                    |
| chr7-106  | 8.374686 | -0.13389 | 0.805915 | -0.16613 | 0.868054 | 0.981636 | chr7  | 1.06E+08 | 1.06E+08  | + | 0 | NA | 3' UTR (3' UTR (N   | 20738 NM_18271E  | 6856 Hs. 80919 NM_006754   | ENSG00000SYPL1   | H-SP1 SYF synaptopl protein-coding |                                    |
| chr12-131 | 9.706941 | 0.12516  | 0.75378  | 0.166043 | 0.868123 | 0.981636 | chr12 | 1.32E+08 | 1.32E+08  | + | 0 | NA | intron (THE1B-int   | 32673 NM_00459E  | 6433 Hs. 308171NM_00459E   | ENSG00000SFSWAP  | SFRS8 SW splicing protein-coding   |                                    |
| chr4-8677 | 9.706941 | 0.12516  | 0.75378  | 0.166043 | 0.868123 | 0.981636 | chr4  | 86771553 | 86773204  | + | 0 | NA | intron (AluSx SIN   | 77006 NM_19796E  | 345274 Hs. 452996NM_19796E | ENSG00000SLC10A6 | SOAT solute c protein-coding       |                                    |
| chr1-1562 | 7.649867 | 0.139084 | 0.83764  | 0.166042 | 0.868124 | 0.981636 | chr1  | 1.56E+08 | 1.56E+08  | + | 0 | NA | intron (AluJo SIN   | 4173 NM_015327   | 23381 Hs. 516837NM_015327  | ENSG00000SMG5    | EST1B LPI5MG5 nonprotein-coding    |                                    |
| chr15-642 | 7.649867 | 0.139084 | 0.83764  | 0.166042 | 0.868124 | 0.981636 | chr15 | 64201997 | 64205006  | + | 0 | NA | intron (AluSp SIN   | -40346 NM_00094E | 5479 Hs. 434937NM_00094E   | ENSG00000PPIB    | B CYP-S1 peptidyl protein-coding   |                                    |
| chr16-145 | 7.649867 | 0.139084 | 0.83764  | 0.166042 | 0.868124 | 0.981636 | chr16 | 14879138 | 14882305  | + | 0 | NA | intron (AluSq2 SI   | -20922 NR_03614E | 1E+08                      | NR_03614E        | ENSG00000MIR3179                   | microRNA ncRNA                     |
| chr16-505 | 7.649867 | 0.139084 | 0.83764  | 0.166042 | 0.868124 | 0.981636 | chr16 | 50363128 | 50363402  | + | 0 | NA | intron (intron (N   | 5723 NM_00117E   | 29117 Hs. 437894NM_01326E  | ENSG00000BRD7    | BP75 CEL1 bromodome protein-coding |                                    |
| chr2-6524 | 7.649867 | 0.139084 | 0.83764  | 0.166042 | 0.868124 | 0.981636 | chr2  | 65242317 | 65243425  | + | 0 | NA | intron (intron (N   | 15176 NM_00100E  | 10097 Hs. 643727NM_00572E  | ENSG00000ACTR2   | ARP2 actin rel protein-coding      |                                    |
| chr2-9936 | 7.649867 | 0.139084 | 0.83764  | 0.166042 | 0.868124 | 0.981636 | chr2  | 99367744 | 99370194  | + | 0 | NA | intron (intron (N   | 31569 NM_015904  | 9669 Hs. 158688NM_015904   | ENSG00000EIF5B   | IF2 eukaryot protein-coding        |                                    |
| chr3-197  | 7.649867 | 0.139084 | 0.83764  | 0.166042 | 0.868124 | 0.981636 | chr3  | 1.97E+08 | 1.97E+08  | + | 0 | NA | intron (intron (N   | -21269 NM_03331E | 4241 Hs. 184727NM_00592E   | ENSG00000MELTF   | CD228 MAF melanot protein-coding   |                                    |
| chr5-6962 | 7.649867 | 0.139084 | 0.83764  | 0.166042 | 0.868124 | 0.981636 | chr5  | 69639081 | 69639993  | + | 0 | NA | TTS (NR_C TTS (NR_C | 8392 NR_157804   | 1.02E+08 Hs. 63401E        | NR_157804        | LOC10192E                          | putative pseudo uncharactericRNA   |
| chr6-176  | 7.649867 | 0.139084 | 0.83764  | 0.166042 | 0.868124 | 0.981636 | chr6  | 17660223 | 17662475  | + | 0 | NA | intron (intron (N   | -44781 NR_13461E | 1.05E+08 Hs. 71870E        | NR_13461E        | ENSG00000LOC105374                 | uncharactericRNA                   |
| chr8-942  | 7.649867 | 0.139084 | 0.83764  | 0.166042 | 0.868124 | 0.981636 | chr8  | 94256034 | 94258812  | + | 0 | NA | intron (AluSq2 SI   | 4896 NM_18170E   | 2669 Hs. 65446E            | NR_005261        | ENSG00000CGEM                      | KIR GTP bindi protein-coding       |
| chr9-128  | 7.649867 | 0.139084 | 0.83764  | 0.166042 | 0.868124 | 0.981636 | chr9  | 1.29E+08 | 1.29E+08  | + | 0 | NA | intron (AluJb SIN   | -16637 NM_00119E | 6709 Hs. 372331NM_00312E   | ENSG00000SPTAN1  | EIEE5 NE spectrin protein-coding   |                                    |
| chr1-1801 | 9.194637 | 0.127643 | 0.768934 | 0.166    | 0.868157 | 0.981636 | chr1  | 1.8E+08  | 1.8E+08   | + | 0 | NA | intron (intron (N   | 3381 NM_00282E   | 5768 Hs. 71917E            | NR_00282E        | ENSG00000QSOX1                     | Q6 QSCN6 quiescin protein-coding   |
| chr1-1205 | 9.194637 | 0.127643 | 0.768934 | 0.166    | 0.868157 | 0.981636 | chr1  | 1.81E+08 | 1.81E+08  | + | 0 | NA | 3' UTR (3' UTR (N   | -21374 NR_145481 | 1.03E+08 Hs. 66531E        | NR_145481        | ENSG00000KIAA1614                  | KIAA1614 ncRNA                     |
| chr10-124 | 9.194637 | 0.127643 | 0.768934 | 0.166    | 0.868157 | 0.981636 | chr10 | 1.24E+08 | 1.24E+08  | + | 0 | NA | intron (intron (N   | 17716 NM_00132E  | 4942 Hs. 52333E            | NR_000274        | ENSG00000OAT                       | GACR HOG ornithine protein-coding  |
| chr11-947 | 9.194637 | 0.127643 | 0.768934 | 0.166    | 0.868157 | 0.981636 | chr11 | 94797989 | 9480184   | + | 0 | NA | intron (intron (N   | 18074 NM_00344E  | 7702 Hs. 523471NM_00344E   | ENSG00000ZNF143  | SBF STAF zinc fing protein-coding  |                                    |
| chr11-364 | 9.194637 | 0.127643 | 0.768934 | 0.166    | 0.868157 | 0.981636 | chr11 | 36489991 | 36490631  | + | 0 | NA | exon (NM exon (NM   | 19961 NM_14580E  | 7189 Hs. 44417E            | NR_00462E        | ENSG00000TRAF6                     | MGC:3310 TNF rece protein-coding   |
| chr14-594 | 9.194637 | 0.127643 | 0.768934 | 0.166    | 0.868157 | 0.981636 | chr14 | 59473922 | 59476096  | + | 0 | NA | non-codiron-codir   | 8566 NM_001331   | 112849 Hs. 729061NM_144581 | ENSG00000L3HPDH  | C14orf14E trans-L-c protein-coding |                                    |
| chr16-224 | 9.194637 | 0.127643 | 0.768934 | 0.166    | 0.868157 | 0.981636 | chr16 | 224075   | 227541    | + | 0 | NA | intron (N (AAAAG)n  | 3641 NM_01803E   | 55692 Hs. 16803 NM_01803E  | ENSG00000LUC7L   | LUC7B1 LUC7 like protein-coding    |                                    |
| chr16-86  | 9.194637 | 0.127643 | 0.768934 | 0.166    | 0.868157 | 0.981636 | chr16 | 86504529 | 86508278  | + | 0 | NA | intron (intron (N   | 2457 NR_03392E   | 400550 Hs. 44882E          | NR_03392E        | ENSG00000FENDRR                    | FOXF1-AS1 FOXF1 ad ncRNA           |
| chr2-2411 | 9.194637 | 0.127643 | 0.768934 | 0.166    | 0.868157 | 0.981636 | chr2  | 2.41E+08 | 2.41E+08  | + | 0 | NA | intron (intron (N   | -17926 NM_001001 | 50636 Hs. 16390E           | NR_001001        | ENSG00000AN07                      | D-TMPP DI anoctami protein-coding  |
| chr22-298 | 9.194637 | 0.127643 | 0.768934 | 0.166    | 0.868157 | 0.981636 | chr22 | 29822396 | 29825847  | + | 0 | NA | intron (AluJr SIN   | 14153 NM_00136E  | 84164 Hs. 731754NM_032204  | ENSG00000ASCC2   | ASC1p100 activati protein-coding   |                                    |
| chr3-1837 | 9.194637 | 0.127643 | 0.768934 | 0.166    | 0.868157 | 0.981636 | chr3  | 1.84E+08 | 1.84E+08  | + | 0 | NA | intron (intron (N   | 9106 NR_046727   | 1.01E+08 NR_046727         | YEATS2-AS        | YEATS2 arcncRNA                    |                                    |
| chr5-6604 | 9.194637 | 0.127643 | 0.768934 | 0.166    | 0.868157 | 0.981636 | chr5  | 66042901 | 66045173  | + | 0 | NA | intron (intron (N   | -98464 NR_028474 | 1E+08 Hs. 60806E           | NR_028474        | LOC10030E                          | LSM3 homc pseudo                   |
| chr5-1491 | 9.194637 | 0.127643 | 0.768934 | 0.166    | 0.868157 | 0.981636 | chr5  | 1.49E+08 | 1.49E+08  | + | 0 | NA | intron (intron (N   | 43349 NM_00137E  | 22885 Hs. 49688 NM_01494E  | ENSG00000ABLIM3  | HMFN1661 actin bir protein-coding  |                                    |
| chr6-108  | 9.194637 | 0.127643 | 0.768934 | 0.166    | 0.868157 | 0.981636 | chr6  | 1.09E+08 | 1.09E+08  | + | 0 | NA | intron (intron (N   | 8737 NM_00145E   | 2309 Hs. 22095E            | NR_00145E        | ENSG00000FOX03                     | AF6q21 FK forkhead protein-coding  |
| chr7-6451 | 9.194637 | 0.127643 | 0.768934 | 0.166    | 0.868157 | 0.981636 | chr7  | 64519654 | 64522994  | + | 0 | NA | exon (NM exon (NM   | 4174 NM_17855E   | 340252 Hs. 52088E          | NR_17855E        | ENSG00000ZNF680                    | zinc fing protein-coding           |
| chr7-668  | 9.194637 | 0.127643 | 0.768934 | 0.166    | 0.868157 | 0.981636 | chr7  | 66806727 | 66809997  | + | 0 | NA | 3' UTR (3' UTR (N   | 36464 NR_003934  | 729156 Hs. 70987E          | NR_003934        | ENSG00000GTF2IRD1E                 | GTF2I ref pseudo                   |
| chr1-114  | 8.211168 | 0.135419 | 0.816574 | 0.165838 | 0.868284 | 0.981636 | chr1  | 1.15E+08 | 1.15E+08  | + | 0 | NA | 3' UTR (3' UTR (N   | 13757 NM_00587E  | 10286 Hs. 22960 NM_00587E  | ENSG00000BCAS2   | DAMI SPF2 BCAS2 pr protein-coding  |                                    |
| chr17-496 | 8.211168 | 0.135419 | 0.816574 | 0.165838 | 0.868284 | 0.981636 | chr17 | 49609877 | 49611072  | + | 0 | NA | intron (AluSx SIN   | 16115 NM_00137E  | 8045 Hs. 46338E            | NR_00356E        | ENSG00000SPOF                      | BTBD32 TE speckle protein-coding   |
| chr22-41  | 8.211168 | 0.135419 | 0.816574 | 0.165838 | 0.868284 | 0.981636 | chr22 | 41339181 | 41341945  | + | 0 | NA | intron (L2c LINE    | -26770 NM_00114E | 7008 Hs. 18115E            | NR_00321E        | ENSG00000CTEF                      | TEF trans protein-coding           |
| chr1-9387 | 10.1781  | 0.121393 | 0.732022 | 0.165832 | 0.868289 | 0.981636 | chr1  | 93876440 | 93877605  | + | 0 | NA | exon (NM exon (NM   | 2184 NM_014597   | 30836 Hs. 85769 NM_014597  | ENSG00000DNTTIP2 | ERBP FCF2 deoxynul protein-coding  |                                    |
| chr1-2132 | 10.1781  | 0.121393 | 0.732022 | 0.165832 | 0.868289 | 0.981636 | chr1  | 2.13E+08 | 2.13E+08  | + | 0 | NA | intron (L1PA4 LIN   | 163227 NM_012424 | 26750 Hs. 59141E           | NR_012424        | ENSG00000RPS6K1C                   | RPK118 RS ribosome protein-coding  |
| chr10-737 | 10.1781  | 0.121393 | 0.732022 | 0.165832 | 0.868289 | 0.981636 | chr10 | 73746322 | 73756701  | + | 0 | NA | intron (AluSx SIN   | 7139 NM_00492E   | 9632 Hs. 81964 NM_00492E   | ENSG00000SEC24C  | SEC24 hom protein-coding           |                                    |
| chr11-117 | 10.1781  | 0.121393 | 0.732022 | 0.165832 | 0.868289 | 0.981636 | chr11 | 1.17E+08 | 1.17E+08  | + | 0 | NA | intron (THE1A LTF   | 69845 NM_01495E  | 22897 Hs. 50400E           | NR_01495E        | ENSG00000CEP164                    | PPH15 centroson protein-coding     |
| chr12-107 | 10.1781  | 0.121393 | 0.732022 | 0.165832 | 0.868289 | 0.981636 | chr12 | 1.08E+08 | 1.08E+08  | + | 0 | NA | exon (NM exon (NM   | 7046 NM_01240E   | 11108 Hs. 50665E           | NR_01240E        | ENSG00000PRD4M                     | PFM1 PR/SET c protein-coding       |
| chr14-572 | 10.1781  | 0.121393 | 0.732022 | 0.165832 | 0.868289 | 0.981636 | chr14 | 57228306 | 57229018  | + | 0 | NA | intron (L1PA7 LIN   | 40243 NM_006544  | 10640 Hs. 74398E           | NR_006544        | ENSG00000EXOC5                     | HSEC10 PF exocyst c protein-coding |
| chr16-58  | 10.1781  | 0.121393 | 0.732022 | 0.165832 | 0.868289 | 0.981636 | chr16 | 58543265 | 58547358  | + | 0 | NA | intron (intron (N   | 3322 NR_00297E   | 67727 Hs. 68859E           | NR_00297E        | ENSG00000SNORA46                   | ACA46 small nucsnRNA               |
| chr19-534 | 10.1781  | 0.121393 | 0.732022 | 0.165832 | 0.868289 | 0.981636 | chr19 | 53488826 | 53492017  | + | 0 | NA | exon (NM exon (NM   | 22688 NM_001004  | 126017 Hs. 71078E          | NR_001004        | ENSG00000ZNF813                    | zinc fing protein-coding           |
| chr3-1192 | 10.1781  | 0.121393 | 0.732022 | 0.165832 | 0.868289 | 0.981636 | chr3  | 1.19E+08 | 1.19E+08  | + | 0 | NA | exon (NM exon (NM   | 3368 NR_046574   | 1.01E+08 Hs. 721307E       | NR_046574        | ENSG00000B4GALT4                   | B4GALT4 ncRNA                      |
| chr7-2281 | 10.1781  | 0.121393 | 0.732022 | 0.165832 | 0.868289 | 0.981636 | chr7  | 22816315 | 22818274  | + | 0 | NA | intron (intron (N   | 5555 NM_01905E   | 54543 Hs. 11231E           | NR_01905E        | ENSG00000TOMM7                     | TOM7 transloc c protein-coding     |
| chr7-561  | 10.1781  | 0.121393 | 0.732022 | 0.165832 | 0.868289 | 0.981636 | chr7  | 56100198 | 56104249  | + | 0 | NA | intron (intron (N   | 4253 NM_01613E   | 5142 Hs. 38999E            | NR_01613E        | ENSG00000CHCHD2                    | C7orf17 C coiled-c protein-coding  |
| chr1-1252 | 8.682333 | 0.130446 | 0.786882 | 0.165775 | 0.868334 | 0.981636 | chr1  | 1.252113 | 1.2527236 | + | 0 | NA | 3' UTR (3' UTR (N   | -7952 NM_001014  | 388581 Hs. 19761E          | NR_001014        | ENSG00000C1QTNF12                  | C1QDC2 C1C1 and I protein-coding   |
| chr1-1651 | 8.682333 | 0.130446 | 0.786882 | 0.165775 | 0.868334 | 0.981636 | chr1  | 1651837  | 1657720   | + | 0 | NA | intron (AluV SINE   | 4226 NM_03349C   | 984 Hs. 65122E             | NR_00178E        | ENSG00000CDK11B                    | CDC2L1 C cyclin d protein-coding   |
| chr1-228  | 8.682333 | 0.130446 | 0.786882 | 0.165775 | 0.868334 | 0.981636 | chr1  | 22864907 | 22868803  | + | 0 | NA | intron (AluSq2 SI   | -3629 NR_036214  | 1E+08 NR_036214            | ENSG00000MIR4253 | microRNA ncRNA                     |                                    |
| chr1-5281 | 8.682333 | 0.130446 | 0.786882 | 0.165775 | 0.868334 | 0.981636 | chr1  | 52813736 | 52814458  | + | 0 | NA | intron (AluX1 SI    | -28663 NM_001307 | 440590 Hs. 65845E          | NR_001004        | ENSG00000ZYG11A                    | ZYG11 yig-11 f protein-coding      |
| chr1-1795 | 8.682333 | 0.130446 | 0.786882 | 0.165775 | 0.868334 | 0.981636 | chr1  | 1.8E+08  | 1.8E+08   | + | 0 | NA | intron (intron (N   | 31812 NM_01560E  | 26092 Hs. 49645E           | NR_01560E        | ENSG00000TOR1AIP1                  | LAP1 LAP1 torsin 1 protein-coding  |
| chr10-50  | 8.682333 | 0.130446 | 0.786882 | 0.165775 | 0.868334 | 0.981636 | chr10 | 50082441 | 50087578  | + | 0 | NA | intron (L1MC4 LIN   | 17055 NM_00100E  | 387680 Hs. 36528E          | NR_01823E        | ENSG00000WASHC2A                   | FAM21A F WASH com protein-coding   |
| chr11-44  | 8.682333 | 0.130446 | 0.786882 | 0.165775 | 0.868334 | 0.981636 | chr11 | 44582493 | 44583423  | + | 0 | NA | intron (intron (N   | 17295 NM_002231  | 3732 Hs. 52777E            | NR_002231        | ENSG00000CD82                      | 4F9 C33 CD82 mole protein-coding   |
| chr12-962 | 8.682333 | 0.130446 | 0.786882 |          |          |          |       |          |           |   |   |    |                     |                  |                            |                  |                                    |                                    |

|                   |          |        |          |          |          |       |          |          |   |   |    |                     |                  |                            |                    |                                     |
|-------------------|----------|--------|----------|----------|----------|-------|----------|----------|---|---|----|---------------------|------------------|----------------------------|--------------------|-------------------------------------|
| chr14-92c.170029  | 0.133615 | 0.8082 | 0.165325 | 0.868689 | 0.981636 | chr14 | 92030509 | 92032792 | + | 0 | NA | intron (NLoop)DN    | 8409 NM_004235   | 9321 Hs. 63233cNM_004235   | ENSG000003TRIP11   | ACG1A CEV thyroid f protein-coding  |
| chr15-43c.170029  | 0.133615 | 0.8082 | 0.165325 | 0.868689 | 0.981636 | chr15 | 43054253 | 43060609 | + | 0 | NA | intron (Nintron (N  | 48607 NM_17491f  | 197131 Hs. 591121NM_17491f | ENSG000003UBR1     | JBS ubiquitin protein-coding        |
| chr15-63c.170029  | 0.133615 | 0.8082 | 0.165325 | 0.868689 | 0.981636 | chr15 | 63301809 | 63302675 | + | 0 | NA | intron (Nintron (N  | 24637 NM_031301  | 83464 Hs. 51170cNM_031301  | ENSG000003APH1B    | APH-1B PFaph-1 hom protein-coding   |
| chr15-64c.170029  | 0.133615 | 0.8082 | 0.165325 | 0.868689 | 0.981636 | chr15 | 64398305 | 64404554 | + | 0 | NA | intron (NAluSc8 S1  | 13593 NM_001321  | 9325 Hs. 50034cNM_01621f   | ENSG000003TRIP4    | ASC-1 ASC thyroid f protein-coding  |
| chr15-65c.170029  | 0.133615 | 0.8082 | 0.165325 | 0.868689 | 0.981636 | chr15 | 65453189 | 65453942 | + | 0 | NA | intron (NAluSx S1   | 30618 NM_001032  | 57722 Hs. 458607NM_02096f  | ENSG000003IGDCc4   | DDM36 NOF immunogl protein-coding   |
| chr16-48c.170029  | 0.133615 | 0.8082 | 0.165325 | 0.868689 | 0.981636 | chr16 | 4820639  | 4827078  | + | 0 | NA | exon (NM_exon (NM   | -20908 NM_02458f | 79641 Hs. 45979cNM_02458f  | ENSG000003ROGDI    | KTZS rogdi atyp protein-coding      |
| chr16-90c.170029  | 0.133615 | 0.8082 | 0.165325 | 0.868689 | 0.981636 | chr16 | 9092694  | 9098360  | + | 0 | NA | intron (Nintron (N  | 3883 NM_014117   | 29035 Hs. 221497NM_014117  | ENSG000003C16orf72 | PRO0149 chromosom protein-coding    |
| chr16-115c.170029 | 0.133615 | 0.8082 | 0.165325 | 0.868689 | 0.981636 | chr16 | 11887150 | 11892531 | + | 0 | NA | intron (NAluSx S1   | 26116 NM_002094  | 2935 Hs. 52878cNM_002094   | ENSG000003GSP1     | 55169.2 EG1 to S f protein-coding   |
| chr16-466c.170029 | 0.133615 | 0.8082 | 0.165325 | 0.868689 | 0.981636 | chr16 | 46659729 | 46664689 | + | 0 | NA | intron (Nintron (N  | 26969 NM_01820f  | 55737 Hs. 45452cNM_01820f  | ENSG000003VPS35    | MEM3 PARF VPS35 ret protein-coding  |
| chr16-694c.170029 | 0.133615 | 0.8082 | 0.165325 | 0.868689 | 0.981636 | chr16 | 69426524 | 69433695 | + | 0 | NA | intron (Nintron (N  | 5514 NM_03057f   | 80777 Hs. 461131NM_03057f  | ENSG000003CYB5B    | CYB5-B C cytochrom protein-coding   |
| chr17-247c.170029 | 0.133615 | 0.8082 | 0.165325 | 0.868689 | 0.981636 | chr17 | 2476327  | 2476769  | + | 0 | NA | intron (N L2 LINE L | 35340 NM_02408f  | 79066 Hs. 632237NM_02408f  | ENSG000003METTL16  | METTL10D methyl tr protein-coding   |
| chr17-29f.170029  | 0.133615 | 0.8082 | 0.165325 | 0.868689 | 0.981636 | chr17 | 29509461 | 29512915 | + | 0 | NA | intron (Nintron (N  | 55849 NM_198147  | 116236 Hs. 10651cNM_198147 | ENSG000003ABHD15   | abhydrolase protein-coding          |
| chr17-29c.170029  | 0.133615 | 0.8082 | 0.165325 | 0.868689 | 0.981636 | chr17 | 29668354 | 29672283 | + | 0 | NA | intron (N LTR89 LTF | -48895 NM_032854 | 84940 Hs. 14304cNM_032854  | ENSG000003COR06    | coronin f protein-coding            |
| chr17-31c.170029  | 0.133615 | 0.8082 | 0.165325 | 0.868689 | 0.981636 | chr17 | 31887681 | 31896337 | + | 0 | NA | intron (NAluSg LTF  | 9703 NM_01842f   | 55813 Hs. 58986cNM_01842f  | ENSG000003UTP6     | C17orf40 UTP6 smal protein-coding   |
| chr17-61c.170029  | 0.133615 | 0.8082 | 0.165325 | 0.868689 | 0.981636 | chr17 | 61965712 | 61966744 | + | 0 | NA | intron (Nintron (N  | -38246 NM_00133c | 57508 Hs. 27964cNM_02074f  | ENSG000003INTS2    | INT2 KIAA integratc protein-coding  |
| chr17-82c.170029  | 0.133615 | 0.8082 | 0.165325 | 0.868689 | 0.981636 | chr17 | 82943566 | 82945459 | + | 0 | NA | 3' UTR (N3' UTR (N  | 62436 NR_13546f  | 146712 Hs. 607824NM_00100f | ENSG000003B3GNTL1  | 3-Gn-78 EUDP-GlcNA protein-coding   |
| chr18-63c.170029  | 0.133615 | 0.8082 | 0.165325 | 0.868689 | 0.981636 | chr18 | 63348132 | 63362600 | + | 0 | NA | intron (Nintron (N  | 11840 NM_00203f  | 2531 Hs. 74050 NM_00203f   | ENSG000003KDSR     | DHSR EKV3 f-ketoid protein-coding   |
| chr19-18c.170029  | 0.133615 | 0.8082 | 0.165325 | 0.868689 | 0.981636 | chr19 | 18931989 | 18936479 | + | 0 | NA | intron (Nintron (N  | 4815 NM_00114f   | 9454 Hs. 72020cNM_00483f   | ENSG000003HOMER3   | HOMER-3 hommer sca protein-coding   |
| chr19-467c.170029 | 0.133615 | 0.8082 | 0.165325 | 0.868689 | 0.981636 | chr19 | 46720401 | 46730513 | + | 0 | NA | intron (Nintron (N  | -8330 NM_016457  | 25865 Hs. 466987NM_016457  | ENSG000003PRKD2    | HSPC187 F protein f protein-coding  |
| chr19-49c.170029  | 0.133615 | 0.8082 | 0.165325 | 0.868689 | 0.981636 | chr19 | 49615817 | 49619224 | + | 0 | NA | intron (NAluJo SIN  | 22623 NM_00627c  | 6237 Hs. 51553cNM_00627c   | ENSG000003RRAS     | R-Ras RAS relat protein-coding      |
| chr19-52c.170029  | 0.133615 | 0.8082 | 0.165325 | 0.868689 | 0.981636 | chr19 | 52633752 | 52634893 | + | 0 | NA | intron (Nintron (N  | 4069 NM_00110f   | 55769 Hs. 46721cNM_01830c  | ENSG000003ZNF83    | HPF1 ZNF8 zinc fing protein-coding  |
| chr2-393f.170029  | 0.133615 | 0.8082 | 0.165325 | 0.868689 | 0.981636 | chr2  | 39358403 | 39361300 | + | 0 | NA | intron (N THE1C-int | 77434 NM_00361f  | 8491 Hs. 65575cNM_00361f   | ENSG000003MAP4K3   | GLK MAPKK mitogen-e protein-coding  |
| chr2-442c.170029  | 0.133615 | 0.8082 | 0.165325 | 0.868689 | 0.981636 | chr2  | 44209245 | 44210398 | + | 0 | NA | intron (Nintron (N  | 40946 NM_00270f  | 5495 Hs. 41676cNM_00270f   | ENSG000003PPM1B    | PP2C-beta protein f protein-coding  |
| chr2-950f.170029  | 0.133615 | 0.8082 | 0.165325 | 0.868689 | 0.981636 | chr2  | 95099703 | 95101690 | + | 0 | NA | intron (Nintron (N  | 18611 NM_001321  | 64969 Hs. 65525cNM_03190c  | ENSG000003MRP55    | MRP-55 SE mitochochr protein-coding |
| chr2-109f.170029  | 0.133615 | 0.8082 | 0.165325 | 0.868689 | 0.981636 | chr2  | 1.1E+08  | 1.1E+08  | + | 0 | NA | intron (NAluSc SIN  | -48963 NR_03809f | 1E+08 Hs. 53561cNM_00120f  | ENSG000003LIMS4    | LIMS3L LIM zinc protein-coding      |
| chr2-1914c.170029 | 0.133615 | 0.8082 | 0.165325 | 0.868689 | 0.981636 | chr2  | 1.91E+08 | 1.91E+08 | + | 0 | NA | exon (NM_exon (NM   | 178446 NM_001161 | 4430 Hs. 43962cNM_01222f   | ENSG000003MYO1B    | MMI-alpha myosin I f protein-coding |
| chr2-1974c.170029 | 0.133615 | 0.8082 | 0.165325 | 0.868689 | 0.981636 | chr2  | 1.97E+08 | 1.97E+08 | + | 0 | NA | intron (Nintron (N  | 12696 NM_00132c  | 8219 Hs. 60659cNM_025147   | ENSG000003COQ10B   | - coenzyme protein-coding           |
| chr2-223f.170029  | 0.133615 | 0.8082 | 0.165325 | 0.868689 | 0.981636 | chr2  | 2.24E+08 | 2.24E+08 | + | 0 | NA | intron (NAluSx SIN  | 45647 NM_02083c  | 57590 Hs. 36835cNM_02083c  | ENSG000003WDFY1    | FENS-1 FEWD repeat protein-coding   |
| chr20-321c.170029 | 0.133615 | 0.8082 | 0.165325 | 0.868689 | 0.981636 | chr20 | 32156474 | 32159420 | + | 0 | NA | exon (NM_exon (NM   | 32413 NR_002781  | 128854 Hs. 647447NR_002781 | ENSG000003TSPY26P  | TSPYL3 beta testis sp pseudo        |
| chr20-32f.170029  | 0.133615 | 0.8082 | 0.165325 | 0.868689 | 0.981636 | chr20 | 32833782 | 32834708 | + | 0 | NA | intron (NAluJo SIN  | 14291 NM_01232f  | 22919 Hs. 472437NR_01232f  | ENSG000003MAPRE1   | EB1 microtubul protein-coding       |
| chr20-351c.170029 | 0.133615 | 0.8082 | 0.165325 | 0.868689 | 0.981636 | chr20 | 35125392 | 35127704 | + | 0 | NA | intron (N MR SINE   | 20788 NM_00114f  | 55741 Hs. 720177NM_01821f  | ENSG000003CEDEM2   | C20orf31 ER degradc protein-coding  |
| chr20-37c.170029  | 0.133615 | 0.8082 | 0.165325 | 0.868689 | 0.981636 | chr20 | 38517636 | 38518835 | + | 0 | NA | intron (Nintron (N  | 1672 NR_03960f   | 1.01E+08 Hs. 03960f        | ENSG000003MIR54802 | - microRNA ncRNA                    |
| chr21-38f.170029  | 0.133615 | 0.8082 | 0.165325 | 0.868689 | 0.981636 | chr21 | 37952921 | 37989998 | + | 0 | NA | intron (Nintron (N  | 14197 NR_00331f  | 7267 Hs. 368214NM_00331f   | ENSG000003TTC3     | DCRR1 RNf tetraatric protein-coding |
| chr22-29f.170029  | 0.133615 | 0.8082 | 0.165325 | 0.868689 | 0.981636 | chr22 | 29545795 | 29548932 | + | 0 | NA | intron (N THE1A-int | 6292 NM_00100f   | 8563 Hs. 75361 NM_00367f   | ENSG000003THOC5    | C22orf19 THO compl protein-coding   |
| chr3-125f.170029  | 0.133615 | 0.8082 | 0.165325 | 0.868689 | 0.981636 | chr3  | 12588819 | 12592567 | + | 0 | NA | intron (Nintron (N  | 33606 NM_01416f  | 23609 Hs. 59166cNM_01416f  | ENSG000003MKRN2    | HSPC070 Fmakorin i protein-coding   |
| chr3-490f.170029  | 0.133615 | 0.8082 | 0.165325 | 0.868689 | 0.981636 | chr3  | 49067280 | 49075573 | + | 0 | NA | intron (NAluSx3 S1  | 21206 NM_00132c  | 54870 Hs. 29738cNM_01773c  | ENSG000003QRICH1   | AB-DIP Fglutamine protein-coding    |
| chr3-493c.170029  | 0.133615 | 0.8082 | 0.165325 | 0.868689 | 0.981636 | chr3  | 49333287 | 49337131 | + | 0 | NA | intron (Nintron (N  | 4844 NM_001251   | 7375 Hs. 77500 NM_00336f   | ENSG000003CUSP4    | UNP Umph ubiquitir protein-coding   |
| chr3-1294c.170029 | 0.133615 | 0.8082 | 0.165325 | 0.868689 | 0.981636 | chr3  | 1.29E+08 | 1.29E+08 | + | 0 | NA | intron (Nintron (N  | 5454 NM_00127f   | 8930 Hs. 35947 NM_00392f   | ENSG000003MBD4     | MED1 methyl-Cp protein-coding       |
| chr3-180f.170029  | 0.133615 | 0.8082 | 0.165325 | 0.868689 | 0.981636 | chr3  | 1.81E+08 | 1.81E+08 | + | 0 | NA | intron (Nintron (N  | 36235 NM_00136f  | 8087 Hs. 478407NM_00508f   | ENSG000003FXR1     | FXR1P FMRI atyp protein-coding      |
| chr4-1691c.170029 | 0.133615 | 0.8082 | 0.165325 | 0.868689 | 0.981636 | chr4  | 1691653  | 1696359  | + | 0 | NA | intron (Nintron (N  | -9693 NM_001174  | 152877 Hs. 143314NM_00101f | ENSG000003FAM53A   | DNTNP family wiprotein-coding       |
| chr4-150f.170029  | 0.133615 | 0.8082 | 0.165325 | 0.868689 | 0.981636 | chr4  | 15061188 | 15064664 | + | 0 | NA | intron (Nintron (N  | 60445 NM_001177  | 132864 Hs. 656937NM_18248f | ENSG000003CPEB2    | CPE-BP2 cytoplasm protein-coding    |
| chr4-253f.170029  | 0.133615 | 0.8082 | 0.165325 | 0.868689 | 0.981636 | chr4  | 25388816 | 25398970 | + | 0 | NA | intron (Nintron (N  | 16530 NM_013367  | 29945 Hs. 15217cNM_013367  | ENSG000003ANAPC4   | APC4 anaphase protein-coding        |
| chr4-397f.170029  | 0.133615 | 0.8082 | 0.165325 | 0.868689 | 0.981636 | chr4  | 39769536 | 39770699 | + | 0 | NA | intron (N CpG       | 71981 NM_001111  | 3093 Hs. 50308 NM_00533f   | ENSG000003UBE2K    | E2-25K H ubiquitir protein-coding   |
| chr4-569f.170029  | 0.133615 | 0.8082 | 0.165325 | 0.868689 | 0.981636 | chr4  | 56965898 | 56970191 | + | 0 | NA | intron (NAluSx SIN  | 9562 NM_03231f   | 84273 Hs. 8715 NM_03231f   | ENSG000003NOA1     | C4orf14 N trich o protein-coding    |
| chr4-183f.170029  | 0.133615 | 0.8082 | 0.165325 | 0.868689 | 0.981636 | chr4  | 1.84E+08 | 1.84E+08 | + | 0 | NA | intron (N MR SINE   | 36968 NM_02194f  | 60684 Hs. 44324cNM_02194f  | ENSG000003TRAPP11  | C4orf41 F trafficir protein-coding  |
| chr5-104f.170029  | 0.133615 | 0.8082 | 0.165325 | 0.868689 | 0.981636 | chr5  | 10409698 | 10414478 | + | 0 | NA | intron (Nintron (N  | 9724 NR_16210f   | 1.13E+08 Hs. NR_16210f     | MIR10397           | - microRNA ncRNA                    |
| chr5-1291f.170029 | 0.133615 | 0.8082 | 0.165325 | 0.868689 | 0.981636 | chr5  | 1.29E+08 | 1.29E+08 | + | 0 | NA | intron (Nintron (N  | 9540 NR_03977f   | 1.01E+08 Hs. NR_03977f     | ENSG000003MIR4633  | - microRNA ncRNA                    |
| chr5-150f.170029  | 0.133615 | 0.8082 | 0.165325 | 0.868689 | 0.981636 | chr5  | 1.51E+08 | 1.51E+08 | + | 0 | NA | intron (Nintron (N  | 44698 NM_00154f  | 3340 Hs. 22205cNM_00154f   | ENSG000003NDST1    | HSST MRT4N-deacetyl protein-coding  |
| chr6-110f.170029  | 0.133615 | 0.8082 | 0.165325 | 0.868689 | 0.981636 | chr6  | 1.11E+08 | 1.11E+08 | + | 0 | NA | exon (NM_exon (NM   | 15525 NM_001287  | 262 Hs. 15911cNM_001634    | ENSG000003AMD1     | ADOMETDC adenosyln protein-coding   |
| chr6-126f.170029  | 0.133615 | 0.8082 | 0.165325 | 0.868689 | 0.981636 | chr6  | 1.26E+08 | 1.26E+08 | + | 0 | NA | intron (Nintron (N  | 24999 NM_001031  | 60487 Hs. 40418cNM_02182c  | ENSG000            |                                     |



|                    |          |          |          |          |          |       |          |           |   |   |    |                      |                  |                   |            |                    |                    |                            |                |
|--------------------|----------|----------|----------|----------|----------|-------|----------|-----------|---|---|----|----------------------|------------------|-------------------|------------|--------------------|--------------------|----------------------------|----------------|
| chr7-5336 7.913229 | -0.13562 | 0.821213 | -0.16514 | 0.868834 | 0.981636 | chr7  | 5336088  | 5338152   | + | 0 | NA | intron (N)IMEf LIN   | 54177 NM_00104C  | 222962 Hs. 4302   | NM_153247  | ENSG00000SLC29A4   | ENT4 PMA1          | solute cε protein-coding   |                |
| chr7-4442 7.913229 | -0.13562 | 0.821213 | -0.16514 | 0.868834 | 0.981636 | chr7  | 4422534  | 4422639   | + | 0 | NA | intron (N)intron (N) | 64692 NM_015332  | 23386 Hs. 488171  | NM_015332  | ENSG00000NUCD3     | NudCL              | Nudc domε protein-coding   |                |
| chr7-474 7.913229  | -0.13562 | 0.821213 | -0.16514 | 0.868834 | 0.981636 | chr7  | 47407228 | 47415149  | + | 0 | NA | intron (N)intron (N) | 53615 NR_145813  | 1.1E+08           | NR_145813  | SNORD151           | -                  | small nucsnoRNA            |                |
| chr7-7452 7.913229 | -0.13562 | 0.821213 | -0.16514 | 0.868834 | 0.981636 | chr7  | 47523670 | 47530587  | + | 0 | NA | intron (N)Alu SINE   | 51183 NM_002274F | 64759 Hs. 520814  | NM_002274  | ENSG00000TNS3      | TEM6 TENS          | tensin 3 protein-coding    |                |
| chr7-747 7.913229  | -0.13562 | 0.821213 | -0.16514 | 0.868834 | 0.981636 | chr7  | 74400222 | 74405354  | + | 0 | NA | intron (N)intron (N) | -51118 NM_00568E | 9569 Hs. 64705E   | NM_00568E  | ENSG00000GTF2IRD1  | BEN CREAM          | GTF2I reprotein-coding     |                |
| chr7-139 7.913229  | -0.13562 | 0.821213 | -0.16514 | 0.868834 | 0.981636 | chr7  | 1.39E+08 | 1.39E+08  | + | 0 | NA | intron (N)intron (N) | 8267 NM_08066C   | 92092 Hs. 51283E  | NM_08066C  | ENSG00000CZ3HAV1L  | C7orf39            | zinc fing protein-coding   |                |
| chr8-832 7.913229  | -0.13562 | 0.821213 | -0.16514 | 0.868834 | 0.981636 | chr8  | 8325191  | 8329601   | + | 0 | NA | intron (N)AluSx SIN  | 58848 NM_00136E  | 157285 Hs. 58386E | NM_00108C  | ENSG00000PRAG1     | NACK PEAK          | PEAK1 relprotein-coding    |                |
| chr8-2805 7.913229 | -0.13562 | 0.821213 | -0.16514 | 0.868834 | 0.981636 | chr8  | 28098055 | 28099899  | + | 0 | NA | intron (N)intron (N) | 5838 NM_001284   | 55140 Hs. 49133E  | NM_018091  | ENSG00000ELP3      | KAT9               | elongator protein-coding   |                |
| chr8-585 7.913229  | -0.13562 | 0.821213 | -0.16514 | 0.868834 | 0.981636 | chr8  | 58566400 | 58570089  | + | 0 | NA | intron (N)Tiger3b    | 14983 NM_00562E  | 6386 Hs. 200804   | NM_00562E  | ENSG00000SDCBP     | MDA-9 MDA          | syndecan protein-coding    |                |
| chr8-9771 7.913229 | -0.13562 | 0.821213 | -0.16514 | 0.868834 | 0.981636 | chr8  | 97717900 | 97725618  | + | 0 | NA | intron (N)intron (N) | -54029 NM_018407 | 55353 Hs. 492314  | NM_018407  | ENSG00000LAPTM4B   | LAPTM4bet          | lysosomal protein-coding   |                |
| chr9-324 7.913229  | -0.13562 | 0.821213 | -0.16514 | 0.868834 | 0.981636 | chr9  | 32483688 | 32488522  | + | 0 | NA | intron (N)intron (N) | 40091 NM_014314  | 23586 Hs. 190622  | NM_014314  | ENSG00000DDX58     | RIG-I RIC          | DEXD/Hε protein-coding     |                |
| chrX-240 7.913229  | -0.13562 | 0.821213 | -0.16514 | 0.868834 | 0.981636 | chrX  | 24056436 | 24078803  | + | 0 | NA | intron (N)AluSx SIN  | 12663 NM_00141E  | 1968 Hs. 539684   | NM_00141E  | ENSG00000EIF2S3    | EIF2 EIF2          | eukaryoti protein-coding   |                |
| chr1-2114 9.665801 | 0.123576 | 0.748535 | 0.16509  | 0.868873 | 0.981636 | chr1  | 21148198 | 21149099  | + | 0 | NA | intron (N)Alu SINE   | 19391 NM_00119E  | 8672 Hs. 467084   | NM_00376C  | ENSG00000EIF4G3    | eIF-4G 3 ε         | eukaryoti protein-coding   |                |
| chr10-27 9.665801  | 0.123576 | 0.748535 | 0.16509  | 0.868873 | 0.981636 | chr10 | 27210285 | 27210681  | + | 0 | NA | intron (N)AluSx SIN  | 30003 NM_001301  | 91452 Hs. 530597  | NM_14569E  | ENSG00000ACBD5     | -                  | acyl-CoA protein-coding    |                |
| chr11-614 9.665801 | 0.123576 | 0.748535 | 0.16509  | 0.868873 | 0.981636 | chr11 | 61408031 | 61422395  | + | 0 | NA | intron (N)AluSx SIN  | 14698 NM_024811  | 79869 Hs. 718984  | NM_024811  | ENSG00000CPSPF7    | CFIm59             | cleavage protein-coding    |                |
| chr11-627 9.665801 | 0.123576 | 0.748535 | 0.16509  | 0.868873 | 0.981636 | chr11 | 62733239 | 62735793  | + | 0 | NA | intron (N)AluSx SIN  | 6030 NM_17381C   | 283237 Hs. 31704  | NM_17381C  | ENSG00000TTC9C     | -                  | tetractin protein-coding   |                |
| chr11-11 9.665801  | 0.123576 | 0.748535 | 0.16509  | 0.868873 | 0.981636 | chr11 | 1.17E+08 | 1.17E+08  | + | 0 | NA | intron (N)intron (N) | -35432 NM_00003E | 335 Hs. 93194     | NM_00003E  | ENSG00000CAPOA1    | apo(a)             | apolipoprotein-coding      |                |
| chr11-12 9.665801  | 0.123576 | 0.748535 | 0.16509  | 0.868873 | 0.981636 | chr11 | 1.26E+08 | 1.26E+08  | + | 0 | NA | intron (N)L2c LINE   | 5363 NM_00133C   | 9538 Hs. 643514   | NM_00487E  | ENSG00000E124      | EPG4 PIGE          | E124 autc protein-coding   |                |
| chr12-69 9.665801  | 0.123576 | 0.748535 | 0.16509  | 0.868873 | 0.981636 | chr12 | 69573685 | 69574902  | + | 0 | NA | exon (NM)exon (NM)   | -10430 NR_03747E | 1.01E+08          | NR_03747E  | ENSG00000MIR3913   | 2-mir-3913         | microRNA ncRNA             |                |
| chr13-33 9.665801  | 0.123576 | 0.748535 | 0.16509  | 0.868873 | 0.981636 | chr13 | 33161157 | 33167586  | + | 0 | NA | intron (N)intron (N) | 21720 NM_00124E  | 90627 Hs. 156551  | NM_052851  | ENSG00000CSTARD13  | ARHGAP37 STAR      | relε protein-coding        |                |
| chr17-21 9.665801  | 0.123576 | 0.748535 | 0.16509  | 0.868873 | 0.981636 | chr17 | 21314609 | 21314976  | + | 0 | NA | 3' UTR (N)3' UTR (N) | 26756 NM_00275E  | 5606 Hs. 51401E   | NM_00275E  | ENSG00000MAP2K3    | MAPK3 MEI          | mitogen-ε protein-coding   |                |
| chr2-3644 9.665801 | 0.123576 | 0.748535 | 0.16509  | 0.868873 | 0.981636 | chr2  | 36447653 | 36448176  | + | 0 | NA | intron (N)intron (N) | 92136 NM_016441  | 51232 Hs. 699247  | NM_016441  | ENSG00000CRIM1     | CRIM-1 SE          | cysteine protein-coding    |                |
| chr2-100 9.665801  | 0.123576 | 0.748535 | 0.16509  | 0.868873 | 0.981636 | chr2  | 1E+08    | 1E+08     | + | 0 | NA | exon (NM)exon (NM)   | 98386 NM_00102E  | 3899 Hs. 444414   | NM_00228E  | ENSG00000CAFF3     | LAF4 MLL1          | AFA/FMR2 protein-coding    |                |
| chr2-101 9.665801  | 0.123576 | 0.748535 | 0.16509  | 0.868873 | 0.981636 | chr2  | 1.02E+08 | 1.02E+08  | + | 0 | NA | intron (N)MIRb SINE  | 137827 NM_145687 | 9448 Hs. 70101E   | NM_004834  | ENSG00000MAP4K4    | FLH21957 mi        | togen-ε protein-coding     |                |
| chr20-38 9.665801  | 0.123576 | 0.748535 | 0.16509  | 0.868873 | 0.981636 | chr20 | 38539825 | 38541622  | + | 0 | NA | intron (N)intron (N) | 24160 NR_03960E  | 1.01E+08          | NR_03960E  | ENSG00000MIR54802  | -                  | microRNA ncRNA             |                |
| chr22-38 9.665801  | 0.123576 | 0.748535 | 0.16509  | 0.868873 | 0.981636 | chr22 | 38214357 | 38214793  | + | 0 | NA | exon (NM)exon (NM)   | 10145 NR_132774  | 1.07E+08          | NR_132774  | SNORA92            | -                  | small nucsnoRNA            |                |
| chr22-41 9.665801  | 0.123576 | 0.748535 | 0.16509  | 0.868873 | 0.981636 | chr22 | 41489601 | 41655997  | + | 0 | NA | intron (N)Alu Jo SIN | 31184 NM_00128E  | 2547 Hs. 29249E   | NM_00146E  | ENSG00000XRCC6     | CTC75 CTC          | X-ray reprotein-coding     |                |
| chr3-179 9.665801  | 0.123576 | 0.748535 | 0.16509  | 0.868873 | 0.981636 | chr3  | 1.8E+08  | 1.8E+08   | + | 0 | NA | intron (N)LIPA4 LIN  | 14928 NM_00249E  | 4711 Hs. 730674   | NM_00249E  | ENSG00000NDUF5     | CISGDH SC          | NADH:ubiq protein-coding   |                |
| chr4-44 9.665801   | 0.123576 | 0.748535 | 0.16509  | 0.868873 | 0.981636 | chr4  | 445726   | 427931    | + | 0 | NA | intron (N)LIPA7 LIN  | 14081 NR_002451  | 79963 Hs. 67749E  | NM_02490E  | ENSG00000ABCA11P   | ABCA11 ES          | ATP bindipseudo            |                |
| chr6-132 9.665801  | 0.123576 | 0.748535 | 0.16509  | 0.868873 | 0.981636 | chr6  | 1.32E+08 | 1.32E+08  | + | 0 | NA | intron (N)Tiger12    | 50019 NM_00132E  | 8417 Hs. 59314E   | NM_00356E  | ENSG00000STX7      | -                  | syntxin protein-coding     |                |
| chr7-77 9.665801   | 0.123576 | 0.748535 | 0.16509  | 0.868873 | 0.981636 | chr7  | 77596545 | 77599590  | + | 0 | NA | intron (N)Alu Jb SIN | 60024 NM_001131  | 5782 Hs. 61812    | NM_00283E  | ENSG00000PTPN12    | PTP-PEST           | protein tprotein-coding    |                |
| chr7-10 9.665801   | 0.123576 | 0.748535 | 0.16509  | 0.868873 | 0.981636 | chr7  | 1.59E+08 | 1.59E+08  | + | 0 | NA | Intergeni Intergeni  | -57878 NR_024394 | 154822 Hs. 54478E | NM_19834E  | ENSG00000LINC0068E | -                  | long intncRNA              |                |
| chr8-10 9.665801   | 0.123576 | 0.748535 | 0.16509  | 0.868873 | 0.981636 | chr8  | 1.02E+08 | 1.02E+08  | + | 0 | NA | intron (N)intron (N) | 72504 NR_12541E  | 1.02E+08          | Hs. 49244E | NR_12541E          | ENSG00000UBR5-AS1  | -                          | UBR5 antncRNA  |
| chr9-57 9.665801   | 0.123576 | 0.748535 | 0.16509  | 0.868873 | 0.981636 | chr9  | 5772314  | 5774914   | + | 0 | NA | intron (N)MIR3 SINE  | 59503 NM_02489E  | 79956 Hs. 59107E  | NM_02489E  | ENSG00000CERMP1    | FXNA KIA           | endoplasm protein-coding   |                |
| chr6-1611 7.46789  | -0.14131 | 0.856148 | -0.16506 | 0.868898 | 0.981636 | chr6  | 1611727  | 1612641   | + | 0 | NA | 3' UTR (N)3' UTR (N) | 2269 NM_00145E   | 2296 Hs. 34888E   | NM_00145E  | ENSG00000FOX1C     | ARL ASGE           | forkhead protein-coding    |                |
| chr15-514 12.66682 | 0.109579 | 0.664567 | 0.164887 | 0.869033 | 0.981636 | chr15 | 51484595 | 51486318  | + | 0 | NA | intron (N)intron (N) | 108210 NM_00133C | 342035 Hs. 526441 | NM_18178E  | ENSG00000GLDN      | CROM COL           | gliomedir protein-coding   |                |
| chr1-20 7.657725   | 0.137209 | 0.833649 | 0.164588 | 0.869268 | 0.981636 | chr1  | 20852739 | 20855651  | + | 0 | NA | intron (N)intron (N) | -67507 NM_016287 | 50809 Hs. 14244E  | NM_016287  | ENSG00000CHP1BP3   | HP1-BP74           | heterochr protein-coding   |                |
| chr1-2444 7.657725 | 0.137209 | 0.833649 | 0.164588 | 0.869268 | 0.981636 | chr1  | 24444535 | 24448429  | + | 0 | NA | intron (N)LIPA11 LI  | 30367 NM_00132E  | 57185 Hs. 52344E  | NM_02044E  | ENSG00000NIPAL3    | DJ462023.          | NIPA like protein-coding   |                |
| chr1-2861 7.657725 | 0.137209 | 0.833649 | 0.164588 | 0.869268 | 0.981636 | chr1  | 28614626 | 28615733  | + | 0 | NA | intron (N)intron (N) | 22684 NM_00119E  | 115273 Hs. 652321 | NM_152304  | ENSG00000RAB42     | -                  | RAB42, mε protein-coding   |                |
| chr1-5184 7.657725 | 0.137209 | 0.833649 | 0.164588 | 0.869268 | 0.981636 | chr1  | 51846635 | 51847313  | + | 0 | NA | intron (N)LTR12C LI  | -10572 NR_03158C | 1E+08             | NR_03158C  | ENSG00000MIR761    | hsa-mir-7          | microRNA ncRNA             |                |
| chr1-6694 7.657725 | 0.137209 | 0.833649 | 0.164588 | 0.869268 | 0.981636 | chr1  | 66948535 | 66948822  | + | 0 | NA | TTS (NM_C)TTS (NM_C) | 18422 NM_001077  | 57708 Hs. 60543E  | NM_02094E  | ENSG00000MIR1E1    | ER1 MI             | -EFMIR1 trε protein-coding |                |
| chr1-15 7.657725   | 0.137209 | 0.833649 | 0.164588 | 0.869268 | 0.981636 | chr1  | 1.1783   | NM_002122 | + | 0 | NA | intron (N)intron (N) | 11783 NM_002122  | 54856 Hs. 656361  | NM_03229E  | ENSG00000GON4L     | GON-4 GON          | -E2F1 trε protein-coding   |                |
| chr1-2444 7.657725 | 0.137209 | 0.833649 | 0.164588 | 0.869268 | 0.981636 | chr1  | 2.44E+08 | 2.44E+08  | + | 0 | NA | intron (N)intron (N) | 28694 NM_00112E  | 159 Hs. 49831E    | NM_00112E  | ENSG00000ADSS      | ADEH ADS           | adenylost protein-coding   |                |
| chr10-73 7.657725  | 0.137209 | 0.833649 | 0.164588 | 0.869268 | 0.981636 | chr10 | 73801608 | 73804552  | + | 0 | NA | exon (NM)exon (NM)   | -1681 NR_038357  | 1.01E+08          | Hs. 63182E | NR_038357          | ENSG00000ZSWIM8-AS | -                          | ZSWIM8 arncRNA |
| chr10-91 7.657725  | 0.137209 | 0.833649 | 0.164588 | 0.869268 | 0.981636 | chr10 | 91813053 | 91815051  | + | 0 | NA | intron (N)Tiger3b    | 15626 NM_02523E  | 80351 Hs. 329327  | NM_02523E  | ENSG00000TNSK5     | ARTD6 PAF          | tankyrase protein-coding   |                |
| chr10-97 7.657725  | 0.137209 | 0.833649 | 0.164588 | 0.869268 | 0.981636 | chr10 | 97476771 | 97479170  | + | 0 | NA | intron (N)intron (N) | 20452 NM_02236E  | 64210 Hs. 500721  | NM_02236E  | ENSG00000MMS19     | CIA04 MET          | MMS19 hon protein-coding   |                |
| chr11-6 7.657725   | 0.137209 | 0.833649 | 0.164588 | 0.869268 | 0.981636 | chr11 | 68921654 | 68923644  | + | 0 | NA | intron (N)AluSx4 SI  | 18798 NM_00218C  | 3508 Hs. 50304E   | NM_00218C  | ENSG00000IGHMBP2   | CATF1 CMI          | immunoglε protein-coding   |                |
| chr12-651 7.657725 | 0.137209 | 0.833649 | 0.164588 | 0.869268 | 0.981636 | chr12 | 6519967  | 6524356   | + | 0 | NA | intron (N)AluJr4 SI  | 11939 NR_004387  | 692148            | NR_004387  | ENSG00000SCARNA10  | U85                | small Ca_ncRNA             |                |
| chr12-49 7.657725  | 0.137209 | 0.833649 | 0.164588 | 0.869268 | 0.981636 | chr12 | 49034133 | 49036283  | + | 0 | NA | intron (N)MIRc SINE  | -16432 NM_00120E | 5571 Hs. 53086E   | NM_00273E  | ENSG00000PRKAG1    | AMPKG              | protein tε protein-coding  |                |
| chr13-11 7.657725  | 0.137209 | 0.833649 | 0.164588 | 0.869268 | 0.981636 | chr13 | 1.1E+08  | 1.1E+08   | + | 0 | NA | intron (N)(GGA)n Si  | 79657 NR_148221  | 1.05E+08          | Hs. 13472E | NR_148221          | LOC10537C          | -                          | uncharactncRNA |
| chr14-9 7.657725   | 0.137209 | 0.833649 | 0.164588 | 0.869268 | 0.981636 | chr14 | 92803260 | 92803780  | + | 0 | NA | intron (N)LIM5 LINE  | 9215 NM_00511E   | 9950 Hs. 10432C   | NM_00511E  | ENSG00000GOLGA5    | GOLIM5 RF          | golgin Aε protein-coding   |                |
| chr15-28 7.657725  | 0.137209 | 0.833649 | 0.164588 |          |          |       |          |           |   |   |    |                      |                  |                   |            |                    |                    |                            |                |

|                    |          |          |          |          |          |       |           |          |   |   |    |                     |        |           |          |            |                      |                   |                          |
|--------------------|----------|----------|----------|----------|----------|-------|-----------|----------|---|---|----|---------------------|--------|-----------|----------|------------|----------------------|-------------------|--------------------------|
| chr16-502.7.459631 | -0.13952 | 0.85019  | -0.16411 | 0.869646 | 0.981636 | chr16 | 50228775  | 50229648 | + | 0 | NA | exon (NM exon (NM   | -37340 | NR_001114 | 113      | Hs. 513575 | ENSG000003ADCY7      | AC7               | adenylateprotein-coding  |
| chr4-1254.7.459631 | -0.13952 | 0.85019  | -0.16411 | 0.869646 | 0.981636 | chr4  | 1.25E+08  | 1.25E+08 | + | 0 | NA | intron (Nintron (N  | -90199 | NR_031746 | 1E+08    | NR_031746  | ENSG000003MIR2054    | hsa-mir-2microRNA | ncRNA                    |
| chr11-949.9.153497 | 0.126014 | 0.767985 | 0.164085 | 0.869665 | 0.981636 | chr11 | 94963327  | 94972024 | + | 0 | NA | intron (Nintron (N  | 5881   | NR_016403 | 51503    | Hs. 503597 | ENSG000003CWC15      | AD002 C11CWC15    | splprotein-coding        |
| chr13-111.9.153497 | 0.126014 | 0.767985 | 0.164085 | 0.869665 | 0.981636 | chr13 | 1.11E+08  | 1.11E+08 | + | 0 | NA | intron (Nintron (N  | 21589  | NR_017664 | 55608    | Hs. 525163 | ENSG000003ANKRD10    | -                 | ankyrin 1protein-coding  |
| chr14-103.9.153497 | 0.126014 | 0.767985 | 0.164085 | 0.869665 | 0.981636 | chr14 | 1.03E+08  | 1.03E+08 | + | 0 | NA | intron (Nintron (N  | 60011  | NR_001822 | 1152     | Hs. 173724 | ENSG000003CKB        | B-CK BCK          | creatine protein-coding  |
| chr16-148.9.153497 | 0.126014 | 0.767985 | 0.164085 | 0.869665 | 0.981636 | chr16 | 14853998  | 14856721 | + | 0 | NA | intron (Nintron (N  | 21638  | NR_014287 | 23420    | Hs. 743963 | ENSG000003NOMO1      | Nomo PM5          | NODAL mocprotein-coding  |
| chr16-533.9.153497 | 0.126014 | 0.767985 | 0.164085 | 0.869665 | 0.981636 | chr16 | 53314371  | 53317092 | + | 0 | NA | intron (NAluS2 SIN  | 55481  | NR_001347 | 643802   | Hs. 451333 | ENSG000003LOC643802  | -                 | u3 small protein-coding  |
| chr16-693.9.153497 | 0.126014 | 0.767985 | 0.164085 | 0.869665 | 0.981636 | chr16 | 69333491  | 69336473 | + | 0 | NA | exon (NM exon (NM   | -4394  | NR_022341 | 64146    | Hs. 130845 | ENSG000003PDF        | -                 | peptide cprotein-coding  |
| chr17-287.9.153497 | 0.126014 | 0.767985 | 0.164085 | 0.869665 | 0.981636 | chr17 | 28746547  | 28751185 | + | 0 | NA | intron (Nintron (N  | 4855   | NR_004295 | 9618     | Hs. 8375   | ENSG000003TRAF4      | CART1 MLN         | TNF receprprotein-coding |
| chr17-312.9.153497 | 0.126014 | 0.767985 | 0.164085 | 0.869665 | 0.981636 | chr17 | 31226353  | 31228557 | + | 0 | NA | intron (Nintron (N  | 69784  | NR_002544 | 4974     | Hs. 113874 | ENSG000003OMG        | OMGP              | oligodencprotein-coding  |
| chr19-137.9.153497 | 0.126014 | 0.767985 | 0.164085 | 0.869665 | 0.981636 | chr19 | 13777810  | 13779460 | + | 0 | NA | 3' UTR (N3' UTR (N  | 4179   | NR_014047 | 28974    | Hs. 231616 | ENSG000003C19orf53   | OMG PCO23         | chromosonprotein-coding  |
| chr2-1053.9.153497 | 0.126014 | 0.767985 | 0.164085 | 0.869665 | 0.981636 | chr2  | 1.05E+08  | 1.05E+08 | + | 0 | NA | intron (NAluS2 SIN  | 4467   | NR_001288 | 79074    | Hs. 549577 | ENSG000003C2orf49    | asw               | chromosonprotein-coding  |
| chr2-1087.9.153497 | 0.126014 | 0.767985 | 0.164085 | 0.869665 | 0.981636 | chr2  | 1.09E+08  | 1.09E+08 | + | 0 | NA | exon (NM exon (NM   | -31733 | NR_001351 | 165055   | Hs. 362702 | ENSG000003CCDC138    | -                 | coiled-cprotein-coding   |
| chr2-1332.9.153497 | 0.126014 | 0.767985 | 0.164085 | 0.869665 | 0.981636 | chr2  | 1.33E+08  | 1.33E+08 | + | 0 | NA | intron (Nintron (N  | -53216 | NR_110294 | 1.02E+08 | Hs. 661917 | ENSG000003NCKAP5-AS- | -                 | NCKAP5 arncRNA           |
| chr2-1825.9.153497 | 0.126014 | 0.767985 | 0.164085 | 0.869665 | 0.981636 | chr2  | 1.83E+08  | 1.83E+08 | + | 0 | NA | intron (Nintron (N  | 37788  | NR_013436 | 10787    | Hs. 603732 | ENSG000003NCKAP1     | HEM2 NAP1         | NCK assocprotein-coding  |
| chr20-372.9.153497 | 0.126014 | 0.767985 | 0.164085 | 0.869665 | 0.981636 | chr20 | 37204307  | 37206027 | + | 0 | NA | intron (Nintron (N  | -25619 | NR_021362 | 140699   | Hs. 349122 | ENSG000003MROH8      | C20orf131         | maestro tprotein-coding  |
| chr4-1697.9.153497 | 0.126014 | 0.767985 | 0.164085 | 0.869665 | 0.981636 | chr4  | 1697446   | 16995627 | + | 0 | NA | intron (NAluSc8 SIN | 13812  | NR_001306 | 7884     | Hs. 298342 | ENSG000003SLBP       | HBP               | stem-loopprotein-coding  |
| chr6-7243.9.153497 | 0.126014 | 0.767985 | 0.164085 | 0.869665 | 0.981636 | chr6  | 7248722   | 7249782  | + | 0 | NA | 3' UTR (N3' UTR (N  | 63947  | NR_001292 | 6745     | Hs. 114033 | ENSG000003SSR1       | TRAPA             | signal seprotein-coding  |
| chr6-4354.9.153497 | 0.126014 | 0.767985 | 0.164085 | 0.869665 | 0.981636 | chr6  | 43549073  | 43551644 | + | 0 | NA | intron (Nintron (N  | 25680  | NR_020755 | 57510    | Hs. 203206 | ENSG000003XPO5       | exp5              | exportin protein-coding  |
| chr7-6672.9.153497 | 0.126014 | 0.767985 | 0.164085 | 0.869665 | 0.981636 | chr7  | 66723109  | 66725981 | + | 0 | NA | intron (NAluSc SIN  | -16188 | NR_001367 | 27342    | Hs. 530055 | ENSG000003RABGEF1    | RABEX5 RA         | RAB guaniprotein-coding  |
| chr7-1003.9.153497 | 0.126014 | 0.767985 | 0.164085 | 0.869665 | 0.981636 | chr7  | 1E+08     | 1E+08    | + | 0 | NA | intron (NLM13D L1   | -3515  | NR_003613 | 5379     | Hs. 634244 | ENSG000003PMS2P1     | PMS2L1 PW         | PMS1 homcpseudo          |
| chr7-1378.9.153497 | 0.126014 | 0.767985 | 0.164085 | 0.869665 | 0.981636 | chr7  | 1.38E+08  | 1.38E+08 | + | 0 | NA | intron (Nintron (N  | -33788 | NR_004717 | 9162     | Hs. 242947 | ENSG000003DGM1       | DGK-IOTA          | diacylglyprotein-coding  |
| chr8-3044.9.153497 | 0.126014 | 0.767985 | 0.164085 | 0.869665 | 0.981636 | chr8  | 30442358  | 30443954 | + | 0 | NA | intron (Nintron (N  | -57755 | NR_046205 | 1E+08    | Hs. 126812 | ENSG000003RBPMS-AS1  | -                 | RBPMS antncRNA           |
| chr9-8631.9.153497 | 0.126014 | 0.767985 | 0.164085 | 0.869665 | 0.981636 | chr9  | 86317560  | 86319678 | + | 0 | NA | intron (Nintron (N  | 35791  | NR_024617 | 79670    | Hs. 597057 | ENSG000003TUT7       | PAPD6 TEM         | terminal protein-coding  |
| chr9-1213.9.153497 | 0.126014 | 0.767985 | 0.164085 | 0.869665 | 0.981636 | chr9  | 1.21E+08  | 1.21E+08 | + | 0 | NA | intron (Nintron (N  | 26574  | NR_198194 | 2040     | Hs. 253903 | ENSG000003STOM       | BNDF EPB7         | stomatin protein-coding  |
| chr9-1292.9.153497 | 0.126014 | 0.767985 | 0.164085 | 0.869665 | 0.981636 | chr9  | 1.23E+08  | 1.23E+08 | + | 0 | NA | intron (Nintron (N  | 2880   | NR_003071 | 692206   | Hs. 693255 | ENSG000003SNORD90    | HBII1-295         | small nucsnRNA           |
| chr1-3902.11.16943 | 0.114962 | 0.701764 | 0.163819 | 0.869874 | 0.981636 | chr1  | 39028618  | 39032204 | + | 0 | NA | intron (NAluSx1 SIN | 4061   | NR_004552 | 4725     | Hs. 632388 | ENSG000003NDUFS5     | CI-15K CINADP     | ubiqu protein-coding     |
| chr1-1485.11.16943 | 0.114962 | 0.701764 | 0.163819 | 0.869874 | 0.981636 | chr1  | 1.49E+08  | 1.49E+08 | + | 0 | NA | intron (Nintron (N  | 7922   | NR_015383 | 25832    | Hs. 534676 | ENSG000003NBPF14     | DJ328E19          | NBPF memtprotein-coding  |
| chr18-352.11.16943 | 0.114962 | 0.701764 | 0.163819 | 0.869874 | 0.981636 | chr18 | 35293279  | 35308359 | + | 0 | NA | intron (NLM1E LIN   | 10547  | NR_024566 | 10778    | Hs. 314242 | ENSG000003ZNF271P    | CT-ZFP48          | zinc fingpseudo          |
| chr19-585.11.16943 | 0.114962 | 0.701764 | 0.163819 | 0.869874 | 0.981636 | chr19 | 58282596  | 58296667 | + | 0 | NA | intron (NMLT1D L1   | 10665  | NR_144447 | 1.09E+08 | Hs. 715293 | ENSG000003ZNF8-ERVK- | ZNF8-ERVK         | ncRNA                    |
| chr5-1634.11.16943 | 0.114962 | 0.701764 | 0.163819 | 0.869874 | 0.981636 | chr5  | 1.63E+08  | 1.63E+08 | + | 0 | NA | 3' UTR (N3' UTR (N  | 6428   | NR_199246 | 900      | Hs. 79101  | ENSG000003CCNG1      | CCNG              | cyclin G1protein-coding  |
| chr10-925.1.126129 | 0.173539 | 1.059458 | -0.1638  | 0.869889 | 0.981636 | chr10 | 92218998  | 92319407 | + | 0 | NA | intron (NTiger3 B   | 28035  | NR_017824 | 54708    | Hs. 573493 | ENSG0000035-Mar      | MARCH-V V         | membrane protein-coding  |
| chr12-652.6.957035 | -0.14466 | 0.884047 | -0.16363 | 0.870022 | 0.981636 | chr12 | 65220624  | 65221585 | + | 0 | NA | intron (NLM1B1 L1   | 51521  | NR_014315 | 23592    | Hs. 744152 | ENSG000003LEMDD3     | MAN1              | LEM domainprotein-coding |
| chr15-636.6.957035 | -0.14466 | 0.884047 | -0.16363 | 0.870022 | 0.981636 | chr15 | 63682214  | 63682539 | + | 0 | NA | intron (NMER68-int  | -81549 | NR_03408C | 1E+08    | Hs. 631163 | ENSG000003CASP3-AS1  | -                 | USP3 antncRNA            |
| chr9-1291.6.957035 | -0.14466 | 0.884047 | -0.16363 | 0.870022 | 0.981636 | chr9  | 1.29E+08  | 1.29E+08 | + | 0 | NA | intron (Nintron (N  | 25115  | NR_163192 | 56904    | Hs. 460233 | ENSG000003SH3GLB2    | PP6569 PF         | SH3 domainprotein-coding |
| chr1-1461.10.18596 | 0.119968 | 0.733562 | 0.163542 | 0.870092 | 0.981636 | chr1  | 1.46E+08  | 1.46E+08 | + | 0 | NA | intron (NMLT2A1 L1  | -17804 | NR_001035 | 1E+08    | Hs. 714127 | ENSG000003NBPF10     | AB6 AG1 NBPF      | memtprotein-coding       |
| chr19-236.10.18596 | 0.119968 | 0.733562 | 0.163542 | 0.870092 | 0.981636 | chr19 | 23660024  | 23663206 | + | 0 | NA | intron (NAluSx SIN  | 25597  | NR_13833C | 171392   | Hs. 264343 | ENSG000003ZNF675     | TBZF TIZ          | zinc fingprotein-coding  |
| chr22-428.10.18596 | 0.119968 | 0.733562 | 0.163542 | 0.870092 | 0.981636 | chr22 | 42845270  | 42849640 | + | 0 | NA | intron (Nintron (N  | 11163  | NR_014573 | 26286    | Hs. 685222 | ENSG000003ARFGAP3    | ARFGAP1           | ADP ribosprotein-coding  |
| chr4-5700.10.18596 | 0.119968 | 0.733562 | 0.163542 | 0.870092 | 0.981636 | chr4  | 572004792 | 57207410 | + | 0 | NA | intron (Nintron (N  | 27205  | NR_000938 | 5431     | Hs. 602757 | ENSG000003POLR2B     | POLR2B RF         | RNA polynprotein-coding  |
| chr6-1703.10.18596 | 0.119968 | 0.733562 | 0.163542 | 0.870092 | 0.981636 | chr6  | 1.7E+08   | 1.7E+08  | + | 0 | NA | intron (Nintron (N  | 18906  | NR_039787 | 1.01E+08 | NR_039787  | ENSG000003MIR4644    | -                 | microRNA ncRNA           |
| chr8-7065.10.18596 | 0.119968 | 0.733562 | 0.163542 | 0.870092 | 0.981636 | chr8  | 70655678  | 70657591 | + | 0 | NA | intron (NLM1P1 LIN  | 12551  | NR_016027 | 51110    | Hs. 118554 | ENSG000003LACTB2     | CGI-83            | lactamaseprotein-coding  |
| chr11-778.6.633335 | 0.130432 | 0.797828 | 0.163484 | 0.870137 | 0.981636 | chr11 | 77824385  | 77825310 | + | 0 | NA | intron (Nintron (N  | 12947  | NR_001311 | 1207     | Hs. 430733 | ENSG000003CLNS1A     | CLC1 CLNS         | chloride protein-coding  |
| chr18-577.8.633335 | 0.130432 | 0.797828 | 0.163484 | 0.870137 | 0.981636 | chr18 | 57724493  | 57727253 | + | 0 | NA | intron (NLM1I LINE  | 77442  | NR_005603 | 5205     | Hs. 216622 | ENSG000003ATP8B1     | ATPIC BRIAT       | phase p1protein-coding   |
| chr1-1025.7.145421 | 0.141293 | 0.864278 | 0.163481 | 0.87014  | 0.981636 | chr1  | 10256040  | 10257271 | + | 0 | NA | intron (Nintron (N  | 25891  | NR_001362 | 23095    | Hs. 97858  | ENSG000003KIF1B      | CMT2 CMT2         | kinesin fprotein-coding  |
| chr14-451.7.145421 | 0.141293 | 0.864278 | 0.163481 | 0.87014  | 0.981636 | chr14 | 45095707  | 45097672 | + | 0 | NA | intron (Nintron (N  | 12573  | NR_017922 | 55015    | Hs. 274337 | ENSG000003PRPF39     | -                 | pre-mRNA protein-coding  |
| chr14-761.7.145421 | 0.141293 | 0.864278 | 0.163481 | 0.87014  | 0.981636 | chr14 | 76172612  | 76173617 | + | 0 | NA | 3' UTR (N3' UTR (N  | 18760  | NR_110314 | 55668    | Hs. 410231 | ENSG000003GPATCH2L   | C14orf11E         | G-patch cprotein-coding  |
| chr15-635.7.145421 | 0.141293 | 0.864278 | 0.163481 | 0.87014  | 0.981636 | chr15 | 63567095  | 63568006 | + | 0 | NA | intron (NAluV SINE  | -29837 | NR_001367 | 238307   | Hs. 631163 | ENSG000003FBXL22     | FBXL22            | F-box ancpprotein-coding |
| chr16-146.7.145421 | 0.141293 | 0.864278 | 0.163481 | 0.87014  | 0.981636 | chr16 |           |          |   |   |    |                     |        |           |          |            |                      |                   |                          |





|                    |          |          |          |          |          |       |          |          |   |   |    |                     |                  |                   |                              |                     |                     |                     |                |
|--------------------|----------|----------|----------|----------|----------|-------|----------|----------|---|---|----|---------------------|------------------|-------------------|------------------------------|---------------------|---------------------|---------------------|----------------|
| chr22-237.7.194418 | 0.141266 | 0.867822 | 0.162783 | 0.87069  | 0.981636 | chr22 | 23799506 | 23802461 | + | 0 | NA | exon (NM exon (NM   | 14017 NM_003073  | 6598 Hs. 534353   | ENSG000003SMARCB1            | BAF47 CSS SWI/SNF   | rprotein-coding     |                     |                |
| chr22-382.7.194418 | 0.141266 | 0.867822 | 0.162783 | 0.87069  | 0.981636 | chr22 | 38232596 | 38235174 | + | 0 | NA | intron (NAIuSx SIN  | -9165 NR_132774  | 1.07E+08          | NR_132774                    | SNORA92             | small nucsnoRNA     |                     |                |
| chr4-121.7.194418  | 0.141266 | 0.867822 | 0.162783 | 0.87069  | 0.981636 | chr4  | 1215964  | 1216453  | + | 0 | NA | non-codir non-codir | 6088 NR_104331   | 285463 Hs. 707614 | NR_104331 ENSG00000CTBP1-AS  | PCAT10              | CTBP1 antncRNA      |                     |                |
| chr6-166.7.194418  | 0.141266 | 0.867822 | 0.162783 | 0.87069  | 0.981636 | chr6  | 1.67E+08 | 1.67E+08 | + | 0 | NA | promoter-promoter-  | -188 NR_031734   | 1E+08             | NR_031734 ENSG00000MIR1913   | MIRN1913 microRNA   | ncRNA               |                     |                |
| chr17-78.14.64786  | 0.101399 | 0.622923 | 0.162779 | 0.870693 | 0.981636 | chr17 | 78357152 | 78358880 | + | 0 | NA | 3' UTR (3' UTR (N   | 2063 NM_003955   | 9021 Hs. 527975   | NR_003955 ENSG00000S0CS3     | ATOD4 CIS suppress  | protein-coding      |                     |                |
| chr1-375.8.641193  | 0.12874  | 0.790996 | 0.162757 | 0.87071  | 0.981636 | chr1  | 37508058 | 37509368 | + | 0 | NA | intron (Nintron (N  | 6053 NR_073091   | 64769 Hs. 17118   | NR_022756 ENSG00000MEAF6     | C1orf149 MYST Esa1  | protein-coding      |                     |                |
| chr1-229.8.641193  | 0.12874  | 0.790996 | 0.162757 | 0.87071  | 0.981636 | chr1  | 2.29E+08 | 2.29E+08 | + | 0 | NA | exon (NM exon (NM   | -30568 NM_001100 | 58 Hs. 1288       | NR_001100 ENSG00000ACTA1     | ACTA1 ASMP actin a  | protein-coding      |                     |                |
| chr11-102.8.641193 | 0.12874  | 0.790996 | 0.162757 | 0.87071  | 0.981636 | chr11 | 1.02E+08 | 1.02E+08 | + | 0 | NA | intron (Nintron (N  | 94428 NM_001195  | 10413 Hs. 503692  | NR_006106 ENSG00000YAP1      | YAP1 YAP Yes        | assocprotein-coding |                     |                |
| chr12-647.8.641193 | 0.12874  | 0.790996 | 0.162757 | 0.87071  | 0.981636 | chr12 | 64736516 | 64737054 | + | 0 | NA | intron (Nintron (N  | 22621 NM_002076  | 2799 Hs. 334534   | NR_002076 ENSG00000CGNS      | G6S                 | glucosami           | protein-coding      |                |
| chr14-31.8.641193  | 0.12874  | 0.790996 | 0.162757 | 0.87071  | 0.981636 | chr14 | 91939492 | 91940148 | + | 0 | NA | intron (MLTIE2 L1   | 7882 NM_006325   | 10516 Hs. 332708  | NR_006325 ENSG00000FBLN5     | ADCL2 ARC fibulin 1 | protein-coding      |                     |                |
| chr15-32.8.641193  | 0.12874  | 0.790996 | 0.162757 | 0.87071  | 0.981636 | chr15 | 32531045 | 32533468 | + | 0 | NA | intron (MIRc SINE   | 1485 NR_036650   | 1E+08 Hs. 562622  | NR_036650                    | WHAMMP1             | WHDc1P1             | Was                 | protseuso      |
| chr3-457.8.641193  | 0.12874  | 0.790996 | 0.162757 | 0.87071  | 0.981636 | chr3  | 45722289 | 45724694 | + | 0 | NA | exon (NM exon (NM   | 34095 NM_001315  | 22908 Hs. 156509  | NR_014016 ENSG00000SACM1L    | SAC1                | SAC1 like           | protein-coding      |                |
| chr4-3997.8.641193 | 0.12874  | 0.790996 | 0.162757 | 0.87071  | 0.981636 | chr4  | 39973243 | 39974344 | + | 0 | NA | intron (Nintron (N  | 4118 NM_001100   | 23244 Hs. 331431  | NR_015200 ENSG00000PDS5A     | PDS5A               | SCCSD5              | coha                | protein-coding |
| chr9-3307.8.641193 | 0.12874  | 0.790996 | 0.162757 | 0.87071  | 0.981636 | chr9  | 33070120 | 33073777 | + | 0 | NA | intron (Nintron (N  | 4726 NM_018225   | 55234 Hs. 565351  | NR_018225 ENSG00000SMU1      | BWD SMU-1           | SMU1                | cone                | protein-coding |
| chr9-1104.8.641193 | 0.12874  | 0.790996 | 0.162757 | 0.87071  | 0.981636 | chr9  | 1.1E+08  | 1.1E+08  | + | 0 | NA | intron (Nintron (N  | -87308 NM_001288 | 255220 Hs. 147064 | NR_001006 ENSG00000TXNDC8    | SPTRX-3 S           | thioredo            | protein-coding      |                |
| chr1-1561.8.177887 | 0.131844 | 0.810225 | 0.162725 | 0.870735 | 0.981636 | chr1  | 1561541  | 15651267 | + | 0 | NA | intron (NAIuSg7 SI  | 11529 NM_014188  | 29101 Hs. 30026   | NR_014188 ENSG00000SSU72     | HSPC182 FSSU72      | hon                 | protein-coding      |                |
| chr1-157.8.177887  | 0.131844 | 0.810225 | 0.162725 | 0.870735 | 0.981636 | chr1  | 15782247 | 15782663 | + | 0 | NA | intron (Nintron (N  | -17586 NM_001024 | 54751 Hs. 530101  | NR_017556 ENSG00000FBLIM1    | CAL FBLP            | filam               | protein-coding      |                |
| chr1-254.8.177887  | 0.131844 | 0.810225 | 0.162725 | 0.870735 | 0.981636 | chr1  | 25488500 | 25490099 | + | 0 | NA | intron (Nintron (N  | -45286 NM_015627 | 26119 Hs. 590911  | NR_015627 ENSG00000LDLRAP1   | ARH ARH1            | low                 | densiprotein-coding |                |
| chr1-527.8.177887  | 0.131844 | 0.810225 | 0.162725 | 0.870735 | 0.981636 | chr1  | 52772389 | 52773036 | + | 0 | NA | intron (NAIu SINE   | 46259 NM_024646  | 79699 Hs. 47628   | NR_024646 ENSG00000ZYG11B    | ZYG11               | zyl-1               | protein-coding      |                |
| chr1-116.8.177887  | 0.131844 | 0.810225 | 0.162725 | 0.870735 | 0.981636 | chr1  | 1.16E+08 | 1.16E+08 | + | 0 | NA | intron (Nintron (N  | 14496 NM_001160  | 476 Hs. 371889    | NR_000701 ENSG00000ATP1A1    | CMT2DD HCAT         | Pase                | protein-coding      |                |
| chr1-236.8.177887  | 0.131844 | 0.810225 | 0.162725 | 0.870735 | 0.981636 | chr1  | 2.37E+08 | 2.37E+08 | + | 0 | NA | intron (Nintron (N  | -21324 NR_034040 | 1E+08 Hs. 67737   | NR_034040 ENSG00000LGAL58-AS | -                   | LGAL58              | arncRNA             |                |
| chr10-427.8.177887 | 0.131844 | 0.810225 | 0.162725 | 0.870735 | 0.981636 | chr10 | 42790319 | 42795301 | + | 0 | NA | intron (Nintron (N  | 10015 NM_014753  | 9790 Hs. 10848    | NR_014753 ENSG00000BMS1      | ACC BMS1 BMS1       | ribc                | protein-coding      |                |
| chr11-122.8.177887 | 0.131844 | 0.810225 | 0.162725 | 0.870735 | 0.981636 | chr11 | 12258836 | 12261785 | + | 0 | NA | 3' UTR (3' UTR (N   | -26590 NM_032867 | 84953 Hs. 60371   | NR_032867 ENSG00000MICALCL   | Ebitein MICAL       | C-t                 | protein-coding      |                |
| chr11-471.8.177887 | 0.131844 | 0.810225 | 0.162725 | 0.870735 | 0.981636 | chr11 | 47164713 | 47172622 | + | 0 | NA | intron (NAIuS6 SI   | 8212 NM_032388   | 84364 Hs. 436204  | NR_032388 ENSG00000ARFGAP2   | IRZ NBLA1 ADP       | ribp                | protein-coding      |                |
| chr11-94.8.177887  | 0.131844 | 0.810225 | 0.162725 | 0.870735 | 0.981636 | chr11 | 94829438 | 94830743 | + | 0 | NA | exon (NM exon (NM   | 61734 NM_001301  | 154810 Hs. 503594 | NR_130847 ENSG00000AMOTL1    | JEAP                | angiomot            | protein-coding      |                |
| chr11-31.8.177887  | 0.131844 | 0.810225 | 0.162725 | 0.870735 | 0.981636 | chr11 | 1.11E+08 | 1.11E+08 | + | 0 | NA | intron (Nintron (N  | 105379 NM_001258 | 57569 Hs. 6136    | NR_020809 ENSG00000ARHGAP20  | RARHOGAP            | Rho                 | GTPas               | protein-coding |
| chr12-34.8.177887  | 0.131844 | 0.810225 | 0.162725 | 0.870735 | 0.981636 | chr12 | 341708   | 343825   | + | 0 | NA | intron (Nintron (N  | 46554 NM_001042  | 5927 Hs. 76272    | NR_005056 ENSG00000KDM5A     | RBBP-2 RE           | lysine              | deprotein-coding    |                |
| chr12-80.8.177887  | 0.131844 | 0.810225 | 0.162725 | 0.870735 | 0.981636 | chr12 | 8089382  | 8093408  | + | 0 | NA | intron (MERIA DNA   | 9121 NM_015505   | 25977 Hs. 555927  | NR_015505 ENSG00000NECAP1    | EIEEF21             | NECAP               | enc                 | protein-coding |
| chr12-111.8.177887 | 0.131844 | 0.810225 | 0.162725 | 0.870735 | 0.981636 | chr12 | 1.12E+08 | 1.12E+08 | + | 0 | NA | intron (NAIuSc8 SI  | 28237 NM_006768  | 8315 Hs. 53094    | NR_006768 ENSG00000BRAP      | BRAP2 IMF           | BRCA1               | ass                 | protein-coding |
| chr13-24.8.177887  | 0.131844 | 0.810225 | 0.162725 | 0.870735 | 0.981636 | chr13 | 24465547 | 24466737 | + | 0 | NA | intron (MERS3 DNA   | 46686 NM_006437  | 143 Hs. 744855    | NR_006437 ENSG00000PARP4     | ADPRTL1 Apol        | (ADP-               | protein-coding      |                |
| chr14-73.8.177887  | 0.131844 | 0.810225 | 0.162725 | 0.870735 | 0.981636 | chr14 | 73217159 | 73220880 | + | 0 | NA | intron (Nintron (N  | -18487 NR_158677 | 89932 Hs. 509909  | NR_173462 ENSG00000CAPLN     | PPN                 | papilin,            | protein-coding      |                |
| chr14-74.8.177887  | 0.131844 | 0.810225 | 0.162725 | 0.870735 | 0.981636 | chr14 | 74811993 | 74813827 | + | 0 | NA | intron (Nintron (N  | 49594 NR_019588  | 56250 Hs. 53111   | NR_019588 ENSG00000YLPMP1    | C14orf17 C14        | YLP                 | motif               | protein-coding |
| chr14-94.8.177887  | 0.131844 | 0.810225 | 0.162725 | 0.870735 | 0.981636 | chr14 | 94048746 | 94056898 | + | 0 | NA | intron (Nintron (N  | 26482 NM_023112  | 78990 Hs. 27881   | NR_023112 ENSG00000OTUB2     | C14orf137 OTU       | deub                | protein-coding      |                |
| chr14-102.8.177887 | 0.131844 | 0.810225 | 0.162725 | 0.870735 | 0.981636 | chr14 | 1.03E+08 | 1.03E+08 | + | 0 | NA | intron (Nintron (N  | -45980 NM_030943 | 81693 Hs. 534494  | NR_030943 ENSG00000AMN       | PRO1028 e           | amion               | as                  | protein-coding |
| chr14-102.8.177887 | 0.131844 | 0.810225 | 0.162725 | 0.870735 | 0.981636 | chr14 | 1.03E+08 | 1.03E+08 | + | 0 | NA | intron (Nintron (N  | 30340 NM_030944  | 81693 Hs. 534494  | NR_030944 ENSG00000AMN       | PRO1028 e           | amion               | as                  | protein-coding |
| chr14-102.8.177887 | 0.131844 | 0.810225 | 0.162725 | 0.870735 | 0.981636 | chr14 | 1.03E+08 | 1.03E+08 | + | 0 | NA | intron (NAIuSx1 SI  | 56790 NM_030944  | 81693 Hs. 534494  | NR_030944 ENSG00000AMN       | PRO1028 e           | amion               | as                  | protein-coding |
| chr14-104.8.177887 | 0.131844 | 0.810225 | 0.162725 | 0.870735 | 0.981636 | chr14 | 1.05E+08 | 1.05E+08 | + | 0 | NA | intron (Nintron (N  | -11383 NM_152328 | 122622 Hs. 592327 | NR_152328 ENSG00000ADSSL1    | Adssl MP            | adenylo             | protein-coding      |                |
| chr15-25.8.177887  | 0.131844 | 0.810225 | 0.162725 | 0.870735 | 0.981636 | chr15 | 22908306 | 22913084 | + | 0 | NA | exon (NM exon (NM   | 6753 NM_001033   | 23191 Hs. 26704   | NR_014608 ENSG00000CYF1P1    | P140SRA             | cytoplasm           | protein-coding      |                |
| chr16-22.8.177887  | 0.131844 | 0.810225 | 0.162725 | 0.870735 | 0.981636 | chr16 | 2580815  | 2584448  | + | 0 | NA | intron (Nintron (N  | -20753 NR_105441 | 652276 Hs. 72044  | NR_105441 ENSG00000LOC652276 | -                   | potassium           | pseudo              |                |
| chr17-44.8.177887  | 0.131844 | 0.810225 | 0.162725 | 0.870735 | 0.981636 | chr17 | 44090875 | 44093157 | + | 0 | NA | intron (Nintron (N  | 21105 NR_028582  | 92579 Hs. 29400   | NR_138387 ENSG00000G6PC3     | SCN4 UGRF           | glucose-t           | protein-coding      |                |
| chr18-99.8.177887  | 0.131844 | 0.810225 | 0.162725 | 0.870735 | 0.981636 | chr18 | 9938026  | 9940581  | + | 0 | NA | intron (NAIuSx1 SI  | 25287 NM_003574  | 9218 Hs. 11518    | NR_003574 ENSG00000VAPA      | VAP-33 V            | VAMP                | ass                 | protein-coding |
| chr18-231.8.177887 | 0.131844 | 0.810225 | 0.162725 | 0.870735 | 0.981636 | chr18 | 2194932  | 2319828  | + | 0 | NA | intron (L3 LINE C   | 40755 NM_138375  | 91768 Hs. 11108   | NR_138375 ENSG00000CABLES1   | CABL1 CAE           | Cdk5                | and                 | protein-coding |
| chr19-104.8.177887 | 0.131844 | 0.810225 | 0.162725 | 0.870735 | 0.981636 | chr19 | 10487335 | 10497546 | + | 0 | NA | intron (NAIuSx4 SI  | 10331 NM_012288  | 9817 Hs. 46587    | NR_012288 ENSG00000KEAP1     | INrf2 KLF           | kelch               | lik                 | protein-coding |
| chr19-13.8.177887  | 0.131844 | 0.810225 | 0.162725 | 0.870735 | 0.981636 | chr19 | 13809224 | 13811587 | + | 0 | NA | intron (NAIuSg SIN  | 14962 NM_023072  | 65249 Hs. 46601   | NR_023072 ENSG00000ZSLIM4    | -                   | zinc                | fin                 | protein-coding |
| chr19-31.8.177887  | 0.131844 | 0.810225 | 0.162725 | 0.870735 | 0.981636 | chr19 | 31276489 | 31279311 | + | 0 | NA | exon (NM exon (NM   | 71536 NR_138036  | 57616 Hs. 27843   | NR_020856 ENSG00000TSHZ3     | TSH3 ZNF            | teashirt            | protein-coding      |                |
| chr19-34.8.177887  | 0.131844 | 0.810225 | 0.162725 | 0.870735 | 0.981636 | chr19 | 34376133 | 34387158 | + | 0 | NA | intron (Nintron (N  | 16449 NM_001325  | 2821 Hs. 46647    | NR_000177 ENSG00000GPI       | AMF GNP1            | (G                  | protein-coding      |                |
| chr19-44.8.177887  | 0.131844 | 0.810225 | 0.162725 | 0.870735 | 0.981636 | chr19 | 44870698 | 44879791 | + | 0 | NA | intron (Nintron (N  | -15976 NM_001128 | 10452 Hs. 65590   | NR_006114 ENSG00000TOMM40    | C19orf11 T          | transloc            | protein-coding      |                |
| chr19-49.8.1778    |          |          |          |          |          |       |          |          |   |   |    |                     |                  |                   |                              |                     |                     |                     |                |



chr21-334 9.161355 0.124433 0.766611 0.162315 0.871057 0.981636 chr21 33431335 33434534 + 0 NA intron (NAluSz6|SI 30038 NM\_001325 3460 Hs. 634632NM\_005534ENSG000001FNGR2 AF-1|IFGF interfe protein-coding

chr3-4704 9.161355 0.124433 0.766611 0.162315 0.871057 0.981636 chr3 47040038 47043692 + 0 NA intron (Nintron (N 30323 NR\_024046 1E+08 Hs. 201522NR\_024046 NRAADD neurotrop pseudo

chr3-6905 9.161355 0.124433 0.766611 0.162315 0.871057 0.981636 chr3 69058203 69062117 + 0 NA intron (NML3|LINE|C -7827 NM\_007114 7110 Hs. 267632NM\_007114ENSG000002TMF1 ARA160|TATA elem protein-coding

chr3-128 9.161355 0.124433 0.766611 0.162315 0.871057 0.981636 chr3 1.29E+08 1.29E+08 0 NA intron (NMLT1A|LTF -36110 NR\_162138 1.13E+08 NR\_162138 MIR12124 microRNA ncRNA

chr3-132 9.161355 0.124433 0.766611 0.162315 0.871057 0.981636 chr3 1.33E+08 1.33E+08 0 NA intron (Nintron (N 24198 NR\_002811 348808 Hs. 586111NR\_002811ENSG000002NHP3-AS1 INCRNA0011NHP3 antncRNA

chr3-143 9.161355 0.124433 0.766611 0.162315 0.871057 0.981636 chr3 1.43E+08 1.43E+08 0 NA intron (NTiger1|I 28076 NM\_00132C 23350 Hs. 596572NM\_00108CENSG000002SURP SR140|fsA2 snRNP protein-coding

chr3-185 9.161355 0.124433 0.766611 0.162315 0.871057 0.981636 chr3 1.86E+08 1.86E+08 0 NA intron (NLa2|LINE| 41225 NR\_12632C 646600 Hs. 647949NR\_027317ENSG000002IGF2BP2-3 C3orf65 IGF2BP2 antncRNA

chr4-427 9.161355 0.124433 0.766611 0.162315 0.871057 0.981636 chr4 427633 438897 + 0 NA intron (NMER50-int 40944 NR\_002451 79963 Hs. 677493NM\_02490CENSG000002ABCA11P ABCA11|ES-ATP bind pseudo

chr4-707 9.161355 0.124433 0.766611 0.162315 0.871057 0.981636 chr4 70768649 70771778 + 0 NA intron (NTiger1|I 35803 NM\_00134E 22902 Hs. 740904NM\_014961ENSG000002RUFY3 RIPX|SINCRUN and I protein-coding

chr4-988 9.161355 0.124433 0.766611 0.162315 0.871057 0.981636 chr4 98883721 98887225 + 0 NA intron (NAluJb|SIN 43660 NM\_00113C 1977 Hs. 13211 NM\_001968ENSG000002EIF4E AUTS19|CEukaryot protein-coding

chr5-104 9.161355 0.124433 0.766611 0.162315 0.871057 0.981636 chr5 10402172 10406653 + 0 NA intron (Nintron (N 2048 NR\_16210E 1.13E+08 NR\_16210E MIR10397 microRNA ncRNA

chr5-346 9.161355 0.124433 0.766611 0.162315 0.871057 0.981636 chr5 34665934 34668516 + 0 NA intron (Nintron (N 10734 NM\_00114E 26064 Hs. 43140CNM\_015577ENSG000002CRAI14 NORPEG|R|retinoic protein-coding

chr5-804 9.161355 0.124433 0.766611 0.162315 0.871057 0.981636 chr5 80460169 80463434 + 0 NA intron (NAluSx1|SI -26299 NM\_20554E 167555 Hs. 338182NM\_20554EENSG000002FAM151B UNQ9217 family wiprotein-coding

chr5-132 9.161355 0.124433 0.766611 0.162315 0.871057 0.981636 chr5 1.1094 NM\_052971 116842 Hs. 337588NM\_052971ENSG000002LEAP2 LEAP-2 liver en protein-coding

chr5-141 9.161355 0.124433 0.766611 0.162315 0.871057 0.981636 chr5 1.42E+08 1.42E+08 0 NA intron (NAluJb|SIN 12727 NM\_00429C 9604 Hs. 483616NM\_00429CENSG000002RN14 ARA54|HFE ring fing protein-coding

chr5-150 9.161355 0.124433 0.766611 0.162315 0.871057 0.981636 chr5 1.5E+08 1.5E+08 0 NA intron (NCR1\_Mam|I 6144 NM\_00136E 22993 Hs. 719189NM\_01498CENSG000002HMGXB3 HMGX3|SMF HMG-box c protein-coding

chr5-17 9.161355 0.124433 0.766611 0.162315 0.871057 0.981636 chr5 1.77E+08 1.77E+08 0 NA intron (NAluSz|SIN 28720 NM\_00103E 53917 Hs. 16258 NM\_130781ENSG000002RAB22 RAB24, me protein-coding

chr6-246 9.161355 0.124433 0.766611 0.162315 0.871057 0.981636 chr6 24662370 24664383 + 0 NA intron (NMIR|SINE| 3523 NM\_016614 51567 Hs. 40301CNCM\_016614ENSG000002DP2 ADO22|EAF tyrosyl-I protein-coding

chr6-364 9.161355 0.124433 0.766611 0.162315 0.871057 0.981636 chr6 36495091 36498169 + 0 NA intron (Nintron (N 50849 NM\_007271 11329 Hs. 409578NM\_007271ENSG000002STK38 NDR|NDR1 serine/t protein-coding

chr7-248 9.161355 0.124433 0.766611 0.162315 0.871057 0.981636 chr7 24814351 24815669 + 0 NA intron (Nintron (N -5701 NM\_001127 1687 Hs. 520708NM\_00440CENSG000002GSDME DFNA5|ICF gasderm protein-coding

chr7-449 9.161355 0.124433 0.766611 0.162315 0.871057 0.981636 chr7 44052421 44057898 + 0 NA intron (NLM44|LIN 3393 NR\_10689E 1.02E+08 NR\_10689EENSG000002MIR6837 hsa-mir-6837 microRNA ncRNA

chr7-442 9.161355 0.124433 0.766611 0.162315 0.871057 0.981636 chr7 44203922 44212979 + 0 NA intron (Nintron (N 7472 NM\_00136E 10652 Hs. 520794NM\_00655EENSG000002YKT6 YKT6 v-S protein-coding

chr7-734 9.161355 0.124433 0.766611 0.162315 0.871057 0.981636 chr7 73440644 73448273 + 0 NA intron (Nintron (N 10680 NM\_00350E 8326 Hs. 647029NM\_00350EENSG000002FZD9 CD349|FZ1 frizzled protein-coding

chr7-100 9.161355 0.124433 0.766611 0.162315 0.871057 0.981636 chr7 10106800 10108208 + 0 NA intron (Nintron (N 7170 NM\_00101E 402682 Hs. 53484EENSG000002UFSF1 UFSF1 spec protein-coding

chr7-101 9.161355 0.124433 0.766611 0.162315 0.871057 0.981636 chr7 1.01E+08 1.01E+08 0 NA intron (NAluSz6|SI 9307 NM\_00060E 5054 Hs. 41479EENSG000002SERPINE1 PAI-1|PAI-1serpin f protein-coding

chr8-305 9.161355 0.124433 0.766611 0.162315 0.871057 0.981636 chr8 30544479 30550964 + 0 NA TTS (NM\_CTS (NM\_C -90859 NM\_00120E 1.01E+08 Hs. 65949EENSG000002SMIM18 -small int protein-coding

chr8-865 9.161355 0.124433 0.766611 0.162315 0.871057 0.981636 chr8 86503860 86506957 + 0 NA intron (Nintron (N 3278 NM\_01603E 51115 Hs. 14538EENSG000002RMDN1 CGI-90|fregulator protein-coding

chr8-123 9.161355 0.124433 0.766611 0.162315 0.871057 0.981636 chr8 1.24E+08 1.24E+08 0 NA intron (NLM8B|LIN 32068 NM\_14496E 157769 Hs. 459174NM\_14496EENSG000002FAM91A1 family wiprotein-coding

chr9-362 9.161355 0.124433 0.766611 0.162315 0.871057 0.981636 chr9 36218139 36224575 + 0 NA intron (NMIRB|SINE 30436 NM\_001184 1211 Hs. 522114NM\_00183EENSG000002CLTA LCA clathrin protein-coding

chr9-112 9.161355 0.124433 0.766611 0.162315 0.871057 0.981636 chr9 1.12E+08 1.12E+08 0 NA intron (NTHEID-int 40818 NM\_001244 9991 Hs. 26998EENSG000002PTBP3 ROD1 polypr protein-coding

chr1-917 7.665583 0.135328 0.833797 0.162304 0.871067 0.981636 chr1 9176875 9180290 + 0 NA intron (Nintron (N -3622 NR\_13273E 1.03E+08 Hs. 59929EENSG000002LNCTAM34 GUARDIN|I long non ncRNA

chr1-363 7.665583 0.135328 0.833797 0.162304 0.871067 0.981636 chr1 36392545 36394441 + 0 NA TTS (NM\_CTS (NM\_C 4415 NM\_032881 84967 Hs. 603131NM\_032881ENSG000002LSM10 MSTO704|MSLSM10, U7 protein-coding

chr1-17 7.665583 0.135328 0.833797 0.162304 0.871067 0.981636 chr1 1.18E+08 1.18E+08 0 NA intron (Nintron (N 13530 NM\_006784 10885 Hs. 13108EENSG000002WDR3 DIP2|UTP1WD reuprotein-coding

chr1-178 7.665583 0.135328 0.833797 0.162304 0.871067 0.981636 chr1 1.79E+08 1.79E+08 0 NA intron (Nintron (N -9786 NM\_00467E 9068 Hs. 591474NM\_00467EENSG000002CANGPTL1 ANG3|ANGF angiopoie protein-coding

chr1-186 7.665583 0.135328 0.833797 0.162304 0.871067 0.981636 chr1 1.86E+08 1.86E+08 0 NA intron (Nintron (N -12004 NM\_00237E 10896 Hs. 67923EENSG000002OCLM TISR oculomed protein-coding

chr1-246 7.665583 0.135328 0.833797 0.162304 0.871067 0.981636 chr1 2.47E+08 2.47E+08 0 NA intron (NTiger4|I 2589 NM\_00236E 64216 Hs. 7395 NM\_02236EENSG000002TFB2M Hkpl|mtTF transcrip protein-coding

chr10-701 7.665583 0.135328 0.833797 0.162304 0.871067 0.981636 chr10 70110867 70115816 + 0 NA 3' UTR (3' UTR (N 19484 NM\_032797 84883 Hs. 65068CNCM\_032797ENSG000002ATFM2 AMID|PRG:apoptosis protein-coding

chr12-56 7.665583 0.135328 0.833797 0.162304 0.871067 0.981636 chr12 56540028 56541089 + 0 NA intron (NAluJr|SIN 18738 NM\_00289E 5939 Hs. 50572EENSG000002RBM52 SCR3 RNA bindi protein-coding

chr12-98 7.665583 0.135328 0.833797 0.162304 0.871067 0.981636 chr12 98662355 98668432 + 0 NA intron (NLM4Ea|LI 20093 NM\_18186E 317 Hs. 55265EENSG000002APAF1 APAF-1|CE apoptotic protein-coding

chr12-10 7.665583 0.135328 0.833797 0.162304 0.871067 0.981636 chr12 1.1E+08 1.1E+08 0 NA exon (NM\_exon (NM\_ 34736 NM\_05716E 9815 Hs. 43499EENSG000002GIT2 CAT-2|CAT1G ArfG| protein-coding

chr12-12 7.665583 0.135328 0.833797 0.162304 0.871067 0.981636 chr12 1.21E+08 1.21E+08 0 NA intron (NAluSx1|SIN 13615 NM\_00127E 10645 Hs. 29734EENSG000002CAMKK2 CAMKK|CAM calcium/c protein-coding

chr12-121 7.665583 0.135328 0.833797 0.162304 0.871067 0.981636 chr12 1.21E+08 1.21E+08 0 NA exon (NM\_exon (NM\_ 21815 NM\_00133C 51433 Hs. 7101 NM\_01623EENSG000002ANAPC5 ANPC5 anaphase protein-coding

chr13-32 7.665583 0.135328 0.833797 0.162304 0.871067 0.981636 chr13 32264861 32269451 + 0 NA intron (Nintron (N 44798 NM\_00113E 646799 Hs. 569254NM\_00113EENSG000002ZARIL Z3CXXC7|zygote ar protein-coding

chr13-49 7.665583 0.135328 0.833797 0.162304 0.871067 0.981636 chr13 49254353 49257971 + 0 NA intron (Nintron (N 8237 NM\_030911 81602 Hs. 38822CNCM\_030911ENSG000002CDADC1 NYD-SP15|cytidine protein-coding

chr13-75 7.665583 0.135328 0.833797 0.162304 0.871067 0.981636 chr13 75573057 75574083 + 0 NA intron (NMLT1B|LTF 23820 NM\_00600E 7347 Hs. 162241NM\_00600EENSG000002UCHL3 UCH-L3 ubiqutin protein-coding

chr14-75 7.665583 0.135328 0.833797 0.162304 0.871067 0.981636 chr14 75431953 75436095 + 0 NA intron (Nintron (N 1890 NM\_00113E 122953 Hs. 19648EENSG000002JDP2 JUNDM2 Jun dimer protein-coding

chr15-75 7.665583 0.135328 0.833797 0.162304 0.871067 0.981636 chr15 75386509 75387367 + 0 NA intron (NAluJb|SIN -18311 NM\_00125E 4123 Hs. 26232 NM\_00671EENSG000002MAN2C1 MANG68|ABC mannose di protein-coding

chr16-16 7.665583 0.135328 0.833797 0.162304 0.871067 0.981636 chr16 16032986 16034371 + 0 NA intron (NAluSx|SIN 84062 NM\_00499E 4363 Hs. 391464NM\_00499EENSG000002ABCC1 ABC29|ABC ATP bindi protein-coding

chr16-24 7.665583 0.135328 0.833797 0.162304 0.871067 0.981636 chr16 24928729 24935270 + 0 NA intron (NAluJb|SIN 83370 NM\_00100E 55114 Hs. 37379EENSG000002ARHGAP17 MSTO706|MS Rho GTPas protein-coding

chr16-25 7.665583 0.135328 0.833797 0.162304 0.871067 0.981636 chr16 25140031 25140230 + 0 NA TTS (NR\_CTS (NR\_C 8902 NR\_03999E 1.01E+08 Hs. 65757EENSG000002LCMT1-AS2 LCMT1 antncRNA

chr16-67 7.665583 0.135328 0.833797 0.162304 0.871067 0.981636 chr16 67233393 67239339 + 0 NA intron (Nintron (N 9236 NR\_134524 29100 Hs. 43320EENSG000002TMEM208 HSPC171 transmemt protein-coding

chr17-39 7.665583 0.135328 0.833797 0.162304 0.871067 0.981636 chr17 39436049 39439955 + 0 NA intron (NAluS2|SI 13261 NM\_004774 5469 Hs. 643754NM\_004774ENSG000002MED1 CRSP1|CRS mediator protein-coding

chr17-48 7.665583 0.135328 0.833797 0.162304 0.871067 0.981636 chr17 48069652 48071148 + 0 NA 3' UTR (3' UTR (N 22041 NM\_003204 4779 Hs. 514284NM\_003204ENSG000002NFE2L1 LCR-F1|NF nuclear f protein-coding

chr17-75 7.665583 0.135328 0.833797 0.162304 0.871067 0.981636 chr17 75051805 75054773 + 0 NA intron (Nintron (N 6064 NM\_01535E 23510 Hs. 51446EENSG000002KCTD2 -potassium protein-coding

chr17-75 7.665583 0.135328 0.833797 0.162304 0.871067 0.981636 chr17 75263588 75266719 + 0 NA intron (NAluSx1|SI -2790 NM\_00117E 23163 Hs. 87726 NM\_014001ENSG000002GGA3 -golgi ass protein-coding

chr17-75 7.665583 0.135328 0.833797 0.162304 0.871067 0.981636 chr17 75662034 75663191 + 0 NA exon (NM\_exon (NM\_ -4504 NM\_001301 29115 Hs. 65508EENSG000002SAP30BP HCNPG|HTF SAP30 bir protein-coding

chr17-80 7.665583 0.135328 0.833797 0.162304 0.871067 0.981636 chr17 80207634 80216994 + 0 NA intron (Nintron (N 8919 NM\_00135E 6448 Hs. 31074 NM\_00019EENSG000002SGSH HSS|MPS3|N-sulfolig protein-coding

chr17-80 7.665583 0.135328 0.833797 0.162304 0.871067 0.981636 chr17 80265550 80269954 + 0 NA intron (NTiger1|I 57674 Hs. 19564EENSG000002RNFP213 ALO17|C17ring fing protein-coding

chr18-41 7.665583 0.135328 0.833797 0.162304 0.871067 0.981636 chr18 41999313 42000964 + 0 NA intron (NAluS2|SI 44904 NM\_002647 5289 Hs. 464971NM\_002647ENSG000002PIK3C3 VPS34|Vps phosphat i protein-coding

chr19-20 7.665583 0.135328 0.833797 0.162304 0.871067 0.981636 chr19 2704695 2709321 + 0 NA exon (NM\_exon (NM\_ 19318 NM\_130807 126308 Hs. 74493EENSG000002MOB3A MOB-LAK|MOB kinase protein-coding

chr19-16 7.665583 0.135328 0.833797 0.162304 0.871067 0.981636 chr19 16839631 16843676 + 0 NA intron (Nintron (N 12255 NM\_001297 23309 Hs. 13999 NM\_01526EENSG000002SIN3B SIN3 trar protein-coding

chr19-46 7.665583 0.135328 0.833797 0.162304 0.871067 0.981636 chr19 46732884 46736156 + 0 NA intron (Nintron (N -11537 NM\_00103E 79147 Hs. 51549EENSG000002CFKP LGM2D2|LC fukutin i protein-coding

chr19-47 7.665583 0.135328 0.833797 0.162304 0.871067 0.981636 chr19 47143768 47146531 + 0 NA intron (NAluSp|SIN 14314 NM\_00114E 10055 Hs. 51550EENSG000002SAE1 AOS1|HSPC5001 act protein-coding

chr2-55 7.665583 0.135328 0.833797 0.162304 0.871067 0.981636 chr2 55262083 55265020 + 0 NA intron (NAluSg4|SI 5628 NM\_00100E 4528 Hs. 149894NM\_00245EENSG000002MTIF2 -mitochon protein-coding

chr2-69 7.665583 0.135328 0.833797 0.162304 0.871067 0.981636 chr2 69412112 69415178 + 0 NA intron (NAluSz6|SI 23790 NR\_04563E 27247 Hs. 43043EENSG000002CNFU1 CGI-33|HINFU1 iror protein-coding

chr2-69 7.665583 0.135328 0.833797 0.162304 0.871067 0.981636 chr2 69935279 69938099 + 0 NA intron (Nintron (N 21805 NM\_002357 4084 Hs. 46890EENSG000002MXD1 BHLH58|WMAX dimer protein-coding

chr2-22 7.665583 0.135328 0.833797 0.162304 0.871067 0.981636 chr2 2.3E+08 2.3E+08 0 NA intron (Nintron (N -5335 NM\_13907E 92737 Hs. 234074NM\_13907EENSG000002DNER UNQ26|beta/delta/notr protein-coding

chr20-58 7.665583 0.135328 0.833797 0.162304 0.871067 0.981636 chr20 58356786 58357323 + 0 NA intron (NLM3Ea|LI -32065 NM\_00473E 9217 Hs. 18262EENSG000002VAPB ALS8|VAMF VAMP assc protein-coding

chr21-1 7.665583 0.135328 0.833797 0.162304 0.871067 0.981636 chr21 17603594 17604878 + 0 NA exon (NM\_exon (NM\_ -7450 NR\_14907E 1.11E+08 Hs. 60713EENSG000002BTG3-AS1 ASBEL BTG3 antncRNA

chr21-32 7.665583 0.135328 0.833797 0.162304 0.871067 0.981636 chr21 32356257 32358780 + 0 NA intron (Nintron (N 677846 Hs. 71229EENSG000002SNORA80 ACA67|SNC small nucsRNA

chr21-36 7.665583 0.135328 0.833797 0.162304 0.871067 0.981636 chr21 36345823 36346196 + 0 NA intron (NAluSx|SIN 25812 NM\_01535E 23515 Hs. 42115CNCM\_01535EENSG000002MORC3 NXP2|ZWE MORC fami protein-coding

chr22-20 7.665583 0.135328 0.833797 0.162304 0.871067 0.981636 chr22 20508633 20587904 + 0 NA 3' UTR (3' UTR (N 79096 NM\_00129E 51586 Hs. 517421NM\_01588EENSG000002MED15 ARC105|CA mediator protein-coding

chr22-38 7.665583 0.135328 0.833797 0.162304 0.871067 0.981636 chr22 38244128 38245856 + 0 NA intron (Nintron (N -20272 NR\_132774 1.07E+08 NR\_132774 SNORA92 -small nucsRNA

chr3-50 7.665583 0.135328 0.833797 0.162304 0.871067 0.981636 chr3 50066344 50072068 + 0 NA intron (Nintron (N -19713 NM\_00577E 10181 Hs. 43948CNCM\_00577EENSG000002RBM5 G15|H37|RNA bindi protein-coding

chr3-56 7.665583 0.135328 0.833797 0.162304 0.871067 0.981636 chr3 56567275 56570040 + 0 NA intron (Nintron (N 11482 NM\_001141 285331 Hs. 47639EENSG000002CCDC66 -coiled-cc protein-coding

chr3-56 7.665583 0.135328 0.833797 0.162304 0.871067 0.981636 chr3 56664300 56666527 + 0 NA intron (NAluSx|SIN -1367 NM\_015224 23272 Hs. 116877NM\_015224ENSG000002TASOR C3orf63|F transcrip protein-coding

chr3-12 7.665583 0.135328 0.833797 0.162304 0.871067 0.981636 chr3 1.24E+08 1.24E+08 0 NA intron (NLM3Ei|LI 42198 NM\_05302E 4638 Hs. 47737EENSG000002MYLK AAT7|KRP|myosin I protein-coding

chr4-76 7.665583 0.135328 0.833797 0.162304 0.871067 0.981636 chr4 75652592 75658634 + 0 NA intron (Nintron (N 17546 NM\_012297 9908 Hs. 30367EENSG000002G3BP2 -G3BP stre protein-coding

chr5-44 7.665583 0.135328 0.833797 0.162304 0.871067 0.981636 chr5 45247 460441 + 0 NA intron (Nintron (N 14168 NM\_007277 11336 Hs. 481464NM\_007277ENSG000002EXOC3 SEC6|SEC6 exocyst c protein-coding

chr5-34 7.665583 0.135328 0.833797 0.162304 0.871067 0.981636 chr5 34701194 34702848 + 0 NA intron (NAluS2|SI 14462 NM\_00114E 26064 Hs. 43140CNCM\_015577ENSG000002CRAI14 NORPEG|R|retinoic protein-coding

chr5-34 7.665583 0.135328 0.833797 0.162304 0.871067 0.981636 chr5

|                    |          |          |          |          |          |       |          |          |   |      |                     |                  |                           |                     |                                       |                                  |
|--------------------|----------|----------|----------|----------|----------|-------|----------|----------|---|------|---------------------|------------------|---------------------------|---------------------|---------------------------------------|----------------------------------|
| chr2-2195 7.153279 | 0.139296 | 0.862118 | 0.161574 | 0.871641 | 0.981636 | chr2  | 2.2E+08  | 2.2E+08  | + | 0 NA | intron (Nintron (N  | 2270 NM_00119E   | 79586 Hs. 516711NM_02453E | ENSG00000CHPF       | CHSY2 CSS chondroitinprotein-coding   |                                  |
| chr21-466 7.153279 | 0.139296 | 0.862118 | 0.161574 | 0.871641 | 0.981636 | chr21 | 46538904 | 46540315 | + | 0 NA | intron (Nintron (N  | 65473 NM_006272  | 6285 Hs. 422181NM_006272  | ENSG00000S100B      | NEF S100 S100 calcprotein-coding      |                                  |
| chr4-8305 7.153279 | 0.139296 | 0.862118 | 0.161574 | 0.871641 | 0.981636 | chr4  | 83057107 | 83060083 | + | 0 NA | intron (Nintron (N  | 23412 NM_00133C  | 51138 Hs. 190384NM_01612E | ENSG00000COPS4      | CSN4 SGN4COP9 sigrprotein-coding      |                                  |
| chr4-8804 7.153279 | 0.139296 | 0.862118 | 0.161574 | 0.871641 | 0.981636 | chr4  | 88041151 | 88044309 | + | 0 NA | intron (Nintron (N  | 35095 NR_156488  | 5311 Hs. 181272NM_000297  | ENSG00000PKD2       | APPD2 PC2 polycystinprotein-coding    |                                  |
| chr5-1347 7.153279 | 0.139296 | 0.862118 | 0.161574 | 0.871641 | 0.981636 | chr5  | 135E+08  | 1.35E+08 | + | 0 NA | intron (Nintron (N  | 17110 NM_01482E  | 9879 Hs. 406549NM_01482E  | ENSG00000DDX46      | PRPF5 Prp DEAD-box protein-coding     |                                  |
| chr5-1771 7.153279 | 0.139296 | 0.862118 | 0.161574 | 0.871641 | 0.981636 | chr5  | 1.77E+08 | 1.77E+08 | + | 0 NA | intron (Nintron (N  | 35433 NM_00136E  | 64324 Hs. 106861NM_02245E | ENSG00000CNSD1      | ARA267 Kv nuclear rprotein-coding     |                                  |
| chr5-1775 7.153279 | 0.139296 | 0.862118 | 0.161574 | 0.871641 | 0.981636 | chr5  | 1.78E+08 | 1.78E+08 | + | 0 NA | exon (NM exon (NM   | -2602 NM_00130E  | 79930 Hs. 720849NM_02487E | ENSG00000DOK3       | DOKL docking rprotein-coding          |                                  |
| chr7-2484 7.153279 | 0.139296 | 0.862118 | 0.161574 | 0.871641 | 0.981636 | chr7  | 24848924 | 24851299 | + | 0 NA | intron (Nintron (N  | 42510 NR_104111  | 26031 Hs. 52025E          | ENSG00000OSBPL3     | ORP-3 ORF oxysterolprotein-coding     |                                  |
| chr7-7457 7.153279 | 0.139296 | 0.862118 | 0.161574 | 0.871641 | 0.981636 | chr7  | 74532813 | 74533570 | + | 0 NA | intron (Nintron (N  | -62777 NR_16211E | 1.13E+08                  | NR_162116           | MIR10525                              | - microRNA ncRNA                 |
| chr9-1333 7.153279 | 0.139296 | 0.862118 | 0.161574 | 0.871641 | 0.981636 | chr9  | 1.33E+08 | 1.33E+08 | + | 0 NA | intron (Nintron (N  | 3795 NM_00136E   | 6837 Hs. 78354 NM_00675E  | ENSG00000MED22      | MED24 SRE mediator protein-coding     |                                  |
| chrX-2721 7.153279 | 0.139296 | 0.862118 | 0.161574 | 0.871641 | 0.981636 | chrX  | 2721597  | 2725016  | + | 0 NA | intron (Nintron (N  | -28746 NM_001141 | 7499 Hs. 17967E           | ENSG00000CXG        | PBDX Xg glycof protein-coding         |                                  |
| chr20-277 30.07905 | 0.075375 | 0.466776 | 0.161479 | 0.871716 | 0.981636 | chr20 | 27790199 | 27790448 | + | 0 NA | IntergeniALR/Alpha  | 812342 NR_13231E | 1E+08                     | Hs. 529357NR_13231E | ENSG00000FRG1CP                       | - FSHD regipseudo                |
| chr15-566 8.407968 | -0.12999 | 0.805783 | -0.16133 | 0.871836 | 0.981636 | chr15 | 56698504 | 56698904 | + | 0 NA | 3' UTR (N3' UTR (N  | 35382 NM_00128E  | 54816 Hs. 511477NM_01766E | ENSG00000ZNF280D    | SUHW4 ZNF zinc fingprotein-coding     |                                  |
| chr15-812 8.407968 | -0.12999 | 0.805783 | -0.16133 | 0.871836 | 0.981636 | chr15 | 81286184 | 81286888 | + | 0 NA | intron (Nintron (N  | -10434 NM_00451E | 3603 Hs. 45909E           | ENSG00000LL16       | LHF NLL1E interleukprotein-coding     |                                  |
| chr16-821 8.407968 | -0.12999 | 0.805783 | -0.16133 | 0.871836 | 0.981636 | chr16 | 82155144 | 82155843 | + | 0 NA | intron (Nintron (N  | 14731 NM_00579E  | 10200 Hs. 34440C          | ENSG00000MPHOSPH6   | MPP MPP-epsilon-phase rprotein-coding |                                  |
| chr17-345 8.407968 | -0.12999 | 0.805783 | -0.16133 | 0.871836 | 0.981636 | chr17 | 34989457 | 34990385 | + | 0 NA | intron (Nintron (N  | 9409 NM_01397E   | 3980 Hs. 10029E           | ENSG00000LIG3       | LIG2 LIG2 DNA ligasprotein-coding     |                                  |
| chr2-739 8.407968  | -0.12999 | 0.805783 | -0.16133 | 0.871836 | 0.981636 | chr2  | 73947071 | 73948941 | + | 0 NA | intron (Nintron (N  | 21126 NR_13489E  | 1716 Hs. 469022NM_00192E  | ENSG00000CDGUOK     | MTDPS3 NC deoxyguarprotein-coding     |                                  |
| chr2-2034 8.407968 | -0.12999 | 0.805783 | -0.16133 | 0.871836 | 0.981636 | chr2  | 2.03E+08 | 2.03E+08 | + | 0 NA | intron (Nintron (N  | 70421 NM_001114  | 65065 Hs. 64884E          | ENSG00000NEAL1      | A530083 C neurobeacprotein-coding     |                                  |
| chr21-29C 8.407968 | -0.12999 | 0.805783 | -0.16133 | 0.871836 | 0.981636 | chr21 | 29030845 | 29032544 | + | 0 NA | intron (Nintron (N  | 7026 NM_006447   | 10600 Hs. 99819           | ENSG00000USP16      | UBP-M UBF ubiquitir protein-coding    |                                  |
| chr7-9892 8.407968 | -0.12999 | 0.805783 | -0.16133 | 0.871836 | 0.981636 | chr7  | 98926812 | 98932894 | + | 0 NA | intron (Nintron (N  | 48156 NR_132754  | 1.07E+08                  | NR_132754           | SCARNA28                              | ZL1 small Ca_ncRNA               |
| chr1-2442 8.649051 | 0.127073 | 0.787748 | 0.161312 | 0.871848 | 0.981636 | chr1  | 24421525 | 24422325 | + | 0 NA | intron (Nintron (N  | 5900 NM_00132E   | 57185 Hs. 52344E          | ENSG00000NIPAL3     | DJ462023. NIPA likeprotein-coding     |                                  |
| chr1-2865 8.649051 | 0.127073 | 0.787748 | 0.161312 | 0.871848 | 0.981636 | chr1  | 28697420 | 28698263 | + | 0 NA | intron (Nintron (N  | 29057 NM_00658E  | 10691 Hs. 63237E          | ENSG00000GMEB1      | P96P P Pligluocortprotein-coding      |                                  |
| chr1-2876 8.649051 | 0.127073 | 0.787748 | 0.161312 | 0.871848 | 0.981636 | chr1  | 28769245 | 28770516 | + | 0 NA | TTS (NM_C TTS (NM_C | 32940 NM_00117E  | 51441 Hs. 53228E          | ENSG00000YTHDF2     | CAHL HGRC YTH N6-meprotein-coding     |                                  |
| chr1-5505 8.649051 | 0.127073 | 0.787748 | 0.161312 | 0.871848 | 0.981636 | chr1  | 55093207 | 55098984 | + | 0 NA | intron (Nintron (N  | 55873 NR_110451  | 255738 Hs. 18844          | ENSG00000CPSK9      | FH3 HCHO propteiprotein-coding        |                                  |
| chr1-1087 8.649051 | 0.127073 | 0.787748 | 0.161312 | 0.871848 | 0.981636 | chr1  | 1.09E+08 | 1.09E+08 | + | 0 NA | intron (Nintron (N  | 13833 NM_00726E  | 6814 Hs. 53043E           | ENSG00000STXP3      | MUNC18-3 syntaxin protein-coding      |                                  |
| chr1-1126 8.649051 | 0.127073 | 0.787748 | 0.161312 | 0.871848 | 0.981636 | chr1  | 1.13E+08 | 1.13E+08 | + | 0 NA | intron (Nintron (N  | -25384 NM_00128E | 4343 Hs. 514941NM_02096E  | ENSG00000MOV10      | fSAP113 gMov10 R1Cprotein-coding      |                                  |
| chr1-1128 8.649051 | 0.127073 | 0.787748 | 0.161312 | 0.871848 | 0.981636 | chr1  | 1.13E+08 | 1.13E+08 | + | 0 NA | intron (Nintron (N  | 6771 NR_103744   | 1.01E+08                  | Hs. 41828E          | ENSG00000SLC16A1                      | - SLC16A1 encRNA                 |
| chr1-2241 8.649051 | 0.127073 | 0.787748 | 0.161312 | 0.871848 | 0.981636 | chr1  | 2.24E+08 | 2.24E+08 | + | 0 NA | TTS (NM_C TTS (NM_C | 10195 NM_001321  | 8560 Hs. 29987E           | ENSG00000DEGS1      | DEGS DEGS delta 4-cprotein-coding     |                                  |
| chr10-69C 8.649051 | 0.127073 | 0.787748 | 0.161312 | 0.871848 | 0.981636 | chr10 | 69015668 | 69017497 | + | 0 NA | 3' UTR (N3' UTR (N  | 27779 NM_015634  | 26128 Hs. 27958C          | ENSG00000KIF1BP     | KBPI KIAA1K1F1 bicnprotein-coding     |                                  |
| chr11-467 8.649051 | 0.127073 | 0.787748 | 0.161312 | 0.871848 | 0.981636 | chr11 | 46785522 | 46792168 | + | 0 NA | intron (Nintron (N  | -26346 NR_00305E | 692108 Hs. 69325E         | ENSG00000SNORD67    | HBB1 HBB1 small nucsnRNA              |                                  |
| chr11-118 8.649051 | 0.127073 | 0.787748 | 0.161312 | 0.871848 | 0.981636 | chr11 | 1.19E+08 | 1.19E+08 | + | 0 NA | exon (NM exon (NM   | -23731 NM_00134E | 143941 Hs. 65344E         | ENSG00000TTC36      | HBP21 tetratricprotein-coding         |                                  |
| chr12-275 8.649051 | 0.127073 | 0.787748 | 0.161312 | 0.871848 | 0.981636 | chr12 | 2798444  | 2800479  | + | 0 NA | intron (Nintron (N  | 4491 NM_002014   | 2288 Hs. 52418E           | ENSG00000PKBP4      | FKBP51 FKBP proprotein-coding         |                                  |
| chr12-962 8.649051 | 0.127073 | 0.787748 | 0.161312 | 0.871848 | 0.981636 | chr12 | 96296609 | 96297482 | + | 0 NA | intron (Nintron (N  | 41547 NM_00130E  | 2004 Hs. 46523            | ENSG00000ELK3       | ERP NET SETS transprotein-coding      |                                  |
| chr14-965 8.649051 | 0.127073 | 0.787748 | 0.161312 | 0.871848 | 0.981636 | chr14 | 96556014 | 96559310 | + | 0 NA | intron (Nintron (N  | 54797 NM_00129E  | 10914 Hs. 25372E          | ENSG00000PAPOLA     | PAP PAP-epsilon (A) rprotein-coding   |                                  |
| chr2-2767 8.649051 | 0.127073 | 0.787748 | 0.161312 | 0.871848 | 0.981636 | chr2  | 27675563 | 27679504 | + | 0 NA | intron (Nintron (N  | -13693 NR_00128E | 9913 Hs. 6232             | ENSG00000SUTP7L     | SPT7L STA7 SPT7 likeprotein-coding    |                                  |
| chr22-494 8.649051 | 0.127073 | 0.787748 | 0.161312 | 0.871848 | 0.981636 | chr22 | 49819671 | 49824001 | + | 0 NA | intron (Nintron (N  | 2495 NR_146334   | 23774 Hs. 12795C          | ENSG00000BRD1       | BRL BRPF1 bromodome protein-coding    |                                  |
| chr3-172 8.649051  | 0.127073 | 0.787748 | 0.161312 | 0.871848 | 0.981636 | chr3  | 1.72E+08 | 1.72E+08 | + | 0 NA | intron (Nintron (N  | 123242 NM_00412E | 2693 Hs. 13021E           | ENSG00000GHSR       | GHPD growth hcprotein-coding          |                                  |
| chr4-8674 8.649051 | 0.127073 | 0.787748 | 0.161312 | 0.871848 | 0.981636 | chr4  | 86769885 | 86770695 | + | 0 NA | intron (Nintron (N  | 79139 NM_19796E  | 345274 Hs. 45299E         | ENSG00000SLC10A6    | SOAT solute cprotein-coding           |                                  |
| chr5-2734 8.649051 | 0.127073 | 0.787748 | 0.161312 | 0.871848 | 0.981636 | chr5  | 273410   | 273410   | + | 0 NA | intron (Nintron (N  | 2656 NM_00126E   | 10016 Hs. 50823           | ENSG00000PDCD6      | ALG-2 ALC programme protein-coding    |                                  |
| chr5-134 8.649051  | 0.127073 | 0.787748 | 0.161312 | 0.871848 | 0.981636 | chr5  | 1.34E+08 | 1.34E+08 | + | 0 NA | IntergeniAluJb SIN  | 18326 NM_08065E  | 91368 Hs. 15650E          | ENSG00000CDKN2A1P   | C2A1L CDKN2A irprotein-coding         |                                  |
| chr7-7458 8.649051 | 0.127073 | 0.787748 | 0.161312 | 0.871848 | 0.981636 | chr7  | 74589793 | 74593175 | + | 0 NA | intron (Nintron (N  | -4484 NR_16211E  | 1.13E+08                  | NR_162116           | MIR10525                              | - microRNA ncRNA                 |
| chr8-2215 8.649051 | 0.127073 | 0.787748 | 0.161312 | 0.871848 | 0.981636 | chr8  | 22194937 | 22195922 | + | 0 NA | intron (Nintron (N  | 30057 NR_03340E  | 649 Hs. 1274              | ENSG00000BMP1       | O113 PCOI bone morrprotein-coding     |                                  |
| chr12-575 8.121031 | 0.133575 | 0.828097 | 0.161303 | 0.871855 | 0.981636 | chr12 | 57539571 | 57539770 | + | 0 NA | intron (Nintron (N  | 7189 NM_00134E   | 10540 Hs. 28912E          | ENSG00000DCTN2      | DCTN50 Dydyactin protein-coding       |                                  |
| chr20-344 8.121031 | 0.133575 | 0.828097 | 0.161303 | 0.871855 | 0.981636 | chr20 | 34473226 | 34473649 | + | 0 NA | intron (Nintron (N  | 7112 NR_030374   | 693229                    | NR_030374           | ENSG00000MIR644A                      | MIR644 MimicroRNA ncRNA          |
| chr20-35C 8.121031 | 0.133575 | 0.828097 | 0.161303 | 0.871855 | 0.981636 | chr20 | 35088910 | 35089897 | + | 0 NA | intron (Nintron (N  | 3568 NM_01563E   | 26133 Hs. 16807E          | ENSG00000TRPC4P     | C20orf18E transientprotein-coding     |                                  |
| chr1-5206 12.63192 | 0.107188 | 0.664663 | 0.161267 | 0.871883 | 0.981636 | chr1  | 52060313 | 52061564 | + | 0 NA | intron (Nintron (N  | 4643 NM_15226E   | 91408 Hs. 42983E          | ENSG00000BTF3L4     | - basic trprotein-coding              |                                  |
| chr1-1542 12.63192 | 0.107188 | 0.664663 | 0.161267 | 0.871883 | 0.981636 | chr1  | 1.54E+08 | 1.54E+08 | + | 0 NA | intron (Nintron (N  | -2145 NM_001127  | 9898 Hs. 490551NM_01484E  | ENSG00000UBAP2L     | NICE-4 N ubiquitir protein-coding     |                                  |
| chr1-1815 11.64845 | 0.11087  | 0.68771  | 0.161216 | 0.871923 | 0.981636 | chr1  | 185212   | 187667   | + | 0 NA | IntergeniIntergeni  | 1519 NR_10706E   | 1.02E+08                  | NR_10706E           | ENSG00000MIR6859                      | - hsa-mir-epsilon microRNA ncRNA |
| chr1-1951 11.64845 | 0.11087  | 0.68771  | 0.161216 | 0.871923 | 0.981636 | chr1  | 19195674 | 19201301 | + | 0 NA | intron (Nintron (N  | 11779 NM_02076E  | 23352 Hs. 14807E          | ENSG00000UBR4       | RBAF600 u ubiquitir protein-coding    |                                  |
| chr15-758 8.861566 | -0.12723 | 0.789898 | -0.16107 | 0.87204  | 0.981636 | chr15 | 75869515 | 75870109 | + | 0 NA | intron (Nintron (N  | 25768 NM_00114E  | 92912 Hs. 23033           | ENSG00000UBE2Q2     | - ubiquitir protein-coding            |                                  |
| chr15-795 8.128889 | 0.131789 | 0.818415 | 0.16103  | 0.87207  | 0.981636 | chr15 | 79316180 | 79316826 | + | 0 NA | intron (Nintron (N  | 5391 NM_001301   | 23423 Hs. 71608           | ENSG00000TMED3      | C15orf22 transment protein-coding     |                                  |
| chr16-46C 8.128889 | 0.131789 | 0.818415 | 0.16103  | 0.87207  | 0.981636 | chr16 | 46970382 | 46971333 | + | 0 NA | intron (Nintron (N  | 2817 NM_00588C   | 10294 Hs. 3               |                     |                                       |                                  |



|           |          |          |          |          |          |          |       |          |          |   |   |    |                    |                  |                              |                     |                   |                                |                |
|-----------|----------|----------|----------|----------|----------|----------|-------|----------|----------|---|---|----|--------------------|------------------|------------------------------|---------------------|-------------------|--------------------------------|----------------|
| chr4-1435 | 8.40011  | -0.12831 | 0.800769 | -0.16023 | 0.872697 | 0.981636 | chr4  | 1.44E+08 | 1.44E+08 | + | 0 | NA | intron (Nintron (N | -9299 NR_003675  | 441046 Hs. 135705NM_001011   | ENSG000004GUSBP5    | GYPELOC44GUSB     | pseudogene                     |                |
| chr5-373C | 8.40011  | -0.12831 | 0.800769 | -0.16023 | 0.872697 | 0.981636 | chr5  | 37304932 | 37305796 | + | 0 | NA | intron (NAluJo SIN | -55936 NM_023073 | 65250 Hs. 586199NM_023073    | ENSG000004CLANE1    | C5orf42 Fci       | lignone protein-coding         |                |
| chr5-7147 | 8.40011  | -0.12831 | 0.800769 | -0.16023 | 0.872697 | 0.981636 | chr5  | 71470368 | 71472725 | + | 0 | NA | intron (Nintron (N | 15895 NM_018425  | 55814 Hs. 258272NM_018425    | ENSG000004BDP1      | DFNB112 FB        | double protein-coding          |                |
| chr5-1384 | 8.40011  | -0.12831 | 0.800769 | -0.16023 | 0.872697 | 0.981636 | chr5  | 1.38E+08 | 1.38E+08 | + | 0 | NA | intron (NAluSg4 SI | -5910 NR_073445  | 51308 Hs. 416099NM_016605    | ENSG000004REEP2     | C5orf19 Sreceptor | protein-coding                 |                |
| chr9-980C | 8.40011  | -0.12831 | 0.800769 | -0.16023 | 0.872697 | 0.981636 | chr9  | 98005090 | 98006059 | + | 0 | NA | intron (Nintron (N | 22233 NM_006401  | 51401 Hs. 730654NM_006401    | ENSG000004ANP32B    | A5orf11 PHA       | acidic protein-coding          |                |
| chr1-1662 | 12.16862 | 0.108381 | 0.676628 | 0.160178 | 0.872741 | 0.981636 | chr1  | 16626214 | 16626792 | + | 0 | NA | intron (Nintron (N | 4403 NR_026752   | 84809 Hs. 631865NR_026752    | ENSG000004CROCCP2   | CROCC1            | CROCC                          | pseudogene     |
| chr9-1266 | 8.812569 | -0.128   | 0.799703 | -0.16006 | 0.872833 | 0.981636 | chr9  | 1.27E+08 | 1.27E+08 | + | 0 | NA | intron (NMIRb SINE | 3582 NM_001099   | 403341 Hs. 177633NM_023482   | ENSG000004ZBTB34    | ZNF178            | zinc finger protein-coding     |                |
| chr1-3895 | 10.15268 | 0.117046 | 0.731398 | 0.160031 | 0.872857 | 0.981636 | chr1  | 38998558 | 39007620 | + | 0 | NA | intron (Nintron (N | 11813 NM_024595  | 79647 Hs. 293565NM_024595    | ENSG000004AKIRIN1   | C9orf108 akirin   | 1 protein-coding               |                |
| chr1-4025 | 10.15268 | 0.117046 | 0.731398 | 0.160031 | 0.872857 | 0.981636 | chr1  | 40259801 | 40263425 | + | 0 | NA | intron (Nl2c LINE  | 3377 NM_005857   | 10269 Hs. 132642NM_005857    | ENSG000004ZMPSTE24  | FACE-1 FA         | zinc metal protein-coding      |                |
| chr1-1095 | 10.15268 | 0.117046 | 0.731398 | 0.160031 | 0.872857 | 0.981636 | chr1  | 1.09E+08 | 1.09E+08 | + | 0 | NA | intron (Nl1MA9 LIN | -25811 NM_001266 | 343263 Hs. 443402NM_001010   | ENSG000004MYBPHL    | -                 | myosin b protein-coding        |                |
| chr10-286 | 10.15268 | 0.117046 | 0.731398 | 0.160031 | 0.872857 | 0.981636 | chr10 | 28614790 | 28620176 | + | 0 | NA | intron (Nintron (N | -60038 NM_012342 | 25805 Hs. 533336NM_012342    | ENSG000004BAMBI     | NMA               | BMP and epsilon protein-coding |                |
| chr10-101 | 10.15268 | 0.117046 | 0.731398 | 0.160031 | 0.872857 | 0.981636 | chr10 | 1.02E+08 | 1.02E+08 | + | 0 | NA | exon (NM exon (NM  | -15566 NM_006993 | 10360 Hs. 90691 NM_006993    | ENSG000004NPM3      | PORMIN T          | nucleoph protein-coding        |                |
| chr11-344 | 10.15268 | 0.117046 | 0.731398 | 0.160031 | 0.872857 | 0.981636 | chr11 | 34460752 | 34470103 | + | 0 | NA | intron (Nintron (N | 26493 NM_001752  | 847 Hs. 502302NM_001752      | ENSG000004CAT       | -                 | catalase protein-coding        |                |
| chr11-105 | 10.15268 | 0.117046 | 0.731398 | 0.160031 | 0.872857 | 0.981636 | chr11 | 1.05E+08 | 1.05E+08 | + | 0 | NA | intron (Nintron (N | 5091 NM_001223   | 834 Hs. 2490 NM_001223       | ENSG000004CASP1     | ICE IL1B          | caspase 1 protein-coding       |                |
| chr14-497 | 10.15268 | 0.117046 | 0.731398 | 0.160031 | 0.872857 | 0.981636 | chr14 | 49778296 | 49786646 | + | 0 | NA | 3' UTR (N3' UTR (N | 14318 NM_014315  | 23588 Hs. 509264NM_014315    | ENSG000004KLHDC2    | HCLP1 H           | cellular protein-coding        |                |
| chr14-885 | 10.15268 | 0.117046 | 0.731398 | 0.160031 | 0.872857 | 0.981636 | chr14 | 88571558 | 88580249 | + | 0 | NA | exon (NM exon (NM  | 12556 NM_001322  | 79882 Hs. 684046NM_024824    | ENSG000004ZC3H14    | MRT56 MSU         | zinc finger protein-coding     |                |
| chr14-105 | 10.15268 | 0.117046 | 0.731398 | 0.160031 | 0.872857 | 0.981636 | chr14 | 1.04E+08 | 1.04E+08 | + | 0 | NA | intron (Nintron (N | 39246 NM_001100  | 7517 Hs. 592322NM_005432     | ENSG000004XRCC3     | CM66              | X-ray receptor protein-coding  |                |
| chr16-275 | 10.15268 | 0.117046 | 0.731398 | 0.160031 | 0.872857 | 0.981636 | chr16 | 27523952 | 27529105 | + | 0 | NA | intron (NHAL LINE  | 23385 NM_001520  | 2975 Hs. 371718NM_001520     | ENSG000004GTF3C1    | TF111C TF         | general protein-coding         |                |
| chr17-161 | 10.15268 | 0.117046 | 0.731398 | 0.160031 | 0.872857 | 0.981636 | chr17 | 16069288 | 16072419 | + | 0 | NA | intron (NAluSg2 SI | 71029 NM_017775  | 54902 Hs. 462316NM_017775    | ENSG000004TTC19     | 201020401         | tetralytic protein-coding      |                |
| chr17-425 | 10.15268 | 0.117046 | 0.731398 | 0.160031 | 0.872857 | 0.981636 | chr17 | 42959428 | 42962149 | + | 0 | NA | intron (Nl2a LINE  | 3666 NM_001261   | 80755 Hs. 317403NM_001261    | ENSG000004AARSD1    | -                 | alanine-t protein-coding       |                |
| chr17-554 | 10.15268 | 0.117046 | 0.731398 | 0.160031 | 0.872857 | 0.981636 | chr17 | 55406022 | 55414359 | + | 0 | NA | intron (NMIRa SINE | 11645 NM_012325  | 23531 Hs. 463483NM_012325    | ENSG000004MMD       | MMA MMD1          | monocyte protein-coding        |                |
| chr17-805 | 10.15268 | 0.117046 | 0.731398 | 0.160031 | 0.872857 | 0.981636 | chr17 | 80341345 | 80346157 | + | 0 | NA | intron (Nintron (N | -71416 NR_148041 | 284131 Hs. 389678NM_173627   | ENSG000004ENDOV     | -                 | endonucle protein-coding       |                |
| chr17-805 | 10.15268 | 0.117046 | 0.731398 | 0.160031 | 0.872857 | 0.981636 | chr17 | 80385161 | 80391050 | + | 0 | NA | intron (NAluY SINE | -27062 NR_148041 | 284131 Hs. 389678NM_173627   | ENSG000004ENDOV     | -                 | endonucle protein-coding       |                |
| chr19-443 | 10.15268 | 0.117046 | 0.731398 | 0.160031 | 0.872857 | 0.981636 | chr19 | 44327957 | 44339645 | + | 0 | NA | intron (NMSTA LTR  | 22879 NM_001083  | 7771 Hs. 48589 NM_013380     | ENSG000004ZNF112    | ZFP112 Z          | zinc finger protein-coding     |                |
| chr2-6933 | 10.15268 | 0.117046 | 0.731398 | 0.160031 | 0.872857 | 0.981636 | chr2  | 69333549 | 69340006 | + | 0 | NA | intron (NAluJo SIN | 50450 NM_002056  | 2673 Hs. 580300NM_002056     | ENSG000004GFP1      | CMS12 CMS         | glutamine protein-coding       |                |
| chr2-1602 | 10.15268 | 0.117046 | 0.731398 | 0.160031 | 0.872857 | 0.981636 | chr2  | 1.6E+08  | 1.6E+08  | + | 0 | NA | intron (Nintron (N | -4399 NR_103775  | 1.01E+08 Hs. 729532NR_103775 | ENSG000004LINC02478 | -                 | long intencRNA                 |                |
| chr3-584C | 10.15268 | 0.117046 | 0.731398 | 0.160031 | 0.872857 | 0.981636 | chr3  | 58405023 | 58412083 | + | 0 | NA | intron (Nintron (N | 24994 NM_000925  | 5162 Hs. 511357NM_000925     | ENSG000004PDHB      | PDHBD PD          | pyruvate protein-coding        |                |
| chr5-5528 | 10.15268 | 0.117046 | 0.731398 | 0.160031 | 0.872857 | 0.981636 | chr5  | 55285275 | 55298948 | + | 0 | NA | intron (Nl1MB3 LIN | 15583 NM_001345  | 54505 Hs. 593266NM_019030    | ENSG000004DHX29     | DDX29             | DEXH-box protein-coding        |                |
| chr5-1341 | 10.15268 | 0.117046 | 0.731398 | 0.160031 | 0.872857 | 0.981636 | chr5  | 1.34E+08 | 1.34E+08 | + | 0 | NA | intron (NFLAM_C SI | -21973 NM_006930 | 6500 Hs. 171625NM_006930     | ENSG000004SKP1      | EMC19 OC          | S-phase h protein-coding       |                |
| chr6-3284 | 10.15268 | 0.117046 | 0.731398 | 0.160031 | 0.872857 | 0.981636 | chr6  | 32846555 | 32851612 | + | 0 | NA | exon (NM exon (NM  | 3678 NM_001292   | 6890 Hs. 352018NM_000593     | ENSG000004TAP1      | ABC17 ABC         | transport protein-coding       |                |
| chr7-7547 | 10.15268 | 0.117046 | 0.731398 | 0.160031 | 0.872857 | 0.981636 | chr7  | 75471896 | 75475614 | + | 0 | NA | intron (NAluYa5 SI | 12544 NR_160303  | 1E+08 Hs. 712563NM_001095    | ENSG000004POM121C   | POM121-2          | POM121                         | protein-coding |
| chr8-1411 | 10.15268 | 0.117046 | 0.731398 | 0.160031 | 0.872857 | 0.981636 | chr8  | 1.41E+08 | 1.41E+08 | + | 0 | NA | intron (Nl1MB5 LIN | 9657 NR_148197   | 22898 Hs. 18166 NM_014957    | ENSG000004DENND3    | -                 | DENN domain protein-coding     |                |
| chr9-1215 | 10.15268 | 0.117046 | 0.731398 | 0.160031 | 0.872857 | 0.981636 | chr9  | 1.21E+08 | 1.21E+08 | + | 0 | NA | intron (Nintron (N | 17851 NM_000177  | 2934 Hs. 522373NM_000177     | ENSG000004CSN       | ADF AGEL          | gelsoin protein-coding         |                |
| chr2-628C | 7.954369 | -0.13323 | 0.832618 | -0.16001 | 0.872873 | 0.981636 | chr2  | 62806492 | 62807137 | + | 0 | NA | intron (Nl1MCa LIN | 99917 NM_001354  | 23301 Hs. 271667NM_015252    | ENSG000004EHPB1     | HPC12 NAC         | EH domain protein-coding       |                |
| chr1-9238 | 8.136747 | 0.130031 | 0.812875 | 0.159964 | 0.872909 | 0.981636 | chr1  | 92388296 | 92389257 | + | 0 | NA | 3' UTR (N3' UTR (N | 89701 NM_024813  | 79871 Hs. 444421NM_024813    | ENSG000004RPAP2     | Clorf82 F         | RNA polymerase protein-coding  |                |
| chr10-454 | 8.136747 | 0.130031 | 0.812875 | 0.159964 | 0.872909 | 0.981636 | chr10 | 45926808 | 45927461 | + | 0 | NA | intron (Nl1ME2z LI | 45240 NR_160518  | 1.14E+08 NR_160518           | ENSG000004PARGP1-AC | PARGP1-AC         | pseudogene                     |                |
| chr12-112 | 8.136747 | 0.130031 | 0.812875 | 0.159964 | 0.872909 | 0.981636 | chr12 | 1.12E+08 | 1.12E+08 | + | 0 | NA | intron (Nintron (N | -36599 NR_106921 | 1.02E+08 NR_106921           | ENSG000004MIR6861   | hsa-mir-6         | microRNA ncRNA                 |                |
| chr13-951 | 8.136747 | 0.130031 | 0.812875 | 0.159964 | 0.872909 | 0.981636 | chr13 | 95156753 | 95160693 | + | 0 | NA | intron (Nintron (N | -51726 NR_145733 | 1.1E+08 NR_145733            | SNORD13G            | -                 | small nucleosRNA               |                |
| chr15-598 | 8.136747 | 0.130031 | 0.812875 | 0.159964 | 0.872909 | 0.981636 | chr15 | 59065847 | 59069811 | + | 0 | NA | intron (Nintron (N | -37267 NR_004701 | 9133 Hs. 194698NM_004701     | ENSG000004CCN2B     | Hst17299          | cyclin B protein-coding        |                |
| chr17-365 | 8.136747 | 0.130031 | 0.812875 | 0.159964 | 0.872909 | 0.981636 | chr17 | 36995683 | 36998143 | + | 0 | NA | intron (Nintron (N | -36832 NR_036055 | 1E+08 NR_036055              | ENSG000004MIR2909   | -                 | microRNA ncRNA                 |                |
| chr18-241 | 8.136747 | 0.130031 | 0.812875 | 0.159964 | 0.872909 | 0.981636 | chr18 | 24166496 | 24167480 | + | 0 | NA | intron (Nintron (N | 27504 NM_138644  | 26256 Hs. 511983NM_012188    | ENSG000004CABYR     | CABYRa C          | calcium h protein-coding       |                |
| chr19-395 | 8.136747 | 0.130031 | 0.812875 | 0.159964 | 0.872909 | 0.981636 | chr19 | 39385716 | 39386567 | + | 0 | NA | exon (NM exon (NM  | 4965 NM_001256   | 54623 Hs. 667414NM_019088    | ENSG000004PAF1      | F23149_1 PAF1     | hom protein-coding             |                |
| chr2-1696 | 8.136747 | 0.130031 | 0.812875 | 0.159964 | 0.872909 | 0.981636 | chr2  | 1.7E+08  | 1.7E+08  | + | 0 | NA | intron (NAluSx1 SI | 21389 NM_004792  | 9360 Hs. 470544NM_004792     | ENSG000004PPIG      | CARS-Cyp          | peptidyl protein-coding        |                |
| chr21-255 | 8.136747 | 0.130031 | 0.812875 | 0.159964 | 0.872909 | 0.981636 | chr21 | 25591966 | 25592693 | + | 0 | NA | intron (Nl1MD1 LIN | -9105 NR_024092  | 282566 Hs. 384588NM_024092   | ENSG000004LINC00515 | C2orf71           | long intencRNA                 |                |
| chr3-172  | 8.136747 | 0.130031 | 0.812875 | 0.159964 | 0.872909 | 0.981636 | chr3  | 1.72E+08 | 1.72E+08 | + | 0 | NA | intron (NTHE1B LTF | 201146 NM_001135 | 64778 Hs. 744888NM_022763    | ENSG000004FNDC3B    | FAD104 F          | fibronectin protein-coding     |                |
| chr3-172  | 8.136747 | 0.130031 | 0.812875 | 0.159964 | 0.872909 | 0.981636 | chr3  | 1.72E+08 | 1.72E+08 | + | 0 | NA | intron (NmamRTE1 I | 159898 NM_004122 | 2693 Hs. 130212NM_004122     | ENSG000004GHSR      | GHD1              | growth h protein-coding        |                |
| chr7-882C | 8.136747 | 0.130031 | 0.812875 | 0.159964 | 0.872909 | 0.981636 | chr7  | 88207243 | 88210487 | + | 0 | NA | intron (Nintron (N | -7795 NR_120517  | 1.03E+08 NR_120517           | LOC1027225          | -                 | uncharactercRNA                |                |
| chr8-937C | 8.136747 | 0.130031 | 0.812875 | 0.159964 | 0.872909 | 0.981636 | chr8  | 93703571 | 93707034 | + | 0 | NA | intron (Nintron (N | 4752 NR_156452   | 137392 Hs. 125033NM_145265   | ENSG000004FAM92A    | FAM92A1 F         | family w protein-coding        |                |
| chr8-9988 | 8.136747 | 0.130031 | 0.812875 | 0.159964 | 0.872909 | 0.981636 | chr8  | 99881219 | 99883222 | + | 0 | NA | intron (Nl1MB2 LIN | 11487 NM_004374  | 1345 Hs. 351875NM_004374     | ENSG000004COX6C     | -                 | cytochrome protein-coding      |                |
| chr10-285 | 11.13615 | 0.112286 | 0.702051 | 0.15994  | 0.872928 | 0.981636 | chr10 | 28524061 | 28526025 | + | 0 | NA | intron (Nl1M4 LINE | 7311 NR_033805   | 220906 Hs. 403255NR_033805   | WAC-AS1             | -                 | WAC antisenseRNA               |                |
| chr16-224 | 11.13615 | 0.112286 | 0.702051 | 0.15994  | 0.872928 | 0.981636 | chr16 | 22472136 | 22474050 | + | 0 | NA | intron (NAluY SINE | -31356 NR_024455 | 1E+08 Hs. 648435NR_024455    | LOC100190           | -                 | uncharactercRNA                |                |
| chr6-1341 | 12.63978 | 0.106610 | 0.662959 | 0.159911 | 0.872951 |          |       |          |          |   |   |    |                    |                  |                              |                     |                   |                                |                |

|                    |          |          |          |          |          |       |          |          |   |   |    |                      |                  |          |                    |                      |                                    |                             |
|--------------------|----------|----------|----------|----------|----------|-------|----------|----------|---|---|----|----------------------|------------------|----------|--------------------|----------------------|------------------------------------|-----------------------------|
| chr17-602.8.185745 | 0.130037 | 0.816073 | 0.159344 | 0.873398 | 0.981636 | chr17 | 60221059 | 60223493 | + | 0 | NA | intron (Nintron (N   | 9369 NR_002999   | 677681   | NR_002999          | ENSG000003SCARNA20   | ACA66                              | small Ca <sub>v</sub> ncRNA |
| chr17-695.8.185745 | 0.130037 | 0.816073 | 0.159344 | 0.873398 | 0.981636 | chr17 | 69964871 | 69965801 | + | 0 | NA | intron (NMLT1J1-ir   | 3629 NR_110875   | 1.03E+08 | Hs.451405NR_110874 | ENSG000003LINC01497- |                                    | long intencRNA              |
| chr2-2414.8.185745 | 0.130037 | 0.816073 | 0.159344 | 0.873398 | 0.981636 | chr2  | 2.41E+08 | 2.41E+08 | + | 0 | NA | intron (NAluXs1 SI   | 57519 NM_014805  | 9855     | Hs.726315NM_014805 | ENSG000003FARP2      | FIR FRG FFERM, ARI                 | protein-coding              |
| chr6-296.8.185745  | 0.130037 | 0.816073 | 0.159344 | 0.873398 | 0.981636 | chr6  | 29609248 | 29609650 | + | 0 | NA | intron (Nintron (N   | 18779 NM_021903  | 2550     | Hs.167017NM_001470 | ENSG000003GABR1      | GABABR1 [Gamma-aminoprotein-coding |                             |
| chr6-3744.8.185745 | 0.130037 | 0.816073 | 0.159344 | 0.873398 | 0.981636 | chr6  | 37448958 | 37450808 | + | 0 | NA | intron (N2c LINE     | 66622 NM_021903  | 23070    | Hs.520102NM_015050 | ENSG000003CMTR1      | FTSJD2 KI cap methylprotein-coding |                             |
| chr8-384.8.185745  | 0.130037 | 0.816073 | 0.159344 | 0.873398 | 0.981636 | chr8  | 38427476 | 38429832 | + | 0 | NA | intron (Nintron (N   | 39070 NM_001174  | 2260     | Hs.264887NM_015850 | ENSG000003FGFR1      | BFGFR CD3 fibroblas protein-coding |                             |
| chr9-124.8.185745  | 0.130037 | 0.816073 | 0.159344 | 0.873398 | 0.981636 | chr9  | 1.25E+08 | 1.25E+08 | + | 0 | NA | exon (NM exon (NM    | 12879 NM_030978  | 81873    | Hs.132499NM_030978 | ENSG000003ARPC5L     | ARPC16-2 actin relprotein-coding   |                             |
| chr1-291.7.946511  | -0.13151 | 0.825324 | -0.15934 | 0.8734   | 0.981636 | chr1  | 29165810 | 29166877 | + | 0 | NA | intron (Nintron (N   | 15557 NM_005626  | 6429     | Hs.469977NM_005626 | ENSG000003SRSA4      | SFRS4 SRF serine arprotein-coding  |                             |
| chr12-57.7.946511  | -0.13151 | 0.825324 | -0.15934 | 0.8734   | 0.981636 | chr12 | 57099277 | 57100459 | + | 0 | NA | exon (NM exon (NM    | 10421 NM_001178  | 6778     | Hs.524515NM_003150 | ENSG000003STAT6      | D12S1644 signal trprotein-coding   |                             |
| chr14-91.7.946511  | -0.13151 | 0.825324 | -0.15934 | 0.8734   | 0.981636 | chr14 | 91987099 | 91988170 | + | 0 | NA | intron (Nintron (N   | -39932 NM_006326 | 10516    | Hs.332708NM_006326 | ENSG000003FBLN5      | ADML2 ARC fibulin 5 protein-coding |                             |
| chr4-887.7.946511  | -0.13151 | 0.825324 | -0.15934 | 0.8734   | 0.981636 | chr4  | 88730831 | 88731671 | + | 0 | NA | intron (Nintron (N   | 21462 NR_002806  | 285512   | Hs.744957NR_002806 | ENSG000003FAM13A-AS  | FAM13A10S FAM13A arncRNA           |                             |
| chr6-157.7.946511  | -0.13151 | 0.825324 | -0.15934 | 0.8734   | 0.981636 | chr6  | 1.58E+08 | 1.58E+08 | + | 0 | NA | intron (Nintron (N   | -53520 NM_003898 | 8871     | Hs.434494NM_003898 | ENSG000003SYNJ2      | INPP5H synaptoje protein-coding    |                             |
| chr16-28.11.65631  | 0.109615 | 0.687929 | 0.159341 | 0.8734   | 0.981636 | chr16 | 28825487 | 28836099 | + | 0 | NA | intron (Nintron (N   | 7745 NM_145714   | 11273    | Hs.460499NM_007245 | ENSG000003ATXN2L     | A2D AZL2 ataxin 2 protein-coding   |                             |
| chr19-388.11.65631 | 0.109615 | 0.687929 | 0.159341 | 0.8734   | 0.981636 | chr19 | 38835788 | 38847435 | + | 0 | NA | intron (Nintron (N   | 8366 NM_001533   | 3191     | Hs.644909NM_001533 | ENSG000003HNRNPL     | HNRNPL P/Chateroger protein-coding |                             |
| chr19-574.11.65631 | 0.109615 | 0.687929 | 0.159341 | 0.8734   | 0.981636 | chr19 | 57490485 | 57494763 | + | 0 | NA | intron (Nintron (N   | 4874 NM_001098   | 79744    | Hs.744333NM_024691 | ENSG000003ZNF419     | ZAPHIR Zn zinc fingprotein-coding  |                             |
| chr3-129.11.65631  | 0.109615 | 0.687929 | 0.159341 | 0.8734   | 0.981636 | chr3  | 1.29E+08 | 1.29E+08 | + | 0 | NA | intron (NAluSc SINE  | -6094 NR_106884  | 1.02E+08 | NR_106884          | ENSG000003MIR6826    | hsa-mir-618 microRNA ncRNA         |                             |
| chr6-107.11.65631  | 0.109615 | 0.687929 | 0.159341 | 0.8734   | 0.981636 | chr6  | 1.08E+08 | 1.08E+08 | + | 0 | NA | intron (NTrigger I   | 39868 NM_007214  | 11231    | Hs.26904 NM_007214 | ENSG000003SEC63      | DNAJC23 ESEC63 honprotein-coding   |                             |
| chr1-5507.8.698049 | 0.127074 | 0.797655 | 0.159309 | 0.873425 | 0.981636 | chr1  | 55075781 | 55075986 | + | 0 | NA | intron (NAluJr SINE  | 35661 NR_110451  | 255738   | Hs.18844 NM_174930 | ENSG000003PCCS9      | PH3 HCHOI propteiprotein-coding    |                             |
| chr13-44.8.698049  | 0.127074 | 0.797655 | 0.159309 | 0.873425 | 0.981636 | chr13 | 44999454 | 45000700 | + | 0 | NA | intron (Nintron (N   | 10539 NM_018555  | 55425    | Hs.731811NM_018555 | ENSG000003GALP1P1    | ADQ29 K1A GALP1P mcprotein-coding  |                             |
| chr16-2.8.698049   | 0.127074 | 0.797655 | 0.159309 | 0.873425 | 0.981636 | chr16 | 28377277 | 28380122 | + | 0 | NA | TTS (NM_C TTS (NM_C  | 12352 NR_107058  | 1.02E+08 | NR_107058          | ENSG000003MIR6862-2  | hsa-mir-618 microRNA ncRNA         |                             |
| chr19-221.8.698049 | 0.127074 | 0.797655 | 0.159309 | 0.873425 | 0.981636 | chr19 | 2210283  | 2211123  | + | 0 | NA | exon (NM exon (NM    | 23446 NR_031596  | 1E+08    | NR_031596          | ENSG000003MIR1227    | MIRN1227 microRNA ncRNA            |                             |
| chr2-6394.8.698049 | 0.127074 | 0.797655 | 0.159309 | 0.873425 | 0.981636 | chr2  | 63941205 | 63942405 | + | 0 | NA | intron (NAluS2 SINE  | 77623 NM_016516  | 51542    | Hs.48499 NM_016516 | ENSG000003VPS54      | HCC8 PPP1VPS54 sut protein-coding  |                             |
| chr4-178.8.698049  | 0.127074 | 0.797655 | 0.159309 | 0.873425 | 0.981636 | chr4  | 17802606 | 17804503 | + | 0 | NA | exon (NM exon (NM    | 7203 NR_144303   | 54876    | Hs.614787NM_017741 | ENSG000003DCAF16     | C4orf30 DDB1 and protein-coding    |                             |
| chr8-569.8.698049  | 0.127074 | 0.797655 | 0.159309 | 0.873425 | 0.981636 | chr8  | 56963405 | 56964266 | + | 0 | NA | exon (NM exon (NM    | 30032 NM_017812  | 54928    | Hs.438689NM_017812 | ENSG000003IMPAD1     | GPAPP IMF inositol protein-coding  |                             |
| chr1-777.8.351112  | -0.129   | 0.81027  | -0.1592  | 0.873511 | 0.981636 | chr1  | 7778296  | 7779743  | + | 0 | NA | intron (NAluV SINE   | -5168 NM_001288  | 8863     | Hs.162200NM_016831 | ENSG000003PER3       | FASPS3 G1period ciprotein-coding   |                             |
| chr16-67.8.351112  | -0.129   | 0.81027  | -0.1592  | 0.873511 | 0.981636 | chr16 | 67067740 | 67067975 | + | 0 | NA | intron (NLM4a1 LI    | 38708 NM_001368  | 865      | Hs.460988NM_001750 | ENSG000003CBFB       | PEBP2B core-binc protein-coding    |                             |
| chr16-302.16.1672  | 0.095729 | 0.601344 | 0.159188 | 0.873521 | 0.981636 | chr16 | 30252496 | 30252926 | + | 0 | NA | IntergeniAluXs1 SINE | -4298 NM_001321  | 613037   | Hs.585733NM_001321 | ENSG000003NIPB13     | - nuclear lprotein-coding          |                             |
| chr1-218.7.673441  | 0.133407 | 0.838084 | 0.159181 | 0.873526 | 0.981636 | chr1  | 21863688 | 21865505 | + | 0 | NA | intron (NMIRb SINE   | 52331 NM_001013  | 401944   | Hs.745155NM_001013 | ENSG000003LDLRAD2    | - low densiprotein-coding          |                             |
| chr1-316.7.673441  | 0.133407 | 0.838084 | 0.159181 | 0.873526 | 0.981636 | chr1  | 31653119 | 31653500 | + | 0 | NA | intron (NMIRb SINE   | -8439 NR_033688  | 553115   | Hs.470417NM_012392 | ENSG000003PEP1       | ABP32 PEF penta-EF- protein-coding |                             |
| chr1-4344.7.673441 | 0.133407 | 0.838084 | 0.159181 | 0.873526 | 0.981636 | chr1  | 43443422 | 43444466 | + | 0 | NA | intron (Nintron (N   | -4595 NR_106799  | 1.02E+08 | NR_106799          | ENSG000003MIR6735    | hsa-mir-618 microRNA ncRNA         |                             |
| chr1-202.7.673441  | 0.133407 | 0.838084 | 0.159181 | 0.873526 | 0.981636 | chr1  | 2.03E+08 | 2.03E+08 | + | 0 | NA | intron (NFLAM_A SI   | -8946 NM_002871  | 5877     | Hs.90875 NM_002871 | ENSG000003CRAB1F     | MSS4 RASCAB interprotein-coding    |                             |
| chr10-10.7.673441  | 0.133407 | 0.838084 | 0.159181 | 0.873526 | 0.981636 | chr10 | 1.01E+08 | 1.01E+08 | + | 0 | NA | intron (Nintron (N   | 11379 NM_017902  | 55662    | Hs.500788NM_017902 | ENSG000003HIF1AN     | FIH1 hypoxia iprotein-coding       |                             |
| chr11-104.7.673441 | 0.133407 | 0.838084 | 0.159181 | 0.873526 | 0.981636 | chr11 | 10498194 | 10500952 | + | 0 | NA | intron (NMIR SINE    | 8753 NR_039706   | 1.01E+08 | NR_039706          | ENSG000003MIR4485    | miR-4485 microRNA ncRNA            |                             |
| chr12-12.7.673441  | 0.133407 | 0.838084 | 0.159181 | 0.873526 | 0.981636 | chr12 | 1.24E+08 | 1.24E+08 | + | 0 | NA | exon (NM exon (NM    | 24876 NM_012463  | 23545    | Hs.25786 NM_012463 | ENSG000003ATP6VOA2   | A2 ARCL ATPase H+protein-coding    |                             |
| chr16-36.7.673441  | 0.133407 | 0.838084 | 0.159181 | 0.873526 | 0.981636 | chr16 | 3685596  | 3686494  | + | 0 | NA | exon (NM exon (NM    | 31341 NM_001351  | 1773     | Hs.629638NM_005222 | ENSG000003DNASE1     | DNL1 DN1 deoxyribc protein-coding  |                             |
| chr16-48.7.673441  | 0.133407 | 0.838084 | 0.159181 | 0.873526 | 0.981636 | chr16 | 4853143  | 4859661  | + | 0 | NA | intron (Nintron (N   | 8022 NM_001288   | 29855    | Hs.442061NM_016930 | ENSG000003UBN1       | UT1 UT4 ubiquitc protein-coding    |                             |
| chr19-44.7.673441  | 0.133407 | 0.838084 | 0.159181 | 0.873526 | 0.981636 | chr19 | 44895357 | 44898114 | + | 0 | NA | intron (N2b LINE     | 5481 NM_006114   | 10452    | Hs.655909NM_006114 | ENSG000003TOMM40     | C19orf1 I transloc protein-coding  |                             |
| chr2-3831.7.673441 | 0.133407 | 0.838084 | 0.159181 | 0.873526 | 0.981636 | chr2  | 38312186 | 38312798 | + | 0 | NA | intron (NAluXs3 SI   | 64038 NM_001330  | 64225    | Hs.594959NM_022374 | ENSG000003ATL2       | ARL3IP2 ATlastin protein-coding    |                             |
| chr21-39.7.673441  | 0.133407 | 0.838084 | 0.159181 | 0.873526 | 0.981636 | chr21 | 39239585 | 39240433 | + | 0 | NA | intron (NLM1C1 LI    | -56495 NM_203433 | 8624     | Hs.473838NM_003720 | ENSG000003PSMG1      | C21LRP DS proteason protein-coding |                             |
| chr22-467.7.673441 | 0.133407 | 0.838084 | 0.159181 | 0.873526 | 0.981636 | chr22 | 46793741 | 46794094 | + | 0 | NA | intron (Nintron (N   | 19990 NM_001284  | 25771    | Hs.435044NM_014340 | ENSG000003TBC1D22A   | C22orf4 E TBC1 dom protein-coding  |                             |
| chr3-123.7.673441  | 0.133407 | 0.838084 | 0.159181 | 0.873526 | 0.981636 | chr3  | 1.24E+08 | 1.24E+08 | + | 0 | NA | intron (N3 LINE      | 66183 NM_053026  | 4638     | Hs.473772NM_005960 | ENSG000003MYLK       | AAD7 KR myosin l protein-coding    |                             |
| chr3-17.7.673441   | 0.133407 | 0.838084 | 0.159181 | 0.873526 | 0.981636 | chr3  | 1.72E+08 | 1.72E+08 | + | 0 | NA | intron (NMLT1D LTF   | 181614 NM_004122 | 2693     | Hs.130212NM_004122 | ENSG000003GHSR       | GHTP growth hprotein-coding        |                             |
| chr4-315.7.673441  | 0.133407 | 0.838084 | 0.159181 | 0.873526 | 0.981636 | chr4  | 3153871  | 3154944  | + | 0 | NA | exon (NM exon (NM    | 79726 NM_002111  | 3064     | Hs.518455NM_002111 | ENSG000003HHT        | HD IT15 I huntingtiprotein-coding  |                             |
| chr5-149.7.673441  | 0.133407 | 0.838084 | 0.159181 | 0.873526 | 0.981636 | chr5  | 1.48E+08 | 1.48E+08 | + | 0 | NA | intron (Nintron (N   | 41392 NM_030799  | 81545    | Hs.483775NM_030799 | ENSG000003FBX038     | Fbx38 HMM F-box prcprotein-coding  |                             |
| chr7-147.7.673441  | 0.133407 | 0.838084 | 0.159181 | 0.873526 | 0.981636 | chr7  | 1.49E+08 | 1.49E+08 | + | 0 | NA | intron (N2a LINE     | 6529 NM_003575   | 8427     | Hs.729056NM_003575 | ENSG000003ZNF282     | HUB1 zinc fing protein-coding      |                             |
| chr1-264.8.656909  | 0.125402 | 0.787925 | 0.159155 | 0.873547 | 0.981636 | chr1  | 26435737 | 26448380 | + | 0 | NA | intron (NLM2E2 LI    | 9737 NM_0205861  | 79947    | Hs.369385NM_024887 | ENSG000003DHD5       | CIT CPT I dehydrat protein-coding  |                             |
| chr1-3754.8.656909 | 0.125402 | 0.787925 | 0.159155 | 0.873547 | 0.981636 | chr1  | 37546208 | 37548961 | + | 0 | NA | intron (NAluS2 SINE  | 6709 NM_024700   | 79753    | Hs.47232 NM_024700 | ENSG000003SNIP1      | AB1 PMRE Smad nucl protein-coding  |                             |
| chr1-144.8.656909  | 0.125402 | 0.787925 | 0.159155 | 0.873547 | 0.981636 | chr1  | 1.44E+08 | 1.44E+08 | + | 0 | NA | in                   |                  |          |                    |                      |                                    |                             |



|                    |          |          |          |          |          |         |          |          |   |      |                     |                    |                              |                            |                   |                           |                             |
|--------------------|----------|----------|----------|----------|----------|---------|----------|----------|---|------|---------------------|--------------------|------------------------------|----------------------------|-------------------|---------------------------|-----------------------------|
| chr16-466 9.640377 | 0.119022 | 0.749286 | 0.158848 | 0.873789 | 0.981636 | chr16   | 46670489 | 46672534 | + | 0 NA | intron (AluSx3 SI   | 17667 NM_01820E    | 55737 Hs. 45452ENM_01820E    | ENSG000000VPS35            | MEM3 PARFVPS35    | retprotein-coding         |                             |
| chr2-8502 9.640377 | 0.119022 | 0.749286 | 0.158848 | 0.873789 | 0.981636 | chr2    | 85022937 | 85031154 | + | 0 NA | intron (AluJb SIN   | 37802 NR_14645E    | 1.01E+08 Hs. 43439ENR_14645E | ENSG000000LINC01964-       |                   | long intencRNA            |                             |
| chr5-1775 9.640377 | 0.119022 | 0.749286 | 0.158848 | 0.873789 | 0.981636 | chr5    | 1.78E+08 | 1.78E+08 | + | 0 NA | exon (NM_exon (NM   | 3196 NM_01751C     | 54732 Hs. 27992ENM_01751C    | ENSG000000TMED9            | GMP25 HSC         | transmem protein-coding   |                             |
| chr7-9889 9.640377 | 0.119022 | 0.749286 | 0.158848 | 0.873789 | 0.981636 | chr7    | 98891083 | 98894750 | + | 0 NA | intron (intron (N   | 11219 NR_132754    | 1.07E+08                     | NR_132754                  | SCARNA28          | ZL1                       | small Ca <sup>2+</sup> cRNA |
| chr7-9892 9.640377 | 0.119022 | 0.749286 | 0.158848 | 0.873789 | 0.981636 | chr7    | 98924902 | 98926513 | + | 0 NA | intron (intron (N   | 44010 NR_132754    | 1.07E+08                     | NR_132754                  | SCARNA28          | ZL1                       | small Ca <sup>2+</sup> cRNA |
| chr7-1569 9.640377 | 0.119022 | 0.749286 | 0.158848 | 0.873789 | 0.981636 | chr7    | 1.57E+08 | 1.57E+08 | + | 0 NA | intron (intron (N   | 4592 NM_13840C     | 64434 Hs. 15825 NM_13840C    | ENSG000000CNOM1            | C7orf3 PF         | nucleolar protein-coding  |                             |
| chr10-757 7.616585 | 0.135201 | 0.851423 | 0.158794 | 0.873831 | 0.981636 | chr10   | 75026536 | 75027552 | + | 0 NA | intron (AluSx SIN   | 5311 NR_14581E     | 1.1E+08                      | NR_14581E                  | SNORD172          |                           | small nucleolar RNA         |
| chr3-5031 7.616585 | 0.135201 | 0.851423 | 0.158794 | 0.873831 | 0.981636 | chr3    | 50319410 | 50319611 | + | 0 NA | intron (intron (N   | 3235 NM_00377E     | 8692 Hs. 76873 NM_00377E     | ENSG000000CHVAL2           | LUC2A             | hyaluronin protein-coding |                             |
| chr5-7467 7.616585 | 0.135201 | 0.851423 | 0.158794 | 0.873831 | 0.981636 | chr5    | 74634272 | 74634982 | + | 0 NA | intron (intron (N   | -5396 NM_00129E    | 3074 Hs. 69293 NM_000521     | ENSG000000CHEXB            | ENC-1AS F         | hexosamin protein-coding  |                             |
| chr11-183 7.161137 | 0.137252 | 0.864534 | 0.158759 | 0.873859 | 0.981636 | chr11   | 18305617 | 18307031 | + | 0 NA | exon (NM_exon (NM   | 15816 NM_00721E    | 11234 Hs. 43759ENM_00721E    | ENSG000000HPS5             | A1BP63 BLHPS5     | biogprotein-coding        |                             |
| chr11-837 7.161137 | 0.137252 | 0.864534 | 0.158759 | 0.873859 | 0.981636 | chr11   | 83073869 | 83074710 | + | 0 NA | TTS (NR_C TTS (NR_C | -2223 NR_03890E    | 1.01E+08 Hs. 50342ENR_03890E | ENSG000000RAB30-DT         | RAB30-AS1 RAB30   | divncRNA                  |                             |
| chr12-118 7.161137 | 0.137252 | 0.864534 | 0.158759 | 0.873859 | 0.981636 | chr12   | 1.18E+08 | 1.18E+08 | + | 0 NA | intron (intron (N   | 3439 NM_02249I     | 64426 Hs. 41663CNM_02249I    | ENSG000000SUDS3            | SAP45 SDS         | SDS3 homc protein-coding  |                             |
| chr13-727 7.161137 | 0.137252 | 0.864534 | 0.158759 | 0.873859 | 0.981636 | chr13   | 72791352 | 72793679 | + | 0 NA | exon (NM_exon (NM   | 10382 NR_14620E    | 10464 Hs. 44192ENM_00634E    | ENSG000000PIBF1            | C13orf24          | progester protein-coding  |                             |
| chr14-697 7.161137 | 0.137252 | 0.864534 | 0.158759 | 0.873859 | 0.981636 | chr14   | 69778417 | 69779067 | + | 0 NA | intron (intron (N   | -11029 NR_02937E   | 89932 Hs. 50990ENM_17346E    | ENSG000000PAPLN            | PPN               | papilin, protein-coding   |                             |
| chr14-731 7.161137 | 0.137252 | 0.864534 | 0.158759 | 0.873859 | 0.981636 | chr14   | 73199873 | 73201748 | + | 0 NA | intron (AluSx SIN   | -36696 NR_15867E   | 124446 Hs. 460574NM_19428E   | ENSG000000TMEM219          | IGFBP-3R          | transmem protein-coding   |                             |
| chr16-296 7.161137 | 0.137252 | 0.864534 | 0.158759 | 0.873859 | 0.981636 | chr16   | 29663951 | 29666124 | + | 0 NA | intron (intron (N   | 2958 NR_16146E     | 786 Hs. 14798ENM_000727      | ENSG000000CACNG1           | CACNG1            | calcium v protein-coding  |                             |
| chr17-671 7.161137 | 0.137252 | 0.864534 | 0.158759 | 0.873859 | 0.981636 | chr17   | 67121594 | 67124005 | + | 0 NA | intron (intron (N   | 78245 NM_000727    | 91768 Hs. 11108 NM_13837E    | ENSG000000CABLES1          | CABL CAF          | Cdk5 and protein-coding   |                             |
| chr18-231 7.161137 | 0.137252 | 0.864534 | 0.158759 | 0.873859 | 0.981636 | chr18   | 23189150 | 23191414 | + | 0 NA | intron (intron (N   | 34457 NM_13837E    | 51341 Hs. 591384NM_01589E    | ENSG000000ZBTB7A           | FBI-1 FBI         | zinc fing protein-coding  |                             |
| chr19-408 7.161137 | 0.137252 | 0.864534 | 0.158759 | 0.873859 | 0.981636 | chr19   | 4089269  | 4092037  | + | 0 NA | exon (NM_exon (NM   | -23754 NM_01589E   | 5300 Hs. 46584ENM_006221     | ENSG000000CPIN1            | DOD UBL5          | peptidyl r protein-coding |                             |
| chr19-987 7.161137 | 0.137252 | 0.864534 | 0.158759 | 0.873859 | 0.981636 | chr19   | 9838289  | 9844267  | + | 0 NA | intron (intron (N   | 5960 NR_03883C     | 5746 Hs. 57029ENM_00504E     | ENSG000000PTH2R            | PTH2R             | parathyrc protein-coding  |                             |
| chr2-2087 7.161137 | 0.137252 | 0.864534 | 0.158759 | 0.873859 | 0.981636 | chr2    | 2.08E+08 | 2.08E+08 | + | 0 NA | intron (intron (N   | -12580 NR_00130E   | 1841 Hs. 47187ENM_01214E     | ENSG000000DTYMK            | CDC8 PP37         | deoxythyn protein-coding  |                             |
| chr2-2416 7.161137 | 0.137252 | 0.864534 | 0.158759 | 0.873859 | 0.981636 | chr2    | 2.42E+08 | 2.42E+08 | + | 0 NA | intron (intron (N   | 16923 NR_03325E    | 257203 Hs. 50515ENM_14867E   | ENSG000000DSCR9            | NCRNA000E Down    | syncncRNA                 |                             |
| chr21-372 7.161137 | 0.137252 | 0.864534 | 0.158759 | 0.873859 | 0.981636 | chr21   | 37236774 | 37237762 | + | 0 NA | intron (intron (N   | 28765 NR_02671E    | 55254 Hs. 594171NM_01826E    | ENSG000000TMEM39A          |                   | transmem protein-coding   |                             |
| chr3-1194 7.161137 | 0.137252 | 0.864534 | 0.158759 | 0.873859 | 0.981636 | chr3    | 1.19E+08 | 1.19E+08 | + | 0 NA | intron (Tigger1 I   | 20379 NR_07350E    | 84162 Hs. 408142NM_01531E    | ENSG000000K1AA1109         | ALKKUCS FK1AA1109 | protein-coding            |                             |
| chr4-1222 7.161137 | 0.137252 | 0.864534 | 0.158759 | 0.873859 | 0.981636 | chr4    | 1.22E+08 | 1.22E+08 | + | 0 NA | intron (intron (N   | 49602 NM_01531E    | -18094 NM_00100E             | 387082 Hs. 65716ENM_00100E | ENSG000000SUMO4   | IDDM5 SM1                 | small ubi protein-coding    |
| chr6-1452 7.161137 | 0.137252 | 0.864534 | 0.158759 | 0.873859 | 0.981636 | chr6    | 1.49E+08 | 1.49E+08 | + | 0 NA | intron (NL2 LINE I  | 24807 NM_01602C    | 51106 Hs. 27990ENM_01602C    | ENSG000000TFB1M            | CG1-75 C1         | transri protein-coding    |                             |
| chr6-1557 7.161137 | 0.137252 | 0.864534 | 0.158759 | 0.873859 | 0.981636 | chr6    | 1.58E+08 | 1.58E+08 | + | 0 NA | intron (intron (N   | -59379 NM_00389E   | 8871 Hs. 434494NM_00389E     | ENSG000000SVN12            | INPP5H            | synaptoe protein-coding   |                             |
| chr7-1027 7.161137 | 0.137252 | 0.864534 | 0.158759 | 0.873859 | 0.981636 | chr7    | 1.03E+08 | 1.03E+08 | + | 0 NA | 5' UTR (N5' UTR (N  | 678 NM_00136E      | 1.08E+08                     | NM_00136E                  | ENSG000000UPK3BL2 |                           | uroplakin protein-coding    |
| chr9-9547 7.161137 | 0.137252 | 0.864534 | 0.158759 | 0.873859 | 0.981636 | chr9    | 95471693 | 95474025 | + | 0 NA | intron (intron (N   | 9250 NR_03898E     | 1.01E+08 Hs. 661847NR_03898E | LOC100507-                 |                   | uncharactercRNA           |                             |
| chr9-1518 5.153061 | 0.162555 | 1.024678 | 0.158664 | 0.873953 | 0.981636 | chr9    | 15187063 | 15187390 | + | 0 NA | intron (intron (N   | 62992 NM_00116E    | 158219 Hs. 56363CNM_152574   | ENSG000000TTC39B           | C9orf52           | tetratric protein-coding  |                             |
| chr14-361 6.689972 | 0.143678 | 0.905869 | 0.158608 | 0.873978 | 0.981636 | chr14   | 36115059 | 36116435 | + | 0 NA | exon (NM_exon (NM   | 17756 NM_00119E    | 23405 Hs. 87889 NM_030621    | ENSG000000DICER1           | DCR1 Dicer        | dicer 1, protein-coding   |                             |
| chr16-956 6.689972 | 0.143678 | 0.905869 | 0.158608 | 0.873978 | 0.981636 | chr16   | 9561629  | 95616303 | + | 0 NA | intron (intron (N   | 7642 NM_001351     | 1773 Hs. 62963ENM_00522E     | ENSG000000DNASE1           | DNL1 DRNI         | deoxyribc protein-coding  |                             |
| chr16-745 6.689972 | 0.143678 | 0.905869 | 0.158608 | 0.873978 | 0.981636 | chr16   | 74923056 | 74924029 | + | 0 NA | intron (AluSx SIN   | 61581 NM_030581    | 79726 Hs. 280951NM_030581    | ENSG000000WDR59            | CDW12 FP          | WD repeat protein-coding  |                             |
| chr2-2508 6.689972 | 0.143678 | 0.905869 | 0.158608 | 0.873978 | 0.981636 | chr2    | 95089418 | 95091312 | + | 0 NA | intron (intron (N   | 31192 NM_001321    | 64969 Hs. 65525ENM_03190E    | ENSG000000MRP55            | MRP-55 SM         | mitochonc protein-coding  |                             |
| chr5-1297 6.689972 | 0.143678 | 0.905869 | 0.158608 | 0.873978 | 0.981636 | chr5    | 1.3E+08  | 1.3E+08  | + | 0 NA | intron (LTR9D LTF   | -23216 NM_001257   | 1E+08 Hs. 582534NM_001257    | ENSG000000MINAR2           | K1AA1024I         | membrane protein-coding   |                             |
| chr7-743 6.689972  | 0.143678 | 0.905869 | 0.158608 | 0.873978 | 0.981636 | chr7    | 74339037 | 74340295 | + | 0 NA | intron (MIR SINE    | 50191 NM_00338E    | 7461 Hs. 64701ENM_00338E     | ENSG000000CLIP2            | CLIP CLIF         | CAP-Gly c protein-coding  |                             |
| chr7-100 6.689972  | 0.143678 | 0.905869 | 0.158608 | 0.873978 | 0.981636 | chr7    | 1E+08    | 1E+08    | + | 0 NA | promoter-promoter-  | -336 NR_10689E     | 1.02E+08                     | NR_10689E                  | ENSG000000MIR6840 | hsa-mir-6                 | microRNA ncRNA              |
| chr15-784 12.1248  | 0.107107 | 0.6755   | 0.15856  | 0.874015 | 0.981636 | chr15   | 78488341 | 78489227 | + | 0 NA | intron (intron (N   | -18780 NM_00108E   | 123688 Hs. 307962NM_00101E   | ENSG000000CHVKK            | AGPHD1            | hydroxyl protein-coding   |                             |
| chr1-6596 8.392252 | -0.12667 | 0.799004 | -0.15853 | 0.874037 | 0.981636 | chr1    | 6596885  | 6599362  | + | 0 NA | intron (intron (N   | 4746 NM_001324     | 9903 Hs. 7764 NM_014851      | ENSG000000KHLH21           |                   | kelch lik protein-coding  |                             |
| chr1-6666 8.392252 | -0.12667 | 0.799004 | -0.15853 | 0.874037 | 0.981636 | chr1    | 66663457 | 66667811 | + | 0 NA | intron (L1P6 LIN    | 37644 NR_03606E    | 1E+08                        | NR_03606E                  | ENSG000000MIR3117 | mir-3117                  | microRNA ncRNA              |
| chr1-1097 8.392252 | -0.12667 | 0.799004 | -0.15853 | 0.874037 | 0.981636 | chr1    | 1.1E+08  | 1.1E+08  | + | 0 NA | intron (intron (N   | -6626 NR_02958E    | 406974                       | NR_02958E                  | ENSG000000MIR197  | MIRN197                   | microRNA ncRNA              |
| chr10-151 8.392252 | -0.12667 | 0.799004 | -0.15853 | 0.874037 | 0.981636 | chr10   | 15102180 | 15106098 | + | 0 NA | exon (NM_exon (NM   | 6784 NM_006414     | 10557 Hs. 94986 NM_006414    | ENSG000000CRPP38           |                   | ribonucle protein-coding  |                             |
| chr10-688 8.392252 | -0.12667 | 0.799004 | -0.15853 | 0.874037 | 0.981636 | chr10   | 68944456 | 68945836 | + | 0 NA | intron (L1M5 LINE   | -10980 NM_00472E   | 9188 Hs. 223141NM_00472E     | ENSG000000DDX21            | GUA GDF           | DEXd-box protein-coding   |                             |
| chr11-115 8.392252 | -0.12667 | 0.799004 | -0.15853 | 0.874037 | 0.981636 | chr11   | 1.19E+08 | 1.19E+08 | + | 0 NA | intron (intron (N   | 2977 NM_001311     | 7070 Hs. 644697NM_00628E     | ENSG000000ETHY1            | CD90 CDw          | Thy-1 cel protein-coding  |                             |
| chr11-128 8.392252 | -0.12667 | 0.799004 | -0.15853 | 0.874037 | 0.981636 | chr11   | 1.29E+08 | 1.29E+08 | + | 0 NA | intron (intron (N   | 9339 NM_00523E     | 2113 Hs. 36943ENM_00523E     | ENSG000000ETS1             | ETS-1 EWS         | ETS protc protein-coding  |                             |
| chr12-144 8.392252 | -0.12667 | 0.799004 | -0.15853 | 0.874037 | 0.981636 | chr12   | 14433953 | 14438785 | + | 0 NA | intron (intron (N   | 52088 NM_18135E    | 55729 Hs. 50485ENM_01817E    | ENSG000000ATF7IP           | AM ATF            | -1                        | inactivatir protein-coding  |
| chr13-514 8.392252 | -0.12667 | 0.799004 | -0.15853 | 0.874037 | 0.981636 | chr13   | 51455702 | 51456214 | + | 0 NA | IntergenimER52A LI  | 2613 NR_10381E     | 1.01E+08 Hs. 594897NR_10381E | ENSG000000INTS6-AS1-       | INTS6             | antncRNA                  |                             |
| chr13-112 8.392252 | -0.12667 | 0.799004 | -0.15853 | 0.874037 | 0.981636 | chr13   | 1.13E+08 | 1.13E+08 | + | 0 NA | intron (intron (N   | -103363 NR_046661E | 1.01E+08 Hs. 65869ENR_046661 | ENSG000000ATP11A-AC-       | ATP11A            | arcncRNA                  |                             |
| chr14-311 8.392252 | -0.12667 | 0.799004 | -0.15853 | 0.874037 | 0.981636 | chr14   | 31139166 | 31141782 | + | 0 NA | intron (in FAM SINE | 67319 NM_01538E    | 25831 Hs. 708017NM_01538E    | ENSG000000HECTD1           | EULIR             | HECT domc protein-coding  |                             |
| chr14-677 8.392252 | -0.12667 | 0.799004 | -0.15853 | 0.874037 | 0.981636 | chr14</ |          |          |   |      |                     |                    |                              |                            |                   |                           |                             |

|           |          |          |          |          |          |          |       |          |          |   |   |    |                     |        |            |          |           |                 |                     |                |                                   |
|-----------|----------|----------|----------|----------|----------|----------|-------|----------|----------|---|---|----|---------------------|--------|------------|----------|-----------|-----------------|---------------------|----------------|-----------------------------------|
| chr9-3395 | 8.144605 | 0.12827  | 0.81117  | 0.158129 | 0.874355 | 0.981636 | chr9  | 33932202 | 33934306 | + | 0 | NA | intron (intron (N   | 1110   | NM_001282  | 55833    | Hs.49373c | NM_01844c       | ENSG00000CUBAP2     | UBAP-2         | ubiquitin protein-coding          |
| chr16-892 | 12.64764 | 0.104854 | 0.663184 | 0.158106 | 0.874373 | 0.981636 | chr16 | 89220449 | 89234898 | + | 0 | NA | exon (NM exon (NM   | 9970   | NM_182531  | 197320   | Hs.64738f | NM_182531       | ENSG00000ZNF778     | -              | zinc finger protein-coding        |
| chr21-466 | 12.64764 | 0.104854 | 0.663184 | 0.158106 | 0.874373 | 0.981636 | chr21 | 46652315 | 46656139 | + | 0 | NA | 3' UTR (3' UTR (N   | 18553  | NM_206962  | 3275     | Hs.15416e | NM_00153c       | ENSG00000PRMT2      | HRMT1L1        | protein epsilon protein-coding    |
| chr11-618 | 7.202276 | 0.139114 | 0.880144 | 0.158058 | 0.874411 | 0.981636 | chr11 | 61886621 | 61887273 | + | 0 | NA | intron (intron (N   | 4598   | NM_021727  | 3995     | Hs.21765  | NM_021727       | ENSG00000FADS3      | CYB5RF1        | l fatty acyl protein-coding       |
| chr16-265 | 7.202276 | 0.139114 | 0.880144 | 0.158058 | 0.874411 | 0.981636 | chr16 | 2696189  | 26983221 | + | 0 | NA | intron (intron (N   | 14732  | NM_018992  | 54442    | Hs.61960  | NM_01899c       | ENSG00000KCTD5      | -              | potassium protein-coding          |
| chr15-228 | 6.648833 | 0.141651 | 0.896593 | 0.157989 | 0.874466 | 0.981636 | chr15 | 22862911 | 22863532 | + | 0 | NA | intron (AluS6 SI    | 24580  | NM_001008  | 81614    | Hs.59100e | NM_03092c       | ENSG00000CNP2A      | SLC57A2        | NIPA magr protein-coding          |
| chr15-587 | 6.648833 | 0.141651 | 0.896593 | 0.157989 | 0.874466 | 0.981636 | chr15 | 58716613 | 58718331 | + | 0 | NA | intron (intron (N   | -23865 | NR_07341c  | 664618   | Hs.670224 | NR_002927       | HSP90AB4            | HSP90B4        | heat shock pseudo                 |
| chr15-785 | 6.648833 | 0.141651 | 0.896593 | 0.157989 | 0.874466 | 0.981636 | chr15 | 78920866 | 78923366 | + | 0 | NA | 3' UTR (3' UTR (N   | 22982  | NM_001319  | 1512     | Hs.148641 | NM_00439c       | ENSG00000CTSH       | ACC-4          | ACC theatsir protein-coding       |
| chr16-234 | 6.648833 | 0.141651 | 0.896593 | 0.157989 | 0.874466 | 0.981636 | chr16 | 23480885 | 23481269 | + | 0 | NA | intron (intron (N   | -27888 | NM_15360c  | 91949    | Hs.185807 | NM_15360c       | ENSG00000COG7       | CDG2E          | component protein-coding          |
| chr19-541 | 6.648833 | 0.141651 | 0.896593 | 0.157989 | 0.874466 | 0.981636 | chr19 | 54186014 | 54186719 | + | 0 | NA | intron (NL2 LINE L  | 3214   | NM_001146  | 79143    | Hs.46277c | NM_02429c       | ENSG00000MBOAT7     | BB1            | LENG4 membrane protein-coding     |
| chr20-44  | 6.648833 | 0.141651 | 0.896593 | 0.157989 | 0.874466 | 0.981636 | chr20 | 44056632 | 44058549 | + | 0 | NA | intron (intron (N   | 111694 | NM_001098  | 84969    | Hs.26608  | NM_03288c       | ENSG00000TOX2       | C20orf10C      | TOX high protein-coding           |
| chr3-1505 | 6.648833 | 0.141651 | 0.896593 | 0.157989 | 0.874466 | 0.981636 | chr3  | 1.51E+08 | 1.51E+08 | + | 0 | NA | intron (AluY SINE   | 15462  | NM_03202c  | 83939    | Hs.65578c | NM_03202c       | ENSG00000EIF2A      | CDA02          | EIF eukaryoti protein-coding      |
| chr4-3135 | 6.648833 | 0.141651 | 0.896593 | 0.157989 | 0.874466 | 0.981636 | chr4  | 3135155  | 3136171  | + | 0 | NA | intron (intron (N   | 60982  | NM_002211  | 3064     | Hs.51845c | NM_002211       | ENSG00000HHT        | HD IT15        | l huntingt protein-coding         |
| chr5-1375 | 6.648833 | 0.141651 | 0.896593 | 0.157989 | 0.874466 | 0.981636 | chr5  | 1.38E+08 | 1.38E+08 | + | 0 | NA | intron (intron (N   | -35048 | NR_03790c  | 1E+08    | Hs.61662c | NR_03790c       | LOC100103c          | -              | uncharactericnRNA                 |
| chr1-8415 | 7.938653 | -0.1298  | 0.821675 | -0.15797 | 0.874478 | 0.981636 | chr1  | 84196623 | 84198232 | + | 0 | NA | intron (TTTTAT)r    | 15795  | NM_001242  | 5567     | Hs.48732c | NM_002731       | ENSG00000PRKACB     | PKA C-beta     | protein-coding                    |
| chr1-159  | 7.938653 | -0.1298  | 0.821675 | -0.15797 | 0.874478 | 0.981636 | chr1  | 1.59E+08 | 1.59E+08 | + | 0 | NA | intron (intron (N   | 27488  | NM_001206  | 3428     | Hs.38025c | NM_005531       | ENSG00000IFI16      | IFNGIP1        | l interferc protein-coding        |
| chr10-95  | 7.938653 | -0.1298  | 0.821675 | -0.15797 | 0.874478 | 0.981636 | chr10 | 95617793 | 95623657 | + | 0 | NA | intron (ALIPA6 LIN  | 35986  | NM_00132c  | 5828     | Hs.50064c | NM_00286c       | ENSG00000ALDH18A1   | ADL3           | ALC aldehyde protein-coding       |
| chr10-996 | 7.938653 | -0.1298  | 0.821675 | -0.15797 | 0.874478 | 0.981636 | chr10 | 99610225 | 99611465 | + | 0 | NA | 3' UTR (3' UTR (N   | 9594   | NM_031212  | 81894    | Hs.40379c | NM_031212       | ENSG00000SLC25A28   | MFRN2          | MRS solute epsilon protein-coding |
| chr10-103 | 7.938653 | -0.1298  | 0.821675 | -0.15797 | 0.874478 | 0.981636 | chr10 | 1.03E+08 | 1.03E+08 | + | 0 | NA | exon (NM exon (NM   | 9940   | NM_01591c  | 51063    | Hs.24154c | NM_01591c       | ENSG00000CALHM2     | FAM26B         | calcium I protein-coding          |
| chr11-434 | 7.938653 | -0.1298  | 0.821675 | -0.15797 | 0.874478 | 0.981636 | chr11 | 43460731 | 43461288 | + | 0 | NA | intron (intron (N   | -98647 | NR_031577  | 1E+08    | NR_031577 | ENSG00000MIR670 | hsa-mir-6           | microRNA ncRNA |                                   |
| chr11-636 | 7.938653 | -0.1298  | 0.821675 | -0.15797 | 0.874478 | 0.981636 | chr11 | 63655284 | 63657586 | + | 0 | NA | intron (NLIMEc LIN  | 14941  | NM_01545c  | 25923    | Hs.35671c | NM_01545c       | ENSG00000ATL3       | HSN1F          | atlastin protein-coding           |
| chr11-111 | 7.938653 | -0.1298  | 0.821675 | -0.15797 | 0.874478 | 0.981636 | chr11 | 1.12E+08 | 1.12E+08 | + | 0 | NA | intron (NLIMDa LIN  | 3655   | NM_001352  | 79796    | Hs.74515c | NM_02474c       | ENSG00000ALG9       | CDGL1          | DLIE ALG9 alpl protein-coding     |
| chr12-12  | 7.938653 | -0.1298  | 0.821675 | -0.15797 | 0.874478 | 0.981636 | chr12 | 1.23E+08 | 1.23E+08 | + | 0 | NA | exon (NM exon (NM   | 30391  | NR_103517  | 10198    | Hs.577404 | NM_02278c       | ENSG00000MPHOSPH9   | MPP-9          | MPPM f protein-coding             |
| chr13-236 | 7.938653 | -0.1298  | 0.821675 | -0.15797 | 0.874478 | 0.981636 | chr13 | 23629216 | 23629851 | + | 0 | NA | intron (intron (N   | 50173  | NM_018647  | 55504    | Hs.14916c | NM_01864c       | ENSG00000TNFRSF19   | TAJ1           | TAJ-g-TNF receptor protein-coding |
| chr15-562 | 7.938653 | -0.1298  | 0.821675 | -0.15797 | 0.874478 | 0.981636 | chr15 | 56222984 | 56223936 | + | 0 | NA | intron (NLIMEF LIN  | 20419  | NM_001368  | 64864    | Hs.74508c | NM_02284c       | ENSG00000RFX7       | RFXDC2         | regulator protein-coding          |
| chr19-417 | 7.938653 | -0.1298  | 0.821675 | -0.15797 | 0.874478 | 0.981636 | chr19 | 41288256 | 41290481 | + | 0 | NA | intron (intron (N   | -20804 | NM_05284c  | 90324    | Hs.437497 | NM_05284c       | ENSG00000CCDC97     | -              | coiled-co protein-coding          |
| chr2-4328 | 7.938653 | -0.1298  | 0.821675 | -0.15797 | 0.874478 | 0.981636 | chr2  | 43283638 | 43285041 | + | 0 | NA | intron (NMSTA-int   | 57128  | NR_027251  | 1E+08    | Hs.19448c | NM_17852c       | ENSG00000LINC012c   | -              | long intcncRNA                    |
| chr2-714  | 7.938653 | -0.1298  | 0.821675 | -0.15797 | 0.874478 | 0.981636 | chr2  | 71425722 | 71429229 | + | 0 | NA | intron (intron (N   | -26086 | NM_00113c  | 8291     | Hs.25218c | NM_00349c       | ENSG00000DYSF       | FER1L1         | lC dysferlin protein-coding       |
| chr2-157  | 7.938653 | -0.1298  | 0.821675 | -0.15797 | 0.874478 | 0.981636 | chr2  | 1.57E+08 | 1.57E+08 | + | 0 | NA | intron (intron (N   | 29085  | NM_00130c  | 57471    | Hs.443894 | NM_020711       | ENSG00000ERMN       | JN KIAA1       | l ermin protein-coding            |
| chr20-564 | 7.938653 | -0.1298  | 0.821675 | -0.15797 | 0.874478 | 0.981636 | chr20 | 56447441 | 56447766 | + | 0 | NA | intron (NLTR78 LTF  | -20982 | NM_016407  | 51507    | Hs.517134 | NM_016407       | ENSG00000RTF2       | C20orf43       | l replicat protein-coding         |
| chr3-373  | 7.938653 | -0.1298  | 0.821675 | -0.15797 | 0.874478 | 0.981636 | chr3  | 37301345 | 37303168 | + | 0 | NA | exon (NM exon (NM   | -58061 | NR_14902c  | 152048   | Hs.59617c | NM_15253c       | ENSG00000CLOC15204c | -              | uncharactericnRNA                 |
| chr3-129  | 7.938653 | -0.1298  | 0.821675 | -0.15797 | 0.874478 | 0.981636 | chr3  | 1.29E+08 | 1.29E+08 | + | 0 | NA | intron (AluY SINE   | 12462  | NM_001204  | 339122   | Hs.38113c | NM_19849c       | ENSG00000RAB43      | RAB11B         | l RAB43, mc protein-coding        |
| chr5-138  | 7.938653 | -0.1298  | 0.821675 | -0.15797 | 0.874478 | 0.981636 | chr5  | 13805782 | 13809076 | + | 0 | NA | intron (intron (N   | 137051 | NM_00136c  | 1767     | Hs.21236c | NM_00136c       | ENSG00000DNAH5      | CILD3          | DNB dynein alpha protein-coding   |
| chr5-709  | 7.938653 | -0.1298  | 0.821675 | -0.15797 | 0.874478 | 0.981636 | chr5  | 70953451 | 70957507 | + | 0 | NA | Intergeni Intergeni | 30538  | NM_001297  | 6606     | Hs.53578c | NM_000344       | ENSG00000CSMN1      | BCD541         | lG survival protein-coding        |
| chr6-419  | 7.938653 | -0.1298  | 0.821675 | -0.15797 | 0.874478 | 0.981636 | chr6  | 41912338 | 41917283 | + | 0 | NA | intron (intron (N   | 6133   | NM_00130c  | 9477     | Hs.278434 | NM_00427c       | ENSG00000MED20      | PRO0213        | l mediator protein-coding         |
| chr7-659  | 7.938653 | -0.1298  | 0.821675 | -0.15797 | 0.874478 | 0.981636 | chr7  | 6593595  | 6596557  | + | 0 | NA | intron (AluJb SIN   | 5153   | NM_00130c  | 79034    | Hs.48751c | NM_024067       | ENSG00000C7orf26    | -              | chromosom protein-coding          |
| chr7-743  | 7.938653 | -0.1298  | 0.821675 | -0.15797 | 0.874478 | 0.981636 | chr7  | 74394024 | 74397370 | + | 0 | NA | intron (intron (N   | -58209 | NM_00568c  | 9569     | Hs.64705c | NM_00568c       | ENSG00000GTF2IRD1   | BEN CREAM      | GTF2I ref protein-coding          |
| chr7-989  | 7.938653 | -0.1298  | 0.821675 | -0.15797 | 0.874478 | 0.981636 | chr7  | 98915195 | 98918150 | + | 0 | NA | intron (intron (N   | 34975  | NR_132754  | 1.07E+08 | NR_132754 | SCARNA28        | ZL1                 | small Ca ncRNA |                                   |
| chr7-140  | 7.938653 | -0.1298  | 0.821675 | -0.15797 | 0.874478 | 0.981636 | chr7  | 1.41E+08 | 1.41E+08 | + | 0 | NA | 3' UTR (3' UTR (N   | 58152  | NR_134477  | 27147    | Hs.6385   | NM_01568c       | ENSG00000DENND2A    | FAM31D         | l KIDENN dome protein-coding      |
| chr1-1627 | 10.16054 | 0.115612 | 0.732938 | 0.157738 | 0.874663 | 0.981636 | chr1  | 1.63E+08 | 1.63E+08 | + | 0 | NA | intron (intron (N   | -30300 | NM_001304  | 51478    | Hs.49292c | NM_016371       | ENSG00000HSD17B7    | PRAP SDR       | l hydroxyst protein-coding        |
| chr1-1791 | 10.16054 | 0.115612 | 0.732938 | 0.157738 | 0.874663 | 0.981636 | chr1  | 1.79E+08 | 1.79E+08 | + | 0 | NA | intron (AluX1 SI    | 29903  | NM_0022371 | 64222    | Hs.58495c | NM_022371       | ENSG00000TOR3A      | ADIR ADIF      | l torsin epsilon protein-coding   |
| chr1-2312 | 10.16054 | 0.115612 | 0.732938 | 0.157738 | 0.874663 | 0.981636 | chr1  | 2313     | 2313E+08 | + | 0 | NA | intron (FLAM_A SI   | 27313  | NM_00131c  | 8443     | Hs.49802c | NM_01423c       | ENSG00000GNP47      | DAP-AT         | lD galacton protein-coding        |
| chr1-2448 | 10.16054 | 0.115612 | 0.732938 | 0.157738 | 0.874663 | 0.981636 | chr1  | 2.45E+08 | 2.45E+08 | + | 0 | NA | non-codiron-codir   | 8967   | NM_19807c  | 116228   | Hs.41149c | NM_19807c       | ENSG00000COX20      | FAM36A         | cytochron protein-coding          |
| chr10-73  | 10.16054 | 0.115612 | 0.732938 | 0.157738 | 0.874663 | 0.981636 | chr10 | 73386345 | 73388686 | + | 0 | NA | intron (AluS2 SIN   | 26543  | NM_00115c  | 310      | Hs.63182c | NM_00115c       | ENSG00000ANXA7      | ANX7 SNX       | l amexin I protein-coding         |
| chr10-79  | 10.16054 | 0.115612 | 0.732938 | 0.157738 | 0.874663 | 0.981636 | chr10 | 79349149 | 79354860 | + | 0 | NA | intron (intron (N   | 4535   | NM_00115c  | 10105    | Hs.38107c | NM_00572c       | ENSG00000PPIF       | CYP3           | CyP-terminal dyll protein-coding  |
| chr11-62  | 10.16054 | 0.115612 | 0.       |          |          |          |       |          |          |   |   |    |                     |        |            |          |           |                 |                     |                |                                   |



|                    |          |          |          |          |          |       |           |           |   |      |                     |                   |                              |                      |                                     |                        |
|--------------------|----------|----------|----------|----------|----------|-------|-----------|-----------|---|------|---------------------|-------------------|------------------------------|----------------------|-------------------------------------|------------------------|
| chr16-885.9.177071 | 0.121237 | 0.773298 | 0.156779 | 0.875419 | 0.981636 | chr16 | 8895914   | 8898289   | + | 0 NA | intron (Nintron (N  | -28089 NM_00127E  | 23589 Hs. 632184NM_01431E    | ENSG000002CARHSP1    | CRHSP-24 calcium i protein-coding   |                        |
| chr17-584.9.177071 | 0.121237 | 0.773298 | 0.156779 | 0.875419 | 0.981636 | chr17 | 58490546  | 58495036  | + | 0 NA | intron (Nintron (N  | -4383 NM_00108C   | 124535 Hs. 380061NM_00108C   | ENSG000002HSF5       | HSF 5 HSTheat shocprotein-coding    |                        |
| chr17-671.9.177071 | 0.121237 | 0.773298 | 0.156779 | 0.875419 | 0.981636 | chr17 | 67199179  | 67201436  | + | 0 NA | intron (Nintron (N  | -44469 NR_13639E  | 1.02E+08 Hs. 569824NR_13639E | LOC10192E-           | uncharactncRNA                      |                        |
| chr19-309.9.177071 | 0.121237 | 0.773298 | 0.156779 | 0.875419 | 0.981636 | chr19 | 309354685 | 309369000 | + | 0 NA | intron (Nintron (N  | 15333 NM_00130C   | 55095 Hs. 612332NM_01802E    | ENSG000002SAMD4B     | SMGB Smausterial e protein-coding   |                        |
| chr19-505.9.177071 | 0.121237 | 0.773298 | 0.156779 | 0.875419 | 0.981636 | chr19 | 50578307  | 50793568  | + | 0 NA | intron (Nintron (N  | 2480 NM_00712C    | 7376 Hs. 432977NM_00712E     | ENSG000002NRIH2      | LXR-β LX nuclear i protein-coding   |                        |
| chr2-227.9.177071  | 0.121237 | 0.773298 | 0.156779 | 0.875419 | 0.981636 | chr2  | 2.27E+08  | 2.27E+08  | + | 0 NA | intron (Nintron (N  | 4072 NM_00127E    | 56947 Hs. 47152E             | ENSG000002CMFF       | C2orf33 Emi tohnc protein-coding    |                        |
| chr9-132E.9.177071 | 0.121237 | 0.773298 | 0.156779 | 0.875419 | 0.981636 | chr9  | 1.33E+08  | 1.33E+08  | + | 0 NA | intron (Nintron (N  | 21785 NM_00131E   | 11092 Hs. 62595 NM_01895E    | ENSG000002SPACA9     | C9orf9 Mesper acir protein-coding   |                        |
| chr3-985E.6.136529 | 0.146699 | 0.935964 | 0.156735 | 0.875453 | 0.981636 | chr3  | 98589778  | 98590585  | + | 0 NA | intron (NAluSx SIN  | 3430 NM_00009E    | 1371 Hs. 476982NM_00009E     | ENSG000002CPOX       | COX CPOpropr protein-coding         |                        |
| chr1-935E.7.632301 | 0.13149  | 0.838974 | 0.156727 | 0.87546  | 0.981636 | chr1  | 9356024   | 9357523   | + | 0 NA | intron (Nintron (N  | 63879 NM_02510E   | 80176 Hs. 8261 NM_02510E     | ENSG000002SPSB1      | SSB-1 SSE splA/ryar protein-coding  |                        |
| chr1-201.7.632301  | 0.13149  | 0.838974 | 0.156727 | 0.87546  | 0.981636 | chr1  | 2.2E+08   | 2.2E+08   | + | 0 NA | intron (Nintron (N  | 27522 NR_03170E   | 1E+08 NR_03170E              | ENSG000002MIR664A    | MIR664 MI microRNA ncRNA            |                        |
| chr10-102.7.632301 | 0.13149  | 0.838974 | 0.156727 | 0.87546  | 0.981636 | chr10 | 1.03E+08  | 1.03E+08  | + | 0 NA | intron (Nintron (N  | 8434 NM_00117E    | 51684 Hs. 40408E             | ENSG000002SUFU       | JBT532 PF/SUFU nege protein-coding  |                        |
| chr12-57E.7.632301 | 0.13149  | 0.838974 | 0.156727 | 0.87546  | 0.981636 | chr12 | 57696328  | 57697346  | + | 0 NA | intron (NAlu SINE   | 2705 NM_00681E    | 10956 Hs. 527861NM_00681E    | ENSG000002COS9       | ERLEC2 OSOS9 endor protein-coding   |                        |
| chr12-131.7.632301 | 0.13149  | 0.838974 | 0.156727 | 0.87546  | 0.981636 | chr12 | 1.32E+08  | 1.32E+08  | + | 0 NA | exon (NM exon (NM   | 36729 NM_01540E   | 57634 Hs. 72347E             | ENSG000002EP400      | CAGH32 P4E1A bindi protein-coding   |                        |
| chr15-494.7.632301 | 0.13149  | 0.838974 | 0.156727 | 0.87546  | 0.981636 | chr15 | 49429475  | 49430713  | + | 0 NA | intron (Nintron (N  | 6852 NM_02000E    | 2252 Hs. 56726E              | ENSG000002FGF7       | HBF7-7 KC fibrob protein-coding     |                        |
| chr17-53E.7.632301 | 0.13149  | 0.838974 | 0.156727 | 0.87546  | 0.981636 | chr17 | 533824    | 534403    | + | 0 NA | intron (NAluS6 S1   | -88173 NM_18270E  | 359845 Hs. 34558E            | ENSG000002RFLNB      | CFM1 FAMIrefilin E protein-coding   |                        |
| chr18-577.7.632301 | 0.13149  | 0.838974 | 0.156727 | 0.87546  | 0.981636 | chr18 | 57741212  | 57742172  | + | 0 NA | intron (NMLT1F2 L1  | 61623 NM_00560E   | 5205 Hs. 21662E              | ENSG000002ATP8B1     | ATP1C BR1ATPase p protein-coding    |                        |
| chr2-206E.7.632301 | 0.13149  | 0.838974 | 0.156727 | 0.87546  | 0.981636 | chr2  | 2.06E+08  | 2.06E+08  | + | 0 NA | intron (Nintron (N  | 7464 NM_00119E    | 4719 Hs. 471207NM_00500E     | ENSG000002NDUFS1     | CT-75kd CNADH: X protein-coding     |                        |
| chr5-168E.7.632301 | 0.13149  | 0.838974 | 0.156727 | 0.87546  | 0.981636 | chr5  | 16859461  | 16860256  | + | 0 NA | intron (Nintron (N  | 76430 NM_01233A   | 4651 Hs. 48172E              | ENSG000002MYO10      | - myosin X protein-coding           |                        |
| chr5-154E.7.632301 | 0.13149  | 0.838974 | 0.156727 | 0.87546  | 0.981636 | chr5  | 1.55E+08  | 1.55E+08  | + | 0 NA | intron (Nintron (N  | 6900 NM_01546E    | 25929 Hs. 483921NM_01546E    | ENSG000002GEMIN5     | GEMIN-5 gem nucle protein-coding    |                        |
| chr7-9951.7.632301 | 0.13149  | 0.838974 | 0.156727 | 0.87546  | 0.981636 | chr7  | 99511775  | 99513625  | + | 0 NA | intron (Nintron (N  | 6695 NM_00131E    | 23660 Hs. 11083E             | ENSG000002ZKSCAN5    | ZFP-95 Zf zinc fing protein-coding  |                        |
| chr7-1041.7.632301 | 0.13149  | 0.838974 | 0.156727 | 0.87546  | 0.981636 | chr7  | 91489452  | 91489756  | + | 0 NA | intron (NLP1A8 LIN  | 29720 NM_00255E   | 5001 Hs. 43294E              | ENSG000002ORC5       | ORC5L ORC origin r protein-coding   |                        |
| chr15-39E.14.11013 | 0.098936 | 0.631322 | 0.156712 | 0.875472 | 0.981636 | chr15 | 39581184  | 39594452  | + | 0 NA | intron (NMR SINE    | 6739 NM_00324E    | 7057 Hs. 16422E              | ENSG000002THBS1      | THBS THBS thrombos protein-coding   |                        |
| chr9-723E.14.11013 | 0.098936 | 0.631322 | 0.156712 | 0.875472 | 0.981636 | chr9  | 72354268  | 72364308  | + | 0 NA | intron (Nintron (N  | 5268 NM_00127E    | 7763 Hs. 40609E              | ENSG000002ZFAND5     | ZA20D2 Zf zinc fing protein-coding  |                        |
| chr14-914.8.309973 | -0.13163 | 0.840001 | -0.15671 | 0.875475 | 0.981636 | chr14 | 91489452  | 91489756  | + | 0 NA | intron (Nintron (N  | 20100 NM_00136E   | 55671 Hs. 53388E             | ENSG000002PPP4R3A    | FLFL1 K1 protein i protein-coding   |                        |
| chr12-194.7.436057 | -0.13392 | 0.855576 | -0.15653 | 0.875614 | 0.981636 | chr12 | 1940371   | 1941743   | + | 0 NA | TTS (NR TTS (NR_1   | -4481 NR_03654E   | 1E+08 Hs. 737031NR_03654E    | ENSG000002LINC0094C- | long intencRNA                      |                        |
| chr12-71E.7.436057 | -0.13392 | 0.855576 | -0.15653 | 0.875614 | 0.981636 | chr12 | 71859382  | 78160161  | + | 0 NA | intron (Nintron (N  | 199775 NR_135021  | 1.05E+08 Hs. 15689E          | NR_135021            | ENSG000002LINC0242A-                | long intencRNA         |
| chr12-118.7.436057 | -0.13392 | 0.855576 | -0.15653 | 0.875614 | 0.981636 | chr12 | 1.81E+08  | 1.81E+08  | + | 0 NA | intron (NLC2 LINE   | 21905 NM_00256E   | 5037 Hs. 43386E              | ENSG000002PEBP1      | HCNP HCNF phosphat i protein-coding |                        |
| chr17-64E.7.436057 | -0.13392 | 0.855576 | -0.15653 | 0.875614 | 0.981636 | chr17 | 64514006  | 64514689  | + | 0 NA | non-codir non-codir | 7370 NR_13364A    | 90799 Hs. 56971E             | ENSG000002CEP95      | CCDC45 centroson protein-coding     |                        |
| chr18-18E.7.436057 | -0.13392 | 0.855576 | -0.15653 | 0.875614 | 0.981636 | chr18 | 186200    | 186465    | + | 0 NA | intron (NAluJr SIN  | 27775 NM_005151   | 9097 Hs. 46441E              | ENSG000002USP14      | TGT ubiquitir protein-coding        |                        |
| chr21-46E.7.436057 | -0.13392 | 0.855576 | -0.15653 | 0.875614 | 0.981636 | chr21 | 46241200  | 46241874  | + | 0 NA | non-codir non-codir | 12006 NR_11056E   | 114044 Hs. 65509E            | NR_00277E            | ENSG000002MCM3AP-AS                 | TCORF85 MCM3AP arncRNA |
| chr5-1284.7.436057 | -0.13392 | 0.855576 | -0.15653 | 0.875614 | 0.981636 | chr5  | 1.28E+08  | 1.28E+08  | + | 0 NA | intron (Nintron (N  | 116722 NM_00199E  | 2201 Hs. 51929E              | ENSG000002FBN2       | CCA DA9 E fibrillir protein-coding  |                        |
| chr7-724E.7.436057 | -0.13392 | 0.855576 | -0.15653 | 0.875614 | 0.981636 | chr7  | 74341883  | 74342112  | + | 0 NA | intron (Nintron (N  | 52522 NM_00338E   | 7461 Hs. 64701E              | ENSG000002CLIP2      | CLIP CLIF CAP-Gly c protein-coding  |                        |
| chr7-129E.7.436057 | -0.13392 | 0.855576 | -0.15653 | 0.875614 | 0.981636 | chr7  | 1.3E+08   | 1.3E+08   | + | 0 NA | intron (NLM1Eg LIN  | 28000 NM_00104C   | 4899 Hs. 65436E              | ENSG000002NRF1       | ALPHA-PAL nuclear i protein-coding  |                        |
| chr7-140E.7.436057 | -0.13392 | 0.855576 | -0.15653 | 0.875614 | 0.981636 | chr7  | 1.41E+08  | 1.41E+08  | + | 0 NA | intron (Nintron (N  | 56504 NR_13447E   | 27147 Hs. 6385 NM_01568E     | ENSG000002DENND2A    | FAM31D KIDENN dom e protein-coding  |                        |
| chr8-666E.10.11154 | 0.115547 | 0.738289 | 0.156506 | 0.875634 | 0.981636 | chr8  | 66634272  | 66635294  | + | 0 NA | exon (NM exon (NM   | -21565 NM_00129A  | 4603 Hs. 44589E              | ENSG000002MYBL1      | A-MYB AMY MYB prot protein-coding   |                        |
| chr15-281.8.894848 | -0.12352 | 0.789663 | -0.15642 | 0.8757   | 0.981636 | chr15 | 28160045  | 28160330  | + | 0 NA | intron (NLP1A5 LIN  | -60872 NM_00027E  | 4948 Hs. 654411NM_00027E     | ENSG000002OCA2       | BEY BEY1 OCA2 mele protein-coding   |                        |
| chr5-373E.8.894848 | -0.12352 | 0.789663 | -0.15642 | 0.8757   | 0.981636 | chr5  | 37392087  | 37392802  | + | 0 NA | intron (NAluSx SIN  | 13126 NM_00134E   | 55100 Hs. 21369E             | ENSG000002WDR70      | - WD repeat protein-coding          |                        |
| chr11-34E.8.664767 | 0.123701 | 0.791527 | 0.156282 | 0.875811 | 0.981636 | chr11 | 34913352  | 34913894  | + | 0 NA | intron (NLR12_ L1   | -2507 NM_00116E   | 8050 Hs. 50231E              | ENSG000002PDHX       | DDBP E3E pyruvate protein-coding    |                        |
| chr11-68E.8.664767 | 0.123701 | 0.791527 | 0.156282 | 0.875811 | 0.981636 | chr11 | 68915268  | 68916220  | + | 0 NA | intron (NAluS2 SIN  | 11893 NM_00218E   | 3508 Hs. 50343E              | ENSG000002IGHMBP2    | CATF1 CMI immunogl protein-coding   |                        |
| chr15-43E.8.664767 | 0.123701 | 0.791527 | 0.156282 | 0.875811 | 0.981636 | chr15 | 43003545  | 43003978  | + | 0 NA | intron (Nintron (N  | -82983 NM_17350C  | 146057 Hs. 646511NM_17350E   | ENSG000002TTBK2      | SCA11 TTE tau tubul protein-coding  |                        |
| chr15-434.8.664767 | 0.123701 | 0.791527 | 0.156282 | 0.875811 | 0.981636 | chr15 | 43454445  | 43456344  | + | 0 NA | intron (Nintron (N  | 37762 NM_001141   | 7158 Hs. 44096E              | ENSG000002TP53BP1    | 53BP1 TDF tumor pr protein-coding   |                        |
| chr16-23E.8.664767 | 0.123701 | 0.791527 | 0.156282 | 0.875811 | 0.981636 | chr16 | 23548403  | 23552439  | + | 0 NA | intron (Nintron (N  | 6929 NM_00118E    | 124454 Hs. 620541NM_00108E   | ENSG000002EARS2      | COXP12 W glutamyl protein-coding    |                        |
| chr16-89E.8.664767 | 0.123701 | 0.791527 | 0.156282 | 0.875811 | 0.981636 | chr16 | 89267037  | 89268344  | + | 0 NA | TTS (NM TTS (NM_C   | -28438 NR_13633E  | 1.05E+08 Hs. 657381NR_13633E | ENSG000002LOC105371- | uncharactncRNA                      |                        |
| chr17-75E.8.664767 | 0.123701 | 0.791527 | 0.156282 | 0.875811 | 0.981636 | chr17 | 75320678  | 75322590  | + | 0 NA | intron (Nintron (N  | -32185 NM_02173A  | 60386 Hs. 51447E             | ENSG000002SLC25A19   | DNC MCPH4 THO ce protein-coding     |                        |
| chr18-21E.8.664767 | 0.123701 | 0.791527 | 0.156282 | 0.875811 | 0.981636 | chr18 | 213683    | 216864    | + | 0 NA | TTS (NM TTS (NM_C   | 52774 NM_005131   | 9984 Hs. 71254E              | ENSG000002DHCX       | HPR1 P84 THO ce protein-coding      |                        |
| chr19-18E.8.664767 | 0.123701 | 0.791527 | 0.156282 | 0.875811 | 0.981636 | chr19 | 18925106  | 18926111  | + | 0 NA | intron (NAluSx3 S1  | 5848 NM_01907C    | 54555 Hs. 143181NM_01907E    | ENSG000002DX49       | Ddbp8 R27 DEAD-box protein-coding   |                        |
| chr19-44E.8.664767 | 0.123701 | 0.791527 | 0.156282 | 0.875811 | 0.981636 | chr19 | 44756267  | 44760760  | + | 0 NA | promoter-promoter-  | -144 NR_10705E    | 1.02E+08 NR_10705E           | ENSG000002MIR8085    | hsa-mir-5 microRNA ncRNA            |                        |
| chr2-372E.8.664767 | 0.123701 | 0.791527 | 0.156282 | 0.875811 | 0.981636 | chr2  | 37240236  | 37244478  | + | 0 NA | non-codir non-codir | 10699 NR_14640E   | 55471 Hs. 43346E             | ENSG000002NDUFAF7    | C2orf56 NADH: ubic protein-coding   |                        |
| chr2-234E.8.664767 | 0.123701 | 0.791527 | 0.156282 | 0.875811 | 0.981636 | chr2  | 2.35E+08  | 2.35E+08  | + | 0 NA | intron (Nintron (N  | 4557 NM_001371305 | 128854 Hs. 647447NR_002781   | ENSG000002TSPY26P    | TSPYL3 b testis sr pseudo           |                        |
| chr20-321.8.664767 | 0.123701 | 0.791527 | 0.156282 | 0.875811 | 0.981636 | chr20 | 32160707  | 32163168  | + | 0 NA | intron (Nintron (N  | 28423 NR_002781   | 128854 Hs. 647447NR_002781   | ENSG000002TSPY26P    | TSPYL3 b testis sr pseudo           |                        |
| chr20-36E.8.664767 | 0.123701 | 0.791527 | 0.156282 | 0.875811 | 0.981636 | chr20 | 36523675  | 36525746  | + | 0 NA | intron (NAluSp SIN  | -16809 NM_18152E  | 10398 Hs. 50468E             | ENSG000002MYL9       | LC20 MLC-myosin l i protein-coding  |                        |
| chr21-43E.8.664767 | 0.123701 | 0.791527 | 0.156282 |          |          |       |           |           |   |      |                     |                   |                              |                      |                                     |                        |

|                    |          |          |            |          |          |       |          |          |   |    |                    |                  |                               |                         |                                    |
|--------------------|----------|----------|------------|----------|----------|-------|----------|----------|---|----|--------------------|------------------|-------------------------------|-------------------------|------------------------------------|
| chr4-1866 7.930795 | -0.12808 | 0.821515 | -0.15591   | 0.876103 | 0.981636 | chr4  | 1.87E+08 | 1.87E+08 | 0 | NA | intron (NMIRb SINE | 56049 NM_00524E  | 2195 Hs. 481371NM_00524E      | ENSG0000CFAT1           | CDHF7 CDF FAT atypicprotein-coding |
| chr5-3716 7.930795 | -0.12808 | 0.821515 | -0.15591   | 0.876103 | 0.981636 | chr5  | 37168080 | 37171409 | 0 | NA | intron (NAluSx SIN | -79302 NR_13426E | 1.05E+08 Hs. 17099E NR_13426E | ENSG0000CLOC105374      | - uncharactericRNA                 |
| chr5-1266 7.930795 | -0.12808 | 0.821515 | -0.15591   | 0.876103 | 0.981636 | chr5  | 1.27E+08 | 1.27E+08 | 0 | NA | intron (NAluSx SIN | 10053 NM_032177  | 51808 Hs. 555731NM_032177     | ENSG0000CFHAX           | RNUXA phosphoryprotein-coding      |
| chr5-1346 7.930795 | -0.12808 | 0.821515 | -0.15591   | 0.876103 | 0.981636 | chr5  | 1.35E+08 | 1.35E+08 | 0 | NA | exon (NM exon (NM  | 9218 NM_00113E   | 134553 Hs. 70853E NM_15240E   | ENSG0000C5orf24         | - chromosonprotein-coding          |
| chr5-1775 7.930795 | -0.12808 | 0.821515 | -0.15591   | 0.876103 | 0.981636 | chr5  | 1.77E+08 | 1.77E+08 | 0 | NA | TTS (NM_CTS (NM_C  | 3271 NM_001271   | 27166 Hs. 744904NM_013237     | ENSG0000CPRELID1        | CGI-106 FPRELI donprotein-coding   |
| chr6-1396 7.930795 | -0.12808 | 0.821515 | -0.15591   | 0.876103 | 0.981636 | chr6  | 1390508  | 1396209  | 0 | NA | intron (NCpG       | -2947 NR_10677E  | 1.02E+08 NR_10677E            | ENSG0000CMIR6720        | hsa-mir-εmicroRNA ncRNA            |
| chr6-4266 7.930795 | -0.12808 | 0.821515 | -0.15591   | 0.876103 | 0.981636 | chr6  | 42662797 | 42666413 | 0 | NA | intron (Nintron (N | 57992 NM_000322  | 5961 Hs. 65448E NM_000322     | ENSG0000CPRH2           | AOFMD AVP peripherprotein-coding   |
| chr6-1371 7.930795 | -0.12808 | 0.821515 | -0.15591   | 0.876103 | 0.981636 | chr6  | 1.37E+08 | 1.37E+08 | 0 | NA | exon (NM exon (NM  | 20827 NM_00136E  | 3459 Hs. 520414NM_00041E      | ENSG0000CFNGR1          | CD119 IFN interfeerprotein-coding  |
| chr8-3896 7.930795 | -0.12808 | 0.821515 | -0.15591   | 0.876103 | 0.981636 | chr8  | 38989714 | 38995100 | 0 | NA | intron (NAluJo SIN | 4102 NM_03194C   | 83877 Hs. 7471 NM_03194C      | ENSG0000CTM2D2          | BLP1 TM2 domaiprotein-coding       |
| chr8-3907 7.930795 | -0.12808 | 0.821515 | -0.15591   | 0.876103 | 0.981636 | chr8  | 39071246 | 39073183 | 0 | NA | intron (Nintron (N | -35315 NM_00131E | 203102 Hs. 52154E NM_145004   | ENSG0000CADAM32         | - ADAM metae protein-coding        |
| chr8-7686 7.930795 | -0.12808 | 0.821515 | -0.15591   | 0.876103 | 0.981636 | chr8  | 76850478 | 76851202 | 0 | NA | intron (Nintron (N | 116010 NR_13046C | 1E+08 NR_13046C               | ENSG0000CMIR3149        | - microRNA ncRNA                   |
| chr9-1296 7.930795 | -0.12808 | 0.821515 | -0.15591   | 0.876103 | 0.981636 | chr9  | 1.3E+08  | 1.3E+08  | 0 | NA | intron (NCharlie4z | 65264 NM_01503E  | 23048 Hs. 18940E NM_01503E    | ENSG0000CFNBP1          | FBP17 formin biprotein-coding      |
| chrX-2012 7.930795 | -0.12808 | 0.821515 | -0.15591   | 0.876103 | 0.981636 | chrX  | 20133608 | 20138530 | 0 | NA | TTS (NR_CTS (NR_C  | 344 NR_02335E    | 1E+08 NR_02335E               | SCARNA9L                | - small Ca ncRNA                   |
| chr1-3208 7.930795 | -0.12808 | 0.821515 | -0.15591   | 0.876103 | 0.981636 | chr1  | 32083370 | 32084121 | 0 | NA | intron (NAluSx SIN | -3014 NR_04985E  | 1.01E+08 NR_04985E            | ENSG0000CMIR5585        | - microRNA ncRNA                   |
| chr1-1181 9.135931 | 0.119634 | 0.768969 | 0.155578   | 0.876366 | 0.981636 | chr1  | 11815589 | 11818278 | 0 | NA | intron (Nintron (N | 10742 NM_00128E  | 1185 Hs. 19304E NM_00128E     | ENSG0000CCLCN6          | CLC-6 chloride protein-coding      |
| chr1-6700 9.135931 | 0.119634 | 0.768969 | 0.155578   | 0.876366 | 0.981636 | chr1  | 67002836 | 67004065 | 0 | NA | 3' UTR (N3' UTR (N | 50698 NM_01513E  | 23169 Hs. 21364E NM_01513E    | ENSG0000CSLC35D1        | SHNKND SOLUTE cεprotein-coding     |
| chr1-151 9.135931  | 0.119634 | 0.768969 | 0.155578   | 0.876366 | 0.981636 | chr1  | 1.52E+08 | 1.52E+08 | 0 | NA | intron (NLTRI2C LI | 2236 NM_05305E   | 117145 Hs. 16407E NM_05305E   | ENSG0000CTHEM4          | CTMP thioesterprotein-coding       |
| chr12-12 9.135931  | 0.119634 | 0.768969 | 0.155578   | 0.876366 | 0.981636 | chr12 | 1.2E+08  | 1.2E+08  | 0 | NA | intron (NMIRb SINE | 17621 NR_038924  | 1.01E+08 Hs. 56920E NR_038924 | ENSG0000CPXN-AS1        | EyeLinc4 PXN anticncRNA            |
| chr14-547 9.135931 | 0.119634 | 0.768969 | 0.155578   | 0.876366 | 0.981636 | chr14 | 54778191 | 54780162 | 0 | NA | intron (Nintron (N | 24343 NM_001161  | 23034 Hs. 98259 NM_01558E     | ENSG0000CSAMD4A         | SAMD4 SMA sterile εprotein-coding  |
| chr15-904 9.135931 | 0.119634 | 0.768969 | 0.155578   | 0.876366 | 0.981636 | chr15 | 90434712 | 90434911 | 0 | NA | intron (NTigger4a  | 46569 NM_00387E  | 8826 Hs. 430551NM_00387E      | ENSG0000CIQAP1          | HUMORFAM01IQ motif protein-coding  |
| chr15-925 9.135931 | 0.119634 | 0.768969 | 0.155578   | 0.876366 | 0.981636 | chr15 | 92973345 | 92975298 | 0 | NA | intron (Nintron (N | 69622 NR_03613E  | 1E+08 NR_03613E               | ENSG0000CMIR3175        | mir-3175 microRNA ncRNA            |
| chr16-162 9.135931 | 0.119634 | 0.768969 | 0.155578   | 0.876366 | 0.981636 | chr16 | 16252223 | 16256679 | 0 | NA | intron (Nintron (N | 21856 NM_173614  | 283820 Hs. 460141NM_173614    | ENSG0000CNOMO2          | Nomo PM5 NODAL mocprotein-coding   |
| chr17-72 9.135931  | 0.119634 | 0.768969 | 0.155578   | 0.876366 | 0.981636 | chr17 | 7321288  | 7324271  | 0 | NA | exon (NM exon (NM  | 6331 NM_03244E   | 84461 Hs. 654794NM_03244E     | ENSG0000CNEURL4         | - neuronalε protein-coding         |
| chr17-432 9.135931 | 0.119634 | 0.768969 | 0.155578   | 0.876366 | 0.981636 | chr17 | 42774912 | 42777912 | 0 | NA | intron (NAluSx3 SI | 2963 NM_03235E   | 50016E NM_03235E              | ENSG0000CVPS25          | DERP9 EAF vacuolar protein-coding  |
| chr17-501 9.135931 | 0.119634 | 0.768969 | 0.155578   | 0.876366 | 0.981636 | chr17 | 50134661 | 50136391 | 0 | NA | intron (Nintron (N | -5366 NM_001257  | 201191 Hs. 56776E NM_17492E   | ENSG0000CSAMD14         | - sterile εprotein-coding          |
| chr17-81 9.135931  | 0.119634 | 0.768969 | 0.155578   | 0.876366 | 0.981636 | chr17 | 81913836 | 81915939 | 0 | NA | intron (Nintron (N | 3289 NM_01653E   | 51547 Hs. 51463E NM_01653E    | ENSG0000CSIRT7          | SIRT7 sirtuin 7protein-coding      |
| chr2-151 9.135931  | 0.119634 | 0.768969 | 0.155578   | 0.876366 | 0.981636 | chr2  | 1.51E+08 | 1.51E+08 | 0 | NA | 3' UTR (N3' UTR (N | 12486 NM_198557  | 375287 Hs. 30244E NM_198557   | ENSG0000CBM43           | C2orf38 RNA bindiprotein-coding    |
| chr21-392 9.135931 | 0.119634 | 0.768969 | 0.155578   | 0.876366 | 0.981636 | chr21 | 39204546 | 39205662 | 0 | NA | intron (Nintron (N | -21590 NM_20343E | 8624 Hs. 47383E NM_00372E     | ENSG0000CPMG1           | C21LRP DS proteasoneprotein-coding |
| chr3-4787 9.135931 | 0.119634 | 0.768969 | 0.155578   | 0.876366 | 0.981636 | chr3  | 47870520 | 47872217 | 0 | NA | intron (NL2b LINE  | 21813 NR_03159E  | ENSG0000CMIR1226              | MIRN1226 microRNA ncRNA |                                    |
| chr4-5546 9.135931 | 0.119634 | 0.768969 | 0.155578   | 0.876366 | 0.981636 | chr4  | 55465915 | 55466432 | 0 | NA | intron (NTHEIC LTF | 70216 NM_01847E  | 55858 Hs. 47976E NM_01847E    | ENSG0000CTMEM165        | CDG2K T2E transmentprotein-coding  |
| chr8-9812 9.135931 | 0.119634 | 0.768969 | 0.155578   | 0.876366 | 0.981636 | chr8  | 98128024 | 98132711 | 0 | NA | intron (Nintron (N | 12527 NM_01502E  | 10940 Hs. 25282E NM_01502E    | ENSG0000CPOP1           | ANXD2 POP1 homcprotein-coding      |
| chr1-3945 11.62303 | 0.107043 | 0.688069 | 0.155571   | 0.876371 | 0.981636 | chr1  | 39453948 | 39461395 | 0 | NA | intron (NL2c LINE  | -33965 NM_18180E | 353500 Hs. 472497NM_18180E    | ENSG0000CBMP8A          | - bone morph protein-coding        |
| chr20-367 11.62303 | 0.107043 | 0.688069 | 0.155571   | 0.876371 | 0.981636 | chr20 | 36796400 | 36796632 | 0 | NA | intron (Nintron (N | -22753 NM_00114E | 79980 Hs. 63226E NM_02491E    | ENSG0000CSLR2           | C20orf172 DSN1 com protein-coding  |
| chr1-229E 8.88699  | -0.12187 | 0.783465 | -0.15555   | 0.876384 | 0.981636 | chr1  | 2.3E+08  | 2.3E+08  | 0 | NA | intron (NMIRb SINE | 19255 NM_01440E  | 27097 Hs. 270621NM_01440E     | ENSG0000CTAF5L          | PAF65B TATA-box protein-coding     |
| chr15-56E 8.88699  | -0.12187 | 0.783465 | -0.15555   | 0.876384 | 0.981636 | chr15 | 56676142 | 56676479 | 0 | NA | intron (Nintron (N | 57776 NM_00128E  | 54816 Hs. 511477NM_017661     | ENSG0000CZNF280D        | SUHW4 ZNF zinc fingprotein-coding  |
| chr16-68E 8.88699  | -0.12187 | 0.783465 | -0.15555   | 0.876384 | 0.981636 | chr16 | 68337791 | 68337990 | 0 | NA | intron (NL2c LINE  | 26776 NM_00129C  | 54496 Hs. 64022E NM_01902E    | ENSG0000CPRMT7          | SIBDSS protein εprotein-coding     |
| chr2-614E 8.88699  | -0.12187 | 0.783465 | -0.15555   | 0.876384 | 0.981636 | chr2  | 61488040 | 61488395 | 0 | NA | exon (NM exon (NM  | -17130 NM_01470E | 9736 Hs. 64470E NM_01470E     | ENSG0000CUSP34          | - ubiquitin protein-coding         |
| chr3-1261 8.88699  | -0.12187 | 0.783465 | -0.15555   | 0.876384 | 0.981636 | chr3  | 12611174 | 12612336 | 0 | NA | intron (Nintron (N | 51753 NM_001354  | 5894 Hs. 15913E NM_00288E     | ENSG0000CRAF1           | CMD1NN CFRAF1 prcprotein-coding    |
| chr6-100E 8.88699  | -0.12187 | 0.783465 | -0.15555   | 0.876384 | 0.981636 | chr6  | 1.01E+08 | 1.01E+08 | 0 | NA | intron (NAluYc SIN | -46179 NM_00506E | 6492 Hs. 52029E NM_00506E     | ENSG0000CSIM1           | bHLHeL4 SIM bHLHeL protein-coding  |
| chr1-1611 8.152463 | 0.126473 | 0.813202 | 0.155525   | 0.876407 | 0.981636 | chr1  | 1.61E+08 | 1.61E+08 | 0 | NA | intron (Nintron (N | 4398 NM_00103E   | 9191 Hs. 74409E NM_00421E     | ENSG0000CDEDD           | CASP8IP1 death effprotein-coding   |
| chr1-1657 8.152463 | 0.126473 | 0.813202 | 0.155525   | 0.876407 | 0.981636 | chr1  | 1.66E+08 | 1.66E+08 | 0 | NA | intron (NL2a LINE  | 3011 NM_00136E   | 54499 Hs. 31498 NM_01902E     | ENSG0000CTMCO1          | HP10122 Ftransmentprotein-coding   |
| chr1-193 8.152463  | 0.126473 | 0.813202 | 0.155525   | 0.876407 | 0.981636 | chr1  | 1.93E+08 | 1.93E+08 | 0 | NA | intron (NAluX1 SI  | 5248 NM_19796E   | 51022 Hs. 4828E NM_01606E     | ENSG0000CLRXC2          | IG1-133 GLutaredc protein-coding   |
| chr1-246E 8.152463 | 0.126473 | 0.813202 | 0.155525   | 0.876407 | 0.981636 | chr1  | 2.47E+08 | 2.47E+08 | 0 | NA | intron (NAluS6 SI  | 10432 NM_02236E  | 64216 Hs. 7395 NM_02236E      | ENSG0000CTFBZM          | Hkp1 mtTF transcrip protein-coding |
| chr10-934 8.152463 | 0.126473 | 0.813202 | 0.155525   | 0.876407 | 0.981636 | chr10 | 93412403 | 93412692 | 0 | NA | intron (Nintron (N | 69787 NM_013451  | 26509 Hs. 60208E NM_013451    | ENSG0000CVMYOF          | FERL13 myoferlin protein-coding    |
| chr10-102 8.152463 | 0.126473 | 0.813202 | 0.155525   | 0.876407 | 0.981636 | chr10 | 1.03E+08 | 1.03E+08 | 0 | NA | intron (Nintron (N | 25043 NM_00010E  | 1586 Hs. 43801E NM_00010E     | ENSG0000CYP17A1         | CP17 CYP1 cytochroprotein-coding   |
| chr12-193 8.152463 | 0.126473 | 0.813202 | 0.155525   | 0.876407 | 0.981636 | chr12 | 19360781 | 19362460 | 0 | NA | exon (NM exon (NM  | -77872 NM_001114 | 121536 Hs. 126497NM_15320E    | ENSG0000CAEBP2          | - AE bindir protein-coding         |
| chr12-644 8.152463 | 0.126473 | 0.813202 | 0.155525   | 0.876407 | 0.981636 | chr12 | 64470734 | 64472511 | 0 | NA | intron (NAluSx SIN | 19502 NM_013254  | 29110 Hs. 505874NM_013254     | ENSG0000CTBK1           | FTDALS4 ITANK bincprotein-coding   |
| chr12-111 8.152463 | 0.126473 | 0.813202 | 0.155525   | 0.876407 | 0.981636 | chr12 | 1.11E+08 | 1.11E+08 | 0 | NA | intron (NAluJo SIN | 13232 NM_00547E  | 10019 Hs. 506784NM_00547E     | ENSG0000CSH2B3          | IDDM20 LNSH2B adaf protein-coding  |
| chr12-12 8.152463  | 0.126473 | 0.813202 | 0.155525   | 0.876407 | 0.981636 | chr12 | 1.24E+08 | 1.24E+08 | 0 | NA | intron (NAluJ SINE | 3976 NM_001414   | 1967 Hs. 74127E NM_001414     | ENSG0000EIF2B1          | EIF2B EIF eukaryoti protein-coding |
| chr15-61E 8.152463 | 0.126473 | 0.813202 | 0.155525   | 0.876407 | 0.981636 | chr15 | 61944631 | 61945844 | 0 | NA | intron (NTHEIC LTF | 115210 NM_017684 | 54832 Hs. 51166E NM_017684    | ENSG0000CVPS13C         | PARK23 vacuolar protein-coding     |
| chr16-144 8.152463 | 0.126473 | 0.813202 | 0.155525   | 0.876407 | 0.981636 | chr16 | 14988754 | 14991010 | 0 | NA | intron (NCpG       | 14856 NM_00128E  | 23042 Hs. 370781NM_01502E     | ENSG0000CPDXDC1         | LP8165 pyridoxal protein-coding    |
| chr16-71E 8.152463 | 0.126473 | 0.813202 | 0.155525</ |          |          |       |          |          |   |    |                    |                  |                               |                         |                                    |



|                    |          |          |          |          |          |       |          |          |   |      |                     |                   |                   |                  |                    |                               |                                |                |
|--------------------|----------|----------|----------|----------|----------|-------|----------|----------|---|------|---------------------|-------------------|-------------------|------------------|--------------------|-------------------------------|--------------------------------|----------------|
| chr14-694 7.640159 | 0.129593 | 0.839121 | 0.154439 | 0.877264 | 0.981636 | chr14 | 69456503 | 69457619 | + | 0 NA | intron (Nintron (N  | -27667 NM_001161  | 400224 Hs. 509799 | ENSG00000PLEKHD1 | UPF0639            | pleckstriprotein-coding       |                                |                |
| chr15-526 7.640159 | 0.129593 | 0.839121 | 0.154439 | 0.877264 | 0.981636 | chr15 | 52624329 | 52624797 | + | 0 NA | intron (Nintron (N  | 27477 NM_001288   | 56204 Hs. 152388  | ENSG00000FAM214A | KIAA1370           | family wiprotein-coding       |                                |                |
| chr17-625 7.640159 | 0.129593 | 0.839121 | 0.154439 | 0.877264 | 0.981636 | chr17 | 62575550 | 62577920 | + | 0 NA | exon (NM_exon (NM   | -50935 NM_006035  | 9902 Hs. 7835     | ENSG00000MRC2    | CD280              | CLFmannose rprotein-coding    |                                |                |
| chr2-2034 7.640159 | 0.129593 | 0.839121 | 0.154439 | 0.877264 | 0.981636 | chr2  | 2.03E+08 | 2.03E+08 | + | 0 NA | 3' UTR (N3' UTR (N  | 72428 NM_001282   | 10152 Hs. 471156  | ENSG00000AB12    | hba-2              | ABIabl interprotein-coding    |                                |                |
| chr6-1586 7.640159 | 0.129593 | 0.839121 | 0.154439 | 0.877264 | 0.981636 | chr6  | 1.59E+08 | 1.59E+08 | + | 0 NA | intron (Nintron (N  | 17109 NR_106981   | 1.02E+08          | NR_106981        | ENSG00000MIR1761   | hsa-mir-7                     | microRNA ncRNA                 |                |
| chr9-9652 7.640159 | 0.129593 | 0.839121 | 0.154439 | 0.877264 | 0.981636 | chr9  | 96526249 | 96526467 | + | 0 NA | intron (NAluY SINE  | 40473 NM_001351   | 8555 Hs. 40582    | ENSG00000CDC14B  | CDC14B3            | Cell diviprotein-coding       |                                |                |
| chr1-1934 8.879132 | -0.12028 | 0.780327 | -0.15414 | 0.877497 | 0.981636 | chr1  | 19354234 | 19357400 | + | 0 NA | intron (Nintron (N  | 43491 NM_00104C   | 54896 Hs. 64762C  | ENSG00000SLC66A1 | LAAT-1             | l L solute cprotein-coding    |                                |                |
| chr1-2094 8.879132 | -0.12028 | 0.780327 | -0.15414 | 0.877497 | 0.981636 | chr1  | 20941489 | 20942271 | + | 0 NA | exon (NM_exon (NM   | 46552 NR_031657   | 1E+08             | NR_031657        | ENSG00000MIR1256   | MIRN1256                      | microRNA ncRNA                 |                |
| chr14-528 8.879132 | -0.12028 | 0.780327 | -0.15414 | 0.877497 | 0.981636 | chr14 | 52890053 | 52893936 | + | 0 NA | intron (N L2b LINE  | 59056 NM_006832   | 10979 Hs. 509342  | ENSG00000FERMT2  | KIND2              | MICfermitin protein-coding    |                                |                |
| chr17-456 8.879132 | -0.12028 | 0.780327 | -0.15414 | 0.877497 | 0.981636 | chr17 | 45601885 | 45607504 | + | 0 NA | intron (N FLAM_C SI | 23377 NM_0021075  | 4836 Hs. 53279C   | ENSG00000NMT1    | NMT                | -Myrist protein-coding        |                                |                |
| chr21-366 8.879132 | -0.12028 | 0.780327 | -0.15414 | 0.877497 | 0.981636 | chr21 | 36052584 | 36056915 | + | 0 NA | intron (Nintron (N  | 5615 NM_001007    | 54093 Hs. 60620C  | ENSG00000SETD4   | C2lorf18           | SET domainprotein-coding      |                                |                |
| chr21-372 8.879132 | -0.12028 | 0.780327 | -0.15414 | 0.877497 | 0.981636 | chr21 | 37223155 | 37225040 | + | 0 NA | 3' UTR (N3' UTR (N  | 15594 NR_02671E   | 257203 Hs. 50515E | ENSG00000DSCR9   | NCRNA0002          | Down syncncRNA                |                                |                |
| chr22-411 8.879132 | -0.12028 | 0.780327 | -0.15414 | 0.877497 | 0.981636 | chr22 | 41160433 | 41166148 | + | 0 NA | intron (NAluYa5 SI  | 34211 NR_110514   | 1.02E+08          | Hs. 517517       | NR_110514          | EP300-AS1                     | EP300 antncRNA                 |                |
| chr5-1548 8.879132 | -0.12028 | 0.780327 | -0.15414 | 0.877497 | 0.981636 | chr5  | 1.55E+08 | 1.55E+08 | + | 0 NA | TTS (NM_C TTS (NM_C | 28751 NM_001301   | 9337 Hs. 26703    | NR_00477E        | ENSG00000CNOT8     | CAF1                          | CAL CCR4-NOT protein-coding    |                |
| chr6-1106 8.879132 | -0.12028 | 0.780327 | -0.15414 | 0.877497 | 0.981636 | chr6  | 1.11E+08 | 1.11E+08 | + | 0 NA | intron (N L2c LINE  | 4123 NM_032194    | 84154 Hs. 37226E  | ENSG00000RPF7    | BXDC1              | ba2:ribosome protein-coding   |                                |                |
| chr6-1597 8.879132 | -0.12028 | 0.780327 | -0.15414 | 0.877497 | 0.981636 | chr6  | 1.6E+08  | 1.6E+08  | + | 0 NA | intron (NAluJb SIN  | -10040 NM_005891  | 39 Hs. 571037     | NR_005891        | ENSG00000ACAT2     | -                             | acetyl-Ccprotein-coding        |                |
| chr1-235 9.656093  | 0.115991 | 0.752577 | 0.154124 | 0.877512 | 0.981636 | chr1  | 2.35E+08 | 2.35E+08 | + | 0 NA | intron (NAluY SINE  | 14031 NM_001287   | 6905 Hs. 74499E   | ENSG00000CTBCE   | HRD                | KCS K tubulin rprotein-coding |                                |                |
| chr11-106 9.656093 | 0.115991 | 0.752577 | 0.154124 | 0.877512 | 0.981636 | chr11 | 10622612 | 10623664 | + | 0 NA | intron (Nintron (N  | 29163 NM_001098   | 10335 Hs. 50189E  | ENSG00000MRV11   | IRAG               | JAW murine rprotein-coding    |                                |                |
| chr16-366 9.656093 | 0.115991 | 0.752577 | 0.154124 | 0.877512 | 0.981636 | chr16 | 3658277  | 36587260 | + | 0 NA | TTS (NM_C TTS (NM_C | 3794 NM_001351    | 1773 Hs. 62963E   | ENSG00000DNASE1  | DNL1               | DRNI deoxyribcprotein-coding  |                                |                |
| chr17-462 9.656093 | 0.115991 | 0.752577 | 0.154124 | 0.877512 | 0.981636 | chr17 | 42564553 | 42566466 | + | 0 NA | exon (NM_exon (NM   | -1551 NM_170607   | 6945 Hs. 38301E   | ENSG00000CMLX    | MAD7               | MXD7MAX dimerprotein-coding   |                                |                |
| chr17-465 9.656093 | 0.115991 | 0.752577 | 0.154124 | 0.877512 | 0.981636 | chr17 | 46548070 | 46549226 | + | 0 NA | exon (NM_exon (NM   | 31064 NM_00133C   | 1.01E+08          | Hs. 55925E       | ENSG00000ARL17B    | ARL17                         | ARI ADP ribosprotein-coding    |                |
| chr19-194 9.656093 | 0.115991 | 0.752577 | 0.154124 | 0.877512 | 0.981636 | chr19 | 19465568 | 19469345 | + | 0 NA | intron (N LIME3A LI | 32393 NR_03037C   | 693225            | NR_03037C        | ENSG00000MIR640    | MIRN640                       | l microRNA ncRNA               |                |
| chr19-196 9.656093 | 0.115991 | 0.752577 | 0.154124 | 0.877512 | 0.981636 | chr19 | 36182207 | 36183741 | + | 0 NA | exon (NM_exon (NM   | -30527 NM_001864  | 1346 Hs. 421621   | NR_001864        | ENSG00000COX7A1    | COX7A                         | COX cytochroprotein-coding     |                |
| chr4-1161 9.656093 | 0.115991 | 0.752577 | 0.154124 | 0.877512 | 0.981636 | chr4  | 1.19E+08 | 1.19E+08 | + | 0 NA | intron (Nintron (N  | -2388 NR_10382E   | 729218 Hs. 44851E | NR_10382E        | LOC72921E          | -                             | uncharactpseudo                |                |
| chr5-1136 9.656093 | 0.115991 | 0.752577 | 0.154124 | 0.877512 | 0.981636 | chr5  | 1.14E+08 | 1.14E+08 | + | 0 NA | intron (Nintron (N  | 50720 NM_00134E   | 64848 Hs. 231942  | NR_02282E        | ENSG00000YTHDC2    | CAHL                          | h YTH YTH domainprotein-coding |                |
| chr1-193 8.623627  | 0.121981 | 0.792023 | 0.154012 | 0.8776   | 0.981636 | chr1  | 19339349 | 19339860 | + | 0 NA | exon (NM_exon (NM   | 27278 NM_00104C   | 54896 Hs. 64762C  | ENSG00000SLC66A1 | LAAT-1             | l L solute cprotein-coding    |                                |                |
| chr17-383 8.623627 | 0.121981 | 0.792023 | 0.154012 | 0.8776   | 0.981636 | chr17 | 3839470  | 3840235  | + | 0 NA | intron (N MR SINE   | 6394 NM_001114    | 55421 Hs. 12096E  | ENSG00000NCBP3   | C17orf85           | nuclear cprotein-coding       |                                |                |
| chr3-1838 8.623627 | 0.121981 | 0.792023 | 0.154012 | 0.8776   | 0.981636 | chr3  | 1.84E+08 | 1.84E+08 | + | 0 NA | intron (Nintron (N  | 25180 NM_001037   | 55486 Hs. 47846E  | ENSG00000PARL    | PRO2207            | Fpreseniliprotein-coding      |                                |                |
| chr7-1396 8.623627 | 0.121981 | 0.792023 | 0.154012 | 0.8776   | 0.981636 | chr7  | 1.39E+08 | 1.39E+08 | + | 0 NA | intron (NAluSx SIN  | 19920 NM_01601E   | 51631 Hs. 73148E  | ENSG00000LUC7L2  | CGI-59             | CC LUC7 likeprotein-coding    |                                |                |
| chr19-522 13.13452 | 0.10047  | 0.65257  | 0.15396  | 0.877641 | 0.981636 | chr19 | 52611986 | 52620547 | + | 0 NA | intron (Nintron (N  | 19582 NR_023311   | 7696 Hs. 37364E   | NR_003438        | ZNF137P            | -                             | zinc fingpseudo                |                |
| chr9-839 13.60568  | 0.098559 | 0.641157 | 0.153721 | 0.87783  | 0.981636 | chr9  | 83968996 | 83978160 | + | 0 NA | intron (Nintron (N  | -3721 NR_02960E   | 407043            | NR_02960E        | ENSG00000MIR7-1    | MIRN7-1                       | l microRNA ncRNA               |                |
| chr16-482 11.63089 | 0.105786 | 0.688288 | 0.153695 | 0.877851 | 0.981636 | chr16 | 48290218 | 48290832 | + | 0 NA | intron (N MER21B LI | -42986 NM_00137C  | 85320 Hs. 652267  | NR_03258E        | ENSG00000ABCC11    | EWWD                          | MRP&ATP bindiprotein-coding    |                |
| chr12-104 11.63089 | 0.105786 | 0.688288 | 0.153695 | 0.877851 | 0.981636 | chr12 | 1.04E+08 | 1.04E+08 | + | 0 NA | intron (Nintron (N  | 41976 NM_00100E   | 493861 Hs. 65985E | NR_00100E        | ENSG00000EID3      | NS4EB                         | NSEP300 intrprotein-coding     |                |
| chr16-482 11.63089 | 0.105786 | 0.688288 | 0.153695 | 0.877851 | 0.981636 | chr16 | 48285852 | 48287784 | + | 0 NA | intron (N LIM4 LINE | -39279 NM_00137C  | 85320 Hs. 652267  | NR_03258E        | ENSG00000ABCC11    | EWWD                          | MRP&ATP bindiprotein-coding    |                |
| chr2-6187 11.63089 | 0.105786 | 0.688288 | 0.153695 | 0.877851 | 0.981636 | chr2  | 61874274 | 61884932 | + | 0 NA | intron (Nintron (N  | 9053 NM_00643C    | 10575 Hs. 42150E  | NR_00643C        | ENSG00000CCT4      | CCT-DEL7                      | chaperon rprotein-coding       |                |
| chr5-3888 11.63089 | 0.105786 | 0.688288 | 0.153695 | 0.877851 | 0.981636 | chr5  | 38881476 | 38888013 | + | 0 NA | intron (Nintron (N  | 38732 NM_00132E   | 9180 Hs. 12065E   | NR_00399E        | ENSG00000COSMR     | IL-31R                        | be-oncostatiprotein-coding     |                |
| chr13-952 10.12726 | 0.11269  | 0.733296 | 0.153675 | 0.877866 | 0.981636 | chr13 | 95262218 | 95266784 | + | 0 NA | intron (N LIMC4 LIN | 36945 NM_00584E   | 10257 Hs. 50842E  | NR_00584E        | ENSG00000ABCC4     | MOAT-B                        | MCATP bindiprotein-coding      |                |
| chr15-424 10.12726 | 0.11269  | 0.733296 | 0.153675 | 0.877866 | 0.981636 | chr15 | 42414412 | 42418784 | + | 0 NA | 3' UTR (N3' UTR (N  | 11819 NM_17308E   | 825 Hs. 143261    | NR_00007C        | ENSG00000CAPN3     | CANP3                         | CAN calpain cprotein-coding    |                |
| chr2-3236 10.12726 | 0.11269  | 0.733296 | 0.153675 | 0.877866 | 0.981636 | chr2  | 32383407 | 32384070 | + | 0 NA | intron (NAluSg SIN  | 26185 NM_01625E   | 57448 Hs. 150207  | NR_01625E        | ENSG00000BLRC6     | APOLLON                       | Ebaculoviriprotein-coding      |                |
| chr20-27 27.53325  | 0.073562 | 0.478734 | 0.153659 | 0.877879 | 0.981636 | chr20 | 27091973 | 27092179 | + | 0 NA | IntergeniALR/Alpha  | -882843 NR_04009E | 284801 Hs. 37069E | NR_04009E        | ENSG00000MIR663AHC | -                             | MIR663A lncRNA                 |                |
| chr10-777 6.144387 | 0.144263 | 0.938965 | 0.15364  | 0.877894 | 0.981636 | chr10 | 77780703 | 77781113 | + | 0 NA | IntergeniIntergeni  | -143100 NM_00132E | 3778 Hs. 14479E   | NR_00224E        | ENSG00000KCNMA1    | BKTM                          | CADFe potassiumprotein-coding  |                |
| chr1-6186 8.425533 | -0.12282 | 0.799426 | -0.15363 | 0.877898 | 0.981636 | chr1  | 6188903  | 6197265  | + | 0 NA | intron (Nintron (N  | 6511 NM_00098E    | 6146 Hs. 51532E   | NR_00098E        | ENSG00000RPL22     | EAP                           | HBP1 rribosomalprotein-coding  |                |
| chr1-212 8.425533  | -0.12282 | 0.799426 | -0.15363 | 0.877898 | 0.981636 | chr1  | 2.12E+08 | 2.12E+08 | + | 0 NA | intron (Nintron (N  | 6629 NR_00438E    | 692157 Hs. 70795E | NR_00438E        | ENSG00000SNORA16B  | U98b                          | small nucsnRNA                 |                |
| chr10-118 8.425533 | -0.12282 | 0.799426 | -0.15363 | 0.877898 | 0.981636 | chr10 | 1.18E+08 | 1.18E+08 | + | 0 NA | intron (Nintron (N  | 7048 NM_02206E    | 63877 Hs. 10557E  | NR_02206E        | ENSG00000FAM204A   | C10orf84                      | family wiprotein-coding        |                |
| chr11-662 8.425533 | -0.12282 | 0.799426 | -0.15363 | 0.877898 | 0.981636 | chr11 | 66270025 | 66275142 | + | 0 NA | intron (Nintron (N  | 3944 NM_030981    | 81876 Hs. 30081E  | NR_030981        | ENSG00000RAB1B     | -                             | RAB1B, meprotein-coding        |                |
| chr12-215 8.425533 | -0.12282 | 0.799426 | -0.15363 | 0.877898 | 0.981636 | chr12 | 21515900 | 21517033 | + | 0 NA | 3' UTR (N3' UTR (N  | -9830 NM_03057E   | 80763 Hs. 13069E  | NR_03057E        | ENSG00000SPX       | C12orf39                      | spexin hprotein-coding         |                |
| chr13-205 8.425533 | -0.12282 | 0.799426 | -0.15363 | 0.877898 | 0.981636 | chr13 | 20985709 | 20991246 | + | 0 NA | exon (NM_exon (NM   | -39049 NR_10405E  | 1.02E+08          | Hs. 63763E       | NR_10405E          | ENSG00000LINC00367            | -                              | long intncRNA  |
| chr14-648 8.425533 | -0.12282 | 0.799426 | -0.15363 | 0.877898 | 0.981636 | chr14 | 65076570 | 65079011 | + | 0 NA | intron (Nintron (N  | -12128 NR_04512E  | 1.01E+08          | Hs. 711267       | NR_04512E          | ENSG00000LOC10050E            | -                              | uncharactncRNA |
| chr14-757 8.425533 | -0.12282 | 0.799426 | -0.15363 | 0.877898 | 0.981636 | chr14 | 74732659 | 74733976 | + | 0 NA | intron (N LTR104 Me | 20173 NM_00131E   | 51077 Hs. 57982E  | NR_01596E        | ENSG00000PCF1      | Bka                           | C14orf1 rRN rprotein-coding    |                |
| chr14-776 8.425533 | -0.12282 | 0.799426 | -0.15363 | 0.877898 | 0.981636 | chr1  |          |          |   |      |                     |                   |                   |                  |                    |                               |                                |                |

|            |          |          |          |          |          |          |       |          |            |   |   |    |                       |        |            |          |            |                     |                     |                |                                |
|------------|----------|----------|----------|----------|----------|----------|-------|----------|------------|---|---|----|-----------------------|--------|------------|----------|------------|---------------------|---------------------|----------------|--------------------------------|
| chr19-435  | 12.62221 | 0.101304 | 0.663408 | 0.152703 | 0.878632 | 0.981636 | chr19 | 43912720 | 43927370   | + | 0 | NA | intron (Nintron (N    | 15237  | NM_00342E  | 7596     | Hs.38128E  | NM_00342E           | ENSG000002ZNF45     | KOX5 ZNF1      | zinc finger protein-coding     |
| chr2-8537  | 12.62221 | 0.101304 | 0.663408 | 0.152703 | 0.878632 | 0.981636 | chr2  | 85378543 | 85381432   | + | 0 | NA | intron (NMER4-int)    | 25218  | NM_001113E | 84173    | Hs.269999C | NM_03221E           | ENSG000002ELMOD3    | DFNB88 LS      | ELMO domain protein-coding     |
| chr10-997  | 8.672625 | 0.121943 | 0.798714 | 0.152674 | 0.878656 | 0.981636 | chr10 | 99755719 | 99757116   | + | 0 | NA | TTS (NM_TTS (NM_C     | -23751 | NM_00132C  | 1355     | Hs.28326   | NM_00437E           | ENSG000002COX15     | CEMCOX2        | cytochrome protein-coding      |
| chr19-368  | 8.672625 | 0.121943 | 0.798714 | 0.152674 | 0.878656 | 0.981636 | chr19 | 36859922 | 36860583   | + | 0 | NA | intron (NAluY SINE    | 8601   | NM_001242  | 25850    | Hs.362324N | NM_00341E           | ENSG000002ZNF345    | HZF10          | zinc finger protein-coding     |
| chr5-6571  | 8.672625 | 0.121943 | 0.798714 | 0.152674 | 0.878656 | 0.981636 | chr5  | 65711530 | 65712650   | + | 0 | NA | intron (NAluJo SINE   | 8601   | NM_001242  | 54557    | Hs.482301N | NM_01907E           | ENSG000002SGTB      | SGT2           | small gtp protein-coding       |
| chr1-777   | 7.881798 | -0.12859 | 0.842342 | -0.15265 | 0.878672 | 0.981636 | chr1  | 77708314 | 77709388   | + | 0 | NA | intron (NLMC4 LIN     | -25424 | NM_00130E  | 26009    | Hs.48050E  | NM_01553E           | ENSG000002ZZ3       | ATAC1          | zinc finger protein-coding     |
| chr15-671  | 7.881798 | -0.12859 | 0.842342 | -0.15265 | 0.878672 | 0.981636 | chr15 | 67111169 | 67111661   | + | 0 | NA | intron (NLM1B7 LIN    | -14301 | NM_001114E | 4088     | Hs.72798E  | NM_00590E           | ENSG000002SMAD3     | HSPC193 FS     | MAD fami protein-coding        |
| chr20-366  | 7.881798 | -0.12859 | 0.842342 | -0.15265 | 0.878672 | 0.981636 | chr20 | 36838792 | 36839247   | + | 0 | NA | intron (NMIRc SINE    | 20854  | NM_001918E | 140710   | Hs.460807E | NM_08062E           | ENSG000002SOGA1     | C20orf117      | suppressor protein-coding      |
| chr5-1771  | 7.881798 | -0.12859 | 0.842342 | -0.15265 | 0.878672 | 0.981636 | chr5  | 1.77E+08 | 1.77E+08   | + | 0 | NA | intron (NAluSx SIN    | 9721   | NM_00136E  | 64324    | Hs.106861N | NM_02245E           | ENSG000002CNSD1     | ARA267 K       | nuclear r protein-coding       |
| chr1-378   | 10.64742 | 0.109717 | 0.71939  | 0.152514 | 0.878781 | 0.981636 | chr1  | 37803080 | 37806822   | + | 0 | NA | intron (NMIRb SINE    | -2839  | NM_19844E  | 127687   | Hs.53274E  | NM_19844E           | ENSG000002Clorf122  | ALAESM         | chromosome protein-coding      |
| chr12-927  | 10.64742 | 0.109717 | 0.71939  | 0.152514 | 0.878781 | 0.981636 | chr12 | 92776803 | 92779582   | + | 0 | NA | intron (Nintron (N    | 41703  | NM_001004  | 440107   | Hs.59101E  | NM_001004           | ENSG000002PLEKHG7   | -              | pleckstrin protein-coding      |
| chr14-214  | 10.64742 | 0.109717 | 0.71939  | 0.152514 | 0.878781 | 0.981636 | chr14 | 21421564 | 21431672   | + | 0 | NA | intron (NMIRc SINE    | 10657  | NM_02092C  | 57680    | Hs.53069E  | NM_02092C           | ENSG000002CHD8      | AUTS18 H       | chromosome protein-coding      |
| chr19-583  | 10.64742 | 0.109717 | 0.71939  | 0.152514 | 0.878781 | 0.981636 | chr19 | 58337505 | 58340297   | + | 0 | NA | exon (NM exon (NM     | 4213   | NR_106864E | 1.02E+08 | NR_106864E | ENSG000002MIR6806   | hsa-mir-6           | microRNA ncRNA |                                |
| chr6-994C  | 10.64742 | 0.109717 | 0.71939  | 0.152514 | 0.878781 | 0.981636 | chr6  | 99404034 | 99407233   | + | 0 | NA | intron (Nintron (N    | -11688 | NM_017421  | 51805    | Hs.17362E  | NM_017421           | ENSG000002COQ3      | DHBM2 E        | coenzyme protein-coding        |
| chr9-1223  | 10.64742 | 0.109717 | 0.71939  | 0.152514 | 0.878781 | 0.981636 | chr9  | 1.22E+08 | 1.22E+08   | + | 0 | NA | intron (Nintron (N    | 4839   | NM_001271  | 5742     | Hs.20197E  | NM_00096E           | ENSG000002PTGS1     | COX1 COX       | prostaglandin protein-coding   |
| chr21-44C  | 7.428199 | -0.13188 | 0.865468 | -0.15238 | 0.878886 | 0.981636 | chr21 | 44075715 | 44075914   | + | 0 | NA | intron (NAluSp SIN    | 1490   | NM_00135E  | 7109     | Hs.126221N | NM_00327E           | ENSG000002TRAPP10   | EHOC-1 E       | trafficking protein-coding     |
| chr4-1451  | 6.607693 | 0.139174 | 0.913778 | 0.152306 | 0.878946 | 0.981636 | chr4  | 1.45E+08 | 1.45E+08   | + | 0 | NA | intron (Nintron (N    | 16938  | NM_01749E  | 54726    | Hs.270851N | NM_01749E           | ENSG000002TUD4      | DUBA6 H        | OTU deubiquitin protein-coding |
| chr5-728   | 11.11858 | 0.106983 | 0.702649 | 0.152257 | 0.878984 | 0.981636 | chr5  | 72861085 | 72863634   | + | 0 | NA | intron (NAluJo SIN    | 14220  | NM_001364  | 3842     | Hs.482497N | NM_00227E           | ENSG000002CNTP01    | IPO2 K         | PNP transport protein-coding   |
| chr9-992E  | 11.11858 | 0.106983 | 0.702649 | 0.152257 | 0.878984 | 0.981636 | chr9  | 99227830 | 99231578   | + | 0 | NA | intron (NLM1A2 LIN    | 7422   | NM_00680E  | 10952    | Hs.191887N | NM_00680E           | ENSG000002SEC61B    | -              | SEC61 trans protein-coding     |
| chr12-494  | 7.210134 | 0.136823 | 0.898752 | 0.152236 | 0.879001 | 0.981636 | chr12 | 49462448 | 49462871   | + | 0 | NA | intron (NLTRID LTF    | 73485  | NR_03326E  | 1E+08    | Hs.687044N | NR_03326E           | LOC10033E           | -              | FGFR1 oncogene                 |
| chr1-231E  | 7.811274 | -0.11873 | 0.780144 | -0.15219 | 0.879037 | 0.981636 | chr1  | 2.31E+08 | 2.31E+08   | + | 0 | NA | exon (NM exon (NM     | 29735  | NM_00131E  | 8443     | Hs.49802E  | NM_01423E           | ENSG000002GNP4T     | DAP-AT D       | glycylserine protein-coding    |
| chr11-74E  | 8.871274 | -0.11873 | 0.780144 | -0.15219 | 0.879037 | 0.981636 | chr11 | 74935319 | 74936824   | + | 0 | NA | intron (Nintron (N    | 13020  | NM_00127C  | 143570   | Hs.37014E  | NM_18296E           | ENSG000002XRRA1     | -              | X-ray crystal protein-coding   |
| chr14-24E  | 8.871274 | -0.11873 | 0.780144 | -0.15219 | 0.879037 | 0.981636 | chr14 | 24149535 | 24153843   | + | 0 | NA | intron (Nintron (N    | 4191   | NM_01799E  | 55072    | Hs.375217N | NM_01799E           | ENSG000002RNF31     | HOIP P         | ubiquitin protein-coding       |
| chr16-69E  | 8.871274 | -0.11873 | 0.780144 | -0.15219 | 0.879037 | 0.981636 | chr16 | 69993155 | 69997259   | + | 0 | NA | intron (Nintron (N    | -35139 | NR_03626E  | 1E+08    | NR_03626E  | ENSG000002MIR1972-2 | -                   | microRNA ncRNA |                                |
| chr20-347  | 8.871274 | -0.11873 | 0.780144 | -0.15219 | 0.879037 | 0.981636 | chr20 | 34748737 | 34749805   | + | 0 | NA | intron (NLM1C5 LIN    | 33133  | NM_00124E  | 23054    | Hs.368971N | NM_01407E           | ENSG000002NCOA6     | AIB3 A         | ASC nuclear r protein-coding   |
| chr3-154E  | 8.871274 | -0.11873 | 0.780144 | -0.15219 | 0.879037 | 0.981636 | chr3  | 1.54E+08 | 1.54E+08   | + | 0 | NA | intron (Nintron (N    | 10073  | NM_02086E  | 170506   | Hs.44627C  | NM_02086E           | ENSG000002DHX36     | DDX36 G        | 4FDEAH-box protein-coding      |
| chr3-180E  | 8.871274 | -0.11873 | 0.780144 | -0.15219 | 0.879037 | 0.981636 | chr3  | 1.81E+08 | 1.81E+08   | + | 0 | NA | intron (NLM1P2 LIN    | 31175  | NM_00119C  | 131118   | Hs.230601N | NM_14526E           | ENSG000002DNAJ19    | PAM18 T        | M DnaJ heat protein-coding     |
| chr1-222E  | 8.160321 | 0.124612 | 0.81907  | 0.152138 | 0.879078 | 0.981636 | chr1  | 2.23E+08 | 2.23E+08   | + | 0 | NA | intron (NAluSx SIN    | -6885  | NR_11061E  | 1.01E+08 | Hs.553851N | NR_11061E           | ENSG000002TAF1A-AS1 | -              | TAF1A ant ncRNA                |
| chr12-89E  | 8.160321 | 0.124612 | 0.81907  | 0.152138 | 0.879078 | 0.981636 | chr12 | 894906   | 896549     | + | 0 | NA | intron (NAluSx SIN    | 37349  | NM_001297  | 5893     | Hs.41035E  | NM_13442E           | ENSG000002RAD52     | -              | RAD52 hom protein-coding       |
| chr12-27E  | 8.160321 | 0.124612 | 0.81907  | 0.152138 | 0.879078 | 0.981636 | chr12 | 27578951 | 27579684   | + | 0 | NA | intron (NLM1E3A LIN   | 55111  | NM_00119E  | 8496     | Hs.17244E  | NM_00362E           | ENSG000002PPF1BP1   | L2 SGT2        | PI3FIIA protein-coding         |
| chr15-42E  | 8.160321 | 0.124612 | 0.81907  | 0.152138 | 0.879078 | 0.981636 | chr15 | 42530561 | 42531434   | + | 0 | NA | intron (Nintron (N    | 17796  | NM_15326C  | 255252   | Hs.234681N | NM_15326C           | ENSG000002LRR57     | -              | leucine r protein-coding       |
| chr21-37E  | 8.160321 | 0.124612 | 0.81907  | 0.152138 | 0.879078 | 0.981636 | chr21 | 37236045 | 37231974   | + | 0 | NA | intron (Nintron (N    | 22806  | NR_02671E  | 257203   | Hs.50515E  | NM_14867E           | ENSG000002DSCR9     | NCRNA000E      | Down syndrome ncRNA            |
| chr3-170E  | 8.160321 | 0.124612 | 0.81907  | 0.152138 | 0.879078 | 0.981636 | chr3  | 1.7E+08  | 1.7E+08    | + | 0 | NA | exon (NM exon (NM     | -64320 | NM_005414  | 6498     | Hs.53665E  | NM_005414           | ENSG000002SKIL      | SNOA1 S        | KI like protein-coding         |
| chr7-328E  | 8.160321 | 0.124612 | 0.81907  | 0.152138 | 0.879078 | 0.981636 | chr7  | 32870095 | 32871060   | + | 0 | NA | exon (NM exon (NM     | 21183  | NM_01548E  | 25948    | Hs.372541N | NM_01548E           | ENSG000002KBTBD2    | BKLHD1         | kelch repeat protein-coding    |
| chr7-760E  | 8.160321 | 0.124612 | 0.81907  | 0.152138 | 0.879078 | 0.981636 | chr7  | 76018587 | 76018801   | + | 0 | NA | intron (NLM1B7 LIN    | 11830  | NM_001317  | 51657    | Hs.11615   | NM_01608E           | ENSG000002STYXL1    | DUSP24         | M serine/thr protein-coding    |
| chr8-193E  | 8.160321 | 0.124612 | 0.81907  | 0.152138 | 0.879078 | 0.981636 | chr8  | 19365391 | 19365781   | + | 0 | NA | intron (Nintron (N    | 51610  | NM_001174  | 63898    | Hs.30320E  | NM_02207E           | ENSG000002SH2D4A    | PPP1R38        | S2H2 domain protein-coding     |
| chr19-35E  | 8.111323 | 0.12458  | 0.819491 | 0.152022 | 0.87917  | 0.981636 | chr19 | 35998248 | 35998458   | + | 0 | NA | IntergeniAluSq2 SI    | 3165   | NM_00104E  | 644096   | Hs.35646C  | NM_00104E           | ENSG000002SDHAF1    | LYR8M          | succinate protein-coding       |
| chr7-766E  | 8.111323 | 0.12458  | 0.819491 | 0.152022 | 0.87917  | 0.981636 | chr7  | 76611083 | 76612030   | + | 0 | NA | exon (NM exon (NM     | 15747  | NM_15299E  | 22932    | Hs.488877N | NM_01223C           | ENSG000002POMZP3    | POM-2P3        | F20M121 ar protein-coding      |
| chr2-324E  | 9.614954 | 0.14443  | 0.752785 | 0.152008 | 0.87918  | 0.981636 | chr2  | 32431315 | 32432538   | + | 0 | NA | intron (NLa2 LINE     | 74898  | NM_01625E  | 57448    | Hs.150107N | NM_01625E           | ENSG000002BIRC6     | POLLON E       | ubiquitin protein-coding       |
| chr20-23E  | 9.614954 | 0.14443  | 0.752785 | 0.152008 | 0.87918  | 0.981636 | chr20 | 23374489 | 23376522   | + | 0 | NA | non-coding non-coding | 11142  | NM_001317  | 64412    | Hs.70946E  | NM_02248E           | ENSG000002GZF1      | JLSM Z         | BTE GDNF ind protein-coding    |
| chr3-125E  | 9.614954 | 0.14443  | 0.752785 | 0.152008 | 0.87918  | 0.981636 | chr3  | 1.26E+08 | 1.26E+08   | + | 0 | NA | intron (NAluSp SIN    | 32716  | NM_02277E  | 114885   | Hs.47744C  | NM_02277E           | ENSG000002OSBPL11   | ORF-110        | Oxysterol protein-coding       |
| chr1-191E  | 13.09338 | 0.099283 | 0.653153 | 0.152006 | 0.879182 | 0.981636 | chr1  | 19190807 | 19194739   | + | 0 | NA | intron (NLa2 LINE     | 17493  | NM_02076E  | 23352    | Hs.14807E  | NM_02076E           | ENSG000002UBR4      | BRAF600        | Zubiquitin protein-coding      |
| chr17-501  | 13.61354 | 0.097477 | 0.641386 | 0.151978 | 0.879204 | 0.981636 | chr17 | 50187779 | 50201460   | + | 0 | NA | exon (NM exon (NM     | 7020   | NM_00008E  | 1277     | Hs.17292E  | NM_00008E           | ENSG000002COL1A1    | EDSARTH1       | collagen protein-coding        |
| chr1-375E  | 8.417675 | -0.1212  | 0.797664 | -0.15194 | 0.879235 | 0.981636 | chr1  | 37565574 | 37570181   | + | 0 | NA | intron (Nintron (N    | 10937  | NM_00346E  | 7802     | Hs.40605E  | NM_00346E           | ENSG000002DNAL11    | P28 dJ         | 2E dynein a protein-coding     |
| chr1-3941E | 8.417675 | -0.1212  | 0.797664 | -0.15194 | 0.879235 | 0.981636 | chr1  | 39419313 | 39424819</ |   |   |    |                       |        |            |          |            |                     |                     |                |                                |



|                    |          |          |          |          |          |       |          |          |   |      |                    |                   |                              |                    |               |                          |
|--------------------|----------|----------|----------|----------|----------|-------|----------|----------|---|------|--------------------|-------------------|------------------------------|--------------------|---------------|--------------------------|
| chr17-63:8.631485  | 0.120298 | 0.792199 | 0.151853 | 0.879303 | 0.981636 | chr17 | 63376843 | 63377650 | + | 0 NA | intron (THE1D-int  | 63021 NM_00133C   | 1534 Hs. 355264NM_00191E     | ENSG00000CYB561    | CYB561A1      | cytochromprotein-coding  |
| chr22-287:8.631485 | 0.120298 | 0.792199 | 0.151853 | 0.879303 | 0.981636 | chr22 | 28780953 | 28783645 | + | 0 NA | intron (AluSx1 SI  | 9162 NM_001284    | 150275 Hs. 406466NM_17351    | ENSG00000CCDC117   | dJ3661A.1     | coiled-cpprotein-coding  |
| chr3-978:8.631485  | 0.120298 | 0.792199 | 0.151853 | 0.879303 | 0.981636 | chr3  | 9783689  | 9786029  | + | 0 NA | intron (AluSq2 SI  | -7636 NM_001024   | 10093 Hs. 323342NM_00571E    | ENSG00000CARPC4    | ARC20 P2C     | actin relprotein-coding  |
| chr3-640:8.631485  | 0.120298 | 0.792199 | 0.151853 | 0.879303 | 0.981636 | chr3  | 64098905 | 64100693 | + | 0 NA | exon (NM exon (NM  | -3671 NR_046701.1 | 01E+08 Hs. 668874NR_046701   | PRICKLE2--         | PRICKLE2      | ncRNA                    |
| chr5-179:8.631485  | 0.120298 | 0.792199 | 0.151853 | 0.879303 | 0.981636 | chr5  | 1.8E+08  | 1.8E+08  | + | 0 NA | intron (L1M5 LINE  | 10253 NM_198866   | 23061 Hs. 155829NM_01504E    | ENSG00000TBC1D9B   | GRAMD9B       | TBC1 domprotein-coding   |
| chr9-3391:8.631485 | 0.120298 | 0.792199 | 0.151853 | 0.879303 | 0.981636 | chr9  | 33912458 | 33914028 | + | 0 NA | intron (AluSx1 SI  | 21121 NM_00128E   | 55833 Hs. 493739NM_01844E    | ENSG00000CUBAP2    | UBAP-2        | ubiquitin protein-coding |
| chr6-150:9.086934  | 0.139442 | 0.788376 | 0.151504 | 0.879578 | 0.981636 | chr6  | 1.51E+08 | 1.51E+08 | + | 0 NA | intron (MLT1J LTF  | -12676 NM_00135C  | 25902 Hs. 59134E NM_01544E   | ENSG00000MTHFD1L   | FTFHSFDC1     | methyleneprotein-coding  |
| chr11-125:7.722438 | 0.133053 | 0.878345 | 0.151481 | 0.879596 | 0.981636 | chr11 | 1.3E+08  | 1.3E+08  | + | 0 NA | intron (intron (N  | -6979 NM_001144   | 4798 Hs. 530539NM_00616E     | ENSG00000NFRKB     | IN080G        | nuclear fprotein-coding  |
| chr2-2011:10.13512 | 0.11124  | 0.734839 | 0.15138  | 0.879676 | 0.981636 | chr2  | 2.01E+08 | 2.01E+08 | + | 0 NA | non-codiron-codir  | -7059 NR_04003C   | 65072 Hs. 66461E NR_04003C   | ENSG00000CFLAR-AS1 | ALS2CR10      | CFLAR antncRNA           |
| chr11-124:10.17626 | 0.112662 | 0.744307 | 0.151365 | 0.879688 | 0.981636 | chr11 | 1.24E+08 | 1.24E+08 | + | 0 NA | exon (NM exon (NM  | 29905 NM_00113C   | 4013 Hs. 152944NM_01462E     | ENSG00000VWA5A     | BCSC-1 Bc     | von Wille protein-coding |
| chr3-978:8.079892  | 0.131617 | 0.869634 | 0.151348 | 0.879701 | 0.981636 | chr3  | 97887249 | 97887467 | + | 0 NA | intron (intron (N  | 65347 NM_15360E   | 131544 Hs. 73337E NM_15360E  | ENSG00000CRYBG3    | DKFZp667C     | crystallinprotein-coding |
| chr1-205:11.63875  | 0.104514 | 0.69069  | 0.151319 | 0.879724 | 0.981636 | chr1  | 2.06E+08 | 2.06E+08 | + | 0 NA | 3' UTR (3' UTR (N  | 16681 NM_00197E   | 2005 Hs. 49752E NM_00197E    | ENSG00000CELK4     | SAP1          | ETS transprotein-coding  |
| chr2-216:11.63875  | 0.104514 | 0.69069  | 0.151319 | 0.879724 | 0.981636 | chr2  | 2.16E+08 | 2.16E+08 | + | 0 NA | exon (NM exon (NM  | 2243 NM_001127    | 50485 Hs. 516674NM_01414E    | ENSG00000SMARCAL1  | HARP HHA5 SWI | rprotein-coding          |
| chr1-258:7.648017  | 0.127621 | 0.843434 | 0.151311 | 0.87973  | 0.981636 | chr1  | 25808606 | 25810399 | + | 0 NA | intron (L2b LINE   | 9309 NM_020451    | 57190 Hs. 32339E NM_020451   | ENSG00000SELENON   | CFTD MHFAS    | selenoprprotein-coding   |
| chr1-155:7.648017  | 0.127621 | 0.843434 | 0.151311 | 0.87973  | 0.981636 | chr1  | 1.55E+08 | 1.55E+08 | + | 0 NA | intron (intron (N  | -27970 NR_03028E  | 693140 NR_03028E             | ENSG00000MIR555    | MIRN555       | lncRNA ncRNA             |
| chr11-94:7.648017  | 0.127621 | 0.843434 | 0.151311 | 0.87973  | 0.981636 | chr11 | 94839185 | 94839732 | + | 0 NA | intron (MIRb SINE  | 71102 NM_001301   | 154810 Hs. 503594NM_13084E   | ENSG00000AMOTL1    | JEAP          | angiomotiprotein-coding  |
| chr12-12:7.648017  | 0.127621 | 0.843434 | 0.151311 | 0.87973  | 0.981636 | chr12 | 1.2E+08  | 1.2E+08  | + | 0 NA | intron (AluY SINE  | 9426 NR_033684    | 283459 Hs. 70688E NM_17681E  | ENSG00000CGATC     | 15E1.2        | glutamyl protein-coding  |
| chr13-95:7.648017  | 0.127621 | 0.843434 | 0.151311 | 0.87973  | 0.981636 | chr13 | 95118562 | 95119223 | + | 0 NA | intron (L3 LINE C  | -91452 NR_145733  | 1.1E+08 NR_145733            | SNORD13G           | -             | small nucsnRNA           |
| chr15-90:7.648017  | 0.127621 | 0.843434 | 0.151311 | 0.87973  | 0.981636 | chr15 | 90230461 | 90231454 | + | 0 NA | exon (NM exon (NM  | 2984 NM_006384    | 10519 Hs. 71555E NM_006384   | ENSG00000CIB1      | CIB1 CIBP     | calcium protein-coding   |
| chr18-107:7.648017 | 0.127621 | 0.843434 | 0.151311 | 0.87973  | 0.981636 | chr18 | 10726406 | 10726646 | + | 0 NA | intron (CpG        | 33123 NR_10684E   | 1.02E+08 NR_10684E           | ENSG00000MIR6788   | hsa-mir-6     | microRNA ncRNA           |
| chr2-165:7.648017  | 0.127621 | 0.843434 | 0.151311 | 0.87973  | 0.981636 | chr2  | 1658436  | 1659227  | + | 0 NA | intron (intron (N  | 85684 NM_01229E   | 7837 Hs. 332197NM_01229E     | ENSG00000PXDN      | ASG7 COF      | peroxidasprotein-coding  |
| chr2-148:7.648017  | 0.127621 | 0.843434 | 0.151311 | 0.87973  | 0.981636 | chr2  | 1.48E+08 | 1.48E+08 | + | 0 NA | intron (AluY SINE  | -157484 NM_18174E | 5000 Hs. 558364NM_00255E     | ENSG00000CORC4     | ORCAL ORC     | origin rprotein-coding   |
| chr6-181:7.648017  | 0.127621 | 0.843434 | 0.151311 | 0.87973  | 0.981636 | chr6  | 18168255 | 18168776 | + | 0 NA | intron (L1MB5 LIN  | 13093 NM_001364   | 221656 Hs. 70933E NM_15304E  | ENSG00000KDM1B     | AOF1 C6or     | lysine deprotein-coding  |
| chr12-76:21.80955  | -0.07945 | 0.525195 | -0.15127 | 0.879763 | 0.981636 | chr12 | 76027992 | 76031108 | + | 0 NA | 3' UTR (3' UTR (N  | 2226 NM_00735C    | 22822 Hs. 60208E NM_00735C   | ENSG00000PHLDA1    | DT1P1B11      | pleckstriprotein-coding  |
| chr13-95:9.37387   | -0.11618 | 0.76878  | -0.15112 | 0.879882 | 0.981636 | chr13 | 95305901 | 95306789 | + | 0 NA | IntergeniL1PA4 LIN | -4894 NM_00110E   | 10257 Hs. 50842E NM_00584E   | ENSG00000ABCCA     | MOAT-B MC     | ATP bindi protein-coding |
| chr14-54:9.094792  | 0.117889 | 0.780358 | 0.15107  | 0.87992  | 0.981636 | chr14 | 54822287 | 54483637 | + | 0 NA | intron (intron (N  | 6018 NM_004124    | 2764 Hs. 15141E NM_004124    | ENSG00000GMFB      | GMF           | glia mat protein-coding  |
| chr21-62:9.094792  | 0.117889 | 0.780358 | 0.15107  | 0.87992  | 0.981636 | chr21 | 61682848 | 6262986  | + | 0 NA | intron (intron (N  | 4719 NM_001322    | 1.03E+08 Hs. 743984NM_001322 | LOC102724          | -             | uncharactprotein-coding  |
| chr18-99:7.469339  | -0.12945 | 0.857254 | -0.151   | 0.879974 | 0.981636 | chr18 | 9931896  | 9934228  | + | 0 NA | intron (AluSg7 SI  | 19046 NM_003574   | 9218 Hs. 16519E NM_003574    | ENSG00000VAPA      | VAP-33 VAV    | VAMP asscprotein-coding  |
| chr1-648:9.663951  | 0.114418 | 0.75868  | 0.150812 | 0.880124 | 0.981636 | chr1  | 64833507 | 64834344 | + | 0 NA | TTS (NM_C          | 88850 NM_018211   | 55225 Hs. 59144E NM_018211   | ENSG00000RAVER2    | -             | ribonucle protein-coding |
| chr16-51:9.663951  | 0.114418 | 0.75868  | 0.150812 | 0.880124 | 0.981636 | chr16 | 51139946 | 51140458 | + | 0 NA | exon (NM exon (NM  | 10395 NM_001127   | 6299 Hs. 135787NM_00296E     | ENSG00000SALL1     | HEL-S-89      | spalt likprotein-coding  |
| chr9-137:9.663951  | 0.114418 | 0.75868  | 0.150812 | 0.880124 | 0.981636 | chr9  | 1.34E+08 | 1.34E+08 | + | 0 NA | intron (intron (N  | -27923 NM_007101  | 1757 Hs. 19800E NM_007101    | ENSG00000SARDH     | BPR-2 DMC     | sarcosine protein-coding |
| chr10-89:10.60628  | 0.129287 | 0.71938  | 0.150528 | 0.880348 | 0.981636 | chr10 | 89013957 | 89014865 | + | 0 NA | non-codiron-codir  | -21434 NR_028371  | 1E+08 Hs. 24413E NR_028371   | FAS-AS1            | FAS-AS1       | antisncRNA               |
| chr15-76:7.689157  | 0.108296 | 0.860377 | 0.150278 | 0.880545 | 0.981636 | chr15 | 76211513 | 76212671 | + | 0 NA | IntergeniIntergeni | 12036E NR_12036E  | 1.02E+08 Hs. 631721NR_12036E | ENSG00000LOC10192E | -             | uncharactncRNA           |
| chr19-48:7.689157  | 0.129296 | 0.860377 | 0.150278 | 0.880545 | 0.981636 | chr19 | 48860747 | 48861269 | + | 0 NA | intron (AluSx SIN  | 7609 NM_001161    | 57664 Hs. 9469 NM_020904     | ENSG00000PLEKHA4   | PEPPI         | pleckstriprotein-coding  |
| chr19-18:9.920271  | -0.11823 | 0.786781 | -0.15027 | 0.880551 | 0.981636 | chr19 | 18936902 | 18938817 | + | 0 NA | intron (intron (N  | 1190 NM_00114E    | 9454 Hs. 72020E NM_00483E    | ENSG00000HOMER3    | HOMER-3 V     | homer scprotein-coding   |
| chr3-188:8.920271  | -0.11823 | 0.786781 | -0.15027 | 0.880551 | 0.981636 | chr3  | 1.89E+08 | 1.89E+08 | + | 0 NA | 3' UTR (3' UTR (N  | 72744 NR_04687E   | 1.01E+08 Hs. 616287NR_04687E | ENSG00000TPRG1-AS1 | TPRG1         | antncRNA                 |
| chr4-540:8.920271  | -0.11823 | 0.786781 | -0.15027 | 0.880551 | 0.981636 | chr4  | 54043743 | 54044201 | + | 0 NA | intron (L1PA4 LIN  | 20633 NM_01211C   | 26511 Hs. 33539E NM_01211C   | ENSG00000CHIC2     | BTL           | cysteine protein-coding  |
| chr7-147:8.935987  | -0.1216  | 0.809313 | -0.15025 | 0.880567 | 0.981636 | chr7  | 1472925  | 1473362  | + | 0 NA | exon (NM exon (NM  | -13673 NM_182924  | 79778 Hs. 376617NM_02472E    | ENSG00000MICALL2   | JRAB MICA     | MICAL likprotein-coding  |
| chr19-26:21.11413  | 0.081104 | 0.539943 | 0.150209 | 0.8806   | 0.981636 | chr19 | 26924459 | 26925713 | + | 0 NA | IntergeniALR Alpha | -868345 NR_14673E | 1.02E+08 Hs. 567934NR_14673E | ENSG00000LOC10192E | -             | uncharactncRNA           |
| chr1-155:8.119181  | 0.122814 | 0.817772 | 0.150182 | 0.880621 | 0.981636 | chr1  | 1.56E+08 | 1.56E+08 | + | 0 NA | intron (AluJr SIN  | -23073 NR_132767  | 0.07E+08 NR_132767           | SCARNA26E          | -             | small Ca_ncRNA           |
| chr11-647:8.119181 | 0.122814 | 0.817772 | 0.150182 | 0.880621 | 0.981636 | chr11 | 6476732  | 6478426  | + | 0 NA | intron (intron (N  | -3120 NM_00124E   | 10612 Hs. 59199E NM_00645E   | ENSG00000TRIM3     | BERP HACI     | tripartitprotein-coding  |
| chr2-117:8.119181  | 0.122814 | 0.817772 | 0.150182 | 0.880621 | 0.981636 | chr2  | 1.18E+08 | 1.18E+08 | + | 0 NA | intron (intron (N  | 3243 NM_00677E    | 8886 Hs. 744922NM_00677E     | ENSG00000DDX18     | Has1 MrDE     | DEAD-box protein-coding  |
| chr5-1771:8.119181 | 0.122814 | 0.817772 | 0.150182 | 0.880621 | 0.981636 | chr5  | 1.77E+08 | 1.77E+08 | + | 0 NA | intron (intron (N  | 15668 NM_00136E   | 64324 Hs. 106861NM_02245E    | ENSG00000CNSD1     | ARA26 Kb      | nuclear rprotein-coding  |
| chr18-21:7.591162  | 0.129265 | 0.86107  | 0.150122 | 0.880668 | 0.981636 | chr18 | 21629171 | 21630289 | + | 0 NA | 3' UTR (3' UTR (N  | 17416 NM_00693E   | 6632 Hs. 464734NM_00693E     | ENSG00000SNRPD1    | HsT2456 S     | small nucprotein-coding  |
| chr10-35:7.135713  | 0.131017 | 0.872827 | 0.150107 | 0.880681 | 0.981636 | chr10 | 35026857 | 35027352 | + | 0 NA | intron (intron (N  | 47179 NM_00119E   | 8453 Hs. 82919 NM_003591     | ENSG00000CUL2      | -             | cullin 2 protein-coding  |
| chr11-74:7.135713  | 0.131017 | 0.872827 | 0.150107 | 0.880681 | 0.981636 | chr11 | 74099412 | 74099936 | + | 0 NA | intron (intron (N  | 39417 NM_00127C   | 143570 Hs. 37014E NM_18296E  | ENSG00000XRR1      | -             | X-ray racprotein-coding  |
| chr11-75:7.135713  | 0.131017 | 0.872827 | 0.150107 | 0.880681 | 0.981636 | chr11 | 75410494 | 75410987 | + | 0 NA | intron (SVA_E Ret  | 6319 NR_00002E    | 114599 Hs. 68908E NR_00002E  | ENSG00000SNORD15B  | RNU15B U1     | small nucsnRNA           |
| chr22-214:7.135713 | 0.131017 | 0.872827 | 0.150107 | 0.880681 | 0.981636 | chr22 | 21471164 | 21471846 | + | 0 NA | IntergeniAluJb SIN | 4335 NM_001207    | 645426 Hs. 376511NM_001207   | ENSG00000TMEM191C  | -             | transmem protein-coding  |
| chr7-447:7.135713  | 0.131017 | 0.872827 | 0.150107 | 0.880681 | 0.981636 | chr7  | 44757221 | 44757957 | + | 0 NA | intron (intron (N  | 1401 NM_17492E    | 83637 Hs. 77978 NM_03144E    | ENSG00000ZM1Z      | NET27 TR      | zinc fingprotein-coding  |
| chr7-133:7.135713  | 0.131017 | 0.872827 | 0.150107 | 0.880681 | 0.981636 | chr7  | 1.33E+08 | 1.33E+08 | + | 0 NA | intron (intron (N  | 15178 NM_01781E   | 54927 Hs. 65501E NM_01781E   | ENSG00000CHCHD3    | MICOS19       | coiled-cpprotein-coding  |

|                     |           |          |           |          |          |       |            |          |   |      |                     |                   |                                 |                     |                                     |
|---------------------|-----------|----------|-----------|----------|----------|-------|------------|----------|---|------|---------------------|-------------------|---------------------------------|---------------------|-------------------------------------|
| chr15-425.8.912414  | -0.11664  | 0.780602 | -0.14942  | 0.881222 | 0.981636 | chr15 | 42974489   | 42977041 | + | 0 NA | intron (Alu)Jr SIN  | -54987 NM_17350C  | 146057 Hs. 646511NM_17350C      | ENSG000002TBK2      | SCA11 TTE tau tubulprotein-coding   |
| chr17-21C.8.912414  | -0.11664  | 0.780602 | -0.14942  | 0.881222 | 0.981636 | chr17 | 21024863   | 21028581 | + | 0 NA | intron (Alu)Jo SIN  | 16289 NM_01527E   | 23326 Hs. 462492NM_01527E       | ENSG000002USP22     | USP3L ubiquitin protein-coding      |
| chr17-37E.8.912414  | -0.11664  | 0.780602 | -0.14942  | 0.881222 | 0.981636 | chr17 | 37535177   | 37535935 | + | 0 NA | intron (intron) (N  | 45665 NM_00702E   | 11072 Hs. 91448 NM_00702E       | ENSG000002DUSP14    | MKP-L MKF dual specprotein-coding   |
| chr18-26C.8.912414  | -0.11664  | 0.780602 | -0.14942  | 0.881222 | 0.981636 | chr18 | 26028713   | 26030381 | + | 0 NA | intron (NL2a) LINE  | 61066 NM_001007   | 6760 Hs. 129261NM_005637        | ENSG000002SS18      | SSXT SYT SS18 subtprotein-coding    |
| chr2-318E.8.912414  | -0.11664  | 0.780602 | -0.14942  | 0.881222 | 0.981636 | chr2  | 31898449   | 31900186 | + | 0 NA | intron (L1P47) LIN  | -95337 NR_146994  | 1.05E+08 Hs. 580386NR_146994    | ENSG000002LINC0194E | long intencRNA                      |
| chr22-237.8.912414  | -0.11664  | 0.780602 | -0.14942  | 0.881222 | 0.981636 | chr22 | 23793588   | 23795363 | + | 0 NA | intron (Alu)Jr SIN  | 7509 NM_00307E    | 6598 Hs. 534355NM_00307E        | ENSG000002SMARCB1   | BAF47 CSS SWI/SNF 1protein-coding   |
| chr5-347E.8.912414  | -0.11664  | 0.780602 | -0.14942  | 0.881222 | 0.981636 | chr5  | 34763493   | 34769037 | + | 0 NA | intron (THE1A-int   | -72899 NM_14472E  | 153657 Hs. 435742NM_14472E      | ENSG000002TTC23L    | MC25-1 tetraatricprotein-coding     |
| chr9-1302.8.912414  | -0.11664  | 0.780602 | -0.14942  | 0.881222 | 0.981636 | chr9  | 1.3E+08    | 1.3E+08  | + | 0 NA | intron (L1M5) LINE  | -13898 NR_16214E  | 1.13E+08 Hs. 162140             | MIR12126            | microRNA ncRNA                      |
| chr1-3627.6.152245  | -0.14165  | 0.94809  | -0.149406 | 0.881233 | 0.981636 | chr1  | 3627142    | 3627799  | + | 0 NA | intron (intron) (N  | 2455 NM_18275E    | 127262 Hs. 20529 NM_18275E      | ENSG000002TPRGL     | FAM79A h-tumor prcprotein-coding    |
| chr22-205.6.152245  | -0.14165  | 0.94809  | -0.149406 | 0.881233 | 0.981636 | chr22 | 20985347   | 20986123 | + | 0 NA | intron (intron) (N  | 3438 NM_006767    | 8216 Hs. 78788 NM_006767        | ENSG000002LZTR1     | BTBD29 L2 leucine zprotein-coding   |
| chr13-27C.8.639343  | -0.118558 | 0.795818 | -0.148977 | 0.881572 | 0.981636 | chr13 | 27075098   | 27075297 | + | 0 NA | exon (NM exon) (NM  | -50336 NR_046547  | 1.01E+08 Hs. 52492E NR_046547   | USP12-AS1           | USP12 antncRNA                      |
| chr14-37E.8.639343  | -0.118558 | 0.795818 | -0.148977 | 0.881572 | 0.981636 | chr14 | 37293158   | 37293963 | + | 0 NA | intron (L1P4A) LIN  | 95623 NM_00119E   | 145282 Hs. 66039E NM_138731     | ENSG000002MIPOL1    | CCDC193 mirror-inprotein-coding     |
| chr16-691.8.639343  | -0.118558 | 0.795818 | -0.148977 | 0.881572 | 0.981636 | chr16 | 69119609   | 69121698 | + | 0 NA | intron (intron) (N  | 11306 NM_00136E   | 1.13E+08 Hs. 85962 NM_001002847 | DERPC               | CHTF8 DERPC prcprotein-coding       |
| chr13-207C.8.639343 | -0.118558 | 0.795818 | -0.148977 | 0.881572 | 0.981636 | chr13 | 27075098   | 27075297 | + | 0 NA | exon (NM exon) (NM  | 95623 NM_00119E   | 145282 Hs. 66039E NM_138731     | ENSG000002MIPOL1    | CCDC193 mirror-inprotein-coding     |
| chr6-4367.8.639343  | -0.118558 | 0.795818 | -0.148977 | 0.881572 | 0.981636 | chr6  | 43677576   | 43678420 | + | 0 NA | TTS (NR_C TTS (NR_C | 95623 NM_00119E   | 145282 Hs. 66039E NM_138731     | ENSG000002MIPOL1    | CCDC193 mirror-inprotein-coding     |
| chr11-67E.10.61414  | -0.10691  | 0.71959  | -0.148571 | 0.881892 | 0.981636 | chr11 | 67224919   | 67225888 | + | 0 NA | intron (intron) (N  | 9814 NM_01813E    | 55168 Hs. 52014E NM_01813E      | ENSG000002MRPS18A   | HumanS18E mitochondonprotein-coding |
| chr13-10E.10.61414  | -0.10691  | 0.71959  | -0.148571 | 0.881892 | 0.981636 | chr13 | 1.03E+08   | 1.03E+08 | + | 0 NA | intron (Alu)Sj SIN  | -14611 NM_00125E  | 22992 Hs. 124147NM_01230E       | ENSG000002KDM2A     | CXHC8 FBI lysine deprotein-coding   |
| chr4-293E.10.61414  | -0.10691  | 0.71959  | -0.148571 | 0.881892 | 0.981636 | chr4  | 2938082    | 2940556  | + | 0 NA | intron (NLIMB8) LIN | 36029 NM_00101C   | 196541 Hs. 50862E NM_00101C     | ENSG000002METTL21C  | C13orf39 methyl trcprotein-coding   |
| chr6-436E.10.61414  | -0.10691  | 0.71959  | -0.148571 | 0.881892 | 0.981636 | chr6  | 43600773   | 43602283 | + | 0 NA | exon (NM exon) (NM  | 3773 NR_01545E    | 317648 Hs. 39817E NR_01545E     | ENSG000002NOP14-AS1 | C4orf10 FNOP14 antncRNA             |
| chrX-240E.10.61414  | -0.10691  | 0.71959  | -0.148571 | 0.881892 | 0.981636 | chrX  | 24209467   | 24212295 | + | 0 NA | intron (Alu)Sq2 SI  | 25343 NM_001291   | 5429 Hs. 655467NM_00650E        | ENSG000002POLH      | RAD30 RAL DNA polynprotein-coding   |
| chr2-610E.10.14297  | -0.10975  | 0.739105 | -0.148491 | 0.881955 | 0.981636 | chr2  | 61031214   | 61033008 | + | 0 NA | exon (NM exon) (NM  | 61152 NM_00117E   | 7543 Hs. 336681NM_00341C        | ENSG000002ZFX       | ZNF296 zinc fing protein-coding     |
| chr6-313E.10.14297  | -0.10975  | 0.739105 | -0.148491 | 0.881955 | 0.981636 | chr6  | 31353732   | 31355592 | + | 0 NA | exon (NM exon) (NM  | -13852 NM_00132E  | 150962 Hs. 36834E NM_14470E     | ENSG000002PUS10     | CCDC139 Pseudoprotein-coding        |
| chr17-557.9.192787  | -0.11737  | 0.793716 | -0.148462 | 0.881978 | 0.981636 | chr17 | 55773544   | 55774410 | + | 0 NA | TTS (NR_C TTS (NR_C | 654 NR_106951     | 1.02E+08 Hs. 106951             | ENSG000002MIR6891   | hsa-mir-6microRNA ncRNA             |
| chr16-69E.13.10909  | -0.097033 | 0.653608 | -0.148458 | 0.881981 | 0.981636 | chr16 | 69370016   | 69371033 | + | 0 NA | intron (intron) (N  | 22872 NM_00110E   | 58488 Hs. 28521E NM_02121E      | ENSG000002CPTP      | PC-TP ST phosphatiprotein-coding    |
| chr1-153E.11.6466   | -0.103213 | 0.695331 | -0.148438 | 0.881997 | 0.981636 | chr1  | 1.54E+08   | 1.54E+08 | + | 0 NA | exon (NM exon) (NM  | 15483 NM_00565E   | 7014 Hs. 63335 NM_00565E        | ENSG000002TERF2     | TRBF2 TRF telomericprotein-coding   |
| chr14-321.8.680483  | -0.120098 | 0.809833 | -0.148310 | 0.882106 | 0.981636 | chr14 | 32136559   | 32137004 | + | 0 NA | Intergeni Intergeni | -1528 NM_006694   | 10899 Hs. 6396 NM_006694        | ENSG000002JTB       | HJTB HSPC jumping tprotein-coding   |
| chr12-327.9.358154  | -0.11312  | 0.762894 | -0.14828  | 0.882125 | 0.981636 | chr12 | 327516     | 328998   | + | 0 NA | intron (intron) (N  | 59477 NM_00117E   | 394 Hs. 59231E NM_00117E        | ENSG000002ARHGAP5   | GF12 RhoC GTPas protein-coding      |
| chr13-99E.9.358154  | -0.11312  | 0.762894 | -0.14828  | 0.882125 | 0.981636 | chr13 | 99550292   | 99550683 | + | 0 NA | intron (intron) (N  | 61063 NM_00104E   | 5927 Hs. 76272 NM_00505E        | ENSG000002KDM5A     | RBBP-2 RF2 lysine deprotein-coding  |
| chr15-50E.9.358154  | -0.11312  | 0.762894 | -0.14828  | 0.882125 | 0.981636 | chr15 | 50588875   | 50589769 | + | 0 NA | intron (NL2) LINE I | -26625 NR_12639C  | 1.04E+08 Hs. 639387NR_126390    | LINC0103E           | long intencRNA                      |
| chr3-880E.9.358154  | -0.11312  | 0.762894 | -0.14828  | 0.882125 | 0.981636 | chr3  | 88055172   | 88056370 | + | 0 NA | intron (Alu)Sj SIN  | -42656 NM_20349A  | 373509 Hs. 67775E NM_20349A     | ENSG000002USP50     | ubiquitin protein-coding            |
| chr4-756E.9.358154  | -0.11312  | 0.762894 | -0.14828  | 0.882125 | 0.981636 | chr4  | 75644692   | 75644956 | + | 0 NA | exon (NM exon) (NM  | 3225 NM_00366E    | 8545 Hs. 44481E NM_00366E       | ENSG000002CGGBP1    | CGGBP1 p2CGG triplprotein-coding    |
| chr5-143E.9.358154  | -0.11312  | 0.762894 | -0.14828  | 0.882125 | 0.981636 | chr5  | 14320171   | 14322782 | + | 0 NA | 3' UTR (3' UTR (N   | -14296 NM_00133C  | 8999 Hs. 59169E NM_00394E       | ENSG000002CDKL2     | KKIAMRE F cyclin deprotein-coding   |
| chr1-329E.8.904556  | -0.12003  | 0.809945 | -0.148195 | 0.882189 | 0.981636 | chr1  | 32936891   | 32937090 | + | 0 NA | intron (intron) (N  | -142506 NR_14581E | 1.1E+08 Hs. 14581E              | SNORD170            | small nucsnRNA                      |
| chr22-411.7.606877  | -0.125599 | 0.848497 | -0.148026 | 0.882323 | 0.981636 | chr22 | 41117920   | 41118994 | + | 0 NA | exon (NM exon) (NM  | 27819 NM_001127   | 127544 Hs. 591504NM_153341      | ENSG000002RNF19B    | IBRD3 NR ring fingprotein-coding    |
| chr1-244E.8.904556  | -0.11508  | 0.777475 | -0.14802  | 0.882327 | 0.981636 | chr1  | 24449405   | 24452171 | + | 0 NA | intron (intron) (N  | 25865 NM_00136E   | 2033 Hs. 517517NM_00142E        | ENSG000002CEP300    | KAT3B MKI E1A bindiprotein-coding   |
| chr1-314E.8.904556  | -0.11508  | 0.777475 | -0.14802  | 0.882327 | 0.981636 | chr1  | 31423435   | 31431963 | + | 0 NA | intron (intron) (N  | 34763 NM_00132E   | 57185 Hs. 52344E NM_02044E      | ENSG000002NIPAL3    | DJ462023. NIPA likeprotein-coding   |
| chr1-1114.8.904556  | -0.11508  | 0.777475 | -0.14802  | 0.882327 | 0.981636 | chr1  | 1.11E+08   | 1.11E+08 | + | 0 NA | intron (Alu)Sx1 SI  | 14341 NM_01856E   | 347735 Hs. 27065E NM_01856E     | ENSG000002SERINC2   | FKSG84 PF serine ir protein-coding  |
| chr1-1457.8.904556  | -0.11508  | 0.777475 | -0.14802  | 0.882327 | 0.981636 | chr1  | 1.46E+08   | 1.46E+08 | + | 0 NA | intron (intron) (N  | 9581 NM_00168E    | 515 Hs. 51487E NM_00168E        | ENSG000002ATP5PB    | ATP5F1 PIATP syntt protein-coding   |
| chr1-1831.8.904556  | -0.11508  | 0.777475 | -0.14802  | 0.882327 | 0.981636 | chr1  | 1.83E+08   | 1.83E+08 | + | 0 NA | intron (NL2a) LINE  | 40637 NR_10384E   | 11126 Hs. 488237NM_00705E       | ENSG000002CD160     | Byc5 NK1 CD160 molprotein-coding    |
| chr1-220C.8.904556  | -0.11508  | 0.777475 | -0.14802  | 0.882327 | 0.981636 | chr1  | 2.2E+08    | 2.2E+08  | + | 0 NA | 3' UTR (3' UTR (N   | -1929 NR_14904E   | 1.11E+08 Hs. 60406E NR_14904E   | ENSG000002LAMC1-AS1 | IN-LAMC2 LAMC1 antncRNA             |
| chr1-223E.8.904556  | -0.11508  | 0.777475 | -0.14802  | 0.882327 | 0.981636 | chr1  | 2.24E+08   | 2.24E+08 | + | 0 NA | intron (intron) (N  | 41681 NM_00444E   | 2058 Hs. 49778E NM_00444E       | ENSG000002EPRS      | EARS GLUF glutamyl- protein-coding  |
| chr1-231E.8.904556  | -0.11508  | 0.777475 | -0.14802  | 0.882327 | 0.981636 | chr1  | 2.24E+08   | 2.24E+08 | + | 0 NA | intron (NLIM5) LINE | 37973 NM_001013E  | 7159 Hs. 52396E NM_00542E       | ENSG000002TP53BP2   | 53BP2 ASF tumor prcprotein-coding   |
| chr10-63E.8.904556  | -0.11508  | 0.777475 | -0.14802  | 0.882327 | 0.981636 | chr10 | 38095878   | 38096833 | + | 0 NA | intron (intron) (N  | 4022 NM_00101C    | 83932 Hs. 55489E NM_03201E      | ENSG000002SPRIN     | C1orf124 SprT prcprotein-coding     |
| chr10-40E.8.904556  | -0.11508  | 0.777475 | -0.14802  | 0.882327 | 0.981636 | chr10 | 43387165   | 43395178 | + | 0 NA | intron (intron) (N  | 2018 NM_001324    | 7587 Hs. 29257E NM_003421       | ENSG000002ZNF37A    | KOX21 ZNF zinc fingprotein-coding   |
| chr10-63E.8.904556  | -0.11508  | 0.777475 | -0.14802  | 0.882327 | 0.981636 | chr10 | 43387165   | 43395178 | + | 0 NA | intron (Alu)Sx1 SI  | 5660 NM_00109E    | 3185 Hs. 808 NM_00496E          | ENSG000002HNRNPF    | HNRPF OK/heterogeprotein-coding     |
| chr10-93E.8.904556  | -0.11508  | 0.777475 | -0.14802  | 0.882327 | 0.981636 | chr10 | 93331415   | 93345055 | + | 0 NA | intron (THE1B) LTF  | 37000 NM_00135C   | 9886 Hs. 737374NM_01483E        | ENSG000002RHOBTB1   | RHOBTB1 Rho relatprotein-coding     |
| chr11-86E.8.904556  | -0.11508  | 0.777475 | -0.14802  | 0.882327 | 0.981636 | chr11 | 8690766    | 8700902  | + | 0 NA | intron (intron) (N  | 144099 NM_013451  | 26509 Hs. 60208E NM_013451      | ENSG000002MYOF      | FERL3 myoferlir protein-coding      |
| chr11-114.8.904556  | -0.11508  | 0.777475 | -0.14802  | 0.882327 | 0.981636 | chr11 | 1.14E+08   | 1.14E+08 | + | 0 NA | intron (intron) (N  | 10395 NR_002977   | 677826 Hs. 74555E NR_002977     | ENSG000002SNORA3B   | ACA3-2 SN small nucsnRNA            |
| chr12-57E.8.904556  | -0.11508  | 0.777475 | -0.14802  | 0.882327 | 0.981636 | chr12 | 57494051   | 57506738 | + | 0 NA | TTS (NM_C TTS (NM_C | 10958 NM_01552E   | 25996 Hs. 67719E NM_01552E      | ENSG000002CREX02    | CGI-114 RNA exon protein-coding     |
| chr13-23E.8.904556  | -0.11508  | 0.777475 | -0.14802  | 0.882327 | 0.981636 | chr13 | 23356555   | 23359052 | + | 0 NA | exon (NM exon) (NM  | -11570 NM_00131E  | 64333 Hs. 43712E NM_03249E      | ENSG000002ARHGAP9   | OCI RGL1 Rho GTPas protein-coding   |
| chr14-241.8.904556  | -0.11508  | 0.777475 | -0.14802  | 0.882327 | 0.981636 | chr14 | 24162647</ |          |   |      |                     |                   |                                 |                     |                                     |



|                     |          |          |          |          |          |       |          |          |   |   |    |                     |        |           |          |             |              |            |            |           |                        |                           |                            |                         |
|---------------------|----------|----------|----------|----------|----------|-------|----------|----------|---|---|----|---------------------|--------|-----------|----------|-------------|--------------|------------|------------|-----------|------------------------|---------------------------|----------------------------|-------------------------|
| chr6-1286 8.401959  | -0.1179  | 0.803742 | -0.14669 | 0.883379 | 0.981636 | chr6  | 56613596 | 56614542 | + | 0 | NA | TTS (NM_C           | 28820  | NM_01554E | 667      | Hs. 60491E  | 00172        | ENSG00000  | CDS        | BP240     | BP240                  | dystonin protein-coding   |                            |                         |
| chr8-4307 8.401959  | -0.1179  | 0.803742 | -0.14669 | 0.883379 | 0.981636 | chr8  | 43074003 | 43075127 | + | 0 | NA | intron (NLIM2 LINE  | 18242  | NM_002027 | 2339     | Hs. 37031E  | 002027       | ENSG00000  | FNTA       | FPTA      | PGGT                   | farnesyl protein-coding   |                            |                         |
| chr9-7025 8.401959  | -0.1179  | 0.803742 | -0.14669 | 0.883379 | 0.981636 | chr9  | 70290245 | 70292992 | + | 0 | NA | intron (NLIM4 LINE  | 32640  | NM_01511C | 23137    | Hs. 53418E  | 01511C       | ENSG00000  | SMC5       | SMC5L1    |                        | structure protein-coding  |                            |                         |
| chr9-9206 8.401959  | -0.1179  | 0.803742 | -0.14669 | 0.883379 | 0.981636 | chr9  | 92060974 | 92063980 | + | 0 | NA | intron (NLIM1 LINE  | 52936  | NM_00641E | 10558    | Hs. 90458   | NM_00641E    | ENSG00000  | SPTLC1     | HSAN1     | HSA                    | serine p protein-coding   |                            |                         |
| chr12-10C 8.855558  | -0.11566 | 0.78875  | -0.14664 | 0.883415 | 0.981636 | chr12 | 1E+08    | 1E+08    | + | 0 | NA | intron (NALuSx3 SI  | 12091  | NR_04856E | 64431    | Hs. 11508E  | 02249E       | ENSG00000  | ACTR6      | HPG1      | CDAL                   | actin re protein-coding   |                            |                         |
| chr5-149E 8.855558  | -0.11566 | 0.78875  | -0.14664 | 0.883415 | 0.981636 | chr5  | 1.5E+08  | 1.5E+08  | + | 0 | NA | exon (NM_exon (NM   | 5268   | NM_03095E | 81789    | Hs. 16933E  | 03095E       | ENSG00000  | CTIGD6     |           |                        | tigger tr protein-coding  |                            |                         |
| chr11-111 12.07663  | 0.099691 | 0.680017 | 0.146601 | 0.883447 | 0.981636 | chr11 | 1.19E+08 | 1.19E+08 | + | 0 | NA | intron (NALuJb SIN  | 27297  | NR_106814 | 1.02E+08 | NR_106814   | ENSG00000    | MIR6756    |            | hsa-mir-ε | microRNA               | ncRNA                     |                            |                         |
| chr19-381 12.12563  | 0.099748 | 0.680525 | 0.146575 | 0.883467 | 0.981636 | chr19 | 38162033 | 38163367 | + | 0 | NA | promoter-promoter-  | -396   | NR_145800 | 1.1E+08  | NR_145800   | SNORD152     |            |            |           |                        | small ncnRNA              |                            |                         |
| chr2-131F 6.193384  | 0.143349 | 0.978101 | 0.146559 | 0.88348  | 0.981636 | chr2  | 1.32E+08 | 1.32E+08 | + | 0 | NA | intron (Nintron (N  | 16641  | NR_026922 | 150776   | Hs. 53562E  | NR_026922    | ENSG00000  | LLOC15077E |           |                        |                           | sphingomy pseudo           |                         |
| chr1-180E 11.17544  | 0.10557  | 0.721205 | 0.146361 | 0.883621 | 0.981636 | chr1  | 1.81E+08 | 1.81E+08 | + | 0 | NA | intron (NLIP4 LINE  | 51581  | NM_00473E | 9213     | Hs. 22765E  | NM_00473E    | ENSG00000  | XPR1       | IBGC6     | SLC                    | xenotropin protein-coding |                            |                         |
| chr14-351 7.143571  | 0.128802 | 0.880032 | 0.146361 | 0.883637 | 0.981636 | chr14 | 35105978 | 35106289 | + | 0 | NA | intron (NALuY SINE  | 16409  | NM_00130E | 55012    | Hs. 53071E  | NM_00130E    | ENSG00000  | PPP2R3C    | C14orf10  |                        | protein i protein-coding  |                            |                         |
| chr17-427 7.143571  | 0.128802 | 0.880032 | 0.146361 | 0.883637 | 0.981636 | chr17 | 42713235 | 42713637 | + | 0 | NA | intron (Nintron (N  | -5285  | NR_10683E | 1.02E+08 | NR_10683E   | ENSG00000    | MIR6780A   |            | hsa-mir-ε | microRNA               | ncRNA                     |                            |                         |
| chr2-217 7.143571   | 0.128802 | 0.880032 | 0.146361 | 0.883637 | 0.981636 | chr2  | 21777118 | 21777455 | + | 0 | NA | intron (NL2 LINE L  | -41492 | NM_01331E | 29799    | Hs. 51743E  | NM_01331E    | ENSG00000  | YPEL1      | FKSG3     |                        | yippee lip protein-coding |                            |                         |
| chr7-186E 8.450957  | -0.11732 | 0.801792 | -0.14632 | 0.883671 | 0.981636 | chr7  | 1.86E+08 | 1.86E+08 | + | 0 | NA | TTS (NR_C           | -10514 | NM_00112E | 346653   | Hs. 44523E  | NM_00112E    | ENSG00000  | FAM71F2    | FAM137B   |                        | family wiprotein-coding   |                            |                         |
| chr15-73E 8.450957  | -0.11732 | 0.801792 | -0.14632 | 0.883671 | 0.981636 | chr15 | 73947002 | 73948030 | + | 0 | NA | intron (Nintron (N  | 29613  | NM_001127 | 10216    | Hs. 64772E  | NM_005807    | ENSG00000  | PRG4       | CACP      | HAPC                   | proteogly protein-coding  |                            |                         |
| chr6-314I 8.450957  | -0.11732 | 0.801792 | -0.14632 | 0.883671 | 0.981636 | chr6  | 3141120  | 3141945  | + | 0 | NA | intron (NALuSx3 SI  | -19268 | NR_04006E | 1E+08    | Hs. 59978E  | NR_04006E    | ENSG00000  | LOXL1-AS1  | LOXL1     |                        | antncRNA                  |                            |                         |
| chr7-982E 8.450957  | -0.11732 | 0.801792 | -0.14632 | 0.883671 | 0.981636 | chr7  | 98290860 | 98294617 | + | 0 | NA | intron (NALuSx3 SI  | 16012  | NM_00131C | 7280     | Hs. 65454E  | NM_00106E    | ENSG00000  | TUBB2A     | CDCBM5    | TU                     | tubulin t protein-coding  |                            |                         |
| chr5-109E 9.159505  | 0.114648 | 0.784024 | 0.14623  | 0.88374  | 0.981636 | chr5  | 1.1E+08  | 1.1E+08  | + | 0 | NA | 3' UTR (N3' UTR (N  | 11052  | NM_01537E | 25798    | Hs. 56743E  | NM_01537E    | ENSG00000  | BRI3       | I3        |                        | brain pr protein-coding   |                            |                         |
| chr2-239E 9.350296  | -0.11165 | 0.764066 | -0.14613 | 0.883819 | 0.981636 | chr2  | 2.4E+08  | 2.4E+08  | + | 0 | NA | intron (Nintron (N  | -42564 | NR_03317E | 1E+08    | Hs. 36840E  | NR_03317E    | LINC0184E  |            |           |                        | long intncRNA             |                            |                         |
| chr5-131I 9.350296  | -0.11165 | 0.764066 | -0.14613 | 0.883819 | 0.981636 | chr5  | 1.3E+08  | 1.3E+08  | + | 0 | NA | intron (NLIMC4 LIN  | 38824  | NR_136157 | 4705     | Hs. 27767E  | NM_00454E    | ENSG00000  | NDUFA10    | CI-42KD   | C                      | ubiquitin protein-coding  |                            |                         |
| chr1-145E 10.26535  | -0.10666 | 0.75737  | -0.14611 | 0.883837 | 0.981636 | chr1  | 1.46E+08 | 1.46E+08 | + | 0 | NA | intron (Nintron (N  | 4136   | NM_00534C | 3094     | Hs. 48330E  | NM_00534C    | ENSG00000  | HINT1      | HINT      | NMAH                   | histidine protein-coding  |                            |                         |
| chr1-326E 8.896698  | -0.11354 | 0.777291 | -0.14607 | 0.883866 | 0.981636 | chr1  | 32656939 | 32677527 | + | 0 | NA | non-codirnon-codir  | 34372  | NR_104217 | 1.02E+08 | Hs. 53467E  | NR_104217    | ENSG00000  | CNBP25P    | WI2-925H4 | NBP                    | ment pseudo               |                            |                         |
| chr1-393E 8.896698  | -0.11354 | 0.777291 | -0.14607 | 0.883866 | 0.981636 | chr1  | 39385520 | 39386741 | + | 0 | NA | intron (NLTR13A LI  | 15875  | NM_00113E | 5928     | Hs. 16003   | NM_00561C    | ENSG00000  | RBBP4      | NURF55    | IRF                    | REB                       | bindir protein-coding      |                         |
| chr1-923E 8.896698  | -0.11354 | 0.777291 | -0.14607 | 0.883866 | 0.981636 | chr1  | 92303928 | 92305976 | + | 0 | NA | intron (Nintron (N  | -22943 | NM_01503E | 643314   | Hs. 65876E  | NM_01503E    | ENSG00000  | KIAA0754   |           |                        |                           | KIAA0754 protein-coding    |                         |
| chr1-673E 8.896698  | -0.11354 | 0.777291 | -0.14607 | 0.883866 | 0.981636 | chr1  | 67306836 | 67307929 | + | 0 | NA | intron (NALuSx6 SI  | 5893   | NM_02481E | 79871    | Hs. 44442E  | NM_02481E    | ENSG00000  | RPAP2      | C1orf82   | F                      | RNA polyn protein-coding  |                            |                         |
| chr10-243I 8.896698 | -0.11354 | 0.777291 | -0.14607 | 0.883866 | 0.981636 | chr10 | 243E+08  | 2.43E+08 | + | 0 | NA | intron (Nintron (N  | -33322 | NR_02940I | 731275   | Hs. 72235E  | NR_02940I    | ENSG00000  | LINC01347- |           |                        |                           | long intncRNA              |                         |
| chr10-678E 8.896698 | -0.11354 | 0.777291 | -0.14607 | 0.883866 | 0.981636 | chr10 | 67806836 | 67910792 | + | 0 | NA | intron (NALuSx2 SIN | 17412  | NM_001314 | 23211    | Hs. 36977E  | NM_01223E    | ENSG00000  | SIRT1      | SIR2      | SIR2                   | sirtuin protein-coding    |                            |                         |
| chr10-92E 8.896698  | -0.11354 | 0.777291 | -0.14607 | 0.883866 | 0.981636 | chr10 | 92554119 | 92556074 | + | 0 | NA | intron (NLIM1 LINE  | 18410  | NM_001322 | 3416     | Hs. 50054E  | NM_00496E    | ENSG00000  | IDE        | INSULYSIN |                        | insulin c protein-coding  |                            |                         |
| chr10-93E 8.896698  | -0.11354 | 0.777291 | -0.14607 | 0.883866 | 0.981636 | chr10 | 93969624 | 93969866 | + | 0 | NA | intron (Nintron (N  | 4507   | NM_001347 | 118924   | Hs. 58665E  | NM_14524E    | ENSG00000  | FRA10AC1   | C1orf4    | F                      | FR1A0A                    | asp protein-coding         |                         |
| chr10-11E 8.896698  | -0.11354 | 0.777291 | -0.14607 | 0.883866 | 0.981636 | chr10 | 1.2E+08  | 1.2E+08  | + | 0 | NA | intron (Nintron (N  | 18612  | NM_00124E | 22876    | Hs. 36975E  | NM_014937    | ENSG00000  | INPP5F     | MSTP007   |                        |                           | inositol protein-coding    |                         |
| chr11-64E 8.896698  | -0.11354 | 0.777291 | -0.14607 | 0.883866 | 0.981636 | chr11 | 64871182 | 64875153 | + | 0 | NA | intron (Nintron (N  | 5442   | NR_162101 | 1.13E+08 | NR_162101   | MIR10392     |            |            |           |                        |                           | microRNA                   | ncRNA                   |
| chr11-77E 8.896698  | -0.11354 | 0.777291 | -0.14607 | 0.883866 | 0.981636 | chr11 | 77682359 | 77686179 | + | 0 | NA | intron (Nintron (N  | -46463 | NM_001311 | 1207     | Hs. 43073E  | NM_00129E    | ENSG00000  | CLNS1A     | CLC1      | CLNS                   | chloride protein-coding   |                            |                         |
| chr11-12E 8.896698  | -0.11354 | 0.777291 | -0.14607 | 0.883866 | 0.981636 | chr11 | 1.2E+08  | 1.2E+08  | + | 0 | NA | intron (Nintron (N  | -8126  | NM_001114 | 1111     | Hs. 24523E  | NM_001274    | ENSG00000  | CHEK1      | CHK1      |                        |                           | checkpoir protein-coding   |                         |
| chr12-10E 8.896698  | -0.11354 | 0.777291 | -0.14607 | 0.883866 | 0.981636 | chr12 | 1.05E+08 | 1.05E+08 | + | 0 | NA | intron (NTHEIC LTF  | 43200  | NM_00129E | 23325    | Hs. 12144   | NM_01527E    | ENSG00000  | WASHC4     | KIAA1033  |                        | WASH comp protein-coding  |                            |                         |
| chr13-11E 8.896698  | -0.11354 | 0.777291 | -0.14607 | 0.883866 | 0.981636 | chr13 | 1.1E+08  | 1.1E+08  | + | 0 | NA | intron (NMTR SINE   | 10079  | NR_04658E | 1.01E+08 | Hs. 50871E  | NR_04658E    | ENSG00000  | COL4A2-AS- | COL4A2    |                        | arncRNA                   |                            |                         |
| chr14-73E 8.896698  | -0.11354 | 0.777291 | -0.14607 | 0.883866 | 0.981636 | chr14 | 73206150 | 73209433 | + | 0 | NA | intron (NMERS2A LI  | -29715 | NR_15867E | 89932    | Hs. 50990E  | NM_17346E    | ENSG00000  | PAPLN      | PPN       | paplin, protein-coding |                           |                            |                         |
| chr14-921E 8.896698 | -0.11354 | 0.777291 | -0.14607 | 0.883866 | 0.981636 | chr14 | 92157201 | 92159649 | + | 0 | NA | intron (Nintron (N  | 36456  | NM_001322 | 53981    | Hs. 65763E  | NM_017437    | ENSG00000  | CPSF2      | CPSF100   |                        | cleavage protein-coding   |                            |                         |
| chr15-77E 8.896698  | -0.11354 | 0.777291 | -0.14607 | 0.883866 | 0.981636 | chr15 | 77206152 | 77209002 | + | 0 | NA | intron (NLIMC2 LIN  | 17827  | NR_02681E | 81698    | Hs. 65693E  | NM_030944    | LINC00597E | C15orf5    |           |                        |                           | long intncRNA              |                         |
| chr15-85E 8.896698  | -0.11354 | 0.777291 | -0.14607 | 0.883866 | 0.981636 | chr15 | 85664330 | 85665823 | + | 0 | NA | intron (NALuJc SIN  | 45126  | NM_00127C | 11214    | Hs. 45921E  | NM_00667E    | ENSG00000  | AKAP13     | AKAP-13   |                        |                           | A-kinase protein-coding    |                         |
| chr16-117E 8.896698 | -0.11354 | 0.777291 | -0.14607 | 0.883866 | 0.981636 | chr16 | 11748720 | 11757863 | + | 0 | NA | intron (Nintron (N  | -10434 | NR_13667E | 51061    | Hs. 31384E  | NM_015914    | ENSG00000  | TXNDC11    | EFP1      |                        |                           | thioredox protein-coding   |                         |
| chr16-15E 8.896698  | -0.11354 | 0.777291 | -0.14607 | 0.883866 | 0.981636 | chr16 | 15059693 | 15069865 | + | 0 | NA | intron (Nintron (N  | -8700  | NM_00127E | 123803   | Hs. 59204E  | NM_173474    | ENSG00000  | NTANI      | PNAAL     | PNAAL                  | -                         | termin protein-coding      |                         |
| chr16-214E 8.896698 | -0.11354 | 0.777291 | -0.14607 | 0.883866 | 0.981636 | chr16 | 21466467 | 21469322 | + | 0 | NA | intron (Nintron (N  | -33439 | NR_02445E | 1E+08    | Hs. 64843E  | NR_02445E    | LOC10019C- |            |           |                        |                           | uncharactncRNA             |                         |
| chr16-30E 8.896698  | -0.11354 | 0.777291 | -0.14607 | 0.883866 | 0.981636 | chr16 | 30350552 | 30353734 | + | 0 | NA | 3' UTR (N3' UTR (N  | 2791   | NM_00124E | 10421    | Hs. 20267E  | NM_00611C    | ENSG00000  | CD2BP2     | FWP010    | L                      | ICD2                      | cyto protein-coding        |                         |
| chr16-53E 8.896698  | -0.11354 | 0.777291 | -0.14607 | 0.883866 | 0.981636 | chr16 | 53306207 | 53308044 | + | 0 | NA | intron (Nintron (N  | 64087  | NM_001347 | 643802   | Hs. 45133E  | NM_001207030 | LOC64380E- |            |           |                        |                           | u3 small protein-coding    |                         |
| chr16-68E 8.896698  | -0.11354 | 0.777291 | -0.14607 | 0.883866 | 0.981636 | chr16 | 68301469 | 68304334 | + | 0 | NA | intron (Nintron (N  | 8045   | NM_03217E | 84138    | Hs. 72952E  | NM_03217E    | ENSG00000  | SLC7A60S   | -         |                        |                           |                            | solute c protein-coding |
| chr16-74E 8.896698  | -0.11354 | 0.777291 | -0.14607 | 0.883866 | 0.981636 | chr16 | 74642107 | 74644823 | + | 0 | NA | intron (Nintron (N  | 23412  | NM_018124 | 55159    | Hs. 56752E  | NM_018124    | ENSG00000  | RFPWD3     | FANCW     | RNF                    | ring fing protein-coding  |                            |                         |
| chr16-89E 8.896698  | -0.11354 | 0.777291 | -0.14607 | 0.883866 | 0.981636 | chr16 | 89733268 | 89738301 | + | 0 | NA | intron (NALuSx1 SI  | 14247  | NM_00111E | 92822    | Hs. 290154E | NM_15228E    | ENSG00000  | ZNF276     | CENP-2    |                        |                           | C zinc fing protein-coding |                         |
| chr18-27E 8.896698  | -0.11354 | 0.777291 | -0.14607 | 0.883866 | 0.981636 | chr18 | 2769651  | 2773645  | + | 0 | NA | intron (Nintron (N  | -75358 | NM_03204E | 84034    | Hs. 53281E  | NM_03204E    | ENSG00000  | CEMLIN2    | EMILIN-2  |                        |                           |                            |                         |

|            |          |          |          |          |          |          |       |          |           |   |   |    |                    |                  |                              |                    |                     |                               |                             |
|------------|----------|----------|----------|----------|----------|----------|-------|----------|-----------|---|---|----|--------------------|------------------|------------------------------|--------------------|---------------------|-------------------------------|-----------------------------|
| chr7-6492  | 8.134897 | -0.11906 | 0.825725 | 0.144188 | 0.885352 | 0.981636 | chr7  | 64921750 | 649222347 | + | 0 | NA | intron (NLM3 LINE  | 18806 NM_021144  | 10793 Hs. 520888NM_021144    | ENSG000002ZNF273   | HZF9                | zinc finger protein-coding    |                             |
| chr2-9721  | 11.14216 | 0.1029   | 0.713956 | 0.144127 | 0.8854   | 0.981636 | chr2  | 97214747 | 97216011  | + | 0 | NA | intron (Nintron (N | -63338 NR_103732 | 1.01E+08 Hs. 732616NR_103732 | LOC100506          | -                   | uncharactericRNA              |                             |
| chr8-430C  | 8.721622 | 0.121501 | 0.845626 | 0.143682 | 0.885752 | 0.981636 | chr8  | 43008911 | 43009390  | + | 0 | NA | intron (NAluSx SI  | -47149 NR_03369E | 2339 Hs. 370312NM_020272     | ENSG00000CFNTA     | FPTA PGGT           | farnesyl protein-coding       |                             |
| chr1-316F  | 7.50262  | -0.12468 | 0.867987 | -0.14364 | 0.885786 | 0.981636 | chr1  | 31658672 | 31658871  | + | 0 | NA | intron (Nintron (N | -13895 NR_03368E | 553115 Hs. 470417NM_01239E   | ENSG00000PEF1      | ABP33 PEF           | pena-EP- protein-coding       |                             |
| chr10-12E  | 8.88884  | -0.11199 | 0.780052 | -0.14357 | 0.885843 | 0.981636 | chr10 | 1.26E+08 | 1.26E+08  | + | 0 | NA | intron (NMLT1F2 LI | -9179 NR_039704  | 1.01E+08                     | NR_039704          | ENSG00000MIR4484    | MBP-4484                      | microRNA ncRNA              |
| chr13-331  | 8.88884  | -0.11199 | 0.780052 | -0.14357 | 0.885843 | 0.981636 | chr13 | 33103673 | 33106780  | + | 0 | NA | 3' UTR (N3' UTR (N | 80865 NM_00124E  | 90627 Hs. 156551NM_052851    | ENSG00000CSTARD13  | ARHGAP37 STAR       | relaxin protein-coding        |                             |
| chr13-44E  | 8.88884  | -0.11199 | 0.780052 | -0.14357 | 0.885843 | 0.981636 | chr13 | 44977226 | 44980533  | + | 0 | NA | intron (Nintron (N | 10592 NM_01234E  | 22747 Hs. 525006NM_01234E    | ENSG00000NUF1P1    | NUF1P baE           | nuclear f protein-coding      |                             |
| chr14-51E  | 8.88884  | -0.11199 | 0.780052 | -0.14357 | 0.885843 | 0.981636 | chr14 | 51692930 | 51694837  | + | 0 | NA | intron (Nintron (N | -23400 NM_001267 | 122786 Hs. 434914NM_15233C   | ENSG00000FRMD6     | C14orf31 FERM       | domain protein-coding         |                             |
| chr19-12E  | 8.88884  | -0.11199 | 0.780052 | -0.14357 | 0.885843 | 0.981636 | chr19 | 12656789 | 12658277  | + | 0 | NA | exon (NM exon (NM  | 9209 NM_00052E   | 4125 Hs. 356769NM_00052E     | ENSG00000MAN2B1    | LAMAN MAN           | mannosidase protein-coding    |                             |
| chr2-392E  | 8.88884  | -0.11199 | 0.780052 | -0.14357 | 0.885843 | 0.981636 | chr2  | 39290590 | 39294638  | + | 0 | NA | intron (NMLT1B LTF | -48631 NR_144521 | 344387 Hs. 403201NM_01000E   | ENSG00000CDKL4     | -                   | cyclin D protein-coding       |                             |
| chr2-203I  | 8.88884  | -0.11199 | 0.780052 | -0.14357 | 0.885843 | 0.981636 | chr2  | 2.03E+08 | 2.03E+08  | + | 0 | NA | intron (NLa2a LINE | -45054 NM_17753E | 57404 Hs. 446066NM_020674    | ENSG00000CYP20A1   | CYP-M               | cytochrome protein-coding     |                             |
| chr3-2747  | 8.88884  | -0.11199 | 0.780052 | -0.14357 | 0.885843 | 0.981636 | chr3  | 27477394 | 27478347  | + | 0 | NA | intron (NAluSx SIN | 6514 NM_001321   | 9497 Hs. 250072NM_00361E     | ENSG00000SLC4A7    | NBC2 NBC2           | solute carrier protein-coding |                             |
| chr5-959C  | 8.88884  | -0.11199 | 0.780052 | -0.14357 | 0.885843 | 0.981636 | chr5  | 95903808 | 95908544  | + | 0 | NA | intron (Nintron (N | 53944 NR_02693E  | 202299 Hs. 8373              | 17561E             | ENSG00000LINC01554  | C5orf27 DF                    | long intencRNA              |
| chr6-993E  | 8.88884  | -0.11199 | 0.780052 | -0.14357 | 0.885843 | 0.981636 | chr6  | 99399979 | 99403559  | + | 0 | NA | intron (NMER33 DNA | -7574 NM_017421  | 51805 Hs. 173622NM_017421    | ENSG00000COQ3      | DHBM2 DF            | coenzyme protein-coding       |                             |
| chr6-100E  | 8.88884  | -0.11199 | 0.780052 | -0.14357 | 0.885843 | 0.981636 | chr6  | 1.01E+08 | 1.01E+08  | + | 0 | NA | intron (NMLT2A2 LI | 61900 NM_00682E  | 10973 Hs. 486031NM_00682E    | ENSG00000ASCC3     | ASC1p200 activatir  | protein-coding                |                             |
| chr6-111E  | 8.88884  | -0.11199 | 0.780052 | -0.14357 | 0.885843 | 0.981636 | chr6  | 1.11E+08 | 1.11E+08  | + | 0 | NA | 3' UTR (N3' UTR (N | 7788 NM_15336E   | 91749 Hs. 400572NM_15336E    | ENSG00000MFSDB4B   | KIAA1919 major      | fac protein-coding            |                             |
| chr9-130I  | 8.88884  | -0.11199 | 0.780052 | -0.14357 | 0.885843 | 0.981636 | chr9  | 1.3E+08  | 1.3E+08   | + | 0 | NA | intron (Nintron (N | 39922 NR_135124  | 401554 Hs. 522437NR_135124   | ENSG00000GPRACR    | LncGPR107 GPR107    | acncRNA                       |                             |
| chr15-42E  | 7.453623 | -0.1253  | 0.872916 | -0.14354 | 0.885864 | 0.981636 | chr15 | 42520166 | 42520555  | + | 0 | NA | intron (Nintron (N | 24726 NM_00382E  | 8773 Hs. 511145NM_00382E     | ENSG00000SNAP23    | Hst17016 synapto    | s protein-coding              |                             |
| chr9-363A  | 8.945695 | -0.11298 | 0.787333 | -0.1435  | 0.885897 | 0.981636 | chr9  | 36343450 | 36344675  | + | 0 | NA | intron (NAluSx SI  | 56207 NM_19432E  | 152006 Hs. 333503NM_022781   | ENSG00000RNF38     | -                   | ring finger protein-coding    |                             |
| chr9-111E  | 8.945695 | -0.11298 | 0.787333 | -0.1435  | 0.885897 | 0.981636 | chr9  | 1.11E+08 | 1.11E+08  | + | 0 | NA | exon (NM exon (NM  | -63957 NM_20585E | 26248 Hs. 381312NM_20585E    | ENSG00000COR2K2    | HSHTPCRHC olfactory | protein-coding                |                             |
| chr12-1119 | 2.006645 | 0.115998 | 0.810095 | 0.143191 | 0.88614  | 0.981636 | chr12 | 1.12E+08 | 1.12E+08  | + | 0 | NA | intron (NSVA_F Ret | 36750 NM_025247  | 80724 Hs. 331141NM_025247    | ENSG00000ACAD10    | -                   | acyl-CoA protein-coding       |                             |
| chr6-111E  | 8.394102 | -0.11618 | 0.811849 | -0.1431  | 0.886211 | 0.981636 | chr6  | 1.11E+08 | 1.11E+08  | + | 0 | NA | intron (NLM3A3 LIN | -98793 NR_03410E | 643749 Hs. 486222NR_03410E   | ENSG00000TRAF3IP2  | C6UAS C6c           | TRAF3IP2 ncRNA                |                             |
| chr9-9597  | 8.394102 | -0.11618 | 0.811849 | -0.1431  | 0.886211 | 0.981636 | chr9  | 95972068 | 95972723  | + | 0 | NA | exon (NM exon (NM  | 49416 NR_02412E  | 1E+08 Hs. 43431CNR_02412E    | ENSG00000LINC0009E | NCRNA000E           | long intencRNA                |                             |
| chr11-114  | 8.8477   | -0.1141  | 0.797875 | -0.14301 | 0.886282 | 0.981636 | chr11 | 1.14E+08 | 1.14E+08  | + | 0 | NA | intron (Nintron (N | 6234 NM_00616E   | 4837 Hs. 503911NM_00616E     | ENSG00000NMMT      | -                   | nicotinan protein-coding      |                             |
| chr14-71I  | 8.8477   | -0.1141  | 0.797875 | -0.14301 | 0.886282 | 0.981636 | chr14 | 71102312 | 71102824  | + | 0 | NA | intron (Nintron (N | 195109 NM_00130E | 22994 Hs. 446655NM_01498E    | ENSG00000PCNX1     | PCNX PCNX           | pecanase I protein-coding     |                             |
| chr22-507  | 10.62985 | 0.104032 | 0.727602 | 0.142979 | 0.886307 | 0.981636 | chr22 | 50789438 | 50790263  | + | 0 | NA | intron (Nintron (N | 6121 NR_02698E   | 284942 Hs. 406135NM_203302   | RPL23AP8E          | RPL23A_4E           | ribosomal pseudo              |                             |
| chr16-24E  | 8.937837 | -0.11144 | 0.781154 | -0.14266 | 0.886559 | 0.981636 | chr16 | 24973152 | 24974131  | + | 0 | NA | intron (NLa2c LINE | 41728 NM_00100E  | 55114 Hs. 373793NR_018054    | ENSG00000ARHGAP17  | MST066 MS           | Rho GTPase protein-coding     |                             |
| chr17-53E  | 8.937837 | -0.11144 | 0.781154 | -0.14266 | 0.886559 | 0.981636 | chr17 | 5360816  | 5362548   | + | 0 | NA | intron (Nintron (N | -57959 NM_00116C | 84268 Hs. 462086NM_03230E    | ENSG00000CPAIN     | HRIP RIP            | RPA interprotein-coding       |                             |
| chr18-45E  | 8.937837 | -0.11144 | 0.781154 | -0.14266 | 0.886559 | 0.981636 | chr18 | 45884009 | 45885274  | + | 0 | NA | exon (NM exon (NM  | 58966 NM_21360E  | 284266 Hs. 287692NM_21360E   | ENSG00000SIGLEC15  | CD33L3 Hs           | sialic acid protein-coding    |                             |
| chr20-17E  | 8.937837 | -0.11144 | 0.781154 | -0.14266 | 0.886559 | 0.981636 | chr20 | 17624871 | 17636204  | + | 0 | NA | intron (Nintron (N | 51655 NM_00136E  | 6238 Hs. 47221E              | 004587             | ENSG00000RRBP1      | ES 130                        | E3 ribosome protein-coding  |
| chr4-150I  | 8.937837 | -0.11144 | 0.781154 | -0.14266 | 0.886559 | 0.981636 | chr4  | 15015203 | 15016522  | + | 0 | NA | intron (NMER44A DN | 13381 NM_001177  | 132864 Hs. 656937NM_18248E   | ENSG00000CPEB2     | CPE-BP2 C           | cytoplasm protein-coding      |                             |
| chr9-125E  | 8.937837 | -0.11144 | 0.781154 | -0.14266 | 0.886559 | 0.981636 | chr9  | 1.25E+08 | 1.25E+08  | + | 0 | NA | intron (NAluSx SIN | 12808 NM_005347  | 3309 Hs. 743241NM_005347     | ENSG00000HSPA5     | BTP GRP7E           | heat shock protein-coding     |                             |
| chr1-2057  | 8.937177 | -0.1067  | 0.747981 | -0.14265 | 0.886567 | 0.981636 | chr1  | 2.06E+08 | 2.06E+08  | + | 0 | NA | intron (Nintron (N | 23247 NM_002731  | 64710 Hs. 213061NM_022731    | ENSG00000NUCKS1    | JC7 NUCKS           | nuclear protein-coding        |                             |
| chr5-151E  | 8.937177 | -0.1067  | 0.747981 | -0.14265 | 0.886567 | 0.981636 | chr5  | 1.52E+08 | 1.52E+08  | + | 0 | NA | intron (NAluSq2 SI | 4672 NR_10987E   | 1.02E+08 Hs. 57102E          | NR_10987E          | ENSG00000CLMAT3     | CTB-113P1                     | colorectal ncRNA            |
| chr1-1127  | 9.126223 | 0.111419 | 0.781108 | 0.142642 | 0.886573 | 0.981636 | chr1  | 11233870 | 11234354  | + | 0 | NA | intron (Nintron (N | 28439 NM_00495E  | 2475 Hs. 338207NM_00495E     | ENSG00000MTOR      | FRAP FRAF           | mechanism protein-coding      |                             |
| chr1-267E  | 9.383578 | -0.10816 | 0.758752 | -0.14255 | 0.886646 | 0.981636 | chr1  | 26760615 | 26768047  | + | 0 | NA | intron (Nintron (N | -23632 NM_017837 | 55650 Hs. 25960E             | NR_017837          | ENSG00000PIGV       | FND MTF-1                     | phosphatidyl protein-coding |
| chr1-110C  | 9.383578 | -0.10816 | 0.758752 | -0.14255 | 0.886646 | 0.981636 | chr1  | 1.1E+08  | 1.1E+08   | + | 0 | NA | exon (NM exon (NM  | 16999 NM_00649E  | 257 Hs. 66995E               | NM_00649E          | ENSG00000CALX3      | FND FND1                      | ALX homeo protein-coding    |
| chr1-112E  | 9.383578 | -0.10816 | 0.758752 | -0.14255 | 0.886646 | 0.981636 | chr1  | 1.13E+08 | 1.13E+08  | + | 0 | NA | intron (NLM3A6 LIN | 4823 NR_103744   | 1.01E+08 Hs. 41828E          | NR_10374E          | ENSG00000SLC16A1    | -                             | SLC16A1 ncRNA               |
| chr1-222E  | 9.383578 | -0.10816 | 0.758752 | -0.14255 | 0.886646 | 0.981636 | chr1  | 2.23E+08 | 2.23E+08  | + | 0 | NA | intron (Nintron (N | 11614 NM_022831  | 64853 Hs. 15662E             | NM_022831          | ENSG00000AIDA       | -                             | ACLIN1 intc protein-coding  |
| chr1-243I  | 9.383578 | -0.10816 | 0.758752 | -0.14255 | 0.886646 | 0.981636 | chr1  | 2.43E+08 | 2.43E+08  | + | 0 | NA | intron (Nintron (N | 55491 NM_01481E  | 9859 Hs. 53363E              | NM_01481E          | ENSG00000CEP170     | FAM68A K                      | centrosome protein-coding   |
| chr10-11E  | 9.383578 | -0.10816 | 0.758752 | -0.14255 | 0.886646 | 0.981636 | chr10 | 1.2E+08  | 1.2E+08   | + | 0 | NA | intron (Nintron (N | 18744 NR_13666E  | 7073 Hs. 50120E              | NM_00325E          | ENSG00000TIAL1      | TCPB TIAF                     | TIAI1 cytc protein-coding   |
| chr11-11E  | 9.383578 | -0.10816 | 0.758752 | -0.14255 | 0.886646 | 0.981636 | chr11 | 1.12E+08 | 1.12E+08  | + | 0 | NA | TTS (NR TTS (NR_C  | 2368 NR_16040C   | 26521 Hs. 27991E             | NM_01245E          | ENSG00000TIMM8B     | DDP2 TIMM                     | translocase protein-coding  |
| chr12-57E  | 9.383578 | -0.10816 | 0.758752 | -0.14255 | 0.886646 | 0.981636 | chr12 | 57511339 | 57518789  | + | 0 | NA | intron (Nintron (N | 2376 NR_10681E   | 1.02E+08                     | NR_10681E          | ENSG00000MIR6758    | hsa-mir-6                     | microRNA ncRNA              |
| chr16-67E  | 9.383578 | -0.10816 | 0.758752 | -0.14255 | 0.886646 | 0.981636 | chr16 | 67830468 | 67832216  | + | 0 | NA | exon (NM exon (NM  | -10978 NM_020457 | 57215 Hs. 63220C             | NM_020457          | ENSG00000THAP11     | CTG-B43a THAP                 | domain protein-coding       |
| chr17-36E  | 9.383578 | -0.10816 | 0.758752 | -0.14255 | 0.886646 | 0.981636 | chr17 | 69674851 | 69684958  | + | 0 | NA | intron (NAluY SINE | 28771 NR_14575E  | 57215 Hs. 63220C             | NR_14575E          | SNORD13H            | -                             | small nuc snoRNA            |
| chr17-36E  | 9.383578 | -0.10816 | 0.758752 | -0.14255 | 0.886646 | 0.981636 | chr17 | 36577699 | 36588780  | + | 0 | NA | intron (NAluSc SIN | -8640 NM_02430E  | 79154 Hs. 46285E             | NM_02430E          | ENSG00000DHR511     | ARPG836 S                     | dehydroge protein-coding    |
| chr17-57E  | 9.383578 | -0.10816 | 0.758752 | -0.14255 | 0.886646 | 0.981636 | chr17 | 57973659 | 57974864  | + | 0 | NA | 3' UTR (N3' UTR (N | 13993 NM_00714E  | 7716 Hs. 46356E              | NM_00714E          | ENSG00000VEZF1      | DB1 ZNF1E                     | vascular protein-coding     |
| chr17-75I  | 9.383578 | -0.10816 | 0.758752 | -0.14255 | 0.886646 | 0.981636 | chr17 | 75143000 | 75144849  | + | 0 | NA | intron (NHY1 scRNA | 7549 NM_00128E   | 51155 Hs. 53280E             | NM_01618E          | ENSG00000JPT1       | ARM2 HNI                      | Jupiter n protein-coding    |
| chr18-26I  | 9.383578 | -0.10816 | 0.758752 | -0.14255 | 0.886646 | 0.981636 | chr18 | 26031566 | 26036054  | + | 0 | NA | intron (Nintron (N | 56803 NM_001007  | 6760 Hs. 129261NM_005637     | ENSG00000SS18      | SSXT SVT            | SS18 sub protein-coding       |                             |
| chr19-21E  | 9.383578 | -0.10816 | 0.758752 | -0.14255 | 0.886646 | 0.981636 | chr19 | 2122665  | 2123761   | + | 0 | NA | intron (Nintron (N | 26298 NM_00103E  | 113177 Hs. 42404E            | NM_05287E          | ENSG00000IZUM04     | C19orf36 IZUM                 | fan protein-coding          |
| chr19-16E  | 9.383578 | -0.10816 | 0.758752 | -0.14255 | 0.886646 | 0.981636 | chr19 | 16552905 | 16555174  | + | 0 | NA | intron (NAluSz6 SI | -11604 NM_006387 | 10523 Hs. 740364NM_006387    | ENSG00000CCHERP    | DAN16 SC            | calcium I protein-coding      |                             |
| chr19-40E  | 9.383578 | -0.1     |          |          |          |          |       |          |           |   |   |    |                    |                  |                              |                    |                     |                               |                             |



|           |          |          |          |          |          |          |       |          |          |   |   |    |                    |                   |                  |         |                     |           |                |                      |
|-----------|----------|----------|----------|----------|----------|----------|-------|----------|----------|---|---|----|--------------------|-------------------|------------------|---------|---------------------|-----------|----------------|----------------------|
| chr3-1848 | 8.880982 | -0.11041 | 0.785866 | -0.1405  | 0.888267 | 0.981636 | chr3  | 1.85E+08 | 1.85E+08 | + | 0 | NA | intron (Nintron (N | 43176 NM_00134E   | 23355 Hs. 269262 | 1.01530 | ENSG000000VPSS8     | KIAA0804  | VPSS8          | subt protein-coding  |
| chr6-5648 | 8.880982 | -0.11041 | 0.785866 | -0.1405  | 0.888267 | 0.981636 | chr6  | 56490963 | 56493654 | + | 0 | NA | exon (NM exon (NM  | -98180 NM_00131E  | 81578 Hs. 47629  | 1.03082 | ENSG000000COL21A1   | COL1A1    | FF collagen    | protein-coding       |
| chr1-1614 | 9.37572  | -0.10669 | 0.759918 | -0.1404  | 0.888343 | 0.981636 | chr1  | 16146830 | 16149568 | + | 0 | NA | intron (Nintron (N | 7870 NM_00132E    | 1969 Hs. 17159   | 1.00443 | ENSG000000CEPHA2    | ARCC2     | CTFEPH recep   | protein-coding       |
| chr10-100 | 9.37572  | -0.10669 | 0.759918 | -0.1404  | 0.888343 | 0.981636 | chr10 | 1.01E+08 | 1.01E+08 | + | 0 | NA | intron (Nintron (N | -22586 NM_01789E  | 57715 Hs. 59192  | 1.01789 | ENSG000000SEMA4G    |           | semaphorin     | protein-coding       |
| chr11-433 | 9.37572  | -0.10669 | 0.759918 | -0.1404  | 0.888343 | 0.981636 | chr11 | 43328637 | 4332613  | + | 0 | NA | intron (Nintron (N | 18629 NM_00114E   | 8539 Hs. 43577   | 1.00659 | ENSG000000AP15      | AAC-11    | AA apoptotic   | protein-coding       |
| chr11-627 | 9.37572  | -0.10669 | 0.759918 | -0.1404  | 0.888343 | 0.981636 | chr11 | 62710786 | 62712343 | + | 0 | NA | intron (Nintron (N | -1945 NR_03794E   | 26580 Hs. 53370  | 1.03266 | ENSG000000BCL2L1    | GNG3LG    | HM BCL2L1 li   | protein-coding       |
| chr12-462 | 9.37572  | -0.10669 | 0.759918 | -0.1404  | 0.888343 | 0.981636 | chr12 | 46202780 | 46204529 | + | 0 | NA | intron (Nintron (N | 62862 NM_00127E   | 81539 Hs. 53377  | 1.03067 | ENSG000000SLC38A1   | ATA1      | NET3 solute c  | protein-coding       |
| chr12-962 | 9.37572  | -0.10669 | 0.759918 | -0.1404  | 0.888343 | 0.981636 | chr12 | 96298436 | 96300752 | + | 0 | NA | intron (Nintron (N | 44966 NM_00130E   | 2004 Hs. 46523   | 1.00523 | ENSG000000ELK3      | ERP       | NET3 SETS      | trans protein-coding |
| chr13-331 | 9.37572  | -0.10669 | 0.759918 | -0.1404  | 0.888343 | 0.981636 | chr13 | 33115181 | 33120198 | + | 0 | NA | 3' UTR (N3' UTR (N | 68402 NM_00124E   | 90627 Hs. 15655  | 1.05285 | ENSG000000STARD13   | ARHGAP37  | STAR rel       | protein-coding       |
| chr14-306 | 9.37572  | -0.10669 | 0.759918 | -0.1404  | 0.888343 | 0.981636 | chr14 | 30633084 | 30635460 | + | 0 | NA | intron (Nintron (N | 31538 NM_01610E   | 23256 Hs. 36916  | 1.01610 | ENSG000000SCFD1     | C14orf163 | secl1 fami     | protein-coding       |
| chr15-762 | 9.37572  | -0.10669 | 0.759918 | -0.1404  | 0.888343 | 0.981636 | chr15 | 76230912 | 76231548 | + | 0 | NA | intron (Nintron (N | 28922 NR_02851E   | 7302 Hs. 68488   | 1.02272 | ENSG000000TYR03P    |           | TYR03P pr      | pseudo               |
| chr17-321 | 9.37572  | -0.10669 | 0.759918 | -0.1404  | 0.888343 | 0.981636 | chr17 | 32174953 | 32180480 | + | 0 | NA | intron (Nintron (N | -26145 NR_00222E  | 503640 Hs. 63175 | 1.02222 | ENSG000000ARGFXP2   |           | arginine-p     | pseudo               |
| chr2-235C | 9.37572  | -0.10669 | 0.759918 | -0.1404  | 0.888343 | 0.981636 | chr2  | 2.35E+08 | 2.35E+08 | + | 0 | NA | intron (Nintron (N | 9373 NM_001371306 |                  |         |                     |           |                |                      |
| chr20-367 | 9.37572  | -0.10669 | 0.759918 | -0.1404  | 0.888343 | 0.981636 | chr20 | 36793205 | 36793659 | + | 0 | NA | exon (NM exon (NM  | -19669 NM_00114E  | 79980 Hs. 63226  | 1.02491 | ENSG000000CDSN1     | C20orf172 | DSN1 comp      | protein-coding       |
| chr20-495 | 9.37572  | -0.10669 | 0.759918 | -0.1404  | 0.888343 | 0.981636 | chr20 | 49951542 | 49954515 | + | 0 | NA | 3' UTR (N3' UTR (N | 16631 NM_01868E   | 55905 Hs. 14494  | 1.01868 | ENSG000000RNFI14    | PSORS12   | zring fing     | protein-coding       |
| chr3-4792 | 9.37572  | -0.10669 | 0.759918 | -0.1404  | 0.888343 | 0.981636 | chr3  | 47926092 | 47928184 | + | 0 | NA | intron (Nintron (N | 77583 NR_03159E   | 1E+08            | 1.03159 | ENSG000000MIR1226   | MIRN1226  | microRNA       | ncRNA                |
| chr5-7534 | 9.37572  | -0.10669 | 0.759918 | -0.1404  | 0.888343 | 0.981636 | chr5  | 75344579 | 75349001 | + | 0 | NA | intron (Nintron (N | 9570 NM_00085E    | 3156 Hs. 62809   | 1.00085 | ENSG000000HMGR      | LDLCLQ3   | 3-hydroxy      | protein-coding       |
| chr6-752C | 9.37572  | -0.10669 | 0.759918 | -0.1404  | 0.888343 | 0.981636 | chr6  | 75237156 | 75241056 | + | 0 | NA | intron (Nintron (N | 4695 NR_15878E    | 1347 Hs. 70312   | 1.00186 | ENSG000000COX7A2    | COX7AL    | CC cytochrome  | protein-coding       |
| chr9-269C | 9.37572  | -0.10669 | 0.759918 | -0.1404  | 0.888343 | 0.981636 | chr9  | 26905202 | 26906004 | + | 0 | NA | exon (NM exon (NM  | -12775 NM_00116E  | 79886 Hs. 17835  | 1.02482 | ENSG000000CAAP1     | C9orf82   | Caspase        | protein-coding       |
| chr9-976E | 9.37572  | -0.10669 | 0.759918 | -0.1404  | 0.888343 | 0.981636 | chr9  | 97651831 | 97659489 | + | 0 | NA | intron (Nintron (N | 21839 NM_00248E   | 4686 Hs. 59566   | 1.00248 | ENSG000000NCBP1     | CBP80     | NCE nuclear    | protein-coding       |
| chr9-1101 | 9.37572  | -0.10669 | 0.759918 | -0.1404  | 0.888343 | 0.981636 | chr9  | 1.1E+08  | 1.1E+08  | + | 0 | NA | intron (Nintron (N | 31558 NM_00113E   | 445815 Hs. 59190 | 1.00720 | ENSG000000PALM2-AK7 | AKAP-2    | AK PALM2-AK7   | protein-coding       |
| chr9-110E | 9.37572  | -0.10669 | 0.759918 | -0.1404  | 0.888343 | 0.981636 | chr9  | 1.11E+08 | 1.11E+08 | + | 0 | NA | intron (Nintron (N | 76988 NM_15336E   | 79987 Hs. 52233  | 1.01536 | ENSG000000SVEP1     | C9orf13   | Cushi,         | protein-coding       |
| chr9-132Z | 9.37572  | -0.10669 | 0.759918 | -0.1404  | 0.888343 | 0.981636 | chr9  | 1.32E+08 | 1.32E+08 | + | 0 | NA | 3' UTR (N3' UTR (N | 90911 NM_00135E   | 23064 Hs. 46031  | 1.01504 | ENSG000000SETX      | ALS4      | AOA2 senatax   | protein-coding       |
| chr2-203C | 9.829319 | -0.10531 | 0.750333 | -0.14036 | 0.888379 | 0.981636 | chr2  | 2.03E+08 | 2.03E+08 | + | 0 | NA | intron (Nintron (N | 63953 NM_00111E   | 65065 Hs. 64884  | 1.01984 | ENSG000000NBEAL1    | A530083   | Cneurobeac     | protein-coding       |
| chr14-58E | 8.427383 | -0.11234 | 0.806117 | -0.13936 | 0.889166 | 0.981636 | chr14 | 58232444 | 58233211 | + | 0 | NA | intron (Nintron (N | -11978 NR_03812E  | 5684 Hs. 55879   | 1.00278 | ENSG000000PSMA3     | HCB       | PSC3 proteaso  | protein-coding       |
| chr2-985E | 8.427383 | -0.11234 | 0.806117 | -0.13936 | 0.889166 | 0.981636 | chr2  | 98599595 | 98600094 | + | 0 | NA | 3' UTR (N3' UTR (N | 8668 NM_00100E    | 493753 Hs. 59653 | 1.00100 | ENSG000000COA5      | 6330578E1 | cytochrome     | protein-coding       |
| chr2-201C | 8.427383 | -0.11234 | 0.806117 | -0.13936 | 0.889166 | 0.981636 | chr2  | 20119360 | 20122544 | + | 0 | NA | intron (Nintron (N | 3205 NM_00127E    | 5902 Hs. 24763   | 1.00288 | ENSG000000RANBP1    | HTF9A     | RAN bindi      | protein-coding       |
| chr7-128E | 8.427383 | -0.11234 | 0.806117 | -0.13936 | 0.889166 | 0.981636 | chr7  | 1.29E+08 | 1.29E+08 | + | 0 | NA | IntergeniL2a LINE  | -58728 NR_02436E  | 402483 Hs. 72235 | 1.00103 | ENSG000000LINC0100C |           | long intenc    | ncRNA                |
| chr1-928E | 8.922121 | -0.10837 | 0.777842 | -0.13932 | 0.889201 | 0.981636 | chr1  | 92849583 | 92850588 | + | 0 | NA | intron (Nintron (N | 9366 NR_00244E    | 26782 Hs. 18094  | 1.00244 | ENSG000000SNORA66   | LIGU-2    | U6c small      | nucsnRNA             |
| chr1-113C | 8.922121 | -0.10837 | 0.777842 | -0.13932 | 0.889201 | 0.981636 | chr1  | 1.13E+08 | 1.13E+08 | + | 0 | NA | intron (Nintron (N | 26367 NM_00131E   | 9860 Hs. 44897   | 1.01481 | ENSG000000LRIG2     | RNG-6     | L1C leucine    | protein-coding       |
| chr1-1147 | 8.922121 | -0.10837 | 0.777842 | -0.13932 | 0.889201 | 0.981636 | chr1  | 1.15E+08 | 1.15E+08 | + | 0 | NA | exon (NM exon (NM  | -9449 NM_00252E   | 4893 Hs. 48650   | 1.00252 | ENSG000000CNRAS     | ALPS4     | CMNRRAS        | prot protein-coding  |
| chr10-11E | 8.922121 | -0.10837 | 0.777842 | -0.13932 | 0.889201 | 0.981636 | chr10 | 1.19E+08 | 1.19E+08 | + | 0 | NA | intron (Nintron (N | -4643 NM_21364E   | 119559 Hs. 65516 | 1.01788 | ENSG000000SFAX4     | BCRM1     | COX siderofl   | protein-coding       |
| chr12-15E | 8.922121 | -0.10837 | 0.777842 | -0.13932 | 0.889201 | 0.981636 | chr12 | 15898043 | 15905240 | + | 0 | NA | intron (Nintron (N | -6991 NM_00130E   | 51071 Hs. 39429  | 1.01594 | ENSG000000DERA      | CG1-26    | DF deoxyrib    | protein-coding       |
| chr12-10E | 8.922121 | -0.10837 | 0.777842 | -0.13932 | 0.889201 | 0.981636 | chr12 | 1.07E+08 | 1.07E+08 | + | 0 | NA | intron (Nintron (N | 3133 NM_00131E    | 90488 Hs. 25766  | 1.01526 | ENSG000000TMEM263   | C12orf23  | transmemt      | protein-coding       |
| chr13-30E | 8.922121 | -0.10837 | 0.777842 | -0.13932 | 0.889201 | 0.981636 | chr13 | 30279474 | 30280130 | + | 0 | NA | intron (Nintron (N | 27209 NM_00101E   | 84056 Hs. 24359  | 1.00321 | ENSG000000KATNAL1   |           | katanin        | protein-coding       |
| chr14-30E | 8.922121 | -0.10837 | 0.777842 | -0.13932 | 0.889201 | 0.981636 | chr14 | 30602070 | 30603404 | + | 0 | NA | intron (Nintron (N | -19517 NM_00128E  | 23256 Hs. 36916  | 1.01610 | ENSG000000SCFD1     | C14orf163 | secl1 fami     | protein-coding       |
| chr16-64E | 8.922121 | -0.10837 | 0.777842 | -0.13932 | 0.889201 | 0.981636 | chr16 | 64970725 | 64973098 | + | 0 | NA | intron (Nintron (N | 150152 NM_00179E  | 1009 Hs. 11647   | 1.00179 | ENSG000000CDH11     | CAD11     | CDf cadherin   | protein-coding       |
| chr17-324 | 8.922121 | -0.10837 | 0.777842 | -0.13932 | 0.889201 | 0.981636 | chr17 | 32446790 | 32450113 | + | 0 | NA | intron (Nintron (N | 4026 NM_00281E    | 5717 Hs. 44337   | 1.00281 | ENSG000000PSMD11    | Rpn6      | S9 proteaso    | protein-coding       |
| chr19-101 | 8.922121 | -0.10837 | 0.777842 | -0.13932 | 0.889201 | 0.981636 | chr19 | 10107851 | 10111293 | + | 0 | NA | promoter-promoter  | -177 NR_00368E    | 1E+08            | 1.00368 | ENSG000000SNORD105E |           | small nucsnRNA |                      |
| chr2-8504 | 8.922121 | -0.10837 | 0.777842 | -0.13932 | 0.889201 | 0.981636 | chr2  | 85047911 | 85050885 | + | 0 | NA | exon (NM exon (NM  | 17949 NR_14645E   | 1.01E+08         | 1.43439 | ENSG000000LINC01964 |           | long intenc    | ncRNA                |
| chr2-174E | 8.922121 | -0.10837 | 0.777842 | -0.13932 | 0.889201 | 0.981636 | chr2  | 1.74E+08 | 1.74E+08 | + | 0 | NA | 3' UTR (N3' UTR (N | 13374 NM_00114E   | 1E+08            | 1.00114 | ENSG000000SP9       | ZNF990    | Sp9 trans      | protein-coding       |
| chr2-216E | 8.922121 | -0.10837 | 0.777842 | -0.13932 | 0.889201 | 0.981636 | chr2  | 2.16E+08 | 2.16E+08 | + | 0 | NA | 3' UTR (N3' UTR (N | -11076 NR_00371E  | 150967 Hs. 56876 | 1.00119 | ENSG000000LINC0196C | PK155     | long intenc    | ncRNA                |
| chr4-264E | 8.922121 | -0.10837 | 0.777842 | -0.13932 | 0.889201 | 0.981636 | chr4  | 26429086 | 26431134 | + | 0 | NA | intron (Nintron (N | 60374 NM_00073E   | 886 Hs. 129      | 1.00073 | ENSG000000CCKAR     | CCK-A     | CCk cholect    | protein-coding       |
| chr4-388E | 8.922121 | -0.10837 | 0.777842 | -0.13932 | 0.889201 | 0.981636 | chr4  | 38894336 | 38900775 | + | 0 | NA | intron (Nintron (N | 29523 NR_03030E   | 693159 Hs. 44972 | 1.00303 | ENSG000000MIR574    | MIR574-3  | microRNA       | ncRNA                |
| chr4-420E | 8.922121 | -0.10837 | 0.777842 | -0.13932 | 0.889201 | 0.981636 | chr4  | 42021229 | 42024281 | + | 0 | NA | intron (Nintron (N | 32225 NM_00634E   | 10463 Hs. 47963  | 1.00634 | ENSG000000SLC30A9   | BILAPES   | Csolute c      | protein-coding       |
| chr4-118E | 8.922121 | -0.10837 | 0.777842 | -0.13932 | 0.889201 | 0.981636 | chr4  | 1.19E+08 | 1.19E+08 | + | 0 | NA | non-codirnon-codir | 656 NR_10382E     | 729218 Hs. 44851 | 1.01382 | ENSG000000LOC72921E |           | uncharact      | pseudo               |
| chr8-193E | 8.922121 |          |          |          |          |          |       |          |          |   |   |    |                    |                   |                  |         |                     |           |                |                      |

|                    |           |          |          |          |          |       |          |          |   |   |    |                     |         |            |                 |                                 |                   |                                      |                                    |
|--------------------|-----------|----------|----------|----------|----------|-------|----------|----------|---|---|----|---------------------|---------|------------|-----------------|---------------------------------|-------------------|--------------------------------------|------------------------------------|
| chr22-24c7.973785  | -0.11424  | 0.838389 | -0.13627 | 0.891611 | 0.981636 | chr22 | 24083208 | 24083424 | + | 0 | NA | exon (NM exon (NM   | 71946   | NM_001199  | 23523           | Hs.51747ENM_01229f              | ENSG00000CABIN1   | CAIN KB-ε calcineurin protein-coding |                                    |
| chr1-427f9.409002  | -0.10326  | 0.757781 | -0.13626 | 0.891614 | 0.981636 | chr1  | 42700161 | 42704576 | + | 0 | NA | non-codir non-codir | 19232   | NR_132737  | 4904            | Hs.473583NM_004455f             | ENSG00000YBX1     | BP-8 CBF-Y-box bir protein-coding    |                                    |
| chr1-1131f9.409002 | -0.10326  | 0.757781 | -0.13626 | 0.891614 | 0.981636 | chr1  | 1.13E+08 | 1.13E+08 | + | 0 | NA | intron (Nintron (N  | 44262   | NM_001312  | 9860            | Hs.448972NM_01481f              | ENSG00000CLRIG2   | LIG-2 LIG leucine r protein-coding   |                                    |
| chr1-101f9.409002  | -0.10326  | 0.757781 | -0.13626 | 0.891614 | 0.981636 | chr1  | 2.02E+08 | 2.02E+08 | + | 0 | NA | intron (NAluSx1 S1  | 9887    | NR_106797  | 1.02E+08        | NR_106797f                      | ENSG00000MIR6739  | hsa-mir-ε microRNA ncRNA             |                                    |
| chr10-20f9.409002  | -0.10326  | 0.757781 | -0.13626 | 0.891614 | 0.981636 | chr10 | 1.02E+08 | 1.02E+08 | + | 0 | NA | intron (NAluG4 S1   | 6663    | NM_004471  | 9221            | Hs.52323f                       | ENSG00000NOLC1    | NOPP130 nucleolar protein-coding     |                                    |
| chr11-107f9.409002 | -0.10326  | 0.757781 | -0.13626 | 0.891614 | 0.981636 | chr11 | 10771897 | 10776850 | + | 0 | NA | intron (Nintron (N  | 23127   | NM_00134f  | 9646            | Hs.725151NM_01463f              | ENSG00000CCTR9    | SH2BP1 TSCTR9 homc protein-coding    |                                    |
| chr11-111f9.409002 | -0.10326  | 0.757781 | -0.13626 | 0.891614 | 0.981636 | chr11 | 1.12E+08 | 1.12E+08 | + | 0 | NA | intron (Nintron (N  | 13951   | NM_00271f  | 5519            | Hs.26912f                       | ENSG00000PPP2R1B  | PP2A-Abet protein r protein-coding   |                                    |
| chr12-107f9.409002 | -0.10326  | 0.757781 | -0.13626 | 0.891614 | 0.981636 | chr12 | 10750939 | 10710720 | + | 0 | NA | intron (Nintron (N  | 14994   | NM_003651  | 8531            | Hs.22188f                       | ENSG00000YBX3     | CSDA CSDA-Y-box bir protein-coding   |                                    |
| chr12-64c9.409002  | -0.10326  | 0.757781 | -0.13626 | 0.891614 | 0.981636 | chr12 | 64047984 | 64050375 | + | 0 | NA | intron (N LIMA3 LIN | 173117  | NM_00130c  | 144577          | Hs.444671NM_15244f              | ENSG00000C12orf66 | - chromoson protein-coding           |                                    |
| chr12-12f9.409002  | -0.10326  | 0.757781 | -0.13626 | 0.891614 | 0.981636 | chr12 | 1.22E+08 | 1.22E+08 | + | 0 | NA | intron (NAluSq2 S1  | 7063    | NM_00133c  | 55596           | Hs.37706                        | NM_01761f         | ENSG00000ZCHC8                       | - zinc fing protein-coding         |
| chr13-41f9.409002  | -0.10326  | 0.757781 | -0.13626 | 0.891614 | 0.981636 | chr13 | 41361722 | 41363185 | + | 0 | NA | intron (Nintron (N  | -50415  | NM_001354  | 9617            | Hs.38217f                       | ENSG00000MTRF1    | MRF1 MTTF mitochon protein-coding    |                                    |
| chr13-11c9.409002  | -0.10326  | 0.757781 | -0.13626 | 0.891614 | 0.981636 | chr13 | 1.1E+08  | 1.1E+08  | + | 0 | NA | intron (Nintron (N  | 25219   | NM_001267  | 1E+08           | Hs.64003f                       | ENSG000001267044  | COL4A2-AS-                           | COL4A2 ar protein-coding           |
| chr14-21f9.409002  | -0.10326  | 0.757781 | -0.13626 | 0.891614 | 0.981636 | chr14 | 21258801 | 21266232 | + | 0 | NA | intron (Nintron (N  | 3183    | Hs.50884f  | ENSG00000HNRNPC | C1 C2 HNF hetero protein-coding |                   |                                      |                                    |
| chr16-118f9.409002 | -0.10326  | 0.757781 | -0.13626 | 0.891614 | 0.981636 | chr16 | 11836994 | 11842707 | + | 0 | NA | exon (NM exon (NM   | -11018  | NR_02405c  | 400500          | Hs.24611                        | NR_02404f         | ENSG00000BCAR4                       | - breast cncRNA                    |
| chr17-307f9.409002 | -0.10326  | 0.757781 | -0.13626 | 0.891614 | 0.981636 | chr17 | 30790810 | 30792610 | + | 0 | NA | non-codir non-codir | 32982   | NM_01598f  | 51379           | Hs.64937f                       | ENSG00000CRLF3    | CREME-9 cytokine protein-coding      |                                    |
| chr17-45f9.409002  | -0.10326  | 0.757781 | -0.13626 | 0.891614 | 0.981636 | chr17 | 45093879 | 45100747 | + | 0 | NA | intron (Nintron (N  | 17120   | NR_106842  | 1.02E+08        | NR_106842f                      | ENSG00000MIR6784  | hsa-mir-ε microRNA ncRNA             |                                    |
| chr17-624f9.409002 | -0.10326  | 0.757781 | -0.13626 | 0.891614 | 0.981636 | chr17 | 62446591 | 62446942 | + | 0 | NA | intron (Nintron (N  | 22881   | NM_18172f  | 339175          | Hs.381204NM_18172f              | ENSG00000METTL2   | METTL2 methyltrc protein-coding      |                                    |
| chr17-81f9.409002  | -0.10326  | 0.757781 | -0.13626 | 0.891614 | 0.981636 | chr17 | 81563955 | 81566264 | + | 0 | NA | intron (Nintron (N  | 1493    | NR_13014c  | 55666           | Hs.46433f                       | ENSG00000NPLC2A   | NPL4 nly trc protein-coding          |                                    |
| chr18-51f9.409002  | -0.10326  | 0.757781 | -0.13626 | 0.891614 | 0.981636 | chr18 | 51078216 | 51079335 | + | 0 | NA | 3' UTR (N3' UTR (N  | 48562   | NM_00535f  | 4089            | Hs.75862                        | NM_00535f         | ENSG00000SMAD4                       | DPc4 JIP SMAD fami protein-coding  |
| chr2-3387f9.409002 | -0.10326  | 0.757781 | -0.13626 | 0.891614 | 0.981636 | chr2  | 3387666  | 3390132  | + | 0 | NA | intron (Nintron (N  | 9205    | NM_01603c  | 51112           | Hs.25271f                       | ENSG00000TRAPP12  | CGI-87 PE trafficki protein-coding   |                                    |
| chr2-3544f9.409002 | -0.10326  | 0.757781 | -0.13626 | 0.891614 | 0.981636 | chr2  | 3544482  | 3552164  | + | 0 | NA | intron (N L2b LINE  | 10010   | NM_00128f  | 246243          | Hs.56800f                       | ENSG00000C293f    | ENSG00000C293f                       | H1RNA H1 nucleol protein-coding    |
| chr2-199f9.409002  | -0.10326  | 0.757781 | -0.13626 | 0.891614 | 0.981636 | chr2  | 2E+08    | 2E+08    | + | 0 | NA | intron (Nintron (N  | -5643   | NM_00103f  | 129450          | Hs.20461f                       | ENSG00000TYW5     | C2orf60 tRNA-yw s protein-coding     |                                    |
| chr2-2381f9.409002 | -0.10326  | 0.757781 | -0.13626 | 0.891614 | 0.981636 | chr2  | 2.38E+08 | 2.38E+08 | + | 0 | NA | intron (NAluY SINE  | 14407   | NM_03076f  | 80895           | Hs.92033                        | NM_03076f         | ENSG00000ILKAP                       | ILKAP2 II ILK assoc protein-coding |
| chr20-34f9.409002  | -0.10326  | 0.757781 | -0.13626 | 0.891614 | 0.981636 | chr20 | 34529206 | 34531032 | + | 0 | NA | 5' UTR (N5' UTR (N  | 13735   | NM_01418f  | 83658           | Hs.52932f                       | ENSG00000DYNLRB1  | B1TH BLP dynein l protein-coding     |                                    |
| chr20-57f9.409002  | -0.10326  | 0.757781 | -0.13626 | 0.891614 | 0.981636 | chr20 | 57353971 | 57357736 | + | 0 | NA | intron (Nintron (N  | 3645    | NM_00119c  | 1E+08           | NM_00119f                       | ENSG00000MTRNR2L3 | HN3 MT-RNR2 l protein-coding         |                                    |
| chr3-274f9.409002  | -0.10326  | 0.757781 | -0.13626 | 0.891614 | 0.981636 | chr3  | 27432618 | 27442763 | + | 0 | NA | intron (Nintron (N  | 19088   | NM_00125f  | 9497            | Hs.25007f                       | ENSG00000SLC4A7   | NBC2 NBC3 solute ε protein-coding    |                                    |
| chr3-1324f9.409002 | -0.10326  | 0.757781 | -0.13626 | 0.891614 | 0.981636 | chr3  | 1.32E+08 | 1.32E+08 | + | 0 | NA | intron (Nintron (N  | 76492   | NM_00132f  | 23317           | Hs.12707                        | NM_01526f         | ENSG00000DNACJ13                     | PARK21 RN DnaJ heat protein-coding |
| chr4-880f9.409002  | -0.10326  | 0.757781 | -0.13626 | 0.891614 | 0.981636 | chr4  | 88065566 | 88066376 | + | 0 | NA | intron (Nintron (N  | 58336   | NR_15648f  | 5311            | Hs.18127f                       | ENSG00000PKD2     | APKD2 PC2 polycysti protein-coding   |                                    |
| chr4-168f9.409002  | -0.10326  | 0.757781 | -0.13626 | 0.891614 | 0.981636 | chr4  | 1.69E+08 | 1.69E+08 | + | 0 | NA | intron (NAluSx4 S1  | 81296   | NM_00136f  | 23022           | Hs.15122f                       | ENSG00000PALLD    | CGI-151 C palladin, protein-coding   |                                    |
| chr5-349f9.409002  | -0.10326  | 0.757781 | -0.13626 | 0.891614 | 0.981636 | chr5  | 34909198 | 34912431 | + | 0 | NA | intron (Nintron (N  | 4690    | NR_026591  | 5810            | Hs.38114                        | NM_00285f         | ENSG00000RAD1                        | HRA1 REC RAD1 chec protein-coding  |
| chr5-552f9.409002  | -0.10326  | 0.757781 | -0.13626 | 0.891614 | 0.981636 | chr5  | 55261730 | 55263376 | + | 0 | NA | non-codir non-codir | -28836  | NR_125347  | 10309           | Hs.3041                         | NM_02114f         | ENSG00000CCNO                        | CCNU CILL cyclin 0 protein-coding  |
| chr5-137f9.409002  | -0.10326  | 0.757781 | -0.13626 | 0.891614 | 0.981636 | chr5  | 1.38E+08 | 1.38E+08 | + | 0 | NA | intron (Nintron (N  | 52406   | NM_01438f  | 27039           | Hs.71688f                       | ENSG00000PKD2L2   | TRPP5 polycysti protein-coding       |                                    |
| chr5-149f9.409002  | -0.10326  | 0.757781 | -0.13626 | 0.891614 | 0.981636 | chr5  | 1.5E+08  | 1.5E+08  | + | 0 | NA | intron (N LIMA4 LIN | 26643   | NM_001271  | 1452            | Hs.52982f                       | ENSG00000CSNK1A1  | CK1 CK1a trc ki protein-coding       |                                    |
| chr6-729f9.409002  | -0.10326  | 0.757781 | -0.13626 | 0.891614 | 0.981636 | chr6  | 7293270  | 7310025  | + | 0 | NA | intron (N MER117 DN | 11552   | NM_00129f  | 6745            | Hs.11403f                       | ENSG00000CSSR1    | TRAPA signal sε protein-coding       |                                    |
| chr6-283f9.409002  | -0.10326  | 0.757781 | -0.13626 | 0.891614 | 0.981636 | chr6  | 28389287 | 28393767 | + | 0 | NA | non-codir non-codir | 7239    | NM_00136f  | 9753            | Hs.13481f                       | ENSG00000ZSCAN12  | ZFP96 ZNF zinc fing protein-coding   |                                    |
| chr7-640f9.409002  | -0.10326  | 0.757781 | -0.13626 | 0.891614 | 0.981636 | chr7  | 6406448  | 6417645  | + | 0 | NA | intron (NAluSx1 S1  | 35908   | NM_13917f  | 221955          | Hs.48749f                       | ENSG00000DAGLB    | DAGLBETA diacylgly protein-coding    |                                    |
| chr7-103f9.409002  | -0.10326  | 0.757781 | -0.13626 | 0.891614 | 0.981636 | chr7  | 1.03E+08 | 1.03E+08 | + | 0 | NA | intron (N Charlie7ε | 4921    | NM_00427f  | 9512            | Hs.18421f                       | ENSG00000PMPCB    | Beta-MPP peptidase protein-coding    |                                    |
| chr7-105f9.409002  | -0.10326  | 0.757781 | -0.13626 | 0.891614 | 0.981636 | chr7  | 1.06E+08 | 1.06E+08 | + | 0 | NA | intron (NAluSq2 S1  | 5628    | NM_02193c  | 60561           | Hs.53138f                       | ENSG00000RINT1    | RINT-1 RBD50 intr protein-coding     |                                    |
| chr8-670f9.409002  | -0.10326  | 0.757781 | -0.13626 | 0.891614 | 0.981636 | chr8  | 67080516 | 67081072 | + | 0 | NA | intron (N MER21C L1 | -3054   | NM_001291  | 79848           | Hs.370147f                      | ENSG00000CSP1     | CSP1 JBT5 centroson protein-coding   |                                    |
| chr9-127f9.409002  | -0.10326  | 0.757781 | -0.13626 | 0.891614 | 0.981636 | chr9  | 1.28E+08 | 1.28E+08 | + | 0 | NA | intron (Nintron (N  | 57400   | NM_00100f  | 90678           | Hs.49518f                       | ENSG00000CLRSAM1  | CMT2P RIF leucine r protein-coding   |                                    |
| chr9-127f9.409002  | -0.10326  | 0.757781 | -0.13626 | 0.891614 | 0.981636 | chr9  | 1.28E+08 | 1.28E+08 | + | 0 | NA | intron (Nintron (N  | 40885   | NM_002283f | 64855           | Hs.52240f                       | ENSG00000NIBAN2   | C9orf88 Fniban apc protein-coding    |                                    |
| chr9-137f9.409002  | -0.10326  | 0.757781 | -0.13626 | 0.891614 | 0.981636 | chr9  | 1.33E+08 | 1.33E+08 | + | 0 | NA | intron (Nintron (N  | 7836    | NM_00127f  | 6835            | Hs.15944f                       | ENSG00000SURF2    | SURF-2 surfeit ζ protein-coding      |                                    |
| chr12-694f10.35734 | -0.09904  | 0.729365 | -0.13579 | 0.891989 | 0.981636 | chr12 | 69487023 | 69488279 | + | 0 | NA | intron (N Tigger1 I | 17263   | NM_00127f  | 10818           | Hs.59344f                       | ENSG00000FRS2     | FRS1A FRS fibrobls protein-coding    |                                    |
| chr13-237f10.35734 | -0.123788 | 0.912556 | -0.13565 | 0.892098 | 0.981636 | chr13 | 23780309 | 23780596 | + | 0 | NA | intron (N LIPA5 LIN | -108416 | NM_001014  | 542767          | Hs.642624f                      | ENSG00000PCOTH    | C1QTNF9B-Pro-X-Gly protein-coding    |                                    |
| chr4-166f9.911598  | -0.10151  | 0.748712 | -0.13558 | 0.89215  | 0.981636 | chr4  | 56930521 | 56931949 | + | 0 | NA | exon (NM exon (NM   | 22322   | NM_00119f  | 5978            | Hs.30783f                       | ENSG00000CREST    | DFNA27 GIRE1 siler protein-coding    |                                    |
| chr4-186f9.911598  | -0.10151  | 0.748712 | -0.13558 | 0.89215  | 0.981636 | chr4  | 1.87E+08 | 1.87E+08 | + | 0 | NA | intron (Nintron (N  | 40781   | NM_00524f  | 2195            | Hs.48137f                       | ENSG00000PAT1     | CDHP7 CDF FAT1 atyp protein-coding   |                                    |
| chr1-4357f9.963261 | -0.10619  | 0.785121 | -0.13525 | 0.892414 | 0.981636 | chr1  | 43579031 | 43579564 | + | 0 | NA | intron (Nintron (N  | 48414   | NM_00284c  | 5792            | Hs.27206f                       | ENSG00000PTPRF    | BNAH2 LAF intrafla protein-coding    |                                    |
| chr12-11c8.150613  | 0.114802  | 0.850508 | -0.13498 | 0.892628 | 0.981636 | chr12 | 1.1E+08  | 1.1E+08  | + | 0 | NA | intron (NAluS6 S1   | 17959   | NM_001347  | 28981           | Hs.52382f                       | ENSG00000IFT81    | CDV-1 CDV intrafla protein-coding    |                                    |
| chr1-277f9.854742  | -0.10055  | 0.745056 | -0.13496 | 0.892647 | 0.981636 | chr1  | 27793977 | 27795020 | + | 0 | NA | intron (Nintron (N  | 21279   | NM_177424  | 23673           | Hs.52385f                       | ENSG00000STX12    | STX13 STX syntaxin protein-coding    |                                    |
| chr10-864f9.854742 | -0.10055  | 0.745056 | -0.13496 | 0.892647 | 0.981636 | chr10 | 86499061 | 86500302 | + | 0 | NA | intron (N MER44A DN | 22103   | NM_00131f  | 23063           | Hs.20309f                       | ENSG00000WAPL     | FOE KIAAC WAPL cohe protein-coding   |                                    |
| chr16-69f9.854742  | -0.10055  | 0.745056 | -0.13496 | 0.892647 | 0.981636 | chr16 | 69382057 | 69384481 | + | 0 | NA | intron (N Tigger4ε  | 2738    | NM_00565f  | 7014            | Hs.63335                        | NM_00565f         | ENSG00000TERF2                       | TRBF2 TRF telomeri protein-coding  |
| chr17-57f9.854742  | -0.10055  | 0.745056 | -0.13496 | 0.892647 | 0.981636 | chr17 | 57846423 | 57846746 | + | 0 | NA | intron (N SVA B Ret | 3460    | NM_01607c  | 51649           | Hs.5836                         | NM_01607f         | ENSG00000MRP53                       | CG1-138 Fmitchonc protein-coding   |
| chr8-383f9.854742  | -0.10055  | 0.745056 | -0.13496 | 0.892647 | 0.981636 | chr8  | 38304768 | 38305956 | + | 0 | NA | exon (NM exon (NM   | -36130  | NM_00      |                 |                                 |                   |                                      |                                    |



|           |          |          |          |          |          |          |       |          |          |   |      |                     |                  |          |           |                   |                          |                                      |
|-----------|----------|----------|----------|----------|----------|----------|-------|----------|----------|---|------|---------------------|------------------|----------|-----------|-------------------|--------------------------|--------------------------------------|
| chr6-7351 | 17.55379 | -0.07545 | 0.573519 | -0.13156 | 0.895331 | 0.981636 | chr6  | 73515430 | 73520912 | + | 0 NA | TTS (NR_TTS (NR_1   | 267 NR_132981    | 1.07E+08 | NR_132981 | SNORD141E         | small ncusnoRNA          |                                      |
| chr7-1078 | 8.411667 | -0.10864 | 0.826178 | -0.13149 | 0.895385 | 0.981636 | chr7  | 1.08E+08 | 1.08E+08 | + | 0 NA | intron (NMERS8A DN  | -9758 NM_00127C  | 110662   | Hs. 97627 | NR_181581         | ENSG00000DUS4L           | DUS4 PP3E dihydrour protein-coding   |
| chr1-5178 | 9.393286 | -0.10028 | 0.762865 | -0.13146 | 0.895414 | 0.981636 | chr1  | 51786953 | 51792341 | + | 0 NA | TTS (NM_TTS (NM_C   | 46755 NR_03158C  | 1E+08    | NR_03158C | ENSG00000CMIR761  | hsa-mir-7 microRNA ncRNA |                                      |
| chr11-83C | 9.393286 | -0.10028 | 0.762865 | -0.13146 | 0.895414 | 0.981636 | chr11 | 86024213 | 86026111 | + | 0 NA | intron (NAIUs SIN   | 43922 NM_007166  | 8301     | Hs. 16389 | NR_007166         | ENSG00000PICALM          | CALM CLTF phosphatid protein-coding  |
| chr15-26C | 9.393286 | -0.10028 | 0.762865 | -0.13146 | 0.895414 | 0.981636 | chr15 | 23008021 | 23008281 | + | 0 NA | intron (NFIAM_C SI  | -27253 NM_001324 | 23191    | Hs. 26704 | NR_01460F         | ENSG00000CYFIP1          | P140SRA cytoplasm protein-coding     |
| chr17-59C | 9.393286 | -0.10028 | 0.762865 | -0.13146 | 0.895414 | 0.981636 | chr17 | 59669187 | 59669994 | + | 0 NA | intron (Nintron (N  | 38008 NM_016077  | 51651    | Hs. 12677 | NR_016077         | ENSG00000CPTRH2          | BIT1 CFAP peptidyl protein-coding    |
| chr2-2327 | 9.393286 | -0.10028 | 0.762865 | -0.13146 | 0.895414 | 0.981636 | chr2  | 2.33E+08 | 2.33E+08 | + | 0 NA | exon (NM exon (NM   | 5356 NM_002242   | 3769     | Hs. 46733 | NR_002242         | ENSG00000KCNJ13          | KTR1.4 K1 potassium protein-coding   |
| chr5-176C | 9.393286 | -0.10028 | 0.762865 | -0.13146 | 0.895414 | 0.981636 | chr5  | 1.76E+08 | 1.76E+08 | + | 0 NA | intron (NAIuY SINE  | 2682 NM_020444   | 57179    | Hs. 74325 | NR_020444         | ENSG00000KIAA1191        | p33MONOX KIAA1191 protein-coding     |
| chr1-2431 | 11.56247 | 0.092623 | 0.70465  | 0.131445 | 0.895423 | 0.981636 | chr1  | 2.43E+08 | 2.43E+08 | + | 0 NA | intron (NAIuY SINE  | 65943 NM_014812  | 9859     | Hs. 53363 | NR_014812         | ENSG00000CCEP170         | FAM68A KAP centrosome protein-coding |
| chr10-10C | 10.39062 | -0.09591 | 0.729729 | -0.13143 | 0.895435 | 0.981636 | chr10 | 1E+08    | 1E+08    | + | 0 NA | intron (NLIMB3 LIN  | 4789 NM_001278   | 1147     | Hs. 18999 | NR_001278         | ENSG00000CHUK            | IKBK1 IKF component protein-coding   |
| chr11-12C | 10.39062 | -0.09591 | 0.729729 | -0.13143 | 0.895435 | 0.981636 | chr11 | 1.23E+08 | 1.23E+08 | + | 0 NA | intron (NAIuSx1 SI  | 5361 NM_02476E   | 79827    | Hs. 59194 | NR_02476E         | ENSG00000CLMP            | ACAM ASAM CXADR l1k protein-coding   |
| chr18-21C | 10.39062 | -0.09591 | 0.729729 | -0.13143 | 0.895435 | 0.981636 | chr18 | 21623138 | 21624702 | + | 0 NA | exon (NM exon (NM   | 11606 NM_00693E  | 6632     | Hs. 46473 | NR_00693E         | ENSG00000SNRPD1          | Hst2456 S small nuc protein-coding   |
| chr20-384 | 10.39062 | -0.09591 | 0.729729 | -0.13143 | 0.895435 | 0.981636 | chr20 | 38420444 | 38422381 | + | 0 NA | intron (Nintron (N  | 3918 NR_00291C   | 26776    | Hs. 44047 | NR_00291C         | ENSG00000SNORAT1B        | RNU71B U7 small ncusnoRNA            |
| chr1-207C | 9.888024 | -0.09727 | 0.740444 | -0.13136 | 0.89549  | 0.981636 | chr1  | 20759247 | 20777024 | + | 0 NA | intron (Nintron (N  | 18553 NM_016287  | 50809    | Hs. 14282 | NR_016287         | ENSG00000HP1BP3          | HP1-BP74 heteroch protein-coding     |
| chr1-6741 | 9.888024 | -0.09727 | 0.740444 | -0.13136 | 0.89549  | 0.981636 | chr1  | 67416879 | 67426208 | + | 0 NA | intron (Nintron (N  | 8859 NM_00101E   | 26135    | Hs. 53041 | NR_01564C         | ENSG00000SERBP1          | CGI-55 CF SERPINE1 protein-coding    |
| chr1-952A | 9.888024 | -0.09727 | 0.740444 | -0.13136 | 0.89549  | 0.981636 | chr1  | 95241547 | 95242670 | + | 0 NA | intron (NLTR2B2 LI  | 7898 NM_01548E   | 25950    | Hs. 48351 | NR_01548E         | ENSG00000RWDD3           | RSUME RWD domain protein-coding      |
| chr1-100C | 9.888024 | -0.09727 | 0.740444 | -0.13136 | 0.89549  | 0.981636 | chr1  | 1E+08    | 1E+08    | + | 0 NA | intron (Nintron (N  | -3504 NR_11043E  | 1.01E+08 | Hs. 19226 | NR_11043A         | RTCA-AS1                 | RTCA anticRNA                        |
| chr1-182C | 9.888024 | -0.09727 | 0.740444 | -0.13136 | 0.89549  | 0.981636 | chr1  | 1.83E+08 | 1.83E+08 | + | 0 NA | intron (Nintron (N  | -4663 NR_14893E  | 647070   | Hs. 19151 | NR_14893E         | LOC64707C                | uncharactncRNA                       |
| chr10-687 | 9.888024 | -0.09727 | 0.740444 | -0.13136 | 0.89549  | 0.981636 | chr10 | 68746331 | 68763686 | + | 0 NA | promoter-promoter-  | -164 NR_00307E   | 692211   | NR_00307E | ENSG00000SNORD98  | HBII-419 small ncusnoRNA |                                      |
| chr10-10C | 9.888024 | -0.09727 | 0.740444 | -0.13136 | 0.89549  | 0.981636 | chr10 | 1E+08    | 1E+08    | + | 0 NA | intron (Nintron (N  | 7497 NM_005871   | 10285    | Hs. 63209 | NR_005871         | ENSG00000SMNDC1          | SMNR SPF survival protein-coding     |
| chr12-507 | 9.888024 | -0.09727 | 0.740444 | -0.13136 | 0.89549  | 0.981636 | chr12 | 50796271 | 50800915 | + | 0 NA | intron (NAIuY SINE  | 34492 NM_005171  | 466      | Hs. 64856 | NR_005171         | ENSG00000ATF1            | EWS-ATF1 activator protein-coding    |
| chr12-71C | 9.888024 | -0.09727 | 0.740444 | -0.13136 | 0.89549  | 0.981636 | chr12 | 71605921 | 71637180 | + | 0 NA | intron (NAIuSz SIN  | 42298 NM_14498E  | 196441   | Hs. 24579 | NR_14498E         | ENSG00000ZFC3H1          | CCDC131 zinc fing protein-coding     |
| chr12-71C | 9.888024 | -0.09727 | 0.740444 | -0.13136 | 0.89549  | 0.981636 | chr12 | 71909665 | 71911479 | + | 0 NA | intron (NLIPA3 LIN  | -28273 NR_17335E | 121278   | Hs. 73657 | NR_17335E         | ENSG00000TPH2            | ADHD7 NTF tryptophan protein-coding  |
| chr13-11C | 9.888024 | -0.09727 | 0.740444 | -0.13136 | 0.89549  | 0.981636 | chr13 | 1.1E+08  | 1.1E+08  | + | 0 NA | intron (Nintron (N  | 87277 NR_148221  | 1.05E+08 | Hs. 13472 | NR_148221         | LOC10537C                | uncharactncRNA                       |
| chr13-114 | 9.888024 | -0.09727 | 0.740444 | -0.13136 | 0.89549  | 0.981636 | chr13 | 1.14E+08 | 1.14E+08 | + | 0 NA | intron (NMLT1A LTF  | 7817 NR_04983E   | 1.01E+08 | NR_04983E | ENSG00000MIR548AR | microRNA ncRNA           |                                      |
| chr14-23C | 9.888024 | -0.09727 | 0.740444 | -0.13136 | 0.89549  | 0.981636 | chr14 | 23097045 | 23099683 | + | 0 NA | TTS (NM_TTS (NM_C   | -2750 NM_00116A  | 22985    | Hs. 12449 | NR_00116A         | ENSG00000ACIN1           | ACINUS ACapoptosis protein-coding    |
| chr14-504 | 9.888024 | -0.09727 | 0.740444 | -0.13136 | 0.89549  | 0.981636 | chr14 | 50478067 | 50484563 | + | 0 NA | intron (N(AT)n Sin  | 51254 NM_198794  | 11183    | Hs. 13049 | NR_00657E         | ENSG00000MAP4K5          | GCKR KHS miptogen protein-coding     |
| chr15-484 | 9.888024 | -0.09727 | 0.740444 | -0.13136 | 0.89549  | 0.981636 | chr15 | 48463664 | 48474734 | + | 0 NA | intron (Nintron (N  | 137002 NM_00194E | 1854     | Hs. 52798 | NR_00194E         | ENSG00000CDDUT           | dUTPase deoxyuric protein-coding     |
| chr15-491 | 9.888024 | -0.09727 | 0.740444 | -0.13136 | 0.89549  | 0.981636 | chr15 | 49132272 | 49135297 | + | 0 NA | exon (NM exon (NM   | 21815 NM_00114E  | 9318     | Hs. 36961 | NR_00423E         | ENSG00000COPS2           | ALIEN CSN COP9 sig protein-coding    |
| chr15-784 | 9.888024 | -0.09727 | 0.740444 | -0.13136 | 0.89549  | 0.981636 | chr15 | 78482878 | 78486333 | + | 0 NA | intron (N(Tigger L2 | -22959 NM_00108E | 123688   | Hs. 30796 | NR_00101E         | ENSG00000HYKK            | AGPHD1 hydroxyl protein-coding       |
| chr17-557 | 9.888024 | -0.09727 | 0.740444 | -0.13136 | 0.89549  | 0.981636 | chr17 | 5577881  | 5581523  | + | 0 NA | intron (NLIPA15 LI  | 4807 NM_033004   | 22861    | Hs. 65227 | NR_01492E         | ENSG00000NLRP1           | AIADK CAF/NLR famil protein-coding   |
| chr17-161 | 9.888024 | -0.09727 | 0.740444 | -0.13136 | 0.89549  | 0.981636 | chr17 | 16001330 | 16010006 | + | 0 NA | intron (Nintron (N  | 5844 NM_01777E   | 54902    | Hs. 46231 | NR_01777E         | ENSG00000TTC19           | 20102040 tetraatric protein-coding   |
| chr17-47C | 9.888024 | -0.09727 | 0.740444 | -0.13136 | 0.89549  | 0.981636 | chr17 | 47133744 | 47147117 | + | 0 NA | intron (Nintron (N  | 48865 NM_00125E  | 996      | Hs. 46329 | NR_00125E         | ENSG00000CDDC27          | ANAP3 AF cell divi protein-coding    |
| chr17-471 | 9.888024 | -0.09727 | 0.740444 | -0.13136 | 0.89549  | 0.981636 | chr17 | 47148688 | 47158355 | + | 0 NA | intron (Nintron (N  | 35774 NM_00125E  | 996      | Hs. 46329 | NR_00125E         | ENSG00000CDDC27          | ANAP3 AF cell divi protein-coding    |
| chr2-166C | 9.888024 | -0.09727 | 0.740444 | -0.13136 | 0.89549  | 0.981636 | chr2  | 1668563  | 1680588  | + | 0 NA | intron (Nintron (N  | 69940 NM_01229E  | 7837     | Hs. 33219 | NR_01229E         | ENSG00000PXD             | ASGD7 COF peroxidas protein-coding   |
| chr2-614C | 9.888024 | -0.09727 | 0.740444 | -0.13136 | 0.89549  | 0.981636 | chr2  | 61489281 | 61501808 | + | 0 NA | exon (NM exon (NM   | -24457 NR_01470E | 9736     | Hs. 64470 | NR_01470E         | ENSG00000USP34           | ubiquitin protein-coding             |
| chr2-169C | 9.888024 | -0.09727 | 0.740444 | -0.13136 | 0.89549  | 0.981636 | chr2  | 1.7E+08  | 1.7E+08  | + | 0 NA | TTS (NM_TTS (NM_C   | -4901 NR_14575A  | 1.1E+08  | NR_14575A | SNORD3K           | small ncusnoRNA          |                                      |
| chr2-190C | 9.888024 | -0.09727 | 0.740444 | -0.13136 | 0.89549  | 0.981636 | chr2  | 1.91E+08 | 1.91E+08 | + | 0 NA | intron (N(Tigger L1 | 36355 NM_01490E  | 2744     | Hs. 11644 | NR_01490E         | ENSG00000GLS             | AAD20 CAS glutamine protein-coding   |
| chr2-202C | 9.888024 | -0.09727 | 0.740444 | -0.13136 | 0.89549  | 0.981636 | chr2  | 2.02E+08 | 2.02E+08 | + | 0 NA | exon (NM exon (NM   | 6265 NR_14577A   | 1.1E+08  | NR_14577A | ENSG00000SNORD70B | small ncusnoRNA          |                                      |
| chr2-208C | 9.888024 | -0.09727 | 0.740444 | -0.13136 | 0.89549  | 0.981636 | chr2  | 2.08E+08 | 2.08E+08 | + | 0 NA | intron (NL2a LINE   | 22922 NM_00117E  | 200576   | Hs. 74499 | NR_01504C         | ENSG00000PIKFYVE         | CFD FAB1 phosphoir protein-coding    |
| chr21-29C | 9.888024 | -0.09727 | 0.740444 | -0.13136 | 0.89549  | 0.981636 | chr21 | 29055514 | 29071002 | + | 0 NA | intron (NL2c LINE   | 10440 NM_00658E  | 10694    | Hs. 12511 | NR_00658E         | ENSG00000CCT8            | C2lorf112 chaperon protein-coding    |
| chr21-34F | 9.888024 | -0.09727 | 0.740444 | -0.13136 | 0.89549  | 0.981636 | chr21 | 34825573 | 34835285 | + | 0 NA | intron (Nintron (N  | 58270 NM_001001  | 861      | Hs. 14926 | NR_001175A        | ENSG00000CNRX1           | AML1 AML1RUNX fami protein-coding    |
| chr21-391 | 9.888024 | -0.09727 | 0.740444 | -0.13136 | 0.89549  | 0.981636 | chr21 | 39199447 | 39200322 | + | 0 NA | intron (NAIuS2 SI   | -16370 NM_20343E | 8624     | Hs. 47383 | NR_00372C         | ENSG00000PSMG1           | C21LRP DC proteasome protein-coding  |
| chr3-6904 | 9.888024 | -0.09727 | 0.740444 | -0.13136 | 0.89549  | 0.981636 | chr3  | 69046176 | 69048319 | + | 0 NA | intron (Nintron (N  | 1788 NR_036087   | 1E+08    | NR_036087 | ENSG00000MIR3136  | mir-3136 microRNA ncRNA  |                                      |
| chr3-1337 | 9.888024 | -0.09727 | 0.740444 | -0.13136 | 0.89549  | 0.981636 | chr3  | 1.24E+08 | 1.24E+08 | + | 0 NA | intron (Nintron (N  | 86347 NR_05302E  | 4638     | Hs. 47737 | NR_00596E         | ENSG00000MYLK            | AAT7 KRP myosin l1 protein-coding    |
| chr3-123C | 9.888024 | -0.09727 | 0.740444 | -0.13136 | 0.89549  | 0.981636 | chr3  | 1.34E+08 | 1.34E+08 | + | 0 NA | intron (NAIuSx SIN  | 9157 NM_00128E   | 55573    | Hs. 51826 | NR_01754E         | ENSG00000CDV3            | H41 CDV3 homc protein-coding         |
| chr3-141C | 9.888024 | -0.09727 | 0.740444 | -0.13136 | 0.89549  | 0.981636 | chr3  | 1.41E+08 | 1.41E+08 | + | 0 NA | exon (NM exon (NM   | 42254 NM_00135C  | 253461   | Hs. 51830 | NR_15253E         | ENSG00000ZBTB38          | CIBZ PPP1zinc fing protein-coding    |
| chr4-102C | 9.888024 | -0.09727 | 0.740444 | -0.13136 | 0.89549  | 0.981636 | chr4  | 1.03E+08 | 1.03E+08 | + | 0 NA | intron (NFIAM_A SI  | 111006 NM_00590E | 4126     | Hs. 48041 | NR_00590E         | ENSG00000MANBA           | MANB1 mannosid e protein-coding      |
| chr4-118C | 9.888024 | -0.09727 | 0.740444 | -0.13136 | 0.89549  | 0.981636 | chr4  | 1.19E+08 | 1.19E+08 | + | 0 NA | intron (NAIuJo SIN  | 29257 NM_014822  | 9871     | Hs. 18964 | NR_01482E         | ENSG00000SEC24C          | CLCRP2 SEC24 hon protein-coding      |
| chr4-186C | 9.888024 | -0.09727 | 0.740444 | -0.13136 | 0.89549  | 0.981636 | chr4  | 1.87E+08 | 1.87E+08 | + | 0 NA | intron (NAIuJo SIN  | 32185 NM_00524E  | 2195     | Hs. 48137 | NR_00524E         | ENSG00000FAT1            | CDHF7 CDF FAT1 atyp protein-coding   |
| chr5-323C | 9.888024 | -0.09727 | 0.740444 | -0.13136 | 0.89549  | 0.981636 | chr5  | 32395992 | 32404196 | + | 0 NA | non-codiron-codir   | -5619 NR_03030E  | 693164   | NR_03030E | ENSG00000MIR579   | MIRN579 microRNA ncRNA   |                                      |
| chr6-301C | 9.888024 | -0.09727 | 0.740444 | -0.13136 | 0.89549  | 0.981636 | chr6  | 3010089  | 3012888  | + | 0 NA | intron (NLIM3F LIN  | 11330 NM_00131E  | 4835     | Hs. 53305 | NR_00090A         | ENSG00000NQ02            | DHQP DIAE-riboseyl protein-coding    |
| chr8-202C | 9.888024 | -0.09727 | 0.740444 | -0.13136 | 0.89549  | 0.981636 | chr8  | 20208892 | 20210776 | + | 0 NA | intron (Nintron (N  | 12453 NM_00169E  |          |           |                   |                          |                                      |

|                     |          |          |          |          |          |       |          |          |   |   |    |                    |        |            |          |                       |                    |                 |                                  |                               |
|---------------------|----------|----------|----------|----------|----------|-------|----------|----------|---|---|----|--------------------|--------|------------|----------|-----------------------|--------------------|-----------------|----------------------------------|-------------------------------|
| chr22-507.9.921306  | -0.094   | 0.741254 | -0.12681 | 0.89909  | 0.981636 | chr22 | 50792061 | 50792260 | + | 0 | NA | intron (NMER4A1 LI | 8431   | NR_026982  | 284942   | Hs.406135NM_0203302   | RPL23AP82          | RPL23A_4c       | ribosomal pseudo                 |                               |
| chr9-123.9.921306   | -0.094   | 0.741254 | -0.12681 | 0.89909  | 0.981636 | chr9  | 1.23E+08 | 1.23E+08 | + | 0 | NA | intron (intron (N  | 32807  | NM_005294  | 2844     | Hs.722035NM_005294    | ENSG00000GPR21     | -               | G protein-coding                 |                               |
| chr9-132f.9.921306  | -0.094   | 0.741254 | -0.12681 | 0.89909  | 0.981636 | chr9  | 1.33E+08 | 1.33E+08 | + | 0 | NA | intron (intron (N  | 33167  | NM_001322  | 64794    | Hs.660767NM_022779    | ENSG00000CDDX31    | PPP1R25         | DEAD-box protein-coding          |                               |
| chr10-127.10.36705  | -0.09185 | 0.725547 | -0.12659 | 0.899263 | 0.981636 | chr10 | 1.27E+08 | 1.27E+08 | + | 0 | NA | intron (intron (N  | 126950 | NM_00129C  | 1793     | Hs.159195NM_00138C    | ENSG00000CDOCK1    | DOCK180         | cardiac protein-coding           |                               |
| chr14-517.10.36705  | -0.09185 | 0.725547 | -0.12659 | 0.899263 | 0.981636 | chr14 | 51702451 | 51709356 | + | 0 | NA | intron (intron (N  | -11380 | NM_001267  | 122786   | Hs.434914NM_15233C    | ENSG00000CFRMD6    | C14orf31        | FERM domain protein-coding       |                               |
| chr17-724.10.36705  | -0.09185 | 0.725547 | -0.12659 | 0.899263 | 0.981636 | chr17 | 7240465  | 7241263  | + | 0 | NA | exon (NM_exon (NM  | -1407  | NM_024297  | 79142    | Hs.644724NM_024297    | ENSG00000CPHF23    | hJUNE-1b        | PHD finger protein-coding        |                               |
| chr17-81f.10.36705  | -0.09185 | 0.725547 | -0.12659 | 0.899263 | 0.981636 | chr17 | 81886832 | 81889984 | + | 0 | NA | non-codirnon-codir | -2382  | NM_001288  | 51529    | Hs.534455NM_01647C    | ENSG00000CANAPC11  | APC11           | Apcanaphase protein-coding       |                               |
| chr4-5427.10.36705  | -0.09185 | 0.725547 | -0.12659 | 0.899263 | 0.981636 | chr4  | 54272110 | 54277426 | + | 0 | NA | intron (intron (N  | 40808  | NM_001347  | 5156     | Hs.74615              | NM_00620C          | ENSG00000PDGFR1 | CD140A                           | PII platelet protein-coding   |
| chr8-117f.10.36705  | -0.09185 | 0.725547 | -0.12659 | 0.899263 | 0.981636 | chr8  | 1.18E+08 | 1.18E+08 | + | 0 | NA | intron (intron (N  | 100703 | NR_145799  | 1.1E+08  | NR_145799             | SNORD168           | -               | small nucleolar RNA              |                               |
| chr2-171f.9.872308  | -0.09443 | 0.747713 | -0.12629 | 0.899502 | 0.981636 | chr2  | 1.71E+08 | 1.71E+08 | + | 0 | NA | intron (ALuJr SIN  | -35385 | NM_002477C | 79828    | Hs.135145NM_02477C    | ENSG00000CMTTL8    | TIP             | methyltransferase protein-coding |                               |
| chr12-58f.10.86178  | -0.0895  | 0.710932 | -0.1259  | 0.899815 | 0.981636 | chr12 | 58874396 | 58876562 | + | 0 | NA | intron (intron (N  | 44067  | NM_001136  | 121227   | Hs.253735NM_153377    | ENSG00000CLRIG3    | LIG3            | leucine protein-coding           |                               |
| chr15-671.10.86178  | -0.0895  | 0.710932 | -0.1259  | 0.899815 | 0.981636 | chr15 | 67184122 | 67193610 | + | 0 | NA | intron (intron (N  | 22711  | NM_001145  | 4088     | Hs.727985NM_005905    | ENSG00000CSMAD3    | HSPC193         | SMAD family protein-coding       |                               |
| chr14-88f.10.41604  | -0.09142 | 0.729026 | -0.1254  | 0.900205 | 0.981636 | chr14 | 88602464 | 88603753 | + | 0 | NA | intron (intron (N  | 8688   | NM_207662  | 79882    | Hs.684045NM_024824    | ENSG00000CZC3H14   | MRT56           | MSU zinc finger protein-coding   |                               |
| chr19-19C.10.41604  | -0.09142 | 0.729026 | -0.1254  | 0.900205 | 0.981636 | chr19 | 19016592 | 19019211 | + | 0 | NA | intron (intron (N  | 15616  | NR_147913  | 10147    | Hs.77876              | NM_014884          | ENSG00000CSUGP2 | SFRS14                           | 5FSURP and protein-coding     |
| chr14-814.8.486088  | -0.10255 | 0.817906 | -0.12538 | 0.900226 | 0.981636 | chr14 | 81493263 | 81493540 | + | 0 | NA | intron (ALuSz SIN  | 40452  | NM_005065  | 6400     | Hs.18130C             | NM_005065          | ENSG00000CSEL1L | Hrd3                             | PRO1SEL1L adp protein-coding  |
| chr5-813f.9.831168  | -0.09628 | 0.768487 | -0.12529 | 0.900294 | 0.981636 | chr5  | 81304806 | 81305548 | + | 0 | NA | intron (intron (N  | 3590   | NM_001131  | 84240    | Hs.15536              | NM_03228C          | ENSG00000CZCHC9 | PPP1R41                          | zinc finger protein-coding    |
| chr1-230f.9.913448  | -0.0926  | 0.741054 | -0.12496 | 0.900558 | 0.981636 | chr1  | 23092143 | 23094833 | + | 0 | NA | exon (NM_exon (NM  | 49183  | NR_036057  | 5E+08    | NR_036057             | ENSG00000CMIR3115  | mir-3115        | microRNA ncRNA                   |                               |
| chr10-68f.9.913448  | -0.0926  | 0.741054 | -0.12496 | 0.900558 | 0.981636 | chr10 | 68371448 | 68375538 | + | 0 | NA | intron (ALuJr SIN  | 33696  | NM_017987  | 55680    | Hs.653144NM_017987    | ENSG00000CRUFY2    | RAB1P4RZ        | ZRUN and Fprotein-coding         |                               |
| chr11-12f.9.913448  | -0.0926  | 0.741054 | -0.12496 | 0.900558 | 0.981636 | chr11 | 1.26E+08 | 1.26E+08 | + | 0 | NA | intron (intron (N  | 4064   | NM_003135  | 6734     | Hs.368375NM_003135    | ENSG00000CSRPR4    | DP SRPR SRPR    | receptor protein-coding          |                               |
| chr12-98f.9.913448  | -0.0926  | 0.741054 | -0.12496 | 0.900558 | 0.981636 | chr12 | 98648646 | 98650992 | + | 0 | NA | intron (ML2c LINE  | 4519   | NM_181868  | 317      | Hs.552567NM_00116C    | ENSG00000CAPAF1    | APAF-1          | Ceapoptotic protein-coding       |                               |
| chr12-101f.9.913448 | -0.0926  | 0.741054 | -0.12496 | 0.900558 | 0.981636 | chr12 | 1.01E+08 | 1.01E+08 | + | 0 | NA | intron (intron (N  | 11489  | NM_001177  | 400      | Hs.372615NM_001177    | ENSG00000CARL1     | ARFL1           | ADP ribosyl protein-coding       |                               |
| chr13-32f.9.913448  | -0.0926  | 0.741054 | -0.12496 | 0.900558 | 0.981636 | chr13 | 32235185 | 32238916 | + | 0 | NA | intron (intron (N  | 74904  | NM_001136  | 646799   | Hs.569254NM_001136    | ENSG00000CZAR1L    | Z3CXXC7         | Zzygote ar protein-coding        |                               |
| chr15-82f.9.913448  | -0.0926  | 0.741054 | -0.12496 | 0.900558 | 0.981636 | chr15 | 82813147 | 82820600 | + | 0 | NA | intron (intron (N  | 7245   | NM_00108C  | 123720   | Hs.37736C             | NM_00108C          | ENSG00000CWHAMM | WHAMM1                           | WASP hom protein-coding       |
| chr15-101f.9.913448 | -0.0926  | 0.741054 | -0.12496 | 0.900558 | 0.981636 | chr15 | 1.01E+08 | 1.01E+08 | + | 0 | NA | intron (intron (N  | 17134  | NM_01491E  | 22856    | Hs.110485NM_01491E    | ENSG00000CHSY1     | CHSY1           | CSS1 chondroitin protein-coding  |                               |
| chr16-53f.9.913448  | -0.0926  | 0.741054 | -0.12496 | 0.900558 | 0.981636 | chr16 | 53273813 | 53276781 | + | 0 | NA | intron (ALuSx1 SI  | 66846  | NM_001352  | 80205    | Hs.59159              | NM_015287          | ENSG00000CHD9   | ADD13                            | CHL chromodon protein-coding  |
| chr17-46f.9.913448  | -0.0926  | 0.741054 | -0.12496 | 0.900558 | 0.981636 | chr17 | 46049186 | 46050715 | + | 0 | NA | intron (ALuSx SIN  | 50700  | NM_001007  | 26474    | Hs.661831NM_001007    | ENSG00000CSTH      | MAPTIT          | saitohin protein-coding          |                               |
| chr19-12C.9.913448  | -0.0926  | 0.741054 | -0.12496 | 0.900558 | 0.981636 | chr19 | 12097933 | 12098836 | + | 0 | NA | intron (MERR9A LI  | 6087   | NM_00134E  | 38850    | Hs.127475NM_001004314 | ZNF788P            | ZNF788          | zinc finger protein-coding       |                               |
| chr2-741f.9.913448  | -0.0926  | 0.741054 | -0.12496 | 0.900558 | 0.981636 | chr2  | 74162336 | 74172296 | + | 0 | NA | intron (ALuSx3 SI  | 10998  | NM_001317  | 55233    | Hs.602092NM_018221    | ENSG00000CMOB1A    | C2orf6          | MAPMOB kinase protein-coding     |                               |
| chr20-44f.9.913448  | -0.0926  | 0.741054 | -0.12496 | 0.900558 | 0.981636 | chr20 | 44480717 | 44480954 | + | 0 | NA | intron (MLT10 LTF  | 4961   | NM_001261  | 79183    | Hs.283865NM_024331    | ENSG00000CTTPAL    | C2orf121        | alpha top protein-coding         |                               |
| chr3-690f.9.913448  | -0.0926  | 0.741054 | -0.12496 | 0.900558 | 0.981636 | chr3  | 69024389 | 69027384 | + | 0 | NA | intron (intron (N  | -12202 | NM_001278  | 285203   | Hs.518055NM_173654    | ENSG00000EOGT      | AR61            | AOSBGF domain protein-coding     |                               |
| chr4-183f.9.913448  | -0.0926  | 0.741054 | -0.12496 | 0.900558 | 0.981636 | chr4  | 1.83E+08 | 1.83E+08 | + | 0 | NA | intron (MLMB8 LI   | -33283 | NR_126477  | 1.02E+08 | Hs.570715NR_126477    | ENSG00000CWWC2-AS1 | -               | WWC2 anticRNA                    |                               |
| chr7-776f.9.913448  | -0.0926  | 0.741054 | -0.12496 | 0.900558 | 0.981636 | chr7  | 77626796 | 77629174 | + | 0 | NA | intron (intron (N  | 68280  | NR_134254  | 1.01E+08 | Hs.72451              | NR_038361          | ENSG00000CAPTR  | RSBN1L-AS                        | Alu-mediated ncRNA            |
| chr9-703f.9.913448  | -0.0926  | 0.741054 | -0.12496 | 0.900558 | 0.981636 | chr9  | 70305303 | 70308057 | + | 0 | NA | intron (intron (N  | 47702  | NM_01511C  | 23137    | Hs.534185NM_01511C    | ENSG00000CSC5      | SMC5L1          | structure protein-coding         |                               |
| chr15-70f.9.913448  | -0.09531 | 0.765012 | -0.12459 | 0.900852 | 0.981636 | chr15 | 70662639 | 70665916 | + | 0 | NA | intron (intron (N  | 29028  | NR_126482  | 1.05E+08 | NR_126482             | ENSG00000CSALRNA2  | SAL-RNA2        | senescence ncRNA                 |                               |
| chr19-84f.9.913448  | -0.09531 | 0.765012 | -0.12459 | 0.900852 | 0.981636 | chr19 | 8463599  | 8465884  | + | 0 | NA | intron (intron (N  | 19766  | NM_03120C  | 4670     | Hs.465805NM_005965    | ENSG00000CHNRPMP   | CEAR            | HNRP heterologous protein-coding |                               |
| chr7-128f.9.913448  | -0.09531 | 0.765012 | -0.12459 | 0.900852 | 0.981636 | chr7  | 1.28E+08 | 1.28E+08 | + | 0 | NA | exon (NM_exon (NM  | 13033  | NM_018077  | 55131    | Hs.274265NM_018077    | ENSG00000CRBM28    | ANES            | RNA bindi protein-coding         |                               |
| chr12-124.11.35652  | -0.08747 | 0.702543 | -0.1245  | 0.900921 | 0.981636 | chr12 | 1.24E+08 | 1.24E+08 | + | 0 | NA | intron (intron (N  | 102048 | NM_00120C  | 9612     | Hs.13751C             | NM_006312          | ENSG00000CNCOR2 | CTG26                            | N-C nuclear protein-coding    |
| chr10-11f.10.40819  | -0.09008 | 0.72526  | -0.1242  | 0.901157 | 0.981636 | chr10 | 1.2E+08  | 1.2E+08  | + | 0 | NA | intron (intron (N  | 6487   | NM_00719C  | 11196    | Hs.435004NM_00719C    | ENSG00000CSEC23P   | MSTP053         | FSEC23 intron protein-coding     |                               |
| chr12-49f.10.40819  | -0.09008 | 0.72526  | -0.1242  | 0.901157 | 0.981636 | chr12 | 49054481 | 49055316 | + | 0 | NA | intron (intron (N  | 246    | NM_00348C  | 8085     | Hs.731384NM_00348C    | ENSG00000CKMT2D    | ADD10           | ALF lysine protein-coding        |                               |
| chr12-105f.10.40819 | -0.09008 | 0.72526  | -0.1242  | 0.901157 | 0.981636 | chr12 | 1.09E+08 | 1.09E+08 | + | 0 | NA | intron (MIR3 SINE  | 22434  | NR_13389E  | 83892    | Hs.524731NM_031954    | ENSG00000CKCTD10   | BTBD28          | MS potassium protein-coding      |                               |
| chr12-114f.10.40819 | -0.09008 | 0.72526  | -0.1242  | 0.901157 | 0.981636 | chr12 | 1.14E+08 | 1.14E+08 | + | 0 | NA | intron (intron (N  | 11503  | NM_18148E  | 6910     | Hs.381715NM_000192    | ENSG00000CBX5      | HOS             | T-box protein-coding             |                               |
| chr14-23f.10.40819  | -0.09008 | 0.72526  | -0.1242  | 0.901157 | 0.981636 | chr14 | 23029207 | 23033594 | + | 0 | NA | intron (intron (N  | 3500   | NM_002797  | 5693     | Hs.42299C             | NM_002797          | ENSG00000CPSMB5 | LMPX                             | MB1 proteasome protein-coding |
| chr17-29f.10.40819  | -0.09008 | 0.72526  | -0.1242  | 0.901157 | 0.981636 | chr17 | 29262560 | 29264941 | + | 0 | NA | 3' UTR (3' UTR (N  | 16893  | NM_00520E  | 1411     | Hs.46275              | NM_00520E          | ENSG00000CRYBA1 | CRYB1                            | CTF crystallin protein-coding |
| chr17-38f.10.40819  | -0.09008 | 0.72526  | -0.1242  | 0.901157 | 0.981636 | chr17 | 38495366 | 38507511 | + | 0 | NA | intron (ALuJ SINE  | 72974  | NM_001195  | 57636    | Hs.374445NM_02087C    | ENSG00000CARHGAP23 | -               | Rho GTPase protein-coding        |                               |
| chr19-241.10.40819  | -0.09008 | 0.72526  | -0.1242  | 0.901157 | 0.981636 | chr19 | 24124587 | 24130530 | + | 0 | NA | exon (NM_exon (NM  | 35889  | NR_003603  | 1E+08    | Hs.149312NR_003603    | ENSG00000CAVCRIP1  | -               | hepatitis pseudo                 |                               |
| chr20-441.10.40819  | -0.09008 | 0.72526  | -0.1242  | 0.901157 | 0.981636 | chr20 | 44197326 | 44200630 | + | 0 | NA | intron (MERR44C DN | -11400 | NM_02043C  | 57158    | Hs.441737NM_02043C    | ENSG00000CJPH2     | CMH17           | JP-junctophin protein-coding     |                               |
| chr5-167f.10.40819  | -0.09008 | 0.72526  | -0.1242  | 0.901157 | 0.981636 | chr5  | 16709056 | 16711525 | + | 0 | NA | intron (intron (N  | -93232 | NM_001034  | 54463    | Hs.481704NM_01900C    | ENSG00000CRETREG1  |                 |                                  |                               |



|                    |          |          |          |          |          |       |          |          |   |      |                     |                     |                     |                                   |                                    |                         |
|--------------------|----------|----------|----------|----------|----------|-------|----------|----------|---|------|---------------------|---------------------|---------------------|-----------------------------------|------------------------------------|-------------------------|
| chr3-1944 10.87935 | -0.08396 | 0.708886 | -0.11843 | 0.905723 | 0.981636 | chr3  | 1.94E+08 | 1.94E+08 | + | 0 NA | intron (Nintron (N  | 19002 NM_024524     | 79572 Hs. 529609    | ENSG000004ATP13A3                 | AFURS1                             | ATPase 1;protein-coding |
| chr4-5338 10.87935 | -0.08396 | 0.708886 | -0.11843 | 0.905723 | 0.981636 | chr4  | 53389760 | 53392556 | + | 0 NA | intron (Nintron (N  | 13505 NM_001134     | 81608 Hs. 555109    | ENSG000004FIP1L1                  | FIP1 Rhe factor irprotein-coding   |                         |
| chr5-1385 10.87935 | -0.08396 | 0.708886 | -0.11843 | 0.905723 | 0.981636 | chr5  | 1.39E+08 | 1.39E+08 | + | 0 NA | exon (NM_exon (NM   | 6390 NM_004134      | 3313 Hs. 184233     | ENSG000004HSPA9                   | CRP40 CS heat shocprotein-coding   |                         |
| chr5-1681 10.87935 | -0.08396 | 0.708886 | -0.11843 | 0.905723 | 0.981636 | chr5  | 1.69E+08 | 1.69E+08 | + | 0 NA | intron (NMLT2A LI   | -16413 NM_001355    | 345630 Hs. 166262   | ENSG000004FBLL1                   | - fibrillarprotein-coding          |                         |
| chr6-1121 10.87935 | -0.08396 | 0.708886 | -0.11843 | 0.905723 | 0.981636 | chr6  | 1.12E+08 | 1.12E+08 | + | 0 NA | intron (NLIPA7 LI   | -35845 NR_121199    | 1.02E+08 Hs. 510007 | NR_121193                         | LOC101927                          | - uncharacterncRNA      |
| chr7-1934 10.87935 | -0.08396 | 0.708886 | -0.11843 | 0.905723 | 0.981636 | chr7  | 193499   | 202604   | + | 0 NA | intron (Nintron (N  | 5480 NM_020222      | 56975 Hs. 134742    | ENSG000004FAM20C                  | DMP-4 DMF FAM20C gcprotein-coding  |                         |
| chr8-131C 10.38461 | -0.08603 | 0.72282  | -0.11814 | 0.905954 | 0.981636 | chr8  | 13108854 | 13114847 | + | 0 NA | intron (Nintron (N  | 4394 NM_001164      | 10395 Hs. 134299    | ENSG000004DLC1                    | ARHGAP7 F DLC1 Rho protein-coding  |                         |
| chr6-1354 9.938871 | -0.08788 | 0.744551 | -0.11803 | 0.906047 | 0.981636 | chr6  | 1.35E+08 | 1.35E+08 | + | 0 NA | intron (Nintron (N  | 14395 NM_001134     | 54806 Hs. 386684    | ENSG000004AHI1                    | AHI-1 JBT Abelson tpotein-coding   |                         |
| chr16-303 11.37409 | -0.08206 | 0.696355 | -0.11784 | 0.906192 | 0.981636 | chr16 | 30300077 | 30301090 | + | 0 NA | intron (NAluSq2 SI  | 34791 NR_002452     | 595101 Hs. 654656   | ENSG000004SMG1P5                  | - SMG1 pset pseudo                 |                         |
| chr3-149C 11.37409 | -0.08206 | 0.696355 | -0.11784 | 0.906192 | 0.981636 | chr3  | 1.49E+08 | 1.49E+08 | + | 0 NA | intron (Nintron (N  | 33418 NM_004534     | 2992 Hs. 134299     | ENSG000004GYG1                    | GD515 GYC glycogeninprotein-coding |                         |
| chr6-5661 10.43361 | -0.08561 | 0.727226 | -0.11772 | 0.906292 | 0.981636 | chr6  | 56615801 | 56617334 | + | 0 NA | exon (NM_exon (NM   | 667 Hs. 604919      | ENSG000004CST       | BP240 BP dyostonin protein-coding |                                    |                         |
| chr1-1681 11.86883 | -0.08042 | 0.689534 | -0.11663 | 0.907155 | 0.981636 | chr1  | 1.68E+08 | 1.68E+08 | + | 0 NA | intron (NAluJb SIN  | 18080 NM_001031     | 261726 Hs. 209431   | ENSG000004TIPRL                   | TIP TIP41TOR signcprotein-coding   |                         |
| chr4-121C 10.87149 | -0.08267 | 0.710882 | -0.11629 | 0.907423 | 0.981636 | chr4  | 1.22E+08 | 1.22E+08 | + | 0 NA | intron (Nintron (N  | 16235 NM_001154     | 308 Hs. 480652      | ENSG000004ANXA5                   | ANX5 ENX2 amexin fprotein-coding   |                         |
| chr6-1362 10.87149 | -0.08267 | 0.710882 | -0.11629 | 0.907423 | 0.981636 | chr6  | 1.36E+08 | 1.36E+08 | + | 0 NA | intron (Nintron (N  | 19733 NM_001107     | 9774 Hs. 486542     | ENSG000004BCLAF1                  | BTF bk21 BCL2 assocprotein-coding  |                         |
| chr19-211 11.36623 | -0.08082 | 0.695105 | -0.11627 | 0.907436 | 0.981636 | chr19 | 21180772 | 21184651 | + | 0 NA | exon (NM_exon (NM   | 40671 NM_133472     | 170959 Hs. 156256   | ENSG000004ZNF431                  | - zinc fingprotein-coding          |                         |
| chr7-9941 11.36623 | -0.08082 | 0.695105 | -0.11627 | 0.907436 | 0.981636 | chr7  | 99410678 | 99413910 | + | 0 NA | intron (NKanga2_a   | 3122 NR_162133      | 1.13E+08            | NR_162133                         | MIR12119                           | - microRNA ncRNA        |
| chr7-152 10.42575  | -0.08428 | 0.725841 | -0.11611 | 0.907565 | 0.981636 | chr7  | 1.52E+08 | 1.52E+08 | + | 0 NA | exon (NM_exon (NM   | 101983 NM_001371474 |                     |                                   |                                    |                         |
| chr18-79E 8.024632 | -0.10088 | 0.872078 | -0.11568 | 0.907903 | 0.981636 | chr18 | 79918936 | 79919431 | + | 0 NA | intron (Nintron (N  | 32470 NM_001146     | 80148 Hs. 288284    | ENSG000004SLC66A2                 | PQLC1 solute cprotein-coding       |                         |
| chr7-597E 11.86097 | -0.07918 | 0.685366 | -0.11553 | 0.908027 | 0.981636 | chr7  | 5976031  | 5978705  | + | 0 NA | intron (Nintron (N  | -6685 NM_173565     | 222967 Hs. 442339   | ENSG000004RSPH10B                 | - radial fsprotein-coding          |                         |
| chr19-53C 10.92049 | -0.08226 | 0.712169 | -0.11551 | 0.908043 | 0.981636 | chr19 | 53090596 | 53092047 | + | 0 NA | intron (Nintron (N  | -4284 NM_001322     | 90338 Hs. 655967    | ENSG000004ZNF160                  | F11 HKR1 zinc fingprotein-coding   |                         |
| chr6-1494 12.30671 | -0.07806 | 0.676274 | -0.11543 | 0.908103 | 0.981636 | chr6  | 1.49E+08 | 1.49E+08 | + | 0 NA | 3' UTR (N3' UTR (N  | 9601 NM_001002      | 387082 Hs. 657168   | ENSG000004SUM04                   | IDDM5 SMI small ubiprotein-coding  |                         |
| chr3-172E 8.949395 | -0.09248 | 0.807101 | -0.11458 | 0.90878  | 0.981636 | chr3  | 1.73E+08 | 1.73E+08 | + | 0 NA | 3' UTR (N3' UTR (N  | 69666 NM_001345     | 1894 Hs. 518299     | ENSG000004CCT2                    | ARHGEF31 epithelicprotein-coding   |                         |
| chr12-69F 11.35837 | -0.07959 | 0.695923 | -0.11437 | 0.908946 | 0.981636 | chr12 | 69587021 | 69595655 | + | 0 NA | intron (Nintron (N  | 5449 NM_001194      | 10576 Hs. 189772    | ENSG000004CCT2                    | 99D8.1 CC chaperoniprotein-coding  |                         |
| chr16-30C 11.35837 | -0.07959 | 0.695923 | -0.11437 | 0.908946 | 0.981636 | chr16 | 30066441 | 30074246 | + | 0 NA | TTS (NM_TTS (NM_C   | 4583 NM_184041      | 226 Hs. 513499      | ENSG000004ALDOA                   | ALDA ALD aldolase, protein-coding  |                         |
| chr4-8281 11.35837 | -0.07959 | 0.695923 | -0.11437 | 0.908946 | 0.981636 | chr4  | 82817750 | 82831481 | + | 0 NA | exon (NM_exon (NM   | -25758 NR_024906    | 79966 Hs. 379191    | ENSG000004SCD5                    | ACOD4 FAI stearoyl-protein-coding  |                         |
| chr1-2201 11.41523 | -0.08047 | 0.704703 | -0.11419 | 0.909086 | 0.981636 | chr1  | 2.2E+08  | 2.2E+08  | + | 0 NA | intron (NLIPIA7 LI  | 30526 NR_031705     | 1E+08               | NR_031705                         | ENSG000004MIR664A                  | MIR664 MimicroRNA ncRNA |
| chr8-1447 11.85311 | -0.07797 | 0.683192 | -0.11413 | 0.909138 | 0.981636 | chr8  | 1.45E+08 | 1.45E+08 | + | 0 NA | intron (Nintron (N  | 1798 NR_106909      | 1.02E+08            | NR_106909                         | ENSG000004MIR6850                  | hsa-mir-6microRNA ncRNA |
| chr1-193C 10.91263 | -0.08099 | 0.709748 | -0.11411 | 0.909154 | 0.981636 | chr1  | 1.93E+08 | 1.93E+08 | + | 0 NA | intron (NAluSx SIN  | 8128 NR_135611      | 1.07E+08            | NR_135611                         | ENSG000004SCARNA18E                | - small Ca_ncRNA        |
| chr10-151 10.91263 | -0.08099 | 0.709748 | -0.11411 | 0.909154 | 0.981636 | chr10 | 15131848 | 15135415 | + | 0 NA | intron (NAluJ SIN   | 21716 NR_036506     | 1E+08 Hs. 714691    | NR_036506                         | ENSG000004PPIAP30                  | - peptidy pseudo        |
| chr2-985E 10.91263 | -0.08099 | 0.709748 | -0.11411 | 0.909154 | 0.981636 | chr2  | 9856345  | 9858845  | + | 0 NA | intron (NTHEID LITR | 14121 NM_005688     | 9014 Hs. 584833     | ENSG000004TAF1B                   | MGC:9349 TATA-box protein-coding   |                         |
| chr21-452 10.91263 | -0.08099 | 0.709748 | -0.11411 | 0.909154 | 0.981636 | chr21 | 45271562 | 45272799 | + | 0 NA | intron (NLIPIB1 LI  | 15715 NM_015227     | 23275 Hs. 592164    | ENSG000004POFUT2                  | C2orf80 protein (protein-coding    |                         |
| chr11-95E 10.41789 | -0.08292 | 0.726813 | -0.11409 | 0.909166 | 0.981636 | chr11 | 95979208 | 95979460 | + | 0 NA | exon (NM_exon (NM   | -55127 NM_016155    | 8898 Hs. 181322     | ENSG000004MTMR2                   | CMT4B myotubule protein-coding     |                         |
| chr14-102 10.41789 | -0.08292 | 0.726813 | -0.11409 | 0.909166 | 0.981636 | chr14 | 1.03E+08 | 1.03E+08 | + | 0 NA | intron (NAluSq2 SI  | 42273 NR_030942     | 81693 Hs. 534494    | ENSG000004AMN                     | PRO1028 eamion asprotein-coding    |                         |
| chr5-401E 9.436275 | -0.08856 | 0.777202 | -0.11395 | 0.909281 | 0.981636 | chr5  | 401660   | 402235   | + | 0 NA | intron (NLM3 LINE   | 41213 NR_126522     | 116349 Hs. 446702   | ENSG000004EXOC3-AS1               | 5orf55 EXOC3 antncRNA              |                         |
| chr11-117 3.718028 | -0.13431 | 1.179496 | -0.11387 | 0.909338 | 0.981636 | chr11 | 1.19E+08 | 1.19E+08 | + | 0 NA | intron (NLM7 LIN    | 33425 NM_005188     | 867 Hs. 504099      | ENSG000004CBL                     | C-CBL CBL cl protcprotein-coding   |                         |
| chr22-402 3.718028 | -0.13431 | 1.179496 | -0.11387 | 0.909338 | 0.981636 | chr22 | 40792592 | 40793237 | + | 0 NA | intron (Nintron (N  | 21044 NR_039922     | 1.01E+08            | NR_039922                         | ENSG000004MIR4766                  | mir-4766 microRNA ncRNA |
| chr16-58E 9.395136 | -0.09021 | 0.795384 | -0.11342 | 0.909699 | 0.981636 | chr16 | 58584992 | 58585194 | + | 0 NA | intron (Nintron (N  | -25162 NR_00298C    | 677830 Hs. 677519   | ENSG000004SNORA50A                | ACA50 SNC small nucsnoRNA          |                         |
| chr10-792 4.220625 | -0.12603 | 1.114212 | -0.11306 | 0.909983 | 0.981636 | chr10 | 79252107 | 79252909 | + | 0 NA | intron (Nintron (N  | -94961 NM_005725    | 10105 Hs. 381072    | ENSG000004PPIF                    | CYP3 Cyp-peptidy protein-coding    |                         |
| chr20-441 9.923155 | -0.08491 | 0.751841 | -0.11294 | 0.910081 | 0.981636 | chr20 | 44196654 | 44196928 | + | 0 NA | 3' UTR (N3' UTR (N  | -9213 NM_020433     | 57158 Hs. 441737    | ENSG000004JPH2                    | CMH17 JP-junctophiprotein-coding   |                         |
| chr11-126 10.90477 | -0.0797  | 0.709537 | -0.11233 | 0.91056  | 0.981636 | chr11 | 1.26E+08 | 1.26E+08 | + | 0 NA | intron (NAluSz SIN  | 26447 NM_024555     | 79607 Hs. 276319    | ENSG000004FAM118B                 | - family wiprotein-coding          |                         |
| chr16-302 10.90477 | -0.0797  | 0.709537 | -0.11233 | 0.91056  | 0.981636 | chr16 | 30252888 | 30259772 | + | 0 NA | IntergeniLIPIA5 LI  | -10617 NM_001321    | 613037 Hs. 585732   | ENSG000004NIP1B3                  | - nuclear fprotein-coding          |                         |
| chr4-8681 10.90477 | -0.0797  | 0.709537 | -0.11233 | 0.91056  | 0.981636 | chr4  | 86813173 | 86816218 | + | 0 NA | 3' UTR (N3' UTR (N  | 36489 NM_197962     | 345274 Hs. 452999   | ENSG000004SLC10A6                 | SOAT solute cprotein-coding        |                         |
| chr6-1334 10.90477 | -0.0797  | 0.709537 | -0.11233 | 0.91056  | 0.981636 | chr6  | 1.33E+08 | 1.33E+08 | + | 0 NA | intron (NLM5 LIN    | 228162 NM_001301    | 2070 Hs. 596688     | ENSG000004EYAA                    | CMDJ1 DF EYAA transprotein-coding  |                         |
| chr2-994C 11.39951 | -0.07798 | 0.695864 | -0.11207 | 0.910771 | 0.981636 | chr2  | 99438630 | 99439028 | + | 0 NA | exon (NM_exon (NM   | 51188 NM_016316     | 51455 Hs. 443077    | ENSG000004REV1                    | AIBP80 RF RETV1 DNA protein-coding |                         |
| chr21-371 11.39951 | -0.07798 | 0.695864 | -0.11207 | 0.910771 | 0.981636 | chr21 | 37108102 | 37110293 | + | 0 NA | intron (NLIPIA4 LI  | 26250 NM_003316     | 7267 Hs. 368214     | ENSG000004TTC3                    | DCRR1 RNF tetraictrprotein-coding  |                         |
| chr22-292 11.39951 | -0.07798 | 0.695864 | -0.11207 | 0.910771 | 0.981636 | chr22 | 29281215 | 29290405 | + | 0 NA | intron (Nintron (N  | 17542 NM_005243     | 2130 Hs. 374477     | ENSG000004EWSR1                   | EWS EWS-F EWS RNA tpotein-coding   |                         |
| chr9-7401 11.39951 | -0.07798 | 0.695864 | -0.11207 | 0.910771 | 0.981636 | chr9  | 740158   | 743079   | + | 0 NA | intron (NAlu SINE   | 34941 NM_001354     | 23189 Hs. 306764    | ENSG000004KANK1                   | ANKRD15 CKN motif protein-coding   |                         |
| chr18-164 10.41004 | -0.08153 | 0.730171 | -0.11165 | 0.911097 | 0.981636 | chr18 | 16433391 | 16433909 | + | 0 NA | IntergeniALR Alpha  | -1107831 NR_027417  | 644669 Hs. 579474   | ENSG000004LOC64466E               | - ankyrin tpseudo                  |                         |
| chr21-25E 10.41004 | -0.08153 | 0.730171 | -0.11165 | 0.911097 | 0.981636 | chr21 | 25891439 | 25891742 | + | 0 NA | intron (Nintron (N  | -155936 NM_001003   | 522 Hs. 246319      | ENSG000004ATP5PF                  | ATP5 ATP ATP syntpprotein-coding   |                         |
| chr12-111 4.666365 | -0.11774 | 1.058096 | -0.11127 | 0.911402 | 0.981636 | chr12 | 1.12E+08 | 1.12E+08 | + | 0 NA | intron (NAluSc SIN  | -16877 NM_00069C    | 217 Hs. 604551      | ENSG000004ALDH2                   | ALDH-E2 aldehyde protein-coding    |                         |
| chr2-175 4.212767  | -0.12283 | 1.105401 | -0.11112 | 0.91152  | 0.981636 | chr2  | 1.75E+08 | 1.75E+08 | + | 0 NA | IntergeniTiger2 b   | -6650 NM_001255     | 1386 Hs. 592519     | ENSG000004ATF2                    | CRE-BP1 C activatir protein-coding |                         |
| chr20-35E 4.212767 | -0.12283 | 1.105401 | -0.11112 | 0.91152  | 0.981636 | chr20 | 3596769  | 3597426  | + | 0 NA | intron (NLM1 LINE   | 66302 NM_022133     | 64096 Hs. 302022    | ENSG000004GFRA4                   | - GDNF famiprotein-coding          |                         |
| chr12-497 10.85578 | -0.08002 | 0.721782 | -0.11086 |          |          |       |          |          |   |      |                     |                     |                     |                                   |                                    |                         |

|           |          |          |          |          |          |          |       |                 |                  |                  |                 |                           |                                     |                            |                               |                                  |                                        |
|-----------|----------|----------|----------|----------|----------|----------|-------|-----------------|------------------|------------------|-----------------|---------------------------|-------------------------------------|----------------------------|-------------------------------|----------------------------------|----------------------------------------|
| chr10-735 | 11.88824 | -0.06776 | 0.683889 | -0.09908 | 0.921077 | 0.981636 | chr10 | 73912172        | 73917750         | +                | 0               | NA                        | intron (Nintron (N                  | 3829 NM_002658             | 5328 Hs. 77274 NM_002658      | ENSG000001PLAU                   | ATF1 BDPL1 plasminogen protein-coding  |
| chr6-7285 | 10.41974 | -0.07384 | 0.749242 | -0.09855 | 0.921493 | 0.981636 | chr6  | 7289723         | 7290442          | +                | 0               | NA                        | intron (Nintron (N                  | 23117 NM_001292            | 6745 Hs. 114033 NM_003144     | ENSG000001SSR1                   | TRAPA signal protein-coding            |
| chr12-455 | 5.178669 | -0.09875 | 1.003486 | -0.09841 | 0.921607 | 0.981636 | chr12 | 45383090        | 45385050         | +                | 0               | NA                        | intron (Nintron (N                  | 91380 NM_001142            | 196527 Hs. 505333 NM_001022   | ENSG000001CAN06                  | BDPL17 SCANoctamin protein-coding      |
| chr15-655 | 5.178669 | -0.09875 | 1.003486 | -0.09841 | 0.921607 | 0.981636 | chr15 | 65397275        | 65398082         | +                | 0               | NA                        | intron (Nintron (N                  | -19676 NM_004884           | 9543 Hs. 128292 NM_004884     | ENSG000001IGDC3                  | HsT18880 immunoglobulin protein-coding |
| chr2-201C | 5.178669 | -0.09875 | 1.003486 | -0.09841 | 0.921607 | 0.981636 | chr2  | 210196          | 2.01E+08         | +                | 0               | NA                        | intron (Nintron (N                  | 27906 NM_001321            | 285172 Hs. 24701 NM_173822    | ENSG000001FAMI26B                | HYCC2 family wiprotein-coding          |
| chr22-264 | 5.178669 | -0.09875 | 1.003486 | -0.09841 | 0.921607 | 0.981636 | chr22 | 26480589        | 26481437         | +                | 0               | NA                        | intron (Nintron (N                  | -1332 NM_152841            | 89781 Hs. 474433 NM_022081    | ENSG000001CHPS4                  | BLOC3S2 LHPS4 biogen protein-coding    |
| chr6-1112 | 5.178669 | -0.09875 | 1.003486 | -0.09841 | 0.921607 | 0.981636 | chr6  | 1.11E+08        | 1.11E+08         | +                | 0               | NA                        | 3' UTR (N3' UTR (N                  | 11238 NM_153366            | 91749 Hs. 400572 NM_153366    | ENSG000001MPSD4B                 | KIAA1919 major facprotein-coding       |
| chr6-1571 | 5.178669 | -0.09875 | 1.003486 | -0.09841 | 0.921607 | 0.981636 | chr6  | 1.57E+08        | 1.57E+08         | +                | 0               | NA                        | intron (Nintron (N                  | 138087 NM_018452           | 729515 Hs. 157212 NM_018452   | ENSG000001MEM242                 | BMO33 C6c transmem protein-coding      |
| chr1-1535 | 12.86986 | -0.06459 | 0.657624 | -0.09822 | 0.921759 | 0.981636 | chr1  | 1.54E+08        | 1.54E+08         | +                | 0               | NA                        | intron (Nintron (N                  | 2894 NM_00103C             | 6232 Hs. 546291 NM_00103C     | ENSG000001CRPS27                 | DBA17 MP5 ribosomal protein-coding     |
| chr11-582 | 12.86986 | -0.06459 | 0.657624 | -0.09822 | 0.921759 | 0.981636 | chr11 | 582054          | 585960           | +                | 0               | NA                        | intron (Nintron (N                  | 7537 NM_00128E             | 57661 Hs. 325833 NM_020901    | ENSG000001PHRF1                  | PPP1R125 PHD and i protein-coding      |
| chr20-621 | 12.86986 | -0.06459 | 0.657624 | -0.09822 | 0.921759 | 0.981636 | chr20 | 62137414        | 62140667         | +                | 0               | NA                        | intron (Nintron (N                  | 4354 NM_00279E             | 5688 Hs. 233952 NM_00279E     | ENSG000001PSMA7                  | C6 HEL-5 proteasome protein-coding     |
| chr5-1093 | 12.86986 | -0.06459 | 0.657624 | -0.09822 | 0.921759 | 0.981636 | chr5  | 1.09E+08        | 1.09E+08         | +                | 0               | NA                        | intron (Nintron (N                  | 41091 NM_01481E            | 9867 Hs. 483033 NM_01481E     | ENSG000001CPJA2                  | Neurodapl praja rir protein-coding     |
| chr8-431C | 12.86986 | -0.06459 | 0.657624 | -0.09822 | 0.921759 | 0.981636 | chr8  | 43102241        | 43112873         | +                | 0               | NA                        | intron (Nintron (N                  | 14042 NM_032237            | 84197 Hs. 491644 NM_032237    | ENSG000001POMK                   | MDDG12 N protein (protein-coding       |
| chr11-104 | 12.86986 | -0.06459 | 1.11037  | -0.09811 | 0.921844 | 0.981636 | chr11 | 1.08E+08        | 1.08E+08         | +                | 0               | NA                        | Intergeni MERR46C DN                | 33936 NM_00001E            | 38 Hs. 232375 NM_00001E       | ENSG000001ACAT1                  | ACAT MAT acetyl-C protein-coding       |
| chr19-115 | 4.230332 | -0.10894 | 1.11037  | -0.09811 | 0.921844 | 0.981636 | chr19 | 11933587        | 11934364         | +                | 0               | NA                        | intron (Nintron (N                  | 8868 NM_14456E             | 90592 Hs. 528488 NM_14456E    | ENSG000001ZNF700                 | - zinc fing protein-coding             |
| chr7-943C | 12.37512 | -0.06554 | 0.669733 | -0.09786 | 0.922041 | 0.981636 | chr7  | 94395708        | 94431041         | +                | 0               | NA                        | intron (Nintron (N                  | 18813 NM_000008E           | 1278 Hs. 489142 NM_000008E    | ENSG000001COL1A2                 | EDSAR2B2 collagen protein-coding       |
| chr11-754 | 12.862   | -0.06349 | 0.657399 | -0.09658 | 0.923062 | 0.981636 | chr11 | 75400672        | 75406711         | +                | 0               | NA                        | promoter-promoter-exon (NM exon (NM | -705 NR_00002E             | 114599 Hs. 689088 NR_00002E   | ENSG000001SNORD15B               | RNU15B U1small nucsnoRNA               |
| chr3-1975 | 12.862   | -0.06349 | 0.657399 | -0.09658 | 0.923062 | 0.981636 | chr3  | 1.98E+08        | 1.98E+08         | +                | 0               | NA                        | intron (Nintron (N                  | 3917 NM_000099E            | 6165 Hs. 529631 NM_000099E    | ENSG000001RPL35A                 | DBA5 L35 ribosomal protein-coding      |
| chr4-119E | 12.862   | -0.06349 | 0.657399 | -0.09658 | 0.923062 | 0.981636 | chr4  | 1.2E+08         | 1.2E+08          | +                | 0               | NA                        | intron (Nintron (N                  | 4279 NM_03343C             | 8654 Hs. 647971 NM_001083     | ENSG000001PDE5A                  | CGB-PDE C phosphodi protein-coding     |
| chr10-59E | 5.129672 | -0.09997 | 1.037441 | -0.09637 | 0.923231 | 0.981636 | chr10 | 59807808        | 59808213         | +                | 0               | NA                        | intron (Nintron (N                  | -54555 NM_001304           | 1.01E+08 Hs. 648799 NM_001304 | ENSG000001MRLN                   | LINC00948 myoregulin protein-coding    |
| chr19-202 | 4.725071 | -0.10139 | 1.05214  | -0.09637 | 0.923231 | 0.981636 | chr19 | 2098400         | 2099938          | +                | 0               | NA                        | intron (Nintron (N                  | 2254 NM_001033E            | 113177 Hs. 424045 NM_05287E   | ENSG000001TZUM04                 | C19orf36 IZUM04 fan protein-coding     |
| chr1-456E | 4.676073 | -0.10231 | 1.06496  | -0.09607 | 0.923466 | 0.981636 | chr1  | 45609749        | 45610524         | +                | 0               | NA                        | intron (Nintron (N                  | 13918 NM_00119C            | 149483 Hs. 18912 NM_15250C    | ENSG000001CCDC17                 | - coiled-c protein-coding              |
| chr13-952 | 4.676073 | -0.10231 | 1.06496  | -0.09607 | 0.923466 | 0.981636 | chr13 | 95249722        | 95250884         | +                | 0               | NA                        | intron (Nintron (N                  | 39959 NR_145733            | 1.1E+08 NR_145733             | SNORD13G                         | - small nucsnoRNA                      |
| chr17-82  | 4.676073 | -0.10231 | 1.06496  | -0.09607 | 0.923466 | 0.981636 | chr17 | 82941812        | 82942519         | +                | 0               | NA                        | TTS (NM_C TTS (NM_C                 | 64823 NR_13546E            | 146712 Hs. 607824 NM_00100E   | ENSG000001BGNLTL1                | 3-Gn-T8 EUDP-GlcN protein-coding       |
| chr19-525 | 4.676073 | -0.10231 | 1.06496  | -0.09607 | 0.923466 | 0.981636 | chr19 | 52927346        | 52928777         | +                | 0               | NA                        | non-codiron-codir                   | -10130 NM_00131C           | 388559 NM_00131C              | ENSG000001ZNF888                 | - zinc fing protein-coding             |
| chr5-657  | 4.676073 | -0.10231 | 1.06496  | -0.09607 | 0.923466 | 0.981636 | chr5  | 65705704        | 65706819         | +                | 0               | NA                        | intron (Nintron (N                  | 15848 NM_01907E            | 54557 Hs. 482301 NM_01907E    | ENSG000001SGTB                   | SGT2 small glt protein-coding          |
| chr11-117 | 5.170811 | -0.09614 | 1.00349  | -0.09581 | 0.923674 | 0.981636 | chr11 | 59802 NM_01495E | 22897 Hs. 50400E | ENSG000001CEP164 | 64214 NM_001984 | 2098 Hs. 432491 NM_001984 | ENSG000001CESD                      | 51573 Hs. 512607 NM_016641 | ENSG000001GDE1                | NPHP15 centrosome protein-coding |                                        |
| chr13-467 | 5.170811 | -0.09614 | 1.00349  | -0.09581 | 0.923674 | 0.981636 | chr13 | 46732101        | 46733794         | +                | 0               | NA                        | intron (Nintron (N                  | 19505727                   | 19506558                      | ENSG000001GDE1                   | FGH esterase protein-coding            |
| chr16-19E | 5.170811 | -0.09614 | 1.00349  | -0.09581 | 0.923674 | 0.981636 | chr16 | 67635376        | 67637100         | +                | 0               | NA                        | intron (Nintron (N                  | -8906 NM_00101E            | 146206 Hs. 611432 NM_00101E   | ENSG000001CARMIL2                | 363E6.2 N glycerol p protein-coding    |
| chr17-735 | 5.170811 | -0.09614 | 1.00349  | -0.09581 | 0.923674 | 0.981636 | chr17 | 73218288        | 73220548         | +                | 0               | NA                        | intron (Nintron (N                  | 8299 NM_00128E             | 84923 Hs. 74127E NM_032837    | ENSG000001FAM104A                | CARMIL2B capping f protein-coding      |
| chr2-612E | 5.170811 | -0.09614 | 1.00349  | -0.09581 | 0.923674 | 0.981636 | chr2  | 61267655        | 61269212         | +                | 0               | NA                        | intron (Nintron (N                  | 91015 NR_152211            | 130872 Hs. 655602 NM_15239E   | ENSG000001AHS2P                  | AHA1 AHS activator pseudo              |
| chr22-314 | 5.170811 | -0.09614 | 1.00349  | -0.09581 | 0.923674 | 0.981636 | chr22 | 31448041        | 31450110         | +                | 0               | NA                        | intron (Nintron (N                  | 40481 NM_001164            | 56478 Hs. 51755E NM_01984E    | ENSG000001EIF4ENIF1              | EIF4E-T Clas eukaryot protein-coding   |
| chr7-923E | 5.170811 | -0.09614 | 1.00349  | -0.09581 | 0.923674 | 0.981636 | chr7  | 92354293        | 92355223         | +                | 0               | NA                        | intron (Nintron (N                  | 82556 NR_14599E            | 1.05E+08 NM_001317            | ENSG000001TMBIM7P                | - transmem pseudo                      |
| chr8-506E | 5.170811 | -0.09614 | 1.00349  | -0.09581 | 0.923674 | 0.981636 | chr8  | 54089401        | 54091006         | +                | 0               | NA                        | intron (Nintron (N                  | 11801 NM_00127E            | 10434 Hs. 74404E NM_00633C    | ENSG000001LYPLA1                 | APT-1 API lysophosph protein-coding    |
| chr6-104E | 6.119448 | -0.09038 | 0.947764 | -0.09536 | 0.924025 | 0.981636 | chr6  | 1.07E+08        | 1.07E+08         | +                | 0               | NA                        | intron (Nintron (N                  | -23518 NM_00131E           | 84816 Hs. 15583E NM_03273C    | ENSG000001RTN4IP1                | NIMP OPA reticular protein-coding      |
| chr1-122E | 29.75365 | 0.044698 | 0.46934  | 0.095236 | 0.924127 | 0.981636 | chr1  | 1.23E+08        | 1.23E+08         | +                | 0               | NA                        | Intergeni ALR Alphe                 | 1163975 NR_00395E          | 647121 Hs. 69768E NR_00395E   | ENSG000001EMBPI1                 | - embigin f pseudo                     |
| chr1-9261 | 5.665549 | -0.09117 | 0.967091 | -0.09427 | 0.924896 | 0.981636 | chr1  | 92619272        | 92619886         | +                | 0               | NA                        | intron (Nintron (N                  | -132654 NM_00526E          | 2672 Hs. 73172 NM_00526E      | ENSG000001GFT1                   | GFT-1 GFI growth f protein-coding      |
| chr11-117 | 5.665549 | -0.09117 | 0.967091 | -0.09427 | 0.924896 | 0.981636 | chr11 | 1.17E+08        | 1.17E+08         | +                | 0               | NA                        | intron (Nintron (N                  | 8419 NM_01495E             | 22897 Hs. 50400E NM_01495E    | ENSG000001CEP164                 | NPHP15 centrosome protein-coding       |
| chr15-61E | 5.665549 | -0.09117 | 0.967091 | -0.09427 | 0.924896 | 0.981636 | chr15 | 61913259        | 61914248         | +                | 0               | NA                        | intron (Nintron (N                  | 146694 NM_017684           | 54832 Hs. 51166E NM_017684    | ENSG000001VPS13C                 | PARK23 vacuolar protein-coding         |
| chr19-351 | 5.665549 | -0.09117 | 0.967091 | -0.09427 | 0.924896 | 0.981636 | chr19 | 3518955         | 3519745          | +                | 0               | NA                        | intron (Nintron (N                  | -3606 NM_00113E            | 51343 Hs. 413133 NM_01626E    | ENSG000001FZRI                   | CDC20C C fizzy an protein-coding       |
| chr19-454 | 5.665549 | -0.09117 | 0.967091 | -0.09427 | 0.924896 | 0.981636 | chr19 | 45420805        | 45422262         | +                | 0               | NA                        | intron (Nintron (N                  | 1995 NM_00136E             | 2067 Hs. 435981 NM_00198E     | ENSG000001ERCC1                  | CORF54 RAI ERCC exciprotein-coding     |
| chr2-183C | 5.665549 | -0.09117 | 0.967091 | -0.09427 | 0.924896 | 0.981636 | chr2  | 1.83E+08        | 1.83E+08         | +                | 0               | NA                        | intron (Nintron (N                  | 16409 NM_01343E            | 10787 Hs. 60373E NM_01343E    | ENSG000001CNCKAP1                | HEM2 NAP NCK assoc protein-coding      |
| chr21-32E | 5.665549 | -0.09117 | 0.967091 | -0.09427 | 0.924896 | 0.981636 | chr21 | 32635897        | 32636736         | +                | 0               | NA                        | intron (Nintron (N                  | -23445 NM_00135E           | 56683 Hs. 5811 NM_01783E      | ENSG000001CFAP298                | C21orf48 cilia an protein-coding       |
| chr7-1021 | 5.665549 | -0.09117 | 0.967091 | -0.09427 | 0.924896 | 0.981636 | chr7  | 1.02E+08        | 1.02E+08         | +                | 0               | NA                        | intron (Nintron (N                  | -169166 NM_02097E          | 10603 Hs. 48944E NM_02097E    | ENSG000001SH2B2                  | APS SH2B adaf protein-coding           |
| chr16-651 | 4.222474 | -0.10555 | 1.120036 | -0.09424 | 0.924917 | 0.981636 | chr16 | 65116697        | 65117340         | +                | 0               | NA                        | intron (Nintron (N                  | 5045 NM_001797             | 1009 Hs. 116471 NM_001797     | ENSG000001CDH11                  | CAD11 CDF cadherin protein-coding      |
| chr2-232E | 4.222474 | -0.10555 | 1.120036 | -0.09424 | 0.924917 | 0.981636 | chr2  | 2.33E+08        | 2.33E+08         | +                | 0               | NA                        | intron (Nintron (N                  | 10410 NM_00133C            | 9470 Hs. 29202E NM_00484E     | ENSG000001EIF4E2                 | 4E-1P 4E eukaryot protein-coding       |
| chr7-158E | 4.222474 | -0.10555 | 1.120036 | -0.09424 | 0.924917 | 0.981636 | chr7  | 1.59E+08        | 1.59E+08         | +                | 0               | NA                        | intron (Nintron (N                  | 28897 NM_00135E            | 55112 Hs. 38994E NM_018051    | ENSG000001WDR60                  | FAP163 SFWD repeat protein-coding      |
| chr17-28E | 4.712123 | -0.09856 | 1.048283 | -0.09402 | 0.925096 | 0.981636 | chr17 | 28829475        | 28830620         | +                | 0               | NA                        | intron (Nintron (N                  | 12743 NM_00128E            | 55731 Hs. 56453E NM_01818E    | ENSG000001FAM222B                | FAP163 family wiprotein-coding         |
| chr2-9661 | 4.712123 | -0.09856 | 1.048283 | -0.09402 | 0.925096 | 0.981636 | chr2  | 96619709        | 96620473         | +                | 0               | NA                        | intron (Nintron (N                  | 17900 NR_04765E            | 55683 Hs. 516341 NM_017991    | ENSG000001KANSL3                 | KIAA1310 KAT8 regu protein-coding      |
| chr3-1411 | 4.712123 | -0.09856 | 1.048283 | -0.09402 | 0.925096 | 0.981636 | chr3  | 14113875        | 14115088         | +                | 0               | NA                        | intron (Nintron (N                  | 10389 NM_00109E            | 131474 Hs. 51781E NM_14463E   | ENSG000001CHCHD4                 | MIA40 TIV coiled-c protein-coding      |
| chr12-10E | 8.984341 | 0.079684 | 0.847628 | 0.094008 | 0.925102 | 0.981636 | chr12 | 1.09E+08        | 1.09E+08         | +                | 0               | NA                        | intron (Nintron (N                  | 12780 NM_01470E            | 9733 Hs. 58484E NM_01470E     | ENSG000001SART3                  | DSAP1 PIC spliced protein-coding       |
| chr16-197 | 12.46877 | 0.063842 | 0.685084 | 0.093188 | 0.925754 | 0.981636 | chr16 | 19714375        | 19714619         | +                | 0               | NA                        | exon (NM exon (NM                   | -1959 NM_00130E            | 124152 Hs. 460217 NM_15320E   | ENSG000001IQCK                   | - IQ motif protein-coding              |
| chr1-100E | 5.162953 | -0.09356 | 1.010361 | -0.0926  | 0.926222 | 0.981636 | chr1  | 1               |                  |                  |                 |                           |                                     |                            |                               |                                  |                                        |



|           |          |          |          |          |          |          |       |          |          |   |   |    |                      |         |              |          |           |            |            |           |                  |                               |                           |  |
|-----------|----------|----------|----------|----------|----------|----------|-------|----------|----------|---|---|----|----------------------|---------|--------------|----------|-----------|------------|------------|-----------|------------------|-------------------------------|---------------------------|--|
| chr8-4802 | 4.701497 | -0.0926  | 1.064636 | -0.08697 | 0.930691 | 0.981636 | chr8  | 48026234 | 48027457 | + | 0 | NA | intron (N)LM8B LIN   | 18414   | NM_00335C    | 7336     | Hs.49169  | ENM_00335C | ENSG000003 | UBE2V2    | DDVIT1 DL        | ubiquitin protein-coding      |                           |  |
| chr5-4951 | 19.36322 | 0.048185 | 0.555038 | 0.086814 | 0.93082  | 0.981636 | chr5  | 49555906 | 49557483 | + | 0 | NA | IntergeniALR Alpha   | 884594  | NM_198445    | 133418   | Hs.561411 | NM_198445  | ENSG000003 | EMB       | GP70             | emigin protein-coding         |                           |  |
| chr5-1727 | 15.40762 | 0.052903 | 0.610999 | 0.086584 | 0.931002 | 0.981636 | chr5  | 1.73E+08 | 1.73E+08 | + | 0 | NA | intron (N)intron (N) | 2007    | NM_004417    | 1843     | Hs.17169  | ENM_004417 | ENSG000003 | DUSP1     | CL100 HVF        | dual spec protein-coding      |                           |  |
| chr12-124 | 5.690973 | -0.08316 | 0.960457 | -0.08658 | 0.931005 | 0.981636 | chr12 | 1.25E+08 | 1.25E+08 | + | 0 | NA | intron (N)Tiger18a   | 32967   | NM_03265E    | 57647    | Hs.10738  | ENM_03265E | ENSG000003 | DHX37     | DDX37 Dhr        | DEAH-box protein-coding       |                           |  |
| chr13-325 | 5.690973 | -0.08316 | 0.960457 | -0.08658 | 0.931005 | 0.981636 | chr13 | 32773291 | 32773931 | + | 0 | NA | intron (N)intron (N) | 138041  | NR_047022    | 1.01E+08 | Hs.40629  | CNR_047020 | LINC00425  |           |                  | long intencRNA                |                           |  |
| chr16-475 | 5.690973 | -0.08316 | 0.960457 | -0.08658 | 0.931005 | 0.981636 | chr16 | 47546387 | 47547237 | + | 0 | NA | intron (N)LIPA6 LIN  | 85481   | NM_001031    | 5257     | Hs.78060  | NM_00029   | ENSG000003 | PHKB      | -                |                               | phosphory protein-coding  |  |
| chr3-966  | 5.690973 | -0.08316 | 0.960457 | -0.08658 | 0.931005 | 0.981636 | chr3  | 9666275  | 9667798  | + | 0 | NA | intron (N)intron (N) | 17531   | NM_02248E    | 64619    | Hs.47538  | ENM_02248E | ENSG000003 | MTRM14    | C3orf29          | myotubul protein-coding       |                           |  |
| chr1-2201 | 9.023631 | 0.069682 | 0.804919 | 0.08657  | 0.931013 | 0.981636 | chr1  | 2.2E+08  | 2.2E+08  | + | 0 | NA | intron (N)L2a LINE   | -34464  | NR_029711    | 406969   | NR_029711 | ENSG000003 | MIR194-1   | MIRN194-1 | lincRNA          | ncRNA                         |                           |  |
| chr6-3477 | 11.45202 | 0.060851 | 0.704963 | 0.086318 | 0.931213 | 0.981636 | chr6  | 34773458 | 34774411 | + | 0 | NA | TTS (NM_C)TTS (NM_C) | 16429   | NM_00309     | 6631     | Hs.1063   | NM_00309   | ENSG000003 | CNRPC     | U1C Yhc1         | small nuc protein-coding      |                           |  |
| chr3-1217 | 6.136714 | -0.08033 | 0.932021 | -0.08619 | 0.931316 | 0.981636 | chr3  | 1.22E+08 | 1.22E+08 | + | 0 | NA | intron (N)AluSg SIN  | -21788  | NM_00125E    | 2804     | Hs.21338  | ENM_004487 | ENSG000003 | GOLGB1    | GCP GCP37        | soluble B1 protein-coding     |                           |  |
| chr10-792 | 5.641976 | -0.08399 | 0.976306 | -0.08602 | 0.931447 | 0.981636 | chr10 | 79204586 | 79206505 | + | 0 | NA | intron (N)intron (N) | 136579  | NM_02033E    | 57178    | Hs.19311  | ENM_02033E | ENSG000003 | ZMIZ1     | MIZ RAI1         | 7zinc fing protein-coding     |                           |  |
| chr11-674 | 5.641976 | -0.08399 | 0.976306 | -0.08602 | 0.931447 | 0.981636 | chr11 | 67440274 | 67440638 | + | 0 | NA | intron (N)intron (N) | -2774   | NM_00560E    | 5790     | Hs.15597  | ENM_00560E | ENSG000003 | PTPRCAP   | CD45-AP I        | protein t protein-coding      |                           |  |
| chr2-2706 | 5.641976 | -0.08399 | 0.976306 | -0.08602 | 0.931447 | 0.981636 | chr2  | 27064866 | 27065756 | + | 0 | NA | intron (N)intron (N) | 6343    | NM_001134    | 1E+08    | Hs.50294  | ENM_001134 | ENSG000003 | COST4     | -                |                               | oligosacc protein-coding  |  |
| chr2-1215 | 5.641976 | -0.08399 | 0.976306 | -0.08602 | 0.931447 | 0.981636 | chr2  | 1.28E+08 | 1.28E+08 | + | 0 | NA | intron (N)intron (N) | 30171   | NM_004807    | 9394     | Hs.51284  | ENM_004807 | ENSG000003 | HS6ST1    | HH15 HS6         | heparan s protein-coding      |                           |  |
| chr4-4757 | 5.641976 | -0.08399 | 0.976306 | -0.08602 | 0.931447 | 0.981636 | chr4  | 47576925 | 47577910 | + | 0 | NA | intron (N)intron (N) | -75252  | NR_10702C    | 1.02E+08 | NR_10702C | ENSG000003 | MIR8053    | hsa-mir-ε | microRNA         | ncRNA                         |                           |  |
| chr6-1395 | 17.84387 | 0.048883 | 0.569906 | 0.085774 | 0.931646 | 0.981636 | chr6  | 1.39E+08 | 1.39E+08 | + | 0 | NA | intron (N)intron (N) | 1047    | NM_00116E    | 10370    | Hs.82071  | NM_00607   | ENSG000003 | CITFED2   | ASDB MRG-Cbp     | p300 protein-coding           |                           |  |
| chr20-345 | 8.503469 | 0.070669 | 0.82434  | 0.085728 | 0.931682 | 0.981636 | chr20 | 34929802 | 34930001 | + | 0 | NA | intron (N)L2c LINE   | 25734   | NM_00132E    | 2937     | Hs.82327  | NM_00017   | ENSG000003 | CSSG      | GSHS HEL         | -glutathion protein-coding    |                           |  |
| chr19-344 | 6.631452 | -0.07746 | 0.905605 | -0.08554 | 0.931836 | 0.981636 | chr19 | 34523997 | 34544711 | + | 0 | NA | 3' UTR (N)3' UTR (N) | -10886  | NM_001184    | 2821     | Hs.46647  | NM_00017   | ENSG000003 | GPI       | AMF GNP1         | glucose t protein-coding      |                           |  |
| chr9-1335 | 13.84547 | -0.05442 | 0.637375 | -0.08538 | 0.931959 | 0.981636 | chr9  | 1.33E+08 | 1.33E+08 | + | 0 | NA | promoter-promoter-   | 44      | NR_00001E    | 26813    | NR_00001E | ENSG000003 | SNORD36C   | RNU36C U  | small nuc snoRNA |                               |                           |  |
| chr17-78  | 9.981676 | 0.064199 | 0.755025 | 0.085029 | 0.932238 | 0.981636 | chr17 | 78807227 | 78807924 | + | 0 | NA | exon (NM)exon (NM)   | -25233  | NM_00476E    | 9267     | Hs.19121  | ENM_00476E | ENSG000003 | CYTH1     | B2-1 CYC         | cytohesin protein-coding      |                           |  |
| chr9-9921 | 9.453656 | 0.066778 | 0.785681 | 0.084994 | 0.932266 | 0.981636 | chr9  | 99218133 | 99218503 | + | 0 | NA | exon (NM)exon (NM)   | 3624    | NR_02453Z    | 85365    | Hs.40919  | NM_033087  | ENSG000003 | ALG2      | CDG1I CDC        | ALG2 alpl protein-coding      |                           |  |
| chr20-206 | 6.185711 | -0.0798  | 0.939732 | -0.08492 | 0.932327 | 0.981636 | chr20 | 20026435 | 20027004 | + | 0 | NA | intron (N)intron (N) | 8924    | NM_181527    | 51126    | Hs.36878  | ENM_01610C | ENSG000003 | NAA20     | NAT3 NAT3N       | (alpha)-protein-coding        |                           |  |
| chr20-284 | 6.185711 | -0.0798  | 0.939732 | -0.08492 | 0.932327 | 0.981636 | chr20 | 28402081 | 28402763 | + | 0 | NA | IntergeniALR Alpha   | 200243  | NR_13231E    | 1E+08    | Hs.529357 | NR_13231E  | ENSG000003 | FRG1CP    | -                |                               | FSHD repseudo             |  |
| chr4-1382 | 6.185711 | -0.0798  | 0.939732 | -0.08492 | 0.932327 | 0.981636 | chr4  | 1.38E+08 | 1.38E+08 | + | 0 | NA | intron (N)intron (N) | 2190    | NM_014331    | 23657    | Hs.390594 | NM_014331  | ENSG000003 | SLCTA11   | CCBR1 xCT        | soluble c protein-coding      |                           |  |
| chr2-1018 | 12.41007 | 0.057396 | 0.677483 | 0.084719 | 0.932485 | 0.981636 | chr2  | 1.02E+08 | 1.02E+08 | + | 0 | NA | intron (N)intron (N) | 134173  | NM_145687    | 9448     | Hs.70101  | ENM_004834 | ENSG000003 | MAP4K4    | FLH2 1957        | mitogen-ε protein-coding      |                           |  |
| chr1-225  | 5.683115 | -0.08075 | 0.957471 | -0.08434 | 0.932786 | 0.981636 | chr1  | 22508177 | 22509858 | + | 0 | NA | intron (N)intron (N) | -54472  | NM_00100E    | 2046     | Hs.28361  | ENM_02052E | ENSG000003 | EPH8A     | EEL EK3 E        | EPH receptor protein-coding   |                           |  |
| chr12-102 | 5.683115 | -0.08075 | 0.957471 | -0.08434 | 0.932786 | 0.981636 | chr12 | 1020949  | 1030428  | + | 0 | NA | intron (N)intron (N) | 1990    | NM_001301    | 23085    | Hs.60121  | ENM_17803E | ENSG000003 | ERC1      | Cast2 ELF        | ELKS/RAB                      | ε protein-coding          |  |
| chr13-252 | 5.683115 | -0.08075 | 0.957471 | -0.08434 | 0.932786 | 0.981636 | chr13 | 25272046 | 25272849 | + | 0 | NA | intron (N)LM5 LINE   | 15041   | NM_00468E    | 9107     | Hs.64370  | ENM_00468E | ENSG000003 | MTR6      | -                |                               | myotubul protein-coding   |  |
| chr13-421 | 5.683115 | -0.08075 | 0.957471 | -0.08434 | 0.932786 | 0.981636 | chr13 | 42162042 | 42162378 | + | 0 | NA | intron (N)intron (N) | 24152   | NM_001204    | 160851   | Hs.63038  | ENM_15291C | ENSG000003 | DGKH      | DGKTA            | diacylglycerol protein-coding |                           |  |
| chr16-465 | 5.683115 | -0.08075 | 0.957471 | -0.08434 | 0.932786 | 0.981636 | chr16 | 4695496  | 4696267  | + | 0 | NA | TTS (NM_C)TTS (NM_C) | 2163    | NM_00137C    | 84309    | Hs.51331  | ENM_03234E | ENSG000003 | NUDT16L1  | SDDG5 TIRF       | nucleic hyc protein-coding    |                           |  |
| chr16-685 | 5.683115 | -0.08075 | 0.957471 | -0.08434 | 0.932786 | 0.981636 | chr16 | 68933261 | 68933891 | + | 0 | NA | intron (N)MLT1H LTF  | 90045   | NM_02456E    | 79613    | Hs.13526  | NM_02456E  | ENSG000003 | TANGO6    | TMCO7            | transport protein-coding      |                           |  |
| chr17-371 | 5.683115 | -0.08075 | 0.957471 | -0.08434 | 0.932786 | 0.981636 | chr17 | 37128257 | 37129302 | + | 0 | NA | intron (N)intron (N) | 95034   | NR_03605E    | 1E+08    | NR_03605E | ENSG000003 | MIR2909    | -         |                  | microRNA                      | ncRNA                     |  |
| chr18-355 | 5.683115 | -0.08075 | 0.957471 | -0.08434 | 0.932786 | 0.981636 | chr18 | 35310094 | 35310551 | + | 0 | NA | non-codiron-codir    | 20050   | NM_02456E    | 10778    | Hs.31424  | ENM_00662E | ENSG000003 | ZNF2719   | CT-ZFP48         | zinc fing pseudo              |                           |  |
| chr19-12  | 5.683115 | -0.08075 | 0.957471 | -0.08434 | 0.932786 | 0.981636 | chr19 | 1209221  | 1213566  | + | 0 | NA | intron (N)intron (N) | 5594    | NM_00045E    | 6794     | Hs.51500  | ENM_00045E | ENSG000003 | CSTK11    | LKB1 PJS         | serine/t protein-coding       |                           |  |
| chr19-157 | 5.683115 | -0.08075 | 0.957471 | -0.08434 | 0.932786 | 0.981636 | chr19 | 1578787  | 1580481  | + | 0 | NA | intron (N)intron (N) | -11309  | NM_001174    | 399664   | Hs.43649  | ENM_20330A | ENSG000003 | MEX3D     | MEX-3D MF        | mex-3 RNr protein-coding      |                           |  |
| chr2-235  | 5.683115 | -0.08075 | 0.957471 | -0.08434 | 0.932786 | 0.981636 | chr2  | 69476143 | 69476852 | + | 0 | NA | intron (N)intron (N) | -38869  | NM_001072    | 27247    | Hs.43043  | ENM_01570C | ENSG000003 | NFU1      | CG3-33 HNFU1     | RNAr protein-coding           |                           |  |
| chr2-1331 | 5.683115 | -0.08075 | 0.957471 | -0.08434 | 0.932786 | 0.981636 | chr2  | 1.33E+08 | 1.33E+08 | + | 0 | NA | intron (N)LIPA5 LIN  | -75736  | NR_110294    | 1.02E+08 | Hs.661917 | NR_110294  | ENSG000003 | CNKAP5-AS | -                |                               | NCKAP5 arncRNA            |  |
| chr2-210  | 5.683115 | -0.08075 | 0.957471 | -0.08434 | 0.932786 | 0.981636 | chr2  | 2.1E+08  | 2.1E+08  | + | 0 | NA | intron (N)AluJo SIN  | 9272    | NM_00131E    | 6120     | Hs.28226  | ENM_00691E | ENSG000003 | RPE       | RPE2-1           | ribulose- protein-coding      |                           |  |
| chr2-235  | 5.683115 | -0.08075 | 0.957471 | -0.08434 | 0.932786 | 0.981636 | chr2  | 2.35E+08 | 2.35E+08 | + | 0 | NA | intron (N)intron (N) | -22127  | NM_001371306 |          |           |            |            |           |                  |                               |                           |  |
| chr20-941 | 5.683115 | -0.08075 | 0.957471 | -0.08434 | 0.932786 | 0.981636 | chr20 | 9410749  | 9412362  | + | 0 | NA | intron (N)intron (N) | -102803 | NM_00119E    | 24141    | Hs.22920  | NM_012261  | ENSG000003 | LAMP5     | BAD-LAMP L       | lysosomal protein-coding      |                           |  |
| chr5-435  | 5.683115 | -0.08075 | 0.957471 | -0.08434 | 0.932786 | 0.981636 | chr5  | 43538833 | 43539525 | + | 0 | NA | intron (N)intron (N) | 17898   | NM_006451    | 10605    | Hs.48202  | ENM_006451 | ENSG000003 | PAIP1     | -                |                               | poly (A) t protein-coding |  |
| chr5-185  | 5.683115 | -0.08075 | 0.957471 | -0.08434 | 0.932786 | 0.981636 | chr5  | 1.38E+08 | 1.38E+08 | + | 0 | NA | intron (N)AluSq2 SI  | 32026   | NM_016604    | 51780    | Hs.48348  | ENM_016604 | ENSG000003 | KDM3B     | 5qNCA C5c        | lysine de protein-coding      |                           |  |
| chr5-177  | 5.683115 | -0.08075 | 0.957471 | -0.08434 | 0.932786 | 0.981636 | chr5  | 1.77E+08 | 1.77E+08 | + | 0 | NA | intron (N)AluJb SIN  | 29204   | NM_00130E    | 23567    | Hs.48425  | ENM_01227E | ENSG000003 | ZNF346    | JAZ Zfp34        | zinc fing protein-coding      |                           |  |
| chr6-1552 | 5.683115 | -0.08075 | 0.957471 | -0.08434 | 0.932786 | 0.981636 | chr6  | 15522128 | 15522992 | + | 0 | NA | TTS (NM_C)TTS (NM_C) | 140468  | NR_03644E    | 84062    | Hs.57114  | ENM_03212E | ENSG000003 | DTNBP1    | BLOC1S8 L        | dystrobre protein-coding      |                           |  |
| chr7-474  | 5.683115 | -0.08075 | 0.957471 | -0.08434 | 0.932786 | 0.981636 | chr7  | 47490555 | 47490960 | + | 0 | NA | intron (N)MLT1G3 LI  | -25954  | NR_145813    | 1.1E+08  | NR_145813 | SNORD151   | -          |           | small nuc snoRNA |                               |                           |  |
| chr9-324  | 5.683115 | -0.08075 | 0.957471 | -0.08434 | 0.932786 | 0.981636 | chr9  | 32459374 | 32460102 | + | 0 | NA | intron (N)intron (N) | 66458   | NM_014314    | 23586    | Hs.19062  | ENM_014314 | ENSG000003 | DDX58     | RIG-I RIC        | B5x/H-bc protein-coding       |                           |  |
| chr9-1347 | 5.683115 | -0.08075 | 0.957471 | -0.08434 | 0.932786 | 0.981636 | chr9  | 1.35E+08 | 1.35E+08 | + | 0 | NA | intron (N)intron (N) | -64148  | NR_138045    | 414316   | Hs.57156  | NR_138045  | ENSG000003 | COL5A1-AS | C9orf104 COL5A1  | arncRNA                       |                           |  |
| chr11-331 | 5.683115 | -0.08075 | 0.957471 | -0.08434 | 0.932786 | 0.981636 | chr11 | 33149815 | 33152281 | + | 0 | NA | intron (N)LM8B LIN   | 10432   | NM_00132E    | 1479     | Hs.44402  | ENM_00132E | ENSG000003 | CSTF3     | CSTF-77          | cle                           |                           |  |

|                    |           |          |           |          |          |       |          |          |        |                     |                  |                              |                     |                                     |
|--------------------|-----------|----------|-----------|----------|----------|-------|----------|----------|--------|---------------------|------------------|------------------------------|---------------------|-------------------------------------|
| chr7-7431 6.169995 | -0.07513  | 0.923222 | -0.08138  | 0.935142 | 0.981636 | chr7  | 74319915 | 74323421 | + 0 NA | intron (AluSg7 SI   | 32193 NM_003388  | 7461 Hs. 64701ENM_003388     | ENSG000004CLIP2     | CLIP CLIFCAP-Gly cprotein-coding    |
| chr7-7537 6.169995 | -0.07513  | 0.923222 | -0.08138  | 0.935142 | 0.981636 | chr7  | 75371400 | 75372876 | + 0 NA | IntergeniAluJr SIN  | 12938 NR_040588  | 54441 Hs. 63231CNM_018991    | STAG3L1             | STAG3L1 stromal pseudo              |
| chr7-1507 6.169995 | -0.07513  | 0.923222 | -0.08138  | 0.935142 | 0.981636 | chr7  | 1.51E+08 | 1.51E+08 | + 0 NA | IntergeniMER31-int  | 28522 NM_018384  | 55340 Hs. 64707ENM_018384    | ENSG000004GIMAP5    | HIMAP3 ATGase, lprotein-coding      |
| chr8-6724 6.169995 | -0.07513  | 0.923222 | -0.08138  | 0.935142 | 0.981636 | chr8  | 67242038 | 67243599 | + 0 NA | intron (NLIM1 LINE  | 100963 NM_006421 | 10565 Hs. 656902NM_006421    | ENSG000004ARFGEF1   | ARFGEF1 EADP ribosprotein-coding    |
| chr9-7514 6.169995 | -0.07513  | 0.923222 | -0.08138  | 0.935142 | 0.981636 | chr9  | 75143879 | 75144552 | + 0 NA | intron (Nintron (N  | 55701 NM_012388  | 26578 Hs. 494192NM_012388    | ENSG000004OSTF1     | OSTF SH3P2osteoclastprotein-coding  |
| chr9-1297 6.169995 | -0.07513  | 0.923222 | -0.08138  | 0.935142 | 0.981636 | chr9  | 1.3E+08  | 1.3E+08  | + 0 NA | 3' UTR (N3' UTR (N  | -3788 NR_132102  | 1.02E+08 Hs. 11259ENR_132102 | ENSG000004PRRX2-AS1 | PRRX2 antncRNA                      |
| chrX-7157 6.169995 | -0.07513  | 0.923222 | -0.08138  | 0.935142 | 0.981636 | chrX  | 71573662 | 71574711 | + 0 NA | 3' UTR (N3' UTR (N  | -3838 NM_052957  | 93953 Hs. 135167NM_052957    | ENSG000004GCNA      | ACR4 NAAF germ cellprotein-coding   |
| chr14-761 5.229517 | -0.08144  | 1.003301 | -0.08117  | 0.935304 | 0.981636 | chr14 | 76195170 | 76196004 | + 0 NA | intron (Nintron (N  | 41233 NR_110314  | 55668 Hs. 410231NM_01792f    | ENSG000004GPATCH2L  | 140rf118G-patch cprotein-coding     |
| chr7-158 14.36563  | -0.05072  | 0.626309 | -0.08098  | 0.935457 | 0.981636 | chr7  | 1.59E+08 | 1.59E+08 | + 0 NA | intron (Nintron (N  | 59331 NM_001350  | 55112 Hs. 38994ENM_018051    | ENSG000004WDR60     | FAP163 SFWD repeatprotein-coding    |
| chr10-18 4.734778  | -0.08587  | 1.061179 | -0.08092  | 0.935506 | 0.981636 | chr10 | 18577798 | 18578804 | + 0 NA | intron (AluSx SIN   | 73282 NM_001351  | 221078 Hs. 396177NM_18254f   | ENSG000004NSUN6     | 4933414ECNOP2/Sun protein-coding    |
| chr10-92 6.615736  | -0.07325  | 0.905392 | -0.08091  | 0.935516 | 0.981636 | chr10 | 92008475 | 92009230 | + 0 NA | exon (NM exon (NM   | 85088 NM_003972  | 9044 Hs. 50052fNM_003972     | ENSG000004BTAF1     | MOT1 TAF-4B-TP12 lprotein-coding    |
| chr12-15 6.615736  | -0.07325  | 0.905392 | -0.08091  | 0.935516 | 0.981636 | chr12 | 15884270 | 15885290 | + 0 NA | intron (Nintron (N  | 2393 NM_007178   | 11171 Hs. 743971NM_007178    | ENSG000004STRAP     | MAWD PT-Wserine/tlprotein-coding    |
| chr15-84 6.615736  | -0.07325  | 0.905392 | -0.08091  | 0.935516 | 0.981636 | chr15 | 84769342 | 84770072 | + 0 NA | intron (NL2a LINE   | 21115 NM_014630  | 9640 Hs. 79347 NM_014630     | ENSG000004ZNF592    | CAMOS SC2zinc fingerprotein-coding  |
| chr3-186 6.615736  | -0.07325  | 0.905392 | -0.08091  | 0.935516 | 0.981636 | chr3  | 1.87E+08 | 1.87E+08 | + 0 NA | intron (NLIME3F LI  | 7609 NM_016306   | 51726 Hs. 317192NM_016306    | ENSG000004DNABJ11   | ABBP-2 AE DnaJ heatprotein-coding   |
| chr4-113 6.615736  | -0.07325  | 0.905392 | -0.08091  | 0.935516 | 0.981636 | chr4  | 1.14E+08 | 1.14E+08 | + 0 NA | intron (Nintron (N  | 216060 NM_001354 | 287 Hs. 620557NM_00114f      | ENSG000004ANK2      | ANK-2 LQ1ankyrin 2protein-coding    |
| chr13-114 7.110474 | -0.07108  | 0.879185 | -0.08085  | 0.935556 | 0.981636 | chr13 | 1.14E+08 | 1.14E+08 | + 0 NA | intron (NMIRc SINE  | 35105 NM_001327  | 22821 Hs. 59307fNM_00736f    | ENSG000004RASAS4    | GAP1P4BFRAS p21 fprotein-coding     |
| chr5-777 7.110474  | -0.07108  | 0.879185 | -0.08085  | 0.935556 | 0.981636 | chr5  | 77770837 | 77771203 | + 0 NA | intron (AluSx1 SI   | 5319 NM_001297   | 6902 Hs. 291212NM_004607     | ENSG000004CTBCA     | - tubulin fprotein-coding           |
| chr5-1771 7.471003 | -0.071584 | 0.885447 | -0.08085  | 0.935556 | 0.981636 | chr5  | 17770808 | 1.77E+08 | + 0 NA | intron (AluJb SIN   | 17630 NM_001366  | 64324 Hs. 106861NM_02245f    | ENSG000004NSD1      | ARA267 kub nuclear lprotein-coding  |
| chr20-27 15.34725  | -0.04923  | 0.611416 | -0.08051  | 0.935829 | 0.981636 | chr20 | 27758540 | 27758824 | + 0 NA | IntergeniALR/Alpha  | 843983 NR_13231f | 1E+08 Hs. 529357NR_13231f    | ENSG000004FRG1CP    | - FSHD regipseudo                   |
| chr1-137 6.664734  | -0.07262  | 0.902412 | -0.08047  | 0.935861 | 0.981636 | chr1  | 1372724  | 1373638  | + 0 NA | TTS (NM_C TTS (NM_C | 2026 NM_001127   | 54998 Hs. 63251fNM_01790f    | ENSG000004AURKAIPI1 | AIP AKTIP aurora lprotein-coding    |
| chr17-15 6.664734  | -0.07262  | 0.902412 | -0.08047  | 0.935861 | 0.981636 | chr17 | 15505979 | 15506499 | + 0 NA | intron (NLTR12C LI  | -35403 NR_146601 | 94145 Hs. 69733fNR_146601    | CDRT3               | - CMT1A dupncRNA                    |
| chr2-6111 6.664734 | -0.07262  | 0.902412 | -0.08047  | 0.935861 | 0.981636 | chr2  | 61119807 | 61120441 | + 0 NA | intron (NLIME1 LI   | 24851 NR_03649f  | 339803 Hs. 25243fNR_03649f   | ENSG000004LOC33980f | - uncharactncRNA                    |
| chr20-134 6.664734 | -0.07262  | 0.902412 | -0.08047  | 0.935861 | 0.981636 | chr20 | 1347015  | 1347542  | + 0 NA | exon (NM exon (NM   | 12587 NM_02182f  | 60493 Hs. 74116fNM_02182f    | ENSG000004FASTKDS5  | dJ1187M17FAST kinaseprotein-coding  |
| chr6-16 6.664734   | -0.07262  | 0.902412 | -0.08047  | 0.935861 | 0.981636 | chr6  | 1.66E+08 | 1.66E+08 | + 0 NA | intron (Nintron (N  | -13405 NM_17592f | 285800 Hs. 731862NM_17592f   | ENSG000004PRR18     | - proline lprotein-coding           |
| chr9-1207 6.664734 | -0.07262  | 0.902412 | -0.08047  | 0.935861 | 0.981636 | chr9  | 1.21E+08 | 1.21E+08 | + 0 NA | 3' UTR (N3' UTR (N  | 29434 NM_012164  | 26190 Hs. 49498fNM_012164    | ENSG000004FBXW2     | FBW2 FwdZf-box ancprotein-coding    |
| chr17-29 10.89858  | -0.05859  | 0.728616 | -0.08043  | 0.935909 | 0.981636 | chr17 | 29632603 | 29636530 | + 0 NA | exon (NM exon (NM   | -14943 NM_032854 | 84940 Hs. 14304fNM_032854    | ENSG000004CORO6     | - coronin fprotein-coding           |
| chr11-75 5.180519  | -0.08208  | 1.021037 | -0.08039  | 0.935929 | 0.981636 | chr11 | 75973728 | 75974055 | + 0 NA | intron (NLIP16 LI   | 158681 NM_003366 | 7405 Hs. 20247fNM_003366     | ENSG000004UVRAG     | DHTX VPSfUV radiatprotein-coding    |
| chr13-30 5.180519  | -0.08208  | 1.021037 | -0.08039  | 0.935929 | 0.981636 | chr13 | 30639202 | 30641522 | + 0 NA | intron (Nintron (N  | 6147 NM_001321   | 10208 Hs. 533831NM_00580f    | ENSG000004USPL1     | C13orf22 ubiquitin rprotein-coding  |
| chr13-11 5.180519  | -0.08208  | 1.021037 | -0.08039  | 0.935929 | 0.981636 | chr13 | 1.11E+08 | 1.11E+08 | + 0 NA | intron (AluSp SIN   | 26604 NM_01821C  | 55739 Hs. 408324NM_01821C    | ENSG000004NAXD      | CARKD LP2NAD(P)HX protein-coding    |
| chr14-10 5.180519  | -0.08208  | 1.021037 | -0.08039  | 0.935929 | 0.981636 | chr14 | 1.01E+08 | 1.01E+08 | + 0 NA | promoter-promoter-  | -198 NR_030172   | 574450 Hs. NR_030172         | ENSG000004MIR493    | MIRN493 miR miRNA ncRNA             |
| chr14-10 5.180519  | -0.08208  | 1.021037 | -0.08039  | 0.935929 | 0.981636 | chr14 | 1.04E+08 | 1.04E+08 | + 0 NA | intron (AluS2 SIN   | 25363 NM_001100  | 7517 Hs. 59232fNM_00543f     | ENSG000004XRC33     | CMM6 X-ray repprotein-coding        |
| chr17-36 5.180519  | -0.08208  | 1.021037 | -0.08039  | 0.935929 | 0.981636 | chr17 | 3638811  | 3639439  | + 0 NA | intron (Nintron (N  | 2365 NM_004937   | 1497 Hs. 187667NM_004937     | ENSG000004CTNS      | CTNS-LSB cystinosis lprotein-coding |
| chr2-135 5.180519  | -0.08208  | 1.021037 | -0.08039  | 0.935929 | 0.981636 | chr2  | 1.35E+08 | 1.35E+08 | + 0 NA | intron (N Tigger17a | -22021 NR_14572f | 1.1E+08 NR_14572f            | ENSG000004SNORA40B  | - small nucsnRNA                    |
| chr8-387 5.180519  | -0.08208  | 1.021037 | -0.08039  | 0.935929 | 0.981636 | chr8  | 38789328 | 38790027 | + 0 NA | intron (NL2a LINE   | 1571 NM_001352   | 6867 Hs. 27924fNM_00628f     | ENSG000004TACCI1    | Ga55 transformprotein-coding        |
| chr12-43 9.44921   | -0.06409  | 0.797744 | -0.08035  | 0.935958 | 0.981636 | chr12 | 43751437 | 43752137 | + 0 NA | intron (NLIP15 LI   | 7003 NM_001098   | 83448 Hs. 23554 NM_03129f    | ENSG000004PUSL7     | - pseudouricprotein-coding          |
| chr4-139 4.77223   | 0.061591  | 0.76815  | 0.080259  | 0.936031 | 0.981636 | chr4  | 1.39E+08 | 1.39E+08 | + 0 NA | 3' UTR (N3' UTR (N  | 19093 NR_03129f  | 83452 Hs. 59167fNM_03129f    | ENSG000004RAB33B    | SMC2 RAB33B, nprotein-coding        |
| chr1-162 6.120998  | -0.07601  | 0.948234 | -0.08016  | 0.936108 | 0.981636 | chr1  | 16255642 | 16256156 | + 0 NA | intron (Nintron (N  | -18716 NM_030907 | 79363 Hs. 54643fNM_030907    | ENSG000004CLANE2    | C1orf89 Fciliogeneprotein-coding    |
| chr3-115 6.120998  | -0.07601  | 0.948234 | -0.08016  | 0.936108 | 0.981636 | chr3  | 11594681 | 11595478 | + 0 NA | intron (AluSp SIN   | 9502 NM_001284   | 9686 Hs. 74038fNM_01466f     | ENSG000004VGLL4     | VGL-4 vestigial lprotein-coding     |
| chr4-70 10.95544   | 0.057165  | 0.714319 | 0.080028  | 0.936215 | 0.981636 | chr4  | 7013195  | 7013447  | + 0 NA | intron (NMER20 DNA  | 25813 NM_00128f  | 57533 Hs. 518611NM_02077f    | ENSG000004TBC1D14   | - TBC1 domeprotein-coding           |
| chr18-29 8.478046  | -0.064899 | 0.812788 | -0.079847 | 0.936359 | 0.981636 | chr18 | 2925954  | 2926429  | + 0 NA | intron (Nintron (N  | 20432 NR_02665f  | 727896 Hs. 67312fNR_02665f   | LOC72789f           | - cysteine pseudo                   |
| chr4-10 9.576522   | -0.065429 | 0.747454 | -0.079508 | 0.936629 | 0.981636 | chr4  | 1.06E+08 | 1.06E+08 | + 0 NA | intron (NSVA_A Ret  | -4644 NM_00116f  | 93627 Hs. 15149fNM_03311f    | ENSG000004TBCK      | HSPC302 TBC1 domeprotein-coding     |
| chr14-10 9.748861  | -0.069189 | 0.871855 | -0.079358 | 0.936748 | 0.981636 | chr14 | 1.01E+08 | 1.01E+08 | + 0 NA | IntergeniIntergeni  | -2829 NR_030172  | 574450 Hs. NR_030172         | ENSG000004MIR493    | MIRN493 microRNA ncRNA              |
| chr1-113 6.162138  | -0.07291  | 0.923142 | -0.07899  | 0.937044 | 0.981636 | chr1  | 1.13E+08 | 1.13E+08 | + 0 NA | 3' UTR (N3' UTR (N  | 53794 NM_001312  | 9860 Hs. 44897fNM_01481f     | ENSG000004LRIG2     | LIG-2 LILc leucine lprotein-coding  |
| chr1-145 6.162138  | -0.07291  | 0.923142 | -0.07899  | 0.937044 | 0.981636 | chr1  | 1.46E+08 | 1.46E+08 | + 0 NA | intron (AluS6 SI    | 36888 NR_10384f  | 11126 Hs. 48823fNM_00705f    | ENSG000004CD160     | BY55 NK1 CD160 molprotein-coding    |
| chr10-27 6.162138  | -0.07291  | 0.923142 | -0.07899  | 0.937044 | 0.981636 | chr10 | 27083971 | 27085742 | + 0 NA | intron (AluS2 SI    | 15642 NM_00125f  | 22852 Hs. 361041NM_01491f    | ENSG000004ANKRD26   | THC2 bA14ankyrin lprotein-coding    |
| chr12-46 6.162138  | -0.07291  | 0.923142 | -0.07899  | 0.937044 | 0.981636 | chr12 | 4661985  | 4662941  | + 0 NA | intron (Nintron (N  | 13349 NM_005002  | 4704 Hs. 75227 NM_005002     | ENSG000004NDUFA9    | CC6 C1-3cNADH:ubiq protein-coding   |
| chr12-10 6.162138  | -0.07291  | 0.923142 | -0.07899  | 0.937044 | 0.981636 | chr12 | 1.05E+08 | 1.05E+08 | + 0 NA | intron (Nintron (N  | 10075 NM_00125f  | 55198 Hs. 50660fNM_01817f    | ENSG000004APPL2     | DIP13B adaptor fprotein-coding      |
| chr13-11 6.162138  | -0.07291  | 0.923142 | -0.07899  | 0.937044 | 0.981636 | chr13 | 1.14E+08 | 1.14E+08 | + 0 NA | intron (AluJb SIN   | 12085 NM_001351  | 65110 Hs. 53385fNM_02301f    | ENSG000004UPF3A     | HUPF3A REUPF3A regprotein-coding    |
| chr14-104 6.162138 | -0.07291  | 0.923142 | -0.07899  | 0.937044 | 0.981636 | chr14 | 1.05E+08 | 1.05E+08 | + 0 NA | intron (Nintron (N  | 12487 NM_00516f  | 207 Hs. 52562fNM_00516f      | ENSG000004AKT1      | AKT CWS6 AKT serirprotein-coding    |
| chr15-63 6.162138  | -0.07291  | 0.923142 | -0.07899  | 0.937044 | 0.981636 | chr15 | 63297318 | 63298584 | + 0 NA | intron (Nintron (N  | 20346 NM_031301  | 83464 Hs. 51170fNM_031301    | ENSG000004APH1B     | APH-1B PFaph-1 honprotein-coding    |
| chr16-71 6.162138  | -0.07291  | 0.923142 | -0.07899  | 0.937044 | 0.981636 | chr16 | 71689566 | 71691039 | + 0 NA | intron (NMLT1N2 LI  | 8399 NR_033337   | 1E+08 Hs. 72511fNR_033337    | ENSG000004SNORA70D  | U70D small nucsnRNA                 |
| chr16-84 6.162138  | -0.07291  | 0.923142 | -0.07899  | 0.937044 | 0.981636 | chr16 | 84096876 | 84097336 | + 0 NA | intron (NCR1-3_Crc  | 19836 NM_003379f | 8720 Hs. 75890 NM_003791     | ENSG00000           |                                     |



|           |          |          |          |          |          |          |       |          |          |   |   |    |                    |        |              |          |              |           |           |            |                 |                         |                     |                |  |
|-----------|----------|----------|----------|----------|----------|----------|-------|----------|----------|---|---|----|--------------------|--------|--------------|----------|--------------|-----------|-----------|------------|-----------------|-------------------------|---------------------|----------------|--|
| chr11-866 | 7.143756 | -0.06646 | 0.871712 | -0.07624 | 0.939226 | 0.981636 | chr11 | 86827177 | 86827609 | + | 0 | NA | intron (NLIPA3 LIN | 26851  | NM_001293    | 11098    | Hs.25338     | NM_00717  | ENSG00000 | CRSS23     | SIG13 SPL       | serine p1protein-coding |                     |                |  |
| chr16-156 | 7.143756 | -0.06646 | 0.871712 | -0.07624 | 0.939226 | 0.981636 | chr16 | 15619063 | 15620080 | + | 0 | NA | intron (Nintron (N | -8476  | NR_106761    | 1.02E+08 | NR_106761    | ENSG00000 | MIR6506   | hsa-mir-ε  | microRNA ncRNA  |                         |                     |                |  |
| chr17-322 | 7.143756 | -0.06646 | 0.871712 | -0.07624 | 0.939226 | 0.981636 | chr17 | 32200464 | 32201292 | + | 0 | NA | intron (Nintron (N | -49307 | NR_002222    | 503640   | Hs.631752    | NR_002222 | ARGFXP2   | -          | arginine-pseudo |                         |                     |                |  |
| chr13-756 | 6.15428  | -0.07072 | 0.928325 | -0.07618 | 0.939278 | 0.981636 | chr13 | 75699106 | 75700737 | + | 0 | NA | intron (NMER1 BL L | -60399 | NM_001366    | 4008     | Hs.207631    | NM_005358 | ENSG00000 | LM07       | FBX LIM         | domaiprotein-coding     |                     |                |  |
| chr13-958 | 6.15428  | -0.07072 | 0.928325 | -0.07618 | 0.939278 | 0.981636 | chr13 | 95849512 | 95851327 | + | 0 | NA | intron (NERV3-16A3 | 17380  | NM_006260    | 5611     | Hs.59214     | NM_006260 | ENSG00000 | CNAJ3C     | ACBDH ERC       | DnaJ                    | domaiprotein-coding |                |  |
| chr16-187 | 6.15428  | -0.07072 | 0.928325 | -0.07618 | 0.939278 | 0.981636 | chr16 | 18797385 | 18799039 | + | 0 | NA | intron (NCharlie   | 3158   | NM_001313    | 23204    | Hs.634882    | NM_015161 | ENSG00000 | CARL6P1    | ATP1 ARL        | ADP                     | ribosprotein-coding |                |  |
| chr17-187 | 6.15428  | -0.07072 | 0.928325 | -0.07618 | 0.939278 | 0.981636 | chr17 | 18736487 | 18736897 | + | 0 | NA | TTS (NM_CTS (NM_C  | -7362  | NR_051988    | 10517    | Hs.59212E    | NM_031456 | ENSG00000 | FBXW10     | 10517 HRE       | F-box                   | anprotein-coding    |                |  |
| chr17-302 | 6.15428  | -0.07072 | 0.928325 | -0.07618 | 0.939278 | 0.981636 | chr17 | 30248221 | 30249261 | + | 0 | NA | 3' UTR (N3' UTR (N | -13044 | NR_00104E    | 6532     | Hs.29792     | NM_00104E | ENSG00000 | SLC6A4     | 5-FHT 5-F       | solute c                | protein-coding      |                |  |
| chr17-788 | 6.15428  | -0.07072 | 0.928325 | -0.07618 | 0.939278 | 0.981636 | chr17 | 78863403 | 78864044 | + | 0 | NA | intron (Nintron (N | -23196 | NM_001321    | 57602    | Hs.464242    | NM_02509C | ENSG00000 | CUSP36     | DUB1            | ubiquitin               | protein-coding      |                |  |
| chr19-196 | 6.15428  | -0.07072 | 0.928325 | -0.07618 | 0.939278 | 0.981636 | chr19 | 19519758 | 19521740 | + | 0 | NA | intron (NLMIB8 LIN | 4524   | NM_015966    | 51079    | Hs.534452    | NM_015966 | ENSG00000 | NDUFA13    | B16.6 CD        | NADH:ubiq               | protein-coding      |                |  |
| chr19-370 | 6.15428  | -0.07072 | 0.928325 | -0.07618 | 0.939278 | 0.981636 | chr19 | 37097986 | 37099362 | + | 0 | NA | non-codiron-codir  | 20241  | NM_001325    | 147923   | Hs.444952    | NM_14468E | ENSG00000 | ZNF420     | APAK            | zinc fing               | protein-coding      |                |  |
| chr2-3064 | 6.15428  | -0.07072 | 0.928325 | -0.07618 | 0.939278 | 0.981636 | chr2  | 30640309 | 30641013 | + | 0 | NA | 3' UTR (N3' UTR (N | 166785 | NM_14457E    | 92291    | Hs.660911    | NM_14457E | ENSG00000 | CAPN13     | -               | calpain I               | protein-coding      |                |  |
| chr22-205 | 6.15428  | -0.07072 | 0.928325 | -0.07618 | 0.939278 | 0.981636 | chr22 | 20521160 | 20522224 | + | 0 | NA | intron (NALu SINE  | 13645  | NM_001293    | 51586    | Hs.517421    | NM_01588E | ENSG00000 | MED15      | ARC105 C        | mediator                | protein-coding      |                |  |
| chr3-4371 | 6.15428  | -0.07072 | 0.928325 | -0.07618 | 0.939278 | 0.981636 | chr3  | 43718463 | 43721047 | + | 0 | NA | non-codiron-codir  | -28161 | NM_00134E    | 55129    | Hs.656657    | NM_01807E | ENSG00000 | CNA10      | SCAR10 C        | antiamir                | protein-coding      |                |  |
| chr4-4194 | 6.15428  | -0.07072 | 0.928325 | -0.07618 | 0.939278 | 0.981636 | chr4  | 41948705 | 41951030 | + | 0 | NA | intron (Nintron (N | 14438  | NM_01812E    | 55161    | Hs.31082     | NM_01812E | ENSG00000 | TMEM33     | 1600019D1       | transmemt               | protein-coding      |                |  |
| chr4-139C | 6.15428  | -0.07072 | 0.928325 | -0.07618 | 0.939278 | 0.981636 | chr4  | 1.39E+08 | 1.39E+08 | + | 0 | NA | intron (N(TA)n Sin | 28215  | NM_01211E    | 25819    | Hs.639842    | NM_01211E | ENSG00000 | NOCT       | CCR4L CC        | nocturnin               | protein-coding      |                |  |
| chr6-244C | 6.15428  | -0.07072 | 0.928325 | -0.07618 | 0.939278 | 0.981636 | chr6  | 24409395 | 24410078 | + | 0 | NA | intron (Nintron (N | 6800   | NR_10442E    | 57380    | Hs.658612    | NM_02066E | ENSG00000 | CMS2       | HPT MR          | S21                     | magnesium           | protein-coding |  |
| chr6-965C | 6.15428  | -0.07072 | 0.928325 | -0.07618 | 0.939278 | 0.981636 | chr6  | 96535892 | 96539450 | + | 0 | NA | intron (Nintron (N | 15865  | NM_01532E    | 23376    | Hs.149367    | NM_01532E | ENSG00000 | UFL1       | K1AA0776 U      | FMI1                    | spec                | protein-coding |  |
| chr6-1114 | 6.15428  | -0.07072 | 0.928325 | -0.07618 | 0.939278 | 0.981636 | chr6  | 1.11E+08 | 1.11E+08 | + | 0 | NA | intron (Nintron (N | -12152 | NR_03410E    | 643749   | Hs.48622E    | NR_03410E | ENSG00000 | TRAF3IP2   | -               | C6UAS C6                | TRAF3IP2            | ncRNA          |  |
| chr7-1587 | 6.15428  | -0.07072 | 0.928325 | -0.07618 | 0.939278 | 0.981636 | chr7  | 1.59E+08 | 1.59E+08 | + | 0 | NA | intron (Nintron (N | -40424 | NR_104054    | 54892    | Hs.18616     | NM_01776C | ENSG00000 | CNAPG2     | 3KS CAP         | -Cnc-SMC                | protein-coding      |                |  |
| chr10-431 | 5.708539 | -0.07288 | 0.957543 | -0.07612 | 0.939327 | 0.981636 | chr10 | 43179612 | 43180310 | + | 0 | NA | intron (NLMIB7 LIN | 25064  | NM_00131E    | 55454    | Hs.65756E    | NM_01859C | ENSG00000 | CSGALNACT1 | CHGN2 C         | chondroit               | protein-coding      |                |  |
| chr12-625 | 5.708539 | -0.07288 | 0.957543 | -0.07612 | 0.939327 | 0.981636 | chr12 | 62504432 | 62504467 | + | 0 | NA | intron (NL2a LINE  | 37123  | NM_01502E    | 23041    | Hs.38937E    | NM_01502E | ENSG00000 | MON2       | -               | MON2                    | hmc                 | protein-coding |  |
| chr2-1117 | 5.708539 | -0.07288 | 0.957543 | -0.07612 | 0.939327 | 0.981636 | chr2  | 1.12E+08 | 1.12E+08 | + | 0 | NA | intron (Nintron (N | -16789 | NR_03992E    | 1.01E+08 | NR_03992E    | ENSG00000 | MIR4771-1 | -2-        | -               | microRNA                | ncRNA               |                |  |
| chr2-1175 | 5.708539 | -0.07288 | 0.957543 | -0.07612 | 0.939327 | 0.981636 | chr2  | 1.18E+08 | 1.18E+08 | + | 0 | NA | intron (NMIRb SINE | 36699  | NM_019044    | 54520    | Hs.10784E    | NM_019044 | ENSG00000 | CCDC93     | -               | coiled-c                | protein-coding      |                |  |
| chr20-335 | 5.708539 | -0.07288 | 0.957543 | -0.07612 | 0.939327 | 0.981636 | chr20 | 3326484  | 3327282  | + | 0 | NA | intron (Nintron (N | 80779  | NM_00100E    | 25943    | Hs.51685E    | NM_00100E | ENSG00000 | C20orf194  | -               | chromoson               | protein-coding      |                |  |
| chr20-49C | 5.708539 | -0.07288 | 0.957543 | -0.07612 | 0.939327 | 0.981636 | chr20 | 4901079  | 4901807  | + | 0 | NA | intron (Nintron (N | -77835 | NM_014737    | 9770     | Hs.631504    | NM_014737 | ENSG00000 | CRASSF7    | CENP-34 F       | ras                     | assoc               | protein-coding |  |
| chr20-49C | 5.708539 | -0.07288 | 0.957543 | -0.07612 | 0.939327 | 0.981636 | chr20 | 49063834 | 49064547 | + | 0 | NA | intron (NMER20 DN  | 17878  | NM_00131E    | 1434     | Hs.90073     | NM_00131E | ENSG00000 | SEIL       | CAS CSE1        | chromoson               | protein-coding      |                |  |
| chr3-485E | 5.708539 | -0.07288 | 0.957543 | -0.07612 | 0.939327 | 0.981636 | chr3  | 48525979 | 48527319 | + | 0 | NA | intron (NMLTIC LTF | -21823 | NM_00127E    | 51246    | Hs.41457E    | NM_01647E | ENSG00000 | SHISA5     | SCOTIN          | shisa                   | fan                 | protein-coding |  |
| chr4-788E | 5.708539 | -0.07288 | 0.957543 | -0.07612 | 0.939327 | 0.981636 | chr4  | 78830478 | 78831105 | + | 0 | NA | intron (NTigger1 I | 54413  | NM_19889E    | 55589    | Hs.146551    | NM_01759E | ENSG00000 | BMP2K      | BIKE HRIF       | BMP2                    | indt                | protein-coding |  |
| chr5-436E | 5.708539 | -0.07288 | 0.957543 | -0.07612 | 0.939327 | 0.981636 | chr5  | 43695948 | 43696731 | + | 0 | NA | intron (NTHE1B-int | -93109 | NR_07311E    | 1.01E+08 | Hs.48204E    | NR_07311E | NNT-AS1   | -          | NNT             | antisRNA                |                     |                |  |
| chr6-143E | 5.708539 | -0.07288 | 0.957543 | -0.07612 | 0.939327 | 0.981636 | chr6  | 1.44E+08 | 1.44E+08 | + | 0 | NA | intron (Nintron (N | 14150  | NM_001317    | 5325     | Hs.74322E    | NM_00265E | ENSG00000 | PLAGL1     | LOT1 ZAC        | PLAG1                   | lik                 | protein-coding |  |
| chr6-152E | 5.708539 | -0.07288 | 0.957543 | -0.07612 | 0.939327 | 0.981636 | chr6  | 1.52E+08 | 1.52E+08 | + | 0 | NA | intron (NALuSz SIN | -36871 | NR_120501    | 1.01E+08 | Hs.57120E    | NR_120501 | SYNE1-AS1 | -          | SYNE1           | antncRNA                |                     |                |  |
| chr7-7521 | 5.708539 | -0.07288 | 0.957543 | -0.07612 | 0.939327 | 0.981636 | chr7  | 75219844 | 75220378 | + | 0 | NA | intron (Nintron (N | -17076 | NR_14607E    | 643862   | NR_14607E    | SPDYE10P  | -         | speedy/R1  | pseudo          |                         |                     |                |  |
| chr7-152E | 5.708539 | -0.07288 | 0.957543 | -0.07612 | 0.939327 | 0.981636 | chr7  | 1.52E+08 | 1.52E+08 | + | 0 | NA | intron (Nintron (N | 146631 | NM_001371474 | 146631   | NM_001371474 |           |           |            |                 |                         |                     |                |  |
| chr11-18E | 4.493761 | 0.061386 | 0.809656 | 0.075817 | 0.939565 | 0.981636 | chr11 | 18546333 | 18546595 | + | 0 | NA | intron (Nintron (N | -19522 | NM_00629E    | 7251     | Hs.52351E    | NM_00629E | ENSG00000 | TSGL101    | TSG10 VPS       | tumor sus               | protein-coding      |                |  |
| chr3-5247 | 8.493761 | 0.061386 | 0.809656 | 0.075817 | 0.939565 | 0.981636 | chr3  | 52478451 | 52479276 | + | 0 | NA | intron (Nintron (N | -16475 | NM_01513E    | 23166    | Hs.30198E    | NM_01513E | ENSG00000 | STAB1      | CLEVER-1        | stabilin                | protein-coding      |                |  |
| chr4-137E | 14.83661 | 0.046755 | 0.617352 | 0.075735 | 0.93963  | 0.981636 | chr4  | 1.38E+08 | 1.38E+08 | + | 0 | NA | intron (Nintron (N | 6513   | NM_01903E    | 54510    | Hs.591691    | NM_01903E | ENSG00000 | PCDH18     | PCDH68L         | protocadl               | protein-coding      |                |  |
| chr3-123C | 6.966557 | 0.068426 | 0.903553 | 0.07573  | 0.939634 | 0.981636 | chr3  | 1.23E+08 | 1.23E+08 | + | 0 | NA | intron (NLMIB7 LIN | 26983  | NM_01243C    | 26984    | Hs.477361    | NM_01243C | ENSG00000 | SEC22A     | SEC22L2         | SEC22                   | hon                 | protein-coding |  |
| chr17-605 | 6.203277 | -0.07007 | 0.925858 | -0.07569 | 0.93967  | 0.981636 | chr17 | 60520391 | 60521378 | + | 0 | NA | intron (Nintron (N | 5356   | NM_00128E    | 10513    | Hs.84084     | NM_00638C | ENSG00000 | APPPB2     | APP-BP2         | Amyloid t               | protein-coding      |                |  |
| chr19-466 | 6.203277 | -0.07007 | 0.925858 | -0.07569 | 0.93967  | 0.981636 | chr19 | 46675177 | 46676793 | + | 0 | NA | intron (NALuJb SIN | 14507  | NR_040041    | 1.01E+08 | Hs.434327    | NR_040041 | ENSG00000 | DACT3-AS1  | -               | DACT3                   | antncRNA            |                |  |
| chr2-693E | 6.203277 | -0.07007 | 0.925858 | -0.07569 | 0.93967  | 0.981636 | chr2  | 69382190 | 69383007 | + | 0 | NA | intron (Nintron (N | 4632   | NM_00205E    | 2673     | Hs.58030C    | NM_00205E | ENSG00000 | GFTH1      | CMS12 C         | ms glutamine            | protein-coding      |                |  |
| chr20-344 | 6.203277 | -0.07007 | 0.925858 | -0.07569 | 0.93967  | 0.981636 | chr20 | 34412228 | 34413153 | + | 0 | NA | intron (Nintron (N | 49417  | NM_001324    | 83737    | Hs.63227E    | NM_03148E | ENSG00000 | GPTT1      | ADMFD A         | ifitichy E3             | protein-coding      |                |  |
| chr5-774E | 6.203277 | -0.07007 | 0.925858 | -0.07569 | 0.93967  | 0.981636 | chr5  | 77435815 | 77436401 | + | 0 | NA | intron (Nintron (N | 56208  | NM_01826E    | 55255    | Hs.48257E    | NM_01826E | ENSG00000 | WDR41      | MSTP048         | WD                      | repeat              | protein-coding |  |
| chr11-17E | 11.40118 | 0.05272  | 0.696979 | 0.075641 | 0.939705 | 0.981636 | chr11 | 17073426 | 17076595 | + | 0 | NA | promoter-promoter- | -266   | NR_00002E    | 26822    | NR_00002E    | ENSG00000 | SNORD14A  | RNU14      | RNU             | snoRNA                  |                     |                |  |
| chr5-172E | 7.494577 | 0.064937 | 0.859243 | 0.075574 | 0.939758 | 0.981636 | chr5  | 1.73E+08 | 1.73E+08 | + | 0 | NA | intron (NALuSz6 SI | 5458   | NM_001317    | 51121    | Hs.54639C    | NM_01609E | ENSG00000 | RPL26L1    | RPL26P1         | ribosomal               | protein-coding      |                |  |
| chr16-821 | 9.92297  | 0.056307 | 0.746633 | 0.075414 | 0.939885 | 0.981636 | chr16 | 82161604 | 82164796 | + | 0 | NA | intron (Nintron (N | 7024   | NM_00579E    | 10200    | Hs.34440C    | NM_00579E | ENSG00000 | MPHOSPH6   | MPP MPP         | -E                      | m-phase             | protein-coding |  |
| chr2-555E | 9.92297  | 0.056307 | 0.746633 | 0.075414 | 0.939885 | 0.981636 | chr2  | 55557309 | 55557552 | + | 0 | NA | intron (NALuJb SIN | 37835  | NM_080667    | 112942   | Hs.26420E    | NM_080667 | ENSG00000 | CFAP36     | BARTL1 C        | cilia                   | nc                  | protein-coding |  |
| chr1-1164 | 8.444764 | 0.061217 | 0.812088 | 0.075382 | 0.939911 |          |       |          |          |   |   |    |                    |        |              |          |              |           |           |            |                 |                         |                     |                |  |

|                     |          |          |          |          |          |       |          |          |   |   |    |                     |                    |                            |                     |                     |                         |                 |                |
|---------------------|----------|----------|----------|----------|----------|-------|----------|----------|---|---|----|---------------------|--------------------|----------------------------|---------------------|---------------------|-------------------------|-----------------|----------------|
| chr18-13c.7.00681   | -0.07046 | 0.960441 | -0.07337 | 0.941514 | 0.981636 | chr18 | 13049887 | 13050920 | + | 0 | NA | intron (Nintron (N  | 59041 NM_032142    | 55125 Hs. 100914NM_018066  | ENSG00000CEP192     | PPP1R62             | centrosomprotein-coding |                 |                |
| chr19-16c.5.700681  | -0.07046 | 0.960441 | -0.07337 | 0.941514 | 0.981636 | chr19 | 16632624 | 16633164 | + | 0 | NA | Intergeni Intergeni | -4690 NM_004831    | 9441 Hs. 71504CNM_004831   | ENSG00000MED26      | CRSP7 CRS           | mediator protein-coding |                 |                |
| chr19-21c.5.700681  | -0.07046 | 0.960441 | -0.07337 | 0.941514 | 0.981636 | chr19 | 21039052 | 21039458 | + | 0 | NA | intron (Nintron (N  | 18598 NM_001172    | 80264 Hs. 729202NM_025189  | ENSG00000ZNF430     | -                   | zinc fingprotein-coding |                 |                |
| chr2-36c.5.700681   | -0.07046 | 0.960441 | -0.07337 | 0.941514 | 0.981636 | chr2  | 36492781 | 36493750 | + | 0 | NA | intron (Nintron (N  | 104923 NM_001042   | 9637 Hs. 258566CNM_005102  | ENSG00000PE22       | Hum3CL              | fasciculεprotein-coding |                 |                |
| chr2-60c.5.700681   | -0.07046 | 0.960441 | -0.07337 | 0.941514 | 0.981636 | chr2  | 60894482 | 60895409 | + | 0 | NA | intron (Nintron (N  | 13392 NM_002908    | 5966 Hs. 631886CNM_002908  | ENSG00000REL        | C-Hel               | REL protprotein-coding  |                 |                |
| chr21-25c.5.700681  | -0.07046 | 0.960441 | -0.07337 | 0.941514 | 0.981636 | chr21 | 25587825 | 25589759 | + | 0 | NA | intron (Nintron (N  | -5568 NR_024092    | 282566 Hs. 384589NR_024092 | ENSG00000LINC00515  | C21orf71            | long intencRNA          |                 |                |
| chr21-44c.5.700681  | -0.07046 | 0.960441 | -0.07337 | 0.941514 | 0.981636 | chr21 | 44776638 | 44778601 | + | 0 | NA | intron (Nintron (N  | 24201 NM_182688    | 7327 Hs. 529422CNM_003344  | ENSG00000UBE2G2     | UBC7                | ubiquitinprotein-coding |                 |                |
| chr3-172c.5.700681  | -0.07046 | 0.960441 | -0.07337 | 0.941514 | 0.981636 | chr3  | 1.72E+08 | 1.72E+08 | + | 0 | NA | intron (Nintron (N  | 170735 NM_004122   | 2693 Hs. 130212NM_004122   | ENSG00000GHSR       | GHDP                | growth hprotein-coding  |                 |                |
| chr4-151c.5.700681  | -0.07046 | 0.960441 | -0.07337 | 0.941514 | 0.981636 | chr4  | 1.52E+08 | 1.52E+08 | + | 0 | NA | intron (Nintron (N  | 23959 NM_004564    | 5188 Hs. 119316NM_004564   | ENSG00000GATB       | HSPC199 F           | glutamyl-protein-coding |                 |                |
| chr5-1341c.5.700681 | -0.07046 | 0.960441 | -0.07337 | 0.941514 | 0.981636 | chr5  | 1.47E+08 | 1.34E+08 | + | 0 | NA | intron (Nintron (N  | 21004 NM_001366    | 6932 Hs. 573156NM_003202   | ENSG00000TCF7       | TCF-1               | transcripprotein-coding |                 |                |
| chr7-254c.5.700681  | -0.07046 | 0.960441 | -0.07337 | 0.941514 | 0.981636 | chr7  | 2545790  | 2547354  | + | 0 | NA | intron (Nintron (N  | 8952 NM_00135C     | 221927 Hs. 520622NM_152744 | ENSG00000BRAT1      | BAAT1 C7c           | BRCA1 nucprotein-coding |                 |                |
| chr7-650c.5.700681  | -0.07046 | 0.960441 | -0.07337 | 0.941514 | 0.981636 | chr7  | 65066163 | 65068115 | + | 0 | NA | intron (Nintron (N  | 1140 NR_145725     | 1.1E+08                    | NR_145725           | ENSG00000SNORA22C   | -                       | small nucsnoRNA |                |
| chr8-2237c.5.700681 | -0.07046 | 0.960441 | -0.07337 | 0.941514 | 0.981636 | chr8  | 22378872 | 22379590 | + | 0 | NA | intron (Nintron (N  | 11693 NM_00113E    | 23516 Hs. 491232NM_015356  | ENSG00000SLC39A14   | HCIN HMNI           | solute cprotein-coding  |                 |                |
| chr9-8367c.5.700681 | -0.07046 | 0.960441 | -0.07337 | 0.941514 | 0.981636 | chr9  | 83672455 | 83673023 | + | 0 | NA | intron (Nintron (N  | -35096 NR_135833   | 1.05E+08                   | Hs. 9589 NR_135833  | ENSG00000LOC105376  | -                       | uncharactncRNA  |                |
| chr3-172c.7.086901  | -0.06538 | 0.891924 | -0.07337 | 0.941566 | 0.981636 | chr3  | 1.72E+08 | 1.72E+08 | + | 0 | NA | intron (Nintron (N  | 186290 NM_004122   | 2693 Hs. 130212NM_004122   | ENSG00000GHSR       | GHDP                | growth hprotein-coding  |                 |                |
| chr15-49c.6.690157  | -0.06572 | 0.897505 | -0.07323 | 0.941624 | 0.981636 | chr15 | 49264958 | 49265467 | + | 0 | NA | intron (Nintron (N  | 94965 NM_00128E    | 2585 Hs. 122006NM_002044   | ENSG00000GALK2      | GK2                 | galactokiprotein-coding |                 |                |
| chr17-40c.6.690157  | -0.06572 | 0.897505 | -0.07323 | 0.941624 | 0.981636 | chr17 | 4092901  | 4094112  | + | 0 | NA | intron (Nintron (N  | 49524 NM_01511E    | 23140 Hs. 277624NM_01511E  | ENSG00000ZZEF1      | ZZZ4                | zinc fingprotein-coding |                 |                |
| chr9-134c.6.690157  | -0.06572 | 0.897505 | -0.07323 | 0.941624 | 0.981636 | chr9  | 1.34E+08 | 1.34E+08 | + | 0 | NA | intron (Nintron (N  | 3350 NM_001291     | 6256 Hs. 590886NM_002957   | ENSG00000XRRA       | NR2B1               | retinoid protein-coding |                 |                |
| chr7-7474c.10.40985 | 0.053061 | 0.726549 | 0.073032 | 0.941781 | 0.981636 | chr7  | 74744046 | 74745980 | + | 0 | NA | intron (Nintron (N  | -16095 NR_110044   | 1.02E+08                   | Hs. 654772NR_110044 | ENSG00000LOC101926  | -                       | uncharactncRNA  |                |
| chr8-1167c.10.40985 | 0.053061 | 0.726549 | 0.073032 | 0.941781 | 0.981636 | chr8  | 1.17E+08 | 1.17E+08 | + | 0 | NA | intron (Nintron (N  | 34440 NM_00375E    | 8667 Hs. 492599NM_00375E   | ENSG00000EIF33      | EIF3S3 e            | eukaryotiprotein-coding |                 |                |
| chr17-665c.6.146422 | -0.06849 | 0.939346 | -0.07291 | 0.941878 | 0.981636 | chr17 | 65043602 | 65044836 | + | 0 | NA | intron (Nintron (N  | 11555 NM_00128E    | 10672 Hs. 515018NM_006572  | ENSG00000GNA13      | G13                 | G proteinprotein-coding |                 |                |
| chr5-730c.7.453438  | 0.062829 | 0.862675 | 0.072824 | 0.941946 | 0.981636 | chr5  | 73069031 | 73069654 | + | 0 | NA | intron (Nintron (N  | -51233 NM_001161   | 134285 Hs. 162246NM_17349C | ENSG00000TMEM171    | PRP2                | transmemprotein-coding  |                 |                |
| chr8-2544c.7.453438 | 0.062829 | 0.862675 | 0.072824 | 0.941946 | 0.981636 | chr8  | 25445152 | 25445530 | + | 0 | NA | intron (Nintron (N  | 13092 NM_017634    | 54793 Hs. 72071 NM_017634  | ENSG00000KCTD9      | BTBD27              | potassiumprotein-coding |                 |                |
| chr1-149c.12.41608  | 0.048917 | 0.671823 | 0.072812 | 0.941956 | 0.981636 | chr1  | 1.49E+08 | 1.49E+08 | + | 0 | NA | Intergeni Intergeni | -7401 NM_001037    | 400818 Hs. 44508CNM_001037 | ENSG00000NBPF9      | AE01                | NBPF memprotein-coding  |                 |                |
| chr14-30c.8.931644  | 0.057096 | 0.784329 | 0.072796 | 0.941969 | 0.981636 | chr14 | 30684181 | 30684392 | + | 0 | NA | intron (Nintron (N  | 61967 NM_01610E    | 23256 Hs. 369166NM_01610E  | ENSG00000SCFD1      | C14orf163           | secl famprotein-coding  |                 |                |
| chr17-17c.8.931644  | 0.057096 | 0.784329 | 0.072796 | 0.941969 | 0.981636 | chr17 | 17898243 | 17898758 | + | 0 | NA | intron (Nintron (N  | -61489 NM_00417E   | 6720 Hs. 592122NM_00417E   | ENSG00000SREBF1     | SREBF1 bf           | solut rprotein-coding   |                 |                |
| chr22-24c.8.931644  | 0.057096 | 0.784329 | 0.072796 | 0.941969 | 0.981636 | chr22 | 24321568 | 24322179 | + | 0 | NA | exon (NM exon (NM   | -20235 NM_001254   | 23384 Hs. 474384NM_01533C  | ENSG00000SPECC1L    | CLYTA GBE           | sperm protein-coding    |                 |                |
| chr7-1521c.8.931644 | 0.057096 | 0.784329 | 0.072796 | 0.941969 | 0.981636 | chr7  | 1.52E+08 | 1.52E+08 | + | 0 | NA | exon (NM exon (NM   | 79288 NM_001371474 | 7011 Hs. 508833NM_00711C   | ENSG00000TEP1       | TLPT1 TP1           | telomerasprotein-coding |                 |                |
| chr14-20c.7.981457  | 0.061006 | 0.828113 | 0.072582 | 0.942138 | 0.981636 | chr14 | 20390064 | 20391034 | + | 0 | NA | intron (Nintron (N  | 22952 NM_00711C    | 400550 Hs. 448822NR_03392E | ENSG00000FENDRR     | FOXF1-AS1           | FOXF1 adncRNA           |                 |                |
| chr16-86c.12.8951   | 0.04771  | 0.658254 | 0.072479 | 0.94222  | 0.981636 | chr16 | 86488362 | 86491123 | + | 0 | NA | intron (Nintron (N  | 19118 NR_03392E    | -66117 NR_146904           | 1.05E+08            | Hs. 210837NR_146904 | ENSG00000LINC01926      | -               | long intencRNA |
| chr18-587c.12.8951  | 0.04771  | 0.658254 | 0.072479 | 0.94222  | 0.981636 | chr18 | 58745197 | 58750329 | + | 0 | NA | exon (NM exon (NM   | 7659 NM_00342C     | 7584 Hs. 288658NM_00342C   | ENSG00000ZNF35      | H10.10 HF1          | zinc fingprotein-coding |                 |                |
| chr3-446c.12.8951   | 0.04771  | 0.658254 | 0.072479 | 0.94222  | 0.981636 | chr3  | 44650988 | 44661795 | + | 0 | NA | intron (Nintron (N  | -13761 NM_001367   | 10825 Hs. 191074NM_00665E  | ENSG00000NEU3       | SIAL3               | neuraminprotein-coding  |                 |                |
| chr11-74c.9.459664  | 0.055208 | 0.761813 | 0.07247  | 0.942228 | 0.981636 | chr11 | 74974592 | 74975174 | + | 0 | NA | intron (Nintron (N  | 41559 NM_003291    | 7174 Hs. 432424NM_003291   | ENSG00000TPP2       | TPP-2 TPF           | tripepticprotein-coding |                 |                |
| chr13-10c.9.459664  | 0.055208 | 0.761813 | 0.07247  | 0.942228 | 0.981636 | chr13 | 1.03E+08 | 1.03E+08 | + | 0 | NA | intron (Nintron (N  | 41559 NM_003291    | 7174 Hs. 432424NM_003291   | ENSG00000TPP2       | TPP-2 TPF           | tripepticprotein-coding |                 |                |
| chr6-822c.9.459664  | 0.055208 | 0.761813 | 0.07247  | 0.942228 | 0.981636 | chr6  | 82238899 | 82239439 | + | 0 | NA | intron (Nintron (N  | 8575 NM_00130C     | 25998 Hs. 306422NM_01552E  | ENSG00000IBTK       | BTBD26 BI           | inhibiti protein-coding |                 |                |
| chr8-981c.9.459664  | 0.055208 | 0.761813 | 0.07247  | 0.942228 | 0.981636 | chr8  | 98135910 | 98139258 | + | 0 | NA | intron (Nintron (N  | 19744 NM_01502E    | 10940 Hs. 46161CNM_01774C  | ENSG00000POPI       | ANXD2               | POPI homprotein-coding  |                 |                |
| chr19-534c.7.184896 | -0.06423 | 0.887663 | -0.07235 | 0.942319 | 0.981636 | chr19 | 53436887 | 53438307 | + | 0 | NA | intron (Nintron (N  | 5613 NM_00100E     | 388561 Hs. 433292NM_00100E | ENSG00000ZNF761     | ZNF468              | zinc fingprotein-coding |                 |                |
| chr7-149c.7.184896  | -0.06423 | 0.887663 | -0.07235 | 0.942319 | 0.981636 | chr7  | 1490106  | 1490401  | + | 0 | NA | intron (Nintron (N  | 14136 NM_00108C    | 26173 Hs. 532188NM_00108C  | ENSG00000INTS1      | INT1 NET2           | integrat protein-coding |                 |                |
| chr10-68c.7.622778  | -0.06114 | 0.846135 | -0.07226 | 0.942397 | 0.981636 | chr10 | 68395572 | 68396330 | + | 0 | NA | intron (Nintron (N  | 11238 NM_017987    | 55680 Hs. 653144NM_017987  | ENSG00000RUFY2      | RAB1P4R ZRUN        | and fprotein-coding     |                 |                |
| chr5-1194c.7.622778 | -0.06114 | 0.846135 | -0.07226 | 0.942397 | 0.981636 | chr5  | 1.19E+08 | 1.19E+08 | + | 0 | NA | intron (Nintron (N  | 25411 NM_000414    | 3295 Hs. 406861NM_000414   | ENSG00000HSD17B4    | DBP MFE-2           | hydroxystprotein-coding |                 |                |
| chr9-124c.10.88887  | 0.051843 | 0.712583 | 0.072249 | 0.942404 | 0.981636 | chr9  | 1.24E+08 | 1.24E+08 | + | 0 | NA | intron (Nintron (N  | 1819 NM_00279E     | 5695 Hs. 213477NM_00279E   | ENSG00000PSMB7      | Z                   | proteasomprotein-coding |                 |                |
| chr16-84c.11.41689  | 0.05017  | 0.695222 | 0.072164 | 0.942471 | 0.981636 | chr16 | 84974105 | 84976718 | + | 0 | NA | 3' UTR (N3' UTR (N  | 36124 NM_00114E    | 55625 Hs. 46161CNM_01774C  | ENSG00000ZNF761     | DHHC7 SEF           | zinc fingprotein-coding |                 |                |
| chr22-30c.11.41689  | 0.05017  | 0.695222 | 0.072164 | 0.942471 | 0.981636 | chr22 | 30971566 | 30974278 | + | 0 | NA | non-codirnon-codir  | 3711 NR_152867     | 55000 Hs. 554822NR_00232E  | ENSG00000TUG1       | LINC0008C           | taurine tncRNA          |                 |                |
| chr3-405c.11.41689  | 0.05017  | 0.695222 | 0.072164 | 0.942471 | 0.981636 | chr3  | 40529691 | 40535740 | + | 0 | NA | exon (NM exon (NM   | 7755 NM_198484     | 285268 Hs. 19977 NM_198484 | ENSG00000ZNF621     | -                   | zinc fingprotein-coding |                 |                |
| chr5-954c.11.41689  | 0.05017  | 0.695222 | 0.072164 | 0.942471 | 0.981636 | chr5  | 95487449 | 95492359 | + | 0 | NA | intron (Nintron (N  | 65101 NM_01463E    | 9652 Hs. 482866NM_01463E   | ENSG00000TTC37      | KIAA0372            | tetratricprotein-coding |                 |                |
| chr4-5187c.8.117516 | -0.0603  | 0.835704 | -0.07215 | 0.942482 | 0.981636 | chr4  | 51874419 | 51874916 | + | 0 | NA | intron (Nintron (N  | 31088 NM_001287    | 23142 Hs. 605388NM_01511E  | ENSG00000DCUN1D4    | -                   | defectiveprotein-coding |                 |                |
| chr2-238c.6.982273  | 0.063761 | 0.884295 | 0.072104 | 0.942519 | 0.981636 | chr2  | 2.38E+08 | 2.38E+08 | + | 0 | NA | intron (Nintron (N  | 12977 NM_01651C    | 55552 Hs. 731906NM_01651C  | ENSG00000SCLY       | SCL hSCL            | selenocysprotein-coding |                 |                |
| chr19-117c.13.37412 | 0.046594 | 0.646373 | 0.072085 | 0.942534 | 0.981636 | chr19 | 11720568 | 11725792 | + | 0 | NA | exon (NM exon (NM   | 15766 NM_00108C    | 55552 Hs. 142167NM_017507  | ENSG00000ZNF823     | HSZF36              | zinc fingprotein-coding |                 |                |
| chr1-120c.7.12804   | -0.06249 | 0.867209 | -0.07206 | 0.942557 | 0.981636 | chr1  | 1.21     |          |   |   |    |                     |                    |                            |                     |                     |                         |                 |                |



|                    |          |          |          |          |          |       |          |            |      |                    |                   |                              |                    |               |                                  |
|--------------------|----------|----------|----------|----------|----------|-------|----------|------------|------|--------------------|-------------------|------------------------------|--------------------|---------------|----------------------------------|
| chr2-5532 6.187561 | -0.06565 | 0.920454 | -0.07133 | 0.943138 | 0.981636 | chr2  | 55326214 | 55327692 + | 0 NA | intron (Nintron (N | 44634 NR_02725E   | 344405 Hs. 445292NR_00108C   | ENSG00000PRORSD1P  | NCRNA0011     | prolyl-tf pseudo                 |
| chr2-6132 6.187561 | -0.06565 | 0.920454 | -0.07133 | 0.943138 | 0.981636 | chr2  | 61320918 | 61322514 + | 0 NA | intron (Nintron (N | 95661 NR_003707   | 1E+08 Hs. 67582E NR_003707   | ENSG00000SNORA70B  | -             | small nucsnoRNA                  |
| chr2-6935 6.187561 | -0.06565 | 0.920454 | -0.07133 | 0.943138 | 0.981636 | chr2  | 69394395 | 69395311 + | 0 NA | TTS (NM_C          | -7599 NM_001244   | 2673 Hs. 58030C              | ENSG00000GFPT1     | CMS12 CMS     | glutamine protein-coding         |
| chr2-1875 6.187561 | -0.06565 | 0.920454 | -0.07133 | 0.943138 | 0.981636 | chr2  | 1.88E+08 | 1.88E+08 + | 0 NA | intron (N          | 20968 NM_00132E   | 7035 Hs. 51657E NR_006287    | ENSG00000TFP1      | EPI LAC1      | tissue f protein-coding          |
| chr2-2247 6.187561 | -0.06565 | 0.920454 | -0.07133 | 0.943138 | 0.981636 | chr2  | 2.25E+08 | 2.25E+08 + | 0 NA | intron (N          | 180441 NM_00129E  | 55619 Hs. 46578 NR_01468E    | ENSG00000DOCK10    | DRIP2         | dedicator protein-coding         |
| chr20-327 6.187561 | -0.06565 | 0.920454 | -0.07133 | 0.943138 | 0.981636 | chr20 | 3277051  | 3277801 +  | 0 NA | intron (N          | -38236 NM_001174  | 83959 Hs. 105607NR_032034    | ENSG00000SLC4A11   | BTR1 CDPE     | solute c protein-coding          |
| chr21-43C 6.187561 | -0.06565 | 0.920454 | -0.07133 | 0.943138 | 0.981636 | chr21 | 43099519 | 43100891 + | 0 NA | intron (N          | 7365 NM_00132C    | 1.03E+08 Hs. 36511E          | ENSG00000U2AF15    | -             | U2 small protein-coding          |
| chr21-437 6.187561 | -0.06565 | 0.920454 | -0.07133 | 0.943138 | 0.981636 | chr21 | 43759002 | 43759908 + | 0 NA | 3' UTR (N          | 16920 NM_00010C   | 1476 Hs. 695 NR_00010C       | ENSG00000CSTB      | CPI-B CST     | cytstatin protein-coding         |
| chr22-24C 6.187561 | -0.06565 | 0.920454 | -0.07133 | 0.943138 | 0.981636 | chr22 | 24396839 | 24397131 + | 0 NA | intron (N          | -26612 NM_00127E  | 135 Hs. 19702E               | ENSG00000ADORA2A   | A2AR ADOF     | adenosine protein-coding         |
| chr22-404 6.187561 | -0.06565 | 0.920454 | -0.07133 | 0.943138 | 0.981636 | chr22 | 40428370 | 40430690 + | 0 NA | exon (NM           | 33760 NM_00112E   | 57591 Hs. 65468E             | ENSG00000MRFTA     | BSAC MAL      | myocardin protein-coding         |
| chr4-397E 6.187561 | -0.06565 | 0.920454 | -0.07133 | 0.943138 | 0.981636 | chr4  | 39759274 | 39762439 + | 0 NA | intron (N          | 62720 NM_00111E   | 3093 Hs. 50308 NR_00533E     | ENSG00000UBE2K     | E2-25K H      | ubiquitin protein-coding         |
| chr4-1187 6.187561 | -0.06565 | 0.920454 | -0.07133 | 0.943138 | 0.981636 | chr4  | 1.19E+08 | 1.19E+08 + | 0 NA | intron (N          | 24138 NM_020961   | 57721 Hs. 59687E             | ENSG00000METTL14   | hMETTL14      | methyltransferase protein-coding |
| chr5-431E 6.187561 | -0.06565 | 0.920454 | -0.07133 | 0.943138 | 0.981636 | chr5  | 43162399 | 43162869 + | 0 NA | intron (N          | -29591 NM_153361  | 167359 Hs. 25845 NM_153361   | ENSG00000N1M1K     | N1M1          | seriprotein-coding               |
| chr5-554E 6.187561 | -0.06565 | 0.920454 | -0.07133 | 0.943138 | 0.981636 | chr5  | 55400334 | 55401583 + | 0 NA | intron (N          | 92969 NM_01536C   | 23517 Hs. 274531NR_01536C    | ENSG00000MTREX     | Dobl KIAA     | Mtr4 exos protein-coding         |
| chr5-970E 6.187561 | -0.06565 | 0.920454 | -0.07133 | 0.943138 | 0.981636 | chr5  | 97028971 | 97029509 + | 0 NA | 3' UTR (N          | 70807 NM_17592C   | 4012 Hs. 52719E              | ENSG00000LNPEP     | CAP IRAP      | leucyl ar protein-coding         |
| chr6-326E 6.187561 | -0.06565 | 0.920454 | -0.07133 | 0.943138 | 0.981636 | chr6  | 3263453  | 3265424 +  | 0 NA | 3' UTR (N          | 5491 NM_00112E    | 389362 Hs. 20706E            | ENSG00000PSMG4     | C6orf86 F     | proteasome protein-coding        |
| chr6-130E 6.187561 | -0.06565 | 0.920454 | -0.07133 | 0.943138 | 0.981636 | chr6  | 1.31E+08 | 1.31E+08 + | 0 NA | intron (N          | 49112 NM_00119E   | 1.01E+08 Hs. 38871E          | ENSG00000CSMLR1    | -             | small let protein-coding         |
| chr7-446A 6.187561 | -0.06565 | 0.920454 | -0.07133 | 0.943138 | 0.981636 | chr7  | 44648082 | 44648891 + | 0 NA | intron (N          | 41859 NM_00100C   | 4967 Hs. 488181NR_002541     | ENSG00000OGDH      | AKGDH E1k     | oxoglutarate protein-coding      |
| chr7-151E 6.187561 | -0.06565 | 0.920454 | -0.07133 | 0.943138 | 0.981636 | chr7  | 1.51E+08 | 1.51E+08 + | 0 NA | TTS (NM_C          | 3816 NM_00671E    | 10922 Hs. 647094NR_00671E    | ENSG00000FASTK     | FAST          | Fas activ protein-coding         |
| chr8-541E 6.187561 | -0.06565 | 0.920454 | -0.07133 | 0.943138 | 0.981636 | chr8  | 54142942 | 54148989 + | 0 NA | intron (N          | 10724 NM_01417E   | 29088 Hs. 18349 NR_01417E    | ENSG00000MRPL15    | HSPC145 L     | mitochondr protein-coding        |
| chr8-125E 6.187561 | -0.06565 | 0.920454 | -0.07133 | 0.943138 | 0.981636 | chr8  | 1.25E+08 | 1.25E+08 + | 0 NA | intron (N          | 12753 NM_00312E   | 6713 Hs. 71465 NR_00312E     | ENSG00000SQLE      | -             | squalene protein-coding          |
| chr8-140E 6.187561 | -0.06565 | 0.920454 | -0.07133 | 0.943138 | 0.981636 | chr8  | 1.41E+08 | 1.41E+08 + | 0 NA | intron (N          | -36061 NM_012154  | 27161 Hs. 66018E             | ENSG00000AGO2      | CASC7 E1F     | argon aut protein-coding         |
| chr9-566E 6.187561 | -0.06565 | 0.920454 | -0.07133 | 0.943138 | 0.981636 | chr9  | 5665671  | 5666360 +  | 0 NA | intron (N          | 36896 NM_00120E   | 57589 Hs. 21152C             | ENSG00000CRIC1     | CIP150 K1R1C1 | homc protein-coding              |
| chr9-928E 6.187561 | -0.06565 | 0.920454 | -0.07133 | 0.943138 | 0.981636 | chr9  | 92867098 | 92868957 + | 0 NA | intron (N          | 9941 NM_001354    | 83744 Hs. 66837E             | ENSG00000ZNF484    | BA526D8.4     | zinc finger protein-coding       |
| chr9-123E 6.187561 | -0.06565 | 0.920454 | -0.07133 | 0.943138 | 0.981636 | chr9  | 1.23E+08 | 1.23E+08 + | 0 NA | intron (N          | -19456 NM_005294  | 2844 Hs. 72203E              | ENSG00000GPR21     | -             | G protein protein-coding         |
| chr9-124E 6.187561 | -0.06565 | 0.920454 | -0.07133 | 0.943138 | 0.981636 | chr9  | 1.25E+08 | 1.25E+08 + | 0 NA | intron (N          | 35057 NM_002077   | 2800 Hs. 59504 NM_002077     | ENSG00000GOLGA1    | golgin-97     | golgin Al protein-coding         |
| chrX-123E 6.187561 | -0.06565 | 0.920454 | -0.07133 | 0.943138 | 0.981636 | chrX  | 1.24E+08 | 1.24E+08 + | 0 NA | intron (N          | 34045 NM_001167   | 331 Hs. 35607E               | ENSG00000XIAP      | AP13 BIRC     | X-linked protein-coding          |
| chr15-40C 10.41771 | 0.051658 | 0.724248 | 0.071327 | 0.943138 | 0.981636 | chr15 | 40030079 | 40037953 + | 0 NA | intron (N          | 5165 NM_003134    | 6727 Hs. 53373E              | ENSG00000SRP14     | ALURBP        | signal r protein-coding          |
| chr2-333E 10.41771 | 0.051658 | 0.724248 | 0.071327 | 0.943138 | 0.981636 | chr2  | 33363931 | 33365797 + | 0 NA | intron (N          | -53652 NR_03962E  | 1.01E+08 NR_03962E           | ENSG00000MIR4430   | -             | microRNA ncRNA                   |
| chr21-62E 10.41771 | 0.051658 | 0.724248 | 0.071327 | 0.943138 | 0.981636 | chr21 | 6234323  | 6234575 +  | 0 NA | intron (N          | 17321 NM_00132E   | 1.03E+08 Hs. 743984NR_00132E | ENSG00000LOC10272E | -             | uncharacter protein-coding       |
| chr21-64E 10.41771 | 0.051658 | 0.724248 | 0.071327 | 0.943138 | 0.981636 | chr21 | 6486281  | 6487203 +  | 0 NA | intron (N          | 12506 NM_00132C   | 1.03E+08 Hs. 36511E          | ENSG00000U2AF15    | -             | U2 small protein-coding          |
| chr3-143E 10.41771 | 0.051658 | 0.724248 | 0.071327 | 0.943138 | 0.981636 | chr3  | 1.43E+08 | 1.43E+08 + | 0 NA | intron (N          | 19391 NM_00132C   | 23350 Hs. 59657E             | ENSG00000U2SURP    | SR140 fS2     | snRNP protein-coding             |
| chr3-179E 10.41771 | 0.051658 | 0.724248 | 0.071327 | 0.943138 | 0.981636 | chr3  | 1.8E+08  | 1.8E+08 +  | 0 NA | intron (N          | 3629 NM_00120E    | 57129 Hs. 287334NR_02040E    | ENSG00000MRPL47    | CGI-204 L     | trictulc protein-coding          |
| chr7-740E 10.41771 | 0.051658 | 0.724248 | 0.071327 | 0.943138 | 0.981636 | chr7  | 74099016 | 74101595 + | 0 NA | intron (N          | 7088 NM_001204    | 3984 Hs. 64703E              | ENSG00000LIMK1     | LIMK LIM      | LIM domain protein-coding        |
| chr11-11E 6.633302 | -0.06424 | 0.901983 | -0.07122 | 0.943219 | 0.981636 | chr11 | 1.17E+08 | 1.17E+08 + | 0 NA | intron (N          | -116483 NR_00003E | 335 Hs. 93194 NR_00003E      | ENSG00000APOA1     | apo(a)        | apolipoprotein-coding            |
| chr5-167E 6.633302 | -0.06424 | 0.901983 | -0.07122 | 0.943219 | 0.981636 | chr5  | 16742708 | 16743239 + | 0 NA | intron (N          | -125915 NM_001034 | 54463 Hs. 481704NR_01900C    | ENSG00000RETREG1   | FAMI34B J     | reticuloprotein-coding           |
| chr9-982E 6.633302 | -0.06424 | 0.901983 | -0.07122 | 0.943219 | 0.981636 | chr9  | 98250451 | 98251273 + | 0 NA | intron (N          | 4787 NM_001267    | 55357 Hs. 37101E             | ENSG00000TBC1D2    | PARIS-1 F     | TBC1 domain protein-coding       |
| chr16-224 15.3491  | -0.04334 | 0.608669 | -0.07121 | 0.943234 | 0.981636 | chr16 | 22485076 | 22486536 + | 0 NA | intron (N          | -18643 NR_02445E  | 1E+08 Hs. 64843E             | ENSG00000LOC10019C | -             | uncharacter protein-coding       |
| chr1-2464 12.37494 | 0.04778E | 0.668749 | 0.071155 | 0.943274 | 0.981636 | chr1  | 24645534 | 24665943 + | 0 NA | non-codir          | 8903 NM_00136E    | 10250 Hs. 18192 NR_00583E    | ENSG00000SRRM1     | 160-KD P      | serine ar protein-coding         |
| chr13-77C 8.939502 | 0.05542  | 0.779728 | 0.071076 | 0.943338 | 0.981636 | chr13 | 77057786 | 77058922 + | 0 NA | exon (NM           | -17160 NR_04671E  | 1.01E+08 Hs. 56928E          | ENSG00000MYCBP2-AS | -             | MYCBP2 arncRNA                   |
| chr15-41C 8.939502 | 0.05542  | 0.779728 | 0.071076 | 0.943338 | 0.981636 | chr15 | 41053634 | 41057545 + | 0 NA | intron (N          | 60657 NR_10403E   | 54617 Hs. 29294E             | ENSG00000IN080     | IN080A IN     | IN080 con protein-coding         |
| chr4-564E 8.939502 | 0.05542  | 0.779728 | 0.071076 | 0.943338 | 0.981636 | chr4  | 56490141 | 56490907 + | 0 NA | intron (N          | -14685 NR_20691E  | 132946 Hs. 44444E            | ENSG00000ARL9      | -             | ADP ribos protein-coding         |
| chr5-967E 8.939502 | 0.05542  | 0.779728 | 0.071076 | 0.943338 | 0.981636 | chr5  | 96765402 | 96769795 + | 0 NA | intron (N          | 23996 NR_10428E   | 831 Hs. 43618E               | ENSG00000CAST      | BS-17 P       | calpastat protein-coding         |
| chr10-961 7.461296 | 0.060716 | 0.854274 | 0.071073 | 0.94334  | 0.981636 | chr10 | 96133784 | 96134437 + | 0 NA | intron (N          | 3488 NM_00133C    | 9849 Hs. 60082E              | ENSG00000ZNF518A   | ZNF518        | zinc finger protein-coding       |
| chr19-44E 7.461296 | 0.060716 | 0.854274 | 0.071073 | 0.94334  | 0.981636 | chr19 | 44900539 | 44900947 + | 0 NA | intron (N          | 6088 NM_00481E    | 9404 Hs. 125474NR_00481E     | ENSG00000CLPXN     | LDPL          | leupaxin protein-coding          |
| chr20-37E 7.461296 | 0.060716 | 0.854274 | 0.071073 | 0.94334  | 0.981636 | chr20 | 37518689 | 37519195 + | 0 NA | exon (NM           | -5053 NM_000041   | 348 Hs. 65443E               | ENSG00000APOE      | AD2 APO       | E-apolipoprotein-coding          |
| chr5-7077 7.461296 | 0.060716 | 0.854274 | 0.071073 | 0.94334  | 0.981636 | chr5  | 70771816 | 70772886 + | 0 NA | intron (N          | 1361 NM_001317    | 10904 Hs. 472651NR_00669E    | ENSG00000BLCAP     | BC10          | BLCAP ap protein-coding          |
| chr7-5991 7.461296 | 0.060716 | 0.854274 | 0.071073 | 0.94334  | 0.981636 | chr7  | 5991002  | 59929284 + | 0 NA | intron (N          | 4285 NR_16065E    | 1.03E+08 Hs. 71115E          | ENSG00000LOC10272A | -             | POM121 trp pseudo                |
| chr8-123E 7.461296 | 0.060716 | 0.854274 | 0.071073 | 0.94334  | 0.981636 | chr8  | 1.24E+08 | 1.24E+08 + | 0 NA | 3' UTR (N          | 1695 NM_00132E    | 5395 Hs. 632637NR_00053E     | ENSG00000PMS2      | HNPC4 M       | PMS1 homc protein-coding         |
| chr1-1204 7.177038 | -0.06206 | 0.873856 | -0.07102 | 0.943384 | 0.981636 | chr1  | 1.2E+08  | 1.2E+08 +  | 0 NA | promoter           | -95 NR_00324E     | 76784 Hs. 65718E             | ENSG00000PFN1P2    | C1orf152 P    | profilin pseudo                  |
| chr1-150E 7.177038 | -0.06206 | 0.873856 | -0.07102 | 0.943384 | 0.981636 | chr1  | 1.5E+08  | 1.5E+08 +  | 0 NA | intron (N          | 12167 NR_018997   | 54460 Hs. 40588C             | ENSG00000MRP52     | MDSO16 M      | mitochondr protein-coding        |
| chr18-12E 7.177038 | -0.06206 | 0.873856 | -0.07102 | 0.943384 | 0.981636 | chr18 | 12361259 | 12361508 + | 0 NA | intron (N          | 15893 NM_00679E   | 10939 Hs. 72635E             | ENSG00000AFG3L2    | SCA28 SFA     | AFG3 like protein-coding         |
| chr18-21E 7.177038 | -0.06206 | 0.873856 | -0.07102 | 0.943384 | 0.981636 | chr18 | 21858873 | 21859332 + | 0 NA | intron (N          | -27696            |                              |                    |               |                                  |

|            |          |           |          |          |          |          |       |          |          |   |        |                    |        |           |          |                    |                     |                      |                              |                               |
|------------|----------|-----------|----------|----------|----------|----------|-------|----------|----------|---|--------|--------------------|--------|-----------|----------|--------------------|---------------------|----------------------|------------------------------|-------------------------------|
| chr16-696  | 12.3828  | -0.046416 | 0.668972 | 0.069384 | 0.944684 | 0.981636 | chr16 | 69634290 | 69638200 | + | 0 NA   | intron (THE1A-int  | 70279  | NR_138713 | 10725    | Hs.371987NM_006599 | ENSG000002CNFAT5    | NF-AT5               | NF nuclear f protein-coding  |                               |
| chr1-279C  | 7.16918  | -0.06001  | 0.865059 | -0.06937 | 0.944697 | 0.981636 | chr1  | 27908701 | 27909747 | + | 0 NA   | intron (Tigger12   | 5351   | NR_002946 | 6118     | Hs.79411           | NR_002946           | ENSG000002RPA2       | REP24                        | RP-replicatiprotein-coding    |
| chr1-109C  | 7.16918  | -0.06001  | 0.865059 | -0.06937 | 0.944697 | 0.981636 | chr1  | 1.09E+08 | 1.09E+08 | + | 0 NA   | intron (AluSq2 SI  | -30273 | NR_001266 | 343263   | Hs.443402NM_001010 | ENSG000002MYBPHL    |                      | myosin bi-protein-coding     |                               |
| chr11-196C | 7.16918  | -0.06001  | 0.865059 | -0.06937 | 0.944697 | 0.981636 | chr11 | 963190   | 965110   | + | 0 NA   | intron (intron (   | 38280  | NR_012306 | 161      | Hs.19121           | NR_012306           | ENSG000002AP2A2      | ADTAP                        | CLF adaptor i-protein-coding  |
| chr15-25C  | 7.16918  | -0.06001  | 0.865059 | -0.06937 | 0.944697 | 0.981636 | chr15 | 25091548 | 25093015 | + | 0 NA   | TTS (NR_1TTS (NR_C | 496    | NR_003337 | 1E+08    | NR_003337          | ENSG000002SNORD116  | HBB1                 | -85-2 small nucsnRNA         |                               |
| chr15-59C  | 7.16918  | -0.06001  | 0.865059 | -0.06937 | 0.944697 | 0.981636 | chr15 | 59073183 | 59074279 | + | 0 NA   | intron (Tigger1 I  | -31415 | NR_004701 | 9133     | Hs.194699NM_004701 | ENSG000002CCNB2     | HsT17299             | cyclin B2 protein-coding     |                               |
| chr20-44C  | 7.16918  | -0.06001  | 0.865059 | -0.06937 | 0.944697 | 0.981636 | chr20 | 44614823 | 44617731 | + | 0 NA   | intron (NL2c LINE  | 33698  | NR_001281 | 11142    | Hs.472831NM_007066 | ENSG000002PKIG      | PK1-gamma            | cAMP-depe protein-coding     |                               |
| chr3-115C  | 7.16918  | -0.06001  | 0.865059 | -0.06937 | 0.944697 | 0.981636 | chr3  | 11564724 | 11567298 | + | 0 NA   | intron (intron (   | 2787   | NR_001128 | 9686     | Hs.740389NM_014667 | ENSG000002VGLL4     | VGL-4                | vestigial protein-coding     |                               |
| chr3-524C  | 7.16918  | -0.06001  | 0.865059 | -0.06937 | 0.944697 | 0.981636 | chr3  | 52485712 | 52488465 | + | 0 NA   | intron (intron (   | -8250  | NR_015136 | 23166    | Hs.301989NM_015136 | ENSG000002STAB1     | CLEVER-1             | stabilin protein-coding      |                               |
| chr3-183C  | 7.16918  | -0.06001  | 0.865059 | -0.06937 | 0.944697 | 0.981636 | chr3  | 183E+08  | 1.83E+08 | + | 0 NA   | intron (NLJMC1 LIN | 48156  | NR_12064C | 56922    | Hs.47469           | NR_020166           | ENSG000002MCCC1      | MCC-B                        | MCC methylcr protein-coding   |
| chr4-776C  | 7.16918  | -0.06001  | 0.865059 | -0.06937 | 0.944697 | 0.981636 | chr4  | 7762023  | 7763900  | + | 0 NA   | 3' UTR (3' UTR (   | 8871   | NR_026892 | 84740    | Hs.663029NM_032654 | ENSG000002AFAP1-AS1 | AFAP1-AS1            | AFAP1 antncRNA               |                               |
| chr5-529C  | 7.16918  | -0.06001  | 0.865059 | -0.06937 | 0.944697 | 0.981636 | chr5  | 52992797 | 52993208 | + | 0 NA   | intron (intron (   | 3650   | NR_073104 | 3673     | Hs.482077NM_002203 | ENSG000002ITGA2     | BR CD49B             | integrin protein-coding      |                               |
| chr5-707C  | 7.16918  | -0.06001  | 0.865059 | -0.06937 | 0.944697 | 0.981636 | chr5  | 70793668 | 70794496 | + | 0 NA   | intron (AluSg4 SI  | -14996 | NR_157804 | 1.02E+08 | Hs.634012          | NR_157804           | LOC101922            |                              | putative pseudo               |
| chr8-2217  | 7.16918  | -0.06001  | 0.865059 | -0.06937 | 0.944697 | 0.981636 | chr8  | 22179924 | 22180747 | + | 0 NA   | intron (intron (   | 14963  | NR_033403 | 649      | Hs.1274            | NR_001199           | ENSG000002BMP1       | O113                         | PCOL bone morp protein-coding |
| chr8-265C  | 7.16918  | -0.06001  | 0.865059 | -0.06937 | 0.944697 | 0.981636 | chr8  | 26589412 | 26592487 | + | 0 NA   | intron (intron (   | 12544  | NR_001244 | 1808     | Hs.593187NM_001386 | ENSG000002DPYSL2    | CRMP-2               | CF dihydropy protein-coding  |                               |
| chr9-1212  | 7.16918  | -0.06001  | 0.865059 | -0.06937 | 0.944697 | 0.981636 | chr9  | 1.21E+08 | 1.21E+08 | + | 0 NA   | intron (NMIRb SINE | -4208  | NR_001356 | 2934     | Hs.522373          | NR_000177           | ENSG000002GSN        | ADF AGEL                     | gelsolin protein-coding       |
| chr1-1184  | 6.674441 | -0.06154  | 0.887718 | -0.06933 | 0.944728 | 0.981636 | chr1  | 11841261 | 11843923 | + | 0 NA   | non-codiron-codir  | 2273   | NR_037806 | 1E+08    | Hs.710019          | NR_037806           | NPPA-AS1             | NPPA-AS1 NPPA                | antncRNA                      |
| chr1-170   | 6.674441 | -0.06154  | 0.887718 | -0.06933 | 0.944728 | 0.981636 | chr1  | 17030987 | 17033770 | + | 0 NA   | intron (AluSx1 SI  | -20450 | NR_001141 | 23400    | Hs.128866NM_022088 | ENSG000002ATP13A2   | CLN12                | HSA ATPase                   | protein-coding                |
| chr1-279C  | 6.674441 | -0.06154  | 0.887718 | -0.06933 | 0.944728 | 0.981636 | chr1  | 27986628 | 27991360 | + | 0 NA   | intron (intron (   | 29532  | NR_018056 | 55113    | Hs.55024           | NR_018056           | ENSG000002XKR8       | XRG8                         | HxKX relate protein-coding    |
| chr1-578   | 6.674441 | -0.06154  | 0.887718 | -0.06933 | 0.944728 | 0.981636 | chr1  | 52782913 | 52788115 | + | 0 NA   | intron (AluSc SIN  | -57246 | NR_001307 | 440590   | Hs.658459NM_001004 | ENSG000002ZYG11A    | ZYG11                | zyg-11 f2 protein-coding     |                               |
| chr1-169C  | 6.674441 | -0.06154  | 0.887718 | -0.06933 | 0.944728 | 0.981636 | chr1  | 77866939 | 77867138 | + | 0 NA   | intron (intron (   | -21477 | NR_144573 | 91624    | Hs.612389NM_144573 | ENSG000002NEXN      | CMH20                | NEI nexlin f protein-coding  |                               |
| chr1-1081  | 6.674441 | -0.06154  | 0.887718 | -0.06933 | 0.944728 | 0.981636 | chr1  | 1.08E+08 | 1.08E+08 | + | 0 NA   | intron (AluSx1 SI  | 10072  | NR_213651 | 29957    | Hs.656877NM_013386 | ENSG000002SLC25A24  | APC1                 | SCAM solute protein-coding   |                               |
| chr1-1457  | 6.674441 | -0.06154  | 0.887718 | -0.06933 | 0.944728 | 0.981636 | chr1  | 1.46E+08 | 1.46E+08 | + | 0 NA   | intron (NLIMB2 LIN | 26230  | NR_014456 | 27246    | Hs.523556NM_014456 | ENSG000002RNFI15    | BCA2                 | ZNF ring fing protein-coding |                               |
| chr1-169C  | 6.674441 | -0.06154  | 0.887718 | -0.06933 | 0.944728 | 0.981636 | chr1  | 1.7E+08  | 1.7E+08  | + | 0 NA   | intron (intron (   | 17747  | NR_020423 | 57147    | Hs.435566NM_020423 | ENSG000002SCYL3     | PACE-1               | PA SCYL1                     | like protein-coding           |
| chr1-2118  | 6.674441 | -0.06154  | 0.887718 | -0.06933 | 0.944728 | 0.981636 | chr1  | 2.12E+08 | 2.12E+08 | + | 0 NA   | intron (NLIPA17 LI | -23036 | NR_135818 | 1.03E+08 | Hs.147656          | NR_135818           | ENSG000002LPGAT1-AS- | LPGAT1                       | arncRNA                       |
| chr1-244   | 6.674441 | -0.06154  | 0.887718 | -0.06933 | 0.944728 | 0.981636 | chr1  | 2.45E+08 | 2.45E+08 | + | 0 NA   | intron (AluSp SIN  | 40582  | NR_016076 | 51028    | Hs.498317NM_016076 | ENSG000002DEST12    | Clorf121             | desumoylase protein-coding   |                               |
| chr10-146  | 6.674441 | -0.06154  | 0.887718 | -0.06933 | 0.944728 | 0.981636 | chr10 | 14940903 | 14942532 | + | 0 NA   | intron (NLIM3 LINE | 12379  | NR_001356 | 64221    | Hs.659319NM_022487 | ENSG000002DCLRE1C   | A-SCID               | DCDNA cross protein-coding   |                               |
| chr10-177  | 6.674441 | -0.06154  | 0.887718 | -0.06933 | 0.944728 | 0.981636 | chr10 | 17712635 | 17719238 | + | 0 NA   | 3' UTR (3' UTR (   | -36265 | NR_001098 | 653567   | Hs.564135NM_001010 | ENSG000002TMEM236   | FAM23A               | F2 transmem protein-coding   |                               |
| chr10-49C  | 6.674441 | -0.06154  | 0.887718 | -0.06933 | 0.944728 | 0.981636 | chr10 | 49954191 | 49955587 | + | 0 NA   | TTS (NR_1TTS (NR_1 | 677    | NR_145778 | 1.1E+08  | NR_145778          | SNORA74C-           |                      | small nucsnRNA               |                               |
| chr10-87C  | 6.674441 | -0.06154  | 0.887718 | -0.06933 | 0.944728 | 0.981636 | chr10 | 87902485 | 87905121 | + | 0 NA   | intron (NLIPA6 LIN | 40178  | NR_000314 | 5728     | Hs.500466NM_000314 | ENSG000002PTEN      | 10q23del1            | phosphatase protein-coding   |                               |
| chr11-128  | 6.674441 | -0.06154  | 0.887718 | -0.06933 | 0.944728 | 0.981636 | chr11 | 12879899 | 12880933 | + | 0 NA   | intron (NMIRb SINE | 109132 | NR_038904 | 1.01E+08 | Hs.153409          | NR_038904           | ENSG000002LINC0095E  | BLACAT2                      | long intncRNA                 |
| chr11-18C  | 6.674441 | -0.06154  | 0.887718 | -0.06933 | 0.944728 | 0.981636 | chr11 | 18543837 | 18545648 | + | 0 NA   | exon (NM exon (NM  | -17800 | NR_006292 | 7251     | Hs.523512NM_006292 | ENSG000002TSG101    | TSG101               | VPS tumor sup protein-coding |                               |
| chr11-63C  | 6.674441 | -0.06154  | 0.887718 | -0.06933 | 0.944728 | 0.981636 | chr11 | 63987865 | 63989867 | + | 0 NA   | intron (intron (   | 3013   | NR_003098 | 55611    | Hs.473788NM_017677 | ENSG000002OTUB1     | TSC2                 | OTUB1 protein-coding         |                               |
| chr11-70C  | 6.674441 | -0.06154  | 0.887718 | -0.06933 | 0.944728 | 0.981636 | chr11 | 70328250 | 70331236 | + | 0 NA   | intron (AluJb SIN  | 45788  | NR_031624 | 1E+08    | NR_031624          | ENSG000002MIR548K   | MIRN548K             | microRNA ncRNA               |                               |
| chr11-118  | 6.674441 | -0.06154  | 0.887718 | -0.06933 | 0.944728 | 0.981636 | chr11 | 1.18E+08 | 1.18E+08 | + | 0 NA   | exon (NM exon (NM  | 15495  | NR_004788 | 9354     | Hs.75275           | NR_004788           | ENSG000002UBE4A      | E4 UBOX2                     | ubiquitin protein-coding      |
| chr12-76C  | 6.674441 | -0.06154  | 0.887718 | -0.06933 | 0.944728 | 0.981636 | chr12 | 76357086 | 76358886 | + | 0 NA   | intron (intron (   | -9571  | NR_024688 | 79738    | Hs.96322           | NR_024688           | ENSG000002BBS10      | C12orf58                     | Bardet-Bi protein-coding      |
| chr12-111  | 6.674441 | -0.06154  | 0.887718 | -0.06933 | 0.944728 | 0.981636 | chr12 | 1.11E+08 | 1.12E+08 | + | 0 NA   | intron (intron (   | 66043  | NR_001291 | 10019    | Hs.506784NM_005477 | ENSG000002SH2B3     | IDDM20               | LN SH2B                      | adaf protein-coding           |
| chr12-116  | 6.674441 | -0.06154  | 0.887718 | -0.06933 | 0.944728 | 0.981636 | chr12 | 1.18E+08 | 1.18E+08 | + | 0 NA   | intron (intron (   | 8361   | NR_002567 | 5037     | Hs.433866NM_002567 | ENSG000002PEBP1     | HSP6 HCNF            | phosphatid protein-coding    |                               |
| chr14-50C  | 6.674441 | -0.06154  | 0.887718 | -0.06933 | 0.944728 | 0.981636 | chr14 | 50934032 | 50936821 | + | 0 NA   | intron (NMIR SINE  | 9057   | NR_002863 | 5836     | Hs.282417NM_002863 | ENSG000002PYGL      | CSND                 | glyogen protein-coding       |                               |
| chr14-73C  | 6.674441 | -0.06154  | 0.887718 | -0.06933 | 0.944728 | 0.981636 | chr14 | 73932037 | 73935675 | + | 0 NA   | 3' UTR (3' UTR (   | -16078 | NR_18248C | 51004    | Hs.131555NM_182477 | ENSG000002COQ6      | CGI-10               | CCoenzyme protein-coding     |                               |
| chr15-44C  | 6.674441 | -0.06154  | 0.887718 | -0.06933 | 0.944728 | 0.981636 | chr15 | 44649985 | 44651944 | + | 0 NA   | intron (AluSx1 SI  | 12698  | NR_001166 | 80208    | Hs.656271NM_025137 | ENSG000002SPG11     | ALM5                 | CMT2 SPG11                   | ves protein-coding            |
| chr15-74C  | 6.674441 | -0.06154  | 0.887718 | -0.06933 | 0.944728 | 0.981636 | chr15 | 74684941 | 74686430 | + | 0 NA   | intron (AluJo SIN  | 10389  | NR_001142 | 80153    | Hs.96852           | NR_025083           | ENSG000002EDC3       | LSM16                        | MRI enhancer protein-coding   |
| chr15-75C  | 6.674441 | -0.06154  | 0.887718 | -0.06933 | 0.944728 | 0.981636 | chr15 | 75492087 | 75493693 | + | 0 NA   | intron (AluJo SIN  | -37075 | NR_001142 | 25942    | Hs.513039NM_015477 | ENSG000002SIN3A     | WTKOS                | SIN3                         | trarp protein-coding          |
| chr15-83C  | 6.674441 | -0.06154  | 0.887718 | -0.06933 | 0.944728 | 0.981636 | chr15 | 83048172 | 83050420 | + | 0 NA   | intron (NMER6 DNA  | 17956  | NR_001011 | 53339    | Hs.459145NM_025238 | ENSG000002BTBD1     | C15orf1              | NBTB                         | doma protein-coding           |
| chr15-90C  | 6.674441 | -0.06154  | 0.887718 | -0.06933 | 0.944728 | 0.981636 | chr15 | 88463166 | 88463984 | + | 0 NA   | intron (NL2c LINE  | 3813   | NR_022163 | 26589    | Hs.534261NM_022163 | ENSG000002MRPL46    | C15orf4              | Lmi tochoan protein-coding   |                               |
| chr15-98C  | 6.674441 | -0.06154  | 0.887718 | -0.06933 | 0.944728 | 0.981636 | chr15 | 90638756 | 90643467 | + | 0 NA   | non-codiron-codir  | -19123 | NR_120371 | 1.02E+08 | Hs.615349          | NR_120371           | ENSG000002LINC0158E  |                              | long intncRNA                 |
| chr16-24C  | 6.674441 | -0.06154  | 0.887718 | -0.06933 | 0.944728 | 0.981636 | chr16 | 2436040  | 2437556  | + | 0 NA</ |                    |        |           |          |                    |                     |                      |                              |                               |



|            |          |          |          |          |          |          |       |          |          |   |   |    |                     |                   |                                 |                      |              |                              |                     |                         |
|------------|----------|----------|----------|----------|----------|----------|-------|----------|----------|---|---|----|---------------------|-------------------|---------------------------------|----------------------|--------------|------------------------------|---------------------|-------------------------|
| chr1-1505  | 8.596539 | -0.05597 | 0.813355 | -0.06882 | 0.945136 | 0.981636 | chr1  | 15059877 | 15060494 | + | 0 | NA | exon (NM exon (NM   | 92279 NR_027136   | 200197 Hs. 531424NM_182534      | ENSG000002MEM51-AS1  | C1orf126     | TMEM51                       | arncRNA             |                         |
| chr16-295  | 10.37657 | 0.050137 | 0.730799 | 0.068606 | 0.945303 | 0.981636 | chr16 | 29550314 | 29551580 | + | 0 | NA | intron (N intron (N | 44145 NR_135305   | 440354 Hs. 55270CNR_002473      | SMG1P2               | -            | SMG1                         | pseudogene          |                         |
| chr14-358  | 8.101801 | -0.05651 | 0.824645 | -0.06853 | 0.945367 | 0.981636 | chr14 | 35026487 | 35027251 | + | 0 | NA | intron (N AluSc SIN | -18038 NM_001075  | 283635 Hs. 446357NM_173607      | ENSG000002FAM177A1   | C14orf24     | family wiprotein-coding      | uncharacterized     |                         |
| chr3-3728  | 8.101801 | -0.05651 | 0.824645 | -0.06853 | 0.945367 | 0.981636 | chr3  | 37251669 | 37254113 | + | 0 | NA | intron (N L1ME3B L1 | -8696 NR_149022   | 152048 Hs. 596176NM_152532      | ENSG000002LOC152042E | -            | -                            | -                   |                         |
| chr1-5385  | 6.179703 | -0.06341 | 0.925617 | -0.06851 | 0.945383 | 0.981636 | chr1  | 53856264 | 53857308 | + | 0 | NA | intron (N intron (N | -18490 NR_001166  | 55706 Hs. 476522NM_018087       | ENSG000002NDC1       | NET3 TMEB    | NDC1                         | trar protein-coding | putative protein-coding |
| chr10-314  | 6.179703 | -0.06341 | 0.925617 | -0.06851 | 0.945383 | 0.981636 | chr10 | 31472687 | 31473669 | + | 0 | NA | intron (N LIPA3 LIN | -73423 NM_001368  | 1.01E+08 Hs. 730227NM_001368169 | LOC100505E           | -            | -                            | -                   |                         |
| chr10-111  | 6.179703 | -0.06341 | 0.925617 | -0.06851 | 0.945383 | 0.981636 | chr10 | 1.11E+08 | 1.11E+08 | + | 0 | NA | intron (N intron (N | 21507 NR_031614   | 1E+08 Hs. NR_031614             | ENSG000002MIR548E    | MIRN548E     | microRNA ncRNA               | -                   |                         |
| chr12-456  | 6.179703 | -0.06341 | 0.925617 | -0.06851 | 0.945383 | 0.981636 | chr12 | 45940862 | 45941726 | + | 0 | NA | intron (N L1MA9 LIN | 49280 NM_004715   | 9169 Hs. 210367NM_004715        | ENSG000002SCAF11     | CASP11       | SR-relate protein-coding     | -                   |                         |
| chr13-524  | 6.179703 | -0.06341 | 0.925617 | -0.06851 | 0.945383 | 0.981636 | chr13 | 52445104 | 52446067 | + | 0 | NA | intron (N AluY SINE | 4659 NM_001282    | 51028 Hs. 109522NM_016075       | ENSG000002VPS36      | C13orf9      | vacuolar protein-coding      | long intncRNA       |                         |
| chr13-956  | 6.179703 | -0.06341 | 0.925617 | -0.06851 | 0.945383 | 0.981636 | chr13 | 95058356 | 95059170 | + | 0 | NA | intron (N MIRb SINE | 97822 NR_047487   | 1.01E+08 Hs. 48706 NR_047487    | ENSG000002LINC00557  | -            | -                            | -                   |                         |
| chr13-984  | 6.179703 | -0.06341 | 0.925617 | -0.06851 | 0.945383 | 0.981636 | chr13 | 98473623 | 98475261 | + | 0 | NA | intron (N intron (N | 46823 NM_003576   | 8428 Hs. 508514NM_003576        | ENSG000002STK24      | HEL-S-95     | serine/t protein-coding      | -                   |                         |
| chr14-507  | 6.179703 | -0.06341 | 0.925617 | -0.06851 | 0.945383 | 0.981636 | chr14 | 50737884 | 50738947 | + | 0 | NA | intron (N intron (N | -70109 NM_021818  | 60485 Hs. 642842NM_021818       | ENSG000002SAV1       | SAV WW45     | salvador protein-coding      | uncharacterized     |                         |
| chr15-327  | 6.179703 | -0.06341 | 0.925617 | -0.06851 | 0.945383 | 0.981636 | chr15 | 32778630 | 32779013 | + | 0 | NA | intron (N L1MB7 LIN | -59956 NR_109767  | 1E+08 Hs. 610544NR_109767       | ENSG000002LOC100131  | -            | -                            | -                   |                         |
| chr15-325  | 6.179703 | -0.06341 | 0.925617 | -0.06851 | 0.945383 | 0.981636 | chr15 | 32900202 | 32901056 | + | 0 | NA | intron (N intron (N | 167545 NM_001103  | 342184 Hs. 657645NM_198502      | ENSG000002FMM1       | FMM LD       | formin 1 protein-coding      | -                   |                         |
| chr16-162  | 6.179703 | -0.06341 | 0.925617 | -0.06851 | 0.945383 | 0.981636 | chr16 | 1622804  | 1623328  | + | 0 | NA | intron (N AluJb SIN | 8426 NM_020825    | 57585 Hs. 603676NM_020825       | ENSG000002CRAMP1     | CRAMP1 L     | cramped protein-coding       | -                   |                         |
| chr17-285  | 6.179703 | -0.06341 | 0.925617 | -0.06851 | 0.945383 | 0.981636 | chr17 | 28562492 | 28563356 | + | 0 | NA | intron (N AluJb SIN | 8600 NM_033198    | 94005 Hs. 462556NM_033198       | ENSG000002PIGS       | GP1BD18      | phosphatid protein-coding    | -                   |                         |
| chr17-306  | 6.179703 | -0.06341 | 0.925617 | -0.06851 | 0.945383 | 0.981636 | chr17 | 30610522 | 30612445 | + | 0 | NA | intron (N intron (N | -12835 NR_03342C  | 6459 Hs. 684866NR_033420        | SH3GLIP2             | CNSA-P2 SSH3 | domaipseudo                  | -                   |                         |
| chr17-685  | 6.179703 | -0.06341 | 0.925617 | -0.06851 | 0.945383 | 0.981636 | chr17 | 68533938 | 68535799 | + | 0 | NA | TTS (NM_C TTS (NM_C | 19474 NM_001276   | 5573 Hs. 280342NM_002734        | ENSG000002PKRARI1    | ACRDYS1      | protein f protein-coding     | -                   |                         |
| chr19-875  | 6.179703 | -0.06341 | 0.925617 | -0.06851 | 0.945383 | 0.981636 | chr19 | 875340   | 875840   | + | 0 | NA | intron (N intron (N | 15926 NM_001928   | 1675 Hs. 155597NM_001928        | ENSG000002CFD        | ADIPSLIN     | complemer protein-coding     | -                   |                         |
| chr19-176  | 6.179703 | -0.06341 | 0.925617 | -0.06851 | 0.945383 | 0.981636 | chr19 | 17237989 | 17240351 | + | 0 | NA | intron (N AluSc5 SI | 6172 NM_005234    | 2063 Hs. 466148NM_005234        | ENSG000002NR2F6      | EAR-2 EAF    | nuclear r protein-coding     | -                   |                         |
| chr19-1062 | 6.179703 | -0.06341 | 0.925617 | -0.06851 | 0.945383 | 0.981636 | chr19 | 10650887 | 10651861 | + | 0 | NA | intron (N MER33 DNA | 38601 NM_022489   | 79954 Hs. 222494NM_024894       | ENSG000002NOL10      | PQBP5        | nuclear r protein-coding     | -                   |                         |
| chr2-2875  | 6.179703 | -0.06341 | 0.925617 | -0.06851 | 0.945383 | 0.981636 | chr2  | 28759029 | 28761462 | + | 0 | NA | intron (N Tigger3b  | 8415 NM_002705    | 5500 Hs. 702907NM_002705        | ENSG000002PPP1CB     | HEL-S-80r    | protein f protein-coding     | -                   |                         |
| chr2-1572  | 6.179703 | -0.06341 | 0.925617 | -0.06851 | 0.945383 | 0.981636 | chr2  | 1.57E+08 | 1.57E+08 | + | 0 | NA | intron (N LIPA6 LIN | 16709 NM_001325   | 11227 Hs. 269027NM_014568       | ENSG000002GALNT5     | GALNAC-T5    | polypeptide protein-coding   | -                   |                         |
| chr2-2005  | 6.179703 | -0.06341 | 0.925617 | -0.06851 | 0.945383 | 0.981636 | chr2  | 2.01E+08 | 2.01E+08 | + | 0 | NA | intron (N AluJb SIN | 20746 NM_001142   | 60491 Hs. 145284NM_021824       | ENSG000002NIF3L1     | ALS2CR1      | CNGG1                        | te protein-coding   | -                       |
| chr2-2017  | 6.179703 | -0.06341 | 0.925617 | -0.06851 | 0.945383 | 0.981636 | chr2  | 2.02E+08 | 2.02E+08 | + | 0 | NA | intron (N (GAGAA) n | -7815 NM_033066   | 58538 Hs. 63085 NM_033066       | ENSG000002MPP4       | ALS2CR5      | membrane protein-coding      | -                   |                         |
| chr2-2031  | 6.179703 | -0.06341 | 0.925617 | -0.06851 | 0.945383 | 0.981636 | chr2  | 2.03E+08 | 2.03E+08 | + | 0 | NA | intron (N AluJr SIN | -91744 NM_177538  | 57404 Hs. 446065NM_020674       | ENSG000002CYP20A1    | CYP-M        | cytochron protein-coding     | -                   |                         |
| chr20-213  | 6.179703 | -0.06341 | 0.925617 | -0.06851 | 0.945383 | 0.981636 | chr20 | 21382200 | 21384754 | + | 0 | NA | intron (N MIR3 SINE | 10449 NM_033176   | 644524 Hs. NR_033176            | ENSG000002NKX2-4     | NKX2.4       | homeoprotein-coding          | -                   |                         |
| chr3-967   | 6.179703 | -0.06341 | 0.925617 | -0.06851 | 0.945383 | 0.981636 | chr3  | 9670694  | 9671478  | + | 0 | NA | exon (NM exon (NM   | 21581 NM_02248E   | 64419 Hs. 475382NM_02248E       | ENSG000002MTMR14     | C3orf29      | myotubule protein-coding     | -                   |                         |
| chr3-457   | 6.179703 | -0.06341 | 0.925617 | -0.06851 | 0.945383 | 0.981636 | chr3  | 45709705 | 45711543 | + | 0 | NA | intron (N intron (N | 21228 NM_001315   | 22908 Hs. 156505NM_014015       | ENSG000002SACM1L     | SAC1         | SAC1                         | like protein-coding | -                       |
| chr3-1413  | 6.179703 | -0.06341 | 0.925617 | -0.06851 | 0.945383 | 0.981636 | chr3  | 1.41E+08 | 1.41E+08 | + | 0 | NA | intron (N intron (N | -6374 NM_00135C   | 25346 Hs. 518301NM_152535       | ENSG000002ZBTB38     | SIBZ PPP1    | zinc finger protein-coding   | -                   |                         |
| chr4-207   | 6.179703 | -0.06341 | 0.925617 | -0.06851 | 0.945383 | 0.981636 | chr4  | 20704648 | 20707601 | + | 0 | NA | intron (N intron (N | 5666 NM_00133C    | 133015 Hs. 479292NM_145045      | ENSG000002PACRGL     | C4orf28      | parkin cc protein-coding     | -                   |                         |
| chr4-478   | 6.179703 | -0.06341 | 0.925617 | -0.06851 | 0.945383 | 0.981636 | chr4  | 47895667 | 47899518 | + | 0 | NA | exon (NM exon (NM   | -15185 NR_125875  | 1.02E+08 Hs. 13419CNR_125879    | LOC101927-           | -            | -                            | -                   |                         |
| chr5-1705  | 6.179703 | -0.06341 | 0.925617 | -0.06851 | 0.945383 | 0.981636 | chr5  | 1.71E+08 | 1.71E+08 | + | 0 | NA | intron (N THE1B-int | 119052 NM_022897  | 64901 Hs. 41081CNM_022897       | ENSG000002RANBP17    | -            | -                            | -                   |                         |
| chr6-734   | 6.179703 | -0.06341 | 0.925617 | -0.06851 | 0.945383 | 0.981636 | chr6  | 73492861 | 73493991 | + | 0 | NA | intron (N AluSq2 SI | 25012 NR_132981   | 1.07E+08 Hs. NR_132981          | SNORD141E            | -            | -                            | -                   |                         |
| chr8-1334  | 6.179703 | -0.06341 | 0.925617 | -0.06851 | 0.945383 | 0.981636 | chr8  | 1.33E+08 | 1.33E+08 | + | 0 | NA | intron (N intron (N | 83859 NM_003033   | 6482 Hs. 374257NM_003033        | ENSG000002ST3GAL1    | Gal-Nac6S    | ST3 beta-protein-coding      | -                   |                         |
| chr9-1377  | 6.179703 | -0.06341 | 0.925617 | -0.06851 | 0.945383 | 0.981636 | chr9  | 1.38E+08 | 1.38E+08 | + | 0 | NA | intron (N intron (N | 44140 NR_147508   | 651337 Hs. 603195NR_147508      | ENSG000002LOC651337  | -            | -                            | -                   |                         |
| chrX-1581  | 6.179703 | -0.06341 | 0.925617 | -0.06851 | 0.945383 | 0.981636 | chrX  | 15818390 | 15819634 | + | 0 | NA | intron (N AluSq2 SI | 28561 NM_00508E   | 8233 Hs. 171905NM_00508E        | ENSG000002ZRSR2      | U2AF1-RS2    | zinc finger protein-coding   | -                   |                         |
| chr1-7384  | 9.426382 | 0.05193  | 0.758115 | 0.068499 | 0.945388 | 0.981636 | chr1  | 7384442  | 740754   | + | 0 | NA | Intergeni Intergeni | -9247 NR_028327   | 1E+08 Hs. 728864NR_028327       | LOC100133E           | -            | -                            | -                   |                         |
| chr10-10   | 9.426382 | 0.05193  | 0.758115 | 0.068499 | 0.945388 | 0.981636 | chr10 | 58389636 | 58390008 | + | 0 | NA | intron (N intron (N | 4412 NM_003201    | 7019 Hs. 594252NM_003201        | ENSG000002CYP20A1    | MDPFS15      | transcrip protein-coding     | -                   |                         |
| chr10-918  | 9.426382 | 0.05193  | 0.758115 | 0.068499 | 0.945388 | 0.981636 | chr10 | 91830399 | 91832029 | + | 0 | NA | intron (N intron (N | 32788 NM_02523E   | 80351 Hs. 329327NM_02523E       | ENSG000002TNKS2      | ARTD6        | PAF tankyrase protein-coding | -                   |                         |
| chr16-68   | 9.426382 | 0.05193  | 0.758115 | 0.068499 | 0.945388 | 0.981636 | chr16 | 68307581 | 68308925 | + | 0 | NA | intron (N intron (N | 2743 NM_03217E    | 84138 Hs. 729522NM_03217E       | ENSG000002SLC7A60S   | -            | -                            | -                   |                         |
| chr2-461   | 9.426382 | 0.05193  | 0.758115 | 0.068499 | 0.945388 | 0.981636 | chr2  | 46104140 | 46106494 | + | 0 | NA | intron (N Tigger2 E | -192090 NM_00143C | 2034 Hs. 46841CNM_00143C        | ENSG000002EPAS1      | ECYT4        | HIF endotheliprotein-coding  | -                   |                         |
| chr2-2031  | 9.426382 | 0.05193  | 0.758115 | 0.068499 | 0.945388 | 0.981636 | chr2  | 2.03E+08 | 2.03E+08 | + | 0 | NA | intron (N intron (N | -70618 NM_177538  | 57404 Hs. 446065NM_020674       | ENSG000002CYP20A1    | CYP-M        | cytochron protein-coding     | -                   |                         |
| chr2-146   | 9.426382 | 0.05193  | 0.758115 | 0.068499 | 0.945388 | 0.981636 | chr2  | 46509201 | 46512283 | + | 0 | NA | intron (N AluY SINE | 48271 NR_04640C   | 1.01E+08 Hs. 737161NR_04640C    | ENSG000002DIP2A-IT1  | DIP2A        | intncRNA                     | -                   |                         |
| chr3-730   | 9.426382 | 0.05193  | 0.758115 | 0.068499 | 0.945388 | 0.981636 | chr3  | 73005481 | 73006745 | + | 0 | NA | intron (N L1ME1 LIN | 9302 NM_174907    | 151987 Hs. 431092NM_174907      | ENSG000002PPP4R2     | PP4R2        | protein f protein-coding     | -                   |                         |
| chr4-1501  | 9.426382 | 0.05193  | 0.758115 | 0.068499 | 0.945388 | 0.981636 | chr4  | 15016804 | 15017841 | + | 0 | NA | intron (N intron (N | 14841 NM_001177   | 132864 Hs. 656937NM_18248E      | ENSG000002CPEB2      | CPE-BP2      | cytoplasm protein-coding     | -                   |                         |
| chr5-714   | 9.426382 | 0.05193  | 0.758115 | 0.068499 | 0.945388 | 0.981636 | chr5  | 71458623 | 71462541 | + | 0 | NA | intron (N intron (N | 4931 NM_01842E    | 55814 Hs. 258272NM_01842E       | ENSG000002BDP1       | DFNB112      | EB double protein-coding     | -                   |                         |
| chr5-1379  | 9.426382 | 0.05193  | 0.758115 | 0.068499 | 0.945388 | 0.981636 | chr5  | 1.38E+08 | 1.38E+08 | + | 0 | NA | intron (N intron (N | 63593 NM_01438E   | 27039 Hs. 716884NM_01438E       | ENSG000002PKD2L2     | TRPP5        | polycystiprotein-coding      | -                   |                         |
| chr7-4291  | 9.426382 | 0.05193  | 0.758115 | 0.068499 | 0.945388 | 0.981636 | chr7  | 42919509 | 42923919 | + | 0 | NA | intron (N intron (N | -9624 NM_001099   | 79020 Hs. 698122NM_024054       | ENSG000002C7orf25    | -            | -                            | -                   |                         |
| chr7-129   | 9.426382 | 0.05193  | 0.758115 | 0.068499 | 0.945388 | 0.981636 | chr7  | 1.3E+08  | 1.3E+08  | + | 0 | NA | intron (N THE1B-int | 30607 NM_00104C   | 4899 Hs. 654365NM_005011        | ENSG000002NRF1       | ALPHA-PAL    | nuclear r protein-coding     | -                   |                         |
| chr9-113   | 9.426382 | 0.05193  | 0.758115 | 0.068499 | 0.945388 | 0.981636 | chr9  | 1.14E+08 | 1.14E+08 | + | 0 | NA | 3                   |                   |                                 |                      |              |                              |                     |                         |



|                    |          |          |          |          |          |       |           |          |   |      |                    |                  |                            |                     |                                      |                          |                                    |                           |                  |                                 |                   |                 |                           |                 |                                    |
|--------------------|----------|----------|----------|----------|----------|-------|-----------|----------|---|------|--------------------|------------------|----------------------------|---------------------|--------------------------------------|--------------------------|------------------------------------|---------------------------|------------------|---------------------------------|-------------------|-----------------|---------------------------|-----------------|------------------------------------|
| chr22-467.7.161322 | -0.05804 | 0.860718 | -0.06743 | 0.946241 | 0.981636 | chr22 | 46715734  | 46720521 | + | 0 NA | intron (Nintron (N | 20125 NM_022766  | 64781 Hs. 200668NM_022766  | ENSG000002CERK      | LK4 dA59F ceramide protein-coding    |                          |                                    |                           |                  |                                 |                   |                 |                           |                 |                                    |
| chr3-1612.7.161322 | -0.05804 | 0.860718 | -0.06743 | 0.946241 | 0.981636 | chr3  | 1.61E+08  | 1.61E+08 | + | 0 NA | intron (Nintron (N | 17993 NM_015938  | 51068 Hs. 598836NM_015938  | ENSG000002NMD3      | CGI-07 NMD3 ribcprotein-coding       |                          |                                    |                           |                  |                                 |                   |                 |                           |                 |                                    |
| chr5-7145.7.161322 | -0.05804 | 0.860718 | -0.06743 | 0.946241 | 0.981636 | chr5  | 71494144  | 71498226 | + | 0 NA | intron (NAluY SINE | 40534 NM_018425  | 55814 Hs. 258272NM_018425  | ENSG000002BDP1      | DFNB112 FB double protein-coding     |                          |                                    |                           |                  |                                 |                   |                 |                           |                 |                                    |
| chr5-7221.7.161322 | -0.05804 | 0.860718 | -0.06743 | 0.946241 | 0.981636 | chr5  | 72219119  | 72221097 | + | 0 NA | 3' UTR (N3' UTR (N | 40321 NM_001324  | 4131 Hs. 335075NM_005909   | ENSG000002MAP1B     | FUTSCH Pm microtubule protein-coding |                          |                                    |                           |                  |                                 |                   |                 |                           |                 |                                    |
| chr5-1484.7.161322 | -0.05804 | 0.860718 | -0.06743 | 0.946241 | 0.981636 | chr5  | 1.48E+08  | 1.48E+08 | + | 0 NA | intron (NTiger1 L  | 50798 NM_030793  | 81545 Hs. 483772NM_030793  | ENSG000002FBX038    | Fbx38 HMM-F box prcprotein-coding    |                          |                                    |                           |                  |                                 |                   |                 |                           |                 |                                    |
| chr5-1544.7.161322 | -0.05804 | 0.860718 | -0.06743 | 0.946241 | 0.981636 | chr5  | 1.54E+08  | 1.54E+08 | + | 0 NA | intron (NCharlie E | 9524 NR_037897   | 386627 Hs. 652021NR_037897 | SAP30L-AS           | GALNT10-?SAP30L arncRNA              |                          |                                    |                           |                  |                                 |                   |                 |                           |                 |                                    |
| chr5-1765.7.161322 | -0.05804 | 0.860718 | -0.06743 | 0.946241 | 0.981636 | chr5  | 1.77E+08  | 1.77E+08 | + | 0 NA | intron (Nintron (N | 51583 NM_016296  | 51720 Hs. 232721NM_016296  | ENSG000002UTMC1     | RAP80 X2f ubiquitin protein-coding   |                          |                                    |                           |                  |                                 |                   |                 |                           |                 |                                    |
| chr6-3655.7.161322 | -0.05804 | 0.860718 | -0.06743 | 0.946241 | 0.981636 | chr6  | 36535310  | 36541071 | + | 0 NA | intron (NAluY SINE | 9289 NM_007271   | 11329 Hs. 409578NM_007271  | ENSG000002STK38     | NDR NDR1 serine/t protein-coding     |                          |                                    |                           |                  |                                 |                   |                 |                           |                 |                                    |
| chr6-8987.7.161322 | -0.05804 | 0.860718 | -0.06743 | 0.946241 | 0.981636 | chr6  | 89856504  | 89860023 | + | 0 NA | intron (NAluSx1 SI | 28363 NM_012115  | 9994 Hs. 558218NM_012115   | ENSG000002CASP8AP2  | CED-4 FLA caspase 8 protein-coding   |                          |                                    |                           |                  |                                 |                   |                 |                           |                 |                                    |
| chr6-1496.7.161322 | -0.05804 | 0.860718 | -0.06743 | 0.946241 | 0.981636 | chr6  | 1.5E+08   | 1.5E+08  | + | 0 NA | intron (NAluYf1 SI | 27382 NM_007044  | 11104 Hs. 450175NM_007044  | ENSG000002KATNA1    | 28969 Hs. 487636NM_014038            | ENSG000002BZW2           | HSPC028 N basic leu protein-coding |                           |                  |                                 |                   |                 |                           |                 |                                    |
| chr7-1677.7.161322 | -0.05804 | 0.860718 | -0.06743 | 0.946241 | 0.981636 | chr7  | 16704273  | 16707126 | + | 0 NA | intron (NAluY SINE | 44485 NM_001362  | 6566 NR_104007             | 695009NR_104007     | LOC100101                            | FKBP prolpseudo          |                                    |                           |                  |                                 |                   |                 |                           |                 |                                    |
| chr7-7297.7.161322 | -0.05804 | 0.860718 | -0.06743 | 0.946241 | 0.981636 | chr7  | 72975673  | 72976823 | + | 0 NA | IntergeniCpG       | 6260 NM_001301   | 7978 Hs. 532218NM_006988   | ENSG000002MTERF1    | MTERF mitochondon protein-coding     |                          |                                    |                           |                  |                                 |                   |                 |                           |                 |                                    |
| chr7-9187.7.161322 | -0.05804 | 0.860718 | -0.06743 | 0.946241 | 0.981636 | chr7  | 91874028  | 91874856 | + | 0 NA | exon (NM exon (NM  | 2917 NM_001317   | 23471 Hs. 491988NM_014294  | ENSG000002TRAM1     | PNAS8 TR transloc protein-coding     |                          |                                    |                           |                  |                                 |                   |                 |                           |                 |                                    |
| chr8-7067.7.161322 | -0.05804 | 0.860718 | -0.06743 | 0.946241 | 0.981636 | chr8  | 706202089 | 70670416 | + | 0 NA | intron (Nintron (N | 5023026          | 5024690                    | +                   | 0 NA                                 | intron (Nintron (N       | 11451 NM_001282                    | 55833 Hs. 493736NM_018445 | ENSG000002UBAP2  | UBAP-2 ubiquitin protein-coding |                   |                 |                           |                 |                                    |
| chr9-5025.7.161322 | -0.05804 | 0.860718 | -0.06743 | 0.946241 | 0.981636 | chr9  | 5023026   | 5024690  | + | 0 NA | intron (Nintron (N | 33920191         | 33925635                   | +                   | 0 NA                                 | intron (Nintron (N       | 16749431                           | 16750959                  | +                | 0 NA                            | intron (N3 LINE C | 30583 NM_032796 | 94056 Hs. 744258NM_032796 | ENSG000002SYAP1 | BSTA PRO3 synapse 8 protein-coding |
| chr9-3392.7.161322 | -0.05804 | 0.860718 | -0.06743 | 0.946241 | 0.981636 | chr9  | 33920191  | 33925635 | + | 0 NA | intron (Nintron (N | 47640121         | 47641314                   | +                   | 0 NA                                 | intron (Nintron (N       | 9887 NM_005225                     | 2002 Hs. 181128NM_005225  | ENSG000002ELK1   | ETS trans protein-coding        |                   |                 |                           |                 |                                    |
| chrX-1674.7.161322 | -0.05804 | 0.860718 | -0.06743 | 0.946241 | 0.981636 | chrX  | 49032950  | 49035174 | + | 0 NA | intron (Nintron (N | 74279749         | 74281418                   | +                   | 0 NA                                 | intron (Nintron (N       | 6626 NR_030258                     | 66414 NR_030258           | ENSG000002MIR545 | MIRN545 microRNA ncRNA          |                   |                 |                           |                 |                                    |
| chrX-4767.7.161322 | -0.05804 | 0.860718 | -0.06743 | 0.946241 | 0.981636 | chrX  | 1.04E+08  | 1.04E+08 | + | 0 NA | intron (Nintron (N | 2931 NM_012288   | 9643 Hs. 326387NM_012288   | ENSG000002MORF4L2   | MORFL2 MF mortality protein-coding   |                          |                                    |                           |                  |                                 |                   |                 |                           |                 |                                    |
| chrX-4902.7.161322 | -0.05804 | 0.860718 | -0.06743 | 0.946241 | 0.981636 | chrX  | 2.2E+08   | 2.2E+08  | + | 0 NA | non-codirnon-codir | 122 NR_001587    | 6791 Hs. 654845NR_001587   | AURKAP1             | AURKAP1 aurora kipseudo              |                          |                                    |                           |                  |                                 |                   |                 |                           |                 |                                    |
| chr1-2202.8.427198 | 0.05399  | 0.801208 | 0.067386 | 0.946274 | 0.981636 | chr1  | 11734649  | 11736070 | + | 0 NA | intron (NMER20B DN | 7498 NM_001303   | 51061 Hs. 313847NM_015914  | ENSG000002TXNDC11   | EFP1 thioredox protein-coding        |                          |                                    |                           |                  |                                 |                   |                 |                           |                 |                                    |
| chr16-117.8.427198 | 0.05399  | 0.801208 | 0.067386 | 0.946274 | 0.981636 | chr16 | 69356586  | 69357152 | + | 0 NA | 3' UTR (N3' UTR (N | -5083 NM_144676  | 146456 Hs. 729118NM_144676 | ENSG000002TMED6     | PRO34237 transmem protein-coding     |                          |                                    |                           |                  |                                 |                   |                 |                           |                 |                                    |
| chr16-693.8.427198 | 0.05399  | 0.801208 | 0.067386 | 0.946274 | 0.981636 | chr16 | 49661922  | 49663023 | + | 0 NA | exon (NM exon (NM  | -2670 NM_138635  | 83596 Hs. 289052NM_138635  | ENSG000002BCL2L12   | BCL2 like protein-coding             |                          |                                    |                           |                  |                                 |                   |                 |                           |                 |                                    |
| chr19-496.8.427198 | 0.05399  | 0.801208 | 0.067386 | 0.946274 | 0.981636 | chr19 | 58245359  | 58246103 | + | 0 NA | intron (Nintron (N | -17078 NM_001304 | 140731 Hs. 266571NM_080674 | ENSG000002ANKRD60   | C20orf86 ankyrin r protein-coding    |                          |                                    |                           |                  |                                 |                   |                 |                           |                 |                                    |
| chr20-582.8.427198 | 0.05399  | 0.801208 | 0.067386 | 0.946274 | 0.981636 | chr20 | 530558084 | 58261041 | + | 0 NA | intron (Nintron (N | 49645 NM_176806  | 4338 Hs. 163646NM_004531   | ENSG000002MOC52     | MCPBE MC mylben protein-coding       |                          |                                    |                           |                  |                                 |                   |                 |                           |                 |                                    |
| chr5-5305.8.427198 | 0.05399  | 0.801208 | 0.067386 | 0.946274 | 0.981636 | chr5  | 1.28E+08  | 1.28E+08 | + | 0 NA | intron (Nintron (N | 84388 NM_001995  | 2201 Hs. 519294NM_001995   | ENSG000002FBN2      | CCA DA9 F fibrillir protein-coding   |                          |                                    |                           |                  |                                 |                   |                 |                           |                 |                                    |
| chr5-1284.8.427198 | 0.05399  | 0.801208 | 0.067386 | 0.946274 | 0.981636 | chr5  | 25977972  | 25979294 | + | 0 NA | intron (NAluJb SIN | 15831 NM_006355  | 10475 Hs. 584851NM_006355  | ENSG000002TRIM38    | RNF15 ROF tripartit protein-coding   |                          |                                    |                           |                  |                                 |                   |                 |                           |                 |                                    |
| chr6-2597.8.427198 | 0.05399  | 0.801208 | 0.067386 | 0.946274 | 0.981636 | chr6  | 1.25E+08  | 1.25E+08 | + | 0 NA | intron (Nintron (N | 42860 NM_014846  | 9897 Hs. 270045NM_014846   | ENSG000002WASHIC5   | KIAA0196 WASH com protein-coding     |                          |                                    |                           |                  |                                 |                   |                 |                           |                 |                                    |
| chr16-287.8.427198 | 0.05426  | 0.805707 | 0.067345 | 0.946307 | 0.981636 | chr16 | 28735212  | 28737078 | + | 0 NA | TTS (NM_TTS (NM_C  | 11893 NR_106922  | 1.02E+08                   | NR_106922           | ENSG000002MIR6862                    | hsa-mir-6 microRNA ncRNA |                                    |                           |                  |                                 |                   |                 |                           |                 |                                    |
| chr19-931.8.427198 | 0.05426  | 0.805707 | 0.067345 | 0.946307 | 0.981636 | chr19 | 9303853   | 9304980  | + | 0 NA | intron (Nintron (N | 5422 NM_198535   | 374879 Hs. 633842NM_198535 | ENSG000002ZNF699    | hang zinc fing protein-coding        |                          |                                    |                           |                  |                                 |                   |                 |                           |                 |                                    |
| chr15-655.7.733963 | -0.06488 | 0.964456 | -0.06727 | 0.946366 | 0.981636 | chr15 | 65113145  | 65114024 | + | 0 NA | IntergeniAluS6 SI  | -7225 NM_001163  | 390595 Hs. 659255NM_001163 | ENSG000002UBAP1L    | UBAP-1L ubiquitin protein-coding     |                          |                                    |                           |                  |                                 |                   |                 |                           |                 |                                    |
| chr19-105.7.733963 | -0.06488 | 0.964456 | -0.06727 | 0.946366 | 0.981636 | chr19 | 10362008  | 10362495 | + | 0 NA | intron (Nintron (N | 18321 NM_003331  | 7297 Hs. 75516 NM_003331   | ENSG000002CTYK2     | IMD35 JTK tyrosine protein-coding    |                          |                                    |                           |                  |                                 |                   |                 |                           |                 |                                    |
| chr2-3392.7.733963 | -0.06488 | 0.964456 | -0.06727 | 0.946366 | 0.981636 | chr2  | 3392327   | 3393043  | + | 0 NA | intron (Nintron (N | 12991 NM_01603C  | 51112 Hs. 252713NM_01603C  | ENSG000002TRAPP12   | CGI-87 PF trafficki protein-coding   |                          |                                    |                           |                  |                                 |                   |                 |                           |                 |                                    |
| chr2-8576.7.733963 | -0.06488 | 0.964456 | -0.06727 | 0.946366 | 0.981636 | chr2  | 85767882  | 85770287 | + | 0 NA | intron (Nintron (N | 14593 NR_106715  | 1.02E+08                   | NR_106715           | ENSG000002MIR6071                    | hsa-mir-6 microRNA ncRNA |                                    |                           |                  |                                 |                   |                 |                           |                 |                                    |
| chr7-1031.5.733963 | -0.06488 | 0.964456 | -0.06727 | 0.946366 | 0.981636 | chr7  | 1.03E+08  | 1.03E+08 | + | 0 NA | 3' UTR (N3' UTR (N | 27949 NM_001161  | 83787 Hs. 287412NM_031905  | ENSG000002CARM10    | PNAS-112 armadill protein-coding     |                          |                                    |                           |                  |                                 |                   |                 |                           |                 |                                    |
| chr1-3127.6.948992 | 0.059365 | 0.883816 | 0.067169 | 0.946447 | 0.981636 | chr1  | 31275238  | 31275770 | + | 0 NA | intron (NAluS6 SI  | 21284 NM_004814  | 9410 Hs. 33962 NM_004814   | ENSG000002SNRP40    | 40K HPRF small nuc protein-coding    |                          |                                    |                           |                  |                                 |                   |                 |                           |                 |                                    |
| chr1-114.6.948992  | 0.059365 | 0.883816 | 0.067169 | 0.946447 | 0.981636 | chr1  | 1.14E+08  | 1.14E+08 | + | 0 NA | intron (Nintron (N | 90088 NM_003302C | 51592 Hs. 28637 NM_015905  | ENSG000002TRIM33    | CTC7 tripartit protein-coding        |                          |                                    |                           |                  |                                 |                   |                 |                           |                 |                                    |
| chr17-186.6.948992 | 0.059365 | 0.883816 | 0.067169 | 0.946447 | 0.981636 | chr17 | 18908325  | 18908934 | + | 0 NA | intron (Nintron (N | -42047 NM_001282 | 125206 Hs. 462418NM_152351 | ENSG000002SLC5A10   | SGLT-5 Solute c protein-coding       |                          |                                    |                           |                  |                                 |                   |                 |                           |                 |                                    |
| chr17-58.6.948992  | 0.059365 | 0.883816 | 0.067169 | 0.946447 | 0.981636 | chr17 | 58091186  | 58091911 | + | 0 NA | 3' UTR (N3' UTR (N | 8129 NM_080677   | 140735 Hs. 720595NM_080677 | ENSG000002DYLL2     | DNCL1B Dynein l protein-coding       |                          |                                    |                           |                  |                                 |                   |                 |                           |                 |                                    |
| chr14-231.10.38443 | 0.048727 | 0.725915 | 0.067125 | 0.946482 | 0.981636 | chr14 | 23232425  | 23232655 | + | 0 NA | 3' UTR (N3' UTR (N | 2534 NM_00136C   | 8106 Hs. 391464NM_004995   | ENSG000002PABPN1    | OPMD PAB2 poly (A) t protein-coding  |                          |                                    |                           |                  |                                 |                   |                 |                           |                 |                                    |
| chr16-155.10.38443 | 0.048727 | 0.725915 | 0.067125 | 0.946482 | 0.981636 | chr16 | 15980877  | 15982539 | + | 0 NA | intron (Nintron (N | 32092 NM_004995  | 4363 Hs. 391464NM_004995   | ENSG000002ABCC1     | ABC29 ABCATP bindi protein-coding    |                          |                                    |                           |                  |                                 |                   |                 |                           |                 |                                    |
| chr13-755.5.998805 | 0.063727 | 0.949569 | 0.067112 | 0.946493 | 0.981636 | chr13 | 75575615  | 75576369 | + | 0 NA | intron (NAluSx SIN | 26242 NM_006002  | 7347 Hs. 162241NM_006002   | ENSG000002UCHL3     | UCH-13 ubiquitin protein-coding      |                          |                                    |                           |                  |                                 |                   |                 |                           |                 |                                    |
| chr2-2175.5.998805 | 0.063727 | 0.949569 | 0.067112 | 0.946493 | 0.981636 | chr2  | 2.18E+08  | 2.18E+08 | + | 0 NA | exon (NM exon (NM  | 9602 NR_106867   | 1.02E+08                   | NR_106867           | ENSG000002MIR6809                    | hsa-mir-6 microRNA ncRNA |                                    |                           |                  |                                 |                   |                 |                           |                 |                                    |
| chr3-195.8.588681  | -0.05416 | 0.808276 | -0.06701 | 0.946573 | 0.981636 | chr3  | 1.95E+08  | 1.95E+08 | + | 0 NA | intron (Nintron (N | -55688 NM_152531 | 152002 Hs. 478741NM_152531 | ENSG000002XXYL1T    | C3orf21 xyloside protein-coding      |                          |                                    |                           |                  |                                 |                   |                 |                           |                 |                                    |
| chr1-2261.8.955218 | 0.052218 | 0.780095 | 0.066938 | 0.946631 | 0.981636 | chr1  | 2.26E+08  | 2.26E+08 | + | 0 NA | intron (Nintron (N | 2451 NM_002735   | 64746 Hs. 520207NM_002735  | ENSG000002ACBD3     | CGP60 GOC acyl-CoA protein-coding    |                          |                                    |                           |                  |                                 |                   |                 |                           |                 |                                    |
| chr16-857.8.955218 | 0.052218 | 0.780095 | 0.066938 | 0.946631 | 0.981636 | chr16 | 85787391  | 85788937 | + | 0 NA | intron (Nintron (N | -4251 NR_135193  | 1.02E+08                   | Hs. 662217NR_135193 | ENSG000002LOC1010192                 | uncharactncRNA           |                                    |                           |                  |                                 |                   |                 |                           |                 |                                    |
| chr6-7347.8.955218 | 0.052218 | 0.780095 | 0.066938 | 0.946631 | 0.981636 | chr6  | 73470144  | 73472081 | + | 0 NA | intron (Nintron (N | 9375 NM_001122   | 25821 Hs. 347614NM_012122  | ENSG000002MT01      | CGI-02 Cm microRNA ncRNA             |                          |                                    |                           |                  |                                 |                   |                 |                           |                 |                                    |
| chr8-2384.8.955218 | 0.052218 | 0.780095 | 0.066938 | 0.946631 | 0.981636 | chr8  | 23848414  | 23852192 | + | 0 NA | intron (Nintron (N | 4639 NM_003155   | 6781 Hs. 25590 NM_003155   | ENSG000002STC1      | STC stannioce protein-coding         |                          |                                    |                           |                  |                                 |                   |                 |                           |                 |                                    |
| chr1-2688.10.91245 | 0.047497 | 0.709691 | 0.066927 | 0.94664  | 0.981636 | chr1  | 26880060  | 26887856 | + | 0 NA | exon (NM exon (NM  | 6025 NM_018066   | 54707 Hs. 14333 NM_018066  | ENSG000002GPN2      | ATPBD1B GPN-loop protein-coding      |                          |                                    |                           |                  |                                 |                   |                 |                           |                 |                                    |
| chr12-562.10.91245 | 0.047497 | 0.709691 | 0.066927 | 0.94664  | 0.981636 | chr12 | 56204818  | 56217489 | + | 0 NA | intron (NAluSg SIN | 10548 NM_001242  | 10193 Hs. 524502NM_005785  | ENSG000002RNF41     | FLRP NRDF fing protein-coding        |                          |                                    |                           |                  |                                 |                   |                 |                           |                 |                                    |
| chr13-205.10.91245 | 0.047497 | 0.70     |          |          |          |       |           |          |   |      |                    |                  |                            |                     |                                      |                          |                                    |                           |                  |                                 |                   |                 |                           |                 |                                    |



|           |          |          |          |          |          |          |       |          |           |   |   |    |                    |                  |                               |                     |                 |                                  |
|-----------|----------|----------|----------|----------|----------|----------|-------|----------|-----------|---|---|----|--------------------|------------------|-------------------------------|---------------------|-----------------|----------------------------------|
| chr16-295 | 11.39147 | 0.046209 | 0.694555 | 0.06653  | 0.946956 | 0.981636 | chr16 | 29559662 | 1.9561670 | + | 0 | NA | intron (Nintron (N | 34426 NR_13530E  | 440354 Hs. 55270CR_002473     | SMG1P2              | -               | SMG1 pset pseudo                 |
| chr3-4712 | 11.39147 | 0.046209 | 0.694555 | 0.06653  | 0.946956 | 0.981636 | chr3  | 47122869 | 47124351  | + | 0 | NA | exon (NM exon (NM  | 40367 NM_01415E  | 29072 Hs. 517941NM_012271     | ENSG00000SETD2      | HBP231 H1SET    | domaiprotein-coding              |
| chr3-1976 | 11.39147 | 0.046209 | 0.694555 | 0.06653  | 0.946956 | 0.981636 | chr3  | 1.98E+08 | 1.98E+08  | + | 0 | NA | intron (NMER4-int  | 11246 NR_00326E  | 220729 Hs. 478854NR_00326E    | ENSG00000CLOC220729 | -               | succinate pseudo                 |
| chr8-1448 | 11.39147 | 0.046209 | 0.694555 | 0.06653  | 0.946956 | 0.981636 | chr8  | 1.45E+08 | 1.45E+08  | + | 0 | NA | intron (NLM1E3D LI | 16065 NM_00136E  | 58500 Hs. 532277NM_001061     | ENSG00000ZNF250     | MZF647 ZNF      | zinc fingerprotein-coding        |
| chr1-1592 | 8.90622  | 0.052028 | 0.782189 | 0.066516 | 0.946967 | 0.981636 | chr1  | 15928065 | 15930571  | + | 0 | NA | exon (NM exon (NM  | 46814 NM_001324  | 7709 Hs. 433764NM_00344E      | ENSG00000ZBTB17     | ZIF-1 ZNF       | zinc fingerprotein-coding        |
| chr1-6656 | 8.90622  | 0.052028 | 0.782189 | 0.066516 | 0.946967 | 0.981636 | chr1  | 66566343 | 66567617  | + | 0 | NA | intron (NLMER4 LIN | 32827 NM_032291  | 84251 Hs. 132121NM_032291     | ENSG00000CSGIP1     | -               | SH3 domainprotein-coding         |
| chr10-73C | 8.90622  | 0.052028 | 0.782189 | 0.066516 | 0.946967 | 0.981636 | chr10 | 73013189 | 73016940  | + | 0 | NA | intron (NAluSz SIN | -60258 NM_03256E | 84647 Hs. 33317E_NM_03256E    | ENSG00000PLA2G12B   | FKSG71 G        | phospholiprotein-coding          |
| chr12-51C | 8.90622  | 0.052028 | 0.782189 | 0.066516 | 0.946967 | 0.981636 | chr12 | 51052473 | 51052713  | + | 0 | NA | intron (NAluSg SIN | 4266 NR_04502C   | 25875 Hs. 65527E_NM_01541E    | ENSG00000LETMD1     | 111001901LETMD1 | donorprotein-coding              |
| chr15-636 | 8.90622  | 0.052028 | 0.782189 | 0.066516 | 0.946967 | 0.981636 | chr15 | 63625374 | 63625631  | + | 0 | NA | intron (NAluSz SIN | -24675 NR_03408C | 1E+08 Hs. 63116E_NR_03408C    | ENSG00000CASP3-AS1  | -               | USP3 anticrRNA                   |
| chr3-149E | 8.90622  | 0.052028 | 0.782189 | 0.066516 | 0.946967 | 0.981636 | chr3  | 1.5E+08  | 1.5E+08   | + | 0 | NA | intron (Nintron (N | 3928 NM_00262E   | 5217 Hs. 91747 NM_00262E      | ENSG00000PFN2       | D3S1319E        | profilin protein-coding          |
| chr1-2741 | 9.43424  | 0.050415 | 0.758308 | 0.066484 | 0.946992 | 0.981636 | chr1  | 27410813 | 27416007  | + | 0 | NA | intron (Nintron (N | 20788 NM_005281  | 2827 Hs. 66542 NM_005281      | ENSG00000GPR3       | ACCA            | G protein-coding                 |
| chr11-613 | 9.43424  | 0.050415 | 0.758308 | 0.066484 | 0.946992 | 0.981636 | chr11 | 61394902 | 61395366  | + | 0 | NA | intron (NAluJr SIN | 2547 NM_00117E   | 51259 Hs. 26745 NM_01649E     | ENSG00000TMEM216    | HSPC244         | transmembraneprotein-coding      |
| chr12-68E | 9.43424  | 0.050415 | 0.758308 | 0.066484 | 0.946992 | 0.981636 | chr12 | 68649919 | 68660765  | + | 0 | NA | intron (Nintron (N | -27967 NR_03333E | 1E+08 Hs. 72453E_NR_03333E    | ENSG00000SNORA70G   | U70G            | small nucleosRNA                 |
| chr12-112 | 9.43424  | 0.050415 | 0.758308 | 0.066484 | 0.946992 | 0.981636 | chr12 | 1.13E+08 | 1.13E+08  | + | 0 | NA | intron (NMIR1 Am   | 19637 NM_00103E  | 4939 Hs. 41433E_NM_00253E     | ENSG00000OAS2       | -               | 2'-5'-oligoprotein-coding        |
| chr14-884 | 9.43424  | 0.050415 | 0.758308 | 0.066484 | 0.946992 | 0.981636 | chr14 | 88478479 | 88480336  | + | 0 | NA | exon (NM exon (NM  | 75600 NM_00703E  | 11099 Hs. 43704C_NM_00703E    | ENSG00000PTPN21     | PTPDI PTF       | protein tyrosine kinase          |
| chr16-58E | 9.43424  | 0.050415 | 0.758308 | 0.066484 | 0.946992 | 0.981636 | chr16 | 58569367 | 58578780  | + | 0 | NA | intron (NAluJo SIN | -14142 NR_00298C | 677830 Hs. 67751E_NR_00298C   | ENSG00000SNORA50A   | ACA50 SNC       | small nucleosRNA                 |
| chr17-67E | 9.43424  | 0.050415 | 0.758308 | 0.066484 | 0.946992 | 0.981636 | chr17 | 67217573 | 67218606  | + | 0 | NA | intron (NAluSg SIN | -26687 NR_13639E | 1.02E+08 Hs. 569824NR_13639E  | LOC10192E           | -               | uncharacterizedncRNA             |
| chr18-54E | 9.43424  | 0.050415 | 0.758308 | 0.066484 | 0.946992 | 0.981636 | chr18 | 54287374 | 54290627  | + | 0 | NA | intron (NLM14a LI  | 19426 NM_001351  | 11201 Hs. 43853E_NM_00719E    | ENSG00000POL1       | RAD30B RAD      | DNA polymerase                   |
| chr18-63E | 9.43424  | 0.050415 | 0.758308 | 0.066484 | 0.946992 | 0.981636 | chr18 | 63392112 | 63404188  | + | 0 | NA | intron (N(TA)n Sin | 24326 NM_00486E  | 9525 Hs. 12655E_NM_00486E     | ENSG00000VPS4B      | MIG1 SKD1       | vacuolar protein-coding          |
| chr19-114 | 9.43424  | 0.050415 | 0.758308 | 0.066484 | 0.946992 | 0.981636 | chr19 | 1142737  | 1144715   | + | 0 | NA | intron (NMLTIC LTF | -11505 NM_00110E | 22904 Hs. 40870E_NM_01496E    | ENSG00000CBNO2      | KIAA0963        | strawberry protein-coding        |
| chr2-3251 | 9.43424  | 0.050415 | 0.758308 | 0.066484 | 0.946992 | 0.981636 | chr2  | 32515168 | 32520604  | + | 0 | NA | intron (Nintron (N | -14267 NR_03028E | 693143 NR_03028E              | ENSG00000MIR558     | MIR558          | microRNA ncRNA                   |
| chr2-462E | 9.43424  | 0.050415 | 0.758308 | 0.066484 | 0.946992 | 0.981636 | chr2  | 46297964 | 46299493  | + | 0 | NA | intron (NCPG       | 1321 NM_00143C   | 2034 Hs. 46841E_NM_00143C     | ENSG00000EPAS1      | ECYT4 HIF       | endothelin protein-coding        |
| chr2-732A | 9.43424  | 0.050415 | 0.758308 | 0.066484 | 0.946992 | 0.981636 | chr2  | 73243061 | 73246430  | + | 0 | NA | intron (Nintron (N | 10437 NM_00642E  | 10574 Hs. 36814E_NM_00642E    | ENSG00000CCT7       | CCTETA C        | chaperonin protein-coding        |
| chr2-1021 | 9.43424  | 0.050415 | 0.758308 | 0.066484 | 0.946992 | 0.981636 | chr2  | 1.02E+08 | 1.02E+08  | + | 0 | NA | intron (N(L2c LINE | -13800 NM_001351 | 8808 Hs. 65986E_NM_00385E     | ENSG00000L1RL2      | IL-1Rrp2        | interleukin protein-coding       |
| chr2-1974 | 9.43424  | 0.050415 | 0.758308 | 0.066484 | 0.946992 | 0.981636 | chr2  | 1.97E+08 | 1.97E+08  | + | 0 | NA | 3' UTR (N3' UTR (N | 12176 NR_13278E  | 1.07E+08 NR_13278E            | SNORA105E           | -               | small nucleosRNA                 |
| chr20-34C | 9.43424  | 0.050415 | 0.758308 | 0.066484 | 0.946992 | 0.981636 | chr20 | 34087663 | 34090024  | + | 0 | NA | 3' UTR (N3' UTR (N | 23400 NM_00131E  | 8894 Hs. 42918C_NM_00390E     | ENSG00000EIF2S2     | EIF2 EIF2       | eukaryotic protein-coding        |
| chr4-1684 | 9.43424  | 0.050415 | 0.758308 | 0.066484 | 0.946992 | 0.981636 | chr4  | 1.68E+08 | 1.68E+08  | + | 0 | NA | intron (NLM1E2z LI | 12824 NM_001291  | 91351 Hs. 535011NM_00101E     | ENSG00000DDX60L     | -               | DexH/Hc protein-coding           |
| chr6-359C | 9.43424  | 0.050415 | 0.758308 | 0.066484 | 0.946992 | 0.981636 | chr6  | 35909143 | 35911281  | + | 0 | NA | intron (NAluSp SIN | 10886 NM_003137  | 6732 Hs. 443861NM_003137      | ENSG00000SRPK1      | SFRSK1 SRSF     | protprotein-coding               |
| chr8-670A | 9.43424  | 0.050415 | 0.758308 | 0.066484 | 0.946992 | 0.981636 | chr8  | 67047599 | 67052975  | + | 0 | NA | intron (NAluYe6 SI | 11846 NM_006837  | 10987 Hs. 49191E_NM_006837    | ENSG00000COPS5      | CSN5 JAB1       | COP9 sig protein-coding          |
| chr9-575E | 9.43424  | 0.050415 | 0.758308 | 0.066484 | 0.946992 | 0.981636 | chr9  | 5756183  | 57581142  | + | 0 | NA | intron (Nintron (N | 75955 NM_02489E  | 79956 Hs. 59107E_NM_02489E    | ENSG00000ERMP1      | FXNA KIAA       | endoplasmic protein-coding       |
| chr13-72E | 5.684965 | -0.06524 | 0.98579  | -0.06618 | 0.947231 | 0.981636 | chr13 | 72843470 | 72844245  | + | 0 | NA | intron (Nintron (N | 61724 NR_14620E  | 10464 Hs. 44192E_NM_00634E    | ENSG00000PIBF1      | C13orf24        | progesterone protein-coding      |
| chr2-340E | 5.684965 | -0.06524 | 0.98579  | -0.06618 | 0.947231 | 0.981636 | chr2  | 3406328  | 3406527   | + | 0 | NA | intron (Nintron (N | 26733 NM_01603C  | 51112 Hs. 25271E_NM_01603C    | ENSG00000TRAPP12    | CG1-87 PF       | trickrack protein-coding         |
| chr14-88E | 7.956034 | 0.054385 | 0.821907 | 0.06617  | 0.947243 | 0.981636 | chr14 | 88872039 | 88872588  | + | 0 | NA | intron (Nintron (N | 47662 NM_00136E  | 123016 Hs. 30305E_NM_14459E   | ENSG00000TTCS       | BBS8 RP51       | tetratric protein-coding         |
| chr2-117E | 7.956034 | 0.054385 | 0.821907 | 0.06617  | 0.947243 | 0.981636 | chr2  | 11791124 | 11793357  | + | 0 | NA | intron (NMIR3 SINE | 24796 NR_036071  | 1E+08 NR_036071               | ENSG00000MIR548S    | -               | microRNA ncRNA                   |
| chr20-52E | 7.956034 | 0.054385 | 0.821907 | 0.06617  | 0.947243 | 0.981636 | chr20 | 526281   | 528471    | + | 0 | NA | intron (Nintron (N | 16414 NM_00136E  | 1457 Hs. 64405E_NM_00189E     | ENSG00000CSNK2A1    | CK2A1 CKI       | casein kinase protein-coding     |
| chr3-1587 | 7.956034 | 0.054385 | 0.821907 | 0.06617  | 0.947243 | 0.981636 | chr3  | 1.58E+08 | 1.58E+08  | + | 0 | NA | intron (Nintron (N | 13643 NM_001271  | 51319 Hs. 59128E_NM_01662E    | ENSG00000RSRC1      | BM-011 MF       | arginine protein-coding          |
| chr3-1841 | 7.956034 | 0.054385 | 0.821907 | 0.06617  | 0.947243 | 0.981636 | chr3  | 1.84E+08 | 1.84E+08  | + | 0 | NA | intron (Nintron (N | 7595 NM_003907   | 8893 Hs. 283551NM_003907      | ENSG00000EIF2B5     | CACH CLE        | eukaryotic protein-coding        |
| chr5-172E | 7.956034 | 0.054385 | 0.821907 | 0.06617  | 0.947243 | 0.981636 | chr5  | 1.72E+08 | 1.72E+08  | + | 0 | NA | intron (NLMC LINE  | -68930 NM_03364E | 23291 Hs. 48413E_NM_01230C    | ENSG00000FBXW11     | BTRC2 BTF       | beta ancrprotein-coding          |
| chr6-170E | 7.956034 | 0.054385 | 0.821907 | 0.06617  | 0.947243 | 0.981636 | chr6  | 1.7E+08  | 1.7E+08   | + | 0 | NA | intron (Nintron (N | 3736 NR_039787   | 1.01E+08 NR_039787            | ENSG00000MIR4644    | -               | microRNA ncRNA                   |
| chr1-1124 | 6.477827 | 0.060183 | 0.909622 | 0.066163 | 0.947248 | 0.981636 | chr1  | 11245818 | 11246736  | + | 0 | NA | intron (Nintron (N | 16274 NM_00495E  | 2475 Hs. 338207NM_00495E      | ENSG00000MTOR       | FRAP FRAF       | mechanism protein-coding         |
| chr1-2051 | 6.477827 | 0.060183 | 0.909622 | 0.066163 | 0.947248 | 0.981636 | chr1  | 2.05E+08 | 2.05E+08  | + | 0 | NA | intron (N(L2b LINE | 10172 NM_00119E  | 5929 Hs. 51923E_NM_00505E     | ENSG00000RBBP5      | RBQ3 SWD18      | bindin protein-coding            |
| chr11-60E | 6.477827 | 0.060183 | 0.909622 | 0.066163 | 0.947248 | 0.981636 | chr11 | 60920207 | 60921937  | + | 0 | NA | intron (Nintron (N | -3388 NR_178031  | 54972 Hs. 11855E_NM_01787C    | ENSG00000TMEM132A   | GBP HSPA        | transmembraneprotein-coding      |
| chr13-39E | 6.477827 | 0.060183 | 0.909622 | 0.066163 | 0.947248 | 0.981636 | chr13 | 39680527 | 39681157  | + | 0 | NA | intron (NMLT1E2 LI | -16707 NR_03619C | 1E+08 NR_03619C               | ENSG00000MIR4305    | -               | microRNA ncRNA                   |
| chr13-77E | 6.477827 | 0.060183 | 0.909622 | 0.066163 | 0.947248 | 0.981636 | chr13 | 77065332 | 77067847  | + | 0 | NA | intron (NLMC5 LIN  | -8925 NR_04671E  | 1.01E+08 Hs. 56928E_NR_04671E | ENSG00000MYCBP2-AS  | -               | MYCBP2 arncRNA                   |
| chr15-42E | 6.477827 | 0.060183 | 0.909622 | 0.066163 | 0.947248 | 0.981636 | chr15 | 42545288 | 42546118  | + | 0 | NA | intron (Nintron (N | 3090 NM_15326E   | 255252 Hs. 234681NM_15326E    | ENSG00000LRRCS7     | -               | leucine rich protein-coding      |
| chr2-257A | 6.477827 | 0.060183 | 0.909622 | 0.066163 | 0.947248 | 0.981636 | chr2  | 25748662 | 25749334  | + | 0 | NA | intron (Nintron (N | 45693 NM_00136E  | 55252 Hs. 11981E_NM_01826E    | ENSG00000ASXL2      | ASXH2 SH        | ASXL trarprotein-coding          |
| chr5-154E | 6.477827 | 0.060183 | 0.909622 | 0.066163 | 0.947248 | 0.981636 | chr5  | 1.54E+08 | 1.54E+08  | + | 0 | NA | intron (Nintron (N | 64629 NM_198321  | 55568 Hs. 631797NM_01754C     | ENSG00000GALNT10    | GALNACT1C       | polypeptide protein-coding       |
| chr5-150C | 11.87049 | 0.045023 | 0.681417 | 0.066072 | 0.94732  | 0.981636 | chr5  | 1.5E+08  | 1.5E+08   | + | 0 | NA | intron (NLM1Ec LIN | 12613 NM_00136E  | 22993 Hs. 71918E_NM_01498E    | ENSG00000HMGXB3     | HMGX3 SMF       | HMG-box protein-coding           |
| chr2-201E | 7.428014 | 0.056674 | 0.858107 | 0.066046 | 0.947341 | 0.981636 | chr2  | 2.01E+08 | 2.01E+08  | + | 0 | NA | exon (NM exon (NM  | 24570 NM_03335E  | 841 Hs. 59976E_NM_00122E      | ENSG00000CASP8      | ALPS2B C        | caseinase epsilon protein-coding |
| chr9-121E | 7.428014 | 0.056674 | 0.858107 | 0.066046 | 0.947341 | 0.981636 | chr9  | 1.21E+08 | 1.21E+08  | + | 0 | NA | intron (Nintron (N | 8216 NM_198194   | 2040 Hs. 25390E_NM_00409E     | ENSG00000STOM       | BND7 EPB7       | stomatol protein-coding          |
| chr1-172E | 9.913263 | 0.048803 | 0.739655 | 0.06598  | 0.947394 | 0.981636 | chr1  | 17426819 | 17428997  | + | 0 | NA | intron (Nintron (N | 10628 NM_00113E  | 55920 Hs. 380857NM_01871E     | ENSG00000RCC2       | TD-60           | regulator protein-coding         |
| chr1-114E | 9.913263 | 0.048803 | 0.739655 | 0.06598  | 0.947394 | 0.9816   |       |          |           |   |   |    |                    |                  |                               |                     |                 |                                  |

|                    |          |          |          |          |          |       |          |          |   |   |    |                     |        |           |           |           |                    |                     |                   |                                 |                         |
|--------------------|----------|----------|----------|----------|----------|-------|----------|----------|---|---|----|---------------------|--------|-----------|-----------|-----------|--------------------|---------------------|-------------------|---------------------------------|-------------------------|
| chr11-673.8.435056 | 0.052268 | 0.797935 | 0.065505 | 0.947772 | 0.981636 | chr11 | 67308079 | 67308607 | + | 0 | NA | intron (Nintron (N  | 4813   | NR_017857 | 54961     | Hs.29173  | NR_017857          | ENSG000003SSH3      | SSH3L             | slingshotprotein-coding         |                         |
| chr15-505.8.435056 | 0.052268 | 0.797935 | 0.065505 | 0.947772 | 0.981636 | chr15 | 50957358 | 50962159 | + | 0 | NA | intron (N1MA4A LI   | 15629  | NR_027642 | 1E+08     | Hs.73049  | NR_027642          | DCAF13P3            | -                 | DDBI and pseudo                 |                         |
| chr16-532.8.435056 | 0.052268 | 0.797935 | 0.065505 | 0.947772 | 0.981636 | chr16 | 53298594 | 53300953 | + | 0 | NA | intron (Nintron (N  | 71439  | NR_001347 | 643802    | Hs.45133  | NR_001207030       | LOC643802           | -                 | u3 small protein-coding         |                         |
| chr17-324.8.435056 | 0.052268 | 0.797935 | 0.065505 | 0.947772 | 0.981636 | chr17 | 32469192 | 32471186 | + | 0 | NA | intron (NAluJb SIN  | -16804 | NR_003888 | 8851      | Hs.50001  | NR_003888          | ENSG000003CDK5R1    | CDK5P35           | Cyclin dependent protein-coding |                         |
| chr19-467.8.435056 | 0.052268 | 0.797935 | 0.065505 | 0.947772 | 0.981636 | chr19 | 4677520  | 4680239  | + | 0 | NA | promoter-promoter-  | -403   | NR_001242 | 1E+08     | Hs.67813  | NR_001242901       | PPP9-AS1            | -                 | PPP9 antipeptide-coding         |                         |
| chr2-1272.8.435056 | 0.052268 | 0.797935 | 0.065505 | 0.947772 | 0.981636 | chr2  | 12723472 | 12725046 | + | 0 | NA | intron (N12c LINE   | 7323   | NR_027303 | 28951     | Hs.467751 | NR_021643          | ENSG000003TRIB2     | C5WF GS3          | tribbles protein-coding         |                         |
| chr2-2272.8.435056 | 0.052268 | 0.797935 | 0.065505 | 0.947772 | 0.981636 | chr2  | 2.28E+08 | 2.28E+08 | + | 0 | NA | intron (Nintron (N  | 63366  | NR_001133 | 3267      | Hs.352962 | NR_004504          | ENSG000003AGFG1     | HRB RAB FAR GAP   | wiprotein-coding                |                         |
| chr20-385.8.435056 | 0.052268 | 0.797935 | 0.065505 | 0.947772 | 0.981636 | chr20 | 38524806 | 38527222 | + | 0 | NA | exon (NM exon (NM   | 9451   | NR_039605 | 1.01E+08  | NR_039605 | ENSG000003MIR54802 | -                   | microRNA ncRNA    |                                 |                         |
| chr21-466.8.435056 | 0.052268 | 0.797935 | 0.065505 | 0.947772 | 0.981636 | chr21 | 46650579 | 46652033 | + | 0 | NA | intron (Nintron (N  | 15632  | NR_206962 | 3275      | Hs.15416  | NR_001533          | ENSG000003PRMT2     | HRMT1L1           | protein-coding                  |                         |
| chr22-205.8.435056 | 0.052268 | 0.797935 | 0.065505 | 0.947772 | 0.981636 | chr22 | 20565130 | 20566753 | + | 0 | NA | intron (Nintron (N  | 57894  | NR_001293 | 51586     | Hs.51742  | NR_015883          | ENSG000003MED15     | ARC105 C          | mediator protein-coding         |                         |
| chr3-4048.8.435056 | 0.052268 | 0.797935 | 0.065505 | 0.947772 | 0.981636 | chr3  | 40485088 | 40489470 | + | 0 | NA | exon (NM exon (NM   | 10157  | NR_173655 | 285267    | Hs.40715  | NR_173655          | ENSG000003ZNF619    | -                 | zinc finger protein-coding      |                         |
| chr4-1254.8.435056 | 0.052268 | 0.797935 | 0.065505 | 0.947772 | 0.981636 | chr4  | 1.25E+08 | 1.25E+08 | + | 0 | NA | exon (NM exon (NM   | -38441 | NR_031746 | 1E+08     | NR_031746 | ENSG000003MIR2054  | hsa-mir-2           | microRNA ncRNA    |                                 |                         |
| chr5-9576.8.435056 | 0.052268 | 0.797935 | 0.065505 | 0.947772 | 0.981636 | chr5  | 95789968 | 95794074 | + | 0 | NA | intron (NHALI LINE  | 30705  | NR_002064 | 2745      | Hs.28988  | NR_002064          | ENSG000003GLRX      | GRX GRX1          | glutaredc protein-coding        |                         |
| chr7-7662.8.435056 | 0.052268 | 0.797935 | 0.065505 | 0.947772 | 0.981636 | chr7  | 76623868 | 76625941 | + | 0 | NA | intron (NAluYml SI  | 2399   | NR_152992 | 22932     | Hs.48867  | NR_012233          | ENSG000003POMZP3    | POM-ZP3 POM121    | arprotein-coding                |                         |
| chr9-8932.8.435056 | 0.052268 | 0.797935 | 0.065505 | 0.947772 | 0.981636 | chr9  | 89329287 | 89330963 | + | 0 | NA | intron (NMER6B DNA  | 11274  | NR_001282 | 79048     | Hs.59804  | NR_024077          | ENSG000003SECSBP2   | SBP2              | SECS1 birprotein-coding         |                         |
| chr9-9233.8.435056 | 0.052268 | 0.797935 | 0.065505 | 0.947772 | 0.981636 | chr9  | 92300763 | 92308619 | + | 0 | NA | intron (N1M03 LIN   | -10935 | NR_073446 | 3376      | Hs.44540  | NR_002161          | ENSG000003IARS      | GRIDH1 I          | isoleucylprotein-coding         |                         |
| chr4-8929.5.478643 | 0.064916 | 0.991762 | 0.065455 | 0.947811 | 0.981636 | chr4  | 89229898 | 89230662 | + | 0 | NA | intron (Nintron (N  | -29364 | NR_034077 | 1E+08     | Hs.72891  | NR_034077          | ENSG000003THAP9-AS1 | -                 | THAP9 antncRNA                  |                         |
| chr1-1124.10.39228 | 0.047342 | 0.723614 | 0.065425 | 0.947836 | 0.981636 | chr1  | 1.12E+08 | 1.12E+08 | + | 0 | NA | intron (N1Tiger14a  | 6055   | NR_03621C | 1E+08     | NR_03621C | ENSG000003MIR4256  | -                   | microRNA ncRNA    |                                 |                         |
| chr1-1147.10.39228 | 0.047342 | 0.723614 | 0.065425 | 0.947836 | 0.981636 | chr1  | 1.15E+08 | 1.15E+08 | + | 0 | NA | intron (Nintron (N  | -16953 | NR_002524 | 4893      | Hs.48650  | NR_002524          | ENSG000003NRAS      | ALPS4 CMNRAS      | protprotein-coding              |                         |
| chr13-727.10.39228 | 0.047342 | 0.723614 | 0.065425 | 0.947836 | 0.981636 | chr13 | 72775201 | 72777815 | + | 0 | NA | intron (Nintron (N  | 5392   | NR_001322 | 22894     | Hs.74410  | NR_014953          | ENSG000003DIS3      | 2810028NC         | DIS3 homc protein-coding        |                         |
| chr15-925.10.39228 | 0.047342 | 0.723614 | 0.065425 | 0.947836 | 0.981636 | chr15 | 92975781 | 92987851 | + | 0 | NA | intron (Nintron (N  | 77417  | NR_036133 | 1E+08     | NR_036133 | ENSG000003MIR3175  | mir-3175            | microRNA ncRNA    |                                 |                         |
| chr17-665.10.39228 | 0.047342 | 0.723614 | 0.065425 | 0.947836 | 0.981636 | chr17 | 6632211  | 6635299  | + | 0 | NA | intron (N1LME2z LI  | 6956   | NR_001351 | 9851      | Hs.28070  | NR_014804          | ENSG000003KIAA0753  | MNR OFIP          | KIAA0753 protein-coding         |                         |
| chr17-401.10.39228 | 0.047342 | 0.723614 | 0.065425 | 0.947836 | 0.981636 | chr17 | 40125973 | 40137469 | + | 0 | NA | intron (Nintron (N  | -8816  | NR_007355 | 22794     | Hs.74328  | NR_007355          | ENSG000003CASC3     | BTZ MLN51         | CASC3 exc protein-coding        |                         |
| chr17-481.10.39228 | 0.047342 | 0.723614 | 0.065425 | 0.947836 | 0.981636 | chr17 | 48915283 | 48929144 | + | 0 | NA | intron (NAluSg SIN  | -13230 | NR_135674 | 1.05E+08  | Hs.65524  | NR_135674          | ENSG000003LOC105371 | -                 | uncharactncRNA                  |                         |
| chr19-162.10.39228 | 0.047342 | 0.723614 | 0.065425 | 0.947836 | 0.981636 | chr19 | 16216238 | 16224599 | + | 0 | NA | intron (NAluSz SIN  | 22507  | NR_032493 | 8907      | Hs.71040  | NR_032493          | ENSG000003AP1M1     | AP47 CLAF         | adaptor protein-coding          |                         |
| chr20-384.10.39228 | 0.047342 | 0.723614 | 0.065425 | 0.947836 | 0.981636 | chr20 | 38427364 | 38433560 | + | 0 | NA | promoter-promoter-  | -658   | NR_003017 | 677839    | Hs.71151  | NR_003017          | ENSG000003SNORA71C  | U71c              | small nucsnoRNA                 |                         |
| chr3-9425.10.39228 | 0.047342 | 0.723614 | 0.065425 | 0.947836 | 0.981636 | chr3  | 9425984  | 94380160 | + | 0 | NA | intron (Nintron (N  | 34300  | NR_00108C | 55209     | Hs.28816  | NR_018187          | ENSG000003SETD5     | -                 | SET domain protein-coding       |                         |
| chr3-5225.10.39228 | 0.047342 | 0.723614 | 0.065425 | 0.947836 | 0.981636 | chr3  | 52255774 | 52263759 | + | 0 | NA | exon (NM exon (NM   | 8595   | NR_02966C | 406890    | NR_02966C | ENSG000003MIRLET7G | LET7G MI7           | microRNA ncRNA    |                                 |                         |
| chr5-1233.10.39228 | 0.047342 | 0.723614 | 0.065425 | 0.947836 | 0.981636 | chr5  | 1.23E+08 | 1.23E+08 | + | 0 | NA | intron (N1LIPA4 LIN | 67452  | NR_001166 | 153241    | Hs.48320  | NR_15322           | ENSG000003CEP120    | CCDC100 J         | centrosome protein-coding       |                         |
| chr8-3038.10.39228 | 0.047342 | 0.723614 | 0.065425 | 0.947836 | 0.981636 | chr8  | 30385895 | 30387539 | + | 0 | NA | intron (Nintron (N  | -1366  | NR_04620E | 1E+08     | Hs.12681  | NR_04620E          | ENSG000003RBPMS-AS1 | -                 | RBPMS antncRNA                  |                         |
| chrX-4576.10.39228 | 0.047342 | 0.723614 | 0.065425 | 0.947836 | 0.981636 | chrX  | 45769034 | 45769841 | + | 0 | NA | IntergeniIntergeni  | -22313 | NR_02963E | 407007    | NR_02963E | ENSG000003MIR222   | MIRN222             | microRNA ncRNA    |                                 |                         |
| chr10-115.6.95685  | 0.057203 | 0.876876 | 0.065235 | 0.947987 | 0.981636 | chr10 | 11930164 | 11931467 | + | 0 | NA | intron (Nintron (N  | -36105 | NR_038222 | 219731    | Hs.57678  | NR_038222          | ENSG000003PROSER2-1 | -                 | PROSER2 ncRNA                   |                         |
| chr10-495.6.95685  | 0.057203 | 0.876876 | 0.065235 | 0.947987 | 0.981636 | chr10 | 49973623 | 49974748 | + | 0 | NA | non-codiron-codir   | -14133 | NR_00136E | 414189    | Hs.53615  | NR_001077          | ENSG000003AGAP6     | AGAP-6 C          | ArfGAP wiprotein-coding         |                         |
| chr19-171.6.95685  | 0.057203 | 0.876876 | 0.065235 | 0.947987 | 0.981636 | chr19 | 17151200 | 17151778 | + | 0 | NA | intron (N1LIM4 LINE | 59254  | NR_145784 | 1.1E+08   | NR_145784 | SNORA118           | -                   | small nucsnoRNA   |                                 |                         |
| chr2-175.6.95685   | 0.057203 | 0.876876 | 0.065235 | 0.947987 | 0.981636 | chr2  | 1.75E+08 | 1.75E+08 | + | 0 | NA | non-codiron-codir   | -69023 | NR_038133 | 1123      | Hs.38013  | NR_001822          | ENSG000003CHN1      | ARHGAP2 C         | chimerin protein-coding         |                         |
| chr22-502.6.95685  | 0.057203 | 0.876876 | 0.065235 | 0.947987 | 0.981636 | chr22 | 19627    | 1931454  | + | 0 | NA | exon (NM exon (NM   | 83642  | Hs.36540  | NR_031454 | 83642     | Hs.36540           | NR_031454           | ENSG000003SELENOO | SELO                            | selenopr protein-coding |
| chr1-4485.6.171845 | -0.06108 | 0.9366   | -0.06521 | 0.948005 | 0.981636 | chr1  | 44857304 | 44857739 | + | 0 | NA | intron (NAluSp SIN  | -14268 | NR_00373E | 8643      | Hs.59149  | NR_00373E          | ENSG000003PTCH2     | PTC2              | patched 2 protein-coding        |                         |
| chr2-3721.6.171845 | -0.06108 | 0.9366   | -0.06521 | 0.948005 | 0.981636 | chr2  | 37215589 | 37217423 | + | 0 | NA | TTS (NR_1TTS (NR_1  | 15090  | NR_00576C | 10153     | Hs.13540  | NR_00576C          | ENSG000003CEBPZ     | CBF CBF2 C        | CAAT en protein-coding          |                         |
| chr2-2261.6.171845 | -0.06108 | 0.9366   | -0.06521 | 0.948005 | 0.981636 | chr2  | 2.26E+08 | 2.26E+08 | + | 0 | NA | TTS (NR_1TTS (NR_1  | 38141  | NR_046102 | 646736    | Hs.71283  | NR_046102          | LOC646736           | -                 | uncharactncRNA                  |                         |
| chr20-601.6.171845 | -0.06108 | 0.9366   | -0.06521 | 0.948005 | 0.981636 | chr20 | 6015184  | 6016640  | + | 0 | NA | intron (Nintron (N  | 8663   | NR_001322 | 54675     | Hs.74395  | NR_01909E          | ENSG000003CRLS1     | C20orf15          | cardiolin protein-coding        |                         |
| chr4-675.6.171845  | -0.06108 | 0.9366   | -0.06521 | 0.948005 | 0.981636 | chr4  | 67506264 | 67507528 | + | 0 | NA | exon (NM exon (NM   | 38607  | NR_001812 | 1060      | Hs.47986  | NR_001812          | ENSG000003CENPF     | CENP-C C          | centrosome protein-coding       |                         |
| chr6-145.6.171845  | -0.06108 | 0.9366   | -0.06521 | 0.948005 | 0.981636 | chr6  | 1.46E+08 | 1.46E+08 | + | 0 | NA | intron (N1MSTD LTR  | 25672  | NR_17308E | 257218    | Hs.72397  | NR_17308E          | ENSG000003SHPRH     | ba54515.2         | SNF2 hist protein-coding        |                         |
| chr1-1593.7.153464 | -0.05611 | 0.860586 | -0.06521 | 0.948014 | 0.981636 | chr1  | 15937514 | 15938028 | + | 0 | NA | intron (Nintron (N  | 38361  | NR_001324 | 7709      | Hs.43376  | NR_003444          | ENSG000003ZBTB17    | MIZ-1 ZNF         | zinc finger protein-coding      |                         |
| chr1-2074.7.153464 | -0.05611 | 0.860586 | -0.06521 | 0.948014 | 0.981636 | chr1  | 20741631 | 20743015 | + | 0 | NA | TTS (NM_1TTS (NM_1  | -9620  | NR_001103 | 400745    | Hs.59152  | NR_001103          | ENSG000003SH2D5     | -                 | SH2 domain protein-coding       |                         |
| chr1-1124.7.153464 | -0.05611 | 0.860586 | -0.06521 | 0.948014 | 0.981636 | chr1  | 21241785 | 21248075 | + | 0 | NA | intron (N1L2b LINE  | 34685  | NR_001113 | 1889      | Hs.19508  | NR_001397          | ENSG000003ECE1      | ECE               | endothelin protein-coding       |                         |
| chr11-212.7.153464 | -0.05611 | 0.860586 | -0.06521 | 0.948014 | 0.981636 | chr11 | 12930239 | 12935918 | + | 0 | NA | intron (N1Tiger3c   | 56470  | NR_038904 | 1.01E+08  | Hs.15340  | NR_038904          | ENSG000003LINC      |                   |                                 |                         |



|           |          |          |          |          |          |          |       |          |          |   |   |    |                       |        |           |          |                    |                     |                                    |                                 |
|-----------|----------|----------|----------|----------|----------|----------|-------|----------|----------|---|---|----|-----------------------|--------|-----------|----------|--------------------|---------------------|------------------------------------|---------------------------------|
| chr16-50c | 6.42883  | 0.060381 | 0.937279 | 0.064422 | 0.948634 | 0.981636 | chr16 | 50351459 | 50352457 | + | 0 | NA | intron (N) LIMA6 LIN  | 17030  | NM_001173 | 29117    | Hs.437894NM_01326c | ENSG000000CBRD7     | BP75 CELI1bromodome protein-coding |                                 |
| chr1-1377 | 7.435872 | 0.054644 | 0.849664 | 0.064313 | 0.948721 | 0.981636 | chr1  | 13778019 | 13779606 | + | 0 | NA | exon (NM) exon (NM)   | 29397  | NM_001007 | 7799     | Hs.37182c          | ENSG000000PRDM2     | HUMHOXY1 PR/SET dc protein-coding  |                                 |
| chr1-5137 | 7.435872 | 0.054644 | 0.849664 | 0.064313 | 0.948721 | 0.981636 | chr1  | 51372022 | 51372505 | + | 0 | NA | intron (N) intron (N) | -27147 | NM_001144 | 22996    | Hs.11294c          | ENSG000000TTC39A    | C1orf34 Tetratric protein-coding   |                                 |
| chr1-145f | 7.435872 | 0.054644 | 0.849664 | 0.064313 | 0.948721 | 0.981636 | chr1  | 1.46E+08 | 1.46E+08 | + | 0 | NA | exon (NM) exon (NM)   | 10370  | NM_001097 | 653519   | Hs.50432c          | ENSG000000GPR89A    | GPHR GPR6G protei protein-coding   |                                 |
| chr1-1514 | 7.435872 | 0.054644 | 0.849664 | 0.064313 | 0.948721 | 0.981636 | chr1  | 1.51E+08 | 1.51E+08 | + | 0 | NA | intron (N) AluJr SIN  | 17140  | NM_00279c | 5692     | Hs.89545           | ENSG000000PSMB84    | HN3 HN33 protease protein-coding   |                                 |
| chr10-102 | 7.435872 | 0.054644 | 0.849664 | 0.064313 | 0.948721 | 0.981636 | chr10 | 1.02E+08 | 1.02E+08 | + | 0 | NA | 3' UTR (N) 3' UTR (N) | 18308  | NM_02478c | 79847    | Hs.30906c          | ENSG000000MFSD13A   | C10orf77 major fac protein-coding  |                                 |
| chr10-104 | 7.435872 | 0.054644 | 0.849664 | 0.064313 | 0.948721 | 0.981636 | chr10 | 1.04E+08 | 1.04E+08 | + | 0 | NA | intron (N) AluJr4 S1  | 28763  | NR_03076c | 64068    | ENSG000000MIR936   | MIRN936 miRNA ncRNA |                                    |                                 |
| chr13-79f | 7.435872 | 0.054644 | 0.849664 | 0.064313 | 0.948721 | 0.981636 | chr13 | 79335429 | 79336903 | + | 0 | NA | intron (N) intron (N) | 70055  | NM_00128c | 51467    | Hs.55852c          | ENSG000000RBM26     | ARRS2 C13RNA bindi protein-coding  |                                 |
| chr14-99f | 7.435872 | 0.054644 | 0.849664 | 0.064313 | 0.948721 | 0.981636 | chr14 | 99914042 | 99915879 | + | 0 | NA | intron (N) intron (N) | -56462 | NM_00133c | 51466    | Hs.125867          | ENSG000000EVL       | RNB6 Enah/Vasf protein-coding      |                                 |
| chr15-34f | 7.435872 | 0.054644 | 0.849664 | 0.064313 | 0.948721 | 0.981636 | chr15 | 34873862 | 34875290 | + | 0 | NA | intron (N) intron (N) | -79027 | NM_00515c | 70       | Hs.118127          | ENSG000000ACTC1     | ACT ASDFactin al protein-coding    |                                 |
| chr17-42f | 7.435872 | 0.054644 | 0.849664 | 0.064313 | 0.948721 | 0.981636 | chr17 | 4258830  | 4261394  | + | 0 | NA | intron (N) L2a LINE   | 3735   | NM_001257 | 51479    | Hs.696087          | ENSG000000ANKFY1    | ANKHZN Tlankyrin 1 protein-coding  |                                 |
| chr19-49f | 7.435872 | 0.054644 | 0.849664 | 0.064313 | 0.948721 | 0.981636 | chr19 | 49342953 | 49343682 | + | 0 | NA | exon (NM) exon (NM)   | 7911   | NM_00104c | 951      | Hs.16655c          | ENSG000000CD37      | GP52-40 ICD37 molc protein-coding  |                                 |
| chr21-28f | 7.435872 | 0.054644 | 0.849664 | 0.064313 | 0.948721 | 0.981636 | chr21 | 28875947 | 28876586 | + | 0 | NA | 3' UTR (N) 3' UTR (N) | 9101   | NM_01324c | 29104    | Hs.16384c          | ENSG000000N6MT1     | C21orf127N-6 adeniprotein-coding   |                                 |
| chr3-469f | 7.435872 | 0.054644 | 0.849664 | 0.064313 | 0.948721 | 0.981636 | chr3  | 46923712 | 46925115 | + | 0 | NA | intron (N) intron (N) | 42164  | NM_001184 | 5745     | Hs.1019            | NM_00031c           | ENSG000000PTHIR                    | EKNS PFE parathy protein-coding |
| chr3-1964 | 7.435872 | 0.054644 | 0.849664 | 0.064313 | 0.948721 | 0.981636 | chr3  | 1.96E+08 | 1.96E+08 | + | 0 | NA | intron (N) intron (N) | 30653  | NM_152617 | 165918   | Hs.25064c          | ENSG000000RN168     | hRNF168 ring fing protein-coding   |                                 |
| chr5-1414 | 7.435872 | 0.054644 | 0.849664 | 0.064313 | 0.948721 | 0.981636 | chr5  | 14146329 | 14149955 | + | 0 | NA | intron (N) (A)A(TTAA) | 4800   | NM_00711c | 7204     | Hs.130031          | ENSG000000TRIO      | ARGHF23 trio Rho protein-coding    |                                 |
| chr6-131f | 7.435872 | 0.054644 | 0.849664 | 0.064313 | 0.948721 | 0.981636 | chr6  | 1.32E+08 | 1.32E+08 | + | 0 | NA | intron (N) intron (N) | 18747  | NM_00483c | 9439     | Hs.29679           | ENSG000000MED23     | ARC130 CFmediator protein-coding   |                                 |
| chr6-149f | 7.435872 | 0.054644 | 0.849664 | 0.064313 | 0.948721 | 0.981636 | chr6  | 1.5E+08  | 1.5E+08  | + | 0 | NA | intron (N) AluJo SIN  | 3300   | NR_077247 | 645958   | Hs.632614          | NR_077247           | RPS18P9                            | RPS18_6_7ribosomal pseudo       |
| chr9-361f | 7.435872 | 0.054644 | 0.849664 | 0.064313 | 0.948721 | 0.981636 | chr9  | 36107668 | 36112574 | + | 0 | NA | intron (N) intron (N) | -26415 | NR_104637 | 152007   | Hs.49381c          | ENSG000000GLIPR2    | C9orf19 CGLI pathc protein-coding  |                                 |
| chr8-125c | 8.62982  | -0.05217 | 0.811374 | -0.06429 | 0.948737 | 0.981636 | chr8  | 1.25E+08 | 1.25E+08 | + | 0 | NA | intron (N) intron (N) | 30106  | NM_10484c | 9897     | Hs.27004c          | ENSG000000WASHC5    | KIAA0196 WASH com protein-coding   |                                 |
| chr1-1457 | 9.442098 | 0.04891  | 0.761414 | 0.064235 | 0.948783 | 0.981636 | chr1  | 1.46E+08 | 1.46E+08 | + | 0 | NA | 3' UTR (N) 3' UTR (N) | 26870  | NR_10384c | 11126    | Hs.488237          | ENSG000000CD160     | BY55 NK1 CD160 molc protein-coding |                                 |
| chr10-105 | 9.442098 | 0.04891  | 0.761414 | 0.064235 | 0.948783 | 0.981636 | chr10 | 1.03E+08 | 1.03E+08 | + | 0 | NA | exon (NM) exon (NM)   | 6638   | NM_01497c | 22984    | Hs.23949c          | ENSG000000PDCD11    | ALG-4 ALC programme protein-coding |                                 |
| chr11-57f | 9.442098 | 0.04891  | 0.761414 | 0.064235 | 0.948783 | 0.981636 | chr11 | 57556426 | 57558608 | + | 0 | NA | intron (N) AluSp SIN  | 10155  | NM_00422c | 9246     | Hs.425777          | ENSG000000UBE2L6    | RIG-B UB ubiquitir protein-coding  |                                 |
| chr15-99f | 9.442098 | 0.04891  | 0.761414 | 0.064235 | 0.948783 | 0.981636 | chr15 | 99674469 | 99676884 | + | 0 | NA | intron (N) intron (N) | 42698  | NM_00113c | 4205     | Hs.26867c          | ENSG000000MEF2A     | ADCAD1 RS myocyte c protein-coding |                                 |
| chr16-15f | 9.442098 | 0.04891  | 0.761414 | 0.064235 | 0.948783 | 0.981636 | chr16 | 15038091 | 15037829 | + | 0 | NA | exon (NM) exon (NM)   | 21714  | NM_17347c | 123803   | Hs.59204c          | ENSG000000NTAN1     | PNAAL PNAI-N-termin protein-coding |                                 |
| chr22-38c | 9.442098 | 0.04891  | 0.761414 | 0.064235 | 0.948783 | 0.981636 | chr22 | 38686723 | 38689421 | + | 0 | NA | intron (N) intron (N) | 6115   | NM_02024c | 56993    | Hs.59507c          | ENSG000000TOMM22    | IC9-2 MS1 transloc protein-coding  |                                 |
| chr3-581f | 9.442098 | 0.04891  | 0.761414 | 0.064235 | 0.948783 | 0.981636 | chr3  | 58156773 | 58157127 | + | 0 | NA | intron (N) AluSx SIN  | 13685  | NR_135534 | 1.05E+08 | Hs.613914          | NR_135534           | ENSG000000FLNB-AS1                 | FLNB anticnRNA                  |
| chr7-728f | 9.442098 | 0.04891  | 0.761414 | 0.064235 | 0.948783 | 0.981636 | chr7  | 72897859 | 72901707 | + | 0 | NA | intron (N) AluY SINE  | 9156   | NM_17202c | 9883     | Hs.655217          | ENSG000000POM121    | P145 POM1POM121 t protein-coding   |                                 |
| chr9-324f | 9.442098 | 0.04891  | 0.761414 | 0.064235 | 0.948783 | 0.981636 | chr9  | 32417814 | 32419570 | + | 0 | NA | intron (N) L2a LINE   | 18409  | NM_001362 | 48       | Hs.56722c          | ENSG000000AC01      | ACONS HEI acitase protein-coding   |                                 |
| chr9-132f | 9.442098 | 0.04891  | 0.761414 | 0.064235 | 0.948783 | 0.981636 | chr9  | 1.33E+08 | 1.33E+08 | + | 0 | NA | intron (N) intron (N) | 18264  | NM_001362 | 7248     | Hs.370854          | ENSG000000TSC1      | LAM1 TSC TSC compl protein-coding  |                                 |
| chr1-1204 | 11.87835 | 0.043801 | 0.682663 | 0.064162 | 0.948841 | 0.981636 | chr1  | 1.2E+08  | 1.2E+08  | + | 0 | NA | intron (N) LIP2 LINE  | -22149 | NR_00324c | 767846   | Hs.65718c          | ENSG000000PFN1P2    | C1orf152 profilin pseudo           |                                 |
| chr12-69f | 11.87835 | 0.043801 | 0.682663 | 0.064162 | 0.948841 | 0.981636 | chr12 | 69571297 | 69572497 | + | 0 | NA | intron (N) intron (N) | -12826 | NR_03747c | 1.01E+08 | NR_03747c          | ENSG000000MIR3913   | mir-3913-microRNA ncRNA            |                                 |
| chr6-306f | 11.87835 | 0.043801 | 0.682663 | 0.064162 | 0.948841 | 0.981636 | chr6  | 30601401 | 30609908 | + | 0 | NA | intron (N) AluY SINE  | 11559  | NM_002714 | 5514     | Hs.10601c          | ENSG000000PPP1R10   | CAT53 FBI protein protein-coding   |                                 |
| chr15-687 | 5.957665 | 0.061081 | 0.952226 | 0.064146 | 0.948854 | 0.981636 | chr15 | 68782098 | 68782324 | + | 0 | NA | intron (N) intron (N) | 19714  | NR_036197 | 1E+08    | NR_036197          | ENSG000000MIR4312   | microRNA ncRNA                     |                                 |
| chr3-1344 | 5.957665 | 0.061081 | 0.952226 | 0.064146 | 0.948854 | 0.981636 | chr3  | 1.34E+08 | 1.34E+08 | + | 0 | NA | 3' UTR (N) 3' UTR (N) | -7861  | NM_00135c | 80254    | Hs.443301          | ENSG000000CEP63     | SKCL6 centroson protein-coding     |                                 |
| chr2-324c | 8.086085 | -0.05309 | 0.827843 | -0.06413 | 0.948887 | 0.981636 | chr2  | 32401264 | 32401947 | + | 0 | NA | exon (NM) exon (NM)   | 44577  | NM_01625c | 57448    | Hs.150107          | ENSG000000BTRC6     | APOLLON Ebaculovir protein-coding  |                                 |
| chr1-779f | 9.393101 | 0.048709 | 0.760248 | 0.064069 | 0.948915 | 0.981636 | chr1  | 77951981 | 77953419 | + | 0 | NA | intron (N) intron (N) | 26372  | NR_13015c | 8880     | Hs.56738c          | ENSG000000FUBP1     | FBP FUBP far upstr protein-coding  |                                 |
| chr1-200f | 9.393101 | 0.048709 | 0.760248 | 0.064069 | 0.948915 | 0.981636 | chr1  | 2.01E+08 | 2.01E+08 | + | 0 | NA | intron (N) AluSq SIN  | -56585 | NM_00529c | 2848     | Hs.53431c          | ENSG000000GPR25     | G protein protein-coding           |                                 |
| chr1-248f | 9.393101 | 0.048709 | 0.760248 | 0.064069 | 0.948915 | 0.981636 | chr1  | 2.49E+08 | 2.49E+08 | + | 0 | NA | exon (NM) exon (NM)   | 11975  | NM_001017 | 267002   | Hs.602037          | ENSG000000PGBD2     | giggyBac protein-coding            |                                 |
| chr10-974 | 9.393101 | 0.048709 | 0.760248 | 0.064069 | 0.948915 | 0.981636 | chr10 | 97459355 | 97463639 | + | 0 | NA | exon (NM) exon (NM)   | 15322  | NM_19804c | 84287    | Hs.76662           | ENSG000000ZDHH16    | APH2 DHH zinc fing protein-coding  |                                 |
| chr12-87f | 9.393101 | 0.048709 | 0.760248 | 0.064069 | 0.948915 | 0.981636 | chr12 | 871230   | 871846   | + | 0 | NA | intron (N) intron (N) | 61538  | NM_001297 | 5893     | Hs.41035c          | ENSG000000RAD52     | RAD52 hon protein-coding           |                                 |
| chr18-57f | 9.393101 | 0.048709 | 0.760248 | 0.064069 | 0.948915 | 0.981636 | chr18 | 57660245 | 57660935 | + | 0 | NA | intron (N) AluSg SIN  | 30259  | NM_001242 | 1.01E+08 | Hs.6064c           | ENSG000000LOC100505 | uncharact protein-coding           |                                 |
| chr2-993c | 9.393101 | 0.048709 | 0.760248 | 0.064069 | 0.948915 | 0.981636 | chr2  | 99363373 | 99365273 | + | 0 | NA | exon (NM) exon (NM)   | 26934  | NM_015904 | 9669     | Hs.15868c          | ENSG000000EIF5B     | IF2 eukaryoti protein-coding       |                                 |
| chr2-378  | 9.393101 | 0.048709 | 0.760248 | 0.064069 | 0.948915 | 0.981636 | chr2  | 37888154 | 37890774 | + | 0 | NA | TTS (NM) TTS (NM) C   | -16833 | NM_03338c | 85377    | Hs.51761c          | ENSG000000MICALL1   | MICAL-L1 MICAL lik protein-coding  |                                 |
| chr3-1324 | 9.393101 | 0.048709 | 0.760248 | 0.064069 | 0.948915 | 0.981636 | chr3  | 1.32E+08 | 1.32E+08 | + | 0 | NA | intron (N) intron (N) | 66534  | NM_00132c | 23317    | Hs.12707           | ENSG000000DNAJC13   | PARK21 RN DNAJ heat protein-coding |                                 |
| chr4-265f | 9.393101 | 0.048709 | 0.760248 | 0.064069 | 0.948915 | 0.981636 | chr4  | 2.657911 | 2.658417 | + | 0 | NA | intron (N) MIR SINE   | 32732  | NR_04633c | 8603     | Hs.652364          | ENSG000000FAM193A   | C9orf8 RF family w protein-coding  |                                 |
| chr5-315f | 9.393101 | 0.048709 | 0.760248 | 0.064069 | 0.948915 | 0.981636 | chr5  | 31534314 | 31537165 | + | 0 | NA | intron (N) intron (N) | 3438   | NM_01835c | 55322    | Hs.51924c          | ENSG000000C5orf22   | chromoson protein-coding           |                                 |
| chr5-346f | 9.393101 | 0.048709 | 0.760248 | 0.064069 | 0.948915 | 0.981636 |       |          |          |   |   |    |                       |        |           |          |                    |                     |                                    |                                 |



|                     |          |          |          |          |          |       |          |          |   |   |    |                    |                  |                              |                      |                                     |
|---------------------|----------|----------|----------|----------|----------|-------|----------|----------|---|---|----|--------------------|------------------|------------------------------|----------------------|-------------------------------------|
| chr3-4912.7.640344  | -0.0532  | 0.835983 | -0.06364 | 0.949255 | 0.981636 | chr3  | 49129399 | 49131571 | + | 0 | NA | intron (Nintron (N | 2565 NM_002292   | 3913 Hs. 439726NM_002292     | ENSG000003LAMB2      | LAMS NPHS laminin sprotein-coding   |
| chr3-1794.7.640344  | -0.0532  | 0.835983 | -0.06364 | 0.949255 | 0.981636 | chr3  | 1.79E+08 | 1.79E+08 | + | 0 | NA | intron (NAluS2 SI  | 33122 NM_021625  | 59345 Hs. 173032NM_021625    | ENSG000003GNB4       | CMTD1F G proteirprotein-coding      |
| chr4-6833.7.640344  | -0.0532  | 0.835983 | -0.06364 | 0.949255 | 0.981636 | chr4  | 68334583 | 68337430 | + | 0 | NA | intron (Nintron (N | 14084 NM_001330  | 91746 Hs. 175955NM_133370    | ENSG000003YTHDC1     | YT521 YTFYTH domainprotein-coding   |
| chr6-1384.7.640344  | -0.0532  | 0.835983 | -0.06364 | 0.949255 | 0.981636 | chr6  | 1.38E+08 | 1.38E+08 | + | 0 | NA | intron (NMLT1A LI  | 2325 NM_014320   | 23593 Hs. 486589NM_014320    | ENSG000003HEBP2      | G6HF34B heme bincprotein-coding     |
| chr6-1666.7.640344  | -0.0532  | 0.835983 | -0.06364 | 0.949255 | 0.981636 | chr6  | 1.67E+08 | 1.67E+08 | + | 0 | NA | intron (Nintron (N | 8893 NM_021135   | 6196 Hs. 655277NM_021135     | ENSG000003RPS6KA2    | HU-2 MBF ribosomalprotein-coding    |
| chr1-1905.10.40014  | 0.045964 | 0.723821 | 0.063502 | 0.949366 | 0.981636 | chr1  | 19092410 | 19109025 | + | 0 | NA | intron (Nintron (N | 109549 NM_020765 | 23352 Hs. 148075NM_020765    | ENSG000003CUBR4      | RBAF600 Zubiquitin protein-coding   |
| chr1-5652.10.40014  | 0.045964 | 0.723821 | 0.063502 | 0.949366 | 0.981636 | chr1  | 56521900 | 56525997 | + | 0 | NA | intron (NLa2 LINE  | 55615 NM_003711  | 8613 Hs. 405155NM_003711     | ENSG000003PLPP3      | Dr142 LPF phospholiprotein-coding   |
| chr1-1512.10.40014  | 0.045964 | 0.723821 | 0.063502 | 0.949366 | 0.981636 | chr1  | 51512100 | 5151E+08 | + | 0 | NA | intron (Nintron (N | 8064 NM_020832   | 57592 Hs. 146755NM_020832    | ENSG000003ZNF687     | PDB6 zinc fingprotein-coding        |
| chr11-704.10.40014  | 0.045964 | 0.723821 | 0.063502 | 0.949366 | 0.981636 | chr11 | 70404342 | 70423938 | + | 0 | NA | intron (NAluY SINE | 15611 NM_001184  | 2017 Hs. 596164NM_005231     | ENSG000003CTTN       | EMS1 cortactin protein-coding       |
| chr12-656.10.40014  | 0.045964 | 0.723821 | 0.063502 | 0.949366 | 0.981636 | chr12 | 6569517  | 6602856  | + | 0 | NA | intron (NAluY SINE | -4577 NR_003012  | 677780 Hs. 689692NR_003012   | ENSG000003SCARNA11   | ACA57 small ncRNA                   |
| chr14-102.10.40014  | 0.045964 | 0.723821 | 0.063502 | 0.949366 | 0.981636 | chr14 | 1.02E+08 | 1.02E+08 | + | 0 | NA | exon (NM exon (NM  | 53885 NM_005345  | 3320 Hs. 525600NM_005345     | ENSG000003HSP90AA1   | EL52 HEL-heat shockprotein-coding   |
| chr15-590.10.40014  | 0.045964 | 0.723821 | 0.063502 | 0.949366 | 0.981636 | chr15 | 59080645 | 59082671 | + | 0 | NA | intron (NAluJo SIN | -23488 NM_004701 | 9133 Hs. 194695NM_004701     | ENSG000003CCNB2      | Hs1T7299 cyclin B2protein-coding    |
| chr16-1346.10.40014 | 0.045964 | 0.723821 | 0.063502 | 0.949366 | 0.981636 | chr16 | 30703381 | 30725534 | + | 0 | NA | intron (NAluY SINE | 3920 NR_002966   | 677813 Hs. 689715NR_002966   | ENSG000003SNORA30    | ACA30 SNC small nucsnoRNA           |
| chr19-207.10.40014  | 0.045964 | 0.723821 | 0.063502 | 0.949366 | 0.981636 | chr19 | 22298881 | 22305553 | + | 0 | NA | exon (NM exon (NM  | 3932 NR_031596   | 1E+08 NR_031596              | ENSG000003MIR1227    | MIRN1227 microRNA ncRNA             |
| chr19-361.10.40014  | 0.045964 | 0.723821 | 0.063502 | 0.949366 | 0.981636 | chr19 | 36142153 | 36149565 | + | 0 | NA | exon (NM exon (NM  | 4869 NM_001302   | 826 Hs. 515371NM_001302      | ENSG000003CAPNS1     | CALPALIN1 calpain sprotein-coding   |
| chr19-515.10.40014  | 0.045964 | 0.723821 | 0.063502 | 0.949366 | 0.981636 | chr19 | 51580335 | 51588161 | + | 0 | NA | intron (Nintron (N | 10132 NR_034159  | 729975 Hs. 171678NR_034159   | LINC01530            | long intncRNA                       |
| chr19-573.10.40014  | 0.045964 | 0.723821 | 0.063502 | 0.949366 | 0.981636 | chr19 | 53342275 | 53354311 | + | 0 | NA | intron (Nintron (N | 14544 NM_138374  | 91664 Hs. 720672NM_138374    | ENSG000003ZNF845     | zinc fingprotein-coding             |
| chr19-554.10.40014  | 0.045964 | 0.723821 | 0.063502 | 0.949366 | 0.981636 | chr19 | 57412277 | 57422109 | + | 0 | NA | exon (NM exon (NM  | 8542 NM_006959   | 7565 Hs. 729402NM_006959     | ENSG000003CNF17      | HPF3 KOX1zinc fingprotein-coding    |
| chr19-575.10.40014  | 0.045964 | 0.723821 | 0.063502 | 0.949366 | 0.981636 | chr19 | 57501271 | 57509210 | + | 0 | NA | intron (Nintron (N | 5527 NR_130705   | 374928 Hs. 579575NR_198542   | ENSG000003ZNF773     | ZNF419B zinc fingprotein-coding     |
| chr20-2182.10.40014 | 0.045964 | 0.723821 | 0.063502 | 0.949366 | 0.981636 | chr20 | 2.18E+08 | 2.18E+08 | + | 0 | NA | intron (Nintron (N | -16130 NM_001321 | 151306 Hs. 160954NM_170695   | ENSG000003GPBAR1     | BG37 GPCF proteinprotein-coding     |
| chr20-390.10.40014  | 0.045964 | 0.723821 | 0.063502 | 0.949366 | 0.981636 | chr20 | 3908079  | 3915753  | + | 0 | NA | intron (Nintron (N | -5578 NR_029515  | 406896 NR_029515             | ENSG000003MIR103A2   | MIR103-2 microRNA ncRNA             |
| chr22-416.10.40014  | 0.045964 | 0.723821 | 0.063502 | 0.949366 | 0.981636 | chr22 | 41622819 | 41632263 | + | 0 | NA | intron (NAluX1 SI  | 6246 NM_001285   | 2547 Hs. 292493NM_001465     | ENSG000003XRC6       | CTC75 CTCX-ray repprotein-coding    |
| chr3-1415.10.40014  | 0.045964 | 0.723821 | 0.063502 | 0.949366 | 0.981636 | chr3  | 14155098 | 14173485 | + | 0 | NA | intron (Nintron (N | 14310 NR_148951  | 7508 Hs. 475535NM_004625     | ENSG000003XPC        | RAD4 XP3 XPC complprotein-coding    |
| chr3-4906.10.40014  | 0.045964 | 0.723821 | 0.063502 | 0.949366 | 0.981636 | chr3  | 49062831 | 49066238 | + | 0 | NA | intron (NAluX1 SI  | 29098 NM_001320  | 54870 Hs. 274987NM_017730    | ENSG000003TRICH1     | AB-DIP VEFglutaminprotein-coding    |
| chr3-5005.10.40014  | 0.045964 | 0.723821 | 0.063502 | 0.949366 | 0.981636 | chr3  | 50090640 | 50121009 | + | 0 | NA | intron (Nintron (N | -4836 NR_045388  | 1.01E+08 Hs. 439482NR_045388 | ENSG000003RBM5-AS1   | LUST RBM5 antncRNA                  |
| chr4-3890.10.40014  | 0.045964 | 0.723821 | 0.063502 | 0.949366 | 0.981636 | chr4  | 38905489 | 38919635 | + | 0 | NA | intron (NAluSx3 SI | 44530 NR_030300  | 693159 NR_030300             | ENSG000003MIR574     | MIR574-3f microRNA ncRNA            |
| chr5-1346.10.40014  | 0.045964 | 0.723821 | 0.063502 | 0.949366 | 0.981636 | chr5  | 1.35E+08 | 1.35E+08 | + | 0 | NA | intron (Nintron (N | 23180 NM_021982  | 10802 Hs. 595542NM_021982    | ENSG000003SEC24A     | SEC24 honprotein-coding             |
| chr7-2331.10.40014  | 0.045964 | 0.723821 | 0.063502 | 0.949366 | 0.981636 | chr7  | 23317088 | 23319094 | + | 0 | NA | intron (NMRB SINE  | 18752 NM_138445  | 115416 Hs. 87385 NM_138445   | ENSG000003MALSU1     | C7orf30 nmitochonprotein-coding     |
| chr8-3046.10.40014  | 0.045964 | 0.723821 | 0.063502 | 0.949366 | 0.981636 | chr8  | 30469935 | 30471759 | + | 0 | NA | intron (Nintron (N | -8544 NR_046205  | 1E+08 Hs. 126815NR_046205    | ENSG000003RBPMS-AS1  | RBPMS antncRNA                      |
| chr9-1215.10.40014  | 0.045964 | 0.723821 | 0.063502 | 0.949366 | 0.981636 | chr9  | 1.21E+08 | 1.21E+08 | + | 0 | NA | intron (NMRB3 DNA  | 28450 NM_000177  | 2934 Hs. 522375NM_000177     | ENSG000003GSN        | ADF AGEL gelsolin protein-coding    |
| chr17-424.11.82935  | 0.043617 | 0.68754  | 0.063439 | 0.949417 | 0.981636 | chr17 | 42466981 | 42467180 | + | 0 | NA | intron (NAluY SINE | 8202 NM_005177   | 535 Hs. 463074NM_005177      | ENSG000003ATP6VOA1   | ATP6N1 ATATPase H+protein-coding    |
| chr10-875.7.697199  | -0.05489 | 0.865171 | -0.06344 | 0.949417 | 0.981636 | chr10 | 87518038 | 87518204 | + | 0 | NA | intron (Nintron (N | 10538 NM_001175  | 9562 Hs. 121260NM_004897     | ENSG000003MNP1       | HIPER1 Mimultipe protein-coding     |
| chr1-1985.7.914894  | 0.052407 | 0.826837 | 0.063382 | 0.949462 | 0.981636 | chr1  | 19897506 | 19900374 | + | 0 | NA | intron (NAluJb SIN | 16520 NM_015207  | 23252 Hs. 374987NM_015207    | ENSG000003OTUD3      | DUBA4 TUO deubiquitinprotein-coding |
| chr13-454.7.914894  | 0.052407 | 0.826837 | 0.063382 | 0.949462 | 0.981636 | chr13 | 45489916 | 45492704 | + | 0 | NA | intron (Nintron (N | 26371 NM_031431  | 83548 Hs. 507945NM_031431    | ENSG000003COG3       | SEC34 componentprotein-coding       |
| chr3-1217.7.914894  | 0.052407 | 0.826837 | 0.063382 | 0.949462 | 0.981636 | chr3  | 1.22E+08 | 1.22E+08 | + | 0 | NA | intron (NLa2c LINE | -41019 NM_005335 | 3059 Hs. 14601 NM_005335     | ENSG000003HCLS1      | CTTNL HS1hematopoieprotein-coding   |
| chr4-7882.7.914894  | 0.052407 | 0.826837 | 0.063382 | 0.949462 | 0.981636 | chr4  | 78826154 | 78828131 | + | 0 | NA | intron (NMRER2 int | 55589 NM_199892  | 55589 Hs. 146551NM_017595    | ENSG000003BMP2K      | BKE HRIF BMP2 indprotein-coding     |
| chr5-9552.7.914894  | 0.052407 | 0.826837 | 0.063382 | 0.949462 | 0.981636 | chr5  | 95521425 | 95523077 | + | 0 | NA | exon (NM exon (NM  | 32754 NM_014635  | 9652 Hs. 482865NM_014635     | ENSG000003TTC37      | KIAA0372 tetratricprotein-coding    |
| chr5-1464.7.914894  | 0.052407 | 0.826837 | 0.063382 | 0.949462 | 0.981636 | chr5  | 1.46E+08 | 1.46E+08 | + | 0 | NA | intron (NMR SINE   | 16949 NM_006705  | 10915 Hs. 443465NM_006705    | ENSG000003TCERG1     | CAL50 TAF transcripprotein-coding   |
| chr9-4701.7.914894  | 0.052407 | 0.826837 | 0.063382 | 0.949462 | 0.981636 | chr9  | 4701995  | 4704593  | + | 0 | NA | intron (NLA_C_Mam  | 22933 NM_001195  | 50808 Hs. 146551NM_016282    | ENSG000003AK3        | AK3L1 AK6adenylateprotein-coding    |
| chr9-1300.7.914894  | 0.052407 | 0.826837 | 0.063382 | 0.949462 | 0.981636 | chr9  | 1.3E+08  | 1.3E+08  | + | 0 | NA | intron (Nintron (N | 29702 NM_020960  | 57720 Hs. 512461NM_020960    | ENSG000003GPR107     | GCDRP LUSG proteirprotein-coding    |
| chr1-3207.8.442914  | 0.050584 | 0.798107 | 0.06338  | 0.949464 | 0.981636 | chr1  | 32076676 | 32080174 | + | 0 | NA | intron (NAluJb SIN | 5452 NM_001315   | 55116 Hs. 25544 NM_018055    | ENSG000003TMEM39B    | transment protein-coding            |
| chr10-777.8.442914  | 0.050584 | 0.798107 | 0.06338  | 0.949464 | 0.981636 | chr10 | 7774825  | 7776451  | + | 0 | NA | intron (Nintron (N | 12355 NM_012311  | 22944 Hs. 397915NM_012311    | ENSG000003KIN        | BTCD KIN1Kin17 DNprotein-coding     |
| chr10-475.8.442914  | 0.050584 | 0.798107 | 0.06338  | 0.949464 | 0.981636 | chr10 | 47549106 | 47550654 | + | 0 | NA | intron (NAluJb SIN | 3620 NR_160414   | 1.14E+08 Hs. 463017NR_160414 | BMS1P2-AC            | BMS1P2-ACpseudo                     |
| chr10-734.8.442914  | 0.050584 | 0.798107 | 0.06338  | 0.949464 | 0.981636 | chr10 | 73465451 | 73466221 | + | 0 | NA | intron (NCR1-3_Crc | -29916 NR_132103 | 1.02E+08 Hs. 434502NR_132103 | ENSG000003PPP3CB-AS1 | USP54-AS1 PPP3CB arncRNA            |
| chr10-137.8.442914  | 0.050584 | 0.798107 | 0.06338  | 0.949464 | 0.981636 | chr10 | 1.3E+08  | 1.3E+08  | + | 0 | NA | intron (Nintron (N | 26007 NM_001321  | 10539 Hs. 42644 NM_006541    | ENSG000003GLRX3      | GLRX4 GR3glutaredprotein-coding     |
| chr13-190.8.442914  | 0.050584 | 0.798107 | 0.06338  | 0.949464 | 0.981636 | chr13 | 19754819 | 19755767 | + | 0 | NA | intron (Nintron (N | 27652 NM_001354  | 55269 Hs. 213195NM_001042    | ENSG000003PSPC1      | PSP1 paratredprotein-coding         |
| chr13-115.8.442914  | 0.050584 | 0.798107 | 0.06338  | 0.949464 | 0.981636 | chr13 | 1.14E+08 | 1.14E+08 | + | 0 | NA | intron (Nintron (N | 22039 NM_000705  | 496 Hs. 434202NM_000705      | ENSG000003ATP4B      | ATP6B ATPase H+protein-coding       |
| chr15-638.8.442914  | 0.050584 | 0.798107 | 0.06338  | 0.949464 | 0.981636 | chr15 | 63658414 | 63660357 | + | 0 | NA | intron (NAluJr4 SI | -58558 NR_034080 | 1E+08 Hs. 631165NR_034080    | ENSG000003USP3-AS1   | USP3 antncRNA                       |
| chr15-985.8.442914  | 0.050584 | 0.798107 | 0.06338  | 0.949464 | 0.981636 | chr15 | 98921570 | 98926798 | + | 0 | NA | intron (Nintron (N | 81472 NM_001102  | 145814 Hs. 592021NM_001102   | ENSG000003PGPEP1L    | pyroglut protein-coding             |
| chr15-101.8.442914  | 0.050584 | 0.798107 | 0.06338  | 0.       |          |       |          |          |   |   |    |                    |                  |                              |                      |                                     |



|                                                                 |       |          |          |   |   |    |                     |         |              |          |            |                    |                      |                          |                              |                      |
|-----------------------------------------------------------------|-------|----------|----------|---|---|----|---------------------|---------|--------------|----------|------------|--------------------|----------------------|--------------------------|------------------------------|----------------------|
| chr19-498.6.436688.0.057858.0.919972.0.062891.0.949854.0.981636 | chr19 | 49836861 | 49837728 | + | 0 | NA | TTS (NM_C TTS (NM_C | 5276    | NR_10685E    | 1.02E+08 | NR_10685E  | ENSG00000MIR6800   | hsa-mir-ε microRNA   | ncRNA                    |                              |                      |
| chr20-636.6.436688.0.057858.0.919972.0.062891.0.949854.0.981636 | chr20 | 63927008 | 63927242 | + | 0 | NA | intron (N LIMD LINE | 7257    | NR_03063E    | 1E+08    | NR_03063E  | ENSG00000MIR941-3  | MIRN941-ε microRNA   | ncRNA                    |                              |                      |
| chr3-3734.6.436688.0.057858.0.919972.0.062891.0.949854.0.981636 | chr3  | 37349554 | 37350408 | + | 0 | NA | intron (N intron (N | -36288  | NM_178344    | 339883   | Hs. 47594E | ENSG00000C3orf35   | APRG1                | chromosom protein-coding |                              |                      |
| chr3-1192.6.436688.0.057858.0.919972.0.062891.0.949854.0.981636 | chr3  | 1.19E+08 | 1.19E+08 | + | 0 | NA | intron (N intron (N | -212    | NR_046574    | 1.01E+08 | Hs. 721307 | ENSG00000B4GALT4-1 | B4GALT4              | ε ncRNA                  |                              |                      |
| chr9-3435.4.958481.0.066878.1.063638.0.062876.0.949865.0.981636 | chr9  | 34397145 | 34397541 | + | 0 | NA | TTS (NM_C TTS (NM_C | 467     | NR_03259E    | 84688    | Hs. 503334 | NR_03259E          | ENSG00000C9orf24     | CBE1 NYD                 | chromosom protein-coding     |                      |
| chr9-1377.8.191938.0.054666.0.869566.0.062866.0.949874.0.981636 | chr9  | 1.38E+08 | 1.38E+08 | + | 0 | NA | exon (NM_exon (NM   | -2485   | NR_14750E    | 651337   | Hs. 60319E | NR_14750E          | ENSG00000CLOC651337- | uncharactncRNA           |                              |                      |
| chr1-532C.8.921936.0.048791.0.776207.0.062859.0.949879.0.981636 | chr1  | 53200002 | 53207116 | + | 0 | NA | intron (N HAL LINE  | 7135    | NR_00009E    | 1376     | Hs. 71353E | NR_00009E          | ENSG00000CPT2        | CPT1 CPT2                | carnitine protein-coding     |                      |
| chr1-1002.8.921936.0.048791.0.776207.0.062859.0.949879.0.981636 | chr1  | 1E+08    | 1E+08    | + | 0 | NA | intron (N intron (N | -4318   | NR_03027E    | 693138   | NR_03027E  | ENSG00000MIR553    | MIRN553 ε microRNA   | ncRNA                    |                              |                      |
| chr10-811.8.921936.0.048791.0.776207.0.062859.0.949879.0.981636 | chr10 | 811956   | 817491   | + | 0 | NA | exon (NM_exon (NM   | 116982  | NM_001351    | 23185    | Hs. 15906E | NR_01515E          | ENSG00000CLARP4B     | KIAA0217 La              | ribom protein-coding         |                      |
| chr10-105.8.921936.0.048791.0.776207.0.062859.0.949879.0.981636 | chr10 | 1.1E+08  | 1.1E+08  | + | 0 | NA | intron (N AG N Sin  | 41676   | NM_001324    | 7511     | Hs. 39062E | NR_02038E          | ENSG00000CXPPEP1     | APP1 SAMF                | X-prolyl protein-coding      |                      |
| chr10-11E.8.921936.0.048791.0.776207.0.062859.0.949879.0.981636 | chr10 | 1.2E+08  | 1.2E+08  | + | 0 | NA | intron (N LIMC4 LIN | 25737   | NM_024834    | 79892    | Hs. 12462E | NR_024834          | ENSG00000CMCBP       | C10orf15 minichron       | protein-coding               |                      |
| chr11-60C.8.921936.0.048791.0.776207.0.062859.0.949879.0.981636 | chr11 | 600797   | 604240   | + | 0 | NA | intron (N AluSq2 SI | 13432   | NM_00402E    | 3665     | Hs. 16612C | NR_00157E          | ENSG00000CIRF7       | IMD39 IRF                | interferc protein-coding     |                      |
| chr11-467.8.921936.0.048791.0.776207.0.062859.0.949879.0.981636 | chr11 | 46745679 | 46755690 | + | 0 | NA | intron (N intron (N | 2508    | NR_04984E    | 1.01E+08 | NR_04984E  | ENSG00000MIR5582   | -                    | microRNA                 | ncRNA                        |                      |
| chr11-64C.8.921936.0.048791.0.776207.0.062859.0.949879.0.981636 | chr11 | 64360601 | 64364468 | + | 0 | NA | intron (N intron (N | 3372    | NM_00100E    | 8986     | Hs. 105584 | NR_00394E          | ENSG00000CRPS6KA4    | MSK2 RSK                 | ribosomal protein-coding     |                      |
| chr12-101.8.921936.0.048791.0.776207.0.062859.0.949879.0.981636 | chr12 | 1.01E+08 | 1.01E+08 | + | 0 | NA | Intergeni LIPA3 LIN | 17613   | NM_001177    | 400      | Hs. 37261E | NR_001177          | ENSG00000CARL1       | ARFL1                    | ADP ribos protein-coding     |                      |
| chr12-105.8.921936.0.048791.0.776207.0.062859.0.949879.0.981636 | chr12 | 1.05E+08 | 1.05E+08 | + | 0 | NA | intron (N intron (N | 14692   | NM_001034    | 160428   | Hs. 42572  | NR_001034          | ENSG00000CALDH1L2    | mtFHD                    | aldehyde protein-coding      |                      |
| chr12-122.8.921936.0.048791.0.776207.0.062859.0.949879.0.981636 | chr12 | 1.23E+08 | 1.23E+08 | + | 0 | NA | intron (N intron (N | 5091    | NM_00367E    | 8562     | Hs. 22293  | NR_00367E          | ENSG00000CENR        | DRP DRP1                 | aldensity r protein-coding   |                      |
| chr13-23C.8.921936.0.048791.0.776207.0.062859.0.949879.0.981636 | chr13 | 23822045 | 23828059 | + | 0 | NA | intron (N intron (N | -63816  | NM_001014    | 542767   | Hs. 642624 | NR_001014442       | PCOTH                | C1QTNF9B                 | Pro-X-Gly protein-coding     |                      |
| chr13-454.8.921936.0.048791.0.776207.0.062859.0.949879.0.981636 | chr13 | 45493396 | 45499494 | + | 0 | NA | intron (N AluJb SIN | 31506   | NM_031431    | 83548    | Hs. 50794E | NR_031431          | ENSG00000COCG3       | SEC3A                    | component protein-coding     |                      |
| chr13-491.8.921936.0.048791.0.776207.0.062859.0.949879.0.981636 | chr13 | 49186042 | 49189454 | + | 0 | NA | intron (N TTTT n S  | -32590  | NM_001507    | 2862     | Hs. 24812E | NR_001507          | ENSG00000CMLNR       | GPR38 MTL                | motilin r protein-coding     |                      |
| chr13-111.8.921936.0.048791.0.776207.0.062859.0.949879.0.981636 | chr13 | 1.11E+08 | 1.11E+08 | + | 0 | NA | intron (N intron (N | 34667   | NM_001354    | 8874     | Hs. 50873E | NR_00389E          | ENSG00000CARHGEF7    | BETA                     | PiX Rho                      | guani protein-coding |
| chr14-962.8.921936.0.048791.0.776207.0.062859.0.949879.0.981636 | chr14 | 96236258 | 96245371 | + | 0 | NA | exon (NM_exon (NM   | -15396  | NM_00071C    | 623      | Hs. 52557E | NR_00071C          | ENSG00000CBDKRB1     | BIBKR B1F                | bradykinin protein-coding    |                      |
| chr15-39E.8.921936.0.048791.0.776207.0.062859.0.949879.0.981636 | chr15 | 39800941 | 39801915 | + | 0 | NA | exon (NM_exon (NM   | 18522   | NR_13566E    | 1.05E+08 | Hs. 58784E | NR_13566E          | ENSG00000CLOC10537C  | -                        | uncharactncRNA               |                      |
| chr15-59E.8.921936.0.048791.0.776207.0.062859.0.949879.0.981636 | chr15 | 59668032 | 59682520 | + | 0 | NA | intron (N intron (N | 13650   | NM_00132C    | 663      | Hs. 59251E | NR_00433C          | ENSG00000CBNIP2      | BNIP-2 N1ECL2            | inte protein-coding          |                      |
| chr15-651.8.921936.0.048791.0.776207.0.062859.0.949879.0.981636 | chr15 | 65149156 | 65155899 | + | 0 | NA | non-codirnon-codir  | -18719  | NM_005707    | 10081    | Hs. 45859E | NR_005707          | ENSG00000CPDCD7      | ES18 HES1                | programa protein-coding      |                      |
| chr16-11E.8.921936.0.048791.0.776207.0.062859.0.949879.0.981636 | chr16 | 11843843 | 11849933 | + | 0 | NA | intron (N intron (N | 4654    | NM_01565E    | 26156    | Hs. 40184E | NR_01565E          | ENSG00000CRSL1D1     | CSIG L12                 | ribosomal protein-coding     |                      |
| chr16-23C.8.921936.0.048791.0.776207.0.062859.0.949879.0.981636 | chr16 | 23658390 | 23662692 | + | 0 | NA | intron (N La2 LINE  | -18348  | NM_00503C    | 5347     | Hs. 59204E | NR_00503C          | ENSG00000CPLK1       | PLK1 STK1                | polo like protein-coding     |                      |
| chr16-69C.8.921936.0.048791.0.776207.0.062859.0.949879.0.981636 | chr16 | 69314681 | 69327119 | + | 0 | NA | intron (N intron (N | 9550    | NM_01324E    | 27183    | Hs. 12842C | NR_01324E          | ENSG00000CVPS4A      | SKD1 SKD1                | vacuolar protein-coding      |                      |
| chr17-47E.8.921936.0.048791.0.776207.0.062859.0.949879.0.981636 | chr17 | 4797483  | 4799112  | + | 0 | NA | exon (NM_exon (NM   | 2133    | NM_00279E    | 5694     | Hs. 77060  | NR_00279E          | ENSG00000CPSMB6      | DELTA                    | LMF proteasom protein-coding |                      |
| chr17-65E.8.921936.0.048791.0.776207.0.062859.0.949879.0.981636 | chr17 | 6582570  | 6589943  | + | 0 | NA | intron (N MS A LTR  | -29701  | NM_00116E    | 83394    | Hs. 18398E | NR_03122C          | ENSG00000CPTPNM3     | ACKR6 COF                | PITPNM3                      | ε protein-coding     |
| chr17-31E.8.921936.0.048791.0.776207.0.062859.0.949879.0.981636 | chr17 | 31988519 | 31999543 | + | 0 | NA | intron (N intron (N | -13352  | NM_001321    | 114659   | Hs. 514071 | NR_05288E          | ENSG00000CLRRC37B    | LRRC37                   | leucine r protein-coding     |                      |
| chr17-39E.8.921936.0.048791.0.776207.0.062859.0.949879.0.981636 | chr17 | 39509036 | 39512481 | + | 0 | NA | intron (N AluSp SIN | 49272   | NM_01508E    | 51755    | Hs. 34502E | NR_01508E          | ENSG00000CCKD12      | CRK7 CRKf                | cyclin d protein-coding      |                      |
| chr17-42E.8.921936.0.048791.0.776207.0.062859.0.949879.0.981636 | chr17 | 42954211 | 42958745 | + | 0 | NA | exon (NM_exon (NM   | 7976    | NM_001261    | 80755    | Hs. 31740C | NR_001261          | ENSG00000CAARSD1     | -                        | alanyl-t                     | protein-coding       |
| chr17-48E.8.921936.0.048791.0.776207.0.062859.0.949879.0.981636 | chr17 | 48929578 | 48939669 | + | 0 | NA | intron (N AluJr SIN | 10219   | NM_001317    | 11267    | Hs. 12724E | NR_00724E          | ENSG00000CSNF8       | Dot3 EAP                 | SNF8                         | subt protein-coding  |
| chr17-60C.8.921936.0.048791.0.776207.0.062859.0.949879.0.981636 | chr17 | 60051265 | 60059788 | + | 0 | NA | exon (NM_exon (NM   | -12421  | NR_03989E    | 1.01E+08 | NR_03989E  | ENSG00000MIR4737   | -                    | microRNA                 | ncRNA                        |                      |
| chr17-60C.8.921936.0.048791.0.776207.0.062859.0.949879.0.981636 | chr17 | 60455903 | 60465752 | + | 0 | NA | intron (N AluSx SIN | 38748   | NM_181707    | 124773   | Hs. 12931E | NR_181707          | ENSG00000C17orf64    | -                        | chromosom protein-coding     |                      |
| chr17-62C.8.921936.0.048791.0.776207.0.062859.0.949879.0.981636 | chr17 | 62027813 | 62033677 | + | 0 | NA | intron (N intron (N | 34533   | NM_005121    | 9969     | Hs. 28267E | NR_005121          | ENSG00000CMED13      | ARC250 DF                | mediator protein-coding      |                      |
| chr2-3974.8.921936.0.048791.0.776207.0.062859.0.949879.0.981636 | chr2  | 39748633 | 39751962 | + | 0 | NA | intron (N LIPA1 LI  | 28961   | NM_02526E    | 80745    | Hs. 59204E | NR_02526E          | ENSG00000CTHUMPD2    | C2orf8                   | THUMP                        | don protein-coding   |
| chr2-546E.8.921936.0.048791.0.776207.0.062859.0.949879.0.981636 | chr2  | 54625867 | 54633574 | + | 0 | NA | exon (NM_exon (NM   | 71326   | NM_17831E    | 6711     | Hs. 50317E | NR_00312E          | ENSG00000CSPTBN1     | ELF1 HELL3               | spectrin protein-coding      |                      |
| chr2-558E.8.921936.0.048791.0.776207.0.062859.0.949879.0.981636 | chr2  | 55869828 | 55875812 | + | 0 | NA | intron (N intron (N | 50962   | NM_00103E    | 2202     | Hs. 76224  | NR_00410E          | ENSG00000CFEMP1      | DHRD DRAL                | EGF cont                     | ε protein-coding     |
| chr2-6507.8.921936.0.048791.0.776207.0.062859.0.949879.0.981636 | chr2  | 65079803 | 65085216 | + | 0 | NA | intron (N intron (N | 26093   | NM_00131E    | 23177    | Hs. 70925E | NR_01514E          | ENSG00000CEP68       | KIAA0582                 | centrosom protein-coding     |                      |
| chr2-711E.8.921936.0.048791.0.776207.0.062859.0.949879.0.981636 | chr2  | 71134038 | 71140567 | + | 0 | NA | intron (N LIM5 LINE | 6668    | NM_005791    | 10199    | Hs. 65620E | NR_005791          | ENSG00000CMPHOSPHL1C | CT90 MPP1                | M-phase                      | ε protein-coding     |
| chr2-101E.8.921936.0.048791.0.776207.0.062859.0.949879.0.981636 | chr2  | 1.02E+08 | 1.02E+08 | + | 0 | NA | intron (N intron (N | -107910 | NR_103791    | 1.01E+08 | Hs. 51624E | NR_103791          | LINC01127-           | -                        | long intencRNA               |                      |
| chr2-1897.8.921936.0.048791.0.776207.0.062859.0.949879.0.981636 | chr2  | 1.9E+08  | 1.9E+08  | + | 0 | NA | intron (N intron (N | 8441    | NM_001371388 | 1841     | Hs. 47187E | NR_01214E          | ENSG00000CDTYMK      | CDC8 PP37                | deoxythym protein-coding     |                      |
| chr2-241E.8.921936.0.048791.0.776207.0.062859.0.949879.0.981636 | chr2  | 2.42E+08 | 2.42E+08 | + | 0 | NA | intron (N CpG       | 19823   | NR_03325E    | 10043    | Hs. 47470E | NR_00548E          | ENSG00000CTOM1       | -                        | target of                    | protein-coding       |
| chr2-251E.8.921936.0.048791.0.776207.0.062859.0.949879.0.981636 | chr2  | 35284454 | 35291604 | + | 0 | NA | intron (N MER58C DN | -1246   | NM_00113E    | 51386    | Hs. 44685E | NR_016091          | ENSG00000CEIF3L      | EIF3E1P E                | eukaryoti protein-coding     |                      |
| chr2-37E.8.921936.0.048791.0.776207.0.062859.0.949879.0.981636  | chr2  | 37850662 | 37857900 | + | 0 | NA | intron (N La2 LINE  | 4862    | NM_00136C    | 26286    | Hs. 68522E | NR_01457C          | ENSG00000CARFGAP3    | ARFGAP1                  | ADP ribos protein-coding     |                      |
| chr2-42E.8.921936.0.048791.0.776207.0.062859.0.949879.0.981636  | chr2  | 42821384 | 42834228 | + | 0 | NA | intron (N AluJo SIN | 29467   | NM_01457C    | 1499     | Hs. 47601E | NR_001904          | ENSG00000CTNNB1      | CTNNB1 EVF               | catenin t protein-coding     |                      |
| chr2-412C.8.921936.0.048791.0.776207.0.062859.0.949879.0.981636 | chr2  | 41223899 | 41228298 | + | 0 | NA | intron (N MER1B DNA | 26593   | NM_00109E    | -40657   | NM_017577  | ENSG00000GRAMD1C   | -                    | GRAM dom                 | protein-coding               |                      |
| chr3-1137.8.921936.0.048791.0.776207.0.062859.0.949879.0.981636 | chr3  | 1.14E+08 | 1.14E+08 | + | 0 | NA | intron (N AluSx SIN | -40657  | NM_01757     |          |            |                    |                      |                          |                              |                      |

|           |          |          |          |          |          |          |       |          |          |   |   |    |                     |                  |                                |                    |                                      |                          |
|-----------|----------|----------|----------|----------|----------|----------|-------|----------|----------|---|---|----|---------------------|------------------|--------------------------------|--------------------|--------------------------------------|--------------------------|
| chr7-128f | 7.44373  | 0.052699 | 0.845638 | 0.062318 | 0.950309 | 0.981636 | chr7  | 1.29E+08 | 1.29E+08 | + | 0 | NA | IntergeniLIMEg LIN  | -55593 NR_02436f | 402483 Hs. 72235CNCM_001039682 | LINC0100C-         | long intencRNA                       |                          |
| chr9-472C | 7.44373  | 0.052699 | 0.845638 | 0.062318 | 0.950309 | 0.981636 | chr9  | 4720619  | 4723136  | + | 0 | NA | intron (Nintron (N  | 4350 NM_001199   | 50808 Hs. 732022NM_01628f      | ENSG00000AK3       | AK3L1 AKfadenylateprotein-coding     |                          |
| chr9-3391 | 7.44373  | 0.052699 | 0.845638 | 0.062318 | 0.950309 | 0.981636 | chr9  | 33916058 | 33919642 | + | 0 | NA | 3' UTR (N3' UTR (N  | 16514 NM_00128f  | 55833 Hs. 49373fNCM_01844f     | ENSG00000UBAP2     | UBAP-2 ubiquitin protein-coding      |                          |
| chr9-128f | 7.44373  | 0.052699 | 0.845638 | 0.062318 | 0.950309 | 0.981636 | chr9  | 1.28E+08 | 1.28E+08 | + | 0 | NA | exon (NM exon (NM   | 2954 NM_01603f   | 51117 Hs. 98541 NM_01603f      | ENSG00000COQ4      | CGI-92 CC coenzyme protein-coding    |                          |
| chr1-7023 | 9.400959 | 0.047186 | 0.757528 | 0.062289 | 0.950333 | 0.981636 | chr1  | 70230750 | 70235313 | + | 0 | NA | intron (Nintron (N  | 11651 NM_00135f  | 9295 Hs. 47969fNCM_00476f      | ENSG00000SRSF11    | NET2 SFRS serine ar protein-coding   |                          |
| chr1-7023 | 9.400959 | 0.047186 | 0.757528 | 0.062289 | 0.950333 | 0.981636 | chr1  | 70238651 | 70247901 | + | 0 | NA | intron (NMER8 DNA   | 21896 NM_00135f  | 9295 Hs. 47969fNCM_00476f      | ENSG00000SRSF11    | NET2 SFRS serine ar protein-coding   |                          |
| chr1-112f | 9.400959 | 0.047186 | 0.757528 | 0.062289 | 0.950333 | 0.981636 | chr1  | 1.13E+08 | 1.13E+08 | + | 0 | NA | intron (Nintron (N  | -9941 NM_00128f  | 4343 Hs. 514941NM_02096f       | ENSG00000MOV10     | fSAP113 gMov10 RfS protein-coding    |                          |
| chr1-162f | 9.400959 | 0.047186 | 0.757528 | 0.062289 | 0.950333 | 0.981636 | chr1  | 1.63E+08 | 1.63E+08 | + | 0 | NA | intron (Nintron (N  | 21770 NM_01586f  | 127933 Hs. 12731CNCM_14462f    | ENSG00000UHMK1     | KIS KIST U2AF homc protein-coding    |                          |
| chr1-1791 | 9.400959 | 0.047186 | 0.757528 | 0.062289 | 0.950333 | 0.981636 | chr1  | 1.79E+08 | 1.79E+08 | + | 0 | NA | exon (NM exon (NM   | 24357 NM_00515f  | 27 Hs. 15947fNCM_00515f        | ENSG00000CABL2     | ABLL ARG ABL protc protein-coding    |                          |
| chr10-121 | 9.400959 | 0.047186 | 0.757528 | 0.062289 | 0.950333 | 0.981636 | chr10 | 12136117 | 12140040 | + | 0 | NA | intron (Nintron (N  | -7412 NR_03969f  | 1.01E+08                       | NR_03969f          | ENSG00000MIR548AK                    | - microRNA ncRNA         |
| chr10-121 | 9.400959 | 0.047186 | 0.757528 | 0.062289 | 0.950333 | 0.981636 | chr10 | 27110362 | 27118292 | + | 0 | NA | intron (Nintron (N  | -13829 NM_01491f | 22852 Hs. 361041NM_01491f      | ENSG00000ANKRD26   | THC2 ba14ankyrin r protein-coding    |                          |
| chr10-46f | 9.400959 | 0.047186 | 0.757528 | 0.062289 | 0.950333 | 0.981636 | chr10 | 46007262 | 46017191 | + | 0 | NA | intron (NIME4c LI   | 7311 NM_00114f   | 8031 Hs. 64365fNCM_00543f      | ENSG00000NCOA4     | ARA70 ELF nuclear r protein-coding   |                          |
| chr10-97f | 9.400959 | 0.047186 | 0.757528 | 0.062289 | 0.950333 | 0.981636 | chr10 | 97644025 | 97645440 | + | 0 | NA | intron (NMLT1J LTF  | 4046 NM_01842f   | 55361 Hs. 25300 NM_01842f      | ENSG00000PI4K2A    | PI4KII PI phosphatid protein-coding  |                          |
| chr11-107 | 9.400959 | 0.047186 | 0.757528 | 0.062289 | 0.950333 | 0.981636 | chr11 | 10752037 | 10760997 | + | 0 | NA | intron (Nintron (N  | 5721 NM_00134f   | 9646 Hs. 725151NM_01463f       | ENSG00000CTR9      | SH2BP1 TSCTR9 homc protein-coding    |                          |
| chr11-107 | 9.400959 | 0.047186 | 0.757528 | 0.062289 | 0.950333 | 0.981636 | chr11 | 10762262 | 10770638 | + | 0 | NA | exon (NM exon (NM   | 15204 NM_00134f  | 9646 Hs. 725151NM_01463f       | ENSG00000CTR9      | SH2BP1 TSCTR9 homc protein-coding    |                          |
| chr11-11f | 9.400959 | 0.047186 | 0.757528 | 0.062289 | 0.950333 | 0.981636 | chr11 | 11995959 | 12002893 | + | 0 | NA | intron (NLA_C_Mam   | 7393 NM_00101f   | 27122 Hs. 29215fNCM_01325f     | ENSG00000DKK3      | REIC RIG dickkopf protein-coding     |                          |
| chr11-32f | 9.400959 | 0.047186 | 0.757528 | 0.062289 | 0.950333 | 0.981636 | chr11 | 32588896 | 32596630 | + | 0 | NA | intron (Nintron (N  | 8932 NM_00636f   | 1048 Hs. 502244NM_00636f       | ENSG00000EIF3M     | B5 GA17 Eukaryoti protein-coding     |                          |
| chr12-50f | 9.400959 | 0.047186 | 0.757528 | 0.062289 | 0.950333 | 0.981636 | chr12 | 50472794 | 50477105 | + | 0 | NA | intron (Nintron (N  | 18378 NR_13275f  | 1.07E+08                       | NR_13275f          | SNORD133                             | ZL142 ZL4small nucsnRNA  |
| chr14-67f | 9.400959 | 0.047186 | 0.757528 | 0.062289 | 0.950333 | 0.981636 | chr14 | 67376247 | 67378963 | + | 0 | NA | intron (N2b LINE    | 17277 NM_00409f  | 1965 Hs. 151777NM_00409f       | ENSG00000EIF2S1    | EIF-2 EIF eukaryoti protein-coding   |                          |
| chr15-39f | 9.400959 | 0.047186 | 0.757528 | 0.062289 | 0.950333 | 0.981636 | chr15 | 39949214 | 39958054 | + | 0 | NA | intron (NLTR79 LTF  | 19519 NM_00101f  | 440275 Hs. 65667fNCM_00101f    | ENSG00000EIF2AK4   | GCN2 PVOE eukaryoti protein-coding   |                          |
| chr15-48f | 9.400959 | 0.047186 | 0.757528 | 0.062289 | 0.950333 | 0.981636 | chr15 | 48509660 | 48515637 | + | 0 | NA | intron (NLIPIA13 LI | 133140 NM_00013f | 2200 Hs. 59113fNCM_00101f      | ENSG00000FBN1      | ACM1CD EC fibrilli r protein-coding  |                          |
| chr15-491 | 9.400959 | 0.047186 | 0.757528 | 0.062289 | 0.950333 | 0.981636 | chr15 | 49139114 | 49144264 | + | 0 | NA | intron (Nintron (N  | 13910 NM_00114f  | 9318 Hs. 369614NM_00423f       | ENSG00000COPS2     | ALIEN CSN COP9 sigr protein-coding   |                          |
| chr17-23f | 9.400959 | 0.047186 | 0.757528 | 0.062289 | 0.950333 | 0.981636 | chr17 | 2320716  | 2334972  | + | 0 | NA | intron (Nintron (N  | 1366 NR_00307f   | 692208                         | NR_00307f          | ENSG00000SNORD91B                    | HBII-296f small nucsnRNA |
| chr17-46f | 9.400959 | 0.047186 | 0.757528 | 0.062289 | 0.950333 | 0.981636 | chr17 | 46222048 | 46223537 | + | 0 | NA | intron (Nintron (N  | 2582 NM_00119f   | 284058 Hs. 648744NM_01544f     | ENSG00000KANSL1    | CENP-36 KAT8 regu protein-coding     |                          |
| chr19-19f | 9.400959 | 0.047186 | 0.757528 | 0.062289 | 0.950333 | 0.981636 | chr19 | 19023271 | 19031796 | + | 0 | NA | intron (N2a LINE    | 5984 NR_14791f   | 10147 Hs. 77876 NM_01488f      | ENSG00000SUGP2     | SFRS14 SF SURP and protein-coding    |                          |
| chr2-364f | 9.400959 | 0.047186 | 0.757528 | 0.062289 | 0.950333 | 0.981636 | chr2  | 36442279 | 36447651 | + | 0 | NA | intron (N2c LINE    | 89187 NM_01644f  | 51232 Hs. 699247NM_01644f      | ENSG00000CRIM1     | CRIM-1 Sf cysteine protein-coding    |                          |
| chr2-861f | 9.400959 | 0.047186 | 0.757528 | 0.062289 | 0.950333 | 0.981636 | chr2  | 86110899 | 86112565 | + | 0 | NA | intron (NALuSp SIN  | 5497 NM_01795f   | 55037 Hs. 32348fNCM_01795f     | ENSG00000PTCD3     | MRP-539f pentatric protein-coding    |                          |
| chr2-885f | 9.400959 | 0.047186 | 0.757528 | 0.062289 | 0.950333 | 0.981636 | chr2  | 88574117 | 88575336 | + | 0 | NA | exon (NM exon (NM   | 36006 NR_11023f  | 1.02E+08                       | NR_11023f          | ENSG00000LOC10192f                   | - uncharactncRNA         |
| chr2-1351 | 9.400959 | 0.047186 | 0.757528 | 0.062289 | 0.950333 | 0.981636 | chr2  | 1.35E+08 | 1.35E+08 | + | 0 | NA | intron (NSVA_C Ret  | -30830 NR_14572f | 1.1E+08                        | NR_14572f          | ENSG00000SNORA40B                    | - small nucsnRNA         |
| chr2-169f | 9.400959 | 0.047186 | 0.757528 | 0.062289 | 0.950333 | 0.981636 | chr2  | 1.7E+08  | 1.7E+08  | + | 0 | NA | intron (NLIIM8 LIN  | 31421 NM_00479f  | 9360 Hs. 470544NM_00479f       | ENSG00000PP1G      | CARS-Cyp peptidyl r protein-coding   |                          |
| chr2-191f | 9.400959 | 0.047186 | 0.757528 | 0.062289 | 0.950333 | 0.981636 | chr2  | 1.91E+08 | 1.91E+08 | + | 0 | NA | intron (NMLT1A0 LI  | 32709 NM_00116f  | 4430 Hs. 43962CNCM_01222f      | ENSG00000MYO1B     | MMI-alpha myosin II f protein-coding |                          |
| chr2-221  | 9.400959 | 0.047186 | 0.757528 | 0.062289 | 0.950333 | 0.981636 | chr2  | 41168589 | 41172709 | + | 0 | NA | intron (Nintron (N  | 26852 NR_11051f  | 1.02E+08                       | NR_11051f          | EP300-AS1-                           | EP300 antncRNA           |
| chr3-451  | 9.400959 | 0.047186 | 0.757528 | 0.062289 | 0.950333 | 0.981636 | chr3  | 15216988 | 15221872 | + | 0 | NA | intron (N2c LINE    | 13184 NM_01429f  | 23473 Hs. 595234NM_01429f      | ENSG00000CAPN7     | CALPAINT calpain f protein-coding    |                          |
| chr3-988  | 9.400959 | 0.047186 | 0.757528 | 0.062289 | 0.950333 | 0.981636 | chr3  | 98806730 | 98808205 | + | 0 | NA | intron (NMLT1A0 LI  | 44160 NM_00132f  | 10402 Hs. 14871fNCM_00610f     | ENSG00000CT3GAL6   | SIAT10 ST13 beta protein-coding      |                          |
| chr3-125f | 9.400959 | 0.047186 | 0.757528 | 0.062289 | 0.950333 | 0.981636 | chr3  | 1.25E+08 | 1.25E+08 | + | 0 | NA | intron (Nintron (N  | 29768 NM_02073f  | 57493 Hs. 47742CNCM_02073f     | ENSG00000HEG1      | HEG MS11 heart dev protein-coding    |                          |
| chr3-156f | 9.400959 | 0.047186 | 0.757528 | 0.062289 | 0.950333 | 0.981636 | chr3  | 1.57E+08 | 1.57E+08 | + | 0 | NA | intron (NALuJb SIN  | 944 NM_00130f    | 6747 Hs. 51834fNCM_00710f      | ENSG00000SSR3      | TRAPG signal s protein-coding        |                          |
| chr4-699f | 9.400959 | 0.047186 | 0.757528 | 0.062289 | 0.950333 | 0.981636 | chr4  | 6995013  | 6997646  | + | 0 | NA | exon (NM exon (NM   | 8821 NM_00128f   | 57533 Hs. 518611NM_02077f      | ENSG00000TBC1D14   | - TBC1 domc protein-coding           |                          |
| chr4-887f | 9.400959 | 0.047186 | 0.757528 | 0.062289 | 0.950333 | 0.981636 | chr4  | 88747530 | 88750757 | + | 0 | NA | intron (Nintron (N  | 39326 NR_00280f  | 28512 Hs. 74495fNCM_00280f     | ENSG00000FAM13A-AS | FAM13A10 FAM13A arncRNA              |                          |
| chr5-138f | 9.400959 | 0.047186 | 0.757528 | 0.062289 | 0.950333 | 0.981636 | chr5  | 13828112 | 13830599 | + | 0 | NA | intron (Nintron (N  | 11525 NM_00136f  | 1767 Hs. 21236CNCM_00136f      | ENSG00000DNAH5     | CILD3 DNA dynein ar protein-coding   |                          |
| chr5-394f | 9.400959 | 0.047186 | 0.757528 | 0.062289 | 0.950333 | 0.981636 | chr5  | 39416867 | 39418470 | + | 0 | NA | intron (Nintron (N  | 7312 NM_00134f   | 1601 Hs. 696631NM_00134f       | ENSG00000DAB2      | DOC-2 DOC DAB adapt protein-coding   |                          |
| chr5-656f | 9.400959 | 0.047186 | 0.757528 | 0.062289 | 0.950333 | 0.981636 | chr5  | 65637408 | 65638846 | + | 0 | NA | intron (NALuSx SIN  | 13100 NM_02494f  | 80006 Hs. 59176CNCM_02494f     | ENSG00000TRAPP13   | C5orf44 S trafficki protein-coding   |                          |
| chr5-138f | 9.400959 | 0.047186 | 0.757528 | 0.062289 | 0.950333 | 0.981636 | chr5  | 1.39E+08 | 1.39E+08 | + | 0 | NA | intron (NALuJb SIN  | 27369 NM_00129f  | 2107 Hs. 36916fNCM_00473f      | ENSG00000ETF1      | D5S1995 Eukaryoti protein-coding     |                          |
| chr6-435f | 9.400959 | 0.047186 | 0.757528 | 0.062289 | 0.950333 | 0.981636 | chr6  | 43519386 | 43525304 | + | 0 | NA | TTS (NM_TTS (NM_C   | 5256 NM_00136f   | 9533 Hs. 74350fNCM_00487f      | ENSG00000POLR1C    | AC40 HLD1RNA polyn protein-coding    |                          |
| chr6-111f | 9.400959 | 0.047186 | 0.757528 | 0.062289 | 0.950333 | 0.981636 | chr6  | 1.11E+08 | 1.11E+08 | + | 0 | NA | intron (NX6A LINE   | 7151 NM_15336f   | 91749 Hs. 40057fNCM_15336f     | ENSG00000MFS4B     | KIAA1919 major fac protein-coding    |                          |
| chr7-926f | 9.400959 | 0.047186 | 0.757528 | 0.062289 | 0.950333 | 0.981636 | chr7  | 92615219 | 92618146 | + | 0 | NA | intron (Nintron (N  | -26292 NM_00104f | 257145 Hs. 18564 NM_15278f     | ENSG00000FAM133B   | - family wi protein-coding           |                          |
| chr8-390f | 9.400959 | 0.047186 | 0.757528 | 0.062289 | 0.950333 | 0.981636 | chr8  | 39082587 | 39083701 | + | 0 | NA | intron (N2c LINE    | -24385 NM_00131f | 203102 Hs. 52154fNCM_14500f    | ENSG00000ADAM32    | - ADAM metc protein-coding           |                          |
| chr8-102f | 9.400959 | 0.047186 | 0.757528 | 0.062289 | 0.950333 | 0.981636 | chr8  | 1.02E+08 | 1.02E+08 | + | 0 | NA | intron (Nintron (N  | 41080 NR_12541f  | 1.02E+08                       | NR_12541f          | ENSG00000UBR5-AS1                    | - UBR5 antncRNA          |
| chr8-102f | 9.400959 | 0.047186 | 0.757528 | 0.062289 | 0.950333 | 0.981636 | chr8  | 1.02E+08 | 1.02E+08 | + | 0 | NA | intron (Nintron (N  | 56878 NR_12541f  | 1.02E+08                       | NR_12541f          | ENSG00000UBR5-AS1                    | - UBR5 antncRNA          |
| chr9-122f | 9.400959 | 0.047186 | 0.757528 | 0.062289 | 0        |          |       |          |          |   |   |    |                     |                  |                                |                    |                                      |                          |



|           |          |          |          |           |          |          |       |          |          |   |   |    |                    |         |            |          |           |                    |                     |           |                       |                |                |
|-----------|----------|----------|----------|-----------|----------|----------|-------|----------|----------|---|---|----|--------------------|---------|------------|----------|-----------|--------------------|---------------------|-----------|-----------------------|----------------|----------------|
| chr11-295 | 7.922752 | 0.050572 | 0.821272 | 0.061578  | 0.950899 | 0.981636 | chr11 | 2955911  | 2960562  | + | 0 | NA | intron (Nintron (N | 5657    | NR_002982  | 677833   | Hs.689696 | NR_002982          | ENSG000003NORA54    | ACA54     | small                 | nucsnRNA       |                |
| chr11-936 | 7.922752 | 0.050572 | 0.821272 | 0.061578  | 0.950899 | 0.981636 | chr11 | 93683187 | 93685283 | + | 0 | NA | intron (Nintron (N | 22553   | NM_033395  | 85459    | Hs.458418 | NM_033395          | ENSG000003CEP295    | KIAA1731  | centrosom             | protein-coding |                |
| chr12-645 | 7.922752 | 0.050572 | 0.821272 | 0.061578  | 0.950899 | 0.981636 | chr12 | 6496697  | 6497162  | + | 0 | NA | intron (Nintron (N | 2827    | NM_014866  | 9918     | Hs.5719   | NM_014866          | ENSG000003NCAPD2    | CAP-D2    | CNnon-SMC             | protein-coding |                |
| chr12-121 | 7.922752 | 0.050572 | 0.821272 | 0.061578  | 0.950899 | 0.981636 | chr12 | 12148638 | 12151297 | + | 0 | NA | intron (Nintron (N | 38015   | NR_036052  | 1E+08    | NR_036052 | ENSG000003MIR1244  | MIR1244             | lmi       | ncRNA                 |                |                |
| chr12-121 | 7.922752 | 0.050572 | 0.821272 | 0.061578  | 0.950899 | 0.981636 | chr12 | 21645344 | 21646941 | + | 0 | NA | intron (Nintron (N | 11652   | NM_0011174 | 3945     | Hs.446145 | NM_002300          | ENSG000003LDHB      | HEL-S-281 | lactate               | protein-coding |                |
| chr12-928 | 7.922752 | 0.050572 | 0.821272 | 0.061578  | 0.950899 | 0.981636 | chr12 | 92887796 | 92890100 | + | 0 | NA | intron (NAluSz SIN | 40347   | NM_003566  | 8411     | Hs.567367 | NM_003566          | ENSG000003CEEA1     | MST105    | MSearly enc           | protein-coding |                |
| chr12-131 | 7.922752 | 0.050572 | 0.821272 | 0.061578  | 0.950899 | 0.981636 | chr12 | 1.32E+08 | 1.32E+08 | + | 0 | NA | intron (Nintron (N | -40304  | NM_016155  | 4326     | Hs.709245 | NM_016155          | ENSG000003MMP17     | MMP-17    | MTmatrix              | protein-coding |                |
| chr13-207 | 7.922752 | 0.050572 | 0.821272 | 0.061578  | 0.950899 | 0.981636 | chr13 | 20061352 | 20063531 | + | 0 | NA | intron (Nintron (N | -40260  | NR_126388  | 1.04E+08 | Hs.578016 | NR_126388          | ENSG000003LINC01072 |           | long intencr          | RNA            |                |
| chr13-95  | 7.922752 | 0.050572 | 0.821272 | 0.061578  | 0.950899 | 0.981636 | chr13 | 95092008 | 95093185 | + | 0 | NA | intron (Nintron (N | -117748 | NR_145733  | 1.1E+08  | NR_145733 | SNORD13G           |                     | small     | nucsnRNA              |                |                |
| chr14-311 | 7.922752 | 0.050572 | 0.821272 | 0.061578  | 0.950899 | 0.981636 | chr14 | 31162943 | 31163428 | + | 0 | NA | intron (NAluJo SIN | 44608   | NM_015382  | 25831    | Hs.708017 | NM_015382          | ENSG000003HECTD1    | EULLR     | HECT dom              | protein-coding |                |
| chr14-691 | 7.922752 | 0.050572 | 0.821272 | 0.061578  | 0.950899 | 0.981636 | chr14 | 69114478 | 69116660 | + | 0 | NA | intron (Nintron (N | 37030   | NM_001284  | 8816     | Hs.509780 | NM_003861          | ENSG000003DCAF5     | BCRG2     | BCF                   | protein-coding |                |
| chr14-967 | 7.922752 | 0.050572 | 0.821272 | 0.061578  | 0.950899 | 0.981636 | chr14 | 96552107 | 96554879 | + | 0 | NA | intron (NAluJb SIN | 50628   | NM_001293  | 10914    | Hs.253722 | NM_032632          | ENSG000003PAPOLA    | PAP       | PAP- $\alpha$ poly(A) | protein-coding |                |
| chr14-103 | 7.922752 | 0.050572 | 0.821272 | 0.061578  | 0.950899 | 0.981636 | chr14 | 1.04E+08 | 1.04E+08 | + | 0 | NA | intron (Nintron (N | 5786    | NM_001130  | 3831     | Hs.20107  | NM_005552          | ENSG000003KLC1      | KLC       | KNS2                  | protein-coding |                |
| chr15-140 | 7.922752 | 0.050572 | 0.821272 | 0.061578  | 0.950899 | 0.981636 | chr15 | 43024699 | 43027825 | + | 0 | NA | intron (Nintron (N | 79776   | NM_174911  | 197131   | Hs.591121 | NM_174911          | ENSG000003UBR1      | JBS       | ubiquitin             | protein-coding |                |
| chr15-551 | 7.922752 | 0.050572 | 0.821272 | 0.061578  | 0.950899 | 0.981636 | chr15 | 55188413 | 55191488 | + | 0 | NA | intron (Nintron (N | 6991    | NM_016304  | 51187    | Hs.274772 | NM_016304          | ENSG000003RSL24D1   | C15orf15  | ribosomal             | protein-coding |                |
| chr15-64  | 7.922752 | 0.050572 | 0.821272 | 0.061578  | 0.950899 | 0.981636 | chr15 | 64087387 | 64089433 | + | 0 | NA | intron (Nintron (N | 5428    | NM_032231  | 84191    | Hs.439545 | NM_032231          | ENSG000003CIA02A    | CIA2A     | FAM                   | cytosolic      |                |
| chr15-75  | 7.922752 | 0.050572 | 0.821272 | 0.061578  | 0.950899 | 0.981636 | chr15 | 75933223 | 75936877 | + | 0 | NA | non-codirnon-codir | 31172   | NM_147188  | 26263    | Hs.591111 | NM_012170          | ENSG000003FBX022    | FBX22     | FISF-box              | protein-coding |                |
| chr16-293 | 7.922752 | 0.050572 | 0.821272 | 0.061578  | 0.950899 | 0.981636 | chr16 | 29368805 | 29368925 | + | 0 | NA | intron (Nintron (N | 16680   | NM_001310  | 72888    | Hs.720288 | NM_001310          | ENSG000003NIP1B11   | NPIP1     | nuclear               | protein-coding |                |
| chr17-202 | 7.922752 | 0.050572 | 0.821272 | 0.061578  | 0.950899 | 0.981636 | chr17 | 20245443 | 20250545 | + | 0 | NA | intron (Nintron (N | -73180  | NR_023388  | 348254   | Hs.462475 | NR_023388          | CCDC144C            | CCDC144C  | coiled-c              | pseudo         |                |
| chr17-607 | 7.922752 | 0.050572 | 0.821272 | 0.061578  | 0.950899 | 0.981636 | chr17 | 60207407 | 60208533 | + | 0 | NA | intron (Nintron (N | 23675   | NR_002996  | 677681   | NR_002996 | ENSG000003SCARNA20 | ACA66               | small     | ncRNA                 |                |                |
| chr18-497 | 7.922752 | 0.050572 | 0.821272 | 0.061578  | 0.950899 | 0.981636 | chr18 | 49790016 | 49793047 | + | 0 | NA | exon (NM exon (NM  | 22002   | NM_006111  | 10449    | Hs.200133 | NM_006111          | ENSG000003ACAA2     | DSAEAC    | acetyl-C              | protein-coding |                |
| chr19-115 | 7.922752 | 0.050572 | 0.821272 | 0.061578  | 0.950899 | 0.981636 | chr19 | 11935957 | 11936201 | + | 0 | NA | intron (Nintron (N | 10972   | NM_144566  | 90592    | Hs.528488 | NM_144566          | ENSG000003ZNF700    |           | zinc                  | protein-coding |                |
| chr19-58  | 7.922752 | 0.050572 | 0.821272 | 0.061578  | 0.950899 | 0.981636 | chr19 | 58516288 | 58517213 | + | 0 | NA | exon (NM exon (NM  | 2852    | NM_001316  | 84878    | Hs.515662 | NM_032792          | ENSG000003ZBTB45    | ZNF499    | zinc                  | protein-coding |                |
| chr2-6941 | 7.922752 | 0.050572 | 0.821272 | 0.061578  | 0.950899 | 0.981636 | chr2  | 69418064 | 69421180 | + | 0 | NA | intron (Nintron (N | 17813   | NR_045632  | 27247    | Hs.430432 | NM_015700          | ENSG000003NFU1      | CGI-33    | HINFU1                | iror           | protein-coding |
| chr2-8605 | 7.922752 | 0.050572 | 0.821272 | 0.061578  | 0.950899 | 0.981636 | chr2  | 86096816 | 86098989 | + | 0 | NA | intron (Nintron (N | 7984    | NM_015425  | 25885    | Hs.531818 | NM_015425          | ENSG000003POLR1A    | A190      | AFC                   | protein-coding |                |
| chr2-2234 | 7.922752 | 0.050572 | 0.821272 | 0.061578  | 0.950899 | 0.981636 | chr2  | 2.02E+08 | 2.02E+08 | + | 0 | NA | intron (Nintron (N | 92663   | NM_001204  | 659      | Hs.471111 | NM_001204          | ENSG000003BMPR2     | BMPR-II   | Ebone                 | protein-coding |                |
| chr2-2238 | 7.922752 | 0.050572 | 0.821272 | 0.061578  | 0.950899 | 0.981636 | chr2  | 2.24E+08 | 2.24E+08 | + | 0 | NA | IntergeniMLT11 LTF | -36575  | NR_110906  | 130340   | Hs.632555 | NM_178814          | ENSG000003AP153     | PSORS15   | adaptor               | protein-coding |                |
| chr20-176 | 7.922752 | 0.050572 | 0.821272 | 0.061578  | 0.950899 | 0.981636 | chr20 | 17602718 | 17603640 | + | 0 | NA | intron (Nintron (N | 33104   | NM_006878  | 11034    | Hs.304192 | NM_006878          | ENSG000003DSTN      | ACTDP1    | ADF                   | protein-coding |                |
| chr3-333  | 7.922752 | 0.050572 | 0.821272 | 0.061578  | 0.950899 | 0.981636 | chr3  | 33395821 | 33402918 | + | 0 | NA | intron (Nintron (N | 41009   | NM_001128  | 7342     | Hs.729122 | NM_014517          | ENSG000003UBP1      | LBP-1B    | LF                    | protein-coding |                |
| chr4-1997 | 7.922752 | 0.050572 | 0.821272 | 0.061578  | 0.950899 | 0.981636 | chr4  | 1997439  | 1999410  | + | 0 | NA | intron (Nintron (N | 10550   | NM_005662  | 7469     | Hs.21771  | NM_005662          | ENSG000003NELFA     | NELF-A    | PF                    | protein-coding |                |
| chr4-391  | 7.922752 | 0.050572 | 0.821272 | 0.061578  | 0.950899 | 0.981636 | chr4  | 39102529 | 39107050 | + | 0 | NA | intron (NAluSc SIN | 42557   | NM_199035  | 51088    | Hs.272251 | NM_015990          | ENSG000003KLHL5     |           | kelch                 | protein-coding |                |
| chr7-3257 | 7.922752 | 0.050572 | 0.821272 | 0.061578  | 0.950899 | 0.981636 | chr7  | 32572528 | 32577640 | + | 0 | NA | intron (Nintron (N | 79595   | NM_015066  | 23080    | Hs.128055 | NM_015066          | ENSG000003AVL9      | KIAA0241  | AVL9                  | cell           | protein-coding |
| chr7-474  | 7.922752 | 0.050572 | 0.821272 | 0.061578  | 0.950899 | 0.981636 | chr7  | 47433206 | 47453119 | + | 0 | NA | intron (Nintron (N | 30641   | NR_145811  | 1.1E+08  | NR_145811 | SNORD151           |                     | small     | nucsnRNA              |                |                |
| chr7-730  | 7.922752 | 0.050572 | 0.821272 | 0.061578  | 0.950899 | 0.981636 | chr7  | 73068878 | 73069399 | + | 0 | NA | IntergeniIntergeni | -11231  | NR_003664  | 728524   | Hs.571272 | NM_001023562       | SPDYEBP             |           | speedy                | protein-coding |                |
| chr7-137  | 7.922752 | 0.050572 | 0.821272 | 0.061578  | 0.950899 | 0.981636 | chr7  | 1.38E+08 | 1.38E+08 | + | 0 | NA | TTS (NM_CTS (NM_C  | 20780   | NM_001318  | 64764    | Hs.490273 | NM_194071          | ENSG000003CREB3L2   | BBF2H7    | cAMP                  | protein-coding |                |
| chr7-157  | 7.922752 | 0.050572 | 0.821272 | 0.061578  | 0.950899 | 0.981636 | chr7  | 1.57E+08 | 1.57E+08 | + | 0 | NA | TTS (NM_CTS (NM_C  | -82373  | NM_005494  | 10049    | Hs.490745 | NM_005494          | ENSG000003DNABJ6    | DJ4       | DnaJ                  | protein-coding |                |
| chr9-100  | 7.922752 | 0.050572 | 0.821272 | 0.061578  | 0.950899 | 0.981636 | chr9  | 1E+08    | 1E+08    | + | 0 | NA | TTS (NM_CTS (NM_C  | 50953   | NM_001161  | 54881    | Hs.494645 | NM_017744          | ENSG000003TEX10     | Ipi1      | ba2C                  | protein-coding |                |
| chr9-125  | 7.922752 | 0.050572 | 0.821272 | 0.061578  | 0.950899 | 0.981636 | chr9  | 1.25E+08 | 1.25E+08 | + | 0 | NA | 3' UTR (N3' UTR (N | 46122   | NM_001330  | 26130    | Hs.42376  | NM_015632          | ENSG000003GAPVD1    | GAPX5     | GATTPase              | protein-coding |                |
| chr9-1341 | 7.922752 | 0.050572 | 0.821272 | 0.061578  | 0.950899 | 0.981636 | chr9  | 1.34E+08 | 1.34E+08 | + | 0 | NA | intron (Nintron (N | 2385    | NM_052821  | 11091    | Hs.397638 | NM_017588          | ENSG000003WDR5      | BIG-3     | CFAD                  | protein-coding |                |
| chr8-4797 | 7.386874 | 0.054828 | 0.890473 | 0.061572  | 0.950904 | 0.981636 | chr8  | 47977328 | 47977641 | + | 0 | NA | 3' UTR (N3' UTR (N | 16543   | NM_182744  | 4173     | Hs.460184 | NM_005914          | ENSG000003MCM4      | CDC21     | CD                    | protein-coding |                |
| chr21-28  | 6.678818 | 0.050617 | 0.855887 | -0.061535 | 0.950935 | 0.981636 | chr21 | 28984843 | 28985229 | + | 0 | NA | intron (Nintron (N | 7841    | NM_001320  | 26046    | Hs.288773 | NM_015562          | ENSG000003LTN1      | C21orf10  | listerin              | protein-coding |                |
| chr16-29  | 12.84425 | 0.040619 | 0.66053  | 0.061495  | 0.950965 | 0.981636 | chr16 | 29501957 | 29505807 | + | 0 | NA | intron (Nintron (N | 1992    | NM_001355  | 440353   | NR_001355 | NP1PB12            |                     | nuclear   | protein-coding        |                |                |
| chr4-247  | 12.84425 | 0.040619 | 0.66053  | 0.061495  | 0.950965 | 0.981636 | chr4  | 2470899  | 2473553  | + | 0 | NA | intron (Nintron (N | 2773    | NM_001188  | 6047     | Hs.66394  | NR_002938          | ENSG000003CRNF4     | RES4-26   | Spring                | protein-coding |                |
| chr10-495 | 7.632486 | -0.05141 | 0.837732 | -0.06136  | 0.951071 | 0.981636 | chr10 | 49925452 | 49932244 | + | 0 | NA | intron (Nintron (N | 11179   | NR_136755  | 8505     | Hs.535298 | NM_003631          | ENSG000003PARG      | PARG99    | poly(ADP-             | protein-coding |                |
| chr13-405 | 7.632486 | -0.05141 | 0.837732 | -0.06136  | 0.951071 | 0.981636 | chr13 | 40950070 | 40951075 | + | 0 | NA | intron (Nintron (N | -28798  | NR_003365  | 283507   | Hs.442781 | NR_003365          | ENSG000003SUGT1P3   | SUGT1L1   | SUGT1                 | pseud          |                |
| chr14-391 | 7.632486 | -0.05141 | 0.837732 | -0.06136  | 0.951071 | 0.981636 | chr14 | 39152337 | 39155075 | + | 0 | NA | intron (Nintron (N | 16627   | NM_001075  | 122553   | Hs.13303  | NM_177452          | ENSG000003TRAPP6B   | NEDMEBA1  | trafficki             | protein-coding |                |
| chr14-10  | 7.632486 | -0.05141 | 0.837732 | -0.06136  | 0.951071 | 0.981636 | chr14 | 1.01E+08 | 1.01E+08 | + | 0 | NA | TTS (NR_CTS (NR_C  | 252     | NR_003236  | 767568   | NR_003236 | SNORD113-14q       | (I-8)               | small     | nucsnRNA              |                |                |
| chr16-88  | 7.632486 | -0.05141 | 0.837732 | -0.06136  | 0.951071 | 0.981636 | chr16 | 88588341 | 88591126 | + | 0 | NA | intron (Nintron (N | 19330   | NM_144604  | 102425   | Hs.93670  | NM_144604          | ENSG000003ZC3H18    | NHNI      | zinc                  | protein-coding |                |
| chr17-671 | 7.632486 | -0.05141 | 0.837732 | -0.06136  | 0.95107  |          |       |          |          |   |   |    |                    |         |            |          |           |                    |                     |           |                       |                |                |

|                    |          |          |          |          |          |         |          |          |        |                               |                  |                              |                    |                                         |
|--------------------|----------|----------|----------|----------|----------|---------|----------|----------|--------|-------------------------------|------------------|------------------------------|--------------------|-----------------------------------------|
| chr17-381 8.176222 | -0.05051 | 0.832258 | -0.0607  | 0.951601 | 0.981636 | chr17   | 3812870  | 3813346  | + 0 NA | exon (NM_exon (NM_192000))    | 11920 NM_002208  | 3682 Hs. 513867NM_002208     | ENSG000001TGAE     | CD103 HUM integrin protein-coding       |
| chr3-1895 8.176222 | -0.05051 | 0.832258 | -0.0607  | 0.951601 | 0.981636 | chr3    | 1.9E+08  | 1.9E+08  | + 0 NA | intron (NLIP47 LIN            | 138895 NR_030642 | 1E+08 NR_030642              | ENSG000001MIR944   | MIRN944 hmicroRNA ncRNA                 |
| chr16-214 11.36605 | 0.042239 | 0.696082 | 0.060682 | 0.951613 | 0.981636 | chr16   | 21407833 | 21412128 | + 0 NA | intron (NAluSx4 SI            | 15398 NM_130464  | 23117 Hs. 611072NM_130464    | NPIP3B             | KIAA02201 nuclear protein-coding        |
| chr17-161 11.36605 | 0.042239 | 0.696082 | 0.060682 | 0.951613 | 0.981636 | chr17   | 16101270 | 16101842 | + 0 NA | exon (NM_exon (NM_151640))    | NR_145787        | 1.1E+08 NR_145787            | SNORD163           | small nucleolar RNA                     |
| chr6-2837 11.36605 | 0.042239 | 0.696082 | 0.060682 | 0.951613 | 0.981636 | chr6    | 2837321  | 2838177  | + 0 NA | intron (Nintron (N_4114))     | NR_073112        | 1992 Hs. 381167NM_030666     | ENSG000001SERPINB1 | EI ELANHE serpin protein-coding         |
| chr1-2187 8.929794 | 0.047199 | 0.777962 | 0.06067  | 0.951622 | 0.981636 | chr1    | 21871805 | 21882164 | + 0 NA | intron (NAluSx SIN            | 60326 NM_001291  | 3339 Hs. 562227NM_005529     | ENSG000001HSPG2    | HSPG PLC heparan protein-coding         |
| chr1-3294 8.929794 | 0.047199 | 0.777962 | 0.06067  | 0.951622 | 0.981636 | chr1    | 32941653 | 32942354 | + 0 NA | intron (NAluV SINE            | 22806 NM_001127  | 127544 Hs. 591504NM_153341   | ENSG000001RNF19B   | ITBRDC3 NKR ing protein-coding          |
| chr1-3935 8.929794 | 0.047199 | 0.777962 | 0.06067  | 0.951622 | 0.981636 | chr1    | 39336132 | 39342763 | + 0 NA | intron (NL2 LINE L            | -69266 NM_015038 | 643314 Hs. 658766NM_015038   | ENSG000001KIAA0754 | KIAA0754 protein-coding                 |
| chr1-1793 8.929794 | 0.047199 | 0.777962 | 0.06067  | 0.951622 | 0.981636 | chr1    | 1.79E+08 | 1.79E+08 | + 0 NA | intron (Nintron (N_8662))     | NR_030642        | 126859 Hs. 658505NM_144696   | ENSG000001AXDND1   | C1orf125 axonemal protein-coding        |
| chr10-856 8.929794 | 0.047199 | 0.777962 | 0.06067  | 0.951622 | 0.981636 | chr10   | 86621908 | 86624586 | + 0 NA | intron (Nintron (N_32512))    | NR_001333        | 6623 Hs. 349477NM_003087     | ENSG000001SNCG     | BCLG1 SR synuclein protein-coding       |
| chr10-956 8.929794 | 0.047199 | 0.777962 | 0.06067  | 0.951622 | 0.981636 | chr10   | 95613169 | 95616686 | + 0 NA | intron (NLIME3 LIN            | 41784 NM_001323  | 5832 Hs. 500645NM_002866     | ENSG000001ALDH18A1 | ADCSL3 AR aldehyde protein-coding       |
| chr10-103 8.929794 | 0.047199 | 0.777962 | 0.06067  | 0.951622 | 0.981636 | chr10   | 1.03E+08 | 1.03E+08 | + 0 NA | intron (Nintron (N_49299))    | NR_001351        | 22978 Hs. 97439 NM_012225    | ENSG000001CNT5C2   | GMP NT5B 5' nucleol protein-coding      |
| chr10-115 8.929794 | 0.047199 | 0.777962 | 0.06067  | 0.951622 | 0.981636 | chr10   | 1.19E+08 | 1.19E+08 | + 0 NA | intron (Nintron (N_5390))     | NR_001303        | 404636 Hs. 434241NM_207005   | ENSG000001DENND10  | FAM45A DENN domain protein-coding       |
| chr10-118 8.929794 | 0.047199 | 0.777962 | 0.06067  | 0.951622 | 0.981636 | chr10   | 1.2E+08  | 1.2E+08  | + 0 NA | non-coding-non-coding         | -16349 NR_039833 | 1.01E+08 NR_039833           | ENSG000001MIR4682  | microRNA ncRNA                          |
| chr11-595 8.929794 | 0.047199 | 0.777962 | 0.06067  | 0.951622 | 0.981636 | chr11   | 59584034 | 59589173 | + 0 NA | intron (NLIMB2 LIN            | 8555 NR_036120   | 1E+08 NR_036120              | ENSG000001MIR3162  | mir-3162 microRNA ncRNA                 |
| chr11-116 8.929794 | 0.047199 | 0.777962 | 0.06067  | 0.951622 | 0.981636 | chr11   | 1.17E+08 | 1.17E+08 | + 0 NA | exon (NM_exon (NM_5937))      | NR_001155        | 84811 Hs. 437341NM_032722    | ENSG000001BUD13    | Cwc26 f5 BUD13 hom protein-coding       |
| chr11-118 8.929794 | 0.047199 | 0.777962 | 0.06067  | 0.951622 | 0.981636 | chr11   | 1.19E+08 | 1.19E+08 | + 0 NA | intron (Nintron (N_17019))    | NR_106773        | 1.02E+08 NR_106773           | ENSG000001MIR6716  | hsa-mir-6716 microRNA ncRNA             |
| chr11-118 8.929794 | 0.047199 | 0.777962 | 0.06067  | 0.951622 | 0.981636 | chr11   | 1.19E+08 | 1.19E+08 | + 0 NA | intron (NL2 LINE L            | 8346 NR_106773   | 1.02E+08 NR_106773           | ENSG000001MIR6716  | hsa-mir-6716 microRNA ncRNA             |
| chr13-236 8.929794 | 0.047199 | 0.777962 | 0.06067  | 0.951622 | 0.981636 | chr13   | 23626542 | 23629160 | + 0 NA | intron (Nintron (N_48491))    | NR_018647        | 55504 Hs. 149166NM_018647    | ENSG000001TNFRSF19 | TAJ TAJ-α TNF receptor protein-coding   |
| chr15-434 8.929794 | 0.047199 | 0.777962 | 0.06067  | 0.951622 | 0.981636 | chr15   | 43456790 | 43459215 | + 0 NA | intron (NAluSx SIN            | 35154 NM_001141  | 7158 Hs. 440965NM_005657     | ENSG000001TP53BP1  | 53BP1 TDF tumor protein-coding          |
| chr16-27 8.929794  | 0.047199 | 0.777962 | 0.06067  | 0.951622 | 0.981636 | chr16   | 27344678 | 27356684 | + 0 NA | intron (Nintron (N_36707))    | NR_001257        | 3566 Hs. 513457NM_000418     | ENSG000001ILR      | CD124 IL-1 interleukin protein-coding   |
| chr16-532 8.929794 | 0.047199 | 0.777962 | 0.06067  | 0.951622 | 0.981636 | chr16   | 53245455 | 53248717 | + 0 NA | intron (NL2c LINE L           | 38635 NM_001352  | 80205 Hs. 59159 NM_015287    | ENSG000001CHD9     | AD013 CHE chromodon protein-coding      |
| chr17-324 8.929794 | 0.047199 | 0.777962 | 0.06067  | 0.951622 | 0.981636 | chr17   | 32463018 | 32466955 | + 0 NA | intron (Nintron (N_20476))    | NR_002815        | 5717 Hs. 443379NM_002815     | ENSG000001PSMD11   | Rpn6 S9 proteasome protein-coding       |
| chr17-426 8.929794 | 0.047199 | 0.777962 | 0.06067  | 0.951622 | 0.981636 | chr17   | 42668476 | 42673486 | + 0 NA | intron (NCPg-1116             | 5030 NR_073574   | 79990 Hs. 632251NM_024927    | ENSG000001PLEKH3   | pleckstrin protein-coding               |
| chr19-165 8.929794 | 0.047199 | 0.777962 | 0.06067  | 0.951622 | 0.981636 | chr19   | 16559628 | 16567695 | + 0 NA | intron (NAluSz SIN            | 8754 NM_024881   | 79939 Hs. 620596NM_024881    | ENSG000001SLC35E1  | solute carrier protein-coding           |
| chr19-358 8.929794 | 0.047199 | 0.777962 | 0.06067  | 0.951622 | 0.981636 | chr19   | 35888058 | 35890578 | + 0 NA | intron (NAluJr SIN            | 10419 NM_001321  | 84807 Hs. 446653NM_032721    | ENSG000001NFKBID   | IkbNS Ike NFKB inhibitor protein-coding |
| chr2-2031 8.929794 | 0.047199 | 0.777962 | 0.06067  | 0.951622 | 0.981636 | chr2    | 2.03E+08 | 2.03E+08 | + 0 NA | exon (NM_exon (NM_20337))     | NR_177538        | 57404 Hs. 466631NM_020674    | ENSG000001CYP20A1  | CYP-m cytochrome protein-coding         |
| chr2-2186 8.929794 | 0.047199 | 0.777962 | 0.06067  | 0.951622 | 0.981636 | chr2    | 2.19E+08 | 2.19E+08 | + 0 NA | intron (Nintron (N_20337))    | NR_001366        | 7701 Hs. 657966NM_001105     | ENSG000001ZNF142   | HAF454 NE zinc finger protein-coding    |
| chr2-2298 8.929794 | 0.047199 | 0.777962 | 0.06067  | 0.951622 | 0.981636 | chr2    | 2.3E+08  | 2.3E+08  | + 0 NA | intron (Nintron (N_42751))    | NR_001348        | 9320 Hs. 572642NM_004235     | ENSG000001TRIP12   | MRD49 TRI thyroid l protein-coding      |
| chr2-2325 8.929794 | 0.047199 | 0.777962 | 0.06067  | 0.951622 | 0.981636 | chr2    | 2.33E+08 | 2.33E+08 | + 0 NA | intron (NAluSx4 SI            | 15138 NM_001330  | 9470 Hs. 529202NM_004845     | ENSG000001EIF4E    | 4E-LP 4E eukaryotic protein-coding      |
| chr2-2413 8.929794 | 0.047199 | 0.777962 | 0.06067  | 0.951622 | 0.981636 | chr2    | 2.41E+08 | 2.41E+08 | + 0 NA | exon (NM_exon (NM_19843))     | NR_001321        | 4735 Hs. 721234NM_004404     | ENSG000001SEPTIN2  | DIFF6 NEI septin 2 protein-coding       |
| chr21-335 8.929794 | 0.047199 | 0.777962 | 0.06067  | 0.951622 | 0.981636 | chr21   | 33905774 | 33913276 | + 0 NA | intron (NAluSz SIN            | 6279 NM_001697   | 539 Hs. 409144NM_001697      | ENSG000001ATP5P0   | ATP5P0 ATF ATP synthet protein-coding   |
| chr22-245 8.929794 | 0.047199 | 0.777962 | 0.06067  | 0.951622 | 0.981636 | chr22   | 24557795 | 24557772 | + 0 NA | intron (NLTR16B1 L            | 2784 NM_004175   | 6634 Hs. 356545NM_004175     | ENSG000001SNRPD3   | SMD3 Sm-1 small nucleol protein-coding  |
| chr22-413 8.929794 | 0.047199 | 0.777962 | 0.06067  | 0.951622 | 0.981636 | chr22   | 41342674 | 41358666 | + 0 NA | intron (NL2a LINE L           | -16663 NM_001148 | 7008 Hs. 181155NM_003215     | ENSG000001CTEF     | TEF trans protein-coding                |
| chr3-1447 8.929794 | 0.047199 | 0.777962 | 0.06067  | 0.951622 | 0.981636 | chr3    | 14477070 | 14480172 | + 0 NA | intron (Nintron (N_61721))    | NR_001088        | 80852 Hs. 517815NM_001088    | ENSG000001GRIP2    | glutamate protein-coding                |
| chr4-1758 8.929794 | 0.047199 | 0.777962 | 0.06067  | 0.951622 | 0.981636 | chr4    | 17581534 | 17586367 | + 0 NA | intron (Nintron (N_6646))     | NR_015907        | 51056 Hs. 570791NM_015907    | ENSG000001LAP3     | HEL-5-10ε leucine protein-coding        |
| chr7-6433 8.929794 | 0.047199 | 0.777962 | 0.06067  | 0.951622 | 0.981636 | chr7    | 64333629 | 6435432  | + 0 NA | intron (Nintron (N_98988317)) | NR_98993137      | 221955 Hs. 487495NM_139179   | ENSG000001DAGLB    | DAGLBETA diacylglycerol protein-coding  |
| chr7-9808 8.929794 | 0.047199 | 0.777962 | 0.06067  | 0.951622 | 0.981636 | chr7    | 98988317 | 98993137 | + 0 NA | intron (Nintron (N_22438))    | NR_110102        | 1.02E+08 Hs. 636663NR_110102 | LOC101927          | uncharacterized ncRNA                   |
| chr7-1008 8.929794 | 0.047199 | 0.777962 | 0.06067  | 0.951622 | 0.981636 | chr7    | 1.01E+08 | 1.01E+08 | + 0 NA | intron (NAluV SINE            | -5266 NM_001363  | 56996 Hs. 521087NM_020245    | ENSG000001SLC12A9  | CCG6 CIP1 solute carrier protein-coding |
| chr7-1395 8.929794 | 0.047199 | 0.777962 | 0.06067  | 0.951622 | 0.981636 | chr7    | 1.4E+08  | 1.4E+08  | + 0 NA | intron (NLTR65 LTF            | 51014 NM_001088  | 154790 Hs. 57806 NM_001088   | ENSG000001CLEC2L   | C-type lectin protein-coding            |
| chr8-1411 8.929794 | 0.047199 | 0.777962 | 0.06067  | 0.951622 | 0.981636 | chr8    | 1.41E+08 | 1.41E+08 | + 0 NA | 3' UTR (N3' UTR (N_13892))    | NR_148197        | 22898 Hs. 18166 NM_014957    | ENSG000001DENND3   | DENN domain protein-coding              |
| chr9-1133 8.929794 | 0.047199 | 0.777962 | 0.06067  | 0.951622 | 0.981636 | chr9    | 1.13E+08 | 1.13E+08 | + 0 NA | intron (Nintron (N_41928))    | NR_001198        | 22887 Hs. 26023 NM_014947    | ENSG000001FOXJ3    | forkhead protein-coding                 |
| chr1-4225 7.681484 | -0.05096 | 0.840244 | -0.06064 | 0.951642 | 0.981636 | chr1    | 42292770 | 42293285 | + 0 NA | intron (NAluJb SIN            | 7264 NM_024102   | 79084 Hs. 204777NM_024102    | ENSG000001WDR77    | HKMT1069 WD repeat protein-coding       |
| chr1-1114 7.681484 | -0.05096 | 0.840244 | -0.06064 | 0.951642 | 0.981636 | chr1    | 1.11E+08 | 1.11E+08 | + 0 NA | 3' UTR (N3' UTR (N_59792135)) | NR_59793608      | 59792135                     | ENSG000001MIR3608  | LINC00946 myoregulin protein-coding     |
| chr16-587 7.681484 | -0.05096 | 0.840244 | -0.06064 | 0.951642 | 0.981636 | chr16   | 48299436 | 48300052 | + 0 NA | exon (NM_exon (NM_62835504))  | NR_62836612      | 23301 Hs. 271667NM_015252    | ENSG000001EHPB1    | MRP2 MRPE1 bindin protein-coding        |
| chr2-6283 7.681484 | -0.05096 | 0.840244 | -0.06064 | 0.951642 | 0.981636 | chr2    | 62835504 | 62836612 | + 0 NA | intron (NLIP2 LIN             | 129161 NM_001354 | 23301 Hs. 271667NM_015252    | ENSG000001EHPB1    | HPC12 NACH domain protein-coding        |
| chr2-1341 7.681484 | -0.05096 | 0.840244 | -0.06064 | 0.951642 | 0.981636 | chr2    | 1.34E+08 | 1.34E+08 | + 0 NA | intron (NLTR12C LI            | 3849 NR_037455   | 1.01E+08 NR_037455           | ENSG000001MIR3679  | mir-3679 microRNA ncRNA                 |
| chr5-1751 7.681484 | -0.05096 | 0.840244 | -0.06064 | 0.951642 | 0.981636 | chr5    | 1.76E+08 | 1.76E+08 | + 0 NA | intron (Nintron (N_31540))    | NR_022754        | 94081 Hs. 369444NM_022754    | ENSG000001SFXN1    | SLC56A1 sideroflexin protein-coding     |
| chr7-1507 7.681484 | -0.05096 | 0.840244 | -0.06064 | 0.951642 | 0.981636 | chr7    | 1.51E+08 | 1.51E+08 | + 0 NA | Intergenic AluSc SIN          | 29682 NM_001101  | 28959 Hs. 647099NM_014020    | ENSG000001TMEM176B | LRS MS4E2 transmembrane protein-coding  |
| chr15-700 6.972565 | 0.053127 | 0.877117 | 0.06057  | 0.951702 | 0.981636 | chr15   | 70051127 | 70053012 | + 0 NA | intron (NMIRb SINE            | 27399 NR_030714  | 693214 NR_030714             | ENSG000001MIR629   | MIRN629 hmicroRNA ncRNA                 |
| chr17-596 6.972565 | 0.053127 | 0.877117 | 0.06057  | 0.951702 | 0.981636 | chr17   | 59599006 | 59600164 | + 0 NA | intron (Nintron (N_20104))    | NR_001288        | 1213 Hs. 491351NM_004855     | ENSG000001CLTC     | CHC CHC1 clathrin protein-coding        |
| chr19-405 6.494359 | 0.059596 | 0.984832 | 0.060514 | 0.951747 | 0.981636 | chr19</ |          |          |        |                               |                  |                              |                    |                                         |



|           |          |          |          |          |          |          |       |          |          |   |   |    |                    |        |           |          |           |                   |                     |              |                         |                  |                |
|-----------|----------|----------|----------|----------|----------|----------|-------|----------|----------|---|---|----|--------------------|--------|-----------|----------|-----------|-------------------|---------------------|--------------|-------------------------|------------------|----------------|
| chr1-3232 | 7.186745 | -0.05176 | 0.858814 | -0.06026 | 0.951945 | 0.981636 | chr1  | 32324139 | 32328856 | + | 0 | NA | intron (NMER112 DN | 9736   | NM_023000 | 65108    | Hs.75061  | NM_023000         | ENSG000003MARCKSL1  | F52 MACM     | MARCKS                  | liprotein-coding |                |
| chr1-4367 | 7.186745 | -0.05176 | 0.858814 | -0.06026 | 0.951945 | 0.981636 | chr1  | 43679493 | 43680817 | + | 0 | NA | intron (Nintron (N | 27186  | NR_033827 | 1E+08    | Hs.65556  | NR_033827         | KDMA4-AS1-          |              | KDMA4                   | antncRNA         |                |
| chr1-4671 | 7.186745 | -0.05176 | 0.858814 | -0.06026 | 0.951945 | 0.981636 | chr1  | 46714762 | 46716712 | + | 0 | NA | intron (Nintron (N | 3377   | NM_014774 | 9813     | Hs.70768  | ENM_014774        | ENSG000003EFCAB14   | KIAA0494     | EF-hand                 | cprotein-coding  |                |
| chr1-6665 | 7.186745 | -0.05176 | 0.858814 | -0.06026 | 0.951945 | 0.981636 | chr1  | 66654132 | 66657121 | + | 0 | NA | intron (Nintron (N | 27186  | NR_036066 | 1E+08    | NR_036066 | ENSG000003MIR3117 | mir-3117            | microRNA     | ncRNA                   |                  |                |
| chr1-8455 | 7.186745 | -0.05176 | 0.858814 | -0.06026 | 0.951945 | 0.981636 | chr1  | 84509201 | 84510036 | + | 0 | NA | intron (Nintron (N | 17706  | NM_007266 | 2787     | Hs.64542  | NR_005274         | ENSG000003CNG5      |              | G                       | protein-coding   |                |
| chr1-1087 | 7.186745 | -0.05176 | 0.858814 | -0.06026 | 0.951945 | 0.981636 | chr1  | 1.09E+08 | 1.09E+08 | + | 0 | NA | intron (Nintron (N | 17706  | NM_007266 | 6814     | Hs.53043  | ENM_007266        | ENSG000003STXPB3    | MUNC18-3     | syntaxin                | protein-coding   |                |
| chr10-152 | 7.186745 | -0.05176 | 0.858814 | -0.06026 | 0.951945 | 0.981636 | chr10 | 45886618 | 45888237 | + | 0 | NA | intron (Nintron (N | 33550  | NM_001291 | 119016   | Hs.31443  | NR_13344          | ENSG000003AGAP4     | AGAP-4 AC    | ArFGAP                  | wiprotein-coding |                |
| chr10-126 | 7.186745 | -0.05176 | 0.858814 | -0.06026 | 0.951945 | 0.981636 | chr10 | 1.21E+08 | 1.21E+08 | + | 0 | NA | 3' UTR (N3' UTR (N | 57839  | NM_018117 | 55717    | Hs.14444  | NR_018117         | ENSG000003WDR11     | BRWD2 DRWD   | repeatprotein-coding    |                  |                |
| chr10-132 | 7.186745 | -0.05176 | 0.858814 | -0.06026 | 0.951945 | 0.981636 | chr10 | 1.33E+08 | 1.33E+08 | + | 0 | NA | intron (Nintron (N | 9117   | NM_001012 | 503542   | Hs.64968  | NM_001012         | ENSG000003SPRN      | SHAD00 SF    | shadow of               | protein-coding   |                |
| chr12-49  | 7.186745 | -0.05176 | 0.858814 | -0.06026 | 0.951945 | 0.981636 | chr12 | 49643828 | 49644338 | + | 0 | NA | 3' UTR (N3' UTR (N | 13539  | NM_001362 | 25766    | Hs.70682  | NM_012272         | ENSG000003PRPF40B   | HYPX         | pre-mRNA                | protein-coding   |                |
| chr13-111 | 7.186745 | -0.05176 | 0.858814 | -0.06026 | 0.951945 | 0.981636 | chr13 | 1.11E+08 | 1.11E+08 | + | 0 | NA | intron (Nintron (N | 41746  | NM_001352 | 79587    | Hs.50872  | NM_002453         | ENSG000003CARS2     | COCPD27 C    | cysteiny                | protein-coding   |                |
| chr15-64  | 7.186745 | -0.05176 | 0.858814 | -0.06026 | 0.951945 | 0.981636 | chr15 | 64678368 | 64679143 | + | 0 | NA | intron (Nintron (N | 24526  | NM_001301 | 4947     | Hs.74492  | NR_002537         | ENSG000003OAZ2      | AZ2          | ornithine               | protein-coding   |                |
| chr15-94  | 7.186745 | -0.05176 | 0.858814 | -0.06026 | 0.951945 | 0.981636 | chr15 | 94457656 | 94458806 | + | 0 | NA | exon (NM exon (NM  | 102301 | NM_001155 | 55784    | Hs.33368  | NM_01834          | ENSG000003MCTP2     |              | luciferase              | protein-coding   |                |
| chr17-507 | 7.186745 | -0.05176 | 0.858814 | -0.06026 | 0.951945 | 0.981636 | chr17 | 50737503 | 50738304 | + | 0 | NA | intron (NMER105 DN | 18300  | NM_001330 | 51747    | Hs.13029  | NR_006107         | ENSG000003LUC7L3    | CRA CREAF    | LUC7 like               | protein-coding   |                |
| chr19-373 | 7.186745 | -0.05176 | 0.858814 | -0.06026 | 0.951945 | 0.981636 | chr19 | 37355298 | 37356852 | + | 0 | NA | intron (Nintron (N | 15024  | NM_032452 | 84503    | Hs.59094  | NR_032452         | ENSG000003ZNF527    |              | zinc fing               | protein-coding   |                |
| chr2-1098 | 7.186745 | -0.05176 | 0.858814 | -0.06026 | 0.951945 | 0.981636 | chr2  | 1.1E+08  | 1.1E+08  | + | 0 | NA | intron (Nintron (N | 40813  | NM_005054 | 84220    | Hs.46963  | NR_005054         | ENSG000003RGPD5     | BS-63 BS     | RANBP2                  | lprotein-coding  |                |
| chr2-1127 | 7.186745 | -0.05176 | 0.858814 | -0.06026 | 0.951945 | 0.981636 | chr2  | 1.13E+08 | 1.13E+08 | + | 0 | NA | intron (Nintron (N | 26783  | NM_001137 | 84172    | Hs.74512  | NR_019014         | ENSG000003POLR1B    | RPA135 RF    | RNA poly                | protein-coding   |                |
| chr2-237  | 7.186745 | -0.05176 | 0.858814 | -0.06026 | 0.951945 | 0.981636 | chr2  | 1.28E+08 | 1.28E+08 | + | 0 | NA | 3' UTR (N3' UTR (N | 51232  | NM_004807 | 9394     | Hs.51284  | NR_004807         | ENSG000003HSG6ST1   | HH15 HSG     | heparan s               | protein-coding   |                |
| chr2-186  | 7.186745 | -0.05176 | 0.858814 | -0.06026 | 0.951945 | 0.981636 | chr2  | 1.87E+08 | 1.87E+08 | + | 0 | NA | exon (NM exon (NM  | 17174  | NM_177454 | 165215   | Hs.28872  | NM_177454         | ENSG000003FAM171B   | KIAA1946     | family wiprotein-coding |                  |                |
| chr2-218  | 7.186745 | -0.05176 | 0.858814 | -0.06026 | 0.951945 | 0.981636 | chr2  | 2.19E+08 | 2.19E+08 | + | 0 | NA | intron (Nintron (N | 14126  | NM_001366 | 7701     | Hs.65796  | NR_001105         | ENSG000003ZNF142    | HA4654 NE    | zinc fing               | protein-coding   |                |
| chr2-237  | 7.186745 | -0.05176 | 0.858814 | -0.06026 | 0.951945 | 0.981636 | chr2  | 2.37E+08 | 2.37E+08 | + | 0 | NA | intron (NMIR SINE  | 14708  | NM_005716 | 1293     | Hs.23324  | NR_00436          | ENSG000003COL6A3    | BTHLM1 Dy    | collagen                | protein-coding   |                |
| chr20-63  | 7.186745 | -0.05176 | 0.858814 | -0.06026 | 0.951945 | 0.981636 | chr20 | 63942375 | 63944593 | + | 0 | NA | promoter-promoter- | 758    | NR_030377 | 693232   | NR_030377 | ENSG000003MIR647  | MIRN647 mi          | microRNA     | ncRNA                   |                  |                |
| chr21-42  | 7.186745 | -0.05176 | 0.858814 | -0.06026 | 0.951945 | 0.981636 | chr21 | 42006969 | 42008240 | + | 0 | NA | intron (N2c LINE   | 1590   | NR_119384 | 150142   | Hs.14383  | NR_19807          | ENSG000003ZNF295-AS | C21orf12 ZNF | 295                     | arncRNA          |                |
| chr3-710  | 7.186745 | -0.05176 | 0.858814 | -0.06026 | 0.951945 | 0.981636 | chr3  | 71042380 | 71044795 | + | 0 | NA | intron (Nintron (N | 20337  | NM_001346 | 27086    | Hs.59368  | NM_032682         | ENSG000003POXP1     | I2CC4 HSF    | forkhead                | protein-coding   |                |
| chr3-122  | 7.186745 | -0.05176 | 0.858814 | -0.06026 | 0.951945 | 0.981636 | chr3  | 1.23E+08 | 1.23E+08 | + | 0 | NA | exon (NM exon (NM  | 19941  | NM_017554 | 54625    | Hs.51820  | NR_017554         | ENSG000003PARP14    | ARTD8 BAL    | poly (ADP-              | protein-coding   |                |
| chr3-124  | 7.186745 | -0.05176 | 0.858814 | -0.06026 | 0.951945 | 0.981636 | chr3  | 1.25E+08 | 1.25E+08 | + | 0 | NA | intron (Nintron (N | 33534  | NR_036088 | 1E+08    | NR_036088 | ENSG000003MIR544B |                     | microRNA     | ncRNA                   |                  |                |
| chr3-147  | 7.186745 | -0.05176 | 0.858814 | -0.06026 | 0.951945 | 0.981636 | chr3  | 1.5E+08  | 1.5E+08  | + | 0 | NA | intron (Nintron (N | 26126  | NM_002628 | 5217     | Hs.91747  | NM_002628         | ENSG000003PFN2      | D3S1319 P    | profilin                | protein-coding   |                |
| chr4-186  | 7.186745 | -0.05176 | 0.858814 | -0.06026 | 0.951945 | 0.981636 | chr4  | 1.87E+08 | 1.87E+08 | + | 0 | NA | intron (Nintron (N | 49144  | NM_00524E | 2195     | Hs.48137  | NR_00524E         | ENSG000003FAT1      | CDHF7 CDF    | FAT atyp                | protein-coding   |                |
| chr5-373  | 7.186745 | -0.05176 | 0.858814 | -0.06026 | 0.951945 | 0.981636 | chr5  | 37316548 | 37317326 | + | 0 | NA | intron (Nintron (N | 54169  | NM_15348E | 9631     | Hs.54769  | NR_00429E         | ENSG000003CNP155    | ATFB15 N1    | nucleoporin             | protein-coding   |                |
| chr5-658  | 7.186745 | -0.05176 | 0.858814 | -0.06026 | 0.951945 | 0.981636 | chr5  | 65882242 | 65887756 | + | 0 | NA | intron (Nintron (N | 21703  | NM_015342 | 23398    | Hs.12143  | NR_015342         | ENSG000003PPWD1     |              | peptidyl                | protein-coding   |                |
| chr5-129  | 7.186745 | -0.05176 | 0.858814 | -0.06026 | 0.951945 | 0.981636 | chr5  | 1.3E+08  | 1.3E+08  | + | 0 | NA | intron (N2b LINE   | 97131  | NM_001257 | 1E+08    | Hs.58253  | NR_001257         | ENSG000003CMINAR2   | KIAA1024 M   | membrane                | protein-coding   |                |
| chr5-129  | 7.186745 | -0.05176 | 0.858814 | -0.06026 | 0.951945 | 0.981636 | chr5  | 1.3E+08  | 1.3E+08  | + | 0 | NA | intron (Nintron (N | 67360  | NM_001257 | 1E+08    | Hs.58253  | NR_001257         | ENSG000003CMINAR2   | KIAA1024 M   | membrane                | protein-coding   |                |
| chr5-140  | 7.186745 | -0.05176 | 0.858814 | -0.06026 | 0.951945 | 0.981636 | chr5  | 1.4E+08  | 1.4E+08  | + | 0 | NA | intron (Nintron (N | 42051  | NM_017978 | 54882    | Hs.59408  | NR_017978         | ENSG000003ANKHD1    | MASK MSK     | ankyrin                 | lprotein-coding  |                |
| chr5-150  | 7.186745 | -0.05176 | 0.858814 | -0.06026 | 0.951945 | 0.981636 | chr5  | 1.51E+08 | 1.51E+08 | + | 0 | NA | intron (NMIR SINE  | 14118  | NM_00154E | 3340     | Hs.22205  | NR_00154E         | ENSG000003NDST1     | HSST MRT     | 4N-deacety              | protein-coding   |                |
| chr6-107  | 7.186745 | -0.05176 | 0.858814 | -0.06026 | 0.951945 | 0.981636 | chr6  | 10702123 | 10706239 | + | 0 | NA | intron (Nintron (N | 9209   | NM_01790E | 55003    | Hs.31023  | NR_01790E         | ENSG000003PAK11P1   | MAK11 PTF    | PAK1 inte               | protein-coding   |                |
| chr6-332  | 7.186745 | -0.05176 | 0.858814 | -0.06026 | 0.951945 | 0.981636 | chr6  | 33266573 | 33268042 | + | 0 | NA | exon (NM exon (NM  | 4569   | NM_02255E | 6293     | Hs.48035  | NR_02255E         | ENSG000003VPS52     | ARE1 SAC2    | VPS52                   | su               | protein-coding |
| chr7-149  | 7.186745 | -0.05176 | 0.858814 | -0.06026 | 0.951945 | 0.981636 | chr7  | 1.49E+08 | 1.49E+08 | + | 0 | NA | non-codirnon-codir | 16065  | NR_130107 | 1.03E+08 | Hs.62198  | NR_130107         | ENSG000003GHET1     |              | lncRNA-GF               | gastric          | ncRNA          |
| chr7-157  | 7.186745 | -0.05176 | 0.858814 | -0.06026 | 0.951945 | 0.981636 | chr7  | 1.57E+08 | 1.57E+08 | + | 0 | NA | intron (Nintron (N | 51170  | NM_014671 | 9690     | Hs.11835  | NR_014671         | ENSG000003UBE3C     | HECTH2       | ubiquitin               | protein-coding   |                |
| chr9-763  | 7.186745 | -0.05176 | 0.858814 | -0.06026 | 0.951945 | 0.981636 | chr9  | 76387597 | 76388622 | + | 0 | NA | intron (Nintron (N | 6317   | NR_01833E | 55312    | Hs.37558  | NM_01833E         | ENSG000003RFK       | RIFK         | riboflav                | protein-coding   |                |
| chr9-981  | 7.186745 | -0.05176 | 0.858814 | -0.06026 | 0.951945 | 0.981636 | chr9  | 98106489 | 98107990 | + | 0 | NA | intron (Nintron (N | 11983  | NM_01478E | 9830     | Hs.57563  | NR_01478E         | ENSG000003TRIM14    |              | tripartit               | protein-coding   |                |
| chr9-114  | 7.186745 | -0.05176 | 0.858814 | -0.06026 | 0.951945 | 0.981636 | chr9  | 1.14E+08 | 1.14E+08 | + | 0 | NA | intron (NMER102c I | 48711  | NM_00163E | 259      | Hs.43691  | NR_00163E         | ENSG000003AMPB      | A1M EDC1     | alpha-1-n               | protein-coding   |                |
| chr9-137  | 7.186745 | -0.05176 | 0.858814 | -0.06026 | 0.951945 | 0.981636 | chr9  | 1.37E+08 | 1.37E+08 | + | 0 | NA | intron (Nintron (N | 10225  | NM_01772E | 54863    | Hs.49554  | NR_01772E         | ENSG000003TOR4A     | C9orf167     | torsin                  | lprotein-coding  |                |
| chr15-44  | 8.119366 | -0.04899 | 0.815142 | -0.0601  | 0.952077 | 0.981636 | chr15 | 44603351 | 44606071 | + | 0 | NA | intron (Nintron (N | 58951  | NM_00116E | 80208    | Hs.65627  | NR_025137         | ENSG000003SPG11     | ALS5 CMT     | 2SPG11                  | ves              | protein-coding |
| chr15-65  | 8.119366 | -0.04899 | 0.815142 | -0.0601  | 0.952077 | 0.981636 | chr15 | 65499902 | 65500640 | + | 0 | NA | intron (Nintron (N | 17003  | NM_19796E | 54878    | Hs.45860  | NR_01774E         | ENSG000003DPP8      | DP8 DPRP-    | dipeptid                | protein-coding   |                |
| chr15-80  | 8.119366 | -0.04899 | 0.815142 | -0.0601  | 0.952077 | 0.981636 | chr15 | 80515600 | 80516559 | + | 0 | NA | intron (Nintron (N | 46865  | NR_12036E | 1.02E+08 | Hs.56942  | NR_12036E         | ENSG000003LOC10192E |              | uncharact               | ncRNA            |                |
| chr18-51  | 8.119366 | -0.04899 | 0.815142 | -0.0601  | 0.952077 | 0.981636 | chr18 | 51176386 | 51177883 | + | 0 | NA | exon (NM exon (NM  | 21097  | NM_01662E | 51320    | Hs.46514  | NR_01662E         | ENSG000003MEX3C     | BM-013 MF    | mex-3                   | RN               | protein-coding |
| chr20-34  | 8.119366 | -0.04899 | 0.815142 | -0.0601  | 0.952077 | 0.981636 | chr20 | 34456786 | 34458412 | + | 0 | NA | intron (Nintron (N | 8726   | NR_030374 | 693229   | NR_030374 | ENSG000003MIR644A | MIR644 MI           | microRNA     | ncRNA                   |                  |                |
| chr20-47  | 8.119366 | -0.04899 | 0.815142 | -0.0601  | 0.952077 | 0.981636 | chr20 | 47224558 | 47224752 | + | 0 | NA | intron (Nintron (N | 5769   | NR_03741E | 5740     | Hs.30208  | NR_000961         | ENSG000003PTG15     | CYP8 CYP     | prostagl                | protein-coding   |                |
| chr20-49  | 8.119366 | -0.04899 | 0.815142 | -0.0601  | 0.952    |          |       |          |          |   |   |    |                    |        |           |          |           |                   |                     |              |                         |                  |                |

|           |          |          |          |          |          |          |       |          |          |   |   |    |                     |        |           |          |           |                  |                     |                  |                               |
|-----------|----------|----------|----------|----------|----------|----------|-------|----------|----------|---|---|----|---------------------|--------|-----------|----------|-----------|------------------|---------------------|------------------|-------------------------------|
| chr1-1554 | 5.973381 | 0.05614  | 0.940251 | 0.059708 | 0.952388 | 0.981636 | chr1  | 1.55E+08 | 1.55E+08 | + | 0 | NA | intron (AluY SINE   | 16411  | NR_03418C | 645682   | Hs.632482 | NR_03418C        | ENSG000005P05F1P4   | OC3 OC4          | POU class pseudo              |
| chr11-775 | 5.973381 | 0.05614  | 0.940251 | 0.059708 | 0.952388 | 0.981636 | chr11 | 77937402 | 77938012 | + | 0 | NA | intron (AluJo SIN   | 56961  | NR_033547 | 92105    | Hs.533722 | NR_033547        | ENSG00000INTS4      | INT4             | MSTC integratc protein-coding |
| chr16-744 | 5.973381 | 0.05614  | 0.940251 | 0.059708 | 0.952388 | 0.981636 | chr16 | 74475041 | 74475973 | + | 0 | NA | intron (intron (    | -54037 | NR_001011 | 497190   | Hs.45467  | CNM_001011       | ENSG00000CLEC18B    | MRLC2            | C-type Ie protein-coding      |
| chr17-795 | 5.973381 | 0.05614  | 0.940251 | 0.059708 | 0.952388 | 0.981636 | chr17 | 7934438  | 7935044  | + | 0 | NA | intron (intron (    | 2535   | NR_001352 | 116840   | Hs.348012 | NR_001352        | ENSG00000CNTROB     | LIP8 PP12        | centrobrin protein-coding     |
| chr17-667 | 5.973381 | 0.05614  | 0.940251 | 0.059708 | 0.952388 | 0.981636 | chr17 | 66736616 | 66737537 | + | 0 | NA | intron (AluY SINE   | -49996 | NR_030364 | 693219   | NR_030364 | ENSG00000MIR634  | MIRN634             | lmiicroRNA ncRNA |                               |
| chr2-1995 | 5.973381 | 0.05614  | 0.940251 | 0.059708 | 0.952388 | 0.981636 | chr2  | 1.99E+08 | 1.99E+08 | + | 0 | NA | intron (intron (    | 77100  | NR_134967 | 23314    | Hs.516617 | NR_01526E        | ENSG00000SATB2      | GLSS             | SATB home protein-coding      |
| chr20-376 | 5.973381 | 0.05614  | 0.940251 | 0.059708 | 0.952388 | 0.981636 | chr20 | 37237605 | 37238362 | + | 0 | NA | intron (AluJb SIN   | 18925  | NR_021081 | 2691     | Hs.37023  | NR_021081        | ENSG00000GHRH       | GHRF GRF         | growth hc protein-coding      |
| chr4-1406 | 5.973381 | 0.05614  | 0.940251 | 0.059708 | 0.952388 | 0.981636 | chr4  | 1.41E+08 | 1.41E+08 | + | 0 | NA | intron (intron (    | -17762 | NR_07721E | 644962   | Hs.67650C | NR_07721E        | TNRC18P1            | -                | trinuclec pseudo              |
| chr2-1444 | 9.100985 | -0.04674 | 0.783079 | -0.05969 | 0.9524   | 0.981636 | chr2  | 1.44E+08 | 1.44E+08 | + | 0 | NA | intron (intron (    | -28614 | NR_04024E | 1E+08    | Hs.56078E | NR_04024E        | ENSG00000ZEB2-AS1   | ZEB2-AS1 ZEB2    | antincRNA                     |
| chr9-5742 | 9.100985 | -0.04674 | 0.783079 | -0.05969 | 0.9524   | 0.981636 | chr9  | 5742966  | 5744129  | + | 0 | NA | intron (intron (    | 89570  | NR_02489E | 79956    | Hs.59107E | NR_02489E        | ENSG00000ERMP1      | FXNA KIAF        | endoplasm protein-coding      |
| chr19-144 | 5.445361 | 0.059489 | 0.999196 | 0.059536 | 0.952525 | 0.981636 | chr19 | 14466199 | 14466165 | + | 0 | NA | intron (AluJb SIN   | 9022   | NR_00095E | 5731     | Hs.15936C | NR_00095E        | ENSG00000PTGER1     | EP1              | prostagl protein-coding       |
| chr20-114 | 5.445361 | 0.059489 | 0.999196 | 0.059536 | 0.952525 | 0.981636 | chr20 | 1140753  | 1141671  | + | 0 | NA | intron (LIMB8 LIN   | 22610  | NR_00132E | 9491     | Hs.471917 | NR_006814        | ENSG00000PSPMF1     | PI31             | proteasom protein-coding      |
| chr1-1922 | 7.93061  | 0.04878  | 0.819554 | 0.05952  | 0.952538 | 0.981636 | chr1  | 19222572 | 19231993 | + | 0 | NA | intron (MIRb SINE   | 16896  | NR_13511E | 1.02E+08 | Hs.660534 | NR_135114        | ENSG00000EMC1-AS1   | -                | EMC1 antincRNA                |
| chr1-328C | 7.93061  | 0.04878  | 0.819554 | 0.05952  | 0.952538 | 0.981636 | chr1  | 32802241 | 32804937 | + | 0 | NA | intron (Tigger E    | -13853 | NR_00125E | 64766    | Hs.44088C | NR_02275E        | ENSG00000S100PBP    | S100PBP          | S100P protein-coding          |
| chr1-3591 | 7.93061  | 0.04878  | 0.819554 | 0.05952  | 0.952538 | 0.981636 | chr1  | 35918917 | 35920529 | + | 0 | NA | 3' UTR (3' UTR (    | -11382 | NR_177422 | 192669   | Hs.65765E | NR_02485E        | ENSG00000AGO3       | EIF2C3           | argonautc protein-coding      |
| chr1-518C | 7.93061  | 0.04878  | 0.819554 | 0.05952  | 0.952538 | 0.981636 | chr1  | 51802175 | 51804405 | + | 0 | NA | intron (AluS2 SIN   | 33112  | NR_03158C | 1E+08    | NR_03158C | ENSG00000MIR761  | hsa-mir-7           | microRNA ncRNA   |                               |
| chr1-681E | 7.93061  | 0.04878  | 0.819554 | 0.05952  | 0.952538 | 0.981636 | chr1  | 68158111 | 68159266 | + | 0 | NA | intron (MER30 DNA   | 24922  | NR_03166C | 1E+08    | NR_03166C | ENSG00000MIR1262 | MIRN1262            | microRNA ncRNA   |                               |
| chr1-777E | 7.93061  | 0.04878  | 0.819554 | 0.05952  | 0.952538 | 0.981636 | chr1  | 77783546 | 77788890 | + | 0 | NA | intron (THE1B-int   | 6413   | NR_00136E | 374986   | Hs.43775E | NR_19854E        | ENSG00000MIG1A      | FAM73            | mitoguarc protein-coding      |
| chr1-1002 | 7.93061  | 0.04878  | 0.819554 | 0.05952  | 0.952538 | 0.981636 | chr1  | 1E+08    | 1E+08    | + | 0 | NA | intron (LIP47 LIN   | -27627 | NR_00125E | 127495   | Hs.44277  | NR_14462C        | ENSG00000LRR39      | -                | leucine r protein-coding      |
| chr1-162E | 7.93061  | 0.04878  | 0.819554 | 0.05952  | 0.952538 | 0.981636 | chr1  | 1.63E+08 | 1.63E+08 | + | 0 | NA | intron (intron (    | 31227  | NR_00132A | 6675     | Hs.49285E | NR_00311E        | ENSG00000UAP1       | AGX AGX1         | UDP-N-acc protein-coding      |
| chr1-226E | 7.93061  | 0.04878  | 0.819554 | 0.05952  | 0.952538 | 0.981636 | chr1  | 2.26E+08 | 2.26E+08 | + | 0 | NA | intron (intron (    | 40340  | NR_00161E | 142      | Hs.17776C | NR_00161E        | ENSG00000PARP1      | ADPRT ADF        | poly (ADP- protein-coding     |
| chr1-236E | 7.93061  | 0.04878  | 0.819554 | 0.05952  | 0.952538 | 0.981636 | chr1  | 2.37E+08 | 2.37E+08 | + | 0 | NA | TTS (NM_C TTS (NM_C | -24304 | NR_03404C | 1E+08    | Hs.67737E | NR_03404C        | ENSG00000LGALS8-AS- | -                | LGALS8 arncRNA                |
| chr1-240E | 7.93061  | 0.04878  | 0.819554 | 0.05952  | 0.952538 | 0.981636 | chr1  | 2.4E+08  | 2.4E+08  | + | 0 | NA | intron (LIMEc LIN   | 23296  | NR_02246E | 64388    | Hs.98206  | NR_02246E        | ENSG00000GREM2      | CKTSF1B2         | gremlin 2 protein-coding      |
| chr10-10E | 7.93061  | 0.04878  | 0.819554 | 0.05952  | 0.952538 | 0.981636 | chr10 | 1.03E+08 | 1.03E+08 | + | 0 | NA | intron (intron (    | 13429  | NR_01591E | 51063    | Hs.24154E | NR_01591E        | ENSG00000CALHM2     | FAM26B           | calcium f protein-coding      |
| chr11-47E | 7.93061  | 0.04878  | 0.819554 | 0.05952  | 0.952538 | 0.981636 | chr11 | 47573391 | 47575433 | + | 0 | NA | TTS (NM_C TTS (NM_C | 4359   | NR_00131E | 55709    | Hs.71848E | NR_01650E        | ENSG00000KBTBD4     | BKLDHD4          | HS kelch r protein-coding     |
| chr11-737 | 7.93061  | 0.04878  | 0.819554 | 0.05952  | 0.952538 | 0.981636 | chr11 | 73704206 | 73705229 | + | 0 | NA | intron (AluY SINE   | 55376  | NR_00124E | 5870     | Hs.50322E | NR_00286E        | ENSG00000RAB6A      | RAB6             | RAB6, m protein-coding        |
| chr11-11E | 7.93061  | 0.04878  | 0.819554 | 0.05952  | 0.952538 | 0.981636 | chr11 | 1.19E+08 | 1.19E+08 | + | 0 | NA | intron (intron (    | -3579  | NR_00304C | 649946   | Hs.64721E | NR_003040        | RPL23AP64           | RPL23A_2E        | ribosomal pseudo              |
| chr12-487 | 7.93061  | 0.04878  | 0.819554 | 0.05952  | 0.952538 | 0.981636 | chr12 | 48701798 | 48706258 | + | 0 | NA | intron (intron (    | 12679  | NR_00124C | 904      | Hs.92308  | NR_00124C        | ENSG00000CCNT1      | CCNT CYC         | cyclin T1 protein-coding      |
| chr12-95E | 7.93061  | 0.04878  | 0.819554 | 0.05952  | 0.952538 | 0.981636 | chr12 | 95252548 | 95253789 | + | 0 | NA | intron (intron (    | 35361  | NR_01759E | 55591    | Hs.24135  | NR_01759E        | ENSG00000VEZT       | VEZATIN          | vezatin, protein-coding       |
| chr12-111 | 7.93061  | 0.04878  | 0.819554 | 0.05952  | 0.952538 | 0.981636 | chr12 | 1.12E+08 | 1.12E+08 | + | 0 | NA | intron (intron (    | -8756  | NR_03663E | 8759     | Hs.66170E | NR_03663E        | ADAM1A              | ADAM1 ADAM       | metc pseudo                   |
| chr13-11C | 7.93061  | 0.04878  | 0.819554 | 0.05952  | 0.952538 | 0.981636 | chr13 | 1.1E+08  | 1.1E+08  | + | 0 | NA | intron (AluY SINE   | -9034  | NR_001267 | 1E+08    | Hs.64003E | NR_001267044     | COL4A2-AS-          | -                | COL4A2 ar protein-coding      |
| chr14-55E | 7.93061  | 0.04878  | 0.819554 | 0.05952  | 0.952538 | 0.981636 | chr14 | 55677926 | 55680650 | + | 0 | NA | intron (intron (    | -87002 | NR_004844 | 645683   | Hs.663461 | NR_004844        | ENSG00000RPL13AP3   | RPL13A           | 11 ribosomal pseudo           |
| chr14-601 | 7.93061  | 0.04878  | 0.819554 | 0.05952  | 0.952538 | 0.981636 | chr14 | 60144038 | 60146250 | + | 0 | NA | 3' UTR (3' UTR (    | -27054 | NR_01602E | 51635    | Hs.59179  | NR_01602E        | ENSG00000DHR57      | CI-8E            | 5E dehydrog protein-coding    |
| chr14-81E | 7.93061  | 0.04878  | 0.819554 | 0.05952  | 0.952538 | 0.981636 | chr14 | 81502528 | 81504877 | + | 0 | NA | intron (intron (    | 30151  | NR_00506E | 6400     | Hs.18130C | NR_00506E        | ENSG00000SEL1L      | Hrd3 PRO1        | SEL1L adc protein-coding      |
| chr15-407 | 7.93061  | 0.04878  | 0.819554 | 0.05952  | 0.952538 | 0.981636 | chr15 | 40733905 | 40736631 | + | 0 | NA | TTS (NM_C TTS (NM_C | 19986  | NR_01814E | 55177    | Hs.511067 | NR_01814E        | ENSG00000RMDN3      | FAM82A2          | F regulator protein-coding    |
| chr15-75E | 7.93061  | 0.04878  | 0.819554 | 0.05952  | 0.952538 | 0.981636 | chr15 | 75388100 | 75390180 | + | 0 | NA | intron (intron (    | -20513 | NR_00125E | 4123     | Hs.26232  | NR_00671E        | ENSG00000MAN2C1     | MAN6A8 MA        | mannosidc protein-coding      |
| chr15-784 | 7.93061  | 0.04878  | 0.819554 | 0.05952  | 0.952538 | 0.981636 | chr15 | 78476697 | 78479144 | + | 0 | NA | intron (AluJr SIN   | -29644 | NR_00108E | 123688   | Hs.30796E | NR_00101E        | ENSG00000CHYK       | AGPHD1           | hydroxyl protein-coding       |
| chr16-48E | 7.93061  | 0.04878  | 0.819554 | 0.05952  | 0.952538 | 0.981636 | chr16 | 48822385 | 48833266 | + | 0 | NA | intron (intron (    | 16508  | NR_03256E | 84656    | Hs.38725E | NR_03256E        | ENSG00000GLYR1      | BMO45            | HEF glyoxylat protein-coding  |
| chr16-18E | 7.93061  | 0.04878  | 0.819554 | 0.05952  | 0.952538 | 0.981636 | chr16 | 18879093 | 18872407 | + | 0 | NA | intron (intron (    | 54709  | NR_01509E | 23049    | Hs.46017E | NR_01509E        | ENSG00000SMG1       | 61E3.4 ATSMG1    | non protein-coding            |
| chr16-71E | 7.93061  | 0.04878  | 0.819554 | 0.05952  | 0.952538 | 0.981636 | chr16 | 71285037 | 71286062 | + | 0 | NA | exon (NM_exon (NM   | 3853   | NR_01834E | 55783    | Hs.72782  | NR_01834E        | ENSG00000CMTR2      | AFT FTS          | J1 cap methy protein-coding   |
| chr17-411 | 7.93061  | 0.04878  | 0.819554 | 0.05952  | 0.952538 | 0.981636 | chr17 | 4115001  | 4117472  | + | 0 | NA | intron (AluS2 SI    | 26794  | NR_01511E | 23140    | Hs.277624 | NR_01511E        | ENSG00000ZZEF1      | ZZZ4             | zinc fing protein-coding      |
| chr17-46E | 7.93061  | 0.04878  | 0.819554 | 0.05952  | 0.952538 | 0.981636 | chr17 | 4689131  | 4690988  | + | 0 | NA | intron (LIPB1 LIN   | 14078  | NR_01438E | 27043    | Hs.74489E | NR_01438E        | ENSG00000PEL1P      | MNAR P16C        | proline, protein-coding       |
| chr17-17E | 7.93061  | 0.04878  | 0.819554 | 0.05952  | 0.952538 | 0.981636 | chr17 | 17254849 | 17261777 | + | 0 | NA | intron (AluSx SIN   | -21145 | NR_14460E | 201163   | Hs.31652  | NR_14460E        | ENSG00000FLCN       | BHD DENNE        | folliculiprotein-coding       |
| chr17-46E | 7.93061  | 0.04878  | 0.819554 | 0.05952  | 0.952538 | 0.981636 | chr17 | 46336863 | 46337226 | + | 0 | NA | 3' UTR (3' UTR (    | 24743  | NR_00136E | 1.01E+08 | Hs.55925E | NR_00103E        | ENSG00000ARL17B     | ARL17 ARL        | ADP ribos protein-coding      |
| chr17-50E | 7.93061  | 0.04878  | 0.819554 | 0.05952  | 0.952538 | 0.981636 | chr17 | 50365687 | 50370727 | + | 0 | NA | exon (NM_exon (NM   | 4977   | NR_016504 | 51264    | Hs.7736   | NR_016504        | ENSG00000MRPL27     | L27mt            | mitochon protein-coding       |
| chr17-64E | 7.93061  | 0.04878  | 0.819554 | 0.05952  | 0.952538 | 0.981636 | chr17 | 64641971 | 64647551 | + | 0 | NA | intron (AluSx SIN   | 17546  | NR_02273E | 64750    | Hs.515011 | NR_02273E        | ENSG00000SMURF2     | SMAD             | spec protein-coding           |
| chr19-50C | 7.93061  | 0.04878  | 0.819554 | 0.05952  | 0.952538 | 0.981636 | chr19 | 50036869 | 50042178 | + | 0 | NA | intron (MER20 DNA   | -11066 | NR_027257 | 400710   | Hs.62896E | NR_027257        | ENSG00000LOC40071C  | -                | uncharactcRNA                 |
| chr19-521 | 7.93061  | 0.04878  | 0.819554 | 0.05952  | 0.952538 | 0.981636 | chr19 | 52166030 | 52168329 | + | 0 | NA | intron (intron (    | 4442   | NR_00110E | 162962   | Hs.631584 | NR_00110E        | ENSG00000ZNF836     | -                | zinc fing protein-coding      |
| chr2-9627 | 7.93061  | 0.04878  | 0.819554 | 0.05952  | 0.952538 | 0.981636 | chr2  | 96274321 | 96276061 | + | 0 | NA | intron (intron (    | 8966   | NR_004804 | 9391     | Hs.12109  | NR_004804        | ENSG00000CIA01      | CIA1 WDR         | cytosolic protein-coding      |
| chr2-2031 | 7.93061  | 0.04878  | 0.819554 | 0.05952  | 0.952538 | 0.981636 | chr2  |          |          |   |   |    |                     |        |           |          |           |                  |                     |                  |                               |



|           |          |          |          |          |          |          |       |          |          |   |   |    |                     |                  |                                 |                     |                    |                             |
|-----------|----------|----------|----------|----------|----------|----------|-------|----------|----------|---|---|----|---------------------|------------------|---------------------------------|---------------------|--------------------|-----------------------------|
| chr3-1968 | 9.936836 | 0.044429 | 0.752614 | 0.059033 | 0.952926 | 0.981636 | chr3  | 1.97E+08 | 1.97E+08 | + | 0 | NA | intron (NAIuY SINE  | -52790 NM_001308 | 205564 Hs. 240777CNM_152699     | ENSG000003ENP5      | -                  | SUMO specprotein-coding     |
| chr18-795 | 7.40259  | 0.050621 | 0.857692 | 0.05902  | 0.952936 | 0.981636 | chr18 | 79975848 | 79976566 | + | 0 | NA | intron (NFRAM SINE  | 11564 NM_001136  | 440498 Hs. 191582NM_001136      | ENSG000003HSP1L1    | -                  | heat shocprotein-coding     |
| chr3-179  | 7.40259  | 0.050621 | 0.857692 | 0.05902  | 0.952936 | 0.981636 | chr3  | 1.79E+08 | 1.79E+08 | + | 0 | NA | 3' UTR (N3' UTR (N  | -10754 NM_03354C | 55669 Hs. 478388NM_017927       | ENSG000003CFN1      | hfz01 hfz          | mitofusir protein-coding    |
| chr11-66  | 10.41586 | 0.043162 | 0.731835 | 0.058977 | 0.95297  | 0.981636 | chr11 | 66340153 | 66341014 | + | 0 | NA | intron (Nintron (N  | -3807 NM_001363  | 9610 Hs. 1030 NM_004292         | ENSG000003RIN1      | -                  | Ras and Fprotein-coding     |
| chr11-70  | 10.41586 | 0.043162 | 0.731835 | 0.058977 | 0.95297  | 0.981636 | chr11 | 70378577 | 70379090 | + | 0 | NA | TTS (NM_TTS (NM_L   | -19671 NM_13856E | 2017 Hs. 596164NM_005231        | ENSG000003CTN       | EMS1               | cortactir protein-coding    |
| chr18-458 | 10.41586 | 0.043162 | 0.731835 | 0.058977 | 0.95297  | 0.981636 | chr18 | 45858262 | 45860704 | + | 0 | NA | intron (Nintron (N  | 33808 NM_21360E  | 284266 Hs. 287692NM_21360E      | ENSG000003IGLEC15   | CD33L3 Hs          | sialic acprotein-coding     |
| chr1-2305 | 8.409632 | 0.046995 | 0.797416 | 0.058934 | 0.953005 | 0.981636 | chr1  | 23056928 | 23056946 | + | 0 | NA | intron (NAIuJb SIN  | 13891 NR_036057  | 1E+08 NR_036057                 | ENSG000003MIR3115   | mir-3115           | microRNA ncRNA              |
| chr1-9232 | 8.409632 | 0.046995 | 0.797416 | 0.058934 | 0.953005 | 0.981636 | chr1  | 92323551 | 92323734 | + | 0 | NA | intron (Nintron (N  | 26389 NM_02481E  | 79871 Hs. 444422NM_02481E       | ENSG000003RPAP2     | Clorf82 F RNA      | polynprotein-coding         |
| chr1-1204 | 8.409632 | 0.046995 | 0.797416 | 0.058934 | 0.953005 | 0.981636 | chr1  | 1.2E+08  | 1.2E+08  | + | 0 | NA | intron (Nintron (N  | -10503 NR_00324E | 767846 Hs. 657188NR_00324E      | ENSG000003PFNIP2    | Clorf152 profilin  | pseudo                      |
| chr10-21  | 8.409632 | 0.046995 | 0.797416 | 0.058934 | 0.953005 | 0.981636 | chr10 | 21537533 | 21545288 | + | 0 | NA | intron (NAIuSx SIN  | 7238 NM_00119E   | 8028 Hs. 30385 NM_004641        | ENSG000003MLL10     | AF10               | MLLT10 hiprotein-coding     |
| chr10-734 | 8.409632 | 0.046995 | 0.797416 | 0.058934 | 0.953005 | 0.981636 | chr10 | 73436779 | 73438170 | + | 0 | NA | 3' UTR (N3' UTR (N  | -3913 NM_00102E  | 118490 Hs. 631822NM_00102E      | ENSG000003MSS51     | ZMYND17            | MSS51 mitprotein-coding     |
| chr11-167 | 8.409632 | 0.046995 | 0.797416 | 0.058934 | 0.953005 | 0.981636 | chr11 | 16744532 | 16756339 | + | 0 | NA | intron (NCharlie3   | 11788 NM_014267  | 10944 Hs. 368222NM_014267       | ENSG000003C11orf58  | IMAGE145C          | chromosom protein-coding    |
| chr11-337 | 8.409632 | 0.046995 | 0.797416 | 0.058934 | 0.953005 | 0.981636 | chr11 | 33712328 | 33722606 | + | 0 | NA | exon (NM exon (NM   | 5260 NM_001127   | 966 Hs. 278572NM_000611         | ENSG000003CD59      | 16.3A5 FD          | C59 moleprotein-coding      |
| chr11-118 | 8.409632 | 0.046995 | 0.797416 | 0.058934 | 0.953005 | 0.981636 | chr11 | 1.08E+08 | 1.19E+08 | + | 0 | NA | TTS (NR_TTS (NR_C   | 1532 NR_00304C   | 649946 Hs. 647212NR_00304C      | RPL23A P6           | 25ribosomalspseudo |                             |
| chr12-107 | 8.409632 | 0.046995 | 0.797416 | 0.058934 | 0.953005 | 0.981636 | chr12 | 1.08E+08 | 1.08E+08 | + | 0 | NA | non-codiron-codir   | 3038 NR_120474   | 1.02E+08 Hs. 667022NR_120474    | ENSG000003LOC10192E | -                  | uncharactncRNA              |
| chr12-12  | 8.409632 | 0.046995 | 0.797416 | 0.058934 | 0.953005 | 0.981636 | chr12 | 1.23E+08 | 1.23E+08 | + | 0 | NA | intron (Nintron (N  | 11225 NR_103517  | 10198 Hs. 577404NM_02278E       | ENSG000003MPHOSPH9  | MPP-9 MPM          | phase fprotein-coding       |
| chr12-13  | 8.409632 | 0.046995 | 0.797416 | 0.058934 | 0.953005 | 0.981636 | chr12 | 1.32E+08 | 1.32E+08 | + | 0 | NA | intron (NAIuSx4 SI  | 1418 NR_00297E   | 677829 Hs. 742402NR_00297E      | ENSG000003NOR49     | ACA49              | ACA49 small ncsnoRNA        |
| chr12-132 | 8.409632 | 0.046995 | 0.797416 | 0.058934 | 0.953005 | 0.981636 | chr12 | 1.33E+08 | 1.33E+08 | + | 0 | NA | 3' UTR (N3' UTR (N  | 16011 NM_00117C  | 192111 Hs. 102558NM_13857E      | ENSG000003PGAM4     | BXLBV68            | PGAM facprotein-coding      |
| chr13-306 | 8.409632 | 0.046995 | 0.797416 | 0.058934 | 0.953005 | 0.981636 | chr13 | 30658774 | 30659160 | + | 0 | NA | exon (NM exon (NM   | 24752 NM_001321  | 10208 Hs. 533831NM_00580C       | ENSG000003USPL1     | C13orf22 ubiquitin | protein-coding              |
| chr13-10  | 8.409632 | 0.046995 | 0.797416 | 0.058934 | 0.953005 | 0.981636 | chr13 | 51373465 | 51376970 | + | 0 | NA | intron (NAIuS6 SI   | -26578 NR_04987E | 1.01E+08 NR_04987E              | ENSG000003MIR5693   | -                  | microRNA ncRNA              |
| chr13-51  | 8.409632 | 0.046995 | 0.797416 | 0.058934 | 0.953005 | 0.981636 | chr13 | 1E+08    | 1E+08    | + | 0 | NA | intron (NLIJM4 LINE | 32906 NM_00135E  | 5095 Hs. 80741 NM_00028E        | ENSG000003PCCA      | -                  | propionyl protein-coding    |
| chr14-58  | 8.409632 | 0.046995 | 0.797416 | 0.058934 | 0.953005 | 0.981636 | chr14 | 58207279 | 58210973 | + | 0 | NA | intron (Nintron (N  | 8977 NM_018477   | 55860 Hs. 509451NM_018477       | ENSG000003ACTR10    | ACTR11 Ar          | actin relprotein-coding     |
| chr14-594 | 8.409632 | 0.046995 | 0.797416 | 0.058934 | 0.953005 | 0.981636 | chr14 | 59487664 | 59491426 | + | 0 | NA | intron (NMSTB-int   | 5028 NM_01647E   | 51528 Hs. 44685CNM_01647E       | ENSG000003JKAMP     | C14orf10C JNK1     | MAPK fprotein-coding        |
| chr14-65  | 8.409632 | 0.046995 | 0.797416 | 0.058934 | 0.953005 | 0.981636 | chr14 | 65085786 | 65091979 | + | 0 | NA | intron (Nintron (N  | -1036 NR_045122  | 1.01E+08 Hs. 711267NR_045122    | ENSG000003LOC10050E | -                  | uncharactncRNA              |
| chr15-41  | 8.409632 | 0.046995 | 0.797416 | 0.058934 | 0.953005 | 0.981636 | chr15 | 41048760 | 41050776 | + | 0 | NA | intron (NAIuSx1 SI  | 66478 NR_10403E  | 54617 Hs. 292942NM_01755E       | ENSG000003IN080     | IN080A IN          | IN080 conprotein-coding     |
| chr15-48  | 8.409632 | 0.046995 | 0.797416 | 0.058934 | 0.953005 | 0.981636 | chr15 | 48531888 | 48533373 | + | 0 | NA | intron (Nintron (N  | 113158 NM_00013E | 2200 Hs. 591133NM_00013E        | ENSG000003FBN1      | ACMDC EC           | fibrillir protein-coding    |
| chr15-731 | 8.409632 | 0.046995 | 0.797416 | 0.058934 | 0.953005 | 0.981636 | chr15 | 73165687 | 73167384 | + | 0 | NA | intron (NLTFR39 LTF | 114051 NM_00117E | 4756 Hs. 38861E NM_00249E       | ENSG000003NEO1      | IGDC2C NC          | neogenin protein-coding     |
| chr15-774 | 8.409632 | 0.046995 | 0.797416 | 0.058934 | 0.953005 | 0.981636 | chr15 | 77470873 | 77472699 | + | 0 | NA | exon (NM exon (NM   | 50898 NM_001304  | 10363 Hs. 69594 NM_01820C       | ENSG000003HMG20A    | HMGX1 HMC          | high mobiprotein-coding     |
| chr16-14  | 8.409632 | 0.046995 | 0.797416 | 0.058934 | 0.953005 | 0.981636 | chr16 | 14644394 | 14650178 | + | 0 | NA | intron (NAIuS6 SI   | 14605 NM_016561  | 51283 Hs. 435555NM_016561       | ENSG000003BFAR      | BAR RN             | F47bifunctin protein-coding |
| chr16-28  | 8.409632 | 0.046995 | 0.797416 | 0.058934 | 0.953005 | 0.981636 | chr16 | 28110378 | 28111898 | + | 0 | NA | intron (Nintron (N  | -47424 NM_00110E | 146395 Hs. 91910 NM_14467E      | ENSG000003GSL1      | PRO19651 GSG1      | likeprotein-coding          |
| chr16-58  | 8.409632 | 0.046995 | 0.797416 | 0.058934 | 0.953005 | 0.981636 | chr16 | 58586599 | 58589436 | + | 0 | NA | intron (Nintron (N  | -28086 NR_00298C | 677830 Hs. 67751E NR_00298C     | ENSG000003SNORA50A  | ACA50 SNC          | small ncsnoRNA              |
| chr16-62  | 8.409632 | 0.046995 | 0.797416 | 0.058934 | 0.953005 | 0.981636 | chr16 | 69299482 | 69302059 | + | 0 | NA | intron (Nintron (N  | -10580 NM_01324E | 27183 Hs. 12842CNM_01324E       | ENSG000003VPS4A     | ELP2 SKD1          | vacular protein-coding      |
| chr17-76  | 8.409632 | 0.046995 | 0.797416 | 0.058934 | 0.953005 | 0.981636 | chr17 | 761985   | 763464   | + | 0 | NA | intron (Nintron (N  | 10391 NR_02412C  | 1E+08 Hs. 662289NR_02412C       | ENSG000003DBIL5P    | SKDP2              | diazepam pseudo             |
| chr17-15  | 8.409632 | 0.046995 | 0.797416 | 0.058934 | 0.953005 | 0.981636 | chr17 | 1537881  | 1541989  | + | 0 | NA | intron (NAIuS7 SIN  | 22857 NM_006224  | 5306 Hs. 42981E NM_006224       | ENSG000003PITPNA    | HEL-S-36 phosphat  | protein-coding              |
| chr17-35  | 8.409632 | 0.046995 | 0.797416 | 0.058934 | 0.953005 | 0.981636 | chr17 | 35594069 | 35602838 | + | 0 | NA | intron (Nintron (N  | 11131 NM_00103C  | 163 Hs. 51481E NM_00128E        | ENSG000003AP2B1     | ADTB2 AP           | adaptor rprotein-coding     |
| chr17-35  | 8.409632 | 0.046995 | 0.797416 | 0.058934 | 0.953005 | 0.981636 | chr17 | 35627096 | 35629808 | + | 0 | NA | intron (NAIuJb SIN  | 41130 NM_00103C  | 163 Hs. 51481E NM_00128E        | ENSG000003AP2B1     | ADTB2 AP           | adaptor rprotein-coding     |
| chr17-637 | 8.409632 | 0.046995 | 0.797416 | 0.058934 | 0.953005 | 0.981636 | chr17 | 63757284 | 63761436 | + | 0 | NA | intron (NAIuSx1 SI  | 14237 NM_02019E  | 57003 Hs. 202011NM_02019E       | ENSG000003CCDC47    | GK001 MS1          | coiled-cprotein-coding      |
| chr17-64  | 8.409632 | 0.046995 | 0.797416 | 0.058934 | 0.953005 | 0.981636 | chr17 | 64521419 | 64527476 | + | 0 | NA | intron (NAIuSx3 SI  | 17470 NR_133644  | 90799 Hs. 56971E NM_13836E      | ENSG000003CEP95     | CCDC45             | centrosom protein-coding    |
| chr19-88  | 8.409632 | 0.046995 | 0.797416 | 0.058934 | 0.953005 | 0.981636 | chr19 | 889434   | 890442   | + | 0 | NA | intron (Nintron (N  | 3249 NM_005481   | 10025 Hs. 365207NM_005481       | ENSG000003MD16      | DRIP92 TI          | mediator protein-coding     |
| chr19-92  | 8.409632 | 0.046995 | 0.797416 | 0.058934 | 0.953005 | 0.981636 | chr19 | 928719   | 932695   | + | 0 | NA | intron (NAIuY SINE  | 4672 NM_005224   | 1820 Hs. 50129E NM_005224       | ENSG000003ARID3A    | BRIGHT DFAT        | -rich iprotein-coding       |
| chr19-15  | 8.409632 | 0.046995 | 0.797416 | 0.058934 | 0.953005 | 0.981636 | chr19 | 15360375 | 15362490 | + | 0 | NA | intron (NAIuY SINE  | 18355 NM_00585E  | 10270 Hs. 51449E NM_00585E      | ENSG000003AKAP8     | AKAP 95 A          | -kinase protein-coding      |
| chr19-47  | 8.409632 | 0.046995 | 0.797416 | 0.058934 | 0.953005 | 0.981636 | chr19 | 47149947 | 47152251 | + | 0 | NA | intron (Nintron (N  | 20264 NM_00114E  | 10055 Hs. 59500C NM_00550C      | ENSG000003SAE1      | AOS1 HSP           | SUMO1 actprotein-coding     |
| chr19-49  | 8.409632 | 0.046995 | 0.797416 | 0.058934 | 0.953005 | 0.981636 | chr19 | 49087287 | 49089001 | + | 0 | NA | intron (NAIuSx SIN  | 2693 NM_001301   | 6625 Hs. 467097NM_00308E        | ENSG000003SNRNP70   | RNPUIZ RF          | small nucprotein-coding     |
| chr2-392  | 8.409632 | 0.046995 | 0.797416 | 0.058934 | 0.953005 | 0.981636 | chr2  | 39271329 | 39274081 | + | 0 | NA | intron (Nintron (N  | -28722 NR_144521 | 344387 Hs. 403201NM_00100E      | ENSG000003CDKL4     | -                  | cyclin deprotein-coding     |
| chr2-54   | 8.409632 | 0.046995 | 0.797416 | 0.058934 | 0.953005 | 0.981636 | chr2  | 54651993 | 54655412 | + | 0 | NA | exon (NM exon (NM   | -17130 NM_00103E | 400954 Hs. 656692NM_00103E      | ENSG000003EML6      | -                  | EMAP likeprotein-coding     |
| chr2-61   | 8.409632 | 0.046995 | 0.797416 | 0.058934 | 0.953005 | 0.981636 | chr2  | 61033906 | 61036080 | + | 0 | NA | intron (NLIPA6 LIN  | -16734 NM_00132E | 150962 Hs. 36834E NM_14470E     | ENSG000003PUS10     | CCDC139 I          | pseudouriprotein-coding     |
| chr2-61   | 8.409632 | 0.046995 | 0.797416 | 0.058934 | 0.953005 | 0.981636 | chr2  | 61513840 | 61522247 | + | 0 | NA | intron (NAIuSx SIN  | 20313 NM_00340C  | 7514 Hs. 370777NM_00340C        | ENSG000003XPO1      | CRM-1 CRM          | expotin protein-coding      |
| chr2-96   | 8.409632 | 0.046995 | 0.797416 | 0.058934 | 0.953005 | 0.981636 | chr2  | 96183655 | 96187206 | + | 0 | NA | 3' UTR (N3' UTR (N  | -22986 NR_04632E | 285033 Hs. 58648 NM_001037228   | STARTD7-AS-         | STARTD7            | arncRNA                     |
| chr2-131  | 8.409632 | 0.046995 | 0.797416 | 0.058934 | 0.953005 | 0.981636 | chr2  | 1.36E+08 | 1.36E+08 | + | 0 | NA | intron (Nintron (N  | -35869 NR_16347E | 1.08E+08 Hs. 591242NM_001365239 | LOC10798E           | -                  | uncharactncRNA              |
| chr2-230  | 8.409632 | 0.046995 | 0.797416 | 0.058934 | 0.953005 | 0.981636 | chr2  | 2.3E+08  | 2.3E+08  | + | 0 | NA | intron (NMLT1D LTF  | -44090 NM_00120E | 6672 Hs. 36905E NM_00311E       | ENSG000003SP100     | lysp100b           | SP100 nucprotein-coding     |
| chr2-237  | 8.409632 | 0.046995 | 0.797416 | 0.058934 | 0.953005 | 0.981636 | chr2  | 2.31E+08 | 2.31E+08 | + | 0 | NA | intron (Nintron (N  | 17919 NM_00035E  | 80210 Hs. 162411NM_02513E       | ENSG000003ARMC9     | ARM JBT5E          | armadillcprotein-coding     |
| chr2-231  | 8.409    |          |          |          |          |          |       |          |          |   |   |    |                     |                  |                                 |                     |                    |                             |

|                    |          |          |          |          |          |       |          |          |   |      |                      |                   |                              |                     |               |                            |
|--------------------|----------|----------|----------|----------|----------|-------|----------|----------|---|------|----------------------|-------------------|------------------------------|---------------------|---------------|----------------------------|
| chr12-108.7.673626 | -0.04911 | 0.834326 | -0.05886 | 0.953064 | 0.981636 | chr12 | 1.09E+08 | 1.09E+08 | + | 0 NA | 3' UTR (N3' UTR (N   | 40253 NM_001161   | 54434 Hs.199762NM_018984     | ENSG000003SSH1      | SSH1L         | slingshotprotein-coding    |
| chr12-115.7.673626 | -0.04911 | 0.834326 | -0.05886 | 0.953064 | 0.981636 | chr12 | 1.2E+08  | 1.2E+08  | + | 0 NA | intron (Nintron (N   | 11456 NM_006255   | 5564 Hs.741184NM_006255      | ENSG000003PRKAB1    | AMPK HAMF     | protein-coding             |
| chr14-951.7.673626 | -0.04911 | 0.834326 | -0.05886 | 0.953064 | 0.981636 | chr14 | 95102539 | 95106166 | + | 0 NA | intron (Nintron (N   | 29151 NM_001195   | 23405 Hs.87889 NM_030621     | ENSG000003DICER1    | DCR1 Dicer    | Dicer 1, protein-coding    |
| chr15-28.7.673626  | -0.04911 | 0.834326 | -0.05886 | 0.953064 | 0.981636 | chr15 | 28252876 | 28256126 | + | 0 NA | exon (NM exon (NM    | 67651 NM_004667   | 8924 Hs.43489NM_004667       | ENSG000003HERC2     | D15F37S1 HECT | and protein-coding         |
| chr16-18.7.673626  | -0.04911 | 0.834326 | -0.05886 | 0.953064 | 0.981636 | chr16 | 18840995 | 18842958 | + | 0 NA | intron (Nintron (N   | -40427 NM_015161  | 23204 Hs.634882NM_015161     | ENSG000003ARL6IP1   | AIP1 ARL6     | ADP ribos protein-coding   |
| chr16-23.7.673626  | -0.04911 | 0.834326 | -0.05886 | 0.953064 | 0.981636 | chr16 | 23687218 | 23690226 | + | 0 NA | exon (NM exon (NM    | 9833 NM_00503C    | 5347 Hs.59204NM_00503C       | ENSG000003PLK1      | PLK STPK1     | polo like protein-coding   |
| chr16-27.7.673626  | -0.04911 | 0.834326 | -0.05886 | 0.953064 | 0.981636 | chr16 | 27356979 | 27357631 | + | 0 NA | intron (NAluJr SIN   | 43331 NM_001257   | 3566 Hs.513457NM_000418      | ENSG000003ILAR      | CD124 IL      | interleukin protein-coding |
| chr16-28.7.673626  | -0.04911 | 0.834326 | -0.05886 | 0.953064 | 0.981636 | chr16 | 28869444 | 28871436 | + | 0 NA | intron (Nintron (N   | 6447 NM_015503    | 25970 Hs.15744 NM_015503     | ENSG000003SH2B1     | PSM SH2B      | adap protein-coding        |
| chr16-31.7.673626  | -0.04911 | 0.834326 | -0.05886 | 0.953064 | 0.981636 | chr16 | 31733508 | 31735088 | + | 0 NA | intron (NAluJr4 SI   | 21069 NM_00113C   | 12441 Hs.52882NM_001004      | ENSG000003ZNF720    |               | zinc fing protein-coding   |
| chr16-84.7.673626  | -0.04911 | 0.834326 | -0.05886 | 0.953064 | 0.981636 | chr16 | 84574015 | 84574410 | + | 0 NA | intron (NMIR3 SINE   | 43866 NM_021145   | 23406 Hs.289092NM_021145     | ENSG000003COTL1     | CLP           | coactosin protein-coding   |
| chr16-89.7.673626  | -0.04911 | 0.834326 | -0.05886 | 0.953064 | 0.981636 | chr16 | 89272270 | 89275993 | + | 0 NA | intron (Nintron (N   | -21997 NR_136335  | 1.05E+08 Hs.657381NR_136335  | ENSG000003LOC105371 |               | uncharactncRNA             |
| chr17-40.7.673626  | -0.04911 | 0.834326 | -0.05886 | 0.953064 | 0.981636 | chr17 | 40031234 | 40031926 | + | 0 NA | exon (NM exon (NM    | -3935 NR_10236E   | 1.01E+08 NR_10236E           | ENSG000003SNORD124  |               | small nuc snoRNA           |
| chr18-45.7.673626  | -0.04911 | 0.834326 | -0.05886 | 0.953064 | 0.981636 | chr18 | 45874053 | 45879518 | + | 0 NA | intron (Nintron (N   | 51110 NM_213602   | 284266 Hs.287692NM_213602    | ENSG000003SIGLEC15  | CD33L3 Hs     | sialic ac protein-coding   |
| chr19-59.7.673626  | -0.04911 | 0.834326 | -0.05886 | 0.953064 | 0.981636 | chr19 | 59979787 | 5941545  | + | 0 NA | intron (Nintron (N   | 26412 NM_00405E   | 828 Hs.584744NM_00405E       | ENSG000003CAPS      | CAP51         | calcyp protein-coding      |
| chr19-171.7.673626 | -0.04911 | 0.834326 | -0.05886 | 0.953064 | 0.981636 | chr19 | 17174262 | 17179021 | + | 0 NA | intron (Nintron (N   | -38716 NM_018467  | 55850 Hs.16187 NM_018467     | ENSG000003USE1      | D12 MDSO5     | unconvent protein-coding   |
| chr19-45.7.673626  | -0.04911 | 0.834326 | -0.05886 | 0.953064 | 0.981636 | chr19 | 45353820 | 45357677 | + | 0 NA | intron (Nintron (N   | 14839 NM_00113C   | 2068 Hs.487294NM_00040C      | ENSG000003ERC2C     | COFS2 EMC     | ERCC exciprotein-coding    |
| chr2-950.7.673626  | -0.04911 | 0.834326 | -0.05886 | 0.953064 | 0.981636 | chr2  | 9504045  | 9505095  | + | 0 NA | intron (NAluSx3 SI   | 29515 NM_00132C   | 285148 Hs.66722NM_00103E     | ENSG000003IAH1      |               | isoamyl ε protein-coding   |
| chr2-854.7.673626  | -0.04911 | 0.834326 | -0.05886 | 0.953064 | 0.981636 | chr2  | 48459798 | 48461749 | + | 0 NA | intron (Nintron (N   | 20004 NM_001193   | 129285 Hs.65461E             | ENSG000003PP1R21    | CCDC128       | kyosmylin protein-coding   |
| chr21-43.7.673626  | -0.04911 | 0.834326 | -0.05886 | 0.953064 | 0.981636 | chr21 | 43752572 | 43757799 | + | 0 NA | intron (Nintron (N   | 13699 NM_001331   | 8566 Hs.284491NM_003681      | ENSG000003PDXK      | C21orf124     | pyridoxal protein-coding   |
| chr22-45.7.673626  | -0.04911 | 0.834326 | -0.05886 | 0.953064 | 0.981636 | chr22 | 45195427 | 45200456 | + | 0 NA | exon (NM exon (NM    | 3078 NR_031651    | 1E+08 NR_031651              | ENSG000003MIR1249   | MIRN1249      | microRNA ncRNA             |
| chr22-46.7.673626  | -0.04911 | 0.834326 | -0.05886 | 0.953064 | 0.981636 | chr22 | 46097502 | 46103936 | + | 0 NA | intron (Nintron (N   | 9675 NR_03741E    | 1.01E+08 NR_03741E           | ENSG000003MIR3619   |               | microRNA ncRNA             |
| chr3-25.7.673626   | -0.04911 | 0.834326 | -0.05886 | 0.953064 | 0.981636 | chr3  | 25610433 | 25613091 | + | 0 NA | intron (Nintron (N   | 52610 NM_00106E   | 7155 Hs.475733NM_00106E      | ENSG000003TOP2B     | TOP1IB tDNA   | topo protein-coding        |
| chr3-57.7.673626   | -0.04911 | 0.834326 | -0.05886 | 0.953064 | 0.981636 | chr3  | 57588830 | 57590407 | + | 0 NA | intron (NAluSg SIN   | 7726 NM_00166C    | 378 Hs.652183NM_00166C       | ENSG000003ARF4      | ARF2          | ADP ribos protein-coding   |
| chr3-179.7.673626  | -0.04911 | 0.834326 | -0.05886 | 0.953064 | 0.981636 | chr3  | 1.79E+08 | 1.79E+08 | + | 0 NA | intron (Nintron (N   | 18944 NM_03354C   | 55669 Hs.478383NM_017927     | ENSG000003MPN1      | hfz01 hfz     | m1tofusir protein-coding   |
| chr3-185.7.673626  | -0.04911 | 0.834326 | -0.05886 | 0.953064 | 0.981636 | chr3  | 1.86E+08 | 1.86E+08 | + | 0 NA | intron (NAluSg SIN   | 41244 NM_021627   | 59343 Hs.401383NM_021627     | ENSG000003SEN2P     | AXAM2 SM1     | SUMO spec protein-coding   |
| chr4-19.7.673626   | -0.04911 | 0.834326 | -0.05886 | 0.953064 | 0.981636 | chr4  | 1974677  | 1975657  | + | 0 NA | TTS (NR_CTTs (NR_C   | 531 NR_003004     | 677770 Hs.676951NR_003004    | ENSG000003SCARNA22  | ACA11         | small ncRNA                |
| chr4-26.7.673626   | -0.04911 | 0.834326 | -0.05886 | 0.953064 | 0.981636 | chr4  | 26772218 | 26775164 | + | 0 NA | Intergeni (LIPA11 LI | 86553 NR_13467E   | 1.05E+08 Hs.548853NR_13467E  | ENSG000003STIM2-AS1 | STIM2         | antncRNA                   |
| chr4-71.7.673626   | -0.04911 | 0.834326 | -0.05886 | 0.953064 | 0.981636 | chr4  | 71560002 | 71562274 | + | 0 NA | intron (Nintron (N   | 222085 NM_00375E  | 8671 Hs.5462 NM_00375E       | ENSG000003SLC44A    | HNBC1 KNE     | solute c protein-coding    |
| chr4-151.7.673626  | -0.04911 | 0.834326 | -0.05886 | 0.953064 | 0.981636 | chr4  | 1.51E+08 | 1.51E+08 | + | 0 NA | exon (NM exon (NM    | 210 NM_00112E     | 152503 Hs.744982NM_00100E    | ENSG000003SH3D19    | EBP EVE1 SH3  | doma protein-coding        |
| chr6-17.7.673626   | -0.04911 | 0.834326 | -0.05886 | 0.953064 | 0.981636 | chr6  | 17832135 | 17832504 | + | 0 NA | intron (Nintron (N   | 125276 NR_13461E  | 1.05E+08 Hs.718703NR_13461E  | ENSG000003LOC105374 |               | uncharactncRNA             |
| chr7-13.7.673626   | -0.04911 | 0.834326 | -0.05886 | 0.953064 | 0.981636 | chr7  | 1.39E+08 | 1.39E+08 | + | 0 NA | intron (NMLT1J LTF   | 21400 NM_02011E   | 56829 Hs.133512NM_02011E     | ENSG000003ZC3HAV1   | ARTD13 FL     | zinc fing protein-coding   |
| chr7-15.7.673626   | -0.04911 | 0.834326 | -0.05886 | 0.953064 | 0.981636 | chr7  | 1.57E+08 | 1.57E+08 | + | 0 NA | intron (Nintron (N   | 45651 NM_05824A   | 10049 Hs.490745NM_005494     | ENSG000003DNAJB6    | DJ4 DnaJ DnaJ | heat protein-coding        |
| chr8-14.7.673626   | -0.04911 | 0.834326 | -0.05886 | 0.953064 | 0.981636 | chr8  | 1.41E+08 | 1.41E+08 | + | 0 NA | exon (NM exon (NM    | 27452 NR_04071E   | 54108 Hs.279704NM_017444     | ENSG000003CHRAC1    | CHARC1 CF     | chromatir protein-coding   |
| chr9-12.7.673626   | -0.04911 | 0.834326 | -0.05886 | 0.953064 | 0.981636 | chr9  | 1.22E+08 | 1.22E+08 | + | 0 NA | TTS (NM_CTTs (NM_C   | 16413 NM_01422E   | 4702 Hs.495035NM_01422E      | ENSG000003NDUF48    | CI-19KD CNADH | ubiq protein-coding        |
| chr9-12.7.673626   | -0.04911 | 0.834326 | -0.05886 | 0.953064 | 0.981636 | chr9  | 1.23E+08 | 1.23E+08 | + | 0 NA | intron (Nintron (N   | 18640 NR_030331   | 693185 NR_030331             | ENSG000003MIR600    | MIRN600       | microRNA ncRNA             |
| chr9-13.7.673626   | -0.04911 | 0.834326 | -0.05886 | 0.953064 | 0.981636 | chr9  | 1.34E+08 | 1.34E+08 | + | 0 NA | intron (NAluSz SIN   | 8096 NM_052821    | 11091 Hs.397633NR_052821     | ENSG000003WDR5      | BIG-3 CFAD    | repeat protein-coding      |
| chr9-13.7.673626   | -0.04911 | 0.834326 | -0.05886 | 0.953064 | 0.981636 | chr9  | 1.35E+08 | 1.35E+08 | + | 0 NA | intron (Nintron (N   | 33286 NR_039691   | 1.01E+08 NR_039691           | ENSG000003MIR3689C  |               | microRNA ncRNA             |
| chrX-73.7.673626   | -0.04911 | 0.834326 | -0.05886 | 0.953064 | 0.981636 | chrX  | 73999211 | 74003295 | + | 0 NA | intron (NLM3de LI    | 55444 NR_02458E   | 554203 Hs.64831E             | ENSG000003JPX       | DCBALD06 JPX  | transncRNA                 |
| chr17-11.7.673626  | -0.04911 | 0.834326 | -0.05886 | 0.953064 | 0.981636 | chr17 | 7190355  | 7191296  | + | 0 NA | intron (Nintron (N   | -11261 NM_001197  | 432 Hs.12056 NM_001671       | ENSG000003ASGR1     | ASGRP1        | Asialogly protein-coding   |
| chr10-12.7.673626  | -0.04962 | 0.843375 | -0.05883 | 0.953087 | 0.981636 | chr10 | 1.25E+08 | 1.25E+08 | + | 0 NA | intron (Nintron (N   | 25637 NM_01758C   | 54764 Hs.595155NM_01758C     | ENSG000003ZRANB1    | TRABID        | zinc fing protein-coding   |
| chr5-12.7.673626   | -0.04962 | 0.843375 | -0.05883 | 0.953087 | 0.981636 | chr5  | 1.3E+08  | 1.3E+08  | + | 0 NA | intron (Nintron (N   | -59834 NR_125744E | 1.04E+08 Hs.628633NR_125744E | ENSG000003ADAMTS19- | ADAMTS19      | ncRNA                      |
| chr8-14.7.673626   | -0.04962 | 0.843375 | -0.05883 | 0.953087 | 0.981636 | chr8  | 1.41E+08 | 1.41E+08 | + | 0 NA | intron (NAluJb SIN   | -13587 NR_02989E  | 442893 NR_02989E             | ENSG000003MIR151A   | MIR151 Mi     | microRNA ncRNA             |
| chr1-36.2.4.974197 | 0.060427 | 1.028977 | 0.058725 | 0.953171 | 0.981636 | chr1  | 36226687 | 36227556 | + | 0 NA | intron (N2a LINE     | 2678 NM_001321    | 9967 Hs.744057NM_00511E      | ENSG000003THR4P3    | BCLAF2 TF     | thyroid l protein-coding   |
| chr10-11.4.974197  | 0.060427 | 1.028977 | 0.058725 | 0.953171 | 0.981636 | chr10 | 11937054 | 11937549 | + | 0 NA | intron (N2c LINE     | -42591 NR_03822E  | 219731 Hs.576787NR_03822E    | ENSG000003PROSER2-1 | PROSER2       | ncRNA                      |
| chr15-55.10.84588  | 0.041846 | 0.712669 | 0.058718 | 0.953177 | 0.981636 | chr15 | 55847541 | 55848624 | + | 0 NA | intron (NTrigger19E  | 69049 NM_001284   | 4734 Hs.1565 NM_006154       | ENSG000003NEDD4     | NEDD4-1 FN    | NEDD4 E3 protein-coding    |
| chr1-10.11.3739    | 0.040948 | 0.698494 | 0.058623 | 0.953252 | 0.981636 | chr1  | 1.09E+08 | 1.09E+08 | + | 0 NA | intron (Nintron (N   | 17168 NM_00651E   | 6301 Hs.53117E               | ENSG000003SARS      | NEDMAS SE     | eryl-tR3 protein-coding    |
| chr5-14.11.3739    | 0.040948 | 0.698494 | 0.058623 | 0.953252 | 0.981636 | chr5  | 1.41E+08 | 1.41E+08 | + | 0 NA | intron (Nintron (N   | 4244 NM_00373E    | 8637 Hs.594084NM_00373E      | ENSG000003EIF4EBP3  | 4E-BP3 4E     | eukaryotir protein-coding  |
| chr10-61.7.243601  | -0.05317 | 0.908234 | -0.05854 | 0.95332  | 0.981636 | chr10 | 61956183 | 61956529 | + | 0 NA | intron (NMERIB DNA   | 54657 NM_03219E   | 84159 Hs.535297NM_03219E     | ENSG000003CARID5B1  | DESRT MR      | FAT-rich iprotein-coding   |
| chr12-12.8.45863   | 0.047221 | 0.808945 | 0.058373 | 0.953451 | 0.981636 | chr12 | 1.21E+08 | 1.21E+08 | + | 0 NA | intron (NMIR SINE    | 14098 NM_001037   | 8655 Hs.5120 NM_00374E       | ENSG000003DYNL5     | DLCL1 CLAF    | dynein l iprotein-coding   |
| chr14-21.4.8.45863 | 0.047221 | 0.808945 | 0.058373 | 0.953451 | 0.981636 | chr14 | 21419717 | 21420978 | + | 0 NA | intron (Nintron (N   | 16928 NM_02092C   | 57680 Hs.53069E              | ENSG000003CHDR      | AHTS13 HE     | chromodon protein-coding   |
| chr1-31.8.888655   | 0.045393 | 0.       |          |          |          |       |          |          |   |      |                      |                   |                              |                     |               |                            |



|                     |          |          |          |          |          |       |          |          |   |   |    |                      |        |           |          |           |                   |                             |                                        |
|---------------------|----------|----------|----------|----------|----------|-------|----------|----------|---|---|----|----------------------|--------|-----------|----------|-----------|-------------------|-----------------------------|----------------------------------------|
| chr7-9311.6.931426  | 0.050806 | 0.874221 | 0.058115 | 0.953657 | 0.981636 | chr7  | 93112699 | 93114608 | + | 0 | NA | intron (NLIPA5 LIN   | 4326   | NM_017654 | 54809    | Hs.65641  | NM_017654         | ENSG000003SAMD9             | C7orf5 DFsterile ε protein-coding      |
| chr7-1285.6.931426  | 0.050806 | 0.874221 | 0.058115 | 0.953657 | 0.981636 | chr7  | 1.29E+08 | 1.29E+08 | + | 0 | NA | intron (Nintron (N   | 15560  | NM_001364 | 3663     | Hs.521181 | NM_032645         | ENSG000001IRF5              | SLEB10 interfercprotein-coding         |
| chr8-1022.6.931426  | 0.050806 | 0.874221 | 0.058115 | 0.953657 | 0.981636 | chr8  | 1.02E+08 | 1.02E+08 | + | 0 | NA | intron (Nintron (N   | 50526  | NR_125415 | 1.02E+08 | Hs.492445 | NR_125415         | ENSG000001UBR5-AS1          | UBR5 antincRNA                         |
| chr8-1436.6.931426  | 0.050806 | 0.874221 | 0.058115 | 0.953657 | 0.981636 | chr8  | 1.44E+08 | 1.44E+08 | + | 0 | NA | intron (Nintron (N   | 5951   | NM_001082 | 9831     | Hs.43133  | NM_014788         | ENSG000001ZNF623            | zinc fingerprotein-coding              |
| chr9-1285.6.931426  | 0.050806 | 0.874221 | 0.058115 | 0.953657 | 0.981636 | chr9  | 1.29E+08 | 1.29E+08 | + | 0 | NA | exon (NM_exon (NM    | 11371  | NM_014908 | 22845    | Hs.531563 | NM_014908         | ENSG000001DOLK              | CDG1M DK dolichol protein-coding       |
| chr9-1325.6.931426  | 0.050806 | 0.874221 | 0.058115 | 0.953657 | 0.981636 | chr9  | 1.32E+08 | 1.32E+08 | + | 0 | NA | intron (NLIMC4 LIN   | 50587  | NM_001351 | 23064    | Hs.460317 | NM_015045         | ENSG000001SETX              | ALS4 AOA2 senataxir protein-coding     |
| chrX-2012.6.931426  | 0.050806 | 0.874221 | 0.058115 | 0.953657 | 0.981636 | chrX  | 20128669 | 20131277 | + | 0 | NA | intron (Nintron (N   | 6440   | NR_023358 | 1E+08    | NR_023358 | SCARNA9L          | small Ca <sub>v</sub> ncRNA |                                        |
| chr15-5262.6.501401 | 0.053747 | 0.925982 | 0.058044 | 0.953714 | 0.981636 | chr15 | 52664724 | 52665656 | + | 0 | NA | intron (NLIPA16 LI   | -13150 | NM_001288 | 56204    | Hs.152388 | NM_019600         | ENSG000001FAM214A           | KIAA1370 family wiprotein-coding       |
| chr1-2845.7.178887  | -0.04984 | 0.858682 | -0.05804 | 0.953718 | 0.981636 | chr1  | 28496625 | 28497892 | + | 0 | NA | 3' UTR (N3' UTR (N   | -8685  | NM_001048 | 1104     | Hs.469722 | NM_001265         | ENSG000001RCC1              | CHC1 RCC1 regulator protein-coding     |
| chr1-3517.7.178887  | -0.04984 | 0.858682 | -0.05804 | 0.953718 | 0.981636 | chr1  | 35101040 | 35101985 | + | 0 | NA | intron (Nintron (N   | 22127  | NM_024772 | 79830    | Hs.471245 | NM_024772         | ENSG000001ZMYM1             | MYM zinc fingerprotein-coding          |
| chr1-5147.7.178887  | -0.04984 | 0.858682 | -0.05804 | 0.953718 | 0.981636 | chr1  | 51478924 | 51479528 | + | 0 | NA | intron (NLIPA5 LIN   | 40040  | NM_001981 | 2060     | Hs.83722  | NM_001981         | ENSG000001EPRS15            | AF-1P AF1 epidermalprotein-coding      |
| chr1-6813.7.178887  | -0.04984 | 0.858682 | -0.05804 | 0.953718 | 0.981636 | chr1  | 68131649 | 68132755 | + | 0 | NA | intron (Nintron (N   | 51408  | NR_031664 | 1E+08    | NR_031664 | ENSG000001MIR1262 | MIRN1262 microRNA ncRNA     |                                        |
| chr1-2202.7.178887  | -0.04984 | 0.858682 | -0.05804 | 0.953718 | 0.981636 | chr1  | 2.2E+08  | 2.2E+08  | + | 0 | NA | intron (Nintron (N   | 3837   | NR_001587 | 6791     | Hs.654845 | NR_001587         | AURKAP1                     | AURKAP1 aurora kipsudo                 |
| chr10-115.7.178887  | -0.04984 | 0.858682 | -0.05804 | 0.953718 | 0.981636 | chr10 | 11942059 | 11944041 | + | 0 | NA | intron (Nintron (N   | -48340 | NR_038222 | 219731   | Hs.576787 | NR_038222         | ENSG000001PROSER2-1         | PROSER2 εncRNA                         |
| chr10-1217.7.178887 | -0.04984 | 0.858682 | -0.05804 | 0.953718 | 0.981636 | chr10 | 12165709 | 12169230 | + | 0 | NA | 3' UTR (N3' UTR (N   | 28422  | NM_014142 | 11164    | Hs.555955 | NM_014142         | ENSG000001NUDT5             | YSA1 YSA1 nudix hycprotein-coding      |
| chr10-927.7.178887  | -0.04984 | 0.858682 | -0.05804 | 0.953718 | 0.981636 | chr10 | 92024664 | 92025496 | + | 0 | NA | intron (Nintron (N   | 101310 | NM_003972 | 9044     | Hs.500525 | NM_003972         | ENSG000001BTAF1             | MOT1 TAF(B-TFIID) protein-coding       |
| chr10-100.7.178887  | -0.04984 | 0.858682 | -0.05804 | 0.953718 | 0.981636 | chr10 | 2E+08    | 2E+08    | + | 0 | NA | intron (NMER68 LTF   | 10822  | NM_001347 | 10613    | Hs.150087 | NM_006455         | ENSG000001CERLIN1           | C10orf69 ER lipid protein-coding       |
| chr11-337.7.178887  | -0.04984 | 0.858682 | -0.05804 | 0.953718 | 0.981636 | chr11 | 33767046 | 33769720 | + | 0 | NA | intron (Nintron (N   | 6137   | NM_033400 | 26273    | Hs.406787 | NM_012175         | ENSG000001FBX03             | FBA FBX3 E-box prcprotein-coding       |
| chr11-745.7.178887  | -0.04984 | 0.858682 | -0.05804 | 0.953718 | 0.981636 | chr11 | 74915059 | 74917200 | + | 0 | NA | intron (NLIM4c LIN   | 32962  | NM_001277 | 143570   | Hs.370145 | NM_182965         | ENSG000001XRR1A             | X-ray racprotein-coding                |
| chr11-704.7.178887  | -0.04984 | 0.858682 | -0.05804 | 0.953718 | 0.981636 | chr11 | 74971451 | 74973297 | + | 0 | NA | intron (Nintron (N   | -16270 | NM_001367 | 10825    | Hs.191074 | NM_006655         | ENSG000001CNEU3             | SIAL3 neuramin protein-coding          |
| chr11-105.7.178887  | -0.04984 | 0.858682 | -0.05804 | 0.953718 | 0.981636 | chr11 | 1.08E+08 | 1.08E+08 | + | 0 | NA | intron (NALuS6 SI    | -24265 | NM_000019 | 38       | Hs.232375 | NM_000019         | ENSG000001ACAT1             | ACAT MAT acetyl-Cp protein-coding      |
| chr12-165.7.178887  | -0.04984 | 0.858682 | -0.05804 | 0.953718 | 0.981636 | chr12 | 16360152 | 16365481 | + | 0 | NA | intron (NALuJo SIN   | 9399   | NM_145764 | 4257     | Hs.389700 | NM_020300         | ENSG000001MGST1             | GST12 MGs microsome protein-coding     |
| chr12-214.7.178887  | -0.04984 | 0.858682 | -0.05804 | 0.953718 | 0.981636 | chr12 | 21495914 | 21496345 | + | 0 | NA | intron (NERVL-E ir   | 5506   | NM_002907 | 5965     | Hs.235055 | NM_002907         | ENSG000001RECQL             | RECQL1 RecQ like protein-coding        |
| chr12-227.7.178887  | -0.04984 | 0.858682 | -0.05804 | 0.953718 | 0.981636 | chr12 | 22056629 | 22058458 | + | 0 | NA | intron (Nintron (N   | 11325  | NM_018686 | 55907    | Hs.311345 | NM_018686         | ENSG000001CMAS              | RCSL cytidine protein-coding           |
| chr12-306.7.178887  | -0.04984 | 0.858682 | -0.05804 | 0.953718 | 0.981636 | chr12 | 30672740 | 30675599 | + | 0 | NA | intron (Nintron (N   | 3075   | NM_001190 | 10526    | Hs.505135 | NM_006390         | ENSG000001IPO8              | RANBP8 importin protein-coding         |
| chr12-527.7.178887  | -0.04984 | 0.858682 | -0.05804 | 0.953718 | 0.981636 | chr12 | 52073380 | 52077123 | + | 0 | NA | intron (Nintron (N   | -4453  | NM_001365 | 1.14E+08 | Hs.524431 | NM_001369216      | SMIM41                      | small intprotein-coding                |
| chr12-57.7.178887   | -0.04984 | 0.858682 | -0.05804 | 0.953718 | 0.981636 | chr12 | 57095601 | 57097709 | + | 0 | NA | exon (NM_exon (NM    | 7541   | NM_001330 | 4665     | Hs.159225 | NM_005967         | ENSG000001MRPL2             | MADER NGLF-A biprotein-coding          |
| chr12-577.7.178887  | -0.04984 | 0.858682 | -0.05804 | 0.953718 | 0.981636 | chr12 | 57795669 | 57800517 | + | 0 | NA | TTS (NM_TTS (NM_C    | 15306  | NM_001172 | 10102    | Hs.632704 | NM_005725         | ENSG000001TSFM              | EFTS EFTS Ts translprotein-coding      |
| chr12-896.7.178887  | -0.04984 | 0.858682 | -0.05804 | 0.953718 | 0.981636 | chr12 | 89626432 | 89630958 | + | 0 | NA | intron (NL3 LINE C   | 80203  | NM_001366 | 490      | Hs.506275 | NM_001685         | ENSG000001ATP2B1            | PMCA1 PMCA tase h protein-coding       |
| chr12-934.7.178887  | -0.04984 | 0.858682 | -0.05804 | 0.953718 | 0.981636 | chr12 | 93484430 | 93489867 | + | 0 | NA | intron (NALuJb SIN   | 19634  | NR_038160 | 28977    | Hs.199575 | NM_014050         | ENSG000001MRPL42            | HSPC204 L mitochondrion protein-coding |
| chr12-122.7.178887  | -0.04984 | 0.858682 | -0.05804 | 0.953718 | 0.981636 | chr12 | 1.22E+08 | 1.22E+08 | + | 0 | NA | intron (NALuSx3 SI   | -21824 | NM_001351 | 65082    | Hs.487885 | NM_022915         | ENSG000001VPS33A            | MPSPS VPS33A ccprotein-coding          |
| chr13-202.7.178887  | -0.04984 | 0.858682 | -0.05804 | 0.953718 | 0.981636 | chr13 | 20072367 | 20075513 | + | 0 | NA | intron (NLIMB3 LI    | -28761 | NR_126388 | 1.04E+08 | Hs.578015 | NR_126388         | ENSG000001LINC01072         | long intncRNA                          |
| chr13-952.7.178887  | -0.04984 | 0.858682 | -0.05804 | 0.953718 | 0.981636 | chr13 | 95252089 | 95253348 | + | 0 | NA | intron (NMER44D DN   | 42374  | NR_145733 | 1.1E+08  | NR_145733 | SNORD130          | small nucsnRNA              |                                        |
| chr14-705.7.178887  | -0.04984 | 0.858682 | -0.05804 | 0.953718 | 0.981636 | chr14 | 70583712 | 70585098 | + | 0 | NA | 3' UTR (N3' UTR (N   | 16285  | NM_001284 | 10001    | Hs.497355 | NM_005465         | ENSG000001MED6              | ARC33 NY-mediator protein-coding       |
| chr14-737.7.178887  | -0.04984 | 0.858682 | -0.05804 | 0.953718 | 0.981636 | chr14 | 73203407 | 73204293 | + | 0 | NA | intron (Nintron (N   | -33656 | NR_158677 | 89932    | Hs.509905 | NM_173465         | ENSG000001PAPLN             | PPN papilin, protein-coding            |
| chr14-732.7.178887  | -0.04984 | 0.858682 | -0.05804 | 0.953718 | 0.981636 | chr14 | 73729094 | 73731298 | + | 0 | NA | intron (NMIR SINE    | -16062 | NM_006025 | 9240     | Hs.194705 | NM_006025         | ENSG000001PNMA1             | MA1 PNMA famprotein-coding             |
| chr15-506.7.178887  | -0.04984 | 0.858682 | -0.05804 | 0.953718 | 0.981636 | chr15 | 50610912 | 50612105 | + | 0 | NA | intron (Nintron (N   | -64842 | NM_203494 | 373509   | Hs.677755 | NM_203494         | ENSG000001CASP50            | ubiquitin protein-coding               |
| chr15-857.7.178887  | -0.04984 | 0.858682 | -0.05804 | 0.953718 | 0.981636 | chr15 | 85731098 | 85734988 | + | 0 | NA | intron (NHAL1M8 LI   | 25682  | NR_120366 | 1.02E+08 | Hs.513112 | NR_120366         | LOC101925                   | uncharactcrRNA                         |
| chr15-885.7.178887  | -0.04984 | 0.858682 | -0.05804 | 0.953718 | 0.981636 | chr15 | 88909781 | 88911488 | + | 0 | NA | intron (NL2c LINE    | 2534   | NM_001310 | 4240     | Hs.3745   | NM_005925         | ENSG000001MFGF8             | BA46 EDL1 milik fat protein-coding     |
| chr16-800.7.178887  | -0.04984 | 0.858682 | -0.05804 | 0.953718 | 0.981636 | chr16 | 80067    | 81771    | + | 0 | NA | intron (Nintron (N   | 2694   | NM_001015 | 4350     | Hs.459595 | NM_002434         | ENSG000001MCPG              | AAG ADPG N-methyl protein-coding       |
| chr16-691.7.178887  | -0.04984 | 0.858682 | -0.05804 | 0.953718 | 0.981636 | chr16 | 69163164 | 69165070 | + | 0 | NA | intron (NALuYm1 SI   | -23005 | NM_006755 | 6645     | Hs.461117 | NM_006755         | ENSG000001SNTB2             | D16S2531E synthrophin protein-coding   |
| chr17-182.7.178887  | -0.04984 | 0.858682 | -0.05804 | 0.953718 | 0.981636 | chr17 | 1827022  | 1827756  | + | 0 | NA | intron (NL2b LINE    | 2513   | NM_052925 | 114826   | Hs.514602 | NM_052925         | ENSG000001SMYD4             | ZMYND21 SET and h protein-coding       |
| chr18-210.7.178887  | -0.04984 | 0.858682 | -0.05804 | 0.953718 | 0.981636 | chr18 | 21011567 | 21018222 | + | 0 | NA | intron (Nintron (N   | 96919  | NM_005405 | 6093     | Hs.306307 | NM_005405         | ENSG000001ROCK1             | P16OROCK Rho assoc protein-coding      |
| chr18-494.7.178887  | -0.04984 | 0.858682 | -0.05804 | 0.953718 | 0.981636 | chr18 | 49480528 | 49484847 | + | 0 | NA | intron (NALuS5 SI    | 4547   | NM_001195 | 497661   | Hs.603040 | NM_001035         | ENSG000001C18orf32          | chromosn protein-coding                |
| chr18-622.7.178887  | -0.04984 | 0.858682 | -0.05804 | 0.953718 | 0.981636 | chr18 | 62258243 | 62263407 | + | 0 | NA | intron (NLIM4A LI    | -64462 | NM_001270 | 8792     | Hs.204044 | NM_003835         | ENSG000001TNFRSF11          | CD265 FEC TN recep protein-coding      |
| chr19-106.7.178887  | -0.04984 | 0.858682 | -0.05804 | 0.953718 | 0.981636 | chr19 | 10690437 | 10691641 | + | 0 | NA | 3' UTR (N3' UTR (N   | -10400 | NM_031205 | 81890    | Hs.631635 | NM_031205         | ENSG000001QTRT1             | FP3235 T queuine t protein-coding      |
| chr2-3261.7.178887  | -0.04984 | 0.858682 | -0.05804 | 0.953718 | 0.981636 | chr2  | 32610160 | 32613712 | + | 0 | NA | intron (NALuJo SIN</ |        |           |          |           |                   |                             |                                        |

|           |          |          |          |          |          |          |       |          |          |   |   |    |                     |              |           |                     |                      |                   |                    |               |                               |                             |
|-----------|----------|----------|----------|----------|----------|----------|-------|----------|----------|---|---|----|---------------------|--------------|-----------|---------------------|----------------------|-------------------|--------------------|---------------|-------------------------------|-----------------------------|
| chr7-6731 | 9.895697 | 0.042833 | 0.741931 | 0.057732 | 0.953962 | 0.981636 | chr7  | 6731856  | 6738896  | + | 0 | NA | promoter-promoter-  | 71 NR_002217 | 441194    | Hs. 71559CNR_002217 | ENSG00000PMS2CL      | PMS2P13           | PMS2               | C-terminus    | pseudo                        |                             |
| chr1-110  | 9.367677 | 0.043937 | 0.762587 | 0.057616 | 0.954054 | 0.981636 | chr1  | 1.1E+08  | 1.1E+08  | + | 0 | NA | intron (Nintron (N  | 17344        | NR_033088 | 85369               | Hs. 58499ENR_033088  | ENSG00000STRIP1   | FAM40A             | FRS3          | striatin protein-coding       |                             |
| chr15-658 | 9.367677 | 0.043937 | 0.762587 | 0.057616 | 0.954054 | 0.981636 | chr15 | 65886910 | 65890537 | + | 0 | NA | 3' UTR (N3' UTR (N  | 19232        | NR_001206 | 8766                | Hs. 321541NM_004663  | ENSG00000CRAB11A  | YL8                | RAB11A        | nprotein-coding               |                             |
| chr2-120  | 9.367677 | 0.043937 | 0.762587 | 0.057616 | 0.954054 | 0.981636 | chr2  | 1.2E+08  | 1.2E+08  | + | 0 | NA | intron (NArthur B   | 27242        | NR_002281 | 5899                | Hs. 46982CNR_002281  | ENSG00000RALB     |                    | RAM           | like protein-coding           |                             |
| chr12-124 | 6.741005 | -0.05203 | 0.903303 | -0.0576  | 0.954069 | 0.981636 | chr12 | 1.24E+08 | 1.24E+08 | + | 0 | NA | intron (Nintron (N  | -60871       | NR_10694C | 1.02E+08            | NR_10694C            | ENSG00000MIR6880  |                    | hsa-mir-6     | microRNA ncRNA                |                             |
| chr1-1124 | 5.453219 | 0.056679 | 0.984766 | 0.057556 | 0.954102 | 0.981636 | chr1  | 1.12E+08 | 1.12E+08 | + | 0 | NA | intron (NAluSx3 SI  | 23970        | NR_018704 | 55917               | Hs. 74410CNR_018704  | ENSG00000CTTNP2   |                    | CTTNP2        | protein-coding                |                             |
| chr11-86  | 5.453219 | 0.056679 | 0.984766 | 0.057556 | 0.954102 | 0.981636 | chr11 | 8634135  | 8635092  | + | 0 | NA | intron (Nintron (N  | 24223        | NR_01481E | 9866                | Hs. 13083ENR_01481E  | ENSG00000TRIM66   |                    | Clorf29       | tripartite protein-coding     |                             |
| chr14-915 | 5.453219 | 0.056679 | 0.984766 | 0.057556 | 0.954102 | 0.981636 | chr14 | 91972187 | 91974182 | + | 0 | NA | intron (NAluSg SIN  | -25482       | NR_00632E | 10516               | Hs. 33270ENR_00632E  | ENSG00000FBLN5    |                    | AD1orf21      | ARCFibulin 1 protein-coding   |                             |
| chr17-357 | 5.453219 | 0.056679 | 0.984766 | 0.057556 | 0.954102 | 0.981636 | chr17 | 35718007 | 35719187 | + | 0 | NA | intron (NFLAM_A SI  | -13042       | NR_03331E | 91608               | Hs. 744994NM_03331E  | ENSG00000CRASL10B |                    | RRP17         | VTSRAS like protein-coding    |                             |
| chr19-362 | 5.453219 | 0.056679 | 0.984766 | 0.057556 | 0.954102 | 0.981636 | chr19 | 36239001 | 36240300 | + | 0 | NA | intron (Nintron (N  | 6028         | NR_00136E | 147929              | Hs. 59633ENR_152477  | ENSG00000ZNF565   |                    |               | zinc finger protein-coding    |                             |
| chr19-365 | 5.453219 | 0.056679 | 0.984766 | 0.057556 | 0.954102 | 0.981636 | chr19 | 36926605 | 36927252 | + | 0 | NA | intron (NMIR SINE   | 10596        | NR_001204 | 374900              | Hs. 40422CNR_19853E  | ENSG00000ZNF568   |                    | ZFP568        | zinc finger protein-coding    |                             |
| chr2-8814 | 5.453219 | 0.056679 | 0.984766 | 0.057556 | 0.954102 | 0.981636 | chr2  | 8814806  | 8815751  | + | 0 | NA | intron (NAluJb SIN  | 22335        | NR_00134E | 57498               | Hs. 9873             | NR_02073E         | ENSG00000KIDINS22C |               | ARMS SIN                      | kinase D protein-coding     |
| chr20-233 | 5.453219 | 0.056679 | 0.984766 | 0.057556 | 0.954102 | 0.981636 | chr20 | 23387303 | 23388297 | + | 0 | NA | intron (NLMIB7 LIN  | 23437        | NR_001317 | 64412               | Hs. 709462CNR_02248E | ENSG00000GZF1     |                    | JLSM ZBT      | GFND ind protein-coding       |                             |
| chr5-905  | 5.453219 | 0.056679 | 0.984766 | 0.057556 | 0.954102 | 0.981636 | chr5  | 9053578  | 9054244  | + | 0 | NA | promoter-promoter-  | -16          | NR_03977E | 1.01E+08            | NR_03977E            | ENSG00000MIR4636  |                    | mir-4636      | microRNA ncRNA                |                             |
| chr7-129  | 5.453219 | 0.056679 | 0.984766 | 0.057556 | 0.954102 | 0.981636 | chr7  | 1.29E+08 | 1.29E+08 | + | 0 | NA | intron (NLMIB2 LIN  | 21674        | NR_03405E | 23534               | Hs. 19361ENR_01247E  | ENSG00000TNPO3    |                    | IP012 LGM     | transport protein-coding      |                             |
| chr8-786  | 5.453219 | 0.056679 | 0.984766 | 0.057556 | 0.954102 | 0.981636 | chr8  | 78697260 | 78698691 | + | 0 | NA | intron (Nintron (N  | 26399        | NR_07723E | 1.01E+08            | Hs. 388511NR_07723E  |                   | LOC101241-         |               | chromosome pseudo             |                             |
| chr8-104  | 5.453219 | 0.056679 | 0.984766 | 0.057556 | 0.954102 | 0.981636 | chr8  | 1.05E+08 | 1.05E+08 | + | 0 | NA | intron (NLMIB LIN   | -1754        | NR_03033C | 693127              | NR_03033C            | ENSG00000MIR5483  |                    | MIRN5483      | microRNA ncRNA                |                             |
| chr1-208  | 6.160506 | -0.04683 | 0.813745 | -0.05755 | 0.954108 | 0.981636 | chr1  | 20861282 | 20863160 | + | 0 | NA | intron (Nintron (N  | -57533       | NR_016287 | 50809               | Hs. 142442CNR_016287 | ENSG00000HIP1BP3  |                    | HP1-BP74      | heteroch protein-coding       |                             |
| chr1-218  | 6.160506 | -0.04683 | 0.813745 | -0.05755 | 0.954108 | 0.981636 | chr1  | 21868232 | 21868693 | + | 0 | NA | intron (NATAATG T   | 56197        | NR_00101E | 401944              | Hs. 74515ENR_00101E  | ENSG00000LDLRAD2  |                    |               | low density protein-coding    |                             |
| chr10-294 | 6.160506 | -0.04683 | 0.813745 | -0.05755 | 0.954108 | 0.981636 | chr10 | 29463594 | 29464644 | + | 0 | NA | intron (Nintron (N  | 53876        | NR_11092E | 1.03E+08            | Hs. 49920ENR_00393C  | ENSG00000CVIL-AS1 |                    |               | SVIL anticRNA                 |                             |
| chr11-434 | 6.160506 | -0.04683 | 0.813745 | -0.05755 | 0.954108 | 0.981636 | chr11 | 43408647 | 43409116 | + | 0 | NA | intron (NAluJb SIN  | 49961        | NR_01825E | 55761               | Hs. 19118ENR_01825E  | ENSG00000TTC17    |                    |               | tetratric protein-coding      |                             |
| chr16-66  | 6.160506 | -0.04683 | 0.813745 | -0.05755 | 0.954108 | 0.981636 | chr16 | 66610857 | 66614558 | + | 0 | NA | non-codnon-codir    | 7976         | NR_03761E | 123920              | Hs. 29819ENR_144601  | ENSG00000CMTM3    |                    | BNAS2 CKI     | CKLF like protein-coding      |                             |
| chr19-24  | 6.160506 | -0.04683 | 0.813745 | -0.05755 | 0.954108 | 0.981636 | chr19 | 24046701 | 24047094 | + | 0 | NA | intron (NAluSz6 SI  | 13448        | NR_00127E | 9534                | Hs. 43440ENR_00487E  | ENSG00000ZNF254   |                    | BMZF-5        | HE zinc finger protein-coding |                             |
| chr4-150  | 6.160506 | -0.04683 | 0.813745 | -0.05755 | 0.954108 | 0.981636 | chr4  | 15065500 | 15067900 | + | 0 | NA | 3' UTR (N3' UTR (N  | 64219        | NR_001177 | 132864              | Hs. 656937NM_18248E  | ENSG00000CPEB2    |                    | CPE-BP2       | cytoplasm protein-coding      |                             |
| chr5-148  | 6.160506 | -0.04683 | 0.813745 | -0.05755 | 0.954108 | 0.981636 | chr5  | 1.48E+08 | 1.48E+08 | + | 0 | NA | intron (Nintron (N  | 21539        | NR_03079E | 81545               | Hs. 483772CNR_03079E | ENSG00000FBX038   |                    | Fbx38         | HMMF-box prc protein-coding   |                             |
| chr7-1024 | 6.160506 | -0.04683 | 0.813745 | -0.05755 | 0.954108 | 0.981636 | chr7  | 1.02E+08 | 1.02E+08 | + | 0 | NA | intron (NTrigger4 I | -12367       | NR_001271 | 80228               | Hs. 36330ENR_032831  | ENSG00000CORAI2   |                    | C7orf19       | CORAI calc protein-coding     |                             |
| chr7-139  | 6.160506 | -0.04683 | 0.813745 | -0.05755 | 0.954108 | 0.981636 | chr7  | 1.39E+08 | 1.39E+08 | + | 0 | NA | 3' UTR (N3' UTR (N  | -3341        | NR_16210E | 1.13E+08            | NR_16210E            |                   | MIR10399           |               | microRNA ncRNA                |                             |
| chr8-9902 | 6.160506 | -0.04683 | 0.813745 | -0.05755 | 0.954108 | 0.981636 | chr8  | 99023305 | 99024383 | + | 0 | NA | intron (NLMIA5 LIN  | 10578        | NR_01789C | 157680              | Hs. 19154CNR_01524E  | ENSG00000VPS13B   |                    | CHS1 COH      | vacuolar protein-coding       |                             |
| chr9-349  | 6.160506 | -0.04683 | 0.813745 | -0.05755 | 0.954108 | 0.981636 | chr9  | 34996570 | 34997963 | + | 0 | NA | 3' UTR (N3' UTR (N  | 6976         | NR_00113E | 25822               | Hs. 23750ENR_01226E  | ENSG00000DNAJB5   |                    | Hsc40         | DnaJ heat protein-coding      |                             |
| chr1-361  | 7.459446 | 0.048915 | 0.850088 | 0.057541 | 0.954114 | 0.981636 | chr1  | 36167585 | 36168565 | + | 0 | NA | intron (NAluSc SIN  | 11915        | NR_00128E | 55700               | Hs. 35609ENR_018067  | ENSG00000MAP7D1   |                    | PARCC1 RF     | MAP7 dom protein-coding       |                             |
| chr14-362 | 7.459446 | 0.048915 | 0.850088 | 0.057541 | 0.954114 | 0.981636 | chr14 | 36297036 | 36299962 | + | 0 | NA | TTS (NM_C TTS (NM_C | 22138        | NR_00130E | 51562               | Hs. 368647NM_01658E  | ENSG00000CMBIP    |                    |               | MAP3K12 t protein-coding      |                             |
| chr16-87  | 7.459446 | 0.048915 | 0.850088 | 0.057541 | 0.954114 | 0.981636 | chr16 | 87835452 | 87839927 | + | 0 | NA | intron (Nintron (N  | -3029        | NR_10683E | 1.02E+08            | NR_10683E            | ENSG00000MIR6775  |                    | hsa-mir-6     | microRNA ncRNA                |                             |
| chr19-15  | 7.459446 | 0.048915 | 0.850088 | 0.057541 | 0.954114 | 0.981636 | chr19 | 15270300 | 15272400 | + | 0 | NA | intron (Nintron (N  | 8886         | NR_05824C | 23476               | Hs. 18776ENR_01429E  | ENSG00000BRD4     |                    | CAP HUNK      | 1 bromodomain protein-coding  |                             |
| chr19-37  | 7.459446 | 0.048915 | 0.850088 | 0.057541 | 0.954114 | 0.981636 | chr19 | 37328859 | 37329870 | + | 0 | NA | non-codnon-codir    | -5260        | NR_13812E | 284459              | Hs. 64024ENR_18178E  | ENSG00000ZNF875   |                    | HKR1          | zinc finger protein-coding    |                             |
| chr19-51  | 7.459446 | 0.048915 | 0.850088 | 0.057541 | 0.954114 | 0.981636 | chr19 | 51939781 | 53191978 | + | 0 | NA | intron (NMER21B LI  | 2129         | NR_00135E | 79788               | Hs. 74523CNR_02473E  | ENSG00000ZNF665   |                    | ZFP160L       | zinc finger protein-coding    |                             |
| chr3-966  | 7.459446 | 0.048915 | 0.850088 | 0.057541 | 0.954114 | 0.981636 | chr3  | 96625100 | 96626909 | + | 0 | NA | intron (NMIR SINE   | 13204        | NR_00224E | 64419               | Hs. 47538ENR_02248E  | ENSG00000MTMR14   |                    | C3orf29       | myotubule protein-coding      |                             |
| chr7-1514 | 7.459446 | 0.048915 | 0.850088 | 0.057541 | 0.954114 | 0.981636 | chr7  | 1.51E+08 | 1.51E+08 | + | 0 | NA | TTS (NM_C TTS (NM_C | -24802       | NR_13177E | 155051              | Hs. 647104NM_144727  | ENSG00000CRYGN    |                    |               | crystallin protein-coding     |                             |
| chr7-156  | 7.459446 | 0.048915 | 0.850088 | 0.057541 | 0.954114 | 0.981636 | chr7  | 1.57E+08 | 1.57E+08 | + | 0 | NA | intron (Nintron (N  | 13558        | NR_13840C | 64434               | Hs. 15825            | NR_13840C         | ENSG00000NOM1      |               | C7orf3                        | PF nucleolar protein-coding |
| chr11-474 | 10.37472 | 0.041636 | 0.725698 | 0.057373 | 0.954248 | 0.981636 | chr11 | 47421842 | 47425139 | + | 0 | NA | intron (NMIR3 SINE  | 2983         | NR_002804 | 5702                | Hs. 20575ENR_002804  | ENSG00000PSCM3    |                    | TBP1          | proteasome protein-coding     |                             |
| chr12-48  | 10.37472 | 0.041636 | 0.725698 | 0.057373 | 0.954248 | 0.981636 | chr12 | 48694304 | 48696135 | + | 0 | NA | intron (Nintron (N  | -12981       | NR_01782E | 54934               | Hs. 50541ENR_01782E  | ENSG00000KANSL2   |                    | C12orf41 KAT8 | regt protein-coding           |                             |
| chr16-104 | 10.37472 | 0.041636 | 0.725698 | 0.057373 | 0.954248 | 0.981636 | chr16 | 16467    | 16761    | + | 0 | NA | TTS (NR_C TTS (NR_C | 505          | NR_10706E | 1.02E+08            | NR_10706E            | ENSG00000MIR6859  |                    | hsa-mir-6     | microRNA ncRNA                |                             |
| chr3-160  | 10.37472 | 0.041636 | 0.725698 | 0.057373 | 0.954248 | 0.981636 | chr3  | 1E+08    | 1E+08    | + | 0 | NA | intron (Nintron (N  | 28967        | NR_01482C | 9868                | Hs. 22725ENR_01482C  | ENSG00000TOM70    |                    | TOMM70A       | translocase protein-coding    |                             |
| chr7-6114 | 10.37472 | 0.041636 | 0.725698 | 0.057373 | 0.954248 | 0.981636 | chr7  | 6114896  | 6117641  | + | 0 | NA | intron (Nintron (N  | 11319        | NR_03217E | 84132               | Hs. 31856            | NR_03217E         | ENSG00000CASP42    |               |                               | ubiquitin protein-coding    |
| chr9-1911 | 10.37472 | 0.041636 | 0.725698 | 0.057373 | 0.954248 | 0.981636 | chr9  | 19115284 | 19123901 | + | 0 | NA | intron (Nintron (N  | 7900         | NR_00112E | 123                 | Hs. 3416             | NR_00112E         | ENSG00000PLIN2     |               | ADFP ADRF                     | perilipin protein-coding    |
| chr7-9327 | 5.710389 | -0.0569  | 0.992711 | -0.05731 | 0.954295 | 0.981636 | chr7  | 93276505 | 93277344 | + | 0 | NA | TTS (NM_C TTS (NM_C | 44458        | NR_01766E | 55610               | Hs. 202424NM_01766E  | ENSG00000V        |                    |               |                               |                             |



|                    |         |          |          |          |          |       |          |          |   |   |    |                     |                  |                     |               |                |             |            |                 |                |                |                |
|--------------------|---------|----------|----------|----------|----------|-------|----------|----------|---|---|----|---------------------|------------------|---------------------|---------------|----------------|-------------|------------|-----------------|----------------|----------------|----------------|
| chr1-3095 7.665768 | -0.0473 | 0.832285 | -0.05683 | 0.954682 | 0.981636 | chr1  | 30935059 | 30937777 | + | 0 | NA | promoter-promoter-  | -642 NR_033295   | 692235              | NR_033295     | SNORD103E      | U103B       | small      | nucsnRNA        |                |                |                |
| chr1-3634 7.665768 | -0.0473 | 0.832285 | -0.05683 | 0.954682 | 0.981636 | chr1  | 36344647 | 36348616 | + | 0 | NA | intron (NMIRb SINE  | -23397 NM_018166 | 55194 Hs. 87016     | NR_018166     | ENSG00000EVA1B | Clorf78     | [Eva-1 hon | protein-coding  |                |                |                |
| chr1-3757 7.665768 | -0.0473 | 0.832285 | -0.05683 | 0.954682 | 0.981636 | chr1  | 37579397 | 37593634 | + | 0 | NA | intron (Nintron (N  | 9422 NM_013285   | 29889 Hs. 75528     | NR_013285     | ENSG00000C     | GNL2        | HUMAUA     | NTIG            | protein-coding |                |                |
| chr1-3801 7.665768 | -0.0473 | 0.832285 | -0.05683 | 0.954682 | 0.981636 | chr1  | 38016317 | 38026257 | + | 0 | NA | intron (Nintron (N  | 8553 NM_016037   | 51118 Hs. 472038    | NR_016037     | ENSG00000C     | UTP11       | CG1-94     | [CUTP11 sm      | protein-coding |                |                |
| chr1-8565 7.665768 | -0.0473 | 0.832285 | -0.05683 | 0.954682 | 0.981636 | chr1  | 85637579 | 85664048 | + | 0 | NA | Intergeni           | LIM4 LINE        | 58272 NM_001554     | 3491 Hs. 8867 | NR_001554      | ENSG00000CC | NI         | CYR61           | [G] cellular   | protein-coding |                |
| chr1-1178 7.665768 | -0.0473 | 0.832285 | -0.05683 | 0.954682 | 0.981636 | chr1  | 1.18E+08 | 1.18E+08 | + | 0 | NA | intron (NMIR SINE   | 49983 NM_017686  | 54834 Hs. 310805    | NR_017686     | ENSG00000C     | GDAP2       | MACROD3    | [S] gangliosid  | protein-coding |                |                |
| chr1-1204 7.665768 | -0.0473 | 0.832285 | -0.05683 | 0.954682 | 0.981636 | chr1  | 1.2E+08  | 1.2E+08  | + | 0 | NA | intron (Nintron (N  | 5255 NR_102405   | 728841 Hs. 44508    | NR_01037501   | NBPF8          | NBPF8       | memt       | protein-coding  |                |                |                |
| chr10-104 7.665768 | -0.0473 | 0.832285 | -0.05683 | 0.954682 | 0.981636 | chr10 | 1.04E+08 | 1.04E+08 | + | 0 | NA | 3' UTR (N3' UTR (N  | -9105 NR_120622  | 1.02E+08 Hs. 670333 | NR_120622     | ITPR1P-AS-     | ITPR1P      | ancRNA     |                 |                |                |                |
| chr10-12 7.665768  | -0.0473 | 0.832285 | -0.05683 | 0.954682 | 0.981636 | chr10 | 1.21E+08 | 1.21E+08 | + | 0 | NA | intron (Nintron (N  | 8476 NM_018117   | 55717 Hs. 144447    | NR_018117     | ENSG00000C     | WDR11       | BRWD2      | [DR]WD          | repeat         | protein-coding |                |
| chr11-302 7.665768 | -0.0473 | 0.832285 | -0.05683 | 0.954682 | 0.981636 | chr11 | 3022447  | 3030873  | + | 0 | NA | exon (NM exon (NM   | -2634 NR_04658   | 1.01E+08 Hs. 27487  | NR_04658      | ENSG00000C     | CARS-AS1    | CARS       | antncRNA        |                |                |                |
| chr11-374 7.665768 | -0.0473 | 0.832285 | -0.05683 | 0.954682 | 0.981636 | chr11 | 3749120  | 3752927  | + | 0 | NA | intron (NMER1 DN    | 46523 NR_157591  | 4928 Hs. 52475      | NR_005387     | ENSG00000C     | NUP98       | ADIR2      | [N]F nucleop    | protein-coding |                |                |
| chr11-276 7.665768 | -0.0473 | 0.832285 | -0.05683 | 0.954682 | 0.981636 | chr11 | 27686507 | 27689036 | + | 0 | NA | intron (NLIPA7 LIN  | 11896 NM_170734  | 627 Hs. 50218       | NR_001705     | ENSG00000C     | BDNF        | ANON2      | [BU] brain der  | protein-coding |                |                |
| chr11-936 7.665768 | -0.0473 | 0.832285 | -0.05683 | 0.954682 | 0.981636 | chr11 | 93679012 | 93680050 | + | 0 | NA | exon (NM exon (NM   | 17849 NM_033395  | 85459 Hs. 45841     | NR_033395     | ENSG00000C     | CEP295      | KIAA1731   | centrosom       | protein-coding |                |                |
| chr11-108 7.665768 | -0.0473 | 0.832285 | -0.05683 | 0.954682 | 0.981636 | chr11 | 1.08E+08 | 1.08E+08 | + | 0 | NA | non-codir non-codir | 111493 NM_00133C | 160140 Hs. 65318    | NR_152587     | ENSG00000C     | C11orf65    |            | chromoson       | protein-coding |                |                |
| chr12-88C 7.665768 | -0.0473 | 0.832285 | -0.05683 | 0.954682 | 0.981636 | chr12 | 88059345 | 88060315 | + | 0 | NA | intron (Nintron (N  | 24294 NM_001005  | 91298 Hs. 59100     | NR_001005     | ENSG00000C     | C12orf29    |            | chromoson       | protein-coding |                |                |
| chr12-108 7.665768 | -0.0473 | 0.832285 | -0.05683 | 0.954682 | 0.981636 | chr12 | 1.09E+08 | 1.09E+08 | + | 0 | NA | intron (NLIMC4 LIN  | 14275 NM_007076  | 11153 Hs. 66189     | NR_007076     | ENSG00000C     | FICD        | HIP13      | [HY] FIC        | doma           | protein-coding |                |
| chr12-121 7.665768 | -0.0473 | 0.832285 | -0.05683 | 0.954682 | 0.981636 | chr12 | 1.22E+08 | 1.22E+08 | + | 0 | NA | intron (NALuY SINE  | 2737 NR_048555   | 5715 Hs. 13115      | NR_002813     | ENSG00000C     | PMSD9       | Rpn4       | [p27            | proteasom      | protein-coding |                |
| chr13-197 7.665768 | -0.0473 | 0.832285 | -0.05683 | 0.954682 | 0.981636 | chr13 | 19749218 | 19753070 | + | 0 | NA | intron (Nintron (N  | 31801 NM_001354  | 55269 Hs. 21319     | NR_001042     | ENSG00000C     | PSPC1       | PSP1       | paraspecl       | protein-coding |                |                |
| chr13-46C 7.665768 | -0.0473 | 0.832285 | -0.05683 | 0.954682 | 0.981636 | chr13 | 46016664 | 46017391 | + | 0 | NA | intron (NL2 LINE L  | 35719 NM_00133C  | 23091 Hs. 13610     | NR_01507C     | ENSG00000C     | ZC3H13      | KIAA0853   | [z]inc          | fin            | protein-coding |                |
| chr13-52 7.665768  | -0.0473 | 0.832285 | -0.05683 | 0.954682 | 0.981636 | chr13 | 52023789 | 52025374 | + | 0 | NA | promoter-promoter-  | -110 NM_021645   | 9724 Hs. 51296      | NR_021645     | ENSG00000C     | UTP14C      | 2700066    | [J2]UTP14C      | sn             | protein-coding |                |
| chr13-951 7.665768 | -0.0473 | 0.832285 | -0.05683 | 0.954682 | 0.981636 | chr13 | 95103582 | 95111063 | + | 0 | NA | intron (Nintron (N  | -10322 NR_145733 | 1.1E+08             | NR_145733     | SNORD13G       |             | small      | nucsnRNA        |                |                |                |
| chr14-24C 7.665768 | -0.0473 | 0.832285 | -0.05683 | 0.954682 | 0.981636 | chr14 | 24237309 | 24241415 | + | 0 | NA | TTS (NM_C           | 3261 NM_001095   | 26277 Hs. 49619     | NR_012461     | ENSG00000C     | TINF2       | DKCA3      | [TIM            | TERF1          | intr           | protein-coding |
| chr14-617 7.665768 | -0.0473 | 0.832285 | -0.05683 | 0.954682 | 0.981636 | chr14 | 61771933 | 61785397 | + | 0 | NA | intron (Nintron (N  | 16245 NM_003082  | 6617 Hs. 17931      | NR_003082     | ENSG00000C     | SNAPC1      | PTFgamma   | [small          | nuc            | protein-coding |                |
| chr14-774 7.665768 | -0.0473 | 0.832285 | -0.05683 | 0.954682 | 0.981636 | chr14 | 77702650 | 77703332 | + | 0 | NA | intron (Nintron (N  | 5332 NM_00602C   | 8846 Hs. 94542      | NR_00602C     | ENSG00000C     | ALKBH1      | ABH        | [ABH] alkB      | huc            | protein-coding |                |
| chr14-954 7.665768 | -0.0473 | 0.832285 | -0.05683 | 0.954682 | 0.981636 | chr14 | 95435457 | 95436607 | + | 0 | NA | intron (NL2 LINE L  | 39803 NM_001363  | 161176 Hs. 41502    | NR_024633     | ENSG00000C     | SYNE3       | C14orf135  | spectrin        | protein-coding |                |                |
| chr14-10 7.665768  | -0.0473 | 0.832285 | -0.05683 | 0.954682 | 0.981636 | chr14 | 1.04E+08 | 1.04E+08 | + | 0 | NA | intron (Nintron (N  | 21657 NM_00110C  | 7517 Hs. 59232      | NR_005433     | ENSG00000C     | XRCC3       | MM6        | X-ray           | ref            | protein-coding |                |
| chr15-44C 7.665768 | -0.0473 | 0.832285 | -0.05683 | 0.954682 | 0.981636 | chr15 | 44586281 | 44587397 | + | 0 | NA | intron (Nintron (N  | 49692 NM_00375E  | 8669 Hs. 40405      | NR_00375E     | ENSG00000C     | E1F3J       | E1F3S1     | [e]ukaryot      | protein-coding |                |                |
| chr15-504 7.665768 | -0.0473 | 0.832285 | -0.05683 | 0.954682 | 0.981636 | chr15 | 50466089 | 50466932 | + | 0 | NA | intron (NALuSzl SIN | 42105 NM_00112E  | 9101 Hs. 44373      | NR_005154     | ENSG00000C     | USP8        | HumORF8    | [F]ubiquit      | protein-coding |                |                |
| chr15-92C 7.665768 | -0.0473 | 0.832285 | -0.05683 | 0.954682 | 0.981636 | chr15 | 92988517 | 92999031 | + | 0 | NA | intron (NLIM4 LINE  | 83432 NM_00116E  | 56963 Hs. 27127     | NR_020211     | ENSG00000C     | RGMA        | RGM        | repulsive       | protein-coding |                |                |
| chr16-58C 7.665768 | -0.0473 | 0.832285 | -0.05683 | 0.954682 | 0.981636 | chr16 | 58621135 | 58623764 | + | 0 | NA | intron (NLIMC1 LIN  | 7377 NM_026099   | 23019 Hs. 46092     | NR_016284     | ENSG00000C     | CNOT1       | AD-005     | [CE]CCR4-NOT    | protein-coding |                |                |
| chr16-72C 7.665768 | -0.0473 | 0.832285 | -0.05683 | 0.954682 | 0.981636 | chr16 | 72958926 | 72959649 | + | 0 | NA | exon (NM exon (NM   | 88841 NM_00688E  | 463 Hs. 59829       | NR_00688E     | ENSG00000C     | ZFXH3       | ATBF1      | [AT]E           | zinc           | fin            | protein-coding |
| chr16-74 7.665768  | -0.0473 | 0.832285 | -0.05683 | 0.954682 | 0.981636 | chr16 | 74467735 | 74474551 | + | 0 | NA | intron (Nintron (N  | -49673 NM_001011 | 497190 Hs. 45467    | NR_001011     | ENSG00000C     | CLEC18B     | MRLC2      | C-type          | lc             | protein-coding |                |
| chr17-724 7.665768 | -0.0473 | 0.832285 | -0.05683 | 0.954682 | 0.981636 | chr17 | 7244030  | 7244765  | + | 0 | NA | intron (NALuJo SIN  | -2948 NM_00272E  | 11337 Hs. 64742     | NR_00272E     | ENSG00000C     | GABARAP     | ATG8A      | [GAE]GABA       | tp             | protein-coding |                |
| chr17-16C 7.665768 | -0.0473 | 0.832285 | -0.05683 | 0.954682 | 0.981636 | chr17 | 16072569 | 16077198 | + | 0 | NA | intron (NALuY SINE  | 75059 NM_01777E  | 54902 Hs. 46231     | NR_01777E     | ENSG00000C     | TTC19       | 201020401  | tetratric       | protein-coding |                |                |
| chr17-18C 7.665768 | -0.0473 | 0.832285 | -0.05683 | 0.954682 | 0.981636 | chr17 | 18093825 | 18098646 | + | 0 | NA | intron (Nintron (N  | 7387 NM_00133C   | 1819 Hs. 78582      | NR_00138E     | ENSG00000C     | DRG2        |            | developm        | protein-coding |                |                |
| chr17-304 7.665768 | -0.0473 | 0.832285 | -0.05683 | 0.954682 | 0.981636 | chr17 | 30445075 | 30446382 | + | 0 | NA | exon (NM exon (NM   | -31680 NR_004871 | 9527 Hs. 46268      | NR_004871     | ENSG00000C     | GOSR1       | GOLIM2     | [GC] golgi      | SN             | protein-coding |                |
| chr17-47C 7.665768 | -0.0473 | 0.832285 | -0.05683 | 0.954682 | 0.981636 | chr17 | 47978603 | 47979529 | + | 0 | NA | intron (Nintron (N  | 7953 NM_00127E   | 80279 Hs. 20157     | NR_025197     | ENSG00000C     | CDK5RAP3    | C53        | [HSF-2          | CDK5           | regt           | protein-coding |
| chr17-51C 7.665768 | -0.0473 | 0.832285 | -0.05683 | 0.954682 | 0.981636 | chr17 | 51077227 | 51077991 | + | 0 | NA | intron (Nintron (N  | -30731 NM_001251 | 9043 Hs. 46343      | NR_003971     | ENSG00000C     | SPAG9       | CT89       | [HLC-] sperm    | ass            | protein-coding |                |
| chr18-86C 7.665768 | -0.0473 | 0.832285 | -0.05683 | 0.954682 | 0.981636 | chr18 | 8633275  | 8639642  | + | 0 | NA | intron (Nintron (N  | 27013 NM_00102E  | 201475 Hs. 27007    | NR_00102E     | ENSG00000C     | RAB12       |            | RAB12,          | m              | protein-coding |                |
| chr19-331 7.665768 | -0.0473 | 0.832285 | -0.05683 | 0.954682 | 0.981636 | chr19 | 33102446 | 33103617 | + | 0 | NA | intron (Nintron (N  | 21850 NM_01802E  | 55094 Hs. 46643     | NR_01802E     | ENSG00000C     | GPATCH1     | ECGP       | [GPA]G-patch    | c              | protein-coding |                |
| chr19-37 7.665768  | -0.0473 | 0.832285 | -0.05683 | 0.954682 | 0.981636 | chr19 | 37196151 | 37200909 | + | 0 | NA | intron (NALuSp SIN  | 12006 NM_15227E  | 92285 Hs. 39056     | NR_15227E     | ENSG00000C     | ZNF585B     | SZFP41     | zinc            | fin            | protein-coding |                |
| chr19-40C 7.665768 | -0.0473 | 0.832285 | -0.05683 | 0.954682 | 0.981636 | chr19 | 40586697 | 40589020 | + | 0 | NA | intron (NALuJr SIN  | -5308 NM_00357E  | 8425 Hs. 40676      | NR_00357E     | ENSG00000C     | LTBP4       | ARCL1C     | [L] latent      | tp             | protein-coding |                |
| chr19-49C 7.665768 | -0.0473 | 0.832285 | -0.05683 | 0.954682 | 0.981636 | chr19 | 49645264 | 49649242 | + | 0 | NA | intron (Nintron (N  | 5044 NM_02122E   | 58506 Hs. 10352     | NR_02122E     | ENSG00000C     | SCAF1       | SRA1       | SR-relate       | protein-coding |                |                |
| chr2-168C 7.665768 | -0.0473 | 0.832285 | -0.05683 | 0.954682 | 0.981636 | chr2  | 1683675  | 1685196  | + | 0 | NA | intron (Nintron (N  | 60080 NM_01229E  | 7837 Hs. 33219      | NR_01229E     | ENSG00000C     | PXDN        | ASGD7      | [CO] peroxidas  | protein-coding |                |                |
| chr2-875C 7.665768 | -0.0473 | 0.832285 | -0.05683 | 0.954682 | 0.981636 | chr2  | 8756399  | 8758265  | + | 0 | NA | 3' UTR (N3' UTR (N  | 75276 NM_00216E  | 3398 Hs. 18091      | NR_00216E     | ENSG00000C     | ID2         | IGT8       | [ID2] inhibitor | protein-coding |                |                |
| chr2-941 7.665768  | -0.0473 | 0.832285 | -0.05683 | 0.954682 | 0.981636 | chr2  | 9410869  |          |   |   |    |                     |                  |                     |               |                |             |            |                 |                |                |                |



|           |         |         |          |          |          |          |       |          |          |   |    |                    |                  |                                 |                      |                |                            |
|-----------|---------|---------|----------|----------|----------|----------|-------|----------|----------|---|----|--------------------|------------------|---------------------------------|----------------------|----------------|----------------------------|
| chr11-112 | 8.41749 | 0.04531 | 0.797588 | 0.056809 | 0.954697 | 0.981636 | chr11 | 1.12E+08 | 1.12E+08 | 0 | NA | intron (AluX4 SI   | 5011 NR_07706C   | 6392 Hs. 35627CNM_003002        | ENSG000000CDHD       | CBT1 CII-      | succinate protein-coding   |
| chr12-163 | 8.41749 | 0.04531 | 0.797588 | 0.056809 | 0.954697 | 0.981636 | chr12 | 16353215 | 16359137 | 0 | NA | intron (MLT1A0 LI  | 2759 NM_145764   | 4257 Hs. 38970CNM_02030C        | ENSG000000MGST1      | GST12 MG5      | microsome protein-coding   |
| chr12-193 | 8.41749 | 0.04531 | 0.797588 | 0.056809 | 0.954697 | 0.981636 | chr12 | 19365996 | 19368482 | 0 | NA | intron (intron (N  | -72253 NM_001114 | 121536 Hs. 126497NM_153207      | ENSG000000CAEBP2     | AE             | bindir protein-coding      |
| chr13-363 | 8.41749 | 0.04531 | 0.797588 | 0.056809 | 0.954697 | 0.981636 | chr13 | 36324689 | 36326594 | 0 | NA | intron (intron (N  | 20753 NM_015087  | 23111 Hs. 440414NM_015087       | ENSG000000SPART      | SPG20 TAF      | spartin protein-coding     |
| chr13-454 | 8.41749 | 0.04531 | 0.797588 | 0.056809 | 0.954697 | 0.981636 | chr13 | 45404015 | 45408517 | 0 | NA | intron (AluXs1 SI  | -11896 NR_047031 | 0.01E+08 Hs. 658036NR_047031    | ENSG000000SLC25A30-  | SLC25A30       | ncRNA                      |
| chr13-11C | 8.41749 | 0.04531 | 0.797588 | 0.056809 | 0.954697 | 0.981636 | chr13 | 1.1E+08  | 1.1E+08  | 0 | NA | intron (intron (N  | -21398 NM_001267 | 1E+08 Hs. 640035NM_001267044    | COL4A2-AS-           | COL4A2         | ar protein-coding          |
| chr13-112 | 8.41749 | 0.04531 | 0.797588 | 0.056809 | 0.954697 | 0.981636 | chr13 | 1.13E+08 | 1.13E+08 | 0 | NA | intron (NL2b LINE  | 32561 NM_006322  | 10426 Hs. 224152NM_006322       | ENSG000000TUBGCP3    | 104p ALP       | tubulin g protein-coding   |
| chr13-115 | 8.41749 | 0.04531 | 0.797588 | 0.056809 | 0.954697 | 0.981636 | chr13 | 1.14E+08 | 1.14E+08 | 0 | NA | intron (intron (N  | -6028 NM_001365  | 0.01E+08 Hs. 704267NM_001365    | ENSG000000C13orf46   | 104p           | chromosom protein-coding   |
| chr13-114 | 8.41749 | 0.04531 | 0.797588 | 0.056809 | 0.954697 | 0.981636 | chr13 | 1.14E+08 | 1.14E+08 | 0 | NA | intron (intron (N  | -36193 NM_001365 | 0.01E+08 Hs. 704267NM_001365    | ENSG000000C13orf46   | -              | chromosom protein-coding   |
| chr14-645 | 8.41749 | 0.04531 | 0.797588 | 0.056809 | 0.954697 | 0.981636 | chr14 | 64629386 | 64927614 | 0 | NA | intron (intron (N  | 11368 NM_001202  | 0.01E+08 Hs. 325531NM_001202    | ENSG000000CHURC1-F   | FNTB FTa       | CHURC1-F protein-coding    |
| chr14-73C | 8.41749 | 0.04531 | 0.797588 | 0.056809 | 0.954697 | 0.981636 | chr14 | 73085671 | 73087698 | 0 | NA | intron (NLIMC5 LIN | 28150 NM_021235  | 58517 Hs. 531106NM_021235       | ENSG000000RBM25      | NET52 REI      | RNA bindi protein-coding   |
| chr14-777 | 8.41749 | 0.04531 | 0.797588 | 0.056809 | 0.954697 | 0.981636 | chr14 | 77714510 | 77717870 | 0 | NA | intron (AluYe5 SI  | 8087 NR_052025   | 81892 Hs. 655105NM_03121C       | ENSG000000SLIRP      | C14orf155      | SRA stem protein-coding    |
| chr15-404 | 8.41749 | 0.04531 | 0.797588 | 0.056809 | 0.954697 | 0.981636 | chr15 | 40407693 | 40412053 | 0 | NA | intron (AluV SINE  | 4076 NR_148925   | 3712 Hs. 513642NM_002222        | ENSG000000IVD        | ACAD2          | isovalery protein-coding   |
| chr15-421 | 8.41749 | 0.04531 | 0.797588 | 0.056809 | 0.954697 | 0.981636 | chr15 | 42186470 | 42190883 | 0 | NA | intron (intron (N  | 10990 NR_030357  | 693212 NR_030357                | ENSG000000MIR627     | MIRN627        | microRNA ncRNA             |
| chr15-43C | 8.41749 | 0.04531 | 0.797588 | 0.056809 | 0.954697 | 0.981636 | chr15 | 43013664 | 43017302 | 0 | NA | intron (NSVA_D Ret | 90555 NM_174916  | 197131 Hs. 591121NM_174916      | ENSG000000CUBR1      | JBS            | ubiquitin protein-coding   |
| chr15-75E | 8.41749 | 0.04531 | 0.797588 | 0.056809 | 0.954697 | 0.981636 | chr15 | 75686620 | 75693251 | 0 | NA | exon (NM exon (NM  | 22913 NM_001897  | 1464 Hs. 513044NM_001897        | ENSG000000CSPG4      | HMW-MAA        | chondroitin protein-coding |
| chr15-771 | 8.41749 | 0.04531 | 0.797588 | 0.056809 | 0.954697 | 0.981636 | chr15 | 77154865 | 77158328 | 0 | NA | intron (NLIP4 LIN  | 68808 NR_026813  | 81698 Hs. 656935NM_030944       | LINC00597            | C15orf5        | long intncRNA              |
| chr15-78C | 8.41749 | 0.04531 | 0.797588 | 0.056809 | 0.954697 | 0.981636 | chr15 | 78010944 | 78012877 | 0 | NA | intron (AluXs SIN  | -17685 NR_026998 | 91450 Hs. 406766NR_026998       | LOC91450             | -              | uncharactericncRNA         |
| chr16-213 | 8.41749 | 0.04531 | 0.797588 | 0.056809 | 0.954697 | 0.981636 | chr16 | 213745   | 223852   | 0 | NA | intron (intron (N  | 10651 NM_018032  | 55692 Hs. 16803 NM_018032       | ENSG000000LUC7L      | LUC7B L        | LUC7 like protein-coding   |
| chr16-351 | 8.41749 | 0.04531 | 0.797588 | 0.056809 | 0.954697 | 0.981636 | chr16 | 3517551  | 3517904  | 0 | NA | intron (NLIMC4 LIN | 7833 NM_024793   | 23059 Hs. 155995NM_015041       | ENSG000000CLUA1P     | CFAP22 F       | clusterin protein-coding   |
| chr16-16C | 8.41749 | 0.04531 | 0.797588 | 0.056809 | 0.954697 | 0.981636 | chr16 | 16009408 | 16013986 | 0 | NA | intron (AluXs SIN  | 62081 NM_004996  | 4363 Hs. 391464NM_004996        | ENSG000000ABCC1      | ABC29 ABC      | ATP bindi protein-coding   |
| chr16-185 | 8.41749 | 0.04531 | 0.797588 | 0.056809 | 0.954697 | 0.981636 | chr16 | 18319663 | 18320494 | 0 | NA | intron (intron (N  | 12584 NM_001282  | 0.01E+08 Hs. 634612NM_001282    | ENSG000000NIP1A7     | NIP1A8         | nuclear protein-coding     |
| chr16-574 | 8.41749 | 0.04531 | 0.797588 | 0.056809 | 0.954697 | 0.981636 | chr16 | 57452234 | 57455059 | 0 | NA | intron (MamRep137  | -6118 NM_001308  | 57019 Hs. 4900 NM_02031         | ENSG000000CIAPIN1    | Anamorsircytoc | protein-coding             |
| chr16-683 | 8.41749 | 0.04531 | 0.797588 | 0.056809 | 0.954697 | 0.981636 | chr16 | 68305026 | 68306692 | 0 | NA | intron (AluJb SIN  | 5087 NM_032178   | 84138 Hs. 72952CNM_032178       | ENSG000000SLC7A60S   | -              | solute c protein-coding    |
| chr16-717 | 8.41749 | 0.04531 | 0.797588 | 0.056809 | 0.954697 | 0.981636 | chr16 | 71736742 | 71741715 | 0 | NA | intron (intron (N  | -14527 NM_01502C | 23035 Hs. 709455NM_01502C       | ENSG000000PHLPP2     | PHLPP1 P       | PH domain protein-coding   |
| chr17-54C | 8.41749 | 0.04531 | 0.797588 | 0.056809 | 0.954697 | 0.981636 | chr17 | 54035375 | 5411418  | 0 | NA | intron (intron (N  | -12143 NM_00116C | 84268 Hs. 462086NM_03230E       | ENSG000000RPAIN      | HRIP RIP       | RPA inter protein-coding   |
| chr17-161 | 8.41749 | 0.04531 | 0.797588 | 0.056809 | 0.954697 | 0.981636 | chr17 | 16192371 | 16195499 | 0 | NA | intron (NL2 LINE L | 704 NM_00119C    | 9611 Hs. 462322NM_006311        | ENSG000000NCOR1      | N-CoR N-       | C-nuclear protein-coding   |
| chr17-304 | 8.41749 | 0.04531 | 0.797588 | 0.056809 | 0.954697 | 0.981636 | chr17 | 30422473 | 30424403 | 0 | NA | intron (intron (N  | 42960 NM_001195  | 1362 Hs. 446075NM_001304        | ENSG000000CPD        | GP180          | carboxype protein-coding   |
| chr17-604 | 8.41749 | 0.04531 | 0.797588 | 0.056809 | 0.954697 | 0.981636 | chr17 | 60499919 | 60500133 | 0 | NA | intron (AluY SINE  | 26214 NM_001282  | 10513 Hs. 84084 NM_00638C       | ENSG000000APBP2      | APP-BP2 E      | amyloid t protein-coding   |
| chr17-757 | 8.41749 | 0.04531 | 0.797588 | 0.056809 | 0.954697 | 0.981636 | chr17 | 75702274 | 75706659 | 0 | NA | intron (MERR102b L | -16993 NM_001321 | 3691 Hs. 632222NM_000921        | ENSG000000ITGB4      | CD104 GP1      | integrin protein-coding    |
| chr19-118 | 8.41749 | 0.04531 | 0.797588 | 0.056809 | 0.954697 | 0.981636 | chr19 | 11819380 | 11822120 | 0 | NA | intron (intron (N  | 6477 NM_152357   | 126070 Hs. 418192NM_152357      | ENSG000000ZNF440     | -              | zinc fing protein-coding   |
| chr19-177 | 8.41749 | 0.04531 | 0.797588 | 0.056809 | 0.954697 | 0.981636 | chr19 | 17726857 | 17729362 | 0 | NA | exon (NM exon (NM  | 7953 NM_001308   | 55201 Hs. 66048 NM_018174       | ENSG000000MAP1S      | BPY21P1 C      | microtubul protein-coding  |
| chr19-192 | 8.41749 | 0.04531 | 0.797588 | 0.056809 | 0.954697 | 0.981636 | chr19 | 19292784 | 19293850 | 0 | NA | intron (AluXs1 SI  | -20016 NM_001001 | 53345 Hs. 531624NM_20351C       | ENSG000000TM6SF2     | -              | transmemt protein-coding   |
| chr19-343 | 8.41749 | 0.04531 | 0.797588 | 0.056809 | 0.954697 | 0.981636 | chr19 | 34396107 | 34397340 | 0 | NA | intron (intron (N  | -7675 NM_001353  | 84306 Hs. 515344NM_03234C       | ENSG000000PDCD2L     | -              | programme protein-coding   |
| chr19-463 | 8.41749 | 0.04531 | 0.797588 | 0.056809 | 0.954697 | 0.981636 | chr19 | 46389690 | 46390284 | 0 | NA | exon (NM exon (NM  | 24971 NM_03204C  | 83987 Hs. 97876 NM_03204C       | ENSG000000CCDC8      | 3M3 PPP1       | coiled-c protein-coding    |
| chr19-466 | 8.41749 | 0.04531 | 0.797588 | 0.056809 | 0.954697 | 0.981636 | chr19 | 46605214 | 46610569 | 0 | NA | intron (intron (N  | 5819 NM_001325   | 808 Hs. 515487NM_005184         | ENSG000000CALM3      | CALM CAMI      | calmodulil protein-coding  |
| chr19-49C | 8.41749 | 0.04531 | 0.797588 | 0.056809 | 0.954697 | 0.981636 | chr19 | 49098110 | 49109054 | 0 | NA | intron (intron (N  | -10788 NM_022165 | 64130 Hs. 221737NM_022165       | ENSG000000LIN7B      | LIN-7B ML      | lin-7 hom protein-coding   |
| chr2-2913 | 8.41749 | 0.04531 | 0.797588 | 0.056809 | 0.954697 | 0.981636 | chr2  | 29132536 | 29134313 | 0 | NA | intron (NLIMS LINE | 18009 NM_001287  | 79745 Hs. 122927NM_024692       | ENSG000000CLIP4      | RSNL2          | CAP-Gly c protein-coding   |
| chr2-9673 | 8.41749 | 0.04531 | 0.797588 | 0.056809 | 0.954697 | 0.981636 | chr2  | 96731928 | 96734527 | 0 | NA | intron (intron (N  | 6849 NM_001142   | 81562 Hs. 655742NM_03080E       | ENSG000000LMANL2     | MRTN2 VIF      | lectin, n protein-coding   |
| chr2-117E | 8.41749 | 0.04531 | 0.797588 | 0.056809 | 0.954697 | 0.981636 | chr2  | 1.18E+08 | 1.18E+08 | 0 | NA | intron (intron (N  | 6446 NM_006773   | 8886 Hs. 744922NM_006773        | ENSG000000DDX18      | Has1 MrD       | DEAD-box protein-coding    |
| chr2-1193 | 8.41749 | 0.04531 | 0.797588 | 0.056809 | 0.954697 | 0.981636 | chr2  | 1.19E+08 | 1.19E+08 | 0 | NA | intron (intron (N  | 3706 NM_001075   | 1622 Hs. 78888 NM_02054E        | ENSG000000DBI        | ACBD1 ACE      | diazepam protein-coding    |
| chr2-1357 | 8.41749 | 0.04531 | 0.797588 | 0.056809 | 0.954697 | 0.981636 | chr2  | 1.36E+08 | 1.36E+08 | 0 | NA | intron (intron (N  | -18723 NR_163477 | 1.08E+08 Hs. 591242NM_001365239 | LOC10798E-           | -              | uncharactericncRNA         |
| chr2-1602 | 8.41749 | 0.04531 | 0.797588 | 0.056809 | 0.954697 | 0.981636 | chr2  | 1.6E+08  | 1.6E+08  | 0 | NA | intron (MLT1C LTF  | -27109 NR_10377E | 0.01E+08 Hs. 729532NR_10377E    | ENSG000000LINC0247E- | -              | long intncRNA              |
| chr2-2308 | 8.41749 | 0.04531 | 0.797588 | 0.056809 | 0.954697 | 0.981636 | chr2  | 2.31E+08 | 2.31E+08 | 0 | NA | intron (intron (N  | -46530 NM_001287 | 81618 Hs. 111577NM_03092E       | ENSG000000ITMC2      | BRI3 BRIC      | integral protein-coding    |
| chr20-487 | 8.41749 | 0.04531 | 0.797588 | 0.056809 | 0.954697 | 0.981636 | chr20 | 487017   | 493099   | 0 | NA | intron (AluXs3 SI  | -27525 NM_14462E | 128637 Hs. 590876NM_14462E      | ENSG000000TBC1D20    | C20orf14C      | TBC1 dom protein-coding    |
| chr21-44C | 8.41749 | 0.04531 | 0.797588 | 0.056809 | 0.954697 | 0.981636 | chr21 | 44090263 | 44091091 | 0 | NA | intron (NLIMC5a LI | 16353 NM_001351  | 7109 Hs. 126221NM_003274        | ENSG000000TRAPP10    | EHOC-1 E       | trafficki protein-coding   |
| chr21-462 | 8.41749 | 0.04531 | 0.797588 | 0.056809 | 0.954697 | 0.981636 | chr21 | 46242603 | 46248135 | 0 | NA | intron (intron (N  | 16138 NR_11056E  | 114044 Hs. 655095NR_00277E      | ENSG000000MCM3AP-AS  | C21orf85       | MCM3AP arncRNA             |
| chr22-314 | 8.41749 | 0.04531 | 0.797588 | 0.056809 | 0.954697 | 0.981636 | chr22 | 31419967 | 31435478 | 0 | NA | intron (AluJo SIN  | 28118 NM_004147  | 4733 Hs. 115242NM_001417        | ENSG000000CDRG1      | NEDD3          | developm protein-coding    |
| chr22-324 | 8.41749 | 0.04531 | 0.797588 | 0.056809 | 0.954697 | 0.981636 | chr22 | 32486359 | 32486601 | 0 | NA | intron (AluJo SIN  | 11243 NM_001     |                                 |                      |                |                            |



|           |          |          |          |          |          |          |       |          |          |   |   |    |                    |          |            |          |                     |                 |                 |                                       |                                   |
|-----------|----------|----------|----------|----------|----------|----------|-------|----------|----------|---|---|----|--------------------|----------|------------|----------|---------------------|-----------------|-----------------|---------------------------------------|-----------------------------------|
| chr8-4295 | 6.684149 | -0.05059 | 0.897367 | -0.05638 | 0.955041 | 0.981636 | chr8  | 42954124 | 42954492 | + | 0 | NA | intron (Nintron (N | 57330    | NM_03241C  | 84376    | Hs.162852NM_03241C  | ENSG00000003003 | HK3             | hook micrprotein-coding               |                                   |
| chr8-6572 | 6.684149 | -0.05059 | 0.897367 | -0.05638 | 0.955041 | 0.981636 | chr8  | 65721445 | 65723039 | + | 0 | NA | intron (Nintron (N | 52369    | NM_001114F | 9650     | Hs.584788NM_014637  | ENSG00000003003 | CHPFR1          | FAM mitochondonprotein-coding         |                                   |
| chr1-2127 | 8.896513 | 0.0438   | 0.777225 | 0.056354 | 0.955059 | 0.981636 | chr1  | 21272775 | 21273062 | + | 0 | NA | intron (Nintron (N | 6697     | NM_001111F | 1889     | Hs.195088NM_001397  | ENSG00000003003 | ECE             | endotheliprotein-coding               |                                   |
| chr1-867  | 8.896513 | 0.0438   | 0.777225 | 0.056354 | 0.955059 | 0.981636 | chr1  | 86733012 | 86740118 | + | 0 | NA | intron (Nintron (N | 31989    | NM_016009  | 51100    | Hs.136309NM_016009  | ENSG00000003003 | BiF-1           | CG15H3 domainprotein-coding           |                                   |
| chr10-136 | 8.896513 | 0.0438   | 0.777225 | 0.056354 | 0.955059 | 0.981636 | chr10 | 13656528 | 13657461 | + | 0 | NA | exon (NM exon (NM  | 50573    | NM_001318F | 55691    | Hs.330466NM_018027  | ENSG00000003003 | CAFCFA          | FFFERM domprotein-coding              |                                   |
| chr10-271 | 8.896513 | 0.0438   | 0.777225 | 0.056354 | 0.955059 | 0.981636 | chr10 | 27129510 | 27136576 | + | 0 | NA | intron (NMER5A DNA | 21341    | NM_01426F  | 10730    | Hs.74647            | NM_01426F       | ENSG00000003003 | FTSH                                  | MEG4YME1 likeprotein-coding       |
| chr10-10C | 8.896513 | 0.0438   | 0.777225 | 0.056354 | 0.955059 | 0.981636 | chr10 | 1E+08    | 1E+08    | + | 0 | NA | intron (Nintron (N | 11177    | NM_001278F | 1147     | Hs.198999NM_001278  | ENSG00000003003 | IKBKA           | IKK componentprotein-coding           |                                   |
| chr11-12E | 8.896513 | 0.0438   | 0.777225 | 0.056354 | 0.955059 | 0.981636 | chr11 | 12881940 | 12884970 | + | 0 | NA | intron (NMIR SINE  | 106093   | NR_038904F | 1.01E+08 | Hs.153406NR_038904  | ENSG00000003003 | BLACAT2         | long intencRNA                        |                                   |
| chr11-467 | 8.896513 | 0.0438   | 0.777225 | 0.056354 | 0.955059 | 0.981636 | chr11 | 46702496 | 46706247 | + | 0 | NA | exon (NM exon (NM  | 3340     | NM_001184F | 79797    | Hs.656931NM_024741  | ENSG00000003003 | EVR6            | RP72 zinc fingprotein-coding          |                                   |
| chr11-47E | 8.896513 | 0.0438   | 0.777225 | 0.056354 | 0.955059 | 0.981636 | chr11 | 47242367 | 47242950 | + | 0 | NA | exon (NM exon (NM  | 47242367 | NM_001251F | 10062    | Hs.438866NM_005699  | ENSG00000003003 | LXR-a           | LXR nuclear rprotein-coding           |                                   |
| chr11-47E | 8.896513 | 0.0438   | 0.777225 | 0.056354 | 0.955059 | 0.981636 | chr11 | 47232594 | 47631889 | + | 0 | NA | intron (NAluJr SIN | 14818    | NM_014342F | 23788    | Hs.269944NM_014342  | ENSG00000003003 | HSPC032         | Nmitochonprotein-coding               |                                   |
| chr11-59C | 8.896513 | 0.0438   | 0.777225 | 0.056354 | 0.955059 | 0.981636 | chr11 | 59635780 | 59644768 | + | 0 | NA | intron (NAluSq2 SI | 24500    | NM_00255F  | 5007     | Hs.597091NM_00255F  | ENSG00000003003 | OSBP1           | oxysterolprotein-coding               |                                   |
| chr11-85E | 8.896513 | 0.0438   | 0.777225 | 0.056354 | 0.955059 | 0.981636 | chr11 | 85978670 | 85983110 | + | 0 | NA | intron (NMIR SINE  | 88194    | NM_00716F  | 8301     | Hs.163899NM_00716F  | ENSG00000003003 | CALM            | CLTF phosphatiprotein-coding          |                                   |
| chr11-111 | 8.896513 | 0.0438   | 0.777225 | 0.056354 | 0.955059 | 0.981636 | chr11 | 1.12E+08 | 1.12E+08 | + | 0 | NA | intron (Nintron (N | 19455    | NM_00125F  | 143903   | Hs.503831NM_178834  | ENSG00000003003 | LAYLN           | layilin protein-coding                |                                   |
| chr12-80E | 8.896513 | 0.0438   | 0.777225 | 0.056354 | 0.955059 | 0.981636 | chr12 | 8094512  | 8096617  | + | 0 | NA | intron (Nintron (N | 13290    | NM_01550F  | 25977    | Hs.555927NM_01550F  | ENSG00000003003 | EIEE21          | NECAP encrprotein-coding              |                                   |
| chr12-12C | 8.896513 | 0.0438   | 0.777225 | 0.056354 | 0.955059 | 0.981636 | chr12 | 1.21E+08 | 1.21E+08 | + | 0 | NA | intron (NAluSp SIN | 21223    | NM_00133C  | 9921     | Hs.442798NM_01486F  | ENSG00000003003 | RIE2            | ring fingprotein-coding               |                                   |
| chr12-13C | 8.896513 | 0.0438   | 0.777225 | 0.056354 | 0.955059 | 0.981636 | chr12 | 1.33E+08 | 1.33E+08 | + | 0 | NA | intron (NLTR13 LTF | 19486    | NM_00589F  | 2802     | Hs.507333NM_00589F  | ENSG00000003003 | GCP170          | ME golgin A3protein-coding            |                                   |
| chr13-37E | 8.896513 | 0.0438   | 0.777225 | 0.056354 | 0.955059 | 0.981636 | chr13 | 37205053 | 37026585 | + | 0 | NA | intron (Nintron (N | 22758    | NM_18150C  | 11340    | Hs.294041NM_18150C  | ENSG00000003003 | CIP3            | EAP2 exosome cprotein-coding          |                                   |
| chr14-311 | 8.896513 | 0.0438   | 0.777225 | 0.056354 | 0.955059 | 0.981636 | chr14 | 31132557 | 31135142 | + | 0 | NA | intron (Nintron (N | 73944    | NM_01538F  | 25831    | Hs.708017NM_01538F  | ENSG00000003003 | EULLR           | HECT domprotein-coding                |                                   |
| chr14-67E | 8.896513 | 0.0438   | 0.777225 | 0.056354 | 0.955059 | 0.981636 | chr14 | 67343096 | 67353402 | + | 0 | NA | intron (NAluSp SIN | 11555    | NM_015994F | 51382    | Hs.272633NM_015994  | ENSG00000003003 | ATP6M           | VATATPase H+protein-coding            |                                   |
| chr14-757 | 8.896513 | 0.0438   | 0.777225 | 0.056354 | 0.955059 | 0.981636 | chr14 | 75783344 | 75784236 | + | 0 | NA | intron (NL2c LINE  | 122544   | NM_01507F  | 23093    | Hs.709609NM_01507F  | ENSG00000003003 | CORD19          | K1 tubulin rprotein-coding            |                                   |
| chr14-96E | 8.896513 | 0.0438   | 0.777225 | 0.056354 | 0.955059 | 0.981636 | chr14 | 96289591 | 96290764 | + | 0 | NA | intron (Nintron (N | 33967    | NM_00071C  | 623      | Hs.525572NM_00071C  | ENSG00000003003 | B1BRK           | B1F bradykiniprotein-coding           |                                   |
| chr15-297 | 8.896513 | 0.0438   | 0.777225 | 0.056354 | 0.955059 | 0.981636 | chr15 | 29758818 | 29762064 | + | 0 | NA | intron (NAluSz6 SI | 60233    | NM_00135F  | 7082     | Hs.743999NM_003257  | ENSG00000003003 | ZO-1            | tight jurprotein-coding               |                                   |
| chr15-41C | 8.896513 | 0.0438   | 0.777225 | 0.056354 | 0.955059 | 0.981636 | chr15 | 41076136 | 41087562 | + | 0 | NA | intron (Nintron (N | 34397    | NR_10403F  | 54617    | Hs.292949NM_01755F  | ENSG00000003003 | IN080A          | IN IN080 conprotein-coding            |                                   |
| chr15-454 | 8.896513 | 0.0438   | 0.777225 | 0.056354 | 0.955059 | 0.981636 | chr15 | 45410539 | 45412356 | + | 0 | NA | intron (NAluJo SIN | 9111     | NR_13664F  | 79029    | Hs.369657NM_02406F  | ENSG00000003003 | SPATASL1        | - spermatocprotein-coding             |                                   |
| chr15-78C | 8.896513 | 0.0438   | 0.777225 | 0.056354 | 0.955059 | 0.981636 | chr15 | 78015446 | 78016957 | + | 0 | NA | intron (Nintron (N | -21976   | NR_02699F  | 91450    | Hs.406766NR_02699F  | LOC91450        | -               | uncharactncRNA                        |                                   |
| chr16-21C | 8.896513 | 0.0438   | 0.777225 | 0.056354 | 0.955059 | 0.981636 | chr16 | 21965927 | 21974077 | + | 0 | NA | intron (Nintron (N | 18441    | NM_00336F  | 7385     | Hs.528806NM_00336F  | ENSG00000003003 | UQCRC2          | MC3DN5 QC ubiquinolprotein-coding     |                                   |
| chr16-66E | 8.896513 | 0.0438   | 0.777225 | 0.056354 | 0.955059 | 0.981636 | chr16 | 66938205 | 66939615 | + | 0 | NA | intron (NL2b LINE  | 3394     | NM_00136F  | 8824     | Hs.282977NM_00386F  | ENSG00000003003 | CES2            | CE-2 CES2 carboxylprotein-coding      |                                   |
| chr17-81E | 8.896513 | 0.0438   | 0.777225 | 0.056354 | 0.955059 | 0.981636 | chr17 | 815877   | 820099   | + | 0 | NA | intron (NAluSz6 SI | 35635    | NM_01814F  | 55178    | Hs.182722NM_01814F  | ENSG00000003003 | MRM3            | RMTL1 RNW mitochonprotein-coding      |                                   |
| chr17-29E | 8.896513 | 0.0438   | 0.777225 | 0.056354 | 0.955059 | 0.981636 | chr17 | 29542546 | 29544377 | + | 0 | NA | 3' UTR (N3' UTR (N | 23576    | NM_198147F | 116236   | Hs.106511NM_198147  | ENSG00000003003 | ABHD15          | - abhydrolprotein-coding              |                                   |
| chr17-47E | 8.896513 | 0.0438   | 0.777225 | 0.056354 | 0.955059 | 0.981636 | chr17 | 47052346 | 47054544 | + | 0 | NA | IntergeniIntergeni | -74192   | NM_20340C  | 388394   | Hs.367999NM_20340C  | ENSG00000003003 | CRPML           | - reprimolprotein-coding              |                                   |
| chr2-325E | 8.896513 | 0.0438   | 0.777225 | 0.056354 | 0.955059 | 0.981636 | chr2  | 32500288 | 32503713 | + | 0 | NA | intron (Nintron (N | 63153    | NR_03028F  | 693143   | Hs. NR_03028F       | ENSG00000003003 | MIR558          | tmicroRNA ncRNA                       |                                   |
| chr2-170E | 8.896513 | 0.0438   | 0.777225 | 0.056354 | 0.955059 | 0.981636 | chr2  | 1.71E+08 | 1.71E+08 | + | 0 | NA | 3' UTR (N3' UTR (N | 30695    | NM_01553C  | 26003    | Hs.431317NM_01553C  | ENSG00000003003 | GORASP2         | GOLPH6 Golgigr protein-coding         |                                   |
| chr2-2061 | 8.896513 | 0.0438   | 0.777225 | 0.056354 | 0.955059 | 0.981636 | chr2  | 2.06E+08 | 2.06E+08 | + | 0 | NA | intron (NAluSx SIN | 16760    | NM_00119F  | 4719     | Hs.471207NM_00500F  | ENSG00000003003 | CNDUFS1         | CI-75kD NADH:ubiquinoneprotein-coding |                                   |
| chr20-38C | 8.896513 | 0.0438   | 0.777225 | 0.056354 | 0.955059 | 0.981636 | chr20 | 38065917 | 38072634 | + | 0 | NA | intron (Nintron (N | 35529    | NM_00121F  | 58490    | Hs.278833NM_002121F | ENSG00000003003 | RPRD1B          | C20orf177 regulatoriprotein-coding    |                                   |
| chr22-20C | 8.896513 | 0.0438   | 0.777225 | 0.056354 | 0.955059 | 0.981636 | chr22 | 20085808 | 20102567 | + | 0 | NA | intron (Nintron (N | 8129     | NR_03170F  | 1E+08    | NR_03170F           | ENSG00000003003 | MIR1306         | microRNA ncRNA                        |                                   |
| chr3-484  | 8.896513 | 0.0438   | 0.777225 | 0.056354 | 0.955059 | 0.981636 | chr3  | 48441624 | 48444253 | + | 0 | NA | intron (NMIR SINE  | 2681     | NM_00132F  | 51372    | Hs.356444NM_01593F  | ENSG00000003003 | TMA7            | CCDC72 HS translatiiprotein-coding    |                                   |
| chr3-581C | 8.896513 | 0.0438   | 0.777225 | 0.056354 | 0.955059 | 0.981636 | chr3  | 58100659 | 58103115 | + | 0 | NA | intron (Nintron (N | 68748    | NR_135534F | 1.05E+08 | Hs.613914NR_135534  | ENSG00000003003 | FLNB-AS1        | - FLNB antncRNA                       |                                   |
| chr3-170I | 8.896513 | 0.0438   | 0.777225 | 0.056354 | 0.955059 | 0.981636 | chr3  | 1.7E+08  | 1.7E+08  | + | 0 | NA | intron (NL2a LINE  | 19216    | NM_024947F | 80012    | Hs.529592NM_024947  | ENSG00000003003 | PHC3            | EDR3 HPH2 polymorphprotein-coding     |                                   |
| chr3-179E | 8.896513 | 0.0438   | 0.777225 | 0.056354 | 0.955059 | 0.981636 | chr3  | 1.79E+08 | 1.79E+08 | + | 0 | NA | intron (Nintron (N | 6078     | NM_03354C  | 55669    | Hs.478383NM_017927  | ENSG00000003003 | MFN1            | hfz01 hfzmitofusirprotein-coding      |                                   |
| chr4-886E | 8.896513 | 0.0438   | 0.777225 | 0.056354 | 0.955059 | 0.981636 | chr4  | 88680665 | 88681632 | + | 0 | NA | intron (Nintron (N | 16681    | NM_15375F  | 266812   | Hs.12554            | NM_15375F       | ENSG00000003003 | NAP1L5                                | DRLM nucleosonprotein-coding      |
| chr4-140E | 8.896513 | 0.0438   | 0.777225 | 0.056354 | 0.955059 | 0.981636 | chr4  | 1.41E+08 | 1.41E+08 | + | 0 | NA | intron (NL2a LINE  | 20714    | NM_15370F  | 255520   | Hs.45010E           | NM_15370F       | ENSG00000003003 | ELMOD2                                | 9830169G ELMO domprotein-coding   |
| chr5-407E | 8.896513 | 0.0438   | 0.777225 | 0.056354 | 0.955059 | 0.981636 | chr5  | 40769569 | 40772711 | + | 0 | NA | intron (Nintron (N | -15179   | NM_01238F  | 23548    | Hs.34891E           | NM_01238F       | ENSG00000003003 | TTC33                                 | OSRF tetrairicprotein-coding      |
| chr5-7007 | 8.896513 | 0.0438   | 0.777225 | 0.056354 | 0.955059 | 0.981636 | chr5  | 70077387 | 70080345 | + | 0 | NA | IntergeniAluSx SIN | 29343    | NM_001297F | 6606     | Hs.535788NM_000344  | ENSG00000003003 | SMN1            | BCD541 GE survival protein-coding     |                                   |
| chr5-140E | 8.896513 | 0.0438   | 0.777225 | 0.056354 | 0.955059 | 0.981636 | chr5  | 1.41E+08 | 1.41E+08 | + | 0 | NA | intron (Nintron (N | -40837   | NM_00373F  | 8637     | Hs.594084NM_00373F  | ENSG00000003003 | E1F4EBP3        | 4E-BP3 4E eukaryotiprotein-coding     |                                   |
| chr6-3377 | 8.896513 | 0.0438   | 0.777225 | 0.056354 | 0.955059 | 0.981636 | chr6  | 33773739 | 33780973 | + | 0 | NA | intron (Nintron (N | 9586     | NM_001143F | 221496   | Hs.44484E           | NM_18133F       | ENSG00000003003 | LEMD2                                 | CTRCT42 ILEM domaiiprotein-coding |
| chr6-535E | 8.896513 | 0.0438   | 0.777225 | 0.056354 | 0.955059 | 0.981636 | chr6  | 53503084 | 53511038 | + | 0 | NA | intron (Nintron (N | 38040    | NM_00149F  | 2729     | Hs.65446E           | NM_00149F       | ENSG00000003003 | GCLC                                  | GCL GCS glutamateprotein-coding   |
| chr7-147E | 8.896513 | 0.0438   | 0.777225 | 0.056354 | 0.955059 | 0.981636 | chr7  | 1.42E+08 | 1.42E+08 | + | 0 | NA | intron (Nintron (N | 5709     | NM_00125F  | 6742     | Hs.490394NM_00314F  | ENSG00000003003 | SSBP1           | Mt-SSB SC single stprotein-coding     |                                   |
| chr9-113E | 8.896513 | 0.0438   | 0.777225 | 0.056354 | 0.955059 | 0.981636 | chr9  | 1.13E+08 | 1.13E+08 | + | 0 | NA | intron (NL2c LINE  | 4551     | NR_13626F  | 9128     | Hs.744014NM_004697  | ENSG00000003003 | PRPF4           | HSPR4 HPF pre-mRNA protein-coding     |                                   |



|           |          |          |          |          |          |          |       |          |          |   |   |    |                     |        |            |          |           |                  |                    |                |            |                |                |  |
|-----------|----------|----------|----------|----------|----------|----------|-------|----------|----------|---|---|----|---------------------|--------|------------|----------|-----------|------------------|--------------------|----------------|------------|----------------|----------------|--|
| chr21-466 | 9.375535 | 0.042429 | 0.759858 | 0.055838 | 0.95547  | 0.981636 | chr21 | 46647186 | 46649585 | + | 0 | NA | intron (intron (    | 12711  | NM_206962  | 3275     | Hs.154162 | NM_001535        | ENSG00000CPRMT2    | HRMT1L1        | protein    | ε              | protein-coding |  |
| chr3-4941 | 9.375535 | 0.042429 | 0.759858 | 0.055838 | 0.95547  | 0.981636 | chr3  | 49414689 | 49415771 | + | 0 | NA | 3' UTR (3' UTR (    | 3024   | NM_022171  | 6988     | Hs.517962 | NM_022171        | ENSG00000TCTA      | -              | T cell     | le             | protein-coding |  |
| chr4-2941 | 9.375535 | 0.042429 | 0.759858 | 0.055838 | 0.95547  | 0.981636 | chr4  | 2941606  | 2941864  | + | 0 | NA | intron (intron (    | 6189   | NR_015453  | 317648   | Hs.398176 | NR_015453        | ENSG00000NOP14-AS1 | C4orf10 FNOP14 | antncRNA   |                |                |  |
| chr5-1347 | 9.375535 | 0.042429 | 0.759858 | 0.055838 | 0.95547  | 0.981636 | chr5  | 135E+08  | 135E+08  | + | 0 | NA | intron (AluSx S     | 32282  | NM_014822  | 9879     | Hs.406549 | NM_014822        | ENSG00000DDX46     | PRPF5 Prp      | DEAD-box   | protein-coding |                |  |
| chr1-1747 | 8.152648 | -0.04509 | 0.810107 | -0.05566 | 0.955611 | 0.981636 | chr1  | 74740018 | 74741578 | + | 0 | NA | intron (LTR12 L T   | -7390  | NM_001113C | 1429     | Hs.83114  | NM_001113C       | ENSG00000CRYZ      | -              | crystallin | protein-coding |                |  |
| chr1-888  | 8.152648 | -0.04509 | 0.810107 | -0.05566 | 0.955611 | 0.981636 | chr1  | 88855457 | 88860225 | + | 0 | NA | intron (AluSx S     | 33726  | NM_001514  | 2959     | Hs.481852 | NM_001514        | ENSG00000GTF2B     | TF2B TFII      | general t  | protein-coding |                |  |
| chr1-108  | 8.152648 | -0.04509 | 0.810107 | -0.05566 | 0.955611 | 0.981636 | chr1  | 109E+08  | 109E+08  | + | 0 | NA | 3' UTR (3' UTR (    | 17212  | NM_001278  | 23155    | Hs.658489 | NM_015127        | ENSG00000CLCC1     | MCLC           | chloride   | protein-coding |                |  |
| chr1-155  | 8.152648 | -0.04509 | 0.810107 | -0.05566 | 0.955611 | 0.981636 | chr1  | 156E+08  | 156E+08  | + | 0 | NA | intron (AluSx S     | 9634   | NM_032292  | 54856    | Hs.656361 | NM_032292        | ENSG00000GON4L     | GON-4 GON      | GON-4      | lik            | protein-coding |  |
| chr1-207  | 8.152648 | -0.04509 | 0.810107 | -0.05566 | 0.955611 | 0.981636 | chr1  | 2.07E+08 | 2.07E+08 | + | 0 | NA | intron (AluJr S     | 18708  | NR_12534E  | 1604     | Hs.126517 | NM_000574        | ENSG00000CD55      | CHAPLE CFCD55  | molε       | protein-coding |                |  |
| chr10-69  | 8.152648 | -0.04509 | 0.810107 | -0.05566 | 0.955611 | 0.981636 | chr10 | 69368389 | 69370329 | + | 0 | NA | intron (intron (    | 8777   | NM_001057  | 6865     | Hs.88372  | NM_001057        | ENSG00000TACR2     | NK2R NKN       | tachykinin | protein-coding |                |  |
| chr12-19  | 8.152648 | -0.04509 | 0.810107 | -0.05566 | 0.955611 | 0.981636 | chr12 | 19353396 | 19356885 | + | 0 | NA | intron (intron (    | -84352 | NM_001114  | 121536   | Hs.126497 | NM_153207        | ENSG00000AEBP2     | -              | AE bindir  | protein-coding |                |  |
| chr13-98  | 8.152648 | -0.04509 | 0.810107 | -0.05566 | 0.955611 | 0.981636 | chr13 | 98447277 | 98449484 | + | 0 | NA | 3' UTR (3' UTR (    | 73745  | NM_00357E  | 8428     | Hs.508514 | NM_00357E        | ENSG00000STK24     | HEL-S-95       | serine/tl  | protein-coding |                |  |
| chr13-11  | 8.152648 | -0.04509 | 0.810107 | -0.05566 | 0.955611 | 0.981636 | chr13 | 1.14E+08 | 1.14E+08 | + | 0 | NA | intron (intron (    | 5036   | NM_00132C  | 22821    | Hs.59307E | NM_00736E        | ENSG00000RASA3     | GAP1 P4BF      | RAS p21    | protein-coding |                |  |
| chr14-58  | 8.152648 | -0.04509 | 0.810107 | -0.05566 | 0.955611 | 0.981636 | chr14 | 58250298 | 58256143 | + | 0 | NA | intron (AluSx S     | 8377   | NM_00278E  | 5684     | Hs.558799 | NM_00278E        | ENSG00000PSMA3     | H8 P3C3        | proteasom  | protein-coding |                |  |
| chr15-48  | 8.152648 | -0.04509 | 0.810107 | -0.05566 | 0.955611 | 0.981636 | chr15 | 48415557 | 48418075 | + | 0 | NA | intron (intron (    | 84619  | NM_00194E  | 1854     | Hs.52798C | NM_00194E        | ENSG00000CDUT      | dUTPase        | deoxyuric  | protein-coding |                |  |
| chr15-64  | 8.152648 | -0.04509 | 0.810107 | -0.05566 | 0.955611 | 0.981636 | chr15 | 64406014 | 64408661 | + | 0 | NA | intron (intron (    | 19501  | NM_001321  | 9325     | Hs.50034C | NM_01621E        | ENSG00000TRIP4     | ASC-1 ASC      | thyroid l  | protein-coding |                |  |
| chr15-80  | 8.152648 | -0.04509 | 0.810107 | -0.05566 | 0.955611 | 0.981636 | chr15 | 80753485 | 80755593 | + | 0 | NA | 3' UTR (3' UTR (    | -24831 | NM_00129E  | 57214    | Hs.45908E | NM_01868E        | ENSG00000CCMIP4    | CCM1 HVE       | cell m     | protein-coding |                |  |
| chr16-17  | 8.152648 | -0.04509 | 0.810107 | -0.05566 | 0.955611 | 0.981636 | chr16 | 1734497  | 1735144  | + | 0 | NA | promoter-promoter-  | -165   | NR_03613E  | 1E+08    | NR_03613E | ENSG00000MIR3177 | miR-3177           | microRNA       | ncRNA      |                |                |  |
| chr16-45  | 8.152648 | -0.04509 | 0.810107 | -0.05566 | 0.955611 | 0.981636 | chr16 | 4506943  | 4510493  | + | 0 | NA | intron (intron (    | 12860  | NM_001127  | 3163     | Hs.28427E | NM_002134        | ENSG00000HMOX2     | HO-2           | heme oxyg  | protein-coding |                |  |
| chr16-88  | 8.152648 | -0.04509 | 0.810107 | -0.05566 | 0.955611 | 0.981636 | chr16 | 8831109  | 8832676  | + | 0 | NA | intron (intron (    | -17577 | NR_14790E  | 1E+08    | Hs.73551E | NR_14790E        | LOC10013C-         | -              | uncharact  | ncRNA          |                |  |
| chr16-281 | 8.152648 | -0.04509 | 0.810107 | -0.05566 | 0.955611 | 0.981636 | chr16 | 28164968 | 28167987 | + | 0 | NA | intron (intron (    | 45488  | NM_015171  | 23214    | Hs.46046E | NM_015171        | ENSG00000XP06      | EXP6 RAF       | exportin   | protein-coding |                |  |
| chr17-31  | 8.152648 | -0.04509 | 0.810107 | -0.05566 | 0.955611 | 0.981636 | chr17 | 31351499 | 31354636 | + | 0 | NA | intron (AluSx S     | -31445 | NM_00100C  | 2123     | Hs.59119E | NM_01421C        | ENSG00000EV12A     | EVDA EVL       | ecotropic  | protein-coding |                |  |
| chr17-76  | 8.152648 | -0.04509 | 0.810107 | -0.05566 | 0.955611 | 0.981636 | chr17 | 60446588 | 60454402 | + | 0 | NA | intron (AluJb S     | 28006  | NM_181707  | 124773   | Hs.129312 | NM_181707        | ENSG00000C17orf64  | -              | chromosom  | protein-coding |                |  |
| chr17-60  | 8.152648 | -0.04509 | 0.810107 | -0.05566 | 0.955611 | 0.981636 | chr17 | 76038593 | 76055776 | + | 0 | NA | intron (AluJb S     | 6472   | NM_00126C  | 6730     | Hs.51449E | NM_01423C        | ENSG00000SRP68     | -              | signal r   | protein-coding |                |  |
| chr18-20  | 8.152648 | -0.04509 | 0.810107 | -0.05566 | 0.955611 | 0.981636 | chr18 | 20978723 | 20982605 | + | 0 | NA | intron (AluS8 S     | 131149 | NM_00540E  | 6093     | Hs.306307 | NM_00540E        | ENSG00000ROCK1     | P160ROCK       | Rho assoc  | protein-coding |                |  |
| chr19-10  | 8.152648 | -0.04509 | 0.810107 | -0.05566 | 0.955611 | 0.981636 | chr19 | 10558967 | 10560462 | + | 0 | NA | intron (intron (    | 6296   | NM_02300E  | 6595     | Hs.709967 | NM_02300E        | ENSG00000KR11      | -              | KR11       | homc           | protein-coding |  |
| chr19-16  | 8.152648 | -0.04509 | 0.810107 | -0.05566 | 0.955611 | 0.981636 | chr19 | 16650599 | 16655138 | + | 0 | NA | exon (NM exon (     | 7276   | NM_00130C  | 79086    | Hs.356467 | NM_024104        | ENSG00000SMI17     | C19orf42       | small intr | protein-coding |                |  |
| chr20-38  | 8.152648 | -0.04509 | 0.810107 | -0.05566 | 0.955611 | 0.981636 | chr20 | 3873709  | 3874424  | + | 0 | NA | non-codir-non-codir | -14715 | NM_02496C  | 80025    | Hs.11418C | NM_02496C        | ENSG00000PANK2     | C20orf48       | pantho     | protein-coding |                |  |
| chr21-37  | 8.152648 | -0.04509 | 0.810107 | -0.05566 | 0.955611 | 0.981636 | chr21 | 37142023 | 37146089 | + | 0 | NA | intron (LIPA5 L     | 50735  | NR_046651  | 01E+08   | Hs.570411 | NR_046651        | ENSG00000TTC3-AS1  | -              | TTTC3      | antncRNA       |                |  |
| chr22-20  | 8.152648 | -0.04509 | 0.810107 | -0.05566 | 0.955611 | 0.981636 | chr22 | 20044600 | 20049717 | + | 0 | NA | intron (AluSq2 S    | 15019  | NR_02970E  | 406961   | NR_02970E | ENSG00000MIR185  | MIRN185            | mi             | ncRNA      |                |                |  |
| chr22-20  | 8.152648 | -0.04509 | 0.810107 | -0.05566 | 0.955611 | 0.981636 | chr22 | 20573977 | 20579468 | + | 0 | NA | intron (intron (    | 68675  | NM_00129E  | 51586    | Hs.517421 | NM_01588E        | ENSG00000MED15     | ARC105 C       | mediator   | protein-coding |                |  |
| chr3-566  | 8.152648 | -0.04509 | 0.810107 | -0.05566 | 0.955611 | 0.981636 | chr3  | 56666906 | 56672363 | + | 0 | NA | intron (intron (    | -5588  | NM_015224  | 23272    | Hs.116877 | NM_015224        | ENSG00000TASOR     | C3orf63 F      | transcrip  | protein-coding |                |  |
| chr3-940  | 8.152648 | -0.04509 | 0.810107 | -0.05566 | 0.955611 | 0.981636 | chr3  | 94044014 | 94045113 | + | 0 | NA | intron (SVA_A Ret   | -15966 | NM_001001  | 415117   | Hs.67976E | NM_001001        | ENSG00000STX19     | -              | syntxin    | protein-coding |                |  |
| chr3-122  | 8.152648 | -0.04509 | 0.810107 | -0.05566 | 0.955611 | 0.981636 | chr3  | 1.22E+08 | 1.22E+08 | + | 0 | NA | intron (intron (    | 24830  | NR_12540E  | 1.03E+08 | Hs.67505E | NR_12540E        | ENSG00000LOC10272E | -              | uncharact  | ncRNA          |                |  |
| chr3-154  | 8.152648 | -0.04509 | 0.810107 | -0.05566 | 0.955611 | 0.981636 | chr3  | 1.54E+08 | 1.54E+08 | + | 0 | NA | intron (intron (    | 35212  | NM_02086E  | 170506   | Hs.44627C | NM_02086E        | ENSG00000DHX36     | DDX36 G4F      | DEAH-box   | protein-coding |                |  |
| chr3-183  | 8.152648 | -0.04509 | 0.810107 | -0.05566 | 0.955611 | 0.981636 | chr3  | 1.84E+08 | 1.84E+08 | + | 0 | NA | intron (intron (    | 1190   | NR_046727  | 1.01E+08 | NR_046727 | YEATS2-AS-       | -                  | YEATS2         | antncRNA   |                |                |  |
| chr5-276  | 8.152648 | -0.04509 | 0.810107 | -0.05566 | 0.955611 | 0.981636 | chr5  | 276514   | 278122   | + | 0 | NA | TTS (NR_C TTS (NR_C | 5672   | NM_001267  | 10016    | Hs.50823  | NM_01323E        | ENSG00000PCDC6     | ALG-2 ALC      | programme  | protein-coding |                |  |
| chr5-173  | 8.152648 | -0.04509 | 0.810107 | -0.05566 | 0.955611 | 0.981636 | chr5  | 1.73E+08 | 1.73E+08 | + | 0 | NA | intron (THE1B L T   | 4668   | NM_01398C  | 662      | Hs.14572E | NM_00120E        | ENSG00000BNP17     | NIP1 SEC2      | ECL2       | intc           | protein-coding |  |
| chr6-155  | 8.152648 | -0.04509 | 0.810107 | -0.05566 | 0.955611 | 0.981636 | chr6  | 1.55E+08 | 1.55E+08 | + | 0 | NA | exon (NM exon (     | 17428  | NM_01602C  | 51106    | Hs.27990E | NM_01602C        | ENSG00000TFB1M     | CGI-75 C       | transcrip  | protein-coding |                |  |
| chr7-571  | 8.152648 | -0.04509 | 0.810107 | -0.05566 | 0.955611 | 0.981636 | chr7  | 5718781  | 5723461  | + | 0 | NA | exon (NM exon (     | -9211  | NR_106934  | 1.02E+08 | NR_106934 | ENSG00000MIR6874 | hsa-mir-           | ε              | microRNA   | ncRNA          |                |  |
| chr7-358  | 8.152648 | -0.04509 | 0.810107 | -0.05566 | 0.955611 | 0.981636 | chr7  | 35885825 | 35887498 | + | 0 | NA | intron (intron (    | 85442  | NM_00136E  | 989      | Hs.19134E | NM_00178E        | ENSG00000SEPTIN7   | CDCl0 CDC      | septin 7   | protein-coding |                |  |
| chr7-102  | 8.152648 | -0.04509 | 0.810107 | -0.05566 | 0.955611 | 0.981636 | chr7  | 102E+08  | 1.02E+08 | + | 0 | NA | TTS (NM_C TTS (NM_C | 1606   | NR_039677  | 1.01E+08 | NR_039677 | ENSG00000MIR4467 | -                  | microRNA       | ncRNA      |                |                |  |
| chr7-105  | 8.152648 | -0.04509 | 0.810107 | -0.05566 | 0.955611 | 0.981636 | chr7  | 1.06E+08 | 1.06E+08 | + | 0 | NA | intron (AluSg7 S    | 20580  | NM_02193C  | 60561    | Hs.53138E | NM_02193C        | ENSG00000CRINT1    | RINT-1         | RAD50      | intr           | protein-coding |  |
| chr8-739  | 8.152648 | -0.04509 | 0.810107 | -0.05566 | 0.955611 | 0.981636 | chr8  | 73957215 | 73959914 | + | 0 | NA | intron (intron (    | 13344  | NM_001204  | 6921     | Hs.533437 | NM_00564E        | ENSG00000ELOC      | SIII TCFE      | elongin C  | protein-coding |                |  |
| chr8-140  | 8.152648 | -0.04509 | 0.810107 | -0.05566 | 0.955611 | 0.981636 | chr8  | 1.41E+08 | 1.41E+08 | + | 0 | NA | intron (AluJb S     | 59395  | NR_04071E  | 54108    | Hs.279704 | NM_017444        | ENSG00000CHRAC1    | CHARC1 C       | chromatin  | protein-coding |                |  |
| chr8-140  | 8.152648 | -0.04509 | 0.810107 | -0.05566 | 0.955611 | 0.981636 | chr8  | 1.41E+08 | 1.41E+08 | + | 0 | NA | intron (AluSc S     | -28416 | NM_012154  | 27161    | Hs.66018E | NM_012154        | ENSG00000AG02      | C8orf67 EIF    | chromat    | protein-coding |                |  |
| chr9-111  | 8.152648 | -0.04509 | 0.810107 | -0.05566 | 0.955611 | 0.981636 | chr9  | 1.11E+08 | 1.11E+08 | + | 0 | NA | intron (LTR16A L    | -60672 | NM_20585E  | 26248    | Hs.38131E | NM_20585E        | ENSG00000OR2K2     | HSHTPCRH C     | olactory   | protein-coding |                |  |
| chr9-136  | 8.152648 | -0.04509 | 0.810107 | -0.05566 | 0.955611 | 0.981636 | chr9  | 1.36E+08 | 1.36E+08 | + | 0 | NA | intron (intron (    | 10761  | NM_00308E  | 6621     | Hs.11326E | NM_00308E        |                    |                |            |                |                |  |



|           |          |          |          |          |          |          |       |          |           |      |                    |                |                    |                         |           |          |                    |                    |                 |                          |                         |
|-----------|----------|----------|----------|----------|----------|----------|-------|----------|-----------|------|--------------------|----------------|--------------------|-------------------------|-----------|----------|--------------------|--------------------|-----------------|--------------------------|-------------------------|
| chr2-1087 | 7.418306 | 0.046756 | 0.84522  | 0.055318 | 0.955885 | 0.981636 | chr2  | 1.09E+08 | 1.09E+08  | +    | 0                  | NA             | intron (AluSc8 SI  | 21945                   | NM_006267 | 5903     | Hs.199561NM_006267 | ENSG0000CRANBP2    | ADANE ANFRAN    | bindiprotein-coding      |                         |
| chr2-1311 | 7.418306 | 0.046756 | 0.84522  | 0.055318 | 0.955885 | 0.981636 | chr2  | 1.31E+08 | 1.31E+08  | +    | 0                  | NA             | intron (Nintron (N | 35483                   | NM_001305 | 55041    | Hs.469944NM_017958 | ENSG00000PLEKH2    | EV22            | pleckstriprotein-coding  |                         |
| chr2-171  | 7.418306 | 0.046756 | 0.84522  | 0.055318 | 0.955885 | 0.981636 | chr2  | 1.71E+08 | 1.71E+08  | +    | 0                  | NA             | intron (NL2a LINE  | 52606                   | NM_001136 | 9874     | Hs.744917NM_012290 | ENSG00000CTLKI     | PKU-beta        | tousled lprotein-coding  |                         |
| chr2-1908 | 7.418306 | 0.046756 | 0.84522  | 0.055318 | 0.955885 | 0.981636 | chr2  | 1.91E+08 | 1.91E+08  | +    | 0                  | NA             | intron (NTigger16t | 17152                   | NM_014905 | 2744     | Hs.116448NM_014905 | ENSG00000GLS       | AAD20 CAS       | glutamine protein-coding |                         |
| chr2-2236 | 7.418306 | 0.046756 | 0.84522  | 0.055318 | 0.955885 | 0.981636 | chr2  | 2.24E+08 | 2.24E+08  | +    | 0                  | NA             | intron (Nintron (N | 50915                   | NM_020803 | 57590    | Hs.368355NM_020803 | ENSG00000WDFY1     | FENS-1 FEWD     | repeatprotein-coding     |                         |
| chr2-2312 | 7.418306 | 0.046756 | 0.84522  | 0.055318 | 0.955885 | 0.981636 | chr2  | 2.31E+08 | 2.31E+08  | +    | 0                  | NA             | intron (AluSp SIN  | 65888                   | NM_001352 | 80210    | Hs.162411NM_025135 | ENSG00000CARMC9    | ARM JBTS        | armadillcprotein-coding  |                         |
| chr2-2328 | 7.418306 | 0.046756 | 0.84522  | 0.055318 | 0.955885 | 0.981636 | chr2  | 2.33E+08 | 2.33E+08  | +    | 0                  | NA             | intron (AluSc8 SI  | 35723                   | NM_001346 | 389084   | Hs.657509NM_020689 | ENSG00000SNORC     | ASCL830 C       | secondaryprotein-coding  |                         |
| chr2-2335 | 7.418306 | 0.046756 | 0.84522  | 0.055318 | 0.955885 | 0.981636 | chr2  | 2.34E+08 | 2.34E+08  | +    | 0                  | NA             | intron (NLIP3 LIN  | 3331                    | NM_018218 | 55230    | Hs.96513           | NM_018218          | ENSG00000CUSP40 | -                        | ubiquitinprotein-coding |
| chr20-365 | 7.418306 | 0.046756 | 0.84522  | 0.055318 | 0.955885 | 0.981636 | chr20 | 36506893 | 36508728  | +    | 0                  | NA             | non-codirnon-codir | 33709                   | NM_181525 | 10398    | Hs.504687NM_006097 | ENSG00000MYL9      | LC20 MLC        | myosin lprotein-coding   |                         |
| chr21-366 | 7.418306 | 0.046756 | 0.84522  | 0.055318 | 0.955885 | 0.981636 | chr21 | 36358200 | 36373502  | +    | 0                  | NA             | intron (AluSq2 SI  | 19541                   | NM_005441 | 8208     | Hs.75238           | NM_005441          | ENSG00000CHAF1B | CAC-1 CAF                | chromatirprotein-coding |
| chr22-298 | 7.418306 | 0.046756 | 0.84522  | 0.055318 | 0.955885 | 0.981636 | chr22 | 29801524 | 29810619  | +    | 0                  | NA             | intron (Nintron (N | 32203                   | NM_001365 | 84164    | Hs.731754NM_032204 | ENSG00000ASCC2     | ASC1p100        | activatirprotein-coding  |                         |
| chr22-314 | 7.418306 | 0.046756 | 0.84522  | 0.055318 | 0.955885 | 0.981636 | chr22 | 31408453 | 31417004  | +    | 0                  | NA             | intron (AluJb SIN  | 13124                   | NM_004147 | 4733     | Hs.115242NM_004147 | ENSG00000DRG1      | NEDD3           | developme protein-coding |                         |
| chr22-457 | 7.418306 | 0.046756 | 0.84522  | 0.055318 | 0.955885 | 0.981636 | chr22 | 45720187 | 45720927  | +    | 0                  | NA             | intron (NLIMB2 LIN | 39967                   | NR_039915 | 1.01E+08 | NR_039915          | ENSG00000MIR4762   | -               | microRNA ncRNA           |                         |
| chr3-5205 | 7.418306 | 0.046756 | 0.84522  | 0.055318 | 0.955885 | 0.981636 | chr3  | 52059553 | 52094003  | +    | 0                  | NA             | intron (AluXs1 SI  | 19971                   | NM_014674 | 9695     | Hs.224616NM_014674 | ENSG00000EDEM1     | EDEM            | IR degradprotein-coding  |                         |
| chr3-3067 | 7.418306 | 0.046756 | 0.84522  | 0.055318 | 0.955885 | 0.981636 | chr3  | 30671026 | 30671631  | +    | 0                  | NA             | intron (NL2c LINE  | 64727                   | NM_003242 | 7048     | Hs.82028           | NM_003242          | ENSG00000TGFB2  | AAT3 FAA                 | transonprotein-coding   |
| chr3-3313 | 7.418306 | 0.046756 | 0.84522  | 0.055318 | 0.955885 | 0.981636 | chr3  | 33132261 | 33135384  | +    | 0                  | NA             | intron (Nintron (N | 19864                   | NM_006371 | 10491    | Hs.517888NM_006371 | ENSG00000CRTAP     | CASP LEFP       | cartilageprotein-coding  |                         |
| chr3-5265 | 7.418306 | 0.046756 | 0.84522  | 0.055318 | 0.955885 | 0.981636 | chr3  | 52632602 | 52634510  | +    | 0                  | NA             | intron (NLIMB3 LIN | 52043                   | NM_001350 | 55193    | Hs.189922NM_018165 | ENSG00000PBRM1     | BAF180 PE       | polybromprotein-coding   |                         |
| chr3-5265 | 7.418306 | 0.046756 | 0.84522  | 0.055318 | 0.955885 | 0.981636 | chr3  | 52638168 | 52645412  | +    | 0                  | NA             | intron (Nintron (N | 43809                   | NM_001350 | 55193    | Hs.189922NM_018165 | ENSG00000PBRM1     | BAF180 PE       | polybromprotein-coding   |                         |
| chr3-5547 | 7.418306 | 0.046756 | 0.84522  | 0.055318 | 0.955885 | 0.981636 | chr3  | 55475481 | 55481045  | +    | 0                  | NA             | intron (Nintron (N | 3135                    | NM_001255 | 7474     | Hs.643088NM_003392 | ENSG00000WNT5A     | hWNT5A          | Wnt famillprotein-coding |                         |
| chr3-1327 | 7.418306 | 0.046756 | 0.84522  | 0.055318 | 0.955885 | 0.981636 | chr3  | 1.33E+08 | 1.33E+08  | +    | 0                  | NA             | intron (Nintron (N | 19538                   | NR_002281 | 348808   | Hs.586111NR_002811 | ENSG00000NPHP3-AS1 | INCRA001 NPHP3  | antncRNA                 |                         |
| chr3-179  | 7.418306 | 0.046756 | 0.84522  | 0.055318 | 0.955885 | 0.981636 | chr3  | 1.79E+08 | 1.79E+08  | +    | 0                  | NA             | intron (NHERV17-ir | 12939                   | NM_152242 | 64393    | Hs.371609NM_022470 | ENSG00000ZMAT3     | PAG608 W        | zinc fing protein-coding |                         |
| chr3-1978 | 7.418306 | 0.046756 | 0.84522  | 0.055318 | 0.955885 | 0.981636 | chr3  | 1.98E+08 | 1.98E+08  | +    | 0                  | NA             | exon (NM exon (NM  | 44552                   | NM_001365 | 84859    | Hs.518414NM_032775 | ENSG00000LRCH3     | -               | leucine rprotein-coding  |                         |
| chr4-5821 | 7.418306 | 0.046756 | 0.84522  | 0.055318 | 0.955885 | 0.981636 | chr4  | 5821415  | 5822124   | +    | 0                  | NA             | exon (NM exon (NM  | 66044                   | NM_001288 | 1400     | Hs.135272NM_001315 | ENSG00000CRMP1     | CRMP-1 DF       | collapsirprotein-coding  |                         |
| chr4-7765 | 7.418306 | 0.046756 | 0.84522  | 0.055318 | 0.955885 | 0.981636 | chr4  | 7765957  | 7767235   | +    | 0                  | NA             | intron (Nintron (N | 12506                   | NR_026892 | 84740    | Hs.663025NM_032654 | ENSG00000AFAP1-AS1 | AFAP1-AS AFAP1  | antncRNA                 |                         |
| chr4-3985 | 7.418306 | 0.046756 | 0.84522  | 0.055318 | 0.955885 | 0.981636 | chr4  | 39854377 | 39863008  | +    | 0                  | NA             | intron (AluSq2 SI  | 119219                  | NM_001100 | 23244    | Hs.331431NM_015200 | ENSG00000PDS5A     | PIG54 SCD       | PDS5 coheprotein-coding  |                         |
| chr4-7578 | 7.418306 | 0.046756 | 0.84522  | 0.055318 | 0.955885 | 0.981636 | chr4  | 75781980 | 75783534  | +    | 0                  | NA             | exon (NM exon (NM  | 58235                   | NM_001290 | 8615     | Hs.744877NM_003715 | ENSG00000USO1      | P15 TAP USO1    | vesiprotein-coding       |                         |
| chr4-1218 | 7.418306 | 0.046756 | 0.84522  | 0.055318 | 0.955885 | 0.981636 | chr4  | 1.22E+08 | 1.22E+08  | +    | 0                  | NA             | intron (Nintron (N | 11131                   | NM_176824 | 55212    | Hs.591694NM_018190 | ENSG00000BBS7      | BBS2L1 Bardet-B | Bioprotein-coding        |                         |
| chr5-1395 | 7.418306 | 0.046756 | 0.84522  | 0.055318 | 0.955885 | 0.981636 | chr5  | 13924460 | 13925053  | +    | 0                  | NA             | intron (NMIR SINE  | 19724                   | NM_001365 | 1767     | Hs.212360NM_001365 | ENSG00000DNAH5     | CILD3 DN        | dynein asprotein-coding  |                         |
| chr5-4355 | 7.418306 | 0.046756 | 0.84522  | 0.055318 | 0.955885 | 0.981636 | chr5  | 43551586 | 43553501  | +    | 0                  | NA             | intron (Nintron (N | 4534                    | NM_006451 | 10605    | Hs.482035NM_006451 | ENSG00000PAIP1     | -               | poly (A) tprotein-coding |                         |
| chr5-1246 | 7.418306 | 0.046756 | 0.84522  | 0.055318 | 0.955885 | 0.981636 | chr5  | 1.25E+08 | 1.25E+08  | +    | 0                  | NA             | intron (Nintron (N | 104340                  | NM_020747 | 57507    | Hs.266616NM_020747 | ENSG00000ZNF608    | NY-REN-3        | zinc fingprotein-coding  |                         |
| chr5-1297 | 7.418306 | 0.046756 | 0.84522  | 0.055318 | 0.955885 | 0.981636 | chr5  | 1.3E+08  | 1.3E+08   | +    | 0                  | NA             | intron (Nintron (N | 26724                   | NM_001257 | 1E+08    | Hs.582534NM_001257 | ENSG00000CMINAR2   | KIAA1024        | membrane protein-coding  |                         |
| chr5-1347 | 7.418306 | 0.046756 | 0.84522  | 0.055318 | 0.955885 | 0.981636 | chr5  | 1.35E+08 | 1.35E+08  | +    | 0                  | NA             | intron (AluSq2 SI  | 13437                   | NM_014822 | 9879     | Hs.406545NM_014822 | ENSG00000DDX46     | PRPF5 Pr        | DEAD-box protein-coding  |                         |
| chr5-1678 | 7.418306 | 0.046756 | 0.84522  | 0.055318 | 0.955885 | 0.981636 | chr5  | 1.69E+08 | 1.69E+08  | +    | 0                  | NA             | intron (Nintron (N | 21173                   | NM_001355 | 345630   | Hs.166262NM_001355 | ENSG00000FBLL1     | -               | fibrillarprotein-coding  |                         |
| chr6-3172 | 7.418306 | 0.046756 | 0.84522  | 0.055318 | 0.955885 | 0.981636 | chr6  | 31726374 | 31727492  | +    | 0                  | NA             | TTS (NM_C          | 2366                    | NM_001303 | 23564    | Hs.247362NM_013974 | ENSG00000DDAH2     | DDAH DDA        | dimethylprotein-coding   |                         |
| chr6-4264 | 7.418306 | 0.046756 | 0.84522  | 0.055318 | 0.955885 | 0.981636 | chr6  | 42648997 | 42651114  | +    | 0                  | NA             | intron (Nintron (N | 72542                   | NM_000322 | 5961     | Hs.654488NM_000322 | ENSG00000PRPH2     | AOFMD AV        | peripheriprotein-coding  |                         |
| chr6-5308 | 7.418306 | 0.046756 | 0.84522  | 0.055318 | 0.955885 | 0.981636 | chr6  | 53085396 | 53089428  | +    | 0                  | NA             | intron (NMER101-ir | 16439                   | NM_012347 | 26268    | Hs.216655NM_012347 | ENSG00000FBX09     | FBX9 NY-F       | F-box prcprotein-coding  |                         |
| chr6-7348 | 7.418306 | 0.046756 | 0.84522  | 0.055318 | 0.955885 | 0.981636 | chr6  | 73485819 | 73491006  | +    | 0                  | NA             | intron (AluJr SIN  | 26675                   | NM_001123 | 25821    | Hs.347614NM_012125 | ENSG00000MTO1      | CGI-02 C        | mitochoncprotein-coding  |                         |
| chr6-752  | 7.418306 | 0.046756 | 0.84522  | 0.055318 | 0.955885 | 0.981636 | chr6  | 75262280 | 75266291  | +    | 0                  | NA             | intron (Nintron (N | 13987                   | NM_001865 | 1347     | Hs.70312           | NM_001865          | ENSG00000COX7A2 | COX7AL C                 | cytochronprotein-coding |
| chr6-147  | 7.418306 | 0.046756 | 0.84522  | 0.055318 | 0.955885 | 0.981636 | chr6  | 1.47E+08 | 1.47E+08  | +    | 0                  | NA             | intron (Nintron (N | 111318                  | NR_034115 | 729178   | Hs.557608NR_034115 | STXBP5-AS-         | STXBP5          | AS-5 antncRNA            |                         |
| chr6-1505 | 7.418306 | 0.046756 | 0.84522  | 0.055318 | 0.955885 | 0.981636 | chr6  | 1.51E+08 | 1.51E+08  | +    | 0                  | NA             | intron (Nintron (N | 39405                   | NM_001350 | 25902    | Hs.591342NM_015440 | ENSG00000MTHFD1L   | FTHFSDC1        | methylene protein-coding |                         |
| chr7-989  | 7.418306 | 0.046756 | 0.84522  | 0.055318 | 0.955885 | 0.981636 | chr7  | 98936515 | 98942266  | +    | 0                  | NA             | intron (Nintron (N | 57693                   | NR_132754 | 1.07E+08 | NR_132754          | SCARNA28           | ZLI             | small Ca ncRNA           |                         |
| chr8-8167 | 7.418306 | 0.046756 | 0.84522  | 0.055318 | 0.955885 | 0.981636 | chr8  | 81678343 | 81678900  | +    | 0                  | NA             | intron (AluSq2 SI  | 7704                    | NM_005536 | 3612     | Hs.656694NM_005536 | ENSG00000LMPA1     | IMP IMPA        | inositol protein-coding  |                         |
| chr9-363  | 7.418306 | 0.046756 | 0.84522  | 0.055318 | 0.955885 | 0.981636 | chr9  | 36338961 | 36341604  | +    | 0                  | NA             | intron (Nintron (N | 59987                   | NM_194325 | 152006   | Hs.333505NM_022781 | ENSG00000CRNF38    | -               | ring fingprotein-coding  |                         |
| chr9-920  | 7.418306 | 0.046756 | 0.84522  | 0.055318 | 0.955885 | 0.981636 | chr9  | 92033211 | 92034553  | +    | 0                  | NA             | intron (Nintron (N | 81531                   | NM_006415 | 10558    | Hs.90458           | NM_006415          | ENSG00000SPTLC1 | HSAN1 HS                 | serine pprotein-coding  |
| chr9-111  | 7.418306 | 0.046756 | 0.84522  | 0.055318 | 0.955885 | 0.981636 | chr9  | 1.11E+08 | 1.11E+08  | +    | 0                  | NA             | intron (Nintron (N | 54591                   | NM_205855 | 26248    | Hs.381312NM_205855 | ENSG00000OR2K2     | HSHTPCRHC       | olfactoryprotein-coding  |                         |
| chr9-120  | 7.418306 | 0.046756 | 0.84522  | 0.055318 | 0.955885 | 0.981636 | chr9  | 20930    | NM_005047 | 5711 | Hs.193725NM_005047 | ENSG00000PSMD5 | S5B                | proteasonprotein-coding |           |          |                    |                    |                 |                          |                         |
| chr9-124  | 7.418306 | 0.046756 | 0.84522  | 0.055318 | 0.955885 | 0.981636 | chr9  | 1.25E+08 | 1.25E+08  | +    | 0                  | NA             | intron (Nintron (N | 12106                   | NM_002077 | 2800     | Hs.59504           | NM_002077          | ENSG00000GOLGA1 | golgin-97                | golgin Alprotein-coding |
| chrX-457  | 7.418306 | 0.046756 | 0.84522  | 0.055318 | 0.955885 | 0.981636 | chrX  | 45756702 | 45758220  | +    | 0                  | NA             | Intergen LIME1 LIN | 10337                   | NR_029636 | 407007   | NR_029636          | ENSG00000MIR222    | MIRN222         | microRNA ncRNA           |                         |
| chr17-305 | 8.10365  | -0.04563 | 0.825451 | -0.05528 | 0.955914 | 0.981636 | chr17 | 30500682 | 30502044  | +    | 0                  | NA             | intron (NLIMC2 LIN | 23955                   | NM_001007 | 9527     | Hs.462688NM_004871 | ENSG00000GOSR1     | GOLIM2 G        | golgi SN/ protein-coding |                         |
| chr18-955 | 8.10365  | -0.04563 | 0.825451 | -0.05528 | 0.955914 | 0.981636 | chr18 | 9593532  | 9594078   | +    | 0                  | NA             | exon (NM exon (NM  | 20754                   | NR_052003 | 9989     | Hs.743233NM_005134 | ENSG00000PPP4R1    | MEG1 PP4        | (protein tprotein-coding |                         |
| chr12-928 | 9.8545   |          |          |          |          |          |       |          |           |      |                    |                |                    |                         |           |          |                    |                    |                 |                          |                         |



|           |          |          |          |          |          |          |       |          |          |   |      |                      |                   |                            |                     |                     |                            |                |
|-----------|----------|----------|----------|----------|----------|----------|-------|----------|----------|---|------|----------------------|-------------------|----------------------------|---------------------|---------------------|----------------------------|----------------|
| chr3-143c | 8.639528 | -0.04319 | 0.791366 | -0.05457 | 0.956478 | 0.981636 | chr3  | 1.43E+08 | 1.43E+08 | + | 0 NA | intron (Nintron (N   | 21572 NM_00132C   | 23350 Hs. 596572NM_00108C  | ENSG000002SURP      | SR140 fSUA2 snRNP   | protein-coding             |                |
| chr7-538c | 8.639528 | -0.04319 | 0.791366 | -0.05457 | 0.956478 | 0.981636 | chr7  | 5386489  | 5389698  | + | 0 NA | exon (NM_exon (NM    | 35453 NM_00108C   | 84629 Hs. 520638NM_00101C  | ENSG000002NR18      | CAGL79 TN trinuclec | protein-coding             |                |
| chr7-988c | 8.639528 | -0.04319 | 0.791366 | -0.05457 | 0.956478 | 0.981636 | chr7  | 98896089 | 98899086 | + | 0 NA | intron (Nintron (N   | 15890 NR_132754   | 1.07E+08                   | NR_132754           | SCARNA28            | ZL1                        | small Ca_ncrNA |
| chr8-131c | 8.639528 | -0.04319 | 0.791366 | -0.05457 | 0.956478 | 0.981636 | chr8  | 13130651 | 13132071 | + | 0 NA | intron (Nintron (N   | 1928 NM_006094    | 10395 Hs. 134299NM_006094  | ENSG000002DL1C      | ARHGAP7 F DL1C      | Rho protein-coding         |                |
| chr1-258c | 7.65791  | -0.04549 | 0.834025 | -0.05455 | 0.956501 | 0.981636 | chr1  | 25899968 | 25901824 | + | 0 NA | 3' UTR (N3' UTR (N   | 5257 NM_203401    | 3925 Hs. 209983NM_005563   | ENSG000002STM1      | Clorf215 stathmin   | protein-coding             |                |
| chr1-1137 | 7.65791  | -0.04549 | 0.834025 | -0.05455 | 0.956501 | 0.981636 | chr1  | 1.14E+08 | 1.14E+08 | + | 0 NA | intron (N LIM1 LINE  | 38982 NM_006608   | 10745 Hs. 655824NM_006608  | ENSG000002PHTF1     | PHTF                | putative protein-coding    |                |
| chr1-1801 | 7.65791  | -0.04549 | 0.834025 | -0.05455 | 0.956501 | 0.981636 | chr1  | 1.8E+08  | 1.8E+08  | + | 0 NA | intron (N Alu Jr SIN | 7727 NM_00282E    | 5768 Hs. 719177NM_00282E   | ENSG000002QX01      | Q6 QSCN6            | quiescin protein-coding    |                |
| chr10-305 | 7.65791  | -0.04549 | 0.834025 | -0.05455 | 0.956501 | 0.981636 | chr10 | 30339086 | 30340960 | + | 0 NA | intron (Nintron (N   | 9315 NM_018105    | 55149 Hs. 173949NM_018105  | ENSG000002MTAP      | PAPD1 SP miTohcn    | protein-coding             |                |
| chr10-431 | 7.65791  | -0.04549 | 0.834025 | -0.05455 | 0.956501 | 0.981636 | chr10 | 43182024 | 43185525 | + | 0 NA | non-codirnon-codir   | 28877 NM_00131E   | 55454 Hs. 657569NM_01859C  | ENSG000002CSGALNAC1 | CHGN2 ChC           | chondroitin protein-coding |                |
| chr10-105 | 7.65791  | -0.04549 | 0.834025 | -0.05455 | 0.956501 | 0.981636 | chr10 | 1.03E+08 | 1.03E+08 | + | 0 NA | intron (N THE1B-int  | 19224 NM_001351   | 22978 Hs. 97439 NM_01222E  | ENSG000002NT5C2     | GMP NT5B 5'         | nuclec protein-coding      |                |
| chr11-115 | 7.65791  | -0.04549 | 0.834025 | -0.05455 | 0.956501 | 0.981636 | chr11 | 11934119 | 11935017 | + | 0 NA | intron (N L2a LINE   | 74071 NM_00101E   | 27122 Hs. 92475NM_01325E   | ENSG000002DKK3      | REIC RT5B           | dickopf protein-coding     |                |
| chr11-777 | 7.65791  | -0.04549 | 0.834025 | -0.05455 | 0.956501 | 0.981636 | chr11 | 77724883 | 77725437 | + | 0 NA | intron (N LIMB3 LIN  | -87354 NM_001311  | 1207 Hs. 430733NM_00129E   | ENSG000002CLNS1A    | CLCI CLNS           | chloride protein-coding    |                |
| chr12-51C | 7.65791  | -0.04549 | 0.834025 | -0.05455 | 0.956501 | 0.981636 | chr12 | 51069995 | 51074181 | + | 0 NA | intron (Nintron (N   | 11526 NR_04507E   | 81566 Hs. 524422NM_03080E  | ENSG000002CSRNP2    | C12orf2 Cysteine    | protein-coding             |                |
| chr13-45E | 7.65791  | -0.04549 | 0.834025 | -0.05455 | 0.956501 | 0.981636 | chr13 | 45518997 | 45521020 | + | 0 NA | intron (N MERGB DNA  | 54684 NR_031431   | 83548 Hs. 507945NM_031431  | ENSG000002COG3      | SEC3A               | component protein-coding   |                |
| chr14-31C | 7.65791  | -0.04549 | 0.834025 | -0.05455 | 0.956501 | 0.981636 | chr14 | 31021632 | 31022996 | + | 0 NA | intron (N AluY SINE  | -2792 NM_001254   | 11154 Hs. 293411NM_007077  | ENSG000002AP4S1     | AP47B CL adaptor    | protein-coding             |                |
| chr14-501 | 7.65791  | -0.04549 | 0.834025 | -0.05455 | 0.956501 | 0.981636 | chr14 | 50131991 | 50133629 | + | 0 NA | intron (N HSMAR2 DN  | -16238 NR_04973E  | 79609 Hs. 558541NM_02455E  | ENSG000002VCPKMT    | C14orf138 valosin   | protein-coding             |                |
| chr14-55E | 7.65791  | -0.04549 | 0.834025 | -0.05455 | 0.956501 | 0.981636 | chr14 | 55629695 | 55630474 | + | 0 NA | exon (NM_exon (NM    | 49877 NM_00107E   | 3895 Hs. 509414NM_00498E   | ENSG000002CKTN1     | CG1 KNT kinectin    | protein-coding             |                |
| chr15-494 | 7.65791  | -0.04549 | 0.834025 | -0.05455 | 0.956501 | 0.981636 | chr15 | 49442638 | 49444591 | + | 0 NA | intron (N MER63C DN  | 20372 NM_00200E   | 2252 Hs. 567268NM_00200E   | ENSG000002PGF7      | HBGF-7 KC           | fibroblas protein-coding   |                |
| chr15-717 | 7.65791  | -0.04549 | 0.834025 | -0.05455 | 0.956501 | 0.981636 | chr15 | 71764702 | 71765732 | + | 0 NA | intron (Nintron (N   | -45337 NM_01634E  | 10002 Hs. 187354NM_01424E  | ENSG000002NR2E3     | ESCS PNR nuclear    | protein-coding             |                |
| chr15-84E | 7.65791  | -0.04549 | 0.834025 | -0.05455 | 0.956501 | 0.981636 | chr15 | 84639099 | 84642378 | + | 0 NA | TTS (NR_TTS (NR_1    | 9278 NR_00485E    | 54581 Hs. 658114NM_022050  | SCAND2P             | SCAND2              | SCAN dom_e pseudo          |                |
| chr16-35E | 7.65791  | -0.04549 | 0.834025 | -0.05455 | 0.956501 | 0.981636 | chr16 | 3523317  | 3523863  | + | 0 NA | intron (N MER45A DN  | 4208695 NM_02479E | 23059 Hs. 155999NM_015041  | ENSG000002CLUAP1    | CFAP22 P clusterin  | protein-coding             |                |
| chr16-44E | 7.65791  | -0.04549 | 0.834025 | -0.05455 | 0.956501 | 0.981636 | chr16 | 4455936  | 4457405  | + | 0 NA | 3' UTR (N3' UTR (N   | 17955 NM_001351   | 57407 Hs. 288966NM_020677  | ENSG000002NMRAL1    | HSCARG S NmA        | like protein-coding        |                |
| chr16-317 | 7.65791  | -0.04549 | 0.834025 | -0.05455 | 0.956501 | 0.981636 | chr16 | 31731386 | 31731901 | + | 0 NA | intron (N LIMA9 LIN  | 18459 NM_00113E   | 124411 Hs. 528822NM_001004 | ENSG000002ZNF720    | -                   | zinc fing protein-coding   |                |
| chr17-42C | 7.65791  | -0.04549 | 0.834025 | -0.05455 | 0.956501 | 0.981636 | chr17 | 4208695  | 4209907  | + | 0 NA | intron (Nintron (N   | 54546 NM_001257   | 51479 Hs. 696087NM_01637E  | ENSG000002ANKFY1    | ANKHZN BT ankyrin   | protein-coding             |                |
| chr17-31E | 7.65791  | -0.04549 | 0.834025 | -0.05455 | 0.956501 | 0.981636 | chr17 | 31358379 | 31359242 | + | 0 NA | intron (Nintron (N   | -32865 NM_03293E  | 84440 Hs. 406788NM_03293E  | ENSG000002RAB11FIP4 | FIP4-Rab1RAB11      | fan protein-coding         |                |
| chr17-31E | 7.65791  | -0.04549 | 0.834025 | -0.05455 | 0.956501 | 0.981636 | chr17 | 31360478 | 31362533 | + | 0 NA | intron (Nintron (N   | -30170 NM_03293E  | 84440 Hs. 406788NM_03293E  | ENSG000002RAB11FIP4 | FIP4-Rab1RAB11      | fan protein-coding         |                |
| chr17-35E | 7.65791  | -0.04549 | 0.834025 | -0.05455 | 0.956501 | 0.981636 | chr17 | 35622504 | 35625650 | + | 0 NA | intron (N (ATGTCAT)  | 36755 NM_00103C   | 163 Hs. 514815NM_00128E    | ENSG000002AP2B1     | ADTB2 AP1           | adaptor protein-coding     |                |
| chr17-394 | 7.65791  | -0.04549 | 0.834025 | -0.05455 | 0.956501 | 0.981636 | chr17 | 39428199 | 39428645 | + | 0 NA | intron (N AluSc8 SI  | 22841 NM_004774   | 5469 Hs. 643754NM_004774   | ENSG000002MED1      | CRSP1 CRS           | mediator protein-coding    |                |
| chr18-41E | 7.65791  | -0.04549 | 0.834025 | -0.05455 | 0.956501 | 0.981636 | chr18 | 41957691 | 41959734 | + | 0 NA | intron (N (TA)n Sin  | 3478 NM_00264E    | 5289 Hs. 464971NM_00264E   | ENSG000002PIK3C3    | VPS34 Vps           | phosphatid protein-coding  |                |
| chr19-15E | 7.65791  | -0.04549 | 0.834025 | -0.05455 | 0.956501 | 0.981636 | chr19 | 15355900 | 15359486 | + | 0 NA | intron (Nintron (N   | 22094 NM_00585E   | 10270 Hs. 594499NM_00585E  | ENSG000002AKAP8     | AKAP                | 95 A-kinase                | protein-coding |
| chr19-471 | 7.65791  | -0.04549 | 0.834025 | -0.05455 | 0.956501 | 0.981636 | chr19 | 47154800 | 47156467 | + | 0 NA | intron (N AluSq2 SI  | 24798 NM_00114E   | 10055 Hs. 515500NM_00550C  | ENSG000002SAE1      | AOS1 HSPC           | SUMO1 act protein-coding   |                |
| chr2-107E | 7.65791  | -0.04549 | 0.834025 | -0.05455 | 0.956501 | 0.981636 | chr2  | 10796224 | 10798677 | + | 0 NA | intron (Nintron (N   | 15335 NM_00574E   | 10130 Hs. 212102NM_00574E  | ENSG000002PDIA6     | ERP5 P5 I           | protein-coding             |                |
| chr2-8614 | 7.65791  | -0.04549 | 0.834025 | -0.05455 | 0.956501 | 0.981636 | chr2  | 86142635 | 86151384 | + | 0 NA | intron (N AluS6 SI   | 10998 NR_00437E   | 69225 Hs. 723087NR_00437E  | ENSG000002SNORD94   | U94                 | small nucsnRNA             |                |
| chr2-1134 | 7.65791  | -0.04549 | 0.834025 | -0.05455 | 0.956501 | 0.981636 | chr2  | 1.13E+08 | 1.13E+08 | + | 0 NA | intron (Nintron (N   | 25696 NM_00133C   | 150472 Hs. 531333NM_17200E | ENSG000002CBWD2     | -                   | COBW dom_e protein-coding  |                |
| chr20-34E | 7.65791  | -0.04549 | 0.834025 | -0.05455 | 0.956501 | 0.981636 | chr20 | 34392956 | 34395045 | + | 0 NA | intron (N AluS6 SI   | 30727 NM_001324   | 83737 Hs. 632272NM_03148E  | ENSG000002ITCH      | ADMPF ATF           | itchy E3 protein-coding    |                |
| chr20-34E | 7.65791  | -0.04549 | 0.834025 | -0.05455 | 0.956501 | 0.981636 | chr20 | 34504072 | 34508638 | + | 0 NA | intron (N LIMB3 LIN  | -10029 NM_00131E  | 83658 Hs. 59392CNM_01418E  | ENSG000002DYNLRB1   | B1TH BLP dynein     | 1 protein-coding           |                |
| chr20-44E | 7.65791  | -0.04549 | 0.834025 | -0.05455 | 0.956501 | 0.981636 | chr20 | 44972475 | 44976020 | + | 0 NA | non-codirnon-codir   | 7735 NR_147974    | 6789 Hs. 472838NM_00628E   | ENSG000002CTK4      | KRS2 MST1           | serine/tl protein-coding   |                |
| chr20-49C | 7.65791  | -0.04549 | 0.834025 | -0.05455 | 0.956501 | 0.981636 | chr20 | 49074352 | 49077679 | + | 0 NA | intron (N AluSx SIN  | 29703 NM_00131E   | 1434 Hs. 90073 NM_00131E   | ENSG000002CSE1L     | CAS CSE1 chromoson  | protein-coding             |                |
| chr21-25E | 7.65791  | -0.04549 | 0.834025 | -0.05455 | 0.956501 | 0.981636 | chr21 | 25982295 | 25982637 | + | 0 NA | exon (NM_exon (NM    | 157924 NM_00113E  | 351 Hs. 43498CNM_000484    | ENSG000002APP       | AAA ABET amyloid    | l protein-coding           |                |
| chr22-451 | 7.65791  | -0.04549 | 0.834025 | -0.05455 | 0.956501 | 0.981636 | chr22 | 45173947 | 45174574 | + | 0 NA | intron (N AluJb SIN  | 9589 NM_15364E    | 10762 Hs. 475103NM_00717E  | ENSG000002CNP50     | NPAP60 NF           | nucleopor protein-coding   |                |
| chr3-112E | 7.65791  | -0.04549 | 0.834025 | -0.05455 | 0.956501 | 0.981636 | chr3  | 1.13E+08 | 1.13E+08 | + | 0 NA | intron (Nintron (N   | 9732 NM_01417E    | 29083 Hs. 127496NM_01417E  | ENSG000002GTPBP8    | HSPC135             | GTP bind protein-coding    |                |
| chr3-1227 | 7.65791  | -0.04549 | 0.834025 | -0.05455 | 0.956501 | 0.981636 | chr3  | 1.23E+08 | 1.23E+08 | + | 0 NA | intron (Nintron (N   | 38941 NM_017554   | 54625 Hs. 518202NM_017554  | ENSG000002PARP14    | ARTD8 BAL           | poly (ADP- protein-coding  |                |
| chr4-676E | 7.65791  | -0.04549 | 0.834025 | -0.05455 | 0.956501 | 0.981636 | chr4  | 67691476 | 67693044 | + | 0 NA | intron (N Tiger2 I   | 8895 NM_018227    | 55236 Hs. 212774NM_018227  | ENSG000002CUBA6     | E1-L2 MOF           | ubiquitin protein-coding   |                |
| chr4-139E | 7.65791  | -0.04549 | 0.834025 | -0.05455 | 0.956501 | 0.981636 | chr4  | 1.4E+08  | 1.4E+08  | + | 0 NA | intron (Nintron (N   | 10550 NM_00130E   | 80854 Hs. 480792NM_03064E  | ENSG000002SETD7     | KMT7 SET7           | SET domai protein-coding   |                |
| chr5-1284 | 7.65791  | -0.04549 | 0.834025 | -0.05455 | 0.956501 | 0.981636 | chr5  | 1.28E+08 | 1.28E+08 | + | 0 NA | intron (N L2b LINE   | 113846 NM_00119E  | 2201 Hs. 519294NM_00119E   | ENSG000002FBN2      | CCA DA9 E           | fibrillin protein-coding   |                |
| chr5-134E | 7.65791  | -0.04549 | 0.834025 | -0.05455 | 0.956501 | 0.981636 | chr5  | 1.35E+08 | 1.35E+08 | + | 0 NA | intron (Nintron (N   | 25648 NM_00103E   | 51128 Hs. 432984NM_01610E  | ENSG000002SAR1B     | ANDD CMR1           | secretorin protein-coding  |                |
| chr5-179E | 7.65791  | -0.04549 | 0.834025 | -0.05455 | 0.956501 | 0.981636 | chr5  | 1.8E+08  | 1.8E+08  | + | 0 NA | intron (N Tiger17e   | 3845 NM_19886E    | 23061 Hs. 155822NM_01504E  | ENSG000002TBC1D9B   | GRAMD9B             | TBC1 dom_e protein-coding  |                |
| chr6-834E | 7.65791  | -0.04549 | 0.834025 | -0.05455 | 0.956501 | 0.981636 | chr6  | 83423535 | 83425628 | + | 0 NA | intron (N MER99 DNA  | 6470 NM_00239E    | 4199 Hs. 21160 NM_00239E   | ENSG000002CME1      | HUMDME H            | malic enz protein-coding   |                |
| chr8-428E | 7.65791  | -0.04549 | 0.834025 | -0.05455 | 0.956501 | 0.981636 | chr8  | 42860588 | 42861691 | + | 0 NA | intron (Nintron (N   | -17808 NR_19900E  | 55145 Hs. 7432 NM_01810E   | ENSG000002THAP1     | HYD2                | THAP dom_e protein-coding  |                |
| chr9-332E | 7.65791  | -0.04549 | 0.834025 | -0.05455 | 0.956501 | 0.981636 | chr9  | 33293807 | 33300920 | + | 0 NA | intron (Nintron (N   | 6847 NM_147134    | 4799 Hs. 413074NM_002504   | ENSG000002NFX1      | NFX2 TEG-           | nuclear t protein-coding   |                |
| chr9-361E | 7.65791  | -0.04549 | 0.834025 | -0.05455 | 0.956501 | 0.981636 | chr9  | 36197490 | 36198665 | + | 0 NA | intron (N AluSx SIN  | 7156 NM_001184    | 1211 Hs. 522114NM_00183E   | ENSG000002CLTA      | LCA                 | clathrin protein-coding    |                |
| chr9-965C | 7.65791  | -0.04549 | 0.834025 | -0.05455 | 0.956501 | 0.981636 | chr9  | 96508196 | 96509341 | + | 0 NA | intron (Nintron (N   | 58063 NM_001351   | 8555 Hs. 40582 NM_003671   | ENSG000002CDC14B    | CDC14B3 C           | cell divi protein-coding   |                |
| chr9-128E | 7.65791  | -0.04549 | 0.834025 | -0.05455 | 0.956501 | 0.981636 |       |          |          |   |      |                      |                   |                            |                     |                     |                            |                |



|                                                                 |       |          |           |   |      |                    |                   |                             |                      |                    |                           |                |
|-----------------------------------------------------------------|-------|----------|-----------|---|------|--------------------|-------------------|-----------------------------|----------------------|--------------------|---------------------------|----------------|
| chr12-108.8.904371.0.042191.0.778981.0.054162.0.956806.0.981636 | chr12 | 1.09E+08 | 1.09E+08  | + | 0 NA | intron (Nintron (N | 20392 NM_001161   | 54434 Hs. 199762NM_018984   | ENSG00000SSSH1       | SSH1L              | slingshotprotein-coding   |                |
| chr12-111.8.904371.0.042191.0.778981.0.054162.0.956806.0.981636 | chr12 | 1.11E+08 | 1.11E+08  | + | 0 NA | intron (Nintron (N | 20630 NM_001291   | 10019 Hs. 506784NM_005477   | ENSG00000SH2B3       | IDDM20 LN          | SH2B2 adaprotein-coding   |                |
| chr15-23C.8.904371.0.042191.0.778981.0.054162.0.956806.0.981636 | chr15 | 23029382 | 23032478  | + | 0 NA | exon (NM_exon (NM  | 8639 NM_001354    | 114791 Hs. 533899NM_052902  | ENSG00000TUBGCP5     | GCP5               | tubulin gprotein-coding   |                |
| chr16-678.8.904371.0.042191.0.778981.0.054162.0.956806.0.981636 | chr16 | 67942136 | 67964038  | + | 0 NA | intron (NAluSx SIN | -8517 NM_000222   | 3931 Hs. 387233NM_000222    | ENSG00000LCAT        | -                  | lecithin-protein-coding   |                |
| chr17-821.8.904371.0.042191.0.778981.0.054162.0.956806.0.981636 | chr17 | 821812   | 8257410   | + | 0 NA | intron (Nintron (N | 40335 NM_001205   | 64359 Hs. 527989NM_022463   | ENSG00000NXN         | NRX TRG-4          | nucleorecprotein-coding   |                |
| chr17-671.8.904371.0.042191.0.778981.0.054162.0.956806.0.981636 | chr17 | 67128084 | 67128688  | + | 0 NA | intron (Nintron (N | 83832 NM_000727   | 786 Hs. 147989NM_000727     | ENSG00000CACNG1      | CACNLG             | calcium vprotein-coding   |                |
| chr19-124.8.904371.0.042191.0.778981.0.054162.0.956806.0.981636 | chr19 | 1233370  | 12359115  | + | 0 NA | exon (NM_exon (NM  | 3363 NM_152765    | 250557 Hs. 346577NM_152765  | ENSG00000CBARP       | BARP C19c          | CACN subprotein-coding    |                |
| chr19-144.8.904371.0.042191.0.778981.0.054162.0.956806.0.981636 | chr19 | 14407025 | 14411239  | + | 0 NA | TTS (NM_TTS (NM_C  | 10209 NM_005804   | 10212 Hs. 311606NM_005804   | ENSG00000DDX39A      | BAT1 BAT1DEXd      | box protein-coding        |                |
| chr19-413.8.904371.0.042191.0.778981.0.054162.0.956806.0.981636 | chr19 | 41340823 | 41341657  | + | 0 NA | intron (NAluSc8 SI | 12682 NM_00066C   | 7040 Hs. 645227NM_00066C    | ENSG00000TGFB1       | CED DPD1           | transformprotein-coding   |                |
| chr19-588.8.904371.0.042191.0.778981.0.054162.0.956806.0.981636 | chr19 | 58392858 | 58394915  | + | 0 NA | TTS (NR_ITTS (NR_I | 522 NR_162103     | 1.13E+08                    | NR_162103            | MIR10394           | -                         | microRNA ncRNA |
| chr2-2061.8.904371.0.042191.0.778981.0.054162.0.956806.0.981636 | chr2  | 2.06E+08 | 2.06E+08  | + | 0 NA | 3' UTR (N3' UTR (N | -4688 NR_033248   | 1E+08                       | Hs. 356055NR_033248  | GCSHP3             | -                         | glycine cpsudo |
| chr20-594.8.904371.0.042191.0.778981.0.054162.0.956806.0.981636 | chr20 | 5942416  | 5944567   | + | 0 NA | intron (Nintron (N | 7042 NM_01593C    | 51605 Hs. 128791NM_01593C   | ENSG00000TRMT6       | CGI-09 GC          | tRNA met protein-coding   |                |
| chr20-94C.8.904371.0.042191.0.778981.0.054162.0.956806.0.981636 | chr20 | 9401366  | 9404311   | + | 0 NA | intron (NL2b LINE  | 95038 NM_000933   | 5332 Hs. 472101NM_000933    | ENSG00000PLCBA       | ARCN2D PI          | phospholiprotein-coding   |                |
| chr20-478.8.904371.0.042191.0.778981.0.054162.0.956806.0.981636 | chr20 | 47248021 | 47249046  | + | 0 NA | intron (Nintron (N | -69969 NR_024594  | 1E+08                       | Hs. 662547NR_024594  | ENSG00000LOC100131 | -                         | shactncRNA     |
| chr22-31C.8.904371.0.042191.0.778981.0.054162.0.956806.0.981636 | chr22 | 31090260 | 31100836  | + | 0 NA | exon (NM_exon (NM  | 10552 NM_001207   | 6525 Hs. 149099NM_006933    | ENSG00000SMTN        | -                  | smootheliprotein-coding   |                |
| chr3-1001.8.904371.0.042191.0.778981.0.054162.0.956806.0.981636 | chr3  | 10019047 | 10022717  | + | 0 NA | intron (NLIMB4 LIN | 5254 NR_002788    | 152302 Hs. 635072NR_002788  | ENSG00000CIDCEP1     | CICE CIDB          | cell deatpseudo           |                |
| chr3-256C.8.904371.0.042191.0.778981.0.054162.0.956806.0.981636 | chr3  | 25622939 | 25625295  | + | 0 NA | intron (Nintron (N | 40254 NM_00106E   | 7155 Hs. 475733NM_00106E    | ENSG00000TOP2B       | TOP1IB tcDNA       | topoiprotein-coding       |                |
| chr3-382C.8.904371.0.042191.0.778981.0.054162.0.956806.0.981636 | chr3  | 38250348 | 38253831  | + | 0 NA | intron (Nintron (N | -13723 NM_00425E  | 9390 Hs. 225941NM_00425E    | ENSG00000SLC22A13    | OAT10 OC           | solute ce protein-coding  |                |
| chr5-126C.8.904371.0.042191.0.778981.0.054162.0.956806.0.981636 | chr5  | 1.27E+08 | 1.27E+08  | + | 0 NA | intron (NU6 snRNA  | 41828 NM_001201   | 501 Hs. 483233NM_00118E     | ENSG00000ALDH7A1     | ATQ1 EPD           | aldehyde protein-coding   |                |
| chr6-331F.8.904371.0.042191.0.778981.0.054162.0.956806.0.981636 | chr6  | 33194791 | 33197390  | + | 0 NA | intron (Nintron (N | -3622 NM_08068C   | 1302 Hs. 390171NM_08067E    | ENSG00000COL11A2     | DFNA13 DF          | collagen protein-coding   |                |
| chr8-1184.8.904371.0.042191.0.778981.0.054162.0.956806.0.981636 | chr8  | 11842647 | 11847177  | + | 0 NA | 3' UTR (N3' UTR (N | 23175 NM_001190E  | 1508 Hs. 520899NM_001190E   | ENSG00000CTSB        | APPS CPSE          | cathepsir protein-coding  |                |
| chr8-3884.8.904371.0.042191.0.778981.0.054162.0.956806.0.981636 | chr8  | 38840318 | 38844941  | + | 0 NA | intron (Nintron (N | 37679 NM_001352   | 6867 Hs. 27924E NM_00628E   | ENSG00000TACC1       | Gas5               | transformprotein-coding   |                |
| chr9-863C.8.904371.0.042191.0.778981.0.054162.0.956806.0.981636 | chr9  | 86300437 | 86304681  | + | 0 NA | intron (NAluSx SIN | -20021 NM_03094C  | 81689 Hs. 449291NM_03094C   | ENSG00000ISCA1       | HBLD2 ISA          | iron-sulfprotein-coding   |                |
| chr9-1243.8.904371.0.042191.0.778981.0.054162.0.956806.0.981636 | chr9  | 1.24E+08 | 1.24E+08  | + | 0 NA | intron (Nintron (N | 22937 NM_00116E   | 10783 Hs. 197071NM_014397   | ENSG00000NEK6        | SID6-15 E          | NIMA rel protein-coding   |                |
| chr10-702.8.904371.0.043377.0.803633.0.053976.0.956954.0.981636 | chr10 | 70212051 | 70213609  | + | 0 NA | intron (Nintron (N | 20599 NM_02112E   | 5464 Hs. 437403NM_02112E    | ENSG00000PPA1        | HEL-S-66           | gpyrophosp protein-coding |                |
| chr11-35C.8.904371.0.043377.0.803633.0.053976.0.956954.0.981636 | chr11 | 35513648 | 35513869  | + | 0 NA | intron (NMER5B DNA | 11858 NM_001001   | 25891 Hs. 55044 NM_01543C   | ENSG00000PAMR1       | DKFZP586F          | peptidase protein-coding  |                |
| chr11-111.8.904371.0.043377.0.803633.0.053976.0.956954.0.981636 | chr11 | 1.13E+08 | 1.13E+08  | + | 0 NA | intron (Nintron (N | -24497 NM_00127E  | 8451 Hs. 339733NM_00358E    | ENSG00000CULA4       | -                  | cullin 4 protein-coding   |                |
| chr15-29F.8.904371.0.043377.0.803633.0.053976.0.956954.0.981636 | chr15 | 29699526 | 29701784  | + | 0 NA | 3' UTR (N3' UTR (N | 25720 NR_135221   | 1E+08                       | Hs. 525722NR_135221  | ENSG00000LOC10013C | -                         | uncharactncRNA |
| chr15-74F.8.904371.0.043377.0.803633.0.053976.0.956954.0.981636 | chr15 | 74921942 | 74923328  | + | 0 NA | intron (NAluJo SIN | 15438 NM_00425E   | 9377 Hs. 40190E NM_00425E   | ENSG00000COX5A       | COX COX- $\gamma$  | cytochdroprotein-coding   |                |
| chr2-232E.8.904371.0.043377.0.803633.0.053976.0.956954.0.981636 | chr2  | 2.33E+08 | 2.33E+08  | + | 0 NA | non-codirnon-codir | -10464 NM_00134E  | 389084 Hs. 65750E NM_20689E | ENSG00000SNORC       | ASCL830 C          | secondarprotein-coding    |                |
| chr22-41F.8.904371.0.043377.0.803633.0.053976.0.956954.0.981636 | chr22 | 41646347 | 41647927  | + | 0 NA | intron (NAluJo SIN | 25842 NM_00128E   | 2547 Hs. 29249E NM_00146E   | ENSG00000XRC6        | CTC75 CTC          | X-ray re protein-coding   |                |
| chr21-46E.11.38962.0.038241.0.710184.0.053846.0.957058.0.981636 | chr21 | 46534619 | 46535033  | + | 0 NA | intron (Nintron (N | 70256 NM_00627E   | 6285 Hs. 422181NM_00627E    | ENSG00000S100B       | NEF S100 S100      | cal protein-coding        |                |
| chr10-792.9.383393.0.040907.0.76005.0.053822.0.957077.0.981636  | chr10 | 79215359 | 79219181F | + | 0 NA | intron (NAluY SINE | -130199 NM_00572E | 10105 Hs. 38107E NM_00572E  | ENSG00000PP1F        | CYP3 CyP-          | peptidyl protein-coding   |                |
| chr12-297.9.383393.0.040907.0.76005.0.053822.0.957077.0.981636  | chr12 | 29761753 | 29762007  | + | 0 NA | intron (Nintron (N | 22062 NM_001367   | 83857 Hs. 401954NM_03192C   | ENSG00000TMTC1       | ARG99 OLF          | transmet protein-coding   |                |
| chr16-214.9.383393.0.040907.0.76005.0.053822.0.957077.0.981636  | chr16 | 21861891 | 21863276  | + | 0 NA | IntergeniAluJo SIN | 4152 NR_02445E    | 1E+08                       | Hs. 648433NR_02445E  | LOC10019C          | -                         | uncharactncRNA |
| chr2-8504.9.383393.0.040907.0.76005.0.053822.0.957077.0.981636  | chr2  | 85044152 | 85047885  | + | 0 NA | intron (Nintron (N | 21329 NR_14645E   | 1.01E+08                    | Hs. 43439E NR_14645E | ENSG00000LINC01964 | -                         | long intencRNA |
| chr3-4334.9.383393.0.040907.0.76005.0.053822.0.957077.0.981636  | chr3  | 43347471 | 43349218  | + | 0 NA | exon (NM_exon (NM  | 3618 NR_046757    | 1.01E+08                    | Hs. 600984NR_046757  | SNRK-AS1           | -                         | SNRK antncRNA  |
| chr6-530C.9.383393.0.040907.0.76005.0.053822.0.957077.0.981636  | chr6  | 53091932 | 53099856  | + | 0 NA | intron (Nintron (N | 24471 NM_012347   | 26268 Hs. 21665E NM_012347  | ENSG00000FBX09       | FBX9 NY-F          | F-box prcprotein-coding   |                |
| chr7-7542.9.383393.0.040907.0.76005.0.053822.0.957077.0.981636  | chr7  | 75420487 | 75426233  | + | 0 NA | intron (Nintron (N | 13038 NR_10401E   | 155400 Hs. 436034NM_01033E  | ENSG00000NSUN5P1     | NSUN5B W           | ENSUN5 ps pseudo          |                |
| chr9-109C.9.383393.0.040907.0.76005.0.053822.0.957077.0.981636  | chr9  | 1.09E+08 | 1.09E+08  | + | 0 NA | intron (NAluSx SIN | -3348 NR_02950E   | 407036                      | NR_02950E            | ENSG00000MIR32     | MIRN32 hs                 | microRNA ncRNA |
| chr2-1611.4.461893.0.058388.1.085223.0.053803.0.957092.0.981636 | chr2  | 1.61E+08 | 1.61E+08  | + | 0 NA | intron (NAluXs I   | -22038 NM_00659E  | 10716 Hs. 21086E NM_00659E  | ENSG00000TBR1        | IDDA5 TBF          | T-box br protein-coding   |                |
| chr7-1001.4.461893.0.058388.1.085223.0.053803.0.957092.0.981636 | chr7  | 1E+08    | 1E+08     | + | 0 NA | intron (NAluY SINE | 2470 NR_13452E    | 389541 Hs. 40562E NM_00100E | ENSG00000LAMTOR4     | C7orf59            | late end protein-coding   |                |
| chr15-727.6.468119.0.048923.0.909537.0.053789.0.957103.0.981636 | chr15 | 72738396 | 72739985  | + | 0 NA | TTS (NM_TTS (NM_C  | -43645 NR_040107  | 1E+08                       | Hs. 562587NR_040107  | ENSG00000ADPGK-AS1 | -                         | ADPGK antncRNA |
| chr16-727.6.468119.0.048923.0.909537.0.053789.0.957103.0.981636 | chr16 | 72793421 | 72793989  | + | 0 NA | exon (NM_exon (NM  | -128735 NR_12633C | 1.02E+08                    | Hs. 63725E NR_12633C | ENSG00000LINC01572 | -                         | long intencRNA |
| chr9-2647.6.468119.0.048923.0.909537.0.053789.0.957103.0.981636 | chr9  | 2647738  | 2648931   | + | 0 NA | exon (NM_exon (NM  | -25961 NR_01537E  | 401491 Hs. 41604E NR_01537E | ENSG00000VLDLR-AS1   | line-VLDL          | VLDLR antncRNA            |                |
| chr20-514.9.326537.0.04207.0.78281.0.053742.0.957141.0.981636   | chr20 | 51618683 | 51618882  | + | 0 NA | exon (NM_exon (NM  | -55943 NM_00113E  | 4773 Hs. 74414E NM_01234C   | ENSG00000NFATC2      | NFAT1 NF           | nuclear f protein-coding  |                |
| chr11-984.6.725289.0.048.0.893609.0.05372.0.95716.0.981636      | chr11 | 984425   | 985030    | + | 0 NA | exon (NM_exon (NM  | 51991 NM_005961   | 4588 Hs. 52843E NM_005961   | ENSG00000MUC6        | MUC-6              | mucin 6,  protein-coding  |                |
| chr3-182F.6.725289.0.048.0.893609.0.05372.0.95716.0.981636      | chr3  | 1.83E+08 | 1.83E+08  | + | 0 NA | intron (N(TTG)n Si | 81940 NM_01461E   | 23200 Hs. 47842E NM_01461E  | ENSG00000ATP11B      | ATP1F ATF          | ATFase p protein-coding   |                |
| chr1-7977.9.126408.0.04155.0.775475.0.05358.0.957268.0.981636   | chr1  | 7977719  | 7978760   | + | 0 NA | intron (NAluSg SIN | 16528 NM_00726E   | 11315 Hs. 41964C NM_00726E  | ENSG00000PARR7       | DJ-1 DJ1           | Parkinson protein-coding  |                |
| chr7-107.9.126408.0.04155.0.775475.0.05358.0.957268.0.981636    | chr7  | 1.07E+08 | 1.07E+08  | + | 0 NA | intron (Nintron (N | -108135 NM_00529E | 2845 Hs. 657277NM_00529E    | ENSG00000GPR22       | -                  | G protei protein-coding   |                |
| chr1-363C.8.14479.0.04339.0.809941.0.05357.0.957279.0.981636    | chr1  | 36300690 | 36305072  | + | 0 NA | intron (Nintron (N | -3487 NM_00116E   | 79729 Hs. 52449E NM_02467E  | ENSG00000SH3D21      | C1orf113           | SH3 doma protein-coding   |                |
| chr1-467C.8.14479.0.04339.0.809941.0.05357.0.957279.0.981636    | chr1  | 46705376 | 46707392  | + | 0 NA | intron (Nintron (N | 12730 NM_014774   | 9813 Hs. 41964C NM_014774   | ENSG00000EFCAB14     | KIAA0494           | EF-hand  protein-coding   |                |
| chr1-667E.8.14479.0.04339.0.809941.0.05357.0.957279.0.981636    | chr1  | 66723135 | 66723637  | + | 0 NA | intron (Nintron (N | -29073 NM_15266E  | 200132 Hs. 47922E NM_15266E | ENSG00000CTEX1D1     | -                  | Tctex1  protein-coding    |                |
| chr1-150E.8.14479.0.04339.0.809941.0.05357.0.957279.0.981636    | chr1  | 1.51E+08 | 1.51E+08  | + | 0 NA | 3' UTR (N3' UTR (N | -18386 NM_20704C  | 2029 Hs. 63245E NM_00443E   | ENSG00000CENSA       | ARPP-19e           | endosulf protein-coding   |                |
| chr1-172E.8.14479.0.04339.0.809941.0.05357.0.957279.0.981636    | chr1  | 1.73E+08 | 1.73E+08  | + | 0 NA | intron (Nintron (N | 46209 NM_01428E   | 51430 Hs. 20455E NM_0142    |                      |                    |                           |                |



|           |          |          |          |          |          |          |       |          |          |   |   |    |                              |        |            |          |               |                   |                                 |                                    |                           |
|-----------|----------|----------|----------|----------|----------|----------|-------|----------|----------|---|---|----|------------------------------|--------|------------|----------|---------------|-------------------|---------------------------------|------------------------------------|---------------------------|
| chr5-6236 | 6.419122 | 0.048637 | 0.908994 | 0.053507 | 0.957328 | 0.981636 | chr5  | 62363123 | 62367582 | + | 0 | NA | exon (NM_exon (NM_00134E+08  | 38553  | NM_00134E  | 27292    | Hs.73166E+08  | ENSG000004D1M1    | D1M1 D1M1D1M1 rR protein-coding |                                    |                           |
| chr5-1135 | 6.419122 | 0.048637 | 0.908994 | 0.053507 | 0.957328 | 0.981636 | chr5  | 1.14E+08 | 1.14E+08 | + | 0 | NA | 3' UTR (N3' UTR (N_00134E+08 | 79848  | NM_00134E  | 64848    | Hs.231942     | NM_02282E+08      | ENSG000004YTHDC2                | CAHL HYT YTH domain protein-coding |                           |
| chr6-1185 | 6.419122 | 0.048637 | 0.908994 | 0.053507 | 0.957328 | 0.981636 | chr6  | 1.19E+08 | 1.19E+08 | + | 0 | NA | intron (NLTR10B2 I_002667    | 30461  | NM_002667  | 5350     | Hs.17083E+08  | NM_002667         | ENSG000004CPLN                  | CMD1P CM phosphol protein-coding   |                           |
| chr9-1936 | 6.419122 | 0.048637 | 0.908994 | 0.053507 | 0.957328 | 0.981636 | chr9  | 19363076 | 19364591 | + | 0 | NA | intron (NAluSx SIN_00101C    | 16403  | NM_00101C  | 6194     | Hs.40807E+08  | NM_00101C         | ENSG000004RPS6                  | S6                                 | ribosomal protein-coding  |
| chr9-3404 | 6.419122 | 0.048637 | 0.908994 | 0.053507 | 0.957328 | 0.981636 | chr9  | 34043994 | 34044982 | + | 0 | NA | intron (NAluS4 SI_001844E    | 4399   | NM_001844E | 55833    | Hs.49373E+08  | NM_01844E         | ENSG000004UBAP2                 | UBAP-2                             | ubiquitin protein-coding  |
| chr1-3794 | 6.947142 | 0.046743 | 0.874461 | 0.053454 | 0.957371 | 0.981636 | chr1  | 37942425 | 37944321 | + | 0 | NA | intron (N2b LINE _00135C     | -1109  | NM_00135C  | 3633     | Hs.449942E+08 | NM_00554C         | ENSG000004INPP5B                | 5PTase                             | inositol protein-coding   |
| chr10-495 | 6.947142 | 0.046743 | 0.874461 | 0.053454 | 0.957371 | 0.981636 | chr10 | 49554775 | 49559868 | + | 0 | NA | intron (N1MB2 LIN_00145778   | 4459   | NR_145778  | 1.1E+08  | NR_145778     | SNORA74C-         | -                               | small nucsnoRNA                    |                           |
| chr10-115 | 6.947142 | 0.046743 | 0.874461 | 0.053454 | 0.957371 | 0.981636 | chr10 | 1.2E+08  | 1.2E+08  | + | 0 | NA | intron (Nintron (N_00166E    | -23818 | NR_03983C  | 1.01E+08 | NR_03983C     | ENSG000004MIR4682 | -                               | microRNA ncRNA                     |                           |
| chr11-385 | 6.947142 | 0.046743 | 0.874461 | 0.053454 | 0.957371 | 0.981636 | chr11 | 3830014  | 3831355  | + | 0 | NA | intron (NMIR SINE _00166E    | 10275  | NM_00166E  | 391      | Hs.50172E+08  | NM_00166E         | ENSG000004CRHOG                 | ARHG                               | ras homol protein-coding  |
| chr12-171 | 6.947142 | 0.046743 | 0.874461 | 0.053454 | 0.957371 | 0.981636 | chr12 | 17130    | 18101    | + | 0 | NA | intron (Nintron (N_00166E    | 14400  | NR_13074E  | 1E+08    | Hs.45957E+08  | NR_13074E         | ENSG000004WASH8P                | -                                  | Wash protein-coding       |
| chr12-505 | 6.947142 | 0.046743 | 0.874461 | 0.053454 | 0.957371 | 0.981636 | chr12 | 50998419 | 50999774 | + | 0 | NA | intron (Nintron (N_00166E    | 10119  | NM_001174  | 4891     | Hs.50554E+08  | NM_000617         | ENSG000004SLC11A2               | AHMI01 DC                          | solute c protein-coding   |
| chr12-928 | 6.947142 | 0.046743 | 0.874461 | 0.053454 | 0.957371 | 0.981636 | chr12 | 92854621 | 92856042 | + | 0 | NA | intron (NAluY SINE_00356E    | 73964  | NM_00356E  | 8411     | Hs.567367E+08 | NM_00356E         | ENSG000004EEA1                  | MST105 MS                          | early enc protein-coding  |
| chr14-102 | 6.947142 | 0.046743 | 0.874461 | 0.053454 | 0.957371 | 0.981636 | chr14 | 1.02E+08 | 1.02E+08 | + | 0 | NA | IntergeniAluSx SIN_00263C    | 16748  | NM_00263C  | 51550    | Hs.129634E+08 | NM_03263C         | ENSG000004CINP                  | -                                  | cyclin d protein-coding   |
| chr16-875 | 6.947142 | 0.046743 | 0.874461 | 0.053454 | 0.957371 | 0.981636 | chr16 | 87539283 | 87540013 | + | 0 | NA | intron (Nintron (N_00166E    | 21239  | NR_13518C  | 1.02E+08 | Hs.66745E+08  | NR_13518C         | ENSG000004LOC10192E-            | -                                  | uncharacter ncRNA         |
| chr17-312 | 6.947142 | 0.046743 | 0.874461 | 0.053454 | 0.957371 | 0.981636 | chr17 | 31244902 | 31246509 | + | 0 | NA | intron (NMER21B LI_002544    | 51534  | NM_002544  | 4974     | Hs.113874E+08 | NM_002544         | ENSG000004OMG                   | OMGP                               | oligodenc protein-coding  |
| chr17-365 | 6.947142 | 0.046743 | 0.874461 | 0.053454 | 0.957371 | 0.981636 | chr17 | 36523406 | 36527576 | + | 0 | NA | intron (Nintron (N_00134E    | -9271  | NM_00134E  | 284098   | Hs.37888E+08  | NM_178517         | ENSG000004PIGW                  | Gwt1 HPMF                          | phosphat protein-coding   |
| chr18-795 | 6.947142 | 0.046743 | 0.874461 | 0.053454 | 0.957371 | 0.981636 | chr18 | 79931728 | 79935627 | + | 0 | NA | intron (N1LM4b LIN_00114E    | 17976  | NM_00114E  | 80148    | Hs.288284E+08 | NM_02507E         | ENSG000004SLC66A2               | PQLC1                              | solute c protein-coding   |
| chr2-2416 | 6.947142 | 0.046743 | 0.874461 | 0.053454 | 0.957371 | 0.981636 | chr2  | 2.42E+08 | 2.42E+08 | + | 0 | NA | intron (Nintron (N_001271    | 12290  | NM_001271  | 10494    | Hs.516807E+08 | NM_006374         | ENSG000004STRK25                | SOK1 YSK1                          | serine/t protein-coding   |
| chr3-1025 | 6.947142 | 0.046743 | 0.874461 | 0.053454 | 0.957371 | 0.981636 | chr3  | 10252889 | 10253919 | + | 0 | NA | intron (Nintron (N_001476C   | 11658  | NM_00133C  | 84289    | Hs.52917E+08  | NM_03232E         | ENSG000004ING5                  | p281NG5                            | inhibitor protein-coding  |
| chr3-3706 | 6.947142 | 0.046743 | 0.874461 | 0.053454 | 0.957371 | 0.981636 | chr3  | 3706163  | 37062137 | + | 0 | NA | intron (Nintron (N_00125E    | 67800  | NM_00125E  | 4292     | Hs.195364E+08 | NM_00024E         | ENSG000004MLH1                  | COCA2 FCC                          | mutL homc protein-coding  |
| chr3-3852 | 6.947142 | 0.046743 | 0.874461 | 0.053454 | 0.957371 | 0.981636 | chr3  | 38523472 | 38524159 | + | 0 | NA | intron (Nintron (N_001493E   | 27475  | NR_13493E  | 9941     | Hs.517897E+08 | NM_005107         | ENSG000004EXO9                  | ENDOGL1 Exo                        | endor protein-coding      |
| chr3-1285 | 6.947142 | 0.046743 | 0.874461 | 0.053454 | 0.957371 | 0.981636 | chr3  | 1.29E+08 | 1.29E+08 | + | 0 | NA | intron (Nintron (N_001404E   | 35732  | NM_01404E  | 28976    | Hs.56748E+08  | NM_01404E         | ENSG000004ACAD9                 | MC1DN20 Nacyl                      | -CoA protein-coding       |
| chr3-1551 | 6.947142 | 0.046743 | 0.874461 | 0.053454 | 0.957371 | 0.981636 | chr3  | 1.55E+08 | 1.55E+08 | + | 0 | NA | intron (Nintron (N_001636    | -68210 | NR_125399  | 1.02E+08 | Hs.12141E+08  | NR_125399         | ENSG000004LINC01487-            | -                                  | long intencRNA            |
| chr3-3852 | 6.947142 | 0.046743 | 0.874461 | 0.053454 | 0.957371 | 0.981636 | chr3  | 38523472 | 38524159 | + | 0 | NA | intron (Nintron (N_001493E   | 27475  | NR_13493E  | 9941     | Hs.517897E+08 | NM_005107         | ENSG000004EXO9                  | ENDOGL1 Exo                        | endor protein-coding      |
| chr3-1285 | 6.947142 | 0.046743 | 0.874461 | 0.053454 | 0.957371 | 0.981636 | chr3  | 1.29E+08 | 1.29E+08 | + | 0 | NA | intron (Nintron (N_001404E   | 35732  | NM_01404E  | 28976    | Hs.56748E+08  | NM_01404E         | ENSG000004ACAD9                 | MC1DN20 Nacyl                      | -CoA protein-coding       |
| chr3-1551 | 6.947142 | 0.046743 | 0.874461 | 0.053454 | 0.957371 | 0.981636 | chr3  | 1.55E+08 | 1.55E+08 | + | 0 | NA | intron (Nintron (N_001636    | -68210 | NR_125399  | 1.02E+08 | Hs.12141E+08  | NR_125399         | ENSG000004LINC01487-            | -                                  | long intencRNA            |
| chr4-1691 | 6.947142 | 0.046743 | 0.874461 | 0.053454 | 0.957371 | 0.981636 | chr4  | 1.69E+08 | 1.69E+08 | + | 0 | NA | intron (Nintron (N_001493E   | 27475  | NR_13493E  | 9941     | Hs.517897E+08 | NM_005107         | ENSG000004EXO9                  | ENDOGL1 Exo                        | endor protein-coding      |
| chr5-6593 | 6.947142 | 0.046743 | 0.874461 | 0.053454 | 0.957371 | 0.981636 | chr5  | 65938775 | 65940848 | + | 0 | NA | intron (NSVA_D Ret_0028474   | 5762   | NR_028474  | 1E+08    | Hs.60806E+08  | NR_028474         | LOC100303-                      | -                                  | LSM3 homc pseudo          |
| chr7-4781 | 6.947142 | 0.046743 | 0.874461 | 0.053454 | 0.957371 | 0.981636 | chr7  | 4781798  | 4783928  | + | 0 | NA | intron (Nintron (N_001636    | 5776   | NR_03980C  | 1.01E+08 | NR_03980C     | ENSG000004MIR4656 | -                               | microRNA ncRNA                     |                           |
| chr8-143C | 6.947142 | 0.046743 | 0.874461 | 0.053454 | 0.957371 | 0.981636 | chr8  | 1.43E+08 | 1.43E+08 | + | 0 | NA | 3' UTR (N3' UTR (N_00234E    | 3261   | NM_00234E  | 4061     | Hs.52190E+08  | NM_00234E         | ENSG000004LY6E                  | RIG-E RIC                          | lymphocyt protein-coding  |
| chrX-405  | 6.947142 | 0.046743 | 0.874461 | 0.053454 | 0.957371 | 0.981636 | chrX  | 40599045 | 40599839 | + | 0 | NA | intron (Nintron (N_00576E    | 18476  | NM_00576E  | 10159    | Hs.49596E+08  | NM_00576E         | ENSG000004ATP6AP2               | APT6M8-9 ATPase                    | H+ protein-coding         |
| chr10-105 | 9.862415 | 0.039729 | 0.743852 | 0.053409 | 0.957406 | 0.981636 | chr10 | 1.1E+08  | 1.1E+08  | + | 0 | NA | intron (Nintron (N_001324    | 10865  | NM_001324  | 7511     | Hs.39062E+08  | NM_02038E         | ENSG000004XPNPFP1               | NP1 SAMF                           | X-proly protein-coding    |
| chr12-49C | 9.862415 | 0.039729 | 0.743852 | 0.053409 | 0.957406 | 0.981636 | chr12 | 49011587 | 49013171 | + | 0 | NA | intron (NAluSq2 SI_00120E    | 6397   | NM_00120E  | 5571     | Hs.53086E+08  | NM_00273E         | ENSG000004PRKAG1                | AMPKG                              | protein k protein-coding  |
| chr5-140  | 4.989133 | 0.054777 | 1.028903 | 0.053238 | 0.957542 | 0.981636 | chr5  | 1.4E+08  | 1.4E+08  | + | 0 | NA | intron (Nintron (N_00194E    | 11810  | NM_00194E  | 1839     | Hs.799        | NM_00194E         | ENSG000004HBEGF                 | DTR DTS L                          | heparin t protein-coding  |
| chr10-994 | 6.189411 | -0.05096 | 0.957244 | -0.05323 | 0.957546 | 0.981636 | chr10 | 99405442 | 99405871 | + | 0 | NA | intron (N1LM4a LI_00207E     | 24968  | NM_00207E  | 2805     | Hs.50075E+08  | NM_00207E         | ENSG000004GOT1                  | AST1 ASTC                          | glutamic- protein-coding  |
| chr17-421 | 6.189411 | -0.05096 | 0.957244 | -0.05323 | 0.957546 | 0.981636 | chr17 | 42151553 | 42151812 | + | 0 | NA | intron (Nintron (N_00458E    | 3307   | NM_00458E  | 5878     | Hs.65038E+08  | NM_00458E         | ENSG000004CRAB5C                | L1880 RAE                          | RAB5C, me protein-coding  |
| chr12-571 | 8.855373 | 0.04192  | 0.787477 | 0.053234 | 0.957546 | 0.981636 | chr12 | 57149965 | 57151166 | + | 0 | NA | intron (N2c LINE _001636     | -2946  | NR_13193E  | 1.06E+08 | Hs.60954E+08  | NR_13193E         | ENSG000004LRP1-AS               | -                                  | LRP1 antncRNA             |
| chr18-415 | 8.855373 | 0.04192  | 0.787477 | 0.053234 | 0.957546 | 0.981636 | chr18 | 41971126 | 41971631 | + | 0 | NA | intron (Nintron (N_001636    | 16144  | NM_002647  | 5289     | Hs.464971E+08 | NM_002647         | ENSG000004PIK3C3                | VPS34 Vps                          | phosphat protein-coding   |
| chr2-9937 | 8.855373 | 0.04192  | 0.787477 | 0.053234 | 0.957546 | 0.981636 | chr2  | 99379062 | 99380404 | + | 0 | NA | intron (N(TTTC)n _0015904    | 42344  | NM_015904  | 9669     | Hs.15868E+08  | NM_015904         | ENSG000004EIF5B                 | IF2                                | eukaryoti protein-coding  |
| chr3-6994 | 8.855373 | 0.04192  | 0.787477 | 0.053234 | 0.957546 | 0.981636 | chr3  | 69948738 | 69950191 | + | 0 | NA | intron (Nintron (N_00024E    | 12865  | NM_00024E  | 4286     | Hs.166017E+08 | NM_00024E         | ENSG000004MITF                  | CMM3 CMM                           | melanocyt protein-coding  |
| chr17-802 | 7.369309 | 0.046499 | 0.874987 | 0.053124 | 0.957618 | 0.981636 | chr17 | 80251477 | 80251761 | + | 0 | NA | intron (NAluSx SIN_00125E    | -9233  | NM_00125E  | 57674    | Hs.19564E+08  | NM_020914E        | ENSG000004RNF213                | AL017 C17                          | ring fing protein-coding  |
| chr4-3951 | 7.122032 | -0.04815 | 0.906329 | -0.05313 | 0.957627 | 0.981636 | chr4  | 39514121 | 39514333 | + | 0 | NA | intron (Nintron (N_00335E    | 13212  | NM_00335E  | 7358     | Hs.57251E+08  | NM_00335E         | ENSG000004UGDH                  | GDH UDP                            | -CUDP-gluc protein-coding |
| chr1-151E | 6.676291 | -0.04832 | 0.909667 | -0.05312 | 0.95764  | 0.981636 | chr1  | 1.52E+08 | 1.52E+08 | + | 0 | NA | intron (N1LM2C LI_005305E    | 15135  | NM_005305E | 117145   | Hs.16407E+08  | NM_005305E        | ENSG000004THEM4                 | CTMP                               | thioester protein-coding  |
| chr12-645 | 6.676291 | -0.04832 | 0.909667 | -0.05312 | 0.95764  | 0.981636 | chr12 | 6499218  | 6499568  | + | 0 | NA | intron (NAluSx1 SI_001486E   | 5291   | NM_01486E  | 9918     | Hs.5719       | NM_01486E         | ENSG000004CFAD2                 | CAP-D2 Cn                          | non-SMC protein-coding    |
| chr2-6931 | 6.676291 | -0.04832 | 0.909667 | -0.05312 | 0.95764  | 0.981636 | chr2  | 69313393 | 69313648 | + | 0 | NA | IntergeniLIM5 LINE_00205E    | 73707  | NM_00205E  | 2673     | Hs.58030C     | NM_00205E         | ENSG000004GFPT1                 | CMS12 CMS                          | glutamine protein-coding  |
| chr2-1622 | 6.676291 | -0.04832 | 0.909667 | -0.05312 | 0.95764  | 0.981636 | chr2  | 1.62E+08 | 1.62E+08 | + | 0 | NA | intron (NMLT1C LTF_000446E   | 38849  | NM_00446E  | 2191     | Hs.65437E+08  | NM_00446E         | ENSG000004FAP                   | DDP1V FAF                          | fibroblas protein-coding  |
| chr1-174C | 7.426164 | 0.044857 | 0.84536  | 0.053063 | 0.957682 | 0.981636 | chr1  | 17409153 | 17411232 | + | 0 | NA | intron (Nintron (N_00113E    | 28344  | NM_00113E  | 55920    | Hs.38         |                   |                                 |                                    |                           |



|                    |          |          |          |          |          |       |          |          |   |   |    |                     |                  |                              |                      |                    |                                 |        |
|--------------------|----------|----------|----------|----------|----------|-------|----------|----------|---|---|----|---------------------|------------------|------------------------------|----------------------|--------------------|---------------------------------|--------|
| chr9-1364 7.426164 | 0.044857 | 0.84536  | 0.053063 | 0.957682 | 0.981636 | chr9  | 1.36E+08 | 1.36E+08 | + | 0 | NA | intron (Nintron (N  | -4567 NM_001282  | 23203 Hs. 495471NM_015166    | ENSG000002PMPCA      | Alpha-MPF          | peptidase protein-coding        |        |
| chr6-1664 8.688526 | -0.04303 | 0.814079 | -0.05286 | 0.957847 | 0.981636 | chr6  | 1.66E+08 | 1.66E+08 | + | 0 | NA | intron (NLIIPA3 LIN | 36160 NR_046799  | 1.01E+08 Hs. 675696NR_046799 | ENSG000002RPS6KA2-1  | -                  | RPS6KA2                         | incRNA |
| chr5-132f 9.911413 | 0.039814 | 0.75336  | 0.052848 | 0.957853 | 0.981636 | chr5  | 1.33E+08 | 1.33E+08 | + | 0 | NA | intron (NLIIME3F LI | 22955 NR_132124  | 1.02E+08 Hs. 598812NR_132124 | ENSG000002TH2LCRR    | TH2-LCR            | T helper ncRNA                  |        |
| chr11-11f 7.212169 | -0.04546 | 0.861475 | -0.05277 | 0.957915 | 0.981636 | chr11 | 1.17E+08 | 1.17E+08 | + | 0 | NA | intron (NMIRb SINE  | -57960 NM_000039 | 335 Hs. 93194 NM_000039      | ENSG000002APOA1      | apo(a)             | apolipoprotein-coding           |        |
| chr12-31f 7.212169 | -0.04546 | 0.861475 | -0.05277 | 0.957915 | 0.981636 | chr12 | 31281582 | 31282825 | + | 0 | NA | 3' UTR (N3' UTR (N  | -42113 NR_026806 | 79857 Hs. 534485NM_024799    | ENSG000002FLJ13224   | -                  | uncharactericncRNA              |        |
| chr2-691f 7.212169 | -0.04546 | 0.861475 | -0.05277 | 0.957915 | 0.981636 | chr2  | 69184428 | 69185260 | + | 0 | NA | intron (NMER5B DNA  | 81162 NR_036073  | 1E+08 NR_036073              | ENSG000002MIR3126    | mir-3126           | microRNA ncRNA                  |        |
| chr20-45f 7.212169 | -0.04546 | 0.861475 | -0.05277 | 0.957915 | 0.981636 | chr20 | 45949853 | 45950708 | + | 0 | NA | exon (NM exon (NM   | 15597 NM_022104  | 63935 Hs. 472856NM_022104    | ENSG000002PCIF1      | C20orf67 PDX1      | C-terminus protein-coding       |        |
| chr6-1334 7.212169 | -0.04546 | 0.861475 | -0.05277 | 0.957915 | 0.981636 | chr6  | 1.33E+08 | 1.33E+08 | + | 0 | NA | intron (Nintron (N  | 241758 NM_001301 | 2070 Hs. 596688NM_004100     | ENSG000002EY4A       | CMDF1 DFNYA        | transprotein-coding             |        |
| chr6-1581 7.212169 | -0.04546 | 0.861475 | -0.05277 | 0.957915 | 0.981636 | chr6  | 1.58E+08 | 1.58E+08 | + | 0 | NA | 3' UTR (N3' UTR (N  | 24192 NM_207118  | 404672 Hs. 356224NM_207118   | ENSG000002GTF2H5     | C6orf175 general   | tprotein-coding                 |        |
| chr20-45f 7.212169 | -0.04546 | 0.861475 | -0.05277 | 0.957915 | 0.981636 | chr20 | 1.22E+08 | 1.22E+08 | + | 0 | NA | intron (Nintron (N  | 32229 NM_138790  | 153090 Hs. 522378NM_032552   | ENSG000002DAB2IP     | AF9q34 A1DAB2      | inteprotein-coding              |        |
| chr12-14f 10.86946 | 0.037802 | 0.716849 | 0.052733 | 0.957945 | 0.981636 | chr12 | 14460430 | 14461216 | + | 0 | NA | exon (NM exon (NM   | 75542 NM_181352  | 55729 Hs. 504885NM_018175    | ENSG000002ATF7IP     | AM ATF-1           | activator protein-coding        |        |
| chr1-8671 9.613289 | -0.04015 | 0.761979 | -0.0527  | 0.957973 | 0.981636 | chr1  | 86716659 | 86717003 | + | 0 | NA | intron (Nintron (N  | 12255 NM_016005  | 51100 Hs. 136309NM_016005    | ENSG000002SH3GLB1    | Bif-1 CGISH3       | domain protein-coding           |        |
| chr1-1087 9.613289 | -0.04015 | 0.761979 | -0.0527  | 0.957973 | 0.981636 | chr1  | 1.09E+08 | 1.09E+08 | + | 0 | NA | intron (NAluJb SIN  | 7526 NM_007266   | 6814 Hs. 530436NM_007266     | ENSG000002STXP3      | MUNC18-3 syntaxin  | protein-coding                  |        |
| chr14-35f 7.163172 | -0.04587 | 0.871263 | -0.05265 | 0.958008 | 0.981636 | chr14 | 35102912 | 35103172 | + | 0 | NA | intron (NAluXs1 SIN | 19500 NM_001305  | 55012 Hs. 530712NM_017917    | ENSG000002PPP2R3C    | C14orf10 protein   | protein-coding                  |        |
| chr15-494 7.163172 | -0.04587 | 0.871263 | -0.05265 | 0.958008 | 0.981636 | chr15 | 49473255 | 49474640 | + | 0 | NA | intron (NChar1ie21  | 50705 NM_002005  | 2252 Hs. 567268NM_002005     | ENSG000002PGF7       | HBGF-7 KC          | fibroblast protein-coding       |        |
| chr16-91f 7.163172 | -0.04587 | 0.871263 | -0.05265 | 0.958008 | 0.981636 | chr16 | 9121672  | 9122138  | + | 0 | NA | TTS (NM_CTS (NM_C   | 30261 NM_014117  | 29035 Hs. 221497NM_014117    | ENSG000002C16orf72   | PROO149            | chromosome protein-coding       |        |
| chr17-49f 7.163172 | -0.04587 | 0.871263 | -0.05265 | 0.958008 | 0.981636 | chr17 | 4960284  | 4961573  | + | 0 | NA | intron (Nintron (N  | 6889 NM_00489C   | 9552 Hs. 90436 NM_00489C     | ENSG000002CPAG7      | ACRP FSA           | sperm associated protein-coding |        |
| chr18-13f 7.163172 | -0.04587 | 0.871263 | -0.05265 | 0.958008 | 0.981636 | chr18 | 13001854 | 13002580 | + | 0 | NA | intron (NLIIME4a LI | 10855 NM_032142  | 55125 Hs. 100914NM_018066    | ENSG000002CEP192     | PPP1R62            | centrosome protein-coding       |        |
| chr2-698f 7.163172 | -0.04587 | 0.871263 | -0.05265 | 0.958008 | 0.981636 | chr2  | 69865934 | 69867129 | + | 0 | NA | intron (NAluJo SIN  | -27425 NR_03786E | 11017 Hs. 54649 NM_006857    | ENSG000002SNRNP27    | 27K RY1            | small nucprotein-coding         |        |
| chr3-450f 7.163172 | -0.04587 | 0.871263 | -0.05265 | 0.958008 | 0.981636 | chr3  | 45004408 | 45005209 | + | 0 | NA | intron (NLIIME3A LI | -21495 NM_00327E | 7123 Hs. 476092NM_00327E     | ENSG000002CLEC3B     | TN TNA             | C-type lectin protein-coding    |        |
| chr5-5307 7.163172 | -0.04587 | 0.871263 | -0.05265 | 0.958008 | 0.981636 | chr5  | 53072061 | 53073076 | + | 0 | NA | intron (NLIIME3E LI | 37189 NM_17680E  | 4338 Hs. 163646NM_004531     | ENSG000002MOC52      | MCBPE MOc          | molybdenum protein-coding       |        |
| chr16-151 5.468935 | 0.051477 | 0.978048 | 0.052632 | 0.958025 | 0.981636 | chr16 | 15109392 | 15110383 | + | 0 | NA | TTS (NR_TTS (NR_I   | 15476 NR_125434  | 1.01E+08 Hs. 678758NR_125434 | ENSG000002LOC100505E | -                  | uncharactericncRNA              |        |
| chr2-219f 5.468935 | 0.051477 | 0.978048 | 0.052632 | 0.958025 | 0.981636 | chr2  | 2.19E+08 | 2.19E+08 | + | 0 | NA | intron (NTiger3b    | 8636 NM_00131E   | 23549 Hs. 258551NM_01210C    | ENSG000002DNPEP      | ASPEP DAF          | aspartyl protein-coding         |        |
| chr9-121f 5.468935 | 0.051477 | 0.978048 | 0.052632 | 0.958025 | 0.981636 | chr9  | 1.21E+08 | 1.21E+08 | + | 0 | NA | intron (Nintron (N  | 22658 NM_00136E  | 11064 Hs. 652362NM_00701E    | ENSG000002CNTRL      | CEP1 CEP1          | centriole protein-coding        |        |
| chr1-211f 6.898144 | 0.046476 | 0.883123 | 0.052627 | 0.958029 | 0.981636 | chr1  | 21161719 | 21162674 | + | 0 | NA | intron (Nintron (N  | 5843 NM_00119E   | 8672 Hs. 467084NM_00376C     | ENSG000002EIF4G3     | eIF-4G 3 eukaryoti | protein-coding                  |        |
| chr1-161f 6.898144 | 0.046476 | 0.883123 | 0.052627 | 0.958029 | 0.981636 | chr1  | 1.61E+08 | 1.61E+08 | + | 0 | NA | non-codiron-codir   | 2096 NM_001013   | 257177 Hs. 534595NM_001013   | ENSG000002CFAP126    | Clorf192 cilia     | ancprotein-coding               |        |
| chr1-240f 6.898144 | 0.046476 | 0.883123 | 0.052627 | 0.958029 | 0.981636 | chr1  | 2.4E+08  | 2.4E+08  | + | 0 | NA | intron (Nintron (N  | 237936 NM_02006E | 56776 Hs. 24889 NM_02006E    | ENSG000002FMM2       | -                  | formin 2 protein-coding         |        |
| chr15-494 6.898144 | 0.046476 | 0.883123 | 0.052627 | 0.958029 | 0.981636 | chr15 | 49459884 | 49460463 | + | 0 | NA | intron (Nintron (N  | 36481 NM_002005  | -2252 Hs. 567268NM_002005    | ENSG000002PGF7       | HBGF-7 KC          | fibroblast protein-coding       |        |
| chr18-92f 6.898144 | 0.046476 | 0.883123 | 0.052627 | 0.958029 | 0.981636 | chr18 | 9225104  | 9226238  | + | 0 | NA | intron (Nkanga2_a   | 88108 NM_001204  | 23253 Hs. 464585NM_01520E    | ENSG000002ANKRD12    | ANCO-2 AN          | ankyrin I protein-coding        |        |
| chr19-121 6.898144 | 0.046476 | 0.883123 | 0.052627 | 0.958029 | 0.981636 | chr19 | 12216933 | 12170705 | + | 0 | NA | intron (NAluY SINE  | 6924 NM_003437   | 7695 Hs. 479874NM_003437     | ENSG000002ZNF136     | pH2-20 zinc        | finger protein-coding           |        |
| chr19-36f 6.898144 | 0.046476 | 0.883123 | 0.052627 | 0.958029 | 0.981636 | chr19 | 36325727 | 36326183 | + | 0 | NA | intron (NHERV571-i  | 5763 NR_03827E   | 1.01E+08 Hs. 595155NR_03827E | ENSG000002LINC0066E  | -                  | long intencRNA                  |        |
| chr2-189f 6.898144 | 0.046476 | 0.883123 | 0.052627 | 0.958029 | 0.981636 | chr2  | 1.9E+08  | 1.9E+08  | + | 0 | NA | intron (NLIIMEg LIN | 27245 NM_001321  | 5378 Hs. 111745NM_000534     | ENSG000002PMS1       | HNPC33 PMS1        | home protein-coding             |        |
| chr6-129f 6.898144 | 0.046476 | 0.883123 | 0.052627 | 0.958029 | 0.981636 | chr6  | 1.3E+08  | 1.3E+08  | + | 0 | NA | intron (Nintron (N  | 77538 NM_03351E  | 93663 Hs. 486456NM_03351E    | ENSG000002ARHGAP18   | MacGAP SE          | Rho GTPase protein-coding       |        |
| chr7-776f 6.898144 | 0.046476 | 0.883123 | 0.052627 | 0.958029 | 0.981636 | chr7  | 77600210 | 77601545 | + | 0 | NA | intron (Nintron (N  | 62834 NM_001131  | 5782 Hs. 61812 NM_00283E     | ENSG000002PTPN12     | PTP-PEST protein   | tprotein-coding                 |        |
| chr9-123f 6.898144 | 0.046476 | 0.883123 | 0.052627 | 0.958029 | 0.981636 | chr9  | 1.23E+08 | 1.23E+08 | + | 0 | NA | intron (NMIRb SINE  | 26785 NR_030331  | 693185 Hs. 111745NM_000534   | ENSG000002MIR600     | MIRN600 mi         | microRNA ncRNA                  |        |
| chrX-738f 6.898144 | 0.046476 | 0.883123 | 0.052627 | 0.958029 | 0.981636 | chrX  | 73827795 | 73829393 | + | 0 | NA | non-codiron-codir   | 24159 NR_001564  | 7503 Hs. 529901NR_001564     | ENSG000002XIST       | DXS1089 XIST       | inactivincRNA                   |        |
| chr10-844 8.63167  | -0.04155 | 0.789601 | -0.05262 | 0.958033 | 0.981636 | chr10 | 84485613 | 84486502 | + | 0 | NA | intron (NLIIPA5 LIN | 60888 NM_001284  | 54462 Hs. 461985NM_01899E    | ENSG000002CCSER2     | FAM190B Coiled-c   | protein-coding                  |        |
| chr14-311 8.63167  | -0.04155 | 0.789601 | -0.05262 | 0.958033 | 0.981636 | chr14 | 31167224 | 31169789 | + | 0 | NA | intron (Nintron (N  | 39287 NM_01538E  | 25831 Hs. 708017NM_01538E    | ENSG000002HECTD1     | EULIR HECT         | domain protein-coding           |        |
| chr18-95f 8.63167  | -0.04155 | 0.789601 | -0.05262 | 0.958033 | 0.981636 | chr18 | 9525990  | 9530102  | + | 0 | NA | intron (NLIIME1 LIN | 52533 NM_00678E  | 10928 Hs. 528999NM_00678E    | ENSG000002RALBP1     | RIP1 RLR1          | ra1a home protein-coding        |        |
| chr2-8531 8.63167  | -0.04155 | 0.789601 | -0.05262 | 0.958033 | 0.981636 | chr2  | 85314911 | 85317966 | + | 0 | NA | IntergeniIntergeni  | 11551 NM_00136E  | 10618 Hs. 593382NM_006464    | ENSG000002TGOLN2     | TGN38 TGN          | trans-gol protein-coding        |        |
| chr20-51f 8.63167  | -0.04155 | 0.789601 | -0.05262 | 0.958033 | 0.981636 | chr20 | 5108223  | 5110987  | + | 0 | NA | intron (Nintron (N  | 3471 NM_00100E   | 29058 Hs. 472024NM_01414E    | ENSG000002TMEM230    | C20orf30 transmem  | protein-coding                  |        |
| chr5-714f 8.63167  | -0.04155 | 0.789601 | -0.05262 | 0.958033 | 0.981636 | chr5  | 71487170 | 71490155 | + | 0 | NA | intron (NAluSg2 SI  | 32991 NM_01842E  | 55814 Hs. 258272NM_01842E    | ENSG000002BDP1       | DFNB112 FB         | double protein-coding           |        |
| chr7-139f 8.63167  | -0.04155 | 0.789601 | -0.05262 | 0.958033 | 0.981636 | chr7  | 1.39E+08 | 1.39E+08 | + | 0 | NA | intron (NAluSx SIN  | 26049 NM_02011E  | 56829 Hs. 133512NM_02011E    | ENSG000002ZC3HAV1    | ARTD13 FL          | zinc finger protein-coding      |        |
| chr1-798f 7.905186 | 0.043194 | 0.820959 | 0.052614 | 0.958039 | 0.981636 | chr1  | 7983287  | 7986847  | + | 0 | NA | 3' UTR (N3' UTR (N  | 23356 NM_00726E  | 11315 Hs. 419646NM_00726E    | ENSG000002PARK7      | DJ-1 DJ1           | Parkinson protein-coding        |        |
| chr1-273f 7.905186 | 0.043194 | 0.820959 | 0.052614 | 0.958039 | 0.981636 | chr1  | 21267645 | 21271515 | + | 0 | NA | intron (NMIRb SINE  | 10035 NM_00111E  | 1889 Hs. 195088NM_001397     | ENSG000002ECE1       | ECE                | endothelin protein-coding       |        |
| chr1-273f 7.905186 | 0.043194 | 0.820959 | 0.052614 | 0.958039 | 0.981636 | chr1  | 27324434 | 27325941 | + | 0 | NA | non-codiron-codir   | 1313 NR_03392E   | 644961 Hs. 660887NR_03392E   | ACTG1P20             | -                  | actin gauseudo                  |        |
| chr1-374f 7.905186 | 0.043194 | 0.820959 | 0.052614 | 0.958039 | 0.981636 | chr1  | 37480966 | 37484475 | + | 0 | NA | intron (Nintron (N  | 2490 NR_10679C   | 1.02E+08 Hs. NR_10679C       | ENSG000002MIR6732    | hsa-mir-6          | microRNA ncRNA                  |        |
| chr1-112f 7.905186 | 0.043194 | 0.820959 | 0.052614 | 0.958039 | 0.981636 | chr1  | 1.13E+08 | 1.13E+08 | + | 0 | NA | Intergeni(T)n Simp  | 11600 NR_103744  | 1.01E+08 Hs. 418285NR_103744 | ENSG000002SLC16A1-1  | -                  | SLC16A1                         | ncRNA  |
| chr10-1            |          |          |          |          |          |       |          |          |   |   |    |                     |                  |                              |                      |                    |                                 |        |

|           |          |          |          |          |          |          |       |          |          |   |   |    |                    |        |           |          |           |              |            |           |                 |                           |                    |                |                |
|-----------|----------|----------|----------|----------|----------|----------|-------|----------|----------|---|---|----|--------------------|--------|-----------|----------|-----------|--------------|------------|-----------|-----------------|---------------------------|--------------------|----------------|----------------|
| chr7-1022 | 4.940915 | 0.054491 | 1.037415 | 0.052525 | 0.958111 | 0.981636 | chr7  | 1.02E+08 | 1.02E+08 | + | 0 | NA | intron (Nintron (N | -56269 | NM_020979 | 10603    | Hs.48944E | 020979       | ENSG00000  | SH2B2     | APS             | SH2B adapt protein-coding |                    |                |                |
| chr10-127 | 8.193788 | -0.04299 | 0.819623 | -0.05246 | 0.958165 | 0.981636 | chr10 | 1.27E+08 | 1.27E+08 | + | 0 | NA | intron (Nintron (N | 120643 | NM_001035 | 642938   | Hs.613882 | NM_001035    | ENSG00000  | INSY2A    | C10orf141       | inhibitor protein-coding  |                    |                |                |
| chr17-402 | 8.193788 | -0.04299 | 0.819623 | -0.05246 | 0.958165 | 0.981636 | chr17 | 4020928  | 4022765  | + | 0 | NA | intron (Nintron (N | 44743  | NR_146884 | 1.05E+08 | Hs.57923E | NR_146884    | LINCO197E  | -         | long intencRNA  |                           |                    |                |                |
| chr19-108 | 8.193788 | -0.04299 | 0.819623 | -0.05246 | 0.958165 | 0.981636 | chr19 | 10820090 | 10822429 | + | 0 | NA | intron (Nintron (N | 406976 | NR_02958E | 406976   | NR_02958E | ENSG00000    | MIR199A1   | MIR-199-5 | miRNA ncRNA     |                           |                    |                |                |
| chr16-224 | 10.82046 | 0.03761  | 0.718022 | 0.05238  | 0.958226 | 0.981636 | chr16 | 20259010 | 22460294 | + | 0 | NA | intron (NAluJr SIN | -21937 | NR_02746C | 1E+08    | Hs.70957E | NR_02746C    | RNN3P3     | -         | RRN3 hmc pseudo |                           |                    |                |                |
| chr4-1854 | 10.82046 | 0.03761  | 0.718022 | 0.05238  | 0.958226 | 0.981636 | chr4  | 1.85E+08 | 1.85E+08 | + | 0 | NA | intron (NMLT1D LTF | 12999  | NM_18172E | 353322   | Hs.508154 | NM_18172E    | ENSG00000  | CANKRD37  | Lrp2bp          | ankyrin r protein-coding  |                    |                |                |
| chr10-122 | 3.990729 | 0.059664 | 1.140328 | 0.052321 | 0.958273 | 0.981636 | chr10 | 1.26E+08 | 1.26E+08 | + | 0 | NA | intron (NAluJr4 S1 | 26642  | NM_07846E | 56647    | Hs.37029E | NM_016567    | ENSG00000  | BCCP1     | TOK-1           | TOKBRCA2                  | anc protein-coding |                |                |
| chr7-1392 | 3.990729 | 0.059664 | 1.140328 | 0.052321 | 0.958273 | 0.981636 | chr7  | 13928661 | 13929407 | + | 0 | NA | intron (Nintron (N | 57480  | NM_00116E | 2115     | Hs.22634  | NM_00495E    | ENSG00000  | ETV1      | ER81            | ETS vari                  | protein-coding     |                |                |
| chr11-635 | 8.474346 | 0.043683 | 0.835736 | 0.052269 | 0.958314 | 0.981636 | chr11 | 63947846 | 63948570 | + | 0 | NA | intron (NMIR3 SINE | 8877   | NM_00130C | 79829    | Hs.52375E | NM_024771    | ENSG00000  | CNA40     | NAT11           | NatN(alpha)               | protein-coding     |                |                |
| chr7-1022 | 8.474346 | 0.043683 | 0.835736 | 0.052269 | 0.958314 | 0.981636 | chr7  | 1.02E+08 | 1.02E+08 | + | 0 | NA | intron (NAluSx SIN | 9456   | NM_001347 | 1E+08    | Hs.40639E | NM_001242713 | LOC10028E  | -         | uncharact       | protein-coding            |                    |                |                |
| chr1-3128 | 8.384209 | 0.041702 | 0.800348 | 0.052105 | 0.958445 | 0.981636 | chr1  | 31287397 | 31294484 | + | 0 | NA | intron (Nintron (N | 5848   | NM_004814 | 9410     | Hs.33962  | NM_004814    | ENSG00000  | CNRNP40   | 40K             | HPRPF                     | small nuc          | protein-coding |                |
| chr1-3495 | 8.384209 | 0.041702 | 0.800348 | 0.052105 | 0.958445 | 0.981636 | chr1  | 34991737 | 34992339 | + | 0 | NA | intron (Nintron (N | -6691  | NM_00119E | 1.01E+08 | Hs.53398E | NM_00119E    | ENSG00000  | TMEM35B   | ZMYM6NB         | transmemt                 | protein-coding     |                |                |
| chr1-1825 | 8.384209 | 0.041702 | 0.800348 | 0.052105 | 0.958445 | 0.981636 | chr1  | 1.86E+08 | 1.86E+08 | + | 0 | NA | intron (NAluSx S1  | 7964   | NM_017847 | 54953    | Hs.37121E | NM_017847    | ENSG00000  | CDR4      | C1orf27         | lodr-4                    | GPC                | protein-coding |                |
| chr1-2007 | 8.384209 | 0.041702 | 0.800348 | 0.052105 | 0.958445 | 0.981636 | chr1  | 2.01E+08 | 2.01E+08 | + | 0 | NA | intron (NAluJr SIN | 43288  | NM_001297 | 23271    | Hs.23585  | NM_20345E    | ENSG00000  | CAMSAP2   | Camsaf2         | IL1L                      | modulip            | protein-coding |                |
| chr12-515 | 8.384209 | 0.041702 | 0.800348 | 0.052105 | 0.958445 | 0.981636 | chr12 | 51992328 | 51992547 | + | 0 | NA | intron (NAluJo SIN | -14509 | NM_181711 | 160622   | Hs.40720E | NM_181711    | ENSG00000  | GRASP     | TAMALIN         | general i                 | protein-coding     |                |                |
| chr12-535 | 8.384209 | 0.041702 | 0.800348 | 0.052105 | 0.958445 | 0.981636 | chr12 | 53542282 | 53543390 | + | 0 | NA | TTS (NM_C          | 28852  | NR_046221 | 1.01E+08 | Hs.63360E | NR_046221    | ENSG00000  | LOC10065E | -               | uncharact                 | ncRNA              |                |                |
| chr12-575 | 8.384209 | 0.041702 | 0.800348 | 0.052105 | 0.958445 | 0.981636 | chr12 | 57526820 | 57528999 | + | 0 | NA | exon (NM_exon (NM  | 10485  | NM_052897 | 114785   | Hs.52452E | NM_052897    | ENSG00000  | CMBD6     | -               | methyl-C                  | protein-coding     |                |                |
| chr17-622 | 8.384209 | 0.041702 | 0.800348 | 0.052105 | 0.958445 | 0.981636 | chr17 | 62050931 | 62052653 | + | 0 | NA | intron (Nintron (N | 5386   | NM_005121 | 9969     | Hs.28267E | NM_005121    | ENSG00000  | MED13     | ARC250          | DF mediator               | protein-coding     |                |                |
| chr18-587 | 8.384209 | 0.041702 | 0.800348 | 0.052105 | 0.958445 | 0.981636 | chr18 | 58733210 | 58734548 | + | 0 | NA | intron (Nintron (N | -62006 | NM_00128E | 1.02E+08 | Hs.64487E | NM_001289967 | LOC10192E  | -         | uncharact       | protein-coding            |                    |                |                |
| chr19-981 | 8.384209 | 0.041702 | 0.800348 | 0.052105 | 0.958445 | 0.981636 | chr19 | 9813344  | 9814413  | + | 0 | NA | intron (NAluSp SIN | 5201   | NM_00131E | 54850    | Hs.12439  | NM_01770E    | ENSG00000  | FBXL12    | Fb112           | F-box                     | anc protein-coding |                |                |
| chr2-1825 | 8.384209 | 0.041702 | 0.800348 | 0.052105 | 0.958445 | 0.981636 | chr2  | 1.83E+08 | 1.83E+08 | + | 0 | NA | intron (Nintron (N | 43538  | NM_01343E | 10787    | Hs.60373E | NM_01343E    | ENSG00000  | NCKAP1    | HEM2            | NAP1NCK                   | assoc              | protein-coding |                |
| chr3-1081 | 8.384209 | 0.041702 | 0.800348 | 0.052105 | 0.958445 | 0.981636 | chr3  | 1.08E+08 | 1.08E+08 | + | 0 | NA | intron (NTHEID LTF | 31967  | NM_01801C | 55081    | Hs.41219E | NM_01801C    | ENSG00000  | IFT57     | ESRRBL1         | I                         | intraflag          | protein-coding |                |
| chr5-394  | 8.384209 | 0.041702 | 0.800348 | 0.052105 | 0.958445 | 0.981636 | chr5  | 39406594 | 39408744 | + | 0 | NA | intron (Nintron (N | 17311  | NM_00134E | 1601     | Hs.696631 | NM_00134E    | ENSG00000  | CDB2      | DOC-2           | DOC                       | DAB                | adapt          | protein-coding |
| chr7-575  | 8.384209 | 0.041702 | 0.800348 | 0.052105 | 0.958445 | 0.981636 | chr7  | 5758961  | 5760624  | + | 0 | NA | intron (NAluSg SIN | 21871  | NM_207111 | 54476    | Hs.48749E | NM_019011    | ENSG00000  | RNF216    | CAHH            | TRIP                      | ring               | finger         | protein-coding |
| chr7-135  | 8.384209 | 0.041702 | 0.800348 | 0.052105 | 0.958445 | 0.981636 | chr7  | 1.36E+08 | 1.36E+08 | + | 0 | NA | intron (Nintron (N | 26676  | NM_14580E | 136319   | Hs.60201E | NM_14580E    | ENSG00000  | MTPN      | GCDP            | V-1                       | myotroph           | protein-coding |                |
| chr8-2257 | 8.384209 | 0.041702 | 0.800348 | 0.052105 | 0.958445 | 0.981636 | chr8  | 22571030 | 22572583 | + | 0 | NA | exon (NM_exon (NM  | 6077   | NM_00101E | 10174    | Hs.52857E | NM_00577E    | ENSG00000  | SORBS3    | SCAM-1          | SC                        | sorbin             | ar             | protein-coding |
| chr8-3824 | 8.384209 | 0.041702 | 0.800348 | 0.052105 | 0.958445 | 0.981636 | chr8  | 38245156 | 38248805 | + | 0 | NA | intron (Nintron (N | 15027  | NM_00116E | 23259    | Hs.43496E | NM_015214    | ENSG00000  | DDHD2     | SAMWD1          | SF                        | DDHD               | dom            | protein-coding |
| chr1-1837 | 5.947958 | 0.048755 | 0.93718  | 0.052023 | 0.95851  | 0.981636 | chr1  | 1837568  | 1838699  | + | 0 | NA | intron (NAluSx S1  | 52954  | NM_002074 | 2782     | Hs.43042E | NM_002074    | ENSG00000  | GNB1      | MRD42           | G                         | protein            | protein-coding |                |
| chr1-2201 | 5.947958 | 0.048755 | 0.93718  | 0.052023 | 0.95851  | 0.981636 | chr1  | 2.2E+08  | 2.2E+08  | + | 0 | NA | intron (NAluSg SIN | -18284 | NR_029711 | 406969   | NR_029711 | ENSG00000    | MIR194-1   | MIRN194-1 | miRNA           | ncRNA                     |                    |                |                |
| chr10-926 | 5.947958 | 0.048755 | 0.93718  | 0.052023 | 0.95851  | 0.981636 | chr10 | 926392   | 927237   | + | 0 | NA | intron (NAluSx SIN | 4891   | NM_001351 | 23185    | Hs.15906E | NM_01515E    | ENSG00000  | LARP4B    | KIAA0217        | La                        | ribon              | protein-coding |                |
| chr12-644 | 5.947958 | 0.048755 | 0.93718  | 0.052023 | 0.95851  | 0.981636 | chr12 | 6445178  | 6447093  | + | 0 | NA | intron (Nintron (N | 1250   | NM_00124E | 939      | Hs.355307 | NM_00124E    | ENSG00000  | CD27      | S152            | S152                      | CD27               | mol            | protein-coding |
| chr13-42  | 5.947958 | 0.048755 | 0.93718  | 0.052023 | 0.95851  | 0.981636 | chr13 | 42304954 | 42305624 | + | 0 | NA | intron (NMER58B DN | 33306  | NM_01624E | 11215    | Hs.10510E | NM_01624E    | ENSG00000  | AKAP11    | AKAP-11         | A                         | kinase             | protein-coding |                |
| chr13-495 | 5.947958 | 0.048755 | 0.93718  | 0.052023 | 0.95851  | 0.981636 | chr13 | 49556000 | 49558289 | + | 0 | NA | intron (Nintron (N | 28411  | NM_00135E | 55213    | Hs.508021 | NM_018191    | ENSG00000  | RCBTB1    | CLD7            | CLL                       | RCC1               | and            | protein-coding |
| chr13-115 | 5.947958 | 0.048755 | 0.93718  | 0.052023 | 0.95851  | 0.981636 | chr13 | 1.14E+08 | 1.14E+08 | + | 0 | NA | TTS (NM_C          | -34208 | NR_02658C | 7027     | Hs.79353  | NM_007111    | ENSG00000  | TFDP1     | DILC            | DP1                       |                    | transcrip      | protein-coding |
| chr16-508 | 5.947958 | 0.048755 | 0.93718  | 0.052023 | 0.95851  | 0.981636 | chr16 | 5083958  | 5086141  | + | 0 | NA | 3' UTR (N3' UTR (N | 12746  | NM_20140C | 196483   | Hs.406461 | NM_20140C    | ENSG00000  | EEF2KMT   | EFM3            | FAM5                      | eukaryot           | i              | protein-coding |
| chr16-895 | 5.947958 | 0.048755 | 0.93718  | 0.052023 | 0.95851  | 0.981636 | chr16 | 89309922 | 89312036 | + | 0 | NA | intron (NLM14 LINE | -10154 | NM_00124E | 1E+08    | Hs.65699E | NM_001242885 | LOC100287E | -         | uncharact       | protein-coding            |                    |                |                |
| chr17-425 | 5.947958 | 0.048755 | 0.93718  | 0.052023 | 0.95851  | 0.981636 | chr17 | 4288952  | 4291119  | + | 0 | NA | intron (Nintron (N | 572    | NM_00119C | 4092     | Hs.465087 | NM_005904    | ENSG00000  | SMAD7     | CRCS3           | MAI                       | SMAD               | famip          | protein-coding |
| chr19-465 | 5.947958 | 0.048755 | 0.93718  | 0.052023 | 0.95851  | 0.981636 | chr19 | 46677161 | 46677961 | + | 0 | NA | TTS (NR_C          | 16083  | NR_040041 | 1.01E+08 | Hs.434327 | NR_040041    | ENSG00000  | DACT3-AS1 | DACT3           | antncRNA                  |                    |                |                |
| chr19-471 | 5.947958 | 0.048755 | 0.93718  | 0.052023 | 0.95851  | 0.981636 | chr19 | 47183145 | 47184727 | + | 0 | NA | intron (Nintron (N | -43006 | NR_03615E | 1E+08    | NR_03615E | ENSG00000    | MIR3190    | mir-3190  | microRNA        | ncRNA                     |                    |                |                |
| chr2-9655 | 5.947958 | 0.048755 | 0.93718  | 0.052023 | 0.95851  | 0.981636 | chr2  | 96598003 | 96599007 | + | 0 | NA | intron (Nintron (N | 39486  | NR_04765E | 55683    | Hs.516341 | NM_017991    | ENSG00000  | KANSL3    | KIAA1310        | KAT8                      | reg                | protein-coding |                |
| chr20-335 | 5.947958 | 0.048755 | 0.93718  | 0.052023 | 0.95851  | 0.981636 | chr20 | 3368019  | 33689493 | + | 0 | NA | intron (NAluY SINE | 38906  | NM_00100E | 25943    | Hs.51685E | NM_00100E    | ENSG00000  | C20orf194 | -               | chromoson                 | protein-coding     |                |                |
| chr22-194 | 5.947958 | 0.048755 | 0.93718  | 0.052023 | 0.95851  | 0.981636 | chr22 | 19458665 | 19459679 | + | 0 | NA | intron (Nintron (N | -10940 | NM_17379E | 128977   | Hs.65956E | NM_17379E    | ENSG00000  | C22orf39  | -               | chromoson                 | protein-coding     |                |                |
| chr4-2541 | 5.947958 | 0.048755 | 0.93718  | 0.052023 | 0.95851  | 0.981636 | chr4  | 25411355 | 25412981 | + | 0 | NA | intron (NMER21C LI | 34905  | NM_01336E | 29945    | Hs.15217E | NM_01336E    | ENSG00000  | ANAPCA4   | APC4            | anaphase                  | protein-coding     |                |                |
| chr4-4195 | 5.947958 | 0.048755 | 0.93718  | 0.052023 | 0.95851  | 0.981636 | chr4  | 41939331 | 41940287 | + | 0 | NA | intron (Nintron (N | 4380   | NM_01812E | 55161    | Hs.31082  | NM_01812E    | ENSG00000  | TMEM33    | 1600019D1       | transmemt                 | protein-coding     |                |                |
| chr4-570  | 5.947958 | 0.048755 | 0.93718  | 0.052023 | 0.95851  | 0.981636 | chr4  | 57055354 | 57056585 | + | 0 | NA | intron (Nintron (N | -53793 | NR_034081 | 255130   | Hs.691061 | NR_034081    | ENSG00000  | IGFBP7-AS | -               | IGFBP7                    | ar                 | ncRNA          |                |
| chr4-1054 | 5.947958 | 0.048755 | 0.93718  | 0.052023 | 0.95851  | 0.981636 | chr4  | 1.05E+08 | 1.05E+08 | + | 0 | NA | intron (Nintron (N | 38832  | NM_17686E | 27068    | Hs.654957 | NM_00690E    | ENSG00000  | PPA2      | HSPC124         | Spyrophos                 | protein-coding     |                |                |
| chr5-789  | 5.947958 | 0.048755 | 0.93718  | 0.052023 | 0.95851  | 0.981636 | chr5  | 7893898  | 7896700  | + | 0 | NA | intron (Nintron (N | 26151  | NR_13448E | 4552     | Hs.481551 |              |            |           |                 |                           |                    |                |                |



|            |          |          |          |          |          |          |       |          |          |   |   |    |                     |                   |                          |                   |                    |                         |                                      |                         |
|------------|----------|----------|----------|----------|----------|----------|-------|----------|----------|---|---|----|---------------------|-------------------|--------------------------|-------------------|--------------------|-------------------------|--------------------------------------|-------------------------|
| chr17-286  | 6.42698  | 0.046447 | 0.903742 | 0.051394 | 0.959012 | 0.981636 | chr17 | 28650538 | 28652602 | + | 0 | NA | intron (NMIRb SINE  | -6411 NM_001363   | 9703 Hs. 151761NM_01468C | ENSG0000CKIAA0100 | BCOX BCOX KIAA0100 | protein-coding          |                                      |                         |
| chr17-350  | 6.42698  | 0.046447 | 0.903742 | 0.051394 | 0.959012 | 0.981636 | chr17 | 35022631 | 35026767 | + | 0 | NA | intron (Nintron (N  | 37143 NM_001017   | 117584 Hs. 13680         | NR_005717         | ENSG00000RFFL      | CARP-2 Caring           | fingerprotein-coding                 |                         |
| chr17-372  | 6.42698  | 0.046447 | 0.903742 | 0.051394 | 0.959012 | 0.981636 | chr17 | 37250278 | 37251829 | + | 0 | NA | intron (NAluY SINE  | 6252 NR_132772    | 1.07E+08                 | NR_132772         | SNORA90            | -                       | small nucsnoRNA                      |                         |
| chr17-387  | 6.42698  | 0.046447 | 0.903742 | 0.051394 | 0.959012 | 0.981636 | chr17 | 38793491 | 38796461 | + | 0 | NA | intron (NAluXs LI   | 4929 NM_003556    | 8396 Hs. 266060          | ENSG00000PIP4K2B  | PI5P4KB F          | phosphatiprotein-coding |                                      |                         |
| chr17-602  | 6.42698  | 0.046447 | 0.903742 | 0.051394 | 0.959012 | 0.981636 | chr17 | 60201782 | 60203887 | + | 0 | NA | intron (NMLT1C LST  | 28811 NR_002995   | 677681                   | NR_002995         | ENSG00000SCARNA20  | ACA66                   | small Ca <sub>v</sub> ncRNA          |                         |
| chr18-294  | 6.42698  | 0.046447 | 0.903742 | 0.051394 | 0.959012 | 0.981636 | chr18 | 2945601  | 2946868  | + | 0 | NA | non-codiron-codir   | 389 NR_026655     | 727896 Hs. 67312         | NR_026659         | LOC727896          | -                       | cysteine pseudo                      |                         |
| chr18-577  | 6.42698  | 0.046447 | 0.903742 | 0.051394 | 0.959012 | 0.981636 | chr18 | 57700021 | 57703354 | + | 0 | NA | intron (NAluXs SIN  | 71476 NM_001242   | 1.01E+08                 | Hs. 660645        | NR_001242804       | LOC1005050              | -                                    | uncharactprotein-coding |
| chr19-365  | 6.42698  | 0.046447 | 0.903742 | 0.051394 | 0.959012 | 0.981636 | chr19 | 36910790 | 36911759 | + | 0 | NA | intron (NAluSz SIN  | 4767 NM_001171    | 374899 Hs. 720312        | NR_001037         | ENSG00000ZNF829    | -                       | zinc fingerprotein-coding            |                         |
| chr19-435  | 6.42698  | 0.046447 | 0.903742 | 0.051394 | 0.959012 | 0.981636 | chr19 | 43552649 | 43554251 | + | 0 | NA | exon (NM exon (NM   | 20262 NM_174945   | 284346 Hs. 213534        | NR_174945         | ENSG00000ZNF575    | -                       | zinc fingerprotein-coding            |                         |
| chr2-1214  | 6.42698  | 0.046447 | 0.903742 | 0.051394 | 0.959012 | 0.981636 | chr2  | 1.21E+08 | 1.21E+08 | + | 0 | NA | intron (NAluJo SIN  | -121652 NM_104555 | 29842 Hs. 156471         | NR_014555         | ENSG00000TFCP2L1   | CRTR1 LBF               | transcripprotein-coding              |                         |
| chr2-162C  | 6.42698  | 0.046447 | 0.903742 | 0.051394 | 0.959012 | 0.981636 | chr2  | 1.62E+08 | 1.62E+08 | + | 0 | NA | intron (Nintron (N  | 50462 NM_001935   | 1803 Hs. 368912          | NR_001935         | ENSG00000DPP4      | ADABP ADC               | dipeptidprotein-coding               |                         |
| chr22-425  | 6.42698  | 0.046447 | 0.903742 | 0.051394 | 0.959012 | 0.981636 | chr22 | 42572275 | 42575244 | + | 0 | NA | non-codiron-codir   | 8252 NR_002184    | 91695 Hs. 534041         | NR_002184         | ENSG00000RRP7BP    | RRP7B dJ                | ribosomalpseudo                      |                         |
| chr3-1495  | 6.42698  | 0.046447 | 0.903742 | 0.051394 | 0.959012 | 0.981636 | chr3  | 1.5E+08  | 1.5E+08  | + | 0 | NA | intron (NLMCa LIN   | 19913 NM_002625   | 5217 Hs. 91747           | NR_002625         | ENSG00000PFN2      | D3S1319E                | profilin protein-coding              |                         |
| chr4-176C  | 6.42698  | 0.046447 | 0.903742 | 0.051394 | 0.959012 | 0.981636 | chr4  | 17606468 | 17608846 | + | 0 | NA | 3' UTR (N3' UTR (N  | -6984 NM_025205   | 80306 Hs. 73196          | NR_025205         | ENSG00000MED28     | 1500003D1               | mediator protein-coding              |                         |
| chr4-169C  | 6.42698  | 0.046447 | 0.903742 | 0.051394 | 0.959012 | 0.981636 | chr4  | 1.69E+08 | 1.69E+08 | + | 0 | NA | intron (Nintron (N  | -86545 NM_032783  | 84869 Hs. 659311         | NR_032783         | ENSG00000CBR4      | SDR45C1                 | carbonyl protein-coding              |                         |
| chr6-1167  | 6.42698  | 0.046447 | 0.903742 | 0.051394 | 0.959012 | 0.981636 | chr6  | 1.17E+08 | 1.17E+08 | + | 0 | NA | intron (NLMB5 LIN   | 33778 NM_001366   | 3841 Hs. 182971          | NR_002266         | ENSG00000KPN45     | IPOA6 SRF               | karyopherin-coding                   |                         |
| chr6-1597  | 6.42698  | 0.046447 | 0.903742 | 0.051394 | 0.959012 | 0.981636 | chr6  | 1.6E+08  | 1.6E+08  | + | 0 | NA | intron (Nintron (N  | -2724 NM_173515   | 154197 Hs. 349077        | NR_173515         | ENSG00000PNLDC1    | HsPNLDC1                | PARN likeprotein-coding              |                         |
| chr7-1557  | 6.42698  | 0.046447 | 0.903742 | 0.051394 | 0.959012 | 0.981636 | chr7  | 1.56E+08 | 1.56E+08 | + | 0 | NA | intron (Nintron (N  | 57657 NM_053043   | 155435 Hs. 59181         | NR_053043         | ENSG00000RBM33     | PRR8                    | RNA bindiprotein-coding              |                         |
| chr8-5395  | 6.42698  | 0.046447 | 0.903742 | 0.051394 | 0.959012 | 0.981636 | chr8  | 53930899 | 53932330 | + | 0 | NA | intron (NLP1A7 LIN  | 50742 NR_104578   | 8601 Hs. 368733          | NR_003702         | ENSG00000RGS20     | RGS21 ZG                | regulatorprotein-coding              |                         |
| chr8-125C  | 6.42698  | 0.046447 | 0.903742 | 0.051394 | 0.959012 | 0.981636 | chr8  | 1.25E+08 | 1.25E+08 | + | 0 | NA | intron (Nintron (N  | 40673 NM_003125   | 6713 Hs. 71465           | NR_003125         | ENSG00000SCSLE     | -                       | squalene protein-coding              |                         |
| chr9-2691  | 6.42698  | 0.046447 | 0.903742 | 0.051394 | 0.959012 | 0.981636 | chr9  | 26910037 | 26911435 | + | 0 | NA | intron (NAluJb SIN  | -17908 NM_001167  | 79886 Hs. 178357         | NR_024825         | ENSG00000CAAP1     | C9orf82 Caspase         | εprotein-coding                      |                         |
| chr9-109C  | 6.42698  | 0.046447 | 0.903742 | 0.051394 | 0.959012 | 0.981636 | chr9  | 1.09E+08 | 1.09E+08 | + | 0 | NA | intron (NAluSz SIN  | 29692 NM_032012   | 23731 Hs. 308074         | NR_032012         | ENSG00000TMEM245   | C9orf5 CC               | transmemprotein-coding               |                         |
| chr9-1207  | 6.42698  | 0.046447 | 0.903742 | 0.051394 | 0.959012 | 0.981636 | chr9  | 1.21E+08 | 1.21E+08 | + | 0 | NA | intron (Nintron (N  | 15481 NM_012164   | 26190 Hs. 494985         | NR_012164         | ENSG00000FBXW2     | FBW2 FwdZ               | F-box ancprotein-coding              |                         |
| chr9-1208  | 6.42698  | 0.046447 | 0.903742 | 0.051394 | 0.959012 | 0.981636 | chr9  | 1.21E+08 | 1.21E+08 | + | 0 | NA | exon (NM exon (NM   | 10958 NM_104601   | 26147 Hs. 460124         | NR_015651         | ENSG00000PHF19     | MTF2L1 PC               | PHD fingerprotein-coding             |                         |
| chr9-1278  | 6.42698  | 0.046447 | 0.903742 | 0.051394 | 0.959012 | 0.981636 | chr9  | 1.28E+08 | 1.28E+08 | + | 0 | NA | intron (NMIRb SINE  | 7078 NM_001278    | 2022 Hs. 76753           | NR_000115         | ENSG00000CENG      | END HHT1                | endoglin protein-coding              |                         |
| chrX-4798  | 6.42698  | 0.046447 | 0.903742 | 0.051394 | 0.959012 | 0.981636 | chrX  | 47987483 | 47989474 | + | 0 | NA | intron (NMSTB LTR   | 15511 NM_006962   | 7569 Hs. 18969           | NR_006962         | ENSG00000ZNF182    | HHZ150 KC               | zinc fingerprotein-coding            |                         |
| chrX-5362  | 6.42698  | 0.046447 | 0.903742 | 0.051394 | 0.959012 | 0.981636 | chrX  | 53624188 | 53630495 | + | 0 | NA | intron (NTiger20a   | 59378 NM_031407   | 10075 Hs. 13690          | NR_031407         | ENSG00000HUW1      | ARF-BP1 F               | HECT, UB <sup>a</sup> protein-coding |                         |
| chr1-6654  | 9.870273 | 0.038255 | 0.745402 | 0.051322 | 0.959069 | 0.981636 | chr1  | 66547665 | 66547870 | + | 0 | NA | intron (NL2a LINE   | 13614 NM_032291   | 84251 Hs. 132121         | NR_032291         | ENSG00000SGIP1     | -                       | SH3 domainprotein-coding             |                         |
| chr18-29C  | 9.870273 | 0.038255 | 0.745402 | 0.051322 | 0.959069 | 0.981636 | chr18 | 2930598  | 2931388  | + | 0 | NA | intron (Nintron (N  | 15630 NR_026655   | 727896 Hs. 67312         | NR_026659         | LOC727896          | -                       | cysteine pseudo                      |                         |
| chr12-10C  | 5.419938 | 0.051265 | 0.999194 | 0.051306 | 0.959081 | 0.981636 | chr12 | 1E+08    | 1E+08    | + | 0 | NA | intron (NAluS6 SI   | 9814 NR_048568    | 64341 Hs. 115088         | NR_022495         | ENSG00000ACTR6     | ARP6 CDA                | actin relprotein-coding              |                         |
| chr17-535  | 5.419938 | 0.051265 | 0.999194 | 0.051306 | 0.959081 | 0.981636 | chr17 | 5392392  | 5394365  | + | 0 | NA | intron (NAluJr SIN  | -26263 NM_00116C  | 84268 Hs. 46208          | NR_032305         | ENSG00000CRPAIN    | HRIP RIP                | RPA interprotein-coding              |                         |
| chr6-8721  | 5.419938 | 0.051265 | 0.999194 | 0.051306 | 0.959081 | 0.981636 | chr6  | 87216878 | 87217908 | + | 0 | NA | intron (Nintron (N  | 61828 NM_015021   | 23036 Hs. 44480          | NR_015021         | ENSG00000ZNF292    | NblA00365               | zinc fingerprotein-coding            |                         |
| chr6-1175  | 5.419938 | 0.051265 | 0.999194 | 0.051306 | 0.959081 | 0.981636 | chr6  | 1.18E+08 | 1.18E+08 | + | 0 | NA | intron (Nintron (N  | 43100 NM_001366   | 285761 Hs. 658304        | NR_173674         | ENSG00000DCLD1     | dJ94G16                 | discoidin protein-coding             |                         |
| chr7-103C  | 5.419938 | 0.051265 | 0.999194 | 0.051306 | 0.959081 | 0.981636 | chr7  | 1.03E+08 | 1.03E+08 | + | 0 | NA | intron (NLM4a LI    | 22335 NM_001161   | 83787 Hs. 287412         | NR_031905         | ENSG00000CARMC10   | PNAS-112                | armadillprotein-coding               |                         |
| chr10-225  | 4.469751 | 0.055152 | 1.075785 | 0.051266 | 0.959113 | 0.981636 | chr10 | 22539091 | 22539793 | + | 0 | NA | intron (Nintron (N  | -101513 NR_036533 | 1E+08 Hs. 7444           | NR_036533         | LOC100495          | -                       | uncharactncRNA                       |                         |
| chr1-4098  | 8.136932 | -0.04169 | 0.813248 | -0.05126 | 0.959117 | 0.981636 | chr1  | 40995382 | 40999747 | + | 0 | NA | intron (Nintron (N  | 9045 NM_001301    | 1503 Hs. 473087          | NR_001905         | ENSG00000CTPS1     | CTPS GATL               | CTP syntprotein-coding               |                         |
| chr12-1318 | 8.136932 | -0.04169 | 0.813248 | -0.05126 | 0.959117 | 0.981636 | chr12 | 1.32E+08 | 1.32E+08 | + | 0 | NA | intron (Nintron (N  | 9774 NM_004592    | 6433 Hs. 308171          | NR_004592         | ENSG00000SFSWAP    | SFRS8 SW                | splicing protein-coding              |                         |
| chr13-778  | 8.136932 | -0.04169 | 0.813248 | -0.05126 | 0.959117 | 0.981636 | chr13 | 77768316 | 77768657 | + | 0 | NA | exon (NM exon (NM   | 92972 NR_046715   | 1.01E+08 Hs. 56928       | NR_046715         | ENSG00000MYCBP2-AS | -                       | MYCBP2 arncRNA                       |                         |
| chr15-282  | 8.136932 | -0.04169 | 0.813248 | -0.05126 | 0.959117 | 0.981636 | chr15 | 28210172 | 28210889 | + | 0 | NA | intron (N(TACA)n S  | -112125 NM_000275 | 4948 Hs. 654411          | NR_000275         | ENSG00000OCA2      | BEY BEY1                | OCA2 mēlprotein-coding               |                         |
| chr16-864  | 8.136932 | -0.04169 | 0.813248 | -0.05126 | 0.959117 | 0.981636 | chr16 | 86494573 | 86497424 | + | 0 | NA | intron (Nintron (N  | 12862 NR_033925   | 400550 Hs. 44882         | NR_033925         | ENSG00000FENDRR    | FOXF1-AS1               | FOXF1 ad <sub>v</sub> ncRNA          |                         |
| chr17-307  | 8.136932 | -0.04169 | 0.813248 | -0.05126 | 0.959117 | 0.981636 | chr17 | 30735967 | 30736729 | + | 0 | NA | intron (NSVA_F Ret  | 26740 NR_144395   | 440423 Hs. 62888         | NR_024187         | SUZ12P1            | SUZ12P                  | SUZ12 psepseudo                      |                         |
| chr2-1125  | 8.136932 | -0.04169 | 0.813248 | -0.05126 | 0.959117 | 0.981636 | chr2  | 1.13E+08 | 1.13E+08 | + | 0 | NA | 3' UTR (N3' UTR (N  | -12411 NM_001137  | 84172 Hs. 745127         | NR_019014         | ENSG00000POLR1B    | RPA123 RF               | RNA polynprotein-coding              |                         |
| chr2-1135  | 8.136932 | -0.04169 | 0.813248 | -0.05126 | 0.959117 | 0.981636 | chr2  | 1.14E+08 | 1.14E+08 | + | 0 | NA | intron (NHAL1 LINE  | -23772 NR_148507  | 440900 Hs. 66220         | NR_034125         | ENSG00000LINC01191 | VIN Inc- <sup>β</sup>   | long intncRNA                        |                         |
| chr2-1864  | 8.136932 | -0.04169 | 0.813248 | -0.05126 | 0.959117 | 0.981636 | chr2  | 1.86E+08 | 1.86E+08 | + | 0 | NA | intron (NLM3G LI    | 9547 NM_018471    | 55854 Hs. 74118          | NR_018471         | ENSG00000ZC3H15    | HT010 LEF               | zinc fingerprotein-coding            |                         |
| chr20-375  | 8.136932 | -0.04169 | 0.813248 | -0.05126 | 0.959117 | 0.981636 | chr20 | 37998101 | 37999114 | + | 0 | NA | intron (NMIRc SINE  | 34849 NM_001303   | 9675 Hs. 65548           | NR_014657         | ENSG00000CTTI1     | KIAA0406 TELO2          | intprotein-coding                    |                         |
| chr20-385  | 8.136932 | -0.04169 | 0.813248 | -0.05126 | 0.959117 | 0.981636 | chr20 | 38573842 | 38574590 | + | 0 | NA | exon (NM exon (NM   | -6981 NR_130907   | 149685 Hs. 36802         | NR_174905         | ENSG00000ADIG      | SMAP1                   | adipogenprotein-coding               |                         |
| chr3-3736  | 8.136932 | -0.04169 | 0.813248 | -0.05126 | 0.959117 | 0.981636 | chr3  | 37367275 | 37367965 | + | 0 | NA | TTS (NM_C TTS (NM_C | -18649 NM_178344  | 339883 Hs. 47594         | NR_178335         | ENSG00000C3orf35   | APRG1                   | chromosonprotein-coding              |                         |
| chr5-1707  | 8.136932 | -0.04169 | 0.813248 | -0.05126 | 0.959117 | 0.981636 | chr5  | 1.77E+08 | 1.77E+08 | + | 0 | NA | intron (Nintron (N  | 41241 NM_001031   | 53917 Hs. 16258          | NR_130781         | ENSG00000CRAB24    | -                       | RAB24, meprotein-coding              |                         |
| chr1-1707  | 6.717431 | -0.04589 | 0.895829 | -0.05122 | 0.959147 | 0.981636 | chr1  | 1.71E+08 | 1.71E+08 | + | 0 | NA | intron (Nintron (N  | 58669 NM_006902   | 5396 Hs. 28341           | NR_006902         | ENSG00000PRXR1     | AGOTC PHC               | paired reprotein-coding              |                         |
| chr17-786  | 6.717431 | -0.04589 | 0.895829 | -0.05122 | 0.959147 | 0.981636 | chr17 | 78699985 | 78700861 | + | 0 | NA | exon (NM exon (NM   | 16609 NM_001292   | 9267 Hs. 19121           | NR_004762         | ENSG00000CYTH1     | B2-1 CYT                | cytohesin protein-coding             |                         |
| chr2-552   | 6.717431 | -0.04589 | 0.895829 | -0.05122 | 0.959147 | 0.981636 | chr2  | 55252516 | 552      |   |   |    |                     |                   |                          |                   |                    |                         |                                      |                         |

|                     |          |          |          |          |          |       |          |          |      |                     |                  |                              |                     |                     |                          |
|---------------------|----------|----------|----------|----------|----------|-------|----------|----------|------|---------------------|------------------|------------------------------|---------------------|---------------------|--------------------------|
| chr9-1225 7.204311  | -0.04353 | 0.861341 | -0.05054 | 0.95969  | 0.981636 | chr9  | 1.23E+08 | 1.23E+08 | 0 NA | intron (N)IMEF LIN  | -34539 NM_005294 | 2844 Hs. 722036NM_005294     | ENSG000000GPR21     | -                   | G protein-coding         |
| chr1-3884 7.434022  | 0.042935 | 0.849669 | 0.050531 | 0.959699 | 0.981636 | chr1  | 38849394 | 38851393 | 0 NA | intron (N)Alu SINE  | 9379 NM_001271   | 64121 Hs. 532461NM_022157    | ENSG000000RRAGC     | GTR2 RAGC           | Ras relatprotein-coding  |
| chr1-1761 7.434022  | 0.042935 | 0.849669 | 0.050531 | 0.959699 | 0.981636 | chr1  | 1.76E+08 | 1.76E+08 | 0 NA | intron (N)AluSc SIN | 91624 NM_001001  | 64326 Hs. 523744NM_022457    | ENSG000000COP1      | RNFWD2 RNF COP1 E3  | protein-coding           |
| chr11-77 7.434022   | 0.042935 | 0.849669 | 0.050531 | 0.959699 | 0.981636 | chr11 | 773608   | 774519   | 0 NA | exon (NM exon (NM   | 3424 NM_00131E   | 347862 Hs. 218362NM_182612   | ENSG000000GATD1     | PDDC1               | glutamine protein-coding |
| chr13-366 7.434022  | 0.042935 | 0.849669 | 0.050531 | 0.959699 | 0.981636 | chr13 | 36878091 | 36878621 | 0 NA | intron (N)Tigger3a  | 41882 NM_00590E  | 4093 Hs. 123115NM_00590E     | ENSG000000SMAD9     | MADH6 MAI SMAD      | fam protein-coding       |
| chr16-861 7.434022  | 0.042935 | 0.849669 | 0.050531 | 0.959699 | 0.981636 | chr16 | 86145    | 90947    | 0 NA | intron (N)intron (N | 10321 NM_00101E  | 4350 Hs. 459596NM_002434     | ENSG000000MPG       | AAG ADPG N-methyl   | protein-coding           |
| chr16-587 7.434022  | 0.042935 | 0.849669 | 0.050531 | 0.959699 | 0.981636 | chr16 | 58721974 | 58723865 | 0 NA | intron (N)intron (N | 11397 NM_00128E  | 2806 Hs. 599477NM_002088     | ENSG000000GOT2      | KAT4 KAT1           | glutamic protein-coding  |
| chr17-366 7.434022  | 0.042935 | 0.849669 | 0.050531 | 0.959699 | 0.981636 | chr17 | 3663686  | 3665050  | 0 NA | intron (N)intron (N | 4210 NM_014604   | 30851 Hs. 12956 NM_014604    | ENSG000000TAX1BP3   | TIP-1 TIF Tax1      | binc protein-coding      |
| chr19-13C 7.434022  | 0.042935 | 0.849669 | 0.050531 | 0.959699 | 0.981636 | chr19 | 13083378 | 13084078 | 0 NA | intron (N)intron (N | 19130 NM_00558E  | 4066 Hs. 46446 NM_00558E     | ENSG000000LYL1      | bHLHa18             | LYL1 basiprotein-coding  |
| chr19-18F 7.434022  | 0.042935 | 0.849669 | 0.050531 | 0.959699 | 0.981636 | chr19 | 18535844 | 18537005 | 0 NA | intron (N)AluJo SIN | 7149 NM_012181   | 23770 Hs. 173464NM_012181    | ENSG000000FKBP8     | FKBP38 FKFBP        | prolprotein-coding       |
| chr2-113F 7.434022  | 0.042935 | 0.849669 | 0.050531 | 0.959699 | 0.981636 | chr2  | 1.14E+08 | 1.14E+08 | 0 NA | intron (N)AluX3 SI  | -9115 NR_026821  | 654412 Hs. 64026CNR_026821   | ENSG000000FAM138B   | F379 bA3E           | family wincRNA           |
| chr2-1961 7.434022  | 0.042935 | 0.849669 | 0.050531 | 0.959699 | 0.981636 | chr2  | 1.96E+08 | 1.96E+08 | 0 NA | intron (N)Charlie7  | 23032 NM_00422E  | 9262 Hs. 88297 NM_00422E     | ENSG000000STK17B    | DRAK2               | serine/tl protein-coding |
| chr3-144E 7.434022  | 0.042935 | 0.849669 | 0.050531 | 0.959699 | 0.981636 | chr3  | 14468504 | 14468786 | 0 NA | intron (N)intron (N | 66039 NM_001134  | 6533 Hs. 529488NM_00304E     | ENSG000000SLC6A6    | TAUT                | solute c protein-coding  |
| chr5-149E 7.434022  | 0.042935 | 0.849669 | 0.050531 | 0.959699 | 0.981636 | chr5  | 1493332  | 1494802  | 0 NA | intron (N)intron (N | 16789 NR_10672E  | 1.02E+08 NR_10672E           | ENSG000000MIR6075   | hsa-mir-ε           | microRNA ncRNA           |
| chr6-113E 7.434022  | 0.042935 | 0.849669 | 0.050531 | 0.959699 | 0.981636 | chr6  | 1.14E+08 | 1.14E+08 | 0 NA | intron (N)intron (N | -17905 NR_12584E | 1.02E+08 Hs. 12928CNR_12584E | ENSG000000HDAC2-AS2 | HDAC2               | ancncRNA                 |
| chr7-993E 7.434022  | 0.042935 | 0.849669 | 0.050531 | 0.959699 | 0.981636 | chr7  | 99399503 | 99400759 | 0 NA | intron (N)intron (N | 8466 NM_014891   | 11333 Hs. 63229E NM_014891   | ENSG000000PDAP1     | MASP28 PFDGFA       | ass protein-coding       |
| chr8-144E 7.434022  | 0.042935 | 0.849669 | 0.050531 | 0.959699 | 0.981636 | chr8  | 1.44E+08 | 1.44E+08 | 0 NA | TTS (NM_TTS (NM_1   | 788 NR_03063E    | 1E+08 NR_03063E              | ENSG000000MIR939    | HMRN939 hmicroRNA   | ncRNA                    |
| chr9-1314 7.434022  | 0.042935 | 0.849669 | 0.050531 | 0.959699 | 0.981636 | chr9  | 1.31E+08 | 1.31E+08 | 0 NA | intron (N)intron (N | 24933 NM_01331E  | 84726 Hs. 74395E NM_01331E   | ENSG000000PRRC2B    | BAT2L BAI           | proline r protein-coding |
| chr12-78C 6.623812  | -0.03994 | 0.79101  | -0.0505  | 0.959726 | 0.981636 | chr12 | 78007009 | 78007965 | 0 NA | intron (N)intron (N | 176593 NM_01490E | 89795 Hs. 655301NM_01490E    | ENSG000000NAV3      | POMF1L1 Sneur       | nc protein-coding        |
| chr12-9118 6.623812 | -0.03994 | 0.79101  | -0.0505  | 0.959726 | 0.981636 | chr12 | 91103257 | 91103608 | 0 NA | 3' UTR (N3' UTR (N  | 8062 NM_00234E   | 4060 Hs. 40647E NM_00234E    | ENSG000000CLUM      | LDC SLRR2           | lumican protein-coding   |
| chr14-21E 6.623812  | -0.03994 | 0.79101  | -0.0505  | 0.959726 | 0.981636 | chr14 | 21222456 | 21226458 | 0 NA | intron (N)intron (N | -17557 NR_038971 | 283624 Hs. 52521CNR_038971   | ENSG000000LINC00641 | -                   | long intncRNA            |
| chr17-42E 6.623812  | -0.03994 | 0.79101  | -0.0505  | 0.959726 | 0.981636 | chr17 | 42951433 | 42952197 | 0 NA | exon (NM exon (NM   | 12639 NM_001261  | 80755 Hs. 31740E NM_001261   | ENSG000000AARS1     | -                   | alanyl-tf protein-coding |
| chr17-68E 6.623812  | -0.03994 | 0.79101  | -0.0505  | 0.959726 | 0.981636 | chr17 | 68250929 | 68254406 | 0 NA | intron (N)AluJo SIN | -4624 NM_016627  | 51321 Hs. 29356C NM_016627   | ENSG000000CAMZ2     | -                   | archaelys protein-coding |
| chr20-56E 6.623812  | -0.03994 | 0.79101  | -0.0505  | 0.959726 | 0.981636 | chr20 | 56517148 | 56521319 | 0 NA | TTS (NM_TTS (NM_C   | 5496 NM_00101E   | 200232 Hs. 504907NM_00101E   | ENSG000000FAM209A   | C20orf10E           | familyp protein-coding   |
| chr22-314 6.623812  | -0.03994 | 0.79101  | -0.0505  | 0.959726 | 0.981636 | chr22 | 31468976 | 31471612 | 0 NA | intron (N)AluSg SIN | 19262 NM_001164  | 56478 Hs. 51755E NM_01984E   | ENSG000000EIF4ENF1  | EIF4E T Clas        | eukaryotiprotein-coding  |
| chr1-677E 7.913044  | 0.041391 | 0.822996 | 0.050294 | 0.959888 | 0.981636 | chr1  | 67701470 | 67705980 | 0 NA | 3' UTR (N3' UTR (N  | 19874 NM_001924  | 1647 Hs. 80409 NM_001924     | ENSG000000GADD45A   | DDIT1 GAI           | growth ar protein-coding |
| chr1-108E 7.913044  | 0.041391 | 0.822996 | 0.050294 | 0.959888 | 0.981636 | chr1  | 1.09E+08 | 1.09E+08 | 0 NA | intron (N)intron (N | 12981 NM_00127E  | 23155 Hs. 65848E NM_015127   | ENSG000000CLCC1     | MCLC                | chloride protein-coding  |
| chr11-62E 7.913044  | 0.041391 | 0.822996 | 0.050294 | 0.959888 | 0.981636 | chr11 | 62661754 | 62663017 | 0 NA | TTS (NR_TTS (NR_1   | 2831 NR_104411   | 1.02E+08 Hs. 9061 NM_00128E  | ENSG000000C11orf98  | C11orf48            | chromoson protein-coding |
| chr11-72E 7.913044  | 0.041391 | 0.822996 | 0.050294 | 0.959888 | 0.981636 | chr11 | 72028127 | 72029581 | 0 NA | intron (N)intron (N | 14560 NR_10417E  | 1E+08 Hs. 713607NR_10417E    | ENSG000000LOC10012E | -                   | uncharactncRNA           |
| chr12-28E 7.913044  | 0.041391 | 0.822996 | 0.050294 | 0.959888 | 0.981636 | chr12 | 2801109  | 2803158  | 0 NA | intron (N)intron (N | 7163 NM_002014   | 2288 Hs. 52418E NM_002014    | ENSG000000FKBP4     | FKBP51 FKFBP        | prolprotein-coding       |
| chr12-21E 7.913044  | 0.041391 | 0.822996 | 0.050294 | 0.959888 | 0.981636 | chr12 | 21512152 | 21514846 | 0 NA | intron (N(T)n Simp  | 11710 NM_01607E  | 51026 Hs. 6227E NM_01607E    | ENSG000000GOLT1B    | CGI-141 Colgi       | trε protein-coding       |
| chr12-12E 7.913044  | 0.041391 | 0.822996 | 0.050294 | 0.959888 | 0.981636 | chr12 | 1.22E+08 | 1.22E+08 | 0 NA | intron (N)intron (N | -61238 NM_00135E | 65082 Hs. 48788E NM_02291E   | ENSG000000VPS33A    | MPSPS               | VPS33A c protein-coding  |
| chr15-67E 7.913044  | 0.041391 | 0.822996 | 0.050294 | 0.959888 | 0.981636 | chr15 | 67174121 | 67175774 | 0 NA | intron (N)intron (N | 8792 NM_00114E   | 4088 Hs. 72798E NM_00590E    | ENSG000000SMAD3     | HSPC193 FSMAD       | fam protein-coding       |
| chr16-14E 7.913044  | 0.041391 | 0.822996 | 0.050294 | 0.959888 | 0.981636 | chr16 | 14574979 | 14578561 | 0 NA | intron (N)intron (N | 53490 NM_00258E  | 5073 Hs. 253197NM_00258E     | ENSG000000PARN      | DAN DKCBε           | poly(A)-s protein-coding |
| chr17-82E 7.913044  | 0.041391 | 0.822996 | 0.050294 | 0.959888 | 0.981636 | chr17 | 82463039 | 82461972 | 0 NA | intron (N)AluJb SIN | 2414 NM_01233E   | 26502 Hs. 25652E NM_01233E   | ENSG000000NARF      | TOP2                | nuclear f protein-coding |
| chr18-23E 7.913044  | 0.041391 | 0.822996 | 0.050294 | 0.959888 | 0.981636 | chr18 | 23576015 | 23577324 | 0 NA | intron (N)LR12C LI  | 9837 NM_000271   | 4864 Hs. 46477E NM_000271    | ENSG000000NCP1      | NPC POG2 NPC        | intrε protein-coding     |
| chr19-57E 7.913044  | 0.041391 | 0.822996 | 0.050294 | 0.959888 | 0.981636 | chr19 | 5703788  | 5709831  | 0 NA | intron (N)intron (N | 13337 NR_07639E  | 9361 Hs. 35026E NM_00479E    | ENSG000000LONP1     | CODASS LC lon       | peptiprotein-coding      |
| chr19-137 7.913044  | 0.041391 | 0.822996 | 0.050294 | 0.959888 | 0.981636 | chr19 | 13771268 | 13772504 | 0 NA | intron (N)intron (N | -2570 NM_014047  | 28974 Hs. 23161E NM_014047   | ENSG000000C19orf53  | HSPC023 L chromoson | protein-coding           |
| chr2-199E 7.913044  | 0.041391 | 0.822996 | 0.050294 | 0.959888 | 0.981636 | chr2  | 2E+08    | 2E+08    | 0 NA | intron (N)Alu SINE  | -16966 NM_00136E | 79568 Hs. 154494NM_02452E    | ENSG000000MAIP1     | COrf47              | matrix A protein-coding  |
| chr2-233E 7.913044  | 0.041391 | 0.822996 | 0.050294 | 0.959888 | 0.981636 | chr2  | 2.33E+08 | 2.33E+08 | 0 NA | intron (N)MER47A DN | 5844 NM_00119C   | 55054 Hs. 52932E NM_01797E   | ENSG000000ATG16L1   | APG16L AI           | autophagy protein-coding |
| chr20-59E 7.913044  | 0.041391 | 0.822996 | 0.050294 | 0.959888 | 0.981636 | chr20 | 50592859 | 50594336 | 0 NA | intron (N)intron (N | 7811 NR_03037E   | 693230 NR_03037E             | ENSG000000MIR645    | MIRN645 hmicroRNA   | ncRNA                    |
| chr20-50E 7.913044  | 0.041391 | 0.822996 | 0.050294 | 0.959888 | 0.981636 | chr20 | 59037155 | 59038317 | 0 NA | intron (N)intron (N | 5050 NM_01604E   | 51012 Hs. 65686E NM_01604E   | ENSG000000PRELID3B  | C20orf45 PREL1      | don protein-coding       |
| chr22-504 7.913044  | 0.041391 | 0.822996 | 0.050294 | 0.959888 | 0.981636 | chr22 | 50447543 | 50449124 | 0 NA | exon (NM exon (NM   | 26702 NM_00297E  | 6305 Hs. 589924NM_00297E     | ENSG000000SBF1      | CMT4B3 DESET        | bindiprotein-coding      |
| chr3-433E 7.913044  | 0.041391 | 0.822996 | 0.050294 | 0.959888 | 0.981636 | chr3  | 43339430 | 43342187 | 0 NA | intron (N)intron (N | 11154 NR_046757  | 1.01E+08 Hs. 600984NR_046757 | SNRK-AS1            | -                   | SNRK antincRNA           |
| chr3-491E 7.913044  | 0.041391 | 0.822996 | 0.050294 | 0.959888 | 0.981636 | chr3  | 49121664 | 49122972 | 0 NA | exon (NM exon (NM   | -1380 NM_001351  | 10869 Hs. 25559E NM_00667E   | ENSG000000USP19     | ZMYND9              | ubiquitiprotein-coding   |
| chr3-503E 7.913044  | 0.041391 | 0.822996 | 0.050294 | 0.959888 | 0.981636 | chr3  | 50355180 | 50356160 | 0 NA | intron (N)intron (N | 3851 NM_007024   | 11070 Hs. 91566 NM_007024    | ENSG000000TMEM115   | PL6                 | transmemt protein-coding |
| chr3-1017 7.913044  | 0.041391 | 0.822996 | 0.050294 | 0.959888 | 0.981636 | chr3  | 1.02E+08 | 1.02E+08 | 0 NA | intron (N)intron (N | 8900 NM_02454E   | 79598 Hs. 44413E NM_02454E   | ENSG000000CEP97     | 2810403BC           | centroson protein-coding |
| chr3-186E 7.913044  | 0.041391 | 0.822996 | 0.050294 | 0.959888 | 0.981636 | chr3  | 1.86E+08 | 1.86E+08 | 0 NA | exon (NM exon (NM   | 29056 NM_004454  | 2119 Hs. 43697 NM_004454     | ENSG000000ETV5      | ERM                 | ETS variε protein-coding |
| chr4-5684 7.913044  | 0.041391 | 0.822996 | 0.050294 | 0.959888 | 0.981636 | chr4  | 5684119  | 5686108  | 0 NA | intron (N(AC)n Sin  | 22446 NM_147127  | 132884 Hs. 87306 NM_147127   | ENSG000000EVC2      | ELN WAD             | Evc cilie protein-coding |
| chr5-347E 7.913044  | 0.041391 | 0.822996 | 0.050294 | 0.959888 | 0.981636 | chr5  | 34769850 | 34770698 | 0 NA | intron (N)intron (N | -68890 NM_14472E | 153657 Hs. 43574E NM_14472E  | ENSG000000TTC23L    | MC25-1              | tetratric protein-coding |
| chr5-419E 7.913044  | 0.041391 | 0.822996 | 0.050294 | 0.959888 | 0.981636 | chr5  | 419      |          |      |                     |                  |                              |                     |                     |                          |



|                    |          |          |          |          |          |       |          |          |        |                     |                   |                               |                      |                |                           |
|--------------------|----------|----------|----------|----------|----------|-------|----------|----------|--------|---------------------|-------------------|-------------------------------|----------------------|----------------|---------------------------|
| chr17-498.7.691191 | -0.04142 | 0.832727 | -0.04975 | 0.960325 | 0.981636 | chr17 | 49811468 | 49812439 | + 0 NA | intron (Nintron (N  | 23272 NM_001199   | 11143 Hs. 21907 NM_007067     | ENSG000000CKAT7      | HBO1 HBO#      | lysine acprotein-coding   |
| chr19-636.7.691191 | -0.04142 | 0.832727 | -0.04975 | 0.960325 | 0.981636 | chr19 | 6364607  | 6369247  | + 0 NA | intron (NAluJb SIN  | 5396 NM_006012    | 8192 Hs. 515092 NM_006012     | ENSG000000CLPP       | DFNB81 PF      | caseinolyprotein-coding   |
| chr19-218.7.691191 | -0.04142 | 0.832727 | -0.04975 | 0.960325 | 0.981636 | chr19 | 21825383 | 21827492 | + 0 NA | intron (NLTR70 LTF  | 9745 NM_001256    | 7594 Hs. 534366 NM_003423     | ENSG000000ZNF43      | HTF6 KOX2      | zinc fingprotein-coding   |
| chr19-233.7.691191 | -0.04142 | 0.832727 | -0.04975 | 0.960325 | 0.981636 | chr19 | 23337205 | 23339818 | + 0 NA | IntergeniLIM2 LINE  | 56960 NM_003430   | 7644 Hs. 58834 NM_003430      | ENSG000000ZNF91      | HP7 HTF1       | zinc fingprotein-coding   |
| chr2-3401.7.691191 | -0.04142 | 0.832727 | -0.04975 | 0.960325 | 0.981636 | chr2  | 3401870  | 3403256  | + 0 NA | intron (NAluSg SIN  | 22869 NM_01603C   | 51112 Hs. 25271 NM_01603C     | ENSG000000TRAPP12    | CG1-87 PE      | traffickingprotein-coding |
| chr2-2766.7.691191 | -0.04142 | 0.832727 | -0.04975 | 0.960325 | 0.981636 | chr2  | 27694800 | 27695586 | + 0 NA | TTS (NM_C TTS (NM_C | 20539 NR_13520C   | 1E+08 Hs. 515876 NR_13520C    | ENSG000000CLINCO146C | -              | long intencRNA            |
| chr2-5591.7.691191 | -0.04142 | 0.832727 | -0.04975 | 0.960325 | 0.981636 | chr2  | 55913057 | 55914858 | + 0 NA | intron (NAluSx SIN  | 9825 NM_001039    | 2202 Hs. 76224 NM_00410F      | ENSG000000EFEMP1     | DHRD DRAL      | EGF contprotein-coding    |
| chr2-1137.7.691191 | -0.04142 | 0.832727 | -0.04975 | 0.960325 | 0.981636 | chr2  | 1.14E+08 | 1.14E+08 | + 0 NA | intron (Nintron (N  | -16447 NR_039942  | 1.01E+08 Hs. NR_039942        | ENSG000000MIR4782    | -              | microRNA ncRNA            |
| chr20-315.7.691191 | -0.04142 | 0.832727 | -0.04975 | 0.960325 | 0.981636 | chr20 | 31561941 | 31567231 | + 0 NA | intron (NAluJb SIN  | 8677 NR_046855    | 1.01E+08 Hs. 373741 NR_046855 | ENSG000000HM13-AS1   | -              | HM13 antncRNA             |
| chr22-245.7.691191 | -0.04142 | 0.832727 | -0.04975 | 0.960325 | 0.981636 | chr22 | 24571316 | 24572907 | + 0 NA | non-codiron-codir   | -11639 NM_01243C  | 2678 Hs. 595809 NM_00526F     | ENSG000000GGT1       | CD224 D22      | gamma-glu protein-coding  |
| chr22-304.7.691191 | -0.04142 | 0.832727 | -0.04975 | 0.960325 | 0.981636 | chr22 | 30406493 | 30406999 | + 0 NA | intron (NAluS6 SI   | 9728 NM_001204    | 23541 Hs. 335614 NM_01242F    | ENSG000000SECI14L2   | C22orf6 SSEC14 | likprotein-coding         |
| chr22-415.7.691191 | -0.04142 | 0.832727 | -0.04975 | 0.960325 | 0.981636 | chr22 | 41582458 | 41584761 | + 0 NA | intron (Nintron (N  | 6231 NM_00267E    | 5372 Hs. 75835 NM_00267E      | ENSG000000PMM1       | PMM 1 PMW      | phosphome protein-coding  |
| chr3-3161.7.691191 | -0.04142 | 0.832727 | -0.04975 | 0.960325 | 0.981636 | chr3  | 31605987 | 31607015 | + 0 NA | intron (NTHEIB-int  | 47576 NM_17886E   | 201595 Hs. 475812 NM_17886E   | ENSG000000STT3B      | CDGLX SMT3T3   | oligprotein-coding        |
| chr3-1496.7.691191 | -0.04142 | 0.832727 | -0.04975 | 0.960325 | 0.981636 | chr3  | 1.49E+08 | 1.49E+08 | + 0 NA | TTS (NM_C TTS (NM_C | 42851 NM_03238E   | 84343 Hs. 558314 NM_03238E    | ENSG000000HPS3       | BLOC251 SHPS3  | biogprotein-coding        |
| chr3-1612.7.691191 | -0.04142 | 0.832727 | -0.04975 | 0.960325 | 0.981636 | chr3  | 1.61E+08 | 1.61E+08 | + 0 NA | intron (Nintron (N  | 20946 NM_01593E   | 51068 Hs. 598833 NM_01593E    | ENSG000000NMD3       | CGI-07         | NMD3 ribcprotein-coding   |
| chr3-1727.7.691191 | -0.04142 | 0.832727 | -0.04975 | 0.960325 | 0.981636 | chr3  | 1.72E+08 | 1.72E+08 | + 0 NA | exon (NM_exon (NM   | 200762 NM_00412E  | 2693 Hs. 130212 NM_00412E     | ENSG000000GHSR       | GHPD           | growth hprotein-coding    |
| chr3-1837.7.691191 | -0.04142 | 0.832727 | -0.04975 | 0.960325 | 0.981636 | chr3  | 1.73E+08 | 1.73E+08 | + 0 NA | intron (NLA2 LINE   | 14241 NM_00134E   | 1894 Hs. 518295 NM_01809E     | ENSG000000ECT2       | ARHGEF31       | epitheliaprotein-coding   |
| chr4-5186.7.691191 | -0.04142 | 0.832727 | -0.04975 | 0.960325 | 0.981636 | chr4  | 51863930 | 51866219 | + 0 NA | intron (NTHEIB-int  | 20090 NR_12064C   | 56922 Hs. 47649 NM_02016E     | ENSG000000MCCC1      | MCC-B MCC      | methylcrp protein-coding  |
| chr4-8007.7.691191 | -0.04142 | 0.832727 | -0.04975 | 0.960325 | 0.981636 | chr4  | 80001842 | 80004839 | + 0 NA | intron (Nintron (N  | 21495 NM_001287   | 23142 Hs. 605388 NM_01511E    | ENSG000000DCUN1D4    | -              | defectiveprotein-coding   |
| chr5-1347.7.691191 | -0.04142 | 0.832727 | -0.04975 | 0.960325 | 0.981636 | chr5  | 1.35E+08 | 1.35E+08 | + 0 NA | intron (NAluSp SIN  | 69889 NM_00128E   | 118429 Hs. 162963 NM_05817E   | ENSG000000CANTXR2    | CMG-2 CMC      | ANTXR celprotein-coding   |
| chr5-1388.7.691191 | -0.04142 | 0.832727 | -0.04975 | 0.960325 | 0.981636 | chr5  | 1.39E+08 | 1.39E+08 | + 0 NA | intron (Nintron (N  | 39190 NM_01482E   | 9879 Hs. 406546 NM_01482E     | ENSG000000DDX46      | PRPF5 Prp      | DEAD-box protein-coding   |
| chr6-9051.7.691191 | -0.04142 | 0.832727 | -0.04975 | 0.960325 | 0.981636 | chr6  | 90513963 | 90517033 | + 0 NA | 3' UTR (N3' UTR (N  | -47391 NM_00129C  | 1495 Hs. 445981 NM_00190E     | ENSG000000CTNNA1     | CAP102 MC      | catenin aprotein-coding   |
| chr6-1706.7.691191 | -0.04142 | 0.832727 | -0.04975 | 0.960325 | 0.981636 | chr6  | 1.71E+08 | 1.71E+08 | + 0 NA | intron (Nintron (N  | 13426 NM_00279E   | 6885 Hs. 594833 NM_00318E     | ENSG000000MAP3K7     | CSCF FMD2      | mi togen-eprotein-coding  |
| chr7-6177.7.691191 | -0.04142 | 0.832727 | -0.04975 | 0.960325 | 0.981636 | chr7  | 6170065  | 6171016  | + 0 NA | exon (NM_exon (NM   | 1597 NM_001367    | 5689 Hs. 352768 NM_00279E     | ENSG000000PSMB1      | HC5 PMSB1      | proteasomeprotein-coding  |
| chr7-1731.7.691191 | -0.04142 | 0.832727 | -0.04975 | 0.960325 | 0.981636 | chr7  | 17310289 | 17313428 | + 0 NA | intron (Nintron (N  | 19265 NM_001367   | 9265 Hs. 487475 NM_00422E     | ENSG000000CYTH3      | ARNO3 GRF      | cytohesin protein-coding  |
| chr9-3256.7.691191 | -0.04142 | 0.832727 | -0.04975 | 0.960325 | 0.981636 | chr9  | 32564687 | 32565961 | + 0 NA | intron (Nintron (N  | 13206 NM_001621   | 196 Hs. 171188 NM_001621      | ENSG000000AHR        | PRP8 bHLH      | aryl h protein-coding     |
| chr9-3418.7.691191 | -0.04142 | 0.832727 | -0.04975 | 0.960325 | 0.981636 | chr9  | 34184313 | 34185722 | + 0 NA | intron (NAluS2 SI   | 7835 NM_18273E    | 4712 Hs. 493666 NM_00249E     | ENSG000000NDUFB6     | B17 C1         | NADH:ubiq protein-coding  |
| chr12-112.8.871089 | 0.038752 | 0.781453 | 0.049589 | 0.96045  | 0.981636 | chr12 | 1.12E+08 | 1.12E+08 | + 0 NA | 3' UTR (N3' UTR (N  | 5974 NM_001171    | 51271 Hs. 268963 NM_01652E    | ENSG000000UBAP1      | NAG20 SPC      | ubiquitir protein-coding  |
| chr2-1521.8.871089 | 0.038752 | 0.781453 | 0.049589 | 0.96045  | 0.981636 | chr2  | 1.52E+08 | 1.52E+08 | + 0 NA | intron (Nintron (N  | 8565 NR_03743C    | 1.01E+08 Hs. NR_03743C        | ENSG000000MIR3657    | -              | microRNA ncRNA            |
| chr3-4848.8.871089 | 0.038752 | 0.781453 | 0.049589 | 0.96045  | 0.981636 | chr3  | 48467261 | 48468465 | + 0 NA | TTS (NM_C TTS (NM_C | 30701 NM_00584E   | 10254 Hs. 17200 NM_00584E     | ENSG000000STAM2      | Hbp STAM2      | signal tr protein-coding  |
| chr5-1678.8.871089 | 0.038752 | 0.781453 | 0.049589 | 0.96045  | 0.981636 | chr5  | 16750525 | 16752038 | + 0 NA | intron (Nintron (N  | 1633 NM_03362E    | 11277 Hs. 707026 NM_00724E    | ENSG000000TREG1      | AGS1 CRV       | three priprotein-coding   |
| chr5-3718.8.871089 | 0.038752 | 0.781453 | 0.049589 | 0.96045  | 0.981636 | chr5  | 37183957 | 37185046 | + 0 NA | intron (Nintron (N  | -134358 NM_001034 | 54463 Hs. 481704 NM_01900C    | ENSG000000RETREG1    | FAM134B Jret   | ubiq protein-coding       |
| chr6-1558.8.871089 | 0.038752 | 0.781453 | 0.049589 | 0.96045  | 0.981636 | chr6  | 1.55E+08 | 1.55E+08 | + 0 NA | intron (NTHEIB LTF  | 64545 NR_13426E   | 1.05E+08 Hs. 170993 NR_13426E | ENSG000000LOC105374  | -              | uncharactncRNA            |
| chr7-1578.8.871089 | 0.038752 | 0.781453 | 0.049589 | 0.96045  | 0.981636 | chr7  | 1.57E+08 | 1.57E+08 | + 0 NA | intron (Nintron (N  | 7071 NM_01602C    | 51106 Hs. 279906 NM_01602C    | ENSG000000TFB1M      | CGI-75 CC      | transcrip protein-coding  |
| chrX-1045.6.668433 | -0.04587 | 0.928275 | -0.04942 | 0.960586 | 0.981636 | chrX  | 10454148 | 10454347 | + 0 NA | intron (Nintron (N  | -88218 NM_005494  | 10049 Hs. 490746 NM_005494    | ENSG000000DNAJB6     | DJ4 DnaJ       | DnaJ heat protein-coding  |
| chr11-726.5.955815 | 0.046407 | 0.940149 | 0.049361 | 0.960632 | 0.981636 | chr11 | 72685502 | 72686130 | + 0 NA | intron (Nintron (N  | 113566 NM_00119E  | 4281 Hs. 27695 NM_000381      | ENSG000000MID1       | BBB61 FX       | midline l protein-coding  |
| chr12-111.5.955815 | 0.046407 | 0.940149 | 0.049361 | 0.960632 | 0.981636 | chr12 | 1.12E+08 | 1.12E+08 | + 0 NA | intron (NAluS2 SI   | 32255 NM_025247   | 80724 Hs. 331141 NM_025247    | ENSG000000ACAD10     | -              | acyl-CoA protein-coding   |
| chr15-522.5.955815 | 0.046407 | 0.940149 | 0.049361 | 0.960632 | 0.981636 | chr15 | 52055753 | 52056393 | + 0 NA | intron (Nintron (N  | 36854 NM_00274E   | 5597 Hs. 411847 NM_00274E     | ENSG000000MAPK6      | ERK3 HsT       | mi togen-eprotein-coding  |
| chr17-785.5.955815 | 0.046407 | 0.940149 | 0.049361 | 0.960632 | 0.981636 | chr17 | 78975953 | 78977034 | + 0 NA | intron (Nintron (N  | 3430 NM_005567    | 3959 Hs. 514533 NM_005567     | ENSG000000LGALS3BP   | 90K BTBD1      | galectin protein-coding   |
| chr17-826.5.955815 | 0.046407 | 0.940149 | 0.049361 | 0.960632 | 0.981636 | chr17 | 82820005 | 82820562 | + 0 NA | intron (Nintron (N  | 19724 NM_02470E   | 79755 Hs. 464391 NM_02470E    | ENSG000000ZNF750     | ZFP750         | zinc fingprotein-coding   |
| chr4-1475.5.955815 | 0.046407 | 0.940149 | 0.049361 | 0.960632 | 0.981636 | chr4  | 1.48E+08 | 1.48E+08 | + 0 NA | intron (Nintron (N  | 24682 NM_138364   | 90826 Hs. 591692 NM_138364    | ENSG000000PRMT9      | PRMT10         | protein aprotein-coding   |
| chr5-4354.5.955815 | 0.046407 | 0.940149 | 0.049361 | 0.960632 | 0.981636 | chr5  | 43549216 | 43550357 | + 0 NA | intron (NAluS2 SIN  | 7291 NM_006451    | 10605 Hs. 482033 NM_006451    | ENSG000000PAIP1      | -              | poly(A) t protein-coding  |
| chr16-278.5.427796 | 0.048603 | 0.984753 | 0.049356 | 0.960636 | 0.981636 | chr16 | 27682602 | 27683038 | + 0 NA | intron (NMSTC LTR   | 36209 NR_14789E   | 1E+08 Hs. 610277 NR_14789E    | LOC100128E           | -              | uncharactncRNA            |
| chr2-3885.5.427796 | 0.048603 | 0.984753 | 0.049356 | 0.960636 | 0.981636 | chr2  | 38856401 | 38856986 | + 0 NA | intron (NAluJb SIN  | 19241 NM_19896E   | 90957 Hs. 468226 NM_19896E    | ENSG000000DXH57      | DDX57          | DEXh-box protein-coding   |
| chr2-2178.5.427796 | 0.048603 | 0.984753 | 0.049356 | 0.960636 | 0.981636 | chr2  | 2.18E+08 | 2.18E+08 | + 0 NA | intron (NAluJr SIN  | 19584 NR_14579E   | 1.1E+08 Hs. NR_14579E         | SNORA115             | -              | small nucsnRNA            |
| chr3-4705.5.427796 | 0.048603 | 0.984753 | 0.049356 | 0.960636 | 0.981636 | chr3  | 47094674 | 47097490 | + 0 NA | intron (Nintron (N  | 67895 NM_01415E   | 29072 Hs. 517941 NM_012271    | ENSG000000SETD2      | HBP231 HSE     | domaiprotein-coding       |
| chr5-6495.5.427796 | 0.048603 | 0.984753 | 0.049356 | 0.960636 | 0.981636 | chr5  | 64962457 | 64963962 | + 0 NA | intron (NAluSx1 SI  | 194279 NM_001364  | 10283 Hs. 371372 NM_00586E    | ENSG000000CWC27      | NY-CO-10 CWC27 | spl protein-coding        |
| chr6-5705.5.427796 | 0.048603 | 0.984753 | 0.049356 | 0.960636 | 0.981636 | chr6  | 57057185 | 57058448 | + 0 NA | IntergeniAluJb SIN  | 11069 NM_00128E   | 57691 Hs. 709521 NM_020931    | ENSG000000KIAA1586   | -              | KIAA1586 protein-coding   |
| chr9-1135.5.427796 | 0.048603 | 0.984753 | 0.049356 | 0.960636 | 0.981636 | chr9  | 1.14E+08 | 1.14E+08 | + 0 NA | intron (NLA2c LINE  | 88124 NM_001633   | 259 Hs. 436911 NM_001633      | ENSG000000CAMP       | AIM EDC1       | alpha-1-n protein-coding  |
| chr11-726.7.664047 | 0.041071 | 0.833565 | 0.049271 | 0.960703 | 0.981636 | chr11 | 72886797 | 72887485 | + 0 NA | intron (N(AT)n Sin  | 72730 NM_00131E   | 89849 Hs. 653188 NM_03338E    | ENSG000000ATG16L2    | ATG16B Wt      | autophagy protein-coding  |
| chr1-331C.7.664047 | -0.04178 | 0.849447 | -0.04918 | 0.9      |          |       |          |          |        |                     |                   |                               |                      |                |                           |

|                    |          |          |          |          |          |       |          |          |   |   |    |                     |                   |          |            |           |                     |                                    |
|--------------------|----------|----------|----------|----------|----------|-------|----------|----------|---|---|----|---------------------|-------------------|----------|------------|-----------|---------------------|------------------------------------|
| chr15-632.8.178072 | -0.03956 | 0.808735 | -0.04891 | 0.960988 | 0.981636 | chr15 | 63284390 | 63285716 | + | 0 | NA | intron (Nintron (N  | 7448 NM_031301    | 83464    | Hs. 511705 | NR_031301 | ENSG000004APH1B     | APH-1B PFaph-1 honprotein-coding   |
| chr15-846.8.178072 | -0.03956 | 0.808735 | -0.04891 | 0.960988 | 0.981636 | chr15 | 84644817 | 84652584 | + | 0 | NA | intron (Nintron (N  | 5546 NR_130944    | 84942    | Hs. 745027 | NR_032856 | ENSG000004WDR73     | GAMOS GAW WD repeatprotein-coding  |
| chr15-898.8.178072 | -0.03956 | 0.808735 | -0.04891 | 0.960988 | 0.981636 | chr15 | 89883594 | 89888712 | + | 0 | NA | intron (NAluSc5 SI  | -2123 NR_049807   | 1.01E+08 |            | NR_049807 | ENSG000004MIR5009   | microRNA ncRNA                     |
| chr16-166.8.178072 | -0.03956 | 0.808735 | -0.04891 | 0.960988 | 0.981636 | chr16 | 16321359 | 16322929 | + | 0 | NA | intron (NMIR SINE   | -2444 NR_106966   | 1.02E+08 |            | NR_106966 | ENSG000004MIR6511A2 | MIR6511A2-microRNA ncRNA           |
| chr16-167.8.178072 | -0.03956 | 0.808735 | -0.04891 | 0.960988 | 0.981636 | chr16 | 66744081 | 66749641 | + | 0 | NA | intron (NMIRb SINE  | 4748 NM_006141    | 1783     | Hs. 369066 | NR_006141 | ENSG000004DYNCL1L2  | DNCL1L2 Ljdynein cyprotein-coding  |
| chr17-356.8.178072 | -0.03956 | 0.808735 | -0.04891 | 0.960988 | 0.981636 | chr17 | 35693916 | 35695855 | + | 0 | NA | intron (NAluS SIN   | -36754 NM_03331E  | 91608    | Hs. 744994 | NR_03331E | ENSG000004CRASL10B  | RRP17 VTSRAS like protein-coding   |
| chr17-437.8.178072 | -0.03956 | 0.808735 | -0.04891 | 0.960988 | 0.981636 | chr17 | 43768333 | 43774826 | + | 0 | NA | intron (NMIRb SINE  | 7398 NM_004099    | 1845     | Hs. 181046 | NR_004099 | ENSG000004DUSP3     | VHR dual specprotein-coding        |
| chr18-244.8.178072 | -0.03956 | 0.808735 | -0.04891 | 0.960988 | 0.981636 | chr18 | 24440380 | 24446451 | + | 0 | NA | intron (NFLAM_C SI  | 16745 NM_018435   | 55364    | Hs. 515317 | NR_018435 | ENSG000004IMPACT    | RWDD5 impact RFPprotein-coding     |
| chr2-6908.8.178072 | -0.03956 | 0.808735 | -0.04891 | 0.960988 | 0.981636 | chr2  | 69090261 | 69094568 | + | 0 | NA | intron (Nintron (N  | -11268 NR_036073  | 1E+08    |            | NR_036073 | ENSG000004MIR3126   | mir-3126 microRNA ncRNA            |
| chr2-1351.8.178072 | -0.03956 | 0.808735 | -0.04891 | 0.960988 | 0.981636 | chr2  | 1.35E+08 | 1.35E+08 | + | 0 | NA | intron (Nintron (N  | 16664 NR_145723   | 1.1E+08  |            | NR_145723 | ENSG000004SNORA40B  | small nucsnRNA                     |
| chr2-1711.8.178072 | -0.03956 | 0.808735 | -0.04891 | 0.960988 | 0.981636 | chr2  | 1.71E+08 | 1.71E+08 | + | 0 | NA | intron (Nintron (N  | 61187 NM_001136   | 9874     | Hs. 744917 | NR_001136 | ENSG000004TLK1      | PKU-beta tousel lprotein-coding    |
| chr2-1862.8.178072 | -0.03956 | 0.808735 | -0.04891 | 0.960988 | 0.981636 | chr2  | 1.87E+08 | 1.87E+08 | + | 0 | NA | Intergeni HERVK-int | 35193 NM_018471   | 55854    | Hs. 74118  | NR_018471 | ENSG000004ZC3H15    | HTO10 LEFzinc fingprotein-coding   |
| chr20-508.8.178072 | -0.03956 | 0.808735 | -0.04891 | 0.960988 | 0.981636 | chr20 | 50562111 | 50567094 | + | 0 | NA | intron (NAluS SIN   | -21184 NR_03037E  | 693230   |            | NR_03037E | ENSG000004MIR645    | MIRN645 hmicroRNA ncRNA            |
| chr21-392.8.178072 | -0.03956 | 0.808735 | -0.04891 | 0.960988 | 0.981636 | chr21 | 39286973 | 39291414 | + | 0 | NA | intron (NLMIEg LIN  | 24439 NM_018963   | 54014    | Hs. 62713  | NR_018963 | ENSG000004BRWD1     | C21orf17 bromodome protein-coding  |
| chr22-176.8.178072 | -0.03956 | 0.808735 | -0.04891 | 0.960988 | 0.981636 | chr22 | 17609895 | 17614059 | + | 0 | NA | intron (NLMIM LINE  | 16772 NM_00169E   | 529      | Hs. 51733  | NR_00169E | ENSG000004ATP6V1E1  | ARCL2C AIATPase H+protein-coding   |
| chr3-1258.8.178072 | -0.03956 | 0.808735 | -0.04891 | 0.960988 | 0.981636 | chr3  | 1.26E+08 | 1.26E+08 | + | 0 | NA | intron (NMER1 2 DN  | 5200 NM_003794    | 8723     | Hs. 50724  | NR_003794 | ENSG000004SNX4      | ATG24B sorting rprotein-coding     |
| chr3-1968.8.178072 | -0.03956 | 0.808735 | -0.04891 | 0.960988 | 0.981636 | chr3  | 1.97E+08 | 1.97E+08 | + | 0 | NA | intron (NMER2 B LI  | -34415 NR_04663C  | 1.01E+08 |            | NR_04663C | ENSG000004NCBP2-AS1 | NCBP2 antncRNA                     |
| chr5-1785.8.178072 | -0.03956 | 0.808735 | -0.04891 | 0.960988 | 0.981636 | chr5  | 1.79E+08 | 1.79E+08 | + | 0 | NA | intron (NLMIPREC2 I | 15168 NM_05823C   | 117608   | Hs. 724051 | NR_05823C | ENSG000004ZNF354B   | KID2 zinc fingprotein-coding       |
| chr6-2464.8.178072 | -0.03956 | 0.808735 | -0.04891 | 0.960988 | 0.981636 | chr6  | 24649019 | 24654604 | + | 0 | NA | intron (NAluS SIN   | -5620 NM_00135E   | 9856     | Hs. 26441  | NR_01480E | ENSG000004KIAA0319  | AAVR DYLLKIAA0319 protein-coding   |
| chr6-7568.8.178072 | -0.03956 | 0.808735 | -0.04891 | 0.960988 | 0.981636 | chr6  | 75695666 | 75697278 | + | 0 | NA | intron (Nintron (N  | -52767 NM_00136E  | 4646     | Hs. 149387 | NR_00499E | ENSG000004MYO6      | DFNA22 DFmyosin VIprotein-coding   |
| chr6-1588.8.178072 | -0.03956 | 0.808735 | -0.04891 | 0.960988 | 0.981636 | chr6  | 1.59E+08 | 1.59E+08 | + | 0 | NA | exon (NM exon (NM   | -1367 NR_106981   | 1.02E+08 |            | NR_106981 | ENSG000004MIR7161   | hsa-mir-7161 microRNA ncRNA        |
| chr7-5724.8.178072 | -0.03956 | 0.808735 | -0.04891 | 0.960988 | 0.981636 | chr7  | 5724052  | 5726363  | + | 0 | NA | intron (Nintron (N  | -13297 NR_106934  | 1.02E+08 |            | NR_106934 | ENSG000004MIR6874   | hsa-mir-6874 microRNA ncRNA        |
| chr7-6657.8.178072 | -0.03956 | 0.808735 | -0.04891 | 0.960988 | 0.981636 | chr7  | 66571958 | 66575661 | + | 0 | NA | intron (Nintron (N  | 18598 NR_111974   | 493754   | Hs. 73240  | NR_00293E | ENSG000004CGS1-124K | RAB guanipseudo                    |
| chr7-2182.8.178072 | -0.03956 | 0.808735 | -0.04891 | 0.960988 | 0.981636 | chr7  | 1.29E+08 | 1.29E+08 | + | 0 | NA | intron (Nintron (N  | 39838 NM_001364   | 3663     | Hs. 521181 | NR_03264E | ENSG000004IRF5      | SLEB10 interfercprotein-coding     |
| chr7-1514.8.178072 | -0.03956 | 0.808735 | -0.04891 | 0.960988 | 0.981636 | chr7  | 1.51E+08 | 1.51E+08 | + | 0 | NA | intron (Nintron (N  | -29047 NR_13177E  | 155051   | Hs. 647104 | NR_144727 | ENSG000004CRYGN     | crystalliprotein-coding            |
| chr8-3908.8.178072 | -0.03956 | 0.808735 | -0.04891 | 0.960988 | 0.981636 | chr8  | 39058377 | 39064633 | + | 0 | NA | intron (NERVL-B4-i  | -42820 NR_14598E  | 1.1E+08  |            | NR_14573E | ENSG000004SNORD38D  | small nucsnRNA                     |
| chr9-2182.8.178072 | -0.03956 | 0.808735 | -0.04891 | 0.960988 | 0.981636 | chr9  | 21822802 | 21825411 | + | 0 | NA | intron (NLMIP5 LIN  | 21472 NM_002451   | 4507     | Hs. 19326  | NR_002451 | ENSG000004MTAP      | BDMF DMSFmethylthiuprotein-coding  |
| chr9-3628.8.178072 | -0.03956 | 0.808735 | -0.04891 | 0.960988 | 0.981636 | chr9  | 36232851 | 36235383 | + | 0 | NA | exon (NM exon (NM   | 24331 NM_00119C   | 10020    | Hs. 5920   | NR_00547E | ENSG000004GNE       | DMRV GLCN glucosami protein-coding |
| chr9-1131.8.178072 | -0.03956 | 0.808735 | -0.04891 | 0.960988 | 0.981636 | chr9  | 1.13E+08 | 1.13E+08 | + | 0 | NA | exon (NM exon (NM   | 17504 NM_00186E   | 1318     | Hs. 24030  | NR_00186E | ENSG000004SLC31A2   | COPT2 CTF solute cprotein-coding   |
| chr17-751.8.441064 | 0.040043 | 0.819596 | 0.048857 | 0.961033 | 0.981636 | chr17 | 7511064  | 7511828  | + | 0 | NA | exon (NM exon (NM   | 27080 NM_000937   | 5430     | Hs. 270017 | NR_000937 | ENSG000004PDLR2A    | POLR2A POL RNA cypprotein-coding   |
| chr22-458.8.441064 | 0.040043 | 0.819596 | 0.048857 | 0.961033 | 0.981636 | chr22 | 45327789 | 45328973 | + | 0 | NA | intron (Nintron (N  | 9938 NM_00134E    | 55007    | Hs. 26501  | NR_01791E | ENSG000004FAM118A   | C22orf8 family wiprotein-coding    |
| chr1-4668.8.129074 | -0.03997 | 0.820188 | -0.04873 | 0.961133 | 0.981636 | chr1  | 46654658 | 46656004 | + | 0 | NA | intron (Nintron (N  | 10545 NM_00125E   | 64756    | Hs. 100874 | NR_02274E | ENSG000004ATPAF1    | ATP11 ATF ATP syntp protein-coding |
| chr14-994.8.129074 | -0.03997 | 0.820188 | -0.04873 | 0.961133 | 0.981636 | chr14 | 99457200 | 99458113 | + | 0 | NA | intron (Nintron (N  | 23203 NM_19912E   | 84193    | Hs. 510407 | NR_03223E | ENSG000004SETD3     | C14orf154SET domaiprotein-coding   |
| chr4-5187.8.129074 | -0.03997 | 0.820188 | -0.04873 | 0.961133 | 0.981636 | chr4  | 51875948 | 51877657 | + | 0 | NA | intron (NMER8 DNA   | 33223 NM_001287   | 23142    | Hs. 60538  | NR_01511E | ENSG000004DCUN1D4   | defective protein-coding           |
| chr5-1128.8.129074 | -0.03997 | 0.820188 | -0.04873 | 0.961133 | 0.981636 | chr5  | 1.13E+08 | 1.13E+08 | + | 0 | NA | intron (NAluS SIN   | 21261 NM_00566E   | 7905     | Hs. 42960  | NR_00566E | ENSG000004REEP5     | C5orf18 receptor protein-coding    |
| chr6-111.8.129074  | -0.03997 | 0.820188 | -0.04873 | 0.961133 | 0.981636 | chr6  | 1.11E+08 | 1.11E+08 | + | 0 | NA | intron (NLMIAA4 LI  | -86717 NR_03410E  | 643749   | Hs. 48622  | NR_03410E | ENSG000004TRAF31P2  | C6UAS C6C TRAF31P2 ncRNA           |
| chr4-1094.10.83618 | 0.034923 | 0.718446 | 0.048609 | 0.961231 | 0.981636 | chr4  | 1.09E+08 | 1.09E+08 | + | 0 | NA | intron (NMLTID LTF  | -12516 NR_03997E  | 1.01E+08 |            | NR_03997E | ENSG000004SEC24B-AS | 1/2-SBSRN SEC24B arncRNA           |
| chr7-1029.8.829134 | 0.036514 | 0.751348 | 0.048598 | 0.96124  | 0.981636 | chr7  | 1.03E+08 | 1.03E+08 | + | 0 | NA | Intergeni Intergeni | 10630 NM_001114   | 1E+08    | Hs. 61025  | NR_001114 | ENSG000004UPK3BL1   | UPK3BL UF uprolakiprotein-coding   |
| chr8-9424.9.829134 | 0.036514 | 0.751348 | 0.048598 | 0.96124  | 0.981636 | chr8  | 94249616 | 94249845 | + | 0 | NA | 3' UTR (N3' UTR (N  | 12589 NR_08617E   | 2669     | Hs. 65446  | NR_005261 | ENSG000004GEM       | KIR GFP bindiprotein-coding        |
| chr9-4102.9.829134 | 0.036514 | 0.751348 | 0.048598 | 0.96124  | 0.981636 | chr9  | 41023076 | 41023847 | + | 0 | NA | intron (NLMIPA2 LIN | 31200 NR_03400E   | 1E+08    | Hs. 23186  | NR_03400E | ENSG000004FRG1HP    | FRG1HP FSHD regipseudo             |
| chr1-1237.6.91386  | 0.042419 | 0.873996 | 0.048534 | 0.96129  | 0.981636 | chr1  | 12378507 | 12380415 | + | 0 | NA | intron (Nintron (N  | -127785 NR_00302E | 677805   | Hs. 65845  | NR_00302E | ENSG000004SNORA59A  | ACA59 small nucsnRNA               |
| chr1-2685.6.91386  | 0.042419 | 0.873996 | 0.048534 | 0.96129  | 0.981636 | chr1  | 26893067 | 26896734 | + | 0 | NA | intron (NMIRb SINE  | -4617 NM_01806E   | 57407    | Hs. 14333  | NR_01806E | ENSG000004GPN2      | ATPBD1B GPN-loop protein-coding    |
| chr1-3912.6.91386  | 0.042419 | 0.873996 | 0.048534 | 0.96129  | 0.981636 | chr1  | 39125928 | 39126917 | + | 0 | NA | intron (NMLT1C LTF  | 42255 NM_01209E   | 23499    | Hs. 47247  | NR_01209E | ENSG000004MACF1     | ABP620 AC microtub protein-coding  |
| chr1-3938.6.91386  | 0.042419 | 0.873996 | 0.048534 | 0.96129  | 0.981636 | chr1  | 39388866 | 39390985 | + | 0 | NA | intron (NCharlie E  | -19148 NR_01503E  | 643314   | Hs. 65876  | NR_01503E | ENSG000004KIAA0754  | KIAA0754 protein-coding            |
| chr1-6661.6.91386  | 0.042419 | 0.873996 | 0.048534 | 0.96129  | 0.981636 | chr1  | 66610069 | 66612944 | + | 0 | NA | intron (Nintron (N  | -16934 NR_03606C  | 1E+08    |            | NR_03606C | ENSG000004MIR3117   | mir-3117 microRNA ncRNA            |
| chr1-8896.6.91386  | 0.042419 | 0.873996 | 0.048534 | 0.96129  | 0.981636 | chr1  | 88960537 | 88966032 | + | 0 | NA | intron (NLa LINE    | 29345 NM_00116E   | 494115   | Hs. 48189  | NR_01961C | ENSG000004RBMX1     | RBM1 RBMX like protein-coding      |
| chr10-805.6.91386  | 0.042419 | 0.873996 | 0.048534 | 0.96129  | 0.981636 | chr10 | 80512036 | 80515670 | + | 0 | NA | intron (NMERS8 DN   | 22089 NR_120661   | 1.02E+08 | Hs. 59366  | NR_120661 | ENSG000004LOC101925 | uncharactercncRNA                  |
| chr10-100.6.91386  | 0.042419 | 0.873996 | 0.048534 | 0.96129  | 0.981636 | chr10 | 1E+08    | 1E+08    | + | 0 | NA | intron (NAluJr SIN  | 2968 NM_001001    | 282991   | Hs. 34906  | NR_17380E | ENSG000004BLOC1S2   | BLOS2 BOFbiogenesiprotein-coding   |
| chr10-100.6.91386  | 0.042419 | 0.873996 | 0.048534 | 0.96129  | 0.981636 | chr10 | 1.03E+08 | 1.03E+08 | + | 0 | NA | exon (NM exon (NM   | 18106 NM_001591E  | 51063    | Hs. 24154  | NR_01591E | ENSG000004CALHM2    | FAM26B calcium Iprotein-coding     |
| chr11-918.6.91386  | 0.042419 | 0.873996 | 0.048534 | 0.96129  | 0.981636 | chr11 | 9187851  | 9193762  | + | 0 | NA | intron (NHALLb LIN  | 74520 NR_14596E   | 23258    | Hs. 50185  | NR_01521E | ENSG000004DENND5A   | EIEE49 RA DENN dome protein-coding |
| chr11-684.6.91386  | 0.042419 | 0.873996 | 0.048534 | 0.96129  | 0.981636 | chr11 | 68043314 | 68045575 | + | 0 | NA | promoter-promoter-  | -350 NR_106811    | 1.02E+08 |            | NR_106811 | ENSG000004MIR6753   | hsa-mir-6753 microRNA ncRNA        |
| chr11-754.6.91386  | 0.042419 | 0.873996 | 0.048534 | 0.96129  | 0.981636 | chr11 | 75412872 | 75415802 | + | 0 | NA | intron (NAluJ SINE  |                   |          |            |           |                     |                                    |



|                     |          |          |          |          |          |       |          |          |   |      |                    |                  |                    |                              |                              |                              |                |
|---------------------|----------|----------|----------|----------|----------|-------|----------|----------|---|------|--------------------|------------------|--------------------|------------------------------|------------------------------|------------------------------|----------------|
| chr17-676.8.664952  | -0.03792 | 0.788471 | -0.0481  | 0.961639 | 0.981636 | chr17 | 6760137  | 6763590  | + | 0 NA | intron (Nintron (N | 5817 NM_001353   | 54739 Hs. 44197E   | 110752:ENSG00000XAF1         | BIRC4BP FXIAP                | asc protein-coding           |                |
| chr17-788.8.664952  | -0.03792 | 0.788471 | -0.0481  | 0.961639 | 0.981636 | chr17 | 7853337  | 7854278  | + | 0 NA | 3' UTR (N3' UTR (N | -1259 NM_203411  | 92162 Hs. 389666E  | NR_203411:ENSG00000TMEM88    | -                            | transmembrane protein-coding |                |
| chr17-766.8.664952  | -0.03792 | 0.788471 | -0.0481  | 0.961639 | 0.981636 | chr17 | 76092776 | 76095045 | + | 0 NA | intron (Nintron (N | 4166 NR_10692E   | 1.02E+08           | NR_10692E:ENSG00000MIR6868   | hsa-mir-6                    | microRNA ncRNA               |                |
| chr19-1074.8.664952 | -0.03792 | 0.788471 | -0.0481  | 0.961639 | 0.981636 | chr19 | 6746579  | 6752733  | + | 0 NA | intron (NAluJo SIN | 9976 NR_110231   | 9322 Hs. 515094N   | 00424:ENSG00000TRIP10        | CIP4 HSTF                    | thyroid l protein-coding     |                |
| chr19-678.8.664952  | -0.03792 | 0.788471 | -0.0481  | 0.961639 | 0.981636 | chr19 | 10352271 | 10355265 | + | 0 NA | intron (Nintron (N | -14144 NM_00132C | 3385 Hs. 65456E    | NR_00216E:ENSG00000ICAM3     | CD50 CDWE                    | intercell protein-coding     |                |
| chr19-144.8.664952  | -0.03792 | 0.788471 | -0.0481  | 0.961639 | 0.981636 | chr19 | 14463558 | 14464611 | + | 0 NA | exon (NM_exon (NM  | 11270 NM_00095E  | 5731 Hs. 15936CN   | 00095E:ENSG00000PTGER1       | EPI                          | prostagl protein-coding      |                |
| chr19-144.8.664952  | -0.03792 | 0.788471 | -0.0481  | 0.961639 | 0.981636 | chr19 | 14492474 | 14492774 | + | 0 NA | intron (Nintron (N | 3502 NM_00571E   | 10755 Hs. 65501E   | NR_00571E:ENSG00000GTPC1     | C19orf3 CGIP                 | PDZ protein-coding           |                |
| chr19-387.8.664952  | -0.03792 | 0.788471 | -0.0481  | 0.961639 | 0.981636 | chr19 | 38707948 | 38711211 | + | 0 NA | intron (Nintron (N | 34945 NM_144691  | 147968 Hs. 73177E  | NR_144691:ENSG00000CAPN12    | -                            | calpain l protein-coding     |                |
| chr19-413.8.664952  | -0.03792 | 0.788471 | -0.0481  | 0.961639 | 0.981636 | chr19 | 41302490 | 41308158 | + | 0 NA | intron (NMIR SINE  | -4848 NM_05284E  | 90324 Hs. 437497N  | 05284E:ENSG00000CCDC97       | -                            | coiled-c protein-coding      |                |
| chr19-588.8.664952  | -0.03792 | 0.788471 | -0.0481  | 0.961639 | 0.981636 | chr19 | 58311765 | 58315134 | + | 0 NA | intron (NAluSg7 SI | 8075 NR_14444E   | 1.05E+08           | Hs. 435404N                  | 14444E:ENSG00000ERVK3-1      | -                            | endogeno ncRNA |
| chr2-2733.8.664952  | -0.03792 | 0.788471 | -0.0481  | 0.961639 | 0.981636 | chr2  | 27339137 | 27343584 | + | 0 NA | intron (NLMIB4 LIN | 5818 NR_038427   | 1.01E+08           | Hs. 66650E                   | NR_038427:ENSG00000GTF3C2-AS | -                            | GTF3C2 arncRNA |
| chr2-2191.8.664952  | -0.03792 | 0.788471 | -0.0481  | 0.961639 | 0.981636 | chr2  | 2.19E+08 | 2.19E+08 | + | 0 NA | exon (NM_exon (NM  | 2372 NM_001321   | 79137 Hs. 516707N  | 02429E:ENSG00000RETREG2      | C2orf17 Freticulo            | protein-coding               |                |
| chr2-230.8.664952   | -0.03792 | 0.788471 | -0.0481  | 0.961639 | 0.981636 | chr2  | 2.3E+08  | 2.3E+08  | + | 0 NA | intron (Nintron (N | -21214 NM_00120E | 6672 Hs. 36905E    | NR_00311E:ENSG00000SP100     | Lysp100b                     | SP100 nuc protein-coding     |                |
| chr20-323.8.664952  | -0.03792 | 0.788471 | -0.0481  | 0.961639 | 0.981636 | chr20 | 32214870 | 32217592 | + | 0 NA | intron (NMIR3 SINE | 8351 NM_01535E   | 23509 Hs. 47240E   | NR_01535E:ENSG00000POFUT1    | DD2 FUT1                     | intron (C protein-coding     |                |
| chr20-573.8.664952  | -0.03792 | 0.788471 | -0.0481  | 0.961639 | 0.981636 | chr20 | 57365658 | 57371100 | + | 0 NA | intron (Nintron (N | -8881 NM_00119C  | 1E+08              | NR_00119C:ENSG00000MTRNR2L3  | HN3                          | MT-RNR2 l protein-coding     |                |
| chr3-1003.8.664952  | -0.03792 | 0.788471 | -0.0481  | 0.961639 | 0.981636 | chr3  | 1E+08    | 1E+08    | + | 0 NA | intron (Nintron (N | 33142 NM_01482C  | 9868 Hs. 22725E    | NR_01482C:ENSG00000TOMM70    | TOMM70A T                    | transloc protein-coding      |                |
| chr5-1727.8.664952  | -0.03792 | 0.788471 | -0.0481  | 0.961639 | 0.981636 | chr5  | 17274446 | 17277772 | + | 0 NA | 3' UTR (N3' UTR (N | 58478 NM_006317  | 10409 Hs. 201641N  | 006317:ENSG00000CBASP1       | CAP-23 C                     | brain ab protein-coding      |                |
| chr5-109.8.664952   | -0.03792 | 0.788471 | -0.0481  | 0.961639 | 0.981636 | chr5  | 1.09E+08 | 1.09E+08 | + | 0 NA | intron (NAluSq2 SI | -17564 NR_14904C | 285638 Hs. 532104N | NR_14904C:ENSG00000LOC28563E | -                            | uncharactncRNA               |                |
| chr5-1501.8.664952  | -0.03792 | 0.788471 | -0.0481  | 0.961639 | 0.981636 | chr5  | 1.5E+08  | 1.5E+08  | + | 0 NA | intron (NMLT1K LTF | -6059 NM_005211  | 1436 Hs. 58621E    | NR_005211:ENSG00000CSF1R     | C-FMS CD1                    | colony s protein-coding      |                |
| chr5-1501.8.664952  | -0.03792 | 0.788471 | -0.0481  | 0.961639 | 0.981636 | chr5  | 1.5E+08  | 1.5E+08  | + | 0 NA | intron (NMIR3 SINE | 20723 NM_00135E  | 5159 Hs. 509067N   | 00260E:ENSG00000PDGFRB       | CD140B E                     | platelet protein-coding      |                |
| chr6-8221.8.664952  | -0.03792 | 0.788471 | -0.0481  | 0.961639 | 0.981636 | chr6  | 82219860 | 82225351 | + | 0 NA | intron (NTigger 3e | 25139 NM_00130C  | 25998 Hs. 30642E   | NR_001552E:ENSG00000IBTK     | BTD26 BT                     | inhibitor protein-coding     |                |
| chr6-834.8.664952   | -0.03792 | 0.788471 | -0.0481  | 0.961639 | 0.981636 | chr6  | 83405952 | 83407534 | + | 0 NA | intron (NMLT2D LTF | 24308 NM_00239E  | 4199 Hs. 21160     | NR_00239E:ENSG00000CME1      | HUMNDME                      | malic enz protein-coding     |                |
| chr6-898.8.664952   | -0.03792 | 0.788471 | -0.0481  | 0.961639 | 0.981636 | chr6  | 89860908 | 89863349 | + | 0 NA | exon (NM_exon (NM  | 32228 NM_01211E  | 9994 Hs. 55821E    | NR_01211E:ENSG00000CASP8AP2  | CED-4 FL                     | caspace ε protein-coding     |                |
| chr7-446.8.664952   | -0.03792 | 0.788471 | -0.0481  | 0.961639 | 0.981636 | chr7  | 44696292 | 44700530 | + | 0 NA | intron (Nintron (N | -50155 NM_00130C | 83637 Hs. 77978    | NR_03144E:ENSG00000ZM122     | NET27 TR                     | zinc fing protein-coding     |                |
| chr7-1573.8.664952  | -0.03792 | 0.788471 | -0.0481  | 0.961639 | 0.981636 | chr7  | 1.57E+08 | 1.57E+08 | + | 0 NA | intron (NLMIB8 LIN | -77543 NM_005494 | 10049 Hs. 49074E   | NR_005494:ENSG00000DNAJB6    | DJ4 DnaJ DnaJ                | heat protein-coding          |                |
| chr8-670.8.664952   | -0.03792 | 0.788471 | -0.0481  | 0.961639 | 0.981636 | chr8  | 67053094 | 67060020 | + | 0 NA | exon (NM_exon (NM  | 5576 NM_006837   | 10987 Hs. 49191E   | NR_006837:ENSG00000COPS5     | CSN5 JAB1                    | COP9 sigr protein-coding     |                |
| chr8-6717.8.664952  | -0.03792 | 0.788471 | -0.0481  | 0.961639 | 0.981636 | chr8  | 67178999 | 67180391 | + | 0 NA | intron (Nintron (N | 95847 NM_001291  | 79848 Hs. 370147N  | 02479C:ENSG00000CSPP1        | CSPP JBT5                    | centrosom protein-coding     |                |
| chr9-5655.8.664952  | -0.03792 | 0.788471 | -0.0481  | 0.961639 | 0.981636 | chr9  | 5659627  | 5661184  | + | 0 NA | intron (NLP1A11 LI | 31286 NM_00120E  | 57589 Hs. 21152CN  | 02082E:ENSG00000CIC1         | CIP150 KIR1                  | C1 homc protein-coding       |                |
| chr9-122.8.664952   | -0.03792 | 0.788471 | -0.0481  | 0.961639 | 0.981636 | chr9  | 1.22E+08 | 1.22E+08 | + | 0 NA | intron (NAluSc SIN | -14022 NM_01436E | 26468 Hs. 103137N  | 01436E:ENSG00000LHX6         | LHX6.1                       | LIM homec protein-coding     |                |
| chr9-1243.8.664952  | -0.03792 | 0.788471 | -0.0481  | 0.961639 | 0.981636 | chr9  | 1.24E+08 | 1.24E+08 | + | 0 NA | intron (NMIR SINE  | 15753 NM_00116E  | 10783 Hs. 197071N  | 014397:ENSG00000NEK6         | SID6-151E                    | NIMA helc protein-coding     |                |
| chr9-1243.8.664952  | -0.03792 | 0.788471 | -0.0481  | 0.961639 | 0.981636 | chr9  | 1.24E+08 | 1.24E+08 | + | 0 NA | intron (Nintron (N | -27768 NR_02740E | 1E+08              | Hs. 65498CN                  | 02740E                       | LOC10012E                    | uncharactncRNA |
| chr9-1363.8.664952  | -0.03792 | 0.788471 | -0.0481  | 0.961639 | 0.981636 | chr9  | 1.36E+08 | 1.36E+08 | + | 0 NA | intron (Nintron (N | 10516 NM_015597  | 26086 Hs. 23937CN  | 015597:ENSG00000GSPM1        | AGS3                         | G protein protein-coding     |                |
| chr1-3888.7.392882  | 0.040784 | 0.848977 | 0.048039 | 0.961686 | 0.981636 | chr1  | 3888611  | 3891168  | + | 0 NA | 3' UTR (N3' UTR (N | 10383 NM_20735E  | 339448 Hs. 10383E  | NR_20735E:ENSG00000C1orf174  | -                            | chromosom protein-coding     |                |
| chr1-6264.7.392882  | 0.040784 | 0.848977 | 0.048039 | 0.961686 | 0.981636 | chr1  | 62641129 | 62642362 | + | 0 NA | intron (Nintron (N | 44225 NM_01449E  | 27329 Hs. 20915E   | NR_01449E:ENSG00000CANGPTL3  | ANG-5 ANC                    | angiopoie protein-coding     |                |
| chr1-1124.7.392882  | 0.040784 | 0.848977 | 0.048039 | 0.961686 | 0.981636 | chr1  | 1.12E+08 | 1.12E+08 | + | 0 NA | intron (Nintron (N | 25905 NR_03621C  | 1E+08              | NR_03621C:ENSG00000MIR4256   | -                            | microRNA ncRNA               |                |
| chr10-967.7.392882  | 0.040784 | 0.848977 | 0.048039 | 0.961686 | 0.981636 | chr10 | 96057205 | 96060174 | + | 0 NA | 3' UTR (N3' UTR (N | 5710 NR_03611E   | 1E+08              | NR_03611E:ENSG00000MIR3157   | mir-3157                     | microRNA ncRNA               |                |
| chr11-117.7.392882  | 0.040784 | 0.848977 | 0.048039 | 0.961686 | 0.981636 | chr11 | 1.17E+08 | 1.17E+08 | + | 0 NA | intron (NAluSz SIN | 12265 NM_01495E  | 22897 Hs. 50400E   | NR_01495E:ENSG00000CCEP164   | NPHP15                       | centrosom protein-coding     |                |
| chr13-197.7.392882  | 0.040784 | 0.848977 | 0.048039 | 0.961686 | 0.981636 | chr13 | 19756725 | 19758506 | + | 0 NA | intron (NMERS1B LI | 25330 NM_001354  | 55269 Hs. 21319E   | NR_00104E:ENSG00000PSPC1     | PSP1                         | paraspeck protein-coding     |                |
| chr13-957.7.392882  | 0.040784 | 0.848977 | 0.048039 | 0.961686 | 0.981636 | chr13 | 95592629 | 95594120 | + | 0 NA | intron (Nintron (N | 40654 NM_006984  | 9071 Hs. 53437E    | NR_006984:ENSG00000CLDN10    | CPTREL3 E                    | claudin l protein-coding     |                |
| chr13-111.7.392882  | 0.040784 | 0.848977 | 0.048039 | 0.961686 | 0.981636 | chr13 | 1.11E+08 | 1.11E+08 | + | 0 NA | intron (Nintron (N | 38838 NM_00135E  | 79587 Hs. 50872E   | NR_024537:ENSG00000CARS2     | COXP27 C                     | cysteiny l protein-coding    |                |
| chr14-10.7.392882   | 0.040784 | 0.848977 | 0.048039 | 0.961686 | 0.981636 | chr14 | 1.03E+08 | 1.03E+08 | + | 0 NA | intron (NLM1D2 LIN | 50129 NM_00182E  | 1152 Hs. 173724N   | 00182E:ENSG00000CKB          | B-C BCK C                    | retaine protein-coding       |                |
| chr16-224.7.392882  | 0.040784 | 0.848977 | 0.048039 | 0.961686 | 0.981636 | chr16 | 2242402  | 2246724  | + | 0 NA | intron (Nintron (N | 7024 NM_00117E   | 1632 Hs. 40343E    | NR_00191E:ENSG00000CEC1      | DCI                          | enoyl-CoA protein-coding     |                |
| chr17-167.7.392882  | 0.040784 | 0.848977 | 0.048039 | 0.961686 | 0.981636 | chr17 | 16018663 | 16020138 | + | 0 NA | intron (NLM1E3Cz I | 19576 NM_01777E  | 54902 Hs. 46231E   | NR_01777E:ENSG00000TTC19     | 20102040I                    | tetratric protein-coding     |                |
| chr19-157.7.392882  | 0.040784 | 0.848977 | 0.048039 | 0.961686 | 0.981636 | chr19 | 1595324  | 1599735  | + | 0 NA | 3' UTR (N3' UTR (N | -4664 NM_001281  | 53615 Hs. 17872E   | NR_00392E:ENSG00000MBD3      | -                            | methyl-C protein-coding      |                |
| chr19-107.7.392882  | 0.040784 | 0.848977 | 0.048039 | 0.961686 | 0.981636 | chr19 | 10254460 | 10256174 | + | 0 NA | intron (N2b LINE   | 3103 NM_01595E   | 51073 Hs. 27962E   | NR_01595E:ENSG00000MRPL4     | CGI-28 L                     | ami tochon protein-coding    |                |
| chr19-367.7.392882  | 0.040784 | 0.848977 | 0.048039 | 0.961686 | 0.981636 | chr19 | 36918210 | 36919365 | + | 0 NA | intron (NLM1B3 LIN | 2455 NM_001204   | 374900 Hs. 40422N  | NR_19853E:ENSG00000ZNF568    | ZFP568                       | zinc fing protein-coding     |                |
| chr2-3707.7.392882  | 0.040784 | 0.848977 | 0.048039 | 0.961686 | 0.981636 | chr2  | 37037330 | 37038662 | + | 0 NA | exon (NM_exon (NM  | 46376 NM_019024  | 54497 Hs. 744084N  | 019024:ENSG00000HEATR5B      | -                            | HEAT repc protein-coding     |                |
| chr2-2087.7.392882  | 0.040784 | 0.848977 | 0.048039 | 0.961686 | 0.981636 | chr2  | 2.08E+08 | 2.08E+08 | + | 0 NA | intron (Nintron (N | 36351 NM_00117E  | 200576 Hs. 744997N | 01504C:ENSG00000CIKPYVE      | CFD FAB1                     | phosphoi protein-coding      |                |
| chr3-4907.7.392882  | 0.040784 | 0.848977 | 0.048039 | 0.961686 | 0.981636 | chr3  | 49030378 | 49033075 | + | 0 NA | intron (Nintron (N | -2328 NM_000884  | 3615 Hs. 65440E    | NR_000884:ENSG00000LMPDH2    | IMP2 IMF                     | inosine n protein-coding     |                |
| chr4-1222.7.392882  | 0.040784 | 0.848977 | 0.048039 | 0.961686 | 0.981636 | chr4  | 1.22E+08 | 1.22E+08 | + | 0 NA | intron (NMIR SINE  |                  |                    |                              |                              |                              |                |



|                     |          |          |          |          |          |       |          |          |   |   |    |                     |                  |                              |                    |                                       |
|---------------------|----------|----------|----------|----------|----------|-------|----------|----------|---|---|----|---------------------|------------------|------------------------------|--------------------|---------------------------------------|
| chr2-171 7. 683333  | -0.0396  | 0.834466 | -0.04746 | 0.962148 | 0.981636 | chr2  | 1.71E+08 | 1.71E+08 | + | 0 | NA | intron (Nintron (N  | 6434 NM_001136   | 9874 Hs. 744917NM_01229C     | ENSG00000TLK1      | PKU-beta tousel lprotein-coding       |
| chr20-344 7. 683333 | -0.0396  | 0.834466 | -0.04746 | 0.962148 | 0.981636 | chr20 | 34447173 | 34451962 | + | 0 | NA | intron (Nintron (N  | -16758 NR_030374 | 693229 NR_030374             | ENSG00000MIR644A   | MIR644 MI microRNA ncRNA              |
| chr3-709 7. 683333  | -0.0396  | 0.834466 | -0.04746 | 0.962148 | 0.981636 | chr3  | 70963584 | 70967359 | + | 0 | NA | intron (Nintron (N  | 99453 NM_001345  | 27086 Hs. 59368 NM_032682    | ENSG00000FOXP1     | I2CC4 HSF forkhead protein-coding     |
| chr4-1251 7. 683333 | -0.0396  | 0.834466 | -0.04746 | 0.962148 | 0.981636 | chr4  | 1251451  | 1251921  | + | 0 | NA | non-codiron-codir   | 2247 NR_033333   | 92070 Hs. 561314NM_052861    | CTBP1-DT           | C4orf42 CTBP1 divncRNA                |
| chr4-4282 7. 683333 | -0.0396  | 0.834466 | -0.04746 | 0.962148 | 0.981636 | chr4  | 4282549  | 4282974  | + | 0 | NA | intron (NAluSx1 S1  | 6711 NM_001145   | 55646 Hs. 425427NM_01781C    | ENSG00000LYAR      | Z4C2C2 ZL1y1 antiviral protein-coding |
| chr5-959 7. 683333  | -0.0396  | 0.834466 | -0.04746 | 0.962148 | 0.981636 | chr5  | 95930157 | 95931893 | + | 0 | NA | intron (Nintron (N  | 30826 NM_012081  | 22936 Hs. 192221NM_012081    | ENSG00000CELL2     | MRCAT1 elongatic protein-coding       |
| chr6-875 7. 683333  | -0.0396  | 0.834466 | -0.04746 | 0.962148 | 0.981636 | chr6  | 87562125 | 87564439 | + | 0 | NA | intron (Nintron (N  | 26705 NM_02032C  | 57038 Hs. 48591NM_02032C     | ENSG00000RARS2     | ArgRS DAL arginyl-tprotein-coding     |
| chr6-1007 7. 683333 | -0.0396  | 0.834466 | -0.04746 | 0.962148 | 0.981636 | chr6  | 10070181 | 10070181 | + | 0 | NA | intron (NLIPIA11 L1 | 138286 NM_00682E | 10973 Hs. 486031NM_00682E    | ENSG00000ASCC3     | ASC3 P200 activatir protein-coding    |
| chr7-166 7. 683333  | -0.0396  | 0.834466 | -0.04746 | 0.962148 | 0.981636 | chr7  | 16621245 | 16622412 | + | 0 | NA | intron (NAluSx SIN  | 23926 NM_02031E  | 57037 Hs. 15737NM_02031E     | ENSG00000ANKMY2    | ZMYND20 ankryn rprotein-coding        |
| chr7-329 7. 683333  | -0.0396  | 0.834466 | -0.04746 | 0.962148 | 0.981636 | chr7  | 32926887 | 32929831 | + | 0 | NA | intron (NMIRe SINE  | 14820 NM_00350C  | 441212 Hs. 64808NM_00103C    | ENSG00000RP9P      | RP9 pseudseudo                        |
| chr9-1124 7. 683333 | -0.0396  | 0.834466 | -0.04746 | 0.962148 | 0.981636 | chr9  | 1.12E+08 | 1.12E+08 | + | 0 | NA | intron (NLIPIA11 L1 | -19342 NM_001287 | 158405 Hs. 65661NM_13346E    | ENSG00000KIAA1958  | KIAA1958 protein-coding               |
| chr1-1938 8. 878947 | 0.037119 | 0.783217 | 0.047392 | 0.962201 | 0.981636 | chr1  | 19385091 | 19385387 | + | 0 | NA | intron (NLIPIA11 L1 | 72913 NM_00104C  | 54896 Hs. 64762NM_01776E     | ENSG00000SLC66A1   | LAAT-1 L1solute cprotein-coding       |
| chr1-5505 8. 878947 | 0.037119 | 0.783217 | 0.047392 | 0.962201 | 0.981636 | chr1  | 55099265 | 55100418 | + | 0 | NA | exon (NM exon (NM   | 59619 NR_110451  | 255738 Hs. 18844 NM_17493C   | ENSG00000PCSK9     | FH3 HCHO1proteiprotein-coding         |
| chr1-788 8. 878947  | 0.037119 | 0.783217 | 0.047392 | 0.962201 | 0.981636 | chr1  | 78869573 | 78871495 | + | 0 | NA | intron (Nintron (N  | -30007 NM_001321 | 57602 Hs. 46424NM_02509C     | ENSG00000CSP36     | DUB1 ubiquitir protein-coding         |
| chr2-1127 8. 878947 | 0.037119 | 0.783217 | 0.047392 | 0.962201 | 0.981636 | chr2  | 11277704 | 11277930 | + | 0 | NA | intron (NLIPIB1 LIN | 66819 NM_00485C  | 9475 Hs. 68174NM_00485C      | ENSG00000CROCK2    | ROCK-II Rho assoc protein-coding      |
| chr20-62 8. 878947  | 0.037119 | 0.783217 | 0.047392 | 0.962201 | 0.981636 | chr20 | 62263579 | 62266494 | + | 0 | NA | intron (NLIPIA11 L1 | 26515 NM_00136E  | 9885 Hs. 473254NM_01483E     | ENSG00000OSBPL2    | DFNA67 DN oxysterol protein-coding    |
| chr22-217 8. 878947 | 0.037119 | 0.783217 | 0.047392 | 0.962201 | 0.981636 | chr22 | 21798533 | 21799300 | + | 0 | NA | intron (Nintron (N  | -63122 NM_01331E | 29799 Hs. 51743NM_01331E     | ENSG00000CYPEL1    | FKSG3 yippe lprotein-coding           |
| chr3-1237 8. 878947 | 0.037119 | 0.783217 | 0.047392 | 0.962201 | 0.981636 | chr3  | 1.24E+08 | 1.24E+08 | + | 0 | NA | intron (NHAL1 LINE  | 75041 NR_04662E  | 1.01E+08 Hs. 66731CNR_04662E | ENSG00000MYLK-AS2  | MYLK anticncRNA                       |
| chr3-1427 8. 878947 | 0.037119 | 0.783217 | 0.047392 | 0.962201 | 0.981636 | chr3  | 1.43E+08 | 1.43E+08 | + | 0 | NA | intron (NTiger3 3b  | 24774 NM_003304  | 7220 Hs. 250687NM_003304     | ENSG00000TRPC1     | HTRP-1 TF transient protein-coding    |
| chr4-159 8. 878947  | 0.037119 | 0.783217 | 0.047392 | 0.962201 | 0.981636 | chr4  | 159929   | 161338   | + | 0 | NA | intron (NAluSx3 S1  | 32512 NM_00128E  | 255403 Hs. 63663NM_00103E    | ENSG00000ZNF718    | zinc fing protein-coding              |
| chr7-105 8. 878947  | 0.037119 | 0.783217 | 0.047392 | 0.962201 | 0.981636 | chr7  | 1.05E+08 | 1.05E+08 | + | 0 | NA | intron (Nintron (N  | 30925 NM_182931  | 55904 Hs. 592262NM_01868E    | ENSG00000KMT2E     | HDCMC04P lysine mprotein-coding       |
| chr7-137 8. 878947  | 0.037119 | 0.783217 | 0.047392 | 0.962201 | 0.981636 | chr7  | 1.38E+08 | 1.38E+08 | + | 0 | NA | intron (NMIRe SINE  | 32597 NM_00131E  | 64764 Hs. 49027NM_194071     | ENSG00000CREB3L2   | BBF2H7 cAMP res protein-coding        |
| chr4-569 9. 151832  | -0.03652 | 0.752813 | -0.04739 | 0.962227 | 0.981636 | chr4  | 56964873 | 56965147 | + | 0 | NA | intron (NAluSq2 S1  | 12596 NM_03231E  | 84273 Hs. 8715 NM_03231E     | ENSG00000CNOA1     | C4orf14 Nnitric oprotein-coding       |
| chr1-473 9. 151832  | -0.0365  | 0.771274 | -0.04733 | 0.96225  | 0.981636 | chr1  | 47369887 | 47369831 | + | 0 | NA | intron (Nintron (N  | 35619 NM_00136E  | 51727 Hs. 731647NM_01630E    | ENSG00000CMPK1     | CK1 CMK CM cytidine/protein-coding    |
| chr1-201 9. 151832  | -0.0365  | 0.771274 | -0.04733 | 0.96225  | 0.981636 | chr1  | 2.02E+08 | 2.02E+08 | + | 0 | NA | intron (NLIPIA11 L1 | 24480 NM_012134  | 25802 Hs. 51907NM_012134     | ENSG00000LMOD1     | ID 64KD E leiomodir protein-coding    |
| chr13-28 9. 151832  | -0.0365  | 0.771274 | -0.04733 | 0.96225  | 0.981636 | chr13 | 28671880 | 28673512 | + | 0 | NA | intron (NLTR40b L1  | 14986 NM_01593E  | 51371 Hs. 26874NM_01593E     | ENSG00000POMP      | C13orf12 proteason protein-coding     |
| chr13-491 9. 151832 | -0.0365  | 0.771274 | -0.04733 | 0.96225  | 0.981636 | chr13 | 49130937 | 49132814 | + | 0 | NA | intron (NLIPIA11 L1 | 21558 NM_01492E  | 22862 Hs. 50801NM_01492E     | ENSG00000FNDC3A    | FNDC3 HUC fibronectin protein-coding  |
| chr14-20 9. 151832  | -0.0365  | 0.771274 | -0.04733 | 0.96225  | 0.981636 | chr14 | 20991544 | 20995517 | + | 0 | NA | intron (NAluSx4 S1  | 3550 NM_00102E   | 64745 Hs. 51269NM_022734     | ENSG00000METTL17   | METTL1D1 methyltr protein-coding      |
| chr15-19 9. 151832  | -0.0365  | 0.771274 | -0.04733 | 0.96225  | 0.981636 | chr15 | 98939297 | 98941428 | + | 0 | NA | intron (Nintron (N  | 65294 NM_00110E  | 145814 Hs. 592021NM_00110E   | ENSG00000PGPEPIL   | pyroglutl protein-coding              |
| chr16-15 9. 151832  | -0.0365  | 0.771274 | -0.04733 | 0.96225  | 0.981636 | chr16 | 15977539 | 15979221 | + | 0 | NA | intron (NAluJr SIN  | 28764 NM_00499E  | 4363 Hs. 391464NM_00499E     | ENSG00000ABCC1     | ABC29 ABC ATP bindir protein-coding   |
| chr19-13 9. 151832  | -0.0365  | 0.771274 | -0.04733 | 0.96225  | 0.981636 | chr19 | 13919928 | 13922220 | + | 0 | NA | intron (NMLT1J LTF  | 14873 NM_017721  | 54862 Hs. 26959NM_017721     | ENSG00000CC2D1A    | FREUD-1 F coiled-cprotein-coding      |
| chr2-552 9. 151832  | -0.0365  | 0.771274 | -0.04733 | 0.96225  | 0.981636 | chr2  | 55295211 | 55296358 | + | 0 | NA | exon (NM exon (NM   | 13465 NR_02725E  | 344405 Hs. 44529NM_00108C    | ENSG00000PRORS1P   | NCRNA001 proly1-tf pseudo             |
| chr6-875 9. 151832  | -0.0365  | 0.771274 | -0.04733 | 0.96225  | 0.981636 | chr6  | 87513349 | 87521439 | + | 0 | NA | intron (NLIPIA11 L1 | 44420 NM_00641E  | 10559 Hs. 42316NM_00641E     | ENSG00000SLC35A1   | CDGF2 CF sulfte protein-coding        |
| chr7-641 9. 151832  | -0.0365  | 0.771274 | -0.04733 | 0.96225  | 0.981636 | chr7  | 6418066  | 6430038  | + | 0 | NA | intron (Nintron (N  | 23902 NM_13917E  | 221955 Hs. 48749NM_13917E    | ENSG00000CAGLB     | DAGLBETA diacylgly protein-coding     |
| chr9-130 9. 151832  | -0.0365  | 0.771274 | -0.04733 | 0.96225  | 0.981636 | chr9  | 1.31E+08 | 1.31E+08 | + | 0 | NA | intron (Nintron (N  | -10868 NR_10691E | 1.02E+08 NR_10691E           | ENSG00000MIR6856   | hsa-mir-6microRNA ncRNA               |
| chr9-269 9. 151832  | 0.036507 | 0.765405 | 0.047108 | 0.962427 | 0.981636 | chr9  | 26919549 | 26920149 | + | 0 | NA | intron (Nintron (N  | -27021 NM_001167 | 79886 Hs. 178357NM_02482E    | ENSG00000CAAP1     | C9orf82 C caspase r protein-coding    |
| chr1-122 9. 151832  | 0.04603  | 0.978012 | 0.047065 | 0.962462 | 0.981636 | chr1  | 12289867 | 12291759 | + | 0 | NA | intron (Nintron (N  | 60783 NM_01537E  | 55187 Hs. 439381NM_01537E    | ENSG00000CVP313D   | SCAR4 vacuolar protein-coding         |
| chr1-313 9. 151832  | 0.04603  | 0.978012 | 0.047065 | 0.962462 | 0.981636 | chr1  | 31356427 | 31357745 | + | 0 | NA | intron (Nintron (N  | 15990 NM_00410E  | 2170 Hs. 57637NM_00410E      | ENSG00000FABP3     | FABP11 H fatty aciprotein-coding      |
| chr10-30 9. 151832  | 0.04603  | 0.978012 | 0.047065 | 0.962462 | 0.981636 | chr10 | 30334433 | 30336013 | + | 0 | NA | intron (NAluSx SIN  | 14115 NM_01810E  | 55149 Hs. 17394NM_01810E     | ENSG00000MTAP      | PAPD1 SP1mtohcnc protein-coding       |
| chr10-97 9. 151832  | 0.04603  | 0.978012 | 0.047065 | 0.962462 | 0.981636 | chr10 | 97719105 | 97719745 | + | 0 | NA | IntergeniAluSx SIN  | 5695 NM_031484   | 83742 Hs. 74407NM_031484     | ENSG00000MARVELD1  | GB14 MARV MARVEL dc protein-coding    |
| chr11-64 9. 151832  | 0.04603  | 0.978012 | 0.047065 | 0.962462 | 0.981636 | chr11 | 69665357 | 69666048 | + | 0 | NA | 3' UTR (N3' UTR (N  | 9651 NM_153451   | 220064 Hs. 66799NM_153451    | ENSG00000LTO1      | CIAB1 ORL1TO1 mat protein-coding      |
| chr13-24 9. 151832  | 0.04603  | 0.978012 | 0.047065 | 0.962462 | 0.981636 | chr13 | 24470798 | 24472345 | + | 0 | NA | intron (Nintron (N  | 41207 NM_006437  | 143 Hs. 74485NM_006437       | ENSG00000PARP4     | ADPRTL1 poly (ADP)-protein-coding     |
| chr15-40 9. 151832  | 0.04603  | 0.978012 | 0.047065 | 0.962462 | 0.981636 | chr15 | 40417251 | 40417895 | + | 0 | NA | intron (NMER44B DN  | 11776 NR_14892E  | 3712 Hs. 51364NM_00222E      | ENSG00000IVD       | ACAD2 isovaleryl protein-coding       |
| chr15-41 9. 151832  | 0.04603  | 0.978012 | 0.047065 | 0.962462 | 0.981636 | chr15 | 41679077 | 41680035 | + | 0 | NA | intron (NLIPIA11 L1 | -12029 NR_03035E | 693211 NR_03035E             | ENSG00000MIR626    | MIRN626 hmicroRNA ncRNA               |
| chr16-18 9. 151832  | 0.04603  | 0.978012 | 0.047065 | 0.962462 | 0.981636 | chr16 | 18512183 | 18514181 | + | 0 | NA | intron (Nintron (N  | -18606 NR_03614E | 1E+08 NR_03614E              | ENSG00000MIR3179-5 | microRNA ncRNA                        |
| chr17-31 9. 151832  | 0.04603  | 0.978012 | 0.047065 | 0.962462 | 0.981636 | chr17 | 31335089 | 31335657 | + | 0 | NA | intron (Nintron (N  | -13751 NM_00100C | 2123 Hs. 59119NM_01421C      | ENSG00000EV12A     | EVDA EVI- ecotropic protein-coding    |
| chr19-51 9. 151832  | 0.04603  | 0.978012 | 0.047065 | 0.962462 | 0.981636 | chr19 | 51978991 | 51979807 | + | 0 | NA | intron (NHERVK3-ir  | 7441 NM_02163E   | 59348 Hs. 40769NM_02163E     | ENSG00000ZNF350    | ZBRK1 ZFG zinc fing protein-coding    |
| chr2-170 9. 151832  | 0.04603  | 0.978012 | 0.047065 | 0.962462 | 0.981636 | chr2  | 1.7E+08  | 1.7E+08  | + | 0 | NA | intron (Nintron (N  | -96472 NR_04568E | 140469 Hs. 67190NM_13899E    | ENSG00000MYO3B     | myosin II protein-coding              |
| chr20-18 9. 151832  | 0.04603  | 0.978012 | 0.047065 | 0.962462 | 0.981636 | chr20 | 18541554 | 18543092 | + | 0 | NA | exon (NM exon (NM   | -25097 NM_00134E | 388789 Hs. 34909NM_00134E    | ENSG00000SMIM26    | LINC0049E small intr protein-coding   |
| chr20-38 9. 151832  | 0.04603  | 0.978012 | 0.047065 | 0.962462 | 0.981636 | chr20 | 38011666 | 38012502 | + | 0 | NA |                     |                  |                              |                    |                                       |



|                    |          |          |          |          |          |       |          |          |   |    |                    |        |           |          |           |           |           |           |           |              |                |                |                |           |                |                |
|--------------------|----------|----------|----------|----------|----------|-------|----------|----------|---|----|--------------------|--------|-----------|----------|-----------|-----------|-----------|-----------|-----------|--------------|----------------|----------------|----------------|-----------|----------------|----------------|
| chr6-132:8.170214  | -0.03786 | 0.808568 | -0.04682 | 0.962656 | 0.981636 | chr6  | 1.32E+08 | 1.32E+08 | 0 | NA | intron (NMIR SINE  | 34023  | NM_015525 | 26002    | Hs.6909   | NM_015525 | ENSG00000 | MOXD1     | MOX PRO57 | monoxyge     | protein-coding |                |                |           |                |                |
| chr7-233:8.170214  | -0.03786 | 0.808568 | -0.04682 | 0.962656 | 0.981636 | chr7  | 23301312 | 23302988 | 0 | NA | intron (NL2b LINE  | 2811   | NM_138444 | 115416   | Hs.87385  | NM_138444 | ENSG00000 | MALSU1    | C7orf30   | nmitchoncn   | protein-coding |                |                |           |                |                |
| chr7-358:8.170214  | -0.03786 | 0.808568 | -0.04682 | 0.962656 | 0.981636 | chr7  | 35898413 | 35899973 | 0 | NA | intron (Nintron (N | 97974  | NM_001363 | 989      | Hs.191344 | NM_001363 | ENSG00000 | CEPTIN7   | CDIC10    | CDX septin 7 | protein-coding |                |                |           |                |                |
| chr7-922:8.170214  | -0.03786 | 0.808568 | -0.04682 | 0.962656 | 0.981636 | chr7  | 92218330 | 92225836 | 0 | NA | intron (Nintron (N | -17985 | NR_031616 | 23554    | Hs.16529  | NR_031616 | ENSG00000 | MIR1285-1 | MIRN1285  | microRNA     | ncRNA          |                |                |           |                |                |
| chr7-1208:8.170214 | -0.03786 | 0.808568 | -0.04682 | 0.962656 | 0.981636 | chr7  | 92118811 | 92118811 | 0 | NA | intron (Nintron (N | 19967  | NM_012338 | 23554    | Hs.16529  | NM_012338 | ENSG00000 | TSPAN12   | EVRS NET- | tetraspan    | protein-coding |                |                |           |                |                |
| chr7-121:8.170214  | -0.03786 | 0.808568 | -0.04682 | 0.962656 | 0.981636 | chr7  | 1.21E+08 | 1.21E+08 | 0 | NA | intron (Nintron (N | 33571  | NM_057168 | 51384    | Hs.272375 | NM_057168 | ENSG00000 | WNT16     | Wnt       | family       | protein-coding |                |                |           |                |                |
| chr7-1301:8.170214 | -0.03786 | 0.808568 | -0.04682 | 0.962656 | 0.981636 | chr7  | 1.3E+08  | 1.3E+08  | 0 | NA | intron (NALuSx3 SI | -18278 | NR_149033 | 1E+08    | Hs.105944 | NR_149033 | ENSG00000 | LOC100128 |           |              | uncharacter    | ncRNA          |                |           |                |                |
| chr8-423:8.170214  | -0.03786 | 0.808568 | -0.04682 | 0.962656 | 0.981636 | chr8  | 42398723 | 42406897 | 0 | NA | intron (Nintron (N | 10930  | NM_005662 | 7419     | Hs.699301 | NM_005662 | ENSG00000 | VDAC3     | HD-VDAC3  | voltage      | protein-coding |                |                |           |                |                |
| chr8-478:8.170214  | -0.03786 | 0.808568 | -0.04682 | 0.962656 | 0.981636 | chr8  | 47891020 | 47893566 | 0 | NA | intron (NCharlie2f | 67843  | NM_001081 | 5591     | Hs.491682 | NM_006904 | ENSG00000 | PRKDC     | DNA-PKC I | protein      | protein-coding |                |                |           |                |                |
| chr8-125:8.170214  | -0.03786 | 0.808568 | -0.04682 | 0.962656 | 0.981636 | chr8  | 1.25E+08 | 1.25E+08 | 0 | NA | intron (Nintron (N | 11383  | NM_014844 | 9897     | Hs.270044 | NM_014844 | ENSG00000 | WASHC5    | KIAA0196  | WASH         | com            | protein-coding |                |           |                |                |
| chr9-110:8.170214  | -0.03786 | 0.808568 | -0.04682 | 0.962656 | 0.981636 | chr9  | 1.11E+08 | 1.11E+08 | 0 | NA | intron (Nintron (N | 14118  | NM_153366 | 79987    | Hs.522334 | NM_153366 | ENSG00000 | SVFP1     | C9orf13   | Csushi,      | vc             | protein-coding |                |           |                |                |
| chr13-32:9.836992  | 0.035066 | 0.750189 | 0.046742 | 0.962719 | 0.981636 | chr13 | 32512606 | 32512988 | 0 | NA | 3' UTR (N3' UTR (N | -3402  | NR_026928 | 116828   | Hs.658751 | NR_026928 | ENSG00000 | N4BP2L2-1 | ICG300    | N4BP2L2      | ir             | ncRNA          |                |           |                |                |
| chr1-151:9.638712  | -0.03529 | 0.756642 | -0.04663 | 0.962805 | 0.981636 | chr1  | 15911321 | 15912313 | 0 | NA | intron (NALuSx SIN | -63670 | NR_024275 | 729614   | Hs.119294 | NR_024275 | ENSG00000 | FLJ37453  |           |              |                | uncharacter    | ncRNA          |           |                |                |
| chr2-231:9.638712  | -0.03529 | 0.756642 | -0.04663 | 0.962805 | 0.981636 | chr2  | 2.31E+08 | 2.31E+08 | 0 | NA | intron (Nintron (N | 78742  | NM_001352 | 80210    | Hs.162411 | NM_025135 | ENSG00000 | ARMC9     | ARM       | JBTS5        | armadill       | protein-coding |                |           |                |                |
| chr3-979:9.638712  | -0.03529 | 0.756642 | -0.04663 | 0.962805 | 0.981636 | chr3  | 9795812  | 9796050  | 0 | NA | intron (NALuSx SIN | 2849   | NM_001198 | 10093    | Hs.323342 | NM_005718 | ENSG00000 | ARPC4     | ARC20     | P2C          | actin          | rel            | protein-coding |           |                |                |
| chr1-1081:5.914676 | 0.043734 | 0.9428   | 0.046387 | 0.963001 | 0.981636 | chr1  | 1.08E+08 | 1.08E+08 | 0 | NA | intron (Nintron (N | 36456  | NM_213651 | 29957    | Hs.656877 | NM_013388 | ENSG00000 | SLC25A24  | APC1      | SCAM         | solute         | protein-coding |                |           |                |                |
| chr11-57:5.914676  | 0.043734 | 0.9428   | 0.046387 | 0.963001 | 0.981636 | chr11 | 57564607 | 57564983 | 0 | NA | intron (NALuS2 SI  | 2877   | NM_004223 | 9246     | Hs.425777 | NM_004223 | ENSG00000 | UBE2A3    | RIG-B UBC | ubiquitin    | protein-coding |                |                |           |                |                |
| chr12-701:5.914676 | 0.043734 | 0.9428   | 0.046387 | 0.963001 | 0.981636 | chr12 | 7013165  | 7013774  | 0 | NA | intron (NL2b LINE  | 5007   | NM_005768 | 10162    | Hs.655248 | NM_005768 | ENSG00000 | LPCAT3    | C3F       | LPCAI        | lysospho       | protein-coding |                |           |                |                |
| chr13-951:5.914676 | 0.043734 | 0.9428   | 0.046387 | 0.963001 | 0.981636 | chr13 | 95131680 | 95132641 | 0 | NA | intron (NMER2 DNA  | -78184 | NR_145733 | 1.E+08   | NR_145733 | SNORD13G  |           |           |           |              |                | small          | nucsnRNA       |           |                |                |
| chr16-68:5.914676  | 0.043734 | 0.9428   | 0.046387 | 0.963001 | 0.981636 | chr16 | 68300656 | 68301174 | 0 | NA | 3' UTR (N3' UTR (N | 10031  | NM_032178 | 84138    | Hs.729522 | NM_032178 | ENSG00000 | SLC7A60S  |           |              |                |                |                | solute    | protein-coding |                |
| chr17-305:5.914676 | 0.043734 | 0.9428   | 0.046387 | 0.963001 | 0.981636 | chr17 | 30901889 | 30904333 | 0 | NA | intron (NALuSx SIN | 3127   | NM_024683 | 79736    | Hs.31734C | NM_024683 | ENSG00000 | TEFM      | C17orf42  | transcri     | protein-coding |                |                |           |                |                |
| chr3-193:5.914676  | 0.043734 | 0.9428   | 0.046387 | 0.963001 | 0.981636 | chr3  | 1.94E+08 | 1.94E+08 | 0 | NA | intron (Nintron (N | -30591 | NR_046634 | 1.01E+08 | Hs.679364 | NR_046634 | ENSG00000 | OPAI-AS1  |           |              |                |                |                | OPAI      | antncRNA       |                |
| chr3-1967:5.914676 | 0.043734 | 0.9428   | 0.046387 | 0.963001 | 0.981636 | chr3  | 1.97E+08 | 1.97E+08 | 0 | NA | intron (NLIME3D LI | 45736  | NM_002577 | 5062     | Hs.518533 | NM_002577 | ENSG00000 | PAK2      | PAK65 PAK | p21          | (RAC1          | protein-coding |                |           |                |                |
| chr4-2071:5.914676 | 0.043734 | 0.9428   | 0.046387 | 0.963001 | 0.981636 | chr4  | 20713632 | 20714371 | 0 | NA | intron (NLIP1 LINE | 13543  | NM_00133C | 133015   | Hs.479298 | NM_145044 | ENSG00000 | PACRGL    | C4orf28   | parkin       | cc             | protein-coding |                |           |                |                |
| chr5-139:5.914676  | 0.043734 | 0.9428   | 0.046387 | 0.963001 | 0.981636 | chr5  | 13926588 | 13927053 | 0 | NA | intron (Nintron (N | 17660  | NM_00136E | 1767     | Hs.21236C | NM_00136E | ENSG00000 | CNHA5     | CILD3     | DN           | dynein         | alpha          | protein-coding |           |                |                |
| chr6-132:5.914676  | 0.043734 | 0.9428   | 0.046387 | 0.963001 | 0.981636 | chr6  | 1.32E+08 | 1.32E+08 | 0 | NA | intron (Nintron (N | 72738  | NM_015525 | 26002    | Hs.6909   | NM_015525 | ENSG00000 | MOXD1     | MOX PRO57 | monoxyge     | protein-coding |                |                |           |                |                |
| chr7-7307:5.914676 | 0.043734 | 0.9428   | 0.046387 | 0.963001 | 0.981636 | chr7  | 73071227 | 73071640 | 0 | NA | IntergeniNALuS2 SI | 12805  | NM_001351 | 1.01E+08 | Hs.645327 | NM_001351 | ENSG00000 | SPDYE11   |           |              |                |                |                | speedy/Rl | protein-coding |                |
| chr7-754:5.914676  | 0.043734 | 0.9428   | 0.046387 | 0.963001 | 0.981636 | chr7  | 75498555 | 75499186 | 0 | NA | intron (Nintron (N | 5243   | NM_00130E | 442590   | Hs.632298 | NM_00109E | ENSG00000 | SPDYE5    |           |              |                |                |                | speedy/Rl | protein-coding |                |
| chr7-1487:5.914676 | 0.043734 | 0.9428   | 0.046387 | 0.963001 | 0.981636 | chr7  | 1.49E+08 | 1.49E+08 | 0 | NA | intron (NALuJb SIN | 32695  | NM_00137C | 8454     | Hs.146807 | NM_00359E | ENSG00000 | CUL1      |           |              |                |                |                | culin 1   | protein-coding |                |
| chr9-106:5.914676  | 0.043734 | 0.9428   | 0.046387 | 0.963001 | 0.981636 | chr9  | 1.07E+08 | 1.07E+08 | 0 | NA | intron (Nintron (N | 69230  | NM_021224 | 58499    | Hs.370375 | NM_021224 | ENSG00000 | ZNF462    | ZFP1P Zf  | zinc         | finger         | protein-coding |                |           |                |                |
| chr9-125:5.914676  | 0.043734 | 0.9428   | 0.046387 | 0.963001 | 0.981636 | chr9  | 1.25E+08 | 1.25E+08 | 0 | NA | intron (NALuSx SIN | 18863  | NM_005347 | 3309     | Hs.743241 | NM_005347 | ENSG00000 | HSPA5     | BIP GRP78 | heat         | shoc           | protein-coding |                |           |                |                |
| chr9-129:5.914676  | 0.043734 | 0.9428   | 0.046387 | 0.963001 | 0.981636 | chr9  | 1.29E+08 | 1.29E+08 | 0 | NA | intron (NALuJ SINE | 15023  | NM_03280E | 84895    | Hs.63269E | NM_03280E | ENSG00000 | MIGA2     | C9orf54   | Fmitogua     | protein-coding |                |                |           |                |                |
| chrX-156:5.914676  | 0.043734 | 0.9428   | 0.046387 | 0.963001 | 0.981636 | chrX  | 15688907 | 15690383 | 0 | NA | intron (NLIMB3 LIN | 14187  | NR_160542 | 340591   | Hs.732244 | NR_026551 | ENSG00000 | CA5BP1    | CASB1     | CAE          | carbonic       | pseudo         |                |           |                |                |
| chr10-271:5.963673 | 0.044016 | 0.94936  | 0.046364 | 0.96302  | 0.981636 | chr10 | 27139429 | 27140085 | 0 | NA | intron (NLIM5 LINE | 14627  | NM_01426E | 10730    | Hs.74647  | NM_01426E | ENSG00000 | CYME1L1   | FTSH MEG4 | YME1         | like           | protein-coding |                |           |                |                |
| chr1-151:6.442696  | 0.042056 | 0.909273 | 0.046253 | 0.963109 | 0.981636 | chr1  | 1.51E+08 | 1.51E+08 | 0 | NA | intron (NALuSx1 SI | -7849  | NM_207171 | 23126    | Hs.489877 | NM_01510C | ENSG00000 | POGZ      | MRD37     | WH           | pogo           | tr             | protein-coding |           |                |                |
| chr10-10:6.442696  | 0.042056 | 0.909273 | 0.046253 | 0.963109 | 0.981636 | chr10 | 1.01E+08 | 1.01E+08 | 0 | NA | intron (Nintron (N | -4309  | NM_01549C | 25956    | Hs.18889  | NM_01549C | ENSG00000 | SEC31B    | SEC31B-1  | SEC31        | hon            | protein-coding |                |           |                |                |
| chr12-10:6.442696  | 0.042056 | 0.909273 | 0.046253 | 0.963109 | 0.981636 | chr12 | 1.05E+08 | 1.05E+08 | 0 | NA | intron (NALuYb8 SI | 23440  | NM_00129E | 23325    | Hs.12144  | NM_01527E | ENSG00000 | WASHC4    | KIAA1033  | WASH         | com            | protein-coding |                |           |                |                |
| chr16-17:6.442696  | 0.042056 | 0.909273 | 0.046253 | 0.963109 | 0.981636 | chr16 | 1759698  | 1760944  | 0 | NA | intron (Nintron (N | 9813   | NM_00251E | 4832     | Hs.51406E | NM_00251E | ENSG00000 | NME3      | DR-nm23   | NME          | NM23           | protein-coding |                |           |                |                |
| chr16-74:6.442696  | 0.042056 | 0.909273 | 0.046253 | 0.963109 | 0.981636 | chr16 | 74339841 | 74343608 | 0 | NA | intron (Nintron (N | 26531  | NR_02695C | 283922   | NR_02695C | ENSG00000 | LOC283922 |           |           |              |                |                | pyruvate       | pseudo    |                |                |
| chr17-66:6.442696  | 0.042056 | 0.909273 | 0.046253 | 0.963109 | 0.981636 | chr17 | 66687778 | 66690403 | 0 | NA | intron (Nintron (N | -97982 | NR_030364 | 693219   | NR_030364 | ENSG00000 | MIR634    | MIRN634   |           |              |                |                |                | microRNA  | ncRNA          |                |
| chr19-14:6.442696  | 0.042056 | 0.909273 | 0.046253 | 0.963109 | 0.981636 | chr19 | 1412893  | 1413877  | 0 | NA | intron (Nintron (N | 5799   | NM_00135E | 26528    | Hs.22251C | NM_01895E | ENSG00000 | DAZAP1    |           |              |                |                |                | DAZ       | assoc          | protein-coding |
| chr4-105:6.442696  | 0.042056 | 0.909273 | 0.046253 | 0.963109 | 0.981636 | chr4  | 1.05E+08 | 1.05E+08 | 0 | NA | intron (NLIP2 LINE | 47520  | NM_17686E | 27068    | Hs.654957 | NM_00690E | ENSG00000 | PPA2      | HSPC124   | Z            | synphos        | protein-coding |                |           |                |                |
| chr8-143:6.442696  | 0.042056 | 0.909273 | 0.046253 | 0.963109 | 0.981636 | chr8  | 1.43E+08 | 1.43E+08 | 0 | NA | intron (Nintron (N | 4415   | NM_001271 | 286128   | Hs.66801E | NM_17383E | ENSG00000 | ZFP41     | ZNF753 zf | ZFP41        | zir            | protein-coding |                |           |                |                |
| chr9-128:6.442696  | 0.042056 | 0.909273 | 0.046253 | 0.963109 | 0.981636 | chr9  | 1.29E+08 | 1.29E+08 | 0 | NA | intron (NALuSx SIN | -31112 | NM_01490E | 22845    | Hs.53156E | NM_01     |           |           |           |              |                |                |                |           |                |                |

|           |          |          |          |          |          |          |       |          |          |   |   |    |                     |                    |                            |                     |                                     |                          |
|-----------|----------|----------|----------|----------|----------|----------|-------|----------|----------|---|---|----|---------------------|--------------------|----------------------------|---------------------|-------------------------------------|--------------------------|
| chr20-36  | 8.657094 | -0.03631 | 0.786711 | -0.04615 | 0.963189 | 0.981636 | chr20 | 36047084 | 36050019 | + | 0 | NA | non-codirnon-codir  | 2409 NR_027451     | 647979 Hs. 743232NR_027451 | ENSG00000CNORAD     | LINC00657non-codir ncRNA            |                          |
| chr3-122  | 8.657094 | -0.03631 | 0.786711 | -0.04615 | 0.963189 | 0.981636 | chr3  | 1.23E+08 | 1.23E+08 | + | 0 | NA | exon (NM exon (NM   | 5920 NM_001146     | 83666 Hs. 518200NM_031458  | ENSG00000PARP9      | ARTD9 BAl poly (ADP- protein-coding |                          |
| chr3-132  | 8.657094 | -0.03631 | 0.786711 | -0.04615 | 0.963189 | 0.981636 | chr3  | 1.33E+08 | 1.33E+08 | + | 0 | NA | intron (Nintron (N  | 28605 NM_001321    | 79876 Hs. 170737NM_024818  | ENSG00000CUBA5      | EIEE44 Scubiquitin protein-coding   |                          |
| chr3-170  | 8.657094 | -0.03631 | 0.786711 | -0.04615 | 0.963189 | 0.981636 | chr3  | 1.7E+08  | 1.7E+08  | + | 0 | NA | intron (Nintron (N  | 63162 NM_014377    | 25699 Hs. 231320NM_014377  | ENSG00000GPR160     | GPCR1 GPCF protein-coding           |                          |
| chr3-183  | 8.657094 | -0.03631 | 0.786711 | -0.04615 | 0.963189 | 0.981636 | chr3  | 1.84E+08 | 1.84E+08 | + | 0 | NA | intron (Nintron (N  | 7981 NM_001351     | 55688 Hs. 632575NM_018028  | ENSG00000YEATS2     | - YEATS domain protein-coding       |                          |
| chr4-249  | 8.657094 | -0.03631 | 0.786711 | -0.04615 | 0.963189 | 0.981636 | chr4  | 2495678  | 2502645  | + | 0 | NA | intron (NAluSx SI   | 29708 NM_001188    | 6047 Hs. 66394 NM_002938   | ENSG00000CRNF4      | RES4-26 Sring fing protein-coding   |                          |
| chr4-706  | 8.657094 | -0.03631 | 0.786711 | -0.04615 | 0.963189 | 0.981636 | chr4  | 7063438  | 7065159  | + | 0 | NA | intron (NAluY SINE  | 5311 NM_025196     | 80273 Hs. 443722NM_025196  | ENSG00000GRPEL1     | GrpE HMGFGrpE like protein-coding   |                          |
| chr4-122  | 8.657094 | -0.03631 | 0.786711 | -0.04615 | 0.963189 | 0.981636 | chr4  | 1.22E+08 | 1.22E+08 | + | 0 | NA | intron (Nintron (N  | 85824 NM_015312    | 84162 Hs. 408142NM_015312  | ENSG00000K1AA1109   | ALKKUS FK1AA1109 protein-coding     |                          |
| chr4-122  | 8.657094 | -0.03631 | 0.786711 | -0.04615 | 0.963189 | 0.981636 | chr4  | 1.23E+08 | 1.23E+08 | + | 0 | NA | intron (NTHE1B-int  | 41381 NM_007088    | 11162 Hs. 558455NM_007088  | ENSG00000NUDT6      | ASFGF2 FCnudix hyc protein-coding   |                          |
| chr5-103  | 8.657094 | -0.03631 | 0.786711 | -0.04615 | 0.963189 | 0.981636 | chr5  | 10394474 | 10395962 | + | 0 | NA | intron (Nintron (N  | -7146 NR_162106    | 1.13E+08                   | NR_162106           | MIR10397                            | - microRNA ncRNA         |
| chr5-407  | 8.657094 | -0.03631 | 0.786711 | -0.04615 | 0.963189 | 0.981636 | chr5  | 40773863 | 40778082 | + | 0 | NA | intron (NLa2 LINE   | -20011 NM_012382   | 23548 Hs. 348918NM_012382  | ENSG00000TTC33      | OSRF                                | tetratric protein-coding |
| chr5-954  | 8.657094 | -0.03631 | 0.786711 | -0.04615 | 0.963189 | 0.981636 | chr5  | 95498386 | 95500609 | + | 0 | NA | intron (NMSTA LTR   | 55508 NM_014638    | 9652 Hs. 482868NM_014638   | ENSG00000TTC37      | KIAA0372 tetratric protein-coding   |                          |
| chr5-146  | 8.657094 | -0.03631 | 0.786711 | -0.04615 | 0.963189 | 0.981636 | chr5  | 1.46E+08 | 1.46E+08 | + | 0 | NA | intron (Nintron (N  | 66826 NM_018998    | 54439 Hs. 61441 NM_018998  | ENSG00000RBM27      | ARRS1 PscRNA bindi protein-coding   |                          |
| chr5-146  | 8.657094 | -0.03631 | 0.786711 | -0.04615 | 0.963189 | 0.981636 | chr5  | 1.8E+08  | 1.8E+08  | + | 0 | NA | intron (NLIME4b LI  | 14402 NR_110566    | 1.02E+08                   | NR_110566           | ENSG00000LOC101928                  | - uncharactncRNA         |
| chr6-283  | 8.657094 | -0.03631 | 0.786711 | -0.04615 | 0.963189 | 0.981636 | chr6  | 2835234  | 2836504  | + | 0 | NA | non-codirnon-codir  | 5994 NR_073112     | 1992 Hs. 381167NM_030668   | ENSG00000SERPINB1   | EI ELANH2 serpin f2 protein-coding  |                          |
| chr6-264  | 8.657094 | -0.03631 | 0.786711 | -0.04615 | 0.963189 | 0.981636 | chr6  | 26459385 | 26469175 | + | 0 | NA | intron (NLa2 LINE   | 6325 NM_007045     | 11120 Hs. 159028NM_007045  | ENSG00000BTN2A1     | BK14H9.1 butyroph protein-coding    |                          |
| chr6-365  | 8.657094 | -0.03631 | 0.786711 | -0.04615 | 0.963189 | 0.981636 | chr6  | 36521429 | 36522677 | + | 0 | NA | intron (Nintron (N  | 25426 NM_007271    | 11329 Hs. 409578NM_007271  | ENSG00000CTK38      | NDR NDR1 serine/tf protein-coding   |                          |
| chr6-419  | 8.657094 | -0.03631 | 0.786711 | -0.04615 | 0.963189 | 0.981636 | chr6  | 41932673 | 41937970 | + | 0 | NA | 3' UTR (N3' UTR (N  | 6527 NM_001287     | 896 Hs. 534375NM_001287    | ENSG00000CCND3      | - cyclin D3 protein-coding          |                          |
| chr6-821  | 8.657094 | -0.03631 | 0.786711 | -0.04615 | 0.963189 | 0.981636 | chr6  | 82168138 | 82169089 | + | 0 | NA | Intergeni Intergeni | -66848 NR_149138   | 1.03E+08                   | Hs. 485841NR_149134 | LINC02542                           | - long intencRNA         |
| chr6-158  | 8.657094 | -0.03631 | 0.786711 | -0.04615 | 0.963189 | 0.981636 | chr6  | 1.58E+08 | 1.58E+08 | + | 0 | NA | 3' UTR (N3' UTR (N  | 71557 NM_032861    | 84947 Hs. 154706NM_032861  | ENSG00000SERAC1     | - serine acprotein-coding           |                          |
| chr7-203  | 8.657094 | -0.03631 | 0.786711 | -0.04615 | 0.963189 | 0.981636 | chr7  | 203363   | 206873   | + | 0 | NA | intron (Nintron (N  | 12547 NM_020222    | 56975 Hs. 134742NM_020222  | ENSG00000GRAM20C    | DMP-4 DMF FAM20C acprotein-coding   |                          |
| chr7-646  | 8.657094 | -0.03631 | 0.786711 | -0.04615 | 0.963189 | 0.981636 | chr7  | 64691236 | 64692894 | + | 0 | NA | intron (Nintron (N  | 13001 NR_106898    | 1.02E+08                   | NR_106898           | ENSG00000MIR6839                    | hsa-mir-6microRNA ncRNA  |
| chr7-152  | 8.657094 | -0.03631 | 0.786711 | -0.04615 | 0.963189 | 0.981636 | chr7  | 1.52E+08 | 1.52E+08 | + | 0 | NA | intron (Nintron (N  | 72721 NM_001371474 |                            |                     |                                     |                          |
| chr7-172  | 8.657094 | -0.03631 | 0.786711 | -0.04615 | 0.963189 | 0.981636 | chr7  | 17274672 | 17278917 | + | 0 | NA | intron (Nintron (N  | 29836 NM_001366    | 137492 Hs. 343878NM_152418 | ENSG00000VPS37A     | HCRP1 PQE VPS37A sprotein-coding    |                          |
| chr8-1301 | 8.657094 | -0.03631 | 0.786711 | -0.04615 | 0.963189 | 0.981636 | chr8  | 1.3E+08  | 1.3E+08  | + | 0 | NA | intron (NLa2 LINE   | -47783 NR_045388   | 1.01E+08                   | Hs. 106018NR_045388 | ENSG00000ASAP1-IT2                  | - ASAP1 intncRNA         |
| chr8-9    | 8.657094 | -0.03631 | 0.786711 | -0.04615 | 0.963189 | 0.981636 | chr8  | 2836072  | 2837218  | + | 0 | NA | intron (Nintron (N  | 7450 NM_014878     | 9933 Hs. 493308NM_014878   | ENSG00000PUM3       | HA-8 HLA-pumilio F protein-coding   |                          |
| chr8-9    | 8.657094 | -0.03631 | 0.786711 | -0.04615 | 0.963189 | 0.981636 | chr8  | 97683054 | 97684924 | + | 0 | NA | intron (Nintron (N  | 13420 NR_149094    | 7507 Hs. 654364NM_000380   | ENSG00000XPA        | XPI XPAC XPA, DNA protein-coding    |                          |
| chr8-110  | 8.657094 | -0.03631 | 0.786711 | -0.04615 | 0.963189 | 0.981636 | chr8  | 1.1E+08  | 1.1E+08  | + | 0 | NA | intron (Nintron (N  | -37097 NM_001288   | 255220 Hs. 147064NM_001008 | ENSG00000TXNDC8     | SPTRX-3 S thioedox protein-coding   |                          |
| chr8-114  | 8.657094 | -0.03631 | 0.786711 | -0.04615 | 0.963189 | 0.981636 | chr8  | 1.15E+08 | 1.15E+08 | + | 0 | NA | intron (NAluY SINE  | 8574 NM_004888     | 9550 Hs. 388654NM_004888   | ENSG00000ATP6V1G1   | ATP6G ATF ATPase H+ protein-coding  |                          |
| chr8-122  | 8.657094 | -0.03631 | 0.786711 | -0.04615 | 0.963189 | 0.981636 | chr8  | 1.22E+08 | 1.22E+08 | + | 0 | NA | intron (Nintron (N  | 49040 NM_001346    | 92399 Hs. 368011NM_138777  | ENSG00000MRRF       | MRRF MTFR mitoch protein-coding     |                          |
| chr8-138  | 8.713949 | -0.0376  | 0.814612 | -0.04615 | 0.96319  | 0.981636 | chr8  | 13807513 | 13808288 | + | 0 | NA | intron (NMSTA LTR   | 12457 NM_023072    | 65249 Hs. 466018NM_023072  | ENSG00000ZSWIM4     | - zinc fing protein-coding          |                          |
| chr8-1379 | 6.921718 | 0.040366 | 0.876417 | 0.046058 | 0.963264 | 0.981636 | chr8  | 37934745 | 37940127 | + | 0 | NA | intron (NAluS2 SI   | 4828 NM_001355     | 3633 Hs. 449942NM_005548   | ENSG00000INPP5B     | 5PTase inositol protein-coding      |                          |
| chr8-153  | 6.921718 | 0.040366 | 0.876417 | 0.046058 | 0.963264 | 0.981636 | chr8  | 53857484 | 53859764 | + | 0 | NA | intron (NMIRb SINE  | -20328 NM_001168   | 55706 Hs. 476528NM_018087  | ENSG00000NDC1       | NET3 TMEH NDC1 trar protein-coding  |                          |
| chr8-166  | 6.921718 | 0.040366 | 0.876417 | 0.046058 | 0.963264 | 0.981636 | chr8  | 66733715 | 66735363 | + | 0 | NA | intron (NAluSx SIN  | -17920 NM_152668   | 200132 Hs. 479228NM_152668 | ENSG00000CTEX1D1    | Tctex1 dc protein-coding            |                          |
| chr8-196  | 6.921718 | 0.040366 | 0.876417 | 0.046058 | 0.963264 | 0.981636 | chr8  | 2.2E+08  | 2.2E+08  | + | 0 | NA | intron (NAluSx SI   | -42066 NR_046437   | 55532 Hs. 284458NM_018718  | ENSG00000SLC30A10   | HMDPC HMM solute c2 protein-coding  |                          |
| chr8-216  | 6.921718 | 0.040366 | 0.876417 | 0.046058 | 0.963264 | 0.981636 | chr8  | 362071   | 362620   | + | 0 | NA | intron (NCpG        | 183551 NM_001202   | 10771 Hs. 292268NM_006624  | ENSG00000ZMYND11    | BRAM1 BSE zinc fing protein-coding  |                          |
| chr8-271  | 6.921718 | 0.040366 | 0.876417 | 0.046058 | 0.963264 | 0.981636 | chr8  | 27109087 | 27109793 | + | 0 | NA | TTS (NM_C           | -8942 NM_014918    | 22852 Hs. 361041NM_014918  | ENSG00000ANKRD26    | THC2 ba14ankyrin r protein-coding   |                          |
| chr8-109  | 6.921718 | 0.040366 | 0.876417 | 0.046058 | 0.963264 | 0.981636 | chr8  | 69377956 | 69380830 | + | 0 | NA | intron (NLMs LINE   | 37525 NM_001057    | 8665 Hs. 880327NM_001057   | ENSG00000TACR2      | NK2R NKNA tachykinin protein-coding |                          |
| chr8-102  | 6.921718 | 0.040366 | 0.876417 | 0.046058 | 0.963264 | 0.981636 | chr8  | 1.02E+08 | 1.02E+08 | + | 0 | NA | intron (Nintron (N  | 32450 NM_001198    | 8729 Hs. 290242NM_004198   | ENSG00000GBF1       | ARF1GEF golgi br protein-coding     |                          |
| chr8-11   | 6.921718 | 0.040366 | 0.876417 | 0.046058 | 0.963264 | 0.981636 | chr8  | 35685409 | 35686857 | + | 0 | NA | intron (Nintron (N  | 23358 NM_017588    | 54765 Hs. 192108NM_017588  | ENSG00000TRIM44     | AN3 DIPB tripartit protein-coding   |                          |
| chr8-12   | 6.921718 | 0.040366 | 0.876417 | 0.046058 | 0.963264 | 0.981636 | chr8  | 57525569 | 57526419 | + | 0 | NA | exon (NM exon (NM   | 3170 NM_052897     | 114785 Hs. 524528NM_052897 | ENSG00000MBD6       | - methyl-Cp protein-coding          |                          |
| chr8-12   | 6.921718 | 0.040366 | 0.876417 | 0.046058 | 0.963264 | 0.981636 | chr8  | 88536566 | 88538108 | + | 0 | NA | intron (NLIPA16 LI  | 43164 NM_000898    | 4254 Hs. 1048 NM_000898    | ENSG00000CTLG       | DCUA DFNAK1 ligar protein-coding    |                          |
| chr8-21   | 6.921718 | 0.040366 | 0.876417 | 0.046058 | 0.963264 | 0.981636 | chr8  | 21078247 | 21085920 | + | 0 | NA | exon (NM exon (NM   | -11211 NM_001282   | 57447 Hs. 525208NM_016258  | ENSG00000NDRG2      | SYLD NDRG fami protein-coding       |                          |
| chr8-15   | 6.921718 | 0.040366 | 0.876417 | 0.046058 | 0.963264 | 0.981636 | chr8  | 78785140 | 78787635 | + | 0 | NA | intron (NMER45B DN  | 25077 NM_014272    | 11173 Hs. 16441 NM_014272  | ENSG00000ADAMT57    | ADAM-27 ADAM metz protein-coding    |                          |
| chr8-17   | 6.921718 | 0.040366 | 0.876417 | 0.046058 | 0.963264 | 0.981636 | chr8  | 5332035  | 53335633 | + | 0 | NA | intron (NAluSx SIN  | 50515 NM_001291    | 9135 Hs. 584784NM_004708   | ENSG00000RABEP1     | RAB5EP Rabrapatin, protein-coding   |                          |
| chr8-17   | 6.921718 | 0.040366 | 0.876417 | 0.046058 | 0.963264 | 0.981636 | chr8  | 7001002  | 7001552  | + | 0 | NA | intron (Nintron (N  | 5228 NM_000697     | 239 Hs. 654431NM_000697    | ENSG00000ALOX12     | 12-LOX 12 arachidor protein-coding  |                          |
| chr8-17   | 6.921718 | 0.040366 | 0.876417 | 0.046058 | 0.963264 | 0.981636 | chr8  | 51265212 | 51267177 | + | 0 | NA | exon (NM exon (NM   | 5648 NM_016001     | 51096 Hs. 709327NM_016001  | ENSG00000UTP18      | CGI-48 WUUTP18 sm protein-coding    |                          |
| chr8-17   | 6.921718 | 0.040366 | 0.876417 | 0.046058 | 0.963264 | 0.981636 | chr8  | 62426821 | 62430504 | + | 0 | NA | intron (NMER21C LI  | 4777 NM_181728     | 339175 Hs. 381204NM_181728 | ENSG00000METTL2A    | METTL2 methyl tr protein-coding     |                          |
| chr8-17   | 6.921718 | 0.040366 | 0.876417 | 0.046058 | 0.963264 | 0.981636 | chr8  | 62687874 | 62692314 | + | 0 | NA | intron (Nintron (N  | -16112 NR_147888   | 1.05E+08                   | Hs. 446268NR_147888 | ENSG00000LOC105371                  | - uncharactncRNA         |
| chr8-17   | 6.921718 | 0.040366 | 0.876417 | 0.046058 | 0.963264 | 0.981636 | chr8  | 82582791 | 82585413 | + | 0 | NA | exon (NM exon (NM   | 64342 NM_019618    | 56270 Hs. 132161NM_019618  | ENSG00000WDR45B     | NEDSBAS WWD repeat protein-coding   |                          |
| chr8-19   | 6.921718 | 0.040366 | 0.876417 | 0.046058 | 0.963264 | 0.981636 | chr8  | 34388295 | 34389042 | + | 0 | NA | intron (Nintron (N  | -15730 NM_001355   | 84306 Hs. 515344NM_032348  | ENSG00000PDCD2L     | - programme protein-coding          |                          |
| chr8-2    | 6.921718 | 0.040366 | 0.876417 | 0.046058 | 0.963264 | 0.981636 | chr8  | 37665296 | 37667319 | + | 0 | NA | intron (NMER103C I  | 5892 NM_001277     | 10602 Hs. 369574NM_006448  | ENSG00000CDC42EP3   | BORG2 CEF CDC42 eff protein-coding  |                          |
| chr8-2    | 6.921718 | 0.040366 | 0.876417 | 0.046058 | 0.963264 | 0.981636 | chr8  | 74885363 | 74886974 | + | 0 | NA | intron (NLa2 LINE   | -22963 NR_125792   | 1.03E+08                   | Hs. 708648NR_125792 | ENSG00000LINC01291                  | - long intencRNA         |



|                    |          |          |          |          |          |       |          |          |        |                     |                   |                            |                    |                                        |                                       |
|--------------------|----------|----------|----------|----------|----------|-------|----------|----------|--------|---------------------|-------------------|----------------------------|--------------------|----------------------------------------|---------------------------------------|
| chr6-5646 9.143974 | -0.03495 | 0.768154 | -0.0455  | 0.963712 | 0.981636 | chr6  | 56467794 | 56477376 | + 0 NA | intron (Nintron (N  | -78457 NM_00131E  | 81578 Hs. 47629            | NM_03082C          | ENSG00000COL21A1                       | COLA1L FF collagen protein-coding     |
| chr6-5655 9.143974 | -0.03495 | 0.768154 | -0.0455  | 0.963712 | 0.981636 | chr6  | 56508152 | 56509938 | + 0 NA | intron (Nintron (N  | -114917 NM_00131E | 81578 Hs. 47629            | NM_03082C          | ENSG00000COL21A1                       | COLA1L FF collagen protein-coding     |
| chr7-747 9.143974  | -0.03495 | 0.768154 | -0.0455  | 0.963712 | 0.981636 | chr7  | 74759715 | 74760866 | + 0 NA | 3' UTR (N3' UTR (N  | -13672 NM_00026E  | 653361 Hs. 647047NM_00026E | ENSG00000CNC1      | NCF1A NOX neurotrophin protein-coding  |                                       |
| chr6-8967 9.308972 | 0.035572 | 0.782431 | 0.045464 | 0.963738 | 0.981636 | chr6  | 89677059 | 89677505 | + 0 NA | intron (NAluS6 S1   | -38535 NM_02046E  | 572226 Hs. 17727E          | NM_02046E          | ENSG00000LYRM2                         | DJ12208.ZLYR motif protein-coding     |
| chr11-636 8.219211 | -0.03736 | 0.822003 | -0.04546 | 0.963745 | 0.981636 | chr11 | 63647391 | 63649160 | + 0 NA | intron (NHAL LINE   | 23101 NM_01545E   | 25923 Hs. 35671E           | NM_01545E          | ENSG00000ATL3                          | HSN1F atlastin protein-coding         |
| chr13-242 8.219211 | -0.03736 | 0.822003 | -0.04546 | 0.963745 | 0.981636 | chr13 | 24289505 | 24291059 | + 0 NA | intron (Nintron (N  | -16884 NM_00130E  | 338872 Hs. 362854NM_17854C | ENSG00000C1QTNF9   | AQL1 C1QC1q and 1protein-coding        |                                       |
| chr9-1322 8.219211 | -0.03736 | 0.822003 | -0.04546 | 0.963745 | 0.981636 | chr9  | 1.32E+08 | 1.32E+08 | + 0 NA | intron (NCharlie2E  | 86794 NM_001351   | 23064 Hs. 460317NM_01504E  | ENSG00000SETX      | ALB1 AOA2 senataxin protein-coding     |                                       |
| chr1-3097 7.879763 | 0.037531 | 0.826219 | 0.045425 | 0.963769 | 0.981636 | chr1  | 30978105 | 30980316 | + 0 NA | intron (Nintron (N  | -10973 NR_00306E  | 692200                     | NR_00306E          | SNORD103C HBS1-251 small nucsnoRNA     |                                       |
| chr1-2367 7.879763 | 0.037531 | 0.826219 | 0.045425 | 0.963769 | 0.981636 | chr1  | 2.37E+08 | 2.37E+08 | + 0 NA | intron (Nintron (N  | -33399 NR_03404C  | 1E+08 Hs. 67737E           | NR_03404C          | ENSG00000LGALS8-AS-                    | LGALS8 arncRNA                        |
| chr11-337 7.879763 | 0.037531 | 0.826219 | 0.045425 | 0.963769 | 0.981636 | chr11 | 33730264 | 33730618 | + 0 NA | intron (NTigger2b   | 6038 NM_203331    | 966 Hs. 27857E             | NM_00061E          | ENSG00000CD59                          | 16.3A5 1FCDS9 mole protein-coding     |
| chr12-942 7.879763 | 0.037531 | 0.826219 | 0.045425 | 0.963769 | 0.981636 | chr12 | 943373   | 944457   | + 0 NA | intron (Nintron (N  | 5779 NM_134424    | 5893 Hs. 41035E            | NM_134424          | ENSG00000RAD52                         | - RAD52 hon protein-coding            |
| chr12-121 7.879763 | 0.037531 | 0.826219 | 0.045425 | 0.963769 | 0.981636 | chr12 | 12157519 | 12159075 | + 0 NA | intron (Nintron (N  | 46345 NR_03605E   | 1E+08                      | NR_03605E          | ENSG00000MIR1244-1                     | MIR1244 microRNA ncRNA                |
| chr13-198 7.879763 | 0.037531 | 0.826219 | 0.045425 | 0.963769 | 0.981636 | chr13 | 19837572 | 19838483 | + 0 NA | intron (Nintron (N  | 25609 NM_00103E   | 9205 Hs. 53098E            | NM_01424E          | ENSG00000ZMYM5                         | HSPC050 zinc fing protein-coding      |
| chr14-241 7.879763 | 0.037531 | 0.826219 | 0.045425 | 0.963769 | 0.981636 | chr14 | 24160134 | 24160636 | + 0 NA | promoter-promoter-  | -880 NM_00608E    | 10379 Hs. 1706             | NM_00608E          | ENSG00000IRF9                          | IRF9-9 ISC interferon protein-coding  |
| chr17-181 7.879763 | 0.037531 | 0.826219 | 0.045425 | 0.963769 | 0.981636 | chr17 | 18194981 | 18199899 | + 0 NA | intron (Nintron (N  | 13612 NM_01775E   | 54890 Hs. 74413C           | NM_01775E          | ENSG00000ALKBH5                        | ABH5 OFO alkB homc protein-coding     |
| chr22-387 7.879763 | 0.037531 | 0.826219 | 0.045425 | 0.963769 | 0.981636 | chr22 | 38724145 | 38725475 | + 0 NA | intron (NMIRb SINE  | 18866 NM_00428E   | 9567 Hs. 27692E            | NM_00428E          | ENSG00000GTPBP1                        | GP-1 GPI GTP bindi protein-coding     |
| chr4-122 7.879763  | 0.037531 | 0.826219 | 0.045425 | 0.963769 | 0.981636 | chr4  | 1.22E+08 | 1.22E+08 | + 0 NA | intron (Nintron (N  | 68660 NM_01531E   | 84162 Hs. 40814E           | NM_01531E          | ENSG00000KIAA1109                      | ALKKUS5 FKIAA1109 protein-coding      |
| chr5-137 7.879763  | 0.037531 | 0.826219 | 0.045425 | 0.963769 | 0.981636 | chr5  | 13720600 | 13720932 | + 0 NA | intron (Nintron (N  | 223714 NM_00136E  | 1767 Hs. 21236C            | NM_00136E          | ENSG00000DNAH5                         | CILD3 DN dynein alpha protein-coding  |
| chr5-361 7.879763  | 0.037531 | 0.826219 | 0.045425 | 0.963769 | 0.981636 | chr5  | 36103777 | 36108352 | + 0 NA | intron (NLMCC LIN   | 40124 NR_03030E   | 693165                     | NR_03030E          | ENSG00000MIR580                        | MIR580 microRNA ncRNA                 |
| chr8-253 7.879763  | 0.037531 | 0.826219 | 0.045425 | 0.963769 | 0.981636 | chr8  | 25304455 | 25304787 | + 0 NA | intron (NLMIB6 LIN  | -40786 NR_10693E  | 1.02E+08                   | NR_10693E          | ENSG00000MIR6876                       | hsa-mir-6876 microRNA ncRNA           |
| chr4-150 5.378798  | 0.048416 | 1.068394 | 0.045317 | 0.963855 | 0.981636 | chr4  | 1.5E+08  | 1.5E+08  | + 0 NA | non-codir non-codir | 177997 NM_00104C  | 166614 Hs. 59168E          | NM_15261E          | ENSG00000DCLK2                         | CL2 CLIC8 doublecortin protein-coding |
| chr11-118 7.188595 | -0.03944 | 0.873951 | -0.04513 | 0.964003 | 0.981636 | chr11 | 1.18E+08 | 1.18E+08 | + 0 NA | intron (Nintron (N  | 7093 NM_00478E    | 9354 Hs. 75275             | NM_00478E          | ENSG00000UBE4A                         | E4 UBOX2 ubiquitin protein-coding     |
| chr20-336 7.188595 | -0.03944 | 0.873951 | -0.04513 | 0.964003 | 0.981636 | chr20 | 33638614 | 33638933 | + 0 NA | intron (Nintron (N  | -23554 NM_08082E  | 128864 Hs. 324104NM_08082E | ENSG00000C20orf144 | dJ63M2.6 chromosom protein-coding      |                                       |
| chr5-613 7.188595  | -0.03944 | 0.873951 | -0.04513 | 0.964003 | 0.981636 | chr5  | 61336964 | 61337411 | + 0 NA | intron (NAluSx1 S1  | 4929 NM_02092E    | 57688 Hs. 74493E           | NM_02092E          | ENSG00000ZSWIM7                        | AFND NEM zinc fing protein-coding     |
| chr7-9954 7.188595 | -0.03944 | 0.873951 | -0.04513 | 0.964003 | 0.981636 | chr7  | 99543565 | 99544026 | + 0 NA | Intergeni Intergeni | 8319 NM_145111    | 221786 Hs. 596587NM_145111 | ENSG00000FAM200A   | C7orf38 family wiprotein-coding        |                                       |
| chr8-132 7.188595  | -0.03944 | 0.873951 | -0.04513 | 0.964003 | 0.981636 | chr8  | 1.33E+08 | 1.33E+08 | + 0 NA | intron (Nintron (N  | -2370 NM_00323E   | 7038 Hs. 654591NM_00323E   | ENSG00000CTG       | AITD3 TGN thyroglobulin protein-coding |                                       |
| chr12-504 8.358785 | 0.036458 | 0.806889 | 0.044993 | 0.964113 | 0.981636 | chr12 | 50443501 | 50445551 | + 0 NA | intron (Nintron (N  | -12045 NR_13275E  | 1.07E+08                   | NR_13275E          | SNORD133                               | CL2142 Z4small nucsnoRNA              |
| chr17-14 8.407783  | 0.036458 | 0.811392 | 0.044933 | 0.964161 | 0.981636 | chr17 | 14033660 | 14034380 | + 0 NA | non-codir non-codir | 9522 NR_003261    | 94158 Hs. 63307E           | NR_003261          | CDRT15P1                               | CDRT15P CMT1A dup pseudo              |
| chr2-113 8.407783  | 0.036458 | 0.811392 | 0.044933 | 0.964161 | 0.981636 | chr2  | 1.13E+08 | 1.13E+08 | + 0 NA | intron (NMER135 DN  | 1738 NR_015377    | 654433 Hs. 65666C          | NR_015377          | ENSG00000PAX8-AS1                      | - PAX8 antncRNA                       |
| chr22-451 8.407783 | 0.036458 | 0.811392 | 0.044933 | 0.964161 | 0.981636 | chr22 | 45156910 | 45158115 | + 0 NA | intron (Nintron (N  | -4928 NR_038957   | 1.01E+08                   | NR_038957          | ENSG00000NUP50-DN                      | NUP50-AS1 NUP50 divncRNA              |
| chr3-1421 8.407783 | 0.036458 | 0.811392 | 0.044933 | 0.964161 | 0.981636 | chr3  | 1.42E+08 | 1.42E+08 | + 0 NA | intron (Nintron (N  | -27834 NM_00117E  | 7029 Hs. 37901E            | NM_00628E          | ENSG00000TFDP2                         | DP2 transcrip protein-coding          |
| chr5-346 8.407783  | 0.036458 | 0.811392 | 0.044933 | 0.964161 | 0.981636 | chr5  | 34658120 | 34658605 | + 0 NA | intron (Nintron (N  | 1871 NM_00114E    | 26064 Hs. 43140C           | NM_01557E          | ENSG00000RAI14                         | NORPEG R retinoic protein-coding      |
| chr1-150 6.872721  | 0.039974 | 0.889908 | 0.04492  | 0.964171 | 0.981636 | chr1  | 1.51E+08 | 1.51E+08 | + 0 NA | Intergeni AluS6 S1  | 10755 NM_207047   | 2029 Hs. 63245E            | NM_00443E          | ENSG00000ENSA                          | ARPP-19e endosulf protein-coding      |
| chr2-325 6.872721  | 0.039974 | 0.889908 | 0.04492  | 0.964171 | 0.981636 | chr2  | 32578374 | 32578812 | + 0 NA | intron (NAluS6 S1   | -3775 NR_12579E   | 1.04E+08                   | NR_12579E          | ENSG00000BIRC6-AS2                     | linc-birc6 BIRC6 antncRNA             |
| chr4-139 6.872721  | 0.039974 | 0.889908 | 0.04492  | 0.964171 | 0.981636 | chr4  | 1.4E+08  | 1.4E+08  | + 0 NA | 3' UTR (N3' UTR (N  | 46660 NM_00130E   | 80854 Hs. 48079E           | NM_03064E          | ENSG00000SETD7                         | KMT7 SET7 SET domain protein-coding   |
| chr13-491 7.237593 | -0.03902 | 0.868852 | -0.04491 | 0.96418  | 0.981636 | chr13 | 49173777 | 49175739 | + 0 NA | intron (Nintron (N  | -45580 NM_001507  | 2862 Hs. 24812E            | NM_001507          | ENSG00000MLNR                          | GPR38 MTL motilin r protein-coding    |
| chr17-504 7.237593 | -0.03902 | 0.868852 | -0.04491 | 0.96418  | 0.981636 | chr17 | 50484939 | 50485731 | + 0 NA | non-codir non-codir | 6475 NM_01834E    | 55316 Hs. 8033             | NM_01834E          | ENSG00000CRSAD1                        | HemW radical S protein-coding         |
| chr7-2194 7.237593 | -0.03902 | 0.868852 | -0.04491 | 0.96418  | 0.981636 | chr7  | 219429   | 220139   | + 0 NA | intron (Nintron (N  | 27213 NM_00202E   | 56975 Hs. 13474E           | NM_02022E          | ENSG00000FAM20C                        | DMP-4 DMF FAM20C g protein-coding     |
| chr1-2067 6.675476 | -0.03772 | 0.840082 | -0.0449  | 0.964185 | 0.981636 | chr1  | 20657758 | 20659198 | + 0 NA | intron (NMER113 DN  | 3066 NM_00521E    | 1650 Hs. 52314E            | NM_00521E          | ENSG00000DDOST                         | AGER1 CDC dihydril protein-coding     |
| chr1-179 6.675476  | -0.03772 | 0.840082 | -0.0449  | 0.964185 | 0.981636 | chr1  | 1.8E+08  | 1.8E+08  | + 0 NA | intron (NAluSx SIN  | 20078 NM_01560E   | 26092 Hs. 49645E           | NM_01560E          | ENSG00000TORIAIP1                      | LAP1 LAP1 torsin 1 protein-coding     |
| chr13-11 6.675476  | -0.03772 | 0.840082 | -0.0449  | 0.964185 | 0.981636 | chr13 | 1.11E+08 | 1.11E+08 | + 0 NA | intron (NAluSx3 S1  | 18656 NM_00135E   | 79587 Hs. 50872E           | NM_02453E          | ENSG00000CAR52                         | COXP27 cysteiny protein-coding        |
| chr14-64 6.675476  | -0.03772 | 0.840082 | -0.0449  | 0.964185 | 0.981636 | chr14 | 64932658 | 64934245 | + 0 NA | 3' UTR (N3' UTR (N  | 9294 NR_13807E    | 2877 Hs. 2074              | NM_00208E          | ENSG00000GPX2                          | GI-GPx G glutathic protein-coding     |
| chr16-74 6.675476  | -0.03772 | 0.840082 | -0.0449  | 0.964185 | 0.981636 | chr16 | 74344089 | 74344735 | + 0 NA | intron (NAluSx SIN  | 23843 NR_02695C   | 283922 Hs. 55872E          | NR_02695C          | ENSG00000LOC28392                      | - pyruvate pseudo                     |
| chr17-671 6.675476 | -0.03772 | 0.840082 | -0.0449  | 0.964185 | 0.981636 | chr17 | 67142529 | 67143443 | + 0 NA | intron (NAluSx1 S1  | 98432 NM_000727   | 786 Hs. 14798E             | NM_000727          | ENSG00000CACNG1                        | CACNLG calcium v protein-coding       |
| chr22-17 6.675476  | -0.03772 | 0.840082 | -0.0449  | 0.964185 | 0.981636 | chr22 | 17098748 | 17099174 | + 0 NA | intron (Nintron (N  | 14002 NM_00128E   | 23765 Hs. 48353            | NM_01433E          | ENSG00000IL17RA                        | CANDF5 C interleuk protein-coding     |
| chr3-149 6.675476  | -0.03772 | 0.840082 | -0.0449  | 0.964185 | 0.981636 | chr3  | 1.49E+08 | 1.49E+08 | + 0 NA | intron (NLMIME2 LIN | -3707 NR_04664E   | 1.01E+08                   | NR_04664E          | ENSG00000HLTF-AS1                      | - HLTF antncRNA                       |
| chr5-715 6.675476  | -0.03772 | 0.840082 | -0.0449  | 0.964185 | 0.981636 | chr5  | 71509127 | 71510276 | + 0 NA | exon (NM exon (NM   | 54050 NM_01842E   | 55814 Hs. 25827E           | NM_01842E          | ENSG00000BDP1                          | DFNB112 EB double protein-coding      |
| chr6-135 6.675476  | -0.03772 | 0.840082 | -0.0449  | 0.964185 | 0.981636 | chr6  | 1.35E+08 | 1.35E+08 | + 0 NA | intron (NMLT1F2 LI  | 33221 NM_001134   | 54806 Hs. 386684NM_017651  | ENSG00000CAH1      | AHI-1 JBT Abelson t protein-coding     |                                       |
| chr7-639 6.675476  | -0.03772 | 0.840082 | -0.0449  | 0.964185 | 0.981636 | chr7  | 6392167  | 6392982  | + 0 NA | intron (Nintron (N  | 18047 NM_00690E   | 5879 Hs. 41381E            | NM_00690E          | ENSG00000RAC1                          | MIG5 MRD4 Rac fami protein-coding     |
| chr7-111 6.675476  | -0.03772 | 0.840082 | -0.0449  | 0.964185 | 0.981636 | chr7  | 1.12E+08 | 1.12E+08 | + 0 NA | intron (Nintron (N  | 125399 NR_10380E  | 1.01E+08                   | NR_10380E          | ENSG00000DOCK4-AS1                     | - DOCK4 antncRNA                      |
| chr7-155 6.675476  | -0.03772 | 0.840082 | -0.0449  | 0.964185 | 0.981636 | chr7  | 1.56E+08 | 1.56E+08 | + 0 NA | intron (NMIRc SINE  | 3731 NM_05304E    | 155435 Hs. 59181E          | NM_05304E          | ENSG00000CRBM33                        |                                       |

|           |          |          |          |          |          |          |       |          |          |   |   |    |                    |         |            |          |                       |                    |                                    |                                   |
|-----------|----------|----------|----------|----------|----------|----------|-------|----------|----------|---|---|----|--------------------|---------|------------|----------|-----------------------|--------------------|------------------------------------|-----------------------------------|
| chr8-4315 | 5.922534 | 0.04139  | 0.939939 | 0.044035 | 0.964877 | 0.981636 | chr8  | 43157494 | 43158964 | + | 0 | NA | intron (AluSc5 SI  | 17765   | NM_15241E  | 138050   | Hs. 600384NM_15241E   | ENSG00000CHGSNAT   | HGNAT MPS heparan-ε protein-coding |                                   |
| chr1-8534 | 8.649236 | -0.0347  | 0.788114 | -0.04403 | 0.964884 | 0.981636 | chr1  | 85349075 | 85350976 | + | 0 | NA | intron (L1ME3Cz L  | 54481   | NM_00133C  | 23576    | Hs. 713411NM_012137   | ENSG00000DDAH1     | DDAH DDAF dimethylε protein-coding |                                   |
| chr13-20C | 8.649236 | -0.0347  | 0.788114 | -0.04403 | 0.964884 | 0.981636 | chr13 | 20058565 | 20060216 | + | 0 | NA | intron (intron (   | -4331   | NR_12638C  | 1.04E+08 | Hs. 57801ENR_12638C   | ENSG00000LINC01072 | long intncRNA                      |                                   |
| chr13-30F | 8.649236 | -0.0347  | 0.788114 | -0.04403 | 0.964884 | 0.981636 | chr13 | 30642477 | 30645451 | + | 0 | NA | intron (intron (   | 9759    | NM_00132I  | 10208    | Hs. 533831NM_00580C   | ENSG00000USPL1     | C13orf22 ubiquitin protein-coding  |                                   |
| chr13-41C | 8.649236 | -0.0347  | 0.788114 | -0.04403 | 0.964884 | 0.981636 | chr13 | 41074667 | 41079654 | + | 0 | NA | intron (L1PB4 LIN  | 15651   | NM_00118T  | 11193    | Hs. 41130CNM_007187   | ENSG00000WBP4      | FBP21 WW domain protein-coding     |                                   |
| chr14-34F | 8.649236 | -0.0347  | 0.788114 | -0.04403 | 0.964884 | 0.981636 | chr14 | 34853636 | 34853993 | + | 0 | NA | intron (intron (   | -20377  | NR_16077E  | 1.12E+08 | Hs. 50914CNR_16077E   | LOC11226E          | uncharactncRNA                     |                                   |
| chr14-73H | 8.649236 | -0.0347  | 0.788114 | -0.04403 | 0.964884 | 0.981636 | chr14 | 73198052 | 73198592 | + | 0 | NA | intron (intron (   | -39184  | NR_158677  | 89932    | Hs. 509909NM_17346E   | ENSG00000PAPLN     | PPN papilin, protein-coding        |                                   |
| chr14-88A | 8.649236 | -0.0347  | 0.788114 | -0.04403 | 0.964884 | 0.981636 | chr14 | 88410295 | 88411198 | + | 0 | NA | intron (L1PA7 LIN  | 25089   | NM_01841E  | 55812    | Hs. 52551ENM_01841E   | ENSG00000SPATA7    | HEL-S-29ε spermatog protein-coding |                                   |
| chr15-59C | 8.649236 | -0.0347  | 0.788114 | -0.04403 | 0.964884 | 0.981636 | chr15 | 59088883 | 59091770 | + | 0 | NA | intron (AluSx1 SI  | -14820  | NM_00470I  | 9133     | Hs. 19469ENM_00470I   | ENSG00000CCNB2     | HLT12799 cyclin B2 protein-coding  |                                   |
| chr15-99E | 8.649236 | -0.0347  | 0.788114 | -0.04403 | 0.964884 | 0.981636 | chr15 | 99678251 | 99679276 | + | 0 | NA | 3' UTR (3' UTR (   | 45875   | NM_00113C  | 4205     | Hs. 26867ENM_005587   | ENSG00000MEF2A     | ADCAD1 RS myocyte ε protein-coding |                                   |
| chr16-18E | 8.649236 | -0.0347  | 0.788114 | -0.04403 | 0.964884 | 0.981636 | chr16 | 18895826 | 18896814 | + | 0 | NA | intron (intron (   | 30084   | NM_01841E  | 23049    | Hs. 46017ENM_01509E   | ENSG00000SMG1      | 61E3.4 ATSMG1 nonsprotein-coding   |                                   |
| chr17-54E | 8.649236 | -0.0347  | 0.788114 | -0.04403 | 0.964884 | 0.981636 | chr17 | 5483044  | 5484581  | + | 0 | NA | intron (intron (   | 2366    | NM_01604I  | 51009    | Hs. 286131NM_01604I   | ENSG00000CERL2     | CGI-101 Ederlin 2 protein-coding   |                                   |
| chr17-41E | 8.649236 | -0.0347  | 0.788114 | -0.04403 | 0.964884 | 0.981636 | chr17 | 41867922 | 41869024 | + | 0 | NA | intron (intron (   | -3050   | NM_01814Z  | 55175    | Hs. 13268             | NM_01814Z          | ENSG00000KLHL11                    | kelch likprotein-coding           |
| chr17-60E | 8.649236 | -0.0347  | 0.788114 | -0.04403 | 0.964884 | 0.981636 | chr17 | 60066720 | 60075970 | + | 0 | NA | intron (L1MC5 LIN  | 7586    | NM_02207C  | 63897    | Hs. 22189ENM_02207C   | ENSG00000HEATR6    | ABC1 HEAT repeprotein-coding       |                                   |
| chr18-57E | 8.649236 | -0.0347  | 0.788114 | -0.04403 | 0.964884 | 0.981636 | chr18 | 57687867 | 57689976 | + | 0 | NA | intron (intron (   | 58590   | NM_00124E  | 1.01E+08 | Hs. 66064ENM_00124E   | LOC10050E          | uncharactprotein-coding            |                                   |
| chr18-79E | 8.649236 | -0.0347  | 0.788114 | -0.04403 | 0.964884 | 0.981636 | chr18 | 79228579 | 79231154 | + | 0 | NA | intron (L1M4b LIN  | 21787   | NM_00114E  | 80148    | Hs. 288284NM_02507E   | ENSG00000SLC66A2   | PQLC1 solute cε protein-coding     |                                   |
| chr2-323E | 8.649236 | -0.0347  | 0.788114 | -0.04403 | 0.964884 | 0.981636 | chr2  | 32391801 | 32400855 | + | 0 | NA | intron (intron (   | 38915   | NM_01625E  | 57448    | Hs. 150107NM_01625E   | ENSG00000BIRC6     | APOLLON Ebaculovir protein-coding  |                                   |
| chr2-324E | 8.649236 | -0.0347  | 0.788114 | -0.04403 | 0.964884 | 0.981636 | chr2  | 32438894 | 32444722 | + | 0 | NA | intron (intron (   | 86280   | NM_01625E  | 57448    | Hs. 150107NM_01625E   | ENSG00000BIRC6     | APOLLON Ebaculovir protein-coding  |                                   |
| chr2-3947 | 8.649236 | -0.0347  | 0.788114 | -0.04403 | 0.964884 | 0.981636 | chr2  | 39475001 | 39475515 | + | 0 | NA | intron (L1MEi LIN  | 37842   | NR_03787E  | 728730   | Hs. 655344NR_03787E   | ENSG00000MAP4K3-D1 | MAP4K3 dincRNA                     |                                   |
| chr2-2018 | 8.649236 | -0.0347  | 0.788114 | -0.04403 | 0.964884 | 0.981636 | chr2  | 47815391 | 47815976 | + | 0 | NA | intron (intron (   | 31728   | NM_00128I  | 2956     | Hs. 44505ENM_00017E   | ENSG00000MSH6      | GTBP GTME mutS homc protein-coding |                                   |
| chr2-177E | 8.649236 | -0.0347  | 0.788114 | -0.04403 | 0.964884 | 0.981636 | chr2  | 212529   | 2.02E+08 | + | 0 | NA | intron (L1M87 LIN  | -23443  | NM_003306E | 58538    | Hs. 63085             | NM_003306E         | ENSG00000MPP4                      | ALS2CR5 Lmembrane protein-coding  |
| chr21-31E | 8.649236 | -0.0347  | 0.788114 | -0.04403 | 0.964884 | 0.981636 | chr21 | 31685387 | 31688455 | + | 0 | NA | intron (MER1B DNA  | 27299   | NM_000454  | 6647     | Hs. 443914NM_000454   | ENSG00000SOD1      | ALS ALS1 superoxic protein-coding  |                                   |
| chr21-392 | 8.649236 | -0.0347  | 0.788114 | -0.04403 | 0.964884 | 0.981636 | chr21 | 39223579 | 39224774 | + | 0 | NA | intron (intron (   | -40662  | NM_20343E  | 8624     | Hs. 47383ENM_00372C   | ENSG00000PSMG1     | C21LRP DP proteason protein-coding |                                   |
| chr3-4804 | 8.649236 | -0.0347  | 0.788114 | -0.04403 | 0.964884 | 0.981636 | chr3  | 48048542 | 48051270 | + | 0 | NA | intron (AluSx3 SI  | 38942   | NM_00237E  | 4134     | Hs. 51794ENM_00237E   | ENSG00000MAP4      | microtub protein-coding            |                                   |
| chr3-1701 | 8.649236 | -0.0347  | 0.788114 | -0.04403 | 0.964884 | 0.981636 | chr3  | 1.7E+08  | 1.7E+08  | + | 0 | NA | intron (L1ME4a LI  | 66384   | NM_024947  | 80012    | Hs. 52959ENM_024947   | ENSG00000PHC3      | EDR3 HPHε polyhomec protein-coding |                                   |
| chr3-189E | 8.649236 | -0.0347  | 0.788114 | -0.04403 | 0.964884 | 0.981636 | chr3  | 1.9E+08  | 1.9E+08  | + | 0 | NA | intron (intron (   | 133429  | NR_03064Z  | 55763    | Hs. 26966ENM_01826I   | ENSG00000EXOC1     | MIRN944 fmiocrna ncRNA             |                                   |
| chr4-558E | 8.649236 | -0.0347  | 0.788114 | -0.04403 | 0.964884 | 0.981636 | chr4  | 55899399 | 55900934 | + | 0 | NA | intron (intron (   | 46786   | NM_01826I  | 2926     | Hs. 30976ENM_00209E   | ENSG00000GRSF1     | BM-102 SE excyst cε protein-coding |                                   |
| chr4-707E | 8.649236 | -0.0347  | 0.788114 | -0.04403 | 0.964884 | 0.981636 | chr4  | 70792719 | 70797296 | + | 0 | NA | intron (intron (   | 44496   | NM_00109E  | 57491    | Hs. 50823             | NM_02073I          | ENSG00000AHRH                      | AHH AHRH aryl-hydr protein-coding |
| chr5-360E | 8.649236 | -0.0347  | 0.788114 | -0.04403 | 0.964884 | 0.981636 | chr5  | 360571   | 366251   | + | 0 | NA | intron (NLTR78 LTF | 59235   | NM_02073I  | 51406    | Hs. 30624ENM_016167   | ENSG00000NOL7      | GHR f90 Nucleolar protein-coding   |                                   |
| chr6-1361 | 8.649236 | -0.0347  | 0.788114 | -0.04403 | 0.964884 | 0.981636 | chr6  | 13616840 | 13624911 | + | 0 | NA | TTS (NM_C          | 5540    | NM_016167  | 81578    | Hs. 47629             | NM_03082C          | ENSG00000COL21A1                   | COLA1L FF collagen protein-coding |
| chr6-5651 | 8.649236 | -0.0347  | 0.788114 | -0.04403 | 0.964884 | 0.981636 | chr6  | 56514723 | 56515565 | + | 0 | NA | intron (intron (   | -121016 | NM_00131E  | 91749    | Hs. 40057ENM_15336E   | ENSG00000MFSDB4    | KIAA1919 major fac protein-coding  |                                   |
| chr6-111E | 8.649236 | -0.0347  | 0.788114 | -0.04403 | 0.964884 | 0.981636 | chr6  | 1.11E+08 | 1.11E+08 | + | 0 | NA | intron (intron (   | 104407  | NM_15336E  | 9275     | Hs. 647051NM_001707   | ENSG00000BCL7B     | BAF major protein-coding           |                                   |
| chr7-735E | 8.649236 | -0.0347  | 0.788114 | -0.04403 | 0.964884 | 0.981636 | chr7  | 73538623 | 73541334 | + | 0 | NA | exon (NM_exon (NM  | 15847   | NM_00010E  | 1738     | Hs. 131711NM_00010E   | ENSG00000CLD5      | DLDD DLDF dihydroliprotein-coding  |                                   |
| chr7-107E | 8.649236 | -0.0347  | 0.788114 | -0.04403 | 0.964884 | 0.981636 | chr7  | 1.08E+08 | 1.08E+08 | + | 0 | NA | intron (L2c LINE   | 15847   | NM_00010E  | 1738     | Hs. 131711NM_00010E   | ENSG00000CLD5      | DLDD DLDF dihydroliprotein-coding  |                                   |
| chr8-102  | 8.649236 | -0.0347  | 0.788114 | -0.04403 | 0.964884 | 0.981636 | chr8  | 1.02E+08 | 1.02E+08 | + | 0 | NA | intron (intron (   | 15192   | NR_12541E  | 1.02E+08 | Hs. 49244ENR_12541E   | ENSG00000UBR5-AS1  | UBR5 anticncRNA                    |                                   |
| chr9-1104 | 8.649236 | -0.0347  | 0.788114 | -0.04403 | 0.964884 | 0.981636 | chr9  | 1.1E+08  | 1.1E+08  | + | 0 | NA | intron (intron (   | -78996  | NM_00128E  | 255220   | Hs. 147064NM_00100E   | ENSG00000TXNDX8    | SPTRX-3 Sthioredox protein-coding  |                                   |
| chr9-1114 | 8.649236 | -0.0347  | 0.788114 | -0.04403 | 0.964884 | 0.981636 | chr9  | 1.11E+08 | 1.11E+08 | + | 0 | NA | intron (AluJb SIN  | 67912   | NM_001364  | 23392    | Hs. 36825ENM_00108C   | ENSG00000ECPAS     | ECM29 KIAEcm29 prc protein-coding  |                                   |
| chr17-634 | 8.211353 | -0.03569 | 0.814734 | -0.04338 | 0.965063 | 0.981636 | chr17 | 63418054 | 63418669 | + | 0 | NA | exon (NM_exon (NM  | 21906   | NM_00133C  | 1534     | Hs. 355264NM_00191E   | ENSG00000CYB561    | CYB561A1 cytochrom protein-coding  |                                   |
| chr2-1301 | 8.211353 | -0.03569 | 0.814734 | -0.04338 | 0.965063 | 0.981636 | chr2  | 1.3E+08  | 1.3E+08  | + | 0 | NA | intron (intron (   | 14503   | NR_03322C  | 55627    | Hs. 51645ENM_01775I   | ENSG00000SMPD4     | NET13 NSM synthom protein-coding   |                                   |
| chr1-9171 | 7.371159 | 0.06295  | 1.437577 | 0.043789 | 0.965072 | 0.981636 | chr1  | 91712230 | 91712501 | + | 0 | NA | exon (NM_exon (NM  | 173786  | NR_036634  | 7049     | Hs. 48239ENM_00324E   | ENSG00000TGFB3     | BGCAN bet transform protein-coding |                                   |
| chr3-520  | 4.915492 | 0.045552 | 1.041718 | 0.043728 | 0.965122 | 0.981636 | chr3  | 5217064  | 5218198  | + | 0 | NA | 3' UTR (3' UTR (   | 29924   | NM_014674  | 9695     | Hs. 22461ENM_014674   | ENSG00000EDEMI     | EDEM ER degrad protein-coding      |                                   |
| chr5-140  | 4.915492 | 0.045552 | 1.041718 | 0.043728 | 0.965122 | 0.981636 | chr5  | 14000613 | 14001811 | + | 0 | NA | IntergeniL1PA16 LI | -56507  | NM_00136E  | 1767     | Hs. 21236CNR_00136E   | ENSG00000DNAH5     | CILD3 DNε dynein asprotein-coding  |                                   |
| chr11-34E | 8.93847  | 0.033457 | 0.767167 | 0.043611 | 0.965215 | 0.981636 | chr11 | 34932607 | 34932870 | + | 0 | NA | intron (L1MC5a LI  | -9099   | NR_03983E  | 1.01E+08 | Hs. 533444NM_00019I   | ENSG00000MIR1343   | microRNA ncRNA                     |                                   |
| chr1-2381 | 6.401556 | 0.039585 | 0.908688 | 0.043563 | 0.965253 | 0.981636 | chr1  | 23818623 | 23820386 | + | 0 | NA | intron (AluSx1 SI  | 5925    | NM_00019I  | 3155     | Hs. 533444NM_00019I   | ENSG00000CUGL2     | HL 3-hydroxy protein-coding        |                                   |
| chr10-35E | 6.401556 | 0.039585 | 0.908688 | 0.043563 | 0.965253 | 0.981636 | chr10 | 35046650 | 35049264 | + | 0 | NA | intron (intron (   | 26326   | NM_00119E  | 8453     | Hs. 82919             | NM_00359I          | ENSG00000CHML2                     | culin 2 protein-coding            |
| chr12-45E | 6.401556 | 0.039585 | 0.908688 | 0.043563 | 0.965253 | 0.981636 | chr12 | 45986910 | 45987360 | + | 0 | NA | intron (FLAM_C SI  | 3439    | NM_00471E  | 9169     | Hs. 210367NM_00471E   | ENSG00000SCAF11    | CASP11 SF SR-relate protein-coding |                                   |
| chr12-117 | 6.401556 | 0.039585 | 0.908688 | 0.043563 | 0.965253 | 0.981636 | chr12 | 1.17E+08 | 1.17E+08 | + | 0 | NA | intron (L1MC5 LIN  | 9055    | NM_01500Z  | 23014    | Hs. 74037ENM_01500Z</ |                    |                                    |                                   |



|                     |          |          |          |          |          |       |          |          |   |      |                     |                  |                            |                     |                     |                           |                |
|---------------------|----------|----------|----------|----------|----------|-------|----------|----------|---|------|---------------------|------------------|----------------------------|---------------------|---------------------|---------------------------|----------------|
| chr12-48c.6.880579  | 0.037984 | 0.882908 | 0.043021 | 0.965685 | 0.981636 | chr12 | 48062645 | 48063595 | + | 0 NA | intron (Nintron (N  | -42133 NM_001354 | 5213 Hs. 75160 NM_00028c   | ENSG0000CPFKM       | ATP-PFK             | Chosphofr protein-coding  |                |
| chr12-58c.6.880579  | 0.037984 | 0.882908 | 0.043021 | 0.965685 | 0.981636 | chr12 | 58907016 | 58908593 | + | 0 NA | intron (Nintron (N  | 11742 NM_00113c  | 121227 Hs. 25373c          | ENSG0000LRIG3       | LIG3                | leucine r protein-coding  |                |
| chr17-59c.6.880579  | 0.037984 | 0.882908 | 0.043021 | 0.965685 | 0.981636 | chr17 | 59040608 | 59041934 | + | 0 NA | intron (NMIRc SINE  | 65609 NR_148347  | 4591 Hs. 57907c            | ENSG0000C TRIM37    | MUL POB1            | tripartit protein-coding  |                |
| chr3-129c.6.880579  | 0.037984 | 0.882908 | 0.043021 | 0.965685 | 0.981636 | chr3  | 1.3E+08  | 1.3E+08  | + | 0 NA | intron (Nintron (N  | 8149 NM_00130c   | 132243 Hs. 97358 NM_15383c | ENSG0000CH1FO0      | H.8 H1oc H          | histor protein-coding     |                |
| chr5-722c.6.880579  | 0.037984 | 0.882908 | 0.043021 | 0.965685 | 0.981636 | chr5  | 72206039 | 72207169 | + | 0 NA | 3' UTR (N3' UTR (N  | 26817 NM_001324  | 4131 Hs. 33507c            | ENSG0000MAP1B       | FUT5CH MA           | microtub protein-coding   |                |
| chr8-899c.6.880579  | 0.037984 | 0.882908 | 0.043021 | 0.965685 | 0.981636 | chr8  | 89925002 | 89925340 | + | 0 NA | exon (NM_exon (NM   | 22601 NM_00112c  | 734 Hs. 43644c             | ENSG0000C OSGIN2    | C8orf1 h            | oxidative protein-coding  |                |
| chr10-99c.6.822997  | -0.03229 | 0.75079  | -0.04301 | 0.965694 | 0.981636 | chr10 | 99950238 | 99952918 | + | 0 NA | intron (THEIB-int   | -20671 NM_00131c | 23268 Hs. 50077c           | ENSG0000C DNMBP     | HGF6F36 d           | ynamn t protein-coding    |                |
| chr11-467c.6.822997 | -0.03229 | 0.75079  | -0.04301 | 0.965694 | 0.981636 | chr11 | 46760229 | 46764059 | + | 0 NA | TTS (NR_C TTS (NR_C | 355 NR_00305c    | 692108 Hs. 69325c          | ENSG0000C SNORD67   | HBII1-166           | small nucsnoRNA           |                |
| chr12-58c.6.822997  | -0.03229 | 0.75079  | -0.04301 | 0.965694 | 0.981636 | chr12 | 58889323 | 58890584 | + | 0 NA | intron (Nintron (N  | 29593 NM_00113c  | 121227 Hs. 25373c          | ENSG0000C LRIG3     | LIG3                | leucine r protein-coding  |                |
| chr17-84c.6.822997  | -0.03229 | 0.75079  | -0.04301 | 0.965694 | 0.981636 | chr17 | 8454707  | 8458396  | + | 0 NA | intron (NAluSx SIN  | 20667 NM_00308c  | 81565 Hs. 37212c           | ENSG0000C NDEL1     | EOPA MITF           | nude n protein-coding     |                |
| chr17-19c.6.822997  | -0.03229 | 0.75079  | -0.04301 | 0.965694 | 0.981636 | chr17 | 19379822 | 19384182 | + | 0 NA | exon (NM_exon (NM   | 3504 NM_00274c   | 5598 Hs. 15013c            | ENSG0000C MAPK7     | BMK1 ERK4           | mitogen e protein-coding  |                |
| chr3-138c.6.822997  | -0.03229 | 0.75079  | -0.04301 | 0.965694 | 0.981636 | chr3  | 1.39E+08 | 1.39E+08 | + | 0 NA | IntergeniLIM2b LIN  | 40481 NM_018147  | 55179 Hs. 17343c           | ENSG0000C FAIM      | FAIM1               | Fas apopt protein-coding  |                |
| chr9-338c.6.822997  | -0.03229 | 1.135534 | 0.042911 | 0.965773 | 0.981636 | chr9  | 33866347 | 33867243 | + | 0 NA | intron (NLIME3A LI  | 49635 NM_017811  | 54926 Hs. 64364c           | ENSG0000C UBE2R2    | CDC34B E2           | ubiquitir protein-coding  |                |
| chr17-81c.6.822997  | -0.03229 | 0.789817 | -0.04288 | 0.965794 | 0.981636 | chr17 | 81575565 | 81579257 | + | 0 NA | intron (Nintron (N  | 1672 NR_13013c   | 55666 Hs. 44333c           | ENSG0000C NPLOC4    | NPL4                | hmc protein-coding        |                |
| chr15-51c.6.822997  | -0.03229 | 0.80706  | 0.042863 | 0.965811 | 0.981636 | chr15 | 51959118 | 51961472 | + | 0 NA | intron (Nintron (N  | 11483 NM_00132c  | 123169 Hs. 56766c          | ENSG0000C LEO1      | RDL                 | LEO1 hmc protein-coding   |                |
| chr5-796c.6.822997  | -0.03229 | 0.80706  | 0.042863 | 0.965811 | 0.981636 | chr5  | 79648835 | 79650097 | + | 0 NA | intron (Nintron (N  | 37025 NM_00134c  | 167153 Hs. 41819c          | ENSG0000C TENT2     | APD4 GLD2           | terminal protein-coding   |                |
| chr19-44c.6.822997  | -0.03229 | 1.006124 | 0.042748 | 0.965902 | 0.981636 | chr19 | 4819454  | 4820237  | + | 0 NA | intron (NAluS2 SI   | 11897 NM_18291c  | 148022 Hs. 29344           | ENSG0000C TICAM1    | I1AE6 Myf           | tol l like protein-coding |                |
| chr20-44c.6.822997  | -0.03229 | 0.868718 | -0.04268 | 0.965959 | 0.981636 | chr20 | 44498139 | 44498720 | + | 0 NA | 3' UTR (N3' UTR (N  | 22555 NM_001261  | 79183 Hs. 28386c           | ENSG0000C TTPAL     | C20orf12            | alpha toc protein-coding  |                |
| chr20-58c.6.822997  | -0.03229 | 0.776428 | -0.0426  | 0.966018 | 0.981636 | chr20 | 58702872 | 58704356 | + | 0 NA | intron (Nintron (N  | 10814 NM_02466c  | 79716 Hs. 65486c           | ENSG0000C NPEPL1    | ba261P9.2           | aminopept protein-coding  |                |
| chr6-159c.6.822997  | -0.03229 | 0.776428 | -0.0426  | 0.966018 | 0.981636 | chr6  | 15496540 | 15497232 | + | 0 NA | exon (NM_exon (NM   | 166142 NR_03644c | 84062 Hs. 57114c           | ENSG0000C DTNBP1    | BLOC158 L           | dystrobre protein-coding  |                |
| chr7-124c.6.822997  | -0.03229 | 0.776428 | -0.0426  | 0.966018 | 0.981636 | chr7  | 1.29E+08 | 1.29E+08 | + | 0 NA | intron (Nintron (N  | 40334 NR_03405c  | 23534 Hs. 19361c           | ENSG0000C TNPO3     | IP012 LG            | transpob protein-coding   |                |
| chr1-326c.6.822997  | -0.03229 | 0.789096 | 0.042541 | 0.966068 | 0.981636 | chr1  | 32653781 | 32654964 | + | 0 NA | intron (NAluJb SIN  | 3014 NM_00113c   | 5928 Hs. 16003             | ENSG0000C RBBP4     | NURF55 RE           | RB bindir protein-coding  |                |
| chr1-237c.6.822997  | -0.03229 | 0.837309 | -0.04237 | 0.966206 | 0.981636 | chr1  | 23794259 | 23795083 | + | 0 NA | TTS (NM_C TTS (NM_C | 3526 NM_00726c   | 11313 Hs. 53347c           | ENSG0000C LYPLA2    | APT-2 API           | lysophos protein-coding   |                |
| chr1-277c.6.822997  | -0.03229 | 0.837309 | -0.04237 | 0.966206 | 0.981636 | chr1  | 27760367 | 27760738 | + | 0 NA | exon (NM_exon (NM   | -12667 NM_177424 | 23673 Hs. 52385c           | ENSG0000C STX12     | STX13 STY           | syntin protein-coding     |                |
| chr10-98c.6.822997  | -0.03229 | 0.837309 | -0.04237 | 0.966206 | 0.981636 | chr10 | 98386711 | 98387261 | + | 0 NA | intron (Nintron (N  | 8321 NR_03161c   | 1E+08                      | NR_03161c           | ENSG0000C MIR1287   | MIRN1287                  | microRNA ncRNA |
| chr17-401c.6.822997 | -0.03229 | 0.837309 | -0.04237 | 0.966206 | 0.981636 | chr17 | 40144273 | 40145357 | + | 0 NA | intron (NAluJo SIN  | 4278 NM_00735c   | 22794 Hs. 74328c           | ENSG0000C CAS3      | BTZ MLN51           | CASC3 exc protein-coding  |                |
| chr20-34c.6.822997  | -0.03229 | 0.837309 | -0.04237 | 0.966206 | 0.981636 | chr20 | 34409262 | 34410514 | + | 0 NA | intron (NFAM SINE   | 46615 NM_001324  | 83737 Hs. 63227c           | ENSG0000C ITC       | ADMPD AIF           | itichy E3 protein-coding  |                |
| chr7-138c.6.822997  | -0.03229 | 0.837309 | -0.04237 | 0.966206 | 0.981636 | chr7  | 1.39E+08 | 1.39E+08 | + | 0 NA | intron (Nintron (N  | 66709 NM_01590c  | 8805 Hs. 49028c            | ENSG0000C TRIM24    | PTC6 RNFF           | tripartit protein-coding  |                |
| chr17-55c.6.822997  | -0.03229 | 1.076187 | 0.042217 | 0.966326 | 0.981636 | chr17 | 5537393  | 5538079  | + | 0 NA | intron (Nintron (N  | -36730 NM_00116c | 728392 Hs. 10430c          | ENSG0000C LOC72839c | -                   | uncharact protein-coding  |                |
| chr7-5481c.6.822997 | -0.03229 | 1.076187 | 0.042217 | 0.966326 | 0.981636 | chr7  | 5481812  | 5482263  | + | 0 NA | intron (Nintron (N  | 13880 NR_03031c  | 693174                     | NR_03031c           | ENSG0000C MIR589    | MIRN589                   | hmcRNA ncRNA   |
| chr5-1461c.6.822997 | -0.03229 | 0.723532 | -0.04212 | 0.966402 | 0.981636 | chr5  | 1.46E+08 | 1.46E+08 | + | 0 NA | intron (NAluSc SIN  | 14856 NM_020117  | 51520 Hs. 43267c           | ENSG0000C LARS      | HSPC192 I           | leucyl-tf protein-coding  |                |
| chr1-586c.6.822997  | -0.03229 | 0.849885 | -0.04207 | 0.966447 | 0.981636 | chr1  | 58665413 | 58665987 | + | 0 NA | intron (Nintron (N  | 34362 NM_00108c  | 114803 Hs. 74492c          | ENSG0000C MYSM1     | 2A-DUB 2            | My like, protein-coding   |                |
| chr16-18c.6.822997  | -0.03229 | 0.818794 | -0.04196 | 0.966528 | 0.981636 | chr16 | 18875366 | 18876402 | + | 0 NA | intron (Nintron (N  | 50520 NM_01509c  | 23049 Hs. 46017c           | ENSG0000C SMG1      | 61E.3 A1            | SMG1 nons protein-coding  |                |
| chr16-53c.6.822997  | -0.03229 | 0.818794 | -0.04196 | 0.966528 | 0.981636 | chr16 | 53308857 | 53309717 | + | 0 NA | intron (NL3 LINE C  | 61925 NM_001347  | 643802 Hs. 45133c          | ENSG0000C LOC64380c | -                   | u3 small protein-coding   |                |
| chr17-31c.6.822997  | -0.03229 | 0.818794 | -0.04196 | 0.966528 | 0.981636 | chr17 | 31265526 | 31266611 | + | 0 NA | intron (NMIRb SINE  | 31171 NM_002544  | 4974 Hs. 11387c            | ENSG0000C OMG       | OMGP                | oligodenc protein-coding  |                |
| chr7-151c.6.822997  | -0.03229 | 0.818794 | -0.04196 | 0.966528 | 0.981636 | chr7  | 1.51E+08 | 1.51E+08 | + | 0 NA | intron (NMER21C LI  | 4997 NM_00136c   | 51666 Hs. 64708c           | ENSG0000C NUB1      | BS4 NUB1            | negative protein-coding   |                |
| chr1-364c.6.822997  | -0.03229 | 0.811094 | -0.04193 | 0.966556 | 0.981636 | chr1  | 36455846 | 36456842 | + | 0 NA | exon (NM_exon (NM   | -5859 NM_00133c  | 127700 Hs. 20220c          | ENSG0000C OSCP1     | Clorf102            | organic s protein-coding  |                |
| chr1-550c.6.822997  | -0.03229 | 0.811094 | -0.04193 | 0.966556 | 0.981636 | chr1  | 55088305 | 55089974 | + | 0 NA | intron (NAluSx SIN  | 48917 NR_110451  | 255738 Hs. 18844           | ENSG0000C PCSK9     | FH3 HCHO            | proprote protein-coding   |                |
| chr1-235c.6.822997  | -0.03229 | 0.811094 | -0.04193 | 0.966556 | 0.981636 | chr1  | 2.35E+08 | 2.35E+08 | + | 0 NA | intron (NAluJb SIN  | -43225 NR_03990c | 1.01E+08                   | NR_03990c           | ENSG0000C MIR4753   | mir-4753                  | microRNA ncRNA |
| chr10-997c.6.822997 | -0.03229 | 0.811094 | -0.04193 | 0.966556 | 0.981636 | chr10 | 99714326 | 99717216 | + | 0 NA | intron (NLIME3G LI  | -16463 NM_01596c | 51076 Hs. 16606            | ENSG0000C CUTC      | CGI-32              | cutC copr protein-coding  |                |
| chr14-72c.6.822997  | -0.03229 | 0.811094 | -0.04193 | 0.966556 | 0.981636 | chr14 | 72956226 | 72956546 | + | 0 NA | non-codiron-codir   | 29922 NM_00135c  | 26094 Hs. 33149c           | ENSG0000C DCAF4     | WDR21 WDF           | DBD1 and protein-coding   |                |
| chr17-77c.6.822997  | -0.03229 | 0.811094 | -0.04193 | 0.966556 | 0.981636 | chr17 | 77495688 | 77496689 | + | 0 NA | intron (NAluSx SIN  | 21024 NM_00111c  | 10801 Hs. 11289c           | ENSG0000C SEPTIN9   | Afl17q25            | septin 9 protein-coding   |                |
| chr2-2057c.6.822997 | -0.03229 | 0.811094 | -0.04193 | 0.966556 | 0.981636 | chr2  | 2.06E+08 | 2.06E+08 | + | 0 NA | intron (Nintron (N  | 45900 NM_018534  | 8828 Hs. 47120c            | ENSG0000C CNRP2     | NP2 NP2             | neuropil protein-coding   |                |
| chr5-774c.6.822997  | -0.03229 | 0.811094 | -0.04193 | 0.966556 | 0.981636 | chr5  | 77484645 | 77485709 | + | 0 NA | intron (NERV3-16A3  | 7139 NM_01826c   | 55255 Hs. 48257c           | ENSG0000C WDR41     | MSTP048             | WD repeat protein-coding  |                |
| chr1-2647c.6.822997 | -0.03229 | 0.843066 | 0.041775 | 0.966678 | 0.981636 | chr1  | 26477509 | 26477835 | + | 0 NA | IntergeniIntergeni  | 5232 NM_005517   | 3151 Hs. 18116c            | ENSG0000C HMG21     | HMG17               | high mobiprotein-coding   |                |
| chr13-48c.6.822997  | -0.03229 | 0.843066 | 0.041775 | 0.966678 | 0.981636 | chr13 | 48084074 | 48084273 | + | 0 NA | intron (NAluSz SIN  | 7036 NR_046511   | 1.01E+08                   | Hs. 61624c          | ENSG0000C MED4-AS1  | MED4-AS                   | MED4 antncRNA  |
| chr17-281c.6.822997 | -0.03229 | 0.977057 | 0.041766 | 0.966685 | 0.981636 | chr17 | 28142371 | 28143749 | + | 0 NA | intron (NAluSc8 SI  | -83503 NR_003064 | 23615 Hs. 15719c           | ENSG0000C PYY2      | -                   | peptide l pseudo          |                |
| chr12-12c.6.822997  | -0.03229 | 0.792744 | -0.04171 | 0.966729 | 0.981636 | chr12 | 1.22E+08 | 1.22E+08 | + | 0 NA | intron (NAluSx1 SI  | -43234 NR_04538c | 1.01E+08                   | Hs. 62425c          | ENSG0000C CLIP1-AS1 | CLIP1-AS1                 | antncRNA       |
| chr15-67c.6.822997  | -0.03229 | 0.792744 | -0.04171 | 0.966729 | 0.981636 | chr15 | 60769779 | 60772955 | + | 0 NA | intron (Nintron (N  | 5765 NM_00590c   | 4088 Hs. 72798c            | ENSG0000C SMAD3     | HSPC193 E           | SMAD famiprotein-coding   |                |
| chr17-35c.6.822997  | -0.03229 | 0.792744 | -0.04171 | 0.966729 | 0.981636 | chr17 | 35670761 | 35675127 | + | 0 NA | intron (Nintron (N  | -58695 NM_03331c | 91608 Hs. 74499c           | ENSG0000C RASL10B   | RRP17 VTS           | RAS like protein-coding   |                |
| chr4-983c.6.822997  | -0.03229 | 0.792744 | -0.04171 | 0.966729 | 0.981636 | chr4  | 98366176 | 98367544 | + | 0 NA | intron (THEIB-int   | 105476 NM_02115c | 5910 Hs. 13285c            | ENSG0000C RAP1GDS   |                     |                           |                |

|             |        |          |          |          |          |          |       |          |          |   |   |    |                           |         |           |          |            |                    |                     |                    |                            |                        |                     |                |
|-------------|--------|----------|----------|----------|----------|----------|-------|----------|----------|---|---|----|---------------------------|---------|-----------|----------|------------|--------------------|---------------------|--------------------|----------------------------|------------------------|---------------------|----------------|
| chr12-292.9 | 177256 | -0.03153 | 0.770276 | -0.04093 | 0.967353 | 0.981636 | chr12 | 2928985  | 2932320  | + | 0 | NA | intron (AluY SINE         | -28745  | NM_003213 | 7004     | Hs. 94865  | NM_003213          | ENSG000002TEAD4     | EFTR-2 RTTEA       | domaiprotein-coding        |                        |                     |                |
| chr15-52.9  | 177256 | -0.03153 | 0.770276 | -0.04093 | 0.967353 | 0.981636 | chr15 | 52057739 | 52060129 | + | 0 | NA | intron (intron (N         | 39715   | NM_002748 | 5597     | Hs. 411847 | NM_002748          | ENSG000002MAPK6     | ERK3 HsTlmitogen-ε | protein-coding             |                        |                     |                |
| chr19-144.9 | 177256 | -0.03153 | 0.770276 | -0.04093 | 0.967353 | 0.981636 | chr19 | 14488047 | 14491766 | + | 0 | NA | intron (intron (N         | 6221    | NM_005716 | 10755    | Hs. 655012 | NM_005716          | ENSG000002GIPC1     | C19orf3 GIPC       | PDZ protein-coding         |                        |                     |                |
| chr19-219.9 | 177256 | -0.03153 | 0.770276 | -0.04093 | 0.967353 | 0.981636 | chr19 | 21407444 | 21410334 | + | 0 | NA | TTS (NM_TTS (NM_1         | 11756   | NM_145326 | 284443   | Hs. 656558 | NM_145326          | ENSG000002ZNF493    | ZNF493             | zinc finger protein-coding |                        |                     |                |
| chr19-296.9 | 177256 | -0.03153 | 0.770276 | -0.04093 | 0.967353 | 0.981636 | chr19 | 29611795 | 29612712 | + | 0 | NA | intron (intron (N         | 5970    | NR_027366 | 10775    | Hs. 012877 | NR_027366          | ENSG000002POP4      | POP4               | home protein-coding        |                        |                     |                |
| chr19-387.9 | 177256 | -0.03153 | 0.770276 | -0.04093 | 0.967353 | 0.981636 | chr19 | 38713514 | 38730176 | + | 0 | NA | intron (intron (N         | 22629   | NM_144691 | 147968   | Hs. 731777 | NM_144691          | ENSG000002CAPN12    | CAPN12             | calpain I protein-coding   |                        |                     |                |
| chr2-962.9  | 177256 | -0.03153 | 0.770276 | -0.04093 | 0.967353 | 0.981636 | chr2  | 96299145 | 96303863 | + | 0 | NA | intron (intron (N         | 4042    | NM_014014 | 23020    | Hs. 246112 | NM_014014          | ENSG000002SNRNP200  | SNRNP200           | ASCC3 L1 Esmal1            | nucprotein-coding      |                     |                |
| chr20-197.9 | 177256 | -0.03153 | 0.770276 | -0.04093 | 0.967353 | 0.981636 | chr20 | 19799927 | 19803919 | + | 0 | NA | Intergeni Intergeni       | -84598  | NM_001242 | 54453    | Hs. 472277 | NM_001242          | ENSG000002C19N2     | C19N2              | MACS RRAS Ras and F        | protein-coding         |                     |                |
| chr20-491.9 | 177256 | -0.03153 | 0.770276 | -0.04093 | 0.967353 | 0.981636 | chr20 | 49117422 | 49118596 | + | 0 | NA | exon (NM_exon (NM_        | 70361   | NM_001322 | 6780     | Hs. 596704 | NM_004602          | ENSG000002STAU1     | STAU1              | PPP1R150 staufen c         | protein-coding         |                     |                |
| chr5-135.9  | 177256 | -0.03153 | 0.770276 | -0.04093 | 0.967353 | 0.981636 | chr5  | 1.35E+08 | 1.35E+08 | + | 0 | NA | intron (intron (N         | 30156   | NM_138609 | 9555     | Hs. 420272 | NM_004893          | ENSG000002H2AFY     | H2AFY              | H2A.y H2M2A                | histc protein-coding   |                     |                |
| chr6-215.9  | 177256 | -0.03153 | 0.770276 | -0.04093 | 0.967353 | 0.981636 | chr6  | 21595331 | 21595744 | + | 0 | NA | exon (NM_exon (NM_        | 1786    | NM_003107 | 6659     | Hs. 643913 | NM_003107          | ENSG000002SOX4      | SOX4               | EVII6                      | SRY-box t              | protein-coding      |                |
| chr9-130.9  | 177256 | -0.03153 | 0.770276 | -0.04093 | 0.967353 | 0.981636 | chr9  | 1.3E+08  | 1.3E+08  | + | 0 | NA | intron (MLT1L LTF         | 24669   | NM_02096C | 57720    | Hs. 512461 | NM_02096C          | ENSG000002GPR107    | GPR107             | GCDRP LUSG                 | proteir protein-coding |                     |                |
| chr13-32.6  | 888436 | 0.035961 | 0.880705 | 0.040832 | 0.96743  | 0.981636 | chr13 | 32230610 | 32232850 | + | 0 | NA | intron (intron (N         | 80224   | NM_001133 | 646799   | Hs. 569254 | NM_001133          | ENSG000002ZARIL     | ZARIL              | Z3CXXC7 Zyzygo             | arprotein-coding       |                     |                |
| chr14-100.6 | 888436 | 0.035961 | 0.880705 | 0.040832 | 0.96743  | 0.981636 | chr14 | 1.01E+08 | 1.01E+08 | + | 0 | NA | intron (intron (N         | 4485    | NR_00308C | 692215   | NR_00308C  | ENSG000002SNORD112 | SNORD112            | 14q(0)             | small                      | nucsnRNA               |                     |                |
| chr17-161.6 | 888436 | 0.035961 | 0.880705 | 0.040832 | 0.96743  | 0.981636 | chr17 | 16140698 | 16141527 | + | 0 | NA | intron (Kanga2_a          | 12084   | NR_145787 | 1.1E+08  | NR_145787  | SNORD163           |                     | small              | nucsnRNA                   |                        |                     |                |
| chr17-444.6 | 888436 | 0.035961 | 0.880705 | 0.040832 | 0.96743  | 0.981636 | chr17 | 44472635 | 44473600 | + | 0 | NA | intron (intron (N         | 30289   | NM_001002 | 23131    | Hs. 463125 | NM_001002          | ENSG000002GPATCH8   | GPATCH8            | PKI G-patch                | c protein-coding       |                     |                |
| chr18-462.6 | 888436 | 0.035961 | 0.880705 | 0.040832 | 0.96743  | 0.981636 | chr18 | 46263005 | 46264303 | + | 0 | NA | 3' UTR (3' UTR (N         | -70364  | NM_15247C | 494470   | Hs. 501114 | NM_15247C          | ENSG000002CRNF165   | CRNF165            | ARKL2 Arkring              | finprotein-coding      |                     |                |
| chr18-576.6 | 888436 | 0.035961 | 0.880705 | 0.040832 | 0.96743  | 0.981636 | chr18 | 57657183 | 57658238 | + | 0 | NA | intron (intron (N         | 27379   | NM_001242 | 1.01E+08 | Hs. 66064E | NM_001242804       | LOC100505E          |                    | uncharact                  | protein-coding         |                     |                |
| chr21-466.6 | 888436 | 0.035961 | 0.880705 | 0.040832 | 0.96743  | 0.981636 | chr21 | 46362896 | 46364964 | + | 0 | NA | exon (NM_exon (NM_        | 39263   | NM_001315 | 5116     | Hs. 474066 | NM_006031          | ENSG000002PCNT      | PCNT               | KEN MOPD2                  | pericentri             | protein-coding      |                |
| chr5-129.6  | 888436 | 0.035961 | 0.880705 | 0.040832 | 0.96743  | 0.981636 | chr5  | 1.3E+08  | 1.3E+08  | + | 0 | NA | intron (NLIPREC2 I        | -120590 | NM_001257 | 1E+08    | Hs. 582534 | NM_001257          | ENSG000002CMINAR2   | CMINAR2            | KIAA1024 membrane          | protein-coding         |                     |                |
| chr7-128.6  | 888436 | 0.035961 | 0.880705 | 0.040832 | 0.96743  | 0.981636 | chr7  | 1.29E+08 | 1.29E+08 | + | 0 | NA | Intergeni AluJr4 SI       | -65675  | NR_024366 | 402483   | Hs. 72235C | NM_001039682       | LINC0100C           |                    | long                       | intcncRNA              |                     |                |
| chr9-1347.6 | 888436 | 0.035961 | 0.880705 | 0.040832 | 0.96743  | 0.981636 | chr9  | 1.35E+08 | 1.35E+08 | + | 0 | NA | intron (intron (N         | 49193   | NR_039691 | 1.01E+08 | NR_039691  | ENSG000002MIR3689C | MIR3689C            |                    | microRNA                   | ncRNA                  |                     |                |
| chr17-171.5 | 402372 | 0.040474 | 0.991571 | 0.040818 | 0.967441 | 0.981636 | chr17 | 17185029 | 17185801 | + | 0 | NA | 3' UTR (3' UTR (N         | 20918   | NM_17883C | 201164   | Hs. 729079 | NM_17883C          | ENSG000002PLD6      | PLD6               | ZUC                        | phospholip             | protein-coding      |                |
| chr6-897.5  | 402372 | 0.040474 | 0.991571 | 0.040818 | 0.967441 | 0.981636 | chr6  | 89793243 | 89793822 | + | 0 | NA | intron (AluJo SIN         | 26262   | NM_014611 | 23195    | Hs. 52994E | NM_014611          | ENSG000002MDN1      | MDN1               | Real                       | midasin f              | protein-coding      |                |
| chr6-1484.5 | 402372 | 0.040474 | 0.991571 | 0.040818 | 0.967441 | 0.981636 | chr6  | 1.48E+08 | 1.48E+08 | + | 0 | NA | intron (AluSx1 SI         | -30534  | NM_00134C | 23328    | Hs. 193133 | NM_01527E          | ENSG000002SASH1     | SASH1              | CAPOK DUF                  | SAM and f              | protein-coding      |                |
| chrX-702.5  | 402372 | 0.040474 | 0.991571 | 0.040818 | 0.967441 | 0.981636 | chrX  | 70286360 | 70288103 | + | 0 | NA | intron (intron (N         | 2629    | NM_00137C | 51248    | Hs. 11042  | NM_016484          | ENSG000002PDZD11    | PDZD11             | AIPP1 PDZ                  | PDZ                    | domaiprotein-coding |                |
| chr3-180.7  | 895479 | 0.033779 | 0.834192 | 0.040493 | 0.9677   | 0.981636 | chr3  | 1.81E+08 | 1.81E+08 | + | 0 | NA | intron (intron (T) n Simp | 18497   | NM_00119C | 131118   | Hs. 230601 | NM_145261          | ENSG000002DNACJ19   | DNACJ19            | PAM18 TIM                  | DnaJ                   | heat                | protein-coding |
| chr7-7434.7 | 895479 | 0.033779 | 0.834192 | 0.040493 | 0.9677   | 0.981636 | chr7  | 74342150 | 74342422 | + | 0 | NA | intron (AluSx SIN         | 52821   | NM_00338E | 7461     | Hs. 64701E | NM_00338E          | ENSG000002CLIP2     | CLIP2              | CLIP CLIF                  | CAP-Gly                | c                   | protein-coding |
| chr10-245.8 | 374501 | 0.032809 | 0.810713 | 0.040469 | 0.967719 | 0.981636 | chr10 | 24583824 | 24586229 | + | 0 | NA | exon (NM_exon (NM_        | 37871   | NM_00136E | 57584    | Hs. 52419E | NM_020824          | ENSG000002ARHGAP21  | ARHGAP21           | RHO                        | GTPas                  | protein-coding      |                |
| chr19-34.8  | 374501 | 0.032809 | 0.810713 | 0.040469 | 0.967719 | 0.981636 | chr19 | 3494948  | 3494944  | + | 0 | NA | intron (AluS6 SI          | 4828    | NM_00114E | 83475    | Hs. 515064 | NM_031304          | ENSG000002DOHH      | DOHH               | HLRC1 hDC                  | deoxyhyp               | protein-coding      |                |
| chr1-542.9  | 664136 | -0.03051 | 0.754327 | -0.04045 | 0.967734 | 0.981636 | chr1  | 54236994 | 54238066 | + | 0 | NA | non-codir non-codir       | 1087    | NR_103541 | 619518   | Hs. 59143E | NM_001034          | ENSG000002SSBP3-AS1 | SSBP3-AS1          | C1orf191 SSBP3             | antncRNA               |                     |                |
| chr15-991.9 | 664136 | -0.03051 | 0.754327 | -0.04045 | 0.967734 | 0.981636 | chr15 | 99194100 | 99193039 | + | 0 | NA | intron (THE1B-int         | 57362   | NM_00128E | 64927    | Hs. 51319E | NM_02290E          | ENSG000002TTC23     | TTC23              | HCC-8                      | zetratic               | protein-coding      |                |
| chr19-11.9  | 664136 | -0.03051 | 0.754327 | -0.04045 | 0.967734 | 0.981636 | chr19 | 11606071 | 11608030 | + | 0 | NA | intron (THE1C-int         | 9567    | NM_14529E | 199692   | Hs. 52666E | NM_14529E          | ENSG000002ZNF627    | ZNF627             |                            | zinc                   | finprotein-coding   |                |
| chr4-147.9  | 664136 | -0.03051 | 0.754327 | -0.04045 | 0.967734 | 0.981636 | chr4  | 1.48E+08 | 1.48E+08 | + | 0 | NA | intron (MLT1B LTF         | 130931  | NR_039962 | 1.01E+08 | NR_039962  | ENSG000002MIR4799  | MIR4799             |                    | microRNA                   | ncRNA                  |                     |                |
| chr7-9941.9 | 664136 | -0.03051 | 0.754327 | -0.04045 | 0.967734 | 0.981636 | chr7  | 99419378 | 99420686 | + | 0 | NA | TTS (NM_TTS (NM_C         | 10860   | NR_162133 | 1.13E+08 | NR_162133  | MIR12119           |                     | microRNA           | ncRNA                      |                        |                     |                |
| chr1-3571.7 | 367459 | 0.034668 | 0.857162 | 0.040445 | 0.967738 | 0.981636 | chr1  | 35714636 | 35716164 | + | 0 | NA | 3' UTR (3' UTR (N         | 1511    | NM_00134E | 127703   | Hs. 11202E | NM_152374          | ENSG000002C1orf216  | C1orf216           |                            | chromoson              | protein-coding      |                |
| chr1-1131.7 | 367459 | 0.034668 | 0.857162 | 0.040445 | 0.967738 | 0.981636 | chr1  | 1.13E+08 | 1.13E+08 | + | 0 | NA | 3' UTR (3' UTR (N         | 51835   | NM_001312 | 9860     | Hs. 448972 | NM_01481E          | ENSG000002LRIG2     | LRIG2              | LIG-2 LIC                  | leucine i              | protein-coding      |                |
| chr10-87.7  | 367459 | 0.034668 | 0.857162 | 0.040445 | 0.967738 | 0.981636 | chr10 | 87806715 | 87807367 | + | 0 | NA | intron (NMER3A1 I         | 11190   | NM_001321 | 84896    | Hs. 43594E | NM_03281C          | ENSG000002ATAD1     | ATAD1              | AFDC1 FN                   | ATPase f               | protein-coding      |                |
| chr17-39.7  | 367459 | 0.034668 | 0.857162 | 0.040445 | 0.967738 | 0.981636 | chr17 | 39903681 | 39903920 | + | 0 | NA | TTS (NM_TTS (NM_C         | 13740   | NM_00136E | 55876    | Hs. 306777 | NM_01853C          | ENSG000002GSDMB     | GSDMB              | PP4 gasderm                | in                     | protein-coding      |                |
| chr1-5281.7 | 416456 | 0.034835 | 0.862206 | 0.040402 | 0.967773 | 0.981636 | chr1  | 52818615 | 52819822 | + | 0 | NA | intron (intron (N         | -23542  | NM_001307 | 440590   | Hs. 65845E | NM_001004          | ENSG000002ZYG11A    | ZYG11A             | ZYG11                      | zyg-11 f               | protein-coding      |                |
| chr2-207.7  | 416456 | 0.034835 | 0.862206 | 0.040402 | 0.967773 | 0.981636 | chr2  | 20747093 | 20747633 | + | 0 | NA | intron (intron (N         | -26750  | NM_00018E | 3053     | Hs. 47427C | NM_00018E          | ENSG000002SERPIND1  | SERPIND1           | B225673 Eserpin            | f                      | protein-coding      |                |
| chr4-349.7  | 416456 | 0.034835 | 0.862206 | 0.040402 | 0.967773 | 0.981636 | chr4  | 3494345  | 3503799  | + | 0 | NA | promoter-promoter-        | -295    | NR_030297 | 693156   | NR_030297  | ENSG000002MIR571   | MIR571              | l                  | microRNA                   | ncRNA                  |                     |                |
| chr5-6957.7 | 416456 | 0.034835 | 0.862206 | 0.040402 | 0.967773 | 0.981636 | chr5  | 69575337 | 69576184 | + | 0 | NA | intron (Tigger1 I         | 15515   | NM_00109E | 728340   | Hs. 19135E | NM_00109E          | ENSG000002GTF2H2C   | GTF2H2C            | GTF2H2C_2                  | GTF2H2 f               | protein-coding      |                |
| chr9-1344.7 | 416456 | 0.034835 | 0.862206 | 0.040402 | 0.967773 | 0.981636 | chr9  | 1.34E+08 | 1.34E+08 | + | 0 | NA | intron (intron (N         | 11167   | NM_001291 | 6256     | Hs. 59088E | NM_00295F          | ENSG000002RXRA      | RXRA               | NR2B1                      | retinoid               | protein-coding      |                |
| chr19-541.8 | 853523 | 0.031903 | 0.790873 | 0.040339 | 0.967823 | 0.981636 | chr19 | 54106278 | 54106625 | + | 0 | NA | TTS (NM_TTS (NM_C         | 3596    | NM_004542 | 4696     | Hs. 19826E | NM_004542          | ENSG000002NDUFA3    | NDUFA3             | B9 CI-B9                   | NADH:ubiq              | protein-coding      |                |
| chr6-4367.6 | 937434 | 0.036004 | 0.89604  | 0.040181 | 0.967949 | 0.981636 | chr6  | 43673390 | 43674124 | + | 0 | NA | intron (intron (N         | 14055   | NM_01813E | 55168    | Hs. 52014E | NM_01813E          | ENSG000002MRPS18A   | MRPS18A            | HumanS18                   | mitochonc              | protein-coding      |                |
| chr2-171.7  | 221877 | -0.03502 | 0.872823 | -0.04013 | 0.967991 | 0.981636 | chr2  | 1.72E+08 | 1.72E+08 | + | 0 | NA | intron (NMER5A LI         | 18897   | NM_00370E | 8604     | Hs. 47060E | NM_00370E          | ENSG000002SLC25A12  | SL                 |                            |                        |                     |                |



|                    |          |          |          |          |          |       |          |          |   |   |    |                     |                  |                            |                     |                                     |                                  |
|--------------------|----------|----------|----------|----------|----------|-------|----------|----------|---|---|----|---------------------|------------------|----------------------------|---------------------|-------------------------------------|----------------------------------|
| chr15-434.9.169398 | -0.03    | 0.76716  | -0.0391  | 0.96881  | 0.981636 | chr15 | 43450684 | 43453156 | + | 0 | NA | intron (AluS26 SI   | 41236 NM_001141  | 7158 Hs. 440966NM_005657   | ENSG000002TP53BP1   | 53BP1 TDF tumor prcprotein-coding   |                                  |
| chr15-446.9.169398 | -0.03    | 0.76716  | -0.0391  | 0.96881  | 0.981636 | chr15 | 44628557 | 44630691 | + | 0 | NA | intron (MIRB SINE   | 34038 NM_001166  | 80208 Hs. 656271NM_025137  | ENSG000002SPG11     | ALS5 CMT2SPG11 vesprotein-coding    |                                  |
| chr15-671.9.169398 | -0.03    | 0.76716  | -0.0391  | 0.96881  | 0.981636 | chr15 | 67168323 | 67173345 | + | 0 | NA | intron (intron (    | 4679 NM_001145   | 4088 Hs. 727986NM_005902   | ENSG000002SMAD3     | HSPC193 SMAD famiprotein-coding     |                                  |
| chr16-117.9.169398 | -0.03    | 0.76716  | -0.0391  | 0.96881  | 0.981636 | chr16 | 11759319 | 11777024 | + | 0 | NA | intron (intron (    | -25314 NR_136673 | 51061 Hs. 313847NM_015914  | ENSG000002TXNDC11   | EFP1 thiosedolprotein-coding        |                                  |
| chr16-187.9.169398 | -0.03    | 0.76716  | -0.0391  | 0.96881  | 0.981636 | chr16 | 18780756 | 18779096 | + | 0 | NA | intron (intron (    | 5408 NM_00103C   | 6210 Hs. 370504NM_001015   | ENSG000002RPS15A    | DBA20 SIF ribosomalprotein-coding   |                                  |
| chr16-702.9.169398 | -0.03    | 0.76716  | -0.0391  | 0.96881  | 0.981636 | chr16 | 70255243 | 70272837 | + | 0 | NA | intron (AluSg SIN   | -12100 NM_058215 | 118460 Hs. 660633NM_058215 | ENSG000002EXOSC6    | EAP4 MTR:exosome cprotein-coding    |                                  |
| chr16-896.9.169398 | -0.03    | 0.76716  | -0.0391  | 0.96881  | 0.981636 | chr16 | 89877941 | 89881355 | + | 0 | NA | intron (CPg         | 6056 NM_014972   | 22980 Hs. 415342NM_014972  | ENSG000002TCF25     | FKS626 Hs transcriptiprotein-coding |                                  |
| chr17-376.9.169398 | -0.03    | 0.76716  | -0.0391  | 0.96881  | 0.981636 | chr17 | 37621112 | 37624386 | + | 0 | NA | intron (intron (    | -7710 NR_106744  | 1.02E+08                   | NR_106744           | ENSG000002MIR378J                   | hsa-mir-3 microRNA ncRNA         |
| chr17-511.9.169398 | -0.03    | 0.76716  | -0.0391  | 0.96881  | 0.981636 | chr17 | 51191060 | 51192844 | + | 0 | NA | intron (intron (    | 25230 NM_001015  | 4831 Hs. 463456NM_002512   | ENSG000002NM2E      | NDKB NDPKNME/NM23 protein-coding    |                                  |
| chr17-576.9.169398 | -0.03    | 0.76716  | -0.0391  | 0.96881  | 0.981636 | chr17 | 57838909 | 57841146 | + | 0 | NA | intron (intron (    | 10017 NM_01607C  | 51649 Hs. 5836             | NR_01607C           | ENSG000002MRP523                    | CG1-138 Emiitochonprotein-coding |
| chr17-82.9.169398  | -0.03    | 0.76716  | -0.0391  | 0.96881  | 0.981636 | chr17 | 82234814 | 82239644 | + | 0 | NA | TTS (NR_1TTS (NR_1  | 561 NR_10684E    | 1.02E+08                   | NR_10684E           | ENSG000002MIR6787                   | hsa-mir-5 microRNA ncRNA         |
| chr19-491.9.169398 | -0.03    | 0.76716  | -0.0391  | 0.96881  | 0.981636 | chr19 | 49196413 | 49196989 | + | 0 | NA | exon (NM exon (NM   | 38909 NM_01763C  | 54795 Hs. 467101NM_01763C  | ENSG000002TRPM4     | LTrpC4 PF transientprotein-coding   |                                  |
| chr2-1816.9.169398 | -0.03    | 0.76716  | -0.0391  | 0.96881  | 0.981636 | chr2  | 1.82E+08 | 1.82E+08 | + | 0 | NA | intron (intron (    | 9324 NM_001287   | 6744 Hs. 196982NM_006751   | ENSG000002ITPRD2    | CS-1 CSI1 ITPR inteprotein-coding   |                                  |
| chr2-1913.9.169398 | -0.03    | 0.76716  | -0.0391  | 0.96881  | 0.981636 | chr2  | 1.91E+08 | 1.91E+08 | + | 0 | NA | intron (intron (    | 145447 NM_001161 | 4430 Hs. 439622NM_012222   | ENSG000002MYO1B     | MM1-alpha myosin I protein-coding   |                                  |
| chr20-211.9.169398 | -0.03    | 0.76716  | -0.0391  | 0.96881  | 0.981636 | chr20 | 2116665  | 2118588  | + | 0 | NA | intron (AluSx1 SI   | 15799 NM_08083C  | 140901 Hs. 100057NM_08083C | ENSG000002STK35     | CLIK1 STK serine/th protein-coding  |                                  |
| chr21-371.9.169398 | -0.03    | 0.76716  | -0.0391  | 0.96881  | 0.981636 | chr21 | 37151731 | 37153373 | + | 0 | NA | intron (AluV SINE   | 41374 NR_046651  | 1.01E+08                   | Hs. 570411NR_046651 | ENSG000002TTC3-AS1                  | TTC3 antncRNA                    |
| chr3-946.9.169398  | -0.03    | 0.76716  | -0.0391  | 0.96881  | 0.981636 | chr3  | 9469231  | 9481581  | + | 0 | NA | intron (intron (    | 77706 NM_00108C  | 55209 Hs. 288164NM_018187  | ENSG000002SETD5     | SET domainprotein-coding            |                                  |
| chr3-486.9.169398  | -0.03    | 0.76716  | -0.0391  | 0.96881  | 0.981636 | chr3  | 48606495 | 48608187 | + | 0 | NA | intron (AluSc SIN   | -2191 NR_132776  | NR_132776                  | SNORA94             | small nucsnRNA                      |                                  |
| chr3-1002.9.169398 | -0.03    | 0.76716  | -0.0391  | 0.96881  | 0.981636 | chr3  | 1E+08    | 1E+08    | + | 0 | NA | intron (AluSq2 SI   | 30945 NM_001195  | 55773 Hs. 477003NM_018305  | ENSG000002TBC1D23   | NS4ATP1 TBC1 dom protein-coding     |                                  |
| chr4-109.9.169398  | -0.03    | 0.76716  | -0.0391  | 0.96881  | 0.981636 | chr4  | 1.1E+08  | 1.1E+08  | + | 0 | NA | exon (NM exon (NM   | -29855 NM_01791E | 55013 Hs. 234145NM_01791E  | ENSG000002CMCB      | CCDC109B mitochonprotein-coding     |                                  |
| chr5-1126.9.169398 | -0.03    | 0.76716  | -0.0391  | 0.96881  | 0.981636 | chr5  | 1.13E+08 | 1.13E+08 | + | 0 | NA | intron (AluJb SIN   | 5149 NM_003133   | 6728 Hs. 637001NM_003133   | ENSG000002SRP19     | signal rprotein-coding              |                                  |
| chr5-1404.9.169398 | -0.03    | 0.76716  | -0.0391  | 0.96881  | 0.981636 | chr5  | 1.4E+08  | 1.4E+08  | + | 0 | NA | exon (NM exon (NM   | -50583 NM_003732 | 8637 Hs. 594084NM_003732   | ENSG000002EIF4EBP3  | 4E-BP3 4E eukaryotiprotein-coding   |                                  |
| chr6-8317.9.169398 | -0.03    | 0.76716  | -0.0391  | 0.96881  | 0.981636 | chr6  | 83179814 | 83181891 | + | 0 | NA | intron (MER102b I   | 12413 NM_001195  | 5238 Hs. 661665NM_015595   | ENSG000002PGM3      | AGM1 IMD2 phosphoglp protein-coding |                                  |
| chr7-299.9.169398  | -0.03    | 0.76716  | -0.0391  | 0.96881  | 0.981636 | chr7  | 29934690 | 29941608 | + | 0 | NA | intron (AluS2 SIN   | 51652 NM_014766  | 9805 Hs. 52074CNM_014766   | ENSG000002SCRN1     | SES1 secernin protein-coding        |                                  |
| chr7-473.9.169398  | -0.03    | 0.76716  | -0.0391  | 0.96881  | 0.981636 | chr7  | 47394085 | 47397623 | + | 0 | NA | intron (intron (    | 68949 NR_145811  | 1.1E+08                    | NR_145811           | SNORD151                            | small nucsnRNA                   |
| chr8-226.9.169398  | -0.03    | 0.76716  | -0.0391  | 0.96881  | 0.981636 | chr8  | 22607640 | 22616618 | + | 0 | NA | intron (AluS2 SIN   | 7087 NM_001363   | 57805 Hs. 744848NM_021174  | ENSG000002CCAR2     | DBC-1 DBC cell cyclprotein-coding   |                                  |
| chr8-3832.9.169398 | -0.03    | 0.76716  | -0.0391  | 0.96881  | 0.981636 | chr8  | 38328430 | 38331193 | + | 0 | NA | exon (NM exon (NM   | 52460 NM_023034  | 54904 Hs. 434966NM_001777  | ENSG000002NSD3      | KMT3F KMT nuclear rprotein-coding   |                                  |
| chr9-1912.9.169398 | -0.03    | 0.76716  | -0.0391  | 0.96881  | 0.981636 | chr9  | 19123984 | 19126090 | + | 0 | NA | intron (LIMB8 LIN   | 2455 NM_001122   | 123 Hs. 3416               | NR_001122           | ENSG000002PLIN2                     | ADFP ADRF perlipiprotein-coding  |
| chr9-355.9.169398  | -0.03    | 0.76716  | -0.0391  | 0.96881  | 0.981636 | chr9  | 35554920 | 35561841 | + | 0 | NA | intron (intron (    | 5498 NM_001287   | 730112 Hs. 98959           | NR_001095           | ENSG000002FAM166B                   | family wiprotein-coding          |
| chr9-954.9.169398  | -0.03    | 0.76716  | -0.0391  | 0.96881  | 0.981636 | chr9  | 95465191 | 95469206 | + | 0 | NA | exon (NM exon (NM   | 3589 NR_038982   | 1.01E+08                   | Hs. 661847NR_038982 | LOC100507                           | uncharactncRNA                   |
| chr2-1905.9.1204   | -0.03035 | 0.776495 | -0.03908 | 0.968827 | 0.981636 | chr2  | 1.91E+08 | 1.91E+08 | + | 0 | NA | intron (MIRc SINE   | 45044 NM_014905  | 2744 Hs. 116444NM_014905   | ENSG000002GLS       | AAD20 CAS glutamine protein-coding  |                                  |
| chr3-437.9.1204    | -0.03035 | 0.776495 | -0.03908 | 0.968827 | 0.981636 | chr3  | 43576786 | 43577329 | + | 0 | NA | exon (NM exon (NM   | 44869 NM_001346  | 55129 Hs. 656657NM_018075  | ENSG000002AN010     | SCAR10 TV anacetamir protein-coding |                                  |
| chr4-519.9.1204    | -0.03035 | 0.776495 | -0.03908 | 0.968827 | 0.981636 | chr4  | 51901489 | 51901628 | + | 0 | NA | intron (intron (    | 58009 NM_001287  | 23142 Hs. 603388NM_015115  | ENSG000002DCUN1D4   | defective protein-coding            |                                  |
| chr6-565.9.1204    | -0.03035 | 0.776495 | -0.03908 | 0.968827 | 0.981636 | chr6  | 56599936 | 56603422 | + | 0 | NA | intron (intron (    | 41210 NM_015548  | 667 Hs. 604915NM_001722    | ENSG000002CST       | BP240 BP dystonin protein-coding    |                                  |
| chr1-1226.4.931208 | 0.039953 | 1.025386 | 0.038964 | 0.968919 | 0.981636 | chr1  | 12287953 | 12288761 | + | 0 | NA | intron (intron (    | 58327 NM_015378  | 55187 Hs. 439381NM_015378  | ENSG000002VPS13D    | SCAR4 vacuolar protein-coding       |                                  |
| chr10-912.7.65976  | -0.03035 | 0.864465 | -0.03893 | 0.968945 | 0.981636 | chr10 | 91263852 | 91264450 | + | 0 | NA | Intergeni THE1B LTF | 8920 NM_005398   | 5507 Hs. 30309CNM_005398   | ENSG000002PPP1R3C   | PPP1R5 P1 protein protein-coding    |                                  |
| chr1-222.9.607281  | -0.02939 | 0.755856 | -0.03888 | 0.968984 | 0.981636 | chr1  | 2.23E+08 | 2.23E+08 | + | 0 | NA | intron (intron (    | 13774 NM_00130C  | 375056 Hs. 118474NM_198551 | ENSG000002CIA3      | ARNT D32CIA SH3 cprotein-coding     |                                  |
| chr16-28.9.607281  | -0.02939 | 0.755856 | -0.03888 | 0.968984 | 0.981636 | chr16 | 28956696 | 28957005 | + | 0 | NA | intron (intron (    | -1733 NR_039742  | 1.01E+08                   | NR_039742           | ENSG000002MIR4517                   | miR-4517 microRNA ncRNA          |
| chr1-436.9.656278  | -0.02903 | 0.750036 | -0.03871 | 0.969123 | 0.981636 | chr1  | 43653546 | 43671398 | + | 0 | NA | intron (AluSg7 SI   | 12323 NM_014663  | 9682 Hs. 155983NM_014663   | ENSG000002KDMA4     | JHDM3A JM lysine deprotein-coding   |                                  |
| chr1-462.9.656278  | -0.02903 | 0.750036 | -0.03871 | 0.969123 | 0.981636 | chr1  | 46294471 | 46298300 | + | 0 | NA | intron (AluSp SIN   | 6981 NM_006365   | 10489 Hs. 144941NM_006365  | ENSG000002LRR41     | MUF1 PPP77 leucine rprotein-coding  |                                  |
| chr10-99.9.656278  | -0.02903 | 0.750036 | -0.03871 | 0.969123 | 0.981636 | chr10 | 99893626 | 99899541 | + | 0 | NA | intron (intron (    | 17509 NM_00131E  | 23268 Hs. 500771NM_015222  | ENSG000002DNMBP     | ARHGAP36 dynamin tprotein-coding    |                                  |
| chr11-636.9.656278 | -0.02903 | 0.750036 | -0.03871 | 0.969123 | 0.981636 | chr11 | 63628150 | 63633788 | + | 0 | NA | intron (intron (    | -16500 NM_00112E | 11445 Hs. 280881NM_004195  | ENSG000002PLAAT3    | ADPLA H-F phospholiprotein-coding   |                                  |
| chr11-671.9.656278 | -0.02903 | 0.750036 | -0.03871 | 0.969123 | 0.981636 | chr11 | 67184423 | 67187240 | + | 0 | NA | intron (MLT1A LI    | -54183 NM_00125E | 22992 Hs. 124147NM_012305  | ENSG000002KDM2A     | CXXC8 FBI lysine deprotein-coding   |                                  |
| chr14-504.9.656278 | -0.02903 | 0.750036 | -0.03871 | 0.969123 | 0.981636 | chr14 | 50443360 | 50447126 | + | 0 | NA | intron (intron (    | -47945 NM_001367 | 8814 Hs. 280881NM_004195   | ENSG000002CDKL1     | KKIALRE Cyclin deprotein-coding     |                                  |
| chr14-76.9.656278  | -0.02903 | 0.750036 | -0.03871 | 0.969123 | 0.981636 | chr14 | 76004102 | 76005946 | + | 0 | NA | intron (LIMEF LIN   | 19261 NM_00125E  | 112752 Hs. 532625NM_052872 | ENSG000002IFT43     | C14orf175 intraflag protein-coding  |                                  |
| chr19-17.9.656278  | -0.02903 | 0.750036 | -0.03871 | 0.969123 | 0.981636 | chr19 | 17313649 | 17317422 | + | 0 | NA | intron (AluJr SIN   | 5972 NM_02405C   | 79016 Hs. 466154NM_02405C  | ENSG000002DDA1      | C19orf58 DET1 and protein-coding    |                                  |
| chr19-447.9.656278 | -0.02903 | 0.750036 | -0.03871 | 0.969123 | 0.981636 | chr19 | 44750175 | 44752989 | + | 0 | NA | intron (MIRB SINE   | 2874 NM_00517E   | 602 Hs. 31210              | NR_00517E           | ENSG000002BCL3                      | BCL4 D19BCL3 trarprotein-coding  |
| chr19-571.9.656278 | -0.02903 | 0.750036 | -0.03871 | 0.969123 | 0.981636 | chr19 | 57193064 | 57195745 | + | 0 | NA | intron (intron (    | 2904 NM_003417   | 9422 Hs. 515634NM_003417   | ENSG000002ZNF264    | zinc fingprotein-coding             |                                  |
| chr2-270.9.656278  | -0.02903 | 0.750036 | -0.03871 | 0.969123 | 0.981636 | chr2  | 27066589 | 27070107 | + | 0 | NA | intron (intron (    | 3306 NM_001134   | 1E+08                      | Hs. 502948NM_001134 | ENSG000002OST4                      | oligosaccprotein-coding          |
| chr2-317.9.656278  | -0.02903 | 0.750036 | -0.03871 | 0.969123 | 0.981636 | chr22 | 31702606 | 31702990 | + | 0 | NA | intron (AluSx SIN   | -40234 NM_00132E | 23761 Hs. 420555NM_014335  | ENSG000002PISD      | DJ85816 phosphatiprotein-coding     |                                  |
| chr4-106.9.656278  | -0.02903 | 0.750036 | -0.03871 | 0.969123 | 0.981636 | chr4  | 1.06E+08 | 1        |   |   |    |                     |                  |                            |                     |                                     |                                  |

|           |          |          |          |          |          |          |       |          |          |   |      |                     |                  |                              |                     |                   |                          |                      |                |
|-----------|----------|----------|----------|----------|----------|----------|-------|----------|----------|---|------|---------------------|------------------|------------------------------|---------------------|-------------------|--------------------------|----------------------|----------------|
| chr3-6902 | 8.67466  | -0.02946 | 0.78865  | -0.03736 | 0.970198 | 0.981636 | chr3  | 69053919 | 69056871 | + | 0 NA | 3' UTR (N3' UTR (N  | -3062 NM_007114  | 7110 Hs. 267632NM_007114     | ENSG000002TMF1      | ARA160 T TATA     | elenprotein-coding       |                      |                |
| chr3-1002 | 8.67466  | -0.02946 | 0.78865  | -0.03736 | 0.970198 | 0.981636 | chr3  | 1E+08    | 1E+08    | + | 0 NA | intron (NAluX S     | 21204 NM_001199  | 55773 Hs. 477003NM_018306    | ENSG000002TBC1D23   | NS4ATP1 F TBC1    | dom protein-coding       |                      |                |
| chr3-1722 | 8.67466  | -0.02946 | 0.78865  | -0.03736 | 0.970198 | 0.981636 | chr3  | 1.72E+08 | 1.72E+08 | + | 0 NA | intron (Nintron (N  | 178295 NM_004122 | 2693 Hs. 130212NM_004122     | ENSG000002GHSR      | GHPD              | growth hcprotein-coding  |                      |                |
| chr4-5588 | 8.67466  | -0.02946 | 0.78865  | -0.03736 | 0.970198 | 0.981636 | chr4  | 55880967 | 55882514 | + | 0 NA | intron (NMER4A L    | 28099 NM_018261  | 55763 Hs. 269666NM_018261    | ENSG000002EXOC1     | BM-102 S E        | exocyst cprotein-coding  |                      |                |
| chr4-1186 | 8.67466  | -0.02946 | 0.78865  | -0.03736 | 0.970198 | 0.981636 | chr4  | 1.19E+08 | 1.19E+08 | + | 0 NA | intron (Nintron (N  | 5402 NM_020961   | 57721 Hs. 596872NM_020961    | ENSG000002METTL14   | MeTTL14           | methyltra protein-coding |                      |                |
| chr5-6595 | 8.67466  | -0.02946 | 0.78865  | -0.03736 | 0.970198 | 0.981636 | chr5  | 65992150 | 65993212 | + | 0 NA | intron (Nintron (N  | -47108 NR_028474 | 1E+08 Hs. 60806CNR_028474    | LOC100303           | LSM3              | homc pseudo              |                      |                |
| chr6-2048 | 8.67466  | -0.02946 | 0.78865  | -0.03736 | 0.970198 | 0.981636 | chr6  | 20488919 | 20491603 | + | 0 NA | 3' UTR (N3' UTR (N  | -43746 NM_017774 | 54901 Hs. 657604NM_017774    | ENSG000002CDKAL1    | -                 | CDK5                     | regt protein-coding  |                |
| chr7-3291 | 8.67466  | -0.02946 | 0.78865  | -0.03736 | 0.970198 | 0.981636 | chr7  | 32919940 | 32921710 | + | 0 NA | intron (NAluYc S N  | 22345 NR_003500  | 441212 Hs. 648086NM_001036   | ENSG000002RFP9      | -                 | RFP9                     | pseud pseudo         |                |
| chr7-1314 | 8.67466  | -0.02946 | 0.78865  | -0.03736 | 0.970198 | 0.981636 | chr7  | 1.31E+08 | 1.31E+08 | + | 0 NA | intron (N L2a LINE  | 107559 NM_001018 | 5420 Hs. 744212NM_005397     | ENSG000002PODXL     | Gp200 P C         | podocaly protein-coding  |                      |                |
| chr8-1725 | 8.67466  | -0.02946 | 0.78865  | -0.03736 | 0.970198 | 0.981636 | chr8  | 17294355 | 17301036 | + | 0 NA | 3' UTR (N3' UTR (N  | 52777 NM_001363  | 137492 Hs. 343873NM_152411   | ENSG000002VPS37A    | BCRP1 PQ E        | VPS37A                   | st protein-coding    |                |
| chr9-2074 | 8.67466  | -0.02946 | 0.78865  | -0.03736 | 0.970198 | 0.981636 | chr9  | 2074606  | 2074805  | + | 0 NA | intron (NAluJb S N  | 52760 NM_001285  | 6595 Hs. 29899CNR_003070     | ENSG000002SMARCA2   | HAF190 BF SWI SNF | r protein-coding         |                      |                |
| chr9-9474 | 8.67466  | -0.02946 | 0.78865  | -0.03736 | 0.970198 | 0.981636 | chr9  | 94749281 | 94750138 | + | 0 NA | intron (N LIMEb LIN | -9940 NM_001193  | 84909 Hs. 434255NM_032823    | ENSG000002AOPEP     | AP-0 APO          | aminopept protein-coding |                      |                |
| chr6-1102 | 10.82647 | 0.027516 | 0.736525 | -0.03736 | 0.970198 | 0.981636 | chr6  | 1.1E+08  | 1.1E+08  | + | 0 NA | intron (Nintron (N  | 35103 NM_015891  | 51362 Hs. 428147NM_015891    | ENSG000002CDC40     | EHB3 PRP1         | cell divi protein-coding |                      |                |
| chr8-3824 | 7.424314 | 0.032632 | 0.875952 | -0.03754 | 0.970283 | 0.981636 | chr8  | 38240341 | 38240542 | + | 0 NA | intron (Nintron (N  | 8488 NM_001164   | 23259 Hs. 434966NM_015214    | ENSG000002DDHD2     | SAMMD1 SF         | DDHD                     | dom protein-coding   |                |
| chr3-437  | 7.214019 | -0.03283 | 0.88141  | -0.03725 | 0.970284 | 0.981636 | chr3  | 43703102 | 43703782 | + | 0 NA | intron (NAluSz S N  | -11848 NM_001346 | 5129 Hs. 656657NM_018073     | ENSG000002CANO10    | SCAR10 T V        | anoctami protein-coding  |                      |                |
| chr1-328C | 9.16154  | -0.02847 | 0.766971 | -0.03712 | 0.97039  | 0.981636 | chr1  | 32805502 | 32811657 | + | 0 NA | intron (Nintron (N  | -8863 NM_001256  | 64766 Hs. 44088CNR_022755    | ENSG000002S100BPB   | S100BPBR          | S100P                    | bir protein-coding   |                |
| chr1-3937 | 9.16154  | -0.02847 | 0.766971 | -0.03712 | 0.97039  | 0.981636 | chr1  | 39379395 | 39383371 | + | 0 NA | intron (NAluJo S N  | -27522 NM_015038 | 643314 Hs. 65876CNR_015038   | ENSG000002KIAA0754  | -                 | KIAA0754                 | protein-coding       |                |
| chr1-4041 | 9.16154  | -0.02847 | 0.766971 | -0.03712 | 0.97039  | 0.981636 | chr1  | 40414934 | 40419457 | + | 0 NA | intron (Nintron (N  | 20395 NM_001198  | 64744 Hs. 15200 NM_002273    | ENSG000002SMAP2     | SMAP1L            | small Arf protein-coding |                      |                |
| chr1-150C | 9.16154  | -0.02847 | 0.766971 | -0.03712 | 0.97039  | 0.981636 | chr1  | 1.5E+08  | 1.5E+08  | + | 0 NA | intron (Nintron (N  | 6575 NM_001278   | 11311 Hs. 44375CNR_002725    | ENSG000002VPS45     | HI H1 VPS4        | vacuolar protein-coding  |                      |                |
| chr1-209E | 9.16154  | -0.02847 | 0.766971 | -0.03712 | 0.97039  | 0.981636 | chr1  | 2.1E+08  | 2.1E+08  | + | 0 NA | intron (Nintron (N  | 5570 NM_014388   | 27042 Hs. 194754NM_014388    | ENSG000002UTP25     | C1orf107 U        | TP25                     | sm protein-coding    |                |
| chr10-87C | 9.16154  | -0.02847 | 0.766971 | -0.03712 | 0.97039  | 0.981636 | chr10 | 87055020 | 87053933 | + | 0 NA | intron (NAluXs L S  | 31932 NM_001146  | 64316 Hs. 729944NM_001146    | ENSG000002FAM25A    | ba96C23.5         | family wiprotein-coding  |                      |                |
| chr11-914 | 9.16154  | -0.02847 | 0.766971 | -0.03712 | 0.97039  | 0.981636 | chr11 | 9141780  | 9146711  | + | 0 NA | exon (NM exon (NM   | 49882 NR_027713  | 283102 Hs. 689472NR_027713   | ENSG000002KRTP41    | -                 | keratin 8                | pseudo               |                |
| chr11-337 | 9.16154  | -0.02847 | 0.766971 | -0.03712 | 0.97039  | 0.981636 | chr11 | 33707340 | 33710711 | + | 0 NA | 3' UTR (N3' UTR (N  | -8285 NM_001166  | 1E+08 Hs. 709466NM_001166    | ENSG000002C11orf91  | -                 | chromosom                | protein-coding       |                |
| chr11-118 | 9.16154  | -0.02847 | 0.766971 | -0.03712 | 0.97039  | 0.981636 | chr11 | 1.19E+08 | 1.19E+08 | + | 0 NA | intron (NAluSz S N  | 13194 NM_001257  | 1656 Hs. 408461NM_004397     | ENSG000002DDX6      | HLR2 P54          | DEAD-box                 | protein-coding       |                |
| chr12-106 | 9.16154  | -0.02847 | 0.766971 | -0.03712 | 0.97039  | 0.981636 | chr12 | 10697318 | 10704418 | + | 0 NA | intron (Nintron (N  | 22455 NM_003651  | 8531 Hs. 221885NM_003651     | ENSG000002YBX3      | CSDA CSDA         | Y-box                    | bir protein-coding   |                |
| chr12-562 | 9.16154  | -0.02847 | 0.766971 | -0.03712 | 0.97039  | 0.981636 | chr12 | 56271091 | 56286385 | + | 0 NA | intron (NAluSc S N  | 11412 NM_001099  | 93058 Hs. 4096 NM_144576     | ENSG000002COQ10A    | -                 | coenzyme                 | protein-coding       |                |
| chr12-11C | 9.16154  | -0.02847 | 0.766971 | -0.03712 | 0.97039  | 0.981636 | chr12 | 1.1E+08  | 1.1E+08  | + | 0 NA | intron (Nintron (N  | 6534 NM_001278   | 10094 Hs. 524741NM_001278    | ENSG000002ARPC3     | ARC21 p2          | actin rel                | protein-coding       |                |
| chr13-44E | 9.16154  | -0.02847 | 0.766971 | -0.03712 | 0.97039  | 0.981636 | chr13 | 44556663 | 44557305 | + | 0 NA | intron (NAluSp S N  | -18912 NR_038381 | 641467 Hs. 624196NR_038381   | ENSG000002TSC22D1-1 | -                 | TSC22D1                  | ancRNA               |                |
| chr13-114 | 9.16154  | -0.02847 | 0.766971 | -0.03712 | 0.97039  | 0.981636 | chr13 | 1.14E+08 | 1.14E+08 | + | 0 NA | intron (N Tigger17a | 13841 NR_049836  | 1.01E+08 Hs. 624196NR_049836 | ENSG000002MIR548AR  | -                 | microRNA                 | ncRNA                |                |
| chr14-213 | 9.16154  | -0.02847 | 0.766971 | -0.03712 | 0.97039  | 0.981636 | chr14 | 21359021 | 21370121 | + | 0 NA | intron (Nintron (N  | 19448 NM_007192  | 11198 Hs. 213724NM_007192    | ENSG000002SUPT16H   | CDC68 FAC         | SPT16                    | hon protein-coding   |                |
| chr14-52C | 9.16154  | -0.02847 | 0.766971 | -0.03712 | 0.97039  | 0.981636 | chr14 | 52057143 | 52061067 | + | 0 NA | intron (N MRB S INE | 9954 NM_007361   | 22795 Hs. 36984CNR_007361    | ENSG000002CID2      | NID-2             | nidogen 2                | protein-coding       |                |
| chr14-74E | 9.16154  | -0.02847 | 0.766971 | -0.03712 | 0.97039  | 0.981636 | chr14 | 74672618 | 74676856 | + | 0 NA | intron (Nintron (N  | 38343 NM_001038  | 9870 Hs. 497417NM_014821     | ENSG000002AREL1     | F1EL1 KI          | apoptosis                | protein-coding       |                |
| chr14-102 | 9.16154  | -0.02847 | 0.766971 | -0.03712 | 0.97039  | 0.981636 | chr14 | 1.02E+08 | 1.02E+08 | + | 0 NA | 3' UTR (N3' UTR (N  | 36463 NM_005348  | 3320 Hs. 525606NM_005348     | ENSG000002HSP90AA1  | EL52 HEL-         | heat                     | shoc protein-coding  |                |
| chr15-77Z | 9.16154  | -0.02847 | 0.766971 | -0.03712 | 0.97039  | 0.981636 | chr15 | 77257679 | 77259048 | + | 0 NA | intron (N LIPA3 LIN | -32959 NR_026813 | 81698 Hs. 656933NM_030944    | LINC00597           | C15orf5           | long                     | intencRNA            |                |
| chr15-89C | 9.16154  | -0.02847 | 0.766971 | -0.03712 | 0.97039  | 0.981636 | chr15 | 89329413 | 89333254 | + | 0 NA | intron (Nintron (N  | 3466 NM_002693   | 5428 Hs. 706868NM_002693     | ENSG000002POLG      | MDP1 MR           | RNA                      | polyn protein-coding |                |
| chr16-16C | 9.16154  | -0.02847 | 0.766971 | -0.03712 | 0.97039  | 0.981636 | chr16 | 16030281 | 16032145 | + | 0 NA | intron (Nintron (N  | 81601 NM_004996  | 4363 Hs. 391464NM_004996     | ENSG000002ABCC1     | ABC29 ABC         | ATP                      | bindi protein-coding |                |
| chr17-16C | 9.16154  | -0.02847 | 0.766971 | -0.03712 | 0.97039  | 0.981636 | chr17 | 16031812 | 16037348 | + | 0 NA | intron (NAluJb S N  | 34756 NM_017775  | 54902 Hs. 462316NM_017775    | ENSG000002TTC19     | 201020401         | tetratric                | protein-coding       |                |
| chr17-294 | 9.16154  | -0.02847 | 0.766971 | -0.03712 | 0.97039  | 0.981636 | chr17 | 29466673 | 29469269 | + | 0 NA | intron (NAluSx S N  | 77046 NM_025142  | 57551 Hs. 597434NM_002079    | ENSG000002TAOK1     | KFC-B MAF         | TAO                      | kinas                | protein-coding |
| chr17-301 | 9.16154  | -0.02847 | 0.766971 | -0.03712 | 0.97039  | 0.981636 | chr17 | 30178119 | 30186128 | + | 0 NA | intron (Nintron (N  | 53574 NM_001046  | 6532 Hs. 29792 NM_001046     | ENSG000002SLC66A1   | 5-HTT 5-F         | tao                      | cprotein-coding      |                |
| chr18-27Z | 9.16154  | -0.02847 | 0.766971 | -0.03712 | 0.97039  | 0.981636 | chr18 | 2729809  | 2732846  | + | 0 NA | intron (Nintron (N  | 75440 NM_015295  | 23347 Hs. 8118 NM_015295     | ENSG000002SMCHD1    | BAMS FSH          | E                        | structure            | protein-coding |
| chr2-2877 | 9.16154  | -0.02847 | 0.766971 | -0.03712 | 0.97039  | 0.981636 | chr2  | 28777699 | 28790552 | + | 0 NA | intron (NAluSx3 S   | -17659 NM_182756 | 245711 Hs. 511956NM_182756   | ENSG000002SPDYA     | RING03 RI         | speedy/RI                | protein-coding       |                |
| chr2-218E | 9.16154  | -0.02847 | 0.766971 | -0.03712 | 0.97039  | 0.981636 | chr2  | 2.19E+08 | 2.19E+08 | + | 0 NA | intron (Nintron (N  | -26199 NR_032726 | 84812 Hs. 632525NM_032726    | ENSG000002PLCDA     | -                 | phospholip               | protein-coding       |                |
| chr20-58E | 9.16154  | -0.02847 | 0.766971 | -0.03712 | 0.97039  | 0.981636 | chr20 | 58674971 | 58676934 | + | 0 NA | intron (Nintron (N  | -13179 NM_001204 | 79716 Hs. 654866NM_024663    | ENSG000002NPEPL1    | ba261P9.2         | aminopept                | protein-coding       |                |
| chr21-371 | 9.16154  | -0.02847 | 0.766971 | -0.03712 | 0.97039  | 0.981636 | chr21 | 37160392 | 37170580 | + | 0 NA | intron (Nintron (N  | 28440 NR_046651  | 1.01E+08 Hs. 570411NR_046651 | ENSG000002TTC3-AS1  | -                 | TTC3                     | antincRNA            |                |
| chr22-42E | 9.16154  | -0.02847 | 0.766971 | -0.03712 | 0.97039  | 0.981636 | chr22 | 42597698 | 42603265 | + | 0 NA | intron (NAluYml S   | 14402 NR_10382C  | 84271 Hs. 505802NM_032311    | ENSG000002POLDIP3   | PDIP3 PDID        | NA                       | polyn protein-coding |                |
| chr3-690Z | 9.16154  | -0.02847 | 0.766971 | -0.03712 | 0.97039  | 0.981636 | chr3  | 69037242 | 69045054 | + | 0 NA | intron (Nintron (N  | 7887 NR_036087   | 1E+08 Hs. 5036087            | ENSG000002MIR3136   | mir-3136          | microRNA                 | ncRNA                |                |
| chr3-123E | 9.16154  | -0.02847 | 0.766971 | -0.03712 | 0.97039  | 0.981636 | chr3  | 1.24E+08 | 1.24E+08 | + | 0 NA | intron (Nintron (N  | -8197 NR_046622  | 1.01E+08 Hs. 667316NR_046622 | ENSG000002MYLK-AS2  | -                 | MYLK                     | antincRNA            |                |
| chr4-288Z | 9.16154  | -0.02847 | 0.766971 | -0.03712 | 0.97039  | 0.981636 | chr4  | 2882850  | 2886916  | + | 0 NA | intron (Nintron (N  | 40733 NM_001286  | 118 Hs. 183706NM_001119      |                     |                   |                          |                      |                |



|           |          |          |          |          |          |          |       |          |          |   |   |    |                     |        |           |          |                    |                    |                |                            |                          |
|-----------|----------|----------|----------|----------|----------|----------|-------|----------|----------|---|---|----|---------------------|--------|-----------|----------|--------------------|--------------------|----------------|----------------------------|--------------------------|
| chr1-1461 | 10.1353  | -0.02678 | 0.732669 | -0.03656 | 0.970838 | 0.981636 | chr1  | 1.46E+08 | 1.46E+08 | + | 0 | NA | intron (AluJb SIN   | 5203   | NR_001302 | 1E+08    | Hs.714127NM_001039 | ENSG00000CNBP10    | AB6 AG1 NBPF   | memt protein-coding        |                          |
| chr1-1715 | 10.1353  | -0.02678 | 0.732669 | -0.03656 | 0.970838 | 0.981636 | chr1  | 1.72E+08 | 1.72E+08 | + | 0 | NA | intron (intron (N   | -31854 | NR_001368 | 1.1E+08  | NM_001368164       | MYOCOS             | -              | myocilin protein-coding    |                          |
| chr10-737 | 10.1353  | -0.02678 | 0.732669 | -0.03656 | 0.970838 | 0.981636 | chr10 | 73732867 | 73733097 | + | 0 | NA | IntergeniCpG        | 2420   | NR_048575 | 2749     | Hs.680699NR_048575 | ENSG00000GLUD1P3   | C10orf102      | glutamate pseudo           |                          |
| chr10-103 | 10.1353  | -0.02678 | 0.732669 | -0.03656 | 0.970838 | 0.981636 | chr10 | 1.04E+08 | 1.04E+08 | + | 0 | NA | intron (intron (N   | 20985  | NR_001366 | 9644     | Hs.678727NM_014631 | ENSG00000SH3PXD2A  | FISH SH3       | SH3 and Irfrotein-coding   |                          |
| chr12-565 | 10.1353  | -0.02678 | 0.732669 | -0.03656 | 0.970838 | 0.981636 | chr12 | 56562199 | 56565083 | + | 0 | NA | intron (intron (N   | 41821  | NR_002895 | 5939     | Hs.505725NM_002895 | ENSG00000RBM52     | SCR3           | RNA bindi protein-coding   |                          |
| chr12-928 | 10.1353  | -0.02678 | 0.732669 | -0.03656 | 0.970838 | 0.981636 | chr12 | 92824566 | 92827825 | + | 0 | NA | exon (NM_exon (NM   | 89706  | NR_001004 | 440107   | Hs.591015NM_001004 | ENSG00000PLEKHG7   | -              | pleckstri protein-coding   |                          |
| chr12-132 | 10.1353  | -0.02678 | 0.732669 | -0.03656 | 0.970838 | 0.981636 | chr12 | 1.32E+08 | 1.32E+08 | + | 0 | NA | intron (intron (N   | 13922  | NR_002979 | 677829   | Hs.742405NR_002979 | ENSG00000SNORA49   | ACA49          | small nucsnoRNA            |                          |
| chr16-218 | 10.1353  | -0.02678 | 0.732669 | -0.03656 | 0.970838 | 0.981636 | chr16 | 21887411 | 21887944 | + | 0 | NA | IntergeniIntergeni  | -20942 | NR_024456 | 1E+08    | Hs.648435NR_024456 | LOC1001019C        | -              | uncharactncRNA             |                          |
| chr16-282 | 10.1353  | -0.02678 | 0.732669 | -0.03656 | 0.970838 | 0.981636 | chr16 | 28396920 | 28401656 | + | 0 | NA | intron (MIRc SINE   | 4597   | NR_001095 | 728689   | Hs.567374NM_001095 | ENSG00000EIF3CL    | -              | eukaryoti protein-coding   |                          |
| chr17-152 | 10.1353  | -0.02678 | 0.732669 | -0.03656 | 0.970838 | 0.981636 | chr17 | 15244722 | 15259526 | + | 0 | NA | promoter-promoter-  | -428   | NR_039884 | 1.01E+08 | NR_039884          | ENSG00000MIR4731   | -              | microRNA ncRNA             |                          |
| chr2-3715 | 10.1353  | -0.02678 | 0.732669 | -0.03656 | 0.970838 | 0.981636 | chr2  | 37130342 | 37142107 | + | 0 | NA | intron (intron (N   | 11598  | NR_001135 | 5610     | Hs.131431NM_002755 | ENSG00000EIF2AK2   | EIF2AK1        | Fukaryoti protein-coding   |                          |
| chr2-6118 | 10.1353  | -0.02678 | 0.732669 | -0.03656 | 0.970838 | 0.981636 | chr2  | 61181462 | 61187444 | + | 0 | NA | intron (intron (N   | 7035   | NR_152211 | 130872   | Hs.655602NM_152392 | ENSG00000AHS2P     | AHA1 AHS       | activator pseudo           |                          |
| chr3-1237 | 10.1353  | -0.02678 | 0.732669 | -0.03656 | 0.970838 | 0.981636 | chr3  | 1.24E+08 | 1.24E+08 | + | 0 | NA | intron (MIRb SINE   | 25754  | NR_046625 | 1.01E+08 | Hs.667315NR_046625 | ENSG00000MYLK-AS2  | -              | MYLK anticncRNA            |                          |
| chr3-1254 | 10.1353  | -0.02678 | 0.732669 | -0.03656 | 0.970838 | 0.981636 | chr3  | 1.25E+08 | 1.25E+08 | + | 0 | NA | intron (AluJo SINE  | 52561  | NR_003794 | 8723     | Hs.507245NM_003794 | ENSG00000SNX4      | ATG24B         | sorting ir protein-coding  |                          |
| chr5-6152 | 10.1353  | -0.02678 | 0.732669 | -0.03656 | 0.970838 | 0.981636 | chr5  | 61539852 | 61546339 | + | 0 | NA | intron (intron (N   | -94665 | NR_161251 | 285668   | Hs.683865NR_126525 | ENSG00000C5orf64   | -              | chromosnncRNA              |                          |
| chr7-4731 | 10.1353  | -0.02678 | 0.732669 | -0.03656 | 0.970838 | 0.981636 | chr7  | 47318537 | 47321880 | + | 0 | NA | intron (MIRb SINE   | 144595 | NR_145813 | 1.1E+08  | NR_145813          | SNORD151           | -              | small nucsnoRNA            |                          |
| chr1-2535 | 10.0863  | -0.02716 | 0.743164 | -0.03655 | 0.970847 | 0.981636 | chr1  | 25361331 | 25362152 | + | 0 | NA | TTS (NM_C TTS (NM_C | 23407  | NR_014133 | 23585    | Hs.705695NM_014133 | ENSG00000TMEM50A   | IFNRC SMF      | transment protein-coding   |                          |
| chr4-2328 | 10.0863  | -0.02716 | 0.743164 | -0.03655 | 0.970847 | 0.981636 | chr4  | 23282091 | 23282520 | + | 0 | NA | TTS (NM_C TTS (NM_C | 36508  | NR_001172 | 57732    | Hs.292055NM_020972 | ENSG00000ZFVYE28   | LST2 LYS1      | zinc fing protein-coding   |                          |
| chr7-1062 | 8.723657 | -0.02898 | 0.797979 | -0.03631 | 0.971035 | 0.981636 | chr7  | 1.06E+08 | 1.06E+08 | + | 0 | NA | exon (NM_exon (NM   | 31885  | NR_005746 | 10135    | Hs.489615NM_005746 | ENSG00000NAMP7     | 111003501      | nicotinan protein-coding   |                          |
| chr1-1352 | 10.62218 | -0.0261  | 0.719098 | -0.0363  | 0.971047 | 0.981636 | chr1  | 1352971  | 13556005 | + | 0 | NA | intron (intron (N   | 4259   | NR_001282 | 54587    | Hs.515687NM_032345 | ENSG00000MXRA8     | ASP3           | matrix re protein-coding   |                          |
| chr1-2024 | 10.62218 | -0.0261  | 0.719098 | -0.0363  | 0.971047 | 0.981636 | chr1  | 2.02E+08 | 2.02E+08 | + | 0 | NA | intron (AluSz SIN   | 26153  | NR_032103 | 4660     | Hs.444405NM_002481 | ENSG00000PPP1R12B  | MYPT2 PP1      | protein ir protein-coding  |                          |
| chr13-407 | 4.460043 | 0.039136 | 1.085289 | 0.03606  | 0.971234 | 0.981636 | chr13 | 40722314 | 40722991 | + | 0 | NA | IntergeniLIMed LIN  | 5235   | NR_031722 | 1E+08    | NR_031722          | ENSG00000MIR320D1  | MIR320D        | 1-microRNA ncRNA           |                          |
| chr5-7094 | 4.939066 | 0.037094 | 1.02923  | 0.03604  | 0.97125  | 0.981636 | chr5  | 70945289 | 70946206 | + | 0 | NA | intron (intron (N   | 20806  | NR_001297 | 6606     | Hs.535785NM_000344 | ENSG00000CSMN1     | BCD541 GF      | survival protein-coding    |                          |
| chr13-489 | 9.210537 | -0.02805 | 0.778579 | -0.03602 | 0.971263 | 0.981636 | chr13 | 48394606 | 48395168 | + | 0 | NA | intron (LIPA7 LIN   | 18226  | NR_001162 | 10161    | Hs.123464NM_005767 | ENSG00000LPAR6     | ARWH1 HYF      | lysophos protein-coding    |                          |
| chr2-1866 | 8.910379 | 0.029703 | 0.825444 | 0.035984 | 0.971295 | 0.981636 | chr2  | 1.87E+08 | 1.87E+08 | + | 0 | NA | intron (intron (N   | 44103  | NR_001144 | 3685     | Hs.436875NM_002211 | ENSG00000ITGAV     | CD51 MSK       | integrin protein-coding    |                          |
| chr1-2368 | 3.932023 | 0.041261 | 1.147567 | 0.035956 | 0.971318 | 0.981636 | chr1  | 2.37E+08 | 2.37E+08 | + | 0 | NA | intron (intron (N   | 52557  | NR_001291 | 4548     | Hs.498187NM_000254 | ENSG00000CMT8      | HMAG MS c5     | methylt protein-coding     |                          |
| chr13-113 | 5.418088 | 0.035368 | 0.984784 | 0.035915 | 0.97135  | 0.981636 | chr13 | 1.14E+08 | 1.14E+08 | + | 0 | NA | intron (intron (N   | -25896 | NR_001366 | 1.01E+08 | Hs.704267NM_001366 | ENSG00000C13orf46  | -              | chromosn protein-coding    |                          |
| chr14-716 | 5.418088 | 0.035368 | 0.984784 | 0.035915 | 0.97135  | 0.981636 | chr14 | 71661596 | 71662111 | + | 0 | NA | intron (intron (N   | 75555  | NR_001284 | 26037    | Hs.654657NM_015555 | ENSG00000S1PALL1   | E6TP1 SP       | signal ir protein-coding   |                          |
| chr19-50  | 5.418088 | 0.035368 | 0.984784 | 0.035915 | 0.97135  | 0.981636 | chr19 | 5036373  | 5038160  | + | 0 | NA | intron (intron (N   | 68153  | NR_001374 | 23030    | Hs.654815NM_015015 | ENSG00000KDM4B     | JMJD2B TAN     | lysine de protein-coding   |                          |
| chr2-159  | 5.418088 | 0.035368 | 0.984784 | 0.035915 | 0.97135  | 0.981636 | chr2  | 1.59E+08 | 1.59E+08 | + | 0 | NA | intron (intron (N   | 38110  | NR_146421 | 85461    | Hs.61590           | NR_033394          | ENSG00000MTC1C | ROLSB TAB                  | tetratri protein-coding  |
| chr7-473  | 5.418088 | 0.035368 | 0.984784 | 0.035915 | 0.97135  | 0.981636 | chr7  | 47385311 | 47386228 | + | 0 | NA | intron (intron (N   | 79034  | NR_145813 | 1.1E+08  | NR_145813          | SNORD151           | -              | small nucsnoRNA            |                          |
| chr15-225 | 5.89711  | 0.033862 | 0.948962 | 0.035683 | 0.971535 | 0.981636 | chr15 | 22873682 | 22874140 | + | 0 | NA | intron (AluJb SIN   | 35270  | NR_001008 | 81614    | Hs.591005NM_030922 | ENSG00000N1PA2     | SLC57A2        | N1PA magr protein-coding   |                          |
| chr15-754 | 5.89711  | 0.033862 | 0.948962 | 0.035683 | 0.971535 | 0.981636 | chr15 | 75473830 | 75474380 | + | 0 | NA | intron (L2a LINE    | -18290 | NR_001145 | 25942    | Hs.513035NM_015477 | ENSG00000S1N3A     | WITKOS         | S1N3 trar protein-coding   |                          |
| chr19-45  | 5.89711  | 0.033862 | 0.948962 | 0.035683 | 0.971535 | 0.981636 | chr19 | 45365420 | 45367133 | + | 0 | NA | intron (AluSp SIN   | 4311   | NR_001135 | 2068     | Hs.487294NM_000405 | ENSG00000ERC2C     | COFS2 EM       | ERCC exci protein-coding   |                          |
| chr5-508  | 5.89711  | 0.033862 | 0.948962 | 0.035683 | 0.971535 | 0.981636 | chr5  | 50835008 | 50835758 | + | 0 | NA | intron (AluSx SIN   | 134804 | NR_104655 | 1E+08    | Hs.519295NR_104655 | ENSG00000LINC02105 | -              | long intncRNA              |                          |
| chr8-1204 | 5.89711  | 0.033862 | 0.948962 | 0.035683 | 0.971535 | 0.981636 | chr8  | 1.2E+08  | 1.2E+08  | + | 0 | NA | intron (L3 LINE C   | 13679  | NR_014078 | 28998    | Hs.333825NM_014078 | ENSG00000MRPL13    | L13 L13A       | mitochon protein-coding    |                          |
| chrX-5355 | 5.89711  | 0.033862 | 0.948962 | 0.035683 | 0.971535 | 0.981636 | chrX  | 53569410 | 53570481 | + | 0 | NA | intron (MIRc SINE   | -12671 | NR_029484 | 406889   | NR_029484          | ENSG00000MIRLET7F2 | LET7F2 M       | microRNA ncRNA             |                          |
| chr15-407 | 7.383175 | 0.037074 | 0.861665 | 0.035633 | 0.971575 | 0.981636 | chr15 | 80134139 | 80135010 | + | 0 | NA | intron (Tiger2 I    | -18425 | NR_000137 | 2184     | Hs.73875           | NR_000137          | ENSG00000FAH   | -                          | fumarylac protein-coding |
| chr19-801 | 7.383175 | 0.037074 | 0.861665 | 0.035633 | 0.971575 | 0.981636 | chr19 | 40172865 | 40173922 | + | 0 | NA | intron (AluJg SIN   | 1726   | NR_001142 | 79934    | Hs.130712NM_024875 | ENSG00000COQB8     | ADCK4 NPF      | coenzyme protein-coding    |                          |
| chr14-716 | 6.904152 | 0.031659 | 0.890377 | 0.035556 | 0.971636 | 0.981636 | chr14 | 71084769 | 71085752 | + | 0 | NA | intron (LIPA7 LIN   | 177801 | NR_001308 | 22990    | Hs.446555NM_014982 | ENSG00000PCNX1     | PCNX1 PCNX     | pecanex I protein-coding   |                          |
| chr21-321 | 6.904152 | 0.031659 | 0.890377 | 0.035556 | 0.971636 | 0.981636 | chr21 | 32318679 | 32319275 | + | 0 | NA | intron (intron (N   | 27164  | NR_001288 | 56246    | Hs.584949NM_178817 | ENSG00000MRAP      | B27 C21or      | melanocor protein-coding   |                          |
| chr7-439  | 6.904152 | 0.031659 | 0.890377 | 0.035556 | 0.971636 | 0.981636 | chr7  | 4395961  | 4396108  | + | 0 | NA | intron (intron (N   | 7244   | NR_170688 | 57541    | Hs.632032NM_020781 | ENSG00000ZNF398    | P51 P71        | L1zinc fing protein-coding |                          |
| chr18-217 | 8.341219 | 0.028972 | 0.817563 | 0.035437 | 0.971731 | 0.981636 | chr18 | 21789252 | 21789516 | + | 0 | NA | intron (MLT1C LTF   | 36401  | NR_029675 | 406922   | NR_029675          | ENSG00000MIR133A1  | MIR133A1       | microRNA ncRNA             |                          |
| chr11-77  | 6.376132 | 0.032518 | 0.919412 | 0.035368 | 0.971786 | 0.981636 | chr11 | 77900241 | 77901194 | + | 0 | NA | TTS (NM_C TTS (NM_C | 59579  | NR_001362 | 28971    | Hs.745044NM_024684 | ENSG00000AAMD      | C11orf67       | adipogene protein-coding   |                          |
| chr15-433 | 6.376132 | 0.032518 | 0.919412 | 0.035368 | 0.971786 | 0.981636 | chr15 | 43340515 | 43341300 | + | 0 | NA | intron (intron (N   | 10235  | NR_001362 | 161823   | Hs.533915NM_010102 | ENSG00000ADAL      | -              | adenosine protein-coding   |                          |
| chr4-168  | 6.376132 | 0.032518 | 0.919412 | 0.035368 | 0.971786 | 0.981636 | chr4  | 1.68E+08 | 1.68E+08 | + | 0 | NA | intron (intron (N   | 664    | NR_001202 | 8837     | Hs.390735NM_003875 | ENSG00000CFLAR     | CASH CAS       | FASP8 anc protein-coding   |                          |
| chr14-100 | 6.42513  | 0.032699 | 0.925208 | 0.035343 | 0.971806 | 0.981636 | chr14 | 1.01E+08 | 1.01E+08 | + | 0 | NA | intron (Tiger7 I    | 38681  | NR_017631 | 55601    | Hs.591715NM_017631 | ENSG00000DDX60     | -              | DexD/H-bc protein-coding   |                          |
| chr16-211 | 6.42513  | 0.032699 | 0.925208 | 0.035343 | 0.971806 | 0.981636 | chr16 | 2111111  | 2112427  | + | 0 | NA | IntergeniLIPB1 LIN  | 1589   | NR_030617 | 1E+08    | NR_030617          | ENSG00000MIR665    | MIRN665        | 1-microRNA ncRNA           |                          |
| chr2-7565 | 6.42513  | 0.032699 | 0.925208 | 0.035343 | 0.971806 | 0.981636 | chr2  | 75697714 | 75698907 | + | 0 | NA | exon (NM_exon (NM   | -5016  | NR_106775 | 1.02E+08 | NR_106775          | ENSG00000MIR6511B1 | MIR6511B1      | microRNA ncRNA             |                          |
| chr2-1351 | 6.42513  | 0.032699 | 0.925208 | 0.035343 | 0.971806 | 0.981636 | chr2  | 1.35E+08 | 1.35E+08 | + | 0 | NA | intron (L1ME4c LI   | 12605  | NR_003203 | 6936     | Hs.303805NM_003203 | ENSG00000GCFC2     | C2orf3 DN      | C-rich s protein-coding    |                          |
| chr5-389  | 6.666802 | -0.02779 | 0.79328  | -0.03504 | 0        |          |       |          |          |   |   |    |                     |        |           |          |                    |                    |                |                            |                          |

|                    |          |          |          |          |          |       |          |          |   |      |                     |                  |          |                  |                    |                     |                                     |
|--------------------|----------|----------|----------|----------|----------|-------|----------|----------|---|------|---------------------|------------------|----------|------------------|--------------------|---------------------|-------------------------------------|
| chr10-121 9.632704 | -0.02464 | 0.753541 | -0.0327  | 0.97391  | 0.981731 | chr10 | 12149560 | 12150472 | + | 0 NA | intron (Nintron (N  | -19200 NR_039699 | 1.01E+08 | NR_039699        | ENSG000003MIR548AK | -                   | microRNA ncRNA                      |
| chr14-746 9.632704 | -0.02464 | 0.753541 | -0.0327  | 0.97391  | 0.981731 | chr14 | 74669172 | 74670547 | + | 0 NA | intron (Nintron (N  | 43221 NM_001035  |          | 9870 Hs. 497417  | NR_014821          | ENSG000003AREL1     | FIEL1 K1A apoptosis protein-coding  |
| chr21-336 9.632704 | -0.02464 | 0.753541 | -0.0327  | 0.97391  | 0.981731 | chr21 | 33600493 | 33603455 | + | 0 NA | intron (Nintron (N  | -13290 NM_017613 |          | 29980 Hs. 436341 | NR_017613          | ENSG000003DONSON    | B17 C21or downstree protein-coding  |
| chr7-7434 9.145824 | -0.02533 | 0.775486 | -0.03267 | 0.973938 | 0.981731 | chr7  | 74345134 | 74345591 | + | 0 NA | intron (NAluSz6 S1  | 55887 NM_003388  |          | 7461 Hs. 64701   | NR_003388          | ENSG000003CLIP2     | CLIP CLIF CAP-Gly cprotein-coding   |
| chr19-233 8.707941 | -0.02581 | 0.79121  | -0.03262 | 0.973981 | 0.981731 | chr19 | 23378992 | 23380631 | + | 0 NA | intron (Nintron (N  | 15660 NM_00343C  |          | 7641 Hs. 58834   | NR_00343C          | ENSG000003ZNF91     | HPF7 HTF1zinc fingprotein-coding    |
| chr4-777 8.707941  | -0.02581 | 0.79121  | -0.03262 | 0.973981 | 0.981731 | chr4  | 7777471  | 7778611  | + | 0 NA | non-codir non-codir | 23951 NR_02689E  |          | 84740 Hs. 66302  | NR_02689E          | ENSG000003AFAP1-AS1 | AFAP1-AS AFAP1 antncRNA             |
| chr1-2007 10.60646 | -0.02343 | 0.718679 | -0.0326  | 0.973994 | 0.981731 | chr1  | 2.01E+08 | 2.01E+08 | + | 0 NA | intron (Nintron (N  | 21803 NM_001297  |          | 23271 Hs. 23585  | NR_020345          | ENSG000003CAMSAP2   | CAMSAP1 Calmodulin protein-coding   |
| chr2-325 10.60646  | -0.02343 | 0.718679 | -0.0326  | 0.973994 | 0.981731 | chr2  | 32504901 | 32507133 | + | 0 NA | intron (NAluJo SIN  | -26136 NR_030288 |          | 693143           | NR_030288          | ENSG000003MIR558    | MIRN558 miRNA ncRNA                 |
| chr5-9551 8.221061 | -0.02663 | 0.817118 | -0.03258 | 0.974006 | 0.981731 | chr5  | 95518654 | 95519444 | + | 0 NA | intron (NLIAMA5 LI  | 35956 NM_01463E  |          | 9652 Hs. 48286   | NR_01463E          | ENSG000003TTC37     | KIAA0372 tetratric protein-coding   |
| chr6-158 8.221061  | -0.02663 | 0.817118 | -0.03258 | 0.974006 | 0.981731 | chr6  | 1.58E+08 | 1.58E+08 | + | 0 NA | intron (Nintron (N  | 69487 NM_00117E  |          | 8871 Hs. 43449   | NR_00389E          | ENSG000003SYN2J     | INPP5F synapto protein-coding       |
| chr16-705 9.194822 | -0.02503 | 0.769296 | -0.03254 | 0.974045 | 0.981731 | chr16 | 70526400 | 70526946 | + | 0 NA | exon (NM exon (NM   | -2826 NR_03742C  |          | 1E+08            | NR_03742C          | SNORD111E           | SNORD111E microRNA ncRNA            |
| chr17-319 9.194822 | -0.02503 | 0.769296 | -0.03254 | 0.974045 | 0.981731 | chr17 | 31949097 | 31951766 | + | 0 NA | intron (NAluSz6 S1  | 13424 NM_01535E  |          | 23512 Hs. 46273  | NR_01535E          | ENSG000003SUZ12     | CHET9 JJ#SUZ12 polprotein-coding    |
| chr19-444 9.194822 | -0.02503 | 0.769296 | -0.03254 | 0.974045 | 0.981731 | chr19 | 44490879 | 44496885 | + | 0 NA | intron (NMLT1F LTF  | 6640 NM_01325E   |          | 7733 Hs. 22305   | NR_01325E          | ENSG000003ZNF180    | HHZ168 zinc fingprotein-coding      |
| chr2-197 9.194822  | -0.02503 | 0.769296 | -0.03254 | 0.974045 | 0.981731 | chr2  | 1.94E+08 | 1.97E+08 | + | 0 NA | intron (NLIIPA5 LIN | 12566 NM_00100E  |          | 23451 Hs. 63255  | NR_01243E          | ENSG000003SF3B1     | Hsh155 ML splicing protein-coding   |
| chr8-3774 9.194822 | -0.02503 | 0.769296 | -0.03254 | 0.974045 | 0.981731 | chr8  | 37741197 | 37743094 | + | 0 NA | intron (NAluSc SIN  | -4719 NR_125821  |          | 1.03E+08         | NR_125821          | ENSG000003LOC10272E | -                                   |
| chr1-2098 8.658944 | -0.02605 | 0.80134  | -0.03251 | 0.974065 | 0.981731 | chr1  | 2.1E+08  | 2.1E+08  | + | 0 NA | intron (Nintron (N  | 9389 NM_01438E   |          | 27042 Hs. 19475  | NR_01438E          | ENSG000003UTP25     | Clorf107 UTP25 sm protein-coding    |
| chr1-427 11.58023  | -0.02249 | 0.692857 | -0.03246 | 0.974103 | 0.981731 | chr1  | 42751678 | 42753077 | + | 0 NA | intron (Nintron (N  | -12123 NM_00118E |          | 149641 Hs. 49627 | NR_00118E          | ENSG000003CLDN19    | HOMG5 claudin lprotein-coding       |
| chr17-475 6.912101 | 0.029295 | 0.9029   | 0.03246  | 0.974116 | 0.981731 | chr17 | 45119805 | 45121064 | + | 0 NA | exon (NM exon (NM   | -6001 NR_106842  |          | 1.02E+08         | NR_106842          | ENSG000003MIR6784   | hsa-mir-6784 microRNA ncRNA         |
| chr1-2296 9.681702 | -0.02432 | 0.750636 | -0.0324  | 0.974154 | 0.981731 | chr1  | 2.3E+08  | 2.3E+08  | + | 0 NA | intron (Nintron (N  | 15816 NM_01440E  |          | 27097 Hs. 27062  | NR_01440E          | ENSG000003TAF5L     | PAF65B TATA-box protein-coding      |
| chr10-101 9.681702 | -0.02432 | 0.750636 | -0.0324  | 0.974154 | 0.981731 | chr10 | 1014851  | 1018580  | + | 0 NA | intron (Nintron (N  | -5922 NR_02770E  |          | 55853 Hs. 72853  | NR_01847E          | ENSG000003IDI2-AS1  | C1orf11C IDI2 antncRNA              |
| chr14-544 9.681702 | -0.02432 | 0.750636 | -0.0324  | 0.974154 | 0.981731 | chr14 | 54427717 | 54430437 | + | 0 NA | intron (Nintron (N  | 12297 NM_00577E  |          | 10175 Hs. 29460  | NR_00577E          | ENSG000003CNIH1     | CNIH1 CNIH cornichon protein-coding |
| chr15-484 9.681702 | -0.02432 | 0.750636 | -0.0324  | 0.974154 | 0.981731 | chr15 | 48425117 | 48427649 | + | 0 NA | intron (Nintron (N  | 94186 NM_00194E  |          | 1854 Hs. 52798   | NR_00194E          | ENSG000003CUDT      | dUTPase deoxyuric protein-coding    |
| chr16-17 9.681702  | -0.02432 | 0.750636 | -0.0324  | 0.974154 | 0.981731 | chr16 | 71733624 | 71734811 | + | 0 NA | intron (Nintron (N  | -9516 NM_01502C  |          | 23035 Hs. 70945  | NR_01502C          | ENSG000003PHLPP2    | PHLPP1 PFPH domain protein-coding   |
| chr19-781 9.681702 | -0.02432 | 0.750636 | -0.0324  | 0.974154 | 0.981731 | chr19 | 78156322 | 78157627 | + | 0 NA | intron (NAluY SINE  | -6306 NM_001321  |          | 7311 Hs. 5308    | NR_00333E          | ENSG000003UBA52     | CEP52 HUBubiquitin protein-coding   |
| chr8-605 9.681702  | -0.02432 | 0.750636 | -0.0324  | 0.974154 | 0.981731 | chr8  | 60592200 | 60594974 | + | 0 NA | intron (NLIAMD1 LIN | 76600 NM_00286E  |          | 5862 Hs. 36901   | NR_00286E          | ENSG000003RAB2A     | LHX RAB2 RAB2A, mcprotein-coding    |
| chr9-332 9.681702  | -0.02432 | 0.750636 | -0.0324  | 0.974154 | 0.981731 | chr9  | 33262104 | 33262500 | + | 0 NA | intron (Nintron (N  | 2406 NM_00117E   |          | 573 Hs. 37748    | NR_00432E          | ENSG000003BAG1      | BAG-1 HAF BCL2 assc protein-coding  |
| chr3-257 4.897926  | 0.033705 | 1.0417   | 0.032356 | 0.974189 | 0.981731 | chr3  | 25732249 | 25733297 | + | 0 NA | intron (NLIIMEg LIN | 50670 NM_018297  |          | 55768 Hs. 36896  | NR_018297          | ENSG000003NGLY1     | CDGD CDG1N-glycan protein-coding    |
| chr11-865 10.16858 | -0.02369 | 0.734677 | -0.03224 | 0.974278 | 0.981731 | chr11 | 86337352 | 86338185 | + | 0 NA | intron (NAluSx SIN  | 35528 NM_00132E  |          | 51501 Hs. 28332  | NR_016401          | ENSG000003CHKESH1   | C11orf73 heat shoc protein-coding   |
| chr18-796 10.16858 | -0.02369 | 0.734677 | -0.03224 | 0.974278 | 0.981731 | chr18 | 79973441 | 79973981 | + | 0 NA | exon (NM exon (NM   | 9068 NM_00113E   |          | 44098 Hs. 19158  | NR_00113E          | ENSG000003HSBP1L1   | -                                   |
| chr19-105 10.16858 | -0.02369 | 0.734677 | -0.03224 | 0.974278 | 0.981731 | chr19 | 10689835 | 10689838 | + | 0 NA | intron (Nintron (N  | -12403 NM_03120E |          | 81890 Hs. 63163  | NR_03120E          | ENSG000003QTRT1     | FP3235 Tc heatin tprotein-coding    |
| chr3-639 10.16858  | -0.02369 | 0.734677 | -0.03224 | 0.974278 | 0.981731 | chr3  | 63994770 | 63996334 | + | 0 NA | exon (NM exon (NM   | -8470 NR_03828E  |          | 1.01E+08         | NR_03828E          | ENSG000003PSMD6-AS2 | -                                   |
| chr9-137 10.16858  | -0.02369 | 0.734677 | -0.03224 | 0.974278 | 0.981731 | chr9  | 1.34E+08 | 1.34E+08 | + | 0 NA | exon (NM exon (NM   | -35024 NR_007101 |          | 1757 Hs. 19800   | NR_007101          | ENSG000003SARDH     | BPR-2 DMC sarcosine protein-coding  |
| chr6-144 8.172604  | -0.02676 | 0.832089 | -0.03216 | 0.974346 | 0.981731 | chr6  | 1.47E+08 | 1.47E+08 | + | 0 NA | intron (NLIIME4b LI | -35079 NR_03411E |          | 729178 Hs. 55760 | NR_03411E          | ENSG000003STXP5-AS  | STXP5-AS microRNA ncRNA             |
| chr16-82 10.65546  | -0.02314 | 0.720995 | -0.0321  | 0.974394 | 0.981731 | chr16 | 82097859 | 82099906 | + | 0 NA | TTS (NM TTS (NM C   | 63629 NM_00215E  |          | 3294 Hs. 16279   | NR_00215E          | ENSG000003HSD17B2   | EDH17B2 Hydroxyst protein-coding    |
| chr19-23 10.65546  | -0.02314 | 0.720995 | -0.0321  | 0.974394 | 0.981731 | chr19 | 23381371 | 23385255 | + | 0 NA | intron (NLIIPREC2 I | 12518 NM_00343C  |          | 7644 Hs. 58834   | NR_00343C          | ENSG000003ZNF91     | HPF7 HTF1zinc fingprotein-coding    |
| chr1-1208 11.14234 | -0.02268 | 0.709255 | -0.03198 | 0.974487 | 0.981731 | chr1  | 1.21E+08 | 1.21E+08 | + | 0 NA | intron (Nintron (N  | 81583 NM_001351  |          | 1.01E+08         | NR_001351          | ENSG000003CNBP26    | -                                   |
| chr17-29 6.432988  | 0.030099 | 0.94274  | 0.031927 | 0.97453  | 0.981731 | chr17 | 29077847 | 29078723 | + | 0 NA | intron (NAluSx SIN  | -2676 NM_00474C  |          | 9220 Hs. 46259   | NR_00474C          | ENSG000003TIAP1     | MAJN SPR2 TGFB1-inc protein-coding  |
| chr17-44 7.247301  | -0.02821 | 0.885455 | -0.03186 | 0.974582 | 0.981731 | chr17 | 44084830 | 44085317 | + | 0 NA | exon (NM exon (NM   | 14162 NR_02858E  |          | 92579 Hs. 29400  | NR_13838E          | ENSG000003G6P3C     | SMN4 UGRF glucosyl-cprotein-coding  |
| chr2-131 7.247301  | -0.02821 | 0.885455 | -0.03186 | 0.974582 | 0.981731 | chr2  | 1.31E+08 | 1.31E+08 | + | 0 NA | 3' UTR (N3' UTR (N  | 42349 NR_001321  |          | 130074 Hs. 53467 | NR_00100E          | ENSG000003FAM168B   | MAN1 family wprotein-coding         |
| chr2-4434 11.08549 | -0.02166 | 0.706806 | -0.03064 | 0.975556 | 0.981731 | chr2  | 44340510 | 44341009 | + | 0 NA | intron (NAluSx1 SI  | 18990 NM_00104E  |          | 9581 Hs. 44434   | NR_00603E          | ENSG000003PREPL     | CMS22 prolyl er protein-coding      |
| chr22-408 11.08549 | -0.02166 | 0.706806 | -0.03064 | 0.975556 | 0.981731 | chr22 | 40825136 | 40827529 | + | 0 NA | 3' UTR (N3' UTR (N  | -6933 NM_00128E  |          | 10478 Hs. 47493  | NR_00635E          | ENSG000003SLC25A17  | PMP34 sulfate cprotein-coding       |
| chr1-394 9.186964  | -0.0235  | 0.769107 | -0.03055 | 0.975626 | 0.981731 | chr1  | 39426793 | 39429431 | + | 0 NA | exon (NM exon (NM   | 19039 NR_00128E  |          | 643314 Hs. 65876 | NR_001351          | ENSG000003KIAA0754  | -                                   |
| chr1-181 9.186964  | -0.0235  | 0.769107 | -0.03055 | 0.975626 | 0.981731 | chr1  | 1.81E+08 | 1.81E+08 | + | 0 NA | intron (Nintron (N  | 18920 NM_00581E  |          | 10228 Hs. 51841  | NR_00581E          | ENSG000003STX6      | -                                   |
| chr10-89 9.186964  | -0.0235  | 0.769107 | -0.03055 | 0.975626 | 0.981731 | chr10 | 89337489 | 89339366 | + | 0 NA | intron (NMLT2B1 LI  | 5898 NM_001031   |          | 3437 Hs. 47338   | NR_00154E          | ENSG000003IFIT3     | CIG-49 G1 interfeer protein-coding  |
| chr12-27 9.186964  | -0.0235  | 0.769107 | -0.03055 | 0.975626 | 0.981731 | chr12 | 27723834 | 27725725 | + | 0 NA | intron (Nintron (N  | 13947 NM_021821  |          | 60488 Hs. 71407  | NR_021821          | ENSG000003MRP35     | HDCMD11P mitochon protein-coding    |
| chr16-22 9.186964  | -0.0235  | 0.769107 | -0.03055 | 0.975626 | 0.981731 | chr16 | 22505844 | 22506403 | + | 0 NA | non-codir non-codir | 1674 NR_02445E   |          | 1E+08            | NR_02445E          | LOC10019C           | -                                   |
| chr19-564 9.186964 | -0.0235  | 0.769107 | -0.03055 | 0.975626 | 0.981731 | chr19 | 5645307  | 5648908  | + | 0 NA | intron (Nintron (N  | 24024 NM_002967  |          | 6294 Hs. 72880   | NR_002967          | ENSG000003SAFB      | HAP HET Scaffold protein-coding     |
| chr2-1514 9.186964 | -0.0235  | 0.769107 | -0.03055 | 0.975626 | 0.981731 | chr2  | 1.51E+08 | 1.51E+08 | + | 0 NA | intron (NAluY SINE  | 37258 NM_001177  |          | 55183 Hs. 53653  | NR_018151          | ENSG000003CRIF1     | -                                   |
| chr1-240 9.673844  | -0.02287 | 0.749089 | -0.03053 | 0.975642 | 0.981731 | chr1  | 2.4E+08  | 2.4E+08  | + | 0 NA | intron (Nintron (N  | 25260 NM_02246E  |          | 64388 Hs. 98206  | NR_02246E          | ENSG000003GREM2     | CKT5F1B2 gremlin 2 protein-coding   |
| chr14-96 9.673844  | -0.02287 | 0.749    |          |          |          |       |          |          |   |      |                     |                  |          |                  |                    |                     |                                     |



|                     |          |          |          |          |          |       |          |          |   |      |                     |                  |                            |                    |                   |                           |                |                |
|---------------------|----------|----------|----------|----------|----------|-------|----------|----------|---|------|---------------------|------------------|----------------------------|--------------------|-------------------|---------------------------|----------------|----------------|
| chr15-645.9.137966  | -0.02368 | 0.784529 | -0.03019 | 0.975916 | 0.981731 | chr15 | 64979302 | 64979642 | + | 0 NA | intron (NL3 LINE C  | 9998 NM_001127   | 51324 Hs. 242458NM_016633  | ENSG000003PG21     | ABHD21 ACSPG21    | abf protein-coding        |                |                |
| chr5-7214.7.877913  | 0.025694 | 0.85383  | 0.030093 | 0.975993 | 0.981731 | chr5  | 72148715 | 72149116 | + | 0 NA | intron (NL2b LINE   | -20552 NR_039967 | 1.01E+08                   | NR_039967          | ENSG000003MIR4803 | microRNA ncRNA            |                |                |
| chr16-88C.5.912826  | 0.028811 | 0.961138 | 0.029976 | 0.976086 | 0.981731 | chr16 | 88052302 | 88053198 | + | 0 NA | intron (N(CCA)n Si  | 48235 NR_12031C  | 400553 Hs. 592071NR_12031C | ENSG000003LOC00555 | uncharacterncRNA  |                           |                |                |
| chr20-35C.7.726323  | -0.02544 | 0.853724 | -0.0298  | 0.976227 | 0.981731 | chr20 | 35043473 | 35043913 | + | 0 NA | intron (NMER44A DN  | 49114 NM_015638  | 26133 Hs. 168073NM_015638  | ENSG000003TRPC4AP  | C20orf188         | transient protein-coding  |                |                |
| chr6-1095.5.863829  | 0.028343 | 0.967791 | 0.029286 | 0.976636 | 0.981731 | chr6  | 1.01E+08 | 1.09E+08 | + | 0 NA | intron (Nintron (N  | 9813 NM_00134F   | 8763 Hs. 52031NM_006011    | ENSG000003CD164    | DFNA66 MC         | CD164 mol protein-coding  |                |                |
| chr4-799F.7.239443  | -0.02592 | 0.894109 | -0.02899 | 0.976869 | 0.981731 | chr4  | 79982634 | 79983006 | + | 0 NA | intron (Nintron (N  | 90409 NM_00128E  | 118429 Hs. 162963NM_058172 | ENSG000003ANTXR2   | CMG-2 CMC         | ANTXR cel protein-coding  |                |                |
| chr3-197F.6.342851  | 0.027223 | 0.9419   | 0.028902 | 0.976943 | 0.981731 | chr3  | 1.98E+08 | 1.98E+08 | + | 0 NA | intron (NAluSx SIN  | 58000 NM_00136E  | 84859 Hs. 518414NM_032777  | ENSG000003LRCH3    | leucine r         | protein-coding            |                |                |
| chr21-26F.11.565451 | -0.02006 | 0.696586 | -0.02288 | 0.977025 | 0.981731 | chr21 | 26923577 | 26924256 | + | 0 NA | 3' UTR (N3' UTR (N  | -30045 NR_03991F | 1.01E+08                   | NR_03991F          | ENSG000003MIR4759 | microRNA ncRNA            |                |                |
| chr1-215E.12.10039  | -0.01947 | 0.680177 | -0.02862 | 0.977164 | 0.981731 | chr1  | 2.16E+08 | 2.16E+08 | + | 0 NA | intron (NLIPA11 LI  | 45674 NM_00131E  | 51133 Hs. 335133NM_016121  | ENSG000003KCTD3    | NY-REN-4E         | potassium protein-coding  |                |                |
| chr20-49C.11.61351  | -0.01974 | 0.690358 | -0.02859 | 0.97719  | 0.981731 | chr20 | 49269440 | 49271563 | + | 0 NA | exon (NM exon (NM   | 7556 NM_02103E   | 57169 Hs. 371794NM_02103E  | ENSG000003ZNF1     | zinc finger       | protein-coding            |                |                |
| chr20-50F.11.61351  | -0.01974 | 0.690358 | -0.02859 | 0.97719  | 0.981731 | chr20 | 50893873 | 50894389 | + | 0 NA | exon (NM exon (NM   | 15660 NM_00128E  | 23394 Hs. 293733NM_01533E  | ENSG000003ADNP     | ADNP1 HVT         | protein-coding            |                |                |
| chr1-320C.10.63975  | -0.02046 | 0.71586  | -0.02859 | 0.977194 | 0.981731 | chr1  | 32032779 | 32047628 | + | 0 NA | intron (NAluS2 SI   | 26335 NM_001271  | 10657 Hs. 445893NM_00655E  | ENSG000003KHDRBS1  | Sam68 p6E         | KH RNA bi protein-coding  |                |                |
| chr1-100C.10.63975  | -0.02046 | 0.71586  | -0.02859 | 0.977194 | 0.981731 | chr1  | 1E+08    | 1E+08    | + | 0 NA | intron (NAluYml SI  | 5018 NR_03027E   | 693138                     | NR_03027E          | ENSG000003MIR553  | MIRN553 hm                | icroRNA ncRNA  |                |
| chr1-110C.10.63975  | -0.02046 | 0.71586  | -0.02859 | 0.977194 | 0.981731 | chr1  | 1.1E+08  | 1.1E+08  | + | 0 NA | intron (Nintron (N  | 10703 NM_00124Z  | 10768 Hs. 743973NR_006621  | ENSG000003AHCYL3   | DCAL IRB          | adnosyl protein-coding    |                |                |
| chr1-161F.10.63975  | -0.02046 | 0.71586  | -0.02859 | 0.977194 | 0.981731 | chr1  | 1.62E+08 | 1.62E+08 | + | 0 NA | intron (NLM4 LINE   | 5438 NM_00724C   | 11266 Hs. 416216NM_00724C  | ENSG000003DUSP12   | DUSP1 YVF         | dual spec protein-coding  |                |                |
| chr10-114C.10.63975 | -0.02046 | 0.71586  | -0.02859 | 0.977194 | 0.981731 | chr10 | 1.15E+08 | 1.15E+08 | + | 0 NA | intron (Nintron (N  | 25251 NM_00113E  | 57700 Hs. 192615NM_02094C  | ENSG000003FAM160B1 | KIAA1600 family   | wiprotein-coding          |                |                |
| chr11-46C.10.63975  | -0.02046 | 0.71586  | -0.02859 | 0.977194 | 0.981731 | chr11 | 46319849 | 46321117 | + | 0 NA | exon (NM exon (NM   | -12443 NM_20153E | 8525 Hs. 502461NM_00364E   | ENSG000003CGKZ     | DAGK5 DAC         | diacylgly protein-coding  |                |                |
| chr11-47C.10.63975  | -0.02046 | 0.71586  | -0.02859 | 0.977194 | 0.981731 | chr11 | 47754629 | 47765439 | + | 0 NA | intron (Nintron (N  | 6407 NM_00131E   | 23360 Hs. 6834 NM_01530E   | ENSG000003PNBP4    | FBP30             | formin bi protein-coding  |                |                |
| chr11-65C.10.63975  | -0.02046 | 0.71586  | -0.02859 | 0.977194 | 0.981731 | chr11 | 65526335 | 65528934 | + | 0 NA | intron (NAluSx1 SI  | 2551 NM_00104E   | 57410 Hs. 238833NM_02068C  | ENSG000003SCYL1    | GKLP HTO1         | SCYL1 like protein-coding |                |                |
| chr12-374C.10.63975 | -0.02046 | 0.71586  | -0.02859 | 0.977194 | 0.981731 | chr12 | 374048   | 385166   | + | 0 NA | intron (Nintron (N  | 9713 NM_00104E   | 5927 Hs. 76272 NM_00505E   | ENSG000003KDM5A    | RBBP-2 RE         | lysine de protein-coding  |                |                |
| chr17-35C.10.63975  | -0.02046 | 0.71586  | -0.02859 | 0.977194 | 0.981731 | chr17 | 35259459 | 35266281 | + | 0 NA | intron (NAluJb SIN  | 19798 NM_14497F  | 162394 Hs. 585792NM_14497F | ENSG000003SLFN5    | schlafen          | protein-coding            |                |                |
| chr22-40F.10.63975  | -0.02046 | 0.71586  | -0.02859 | 0.977194 | 0.981731 | chr22 | 40845907 | 40850284 | + | 0 NA | intron (NCharlie5   | 8544 NM_00393Z   | 6767 Hs. 712713NM_00393Z   | ENSG000003ST13     | AAG2 FAM1         | ST13 Hsp7 protein-coding  |                |                |
| chr3-943C.10.63975  | -0.02046 | 0.71586  | -0.02859 | 0.977194 | 0.981731 | chr3  | 9439503  | 9452007  | + | 0 NA | intron (Nintron (N  | 48055 NM_00108C  | 55209 Hs. 288164NM_018187  | ENSG000003SETD5    | SET               | domain protein-coding     |                |                |
| chr3-128C.10.63975  | -0.02046 | 0.71586  | -0.02859 | 0.977194 | 0.981731 | chr3  | 1.28E+08 | 1.28E+08 | + | 0 NA | intron (NAluSg7 SI  | 4532 NM_01333E   | 29927 Hs. 518233NM_01333E  | ENSG000003SEC61A1  | HNFJ4 HSE         | SEC61 tra protein-coding  |                |                |
| chr5-695E.10.63975  | -0.02046 | 0.71586  | -0.02859 | 0.977194 | 0.981731 | chr5  | 69564362 | 69568775 | + | 0 NA | intron (Nintron (N  | 6323 NM_00109E   | 728340 Hs. 191353NM_00109E | ENSG000003GTF2H2C  | GTF2H2C_2         | GTF2H2 E protein-coding   |                |                |
| chr5-1324C.10.63975 | -0.02046 | 0.71586  | -0.02859 | 0.977194 | 0.981731 | chr5  | 1.32E+08 | 1.32E+08 | + | 0 NA | intron (NAluS2 SI   | 5634 NM_00135A   | 3659 Hs. 436061NM_00219E   | ENSG000003IRF1     | IRF-1 MAF         | interferc protein-coding  |                |                |
| chr5-136C.10.63975  | -0.02046 | 0.71586  | -0.02859 | 0.977194 | 0.981731 | chr5  | 1.36E+08 | 1.36E+08 | + | 0 NA | intron (NAluS2 SI   | 12389 NM_00035E  | 7045 Hs. 369397NM_00035E   | ENSG000003TGFB1    | BIGH3 CDF         | transfcr protein-coding   |                |                |
| chr5-149C.10.63975  | -0.02046 | 0.71586  | -0.02859 | 0.977194 | 0.981731 | chr5  | 1.49E+08 | 1.49E+08 | + | 0 NA | exon (NM exon (NM   | 4197 NM_152407   | 134266 Hs. 511816NM_152407 | ENSG000003GRPEL2   | Mt-GrpE2 GrpE     | like protein-coding       |                |                |
| chr6-111C.10.63975  | -0.02046 | 0.71586  | -0.02859 | 0.977194 | 0.981731 | chr6  | 1.11E+08 | 1.11E+08 | + | 0 NA | intron (NMER47A DN  | 49164 NM_15336E  | 91749 Hs. 400572NM_15336E  | ENSG000003MFS4B    | KIAA1919 major    | fac protein-coding        |                |                |
| chr7-669F.10.63975  | -0.02046 | 0.71586  | -0.02859 | 0.977194 | 0.981731 | chr7  | 66987267 | 66993901 | + | 0 NA | intron (Nintron (N  | 5002 NM_01603E   | 51119 Hs. 11044E           | ENSG000003SBDS     | CG1-97            | SLBDS rib protein-coding  |                |                |
| chr8-124F.10.63975  | -0.02046 | 0.71586  | -0.02859 | 0.977194 | 0.981731 | chr8  | 1.25E+08 | 1.25E+08 | + | 0 NA | intron (NTigger1 I  | 5250 NM_00500E   | 4715 Hs. 15977 NM_00500E   | ENSG000003NDUF9    | B22 C1-B2         | NADH:ubiq protein-coding  |                |                |
| chr9-356F.10.63975  | -0.02046 | 0.71586  | -0.02859 | 0.977194 | 0.981731 | chr9  | 35682224 | 35688826 | + | 0 NA | exon (NM exon (NM   | 4400 NM_001301   | 7169 Hs. 300772NM_00328E   | ENSG000003TPM2     | AMC1-DA1          | tropomyos protein-coding  |                |                |
| chr1-666F.11.12663  | -0.02007 | 0.702167 | -0.02858 | 0.977196 | 0.981731 | chr1  | 66679239 | 66681012 | + | 0 NA | intron (Nintron (N  | 51685 NR_03606C  | ENSG000003MIR3117          | 1E+08              | NR_03606C         | ENSG000003MIR3117         | miR-3117       | microRNA ncRNA |
| chr12-56F.11.12663  | -0.02007 | 0.702167 | -0.02858 | 0.977196 | 0.981731 | chr12 | 56341523 | 56358044 | + | 0 NA | intron (NAluSx SIN  | 10324 NM_19833Z  | 6773 Hs. 530595NM_00541E   | ENSG000003STAT2    | IMD44 ISC         | signal tr protein-coding  |                |                |
| chr12-95C.11.12663  | -0.02007 | 0.702167 | -0.02858 | 0.977196 | 0.981731 | chr12 | 95001014 | 95001213 | + | 0 NA | intron (NAluJo SIN  | 2584 NM_01883E   | 55967 Hs. 506374NM_01883E  | ENSG000003NDUFA12  | B17.2 DAF         | NADH:ubiq protein-coding  |                |                |
| chr19-584C.11.12663 | -0.02007 | 0.702167 | -0.02858 | 0.977196 | 0.981731 | chr19 | 58414990 | 58423436 | + | 0 NA | TTS (NR_TTS (NR_1   | 10539 NM_00131E  | 201514 Hs. 439551NM_17354E | ENSG000003ZNF584   | zinc finger       | protein-coding            |                |                |
| chr2-105F.11.12663  | -0.02007 | 0.702167 | -0.02858 | 0.977196 | 0.981731 | chr2  | 1.05E+08 | 1.05E+08 | + | 0 NA | intron (Nintron (N  | 30228 NM_00128E  | 79074 Hs. 549577NM_02409E  | ENSG000003C2orf49  | asw               | chromoson protein-coding  |                |                |
| chr2-230C.11.12663  | -0.02007 | 0.702167 | -0.02858 | 0.977196 | 0.981731 | chr2  | 2.3E+08  | 2.3E+08  | + | 0 NA | intron (NLP18A LI   | 69538 NM_00120E  | 6672 Hs. 369056NM_00311E   | ENSG000003SP100    | lysp100B          | SP100 nuc protein-coding  |                |                |
| chr3-179C.11.12663  | -0.02007 | 0.702167 | -0.02858 | 0.977196 | 0.981731 | chr3  | 1.79E+08 | 1.79E+08 | + | 0 NA | intron (Nintron (N  | 4849 NM_15224C   | 64393 Hs. 371606NM_02247C  | ENSG000003ZMAT3    | PAG608 W1z        | inc finger protein-coding |                |                |
| chr13-32F.10.15287  | -0.02091 | 0.731751 | -0.02858 | 0.977201 | 0.981731 | chr13 | 32536282 | 32536773 | + | 0 NA | exon (NM exon (NM   | 2268 NM_014887   | 10443 Hs. 50768C           | ENSG000003N4BP2L2  | 92M18.3 C         | NEDD4 bir protein-coding  |                |                |
| chr13-94C.10.15287  | -0.02091 | 0.731751 | -0.02858 | 0.977201 | 0.981731 | chr13 | 94580384 | 94583476 | + | 0 NA | intron (NAluSp SIN  | 14222 NM_001304  | 23483 Hs. 12393 NM_01430E  | ENSG000003TGDS     | CATMANS S         | TDP-glucc protein-coding  |                |                |
| chr13-114C.10.15287 | -0.02091 | 0.731751 | -0.02858 | 0.977201 | 0.981731 | chr13 | 1.14E+08 | 1.14E+08 | + | 0 NA | intron (Nintron (N  | -7323 NR_03972A  | ENSG000003MIR4502          | 1.01E+08           | NR_03972A         | ENSG000003MIR4502         | microRNA ncRNA |                |
| chr15-484C.10.15287 | -0.02091 | 0.731751 | -0.02858 | 0.977201 | 0.981731 | chr15 | 48429322 | 48438338 | + | 0 NA | intron (Nintron (N  | 101633 NM_00194E | 1854 Hs. 52798C            | ENSG000003CDDUT    | dUTPase           | deoxyuric protein-coding  |                |                |
| chr16-851C.10.15287 | -0.02091 | 0.731751 | -0.02858 | 0.977201 | 0.981731 | chr16 | 85182365 | 85186039 | + | 0 NA | Intergeni Intergeni | -23594 NR_16214Z | 1.13E+08                   | NR_16214Z          | MIR12128          | microRNA ncRNA            |                |                |
| chr17-161C.10.15287 | -0.02091 | 0.731751 | -0.02858 | 0.977201 | 0.981731 | chr17 | 16112581 | 16121115 | + | 0 NA | intron (NCharlie2   | 36348 NR_145787  | 1.1E+08                    | NR_145787          | SNORD163          | small nuc                 | snoRNA         |                |
| chr19-57C.10.15287  | -0.02091 | 0.731751 | -0.02858 | 0.977201 | 0.981731 | chr19 | 57907471 | 57914600 | + | 0 NA | intron (NAluS2 SI   | 5557 NM_001297   | 147687 Hs. 56771C          | ENSG000003ZNF417   | zinc finger       | protein-coding            |                |                |
| chr2-853C.10.15287  | -0.02091 | 0.731751 | -0.02858 | 0.977201 | 0.981731 | chr2  | 85320100 | 85326568 | + | 0 NA | intron (NAluSx1 SI  | 4655 NM_00136E   | 10618 Hs. 593382NM_006464  | ENSG000003TGOLN2   | TGN38 TGN         | trans-gol protein-coding  |                |                |
| chr5-735C.10.15287  | -0.02091 | 0.731751 | -0.02858 | 0.977201 | 0.981731 | chr5  | 73500135 | 73506208 | + | 0 NA | exon (NM exon (NM   | 4656 NM_001037   | 689 Hs. 591766NM_001207    | ENSG000003CBTF3    | BETA-NAC          | trans en protein-coding   |                |                |
| chr8-478C.10.15287  | -0.02091 | 0.731751 | -0.02858 | 0.977201 | 0.981731 | chr8  | 47830144 | 47830800 | + | 0 NA | intron (NMTRe SINE  | -92308 NM_00519E | 1052 Hs. 440823NM_00519E   | ENSG000003CEBPD    | C/EBP-de          | CCAAT tr protein-coding   |                |                |
| chr8-1254C.10.15287 | -0.02091 | 0.731751 | -0.02858 | 0.977201 | 0.981731 | chr8  | 1.25E+08 | 1.25E+08 | + | 0 NA | intron (Nintron (N  | 1904 NM_00128E   |                            |                    |                   |                           |                |                |

|                    |          |          |          |          |          |       |          |          |   |   |    |                     |                    |          |            |                     |                    |                     |                |                |                |  |  |
|--------------------|----------|----------|----------|----------|----------|-------|----------|----------|---|---|----|---------------------|--------------------|----------|------------|---------------------|--------------------|---------------------|----------------|----------------|----------------|--|--|
| chr15-235 8.725507 | -0.0187  | 0.800179 | -0.02337 | 0.981354 | 0.984388 | chr15 | 25087615 | 25087814 | + | 0 | NA | promoter-promoter-  | 53 NR_003334       | 1E+08    | NR_003334  | ENSG000003NORD116-  | HBII-85-2          | small               | nuc            | snoRNA         |                |  |  |
| chr10-12C 11.10305 | -0.01624 | 0.708184 | -0.02293 | 0.981709 | 0.984548 | chr10 | 12028819 | 12029508 | + | 0 | NA | exon (NM exon (NM   | 13646 NM_015542    | 26019    | Hs. 370688 | NR_015542           | ENSG000004UPF2     | HUPF2 RENUP2        | reg            | protein-coding |                |  |  |
| chr17-28C 11.63893 | -0.01579 | 0.688846 | -0.02292 | 0.981714 | 0.984548 | chr17 | 28658521 | 28660186 | + | 0 | NA | intron (NSVA_A Ret  | 2553 NM_006923     | 6388     | Hs. 51403  | ENSG000003CDF2      | -                  | stromal             | c              | protein-coding |                |  |  |
| chr2-241C 11.63893 | -0.01579 | 0.688846 | -0.02292 | 0.981714 | 0.984548 | chr2  | 2.41E+08 | 2.41E+08 | + | 0 | NA | intron (Nintron (N  | -13409 NM_001282   | 9855     | Hs. 72631  | ENSG000003FARP2     | FIR FRG FFERM, ARF | protein-coding      |                |                |                |  |  |
| chr1-145E 11.15205 | -0.01597 | 0.701665 | -0.02276 | 0.981841 | 0.984548 | chr1  | 1.46E+08 | 1.46E+08 | + | 0 | NA | TTS (NM_C TTS (NM_C | 36881 NM_001371359 |          |            |                     |                    |                     |                |                |                |  |  |
| chr1-200E 11.15205 | -0.01597 | 0.701665 | -0.02276 | 0.981841 | 0.984548 | chr1  | 2.01E+08 | 2.01E+08 | + | 0 | NA | intron (NLIPA13 LI  | -36584 NM_00529E   | 2848     | Hs. 53431  | ENSG000003GPR25     | -                  | G                   | protein-coding |                |                |  |  |
| chr14-52T 11.15205 | -0.01597 | 0.701665 | -0.02276 | 0.981841 | 0.984548 | chr14 | 52717764 | 52722814 | + | 0 | NA | intron (NALuJr SIN  | -9877 NM_00113C    | 6815     | Hs. 36498  | NR_145251           | ENSG000003STYX     | -                   | serine/t       | protein-coding |                |  |  |
| chr16-84T 11.15205 | -0.01597 | 0.701665 | -0.02276 | 0.981841 | 0.984548 | chr16 | 84485012 | 84498090 | + | 0 | NA | intron (NALuSz SIN  | 13108 NM_020947    | 57707    | Hs. 28827  | NR_020947           | ENSG000003MEA7     | KIAA1609 MTOR       | asc            | protein-coding |                |  |  |
| chr17-80C 11.15205 | -0.01597 | 0.701665 | -0.02276 | 0.981841 | 0.984548 | chr17 | 80356191 | 80366089 | + | 0 | NA | intron (N(CATGCAA   | -54027 NR_148041   | 284131   | Hs. 38967  | ENSG000003ENDOV     | -                  | endonucle           | protein-coding |                |                |  |  |
| chr2-241C 11.15205 | -0.01597 | 0.701665 | -0.02276 | 0.981841 | 0.984548 | chr2  | 2.41E+08 | 2.41E+08 | + | 0 | NA | intron (Nintron (N  | 8877 NM_00132C     | 3069     | Hs. 47185  | NR_00533            | ENSG000003HDLPB    | HBP PROZ2           | high           | dens           | protein-coding |  |  |
| chr2-241C 11.15205 | -0.01597 | 0.701665 | -0.02276 | 0.981841 | 0.984548 | chr2  | 2.41E+08 | 2.41E+08 | + | 0 | NA | intron (Nintron (N  | -6406 NM_001282    | 9855     | Hs. 72631  | ENSG000003FARP2     | FIR FRG FFERM, ARF | protein-coding      |                |                |                |  |  |
| chr3-184T 11.15205 | -0.01597 | 0.701665 | -0.02276 | 0.981841 | 0.984548 | chr3  | 1.84E+08 | 1.84E+08 | + | 0 | NA | exon (NM exon (NM   | -5100 NM_01835E    | 55324    | Hs. 36132  | ENSG000003ABCF3     | EST201864          | ATP                 | bindi          | protein-coding |                |  |  |
| chr8-82T 11.15205  | -0.01597 | 0.701665 | -0.02276 | 0.981841 | 0.984548 | chr8  | 1.02E+08 | 1.02E+08 | + | 0 | NA | intron (NLIMEf LIN  | 26835 NR_12541E    | 1.02E+08 | Hs. 49244  | ENSG000003UBR5-AS1  | UBR5               | antinc              | RNA            |                |                |  |  |
| chr9-103C 11.15205 | -0.01597 | 0.701665 | -0.02276 | 0.981841 | 0.984548 | chr9  | 33337193 | 33349440 | + | 0 | NA | intron (N(Charlie L | 52800 NM_147134    | 4799     | Hs. 41307  | NR_002504           | ENSG000003CNFX1    | NFX2 TEG            | nuclear        | protein-coding |                |  |  |
| chr9-125C 11.15205 | -0.01597 | 0.701665 | -0.02276 | 0.981841 | 0.984548 | chr9  | 1.25E+08 | 1.25E+08 | + | 0 | NA | intron (NTHE1B LTF  | 89486 NM_00133C    | 26130    | Hs. 42376  | NR_01563            | ENSG000003GAPVD1   | GAPX5 GATPase       | ac             | protein-coding |                |  |  |
| chr1-193C 10.66517 | -0.01618 | 0.716503 | -0.02259 | 0.981981 | 0.984595 | chr1  | 1.93E+08 | 1.93E+08 | + | 0 | NA | intron (Nintron (N  | -49939 NM_00378E   | 8707     | Hs. 51883  | NR_00378E           | ENSG000003B3GAL72  | BETA3GALbeta-1,3-   | protein-coding |                |                |  |  |
| chr10-11C 10.66517 | -0.01618 | 0.716503 | -0.02259 | 0.981981 | 0.984595 | chr10 | 1.12E+08 | 1.12E+08 | + | 0 | NA | exon (NM exon (NM   | 12553 NM_022494    | 64429    | Hs. 19699  | NR_022494           | ENSG000003ZDHH6C   | DHHC-6 Zn           | inc            | protein-coding |                |  |  |
| chr19-14C 10.66517 | -0.01618 | 0.716503 | -0.02259 | 0.981981 | 0.984595 | chr19 | 14514181 | 14516554 | + | 0 | NA | 3' UTR (N3' UTR (N  | 2495 NM_00130C     | 3337     | Hs. 51521  | ENSG000003DNAJB1    | HSPF1 HdjDnaJ      | heat                | protein-coding |                |                |  |  |
| chr22-35C 10.66517 | -0.01618 | 0.716503 | -0.02259 | 0.981981 | 0.984595 | chr22 | 35263330 | 35266147 | + | 0 | NA | non-codir non-codir | 7245 NM_00136E     | 10042    | Hs. 58881  | ENSG000003HMGXB4    | HMG2L1 HM          | HMG-box             | c              | protein-coding |                |  |  |
| chr15-437 10.17829 | -0.01641 | 0.733713 | -0.02237 | 0.982156 | 0.984654 | chr15 | 43792723 | 43796643 | + | 0 | NA | promoter-promoter-  | -924 NR_03169E     |          |            |                     |                    |                     |                |                |                |  |  |
| chr15-937 10.17829 | -0.01641 | 0.733713 | -0.02237 | 0.982156 | 0.984654 | chr15 | 99710448 | 99711263 | + | 0 | NA | intron (Nintron (N  | 22582 NM_001284    | 145748   | Hs. 56256  | ENSG000003LYSMD4    | LysM               | dom                 | protein-coding |                |                |  |  |
| chr2-134C 10.17829 | -0.01641 | 0.733713 | -0.02237 | 0.982156 | 0.984654 | chr2  | 1.34E+08 | 1.34E+08 | + | 0 | NA | intron (NLIP3 LIN   | 78290 NM_00241C    | 4249     | Hs. 4988   | NR_00241C           | ENSG000003MGAT5    | GNT-V GNTalpha-1,   | protein-coding |                |                |  |  |
| chr7-1394 10.17829 | -0.01641 | 0.733713 | -0.02237 | 0.982156 | 0.984654 | chr7  | 1.39E+08 | 1.39E+08 | + | 0 | NA | intron (Nintron (N  | 24256 NR_03399E    | 1E+08    | Hs. 74444  | ENSG000003LOC10012E | -                  | uncharact           | ncRNA          |                |                |  |  |
| chr8-424C 10.17829 | -0.01641 | 0.733713 | -0.02237 | 0.982156 | 0.984654 | chr8  | 42431481 | 42433110 | + | 0 | NA | intron (N(Tigger1 E | 40415 NM_00566E    | 7419     | Hs. 69930  | NR_00566E           | ENSG000003VDAC3    | HD-VDAC3 voltage    | c              | protein-coding |                |  |  |
| chr11-74C 10.12929 | -0.01658 | 0.746642 | -0.02221 | 0.982282 | 0.984757 | chr11 | 74078043 | 74078600 | + | 0 | NA | exon (NM exon (NM   | -69084 NM_02280C   | 7352     | Hs. 10133  | NR_00335E           | ENSG000003UCP3     | SLC25A9             | uncouplir      | protein-coding |                |  |  |
| chr10-61E 9.69141  | -0.01663 | 0.753747 | -0.02207 | 0.982394 | 0.984776 | chr10 | 61940211 | 61942717 | + | 0 | NA | intron (Nintron (N  | 39765 NM_03219E    | 84159    | Hs. 53529  | NR_03219E           | ENSG000003ARID5B   | DESRT MRF           | AT-rich        | protein-coding |                |  |  |
| chr17-62E 9.69141  | -0.01663 | 0.753747 | -0.02207 | 0.982394 | 0.984776 | chr17 | 62680003 | 62680246 | + | 0 | NA | intron (NCpG        | -26282 NR_14788E   | 1.05E+08 | Hs. 44626  | ENSG000003LOC105371 | -                  | uncharact           | ncRNA          |                |                |  |  |
| chr2-114E 9.69141  | -0.01663 | 0.753747 | -0.02207 | 0.982394 | 0.984776 | chr2  | 11451959 | 11453357 | + | 0 | NA | intron (Nintron (N  | 13503 NR_10349C    | 1876     | Hs. 60309  | NR_19825E           | ENSG000003E2F6     | E2F-6               | E2F            | trans          | protein-coding |  |  |
| chr5-150E 9.69141  | -0.01663 | 0.753747 | -0.02207 | 0.982394 | 0.984776 | chr5  | 1.5E+08  | 1.5E+08  | + | 0 | NA | intron (Nintron (N  | 40840 NR_10996E    | 1436     | Hs. 58621  | ENSG000003CSF1R     | C-FMS CD1          | colony              | st             | protein-coding |                |  |  |
| chr1-248E 9.204529 | -0.01682 | 0.771196 | -0.02164 | 0.982733 | 0.985068 | chr1  | 2.49E+08 | 2.49E+08 | + | 0 | NA | intron (Nintron (N  | 7494 NM_02483E     | 79894    | Hs. 52115  | NR_02483E           | ENSG000003ZNF672   | ATP5A1 ATF          | ATP            | synth          | protein-coding |  |  |
| chr2-238I 9.204529 | -0.01682 | 0.771196 | -0.02164 | 0.982733 | 0.985068 | chr2  | 2.38E+08 | 2.38E+08 | + | 0 | NA | intron (Nintron (N  | 18365 NM_03076E    | 80895    | Hs. 92033  | NR_03076E           | ENSG000003ILKAP    | ILKAP2 II           | ILK            | assoc          | protein-coding |  |  |
| chr11-64E 12.11795 | -0.01445 | 0.675598 | -0.02139 | 0.982932 | 0.985177 | chr11 | 64764240 | 64777359 | + | 0 | NA | intron (Nintron (N  | 6962 NM_00117E     | 7536     | Hs. 50282  | ENSG000003SF1       | BBP D1E5           | splicing            | protein-coding |                |                |  |  |
| chr7-116E 12.11795 | -0.01445 | 0.675598 | -0.02139 | 0.982932 | 0.985177 | chr7  | 1.17E+08 | 1.17E+08 | + | 0 | NA | intron (Nintron (N  | -36365 NM_00136E   | 7982     | Hs. 36813  | NR_01841E           | ENSG000003ST7      | ST57q FAM           | suppress       | protein-coding |                |  |  |
| chr16-144 5.887402 | 0.020722 | 0.977207 | 0.021205 | 0.983082 | 0.985177 | chr16 | 1446484  | 1446884  | + | 0 | NA | exon (NM exon (NM   | -2195 NM_00114E    | 645811   | Hs. 35523  | ENSG000003CCDC154   | C16orf29           | coiled-c            | protein-coding |                |                |  |  |
| chr16-15C 11.63107 | -0.01456 | 0.687598 | -0.02118 | 0.983102 | 0.985177 | chr16 | 15003698 | 15007596 | + | 0 | NA | intron (Nintron (N  | 4750 NR_036054     | 1E+08    | Hs. 30605  | ENSG000003MIR1972-1 | MIR1972 mi         | microRNA            | ncRNA          |                |                |  |  |
| chr18-46C 11.63107 | -0.01456 | 0.687598 | -0.02118 | 0.983102 | 0.985177 | chr18 | 46079349 | 46095138 | + | 0 | NA | intron (Nintron (N  | 11053 NM_001001    | 498      | Hs. 29828  | NR_00404E           | ENSG000003ATP5F1A  | ATP5A1 ATF          | ATP            | synth          | protein-coding |  |  |
| chr21-38E 11.63107 | -0.01456 | 0.687598 | -0.02118 | 0.983102 | 0.985177 | chr21 | 38809577 | 38823976 | + | 0 | NA | intron (Nintron (N  | 10847 NM_00523E    | 2114     | Hs. 64423  | NR_00523E           | ENSG000003ETS2     | ETS2IT1             | ETS            | prot           | protein-coding |  |  |
| chr5-553C 11.63107 | -0.01456 | 0.687598 | -0.02118 | 0.983102 | 0.985177 | chr5  | 55300094 | 55302950 | + | 0 | NA | intron (NALuSp SIN  | 6172 NM_00134E     | 54505    | Hs. 59326  | NR_01903C           | ENSG000003DHX29    | DDX29               | DEX            | box            | protein-coding |  |  |
| chr5-5454 8.717649 | -0.01693 | 0.804853 | -0.02104 | 0.983217 | 0.985177 | chr5  | 54543338 | 54544134 | + | 0 | NA | 3' UTR (N3' UTR (N  | 25977 NM_00110E    | 112574   | Hs. 43275  | ENSG000003SNX18     | SNX18 FAM          | sorti               | protein-coding |                |                |  |  |
| chr1-842I 11.14419 | -0.0147  | 0.70145  | -0.02095 | 0.983282 | 0.985177 | chr1  | 84218976 | 84219757 | + | 0 | NA | intron (NALuSq2 SI  | 37734 NM_00124E    | 5567     | Hs. 48732  | ENSG000003PRKACB    | PKA C-beta         | protein-coding      |                |                |                |  |  |
| chr10-68C 11.14419 | -0.0147  | 0.70145  | -0.02095 | 0.983282 | 0.985177 | chr10 | 68020761 | 68022364 | + | 0 | NA | intron (NALuSp SIN  | -10679 NR_131184   | 1E+08    | Hs. 131184 | POU5F1P5            | Oct4-pg5           | POU                 | class          | pseudo         |                |  |  |
| chr11-144 11.14419 | -0.0147  | 0.70145  | -0.02095 | 0.983282 | 0.985177 | chr11 | 14469314 | 14498684 | + | 0 | NA | intron (NLIMC4a LI  | 15859 NM_016451    | 1315     | Hs. 33927  | NR_016451           | ENSG000003COPB1    | COPB                | coater         | protein-coding |                |  |  |
| chr11-121 11.14419 | -0.0147  | 0.70145  | -0.02095 | 0.983282 | 0.985177 | chr11 | 1.21E+08 | 1.21E+08 | + | 0 | NA | intron (Nintron (N  | 14171 NM_001024    | 6309     | Hs. 28774  | NR_00691E           | ENSG000003SC5D     | ERG3 S5D            | sterol-C       | protein-coding |                |  |  |
| chr14-52T 11.14419 | -0.0147  | 0.70145  | -0.02095 | 0.983282 | 0.985177 | chr14 | 52034461 | 52042601 | + | 0 | NA | intron (Nintron (N  | 30528 NM_007361    | 22795    | Hs. 36984  | NR_007361           | ENSG000003NID2     | NID-2               | nidogen        | protein-coding |                |  |  |
| chr14-551 11.14419 | -0.0147  | 0.70145  | -0.02095 | 0.983282 | 0.985177 | chr14 | 55138240 | 55146681 | + | 0 | NA | intron (Nintron (N  | 5477 NR_00322E     | 3958     | Hs. 53108  | NR_00230E           | ENSG000003LGLS3    | CBP35 GAL           | nadogen        | protein-coding |                |  |  |
| chr15-43C 11.14419 | -0.0147  | 0.70145  | -0.02095 | 0.983282 | 0.985177 | chr15 | 43356819 | 43369894 | + | 0 | NA | intron (NMIRb SINE  | 6704 NM_15224E     | 146050   | Hs. 41828  | NR_15245E           | ENSG000003ZSCAN29  | ZNF690 Zf           | zinc           | finger         | protein-coding |  |  |
| chr17-76T 11.14419 | -0.0147  | 0.70145  | -0.02095 | 0.983282 | 0.985177 | chr17 | 76717377 | 76725345 | + | 0 | NA | intron (N(AAACA)n   | 5065 NM_001081     | 23210    | Hs. 51450  | NR_01516E           | ENSG000003JMJD6    | PSR PTDSF           | jumonji        | c              | protein-coding |  |  |
| chr18-59C 11.14419 | -0.0147  | 0.70145  | -0.02095 | 0.983282 | 0.985177 | chr18 | 59343847 | 59355816 | + | 0 | NA | intron (Nintron (N  | 9434 NM_00557C     | 3998     | Hs. 46529  | NR_00557C           | ENSG000003CLMAN1   | ERGIC-53 lectin,    | n              | protein-coding |                |  |  |
| chr2-618T 11.14419 | -0.0147  | 0.70145  | -0.02095 | 0.983282 | 0.985177 | chr2  | 61870641 | 61873933 | + | 0 | NA | exon (NM exon (NM   | 16369 NM_00643C    | 10575    | Hs. 42150  | NR_00643C           | ENSG000003CCT4     | CCT-DELTA7 chaperon | protein-coding |                |                |  |  |
| chr14-55E 6.894444 | 0.019571 | 0.934154 | 0.020951 | 0.983285 | 0.985177 | chr14 | 55312757 | 55312956 | + |   |    |                     |                    |          |            |                     |                    |                     |                |                |                |  |  |



|           |          |          |          |          |          |          |       |          |          |   |      |                     |        |           |          |                    |                  |                 |           |                |                   |
|-----------|----------|----------|----------|----------|----------|----------|-------|----------|----------|---|------|---------------------|--------|-----------|----------|--------------------|------------------|-----------------|-----------|----------------|-------------------|
| chr14-55e | 15.09193 | -0.00202 | 0.612748 | -0.00329 | 0.997375 | 0.997541 | chr14 | 55618840 | 55621237 | + | 0 NA | intron (N THE1B-int | 39831  | NM_001075 | 3895     | Hs.509414NM_004986 | ENSG0000CKTN1    | CG1 KNT k       | kinectin  | protein-coding |                   |
| chr10-17e | 15.59638 | 0.001554 | 0.603674 | 0.002574 | 0.997947 | 0.998065 | chr10 | 17229905 | 17237920 | + | 0 NA | exon (NM_exon (NM_  | -3927  | NR_108061 | 1.01E+08 | Hs.740502NR_108066 | ENSG0000CVIM-AS1 | -               | VIM       | antisncRNA     |                   |
| chr9-1014 | 15.59638 | 0.001554 | 0.603674 | 0.002574 | 0.997947 | 0.998065 | chr9  | 1.01E+08 | 1.01E+08 | + | 0 NA | intron (N L2c LINE  | 6219   | NM_001278 | 7743     | Hs.50123           | NM_003452        | ENSG0000CZNF189 | -         | zinc finger    | protein-coding    |
| chr8-9451 | 13.15227 | -0.00156 | 0.653377 | -0.00238 | 0.998098 | 0.998192 | chr8  | 94511164 | 94511678 | + | 0 NA | exon (NM_exon (NM_  | -36306 | NM_001205 | 25788    | Hs.30561           | NM_006556        | ENSG0000CRAD54B | RDH54     | RAD54          | homprotein-coding |
| chr10-377 | 14.11817 | -0.00128 | 0.631062 | -0.00203 | 0.998377 | 0.998448 | chr10 | 3777691  | 3784528  | + | 0 NA | intron (N intron (N | 4100   | NR_027652 | 1316     | Hs.4055            | NM_001306        | ENSG0000CKLF6   | BCD1 CBA1 | Kruppel        | protein-coding    |
| chr19-578 | 15.11736 | 0.001056 | 0.612732 | 0.001724 | 0.998625 | 0.998651 | chr19 | 57853305 | 57868708 | + | 0 NA | 3' UTR (N 3' UTR (N | -6754  | NR_144562 | 1.01E+08 | Hs.65482CNR_144562 | UBE2CP5          | -               | ubiquitin | pseudo         |                   |
| chr11-107 | 15.08407 | -0.00105 | 0.612516 | -0.00172 | 0.998627 | 0.998651 | chr11 | 10796252 | 10807860 | + | 0 NA | promoter-promoter-  | -448   | NR_004403 | 692223   | Hs.723086NR_004403 | ENSG0000CSNORD97 | U97             | small     | nucsnRNA       |                   |
| chr20-50e | 12.65753 | 6.04E-05 | 0.669384 | 9.02E-05 | 0.999928 | 0.999928 | chr20 | 50548513 | 50548935 | + | 0 NA | intron (N LIMEi LIN | -37062 | NR_030375 | 693230   | NR_030375          | ENSG0000CMIR645  | MIRN645 t       | microRNA  | ncRNA          |                   |

Supplementary Information

Supplementary Table 8. Genome-wide profiling of differential peaks between senescent cells and counterparts exposed to ML324 (ChIP-seq for H3K9me3).

| geneID    | baseMea  | log2Fold | lfcSE    | stat     | pvalue   | padj     | Chr   | Start    | End      | Strand | Peak | Focus | Annotati          | Detailed   | Distance | Nearest   | F        | Entrez     | ID           | Nearest   | Nearest   | F         | Nearest   | F | Gene | Na | Gene | Ali | Gene | De | Gene                       | Type                     |                          |
|-----------|----------|----------|----------|----------|----------|----------|-------|----------|----------|--------|------|-------|-------------------|------------|----------|-----------|----------|------------|--------------|-----------|-----------|-----------|-----------|---|------|----|------|-----|------|----|----------------------------|--------------------------|--------------------------|
| chr16-463 | 1337.821 | 0.957639 | 0.124498 | 7.691982 | 1.45E-14 | 2.36E-11 | chr16 | 46385249 | 46391418 | +      | 0    | NA    | Intergeni         | Intergeni  | 180764   | NR_026556 | 124149   | Hs. 97414  | NM_001004299 |           | ANKRD26P1 | -         |           |   |      |    |      |     |      |    | ankyrin ipseudo            |                          |                          |
| chr13-182 | 155.23   | 0.627866 | 0.215772 | 7.665826 | 1.78E-14 | 2.36E-11 | chr13 | 18211764 | 18212397 | +      | 0    | NA    | intron            | (HSATI)Sat | 16783    | NR_027278 | 26080    | Hs. 44858  | NR_027278    | ENSG00000 | FAM230C   |           | LINC00281 |   |      |    |      |     |      |    | family wincRNA             |                          |                          |
| chr16-463 | 1994.26  | 0.969054 | 0.121511 | 7.579116 | 3.48E-14 | 3.08E-11 | chr16 | 46394248 | 46395191 | +      | 0    | NA    | Intergeni         | Intergeni  | 174378   | NR_026556 | 124149   | Hs. 97414  | NM_001004299 |           | ANKRD26P1 | -         |           |   |      |    |      |     |      |    | ankyrin ipseudo            |                          |                          |
| chr16-345 | 977.4214 | 0.933407 | 0.129949 | 7.182895 | 6.83E-13 | 3.73E-10 | chr16 | 34576209 | 34576651 | +      | 0    | NA    | Intergeni         | (AATGGAC)  | -194950  | NR_158158 | 1.03E+08 | Hs. 69271  | (NR_158158)  |           | CCNYL3    | -         |           |   |      |    |      |     |      |    | cyclin Y pseudo            |                          |                          |
| chr16-345 | 985.1891 | 0.934876 | 0.130222 | 7.192119 | 7.01E-13 | 3.73E-10 | chr16 | 34581384 | 34583827 | +      | 0    | NA    | Intergeni         | Intergeni  | -201125  | NR_158158 | 1.03E+08 | Hs. 69271  | (NR_158158)  |           | CCNYL3    | -         |           |   |      |    |      |     |      |    | cyclin Y pseudo            |                          |                          |
| chr16-345 | 398.8351 | 1.116115 | 0.175359 | 6.33908  | 2.31E-10 | 1.03E-07 | chr16 | 34592600 | 34596135 | +      | 0    | NA    | Intergeni         | (ATGATTC)  | -212887  | NR_158158 | 1.03E+08 | Hs. 69271  | (NR_158158)  |           | CCNYL3    | -         |           |   |      |    |      |     |      |    | cyclin Y pseudo            |                          |                          |
| chr3-9347 | 19119.9  | 0.746191 | 0.119444 | 6.247216 | 4.18E-10 | 1.59E-07 | chr3  | 93470447 | 93470718 | +      | 0    | NA    | Intergeni         | SAR SatE   | 503499   | NM_001314 | 5627     | Hs. 64016  | NM_00031     | ENSG0000C | PROS1     |           | PROS PS2  |   |      |    |      |     |      |    | protein iprotein-coding    |                          |                          |
| chr16-345 | 460.984  | 0.955031 | 0.158226 | 6.03587  | 1.58E-09 | 5.26E-07 | chr16 | 34584711 | 34588633 | +      | 0    | NA    | Intergeni         | Intergeni  | -205192  | NR_158158 | 1.03E+08 | Hs. 69271  | (NR_158158)  |           | CCNYL3    | -         |           |   |      |    |      |     |      |    | cyclin Y pseudo            |                          |                          |
| chr4-7392 | 208.1846 | 1.267215 | 0.159423 | 5.998106 | 2.68E-09 | 7.86E-07 | chr4  | 73906089 | 73906784 | +      | 0    | NA    | Intergeni         | LIP3 LIN   | 37043    | NM_001511 | 2919     | Hs. 789    | NM_001511    | ENSG0000C | CXCL1     |           | FSP GRO1  |   |      |    |      |     |      |    | C-X-C motif protein-coding |                          |                          |
| chr21-792 | 216.0886 | 1.127218 | 0.189427 | 5.950681 | 2.67E-09 | 7.90E-07 | chr21 | 7924944  | 7926545  | +      | 0    | NA    | Intergeni         | (ATTCCAT)  | -96112   | NM_001366 | 1.03E+08 |            | NM_00133C    | ENSG0000C | KCNE1B    |           |           |   |      |    |      |     |      |    |                            | potassium protein-coding |                          |
| chr1-1251 | 2923.842 | 0.69986  | 0.118592 | 5.9014   | 3.60E-09 | 9.59E-07 | chr1  | 1.25E+08 | 1.25E+08 | +      | 0    | NA    | Intergeni         | (ATCCAT)   | 3662312  | NR_00395F | 647121   | Hs. 697682 | NR_00395F    | ENSG0000C | EMBP1     |           |           |   |      |    |      |     |      |    |                            | embigin ipseudo          |                          |
| chr4-7457 | 70.92159 | 1.580935 | 0.266207 | 5.883871 | 1.57E-08 | 3.81E-06 | chr4  | 74597145 | 74598143 | +      | 0    | NA    | Intergeni         | TheIB-int  | 152508   | NM_001657 | 374      | Hs. 27083  | NM_001657    | ENSG0000C | AREG      |           | AR AREG   |   |      |    |      |     |      |    |                            | amphireg protein-coding  |                          |
| chr21-82  | 77.82138 | 1.600935 | 0.283207 | 5.652871 | 1.58E-08 | 3.82E-06 | chr21 | 8238242  | 8239161  | +      | 0    | NA    | intron            | (CpG)      | -10804   | NR_12871F | 1.04E+08 |            | NR_12871F    | ENSG0000C | MIR6724-2 |           | hsa-mir-6 |   |      |    |      |     |      |    |                            | microRNA ncRNA           |                          |
| chr21-84  | 80.48769 | 1.519658 | 0.277522 | 5.475478 | 4.36E-08 | 9.68E-06 | chr21 | 8465906  | 8466762  | +      | 0    | NA    | Intergeni         | CpG        | 25188    | NR_145822 | 1.07E+08 |            | NR_145822    | RNA28SN1  |           | RNA28S4   |           |   |      |    |      |     |      |    |                            | RNA, 28S rRNA            |                          |
| chr16-345 | 369.4686 | 0.860228 | 0.15846  | 5.4312   | 5.60E-08 | 1.15E-05 | chr16 | 34571570 | 34574179 | +      | 0    | NA    | Intergeni         | (GAATG)n   | -191394  | NR_158158 | 1.03E+08 | Hs. 69271  | (NR_158158)  |           | CCNYL3    | -         |           |   |      |    |      |     |      |    |                            | cyclin Y pseudo          |                          |
| chr22-187 | 67.48959 | 1.697298 | 0.317163 | 5.351505 | 8.72E-08 | 1.66E-05 | chr22 | 18730403 | 18730687 | +      | 0    | NA    | Intergeni         | AluSc8 S1  | -3369    | NR_136561 | 642643   |            | NR_136561    | ENSG0000C | FAM230E   |           | LINC01662 |   |      |    |      |     |      |    |                            | family wincRNA           |                          |
| chr19-74  | 78.96977 | 1.471225 | 0.277574 | 5.300306 | 1.16E-07 | 2.05E-05 | chr19 | 7450649  | 7451088  | +      | 0    | NA    | intron            | (intron)   | 11180    | NM_00113C | 23370    | Hs. 465761 | NM_01531F    | ENSG0000C | ARHGFE18  |           | P114-RhoC |   |      |    |      |     |      |    |                            | Rho/Rac iprotein-coding  |                          |
| chr18-106 | 598.889  | 0.755311 | 0.144577 | 5.224923 | 1.75E-07 | 2.91E-05 | chr18 | 106751   | 110983   | +      | 0    | NA    | promoter-promoter |            | -198     | NR_03377C | 727758   | Hs. 58584  | NR_03377C    | ENSG0000C | ROCK1P1   |           | ROCK1P    |   |      |    |      |     |      |    |                            | Rho assoc pseudo         |                          |
| chr4-7461 | 565.6883 | 0.74311  | 0.139761 | 5.201193 | 1.78E-07 | 2.97E-05 | chr4  | 74616713 | 74616924 | +      | 0    | NA    | Intergeni         | AluYg6 S1  | 171682   | NM_001657 | 374      | Hs. 27083  | NM_001657    | ENSG0000C | AREG      |           | AR AREG   |   |      |    |      |     |      |    |                            | amphireg protein-coding  |                          |
| chr22-187 | 58.06839 | 1.666498 | 0.329684 | 5.054834 | 4.31E-07 | 6.74E-05 | chr22 | 18896273 | 18896495 | +      | 0    | NA    | Intergeni         | AluSc8 S1  | -1953    | NR_136571 | 1.01E+08 | Hs. 63166  | NR_136571    | FAM230F   |           | LINC01662 |           |   |      |    |      |     |      |    |                            | family wincRNA           |                          |
| chr22-12  | 220.3159 | 0.911259 | 0.180555 | 4.924263 | 8.47E-07 | 0.00125  | chr22 | 12691998 | 12692698 | +      | 0    | NA    | Intergeni         | BSR Beta   | 794942   | NR_110761 | 1.03E+08 | Hs. 65292  | NR_110761    | LOC10272  |           |           |           |   |      |    |      |     |      |    |                            | uncharactncRNA           |                          |
| chr16-345 | 209.8437 | 0.885876 | 0.187485 | 4.725048 | 2.30E-06 | 0.00311  | chr16 | 34590197 | 34590971 | +      | 0    | NA    | Intergeni         | Intergeni  | -209104  | NR_158158 | 1.03E+08 | Hs. 69271  | (NR_158158)  |           | CCNYL3    | -         |           |   |      |    |      |     |      |    |                            | cyclin Y pseudo          |                          |
| chr1-143  | 954.515  | 0.618264 | 0.131109 | 4.715658 | 2.41E-06 | 0.000311 | chr1  | 1.43E+08 | 1.43E+08 | +      | 0    | NA    | Intergeni         | Intergeni  | 190305   | NR_027354 | 645166   | Hs. 74418  | NR_027354    | LSP1P5    | -         |           |           |   |      |    |      |     |      |    |                            | LSP1 pset pseudo         |                          |
| chr10-38  | 105.5385 | 1.52831  | 0.24467  | 4.71178  | 2.46E-06 | 0.000311 | chr10 | 38814066 | 38814283 | +      | 0    | NA    | Intergeni         | (TTCCA)n   | 117578   | NR_04500C | 399746   | Hs. 742607 | NR_04500C    | ACTR3BP5  |           | FKSG74    |           |   |      |    |      |     |      |    |                            | ACTR3B ipseudo           |                          |
| chr1-143  | 539.7323 | 0.693613 | 0.148042 | 4.685239 | 2.80E-06 | 0.000327 | chr1  | 1.43E+08 | 1.43E+08 | +      | 0    | NA    | Intergeni         | Intergeni  | 220714   | NR_027354 | 645166   | Hs. 74418  | NR_027354    | LSP1P5    | -         |           |           |   |      |    |      |     |      |    |                            |                          | LSP1 pset pseudo         |
| chr21-841 | 83.01365 | 1.25844  | 0.268731 | 4.682901 | 2.83E-06 | 0.000327 | chr21 | 8417753  | 8421618  | +      | 0    | NA    | Intergeni         | (CT)n Sin  | -12845   | NR_12871F | 1.04E+08 |            | NR_12871F    | ENSG0000C | MIR6724-2 |           | hsa-mir-6 |   |      |    |      |     |      |    |                            |                          | microRNA ncRNA           |
| chr5-496  | 201.9791 | 0.88438  | 0.191229 | 4.624706 | 3.75E-06 | 0.000416 | chr5  | 49656727 | 49661851 | +      | 0    | NA    | Intergeni         | (TCCAT)n   | 781999   | NR_19844F | 133418   | Hs. 56141  | NM_19844F    | ENSG0000C | EMB       |           | GP70      |   |      |    |      |     |      |    |                            |                          | embigin protein-coding   |
| chrY-113  | 154.9628 | 0.959134 | 0.209637 | 4.575216 | 4.76E-06 | 0.000491 | chrY  | 11308780 | 11309700 | +      | 0    | NA    | Intergeni         | BSR Beta   | 1112350  | NR_033667 | 352887   | Hs. 54622  | NR_033667    | ENSG0000C | GYG2P1    |           | GYG2P     |   |      |    |      |     |      |    |                            |                          | glycogenipseudo          |
| chr4-744  | 442.1046 | 0.782491 | 0.146344 | 4.438981 | 4.80E-06 | 0.000491 | chr4  | 74498802 | 74499010 | +      | 0    | NA    | Intergeni         | LIM2 LINE  | 53770    | NM_001657 | 374      | Hs. 27083  | NM_001657    | ENSG0000C | AREG      |           | AR AREG   |   |      |    |      |     |      |    |                            |                          | amphireg protein-coding  |
| chr1-143  | 456.4059 | 0.728491 | 0.159443 | 4.568982 | 4.90E-06 | 0.000491 | chr1  | 1.43E+08 | 1.43E+08 | +      | 0    | NA    | Intergeni         | Intergeni  | 228599   | NR_027354 | 645166   | Hs. 74418  | NR_027354    | LSP1P5    | -         |           |           |   |      |    |      |     |      |    |                            |                          | LSP1 pset pseudo         |
| chr1-143  | 859.2624 | 0.61188  | 0.134027 | 4.565351 | 4.99E-06 | 0.000491 | chr1  | 1.43E+08 | 1.43E+08 | +      | 0    | NA    | Intergeni         | Intergeni  | 225059   | NR_027354 | 645166   | Hs. 74418  | NR_027354    | LSP1P5    | -         |           |           |   |      |    |      |     |      |    |                            |                          | LSP1 pset pseudo         |
| chr1-143  | 861.5436 | 0.60632  | 0.133534 | 4.540562 | 5.61E-06 | 0.000533 | chr1  | 1.43E+08 | 1.43E+08 | +      | 0    | NA    | Intergeni         | Intergeni  | 159146   | NR_027354 | 645166   | Hs. 74418  | NR_027354    | LSP1P5    | -         |           |           |   |      |    |      |     |      |    |                            |                          | LSP1 pset pseudo         |
| chr21-84  | 81.33793 | 1.214809 | 0.270321 | 4.493945 | 6.99E-06 | 0.000642 | chr21 | 8462267  | 8464656  | +      | 0    | NA    | Intergeni         | CpG        | 22315    | NR_145822 | 1.07E+08 |            | NR_145822    | RNA28SN1  |           | RNA28S4   |           |   |      |    |      |     |      |    |                            |                          | RNA, 28S rRNA            |
| chr4-1901 | 435.2916 | 0.661489 | 0.151437 | 4.368082 | 1.25E-05 | 0.001089 | chr4  | 1.9E+08  | 1.9E+08  | +      | 0    | NA    | intron            | (BSR Beta) | 4915     | NM_00129F | 1E+08    | Hs. 72874  | NR_00120F    | ENSG0000C | DUX4      |           | DUX4L     |   |      |    |      |     |      |    |                            |                          | double hc protein-coding |
| chr21-841 | 83.19381 | 1.176564 | 0.269522 | 4.36537  | 1.27E-05 | 0.001089 | chr21 | 8413209  | 8414866  | +      | 0    | NA    | Intergeni         | (GA)n Sin  | 17111    | NR_146154 | 1.1E+08  |            | NR_146154    | RNA28SN3  |           |           |           |   |      |    |      |     |      |    |                            |                          | RNA, 28S rRNA            |
| chr21-82  | 85.05329 | 1.166188 | 0.271275 | 4.298908 | 1.72E-05 | 0.001427 | chr21 | 8231679  | 8232093  | +      | 0    | NA    | intron            | (intron)   | -17619   | NR_12871F | 1.04E+08 |            | NR_12871F    | ENSG0000C | MIR6724-2 |           | hsa-mir-6 |   |      |    |      |     |      |    |                            |                          | microRNA ncRNA           |
| chr21-82  | 81.11978 | 1.155908 | 0.269441 | 4.29002  | 1.79E-05 | 0.001441 | chr21 | 8234470  | 8237329  | +      | 0    | NA    | intron            | (intron)   | -13606   | NR_12871F | 1.04E+08 |            | NR_12871F    | ENSG0000C | MIR6724-2 |           | hsa-mir-6 |   |      |    |      |     |      |    |                            |                          |                          |



|                   |          |          |          |          |          |       |          |          |   |      |                     |          |           |          |                                         |                                   |                          |                         |
|-------------------|----------|----------|----------|----------|----------|-------|----------|----------|---|------|---------------------|----------|-----------|----------|-----------------------------------------|-----------------------------------|--------------------------|-------------------------|
| chr4-491.35.89665 | 1.03714  | 0.38641  | 2.68404  | 0.007274 | 0.174109 | chr4  | 49147322 | 49147735 | + | O NA | Intergeni (TCCAT)n  | 160886   | NM_001286 | 80157    | Hs.47970:NM_025087:ENSG00000:CWH43      | CWH43-C Cell wall protein-coding  |                          |                         |
| chr4-491.50.48084 | 0.875923 | 0.327075 | 2.678044 | 0.007405 | 0.174109 | chr4  | 49118457 | 49123545 | + | O NA | Intergeni (TCCAT)n  | 134359   | NM_001286 | 80157    | Hs.47970:NM_025087:ENSG00000:CWH43      | CWH43-C Cell wall protein-coding  |                          |                         |
| chr21-82.78.14614 | 0.720527 | 0.269114 | 2.677406 | 0.007419 | 0.174109 | chr21 | 8205089  | 8221436  | + | O NA | promoter-promoter-  | -626     | NR_003287 | 1E+08    | NR_003287                               | RNA28SN5                          | RN28S1 RNA, 28S rRNA     |                         |
| chr14-17.166.7364 | 0.535958 | 0.200289 | 2.675919 | 0.007452 | 0.174109 | chr14 | 17292175 | 17293039 | + | O NA | IntergeniALR/Alph   | -1308240 | NM_001013 | 440153   | Hs.53488:NM_001013:ENSG00000:OR11H12    | -                                 | olfactory protein-coding |                         |
| chr10-13.31.60412 | 1.104161 | 0.412637 | 2.675625 | 0.007459 | 0.174109 | chr10 | 1.34E+08 | 1.34E+08 | + | O NA | IntergeniCpG        | -127266  | NM_00108C | 441581   | Hs.69047:NM_00108C:ENSG00000:FRG2B      | -                                 | FSHD regiprotein-coding  |                         |
| chr22-12.39.57452 | 0.999502 | 0.375708 | 2.660315 | 0.007807 | 0.180642 | chr22 | 12693729 | 12693954 | + | O NA | IntergeniCpG        | 796435   | NR_110761 | 1.03E+08 | Hs.65292:NR_110761                      | LOC102722-                        | uncharactncRNA           |                         |
| chr10-42.67.88027 | 0.758687 | 0.285923 | 2.653469 | 0.007967 | 0.182758 | chr10 | 42085740 | 42086729 | + | O NA | IntergeniIntergeni  | 281811   | NR_02438C | 441666   | Hs.25572:NR_02438C:ENSG00000:LOC441666- | -                                 | zinc finpseuso           |                         |
| chr4-493.29.189   | 1.102452 | 0.422514 | 2.609266 | 0.009074 | 0.205691 | chr4  | 49303480 | 49304037 | + | O NA | IntergeniIntergeni  | 317116   | NM_001286 | 80157    | Hs.47970:NM_025087:ENSG00000:CWH43      | CWH43-C Cell wall protein-coding  |                          |                         |
| chr21-12.148.0029 | 0.547554 | 0.210121 | 2.605902 | 0.009163 | 0.205691 | chr21 | 12034962 | 12035320 | + | O NA | IntergeniALR/Alph   | -1003025 | NR_02691E | 149992   | Hs.55864:NM_153773                      | ANKRD30B C2lorf99 ankyrin ipseudo |                          |                         |
| chr21-82.72.00717 | 0.73403  | 0.281822 | 2.604587 | 0.009199 | 0.205691 | chr21 | 8249636  | 8251949  | + | O NA | intron (CpG)        | 1287     | NR_12871E | 1.04E+08 | NR_12871E:ENSG00000:MIR6724-            | hsa-mir-6724-microRNA ncRNA       |                          |                         |
| chrY-113.79.82128 | 0.701415 | 0.271055 | 2.587725 | 0.009661 | 0.211226 | chrY  | 11332065 | 11332297 | + | O NA | IntergeniIntergeni  | 1089409  | NR_033667 | 352887   | Hs.546221:NR_033667:ENSG00000:GYG2P1    | GYG2P                             | glycogenipseudo          |                         |
| chr4-496.31.0989  | 1.060981 | 0.410008 | 2.587711 | 0.009662 | 0.211226 | chr4  | 49654730 | 49657834 | + | O NA | Intergeni (GAATG)n  | 669640   | NM_001286 | 80157    | Hs.47970:NM_025087:ENSG00000:CWH43      | CWH43-C Cell wall protein-coding  |                          |                         |
| chr1-143.153.7888 | 0.536175 | 0.207364 | 2.585666 | 0.009719 | 0.211226 | chr1  | 1.43E+08 | 1.43E+08 | + | O NA | IntergeniIntergeni  | 215927   | NR_027354 | 645166   | Hs.74418:NR_027354                      | LSP1P5                            | LSP1 psetpseudo          |                         |
| chr6-591.616.6632 | 0.377905 | 0.146243 | 2.584093 | 0.009764 | 0.211226 | chr6  | 59163307 | 59163384 | + | O NA | IntergeniALR/Alph   | -1201764 | NR_132994 | 1.07E+08 | Hs.56153:NR_125727:ENSG00000:LINC0068C- | -                                 | long intencRNA           |                         |
| chrY-568.532.6253 | 0.562954 | 0.219017 | 2.570363 | 0.010159 | 0.216975 | chrY  | 56850780 | 56851016 | + | O NA | IntergeniBSR/BetaI  | -103357  | NM_00584C | 10251    | Hs.38191:NM_00584C:ENSG00000:SPRY3      | spry-3                            | sprouty protein-coding   |                         |
| chr4-490.45.13812 | 0.882643 | 0.343632 | 2.568572 | 0.010212 | 0.216975 | chr4  | 49094824 | 49100395 | + | O NA | Intergeni (CATT)n   | 110967   | NM_001286 | 80157    | Hs.47970:NM_025087:ENSG00000:CWH43      | CWH43-C Cell wall protein-coding  |                          |                         |
| chr4-490.45.19931 | 0.879535 | 0.342746 | 2.566145 | 0.010284 | 0.216975 | chr4  | 49091335 | 49093996 | + | O NA | Intergeni (CATT)n   | 106023   | NM_001286 | 80157    | Hs.47970:NM_025087:ENSG00000:CWH43      | CWH43-C Cell wall protein-coding  |                          |                         |
| chr19-25.57.42127 | 0.795919 | 0.310454 | 2.563729 | 0.010355 | 0.216975 | chr19 | 25339220 | 25339455 | + | O NA | IntergeniALR/Alph   | -1175890 | NR_00360C | 1E+08    | Hs.14931:NR_00360C:ENSG00000:HAVCR1P1   | -                                 | hepatitis ipseudo        |                         |
| chr17-26.1060.693 | 0.37827  | 0.14771  | 2.560891 | 0.010444 | 0.217046 | chr17 | 26889099 | 26889598 | + | O NA | IntergeniALR/Alph   | 205808   | NR_135673 | 1.05E+08 | Hs.64991:NR_135673                      | LOC105371-                        | uncharactncRNA           |                         |
| chr14-17.44.1853  | 0.90061  | 0.3541   | 2.543375 | 0.010979 | 0.225562 | chr14 | 17293992 | 17294229 | + | O NA | IntergeniALR/Alph   | -1307007 | NM_001013 | 440153   | Hs.53488:NM_001013:ENSG00000:OR11H12    | -                                 | olfactory protein-coding |                         |
| chr21-84.92.51276 | 0.637477 | 0.25077  | 2.542077 | 0.01102  | 0.225562 | chr21 | 8434042  | 8439078  | + | O NA | promoter-promoter-  | 235      | NR_16210E | 1.13E+08 | NR_16210E                               | MIR10396-                         | microRNA ncRNA           |                         |
| chr17-21.44.42978 | 0.870158 | 0.345276 | 2.520185 | 0.011729 | 0.237431 | chr17 | 21972992 | 21973211 | + | O NA | Intergeni (ATGG)n   | -229894  | NR_14454E | 23666    | Hs.49991:NR_14454E:ENSG00000:UBBP4      | -                                 | ubiquitin ipseudo        |                         |
| chr7-158.20.03978 | 1.289115 | 0.511812 | 2.51873  | 0.011778 | 0.237431 | chr7  | 1.58E+08 | 1.58E+08 | + | O NA | intron (intron)     | 296834   | NR_03896E | 1.01E+08 | Hs.66126:NR_03896E                      | LOC10050E-                        | uncharactncRNA           |                         |
| chr17-26.834.0117 | 0.359579 | 0.14324  | 2.510323 | 0.012062 | 0.241332 | chr17 | 26619430 | 26620602 | + | O NA | IntergeniALR/Alph   | 469225   | NR_135673 | 1.05E+08 | Hs.64991:NR_135673                      | LOC105371-                        | uncharactncRNA           |                         |
| chr21-83.76.2707  | 0.678223 | 0.272041 | 2.493095 | 0.012663 | 0.251026 | chr21 | 8392494  | 8397399  | + | O NA | promoter-promoter-  | -660     | NR_14615E | 1.1E+08  | NR_14615E:ENSG00000:RNA5-8SN-           | -                                 | RNA, 5.8S rRNA           |                         |
| chr2-161.28.61976 | 1.060872 | 0.425751 | 2.491088 | 0.012735 | 0.251026 | chr2  | 1.61E+08 | 1.61E+08 | + | O NA | IntergeniMER21B L   | -25954   | NR_11059E | 1.02E+08 | Hs.66648:NR_11059E                      | LOC10192E-                        | uncharactncRNA           |                         |
| chr10-13.24.75264 | 1.143825 | 0.460136 | 2.485839 | 0.012925 | 0.252886 | chr10 | 1.34E+08 | 1.34E+08 | + | O NA | IntergeniCpG        | -40735   | NM_00108C | 441581   | Hs.69047:NM_00108C:ENSG00000:FRG2B      | -                                 | FSHD regiprotein-coding  |                         |
| chr1-143.132.4453 | 0.539797 | 0.217869 | 2.477627 | 0.013226 | 0.256892 | chr1  | 1.43E+08 | 1.43E+08 | + | O NA | IntergeniIntergeni  | 176896   | NR_027354 | 645166   | Hs.74418:NR_027354                      | LSP1P5                            | LSP1 psetpseudo          |                         |
| chr13-16.74.28317 | 0.681099 | 0.275448 | 2.474208 | 0.013421 | 0.258785 | chr13 | 16499361 | 16499620 | + | O NA | IntergeniALR/Alph   | -1695807 | NR_02727E | 26080    | Hs.44858:NR_02727E:ENSG00000:FAM230C    | LINC00281                         | family wincRNA           |                         |
| chr4-491.35.33288 | 0.954049 | 0.38792  | 2.459394 | 0.013917 | 0.266429 | chr4  | 49143929 | 49144792 | + | O NA | Intergeni (TCCAT)n  | 157718   | NM_001286 | 80157    | Hs.47970:NM_025087:ENSG00000:CWH43      | CWH43-C Cell wall protein-coding  |                          |                         |
| chr10-40.382.6345 | 0.391855 | 0.159581 | 2.455524 | 0.014068 | 0.267191 | chr10 | 40980955 | 40981353 | + | O NA | IntergeniALR/Alph   | 1386891  | NR_02438C | 441666   | Hs.25572:NR_02438C:ENSG00000:LOC441666- | -                                 | zinc finpseuso           |                         |
| chr1-125.111.6982 | 0.573006 | 0.233571 | 2.453235 | 0.014158 | 0.267191 | chr1  | 1.25E+08 | 1.25E+08 | + | O NA | IntergeniIntergeni  | 3648968  | NR_00395E | 647121   | Hs.69768:NR_00395E:ENSG00000:EMB1P1     | -                                 | embigin ipseudo          |                         |
| chr21-83.68.03768 | 0.700149 | 0.28654  | 2.44346  | 0.014547 | 0.272606 | chr21 | 8398309  | 8402921  | + | O NA | non-codir-non-codir | 3689     | NR_146154 | 1.1E+08  | NR_146154                               | RNA28SN3                          | RNA, 28S rRNA            |                         |
| chr10-38.33.01654 | 0.972795 | 0.398575 | 2.440684 | 0.014659 | 0.272789 | chr10 | 38526789 | 38529774 | + | O NA | IntergeniIntergeni  | 100135   | NR_024497 | 399744   | Hs.49795:NM_001013665                   | LINC0099E-                        | long intencRNA           |                         |
| chr15-20.18.44122 | 1.284102 | 0.529836 | 2.423585 | 0.015368 | 0.283991 | chr15 | 20340307 | 20342614 | + | O NA | Intergeni (AGCAGCC) | 58716    | NR_03883C | 646096   | Hs.44878:NR_03883E:ENSG00000:CHEK2P2    | -                                 | checkpoir pseudo         |                         |
| chr21-82.52.29612 | 0.770448 | 0.320399 | 2.404652 | 0.016188 | 0.290705 | chr21 | 8257870  | 8260861  | + | O NA | non-codir-non-codir | 2584     | NR_14612C | 1.1E+08  | NR_14612C                               | RNA5-8SN-8S1 FRNA, 5.8S rRNA      |                          |                         |
| chr4-493.41.49717 | 0.861599 | 0.359503 | 2.39664  | 0.016546 | 0.299946 | chr4  | 49331326 | 49331603 | + | O NA | IntergeniIntergeni  | 344822   | NM_001286 | 80157    | Hs.47970:NM_025087:ENSG00000:CWH43      | CWH43-C Cell wall protein-coding  |                          |                         |
| chr21-98.24.49776 | 1.116632 | 0.466017 | 2.396119 | 0.01657  | 0.299946 | chr21 | 9818836  | 9819818  | + | O NA | intron (SST1 Sate)  | 1734     | NR_038377 | 441058   | Hs.13053:NR_038377                      | LINC01667-                        | long intencRNA           |                         |
| chr5-496.285.275  | 0.429149 | 0.179328 | 2.393092 | 0.016707 | 0.300388 | chr5  | 49612239 | 49617181 | + | O NA | IntergeniALR/Alph   | 826578   | NR_19844E | 133418   | Hs.56141:NM_19844E:ENSG00000:EMB        | GP70                              | embigin protein-coding   |                         |
| chr4-492.39.14938 | 0.873678 | 0.366481 | 2.383961 | 0.017127 | 0.303775 | chr4  | 49628921 | 49624287 | + | O NA | IntergeniIntergeni  | 296982   | NM_001286 | 80157    | Hs.47970:NM_025087:ENSG00000:CWH43      | CWH43-C Cell wall protein-coding  |                          |                         |
| chr4-496.23.21414 | 1.124193 | 0.471661 | 2.383475 | 0.01715  | 0.303775 | chr4  | 49605029 | 4962998  | + | O NA | Intergeni (GAATG)n  | 665121   | NR_001286 | 80157    | Hs.47970:NM_025087:ENSG00000:CWH43      | CWH43-C Cell wall protein-coding  |                          |                         |
| chr1-228.17.15533 | 1.307567 | 0.54903  | 2.381594 | 0.017238 | 0.303775 | chr1  | 2.29E+08 | 2.29E+08 | + | O NA | promoter-promoter-  | -332     | NR_02336E | 1E+08    | NR_02336E:ENSG00000:RNA5S3              | RN5S3                             | RNA, 5S rRNA             |                         |
| chr13-17.44.97342 | 0.817364 | 0.345641 | 2.36478  | 0.018041 | 0.315832 | chr13 | 17938650 | 17939828 | + | O NA | IntergeniALR/Alph   | -256500  | NR_02727E | 26080    | Hs.44858:NR_02727E:ENSG00000:FAM230C    | LINC00281                         | family wincRNA           |                         |
| chr17-26.74.36995 | 0.652367 | 0.276462 | 2.3597   | 0.01829  | 0.318098 | chr17 | 26398434 | 26398681 | + | O NA | IntergeniALR/Alph   | 690684   | NR_135673 | 1.05E+08 | Hs.64991:NR_135673                      | LOC105371-                        | uncharactncRNA           |                         |
| chr3-924.30.38413 | 0.976656 | 0.417803 | 2.337598 | 0.019408 | 0.335357 | chr3  | 92488771 | 92489132 | + | O NA | IntergeniALR/Alph   | 1485130  | NM_001314 | 5627     | Hs.64016                                | NM_00031E:ENSG00000:PROS1         | PROS PS21                | protein iprotein-coding |
| chr20-31.43.71558 | 0.810873 | 0.348192 | 2.328812 | 0.019869 | 0.339873 | chr20 | 31070737 | 31075918 | + | O NA | Intergeni (GGAAT)n  | -184337  | NM_001037 | 245929   | Hs.58079:NM_001037:ENSG00000:DEFB115    | DEFB-15                           | defensin protein-coding  |                         |
| chr20-31.45.23321 | 0.796001 | 0.342136 | 2.326563 | 0.019889 | 0.339873 | chr20 | 31051831 | 31069353 | + | O NA | Intergeni (GGAAT)n  | -197072  | NM_001037 | 245929   | Hs.58079:NM_001037:ENSG00000:DEFB115    | DEFB-15                           | defensin protein-coding  |                         |
| chr22-10.18.70441 | 1.221582 | 0.529228 | 2.322717 | 0.020194 | 0.339873 | chr22 | 10936435 | 10936654 | + | O NA | IntergeniAluJ SIN   | 24985    | NR_13232C | 1.03E+08 | NR_13232C                               | FRG1P                             | FSHD regipseudo          |                         |
| chr10-41.27.70526 | 1.000464 | 0.430813 | 2.322272 | 0.020218 | 0.339873 | chr10 | 41898644 | 41900563 | + | O NA | Intergeni (AATGG)n  | 468442   | NR_02438C | 441666   | Hs.25572:NR_02438C:ENSG00000:LOC441666- | -                                 | zinc finpseuso           |                         |
| chr3-918.49.22328 | 0.770781 | 0.332146 | 2.320607 | 0.020308 | 0.339873 | chr3  | 91891250 | 91891551 | + | O NA | IntergeniACRO1 Sat  | 2082681  | NM_001314 | 5627     | Hs.64016                                | NM_00031E:ENSG                    |                          |                         |

|           |          |          |            |          |          |          |       |          |          |   |      |                    |          |           |          |           |           |            |                 |                                   |
|-----------|----------|----------|------------|----------|----------|----------|-------|----------|----------|---|------|--------------------|----------|-----------|----------|-----------|-----------|------------|-----------------|-----------------------------------|
| chr21-104 | 16.76324 | 1.078207 | 0.554932   | 1.942954 | 0.052022 | 0.595334 | chr21 | 10422932 | 10423215 | + | O NA | intron (AluSx)SIN  | 9541     | NM_182481 | 85318    | Hs.545788 | NR_182481 | BAGE3      | CT2.3           | BAGE famiprotein-coding           |
| chr19-266 | 84.33193 | 0.505273 | 0.26039    | 1.940447 | 0.052325 | 0.595334 | chr19 | 26504043 | 26504551 | + | O NA | IntergeniALR/Alphe | -1289134 | NR_110688 | 1.02E+08 | Hs.567934 | NR_110688 | ENSG000001 | LOC101927       | uncharacteractnRNA                |
| chr4-4911 | 28.5187  | 0.817695 | 0.422057   | 1.937405 | 0.052696 | 0.595334 | chr4  | 49114412 | 49115632 | + | O NA | Intergeni(TCCAT)n  | 128380   | NM_001286 | 80157    | Hs.479703 | NR_025087 | ENSG00000  | CWH43           | CWH43-C fcell wallprotein-coding  |
| chr5-477  | 60.71318 | 0.587494 | 0.303515   | 1.935649 | 0.052911 | 0.595334 | chr5  | 47739713 | 47739935 | + | O NA | IntergeniALR/Alphe | -2043444 | NR_021072 | 348980   | Hs.353176 | NR_021072 | ENSG00000  | HCN1            | BCNG-1 BChyperpolz:protein-coding |
| chr7-6051 | 58.72452 | 0.587991 | 0.303524   | 1.935667 | 0.052921 | 0.595334 | chr7  | 60517707 | 60518137 | + | O NA | IntergeniALR/Alphe | 2786134  | NR_003952 | 643955   | Hs.583308 | NR_003952 | ENSG00000  | ZNF733          | ZNF733 zinc fingpseudo            |
| chr22-121 | 18.2837  | 1.017188 | 0.525751   | 1.934734 | 0.053023 | 0.595334 | chr22 | 12171044 | 12172316 | + | O NA | IntergeniACRO1 Sat | 274274   | NR_110761 | 1.03E+08 | Hs.652928 | NR_110761 | LOC102722  | -               | uncharacteractnRNA                |
| chr10-418 | 42.05214 | 0.679138 | 0.352768   | 1.925169 | 0.054208 | 0.604519 | chr10 | 41845595 | 41846536 | + | O NA | IntergeniIntergeni | 521980   | NR_024388 | 441666   | Hs.255729 | NR_024388 | ENSG00000  | LOC441666       | zinc fingpseudo                   |
| chr22-141 | 46.54383 | 0.652161 | 0.338878   | 1.924473 | 0.054295 | 0.604519 | chr22 | 14170542 | 14170789 | + | O NA | IntergeniALR/Alphe | -1357494 | NM_001006 | 81061    | Hs.554706 | NR_001006 | ENSG00000  | OR11H12         | OR11H12 colfactoryprotein-coding  |
| chr19-248 | 98.23847 | 0.476154 | 0.247825   | 1.921329 | 0.05469  | 0.606378 | chr19 | 24891532 | 24891790 | + | O NA | IntergeniALR/Alphe | -728214  | NR_003605 | 1E+08    | Hs.149312 | NR_003605 | ENSG00000  | HAVCR1P1        | hepatitispseudo                   |
| chr14-174 | 39.31538 | 0.710116 | 0.370666   | 1.915787 | 0.055392 | 0.610014 | chr14 | 17498868 | 17499418 | + | O NA | IntergeniALR/Alphe | -1101974 | NM_001013 | 440153   | Hs.534888 | NR_001013 | ENSG00000  | OR11H12         | olfactoryprotein-coding           |
| chr19-266 | 82.87833 | 0.506051 | 0.264528   | 1.913037 | 0.055743 | 0.610014 | chr19 | 26951168 | 26951399 | + | O NA | IntergeniALR/Alphe | -842148  | NR_110688 | 1.02E+08 | Hs.567934 | NR_110688 | ENSG00000  | LOC101927       | uncharacteractnRNA                |
| chr4-4932 | 50.17052 | 0.622166 | 0.325628   | 1.910665 | 0.056048 | 0.610014 | chr4  | 49321369 | 49321614 | + | O NA | IntergeniIntergeni | 334849   | NM_001286 | 80157    | Hs.479703 | NR_025087 | ENSG00000  | CWH43           | CWH43-C fcell wallprotein-coding  |
| chr12-351 | 30.9563  | 0.798962 | 0.41834    | 1.909842 | 0.056154 | 0.610014 | chr12 | 35133494 | 35133761 | + | O NA | IntergeniALR/Alphe | 1111131  | NM_032834 | 84920    | Hs.102971 | NR_032834 | ENSG00000  | ALG10           | ALG10 DIALG10 al protein-coding   |
| chr5-488  | 118.9689 | 0.45212  | 0.236809   | 1.909221 | 0.056234 | 0.610014 | chr5  | 48860477 | 48860835 | + | O NA | IntergeniALR/Alphe | 1580632  | NR_198444 | 133418   | Hs.561411 | NR_198444 | ENSG00000  | EMB             | GP70 embigin protein-coding       |
| chr4-496  | 21.74098 | 0.917308 | 0.480774   | 1.907981 | 0.056394 | 0.610014 | chr4  | 49647424 | 49648793 | + | O NA | Intergeni(GAATG)n  | 661466   | NM_001286 | 80157    | Hs.479703 | NR_025087 | ENSG00000  | CWH43           | CWH43-C fcell wallprotein-coding  |
| chr3-908  | 26.6054  | 0.842639 | 0.444363   | 1.896285 | 0.057922 | 0.615386 | chr3  | 90835879 | 90836119 | + | O NA | IntergeniALR/Alphe | 1728378  | NR_005233 | 2042     | Hs.123642 | NR_005233 | ENSG00000  | EPH43           | EK4 ETK EHPH recep protein-coding |
| chr19-266 | 117.1375 | 0.454218 | 0.239806   | 1.894107 | 0.058211 | 0.615386 | chr19 | 26353442 | 26353692 | + | O NA | IntergeniALR/Alphe | -1439864 | NR_110688 | 1.02E+08 | Hs.567934 | NR_110688 | ENSG00000  | LOC101927       | uncharacteractnRNA                |
| chrY-1116 | 16.41913 | 0.501099 | 0.554467   | 1.89407  | 0.058216 | 0.615386 | chrY  | 11194869 | 11195237 | + | O NA | IntergeniAluSx1 S1 | 125637   | NR_033667 | 352887   | Hs.546221 | NR_033667 | ENSG00000  | GYG2P1          | GYG2P glycoenipseudo              |
| chr21-104 | 16.45001 | 1.046008 | 0.552295   | 1.893929 | 0.058234 | 0.615386 | chr21 | 10425419 | 10425988 | + | O NA | intron (L1MC5)LIN  | 12171    | NM_182481 | 85318    | Hs.545788 | NR_182481 | BAGE3      | CT2.3           | BAGE famiprotein-coding           |
| chr13-167 | 46.25581 | 0.637558 | 0.337049   | 1.891587 | 0.058546 | 0.615386 | chr13 | 16776587 | 16777463 | + | O NA | IntergeniALR/Alphe | -1418272 | NR_027278 | 26080    | Hs.448588 | NR_027278 | ENSG00000  | FAM230C         | LINC00281family wincRNA           |
| chr22-141 | 46.48032 | 1.041811 | 0.552529   | 1.885532 | 0.059358 | 0.615386 | chr22 | 14150454 | 14150762 | + | O NA | IntergeniALR/Alphe | -1377551 | NM_001006 | 81061    | Hs.554706 | NR_001006 | ENSG00000  | OR11H1          | OR11H12 colfactoryprotein-coding  |
| chr10-418 | 25.71405 | 0.836114 | 0.444207   | 1.882263 | 0.0598   | 0.615386 | chr10 | 41857801 | 41861974 | + | O NA | Intergeni(ATGGA)n  | 508158   | NR_024388 | 441666   | Hs.255729 | NR_024388 | ENSG00000  | LOC441666       | zinc fingpseudo                   |
| chr19-256 | 96.02468 | 0.465831 | 0.247576   | 1.881569 | 0.059895 | 0.615386 | chr19 | 25050249 | 25051413 | + | O NA | IntergeniALR/Alphe | -887384  | NR_003605 | 1E+08    | Hs.149312 | NR_003605 | ENSG00000  | HAVCR1P1        | hepatitispseudo                   |
| chr14-166 | 26.23211 | 0.826304 | 0.43931    | 1.880913 | 0.059984 | 0.615386 | chr14 | 16982305 | 16982973 | + | O NA | IntergeniALR/Alphe | -1618478 | NR_001013 | 440153   | Hs.534888 | NR_001013 | ENSG00000  | OR11H12         | olfactoryprotein-coding           |
| chr10-395 | 89.90884 | 0.476016 | 0.253197   | 1.880024 | 0.060105 | 0.615386 | chr10 | 39986335 | 39987416 | + | O NA | IntergeniALR/Alphe | 1290279  | NR_045000 | 399746   | Hs.742607 | NR_045000 | ACTR3BP5   | FKSG74          | ACTR3B pspseudo                   |
| chr11-526 | 52.82625 | 0.598962 | 0.318615   | 1.879894 | 0.060123 | 0.615386 | chr11 | 52690099 | 52690350 | + | O NA | IntergeniALR/Alphe | 1913774  | NM_001004 | 119749   | Hs.553564 | NR_001004 | ENSG00000  | ORC46           | olfactoryprotein-coding           |
| chr4-4932 | 36.18192 | 0.708844 | 0.377369   | 1.878383 | 0.060329 | 0.615386 | chr4  | 49328916 | 49329125 | + | O NA | IntergeniACRO1 Sat | 343778   | NR_001286 | 80157    | Hs.479703 | NR_025087 | ENSG00000  | CWH43           | CWH43-C fcell wallprotein-coding  |
| chr13-184 | 47.70007 | 0.63952  | 0.341281   | 1.873881 | 0.060947 | 0.615386 | chr13 | 18002268 | 18002665 | + | O NA | IntergeniALR/Alphe | -192831  | NR_027278 | 26080    | Hs.448588 | NR_027278 | ENSG00000  | FAM230C         | LINC00281family wincRNA           |
| chr13-167 | 38.76314 | 0.684148 | 0.365263   | 1.87303  | 0.061064 | 0.615386 | chr13 | 16723999 | 16724328 | + | O NA | IntergeniALR/Alphe | -1471134 | NR_027278 | 26080    | Hs.448588 | NR_027278 | ENSG00000  | FAM230C         | LINC00281family wincRNA           |
| chr1-1241 | 134.787  | 0.405227 | 0.216534   | 1.871423 | 0.061286 | 0.615386 | chr1  | 1.24E+08 | 1.24E+08 | + | O NA | IntergeniALR/Alphe | 2604874  | NR_003952 | 647121   | Hs.697682 | NR_003952 | ENSG00000  | EMB1P           | embigin ipseudo                   |
| chr17-266 | 283.6617 | 0.319534 | 0.171143   | 1.867059 | 0.061893 | 0.615386 | chr17 | 26041053 | 26041344 | + | O NA | IntergeniALR/Alphe | 1048043  | NR_135673 | 1.05E+08 | Hs.649918 | NR_135673 | LOC105371  | -               | uncharacteractnRNA                |
| chr4-4926 | 35.27329 | 0.712285 | 0.3816     | 1.866576 | 0.061961 | 0.615386 | chr4  | 49286403 | 49287435 | + | O NA | IntergeniIntergeni | 300277   | NM_001286 | 80157    | Hs.479703 | NR_025087 | ENSG00000  | CWH43           | CWH43-C fcell wallprotein-coding  |
| chr19-266 | 60.05527 | 0.567497 | 0.304305   | 1.864893 | 0.062196 | 0.615386 | chr19 | 26041039 | 26041446 | + | O NA | IntergeniALR/Alphe | -1752189 | NR_110688 | 1.02E+08 | Hs.567934 | NR_110688 | ENSG00000  | LOC101927       | uncharacteractnRNA                |
| chr1-1245 | 70.37648 | 0.525019 | 0.28166    | 1.864018 | 0.062319 | 0.615386 | chr1  | 1.25E+08 | 1.25E+08 | + | O NA | IntergeniALR/Alphe | 2995394  | NR_003952 | 647121   | Hs.697682 | NR_003952 | ENSG00000  | EMB1P           | embigin ipseudo                   |
| chr20-27  | 29.26736 | 0.778767 | 0.417812   | 1.863916 | 0.062334 | 0.615386 | chr20 | 27331621 | 27331920 | + | O NA | IntergeniALR/Alphe | -1225237 | NR_040099 | 284801   | Hs.370699 | NR_040099 | ENSG00000  | MIR663AHC       | MIR663A lncRNA                    |
| chr4-4928 | 18.39135 | 0.979391 | 0.525479   | 1.863805 | 0.062349 | 0.615386 | chr4  | 49280388 | 49281356 | + | O NA | IntergeniIntergeni | 294230   | NM_001286 | 80157    | Hs.479703 | NR_025087 | ENSG00000  | CWH43           | CWH43-C fcell wallprotein-coding  |
| chr4-5047 | 33.75452 | 0.727517 | 0.390776   | 1.861725 | 0.062642 | 0.615386 | chr4  | 50472300 | 50472601 | + | O NA | IntergeniALR/Alphe | -1370550 | NM_001286 | 23142    | Hs.605388 | NR_015111 | ENSG00000  | CUN1D4          | defectiveprotein-coding           |
| chr22-13  | 17.99908 | 0.983201 | 0.528429   | 1.86061  | 0.062799 | 0.615386 | chr22 | 13386009 | 13386357 | + | O NA | IntergeniALR/Alphe | 1488774  | NR_110761 | 1.03E+08 | Hs.652928 | NR_110761 | LOC102722  | -               | uncharacteractnRNA                |
| chr10-418 | 18.93746 | 0.957767 | 0.514902   | 1.860093 | 0.062872 | 0.615386 | chr10 | 41885191 | 41894312 | + | O NA | Intergeni(AATGG)n  | 478274   | NR_024388 | 441666   | Hs.255729 | NR_024388 | ENSG00000  | LOC441666       | zinc fingpseudo                   |
| chr9-447  | 41.24719 | 0.667098 | 0.358721   | 1.859656 | 0.062934 | 0.615386 | chr9  | 44763950 | 44764446 | + | O NA | IntergeniALR/Alphe | 1683032  | NR_160669 | 1.03E+08 | NR_160669 | LOC102722 | -          | methylencpseudo |                                   |
| chr20-271 | 28.78245 | 0.78445  | 0.422064   | 1.858603 | 0.063083 | 0.615386 | chr20 | 27143667 | 27143950 | + | O NA | IntergeniALR/Alphe | -934575  | NR_040099 | 284801   | Hs.370699 | NR_040099 | ENSG00000  | MIR663AHC       | MIR663A lncRNA                    |
| chr9-4351 | 30.29725 | 0.763521 | 0.410883   | 1.858245 | 0.063134 | 0.615386 | chr9  | 43511966 | 43512232 | + | O NA | IntergeniALR/Alphe | 385933   | NR_160669 | 1.03E+08 | NR_160669 | LOC102722 | -          | methylencpseudo |                                   |
| chr6-5956 | 224.5186 | 0.337934 | 0.182094   | 1.855818 | 0.06348  | 0.616493 | chr6  | 59566187 | 59566483 | + | O NA | IntergeniALR/Alphe | -1604889 | NR_132994 | 1.07E+08 | Hs.561538 | NR_132994 | ENSG00000  | LINC00688       | long intencnRNA                   |
| chr19-27  | 234.3819 | 0.329149 | 0.17857    | 1.843247 | 0.065293 | 0.62737  | chr19 | 27022720 | 27022981 | + | O NA | IntergeniALR/Alphe | -770581  | NR_110688 | 1.02E+08 | Hs.567934 | NR_110688 | ENSG00000  | LOC101927       | uncharacteractnRNA                |
| chr5-484  | 59.66073 | 0.564903 | 0.306556   | 1.842737 | 0.065367 | 0.62737  | chr5  | 48441498 | 48441938 | + | O NA | IntergeniALR/Alphe | 1999570  | NR_198444 | 133418   | Hs.561411 | NR_198444 | ENSG00000  | EMB             | GP70 embigin protein-coding       |
| chr20-26  | 177.0331 | 0.384663 | 0.208811   | 1.842163 | 0.065451 | 0.62737  | chr20 | 16823810 | 16824208 | + | O NA | IntergeniALR/Alphe | -2634810 | NR_040099 | 284801   | Hs.370699 | NR_040099 | ENSG00000  | MIR663AHC       | MIR663A lncRNA                    |
| chr19-248 | 54.05869 | 0.580129 | 0.3151     | 1.841092 | 0.065608 | 0.62737  | chr19 | 24892787 | 24893284 | + | O NA | IntergeniALR/Alphe | -729588  | NR_003605 | 1E+08    | Hs.149312 | NR_003605 | ENSG00000  | HAVCR1P1        | hepatitispseudo                   |
| chr10-418 | 20.48654 | 0.909965 | 0.494715   | 1.839374 | 0.06586  | 0.62737  | chr10 | 41875315 | 41877971 | + | O NA | Intergeni(ATGGA)n  | 491402   | NR_024388 | 441666   | Hs.255729 | NR_024388 | ENSG00000  | LOC441666       | zinc fingpseudo                   |
| chr14-174 | 54.15246 | 0.576515 | 0.313608   | 1.838328 | 0.066014 | 0.62737  | chr14 | 17864984 | 17865312 | + | O NA | IntergeniALR/Alphe | -735969  | NM_001013 | 440153   | Hs.534888 | NR_001013 | ENSG00000  | OR11H12         | olfactoryprotein-coding           |
| chr14-17  | 20.97031 | 0.898708 | 0.490011   | 1.834056 | 0.066646 | 0.631118 | chr14 | 17597225 | 17597434 | + | O NA | IntergeniALR/Alphe | -1003788 | NM_001013 | 440153   | Hs.534888 | NR_001013 | ENSG00000  | OR11H12         | olfactoryprotein-coding           |
| chr8-857  | 20.03194 | 0.918304 | 0.502401</ |          |          |          |       |          |          |   |      |                    |          |           |          |           |           |            |                 |                                   |



|           |           |          |          |          |          |          |       |          |          |   |   |    |                    |          |           |          |           |           |           |           |                    |                         |
|-----------|-----------|----------|----------|----------|----------|----------|-------|----------|----------|---|---|----|--------------------|----------|-----------|----------|-----------|-----------|-----------|-----------|--------------------|-------------------------|
| chr9-605  | 43.74276  | 0.571093 | 0.346463 | 1.64835  | 0.099281 | 0.7392   | chr9  | 60591243 | 60591519 | + | O | NA | IntergeniALR/Alphe | -323026  | NM_015667 | 26165    | Hs.123004 | NM_015667 | ENSG00000 | SPATA31A7 | AEP1 C9orSPATA31   | sprotein-coding         |
| chr19-271 | 143.7219  | 0.347222 | 0.211217 | 1.64391  | 0.100195 | 0.7392   | chr19 | 27130498 | 27130730 | + | O | NA | IntergeniALR/Alphe | -662817  | NR_110688 | 1.02E+08 | Hs.567934 | NR_110688 | ENSG00000 | LOC101927 | -                  | uncharactncRNA          |
| chr19-254 | 102.1126  | 0.395    | 0.240319 | 1.643651 | 0.100248 | 0.7392   | chr19 | 25439308 | 25439602 | + | O | NA | IntergeniALR/Alphe | -1276008 | NR_003603 | 1E+08    | Hs.149312 | NR_003603 | ENSG00000 | HAVCR1P1  | -                  | hepatitispseudo         |
| chr5-474  | 76.84643  | 0.403405 | 0.24547  | 1.643397 | 0.100301 | 0.7392   | chr5  | 47450737 | 47451920 | + | O | NA | IntergeniALR/Alphe | -1754948 | NM_021072 | 348980   | Hs.353176 | NM_021072 | ENSG00000 | HCN1      | BCNG-1 BChyperpolz | protein-coding          |
| chr1-1237 | 73.268666 | 0.453806 | 0.276801 | 1.63954  | 0.101101 | 0.7392   | chr1  | 1.24E+08 | 1.24E+08 | + | O | NA | IntergeniALR/Alphe | 2271276  | NR_003955 | 647121   | Hs.697682 | NR_003955 | ENSG00000 | EMBP1     | -                  | embigin ipseudo         |
| chr4-494  | 27.53462  | 0.712474 | 0.434725 | 1.638909 | 0.101232 | 0.7392   | chr4  | 49496052 | 49496304 | + | O | NA | IntergeniMER4E1 L1 | 509536   | NM_001286 | 80157    | Hs.479703 | NM_025087 | ENSG00000 | CWH43     | CWH43-C fcell wall | protein-coding          |
| chr1-124  | 45.8997   | 0.55637  | 0.339709 | 1.637783 | 0.101467 | 0.7392   | chr1  | 1.24E+08 | 1.24E+08 | + | O | NA | IntergeniALR/Alphe | 2488381  | NR_003955 | 647121   | Hs.697682 | NR_003955 | ENSG00000 | EMBP1     | -                  | embigin ipseudo         |
| chr18-465 | 17.56894  | 0.871394 | 0.532258 | 1.637165 | 0.101596 | 0.7392   | chr18 | 46967060 | 46969706 | + | O | NA | intron (Nintron (N | -3739    | NM_001242 | 1.01E+08 | Hs.729822 | NM_001242 | ENSG00000 | ELOA3D    | ELOA3L2 telongin / | protein-coding          |
| chr20-273 | 30.10054  | 0.669611 | 0.409688 | 1.634441 | 0.102166 | 0.7392   | chr20 | 27358634 | 27360558 | + | O | NA | IntergeniALR/Alphe | -1150363 | NR_040095 | 284801   | Hs.370695 | NR_040095 | ENSG00000 | MIR663AHC | -                  | MIR663A lncRNA          |
| chr1-2652 | 18.08473  | 0.855699 | 0.524001 | 1.633525 | 0.102359 | 0.7392   | chr1  | 2652145  | 2661704  | + | O | NA | intron (Nintron (N | 6625145  | NM_033467 | 79258    | Hs.591455 | NM_033467 | ENSG00000 | MMEL1     | MMEL2 NEI          | membrane protein-coding |
| chr10-395 | 41.79858  | 0.576265 | 0.353021 | 1.632382 | 0.102599 | 0.7392   | chr10 | 39951235 | 39951549 | + | O | NA | IntergeniALR/Alphe | 1254796  | NR_045000 | 399746   | Hs.742607 | NR_045000 | ACTR3BP5  | FKSG74    | ACTR3B             | pspseudo                |
| chrY-568  | 18.53989  | 0.848643 | 0.520722 | 1.629742 | 0.103156 | 0.7392   | chrY  | 56860336 | 56861667 | + | O | NA | IntergeniLIMEd LIN | -93254   | NM_005840 | 10251    | Hs.381912 | NM_005840 | ENSG00000 | SPRY3     | spry-3             | sprouty fprotein-coding |
| chr7-600  | 18.60052  | 0.841426 | 0.516668 | 1.628526 | 0.103413 | 0.7392   | chr7  | 60006223 | 60006422 | + | O | NA | IntergeniALR/Alphe | 2556141  | NM_001155 | 441234   | Hs.533121 | NM_001155 | ENSG00000 | ZNF716    | -                  | zinc fingprotein-coding |
| chr13-173 | 39.25107  | 0.590283 | 0.362698 | 1.627478 | 0.103636 | 0.7392   | chr13 | 17540080 | 17540432 | + | O | NA | IntergeniALR/Alphe | -655041  | NR_027278 | 26080    | Hs.448583 | NR_027278 | ENSG00000 | FAM230C   | LINC00281          | family wincRNA          |
| chr22-14  | 26.09546  | 0.712189 | 0.438347 | 1.624716 | 0.104223 | 0.7392   | chr22 | 14386492 | 14386889 | + | O | NA | IntergeniALR/Alphe | -1141469 | NM_001005 | 81061    | Hs.554706 | NM_001005 | ENSG00000 | OR11H1    | OR11H12 Colfactory | protein-coding          |
| chr20-28  | 51.04685  | 0.528839 | 0.325506 | 1.624666 | 0.104234 | 0.7392   | chr20 | 28022764 | 28023102 | + | O | NA | IntergeniALR/Alphe | 579732   | NR_132315 | 1E+08    | Hs.529357 | NR_132315 | ENSG00000 | FRG1CP    | -                  | FSHD regipseudo         |
| chr4-491  | 19.60179  | 0.818032 | 0.503517 | 1.624635 | 0.10424  | 0.7392   | chr4  | 49135908 | 49137297 | + | O | NA | Intergeni (TCCAT)n | 149960   | NM_001286 | 80157    | Hs.479703 | NM_025087 | ENSG00000 | CWH43     | CWH43-C fcell wall | protein-coding          |
| chr21-123 | 22.57529  | 0.763592 | 0.470238 | 1.623841 | 0.10441  | 0.7392   | chr21 | 12345729 | 12346095 | + | O | NA | IntergeniALR/Alphe | -1294254 | NR_026915 | 149992   | Hs.558645 | NM_153773 | ANKRD30BF | C2lorf99  | ankyrin ipseudo    |                         |
| chr2-898  | 21.08911  | 0.788845 | 0.485811 | 1.623769 | 0.104425 | 0.7392   | chr2  | 89840280 | 89841172 | + | O | NA | Intergeni (TGAA)n  | -202819  | NR_136325 | 1.02E+08 | Hs.578075 | NR_136329 | LOC101927 | -         | lysine mpseudo     |                         |
| chr13-174 | 18.63253  | 0.837994 | 0.516436 | 1.622647 | 0.104665 | 0.7392   | chr13 | 17445426 | 17445630 | + | O | NA | IntergeniALR/Alphe | -749769  | NR_027278 | 26080    | Hs.448583 | NR_027278 | ENSG00000 | FAM230C   | LINC00281          | family wincRNA          |
| chr21-911 | 20.11815  | 0.805644 | 0.49688  | 1.621406 | 0.104931 | 0.7392   | chr21 | 9111941  | 9112227  | + | O | NA | intron (Nintron (N | 9111941  | NR_112227 | 1E+08    | Hs.487562 | NR_174945 | ENSG00000 | TEKT4P2   | MAFIPL Ti          | tektin 4 pseudo         |
| chr22-145 | 22.08924  | 0.770582 | 0.475572 | 1.620328 | 0.105162 | 0.7392   | chr22 | 14984244 | 14984602 | + | O | NA | IntergeniALR/Alphe | -543736  | NM_001005 | 81061    | Hs.554706 | NM_001005 | ENSG00000 | OR11H1    | OR11H12 Colfactory | protein-coding          |
| chr21-91  | 24.48462  | 0.741182 | 0.457783 | 1.619069 | 0.105432 | 0.7392   | chr21 | 9103646  | 9104009  | + | O | NA | intron (NAluSp SIN | 25934    | NR_038325 | 1E+08    | Hs.487562 | NR_174945 | ENSG00000 | TEKT4P2   | MAFIPL Ti          | tektin 4 pseudo         |
| chrY-568  | 23.51367  | 0.752236 | 0.465331 | 1.618713 | 0.105509 | 0.7392   | chrY  | 56843600 | 56843916 | + | O | NA | IntergeniBSR/Betal | -110497  | NR_005846 | 10251    | Hs.381912 | NM_005840 | ENSG00000 | SPRY3     | spry-3             | sprouty fprotein-coding |
| chr8-857  | 22.40984  | 0.797078 | 0.492617 | 1.618047 | 0.105653 | 0.7392   | chr8  | 85755559 | 85755809 | + | O | NA | IntergeniIntergeni | 8215     | NR_003594 | 1E+08    | Hs.535055 | NR_003594 | REX01L2P  | -         | REX01 li pseudo    |                         |
| chr21-11  | 19.11858  | 0.82784  | 0.511788 | 1.617545 | 0.105761 | 0.7392   | chr21 | 11334788 | 11335032 | + | O | NA | IntergeniALR/Alphe | 813396   | NM_199265 | 7179     | Hs.122985 | NM_199255 | ENSG00000 | TPTE      | CT44 PTE           | transmem protein-coding |
| chr9-438  | 21.12055  | 0.785085 | 0.485982 | 1.616942 | 0.105891 | 0.7392   | chr9  | 43822664 | 43822942 | + | O | NA | IntergeniALR/Alphe | 696637   | NR_160669 | 1.03E+08 | Hs.578075 | NR_160669 | LOC102722 | -         | methylencpseudo    |                         |
| chr20-265 | 28.15919  | 0.68474  | 0.423712 | 1.616048 | 0.106084 | 0.7392   | chr20 | 26964000 | 26964259 | + | O | NA | IntergeniALR/Alphe | -754896  | NR_040095 | 284801   | Hs.370695 | NR_040095 | ENSG00000 | MIR663AHC | -                  | MIR663A lncRNA          |
| chr12-366 | 22.54271  | 0.766442 | 0.474643 | 1.614774 | 0.10636  | 0.7392   | chr12 | 36678775 | 36679051 | + | O | NA | IntergeniALR/Alphe | -1637861 | NM_001011 | 144245   | Hs.529357 | NM_001011 | ENSG00000 | ALG10B    | ALG10 KCF          | ALG10 al protein-coding |
| chr5-478  | 23.63832  | 0.742216 | 0.459846 | 1.614054 | 0.106516 | 0.7392   | chr5  | 47896458 | 47896774 | + | O | NA | IntergeniALR/Alphe | -2200236 | NM_021072 | 348980   | Hs.353176 | NM_021072 | ENSG00000 | HCN1      | BCNG-1 BChyperpolz | protein-coding          |
| chr9-440  | 18.66341  | 0.834461 | 0.517309 | 1.61308  | 0.106727 | 0.7392   | chr9  | 44090804 | 44091068 | + | O | NA | IntergeniALR/Alphe | 964770   | NR_160669 | 1.03E+08 | Hs.578075 | NR_160669 | LOC102722 | -         | methylencpseudo    |                         |
| chr6-589  | 24.61041  | 0.730591 | 0.453203 | 1.612058 | 0.106949 | 0.7392   | chr6  | 58952907 | 58953357 | + | O | NA | IntergeniALR/Alphe | -991686  | NR_132994 | 1.07E+08 | Hs.561535 | NR_125727 | ENSG00000 | LINC0068C | -                  | long intencRNA          |
| chr1-122  | 20.11645  | 0.805517 | 0.501202 | 1.607169 | 0.108017 | 0.7392   | chr1  | 1.23E+08 | 1.23E+08 | + | O | NA | IntergeniALR/Alphe | 994688   | NR_003955 | 647121   | Hs.697682 | NR_003955 | ENSG00000 | EMBP1     | -                  | embigin ipseudo         |
| chr9-440  | 21.66779  | 0.772043 | 0.48204  | 1.601616 | 0.109241 | 0.749818 | chr9  | 44064256 | 44064538 | + | O | NA | IntergeniALR/Alphe | 938231   | NR_160669 | 1.03E+08 | Hs.578075 | NR_160669 | LOC102722 | -         | methylencpseudo    |                         |
| chr20-27  | 35.82411  | 0.604884 | 0.377767 | 1.601208 | 0.109331 | 0.749818 | chr20 | 27054289 | 27055659 | + | O | NA | IntergeniALR/Alphe | -845741  | NR_040095 | 284801   | Hs.370695 | NR_040095 | ENSG00000 | MIR663AHC | -                  | MIR663A lncRNA          |
| chr19-25  | 71.9822   | 0.444734 | 0.278143 | 1.598943 | 0.109833 | 0.751328 | chr19 | 25580581 | 25583614 | + | O | NA | IntergeniALR/Alphe | -1418650 | NR_003603 | 1E+08    | Hs.149312 | NR_003603 | ENSG00000 | HAVCR1P1  | -                  | hepatitispseudo         |
| chr10-41  | 33.17064  | 0.606667 | 0.406246 | 1.577041 | 0.114786 | 0.75244  | chr10 | 41847792 | 41848783 | + | O | NA | IntergeniIntergeni | 519758   | NR_02438C | 441666   | Hs.255725 | NR_02438C | ENSG00000 | LOC441666 | -                  | zinc fingpseudo         |
| chr19-267 | 70.51075  | 0.448755 | 0.281598 | 1.593599 | 0.111026 | 0.7556   | chr19 | 26714344 | 26715330 | + | O | NA | IntergeniALR/Alphe | -1078594 | NR_110688 | 1.02E+08 | Hs.567934 | NR_110688 | ENSG00000 | LOC101927 | -                  | uncharactncRNA          |
| chr19-247 | 42.00227  | 0.55869  | 0.351755 | 1.589107 | 0.112036 | 0.757244 | chr19 | 24742808 | 24743088 | + | O | NA | IntergeniALR/Alphe | -579501  | NR_003603 | 1E+08    | Hs.149312 | NR_003603 | ENSG00000 | HAVCR1P1  | -                  | hepatitispseudo         |
| chr13-17  | 32.30337  | 0.628611 | 0.396167 | 1.586732 | 0.112573 | 0.757244 | chr13 | 17304358 | 17305636 | + | O | NA | IntergeniALR/Alphe | -890300  | NR_027278 | 26080    | Hs.448583 | NR_027278 | ENSG00000 | FAM230C   | LINC00281          | family wincRNA          |
| chr9-606  | 37.91702  | 0.588551 | 0.371469 | 1.584389 | 0.113105 | 0.757244 | chr9  | 60625747 | 60625977 | + | O | NA | IntergeniALR/Alphe | -288545  | NM_015667 | 26165    | Hs.123004 | NM_015667 | ENSG00000 | SPATA31A7 | AEP1 C9orSPATA31   | sprotein-coding         |
| chr6-591  | 87.79137  | 0.408173 | 0.257953 | 1.582357 | 0.113568 | 0.757244 | chr6  | 59183848 | 59184095 | + | O | NA | IntergeniALR/Alphe | -1222525 | NR_132994 | 1.07E+08 | Hs.561535 | NR_125727 | ENSG00000 | LINC0068C | -                  | long intencRNA          |
| chr22-13  | 16.17823  | 0.902932 | 0.571138 | 1.580935 | 0.113893 | 0.757244 | chr22 | 13589588 | 13589814 | + | O | NA | IntergeniALR/Alphe | 1691295  | NR_110761 | 1.03E+08 | Hs.652925 | NR_110761 | LOC102722 | -         | uncharactncRNA     |                         |
| chr5-495  | 142.726   | 0.349873 | 0.22143  | 1.580058 | 0.114094 | 0.757244 | chr5  | 49530989 | 49531244 | + | O | NA | IntergeniALR/Alphe | 910172   | NM_198445 | 133418   | Hs.561411 | NM_198445 | ENSG00000 | EMB       | GP70               | embigin protein-coding  |
| chr22-15  | 33.88276  | 0.613501 | 0.388499 | 1.579156 | 0.1143   | 0.757244 | chr22 | 15021997 | 15022198 | + | O | NA | IntergeniALR/Alphe | -506620  | NM_001005 | 81061    | Hs.554706 | NM_001005 | ENSG00000 | OR11H1    | OR11H12 Colfactory | protein-coding          |
| chr10-41  | 33.17064  | 0.606667 | 0.406246 | 1.577041 | 0.114786 | 0.757244 | chr10 | 41847792 | 41848783 | + | O | NA | IntergeniALR/Alphe | 865073   | NR_02438C | 441666   | Hs.255725 | NR_02438C | ENSG00000 | LOC441666 | -                  | zinc fingpseudo         |
| chr5-486  | 28.2371   | 0.666385 | 0.423952 | 1.571839 | 0.115988 | 0.757244 | chr5  | 48617235 | 48617471 | + | O | NA | IntergeniALR/Alphe | 1823935  | NM_198445 | 133418   | Hs.561411 | NM_198445 | ENSG00000 | EMB       | GP70               | embigin protein-coding  |
| chr21-11  | 36.2059   | 0.618238 | 0.393478 | 1.571215 | 0.116133 | 0.757244 | chr21 | 11893646 | 11894061 | + | O | NA | IntergeniALR/Alphe | -1144313 | NR_026915 | 149992   | Hs.558645 | NM_153773 | ANKRD30BF | C2lorf99  | ankyrin ipseudo    |                         |
| chr1-1237 | 73.268666 | 0.453806 | 0.276801 | 1.569053 | 0.116636 | 0.757244 | chr1  | 1.24E    |          |   |   |    |                    |          |           |          |           |           |           |           |                    |                         |

|           |          |          |          |          |          |          |       |          |          |   |   |    |                    |          |           |          |           |           |                         |                 |                          |
|-----------|----------|----------|----------|----------|----------|----------|-------|----------|----------|---|---|----|--------------------|----------|-----------|----------|-----------|-----------|-------------------------|-----------------|--------------------------|
| chr21-127 | 19.03425 | 0.751012 | 0.509568 | 1.47382  | 0.14053  | 0.757244 | chr21 | 12720190 | 12720564 | + | O | NA | IntergeniALR/Alpha | -317789  | NR_026916 | 149992   | Hs.55864  | NM_153773 | ANKRD30BF               | C21orf99        | ankyrin ipseudo          |
| chr2-898  | 18.03184 | 0.771054 | 0.523186 | 1.473767 | 0.140544 | 0.757244 | chr2  | 89838074 | 89838780 | + | O | NA | Intergeni(TGGAA)n  | -200520  | NR_136325 | 1.02E+08 | Hs.57807  | NR_136329 | LOC101927-              |                 | lysine mepseudo          |
| chr21-937 | 18.03184 | 0.771054 | 0.523186 | 1.473767 | 0.140544 | 0.757244 | chr21 | 9371316  | 9376764  | + | O | NA | IntergeniIntergeni | -168990  | NR_135512 | 1.05E+08 | Hs.46232  | NR_135512 | LOC10537-               |                 | nuclear ipseudo          |
| chr18-156 | 19.03312 | 0.75093  | 0.509545 | 1.473725 | 0.140556 | 0.757244 | chr18 | 15693226 | 15693642 | + | O | NA | IntergeniALR/Alpha | -367515  | NR_027417 | 644669   | Hs.57947  | NR_027417 | ENSG000001064466        | -               | ankyrin ipseudo          |
| chr1-123  | 78.63102 | 0.393105 | 0.266792 | 1.473452 | 0.140629 | 0.757244 | chr1  | 1.23E+08 | 1.23E+08 | + | O | NA | IntergeniALR/Alpha | 1539418  | NR_003955 | 647121   | Hs.69768  | NR_003955 | ENSG00000006BP1         | -               | embigin ipseudo          |
| chr13-17  | 20.55074 | 0.722987 | 0.490677 | 1.473449 | 0.14063  | 0.757244 | chr13 | 17078992 | 17080614 | + | O | NA | IntergeniALR/Alpha | -1115494 | NR_027278 | 26080    | Hs.44858  | NR_027278 | ENSG0000000FAM230C      | LINC00281       | family wincRNA           |
| chr9-435  | 18.54877 | 0.759045 | 0.515677 | 1.471938 | 0.141038 | 0.757244 | chr9  | 43531157 | 43531544 | + | O | NA | IntergeniALR/Alpha | 405184   | NR_160669 | 1.03E+08 | Hs.160669 | NR_160669 | LOC10272-               |                 | methylenepseudo          |
| chr12-36  | 18.5482  | 0.759003 | 0.515666 | 1.471889 | 0.141051 | 0.757244 | chr12 | 36011114 | 36011441 | + | O | NA | IntergeniALR/Alpha | 1988781  | NM_032834 | 84920    | Hs.102971 | NM_032834 | ENSG00000000ALG10       | ALG10A          | DJALG10 alprotein-coding |
| chr8-857  | 18.5482  | 0.759003 | 0.515666 | 1.471889 | 0.141051 | 0.757244 | chr8  | 85770281 | 85771253 | + | O | NA | IntergeniMIR[SINE] | 5326     | NR_003594 | 1E+08    | Hs.53505  | NR_003594 | REX01L2P                | -               | REX01 lipseudo           |
| chr5-488  | 64.89975 | 0.431701 | 0.293565 | 1.470549 | 0.141413 | 0.757244 | chr5  | 48866114 | 48868361 | + | O | NA | IntergeniALR/Alpha | 1555058  | NM_198445 | 133418   | Hs.56141  | NM_198445 | ENSG00000000EMB         | GP70            | embigin protein-coding   |
| chr7-5971 | 19.55061 | 0.740124 | 0.503459 | 1.47008  | 0.14154  | 0.757244 | chr7  | 59718357 | 59718614 | + | O | NA | IntergeniALR/Alpha | 2268308  | NM_001155 | 441234   | Hs.533121 | NM_001155 | ENSG00000000ZNF716      | -               | zinc finprotein-coding   |
| chr7-5806 | 18.54764 | 0.75896  | 0.51648  | 1.469486 | 0.141701 | 0.757244 | chr7  | 58067473 | 58067937 | + | O | NA | Intergeni(CCATT)n  | 617528   | NM_001155 | 441234   | Hs.533121 | NM_001155 | ENSG00000000ZNF716      | -               | zinc finprotein-coding   |
| chr16-37  | 20.00577 | 0.736273 | 0.501116 | 1.469268 | 0.14176  | 0.757244 | chr16 | 37073734 | 37074079 | + | O | NA | IntergeniALR/Alpha | 1327354  | NR_033988 | 400533   | Hs.49913  | NR_033988 | ENSG00000000LINC02167-  |                 | long intncRNA            |
| chr20-27  | 18.06329 | 0.767538 | 0.522494 | 1.46899  | 0.141835 | 0.757244 | chr20 | 27220069 | 27220666 | + | O | NA | IntergeniALR/Alpha | -1011134 | NR_040095 | 284801   | Hs.37069  | NR_040095 | ENSG00000000MIR663AH(-) |                 | MIR663A lncRNA           |
| chr21-91  | 18.06272 | 0.767492 | 0.52291  | 1.467733 | 0.142177 | 0.757244 | chr21 | 9109338  | 9111375  | + | O | NA | intron(MLIMB2)LIN  | 19405    | NR_038328 | 1E+08    | Hs.48756  | NR_17494  | ENSG00000000TEK4P2      | MAF1P Tfektin   | 4 pseudo                 |
| chr13-18  | 19.06513 | 0.747646 | 0.509391 | 1.467726 | 0.142179 | 0.757244 | chr13 | 18014970 | 18016079 | + | O | NA | IntergeniALR/Alpha | -179773  | NR_027278 | 26080    | Hs.44858  | NR_027278 | ENSG00000000FAM230C     | LINC00281       | family wincRNA           |
| chr10-41  | 117.0736 | 0.337903 | 0.230241 | 1.467606 | 0.142211 | 0.757244 | chr10 | 41265303 | 41265743 | + | O | NA | IntergeniALR/Alpha | 1102522  | NR_02438C | 441666   | Hs.25572  | NR_02438C | ENSG00000000LOC441666-  |                 | zinc finpseudo           |
| chr21-112 | 44.4935  | 0.513717 | 0.350188 | 1.466974 | 0.142383 | 0.757244 | chr21 | 11256410 | 11256611 | + | O | NA | IntergeniALR/Alpha | 734996   | NM_19926C | 7179     | Hs.12298  | NM_199265 | ENSG00000000TPTE        | CT44 PTE        | transmem protein-coding  |
| chr21-128 | 64.45138 | 0.430616 | 0.293552 | 1.466917 | 0.142399 | 0.757244 | chr21 | 12866804 | 12867093 | + | O | NA | IntergeniALR/Alpha | -171218  | NR_026916 | 149992   | Hs.55864  | NM_153773 | ANKRD30BF               | C21orf99        | ankyrin ipseudo          |
| chr13-17  | 19.48998 | 0.746879 | 0.509712 | 1.465296 | 0.14284  | 0.757244 | chr13 | 17225374 | 17225596 | + | O | NA | IntergeniALR/Alpha | -969812  | NR_027278 | 26080    | Hs.44858  | NR_027278 | ENSG00000000FAM230C     | LINC00281       | family wincRNA           |
| chr22-107 | 19.03538 | 0.751106 | 0.512798 | 1.464719 | 0.142998 | 0.757244 | chr22 | 10738014 | 10739061 | + | O | NA | IntergeniIntergeni | 222992   | NR_13232C | 1.03E+08 | NR_132320 | FRG1FP    | -                       | FSHD regipseudo |                          |
| chr9-436  | 19.58035 | 0.736768 | 0.503039 | 1.464635 | 0.143021 | 0.757244 | chr9  | 43620852 | 43621538 | + | O | NA | IntergeniALR/Alpha | 495029   | NR_160669 | 1.03E+08 | NR_160669 | LOC10272- |                         | methylenepseudo |                          |
| chr5-491  | 93.48197 | 0.363267 | 0.248597 | 1.462717 | 0.143545 | 0.757244 | chr5  | 49103386 | 49103688 | + | O | NA | IntergeniALR/Alpha | 1337751  | NM_198445 | 133418   | Hs.56141  | NM_198445 | ENSG00000000EMB         | GP70            | embigin protein-coding   |
| chr4-496  | 17.57725 | 0.77647  | 0.530973 | 1.462353 | 0.143645 | 0.757244 | chr4  | 49637329 | 49638324 | + | O | NA | Intergeni(GAATC)n  | 651184   | NM_00128C | 80157    | Hs.47970  | NM_025087 | ENSG00000000CWH43       | CWH43-C         | cell wallprotein-coding  |
| chr22-141 | 33.31521 | 0.57287  | 0.391972 | 1.46151  | 0.143876 | 0.757244 | chr22 | 14122680 | 14122926 | + | O | NA | IntergeniALR/Alpha | -1405356 | NM_001005 | 81061    | Hs.55470  | NM_001005 | ENSG00000000OR11H1      | OR11H12         | Colfactoryprotein-coding |
| chr13-17  | 20.09728 | 0.72655  | 0.497802 | 1.459517 | 0.144423 | 0.757244 | chr13 | 17257731 | 17258693 | + | O | NA | IntergeniALR/Alpha | -937085  | NR_027278 | 26080    | Hs.44858  | NR_027278 | ENSG00000000FAM230C     | LINC00281       | family wincRNA           |
| chr5-484  | 21.61377 | 0.701591 | 0.481319 | 1.457644 | 0.144939 | 0.757244 | chr5  | 48495931 | 48496277 | + | O | NA | IntergeniALR/Alpha | 1945184  | NM_198445 | 133418   | Hs.56141  | NM_198445 | ENSG00000000EMB         | GP70            | embigin protein-coding   |
| chr13-17  | 29.18661 | 0.605834 | 0.416907 | 1.453163 | 0.146179 | 0.757244 | chr13 | 17927302 | 17928704 | + | O | NA | IntergeniALR/Alpha | -267294  | NR_027278 | 26080    | Hs.44858  | NR_027278 | ENSG00000000FAM230C     | LINC00281       | family wincRNA           |
| chr19-24  | 95.56072 | 0.339969 | 0.247747 | 1.452699 | 0.146232 | 0.757244 | chr19 | 24894134 | 24895743 | + | O | NA | IntergeniALR/Alpha | -731491  | NR_00360C | 1E+08    | Hs.14931  | NR_00360C | ENSG00000000HAVCR1P1    | -               | hepatitispseudo          |
| chr21-12  | 29.15573 | 0.608405 | 0.418486 | 1.452965 | 0.146234 | 0.757244 | chr21 | 12204650 | 12204916 | + | O | NA | IntergeniALR/Alpha | -833083  | NR_026916 | 149992   | Hs.55864  | NM_153773 | ANKRD30BF               | C21orf99        | ankyrin ipseudo          |
| chr1-1231 | 50.81076 | 0.475435 | 0.327547 | 1.4515   | 0.146641 | 0.757244 | chr1  | 1.23E+08 | 1.23E+08 | + | O | NA | IntergeniALR/Alpha | 1599527  | NR_003955 | 647121   | Hs.69768  | NR_003955 | ENSG00000000EMBP1       | -               | embigin ipseudo          |
| chr20-27  | 53.56203 | 0.456769 | 0.314762 | 1.451156 | 0.146736 | 0.757244 | chr20 | 27860019 | 27860492 | + | O | NA | IntergeniALR/Alpha | 742410   | NR_13231E | 1E+08    | Hs.529357 | NR_13231E | ENSG00000000FRG1CP      | -               | FSHD regipseudo          |
| chr14-17  | 44.72807 | 0.496256 | 0.342559 | 1.448672 | 0.147429 | 0.757244 | chr14 | 17295841 | 17296551 | + | O | NA | IntergeniALR/Alpha | -1304921 | NM_00101E | 440153   | Hs.53488  | NM_00101E | ENSG00000000OR11H12     | -               | olfactoryprotein-coding  |
| chr14-16  | 36.39693 | 0.544988 | 0.376664 | 1.446881 | 0.14793  | 0.757244 | chr14 | 16608047 | 16609255 | + | O | NA | IntergeniALR/Alpha | -1992466 | NM_00101E | 440153   | Hs.53488  | NM_00101E | ENSG00000000OR11H12     | -               | olfactoryprotein-coding  |
| chr5-475  | 144.0885 | 0.305292 | 0.211098 | 1.44621  | 0.148118 | 0.757244 | chr5  | 47547411 | 47547703 | + | O | NA | IntergeniALR/Alpha | -1851177 | NM_02107E | 348980   | Hs.35317  | NM_02107E | ENSG00000000HCN1        | BCNG-1 B        | hyperpolprotein-coding   |
| chr13-16  | 35.9412  | 0.544334 | 0.376641 | 1.445233 | 0.148392 | 0.757244 | chr13 | 16485696 | 16486990 | + | O | NA | IntergeniALR/Alpha | -1708954 | NR_027278 | 26080    | Hs.44858  | NR_027278 | ENSG00000000FAM230C     | LINC00281       | family wincRNA           |
| chr10-40  | 35.39453 | 0.549111 | 0.380228 | 1.444164 | 0.148693 | 0.757244 | chr10 | 40898300 | 40898543 | + | O | NA | IntergeniALR/Alpha | 1649624  | NR_02438C | 441666   | Hs.25572  | NR_02438C | ENSG00000000LOC441666-  |                 | zinc finpseudo           |
| chr14-17  | 22.12843 | 0.692899 | 0.479887 | 1.443881 | 0.148772 | 0.757244 | chr14 | 17567673 | 17567908 | + | O | NA | IntergeniALR/Alpha | -1033327 | NM_00101E | 440153   | Hs.53488  | NM_00101E | ENSG00000000OR11H12     | -               | olfactoryprotein-coding  |
| chr10-40  | 27.73075 | 0.613773 | 0.425635 | 1.442015 | 0.149298 | 0.757244 | chr10 | 40841572 | 40841831 | + | O | NA | IntergeniALR/Alpha | 1526344  | NR_02438C | 441666   | Hs.25572  | NR_02438C | ENSG00000000LOC441666-  |                 | zinc finpseudo           |
| chr1-122  | 59.8951  | 0.434682 | 0.301461 | 1.441915 | 0.149326 | 0.757244 | chr1  | 1.23E+08 | 1.23E+08 | + | O | NA | IntergeniALR/Alpha | 1414776  | NR_003955 | 647121   | Hs.69768  | NR_003955 | ENSG00000000EMBP1       | -               | embigin ipseudo          |
| chr21-89  | 39.58489 | 0.523963 | 0.36341  | 1.441799 | 0.149359 | 0.757244 | chr21 | 8987032  | 8988408  | + | O | NA | TTS(NR_C           | 103      | NR_16210E | 1.13E+08 | NR_162105 | MIR10396  | -                       | microRNA ncRNA  |                          |
| chr7-592  | 74.04838 | 0.39503  | 0.27424  | 1.440457 | 0.149738 | 0.757244 | chr7  | 59251605 | 59251979 | + | O | NA | IntergeniALR/Alpha | 1801615  | NM_001155 | 441234   | Hs.533121 | NM_001155 | ENSG00000000ZNF716      | -               | zinc finprotein-coding   |
| chr17-26  | 17.45769 | 0.792109 | 0.550405 | 1.439137 | 0.150112 | 0.757244 | chr17 | 26292298 | 26292508 | + | O | NA | IntergeniALR/Alpha | 796838   | NR_135673 | 1.05E+08 | Hs.64991  | NR_135673 | LOC105371-              |                 | uncharactncRNA           |
| chr20-27  | 29.309   | 0.597106 | 0.415081 | 1.438528 | 0.150284 | 0.757244 | chr20 | 27056661 | 27056932 | + | O | NA | IntergeniALR/Alpha | -847563  | NR_04009E | 284801   | Hs.37069  | NR_04009E | ENSG00000000MIR663AH(-) |                 | MIR663A lncRNA           |
| chr14-17  | 35.97321 | 0.542626 | 0.377517 | 1.437354 | 0.150617 | 0.757244 | chr14 | 17241897 | 17242129 | + | O | NA | IntergeniALR/Alpha | -1359104 | NM_00101E | 440153   | Hs.53488  | NM_00101E | ENSG00000000OR11H12     | -               | olfactoryprotein-coding  |
| chr5-488  | 133.8833 | 0.313551 | 0.218163 |          |          |          |       |          |          |   |   |    |                    |          |           |          |           |           |                         |                 |                          |



|                    |          |          |          |          |          |       |          |          |   |   |    |                     |          |           |          |                    |                     |                 |                         |
|--------------------|----------|----------|----------|----------|----------|-------|----------|----------|---|---|----|---------------------|----------|-----------|----------|--------------------|---------------------|-----------------|-------------------------|
| chr5-494:241.5606  | 0.239695 | 0.177893 | 1.347406 | 0.177849 | 0.757244 | chr5  | 49423219 | 49423479 | + | O | NA | IntergeniALR/Alph   | 1017939  | NM_198449 | 133418   | Hs.561411NM_198449 | ENSG00000CEMB       | GP70            | embigin protein-coding  |
| chr3-909:22.95556  | 0.62574  | 0.464561 | 1.34695  | 0.177996 | 0.757244 | chr3  | 90909548 | 90909775 | + | O | NA | IntergeniALR/Alph   | 1802040  | NM_005233 | 2042     | Hs.123642NM_005233 | ENSG00000EPH3       | EK4 ETK EPEH    | receptprotein-coding    |
| chr20-26:30.65136  | 0.545934 | 0.406184 | 1.344057 | 0.17893  | 0.757244 | chr20 | 26532693 | 26533669 | + | O | NA | IntergeniALR/Alph   | -323948  | NR_040095 | 284801   | Hs.370695NR_040095 | ENSG00000MIR663AH   | -               | MIR663A lncRNA          |
| chr20-27:30.64909  | 0.545827 | 0.40614  | 1.343937 | 0.178969 | 0.757244 | chr20 | 27011712 | 27018467 | + | O | NA | IntergeniALR/Alph   | -808556  | NR_040095 | 284801   | Hs.370695NR_040095 | ENSG00000MIR663AH   | -               | MIR663A lncRNA          |
| chr22-14:50.38572  | 0.451123 | 0.325283 | 1.34072  | 0.180011 | 0.757244 | chr22 | 14520915 | 14521648 | + | O | NA | IntergeniALR/Alph   | -1006878 | NM_001005 | 81061    | Hs.554706NM_001005 | ENSG00000COR11H1    | OR11H12 Co      | factoryprotein-coding   |
| chr17-26:134.959   | 0.289264 | 0.215957 | 1.339451 | 0.180424 | 0.757244 | chr17 | 26299347 | 26299599 | + | O | NA | IntergeniALR/Alph   | 789768   | NR_135673 | 1.05E+08 | Hs.649915NR_135673 | LOC105371-          | -               | uncharactncRNA          |
| chr13-17:21.95316  | 0.636207 | 0.475228 | 1.338741 | 0.180655 | 0.757244 | chr13 | 17351160 | 17352977 | + | O | NA | IntergeniALR/Alph   | -843229  | NR_027278 | 26080    | Hs.448585NR_027278 | ENSG00000FAM230C    | LINC00281       | family wincRNA          |
| chr5-471:23.5011   | 0.616712 | 0.46085  | 1.338206 | 0.180829 | 0.757244 | chr5  | 47140622 | 47140896 | + | O | NA | IntergeniALR/Alph   | -1444379 | NM_021072 | 348980   | Hs.353176NM_021072 | ENSG00000HCN1       | BCNG-1 B        | hyperpolaprotein-coding |
| chr19-26:46.80408  | 0.454745 | 0.340036 | 1.337345 | 0.18111  | 0.757244 | chr19 | 26412831 | 26413031 | + | O | NA | IntergeniALR/Alph   | -1380500 | NR_110688 | 1.02E+08 | Hs.567934NR_110688 | ENSG00000LOC101927- | -               | uncharactncRNA          |
| chr21-92:36.95078  | 0.49667  | 0.37247  | 1.333448 | 0.182385 | 0.757244 | chr21 | 9251644  | 9252502  | + | O | NA | IntergeniLTR48B L1  | -122312  | NR_038322 | 1E+08    | Hs.487562NM_174944 | ENSG00000TEK4P2     | MAFIPL Ti       | tektin 4 pseudo         |
| chr10-40:280.5197  | 0.226086 | 0.169844 | 1.331136 | 0.183144 | 0.757244 | chr10 | 40593342 | 40593676 | + | O | NA | IntergeniALR/Alph   | 1745336  | NR_024388 | 441666   | Hs.255729NR_024388 | ENSG00000LOC441666- | -               | zinc fing pseudo        |
| chr21-127:28.64769 | 0.556299 | 0.418363 | 1.329707 | 0.183615 | 0.757244 | chr21 | 12791891 | 12793296 | + | O | NA | IntergeniALR/Alph   | -245573  | NR_026916 | 149992   | Hs.558645NM_153773 | ANKRD30B C2lorf99   | ankyrin ipseudo |                         |
| chrY-112:19.95119  | 0.660533 | 0.496923 | 1.329248 | 0.183766 | 0.757244 | chrY  | 11292237 | 11296471 | + | O | NA | IntergeniIntergeni  | 1129236  | NR_033667 | 352887   | Hs.546221NR_033667 | ENSG00000GYG2P1     | GYG2P           | glyconipseudo           |
| chr14-18:20.34459  | 0.665176 | 0.500488 | 1.329055 | 0.18383  | 0.757244 | chr14 | 18005410 | 18005786 | + | O | NA | IntergeniALR/Alph   | -595519  | NM_001013 | 440153   | Hs.534888NM_001013 | ENSG00000COR11H12   | -               | olfactoryprotein-coding |
| chr11-51:20.95133  | 0.647734 | 0.48746  | 1.328793 | 0.183916 | 0.757244 | chr11 | 51575720 | 51576083 | + | O | NA | IntergeniALR/Alph   | 1166754  | NR_024504 | 646813   | Hs.684175NR_024504 | LOC646813-          | -               | DEXH-box pseudo         |
| chr22-11:21.49913  | 0.637478 | 0.479836 | 1.328531 | 0.184003 | 0.757244 | chr22 | 11879720 | 11881760 | + | O | NA | IntergeniAluSz SIN  | -16666   | NR_110761 | 1.03E+08 | Hs.652929NR_110761 | LOC102722-          | -               | uncharactncRNA          |
| chr14-16:40.03136  | 0.477538 | 0.359472 | 1.328443 | 0.184032 | 0.757244 | chr14 | 16780201 | 16780853 | + | O | NA | IntergeniALR/Alph   | -1820590 | NM_001013 | 440153   | Hs.534888NM_001013 | ENSG00000COR11H12   | -               | olfactoryprotein-coding |
| chr5-491:18.9196   | 0.67803  | 0.511179 | 1.326404 | 0.184706 | 0.757244 | chr5  | 49117832 | 49118132 | + | O | NA | IntergeniALR/Alph   | 1323306  | NM_198449 | 133418   | Hs.561411NM_198449 | ENSG00000EMB        | GP70            | embigin protein-coding  |
| chr5-489:55.81078  | 0.412158 | 0.310931 | 1.325563 | 0.184984 | 0.757244 | chr5  | 48949791 | 48951004 | + | O | NA | IntergeniALR/Alph   | 1490891  | NM_198449 | 133418   | Hs.561411NM_198449 | ENSG00000EMB        | GP70            | embigin protein-coding  |
| chr17-25:390.304   | 0.205081 | 0.154765 | 1.325108 | 0.185135 | 0.757244 | chr17 | 25383645 | 25383941 | + | O | NA | IntergeniALR/Alph   | 1705448  | NR_135673 | 1.05E+08 | Hs.649915NR_135673 | LOC105371-          | -               | uncharactncRNA          |
| chr20-27:19.46571  | 0.665767 | 0.502939 | 1.323752 | 0.185586 | 0.757244 | chr20 | 27389969 | 27392052 | + | O | NA | IntergeniALR/Alph   | -1181777 | NR_040095 | 284801   | Hs.370695NR_040095 | ENSG00000MIR663AH   | -               | MIR663A lncRNA          |
| chr20-27:18.43413  | 0.684014 | 0.516805 | 1.323545 | 0.185654 | 0.757244 | chr20 | 27932993 | 27934425 | + | O | NA | IntergeniALR/Alph   | 668956   | NR_132313 | 1E+08    | Hs.529357NR_132313 | ENSG00000FRG1CP     | -               | FSHD regipseudo         |
| chr4-18:27.6161    | 0.564388 | 0.426831 | 1.322275 | 0.186077 | 0.757244 | chr4  | 18049613 | 18051023 | + | O | NA | IntergeniALR/Alph   | -550799  | NM_001013 | 440153   | Hs.534888NM_001013 | ENSG00000COR11H12   | -               | olfactoryprotein-coding |
| chr5-489:53.74422  | 0.41501  | 0.313901 | 1.322104 | 0.186134 | 0.757244 | chr5  | 48905902 | 48906114 | + | O | NA | IntergeniALR/Alph   | 1535280  | NM_198449 | 133418   | Hs.561411NM_198449 | ENSG00000EMB        | GP70            | embigin protein-coding  |
| chr19-251:40.63979 | 0.471133 | 0.356879 | 1.320149 | 0.186785 | 0.757244 | chr19 | 25172111 | 25172622 | + | O | NA | IntergeniALR/Alph   | -1008919 | NR_003603 | 1E+08    | Hs.149312NR_003603 | ENSG00000HAVCR1P1   | -               | hepatitispseudo         |
| chr11-51:18.9808   | 0.671324 | 0.508812 | 1.319396 | 0.187037 | 0.757244 | chr11 | 51925510 | 51926266 | + | O | NA | IntergeniALR/Alph   | 1516741  | NR_024504 | 646813   | Hs.684175NR_024504 | LOC646813-          | -               | DEXH-box pseudo         |
| chr17-25:31.80476  | 0.531129 | 0.403033 | 1.317831 | 0.18756  | 0.757244 | chr17 | 25125379 | 25125636 | + | O | NA | IntergeniALR/Alph   | 1963734  | NR_135673 | 1.05E+08 | Hs.649915NR_135673 | LOC105371-          | -               | uncharactncRNA          |
| chr20-27:27.13006  | 0.566274 | 0.429707 | 1.317815 | 0.187565 | 0.757244 | chr20 | 27539269 | 27542138 | + | O | NA | IntergeniALR/Alph   | 1061962  | NR_132313 | 1E+08    | Hs.529357NR_132313 | ENSG00000FRG1CP     | -               | FSHD regipseudo         |
| chr13-17:22.56273  | 0.621034 | 0.471767 | 1.31616  | 0.18804  | 0.757244 | chr13 | 17474907 | 17475145 | + | O | NA | IntergeniALR/Alph   | -720271  | NR_027278 | 26080    | Hs.448585NR_027278 | ENSG00000FAM230C    | LINC00281       | family wincRNA          |
| chr6-589:17.46374  | 0.697113 | 0.529677 | 1.31611  | 0.188137 | 0.757244 | chr6  | 58971044 | 58972374 | + | O | NA | IntergeniALR/Alph   | -1010263 | NR_132994 | 1.07E+08 | Hs.561535NR_132994 | ENSG00000LINC0068C- | -               | long intncRNA           |
| chr22-13:50.63219  | 0.426077 | 0.32374  | 1.316106 | 0.188138 | 0.757244 | chr22 | 13863503 | 13863747 | + | O | NA | IntergeniALR/Alph   | -1664534 | NM_001005 | 81061    | Hs.554706NM_001005 | ENSG00000COR11H1    | OR11H12 Co      | factoryprotein-coding   |
| chr10-40:43.78383  | 0.452749 | 0.34402  | 1.316052 | 0.188157 | 0.757244 | chr10 | 40440986 | 40442603 | + | O | NA | IntergeniALR/Alph   | 1745198  | NR_045000 | 399746   | Hs.742607NR_045000 | ACTR3BP5            | FKSG74          | ACTR3B pspseudo         |
| chr14-17:16.94738  | 0.707963 | 0.537979 | 1.315969 | 0.188185 | 0.757244 | chr14 | 17437690 | 17437968 | + | O | NA | IntergeniALR/Alph   | -1632888 | NM_001013 | 440153   | Hs.534888NM_001013 | ENSG00000COR11H12   | -               | olfactoryprotein-coding |
| chr22-13:16.91763  | 0.711846 | 0.541186 | 1.315344 | 0.188394 | 0.757244 | chr22 | 13323879 | 13324483 | + | O | NA | IntergeniALR/Alph   | 1426775  | NR_110761 | 1.03E+08 | Hs.652929NR_110761 | LOC102722-          | -               | uncharactncRNA          |
| chr20-27:17.46317  | 0.69870  | 0.530125 | 1.314916 | 0.188538 | 0.757244 | chr20 | 27483401 | 27487888 | + | O | NA | IntergeniALR/Alph   | 1117021  | NR_132313 | 1E+08    | Hs.529357NR_132313 | ENSG00000FRG1CP     | -               | FSHD regipseudo         |
| chr11-51:61.70263  | 0.388839 | 0.295928 | 1.313967 | 0.188857 | 0.757244 | chr11 | 51603412 | 51603668 | + | O | NA | IntergeniALR/Alph   | 1194393  | NR_024504 | 646813   | Hs.684175NR_024504 | LOC646813-          | -               | DEXH-box pseudo         |
| chr9-435:21.49743  | 0.637321 | 0.485055 | 1.313914 | 0.188875 | 0.757244 | chr9  | 43533738 | 43533951 | + | O | NA | IntergeniALR/Alph   | 407678   | NR_160669 | 1.03E+08 | NR_160669          | LOC102722-          | -               | methylencpseudo         |
| chr21-12:18.43243  | 0.683939 | 0.520649 | 1.313626 | 0.188972 | 0.757244 | chr21 | 12509690 | 12509914 | + | O | NA | IntergeniALR/Alph   | -528364  | NR_026916 | 149992   | Hs.558645NM_153773 | ANKRD30B C2lorf99   | ankyrin ipseudo |                         |
| chr20-27:16.4619   | 0.715645 | 0.545629 | 1.311594 | 0.189657 | 0.757244 | chr20 | 27077221 | 27077420 | + | O | NA | IntergeniALR/Alph   | -868087  | NR_040095 | 284801   | Hs.370695NR_040095 | ENSG00000MIR663AH   | -               | MIR663A lncRNA          |
| chr9-438:28.49102  | 0.56771  | 0.433038 | 1.310993 | 0.18986  | 0.757244 | chr9  | 43854864 | 43855287 | + | O | NA | IntergeniALR/Alph   | 728909   | NR_160669 | 1.03E+08 | NR_160669          | LOC102722-          | -               | methylencpseudo         |
| chr19-25:19.52804  | 0.659338 | 0.503336 | 1.309936 | 0.190217 | 0.757244 | chr19 | 25751514 | 25751720 | + | O | NA | IntergeniALR/Alph   | -1588170 | NR_003603 | 1E+08    | Hs.149312NR_003603 | ENSG00000HAVCR1P1   | -               | hepatitispseudo         |
| chr19-26:63.82699  | 0.385028 | 0.293947 | 1.309856 | 0.190244 | 0.757244 | chr19 | 26049107 | 26049336 | + | O | NA | IntergeniALR/Alph   | -1744210 | NR_110688 | 1.02E+08 | Hs.567934NR_110688 | ENSG00000LOC101927- | -               | uncharactncRNA          |
| chr4-936:18.49475  | 0.677092 | 0.517041 | 1.309554 | 0.190347 | 0.757244 | chr4  | 9368109  | 9368938  | + | O | NA | non-codir non-codir | 649      | NR_027278 | 391622   | Hs.722655NR_027278 | ENSG00000USP17L6P   | DUB4 USP        | ubiquitirpseudo         |
| chr21-12:17.98123  | 0.686793 | 0.525005 | 1.308508 | 0.190701 | 0.757244 | chr21 | 12883466 | 12884137 | + | O | NA | IntergeniALR/Alph   | -154365  | NR_026916 | 149992   | Hs.558645NM_153773 | ANKRD30B C2lorf99   | ankyrin ipseudo |                         |
| chr2-898:16.49278  | 0.711807 | 0.545224 | 1.305532 | 0.191712 | 0.757244 | chr2  | 89832331 | 89833459 | + | O | NA | Intergeni(ATTC)n    | -194988  | NR_136322 | 1.02E+08 | Hs.578075NR_136322 | LOC101927-          | -               | lysine mpseudo          |
| chr21-93:16.49278  | 0.711807 | 0.545224 | 1.305532 | 0.191712 | 0.757244 | chr21 | 9300367  | 9308109  | + | O | NA | IntergeniHERVK9-ir  | -174477  | NR_038322 | 1E+08    | Hs.487562NM_174944 | ENSG00000TEK4P2     | MAFIPL Ti       | tektin 4 pseudo         |
| chr3-908:25.61356  | 0.577502 | 0.442524 | 1.305019 | 0.191886 | 0.757244 | chr3  | 90881536 | 90882088 | + | O | NA | IntergeniALR/Alph   | 1774191  | NM_005233 | 2042     | Hs.123642NM_005233 | ENSG00000EPH3       | EK4 ETK EPEH    | receptprotein-coding    |
| chr13-17:          |          |          |          |          |          |       |          |          |   |   |    |                     |          |           |          |                    |                     |                 |                         |

|                    |          |          |          |          |          |       |          |          |   |      |                    |          |           |          |           |           |           |           |          |  |            |                |  |  |
|--------------------|----------|----------|----------|----------|----------|-------|----------|----------|---|------|--------------------|----------|-----------|----------|-----------|-----------|-----------|-----------|----------|--|------------|----------------|--|--|
| chr22-141 42.47046 | 0.438981 | 0.352653 | 1.244797 | 0.213206 | 0.757244 | chr22 | 14107278 | 14107651 | + | 0 NA | IntergeniALR/Alph  | -1420695 | NM_001005 | 81061    | Hs.55470c | NM_001005 | ENSG00000 | COR11H1   | OR11H12  |  | Colfactory | protein-coding |  |  |
| chr22-136 36.68343 | 0.468454 | 0.376449 | 1.244403 | 0.213351 | 0.757244 | chr22 | 13638176 | 13638442 | + | 0 NA | IntergeniALR/Alph  | 1740903  | NR_110761 | 1.03E+08 | Hs.65292c | NR_110761 |           |           |          |  |            |                |  |  |
| chr1-1224 41.46749 | 0.439888 | 0.353533 | 1.244241 | 0.213411 | 0.757244 | chr1  | 1.23E+08 | 1.23E+08 | + | 0 NA | IntergeniALR/Alph  | 1360849  | NR_003955 | 647121   | Hs.697682 | NR_003955 | ENSG00000 | EMBPI     |          |  |            |                |  |  |
| chr9-447 41.49724  | 0.438331 | 0.352363 | 1.243977 | 0.213508 | 0.757244 | chr9  | 44740829 | 44741127 | + | 0 NA | IntergeniALR/Alph  | 1614812  | NR_160669 | 1.03E+08 | NR_160669 |           |           |           |          |  |            |                |  |  |
| chr21-128 25.81329 | 0.548742 | 0.441322 | 1.243404 | 0.213719 | 0.757244 | chr21 | 12817704 | 12818109 | + | 0 NA | IntergeniALR/Alph  | -220260  | NR_026916 | 149992   | Hs.55864c | NM_153773 |           |           |          |  |            |                |  |  |
| chr22-14 18.18038  | 0.644054 | 0.518991 | 1.240972 | 0.214616 | 0.757244 | chr22 | 14376671 | 14378838 | + | 0 NA | IntergeniALR/Alph  | -150405  | NM_001005 | 81061    | Hs.55470c | NM_001005 | ENSG00000 | COR11H1   | OR11H12  |  | Colfactory | protein-coding |  |  |
| chr20-267 45.15594 | 0.421738 | 0.340044 | 1.240244 | 0.214885 | 0.757244 | chr20 | 26784756 | 26785071 | + | 0 NA | IntergeniALR/Alph  | -575680  | NR_040099 | 284801   | Hs.37069c | NR_040099 | ENSG00000 | MIR663AHC |          |  |            |                |  |  |
| chr1-1231 34.18154 | 0.482613 | 0.389135 | 1.240221 | 0.214894 | 0.757244 | chr1  | 15961119 | 15960395 | + | 0 NA | IntergeniALR/Alph  | 15961119 | NR_003955 | 647121   | Hs.697682 | NR_003955 | ENSG00000 | EMBPI     |          |  |            |                |  |  |
| chr14-166 17.66459 | 0.652919 | 0.526481 | 1.240156 | 0.214918 | 0.757244 | chr14 | 16635790 | 16638933 | + | 0 NA | IntergeniALR/Alph  | -1963756 | NM_001015 | 440153   | Hs.53488c | NM_001015 | ENSG00000 | COR11H12  |          |  |            |                |  |  |
| chr20-268 17.66459 | 0.652919 | 0.526481 | 1.240156 | 0.214918 | 0.757244 | chr20 | 26818208 | 26820931 | + | 0 NA | IntergeniALR/Alph  | -610336  | NR_040099 | 284801   | Hs.37069c | NR_040099 | ENSG00000 | MIR663AHC |          |  |            |                |  |  |
| chr21-918 22.7956  | 0.584926 | 0.471742 | 1.239928 | 0.215002 | 0.757244 | chr21 | 9181070  | 9181403  | + | 0 NA | IntergeniAluSz SIN | -51475   | NR_038325 | 1E+08    | Hs.487562 | NM_174945 | ENSG00000 | TEKT4P2   | MAFIPL T |  |            |                |  |  |
| chr22-111 18.17982 | 0.644013 | 0.519864 | 1.238811 | 0.215416 | 0.757244 | chr22 | 11929636 | 11934415 | + | 0 NA | intron (intron)    | 34619    | NR_110761 | 1.03E+08 | Hs.65292c | NR_110761 |           |           |          |  |            |                |  |  |
| chr10-407 32.05094 | 0.495546 | 0.400398 | 1.237634 | 0.215852 | 0.757244 | chr10 | 40755976 | 40756679 | + | 0 NA | IntergeniALR/Alph  | 1611718  | NR_02438C | 441666   | Hs.25572c | NR_02438C | ENSG00000 | LOC441666 |          |  |            |                |  |  |
| chr1-123 25.35982  | 0.548075 | 0.443023 | 1.237127 | 0.21604  | 0.757244 | chr1  | 1.24E+08 | 1.24E+08 | + | 0 NA | IntergeniALR/Alph  | 2155010  | NR_003955 | 647121   | Hs.697682 | NR_003955 | ENSG00000 | EMBPI     |          |  |            |                |  |  |
| chr10-411 18.57152 | 0.649393 | 0.524968 | 1.237015 | 0.216082 | 0.757244 | chr10 | 41278485 | 41278784 | + | 0 NA | IntergeniALR/Alph  | 1089411  | NR_02438C | 441666   | Hs.25572c | NR_02438C | ENSG00000 | LOC441666 |          |  |            |                |  |  |
| chr22-118 21.24822 | 0.602897 | 0.487518 | 1.236665 | 0.216211 | 0.757244 | chr22 | 11883138 | 11883736 | + | 0 NA | IntergeniIntergeni | -13969   | NR_110761 | 1.03E+08 | Hs.65292c | NR_110761 |           |           |          |  |            |                |  |  |
| chr17-26 88.46334  | 0.320749 | 0.25941  | 1.236457 | 0.216289 | 0.757244 | chr17 | 26328659 | 26328911 | + | 0 NA | IntergeniALR/Alph  | 760456   | NR_135673 | 1.05E+08 | Hs.64991c | NR_135673 |           |           |          |  |            |                |  |  |
| chr14-18 64.75951  | 0.358784 | 0.290196 | 1.236349 | 0.216329 | 0.757244 | chr14 | 10725246 | 10728855 | + | 0 NA | IntergeniALR/Alph  | -528402  | NM_001015 | 440153   | Hs.53488c | NM_001015 | ENSG00000 | COR11H12  |          |  |            |                |  |  |
| chr20-268 25.35869 | 0.548017 | 0.443561 | 1.235493 | 0.216647 | 0.757244 | chr20 | 26865891 | 26867726 | + | 0 NA | IntergeniALR/Alph  | -657575  | NR_040099 | 284801   | Hs.37069c | NR_040099 | ENSG00000 | MIR663AHC |          |  |            |                |  |  |
| chr20-27 16.60156  | 0.676158 | 0.547455 | 1.235093 | 0.216796 | 0.757244 | chr20 | 27840157 | 27843221 | + | 0 NA | IntergeniALR/Alph  | 760976   | NR_132315 | 1E+08    | Hs.529357 | NR_132315 | ENSG00000 | FRG1CP    |          |  |            |                |  |  |
| chr10-42 16.63301  | 0.672333 | 0.544409 | 1.234979 | 0.216838 | 0.757244 | chr10 | 42093916 | 42094984 | + | 0 NA | IntergeniIntergeni | 273595   | NR_02438C | 441666   | Hs.25572c | NR_02438C | ENSG00000 | LOC441666 |          |  |            |                |  |  |
| chr20-268 18.21126 | 0.640627 | 0.518801 | 1.234821 | 0.216897 | 0.757244 | chr20 | 26827493 | 26828701 | + | 0 NA | IntergeniALR/Alph  | -618864  | NR_040099 | 284801   | Hs.37069c | NR_040099 | ENSG00000 | MIR663AHC |          |  |            |                |  |  |
| chr11-52 17.17968  | 0.658672 | 0.533432 | 1.234782 | 0.216912 | 0.757244 | chr11 | 52228068 | 52228294 | + | 0 NA | IntergeniALR/Alph  | 1819034  | NR_024504 | 646813   | Hs.68417c | NR_024504 |           |           |          |  |            |                |  |  |
| chr14-17 17.17968  | 0.658672 | 0.533432 | 1.234782 | 0.216912 | 0.757244 | chr14 | 17495848 | 17498036 | + | 0 NA | IntergeniALR/Alph  | -1104175 | NM_001015 | 440153   | Hs.53488c | NM_001015 | ENSG00000 | COR11H12  |          |  |            |                |  |  |
| chr7-602 85.03836  | 0.321444 | 0.260408 | 1.234384 | 0.21706  | 0.757244 | chr7  | 60250524 | 60250869 | + | 0 NA | IntergeniALR/Alph  | 2800519  | NM_001155 | 441234   | Hs.533121 | NM_001155 | ENSG00000 | ZNF716    |          |  |            |                |  |  |
| chr12-34 17.69491  | 0.649344 | 0.526125 | 1.234201 | 0.217128 | 0.757244 | chr12 | 34944057 | 34944435 | + | 0 NA | IntergeniALR/Alph  | 921750   | NR_032834 | 84920    | Hs.102971 | NM_032834 | ENSG00000 | ALG10     | ALG10A D |  |            |                |  |  |
| chr13-171 18.2107  | 0.640577 | 0.519673 | 1.232653 | 0.217705 | 0.757244 | chr13 | 17166434 | 17166652 | + | 0 NA | IntergeniALR/Alph  | -1028754 | NR_027278 | 26080    | Hs.44858c | NR_027278 | ENSG00000 | FAM230C   |          |  |            |                |  |  |
| chr20-28 18.2107   | 0.640577 | 0.519673 | 1.232653 | 0.217705 | 0.757244 | chr20 | 28331794 | 28332850 | + | 0 NA | IntergeniALR/Alph  | 270343   | NR_132315 | 1E+08    | Hs.529357 | NR_132315 | ENSG00000 | FRG1CP    |          |  |            |                |  |  |
| chr5-484 79.22102  | 0.327497 | 0.266144 | 1.230524 | 0.218501 | 0.757244 | chr5  | 48498089 | 48498367 | + | 0 NA | IntergeniALR/Alph  | 1943060  | NM_198445 | 133418   | Hs.561411 | NM_198445 | ENSG00000 | EMB       |          |  |            |                |  |  |
| chr18-207 16.60043 | 0.676126 | 0.549468 | 1.230511 | 0.218506 | 0.757244 | chr18 | 20732895 | 20733216 | + | 0 NA | IntergeniALR/Alph  | 378758   | NM_005406 | 6093     | Hs.306307 | NM_005406 | ENSG00000 | ROCK1     |          |  |            |                |  |  |
| chr21-11 16.66445  | 0.668596 | 0.543684 | 1.229752 | 0.21879  | 0.757244 | chr21 | 11450079 | 11450309 | + | 0 NA | IntergeniALR/Alph  | 928680   | NM_19926C | 7179     | Hs.12298c | NM_19926C | ENSG00000 | TPTE      | CT44 PTE |  |            |                |  |  |
| chr20-27 17.21056  | 0.650441 | 0.533411 | 1.228646 | 0.219205 | 0.757244 | chr20 | 27272350 | 27273415 | + | 0 NA | IntergeniALR/Alph  | -1063649 | NR_040099 | 284801   | Hs.37069c | NR_040099 | ENSG00000 | MIR663AHC |          |  |            |                |  |  |
| chr10-38 16.69364  | 0.664685 | 0.541176 | 1.228225 | 0.219363 | 0.757244 | chr10 | 38918348 | 38920911 | + | 0 NA | Intergeni(GAATG) n | 223033   | NR_045000 | 399746   | Hs.742607 | NR_045000 |           |           |          |  |            |                |  |  |
| chr10-41 26.38914  | 0.539839 | 0.439619 | 1.22797  | 0.219458 | 0.757244 | chr10 | 41533473 | 41534572 | + | 0 NA | IntergeniALR/Alph  | 834023   | NR_02438C | 441666   | Hs.25572c | NR_02438C | ENSG00000 | LOC441666 |          |  |            |                |  |  |
| chr5-488 61.67949  | 0.363872 | 0.296347 | 1.227858 | 0.2195   | 0.757244 | chr5  | 48850737 | 48851635 | + | 0 NA | IntergeniALR/Alph  | 1590102  | NM_198445 | 133418   | Hs.561411 | NM_198445 | ENSG00000 | EMB       |          |  |            |                |  |  |
| chr21-11 17.18449  | 0.631257 | 0.514148 | 1.227773 | 0.219532 | 0.757244 | chr21 | 11703771 | 11703970 | + | 0 NA | IntergeniALR/Alph  | 1182356  | NM_19926C | 7179     | Hs.12298c | NM_19926C | ENSG00000 | TPTE      | CT44 PTE |  |            |                |  |  |
| chr5-492 53.72391  | 0.368418 | 0.314878 | 1.227198 | 0.219748 | 0.757244 | chr5  | 49234327 | 49242116 | + | 0 NA | IntergeniALR/Alph  | 1197567  | NM_198445 | 133418   | Hs.561411 | NM_198445 | ENSG00000 | EMB       |          |  |            |                |  |  |
| chr5-175 24.90522  | 0.547374 | 0.446254 | 1.226596 | 0.219974 | 0.757244 | chr5  | 17525161 | 17530394 | + | 0 NA | IntergeniIntergeni | 83767    | NR_134271 | 1.03E+08 | NR_134271 | ENSG00000 | LINC02215 |           |          |  |            |                |  |  |
| chr13-18 31.65981  | 0.490268 | 0.399874 | 1.226056 | 0.220177 | 0.757244 | chr13 | 18018909 | 18019145 | + | 0 NA | IntergeniALR/Alph  | -176270  | NR_027278 | 26080    | Hs.44858c | NR_027278 | ENSG00000 | FAM230C   |          |  |            |                |  |  |
| chr14-167 55.80209 | 0.378958 | 0.309234 | 1.225472 | 0.220397 | 0.757244 | chr14 | 16729999 | 16730374 | + | 0 NA | IntergeniALR/Alph  | -1870931 | NM_001015 | 440153   | Hs.53488c | NM_001015 | ENSG00000 | COR11H12  |          |  |            |                |  |  |
| chr19-24 23.81188  | 0.561569 | 0.458986 | 1.223499 | 0.221141 | 0.757244 | chr19 | 24944707 | 24946356 | + | 0 NA | IntergeniALR/Alph  | -782084  | NR_00360C | 1E+08    | Hs.14931c | NR_00360C | ENSG00000 | HAVCR1P1  |          |  |            |                |  |  |
| chr22-11 16.20929  | 0.671224 | 0.548822 | 1.223025 | 0.22132  | 0.757244 | chr22 | 11895722 | 11897831 | + | 0 NA | promoter-promoter  | -630     | NR_110761 | 1.03E+08 | Hs.65292c | NR_110761 |           |           |          |  |            |                |  |  |
| chr1-1231 35.3202  | 0.643452 | 0.379254 | 1.222009 | 0.221704 | 0.757244 | chr1  | 1.23E+08 | 1.23E+08 | + | 0 NA | IntergeniALR/Alph  | 1588838  | NR_003955 | 647121   | Hs.697682 | NR_003955 | ENSG00000 | EMBPI     |          |  |            |                |  |  |
| chr17-261 30.08268 | 0.500145 | 0.409426 | 1.221578 | 0.221867 | 0.757244 | chr17 | 26127964 | 26128234 | + | 0 NA | IntergeniALR/Alph  | 961142   | NR_135673 | 1.05E+08 | Hs.64991c | NR_135673 |           |           |          |  |            |                |  |  |
| chr20-27 23.87307  | 0.556278 | 0.455493 | 1.221265 | 0.221986 | 0.757244 | chr20 | 27416178 | 27118378 | + | 0 NA | IntergeniALR/Alph  | -908045  | NR_040099 | 284801   | Hs.37069c | NR_040099 | ENSG00000 | MIR6      |          |  |            |                |  |  |



|           |          |          |          |          |          |          |       |          |          |   |   |    |                    |          |           |          |           |           |                     |           |           |                |                |
|-----------|----------|----------|----------|----------|----------|----------|-------|----------|----------|---|---|----|--------------------|----------|-----------|----------|-----------|-----------|---------------------|-----------|-----------|----------------|----------------|
| chr20-265 | 19.41452 | 0.588743 | 0.503285 | 1.1698   | 0.242081 | 0.757244 | chr20 | 26922869 | 26924253 | + | O | NA | IntergeniALR/Alph  | -714328  | NR_04009F | 284801   | Hs.370699 | NR_04009F | ENSG000001MIR663AHC | -         | MIR663A   | lncRNA         |                |
| chr14-166 | 40.20908 | 0.421562 | 0.360379 | 1.169776 | 0.242091 | 0.757244 | chr14 | 16514134 | 16514355 | + | O | NA | IntergeniALR/Alph  | -2086873 | NM_00101F | 440153   | Hs.53488C | NM_00101F | ENSG000001C11H12    | -         | olfactory | protein-coding |                |
| chr21-122 | 30.25266 | 0.478457 | 0.409341 | 1.168847 | 0.242465 | 0.757244 | chr21 | 12224319 | 12224856 | + | O | NA | IntergeniALR/Alph  | -813579  | NR_02691E | 149992   | Hs.55864E | NM_153773 | ANKRD30BF           | C21orf99  | ankyrin   | pseudo         |                |
| chr1-1247 | 61.89366 | 0.348001 | 0.298354 | 1.166401 | 0.243452 | 0.757244 | chr1  | 1.25E+08 | 1.25E+08 | + | O | NA | IntergeniALR/Alph  | 3263118  | NR_00395F | 647121   | Hs.69768E | NR_00395F | ENSG000001EMB1      | -         | embigin   | pseudo         |                |
| chr10-412 | 17.86545 | 0.610072 | 0.52363  | 1.165082 | 0.243986 | 0.757244 | chr10 | 41313922 | 41314295 | + | O | NA | IntergeniALR/Alph  | 1053932  | NR_02438C | 441666   | Hs.25572E | NR_02438C | ENSG000001LOC44166E | -         | zinc      | fin            | pseudo         |
| chr5-474  | 17.86545 | 0.610072 | 0.52363  | 1.165082 | 0.243986 | 0.757244 | chr5  | 47403257 | 47403487 | + | O | NA | IntergeniALR/Alph  | -1706992 | NM_02107Z | 348980   | Hs.35317E | NM_02107Z | ENSG000001HCN1      | BCNG-1    | BC        | hyperpol       | protein-coding |
| chr20-27  | 25.65332 | 0.512194 | 0.440435 | 1.162926 | 0.24486  | 0.757244 | chr20 | 27021568 | 27023890 | + | O | NA | IntergeniALR/Alph  | -813496  | NR_04009F | 284801   | Hs.370699 | NR_04009F | ENSG000001MIR663AHC | -         | MIR663A   | lncRNA         |                |
| chr14-166 | 17.86545 | 0.610187 | 0.525497 | 1.161162 | 0.245576 | 0.757244 | chr14 | 16695667 | 16697219 | + | O | NA | IntergeniALR/Alph  | -1904674 | NM_00101F | 440153   | Hs.53488C | NM_00101F | ENSG000001C11H12    | -         | olfactory | protein-coding |                |
| chr19-252 | 34.97609 | 0.446927 | 0.385206 | 1.160231 | 0.245955 | 0.757244 | chr19 | 25207128 | 25207830 | + | O | NA | IntergeniALR/Alph  | -1044032 | NR_00360F | 1E+08    | Hs.14931E | NR_00360F | ENSG000001HAVCR1P1  | -         | hepatitis | pseudo         |                |
| chr1-123  | 19.44597 | 0.58557  | 0.505353 | 1.158734 | 0.246564 | 0.757244 | chr1  | 1.24E+08 | 1.24E+08 | + | O | NA | IntergeniALR/Alph  | 2442840  | NR_00395F | 647121   | Hs.69768E | NR_00395F | ENSG000001EMB1      | -         | embigin   | pseudo         |                |
| chr1-124  | 64.73977 | 0.335133 | 0.28942  | 1.157946 | 0.246886 | 0.757244 | chr1  | 1.24E+08 | 1.24E+08 | + | O | NA | IntergeniALR/Alph  | 2561184  | NR_00395F | 647121   | Hs.69768E | NR_00395F | ENSG000001EMB1      | -         | embigin   | pseudo         |                |
| chr20-28  | 17.89746 | 0.606703 | 0.524203 | 1.157381 | 0.247117 | 0.757244 | chr20 | 28366453 | 28367409 | + | O | NA | IntergeniALR/Alph  | 235734   | NR_13231F | 1E+08    | Hs.529357 | NR_13231F | ENSG000001FRG1CP    | -         | FSHD      | regip          | pseudo         |
| chr21-121 | 34.54954 | 0.443    | 0.383022 | 1.156591 | 0.247439 | 0.757244 | chr21 | 12199547 | 12199837 | + | O | NA | IntergeniALR/Alph  | -838474  | NR_02691E | 149992   | Hs.55864E | NM_153773 | ANKRD30BF           | C21orf99  | ankyrin   | pseudo         |                |
| chr9-434  | 17.92721 | 0.603159 | 0.522149 | 1.155148 | 0.24803  | 0.757244 | chr9  | 43431280 | 43431941 | + | O | NA | IntergeniALR/Alph  | 305444   | NR_16066E | 1.03E+08 | Hs.55470E | NM_16066E | LOC10272Z           | -         | methylenc | pseudo         |                |
| chr1-1217 | 35.09734 | 0.439752 | 0.380875 | 1.154584 | 0.248261 | 0.757244 | chr1  | 1.22E+08 | 1.22E+08 | + | O | NA | IntergeniALR/Alph  | 226991   | NR_00395F | 647121   | Hs.69768E | NR_00395F | ENSG000001EMB1      | -         | embigin   | pseudo         |                |
| chr1-1217 | 23.55757 | 0.529744 | 0.459125 | 1.153813 | 0.248577 | 0.757244 | chr1  | 1.22E+08 | 1.22E+08 | + | O | NA | IntergeniALR/Alph  | 251070   | NR_00395F | 647121   | Hs.69768E | NR_00395F | ENSG000001EMB1      | -         | embigin   | pseudo         |                |
| chr1-123  | 23.55757 | 0.529744 | 0.459125 | 1.153813 | 0.248577 | 0.757244 | chr1  | 1.24E+08 | 1.24E+08 | + | O | NA | IntergeniALR/Alph  | 2089130  | NR_00395F | 647121   | Hs.69768E | NR_00395F | ENSG000001EMB1      | -         | embigin   | pseudo         |                |
| chr4-4927 | 66.38091 | 0.33225  | 0.288161 | 1.153    | 0.24891  | 0.757244 | chr4  | 49278678 | 49278901 | + | O | NA | IntergeniALR/Alph  | 292147   | NR_00128E | 81057    | Hs.47970E | NM_025087 | ENSG000001CWH43     | CWH43-C   | cell      | wall           | protein-coding |
| chr22-15  | 17.38167 | 0.614608 | 0.533117 | 1.152857 | 0.248969 | 0.757244 | chr22 | 15018082 | 15019125 | + | O | NA | IntergeniALR/Alph  | -509556  | NM_00100F | 81061    | Hs.55470E | NM_00100F | ENSG000001C11H1     | OR11H12   | Col       | factory        | protein-coding |
| chr8-858  | 16.89506 | 0.61913  | 0.537065 | 1.152803 | 0.248991 | 0.757244 | chr8  | 85802068 | 85806432 | + | O | NA | promoter-promoter- | -689     | NR_00359F | 1E+08    | Hs.53505E | NR_00359F | REXO1L2P            | -         | REXO1     | lip            | pseudo         |
| chr22-14  | 29.85869 | 0.472506 | 0.409934 | 1.152637 | 0.249059 | 0.757244 | chr22 | 14032195 | 14032596 | + | O | NA | IntergeniALR/Alph  | -1495764 | NM_00100F | 81061    | Hs.55470E | NM_00100F | ENSG000001C11H1     | OR11H12   | Col       | factory        | protein-coding |
| chr5-487  | 106.537  | 0.275275 | 0.238963 | 1.151957 | 0.249339 | 0.757244 | chr5  | 48753951 | 48754193 | + | O | NA | IntergeniALR/Alph  | 1687216  | NR_19844E | 133418   | Hs.561411 | NM_19844E | ENSG000001EMB       | GP70      | embigin   | protein-coding |                |
| chr10-406 | 31.95443 | 0.619179 | 0.400985 | 1.151955 | 0.24934  | 0.757244 | chr10 | 40683362 | 40683668 | + | O | NA | IntergeniALR/Alph  | 1684530  | NR_02438C | 441666   | Hs.25572E | NR_02438C | ENSG000001LOC44166E | -         | zinc      | fin            | pseudo         |
| chr21-52  | 16.89563 | 0.619179 | 0.537573 | 1.151806 | 0.249401 | 0.757244 | chr21 | 5232263  | 5232906  | + | O | NA | IntergeniALR/Alph  | -77926   | NM_00136E | 1.03E+08 | Hs.44907E | NM_00136E | ENSG000001LOC10272Z | -         | periodic  | protein-coding |                |
| chr20-27  | 16.3787  | 0.627841 | 0.545715 | 1.150493 | 0.249941 | 0.757244 | chr20 | 27410230 | 27411129 | + | O | NA | IntergeniALR/Alph  | 1191986  | NR_13231F | 1E+08    | Hs.529357 | NR_13231F | ENSG000001FRG1CP    | -         | FSHD      | regip          | pseudo         |
| chr10-411 | 70.08664 | 0.322194 | 0.280294 | 1.149485 | 0.250356 | 0.757244 | chr10 | 41124928 | 41126511 | + | O | NA | IntergeniALR/Alph  | 1242326  | NR_02438C | 441666   | Hs.25572E | NR_02438C | ENSG000001LOC44166E | -         | zinc      | fin            | pseudo         |
| chr1-122  | 48.69008 | 0.386668 | 0.336427 | 1.149337 | 0.250417 | 0.757244 | chr1  | 1.23E+08 | 1.23E+08 | + | O | NA | IntergeniALR/Alph  | 1403682  | NR_00395F | 647121   | Hs.69768E | NR_00395F | ENSG000001EMB1      | -         | embigin   | pseudo         |                |
| chr14-17  | 17.80142 | 0.617257 | 0.537168 | 1.149094 | 0.250517 | 0.757244 | chr14 | 17985736 | 17985980 | + | O | NA | IntergeniALR/Alph  | -615259  | NM_00101F | 440153   | Hs.53488C | NM_00101F | ENSG000001C11H12    | -         | olfactory | protein-coding |                |
| chr13-171 | 24.13625 | 0.520658 | 0.45312  | 1.149051 | 0.250535 | 0.757244 | chr13 | 17114036 | 17115564 | + | O | NA | IntergeniALR/Alph  | -1080497 | NR_02727E | 26080    | Hs.44858E | NR_02727E | ENSG000001FAM230C   | LINC00281 | family    | winc           | ncRNA          |
| chr1-1247 | 35.51147 | -0.43974 | 0.382942 | -1.14883 | 0.250832 | 0.757244 | chr1  | 1.25E+08 | 1.25E+08 | + | O | NA | IntergeniALR/Alph  | 3279736  | NR_00395F | 647121   | Hs.69768E | NR_00395F | ENSG000001EMB1      | -         | embigin   | pseudo         |                |
| chr4-5071 | 16.37813 | 0.627803 | 0.546743 | 1.14826  | 0.250861 | 0.757244 | chr4  | 50711095 | 50711548 | + | O | NA | IntergeniALR/Alph  | -1131679 | NM_00128E | 23142    | Hs.60538E | NM_00128E | ENSG000001DCUN1D4   | -         | defective | protein-coding |                |
| chr9-440  | 28.67101 | 0.488116 | 0.425321 | 1.14764  | 0.251117 | 0.757244 | chr9  | 44059268 | 44059549 | + | O | NA | IntergeniALR/Alph  | 933242   | NR_16066E | 1.03E+08 | Hs.55470E | NR_16066E | LOC10272Z           | -         | methylenc | pseudo         |                |
| chr19-26  | 16.92594 | 0.615476 | 0.536768 | 1.146632 | 0.251534 | 0.757244 | chr19 | 26018229 | 26018476 | + | O | NA | IntergeniALR/Alph  | -1752079 | NR_11068E | 1.02E+08 | Hs.56793E | NR_11068E | ENSG000001LOC10192Z | -         | uncharact | ncRNA          |                |
| chr5-484  | 27.2344  | 0.500032 | 0.436253 | 1.146197 | 0.251714 | 0.757244 | chr5  | 48438405 | 48438643 | + | O | NA | IntergeniALR/Alph  | 2002764  | NR_19844E | 133418   | Hs.561411 | NM_19844E | ENSG000001EMB       | GP70      | embigin   | protein-coding |                |
| chr22-12  | 16.40958 | 0.624065 | 0.544734 | 1.145632 | 0.251947 | 0.757244 | chr22 | 12868384 | 12876092 | + | O | NA | IntergeniALR/Alph  | 974832   | NR_110761 | 1.03E+08 | Hs.65292E | NR_110761 | LOC10272Z           | -         | uncharact | ncRNA          |                |
| chr20-27  | 16.92651 | 0.615519 | 0.537275 | 1.145631 | 0.251948 | 0.757244 | chr20 | 27096171 | 27097684 | + | O | NA | IntergeniALR/Alph  | -887894  | NR_04009F | 284801   | Hs.370699 | NR_04009F | ENSG000001MIR663AHC | -         | MIR663A   | lncRNA         |                |
| chr5-476  | 206.4671 | 0.216358 | 0.189306 | 1.1429   | 0.25308  | 0.757244 | chr5  | 47648571 | 47648811 | + | O | NA | IntergeniALR/Alph  | -1952311 | NM_02107Z | 348980   | Hs.35317E | NM_02107Z | ENSG000001HCN1      | BCNG-1    | BC        | hyperpol       | protein-coding |
| chr22-13  | 28.31075 | 0.479744 | 0.419909 | 1.142494 | 0.253249 | 0.757244 | chr22 | 13631936 | 13632467 | + | O | NA | IntergeniALR/Alph  | 1734795  | NR_110761 | 1.03E+08 | Hs.65292E | NR_110761 | LOC10272Z           | -         | uncharact | ncRNA          |                |
| chr18-15  | 32.45436 | 0.451475 | 0.39568  | 1.14101  | 0.253866 | 0.757244 | chr18 | 15551181 | 15553044 | + | O | NA | IntergeniALR/Alph  | -226193  | NR_02741F | 644669   | Hs.57947E | NR_02741F | ENSG000001LOC64466E | -         | ankyrin   | pseudo         |                |
| chr20-27  | 22.58718 | 0.532888 | 0.46744  | 1.140013 | 0.254281 | 0.757244 | chr20 | 27712467 | 27714548 | + | O | NA | IntergeniALR/Alph  | 889158   | NR_13231F | 1E+08    | Hs.529357 | NR_13231F | ENSG000001FRG1CP    | -         | FSHD      | regip          | pseudo         |
| chr19-26  | 45.16594 | 0.386384 | 0.33903  | 1.139674 | 0.254422 | 0.757244 | chr19 | 26439050 | 26440183 | + | O | NA | IntergeniALR/Alph  | -1353815 | NR_11068E | 1.02E+08 | Hs.56793E | NR_11068E | ENSG000001LOC10192Z | -         | uncharact | ncRNA          |                |
| chr10-40  | 93.07052 | 0.288361 | 0.253179 | 1.138962 | 0.254719 | 0.757244 | chr10 | 40279754 | 40280243 | + | O | NA | IntergeniALR/Alph  | 1583402  | NR_04500C | 399746   | Hs.742607 | NR_04500C | ACTR3BP5            | FKSG74    | ACTR3B    | ps             | pseudo         |
| chr14-18  | 41.28769 | 0.410323 | 0.360313 | 1.138797 | 0.254788 | 0.757244 | chr14 | 18060907 | 18061311 | + | O | NA | IntergeniALR/Alph  | -540008  | NM_00101F | 440153   | Hs.53488C | NM_00101F | ENSG000001C11H12    | -         | olfactory | protein-coding |                |
| chr21-11  | 41.47637 | 0.401308 | 0.352528 | 1.138371 | 0.254965 | 0.757244 | chr21 | 11588522 | 11588851 | + | O | NA | IntergeniALR/Alph  | 1067172  | NR_19926C | 7179     | Hs.12298E | NM_19926C | ENSG000001TPTE      | CT44      | PTE       | transmem       | protein-coding |
| chr20-28  | 22.55517 | 0.535585 | 0.470808 | 1.137587 | 0.255293 | 0.757244 | chr20 | 28194439 | 28195896 | + | O | NA | IntergeniALR/Alph  | 40798    | NR_13231F | 1E+08    | Hs.529357 | NR_13231F | ENSG000001FRG1CP    | -         | FSHD      | regip          | pseudo         |
| chr22-13  | 17.47261 | 0.603748 | 0.531171 | 1.136636 | 0.25569  | 0.757244 | chr22 | 13643852 | 13644143 | + | O | NA | IntergeniALR/Alph  | 1746591  | NR_110761 | 1.03E+08 | Hs.65292E | NR_110761 | LOC10272Z           | -         | uncharact | ncRNA          |                |
| chr19-26  | 60.07866 | 0.340112 | 0.299235 | 1.136606 | 0.255703 | 0.757244 | chr19 | 26485616 | 26485852 | + | O | NA | IntergeniALR/Alph  | -1307697 | NR_11068E | 1.02E+08 | Hs.56793E | NR_11068E | ENSG000001LOC10192Z | -         | uncharact | ncRNA          |                |
| chr14-17  | 22.07139 | 0.537378 | 0.47301  | 1.136082 | 0.255922 | 0.757244 | chr14 | 17509165 | 17511076 | + | O | NA | IntergeniALR/Alph  | -1090997 | NM_00101F | 440153   | Hs.53488C | NM_00101F | ENSG000001C11H12    | -         |           |                |                |

|                    |          |          |          |          |          |       |           |           |    |    |                    |          |           |          |                    |                     |                   |                |                |
|--------------------|----------|----------|----------|----------|----------|-------|-----------|-----------|----|----|--------------------|----------|-----------|----------|--------------------|---------------------|-------------------|----------------|----------------|
| chr8-458:51.19972  | 0.35055  | 0.323291 | 1.084316 | 0.278225 | 0.757244 | chr8  | 45840470  | 45840759  | +0 | NA | IntergeniALR/Alpha | 777029   | NR_146077 | 389652   | NR_146077          | ENSG000004ASNSP1    | ASNSL1            | asparagiri     | pseudo         |
| chr13-18:17.58139  | 0.571652 | 0.527341 | 1.084028 | 0.278353 | 0.757244 | chr13 | 18013269  | 18013468  | +0 | NA | IntergeniALR/Alpha | -181929  | NR_027278 | 26080    | Hs.44858:NR_027278 | ENSG000004FAM230C   | LINC00281         | family         | wincRNA        |
| chr3-910:24.88265  | 0.485155 | 0.447606 | 1.083888 | 0.278414 | 0.757244 | chr3  | 91048944  | 91049168  | +0 | NA | IntergeniALR/Alpha | 1941435  | NM_005233 | 2042     | Hs.12364:NM_005233 | ENSG000004EPAH3     | EK4 ETK E EPH     | recept         | protein-coding |
| chr1-123:19.15908  | 0.549746 | 0.507599 | 1.083032 | 0.278794 | 0.757244 | chr1  | 1.23E+08  | 1.23E+08  | +0 | NA | IntergeniALR/Alpha | 1769817  | NR_003955 | 647121   | Hs.69768:NR_003955 | ENSG000004EMBP1     | -                 | emigin         | pseudo         |
| chr19-26:68.90982  | 0.310831 | 0.287018 | 1.082966 | 0.278824 | 0.757244 | chr19 | 263598831 | 263599037 | +0 | NA | IntergeniALR/Alpha | -1434497 | NR_110688 | 1.02E+08 | Hs.56793:NR_110688 | ENSG000004LOC101927 | -                 | uncharact      | ncRNA          |
| chr13-17:18.12807  | 0.561707 | 0.518676 | 1.082964 | 0.278824 | 0.757244 | chr13 | 17231269  | 17233559  | +0 | NA | IntergeniALR/Alpha | -962883  | NR_027278 | 26080    | Hs.44858:NR_027278 | ENSG000004FAM230C   | LINC00281         | family         | wincRNA        |
| chr21-121:18.64329 | 0.55555  | 0.513001 | 1.08294  | 0.278835 | 0.757244 | chr21 | 12122946  | 12124387  | +0 | NA | IntergeniALR/Alpha | -914500  | NR_026910 | 149992   | Hs.55864:NM_153773 | ANKRD30B C21orf99   | ankyrin           | pseudo         |                |
| chr5-495:52.20325  | 0.351601 | 0.325265 | 1.080967 | 0.279712 | 0.757244 | chr5  | 49506291  | 49506567  | +0 | NA | IntergeniALR/Alpha | 934859   | NM_198445 | 133418   | Hs.56141:NM_198445 | ENSG000004EMB       | GP70              | emigin         | protein-coding |
| chr6-593:88.80773  | 0.274245 | 0.253855 | 1.080323 | 0.279998 | 0.757244 | chr6  | 59399299  | 59399655  | +0 | NA | IntergeniALR/Alpha | -1438031 | NR_132994 | 1.07E+08 | Hs.56153:NR_125727 | ENSG000004LINC0068C | -                 | long           | intencRNA      |
| chr9-4481:17.61227 | 0.568164 | 0.526042 | 1.080072 | 0.280111 | 0.757244 | chr9  | 44817490  | 44817697  | +0 | NA | IntergeniALR/Alpha | 1691427  | NR_160666 | 1.03E+08 | NR_160669          | LOC102722           | -                 | methylenc      | pseudo         |
| chr22-13:17.61171  | 0.568118 | 0.526031 | 1.080009 | 0.280138 | 0.757244 | chr22 | 13516551  | 13519740  | +0 | NA | IntergeniALR/Alpha | 1620739  | NR_110761 | 1.03E+08 | Hs.65292:NR_110761 | ENSG000004TPTTE     | CT44 PTE          | transmem       | protein-coding |
| chr5-484:17.61171  | 0.568118 | 0.526031 | 1.080009 | 0.280138 | 0.757244 | chr5  | 48453691  | 48454422  | +0 | NA | IntergeniALR/Alpha | 1987232  | NM_198445 | 133418   | Hs.56141:NM_198445 | ENSG000004EMB       | GP70              | emigin         | protein-coding |
| chr6-596:28.54135  | 0.452533 | 0.41906  | 1.079878 | 0.280196 | 0.757244 | chr6  | 59661346  | 59662142  | +0 | NA | IntergeniALR/Alpha | -1700298 | NR_132994 | 1.07E+08 | Hs.56153:NR_125727 | ENSG000004LINC0068C | -                 | long           | intencRNA      |
| chr19-27:18.12693  | 0.561615 | 0.520483 | 1.079026 | 0.280576 | 0.757244 | chr19 | 27178379  | 27178948  | +0 | NA | IntergeniALR/Alpha | -614768  | NR_110688 | 1.02E+08 | Hs.56793:NR_110688 | ENSG000004LOC101927 | -                 | uncharact      | ncRNA          |
| chr9-4351:18.12693 | 0.561615 | 0.520483 | 1.079026 | 0.280576 | 0.757244 | chr9  | 43516621  | 43516946  | +0 | NA | IntergeniALR/Alpha | 396167   | NR_160666 | 1.03E+08 | NR_160669          | LOC102722           | -                 | methylenc      | pseudo         |
| chr1-123:29.03023  | 0.452839 | 0.419805 | 1.07869  | 0.280726 | 0.757244 | chr1  | 1.23E+08  | 1.23E+08  | +0 | NA | IntergeniALR/Alpha | 1945835  | NR_003955 | 647121   | Hs.69768:NR_003955 | ENSG000004EMBP1     | -                 | emigin         | pseudo         |
| chr21-11:33.16874  | 0.428493 | 0.397325 | 1.078444 | 0.280836 | 0.757244 | chr21 | 11493424  | 11493847  | +0 | NA | IntergeniALR/Alpha | 972121   | NM_199260 | 7179     | Hs.12298:NM_199255 | ENSG000004TPTTE     | CT44 PTE          | transmem       | protein-coding |
| chr5-473:19.15852  | 0.549677 | 0.509728 | 1.078372 | 0.280868 | 0.757244 | chr5  | 47375972  | 47376180  | +0 | NA | IntergeniALR/Alpha | -1679696 | NM_021072 | 348980   | Hs.35317:NM_021072 | ENSG000004HCN1      | BCNG-1 B hyperpol | protein-coding |                |
| chr17-251:96.81146 | 0.265766 | 0.246542 | 1.077974 | 0.281045 | 0.757244 | chr17 | 25139805  | 25140054  | +0 | NA | IntergeniALR/Alpha | 1949312  | NR_135673 | 1.05E+08 | Hs.64991:NR_135673 | ENSG000004LOC105371 | -                 | uncharact      | ncRNA          |
| chrX-624:22.57772  | 0.503665 | 0.467307 | 1.077802 | 0.281122 | 0.757244 | chrX  | 62465467  | 62465987  | +0 | NA | IntergeniALR/Alpha | 885605   | NM_001012 | 139886   | Hs.61278:NM_001012 | ENSG000004SPIN4     | TDRD28            | spindlin       | protein-coding |
| chr19-24:25.85413  | -0.47835 | 0.44395  | -1.07748 | 0.281266 | 0.757244 | chr19 | 24863116  | 24863348  | +0 | NA | IntergeniALR/Alpha | -699785  | NR_003608 | 1E+08    | Hs.14931:NR_003608 | ENSG000004HAVCR1P1  | -                 | hepatitis      | pseudo         |
| chr13-16:27.99694  | 0.456927 | 0.424072 | 1.077475 | 0.281268 | 0.757244 | chr13 | 16848772  | 16849182  | +0 | NA | IntergeniALR/Alpha | -1346320 | NR_027278 | 26080    | Hs.44858:NR_027278 | ENSG000004FAM230C   | LINC00281         | family         | wincRNA        |
| chr20-26:17.09535  | 0.574915 | 0.534307 | 1.076002 | 0.281926 | 0.757244 | chr20 | 26722837  | 26723575  | +0 | NA | IntergeniALR/Alpha | -513973  | NR_040095 | 284801   | Hs.37069:NR_040095 | ENSG000004MIR663AH  | -                 | MIR663A        | lncRNA         |
| chr13-16:23.33584  | 0.49483  | 0.460008 | 1.0757   | 0.282062 | 0.757244 | chr13 | 16930417  | 16930721  | +0 | NA | IntergeniALR/Alpha | -1264728 | NR_027278 | 26080    | Hs.44858:NR_027278 | ENSG000004FAM230C   | LINC00281         | family         | wincRNA        |
| chr14-17:21.25483  | 0.526301 | 0.489384 | 1.075435 | 0.28218  | 0.757244 | chr14 | 17381885  | 17382128  | +0 | NA | IntergeniALR/Alpha | -1219111 | NM_001013 | 440153   | Hs.53488:NM_001013 | ENSG000004OR11H12   | -                 | olfactory      | protein-coding |
| chr13-17:17.64315  | 0.564692 | 0.525843 | 1.073879 | 0.282277 | 0.757244 | chr13 | 17061320  | 17062739  | +0 | NA | IntergeniALR/Alpha | -1133268 | NR_027278 | 26080    | Hs.44858:NR_027278 | ENSG000004FAM230C   | LINC00281         | family         | wincRNA        |
| chr20-20:17.64315  | 0.564692 | 0.525843 | 1.073879 | 0.282277 | 0.757244 | chr20 | 21989105  | 21991016  | +0 | NA | IntergeniALR/Alpha | 612600   | NR_132316 | 1E+08    | Hs.52935:NR_132316 | ENSG000004FRG1CP    | -                 | FSHD           | regipseudo     |
| chr19-26:39.51802  | 0.391838 | 0.364895 | 1.073839 | 0.282895 | 0.757244 | chr19 | 26897599  | 26897860  | +0 | NA | IntergeniALR/Alpha | -895702  | NR_110688 | 1.02E+08 | Hs.56793:NR_110688 | ENSG000004LOC101927 | -                 | uncharact      | ncRNA          |
| chr12-36:17.64259  | 0.564647 | 0.525832 | 1.073816 | 0.282905 | 0.757244 | chr12 | 36367140  | 36367464  | +0 | NA | IntergeniALR/Alpha | -1949472 | NM_001013 | 144245   | Hs.52935:NM_001013 | ENSG000004ALG10     | ALG10 KCF         | ALG10          | protein-coding |
| chr13-16:52.90376  | 0.344219 | 0.320605 | 1.073657 | 0.282977 | 0.757244 | chr13 | 16690045  | 16690395  | +0 | NA | IntergeniALR/Alpha | -1505077 | NR_027278 | 26080    | Hs.44858:NR_027278 | ENSG000004FAM230C   | LINC00281         | family         | wincRNA        |
| chr20-28:16.58012  | 0.582227 | 0.542602 | 1.073026 | 0.283259 | 0.757244 | chr20 | 28170803  | 28173122  | +0 | NA | IntergeniALR/Alpha | 430703   | NR_132316 | 1E+08    | Hs.52935:NR_132316 | ENSG000004FRG1CP    | -                 | FSHD           | regipseudo     |
| chr1-124:16.58012  | 0.582227 | 0.542602 | 1.073026 | 0.283259 | 0.757244 | chr1  | 1.24E+08  | 1.24E+08  | +0 | NA | IntergeniALR/Alpha | 2554076  | NR_003955 | 647121   | Hs.69768:NR_003955 | ENSG000004EMBP1     | -                 | emigin         | pseudo         |
| chr5-492:17.57193  | 0.51546  | 0.533091 | 1.072135 | 0.283659 | 0.757244 | chr5  | 49226806  | 49227952  | +0 | NA | IntergeniALR/Alpha | 1213909  | NM_198445 | 133418   | Hs.56141:NM_198445 | ENSG000004EMB       | GP70              | emigin         | protein-coding |
| chr21-10:17.1268   | 0.57138  | 0.533001 | 1.072005 | 0.283718 | 0.757244 | chr21 | 10368165  | 10368958  | +0 | NA | IntergeniALR/Alpha | -44959   | NM_001187 | 574      | Hs.54578:NM_001187 | BAGE                | BAGE1 CT2B        | melano         | protein-coding |
| chr19-26:44.39868  | 0.369343 | 0.344864 | 1.070983 | 0.284177 | 0.757111 | chr19 | 26008793  | 26009024  | +0 | NA | IntergeniALR/Alpha | -1784523 | NR_110688 | 1.02E+08 | Hs.56793:NR_110688 | ENSG000004LOC101927 | -                 | uncharact      | ncRNA          |
| chr21-11:40.19161  | 0.383508 | 0.35856  | 1.069577 | 0.28481  | 0.758295 | chr21 | 11499718  | 11499932  | +0 | NA | IntergeniALR/Alpha | 978311   | NM_199260 | 7179     | Hs.12298:NM_199255 | ENSG000004TPTTE     | CT44 PTE          | transmem       | protein-coding |
| chr22-14:27.54065  | 0.454561 | 0.42536  | 1.068648 | 0.285228 | 0.758295 | chr22 | 14930390  | 14931819  | +0 | NA | IntergeniALR/Alpha | -597055  | NM_001005 | 81061    | Hs.55470:NM_001005 | ENSG000004OR11H1    | OR11H12 C         | olfactory      | protein-coding |
| chr9-438:23.30213  | 0.497303 | 0.465379 | 1.068597 | 0.285251 | 0.758295 | chr9  | 43844817  | 43845131  | +0 | NA | IntergeniALR/Alpha | 718808   | NR_160666 | 1.03E+08 | NR_160669          | LOC102722           | -                 | methylenc      | pseudo         |
| chr10-40:89.47905  | 0.271016 | 0.253956 | 1.067179 | 0.285891 | 0.759237 | chr10 | 40019603  | 40020472  | +0 | NA | IntergeniALR/Alpha | 1323441  | NR_045000 | 399746   | Hs.74260:NR_045000 | ACTR3BP5            | FKSG74            | ACTR3B         | pseudo         |
| chr19-27:26.99341  | 0.458985 | 0.430368 | 1.066493 | 0.286201 | 0.759302 | chr19 | 27008296  | 27009701  | +0 | NA | IntergeniALR/Alpha | -784433  | NR_110688 | 1.02E+08 | Hs.56793:NR_110688 | ENSG000004LOC101927 | -                 | uncharact      | ncRNA          |
| chr10-40:45.98911  | 0.360013 | 0.338449 | 1.063716 | 0.287457 | 0.761184 | chr10 | 40266972  | 40269022  | +0 | NA | IntergeniALR/Alpha | 1571401  | NR_045000 | 399746   | Hs.74260:NR_045000 | ACTR3BP5            | FKSG74            | ACTR3B         | pseudo         |
| chr12-35:16.60931  | 0.578391 | 0.544177 | 1.062874 | 0.287839 | 0.761184 | chr12 | 35688783  | 35689439  | +0 | NA | IntergeniALR/Alpha | 1666615  | NM_032834 | 84920    | Hs.10297:NM_032834 | ENSG000004ALG10     | ALG10A DIALG10    | al             | protein-coding |
| chr19-27:38.61052  | 0.386839 | 0.364447 | 1.061442 | 0.288489 | 0.761184 | chr19 | 27138456  | 27140712  | +0 | NA | IntergeniALR/Alpha | -653847  | NR_110688 | 1.02E+08 | Hs.56793:NR_110688 | ENSG000004LOC101927 | -                 | uncharact      | ncRNA          |
| chr21-11:17.09818  | 0.57522  | 0.54194  | 1.061409 | 0.288504 | 0.761184 | chr21 | 11336681  | 11337196  | +0 | NA | IntergeniALR/Alpha | 815424   | NM_199260 | 7179     | Hs.12298:NM_199255 | ENSG000004TPTTE     | CT44 PTE          | transmem       | protein-coding |
| chr22-14:21.7862   | 0.505644 | 0.476432 | 1.061314 | 0.288547 | 0.761184 | chr22 | 14796045  | 14797116  | +0 | NA | IntergeniALR/Alpha | -731579  | NM_001005 | 81061    | Hs.55470:NM_001005 | ENSG000004OR11H1    | OR11H12 C         | olfactory      | protein-coding |
| chr13-16:42.33211  | 0.370825 | 0.349459 | 1.061114 | 0.288626 | 0.761184 | chr13 | 16657916  | 16658560  | +0 | NA | IntergeniALR/Alpha | -1537059 | NR_027278 | 26080    | Hs.44858:NR_027278 | ENSG000004FAM230C   | LINC00281         | family         | wincRNA        |
| chr10-40:28.11876  | 0.448117 | 0.422734 | 1.060045 | 0.289124 | 0.761208 | chr10 | 40771324  | 40772361  | +0 | NA | IntergeniALR/Alpha | 1596203  | NR_02438C |          |                    |                     |                   |                |                |



|                     |          |          |          |          |          |       |           |          |   |      |                    |                    |          |                     |                   |           |                |                |
|---------------------|----------|----------|----------|----------|----------|-------|-----------|----------|---|------|--------------------|--------------------|----------|---------------------|-------------------|-----------|----------------|----------------|
| chr20-28: 17.84345  | 0.522306 | 0.522333 | 1.001672 | 0.316502 | 0.763126 | chr20 | 28380528  | 28381744 | + | O NA | IntergeniALR/Alphe | 221529 NR_13231F   | 1E+08    | Hs. 529357NR_13231F | ENSG0000CFRG1CP   | -         | FSHD           | regipseudo     |
| chr22-14f 17.29734  | 0.532183 | 0.531434 | 1.00141  | 0.316629 | 0.763126 | chr22 | 14863776  | 14865305 | + | O NA | IntergeniALR/Alphe | -663619 NM_00100F  | 81061    | Hs. 55470fNM_00100F | ENSG0000COR11H1   | OR11H12   | Colfactory     | protein-coding |
| chr5-476f 37.81067  | 0.368429 | 0.368312 | 1.000317 | 0.317157 | 0.763126 | chr5  | 47607622  | 47608338 | + | O NA | IntergeniALR/Alphe | -1911600 NM_02107Z | 348980   | Hs. 35317fNM_02107Z | ENSG0000HCN1      | BCNG-1    | BChyperpolz    | protein-coding |
| chr5-487f 38.93603  | 0.362939 | 0.362892 | 1.00013  | 0.317248 | 0.763126 | chr5  | 48791255  | 48792631 | + | O NA | IntergeniALR/Alphe | 1649345 NM_19844f  | 133418   | Hs. 56141NM_19844f  | ENSG0000EMB       | GP70      | embigin        | protein-coding |
| chr22-14f 21.48827  | 0.48935  | 0.489623 | 0.999443 | 0.31758  | 0.763126 | chr22 | 14939638  | 14939959 | + | O NA | IntergeniALR/Alphe | -588361 NM_00100F  | 81061    | Hs. 55470fNM_00100F | ENSG0000COR11H1   | OR11H12   | Colfactory     | protein-coding |
| chr1-124f 71.10566  | 0.278355 | 0.278567 | 0.99924  | 0.317678 | 0.763126 | chr1  | 1.24E+08  | 1.24E+08 | + | O NA | IntergeniALR/Alphe | 2648746 NR_00395F  | 647121   | Hs. 69768fNR_00395F | ENSG0000EMB       | -         | embigin        | pseudo         |
| chr5-482f 24.08564  | 0.459217 | 0.459634 | 0.999094 | 0.317749 | 0.763126 | chr5  | 48280249  | 48280723 | + | O NA | IntergeniALR/Alphe | 2160802 NR_19844f  | 133418   | Hs. 56141NM_19844f  | ENSG0000EMB       | GP70      | embigin        | protein-coding |
| chr8-456f 17.77999  | 0.530001 | 0.530532 | 0.999    | 0.317795 | 0.763126 | chr8  | 45651344  | 45651608 | + | O NA | IntergeniALR/Alphe | 966167 NR_14607f   | 389652   | NR_14607f           | ENSG0000ASNSP1    | ASNSL1    | asparagip      | pseudo         |
| chr22-107f 23.08153 | 0.461781 | 0.462366 | 0.998734 | 0.317923 | 0.763126 | chr22 | 10755507  | 10755921 | + | O NA | IntergeniAluJb SIN | 205815 NR_13232C   | 1.03E+08 | NR_132320           | FRG1FP            | -         | FSHD           | regipseudo     |
| chr5-486f 27.28804  | 0.426397 | 0.427135 | 0.998272 | 0.318147 | 0.763126 | chr5  | 48688567  | 48690249 | + | O NA | IntergeniALR/Alphe | 1751880 NM_19844f  | 133418   | Hs. 56141NM_19844f  | ENSG0000EMB       | GP70      | embigin        | protein-coding |
| chr20-26f 17.32765  | 0.528662 | 0.529617 | 0.998116 | 0.318223 | 0.763126 | chr20 | 26957539  | 26959873 | + | O NA | IntergeniALR/Alphe | -749473 NR_04009F  | 284801   | Hs. 37069fNR_04009F | ENSG0000MIR663AH  | BCNG-1    | BChyperpolz    | protein-coding |
| chr20-27f 17.32765  | 0.528662 | 0.529617 | 0.998116 | 0.318223 | 0.763126 | chr20 | 27206757  | 27208949 | + | O NA | IntergeniALR/Alphe | -998620 NR_04009F  | 284801   | Hs. 37069fNR_04009F | ENSG0000MIR663AH  | BCNG-1    | BChyperpolz    | protein-coding |
| chr10-40f 21.98819  | 0.472977 | 0.474011 | 0.997819 | 0.318367 | 0.763126 | chr10 | 40246748  | 40248460 | + | O NA | IntergeniALR/Alphe | 1551008 NR_045000  | 399746   | Hs. 74260fNR_045000 | ACTR3BP5          | FKSG74    | ACTR3B         | pseudo         |
| chr1-123f 17.32822  | 0.528668 | 0.530122 | 0.997257 | 0.31864  | 0.763126 | chr1  | 1.23E+08  | 1.23E+08 | + | O NA | IntergeniALR/Alphe | 1741761 NR_00395F  | 647121   | Hs. 69768fNR_00395F | ENSG0000EMB       | -         | embigin        | pseudo         |
| chr5-489f 18.90761  | 0.51009  | 0.511577 | 0.997093 | 0.31872  | 0.763126 | chr5  | 48924486  | 48924695 | + | O NA | IntergeniALR/Alphe | 1516698 NR_19844f  | 133418   | Hs. 56141NM_19844f  | ENSG0000EMB       | GP70      | embigin        | protein-coding |
| chr9-435f 31.52486  | 0.398613 | 0.399883 | 0.996958 | 0.318785 | 0.763126 | chr9  | 43546660  | 43547263 | + | O NA | IntergeniALR/Alphe | 420795 NR_160666   | 1.03E+08 | NR_160669           | LOC10272Z         | -         | methylenz      | pseudo         |
| chr19-27f 16.78042  | 0.537955 | 0.539817 | 0.99655  | 0.318983 | 0.763126 | chr19 | 27122346  | 27122545 | + | O NA | IntergeniALR/Alphe | -670986 NR_11068F  | 1.02E+08 | Hs. 56793fNR_11068F | ENSG0000LOC10192Z | -         | uncharactncRNA |                |
| chr14-17f 21.98876  | 0.473027 | 0.474735 | 0.996403 | 0.319054 | 0.763126 | chr14 | 17915239  | 17916260 | + | O NA | IntergeniALR/Alphe | -685368 NM_00101F  | 440153   | Hs. 53488fNM_00101F | ENSG0000COR11H12  | -         | olfactory      | protein-coding |
| chr1-123f 23.05292  | 0.464543 | 0.466257 | 0.996325 | 0.319092 | 0.763126 | chr1  | 1.24E+08  | 1.24E+08 | + | O NA | IntergeniALR/Alphe | 2292329 NR_00395F  | 647121   | Hs. 69768fNR_00395F | ENSG0000EMB       | -         | embigin        | pseudo         |
| chr20-27f 18.39125  | 0.514846 | 0.51679  | 0.996239 | 0.319134 | 0.763126 | chr20 | 27983943  | 27984194 | + | O NA | IntergeniALR/Alphe | 618597 NR_13231F   | 1E+08    | Hs. 529357NR_13231F | ENSG0000CFRG1CP   | -         | FSHD           | regipseudo     |
| chr20-27f 17.32765  | 0.528662 | 0.529617 | 0.998116 | 0.319228 | 0.763126 | chr20 | 12110978  | 12111799 | + | O NA | IntergeniALR/Alphe | -926778 NR_02691F  | 149992   | Hs. 55864fNM_15377Z | ANKRD30BF         | C2orf99   | ankyrin        | pseudo         |
| chr1-123f 41.50308  | 0.355399 | 0.357344 | 0.994558 | 0.319951 | 0.763126 | chr1  | 1.24E+08  | 1.24E+08 | + | O NA | IntergeniALR/Alphe | 2342126 NR_00395F  | 647121   | Hs. 69768fNR_00395F | ENSG0000EMB       | -         | embigin        | pseudo         |
| chr21-92f 27.28634  | 0.426294 | 0.428684 | 0.994426 | 0.320016 | 0.763126 | chr21 | 9259210   | 9260163  | + | O NA | IntergeniIntergeni | -129925 NR_03832Z  | 1E+08    | Hs. 48756fNR_17494F | ENSG0000TEKT4P2   | MAFIPL TI | tektin 4       | pseudo         |
| chr7-60f 11.13541   | 0.277443 | 0.279076 | 0.994149 | 0.32015  | 0.763126 | chr7  | 60591144  | 6060142  | + | O NA | IntergeniALR/Alphe | 2712763 NR_00395F  | 643955   | Hs. 58330fNR_00395F | ENSG0000ZNF733P   | ZNF733    | zinc           | finz           |
| chr8-451f 41.62434  | 0.349365 | 0.35162  | 0.993589 | 0.320423 | 0.763126 | chr8  | 45187911  | 45188840 | + | O NA | IntergeniALR/Alphe | 1429268 NR_14607f  | 389652   | NR_14607f           | ENSG0000ASNSP1    | ASNSL1    | asparagip      | pseudo         |
| chr21-11f 16.8113   | 0.534314 | 0.537813 | 0.993494 | 0.320469 | 0.763126 | chr21 | 11563630  | 11564748 | + | O NA | IntergeniALR/Alphe | 1042679 NR_19926F  | 7179     | Hs. 12298fNR_19926F | ENSG0000TPTE      | CT44 PTE  | transmem       | protein-coding |
| chr5-476f 22.01964  | 0.470258 | 0.473343 | 0.993483 | 0.320475 | 0.763126 | chr5  | 47675470  | 47676735 | + | O NA | IntergeniALR/Alphe | -1979722 NR_02107Z | 348980   | Hs. 35317fNM_02107Z | ENSG0000HCN1      | BCNG-1    | BChyperpolz    | protein-coding |
| chr20-29f 17.3591   | 0.525169 | 0.529917 | 0.991039 | 0.321666 | 0.763126 | chr20 | 29088471  | 29088794 | + | O NA | intron (intron)    | 8242 NR_13231F     | 1.03E+08 | NR_132316           | FRG1DP            | -         | FSHD           | regipseudo     |
| chr10-41f 33.60473  | 0.38524  | 0.388732 | 0.991017 | 0.321677 | 0.763126 | chr10 | 41187901  | 41188627 | + | O NA | IntergeniALR/Alphe | 1179781 NR_02438F  | 441666   | Hs. 25572fNR_02438F | ENSG0000LOC44166F | -         | zinc           | finz           |
| chr4-503f 17.35797  | 0.525077 | 0.529895 | 0.990907 | 0.321731 | 0.763126 | chr4  | 50349218  | 50349434 | + | O NA | IntergeniALR/Alphe | 1362684 NM_00128F  | 80157    | Hs. 47970fNM_02508F | ENSG0000CWH43     | CWH43-C   | f cell         | wall           |
| chr11-51f 22.04995  | 0.467475 | 0.471997 | 0.990419 | 0.321969 | 0.763126 | chr11 | 51951183  | 51951787 | + | O NA | IntergeniALR/Alphe | 1542338 NR_02450F  | 646813   | Hs. 68417fNR_02450F | LOC64681F         | -         | DEXH-box       | pseudo         |
| chr10-41f 29.4124   | 0.415813 | 0.420076 | 0.989852 | 0.322246 | 0.763126 | chr10 | 41418086  | 41418388 | + | O NA | IntergeniALR/Alphe | 949808 NR_02438F   | 441666   | Hs. 25572fNR_02438F | ENSG0000LOC44166F | -         | zinc           | finz           |
| chr5-175f 16.84274  | 0.530759 | 0.536994 | 0.988389 | 0.322962 | 0.763126 | chr5  | 17517590  | 17524003 | + | O NA | IntergeniIntergeni | 76786 NR_152427    | 1.03E+08 | NR_13427C           | ENSG0000LINC0221F | -         | long           | intencRNA      |
| chr20-26f 16.84217  | 0.530711 | 0.536982 | 0.988321 | 0.322995 | 0.763126 | chr20 | 26948841  | 26949826 | + | O NA | IntergeniALR/Alphe | -740100 NR_04009F  | 284801   | Hs. 37069fNR_04009F | ENSG0000MIR663AH  | BCNG-1    | BChyperpolz    | protein-coding |
| chr22-14f 17.35967  | 0.525205 | 0.531415 | 0.988315 | 0.322998 | 0.763126 | chr22 | 14587364  | 14587667 | + | O NA | IntergeniALR/Alphe | -940644 NM_00100F  | 81061    | Hs. 55470fNM_00100F | ENSG0000COR11H1   | OR11H12   | Colfactory     | protein-coding |
| chr16-34f 20.48643  | 0.493902 | 0.499922 | 0.987958 | 0.323173 | 0.763126 | chr16 | 34276979  | 34277178 | + | O NA | IntergeniALR/Alphe | 104402 NR_15815F   | 1.03E+08 | Hs. 69271fNR_15815F | CCNYL3            | -         | cyclin         | Y              |
| chr5-47f 29.9449    | 0.403664 | 0.409027 | 0.98689  | 0.323697 | 0.763126 | chr5  | 4788481   | 4790863  | + | O NA | IntergeniALR/Alphe | -1793292 NR_02107Z | 348980   | Hs. 35317fNM_02107Z | ENSG0000HCN1      | BCNG-1    | BChyperpolz    | protein-coding |
| chr22-14f 21.50384  | 0.473386 | 0.479856 | 0.986517 | 0.32388  | 0.763126 | chr22 | 14146208  | 14146635 | + | O NA | IntergeniALR/Alphe | -1381738 NM_00100F | 81061    | Hs. 55470fNM_00100F | ENSG0000COR11H1   | OR11H12   | Colfactory     | protein-coding |
| chr22-14f 16.84161  | 0.530662 | 0.538001 | 0.986359 | 0.323957 | 0.763126 | chr22 | 14948438  | 14948958 | + | O NA | IntergeniALR/Alphe | -579461 NM_00100F  | 81061    | Hs. 55470fNM_00100F | ENSG0000COR11H1   | OR11H12   | Colfactory     | protein-coding |
| chr5-489f 71.69936  | 0.27306  | 0.277184 | 0.985121 | 0.324565 | 0.763126 | chr5  | 489870156 | 48997049 | + | O NA | IntergeniALR/Alphe | 1471006 NR_19844f  | 133418   | Hs. 56141NM_19844f  | ENSG0000EMB       | GP70      | embigin        | protein-coding |
| chr3-908f 22.59549  | 0.461793 | 0.468773 | 0.98511  | 0.32457  | 0.763126 | chr3  | 90874667  | 90874906 | + | O NA | IntergeniALR/Alphe | 1767165 NM_00523Z  | 2042     | Hs. 12364fNM_00523Z | ENSG0000EPH3      | EK4 ETK E | EPH            | recep          |
| chr21-11f 16.77872  | 0.537927 | 0.546091 | 0.98505  | 0.324599 | 0.763126 | chr21 | 11516814  | 11517437 | + | O NA | IntergeniALR/Alphe | 995611 NM_19926F   | 7179     | Hs. 12298fNR_19926F | ENSG0000TPTE      | CT44 PTE  | transmem       | protein-coding |
| chr11-53f 16.32638  | 0.536689 | 0.544995 | 0.984759 | 0.324742 | 0.763126 | chr11 | 53509096  | 53509914 | + | O NA | IntergeniALR/Alphe | 1094493 NM_00100F  | 119749   | Hs. 55356fNM_00100F | ENSG0000COR4C6    | -         | olfactory      | protein-coding |
| chr20-28f 16.32638  | 0.536689 | 0.544995 | 0.984759 | 0.324742 | 0.763126 | chr20 | 28371352  | 28374310 | + | O NA | IntergeniALR/Alphe | 229834 NR_13231F   | 1E+08    | Hs. 529357NR_13231F | ENSG0000CFRG1CP   | -         | FSHD           | regipseudo     |
| chrY-568f 16.32582  | 0.536642 | 0.545521 | 0.983724 | 0.325251 | 0.763126 | chrY  | 56865487  | 56871536 | + | O NA | IntergeniALR/Alphe | -85744 NM_00584C   | 10251    | Hs. 38191fNM_00584C | ENSG0000SPRY3     | spry-3    | olfactory      | protein-coding |
| chr10-39f 21.53246  | 0.470409 | 0.478737 | 0.982604 | 0.325802 | 0.763126 | chr10 | 39989702  | 39990776 | + | O NA | IntergeniALR/Alphe | 1293643 NR_045000  | 399746   | Hs. 74260fNR_045000 | ACTR3BP5          | FKSG74    | ACTR3B         | pseudo         |
| chr6-587f 16.84104  | 0.53061  | 0.540065 | 0.982494 | 0.325857 | 0.763126 | chr6  | 58731200  | 58731874 | + | O NA | IntergeniALR/Alphe | -770091 NR_13299F  | 1.07E+08 | Hs. 56153fNR_12572Z | ENSG0000LINC0068C | -         | long           | intencRNA      |
| chr9-439f 25.16198  | 0.438301 | 0.446454 | 0.981399 | 0.326228 | 0.763126 | chr9  | 43981627  | 43981847 | + | O NA | IntergeniALR/Alphe | 855571 NR_160666   | 1.03E+08 | NR_160669           | LOC10272Z         | -         | methylenz      | pseudo         |
| chr20-26f 16.87362  | 0.527157 |          |          |          |          |       |           |          |   |      |                    |                    |          |                     |                   |           |                |                |

|          |          |          |          |          |          |          |       |           |           |   |   |    |                    |          |           |          |                    |                    |           |              |                |                |
|----------|----------|----------|----------|----------|----------|----------|-------|-----------|-----------|---|---|----|--------------------|----------|-----------|----------|--------------------|--------------------|-----------|--------------|----------------|----------------|
| chr20-27 | 18.01286 | 0.486251 | 0.521257 | 0.932843 | 0.350901 | 0.771949 | chr20 | 27636551  | 27637602  | + | 0 | NA | IntergeniALR/Alph  | 965589   | NR_13231F | 1E+08    | Hs.529357NR_13231F | ENSG00000FRG1CP    | -         | FSHD         | regipseudo     |                |
| chr19-25 | 22.7666  | 0.433393 | 0.464633 | 0.932763 | 0.350942 | 0.771949 | chr19 | 25348435  | 25350508  | + | 0 | NA | IntergeniALR/Alph  | -186024  | NR_00360F | 1E+08    | Hs.149312NR_00360F | ENSG00000HAVCR1P1  | -         | hepatitis    | pseudo         |                |
| chr10-41 | 33.88095 | 0.368667 | 0.395425 | 0.932332 | 0.351165 | 0.771949 | chr10 | 41329702  | 41329904  | + | 0 | NA | IntergeniALR/Alph  | 1038242  | NR_02438C | 441666   | Hs.255729NR_02438C | ENSG00000LOC441666 | -         | zinc         | finp           | pseudo         |
| chrX-620 | 33.25949 | 0.367326 | 0.394103 | 0.932056 | 0.351308 | 0.771949 | chrX  | 620028972 | 620030283 | + | 0 | NA | IntergeniALR/Alph  | 1321705  | NM_00101E | 139886   | Hs.612782NR_00101E | ENSG00000SPIN4     | TDRD28    | spindlin     | protein-coding |                |
| chr9-435 | 22.21993 | 0.438226 | 0.470772 | 0.930941 | 0.351884 | 0.772354 | chr9  | 43585604  | 43586046  | + | 0 | NA | IntergeniALR/Alph  | 4596569  | NR_160669 | 1.03E+08 | Hs.529357NR_13231F | ENSG00000FRG1CP    | -         | FSHD         | regipseudo     |                |
| chr20-28 | 18.04544 | 0.483037 | 0.520149 | 0.928652 | 0.353069 | 0.772354 | chr20 | 28049227  | 28050735  | + | 0 | NA | IntergeniALR/Alph  | 552684   | NR_13231F | 1E+08    | Hs.529357NR_13231F | ENSG00000FRG1CP    | -         | FSHD         | regipseudo     |                |
| chr21-12 | 18.04544 | 0.483037 | 0.520149 | 0.928652 | 0.353069 | 0.772354 | chr21 | 12257025  | 12258117  | + | 0 | NA | IntergeniALR/Alph  | -780595  | NR_02691F | 149992   | Hs.558644NR_153773 | ANKRD30BF          | C21orf99  | ankyrin      | ipseudo        |                |
| chr22-13 | 18.04374 | 0.482902 | 0.520114 | 0.928454 | 0.353172 | 0.772354 | chr22 | 13655316  | 13655946  | + | 0 | NA | IntergeniALR/Alph  | 1758225  | NR_110761 | 1.03E+08 | Hs.652929NR_110761 | LOC10272Z          | -         | uncharact    | ncRNA          |                |
| chr20-27 | 18.59097 | 0.475752 | 0.513015 | 0.927365 | 0.353737 | 0.772354 | chr20 | 27688376  | 27688865  | + | 0 | NA | IntergeniALR/Alph  | 914045   | NR_13231F | 1E+08    | Hs.529357NR_13231F | ENSG00000FRG1CP    | -         | FSHD         | regipseudo     |                |
| chr10-40 | 22.25081 | 0.435559 | 0.469882 | 0.927076 | 0.353887 | 0.772354 | chr10 | 40080043  | 40082761  | + | 0 | NA | IntergeniALR/Alph  | 1384806  | NR_045000 | 399746   | Hs.742607NR_045000 | ACTR3BP5           | FKSG74    | ACTR3B       | ps             | pseudo         |
| chr20-27 | 22.25137 | 0.435598 | 0.470537 | 0.925747 | 0.354578 | 0.772354 | chr20 | 27537881  | 27538327  | + | 0 | NA | IntergeniALR/Alph  | 1064561  | NR_13231F | 1E+08    | Hs.529357NR_13231F | ENSG00000FRG1CP    | -         | FSHD         | regipseudo     |                |
| chr19-24 | 30.20808 | 0.376771 | 0.407029 | 0.925661 | 0.354622 | 0.772354 | chr19 | 24848156  | 24848397  | + | 0 | NA | IntergeniALR/Alph  | -684829  | NR_00360F | 1E+08    | Hs.149312NR_00360F | ENSG00000HAVCR1P1  | -         | hepatitis    | pseudo         |                |
| chr6-596 | 17.52851 | 0.487117 | 0.526558 | 0.925058 | 0.354936 | 0.772354 | chr6  | 59683252  | 59683655  | + | 0 | NA | IntergeniALR/Alph  | -1722007 | NR_132994 | 1.07E+08 | Hs.561539NR_125727 | ENSG00000LINC0068C | -         | long         | intenc         | ncRNA          |
| chr7-604 | 17.52851 | 0.487117 | 0.526558 | 0.925058 | 0.354936 | 0.772354 | chr7  | 60400908  | 60401453  | + | 0 | NA | IntergeniALR/Alph  | 2902876  | NR_00395E | 643955   | Hs.583309NR_00395E | ENSG00000ZNF733P   | ZNF733    | zinc         | finp           | pseudo         |
| chr14-16 | 17.4965  | 0.490512 | 0.530313 | 0.924948 | 0.354993 | 0.772354 | chr14 | 16889979  | 16890190  | + | 0 | NA | IntergeniALR/Alph  | -1711033 | NM_00101E | 440153   | Hs.534888NR_00101E | ENSG00000ORI1H12   | -         | olfactory    | protein-coding |                |
| chr5-487 | 25.87693 | 0.409249 | 0.442711 | 0.924416 | 0.35527  | 0.772354 | chr5  | 48756076  | 48756298  | + | 0 | NA | IntergeniALR/Alph  | 1685101  | NM_19844E | 133418   | Hs.561411NM_19844E | ENSG00000EMB       | GP70      | embigin      | protein-coding |                |
| chr21-11 | 23.28012 | 0.431138 | 0.466657 | 0.923886 | 0.355545 | 0.772354 | chr21 | 11713262  | 11713687  | + | 0 | NA | IntergeniALR/Alph  | 1191960  | NM_19926C | 7179     | Hs.122988NM_19925E | ENSG00000TPTE      | CT44      | PTEN         | transmem       | protein-coding |
| chr1-127 | 109.0333 | 0.21613  | 0.234114 | 0.923184 | 0.355911 | 0.772354 | chr1  | 1.24E+08  | 1.24E+08  | + | 0 | NA | IntergeniALR/Alph  | 2429015  | NR_00395E | 647121   | Hs.697682NR_00395E | ENSG00000EMB       | EMB1      | -            | embigin        | ipseudo        |
| chr15-18 | 22.24911 | 0.435455 | 0.471911 | 0.922747 | 0.356139 | 0.772354 | chr15 | 18545551  | 18546527  | + | 0 | NA | IntergeniALR/Alph  | -1736705 | NR_03883C | 646096   | Hs.448789NR_03883C | ENSG00000CHEK2P2   | -         | checkpoir    | pseudo         |                |
| chr6-592 | 16.95039 | 0.498756 | 0.541025 | 0.921874 | 0.356594 | 0.772354 | chr6  | 59217559  | 59219644  | + | 0 | NA | IntergeniALR/Alph  | -1257155 | NR_132994 | 1.07E+08 | Hs.561539NR_125727 | ENSG00000LINC0068C | -         | long         | intenc         | ncRNA          |
| chr10-40 | 21.73501 | 0.437828 | 0.475598 | 0.920585 | 0.357267 | 0.772354 | chr10 | 40610428  | 40612734  | + | 0 | NA | IntergeniALR/Alph  | 1756464  | NR_02438C | 441666   | Hs.255729NR_02438C | ENSG00000LOC441666 | -         | zinc         | finp           | pseudo         |
| chr10-40 | 29.11474 | 0.382272 | 0.415492 | 0.920046 | 0.357549 | 0.772354 | chr10 | 40601150  | 40601654  | + | 0 | NA | IntergeniALR/Alph  | 1766643  | NR_02438C | 441666   | Hs.255729NR_02438C | ENSG00000LOC441666 | -         | zinc         | finp           | pseudo         |
| chr13-17 | 32.86551 | 0.360252 | 0.39159  | 0.919974 | 0.357586 | 0.772354 | chr13 | 17173199  | 17174252  | + | 0 | NA | IntergeniALR/Alph  | -1021572 | NR_02727E | 26080    | Hs.448588NR_02727E | ENSG00000FAM230C   | LINC00281 | family       | winc           | ncRNA          |
| chrY-11  | 17.55939 | 0.483696 | 0.525888 | 0.919769 | 0.357693 | 0.772354 | chrY  | 11289000  | 11289078  | + | 0 | NA | IntergeniIntergeni | 1131600  | NR_033667 | 352887   | Hs.546221NR_033667 | ENSG00000GYC2P1    | GYC2P     | glycogenip   | pseudo         |                |
| chr17-26 | 27.52261 | 0.398851 | 0.433754 | 0.919532 | 0.357817 | 0.772354 | chr17 | 26465526  | 26465743  | + | 0 | NA | IntergeniALR/Alph  | 623607   | NR_135673 | 1.05E+08 | Hs.649918NR_135673 | LOC105371          | -         | uncharact    | ncRNA          |                |
| chr13-16 | 17.01272 | 0.491545 | 0.534905 | 0.918938 | 0.358128 | 0.772354 | chr13 | 16904428  | 16905324  | + | 0 | NA | IntergeniALR/Alph  | -1293934 | NR_02727E | 26080    | Hs.448588NR_02727E | ENSG00000FAM230C   | LINC00281 | family       | winc           | ncRNA          |
| chr5-476 | 25.97013 | 0.402232 | 0.43775  | 0.918862 | 0.358168 | 0.772354 | chr5  | 47636194  | 47636479  | + | 0 | NA | IntergeniALR/Alph  | -1939956 | NM_02107Z | 348980   | Hs.353179NM_02107Z | ENSG00000HCN1      | BCNG-1    | [B]hyperpol  | protein-coding |                |
| chr17-26 | 36.07131 | 0.34456  | 0.375672 | 0.917182 | 0.359047 | 0.77253  | chr17 | 26548951  | 26549501  | + | 0 | NA | IntergeniALR/Alph  | 540015   | NR_135673 | 1.05E+08 | Hs.649918NR_135673 | LOC105371          | -         | uncharact    | ncRNA          |                |
| chr10-39 | 129.6836 | 0.204303 | 0.222772 | 0.917097 | 0.359092 | 0.77253  | chr10 | 39967487  | 39968432  | + | 0 | NA | IntergeniALR/Alph  | 1271362  | NR_045000 | 399746   | Hs.742607NR_045000 | ACTR3BP5           | FKSG74    | ACTR3B       | ps             | pseudo         |
| chr9-41  | 28.10663 | 0.476321 | 0.519965 | 0.916063 | 0.359634 | 0.77253  | chr9  | 41224934  | 41225222  | + | 0 | NA | IntergeniIntergeni | -8677    | NR_03968E | 1.01E+08 | NR_03968E          | ENSG00000MIR4477A  | -         | micro        | RNA            | ncRNA          |
| chr5-484 | 21.76589 | 0.435072 | 0.474967 | 0.916005 | 0.359664 | 0.77253  | chr5  | 48479609  | 48480534  | + | 0 | NA | IntergeniALR/Alph  | 1961217  | NM_19844E | 133418   | Hs.561411NM_19844E | ENSG00000EMB       | GP70      | embigin      | protein-coding |                |
| chr16-34 | 17.04303 | 0.487962 | 0.533571 | 0.914521 | 0.360443 | 0.77253  | chr16 | 34062721  | 34064881  | + | 0 | NA | IntergeniAluYj4 S  | -99777   | NR_162093 | 1.13E+08 | NR_162093          | MIR9901            | -         | micro        | RNA            | ncRNA          |
| chr12-34 | 26.49338 | 0.396546 | 0.433907 | 0.913898 | 0.360777 | 0.77253  | chr12 | 34834858  | 34835114  | + | 0 | NA | IntergeniALR/Alph  | 812490   | NM_032834 | 84920    | Hs.102971NM_032834 | ENSG00000ALG10     | ALG10A    | [D]ALG10     | al             | protein-coding |
| chr7-581 | 29.1765  | 0.378139 | 0.413789 | 0.913845 | 0.360798 | 0.77253  | chr7  | 58181856  | 58183148  | + | 0 | NA | IntergeniALR/Alph  | 732325   | NM_00115E | 441234   | Hs.533121NM_00115E | ENSG00000ZNF716    | -         | zinc         | finp           | protein-coding |
| chr19-26 | 26.00328 | 0.400048 | 0.437787 | 0.913795 | 0.360825 | 0.77253  | chr19 | 26488721  | 26488932  | + | 0 | NA | IntergeniALR/Alph  | -1304605 | NR_110688 | 1.02E+08 | Hs.567934NR_110688 | ENSG00000LOC101927 | -         | uncharact    | ncRNA          |                |
| chr10-40 | 95.35748 | 0.227123 | 0.248605 | 0.913587 | 0.360934 | 0.77253  | chr10 | 40412450  | 40414652  | + | 0 | NA | IntergeniALR/Alph  | 1716955  | NR_045000 | 399746   | Hs.742607NR_045000 | ACTR3BP5           | FKSG74    | ACTR3B       | ps             | pseudo         |
| chr8-458 | 21.73671 | 0.43799  | 0.481185 | 0.910231 | 0.362701 | 0.77253  | chr8  | 45866419  | 45866767  | + | 0 | NA | IntergeniALR/Alph  | 715050   | NR_146077 | 389652   | NR_146077          | ENSG00000ASNSP1    | ASNSL1    | asparagip    | pseudo         |                |
| chr19-25 | 17.58914 | 0.480157 | 0.528205 | 0.909036 | 0.363331 | 0.77253  | chr19 | 25840980  | 25842266  | + | 0 | NA | IntergeniALR/Alph  | -1678176 | NR_00360F | 1E+08    | Hs.149312NR_00360F | ENSG00000HAVCR1P1  | -         | hepatitis    | pseudo         |                |
| chr5-486 | 32.92897 | 0.356674 | 0.392477 | 0.908776 | 0.363468 | 0.77253  | chr5  | 48696127  | 48696344  | + | 0 | NA | IntergeniALR/Alph  | 1745053  | NM_19844E | 133418   | Hs.561411NM_19844E | ENSG00000EMB       | GP70      | embigin      | protein-coding |                |
| chr11-52 | 36.08265 | 0.35108  | 0.387211 | 0.90669  | 0.364571 | 0.77253  | chr11 | 52323112  | 52323338  | + | 0 | NA | IntergeniALR/Alph  | 1914078  | NR_024504 | 646813   | Hs.684179NR_024504 | LOC646813          | -         | DEXH         | box            | pseudo         |
| chr8-858 | 17.59197 | 0.480359 | 0.530757 | 0.905045 | 0.365441 | 0.77253  | chr8  | 85807267  | 85808822  | + | 0 | NA | IntergeniMLT1F1 L  | -4483    | NR_003594 | 1E+08    | Hs.535056NR_003594 | REXO1L2P           | -         | REXO1        | lip            | pseudo         |
| chr21-12 | 24.97    | 0.402478 | 0.444714 | 0.904972 | 0.36548  | 0.77253  | chr21 | 12571974  | 12573005  | + | 0 | NA | IntergeniALR/Alph  | -465677  | NR_02691F | 149992   | Hs.558644NR_153773 | ANKRD30BF          | C21orf99  | ankyrin      | ipseudo        |                |
| chr11-51 | 16.5575  | 0.488862 | 0.541383 | 0.902987 | 0.366533 | 0.77253  | chr11 | 51795006  | 51796196  | + | 0 | NA | IntergeniALR/Alph  | 1386454  | NR_024504 | 646813   | Hs.684179NR_024504 | LOC646813          | -         | DEXH         | box            | pseudo         |
| chr19-26 | 17.62058 | 0.476762 | 0.528159 | 0.902686 | 0.366693 | 0.77253  | chr19 | 26912870  | 26913508  | + | 0 | NA | IntergeniALR/Alph  | -880242  | NR_110688 | 1.02E+08 | Hs.567934NR_110688 | ENSG00000LOC101927 | -         | uncharact    | ncRNA          |                |
| chr1-124 | 20.73205 | 0.43965  | 0.487557 | 0.901742 | 0.367194 | 0.77253  | chr1  | 1.24E+08  | 1.24E+08  | + | 0 | NA | IntergeniALR/Alph  | 2861291  | NR_00395E | 647121   | Hs.697682NR_00395E | ENSG00000EMB       | EMB1      | -            | embigin        | ipseudo        |
| chr14-17 | 18.6516  | 0.468938 | 0.520446 | 0.901032 | 0.367571 | 0.77253  | chr14 | 17977977  | 17978260  | + | 0 | NA | IntergeniALR/Alph  | -622999  | NM_00101E | 440153   | Hs.534888NR_00101E | ENSG00000ORI1H12   | -         | olfactory    | protein-coding |                |
| chr5-484 | 21.27872 | 0.434401 | 0.482128 | 0.901006 | 0.367585 | 0.77253  | chr5  | 48414025  | 48414392  | + | 0 | NA | IntergeniALR/Alph  | 2027080  | NM_19844E | 133418   | Hs.561411NM_19844E | ENSG00000EMB       | GP70      | embigin      | protein-coding |                |
| chr22-14 | 24.42219 | 0.406208 | 0.450965 | 0.900753 | 0.36772  | 0.77253  | chr22 | 14404607  | 14407328  | + | 0 | NA | IntergeniALR/Alph  | -1122192 | NR_00100E | 81061    | Hs.554706NR_00100E | ENSG00000ORI1H1    | ORI1H12   | [C]olfactory | protein-coding |                |
| chr19-24 | 31.28613 | 0.363297 | 0.403402 | 0.900583 | 0.36781  | 0.77253  | chr19 | 24929888  | 24931327  | + | 0 | NA | IntergeniALR/Alph  | -767160  | NR_00360F | 1E+08    | Hs.149312NR_00360F | ENSG00000HAVCR1P1  | -         | hepatitis    | pseudo         |                |



|                     |          |          |          |          |         |       |          |          |   |      |                    |          |           |          |                      |                     |                    |                          |
|---------------------|----------|----------|----------|----------|---------|-------|----------|----------|---|------|--------------------|----------|-----------|----------|----------------------|---------------------|--------------------|--------------------------|
| chr13-17: 17.7288   | 0.446763 | 0.524341 | 0.852048 | 0.394187 | 0.77253 | chr13 | 17373537 | 17375780 | + | O NA | IntergeniALR/Alph  | -820639  | NR_027278 | 26080    | Hs. 44858:NR_027278  | ENSG000003FAM230C   | LINC00281          | family wincRNA           |
| chr1-124: 82.77451  | 0.225225 | 0.264376 | 0.851912 | 0.394263 | 0.77253 | chr1  | 1.25E+08 | 1.25E+08 | + | O NA | IntergeniALR/Alph  | 3026728  | NR_003955 | 647121   | Hs. 697682:NR_003955 | ENSG000003EMPB1     | -                  | embigin ipseudo          |
| chr18-187: 18.82271 | 0.434593 | 0.510504 | 0.851301 | 0.394602 | 0.77253 | chr18 | 18734904 | 18735299 | + | O NA | IntergeniALR/Alph  | 2376712  | NM_005406 | 6093     | Hs. 306307:NM_005406 | ENSG000003ROCK1     | P160ROCK           | Rho assoc protein-coding |
| chr10-40: 37.92833  | 0.3135   | 0.368682 | 0.850325 | 0.395144 | 0.77253 | chr10 | 40599670 | 40599670 | + | O NA | IntergeniALR/Alph  | 17689430 | NR_024388 | 441666   | Hs. 255722:NR_024388 | ENSG000003LOC441666 | -                  | zinc fin ipseudo         |
| chr1-122: 21.41951  | 0.407444 | 0.479498 | 0.849731 | 0.395475 | 0.77253 | chr1  | 1.23E+08 | 1.23E+08 | + | O NA | IntergeniALR/Alph  | 1351013  | NR_003955 | 647121   | Hs. 697682:NR_003955 | ENSG000003EMPB1     | -                  | embigin ipseudo          |
| chr1-124: 17.72823  | 0.446735 | 0.525811 | 0.84961  | 0.395542 | 0.77253 | chr1  | 1.24E+08 | 1.24E+08 | + | O NA | IntergeniALR/Alph  | 2938015  | NR_003955 | 647121   | Hs. 697682:NR_003955 | ENSG000003EMPB1     | -                  | embigin ipseudo          |
| chr1-123: 41.73917  | 0.299367 | 0.352665 | 0.848872 | 0.395953 | 0.77253 | chr1  | 1.24E+08 | 1.24E+08 | + | O NA | IntergeniALR/Alph  | 2084346  | NR_003955 | 647121   | Hs. 697682:NR_003955 | ENSG000003EMPB1     | -                  | embigin ipseudo          |
| chr12-37: 31.48755  | 0.341774 | 0.402656 | 0.848799 | 0.395993 | 0.77253 | chr12 | 37235338 | 37240633 | + | O NA | IntergeniALR/Alph  | -1078789 | NM_001011 | 144245   | Hs. 259300:NM_001011 | ENSG000003ALG10B    | ALG10 KCFALG10     | al protein-coding        |
| chr12-37: 21.42008  | 0.407496 | 0.480267 | 0.848478 | 0.396172 | 0.77253 | chr12 | 37266624 | 37266892 | + | O NA | IntergeniALR/Alph  | -1050016 | NM_001011 | 144245   | Hs. 259300:NM_001011 | ENSG000003ALG10B    | ALG10 KCFALG10     | al protein-coding        |
| chr21-127: 17.76025 | 0.443444 | 0.522711 | 0.848354 | 0.396241 | 0.77253 | chr21 | 12725269 | 12726803 | + | O NA | IntergeniALR/Alph  | -312130  | NR_026911 | 149992   | Hs. 55864:NR_153773  | ANKRD30BF C21orf99  | ankyrin ipseudo    |                          |
| chr22-14: 17.76025  | 0.443444 | 0.522711 | 0.848354 | 0.396241 | 0.77253 | chr22 | 14395521 | 14396628 | + | O NA | IntergeniALR/Alph  | -132085  | NM_001006 | 81061    | Hs. 554700:NM_001006 | ENSG000003OR11H1    | OR11H12 Colfactory | protein-coding           |
| chr14-17: 21.99763  | 0.400458 | 0.472554 | 0.847432 | 0.396754 | 0.77253 | chr14 | 17052725 | 17052993 | + | O NA | IntergeniALR/Alph  | -1548258 | NM_001011 | 440153   | Hs. 53488:NM_001011  | ENSG000003OR11H12   | -                  | olfactory protein-coding |
| chr1-121: 52.43178  | 0.272191 | 0.321261 | 0.847259 | 0.396851 | 0.77253 | chr1  | 1.22E+08 | 1.22E+08 | + | O NA | IntergeniALR/Alph  | 256065   | NR_003955 | 647121   | Hs. 697682:NR_003955 | ENSG000003EMPB1     | -                  | embigin ipseudo          |
| chr14-18: 21.93757  | 0.406962 | 0.479316 | 0.847171 | 0.3969   | 0.77253 | chr14 | 18066259 | 18066583 | + | O NA | IntergeniALR/Alph  | -534696  | NM_001011 | 440153   | Hs. 53488:NM_001011  | ENSG000003OR11H12   | -                  | olfactory protein-coding |
| chr21-88: 18.30692  | 0.437278 | 0.516176 | 0.84715  | 0.396912 | 0.77253 | chr21 | 8862931  | 8868354  | + | O NA | IntergeniIntergeni | -121357  | NR_128711 | 348980   | Hs. 554700:NR_128711 | ENSG000003MIR3648   | hsa-mir-2          | microRNA ncRNA           |
| chr21-12: 25.17085  | 0.374997 | 0.443053 | 0.846392 | 0.397334 | 0.77253 | chr21 | 12266369 | 12268802 | + | O NA | IntergeniALR/Alph  | -770581  | NR_026911 | 149992   | Hs. 55864:NR_153773  | ANKRD30BF C21orf99  | ankyrin ipseudo    |                          |
| chr1-123: 28.34521  | 0.355423 | 0.420131 | 0.845982 | 0.397563 | 0.77253 | chr1  | 1.23E+08 | 1.23E+08 | + | O NA | IntergeniALR/Alph  | 1904068  | NR_003955 | 647121   | Hs. 697682:NR_003955 | ENSG000003EMPB1     | -                  | embigin ipseudo          |
| chr5-47: 25.17029   | 0.374965 | 0.443343 | 0.845767 | 0.397683 | 0.77253 | chr5  | 47952831 | 47954155 | + | O NA | IntergeniALR/Alph  | -2257113 | NM_021072 | 348980   | Hs. 353170:NM_021072 | ENSG000003HCN1      | BCNG-1 B           | hyperpol: protein-coding |
| chr9-44: 21.9982    | 0.40049  | 0.473659 | 0.845524 | 0.397818 | 0.77253 | chr9  | 44147028 | 44147227 | + | O NA | IntergeniALR/Alph  | 1020961  | NR_160669 | 1.03E+08 | NR_160669            | LOC102722           | -                  | methylenc pseudo         |
| chr20-29: 18.30635  | 0.437222 | 0.517107 | 0.845515 | 0.397824 | 0.77253 | chr20 | 29500852 | 29501054 | + | O NA | IntergeniMSTA LTR  | -3619    | NR_146067 | 1.03E+08 | NR_146067            | FRG1EP              | -                  | FSHD regipseudo          |
| chr20-28: 17.21301  | 0.449947 | 0.532292 | 0.8453   | 0.397944 | 0.77253 | chr20 | 28816385 | 28817766 | + | O NA | IntergeniALR/Alph  | -214410  | NR_132311 | 1E+08    | Hs. 529357:NR_132311 | ENSG000003FRG1CP    | -                  | FSHD regipseudo          |
| chr18-79: 17.75911  | 0.443357 | 0.524656 | 0.845044 | 0.398087 | 0.77253 | chr18 | 79618662 | 79620626 | + | O NA | IntergeniIntergeni | 40362    | NR_148949 | 284240   | Hs. 44891:NR_148949  | LOC28424            | -                  | uncharactncRNA           |
| chr21-11: 41.80262  | 0.29655  | 0.351028 | 0.844802 | 0.398221 | 0.77253 | chr21 | 11641143 | 11642059 | + | O NA | IntergeniALR/Alph  | 1120087  | NM_199260 | 7179     | Hs. 12298:NM_199255  | ENSG000003TPTE      | CT44 PTE           | transmem protein-coding  |
| chr1-122: 45.03761  | 0.287126 | 0.340082 | 0.844284 | 0.398511 | 0.77253 | chr1  | 1.23E+08 | 1.23E+08 | + | O NA | IntergeniALR/Alph  | 1258736  | NR_003955 | 647121   | Hs. 697682:NR_003955 | ENSG000003EMPB1     | -                  | embigin ipseudo          |
| chr19-26: 32.12799  | 0.334228 | 0.395895 | 0.844233 | 0.398539 | 0.77253 | chr19 | 26965800 | 26968012 | + | O NA | IntergeniALR/Alph  | -826525  | NR_110688 | 1.02E+08 | Hs. 56793:NR_110688  | ENSG000003LOC101927 | -                  | uncharactncRNA           |
| chr1-124: 28.92333  | 0.351005 | 0.415772 | 0.844225 | 0.398544 | 0.77253 | chr1  | 1.25E+08 | 1.25E+08 | + | O NA | IntergeniALR/Alph  | 3228454  | NR_003955 | 647121   | Hs. 697682:NR_003955 | ENSG000003EMPB1     | -                  | embigin ipseudo          |
| chr7-58: 224.5676   | 0.153669 | 0.182119 | 0.844232 | 0.399099 | 0.77253 | chr7  | 58797682 | 58798049 | + | O NA | IntergeniALR/Alph  | 1347688  | NM_001155 | 441234   | Hs. 553121:NM_001155 | ENSG000003ZNF716    | -                  | zinc fin protein-coding  |
| chr21-11: 44.46289  | 0.289395 | 0.343282 | 0.843023 | 0.399215 | 0.77253 | chr21 | 11968826 | 11969139 | + | O NA | IntergeniALR/Alph  | -1069184 | NR_026911 | 149992   | Hs. 55864:NR_153773  | ANKRD30BF C21orf99  | ankyrin ipseudo    |                          |
| chr5-47: 60.58991   | 0.253465 | 0.300896 | 0.842965 | 0.399248 | 0.77253 | chr5  | 47604224 | 47604455 | + | O NA | IntergeniALR/Alph  | -1907959 | NM_021072 | 348980   | Hs. 353170:NM_021072 | ENSG000003HCN1      | BCNG-1 B           | hyperpol: protein-coding |
| chr1-122: 32.12856  | 0.332653 | 0.396767 | 0.84244  | 0.399542 | 0.77253 | chr1  | 1.23E+08 | 1.23E+08 | + | O NA | IntergeniALR/Alph  | 1406417  | NR_003955 | 647121   | Hs. 697682:NR_003955 | ENSG000003EMPB1     | -                  | embigin ipseudo          |
| chr11-54: 17.24446  | 0.446517 | 0.53052  | 0.841659 | 0.399979 | 0.77253 | chr11 | 54298656 | 54298870 | + | O NA | IntergeniALR/Alph  | 305235   | NM_001004 | 119749   | Hs. 55356:NM_001004  | ENSG000003OR4C46    | -                  | olfactory protein-coding |
| chr1-121: 17.24389  | 0.44647  | 0.530509 | 0.841588 | 0.400018 | 0.77253 | chr1  | 1.22E+08 | 1.22E+08 | + | O NA | IntergeniALR/Alph  | 232824   | NR_003955 | 647121   | Hs. 697682:NR_003955 | ENSG000003EMPB1     | -                  | embigin ipseudo          |
| chr21-93: 17.79169  | 0.44014  | 0.523089 | 0.841425 | 0.40011  | 0.77253 | chr21 | 9360015  | 9361765  | + | O NA | IntergeniCER Satel | -182140  | NR_135512 | 1.05E+08 | NR_135512            | LOC105375           | -                  | nuclear ipseudo          |
| chr11-94: 20.90259  | 0.409063 | 0.486303 | 0.841169 | 0.400253 | 0.77253 | chr11 | 94237872 | 94239845 | + | O NA | IntergeniLIPA4 LIN | -66779   | NM_001199 | 390243   | Hs. 55375:NM_001088  | ENSG000003IZUM01R   | FOLR4 FolIZUM01    | re protein-coding        |
| chr10-41: 24.5916   | 0.380594 | 0.45281  | 0.840515 | 0.40062  | 0.77253 | chr10 | 41084181 | 41084400 | + | O NA | IntergeniALR/Alph  | 1283755  | NR_024388 | 441666   | Hs. 255722:NR_024388 | ENSG000003LOC441666 | -                  | zinc fin pseudo          |
| chr13-17: 27.7974   | 0.357877 | 0.425844 | 0.840396 | 0.400687 | 0.77253 | chr13 | 17659813 | 17660072 | + | O NA | IntergeniALR/Alph  | -535355  | NR_027278 | 26080    | Hs. 44858:NR_027278  | ENSG000003FAM230C   | LINC00281          | family wincRNA           |
| chr6-58: 91.17855   | 0.211475 | 0.251753 | 0.84001  | 0.400903 | 0.77253 | chr6  | 58450046 | 58450908 | + | O NA | IntergeniALR/Alph  | -489031  | NR_132299 | 1.07E+08 | Hs. 56153:NR_125727  | ENSG000003LINC0068  | -                  | long intncRNA            |
| chr18-19: 17.79226  | 0.440176 | 0.524577 | 0.839106 | 0.40141  | 0.77253 | chr18 | 19658491 | 19658701 | + | O NA | IntergeniALR/Alph  | 1453217  | NR_005406 | 6093     | Hs. 306307:NM_005406 | ENSG000003ROCK1     | P160ROCK           | Rho assoc protein-coding |
| chr20-27: 20.9346   | 0.406264 | 0.484434 | 0.838637 | 0.401673 | 0.77253 | chr20 | 27613897 | 27614827 | + | O NA | IntergeniALR/Alph  | 988303   | NR_132311 | 1E+08    | Hs. 529357:NR_132311 | ENSG000003FRG1CP    | -                  | FSHD regipseudo          |
| chr22-14: 31.03238  | 0.33789  | 0.403737 | 0.836905 | 0.402646 | 0.77253 | chr22 | 14307405 | 14308740 | + | O NA | IntergeniALR/Alph  | -1220087 | NM_001006 | 81061    | Hs. 554700:NM_001006 | ENSG000003OR11H1    | OR11H12 Colfactory | protein-coding           |
| chr20-28: 17.27534  | 0.443072 | 0.52982  | 0.83627  | 0.403003 | 0.77253 | chr20 | 28868562 | 28871424 | + | O NA | IntergeniALR/Alph  | -210397  | NR_132311 | 1.03E+08 | NR_132311            | FRG1DP              | -                  | FSHD regipseudo          |
| chr10-40: 27.85973  | 0.353573 | 0.422941 | 0.835986 | 0.403163 | 0.77253 | chr10 | 48078269 | 48079804 | + | O NA | IntergeniALR/Alph  | 1489009  | NR_024388 | 441666   | Hs. 255722:NR_024388 | ENSG000003LOC441666 | -                  | zinc fin pseudo          |
| chr20-26: 31.0644   | 0.336001 | 0.402187 | 0.835436 | 0.403472 | 0.77253 | chr20 | 26050593 | 26059724 | + | O NA | IntergeniALR/Alph  | -839235  | NR_040099 | 284801   | Hs. 370699:NR_040099 | ENSG000003MIR663AH  | -                  | MIR663A lncRNA           |
| chr14-17: 31.06383  | 0.335974 | 0.402176 | 0.83539  | 0.403498 | 0.77253 | chr14 | 17911126 | 17911452 | + | O NA | IntergeniALR/Alph  | -689828  | NM_001011 | 440153   | Hs. 53488:NM_001011  | ENSG000003OR11H12   | -                  | olfactory protein-coding |
| chr12-35: 16.6652   | 0.457005 | 0.547094 | 0.835333 | 0.40353  | 0.77253 | chr12 | 35466939 | 35467386 | + | O NA | IntergeniALR/Alph  | 1444666  | NM_032834 | 84920    | Hs. 102971:NM_032834 | ENSG000003ALG10     | ALG10A DIALG10     | al protein-coding        |
| chr10-41: 20.96492  | 0.403379 | 0.482949 | 0.835242 | 0.403582 | 0.77253 | chr10 | 41011090 | 41011491 | + | O NA | IntergeniALR/Alph  | 1356755  | NR_024388 | 441666   | Hs. 255722:NR_024388 | ENSG000003LOC441666 | -                  | zinc fin pseudo          |
| chr13-17: 16.7281   | 0.44973  | 0.538755 | 0.834758 | 0.403854 | 0.77253 | chr13 | 17947873 | 17949276 | + | O NA | IntergeniALR/Alph  | -246723  | NR_027278 | 26080    | Hs. 44858:NR_027278  | ENSG000003FAM230C   | LINC00281          | family wincRNA           |
| chr22-14: 16.7281   | 0.44973  | 0.538755 | 0.834758 | 0.403854 | 0.77253 | chr22 | 14234319 | 14236688 | + | O NA | IntergeniALR/Alph  | -1292658 | NM_001006 | 81061    |                      |                     |                    |                          |

|           |          |          |          |          |            |         |       |           |           |   |   |    |                    |           |           |           |           |           |           |           |           |           |                |                |           |                |        |  |
|-----------|----------|----------|----------|----------|------------|---------|-------|-----------|-----------|---|---|----|--------------------|-----------|-----------|-----------|-----------|-----------|-----------|-----------|-----------|-----------|----------------|----------------|-----------|----------------|--------|--|
| chr3-937  | 28.48317 | 0.335889 | 0.422835 | 0.794374 | 0.426978   | 0.77253 | chr3  | 93707920  | 93708854  | + | 0 | NA | IntergeniALR/Alphe | 265694    | NM_001314 | 5627      | Hs.64016  | NM_00031  | ENSG00000 | PROS1     | PROS1     | PS21      | protein        | protein-coding |           |                |        |  |
| chr18-205 | 25.30995 | 0.352763 | 0.444479 | 0.793653 | 0.427397   | 0.77253 | chr18 | 20920124  | 20922964  | + | 0 | NA | IntergeniALR/Alphe | 290269    | NM_005406 | 6093      | Hs.306307 | NM_00540  | ENSG00000 | ROCK1     | P160ROCK  | Rho       | assoc          | protein-coding |           |                |        |  |
| chr11-532 | 23.22837 | 0.367796 | 0.463472 | 0.793567 | 0.427448   | 0.77253 | chr11 | 53208782  | 53209058  | + | 0 | NA | IntergeniALR/Alphe | 1395078   | NM_001004 | 119749    | Hs.553564 | NM_00100  | ENSG00000 | OR4C46    |           |           | olfactory      | protein-coding |           |                |        |  |
| chrX-618  | 18.99325 | 0.400855 | 0.50609  | 0.792063 | 0.428324   | 0.77253 | chrX  | 61821703  | 61822775  | + | 0 | NA | IntergeniALR/Alphe | 1529093   | NM_001012 | 139886    | Hs.612782 | NM_00101  | ENSG00000 | SPIN4     | TDRD28    | spindlin  | protein-coding |                |           |                |        |  |
| chr19-271 | 49.03739 | 0.25892  | 0.326892 | 0.791848 | 0.428449   | 0.77253 | chr19 | 27155416  | 27156226  | + | 0 | NA | IntergeniALR/Alphe | 637610    | NR_211068 | 1.02E+08  | Hs.567934 | NR_21106  | ENSG00000 | LOC101927 |           |           | uncharact      | ncRNA          |           |                |        |  |
| chr9-434  | 18.99382 | 0.400897 | 0.506552 | 0.791423 | 0.428697   | 0.77253 | chr9  | 43404739  | 43405154  | + | 0 | NA | IntergeniALR/Alphe | 278780    | NR_160666 | 1.03E+08  | NR_160669 | LOC10272  |           |           |           |           |                | methylene      | pseudo    |                |        |  |
| chr10-405 | 18.41457 | 0.40893  | 0.516704 | 0.791421 | 0.428698   | 0.77253 | chr10 | 40966719  | 40967731  | + | 0 | NA | IntergeniALR/Alphe | 1400820   | NR_02438C | 441666    | Hs.255722 | NR_02438  | ENSG00000 | LOC441666 |           |           |                |                | zinc      | fin            | pseudo |  |
| chr10-407 | 22.71315 | 0.368525 | 0.465746 | 0.791258 | 0.428794   | 0.77253 | chr10 | 40715108  | 40715938  | + | 0 | NA | IntergeniALR/Alphe | 1652522   | NR_02438C | 441666    | Hs.255722 | NR_02438  | ENSG00000 | LOC441666 |           |           |                |                | zinc      | fin            | pseudo |  |
| chr5-473  | 44.72607 | 0.271896 | 0.343864 | 0.790708 | 0.429114   | 0.77253 | chr5  | 47333264  | 47333476  | + | 0 | NA | IntergeniALR/Alphe | 1636990   | NM_021072 | 348980    | Hs.353177 | NM_02107  | ENSG00000 | HCN1      | BCNG-1    | BC        | hyperpol       | protein-coding |           |                |        |  |
| chr19-263 | 19.4759  | 0.402104 | 0.508906 | 0.790134 | 0.429449   | 0.77253 | chr19 | 26365465  | 26365668  | + | 0 | NA | IntergeniALR/Alphe | 1427865   | NR_110688 | 1.02E+08  | Hs.567934 | NR_11068  | ENSG00000 | LOC101927 |           |           |                |                | uncharact | ncRNA          |        |  |
| chr22-132 | 22.16648 | 0.371885 | 0.47077  | 0.78995  | 0.429557   | 0.77253 | chr22 | 13566804  | 13567041  | + | 0 | NA | IntergeniALR/Alphe | 1669516   | NR_110761 | 1.03E+08  | Hs.652922 | NR_11076  | ENSG00000 | LOC102722 |           |           |                |                | uncharact | ncRNA          |        |  |
| chr8-8577 | 18.44602 | 0.405716 | 0.513799 | 0.78964  | 0.429738   | 0.77253 | chr8  | 85772118  | 85779128  | + | 0 | NA | non-codir          | non-codir | 470       | NR_003594 | 1E+08     | Hs.535056 | NR_003594 | REX01L2P  |           |           |                |                | REX01     | lip            | pseudo |  |
| chr13-171 | 22.13786 | 0.374766 | 0.475025 | 0.788939 | 0.430148   | 0.77253 | chr13 | 17175128  | 17175365  | + | 0 | NA | IntergeniALR/Alphe | 1020051   | NR_027278 | 26080     | Hs.44858  | NR_02727  | ENSG00000 | FAM230C   | LINC00281 | family    | wincRNA        |                |           |                |        |  |
| chr20-277 | 18.44545 | 0.405682 | 0.51473  | 0.788146 | 0.430612   | 0.77253 | chr20 | 27764752  | 27766026  | + | 0 | NA | IntergeniALR/Alphe | 837276    | NR_13231E | 1E+08     | Hs.529357 | NR_13231  | ENSG00000 | FRG1CP    |           |           |                |                | FSHD      | regip          | pseudo |  |
| chr10-402 | 31.17148 | 0.320302 | 0.406961 | 0.787058 | 0.431248   | 0.77253 | chr10 | 40626293  | 40263185  | + | 0 | NA | IntergeniALR/Alphe | 1566293   | NR_045000 | 399746    | Hs.742607 | NR_045000 | ACTR3BP5  | FKSG74    | ACTR3B    | ps        | pseudo         |                |           |                |        |  |
| chr11-525 | 16.36784 | 0.43477  | 0.553042 | 0.786143 | 0.431784   | 0.77253 | chr11 | 52550681  | 52550907  | + | 0 | NA | IntergeniALR/Alphe | 2053204   | NM_001004 | 119749    | Hs.553564 | NM_00100  | ENSG00000 | OR4C46    |           |           |                |                | olfactory | protein-coding |        |  |
| chr3-921  | 18.99495 | 0.400973 | 0.510217 | 0.785888 | 0.431933   | 0.77253 | chr3  | 91213803  | 91214340  | + | 0 | NA | IntergeniALR/Alphe | 2106450   | NM_00523E | 2042      | Hs.123642 | NM_00523  | ENSG00000 | EPHA3     | EK4 ETK   | E EPH     | recept         | protein-coding |           |                |        |  |
| chr1-1123 | 19.02413 | 0.397739 | 0.506527 | 0.785227 | 0.432322   | 0.77253 | chr1  | 1.24E+08  | 1.24E+08  | + | 0 | NA | IntergeniALR/Alphe | 2215157   | NR_00395E | 647121    | Hs.697682 | NR_00395  | ENSG00000 | EMBP1     |           |           |                |                | embigin   | pseudo         |        |  |
| chr1-1247 | 19.02413 | 0.397739 | 0.506527 | 0.785227 | 0.432322   | 0.77253 | chr1  | 1.25E+08  | 1.25E+08  | + | 0 | NA | IntergeniALR/Alphe | 3249819   | NR_00395E | 647121    | Hs.697682 | NR_00395  | ENSG00000 | EMBP1     |           |           |                |                | embigin   | pseudo         |        |  |
| chr10-402 | 18.47746 | 0.402558 | 0.512811 | 0.785002 | 0.432452   | 0.77253 | chr10 | 40284697  | 40289739  | + | 0 | NA | IntergeniALR/Alphe | 1590622   | NR_045000 | 399746    | Hs.742607 | NR_045000 | ACTR3BP5  | FKSG74    | ACTR3B    | ps        | pseudo         |                |           |                |        |  |
| chr21-887 | 18.47746 | 0.402558 | 0.512811 | 0.785002 | 0.432452   | 0.77253 | chr21 | 8871428   | 8872191   | + | 0 | NA | IntergeniL2c       | LINE1     | 115190    | NR_128711 | 1.04E+08  | NR_128711 | ENSG00000 | MIR3648   | hsa-mir-  | microRNA  | ncRNA          |                |           |                |        |  |
| chr21-931 | 18.47746 | 0.402558 | 0.512811 | 0.785002 | 0.432452   | 0.77253 | chr21 | 9317371   | 9321746   | + | 0 | NA | IntergeniLIMA3     | LINE1     | 189797    | NR_03832E | 1E+08     | Hs.487562 | NM_17494  | ENSG00000 | TEKT4P2   | MAFIPL Tf | tektin         | 4              | pseudo    |                |        |  |
| chr20-277 | 35.04917 | 0.299496 | 0.381574 | 0.784895 | 0.432515   | 0.77253 | chr20 | 27716405  | 27717108  | + | 0 | NA | IntergeniALR/Alphe | 885909    | NR_13231E | 1E+08     | Hs.529357 | NR_13231  | ENSG00000 | FRG1CP    |           |           |                |                | FSHD      | regip          | pseudo |  |
| chr19-256 | 29.70004 | 0.323756 | 0.412603 | 0.784666 | 0.432649   | 0.77253 | chr19 | 25641070  | 25640383  | + | 0 | NA | IntergeniALR/Alphe | 1476829   | NR_050360 | 1E+08     | Hs.149312 | NR_00360  | ENSG00000 | HAVCR1P1  |           |           |                |                | hepatitis | pseudo         |        |  |
| chr1-1225 | 28.60782 | 0.327519 | 0.417418 | 0.784631 | 0.43267    | 0.77253 | chr1  | 1.23E+08  | 1.23E+08  | + | 0 | NA | IntergeniALR/Alphe | 1394132   | NR_00395E | 647121    | Hs.697682 | NR_00395  | ENSG00000 | EMBP1     |           |           |                |                | embigin   | pseudo         |        |  |
| chr10-408 | 28.60669 | 0.32746  | 0.417396 | 0.784531 | 0.432729   | 0.77253 | chr10 | 40835166  | 40835661  | + | 0 | NA | IntergeniALR/Alphe | 1532633   | NR_02438C | 441666    | Hs.255722 | NR_02438  | ENSG00000 | LOC441666 |           |           |                |                | zinc      | fin            | pseudo |  |
| chr5-492  | 50.1908  | 0.255556 | 0.325792 | 0.784415 | 0.432797   | 0.77253 | chr5  | 49245693  | 49245934  | + | 0 | NA | IntergeniALR/Alphe | 1195475   | NM_19844E | 133418    | Hs.561411 | NM_19844  | ENSG00000 | EMB       | GP70      |           |                |                | embigin   | protein-coding |        |  |
| chr20-267 | 25.40202 | 0.345681 | 0.441226 | 0.783456 | 0.433359   | 0.77253 | chr20 | 26724437  | 26725594  | + | 0 | NA | IntergeniALR/Alphe | 515782    | NR_04009E | 284801    | Hs.370699 | NR_04009  | ENSG00000 | MIR663AH  |           |           |                |                | MIR663A   | lncRNA         |        |  |
| chr9-606  | 38.02971 | 0.331561 | 0.423224 | 0.783417 | 0.433382   | 0.77253 | chr9  | 60604847  | 60605060  | + | 0 | NA | IntergeniALR/Alphe | 309454    | NM_015667 | 26165     | Hs.123004 | NM_01566  | ENSG00000 | SPATA31A7 | AEP1 C9o  | SPATA31   | s              | protein-coding |           |                |        |  |
| chr5-4936 | 31.84337 | 0.31113  | 0.397186 | 0.783334 | 0.433431   | 0.77253 | chr5  | 49366294  | 49368506  | + | 0 | NA | IntergeniALR/Alphe | 1073888   | NM_19844E | 133418    | Hs.561411 | NM_19844  | ENSG00000 | EMB       | GP70      |           |                |                | embigin   | protein-coding |        |  |
| chr1-1227 | 142.9741 | 0.167307 | 0.213741 | 0.782753 | 0.433772   | 0.77253 | chr1  | 1.23E+08  | 1.23E+08  | + | 0 | NA | IntergeniALR/Alphe | 1222505   | NR_00395E | 647121    | Hs.697682 | NR_00395  | ENSG00000 | EMBP1     |           |           |                |                | embigin   | pseudo         |        |  |
| chr1-1223 | 31.2967  | 0.312609 | 0.400886 | 0.779794 | 0.433512   | 0.77253 | chr1  | 1.23E+08  | 1.23E+08  | + | 0 | NA | IntergeniALR/Alphe | 1006062   | NR_00395E | 647121    | Hs.697682 | NR_00395  | ENSG00000 | EMBP1     |           |           |                |                | embigin   | pseudo         |        |  |
| chr19-243 | 37.79811 | 0.285938 | 0.36728  | 0.778528 | 0.436258   | 0.77253 | chr19 | 24816037  | 24816300  | + | 0 | NA | IntergeniALR/Alphe | 652721    | NR_00360E | 1E+08     | Hs.149312 | NR_00360  | ENSG00000 | HAVCR1P1  |           |           |                |                | hepatitis | pseudo         |        |  |
| chr5-495  | 21.68213 | 0.369982 | 0.475251 | 0.7785   | 0.436274   | 0.77253 | chr5  | 49555878  | 49558771  | + | 0 | NA | IntergeniALR/Alphe | 883964    | NM_19844E | 133418    | Hs.561411 | NM_19844  | ENSG00000 | EMB       | GP70      |           |                |                | embigin   | protein-coding |        |  |
| chr20-28  | 28.02744 | 0.331502 | 0.426358 | 0.777519 | 0.436852   | 0.77253 | chr20 | 28473910  | 28474450  | + | 0 | NA | IntergeniALR/Alphe | 128485    | NR_13231E | 1E+08     | Hs.529357 | NR_13231  | ENSG00000 | FRG1CP    |           |           |                |                | FSHD      | regip          | pseudo |  |
| chr19-25  | 33.98501 | 0.30007  | 0.386078 | 0.777226 | 0.437025   | 0.77253 | chr19 | 25317917  | 25319074  | + | 0 | NA | IntergeniALR/Alphe | 1155048   | NR_00360E | 1E+08     | Hs.149312 | NR_00360  | ENSG00000 | HAVCR1P1  |           |           |                |                | hepatitis | pseudo         |        |  |
| chr14-166 | 17.96167 | 0.404358 | 0.520353 | 0.777084 | 0.437109   | 0.77253 | chr14 | 16686005  | 16686238  | + | 0 | NA | IntergeniALR/Alphe | 1914996   | NM_00101E | 440153    | Hs.53488  | NM_00101  | ENSG00000 | OR11H12   |           |           |                |                | olfactory | protein-coding |        |  |
| chr18-15  | 17.96167 | 0.404358 | 0.520353 | 0.777084 | 0.437109   | 0.77253 | chr18 | 15505843  | 15506935  | + | 0 | NA | IntergeniALR/Alphe | 180470    | NR_027417 | 644669    | Hs.579474 | NR_02741  | ENSG00000 | LOC644666 |           |           |                |                | ankyrin   | pseudo         |        |  |
| chr6-585  | 31.32645 | 0.310659 | 0.399972 | 0.776702 | 0.437335   | 0.77253 | chr6  | 58560741  | 58561589  | + | 0 | NA | IntergeniALR/Alphe | 599719    | NR_132994 | 1.07E+08  | Hs.561539 | NR_12572  | ENSG00000 | LINC0068  |           |           |                |                | long      | intenc         | ncRNA  |  |
| chr19-266 | 44.27147 | 0.268413 | 0.345599 | 0.776661 | 0.437359   | 0.77253 | chr19 | 268607921 | 268608214 | + | 0 | NA | IntergeniALR/Alphe | 985364    | NR_110688 | 1.02E+08  | Hs.567934 | NR_11068  | ENSG00000 | LOC101927 |           |           |                |                | uncharact | ncRNA          |        |  |
| chr12-357 | 18.47916 | 0.402703 | 0.51855  | 0.776595 | 0.437398   | 0.77253 | chr12 | 35786055  | 35786498  | + | 0 | NA | IntergeniALR/Alphe | 1763780   | NM_03283A | 84920     | Hs.102971 | NM_03283  | ENSG00000 | ALG10     | ALG10A D  | ALG10     | al             | protein-coding |           |                |        |  |
| chr17-23  | 19.05558 | 0.394628 | 0.508337 | 0.776312 | 0.437565   | 0.77253 | chr17 | 23531109  | 23531338  | + | 0 | NA | IntergeniALR/Alphe | 1008112   | NM_00119C | 1E+08     | Hs.74018  | NM_00119  | ENSG00000 | MTRNR2L1  | HN1       | MT-RNR2   | l              | protein-coding |           |                |        |  |
| chr1-1241 | 54.60042 | 0.242063 | 0.311926 | 0.776029 | 0.437732   | 0.77253 | chr1  | 1.24E+08  | 1.24E+08  | + | 0 | NA | IntergeniALR/Alphe | 2625353   | NR_00395E | 647121    | Hs.697682 | NR_00395  | ENSG00000 | EMBP1     |           |           |                |                | embigin   | pseudo         |        |  |
| chr5-4791 | 34.01532 | 0.298292 | 0.385183 | 0.774416 | 0.438685   | 0.77253 | chr5  | 47912908  | 47914813  | + | 0 | NA | IntergeniALR/Alphe | 2217480   | NM_021072 | 348980    | Hs.353177 | NM_02107  | ENSG00000 | HCN1      | BCNG-1    | BC        | hyperpol       | protein-coding |           |                |        |  |
| chr6-594  | 17.32123 | 0.42034  | 0.543487 | 0.773587 | 0.439175   | 0.77253 | chr6  | 59404713  | 59405272  | + | 0 | NA | IntergeniALR/Alphe | 1443546   | NR_132994 | 1.07E+08  | Hs.561539 | NR_12572  | ENSG00000 | LINC0068  |           |           |                |                | long      | intenc         | ncRNA  |  |
| chr17-251 | 70.94871 | 0.216292 | 0.279804 | 0.77301  | 0.439516</ |         |       |           |           |   |   |    |                    |           |           |           |           |           |           |           |           |           |                |                |           |                |        |  |



|           |          |          |          |          |          |          |       |          |          |   |   |    |                     |          |           |          |           |                  |                     |                |                            |
|-----------|----------|----------|----------|----------|----------|----------|-------|----------|----------|---|---|----|---------------------|----------|-----------|----------|-----------|------------------|---------------------|----------------|----------------------------|
| chr15-196 | 17.02046 | 0.397635 | 0.536098 | 0.74172  | 0.458257 | 0.773878 | chr15 | 19640129 | 19641599 | + | 0 | NA | IntergeniALR/Alph   | -641880  | NR_038836 | 646096   | Hs.448788 | NR_038836        | ENSG000004CHEK2P2   | -              | checkpoirpseudo            |
| chr7-582  | 19.64758 | 0.370088 | 0.499683 | 0.740646 | 0.458908 | 0.773878 | chr7  | 58237971 | 58238218 | + | 0 | NA | IntergeniALR/Alph   | 787917   | NM_001156 | 441234   | Hs.533121 | NM_001156        | ENSG000004ZNF716    | -              | zinc_fingprotein-coding    |
| chr1-124  | 48.11233 | 0.247629 | 0.334767 | 0.739705 | 0.459479 | 0.773878 | chr1  | 1.25E+08 | 1.25E+08 | + | 0 | NA | IntergeniALR/Alph   | 3389561  | NR_003955 | 647121   | Hs.697682 | NR_003955        | ENSG000004EMBP1     | -              | embigin_pseudo             |
| chr19-26  | 16.47232 | 0.402977 | 0.545012 | 0.739429 | 0.459647 | 0.773878 | chr19 | 26053111 | 26054021 | + | 0 | NA | IntergeniALR/Alph   | -1739865 | NR_110688 | 1.02E+08 | Hs.567934 | NR_110688        | ENSG000004LOC101927 | -              | uncharactncRNA             |
| chr10-407 | 29.32447 | 0.304497 | 0.412388 | 0.739056 | 0.459873 | 0.773878 | chr10 | 40728317 | 40728966 | + | 0 | NA | IntergeniALR/Alph   | 1639104  | NR_024388 | 441666   | Hs.255729 | NR_024388        | ENSG000004LOC441666 | -              | zinc_fingpseudo            |
| chr1-122  | 19.67959 | 0.367164 | 0.497601 | 0.737868 | 0.460595 | 0.773878 | chr1  | 1.23E+08 | 1.23E+08 | + | 0 | NA | IntergeniALR/Alph   | 1000342  | NR_003955 | 647121   | Hs.697682 | NR_003955        | ENSG000004EMBP1     | -              | embigin_pseudo             |
| chr21-11  | 19.67959 | 0.367164 | 0.497601 | 0.737868 | 0.460595 | 0.773878 | chr21 | 11943528 | 11945172 | + | 0 | NA | IntergeniALR/Alph   | -1093816 | NR_026910 | 149992   | Hs.558644 | NM_153773        | ANKR230BF           | C21orf99       | ankyrin_pseudo             |
| chr5-475  | 43.37615 | 0.254434 | 0.344876 | 0.737755 | 0.460663 | 0.773878 | chr5  | 47583167 | 47584355 | + | 0 | NA | IntergeniALR/Alph   | -1887381 | NM_021072 | 348980   | Hs.353176 | NM_021072        | ENSG000004HCN1      | BCNG-1         | BC(hyperpol)protein-coding |
| chr6-592  | 22.88426 | 0.341354 | 0.463341 | 0.736723 | 0.461291 | 0.773878 | chr6  | 59283368 | 59285706 | + | 0 | NA | IntergeniALR/Alph   | -1323091 | NR_132994 | 1.07E+08 | Hs.561539 | NR_125727        | ENSG000004LINC0068C | -              | long_intencRNA             |
| chr1-123  | 22.88369 | 0.341318 | 0.46333  | 0.736662 | 0.461328 | 0.773878 | chr1  | 1.23E+08 | 1.23E+08 | + | 0 | NA | IntergeniALR/Alph   | 1812138  | NR_003955 | 647121   | Hs.697682 | NR_003955        | ENSG000004EMBP1     | -              | embigin_pseudo             |
| chr20-26  | 33.62588 | 0.290677 | 0.394665 | 0.736515 | 0.461417 | 0.773878 | chr20 | 26610253 | 26610471 | + | 0 | NA | IntergeniALR/Alph   | -401129  | NR_040099 | 284801   | Hs.370699 | NR_040099        | ENSG000004MIR663AH  | -              | MIR663A_lncRNA             |
| chr14-171 | 34.70223 | 0.281499 | 0.382551 | 0.735847 | 0.461824 | 0.773878 | chr14 | 17151416 | 17151772 | + | 0 | NA | IntergeniALR/Alph   | -1449523 | NM_001010 | 440153   | Hs.534888 | NM_001010        | ENSG000004C11H12    | -              | olfactoryprotein-coding    |
| chr20-26  | 32.01165 | 0.292064 | 0.396767 | 0.73572  | 0.461901 | 0.773878 | chr20 | 26529149 | 26529574 | + | 0 | NA | IntergeniALR/Alph   | -320128  | NR_040099 | 284801   | Hs.370699 | NR_040099        | ENSG000004MIR663AH  | -              | MIR663A_lncRNA             |
| chr5-488  | 22.88313 | 0.341285 | 0.46402  | 0.735498 | 0.462036 | 0.773878 | chr5  | 48847443 | 48847675 | + | 0 | NA | IntergeniALR/Alph   | 1593729  | NM_198444 | 133418   | Hs.561411 | NM_198444        | ENSG000004EMB       | GP70           | embigin protein-coding     |
| chr5-477  | 42.87566 | 0.258848 | 0.351949 | 0.735472 | 0.462052 | 0.773878 | chr5  | 47738527 | 47738743 | + | 0 | NA | IntergeniALR/Alph   | -2042255 | NM_021072 | 348980   | Hs.353176 | NM_021072        | ENSG000004HCN1      | BCNG-1         | BC(hyperpol)protein-coding |
| chr7-588  | 225.5063 | 0.134167 | 0.182449 | 0.735366 | 0.462117 | 0.773878 | chr7  | 58818464 | 58818831 | + | 0 | NA | IntergeniALR/Alph   | 1368470  | NM_001156 | 441234   | Hs.533121 | NM_001156        | ENSG000004ZNF716    | -              | zinc_fingprotein-coding    |
| chr19-25  | 22.85508 | 0.344108 | 0.468783 | 0.734045 | 0.462921 | 0.774307 | chr19 | 25879761 | 25880228 | + | 0 | NA | IntergeniALR/Alph   | -1716547 | NR_003600 | 1E+08    | Hs.149312 | NR_003600        | ENSG000004HAVCR1P1  | -              | hepatitis_pseudo           |
| chr10-41  | 20.22546 | 0.363382 | 0.495134 | 0.733907 | 0.463005 | 0.774307 | chr10 | 41231540 | 41232264 | + | 0 | NA | IntergeniALR/Alph   | 1126143  | NR_024388 | 441666   | Hs.255729 | NR_024388        | ENSG000004LOC441666 | -              | zinc_fingpseudo            |
| chr19-25  | 32.04366 | 0.29027  | 0.395726 | 0.733513 | 0.463246 | 0.774307 | chr19 | 25087989 | 25090298 | + | 0 | NA | IntergeniALR/Alph   | -925696  | NR_003600 | 1E+08    | Hs.149312 | NR_003600        | ENSG000004HAVCR1P1  | -              | hepatitis_pseudo           |
| chr17-26  | 18.34372 | -0.38034 | 0.519521 | -0.7321  | 0.464108 | 0.774691 | chr17 | 26522137 | 26522377 | + | 0 | NA | IntergeniALR/Alph   | 566984   | NR_135673 | 1.05E+08 | Hs.649919 | NR_135673        | LOC105371           | -              | uncharactncRNA             |
| chrX-606  | 22.91514 | 0.338791 | 0.462872 | 0.731932 | 0.46421  | 0.774691 | chrX  | 60691088 | 60692269 | + | 0 | NA | IntergeniALR/Alph   | 2659654  | NM_001010 | 139886   | Hs.612782 | NM_001010        | ENSG000004SPIN4     | TDRD28         | spindlin protein-coding    |
| chr10-401 | 31.94054 | 0.305369 | 0.417371 | 0.731649 | 0.464383 | 0.774691 | chr10 | 40101700 | 40101946 | + | 0 | NA | IntergeniALR/Alph   | 1405227  | NR_045000 | 399746   | Hs.742607 | NR_045000        | ACTR3BP5            | FKSG74         | ACTR3B_pseudo              |
| chr19-25  | 19.71104 | 0.364224 | 0.498099 | 0.731228 | 0.46464  | 0.774691 | chr19 | 25274916 | 25276192 | + | 0 | NA | IntergeniALR/Alph   | -1121107 | NR_003600 | 1E+08    | Hs.149312 | NR_003600        | ENSG000004HAVCR1P1  | -              | hepatitis_pseudo           |
| chr20-26  | 22.36733 | 0.341359 | 0.468984 | 0.727869 | 0.466694 | 0.77628  | chr20 | 26682555 | 26683121 | + | 0 | NA | IntergeniALR/Alph   | -473605  | NR_040099 | 284801   | Hs.370699 | NR_040099        | ENSG000004MIR663AH  | -              | MIR663A_lncRNA             |
| chr1-124  | 42.31312 | 0.253895 | 0.349669 | 0.726102 | 0.467777 | 0.778438 | chr1  | 1.25E+08 | 1.25E+08 | + | 0 | NA | IntergeniALR/Alph   | 3104247  | NR_003955 | 647121   | Hs.697682 | NR_003955        | ENSG000004EMBP1     | -              | embigin_pseudo             |
| chr5-490  | 22.94602 | 0.336228 | 0.463074 | 0.72608  | 0.46779  | 0.778438 | chr5  | 49044907 | 49045106 | + | 0 | NA | IntergeniALR/Alph   | 1396288  | NM_198444 | 133418   | Hs.561411 | NM_198444        | ENSG000004EMB       | GP70           | embigin protein-coding     |
| chr9-638  | 18.58511 | 0.375107 | 0.517205 | 0.725259 | 0.468293 | 0.778438 | chr9  | 63816670 | 63819888 | + | 0 | NA | non-codir non-codir | -1295    | NR_039688 | 1.03E+08 | Hs.641018 | NR_039688        | ENSG000004MIR4477B  | -              | microRNA_ncRNA             |
| chr14-17  | 19.19411 | 0.364818 | 0.5033   | 0.724852 | 0.468543 | 0.778438 | chr14 | 17267006 | 17268332 | + | 0 | NA | IntergeniALR/Alph   | -1333448 | NM_001010 | 440153   | Hs.534888 | NM_001010        | ENSG000004C11H12    | -              | olfactoryprotein-coding    |
| chr5-483  | 19.19468 | 0.364861 | 0.503761 | 0.724275 | 0.468897 | 0.778438 | chr5  | 48333308 | 48335096 | + | 0 | NA | IntergeniALR/Alph   | 2107086  | NM_198444 | 133418   | Hs.561411 | NM_198444        | ENSG000004EMB       | GP70           | embigin protein-coding     |
| chr1-121  | 22.39878 | 0.338769 | 0.467775 | 0.724213 | 0.468935 | 0.778438 | chr1  | 1.22E+08 | 1.22E+08 | + | 0 | NA | IntergeniALR/Alph   | 93514    | NR_003955 | 647121   | Hs.697682 | NR_003955        | ENSG000004EMBP1     | -              | embigin_pseudo             |
| chr19-26  | 51.62806 | 0.231925 | 0.320458 | 0.723729 | 0.469232 | 0.778446 | chr19 | 26842726 | 26843730 | + | 0 | NA | IntergeniALR/Alph   | -950203  | NR_110688 | 1.02E+08 | Hs.567934 | NR_110688        | ENSG000004LOC101927 | -              | uncharactncRNA             |
| chr5-495  | 22.39991 | 0.338848 | 0.469248 | 0.722109 | 0.470227 | 0.77961  | chr5  | 49568766 | 49569772 | + | 0 | NA | IntergeniALR/Alph   | 872019   | NM_198444 | 133418   | Hs.561411 | NM_198444        | ENSG000004EMB       | GP70           | embigin protein-coding     |
| chr5-475  | 18.58681 | 0.375337 | 0.502121 | 0.721633 | 0.47052  | 0.77961  | chr5  | 47509245 | 47509859 | + | 0 | NA | IntergeniALR/Alph   | -1813172 | NM_021072 | 348980   | Hs.353176 | NM_021072        | ENSG000004HCN1      | BCNG-1         | BC(hyperpol)protein-coding |
| chr20-26  | 16.567   | 0.39231  | 0.544373 | 0.720664 | 0.471116 | 0.780005 | chr20 | 26935661 | 26935885 | + | 0 | NA | IntergeniALR/Alph   | -726540  | NR_040099 | 284801   | Hs.370699 | NR_040099        | ENSG000004MIR663AH  | -              | MIR663A_lncRNA             |
| chr20-26  | 21.85211 | 0.341479 | 0.474532 | 0.719612 | 0.471764 | 0.780005 | chr20 | 26492232 | 26494517 | + | 0 | NA | IntergeniALR/Alph   | -284141  | NR_040099 | 284801   | Hs.370699 | NR_040099        | ENSG000004MIR663AH  | -              | MIR663A_lncRNA             |
| chrX-604  | 36.35895 | 0.270657 | 0.37647  | 0.718934 | 0.472182 | 0.780005 | chrX  | 60403677 | 60404348 | + | 0 | NA | IntergeniALR/Alph   | -2493379 | NM_007156 | 7789     | Hs.550099 | NM_007156        | ENSG000004XZDA      | ZNF896         | zinc_fingprotein-coding    |
| chr19-25  | 19.22556 | 0.361806 | 0.503774 | 0.71819  | 0.47264  | 0.780005 | chr19 | 25299739 | 25300645 | + | 0 | NA | IntergeniALR/Alph   | -1136745 | NR_003600 | 1E+08    | Hs.149312 | NR_003600        | ENSG000004HAVCR1P1  | -              | hepatitis_pseudo           |
| chr9-436  | 18.58738 | 0.375475 | 0.523052 | 0.717854 | 0.472847 | 0.780005 | chr9  | 43642011 | 43642367 | + | 0 | NA | IntergeniALR/Alph   | 516023   | NR_160669 | 1.03E+08 | Hs.641018 | NR_160669        | LOC102722           | -              | methylencpseudo            |
| chr3-930  | 23.12135 | -0.33311 | 0.464091 | -0.71778 | 0.472895 | 0.780005 | chr3  | 93039078 | 93039324 | + | 0 | NA | IntergeniALR/Alph   | 934880   | NM_001314 | 5627     | Hs.64016  | NM_000310        | ENSG000004PROS1     | PROS1          | PROS1protein_coding        |
| chr14-17  | 19.71166 | 0.358147 | 0.498987 | 0.717749 | 0.472912 | 0.780005 | chr14 | 17493227 | 17493455 | + | 0 | NA | IntergeniALR/Alph   | -1197776 | NM_001010 | 440153   | Hs.534888 | NM_001010        | ENSG000004C11H12    | -              | olfactoryprotein-coding    |
| chr7-591  | 25.08652 | 0.318861 | 0.444444 | 0.717438 | 0.473104 | 0.780005 | chr7  | 59148624 | 59149855 | + | 0 | NA | IntergeniALR/Alph   | 1699062  | NM_001156 | 441234   | Hs.533121 | NM_001156        | ENSG000004ZNF716    | -              | zinc_fingprotein-coding    |
| chr11-53  | 18.67832 | 0.365528 | 0.510131 | 0.716536 | 0.47366  | 0.78044  | chr11 | 53976930 | 53977942 | + | 0 | NA | IntergeniALR/Alph   | 626562   | NM_001004 | 119749   | Hs.553564 | NM_001004        | ENSG000004OR4C46    | -              | olfactoryprotein-coding    |
| chr11-51  | 21.88299 | 0.338785 | 0.473255 | 0.71586  | 0.474078 | 0.780644 | chr11 | 51703196 | 51703427 | + | 0 | NA | IntergeniALR/Alph   | 1294164  | NR_024504 | 646813   | Hs.684179 | NR_024504        | LOC646813           | -              | DEXH-box_pseudo            |
| chr17-25  | 68.58307 | 0.205539 | 0.287374 | 0.715232 | 0.474466 | 0.7808   | chr17 | 25115349 | 25115596 | + | 0 | NA | IntergeniALR/Alph   | 1973769  | NR_135673 | 1.05E+08 | Hs.649919 | NR_135673        | LOC105371           | -              | uncharactncRNA             |
| chr8-450  | 33.7307  | 0.276258 | 0.386672 | 0.714451 | 0.474949 | 0.781111 | chr8  | 45039184 | 45039618 | + | 0 | NA | IntergeniALR/Alph   | 1578242  | NR_146077 | 389652   | NR_146077 | ENSG000004ASNSP1 | ASNSL1              | asparagipseudo |                            |
| chr1-123  | 26.21358 | 0.312923 | 0.438743 | 0.713226 | 0.475706 | 0.781258 | chr1  | 1.23E+08 | 1.23E+08 | + | 0 | NA | IntergeniALR/Alph   | 1878537  | NR_003955 | 647121   | Hs.697682 | NR_003955        | ENSG000004EMBP1     | -              | embigin_pseudo             |
| chr20-26  | 24.54042 | 0.320922 | 0.450089 | 0.713017 | 0.475835 | 0.781258 | chr20 | 26440940 | 26442327 | + | 0 | NA | IntergeniALR/Alph   | -232400  | NR_040099 | 284801   | Hs.370699 | NR_040099        | ENSG000004MIR663AH  | -              | MIR663A_lncRNA             |
| chr22-13  | 21.84984 | 0.341392 | 0.479043 | 0.712654 | 0.47606  | 0.781258 | chr22 | 13359040 | 13359253 | + | 0 | NA | IntergeniALR/Alph   | 1461740  | NR_110761 | 1.03E+08 | Hs.652929 | NR_110761        | LOC102722           | -              | uncharactncRNA             |
| chr11-51  | 28.35522 | 0.299493 | 0.420553 | 0.712141 | 0.476377 | 0.781258 | chr11 | 51409752 | 51409974 | + | 0 | NA | IntergeniALR/Alph   | 1000716  | NR_024504 | 646813   | Hs.684179 | NR_024504        | LOC6                |                |                            |

|           |          |          |          |          |          |          |       |          |          |   |   |    |                    |          |           |          |           |              |            |           |                         |                            |                  |
|-----------|----------|----------|----------|----------|----------|----------|-------|----------|----------|---|---|----|--------------------|----------|-----------|----------|-----------|--------------|------------|-----------|-------------------------|----------------------------|------------------|
| chr22-137 | 18.14343 | -0.35131 | 0.523139 | -0.67154 | 0.501877 | 0.786204 | chr22 | 13741327 | 13741546 | + | O | NA | IntergeniALR/Alphe | -1786723 | NM_001006 | 81061    | Hs.55470c | NM_001006    | ENSG00000C | OR11H1    | Colfatoryprotein-coding |                            |                  |
| chr20-288 | 16.67578 | 0.361666 | 0.538571 | 0.671528 | 0.501884 | 0.786204 | chr20 | 28876175 | 28877743 | + | O | NA | IntergeniALR/Alphe | -203431  | NR_132316 | 1.03E+08 | Hs.55470c | NM_001006    | ENSG00000C | FRG1DP    | FSHD                    | regipseudo                 |                  |
| chrX-6207 | 19.87931 | 0.332794 | 0.496187 | 0.670703 | 0.50241  | 0.786204 | chrX  | 62074740 | 62075452 | + | O | NA | IntergeniALR/Alphe | 1276236  | NM_001012 | 139886   | Hs.612782 | NM_001012    | ENSG00000C | SPIN4     | TDRD28                  | spindlin protein-coding    |                  |
| chr1-1247 | 148.0935 | 0.142021 | 0.290991 | 0.670529 | 0.502521 | 0.786204 | chr1  | 1.25E+08 | 1.25E+08 | + | O | NA | IntergeniALR/Alphe | 3206061  | NR_003955 | 647121   | Hs.697682 | NR_003955    | ENSG00000C | EMBPP1    | -                       | embigin ipseudo            |                  |
| chr11-534 | 69.38159 | 0.191702 | 0.285956 | 0.670389 | 0.50261  | 0.786204 | chr11 | 53456744 | 53456998 | + | O | NA | IntergeniALR/Alphe | 1147127  | NM_001004 | 119749   | Hs.553564 | NM_001004    | ENSG00000C | OR4C46    | -                       | olfactoryprotein-coding    |                  |
| chr5-4982 | 21.74868 | -0.32032 | 0.478145 | -0.66992 | 0.50291  | 0.786204 | chr5  | 49828223 | 49828495 | + | O | NA | IntergeniALR/Alphe | 612929   | NM_198444 | 133418   | Hs.561411 | NM_198444    | ENSG00000C | EMB       | GP70                    | embigin protein-coding     |                  |
| chr20-264 | 41.35831 | 0.342277 | 0.361731 | 0.669771 | 0.503004 | 0.786204 | chr20 | 26484563 | 26484792 | + | O | NA | IntergeniALR/Alphe | -275444  | NR_040099 | 284801   | Hs.370699 | NR_040099    | ENSG00000C | MIR663AHC | -                       | MIR663A lncRNA             |                  |
| chr5-4805 | 19.91076 | 0.292989 | 0.494581 | 0.667028 | 0.504754 | 0.786204 | chr5  | 48093610 | 48093895 | + | O | NA | IntergeniALR/Alphe | 2347536  | NM_198444 | 133418   | Hs.561411 | NM_198444    | ENSG00000C | EMB       | GP70                    | embigin protein-coding     |                  |
| chr20-264 | 44.80832 | 0.227103 | 0.34065  | 0.666675 | 0.50498  | 0.786204 | chr20 | 26523033 | 26523517 | + | O | NA | IntergeniALR/Alphe | -314042  | NR_040099 | 284801   | Hs.370699 | NR_040099    | ENSG00000C | MIR663AHC | -                       | MIR663A lncRNA             |                  |
| chr7-6061 | 19.33321 | 0.335743 | 0.504143 | 0.665966 | 0.505433 | 0.786204 | chr7  | 60618684 | 60619039 | + | O | NA | IntergeniALR/Alphe | 2685195  | NR_003952 | 643955   | Hs.583308 | NR_003952    | ENSG00000C | ZNF733P   | ZNF733                  | zinc finipseudo            |                  |
| chr20-288 | 16.70609 | 0.358125 | 0.537843 | 0.665855 | 0.505504 | 0.786204 | chr20 | 28820977 | 28821467 | + | O | NA | IntergeniALR/Alphe | -2185097 | NR_132316 | 1E+08    | Hs.529355 | NR_132316    | ENSG00000C | FRG1CP    | -                       | FSHD                       | regipseudo       |
| chr22-148 | 16.70609 | 0.358125 | 0.537843 | 0.665855 | 0.505504 | 0.786204 | chr22 | 14858720 | 14859124 | + | O | NA | IntergeniALR/Alphe | -669237  | NM_001006 | 81061    | Hs.55470c | NM_001006    | ENSG00000C | OR11H1    | OR11H12                 | Colfatoryprotein-coding    |                  |
| chr2-9215 | 19.91019 | 0.329588 | 0.495433 | 0.665797 | 0.505541 | 0.786204 | chr2  | 92197201 | 92198000 | + | O | NA | IntergeniALR/Alphe | 256467   | NR_027714 | 440888   | Hs.730239 | NM_001032412 | ACTR3BP2   | FKSG73    | ACTR3B                  | pspseudo                   |                  |
| chr5-4854 | 19.3012  | 0.338825 | 0.508986 | 0.665687 | 0.505611 | 0.786204 | chr5  | 48540092 | 48540405 | + | O | NA | IntergeniALR/Alphe | 1901040  | NM_198444 | 133418   | Hs.561411 | NM_198444    | ENSG00000C | EMB       | GP70                    | embigin protein-coding     |                  |
| chrX-6095 | 25.22562 | 0.29713  | 0.446508 | 0.665453 | 0.505761 | 0.786204 | chrX  | 60950116 | 60951190 | + | O | NA | IntergeniALR/Alphe | 2400679  | NM_001012 | 139886   | Hs.612782 | NM_001012    | ENSG00000C | SPIN4     | TDRD28                  | spindlin protein-coding    |                  |
| chr1-1246 | 52.48267 | 0.210524 | 0.316846 | 0.664438 | 0.50641  | 0.786204 | chr1  | 1.25E+08 | 1.25E+08 | + | O | NA | IntergeniALR/Alphe | 3167815  | NR_003955 | 647121   | Hs.697682 | NR_003955    | ENSG00000C | EMBPP1    | -                       | embigin ipseudo            |                  |
| chr11-521 | 19.33434 | 0.33587  | 0.505984 | 0.663797 | 0.50682  | 0.786204 | chr11 | 52183466 | 52183708 | + | O | NA | IntergeniALR/Alphe | 1774441  | NR_024504 | 646813   | Hs.684179 | NR_024504    | LOC646813  | -         | DEXH-box pseudo         |                            |                  |
| chr5-492  | 48.68374 | 0.219205 | 0.330396 | 0.663467 | 0.507034 | 0.786204 | chr5  | 49208426 | 49208716 | + | O | NA | IntergeniALR/Alphe | 1232717  | NM_198444 | 133418   | Hs.561411 | NM_198444    | ENSG00000C | EMB       | GP70                    | embigin protein-coding     |                  |
| chr7-5887 | 16.15942 | 0.362332 | 0.547184 | 0.662176 | 0.507858 | 0.786204 | chr7  | 58879794 | 58880003 | + | O | NA | IntergeniALR/Alphe | 1429721  | NM_001155 | 441234   | Hs.533121 | NM_001155    | ENSG00000C | ZNF716    | -                       | zinc finipseudo            |                  |
| chr10-402 | 27.94708 | 0.281431 | 0.425384 | 0.661593 | 0.508232 | 0.786204 | chr10 | 40213435 | 40213647 | + | O | NA | IntergeniALR/Alphe | 1516945  | NR_045000 | 399746   | Hs.742607 | NR_045000    | ACTR3BP5   | FKSG74    | ACTR3B                  | pspseudo                   |                  |
| chrX-6076 | 16.15999 | 0.362391 | 0.547776 | 0.661567 | 0.508249 | 0.786204 | chrX  | 60758068 | 60760021 | + | O | NA | IntergeniALR/Alphe | 60758068 | NM_001012 | 139886   | Hs.612782 | NM_001012    | ENSG00000C | SPIN4     | TDRD28                  | spindlin protein-coding    |                  |
| chr19-256 | 16.15885 | 0.362288 | 0.547754 | 0.661407 | 0.508351 | 0.786204 | chr19 | 25526965 | 25528210 | + | O | NA | IntergeniALR/Alphe | -1364140 | NR_003606 | 1E+08    | Hs.149312 | NR_003606    | ENSG00000C | HAVCR1P1  | -                       | hepatitisipseudo           |                  |
| chr14-167 | 21.52386 | 0.324915 | 0.491554 | 0.660995 | 0.508615 | 0.786204 | chr14 | 16795163 | 16795414 | + | O | NA | IntergeniALR/Alphe | -1805829 | NM_001013 | 440153   | Hs.534888 | NM_001013    | ENSG00000C | OR11H12   | -                       | olfactoryprotein-coding    |                  |
| chr10-401 | 30.66626 | 0.268387 | 0.406399 | 0.660403 | 0.508995 | 0.786204 | chr10 | 40157645 | 40158999 | + | O | NA | IntergeniALR/Alphe | 1461726  | NR_045000 | 399746   | Hs.742607 | NR_045000    | ACTR3BP5   | FKSG74    | ACTR3B                  | pspseudo                   |                  |
| chr5-4771 | 34.53999 | 0.252911 | 0.3833   | 0.659825 | 0.509366 | 0.786204 | chr5  | 47718398 | 47719665 | + | O | NA | IntergeniALR/Alphe | -2022651 | NM_021072 | 348980   | Hs.353176 | NM_021072    | ENSG00000C | HCN1      | BCNG-1                  | BC hyperpol:protein-coding |                  |
| chr20-268 | 16.15829 | 0.362259 | 0.549497 | 0.659255 | 0.509732 | 0.786204 | chr20 | 26884002 | 26886503 | + | O | NA | IntergeniALR/Alphe | -676019  | NR_040099 | 284801   | Hs.370699 | NR_040099    | ENSG00000C | MIR663AHC | -                       | MIR663A lncRNA             |                  |
| chr12-351 | 22.60134 | 0.309588 | 0.469183 | 0.658715 | 0.510079 | 0.786204 | chr12 | 35128575 | 35129331 | + | O | NA | IntergeniALR/Alphe | 1106457  | NM_032834 | 84920    | Hs.102971 | NM_032834    | ENSG00000C | ALG10     | ALG10A                  | DIALG10                    | alprotein-coding |
| chr1-1232 | 22.63052 | 0.306349 | 0.465404 | 0.658243 | 0.510382 | 0.786204 | chr1  | 1.23E+08 | 1.23E+08 | + | O | NA | IntergeniALR/Alphe | 1711304  | NR_003955 | 647121   | Hs.697682 | NR_003955    | ENSG00000C | EMBPP1    | -                       | embigin ipseudo            |                  |
| chr5-478  | 31.27526 | 0.263847 | 0.401114 | 0.657785 | 0.510676 | 0.786204 | chr5  | 47855296 | 47857108 | + | O | NA | IntergeniALR/Alphe | -2159822 | NM_021072 | 348980   | Hs.353176 | NM_021072    | ENSG00000C | HCN1      | BCNG-1                  | BC hyperpol:protein-coding |                  |
| chr19-264 | 16.73811 | 0.35472  | 0.539335 | 0.657699 | 0.510732 | 0.786204 | chr19 | 26405198 | 26405653 | + | O | NA | IntergeniALR/Alphe | -1388006 | NR_110688 | 1.02E+08 | Hs.567934 | NR_110688    | ENSG00000C | LOC101927 | -                       | uncharactcRNA              |                  |
| chr5-4756 | 36.71364 | 0.24461  | 0.372073 | 0.657425 | 0.510908 | 0.786204 | chr5  | 47565193 | 47565512 | + | O | NA | IntergeniALR/Alphe | -1868972 | NM_021072 | 348980   | Hs.353176 | NM_021072    | ENSG00000C | HCN1      | BCNG-1                  | BC hyperpol:protein-coding |                  |
| chr8-458  | 19.94051 | 0.326689 | 0.492228 | 0.657382 | 0.510935 | 0.786204 | chr8  | 45829548 | 45829774 | + | O | NA | IntergeniALR/Alphe | 787982   | NR_146077 | 389652   | NR_146077 | ENSG00000C   | ASNSP1     | ASNSL1    | asparaginipseudo        |                            |                  |
| chrX-5925 | 28.0077  | 0.271163 | 0.421556 | 0.657359 | 0.51095  | 0.786204 | chrX  | 59239676 | 59241388 | + | O | NA | IntergeniALR/Alphe | -1329899 | NM_007156 | 7789     | Hs.550094 | NM_007156    | ENSG00000C | ZXD4      | ZNF896                  | zinc finipseudo            |                  |
| chr7-594  | 18.34611 | 0.346364 | 0.527583 | 0.65651  | 0.511496 | 0.786204 | chr7  | 59449346 | 59449644 | + | O | NA | IntergeniALR/Alphe | 1999318  | NM_001155 | 441234   | Hs.533121 | NM_001155    | ENSG00000C | ZNF716    | -                       | zinc finipseudo            |                  |
| chr20-272 | 16.18973 | 0.358766 | 0.546392 | 0.656445 | 0.511538 | 0.786204 | chr20 | 27225182 | 27227070 | + | O | NA | IntergeniALR/Alphe | -1016893 | NR_040099 | 284801   | Hs.370699 | NR_040099    | ENSG00000C | MIR663AHC | -                       | MIR663A lncRNA             |                  |
| chr22-136 | 22.05183 | 0.310864 | 0.47376  | 0.656164 | 0.511719 | 0.786204 | chr22 | 13627936 | 13628532 | + | O | NA | IntergeniALR/Alphe | 1730828  | NR_110761 | 1.03E+08 | Hs.652929 | NR_110761    | LOC102722  | -         | uncharactcRNA           |                            |                  |
| chr3-9157 | 116.0784 | 0.152964 | 0.233124 | 0.656151 | 0.511727 | 0.786204 | chr3  | 91572734 | 91573034 | + | O | NA | IntergeniALR/Alphe | 2401197  | NM_001314 | 5627     | Hs.64016  | NM_000314    | ENSG00000C | PROS1     | PROS                    | PS21                       | protein-coding   |
| chr7-6001 | 104.9163 | 0.160388 | 0.244879 | 0.654967 | 0.512489 | 0.786204 | chr7  | 60019356 | 60019743 | + | O | NA | IntergeniALR/Alphe | 2569372  | NM_001155 | 441234   | Hs.533121 | NM_001155    | ENSG00000C | ZNF716    | -                       | zinc finipseudo            |                  |
| chr11-536 | 32.83765 | 0.258058 | 0.395075 | 0.653187 | 0.513636 | 0.787273 | chr11 | 53620763 | 53621085 | + | O | NA | IntergeniALR/Alphe | 983074   | NM_001004 | 119749   | Hs.553564 | NM_001004    | ENSG00000C | OR4C46    | -                       | olfactoryprotein-coding    |                  |
| chr19-271 | 19.97365 | 0.324104 | 0.496424 | 0.652877 | 0.513836 | 0.787723 | chr19 | 27138803 | 27189703 | + | O | NA | IntergeniALR/Alphe | -604178  | NR_110688 | 1.02E+08 | Hs.567934 | NR_110688    | ENSG00000C | LOC101927 | -                       | uncharactcRNA              |                  |
| chr1-1241 | 31.30614 | 0.261967 | 0.401311 | 0.652778 | 0.5139   | 0.787723 | chr1  | 1.24E+08 | 1.24E+08 | + | O | NA | IntergeniALR/Alphe | 2607381  | NR_003955 | 647121   | Hs.697682 | NR_003955    | ENSG00000C | EMBPP1    | -                       | embigin ipseudo            |                  |
| chr19-261 | 19.42698 | 0.326762 | 0.502214 | 0.650643 | 0.515277 | 0.788362 | chr19 | 26137593 | 26138629 | + | O | NA | IntergeniALR/Alphe | -1655320 | NR_110688 | 1.02E+08 | Hs.567934 | NR_110688    | ENSG00000C | LOC101927 | -                       | uncharactcRNA              |                  |
| chr1-1236 | 16.76785 | 0.351111 | 0.539638 | 0.650642 | 0.515277 | 0.788362 | chr1  | 1.24E+08 | 1.24E+08 | + | O | NA | IntergeniALR/Alphe | 2128981  | NR_003955 | 647121   | Hs.697682 | NR_003955    | ENSG00000C | EMBPP1    | -                       | embigin ipseudo            |                  |
| chr18-168 | 16.76785 | 0.351111 | 0.539638 | 0.650642 | 0.515277 | 0.788362 | chr18 | 16855004 | 16855402 | + | O | NA | IntergeniALR/Alphe | -1529284 | NR_027417 | 644669   | Hs.579474 | NR_02        |            |           |                         |                            |                  |





|           |          |          |          |          |          |          |       |                   |          |                    |           |                    |                    |          |                       |                     |                 |                          |
|-----------|----------|----------|----------|----------|----------|----------|-------|-------------------|----------|--------------------|-----------|--------------------|--------------------|----------|-----------------------|---------------------|-----------------|--------------------------|
| chr8-8564 | 17.59215 | 0.28374  | 0.526968 | 0.538444 | 0.59027  | 0.808207 | chr8  | 85645401          | 85645760 | +                  | O NA      | IntergeniHSMAR2 DN | 10096 NR_003594    | 1E+08    | Hs.535056NR_003594    | REXO1L2P            | -               | REXO1 l k pseudo         |
| chr11-542 | 20.31304 | 0.263848 | 0.49006  | 0.5384   | 0.590301 | 0.808207 | chr11 | 54270106          | 54271153 | +                  | O NA      | IntergeniALR Alphe | 333369 NM_001004   | 119749   | Hs.553564NM_001004    | ENSG000000C0R4C46   | -               | olfactory protein-coding |
| chr10-40  | 28.47344 | 0.2269   | 0.422221 | 0.537396 | 0.590994 | 0.808207 | chr10 | 40086856          | 40087370 | +                  | O NA      | IntergeniALR Alphe | 1390517 NR_045000  | 399746   | Hs.742607NR_045000    | ACTR3BP5 FKS        | FG74            | ACTR3B p pseudo          |
| chr11-517 | 20.31911 | 0.263772 | 0.490896 | 0.537327 | 0.591042 | 0.808207 | chr11 | 51793531          | 51793774 | +                  | O NA      | IntergeniALR Alphe | 1384505 NR_024504  | 646813   | Hs.684175NR_024504    | LOC646813           | -               | DEX box pseudo           |
| chr19-255 | 54.83574 | 0.367724 | 0.311226 | 0.537307 | 0.591056 | 0.808207 | chr19 | 25211520          | 25211770 | +                  | O NA      | IntergeniALR Alphe | -1048198 NR_020360 | 1E+08    | Hs.149312NR_00360     | ENSG000000HAVCR1P1  | -               | hepatitis pseudo         |
| chr13-173 | 36.14666 | 0.202845 | 0.377618 | 0.53717  | 0.59115  | 0.808207 | chr13 | 17389770          | 17389987 | +                  | O NA      | IntergeniALR Alphe | -805419 NR_027278  | 26080    | Hs.44858NR_027278     | ENSG000000FAM230C   | LINC00281       | family w ncRNA           |
| chr20-277 | 43.30183 | 0.185397 | 0.345308 | 0.536902 | 0.591335 | 0.808207 | chr20 | 27711142          | 27711596 | +                  | O NA      | IntergeniALR Alphe | 891296 NR_13231F   | 1E+08    | Hs.529357NR_13231F    | ENSG000000FRG1CP    | -               | FSHD reg pseudo          |
| chr17-251 | 21.98564 | 0.288259 | 0.481036 | 0.536882 | 0.591349 | 0.808207 | chr17 | 25796411          | 25796637 | +                  | O NA      | IntergeniALR Alphe | 1292717 NR_135673  | 1.05E+08 | Hs.649918NR_135673    | LOC105371           | -               | uncharact ncRNA          |
| chr5-467  | 23.03458 | -0.24899 | 0.464206 | -0.53639 | 0.591691 | 0.808259 | chr5  | 46721258          | 46721593 | +                  | O NA      | IntergeniALR Alphe | -1025045 NM_021072 | 348980   | Hs.353176NM_021072    | ENSG000000HCN1      | BCNG-1 B C      | hyperpol protein-coding  |
| chr10-408 | 17.6236  | 0.280509 | 0.524363 | 0.534951 | 0.592683 | 0.808497 | chr10 | 40829612          | 40831738 | +                  | O NA      | IntergeniALR Alphe | 1537370 NR_02438C  | 441666   | Hs.255729NR_02438C    | ENSG000000LOC441666 | -               | zinc fin pseudo          |
| chr17-266 | 33.3915  | 0.209957 | 0.392515 | 0.5349   | 0.592719 | 0.808497 | chr17 | 26067647          | 26068068 | +                  | O NA      | IntergeniALR Alphe | 1021384 NR_135673  | 1.05E+08 | Hs.649918NR_135673    | LOC105371           | -               | uncharact ncRNA          |
| chr20-288 | 28.44369 | 0.229073 | 0.42832  | 0.534818 | 0.592776 | 0.808497 | chr20 | 28544833          | 28545032 | +                  | O NA      | IntergeniALR Alphe | 57733 NR_13231F    | 1E+08    | Hs.529357NR_13231F    | ENSG000000FRG1CP    | -               | FSHD reg pseudo          |
| chr3-912  | 27.98589 | 0.229178 | 0.429423 | 0.53369  | 0.593556 | 0.808567 | chr3  | 91242585          | 91242626 | +                  | O NA      | IntergeniALR Alphe | 2138434 NM_00523E  | 2042     | Hs.123642NM_00523E    | ENSG000000EPH3      | EK4 ETK E       | EPH rece protein-coding  |
| chr5-484  | 25.20418 | 0.236748 | 0.443721 | 0.533552 | 0.593651 | 0.808567 | chr5  | 48452305          | 48452556 | +                  | O NA      | IntergeniALR Alphe | 1988858 NM_19844E  | 133418   | Hs.561411NM_19844E    | ENSG000000EMB       | GP70            | embigin pr tein-coding   |
| chr1-124  | 16.47897 | -0.29445 | 0.551996 | -0.53343 | 0.593739 | 0.808567 | chr1  | 1.24E+08          | 1.24E+08 | +                  | O NA      | IntergeniALR Alphe | 2551597 NR_00395E  | 647121   | Hs.697682NR_00395E    | ENSG000000EMB1      | -               | embigin  pseudo          |
| chr13-168 | 18.20285 | 0.275866 | 0.519729 | 0.530789 | 0.595565 | 0.810454 | chr13 | 16536101          | 16536324 | +                  | O NA      | IntergeniALR Alphe | -1659085 NR_027278 | 26080    | Hs.44858NR_027278     | ENSG000000FAM230C   | LINC00281       | family w ncRNA           |
| chr21-127 | 19.73662 | 0.268096 | 0.505321 | 0.530546 | 0.595734 | 0.810454 | chr21 | 12711699          | 12711929 | +                  | O NA      | IntergeniALR Alphe | -326352 NR_02691E  | 149992   | Hs.55864E NM_153773   | ANKRD30B C2lorf99   | ankyrin  pseudo |                          |
| chr22-134 | 17.04775 | 0.285824 | 0.539325 | 0.529966 | 0.596135 | 0.810586 | chr22 | 1578049 NR_110761 | 1.03E+08 | Hs.652929NR_110761 | LOC10272E | -                  | uncharact ncRNA    |          |                       |                     |                 |                          |
| chr11-53  | 20.88833 | 0.259875 | 0.49086  | 0.529427 | 0.596509 | 0.81068  | chr11 | 53519613          | 53519917 | +                  | O NA      | IntergeniALR Alphe | 1084233 NM_001004  | 119749   | Hs.553564NM_001004    | ENSG000000C0R4C46   | -               | olfactory protein-coding |
| chr19-27  | 39.39666 | 0.192584 | 0.364128 | 0.528892 | 0.59688  | 0.81077  | chr19 | 27098638          | 27098875 | +                  | O NA      | IntergeniALR Alphe | -694675 NR_11068E  | 1.02E+08 | Hs.567934NR_11068E    | ENSG000000LOC101927 | -               | uncharact ncRNA          |
| chr1-124  | 34.29331 | -0.20399 | 0.386312 | -0.52806 | 0.59746  | 0.810795 | chr1  | 1.24E+08          | 1.24E+08 | +                  | O NA      | IntergeniALR Alphe | 2788793 NR_00395E  | 647121   | Hs.697682NR_00395E    | ENSG000000EMB1      | -               | embigin  pseudo          |
| chr10-40  | 17.07636 | 0.282136 | 0.534362 | 0.527987 | 0.597508 | 0.810795 | chr10 | 40377877          | 40379220 | +                  | O NA      | IntergeniALR Alphe | 1681952 NR_045000  | 399746   | Hs.742607NR_045000    | ACTR3BP5 FKS        | FG74            | ACTR3B p pseudo          |
| chr1-124  | 30.3748  | 0.258202 | 0.489518 | 0.527461 | 0.597874 | 0.810831 | chr1  | 1.25E+08          | 1.25E+08 | +                  | O NA      | IntergeniALR Alphe | 3061937 NR_00395E  | 647121   | Hs.697682NR_00395E    | ENSG000000EMB1      | -               | embigin  pseudo          |
| chr10-40  | 22.51531 | 0.246497 | 0.467674 | 0.527071 | 0.598144 | 0.810831 | chr10 | 40371476          | 40372388 | +                  | O NA      | IntergeniALR Alphe | 1675336 NR_045000  | 399746   | Hs.742607NR_045000    | ACTR3BP5 FKS        | FG74            | ACTR3B p pseudo          |
| chr1-124  | 17.10837 | 0.278848 | 0.531662 | 0.524484 | 0.599942 | 0.812069 | chr1  | 1.24E+08          | 1.24E+08 | +                  | O NA      | IntergeniALR Alphe | 2511281 NR_00395E  | 647121   | Hs.697682NR_00395E    | ENSG000000EMB1      | -               | embigin  pseudo          |
| chr2-928  | 25.26764 | 0.232272 | 0.443079 | 0.524222 | 0.600124 | 0.812069 | chr2  | 92874419          | 92874790 | +                  | O NA      | IntergeniALR Alphe | 933471 NR_027714   | 440888   | Hs.730239NM_001032412 | ACTR3BP2 FKS        | FG73            | ACTR3B p pseudo          |
| chr19-24  | 25.95519 | -0.22974 | 0.438491 | -0.52393 | 0.600328 | 0.812069 | chr19 | 24933790          | 24934002 | +                  | O NA      | IntergeniALR Alphe | -770449 NR_029360E | 1E+08    | Hs.149312NR_00360     | ENSG000000HAVCR1P1  | -               | hepatitis pseudo         |
| chr19-268 | 19.76354 | 0.264828 | 0.505656 | 0.523732 | 0.600465 | 0.812069 | chr19 | 26823512          | 26823748 | +                  | O NA      | IntergeniALR Alphe | -969801 NR_11068E  | 1.02E+08 | Hs.567934NR_11068E    | ENSG000000LOC101927 | -               | uncharact ncRNA          |
| chr7-588  | 19.82756 | 0.259019 | 0.495346 | 0.522906 | 0.60104  | 0.812069 | chr7  | 58884865          | 58885129 | +                  | O NA      | IntergeniALR Alphe | 1434820 NM_00115E  | 441234   | Hs.533121NM_00115E    | ENSG000000ZNF716    | -               | zinc fin protein-coding  |
| chr7-588  | 24.68782 | 0.234684 | 0.449172 | 0.522482 | 0.601335 | 0.812069 | chr7  | 58802802          | 58803148 | +                  | O NA      | IntergeniALR Alphe | 13582807 NM_00115E | 441234   | Hs.533121NM_00115E    | ENSG000000ZNF716    | -               | zinc fin protein-coding  |
| chr7-593  | 17.68593 | 0.274039 | 0.524682 | 0.522295 | 0.601465 | 0.812069 | chr7  | 59328510          | 59329424 | +                  | O NA      | IntergeniALR Alphe | 1878790 NM_00115E  | 441234   | Hs.533121NM_00115E    | ENSG000000ZNF716    | -               | zinc fin protein-coding  |
| chr21-107 | 21.71225 | -0.24882 | 0.476439 | -0.52225 | 0.601499 | 0.812069 | chr21 | 10794542          | 10814490 | +                  | O NA      | IntergeniL LINE    | 283002 NR_19926C   | 7179     | Hs.122988NM_19925E    | ENSG000000TPTE      | CT44 PTE        | transmem protein-coding  |
| chr5-483  | 18.88492 | -0.27783 | 0.532672 | -0.52157 | 0.601967 | 0.812289 | chr5  | 48325069          | 48325315 | +                  | O NA      | IntergeniALR Alphe | 2116096 NM_19844E  | 133418   | Hs.561411NM_19844E    | ENSG000000EMB       | GP70            | embigin pr tein-coding   |
| chr10-41  | 24.7187  | 0.232327 | 0.447732 | 0.518898 | 0.603832 | 0.813425 | chr10 | 41438905          | 41440469 | +                  | O NA      | IntergeniALR Alphe | 928358 NR_02438C   | 441666   | Hs.255729NR_02438C    | ENSG000000LOC441666 | -               | zinc fin pseudo          |
| chr4-500  | 17.13869 | 0.275456 | 0.53105  | 0.518701 | 0.603969 | 0.813425 | chr4  | 50066875          | 50068795 | +                  | O NA      | IntergeniALR Alphe | 1081193 NM_00128E  | 80157    | Hs.479700NM_025087    | ENSG000000CWH43     | CWH43-3 C       | cell wall protein-coding |
| chr19-25  | 34.56614 | 0.198615 | 0.383113 | 0.518424 | 0.604163 | 0.813425 | chr19 | 25667752          | 25667956 | +                  | O NA      | IntergeniALR Alphe | -1504407 NR_00360E | 1E+08    | Hs.149312NR_00360     | ENSG000000HAVCR1P1  | -               | hepatitis pseudo         |
| chr10-41  | 29.60984 | 0.214576 | 0.414103 | 0.51817  | 0.60434  | 0.813425 | chr10 | 41466442          | 41466900 | +                  | O NA      | IntergeniALR Alphe | 901374 NR_02438C   | 441666   | Hs.255729NR_02438C    | ENSG000000LOC441666 | -               | zinc fin pseudo          |
| chr1-124  | 17.13982 | 0.275551 | 0.532172 | 0.517786 | 0.604608 | 0.813425 | chr1  | 1.25E+08          | 1.25E+08 | +                  | O NA      | IntergeniALR Alphe | 3202994 NR_00395E  | 647121   | Hs.697682NR_00395E    | ENSG000000EMB1      | -               | embigin  pseudo          |
| chr1-124  | 16.7364  | 0.193509 | 0.374266 | 0.517037 | 0.60513  | 0.813425 | chr1  | 1.25E+08          | 1.25E+08 | +                  | O NA      | IntergeniALR Alphe | 3160243 NR_00395E  | 647121   | Hs.697682NR_00395E    | ENSG000000EMB1      | -               | embigin  pseudo          |
| chr11-51  | 16.5617  | 0.280542 | 0.542715 | 0.516923 | 0.60521  | 0.813425 | chr11 | 51614119          | 51615075 | +                  | O NA      | IntergeniALR Alphe | 1205450 NR_024504  | 646813   | Hs.684175NR_024504    | LOC646813           | -               | DEX box pseudo           |
| chr20-26  | 19.85788 | 0.256089 | 0.495471 | 0.51686  | 0.605254 | 0.813425 | chr20 | 26859852          | 26860072 | +                  | O NA      | IntergeniALR Alphe | -650729 NR_04009E  | 284801   | Hs.370699NR_04009E    | ENSG000000MIR663AH  | -               | MIR663A l ncRNA          |
| chr7-595  | 40.67471 | 0.18445  | 0.357288 | 0.51625  | 0.60568  | 0.813586 | chr7  | 5942265           | 5942511  | +                  | O NA      | IntergeniALR Alphe | 2092211 NM_00115E  | 441234   | Hs.533121NM_00115E    | ENSG000000ZNF716    | -               | zinc fin protein-coding  |
| chr5-484  | 46.61075 | 0.175392 | 0.340098 | 0.515711 | 0.606056 | 0.813681 | chr5  | 48424557          | 48424796 | +                  | O NA      | IntergeniALR Alphe | 2016612 NM_19844E  | 133418   | Hs.561411NM_19844E    | ENSG000000EMB       | GP70            | embigin pr tein-coding   |
| chr19-25  | 82.56732 | 0.134853 | 0.262748 | 0.513239 | 0.607784 | 0.81386  | chr19 | 25636208          | 25636454 | +                  | O NA      | IntergeniALR Alphe | -1472884 NR_00360E | 1E+08    | Hs.149312NR_00360     | ENSG000000HAVCR1P1  | -               | hepatitis pseudo         |
| chr19-26  | 26.92323 | 0.220552 | 0.429818 | 0.513128 | 0.607862 | 0.81386  | chr19 | 26288073          | 26289743 | +                  | O NA      | IntergeniALR Alphe | -1504523 NR_11068E | 1.02E+08 | Hs.567934NR_11068E    | ENSG000000LOC101927 | -               | uncharact ncRNA          |
| chr6-590  | 16.59202 | 0.276988 | 0.539859 | 0.513075 | 0.607899 | 0.81386  | chr6  | 59059751          | 59060574 | +                  | O NA      | IntergeniALR Alphe | -1098716 NR_132994 | 1.07E+08 | Hs.561539NR_125727    | ENSG000000LINC0068C | -               | long int ncRNA           |
| chr21-12  | 21.39222 | 0.250745 | 0.488878 | 0.5129   | 0.608022 | 0.81386  | chr21 | 12007811          | 12008110 | +                  | O NA      | IntergeniALR Alphe | -1030206 NR_02691E | 149992   | Hs.55864E NM_153773   | ANKRD30B C2lorf99   | ankyrin  pseudo |                          |
| chr1-124  | 30.25199 | 0.290937 | 0.470607 | 0.512838 | 0.608065 | 0.81386  | chr1  | 1.25E+08          | 1.25E+08 | +                  | O NA      | IntergeniALR Alphe | 3140874 NR_00395E  | 647121   | Hs.697682NR_00395E    | ENSG000000EMB1      | -               | embigin  pseudo          |
| chr22-13  | 24.7221  | 0.232608 | 0.453777 | 0.512604 | 0.608228 | 0.81386  |       |                   |          |                    |           |                    |                    |          |                       |                     |                 |                          |



|           |          |          |          |          |          |          |       |          |          |   |   |    |                    |          |           |          |           |              |                     |           |                            |
|-----------|----------|----------|----------|----------|----------|----------|-------|----------|----------|---|---|----|--------------------|----------|-----------|----------|-----------|--------------|---------------------|-----------|----------------------------|
| chr11-52  | 24.95157 | 0.20137  | 0.44473  | 0.459    | 0.646234 | 0.833686 | chr11 | 52071729 | 52072688 | + | O | NA | IntergeniALR/Alphe | 1663061  | NR_024504 | 646813   | Hs.684179 | NR_024504    | LOC646813           | -         | DEXH-box pseudo            |
| chr11-53  | 22.77849 | 0.212876 | 0.463923 | 0.458861 | 0.646334 | 0.833686 | chr11 | 53306319 | 53307889 | + | O | NA | IntergeniALR/Alphe | 1296894  | NM_001004 | 119749   | Hs.553564 | NM_001004    | ENSG000004OR4C46    | -         | olfactory protein-coding   |
| chr14-17  | 22.78019 | 0.212985 | 0.466184 | 0.456869 | 0.647765 | 0.835128 | chr14 | 17209945 | 17210203 | + | O | NA | IntergeniALR/Alphe | -1391043 | NM_001013 | 440153   | Hs.534888 | NM_001013    | ENSG000004OR11H12   | -         | olfactory protein-coding   |
| chr19-24  | 16.21692 | -0.25479 | 0.560025 | -0.45497 | 0.649131 | 0.836287 | chr19 | 24632695 | 24632953 | + | O | NA | IntergeniALR/Alphe | -469377  | NR_003603 | 1E+08    | Hs.149312 | NR_003603    | ENSG000004HAVCR1P1  | -         | hepatitis pseudo           |
| chr11-51  | 30.48486 | 0.186051 | 0.409134 | 0.454745 | 0.649293 | 0.836287 | chr11 | 51506786 | 51507011 | + | O | NA | IntergeniALR/Alphe | 1097751  | NR_024504 | 646813   | Hs.684179 | NR_024504    | LOC646813           | -         | DEXH-box pseudo            |
| chr11-52  | 28.31007 | 0.191586 | 0.422284 | 0.45369  | 0.650052 | 0.836652 | chr11 | 52428265 | 52428557 | + | O | NA | IntergeniALR/Alphe | 2019264  | NR_024504 | 646813   | Hs.684179 | NR_024504    | LOC646813           | -         | DEXH-box pseudo            |
| chr1-123  | 17.88792 | 0.237243 | 0.523165 | 0.453477 | 0.650205 | 0.836652 | chr1  | 1.24E+08 | 1.24E+08 | + | O | NA | IntergeniALR/Alphe | 2480906  | NR_003955 | 647121   | Hs.697682 | NR_003955    | ENSG000004EMB1      | -         | emigin pseudo              |
| chr5-4967 | 16.82365 | -0.24629 | 0.543774 | -0.45292 | 0.650607 | 0.836765 | chr5  | 49672852 | 49673155 | + | O | NA | IntergeniALR/Alphe | 768285   | NM_198444 | 133418   | Hs.561411 | NM_198444    | ENSG000004EMB       | GP70      | emigin protein-coding      |
| chr5-487  | 22.23069 | 0.212551 | 0.47114  | 0.451143 | 0.651887 | 0.838005 | chr5  | 48784834 | 48786749 | + | O | NA | IntergeniALR/Alphe | 1655497  | NM_198444 | 133418   | Hs.561411 | NM_198444    | ENSG000004EMB       | GP70      | emigin protein-coding      |
| chr19-25  | 27.76397 | 0.1911   | 0.424231 | 0.450463 | 0.652377 | 0.83823  | chr19 | 25870257 | 25870509 | + | O | NA | IntergeniALR/Alphe | -1706936 | NR_003603 | 1E+08    | Hs.149312 | NR_003603    | ENSG000004HAVCR1P1  | -         | hepatitis pseudo           |
| chr1-124  | 17.33954 | 0.237466 | 0.527978 | 0.449766 | 0.652879 | 0.838471 | chr1  | 1.24E+08 | 1.24E+08 | + | O | NA | IntergeniALR/Alphe | 2764470  | NR_003955 | 647121   | Hs.697682 | NR_003955    | ENSG000004EMB1      | -         | emigin pseudo              |
| chr1-123  | 29.38982 | 0.184765 | 0.412439 | 0.447982 | 0.654166 | 0.839719 | chr1  | 1.23E+08 | 1.23E+08 | + | O | NA | IntergeniALR/Alphe | 1715750  | NR_003955 | 647121   | Hs.697682 | NR_003955    | ENSG000004EMB1      | -         | emigin pseudo              |
| chr14-17  | 20.63912 | 0.220814 | 0.493903 | 0.44708  | 0.654817 | 0.840149 | chr14 | 17392962 | 17393172 | + | O | NA | IntergeniALR/Alphe | -1208050 | NM_001013 | 440153   | Hs.534888 | NM_001013    | ENSG000004OR11H12   | -         | olfactory protein-coding   |
| chr2-924  | 16.76256 | 0.241342 | 0.540601 | 0.446433 | 0.655285 | 0.840343 | chr2  | 92482285 | 92482550 | + | O | NA | IntergeniALR/Alphe | 541284   | NR_027714 | 440888   | Hs.730239 | NM_001032412 | ACTR3BP2            | FKSG73    | ACTR3B ps pseudo           |
| chr5-489  | 25.06686 | -0.19946 | 0.448773 | -0.44446 | 0.656713 | 0.841629 | chr5  | 48960928 | 48961191 | + | O | NA | IntergeniALR/Alphe | 1480229  | NM_198444 | 133418   | Hs.561411 | NM_198444    | ENSG000004EMB       | GP70      | emigin protein-coding      |
| chr20-26  | 38.20227 | 0.162415 | 0.365674 | 0.444152 | 0.656933 | 0.841629 | chr20 | 26501668 | 26502020 | + | O | NA | IntergeniALR/Alphe | -292611  | NR_040099 | 284801   | Hs.370699 | NR_040099    | ENSG000004MIR663AHC | -         | MIR663A lncRNA             |
| chr7-5981 | 17.37099 | 0.234243 | 0.527923 | 0.443707 | 0.657254 | 0.841629 | chr7  | 59816742 | 59817195 | + | O | NA | IntergeniALR/Alphe | 2366791  | NM_001159 | 441234   | Hs.533121 | NM_001159    | ENSG000004ZNF716    | -         | zinc finger protein-coding |
| chr5-485  | 16.73338 | 0.245318 | 0.553397 | 0.443295 | 0.657552 | 0.841629 | chr5  | 47540993 | 47541226 | + | O | NA | IntergeniALR/Alphe | -1844729 | NM_021072 | 348980   | Hs.353176 | NM_021072    | ENSG000004HCN1      | BCNG-1    | BC hyperpol protein-coding |
| chr19-26  | 22.84252 | 0.207926 | 0.469556 | 0.442809 | 0.657904 | 0.841674 | chr19 | 26360670 | 26360900 | + | O | NA | IntergeniALR/Alphe | -1432646 | NR_110688 | 1.02E+08 | Hs.567934 | NR_110688    | ENSG000004LOC101927 | -         | uncharactncRNA             |
| chr5-474  | 16.79231 | 0.237792 | 0.537898 | 0.442076 | 0.658434 | 0.841948 | chr5  | 47480912 | 47481357 | + | O | NA | IntergeniALR/Alphe | -1784754 | NM_021072 | 348980   | Hs.353176 | NM_021072    | ENSG000004HCN1      | BCNG-1    | BC hyperpol protein-coding |
| chr7-586  | 28.84314 | 0.184123 | 0.417502 | 0.44101  | 0.659206 | 0.84253  | chr7  | 58657766 | 58658002 | + | O | NA | IntergeniALR/Alphe | 1207707  | NM_001159 | 441234   | Hs.533121 | NM_001159    | ENSG000004ZNF716    | -         | zinc finger protein-coding |
| chr1-122  | 28.23415 | 0.187713 | 0.427776 | 0.438811 | 0.660798 | 0.843545 | chr1  | 1.23E+08 | 1.23E+08 | + | O | NA | IntergeniALR/Alphe | 1096812  | NR_003955 | 647121   | Hs.697682 | NR_003955    | ENSG000004EMB1      | -         | emigin pseudo              |
| chr5-493  | 84.26663 | 0.116457 | 0.259085 | 0.438649 | 0.660916 | 0.843545 | chr5  | 49351635 | 49351914 | + | O | NA | IntergeniALR/Alphe | 1089514  | NM_198444 | 133418   | Hs.561411 | NM_198444    | ENSG000004EMB       | GP70      | emigin protein-coding      |
| chr19-26  | 23.88968 | 0.201055 | 0.458565 | 0.438444 | 0.661065 | 0.843545 | chr19 | 26051801 | 26052109 | + | O | NA | IntergeniALR/Alphe | -1741476 | NR_110688 | 1.02E+08 | Hs.567934 | NR_110688    | ENSG000004LOC101927 | -         | uncharactncRNA             |
| chr1-123  | 24.46383 | 0.198901 | 0.453944 | 0.438163 | 0.661268 | 0.843545 | chr1  | 1.24E+08 | 1.24E+08 | + | O | NA | IntergeniALR/Alphe | 2431137  | NR_003955 | 647121   | Hs.697682 | NR_003955    | ENSG000004EMB1      | -         | emigin pseudo              |
| chrX-585  | 26.09251 | 0.191477 | 0.438897 | 0.436268 | 0.662642 | 0.844266 | chrX  | 58540919 | 58555112 | + | O | NA | IntergeniALR/Alphe | -637582  | NM_007156 | 7789     | Hs.550094 | NM_007156    | ENSG000004ZXA       | ZNF896    | zinc finger protein-coding |
| chr5-495  | 156.6328 | 0.109177 | 0.210417 | 0.436134 | 0.662739 | 0.844266 | chr5  | 49563517 | 49563771 | + | O | NA | IntergeniALR/Alphe | 877644   | NM_198444 | 133418   | Hs.561411 | NM_198444    | ENSG000004EMB       | GP70      | emigin protein-coding      |
| chr20-26  | 26.09081 | 0.191375 | 0.438862 | 0.436071 | 0.662785 | 0.844266 | chr20 | 26438021 | 26438357 | + | O | NA | IntergeniALR/Alphe | -228956  | NR_040099 | 284801   | Hs.370699 | NR_040099    | ENSG000004MIR663AHC | -         | MIR663A lncRNA             |
| chr5-483  | 72.46686 | -0.12142 | 0.29261  | -0.43479 | 0.663717 | 0.845048 | chr5  | 48355529 | 48355770 | + | O | NA | IntergeniALR/Alphe | 2085639  | NM_198444 | 133418   | Hs.561411 | NM_198444    | ENSG000004EMB       | GP70      | emigin protein-coding      |
| chr19-26  | 24.52786 | 0.194363 | 0.44857  | 0.433294 | 0.664801 | 0.84561  | chr19 | 26437149 | 26438058 | + | O | NA | IntergeniALR/Alphe | -1355828 | NR_110688 | 1.02E+08 | Hs.567934 | NR_110688    | ENSG000004LOC101927 | -         | uncharactncRNA             |
| chrX-613  | 30.00108 | 0.181538 | 0.418974 | 0.433293 | 0.664802 | 0.84561  | chrX  | 61304169 | 61304475 | + | O | NA | IntergeniALR/Alphe | 2047010  | NM_001012 | 139886   | Hs.612782 | NM_001012    | ENSG000004SPIN4     | TDRD28    | spindlin protein-coding    |
| chr5-485  | 31.1253  | 0.180563 | 0.417132 | 0.432866 | 0.665112 | 0.84561  | chr5  | 48507078 | 48507309 | + | O | NA | IntergeniALR/Alphe | 1934095  | NM_198444 | 133418   | Hs.561411 | NM_198444    | ENSG000004EMB       | GP70      | emigin protein-coding      |
| chr20-26  | 31.1053  | 0.173597 | 0.402106 | 0.431719 | 0.665946 | 0.84561  | chr20 | 26551376 | 26551655 | + | O | NA | IntergeniALR/Alphe | -342582  | NR_040099 | 284801   | Hs.370699 | NR_040099    | ENSG000004MIR663AHC | -         | MIR663A lncRNA             |
| chr1-123  | 22.90144 | 0.202645 | 0.469422 | 0.431691 | 0.665966 | 0.84569  | chr1  | 1.24E+08 | 1.24E+08 | + | O | NA | IntergeniALR/Alphe | 2000164  | NR_003955 | 647121   | Hs.697682 | NR_003955    | ENSG000004EMB1      | -         | emigin pseudo              |
| chr19-26  | 16.8552  | 0.231129 | 0.535681 | 0.431468 | 0.666128 | 0.84569  | chr19 | 26489812 | 26491782 | + | O | NA | IntergeniALR/Alphe | -1302654 | NR_110688 | 1.02E+08 | Hs.567934 | NR_110688    | ENSG000004LOC101927 | -         | uncharactncRNA             |
| chrX-611  | 26.73125 | 0.18555  | 0.430627 | 0.430882 | 0.666554 | 0.845828 | chrX  | 61113243 | 61113824 | + | O | NA | IntergeniALR/Alphe | 2237799  | NM_001012 | 139886   | Hs.612782 | NM_001012    | ENSG000004SPIN4     | TDRD28    | spindlin protein-coding    |
| chr1-124  | 19.60527 | 0.214764 | 0.498997 | 0.430392 | 0.666911 | 0.845877 | chr1  | 1.25E+08 | 1.25E+08 | + | O | NA | IntergeniALR/Alphe | 3171862  | NR_003955 | 647121   | Hs.697682 | NR_003955    | ENSG000004EMB1      | -         | emigin pseudo              |
| chr10-41  | 16.27651 | 0.234704 | 0.546679 | 0.429326 | 0.667686 | 0.846457 | chr10 | 41840858 | 41842044 | + | O | NA | IntergeniALR/Alphe | 526594   | NR_02438C | 441666   | Hs.255729 | NR_02438C    | ENSG000004LOC441666 | -         | zinc finger pseudo         |
| chr2-936  | 30.8469  | -0.17306 | 0.404108 | -0.42825 | 0.66847  | 0.847047 | chr2  | 93612209 | 93612474 | + | O | NA | IntergeniALR/Alphe | 596078   | NR_146105 | 728034   | Hs.448588 | NR_146105    | BMS1P14             | -         | BMS1 pset pseudo           |
| chr13-17  | 21.8081  | 0.201832 | 0.474404 | 0.425771 | 0.670275 | 0.84893  | chr13 | 17936661 | 17936887 | + | O | NA | IntergeniALR/Alphe | -258523  | NR_027278 | 26080    | Hs.448588 | NR_027278    | ENSG000004FAM230C   | LINC00281 | family wncRNA              |
| chr5-5001 | 32.62827 | -0.16808 | 0.395325 | -0.42516 | 0.67072  | 0.849089 | chr5  | 50016692 | 50016950 | + | O | NA | IntergeniALR/Alphe | 424467   | NM_198444 | 133418   | Hs.561411 | NM_198444    | ENSG000004EMB       | GP70      | emigin protein-coding      |
| chr1-124  | 33.37176 | 0.164401 | 0.388772 | 0.422874 | 0.672387 | 0.85054  | chr1  | 1.24E+08 | 1.24E+08 | + | O | NA | IntergeniALR/Alphe | 2979790  | NR_003955 | 647121   | Hs.697682 | NR_003955    | ENSG000004EMB1      | -         | emigin pseudo              |
| chr5-483  | 30.63869 | 0.17611  | 0.417014 | 0.422313 | 0.672796 | 0.85054  | chr5  | 48321979 | 48322224 | + | O | NA | IntergeniALR/Alphe | 2119187  | NM_198444 | 133418   | Hs.561411 | NM_198444    | ENSG000004EMB       | GP70      | emigin protein-coding      |
| chr19-26  | 21.74294 | 0.206911 | 0.491683 | 0.420822 | 0.673885 | 0.85054  | chr19 | 26674417 | 26674665 | + | O | NA | IntergeniALR/Alphe | -1118890 | NR_110688 | 1.02E+08 | Hs.567934 | NR_110688    | ENSG000004LOC101927 | -         | uncharactncRNA             |
| chr1-123  | 26.21546 | 0.182637 | 0.434409 | 0.420426 | 0.674174 | 0.85054  | chr1  | 1.23E+08 | 1.23E+08 | + | O | NA | IntergeniALR/Alphe | 1913989  | NR_003955 | 647121   | Hs.697682 | NR_003955    | ENSG000004EMB1      | -         | emigin pseudo              |
| chr1-122  | 26.21603 | 0.182668 | 0.435029 | 0.419897 | 0.67456  | 0.85054  | chr1  | 1.23E+08 | 1.23E+08 | + | O | NA | IntergeniALR/Alphe | 1035186  | NR_003955 | 647121   | Hs.697682 | NR_003955    | ENSG000004EMB1      | -         | emigin pseudo              |
| chr7-601  | 21.26199 | 0.201325 | 0.479572 | 0.419802 | 0.67463  | 0.85054  | chr7  | 60100933 | 60101322 | + | O | NA | IntergeniALR/Alphe | 2650950  | NM_001159 | 441234   | Hs.533121 | NM_001159    | ENSG000004ZNF716    | -         | zinc finger protein-coding |
| chr5-494  | 52.71629 | 0.132946 | 0.317032 | 0.419346 | 0.674963 | 0.85054  | chr5  | 49492262 | 49493479 | + | O | NA | IntergeniALR/Alphe | 948418   | NM_198444 | 133418   | Hs.561411 | NM_198444    | ENSG000004EMB       | GP70      | emigin protein-coding      |
| chr17-23  | 16.33884 | 0.227769 | 0.543206 | 0.419306 | 0.674993 | 0.85054  | chr17 | 23453743 | 23453942 | + | O | NA | IntergeniALR/Alphe | 930731   | NM_001199 | 1E+08    | Hs.740188 | NM_001199    | ENSG000004MTRNR2L1  | HN1       | MT-RNR2 lprotein-coding    |
| chr19-26  | 16.33884 | 0.227769 | 0.543206 | 0.419306 | 0.674    |          |       |          |          |   |   |    |                    |          |           |          |           |              |                     |           |                            |

|                    |          |          |          |          |          |       |          |          |   |      |                    |                    |           |                        |                      |                    |                 |                 |                 |
|--------------------|----------|----------|----------|----------|----------|-------|----------|----------|---|------|--------------------|--------------------|-----------|------------------------|----------------------|--------------------|-----------------|-----------------|-----------------|
| chr19-268 39.86078 | -0.12911 | 0.359938 | -0.3587  | 0.719822 | 0.87656  | chr19 | 26818302 | 26818516 | + | O NA | IntergeniALR/Alph  | -975022 NR_110688  | 1.02E+08  | Hs. 567934NR_110687    | ENSG0000CLOC101927-  | uncharactncRNA     |                 |                 |                 |
| chr13-161 36.36914 | 0.133886 | 0.375745 | 0.35632  | 0.721601 | 0.87656  | chr13 | 16736413 | 16736664 | + | O NA | IntergeniALR/Alph  | -1458759 NR_027278 | 26080     | Hs. 44858:NR_027278    | ENSG0000C FAM230C    | LINC00281          | family wncRNA   |                 |                 |
| chr1-124 54.78947  | 0.11141  | 0.31289  | 0.356067 | 0.72179  | 0.87656  | chr1  | 1.24E+08 | 1.24E+08 | + | O NA | IntergeniALR/Alph  | 2964625 NR_003955  | 647121    | Hs. 697682NR_003955    | ENSG0000C EMBP1      | -                  | embigin ipseudo |                 |                 |
| chr17-231 29.25599 | 0.148411 | 0.417023 | 0.355882 | 0.721929 | 0.87656  | chr17 | 23143681 | 23144077 | + | O NA | IntergeniALR/Alph  | 620768             | NR_00119C | 1E+08                  | Hs. 74018:NR_00119C  | ENSG0000C MTRNR2L1 | HNI             | MT-RNR2         | lprotein-coding |
| chrX-6161 65.85291 | 0.102725 | 0.28883  | 0.355661 | 0.722095 | 0.87656  | chrX  | 61614907 | 61615295 | + | O NA | IntergeniALR/Alph  | 1736231 NR_001019  | 139886    | Hs. 612782:NR_001019   | ENSG0000C SPIN4      | TD RD28            | spindlin        | protein-coding  |                 |
| chr19-268 52.52998 | 0.114777 | 0.322826 | 0.355537 | 0.722188 | 0.87656  | chr19 | 26802671 | 26802901 | + | O NA | IntergeniALR/Alph  | -990645 NR_110688  | 1.02E+08  | Hs. 567934NR_110687    | ENSG0000C LOC101927- | uncharactncRNA     |                 |                 |                 |
| chr2-934 17.0875   | 0.189992 | 0.534237 | 0.355446 | 0.722256 | 0.87656  | chr2  | 93432421 | 93432801 | + | O NA | IntergeniALR/Alph  | 775808 NR_146107   | 728034    | NR_146105              | BMS1P14              | -                  | BMS1            | pseudo          |                 |
| chr17-225 16.50882 | 0.192095 | 0.541856 | 0.354514 | 0.722954 | 0.87656  | chr17 | 22548350 | 22549146 | + | O NA | IntergeniALR/Alph  | 425637 NR_00119C   | 1E+08     | Hs. 74018:NR_00119C    | ENSG0000C MTRNR2L1   | HNI                | MT-RNR2         | lprotein-coding |                 |
| chr19-271 23.69656 | 0.161298 | 0.455276 | 0.354286 | 0.723125 | 0.87656  | chr19 | 27141622 | 27143552 | + | O NA | IntergeniALR/Alph  | -650844 NR_110688  | 1.02E+08  | Hs. 567934NR_110687    | ENSG0000C LOC101927- | uncharactncRNA     |                 |                 |                 |
| chr5-477 23.69656  | 0.161298 | 0.455276 | 0.354286 | 0.723125 | 0.87656  | chr5  | 47748978 | 47751034 | + | O NA | IntergeniALR/Alph  | -2053626 NR_021072 | 348980    | Hs. 35317:NR_021072    | ENSG0000C HCN1       | BCNG-1             | BC hyperpol     | protein-coding  |                 |
| chr5-482 21.49316  | 0.168837 | 0.476705 | 0.354175 | 0.723208 | 0.87656  | chr5  | 48241475 | 48242323 | + | O NA | IntergeniALR/Alph  | 2199389 NR_198445  | 133418    | Hs. 56141:NR_198445    | ENSG0000C EMB        | GP70               | embigin         | protein-coding  |                 |
| chr1-124 23.696    | 0.161262 | 0.45562  | 0.353939 | 0.723385 | 0.87656  | chr1  | 1.24E+08 | 1.24E+08 | + | O NA | IntergeniALR/Alph  | 2695295 NR_003955  | 647121    | Hs. 697682NR_003955    | ENSG0000C EMBP1      | -                  | embigin ipseudo |                 |                 |
| chr7-584 23.696    | 0.161262 | 0.45562  | 0.353939 | 0.723385 | 0.87656  | chr7  | 58433908 | 58435615 | + | O NA | IntergeniALR/Alph  | 984584 NR_001155   | 441234    | Hs. 53312:NR_001155    | ENSG0000C ZNF716     | -                  | zinc fin        | protein-coding  |                 |
| chr13-175 19.28863 | 0.178018 | 0.503751 | 0.353385 | 0.7238   | 0.876664 | chr13 | 17943918 | 17944322 | + | O NA | IntergeniALR/Alph  | -251177 NR_027278  | 26080     | Hs. 44858:NR_027278    | ENSG0000C FAM230C    | LINC00281          | family wncRNA   |                 |                 |
| chr11-518 24.08986 | -0.16001 | 0.454971 | -0.35169 | 0.72507  | 0.877803 | chr11 | 51855832 | 51856061 | + | O NA | IntergeniALR/Alph  | 1446799 NR_024504  | 646813    | Hs. 68417:NR_024504    | LOC646813            | -                  | DEXH-box        | pseudo          |                 |
| chr14-161 35.38487 | 0.132772 | 0.380975 | 0.348505 | 0.727461 | 0.880297 | chr14 | 16770023 | 16770275 | + | O NA | IntergeniALR/Alph  | -1830968 NR_001019 | 440153    | Hs. 53488:NR_001019    | ENSG0000C OR11H12    | -                  | olfactory       | protein-coding  |                 |
| chr1-123 18.18688  | -0.18039 | 0.518747 | -0.34774 | 0.728035 | 0.880376 | chr1  | 1.23E+08 | 1.23E+08 | + | O NA | IntergeniALR/Alph  | 1768704 NR_003955  | 647121    | Hs. 697682NR_003955    | ENSG0000C EMBP1      | -                  | embigin ipseudo |                 |                 |
| chr5-487 19.32178  | 0.175258 | 0.504285 | 0.347537 | 0.728188 | 0.880376 | chr5  | 48765953 | 48766154 | + | O NA | IntergeniALR/Alph  | 1675235 NR_198445  | 133418    | Hs. 56141:NR_198445    | ENSG0000C EMB        | GP70               | embigin         | protein-coding  |                 |
| chr7-6001 20.94649 | 0.167473 | 0.483216 | 0.346579 | 0.728907 | 0.880621 | chr7  | 60016928 | 60017133 | + | O NA | IntergeniALR/Alph  | 2566853 NR_001155  | 441234    | Hs. 53312:NR_001155    | ENSG0000C ZNF716     | -                  | zinc fin        | protein-coding  |                 |
| chr1-123 41.74726  | -0.12733 | 0.36759  | -0.34639 | 0.729053 | 0.880621 | chr1  | 1.23E+08 | 1.23E+08 | + | O NA | IntergeniALR/Alph  | 1809362 NR_003955  | 647121    | Hs. 697682NR_003955    | ENSG0000C EMBP1      | -                  | embigin ipseudo |                 |                 |
| chr11-54 19.32235  | 0.175274 | 0.506724 | 0.345896 | 0.729421 | 0.880667 | chr11 | 54221939 | 54222718 | + | O NA | IntergeniALR/Alph  | 2566853 NR_001155  | 119749    | Hs. 55356:NR_001009    | ENSG0000C ORC4C6     | -                  | olfactory       | protein-coding  |                 |
| chr11-53 16.57001  | 0.185245 | 0.539588 | 0.343308 | 0.731367 | 0.882615 | chr11 | 53454475 | 53455704 | + | O NA | IntergeniALR/Alph  | 1148909 NR_001004  | 119749    | Hs. 55356:NR_001009    | ENSG0000C ORC4C6     | -                  | olfactory       | protein-coding  |                 |
| chr20-26 18.77398  | 0.173826 | 0.50836  | 0.341936 | 0.732399 | 0.883398 | chr20 | 26582124 | 26584211 | + | O NA | IntergeniALR/Alph  | -374029 NR_040095  | 284801    | Hs. 37069:NR_040095    | ENSG0000C MIR663AHC  | -                  | MIR663A         | lncRNA          |                 |
| chr5-491 20.97681  | 0.167443 | 0.482318 | 0.341564 | 0.732679 | 0.883398 | chr5  | 49129139 | 49129355 | + | O NA | IntergeniALR/Alph  | 1249041 NR_198445  | 133418    | Hs. 56141:NR_198445    | ENSG0000C EMB        | GP70               | embigin         | protein-coding  |                 |
| chr20-27 25.38587  | 0.151574 | 0.445098 | 0.340541 | 0.733449 | 0.883552 | chr20 | 27906140 | 27906625 | + | O NA | IntergeniALR/Alph  | 696283 NR_132315   | 1E+08     | Hs. 529357NR_132315    | ENSG0000C FRG1CP     | -                  | FSHD            | regipseudo      |                 |
| chr2-925 27.01001  | 0.147116 | 0.432042 | 0.340512 | 0.733471 | 0.883552 | chr2  | 92549367 | 92550647 | + | O NA | IntergeniALR/Alph  | 608874 NR_027714   | 440888    | Hs. 73023:NR_001032412 | ACTR3BP2             | FKSG73             | ACTR3B          | pspseudo        |                 |
| chr8-449 24.33757  | 0.155515 | 0.457548 | 0.339887 | 0.733942 | 0.883719 | chr8  | 44958124 | 44958435 | + | O NA | IntergeniALR/Alph  | 1659364 NR_146077  | 389652    | NR_146077              | ENSG0000C ASNSP1     | ASNSL1             | asparagip       | pseudo          |                 |
| chr20-29 40.95582  | -0.12024 | 0.354842 | -0.33885 | 0.734724 | 0.883928 | chr20 | 29884986 | 29886222 | + | O NA | IntergeniALR/Alph  | -5141 NR_039685    | 1.01E+08  | NR_039685              | ENSG0000C MIR4477A   | -                  | microRNA        | ncRNA           |                 |
| chr1-124 40.3848   | 0.120708 | 0.356307 | 0.338774 | 0.73478  | 0.883928 | chr1  | 1.25E+08 | 1.25E+08 | + | O NA | IntergeniALR/Alph  | 3174211 NR_003955  | 647121    | Hs. 697682NR_003955    | ENSG0000C EMBP1      | -                  | embigin ipseudo |                 |                 |
| chr1-123 18.7171   | 0.173643 | 0.514377 | 0.337579 | 0.73568  | 0.884607 | chr1  | 1.23E+08 | 1.23E+08 | + | O NA | IntergeniALR/Alph  | 1494472 NR_003955  | 647121    | Hs. 697682NR_003955    | ENSG0000C EMBP1      | -                  | embigin ipseudo |                 |                 |
| chr7-603 23.21165  | 0.155043 | 0.459874 | 0.337143 | 0.736009 | 0.884607 | chr7  | 60383157 | 60383396 | + | O NA | IntergeniALR/Alph  | 2920780 NR_003955  | 643955    | Hs. 58330:NR_003955    | ENSG0000C ZNF733P    | ZNF733             | zinc fin        | pseudo          |                 |
| chr7-594 21.00825  | 0.162104 | 0.482152 | 0.33621  | 0.736712 | 0.884898 | chr7  | 59400249 | 59441443 | + | O NA | IntergeniALR/Alph  | 1990668 NR_001155  | 441234    | Hs. 53312:NR_001155    | ENSG0000C ZNF716     | -                  | zinc fin        | protein-coding  |                 |
| chr1-122 35.94599  | 0.162262 | 0.375739 | 0.33594  | 0.736916 | 0.884898 | chr1  | 1.22E+08 | 1.22E+08 | + | O NA | IntergeniALR/Alph  | 757578 NR_003955   | 647121    | Hs. 697682NR_003955    | ENSG0000C EMBP1      | -                  | embigin ipseudo |                 |                 |
| chr10-41 16.60259  | 0.181971 | 0.543626 | 0.334735 | 0.737825 | 0.885413 | chr10 | 41408350 | 41409072 | + | O NA | IntergeniALR/Alph  | 959334 NR_02438C   | 441666    | Hs. 25572:NR_02438C    | ENSG0000C LOC441666  | -                  | zinc fin        | pseudo          |                 |
| chr19-24 27.65046  | 0.142335 | 0.42557  | 0.334457 | 0.738035 | 0.885413 | chr19 | 24605343 | 24605546 | + | O NA | IntergeniALR/Alph  | -441997 NR_003606  | 1E+08     | Hs. 14931:NR_003606    | ENSG0000C HAVCR1P1   | -                  | hepatitis       | pseudo          |                 |
| chr10-41 28.22858  | 0.141732 | 0.424585 | 0.333814 | 0.73852  | 0.885413 | chr10 | 41237286 | 41237589 | + | O NA | IntergeniALR/Alph  | 1130608 NR_02438C  | 441666    | Hs. 25572:NR_02438C    | ENSG0000C LOC441666  | -                  | zinc fin        | pseudo          |                 |
| chr10-40 31.50775  | 0.133323 | 0.400668 | 0.333251 | 0.738945 | 0.885413 | chr10 | 40315259 | 40315534 | + | O NA | IntergeniALR/Alph  | 1618800 NR_04500C  | 399746    | Hs. 742607NR_045000    | ACTR3BP5             | FKSG74             | ACTR3B          | pspseudo        |                 |
| chr1-125 16.60316  | 0.181983 | 0.547321 | 0.332498 | 0.739513 | 0.885413 | chr1  | 1.25E+08 | 1.25E+08 | + | O NA | IntergeniIntergeni | 3595100 NR_003955  | 647121    | Hs. 697682NR_003955    | ENSG0000C EMBP1      | -                  | embigin ipseudo |                 |                 |
| chr11-53 18.80655  | 0.170928 | 0.514516 | 0.332211 | 0.73973  | 0.885413 | chr11 | 53176513 | 53176728 | + | O NA | IntergeniALR/Alph  | 1427378 NR_001004  | 119749    | Hs. 55356:NR_001009    | ENSG0000C ORC4C6     | -                  | olfactory       | protein-coding  |                 |
| chr9-628 16.95387  | -0.17834 | 0.537008 | -0.3321  | 0.739815 | 0.885413 | chr9  | 62841631 | 62844802 | + | O NA | intron (L1P1Ba)LI  | 2571 NR_13501C     | 442421    | Hs. 58534:NR_024496    | PTGER4P2             | -                  | PTGER4P2        | pseudo          |                 |
| chr17-24 16.98645  | -0.18121 | 0.546062 | -0.33184 | 0.740007 | 0.885413 | chr17 | 24391218 | 24391424 | + | O NA | IntergeniALR/Alph  | 1868210 NR_00119C  | 1E+08     | Hs. 74018:NR_00119C    | ENSG0000C MTRNR2L1   | HNI                | MT-RNR2         | lprotein-coding |                 |
| chr19-25 27.10209  | 0.140719 | 0.427722 | 0.328996 | 0.742159 | 0.887575 | chr19 | 25837910 | 25839213 | + | O NA | IntergeniALR/Alph  | -1675114 NR_003606 | 1E+08     | Hs. 14931:NR_003606    | ENSG0000C HAVCR1P1   | -                  | hepatitis       | pseudo          |                 |
| chr1-122 18.25762  | 0.169252 | 0.515118 | 0.328569 | 0.742481 | 0.887575 | chr1  | 1.22E+08 | 1.22E+08 | + | O NA | IntergeniALR/Alph  | 734485 NR_003955   | 647121    | Hs. 697682NR_003955    | ENSG0000C EMBP1      | -                  | embigin ipseudo |                 |                 |
| chr19-26 36.00775  | 0.123044 | 0.375403 | 0.327766 | 0.743088 | 0.887704 | chr19 | 26385323 | 26386248 | + | O NA | IntergeniALR/Alph  | -1407646 NR_110688 | 1.02E+08  | Hs. 567934NR_110687    | ENSG0000C LOC101927- | uncharactncRNA     |                 |                 |                 |
| chr1-123 74.45611  | 0.091281 | 0.279025 | 0.327143 | 0.74356  | 0.887704 | chr1  | 1.24E+08 | 1.24E+08 | + | O NA | IntergeniALR/Alph  | 2030596 NR_003955  | 647121    | Hs. 697682NR_003955    | ENSG0000C EMBP1      | -                  | embigin ipseudo |                 |                 |
| chr19-25 41.57475  | 0.118844 | 0.363321 | 0.327104 | 0.743589 | 0.887704 | chr19 | 25733804 | 25734016 | + | O NA | IntergeniALR/Alph  | -1570463 NR_003606 | 1E+08     | Hs. 14931:NR_003606    | ENSG0000C HAVCR1P1   | -                  | hepatitis       | pseudo          |                 |
| chr1-122 39.3977   | 0.119043 | 0.366462 | 0.324844 | 0.745299 | 0.889346 | chr1  | 1.23E+08 | 1.23E+08 | + | O NA | IntergeniALR/Alph  | 1413581 NR_003955  | 647121    | Hs. 697682NR_003955    | ENSG0000C EMBP1      | -                  | embigin ipseudo |                 |                 |
| chr20-28 20.49189  | 0.157747 | 0.487576 | 0.323533 | 0.746292 | 0.890131 | chr20 | 28521783 | 28521714 | + | O NA | IntergeniALR/Alph  | 78187 NR_132315    | 1E+08     | Hs. 529357NR_132315    | ENSG0000C FRG1CP     | -                  | FSHD            | regipseudo      |                 |
| chr15-17 17.53085  | -0.16943 | 0.527569 | -0.32115 | 0.748095 | 0.891445 | chr15 | 17024484 | 17028930 | + | O NA |                    |                    |           |                        |                      |                    |                 |                 |                 |



|           |          |          |          |          |          |          |       |          |          |   |   |    |                    |           |           |           |           |              |                  |                  |         |         |                |                |                |                |        |
|-----------|----------|----------|----------|----------|----------|----------|-------|----------|----------|---|---|----|--------------------|-----------|-----------|-----------|-----------|--------------|------------------|------------------|---------|---------|----------------|----------------|----------------|----------------|--------|
| chr2-9246 | 31.22256 | 0.108214 | 0.403808 | 0.267984 | 0.788712 | 0.909871 | chr2  | 92468644 | 92469174 | + | 0 | NA | IntergeniALR/Alphe | 527776    | NR_027714 | 440888    | Hs.730239 | NR_001032412 | ACTR3BP2         | FKSG73           | ACTR3B  | ps      | pseudo         |                |                |                |        |
| chr5-4946 | 45.76973 | 0.09025  | 0.336964 | 0.267833 | 0.788828 | 0.909871 | chr5  | 49464927 | 49466069 | + | 0 | NA | IntergeniALR/Alphe | 975790    | NR_198449 | 133418    | Hs.561411 | NR_198449    | ENSG000000000000 | EMB              | GP70    | embigin | protein-coding |                |                |                |        |
| chr21-107 | 20.66187 | 0.129994 | 0.486278 | 0.267325 | 0.789219 | 0.909927 | chr21 | 10745909 | 10750550 | + | 0 | NA | IntergeniALR/Alphe | 226715    | NR_199260 | 7179      | Hs.122988 | NR_199259    | ENSG000000000000 | TPTE             | CT44    | PTEN    | transmem       | protein-coding |                |                |        |
| chr7-584  | 17.8203  | 0.142591 | 0.538349 | 0.264867 | 0.791112 | 0.911715 | chr7  | 58430730 | 58441024 | + | 0 | NA | IntergeniALR/Alphe | 980700    | NR_001159 | 441234    | Hs.533121 | NR_001159    | ENSG000000000000 | ZNF716           | -       | -       | zinc           | fin            | protein-coding |                |        |
| chr1-1242 | 28.34169 | -0.11192 | 0.425062 | -0.26329 | 0.792326 | 0.911923 | chr1  | 1.24E+08 | 1.24E+08 | + | 0 | NA | IntergeniALR/Alphe | 2687936   | NR_003959 | 647121    | Hs.697682 | NR_003959    | ENSG000000000000 | EMB              | BCNG-1  | BC      | hyperpol       | protein-coding |                |                |        |
| chr14-17  | 18.45847 | 0.134995 | 0.512762 | 0.263271 | 0.792342 | 0.911923 | chr14 | 17344384 | 17344861 | + | 0 | NA | IntergeniALR/Alphe | -1256495  | NR_001010 | 440153    | Hs.534888 | NR_001010    | ENSG000000000000 | COR11H12         | -       | -       | olfactory      | protein-coding |                |                |        |
| chr5-467  | 27.97314 | 0.111559 | 0.425629 | 0.262105 | 0.793241 | 0.911923 | chr5  | 46756735 | 46757105 | + | 0 | NA | IntergeniALR/Alphe | -1060540  | NR_021072 | 348980    | Hs.353176 | NR_021072    | ENSG000000000000 | HCN1             | BCNG-1  | BC      | hyperpol       | protein-coding |                |                |        |
| chr1-1245 | 38.45846 | 0.096367 | 0.368272 | 0.261674 | 0.793573 | 0.911923 | chr1  | 46669238 | 46669575 | + | 0 | NA | IntergeniALR/Alphe | 3393844   | NR_003959 | 647121    | Hs.697682 | NR_003959    | ENSG000000000000 | EMB              | BCNG-1  | BC      | hyperpol       | protein-coding |                |                |        |
| chr2-925  | 22.92646 | 0.121035 | 0.462862 | 0.261493 | 0.793712 | 0.911923 | chr2  | 92592042 | 92592490 | + | 0 | NA | IntergeniALR/Alphe | 651133    | NR_027714 | 440888    | Hs.730239 | NR_001032412 | ACTR3BP2         | FKSG73           | ACTR3B  | ps      | pseudo         |                |                |                |        |
| chr5-483  | 20.69388 | 0.127382 | 0.487169 | 0.261474 | 0.793727 | 0.911923 | chr5  | 48356632 | 48357790 | + | 0 | NA | IntergeniALR/Alphe | 2084077   | NR_198449 | 133418    | Hs.561411 | NR_198449    | ENSG000000000000 | EMB              | GP70    | embigin | protein-coding |                |                |                |        |
| chr5-466  | 25.16074 | 0.115905 | 0.443335 | 0.261438 | 0.793755 | 0.911923 | chr5  | 46669238 | 46669575 | + | 0 | NA | IntergeniALR/Alphe | -973026   | NR_021072 | 348980    | Hs.353176 | NR_021072    | ENSG000000000000 | HCN1             | BCNG-1  | BC      | hyperpol       | protein-coding |                |                |        |
| chrX-613  | 25.16017 | 0.115863 | 0.443321 | 0.260764 | 0.794275 | 0.911923 | chrX  | 61390675 | 61391024 | + | 0 | NA | IntergeniALR/Alphe | 1960483   | NR_001010 | 139886    | Hs.612782 | NR_001010    | ENSG000000000000 | SPIN4            | TDRD28  | -       | -              | spindlin       | protein-coding |                |        |
| chr7-587  | 16.25508 | 0.141366 | 0.544593 | 0.259581 | 0.795187 | 0.911923 | chr7  | 58706928 | 58708626 | + | 0 | NA | IntergeniALR/Alphe | 1257600   | NR_001159 | 441234    | Hs.533121 | NR_001159    | ENSG000000000000 | ZNF716           | -       | -       | zinc           | fin            | protein-coding |                |        |
| chr7-597  | 16.25508 | 0.141366 | 0.544593 | 0.259581 | 0.795187 | 0.911923 | chr7  | 59754184 | 59756119 | + | 0 | NA | IntergeniALR/Alphe | 2304974   | NR_001159 | 441234    | Hs.533121 | NR_001159    | ENSG000000000000 | ZNF716           | -       | -       | zinc           | fin            | protein-coding |                |        |
| chr1-1241 | 26.78998 | 0.11398  | 0.440176 | 0.258942 | 0.79568  | 0.911923 | chr1  | 1.24E+08 | 1.24E+08 | + | 0 | NA | IntergeniALR/Alphe | 2636015   | NR_003959 | 647121    | Hs.697682 | NR_003959    | ENSG000000000000 | EMB              | -       | -       | embigin        | ps             | pseudo         |                |        |
| chr10-404 | 44.17759 | 0.089278 | 0.345373 | 0.258497 | 0.796023 | 0.911923 | chr10 | 40893772 | 40893972 | + | 0 | NA | IntergeniALR/Alphe | 1474173   | NR_024380 | 441666    | Hs.255729 | NR_024380    | ENSG000000000000 | L0C441666        | -       | -       | zinc           | fin            | ps             | pseudo         |        |
| chr19-26  | 30.7096  | 0.104611 | 0.405335 | 0.258085 | 0.796342 | 0.911923 | chr19 | 26056210 | 26056531 | + | 0 | NA | IntergeniALR/Alphe | -1737061  | NR_110688 | 1.02E+08  | Hs.567934 | NR_110688    | ENSG000000000000 | L0C101927        | -       | -       | uncharact      | ncRNA          | -              | -              |        |
| chr5-495  | 19.0686  | 0.131615 | 0.510382 | 0.257875 | 0.796504 | 0.911923 | chr5  | 49589268 | 49590194 | + | 0 | NA | IntergeniALR/Alphe | 851557    | NR_198449 | 133418    | Hs.561411 | NR_198449    | ENSG000000000000 | EMB              | GP70    | embigin | protein-coding |                |                |                |        |
| chr10-395 | 30.20013 | -0.10762 | 0.41933  | -0.25665 | 0.797447 | 0.911923 | chr10 | 39965083 | 39965286 | + | 0 | NA | IntergeniALR/Alphe | 1268588   | NR_045000 | 399746    | Hs.742607 | NR_045000    | ACTR3BP5         | FKSG74           | ACTR3B  | ps      | pseudo         |                |                |                |        |
| chr5-492  | 34.83923 | -0.10079 | 0.392801 | -0.25659 | 0.797492 | 0.911923 | chr5  | 49218769 | 49219002 | + | 0 | NA | IntergeniALR/Alphe | 1222403   | NR_198449 | 133418    | Hs.561411 | NR_198449    | ENSG000000000000 | EMB              | GP70    | embigin | protein-coding |                |                |                |        |
| chr15-19  | 21.74105 | 0.124356 | 0.485402 | 0.256191 | 0.797803 | 0.911923 | chr15 | 19527355 | 19527656 | + | 0 | NA | IntergeniALR/Alphe | -755239   | NR_195283 | 646096    | Hs.448789 | NR_038839    | ENSG000000000000 | CHEK2P2          | -       | -       | checkpoir      | pseudo         |                |                |        |
| chr5-464  | 144.8113 | -0.05433 | 0.212138 | -0.2561  | 0.797873 | 0.911923 | chr5  | 46433391 | 46433765 | + | 0 | NA | IntergeniALR/Alphe | -738198   | NR_021072 | 348980    | Hs.353176 | NR_021072    | ENSG000000000000 | HCN1             | BCNG-1  | BC      | hyperpol       | protein-coding |                |                |        |
| chr5-492  | 32.97306 | 0.099989 | 0.390774 | 0.255874 | 0.798048 | 0.911923 | chr5  | 49260429 | 49261153 | + | 0 | NA | IntergeniALR/Alphe | 1180497   | NR_198449 | 133418    | Hs.561411 | NR_198449    | ENSG000000000000 | EMB              | GP70    | embigin | protein-coding |                |                |                |        |
| chr10-40  | 25.73603 | 0.115433 | 0.451356 | 0.255746 | 0.798147 | 0.911923 | chr10 | 40001929 | 40002158 | + | 0 | NA | IntergeniALR/Alphe | 1305447   | NR_045000 | 399746    | Hs.742607 | NR_045000    | ACTR3BP5         | FKSG74           | ACTR3B  | ps      | pseudo         |                |                |                |        |
| chr7-587  | 24.0062  | 0.116133 | 0.457502 | 0.253842 | 0.799617 | 0.912967 | chr7  | 58794972 | 58795175 | + | 0 | NA | IntergeniALR/Alphe | 1344896   | NR_001159 | 441234    | Hs.533121 | NR_001159    | ENSG000000000000 | ZNF716           | -       | -       | zinc           | fin            | protein-coding |                |        |
| chr1-122  | 16.28652 | 0.13801  | 0.544602 | 0.253414 | 0.799948 | 0.912967 | chr1  | 1.23E+08 | 1.23E+08 | + | 0 | NA | IntergeniALR/Alphe | 1388768   | NR_003959 | 647121    | Hs.697682 | NR_003959    | ENSG000000000000 | EMB              | -       | -       | embigin        | ps             | pseudo         |                |        |
| chr6-595  | 16.28539 | 0.137905 | 0.54458  | 0.253231 | 0.800089 | 0.912967 | chr6  | 59561812 | 59562487 | + | 0 | NA | IntergeniALR/Alphe | 1600303   | NR_132994 | 1.07E+08  | Hs.561539 | NR_125727    | ENSG000000000000 | LINC00680        | -       | -       | long           | int            | ncRNA          |                |        |
| chr22-14  | 17.29855 | -0.13397 | 0.531466 | -0.25208 | 0.80098  | 0.913224 | chr22 | 14655244 | 14655516 | + | 0 | NA | IntergeniALR/Alphe | -872779   | NR_001000 | 81061     | Hs.554700 | NR_001000    | ENSG000000000000 | COR11H1          | OR11H12 | (o      | l              | f              | actory         | protein-coding |        |
| chr15-17  | 29.69275 | 0.104088 | 0.415062 | 0.250778 | 0.801986 | 0.913224 | chr15 | 17009112 | 17009372 | + | 0 | NA | IntergeniALR/Alphe | -3273502  | NR_038839 | 646096    | Hs.448789 | NR_038839    | ENSG000000000000 | CHEK2P2          | -       | -       | checkpoir      | pseudo         |                |                |        |
| chr1-123  | 29.11464 | 0.104023 | 0.415027 | 0.250642 | 0.802091 | 0.913224 | chr1  | 1.24E+08 | 1.24E+08 | + | 0 | NA | IntergeniALR/Alphe | 2371184   | NR_003959 | 647121    | Hs.697682 | NR_003959    | ENSG000000000000 | EMB              | -       | -       | embigin        | ps             | pseudo         |                |        |
| chr20-28  | 53.73815 | 0.078878 | 0.315214 | 0.250236 | 0.802405 | 0.913224 | chr20 | 28643719 | 28646096 | + | 0 | NA | IntergeniALR/Alphe | -42242    | NR_132310 | 1E+08     | Hs.529357 | NR_132310    | ENSG000000000000 | FRG1CP           | -       | -       | FSHD           | regip          | pseudo         |                |        |
| chr17-26  | 36.31683 | 0.093603 | 0.375244 | 0.249446 | 0.803016 | 0.913224 | chr17 | 26624975 | 26626420 | + | 0 | NA | IntergeniALR/Alphe | 463544    | NR_135673 | 1.05E+08  | Hs.649918 | NR_135673    | LOC105371        | -                | -       | -       | -              | uncharact      | ncRNA          |                |        |
| chr1-1234 | 48.15897 | 0.082881 | 0.332767 | 0.249066 | 0.80331  | 0.913224 | chr1  | 1.23E+08 | 1.23E+08 | + | 0 | NA | IntergeniALR/Alphe | 1949635   | NR_003959 | 647121    | Hs.697682 | NR_003959    | ENSG000000000000 | EMB              | -       | -       | embigin        | ps             | pseudo         |                |        |
| chr19-27  | 43.08255 | 0.086192 | 0.346193 | 0.24897  | 0.803384 | 0.913224 | chr19 | 27091437 | 27092983 | + | 0 | NA | IntergeniALR/Alphe | -701221   | NR_110688 | 1.02E+08  | Hs.567934 | NR_110688    | ENSG000000000000 | L0C101927        | -       | -       | uncharact      | ncRNA          |                |                |        |
| chr5-475  | 36.38632 | -0.09431 | 0.379675 | -0.2484  | 0.803828 | 0.913224 | chr5  | 47500844 | 47501061 | + | 0 | NA | IntergeniALR/Alphe | -1804572  | NR_021072 | 348980    | Hs.353176 | NR_021072    | ENSG000000000000 | HCN1             | BCNG-1  | BC      | hyperpol       | protein-coding |                |                |        |
| chr3-919  | 17.94325 | 0.129382 | 0.521561 | 0.248066 | 0.804083 | 0.913224 | chr3  | 91926218 | 91926445 | + | 0 | NA | IntergeniALR/Alphe | 2047750   | NR_001314 | 5627      | Hs.64016  | NR_000310    | ENSG000000000000 | PROS1            | PROS    | PS21    | protein        | protein-coding |                |                |        |
| chr16-22  | 16.65924 | -0.13544 | 0.547091 | -0.24756 | 0.804474 | 0.913224 | chr16 | 22570444 | 22571468 | + | 0 | NA | intron (n          | intron (n | 25258     | NR_003670 | 653786    | Hs.56494     | NR_003670        | ENSG000000000000 | OTOA    | P1      | -              | -              | OTOA           | ps             | pseudo |
| chr1-123  | 24.82625 | -0.11083 | 0.448101 | -0.24734 | 0.804648 | 0.913224 | chr1  | 1.23E+08 | 1.23E+08 | + | 0 | NA | IntergeniALR/Alphe | 1512645   | NR_003959 | 647121    | Hs.697682 | NR_003959    | ENSG000000000000 | EMB              | -       | -       | embigin        | ps             | pseudo         |                |        |
| chr12-34  | 16.31684 | 0.13455  | 0.544359 | 0.247172 | 0.804775 | 0.913224 | chr12 | 34792872 | 34793217 | + | 0 | NA | IntergeniALR/Alphe | 770548    | NR_032834 | 84920     | Hs.102971 | NR_032834    | ENSG000000000000 | ALG10            | ALG10A  | DI      | ALG10          | al             | protein-coding |                |        |
| chr2-928  | 17.94381 | 0.129459 | 0.523766 | 0.24717  | 0.804776 | 0.913224 | chr2  | 92854553 | 92855098 | + | 0 | NA | IntergeniALR/Alphe | 913692    | NR_027714 | 440888    | Hs.730239 | NR_001032412 | ACTR3BP2         | FKSG73           | ACTR3B  | ps      | pseudo         |                |                |                |        |
| chr5-480  | 16.89382 | 0.133742 | 0.543205 | 0.24621  | 0.80552  | 0.913642 | chr5  | 48013865 | 48014073 | + | 0 | NA | IntergeniALR/Alphe | -2317589  | NR_021072 | 348980    | Hs.353176 | NR_021072    | ENSG000000000000 | HCN1             | BCNG-1  | BC      | hyperpol       | protein-coding |                |                |        |
| chr3-910  | 16.3157  | 0.134416 | 0.54684  | 0.245805 | 0.805833 | 0.913642 | chr3  | 91094176 | 91094707 | + | 0 | NA | IntergeniALR/Alphe | 1986820   | NR_005230 | 2042      | Hs.123642 | NR_005230    | ENSG000000000000 | EPHA3            | EK4     | ETK     | EPH            | recep          | protein-coding |                |        |
| chr2-930  | 23.68588 | -0.11255 | 0.45872  | -0.24536 | 0.806175 | 0.913642 | chr2  | 93003783 | 93004042 | + | 0 | NA | IntergeniALR/Alphe | 9602779   | NR_027714 | 440888    | Hs.730239 | NR_001032412 | ACTR3BP2         | FKSG73           | ACTR3B  | ps      | pseudo         |                |                |                |        |
| chr21-12  | 26.57448 | -0.10689 | 0.436594 | -0.24482 | 0.806597 | 0.913731 | chr21 | 12226333 | 12226569 | + | 0 | NA | IntergeniALR/Alphe | -811715   | NR_026910 | 149992    | Hs.55864  | NR_153773    | ANKRD30B         | C21orf99         | ankyrin | ps      | pseudo         |                |                |                |        |
| chr20-29  | 58.19027 | 0.074104 | 0.303345 | 0.24429  | 0.807007 | 0.913806 | chr20 | 29261791 | 29263962 | + | 0 | NA | IntergeniALR/Alphe | 154085    | NR_037925 | 647476    | Hs.274541 | NR_037925    | FRG2EP           | -                | -       |         |                |                |                |                |        |

|           |          |          |          |          |          |          |       |          |          |   |   |    |                    |          |           |          |           |              |           |           |          |                |                |                |                |
|-----------|----------|----------|----------|----------|----------|----------|-------|----------|----------|---|---|----|--------------------|----------|-----------|----------|-----------|--------------|-----------|-----------|----------|----------------|----------------|----------------|----------------|
| chr2-9292 | 16.51939 | 0.096785 | 0.546414 | 0.177127 | 0.859409 | 0.940789 | chr2  | 92926924 | 92927177 | + | 0 | NA | IntergeniALR/Alphe | 985917   | NR_027714 | 440888   | Hs.730239 | NR_001032412 | ACTR3BP2  | FKSG73    | ACTR3B   | ps             | pseudo         |                |                |
| chr2-9293 | 17.03707 | -0.09437 | 0.534007 | -0.17671 | 0.859733 | 0.940789 | chr2  | 92934719 | 92935768 | + | 0 | NA | IntergeniALR/Alphe | 994110   | NR_027714 | 440888   | Hs.730239 | NR_001032412 | ACTR3BP2  | FKSG73    | ACTR3B   | ps             | pseudo         |                |                |
| chr19-256 | 22.0963  | 0.083122 | 0.471472 | 0.176303 | 0.860056 | 0.940789 | chr19 | 25618814 | 25619063 | + | 0 | NA | IntergeniALR/Alphe | -1455491 | NR_003606 | 440888   | Hs.149312 | NR_003606    | ENSG00000 | HAVCR1P1  | -        | hepatitis      | pseudo         |                |                |
| chr1-124  | 20.43901 | 0.086097 | 0.488582 | 0.176217 | 0.860123 | 0.940789 | chr1  | 1.24E+08 | 1.24E+08 | + | 0 | NA | IntergeniALR/Alphe | 2703141  | NR_003955 | 647121   | Hs.697682 | NR_003955    | ENSG00000 | EMBPP1    | -        | embigin        | pseudo         |                |                |
| chr20-285 | 20.44014 | 0.086178 | 0.498514 | 0.176047 | 0.860257 | 0.940789 | chr20 | 28552122 | 28554482 | + | 0 | NA | IntergeniALR/Alphe | 49363    | NR_13231F | 647121   | Hs.529357 | NR_13231F    | ENSG00000 | FRG1CP    | -        | FSHD           | regipseudo     |                |                |
| chr10-407 | 18.78285 | 0.089703 | 0.510941 | 0.175563 | 0.860637 | 0.940789 | chr10 | 40766237 | 40766510 | + | 0 | NA | IntergeniALR/Alphe | 1601672  | NR_02438C | 441666   | Hs.255729 | NR_02438C    | ENSG00000 | LOC441666 | -        | zinc           | fin            | pseudo         |                |
| chr5-497  | 28.61074 | -0.07345 | 0.41883  | -0.17538 | 0.860781 | 0.940789 | chr5  | 49773885 | 49774099 | + | 0 | NA | IntergeniALR/Alphe | 667296   | NR_19844F | 133418   | Hs.561411 | NR_19844F    | ENSG00000 | EMB       | GP70     | embigin        | protein-coding |                |                |
| chr1-124  | 28.03602 | -0.07669 | 0.437614 | -0.17524 | 0.860888 | 0.940789 | chr1  | 1.25E+08 | 1.25E+08 | + | 0 | NA | IntergeniALR/Alphe | 3007699  | NR_003955 | 647121   | Hs.697682 | NR_003955    | ENSG00000 | EMBPP1    | -        | embigin        | pseudo         |                |                |
| chr1-1247 | 38.42145 | 0.063673 | 0.36533  | 0.174289 | 0.861638 | 0.94098  | chr1  | 1.25E+08 | 1.25E+08 | + | 0 | NA | IntergeniALR/Alphe | 3218506  | NR_003955 | 647121   | Hs.697682 | NR_003955    | ENSG00000 | EMBPP1    | -        | embigin        | pseudo         |                |                |
| chr11-53  | 73.32499 | 0.048085 | 0.276159 | 0.174122 | 0.86177  | 0.94098  | chr11 | 53207336 | 53207594 | + | 0 | NA | IntergeniALR/Alphe | 1396533  | NR_001004 | 119749   | Hs.553564 | NR_001004    | ENSG00000 | OR4C46    | -        | olfactory      | protein-coding |                |                |
| chr1-124  | 18.75555 | -0.08731 | 0.510339 | -0.17108 | 0.864159 | 0.943202 | chr1  | 1.24E+08 | 1.24E+08 | + | 0 | NA | IntergeniALR/Alphe | 2899093  | NR_003955 | 647121   | Hs.697682 | NR_003955    | ENSG00000 | EMBPP1    | -        | embigin        | pseudo         |                |                |
| chr19-26  | 22.12548 | 0.080496 | 0.471952 | 0.17056  | 0.864569 | 0.943263 | chr19 | 26507466 | 26507949 | + | 0 | NA | IntergeniALR/Alphe | -1285724 | NR_11068F | 1.02E+08 | Hs.567934 | NR_11068F    | ENSG00000 | LOC101927 | -        | uncharactncRNA |                |                |                |
| chr1-122  | 27.23618 | 0.074    | 0.436452 | 0.169549 | 0.865365 | 0.943589 | chr1  | 1.23E+08 | 1.23E+08 | + | 0 | NA | IntergeniALR/Alphe | 1476114  | NR_003955 | 647121   | Hs.697682 | NR_003955    | ENSG00000 | EMBPP1    | -        | embigin        | pseudo         |                |                |
| chr5-494  | 39.53037 | 0.060953 | 0.360074 | 0.169279 | 0.865577 | 0.943589 | chr5  | 49499145 | 49499382 | + | 0 | NA | IntergeniALR/Alphe | 942025   | NR_19844F | 133418   | Hs.561411 | NR_19844F    | ENSG00000 | EMB       | GP70     | embigin        | protein-coding |                |                |
| chr10-406 | 29.99956 | 0.068529 | 0.409083 | 0.167518 | 0.866962 | 0.94207  | chr10 | 40647454 | 40647743 | + | 0 | NA | IntergeniALR/Alphe | 1720447  | NR_02438C | 441666   | Hs.255729 | NR_02438C    | ENSG00000 | LOC441666 | -        | zinc           | fin            | pseudo         |                |
| chr11-53  | 19.36398 | -0.08451 | 0.504639 | -0.16747 | 0.867002 | 0.94207  | chr11 | 53899298 | 53899743 | + | 0 | NA | IntergeniALR/Alphe | 704478   | NR_001004 | 119749   | Hs.553564 | NR_001004    | ENSG00000 | OR4C46    | -        | olfactory      | protein-coding |                |                |
| chr1-122  | 19.86447 | -0.08392 | 0.501915 | -0.16721 | 0.867209 | 0.94207  | chr1  | 1.23E+08 | 1.23E+08 | + | 0 | NA | IntergeniALR/Alphe | 1175737  | NR_003955 | 647121   | Hs.697682 | NR_003955    | ENSG00000 | EMBPP1    | -        | embigin        | pseudo         |                |                |
| chr2-932  | 27.12484 | 0.072412 | 0.43647  | 0.165904 | 0.868233 | 0.94491  | chr2  | 93286111 | 93286611 | + | 0 | NA | IntergeniALR/Alphe | 922058   | NR_146107 | 728034   | NR_146105 | BMS1P14      | -         | BMS1      | pseu     | pseudo         |                |                |                |
| chr5-465  | 26.33    | -0.07349 | 0.444108 | -0.16548 | 0.868565 | 0.94491  | chr5  | 46524135 | 46524408 | + | 0 | NA | IntergeniALR/Alphe | -827891  | NR_021072 | 348980   | Hs.353176 | NR_021072    | ENSG00000 | HCN1      | BCNG-1   | [BC            | hyperpol       | protein-coding |                |
| chr14-17  | 20.5019  | 0.080717 | 0.491273 | 0.164302 | 0.869494 | 0.945534 | chr14 | 17064963 | 17065193 | + | 0 | NA | IntergeniALR/Alphe | -1536039 | NR_00101F | 440153   | Hs.53488C | NR_00101F    | ENSG00000 | OR11H12   | -        | olfactory      | protein-coding |                |                |
| chr1-124  | 27.76642 | 0.069044 | 0.422929 | 0.163251 | 0.870321 | 0.946047 | chr1  | 1.25E+08 | 1.25E+08 | + | 0 | NA | IntergeniALR/Alphe | 3386901  | NR_003955 | 647121   | Hs.697682 | NR_003955    | ENSG00000 | EMBPP1    | -        | embigin        | pseudo         |                |                |
| chr19-26  | 23.23667 | 0.075065 | 0.463701 | 0.161883 | 0.871398 | 0.946832 | chr19 | 26502230 | 26502616 | + | 0 | NA | IntergeniALR/Alphe | -1291008 | NR_11068F | 1.02E+08 | Hs.567934 | NR_11068F    | ENSG00000 | LOC101927 | -        | uncharactncRNA |                |                |                |
| chr5-495  | 22.18951 | 0.075626 | 0.472478 | 0.160063 | 0.872831 | 0.948002 | chr5  | 49572659 | 49574944 | + | 0 | NA | IntergeniALR/Alphe | 867487   | NR_19844F | 133418   | Hs.561411 | NR_19844F    | ENSG00000 | EMB       | GP70     | embigin        | protein-coding |                |                |
| chr1-123  | 72.3918  | -0.04622 | 0.290524 | -0.15908 | 0.873606 | 0.948455 | chr1  | 1.23E+08 | 1.23E+08 | + | 0 | NA | IntergeniALR/Alphe | 1601279  | NR_003955 | 647121   | Hs.697682 | NR_003955    | ENSG00000 | EMBPP1    | -        | embigin        | pseudo         |                |                |
| chr8-445  | 27.79843 | 0.067096 | 0.424055 | 0.158225 | 0.874279 | 0.9488   | chr8  | 44594356 | 44595530 | + | 0 | NA | IntergeniALR/Alphe | 1302501  | NR_00100F | 340441   | Hs.531576 | NR_00100F    | ENSG00000 | POTEA     | A26A1    | [CTI           | POTE           | anky           | protein-coding |
| chr1-124  | 19.34567 | 0.078769 | 0.503457 | 0.156457 | 0.875673 | 0.949896 | chr1  | 1.25E+08 | 1.25E+08 | + | 0 | NA | IntergeniALR/Alphe | 3343248  | NR_003955 | 647121   | Hs.697682 | NR_003955    | ENSG00000 | EMBPP1    | -        | embigin        | pseudo         |                |                |
| chr20-28  | 31.75063 | 0.062189 | 0.398548 | 0.156038 | 0.876003 | 0.949896 | chr20 | 28528750 | 28529027 | + | 0 | NA | IntergeniALR/Alphe | 73777    | NR_13231F | 647121   | Hs.529357 | NR_13231F    | ENSG00000 | FRG1CP    | -        | FSHD           | regipseudo     |                |                |
| chr5-498  | 19.30392 | -0.07884 | 0.509338 | -0.15479 | 0.876986 | 0.950571 | chr5  | 49896724 | 49897010 | + | 0 | NA | IntergeniALR/Alphe | 544421   | NR_19844F | 133418   | Hs.561411 | NR_19844F    | ENSG00000 | EMB       | GP70     | embigin        | protein-coding |                |                |
| chr10-40  | 27.21861 | 0.066089 | 0.428201 | 0.154342 | 0.87734  | 0.950571 | chr10 | 40507780 | 40508164 | + | 0 | NA | IntergeniALR/Alphe | 1811376  | NR_045000 | 399746   | Hs.742607 | NR_045000    | ACTR3BP5  | FKSG74    | ACTR3B   | ps             | pseudo         |                |                |
| chr5-489  | 21.01958 | -0.07401 | 0.483318 | -0.15313 | 0.878295 | 0.951218 | chr5  | 48902732 | 48903115 | + | 0 | NA | IntergeniALR/Alphe | 1538365  | NR_19844F | 133418   | Hs.561411 | NR_19844F    | ENSG00000 | EMB       | GP70     | embigin        | protein-coding |                |                |
| chr7-613  | 19.27078 | -0.07624 | 0.503077 | -0.15154 | 0.879546 | 0.952186 | chr7  | 61378519 | 61379499 | + | 0 | NA | IntergeniALR/Alphe | 1925047  | NR_003955 | 643955   | Hs.58330F | NR_003955    | ENSG00000 | ZNF733P   | ZNF733   | zinc           | fin            | pseudo         |                |
| chr3-911  | 25.59578 | -0.06662 | 0.441611 | -0.15085 | 0.880096 | 0.952394 | chr3  | 91152293 | 91152514 | + | 0 | NA | IntergeniALR/Alphe | 2044782  | NR_00523F | 2042     | Hs.123642 | NR_00523F    | ENSG00000 | EPH3A     | EK4      | [ETK           | [EPH           | recep          | protein-coding |
| chr1-124  | 55.35813 | 0.046844 | 0.311619 | 0.150323 | 0.88051  | 0.952454 | chr1  | 1.25E+08 | 1.25E+08 | + | 0 | NA | IntergeniALR/Alphe | 3402739  | NR_003955 | 647121   | Hs.697682 | NR_003955    | ENSG00000 | EMBPP1    | -        | embigin        | pseudo         |                |                |
| chr19-26  | 50.93519 | 0.048239 | 0.322406 | 0.149622 | 0.881063 | 0.952665 | chr19 | 26024094 | 26024311 | + | 0 | NA | IntergeniALR/Alphe | -1769229 | NR_11068F | 1.02E+08 | Hs.567934 | NR_11068F    | ENSG00000 | LOC101927 | -        | uncharactncRNA |                |                |                |
| chrX-606  | 33.03537 | -0.05904 | 0.403481 | -0.14632 | 0.883669 | 0.954061 | chrX  | 60654455 | 60654909 | + | 0 | NA | IntergeniALR/Alphe | 2696650  | NR_00101F | 139886   | Hs.612782 | NR_00101F    | ENSG00000 | SPIN4     | TDRD28   | spindlin       | protein-coding |                |                |
| chr10-411 | 32.8893  | 0.057151 | 0.391698 | 0.145905 | 0.883996 | 0.954061 | chr10 | 41117444 | 41118079 | + | 0 | NA | IntergeniALR/Alphe | 1250284  | NR_02438C | 441666   | Hs.255729 | NR_02438C    | ENSG00000 | LOC441666 | -        | zinc           | fin            | pseudo         |                |
| chr14-106 | 19.2399  | -0.07347 | 0.503999 | -0.14577 | 0.884105 | 0.954061 | chr14 | 1.07E+08 | 1.07E+08 | + | 0 | NA | IntergeniALR/Alphe | 98598    | NR_049827 | 1.01E+08 | NR_049827 | ENSG00000    | MIR5195   | -         | microRNA | ncRNA          |                |                |                |
| chr5-472  | 26.67364 | 0.063235 | 0.434715 | 0.145462 | 0.884346 | 0.954061 | chr5  | 47299167 | 47299399 | + | 0 | NA | IntergeniALR/Alphe | -1602903 | NR_021072 | 348980   | Hs.353176 | NR_021072    | ENSG00000 | HCN1      | BCNG-1   | [BC            | hyperpol       | protein-coding |                |
| chr2-925  | 17.14114 | 0.077454 | 0.534104 | 0.145017 | 0.884697 | 0.954061 | chr2  | 92516603 | 92517825 | + | 0 | NA | IntergeniALR/Alphe | 576081   | NR_027714 | 440888   | Hs.730239 | NR_001032412 | ACTR3BP2  | FKSG73    | ACTR3B   | ps             | pseudo         |                |                |
| chr2-930  | 18.6326  | -0.07551 | 0.522232 | -0.14458 | 0.88504  | 0.954061 | chr2  | 93049894 | 93050876 | + | 0 | NA | IntergeniALR/Alphe | 1109252  | NR_027714 | 440888   | Hs.730239 | NR_001032412 | ACTR3BP2  | FKSG73    | ACTR3B   | ps             | pseudo         |                |                |
| chr19-27  | 17.7507  | 0.075606 | 0.523141 | 0.144524 | 0.885087 | 0.954061 | chr19 | 27095956 | 27096787 | + | 0 | NA | IntergeniALR/Alphe | -697066  | NR_11068F | 1.02E+08 | Hs.567934 | NR_11068F    | ENSG00000 | LOC101927 | -        | uncharactncRNA |                |                |                |
| chr9-606  | 17.14057 | 0.077444 | 0.536492 | 0.144352 | 0.885223 | 0.954061 | chr9  | 60602817 | 60603293 | + | 0 | NA | IntergeniALR/Alphe | -311352  | NR_015667 | 26165    | Hs.123004 | NR_015667    | ENSG00000 | SPATA31A7 | AEP1     | [C9or          | SPATA31        | s              | protein-coding |
| chr2-925  | 27.28452 | -0.06147 | 0.42798  | -0.14362 | 0.885799 | 0.954296 | chr2  | 92588763 | 92589501 | + | 0 | NA | IntergeniALR/Alphe | 647999   | NR_027714 | 440888   | Hs.730239 | NR_001032412 | ACTR3BP2  | FKSG73    | ACTR3B   | ps             | pseudo         |                |                |
| chr1-122  | 92.16148 | 0.035756 | 0.250617 | 0.142673 | 0.886548 | 0.954458 | chr1  | 1.23E+08 | 1.23E+08 | + | 0 | NA | IntergeniALR/Alphe | 1392312  | NR_003955 | 647121   | Hs.697682 | NR_003955    | ENSG00000 | EMBPP1    | -        | embigin        | pseudo         |                |                |
| chr5-495  | 103.3646 | 0.033665 | 0.239752 | 0.141668 | 0.887342 | 0.954458 | chr5  | 49576831 | 49577101 | + | 0 | NA | IntergeniALR/Alphe | 864322   | NR_19844F | 133418   | Hs.561411 | NR_19844F    | ENSG00000 | EMB       | GP70     | embigin        | protein-coding |                |                |
| chr11-51  | 21.0939  | 0.06825  | 0.482022 | 0.14159  | 0.887404 | 0.954458 | chr11 | 51704395 | 51705514 | + | 0 | NA | IntergeniALR/Alphe | 1295807  | NR_024504 | 646813   | Hs.684179 | NR_024504    | LOC646813 | -         | DEXH     | box            | pseudo         |                |                |
| chr7-597  | 21.0939  | 0.06825  | 0.482022 | 0.14159  | 0.887404 | 0.954458 | chr7  | 59785771 | 59786034 | + | 0 | NA | IntergeniALR/Alphe | 2335725  | NR_00115F | 441234   | Hs.533121 | NR_00115F    | ENSG00000 | ZNF716    | -        | zinc           | fin            | protein-coding |                |
| chr1-124  | 58.79624 | 0.043167 | 0.305803 | 0.141161 | 0.887743 | 0.954458 | chr   |          |          |   |   |    |                    |          |           |          |           |              |           |           |          |                |                |                |                |



|           |          |          |          |          |          |          |       |          |          |   |      |                    |          |           |          |            |              |                      |                                       |                          |
|-----------|----------|----------|----------|----------|----------|----------|-------|----------|----------|---|------|--------------------|----------|-----------|----------|------------|--------------|----------------------|---------------------------------------|--------------------------|
| chr21-802 | 16.20219 | 0.051066 | 0.545651 | 0.093587 | 0.925437 | 0.965721 | chr21 | 8021542  | 8022750  | + | O NA | IntergeniALR/Alphe | -175474  | NR_038958 | 1.01E+08 | Hs. 426704 | NR_038958    | LOC100507-           | uncharactncRNA                        |                          |
| chr1-1235 | 17.35257 | -0.04853 | 0.529085 | -0.09173 | 0.926911 | 0.966879 | chr1  | 1.24E+08 | 1.24E+08 | + | O NA | IntergeniALR/Alphe | 2036147  | NR_003955 | 647121   | Hs. 697682 | NR_003955    | ENSG000000EMB1       | embigin ipseudo                       |                          |
| chr1-1221 | 17.88866 | 0.047489 | 0.522928 | 0.090813 | 0.927641 | 0.967262 | chr1  | 1.22E+08 | 1.22E+08 | + | O NA | IntergeniALR/Alphe | 609338   | NR_003955 | 647121   | Hs. 697682 | NR_003955    | ENSG000000EMB1       | embigin ipseudo                       |                          |
| chr1-1233 | 19.07162 | -0.04568 | 0.508589 | -0.08981 | 0.928434 | 0.967711 | chr1  | 1.23E+08 | 1.23E+08 | + | O NA | IntergeniALR/Alphe | 1832223  | NR_003955 | 647121   | Hs. 697682 | NR_003955    | ENSG000000EMB1       | embigin ipseudo                       |                          |
| chr7-5831 | 16.23307 | 0.04771  | 0.545565 | 0.087451 | 0.930313 | 0.968711 | chr7  | 58316230 | 58316529 | + | O NA | IntergeniALR/Alphe | 866202   | NM_001155 | 441234   | Hs. 533121 | NM_001155    | ENSG000000ZNF716     | zinc finprotein-coding                |                          |
| chr19-265 | 21.26331 | 0.042244 | 0.483459 | 0.087378 | 0.930371 | 0.968711 | chr19 | 26575072 | 26575303 | + | O NA | IntergeniALR/Alphe | -1218244 | NR_110688 | 1.02E+08 | Hs. 567934 | NR_110688    | ENSG000000LOC101927- | uncharactncRNA                        |                          |
| chr5-492  | 49.55836 | 0.0285   | 0.327249 | 0.08709  | 0.9306   | 0.968711 | chr5  | 49203149 | 49203429 | + | O NA | IntergeniALR/Alphe | 1237999  | NM_198444 | 133418   | Hs. 561411 | NM_198444    | ENSG000000EMB        | embigin protein-coding                |                          |
| chr5-4875 | 32.81497 | -0.03407 | 0.392659 | -0.08677 | 0.93085  | 0.968711 | chr5  | 48790045 | 48790289 | + | O NA | IntergeniALR/Alphe | 1651121  | NM_198444 | 133418   | Hs. 561411 | NM_198444    | ENSG000000EMB        | embigin protein-coding                |                          |
| chr1-124  | 60.39697 | 0.026129 | 0.304105 | 0.085922 | 0.931528 | 0.969037 | chr1  | 1.24E+08 | 1.24E+08 | + | O NA | IntergeniALR/Alphe | 2948039  | NR_003955 | 647121   | Hs. 697682 | NR_003955    | ENSG000000EMB1       | embigin ipseudo                       |                          |
| chr2-925  | 19.03791 | -0.04308 | 0.509139 | -0.08461 | 0.932573 | 0.969513 | chr2  | 92533592 | 92534575 | + | O NA | IntergeniALR/Alphe | 592950   | NR_027714 | 440888   | Hs. 730239 | NM_001032412 | ACTR3BP2             | FKSG73                                | ACTR3B pspseudo          |
| chr7-595  | 27.54299 | 0.035813 | 0.426018 | 0.084064 | 0.933005 | 0.969513 | chr7  | 59526079 | 59527087 | + | O NA | IntergeniALR/Alphe | 2076406  | NM_001155 | 441234   | Hs. 533121 | NM_001155    | ENSG000000ZNF716     | zinc finprotein-coding                |                          |
| chr2-926  | 19.60772 | 0.04186  | 0.498503 | 0.083971 | 0.933079 | 0.969513 | chr2  | 92632176 | 92633599 | + | O NA | IntergeniALR/Alphe | 691754   | NR_027714 | 440888   | Hs. 730239 | NM_001032412 | ACTR3BP2             | FKSG73                                | ACTR3B pspseudo          |
| chr10-40  | 31.06787 | -0.0331  | 0.402913 | -0.08216 | 0.934522 | 0.970633 | chr10 | 40567551 | 40567810 | + | O NA | IntergeniALR/Alphe | 1800365  | NR_024380 | 441666   | Hs. 255729 | NR_024380    | ENSG000000LOC441666- | zinc finpseudo                        |                          |
| chr5-490  | 23.58777 | -0.03821 | 0.469236 | -0.08143 | 0.935099 | 0.970845 | chr5  | 49083122 | 49083367 | + | O NA | IntergeniALR/Alphe | 1358044  | NM_198444 | 133418   | Hs. 561411 | NM_198444    | ENSG000000EMB        | embigin protein-coding                |                          |
| chr19-26  | 25.2801  | 0.03577  | 0.441126 | 0.08054  | 0.935808 | 0.970845 | chr19 | 26355531 | 26355821 | + | O NA | IntergeniALR/Alphe | -1437755 | NR_110688 | 1.02E+08 | Hs. 567934 | NR_110688    | ENSG000000LOC101927- | uncharactncRNA                        |                          |
| chr18-16  | 241.5171 | 0.014398 | 0.178797 | 0.080525 | 0.93582  | 0.970845 | chr18 | 16265850 | 16266213 | + | O NA | IntergeniALR/Alphe | -940112  | NR_027417 | 644669   | Hs. 579474 | NR_027417    | ENSG000000LOC644666- | ankyrin ipseudo                       |                          |
| chr3-9117 | 19.63916 | 0.03912  | 0.497924 | 0.078566 | 0.937377 | 0.972082 | chr3  | 91177444 | 91177958 | + | O NA | IntergeniALR/Alphe | 2070080  | NM_005233 | 2042     | Hs. 123642 | NM_005233    | ENSG000000EPAH3      | EK4 ETK E EPH receptor protein-coding |                          |
| chr2-925  | 24.77375 | -0.03244 | 0.452163 | -0.07572 | 0.93964  | 0.974048 | chr2  | 92558764 | 92559062 | + | O NA | IntergeniALR/Alphe | 617780   | NR_027714 | 440888   | Hs. 730239 | NM_001032412 | ACTR3BP2             | FKSG73                                | ACTR3B pspseudo          |
| chr7-5911 | 43.64168 | -0.02592 | 0.345217 | -0.07507 | 0.940158 | 0.974206 | chr7  | 59111297 | 59111883 | + | O NA | IntergeniALR/Alphe | 1661413  | NM_001155 | 441234   | Hs. 533121 | NM_001155    | ENSG000000ZNF716     | zinc finprotein-coding                |                          |
| chr7-581  | 17.983   | 0.038468 | 0.521406 | 0.073777 | 0.941188 | 0.974693 | chr7  | 58198384 | 58198621 | + | O NA | IntergeniALR/Alphe | 748325   | NM_001155 | 441234   | Hs. 533121 | NM_001155    | ENSG000000ZNF716     | zinc finprotein-coding                |                          |
| chr5-480  | 31.00555 | -0.02959 | 0.403077 | -0.07341 | 0.941481 | 0.974693 | chr5  | 48005507 | 48005719 | + | O NA | IntergeniALR/Alphe | -2309233 | NM_021072 | 348980   | Hs. 353176 | NR_021072    | ENSG000000HCN1       | BCNG-1 B Chyperpol:protein-coding     |                          |
| chr1-236  | 16.14987 | -0.03979 | 0.546934 | -0.07275 | 0.942008 | 0.974693 | chr1  | 2.37E+08 | 2.37E+08 | + | O NA | intron (intron)    | 27437    | NM_001278 | 88       | Hs. 498178 | NM_001100    | ENSG000000ACTN2      | CMD1A C actinin 2 protein-coding      |                          |
| chr21-12  | 42.32416 | 0.025571 | 0.354163 | 0.072201 | 0.942442 | 0.974693 | chr21 | 12245149 | 12245414 | + | O NA | IntergeniALR/Alphe | -792885  | NR_026916 | 149992   | Hs. 558649 | NM_153773    | ANKRD30B C21orf99    | ankyrin ipseudo                       |                          |
| chr20-28  | 17.86836 | -0.03763 | 0.512353 | -0.07218 | 0.94246  | 0.974693 | chr20 | 28884030 | 28889998 | + | O NA | IntergeniALR/Alphe | -193378  | NR_132316 | 1.03E+08 | Hs. 740188 | NR_132316    | FRG1DP               | FSHD regipseudo                       |                          |
| chr5-470  | 23.04356 | 0.032988 | 0.462525 | 0.071321 | 0.943143 | 0.974825 | chr5  | 47074226 | 47074446 | + | O NA | IntergeniALR/Alphe | -1377956 | NM_021072 | 348980   | Hs. 353176 | NR_021072    | ENSG000000HCN1       | BCNG-1 B Chyperpol:protein-coding     |                          |
| chr18-19  | 23.04299 | 0.032955 | 0.464078 | 0.071012 | 0.943388 | 0.974825 | chr18 | 19426399 | 19426758 | + | O NA | IntergeniALR/Alphe | 1685235  | NM_005400 | 6093     | Hs. 306307 | NM_005400    | ENSG000000ROCK1      | P160ROCK Rh assoc protein-coding      |                          |
| chr19-25  | 67.06784 | -0.02049 | 0.290107 | -0.07064 | 0.943686 | 0.974825 | chr19 | 25955267 | 25955266 | + | O NA | IntergeniALR/Alphe | -1791701 | NR_003606 | 1E+08    | Hs. 149312 | NR_003606    | ENSG000000HAVCR1P1   | hepatitis:pseudo                      |                          |
| chr2-926  | 17.40432 | 0.035992 | 0.527472 | 0.068235 | 0.945598 | 0.975325 | chr2  | 92622874 | 92625785 | + | O NA | IntergeniALR/Alphe | 683196   | NR_027714 | 440888   | Hs. 730239 | NM_001032412 | ACTR3BP2             | FKSG73                                | ACTR3B pspseudo          |
| chr12-35  | 19.70149 | 0.033571 | 0.499944 | 0.06715  | 0.946643 | 0.975325 | chr12 | 35614815 | 35615520 | + | O NA | IntergeniALR/Alphe | 1592671  | NR_032834 | 84920    | Hs. 102971 | NM_032834    | ENSG000000ALG10      | ALG10A D ALG10 al protein-coding      |                          |
| chr22-15  | 19.09079 | 0.034003 | 0.507251 | 0.067034 | 0.946554 | 0.975325 | chr22 | 15054057 | 15054297 | + | O NA | IntergeniALR/Alphe | -473982  | NM_001000 | 81061    | Hs. 554706 | NM_001000    | ENSG000000COR11H1    | OR11H12 C ofactory protein-coding     |                          |
| chrX-595  | 20.77953 | 0.0325   | 0.486443 | 0.066812 | 0.946731 | 0.975325 | chrX  | 59501238 | 59504425 | + | O NA | IntergeniALR/Alphe | -1592198 | NM_007150 | 7789     | Hs. 550094 | NM_007150    | ENSG000000ZXDA       | ZNF896                                | zinc finprotein-coding   |
| chr1-124  | 17.22735 | -0.03605 | 0.539496 | -0.06681 | 0.946731 | 0.975325 | chr1  | 1.25E+08 | 1.25E+08 | + | O NA | IntergeniALR/Alphe | 3360226  | NR_003955 | 647121   | Hs. 697682 | NR_003955    | ENSG000000EMB1       | embigin ipseudo                       |                          |
| chr1-124  | 21.38796 | 0.031979 | 0.478684 | 0.066806 | 0.946736 | 0.975325 | chr1  | 1.25E+08 | 1.25E+08 | + | O NA | IntergeniALR/Alphe | 3255992  | NR_003955 | 441666   | Hs. 697682 | NR_003955    | ENSG000000EMB1       | embigin ipseudo                       |                          |
| chr10-40  | 21.38796 | 0.031979 | 0.478684 | 0.066806 | 0.946736 | 0.975325 | chr10 | 40837427 | 40838060 | + | O NA | IntergeniALR/Alphe | 1530302  | NR_024380 | 441666   | Hs. 255729 | NR_024380    | ENSG000000LOC441666- | zinc finpseudo                        |                          |
| chr18-16  | 34.37963 | -0.02518 | 0.385498 | -0.06532 | 0.94792  | 0.976167 | chr18 | 16008586 | 16008883 | + | O NA | IntergeniALR/Alphe | -682815  | NR_027417 | 644669   | Hs. 579474 | NR_027417    | ENSG000000LOC644666- | ankyrin ipseudo                       |                          |
| chr5-493  | 23.60194 | -0.02986 | 0.462641 | -0.06454 | 0.948541 | 0.976428 | chr5  | 49383151 | 49383641 | + | O NA | IntergeniALR/Alphe | 1057761  | NM_198444 | 133418   | Hs. 561411 | NM_198444    | ENSG000000EMB        | embigin protein-coding                |                          |
| chr1-124  | 44.57288 | 0.02162  | 0.342144 | 0.06319  | 0.949615 | 0.977156 | chr1  | 1.25E+08 | 1.25E+08 | + | O NA | IntergeniALR/Alphe | 3367901  | NR_003955 | 647121   | Hs. 697682 | NR_003955    | ENSG000000EMB1       | embigin ipseudo                       |                          |
| chr5-477  | 22.95979 | -0.02854 | 0.464522 | -0.06143 | 0.951017 | 0.977635 | chr5  | 47731357 | 47731809 | + | O NA | IntergeniALR/Alphe | -2035203 | NM_021072 | 348980   | Hs. 353176 | NR_021072    | ENSG000000HCN1       | BCNG-1 B Chyperpol:protein-coding     |                          |
| chr22-13  | 30.4653  | 0.024884 | 0.406803 | 0.061169 | 0.951225 | 0.977635 | chr22 | 13785364 | 13785621 | + | O NA | IntergeniALR/Alphe | -1742667 | NM_001000 | 81061    | Hs. 554706 | NM_001000    | ENSG000000COR11H1    | OR11H12 C ofactory protein-coding     |                          |
| chr5-492  | 27.08896 | 0.026082 | 0.430731 | 0.060552 | 0.951716 | 0.977635 | chr5  | 49256773 | 49257117 | + | O NA | IntergeniALR/Alphe | 1184343  | NM_198444 | 133418   | Hs. 561411 | NM_198444    | ENSG000000EMB        | embigin protein-coding                |                          |
| chr1-124  | 25.40305 | 0.026908 | 0.44613  | 0.060315 | 0.951905 | 0.977635 | chr1  | 1.25E+08 | 1.25E+08 | + | O NA | IntergeniALR/Alphe | 3235588  | NR_003955 | 647121   | Hs. 697682 | NR_003955    | ENSG000000EMB1       | embigin ipseudo                       |                          |
| chr7-604  | 17.80717 | -0.03155 | 0.524041 | -0.0602  | 0.951995 | 0.977635 | chr7  | 60421222 | 60421440 | + | O NA | IntergeniALR/Alphe | 2882725  | NR_003955 | 643955   | Hs. 583308 | NR_003955    | ENSG000000ZNF733P    | ZNF733                                | zinc finpseudo           |
| chr21-83  | 51.46958 | -0.01929 | 0.322335 | -0.05984 | 0.952285 | 0.977635 | chr21 | 8385781  | 8387075  | + | O NA | intron (intron)    | -1934    | NR_128716 | 1.04E+08 | Hs. 128716 | NR_128716    | ENSG000000MIR6724-   | hsa-mir-2 microRNA ncRNA              |                          |
| chr19-25  | 63.54629 | -0.01694 | 0.297189 | -0.057   | 0.954542 | 0.978096 | chr19 | 25271153 | 25271381 | + | O NA | IntergeniALR/Alphe | -1107820 | NR_003606 | 1E+08    | Hs. 149312 | NR_003606    | ENSG000000HAVCR1P1   | hepatitis:pseudo                      |                          |
| chr1-123  | 17.46665 | 0.0298   | 0.527514 | 0.056491 | 0.954951 | 0.978096 | chr1  | 1.23E+08 | 1.23E+08 | + | O NA | IntergeniALR/Alphe | 1917074  | NR_003955 | 647121   | Hs. 697682 | NR_003955    | ENSG000000EMB1       | embigin ipseudo                       |                          |
| chr17-2   | 17.46608 | 0.02975  | 0.527503 | 0.056397 | 0.955025 | 0.978096 | chr17 | 23267491 | 23267701 | + | O NA | IntergeniALR/Alphe | 744485   | NM_001190 | 1E+08    | Hs. 740188 | NR_001190    | ENSG000000MTRNR2L1   | HN1                                   | MT-RNR2 l protein-coding |
| chr2-927  | 17.46608 | 0.02975  | 0.527503 | 0.056397 | 0.955025 | 0.978096 | chr2  | 92755302 | 92756056 | + | O NA | IntergeniALR/Alphe | 814546   | NR_027714 | 44088    |            |              |                      |                                       |                          |

Supplementary Information

Supplement Table 9. Genome-wide profiling of differential peaks between senescent cells and counterparts exposed to ML324 (ChIP-seq for H3K36me3).

| geneID    | baseMea   | log2Fold  | lfcSE    | stat     | pvalue   | padj     | Chr   | Start    | End      | Stranc | Peak | ε  | Focus     | Annotati  | Detailed | Distance  | Nearest  | F        | Entrez     | ID         | Nearest   | U | Nearest   | F        | Nearest | E | Gene | Nar | Gene | Ali | Gene | De | Gene           | Type                   |                        |                        |
|-----------|-----------|-----------|----------|----------|----------|----------|-------|----------|----------|--------|------|----|-----------|-----------|----------|-----------|----------|----------|------------|------------|-----------|---|-----------|----------|---------|---|------|-----|------|-----|------|----|----------------|------------------------|------------------------|------------------------|
| chr16-382 | 770.5261  | 0.972888  | 0.075115 | 12.95205 | 2.29E-38 | 8.61E-35 | chr16 | 38276157 | 38276483 | +      | 0    | NA | Intergeni | ALR Alphe | 2529768  | NR_033985 | 400533   | Hs.49913 | ENR_033985 | ENSG000004 | LINC02167 | - |           |          |         |   |      |     |      |     |      |    | long intencRNA |                        |                        |                        |
| chr17-266 | 842.7855  | 0.757288  | 0.07     | 10.81843 | 2.82E-27 | 5.30E-24 | chr17 | 26603798 | 26604053 | +      | 0    | NA | Intergeni | ALR Alphe | 485316   | NR_135673 | 1.05E+08 | Hs.64991 | ENR_135673 | ENSG000004 | LOC105371 | - |           |          |         |   |      |     |      |     |      |    |                | uncharactcRNA          |                        |                        |
| chr5-487  | 302.3381  | 0.985717  | 0.129479 | 7.612972 | 2.68E-14 | 3.36E-11 | chr5  | 48732109 | 48732399 | +      | 0    | NA | Intergeni | ALR Alphe | 1709304  | NR_198445 | 133418   | Hs.56141 | ENR_198445 | ENSG000004 | EMB       | - | GP70      |          |         |   |      |     |      |     |      |    |                | embigin protein-coding |                        |                        |
| chr19-265 | 262.9757  | 1.028475  | 0.138631 | 7.418793 | 1.18E-13 | 1.11E-10 | chr19 | 26331628 | 26331985 | +      | 0    | NA | Intergeni | ALR Alphe | -1461625 | NR_146733 | 1.02E+08 | Hs.56793 | ENR_110687 | ENSG000004 | LOC101927 | - |           |          |         |   |      |     |      |     |      |    |                | uncharactcRNA          |                        |                        |
| chr5-4961 | 231.2037  | 1.087339  | 0.152058 | 7.15083  | 8.63E-13 | 6.49E-10 | chr5  | 49612258 | 49615611 | +      | 0    | NA | Intergeni | ALR Alphe | 827354   | NR_198445 | 133418   | Hs.56141 | ENR_198445 | ENSG000004 | EMB       | - | GP70      |          |         |   |      |     |      |     |      |    |                | embigin protein-coding |                        |                        |
| chr5-4965 | 196.4947  | 1.058742  | 0.164615 | 6.431619 | 1.26E-10 | 7.92E-08 | chr5  | 49630809 | 49632109 | +      | 0    | NA | Intergeni | ALR Alphe | 809829   | NR_198445 | 133418   | Hs.56141 | ENR_198445 | ENSG000004 | EMB       | - | GP70      |          |         |   |      |     |      |     |      |    |                | embigin protein-coding |                        |                        |
| chr19-271 | 133.2163  | 1.30337   | 0.204471 | 6.374352 | 1.84E-10 | 9.88E-08 | chr19 | 27146759 | 27146980 | +      | 0    | NA | Intergeni | ALR Alphe | -646562  | NR_146733 | 1.02E+08 | Hs.56793 | ENR_110687 | ENSG000004 | LOC101927 | - |           |          |         |   |      |     |      |     |      |    |                | uncharactcRNA          |                        |                        |
| chr1-123  | 271.1514  | 0.855162  | 0.135126 | 6.328639 | 2.47E-10 | 1.16E-07 | chr1  | 1.24E+08 | 1.24E+08 | +      | 0    | NA | Intergeni | ALR Alphe | 2407205  | NR_003955 | 647121   | Hs.69768 | ENR_003955 | ENSG000004 | EMB       | - | GP70      |          |         |   |      |     |      |     |      |    |                | embigin ppsudo         |                        |                        |
| chr5-4961 | 174.3077  | -0.99273  | 0.158584 | -6.26001 | 3.33E-10 | 1.39E-07 | chr5  | 49616438 | 49617194 | +      | 0    | NA | Intergeni | ALR Alphe | 824472   | NR_198445 | 133418   | Hs.56141 | ENR_198445 | ENSG000004 | EMB       | - | GP70      |          |         |   |      |     |      |     |      |    |                |                        | embigin protein-coding |                        |
| chr4-739C | 172.1431  | 1.101746  | 0.175044 | 6.278116 | 3.40E-10 | 1.41E-07 | chr4  | 73906089 | 73906784 | +      | 0    | NA | Intergeni | LIPA3 LIN | 37043    | NR_001511 | 2919     | Hs.789   | NR_001511  | ENSG000004 | CXCL1     | - | FSP GRO1  | C-X-C    | mot     |   |      |     |      |     |      |    |                |                        | protein-coding         |                        |
| chr4-745  | 165.1044  | 1.031746  | 0.186044 | 6.278036 | 3.42E-10 | 1.42E-07 | chr4  | 74597145 | 74598143 | +      | 0    | NA | Intergeni | THE1B-int | 152508   | NR_001657 | 374      | Hs.27083 | ENR_001657 | ENSG000004 | AREG      | - | AR AREGB  | amphireg |         |   |      |     |      |     |      |    |                |                        | protein-coding         |                        |
| chr10-405 | 210.9468  | -0.99273  | 0.158584 | -6.26001 | 3.33E-10 | 1.45E-07 | chr10 | 40980950 | 40981326 | +      | 0    | NA | Intergeni | ALR Alphe | 1386907  | NR_02438C | 441666   | Hs.25572 | ENR_02438C | ENSG000004 | LOC441666 | - |           |          |         |   |      |     |      |     |      |    |                | zinc fingpsudo         |                        |                        |
| chr17-266 | 396.1376  | -0.68484  | 0.110748 | -6.18377 | 6.26E-10 | 2.14E-07 | chr17 | 26619531 | 26620055 | +      | 0    | NA | Intergeni | ALR Alphe | 469448   | NR_135673 | 1.05E+08 | Hs.64991 | ENR_135673 | ENSG000004 | LOC105371 | - |           |          |         |   |      |     |      |     |      |    |                |                        | uncharactcRNA          |                        |
| chr1-1247 | 131.1533  | -1.23744  | 0.205448 | -6.02312 | 1.71E-09 | 5.18E-07 | chr1  | 1.25E+08 | 1.25E+08 | +      | 0    | NA | Intergeni | ALR Alphe | 3222330  | NR_003955 | 647121   | Hs.69768 | ENR_003955 | ENSG000004 | EMB       | - |           |          |         |   |      |     |      |     |      |    |                | embigin ppsudo         |                        |                        |
| chr4-746  | 142.15    | 1.367431  | 0.204347 | 6.023018 | 3.85E-10 | 1.45E-07 | chr4  | 74616713 | 74616924 | +      | 0    | NA | Intergeni | AluYg6 SI | 171682   | NR_001657 | 374      | Hs.27083 | ENR_001657 | ENSG000004 | AREG      | - | AR AREGB  | amphireg |         |   |      |     |      |     |      |    |                |                        | protein-coding         |                        |
| chr17-23C | 347.2216  | -0.710663 | 0.18125  | -6.01589 | 1.79E-09 | 5.18E-07 | chr17 | 23016338 | 23016540 | +      | 0    | NA | Intergeni | ALR Alphe | 493328   | NR_00119C | 1E+08    | Hs.74018 | ENR_00119C | ENSG000004 | MTRNR2L1  | - | HNI       | MT-RNR2  | l       |   |      |     |      |     |      |    |                |                        | protein-coding         |                        |
| chr17-268 | 281.1627  | -0.81174  | 0.137685 | -5.89562 | 3.73E-09 | 1.00E-06 | chr17 | 26880960 | 26885887 | +      | 0    | NA | Intergeni | ALR Alphe | 205818   | NR_135673 | 1.05E+08 | Hs.64991 | ENR_135673 | ENSG000004 | LOC105371 | - |           |          |         |   |      |     |      |     |      |    |                |                        | uncharactcRNA          |                        |
| chr6-591f | 262.8307  | -0.80019  | 0.137833 | -5.80552 | 6.42E-09 | 1.61E-06 | chr6  | 59163123 | 59163346 | +      | 0    | NA | Intergeni | ALR Alphe | -1201788 | NR_132994 | 1.07E+08 | Hs.56153 | ENR_125727 | ENSG000004 | LINC0068C | - |           |          |         |   |      |     |      |     |      |    |                |                        | long intencRNA         |                        |
| chr5-4964 | 161.8593  | -1.0534   | 0.182829 | -5.76165 | 8.33E-09 | 1.96E-06 | chr5  | 49643674 | 49646210 | +      | 0    | NA | Intergeni | ALR Alphe | 796346   | NR_198445 | 133418   | Hs.56141 | ENR_198445 | ENSG000004 | EMB       | - | GP70      |          |         |   |      |     |      |     |      |    |                |                        | embigin protein-coding |                        |
| chr10-405 | 209.013   | -0.90897  | 0.158577 | -5.73203 | 9.92E-09 | 2.20E-06 | chr10 | 40556268 | 40556895 | +      | 0    | NA | Intergeni | ALR Alphe | 1811464  | NR_02438C | 441666   | Hs.25572 | ENR_02438C | ENSG000004 | LOC441666 | - |           |          |         |   |      |     |      |     |      |    |                | zinc fingpsudo         |                        |                        |
| chr5-4954 | 118.5783  | 1.226714  | 0.215531 | 5.691578 | 1.26E-08 | 2.63E-06 | chr5  | 49547195 | 49547490 | +      | 0    | NA | Intergeni | ALR Alphe | 893946   | NR_198445 | 133418   | Hs.56141 | ENR_198445 | ENSG000004 | EMB       | - | GP70      |          |         |   |      |     |      |     |      |    |                |                        | embigin protein-coding |                        |
| chr5-485  | 229.7896  | 0.86783   | 0.153364 | 5.686361 | 1.53E-08 | 3.02E-06 | chr5  | 48589523 | 48589723 | +      | 0    | NA | Intergeni | ALR Alphe | 1851665  | NR_198445 | 133418   | Hs.56141 | ENR_198445 | ENSG000004 | EMB       | - | GP70      |          |         |   |      |     |      |     |      |    |                |                        | embigin protein-coding |                        |
| chr5-4964 | 111.6384  | 1.23595   | 0.221868 | 5.570662 | 2.54E-08 | 4.77E-06 | chr5  | 49642240 | 49642817 | +      | 0    | NA | Intergeni | ALR Alphe | 798760   | NR_198445 | 133418   | Hs.56141 | ENR_198445 | ENSG000004 | EMB       | - | GP70      |          |         |   |      |     |      |     |      |    |                |                        |                        | embigin protein-coding |
| chr10-405 | 181.1677  | 0.922596  | 0.170121 | 5.423171 | 5.86E-08 | 1.05E-05 | chr10 | 40593352 | 40593603 | +      | 0    | NA | Intergeni | ALR Alphe | 1774568  | NR_02438C | 441666   | Hs.25572 | ENR_02438C | ENSG000004 | LOC441666 | - |           |          |         |   |      |     |      |     |      |    |                |                        | zinc fingpsudo         |                        |
| chr5-464  | 60.87076  | 1.632742  | 0.302364 | 5.399921 | 6.67E-08 | 1.14E-05 | chr5  | 46434582 | 46434946 | +      | 0    | NA | Intergeni | ALR Alphe | -738384  | NR_021072 | 348980   | Hs.35317 | ENR_021072 | ENSG000004 | HCN1      | - | BCNG-1 BC | hyperpol |         |   |      |     |      |     |      |    |                |                        | protein-coding         |                        |
| chr5-479  | 137.1194  | 1.07577   | 0.199947 | 5.380283 | 7.44E-08 | 1.22E-05 | chr5  | 47982825 | 47983163 | +      | 0    | NA | Intergeni | ALR Alphe | -2286614 | NR_021072 | 348980   | Hs.35317 | ENR_021072 | ENSG000004 | HCN1      | - | BCNG-1 BC | hyperpol |         |   |      |     |      |     |      |    |                |                        | protein-coding         |                        |
| chr10-408 | 169.6754  | 0.96256   | 0.179625 | 5.358711 | 8.38E-08 | 1.31E-05 | chr10 | 40892151 | 40892527 | +      | 0    | NA | Intergeni | ALR Alphe | 1475706  | NR_02438C | 441666   | Hs.25572 | ENR_02438C | ENSG000004 | LOC441666 | - |           |          |         |   |      |     |      |     |      |    |                |                        | zinc fingpsudo         |                        |
| chr4-744  | 145.2174  | 0.985251  | 0.185621 | 5.31487  | 8.84E-08 | 1.34E-05 | chr4  | 74498802 | 74499010 | +      | 0    | NA | Intergeni | LIM2 LINE | 53770    | NR_001657 | 374      | Hs.27083 | ENR_001657 | ENSG000004 | AREG      | - | AR AREGB  | amphireg |         |   |      |     |      |     |      |    |                |                        | protein-coding         |                        |
| chr1-1217 | 133.0313  | -1.07427  | 0.203394 | -5.28169 | 1.28E-07 | 1.93E-05 | chr1  | 1.22E+08 | 1.22E+08 | +      | 0    | NA | Intergeni | ALR Alphe | 252637   | NR_003955 | 647121   | Hs.69768 | ENR_003955 | ENSG000004 | EMB       | - |           |          |         |   |      |     |      |     |      |    |                |                        | embigin ppsudo         |                        |
| chr10-414 | 123.694   | -1.11654  | 0.211969 | -5.26748 | 1.38E-07 | 2.00E-05 | chr10 | 41405822 | 41406021 | +      | 0    | NA | Intergeni | ALR Alphe | 962124   | NR_02438C | 441666   | Hs.25572 | ENR_02438C | ENSG000004 | LOC441666 | - |           |          |         |   |      |     |      |     |      |    |                |                        | zinc fingpsudo         |                        |
| chr1-1247 | 128.6484  | -1.10302  | 0.210132 | -5.24916 | 1.53E-07 | 2.06E-05 | chr1  | 1.25E+08 | 1.25E+08 | +      | 0    | NA | Intergeni | ALR Alphe | 3259081  | NR_003955 | 647121   | Hs.69768 | ENR_003955 | ENSG000004 | EMB       | - |           |          |         |   |      |     |      |     |      |    |                |                        | embigin ppsudo         |                        |
| chr10-402 | 102.437   | -1.21436  | 0.231359 | -5.24884 | 1.53E-07 | 2.06E-05 | chr10 | 40267807 | 40268087 | +      | 0    | NA | Intergeni | ALR Alphe | 1571351  | NR_04500C | 399746   | Hs.74260 | NR_045000  | ACTR3BP5   | FKSG74    | - |           |          |         |   |      |     |      |     |      |    |                |                        |                        | ACTR3B ppsudo          |
| chr1-1247 | 170.08757 | -1.44511  | 0.279619 | -5.16814 | 2.36E-07 | 3.07E-05 | chr1  | 1.25E+08 | 1.25E+08 | +      | 0    | NA | Intergeni | ALR Alphe | 3251931  | NR_003955 | 647121   | Hs.69768 | ENR_003955 | ENSG000004 | EMB       | - |           |          |         |   |      |     |      |     |      |    |                |                        |                        | embigin ppsudo         |
| chr10-401 | 145.177   | 1.015933  | 0.197807 | 5.13598  | 2.81E-07 | 3.52E-05 | chr10 | 40135068 | 40135333 | +      | 0    | NA | Intergeni | ALR Alphe | 1438604  | NR_04500C | 399746   | Hs.74260 | NR_045000  | ACTR3BP5   | FKSG74    | - |           |          |         |   |      |     |      |     |      |    |                |                        |                        | ACTR3B ppsudo          |
| chr5-488  | 109.7955  | 1.1345    | 0.223599 | 5.073822 | 3.90E-07 | 4.73E-05 | chr5  | 48850749 | 48850994 | +      | 0    | NA | Intergeni | ALR       |          |           |          |          |            |            |           |   |           |          |         |   |      |     |      |     |      |    |                |                        |                        |                        |



|                    |          |          |          |          |          |       |          |          |   |      |                    |                    |                               |                     |               |                         |                      |
|--------------------|----------|----------|----------|----------|----------|-------|----------|----------|---|------|--------------------|--------------------|-------------------------------|---------------------|---------------|-------------------------|----------------------|
| chr10-40: 24.69934 | 1.187364 | 0.320292 | 3.707132 | 0.00021  | 0.007171 | chr10 | 40367454 | 40368623 | + | 0 NA | IntergeniALR/Alph  | 1671442 NR_045000  | 399746 Hs. 742607NR_045000    | ACTR3BP5            | FKSG74        | ACTR3B                  | pspseudo             |
| chr1-124: 69.53782 | 1.010731 | 0.274086 | 3.687641 | 0.000226 | 0.007669 | chr1  | 1.24E+08 | 1.24E+08 | + | 0 NA | IntergeniALR/Alph  | 2515484 NR_003955  | 647121 Hs. 697682NR_003955    | ENSG000000EMB1      | -             | embigin                 | fpseudo              |
| chr12-37: 63.06965 | 1.060742 | 0.287901 | 3.684392 | 0.000229 | 0.007669 | chr12 | 37237603 | 37238561 | + | 0 NA | IntergeniALR/Alph  | -1078692 NM_001013 | 144245 Hs. 259305NM_001013    | ENSG000000CALG10B   | ALG10 KCF     | ALG10                   | alprotein-coding     |
| chr11-53: 17.18073 | 1.521699 | 0.413139 | 3.683239 | 0.00023  | 0.007669 | chr11 | 53509604 | 53509886 | + | 0 NA | IntergeniALR/Alph  | 1094253 NM_001004  | 119749 Hs. 553564NM_001004    | ENSG000000OR4C6     | -             | olfactory               | protein-coding       |
| chr10-40: 23.45979 | 1.203594 | 0.327194 | 3.678535 | 0.000235 | 0.007693 | chr10 | 40633542 | 40633977 | + | 0 NA | IntergeniALR/Alph  | 1734288 NR_02438C  | 441666 Hs. 255725NR_02438C    | ENSG000000LOC441666 | -             | zinc                    | fingerpseud          |
| chr7-55: 16.68248  | 1.564241 | 0.425315 | 3.677841 | 0.000235 | 0.007697 | chr7  | 5528433  | 5530459  | + | 0 NA | intron (ncpG)      | 1155 NM_001101     | 60 Hs. 520644NM_001101        | ENSG000000ACTB      | BRWS1 PS1     | actin                   | betprotein-coding    |
| chr1-124: 12.7867  | 1.820345 | 0.221177 | 3.678282 | 0.00024  | 0.007782 | chr1  | 1.24E+08 | 1.24E+08 | + | 0 NA | IntergeniALR/Alph  | 2731658 NR_003955  | 647121 Hs. 697682NR_003955    | ENSG000000EMB1      | -             | embigin                 | fpseudo              |
| chr19-27: 43.714   | 1.816097 | 0.343619 | 3.667132 | 0.000245 | 0.007889 | chr19 | 27065031 | 27065528 | + | 0 NA | IntergeniALR/Alph  | -728152 NR_146733  | 1.02E+08 Hs. 567934NR_110687  | ENSG000000LOC101927 | -             | uncharactncRNA          |                      |
| chr19-27: 23.91647 | 1.183219 | 0.323773 | 3.654473 | 0.000258 | 0.008218 | chr19 | 27008326 | 27009103 | + | 0 NA | IntergeniALR/Alph  | -784717 NR_146733  | 1.02E+08 Hs. 567934NR_110687  | ENSG000000LOC101927 | -             | uncharactncRNA          |                      |
| chr2-92: 21.64682  | 1.243399 | 0.340859 | 3.649246 | 0.000263 | 0.008311 | chr2  | 92550084 | 92550747 | + | 0 NA | IntergeniALR/Alph  | 609282 NR_027714   | 440888 Hs. 730233NM_001032412 | ACTR3BP2            | FKSG73        | ACTR3B                  | pspseudo             |
| chr1-123: 27.03532 | 1.138686 | 0.312421 | 3.644711 | 0.000268 | 0.008394 | chr1  | 1.23E+08 | 1.23E+08 | + | 0 NA | IntergeniALR/Alph  | 1628105 NR_003955  | 647121 Hs. 697682NR_003955    | ENSG000000EMB1      | -             | embigin                 | fpseudo              |
| chr11-65: 14.71425 | -1.77169 | 0.487157 | -3.6368  | 0.000276 | 0.008585 | chr11 | 65423118 | 65425808 | + | 0 NA | non-codirnon-codir | 1665 NR_028272     | 283131 Hs. 523788NR_002802    | ENSG000000NEAT1     | LINC00084     | nuclear                 | ncRNA                |
| chr10-40: 33.01611 | -1.20144 | 0.330999 | -3.62975 | 0.000284 | 0.00875  | chr10 | 40462784 | 40463063 | + | 0 NA | IntergeniALR/Alph  | 1766327 NR_045000  | 399746 Hs. 742607NR_045000    | ACTR3BP5            | FKSG74        | ACTR3B                  | pspseudo             |
| chr5-45: 28.97682  | -1.13207 | 0.312432 | -3.62341 | 0.000291 | 0.008895 | chr5  | 48538105 | 48538413 | + | 0 NA | IntergeniALR/Alph  | 1903029 NM_198445  | 133418 Hs. 561411NM_198445    | ENSG000000EMB       | GP70          | embigin                 | protein-coding       |
| chr19-26: 56.71801 | -1.08159 | 0.299023 | -3.61706 | 0.000298 | 0.008972 | chr19 | 26967507 | 26967995 | + | 0 NA | IntergeniALR/Alph  | -825680 NR_146733  | 1.02E+08 Hs. 567934NR_110687  | ENSG000000LOC101927 | -             | uncharactncRNA          |                      |
| chr19-27: 30.59296 | -1.14365 | 0.316188 | -3.61701 | 0.000298 | 0.008972 | chr19 | 27091791 | 27092829 | + | 0 NA | IntergeniALR/Alph  | -701121 NR_146733  | 1.02E+08 Hs. 567934NR_110687  | ENSG000000LOC101927 | -             | uncharactncRNA          |                      |
| chr18-16: 18.9417  | -1.35147 | 0.375786 | -3.59638 | 0.000323 | 0.009637 | chr18 | 16677690 | 16677909 | + | 0 NA | IntergeniALR/Alph  | -135180 NR_027417  | 644669 Hs. 579474NR_027417    | ENSG000000LOC644669 | -             | ankyrin                 | fpseudo              |
| chr5-49: 19.95058  | -1.29305 | 0.359842 | -3.59339 | 0.000326 | 0.009646 | chr5  | 49419249 | 49419511 | + | 0 NA | IntergeniALR/Alph  | 1021908 NM_198445  | 133418 Hs. 561411NM_198445    | ENSG000000EMB       | GP70          | embigin                 | protein-coding       |
| chr5-48: 55.49304  | -1.08693 | 0.302595 | -3.59202 | 0.000328 | 0.009646 | chr5  | 48929424 | 48930402 | + | 0 NA | IntergeniALR/Alph  | 1511375 NM_198445  | 133418 Hs. 561411NM_198445    | ENSG000000EMB       | GP70          | embigin                 | protein-coding       |
| chr19-25: 55.96873 | -1.08097 | 0.301604 | -3.58407 | 0.000338 | 0.009868 | chr19 | 25052059 | 25051340 | + | 0 NA | IntergeniALR/Alph  | -887352 NR_003603  | 1E+08 Hs. 149312NR_003603     | ENSG000000HAVCR1P1  | -             | hepatitis               | pseudo               |
| chr2-92: 16.89831  | -1.49048 | 0.416746 | -3.57647 | 0.000348 | 0.010081 | chr2  | 92934828 | 92935157 | + | 0 NA | IntergeniALR/Alph  | 993859 NR_027714   | 440888 Hs. 730233NM_001032412 | ACTR3BP2            | FKSG73        | ACTR3B                  | pspseudo             |
| chr10-40: 28.83369 | -1.11317 | 0.311675 | -3.57158 | 0.000355 | 0.010193 | chr10 | 40080123 | 40080384 | + | 0 NA | IntergeniALR/Alph  | 1383657 NR_045000  | 399746 Hs. 742607NR_045000    | ACTR3BP5            | FKSG74        | ACTR3B                  | pspseudo             |
| chr7-59: 74.55807  | -0.9411  | 0.263818 | -3.56723 | 0.000361 | 0.010219 | chr7  | 59734599 | 59735003 | + | 0 NA | IntergeniALR/Alph  | 2284624 NM_001155  | 441234 Hs. 533121NM_001155    | ENSG000000ZNF716    | -             | zinc                    | fingerprotein-coding |
| chr10-40: 50.95375 | -1.12732 | 0.316048 | -3.56693 | 0.000361 | 0.010219 | chr10 | 40412688 | 40414995 | + | 0 NA | IntergeniALR/Alph  | 1717245 NR_045000  | 399746 Hs. 742607NR_045000    | ACTR3BP5            | FKSG74        | ACTR3B                  | pspseudo             |
| chr5-47: 21.39138  | -1.21763 | 0.342024 | -3.56006 | 0.000371 | 0.010412 | chr5  | 47694883 | 47696328 | + | 0 NA | IntergeniALR/Alph  | -1999225 NM_021072 | 348980 Hs. 353176NM_021072    | ENSG000000HCN1      | BCNG-1 BC     | hyperpolaprotein-coding |                      |
| chr1-124: 34.26229 | -1.19163 | 0.335767 | -3.54896 | 0.000387 | 0.01078  | chr1  | 1.24E+08 | 1.24E+08 | + | 0 NA | IntergeniALR/Alph  | 2829607 NR_003955  | 647121 Hs. 697682NR_003955    | ENSG000000EMB1      | -             | embigin                 | fpseudo              |
| chr1-124: 37.78298 | -1.26407 | 0.356518 | -3.54561 | 0.000392 | 0.010838 | chr1  | 1.24E+08 | 1.24E+08 | + | 0 NA | IntergeniALR/Alph  | 2645233 NR_003955  | 647121 Hs. 697682NR_003955    | ENSG000000EMB1      | -             | embigin                 | fpseudo              |
| chr1-122: 85.63958 | 0.875482 | 0.24765  | 3.53516  | 0.000408 | 0.011194 | chr1  | 1.23E+08 | 1.23E+08 | + | 0 NA | IntergeniALR/Alph  | 1222498 NR_003955  | 647121 Hs. 697682NR_003955    | ENSG000000EMB1      | -             | embigin                 | fpseudo              |
| chr5-49: 36.30397  | 1.22974  | 0.348568 | 3.527068 | 0.00042  | 0.011394 | chr5  | 49479027 | 49479228 | + | 0 NA | IntergeniALR/Alph  | 962161 NM_198445   | 133418 Hs. 561411NM_198445    | ENSG000000EMB       | GP70          | embigin                 | protein-coding       |
| chr19-25: 57.07312 | 1.065266 | 0.320664 | 3.526624 | 0.000421 | 0.011394 | chr19 | 25439330 | 25439541 | + | 0 NA | IntergeniALR/Alph  | -1275988 NR_003603 | 1E+08 Hs. 149312NR_003603     | ENSG000000HAVCR1P1  | -             | hepatitis               | pseudo               |
| chr5-49: 37.36705  | 1.244513 | 0.353746 | 3.518096 | 0.000435 | 0.011683 | chr5  | 49182269 | 49183335 | + | 0 NA | IntergeniALR/Alph  | 1258486 NM_198445  | 133418 Hs. 561411NM_198445    | ENSG000000EMB       | GP70          | embigin                 | protein-coding       |
| chr10-40: 27.72905 | 1.087227 | 0.310135 | 3.50566  | 0.000455 | 0.012086 | chr10 | 40975909 | 40976161 | + | 0 NA | IntergeniALR/Alph  | 1392014 NR_02438C  | 441666 Hs. 255725NR_02438C    | ENSG000000LOC441666 | -             | zinc                    | fingerpseud          |
| chr5-48: 13.919    | 1.800542 | 0.513803 | 3.504342 | 0.000458 | 0.012086 | chr5  | 48241487 | 48242221 | + | 0 NA | IntergeniALR/Alph  | 2199434 NM_198445  | 133418 Hs. 561411NM_198445    | ENSG000000EMB       | GP70          | embigin                 | protein-coding       |
| chr1-19: 13.94376  | 1.798564 | 0.513371 | 3.503441 | 0.000459 | 0.012086 | chr1  | 1.93E+08 | 1.93E+08 | + | 0 NA | intron (intron)    | 1827 NM_002922     | 5997 Hs. 78944 NM_002922      | ENSG000000CRGS2     | GOS8          | regulator               | protein-coding       |
| chr10-40: 25.21855 | 1.105248 | 0.316039 | 3.499083 | 0.000467 | 0.0122   | chr10 | 40595496 | 40596559 | + | 0 NA | IntergeniALR/Alph  | 1772018 NR_02438C  | 441666 Hs. 255725NR_02438C    | ENSG000000LOC441666 | -             | zinc                    | fingerpseud          |
| chr19-26: 19.08459 | 1.291787 | 0.370342 | 3.487924 | 0.000487 | 0.012633 | chr19 | 26918117 | 26918364 | + | 0 NA | IntergeniALR/Alph  | -875191 NR_146733  | 1.02E+08 Hs. 567934NR_110687  | ENSG000000LOC101927 | -             | uncharactncRNA          |                      |
| chr10-40: 18.55495 | 1.320191 | 0.379409 | 3.479602 | 0.000502 | 0.012943 | chr10 | 40400425 | 40400712 | + | 0 NA | IntergeniALR/Alph  | 1703972 NR_045000  | 399746 Hs. 742607NR_045000    | ACTR3BP5            | FKSG74        | ACTR3B                  | pspseudo             |
| chr6-59: 51.80495  | 1.088129 | 0.311718 | 3.468833 | 0.000523 | 0.013381 | chr6  | 59586841 | 59587042 | + | 0 NA | IntergeniALR/Alph  | -1625495 NR_132994 | 1.07E+08 Hs. 561535NR_125727  | ENSG000000LINC0068C | -             | long                    | intcncRNA            |
| chr7-58: 25.73494  | 1.088011 | 0.314078 | 3.464146 | 0.000532 | 0.013524 | chr7  | 58893059 | 58893259 | + | 0 NA | IntergeniALR/Alph  | 1442982 NM_001155  | 441234 Hs. 533121NM_001155    | ENSG000000ZNF716    | -             | zinc                    | fingerprotein-coding |
| chr19-26: 32.3993  | 1.119429 | 0.323382 | 3.461634 | 0.000537 | 0.01356  | chr19 | 26549334 | 26550173 | + | 0 NA | IntergeniALR/Alph  | -1243678 NR_146733 | 1.02E+08 Hs. 567934NR_110687  | ENSG000000LOC101927 | -             | uncharactncRNA          |                      |
| chr19-25: 42.18876 | 1.189438 | 0.345864 | 3.439036 | 0.000584 | 0.014645 | chr19 | 25736921 | 25737124 | + | 0 NA | IntergeniALR/Alph  | -1573575 NR_003603 | 1E+08 Hs. 149312NR_003603     | ENSG000000HAVCR1P1  | -             | hepatitis               | pseudo               |
| chr5-49: 16.10882  | 1.496103 | 0.435676 | 3.433977 | 0.000595 | 0.014823 | chr5  | 49459379 | 49459706 | + | 0 NA | IntergeniALR/Alph  | 981746 NM_198445   | 133418 Hs. 561411NM_198445    | ENSG000000EMB       | GP70          | embigin                 | protein-coding       |
| chr11-51: 15.12912 | 1.590037 | 0.463645 | 3.429431 | 0.000605 | 0.014974 | chr11 | 51770378 | 51770586 | + | 0 NA | IntergeniALR/Alph  | 1361335 NR_024504  | 646813 Hs. 684175NR_024504    | LOC646813           | -             | DEX                     | box pseudo           |
| chr1-124: 33.17996 | -1.12286 | 0.328194 | -3.42133 | 0.000623 | 0.015327 | chr1  | 1.25E+08 | 1.25E+08 | + | 0 NA | IntergeniALR/Alph  | 3167745 NR_003955  | 647121 Hs. 697682NR_003955    | ENSG000000EMB1      | -             | embigin                 | fpseudo              |
| chr1-122: 57.67907 | -1.01455 | 0.297047 | -3.41547 | 0.000637 | 0.015558 | chr1  | 1.23E+08 | 1.23E+08 | + | 0 NA | IntergeniALR/Alph  | 1126228 NR_003955  | 647121 Hs. 697682NR_003955    | ENSG000000EMB1      | -             | embigin                 | fpseudo              |
| chr1-125: 15.62979 | -1.59104 | 0.466586 | -3.40996 | 0.00065  | 0.015774 | chr1  | 1.46E+08 | 1.46E+08 | + | 0 NA | intron (intron)    | 31303 NR_104217    | 1.02E+08 Hs. 534675NR_104217  | ENSG000000NBPF25P   | WI2-925H NBPF | memt                    | pseudo               |
| chr6-37: 11.88799  | -2.12293 | 0.623399 | -3.40542 | 0.000661 | 0.015936 | chr6  | 37171230 | 37171598 | + | 0 NA | exon (NM exon)     | 1262 NM_001243     | 5292 Hs. 81170 NM_002644      | ENSG000000PIM1      | PIM           | Pim-1                   | prcprotein-coding    |
| chr15-10: 13.64676 | -1.76172 | 0.52014  | -3.38701 | 0.000707 | 0.016734 | chr15 | 1.02E+08 | 1.02E+08 | + | 0 NA | IntergeniCpG       | -12823 NM_001321   | 1E+08 Hs. 104864NM_001321551  | LOC100128           | -             | putative                | protein-coding       |
| chr5-49: 18.39723  | -1.29074 | 0.381202 | -3.38596 | 0.000709 | 0.016734 | chr5  | 49545496 | 49546353 | + | 0 NA | IntergeniALR/Alph  | 895364 NM_198445   |                               |                     |               |                         |                      |

|           |           |          |          |          |          |          |       |          |           |   |    |                     |          |           |          |           |             |            |            |            |                          |                         |                 |
|-----------|-----------|----------|----------|----------|----------|----------|-------|----------|-----------|---|----|---------------------|----------|-----------|----------|-----------|-------------|------------|------------|------------|--------------------------|-------------------------|-----------------|
| chr5-4735 | 16.98896  | 1.223098 | 0.402111 | 3.041694 | 0.002353 | 0.037994 | chr5  | 47358734 | 47359982+ | 0 | NA | IntergeniALR/Alphe  | -1662978 | NM_021072 | 348980   | Hs.35317c | NM_021072   | ENSG00000  | HCN1       | BCNG-1     | BC                       | hyperpolaprotein-coding |                 |
| chr15-494 | 8.326801  | 2.697719 | 0.890537 | 3.029318 | 0.002451 | 0.039416 | chr15 | 49423717 | 49427312+ | 0 | NA | intron (N(AAATTAT)R | 2272     | NM_002005 | 2252     | Hs.567262 | NM_002005   | ENSG00000  | FGF7       | HbGF-7     | KC                       | fibroblasprotein-coding |                 |
| chr19-256 | 16.00485  | 1.285899 | 0.425691 | 3.020735 | 0.002522 | 0.04026  | chr19 | 25837936 | 25839035+ | 0 | NA | IntergeniALR/Alphe  | -1675038 | NR_003603 | 1E+08    | Hs.149312 | NR_003603   | ENSG00000  | HAVCR1P1   |            |                          | hepatitispseudo         |                 |
| chr1-1217 | 53.73945  | 0.93823  | 0.310637 | 3.02034  | 0.002525 | 0.04026  | chr1  | 1.22E+08 | 1.22E+08+ | 0 | NA | IntergeniALR/Alphe  | 231238   | NR_003956 | 647121   | Hs.697682 | NR_003956   | ENSG00000  | EMB1P1     |            |                          | embigin fpseudo         |                 |
| chr7-5914 | 16.04199  | 1.284316 | 0.425915 | 3.015425 | 0.002566 | 0.040745 | chr7  | 59149122 | 59149760+ | 0 | NA | IntergeniALR/Alphe  | 1699264  | NM_001155 | 441234   | Hs.533121 | NM_001155   | ENSG00000  | ZNF716     |            |                          | zinc fingprotein-coding |                 |
| chr19-248 | 39.27837  | 1.069288 | 0.355021 | 3.0119   | 0.002596 | 0.041048 | chr19 | 24893005 | 24893298+ | 0 | NA | IntergeniALR/Alphe  | -729704  | NR_003603 | 1E+08    | Hs.149312 | NR_003603   | ENSG00000  | HAVCR1P1   |            |                          | hepatitispseudo         |                 |
| chr1-1494 | 15.53357  | 1.321067 | 0.438824 | 3.01047  | 0.002608 | 0.041069 | chr1  | 1.49E+08 | 1.5E+08+  | 0 | NA | exon (NM exon (NM   | 39111    | NM_001351 | 1.01E+08 | Hs.44508C | NM_001351   | ENSG00000  | NBPF19     |            |                          | NBPF memtprotein-coding |                 |
| chr10-395 | 35.58207  | 1.01878  | 0.339276 | 3.002806 | 0.002675 | 0.041942 | chr10 | 39983438 | 39983710+ | 0 | NA | IntergeniALR/Alphe  | 1286978  | NR_045000 | 399746   | Hs.742607 | NR_045000   | ACTR3BP5   | FKSG74     |            |                          | ACTR3B pspseudo         |                 |
| chr19-271 | 27.54304  | 0.916511 | 0.30566  | 2.998461 | 0.002713 | 0.042368 | chr19 | 27139682 | 27140680+ | 0 | NA | IntergeniALR/Alphe  | -653250  | NR_146735 | 1.02E+08 | Hs.567934 | NR_110687   | ENSG00000  | LOC101927- |            |                          | uncharactncRNA          |                 |
| chr20-264 | 26.2721   | 0.916897 | 0.307347 | 2.98239  | 0.00286  | 0.044473 | chr20 | 26468721 | 26469385+ | 0 | NA | IntergeniALR/Alphe  | -259820  | NR_040099 | 284801   | Hs.370699 | NR_040099   | ENSG00000  | MIR663AHC- |            |                          | MIR663A lncRNA          |                 |
| chr1-1225 | 19.71725  | 1.048084 | 0.352655 | 2.971979 | 0.002959 | 0.04582  | chr1  | 1.23E+08 | 1.23E+08+ | 0 | NA | IntergeniALR/Alphe  | 1063707  | NR_003956 | 647121   | Hs.697682 | NR_003956   | ENSG00000  | EMB1P1     |            |                          | embigin fpseudo         |                 |
| chr5-4881 | 35.34122  | 1.003037 | 0.337896 | 2.968482 | 0.002993 | 0.045975 | chr5  | 48810888 | 48811807+ | 0 | NA | IntergeniALR/Alphe  | 1629941  | NM_198444 | 133418   | Hs.561411 | NM_198444   | ENSG00000  | EMB        | GP70       |                          | embigin protein-coding  |                 |
| chr10-395 | 45.45395  | 0.981231 | 0.330556 | 2.968425 | 0.002993 | 0.045975 | chr10 | 39986368 | 39987336+ | 0 | NA | IntergeniALR/Alphe  | 1290256  | NR_045000 | 399746   | Hs.742607 | NR_045000   | ACTR3BP5   | FKSG74     |            |                          | ACTR3B pspseudo         |                 |
| chr10-401 | 18.74552  | 1.0898   | 0.367446 | 2.965881 | 0.003018 | 0.046    | chr10 | 40157670 | 40158953+ | 0 | NA | IntergeniALR/Alphe  | 1461715  | NR_045000 | 399746   | Hs.742607 | NR_045000   | ACTR3BP5   | FKSG74     |            |                          | ACTR3B pspseudo         |                 |
| chr1-1245 | 30.90716  | -0.92535 | 0.312132 | -2.96461 | 0.003031 | 0.046    | chr1  | 1.25E+08 | 1.25E+08+ | 0 | NA | IntergeniALR/Alphe  | 2995430  | NR_003956 | 647121   | Hs.697682 | NR_003956   | ENSG00000  | EMB1P1     |            |                          | embigin fpseudo         |                 |
| chr20-275 | 19.22476  | -1.06722 | 0.36     | -2.96451 | 0.003032 | 0.046    | chr20 | 27966984 | 27967183+ | 0 | NA | IntergeniALR/Alphe  | 635582   | NR_13231F | 1E+08    | Hs.529357 | NR_13231F   | ENSG00000  | FRG1CP     |            |                          | FSHD regipseudo         |                 |
| chr5-486  | 21.28495  | -0.99371 | 0.335575 | -2.96121 | 0.003064 | 0.046132 | chr5  | 48603636 | 48604534+ | 0 | NA | IntergeniALR/Alphe  | 1837203  | NM_198444 | 133418   | Hs.561411 | NM_198444   | ENSG00000  | EMB        | GP70       |                          | embigin protein-coding  |                 |
| chr1-1221 | 221.29512 | -0.99334 | 0.335558 | -2.96207 | 0.003074 | 0.046132 | chr1  | 1.23E+08 | 1.23E+08+ | 0 | NA | IntergeniALR/Alphe  | 1258730  | NR_003956 | 647121   | Hs.697682 | NR_003956   | ENSG00000  | EMB1P1     |            |                          | embigin fpseudo         |                 |
| chr1-1217 | 37.97445  | -1.03707 | 0.350376 | -2.95987 | 0.003078 | 0.046132 | chr1  | 1.22E+08 | 1.22E+08+ | 0 | NA | IntergeniALR/Alphe  | 245491   | NR_003956 | 647121   | Hs.697682 | NR_003956   | ENSG00000  | EMB1P1     |            |                          | embigin fpseudo         |                 |
| chr16-865 | 10.32421  | -2.05692 | 0.695211 | -2.9587  | 0.003089 | 0.046132 | chr16 | 86510703 | 86518334+ | 0 | NA | 3' UTR (N3' UTR (N  | 3991     | NM_001451 | 2294     | Hs.155591 | NM_001451   | ENSG00000  | FOXP1      | ACDMPV     | FK                       | forkhead protein-coding |                 |
| chr1-8556 | 14.03441  | -1.44228 | 0.48782  | -2.95657 | 0.003111 | 0.046268 | chr1  | 85580922 | 85583536+ | 0 | NA | exon (NM exon (NM   | 1468     | NM_001554 | 3491     | Hs.8867   | NM_001554   | ENSG00000  | CCN1       | CYR61      | GI                       | cellular protein-coding |                 |
| chr2-4322 | 10.30962  | -2.05548 | 0.695896 | -2.95371 | 0.00314  | 0.046278 | chr2  | 43222536 | 43225508+ | 0 | NA | 3' UTR (N3' UTR (N  | 2584     | NM_006887 | 678      | Hs.503093 | NM_006887   | ENSG00000  | ZFP36L2    | BRF2       | ERF-                     | ZFP36 rirprotein-coding |                 |
| chr4-1375 | 10.30962  | -2.05548 | 0.695896 | -2.95371 | 0.00314  | 0.046278 | chr4  | 1.38E+08 | 1.38E+08+ | 0 | NA | intron (N(TAT)n Si  | 6453     | NM_019035 | 54510    | Hs.591691 | NM_019035   | ENSG00000  | PCDH18     | PCDH68L    | protopctd protein-coding |                         |                 |
| chr19-25  | 17.7592   | -1.13645 | 0.384861 | -2.95287 | 0.003148 | 0.046278 | chr19 | 25021130 | 25021580+ | 0 | NA | IntergeniALR/Alphe  | -857908  | NR_003603 | 1E+08    | Hs.149312 | NR_003603   | ENSG00000  | HAVCR1P1   |            |                          | hepatitispseudo         |                 |
| chr1-1225 | 17.27554  | -1.1628  | 0.394756 | -2.94562 | 0.003223 | 0.047192 | chr1  | 1.23E+08 | 1.23E+08+ | 0 | NA | IntergeniALR/Alphe  | 1000952  | NR_003956 | 647121   | Hs.697682 | NR_003956   | ENSG00000  | EMB1P1     |            |                          | embigin fpseudo         |                 |
| chr1-1247 | 22.19832  | -0.9613  | 0.326983 | -2.93991 | 0.003283 | 0.047796 | chr1  | 1.25E+08 | 1.25E+08+ | 0 | NA | IntergeniALR/Alphe  | 3220783  | NR_003956 | 647121   | Hs.697682 | NR_003956   | ENSG00000  | EMB1P1     |            |                          | embigin fpseudo         |                 |
| chr5-488  | 70.38132  | -0.79721 | 0.271227 | -2.93928 | 0.00329  | 0.047796 | chr5  | 48860545 | 48860791+ | 0 | NA | IntergeniALR/Alphe  | 1580620  | NM_198444 | 133418   | Hs.561411 | NM_198444   | ENSG00000  | EMB        | GP70       |                          | embigin protein-coding  |                 |
| chr6-5938 | 58.57665  | -0.85511 | 0.292187 | -2.92658 | 0.003427 | 0.04958  | chr6  | 59383276 | 59383494+ | 0 | NA | IntergeniALR/Alphe  | -1421939 | NR_132994 | 1.07E+08 | Hs.561535 | NR_125727   | ENSG00000  | LINC0068C- |            |                          | long intencRNA          |                 |
| chr8-445  | 38.58886  | -1.03985 | 0.355442 | -2.92551 | 0.003439 | 0.04958  | chr8  | 44594451 | 44594671+ | 0 | NA | IntergeniALR/Alphe  | 1302119  | NM_001005 | 340441   | Hs.531575 | NM_001005   | ENSG00000  | POTEA      | A26A1      | CTI                      | POTE ankyprotein-coding |                 |
| chr1-124  | 34.03288  | -0.96207 | 0.330431 | -2.91155 | 0.003596 | 0.051653 | chr1  | 1.24E+08 | 1.24E+08+ | 0 | NA | IntergeniALR/Alphe  | 2486311  | NR_003956 | 647121   | Hs.697682 | NR_003956   | ENSG00000  | EMB1P1     |            |                          | embigin fpseudo         |                 |
| chr2-9237 | 16.1915   | -1.21819 | 0.418824 | -2.90861 | 0.00363  | 0.051944 | chr2  | 92374494 | 92374819+ | 0 | NA | IntergeniALR/Alphe  | 433523   | NR_027714 | 440888   | Hs.730235 | NM_01032412 | ACTR3BP2   | FKSG73     |            |                          | ACTR3B pspseudo         |                 |
| chr19-362 | 12.99414  | -1.5419  | 0.530855 | -2.90457 | 0.003678 | 0.05242  | chr19 | 36280523 | 36281852+ | 0 | NA | IntergeniSST1 Sate  | -30156   | NR_029389 | 1E+08    | Hs.46655C | NR_029389   | LOC100134- |            |            |                          | uncharactncRNA          |                 |
| chr1-1227 | 15.73261  | -1.24944 | 0.430728 | -2.90077 | 0.003723 | 0.05286  | chr1  | 1.23E+08 | 1.23E+08+ | 0 | NA | IntergeniALR/Alphe  | 1203522  | NR_003956 | 647121   | Hs.697682 | NR_003956   | ENSG00000  | EMB1P1     |            |                          | embigin fpseudo         |                 |
| chr19-265 | 15.21977  | -1.2832  | 0.445241 | -2.88203 | 0.003951 | 0.055764 | chr19 | 26519309 | 26519508+ | 0 | NA | IntergeniALR/Alphe  | -1274023 | NR_146735 | 1.02E+08 | Hs.567934 | NR_110687   | ENSG00000  | LOC101927- |            |                          | uncharactncRNA          |                 |
| chr1-1242 | 12.05159  | 1.66485  | 0.577553 | 2.881596 | 0.003957 | 0.055764 | chr1  | 1.24E+08 | 1.24E+08+ | 0 | NA | IntergeniALR/Alphe  | 2702645  | NR_003956 | 647121   | Hs.697682 | NR_003956   | ENSG00000  | EMB1P1     |            |                          | embigin fpseudo         |                 |
| chr1-1241 | 34.83254  | 0.971084 | 0.337469 | 2.877549 | 0.004008 | 0.056273 | chr1  | 1.24E+08 | 1.24E+08+ | 0 | NA | IntergeniALR/Alphe  | 2648738  | NR_003956 | 647121   | Hs.697682 | NR_003956   | ENSG00000  | EMB1P1     |            |                          | embigin fpseudo         |                 |
| chr10-415 | 12.02241  | 1.662685 | 0.578774 | 2.872772 | 0.004069 | 0.056919 | chr10 | 41380177 | 41380376+ | 0 | NA | IntergeniALR/Alphe  | 987769   | NR_02438C | 441666   | Hs.255725 | NR_02438C   | ENSG00000  | LOC44166C- |            |                          | zinc fingpseudo         |                 |
| chr5-4771 | 19.97244  | 0.990772 | 0.348252 | 2.868818 | 0.00412  | 0.057028 | chr5  | 47718440 | 47719621+ | 0 | NA | IntergeniALR/Alphe  | -2022655 | NM_021072 | 348980   | Hs.35317c | NM_021072   | ENSG00000  | HCN1       | BCNG-1     | BC                       | hyperpolaprotein-coding |                 |
| chr11-522 | 24.73775  | 0.893646 | 0.31155  | 2.868391 | 0.004126 | 0.057028 | chr11 | 52839828 | 52840055+ | 0 | NA | IntergeniALR/Alphe  | 1764057  | NM_001004 | 119749   | Hs.553564 | NM_001004   | ENSG00000  | OR4C46     |            |                          | olfactoryprotein-coding |                 |
| chr19-255 | 19.98262  | 0.998618 | 0.348263 | 2.867429 | 0.004138 | 0.057028 | chr19 | 25317925 | 25319026+ | 0 | NA | IntergeniALR/Alphe  | -1155028 | NR_003603 | 1E+08    | Hs.149312 | NR_003603   | ENSG00000  | HAVCR1P1   |            |                          | hepatitispseudo         |                 |
| chr9-4352 | 20.51225  | 0.981493 | 0.342302 | 2.867328 | 0.00414  | 0.057028 | chr9  | 43524994 | 43525251+ | 0 | NA | IntergeniALR/Alphe  | 398957   | NR_160666 | 1.03E+08 | Hs.561411 | NR_160666   | ENSG00000  | EMB        | LOC102724- |                          |                         | methylenepseudo |
| chr5-4897 | 34.47718  | 0.952062 | 0.332153 | 2.86634  | 0.004152 | 0.057028 | chr5  | 48973351 | 48974271+ | 0 | NA | IntergeniALR/Alphe  | 1467477  | NM_198444 | 133418   | Hs.561411 | NM_198444   | ENSG00000  | EMB        | GP70       |                          | embigin protein-coding  |                 |
| chr17-614 | 9.055475  | 2.267945 | 0.792576 | 2.861485 | 0.004217 | 0.057699 | chr17 | 61400302 | 61409492+ | 0 | NA | intron (NCPg-11505  | 5054     | NM_005994 | 6909     | Hs.531085 | NM_005994   | ENSG00000  | TBX2       | VETD       |                          | T-box traprotein-coding |                 |
| chr10-405 | 53.51789  | 0.874875 | 0.30588  | 2.860186 | 0.004234 | 0.057726 | chr10 | 40971781 | 40971989+ | 0 | NA | IntergeniALR/Alphe  | 1396160  | NR_02438C | 441666   | Hs.255725 | NR_02438C   | ENSG00000  | LOC44166C- |            |                          | zinc fingpseudo         |                 |
| chr5-4735 | 18.49008  | 1.058431 | 0.370397 | 2.857555 | 0.004269 | 0.057932 | chr5  |          |           |   |    |                     |          |           |          |           |             |            |            |            |                          |                         |                 |



|           |          |          |          |          |          |          |       |          |          |    |    |                     |          |           |          |           |              |                     |           |                              |                |
|-----------|----------|----------|----------|----------|----------|----------|-------|----------|----------|----|----|---------------------|----------|-----------|----------|-----------|--------------|---------------------|-----------|------------------------------|----------------|
| chr2-5587 | 9.229497 | 1.851922 | 0.744944 | 2.485989 | 0.012919 | 0.136295 | chr2  | 55873504 | 55875065 | +0 | NA | intron (Nintron (N  | 49498    | NM_001036 | 2202     | Hs.76224  | NM_004105    | ENSG000004EFEMP1    | DHRD DRAI | EGF contaprotein-coding      |                |
| chr1-1967 | 9.715362 | 1.75495  | 0.706476 | 2.48409  | 0.012988 | 0.136295 | chr1  | 1.97E+08 | 1.97E+08 | +0 | NA | intron (THEIC-int   | -35669   | NM_021022 | 10878    | Hs.709217 | NM_021022    | ENSG000004CFHR3     | CFHL3 DOW | comlemerprotein-coding       |                |
| chr10-40  | 10.6725  | 1.594231 | 0.64188  | 2.483689 | 0.013003 | 0.136295 | chr10 | 40389388 | 40390526 | +0 | NA | IntergeniALR/Alphe  | 1693361  | NR_045000 | 399746   | Hs.742607 | NR_045000    | ACTR3BP5            | FKSG74    | ACTR3B                       | pspseudo       |
| chr11-534 | 10.6725  | 1.594231 | 0.64188  | 2.483689 | 0.013003 | 0.136295 | chr11 | 53416348 | 53416621 | +0 | NA | IntergeniALR/Alphe  | 1187514  | NM_001004 | 119749   | Hs.553564 | NM_001004    | ENSG000004CRK46     | -         | olfactoryprotein-coding      |                |
| chr2-1331 | 9.200316 | 1.848395 | 0.745197 | 2.480411 | 0.013123 | 0.137173 | chr2  | 1.33E+08 | 1.33E+08 | +0 | NA | intron (Nintron (N  | -11131   | NR_110294 | 1.02E+08 | Hs.661917 | NR_110294    | ENSG000004NCAP5-AS- | -         | NKAP5                        | arncRNA        |
| chr17-48  | 10.6703  | 1.590637 | 0.642801 | 2.474542 | 0.013341 | 0.138154 | chr17 | 48542138 | 48543626 | +0 | NA | 3' UTR (N3' UTR (N  | -1469    | NR_102277 | 1.01E+08 | Hs.17180  | NR_102277    | ENSG000004HOXB-AS1  | HOXB30S   | HOXB                         | cluscncRNA     |
| chr18-54  | 9.686182 | 1.751671 | 0.708124 | 2.473678 | 0.013373 | 0.138154 | chr18 | 54924912 | 54927104 | +0 | NA | intron (MamRep187   | 32040    | NM_001144 | 80323    | Hs.12079  | NM_002514    | ENSG000004CCDC68    | SE57-1    | coiled-cpprotein-coding      |                |
| chr19-12  | 9.686182 | 1.751671 | 0.708124 | 2.473678 | 0.013373 | 0.138154 | chr19 | 12247360 | 12250793 | +0 | NA | IntergeniAluSg4 S1  | 45536    | NM_001355 | 51710    | Hs.296731 | NM_016264    | ENSG000004ZNF44     | GIOT-2 KC | zinc fingerprotein-coding    |                |
| chr19-257 | 9.17555  | 1.854632 | 0.750047 | 2.472689 | 0.01341  | 0.138154 | chr19 | 25711233 | 25711466 | +0 | NA | IntergeniALR/Alphe  | -1547902 | NR_003603 | 1E+08    | Hs.149312 | NR_003603    | ENSG000004HAVCR1P1  | -         | hepatitispseudo              |                |
| chr17-554 | 9.713155 | 1.750557 | 0.708066 | 2.472309 | 0.013424 | 0.138154 | chr17 | 55413069 | 55414359 | +0 | NA | intron (Nintron (N  | 8121     | NM_012325 | 23531    | Hs.46348  | NM_012325    | ENSG000004MMD1      | MMA MMD1  | monocyte protein-coding      |                |
| chr7-1117 | 8.685269 | 1.956728 | 0.791568 | 2.471965 | 0.013437 | 0.138154 | chr7  | 1.12E+08 | 1.12E+08 | +0 | NA | intron (NLMef LIN   | -31010   | NR_103800 | 1.01E+08 | Hs.67751  | NR_103800    | ENSG000004DOCK4-AS1 | -         | DOCK4                        | antncRNA       |
| chr1-122  | 10.68268 | 1.588423 | 0.643736 | 2.467509 | 0.013606 | 0.139126 | chr1  | 1.23E+08 | 1.23E+08 | +0 | NA | IntergeniALR/Alphe  | 1148295  | NR_003956 | 647121   | Hs.69768  | NR_003956    | ENSG000004EMB1P1    | -         | embigin                      | fpseudo        |
| chr2-931  | 10.68268 | 1.588423 | 0.643736 | 2.467509 | 0.013606 | 0.139126 | chr2  | 93100686 | 93100915 | +0 | NA | IntergeniALR/Alphe  | 1107619  | NR_146107 | 728034   | NR_146105 | BMS1P14      | -                   | BMS1      | pspseudo                     |                |
| chr1-178  | 9.698564 | 1.748887 | 0.709558 | 2.46468  | 0.013714 | 0.139849 | chr1  | 1.79E+08 | 1.79E+08 | +0 | NA | intron (NLIAPA2 LIN | -26125   | NM_004673 | 9068     | Hs.591474 | NM_004673    | ENSG000004ANGPTL1   | ANG3 ANGF | angiopoicprotein-coding      |                |
| chr1-123  | 15.62421 | 1.0452   | 0.425051 | 2.458996 | 0.013933 | 0.141698 | chr1  | 1.23E+08 | 1.23E+08 | +0 | NA | IntergeniALR/Alphe  | 1531124  | NR_003956 | 647121   | Hs.69768  | NR_003956    | ENSG000004EMB1P1    | -         | embigin                      | fpseudo        |
| chr3-9157 | 51.98639 | 0.758009 | 0.308593 | 2.456337 | 0.014036 | 0.142092 | chr3  | 91572763 | 91572986 | +0 | NA | IntergeniALR/Alphe  | 2401207  | NM_001314 | 5627     | Hs.64016  | NM_000313    | ENSG000004PROS1     | PROS PS21 | protein Sprotein-coding      |                |
| chr1-124  | 12.95208 | 1.276654 | 0.519797 | 2.456064 | 0.014047 | 0.142092 | chr1  | 1.24E+08 | 1.24E+08 | +0 | NA | IntergeniALR/Alphe  | 2659994  | NR_003956 | 647121   | Hs.69768  | NR_003956    | ENSG000004EMB1P1    | -         | embigin                      | fpseudo        |
| chr10-401 | 21.34862 | 0.806655 | 0.3296   | 2.447376 | 0.01439  | 0.145174 | chr10 | 40847368 | 40848517 | +0 | NA | IntergeniALR/Alphe  | 1520103  | NR_02438C | 441666   | Hs.25572  | NR_02438C    | ENSG000004LOC441666 | -         | zinc                         | fingerpseudo   |
| chr5-489  | 15.15515 | 1.072556 | 0.438788 | 2.444361 | 0.014511 | 0.145855 | chr5  | 48902736 | 48903032 | +0 | NA | IntergeniALR/Alphe  | 1538404  | NM_198445 | 133418   | Hs.561411 | NM_198445    | ENSG000004EMB       | GP70      | embigin                      | protein-coding |
| chr5-473  | 15.14056 | -1.072   | 0.438668 | -2.44376 | 0.014535 | 0.145855 | chr5  | 47325082 | 47326421 | +0 | NA | IntergeniALR/Alphe  | -1629371 | NM_021072 | 348980   | Hs.35317  | NM_021072    | ENSG000004HCN1      | BCNG-1 BC | hyperpolaprotein-coding      |                |
| chr6-3667 | 12.44145 | -1.32212 | 0.541588 | -2.44119 | 0.014639 | 0.146507 | chr6  | 36678787 | 36686308 | +0 | NA | intron (Nintron (N  | 3833     | NM_00038E | 1026     | Hs.370771 | NM_00038E    | ENSG000004CDKN1A    | CAP20 CDK | hypercyclin deprotein-coding |                |
| chr12-124 | 15.12376 | -1.07023 | 0.438872 | -2.4386  | 0.014744 | 0.147171 | chr12 | 1.25E+08 | 1.25E+08 | +0 | NA | exon (NM exon (NM   | 1640     | NM_021005 | 7316     | Hs.52034  | NM_021005    | ENSG000004UBC       | HMG20     | ubiquitinprotein-coding      |                |
| chr1-124  | 43.99295 | -0.81111 | 0.332956 | -2.43608 | 0.014848 | 0.147808 | chr1  | 1.24E+08 | 1.24E+08 | +0 | NA | IntergeniALR/Alphe  | 2579739  | NR_003956 | 647121   | Hs.69768  | NR_003956    | ENSG000004EMB1P1    | -         | embigin                      | fpseudo        |
| chr1-122  | 26.60997 | -0.73595 | 0.302831 | -2.43024 | 0.015089 | 0.149813 | chr1  | 1.23E+08 | 1.23E+08 | +0 | NA | IntergeniALR/Alphe  | 1163975  | NR_003956 | 647121   | Hs.69768  | NR_003956    | ENSG000004EMB1P1    | -         | embigin                      | fpseudo        |
| chr19-265 | 18.36489 | -0.88953 | 0.366823 | -2.42495 | 0.015311 | 0.151616 | chr19 | 26924473 | 26925713 | +0 | NA | IntergeniALR/Alphe  | -868338  | NR_146733 | 1.02E+08 | Hs.567934 | NR_110687    | ENSG000004LOC101927 | -         | uncharactncRNA               |                |
| chr20-27  | 17.89141 | -0.90594 | 0.375187 | -2.41463 | 0.015751 | 0.155569 | chr20 | 27054773 | 27055564 | +0 | NA | IntergeniALR/Alphe  | -845935  | NR_04009E | 284801   | Hs.37069  | NR_04009E    | ENSG000004MIR663AHC | -         | MIR663A                      | lncRNA         |
| chr1-124  | 17.83746 | -0.906   | 0.37552  | -2.41265 | 0.015837 | 0.156006 | chr1  | 1.24E+08 | 1.24E+08 | +0 | NA | IntergeniALR/Alphe  | 2935592  | NR_003956 | 647121   | Hs.69768  | NR_003956    | ENSG000004EMB1P1    | -         | embigin                      | fpseudo        |
| chr6-5927 | 90.66336 | -0.59065 | 0.245367 | -2.40721 | 0.016075 | 0.157935 | chr6  | 59276231 | 59276430 | +0 | NA | IntergeniALR/Alphe  | -1314884 | NR_132994 | 1.07E+08 | Hs.56153  | NR_125727    | ENSG000004LINC0068C | -         | long                         | intencRNA      |
| chr1-234  | 11.44274 | -1.42189 | 0.592242 | -2.40086 | 0.016357 | 0.15993  | chr1  | 2.35E+08 | 2.35E+08 | +0 | NA | 3' UTR (N3' UTR (N  | 2842     | NM_18297E | 359948   | Hs.35026  | NM_18297E    | ENSG000004IRF2BP2   | CVID14    | interfercprotein-coding      |                |
| chr12-921 | 11.42815 | -1.42065 | 0.591959 | -2.39992 | 0.016399 | 0.15993  | chr12 | 92141869 | 92145285 | +0 | NA | promoter-promoter-  | -746     | NR_132341 | 256021   | Hs.651357 | NM_00125E    | ENSG000004LINC0161E | C12orf79  | long                         | intencRNA      |
| chr1-122  | 17.337   | -0.92339 | 0.384781 | -2.39977 | 0.016405 | 0.15993  | chr1  | 1.23E+08 | 1.23E+08 | +0 | NA | IntergeniALR/Alphe  | 1035182  | NR_003956 | 647121   | Hs.69768  | NR_003956    | ENSG000004EMB1P1    | -         | embigin                      | fpseudo        |
| chr2-925  | 36.84323 | -0.82181 | 0.342821 | -2.39719 | 0.016521 | 0.160647 | chr2  | 92994221 | 92994573 | +0 | NA | IntergeniALR/Alphe  | 1053264  | NR_027714 | 440888   | Hs.73023  | NR_001032412 | ACTR3BP2            | FKSG73    | ACTR3B                       | pspseudo       |
| chr2-1504 | 8.432036 | -1.90616 | 0.796401 | -2.39455 | 0.016641 | 0.16139  | chr2  | 1.5E+08  | 1.5E+08  | +0 | NA | intron (Nintron (N  | 7526     | NM_00516E | 390      | Hs.6838   | NM_00516E    | ENSG000004RND3      | ARHE Rho  | Rho familprotein-coding      |                |
| chr1-124  | 16.86352 | -0.94175 | 0.394621 | -2.38648 | 0.01701  | 0.164551 | chr1  | 1.25E+08 | 1.25E+08 | +0 | NA | IntergeniALR/Alphe  | 3000511  | NR_003956 | 647121   | Hs.69768  | NR_003956    | ENSG000004EMB1P1    | -         | embigin                      | fpseudo        |
| chr10-40  | 13.65599 | -1.16189 | 0.487738 | -2.3822  | 0.01721  | 0.165859 | chr10 | 40396881 | 40397628 | +0 | NA | IntergeniALR/Alphe  | 1700558  | NR_045000 | 399746   | Hs.742607 | NR_045000    | ACTR3BP5            | FKSG74    | ACTR3B                       | pspseudo       |
| chr5-495  | 10.91531 | -1.479   | 0.620988 | -2.38168 | 0.017234 | 0.165859 | chr5  | 49134512 | 49136221 | +0 | NA | IntergeniALR/Alphe  | 1305922  | NM_198445 | 133418   | Hs.561411 | NM_198445    | ENSG000004EMB       | GP70      | embigin                      | protein-coding |
| chr1-1717 | 10.92769 | -1.47699 | 0.620748 | -2.37937 | 0.017342 | 0.166478 | chr1  | 1.72E+08 | 1.72E+08 | +0 | NA | intron (Nintron (N  | 33023    | NR_033704 | 8674     | Hs.6651   | NM_00376E    | ENSG000004VAMP4     | VAMP-4 V  | vesicle aprotein-coding      |                |
| chr1-2064 | 10.94008 | -1.47494 | 0.6226   | -2.36901 | 0.017836 | 0.170781 | chr1  | 2.06E+08 | 2.06E+08 | +0 | NA | intron (Nintron (N  | -49059   | NM_00119E | 9641     | Hs.32104  | NM_01400E    | ENSG000004IKBK      | IKK-E IKK | inhibitorprotein-coding      |                |
| chr9-965  | 8.415238 | -1.89851 | 0.802096 | -2.36693 | 0.017936 | 0.171304 | chr9  | 96538999 | 96539222 | +0 | NA | exon (NM exon (NM   | 27271    | NM_001351 | 8555     | Hs.40582  | NM_003671    | ENSG000004C14B1     | CDC14B3   | cell diviprotein-coding      |                |
| chr17-554 | 10.41486 | -1.54206 | 0.651803 | -2.36583 | 0.01799  | 0.17138  | chr17 | 55403434 | 55405405 | +0 | NA | intron (Nintron (N  | 17416    | NM_01232E | 23531    | Hs.46348  | NM_01232E    | ENSG000004MMD       | MMA MMD1  | monocyte protein-coding      |                |
| chr19-271 | 13.1825  | -1.19573 | 0.507541 | -2.35594 | 0.018476 | 0.175569 | chr19 | 27105822 | 27105653 | +0 | NA | IntergeniALR/Alphe  | -687239  | NR_146733 | 1.02E+08 | Hs.567934 | NR_110687    | ENSG000004LOC101927 | -         | uncharactncRNA               |                |
| chr4-87   | 9.902017 | -1.61548 | 0.686209 | -2.35421 | 0.018562 | 0.175615 | chr4  | 1.07E+08 | 1.07E+08 | +0 | NA | IntergeniCpG-2170E  | -1174    | NM_00524E | 2195     | Hs.481371 | NM_00524E    | ENSG000004FAT1      | CDHF7 CDF | FAT atypiprotein-coding      |                |
| chr17-404 | 9.443124 | -1.6968  | 0.720823 | -2.35397 | 0.018574 | 0.175615 | chr17 | 40443944 | 40458809 | +0 | NA | intron (NCR1_Mam I  | 7926     | NM_00155E | 3487     | Hs.46299  | NM_00155E    | ENSG000004IGFBP4    | BP-4 HT2  | insulin lprotein-coding      |                |
| chr5-477  | 15.83563 | -0.98204 | 0.4185   | -2.34657 | 0.018947 | 0.17869  | chr5  | 47735194 | 47736041 | +0 | NA | IntergeniALR/Alphe  | -2039237 | NM_021072 | 348980   | Hs.35317  | NM_021072    | ENSG000004HCN1      | BCNG-1 BC | hyperpolaprotein-coding      |                |
| chr11-52  | 20.03611 | -0.80011 | 0.341682 | -2.34167 | 0.019198 | 0.180601 | chr11 | 52690121 | 52690618 | +0 | NA | IntergeniALR/Alphe  | 1913629  | NM_001004 | 119749   | Hs.553564 | NM_001004    | ENSG000004CRK46     | -         | olfactoryprotein-coding      |                |
| chr1-122  | 15.37895 | -1.00574 | 0.43055  | -2.33594 | 0.019494 | 0.182936 | chr1  | 1.23E+08 | 1.23E+08 | +0 | NA | IntergeniALR/Alphe  |          |           |          |           |              |                     |           |                              |                |

|           |          |          |          |          |          |          |       |          |             |   |    |                     |          |           |          |           |              |          |           |           |           |                |                |                |
|-----------|----------|----------|----------|----------|----------|----------|-------|----------|-------------|---|----|---------------------|----------|-----------|----------|-----------|--------------|----------|-----------|-----------|-----------|----------------|----------------|----------------|
| chr1-1452 | 12.58629 | -1.10483 | 0.525303 | -2.10323 | 0.035446 | 0.277606 | chr1  | 1.45E+08 | 1.45E+08    | 0 | NA | intron (Nintron (N  | 58061    | NM_00127E | 1E+08    | Hs.44508  | NC_00127E    | ENS00000 | NCBPFP20  | -         | NBPF memt | protein-coding |                |                |
| chr12-652 | 12.58629 | -1.10483 | 0.525303 | -2.10323 | 0.035446 | 0.277606 | chr12 | 6534857  | 6538393     | 0 | NA | intron (Nintron (N  | 1361     | NM_00125E | 2597     | Hs.544577 | NC_00204E    | ENS00000 | GAPDH     | G3PD      | [GAP]     | glyceralc      | protein-coding |                |
| chr12-352 | 28.28536 | -0.63205 | 0.300576 | -2.10279 | 0.035485 | 0.277606 | chr12 | 35030728 | 35030959    | 0 | NA | IntergeniALR/Alphe  | 1008347  | NM_032834 | 84920    | Hs.102971 | NC_032834    | ENS00000 | CALG10    | ALG10A    | [DIALG10] | al             | protein-coding |                |
| chr1-8905 | 9.91415  | -1.43315 | 0.682606 | -2.09953 | 0.03577  | 0.279257 | chr1  | 89052675 | 89053086    | 0 | NA | 3' UTR (N3' UTR (N  | 12328    | NM_00205E | 2633     | Hs.62661  | NC_00205E    | ENS00000 | GBP1      | -         | guanylate | protein-coding |                |                |
| chr1-1245 | 14.80174 | -0.92812 | 0.443283 | -2.09375 | 0.036282 | 0.282659 | chr1  | 1.25E+08 | 1.25E+08    | 0 | NA | IntergeniALR/Alphe  | 3042236  | NR_00395E | 647121   | Hs.697682 | NR_00395E    | ENS00000 | EMBP1     | -         | embigin   | fpseudo        |                |                |
| chr19-245 | 12.10263 | -1.14234 | 0.548322 | -2.08333 | 0.037221 | 0.289384 | chr19 | 24944763 | 24946356    | 0 | NA | IntergeniALR/Alphe  | -782112  | NR_00360E | 1E+08    | Hs.149312 | NR_00360E    | ENS00000 | HAVCR1P1  | -         | hepatitis | pseudo         |                |                |
| chr8-1026 | 12.10042 | -1.13977 | 0.547906 | -2.08023 | 0.037505 | 0.290989 | chr8  | 1.03E+08 | 1.03E+08    | 0 | NA | non-codiron-codir   | 3864     | NM_00103E | 7071     | Hs.435001 | NC_00565E    | ENS00000 | KLF10     | EGR-alpha | Kruppel   | l              | protein-coding |                |
| chr11-615 | 12.08583 | -1.13865 | 0.548473 | -2.07604 | 0.03789  | 0.293376 | chr11 | 61963776 | 61967191    | 0 | NA | TTS (NM_TTS (NM_C   | 2151     | NM_00203E | 2495     | Hs.52491C | NC_00203E    | ENS00000 | FTH1      | FHC       | [FTH]     | Ferritin       | protein-coding |                |
| chr10-408 | 17.05213 | -0.79884 | 0.387206 | -2.06309 | 0.039104 | 0.302151 | chr10 | 40835250 | 40835639    | 0 | NA | IntergeniALR/Alphe  | 1532601  | NR_02438C | 441666   | Hs.25572E | NR_02438C    | ENS00000 | LOC44166E | -         | zinc fing | pseudo         |                |                |
| chr20-261 | 11.5752  | -1.18009 | 0.573572 | -2.05744 | 0.039644 | 0.305694 | chr20 | 26557899 | 26558615    | 0 | NA | IntergeniALR/Alphe  | -349024  | NR_04009E | 284801   | Hs.37069E | NR_04009E    | ENS00000 | MIR663AHC | -         | MIR663a   | hncRNA         |                |                |
| chr1-1234 | 12.0195  | -1.14085 | 0.556597 | -2.04969 | 0.040395 | 0.310849 | chr1  | 1.23E+08 | 1.23E+08    | 0 | NA | IntergeniALR/Alphe  | 1916830  | NR_00395E | 647121   | Hs.697682 | NR_00395E    | ENS00000 | EMBP1     | -         | embigin   | fpseudo        |                |                |
| chr19-255 | 11.5584  | -1.17595 | 0.575779 | -2.04237 | 0.041115 | 0.315747 | chr19 | 25963839 | 25964852    | 0 | NA | IntergeniALR/Alphe  | -1800898 | NR_00360E | 1E+08    | Hs.149312 | NR_00360E    | ENS00000 | HAVCR1P1  | -         | hepatitis | pseudo         |                |                |
| chr19-277 | 11.08933 | -1.22247 | 0.599237 | -2.04005 | 0.041346 | 0.316226 | chr19 | 27188814 | 27189689    | 0 | NA | IntergeniALR/Alphe  | -604180  | NR_04009E | 1.02E+08 | Hs.567934 | NR_110687    | ENS00000 | LOC101927 | -         | uncharact | ncRNA          |                |                |
| chr5-477  | 11.08933 | -1.22247 | 0.599237 | -2.04005 | 0.041346 | 0.316226 | chr5  | 47700281 | 47701093    | 0 | NA | IntergeniALR/Alphe  | -2004307 | NM_02107E | 348980   | Hs.35317E | NC_02107E    | ENS00000 | HCHN1     | BCNG-1    | [BC]      | hyperpol       | protein-coding |                |
| chr19-124 | 11.10172 | -1.22062 | 0.599034 | -2.03765 | 0.041585 | 0.31741  | chr19 | 1249884  | 1252405     | 0 | NA | intron (NCpG-1301C  | 2591     | NM_177401 | 90007    | Hs.46552E | NC_177401    | ENS00000 | MIDN      | -         | midnoln   | protein-coding |                |                |
| chr5-5594 | 11.08713 | -1.21927 | 0.599742 | -2.033   | 0.042053 | 0.319687 | chr5  | 55945996 | 55947339    | 0 | NA | intron (NAluSz SIN  | 48296    | NM_00136E | 3572     | Hs.53208E | NC_002184    | ENS00000 | IL6ST     | CD130     | [CDW]     | interleuk      | protein-coding |                |
| chr6-3072 | 11.08713 | -1.21927 | 0.599742 | -2.033   | 0.042053 | 0.319687 | chr6  | 30723332 | 30725788    | 0 | NA | non-codiron-codir   | 2922     | NM_00129E | 203068   | Hs.63648C | NC_178014    | ENS00000 | TUBB      | CDCBM6    | [CS]      | tubulin        | l              | protein-coding |
| chr1-1838 | 8.093219 | -1.61243 | 0.794387 | -2.02977 | 0.042379 | 0.32152  | chr1  | 1.84E+08 | 1.84E+08    | 0 | NA | intron (NLMIB1 LIN  | -3086    | NM_001297 | 23179    | Hs.49714E | NC_01514E    | ENS00000 | RGL1      | RGL       |           | guanip         | protein-coding |                |
| chr2-9256 | 11.06015 | -1.21977 | 0.60173  | -2.0271  | 0.042652 | 0.322934 | chr2  | 92564348 | 92564553    | 0 | NA | IntergeniALR/Alphe  | 623317   | NR_027714 | 440888   | Hs.73023E | NC_001032412 | ACTR3BP2 | FKSG73    | ACTR3B    | ps        | pseudo         |                |                |
| chr1-1224 | 8.1224   | -1.61674 | 0.798519 | -2.02468 | 0.0429   | 0.323001 | chr1  | 1.22E+08 | 1.22E+08    | 0 | NA | IntergeniALR/Alphe  | 968809   | NR_00395E | 647121   | Hs.697682 | NR_00395E    | ENS00000 | EMBP1     | -         | embigin   | fpseudo        |                |                |
| chr18-838 | 8.078629 | -1.6103  | 0.795395 | -2.02453 | 0.042916 | 0.323001 | chr18 | 8386795  | 8388614     | 0 | NA | intron (Nintron (N  | -20670   | NR_02441E | 1E+08    | Hs.66665E | NR_02441E    | ENS00000 | LOC100192 | -         | uncharact | ncRNA          |                |                |
| chr19-267 | 11.09951 | -1.21738 | 0.601376 | -2.02433 | 0.042937 | 0.323001 | chr19 | 26753253 | 26754252    | 0 | NA | IntergeniALR/Alphe  | -1039679 | NR_14673E | 1.02E+08 | Hs.567934 | NR_110687    | ENS00000 | LOC101927 | -         | uncharact | ncRNA          |                |                |
| chr5-484  | 15.98489 | -0.82941 | 0.409997 | -2.02296 | 0.043077 | 0.323001 | chr5  | 48414003 | 48414324    | 0 | NA | IntergeniALR/Alphe  | 2027125  | NM_19844E | 133418   | Hs.561411 | NC_19844E    | ENS00000 | CEMB      | GP70      |           | embigin        | protein-coding |                |
| chr19-255 | 13.30037 | -0.99825 | 0.493727 | -2.02187 | 0.04319  | 0.323001 | chr19 | 25956140 | 25957281    | 0 | NA | IntergeniALR/Alphe  | -1793263 | NR_00360E | 1E+08    | Hs.149312 | NR_00360E    | ENS00000 | HAVCR1P1  | -         | hepatitis | pseudo         |                |                |
| chr19-578 | 8.095427 | -1.61824 | 0.800911 | -2.02049 | 0.043332 | 0.323001 | chr19 | 57511265 | 57511494    | 0 | NA | intron (NLMIE1 LIN  | 11441    | NR_13070E | 374928   | Hs.57957E | NC_19854E    | ENS00000 | ZNF773    | ZNF419B   |           | zinc fing      | protein-coding |                |
| chr12-111 | 8.091012 | -1.60673 | 0.795271 | -2.02036 | 0.043346 | 0.323001 | chr12 | 1.11E+08 | 1.11E+08    | 0 | NA | 3' UTR (N3' UTR (N  | 15703    | NM_00108E | 79600    | Hs.211511 | NC_02454E    | ENS00000 | TCTN1     | JBTS13    | [TF]      | ectonic        | protein-coding |                |
| chr5-4952 | 10.58888 | -1.26789 | 0.62756  | -2.02035 | 0.043347 | 0.323001 | chr5  | 49526974 | 49528359    | 0 | NA | IntergeniALR/Alphe  | 913622   | NR_19844E | 133418   | Hs.561411 | NC_19844E    | ENS00000 | EMB       | GP70      |           | embigin        | protein-coding |                |
| chr10-588 | 8.076421 | -1.60455 | 0.798357 | -2.00982 | 0.04445  | 0.329084 | chr10 | 58811826 | 58812035    | 0 | NA | intron (NLMIE3 LINE | 96915    | NR_02750E | 728640   | Hs.72920E | NR_02750E    | FAM133CP | -         | family    | wipseudo  |                |                |                |
| chr13-958 | 8.076421 | -1.60455 | 0.798357 | -2.00982 | 0.04445  | 0.329084 | chr13 | 95115244 | 95115894    | 0 | NA | intron (Nintron (N  | -94775   | NR_14573E | 1.1E+08  | Hs.697682 | NR_14573E    | ENS00000 | SNORD13G  | -         | small     | nucsnRNA       |                |                |
| chr6-1338 | 8.606058 | -1.52376 | 0.758407 | -2.00916 | 0.04452  | 0.329084 | chr6  | 1.34E+08 | 1.34E+08    | 0 | NA | TTS (NM_TTS (NM_C   | 4042     | NM_00320E | 6943     | Hs.78061  | NC_00320E    | ENS00000 | TCF21     | POD1      | [bHLH]    | transcrip      | protein-coding |                |
| chr1-1823 | 10.10301 | -1.31993 | 0.65786  | -2.00641 | 0.044813 | 0.329084 | chr1  | 1.82E+08 | 1.82E+08    | 0 | NA | intron (Nintron (N  | 5424     | NM_00103E | 2752     | Hs.13201E | NC_00206E    | ENS00000 | GLUL      | GLNS      | [GS]      | Fglutamat      | protein-coding |                |
| chr16-864 | 10.10301 | -1.31993 | 0.65786  | -2.00641 | 0.044813 | 0.329084 | chr16 | 86488680 | 8649127E+08 | 0 | NA | intron (NLMIE3A LI  | 18882    | NR_036444 | 400550   | Hs.44882E | NR_03392E    | ENS00000 | PENRR     | FOXF1-AS1 | FOXF1     | ad             | ncRNA          |                |
| chr12-123 | 8.591468 | -1.52177 | 0.758469 | -2.00636 | 0.044817 | 0.329084 | chr12 | 1.23E+08 | 1.23E+08    | 0 | NA | intron (Nintron (N  | 1247     | NR_036187 | 1E+08    | Hs.697682 | NR_036187    | ENS00000 | MIR4304   | -         | microRNA  | ncRNA          |                |                |
| chr2-848  | 8.051656 | -1.61179 | 0.804029 | -2.00464 | 0.045001 | 0.329084 | chr2  | 84835693 | 84835892    | 0 | NA | TTS (NM_TTS (NM_C   | 45292    | NM_00108C | 129293   | Hs.469134 | NC_00108C    | ENS00000 | TRABD2A   | C2orf89   | [T]       | TraB           | dom            | protein-coding |
| chr1-1217 | 10.07604 | -1.32067 | 0.658917 | -2.00443 | 0.045038 | 0.329084 | chr1  | 1.22E+08 | 1.22E+08    | 0 | NA | IntergeniALR/Alphe  | 234025   | NR_00395E | 647121   | Hs.697682 | NR_00395E    | ENS00000 | EMBP1     | -         | embigin   | fpseudo        |                |                |
| chr1-1226 | 10.07604 | -1.32067 | 0.658917 | -2.00443 | 0.045038 | 0.329084 | chr1  | 1.23E+08 | 1.23E+08    | 0 | NA | IntergeniALR/Alphe  | 1134302  | NR_00395E | 647121   | Hs.697682 | NR_00395E    | ENS00000 | EMBP1     | -         | embigin   | fpseudo        |                |                |
| chr2-462  | 10.07604 | -1.32067 | 0.658917 | -2.00443 | 0.045038 | 0.329084 | chr2  | 46298721 | 46299493    | 0 | NA | intron (NCpG        | 1700     | NM_00143C | 2034     | Hs.46841C | NC_00143C    | ENS00000 | EPAS1     | ECYT4     | [HIF]     | endothelip     | protein-coding |                |
| chr1-2356 | 10.08842 | -1.31833 | 0.658713 | -2.00137 | 0.045352 | 0.329498 | chr1  | 2.36E+08 | 2.36E+08    | 0 | NA | intron (NHERV10E    | -20154   | NM_00109E | 2786     | Hs.159711 | NC_00448E    | ENS00000 | GN4       | -         | G         | protein        | protein-coding |                |
| chr17-501 | 10.08842 | -1.31833 | 0.658713 | -2.00137 | 0.045352 | 0.329498 | chr17 | 50184723 | 50200752    | 0 | NA | intron (Nintron (N  | 8902     | NM_00008E | 1277     | Hs.12792E | NC_00008E    | ENS00000 | COL1A1    | EDSARTH1  |           | collagen       | protein-coding |                |
| chr1-2276 | 9.106514 | -1.44997 | 0.724791 | -2.00053 | 0.045443 | 0.329498 | chr1  | 2.28E+08 | 2.28E+08    | 0 | NA | exon (NM_exon (NM   | 42989    | NR_03675E | 401983   | Hs.68181E | NR_03675E    | ZNF847P  | -         | zinc fing | pseudo    |                |                |                |
| chr7-5944 | 9.590173 | -1.37914 | 0.690046 | -1.99862 | 0.04565  | 0.329498 | chr7  | 59440414 | 59441309    | 0 | NA | IntergeniALR/Alphe  | 1990684  | NM_00115E | 441234   | Hs.533121 | NC_00115E    | ENS00000 | ZNF716    | -         | zinc fing | protein-coding |                |                |
| chr2-22   | 12.8145  | -1.02623 | 0.513489 | -1.99855 | 0.045657 | 0.329498 | chr2  | 20447894 | 20449244    | 0 | NA | 3' UTR (N3' UTR (N  | 1495     | NM_00440E | 388      | Hs.50287E | NC_00404C    | ENS00000 | RHOB      | ARH6      | [ARH]     | homol          | protein-coding |                |
| chr9-110  | 8.049448 | -1.60597 | 0.803729 | -1.99815 | 0.045701 | 0.329498 | chr9  | 1.11E+08 | 1.11E+08    | 0 | NA | exon (NM_exon (NM   | 76667    | NM_15336E | 79987    | Hs.522334 | NC_15336E    | ENS00000 | SVEP1     | C9orf13   | [C]       | sushi,         | vc             | protein-coding |
| chr1-2331 | 8.633031 | -1.52252 | 0.762307 | -1.99726 | 0.045797 | 0.329498 | chr1  | 2.33E+08 | 2.33E+08    | 0 | NA | intron (NLMIE3B LI  | 123579   | NR_014801 | 80003    | Hs.37060E | NC_014801    | ENS00000 | PCNX2     | PCNX2     |           | pecanex        | 2              | protein-coding |
| chr4-119  | 8.603851 | -1.51852 | 0.760548 | -1.99661 | 0.045867 | 0.329498 | chr4  | 1.2E+08  | 1.2E+08     | 0 | NA | intron (Nintron (N  | 67523    | NR_03763C | 645513   | Hs.67754E | NR_03763C    | ENS00000 | LOC64551E | -         | septin 7  | pseudo         |                |                |
| chr4-119  | 8.603851 | -1.51852 | 0.760548 | -1.99661 | 0.045867 | 0.329498 | chr4  | 1.2E+08  | 1.2E+08     | 0 | NA | intron (Nintron (N  | 67523    | NR_03763C | 645513   | Hs.67754E | NR_03763C    | ENS00000 | LOC64551E | -         | septin 7  | pseudo         |                |                |
| chr17-416 | 12.79991 | -1.02526 | 0.514292 | -1.99353 | 0.046203 | 0.331165 | chr17 | 41689500 | 41693207    | 0 | NA | 3' UTR (N3' UTR (N  | 2468     | NM_005801 | 10209    | Hs.15058C | NC_005801    | ENS00000 | E1F1      | A121      | [EIF]     | eukaryoti      | protein-coding |                |
| chr10-405 | 10.07383 | -1.3167  | 0.660957 | -1.99211 | 0.046359 | 0.331652 | chr10 | 40378442 | 40379131    | 0 | NA | IntergeniALR/Alphe  | 1682190  | NR_04500C | 399746   | Hs.742607 | NR_04500C    | ACTR3BP5 | FKSG74    | ACTR3B    | ps        | pseudo         |                |                |
| chr11-515 | 15.00298 | -0.86639 | 0.435777 |          |          |          |       |          |             |   |    |                     |          |           |          |           |              |          |           |           |           |                |                |                |



|           |          |          |          |          |          |          |       |          |          |   |      |                    |                    |                            |                  |                                   |                         |                           |
|-----------|----------|----------|----------|----------|----------|----------|-------|----------|----------|---|------|--------------------|--------------------|----------------------------|------------------|-----------------------------------|-------------------------|---------------------------|
| chr18-318 | 8.790505 | -1.37874 | 0.74338  | -1.85469 | 0.063641 | 0.397808 | chr18 | 31851878 | 31852401 | + | O NA | intron (AluJb SIN  | 90989 NM_01493E    | 22878 Hs. 202001NM_01493E  | ENSG00000TRAPPC8 | GSGL HsT2                         | traffickiprotein-coding |                           |
| chr5-483E | 12.04623 | -1.00967 | 0.545429 | -1.85115 | 0.064148 | 0.400313 | chr5  | 48356698 | 48357775 | + | O NA | IntergeniALR/Alphe | 2084052 NM_19844E  | 133418 Hs. 561411NM_19844E | ENSG00000EMB     | GP70                              | emigin protein-coding   |                           |
| chr7-821E | 9.330317 | -1.31367 | 0.710962 | -1.84774 | 0.06464  | 0.402716 | chr7  | 82124182 | 82124576 | + | O NA | intron (MER51A LI  | 115202 NR_110077   | 1.02E+08 Hs. 57134E        | NR_110077        | ENSG00000LOC101927-               |                         | uncharactcRNA             |
| chr7-100C | 14.25726 | -0.84109 | 0.456789 | -1.84131 | 0.065576 | 0.407872 | chr7  | 1E+08    | 1E+08    | + | O NA | intron (Nintron (N | 8022 NM_01771E     | 7551 Hs. 435302NM_01771E   | ENSG00000ZNF3-   | A8-51 HF.                         | zinc fingprotein-coding |                           |
| chr10-43C | 11.54798 | -1.04302 | 0.570268 | -1.82899 | 0.067401 | 0.417842 | chr10 | 43642429 | 43646871 | + | O NA | exon (NM exon (NM  | 778 NR_047557      | 414197 Hs. 60583E          | NR_047557        | ENSG00000ZNF32-AS1 ZNF320S1 ZNF32 | antncRNA                |                           |
| chr2-926E | 11.54798 | -1.04302 | 0.570268 | -1.82899 | 0.067401 | 0.417842 | chr2  | 92624184 | 92625662 | + | O NA | IntergeniALR/Alphe | 683790 NR_027714   | 440888 Hs. 73023E          | NR_001032412     | ACTR3BP2                          | FKSG73                  | ACTR3B pspseudo           |
| chr17-16E | 11.54577 | -1.04013 | 0.569781 | -1.82549 | 0.067927 | 0.41902  | chr17 | 16525050 | 16567530 | + | O NA | intron (NLMC4 LIN  | 9414 NM_02065E     | 57336 Hs. 99724            | NR_02065E        | ENSG00000ZNF287                   | ZKSCAN3                 | zinc fingprotein-coding   |
| chr17-64E | 11.54577 | -1.04013 | 0.569781 | -1.82549 | 0.067927 | 0.41902  | chr17 | 64498996 | 64505865 | + | O NA | intron (Nintron (N | -1117 NR_03996E    | 1.01E+08                   | NR_03996E        | ENSG00000MIR5047                  |                         | microRNA ncRNA            |
| chr19-26E | 11.521   | -1.0434  | 0.571621 | -1.82534 | 0.067949 | 0.41902  | chr19 | 26584213 | 26584842 | + | O NA | IntergeniALR/Alphe | -1208904 NR_14673E | 1.02E+08 Hs. 567934        | NR_110687        | ENSG00000LOC101927-               |                         | uncharactcRNA             |
| chr19-26E | 11.55018 | -1.04598 | 0.573211 | -1.82476 | 0.068037 | 0.41902  | chr19 | 26631766 | 26632414 | + | O NA | IntergeniALR/Alphe | -1161341 NR_14673E | 1.02E+08 Hs. 567934        | NR_110687        | ENSG00000LOC101927-               |                         | uncharactcRNA             |
| chr4-146E | 11.49403 | -1.04384 | 0.575524 | -1.81373 | 0.06972  | 0.428687 | chr4  | 1.46E+08 | 1.46E+08 | + | O NA | intron (Nintron (N | 71983 NM_001371071 |                            |                  |                                   |                         |                           |
| chr1-156E | 11.04752 | -1.07663 | 0.595837 | -1.80693 | 0.070774 | 0.434457 | chr1  | 1.56E+08 | 1.56E+08 | + | O NA | intron (NCpG       | 10022 NM_001257    | 4000 Hs. 594444            | NM_00557E        | ENSG00000CLMNA                    | CDCD1 CDE               | lamin A/C (protein-coding |
| chr6-329E | 11.03293 | -1.07526 | 0.596019 | -1.80406 | 0.071221 | 0.436492 | chr6  | 32972393 | 32982059 | + | O NA | intron (Nintron (N | 4142 NM_00119E     | 6046 Hs. 75243             | NR_005104        | ENSG00000BRD2                     | BRD2-IT1                | bromodom protein-coding   |
| chr17-43E | 11.07449 | -1.07618 | 0.597484 | -1.80119 | 0.071672 | 0.438016 | chr17 | 43939994 | 43400986 | + | O NA | 3' UTR (N3' UTR (N | 1470 NM_00116E     | 379 Hs. 18315E             | NR_001661        | ENSG00000ARL4D                    | ARF4 ARI                | ADP ribosprotein-coding   |
| chr5-490E | 11.03735 | -1.08178 | 0.600743 | -1.80074 | 0.071744 | 0.438016 | chr5  | 49076030 | 49077019 | + | O NA | IntergeniALR/Alphe | 1364764 NM_19844E  | 133418 Hs. 561411          | NM_19844E        | ENSG00000EMB                      | GP70                    | emigin protein-coding     |
| chr16-22E | 15.98243 | -0.73482 | 0.408174 | -1.80026 | 0.071819 | 0.438016 | chr16 | 22534046 | 22537849 | + | O NA | exon (NM exon (NM  | -9751 NR_00367E    | 653786 Hs. 56494E          | NR_00367E        | ENSG00000OTOAP1                   |                         | OTOA psseudo              |
| chr7-730E | 11.01834 | -1.07387 | 0.597325 | -1.79779 | 0.07221  | 0.439685 | chr7  | 73041265 | 73042262 | + | O NA | IntergeniAluJr SIN | -12001 NR_00366E   | 728524 Hs. 57127E          | NR_001023562     | SPDYEBP                           |                         | speedy/Rlpseudo           |
| chr1-123E | 13.27756 | -0.88677 | 0.494115 | -1.79467 | 0.072706 | 0.441994 | chr1  | 1.23E+08 | 1.23E+08 | + | O NA | IntergeniALR/Alphe | -1870538 NR_00395E | 647121 Hs. 69768E          | NR_00395E        | ENSG00000CEMBP1                   |                         | emigin psseudo            |
| chr5-485E | 19.17979 | -0.62528 | 0.349004 | -1.79161 | 0.073195 | 0.442425 | chr5  | 48505017 | 48506150 | + | O NA | IntergeniALR/Alphe | 1935705 NM_19844E  | 133418 Hs. 561411          | NM_19844E        | ENSG00000EMB                      | GP70                    | emigin protein-coding     |
| chr1-122E | 10.53468 | -1.11563 | 0.624048 | -1.78773 | 0.073819 | 0.447128 | chr1  | 1.22E+08 | 1.22E+08 | + | O NA | IntergeniALR/Alphe | 818845 NR_00395E   | 647121 Hs. 69768E          | NR_00395E        | ENSG00000CEMBP1                   |                         | emigin psseudo            |
| chr1-160E | 10.54706 | -1.11359 | 0.623866 | -1.78498 | 0.074264 | 0.447128 | chr1  | 1.6E+08  | 1.6E+08  | + | O NA | intron (Nintron (N | 5111 NR_03649E     | 5824 Hs. 51723E            | NR_002857        | ENSG00000PEX19                    | D1S2223E                | peroxisomprotein-coding   |
| chr1-171E | 10.54706 | -1.11359 | 0.623866 | -1.78498 | 0.074264 | 0.447128 | chr1  | 1.72E+08 | 1.72E+08 | + | O NA | intron (Nintron (N | 6917 NR_03370A     | 8674 Hs. 6651              | NR_00376E        | ENSG00000VAMP4                    | VAMP-4 V                | vesicle aprotein-coding   |
| chr12-104 | 10.54706 | -1.11359 | 0.623866 | -1.78498 | 0.074264 | 0.447128 | chr12 | 1.04E+08 | 1.04E+08 | + | O NA | intron (Nintron (N | 18618 NM_00100E    | 493861 Hs. 659857          | NR_00100E        | ENSG00000EID3                     | NS4EB NSF               | EP300 intrprotein-coding  |
| chr15-40E | 10.54706 | -1.11359 | 0.623866 | -1.78498 | 0.074264 | 0.447128 | chr15 | 40573527 | 40574446 | + | O NA | exon (NM exon (NM  | 4687 NM_15226E     | 27079 Hs. 17331            | NM_15226E        | ENSG00000RPU5D2                   | C15orf19                | RNA psuicprotein-coding   |
| chr10-40E | 10.52009 | -1.11413 | 0.62487  | -1.78297 | 0.074591 | 0.448377 | chr10 | 40658214 | 40659018 | + | O NA | IntergeniALR/Alphe | 1709429 NR_02438E  | 441666 Hs. 25572E          | NR_02438E        | ENSG00000LOC44166E-               |                         | zinc fingpsudo            |
| chr19-26E | 10.50771 | -1.11619 | 0.627207 | -1.77962 | 0.075137 | 0.449288 | chr19 | 26688322 | 26689695 | + | O NA | IntergeniALR/Alphe | -1104393 NR_14673E | 1.02E+08 Hs. 567934        | NR_110687        | ENSG00000LOC101927-               |                         | uncharactcRNA             |
| chr16-47E | 8.051406 | -1.39259 | 0.783582 | -1.77721 | 0.075533 | 0.449288 | chr16 | 4757551  | 4757818  | + | O NA | intron (NLMC4 LIN  | 113616 NR_11090E   | 1.02E+08 Hs. 63465E        | NR_11090E        | ITFG1-AS1-                        |                         | ITFG1 antncRNA            |
| chr2-189E | 8.051406 | -1.39259 | 0.783582 | -1.77721 | 0.075533 | 0.449288 | chr2  | 1.9E+08  | 1.9E+08  | + | O NA | intron (Nintron (N | 16546 NM_01458E    | 30061 Hs. 64300E           | NR_01458E        | ENSG00000SLC40A1                  | FPN1 HFE4               | solute cprotein-coding    |
| chr4-714E | 8.051406 | -1.39259 | 0.783582 | -1.77721 | 0.075533 | 0.449288 | chr4  | 71408375 | 71410444 | + | O NA | intron (THE1A-int  | 70356 NM_00375E    | 8671 Hs. 5462              | NR_00375E        | ENSG00000SLC44A                   | HNBC1 KNE               | solute cprotein-coding    |
| chr1-147E | 8.053614 | -1.39288 | 0.788335 | -1.77371 | 0.076111 | 0.449288 | chr1  | 1.48E+08 | 1.48E+08 | + | O NA | exon (NM exon (NM  | 22144 NR_11193E    | 1E+08 Hs. 69657E           | NR_003377        | PDZK1P1                           | PDZ                     | domaipseudo               |
| chr2-203E | 10.04882 | -1.15839 | 0.653434 | -1.77277 | 0.076267 | 0.449288 | chr2  | 2.03E+08 | 2.03E+08 | + | O NA | intron (NLMC4 LI   | 89698 NM_001114    | 65065 Hs. 64884E           | NR_19894E        | ENSG00000NBAL1                    | A530083C                | neurobeacprotein-coding   |
| chr1-204E | 10.51788 | -1.11054 | 0.626815 | -1.77171 | 0.076443 | 0.449288 | chr1  | 2.04E+08 | 2.04E+08 | + | O NA | 3' UTR (N3' UTR (N | 7240 NM_03283E     | 84919 Hs. 30437E           | NR_03283E        | ENSG00000PPP1R15B                 | CREP MSSC               | protein fprotein-coding   |
| chr10-40E | 10.54486 | -1.10999 | 0.626663 | -1.77127 | 0.076517 | 0.449288 | chr10 | 40081253 | 40082143 | + | O NA | IntergeniALR/Alphe | 1385102 NR_04500E  | 399746 Hs. 742607          | NR_04500E        | ACTR3BP5                          | FKSG74                  | ACTR3B pspseudo           |
| chr1-124E | 12.76031 | -0.90599 | 0.511559 | -1.77104 | 0.076554 | 0.449288 | chr1  | 1.25E+08 | 1.25E+08 | + | O NA | IntergeniALR/Alphe | 3248683 NR_00395E  | 647121 Hs. 69768E          | NR_00395E        | ENSG00000CEMBP1                   |                         | emigin psseudo            |
| chr1-149E | 10.03423 | -1.15675 | 0.653606 | -1.7698  | 0.076761 | 0.449288 | chr1  | 1.49E+08 | 1.49E+08 | + | O NA | intron (Nintron (N | 19050 NM_001037    | 400818 Hs. 44508E          | NR_001037        | ENSG00000NBPF9                    | AEO1                    | NBPF memtprotein-coding   |
| chr1-243E | 10.03423 | -1.15675 | 0.653606 | -1.7698  | 0.076761 | 0.449288 | chr1  | 2.43E+08 | 2.43E+08 | + | O NA | intron (NLM5 LINE  | -37445 NR_029401   | 731275 Hs. 72235E          | NR_029401        | ENSG00000LINC01347-               |                         | long intncRNA             |
| chr17-29E | 10.02184 | -1.15904 | 0.655053 | -1.76938 | 0.076831 | 0.449288 | chr17 | 29631747 | 29632821 | + | O NA | exon (NM exon (NM  | -10861 NM_03285A   | 84940 Hs. 14304E           | NR_03285A        | ENSG00000COR06                    |                         | coronin fprotein-coding   |
| chr3-172E | 10.0612  | -1.1561  | 0.654527 | -1.76632 | 0.077342 | 0.449288 | chr3  | 1.72E+08 | 1.72E+08 | + | O NA | intron (Nintron (N | 95096 NR_198407    | 2693 Hs. 13021E            | NR_00412E        | ENSG00000GHSR                     | GHPD                    | growth hcprotein-coding   |
| chr5-143E | 10.0612  | -1.1561  | 0.654527 | -1.76632 | 0.077342 | 0.449288 | chr5  | 14343294 | 14343493 | + | O NA | intron (NLM2 LIN   | -120599 NR_14581E  | 1.1E+08                    | NR_14581E        | SNORD170                          |                         | small ncusnoRNA           |
| chr7-592E | 10.04661 | -1.15446 | 0.6547   | -1.76333 | 0.077844 | 0.449288 | chr7  | 59274995 | 59275528 | + | O NA | IntergeniALR/Alphe | 1825084 NM_00115E  | 441234 Hs. 533121          | NM_00115E        | ENSG00000ZNF716                   |                         | zinc fingprotein-coding   |
| chr1-173E | 10.01964 | -1.1551  | 0.655236 | -1.76287 | 0.077922 | 0.449288 | chr1  | 1.74E+08 | 1.74E+08 | + | O NA | 3' UTR (N3' UTR (N | -17930 NR_152521   | 60674 Hs. 53185E           | NR_00257E        | ENSG00000GAS5                     | NCRNA000E               | growth arncRNA            |
| chr1-124E | 9.550567 | -1.20865 | 0.685715 | -1.76261 | 0.077966 | 0.449288 | chr1  | 1.25E+08 | 1.25E+08 | + | O NA | IntergeniALR/Alphe | 3031306 NR_00395E  | 647121 Hs. 69768E          | NR_00395E        | ENSG00000CEMBP1                   |                         | emigin psseudo            |
| chr19-95E | 14.98594 | -0.76428 | 0.433627 | -1.76252 | 0.077981 | 0.449288 | chr19 | 9522759  | 9537725  | + | O NA | intron (AluJb SIN  | 8403 NM_02410E     | 79088 Hs. 38647E           | NR_02410E        | ENSG00000ZNF426                   | K-RBP                   | zinc fingprotein-coding   |
| chr3-183E | 8.551862 | -1.32471 | 0.751627 | -1.76246 | 0.077991 | 0.449288 | chr3  | 1.84E+08 | 1.84E+08 | + | O NA | intron (MERSB DNV  | 58630 NR_03965E    | 1.01E+08                   | NR_03965E        | ENSG00000MIR4448                  |                         | microRNA ncRNA            |
| chr13-44E | 10.00725 | -1.15739 | 0.656695 | -1.76245 | 0.077993 | 0.449288 | chr13 | 4432851  | 4434705  | + | O NA | 3' UTR (N3' UTR (N | 3080 NM_06022E     | 8848 Hs. 43638E            | NR_06022E        | ENSG00000TSC22D1                  | Ptg-2 TGf               | TSC2 donprotein-coding    |
| chr1-520E | 8.564245 | -1.3216  | 0.751523 | -1.75856 | 0.078653 | 0.449288 | chr1  | 52024187 | 52024523 | + | O NA | intron (Nintron (N | 9455 NM_138417     | 112970 Hs. 47603E          | NR_138417        | ENSG00000CT112                    | SBB181 T                | CT112 chrprotein-coding   |
| chr1-124E | 8.566453 | -1.32682 | 0.754615 | -1.75827 | 0.078702 | 0.449288 | chr1  | 1.24E+08 | 1.24E+08 | + | O NA | IntergeniALR/Alphe | 2549267 NR_00395E  | 647121 Hs. 69768E          | NR_00395E        | ENSG00000CEMBP1                   |                         | emigin psseudo            |
| chr20-27E | 12.74351 | -0.90278 | 0.513508 | -1.75806 | 0.078737 | 0.449288 | chr20 | 27099525 | 27100070 | + | O NA | IntergeniALR/Alphe | -890564 NR_04009E  | 284801 Hs. 37069E          | NR_04009E        | ENSG00000MIR663AHC-               |                         | MIR663A lncRNA            |
| chr1-178E | 8.549655 | -1.31954 | 0.750575 | -1.75803 | 0.078742 | 0.449288 | chr1  | 1.79E+08 | 1.79E+08 | + | O NA | intron (NLMed LIN  | 61731 NM_00467E    | 9068 Hs. 591474            | NR_00467E        | ENSG00000ANGPTL1                  | ANG3 ANG                | angiopoieprotein-coding   |
| chr1-236E | 8.549655 | -1.31954 | 0.750575 | -1.75803 | 0.078742 | 0.449288 | chr1  | 2.36E+08 | 2.36E+08 | + | O NA | intron (NAluSq SIN | 35971 NM_00250E    | 4811 Hs. 356624            | NR_00250E        | ENSG00000NID1                     | NID                     | nidogen lprotein-coding   |
| chr2-512E | 8.549655 | -1.31954 | 0.750575 | -1.75803 | 0.078742 | 0.449288 | chr2  | 1.12E+08 | 1.12E+08 | + | O NA | intron (Nintron (N | 54930 NM_00505A    | 84220 Hs. 44693E           | NR_00505A        | ENSG00000RGPD5                    | BS-63 BS                | RANBP2 lprotein-coding    |
| chr4-542E | 8.549655 | -1.31954 | 0.750575 | -1.75803 | 0.078742 | 0.449288 | chr4  | 54277889 | 54280267 | + | O NA | intron (Nintron (N | 45118 NM_001347    | 5156 Hs. 74615             | NR_00620E        | ENSG00000PDGFR                    | CD140A P                | lplatelet protein-coding  |
| chr4-119E | 8.549655 | -1.31954 | 0.750575 | -1.75803 | 0.078742 | 0.449288 | chr4  | 1.19E+08 | 1.2E+08  | + |      |                    |                    |                            |                  |                                   |                         |                           |

|           |          |           |          |           |          |         |       |          |          |   |    |                     |         |            |          |           |                   |                     |                             |                            |                |
|-----------|----------|-----------|----------|-----------|----------|---------|-------|----------|----------|---|----|---------------------|---------|------------|----------|-----------|-------------------|---------------------|-----------------------------|----------------------------|----------------|
| chr1-2155 | 9.749604 | -1.09693  | 0.667961 | -1.64221  | 0.100547 | 0.49789 | chr1  | 2.16E+08 | 2.16E+08 | 0 | NA | intron (Nintron (N  | 13054   | NM_016121  | 51133    | Hs.33513  | ENSG00000CKTD3    | NY-REN-4            | potassium protein-coding    |                            |                |
| chr19-467 | 9.749604 | -1.09693  | 0.667961 | -1.64221  | 0.100547 | 0.49789 | chr19 | 46773856 | 46783675 | 0 | NA | exon (NM exon (NM   | 6049    | NM_00114E  | 6510     | Hs.631582 | ENSG00000SLCIA5   | AAAT ASCI           | solute caprotein-coding     |                            |                |
| chr11-684 | 8.252651 | -1.25449  | 0.763984 | -1.64203  | 0.100583 | 0.49789 | chr11 | 68428293 | 68430709 | 0 | NA | intron (Nintron (N  | -31251  | NM_00135E  | 55291    | Hs.503022 | ENSG00000PPP6R3   | C11orf23            | protein fprotein-coding     |                            |                |
| chr13-236 | 8.252651 | -1.25449  | 0.763984 | -1.64203  | 0.100583 | 0.49789 | chr13 | 23658641 | 23662293 | 0 | NA | exon (NM exon (NM   | 81107   | NM_018647  | 55504    | Hs.149168 | ENSG00000TNFRSF19 | TAJ TAJ-ε           | TNF receptor protein-coding |                            |                |
| chr3-584  | 8.252651 | -1.25449  | 0.763984 | -1.64203  | 0.100583 | 0.49789 | chr3  | 58406641 | 58412073 | 0 | NA | intron (Nintron (N  | 24772   | NM_00092E  | 5162     | Hs.161357 | ENSG00000PDHB     | PDBHD PDF           | tyrinate protein-coding     |                            |                |
| chr16-68  | 12.47569 | -0.85655  | 0.521655 | -1.64198  | 0.100593 | 0.49789 | chr16 | 68540875 | 68546606 | 0 | NA | intron (N L2c LINE  | 13449   | NR_130977  | 146198   | Hs.461074 | ENSG00000ZFP90    | FIK NK10 ZFP90      | zif protein-coding          |                            |                |
| chr7-753  | 12.47569 | -0.85655  | 0.521655 | -1.64198  | 0.100593 | 0.49789 | chr7  | 75361451 | 75366802 | 0 | NA | intron (N AluSx SIN | 4926    | NR_04058E  | 54441    | Hs.63231  | CNM_018991        | STAG3L1             | stromal apseudo             |                            |                |
| chr11-515 | 12.50266 | -0.85632  | 0.521799 | -1.64111  | 0.100776 | 0.49789 | chr11 | 51948627 | 51949492 | 0 | NA | IntergeniALR/Alphe  | 1539912 | NR_024504  | 646813   | Hs.68417E | NR_024504         | LOC646813           | DEXH-box                    | pseudo                     |                |
| chr2-189  | 9.776577 | -1.09628  | 0.668197 | -1.64065  | 0.100871 | 0.49789 | chr2  | 1.89E+08 | 1.89E+08 | 0 | NA | intron (N MER106A I | 10394   | NR_037401  | 1.01E+08 | NR_037401 | ENSG00000MIR3606  | mir-3606            | microRNA ncRNA              |                            |                |
| chr6-283  | 9.265946 | -1.14644  | 0.699172 | -1.63972  | 0.101064 | 0.49789 | chr6  | 28363180 | 28366884 | 0 | NA | intron (Nintron (N  | -8761   | NM_00113E  | 64288    | Hs.65641E | CNM_03089E        | ENSG00000ZSCAN31    | ZNF20-Lp                    | zinc fingprotein-coding    |                |
| chr1-1231 | 9.280536 | -1.14834  | 0.700823 | -1.63856  | 0.101306 | 0.49789 | chr1  | 1.23E+08 | 1.23E+08 | 0 | NA | IntergeniALR/Alphe  | 1666479 | NR_00395E  | 647121   | Hs.69768E | NR_00395E         | ENSG00000EMB1       | -                           | embigin fpseudo            |                |
| chr1-1971 | 12.48807 | -0.85527  | 0.521977 | -1.63852  | 0.101313 | 0.49789 | chr1  | 1.97E+08 | 1.97E+08 | 0 | NA | intron (N AluSx1 S1 | 13941   | NM_194314  | 360023   | Hs.52943E | NM_194314         | ENSG00000ZBTB41     | FRBZ1 ZNF                   | zinc fingprotein-coding    |                |
| chr1-5507 | 8.265033 | -1.25128  | 0.763929 | -1.63795  | 0.101432 | 0.49789 | chr1  | 55073514 | 55073804 | 0 | NA | intron (Nintron (N  | 33437   | NR_110451  | 255738   | Hs.18844  | NM_17493E         | ENSG00000PCSK9      | FH3 HCHO1                   | proteiteprotein-coding     |                |
| chr12-58  | 8.265033 | -1.25128  | 0.763929 | -1.63795  | 0.101432 | 0.49789 | chr12 | 58880104 | 58880789 | 0 | NA | intron (Nintron (N  | 39100   | NM_00113E  | 121227   | Hs.2537E  | CNM_15337E        | ENSG00000LRIG3      | LIG3                        | leucine iprotein-coding    |                |
| chr15-49  | 8.265033 | -1.25128  | 0.763929 | -1.63795  | 0.101432 | 0.49789 | chr15 | 49613927 | 49615156 | 0 | NA | intron (N LOR1a LTF | 6277    | NM_00133C  | 196951   | Hs.17295E | NM_15264E         | ENSG00000PAM227B    | C15orf33                    | family wiprotein-coding    |                |
| chr4-412  | 8.265033 | -1.25128  | 0.763929 | -1.63795  | 0.101432 | 0.49789 | chr4  | 41260372 | 41267496 | 0 | NA | intron (Nintron (N  | 7006    | NM_004181  | 7345     | Hs.518731 | CNM_004181        | ENSG00000UCHL1      | HEL-117                     | fubiquitirprotein-coding   |                |
| chr5-128  | 8.265033 | -1.25128  | 0.763929 | -1.63795  | 0.101432 | 0.49789 | chr5  | 1.28E+08 | 1.28E+08 | 0 | NA | intron (Nintron (N  | 205983  | NM_00199E  | 2201     | Hs.519294 | NM_00199E         | ENSG00000PBN2       | CCA DA9                     | fibrillirprotein-coding    |                |
| chr4-54   | 8.78008  | -1.19576  | 0.731675 | -1.63674  | 0.101685 | 0.49789 | chr4  | 54261390 | 54267811 | 0 | NA | intron (Nintron (N  | 30640   | NM_001347  | 5156     | Hs.74615  | NM_00620E         | ENSG00000FDGPA      | CD140A PL                   | platelet protein-coding    |                |
| chr1-155  | 9.251356 | -1.14457  | 0.69931  | -1.63671  | 0.101691 | 0.49789 | chr1  | 1.55E+08 | 1.55E+08 | 0 | NA | intron (N AluS8 S1  | 5000    | NM_00127E  | 23623    | Hs.22649E | NM_01432E         | ENSG00000RUSC1      | NESCA                       | RUN and Sprotein-coding    |                |
| chr1-2024 | 9.251356 | -1.14457  | 0.69931  | -1.63671  | 0.101691 | 0.49789 | chr1  | 2.02E+08 | 2.02E+08 | 0 | NA | intron (N AluS8 S1  | -13381  | NM_03210A  | 4660     | Hs.44440E | NM_002481         | ENSG00000PPP1R12B   | MYPT2 PP1                   | protein fprotein-coding    |                |
| chr22-41  | 9.278329 | -1.1438   | 0.699032 | -1.63627  | 0.101784 | 0.49789 | chr22 | 41304874 | 41305178 | 0 | NA | intron (N AluSx1 S1 | -2657   | NM_001317  | 5905     | Hs.18380C | NM_00288E         | ENSG00000RANGAP1    | Fug1 RAN                    | Ran GTPase protein-coding  |                |
| chr3-149  | 9.278329 | -1.1438   | 0.699032 | -1.63627  | 0.101784 | 0.49789 | chr3  | 1.49E+08 | 1.49E+08 | 0 | NA | intron (Nintron (N  | 3846    | NM_01422C  | 4071     | Hs.35131E | NM_01422C         | ENSG00000TM4SF1     | H-16 L6                     | M transment protein-coding |                |
| chr1-109  | 8.76549  | -1.19554  | 0.730771 | -1.636    | 0.10184  | 0.49789 | chr1  | 1.09E+08 | 1.09E+08 | 0 | NA | intron (N LIMB4 LIN | -33245  | NM_00126E  | 343263   | Hs.44340E | NM_00101C         | ENSG00000MYBPHL     | -                           | myosin biiprotein-coding   |                |
| chr1-2064 | 8.76549  | -1.19554  | 0.730771 | -1.636    | 0.10184  | 0.49789 | chr1  | 2.06E+08 | 2.06E+08 | 0 | NA | intron (Nintron (N  | -14890  | NM_18266E  | 83593    | Hs.49757E | NM_031437         | ENSG00000RASSF5     | Maxp1 NOF                   | Ras assocprotein-coding    |                |
| chr1-2305 | 8.76549  | -1.19554  | 0.730771 | -1.636    | 0.10184  | 0.49789 | chr1  | 2.31E+08 | 2.31E+08 | 0 | NA | intron (N LIME3F LI | 50180   | NM_02452E  | 79573    | Hs.42478E | NM_02452E         | ENSG00000TTC13      | -                           | tetratric protein-coding   |                |
| chr17-42  | 8.76549  | -1.19554  | 0.730771 | -1.636    | 0.10184  | 0.49789 | chr17 | 42581686 | 42582808 | 0 | NA | non-codiron-codir   | -4416   | NR_104567C | 29893    | Hs.38301E | NM_01329C         | ENSG00000PSCM3IP    | GT198 HOF                   | PSCM3 intrprotein-coding   |                |
| chr2-420  | 8.76549  | -1.19554  | 0.730771 | -1.636    | 0.10184  | 0.49789 | chr2  | 42051672 | 42060789 | 0 | NA | intron (Nintron (N  | 8209    | NM_13837C  | 91461    | Hs.40854E | NM_13837C         | ENSG00000PKDC       | SGK493 V1                   | protein kprotein-coding    |                |
| chr2-229  | 8.76549  | -1.19554  | 0.730771 | -1.636    | 0.10184  | 0.49789 | chr2  | 2.3E+08  | 2.3E+08  | 0 | NA | intron (Nintron (N  | -103393 | NM_13907E  | 92737    | Hs.234074 | NM_13907E         | ENSG00000DNER       | UNQ26 bet                   | delta/not protein-coding   |                |
| chr7-7704 | 8.76549  | -1.19554  | 0.730771 | -1.636    | 0.10184  | 0.49789 | chr7  | 77044912 | 77045589 | 0 | NA | intron (N LTR45B LI | 5770    | NR_02805E  | 1E+08    | Hs.29299E | NM_001129851      | PMS2P9              | PMS2L17                     | FPM51                      | hpcpseudo      |
| chr9-1104 | 8.76549  | -1.19554  | 0.730771 | -1.636    | 0.10184  | 0.49789 | chr9  | 1.1E+08  | 1.1E+08  | 0 | NA | intron (N MLT2A2 LI | 83345   | NR_15336E  | 79987    | Hs.522334 | NM_15336E         | ENSG00000SVEP1      | C9orf13 C                   | (sushi, hvc)               | protein-coding |
| chr5-935  | 9.761987 | -1.09453  | 0.669166 | -1.63565  | 0.101912 | 0.49789 | chr5  | 93536466 | 93537248 | 0 | NA | intron (N THE1B LTF | 34486   | NR_10982E  | 441094   | Hs.457407 | NR_01536E         | ENSG00000NR2F1-AS1  | -                           | NR2F1 antncRNA             |                |
| chr5-128  | 8.753107 | -1.19847  | 0.732752 | -1.63557  | 0.10193  | 0.49789 | chr5  | 1.28E+08 | 1.28E+08 | 0 | NA | intron (Nintron (N  | 218669  | NM_00104E  | 6558     | Hs.16258E | NM_00104E         | ENSG00000SLC12A2    | BSC BSC2                    | solute caprotein-coding    |                |
| chr8-117  | 9.292919 | -1.145683 | 0.700683 | -1.635094 | 0.102029 | 0.49789 | chr8  | 1.18E+08 | 1.18E+08 | 0 | NA | intron (Nintron (N  | 90762   | NR_14579E  | 1.1E+08  | NR_14579E | NR_14579E         | ENSG00000SNCR168    | -                           | small nucsnRNA             |                |
| chr4-499  | 8.23806  | -1.252319 | 0.766195 | -1.634465 | 0.102161 | 0.49789 | chr4  | 49987791 | 49988390 | 0 | NA | IntergeniALR/Alphe  | 1001448 | NM_00128E  | 80157    | Hs.47970E | NM_02508E         | ENSG00000CWH43      | CWH43-C                     | F cell wall protein-coding |                |
| chr7-817  | 8.23806  | -1.252319 | 0.766195 | -1.634465 | 0.102161 | 0.49789 | chr7  | 81751249 | 81752888 | 0 | NA | 3' UTR (N3' UTR (N  | 17979   | NM_00101C  | 3082     | Hs.39653C | NM_000601         | ENSG00000HGF        | DFNB39 F                    | hepatocyt protein-coding   |                |
| chr9-4377 | 17.40263 | 0.615215  | 0.376421 | -1.63438  | 0.102179 | 0.49789 | chr9  | 43777445 | 43777877 | 0 | NA | IntergeniALR/Alphe  | 651495  | NR_160669  | 1.03E+08 | NR_160669 | LOC102724-        | -                   | methylenepseudo             |                            |                |
| chr1-121  | 9.735014 | -1.095169 | 0.67054  | -1.633263 | 0.102414 | 0.49789 | chr1  | 1.21E+08 | 1.21E+08 | 0 | NA | intron (Nintron (N  | 10584   | NR_10418E  | 1.01E+08 | Hs.56852E | NR_10418E         | ENSG00000SRGAP2-AS- | -                           | SRGAP2 arncRNA             |                |
| chr1-171  | 9.263738 | -1.141926 | 0.699172 | -1.633255 | 0.102415 | 0.49789 | chr1  | 1.72E+08 | 1.72E+08 | 0 | NA | intron (N LIME1 LI  | 15186   | NR_03370A  | 8674     | Hs.6651   | NM_00376E         | ENSG00000VAMP4      | VAMP-4 V                    | vesicle aprotein-coding    |                |
| chr1-180  | 9.263738 | -1.141926 | 0.699172 | -1.633255 | 0.102415 | 0.49789 | chr1  | 1.8E+08  | 1.8E+08  | 0 | NA | intron (N LIME2 LI  | 25559   | NM_00282E  | 5768     | Hs.71917E | NM_00282E         | ENSG00000QSOX1      | Q6 QSCN6                    | quiescin protein-coding    |                |
| chr2-189  | 9.263738 | -1.141926 | 0.699172 | -1.633255 | 0.102415 | 0.49789 | chr2  | 1.89E+08 | 1.89E+08 | 0 | NA | intron (Nintron (N  | 56910   | NR_037401  | 1.01E+08 | NR_037401 | ENSG00000MIR3606  | mir-3606            | microRNA ncRNA              |                            |                |
| chr2-11   | 9.263738 | -1.141926 | 0.699172 | -1.633255 | 0.102415 | 0.49789 | chr2  | 26837463 | 26844796 | 0 | NA | exon (NM exon (NM   | 4280    | NM_00698E  | 9510     | Hs.643357 | NM_00698E         | ENSG00000ADAMT5     | C3-C5 MET                   | ADAM metaprotein-coding    |                |
| chr4-496  | 9.263738 | -1.141926 | 0.699172 | -1.633255 | 0.102415 | 0.49789 | chr4  | 1.2E+08  | 1.2E+08  | 0 | NA | intron (N TGAA N S  | 21477   | NM_03343C  | 8654     | Hs.647971 | NM_0108E          | ENSG00000PDEA5      | CGB-68E                     | phosphodi protein-coding   |                |
| chr2-1124 | 9.238973 | -1.147243 | 0.702691 | -1.632641 | 0.102544 | 0.49789 | chr2  | 1.12E+08 | 1.12E+08 | 0 | NA | intron (N AluS8 S1  | 22922   | NM_005054  | 84220    | Hs.46963C | NM_005054         | ENSG00000RGPD5      | BS-63 BS                    | RANBP2 liprotein-coding    |                |
| chr17-554 | 8.750899 | -1.193518 | 0.731848 | -1.630829 | 0.102926 | 0.49789 | chr17 | 55406343 | 55411609 | 0 | NA | intron (N AluSz SIN | 12859   | NM_01232E  | 23531    | Hs.46348E | NM_01232E         | ENSG00000MMD        | MMA MMD1                    | monocyte protein-coding    |                |
| chr4-542  | 8.750899 | -1.193518 | 0.731848 | -1.630829 | 0.102926 | 0.49789 | chr4  | 54285235 | 54299083 | 0 | NA | intron (N LIPA11 LI | -40733  | NR_14716C  | 1.05E+08 | Hs.157697 | NR_14716C         | LINC0228E-          | -                           | long intencRNA             |                |
| chr9-438  | 8.750899 | -1.193518 | 0.731848 | -1.630829 | 0.102926 | 0.49789 | chr9  | 43830184 | 43830603 | 0 | NA | IntergeniALR/Alphe  | 704227  | NR_16066E  | 1.03E+08 | NR_160669 | LOC102724-        | -                   | methylenepseudo             |                            |                |
| chr1-1805 | 8.738517 | -1.196445 | 0.733835 | -1.630402 | 0.103017 | 0.49789 | chr1  | 1.81E+08 | 1.81E+08 | 0 | NA | exon (NM exon (NM   | 4006    | NM_02095C  | 57710    | Hs.73481E | NM_02095C         | ENSG00000KIAA1614   | -                           | KIAA1614 protein-coding    |                |
| chr13-32  | 8.250443 | -1.249091 | 0.766144 | -1.63036  | 0.103025 | 0.49789 | chr13 | 32239091 | 32241078 | 0 | NA | intron (Nintron (N  | 71870   | NM_00113E  | 646799   | Hs.569254 | NM_00113E         | ENSG00000ZAR1L      | Z3CCXC7                     | zygot aprotein-coding      |                |
| chr13-95  | 8.250443 | -1.249091 | 0.766144 | -1.63036  | 0.103025 | 0.49789 | chr13 | 95097608 | 95098083 | 0 | NA | intron (N LIME2 LI  | -112499 | NR_145733  | 1.1E+08  | NR_145733 | SNORD13G          | -                   | small nucsnRNA              |                            |                |
| chr16-67  | 8.250443 | -1.249091 | 0.766144 | -1.63036  | 0.103025 | 0.49789 | chr16 | 67545194 | 67546624 | 0 | NA | intron (Nintron (N  | 8447    | NM_00119E  | 79567    | Hs.152717 | NM_02451E         | ENSG00000RIPOR1     | FAM65A                      | RHO familiprotein-coding   |                |
| chr17-291 | 8.250443 | -1.249091 | 0.766144 | -1.63036  | 0.103025 | 0.49789 | chr17 | 29108391 | 29111758 | 0 | NA | exon (NM exon (NM   | 30315   | NM_00134E  | 399687   |           |                   |                     |                             |                            |                |



|           |          |          |          |          |          |          |       |                 |          |           |           |                     |                    |           |           |                    |                     |                             |                              |
|-----------|----------|----------|----------|----------|----------|----------|-------|-----------------|----------|-----------|-----------|---------------------|--------------------|-----------|-----------|--------------------|---------------------|-----------------------------|------------------------------|
| chr1-1562 | 9.479573 | -1.03634 | 0.681333 | -1.52104 | 0.128249 | 0.538991 | chr1  | 1.56E+08        | 1.56E+08 | 0         | NA        | intron (AluJo SIN   | -7608 NM_001272    | 79957     | Hs.23587  | ENSG000002PAQR6    | PRdelta             | progesterone-protein-coding |                              |
| chr1-2017 | 9.479573 | -1.03634 | 0.681333 | -1.52104 | 0.128249 | 0.538991 | chr1  | 2.02E+08        | 2.02E+08 | 0         | NA        | intron (AluY SINE   | -23645 NR_031599   | 1E+08     | NR_031599 | ENSG000002MIR1231  | MIRN1231            | microRNA ncRNA              |                              |
| chr1-2028 | 9.479573 | -1.03634 | 0.681333 | -1.52104 | 0.128249 | 0.538991 | chr1  | 2.03E+08        | 2.03E+08 | 0         | NA        | exon (NM_exon (NM   | -5445 NM_002871    | 5877      | Hs.90875  | NM_002871          | ENSG000002CRABIF    | MSS4 RASC                   | RAB interprotein-coding      |
| chr1-2029 | 9.479573 | -1.03634 | 0.681333 | -1.52104 | 0.128249 | 0.538991 | chr1  | 2.03E+08        | 2.03E+08 | 0         | NA        | intron (N LIPB3 LIN | 12579 NM_001290    | 51094     | Hs.5298   | NM_015999          | ENSG000002ADIPOR1   | ACDCR1 CC                   | adiponectin-protein-coding   |
| chr11-51F | 9.479573 | -1.03634 | 0.681333 | -1.52104 | 0.128249 | 0.538991 | chr11 | 51523027        | 51523950 | 0         | NA        | IntergeniALR/Alphe  | 1114341 NR_024504  | 646813    | Hs.684175 | NR_024504          | LOC646813           | DEXH-box                    | pseudo                       |
| chr11-66C | 9.479573 | -1.03634 | 0.681333 | -1.52104 | 0.128249 | 0.538991 | chr11 | 66053395        | 66069441 | 0         | NA        | intron (NMIR3 SINE  | 8274 NR_145738     | 1.1E+08   | NR_145738 | SNORD13F           | -                   | small nucsnoRNA             |                              |
| chr17-31F | 9.479573 | -1.03634 | 0.681333 | -1.52104 | 0.128249 | 0.538991 | chr17 | 31373745        | 31374231 | 0         | NA        | intron (N intron (N | -17687 NM_032932   | 84440     | Hs.40678E | NM_032932          | ENSG000002RAB11F1P4 | Rab11                       | fanprotein-coding            |
| chr17-80S | 9.479573 | -1.03634 | 0.681333 | -1.52104 | 0.128249 | 0.538991 | chr17 | 80350829        | 80355093 | 0         | NA        | exon (NM_exon (NM   | -62206 NM_001352   | 284131    | Hs.38967E | NM_173627          | ENSG000002ENDOV     | -                           | endonucleprotein-coding      |
| chr19-377 | 9.479573 | -1.03634 | 0.681333 | -1.52104 | 0.128249 | 0.538991 | chr19 | 37737261        | 37740659 | 0         | NA        | exon (NM_exon (NM   | -19199 NM_03268E   | 84775     | Hs.116622 | NM_03268E          | ENSG000002ZNF607    | -                           | zinc fingprotein-coding      |
| chr19-57E | 9.479573 | -1.03634 | 0.681333 | -1.52104 | 0.128249 | 0.538991 | chr19 | 57698819        | 57706889 | 0         | NA        | intron (N intron (N | 6350 NR_11097E     | 7710      | Hs.64637E | NM_003444          | ENSG000002ZNF154    | pH2-92                      | zinc fingprotein-coding      |
| chr2-1214 | 9.479573 | -1.03634 | 0.681333 | -1.52104 | 0.128249 | 0.538991 | chr2  | 1.21E+08        | 1.21E+08 | 0         | NA        | intron (N intron (N | -83215 NR_02334E   | 1E+08     | Hs.68963E | NR_02334E          | ENSG000002RNU4ATAC  | MOPD1 RFW                   | RNA, U4at5nRNA               |
| chr22-36E | 9.479573 | -1.03634 | 0.681333 | -1.52104 | 0.128249 | 0.538991 | chr22 | 36278886        | 36301624 | 0         | NA        | intron (AluJr SIN   | -3348 NR_106877    | 1.02E+08  | NR_106877 | ENSG000002MIR6819  | hsa-mir-ε           | microRNA ncRNA              |                              |
| chr3-134F | 9.479573 | -1.03634 | 0.681333 | -1.52104 | 0.128249 | 0.538991 | chr3  | 1.34E+08        | 1.34E+08 | 0         | NA        | intron (N intron (N | -1585 NR_10688E    | 1.02E+08  | NR_10688E | ENSG000002MIR6827  | hsa-mir-ε           | microRNA ncRNA              |                              |
| chr5-151E | 9.479573 | -1.03634 | 0.681333 | -1.52104 | 0.128249 | 0.538991 | chr5  | 1.52E+08        | 1.52E+08 | 0         | NA        | intron (N intron (N | -10235 NR_10987E   | 1.02E+08  | Hs.57102E | NR_10987E          | ENSG000002CLMAT3    | CTB-113P                    | colorectncRNA                |
| chr6-821F | 9.479573 | -1.03634 | 0.681333 | -1.52104 | 0.128249 | 0.538991 | chr6  | 82198736        | 82200899 | 0         | NA        | intron (NL2c LINE   | 47927 NM_001300    | 25998     | Hs.30642E | NM_01552E          | ENSG000002IBTK      | BTBD26 B1                   | inhibitorprotein-coding      |
| chr7-445E | 9.479573 | -1.03634 | 0.681333 | -1.52104 | 0.128249 | 0.538991 | chr7  | 44567257        | 44572729 | 0         | NA        | intron (N intron (N | 4545 NM_001257     | 54606     | Hs.65476E | NM_01908E          | ENSG000002DDX56     | DDX21 DD                    | DEAD-box protein-coding      |
| chr9-122F | 9.479573 | -1.03634 | 0.681333 | -1.52104 | 0.128249 | 0.538991 | chr9  | 1.22E+08        | 1.22E+08 | 0         | NA        | intron (NMER58A DN  | 5232 NM_001271     | 5742      | Hs.20197E | NM_00096E          | ENSG000002PTGS1     | COX1 COX                    | prostaglandin-protein-coding |
| chr4-8734 | 9.963232 | -0.99457 | 0.654132 | -1.52045 | 0.128399 | 0.538991 | chr4  | 87344815        | 87345408 | 0         | NA        | intron (AluJo SIN   | -22229 NM_17813E   | 345275    | Hs.284414 | NM_17813E          | ENSG000002HSD17B13  | HMFN0376                    | hydroxystprotein-coding      |
| chr10-40E | 9.990205 | -0.99401 | 0.653937 | -1.52004 | 0.1285   | 0.538991 | chr10 | 40545676        | 40546475 | 0         | NA        | IntergeniALR/Alphe  | 1821970 NR_02438C  | 441666    | Hs.25572E | NR_02438C          | ENSG000002LOC44166E | -                           | zinc fingpseudo              |
| chr1-124F | 9.469398 | -1.04323 | 0.687341 | -1.51777 | 0.129072 | 0.538991 | chr1  | 1.24E+08        | 1.24E+08 | 0         | NA        | IntergeniALR/Alphe  | 2846695 NR_00395E  | 647121    | Hs.69768E | NR_00395E          | ENSG000002EMBP1     | -                           | embigin fpseudo              |
| chr1-564S | 8.495459 | -1.12947 | 0.744583 | -1.51692 | 0.129287 | 0.538991 | chr1  | 56493952        | 56496811 | 0         | NA        | 3' UTR (N3' UTR (N  | 80418 NR_14716E    | 1.05E+08  | Hs.183974 | NR_14716E          | ENSG000002LINC01767 | -                           | long intncRNA                |
| chr1-2064 | 8.495459 | -1.12947 | 0.744583 | -1.51692 | 0.129287 | 0.538991 | chr1  | 2.06E+08        | 2.06E+08 | 0         | NA        | intron (N intron (N | -64578 NM_00119E   | 9641      | Hs.32104E | NM_01400E          | ENSG000002IKBKE     | IKK-ε IKK                   | inhibitorprotein-coding      |
| chr13-95E | 8.495459 | -1.12947 | 0.744583 | -1.51692 | 0.129287 | 0.538991 | chr13 | 95205828        | 95213365 | 0         | NA        | promoter-promoter-  | -748 NR_14573E     | 1.1E+08   | NR_14573E | SNORD13G           | -                   | small nucsnoRNA             |                              |
| chr19-12E | 8.495459 | -1.12947 | 0.744583 | -1.51692 | 0.129287 | 0.538991 | chr19 | 12318068        | 12322723 | 0         | NA        | intron (AluJb SIN   | 13238 NM_14527E    | 147837    | Hs.66351C | NM_14527E          | ENSG000002ZNF154    | -                           | zinc fingprotein-coding      |
| chr19-18E | 8.495459 | -1.12947 | 0.744583 | -1.51692 | 0.129287 | 0.538991 | chr19 | 18386690        | 18389759 | 0         | NA        | intron (N intron (N | 1662 NR_03615E     | 1E+08     | NR_03615E | ENSG000002MIR3189  | mir-3189            | microRNA ncRNA              |                              |
| chr17-67E | 8.981325 | -1.08141 | 0.713061 | -1.51658 | 0.129374 | 0.538991 | chr17 | 6764278         | 6774769  | 0         | NA        | intron (NLIMed LIN  | -6692 NM_15323C    | 162517    | Hs.368364 | NM_15323C          | ENSG000002FBX03     | CT144 Fbx                   | F-box prcprotein-coding      |
| chr4-185I | 8.510049 | -1.13161 | 0.746696 | -1.51549 | 0.129648 | 0.538991 | chr4  | 1.85E+08        | 1.85E+08 | 0         | NA        | 3' UTR (N3' UTR (N  | 19258 NM_001151    | 291       | Hs.24650E | NM_001151          | ENSG000002LIC25A4   | AAC1 ANT                    | solute cprotein-coding       |
| chr14-10C | 8.497667 | -1.13466 | 0.748742 | -1.51543 | 0.129664 | 0.538991 | chr14 | 1.01E+08        | 1.01E+08 | 0         | NA        | promoter-promoter-  | -326 NR_00320E     | 767588    | NR_00320E | ENSG000002SNORD114 | 14q (I1-1C          | small nucsnoRNA             |                              |
| chr11-62F | 9.491956 | -1.03384 | 0.68264  | -1.51448 | 0.129905 | 0.538991 | chr11 | 62593855        | 62598975 | 0         | NA        | intron (N intron (N | 4835 NM_00133C     | 9219      | Hs.17304E | NM_00473E          | ENSG000002MTA2      | MTA11 P1                    | metastasiaprotein-coding     |
| chr2-105F | 9.491956 | -1.03384 | 0.68264  | -1.51448 | 0.129905 | 0.538991 | chr2  | 1.05E+08        | 1.05E+08 | 0         | NA        | 3' UTR (N3' UTR (N  | 9455 NM_02409E     | 79074     | Hs.549577 | NM_02409E          | ENSG000002Corf49    | asw                         | chromosonprotein-coding      |
| chr8-672E | 9.491956 | -1.03384 | 0.68264  | -1.51448 | 0.129905 | 0.538991 | chr8  | 67225417        | 67227682 | 0         | NA        | intron (NMIR SINE   | 117232 NM_006421   | 10565     | Hs.65690E | NM_006421          | ENSG000002ARFGEP1   | ARFGEP1 EADP                | ribosprotein-coding          |
| chr8-994F | 9.010506 | -1.08542 | 0.71676  | -1.51433 | 0.129941 | 0.538991 | chr8  | 99432410        | 99434053 | 0         | NA        | intron (N intron (N | 103499 NR_03032E   | 693184    | NR_03032E | ENSG000002MIR599   | MIRN599             | microRNA ncRNA              |                              |
| chr4-119I | 9.464983 | -1.03449 | 0.683239 | -1.51411 | 0.13     | 0.538991 | chr4  | 1.2E+08         | 1.2E+08  | 0         | NA        | intron (N intron (N | 62692 NR_03343C    | 8654      | Hs.647971 | NM_00108E          | ENSG000002PDE5A     | CGB-PDE                     | phosphodiaprotein-coding     |
| chr5-371E | 9.464983 | -1.03449 | 0.683239 | -1.51411 | 0.13     | 0.538991 | chr5  | 37121395        | 37121648 | 0         | NA        | intron (N intron (N | -127525 NR_13426E  | 1.05E+08  | Hs.17099E | NR_13426E          | ENSG000002LOC105374 | -                           | uncharactncRNA               |
| chr7-552E | 9.464983 | -1.03449 | 0.683239 | -1.51411 | 0.13     | 0.538991 | chr7  | 55200102        | 55203631 | 0         | NA        | intron (N intron (N | -12917 NR_047551   | 1.01E+08  | Hs.72048E | NR_047551          | ENSG000002EGFR-AS1  | -                           | EGFR antncRNA                |
| chr1-128E | 8.480868 | -1.12735 | 0.744634 | -1.51397 | 0.130034 | 0.538991 | chr1  | 35381441        | 35381992 | 0         | NA        | exon (NM_exon (NM   | 240 NR_02961E      | 406955    | NR_02961E | ENSG000002MIR181B1 | MIRN181B1           | microRNA ncRNA              |                              |
| chr1-198E | 8.480868 | -1.12735 | 0.744634 | -1.51397 | 0.130034 | 0.538991 | chr1  | 1.99E+08        | 1.99E+08 | 0         | NA        | TTS (NR_C TTS (NR_C | 8103 NM_00128E     | 252839    | Hs.181444 | NM_01645E          | ENSG000002TMEM9     | DERM4 TME                   | transmemprotein-coding       |
| chr1-2011 | 8.480868 | -1.12735 | 0.744634 | -1.51397 | 0.130034 | 0.538991 | chr1  | 2.07E+08        | 2.07E+08 | 0         | NA        | 3' UTR (N3' UTR (N  | -38352 NM_15375E   | 29949     | Hs.661017 | NM_013371          | ENSG000002LINC119   | IL-10C MC                   | interleukprotein-coding      |
| chr1-230E | 8.480868 | -1.12735 | 0.744634 | -1.51397 | 0.130034 | 0.538991 | chr1  | 2.31E+08        | 2.31E+08 | 0         | NA        | intron (N intron (N | 49426 NR_110681    | 1.02E+08  | Hs.63892E | NR_110681          | ENSG000002LOC101927 | -                           | uncharactncRNA               |
| chr10-73I | 8.480868 | -1.12735 | 0.744634 | -1.51397 | 0.130034 | 0.538991 | chr10 | 73174758        | 73182877 | 0         | NA        | intron (N intron (N | 10698 NR_17334E    | 317662    | Hs.408577 | NM_17334E          | ENSG000002FAM149B1  | KIAA0974                    | family wiprotein-coding      |
| chr12-57I | 8.480868 | -1.12735 | 0.744634 | -1.51397 | 0.130034 | 0.538991 | chr12 | 51723957        | 51723926 | 0         | NA        | intron (N intron (N | -1343 NR_031597    | 1E+08     | NR_031597 | ENSG000002MIR1228  | MIRN1228            | microRNA ncRNA              |                              |
| chr16-16C | 8.480868 | -1.12735 | 0.744634 | -1.51397 | 0.130034 | 0.538991 | chr16 | 16097884        | 16127555 | 0         | NA        | intron (N intron (N | 110752 NM_001171   | 368       | Hs.44218E | NM_001171          | ENSG000002ABCC6     | ABC34 AR                    | ATP bindiprotein-coding      |
| chr17-81E | 8.480868 | -1.12735 | 0.744634 | -1.51397 | 0.130034 | 0.538991 | chr17 | 817722          | 820297   | 0         | NA        | intron (AluXs1 SI   | 36656 NM_001317    | 55178     | Hs.18272E | NM_01814E          | ENSG000002MRM3      | RMTL1 RN                    | mitochondncprotein-coding    |
| chr17-80S | 8.480868 | -1.12735 | 0.744634 | -1.51397 | 0.130034 | 0.538991 | chr17 | 80385201        | 80391645 | 0         | NA        | intron (N intron (N | -26744 NM_00135E   | 284131    | Hs.38967E | NM_173627          | ENSG000002ENDOV     | -                           | endonucleprotein-coding      |
| chr17-80E | 8.480868 | -1.12735 | 0.744634 | -1.51397 | 0.130034 | 0.538991 | chr17 | 80995030        | 80997843 | 0         | NA        | intron (N intron (N | 4959 NM_024591     | 79643     | Hs.51456E | NM_024591          | ENSG000002CHMP6     | VPS20                       | charged nprotein-coding      |
| chr2-702E | 8.480868 | -1.12735 | 0.744634 | -1.51397 | 0.130034 | 0.538991 | chr2  | 70274883        | 70277280 | 0         | NA        | intron (AluXs1 SI   | 17143 NM_001317    | 6637      | Hs.465167 | NM_00309E          | ENSG000002SNRFP     | SMG Sm-G                    | small nucprotein-coding      |
| chr21-26E | 8.480868 | -1.12735 | 0.744634 | -1.51397 | 0.130034 | 0.538991 | chr21 | 26927428        | 26927975 | 0         | NA        | intron (NL2a LINE   | -26260 NR_03991E   | 1.01E+08  | NR_03991E | ENSG000002MIR4759  | -                   | microRNA ncRNA              |                              |
| chr21-20E | 8.480868 | -1.12735 | 0.744634 | -1.51397 | 0.130034 | 0.538991 | chr22 | 27063583        | 27065635 | 0         | NA        | intron (N intron (N | -9504 NM_00018E    | 3053      | Hs.47427E | NM_00018E          | ENSG000002SERPIND1  | D22S673 E                   | serpin fprotein-coding       |
| chr5-476E | 8.480868 | -1.12735 | 0.744634 | -1.51397 | 0.130034 | 0.538991 | chr5  | 47631951        | 47633692 | 0         | NA        | IntergeniALR/Alphe  | -1936441 NM_02107E | 348980    | Hs.35317E | NM_02107E          | ENSG000002HCN1      | BCNG-1 B                    | hyperpoleprotein-coding      |
| chr7-111E | 8.480868 | -1.12735 | 0.744634 | -1.51397 | 0.130034 | 0.538991 | chr7  | 1.2E+08         | 1.2E+08  | 0         | NA        | intron (N intron (N | 135431 NR_10380E   | 1.01E+08  | Hs.67751E | NR_10380E          | ENSG000002DOCK4-AS1 | -                           | DOCK4 antncRNA               |
| chr9-1274 | 8.480868 | -1.12735 | 0.744634 | -1.51397 | 0.130034 | 0.538991 | chr9  | 33216 NM_00100E | 90678    | Hs.49518E | NM_138361 | ENSG000002LRSM1     | 90678              | Hs.49518E | NM_138361 | ENSG000002LRSM1    | CMT2P RF            | leucine rprotein-coding     |                              |
| chr5-128E | 8.468486 | -1.13037 | 0.746662 | -1.513   |          |          |       |                 |          |           |           |                     |                    |           |           |                    |                     |                             |                              |

|           |          |          |          |          |          |          |       |          |          |   |    |                     |         |           |          |           |               |            |             |                |                            |                    |                |
|-----------|----------|----------|----------|----------|----------|----------|-------|----------|----------|---|----|---------------------|---------|-----------|----------|-----------|---------------|------------|-------------|----------------|----------------------------|--------------------|----------------|
| chr2-3073 | 10.20825 | -0.90599 | 0.634768 | -1.42727 | 0.153502 | 0.570268 | chr2  | 2.37E+08 | 2.37E+08 | 0 | NA | intron (Nintron (N  | 56858   | NM_057165 | 1293     | Hs.23324  | CNM_004366    | ENS00000   | COL6A3      | BTHLM1         | DIYcollagen protein-coding |                    |                |
| chr20-586 | 10.20825 | -0.90599 | 0.634768 | -1.42727 | 0.153502 | 0.570268 | chr20 | 58908372 | 58912472 | 0 | NA | intron (Nintron (N  | 18259   | NR_132272 | 2778     | Hs.12589  | NR_00051      | ENS00000   | GNAS        | AHO C20rGNAS   | comp protein-coding        |                    |                |
| chr3-757  | 10.20825 | -0.90599 | 0.634768 | -1.42727 | 0.153502 | 0.570268 | chr3  | 75737578 | 75744829 | 0 | NA | intron (Nintron (N  | 2923    | NR_036235 | 1E+08    | NR_036235 | ENS00000      | CIR4273    | -           | microRNA       | ncRNA                      |                    |                |
| chr3-128  | 10.20825 | -0.90599 | 0.634768 | -1.42727 | 0.153502 | 0.570268 | chr3  | 1.28E+08 | 1.28E+08 | 0 | NA | exon (NM exon (NM   | 8659    | NR_046646 | 1.01E+08 | Hs.58160  | NR_046646     | ENS00000   | RUVBL1-AS   | RUVBL1         | arnRNA                     |                    |                |
| chr19-250 | 10.23522 | -0.90552 | 0.63629  | -1.42312 | 0.1547   | 0.570268 | chr19 | 25058553 | 25059514 | 0 | NA | IntergeniALR/Alphe  | 89558   | NR_003603 | 1E+08    | Hs.14931  | NR_003603     | ENS00000   | HAVCR1P1    | -              | hepatitis pseudo           |                    |                |
| chr1-146  | 10.19366 | -0.90434 | 0.635696 | -1.4226  | 0.154851 | 0.570268 | chr1  | 1.47E+08 | 1.47E+08 | 0 | NA | intron (N LIPA4 LIN | 42213   | NM_001275 | 149013   | Hs.66698  | NM_001275     | ENS00000   | NCBP12      | COA51 KI NCBP  | memt protein-coding        |                    |                |
| chr11-57  | 10.19366 | -0.90434 | 0.635696 | -1.4226  | 0.154851 | 0.570268 | chr11 | 57801447 | 57817908 | 0 | NA | intron (Nintron (N  | 47875   | NM_001206 | 1500     | Hs.16601  | NM_001331     | ENS00000   | CTNND1      | B2C52 CAS      | catenin cprotein-coding    |                    |                |
| chr5-958  | 10.19366 | -0.90434 | 0.635696 | -1.4226  | 0.154851 | 0.570268 | chr5  | 95886105 | 95901734 | 0 | NA | intron (Nintron (N  | 41687   | NR_026936 | 202299   | Hs.8373   | NM_17561      | ENS00000   | LINC01554   | C5orf27 F      | long intencrNA             |                    |                |
| chr1-201  | 10.22063 | -0.90388 | 0.635722 | -1.42181 | 0.15508  | 0.570268 | chr1  | 2.02E+08 | 2.02E+08 | 0 | NA | intron (N AluJo SIN | 8531    | NM_006335 | 10440    | Hs.20716  | NM_006335     | ENS00000   | TIMM17A     | TIM17 TIM      | translocaprotein-coding    |                    |                |
| chr19-441 | 10.22063 | -0.90388 | 0.635722 | -1.42181 | 0.15508  | 0.570268 | chr19 | 44143241 | 44158782 | 0 | NA | intron (N AluSg SIN | 9457    | NM_006633 | 10780    | Hs.23599  | NM_006633     | ENS00000   | ZNF234      | HZF4 ZNF2      | zinc fingprotein-coding    |                    |                |
| chr21-63  | 9.785251 | 0.954811 | 0.675417 | 1.413661 | 0.157461 | 0.570268 | chr21 | 6332954  | 6333847  | 0 | NA | IntergeniLIMB1 LIN  | 66064   | NM_001322 | 1.03E+08 | Hs.74398  | NR_001322     | 047        | LNC012724   | -              | uncharactprotein-coding    |                    |                |
| chr1-154  | 9.70999  | -0.93976 | 0.664981 | -1.41321 | 0.157595 | 0.570268 | chr1  | 1.55E+08 | 1.55E+08 | 0 | NA | promoter-promoter-  | 790     | NR_046666 | 1.01E+08 | NR_046666 | ENS00000      | UBE2Q1-AS  | -           | UBE2Q1         | arnRNA                     |                    |                |
| chr2-925  | 9.70999  | -0.93976 | 0.664981 | -1.41321 | 0.157595 | 0.570268 | chr2  | 92533517 | 92534424 | 0 | NA | IntergeniALR/Alphe  | 592837  | NR_027714 | 440888   | Hs.73023  | CNM_001032412 | ACTR3BP2   | FKSG73      | ACTR3B         | pspseudo                   |                    |                |
| chr6-3061 | 9.724589 | -0.94156 | 0.666513 | -1.41266 | 0.157755 | 0.570268 | chr6  | 30619549 | 30622441 | 0 | NA | intron (Nintron (N  | 3155    | NM_014046 | 28973    | Hs.65532  | CNM_014046    | ENS00000   | MRPS18B     | C6orf14 F      | mitochncprotein-coding     |                    |                |
| chr18-352 | 12.43387 | -0.73541 | 0.520748 | -1.41221 | 0.157888 | 0.570268 | chr18 | 35242559 | 35255020 | 0 | NA | 3' UTR (N3' UTR (N  | 7755    | NM_001135 | 84307    | Hs.59106  | NM_032347     | ENS00000   | ZNF397      | ZNF47 ZSC      | zinc fingprotein-coding    |                    |                |
| chr20-294 | 17.3732  | -0.53058 | 0.375804 | -1.41187 | 0.157989 | 0.570268 | chr20 | 29457938 | 29459789 | 0 | NA | TTS (NR_TTS (NR_1   | 10346   | NR_134504 | 1.05E+08 | Hs.70227  | NR_134504     | LOC105375  | -           | uncharactncRNA |                            |                    |                |
| chr1-155  | 9.695408 | -0.93797 | 0.665149 | -1.41017 | 0.15849  | 0.570268 | chr1  | 1.56E+08 | 1.56E+08 | 0 | NA | intron (Nintron (N  | 6816    | NR_106796 | 1.02E+08 | NR_106796 | ENS00000      | MIR6738    | hsa-mir-6   | microRNA       | ncRNA                      |                    |                |
| chr1-202  | 9.695408 | -0.93797 | 0.665149 | -1.41017 | 0.15849  | 0.570268 | chr1  | 2.4E+08  | 2.4E+08  | 0 | NA | intron (Nintron (N  | 166232  | NM_001305 | 56776    | Hs.24889  | NM_020066     | ENS00000   | PMN2        | -              | formin 2 protein-coding    |                    |                |
| chr12-57  | 9.695408 | -0.93797 | 0.665149 | -1.41017 | 0.15849  | 0.570268 | chr12 | 57820511 | 57829592 | 0 | NA | promoter-promoter-  | 359     | NR_029847 | 407016   | NR_029847 | ENS00000      | MIR26A2    | MIRN26A2    | microRNA       | ncRNA                      |                    |                |
| chr18-124 | 9.695408 | -0.93797 | 0.665149 | -1.41017 | 0.15849  | 0.570268 | chr18 | 12426802 | 12430050 | 0 | NA | intron (Nintron (N  | 4348    | NR_136514 | 1.05E+08 | Hs.51528  | NR_136514     | LOC105371  | -           | uncharactncRNA |                            |                    |                |
| chr10-43  | 9.722381 | -0.93743 | 0.664846 | -1.40999 | 0.158543 | 0.570268 | chr10 | 43614916 | 43617401 | 0 | NA | intron (Nintron (N  | 9720    | NM_145312 | 220992   | Hs.14744  | CNM_145312    | ENS00000   | ZNF485      | -              | zinc fingprotein-coding    |                    |                |
| chr14-71  | 10.19145 | -0.90053 | 0.639125 | -1.409   | 0.158834 | 0.570268 | chr14 | 71064429 | 71065655 | 0 | NA | intron (N LIPA7 LIN | 157583  | NM_001308 | 22990    | Hs.44655  | CNM_014982    | ENS00000   | PCNX1       | PCNX PCNX      | pecanex lprotein-coding    |                    |                |
| chr1-173  | 9.707791 | -0.93564 | 0.665015 | -1.40695 | 0.159443 | 0.570268 | chr1  | 1.74E+08 | 1.74E+08 | 0 | NA | intron (Nintron (N  | 30247   | NR_000488 | 462      | Hs.75599  | NM_000488     | ENS00000   | SERPINC1    | AT3 AT3D       | serpin faprotein-coding    |                    |                |
| chr1-250  | 9.707791 | -0.93564 | 0.665015 | -1.40695 | 0.159443 | 0.570268 | chr1  | 2.04E+08 | 2.04E+08 | 0 | NA | intron (Nintron (N  | 29087   | NR_003015 | 677843   | Hs.67613  | NR_003015     | ENS00000   | SNORA77     | ACA63 SNC      | small ncRNA                |                    |                |
| chr10-93  | 9.707791 | -0.93564 | 0.665015 | -1.40695 | 0.159443 | 0.570268 | chr10 | 93371767 | 93376127 | 0 | NA | intron (N LIPA6 LIN | 108387  | NM_013451 | 26509    | Hs.60208  | CNM_013451    | ENS00000   | MYOF        | FERL13         | myoferlir                  | protein-coding     |                |
| chr11-281 | 9.707791 | -0.93564 | 0.665015 | -1.40695 | 0.159443 | 0.570268 | chr11 | 28173004 | 28174771 | 0 | NA | intron (N LIMC3 LIN | 65499   | NM_001297 | 196074   | Hs.24332  | CNM_152635    | ENS00000   | METTL15     | METT5D1        | methytra                   | protein-coding     |                |
| chr12-571 | 9.707791 | -0.93564 | 0.665015 | -1.40695 | 0.159443 | 0.570268 | chr12 | 57152614 | 57171574 | 0 | NA | intron (Nintron (N  | 14475   | NR_131938 | 1.06E+08 | Hs.60954  | CNR_131938    | ENS00000   | LRP1-AS     | -              | LRP1                       | antincRNA          |                |
| chr21-38  | 9.707791 | -0.93564 | 0.665015 | -1.40695 | 0.159443 | 0.570268 | chr21 | 38807544 | 38823689 | 0 | NA | intron (Nintron (N  | 9687    | NM_005235 | 2114     | Hs.64423  | CNM_005235    | ENS00000   | ETS2        | ETS2I1         | ETS protc                  | protein-coding     |                |
| chr3-521  | 9.707791 | -0.93564 | 0.665015 | -1.40695 | 0.159443 | 0.570268 | chr3  | 52198972 | 52215594 | 0 | NA | intron (N AluY SINE | 9123    | NM_000688 | 211      | Hs.47630  | CNM_000688    | ENS00000   | ALAS1       | ALAS ALAS      | 5'-amino                   | protein-coding     |                |
| chr3-187  | 9.707791 | -0.93564 | 0.665015 | -1.40695 | 0.159443 | 0.570268 | chr3  | 1.88E+08 | 1.88E+08 | 0 | NA | intron (Nintron (N  | 6736    | NM_001134 | 604      | Hs.47858  | NM_001705     | ENS00000   | BCL6        | BCL5 BCL6      | trarp                      | protein-coding     |                |
| chr5-393  | 9.707791 | -0.93564 | 0.665015 | -1.40695 | 0.159443 | 0.570268 | chr5  | 39370700 | 39394709 | 0 | NA | exon (NM exon (NM   | 18209   | NM_001737 | 735      | Hs.65444  | CNM_001737    | ENS00000   | CC9         | ARM15 C9       | complemer                  | protein-coding     |                |
| chr9-127  | 9.707791 | -0.93564 | 0.665015 | -1.40695 | 0.159443 | 0.570268 | chr9  | 1.28E+08 | 1.28E+08 | 0 | NA | intron (Nintron (N  | 54470   | NM_022833 | 64855    | Hs.52240  | NM_022833     | ENS00000   | LIBAN2      | C9orf88 F      | liban ap                   | protein-coding     |                |
| chr7-408  | 9.21175  | -0.97764 | 0.697793 | -1.40104 | 0.161201 | 0.570268 | chr7  | 40839918 | 40840392 | 0 | NA | intron (N MER5A DN  | 139784  | NR_110283 | 1.02E+08 | Hs.63976  | NR_110283     | ENS00000   | LINC0145C   | -              | long intencrNA             |                    |                |
| chr5-488  | 9.224133 | -0.97504 | 0.696155 | -1.40061 | 0.16133  | 0.570268 | chr5  | 48836112 | 48836587 | 0 | NA | IntergeniALR/Alphe  | 1604939 | NM_198445 | 133418   | Hs.56141  | CNM_198445    | ENS00000   | CEMB        | GP70           | embigin                    | protein-coding     |                |
| chr1-211  | 9.693201 | -0.93383 | 0.666888 | -1.40029 | 0.161428 | 0.570268 | chr1  | 2.11E+08 | 2.11E+08 | 0 | NA | TTS (NM_CTS (NM_C   | 13286   | NM_004615 | 7188     | Hs.52393  | CNM_004615    | ENS00000   | TRAF5       | MGC-3978       | TNF recep                  | protein-coding     |                |
| chr14-22  | 9.19716  | -0.97569 | 0.696972 | -1.3999  | 0.161544 | 0.570268 | chr14 | 22839411 | 22847356 | 0 | NA | exon (NM exon (NM   | 6798    | NM_004995 | 4323     | Hs.2399   | NM_004995     | ENS00000   | MMP14       | MMP-14 M       | matrx                      | protein-coding     |                |
| chr1-205  | 9.209542 | -0.97311 | 0.69534  | -1.39947 | 0.161672 | 0.570268 | chr1  | 2.05E+08 | 2.05E+08 | 0 | NA | intron (Nintron (N  | 14839   | NM_030952 | 81788    | Hs.49751  | CNM_030952    | ENS00000   | CNUAK2      | SNARK          | NUAK                       | famiprotein-coding |                |
| chr13-414 | 9.209542 | -0.97311 | 0.69534  | -1.39947 | 0.161672 | 0.570268 | chr13 | 41459394 | 41471770 | 0 | NA | intron (N MR3 SINE  | 8032    | NM_014055 | 28984    | Hs.50786  | CNM_014055    | ENS00000   | RCR2A       | C13orf15       | regulator                  | protein-coding     |                |
| chr17-751 | 9.209542 | -0.97311 | 0.69534  | -1.39947 | 0.161672 | 0.570268 | chr17 | 75112124 | 75174851 | 0 | NA | exon (NM exon (NM   | 28666   | NM_000937 | 5430     | Hs.27001  | CNM_000937    | POLR2A     | POLR2L POLR | polyn          | protein-coding             |                    |                |
| chr19-48  | 9.209542 | -0.97311 | 0.69534  | -1.39947 | 0.161672 | 0.570268 | chr19 | 48381501 | 48389685 | 0 | NA | intron (Nintron (N  | 5958    | NM_006801 | 10945    | Hs.51551  | CNM_006801    | ENS00000   | KDEL1R1     | ERD2 ERD2      | KDEL                       | endc               | protein-coding |
| chr2-41   | 9.209542 | -0.97311 | 0.69534  | -1.39947 | 0.161672 | 0.570268 | chr2  | 41244946 | 41285041 | 0 | NA | intron (N L2c LINE  | 11943   | NR_106949 | 1.02E+08 | NR_106949 | ENS00000      | MIR6889    | hsa-mir-6   | microRNA       | ncRNA                      |                    |                |
| chr5-143  | 9.209542 | -0.97311 | 0.69534  | -1.39947 | 0.161672 | 0.570268 | chr5  | 14364063 | 14398855 | 0 | NA | intron (Nintron (N  | 82524   | NR_145815 | 1.1E+08  | NR_145815 | SNORD170      | -          | small ncRNA |                |                            |                    |                |
| chr7-134  | 9.209542 | -0.97311 | 0.69534  | -1.39947 | 0.161672 | 0.570268 | chr7  | 1.34E+08 | 1.34E+08 | 0 | NA | intron (N MRB SINE  | 12177   | NM_001628 | 231      | Hs.52121  | CNM_001628    | ENS00000   | AKR1B1      | ADR ALDR1      | aldo-ketc                  | protein-coding     |                |
| chr8-102  | 9.209542 | -0.97311 | 0.69534  | -1.39947 | 0.161672 | 0.570268 | chr8  | 1.02E+08 | 1.02E+08 | 0 | NA | intron (Nintron (N  | 28266   | NR_125415 | 1.02E+08 | Hs.49244  | NR_125415     | ENS00000   | UBR5-AS1    | -              | UBR5                       | antincRNA          |                |
| chr12-29  | 9.238723 | -0.977   | 0.698901 | -1.39791 | 0.162139 | 0.570268 | chr12 | 2909387  | 2910920  | 0 | NA | intron (N AluYk4 SI | 19262   | NM_001166 | 7289     | Hs.65533  | CNM_003324    | ENS00000   | TULP3       | TUBL3          | TUB                        | like               | protein-coding |
| chr18-24  | 9.213045 | -1.06337 | 0.760919 | -1.39748 | 0.162268 | 0.570268 | chr18 | 24097070 | 24097413 | 0 | NA | intron (N HSMAR2 DN | 16086   | NM_001292 | 125488   | Hs.12857  | CNM_153211    | ENS00000   | TTC39C      | C18orf17       | tetratric                  | protein-coding     |                |
| chr1-669  | 8.225428 | -1.06025 | 0.758848 | -1.39718 | 0.16236  | 0.570268 | chr1  | 66998216 | 66999062 | 0 | NA | TTS (NM_CTS (NM_C   | 55509   | NM_015135 | 23169    | Hs.21364  | CNM_015135    | ENS00000   | SLC35D1     | SHKND U        | solute cap                 | protein-coding     |                |
| chr1-168  | 8.225428 | -1.06025 | 0.758848 | -1.39718 | 0.16236  | 0.570268 | chr1  | 1.68E+08 | 1.68E+08 | 0 | NA | intron (N L2 LINE I | 28363   | NR_031702 | 1E+08    | NR_031702 | ENS00000      | CIR12155B2 | MIRN1255B   | microRNA       | ncRNA                      |                    |                |
| chr12-22  | 8.198455 | -1.06112 | 0.759745 | -1.39667 | 0.162512 | 0.570268 | chr12 | 22056629 | 22057208 | 0 | NA | intron (Nintron (N  | 10700   | NM_018688 | 55907    | Hs.31134  | CNM_018688    | ENS00000   | CMAS        | CSS1           | cytidine                   | protein-coding     |                |
| chr8-118  | 8.198455 | -1.06112 | 0.759745 | -1.39667 | 0.162512 | 0.570268 | chr8  | 1.19E+08 | 1.19E    |   |    |                     |         |           |          |           |               |            |             |                |                            |                    |                |



|           |          |          |          |          |          |          |       |                 |                 |      |                    |                   |                            |                     |                   |                              |                              |                         |
|-----------|----------|----------|----------|----------|----------|----------|-------|-----------------|-----------------|------|--------------------|-------------------|----------------------------|---------------------|-------------------|------------------------------|------------------------------|-------------------------|
| chr11-111 | 8.20863  | -1.05264 | 0.760922 | -1.38338 | 0.166549 | 0.570268 | chr11 | 1.12E+08        | 1.12E+08        | 0 NA | intron (Nintron (N | 19505 NM_00125E   | 143903 Hs. 503831NM_178834 | ENSG00000CLAYN      | -                 | layilin protein-coding       |                              |                         |
| chr17-738 | 8.20863  | -1.05264 | 0.760922 | -1.38338 | 0.166549 | 0.570268 | chr17 | 7389387         | 7393029         | 0 NA | intron (Nintron (N | 3317 NM_001366    | 57048 Hs. 534591NM_02036C  | ENSG00000PLSCR3     | -                 | phospholiprotein-coding      |                              |                         |
| chr6-111  | 8.20863  | -1.05264 | 0.760922 | -1.38338 | 0.166549 | 0.570268 | chr6  | 1.11E+08        | 1.11E+08        | 0 NA | intron (Nintron (N | -85063 NR_03411C  | 643749 Hs. 48622ENR_03410E | ENSG00000CTRAF3IP2  | C6UAS C6c         | TRAF3IP2 ncRNA               |                              |                         |
| chr6-1572 | 8.20863  | -1.05264 | 0.760922 | -1.38338 | 0.166549 | 0.570268 | chr6  | 1.57E+08        | 1.57E+08        | 0 NA | exon (NM exon (NM  | 122994 NM_01845E  | 729515 Hs. 157212NM_01845E | ENSG00000TMEM242    | BMO33 C6c         | transmembrane protein-coding |                              |                         |
| chr7-647C | 8.20863  | -1.05264 | 0.760922 | -1.38338 | 0.166549 | 0.570268 | chr7  | 64706147        | 64707135        | 0 NA | exon (NM exon (NM  | 27577 NR_10689E   | 1.02E+08                   | NR_10689E           | ENSG00000MIR6839  | hsa-mir-610                  | microRNA ncRNA               |                         |
| chr8-327F | 8.20863  | -1.05264 | 0.760922 | -1.38338 | 0.166549 | 0.570268 | chr8  | 32759252        | 32761593        | 0 NA | 3' UTR (N3' UTR (N | 38587 NM_00132Z   | 3084 Hs. 453951NM_00449E   | ENSG00000CNRG1      | ARIA GGF          | neuregulin protein-coding    |                              |                         |
| chr1-2064 | 8.694496 | -1.00635 | 0.729543 | -1.38216 | 0.166922 | 0.571023 | chr1  | 2.06E+08        | 2.06E+08        | 0 NA | promoter-promoter- | 79 NR_10691E      | 1.02E+08                   | NR_10691E           | ENSG00000MIR6769B | hsa-mir-610                  | microRNA ncRNA               |                         |
| chr2-189C | 9.196244 | -0.96658 | 0.70091  | -1.37903 | 0.167885 | 0.573718 | chr2  | 1.89E+08        | 1.89E+08        | 0 NA | intron (Nintron (N | 15613 NR_037401   | 1.01E+08                   | NR_037401           | ENSG00000MIR3606  | hsa-mir-3606                 | microRNA ncRNA               |                         |
| chr7-107F | 8.721469 | -1.00757 | 0.730857 | -1.37861 | 0.168014 | 0.573718 | chr7  | 1.08E+08        | 1.08E+08        | 0 NA | intron (NAluSc8 SI | 5735 NM_002291    | 3912 Hs. 65058E            | NM_002291           | ENSG00000CLAMB1   | CLM LIS5                     | laminin sprotein-coding      |                         |
| chr16-18F | 9.639254 | -0.93487 | 0.679094 | -1.37665 | 0.168622 | 0.575271 | chr16 | 1.8338489       | 1.8338804       | 0 NA | intron (Nigger6a   | -2786 NM_00128E   | 1.01E+08                   | Hs. 63656E          | NM_00128E         | ENSG00000NIPPA8              | LCR16a9 N                    | nuclear rprotein-coding |
| chr12-11F | 8.667523 | -1.00907 | 0.734038 | -1.37468 | 0.169223 | 0.575385 | chr12 | 1.12E+08        | 1.12E+08        | 0 NA | exon (NM exon (NM  | -21445 NR_106921  | 1.02E+08                   | NR_106921           | ENSG00000MIR6861  | hsa-mir-610                  | microRNA ncRNA               |                         |
| chr4-113F | 8.667523 | -1.00907 | 0.734038 | -1.37468 | 0.169223 | 0.575385 | chr4  | 1.14E+08        | 1.14E+08        | 0 NA | exon (NM exon (NM  | 76628 NM_02459C   | 79642 Hs. 22895            | NM_02459C           | ENSG00000CARSJ    | ASJ                          | arylsulfatase protein-coding |                         |
| chr1-666E | 8.19404  | -1.05033 | 0.764529 | -1.37383 | 0.169495 | 0.575385 | chr1  | 66666577        | 66667549        | 0 NA | intron (Nintron (N | 38623 NR_03606C   | 1E+08                      | NR_03606C           | ENSG00000CIR3117  | mir-3117                     | microRNA ncRNA               |                         |
| chr2-958E | 8.19404  | -1.05033 | 0.764529 | -1.37383 | 0.169495 | 0.575385 | chr2  | 95893183        | 95893477        | 0 NA | intron (Nintron (N | -66349 NR_103734  | 150759 Hs. 50346E          | NR_103734           | LINC0034Z         | NCRNA0034                    | long intencRNA               |                         |
| chr7-128E | 8.19404  | -1.05033 | 0.764529 | -1.37383 | 0.169495 | 0.575385 | chr7  | 1.29E+08        | 1.29E+08        | 0 NA | IntergeniIntergeni | -22247 NR_02436E  | 402483 Hs. 72235C          | NM_001039682        | LINC0100C         | -                            | long intencRNA               |                         |
| chr3-122A | 8.250193 | -1.05393 | 0.767288 | -1.37358 | 0.169573 | 0.575385 | chr3  | 1.22E+08        | 1.22E+08        | 0 NA | intron (NAluYg6 SI | 22941 NM_002264   | 3836 Hs. 16100E            | NM_002264           | ENSG00000CPNA1    | IPOA5 NP1                    | karyopher protein-coding     |                         |
| chr11-10F | 8.706879 | -1.00542 | 0.733112 | -1.37145 | 0.170236 | 0.576568 | chr11 | 1.08E+08        | 1.08E+08        | 0 NA | exon (NM exon (NM  | 102027 NM_152587  | 160140 Hs. 65318C          | NM_152587           | ENSG00000C11orf65 | -                            | chromosom protein-coding     |                         |
| chr4-141E | 8.706879 | -1.00542 | 0.733112 | -1.37145 | 0.170236 | 0.576568 | chr4  | 1.41E+08        | 1.41E+08        | 0 NA | intron (Nintron (N | 12509 NM_014487   | 27309 Hs. 12076E           | NM_014487           | ENSG00000CNF330   | HSA6591 N                    | zinc fing protein-coding     |                         |
| chr5-432E | 8.679905 | -1.00618 | 0.733982 | -1.37085 | 0.17042  | 0.576568 | chr5  | 43293779        | 43294120        | 0 NA | intron (NAluSx SIN | 19232 NM_001324   | 3157 Hs. 39772E            | NM_00213C           | ENSG00000HMGC51   | HMGC5                        | 3-hydroxy protein-coding     |                         |
| chr11-51F | 16.34532 | -0.54275 | 0.396027 | -1.37049 | 0.170534 | 0.576568 | chr11 | 51963373        | 51963612        | 0 NA | IntergeniALR/Alphe | 1554435 NR_024504 | 646813 Hs. 68417E          | NR_024504           | LOC646813         | -                            | DEXH-box pseudo              |                         |
| chr1-231E | 8.221013 | -1.04938 | 0.767321 | -1.36759 | 0.171441 | 0.578595 | chr1  | 2.31E+08        | 2.31E+08        | 0 NA | intron (NMSTB1 LTF | 14754 NM_15237E   | 128061 Hs. 743464NM_15237E | ENSG00000Clorf131   | -                 | chromosom protein-coding     |                              |                         |
| chr5-682E | 8.221013 | -1.04938 | 0.767321 | -1.36759 | 0.171441 | 0.578595 | chr5  | 68293328        | 68293708        | 0 NA | intron (Nintron (N | 941 NM_00124Z     | 5295 Hs. 13222E            | NM_181504           | ENSG00000PIK3R1   | AGM7 GRB1                    | phosphoir protein-coding     |                         |
| chr2-22Z  | 8.692288 | -1.00321 | 0.737616 | -1.36007 | 0.173809 | 0.585389 | chr2  | 22306489        | 22307065        | 0 NA | intron (Nintron (N | 8679 NR_02729E    | 96610 Hs. 449601NM_080926  | BMS1P20             | IGL IGLV BMS1     | pset pseudo                  |                              |                         |
| chr3-183E | 8.179449 | -1.04793 | 0.770688 | -1.35974 | 0.173912 | 0.585389 | chr3  | 1.84E+08        | 1.84E+08        | 0 NA | intron (Nintron (N | -18660 NR_04657E  | 1.01E+08                   | Hs. 57069E          | NR_04657E         | ENSG00000ABC5-AS1            | -                            | chromosom antncRNA      |
| chr20-27J | 13.62144 | -0.64303 | 0.472914 | -1.35971 | 0.173921 | 0.585389 | chr20 | 27758540        | 27758824        | 0 NA | IntergeniALR/Alphe | 843983 NR_13231E  | 1E+08                      | Hs. 529357NR_13231E | ENSG00000FRG1CP   | -                            | FSHD regipseudo              |                         |
| chr3-180E | 9.190537 | -0.9617  | 0.710761 | -1.35306 | 0.176036 | 0.591978 | chr3  | 1.81E+08        | 1.81E+08        | 0 NA | intron (NAluSp SIN | 28133 NM_00136E   | 8087 Hs. 478407NM_005087   | ENSG00000CFXR1      | FXR1P             | FMRI                         | autc protein-coding          |                         |
| chr9-128E | 8.677698 | -1.00088 | 0.744529 | -1.34432 | 0.178846 | 0.59423  | chr9  | 1.28E+08        | 1.28E+08        | 0 NA | intron (NLTR13A LI | 3653 NM_00131E    | 375757 Hs. 259594NM_00104C | ENSG00000CSW15      | C9orf119 N        | SW15                         | homc protein-coding          |                         |
| chr4-183E | 8.191832 | -1.04453 | 0.77724  | -1.3439  | 0.17898  | 0.59423  | chr4  | 1.83E+08        | 1.83E+08        | 0 NA | exon (NM exon (NM  | -20773 NR_12647E  | 1.02E+08                   | Hs. 57071E          | NR_12647E         | ENSG00000WWC2-AS1            | -                            | WWC2 antncRNA           |
| chr17-39J | 10.93692 | -0.79566 | 0.592662 | -1.34252 | 0.179426 | 0.59423  | chr17 | 39200746        | 39204971        | 0 NA | intron (NMIR SINE  | 2535 NM_00133C    | 6143 Hs. 381061NM_000981   | ENSG00000RPL19      | L19               | ribosomal protein-coding     |                              |                         |
| chr1-232E | 8.164859 | -1.04542 | 0.779643 | -1.34089 | 0.179956 | 0.59423  | chr1  | 2.43E+08        | 2.43E+08        | 0 NA | intron (Nintron (N | 80665 NR_039824   | 1.01E+08                   | NR_039824           | ENSG00000MIR4677  | mir-4677                     | microRNA ncRNA               |                         |
| chr1-225J | 10.92233 | -0.79421 | 0.592854 | -1.33964 | 0.180362 | 0.59423  | chr1  | 2.26E+08        | 2.26E+08        | 0 NA | intron (NAluSg SIN | 10663 NM_00113C   | 6726 Hs. 51142E            | NM_00313E           | ENSG00000SRP9     | ALURBP                       | signal rprotein-coding       |                         |
| chr18-49J | 10.92233 | -0.79421 | 0.592854 | -1.33964 | 0.180362 | 0.59423  | chr18 | 49489068        | 49492177        | 0 NA | TTS (NR_CTS (NR_C  | 307 NM_00136E     | 6139 Hs. 29365E            | NM_00098E           | ENSG00000RPL17    | L17 PD-1                     | ribosomal protein-coding     |                         |
| chr19-11J | 10.92233 | -0.79421 | 0.592854 | -1.33964 | 0.180362 | 0.59423  | chr19 | 11770240        | 11785813        | 0 NA | intron (NAluSg2a   | 11026 NM_15235E   | 126068 Hs. 67513E          | NM_15235E           | ENSG00000CNF441   | -                            | zinc fing protein-coding     |                         |
| chr8-130E | 10.92233 | -0.79421 | 0.592854 | -1.33964 | 0.180362 | 0.59423  | chr8  | 13082422        | 13101003        | 0 NA | intron (Nintron (N | 24532 NM_001164   | 10395 Hs. 13429E           | NM_006094           | ENSG00000DLC1     | ARHGAP7 D                    | LDC1                         | Rho protein-coding      |
| chr5-699J | 13.17714 | -0.65627 | 0.490712 | -1.33738 | 0.181099 | 0.59423  | chr5  | 69913813        | 69916129        | 0 NA | intron (NAluJo SIN | -10951 NR_157804  | 1.02E+08                   | Hs. 63401E          | NR_157804         | LOC10192E                    | -                            | putative pseudo         |
| chr1-246J | 10.93471 | -0.79242 | 0.593544 | -1.33507 | 0.181852 | 0.59423  | chr1  | 24645332        | 24659660        | 0 NA | non-codiron-codir  | 8917 NM_00136E    | 10250 Hs. 18192            | NR_00583E           | ENSG00000SRRM1    | 160-KD P                     | serine ar protein-coding     |                         |
| chr1-144E | 10.93471 | -0.79242 | 0.593544 | -1.33507 | 0.181852 | 0.59423  | chr1  | 1.45E+08        | 1.45E+08        | 0 NA | intron (Nintron (N | 174388 NR_027354  | 645166 Hs. 74418E          | NR_027354           | LSP1P5            | -                            | LSP1 pset pseudo             |                         |
| chr2-928E | 10.93471 | -0.79242 | 0.593544 | -1.33507 | 0.181852 | 0.59423  | chr2  | 92823857        | 92824740        | 0 NA | IntergeniALR/Alphe | 883165 NR_027714  | 440888 Hs. 73023E          | NR_001032412        | ACTR3BP2          | FKSG73                       | ACTR3B pspseudo              |                         |
| chr6-365E | 10.93471 | -0.79242 | 0.593544 | -1.33507 | 0.181852 | 0.59423  | chr6  | 36595116        | 36610684        | 0 NA | non-codiron-codir  | 8538 NR_003017    | 6428 Hs. 405144NM_003017   | ENSG00000SRSF3      | SFRS3 SR          | serine ar protein-coding     |                              |                         |
| chr16-32Z | 13.14796 | -0.65442 | 0.490469 | -1.33427 | 0.182116 | 0.59423  | chr16 | 3221576         | 3233748         | 0 NA | intron (NTHEID LTF | 7496 NM_00114E    | 7752 Hs. 63222E            | NM_003454           | ENSG00000ZNF200   | -                            | zinc fing protein-coding     |                         |
| chr14-71J | 10.89315 | -0.79125 | 0.597059 | -1.32524 | 0.185091 | 0.59423  | chr14 | 71102312        | 71102533        | 0 NA | intron (NAluJb SIN | 194963 NM_00130E  | 22990 Hs. 44655E           | NM_01498E           | ENSG00000PCNX1    | PCNX PCN                     | pecanex I protein-coding     |                         |
| chr1-123E | 10.42408 | -0.8195  | 0.620232 | -1.32127 | 0.18641  | 0.59423  | chr1  | 1.24E+08        | 1.24E+08        | 0 NA | IntergeniALR/Alphe | 2451193 NR_00395E | 647121 Hs. 69768E          | NR_00395E           | ENSG00000EMB1     | -                            | embigin pset pseudo          |                         |
| chr9-127J | 10.42408 | -0.8195  | 0.620232 | -1.32127 | 0.18641  | 0.59423  | chr9  | 1.28E+08        | 1.28E+08        | 0 NA | 3' UTR (N3' UTR (N | 3953 NM_001261    | 1025 Hs. 15042E            | NM_001261           | ENSG00000CDK9     | C-2K CDC                     | cyclin d protein-coding      |                         |
| chr5-483E | 10.45106 | -0.81911 | 0.620262 | -1.31983 | 0.186892 | 0.59423  | chr5  | 48364399        | 48365273        | 0 NA | IntergeniALR/Alphe | 207645E NM_19844E | 133418 Hs. 561411NM_19844E | ENSG00000EMB        | GP70              | embigin protein-coding       |                              |                         |
| chr1-154J | 10.43647 | -0.81752 | 0.620088 | -1.31839 | 0.187372 | 0.59423  | chr1  | 1.54E+08        | 1.54E+08        | 0 NA | 3' UTR (N3' UTR (N | -10195 NM_00115E  | 91181 Hs. 67639E           | NR_20730E           | ENSG00000NUP210L  | -                            | nucleopor protein-coding     |                         |
| chr1-157J | 10.43647 | -0.81752 | 0.620088 | -1.31839 | 0.187372 | 0.59423  | chr1  | 1.57E+08        | 1.57E+08        | 0 NA | TTS (NM_CTS (NM_C  | 4574 NR_00156C    | 360155 Hs. 49180E          | NR_00156C           | ENSG00000CYCSP52  | HC6 HCP2                     | CYCS                         | pset pseudo             |
| chr12-56E | 10.43647 | -0.81752 | 0.620088 | -1.31839 | 0.187372 | 0.59423  | chr12 | 56637816        | 56645633        | 0 NA | intron (NAluSc8 SI | 2030 NR_00304E    | 692090 Hs. 67513E          | NR_00304E           | SNORD59B          | U59B                         | small nucsnoRNA              |                         |
| chr12-11J | 10.43647 | -0.81752 | 0.620088 | -1.31839 | 0.187372 | 0.59423  | chr12 | 1.12E+08        | 1.12E+08        | 0 NA | intron (Nintron (N | 3138 NM_00132C    | 6128 Hs. 52866E            | NM_00097C           | ENSG00000RPL6     | L6 SHUJUN                    | ribosomal protein-coding     |                         |
| chr1-156J | 10.42187 | -0.81592 | 0.620997 | -1.31389 | 0.188883 | 0.59423  | chr1  | 10760 NM_001271 | 4209 Hs. 314327 | 0 NA | intron (Nintron (N | 10760 NM_001271   | 4209 Hs. 314327            | NR_00592C           | ENSG00000MRF2D    | -                            | myocyte protein-coding       |                         |
| chr1-201E | 10.42187 | -0.81592 | 0.620997 | -1.31389 | 0.188883 | 0.59423  | chr1  | 2.02E+08        | 2.02E+08        | 0 NA | intron (Nintron (N | -7253 NR_106797   | 1.02E+08                   | NR_106797           | ENSG00000MIR6739  | hsa-mir-610                  | microRNA ncRNA               |                         |
| chr1-224E | 10.42187 | -0.81592 | 0.620997 | -1.31389 | 0.188883 | 0.59423  | chr1  | 2.24E+08        | 2.24E+08        | 0 NA | intron (NLMIB8 LIN | 7681 NR_03989E    | 1.01E+08                   | NR_03989E           | ENSG00000MIR4742  | mir-4742                     | microRNA ncRNA               |                         |
| chr10-91E | 10.3949  | -0.81629 | 0.623518 | -1.30917 | 0.190477 | 0.59423  | chr10 | 91628713        | 91632250        | 0 NA | exon (NM exon (NM  | 2590 NM_00539E    | 5507 Hs. 30309E            | NM_00539E           | ENSG00000PPP1R3C  | PPP1R5 P                     | PI protein-coding            |                         |
| chr19-25J | 17.6138  | -0.48571 | 0.371255 | -1.30829 | 0.190776 | 0.59423  | chr19 | 25108820        | 25109029        | 0 NA | IntergeniALR/Alphe | -94547 NR_00360E  | 1E+08                      | Hs. 14931E          | NR_00360E         | ENSG00000HAVCR1P1            | -                            | hepatitis pseudo        |
| chr1-233E | 14.86075 | -0.56514 | 0.433037 | -1.30506 | 0.191873 |          |       |                 |                 |      |                    |                   |                            |                     |                   |                              |                              |                         |

|                    |          |          |          |          |         |       |          |          |   |    |                    |                   |                               |                     |             |                             |
|--------------------|----------|----------|----------|----------|---------|-------|----------|----------|---|----|--------------------|-------------------|-------------------------------|---------------------|-------------|-----------------------------|
| chr1-3517.9.396197 | -0.87097 | 0.683348 | -1.27456 | 0.202465 | 0.59423 | chr1  | 35175358 | 35191998 | + | NA | 3' UTR (N3' UTR (N | 9467 NR_136703    | 6421 Hs. 355934NM_005066      | ENSG000003FPQ       | POMP100 F   | splicing protein-coding     |
| chr1-2582.8.924921 | -0.90496 | 0.710032 | -1.27454 | 0.202474 | 0.59423 | chr1  | 25825373 | 25834614 | + | NA | intron (Nintron (N | -6387 NR_024498   | 646471 Hs. 727271NR_024498    | LOC646471           | -           | uncharactercncRNA           |
| chr1-2688.8.924921 | -0.90496 | 0.710032 | -1.27454 | 0.202474 | 0.59423 | chr1  | 26832566 | 26836498 | + | NA | intron (NL2c LINE  | 7844 NM_032288    | 84243 Hs. 523731CNM_032288    | ENSG000003ZDHC18    | DHHC-18 Z   | inc zinc fingprotein-coding |
| chr1-4368.8.924921 | -0.90496 | 0.710032 | -1.27454 | 0.202474 | 0.59423 | chr1  | 43689254 | 43705141 | + | NA | intron (NL2a LINE  | 10144 NR_033827   | 1E+08 Hs. 655566NR_033827     | KDMA4-AS1-          | KDMA4       | antncRNA                    |
| chr1-8421.8.924921 | -0.90496 | 0.710032 | -1.27454 | 0.202474 | 0.59423 | chr1  | 84218796 | 84219642 | + | NA | intron (NLIM4A LI  | 37587 NR_001242   | 5567 Hs. 487326NM_002731      | ENSG000003PRKACB    | PKA C-beta  | protein-coding              |
| chr1-9458.8.924921 | -0.90496 | 0.710032 | -1.27454 | 0.202474 | 0.59423 | chr1  | 94531025 | 94533508 | + | NA | intron (Nintron (N | 9493 NM_001995    | 2152 Hs. 62192 NM_001995      | ENSG000003CF3       | CD142 TF    | coagulatiprotein-coding     |
| chr1-1548.8.924921 | -0.90496 | 0.710032 | -1.27454 | 0.202474 | 0.59423 | chr1  | 1.55E+08 | 1.55E+08 | + | NA | intron (Nintron (N | 14515 NM_001193   | 103 Hs. 12341 NM_001111       | ENSG000003ADAR      | ADAR1 AGS   | adenosineprotein-coding     |
| chr1-1627.8.924921 | -0.90496 | 0.710032 | -1.27454 | 0.202474 | 0.59423 | chr1  | 1.63E+08 | 1.63E+08 | + | NA | intron (Nintron (N | -20436 NM_001304  | 51478 Hs. 492926NM_016371     | ENSG000003HSD17B7   | PRAP SDR    | hydroxystprotein-coding     |
| chr1-1688.8.924921 | -0.90496 | 0.710032 | -1.27454 | 0.202474 | 0.59423 | chr1  | 1.68E+08 | 1.68E+08 | + | NA | intron (Nintron (N | 66479 NM_001267   | 23432 Hs. 27180NM_007366      | ENSG000003GPR161    | RE2         | G proteirprotein-coding     |
| chr1-1808.8.924921 | -0.90496 | 0.710032 | -1.27454 | 0.202474 | 0.59423 | chr1  | 1.8E+08  | 1.8E+08  | + | NA | intron (NAluSx LIN | -78877 NM_001004  | 5768 Hs. 719176NM_002826      | ENSG000003QSOX1     | Q6 QSCN6    | quiescin protein-coding     |
| chr1-2226.8.924921 | -0.90496 | 0.710032 | -1.27454 | 0.202474 | 0.59423 | chr1  | 2.23E+08 | 2.23E+08 | + | NA | intron (NLIMEg LI  | 12480 NM_001300   | 375056 Hs. 118474NM_198551    | ENSG000003MIA3      | ARNT D32    | MIA SH3 cprotein-coding     |
| chr10-378.8.924921 | -0.90496 | 0.710032 | -1.27454 | 0.202474 | 0.59423 | chr10 | 37951752 | 37957700 | + | NA | intron (Nintron (N | 21254 NR_138066   | 219749 Hs. 499425NM_145011    | ENSG000003ZNF25     | KOX19 Zfz   | inc zinc fingprotein-coding |
| chr11-868.8.924921 | -0.90496 | 0.710032 | -1.27454 | 0.202474 | 0.59423 | chr11 | 8683320  | 8686973  | + | NA | promoter-promoter- | -293 NR_002977    | 677826 Hs. 745552NR_002977    | ENSG000003SNORA3B   | AC3-2 S     | small nucsnoRNA             |
| chr11-647.8.924921 | -0.90496 | 0.710032 | -1.27454 | 0.202474 | 0.59423 | chr11 | 64761282 | 64777349 | + | NA | exon (NM exon (NM  | 8446 NM_001178    | 7536 Hs. 502825NM_004632      | ENSG000003SF1       | BBP D115    | splice protein-coding       |
| chr12-104.8.924921 | -0.90496 | 0.710032 | -1.27454 | 0.202474 | 0.59423 | chr12 | 1.04E+08 | 1.04E+08 | + | NA | intron (Nintron (N | 43389 NM_001008   | 493861 Hs. 659857NM_001008    | ENSG000003EID3      | NS4EB NSE   | EP300 intrprotein-coding    |
| chr12-108.8.924921 | -0.90496 | 0.710032 | -1.27454 | 0.202474 | 0.59423 | chr12 | 1.09E+08 | 1.09E+08 | + | NA | intron (Nintron (N | 5632 NM_00132C    | 23479 Hs. 615131NM_014301     | ENSG000003ISCU      | CCD120 H4C  | coiled-cpseuso              |
| chr17-203.8.924921 | -0.90496 | 0.710032 | -1.27454 | 0.202474 | 0.59423 | chr17 | 20304462 | 20308143 | + | NA | intron (NLIMed LI  | -14872 NR_023380  | 348254 Hs. 462477NR_023380    | CCDC144CC           | CCDC144C    | coiled-cpseuso              |
| chr17-395.8.924921 | -0.90496 | 0.710032 | -1.27454 | 0.202474 | 0.59423 | chr17 | 39983756 | 39999726 | + | NA | intron (Nintron (N | 10934 NM_002808   | 5709 Hs. 12970 NM_002808      | ENSG000003PSMD3     | P58 RPN3    | proteasoneprotein-coding    |
| chr2-952.8.924921  | -0.90496 | 0.710032 | -1.27454 | 0.202474 | 0.59423 | chr2  | 95209551 | 95217792 | + | NA | IntergeniIntergeni | 47862 NM_001282   | 7549 Hs. 590916NM_021088      | ENSG000003ZNF2      | A1-5 ZNF2   | inc zinc fingprotein-coding |
| chr20-388.8.924921 | -0.90496 | 0.710032 | -1.27454 | 0.202474 | 0.59423 | chr20 | 3854181  | 3867260  | + | NA | intron (NAluSg SI  | 13886 NR_037921   | 57506 Hs. 570362NM_020746     | ENSG000003MAVS      | CARDIF I    | mitochondncprotein-coding   |
| chr20-538.8.924921 | -0.90496 | 0.710032 | -1.27454 | 0.202474 | 0.59423 | chr20 | 53564468 | 53578060 | + | NA | intron (NAluSg SI  | 11833 NM_006526   | 7764 Hs. 15504CNM_006526      | ENSG000003ZNF217    | ZABCI       | inc zinc fingprotein-coding |
| chr3-2728.8.924921 | -0.90496 | 0.710032 | -1.27454 | 0.202474 | 0.59423 | chr3  | 27298436 | 27301464 | + | NA | intron (NTHE1B-int | 69433 NM_199347   | 152110 Hs. 506115NM_152534    | ENSG000003NEK10     | -           | NIMA releprotein-coding     |
| chr3-7572.8.924921 | -0.90496 | 0.710032 | -1.27454 | 0.202474 | 0.59423 | chr3  | 75728666 | 75729659 | + | NA | TTS (NM_C          | -9118 NR_036235   | 1E+08 NR_036235               | ENSG000003MIR4273   | -           | microRNA ncRNA              |
| chr4-868.8.924921  | -0.90496 | 0.710032 | -1.27454 | 0.202474 | 0.59423 | chr4  | 8683320  | 8686973  | + | NA | intron (Nintron (N | -77884 NM_005958  | 4543 Hs. 243467NM_005958      | ENSG000003MTNR1A    | MEL-1A-R    | melatoninprotein-coding     |
| chr8-1318.8.924921 | -0.90496 | 0.710032 | -1.27454 | 0.202474 | 0.59423 | chr8  | 13109183 | 13114847 | + | NA | intron (NAluJo SI  | 4229 NM_001164    | 10395 Hs. 134296NM_006094     | ENSG000003DLC1      | ARHGAP7 F   | DLC1 Rho protein-coding     |
| chr1-2478.8.426673 | -0.94397 | 0.740975 | -1.27395 | 0.202679 | 0.59423 | chr1  | 2.47E+08 | 2.47E+08 | + | NA | exon (NM exon (NM  | -30076 NM_020394  | 57116 Hs. 669895NM_020394     | ENSG000003ZNF695    | SBZF3       | inc zinc fingprotein-coding |
| chr12-121.8.426673 | -0.94397 | 0.740975 | -1.27395 | 0.202679 | 0.59423 | chr12 | 1.21E+08 | 1.21E+08 | + | NA | intron (Nintron (N | 21061 NM_001217   | 10645 Hs. 297345NM_006546     | ENSG000003CAMK2C    | CAMK2C CAM  | calcium/cprotein-coding     |
| chr13-102.8.426673 | -0.94397 | 0.740975 | -1.27395 | 0.202679 | 0.59423 | chr13 | 1.03E+08 | 1.03E+08 | + | NA | intron (Nintron (N | 32987 NR_160411   | 7174 Hs. 432424NM_003291      | ENSG000003TPP2      | TPP-2 TPF   | tripepticprotein-coding     |
| chr2-2737.8.426673 | -0.94397 | 0.740975 | -1.27395 | 0.202679 | 0.59423 | chr2  | 27373107 | 27378983 | + | NA | intron (Nintron (N | 4399 NM_001201    | 130557 Hs. 515872NM_144631    | ENSG000003ZNF513    | HMFT0656 z  | inc zinc fingprotein-coding |
| chr3-5322.8.426673 | -0.94397 | 0.740975 | -1.27395 | 0.202679 | 0.59423 | chr3  | 53221251 | 53242314 | + | NA | intron (Nintron (N | 24240 NM_001064   | 7086 Hs. 89643NM_001064       | ENSG000003TKF       | HEL-S-48    | transketprotein-coding      |
| chr17-241.12.14705 | -0.67978 | 0.533704 | -1.2737  | 0.202768 | 0.59423 | chr17 | 24188150 | 24188723 | + | NA | IntergeniALR/Alphe | 1665325 NM_00119C | 1E+08 Hs. 740188NM_00119C     | ENSG000003MTRNR2L1  | HNI         | MT-RNR2 lprotein-coding     |
| chr10-126.8.42888  | -0.94915 | 0.745867 | -1.27255 | 0.203177 | 0.59423 | chr10 | 1.27E+08 | 1.27E+08 | + | NA | intron (NLA_A_Mam  | 80136 NM_00129C   | 1793 Hs. 159193NM_00138C      | ENSG000003DOCK1     | DOCK1 D     | cdedicatorprotein-coding    |
| chr6-1315.8.42888  | -0.94915 | 0.745867 | -1.27255 | 0.203177 | 0.59423 | chr6  | 1.32E+08 | 1.32E+08 | + | NA | 3' UTR (N3' UTR (N | 2485 NM_001901    | 1490 Hs. 410037NM_001901      | ENSG000003CCN2      | CTGF HCS2   | cellular protein-coding     |
| chr14-218.8.453646 | -0.94325 | 0.742068 | -1.27111 | 0.20369  | 0.59423 | chr14 | 21387433 | 21387632 | + | NA | intron (NAluSp SI  | -3513 NM_007192   | 11198 Hs. 213724NM_007192     | ENSG000003SPT16H    | CDC68 FAC   | SPT16 honprotein-coding     |
| chr2-9228.8.453646 | -0.94325 | 0.742068 | -1.27111 | 0.20369  | 0.59423 | chr2  | 92296775 | 92297631 | + | NA | IntergeniALR/Alphe | 356070 NR_027714  | 440888 Hs. 730233NM_001032412 | ACTR3BP2            | FKSG73      | ACTR3B psseudo              |
| chr4-3868.8.453646 | -0.94325 | 0.742068 | -1.27111 | 0.20369  | 0.59423 | chr4  | 38681032 | 38683025 | + | NA | intron (Nintron (N | -17400 NR_026804  | 79667 Hs. 29275 NM_024614     | ENSG000003KLF3-AS1  | -           | KLF3 antncRNA               |
| chr1-1567.8.951894 | -0.90433 | 0.711453 | -1.27111 | 0.203693 | 0.59423 | chr1  | 1.57E+08 | 1.57E+08 | + | NA | intron (NAluSq2 SI | 22838 NM_005975   | 5546 Hs. 516944NM_005975      | ENSG000003PRCC      | RCCP1 TPF   | proline rprotein-coding     |
| chr14-321.8.951894 | -0.90433 | 0.711453 | -1.27111 | 0.203693 | 0.59423 | chr14 | 32153786 | 32157830 | + | NA | 3' UTR (N3' UTR (N | -46237 NR_004394  | 26827 NR_004394               | ENSG000003RNU6-1    | RNU6 RNU6A, | U6 ssnRNA                   |
| chr9-1104.8.951894 | -0.90433 | 0.711453 | -1.27111 | 0.203693 | 0.59423 | chr9  | 1.1E+08  | 1.1E+08  | + | NA | intron (Nintron (N | -77303 NR_00128E  | 255220 Hs. 147064NM_001003    | ENSG000003TXND8     | SRP18-3 S   | thioredoxprotein-coding     |
| chr9-1218.8.951894 | -0.90433 | 0.711453 | -1.27111 | 0.203693 | 0.59423 | chr9  | 1.21E+08 | 1.21E+08 | + | NA | intron (Nintron (N | 6038 NM_000177    | 2934 Hs. 522377NM_000177      | ENSG000003CGSN      | ADF AGEL    | gelsolin protein-coding     |
| chr1-6655.8.439055 | -0.94105 | 0.740954 | -1.27006 | 0.204065 | 0.59423 | chr1  | 66534475 | 66542547 | + | NA | intron (Nintron (N | 4358 NM_032291    | 84251 Hs. 132121NM_032291     | ENSG000003SGIP1     | -           | SH3 domaiprotein-coding     |
| chr1-1537.8.439055 | -0.94105 | 0.740954 | -1.27006 | 0.204065 | 0.59423 | chr1  | 1.54E+08 | 1.54E+08 | + | NA | intron (Nintron (N | -14752 NR_145826  | 11000 Hs. 438725NM_02433C     | ENSG000003SLC27A3   | ACSVL3 F    | soluble cprotein-coding     |
| chr1-1568.8.439055 | -0.94105 | 0.740954 | -1.27006 | 0.204065 | 0.59423 | chr1  | 1.57E+08 | 1.57E+08 | + | NA | intron (Nintron (N | -48503 NR_030527  | 768220 NR_030527              | ENSG000003MIR765    | MIRN765 f   | microRNA ncRNA              |
| chr1-2057.8.439055 | -0.94105 | 0.740954 | -1.27006 | 0.204065 | 0.59423 | chr1  | 2.06E+08 | 2.06E+08 | + | NA | intron (Nintron (N | 17250 NM_173854   | 254428 Hs. 20274 NM_173854    | ENSG000003SLC41A1   | MgIE        | soluble cprotein-coding     |
| chr1-2112.8.439055 | -0.94105 | 0.740954 | -1.27006 | 0.204065 | 0.59423 | chr1  | 2.11E+08 | 2.11E+08 | + | NA | intron (Nintron (N | -30312 NM_004615  | 7188 Hs. 52393CNM_004615      | ENSG000003TRAF5     | MGC-3978C   | TNF receprotein-coding      |
| chr1-2156.8.439055 | -0.94105 | 0.740954 | -1.27006 | 0.204065 | 0.59423 | chr1  | 2.16E+08 | 2.16E+08 | + | NA | intron (NL2c LINE  | 41996 NM_016121   | 51133 Hs. 335133NM_016121     | ENSG000003CKTD3     | NY-REN-4    | potassiumprotein-coding     |
| chr11-351.8.439055 | -0.94105 | 0.740954 | -1.27006 | 0.204065 | 0.59423 | chr11 | 35176062 | 35190687 | + | NA | intron (Nintron (N | 20424 NR_145794   | 1E+08 NR_145794               | SNORD164            | -           | small nucsnoRNA             |
| chr18-938.8.439055 | -0.94105 | 0.740954 | -1.27006 | 0.204065 | 0.59423 | chr18 | 9388544  | 9392364  | + | NA | intron (NAluY SINE | 55681 NR_020648   | 57045 Hs. 514688NM_020648     | ENSG000003TWSG1     | TSG         | twisted protein-coding      |
| chr19-488.8.439055 | -0.94105 | 0.740954 | -1.27006 | 0.204065 | 0.59423 | chr19 | 48904183 | 48919917 | + | NA | intron (NAluJr SI  | 6841 NR_046633    | 1E+08 Hs. 569933NR_046633     | ENSG000003NUCB1-AS1 | -           | NUCB1 antncRNA              |
| chr2-1115.8.439055 | -0.94105 | 0.740954 | -1.27006 | 0.204065 | 0.59423 | chr2  | 11195171 | 11203140 | + | NA | intron (NAluSz SI  | 43688 NR_104231   | 130814 Hs. 274415NM_152391    | ENSG000003SLC66A3   | C2orf22 F   | soluble cprotein-coding     |
| chr2-3928.8.439055 | -0.94105 | 0.740954 | -1       |          |         |       |          |          |   |    |                    |                   |                               |                     |             |                             |



|           |          |          |          |          |          |         |       |          |          |   |   |    |                    |          |            |          |           |                  |                   |                    |                              |
|-----------|----------|----------|----------|----------|----------|---------|-------|----------|----------|---|---|----|--------------------|----------|------------|----------|-----------|------------------|-------------------|--------------------|------------------------------|
| chr15-851 | 10.16643 | -0.75691 | 0.634085 | -1.1937  | 0.232596 | 0.59423 | chr15 | 85190784 | 85194205 | + | O | NA | IntergeniMamGypLTF | 42287    | NR_158175  | 1.02E+08 | Hs.68166E | NR_158179        | LOC101925         | -                  | golgin A2pseudo              |
| chr1-1384 | 10.13946 | -0.75728 | 0.634401 | -1.1937  | 0.232596 | 0.59423 | chr1  | 1384692  | 1398441  | + | O | NA | TTS (NM_C          | 6776     | NR_00135C  | 81669    | Hs.515704 | NR_030937        | ENS00000CCNL2     | ANIA-6B            | Cyclin L2protein-coding      |
| chr1-1205 | 10.15184 | -0.75522 | 0.634271 | -1.19069 | 0.233777 | 0.59423 | chr1  | 1.21E+08 | 1.21E+08 | + | O | NA | non-codiron-codir  | -109016  | NR_003242  | 767846   | Hs.65718E | NR_003242        | ENS00000PFN1P2    | C1orf152           | profilin pseudo              |
| chr1-149C | 10.15184 | -0.75522 | 0.634271 | -1.19069 | 0.233777 | 0.59423 | chr1  | 1.49E+08 | 1.49E+08 | + | O | NA | intron (N          | 8211     | NR_001037  | 400818   | Hs.44508C | NR_001037        | ENS00000BNBP9     | AEO1               | NBPF memtprotein-coding      |
| chr11-965 | 10.15184 | -0.75522 | 0.634271 | -1.19069 | 0.233777 | 0.59423 | chr11 | 9694034  | 9696150  | + | O | NA | intron (N          | 31015    | NR_001297  | 23075    | Hs.15302E | NR_01505E        | ENS00000SWAP70    | HSPC321            | switchingprotein-coding      |
| chr16-56E | 10.15184 | -0.75522 | 0.634271 | -1.19069 | 0.233777 | 0.59423 | chr16 | 56933289 | 56945498 | + | O | NA | intron (N          | 7251     | NR_01468E  | 9709     | Hs.14639E | NR_01468E        | ENS00000CHERPUD1  | HERP               | Mif1homocysteprotein-coding  |
| chr17-16C | 10.15184 | -0.75522 | 0.634271 | -1.19069 | 0.233777 | 0.59423 | chr17 | 1669801  | 1683784  | + | O | NA | intron (N          | 8075     | NR_00644E  | 10594    | Hs.18136E | NR_00644E        | ENS00000PRPF8     | HPRP8              | PRF pre-mRNA protein-coding  |
| chr19-93C | 10.15184 | -0.75522 | 0.634271 | -1.19069 | 0.233777 | 0.59423 | chr19 | 9335224  | 9345573  | + | O | NA | intron (N          | 15703    | NR_001202  | 1.01E+08 | Hs.728944 | NR_00117E        | ENS00000ZNF559-5A | -                  | ZNF559-5A protein-coding     |
| chr2-3874 | 10.15184 | -0.75522 | 0.634271 | -1.19069 | 0.233777 | 0.59423 | chr2  | 38744530 | 38750440 | + | O | NA | intron (N          | 3876     | NR_001031  | 6432     | Hs.30909C | NR_00627E        | ENS00000SRSP7     | 9G8                | AAG3 serine arprotein-coding |
| chr20-35T | 10.15184 | -0.75522 | 0.634271 | -1.19069 | 0.233777 | 0.59423 | chr20 | 35700208 | 35740984 | + | O | NA | intron (N          | 21191    | NR_008074E | 140823   | Hs.472564 | NR_008074E       | ENS00000ROMO1     | hso0rf52           | reactive protein-coding      |
| chr3-1295 | 10.15184 | -0.75522 | 0.634271 | -1.19069 | 0.233777 | 0.59423 | chr3  | 1.29E+08 | 1.29E+08 | + | O | NA | intron (N          | -7612    | NR_106884  | 1.02E+08 | NR_106884 | ENS00000MIR6826  | hsa-mir-6         | microRNA ncRNA     |                              |
| chr3-1571 | 10.15184 | -0.75522 | 0.634271 | -1.19069 | 0.233777 | 0.59423 | chr3  | 1.57E+08 | 1.57E+08 | + | O | NA | intron (N          | 8165     | NR_00130E  | 57018    | Hs.4859   | NR_020307        | ENS00000CCNL1     | ANIA6A             | B cyclin L1protein-coding    |
| chr19-521 | 12.37968 | -0.61699 | 0.520587 | -1.18518 | 0.235948 | 0.59423 | chr19 | 52031860 | 52047999 | + | O | NA | intron (N          | 8632     | NR_00132E  | 9668     | Hs.655934 | NR_01465C        | ENS00000ZNF432    | -                  | zinc fingprotein-coding      |
| chr19-29C | 10.13725 | -0.75351 | 0.636053 | -1.18466 | 0.23615  | 0.59423 | chr19 | 29144007 | 2918752  | + | O | NA | intron (N          | 9471     | NR_00131E  | 126295   | Hs.59137E | NR_17348C        | ENS00000ZNF57     | ZNF424             | zinc fingprotein-coding      |
| chr6-4424 | 10.13725 | -0.75351 | 0.636053 | -1.18466 | 0.23615  | 0.59423 | chr6  | 44248009 | 44256614 | + | O | NA | intron (N          | 1974     | NR_03979C  | 1.01E+08 | NR_03979C | ENS00000MIR4647  | mir-4647          | microRNA ncRNA     |                              |
| chr20-392 | 10.16423 | -0.75312 | 0.636289 | -1.18362 | 0.236655 | 0.59423 | chr20 | 3920258  | 3920859  | + | O | NA | intron (N          | -2995    | NR_03172E  | 1E+08    | NR_03172E | ENS00000MIR103B2 | MIR103-2          | microRNA ncRNA     |                              |
| chr19-707 | 12.36509 | -0.61588 | 0.520776 | -1.18263 | 0.236956 | 0.59423 | chr19 | 7070639  | 7092325  | + | O | NA | intron (N          | 11779    | NR_001044  | 79230    | Hs.59138C | NR_024341        | ENS00000ZNF557    | -                  | zinc fingprotein-coding      |
| chr19-44C | 12.36509 | -0.61588 | 0.520776 | -1.18263 | 0.236956 | 0.59423 | chr19 | 44026622 | 44035356 | + | O | NA | intron (N          | 4700     | NR_00112E  | 7673     | Hs.27984C | NR_01336C        | ENS00000PRPF22    | -                  | zinc fingprotein-coding      |
| chr1-185E | 9.668186 | -0.78227 | 0.663879 | -1.17833 | 0.238665 | 0.59423 | chr1  | 1.85E+08 | 1.85E+08 | + | O | NA | intron (N          | 66062    | NR_01767E  | 54823    | Hs.13418E | NR_01767E        | ENS00000SWT1      | C1orf26            | SWT1 RNA protein-coding      |
| chr1-150E | 9.653595 | -0.78043 | 0.663149 | -1.17685 | 0.239254 | 0.59423 | chr1  | 1.46E+08 | 1.46E+08 | + | O | NA | intron (N          | 10279    | NR_00130E  | 10623    | Hs.51576E | NR_00646E        | ENS00000POLR3C    | RPC3               | RPC RNA polynprotein-coding  |
| chr1-145C | 9.653595 | -0.78043 | 0.663149 | -1.17685 | 0.239254 | 0.59423 | chr1  | 1.5E+08  | 1.5E+08  | + | O | NA | intron (N          | 19194    | NR_00469E  | 9129     | Hs.11776  | NR_00469E        | ENS00000PRPF3     | HPRP3              | PRF pre-mRNA protein-coding  |
| chr1-151E | 9.653595 | -0.78043 | 0.663149 | -1.17685 | 0.239254 | 0.59423 | chr1  | 1.51E+08 | 1.51E+08 | + | O | NA | intron (N          | 27453    | NR_00113E  | 8394     | Hs.655131 | NR_003557        | ENS00000PIP5K1A   | -                  | phosphatiprotein-coding      |
| chr1-153E | 9.653595 | -0.78043 | 0.663149 | -1.17685 | 0.239254 | 0.59423 | chr1  | 1.54E+08 | 1.54E+08 | + | O | NA | intron (N          | 2892     | NR_00103C  | 6232     | Hs.546291 | NR_00103C        | ENS00000RPS27     | DBA17              | MPS ribosomalprotein-coding  |
| chr1-156E | 9.653595 | -0.78043 | 0.663149 | -1.17685 | 0.239254 | 0.59423 | chr1  | 1.56E+08 | 1.56E+08 | + | O | NA | exon (NM           | 16969    | NR_015327  | 23381    | Hs.516837 | NR_015327        | ENS00000SMG5      | EST1B              | LPTSMG5 nonsprotein-coding   |
| chr1-171E | 9.653595 | -0.78043 | 0.663149 | -1.17685 | 0.239254 | 0.59423 | chr1  | 1.72E+08 | 1.72E+08 | + | O | NA | intron (N          | 52832    | NR_01517E  | 23215    | Hs.494614 | NR_01517E        | ENS00000PRRC2C    | BAT2               | iso proline rprotein-coding  |
| chr1-203E | 9.653595 | -0.78043 | 0.663149 | -1.17685 | 0.239254 | 0.59423 | chr1  | 2.04E+08 | 2.04E+08 | + | O | NA | intron (N          | -28951   | NR_003094  | 6635     | Hs.33461E | NR_003094        | ENS00000SNRPE     | HYPT11             | S small nucprotein-coding    |
| chr10-37E | 9.653595 | -0.78043 | 0.663149 | -1.17685 | 0.239254 | 0.59423 | chr10 | 37827040 | 37838741 | + | O | NA | exon (NM           | 24720    | NR_14799E  | 57209    | Hs.52842E | NR_02104E        | ENS00000ZNF248    | BAI62G10           | zinc fingprotein-coding      |
| chr11-18E | 9.653595 | -0.78043 | 0.663149 | -1.17685 | 0.239254 | 0.59423 | chr11 | 18394728 | 18408903 | + | O | NA | intron (N          | 5549     | NR_00116E  | 3939     | Hs.2795   | NR_00556E        | ENS00000LDHA      | GSD11              | HEL lactate cprotein-coding  |
| chr14-102 | 9.653595 | -0.78043 | 0.663149 | -1.17685 | 0.239254 | 0.59423 | chr14 | 1.03E+08 | 1.03E+08 | + | O | NA | intron (N          | 67247    | NR_003094E | 81693    | Hs.534494 | NR_03094E        | ENS00000AMN       | PRU1028            | epsilon amino asnoRNA        |
| chr19-39C | 9.653595 | -0.78043 | 0.663149 | -1.17685 | 0.239254 | 0.59423 | chr19 | 3972125  | 3985074  | + | O | NA | intron (N          | 3973     | NR_00260E  | 26812    | NR_00260E | ENS00000SNORD37  | RNU37             | U37 small nucsoRNA |                              |
| chr19-21E | 9.653595 | -0.78043 | 0.663149 | -1.17685 | 0.239254 | 0.59423 | chr19 | 21806262 | 21822540 | + | O | NA | intron (N          | 21781    | NR_00342E  | 7594     | Hs.53436E | NR_00342E        | ENS00000ZNF43     | HTF6               | KOX2 zinc fingprotein-coding |
| chr19-37E | 9.653595 | -0.78043 | 0.663149 | -1.17685 | 0.239254 | 0.59423 | chr19 | 37372264 | 37390523 | + | O | NA | intron (N          | 10294    | NR_003245E | 84503    | Hs.59094C | NR_003245E       | ENS00000ZNF527    | -                  | zinc fingprotein-coding      |
| chr19-38E | 9.653595 | -0.78043 | 0.663149 | -1.17685 | 0.239254 | 0.59423 | chr19 | 38834494 | 38848755 | + | O | NA | intron (N          | 38834    | NR_00153E  | 3191     | Hs.64490E | NR_00153E        | ENS00000HNRNPL    | HNRNPL             | P C heterogprotein-coding    |
| chr2-4634 | 9.653595 | -0.78043 | 0.663149 | -1.17685 | 0.239254 | 0.59423 | chr2  | 46346469 | 46363407 | + | O | NA | intron (N          | 39229    | NR_14699E  | 1.05E+08 | Hs.57016E | NR_14699E        | ENS00000LINC0182C | -                  | long intencRNA               |
| chr2-197E | 9.653595 | -0.78043 | 0.663149 | -1.17685 | 0.239254 | 0.59423 | chr2  | 1.97E+08 | 1.97E+08 | + | O | NA | intron (N          | 30195    | NR_00130E  | 23451    | Hs.632554 | NR_01243E        | ENS00000SF3B1     | Hsh155             | ML splicing protein-coding   |
| chr3-184E | 9.653595 | -0.78043 | 0.663149 | -1.17685 | 0.239254 | 0.59423 | chr3  | 1.84E+08 | 1.84E+08 | + | O | NA | intron (N          | -4824    | NR_001351  | 55324    | Hs.36132E | NR_01835E        | ENS00000ABCFC3    | EST201864          | ATP bindi protein-coding     |
| chr3-184E | 9.653595 | -0.78043 | 0.663149 | -1.17685 | 0.239254 | 0.59423 | chr3  | 1.84E+08 | 1.84E+08 | + | O | NA | intron (N          | 4708     | NR_00127E  | 5708     | Hs.518464 | NR_00280E        | ENS00000PSMD2     | P97                | RPN1 proteasonprotein-coding |
| chr6-2744 | 9.653595 | -0.78043 | 0.663149 | -1.17685 | 0.239254 | 0.59423 | chr6  | 27449514 | 27467764 | + | O | NA | intron (N          | 14259    | NR_00131E  | 7738     | Hs.158174 | NR_00714E        | ENS00000ZNF184    | kr-ZNF3            | zinc fingprotein-coding      |
| chr6-1324 | 9.653595 | -0.78043 | 0.663149 | -1.17685 | 0.239254 | 0.59423 | chr6  | 1.32E+08 | 1.32E+08 | + | O | NA | intron (N          | 50323    | NR_00132E  | 8417     | Hs.59314E | NR_00356E        | ENS00000STX7      | RNU37              | U37 small nucsoRNA           |
| chr22-411 | 9.62883  | -0.78506 | 0.668442 | -1.17446 | 0.240211 | 0.59423 | chr22 | 41176917 | 41178904 | + | O | NA | exon (NM           | 19591    | NR_110514  | 1.02E+08 | Hs.517517 | NR_110514        | EP300-AS1         | EP300              | antcRNA                      |
| chr9-436E | 20.03271 | -0.39356 | 0.335505 | -1.17304 | 0.240782 | 0.59423 | chr9  | 43680400 | 43680705 | + | O | NA | IntergeniALR/Alphe | 554836   | NR_16066E  | 1.03E+08 | NR_160669 | LOC102724        | -                 | methylenepseudo    |                              |
| chr1-191E | 9.639005 | -0.77859 | 0.664222 | -1.17218 | 0.241124 | 0.59423 | chr1  | 19181106 | 19202358 | + | O | NA | intron (N          | 18534    | NR_02076E  | 23352    | Hs.14807E | NR_02076E        | ENS00000UBR4      | RBAF600            | Zubiquitin rprotein-coding   |
| chr1-2374 | 9.639005 | -0.77859 | 0.664222 | -1.17218 | 0.241124 | 0.59423 | chr1  | 23749471 | 23761248 | + | O | NA | intron (N          | 11993    | NR_00319E  | 6924     | Hs.15535  | NR_00319E        | ENS00000CELOA     | SIII               | SIII elongin rprotein-coding |
| chr14-23C | 9.639005 | -0.77859 | 0.664222 | -1.17218 | 0.241124 | 0.59423 | chr14 | 23058834 | 23069507 | + | O | NA | exon (NM           | -6632    | NR_14498E  | 64403    | Hs.15591E | NR_02247E        | ENS00000CDH24     | CDH11L             | cadherin protein-coding      |
| chr16-89E | 9.639005 | -0.77859 | 0.664222 | -1.17218 | 0.241124 | 0.59423 | chr16 | 89219061 | 89236208 | + | O | NA | exon (NM           | 9931     | NR_001201  | 197320   | Hs.64738E | NR_182531        | ENS00000ZNF778    | -                  | zinc fingprotein-coding      |
| chr17-80E | 9.639005 | -0.77859 | 0.664222 | -1.17218 | 0.241124 | 0.59423 | chr17 | 80287439 | 80314267 | + | O | NA | intron (N          | 40001    | NR_020954  | 57674    | Hs.19564E | NR_020914        | ENS00000RNF213    | ALO17              | C17 ring fingprotein-coding  |
| chr19-29E | 9.639005 | -0.77859 | 0.664222 | -1.17218 | 0.241124 | 0.59423 | chr19 | 2929643  | 2940788  | + | O | NA | intron (N          | 9756     | NR_002121E | 58492    | Hs.38004  | NR_002121E       | ENS00000ZNF77     | pT1                | zinc fingprotein-coding      |
| chr22-39E | 9.639005 | -0.77859 | 0.664222 | -1.17218 | 0.241124 | 0.59423 | chr22 | 39310458 | 39319007 | + | O | NA | promoter-promoter- | 578      | NR_000027  | 116937   | NR_000027 | ENS00000SNORD83A | RNU83A            | U8 small nucsoRNA  |                              |
| chr5-476E | 9.639005 | -0.77859 | 0.664222 | -1.17218 | 0.241124 | 0.59423 | chr5  | 47626449 | 47627365 | + | O | NA | IntergeniALR/Alphe | -1930527 | NR_02107E  | 348980   | Hs.35317E | NR_02107E        | ENS00000HCN1      | BCNG-1             | BC hyperpol protein-coding   |
| chr1-587E | 9.665978 | -0.77814 | 0.664282 | -1.17141 | 0.241436 | 0.59423 | chr1  | 58781060 | 58782790 | + | O | NA | 3' UTR (N          | 2122     | NR_00222E  | 3725     | Hs.696684 | NR_00222E        | ENS00000JUN       | AP-1               | AP1 Jun protcprotein-coding  |
| chr2-465E | 9.665978 | -0.77814 | 0.664282 | -1.17141 | 0.241436 | 0.59423 | chr2  | 46576755 | 46577164 | + | O | NA | intron (N          | 3279     | NR_10418E  | 1.01E+08 |           |                  |                   |                    |                              |

|            |          |          |          |          |          |         |       |           |           |   |    |                     |                   |                   |           |           |            |                          |                              |                |  |
|------------|----------|----------|----------|----------|----------|---------|-------|-----------|-----------|---|----|---------------------|-------------------|-------------------|-----------|-----------|------------|--------------------------|------------------------------|----------------|--|
| chr2-1891  | 8.65489  | -0.83558 | 0.724076 | -1.15399 | 0.248504 | 0.59423 | chr2  | 1.89E+08  | 1.89E+08  | 0 | NA | intron (Nintron (N  | 23305 NR_036076   | 1E+08             | NR_036076 | ENS00000C | MIR3129    | mir-3129                 | microRNA                     | ncRNA          |  |
| chr2-2312  | 8.65489  | -0.83558 | 0.724076 | -1.15399 | 0.248504 | 0.59423 | chr2  | 2.31E+08  | 2.31E+08  | 0 | NA | intron (Nintron (N  | 36985 NM_001291   | 80210 Hs. 162411  | NR_025136 | ENS00000C | ARMC9      | ARM JBT5                 | armadillo protein-coding     |                |  |
| chr22-302  | 8.65489  | -0.83558 | 0.724076 | -1.15399 | 0.248504 | 0.59423 | chr22 | 30240178  | 30246086  | 0 | NA | 3' UTR (N3' UTR (N  | -3078 NR_148946   | 91370 Hs. 658999  | NR_052856 | ENS00000C | LOC91370   | -                        | uncharacterized              | ncRNA          |  |
| chr22-352  | 8.65489  | -0.83558 | 0.724076 | -1.15399 | 0.248504 | 0.59423 | chr22 | 35286444  | 35290946  | 0 | NA | intron (Nintron (N  | -10580 NM_001136  | 10043 Hs. 47470E  | NR_005488 | ENS00000C | TGM1       | -                        | target of protein-coding     |                |  |
| chr3-1723  | 8.65489  | -0.83558 | 0.724076 | -1.15399 | 0.248504 | 0.59423 | chr3  | 1.72E+08  | 1.72E+08  | 0 | NA | intron (Nintron (N  | 68626 NM_001136   | 2693 Hs. 13021E   | NR_004122 | ENS00000C | GHSR       | GHPD                     | growth h protein-coding      |                |  |
| chr5-347E  | 8.65489  | -0.83558 | 0.724076 | -1.15399 | 0.248504 | 0.59423 | chr5  | 34795751  | 34806432  | 0 | NA | intron (Nintron (N  | -38073 NM_14472E  | 153657 Hs. 435742 | NR_14472E | ENS00000C | TTC23L     | MC25-1                   | tetratric protein-coding     |                |  |
| chr7-138E  | 8.65489  | -0.83558 | 0.724076 | -1.15399 | 0.248504 | 0.59423 | chr7  | 1.39E+08  | 1.39E+08  | 0 | NA | intron (Nintron (N  | 95123 NM_01590E   | 8805 Hs. 490287   | NR_00385E | ENS00000C | TRIM24     | PTC6 RNFE                | tripartite protein-coding    |                |  |
| chr8-306E  | 8.65489  | -0.83558 | 0.724076 | -1.15399 | 0.248504 | 0.59423 | chr8  | 30690500  | 30693205  | 0 | NA | intron (NAluJb SIN  | 33666 NM_00209E   | 2961 Hs. 77100    | NR_00209E | ENS00000C | GTF2E2     | FE TFE2E                 | general protein-coding       |                |  |
| chr8-1177  | 8.65489  | -0.83558 | 0.724076 | -1.15399 | 0.248504 | 0.59423 | chr8  | 1.18E+08  | 1.18E+08  | 0 | NA | intron (Ntigger3a   | 118349 NR_14579E  | 1.1E+08           | NR_14579E | SNORD168  | -          | small nucsnoRNA          |                              |                |  |
| chr1-155E  | 8.156642 | -0.87115 | 0.754963 | -1.15399 | 0.248543 | 0.59423 | chr1  | 1.56E+08  | 1.56E+08  | 0 | NA | exon (NM exon (NM   | 21842 NM_15228E   | 23208 Hs. 32984   | NR_15228E | ENS00000C | SYT11      | SYT12 syt                | synaptotagmin protein-coding |                |  |
| chr1-2064  | 8.156642 | -0.87115 | 0.754963 | -1.15399 | 0.248543 | 0.59423 | chr1  | 2.06E+08  | 2.06E+08  | 0 | NA | intron (NAluJo SIN  | 9641 Hs. 32104E   | NR_01400E         | ENS00000C | IKKBE     | IKK-E IKK  | inhibitor protein-coding |                              |                |  |
| chr10-294  | 8.156642 | -0.87115 | 0.754963 | -1.15399 | 0.248543 | 0.59423 | chr10 | 29468948  | 29470746  | 0 | NA | TTS (NR_1TTS (NR_1  | 59604 NR_11092E   | 1.03E+08          | NR_00393C | ENS00000C | SVIL-AS1   | -                        | SVIL anticRNA                |                |  |
| chr10-10E  | 8.156642 | -0.87115 | 0.754963 | -1.15399 | 0.248543 | 0.59423 | chr10 | 1.02E+08  | 1.02E+08  | 0 | NA | intron (NMER102a I  | 17634 NM_00573E   | 10121 Hs. 153961  | NR_00573E | ENS00000C | ACTRIA     | ARPI Arp                 | actin rel protein-coding     |                |  |
| chr13-11C  | 8.156642 | -0.87115 | 0.754963 | -1.15399 | 0.248543 | 0.59423 | chr13 | 1.1E+08   | 1.1E+08   | 0 | NA | intron (Nintron (N  | 31312 NM_00126E   | 1E+08             | NR_00403E | ENS00000C | COL4A2-AS- | -                        | COL4A2 as protein-coding     |                |  |
| chr19-447  | 8.156642 | -0.87115 | 0.754963 | -1.15399 | 0.248543 | 0.59423 | chr19 | 44749896  | 44752989  | 0 | NA | intron (Nintron (N  | 2734 NM_00517E    | 602 Hs. 31210     | NR_00517E | ENS00000C | BCL3       | BCL4 D19E                | BCL3 trar protein-coding     |                |  |
| chr16-667  | 8.609824 | -0.77479 | 0.671991 | -1.15297 | 0.248923 | 0.59423 | chr16 | 66739779  | 66740001  | 0 | NA | intron (Nintron (N  | 11719 NM_00614E   | 1783 Hs. 36906E   | NR_00614E | ENS00000C | DYNC1L12   | DNCL12 Lly               | dnein cy protein-coding      |                |  |
| chr20-19E  | 8.144259 | -0.8742  | 0.75882  | -1.15205 | 0.249302 | 0.59423 | chr20 | 19819067  | 19819426  | 0 | NA | IntergenimLTI1A LTF | -67275 NM_00124E  | 54453 Hs. 47227   | NR_01899E | ENS00000C | CRIN2      | MACS RASS                | Ras and F protein-coding     |                |  |
| chr1-198   | 8.138549 | -0.80215 | 0.69636  | -1.15193 | 0.249352 | 0.59423 | chr1  | 1.99E+08  | 1.99E+08  | 0 | NA | intron (Nintron (N  | 38283 NR_04007E   | 1E+08             | NR_11077  | NR_04007E | MIR181A1E  | -                        | MIR181A1                     | ncRNA          |  |
| chr4-8281  | 9.138549 | -0.80215 | 0.69636  | -1.15193 | 0.249352 | 0.59423 | chr4  | 82817126  | 82833490  | 0 | NA | intron (NL2c LINE   | -26451 NM_02490E  | 79966 Hs. 379191  | NR_02490E | ENS00000C | SCD5       | ACOD4 FAI                | stearoyl- protein-coding     |                |  |
| chr1-150E  | 8.142051 | -0.86884 | 0.754965 | -1.15083 | 0.249801 | 0.59423 | chr1  | 1.5E+08   | 1.5E+08   | 0 | NA | intron (Nintron (N  | 7743 NM_01899E    | 54460 Hs. 40588   | NR_01899E | ENS00000C | MRPS21     | MDSO16 MF                | mitochondon protein-coding   |                |  |
| chr1-151E  | 8.142051 | -0.86884 | 0.754965 | -1.15083 | 0.249801 | 0.59423 | chr1  | 1.51E+08  | 1.51E+08  | 0 | NA | intron (Nintron (N  | -2356 NR_13197E   | 1.02E+08          | NR_63404E | NR_13197E | GBAT2      | -                        | glioblastncRNA               |                |  |
| chr1-178E  | 8.142051 | -0.86884 | 0.754965 | -1.15083 | 0.249801 | 0.59423 | chr1  | 1.79E+08  | 1.79E+08  | 0 | NA | intron (NL2a LINE   | 33871 NM_00467E   | 9068 Hs. 591474   | NR_00467E | ENS00000C | ANGPTL1    | ANG3 ANG                 | angiopoie protein-coding     |                |  |
| chr10-587  | 8.142051 | -0.86884 | 0.754965 | -1.15083 | 0.249801 | 0.59423 | chr10 | 5876109   | 5888211   | 0 | NA | intron (Nintron (N  | -7412 NM_00125E   | 84893 Hs. 49854E  | NR_03280E | ENS00000C | FBH1       | FBXO18 Ft                | F-box DN protein-coding      |                |  |
| chr11-151E | 8.142051 | -0.86884 | 0.754965 | -1.15083 | 0.249801 | 0.59423 | chr11 | 72227101  | 72238527  | 0 | NA | intron (Nintron (N  | 8047 NM_00156E    | 3636 Hs. 52387E   | NR_00156E | ENS00000C | INPPL1     | OPSM SDI                 | inositol protein-coding      |                |  |
| chr11-12E  | 8.142051 | -0.86884 | 0.754965 | -1.15083 | 0.249801 | 0.59423 | chr11 | 1.23E+08  | 1.23E+08  | 0 | NA | intron (NMLT1F2 LI  | -53944 NM_15320E  | 3312 Hs. 180414   | NR_00659E | ENS00000C | HSPA8      | HEL-33 Hf                | heat shoc protein-coding     |                |  |
| chr12-49C  | 8.142051 | -0.86884 | 0.754965 | -1.15083 | 0.249801 | 0.59423 | chr12 | 49001318  | 49005815  | 0 | NA | exon (NM exon (NM   | -4191 NM_01508E   | 23109 Hs. 591044  | NR_01508E | ENS00000C | DDN        | -                        | dendrin protein-coding       |                |  |
| chr13-30C  | 8.142051 | -0.86884 | 0.754965 | -1.15083 | 0.249801 | 0.59423 | chr13 | 30460445  | 30462691  | 0 | NA | 3' UTR (N3' UTR (N  | 2759 NM_00131E    | 3146 Hs. 43410E   | NR_00212E | ENS00000C | HMG1B      | HMG-1 HMC                | high mob protein-coding      |                |  |
| chr16-44E  | 8.142051 | -0.86884 | 0.754965 | -1.15083 | 0.249801 | 0.59423 | chr16 | 4468453   | 4469588   | 0 | NA | intron (Nintron (N  | 5605 NM_00135E    | 57407 Hs. 28896E  | NR_02067E | ENS00000C | NMRAL1     | HSCARG SE                | NmrA like protein-coding     |                |  |
| chr17-50C  | 8.142051 | -0.86884 | 0.754965 | -1.15083 | 0.249801 | 0.59423 | chr17 | 50075689  | 50085524  | 0 | NA | intron (NL2c LINE   | -14131 NM_00119E  | 5164 Hs. 256667   | NR_00261E | ENS00000C | PDK2       | PDHK2 PDF                | pyruvate protein-coding      |                |  |
| chr19-10E  | 8.142051 | -0.86884 | 0.754965 | -1.15083 | 0.249801 | 0.59423 | chr19 | 1029787   | 1038974   | 0 | NA | intron (NCpC        | -5723 NR_09191E   | 10347 Hs. 134514  | NR_01911E | ENS00000C | ABC7       | ABCA-SSN ATP             | bindi protein-coding         |                |  |
| chr2-1331  | 8.142051 | -0.86884 | 0.754965 | -1.15083 | 0.249801 | 0.59423 | chr2  | 1.33E+08  | 1.33E+08  | 0 | NA | intron (NLIPI LINE  | -164770 NR_11029E | 1.02E+08          | NR_661917 | NR_11029E | ENS00000C  | NCKAP5-AS-               | -                            | NCKAP5 arncRNA |  |
| chr3-491E  | 8.142051 | -0.86884 | 0.754965 | -1.15083 | 0.249801 | 0.59423 | chr3  | 49108066  | 49118903  | 0 | NA | intron (NAluSc8 SI  | 7454 NM_00135E    | 10869 Hs. 25559E  | NR_00667E | ENS00000C | USP19      | ZMYND9                   | ubiquitin protein-coding     |                |  |
| chr3-9984  | 8.142051 | -0.86884 | 0.754965 | -1.15083 | 0.249801 | 0.59423 | chr3  | 99847608  | 99851292  | 0 | NA | exon (NM exon (NM   | -25585 NR_11082E  | 1.02E+08          | NR_74161E | NR_11082E | HP09053    | -                        | uncharacterized              | ncRNA          |  |
| chr4-541E  | 8.142051 | -0.86884 | 0.754965 | -1.15083 | 0.249801 | 0.59423 | chr4  | 5416740   | 5418635   | 0 | NA | intron (NHALIM8 LI  | -106882 NR_12651E | 10141 Hs. 17797E  | NR_00575E | ENS00000C | LINC01587C | 4orf6 aC                 | long intencRNA               |                |  |
| chr5-1511  | 8.142051 | -0.86884 | 0.754965 | -1.15083 | 0.249801 | 0.59423 | chr5  | 1.51E+08  | 1.51E+08  | 0 | NA | intron (NMADE1 DN   | 8808 NM_00119E    | 309 Hs. 412117    | NR_00115E | ENS00000C | ANXA6      | ANX6 CBP                 | annexin A protein-coding     |                |  |
| chr8-1447  | 8.142051 | -0.86884 | 0.754965 | -1.15083 | 0.249801 | 0.59423 | chr8  | 1.45E+08  | 1.45E+08  | 0 | NA | intron (NMLTR14B LI | 7993 NM_03058E    | 80778 Hs. 631854  | NR_03058E | ENS00000C | ZNF34      | KOX32                    | zinc fing protein-coding     |                |  |
| chr10-57E  | 9.165522 | -0.80162 | 0.697026 | -1.15006 | 0.25012  | 0.59423 | chr10 | 5795457   | 5797291   | 0 | NA | intron (Nintron (N  | 17060 NM_00149E   | 2665 Hs. 29905E   | NR_00149E | ENS00000C | CGD12      | HEL-S-46E                | GDP discs protein-coding     |                |  |
| chr10-93E  | 9.165522 | -0.80162 | 0.697026 | -1.15006 | 0.25012  | 0.59423 | chr10 | 93354606  | 93357032  | 0 | NA | intron (Nintron (N  | 126515 NM_01345E  | 26509 Hs. 60208E  | NR_01345E | ENS00000C | MYOF       | FERIL3                   | myoferlin protein-coding     |                |  |
| chr1-154   | 8.169024 | -0.86815 | 0.75499  | -1.14989 | 0.25019  | 0.59423 | chr1  | 1.54E+08  | 1.54E+08  | 0 | NA | intron (Nintron (N  | -36904 NR_14785E  | 1.02E+08          | NR_61708E | NR_14785E | ENS00000C  | IL6R-AS1                 | -                            | IL6R anticRNA  |  |
| chr1-1787  | 8.169024 | -0.86815 | 0.75499  | -1.14989 | 0.25019  | 0.59423 | chr1  | 1.79E+08  | 1.79E+08  | 0 | NA | intron (Ntigger2 I  | 72493 NM_00467E   | 9068 Hs. 591474   | NR_00467E | ENS00000C | ANGPTL1    | ANG3 ANG                 | angiopoie protein-coding     |                |  |
| chr14-96E  | 8.169024 | -0.86815 | 0.75499  | -1.14989 | 0.25019  | 0.59423 | chr14 | 96258335  | 96259977  | 0 | NA | intron (NBLACKJACK  | 2946 NM_00071E    | 623 Hs. 52557E    | NR_00071E | ENS00000C | BDRKB1     | B1BRK B1F                | bradykinin protein-coding    |                |  |
| chr2-1021  | 8.169024 | -0.86815 | 0.75499  | -1.14989 | 0.25019  | 0.59423 | chr2  | 1.02E+08  | 1.02E+08  | 0 | NA | intron (Nintron (N  | 3384 NM_00087E    | 3554 Hs. 17198E   | NR_00087E | ENS00000C | IL1R1      | CD121A D2                | interleukin protein-coding   |                |  |
| chr3-172E  | 8.169024 | -0.86815 | 0.75499  | -1.14989 | 0.25019  | 0.59423 | chr3  | 1.72E+08  | 1.72E+08  | 0 | NA | intron (Nintron (N  | 115626 NM_19840E  | 2693 Hs. 13021E   | NR_00412E | ENS00000C | GHSR       | GHPD                     | growth h protein-coding      |                |  |
| chr5-166E  | 8.169024 | -0.86815 | 0.75499  | -1.14989 | 0.25019  | 0.59423 | chr5  | 1.6665381 | 1.6669340 | 0 | NA | intron (Nintron (N  | -50302 NM_00103E  | 54463 Hs. 481704  | NR_01900E | ENS00000C | RETREG1    | FAM134B J                | reticuloc protein-coding     |                |  |
| chr8-1334  | 8.169024 | -0.86815 | 0.75499  | -1.14989 | 0.25019  | 0.59423 | chr8  | 1.33E+08  | 1.33E+08  | 0 | NA | intron (Nintron (N  | 108557 NM_03003E  | 6482 Hs. 374257   | NR_03003E | ENS00000C | ST3GAL1    | Gal-Nac6E                | ST3 beta protein-coding      |                |  |
| chr1-4054  | 8.6403   | -0.83342 | 0.725293 | -1.14908 | 0.250522 | 0.59423 | chr1  | 40544123  | 40547591  | 0 | NA | intron (Nintron (N  | 14220 NM_15237E   | 127396 Hs. 524767 | NR_15237E | ENS00000C | ZNF684     | AL55 CMT2                | SPG11 ves protein-coding     |                |  |
| chr1-150E  | 8.6403   | -0.83342 | 0.725293 | -1.14908 | 0.250522 | 0.59423 | chr1  | 1.5E+08   | 1.5E+08   | 0 | NA | non-codiron-codir   | 2688 NM_00107E    | 51107 Hs. 10840E  | NR_01602E | ENS00000C | APH1A      | 6530402N                 | cap-1 hom protein-coding     |                |  |
| chr1-1537  | 8.6403   | -0.83342 | 0.725293 | -1.14908 | 0.250522 | 0.59423 | chr1  | 1.54E+08  | 1.54E+08  | 0 | NA | intron (Nintron (N  | -2509 NR_14582E   | 11000 Hs. 43872E  | NR_02433E | ENS00000C | SLC27A3    | ACSVL3 F                 | solute c protein-coding      |                |  |
| chr14-74E  | 8.6403   | -0.83342 | 0.725293 | -1.14908 | 0.250522 | 0.59423 | chr14 | 74887439  | 74904735  | 0 | NA | intron (NAluJo SIN  | 14171 NM_00124E   | 1743 Hs. 52545E   | NR_00193E | ENS00000C | DLST       | DLTS                     | dihydrolyl protein-coding    |                |  |
| chr15-60E  | 8.6403   | -0.83342 | 0.725293 | -1.14908 | 0.250522 | 0.59423 | chr15 | 60344708  | 60349745  | 0 | NA | TTS (NM_1TTS (NM_1  | 50760 NM_00100E   | 302 Hs. 51160E    | NR_00403E | ENS00000C | ANXA2      | ANX2 ANX                 | annexin A protein-coding     |                |  |
| chr15-64E  | 8.6403   | -0.83342 | 0.725293 | -1.14908 | 0.250522 | 0.59423 | chr15 | 6413420   |           |   |    |                     |                   |                   |           |           |            |                          |                              |                |  |





|           |          |          |          |          |          |         |       |           |           |          |      |                     |        |            |          |                    |                    |                    |                                    |                     |
|-----------|----------|----------|----------|----------|----------|---------|-------|-----------|-----------|----------|------|---------------------|--------|------------|----------|--------------------|--------------------|--------------------|------------------------------------|---------------------|
| chr2-1632 | 8.870725 | -0.73732 | 0.708663 | -1.04044 | 0.298136 | 0.59423 | chr2  | 1632500   | 1636186   | +0.00686 | 0 NA | intron (Nintron (N  | 110172 | NM_012293  | 7837     | Hs.332197NM_012293 | ENSG00000CPXD      | ASGD7              | COF peroxidase protein-coding      |                     |
| chr5-1787 | 8.870725 | -0.73732 | 0.708663 | -1.04044 | 0.298136 | 0.59423 | chr5  | 1.79E+08  | 1.79E+08  | +0.00000 | 0 NA | intron (MLT1C LTF   | 10284  | NM_005645  | 6940     | Hs.484324NM_005645 | ENSG00000ZNF354A   | ENZF               | HEL1 zinc finger protein-coding    |                     |
| chr6-3284 | 8.870725 | -0.73732 | 0.708663 | -1.04044 | 0.298136 | 0.59423 | chr6  | 32845261  | 32851816  | +0.00655 | 0 NA | intron (Nintron (N  | -3859  | NM_004155  | 5696     | Hs.180062NM_004155 | ENSG00000PSMB8     | ALDD               | D6S2 protease on protein-coding    |                     |
| chr9-1108 | 8.870725 | -0.73732 | 0.708663 | -1.04044 | 0.298136 | 0.59423 | chr9  | 1.11E+08  | 1.11E+08  | +0.00000 | 0 NA | 3' UTR (N3' UTR (N  | 145968 | NM_001366  | 4593     | Hs.521652NM_005592 | ENSG00000MUSK      | CM59               | FADS muscle as protein-coding      |                     |
| chr4-1028 | 9.42292  | -0.71144 | 0.685154 | -1.03836 | 0.299102 | 0.59423 | chr4  | 1.03E+08  | 1.03E+08  | +0.00000 | 0 NA | promoter-promoter-  | -289   | NM_001300  | 7323     | Hs.518777NM_00334C | ENSG00000UBE2D3    | E2 (17)            | K6 ubiquitin protein-coding        |                     |
| chr2-1195 | 8.897698 | -0.73684 | 0.709624 | -1.03835 | 0.299109 | 0.59423 | chr2  | 1.2E+08   | 1.2E+08   | +0.00000 | 0 NA | intron (Nintron (N  | -55836 | NR_138472  | 57669    | Hs.369232NM_020909 | ENSG00000EPB41L5   | BE37               | YMO1 erythrocyte protein-coding    |                     |
| chr1-110  | 8.883108 | -0.73473 | 0.708618 | -1.03685 | 0.299807 | 0.59423 | chr1  | 1.1E+08   | 1.1E+08   | +0.00000 | 0 NA | intron (Nintron (N  | 12532  | NM_001242  | 10768    | Hs.743977NM_006621 | ENSG00000ACHYL1    | DCAL               | TRB1 adenosyl protein-coding       |                     |
| chr1-1557 | 8.883108 | -0.73473 | 0.708618 | -1.03685 | 0.299807 | 0.59423 | chr1  | 1.56E+08  | 1.56E+08  | +0.00000 | 0 NA | intron (NAluSx S S  | 8261   | NR_132767  | 1.07E+08 | NR_132767          | SCARNA26E          | -                  | small CajncRNA                     |                     |
| chr1-1617 | 8.883108 | -0.73473 | 0.708618 | -1.03685 | 0.299807 | 0.59423 | chr1  | 1.62E+08  | 1.62E+08  | +0.00000 | 0 NA | intron (NLM3E3 LI   | 5874   | NM_00724C  | 11266    | Hs.416216NM_00724C | ENSG00000CUSP12    | DUSP1              | YV dual spec protein-coding        |                     |
| chr1-168  | 8.883108 | -0.73473 | 0.708618 | -1.03685 | 0.299807 | 0.59423 | chr1  | 1.68E+08  | 1.68E+08  | +0.00000 | 0 NA | exon (NM exon (NM   | 5288   | NR_003170Z | 1E+08    | NR_03170Z          | ENSG00000MIR1255B2 | MIR1255B           | microRNA ncRNA                     |                     |
| chr1-1835 | 8.883108 | -0.73473 | 0.708618 | -1.03685 | 0.299807 | 0.59423 | chr1  | 1.84E+08  | 1.84E+08  | +0.00000 | 0 NA | intron (Nintron (N  | 56216  | NM_000433  | 4688     | Hs.587555NM_000433 | ENSG00000CNCF2     | NCF-2              | NO3 neutrophil protein-coding      |                     |
| chr1-205  | 8.883108 | -0.73473 | 0.708618 | -1.03685 | 0.299807 | 0.59423 | chr1  | 2.05E+08  | 2.05E+08  | +0.00000 | 0 NA | intron (Nintron (N  | -17431 | NM_20337E  | 388730   | Hs.146925NM_20337E | ENSG00000TMEM81    | HC3107             | KV transmem protein-coding         |                     |
| chr1-2124 | 8.883108 | -0.73473 | 0.708618 | -1.03685 | 0.299807 | 0.59423 | chr1  | 2.12E+08  | 2.12E+08  | +0.00000 | 0 NA | intron (NMER1B DNF  | 5856   | NM_018252  | 55248    | Hs.445386NM_018252 | ENSG00000PACC1     | Clorf75            | Fproton ac protein-coding          |                     |
| chr1-2226 | 8.883108 | -0.73473 | 0.708618 | -1.03685 | 0.299807 | 0.59423 | chr1  | 2.23E+08  | 2.23E+08  | +0.00000 | 0 NA | intron (NMER68 LTF  | 26110  | NM_022831  | 64853    | Hs.156525NM_022831 | ENSG00000AIDA      | Clorf80            | axin inte protein-coding           |                     |
| chr1-2354 | 8.883108 | -0.73473 | 0.708618 | -1.03685 | 0.299807 | 0.59423 | chr1  | 2.35E+08  | 2.35E+08  | +0.00000 | 0 NA | TTS (NM_TTS (NM_)   | 57256  | NM_001277  | 148789   | Hs.498144NM_15249C | ENSG00000B3GALNT2  | B3GALNAc-beta-1,3- | protein-coding                     |                     |
| chr1-2468 | 8.883108 | -0.73473 | 0.708618 | -1.03685 | 0.299807 | 0.59423 | chr1  | 2.47E+08  | 2.47E+08  | +0.00000 | 0 NA | intron (Nintron (N  | 66502  | NR_015422  | 149134   | Hs.720494NM_207326 | LINC01341-         | -                  | long intncRNA                      |                     |
| chr10-27  | 8.883108 | -0.73473 | 0.708618 | -1.03685 | 0.299807 | 0.59423 | chr10 | 2.7222837 | 2.7223345 | +0.00507 | 0 NA | intron (Nintron (N  | 17395  | NM_001301  | 91452    | Hs.530597NM_14569E | ENSG00000ACBD5     | -                  | acyl-CoA protein-coding            |                     |
| chr10-101 | 8.883108 | -0.73473 | 0.708618 | -1.03685 | 0.299807 | 0.59423 | chr10 | 1.02E+08  | 1.02E+08  | +0.00000 | 0 NA | intron (NAluS2 S S  | 17104  | NM_01221E  | 10724    | Hs.500842NM_01221E | ENSG00000OGA       | MEA5               | MGEF0-GlcNAc protein-coding        |                     |
| chr12-558 | 8.883108 | -0.73473 | 0.708618 | -1.03685 | 0.299807 | 0.59423 | chr12 | 55983644  | 55995613  | +0.01197 | 0 NA | intron (Nintron (N  | -7648  | NM_001032  | 6821     | Hs.558403NM_00045E | ENSG00000SUOX      | -                  | sulfite c protein-coding           |                     |
| chr14-101 | 8.883108 | -0.73473 | 0.708618 | -1.03685 | 0.299807 | 0.59423 | chr14 | 1.02E+08  | 1.02E+08  | +0.00000 | 0 NA | intron (Nintron (N  | 53732  | NM_00137E  | 1778     | Hs.614088NM_00137E | ENSG00000DYNCH1    | CMT20              | DHC dynein cy protein-coding       |                     |
| chr15-428 | 8.883108 | -0.73473 | 0.708618 | -1.03685 | 0.299807 | 0.59423 | chr15 | 42954818  | 42957900  | +0.00308 | 0 NA | intron (NAluS2 S S  | -35581 | NM_17350C  | 146057   | Hs.646511NM_17350C | ENSG00000CTBK2     | SCA11              | TTT tau tubul protein-coding       |                     |
| chr15-484 | 8.883108 | -0.73473 | 0.708618 | -1.03685 | 0.299807 | 0.59423 | chr15 | 48410082  | 48413586  | +0.00350 | 0 NA | intron (Nintron (N  | 79637  | NM_00194E  | 1854     | Hs.527988NM_00194E | ENSG00000DUT       | dUTPase            | deoxyuric protein-coding           |                     |
| chr15-641 | 8.883108 | -0.73473 | 0.708618 | -1.03685 | 0.299807 | 0.59423 | chr15 | 64154322  | 64162008  | +0.00768 | 0 NA | TTS (NM_TTS (NM_C   | 4990   | NM_00094Z  | 5479     | Hs.434937NM_00094Z | ENSG00000PPIB      | B CYP-S1 peptidyl  | protein-coding                     |                     |
| chr16-317 | 8.883108 | -0.73473 | 0.708618 | -1.03685 | 0.299807 | 0.59423 | chr16 | 31752777  | 31762236  | +0.00946 | 0 NA | intron (NLMC4a LI   | 44277  | NM_00113C  | 124411   | Hs.528825NM_001004 | ENSG00000CTFZ20    | -                  | zinc finger protein-coding         |                     |
| chr17-505 | 8.883108 | -0.73473 | 0.708618 | -1.03685 | 0.299807 | 0.59423 | chr17 | 50380092  | 50396658  | +0.01656 | 0 NA | intron (NAluJr S N  | 9148   | NM_018505  | 55379    | Hs.370927NM_018505 | ENSG00000LRRC59    | PRO1855            | l leucine r protein-coding         |                     |
| chr17-59  | 8.883108 | -0.73473 | 0.708618 | -1.03685 | 0.299807 | 0.59423 | chr17 | 59665115  | 59668253  | +0.00314 | 0 NA | intron (Nintron (N  | 40915  | NM_016077  | 51651    | Hs.126777NM_016077 | ENSG00000PTRH2     | BIT1               | CFAF peptidyl-protein-coding       |                     |
| chr19-118 | 8.883108 | -0.73473 | 0.708618 | -1.03685 | 0.299807 | 0.59423 | chr19 | 11801483  | 11808352  | +0.00687 | 0 NA | intron (Nintron (N  | 6395   | NM_15235E  | 126069   | Hs.631634NM_15235E | ENSG00000ZNF491    | -                  | zinc finger protein-coding         |                     |
| chr2-262  | 8.883108 | -0.73473 | 0.708618 | -1.03685 | 0.299807 | 0.59423 | chr2  | 26207896  | 26221959  | +0.01409 | 0 NA | intron (Nintron (N  | 29705  | NM_00018Z  | 3030     | Hs.516032NM_00018Z | ENSG00000HADHA     | ECHA               | GBP hydroxyac protein-coding       |                     |
| chr2-552  | 8.883108 | -0.73473 | 0.708618 | -1.03685 | 0.299807 | 0.59423 | chr2  | 55233157  | 55237041  | +0.00384 | 0 NA | TTS (NR_CTTS (NR_C  | 935    | NR_039624  | 1.01E+08 | NR_039624          | ENSG00000MIR4426   | -                  | microRNA ncRNA                     |                     |
| chr2-690  | 8.883108 | -0.73473 | 0.708618 | -1.03685 | 0.299807 | 0.59423 | chr2  | 69039861  | 69045590  | +0.00573 | 0 NA | intron (NL2 LINE L  | 29581  | NM_053034  | 84168    | Hs.165855NM_01815E | ENSG00000ANTXR1    | ATR GAPO ANTXR     | cel protein-coding                 |                     |
| chr2-691  | 8.883108 | -0.73473 | 0.708618 | -1.03685 | 0.299807 | 0.59423 | chr2  | 69101989  | 69106720  | +0.00483 | 0 NA | TTS (NR_CTTS (NR_C  | 672    | NR_03607E  | 1E+08    | NR_03607E          | ENSG00000MIR3126   | mir-3126           | microRNA ncRNA                     |                     |
| chr2-86   | 8.883108 | -0.73473 | 0.708618 | -1.03685 | 0.299807 | 0.59423 | chr2  | 1.87E+08  | 1.87E+08  | +0.00000 | 0 NA | intron (Nintron (N  | -24073 | NM_177454  | 165215   | Hs.288727NM_177454 | ENSG00000PAM171B   | KIAA1946           | family w protein-coding            |                     |
| chr20-621 | 8.883108 | -0.73473 | 0.708618 | -1.03685 | 0.299807 | 0.59423 | chr20 | 62135401  | 62141226  | +0.00582 | 0 NA | intron (Nintron (N  | 5081   | NM_00279Z  | 5688     | Hs.182395NM_00279Z | ENSG00000PSMA7     | -                  | S-proteasone protein-coding        |                     |
| chr22-378 | 8.883108 | -0.73473 | 0.708618 | -1.03685 | 0.299807 | 0.59423 | chr22 | 37862451  | 37867847  | +0.00539 | 0 NA | intron (NAluJo S N  | 15730  | NM_016091  | 51386    | Hs.446852NM_016091 | ENSG00000EIF3L     | EIF3E1P            | l eukaryoti protein-coding         |                     |
| chr3-1017 | 8.883108 | -0.73473 | 0.708618 | -1.03685 | 0.299807 | 0.59423 | chr3  | 1.02E+08  | 1.02E+08  | +0.00000 | 0 NA | intron (NLM3B LIN   | 7632   | NM_00134E  | 91775    | Hs.595959NM_145037 | ENSG00000NXPE3     | FAM55C             | MC neurexophil protein-coding      |                     |
| chr4-7528 | 8.883108 | -0.73473 | 0.708618 | -1.03685 | 0.299807 | 0.59423 | chr4  | 75282     | 88293     | +0.00111 | 0 NA | intron (NLM3B2 LIN  | 28466  | NM_182524  | 152687   | Hs.709466NM_182524 | ENSG00000ZNF595    | -                  | zinc finger protein-coding         |                     |
| chr4-186  | 8.883108 | -0.73473 | 0.708618 | -1.03685 | 0.299807 | 0.59423 | chr4  | 1.87E+08  | 1.87E+08  | +0.00000 | 0 NA | exon (NM exon (NM   | -63302 | NM_00595E  | 4543     | Hs.243467NM_00595E | ENSG00000MTNR1A    | MEL-1A-R           | melatonin protein-coding           |                     |
| chr5-179  | 8.883108 | -0.73473 | 0.708618 | -1.03685 | 0.299807 | 0.59423 | chr5  | 1.8E+08   | 1.8E+08   | +0.00000 | 0 NA | intron (Nintron (N  | 1277   | NM_001364  | 3187     | Hs.604001NM_00552C | ENSG00000HNRNPH1   | HNRPH              | HNF heteroge protein-coding        |                     |
| chr7-649  | 8.883108 | -0.73473 | 0.708618 | -1.03685 | 0.299807 | 0.59423 | chr7  | 64978144  | 64993326  | +0.01512 | 0 NA | intron (NAluSx3 S S | 5301   | NM_015852  | 51351    | Hs.250593NM_015852 | ENSG00000ZNF117    | -                  | HLN HPF zinc finger protein-coding |                     |
| chr1-1931 | 9.32741  | -0.71076 | 0.686088 | -1.03596 | 0.300221 | 0.59423 | chr1  | 1.93E+08  | 1.93E+08  | +0.00000 | 0 NA | intron (Nintron (N  | 3853   | NM_02452E  | 79577    | Hs.378999NM_02452E | ENSG00000CDC73     | Clorf28            | Fcell divi protein-coding          |                     |
| chr11-65  | 8.856135 | -0.73521 | 0.709887 | -1.03568 | 0.300354 | 0.59423 | chr11 | 65337898  | 65353703  | +0.01581 | 0 NA | exon (NM exon (NM   | -8951  | NM_14571E  | 220359   | Hs.632121NM_14571E | ENSG00000TIGD3     | -                  | tigger t protein-coding            |                     |
| chr16-22  | 8.856135 | -0.73521 | 0.709887 | -1.03568 | 0.300354 | 0.59423 | chr16 | 2252801   | 2266480   | +0.01479 | 0 NA | intron (NAluY S INE | 7697   | NM_00128E  | 10921    | Hs.555642NM_006711 | ENSG00000CRNP51    | E5.1               | RNA bindi protein-coding           |                     |
| chr19-147 | 8.856135 | -0.73521 | 0.709887 | -1.03568 | 0.300354 | 0.59423 | chr19 | 14704769  | 14723334  | +0.01857 | 0 NA | intron (Nintron (N  | 24003  | NM_00135Z  | 84449    | Hs.515215NM_03243E | ENSG00000ZNF333    | -                  | zinc finger protein-coding         |                     |
| chr2-2014 | 8.856135 | -0.73521 | 0.709887 | -1.03568 | 0.300354 | 0.59423 | chr2  | 2.01E+08  | 2.01E+08  | +0.00000 | 0 NA | intron (Nintron (N  | 22857  | NM_00120E  | 55437    | Hs.652333NM_018571 | ENSG00000STRADB    | ALS2CR2            | (STE20 rel protein-coding          |                     |
| chr5-712  | 8.856135 | -0.73521 | 0.709887 | -1.03568 | 0.300354 | 0.59423 | chr5  | 71202244  | 71204595  | +0.00235 | 0 NA | intron (NAluJo S N  | 4712   | NR_02702E  | 728411   | Hs.881818NM_207331 | ENSG00000GUSBP1    | -                  | GUSB psepseudo                     |                     |
| chr7-457  | 8.856135 | -0.73521 | 0.709887 | -1.03568 | 0.300354 | 0.59423 | chr7  | 45726135  | 45729223  | +0.00309 | 0 NA | intron (Nintron (N  | 41339  | NR_024271  | 641977   | Hs.723477NR_024271 | ENSG00000SEPTIN7P2 | SEPT13             | SE septin 7 pseudo                 |                     |
| chr6-352  | 8.843752 | -0.73783 | 0.713006 | -1.03481 | 0.300756 | 0.59423 | chr6  | 35294482  | 35295673  | +0.00119 | 0 NA | intron (Nintron (N  | -2739  | NM_022047  | 50619    | Hs.15476           | NR_022047          | ENSG00000DEF6      | IBP SLAT DEF6                      | guar protein-coding |
| chr20-46  | 9.339793 | -0.70836 | 0.684649 | -1.03463 | 0.300843 | 0.59423 | chr20 | 4698746   | 4700813   | +0.00067 | 0 NA | exon (NM exon (NM   | 13323  | NM_00108C  | 5621     | Hs.472012NM_000311 | ENSG00000CRNP      | ASCR A1Tfprion     | prc protein-coding                 |                     |
| chr8-182  | 8.372477 | -0.76554 | 0.740347 | -1.03402 | 0.301125 | 0.59423 | chr8  | 18222323  | 18222599  | +0.00027 | 0 NA | exon (NM exon (NM   | 793    | NM_00116C  | 9        | Hs.591847NM_00066Z | ENSG00000NAT1      | AAC1               | MAN1N-acetyl protein-coding        |                     |
| chr8-1334 | 8.372477 | -0.76554 | 0.740347 | -1.03402 | 0.301125 | 0.59423 | chr8  | 1.33E+08  | 1.33E+08  | +0.00000 | 0 NA | 3' UTR (N3' UTR (N  | 113327 | NM_003033  | 6482     | Hs.374257NM_003033 | ENSG00000ST3GAL1   | Gal-1              | Nac6S23 beta- protein-coding       |                     |
| chr1-2171 |          |          |          |          |          |         |       |           |           |          |      |                     |        |            |          |                    |                    |                    |                                    |                     |



|                     |          |          |          |          |         |       |          |          |   |   |    |                    |         |           |          |                       |                    |           |          |                      |                      |                |                |
|---------------------|----------|----------|----------|----------|---------|-------|----------|----------|---|---|----|--------------------|---------|-----------|----------|-----------------------|--------------------|-----------|----------|----------------------|----------------------|----------------|----------------|
| chr19-88c.8.370269  | -0.76043 | 0.738656 | -1.02948 | 0.303256 | 0.59423 | chr19 | 8805503  | 8825919  | + | 0 | NA | intron (AluJr SIN  | 6352    | NM_001304 | 148156   | Hs.349444NM_144693    | ENSG000002ZNF558   | -         | -        | zinc                 | fingerprotein-coding |                |                |
| chr19-11f.8.370269  | -0.76043 | 0.738656 | -1.02948 | 0.303256 | 0.59423 | chr19 | 11940268 | 11943105 | + | 0 | NA | intron (LTR12C LI  | 16579   | NM_144566 | 90592    | Hs.528486NM_144566    | ENSG000002ZNF700   | -         | -        | zinc                 | fingerprotein-coding |                |                |
| chr19-171f.8.370269 | -0.76043 | 0.738656 | -1.02948 | 0.303256 | 0.59423 | chr19 | 17158167 | 17179082 | + | 0 | NA | intron (intron (   | -46733  | NM_018467 | 55850    | Hs.16187NM_018467     | ENSG000002UCE1     | D12       | MDS03    | unconvent            | protein-coding       |                |                |
| chr19-36f.8.370269  | -0.76043 | 0.738656 | -1.02948 | 0.303256 | 0.59423 | chr19 | 36936437 | 36952799 | + | 0 | NA | intron (MER20 DN   | 28286   | NM_001204 | 374900   | Hs.404222NM_198539    | ENSG000002ZNF568   | ZFP568    | zinc     | fingerprotein-coding |                      |                |                |
| chr2-165f.8.370269  | -0.76043 | 0.738656 | -1.02948 | 0.303256 | 0.59423 | chr2  | 1667524  | 1667387  | + | 0 | NA | intron (intron (   | 82010   | NM_012293 | 7837     | Hs.332197NM_012293    | ENSG000002PXDN     | ASG7      | COF      | peroxidase           | protein-coding       |                |                |
| chr2-166f.8.370269  | -0.76043 | 0.738656 | -1.02948 | 0.303256 | 0.59423 | chr2  | 1667502  | 1675309  | + | 0 | NA | intron (LIMEd LIN  | 73110   | NM_012293 | 7837     | Hs.332197NM_012293    | ENSG000002PXDN     | ASG7      | COF      | peroxidase           | protein-coding       |                |                |
| chr2-199f.8.370269  | -0.76043 | 0.738656 | -1.02948 | 0.303256 | 0.59423 | chr2  | 1992682  | 19929339 | + | 0 | NA | intron (MER9a2 LI  | -26132  | NM_001008 | 130502   | Hs.591547NM_001008    | ENSG000002FTC32    | -         | -        | tetratric            | protein-coding       |                |                |
| chr2-284f.8.370269  | -0.76043 | 0.738656 | -1.02948 | 0.303256 | 0.59423 | chr2  | 28402154 | 28418676 | + | 0 | NA | intron (intron (   | -15743  | NR_103831 | 403150   | Hs.562977NR_103831    | ENSG000002FLJ31356 | -         | -        | uncharacter          | ncRNA                |                |                |
| chr2-471f.8.370269  | -0.76043 | 0.738656 | -1.02948 | 0.303256 | 0.59423 | chr2  | 47157155 | 47173713 | + | 0 | NA | intron (intron (   | 8773    | NM_001305 | 805      | Hs.468442NM_001305    | ENSG000002CALM2    | CALM      | CALM     | calmodulin           | protein-coding       |                |                |
| chr2-958f.8.370269  | -0.76043 | 0.738656 | -1.02948 | 0.303256 | 0.59423 | chr2  | 95874286 | 95875520 | + | 0 | NA | intron (NLPA3 LIN  | -47922  | NR_103734 | 150759   | Hs.503463NR_103734    | LINC00342          | NCRNA0034 | long     | intcncRNA            |                      |                |                |
| chr2-177f.8.370269  | -0.76043 | 0.738656 | -1.02948 | 0.303256 | 0.59423 | chr2  | 177E+08  | 1.77E+08 | + | 0 | NA | intron (MIR SINE   | 20860   | NR_13847C | 220988   | Hs.516535NM_194247    | ENSG000002MIRNPA3  | 2610510D1 | hetero   | protein-coding       |                      |                |                |
| chr20-10f.8.370269  | -0.76043 | 0.738656 | -1.02948 | 0.303256 | 0.59423 | chr20 | 10654623 | 10664899 | + | 0 | NA | intron (intron (   | -10066  | NR_10693C | 1.02E+08 | NR_10693C             | ENSG000002MIR6870  | hsa-mir-6 | microRNA | ncRNA                |                      |                |                |
| chr20-35f.8.370269  | -0.76043 | 0.738656 | -1.02948 | 0.303256 | 0.59423 | chr20 | 35668339 | 35676022 | + | 0 | NA | intron (AluY SINE  | -7280   | NM_001198 | 10137    | Hs.700188NM_006047    | ENSG000002RBM12    | HRH1HF205 | RNA      | bindi                | protein-coding       |                |                |
| chr20-44f.8.370269  | -0.76043 | 0.738656 | -1.02948 | 0.303256 | 0.59423 | chr20 | 44902306 | 44907968 | + | 0 | NA | intron (intron (   | -4923   | NR_134988 | 80336    | Hs.641481NM_001124    | ENSG000002PABPCIL  | C20orf11  | poly(A)  | t                    | protein-coding       |                |                |
| chr20-63f.8.370269  | -0.76043 | 0.738656 | -1.02948 | 0.303256 | 0.59423 | chr20 | 63866411 | 63879581 | + | 0 | NA | intron (AluY SINE  | 7726    | NM_199361 | 7165     | Hs.473296NM_003288    | ENSG000002TPD52L2  | D54       | TPD54    | TPD52                | lik                  | protein-coding |                |
| chr22-19f.8.370269  | -0.76043 | 0.738656 | -1.02948 | 0.303256 | 0.59423 | chr22 | 19381334 | 19384320 | + | 0 | NA | intron (intron (   | 48906   | NM_00332E | 7290     | Hs.474206NM_00332E    | ENSG000002HIRA     | DGCR1     | TUF      | histone              | c                    | protein-coding |                |
| chr22-50f.8.370269  | -0.76043 | 0.738656 | -1.02948 | 0.303256 | 0.59423 | chr22 | 50414626 | 50425676 | + | 0 | NA | intron (ML2c LINE  | 12709   | NR_162128 | 1.13E+08 | MIR_12114             | -                  | -         | microRNA | ncRNA                |                      |                |                |
| chr3-946f.8.370269  | -0.76043 | 0.738656 | -1.02948 | 0.303256 | 0.59423 | chr3  | 9461980  | 9469190  | + | 0 | NA | intron (intron (   | 67885   | NM_00108C | 55209    | Hs.288164NM_018187    | ENSG000002SETD5    | -         | -        | SET                  | domai                | protein-coding |                |
| chr3-979f.8.370269  | -0.76043 | 0.738656 | -1.02948 | 0.303256 | 0.59423 | chr3  | 9797419  | 9809209  | + | 0 | NA | intron (L3 LINE C  | -6601   | NM_00102E | 26140    | Hs.726433NM_015644    | ENSG000002TLL3     | HOTTL     | tubulin  | t                    | protein-coding       |                |                |
| chr3-146f.8.370269  | -0.76043 | 0.738656 | -1.02948 | 0.303256 | 0.59423 | chr3  | 14654797 | 14667904 | + | 0 | NA | intron (intron (   | 9588    | NM_016474 | 51244    | Hs.517822NM_016474    | ENSG000002CCDC174  | C3orf19   | Fcoiled  | cc                   | protein-coding       |                |                |
| chr3-459f.8.370269  | -0.76043 | 0.738656 | -1.02948 | 0.303256 | 0.59423 | chr3  | 45950898 | 45970131 | + | 0 | NA | intron (intron (   | 17050   | NM_006564 | 10663    | Hs.34526NM_006564     | ENSG000002CXCR6    | BON20     | CD1C-X-C | mot                  | protein-coding       |                |                |
| chr3-113f.8.370269  | -0.76043 | 0.738656 | -1.02948 | 0.303256 | 0.59423 | chr3  | 1.14E+08 | 1.14E+08 | + | 0 | NA | intron (LIM5 LINE  | -30548  | NM_017577 | 54762    | Hs.24583NM_017577     | ENSG000002GRAMD1C  | -         | -        | GRAM                 | doma                 | protein-coding |                |
| chr4-176f.8.370269  | -0.76043 | 0.738656 | -1.02948 | 0.303256 | 0.59423 | chr4  | 17620297 | 17635228 | + | 0 | NA | 3' UTR (3' UTR (   | 13121   | NM_02520E | 80306    | Hs.713966NM_02520E    | ENSG000002MED28    | 1500003D1 | mediator | protein-coding       |                      |                |                |
| chr4-707f.8.370269  | -0.76043 | 0.738656 | -1.02948 | 0.303256 | 0.59423 | chr4  | 70768649 | 70771778 | + | 0 | NA | intron (Tigger I   | 35803   | NR_001291 | 22902    | Hs.740904NM_014961    | ENSG000002RUFY3    | RIPX      | SINC     | RN                   | and                  | F              | protein-coding |
| chr5-143f.8.370269  | -0.76043 | 0.738656 | -1.02948 | 0.303256 | 0.59423 | chr5  | 14306504 | 14322782 | + | 0 | NA | intron (intron (   | -149340 | NR_14581E | 1.1E+08  | NR_14581E             | SNORD170           | -         | -        | small                | nucsnRNA             |                |                |
| chr5-138f.8.370269  | -0.76043 | 0.738656 | -1.02948 | 0.303256 | 0.59423 | chr5  | 1.38E+08 | 1.38E+08 | + | 0 | NA | exon (NM exon (NM  | 10656   | NM_00130C | 10902    | Hs.519337NM_006699    | ENSG000002BRD8     | SMAP      | SMAF     | bromodome            | protein-coding       |                |                |
| chr5-179f.8.370269  | -0.76043 | 0.738656 | -1.02948 | 0.303256 | 0.59423 | chr5  | 1.8E+08  | 1.8E+08  | + | 0 | NA | intron (LIM3Cz I   | 10382   | NM_01617E | 51149    | Hs.741166NM_01617E    | ENSG000002MRN1P    | C5orf45   | MRN      | com                  | protein-coding       |                |                |
| chr6-369f.8.370269  | -0.76043 | 0.738656 | -1.02948 | 0.303256 | 0.59423 | chr6  | 36966469 | 36981742 | + | 0 | NA | intron (intron (   | 12446   | NM_001271 | 23787    | Hs.485262NM_014341    | ENSG000002MTC1H    | CGI-64    | P        | mitochon             | c                    | protein-coding |                |
| chr6-152f.8.370269  | -0.76043 | 0.738656 | -1.02948 | 0.303256 | 0.59423 | chr6  | 1.52E+08 | 1.52E+08 | + | 0 | NA | intron (intron (   | -22724  | NR_120501 | 1.01E+08 | Hs.571203NR_120501    | SYNE1-AS1          | -         | -        | SYNE1                | antncRNA             |                |                |
| chr7-128f.8.370269  | -0.76043 | 0.738656 | -1.02948 | 0.303256 | 0.59423 | chr7  | 1.29E+08 | 1.29E+08 | + | 0 | NA | IntergeniAluJo SIN | -6198   | NR_02436E | 402483   | Hs.722396NM_001039682 | LINC100C           | -         | -        | long                 | intcncRNA            |                |                |
| chr8-705f.8.370269  | -0.76043 | 0.738656 | -1.02948 | 0.303256 | 0.59423 | chr8  | 70573030 | 70607416 | + | 0 | NA | intron (intron (   | 17446   | NM_001317 | 23471    | Hs.491988NM_014294    | ENSG000002TRAM1    | PNAS8     | TR       | transloc             | protein-coding       |                |                |
| chr8-981f.8.370269  | -0.76043 | 0.738656 | -1.02948 | 0.303256 | 0.59423 | chr8  | 98118864 | 98131068 | + | 0 | NA | intron (intron (   | 7126    | NM_01502E | 10940    | Hs.252828NM_01502E    | ENSG000002POP1     | ANXD2     | POP1     | homc                 | protein-coding       |                |                |
| chr8-102f.8.370269  | -0.76043 | 0.738656 | -1.02948 | 0.303256 | 0.59423 | chr8  | 1.02E+08 | 1.02E+08 | + | 0 | NA | intron (L2c LINE   | 68739   | NR_12541E | 1.02E+08 | Hs.492446NR_12541E    | ENSG000002RUB5-AS1 | -         | -        | UBR5                 | antncRNA             |                |                |
| chr9-108f.8.370269  | -0.76043 | 0.738656 | -1.02948 | 0.303256 | 0.59423 | chr9  | 1.09E+08 | 1.09E+08 | + | 0 | NA | intron (intron (   | 16846   | NM_006687 | 10881    | Hs.123533NM_006687    | ENSG000002ACTL7A   | -         | -        | actin                | lik                  | protein-coding |                |
| chr9-121f.8.370269  | -0.76043 | 0.738656 | -1.02948 | 0.303256 | 0.59423 | chr9  | 1.21E+08 | 1.21E+08 | + | 0 | NA | exon (NM exon (NM  | 29425   | NM_000177 | 2934     | Hs.522377NM_000177    | ENSG000002GSN      | ADF       | AGEL     | gelsolin             | protein-coding       |                |                |
| chr9-138f.8.370269  | -0.76043 | 0.738656 | -1.02948 | 0.303256 | 0.59423 | chr9  | 1.28E+08 | 1.28E+08 | + | 0 | NA | intron (AluSp SIN  | 11694   | NM_001131 | 25792    | Hs.740904NM_014961    | ENSG000002RUFY3    | LSFR1     | NP       | CDKRNA               | ir                   | protein-coding |                |
| chr9-128f.8.370269  | -0.76043 | 0.738656 | -1.02948 | 0.303256 | 0.59423 | chr9  | 1.28E+08 | 1.28E+08 | + | 0 | NA | intron (intron (   | -5813   | NM_00131E | 375757   | Hs.259594NM_00104C    | ENSG000002SWI5     | C9orf119  | SWI5     | homc                 | protein-coding       |                |                |
| chr9-132f.8.370269  | -0.76043 | 0.738656 | -1.02948 | 0.303256 | 0.59423 | chr9  | 1.32E+08 | 1.32E+08 | + | 0 | NA | intron (intron (   | 84515   | NM_001351 | 23064    | Hs.460317NM_01504E    | ENSG000002SETX     | ALSA      | AOA2     | senataxi             | protein-coding       |                |                |
| chr9-133f.8.370269  | -0.76043 | 0.738656 | -1.02948 | 0.303256 | 0.59423 | chr9  | 1.33E+08 | 1.33E+08 | + | 0 | NA | intron (MIRc SINE  | 16759   | NM_001271 | 5900     | Hs.106188NM_006266    | ENSG000002RAGDGS   | RGD5      | AL       | guani                | protein-coding       |                |                |
| chr3-446f.11.5946   | -0.57111 | 0.55509  | -1.02886 | 0.303545 | 0.59423 | chr3  | 44650666 | 44662284 | + | 0 | NA | intron (AluSx1 SI  | 7743    | NM_00342C | 7584     | Hs.288658NM_00342C    | ENSG000002ZNF35    | HF.10     | HF1      | zinc                 | fingerprotein-coding |                |                |
| chr11-12f.8.895491  | -0.7321  | 0.711638 | -1.02875 | 0.303596 | 0.59423 | chr11 | 1.23E+08 | 1.23E+08 | + | 0 | NA | intron (MIR1_Am    | -22861  | NM_153201 | 3312     | Hs.180414NM_006597    | ENSG000002HSPAB    | HEL-33    | HE       | heat                 | shoc                 | protein-coding |                |
| chr20-29f.13.78087  | -0.47818 | 0.464993 | -1.02835 | 0.303785 | 0.59423 | chr20 | 29481298 | 29483859 | + | 0 | NA | intron (intron (   | 14756   | NR_146067 | 1.03E+08 | NR_146067             | FRG1EP             | -         | -        | FSHD                 | regipseudo           |                |                |
| chr2-171f.8.345504  | -0.76616 | 0.745732 | -1.02739 | 0.304236 | 0.59423 | chr2  | 1.71E+08 | 1.71E+08 | + | 0 | NA | intron (AluYc SIN  | -24965  | NM_00113C | 9874     | Hs.744917NM_012293    | ENSG000002TLK1     | PKU-beta  | tousled  | l                    | protein-coding       |                |                |
| chr4-147f.8.397242  | -0.75986 | 0.74037  | -1.02633 | 0.304738 | 0.59423 | chr4  | 1.48E+08 | 1.48E+08 | + | 0 | NA | intron (intron (   | 93235   | NR_03996E | 1.01E+08 | NR_03996E             | ENSG000002MIR4799  | -         | -        | microRNA             | ncRNA                |                |                |
| chr6-281f.8.397242  | -0.75986 | 0.74037  | -1.02633 | 0.304738 | 0.59423 | chr6  | 28115006 | 28119591 | + | 0 | NA | IntergeniIntergeni | -7258   | NM_00132C | 80345    | Hs.656641NM_025231    | ENSG000002ZSCAN16  | ZNF392    | Z        | zinc                 | fingerprotein-coding |                |                |
| chr8-706f.8.397242  | -0.75986 | 0.7403   |          |          |         |       |          |          |   |   |    |                    |         |           |          |                       |                    |           |          |                      |                      |                |                |

|                    |          |          |          |          |         |       |          |          |    |    |                    |       |              |          |                    |                   |                    |                               |                              |
|--------------------|----------|----------|----------|----------|---------|-------|----------|----------|----|----|--------------------|-------|--------------|----------|--------------------|-------------------|--------------------|-------------------------------|------------------------------|
| chr12-791.9.597192 | -0.62376 | 0.663515 | -0.94008 | 0.347176 | 0.59423 | chr12 | 7917590  | 7935474  | +0 | NA | intron (Nintron (N | 9655  | NM_006931    | 6515     | Hs.41924CNM_006931 | ENSG00000SLC2A3   | GLUT3              | solute carrier protein-coding |                              |
| chr15-603.9.597192 | -0.62376 | 0.663515 | -0.94008 | 0.347176 | 0.59423 | chr15 | 60350534 | 60362489 | +0 | NA | intron (Nintron (N | 41475 | NM_001002    | 302      | Hs.51160FN_00403E  | ENSG00000ANXA2    | ANX2               | ANX2 amexin A protein-coding  |                              |
| chr15-925.9.597192 | -0.62376 | 0.663515 | -0.94008 | 0.347176 | 0.59423 | chr15 | 92931043 | 92990931 | +0 | NA | intron (Nintron (N | 56588 | NR_03613E    | 1E+08    | NR_03613E          | ENSG00000MIR3175  | mir-3175           | microRNA ncRNA                |                              |
| chr17-18E.9.597192 | -0.62376 | 0.663515 | -0.94008 | 0.347176 | 0.59423 | chr17 | 18666786 | 18681103 | +0 | NA | intron (Nintron (N | 8370  | NM_00136E    | 2310     | Hs.59212E          | NM_00136E134      | FOXO3B             | FKHLR1P1                      | forkhead protein-coding      |
| chr17-28E.9.597192 | -0.62376 | 0.663515 | -0.94008 | 0.347176 | 0.59423 | chr17 | 28969960 | 28925612 | +0 | NA | intron (Nintron (N | 8624  | NR_11080E    | 1.02E+08 | Hs.66570E          | NR_11080E         | ENSG00000LOC101927 | U83                           | uncharactericnRNA            |
| chr17-801.9.597192 | -0.62376 | 0.663515 | -0.94008 | 0.347176 | 0.59423 | chr17 | 80132313 | 80145418 | +0 | NA | intron (Nintron (N | 8263  | NM_01474E    | 9775     | Hs.38964E          | NM_01474E         | ENSG00000EIF4A3    | DDX48                         | Faleukaryotiprotein-coding   |
| chr19-48E.9.597192 | -0.62376 | 0.663515 | -0.94008 | 0.347176 | 0.59423 | chr19 | 4837094  | 4845158  | +0 | NA | intron (Nintron (N | 9384  | NM_18291E    | 148022   | Hs.29344           | NM_014261         | ENSG00000TTCAM1    | I1AE6                         | Myf toll like protein-coding |
| chr2-262E.9.597192 | -0.62376 | 0.663515 | -0.94008 | 0.347176 | 0.59423 | chr2  | 26222422 | 26239777 | +0 | NA | intron (Nintron (N | 13533 | NM_00018E    | 3030     | Hs.61603E          | NM_00018E         | ENSG00000HADHA     | GLG3                          | glyoxalase protein-coding    |
| chr2-101.9.597192  | -0.62376 | 0.663515 | -0.94008 | 0.347176 | 0.59423 | chr2  | 1.01E+08 | 1.01E+08 | +0 | NA | intron (Nintron (N | 2830  | NM_00099E    | 6160     | Hs.46947E          | NM_00099E         | ENSG00000RPL31     | L31                           | ribosomal protein-coding     |
| chr2-200E.9.597192 | -0.62376 | 0.663515 | -0.94008 | 0.347176 | 0.59423 | chr2  | 2.01E+08 | 2.01E+08 | +0 | NA | intron (Nintron (N | 7176  | NM_00132E    | 1195     | Hs.40407E          | ENSG00000CLK1     | CLK                | CLK/CLKC like protein-coding  |                              |
| chr2-218E.9.597192 | -0.62376 | 0.663515 | -0.94008 | 0.347176 | 0.59423 | chr2  | 2.18E+08 | 2.18E+08 | +0 | NA | intron (Nintron (N | 15613 | NM_00132E    | 151306   | Hs.160954N         | NR_17069E         | ENSG00000GPBAR1    | BG37                          | GPCF protein-coding          |
| chr3-500E.9.597192 | -0.62376 | 0.663515 | -0.94008 | 0.347176 | 0.59423 | chr3  | 50090063 | 50121102 | +0 | NA | non-codiron-codir  | 4594  | NR_04538E    | 1.01E+08 | Hs.43948E          | NR_04538E         | ENSG00000RBM5-AS1  | LUST                          | RBM5 anticnRNA               |
| chr5-150E.9.597192 | -0.62376 | 0.663515 | -0.94008 | 0.347176 | 0.59423 | chr5  | 1.51E+08 | 1.51E+08 | +0 | NA | intron (Nintron (N | 5741  | NM_00184E    | 55696    | Hs.713564N         | NR_01804E         | ENSG00000RBM22     | Cwc2                          | ZC3F RNA bindiprotein-coding |
| chr6-315E.9.597192 | -0.62376 | 0.663515 | -0.94008 | 0.347176 | 0.59423 | chr6  | 31529647 | 31541049 | +0 | NA | intron (Nintron (N | 1101  | NR_00314E    | 692233   | NR_00314E          | ENSG00000SNORD117 | U83                | small nucsnoRNA               |                              |
| chr6-635E.9.597192 | -0.62376 | 0.663515 | -0.94008 | 0.347176 | 0.59423 | chr6  | 63576260 | 63583859 | +0 | NA | exon (NM exon (NM  | 8047  | NM_00346E    | 7803     | Hs.22777E          | NM_00346E         | ENSG00000PTP4A1    | HH72                          | PRL-protein tprotein-coding  |
| chr7-2351.9.597192 | -0.62376 | 0.663515 | -0.94008 | 0.347176 | 0.59423 | chr7  | 23512135 | 23522091 | +0 | NA | intron (Nintron (N | 14868 | NM_00136E    | 29896    | Hs.44565E          | NM_01329E         | ENSG00000TRA2A     | AWMS1                         | HIS transformprotein-coding  |
| chr7-261E.9.597192 | -0.62376 | 0.663515 | -0.94008 | 0.347176 | 0.59423 | chr7  | 26188508 | 26195513 | +0 | NA | intron (Nintron (N | 6736  | NM_00213E    | 3181     | Hs.48774E          | NM_00213E         | ENSG00000HNRNP2B1  | HNRNP2B1                      | Heterogeprotein-coding       |
| chr7-662E.9.597192 | -0.62376 | 0.663515 | -0.94008 | 0.347176 | 0.59423 | chr7  | 66287094 | 66287732 | +0 | NA | intron (Nintron (N | 82079 | NM_00359E    | 8460     | Hs.421194N         | NR_00359E         | ENSG00000TPST1     | TANG012A                      | tyrosyl pprotein-coding      |
| chr7-754E.9.597192 | -0.62376 | 0.663515 | -0.94008 | 0.347176 | 0.59423 | chr7  | 75426723 | 75442472 | +0 | NA | intron (Nintron (N | 24275 | NR_10401E    | 155400   | Hs.436034N         | NR_0103E          | ENSG00000NSUN5P1   | NSUN5B                        | WEINSUN5 pseudo              |
| chr8-116E.9.597192 | -0.62376 | 0.663515 | -0.94008 | 0.347176 | 0.59423 | chr8  | 1.17E+08 | 1.17E+08 | +0 | NA | intron (Nintron (N | 26559 | NR_03388E    | 644660   | Hs.706174N         | NR_03388E         | ENSG00000CAD21-AS1 | Corf84                        | 1RAD21 anticnRNA             |
| chr9-9214.9.597192 | -0.62376 | 0.663515 | -0.94008 | 0.347176 | 0.59423 | chr9  | 92142573 | 92145603 | +0 | NA | intron (Nintron (N | 2621  | NR_02734E    | 158314   | Hs.14994E          | NR_02734E         | LINC0047E          | C9orf44                       | long intncRNA                |
| chr9-128E.9.597192 | -0.62376 | 0.663515 | -0.94008 | 0.347176 | 0.59423 | chr9  | 1.29E+08 | 1.29E+08 | +0 | NA | intron (Nintron (N | 4310  | NM_00124E    | 6418     | Hs.43668E          | NM_00301E         | ENSG00000SET       | 2P2PA                         | I2FSET nucleprotein-coding   |
| chr10-50C.9.582601 | -0.62184 | 0.665624 | -0.93422 | 0.350192 | 0.59423 | chr10 | 50097180 | 50102099 | +0 | NA | intron (Nintron (N | 31685 | NM_00100E    | 387680   | Hs.36528E          | NM_01823E         | ENSG00000WASHC2A   | FAM21A                        | WASH comp protein-coding     |
| chr12-561.9.582601 | -0.62184 | 0.665624 | -0.93422 | 0.350192 | 0.59423 | chr12 | 56158949 | 56163016 | +0 | NA | intron (Nintron (N | 2623  | NM_02101E    | 4637     | Hs.63271E          | NM_02101E         | ENSG00000MYL6      | ESMLC                         | LCI myosin liprotein-coding  |
| chr2-226E.9.582601 | -0.62184 | 0.665624 | -0.93422 | 0.350192 | 0.59423 | chr2  | 2.27E+08 | 2.27E+08 | +0 | NA | intron (Nintron (N | 12952 | NM_00554E    | 3667     | Hs.47150E          | NM_00554E         | ENSG00000IRS1      | HIRS-1                        | insulin iprotein-coding      |
| chr9-127E.9.08656  | -0.64535 | 0.694407 | -0.92936 | 0.352704 | 0.59423 | chr9  | 1.28E+08 | 1.28E+08 | +0 | NA | intron (Nintron (N | 2181  | NM_00128E    | 30815    | Hs.10967E          | NM_01344E         | ENSG00000ST6GALNAC | SIAT7-F                       | ST6 protein-coding           |
| chr12-13E.11.81044 | -0.50475 | 0.543583 | -0.92857 | 0.353113 | 0.59423 | chr12 | 1.33E+08 | 1.33E+08 | +0 | NA | intron (Nintron (N | 16217 | NM_00130E    | 7699     | Hs.421155E         | NM_00344E         | ENSG00000ZNF140    | pH2-39                        | zinc fingprotein-coding      |
| chr1-394E.9.098943 | -0.6429  | 0.69297  | -0.92774 | 0.353541 | 0.59423 | chr1  | 39451899 | 39475036 | +0 | NA | intron (Nintron (N | 28169 | NM_18180E    | 353500   | Hs.47249E          | NM_18180E         | ENSG00000BMP8A     | 3                             | bone morpprotein-coding      |
| chr1-117E.9.098943 | -0.6429  | 0.69297  | -0.92774 | 0.353541 | 0.59423 | chr1  | 1.18E+08 | 1.18E+08 | +0 | NA | intron (Nintron (N | 54574 | NM_01768E    | 54834    | Hs.31080E          | NM_01768E         | ENSG00000GDAP2     | MACROD3                       | Sc gangliosiprotein-coding   |
| chr1-150E.9.098943 | -0.6429  | 0.69297  | -0.92774 | 0.353541 | 0.59423 | chr1  | 1.51E+08 | 1.51E+08 | +0 | NA | intron (Nintron (N | 33267 | NM_00119E    | 405      | Hs.63244E          | NM_00166E         | ENSG00000ARNT      | HIF-1                         | beta1 hydprotein-coding      |
| chr1-156E.9.098943 | -0.6429  | 0.69297  | -0.92774 | 0.353541 | 0.59423 | chr1  | 1.56E+08 | 1.56E+08 | +0 | NA | intron (Nintron (N | 7848  | NM_01532E    | 23381    | Hs.51683E          | NM_01532E         | ENSG00000SMG5      | EST1B                         | LP1SMG5 nonsprotein-coding   |
| chr1-160E.9.098943 | -0.6429  | 0.69297  | -0.92774 | 0.353541 | 0.59423 | chr1  | 1.6E+08  | 1.6E+08  | +0 | NA | TTS (NR_CTS (NR_C  | 22526 | NR_14761E    | 1E+08    | Hs.65764E          | NR_14761E         | ENSG00000LOC100287 | 1                             | uncharactericnRNA            |
| chr1-169E.9.098943 | -0.6429  | 0.69297  | -0.92774 | 0.353541 | 0.59423 | chr1  | 1.7E+08  | 1.7E+08  | +0 | NA | intron (Nintron (N | 27353 | NM_02042E    | 57147    | Hs.43556E          | NM_02042E         | ENSG00000SCYL3     | PACE-1                        | PA3CY1 like protein-coding   |
| chr1-1734.9.098943 | -0.6429  | 0.69297  | -0.92774 | 0.353541 | 0.59423 | chr1  | 1.73E+08 | 1.73E+08 | +0 | NA | non-codiron-codir  | 242   | NR_12596E    | 1.02E+08 | Hs.67488E          | NR_12596E         | ENSG00000LOC10192E | 1                             | uncharactericnRNA            |
| chr1-232E.9.098943 | -0.6429  | 0.69297  | -0.92774 | 0.353541 | 0.59423 | chr1  | 2.33E+08 | 2.33E+08 | +0 | NA | intron (Nintron (N | 7778  | NR_13802E    | 84284    | Hs.64271E          | NM_03232E         | ENSG00000NTPCR     | Clorf57                       | H nucleosicprotein-coding    |
| chr10-14E.9.098943 | -0.6429  | 0.69297  | -0.92774 | 0.353541 | 0.59423 | chr10 | 14916581 | 14922559 | +0 | NA | intron (Nintron (N | 34526 | NM_00103E    | 64421    | Hs.65593E          | NM_02248E         | ENSG00000DCLRE1C   | A-SCID                        | DCDNA crossprotein-coding    |
| chr12-53C.9.098943 | -0.6429  | 0.69297  | -0.92774 | 0.353541 | 0.59423 | chr12 | 53015392 | 53042827 | +0 | NA | intron (Nintron (N | 17917 | NM_19831E    | 23371    | Hs.6147            | NM_01531E         | ENSG00000TNS2      | C1-TEN                        | C1tensin 2 protein-coding    |
| chr12-561.9.098943 | -0.6429  | 0.69297  | -0.92774 | 0.353541 | 0.59423 | chr12 | 56106400 | 56114432 | +0 | NA | exon (NM exon (NM  | 5857  | NM_00619E    | 5036     | Hs.52449E          | NM_00619E         | ENSG00000PA2G4     | EBP1                          | HG4-proliferaprotein-coding  |
| chr12-567.9.098943 | -0.6429  | 0.69297  | -0.92774 | 0.353541 | 0.59423 | chr12 | 56710712 | 56716257 | +0 | NA | intron (Nintron (N | 11815 | NM_00111E    | 4666     | Hs.50573E          | NM_00559E         | ENSG00000NACA      | HSD48                         | HAC nascent pprotein-coding  |
| chr14-68E.9.098943 | -0.6429  | 0.69297  | -0.92774 | 0.353541 | 0.59423 | chr14 | 68869644 | 68894777 | +0 | NA | intron (Nintron (N | 85967 | NM_00124E    | 39075    | Hs.85155           | NM_00492E         | ENSG00000ZFP36L1   | BRF1                          | BergZFP36 rirprotein-coding  |
| chr14-10E.9.098943 | -0.6429  | 0.69297  | -0.92774 | 0.353541 | 0.59423 | chr14 | 1.04E+08 | 1.04E+08 | +0 | NA | intron (Nintron (N | 39075 | NM_001371231 | 5685     | Hs.251531N         | NR_00278E         | ENSG00000PSMA4     | HC9                           | Hs1T17proteasoprotein-coding |
| chr15-78E.9.098943 | -0.6429  | 0.69297  | -0.92774 | 0.353541 | 0.59423 | chr15 | 78542493 | 78550107 | +0 | NA | intron (Nintron (N | 5614  | NM_00133E    | 7157     | Hs.43746E          | NM_00054E         | ENSG00000TP53      | BCC7                          | BMF5 tumor prcprotein-coding |
| chr17-76E.9.098943 | -0.6429  | 0.69297  | -0.92774 | 0.353541 | 0.59423 | chr17 | 7667929  | 7676330  | +0 | NA | intron (Nintron (N | 3115  | NM_00127E    | 55175    | Hs.13268           | NM_01814E         | ENSG00000KLHL11    | 1                             | kelch likprotein-coding      |
| chr17-41E.9.098943 | -0.6429  | 0.69297  | -0.92774 | 0.353541 | 0.59423 | chr17 | 41866569 | 41894935 | +0 | NA | intron (Nintron (N | 15329 | NM_01814E    | 90799    | Hs.56971E          | NM_13836E         | ENSG00000CEP95     | CCDC45                        | centrosoprotein-coding       |
| chr17-64E.9.098943 | -0.6429  | 0.69297  | -0.92774 | 0.353541 | 0.59423 | chr17 | 64509227 | 64513317 | +0 | NA | intron (Nintron (N | 4295  | NR_13364E    | 51129    | Hs.9613            | NM_01610E         | ENSG00000ANGPTL4   | ARP4                          | FIAF angiopieprotein-coding  |
| chr19-83E.9.098943 | -0.6429  | 0.69297  | -0.92774 | 0.353541 | 0.59423 | chr19 | 8368021  | 8374664  | +0 | NA | exon (NM exon (NM  | 7187  | NM_00103E    | 126070   | Hs.41819E          | NM_15235E         | ENSG00000ZNF440    | 1                             | zinc fingprotein-coding      |
| chr19-11E.9.098943 | -0.6429  | 0.69297  | -0.92774 | 0.353541 | 0.59423 | chr19 | 11815588 | 11836841 | +0 | NA | intron (Nintron (N | 11941 | NM_15235E    | 171392   | Hs.26434E          | NM_13833E         | ENSG00000ZNF675    | TBZF                          | TIZ zinc fingprotein-coding  |
| chr19-23E.9.098943 | -0.6429  | 0.69297  | -0.92774 | 0.353541 | 0.59423 | chr19 | 23652432 | 23664    |    |    |                    |       |              |          |                    |                   |                    |                               |                              |



|                    |          |          |          |          |         |       |          |          |    |    |                                                 |           |            |           |           |           |                              |                                             |                          |
|--------------------|----------|----------|----------|----------|---------|-------|----------|----------|----|----|-------------------------------------------------|-----------|------------|-----------|-----------|-----------|------------------------------|---------------------------------------------|--------------------------|
| chr17-182.8.586104 | -0.66223 | 0.723725 | -0.91503 | 0.360174 | 0.59423 | chr17 | 18263169 | 18265581 | +0 | NA | exon (NM_exon (NM_125170                        | Hs.655555 | 139162     | ENS00000  | MIEF2     | MID49     | SMC                          | mitochondrial protein-coding                |                          |
| chr19-118.8.586104 | -0.66223 | 0.723725 | -0.91503 | 0.360174 | 0.59423 | chr19 | 11860696 | 11870684 | +0 | NA | promoter-promoter-intron (N_intron (N_90594     | Hs.528731 | 152262     | ENS00000  | ZNF439    |           |                              | zinc finger protein-coding                  |                          |
| chr2-237.8.586104  | -0.66223 | 0.723725 | -0.91503 | 0.360174 | 0.59423 | chr2  | 2.37E+08 | 2.37E+08 | +0 | NA | intron (N_intron (N_23505                       | 23324     | CNM_004365 | ENS00000  | COL6A3    | BTHLM1    | DI                           | collagen protein-coding                     |                          |
| chr3-538.8.586104  | -0.66223 | 0.723725 | -0.91503 | 0.360174 | 0.59423 | chr3  | 53869090 | 53881012 | +0 | NA | intron (N_Alus6 S 61445861                      | 41218     | CNM_022899 | ENS00000  | ACTR8     | ARPF      | IN                           | actin repressor protein-coding              |                          |
| chr3-6414.8.586104 | -0.66223 | 0.723725 | -0.91503 | 0.360174 | 0.59423 | chr3  | 64145861 | 64149373 | +0 | NA | exon (NM_exon (NM_39927                         | 67084     | CNR_046702 | ENS00000  | PRICKLE2  |           |                              | PRICKLE2 ncRNA                              |                          |
| chr6-3441.8.586104 | -0.66223 | 0.723725 | -0.91503 | 0.360174 | 0.59423 | chr6  | 34414623 | 34425359 | +0 | NA | intron (N_Alus6 S 6078                          | 40662     | CNM_001014 | ENS00000  | CRPS10    | DBA9      | S10                          | ribosomal protein-coding                    |                          |
| chr7-839.8.586104  | -0.66223 | 0.723725 | -0.91503 | 0.360174 | 0.59423 | chr7  | 83994901 | 83995341 | +0 | NA | intron (N_L1P2 L1N_199668                       | 252451    | NM_006088  | ENS00000  | SEMA3A    | COLL1     | HHH                          | semaphorin protein-coding                   |                          |
| chr12-121.8.627668 | -0.66402 | 0.726024 | -0.91462 | 0.360402 | 0.59423 | chr12 | 1.21E+08 | 1.21E+08 | +0 | NA | exon (NM_exon (NM_18793                         | 29734     | NM_006545  | ENS00000  | CAMK22    | CAMK1     | CAM                          | calcium/calmodulin-dependent protein-coding |                          |
| chr11-333.8.613077 | -0.66178 | 0.723644 | -0.91452 | 0.360445 | 0.59423 | chr11 | 33345635 | 33354083 | +0 | NA | intron (N_Alus1 S 26249                         | 50226     | CNM_012194 | ENS00000  | KIAA1549  | C11orf41  | KIAA1549                     | protein-coding                              |                          |
| chr17-48.8.613077  | -0.66178 | 0.723644 | -0.91452 | 0.360445 | 0.59423 | chr17 | 28328797 | 28332156 | +0 | NA | exon (NM_exon (NM_4996                          | 705431    | NM_174887  | ENS00000  | IFT20     |           |                              | intraflagellar protein-coding               |                          |
| chr19-277.8.613077 | -0.66178 | 0.723644 | -0.91452 | 0.360445 | 0.59423 | chr19 | 47728339 | 47728525 | +0 | NA | exon (NM_exon (NM_12760                         | 744963    | NM_014601  | ENS00000  | EHD2      | PAST2     | EH                           | domain protein-coding                       |                          |
| chr20-344.8.613077 | -0.66178 | 0.723644 | -0.91452 | 0.360445 | 0.59423 | chr20 | 34438081 | 34448720 | +0 | NA | intron (N_Alus6 S 22925                         | 303074    | NR_030374  | ENS00000  | MIR644A   | MIR644    | M                            | microRNA ncRNA                              |                          |
| chr21-372.8.613077 | -0.66178 | 0.723644 | -0.91452 | 0.360445 | 0.59423 | chr21 | 37200009 | 37203840 | +0 | NA | 3' UTR (N_3' UTR (N_6579                        | 505155    | NM_148675  | ENS00000  | DSCR9     | NCRNA0005 | Down                         | synchrRNA                                   |                          |
| chr8-6577.8.613077 | -0.66178 | 0.723644 | -0.91452 | 0.360445 | 0.59423 | chr8  | 65774986 | 65783570 | +0 | NA | intron (N_intron (N_9779                        | 527115    | NM_022603  | ENS00000  | PDE7A     | HCP1      | PDE                          | phosphodiesterase protein-coding            |                          |
| chr1-161.8.102446  | -0.68887 | 0.755482 | -0.91182 | 0.361862 | 0.59423 | chr1  | 1.61E+08 | 1.61E+08 | +0 | NA | TTS (NM_C_TTS (NM_C_2097                        | 12707     | NM_015268  | ENS00000  | DNAJC13   | PARK21    | RNAJ                         | heat shock protein-coding                   |                          |
| chr3-1324.8.102446 | -0.68887 | 0.755482 | -0.91182 | 0.361862 | 0.59423 | chr3  | 1.32E+08 | 1.32E+08 | +0 | NA | intron (N_intron (N_56269                       | 25960     | NM_017837  | ENS00000  | CP1G      | GPI-MT-1  | I                            | phosphatidylinositol protein-coding         |                          |
| chr1-2677.8.598487 | -0.65956 | 0.72372  | -0.91135 | 0.362114 | 0.59423 | chr1  | 26773335 | 26781916 | +0 | NA | intron (N_Alus6 S 32373503                      | 353454    | NM_018045  | ENS00000  | BSDC1     |           |                              | BSD domain protein-coding                   |                          |
| chr1-3237.8.598487 | -0.65956 | 0.72372  | -0.91135 | 0.362114 | 0.59423 | chr1  | 32373503 | 32391250 | +0 | NA | intron (N_Alus6 S 10171                         | 49718     | NM_006465  | ENS00000  | IVNS1ABP  | ARA3      | FLAF                         | influenza protein-coding                    |                          |
| chr1-185.8.598487  | -0.65956 | 0.72372  | -0.91135 | 0.362114 | 0.59423 | chr1  | 1.85E+08 | 1.85E+08 | +0 | NA | exon (NM_exon (NM_32427                         | 497492    | NM_002393  | ENS00000  | MDM4      | HDMX      | MDM4                         | regulator protein-coding                    |                          |
| chr1-204.8.598487  | -0.65956 | 0.72372  | -0.91135 | 0.362114 | 0.59423 | chr1  | 2.05E+08 | 2.05E+08 | +0 | NA | intron (N_intron (N_21088                       | 29734     | NM_032324  | ENS00000  | NTPCR     | Clorf57   | MDM5                         | protein-coding                              |                          |
| chr1-232.8.598487  | -0.65956 | 0.72372  | -0.91135 | 0.362114 | 0.59423 | chr1  | 2.33E+08 | 2.33E+08 | +0 | NA | intron (N_intron (N_23115                       | 43689     | NM_007055  | ENS00000  | POLR3A    | ADDD      | HLDRNA                       | polymerase protein-coding                   |                          |
| chr10-77.8.598487  | -0.65956 | 0.72372  | -0.91135 | 0.362114 | 0.59423 | chr10 | 77984482 | 78028319 | +0 | NA | intron (N_Alus1 S 22430                         | 502302    | NM_001752  | ENS00000  | CCAT      |           |                              | catalase protein-coding                     |                          |
| chr11-34.8.598487  | -0.65956 | 0.72372  | -0.91135 | 0.362114 | 0.59423 | chr11 | 3449291  | 34473437 | +0 | NA | exon (NM_exon (NM_35191985                      | 527115    | NR_145794  | ENS00000  | SNORD164  |           |                              | small nucleolar RNA                         |                          |
| chr11-61.8.598487  | -0.65956 | 0.72372  | -0.91135 | 0.362114 | 0.59423 | chr11 | 61299108 | 61331322 | +0 | NA | intron (N_intron (N_17967                       | 6278      | NM_015533  | ENS00000  | TKFC      | DAK       | NET4E                        | triokinase protein-coding                   |                          |
| chr11-7.8.598487   | -0.65956 | 0.72372  | -0.91135 | 0.362114 | 0.59423 | chr11 | 77842800 | 77846578 | +0 | NA | intron (N_L1M4b L1N_3551                        | 74504     | CNM_024684 | ENS00000  | AAMD      | C11orf67  | AD                           | lipogenic protein-coding                    |                          |
| chr12-54.8.598487  | -0.65956 | 0.72372  | -0.91135 | 0.362114 | 0.59423 | chr12 | 54393791 | 54411130 | +0 | NA | intron (N_Alus6 S 11162                         | 344055    | NM_015481  | ENS00000  | ZNF385A   | HIF1RZF1  | Z                            | zinc finger protein-coding                  |                          |
| chr12-68.8.598487  | -0.65956 | 0.72372  | -0.91135 | 0.362114 | 0.59423 | chr12 | 68808916 | 68843043 | +0 | NA | intron (N_intron (N_16955                       | 484551    | NM_002392  | ENS00000  | MDM2      | ACTFS     | HDM                          | MDM2                                        | protector protein-coding |
| chr12-71.8.598487  | -0.65956 | 0.72372  | -0.91135 | 0.362114 | 0.59423 | chr12 | 71606029 | 71638476 | +0 | NA | intron (N_L2a LINE 41596                        | 24579     | NM_144982  | ENS00000  | ZFC3H1    | CCDC131   | C                            | zinc finger protein-coding                  |                          |
| chr12-91.8.598487  | -0.65956 | 0.72372  | -0.91135 | 0.362114 | 0.59423 | chr12 | 91554841 | 91177011 | +0 | NA | intron (N_Alus6 S 12720                         | 43914     | NM_001920  | ENS00000  | CCDN      | CSD       | D                            | decorin protein-coding                      |                          |
| chr13-37.8.598487  | -0.65956 | 0.72372  | -0.91135 | 0.362114 | 0.59423 | chr13 | 37032068 | 37040234 | +0 | NA | intron (N_Tigger1 E_23336                       | 43581     | NM_017565  | ENS00000  | SUPT20H   | C13       | C13orf                       | SPT20                                       | homeobox protein-coding  |
| chr13-11.8.598487  | -0.65956 | 0.72372  | -0.91135 | 0.362114 | 0.59423 | chr13 | 1.1E+08  | 1.1E+08  | +0 | NA | intron (N_intron (N_86499                       | 13472     | NR_148221  | ENS00000  | LOC105370 |           |                              | uncharacterized ncRNA                       |                          |
| chr14-51.8.598487  | -0.65956 | 0.72372  | -0.91135 | 0.362114 | 0.59423 | chr14 | 51701933 | 51730742 | +0 | NA | promoter-promoter-intron (N_intron (N_946       | 44096     | NM_005657  | ENS00000  | TP53BP1   | C14orf31  | FERM                         | domain protein-coding                       |                          |
| chr14-71.8.598487  | -0.65956 | 0.72372  | -0.91135 | 0.362114 | 0.59423 | chr14 | 71051794 | 71053940 | +0 | NA | intron (N_intron (N_145408                      | 51675     | NM_014982  | ENS00000  | PCNX1     | PCNX      | PCN                          | pecanexin 1 protein-coding                  |                          |
| chr14-74.8.598487  | -0.65956 | 0.72372  | -0.91135 | 0.362114 | 0.59423 | chr14 | 74459675 | 74694640 | +0 | NA | intron (N_intron (N_6474                        | 204041    | NM_012111  | ENS00000  | AHSA1     | AHA1      | C14                          | activator protein-coding                    |                          |
| chr15-434.8.598487 | -0.65956 | 0.72372  | -0.91135 | 0.362114 | 0.59423 | chr15 | 43465930 | 43483013 | +0 | NA | intron (N (A)n Simp_18685                       | 44096     | NM_005657  | ENS00000  | TP53BP1   | 53BP1     | TDF                          | tumor protein-coding                        |                          |
| chr15-447.8.598487 | -0.65956 | 0.72372  | -0.91135 | 0.362114 | 0.59423 | chr15 | 44714471 | 44719801 | +0 | NA | promoter-promoter-intron (N_intron (N_20980     | 51675     | NR_162102  | ENS00000  | MIR10393  |           |                              | microRNA ncRNA                              |                          |
| chr16-21.8.598487  | -0.65956 | 0.72372  | -0.91135 | 0.362114 | 0.59423 | chr16 | 21178294 | 21182549 | +0 | NA | non-coding-non-coding-intron (N_intron (N_16931 | 38121     | NR_001096  | ENS00000  | ACLY      | DNAC3B    | B                            | dynein axonemal protein-coding              |                          |
| chr17-41.8.598487  | -0.65956 | 0.72372  | -0.91135 | 0.362114 | 0.59423 | chr17 | 41894958 | 41910162 | +0 | NA | intron (N_intron (N_39698                       | 43705     | NM_003152  | ENS00000  | STAT5A    | MGF1      | STAT                         | signal transducer protein-coding            |                          |
| chr17-42.8.598487  | -0.65956 | 0.72372  | -0.91135 | 0.362114 | 0.59423 | chr17 | 42313567 | 42341941 | +0 | NA | intron (N_intron (N_3758                        | 43405     | NM_001988  | ENS00000  | ETV4      | E1A-F     | E1A                          | ETS                                         | variable protein-coding  |
| chr17-63.8.598487  | -0.65956 | 0.72372  | -0.91135 | 0.362114 | 0.59423 | chr17 | 63269981 | 63272868 | +0 | NA | exon (NM_exon (NM_12242                         | 43724     | NM_014966  | ENS00000  | ARG       | USHA      | arylsulfatase protein-coding |                                             |                          |
| chr17-73.8.598487  | -0.65956 | 0.72372  | -0.91135 | 0.362114 | 0.59423 | chr17 | 73204425 | 73210163 | +0 | NA | TTS (NM_C_TTS (NM_C_14239                       | 10355     | NM_018714  | ENS00000  | COG1      | CDG2G     | LDI                          | component protein-coding                    |                          |
| chr18-361.8.598487 | -0.65956 | 0.72372  | -0.91135 | 0.362114 | 0.59423 | chr18 | 36141533 | 36149724 | +0 | NA | intron (N_intron (N_51279                       | 8739      | NM_018255  | ENS00000  | ELP2      | MRT58     | SHI                          | elongator protein-coding                    |                          |
| chr19-484.8.598487 | -0.65956 | 0.72372  | -0.91135 | 0.362114 | 0.59423 | chr19 | 48460558 | 4863678  | +0 | NA | intron (N_Alus6 S 12799                         | 14045     | NM_005817  | ENS00000  | CLIN3     | M6PRBP1   | F                            | perilipin protein-coding                    |                          |
| chr19-45.8.598487  | -0.65956 | 0.72372  | -0.91135 | 0.362114 | 0.59423 | chr19 | 45824975 | 45852193 | +0 | NA | exon (NM_exon (NM_85376528                      | 44644     | NM_030785  | ENS00000  | RSLPD6A   | RSHL1     | RSF                          | radial glial protein-coding                 |                          |
| chr2-8537.8.598487 | -0.65956 | 0.72372  | -0.91135 | 0.362114 | 0.59423 | chr2  | 85376528 | 85381936 | +0 | NA | intron (N_Alus6 S 24463                         | 26999     | NM_032213  | ENS00000  | ELMOD3    | DFNB88    | L                            | ELMO domain protein-coding                  |                          |
| chr2-855.8.598487  | -0.65956 | 0.72372  | -0.91135 | 0.362114 | 0.59423 | chr2  | 85539688 | 85546719 | +0 | NA | intron (N_intron (N_4035                        | 516157    | NM_005911  | ENS00000  | CCAT2A    | MATA2     | MAT                          | methionin protein-coding                    |                          |
| chr2-109.8.598487  | -0.65956 | 0.72372  | -0.91135 | 0.362114 | 0.59423 | chr2  | 1.1E+08  | 1.1E+08  | +0 | NA | intron (N_L1M5a L1L_4925                        | 53561     | NR_027144  | ENS00000  | LIMS3-LOC |           |                              | LIMS3-LOC ncRNA                             |                          |
| chr20-384.8.598487 | -0.65956 | 0.72372  | -0.91135 | 0.362114 | 0.59423 | chr20 | 38418617 | 38433937 | +0 | NA | promoter-promoter-intron (N_intron (N_25292     | 608       | Hs.517517  | NR_110514 | EP300-AS1 |           |                              | EP300 antncRNA                              |                          |
| chr3-2391.8.598487 | -0.65956 | 0.72372  | -0.91135 | 0.362114 | 0.59423 | chr3  | 23917850 | 23921798 | +0 | NA | 3' UTR (N_3' UTR (N_2692                        | 38121     | NR_001252  | ENS00000  | RPL15     | DBA12     | E                            | ribosomal protein-coding                    |                          |
| chr3-2741.8.598487 | -0.65956 | 0.72372  | -0.91135 | 0.362114 | 0.59423 | chr3  | 27417837 | 27421545 | +0 | NA | intron (N_intron (N_37087                       | 43075     | NM_003615  | ENS00000  | SLC4A7    | NBC2      | NBC3                         | solute carrier protein-coding               |                          |
| chr4-389.8.598487  | -0.65956 | 0.72372  | -0.91135 | 0.362114 | 0.59423 | chr4  | 38901371 | 38945630 | +0 | NA | intron (N_Alus6 S 55468                         | 59171     | CNM_017631 | ENS00000  | DDX60     |           |                              | DExD/H-box protein-coding                   |                          |
| chr4-770.8.598487  | -0.65956 | 0.72372  | -0.91135 | 0.36211  |         |       |          |          |    |    |                                                 |           |            |           |           |           |                              |                                             |                          |



|                    |          |          |          |          |         |       |           |          |    |    |                       |        |            |          |           |                   |                |               |                        |                 |
|--------------------|----------|----------|----------|----------|---------|-------|-----------|----------|----|----|-----------------------|--------|------------|----------|-----------|-------------------|----------------|---------------|------------------------|-----------------|
| chr17-758.8.100238 | -0.68354 | 0.752372 | -0.90852 | 0.363604 | 0.59423 | chr17 | 7591714   | 7609480  | +0 | NA | intron (N FLAM_C SI   | -10503 | NM_006942  | 6665     | Hs.95582  | NM_006942         | ENS00000CSOX15 | SOX20 SOX     | SRY-box                | tprotein-coding |
| chr17-286.8.100238 | -0.68354 | 0.752372 | -0.90852 | 0.363604 | 0.59423 | chr17 | 28613895  | 28632034 | +0 | NA | intron (N AluSg SIN   | -8779  | NM_0011174 | 124923   | Hs.729077 | NM_14461C         | ENS00000RSKR   | SGK494        | ribosomal              | protein-coding  |
| chr17-384.8.100238 | -0.68354 | 0.752372 | -0.90852 | 0.363604 | 0.59423 | chr17 | 38466291  | 38508917 | +0 | NA | intron (N AluSx1 SI   | 59140  | NM_001199  | 57636    | Hs.37444  | ENS00000CARHGAP23 | -              | Rho           | GTPase                 | protein-coding  |
| chr17-387.8.100238 | -0.68354 | 0.752372 | -0.90852 | 0.363604 | 0.59423 | chr17 | 38768983  | 38787411 | +0 | NA | intron (N intron (N   | 21708  | NM_003555  | 8396     | Hs.28600  | ENS00000PIP4K2B   | P15P4KB F      | phosphatidyl  | protein-coding         |                 |
| chr17-425.8.100238 | -0.68354 | 0.752372 | -0.90852 | 0.363604 | 0.59423 | chr17 | 425668245 | 42576848 | +0 | NA | non-coding-non-coding | 5170   | NM_001256  | 29893    | Hs.38301  | ENS00000PSMC31P   | GR198 H9F      | PSMC3         | intron-protein-coding  |                 |
| chr17-428.8.100238 | -0.68354 | 0.752372 | -0.90852 | 0.363604 | 0.59423 | chr17 | 42834176  | 42846145 | +0 | NA | intron (N AluSp SIN   | -4420  | NM_001158  | 314      | Hs.14310  | ENS00000CAOC2     | DA02 RAO       | amine oxidase | protein-coding         |                 |
| chr17-758.8.100238 | -0.68354 | 0.752372 | -0.90852 | 0.363604 | 0.59423 | chr17 | 75946081  | 75958227 | +0 | NA | intron (N intron (N   | -13922 | NM_001319  | 85302    | Hs.72066  | ENS00000FBF1      | Alb FBF        | F-1fas        | bindinprotein-coding   |                 |
| chr17-802.8.100238 | -0.68354 | 0.752372 | -0.90852 | 0.363604 | 0.59423 | chr17 | 80225999  | 80242944 | +0 | NA | intron (N LIMEc LIN   | 14044  | NM_17362E  | 284129   | Hs.4866   | ENS00000SLC26A11  | -              | solute        | carboxinprotein-coding |                 |
| chr19-241.8.100238 | -0.68354 | 0.752372 | -0.90852 | 0.363604 | 0.59423 | chr19 | 24115168  | 24123738 | +0 | NA | intron (N AluSx SIN   | 32266  | NM_00127E  | 9534     | Hs.43440  | ENS00000ZNF254    | BZMF-5 HI      | zinc finger   | protein-coding         |                 |
| chr19-367.8.100238 | -0.68354 | 0.752372 | -0.90852 | 0.363604 | 0.59423 | chr19 | 36392005  | 36402896 | +0 | NA | intron (N LIMD LINE   | -18249 | NM_020917  | 57677    | Hs.35524  | ENS00000ZFP14     | ZNF531         | ZFP14         | zinc protein-coding    |                 |
| chr19-371.8.100238 | -0.68354 | 0.752372 | -0.90852 | 0.363604 | 0.59423 | chr19 | 37147189  | 37171526 | +0 | NA | intron (N LIMC5a LIN  | 13079  | NM_19912E  | 199704   | Hs.65923  | ENS00000ZNF585A   | -              | zinc          | finger protein-coding  |                 |
| chr19-371.8.100238 | -0.68354 | 0.752372 | -0.90852 | 0.363604 | 0.59423 | chr19 | 37183031  | 37201194 | +0 | NA | intron (N intron (N   | 18424  | NM_15227E  | 92285    | Hs.39056  | ENS00000ZNF585B   | SZFP41         | zinc finger   | protein-coding         |                 |
| chr19-418.8.100238 | -0.68354 | 0.752372 | -0.90852 | 0.363604 | 0.59423 | chr19 | 41267903  | 41307009 | +0 | NA | intron (N LIMC4 LIN   | 22375  | NM_001321  | 11100    | Hs.15521  | ENS00000HNRNPUL1  | E1B-AP5 E      | heterologous  | protein-coding         |                 |
| chr19-452.8.100238 | -0.68354 | 0.752372 | -0.90852 | 0.363604 | 0.59423 | chr19 | 45897942  | 45901358 | +0 | NA | intron (N AluSx1 SI   | 2963   | NM_001012  | 339344   | Hs.51547  | ENS00000MYPO      | P42p20         | Myb           | relatprotein-coding    |                 |
| chr19-466.8.100238 | -0.68354 | 0.752372 | -0.90852 | 0.363604 | 0.59423 | chr19 | 46672408  | 46711649 | +0 | NA | intron (N intron (N   | 17326  | NR_036157  | 1E+08    | NR_036157 | ENS00000MIR320E   | mir-320e       | microRNA      | ncRNA                  |                 |
| chr19-492.8.100238 | -0.68354 | 0.752372 | -0.90852 | 0.363604 | 0.59423 | chr19 | 49210072  | 49212003 | +0 | NA | exon (NM exon (NM     | 53245  | NM_00119E  | 54795    | Hs.46710  | ENS00000TRPM4     | LTrpC4 PF      | transient     | protein-coding         |                 |
| chr2-320.8.100238  | -0.68354 | 0.752372 | -0.90852 | 0.363604 | 0.59423 | chr2  | 32498358  | 32511511 | +0 | NA | intron (N intron (N   | -27219 | NR_03028E  | 693143   | NR_03028E | ENS00000MIR558    | MIRN558 f      | microRNA      | ncRNA                  |                 |
| chr2-697.8.100238  | -0.68354 | 0.752372 | -0.90852 | 0.363604 | 0.59423 | chr2  | 69070052  | 69074176 | +0 | NA | intron (N intron (N   | 131568 | NR_036073  | 1E+08    | NR_036073 | ENS00000MIR3126   | mir-3126       | microRNA      | ncRNA                  |                 |
| chr2-1602.8.100238 | -0.68354 | 0.752372 | -0.90852 | 0.363604 | 0.59423 | chr2  | 1.6E+08   | 1.6E+08  | +0 | NA | intron (N intron (N   | -12705 | NR_10377E  | 1.01E+08 | Hs.72953  | ENS00000LINC0247E | -              | long          | intencRNA              |                 |
| chr2-1603.8.100238 | -0.68354 | 0.752372 | -0.90852 | 0.363604 | 0.59423 | chr2  | 1.6E+08   | 1.6E+08  | +0 | NA | intron (N AluSx1 SI   | -10489 | NR_10377E  | 1.01E+08 | Hs.72953  | ENS00000LINC0247E | -              | long          | intencRNA              |                 |
| chr2-1916.8.100238 | -0.68354 | 0.752372 | -0.90852 | 0.363604 | 0.59423 | chr2  | 1.91E+08  | 1.91E+08 | +0 | NA | intron (N intron (N   | 14528  | NM_00113C  | 4430     | Hs.43962  | ENS00000MYO1B     | MMI            | alpha         | myosin IF              | protein-coding  |
| chr2-2186.8.100238 | -0.68354 | 0.752372 | -0.90852 | 0.363604 | 0.59423 | chr2  | 2.19E+08  | 2.19E+08 | +0 | NA | exon (NM exon (NM     | 6000   | NM_02245E  | 64320    | Hs.47140  | ENS00000RNF25     | A07            | ring          | finger protein-coding  |                 |
| chr2-2328.8.100238 | -0.68354 | 0.752372 | -0.90852 | 0.363604 | 0.59423 | chr2  | 2.33E+08  | 2.33E+08 | +0 | NA | intron (N intron (N   | -40567 | NM_00117E  | 3769     | Hs.46733  | ENS00000KCNJ13    | KIR1.4 K1      | potassium     | protein-coding         |                 |
| chr2-2411.8.100238 | -0.68354 | 0.752372 | -0.90852 | 0.363604 | 0.59423 | chr2  | 2.41E+08  | 2.41E+08 | +0 | NA | intron (N intron (N   | 5270   | NM_00108C  | 25992    | Hs.47183  | ENS00000SNED1     | IRE-BP1 S      | sushi, ni     | protein-coding         |                 |
| chr20-245.8.100238 | -0.68354 | 0.752372 | -0.90852 | 0.363604 | 0.59423 | chr20 | 2457067   | 2469651  | +0 | NA | promoter-promoter-    | -312   | NR_003684  | 1E+08    | NR_003684 | SNORD119          | -              | small         | nucsnRNA               |                 |
| chr20-455.8.100238 | -0.68354 | 0.752372 | -0.90852 | 0.363604 | 0.59423 | chr20 | 45966031  | 45969024 | +0 | NA | exon (NM exon (NM     | 4376   | NM_02209E  | 63925    | Hs.17419  | ENS00000ZNF335    | MCPH10 N       | zinc          | finger protein-coding  |                 |
| chr22-414.8.100238 | -0.68354 | 0.752372 | -0.90852 | 0.363604 | 0.59423 | chr22 | 41664055  | 4167703  | +0 | NA | intron (N MR SINE     | 4613   | NM_03275E  | 84844    | Hs.47498  | ENS00000PHF5A     | E1 Rds3 PHD    | finger        | protein-coding         |                 |
| chr3-1523.8.100238 | -0.68354 | 0.752372 | -0.90852 | 0.363604 | 0.59423 | chr3  | 15239842  | 15244194 | +0 | NA | intron (N intron (N   | -12166 | NR_046084  | 1.01E+08 | Hs.74502  | ENS00000SH3BP5-AS | -              | SH3BP5        | arnRNA                 |                 |
| chr3-1203.8.100238 | -0.68354 | 0.752372 | -0.90852 | 0.363604 | 0.59423 | chr3  | 1.2E+08   | 1.2E+08  | +0 | NA | intron (N intron (N   | -9666  | NR_029584  | 406975   | NR_029584 | ENS00000MIR198    | MIRN198        | microRNA      | ncRNA                  |                 |
| chr3-1493.8.100238 | -0.68354 | 0.752372 | -0.90852 | 0.363604 | 0.59423 | chr3  | 1.49E+08  | 1.49E+08 | +0 | NA | intron (N intron (N   | -29993 | NR_04664E  | 1.01E+08 | Hs.74242  | ENS00000HLTF-AS1  | -              | HLTF          | antincRNA              |                 |
| chr5-3493.8.100238 | -0.68354 | 0.752372 | -0.90852 | 0.363604 | 0.59423 | chr5  | 34932619  | 34947162 | +0 | NA | intron (N intron (N   | 10297  | NM_19428E  | 134218   | Hs.13188  | ENS00000DNAJC21   | BMF53 DN       | DnaJ          | heat                   | protein-coding  |
| chr5-1517.8.100238 | -0.68354 | 0.752372 | -0.90852 | 0.363604 | 0.59423 | chr5  | 1.52E+08  | 1.52E+08 | +0 | NA | intron (N MER4A LITF  | -3134  | NR_109873  | 1.02E+08 | Hs.57102  | ENS00000CLMAT3    | CTB-113P       | icolactancRNA | -                      |                 |
| chr5-1548.8.100238 | -0.68354 | 0.752372 | -0.90852 | 0.363604 | 0.59423 | chr5  | 1.55E+08  | 1.55E+08 | +0 | NA | intron (N intron (N   | -23685 | NR_039667  | 1.01E+08 | NR_039667 | ENS00000MIR378H   | -              | microRNA      | ncRNA                  |                 |
| chr6-247.8.100238  | -0.68354 | 0.752372 | -0.90852 | 0.363604 | 0.59423 | chr6  | 24701156  | 24719966 | +0 | NA | intron (N AluSp SIN   | 8593   | NM_03093E  | 81688    | Hs.74485  | ENS00000C6orf62   | Nb1a00237      | chromosom     | protein-coding         |                 |
| chr6-2597.8.100238 | -0.68354 | 0.752372 | -0.90852 | 0.363604 | 0.59423 | chr6  | 25972156  | 25986485 | +0 | NA | intron (N LIMS LINE   | 16518  | NM_00635E  | 10475    | Hs.58485  | ENS00000TRIM38    | RNF15 ROF      | tripartit     | protein-coding         |                 |
| chr6-2646.8.100238 | -0.68354 | 0.752372 | -0.90852 | 0.363604 | 0.59423 | chr6  | 26462673  | 26469934 | +0 | NA | intron (N intron (N   | 8348   | NM_00704E  | 11120    | Hs.15902  | ENS00000BTN2A1    | BK14H9.1       | butyrophil    | protein-coding         |                 |
| chr6-4266.8.100238 | -0.68354 | 0.752372 | -0.90852 | 0.363604 | 0.59423 | chr6  | 42662166  | 42664488 | +0 | NA | exon (NM exon (NM     | 59270  | NM_00032E  | 5961     | Hs.65448  | ENS00000PRPH2     | AOFMD AV       | peripheri     | protein-coding         |                 |
| chr7-5214.8.100238 | -0.68354 | 0.752372 | -0.90852 | 0.363604 | 0.59423 | chr7  | 5214439   | 5233425  | +0 | NA | intron (N intron (N   | 9663   | NM_00103E  | 26100    | Hs.12236  | ENS00000WIPI2     | ATG18B At      | mid           | repeat                 | protein-coding  |
| chr7-2331.8.100238 | -0.68354 | 0.752372 | -0.90852 | 0.363604 | 0.59423 | chr7  | 23316651  | 23319935 | +0 | NA | intron (N AluJb SIN   | 18954  | NM_13844E  | 115416   | Hs.87385  | ENS00000MALSU7    | C7orf30        | AT            | titonchonc             | protein-coding  |
| chr7-7603.8.100238 | -0.68354 | 0.752372 | -0.90852 | 0.363604 | 0.59423 | chr7  | 76054689  | 76067302 | +0 | NA | intron (N intron (N   | 12889  | NM_00591E  | 4191     | Hs.52096  | ENS00000MDH2      | EIEE51 M       | malate de     | protein-coding         |                 |
| chr7-1391.8.100238 | -0.68354 | 0.752372 | -0.90852 | 0.363604 | 0.59423 | chr7  | 1.4E+08   | 1.4E+08  | +0 | NA | intron (N intron (N   | 85637  | NM_00135E  | 154790   | Hs.57806  | ENS00000CLEC2L    | -              | C-type        | leprotein-coding       |                 |
| chr8-1411.8.100238 | -0.68354 | 0.752372 | -0.90852 | 0.363604 | 0.59423 | chr8  | 1.41E+08  | 1.41E+08 | +0 | NA | intron (N L2c LINE    | 12143  | NM_00136E  | 22898    | Hs.18166  | ENS00000DENND3    | -              | DENN          | domer                  | protein-coding  |
| chr9-3326.8.100238 | -0.68354 | 0.752372 | -0.90852 | 0.363604 | 0.59423 | chr9  | 33266114  | 33282237 | +0 | NA | intron (N AluJb SIN   | 9126   | NM_01641C  | 51510    | Hs.63531  | ENS00000CHMP5     | C9orf83 C      | charged n     | protein-coding         |                 |
| chr9-1228.8.100238 | -0.68354 | 0.752372 | -0.90852 | 0.363604 | 0.59423 | chr9  | 1.23E+08  | 1.23E+08 | +0 | NA | intron (N intron (N   | 25618  | NR_003071  | 692206   | Hs.69325  | ENS00000SNORD90   | HBII-295       | small         | nucsnRNA               |                 |
| chr9-1364.8.100238 | -0.68354 | 0.752372 | -0.90852 | 0.363604 | 0.59423 | chr9  | 1.36E+08  | 1.36E+08 | +0 | NA | intron (N intron (N   | -16304 | NM_152571  | 158055   | Hs.51261  | ENS00000C9orf163  | -              | chromosom     | protein-coding         |                 |
| chrX-1673.8.100238 | -0.68354 | 0.752372 | -0.90852 | 0.363604 | 0.59423 | chrX  | 16752516  | 16761624 | +0 | NA | intron (N intron (N   | -29362 | NM_00116E  | 55787    | Hs.55596  | ENS00000TXLNG     | CXorf15 E      | taxilin       | protein-coding         |                 |
| chr8-6725.8.559131 | -0.66269 | 0.729479 | -0.90845 | 0.363642 | 0.59423 | chr8  | 67291617  | 67292320 | +0 | NA | exon (NM exon (NM     | 51813  | NM_006421  | 10565    | Hs.65690  | ENS00000ARFGEF1   | ARFGEF1 E      | ADP           | ribos                  | protein-coding  |
| chr10-615.8.129419 | -0.68838 | 0.757877 | -0.9083  | 0.363721 | 0.59423 | chr10 | 61940257  | 61943283 | +0 | NA | intron (N intron (N   | 40071  | NM_03219E  | 84159    | Hs.53529  | ENS00000ARID5B    | DESRT MR       | FAT-rich      | protein-coding         |                 |
| chr7-1436.8.075473 | -0.6894  |          |          |          |         |       |           |          |    |    |                       |        |            |          |           |                   |                |               |                        |                 |





|                     |          |          |          |          |          |       |          |            |      |                     |                  |                               |                      |                     |                         |                |
|---------------------|----------|----------|----------|----------|----------|-------|----------|------------|------|---------------------|------------------|-------------------------------|----------------------|---------------------|-------------------------|----------------|
| chr1-1602.8.814322  | -0.56779 | 0.708431 | -0.80148 | 0.422853 | 0.619909 | chr1  | 1.6E+08  | 1.6E+08    | 0 NA | intron (Nintron (N  | -3720 NR_12372E  | 729867 Hs. 674191NR_12372E    | ENSG000001CLOC729867 | -                   | uncharactncRNA          |                |
| chr1-1798.8.814322  | -0.56779 | 0.708431 | -0.80148 | 0.422853 | 0.619909 | chr1  | 1.8E+08  | 1.8E+08    | 0 NA | intron (NLMIME3Cz L | 13531 NM_001345  | 163590 Hs. 571797NM_022347    | ENSG000001TOR1AIP2   | IFRG15 LU           | torsin 1 protein-coding |                |
| chr1-2260.8.814322  | -0.56779 | 0.708431 | -0.80148 | 0.422853 | 0.619909 | chr1  | 2.26E+08 | 2.26E+08   | 0 NA | intron (NAluSx SIN  | 6835 NR_00231E   | 440926 Hs. 533624NR_002315    | H3F3AP4              | p13                 | H3 historpseudo         |                |
| chr1-2351.8.814322  | -0.56779 | 0.708431 | -0.80148 | 0.422853 | 0.619909 | chr1  | 2.35E+08 | 2.35E+08   | 0 NA | intron (NLMIME4b LI | 15986 NM_001346  | 23029 Hs. 535224NM_015014     | ENSG000001RBM34      | -                   | RNA bindiprotein-coding |                |
| chr10-4578.8.814322 | -0.56779 | 0.708431 | -0.80148 | 0.422853 | 0.619909 | chr10 | 45754555 | 45754555   | 0 NA | intron (NAluSx SIN  | 41971 NM_001351  | 643479 Hs. 522900NM_001351234 | FAM25E               | FAM25D              | family wiprotein-coding |                |
| chr11-185.8.814322  | -0.56779 | 0.708431 | -0.80148 | 0.422853 | 0.619909 | chr11 | 18554308 | 18557852   | 0 NA | intron (Nintron (N  | 23438 NM_001261  | 55293 Hs. 407991NM_018314     | ENSG000001UEVLD      | ATTP UEV:UEV        | and lprotein-coding     |                |
| chr11-348.8.814322  | -0.56779 | 0.708431 | -0.80148 | 0.422853 | 0.619909 | chr11 | 34076140 | 34101676   | 0 NA | intron (Nintron (N  | -16721 NM_001144 | 55226 Hs. 577281NM_024662     | ENSG000001NAT10      | ALP Kre3E           | acetyltprotein-coding   |                |
| chr11-576.8.814322  | -0.56779 | 0.708431 | -0.80148 | 0.422853 | 0.619909 | chr11 | 57659517 | 57662811   | 0 NA | intron (Nintron (N  | 3402 NM_006811   | 10978 Hs. 523687NM_006831     | ENSG000001CLP1       | HEAB HLI            | cleavage protein-coding |                |
| chr11-108.8.814322  | -0.56779 | 0.708431 | -0.80148 | 0.422853 | 0.619909 | chr11 | 1.08E+08 | 1.08E+08   | 0 NA | intron (NLMIP3 LINE | 50745 NM_001351  | 472 Hs. 367437NM_000051       | ENSG000001ATM        | AT1 ATA ATM         | serirprotein-coding     |                |
| chr11-127.8.814322  | -0.56779 | 0.708431 | -0.80148 | 0.422853 | 0.619909 | chr11 | 1.26E+08 | 1.26E+08   | 0 NA | intron (Nintron (N  | 9393 NM_001330   | 9538 Hs. 643514NM_00487E      | ENSG000001E124       | EPG4 PIGEI24        | autcprotein-coding      |                |
| chr12-577.8.814322  | -0.56779 | 0.708431 | -0.80148 | 0.422853 | 0.619909 | chr12 | 57747183 | 57751288   | 0 NA | promoter-promoter-  | -553 NR_106817   | NR_106817                     | ENSG000001MIR6759    | Hsa-gm-ε            | microRNA ncRNA          |                |
| chr14-498.8.814322  | -0.56779 | 0.708431 | -0.80148 | 0.422853 | 0.619909 | chr14 | 49807369 | 49851414   | 0 NA | exon (NM exon (NM   | 23397 NM_00471E  | 9147 Hs. 655964NM_00471E      | ENSG000001CNEMF      | NY-CO-1 S           | nuclear eprotein-coding |                |
| chr14-747.8.814322  | -0.56779 | 0.708431 | -0.80148 | 0.422853 | 0.619909 | chr14 | 74778921 | 74785520   | 0 NA | intron (NM exon (NM | 18904 NM_01958E  | 56252 Hs. 531111NM_01958E     | ENSG000001YLRPM1     | C14orf17C YLP       | motifprotein-coding     |                |
| chr16-278.8.814322  | -0.56779 | 0.708431 | -0.80148 | 0.422853 | 0.619909 | chr16 | 2753621  | 2776180    | 0 NA | exon (NM exon (NM   | 12262 NM_01633E  | 23524 Hs. 433433NM_01633E     | ENSG000001SRM2       | 300-KD C            | serine/arprotein-coding |                |
| chr16-223.8.814322  | -0.56779 | 0.708431 | -0.80148 | 0.422853 | 0.619909 | chr16 | 22344000 | 22352984   | 0 NA | intron (NMER5B DNF  | 26127 NM_001802  | 1039 Hs. 513433NM_001802      | ENSG000001CDR2       | CDR62 Yo            | cerebellaprotein-coding |                |
| chr16-245.8.814322  | -0.56779 | 0.708431 | -0.80148 | 0.422853 | 0.619909 | chr16 | 24956180 | 24970680   | 0 NA | intron (Nintron (N  | 51939 NM_018054  | 55114 Hs. 37379E              | ENSG000001ARHGAP17   | MSTO66 MS           | Rho GTPasprotein-coding |                |
| chr16-307.8.814322  | -0.56779 | 0.708431 | -0.80148 | 0.422853 | 0.619909 | chr16 | 30700102 | 30739772   | 0 NA | intron (NLMIPA16 LI | 9400 NR_00296E   | 677813 Hs. 68971E             | ENSG000001SNORA30    | ACA30 SNC           | small nucsnRNA          |                |
| chr16-707.8.814322  | -0.56779 | 0.708431 | -0.80148 | 0.422853 | 0.619909 | chr16 | 70554032 | 70572964   | 0 NA | intron (Nintron (N  | -16397 NM_15245E | 146433 Hs. 461214NM_15245E    | ENSG000001LR34       | C16orf77 C          | interleukprotein-coding |                |
| chr17-388.8.814322  | -0.56779 | 0.708431 | -0.80148 | 0.422853 | 0.619909 | chr17 | 38800815 | 38815607   | 0 NA | intron (NAluSx3 SI  | -8306 NM_00355E  | 8396 Hs. 26060E               | ENSG000001PIP4K2B    | PIP54KB P           | phosphatiprotein-coding |                |
| chr17-488.8.814322  | -0.56779 | 0.708431 | -0.80148 | 0.422853 | 0.619909 | chr17 | 48916351 | 48943521   | 0 NA | TTS (NM_C           | 14906 NM_001317  | 11267 Hs. 12724E              | ENSG000001SNF8       | Dot3 EAP:SNF8       | subprotein-coding       |                |
| chr17-758.8.814322  | -0.56779 | 0.708431 | -0.80148 | 0.422853 | 0.619909 | chr17 | 75845161 | 75853032   | 0 NA | intron (Nintron (N  | -4379 NM_19924E  | 201294 Hs. 41045 NM_19924E    | ENSG000001UNC13D     | FHL3 HLH:unc-13     | hprotein-coding         |                |
| chr17-788.8.814322  | -0.56779 | 0.708431 | -0.80148 | 0.422853 | 0.619909 | chr17 | 78808319 | 78822257   | 0 NA | intron (NAluSc SIN  | 25239 NM_001321  | 57602 Hs. 46424E              | ENSG000001USP36      | DUB1                | ubiquitirprotein-coding |                |
| chr18-358.8.814322  | -0.56779 | 0.708431 | -0.80148 | 0.422853 | 0.619909 | chr18 | 35256044 | 35264821   | 0 NA | intron (NLMIPA10 LI | 19398 NM_00113E  | 84307 Hs. 591061NM_032347     | ENSG000001ZNF397     | ZNF47 ZSC           | zinc fingprotein-coding |                |
| chr19-758.8.814322  | -0.56779 | 0.708431 | -0.80148 | 0.422853 | 0.619909 | chr19 | 5602820  | 5621750    | 0 NA | intron (Nintron (N  | 10491 NM_01464E  | 9667 Hs. 65539E               | ENSG000001SAFB2      | -                   | scaffold protein-coding |                |
| chr19-358.8.814322  | -0.56779 | 0.708431 | -0.80148 | 0.422853 | 0.619909 | chr19 | 35651026 | 35659143   | 0 NA | intron (NAluSc8 SI  | 6761 NM_00186E   | 1340 Hs. 43166E               | ENSG000001COX6B1     | COX6B CO            | cytochoenprotein-coding |                |
| chr19-477.8.814322  | -0.56779 | 0.708431 | -0.80148 | 0.422853 | 0.619909 | chr19 | 47729963 | 47742974   | 0 NA | exon (NM exon (NM   | -9078 NM_01571E  | 29997 Hs. 421907NM_01571E     | ENSG000001NOP53      | GLTSCR2 FN          | OP53 ritprotein-coding  |                |
| chr2-8611.8.814322  | -0.56779 | 0.708431 | -0.80148 | 0.422853 | 0.619909 | chr2  | 86115272 | 86139556   | 0 NA | intron (Nintron (N  | -8456 NR_00437E  | 692225 Hs. 723087NR_00437E    | ENSG000001SNORD94    | U94                 | small nucsnRNA          |                |
| chr20-458.8.814322  | -0.56779 | 0.708431 | -0.80148 | 0.422853 | 0.619909 | chr20 | 45325806 | 45336285   | 0 NA | intron (NMER41B LI  | 17379 NM_00299E  | 6385 Hs. 632267NM_00299E      | ENSG000001SDCA4      | SYND4               | syndcan protein-coding  |                |
| chr20-492.8.814322  | -0.56779 | 0.708431 | -0.80148 | 0.422853 | 0.619909 | chr20 | 49242372 | 49275786   | 0 NA | intron (NAluJo SIN  | 18528 NM_02103E  | 57169 Hs. 371794NM_02103E     | ENSG000001ZNF1X1     | -                   | zinc fingprotein-coding |                |
| chr22-411.8.814322  | -0.56779 | 0.708431 | -0.80148 | 0.422853 | 0.619909 | chr22 | 41123924 | 41167309   | 0 NA | intron (Nintron (N  | 51885 NR_110514  | 1.02E+08 Hs. 517517NR_110514  | EP300-AS1            | -                   | EP300 antncRNA          |                |
| chr3-1695.8.814322  | -0.56779 | 0.708431 | -0.80148 | 0.422853 | 0.619909 | chr3  | 1.7E+08  | 1.7E+08    | 0 NA | intron (NAluSx1 SI  | 18489 NM_00326E  | 7095 Hs. 74485E               | ENSG000001SEC62      | Dtrp1 HTF           | SEC62 honprotein-coding |                |
| chr3-1978.8.814322  | -0.56779 | 0.708431 | -0.80148 | 0.422853 | 0.619909 | chr3  | 1.98E+08 | 1.98E+08   | 0 NA | intron (Nintron (N  | 4730 NM_00131E   | 6165 Hs. 529631NM_00099E      | ENSG000001RPL35A     | DBA5 L35            | ribosomalprotein-coding |                |
| chr4-7598.8.814322  | -0.56779 | 0.708431 | -0.80148 | 0.422853 | 0.619909 | chr4  | 75954437 | 75983046   | 0 NA | intron (Nintron (N  | -12049 NR_00299E | 1.02E+08 Hs. 63757E           | NR_12590E            | ENSG000001LOC10192E | -                       | uncharactncRNA |
| chr4-7701.8.814322  | -0.56779 | 0.708431 | -0.80148 | 0.422853 | 0.619909 | chr4  | 77016926 | 77021841   | 0 NA | intron (Nintron (N  | 55527 NM_00134E  | 10983 Hs. 518827NM_00683E     | ENSG000001CCNI1      | CCNI1 CY            | cyclin I protein-coding |                |
| chr5-728.8.814322   | -0.56779 | 0.708431 | -0.80148 | 0.422853 | 0.619909 | chr5  | 72861092 | 72877076   | 0 NA | intron (NBLACKJACK  | -9507 NR_03996E  | 1.01E+08 Hs. 430661NM_00219E  | ENSG000001IRF1       | IRF-1 MAF           | interfercprotein-coding |                |
| chr5-1324.8.814322  | -0.56779 | 0.708431 | -0.80148 | 0.422853 | 0.619909 | chr5  | 1.32E+08 | 1.32E+08   | 0 NA | intron (NAluJb SIN  | 12545 NM_183401  | 9604 Hs. 48361E               | ENSG000001CRNF14     | ARA54 HFE           | ring fingprotein-coding |                |
| chr5-1418.8.814322  | -0.56779 | 0.708431 | -0.80148 | 0.422853 | 0.619909 | chr5  | 56456370 | 56460458   | 0 NA | 3' UTR (N3' UTR (N  | -64286 NR_00131E | 81578 Hs. 47629 NM_03082E     | ENSG000001COL21A1    | COLA1L P            | collagen protein-coding |                |
| chr7-4727.8.814322  | -0.56779 | 0.708431 | -0.80148 | 0.422853 | 0.619909 | chr7  | 47276345 | 47276804   | 0 NA | 3' UTR (N3' UTR (N  | 188229 NR_145813 | 1.1E+08 NR_145813             | SNORD151             | -                   | small nucsnRNA          |                |
| chr7-728.8.814322   | -0.56779 | 0.708431 | -0.80148 | 0.422853 | 0.619909 | chr7  | 72831117 | 72839756   | 0 NA | intron (Nintron (N  | 6063 NR_024111   | 155370 Hs. 58505E             | ENSG000001SBDSP1     | SBDSP               | SBDS psetpseudo         |                |
| chr8-3046.8.814322  | -0.56779 | 0.708431 | -0.80148 | 0.422853 | 0.619909 | chr8  | 30469935 | 30472107   | 0 NA | intron (Nintron (N  | -85620 NR_04620E | 1E+08 Hs. 12681E              | NR_04620E            | ENSG000001RBPMS-AS1 | -                       | RBPMS antncRNA |
| chrX-2408.8.814322  | -0.56779 | 0.708431 | -0.80148 | 0.422853 | 0.619909 | chrX  | 24055807 | 24069315   | 0 NA | exon (NM exon (NM   | 7605 NM_00141E   | 1968 Hs. 539684NM_00141E      | ENSG000001EIF2S3     | EIF2 EIF2           | eukaryotprotein-coding  |                |
| chr1-1863.8.841295  | -0.56744 | 0.709741 | -0.7995  | 0.423999 | 0.619909 | chr1  | 1.86E+08 | 1.86E+08   | 0 NA | intron (Nintron (N  | 3282 NM_00329E   | 7175 Hs. 27964E               | ENSG000001TPR        | -                   | translocaprotein-coding |                |
| chr11-888.8.841295  | -0.56744 | 0.709741 | -0.7995  | 0.423999 | 0.619909 | chr11 | 88330805 | 88332716   | 0 NA | intron (NMER21A LI  | 5976 NM_001114   | 1075 Hs. 12806E               | ENSG000001CTSC       | CPP1 DPP            | cathepsirprotein-coding |                |
| chr2-1897.8.841295  | -0.56744 | 0.709741 | -0.7995  | 0.423999 | 0.619909 | chr2  | 1.89E+08 | 1.89E+08   | 0 NA | intron (Nintron (N  | 68142 NR_03607E  | NR_03607E                     | ENSG000001MIR3129    | mir-3129            | microRNA ncRNA          |                |
| chr5-957.8.841295   | -0.56744 | 0.709741 | -0.7995  | 0.423999 | 0.619909 | chr5  | 95736284 | 95739936   | 0 NA | intron (NLMIME3 LIN | -6008 NM_00134E  | 83890 Hs. 50499 NM_03195E     | ENSG000001SPATA9     | NYD-SP16            | spermatogprotein-coding |                |
| chr1-1012.8.826705  | -0.56525 | 0.709885 | -0.7963  | 0.425857 | 0.619909 | chr1  | 10129457 | 10133484   | 0 NA | intron (NAluSx SIN  | -79100 NM_00136E | 23095 Hs. 97858 NM_015074     | ENSG000001KIF1B      | CMT2 CMT            | kinesin fprotein-coding |                |
| chr1-1507.8.826705  | -0.56525 | 0.709885 | -0.7963  | 0.425857 | 0.619909 | chr1  | 1.51E+08 | 1.51E+08   | 0 NA | exon (NM exon (NM   | 3655 NM_00120E   | 1893 Hs. 81071 NM_00442E      | ENSG000001ECMI1      | URBWD               | extracellprotein-coding |                |
| chr1-125.8.826705   | -0.56525 | 0.709885 | -0.7963  | 0.425857 | 0.619909 | chr10 | 12209701 | 12212658   | 0 NA | intron (Nintron (N  | 14991 NM_06020E  | 8872 Hs. 41284E               | ENSG000001CDC123     | C10orf7 C           | cell diviprotein-coding |                |
| chr5-5526.8.826705  | -0.56525 | 0.709885 | -0.7963  | 0.425857 | 0.619909 | chr5  | 55262804 | 55275064   | 0 NA | intron (Nintron (N  | -35217 NR_12534E | 10309 Hs. 3041 NM_021147      | ENSG000001CCNO       | CCNU CILL           | cyclin O protein-coding |                |
| chr8-2898.8.826705  | -0.56525 | 0.709885 | -0.7963  | 0.425857 | 0.619909 | chr8  | 28999299 | 29000749   | 0 NA | intron (NLMIM4 LINE | 109025 NM_001324 | 79618 Hs. 56356E              | ENSG000001HMBOX1     | HNF1LA H            | homeobox protein-coding |                |
| chr15-729.8.774966  | -0.57071 | 0.716878 | -0.7961  | 0.425971 | 0.619909 | chr15 | 72781634 | 72782199   | 0 NA | promoter-promoter-  | -919 NR_040107   | ENSG000001ADPGK-AS1           | -                    | ADPGK antncRNA      |                         |                |
| chr2-2025.8.799731  | -0.5656  | 0.71094  | -0.79556 | 0.426286 | 0.619909 | chr2  | 2.03E+08 | 2.03E+08</ |      |                     |                  |                               |                      |                     |                         |                |



|                    |          |          |          |          |          |       |          |          |   |    |                     |                   |                   |                    |                      |           |                  |                  |
|--------------------|----------|----------|----------|----------|----------|-------|----------|----------|---|----|---------------------|-------------------|-------------------|--------------------|----------------------|-----------|------------------|------------------|
| chr2-1278.8.328456 | -0.58262 | 0.738045 | -0.78941 | 0.429873 | 0.619909 | chr2  | 1.28E+08 | 1.28E+08 | 0 | NA | intron (Nintron (N  | -8596 NM_00480E   | 5433 Hs. 71534E   | ENSG000001POLR2D   | HSRBP4 HSR           | RNA polyn | protein-coding   |                  |
| chr20-398.8.328456 | -0.58262 | 0.738045 | -0.78941 | 0.429873 | 0.619909 | chr20 | 3989272  | 3990004  | 0 | NA | intron (NMLTII LTF  | 25920 NM_001134   | 11237 Hs. 54757E  | ENSG000001RNF24    | GIL                  | ring fing | protein-coding   |                  |
| chr20-458.8.328456 | -0.58262 | 0.738045 | -0.78941 | 0.429873 | 0.619909 | chr20 | 45960585 | 45962594 | 0 | NA | intron (Nintron (N  | 10614 NM_02209E   | 63925 Hs. 17419E  | ENSG000001ZNF335   | MCPH10 N1            | zinc fing | protein-coding   |                  |
| chr20-498.8.328456 | -0.58262 | 0.738045 | -0.78941 | 0.429873 | 0.619909 | chr20 | 49651191 | 49656524 | 0 | NA | intron (Nintron (N  | 60019 NM_004477E  | 9334 Hs. 370487   | ENSG000001B4GLT5   | B4GL1 T5             | beta-1,4- | protein-coding   |                  |
| chr3-9458.8.328456 | -0.58262 | 0.738045 | -0.78941 | 0.429873 | 0.619909 | chr3  | 94529155 | 9459839  | 0 | NA | intron (NAluSx SIN  | 58675 NM_00108C   | 55209 Hs. 208816  | ENSG000001SETD5    | SET                  | domaipro  | tein-coding      |                  |
| chr3-1335.8.328456 | -0.58262 | 0.738045 | -0.78941 | 0.429873 | 0.619909 | chr3  | 1.34E+08 | 1.34E+08 | 0 | NA | intron (Nintron (N  | 8252 NM_00128E    | 55573 Hs. 51826E  | ENSG000001CDV3     | H41                  | CDV3 homc | protein-coding   |                  |
| chr4-3155.8.328456 | -0.58262 | 0.738045 | -0.78941 | 0.429873 | 0.619909 | chr4  | 3155770  | 3165253  | 0 | NA | intron (Nintron (N  | -83858 NM_00133C  | 345222 Hs. 442291 | ENSG000001MSANTD1  | C4orf44              | Ryb/SANT  | protein-coding   |                  |
| chr5-3468.8.328456 | -0.58262 | 0.738045 | -0.78941 | 0.429873 | 0.619909 | chr5  | 34687362 | 34695233 | 0 | NA | intron (Nintron (N  | 3738 NM_00114E    | 26064 Hs. 43140C  | ENSG000001RAI14    | NORPEG Rf            | retinoic  | protein-coding   |                  |
| chr5-8348.8.328456 | -0.58262 | 0.738045 | -0.78941 | 0.429873 | 0.619909 | chr5  | 83494040 | 83494243 | 0 | NA | intron (Nintron (N  | 22397 NM_00438E   | 1462 Hs. 643801   | ENSG000001VCAN     | CSPG2 ER             | versican  | protein-coding   |                  |
| chr5-1408.8.328456 | -0.58262 | 0.738045 | -0.78941 | 0.429873 | 0.619909 | chr5  | 1.41E+08 | 1.41E+08 | 0 | NA | intron (Nintron (N  | -3786 NM_14472E   | 153527 Hs. 350194 | ENSG000001ZMAT2    | Ptg-12 S             | zinc fing | protein-coding   |                  |
| chr6-3328.8.328456 | -0.58262 | 0.738045 | -0.78941 | 0.429873 | 0.619909 | chr6  | 33201539 | 33205253 | 0 | NA | intron (Nintron (N  | -1259 NM_014234   | 7923 Hs. 41505E   | ENSG000001HSD17B8  | D6S2245E             | hydroxyst | protein-coding   |                  |
| chr7-6694.8.328456 | -0.58262 | 0.738045 | -0.78941 | 0.429873 | 0.619909 | chr7  | 66947980 | 66951731 | 0 | NA | intron (Nintron (N  | 28630 NM_017994   | 55069 Hs. 48847E  | ENSG000001TMEM248  | C7orf42              | transmemt | protein-coding   |                  |
| chr7-9941.8.328456 | -0.58262 | 0.738045 | -0.78941 | 0.429873 | 0.619909 | chr7  | 99410468 | 99422367 | 0 | NA | TTS (NM_C           | 7245 NR_162133    | 1.13E+08          | NR_162133          | MIR12119             | -         | microRNA         | ncRNA            |
| chr8-1985.8.328456 | -0.58262 | 0.738045 | -0.78941 | 0.429873 | 0.619909 | chr8  | 19830309 | 19845999 | 0 | NA | intron (NAluSx SIN  | 20738 NM_01814E   | 55174 Hs. 512627  | ENSG000001INTS10   | C8orf35 I            | integratc | protein-coding   |                  |
| chr8-1028.8.328456 | -0.58262 | 0.738045 | -0.78941 | 0.429873 | 0.619909 | chr8  | 1.03E+08 | 1.03E+08 | 0 | NA | intron (Nintron (N  | 27265 NR_14902C   | 401472            | NR_149020          | GASAL1               | GASL1     | growth           | arncRNA          |
| chr9-3298.8.328456 | -0.58262 | 0.738045 | -0.78941 | 0.429873 | 0.619909 | chr9  | 32982815 | 32989915 | 0 | NA | intron (NAluSx SIN  | 15211 NM_00119E   | 54840 Hs. 20158   | ENSG000001APT      | AOA AOA1             | aprataxir | protein-coding   |                  |
| chr9-3504.8.328456 | -0.58262 | 0.738045 | -0.78941 | 0.429873 | 0.619909 | chr9  | 35043074 | 35069114 | 0 | NA | TTS (NM_C           | 13854 NM_20329E   | 138724 Hs. 14825C | ENSG000001C9orf131 | -                    | chromoson | protein-coding   |                  |
| chr9-1258.8.328456 | -0.58262 | 0.738045 | -0.78941 | 0.429873 | 0.619909 | chr9  | 1.25E+08 | 1.25E+08 | 0 | NA | intron (Nintron (N  | 93207 NM_001354   | 26130 Hs. 42376   | ENSG000001GAPVD1   | GAPEX5 G             | GTGase    | protein-coding   |                  |
| chr9-1314.8.328456 | -0.58262 | 0.738045 | -0.78941 | 0.429873 | 0.619909 | chr9  | 1.31E+08 | 1.31E+08 | 0 | NA | intron (Nintron (N  | -16899 NR_002914  | 26786             | NR_002914          | ENSG000001SNORD62A   | RNU62 U6  | small            | nucsnRNA         |
| chr9-1333.8.328456 | -0.58262 | 0.738045 | -0.78941 | 0.429873 | 0.619909 | chr9  | 1.33E+08 | 1.33E+08 | 0 | NA | TTS (NM_C           | 1103 NR_00001E    | 26813             | NR_00001E          | ENSG000001SNORD36C   | RNU36C U  | small            | nucsnRNA         |
| chr9-1364.8.328456 | -0.58262 | 0.738045 | -0.78941 | 0.429873 | 0.619909 | chr9  | 1.36E+08 | 1.36E+08 | 0 | NA | exon (NM            | 7902 NM_01516C    | 23203 Hs. 495471  | ENSG000001PMPCA    | Alpha-MP             | peptidase | protein-coding   |                  |
| chr2-3885.8.2891   | -0.58578 | 0.742654 | -0.78876 | 0.43025  | 0.619909 | chr2  | 38859962 | 38862239 | 0 | NA | exon (NM            | 14834 NM_00132E   | 90957 Hs. 46822E  | ENSG000001DHX57    | DDX57                | DEXH-box  | protein-coding   |                  |
| chr2-5812.8.2891   | -0.58578 | 0.742654 | -0.78876 | 0.43025  | 0.619909 | chr2  | 58123590 | 58123834 | 0 | NA | intron (NAluJb SIN  | 77000 NM_00113C   | 7444 Hs. 71529E   | ENSG000001VRK2     | -                    | VRK serir | protein-coding   |                  |
| chr10-458.8.301483 | -0.58301 | 0.739381 | -0.78851 | 0.430396 | 0.619909 | chr10 | 45825512 | 45827468 | 0 | NA | exon (NM            | -9166 NM_001351   | 643479 Hs. 52290C | ENSG000001P13E234  | FAM25E               | FAM25D    | family           | wiprotein-coding |
| chr11-354.8.301483 | -0.58301 | 0.739381 | -0.78851 | 0.430396 | 0.619909 | chr11 | 35447502 | 35449885 | 0 | NA | intron (NLIPIA10 LI | -28635 NM_00125E  | 6506 Hs. 50233E   | ENSG000001SLCIA2   | EAAT2 E1E            | solute    | carrier          | protein-coding   |
| chr19-258.8.301483 | -0.58301 | 0.739381 | -0.78851 | 0.430396 | 0.619909 | chr19 | 25275012 | 25275862 | 0 | NA | Intergeni           | -111990 NR_00360E | 1E+08             | NR_00360E          | ENSG000001HACLIP1    | -         | hepatitis        | pseudo           |
| chr19-482.8.301483 | -0.58301 | 0.739381 | -0.78851 | 0.430396 | 0.619909 | chr19 | 4841835  | 48418440 | 0 | NA | intron (Nintron (N  | 2541 NR_07302E    | 6141 Hs. 515517   | ENSG000001RPLV1    | DBA18 L1             | ribosomal | protein-coding   |                  |
| chr19-538.8.301483 | -0.58301 | 0.739381 | -0.78851 | 0.430396 | 0.619909 | chr19 | 53568650 | 53579582 | 0 | NA | intron (NAluSx SIN  | 18809 NM_00107E   | 55422 Hs. 185674  | ENSG000001ZNF331   | RITA ZNF             | zinc fing | protein-coding   |                  |
| chr5-1507.8.301483 | -0.58301 | 0.739381 | -0.78851 | 0.430396 | 0.619909 | chr5  | 1.51E+08 | 1.51E+08 | 0 | NA | intron (NAluJb SIN  | -17998 NM_018047  | 55696 Hs. 713564  | ENSG000001RBM22    | Cwc2 ZC3             | RNA bindi | protein-coding   |                  |
| chr6-5358.8.301483 | -0.58301 | 0.739381 | -0.78851 | 0.430396 | 0.619909 | chr6  | 53502795 | 53511557 | 0 | NA | intron (NAluJb SIN  | 37925 NM_001197   | 2729 Hs. 65446E   | ENSG000001GCLC     | GCL GC3              | glutamate | protein-coding   |                  |
| chr18-701.8.839087 | -0.56265 | 0.714243 | -0.78775 | 0.430843 | 0.619909 | chr18 | 70102876 | 70103177 | 0 | NA | intron (NSVA_A Ret  | 102661 NM_17363C  | 25914 Hs. 65480E  | ENSG000001RRTN     | MSSP                 | rotatin   | protein-coding   |                  |
| chr1-4628.8.313866 | -0.58026 | 0.739423 | -0.78475 | 0.432602 | 0.619909 | chr1  | 46284904 | 46286234 | 0 | NA | exon (NM            | 17797 NR_00636E   | 10489 Hs. 144941  | ENSG000001LRC41    | MUF1 PP7             | leucine   | protein-coding   |                  |
| chr1-1108.8.313866 | -0.58026 | 0.739423 | -0.78475 | 0.432602 | 0.619909 | chr1  | 1.1E+08  | 1.1E+08  | 0 | NA | intron (NAluSx SIN  | -5470 NR_102697   | 1.01E+08          | NR_102697          | LAMTOR5-A-           | LAMTOR5   | ancRNA           |                  |
| chr1-1471.8.313866 | -0.58026 | 0.739423 | -0.78475 | 0.432602 | 0.619909 | chr1  | 1.47E+08 | 1.47E+08 | 0 | NA | intron (Nintron (N  | 12213 NR_10387C   | 5565 Hs. 50732    | ENSG000001PRKAB2   | -                    | protein   | kprotein-coding  |                  |
| chr1-1698.8.313866 | -0.58026 | 0.739423 | -0.78475 | 0.432602 | 0.619909 | chr1  | 1.7E+08  | 1.7E+08  | 0 | NA | TTS (NM_C           | 40470 NM_002042E  | 57147 Hs. 43556E  | ENSG000001SCYL3    | PACE-1 P             | PCy1      | like             | protein-coding   |
| chr10-108.8.313866 | -0.58026 | 0.739423 | -0.78475 | 0.432602 | 0.619909 | chr10 | 1E+08    | 1E+08    | 0 | NA | intron (Nintron (N  | -5605 NM_001347   | 10613 Hs. 150087  | ENSG000001ERLIN1   | C10orf69             | ER lipid  | protein-coding   |                  |
| chr11-477.8.313866 | -0.58026 | 0.739423 | -0.78475 | 0.432602 | 0.619909 | chr11 | 47716586 | 47733995 | 0 | NA | intron (Nintron (N  | -9921 NM_02478E   | 79841 Hs. 147377  | ENSG000001AGBL2    | CCP2                 | ATP/GTP   | protein-coding   |                  |
| chr12-534.8.313866 | -0.58026 | 0.739423 | -0.78475 | 0.432602 | 0.619909 | chr12 | 53479220 | 53480817 | 0 | NA | 3' UTR (N3' UTR (N  | 15550 NR_109828E  | 1.02E+08          | NR_109828E         | ENSG000001PCBP2-OT1  | UC3A T    | PCBP2            | ovncRNA          |
| chr12-108.8.313866 | -0.58026 | 0.739423 | -0.78475 | 0.432602 | 0.619909 | chr12 | 1E+08    | 1E+08    | 0 | NA | intron (NAluJb SIN  | 7178 NR_04856E    | 64431 Hs. 11508E  | ENSG000001ACTR6    | ARP6 C3A             | actin     | protein-coding   |                  |
| chr12-111.8.313866 | -0.58026 | 0.739423 | -0.78475 | 0.432602 | 0.619909 | chr12 | 1.1E+08  | 1.1E+08  | 0 | NA | intron (Nintron (N  | 45435 NM_17066E   | 488 Hs. 50675E    | ENSG000001ATP2A2   | ATP2B DAF            | ATPase    | protein-coding   |                  |
| chr14-684.8.313866 | -0.58026 | 0.739423 | -0.78475 | 0.432602 | 0.619909 | chr14 | 68915112 | 68922055 | 0 | NA | intron (NAluJ SINE  | 60719 NM_00110E   | 87 Hs. 23575E     | ENSG000001ACTN1    | BDLP15               | actinin   | protein-coding   |                  |
| chr15-488.8.313866 | -0.58026 | 0.739423 | -0.78475 | 0.432602 | 0.619909 | chr15 | 48462027 | 48466318 | 0 | NA | intron (Nintron (N  | 131975 NM_001194E | 1854 Hs. 52798C   | ENSG000001DUPT     | DUPTase              | deoxyuric | protein-coding   |                  |
| chr15-641.8.313866 | -0.58026 | 0.739423 | -0.78475 | 0.432602 | 0.619909 | chr15 | 64112108 | 64133792 | 0 | NA | intron (Nintron (N  | 26968 NM_00309E   | 6642 Hs. 188634   | ENSG000001SNX1     | Hs1T7379             | sorting   | protein-coding   |                  |
| chr16-281.8.313866 | -0.58026 | 0.739423 | -0.78475 | 0.432602 | 0.619909 | chr16 | 28146463 | 28153746 | 0 | NA | intron (Nintron (N  | 61861 NM_00127C   | 23214 Hs. 46046E  | ENSG000001XPO6     | EXP6 RAN             | exportin  | protein-coding   |                  |
| chr16-717.8.313866 | -0.58026 | 0.739423 | -0.78475 | 0.432602 | 0.619909 | chr16 | 71753270 | 71759751 | 0 | NA | intron (Nintron (N  | 1977 NR_00305E    | 69211 Hs. 46046E  | ENSG000001SNORD71  | HB11-239             | small     | nucsnRNA         |                  |
| chr17-365.8.313866 | -0.58026 | 0.739423 | -0.78475 | 0.432602 | 0.619909 | chr17 | 36579181 | 36590279 | 0 | NA | intron (NAluJr SIN  | -7149 NM_002430E  | 79154 Hs. 46285E  | ENSG000001DHR511   | ARPG836              | dehydroge | protein-coding   |                  |
| chr17-428.8.313866 | -0.58026 | 0.739423 | -0.78475 | 0.432602 | 0.619909 | chr17 | 42816303 | 42822117 | 0 | NA | intron (Nintron (N  | 4669 NM_00131E    | 8678 Hs. 716464   | ENSG000001BECN1    | ATG6 VPS             | beclin 1  | protein-coding   |                  |
| chr17-768.8.313866 | -0.58026 | 0.739423 | -0.78475 | 0.432602 | 0.619909 | chr17 | 76037657 | 76069986 | 0 | NA | promoter-promoter-  | -165 NM_00126E    | 6730 Hs. 51449E   | ENSG000001SRP68    | -                    | signal    | reprotein-coding |                  |
| chr19-438.8.313866 | -0.58026 | 0.739423 | -0.78475 | 0.432602 | 0.619909 | chr19 | 43888275 | 43997995 | 0 | NA | intron (Nintron (N  | 8847 NR_139808E   | 7711 Hs. 27956E   | ENSG000001ZNF155   | pHZ-96               | zinc      | protein-coding   |                  |
| chr2-2738.8.313866 | -0.58026 | 0.739423 | -0.78475 | 0.432602 | 0.619909 | chr2  | 27339065 | 27343231 | 0 | NA | intron (NAluSx SIN  | 5606 NR_038427    | 1.01E+08          | NR_038427          | ENSG000001GTF3C2-AS- | -         | GTF3C2           | arncRNA          |

|           |          |          |          |          |          |          |       |          |          |   |    |                                       |                  |              |          |                                  |                                       |
|-----------|----------|----------|----------|----------|----------|----------|-------|----------|----------|---|----|---------------------------------------|------------------|--------------|----------|----------------------------------|---------------------------------------|
| chr6-131e | 9.07172  | -0.48341 | 0.696287 | -0.69427 | 0.487511 | 0.640316 | chr6  | 1.32E+08 | 1.32E+08 | 0 | NA | exon (NM_exon (NM_25908 NM_00127C     | 9439 Hs. 29679   | NM_00483C    | ENS00000 | CMD23                            | ARC130 CFmediator protein-coding      |
| chr1-171f | 9.030157 | -0.48154 | 0.694257 | -0.6936  | 0.487934 | 0.640316 | chr1  | 1.72E+08 | 1.72E+08 | 0 | NA | intron (N Tigger3b  -36054 NM_001366  | 1.11E+08         | NM_001368164 | MYOCOS   | - myocilin protein-coding        |                                       |
| chr1-2237 | 9.030157 | -0.48154 | 0.694257 | -0.6936  | 0.487934 | 0.640316 | chr1  | 2.24E+08 | 2.24E+08 | 0 | NA | intron (N intron (N_61574 NM_00174E   | 824 Hs. 35089    | NM_00174E    | ENS00000 | CAPN2                            | CANP2 CAN calpain 2 protein-coding    |
| chr13-145 | 9.030157 | -0.48154 | 0.694257 | -0.6936  | 0.487934 | 0.640316 | chr13 | 45335224 | 45340489 | 0 | NA | promoter-promoter- 247 NR_002967      | 677814 Hs. 37459 | NR_002967    | ENS00000 | SNORA31                          | ACT31 SNC small nucsnoRNA             |
| chr19-197 | 9.030157 | -0.48154 | 0.694257 | -0.6936  | 0.487934 | 0.640316 | chr19 | 19709566 | 19723480 | 0 | NA | intron (N AluSz6 SI 16591 NR_002103C  | 7561 Hs. 65993   | NM_002103C   | ENS00000 | ZNF14                            | GIOA3-4 KC zinc finger protein-coding |
| chr3-869f | 9.030157 | -0.48154 | 0.694257 | -0.6936  | 0.487934 | 0.640316 | chr3  | 86967274 | 86969443 | 0 | NA | intron (N intron (N_22791 NM_00132C   | 389136 Hs. 60650 | NM_00132C    | ENS00000 | VGLL3                            | VGL-3 VGL vestigial protein-coding    |
| chr4-102f | 9.030157 | -0.48154 | 0.694257 | -0.6936  | 0.487934 | 0.640316 | chr4  | 1.03E+08 | 1.03E+08 | 0 | NA | intron (N intron (N_126316 NM_00590E  | 4126 Hs. 48041   | NM_00590E    | ENS00000 | MANBA                            | MANB1 mannosidase protein-coding      |
| chr1-168f | 9.05713  | -0.48127 | 0.694083 | -0.69339 | 0.488062 | 0.640316 | chr1  | 1.68E+08 | 1.68E+08 | 0 | NA | intron (N intron (N_1128 NR_03170Z    | 1E+08            | NR_03170Z    | ENS00000 | MIR1255B                         | MIR1255B-microRNA ncRNA               |
| chr15-32f | 9.05713  | -0.48127 | 0.694083 | -0.69339 | 0.488062 | 0.640316 | chr15 | 32846805 | 32848439 | 0 | NA | intron (N AluY SINE -128757 NR_109767 | 1E+08 Hs. 61054  | NR_109767    | ENS00000 | LOC100131-                       | uncharactericncRNA                    |
| chr15-92f | 9.05713  | -0.48127 | 0.694083 | -0.69339 | 0.488062 | 0.640316 | chr15 | 92923258 | 92929872 | 0 | NA | intron (N intron (N_22301 NR_00313E   | 1E+08            | NM_00313E    | ENS00000 | MIR3175                          | mir-3175 microRNA ncRNA               |
| chr16-554 | 9.05713  | -0.48127 | 0.694083 | -0.69339 | 0.488062 | 0.640316 | chr16 | 55487716 | 55494764 | 0 | NA | intron (N MLT1C LTF 9683 NR_001127    | 4313 Hs. 51361   | NM_00453C    | ENS00000 | CMP2                             | CLG4 CLG4 matrix mcp protein-coding   |
| chr5-132f | 9.05713  | -0.48127 | 0.694083 | -0.69339 | 0.488062 | 0.640316 | chr5  | 1.33E+08 | 1.33E+08 | 0 | NA | exon (NM_exon (NM_22723 NM_052971     | 116842 Hs. 33758 | NM_052971    | ENS00000 | LEAP2                            | LEAP-2 liver enr protein-coding       |
| chr8-390f | 9.05713  | -0.48127 | 0.694083 | -0.69339 | 0.488062 | 0.640316 | chr8  | 39053619 | 39057051 | 0 | NA | intron (N LIME4a LI -36650 NR_14598E  | 1.1E+08          | NR_14573E    | ENS00000 | SNORD38D                         | - small nucsnoRNA                     |
| chr2-2317 | 9.076136 | -0.49292 | 0.71107  | -0.69321 | 0.488178 | 0.640316 | chr2  | 2.32E+08 | 2.32E+08 | 0 | NA | promoter-promoter- -366 NR_12871C     | 1.04E+08         | NR_12871C    | ENS00000 | MIR1244-                         | hsa-mir-1244 microRNA ncRNA           |
| chr1-246f | 9.04254  | -0.47914 | 0.694219 | -0.69019 | 0.490074 | 0.640316 | chr1  | 24660520 | 24679183 | 0 | NA | intron (N intron (N_26272 NM_00136E   | 10250 Hs. 18192  | NM_00583E    | ENS00000 | SRRM1                            | 160-KD PC serine ar protein-coding    |
| chr1-1147 | 9.04254  | -0.47914 | 0.694219 | -0.69019 | 0.490074 | 0.640316 | chr1  | 1.15E+08 | 1.15E+08 | 0 | NA | intron (N AluJb SIN -4848 NM_002524   | 4893 Hs. 48650   | NM_002524    | ENS00000 | NRAS                             | ALP54 CML NRAS prot protein-coding    |
| chr10-46f | 9.04254  | -0.47914 | 0.694219 | -0.69019 | 0.490074 | 0.640316 | chr10 | 46006776 | 46018171 | 0 | NA | intron (N intron (N_7064 NM_00114E    | 8031 Hs. 64365   | NM_00543E    | ENS00000 | CNCOA4                           | AR470 ELF nuclear r protein-coding    |
| chr10-97f | 9.04254  | -0.47914 | 0.694219 | -0.69019 | 0.490074 | 0.640316 | chr10 | 97650665 | 97659200 | 0 | NA | intron (N HALIME LI 14246 NM_01842E   | 55361 Hs. 25300  | NM_01842E    | ENS00000 | PI4KA2                           | PI4K11 PI phosphatid protein-coding   |
| chr14-102 | 9.04254  | -0.47914 | 0.694219 | -0.69019 | 0.490074 | 0.640316 | chr14 | 1.02E+08 | 1.02E+08 | 0 | NA | 3' UTR (N3' UTR (N_5926 NM_00534E     | 3320 Hs. 52560   | NM_00534E    | ENS00000 | HSP90AA1                         | EL52 HEL-heat shoc protein-coding     |
| chr15-78f | 9.04254  | -0.47914 | 0.694219 | -0.69019 | 0.490074 | 0.640316 | chr15 | 78878188 | 78904897 | 0 | NA | exon (NM_exon (NM_18553 NM_00126E     | 10933 Hs. 37450  | NM_006791    | ENS00000 | MORF4L1                          | Eaf3 FWPC mortality protein-coding    |
| chr16-214 | 9.04254  | -0.47914 | 0.694219 | -0.69019 | 0.490074 | 0.640316 | chr16 | 21465146 | 21473280 | 0 | NA | intron (N intron (N_-32313 NR_02746C  | 1E+08 Hs. 70957  | NR_02746C    | RRN3P3   | - RRN3 homcpseudo                |                                       |
| chr16-754 | 9.04254  | -0.47914 | 0.694219 | -0.69019 | 0.490074 | 0.640316 | chr16 | 75410330 | 75412592 | 0 | NA | intron (N intron (N_22042 NM_006324   | 10428 Hs. 46136  | NM_006324    | ENS00000 | CFDP1                            | BCNT BUCE craniofac protein-coding    |
| chr17-424 | 9.04254  | -0.47914 | 0.694219 | -0.69019 | 0.490074 | 0.640316 | chr17 | 42474006 | 42482958 | 0 | NA | exon (NM_exon (NM_-16291 NR_04984E    | 1.01E+08         | NR_04984E    | ENS00000 | MIR548AT                         | - microRNA ncRNA                      |
| chr17-58f | 9.04254  | -0.47914 | 0.694219 | -0.69019 | 0.490074 | 0.640316 | chr17 | 58002913 | 58006431 | 0 | NA | 3' UTR (N3' UTR (N_6426 Hs. 68714     | NM_006924        | ENS00000     | SRSF1    | ASF SF2 serine ar protein-coding |                                       |
| chr18-34f | 9.04254  | -0.47914 | 0.694219 | -0.69019 | 0.490074 | 0.640316 | chr18 | 3456201  | 3461055  | 0 | NA | TTS (NM_C TTS (NM_C_4854 NM_173211    | 7050 Hs. 37355   | NM_003244    | ENS00000 | TGIF1                            | HPF4 TGIF1 induc protein-coding       |
| chr19-47f | 9.04254  | -0.47914 | 0.694219 | -0.69019 | 0.490074 | 0.640316 | chr19 | 47352500 | 47364698 | 0 | NA | intron (N AluJo SIN 9284 NM_014681    | 9704 Hs. 15170   | NM_014681    | ENS00000 | DHX34                            | DDX34 HRF DEXH-box protein-coding     |
| chr2-227f | 9.04254  | -0.47914 | 0.694219 | -0.69019 | 0.490074 | 0.640316 | chr2  | 2.28E+08 | 2.28E+08 | 0 | NA | 66981 NM_004504                       | 3267 Hs. 35296   | NM_004504    | ENS00000 | AGFG1                            | HRB HRB FArGAP wiprotein-coding       |
| chr2-29f  | 9.04254  | -0.47914 | 0.694219 | -0.69019 | 0.490074 | 0.640316 | chr2  | 29547043 | 29549456 | 0 | NA | intron (N intron (N_5406 NM_00100Z    | 8563 Hs. 75361   | NM_00367E    | ENS00000 | THOC5                            | C22orf19 THO compl protein-coding     |
| chr5-388f | 9.04254  | -0.47914 | 0.694219 | -0.69019 | 0.490074 | 0.640316 | chr5  | 38874010 | 38889503 | 0 | NA | exon (NM_exon (NM_35744 NM_00132E     | 9180 Hs. 12065   | NM_00399E    | ENS00000 | OSMR                             | IL-31R-beoncostatiprotein-coding      |
| chr5-149f | 9.04254  | -0.47914 | 0.694219 | -0.69019 | 0.490074 | 0.640316 | chr5  | 1.5E+08  | 1.5E+08  | 0 | NA | intron (N intron (N_41619 NM_001271   | 1452 Hs. 52986   | NM_00189Z    | ENS00000 | CNSK1A1                          | CK1 CK1a casein iprotein-coding       |
| chr7-755f | 9.04254  | -0.47914 | 0.694219 | -0.69019 | 0.490074 | 0.640316 | chr7  | 75510070 | 75526205 | 0 | NA | intron (N ATn Sin 9986 NR_02805E      | 5387 Hs. 65987   | NM_00539E    | ENS00000 | PMS2P3                           | PMS2L3 PMS1 homcpseudo                |
| chr9-124f | 9.04254  | -0.47914 | 0.694219 | -0.69019 | 0.490074 | 0.640316 | chr9  | 1.24E+08 | 1.24E+08 | 0 | NA | intron (N intron (N_1771 NM_00279E    | 5695 Hs. 21347   | NM_00279E    | ENS00000 | PSMB7                            | Z proteasom protein-coding            |
| chr6-151f | 9.015566 | -0.47939 | 0.696734 | -0.68806 | 0.491416 | 0.640316 | chr6  | 1.5E+08  | 1.5E+08  | 0 | NA | intron (N AluSz SIN 8824 NM_00135C    | 25902 Hs. 59134  | NM_01544C    | ENS00000 | MTF5DL                           | FTF ZFSDCI1 methyleneprotein-coding   |
| chr10-29f | 9.069513 | -0.47886 | 0.696686 | -0.68734 | 0.491867 | 0.640316 | chr10 | 29654479 | 29658065 | 0 | NA | intron (N intron (N_-21301 NM_02173E  | 6840 Hs. 49920   | NM_003174    | ENS00000 | CSVL                             | - supervill protein-coding            |
| chr2-390f | 9.069513 | -0.47886 | 0.696686 | -0.68734 | 0.491867 | 0.640316 | chr2  | 39022335 | 39023249 | 0 | NA | exon (NM_exon (NM_-62448 NR_02838E    | 375196 Hs. 65903 | NR_02838E    | ENS00000 | LOC37519E                        | uncharactericncRNA                    |
| chr1-400f | 9.027949 | -0.47699 | 0.696698 | -0.68464 | 0.493572 | 0.640316 | chr1  | 40059313 | 40076435 | 0 | NA | intron (N intron (N_27023 NM_00135C   | 10487 Hs. 37058  | NM_006367    | ENS00000 | CAP1                             | CAP CAP1-cyclase ar protein-coding    |
| chr13-331 | 9.027949 | -0.47699 | 0.696698 | -0.68464 | 0.493572 | 0.640316 | chr13 | 33128915 | 33130233 | 0 | NA | exon (NM_exon (NM_56517 NM_178007     | 90627 Hs. 15655  | NM_052851    | ENS00000 | STARD13                          | ARHGAP37 STAR relaprotein-coding      |
| chr6-434  | 9.027949 | -0.47699 | 0.696698 | -0.68464 | 0.493572 | 0.640316 | chr6  | 43440043 | 43440748 | 0 | NA | intron (N L2a LINE 5853 NR_106894     | 1.02E+08         | NR_106894    | ENS00000 | MIR6780B                         | hsa-mir-6780 microRNA ncRNA           |
| chr2-1521 | 9.484634 | -0.46474 | 0.681761 | -0.68167 | 0.495448 | 0.640316 | chr2  | 1.52E+08 | 1.52E+08 | 0 | NA | intron (N AluSc SIN 31022 NM_00584Z   | 10254 Hs. 17200  | NM_00584Z    | ENS00000 | STAM2                            | Hbp STAM2 signal tr protein-coding    |
| chr1-235f | 9.531908 | -0.49347 | 0.724678 | -0.68095 | 0.495903 | 0.640316 | chr1  | 2.35E+08 | 2.35E+08 | 0 | NA | intron (N LIPA3 LIN 19665 NM_001287   | 6905 Hs. 74499   | NM_00319E    | ENS00000 | TBCE                             | HRD KCS1 tubulin f protein-coding     |
| chr19-384 | 9.988593 | -0.47963 | 0.704415 | -0.68089 | 0.495941 | 0.640316 | chr19 | 38405334 | 38405535 | 0 | NA | intron (N intron (N_2299 NM_17490E    | 147965 Hs. 35516 | NM_17490E    | ENS00000 | FAM98C                           | - family wiprotein-coding             |
| chr16-554 | 9.558881 | -0.49317 | 0.72444  | -0.68076 | 0.496021 | 0.640316 | chr16 | 55495634 | 55499087 | 0 | NA | intron (N MER113 DN -11712 NM_01783E  | 54947 Hs. 46085  | NM_01783E    | ENS00000 | LPAT2                            | AGPAT11 lysophosph protein-coding     |
| chr17-31f | 9.558881 | -0.49317 | 0.72444  | -0.68076 | 0.496021 | 0.640316 | chr17 | 31973645 | 31974619 | 0 | NA | intron (N AluJb SIN -33251 NM_001321  | 114659 Hs. 51407 | NM_05288E    | ENS00000 | LRRC37B                          | LRRC37 leucine r protein-coding       |
| chr19-13f | 9.558881 | -0.49317 | 0.72444  | -0.68076 | 0.496021 | 0.640316 | chr19 | 1362361  | 1363775  | 0 | NA | intron (N LIMD2 LIN 5649 NM_00136E    | 84939 Hs. 51501  | NM_03222C    | ENS00000 | PWP3A                            | EXPAND1 PWPW domaprotein-coding       |
| chr3-584f | 9.558881 | -0.49317 | 0.72444  | -0.68076 | 0.496021 | 0.640316 | chr3  | 58424799 | 58431966 | 0 | NA | intron (N intron (N_5450 NM_00092E    | 5162 Hs. 16135   | NM_00092E    | ENS00000 | PDHB                             | PDH pyruvate protein-coding           |
| chr4-107f | 9.558881 | -0.49317 | 0.72444  | -0.68076 | 0.496021 | 0.640316 | chr4  | 1.08E+08 | 1.08E+08 | 0 | NA | intron (N MSTD LTR  19527 NM_00544Z   | 9061 Hs. 36861   | NM_00544Z    | ENS00000 | PAPSS1                           | ATPSK1 P3'3'-phosp protein-coding     |
| chr1-1634 | 9.544291 | -0.49087 | 0.723204 | -0.67874 | 0.497304 | 0.640316 | chr1  | 1634422  | 1657869  | 0 | NA | intron (N LIM4a2 LI 12859 NM_03349C   | 984 Hs. 65122    | NM_001787    | ENS00000 | CDK11B                           | CDC2L1 Cyclin deprotein-coding        |
| chr1-320f | 9.544291 | -0.49087 | 0.723204 | -0.67874 | 0.497304 | 0.640316 | chr1  | 32037402 | 32060922 | 0 | NA | intron (N intron (N_-25219 NM_00131E  | 55116 Hs. 25544  | NM_01805E    | ENS00000 | TMEM39B                          | - transmem protein-coding             |
| chr1-6704 | 9.544291 | -0.49087 | 0.723204 | -0.67874 | 0.497304 | 0.640316 | chr1  | 67046087 | 67051405 | 0 | NA | intron (N intron (N_5402 NM_01513E    | 23169 Hs. 21364  | NM_01513E    | ENS00000 | SLC35D1                          | SHNKND UC solute caprotein-coding     |
| chr1-146f | 9.544291 | -0.49087 | 0.723204 | -0.67874 | 0.497304 | 0.640316 | chr1  | 1.47E+08 | 1.47E+08 | 0 | NA | intron (N LTR5_Hs I 10579 NM_00127E   | 149013 Hs. 66698 | NM_00127E    | ENS00000 | NBPF12                           | COAS1 KI1 NBPF memt protein-coding    |
| chr1-149f | 9.544291 | -0.49087 | 0.723204 | -0.67874 | 0.497304 | 0.640316 | chr1  | 1.5E+08  | 1.5E+08  | 0 | NA | intron (N AluSx SIN -33564 NM_00114E  | 10903 Hs. 42514  | NM_006697    | ENS00000 | MTMR11                           | CRA myotubulaprotein-coding           |
| chr1-151f | 9.544291 | -0.49087 | 0.723204 | -0.67874 | 0.497304 | 0.640316 | chr1  | 1.51E+08 | 1.51E+08 | 0 | NA | intron (N intron (N_7837 NM_00119E    | 5298 Hs. 63246   | NM_002651    | ENS00000 | PI4KB                            | NPK1 PI4b phosphatid protein-coding   |
| chr1-153f | 9.544291 | -0.49087 | 0.723204 | -0.67874 | 0.497304 | 0.640316 | chr1  | 1.54E+08 | 1.54E+08 | 0 | NA | intron (N MRB SINE -4299 NM_01485E    | 9909 Hs. 74487   | NM_01485E    | ENS00000 | DENN4B                           | KIAA0476 DENN domaprotein-coding      |
| chr1-171f | 9.544291 | -0.49087 | 0.723204 |          |          |          |       |          |          |   |    |                                       |                  |              |          |                                  |                                       |



|                    |          |          |          |          |          |       |          |          |   |    |                     |        |         |                    |           |           |                |                           |                          |
|--------------------|----------|----------|----------|----------|----------|-------|----------|----------|---|----|---------------------|--------|---------|--------------------|-----------|-----------|----------------|---------------------------|--------------------------|
| chr12-577.8.556674 | -0.48826 | 0.724714 | -0.67373 | 0.500485 | 0.640316 | chr12 | 57794894 | 57797248 | 0 | NA | intron (Nintron (N  | 13284  | 10102   | Hs.632704NM_00572c | ENS00000  | TSFM      | EFTS EFTS      | translprotein-coding      |                          |
| chr14-504.8.556674 | -0.48826 | 0.724714 | -0.67373 | 0.500485 | 0.640316 | chr14 | 50443148 | 50447021 | 0 | NA | exon (NM exon (NM   | -47786 | 8814    | Hs.280881NM_00419c | ENS00000  | CDKL1     | KKIALRE F      | cyclin deprotein-coding   |                          |
| chr15-658.8.556674 | -0.48826 | 0.724714 | -0.67373 | 0.500485 | 0.640316 | chr15 | 65876579 | 65883873 | 0 | NA | intron (Nintron (N  | 10735  | 8766    | Hs.321541NM_00466c | ENS00000  | CAB11A    | YL8            | RAB11A, nprotein-coding   |                          |
| chr2-652.8.556674  | -0.48826 | 0.724714 | -0.67373 | 0.500485 | 0.640316 | chr2  | 65259132 | 65259344 | 0 | NA | intron (NAluJo SIN  | 31543  | 10097   | Hs.643727NM_00572c | ENS00000  | ACTR2     | ARP2           | actin relprotein-coding   |                          |
| chr2-1751.8.556674 | -0.48826 | 0.724714 | -0.67373 | 0.500485 | 0.640316 | chr2  | 1.75E+08 | 1.75E+08 | 0 | NA | 3' UTR (N3' UTR (N  | 3534   | 518     | Hs.429             | NR_00168c | ENS00000  | ATP5MC3        | ATP5G3 PE                 | ATP synthprotein-coding  |
| chr4-5702.8.556674 | -0.48826 | 0.724714 | -0.67373 | 0.500485 | 0.640316 | chr4  | 57021284 | 57023016 | 0 | NA | intron (Nintron (N  | 43254  | 5431    | Hs.602757NM_00093c | ENS00000  | POLR2B    | POL2RB RF      | RNA polynprotein-coding   |                          |
| chr5-959.8.556674  | -0.48826 | 0.724714 | -0.67373 | 0.500485 | 0.640316 | chr5  | 95902973 | 95916319 | 0 | NA | intron (Nintron (N  | 52205  | 22936   | Hs.192221NM_01208c | ENS00000  | ELL2      | MRCRAT1        | elongaticprotein-coding   |                          |
| chr7-1305.8.048225 | -0.50956 | 0.759126 | -0.67125 | 0.502064 | 0.640316 | chr7  | 1.31E+08 | 1.31E+08 | 0 | NA | intron (NLCz LINE   | 10626  | 378805  | Hs.15055c          | ENS00000  | LINC-PINT | LINCRNA-F      | long intencRNA            |                          |
| chr4-999.8.060633  | -0.50667 | 0.755779 | -0.6704  | 0.502604 | 0.640316 | chr4  | 99905941 | 99906682 | 0 | NA | intron (NLS LINE C  | -11765 | 8649    | Hs.43333c          | ENS00000  | LAMTOR3   | MAP2K1 P1      | late endcprotein-coding   |                          |
| chr12-327.8.046042 | -0.50416 | 0.752819 | -0.66969 | 0.503053 | 0.640316 | chr12 | 32739908 | 32740259 | 0 | NA | exon (NM exon (NM   | 15814  | 51067   | Hs.505231NM_01593c | ENS00000  | YARS2     | CGI-04 ML      | tyrosyl-tprotein-coding   |                          |
| chr12-102.8.046042 | -0.50416 | 0.752819 | -0.66969 | 0.503053 | 0.640316 | chr12 | 1.02E+08 | 1.02E+08 | 0 | NA | intron (N(SVA_A Ret | -27384 | 51019   | Hs.405692NM_01605c | ENS00000  | WASHC3    | CCG53 CC       | WASH compprotein-coding   |                          |
| chr17-638.8.046042 | -0.50416 | 0.752819 | -0.66969 | 0.503053 | 0.640316 | chr17 | 63829392 | 63837943 | 0 | NA | exon (NM exon (NM   | 5061   | 6603    | Hs.250581NM_00307c | ENS00000  | SMARCD2   | BAF60B CF      | SWI/SNF rprotein-coding   |                          |
| chr20-195.8.046042 | -0.50416 | 0.752819 | -0.66969 | 0.503053 | 0.640316 | chr20 | 19965514 | 19967700 | 0 | NA | intron (NAluSq2 SI  | -50683 | 51126   | Hs.39878c          | ENS00000  | NAA20     | NAT3 NAT       | (alpha)-protein-coding    |                          |
| chr8-1407.8.046042 | -0.50416 | 0.752819 | -0.66969 | 0.503053 | 0.640316 | chr8  | 1.41E+08 | 1.41E+08 | 0 | NA | intron (NAluS26 SI  | 5271   | 5747    | Hs.35657c          | ENS00000  | PTK2      | FADK FAK       | protein tprotein-coding   |                          |
| chr16-160.8.502727 | -0.48883 | 0.730153 | -0.66949 | 0.503182 | 0.640316 | chr16 | 16030281 | 16030930 | 0 | NA | intron (NLMC5 LIN   | 80989  | 4363    | Hs.391464NM_00499c | ENS00000  | ABCC1     | ABC29 ABC      | ATP bindiprotein-coding   |                          |
| chr12-115.8.542083 | -0.48593 | 0.726107 | -0.66923 | 0.503348 | 0.640316 | chr12 | 1.16E+08 | 1.16E+08 | 0 | NA | 3' UTR (N3' UTR (N  | 187501 | 693205  | NR_030351          | ENS00000  | MIR620    | MIRN620        | microRNA ncRNA            |                          |
| chr18-101.8.542083 | -0.48593 | 0.726107 | -0.66923 | 0.503348 | 0.640316 | chr18 | 10538802 | 10542419 | 0 | NA | intron (Nintron (N  | 14583  | 8774    | Hs.464622NM_00382c | ENS00000  | CNAPG     | GAMMASNAF      | NSF attacprotein-coding   |                          |
| chr2-727.8.542083  | -0.48593 | 0.726107 | -0.66923 | 0.503348 | 0.640316 | chr2  | 72763211 | 72764126 | 0 | NA | intron (NAluSz SIN  | 62365  | 23233   | Hs.303454NM_01518c | ENS00000  | EXOC6B    | SEC15B SE      | exocyst protein-coding    |                          |
| chr6-564.8.542083  | -0.48593 | 0.726107 | -0.66923 | 0.503348 | 0.640316 | chr6  | 56461937 | 56466301 | 0 | NA | intron (Nintron (N  | -69991 | 81578   | Hs.47629           | NR_03082c | ENS00000  | COL21A1        | COLA1L F                  | collagen protein-coding  |
| chr5-704.8.583647  | -0.48791 | 0.73056  | -0.66786 | 0.504221 | 0.640316 | chr5  | 70496148 | 70496776 | 0 | NA | intron (NMIR3 SINE  | 4306   | 1E+08   | Hs.665231NR_03396c | ENS00000  | GUSBP9    | -              | GUSB pseupseudo           |                          |
| chr1-408.8.51511   | -0.48621 | 0.728657 | -0.66726 | 0.504603 | 0.640316 | chr19 | 40708504 | 40710255 | 0 | NA | intron (NLMC5a LI   | 5740   | 79934   | Hs.13071c          | ENS00000  | COQB8     | ADCK4 NP       | coenzyme protein-coding   |                          |
| chr1-3284.8.058425 | -0.50135 | 0.752905 | -0.66588 | 0.505486 | 0.640316 | chr1  | 32845726 | 32848174 | 0 | NA | intron (NAluSp SIN  | 21637  | 64766   | Hs.44088c          | ENS00000  | S100PPP   | S100PPBP       | S100P                     | birprotein-coding        |
| chr1-114.8.058425  | -0.50135 | 0.752905 | -0.66588 | 0.505486 | 0.640316 | chr1  | 1.15E+08 | 1.15E+08 | 0 | NA | 3' UTR (N3' UTR (N  | 13757  | 10286   | Hs.22960           | NR_00587c | ENS00000  | BCAS2          | DAM1 SPF                  | 2C preprotein-coding     |
| chr11-157.8.058425 | -0.50135 | 0.752905 | -0.66588 | 0.505486 | 0.640316 | chr11 | 5706230  | 5709800  | 0 | NA | intron (Nintron (N  | 18225  | 10346   | Hs.50177c          | ENS00000  | TRIM22    | GPSTAF50       | tripartitprotein-coding   |                          |
| chr12-193.8.058425 | -0.50135 | 0.752905 | -0.66588 | 0.505486 | 0.640316 | chr12 | 19370570 | 19372284 | 0 | NA | 3' UTR (N3' UTR (N  | -68065 | 121536  | Hs.126497NM_15320c | ENS00000  | AEBP2     | -              | AE bindirprotein-coding   |                          |
| chr12-297.8.058425 | -0.50135 | 0.752905 | -0.66588 | 0.505486 | 0.640316 | chr12 | 29757469 | 29758742 | 0 | NA | intron (Nintron (N  | 25837  | 83857   | Hs.401954NM_03192c | ENS00000  | TMTC1     | ARG99 OLF      | transmentprotein-coding   |                          |
| chr14-36.8.058425  | -0.50135 | 0.752905 | -0.66588 | 0.505486 | 0.640316 | chr14 | 36309419 | 36311710 | 0 | NA | intron (NLCz LINE   | 10073  | 51562   | Hs.308647NM_01518c | ENS00000  | CMBIP     | -              | MAP3K12                   | tprotein-coding          |
| chr17-207.8.058425 | -0.50135 | 0.752905 | -0.66588 | 0.505486 | 0.640316 | chr17 | -2078907 | 2081373  | 0 | NA | intron (Nintron (N  | 8621   | 23293   | Hs.44834c          | ENS00000  | SMG6      | C17orf31       | SMG6 nonsprotein-coding   |                          |
| chr17-294.8.058425 | -0.50135 | 0.752905 | -0.66588 | 0.505486 | 0.640316 | chr17 | 29495310 | 29506233 | 0 | NA | intron (NLMB4 LIN   | 66266  | 116236  | Hs.10651c          | ENS00000  | ABHD15    | -              | abhydrola                 | protein-coding           |
| chr18-63.8.058425  | -0.50135 | 0.752905 | -0.66588 | 0.505486 | 0.640316 | chr18 | 63388777 | 63404091 | 0 | NA | intron (NAluJb SIN  | 26042  | 9525    | Hs.12655c          | ENS00000  | VPS4B     | MIG1 SKD       | 1 vacuolar protein-coding |                          |
| chr19-39.8.058425  | -0.50135 | 0.752905 | -0.66588 | 0.505486 | 0.640316 | chr19 | 3953190  | 3968397  | 0 | NA | TTS (NR_C TTS (NR_C | 719    | 693222  | NR_030367          | ENS00000  | MIR637    | MIRN637        | microRNA ncRNA            |                          |
| chr2-2307.8.058425 | -0.50135 | 0.752905 | -0.66588 | 0.505486 | 0.640316 | chr2  | 2.31E+08 | 2.31E+08 | 0 | NA | intron (NAluSx1 SI  | 30578  | 51719   | Hs.60393c          | ENS00000  | CAB39     | CGI-66 MC      | calcium tprotein-coding   |                          |
| chr2-2381.8.058425 | -0.50135 | 0.752905 | -0.66588 | 0.505486 | 0.640316 | chr2  | 2.38E+08 | 2.38E+08 | 0 | NA | intron (NLMC5a LI   | 21443  | 151176  | Hs.24951           | NR_15252c | ENS00000  | ERFE           | C1QNF15                   | erythrofeprotein-coding  |
| chr3-4597.8.058425 | -0.50135 | 0.752905 | -0.66588 | 0.505486 | 0.640316 | chr3  | 45976256 | 45981262 | 0 | NA | intron (Nintron (N  | 17065  | 79443   | Hs.200227NM_02451c | ENS00000  | FYCO1     | CATC2 CT       | FYVE and protein-coding   |                          |
| chr5-407.8.058425  | -0.50135 | 0.752905 | -0.66588 | 0.505486 | 0.640316 | chr5  | 40760728 | 40765420 | 0 | NA | intron (Nintron (N  | -7113  | 23548   | Hs.34891c          | ENS00000  | TTCC3     | OSRF           | tetratricprotein-coding   |                          |
| chr6-411.8.058425  | -0.50135 | 0.752905 | -0.66588 | 0.505486 | 0.640316 | chr6  | 4115536  | 4125706  | 0 | NA | intron (NAluSx SIN  | 14847  | 10455   | Hs.15250           | NR_00611c | ENS00000  | CEC12          | ACBD2 DRS                 | enoyl-CoA protein-coding |
| chr6-565.8.058425  | -0.50135 | 0.752905 | -0.66588 | 0.505486 | 0.640316 | chr6  | 56588331 | 56594082 | 0 | NA | intron (Nintron (N  | 51683  | 667     | Hs.60491c          | ENS00000  | CDST      | BP240 BP       | dystonin protein-coding   |                          |
| chr6-150.8.058425  | -0.50135 | 0.752905 | -0.66588 | 0.505486 | 0.640316 | chr6  | 1.51E+08 | 1.51E+08 | 0 | NA | intron (Nintron (N  | 20638  | 25902   | Hs.59134c          | ENS00000  | CTHFD1L   | FTHFSDC1       | methyleneprotein-coding   |                          |
| chr7-262.8.058425  | -0.50135 | 0.752905 | -0.66588 | 0.505486 | 0.640316 | chr7  | 26204997 | 26212318 | 0 | NA | intron (NAluSq2 SI  | 6912   | 11335   | Hs.38118c          | ENS00000  | CBX3      | HECH HPI       | chromoboxprotein-coding   |                          |
| chr7-762.8.058425  | -0.50135 | 0.752905 | -0.66588 | 0.505486 | 0.640316 | chr7  | 77627018 | 77629458 | 0 | NA | intron (Nintron (N  | 68027  | 101E+08 | Hs.72451           | NR_03836c | ENS00000  | CAPTR          | RSBN1L-AS                 | Alu-mediencRNA           |
| chr7-871.8.058425  | -0.50135 | 0.752905 | -0.66588 | 0.505486 | 0.640316 | chr7  | 87164553 | 87177330 | 0 | NA | intron (Nintron (N  | 18387  | 9988    | Hs.19612c          | ENS00000  | DMT1F     | DMP1 DMT       | f cyclin D protein-coding |                          |
| chr8-2537.8.058425 | -0.50135 | 0.752905 | -0.66588 | 0.505486 | 0.640316 | chr8  | 25376795 | 25379498 | 0 | NA | intron (NMER2 C LI  | -16634 | 105E+08 | NR_159962          | LOC10537c | -         | uncharactncRNA |                           |                          |
| chr8-6724.8.058425 | -0.50135 | 0.752905 | -0.66588 | 0.505486 | 0.640316 | chr8  | 67247189 | 67253274 | 0 | NA | intron (NLCz LINE   | 93550  | 10565   | Hs.65690c          | ENS00000  | ARFGF1    | ARFGEP1 E      | ADP ribosprotein-coding   |                          |
| chr22-11.8.5761    | 0.247374 | 0.372541 | 0.664018 | 0.506679 | 0.640316 | chr22 | 11905785 | 11906098 | 0 | NA | intron (NAluSx4 SI  | 8535   | 6E+08   | Hs.65292c          | NR_110761 | LOC10272c | -              | uncharactncRNA            |                          |
| chr1-178.8.043835  | -0.49887 | 0.7529   | -0.66259 | 0.507591 | 0.640316 | chr1  | 1785022  | 1797824  | 0 | NA | intron (NAluSp SIN  | -11392 | 56220   | Hs.65479c          | ENS00000  | CNADK     | dJ283E3.1N     | AD kinaseprotein-coding   |                          |
| chr1-1107.8.043835 | -0.49887 | 0.7529   | -0.66259 | 0.507591 | 0.640316 | chr1  | 11072523 | 11097741 | 0 | NA | intron (NLIPI3 LIN  | -14543 | 10218   | Hs.14655c          | ENS00000  | ANGPTL7   | AngX CDT       | angiopoicprotein-coding   |                          |
| chr1-112.8.043835  | -0.49887 | 0.7529   | -0.66259 | 0.507591 | 0.640316 | chr1  | 11203229 | 11204695 | 0 | NA | intron (NMLT1G LI   | 14607  | 200081  | Hs.17987           | NR_17585c | ENS00000  | TXLNA          | IL14 TXL                  | taxilin tprotein-coding  |
| chr1-321.8.043835  | -0.49887 | 0.7529   | -0.66259 | 0.507591 | 0.640316 | chr1  | 32180516 | 32198495 | 0 | NA | intron (Nintron (N  | 9830   | 7579    | Hs.44270c          | ENS00000  | ZSCAN20   | KOX29 ZFF      | zinc fingprotein-coding   |                          |
| chr1-3347.8.043835 | -0.49887 | 0.7529   | -0.66259 | 0.507591 | 0.640316 | chr1  | 33479369 | 33482474 | 0 | NA | intron (NTigger12c  | 8276   | 79729   | Hs.52449c          | ENS00000  | SH3D21    | Clorf113       | SH3                       | domaiprotein-coding      |
| chr1-362.8.043835  | -0.49887 | 0.7529   | -0.66259 | 0.507591 | 0.640316 | chr1  | 36285737 | 36299737 | 0 | NA | intron (Nintron (N  | -13631 | 115353  | Hs.40094           | NR_05294c | ENS00000  | LRRC42         | dJ167A19.                 | leucine rprotein-coding  |
| chr1-539.8         |          |          |          |          |          |       |          |          |   |    |                     |        |         |                    |           |           |                |                           |                          |

|           |          |          |          |          |          |          |       |          |          |    |    |                         |         |              |          |           |           |                      |             |            |                               |  |
|-----------|----------|----------|----------|----------|----------|----------|-------|----------|----------|----|----|-------------------------|---------|--------------|----------|-----------|-----------|----------------------|-------------|------------|-------------------------------|--|
| chr2-1054 | 8.043835 | -0.49887 | 0.7529   | -0.66259 | 0.507591 | 0.640316 | chr2  | 95097225 | 95106190 | +0 | NA | exon (NM_exon (NM_19850 | 19850   | NR_001321    | 64969    | Hs.655255 | NR_031902 | ENSG000003MRP55      | MRP-S5      | SE         | mitochondrial protein-coding  |  |
| chr2-1084 | 8.043835 | -0.49887 | 0.7529   | -0.66259 | 0.507591 | 0.640316 | chr2  | 1.08E+08 | 1.09E+08 | +0 | NA | intron (NM_LIMC5a LI    | 33290   | NR_13529C    | 644903   | Hs.474938 | NR_003265 | ENSG000003GCC2-AS1   |             |            | GCC2 anticrRNA                |  |
| chr2-162C | 8.043835 | -0.49887 | 0.7529   | -0.66259 | 0.507591 | 0.640316 | chr2  | 1.62E+08 | 1.62E+08 | +0 | NA | intron (NMIR3 SINE      | 37459   | NR_00193E    | 1803     | Hs.368912 | NR_00193E | ENSG000003DPP4       | ADABP       | ADC        | dipeptidylprotein-coding      |  |
| chr2-169F | 8.043835 | -0.49887 | 0.7529   | -0.66259 | 0.507591 | 0.640316 | chr2  | 1.7E+08  | 1.7E+08  | +0 | NA | intron (NALuSx1 SI      | 26780   | NR_00479Z    | 9360     | Hs.470544 | NR_00479Z | ENSG000003PP1G       | CARS-Cyp    | peptidyl   | protein-coding                |  |
| chr2-2017 | 8.043835 | -0.49887 | 0.7529   | -0.66259 | 0.507591 | 0.640316 | chr2  | 2.02E+08 | 2.02E+08 | +0 | NA | intron (NALuSx1 SI      | 40622   | NR_00306E    | 58538    | Hs.63085  | NR_00306E | ENSG000003MPP4       | ALS2CR3     | Lumebriane | protein-coding                |  |
| chr2-231C | 8.043835 | -0.49887 | 0.7529   | -0.66259 | 0.507591 | 0.640316 | chr2  | 2.31E+08 | 2.31E+08 | +0 | NA | intron (NALuSx1 SI      | 7668    | NR_002807    | 5707     | Hs.3887   | NR_002807 | ENSG000003PSMD1      | P112 Rpn2   | protease   | protein-coding                |  |
| chr20-114 | 8.043835 | -0.49887 | 0.7529   | -0.66259 | 0.507591 | 0.640316 | chr20 | 1123754  | 1130523  | +0 | NA | intron (NALuSx1 SI      | 8536    | NR_001322    | 9491     | Hs.471917 | NR_006814 | ENSG000003PSMF1      | P131        | protease   | protein-coding                |  |
| chr20-304 | 8.043835 | -0.49887 | 0.7529   | -0.66259 | 0.507591 | 0.640316 | chr20 | 3047626  | 3049617  | +0 | NA | TTS (NM_CTTs (NM_C      | 2569    | NR_00318E    | 64949    | Hs.18946  | NR_030811 | ENSG000003MRP526     | C20orf19    | 5          | mitochondrial protein-coding  |  |
| chr20-354 | 8.043835 | -0.49887 | 0.7529   | -0.66259 | 0.507591 | 0.640316 | chr20 | 35403963 | 35410066 | +0 | NA | intron (NALIMB3 LIN     | 4959    | NR_018244    | 55245    | Hs.72629C | NR_018244 | ENSG000003UQCC1      | BFZB        | C20c       | ubiquinol protein-coding      |  |
| chr20-621 | 8.043835 | -0.49887 | 0.7529   | -0.66259 | 0.507591 | 0.640316 | chr20 | 62124345 | 62134434 | +0 | NA | intron (NALuSx1 SI      | 6914    | NR_14470C    | 149986   | Hs.105379 | NR_14470C | ENSG000003LSM142E    | C20orf40    | LSM        | family protein-coding         |  |
| chr21-347 | 8.043835 | -0.49887 | 0.7529   | -0.66259 | 0.507591 | 0.640316 | chr21 | 34797116 | 34800038 | +0 | NA | intron (NMER2 DNA       | 52752   | NR_03888E    | 1.01E+08 | Hs.120175 | NR_03888E | ENSG000003LINC0142E  | lincRNA-t   | -          | long intencRNA                |  |
| chr21-371 | 8.043835 | -0.49887 | 0.7529   | -0.66259 | 0.507591 | 0.640316 | chr21 | 37131042 | 37175501 | +0 | NA | exon (NM_exon (NM_      | 40655   | NR_046651    | 1.01E+08 | Hs.570411 | NR_046651 | ENSG000003TTC3-AS1   |             |            | TTC3 anticrRNA                |  |
| chr22-26E | 8.043835 | -0.49887 | 0.7529   | -0.66259 | 0.507591 | 0.640316 | chr22 | 26500096 | 26511488 | +0 | NA | intron (NALuSx1 SI      | 6276    | NR_01214E    | 24144    | Hs.20225  | NR_01214E | ENSG000003TFIP11     | NTRI        | STIF       | tuftelin protein-coding       |  |
| chr22-40F | 8.043835 | -0.49887 | 0.7529   | -0.66259 | 0.507591 | 0.640316 | chr22 | 40822769 | 40851958 | +0 | NA | intron (NALuSx1 SI      | -17964  | NR_00128E    | 10478    | Hs.474938 | NR_00635E | ENSG000003SLC25A17   | PMP34       |            | solute carrier protein-coding |  |
| chr3-9387 | 8.043835 | -0.49887 | 0.7529   | -0.66259 | 0.507591 | 0.640316 | chr3  | 9387725  | 9395257  | +0 | NA | intron (NALuSx1 SI      | 5132    | NR_132781    | 440944   | Hs.598958 | NR_00101E | ENSG000003THUMP3D3   | ASET5D5-AS1 | THUMP3     | ancRNA                        |  |
| chr3-1014 | 8.043835 | -0.49887 | 0.7529   | -0.66259 | 0.507591 | 0.640316 | chr3  | 10148851 | 10154690 | +0 | NA | 3' UTR (NM_3' UTR (N    | 9992    | NR_19815E    | 7428     | Hs.517792 | NR_000551 | ENSG000003VHL        | HRCAL1      | RC         | von Hippel protein-coding     |  |
| chr3-154F | 8.043835 | -0.49887 | 0.7529   | -0.66259 | 0.507591 | 0.640316 | chr3  | 15431509 | 15438186 | +0 | NA | intron (NALuSx1 SI      | 7249    | NR_03308E    | 85403    | Hs.71673E | NR_03308E | ENSG000003CEAF1      |             |            | ELL assoc protein-coding      |  |
| chr3-163F | 8.043835 | -0.49887 | 0.7529   | -0.66259 | 0.507591 | 0.640316 | chr3  | 16375800 | 16378340 | +0 | NA | intron (NALuSx1 SI      | 111858  | NR_00135E    | 92106    | Hs.65544E | NR_138381 | ENSG000003OXNAD1     |             |            | oxidoreductase protein-coding |  |
| chr3-124E | 8.043835 | -0.49887 | 0.7529   | -0.66259 | 0.507591 | 0.640316 | chr3  | 1.25E+08 | 1.25E+08 | +0 | NA | intron (NALuSx1 SI      | 53533   | NR_02073C    | 57493    | Hs.47742C | NR_02073C | ENSG000003HEG1       | HEG         | MST1       | heart dev protein-coding      |  |
| chr4-150F | 8.043835 | -0.49887 | 0.7529   | -0.66259 | 0.507591 | 0.640316 | chr4  | 15057715 | 15068264 | +0 | NA | intron (NALuSx1 SI      | 60508   | NR_001177    | 132864   | Hs.656937 | NR_18248E | ENSG000003CPEB2      | CPE-BP2     | C          | cytoplasm protein-coding      |  |
| chr4-253E | 8.043835 | -0.49887 | 0.7529   | -0.66259 | 0.507591 | 0.640316 | chr4  | 25388749 | 25398616 | +0 | NA | intron (NALuSx1 SI      | 16419   | NR_013367    | 29945    | Hs.15217E | NR_013367 | ENSG000003ANAPC4     | APC4        |            | anaphase protein-coding       |  |
| chr4-7081 | 8.043835 | -0.49887 | 0.7529   | -0.66259 | 0.507591 | 0.640316 | chr4  | 70819049 | 70838298 | +0 | NA | intron (NALuSx1 SI      | 10830   | NR_00109E    | 2926     | Hs.30976E | NR_00209E | ENSG000003GRSF1      |             |            | G-rich Rb protein-coding      |  |
| chr4-758C | 8.043835 | -0.49887 | 0.7529   | -0.66259 | 0.507591 | 0.640316 | chr4  | 75807515 | 75813943 | +0 | NA | intron (NALuSx1 SI      | 86207   | NR_00371E    | 8615     | Hs.744877 | NR_00371E | ENSG000003USO1       | P115 TAP    | USO1       | vesicle protein-coding        |  |
| chr5-143E | 8.043835 | -0.49887 | 0.7529   | -0.66259 | 0.507591 | 0.640316 | chr5  | 14323538 | 14342502 | +0 | NA | intron (NALuSx1 SI      | -130963 | NR_14581E    | 1.1E+08  | Hs.120175 | NR_03888E | ENSG000003LINC0142E  |             |            | small ncRNA                   |  |
| chr5-7211 | 8.043835 | -0.49887 | 0.7529   | -0.66259 | 0.507591 | 0.640316 | chr5  | 72114625 | 72121125 | +0 | NA | intron (NALuSx1 SI      | 10400   | NR_00590E    | 4131     | Hs.33507E | NR_00590E | ENSG000003MAP1B      | FUTSCH      | M          | microtubule protein-coding    |  |
| chr5-127E | 8.043835 | -0.49887 | 0.7529   | -0.66259 | 0.507591 | 0.640316 | chr5  | 1.28E+08 | 1.28E+08 | +0 | NA | intron (NALuSx1 SI      | 14380   | NR_00128E    | 133619   | Hs.48325E | NR_13080E | ENSG000003PRR1       |             |            | proline r protein-coding      |  |
| chr5-132E | 8.043835 | -0.49887 | 0.7529   | -0.66259 | 0.507591 | 0.640316 | chr5  | 1.33E+08 | 1.33E+08 | +0 | NA | intron (NALuSx1 SI      | 32719   | NR_132124    | 1.02E+08 | Hs.59881E | NR_132124 | ENSG000003TH2LCRR    | TH2-LCR     |            | T helper ncRNA                |  |
| chr6-1224 | 8.043835 | -0.49887 | 0.7529   | -0.66259 | 0.507591 | 0.640316 | chr6  | 1.22E+08 | 1.22E+08 | +0 | NA | intron (NALuSx1 SI      | 17716   | NR_02075E    | 57515    | Hs.14666E | NR_02075E | ENSG000003SERINC1    | TDEL        | L          | TDF serine r protein-coding   |  |
| chr6-148E | 8.043835 | -0.49887 | 0.7529   | -0.66259 | 0.507591 | 0.640316 | chr6  | 1.49E+08 | 1.49E+08 | +0 | NA | exon (NM_exon (NM_      | 35569   | NR_100134E   | 23328    | Hs.19313E | NR_01527E | ENSG000003SASH1      | CAPOK       | DUF        | SAM and S protein-coding      |  |
| chr7-474C | 8.043835 | -0.49887 | 0.7529   | -0.66259 | 0.507591 | 0.640316 | chr7  | 47437787 | 47440834 | +0 | NA | intron (NALuSx1 SI      | 25493   | NR_14581E    | 1.1E+08  | Hs.120175 | NR_03888E | ENSG000003SNORD151   |             |            | small ncRNA                   |  |
| chr7-100C | 8.043835 | -0.49887 | 0.7529   | -0.66259 | 0.507591 | 0.640316 | chr7  | 1E+08    | 1E+08    | +0 | NA | intron (NALuSx1 SI      | 10356   | NR_00134E    | 7586     | Hs.61536E | NR_00343E | ENSG000003ZKSCAN1    | KOX18       | PHZ        | zinc finger protein-coding    |  |
| chr7-103E | 8.043835 | -0.49887 | 0.7529   | -0.66259 | 0.507591 | 0.640316 | chr7  | 1.01E+08 | 1.01E+08 | +0 | NA | intron (NALuSx1 SI      | 7055    | NR_00101E    | 402682   | Hs.53484E | NR_00101E | ENSG000003UFSP1      | UFSP        |            | UFMI spec protein-coding      |  |
| chr7-100F | 8.043835 | -0.49887 | 0.7529   | -0.66259 | 0.507591 | 0.640316 | chr7  | 1.03E+08 | 1.03E+08 | +0 | NA | intron (NALuSx1 SI      | 16319   | NR_00280E    | 5701     | Hs.43736E | NR_00280E | ENSG000003PCMC2      | MSS1        | Nbl        | protease protein-coding       |  |
| chr7-116E | 8.043835 | -0.49887 | 0.7529   | -0.66259 | 0.507591 | 0.640316 | chr7  | 1.17E+08 | 1.17E+08 | +0 | NA | intron (NALuSx1 SI      | -38079  | NR_00136E    | 7982     | Hs.368131 | NR_01841E | ENSG000003ST7        | ETS7q       | FA         | suppressin protein-coding     |  |
| chr8-226E | 8.043835 | -0.49887 | 0.7529   | -0.66259 | 0.507591 | 0.640316 | chr8  | 22605905 | 22616618 | +0 | NA | intron (NALuSx1 SI      | 6219    | NR_0021174   | 57805    | Hs.74484E | NR_021174 | ENSG000003CCAR2      | DBC-1       | DBC        | cell cycl protein-coding      |  |
| chr8-9814 | 8.043835 | -0.49887 | 0.7529   | -0.66259 | 0.507591 | 0.640316 | chr8  | 98147769 | 98148988 | +0 | NA | intron (NALuSx1 SI      | 30538   | NR_01502E    | 10940    | Hs.25282E | NR_01502E | ENSG000003POP1       | ANXD2       |            | POP1 hom protein-coding       |  |
| chr8-1237 | 8.043835 | -0.49887 | 0.7529   | -0.66259 | 0.507591 | 0.640316 | chr8  | 1.24E+08 | 1.24E+08 | +0 | NA | intron (NALuSx1 SI      | 14747   | NR_001317    | 157769   | Hs.459174 | NR_14496E | ENSG000003FAM91A1    |             |            | family wiprotein-coding       |  |
| chr8-1254 | 8.043835 | -0.49887 | 0.7529   | -0.66259 | 0.507591 | 0.640316 | chr8  | 1.25E+08 | 1.25E+08 | +0 | NA | exon (NM_exon (NM_      | 4132    | NR_00128E    | 10221    | Hs.444947 | NR_02519E | ENSG000003TRIB1      | C8FW        | GIG        | tribbles protein-coding       |  |
| chr8-144E | 8.043835 | -0.49887 | 0.7529   | -0.66259 | 0.507591 | 0.640316 | chr8  | 1.45E+08 | 1.45E+08 | +0 | NA | 3' UTR (NM_3' UTR (N    | 18853   | NR_00136E    | 58500    | Hs.532277 | NR_021061 | ENSG000003ZNF250     | ZFP647      | Zn         | zinc finger protein-coding    |  |
| chr9-2691 | 8.043835 | -0.49887 | 0.7529   | -0.66259 | 0.507591 | 0.640316 | chr9  | 26918508 | 26926349 | +0 | NA | intron (NALuSx1 SI      | -24562  | NR_00109E    | 80173    | Hs.14540E | NR_02510E | ENSG000003IFT74      | BBS20       | CCI        | intraflag protein-coding      |  |
| chr9-2721 | 8.043835 | -0.49887 | 0.7529   | -0.66259 | 0.507591 | 0.640316 | chr9  | 27212821 | 27215258 | +0 | NA | intron (NALuSx1 SI      | 68754   | NR_002667E   | 158035   | Hs.201554 | NR_02667E | ENSG000003LINC00032E | C9orf14     | N          | long intencRNA                |  |
| chr9-332E | 8.043835 | -0.49887 | 0.7529   | -0.66259 | 0.507591 | 0.640316 | chr9  | 33251846 | 33263059 | +0 | NA | intron (NALuSx1 SI      | 7256    | NR_00117E    | 573      | Hs.377484 | NR_00432E | ENSG000003BAG1       | BAG-1       | HAF        | BCL2 assoc protein-coding     |  |
| chr9-113E | 8.043835 | -0.49887 | 0.7529   | -0.66259 | 0.507591 | 0.640316 | chr9  | 1.13E+08 | 1.13E+08 | +0 | NA | intron (NALuSx1 SI      | 10804   | NR_001371234 |          |           |           |                      |             |            |                               |  |
| chrX-138E | 8.043835 | -0.49887 | 0.7529   | -0.66259 | 0.507591 | 0.640316 | chrX  | 1385906  | 1391495  | +0 | NA | intron (NALuSx1 SI      | 3413    | NR_00163E    | 293      | Hs.350927 | NR_00163E | ENSG000003SLC25A6    | AAC3        | AIF        | solute carrier protein-coding |  |
| chrX-108E | 8.043835 | -0.49887 | 0.7529   | -0.66259 | 0.507591 | 0.640316 | chrX  | 24069332 | 24079129 | +0 | NA | intron (NALuSx1 SI      | 19274   | NR_00141E    | 1968     | Hs.539684 | NR_00141E | ENSG000003EIF2S3     | EIF2        | ENT        | eukaryot protein-coding       |  |
| chr4-554E | 8.554466 | -0.48323 | 0.730719 | -0.66131 | 0.508413 | 0.641139 | chr4  | 55465915 | 55466598 | +0 | NA | intron (THEIB LTF       | 70299   | NR_01847E    | 55858    | Hs.47976E | NR_01847E | ENSG000003TMEM165    | CDGK2       | FTZ        | transmem protein-coding       |  |
| chr1-252E | 9.213405 | 0.452444 | 0.691349 | 0.654437 | 0.51283  | 0.646457 | chr1  | 2522689  | 2522984  | +0 | NA | intron (NALuSx1 SI      | 3760    | NR_01821E    | 55229    | Hs.26156  | NR_01821E | ENSG000003PANK4      |             |            | pantothier protein-coding     |  |
| chr8-241F | 10.75754 | -0.3889  | 0.594454 | -0.65421 | 0.512974 | 0.646457 | chr8  | 241556   | 248678   | +0 | NA | intron (NALuSx1 SI      | 12661   | NR_00104E    | 169270   | Hs.59138E | NR_17353E | ENSG000003ZNF596     |             |            | zinc finger protein-coding    |  |
| chr1-170F | 10.76992 | -0.38719 | 0.59434  | -0.65146 | 0.514747 | 0.647824 | chr1  | 1.71E+08 | 1.71E+08 | +0 | NA | intron (NALuSx1 SI      | -8698   | NR_12595E    | 1.02E+08 | Hs.67666E | NR_12595E | ENSG000003GORAB-AS1  | GORAB       |            | GORAB anticrRNA               |  |
| chr19-40C | 10.76992 | -0.38719 | 0.59434  | -0.65146 | 0.514747 | 0        |       |          |          |    |    |                         |         |              |          |           |           |                      |             |            |                               |  |



|           |          |          |          |          |          |          |       |          |          |    |      |                    |                  |            |                 |           |           |                |                             |                            |                    |
|-----------|----------|----------|----------|----------|----------|----------|-------|----------|----------|----|------|--------------------|------------------|------------|-----------------|-----------|-----------|----------------|-----------------------------|----------------------------|--------------------|
| chr1-666  | 8.787099 | -0.40441 | 0.710591 | -0.56912 | 0.569274 | 0.676573 | chr1  | 66630018 | 66630640 | +0 | 0 NA | intron (Nintron (N | 1889 NR_03606C   | 1E+08      | NR_03606C       | ENS00000C | MIR3117   | mir-3117       | microRNA ncRNA              |                            |                    |
| chr1-1804 | 8.787099 | -0.40441 | 0.710591 | -0.56912 | 0.569274 | 0.676573 | chr1  | 1.8E+08  | 1.8E+08  | +0 | 0 NA | intron (NLM1E LIN  | 27214 NM_03236C  | 84320 Hs.  | 200051NM_03236C | ENS00000C | ACBD6     | -              | acyl-CoA protein-coding     |                            |                    |
| chr6-1354 | 8.787099 | -0.40441 | 0.710591 | -0.56912 | 0.569274 | 0.676573 | chr6  | 1.35E+08 | 1.35E+08 | +0 | 0 NA | intron (NLM3D3 LIN | 15672 NM_001134  | 54806 Hs.  | 386684NM_017651 | ENS00000C | AHI1      | AHI-1 JBI      | Abelson tprotein-coding     |                            |                    |
| chr1-3348 | 8.772509 | -0.40216 | 0.709418 | -0.56688 | 0.570795 | 0.676573 | chr1  | 33483724 | 33489191 | +0 | 0 NA | intron (Nintron (N | 18312 NM_145238  | 7579 Hs.   | 44270E          | NR_145238 | ENS00000C | ZSCAN20        | KOX29 ZFF                   | zinc fingerprotein-coding  |                    |
| chr1-1536 | 8.772509 | -0.40216 | 0.709418 | -0.56688 | 0.570795 | 0.676573 | chr1  | 1.54E+08 | 1.54E+08 | +0 | 0 NA | intron (NAluSx SIN | 4868 NM_001024   | 6284 Hs.   | 51650E          | NR_00597E | ENS00000C | S100A13        | -                           | S100 calprotein-coding     |                    |
| chr1-1625 | 8.772509 | -0.40216 | 0.709418 | -0.56688 | 0.570795 | 0.676573 | chr1  | 1.63E+08 | 1.63E+08 | +0 | 0 NA | intron (NMER20 DN  | 21939 NM_17586E  | 127933 Hs. | 12731CNM_144624 | ENS00000C | UHMK1     | KIS KIST U2AF  | homcprotein-coding          |                            |                    |
| chr1-1735 | 8.772509 | -0.40216 | 0.709418 | -0.56688 | 0.570795 | 0.676573 | chr1  | 1.74E+08 | 1.74E+08 | +0 | 0 NA | intron (NAluSx SIN | 1838 NM_00130C   | 149041 Hs. | 30258 NM_172071 | ENS00000C | RC3H1     | RNF198 RCR     | ring fingerprotein-coding   |                            |                    |
| chr1-2351 | 8.772509 | -0.40216 | 0.709418 | -0.56688 | 0.570795 | 0.676573 | chr1  | 2.35E+08 | 2.35E+08 | +0 | 0 NA | intron (NAluSx SIN | 11255 NR_00295E  | 677802 Hs. | 74474E          | NR_00295E | ENS00000C | SNORA14B       | ACA14B                      | small nucsnoRNA            |                    |
| chr11-433 | 8.772509 | -0.40216 | 0.709418 | -0.56688 | 0.570795 | 0.676573 | chr11 | 43336134 | 43337823 | +0 | 0 NA | intron (NAluYml SI | -21907 NM_001307 | 55761 Hs.  | 19118E          | NR_01825E | ENS00000C | TTC17          | -                           | tetratricprotein-coding    |                    |
| chr11-614 | 8.772509 | -0.40216 | 0.709418 | -0.56688 | 0.570795 | 0.676573 | chr11 | 61436304 | 61442016 | +0 | 0 NA | intron (NMLT1J LTF | 9035 NM_017841   | 54949 Hs.  | 313247NM_017841 | ENS00000C | SDHAF2    | C1lorf79       | succinateprotein-coding     |                            |                    |
| chr15-682 | 8.772509 | -0.40216 | 0.709418 | -0.56688 | 0.570795 | 0.676573 | chr15 | 68289850 | 68292166 | +0 | 0 NA | exon (NM exon (NM  | 13263 NM_01532E  | 10116 Hs.  | 36273E          | NR_01532E | ENS00000C | FEM1B          | F1A-ALPHA                   | fem-1 honprotein-coding    |                    |
| chr16-482 | 8.772509 | -0.40216 | 0.709418 | -0.56688 | 0.570795 | 0.676573 | chr16 | 48259410 | 48264595 | +0 | 0 NA | intron (Nintron (N | -14463 NM_00137C | 85320 Hs.  | 652267NM_03258E | ENS00000C | ABCC11    | EWWD MRPE      | ATP bindi protein-coding    |                            |                    |
| chr16-896 | 8.772509 | -0.40216 | 0.709418 | -0.56688 | 0.570795 | 0.676573 | chr16 | 89643664 | 89648440 | +0 | 0 NA | exon (NM exon (NM  | 11656 NM_00108E  | 5119 Hs.   | 589427NM_00276E | ENS00000C | CHMP1A    | CHMP1          | PCF charged nprotein-coding |                            |                    |
| chr17-136 | 8.772509 | -0.40216 | 0.709418 | -0.56688 | 0.570795 | 0.676573 | chr17 | 13630113 | 1364876  | +0 | 0 NA | intron (NMER20 DN  | 36278 NM_006761  | 7531 Hs.   | 513851NM_006761 | ENS00000C | YWHAE     | 14-3-3E        | tyrosine protein-coding     |                            |                    |
| chr17-388 | 8.772509 | -0.40216 | 0.709418 | -0.56688 | 0.570795 | 0.676573 | chr17 | 38845417 | 38853191 | +0 | 0 NA | 3' UTR (N3' UTR (N | 2354 NR_145761   | 1.1E+08    | NR_145761       | ENS00000C | SNORA21B  | -              | small nucsnoRNA             |                            |                    |
| chr19-408 | 8.772509 | -0.40216 | 0.709418 | -0.56688 | 0.570795 | 0.676573 | chr19 | 40007287 | 40016331 | +0 | 0 NA | intron (NMLT1C LTF | 14749 NM_001297  | 339327 Hs. | 12500E          | NR_178544 | ENS00000C | ZNF546         | ZNF49                       | zinc fingerprotein-coding  |                    |
| chr2-8531 | 8.772509 | -0.40216 | 0.709418 | -0.56688 | 0.570795 | 0.676573 | chr2  | 85319480 | 85327457 | +0 | 0 NA | intron (NAluSx1 SI | 4521 NM_00120E   | 10618 Hs.  | 59338E          | NR_006464 | ENS00000C | TGOLN2         | TGN38 TG                    | trans-golprotein-coding    |                    |
| chr2-1772 | 8.772509 | -0.40216 | 0.709418 | -0.56688 | 0.570795 | 0.676573 | chr2  | 1.77E+08 | 1.77E+08 | +0 | 0 NA | intron (Nintron (N | 6608 NR_13847C   | 220988 Hs. | 51653E          | NR_194247 | ENS00000C | HNRNP3A        | 2610510D                    | heterogolprotein-coding    |                    |
| chr2-2225 | 8.772509 | -0.40216 | 0.709418 | -0.56688 | 0.570795 | 0.676573 | chr2  | 2.23E+08 | 2.23E+08 | +0 | 0 NA | intron (Nintron (N | 49197 NM_001354  | 2181 Hs.   | 65577E          | NR_004457 | ENS00000C | ACSL3          | ACS3 FAC1                   | acyl-CoA protein-coding    |                    |
| chr20-39C | 8.772509 | -0.40216 | 0.709418 | -0.56688 | 0.570795 | 0.676573 | chr20 | 3908079  | 3919362  | +0 | 0 NA | intron (NLM1B7 LIN | -3774 NR_02951E  | 406896     | NR_02951E       | ENS00000C | MIR103A2  | MIR103-2       | microRNA ncRNA              |                            |                    |
| chr3-1514 | 8.772509 | -0.40216 | 0.709418 | -0.56688 | 0.570795 | 0.676573 | chr3  | 1.02E+08 | 1.02E+08 | +0 | 0 NA | intron (Nintron (N | 4153 NM_00098E   | 6152 Hs.   | 47702E          | NR_00098E | ENS00000C | RPL24          | HEL-5-31                    | (ribosomal) protein-coding |                    |
| chr5-1341 | 8.772509 | -0.40216 | 0.709418 | -0.56688 | 0.570795 | 0.676573 | chr5  | 1.34E+08 | 1.34E+08 | +0 | 0 NA | intron (NAluSx SIN | 12689 NM_17067E  | 6500 Hs.   | 17162E          | NR_00693C | ENS00000C | SKP1           | EMC19 OCF                   | S-phase kprotein-coding    |                    |
| chr6-2822 | 8.772509 | -0.40216 | 0.709418 | -0.56688 | 0.570795 | 0.676573 | chr6  | 28227076 | 28235130 | +0 | 0 NA | intron (NMER44B DN | 5828 NM_00629E   | 7746 Hs.   | 100921NM_00629E | ENS00000C | ZSCAN9    | PRD51 ZNF      | zinc fingerprotein-coding   |                            |                    |
| chr6-7562 | 8.772509 | -0.40216 | 0.709418 | -0.56688 | 0.570795 | 0.676573 | chr6  | 75659481 | 75663443 | +0 | 0 NA | intron (NMLP1A1 LI | 59582 NM_00110C  | 26054 Hs.  | 485784NM_015571 | ENS00000C | SENPE6    | SSP1 SUSF      | SUMO specprotein-coding     |                            |                    |
| chr8-8354 | 8.772509 | -0.40216 | 0.709418 | -0.56688 | 0.570795 | 0.676573 | chr8  | 8354229  | 8368756  | +0 | 0 NA | intron (NHERV1-int | 24752 NM_00136E  | 157285 Hs. | 58386E          | NR_00108C | ENS00000C | PRAG1          | NACK PEAK                   | PEAK1 relprotein-coding    |                    |
| chr9-1132 | 8.772509 | -0.40216 | 0.709418 | -0.56688 | 0.570795 | 0.676573 | chr9  | 1.13E+08 | 1.13E+08 | +0 | 0 NA | intron (NAluJb SIN | 15784 NM_13928E  | 246184 Hs. | 72764E          | NR_13928E | ENS00000C | CDC26          | ANAP29                      | cell divi protein-coding   |                    |
| chr1-2077 | 8.745536 | -0.40236 | 0.710807 | -0.56606 | 0.571351 | 0.676573 | chr1  | 2.08E+08 | 2.08E+08 | +0 | 0 NA | intron (NHE1C LTF  | 470726           | NR_02983E  | ENS00000C       | VEZF1     | MIRN21C   | microRNA ncRNA |                             |                            |                    |
| chr11-115 | 8.745536 | -0.40236 | 0.710807 | -0.56606 | 0.571351 | 0.676573 | chr11 | 1.19E+08 | 1.19E+08 | +0 | 0 NA | exon (NM exon (NM  | -2070 NM_00210E  | 3014 Hs.   | 47787E          | NR_00210E | ENS00000C | H2AFX          | H2A.X H2A                   | histcprotein-coding        |                    |
| chr4-558E | 8.745536 | -0.40236 | 0.710807 | -0.56606 | 0.571351 | 0.676573 | chr4  | 55868444 | 55869468 | +0 | 0 NA | intron (Nintron (N | 15306 NM_178237  | 55763 Hs.  | 26966E          | NR_018261 | ENS00000C | EXOC1          | BM-102 SE                   | exocyst cprotein-coding    |                    |
| chr8-8374 | 8.745536 | -0.40236 | 0.710807 | -0.56606 | 0.571351 | 0.676573 | chr8  | 8374261  | 8384186  | +0 | 0 NA | intron (Nintron (N | 7021 NM_00136E   | 157285 Hs. | 58386E          | NR_00108C | ENS00000C | PRAG1          | NACK PEAK                   | PEAK1 relprotein-coding    |                    |
| chr1-1008 | 8.757918 | -0.39989 | 0.710806 | -0.56259 | 0.573716 | 0.676573 | chr1  | 1.01E+08 | 1.01E+08 | +0 | 0 NA | intron (NMLT1J LTF | 3673 NM_001144   | 148867 Hs. | 53390E          | NR_13349E | ENS00000C | SLC30A7        | ZNT7 ZnT                    | solute cprotein-coding     |                    |
| chr1-149C | 8.757918 | -0.39989 | 0.710806 | -0.56259 | 0.573716 | 0.676573 | chr1  | 1.49E+08 | 1.49E+08 | +0 | 0 NA | IntergeniLIMC2 LIN | -14225 NM_001277 | 400818 Hs. | 44508C          | NR_001037 | ENS00000C | NBP9F          | AEO1                        | NBPF                       | menfprotein-coding |
| chr11-13C | 8.757918 | -0.39989 | 0.710806 | -0.56259 | 0.573716 | 0.676573 | chr11 | 1.31E+08 | 1.31E+08 | +0 | 0 NA | intron (Nintron (N | 12900 NM_001301  | 399979 Hs. | 444024NM_01475E | ENS00000C | SNX19     | CHET8          | sorting rprotein-coding     |                            |                    |
| chr12-34E | 8.757918 | -0.39989 | 0.710806 | -0.56259 | 0.573716 | 0.676573 | chr12 | 346579   | 386553   | +0 | 0 NA | intron (Nintron (N | 22754 NM_00104E  | 5927 Hs.   | 76272 NM_00505E | ENS00000C | KDM5A     | RBBP-2 RE      | lysine deprotein-coding     |                            |                    |
| chr14-674 | 8.757918 | -0.39989 | 0.710806 | -0.56259 | 0.573716 | 0.676573 | chr14 | 67343227 | 67353951 | +0 | 0 NA | intron (NAluSg SIN | 11215 NM_015994  | 51382 Hs.  | 27263C          | NR_015994 | ENS00000C | ATPGV1D        | ATP6M VAI                   | ATPase Hprotein-coding     |                    |
| chr2-1514 | 8.757918 | -0.39989 | 0.710806 | -0.56259 | 0.573716 | 0.676573 | chr2  | 1.51E+08 | 1.51E+08 | +0 | 0 NA | intron (Nintron (N | 60153 NM_001177  | 55183 Hs.  | 536537NM_018151 | ENS00000C | RIF1      | -              | replicati protein-coding    |                            |                    |
| chr9-1101 | 8.757918 | -0.39989 | 0.710806 | -0.56259 | 0.573716 | 0.676573 | chr9  | 1.1E+08  | 1.1E+08  | +0 | 0 NA | intron (Nintron (N | 13233 NM_00113E  | 445815 Hs. | 59190E          | NR_00720E | ENS00000C | PALM2-AK       | AKAP-2 AK                   | PALM2-AK                   | protein-coding     |
| chr10-102 | 8.784891 | -0.39967 | 0.712159 | -0.5612  | 0.574659 | 0.676573 | chr10 | 1.02E+08 | 1.02E+08 | +0 | 0 NA | intron (NAluSg SIN | 16862 NM_024541  | 79591 Hs.  | 16004 NM_024541 | ENS00000C | ARMH3     | C1oorf76       | armadil11cprotein-coding    |                            |                    |
| chr10-924 | 8.726468 | -0.41476 | 0.742961 | -0.55826 | 0.576668 | 0.676573 | chr10 | 92454766 | 92455156 | +0 | 0 NA | intron (Nintron (N | 36300 NR_03824E  | 1.01E+08   | Hs.             | 56877E    | NR_03824E | MARK2P9        | -                           | microtub pseudo            |                    |
| chr15-988 | 8.261877 | -0.41228 | 0.740085 | -0.55707 | 0.577478 | 0.676573 | chr15 | 98829928 | 98832166 | +0 | 0 NA | intron (NMSTB LTR  | 46621 NR_039864  | 1.01E+08   | NR_039864       | ENS00000C | MIR4714   | -              | microRNA ncRNA              |                            |                    |
| chr6-1391 | 8.261877 | -0.41228 | 0.740085 | -0.55707 | 0.577478 | 0.676573 | chr6  | 1.39E+08 | 1.39E+08 | +0 | 0 NA | exon (NM exon (NM  | 32191 NM_016217  | 51696 Hs.  | 197644NM_016217 | ENS00000C | HECA      | HDCL hdcl      | homolprotein-coding         |                            |                    |
| chr1-669E | 8.770301 | -0.39738 | 0.713563 | -0.55689 | 0.577602 | 0.676573 | chr1  | 66969986 | 66971824 | +0 | 0 NA | exon (NM exon (NM  | 40649 NM_001077  | 57708 Hs.  | 60543E          | NR_02094E | ENS00000C | MIER1          | ER1 MI                      | EFMIER1 tprotein-coding    |                    |
| chr5-1604 | 8.770301 | -0.39738 | 0.713563 | -0.55689 | 0.577602 | 0.676573 | chr5  | 1.6E+08  | 1.6E+08  | +0 | 0 NA | intron (NLM1E4c LI | 6816 NM_001364   | 10569 Hs.  | 43534E          | NR_00642E | ENS00000C | SLU7           | 9G8 hSu7                    | SLU7 hprotein-coding       |                    |
| chr1-524C | 8.27426  | -0.4096  | 0.738605 | -0.55456 | 0.579193 | 0.676573 | chr1  | 52405438 | 52420776 | +0 | 0 NA | intron (NMIRb SINE | 8505 NM_032864   | 84950 Hs.  | 5301 NM_032284  | ENS00000C | PRPF38A   | PRP38A Prp     | mRNA protein-coding         |                            |                    |
| chr11-831 | 8.27426  | -0.4096  | 0.738605 | -0.55456 | 0.579193 | 0.676573 | chr11 | 83189145 | 83192887 | +0 | 0 NA | TTS (NR_1TTS (NR_1 | 2653 NR_14900E   | 1.01E+08   | Hs.             | 58550E    | NR_018705 | LOC10050E      | -                           | uncharactncRNA             |                    |
| chr14-49E | 8.27426  | -0.4096  | 0.738605 | -0.55456 | 0.579193 | 0.676573 | chr14 | 49893565 | 49896697 | +0 | 0 NA | 3' UTR (N3' UTR (N | 2049 NM_00166E   | 382 Hs.    | 52533C          | NR_00166E | ENS00000C | ARF6           | -                           | ADP ribos protein-coding   |                    |
| chr17-517 | 8.27426  | -0.4096  | 0.738605 | -0.5545  |          |          |       |          |          |    |      |                    |                  |            |                 |           |           |                |                             |                            |                    |





|                    |          |          |          |          |          |       |          |          |   |    |                                     |        |          |                     |                     |             |                               |
|--------------------|----------|----------|----------|----------|----------|-------|----------|----------|---|----|-------------------------------------|--------|----------|---------------------|---------------------|-------------|-------------------------------|
| chr4-7695.8.988344 | -0.32091 | 0.69522  | -0.4616  | 0.644371 | 0.731633 | chr4  | 76995486 | 77000865 | 0 | NA | intron (Nintron (N                  | 48423  | 55752    | Hs.128199           | ENS000000SEPTIN11   | 11-Sep      | septin 11protein-coding       |
| chr1-2332.8.973753 | -0.3187  | 0.696601 | -0.45751 | 0.647303 | 0.731633 | chr1  | 23321621 | 23338538 | 0 | NA | intron (Nintron (N                  | 14205  | 10236    | Hs.373765           | ENS000000HNRNPR     | HNRNPR      | hnf heteroer protein-coding   |
| chr17-51(8.973753  | -0.3187  | 0.696601 | -0.45751 | 0.647303 | 0.731633 | chr17 | 5105201  | 5110721  | 0 | NA | intron (Nintron (N                  | -3974  | 1.02E+08 | Hs.66004ENR_135657  | ENS000000LOC10192E- |             | uncharactcncRNA               |
| chr19-56(8.973753  | -0.3187  | 0.696601 | -0.45751 | 0.647303 | 0.731633 | chr19 | 56372750 | 56377780 | 0 | NA | intron (Nintron (N                  | -6882  | 79149    | Hs.177688           | ENS000000ZSCAN5A    | ZNF495      | ZS zinc fingprotein-coding    |
| chr7-6731(8.973753 | -0.3187  | 0.696601 | -0.45751 | 0.647303 | 0.731633 | chr7  | 6731596  | 6746398  | 0 | NA | intron (NAluSp SIN                  | 3692   | 441194   | Hs.71559            | ENS000000PMS2CL     | PMS2P13     | PMS2 C-tepsudo                |
| chr7-102(8.973753  | -0.3187  | 0.696601 | -0.45751 | 0.647303 | 0.731633 | chr7  | 1.03E+08 | 1.03E+08 | 0 | NA | promoter-promoter-exon (NM exon (NM | -54601 | 441273   | Hs.65642ENM_001031  | ENS000000SPDYE2     | SPDYB2-L1   | speedy/R1protein-coding       |
| chr1-178(9.000726  | -0.31857 | 0.696443 | -0.45742 | 0.647366 | 0.731633 | chr1  | 1.78E+08 | 1.78E+08 | 0 | NA | intron (NAluJb SIN                  | -54601 | 84066    | Hs.534501           | ENS000000TEX35      | Clorf49     | testis exprotein-coding       |
| chr17-16(9.000726  | -0.31857 | 0.696443 | -0.45742 | 0.647366 | 0.731633 | chr17 | 16031812 | 16037348 | 0 | NA | intron (NAluJb SIN                  | 34756  | 54902    | Hs.46231ENM_01777E  | ENS000000TTC19      | 201020401   | tetratric protein-coding      |
| chr3-641(9.000726  | -0.31857 | 0.696443 | -0.45742 | 0.647366 | 0.731633 | chr3  | 64196289 | 64199312 | 0 | NA | intron (NLIPIA13 LI                 | 10256  | 101E+08  | Hs.67084CNR_04670E  | ENS000000PRICKLE2-  |             | PRICKLE2 ncRNA                |
| chr3-142(9.000726  | -0.31857 | 0.696443 | -0.45742 | 0.647366 | 0.731633 | chr3  | 1.42E+08 | 1.42E+08 | 0 | NA | intron (NAluSq2 SI                  | 104819 | 54464    | Hs.43510CENM_019001 | ENS000000XRN1       | 1-Sep 5'-3' | excpprotein-coding            |
| chr6-5647(9.000726 | -0.31857 | 0.696443 | -0.45742 | 0.647366 | 0.731633 | chr6  | 56475480 | 56483982 | 0 | NA | intron (NLIPIB4 LIN                 | -85603 | 81578    | Hs.47629            | ENS000000COL21A1    | COL1A1      | FF collagen protein-coding    |
| chr6-570(9.000726  | -0.31857 | 0.696443 | -0.45742 | 0.647366 | 0.731633 | chr6  | 57098118 | 57105146 | 0 | NA | exon (NM exon (NM                   | 11444  | 26036    | Hs.48562ENM_01555E  | ENS000000ZNF451     | COASTER     | zinc fingprotein-coding       |
| chr1-222(8.986136  | -0.31635 | 0.697832 | -0.45333 | 0.650313 | 0.731633 | chr1  | 2.23E+08 | 2.23E+08 | 0 | NA | intron (Nintron (N                  | 11595  | 64853    | Hs.15662ENM_022831  | ENS000000AIDA       | Clorf80     | axin inteprotein-coding       |
| chr5-6964(8.959163 | -0.31645 | 0.700537 | -0.45173 | 0.651466 | 0.731633 | chr5  | 69645753 | 69646096 | 0 | NA | non-codiron-codir                   | 14779  | 1.02E+08 | Hs.63401ENR_157804  | ENS000000LOC10192E- |             | putative pseudo               |
| chr1-1461(11.21397 | -0.25602 | 0.570586 | -0.44869 | 0.653657 | 0.731633 | chr1  | 1.46E+08 | 1.46E+08 | 0 | NA | intron (Nintron (N                  | 41260  | 388677   | Hs.65515ENM_20345E  | ENS000000NOTCH2NL2  | NOTCH2NL2   | NOTCH notch 2 protein-coding  |
| chr19-39(8.490095  | -0.32337 | 0.725298 | -0.44584 | 0.655712 | 0.731633 | chr19 | 39972016 | 39984868 | 0 | NA | intron (Nintron (N                  | 7277   | 5704     | Hs.211594           | ENS000000PSMC4      | MIP224      | HSF proteasoneprotein-coding  |
| chr3-710(8.490095  | -0.32337 | 0.725298 | -0.44584 | 0.655712 | 0.731633 | chr3  | 71012667 | 71016586 | 0 | NA | intron (NLIPIA5 LIN                 | 50298  | 27086    | Hs.59368            | ENS000000FOX1       | 12CC4       | HSF forkhead protein-coding   |
| chr8-1728(8.490095 | -0.32337 | 0.725298 | -0.44584 | 0.655712 | 0.731633 | chr8  | 17284373 | 17292888 | 0 | NA | intron (NLIPIA7 LIN                 | 41672  | 137492   | Hs.34387            | ENS000000VPS37A     | HCRP1       | PQE VPS37A sprotein-coding    |
| chr6-1387(8.517068 | -0.32324 | 0.728097 | -0.44395 | 0.657077 | 0.731633 | chr6  | 1.39E+08 | 1.39E+08 | 0 | NA | intron (NAluJb SIN                  | -7417  | 345930   | Hs.66060ENM_001077  | ENS000000ECTZL      | ARHGAP32    | epitheliaprotein-coding       |
| chr8-115(8.531659  | -0.32571 | 0.733851 | -0.44384 | 0.657162 | 0.731633 | chr8  | 1.16E+08 | 1.16E+08 | 0 | NA | exon (NM exon (NM                   | 48480  | 7227     | Hs.65701ENM_01411E  | ENS000000TRPS1      | CG79        | LGCF transcrip protein-coding |
| chr11-57(8.475505  | -0.32098 | 0.725369 | -0.44251 | 0.658123 | 0.731633 | chr11 | 57295406 | 57303856 | 0 | NA | TTS (NM_CTS (NM_C                   | 25321  | 85456    | Hs.53073CENM_03339E | ENS000000TNKS1BP1   | TAB18       | tankyrase protein-coding      |
| chr14-241(8.475505 | -0.32098 | 0.725369 | -0.44251 | 0.658123 | 0.731633 | chr14 | 24137567 | 24139539 | 0 | NA | TTS (NM_CTS (NM_C                   | 2359   | 5720     | Hs.75348            | ENS000000PSME1      | HEL-S-12E   | proteasoneprotein-coding      |
| chr14-751(8.475505 | -0.32098 | 0.725369 | -0.44251 | 0.658123 | 0.731633 | chr14 | 75133372 | 75135804 | 0 | NA | 3' UTR (N3' UTR (N                  | -7540  | 91754    | Hs.7200             | ENS000000CNEK9      | APUG        | LCCS NIMA relaprotein-coding  |
| chr19-40(8.475505  | -0.32098 | 0.725369 | -0.44251 | 0.658123 | 0.731633 | chr19 | 40443314 | 40442496 | 0 | NA | 3' UTR (N3' UTR (N                  | 1193   | 29946    | Hs.51541ENM_01336E  | ENS000000SERTAD3    | RBT1        | SERTA donprotein-coding       |
| chr19-44(8.475505  | -0.32098 | 0.725369 | -0.44251 | 0.658123 | 0.731633 | chr19 | 44324778 | 44341965 | 0 | NA | intron (Nintron (N                  | 23309  | 7771     | Hs.48589            | ENS000000ZNF112     | ZFP112      | Zn zinc fingprotein-coding    |
| chr19-58(8.475505  | -0.32098 | 0.725369 | -0.44251 | 0.658123 | 0.731633 | chr19 | 58410968 | 58424292 | 0 | NA | non-codiron-codir                   | 8956   | 201514   | Hs.439551ENM_17354E | ENS000000ZNF584     |             | zinc fingprotein-coding       |
| chr7-416(8.475505  | -0.32098 | 0.725369 | -0.44251 | 0.658123 | 0.731633 | chr7  | 41688807 | 41690941 | 0 | NA | exon (NM exon (NM                   | -4045  | 285954   | Hs.65686ENR_02711E  | ENS000000INHBA-AS1  |             | INHBA antncRNA                |
| chr7-102(8.475505  | -0.32098 | 0.725369 | -0.44251 | 0.658123 | 0.731633 | chr7  | 1.03E+08 | 1.03E+08 | 0 | NA | intron (Nintron (N                  | 9231   | 548644   | Hs.61025ENM_00101E  | ENS000000POLR2J3    | POLR2J2     | URNA polynprotein-coding      |
| chr7-102(8.475505  | -0.32098 | 0.725369 | -0.44251 | 0.658123 | 0.731633 | chr7  | 1.03E+08 | 1.03E+08 | 0 | NA | Intergeni Intergeni                 | 10865  | 1E+08    | Hs.61025ENM_001114  | ENS000000UPK3BL1    | UPK3BL      | UVU roluplakim protein-coding |
| chr9-277(8.475505  | -0.32098 | 0.725369 | -0.44251 | 0.658123 | 0.731633 | chr9  | 2772469  | 2779438  | 0 | NA | IntergeniAluSz SIN                  | 58443  | 169522   | Hs.62267ENM_133497  | ENS000000CKNV2      | KV11.1      | kv putakim protein-coding     |
| chr1-1457(8.502478 | -0.32084 | 0.725334 | -0.44233 | 0.65825  | 0.731633 | chr1  | 1.46E+08 | 1.46E+08 | 0 | NA | 3' UTR (N3' UTR (N                  | 26857  | 11126    | Hs.488237ENM_00705E | ENS000000CD160      | CD160       | molprotein-coding             |
| chr12-68(8.502478  | -0.32084 | 0.725334 | -0.44233 | 0.65825  | 0.731633 | chr12 | 68648987 | 68663764 | 0 | NA | exon (NM exon (NM                   | -29000 | 1E+08    | Hs.72453CNR_03333E  | ENS000000SNR070G    | U70G        | small nucsnoRNA               |
| chr15-92(8.502478  | -0.32084 | 0.725334 | -0.44233 | 0.65825  | 0.731633 | chr15 | 92884318 | 92899256 | 0 | NA | intron (Nintron (N                  | 8491   | 1.01E+08 | Hs.622504ENR_037600 | ENS000000LINC0157E- |             | long intncRNA                 |
| chr15-99(8.502478  | -0.32084 | 0.725334 | -0.44233 | 0.65825  | 0.731633 | chr15 | 99674504 | 99677556 | 0 | NA | intron (NAluSx SIN                  | 43052  | 4205     | Hs.26867ENM_00558E  | ENS000000MEF2A      | ADCAD1      | RMycocyte eprotein-coding     |
| chr16-91(8.502478  | -0.32084 | 0.725334 | -0.44233 | 0.65825  | 0.731633 | chr16 | 9103029  | 9110104  | 0 | NA | intron (NAluSx SIN                  | 14922  | 29035    | Hs.221497ENM_01411E | ENS000000Cl6orf72   | PREL049     | chromosoneprotein-coding      |
| chr17-771(8.502478 | -0.32084 | 0.725334 | -0.44233 | 0.65825  | 0.731633 | chr17 | 77142744 | 77145531 | 0 | NA | intron (Nintron (N                  | 3168   | 6397     | Hs.464184ENM_00300E | ENS000000SECI4L1    | PRELID4A    | SEC14 likprotein-coding       |
| chr2-182(8.502478  | -0.32084 | 0.725334 | -0.44233 | 0.65825  | 0.731633 | chr2  | 1.83E+08 | 1.83E+08 | 0 | NA | intron (NLIPIA4 LIN                 | 77337  | 10787    | Hs.60373ENM_01343E  | ENS000000CNCKAP1    | HEM2        | NAP1NCK assocprotein-coding   |
| chr3-446(8.502478  | -0.32084 | 0.725334 | -0.44233 | 0.65825  | 0.731633 | chr3  | 44627080 | 44645144 | 0 | NA | intron (NAluY SINE                  | 11076  | 10168    | Hs.15703ENM_00699E  | ENS000000ZNF197     | D3S1363E    | zinc fingprotein-coding       |
| chr4-5787(8.502478 | -0.32084 | 0.725334 | -0.44233 | 0.65825  | 0.731633 | chr4  | 5787180  | 5789487  | 0 | NA | intron (NMLT1F2 LI                  | 77132  | 2121     | Hs.64689ENM_01455E  | ENS000000EVC        | DWF-1       | EVC Evc cilia protein-coding  |
| chr6-136(8.502478  | -0.32084 | 0.725334 | -0.44233 | 0.65825  | 0.731633 | chr6  | 1.36E+08 | 1.36E+08 | 0 | NA | intron (Nintron (N                  | -19561 | 113115   | Hs.12153ENM_13841E  | ENS000000MTFR2      | DUFD1       | FAM mitochondncprotein-coding |
| chr7-746(8.502478  | -0.32084 | 0.725334 | -0.44233 | 0.65825  | 0.731633 | chr7  | 74694691 | 74715277 | 0 | NA | intron (Nintron (N                  | 23984  | 23984    | Hs.110044           | ENS000000LOC10192E- |             | uncharactcncRNA               |
| chrX-411(8.502478  | -0.32084 | 0.725334 | -0.44233 | 0.65825  | 0.731633 | chrX  | 41189022 | 41222390 | 0 | NA | intron (Nintron (N                  | -73033 | 1E+08    | Hs.54611ENR_13561E  | ENS000000LINC02601- |             | long intncRNA                 |
| chr6-1297(8.448532 | -0.32113 | 0.731103 | -0.43924 | 0.660491 | 0.731633 | chr6  | 1.3E+08  | 1.3E+08  | 0 | NA | intron (NAluSx SIN                  | 3442   | 93663    | Hs.48645ENM_03351E  | ENS000000ARHGAP18   | MacGAP      | SERHO GTPasprotein-coding     |
| chr1-7317(8.487887 | -0.31845 | 0.725408 | -0.43899 | 0.660667 | 0.731633 | chr1  | 731747   | 733490   | 0 | NA | Intergeni Intergeni                 | -2267  | 1E+08    | Hs.728864ENR_028327 | ENS000000LOC10013E- |             | uncharactcncRNA               |
| chr1-109(8.487887  | -0.31845 | 0.725408 | -0.43899 | 0.660667 | 0.731633 | chr1  | 31905188 | 31920728 | 0 | NA | intron (Nintron (N                  | 24860  | 8073     | Hs.470477ENM_00347E | ENS000000PTCA4A2    | HH13        | HH17 protein tprotein-coding  |
| chr1-187(8.487887  | -0.31845 | 0.725408 | -0.43899 | 0.660667 | 0.731633 | chr1  | 1.09E+08 | 1.09E+08 | 0 | NA | intron (NTHE1C LTF                  | 37589  | 6814     | Hs.53043ENM_00726E  | ENS000000STXP3      | MUNC18-3    | syntaxin protein-coding       |
| chr1-1481(8.487887 | -0.31845 | 0.725408 | -0.43899 | 0.660667 | 0.731633 | chr1  | 1.48E+08 | 1.48E+08 | 0 | NA | intron (NLTR5_Hs L                  | -2116  | 200030   | Hs.72158ENM_18337E  | ENS000000NBPF11     | NBPF24      | NBPF memtprotein-coding       |
| chr1-143(8.487887  | -0.31845 | 0.725408 | -0.43899 | 0.660667 | 0.731633 | chr1  | 1.49E+08 | 1.49E+08 | 0 | NA | intron (Nintron (N                  | 59526  | 400818   | Hs.44508CENM_001037 | ENS000000NBPF9      | NBPF        | memtprotein-coding            |
| chr10-73(8.487887  | -0.31845 | 0.725408 | -0.43899 | 0.660667 | 0.731633 | chr10 | 73466206 | 73466490 | 0 | NA | intron (Nintron (N                  | -29404 | 59254    | Hs.43450ENR_13210E  | ENS000000PPP3CB-AS1 | USP54-AS1   | PPP3CB arncRNA                |
| chr10-737(8.487887 | -0.31845 | 0.725408 | -0.43899 | 0.660667 | 0.731633 | chr10 | 73725189 | 73728241 | 0 | NA | intron (NAluJb SIN                  | 3791   | 1.14E+08 | NR_16042E           | ENS000000BMS1P4-AC  | BMS1P4-AC   | pseudo                        |
| chr10-11(8.487887  | -0.31845 | 0.725408 | -0.43899 | 0.660667 | 0.731633 | chr10 | 1.19E+08 | 1.19E+08 | 0 | NA | intron (NAluSp SIN                  | 5554   | 641451   | Hs.68865ENR_00291E  | ENS000000SNORA19    | ACA19       | small nucsnoRNA               |
|                    |          |          |          |          |          |       |          |          |   |    |                                     |        |          |                     |                     |             |                               |

|                    |          |          |          |          |          |       |          |          |   |    |                     |                  |                     |                     |                     |          |                             |                           |
|--------------------|----------|----------|----------|----------|----------|-------|----------|----------|---|----|---------------------|------------------|---------------------|---------------------|---------------------|----------|-----------------------------|---------------------------|
| chr6-1062.9.216561 | -0.24179 | 0.681878 | -0.35459 | 0.722897 | 0.792848 | chr6  | 1.06E+08 | 1.06E+08 | 0 | NA | intron (Nintron (N  | 24476 NR_104402  | 9474 Hs. 486066     | ENSG000004ATG5      | APG5                | APG5     | autophagyprotein-coding     |                           |
| chr14-226.9.189588 | -0.24185 | 0.683288 | -0.35395 | 0.723376 | 0.792911 | chr14 | 22601491 | 22606156 | 0 | NA | intron (Nintron (N  | 5585 NM_022066   | 63874 Hs. 445666    | ENSG000004ABHD4     | ABHD4               | ABHD4    | abhydrolaseprotein-coding   |                           |
| chr9-1542.9.189588 | -0.24185 | 0.683288 | -0.35395 | 0.723376 | 0.792911 | chr9  | 15424788 | 15426258 | 0 | NA | intron (Nintron (N  | 2647 NR_161445   | 6619 Hs. 546299     | ENSG000004SNAPC3    | PTFbeta             | PTFbeta  | small nucprotein-coding     |                           |
| chr2-850f.9.201971 | -0.23963 | 0.68325  | -0.35072 | 0.7258   | 0.795336 | chr2  | 85052955 | 85053323 | 0 | NA | intron (Nintron (N  | 14208 NR_146455  | 1.01E+08 Hs. 434398 | ENSG000004LINC01964 |                     |          | long intencRNA              |                           |
| chr9-410c.11.42981 | -0.19537 | 0.595357 | -0.34928 | 0.726883 | 0.796291 | chr9  | 41005071 | 41012722 | 0 | NA | intron (NMER33 DN   | 18910 NR_156733  | 1E+08 Hs. 231861    | NR_034006           | FRG1HP              |          | FSDH recpseudo              |                           |
| chr15-67c.9.174998 | -0.23966 | 0.68714  | -0.34878 | 0.727253 | 0.796465 | chr15 | 67075655 | 67075872 | 0 | NA | intron (NAluSx1 SI  | 10161 NM_005902  | 4088 Hs. 72798      | ENSG000004SMAD3     | HSPC193             | HSPC193  | SMAD famiprotein-coding     |                           |
| chr7-920c.9.214354 | -0.23737 | 0.685517 | -0.34627 | 0.729143 | 0.798302 | chr7  | 92026509 | 92028050 | 0 | NA | intron (NSVA_A Ret  | 86404 NM_005751  | 10142 Hs. 651221    | ENSG000004AKAP9     | AKAP-9              | AKAP-9   | AKA-kinase protein-coding   |                           |
| chr12-105.9.241327 | -0.23725 | 0.688783 | -0.34445 | 0.730506 | 0.799562 | chr12 | 1.09E+08 | 1.09E+08 | 0 | NA | intron (NMER9a3 LI  | 18188 NM_183415  | 89910 Hs. 374067    | ENSG000004UBE3B     | BPD15               | BPD15    | KO5ubiquitinprotein-coding  |                           |
| chr15-101.13.62625 | -0.16118 | 0.468928 | -0.34373 | 0.73105  | 0.799925 | chr15 | 1.02E+08 | 1.02E+08 | 0 | NA | intron (Nintron (N  | 4622 NR_003655   | 374666 Hs. 459577   | NR_199163           | WASH3P              | FAM39DP  | WASP famipseudo             |                           |
| chr1-156.8.708138  | -0.2469  | 0.719407 | -0.34319 | 0.731454 | 0.800134 | chr1  | 1.57E+08 | 1.57E+08 | 0 | NA | intron (NAluJb SIN  | -45393 NR_030527 | 768220              | NR_030527           | ENSG000004MIR765    | MIRN765  | lincRNA ncRNA               |                           |
| chr3-111.8.735111  | -0.24687 | 0.721043 | -0.34237 | 0.732071 | 0.800576 | chr3  | 1.11E+08 | 1.11E+08 | 0 | NA | intron (Nintron (N  | 47411 NM_001243  | 25945 Hs. 293917    | NR_015488           | ENSG000004NECTIN3   | CD113    | CD113                       | CDWnectin cprotein-coding |
| chr14-607.8.70593  | -0.24201 | 0.712777 | -0.33953 | 0.734208 | 0.80268  | chr14 | 60717174 | 60718090 | 0 | NA | intron (Nintron (N  | 6719 NM_017420   | 51804 Hs. 97849     | NR_017420           | ENSG000004SIX4      | AREC3    | SIX                         | homecprotein-coding       |
| chr1-1784.8.718313 | -0.2396  | 0.711499 | -0.33675 | 0.736303 | 0.803932 | chr1  | 1.78E+08 | 1.78E+08 | 0 | NA | intron (Nintron (N  | -70574 NM_032122 | 84066 Hs. 534501    | NR_032122           | ENSG000004TEX35     | Clorf49  | Clorf49                     | testis exprprotein-coding |
| chr17-604.8.718313 | -0.2396  | 0.711499 | -0.33675 | 0.736303 | 0.803932 | chr17 | 60486674 | 60493916 | 0 | NA | intron (NLMIM2 LI   | 35945 NM_001282  | 10513 Hs. 84084     | NR_006380           | ENSG000004APPBP2    | APP-BP2  | Famlyoid tprotein-coding    |                           |
| chr5-3901.8.718313 | -0.2396  | 0.711499 | -0.33675 | 0.736303 | 0.803932 | chr5  | 39010040 | 39012848 | 0 | NA | intron (NTHE1C-int  | 62955 NM_001282  | 253260 Hs. 407922   | NR_152755           | ENSG000004RICTOR    | AVO3     | PIA                         | RPTOR incprotein-coding   |
| chr8-103c.8.718313 | -0.2396  | 0.711499 | -0.33675 | 0.736303 | 0.803932 | chr8  | 1.03E+08 | 1.03E+08 | 0 | NA | intron (NL2c LINE   | 21795 NR_145795  | 1.1E+08             | NR_145795           | SNORD173            |          | small nucsnRNA              |                           |
| chr14-754.8.69134  | -0.23967 | 0.712883 | -0.33662 | 0.736722 | 0.803932 | chr14 | 75431502 | 75432946 | 0 | NA | promoter-promoter-  | 90 NM_001135     | 122953 Hs. 196482   | NR_130465           | ENSG000004JDP2      | JUNDM2   | Jun dimerprotein-coding     |                           |
| chr8-427.8.69134   | -0.23967 | 0.712883 | -0.33662 | 0.736722 | 0.803932 | chr8  | 42276007 | 42276225 | 0 | NA | intron (NAluSx1 SIN | 4814 NM_001190   | 3551 Hs. 597664     | NR_001555           | ENSG000004IKKBK     | IKK-beta | inhibitorprotein-coding     |                           |
| chr17-45f.8.703722 | -0.23726 | 0.711607 | -0.33342 | 0.738816 | 0.803932 | chr17 | 45513929 | 45516500 | 0 | NA | promoter-promoter-  | -15 NM_001330    | 1.01E+08 Hs. 559255 | NR_001035           | ENSG000004ARL17B    | ARL17    | ARLADP                      | ribosprotein-coding       |
| chr18-23f.8.703722 | -0.23726 | 0.711607 | -0.33342 | 0.738816 | 0.803932 | chr18 | 23516331 | 23523557 | 0 | NA | intron (Nintron (N  | 16433 NM_013322  | 29919 Hs. 464777    | NR_013322           | ENSG000004RMC1      | C18orf8  | Regulatorprotein-coding     |                           |
| chr19-53c.8.703722 | -0.23726 | 0.711607 | -0.33342 | 0.738816 | 0.803932 | chr19 | 53064952 | 53102548 | 0 | NA | intron (NAluJb SIN  | 3287 NM_001322   | 90338 Hs. 655967    | NR_033288           | ENSG000004ZNF160    | F11      | Hkr1                        | zinc fingprotein-coding   |
| chr19-53c.8.703722 | -0.23726 | 0.711607 | -0.33342 | 0.738816 | 0.803932 | chr19 | 53397530 | 53415822 | 0 | NA | intron (NAluSx1 SIN | 11527 NM_001040  | 91661 Hs. 657821    | NR_001040           | ENSG000004ZNF765    |          | zinc fingprotein-coding     |                           |
| chr3-125f.8.703722 | -0.23726 | 0.711607 | -0.33342 | 0.738816 | 0.803932 | chr3  | 1.26E+08 | 1.26E+08 | 0 | NA | intron (NAluSx1 SI  | 13073 NR_073435  | 8723 Hs. 507242     | NR_003794           | ENSG000004SNX4      | ATG24B   | sorting rprotein-coding     |                           |
| chr4-118f.8.703722 | -0.23726 | 0.711607 | -0.33342 | 0.738816 | 0.803932 | chr4  | 1.19E+08 | 1.19E+08 | 0 | NA | intron (NL2c LINE   | 5333 NR_001318   | 9871 Hs. 189641     | NR_014822           | ENSG000004SEC24D    | CLCRP2   | SEC24                       | honprotein-coding         |
| chr5-150f.8.703722 | -0.23726 | 0.711607 | -0.33342 | 0.738816 | 0.803932 | chr5  | 1.5E+08  | 1.5E+08  | 0 | NA | intron (Nintron (N  | 11722 NM_014983  | 22993 Hs. 719185    | NR_014983           | ENSG000004HMGXB3    | HMGX3    | SMF HMG-box cprotein-coding |                           |
| chr6-264f.8.703722 | -0.23726 | 0.711607 | -0.33342 | 0.738816 | 0.803932 | chr6  | 26459271 | 26461500 | 0 | NA | intron (Nintron (N  | 2430 NM_007045   | 11120 Hs. 159022    | NR_007045           | ENSG000004BTN2A1    | BK14H9.1 | l ubtrophinprotein-coding   |                           |
| chr3-1137.8.730696 | -0.23719 | 0.712804 | -0.33276 | 0.739314 | 0.803932 | chr3  | 1.14E+08 | 1.14E+08 | 0 | NA | 3' UTR (N3' UTR (N  | -24398 NR_111981 | 205717 Hs. 632577   | NR_001005           | ENSG000004ZNF31     | KIAA2018 | upstream protein-coding     |                           |
| chr1-205f.8.716105 | -0.23485 | 0.712913 | -0.32942 | 0.741836 | 0.803932 | chr1  | 2.06E+08 | 2.06E+08 | 0 | NA | intron (Nintron (N  | 9656 NM_001973   | 2005 Hs. 497520     | NR_001973           | ENSG000004ELK4      | SAP1     | ETS                         | transprotein-coding       |
| chr20-34c.8.716105 | -0.23485 | 0.712913 | -0.32942 | 0.741836 | 0.803932 | chr20 | 34369013 | 34375390 | 0 | NA | intron (NAluY SINE  | 8928 NM_001257   | 83737 Hs. 632272    | NR_031482           | ENSG000004ITCH      | ADMFD    | AIF                         | itchy E3 protein-coding   |
| chr20-41c.8.689132 | -0.23491 | 0.714479 | -0.32878 | 0.742323 | 0.803932 | chr20 | 41061330 | 41063211 | 0 | NA | intron (Nintron (N  | 33448 NM_003288  | 7150 Hs. 472737     | NR_003288           | ENSG000004TOP1      | TOP1     | DNA topoisprotein-coding    |                           |
| chr1-1931.8.701515 | -0.23247 | 0.715801 | -0.32476 | 0.74536  | 0.803932 | chr1  | 1.93E+08 | 1.93E+08 | 0 | NA | intron (Nintron (N  | 6319 NM_024525   | 79577 Hs. 378996    | NR_024525           | ENSG000004CDC73     | Clorf28  | cell diviprotein-coding     |                           |
| chr11-97f.15.35584 | -0.13452 | 0.416372 | -0.32307 | 0.746639 | 0.803932 | chr11 | 975370   | 975744   | 0 | NA | intron (NCPg        | 49687 NR_144510  | 161 Hs. 19121       | NR_012305           | ENSG000004AP2A2     | ADTBA    | Cladaptor rprotein-coding   |                           |
| chr2-4631.8.674542 | -0.23247 | 0.720273 | -0.32275 | 0.746881 | 0.803932 | chr2  | 46317137 | 46317920 | 0 | NA | intron (NTigger1 I  | 20121 NM_001430  | 2034 Hs. 468410     | NR_001430           | ENSG000004EPAS1     | ECTY4    | HLF                         | endothelinprotein-coding  |
| chr7-1247.8.207682 | -0.2399  | 0.74489  | -0.32206 | 0.747404 | 0.803932 | chr7  | 1.25E+08 | 1.25E+08 | 0 | NA | intron (NAluJb SIN  | 6576 NM_005302   | 2861 Hs. 406094     | NR_005302           | ENSG000004GPR37     | EDNRBL   | Pg                          | protein-coding            |
| chr2-6991.8.220664 | -0.23726 | 0.742041 | -0.31974 | 0.749162 | 0.803932 | chr2  | 69913033 | 69913322 | 0 | NA | IntergeniIntergeni  | -1864 NM_001202  | 4084 Hs. 468908     | NR_002357           | ENSG000004MXD1      | BHLH538  | MAX                         | dimerprotein-coding       |
| chr6-1345.8.713898 | -0.22996 | 0.719794 | -0.31948 | 0.749365 | 0.803932 | chr6  | 1.35E+08 | 1.35E+08 | 0 | NA | exon (NM exon (NM   | -18003 NR_037435 | 1.01E+08            | NR_037435           | ENSG000004MIR3662   | mir-3662 | microRNA ncRNA              |                           |
| chr7-746f.8.713898 | -0.22996 | 0.719794 | -0.31948 | 0.749365 | 0.803932 | chr7  | 74659290 | 74659634 | 0 | NA | intron (NAluSx1 SIN | 1744 NM_033000   | 2969 Hs. 647041     | NR_001515           | ENSG000004GTF2I     | BAP135   | B1                          | general tprotein-coding   |
| chr3-111f.8.647569 | -0.23239 | 0.730665 | -0.31806 | 0.750442 | 0.803932 | chr3  | 1.12E+08 | 1.12E+08 | 0 | NA | non-codiron-codir   | -7479 NM_013255  | 29114 Hs. 169330    | NR_013255           | ENSG000004TAGLN3    | NP22     | NP24                        | transgeliprotein-coding   |
| chr1-3902.8.205474 | -0.23472 | 0.740523 | -0.31697 | 0.751265 | 0.803932 | chr1  | 39028223 | 39039424 | 0 | NA | intron (NAluSx1 SIN | 7183 NM_004552   | 4725 Hs. 632387     | NR_004552           | ENSG000004DNLF5     | Cl-15k   | CINADH                      | ubiquitinprotein-coding   |
| chr11-91f.8.205474 | -0.23472 | 0.740523 | -0.31697 | 0.751265 | 0.803932 | chr11 | 9164878  | 9166394  | 0 | NA | intron (NAluJr SIN  | 71273 NR_027713  | 283102 Hs. 689472   | NR_027713           | ENSG000004KRT8P41   |          | keratin Epseudo             |                           |
| chr11-73f.8.205474 | -0.23472 | 0.740523 | -0.31697 | 0.751265 | 0.803932 | chr11 | 73014085 | 73011251 | 0 | NA | intron (NLMIM2 LI   | 131450 NM_014824 | 9873 Hs. 744955     | NR_014824           | ENSG000004CHSD2     | NWK      | NWK1                        | FCN and cprotein-coding   |
| chr14-67c.8.205474 | -0.23472 | 0.740523 | -0.31697 | 0.751265 | 0.803932 | chr14 | 67682385 | 67693252 | 0 | NA | intron (NAluSx2 SI  | 7946 NM_001252   | 51109 Hs. 719922    | NR_016022           | ENSG000004RDH11     | ARSDR1   | CC                          | retinol cprotein-coding   |
| chr16-30f.8.205474 | -0.23472 | 0.740523 | -0.31697 | 0.751265 | 0.803932 | chr16 | 30202276 | 30205059 | 0 | NA | TTS (NR_CTS (NR_C   | 3260 NR_002557   | 613038 Hs. 569582   | NR_002557           | ENSG000004LOC613038 |          | SAGA compseudo              |                           |
| chr16-351.8.205474 | -0.23472 | 0.740523 | -0.31697 | 0.751265 | 0.803932 | chr16 | 85182103 | 85187306 | 0 | NA | IntergeniLIM5 LI    | -23092 NR_162142 | 1.13E+08            | NR_162142           | MIR1218             |          | microRNA ncRNA              |                           |
| chr19-351.8.205474 | -0.23472 | 0.740523 | -0.31697 | 0.751265 | 0.803932 | chr19 | 35156029 | 35168448 | 0 | NA | intron (Nintron (N  | 7503 NM_144775   | 53827 Hs. 333411    | NR_014164           | ENSG000004FXD5      | DYSAD    | HSE                         | FXD5 domeprotein-coding   |
| chr19-351.8.205474 | -0.23472 | 0.740523 | -0.31697 | 0.751265 | 0.803932 | chr19 | 39431290 | 39435574 | 0 | NA | intron (Nintron (N  | 2517 NM_001020   | 6217 Hs. 397609     | NR_001020           | ENSG000004RPS16     | S16      | ribosomalprotein-coding     |                           |
| chr19-57f.8.205474 | -0.23472 | 0.740523 | -0.31697 | 0.751265 | 0.803932 | chr19 | 57936911 | 57944907 | 0 | NA | TTS (NM_CTS (NM_C   | -5507 NM_001317  | 147686 Hs. 660722   | NR_133460           | ENSG000004ZNF418    |          | zinc fingprotein-coding     |                           |
| chr4-118f.8.205474 | -0.23472 | 0.740523 | -0.31697 | 0.751265 | 0.803932 | chr4  | 1.19E+08 | 1.19E+08 | 0 | NA | intron (NAluJo SIN  | 11871 NM_001318  | 9871 Hs. 189641     | NR_014822           | ENSG000004SEC24D    | CLCRP2   | SEC24                       | honprotein-coding         |
| chr6-656f.8.205474 | -0.23472 | 0.740523 | -0.31697 | 0.751265 | 0.803932 | chr6  | 656308   | 657146   | 0 | NA |                     |                  |                     |                     |                     |          |                             |                           |



|                     |          |          |          |          |          |       |          |          |   |    |                      |        |                    |          |                     |                                      |                                    |                                    |
|---------------------|----------|----------|----------|----------|----------|-------|----------|----------|---|----|----------------------|--------|--------------------|----------|---------------------|--------------------------------------|------------------------------------|------------------------------------|
| chr10-68: 9.432396  | -0.16888 | 0.668261 | -0.25272 | 0.800487 | 0.847323 | chr10 | 68375449 | 68376209 | 0 | NA | intron (AluSx SIN    | 31360  | NM_017987          | 55680    | Hs.653144NM_017987  | ENSG000003RUFY2                      | RABIP4R ZRUN and Fprotein-coding   |                                    |
| chr19-362: 9.432396 | -0.16888 | 0.668261 | -0.25272 | 0.800487 | 0.847323 | chr19 | 36226166 | 36241091 | 0 | NA | intron (LTR5_Hs L    | 12300  | NM_001366          | 147929   | Hs.596338NM_152477  | ENSG000003ZNF565                     | - zinc fingprotein-coding          |                                    |
| chr4-6361: 10.49477 | 0.154266 | 0.612851 | 0.251719 | 0.801258 | 0.847901 | chr4  | 63613    | 63812    | 0 | NA | intron (AluSx3 SI    | 10391  | NM_182524          | 152687   | Hs.709466NM_182524  | ENSG000003ZNF595                     | - zinc fingprotein-coding          |                                    |
| chr4-1508: 8.921765 | -0.16501 | 0.700892 | -0.23542 | 0.813879 | 0.861014 | chr4  | 1.51E+08 | 1.51E+08 | 0 | NA | intron (NL1PA4 LIN   | 119629 | NM_001199          | 987      | Hs.480938NM_00672f  | ENSG000003LRBA                       | BGL CDC41LPS respprotein-coding    |                                    |
| chr4-4302: 8.961121 | -0.16272 | 0.701044 | -0.2321  | 0.816457 | 0.863257 | chr4  | 4302524  | 4303316  | 0 | NA | exon (NM exon (NM    | 12669  | NR_138481          | 166793   | Hs.419997NM_145291  | ENSG000003ZBTB49                     | ZNF509 zinc fingprotein-coding     |                                    |
| chr3-676: 8.907175  | -0.16271 | 0.701029 | -0.2321  | 0.816458 | 0.863257 | chr3  | 67608971 | 67609621 | 0 | NA | intron (intron (N    | 45318  | NM_00384f          | 8801     | Hs.64491fNM_00384f  | ENSG000003SUGL2                      | G-SCS GBE succinateprotein-coding  |                                    |
| chr4-603: 11.02     | 0.134105 | 0.582469 | 0.230235 | 0.817909 | 0.863605 | chr4  | 60307    | 62494    | 0 | NA | intron (AluSx1 SI    | 8079   | NM_182524          | 152687   | Hs.709466NM_182524  | ENSG000003ZNF595                     | - zinc fingprotein-coding          |                                    |
| chr14-101: 8.946531 | -0.16042 | 0.698495 | -0.22966 | 0.818357 | 0.863605 | chr14 | 1.02E+08 | 1.02E+08 | 0 | NA | intron (intron (N    | 14456  | NM_00137f          | 1778     | Hs.61408fNM_00137f  | ENSG000003DYN5C1H1                   | CMT20 DHC dynein cyprotein-coding  |                                    |
| chr2-1731: 8.946531 | -0.16042 | 0.698495 | -0.22966 | 0.818357 | 0.863605 | chr2  | 1.73E+08 | 1.73E+08 | 0 | NA | non-codiron-codir    | 83583  | NR_03388f          | 339751   | Hs.57008fNR_03388f  | ENSG000003MAP3K20                    | MAP3K20 a ncRNA                    |                                    |
| chr9-4697: 8.946531 | -0.16042 | 0.698495 | -0.22966 | 0.818357 | 0.863605 | chr9  | 4697833  | 4698748  | 0 | NA | intron (NLIME4a LI   | 18721  | NM_01791f          | 55664    | Hs.66643fNM_01791f  | ENSG000003CDC37L1                    | CDC37B Hf cell diviprotein-coding  |                                    |
| chr1-151: 8.919557  | -0.16042 | 0.698641 | -0.22961 | 0.818394 | 0.863605 | chr1  | 1.52E+08 | 1.52E+08 | 0 | NA | intron (LTR12C LI    | 2152   | NM_05305f          | 117145   | Hs.16407fNM_05305f  | ENSG000003THEM4                      | CTMP thioesterprotein-coding       |                                    |
| chr17-45: 8.919557  | -0.16042 | 0.698641 | -0.22961 | 0.818394 | 0.863605 | chr17 | 45517621 | 45519917 | 0 | NA | non-codiron-codir    | 1754   | NR_00294f          | 55073    | Hs.59675fNM_018001  | LRRRC37A4 LRRRC37 LF leucine rpseudo |                                    |                                    |
| chr19-53: 8.919557  | -0.16042 | 0.698641 | -0.22961 | 0.818394 | 0.863605 | chr19 | 53337478 | 53555056 | 0 | NA | intron (NLIM4c LIN   | 91664  | Hs.72067fNM_138374 | 91664    | Hs.72067fNM_138374  | ENSG000003ZNF845                     | - zinc fingprotein-coding          |                                    |
| chr10-124: 8.850522 | 0.161983 | 0.710156 | 0.228096 | 0.819572 | 0.864587 | chr10 | 1.25E+08 | 1.25E+08 | 0 | NA | IntergeniAluSg SIN   | -18989 | NM_01758f          | 54764    | Hs.59515fNM_01758f  | ENSG000003ZNRAN1                     | TRABID zinc fingprotein-coding     |                                    |
| chr11-62: 8.93194   | -0.15813 | 0.698635 | -0.22635 | 0.820933 | 0.864587 | chr11 | 62882134 | 62890033 | 0 | NA | intron (AluSg SIN    | 4384   | NR_03719f          | 6520     | Hs.50276fNM_002394  | ENSG000003SLC3A2                     | 4F2 4F2HC solute caprotein-coding  |                                    |
| chr12-71: 8.93194   | -0.15813 | 0.698635 | -0.22635 | 0.820933 | 0.864587 | chr12 | 71649708 | 71661837 | 0 | NA | intron (NLIME1 LIN   | 8076   | NM_14498f          | 196441   | Hs.24579fNM_14498f  | ENSG000003ZFC3H1                     | CCDC131 C zinc fingprotein-coding  |                                    |
| chr13-114: 8.93194  | -0.15813 | 0.698635 | -0.22635 | 0.820933 | 0.864587 | chr13 | 1.14E+08 | 1.14E+08 | 0 | NA | exon (NM exon (NM    | 9002   | NR_126391          | 1.04E+08 | Hs.56921fNR_126391  | LINC01054                            | long intencRNA                     |                                    |
| chr14-94: 8.93194   | -0.15813 | 0.698635 | -0.22635 | 0.820933 | 0.864587 | chr14 | 94070870 | 94079445 | 0 | NA | intron (NLIME1 LIN   | 6045   | NM_020414          | 57062    | Hs.51032fNM_020414  | ENSG000003DDX24                      | - DEAD-box protein-coding          |                                    |
| chr16-214: 8.93194  | -0.15813 | 0.698635 | -0.22635 | 0.820933 | 0.864587 | chr16 | 21445392 | 21460814 | 0 | NA | intron (intron (N    | -18648 | NR_02445f          | 1E+08    | Hs.64843fNR_02445f  | LOC10019c                            | uncharactncRNA                     |                                    |
| chr17-46: 8.93194   | -0.15813 | 0.698635 | -0.22635 | 0.820933 | 0.864587 | chr17 | 46213619 | 46223910 | 0 | NA | intron (AluSg SIN    | 6610   | NM_00119f          | 284058   | Hs.64874fNM_01544f  | ENSG000003KANSL1                     | CENP-36 KAT8 regu protein-coding   |                                    |
| chr5-140: 8.944323  | -0.15582 | 0.701011 | -0.22228 | 0.824096 | 0.867313 | chr5  | 1.4E+08  | 1.4E+08  | 0 | NA | intron (AluSg SIN    | 3223   | NM_00262f          | 5201     | Hs.48356fNM_00262f  | ENSG000003PPFN1                      | PDF PDF1 prefoldirprotein-coding   |                                    |
| chr7-139: 8.944323  | -0.15582 | 0.701011 | -0.22228 | 0.824096 | 0.867313 | chr7  | 1.4E+08  | 1.4E+08  | 0 | NA | intron (intron (N    | 8322   | NM_00111f          | 28996    | Hs.73141fNM_002274  | ENSG000003HIPK2                      | PROO593 homodomeprotein-coding     |                                    |
| chr2-738: 8.91735   | -0.15582 | 0.701465 | -0.22213 | 0.824212 | 0.867313 | chr2  | 73831769 | 73833852 | 0 | NA | intron (MER20 DN     | 3843   | NM_00135f          | 10617    | Hs.46901fNM_00646f  | ENSG000003STAMPB                     | AMSH MICC STAM binprotein-coding   |                                    |
| chr4-395: 8.942115  | -0.15105 | 0.70878  | -0.21311 | 0.831243 | 0.874466 | chr4  | 39564652 | 39565221 | 0 | NA | intron (AluJr SIN    | 37097  | NR_04767f          | 1.01E+08 | Hs.64076fNR_04767f  | ENSG000003UGDH-AS1                   | UGDH anticncRNA                    |                                    |
| chr1-110: 9.331972  | 0.144978 | 0.681929 | 0.2126   | 0.831639 | 0.874625 | chr1  | 1.1E+08  | 1.1E+08  | 0 | NA | exon (NM exon (NM    | 2171   | NM_00120f          | 64783    | Hs.43594fNM_002276  | ENSG000003RBM15                      | OTT OTT1 RNA bindiprotein-coding   |                                    |
| chr1-538: 8.448282  | -0.15344 | 0.728734 | -0.21055 | 0.833238 | 0.874625 | chr1  | 53881919 | 53883486 | 0 | NA | intron (AluJb SIN    | 7095   | NR_13507f          | 54432    | Hs.11923            | NM_01898f                            | ENSG000003YIPF1                    | DJ167A19. Yip1 dome protein-coding |
| chr1-242: 8.433692  | -0.15095 | 0.727294 | -0.20755 | 0.835578 | 0.874625 | chr1  | 24284    | 24692    | 0 | NA | intron (intron (N    | 4892   | NR_02454f          | 653635   | Hs.44646fNR_02454f  | WASH7P                               | FAM39F Wf WASP fampseudo           |                                    |
| chr1-3294: 8.433692 | -0.15095 | 0.727294 | -0.20755 | 0.835578 | 0.874625 | chr1  | 32940193 | 32948643 | 0 | NA | intron (MIRb SINE    | 20391  | NM_00112f          | 127544   | Hs.591504NM_153341  | ENSG000003RNF19B                     | IBRD3 Nf ring fingprotein-coding   |                                    |
| chr1-112: 8.433692  | -0.15095 | 0.727294 | -0.20755 | 0.835578 | 0.874625 | chr1  | 1.13E+08 | 1.13E+08 | 0 | NA | intron (intron (N    | -24514 | NM_02096f          | 4343     | Hs.514941NM_02096f  | ENSG000003MOV10                      | fSAP113 fMov10 RfS protein-coding  |                                    |
| chr1-145: 8.433692  | -0.15095 | 0.727294 | -0.20755 | 0.835578 | 0.874625 | chr1  | 1.46E+08 | 1.46E+08 | 0 | NA | intron (AluSg6 SI    | 36196  | NM_01445f          | 27246    | Hs.52355fNM_01445f  | ENSG000003RNF115                     | BCF2 ZNFc ring fingprotein-coding  |                                    |
| chr10-57: 8.433692  | -0.15095 | 0.727294 | -0.20755 | 0.835578 | 0.874625 | chr10 | 5763457  | 5770316  | 0 | NA | intron (intron (N    | 46548  | NM_001494          | 2665     | Hs.29905fNM_001494  | ENSG000003GDI2                       | HEL-S-46cGDP disscprotein-coding   |                                    |
| chr10-57: 8.433692  | -0.15095 | 0.727294 | -0.20755 | 0.835578 | 0.874625 | chr10 | 5780739  | 5791854  | 0 | NA | intron (AluSx1 SI    | 27138  | NM_001494          | 2665     | Hs.29905fNM_001494  | ENSG000003GDI2                       | HEL-S-46cGDP disscprotein-coding   |                                    |
| chr11-59: 8.433692  | -0.15095 | 0.727294 | -0.20755 | 0.835578 | 0.874625 | chr11 | 59575638 | 59603620 | 0 | NA | intron (AluSx1 SI    | 5529   | NR_03612f          | 1E+08    | NR_03612f           | ENSG000003MIR3162                    | mir-3162 microRNA ncRNA            |                                    |
| chr12-11: 8.433692  | -0.15095 | 0.727294 | -0.20755 | 0.835578 | 0.874625 | chr12 | 1.1E+08  | 1.1E+08  | 0 | NA | intron (AluSx1 SI    | 18295  | NM_03312f          | 88455    | Hs.52870fNM_03312f  | ENSG000003ANKRD13A                   | ANKRD13 ankyrin rprotein-coding    |                                    |
| chr18-23: 8.433692  | -0.15095 | 0.727294 | -0.20755 | 0.835578 | 0.874625 | chr18 | 23524507 | 23546150 | 0 | NA | intron (intron (N    | 31817  | NM_01332f          | 29919    | Hs.46477fNM_01332f  | ENSG000003RMC1                       | C18orf8 F regulator protein-coding |                                    |
| chr19-19: 8.433692  | -0.15095 | 0.727294 | -0.20755 | 0.835578 | 0.874625 | chr19 | 19323    | 190109   | 0 | NA | intron (intron (N    | 19323  | NM_00109f          | 440515   | Hs.35190fNM_00109f  | ENSG000003ZNF506                     | - zinc fingprotein-coding          |                                    |
| chr4-806: 8.433692  | -0.15095 | 0.727294 | -0.20755 | 0.835578 | 0.874625 | chr4  | 80065382 | 80069417 | 0 | NA | intron (intron (N    | 5830   | NM_05817f          | 118429   | Hs.16296fNM_05817f  | ENSG000003ANTXR2                     | CMG-2 CMCANTXR celprotein-coding   |                                    |
| chr5-349: 8.433692  | -0.15095 | 0.727294 | -0.20755 | 0.835578 | 0.874625 | chr5  | 34924574 | 34926398 | 0 | NA | 3' UTR (N' 3' UTR (N | -3983  | NM_00101f          | 134218   | Hs.13188fNM_19428f  | ENSG000003DNJ1                       | BMF25 DNJ DnaJ heatprotein-coding  |                                    |
| chr8-644: 8.433692  | -0.15095 | 0.727294 | -0.20755 | 0.835578 | 0.874625 | chr8  | 6445082  | 6445908  | 0 | NA | exon (NM exon (NM    | 38342  | NM_00132f          | 79648    | Hs.59380fNM_002459f | ENSG000003MCPH1                      | BRIT1 MC1microcelprotein-coding    |                                    |
| chr8-9734: 8.433692 | -0.15095 | 0.727294 | -0.20755 | 0.835578 | 0.874625 | chr8  | 9734422  | 9736281  | 0 | NA | intron (intron (N    | -6321  | NR_03032f          | 693182   | NR_03032f           | ENSG000003MIR597                     | MIR597 f microRNA ncRNA            |                                    |
| chr8-127: 8.433692  | -0.15095 | 0.727294 | -0.20755 | 0.835578 | 0.874625 | chr8  | 1.28E+08 | 1.28E+08 | 0 | NA | intron (intron (N    | 4156   | NM_00246f          | 4609     | Hs.20245fNM_00246f  | ENSG000003MYC                        | MRTL MYCCMYC protcprotein-coding   |                                    |
| chr9-922: 8.433692  | -0.15095 | 0.727294 | -0.20755 | 0.835578 | 0.874625 | chr9  | 92278917 | 92289660 | 0 | NA | intron (NLIMC5 LIN   | 8259   | NR_037424          | 1.01E+08 | NR_037424f          | ENSG000003MIR3651                    | mir-3651 microRNA ncRNA            |                                    |
| chr2-2071: 8.460665 | -0.15097 | 0.730122 | -0.20677 | 0.836192 | 0.874782 | chr2  | 2.07E+08 | 2.07E+08 | 0 | NA | exon (NM exon (NM    | 10088  | NM_00127f          | 8609     | Hs.59908            | NM_00370f                            | ENSG000003KLF7                     | UKLF Kruppel lprotein-coding       |
| chr4-150: 8.460665  | -0.15097 | 0.730122 | -0.20677 | 0.836192 | 0.874782 | chr4  | 15032953 | 15033979 | 0 | NA | intron (MIR SINE     | 30985  | NM_00117f          | 132864   | Hs.65693fNM_18248f  | ENSG000003CPEB2                      | CPE-BP2 C cytoplasm protein-coding |                                    |
| chr11-121: 8.379745 | -0.15092 | 0.738957 | -0.20423 | 0.838172 | 0.876074 | chr11 | 12162294 | 12163180 | 0 | NA | promoter-promoter-   | 658    | NM_00128f          | 9645     | Hs.50192fNM_01463f  | ENSG000003MICAL2                     | MICAL-2 f microtub protein-coding  |                                    |
| chr17-68: 8.46074   | -0.14848 | 0.728677 | -0.20377 | 0.838534 | 0.876074 | chr17 | 68515531 | 68520386 | 0 | NA | intron (THE1C-int    | 2564   | NM_00127f          | 5573     | Hs.28034fNM_002734  | ENSG000003PRKARIA                    | ACRDY1 A protein kprotein-coding   |                                    |
| chr18-45: 8.46074   | -0.14848 | 0.728677 | -0.20377 | 0.838534 | 0.876074 | chr18 | 45934692 | 45950430 | 0 | NA | intron (AluSg6 SI    | 24768  | NM_02096f          | 57724    | Hs.51484fNM_02096f  | ENSG000003EPG5                       | HEEW1 K1f ectopic Fprotein-coding  |                                    |
| chr16-294: 8.419101 | -0.14847 | 0.728883 | -0.2037  | 0.838592 | 0.876074 | chr16 | 29441897 | 29449939 | 0 | NA | intron (AAAAG)n      | 1108   | NR_13531f          | 1E+08    | Hs.55270fNR_13531f  | ENSG000003SMG1P6                     | SMG1 psetpseudo                    |                                    |
| chr2-738: 8.419101  | -0.14847 | 0.728883 | -0.2037  | 0.838592 | 0.876074 | chr2  | 73852779 | 73858867 | 0 | NA | intron (intron (N    | 25356  | NM_00135f          | 10617    | Hs.46901fNM_00646f  | ENSG000003STAMPB                     | AMSH M                             |                                    |

|            |          |          |          |           |          |          |       |          |          |   |      |                     |        |           |                |           |                         |                    |                          |                          |
|------------|----------|----------|----------|-----------|----------|----------|-------|----------|----------|---|------|---------------------|--------|-----------|----------------|-----------|-------------------------|--------------------|--------------------------|--------------------------|
| chr19-565  | 10.88754 | -0.05625 | 0.588049 | -0.09566  | 0.923789 | 0.945395 | chr19 | 56568505 | 56581890 | + | 0 NA | intron (TTT)n S     | 7729   | NM_001001 | 388566         | Hs.20444  | ENSG000002ZNF470        | CZF-1              | zinc fingprotein-coding  |                          |
| chr17-815  | 8.632729 | -0.06683 | 0.721005 | -0.09269  | 0.926151 | 0.947555 | chr17 | 81911773 | 81916124 | + | 0 NA | intron (Nintron (N  | -2549  | NM_001184 | 5833           | Hs.56984  | ENSG00000PCYT2          | ET                 | phosphateprotein-coding  |                          |
| chr22-105  | 13.04463 | -0.0453  | 0.491756 | -0.09213  | 0.926597 | 0.947753 | chr22 | 10957519 | 10957891 | + | 0 NA | intron (NLIMEc LIN  | 3824   | NR_13232C | 1.03E+08       | NR_132320 | FRG1FP                  | -                  | FSHD regipseudo          |                          |
| chr18-455  | 9.620033 | -0.05833 | 0.665939 | -0.08759  | 0.930203 | 0.951183 | chr18 | 45952074 | 45953518 | + | 0 NA | intron (Nintron (N  | 14533  | NM_020964 | 57724          | Hs.51484  | ENSG00000EPG5           | HEEW1 KI           | ectopic Fprotein-coding  |                          |
| chr5-7856  | 8.657494 | -0.06188 | 0.728669 | -0.08491  | 0.932329 | 0.9521   | chr5  | 78560236 | 78560465 | + | 0 NA | intron (Nintron (N  | 88422  | NM_005775 | ENSG00000LHFL2 | -         | LHFPL tetprotein-coding |                    |                          |                          |
| chr8-1254  | 9.58962  | 0.056293 | 0.663175 | 0.084884  | 0.932354 | 0.9521   | chr8  | 12540945 | 12542058 | + | 0 NA | intron (NAluSc SIN  | 104488 | NR_040091 | 1.01E+08       | Hs.65689  | NR_040091               | LOC100506          | -                        | uncharactncRNA           |
| chr1-2066  | 8.151278 | -0.06167 | 0.74509  | -0.08277  | 0.934036 | 0.9521   | chr1  | 2.07E+08 | 2.07E+08 | + | 0 NA | intron (NAluJr4 S   | 2012   | NM_006689 | 1939           | Hs.49758  | ENSG00000EIF2D          | HCA56 LG           | leukaryotiprotein-coding |                          |
| chr9-9208  | 8.151278 | -0.06167 | 0.74509  | -0.08277  | 0.934036 | 0.9521   | chr9  | 92080609 | 92089265 | + | 0 NA | intron (NLIPA3 LIN  | 27746  | NM_006415 | 10558          | Hs.90458  | NM_006415               | ENSG00000SPTLC1    | HSAN1 HSA                | serine pprotein-coding   |
| chr16-150  | 11.80286 | 0.044393 | 0.543446 | 0.081688  | 0.934895 | 0.9521   | chr16 | 15015088 | 15016908 | + | 0 NA | intron (Nintron (N  | -5601  | NR_036265 | 1E+08          | NR_036265 | ENSG00000MIR1972-2      | -                  | microRNA ncRNA           |                          |
| chr2-1135  | 16.25412 | -0.03189 | 0.396338 | -0.080461 | 0.935871 | 0.9521   | chr2  | 1.14E+08 | 1.14E+08 | + | 0 NA | intron (NAluSp SIN  | 2840   | NR_024077 | 375260         | Hs.44646  | NM_19894                | ENSG00000WASH2P    | FAM39B                   | WASP famipseudo          |
| chr12-760  | 8.163661 | -0.05914 | 0.743822 | -0.07951  | 0.936663 | 0.9521   | chr12 | 76047903 | 76074333 | + | 0 NA | intron (Nintron (N  | 23567  | NM_139207 | 4673           | Hs.52459  | NM_004537               | ENSG00000NAP1L1    | NAP1 NAP                 | nucleosonprotein-coding  |
| chr12-105  | 8.163661 | -0.05914 | 0.743822 | -0.07951  | 0.936663 | 0.9521   | chr12 | 1.05E+08 | 1.05E+08 | + | 0 NA | intron (Nintron (N  | 19623  | NM_001251 | 55198          | Hs.50660  | NM_018171               | ENSG00000APPL2     | DIP13B                   | adaptor fprotein-coding  |
| chr12-133  | 8.163661 | -0.05914 | 0.743822 | -0.07951  | 0.936663 | 0.9521   | chr12 | 1.33E+08 | 1.33E+08 | + | 0 NA | intron (NL2c LINE   | 6553   | NM_015394 | 7556           | Hs.57398  | NM_015394               | ENSG00000ZNF10     | KOX1                     | zinc fingprotein-coding  |
| chr13-365  | 8.163661 | -0.05914 | 0.743822 | -0.07951  | 0.936663 | 0.9521   | chr13 | 36321913 | 36323471 | + | 0 NA | intron (NL4_A_Mam   | 23702  | NM_015087 | 23111          | Hs.44041  | NM_015087               | ENSG00000SPART     | SPG20 TAF                | spartin protein-coding   |
| chr15-515  | 8.163661 | -0.05914 | 0.743822 | -0.07951  | 0.936663 | 0.9521   | chr15 | 51957799 | 51958505 | + | 0 NA | intron (Nintron (N  | 13626  | NM_138792 | 123169         | Hs.56766  | NM_138792               | ENSG00000LEO1      | RDL                      | LEO1 homcprotein-coding  |
| chr17-304  | 8.163661 | -0.05914 | 0.743822 | -0.07951  | 0.936663 | 0.9521   | chr17 | 30460830 | 30463189 | + | 0 NA | exon (NM exon (NM   | -15399 | NM_004871 | 9527           | Hs.46268  | NM_004871               | ENSG00000GOSR1     | GOLIM2 GC                | golgi SN^protein-coding  |
| chr16-145  | 11.81746 | 0.043027 | 0.54203  | 0.079381  | 0.93673  | 0.9521   | chr16 | 14997243 | 15013793 | + | 0 NA | intron (Nintron (N  | 4879   | NR_036054 | 1E+08          | NR_036054 | ENSG00000MIR1972-1      | MIR1972 f          | microRNA ncRNA           |                          |
| chr17-408  | 8.190634 | -0.05926 | 0.748631 | -0.07916  | 0.936906 | 0.9521   | chr17 | 40817043 | 4081873  | + | 0 NA | TTS (NM_CTTS (NM_C  | -1687  | NR_160887 | 147184         | Hs.35316  | NM_145274               | ENSG00000MEM99     | -                        | transmentncRNA           |
| chr2-9725  | 9.591828 | 0.052176 | 0.659676 | 0.079093  | 0.936958 | 0.9521   | chr2  | 97229833 | 97231776 | + | 0 NA | intron (NLIPA3 LIN  | -47913 | NR_103732 | 1.01E+08       | Hs.73261  | NR_103732               | LOC100506          | -                        | uncharactncRNA           |
| chr1-1791  | 8.14907  | -0.05651 | 0.743859 | -0.07597  | 0.93944  | 0.9521   | chr1  | 1.79E+08 | 1.79E+08 | + | 0 NA | intron (Nintron (N  | 21501  | NM_005158 | 27             | Hs.15947  | NM_005158               | ENSG00000ABL2      | ABLL ARG                 | ABL protcprotein-coding  |
| chr10-104  | 8.14907  | -0.05651 | 0.743859 | -0.07597  | 0.93944  | 0.9521   | chr10 | 1.04E+08 | 1.04E+08 | + | 0 NA | intron (NLIME3A LI  | 2990   | NR_039702 | 1.01E+08       | NR_039702 | ENSG00000MIR4482        | MIR4482-1          | microRNA ncRNA           |                          |
| chr14-572  | 8.14907  | -0.05651 | 0.743859 | -0.07597  | 0.93944  | 0.9521   | chr14 | 57273821 | 57275946 | + | 0 NA | exon (NM exon (NM   | 5912   | NM_018225 | 55745          | Hs.59734  | NM_018225               | ENSG00000AP5M1     | C14orf10                 | adaptor rprotein-coding  |
| chr15-490  | 8.14907  | -0.05651 | 0.743859 | -0.07597  | 0.93944  | 0.9521   | chr15 | 49041494 | 49043093 | + | 0 NA | intron (NLIM3 LINE  | 4153   | NM_014701 | 9728           | Hs.9997   | NM_014701               | ENSG00000SECISBP21 | SBP2L SLA                | SECIS birprotein-coding  |
| chr17-542  | 8.14907  | -0.05651 | 0.743859 | -0.07597  | 0.93944  | 0.9521   | chr17 | 51573469 | 51590707 | + | 0 NA | intron (NAluJr SIN  | -4390  | NM_00132C | 4927           | Hs.58478  | NM_002532               | ENSG00000NUP88     | FADS4                    | nucleoporprotein-coding  |
| chr17-424  | 8.14907  | -0.05651 | 0.743859 | -0.07597  | 0.93944  | 0.9521   | chr17 | 42460991 | 42472855 | + | 0 NA | intron (NAluV SINE  | 8045   | NM_00113C | 535            | Hs.46307  | NM_005177               | ENSG00000ATP6VOA1  | ATP6N1 A1AT              | Pase H^protein-coding    |
| chr19-182  | 8.14907  | -0.05651 | 0.743859 | -0.07597  | 0.93944  | 0.9521   | chr19 | 18349899 | 18364463 | + | 0 NA | intron (Nintron (N  | 16583  | NM_00130C | 54858          | Hs.13177  | NM_017712               | ENSG00000PGPEP1    | PAP-1 PG1                | pyroglutaprotein-coding  |
| chr19-515  | 8.14907  | -0.05651 | 0.743859 | -0.07597  | 0.93944  | 0.9521   | chr19 | 51573469 | 51590707 | + | 0 NA | intron (NLIM5 LINE  | 10805  | NR_13620E | 7728           | Hs.11901  | NM_007147               | ENSG00000ZNF175    | OTK18                    | zinc fingprotein-coding  |
| chr21-295  | 8.14907  | -0.05651 | 0.743859 | -0.07597  | 0.93944  | 0.9521   | chr21 | 29326232 | 29330279 | + | 0 NA | intron (Nintron (N  | 23051  | NR_027655 | 571            | Hs.15427  | NM_00118E               | ENSG00000BACH1     | BACH-1 BTBTB             | domaiprotein-coding      |
| chr3-1490  | 8.14907  | -0.05651 | 0.743859 | -0.07597  | 0.93944  | 0.9521   | chr3  | 1.49E+08 | 1.49E+08 | + | 0 NA | intron (NMERIB DNA  | 33996  | NM_001184 | 2992           | Hs.47789  | NM_00413C               | ENSG00000GYG1      | GSD15 GYC                | glycogeniprotein-coding  |
| chr5-3241  | 8.14907  | -0.05651 | 0.743859 | -0.07597  | 0.93944  | 0.9521   | chr5  | 32412408 | 32415423 | + | 0 NA | intron (Nintron (N  | -19440 | NR_03030E | 693164         | NR_03030E | ENSG00000MIR579         | MIR579 f           | microRNA ncRNA           |                          |
| chr8-9101  | 8.14907  | -0.05651 | 0.743859 | -0.07597  | 0.93944  | 0.9521   | chr8  | 91014277 | 91021348 | + | 0 NA | intron (Nintron (N  | 23047  | NM_01871C | 55529          | Hs.20251  | NM_01871C               | ENSG00000PIP4P2    | TMEM55A                  | phosphatiprotein-coding  |
| chr1-1554  | 8.176043 | -0.05661 | 0.745283 | -0.07596  | 0.93945  | 0.9521   | chr1  | 1.55E+08 | 1.55E+08 | + | 0 NA | exon (NM exon (NM   | 48032  | NR_03418C | 645682         | Hs.63248  | NR_03418C               | ENSG00000POU5F1P4  | OMT3 OCT4                | POU classpseud           |
| chr12-2297 | 8.176043 | -0.05661 | 0.745283 | -0.07596  | 0.93945  | 0.9521   | chr12 | 95861521 | 95863877 | + | 0 NA | intron (NLIMB3 LIN  | 3747   | NM_00309E | 54788          | Hs.50001  | NM_00309E               | ENSG00000NMRFP     | SMT Sm F                 | small rprotein-coding    |
| chr14-506  | 8.176043 | -0.05661 | 0.745283 | -0.07596  | 0.93945  | 0.9521   | chr14 | 50659282 | 50665767 | + | 0 NA | intron (Nintron (N  | 5782   | NM_02181E | 60485          | Hs.64284  | NM_02181E               | ENSG00000SAV1      | SAV WW45                 | salvador protein-coding  |
| chr5-1591  | 8.176043 | -0.05661 | 0.745283 | -0.07596  | 0.93945  | 0.9521   | chr5  | 1.59E+08 | 1.59E+08 | + | 0 NA | intron (NAluJb SIN  | 17459  | NM_00119E | 153830         | Hs.34930  | NM_14472E               | ENSG00000RNF145    | -                        | ring fingprotein-coding  |
| chr7-2297  | 8.176043 | -0.05661 | 0.745283 | -0.07596  | 0.93945  | 0.9521   | chr7  | 22974429 | 22976891 | + | 0 NA | intron (Nintron (N  | 38470  | NM_00136E | 84668          | Hs.85603  | NM_032581               | ENSG00000FAM126A   | DRCTNNB1^                | family wiprotein-coding  |
| chr8-3895  | 8.176043 | -0.05661 | 0.745283 | -0.07596  | 0.93945  | 0.9521   | chr8  | 38991857 | 38995260 | + | 0 NA | exon (NM exon (NM   | 2951   | NM_03194C | 83877          | Hs.7471   | NM_03194C               | ENSG00000TM2D2     | BLP1                     | TM2 domaiprotein-coding  |
| chr20-114  | 11.81966 | 0.040391 | 0.541903 | 0.074536  | 0.940584 | 0.952993 | chr20 | 1149818  | 1150098  | + | 0 NA | intron (NAluJb SIN  | 31356  | NM_00132E | 9491           | Hs.47191  | NM_006814               | ENSG00000PSMF1     | PI31                     | proteasonprotein-coding  |
| chr10-725  | 8.161453 | -0.05398 | 0.745323 | -0.07242  | 0.942265 | 0.953183 | chr10 | 72339568 | 72341134 | + | 0 NA | intron (NAluX SIN   | 14568  | NR_10712E | 54788          | Hs.50001  | NM_00309E               | ENSG00000DNABJ12   | DJ10                     | DnaJ heatprotein-coding  |
| chr16-158  | 8.161453 | -0.05398 | 0.745323 | -0.07242  | 0.942265 | 0.953183 | chr16 | 15881718 | 15883795 | + | 0 NA | intron (N(TATC)n S  | 5847   | NM_001304 | 123811         | Hs.51417  | NM_14460C               | ENSG00000FOPNL     | C16orf63 FGFR10P         | l^protein-coding         |
| chr9-1355  | 8.161453 | -0.05398 | 0.745323 | -0.07242  | 0.942265 | 0.953183 | chr9  | 1.36E+08 | 1.36E+08 | + | 0 NA | Intergeni MLT1A1 LI | -6263  | NM_015447 | 157922         | Hs.52249  | NM_015447               | ENSG00000CAMSAP1   | -                        | calmoduliprotein-coding  |
| chr6-8755  | 8.188426 | -0.05405 | 0.749537 | -0.07211  | 0.942514 | 0.953183 | chr6  | 87554259 | 87554910 | + | 0 NA | intron (NAluJr SIN  | 35403  | NM_02032C | 57038          | Hs.48591  | NM_02032C               | ENSG00000RARS2     | ArgRS DAI                | arginyl-t^protein-coding |
| chr1-2235  | 8.13448  | -0.05386 | 0.747267 | -0.07207  | 0.942544 | 0.953183 | chr1  | 2.24E+08 | 2.24E+08 | + | 0 NA | intron (NMLTID LTF  | 34500  | NR_13211E | 441124         | Hs.52058  | NR_132119               | GTF2IP20           | -                        | general tpsudo           |
| chr12-128  | 8.13448  | -0.05386 | 0.747267 | -0.07207  | 0.942544 | 0.953183 | chr12 | 12821247 | 12822982 | + | 0 NA | intron (Nintron (N  | 8768   | NM_016355 | 51202          | Hs.71993  | NM_016355               | ENSG00000DDX47     | E4-DBP HG                | DEAD-box protein-coding  |
| chr2-9435  | 8.13448  | -0.05386 | 0.747267 | -0.07207  | 0.942544 | 0.953183 | chr2  | 9435697  | 9438653  | + | 0 NA | intron (NAluSx SIN  | 13521  | NM_016207 | 51692          | Hs.51597  | NM_016207               | ENSG00000CPSF3     | CPSF-73 C                | cleavage protein-coding  |
| chr4-1025  | 8.146863 | -0.0513  | 0.748747 | -0.06851  | 0.945381 | 0.955538 | chr4  | 1.03E+08 | 1.03E+08 | + | 0 NA | intron (NLIPA5 LIN  | -68662 | NR_132602 | 1.05E+08       | Hs.15833  | NR_136202               | LOC105377          | -                        | uncharactncRNA           |
| chr5-1325  | 8.146863 | -0.0513  | 0.748747 | -0.06851  | 0.945381 | 0.955538 | chr5  | 1.32E+08 | 1.32E+08 | + | 0 NA | intron (Nintron (N  | 9755   | NM_003687 | 8572           | Hs.42431  | NM_003687               | ENSG00000PDLIM4    | RIL                      | PDZ and l^protein-coding |
| chr13-445  | 9.888832 | -0.02946 | 0.643376 | -0.04578  | 0.963482 | 0.973572 | chr13 | 44556827 | 44557478 | + | 0 NA | intron (NAluSp SIN  | -18744 | NR_033881 | 641467         | Hs.62419  | NR_033881               | ENSG00000TSC22D1-A | -                        | TSC22D1 encRNA           |
| chr9-4095  | 12.08749 | -0.02354 | 0.529546 | -0.04446  | 0.964536 | 0.974164 | chr9  | 40998179 | 41002054 | + | 0 NA | intron (NAluJb SIN  | 7855   | NR_15673C | 1E+08          | Hs.23186  | NR_034006               | FRG1HP             | -                        | FSHD regipseudo          |
| chr16-701  | 10.06752 | 0.028221 | 0.635598 | 0.0444    | 0.964585 | 0.974164 | chr16 | 70159769 | 70161680 | + | 0 NA | 3' UTR (N3' UTR (N  | 12724  | NR_126007 | 400541         | Hs.46118  | NR_126007               | ENSG00000LOC400541 | -                        | uncharactncRNA           |
| chr4-5201  | 8.348107 | 0.028015 | 0.742212 | 0.037746  | 0.969891 | 0.979259 | chr4  | 52013993 | 52014214 | + | 0 NA | intron (NAluSp SIN  | 6260   | NM_001024 | 339977         | Hs.66145  | NM_001024               | ENSG00000LRRC66    | -                        | leucine r^protein-coding |
| chr1-8543  | 8.362698 |          |          |           |          |          |       |          |          |   |      |                     |        |           |                |           |                         |                    |                          |                          |



## Supplementary Information

**Supplementary Table 10. Antibody information for experimental assays.**

| Antibody                 | Source and Identifier                    | Application |
|--------------------------|------------------------------------------|-------------|
| Anti-p-ATM               | Abways, cat. no. CY5111                  | IB          |
| Anti-ATM                 | Abways, cat. no. CY5207                  | IB          |
| Anti-H3K9me3             | Abcam, cat. no. ab8898                   | IB, IHC, IF |
| Anti-H3K36me3            | ABclonal, cat. no. A2366                 | IB, IHC, IF |
| Anti-H3K9me3             | Active Motive, cat. no. 39161            | ChIP-seq    |
| Anti-H3K36me3            | Active Motive, cat. no. 61101            | ChIP-seq    |
| Anti-H3K9me2             | Cell Signaling Technology, cat. no. 4658 | IB          |
| Anti-H3K36me2            | Bioss, cat. no. bsm-53020M               | IB          |
| Anti-p16                 | Abways, cat. no. CY5357                  | IB          |
| Anti-p21                 | Abways, cat. no. CY5088                  | IB          |
| Anti-CXCL8               | Proteintech, cat. no. 17038-1-AP         | IB          |
| Anti-KDM4A               | Abways, cat. no. CY8322                  | IB, IHC, IF |
| Anti-KDM4A               | abcam, cat. no. ab24545                  | ChIP-PCR    |
| Anti-KDM4B               | Cell Signaling Technology, cat. no. 8639 | IB, IHC,IF  |
| Anti-KDM4C               | Abcam, cat. no. ab85454                  | IB          |
| Anti-KDM4D               | Abcam, cat. no. ab198209                 | IB          |
| Anti-SUV39H1             | Cell Signaling Technology, cat. no. 8729 | IB          |
| Anti-HA                  | Cell Signaling Technology, cat. no. 3724 | IB          |
| Anti-Ubiquitin           | Abways, cat. no. CY1295                  | IB          |
| Anti-γH2AX               | Cell Signaling Technology, cat. no. 9718 | IB, IF      |
| Anti-H2AX                | Cell Signaling Technology, cat. no. 7361 | IB          |
| Anti-p-53BP1             | Santa Cruz, cat. no. sc-135748           | IB, IF      |
| Anti-53BP1               | Proteintech, cat. no. 20002-1-AP         | IB          |
| Anti-p65                 | Santa Cruz, cat. no. sc-8008             | IB          |
| Anti-Histone H3          | Cell Signaling Technology, cat. no. 4499 | IB          |
| Anti-Caspase 3 (cleaved) | Cell Signaling Technology, cat. no. 9661 | IB, IHC     |
| Anti-Caspase 3           | Cell Signaling Technology, cat. no. 9662 | IB          |
| Anti-GAPDH               | Abways, cat. no. AB0037                  | IB          |

Note: IB, immunoblot; IHC, immunohistochemistry; IF, immunofluorescence.

## Supplementary Information

**Supplementary Table 11. Primer sequences for qRT-PCR assays.**

| Gene name                      | Forward (5'-3')       | Reverse (5'-3')       |
|--------------------------------|-----------------------|-----------------------|
| <i>IL6</i>                     | TTCTGCGCAGCTTTAAGGAG  | AGGTGCCCATGCTACATTTG  |
| <i>CXCL8</i>                   | ATGACTTCCAAGCTGGCCGTG | TGTGTTGGCGCAGTGTGGTC  |
| <i>IL-1<math>\alpha</math></i> | AATGACGCCCTCAATCAAAG  | TGGGTATCTCAGGCATCTCC  |
| <i>IL-1<math>\beta</math></i>  | TGGGTATCTCAGGCATCTCC  | TTCTGCTTGAGAGGTGCTGA  |
| <i>GM-CSF</i>                  | ATGTGAATGCCATCCAGGAG  | AGGGCAGTGCTGCTTGTAGT  |
| <i>AREG</i>                    | AGCTGCCTTTATGTCTGCTG  | TTTCGTTCCCTCAGCTTCTCC |
| <i>CXCL1</i>                   | CACCCAAGAACATCCAAAG   | TAACTATGGGGGATGCAGGA  |
| <i>CXCL3</i>                   | GGAGCACCAACTGACAGGAG  | CCTTCCAGCTGTCCCTAGA   |
| <i>CCL3</i>                    | TGCAACCAGTTCTCTGCATC  | TTTCTGGACCCACTCCTCAC  |
| <i>CCL8</i>                    | TCACCTGCTGCTTTAACGTG  | ATCCCTGACCCATCTCTCCT  |
| <i>MMP1</i>                    | GGTCTCTGAGGGTCAAGCAG  | AGTTCATGAGCTGCAACACG  |
| <i>MMP3</i>                    | AGGGAACTTGAGCGTGAATC  | TCACTTGTCTGTTGCACACG  |
| <i>MMP8</i>                    | TCTGCAAGGTTATCCCAAGG  | CTTGCTGGAAAACCTGCATCA |
| <i>MMP10</i>                   | GGCTCTTTCACCTCAGCCAAC | TCCCGAAGGAACAGATTTTG  |
| <i>SPINK1</i>                  | CCTTGGCCCTGTTGAGTCTA  | GCCCAGATTTTTGAATGAGG  |
| <i>WNT16B</i>                  | GCTCCTGTGCTGTGAAAACA  | TGCATTCTCTGCCTTGTGTC  |
| <i>p16<sup>INK4a</sup></i>     | CTTCCTGGACACGCTGGT    | ATCTATGCGGGCATGGTTAC  |
| <i>P21<sup>CIP1</sup></i>      | ATGAAATTCACCCCCTTTCC  | CCCTAGGCTGTGCTCACTTC  |
| <i>KDM4A</i>                   | TGGAATTGGTGGAAAAGGAG  | GTCTTCAGTGTGCCAAGCAA  |
| <i>KDM4B</i>                   | GGACTGACGGCAACCTCTAC  | CGTCCTCAAACCTCCACCTG  |
| <i>KDM4C</i>                   | TGCCTGTCTGTTTTCTCAG   | CATGTCGAGCAACTTCAGGA  |
| <i>KDM4D</i>                   | TTTCCCTATGGCTACCATGC  | TCATAGCGTTCAGGTTGCAG  |
| <i>SUV39H1</i>                 | GTCATGGAGTACGTGGGAGAG | CCTGACGGTCGTAGATCTGG  |
| <i>RPL13A</i>                  | GTACGCTGTGAAGGCATCAA  | CGCTTTTTCTTGTCTGAGGG  |



## Supplementary Information

### Supplementary Table 12. Basic characteristics and QC of ChIP-seq libraries (CTRL group).

|                                   |                              |        |                |                |                 |                 |    |
|-----------------------------------|------------------------------|--------|----------------|----------------|-----------------|-----------------|----|
| ##FastQC                          | 0.11.9                       |        |                |                |                 |                 |    |
| >>Basic Statistics                | pass                         |        |                |                |                 |                 |    |
| #Measure                          | Value                        |        |                |                |                 |                 |    |
| Filename                          | CTRL-1-3-input_2_val_2.fq.gz |        |                |                |                 |                 |    |
| File type                         | Conventional base calls      |        |                |                |                 |                 |    |
| Encoding                          | Sanger / Illumina 1.9        |        |                |                |                 |                 |    |
| Total Sequences                   | 14693315                     |        |                |                |                 |                 |    |
| Sequences flagged as poor quality | 0                            |        |                |                |                 |                 |    |
| Sequence length                   | 20-150                       |        |                |                |                 |                 |    |
| %GC                               | 39                           |        |                |                |                 |                 |    |
| >>END_MODULE                      |                              |        |                |                |                 |                 |    |
| >>Per base sequence quality       | pass                         |        |                |                |                 |                 |    |
| #Base                             | Mean                         | Median | Lower Quartile | Upper Quartile | 10th Percentile | 90th Percentile |    |
| 1                                 | 35.7745                      | 37     | 37             | 37             | 37              | 37              | 37 |
| 2                                 | 35.57287                     | 37     | 37             | 37             | 37              | 37              | 37 |
| 3                                 | 35.75874                     | 37     | 37             | 37             | 37              | 37              | 37 |
| 4                                 | 35.76841                     | 37     | 37             | 37             | 37              | 37              | 37 |
| 5                                 | 35.8496                      | 37     | 37             | 37             | 37              | 37              | 37 |
| 6                                 | 35.8214                      | 37     | 37             | 37             | 37              | 37              | 37 |
| 7                                 | 35.79939                     | 37     | 37             | 37             | 37              | 37              | 37 |
| 8                                 | 35.82203                     | 37     | 37             | 37             | 37              | 37              | 37 |
| 9                                 | 35.81694                     | 37     | 37             | 37             | 37              | 37              | 37 |
|                                   | 35.857                       | 37     | 37             | 37             | 37              | 37              | 37 |
| 15-19                             | 35.84111                     | 37     | 37             | 37             | 37              | 37              | 37 |
| 20-24                             | 35.79981                     | 37     | 37             | 37             | 37              | 37              | 37 |
| 25-29                             | 35.73897                     | 37     | 37             | 37             | 37              | 37              | 37 |
| 30-34                             | 35.69198                     | 37     | 37             | 37             | 37              | 37              | 37 |
| 35-39                             | 35.66943                     | 37     | 37             | 37             | 37              | 37              | 37 |
| 40-44                             | 35.64014                     | 37     | 37             | 37             | 37              | 37              | 37 |
| 45-49                             | 35.57315                     | 37     | 37             | 37             | 37              | 37              | 37 |
| 50-54                             | 35.54193                     | 37     | 37             | 37             | 37              | 37              | 37 |
| 55-59                             | 35.49454                     | 37     | 37             | 37             | 37              | 37              | 37 |
| 60-64                             | 35.45118                     | 37     | 37             | 37             | 37              | 37              | 37 |

|              |              |    |    |    |      |    |
|--------------|--------------|----|----|----|------|----|
| 65-69        | 35.40584     | 37 | 37 | 37 | 37   | 37 |
| 70-74        | 35.39193     | 37 | 37 | 37 | 37   | 37 |
| 75-79        | 35.32191     | 37 | 37 | 37 | 34.6 | 37 |
| 80-84        | 35.26352     | 37 | 37 | 37 | 34.6 | 37 |
| 85-89        | 35.28055     | 37 | 37 | 37 | 37   | 37 |
| 90-94        | 35.19622     | 37 | 37 | 37 | 25   | 37 |
| 95-99        | 35.13609     | 37 | 37 | 37 | 25   | 37 |
| 100-104      | 35.09063     | 37 | 37 | 37 | 25   | 37 |
| 105-109      | 35.04995     | 37 | 37 | 37 | 25   | 37 |
| 110-114      | 35.01937     | 37 | 37 | 37 | 25   | 37 |
| 115-119      | 34.98532     | 37 | 37 | 37 | 25   | 37 |
| 120-124      | 34.81667     | 37 | 37 | 37 | 25   | 37 |
| 125-129      | 34.79613     | 37 | 37 | 37 | 25   | 37 |
| 130-134      | 34.8112      | 37 | 37 | 37 | 25   | 37 |
| 135-139      | 34.63038     | 37 | 37 | 37 | 25   | 37 |
| 140-144      | 34.56597     | 37 | 37 | 37 | 25   | 37 |
| 145-149      | 34.5588      | 37 | 37 | 37 | 25   | 37 |
| >>END_MODULE | 150 34.41528 | 37 | 37 | 37 | 25   | 37 |



### Supplementary Information

**Supplementary Table 13. Basic characteristics and QC of CHIP-seq libraries (BLEO group).**

|                                   |                              |        |                |                |                 |                 |    |
|-----------------------------------|------------------------------|--------|----------------|----------------|-----------------|-----------------|----|
| ##FastQC                          | 0.11.9                       |        |                |                |                 |                 |    |
| >>Basic Statistics                | pass                         |        |                |                |                 |                 |    |
| #Measure                          | Value                        |        |                |                |                 |                 |    |
| Filename                          | BLEO-2-2-input_2_val_2.fq.gz |        |                |                |                 |                 |    |
| File type                         | Conventional base calls      |        |                |                |                 |                 |    |
| Encoding                          | Sanger / Illumina 1.9        |        |                |                |                 |                 |    |
| Total Sequences                   | 33271794                     |        |                |                |                 |                 |    |
| Sequences flagged as poor quality | 0                            |        |                |                |                 |                 |    |
| Sequence length                   | 20-150                       |        |                |                |                 |                 |    |
| %GC                               | 39                           |        |                |                |                 |                 |    |
| >>END_MODULE                      |                              |        |                |                |                 |                 |    |
| >>Per base sequence quality       | pass                         |        |                |                |                 |                 |    |
| #Base                             | Mean                         | Median | Lower Quartile | Upper Quartile | 10th Percentile | 90th Percentile |    |
| 1                                 | 35.82588                     | 37     | 37             | 37             | 37              | 37              | 37 |
| 2                                 | 35.86822                     | 37     | 37             | 37             | 37              | 37              | 37 |
| 3                                 | 35.99687                     | 37     | 37             | 37             | 37              | 37              | 37 |
| 4                                 | 35.97876                     | 37     | 37             | 37             | 37              | 37              | 37 |
| 5                                 | 36.02685                     | 37     | 37             | 37             | 37              | 37              | 37 |
| 6                                 | 36.0085                      | 37     | 37             | 37             | 37              | 37              | 37 |
| 7                                 | 35.97396                     | 37     | 37             | 37             | 37              | 37              | 37 |
| 8                                 | 35.96807                     | 37     | 37             | 37             | 37              | 37              | 37 |
| 9                                 | 35.95195                     | 37     | 37             | 37             | 37              | 37              | 37 |
|                                   | 35.98313                     | 37     | 37             | 37             | 37              | 37              | 37 |
| 15-19                             | 36.05518                     | 37     | 37             | 37             | 37              | 37              | 37 |
| 20-24                             | 36.02828                     | 37     | 37             | 37             | 37              | 37              | 37 |
| 25-29                             | 35.9411                      | 37     | 37             | 37             | 37              | 37              | 37 |
| 30-34                             | 35.90737                     | 37     | 37             | 37             | 37              | 37              | 37 |
| 35-39                             | 35.88251                     | 37     | 37             | 37             | 37              | 37              | 37 |
| 40-44                             | 35.84138                     | 37     | 37             | 37             | 37              | 37              | 37 |
| 45-49                             | 35.77285                     | 37     | 37             | 37             | 37              | 37              | 37 |
| 50-54                             | 35.69475                     | 37     | 37             | 37             | 37              | 37              | 37 |
| 55-59                             | 35.68489                     | 37     | 37             | 37             | 37              | 37              | 37 |
| 60-64                             | 35.66751                     | 37     | 37             | 37             | 37              | 37              | 37 |

|         |              |    |    |    |      |    |
|---------|--------------|----|----|----|------|----|
| 65-69   | 35.55309     | 37 | 37 | 37 | 37   | 37 |
| 70-74   | 35.55462     | 37 | 37 | 37 | 37   | 37 |
| 75-79   | 35.46192     | 37 | 37 | 37 | 37   | 37 |
| 80-84   | 35.41105     | 37 | 37 | 37 | 37   | 37 |
| 85-89   | 35.37145     | 37 | 37 | 37 | 37   | 37 |
| 90-94   | 35.38655     | 37 | 37 | 37 | 37   | 37 |
| 95-99   | 35.2612      | 37 | 37 | 37 | 29.8 | 37 |
| 100-104 | 35.14181     | 37 | 37 | 37 | 25   | 37 |
| 105-109 | 35.09898     | 37 | 37 | 37 | 25   | 37 |
| 110-114 | 35.11619     | 37 | 37 | 37 | 25   | 37 |
| 115-119 | 34.99176     | 37 | 37 | 37 | 25   | 37 |
| 120-124 | 34.8854      | 37 | 37 | 37 | 25   | 37 |
| 125-129 | 34.81463     | 37 | 37 | 37 | 25   | 37 |
| 130-134 | 34.75972     | 37 | 37 | 37 | 25   | 37 |
| 135-139 | 34.60572     | 37 | 37 | 37 | 25   | 37 |
| 140-144 | 34.53947     | 37 | 37 | 37 | 25   | 37 |
| 145-149 | 34.28972     | 37 | 37 | 37 | 25   | 37 |
|         | 150 34.32601 | 37 | 37 | 37 | 25   | 37 |

>>END\_MODULE



### Supplementary Information

**Supplementary Table 14. Basic characteristics and QC of ChIP-seq libraries (BLEO/ML324 group).**

```

##FastQC                0.11.9
>>Basic Statistics      pass
#Measure                Value
Filename                BLEO-ML324-3-4-H3K36me3_2_val_2.fq.gz
File type               Conventional base calls
Encoding                Sanger / Illumina 1.9
Total Sequences        24178187
Sequences flagged as poor quality  0
Sequence length        20-150
%GC                     42
>>END_MODULE
>>Per base sequence quality  pass
#Base                   Mean      Median   Lower Quartile Upper Quartile 10th Percentile 90th Percentile
1 35.47687              37       37       37       37       37       37
2 35.48851              37       37       37       37       37       37
3 35.59955              37       37       37       37       37       37
4 35.54916              37       37       37       37       37       37
5 35.58892              37       37       37       37       37       37
6 35.60606              37       37       37       37       37       37
7 35.61358              37       37       37       37       37       37
8 35.58155              37       37       37       37       37       37
9 35.60267              37       37       37       37       37       37
   35.6411              37       37       37       37       37       37
15-19                   35.64139  37       37       37       37       37
20-24                   35.60147  37       37       37       37       37
25-29                   35.51056  37       37       37       37       37
30-34                   35.4785   37       37       37       37       37
35-39                   35.458    37       37       37       37       37
40-44                   35.42439  37       37       37       37       37
45-49                   35.31269  37       37       37       34.6     37
50-54                   35.21263  37       37       37       27.4     37
55-59                   35.22509  37       37       37       27.4     37
60-64                   35.21736  37       37       37       27.4     37

```

|         |             |    |    |    |    |    |
|---------|-------------|----|----|----|----|----|
| 65-69   | 35.0841     | 37 | 37 | 37 | 25 | 37 |
| 70-74   | 35.09653    | 37 | 37 | 37 | 25 | 37 |
| 75-79   | 34.96084    | 37 | 37 | 37 | 25 | 37 |
| 80-84   | 34.91946    | 37 | 37 | 37 | 25 | 37 |
| 85-89   | 34.85124    | 37 | 37 | 37 | 25 | 37 |
| 90-94   | 34.86545    | 37 | 37 | 37 | 25 | 37 |
| 95-99   | 34.73031    | 37 | 37 | 37 | 25 | 37 |
| 100-104 | 34.61884    | 37 | 37 | 37 | 25 | 37 |
| 105-109 | 34.58245    | 37 | 37 | 37 | 25 | 37 |
| 110-114 | 34.61261    | 37 | 37 | 37 | 25 | 37 |
| 115-119 | 34.43888    | 37 | 37 | 37 | 25 | 37 |
| 120-124 | 34.3913     | 37 | 37 | 37 | 25 | 37 |
| 125-129 | 34.29534    | 37 | 37 | 37 | 25 | 37 |
| 130-134 | 34.19898    | 37 | 37 | 37 | 25 | 37 |
| 135-139 | 34.04085    | 37 | 37 | 37 | 25 | 37 |
| 140-144 | 33.95945    | 37 | 37 | 37 | 25 | 37 |
| 145-149 | 33.69617    | 37 | 37 | 37 | 25 | 37 |
|         | 150 33.7233 | 37 | 37 | 37 | 25 | 37 |

>>END\_MODULE



**Supplementary Information**

**Supplementary Table 15. FastqC output of ChIP-seq libraries (mapping statistics for all).**

| <b>Modification</b> | <b>Sample Name</b>      | <b>Total Reads</b> | <b>Mapped Reads</b> | <b>% Mapped</b> |
|---------------------|-------------------------|--------------------|---------------------|-----------------|
| None                | CTRL-1-1-input          | 36477776           | 30693636            | 84.14%          |
| None                | CTRL-1-2-input          | 36884260           | 31441905            | 85.24%          |
| H3K9me3             | CTRL-1-1-H3K9me3        | 44260666           | 42184447            | 95.31%          |
| H3K9me3             | CTRL-1-2-H3K9me3        | 51104202           | 48269305            | 94.45%          |
| None                | CTRL-1-3-input          | 29386630           | 27467563            | 93.47%          |
| None                | CTRL-1-4-input          | 36867136           | 29086228            | 78.89%          |
| H3K36me3            | CTRL-1-3-H3K36me3       | 26535286           | 25394486            | 95.70%          |
| H3K36me3            | CTRL-1-4-H3K36me3       | 28486164           | 27626815            | 96.98%          |
| None                | BLEO-2-1-input          | 59987896           | 53737650            | 89.58%          |
| None                | BLEO-2-2-input          | 66543588           | 60547204            | 90.99%          |
| H3K9me3             | BLEO-2-1-H3K9me3        | 63076954           | 61376933            | 97.30%          |
| H3K9me3             | BLEO-2-2-H3K9me3        | 56499018           | 54750066            | 96.90%          |
| None                | BLEO-2-3-input          | 28006786           | 25085110            | 89.57%          |
| None                | BLEO-2-4-input          | 33857258           | 31055106            | 91.72%          |
| H3K36me3            | BLEO-2-3-H3K36me3       | 37027760           | 35818900            | 96.74%          |
| H3K36me3            | BLEO-2-4-H3K36me3       | 40670232           | 39383872            | 96.84%          |
| None                | BLEO-ML324-3-1-input    | 43434654           | 41928500            | 96.53%          |
| None                | BLEO-ML324-3-2-input    | 48718064           | 47048384            | 96.57%          |
| H3K9me3             | BLEO-ML324-3-1-H3K9me3  | 45302648           | 43662391            | 96.38%          |
| H3K9me3             | BLEO-ML324-3-2-H3K9me3  | 53378402           | 51565319            | 96.60%          |
| None                | BLEO-ML324-3-3-input    | 41647824           | 40101109            | 96.29%          |
| None                | BLEO-ML324-3-4-input    | 63531914           | 60743434            | 95.61%          |
| H3K36me3            | BLEO-ML324-3-3-H3K36me3 | 52006598           | 51062341            | 98.18%          |
| H3K36me3            | BLEO-ML324-3-4-H3K36me3 | 48356374           | 47514433            | 98.26%          |

## Supplementary Information

Supplementary Table 16. Primer sequences for ChIP-PCR assays.

| Gene name                      | Forward (5'-3')      | Reverse (5'-3')      |
|--------------------------------|----------------------|----------------------|
| <i>IL6</i>                     | GGCAGGAAACTGTCAAGAGC | GCAGACACCAGGCTCTAAGG |
| <i>CXCL1</i>                   | ATCCGAGACACAACGCTCTT | TCTGGGATATTCGCCTTCTG |
| <i>IL-1<math>\alpha</math></i> | TTGTGATCTTGGGTTGGTCA | ATGTTGGTGGGTGACTGGAT |
| <i>IL-1<math>\beta</math></i>  | CCTGTATCCCAAGTCCAGCA | TGATCACAGCAGCCTCAAAC |
| <i>AREG</i>                    | ATCTTGGCTCACTGCGATCT | GCAGGTGGATCATCTCAGGT |
| <i>MMP3</i>                    | ATCCCTGGGAGGTCAGATTT | GAAAGGGGGAGGAAGATGAG |
| <i>p16<sup>INK4a</sup></i>     | CAGCACTTTGGGAGGCTAAG | GAGCAATTCTCCTGCCTCAG |
| <i>p21<sup>CIP1</sup></i>      | GGCAGATTCAAGACCTGGAG | AAGTTCTGCCAGAAAGCAA  |
